# Supplementary material
Source: PubMed Central journal article supplement (PMC4739669)

022714\_SCW\_II\_53\_1\_2ndZT

20929

ITMS; CID

304.08

832.41

Vdac3

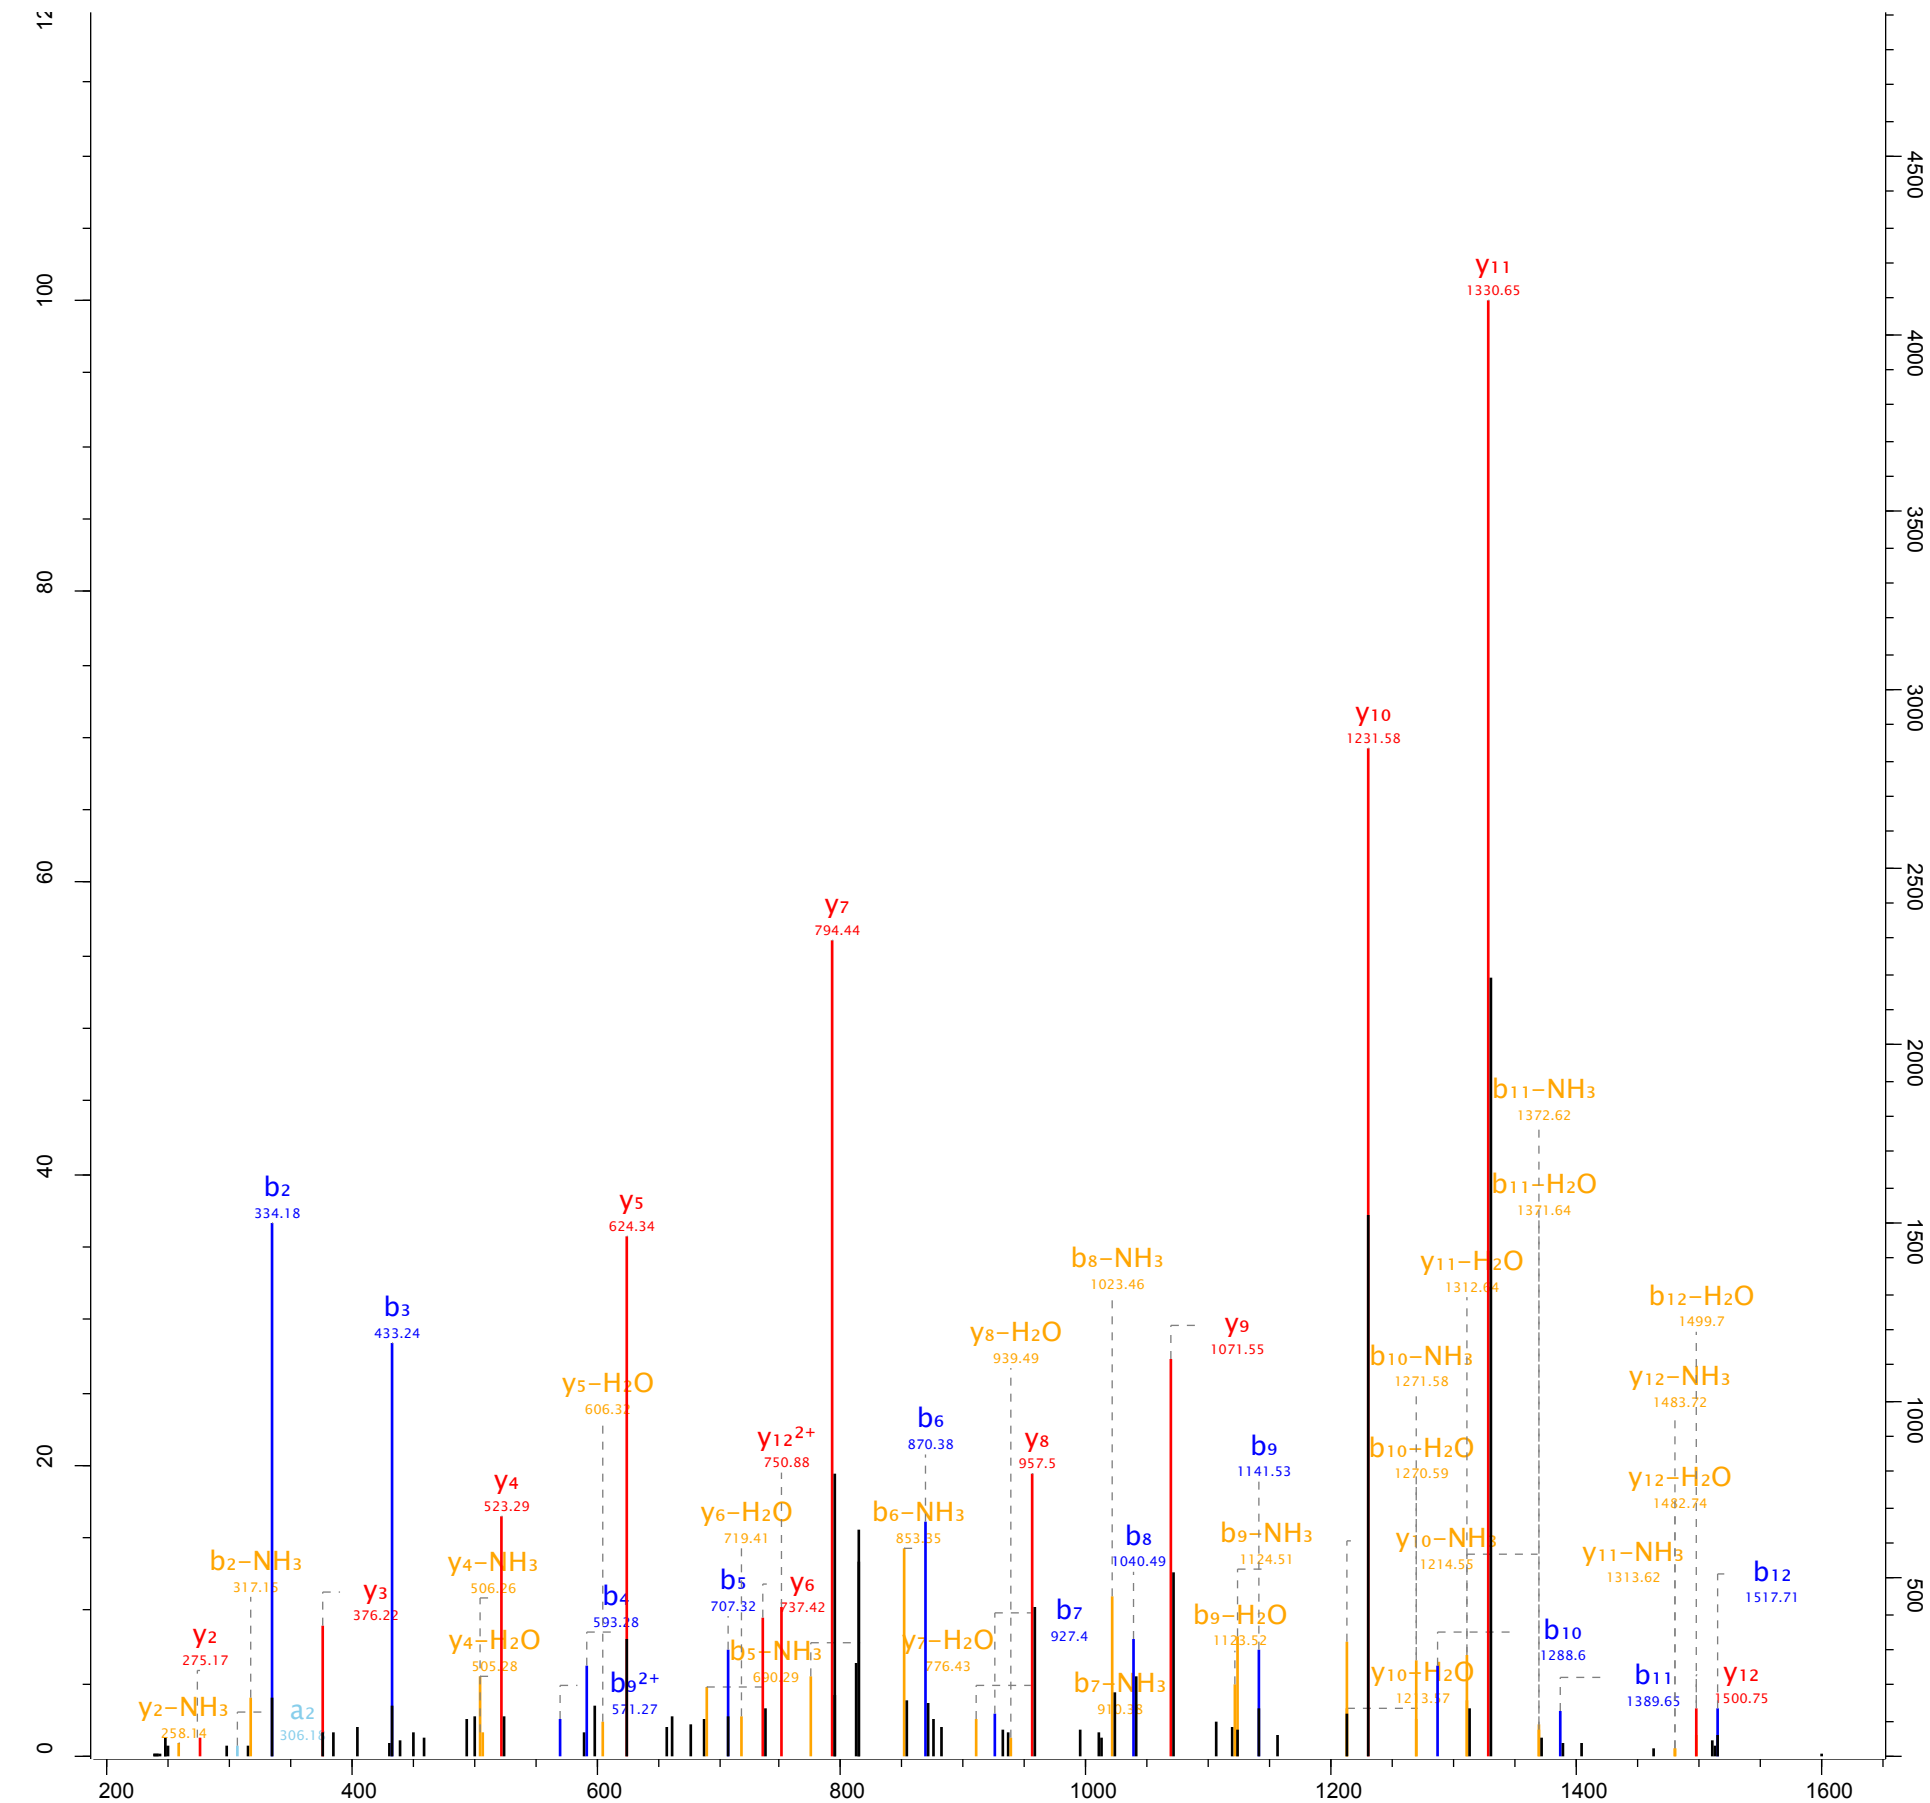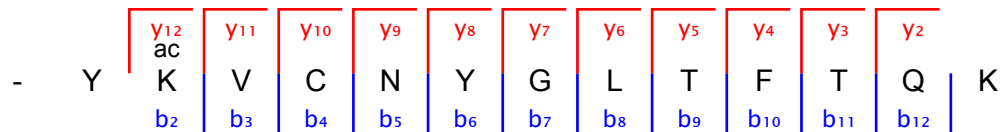

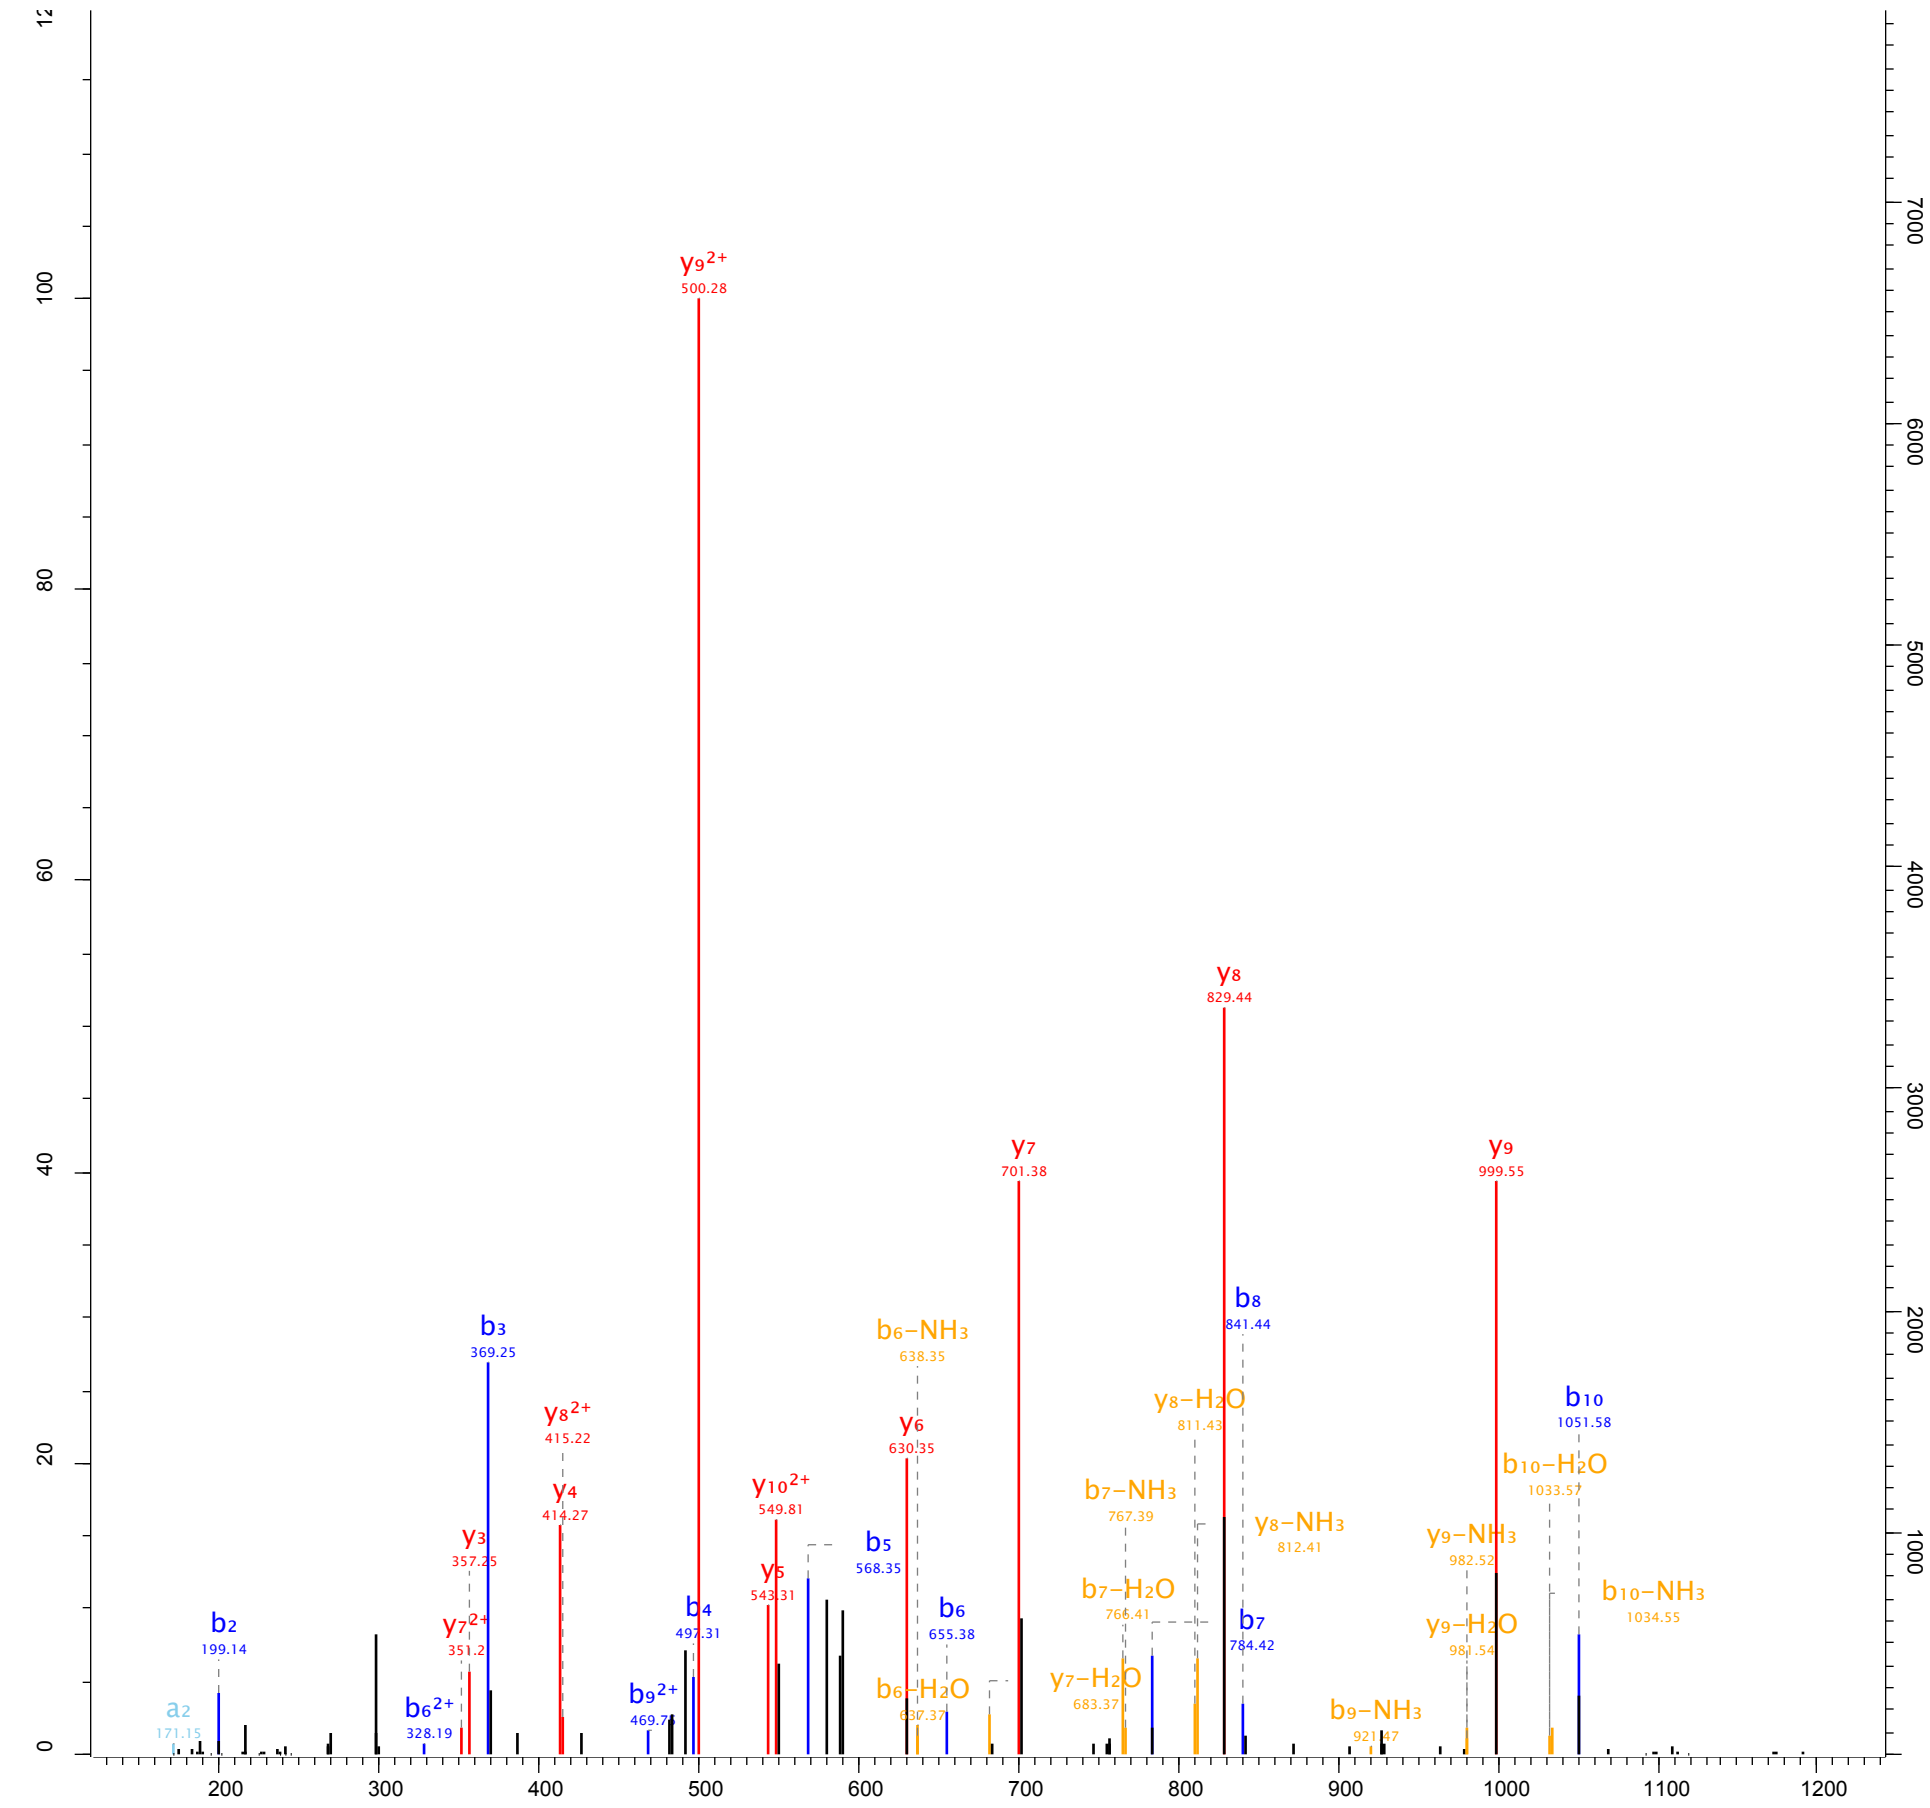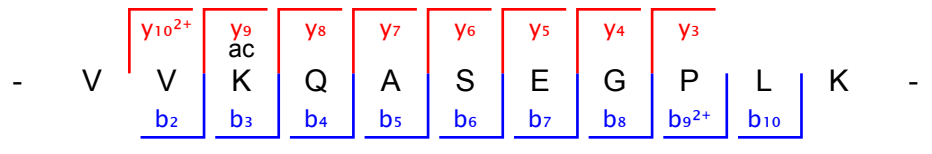

Raw file 022714\_SCW\_II\_53\_4\_2ndZT Scan 14396 Method ITMS; CID Score 214.67 m/z 617.82 Gene names Ckb

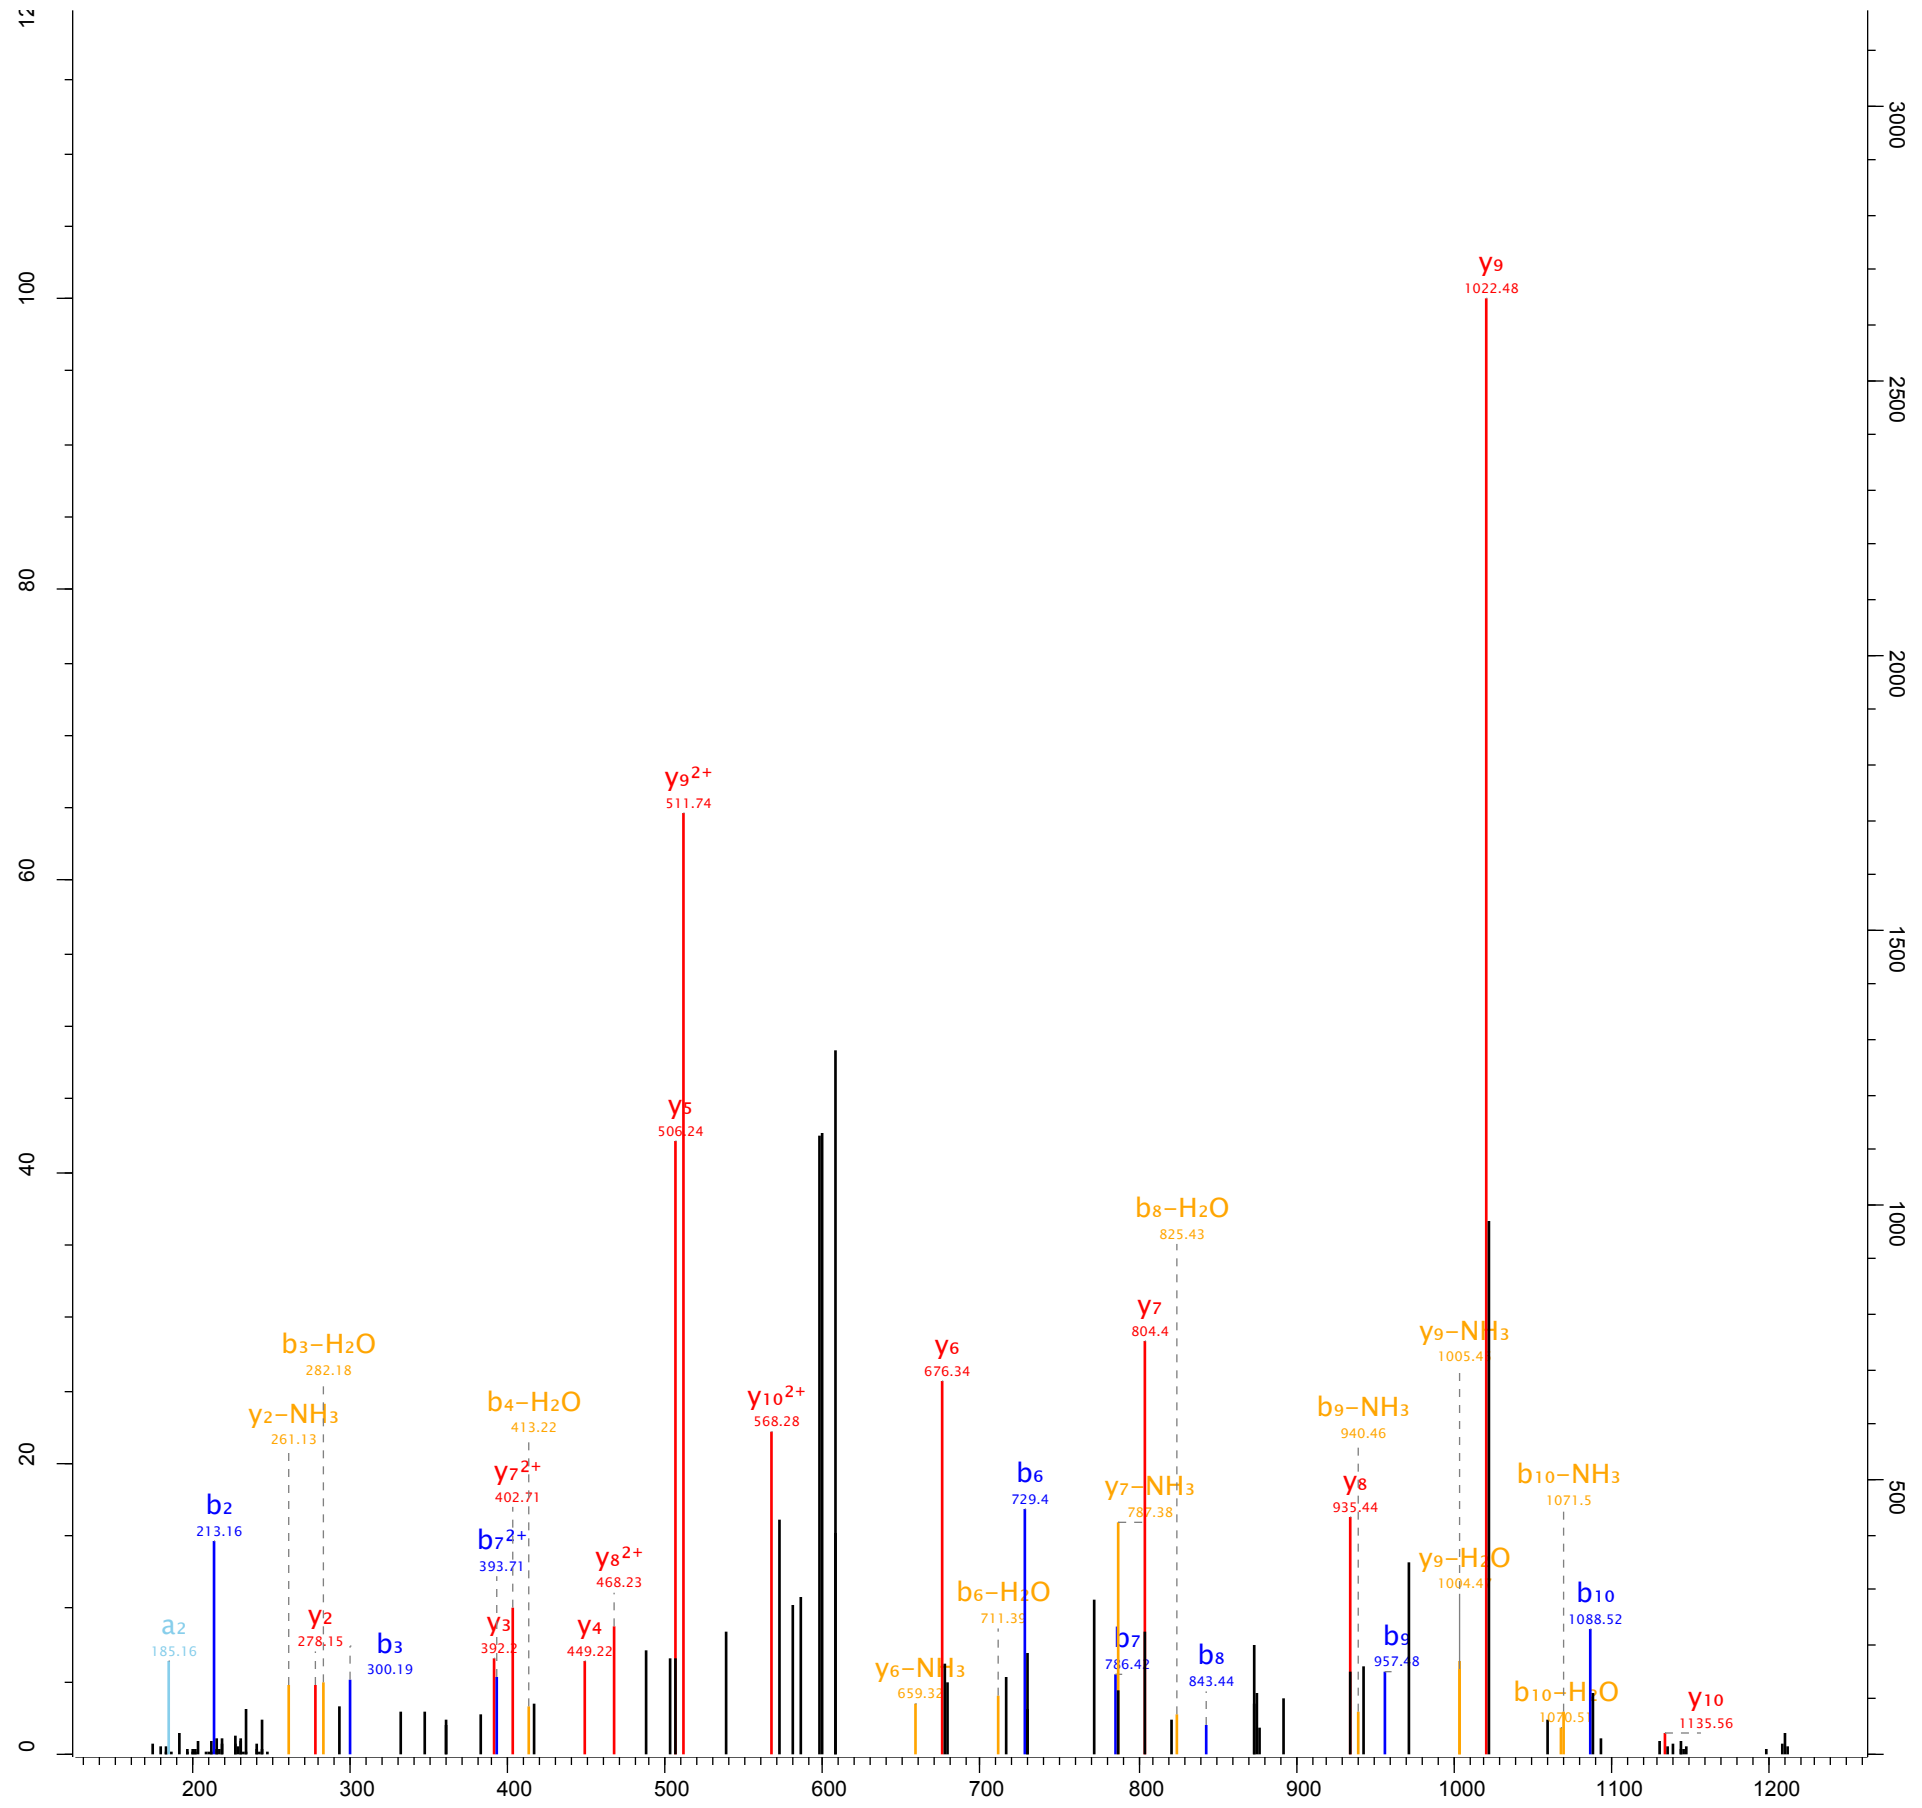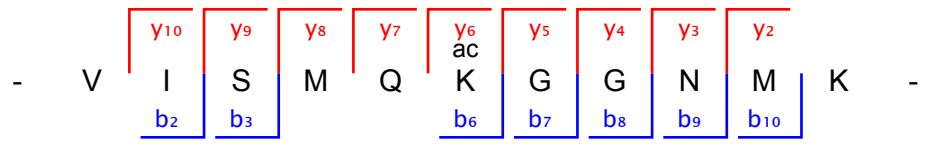

Raw file: 022714\_SCW\_II\_53\_4\_2ndZT  
 Scan: 14528 Method: ITMS; CID Score: 271.04 m/z: 743.91 Gene names: Hadha

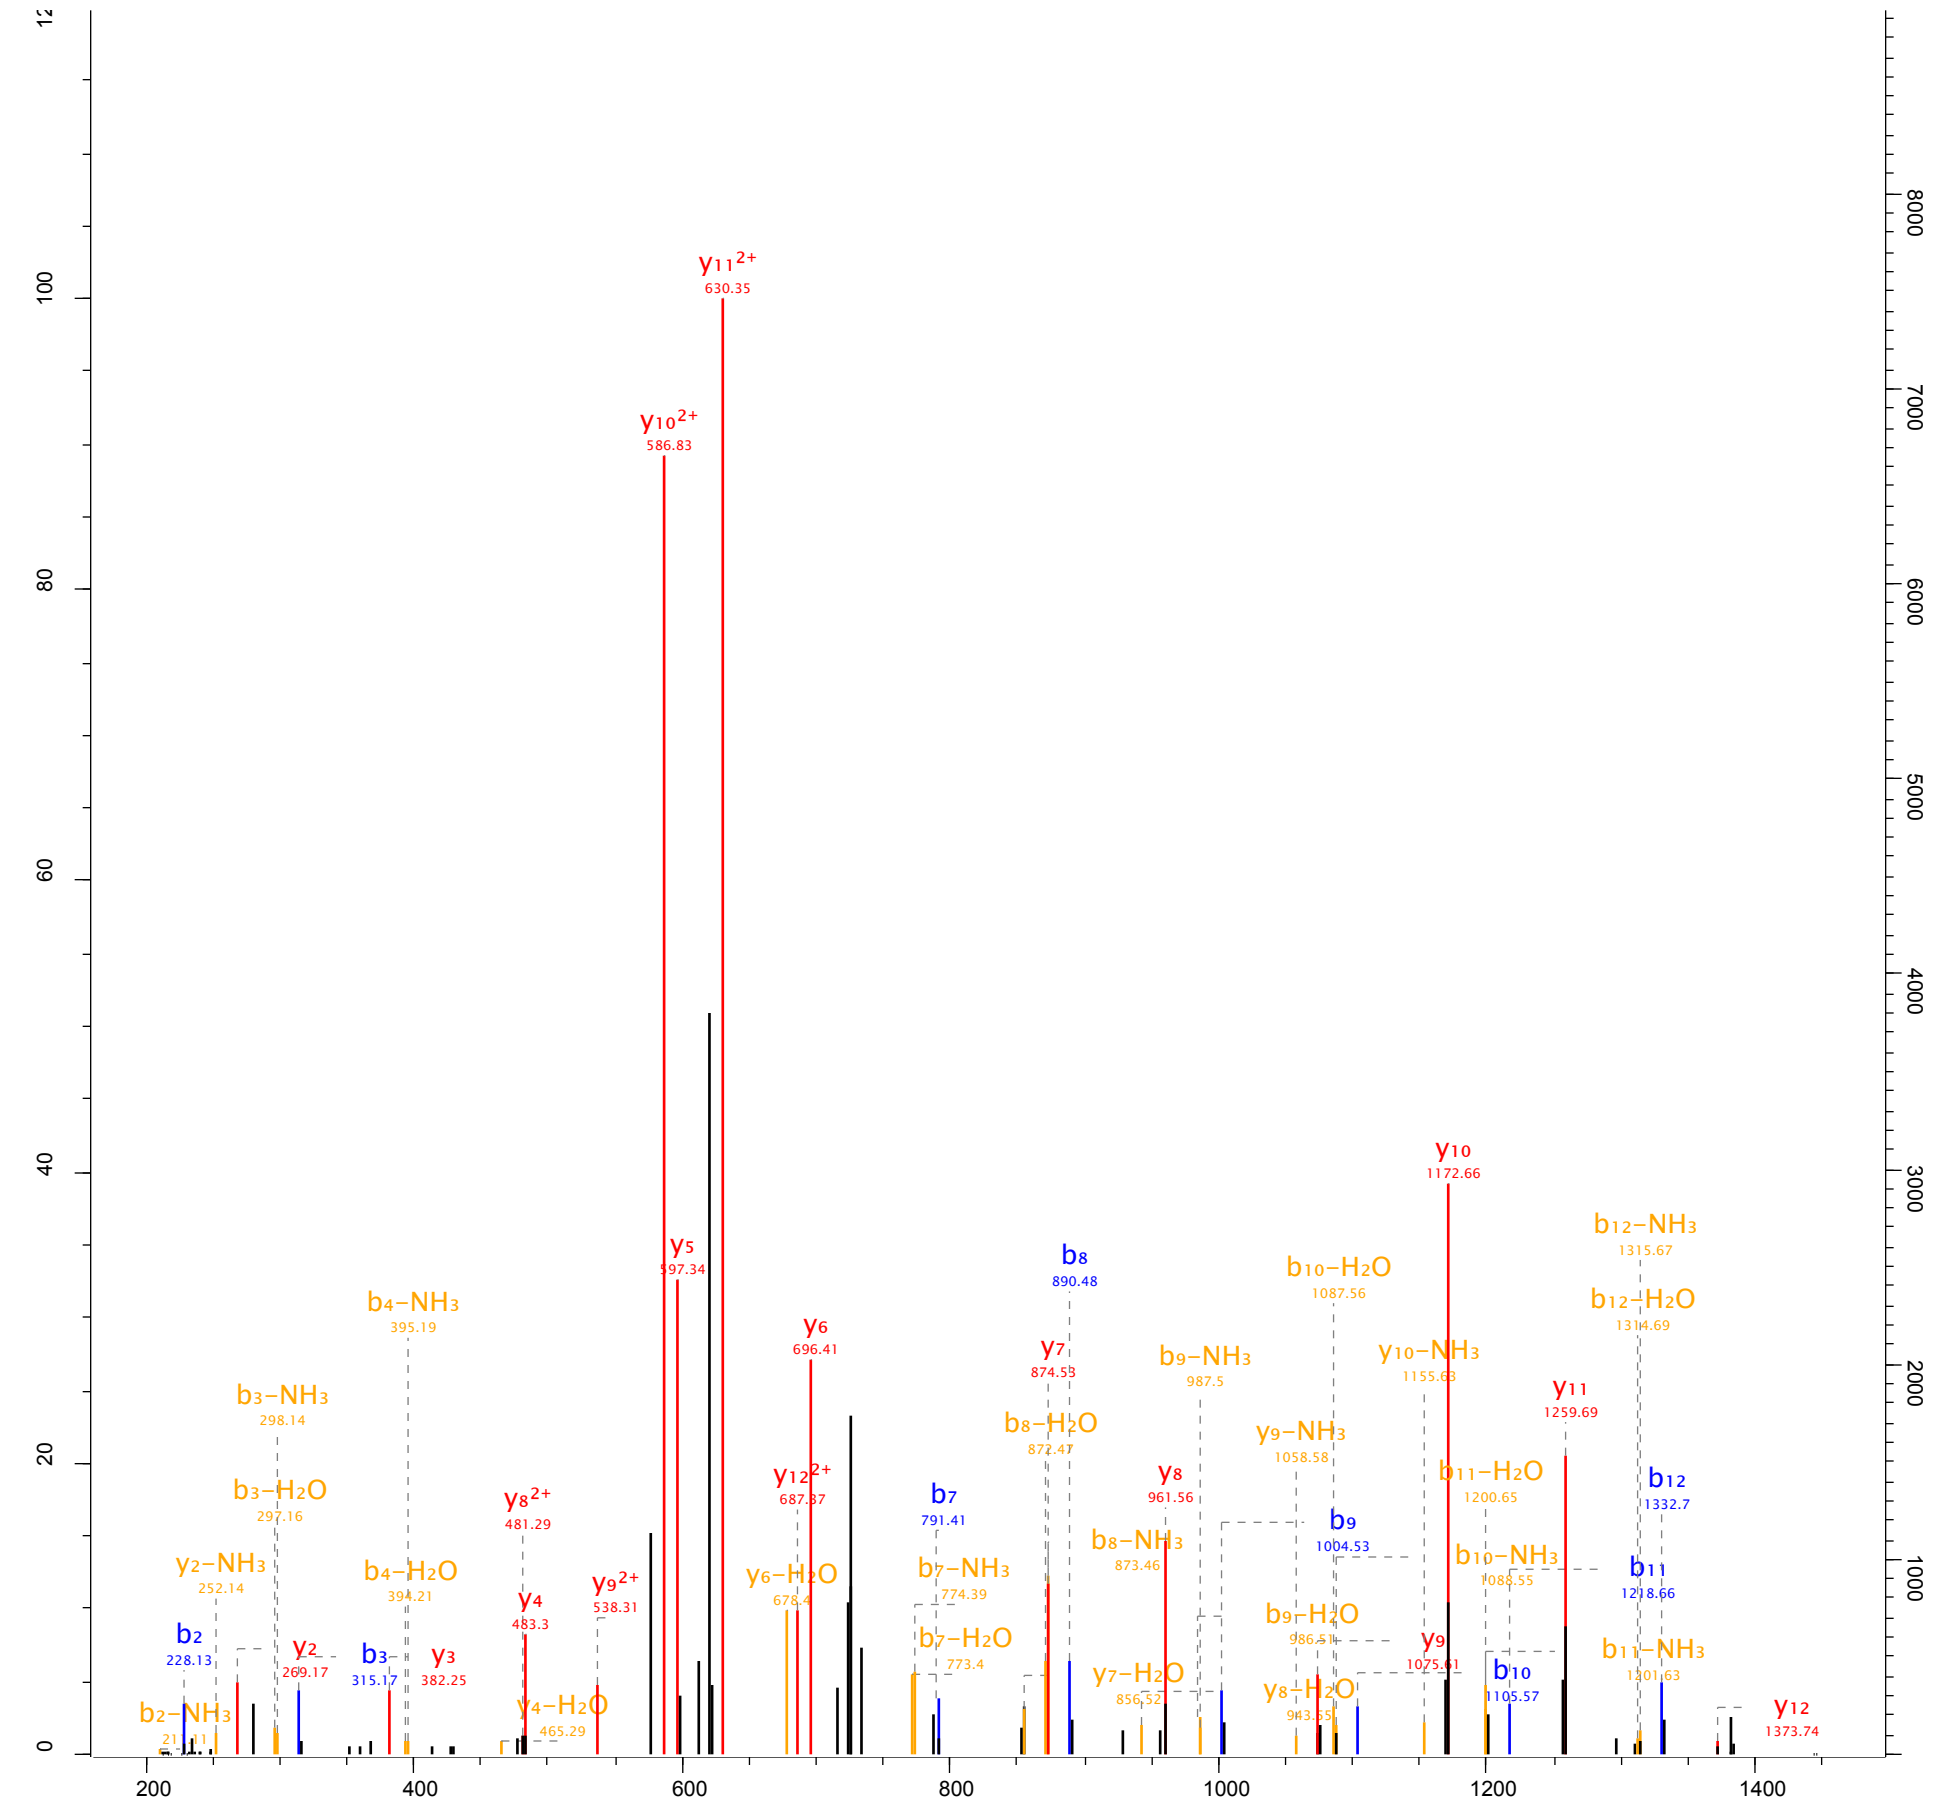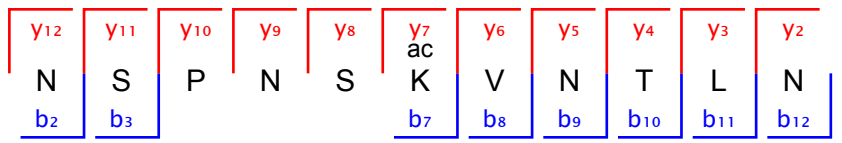

Raw file 022714\_SCW\_II\_53\_4\_2ndZT Scan 15182 Method ITMS; CID 145.83 m/z 644.37 Gene names Wipi2

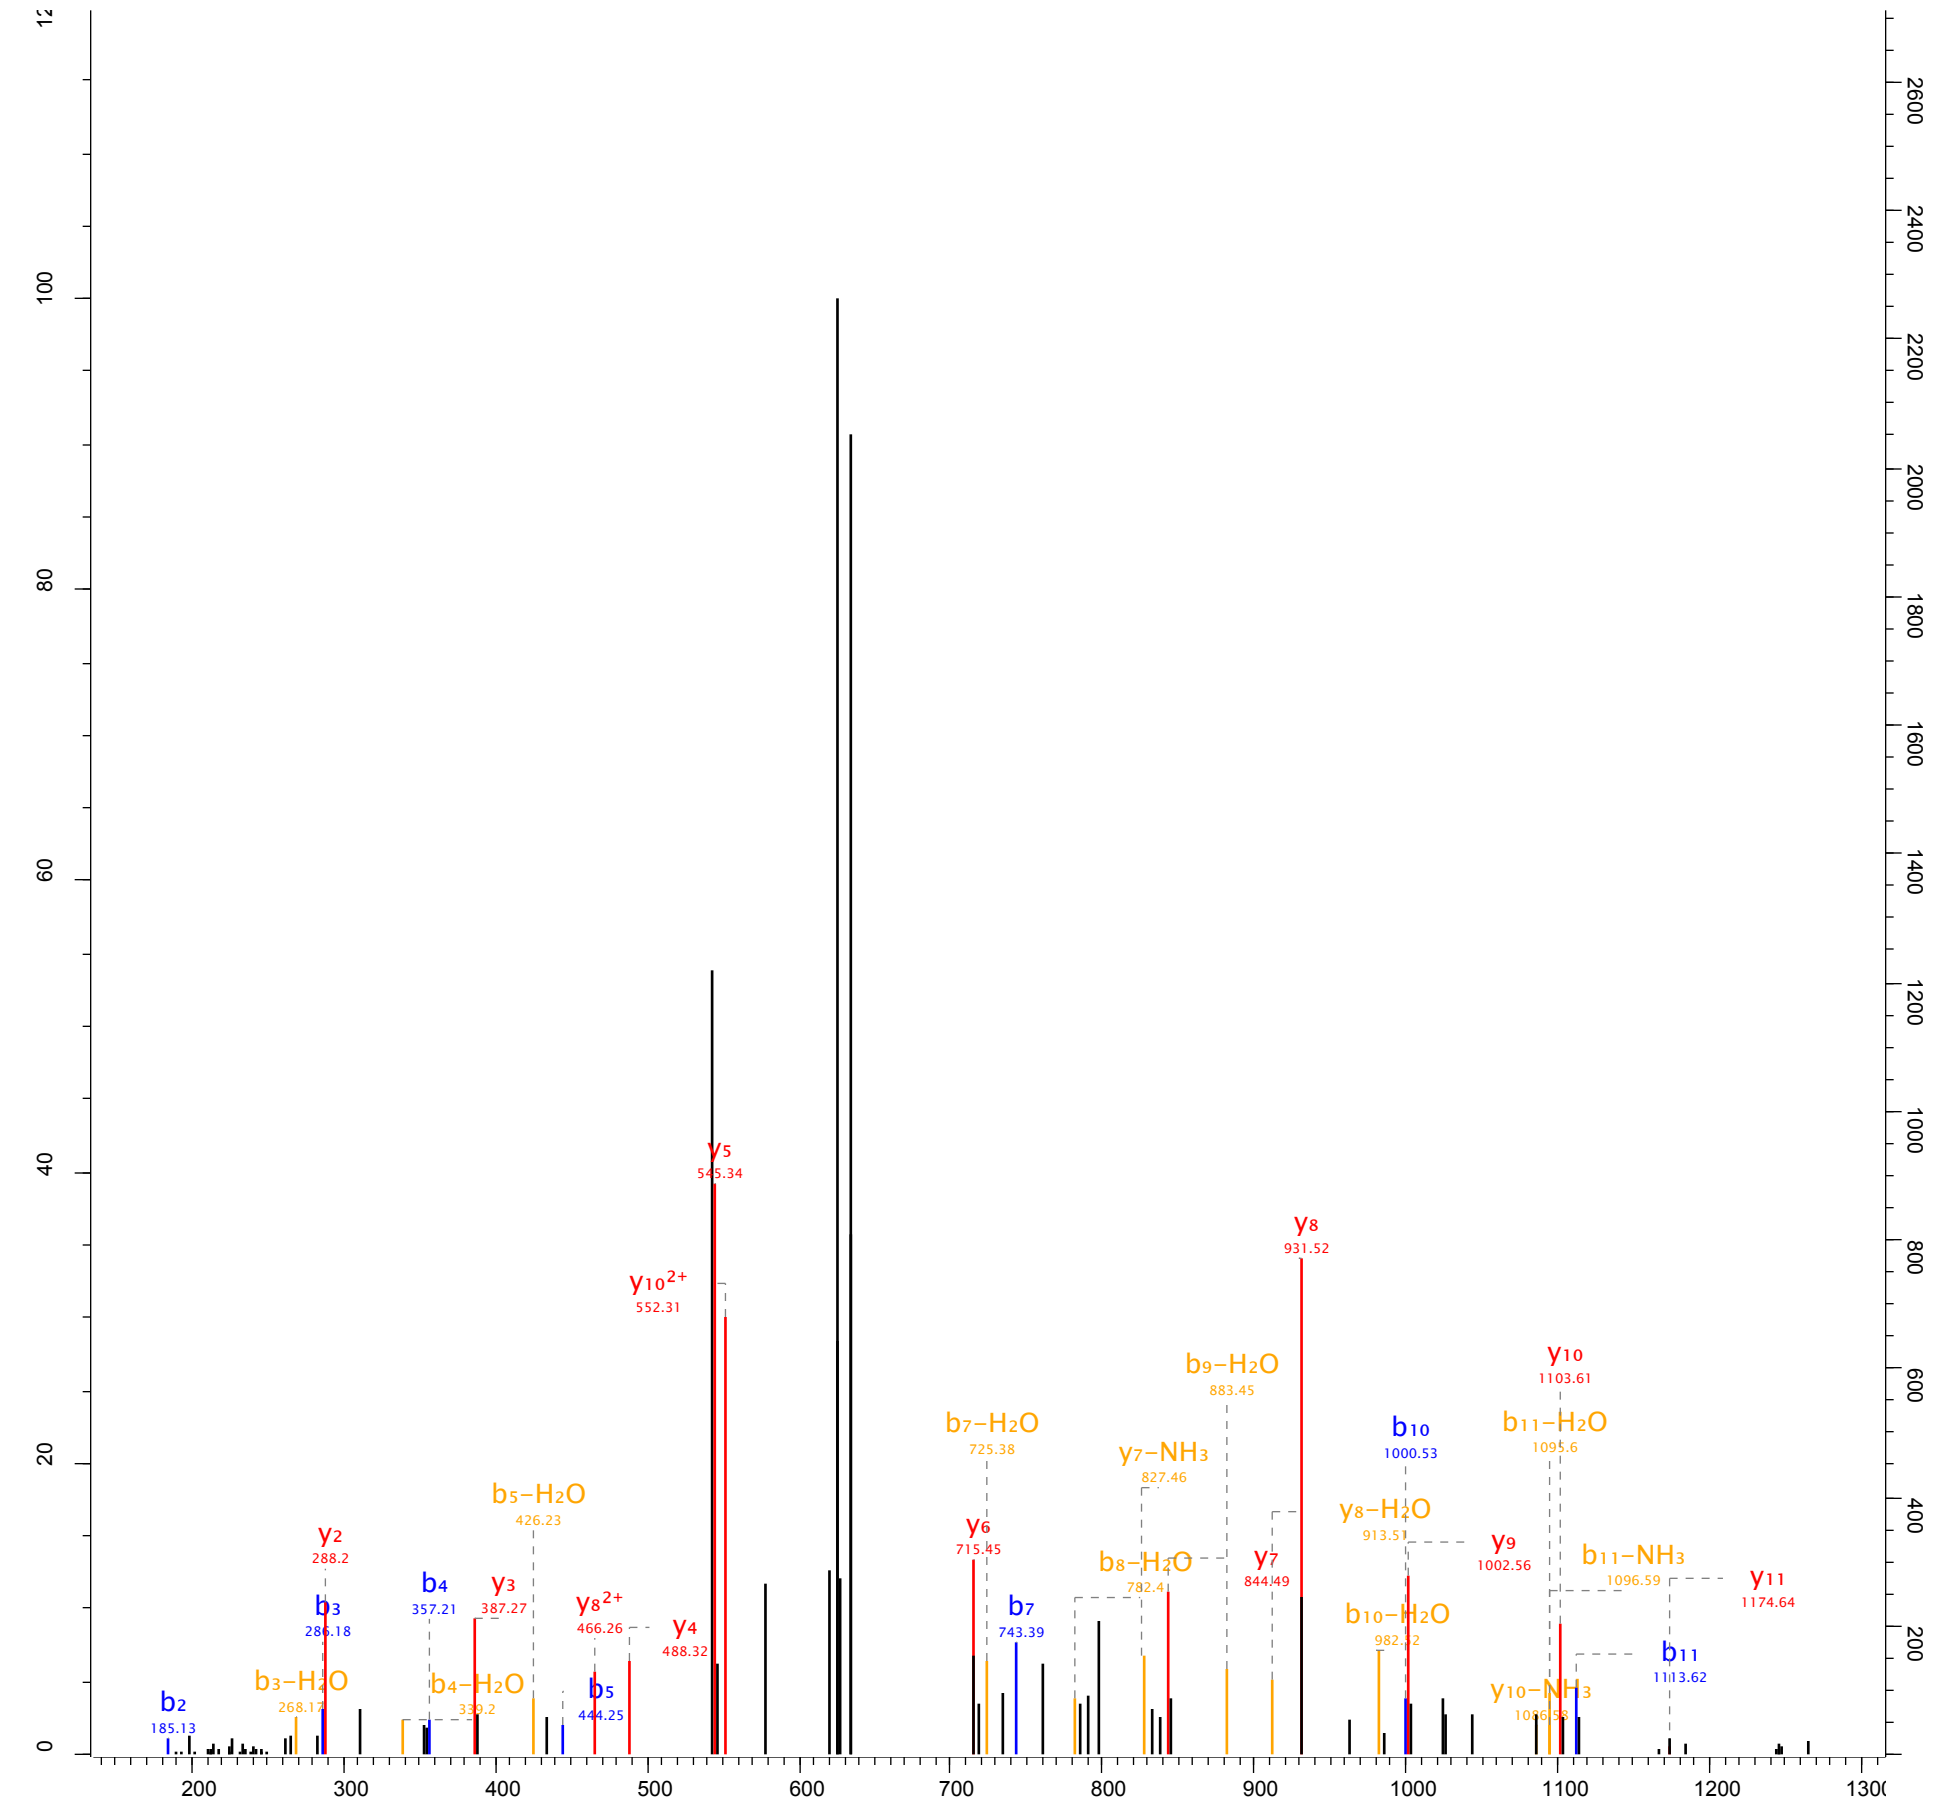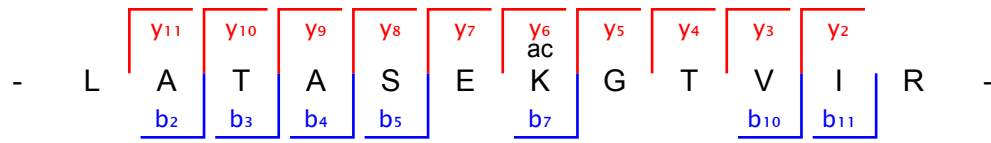

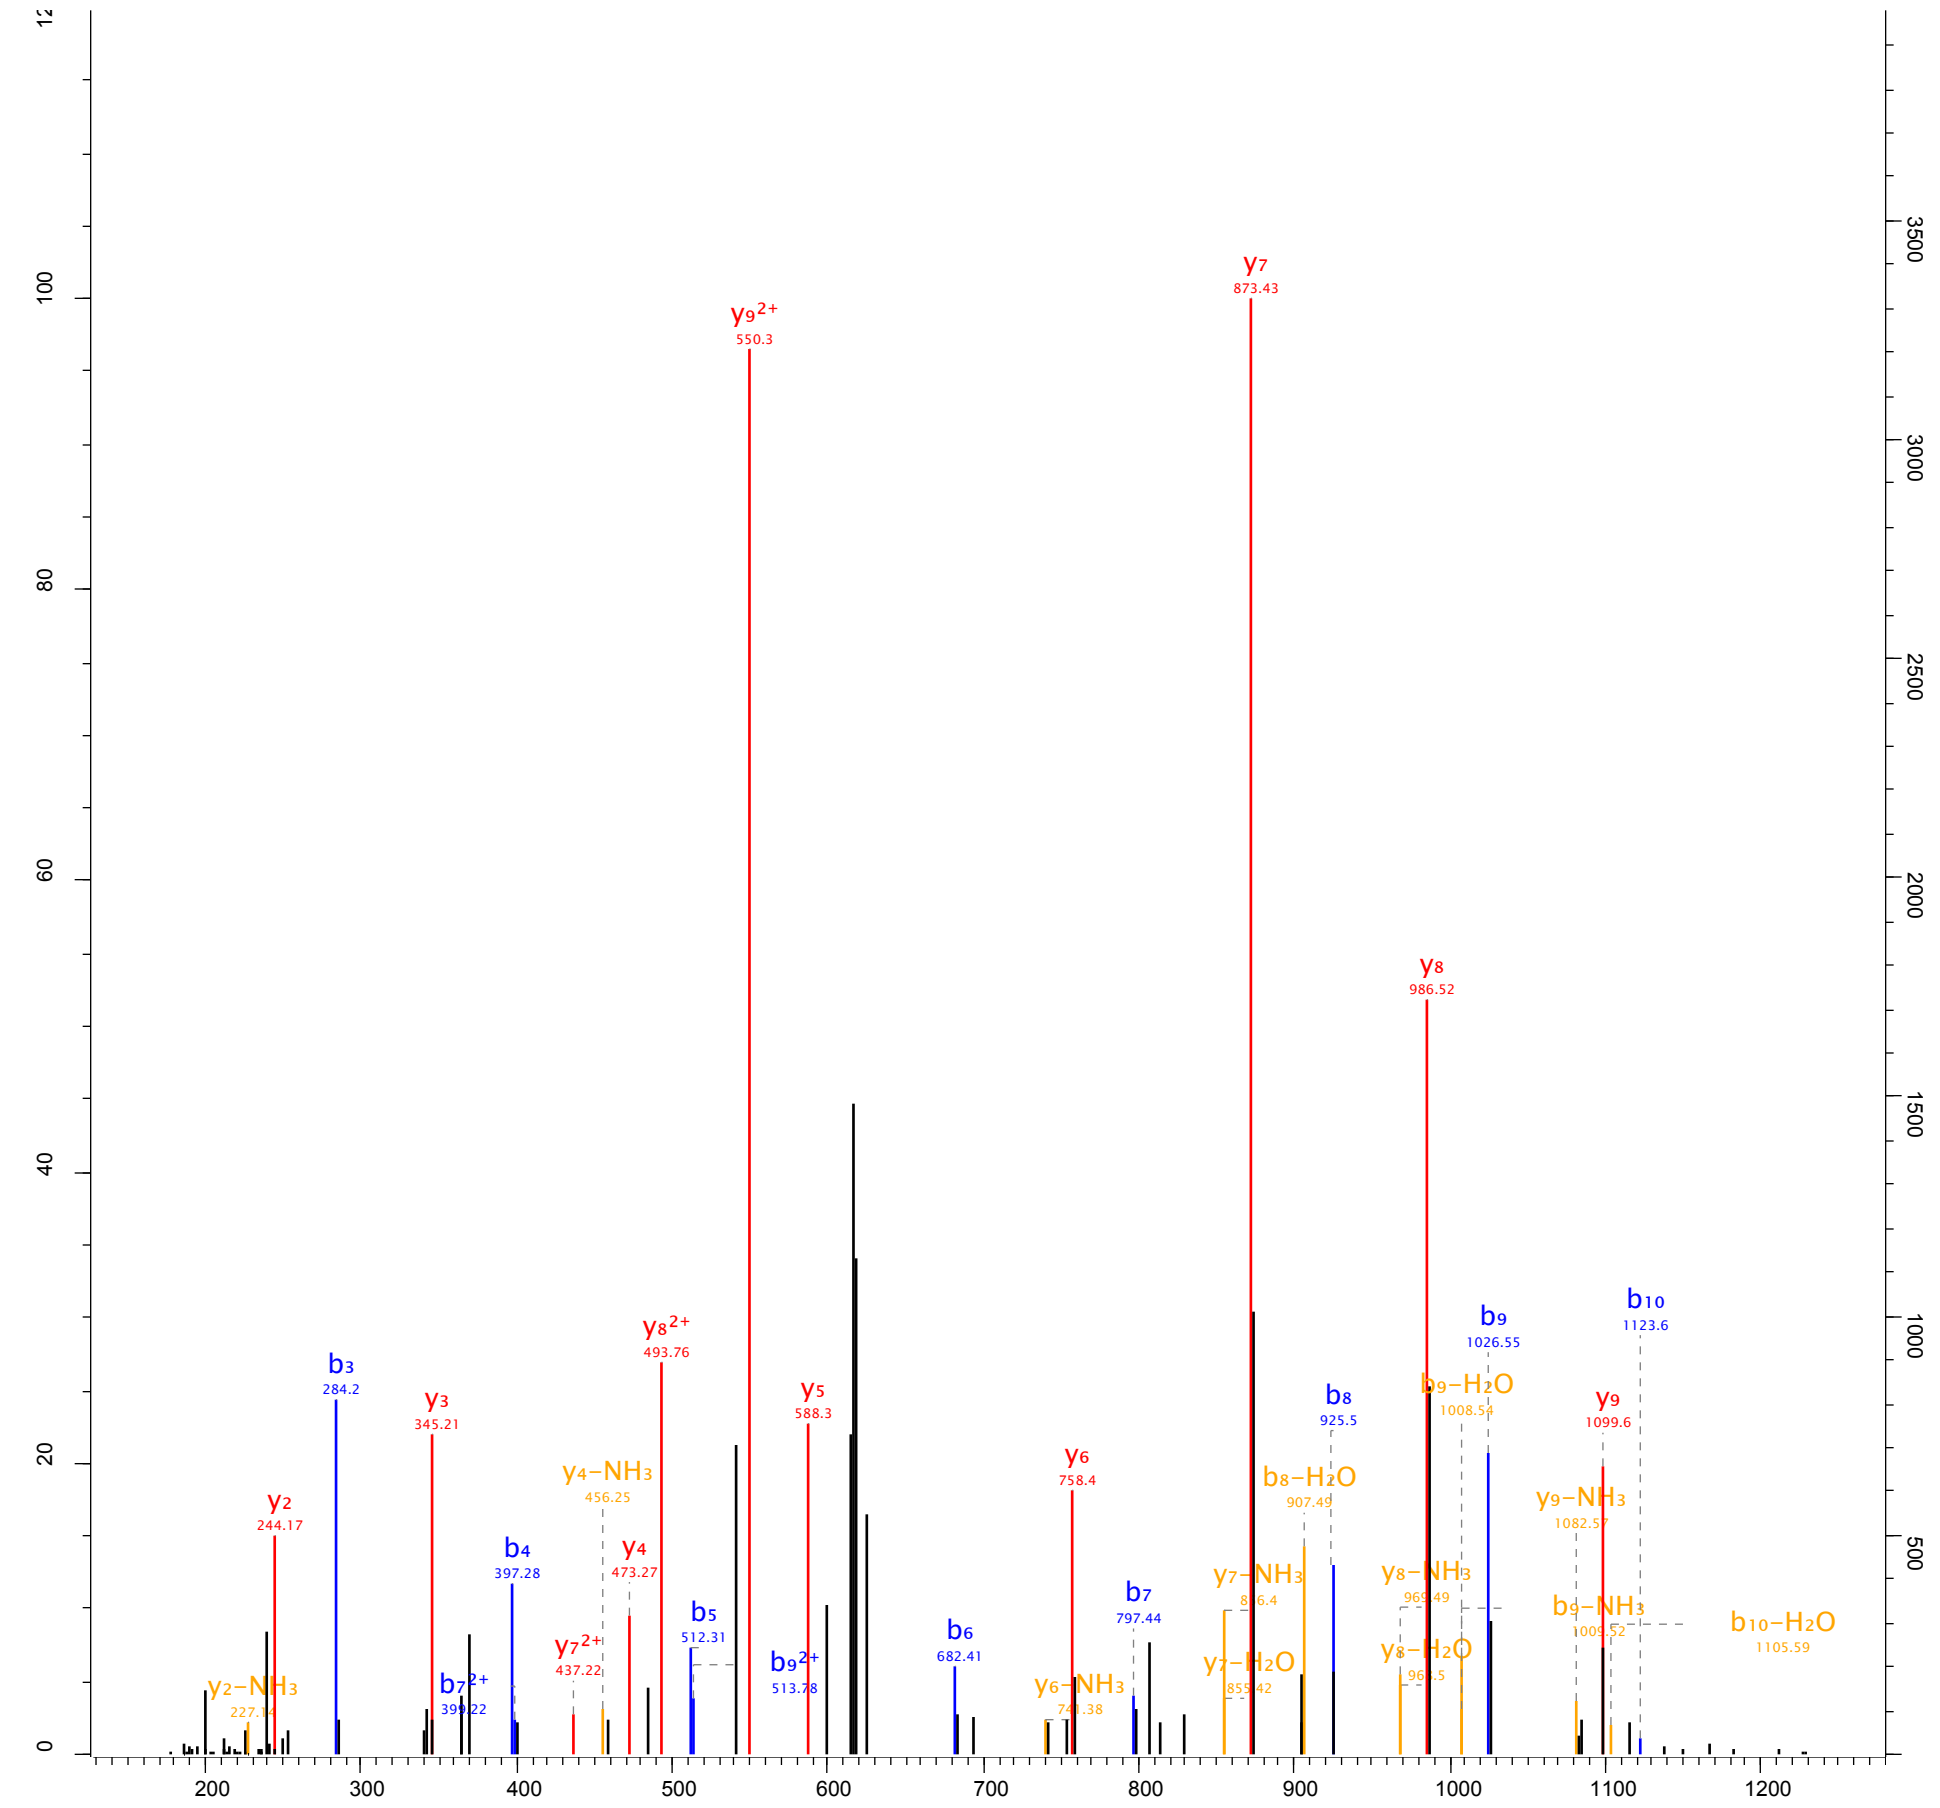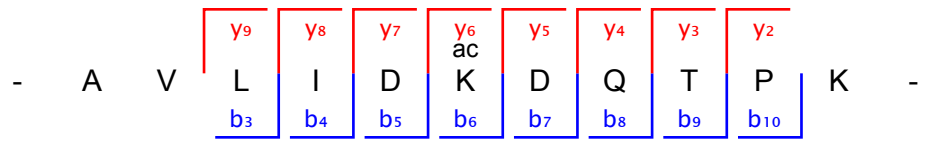

Raw file 022714\_SCW\_II\_53\_4\_2ndZT Scan 15997 Method ITMS; CID Score 98.58 m/z 750.87 Gene names Mthfd1

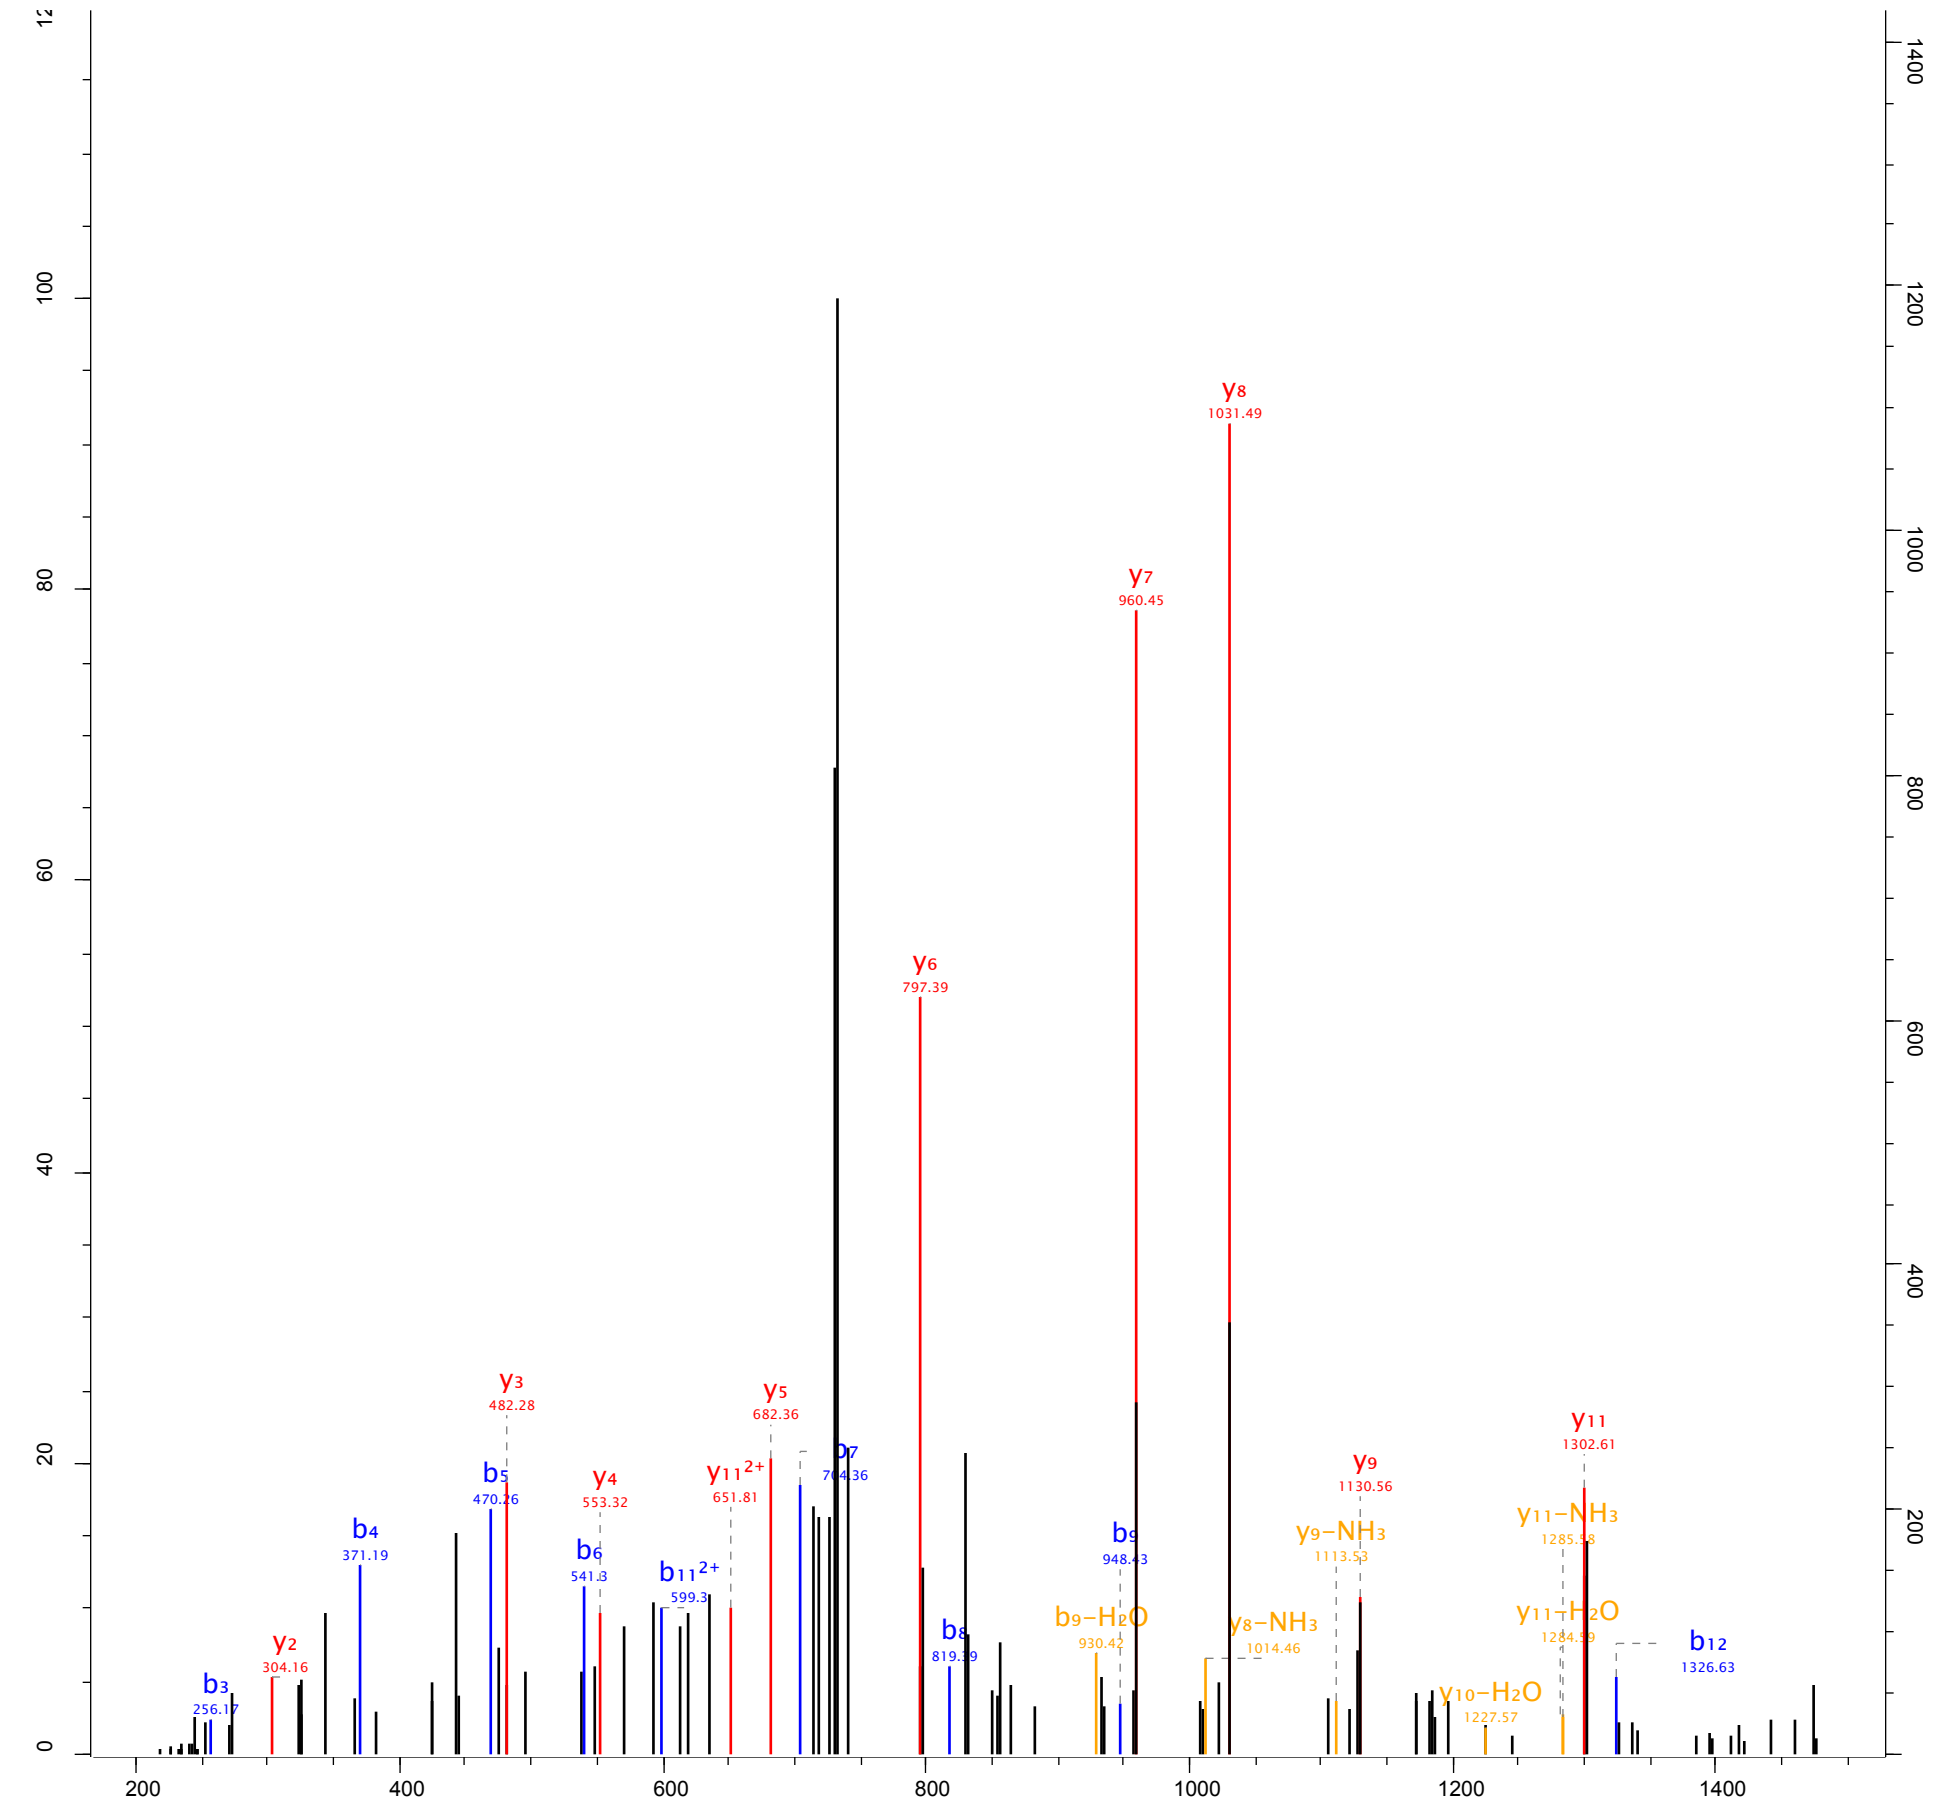

- V V G D V A Y D E A K E R -

b<sub>3</sub> b<sub>4</sub> b<sub>5</sub> b<sub>6</sub> b<sub>7</sub> b<sub>8</sub> b<sub>9</sub> b<sub>11</sub><sup>2+</sup> b<sub>12</sub>

Raw file: 022714\_SCW\_II\_53\_4\_2ndZT  
 Scan: 16127 Method: ITMS; CID Score: 145.14 m/z: 650.38 Gene names: Rbm14

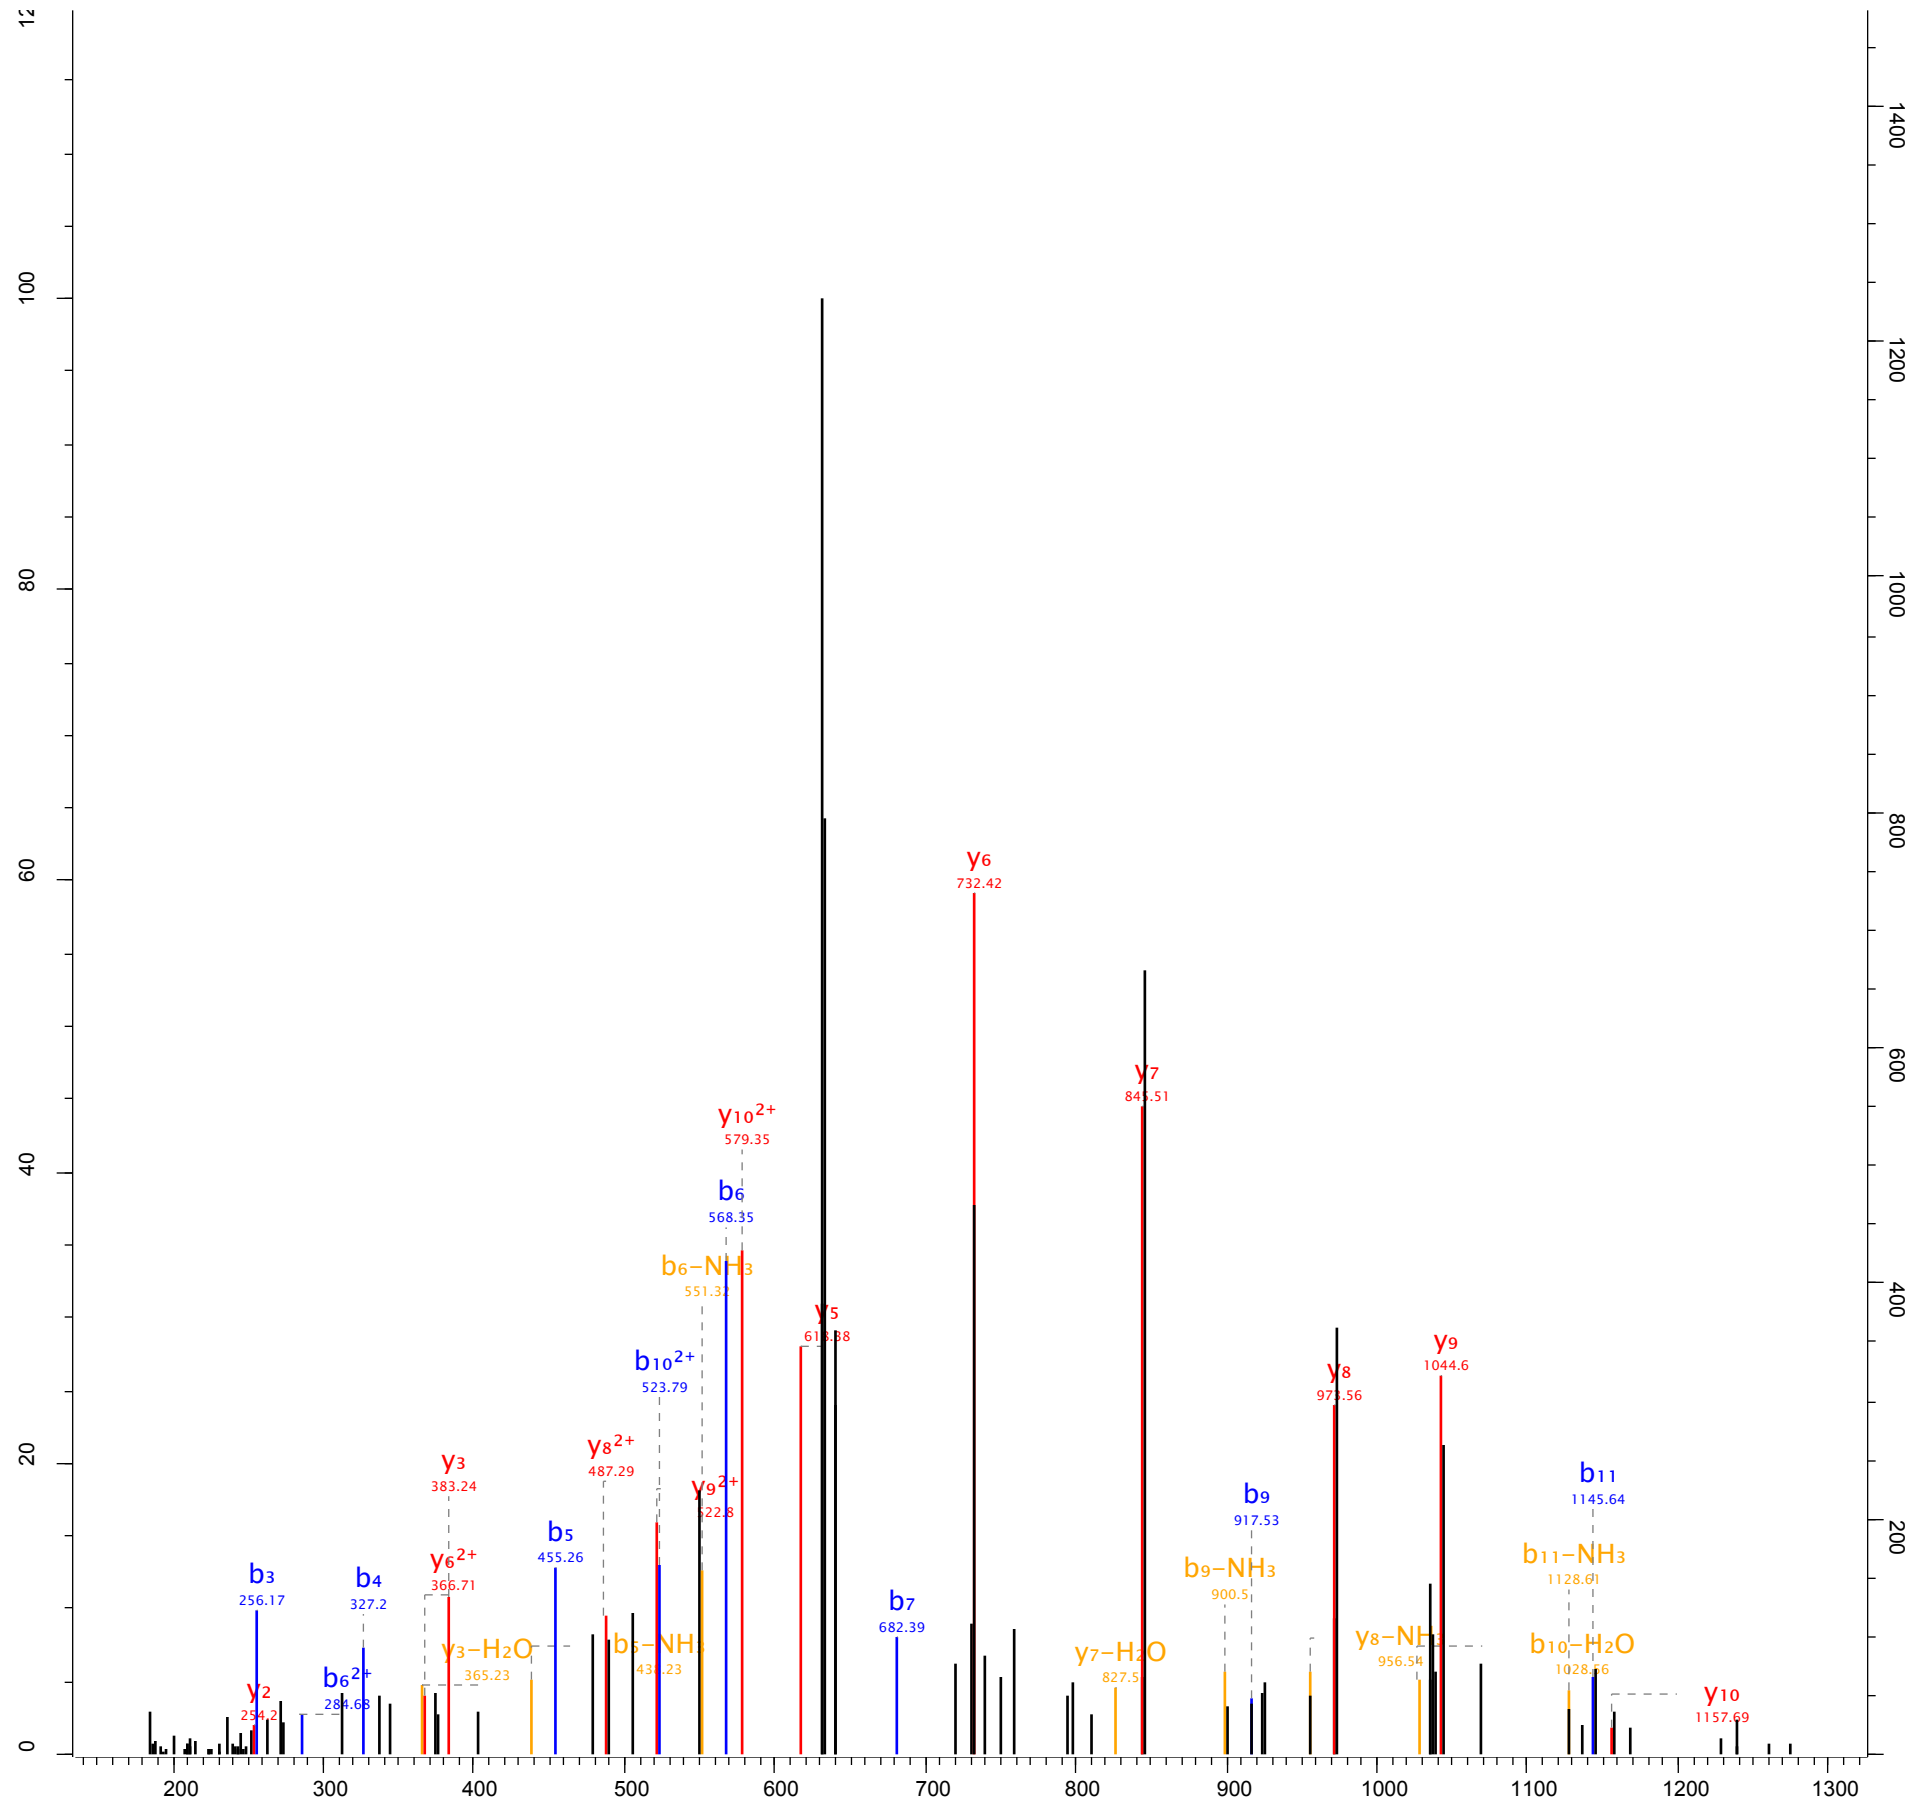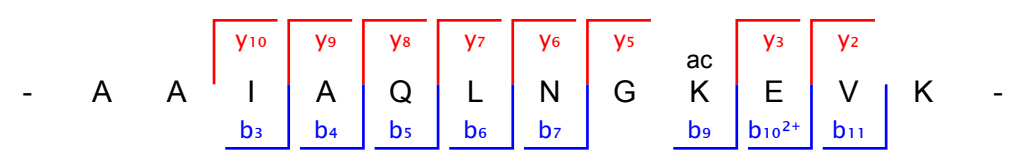



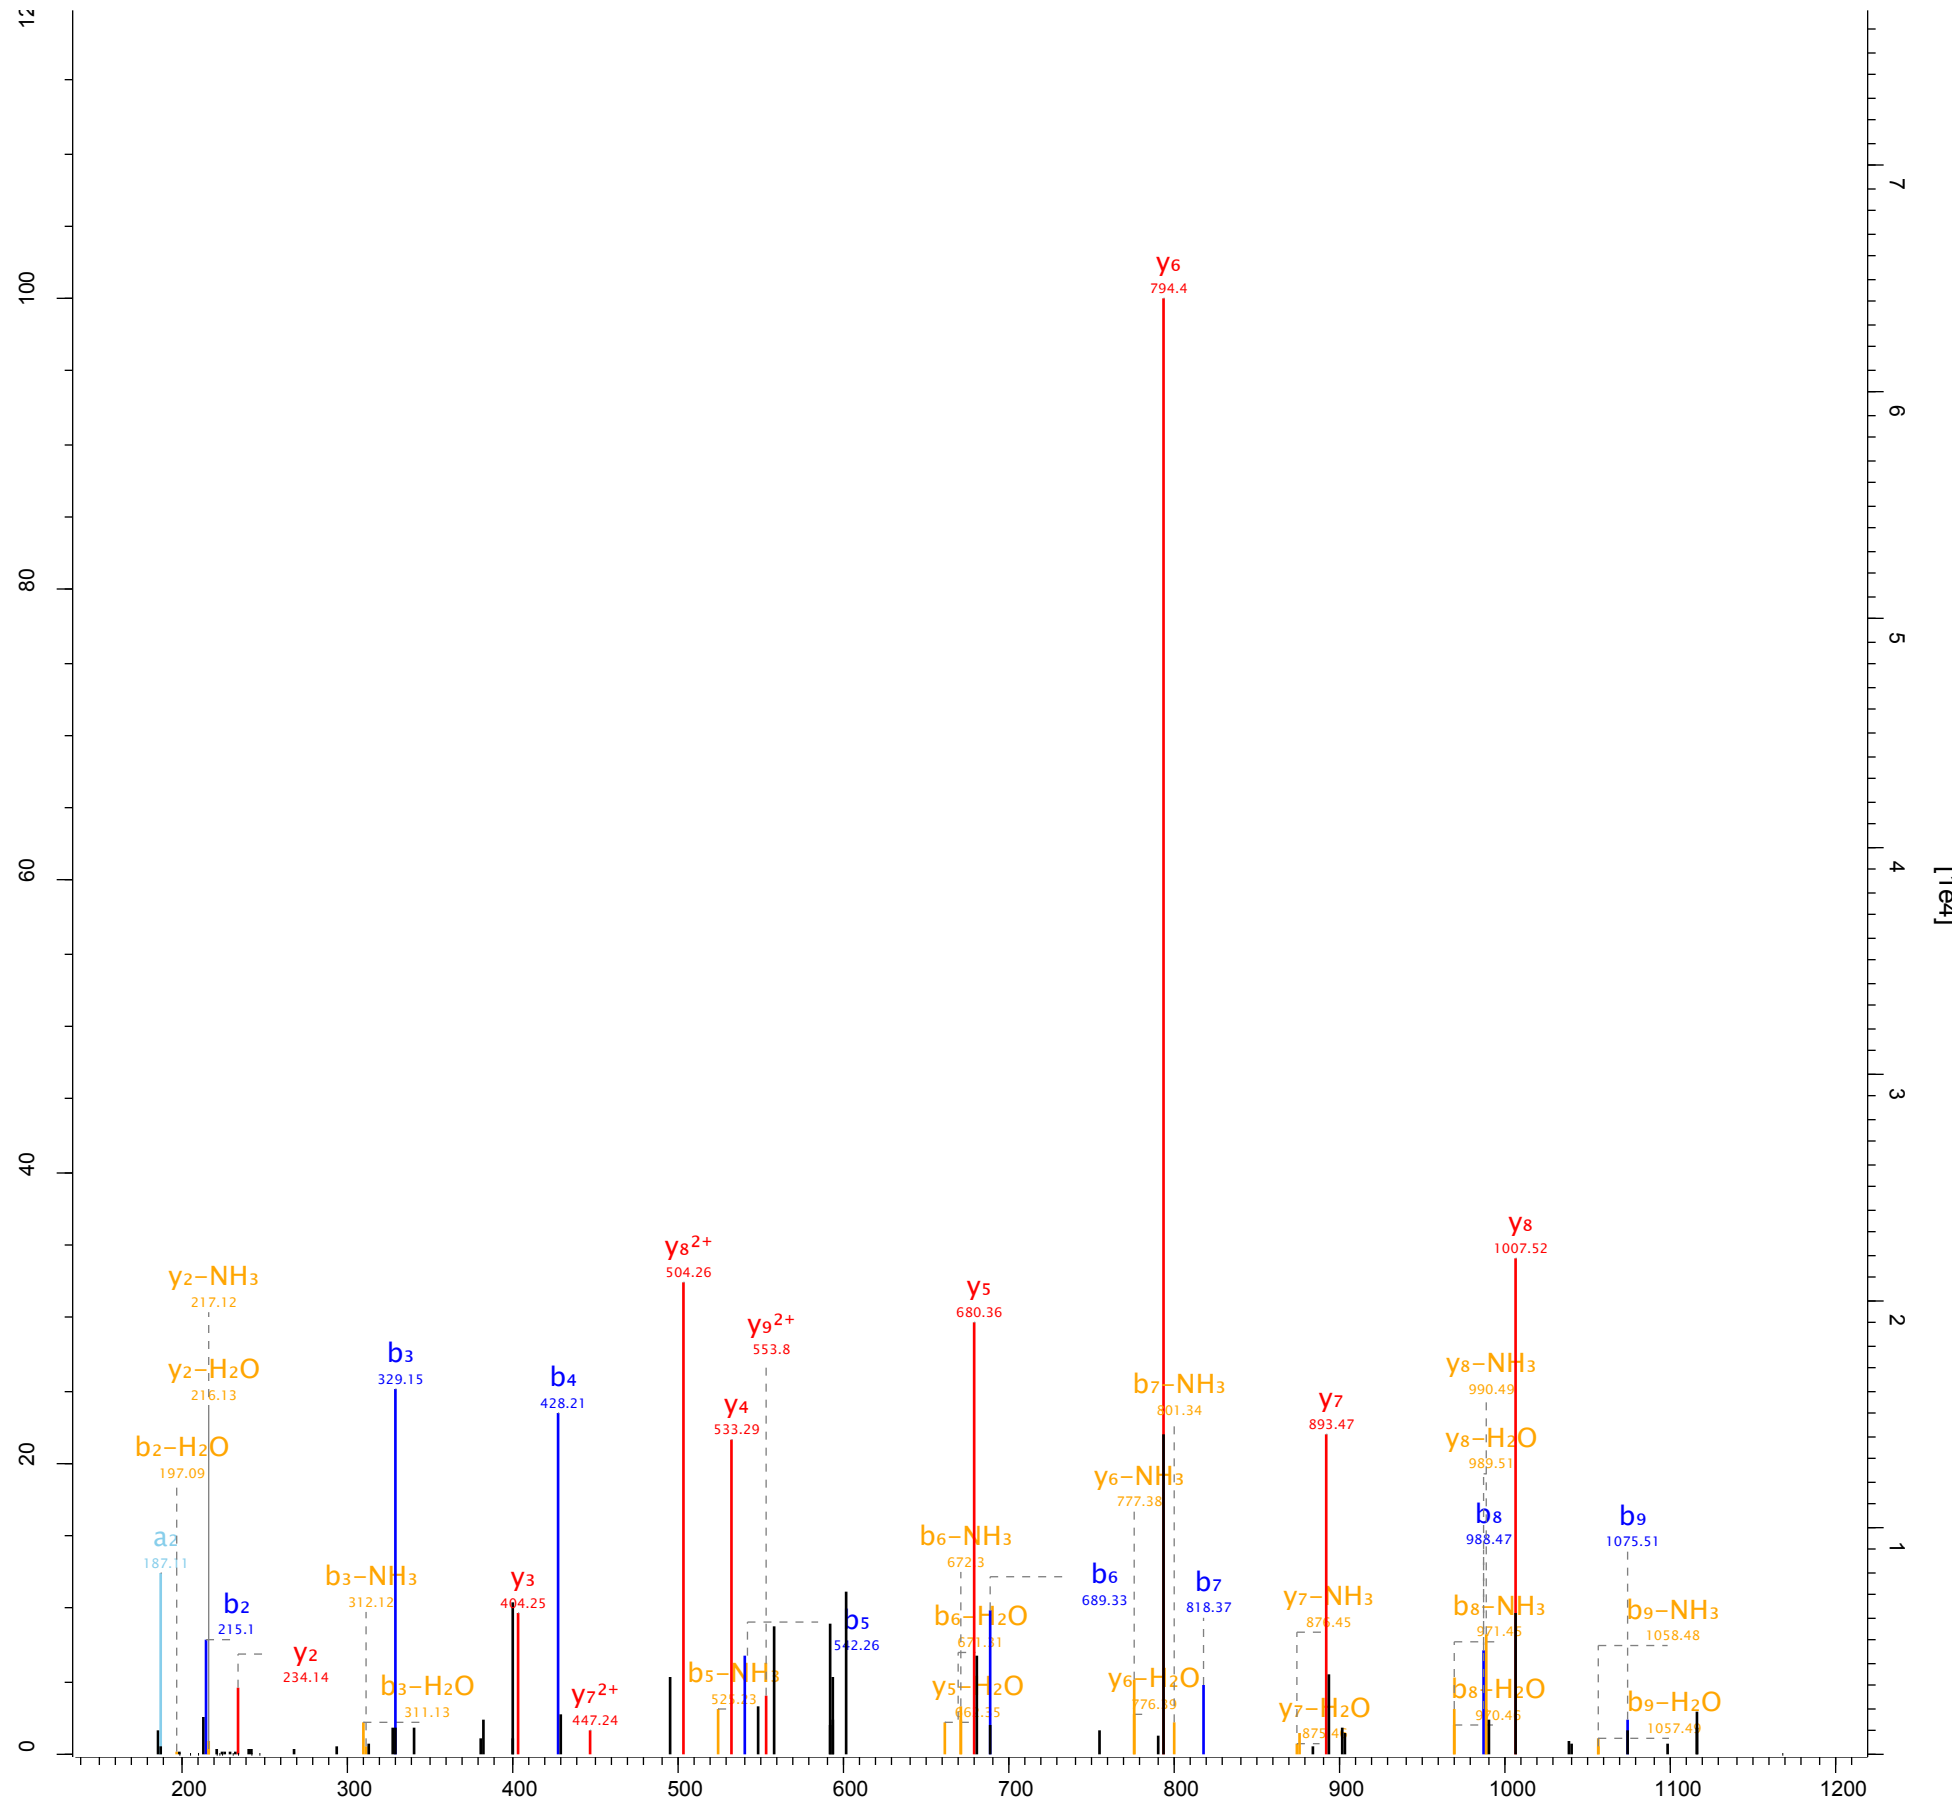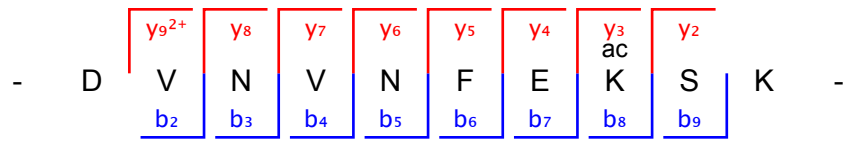

022714\_SCW\_II\_53\_4\_2ndZT

16576

ITMS; CID

170.74

696.38

Pdlim5

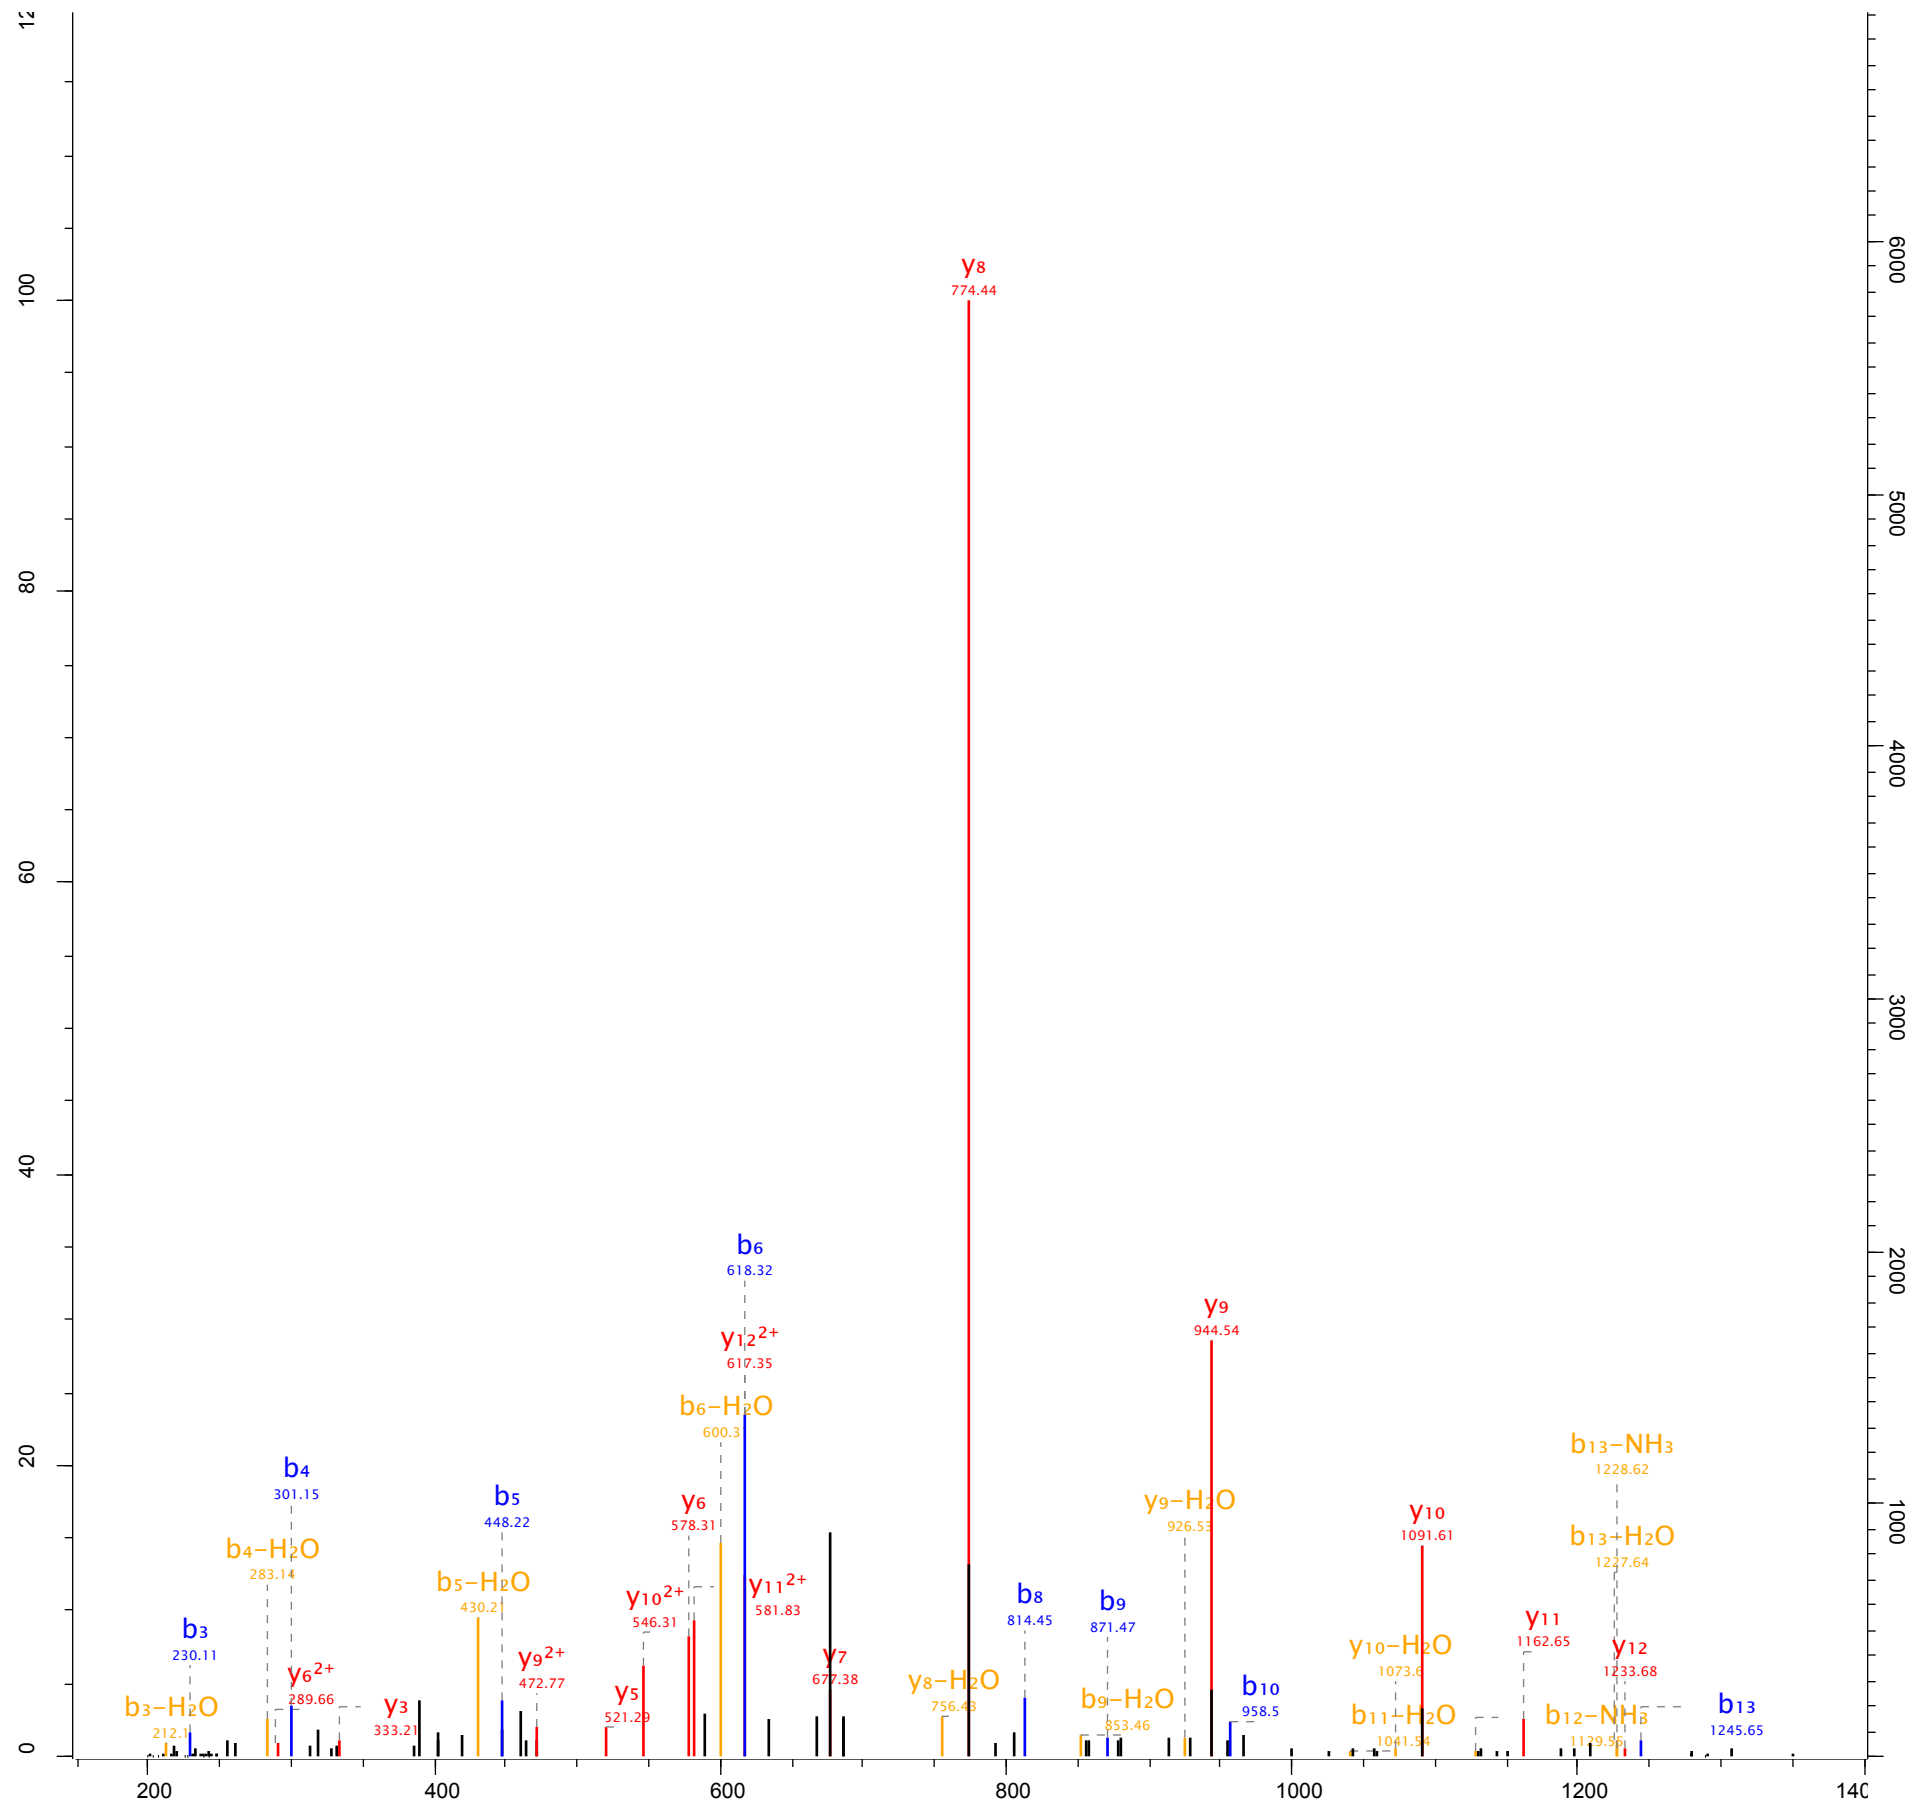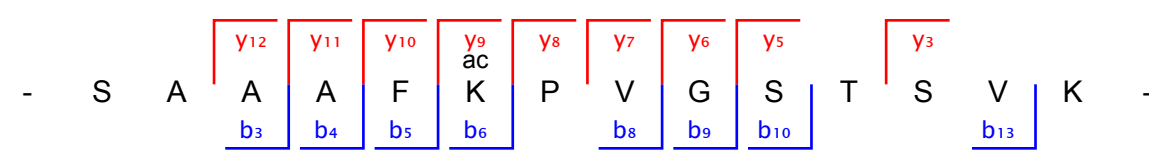

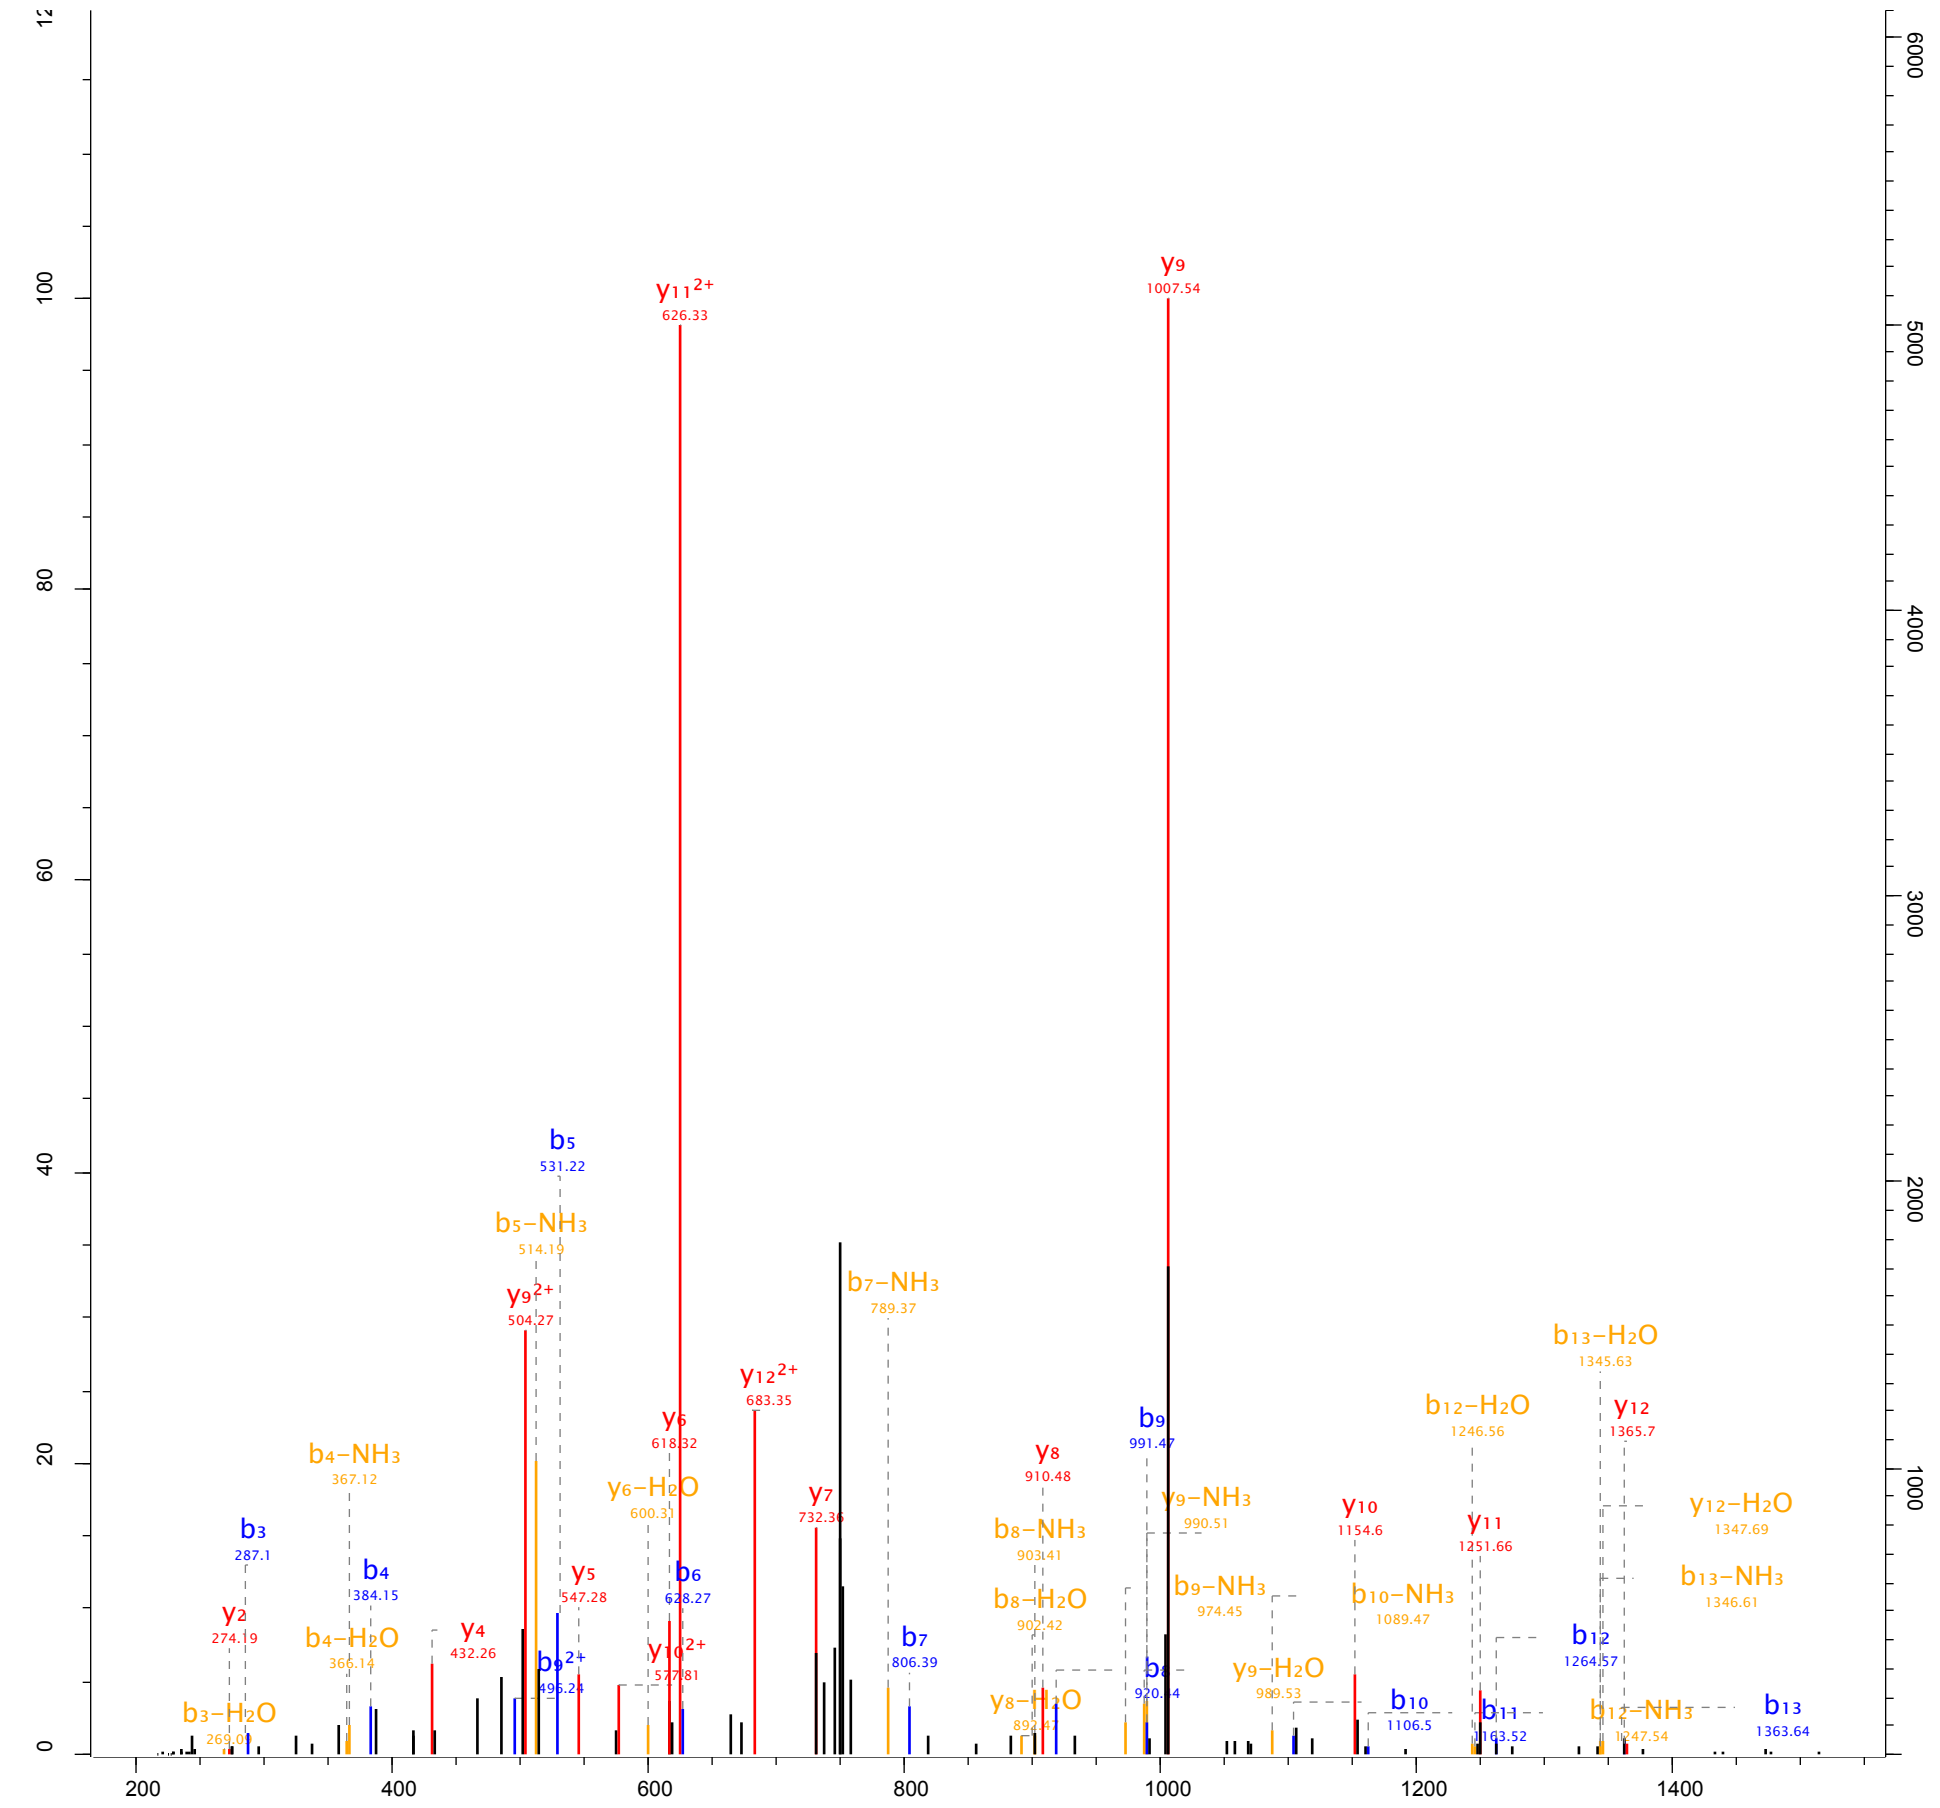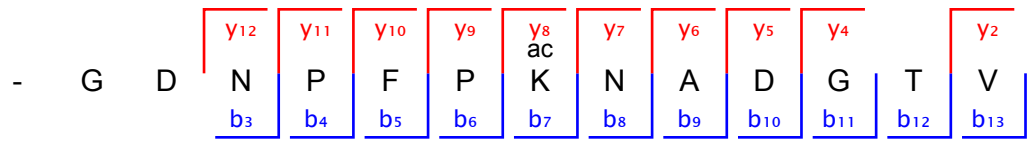

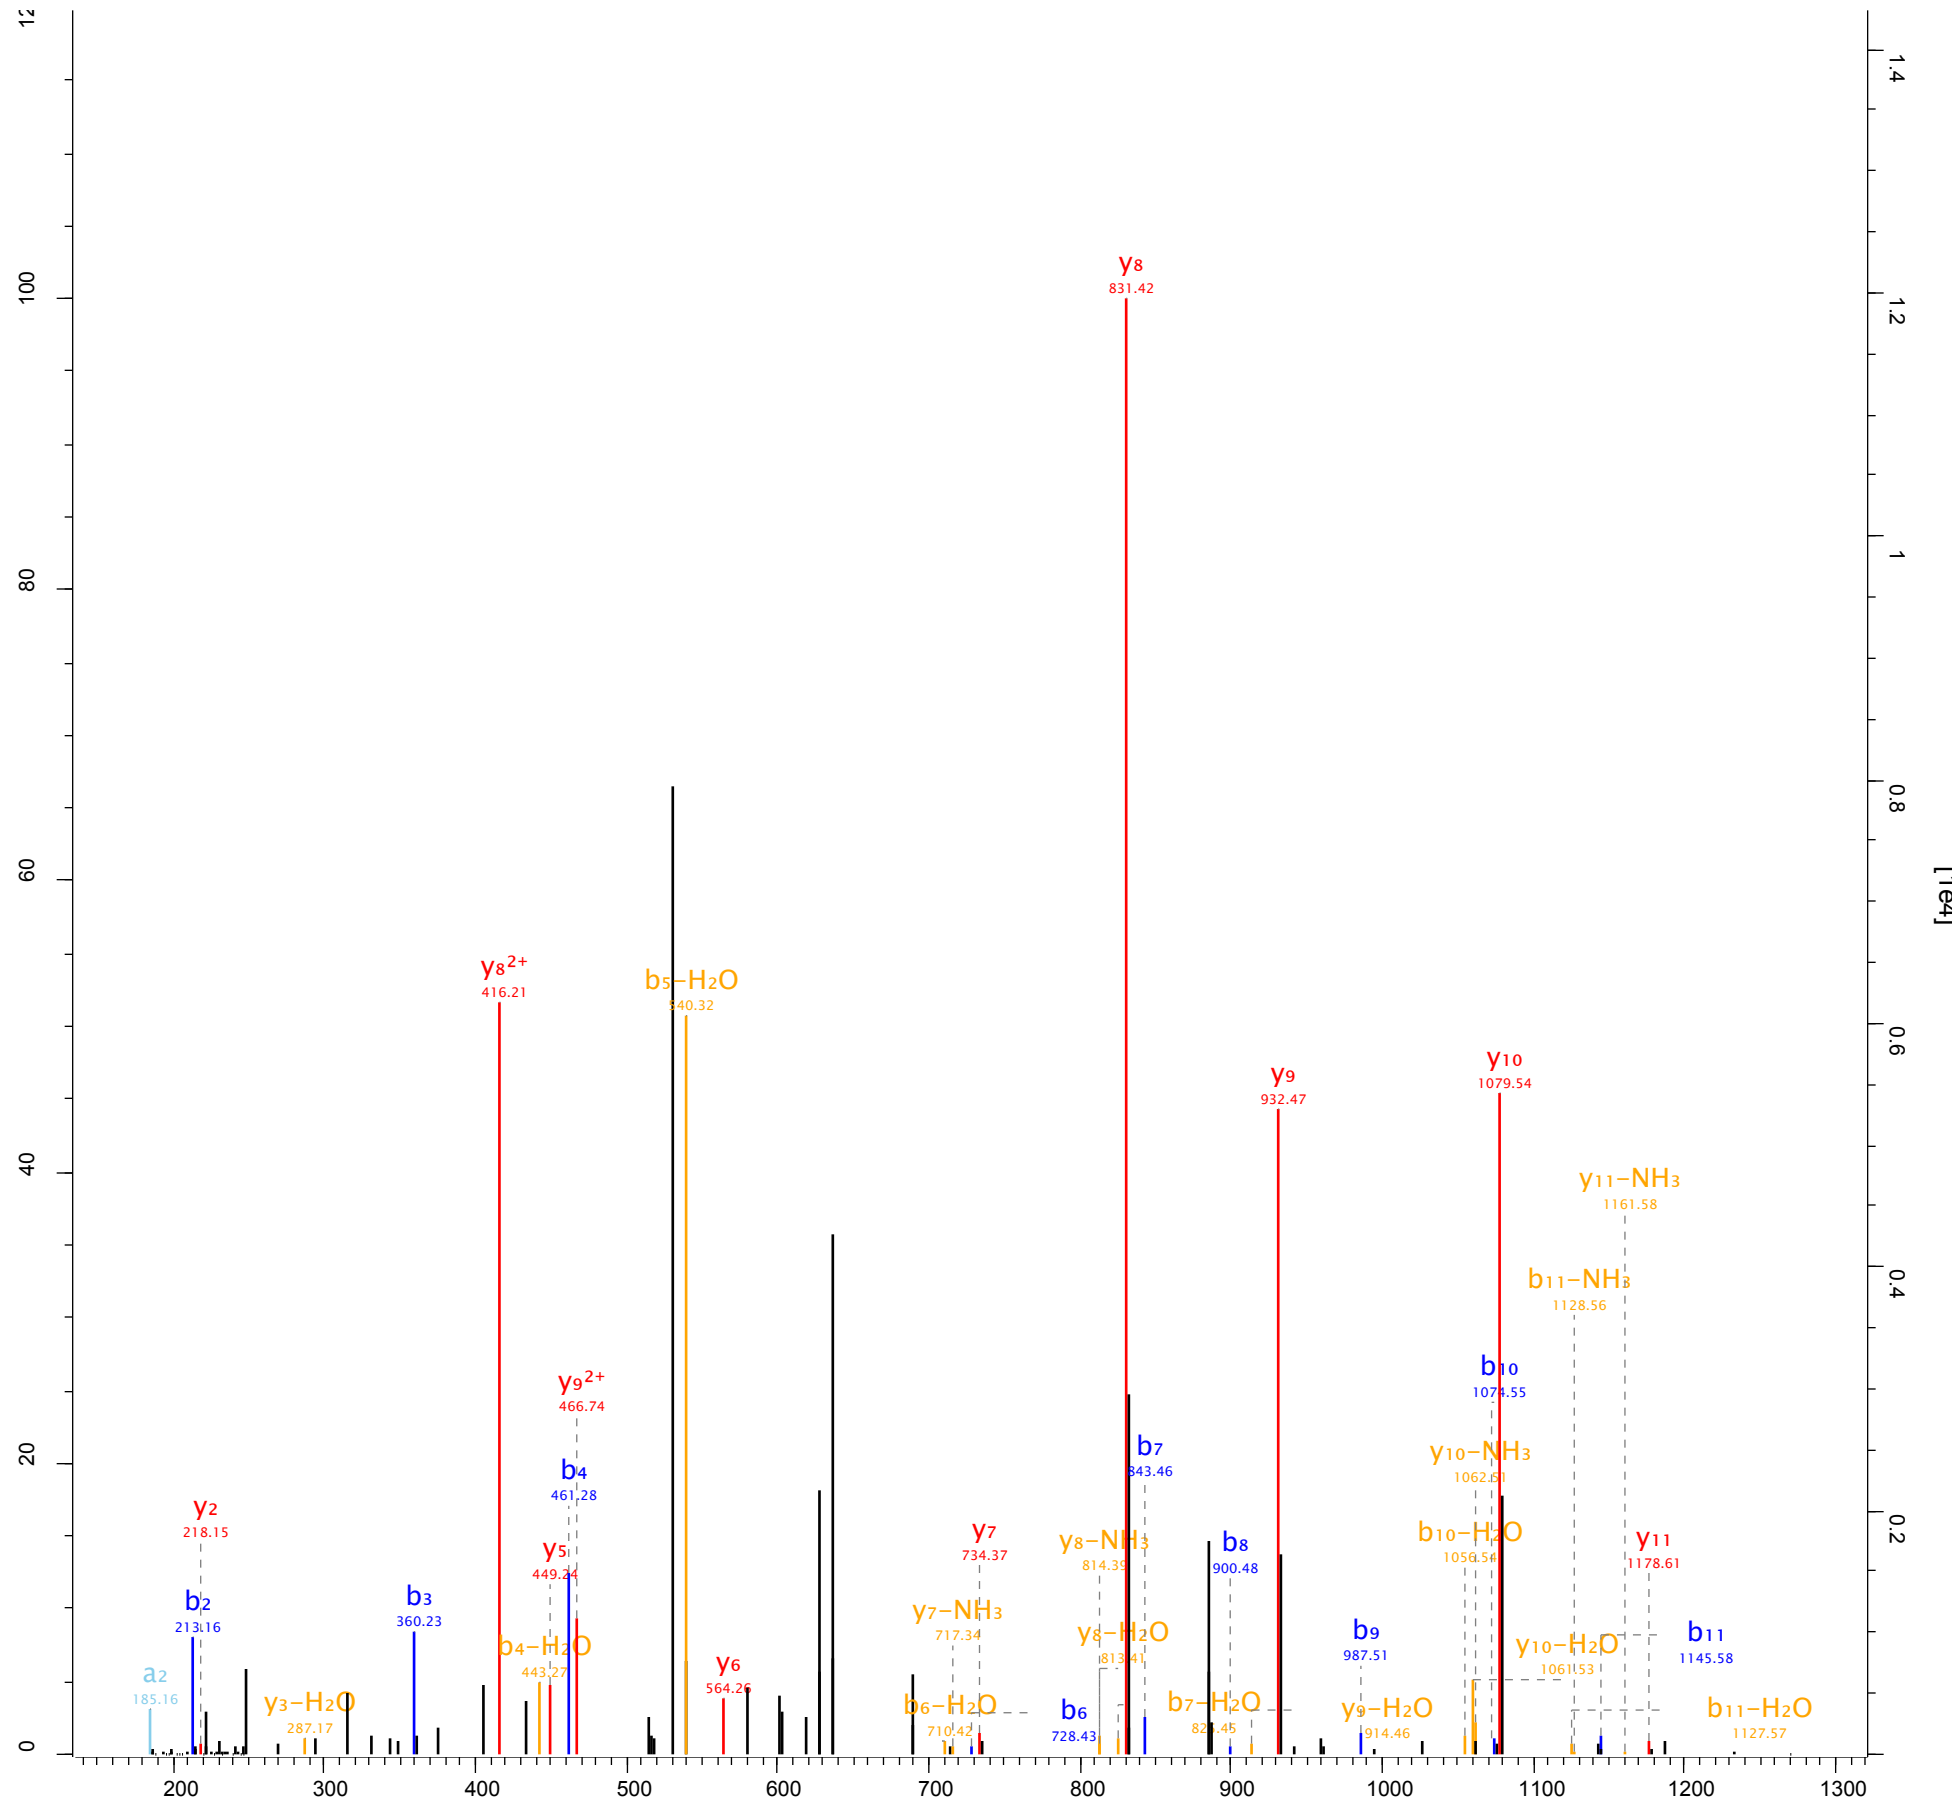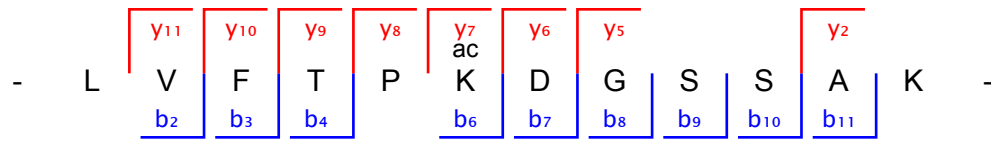

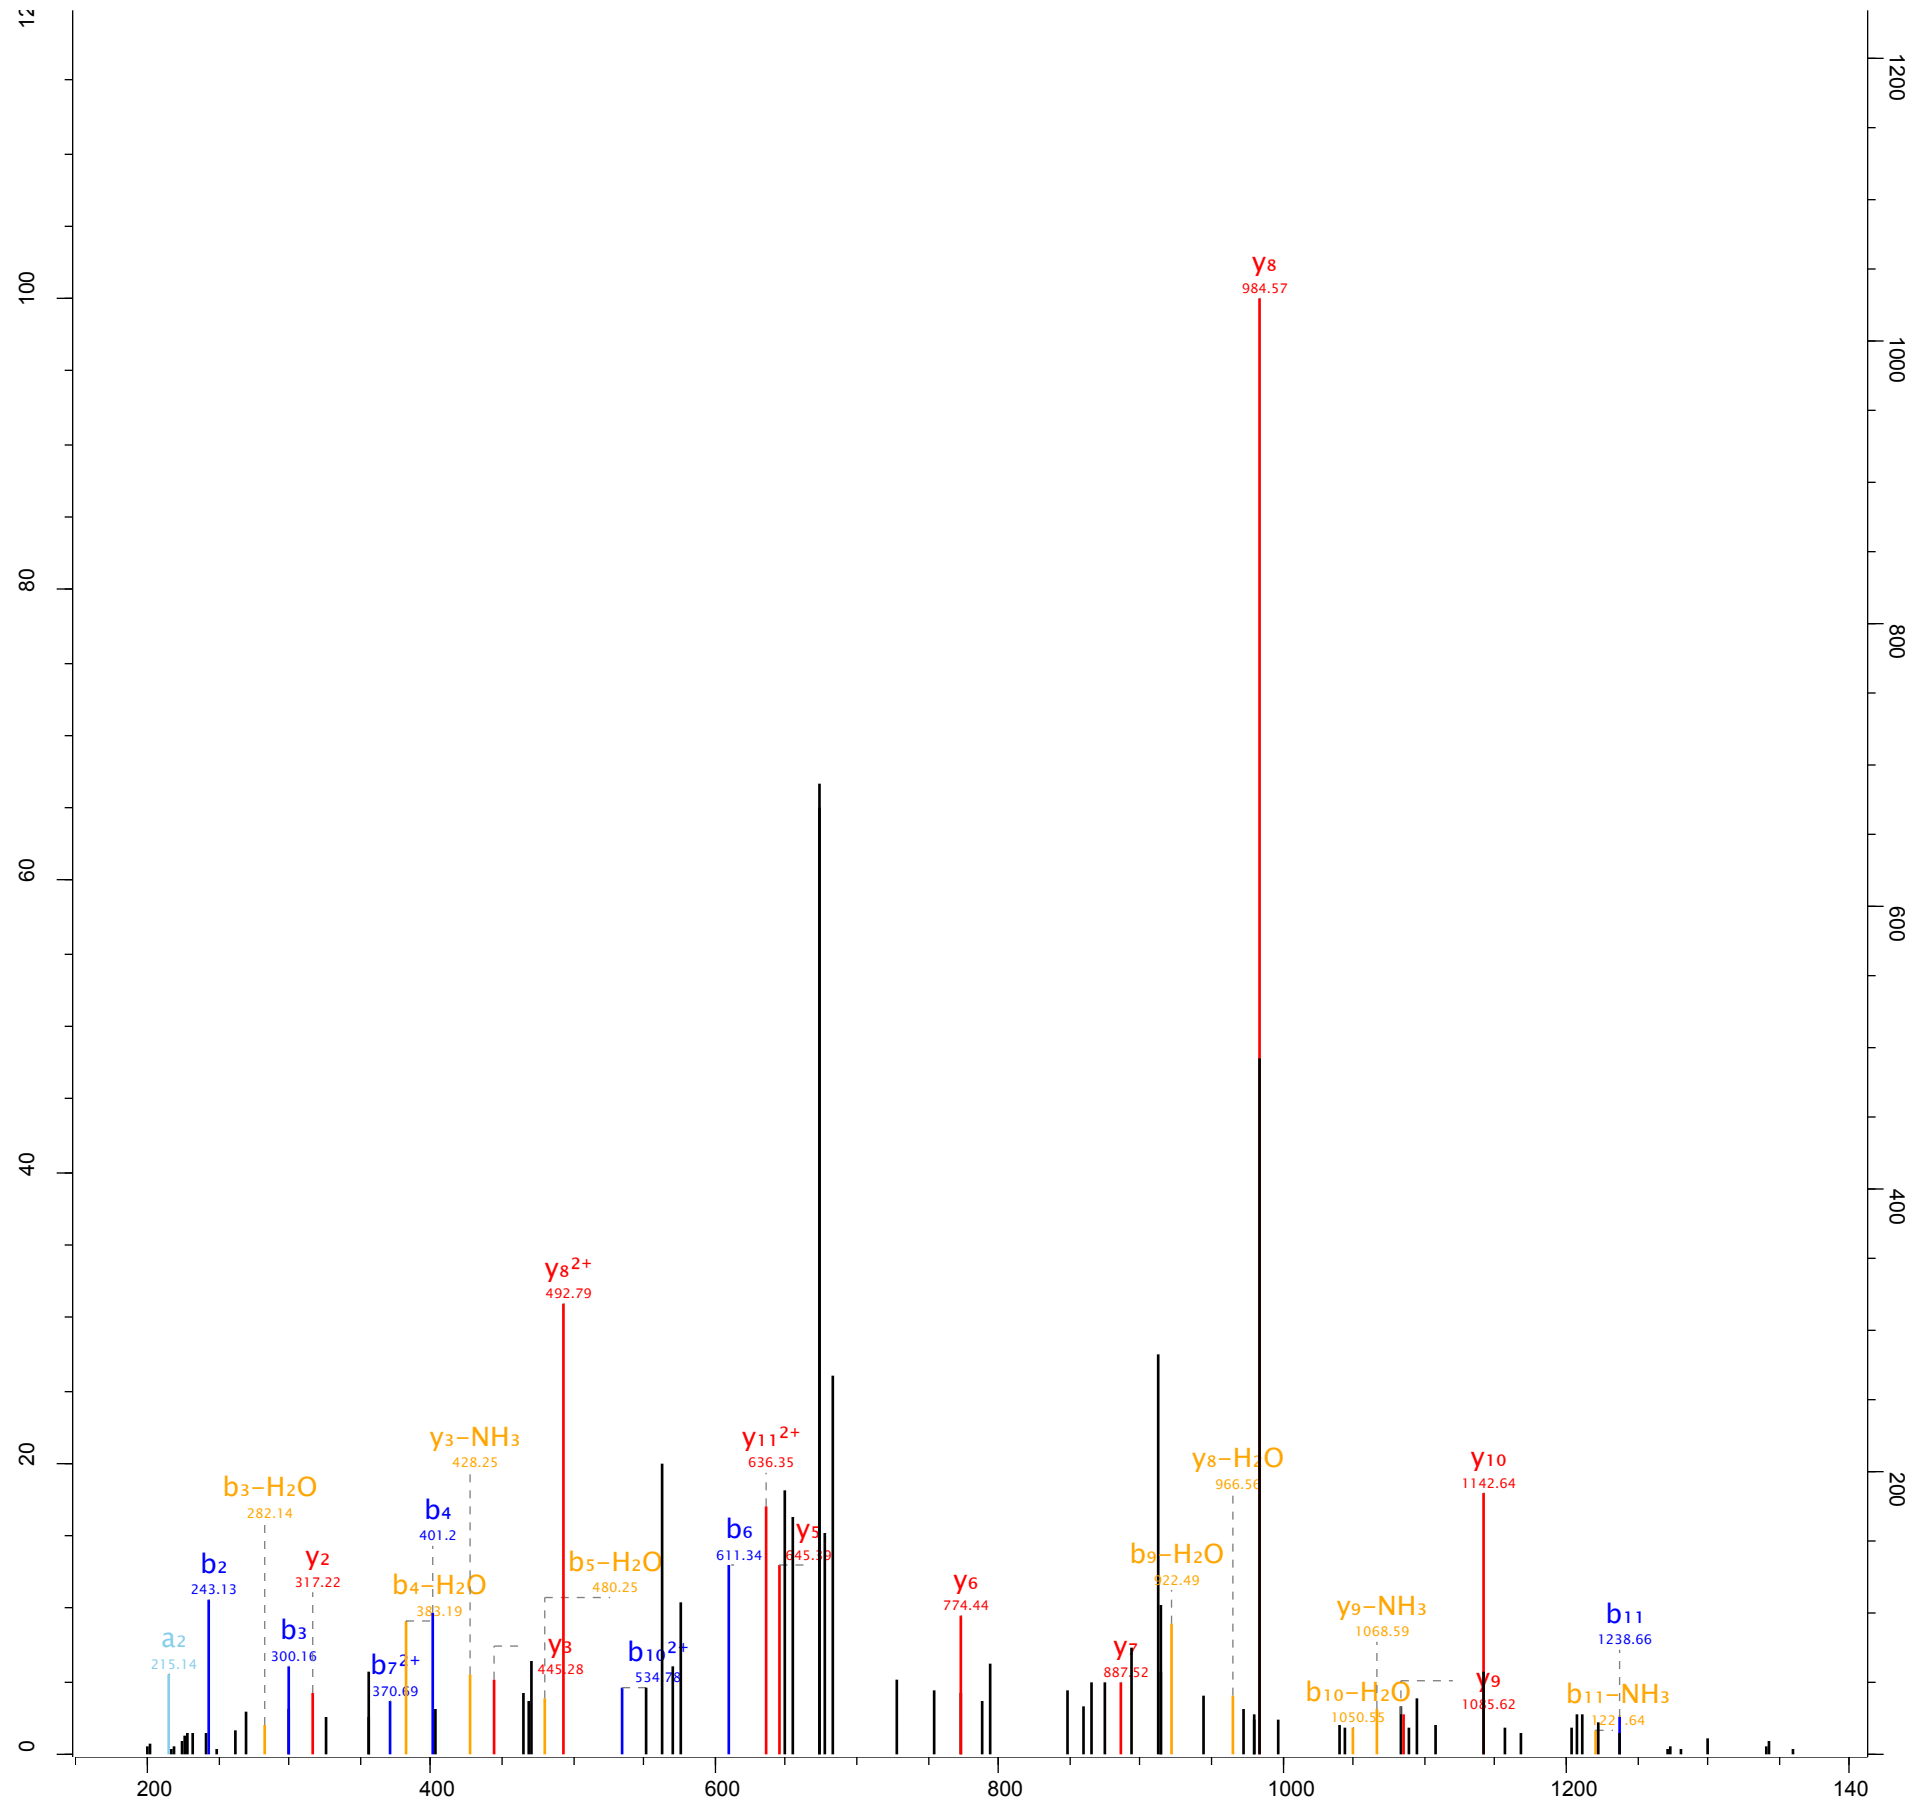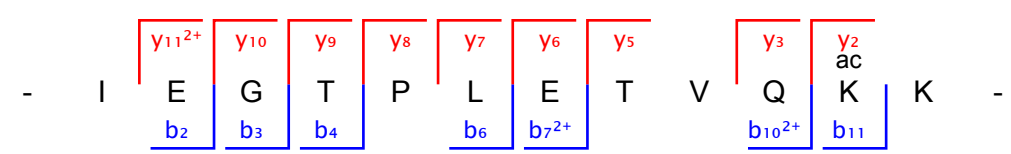

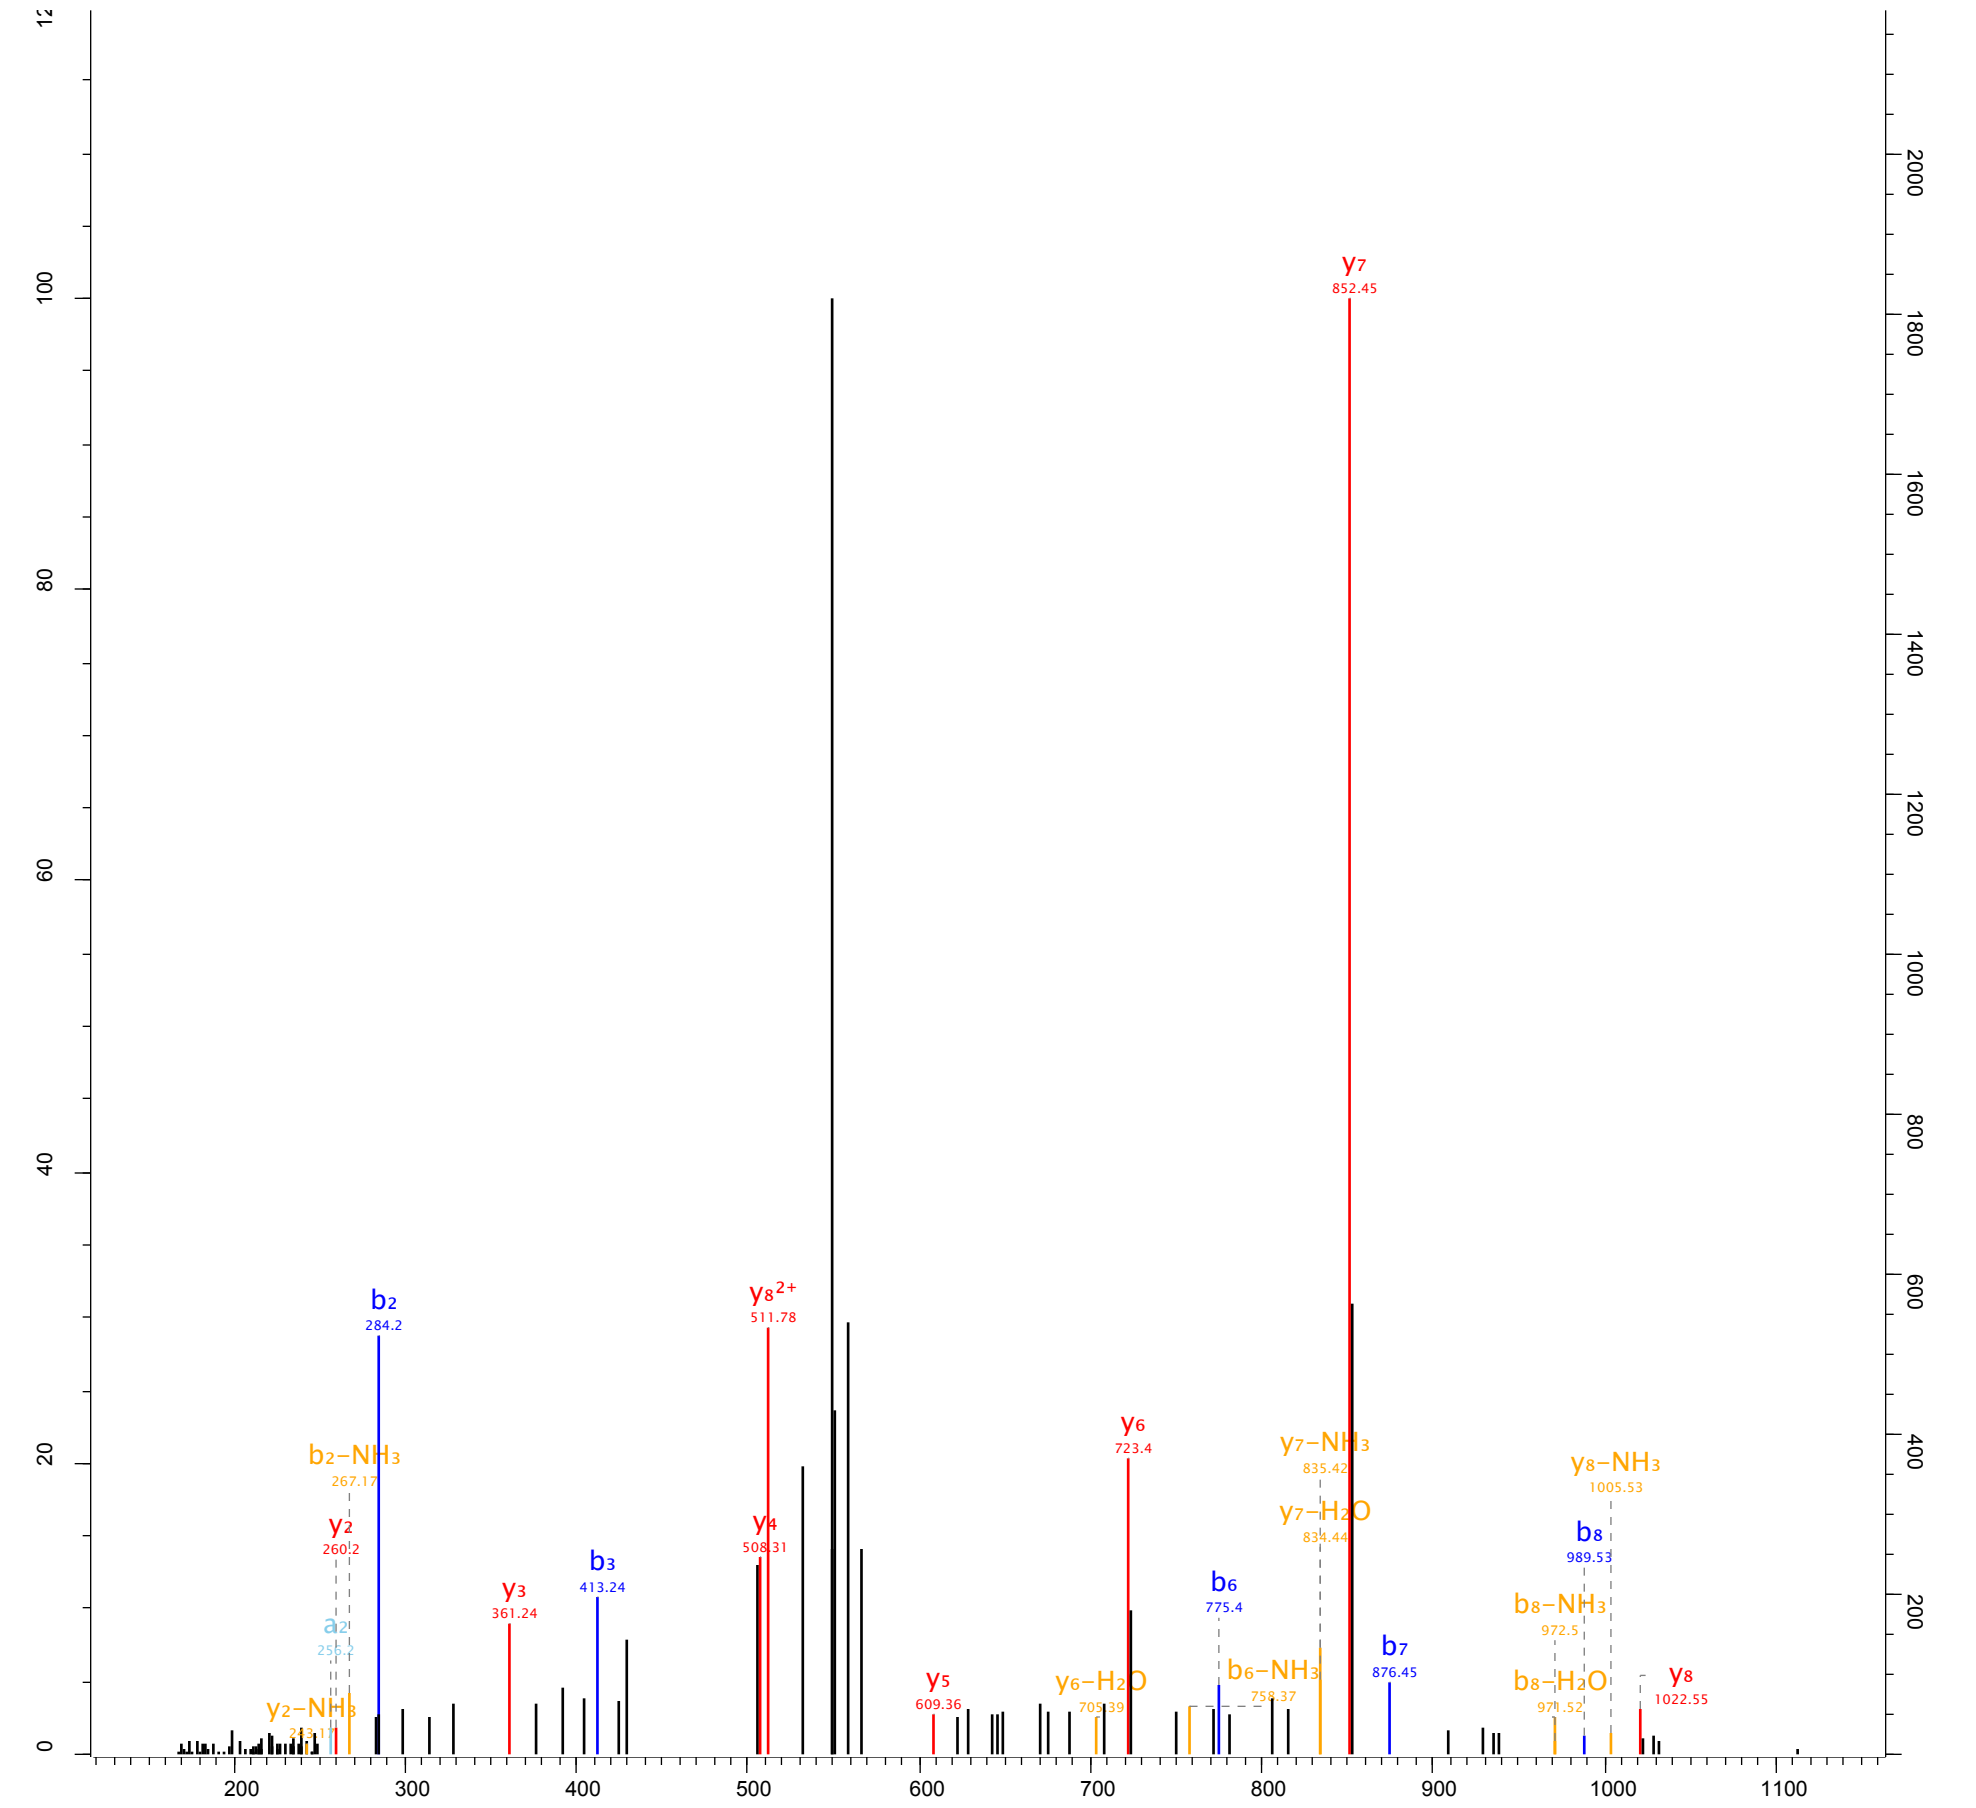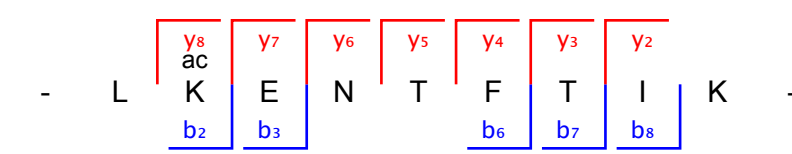

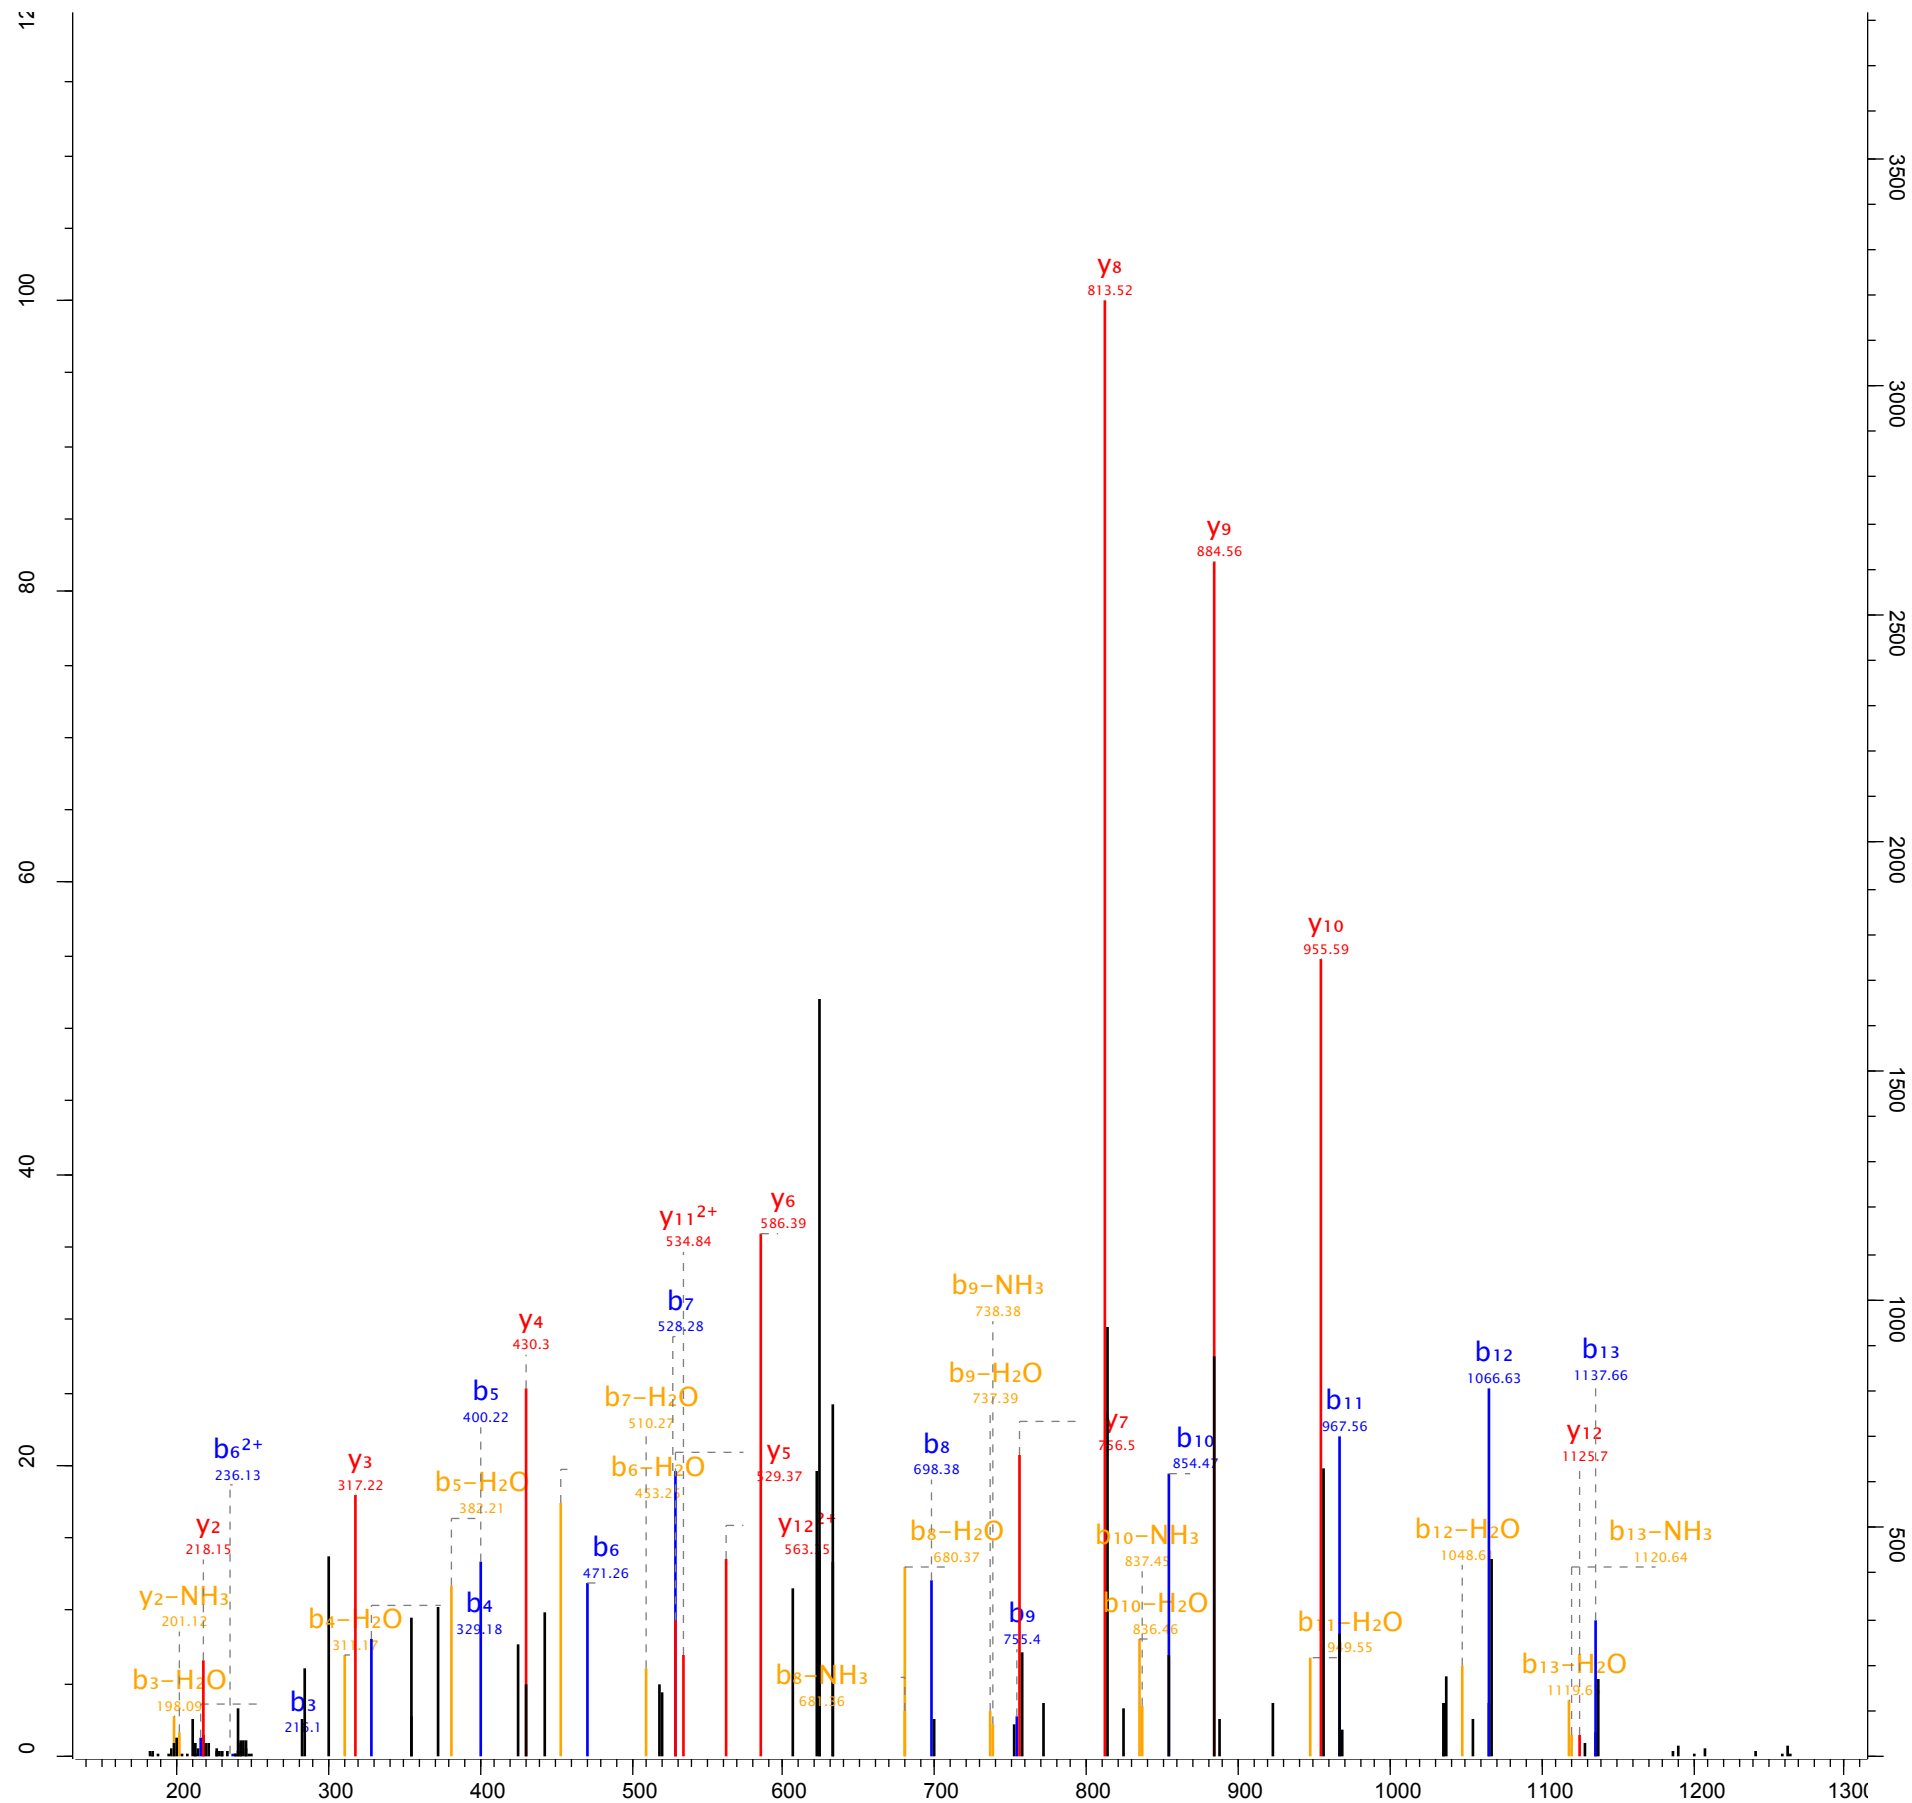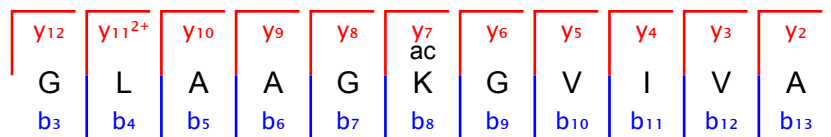

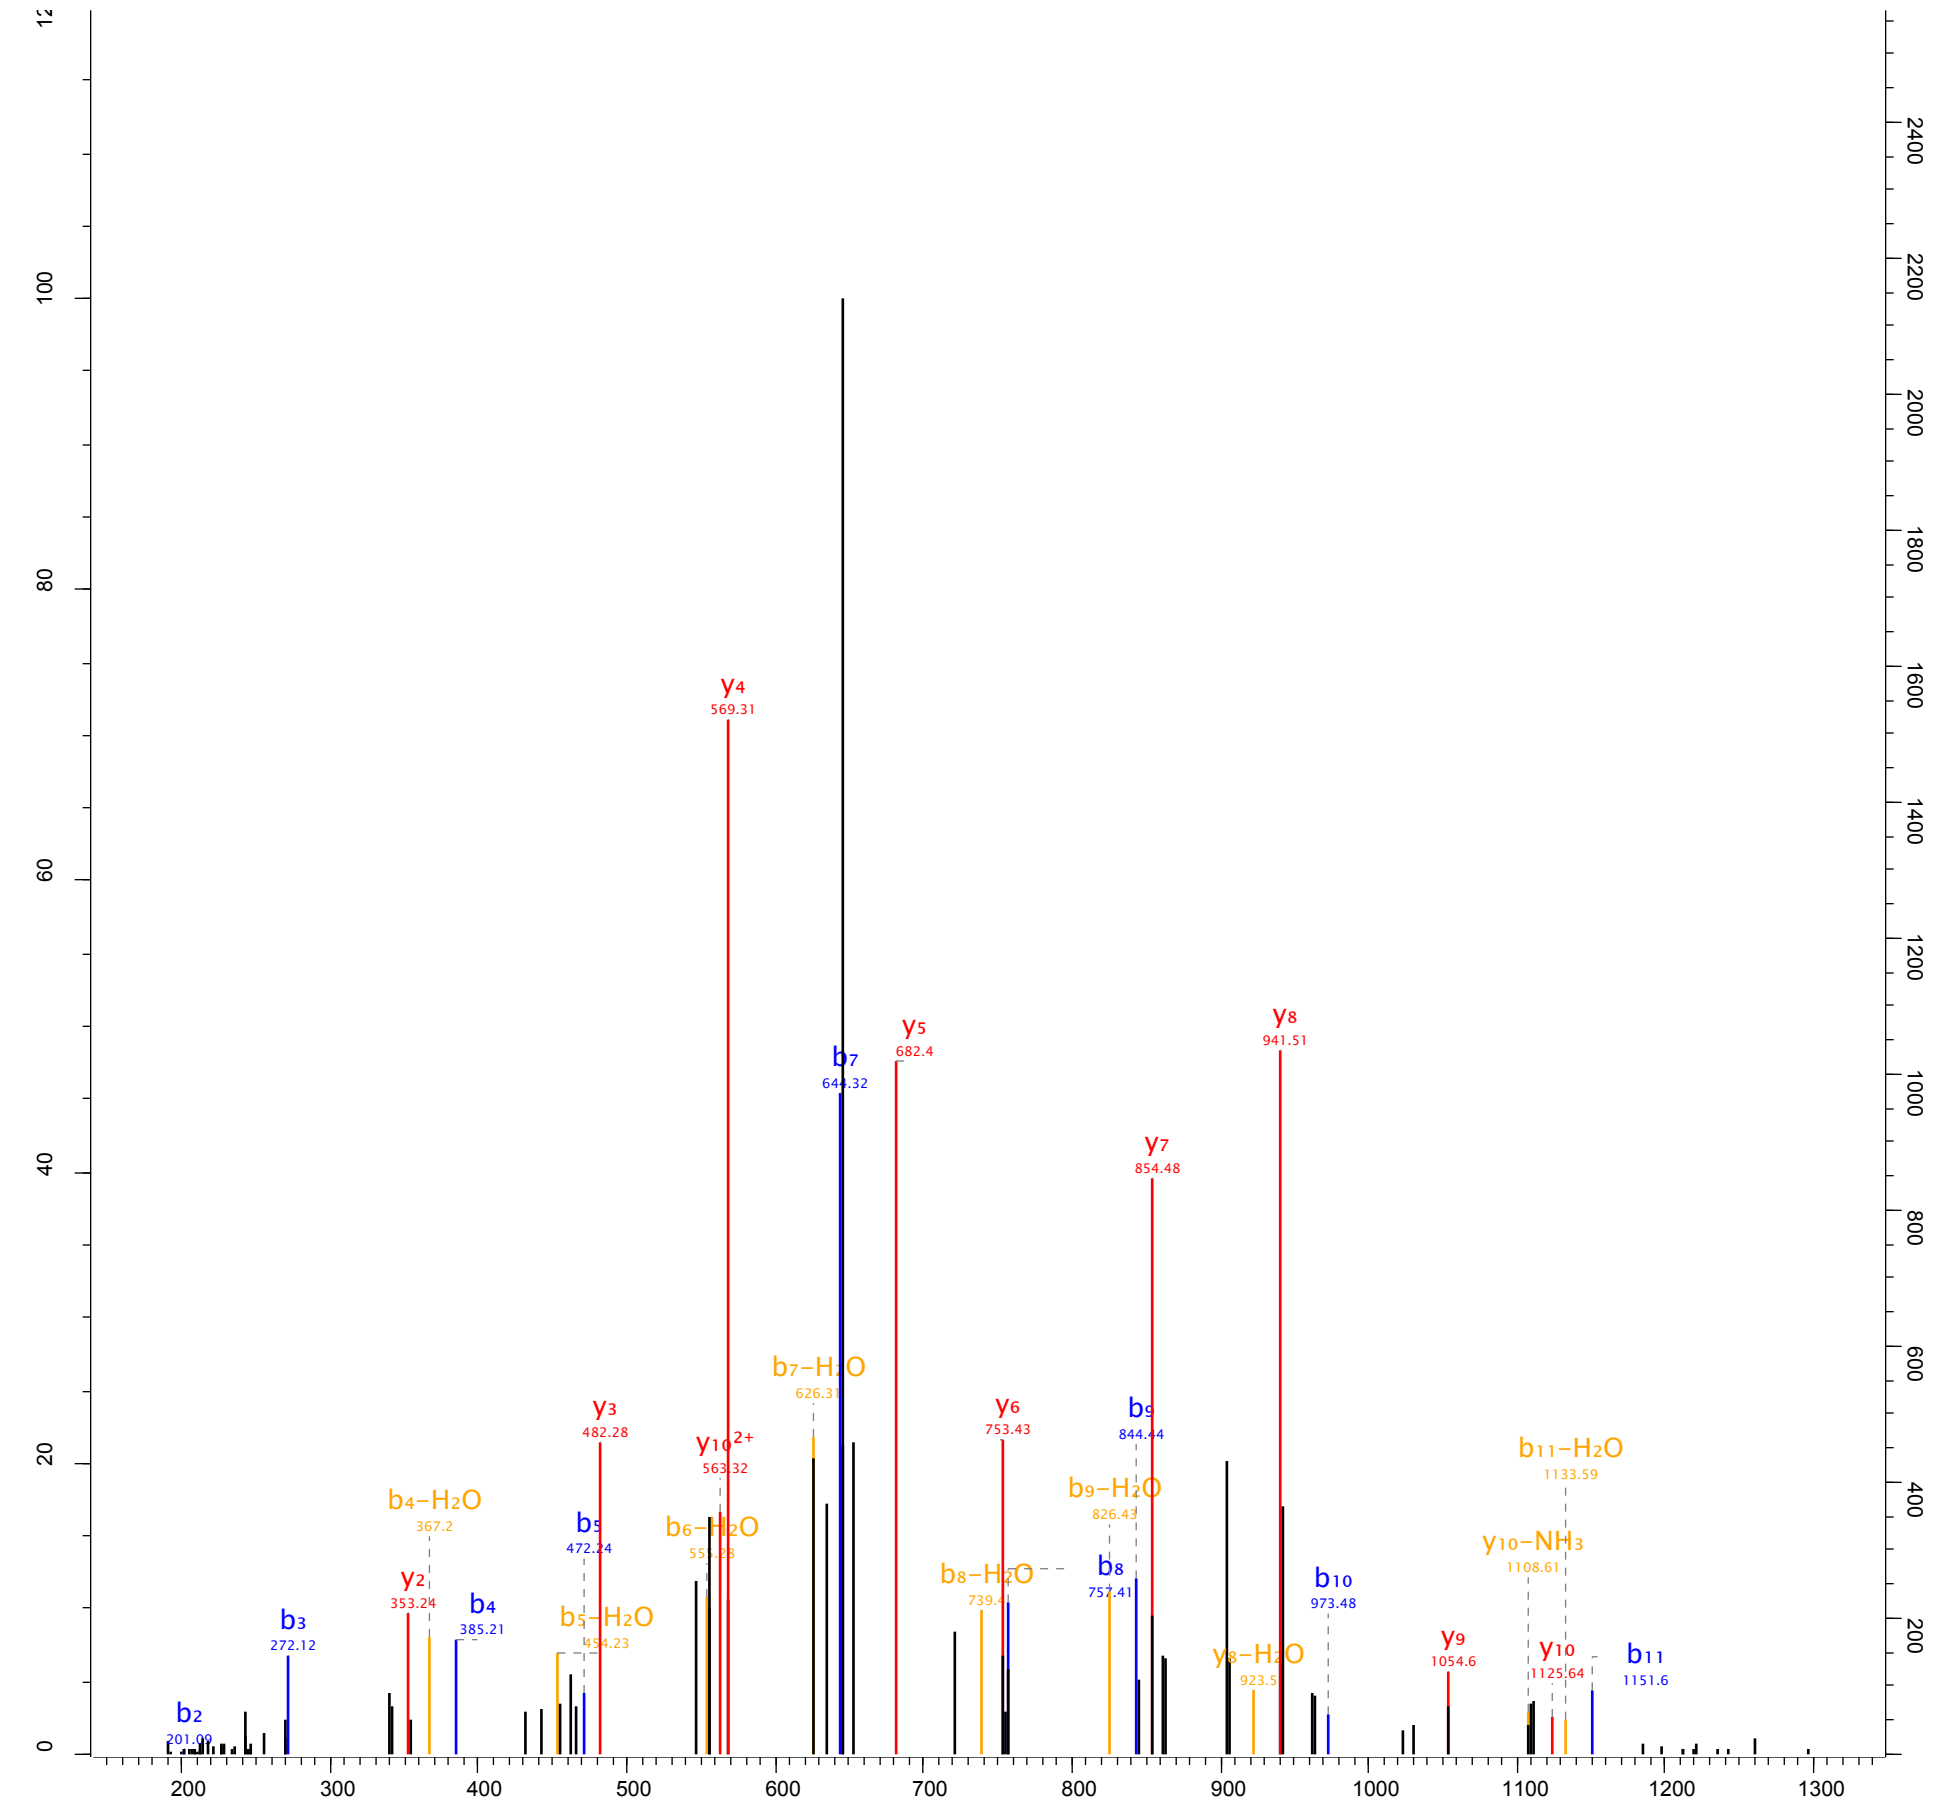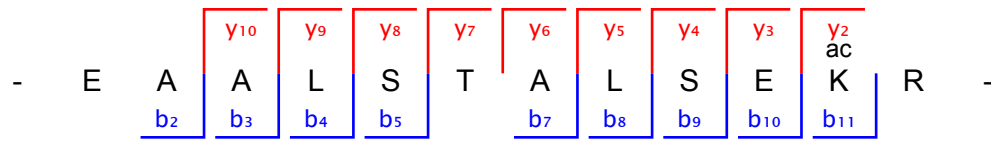



022714\_SCW\_II\_53\_4\_2ndZT

18301 ITMS; CID 164.11 670.35 Hspa41

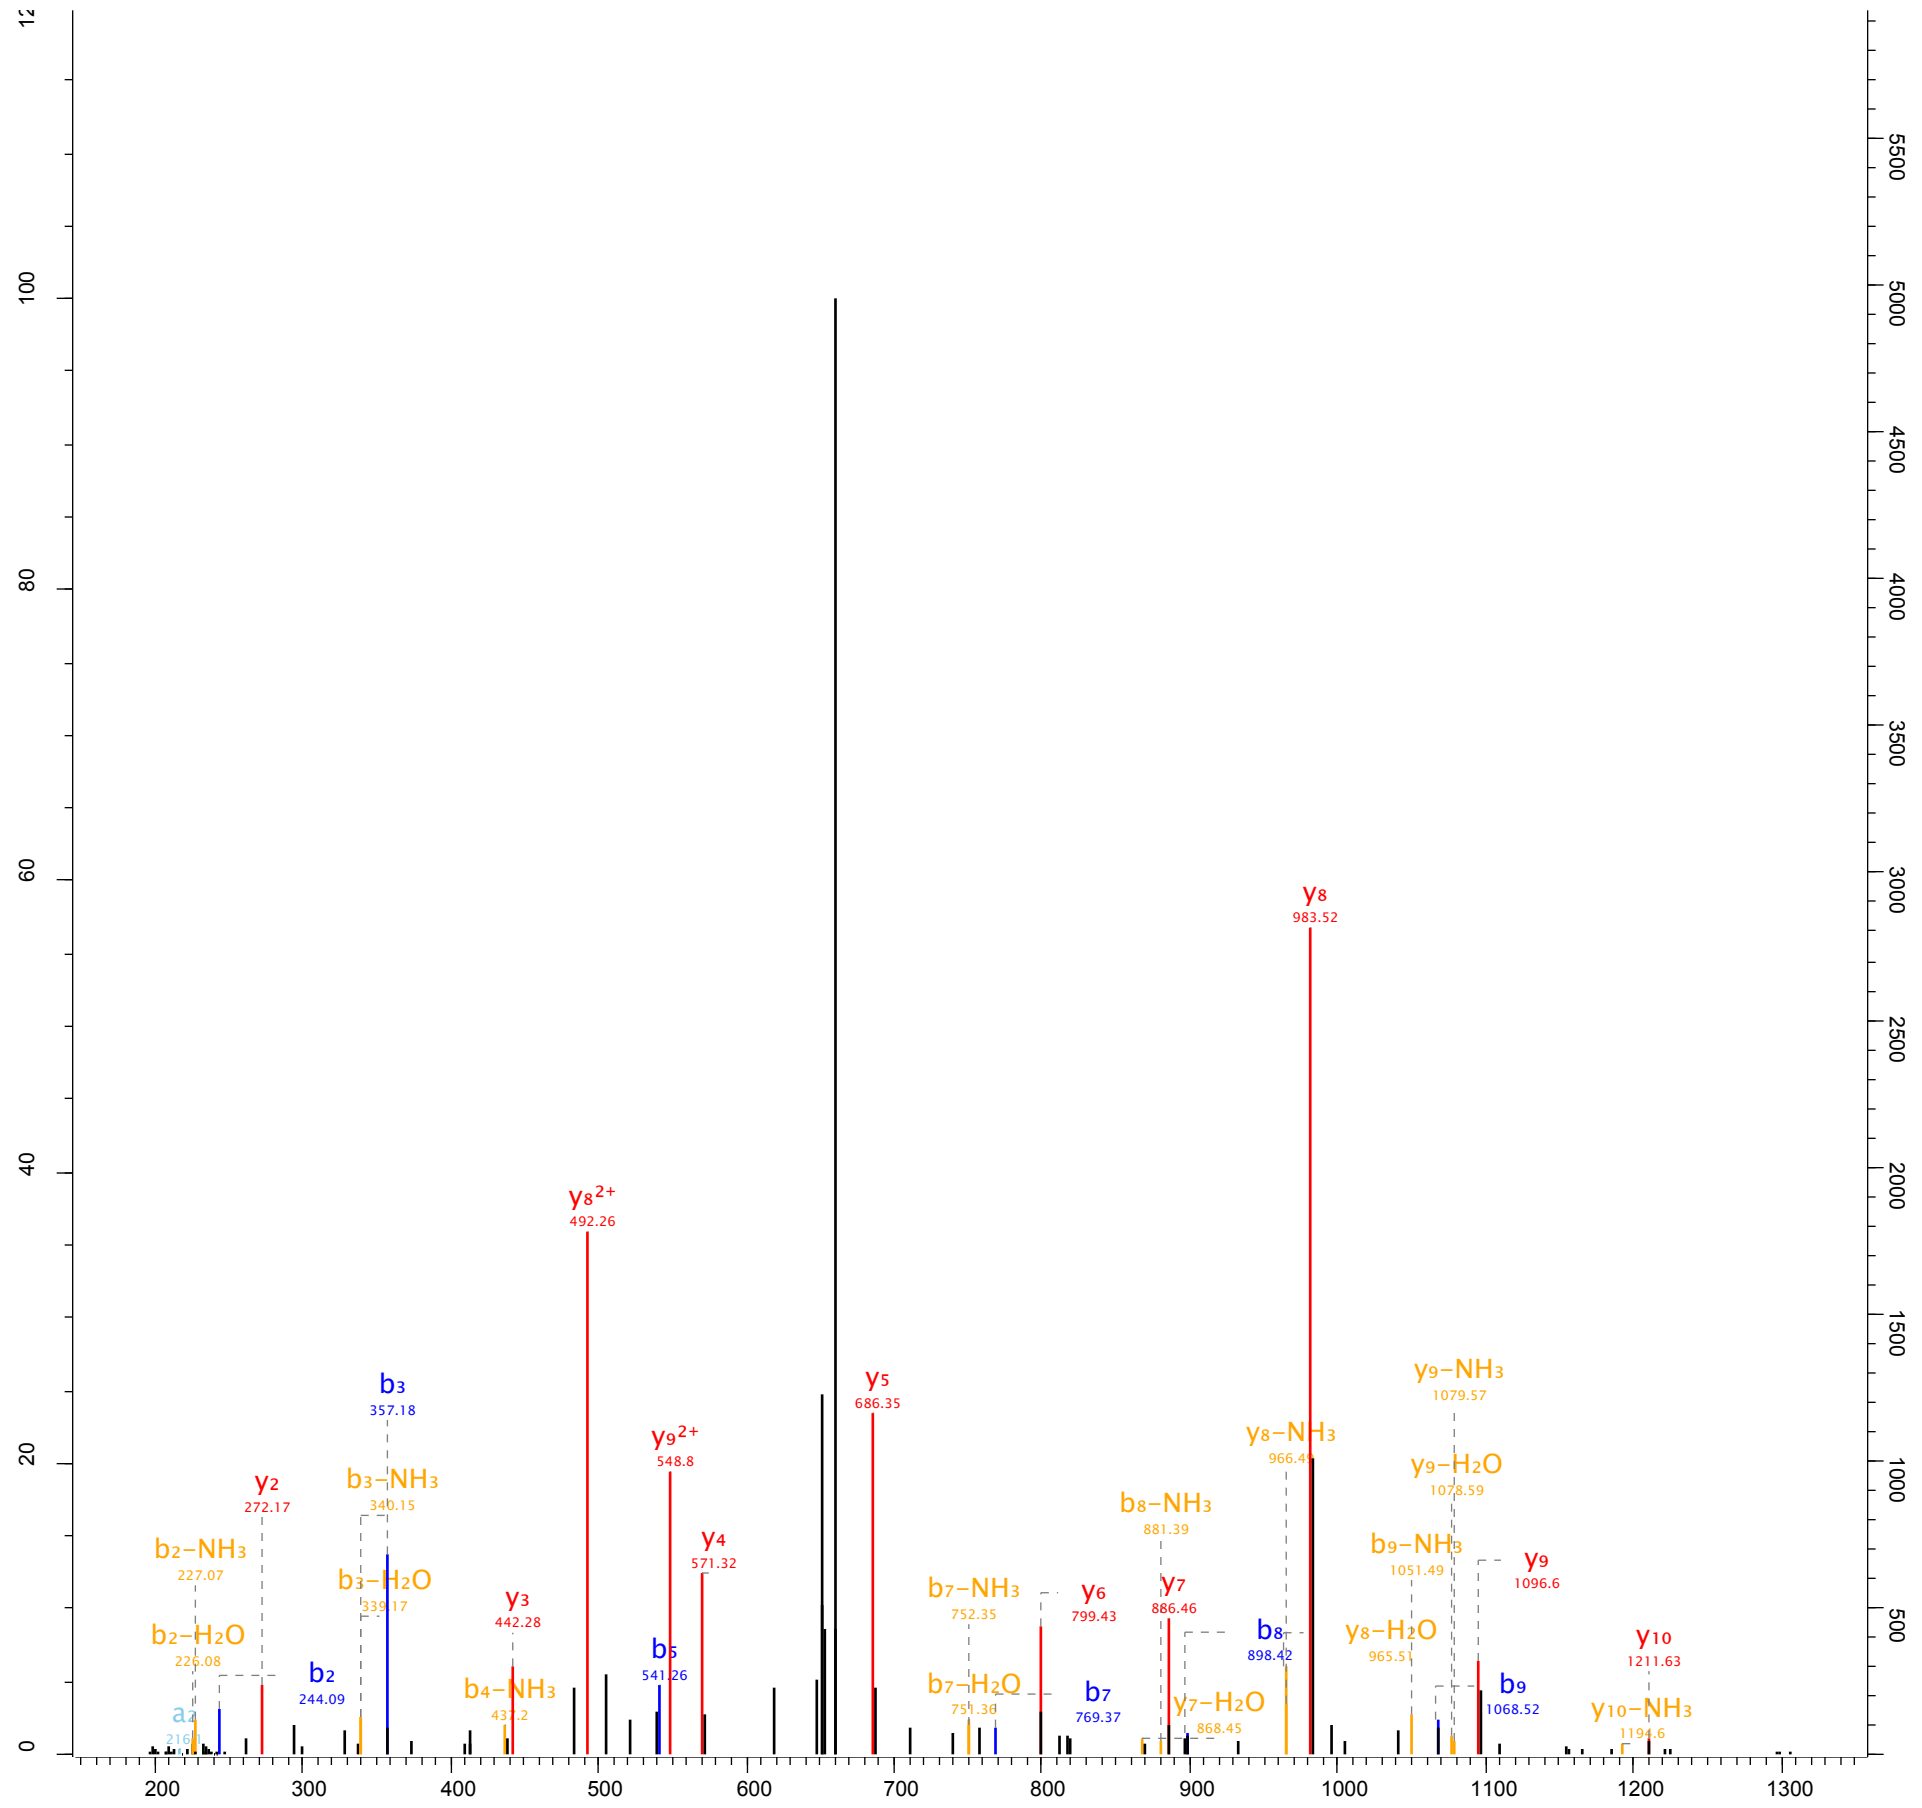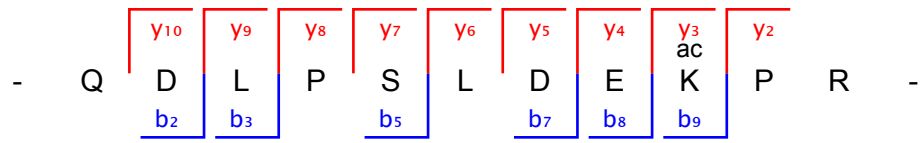

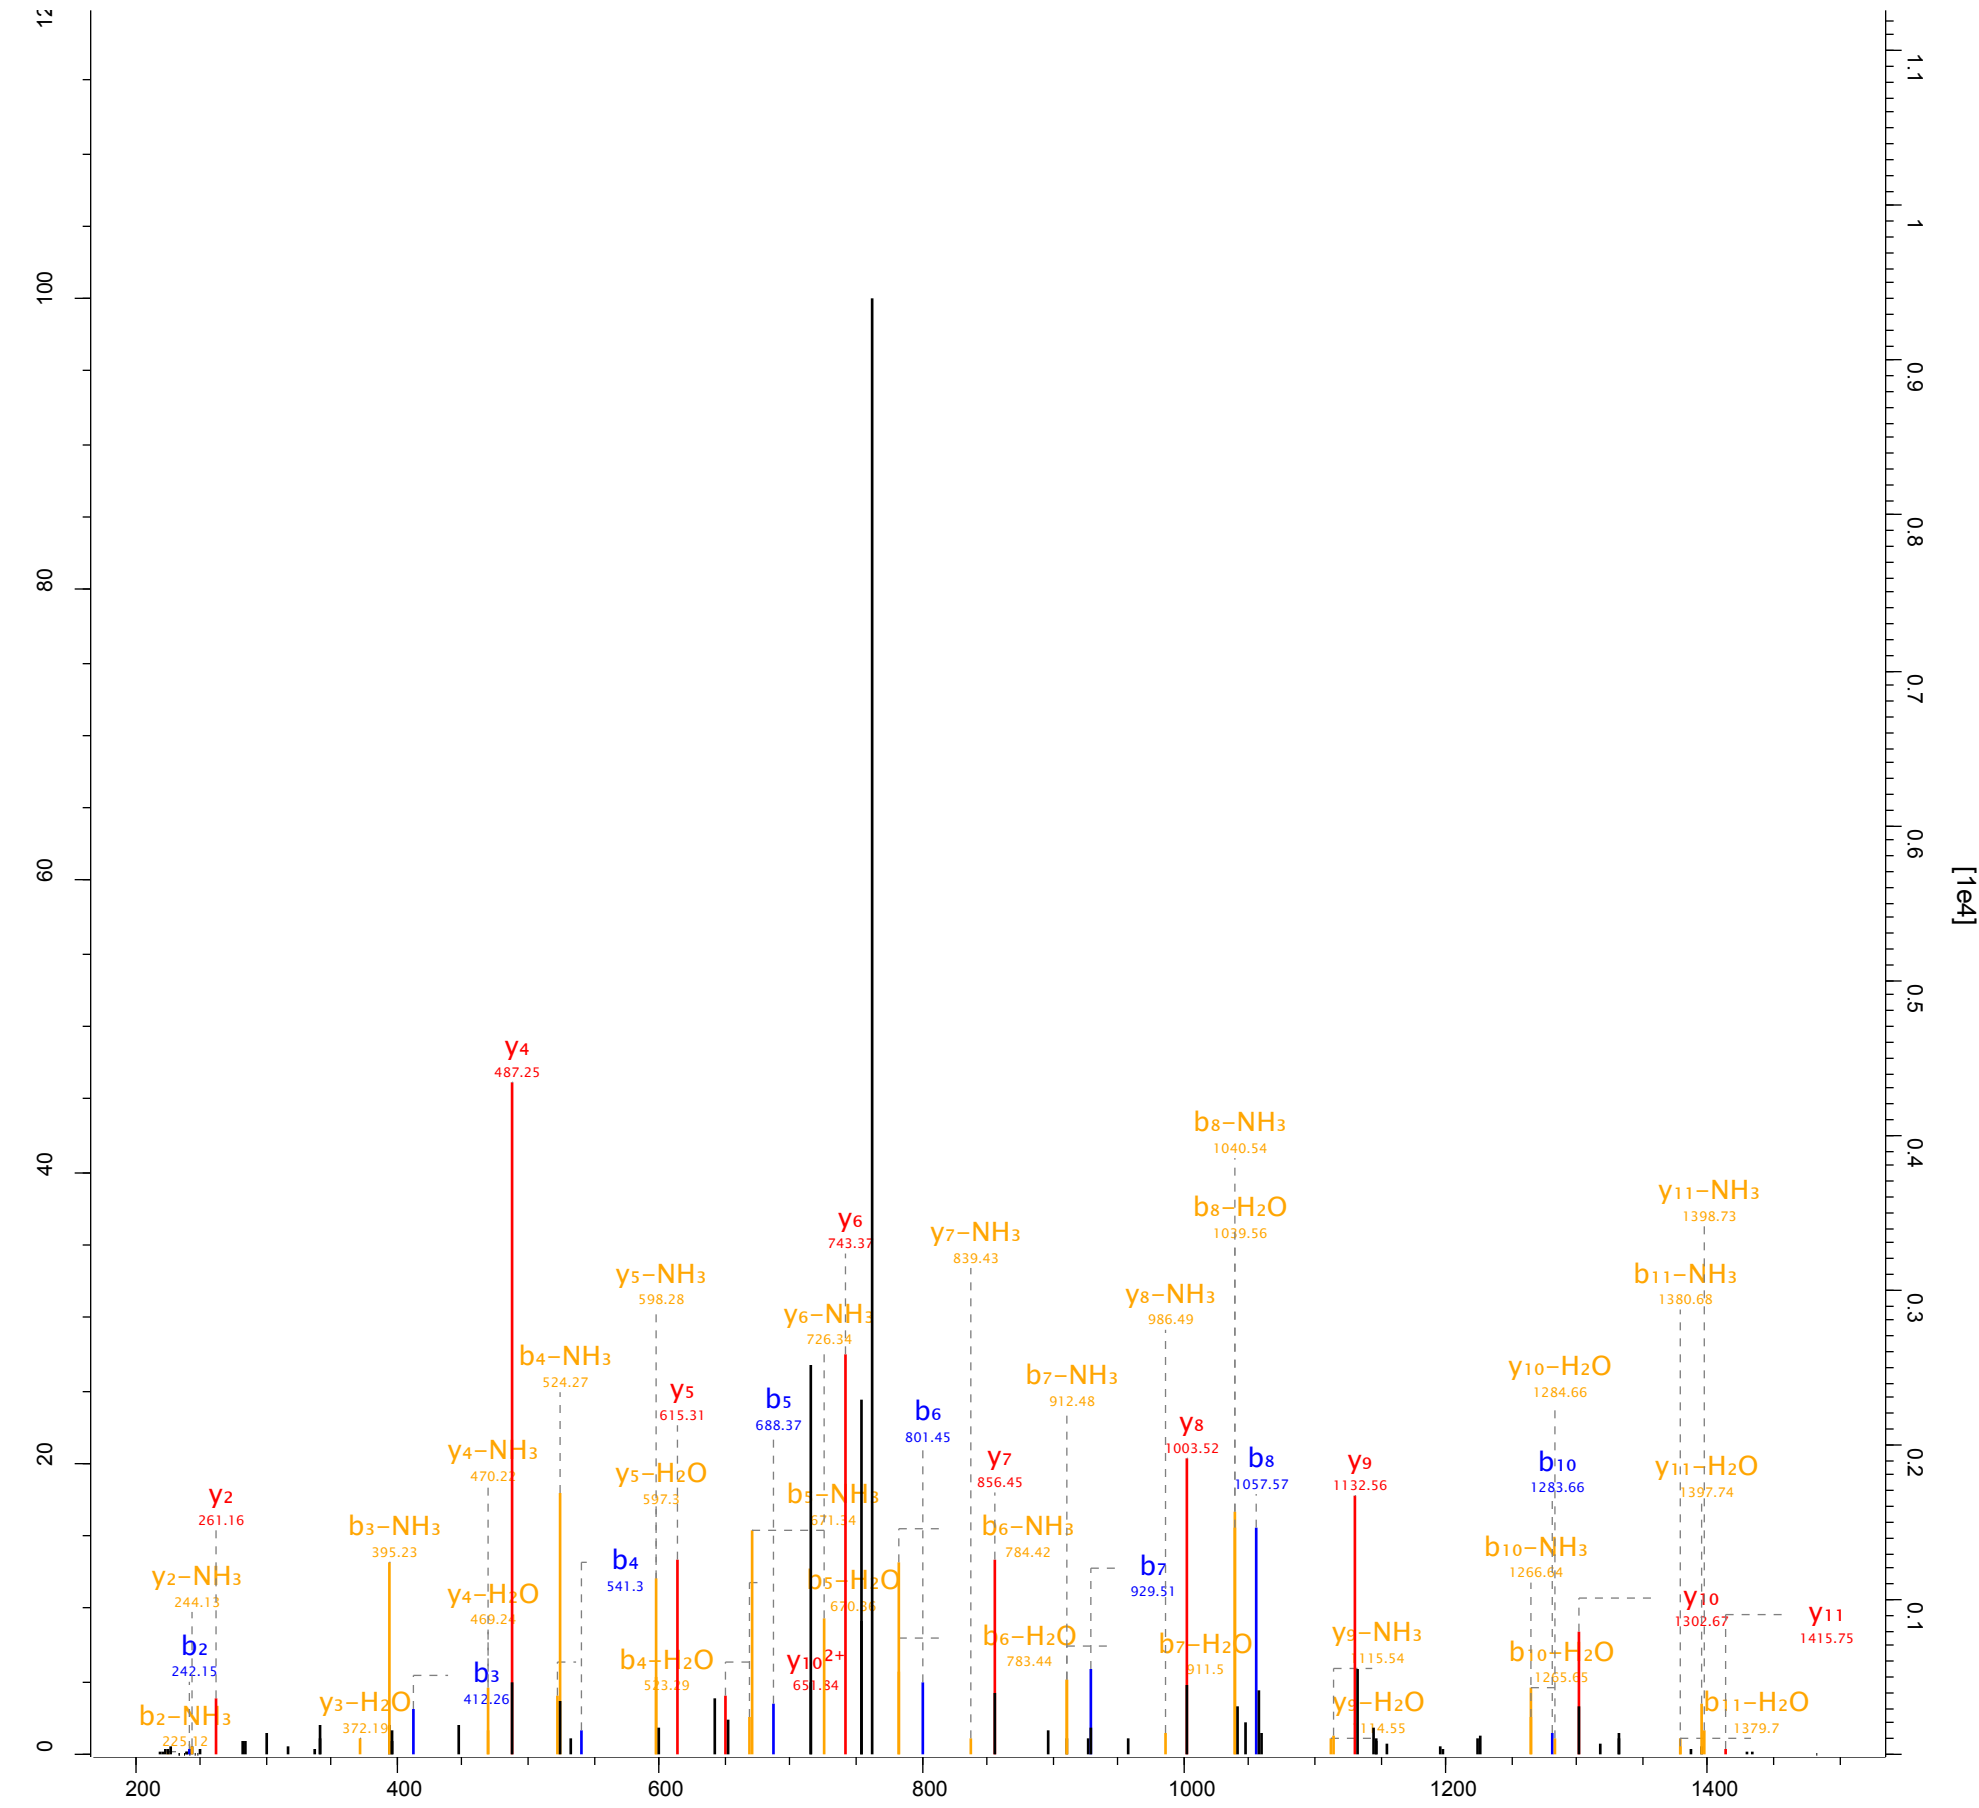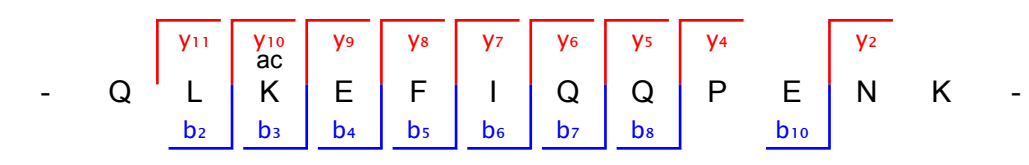

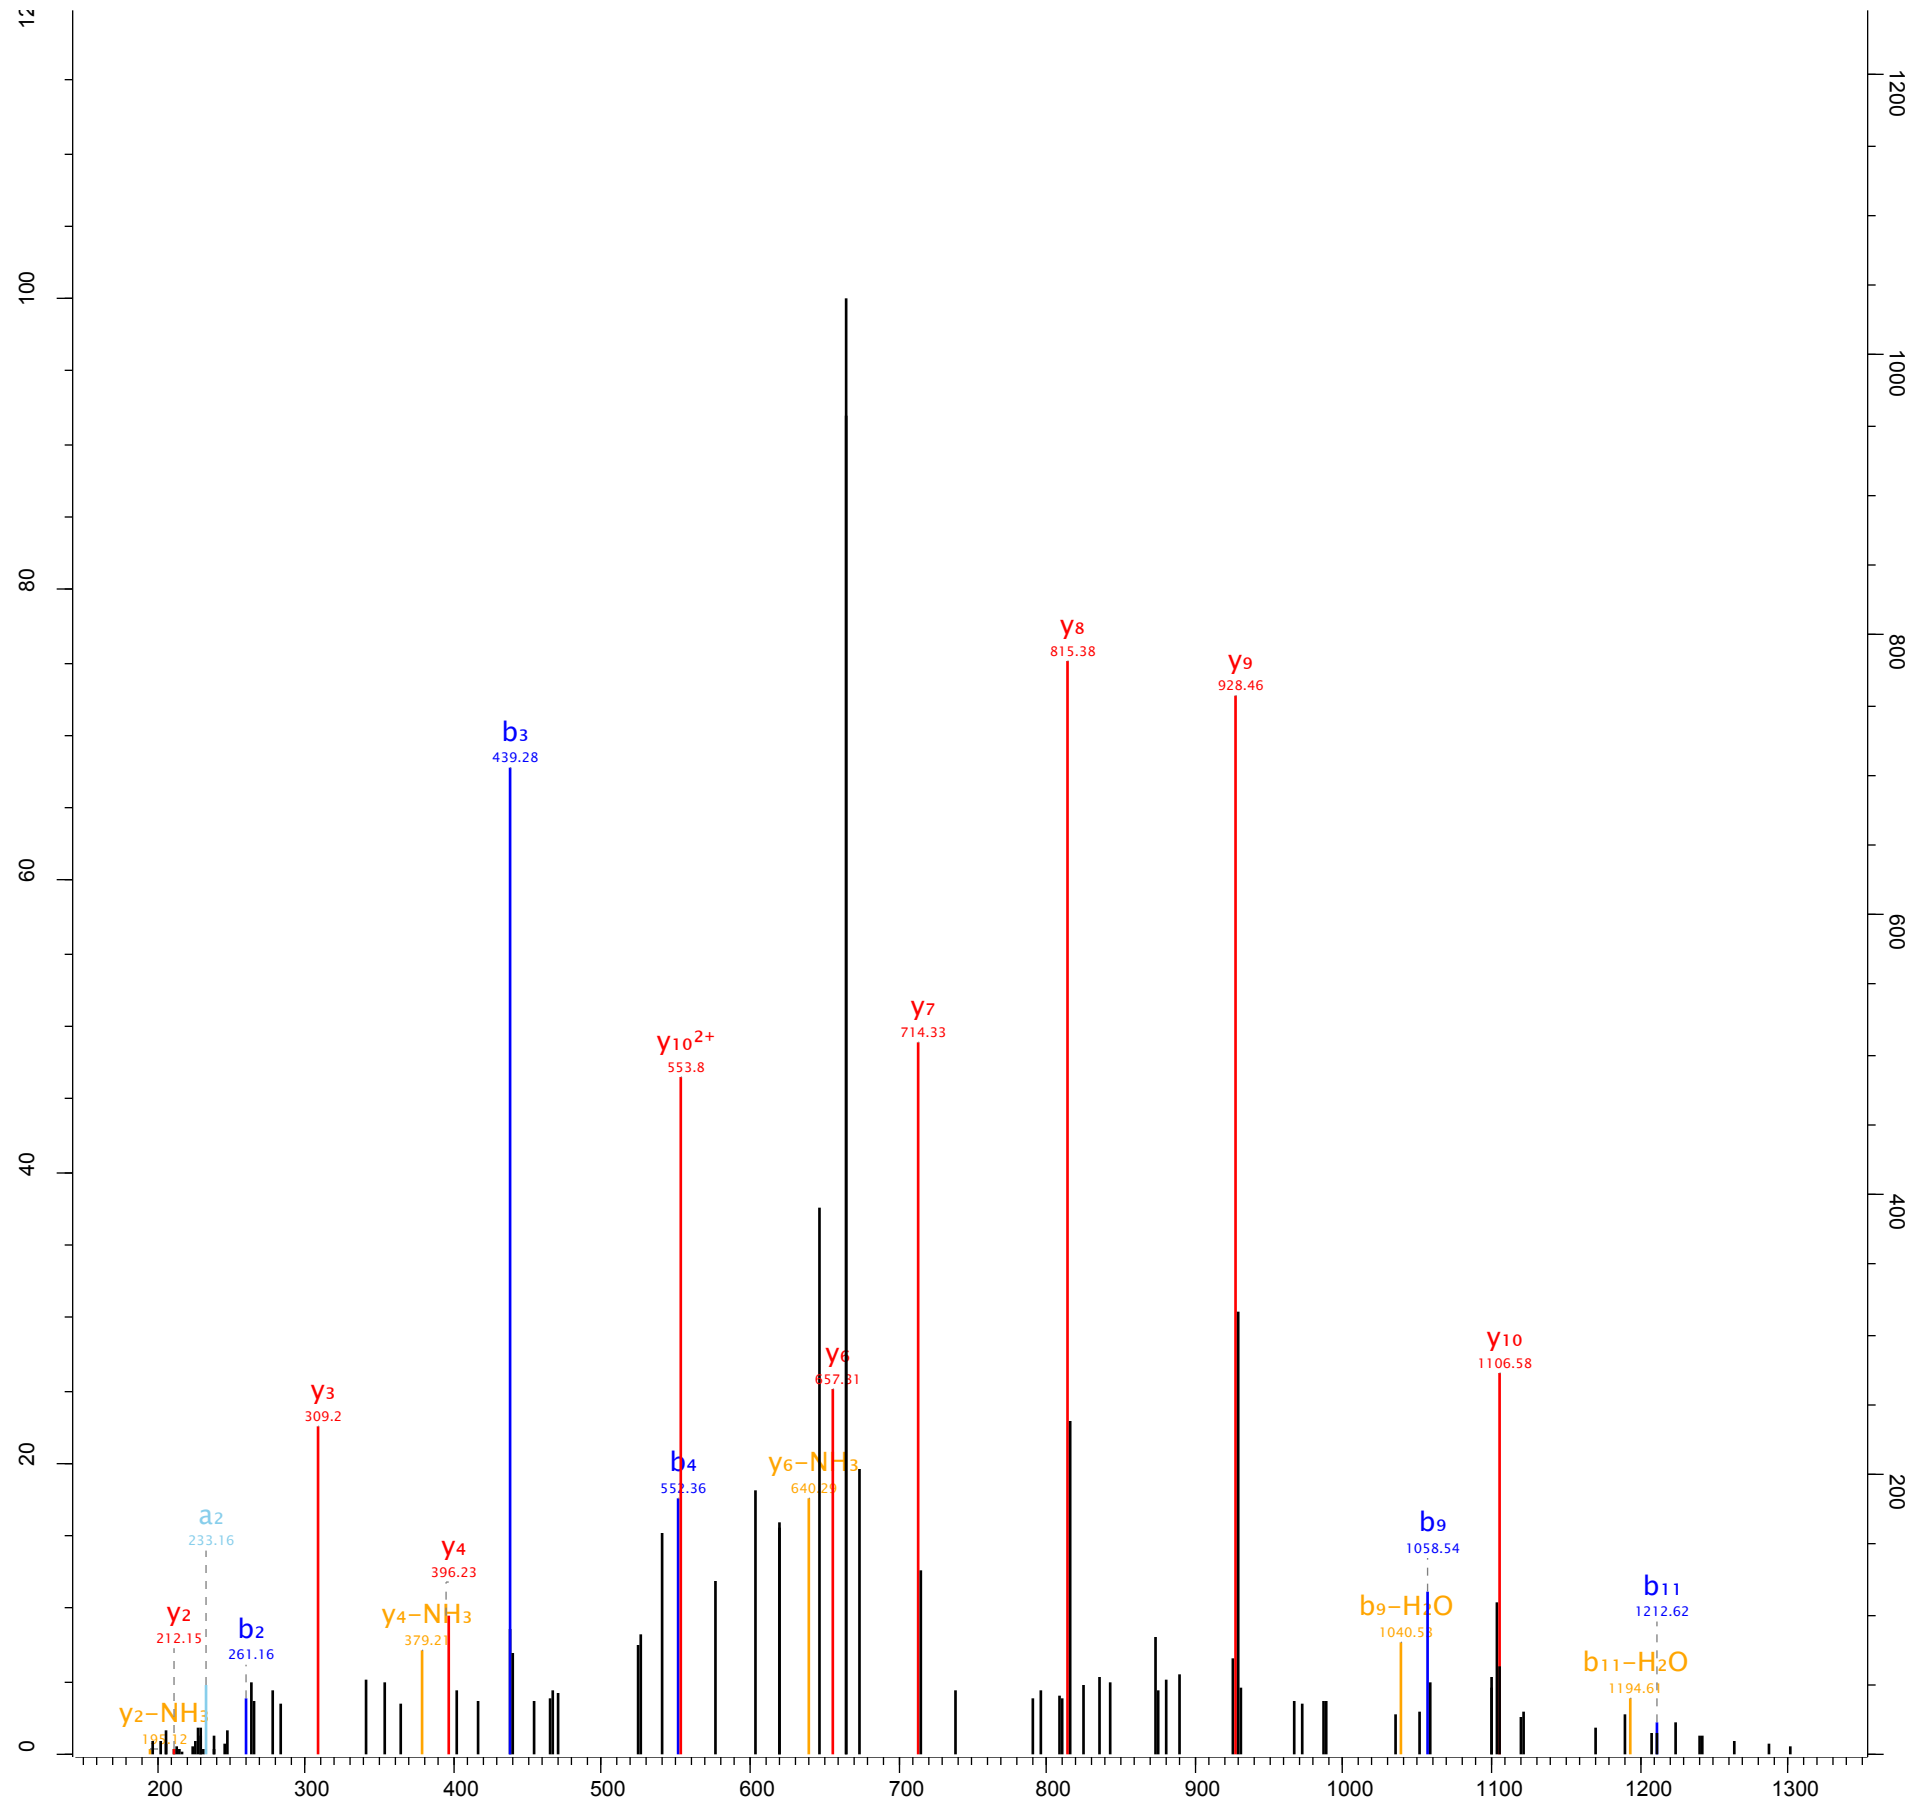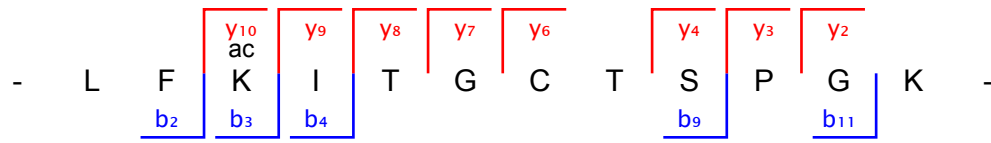

Raw file 022714\_SCW\_II\_53\_4\_2ndZT Scan 18872 Method ITMS; CID Score 137.73 m/z 743.41 Gene names Myc

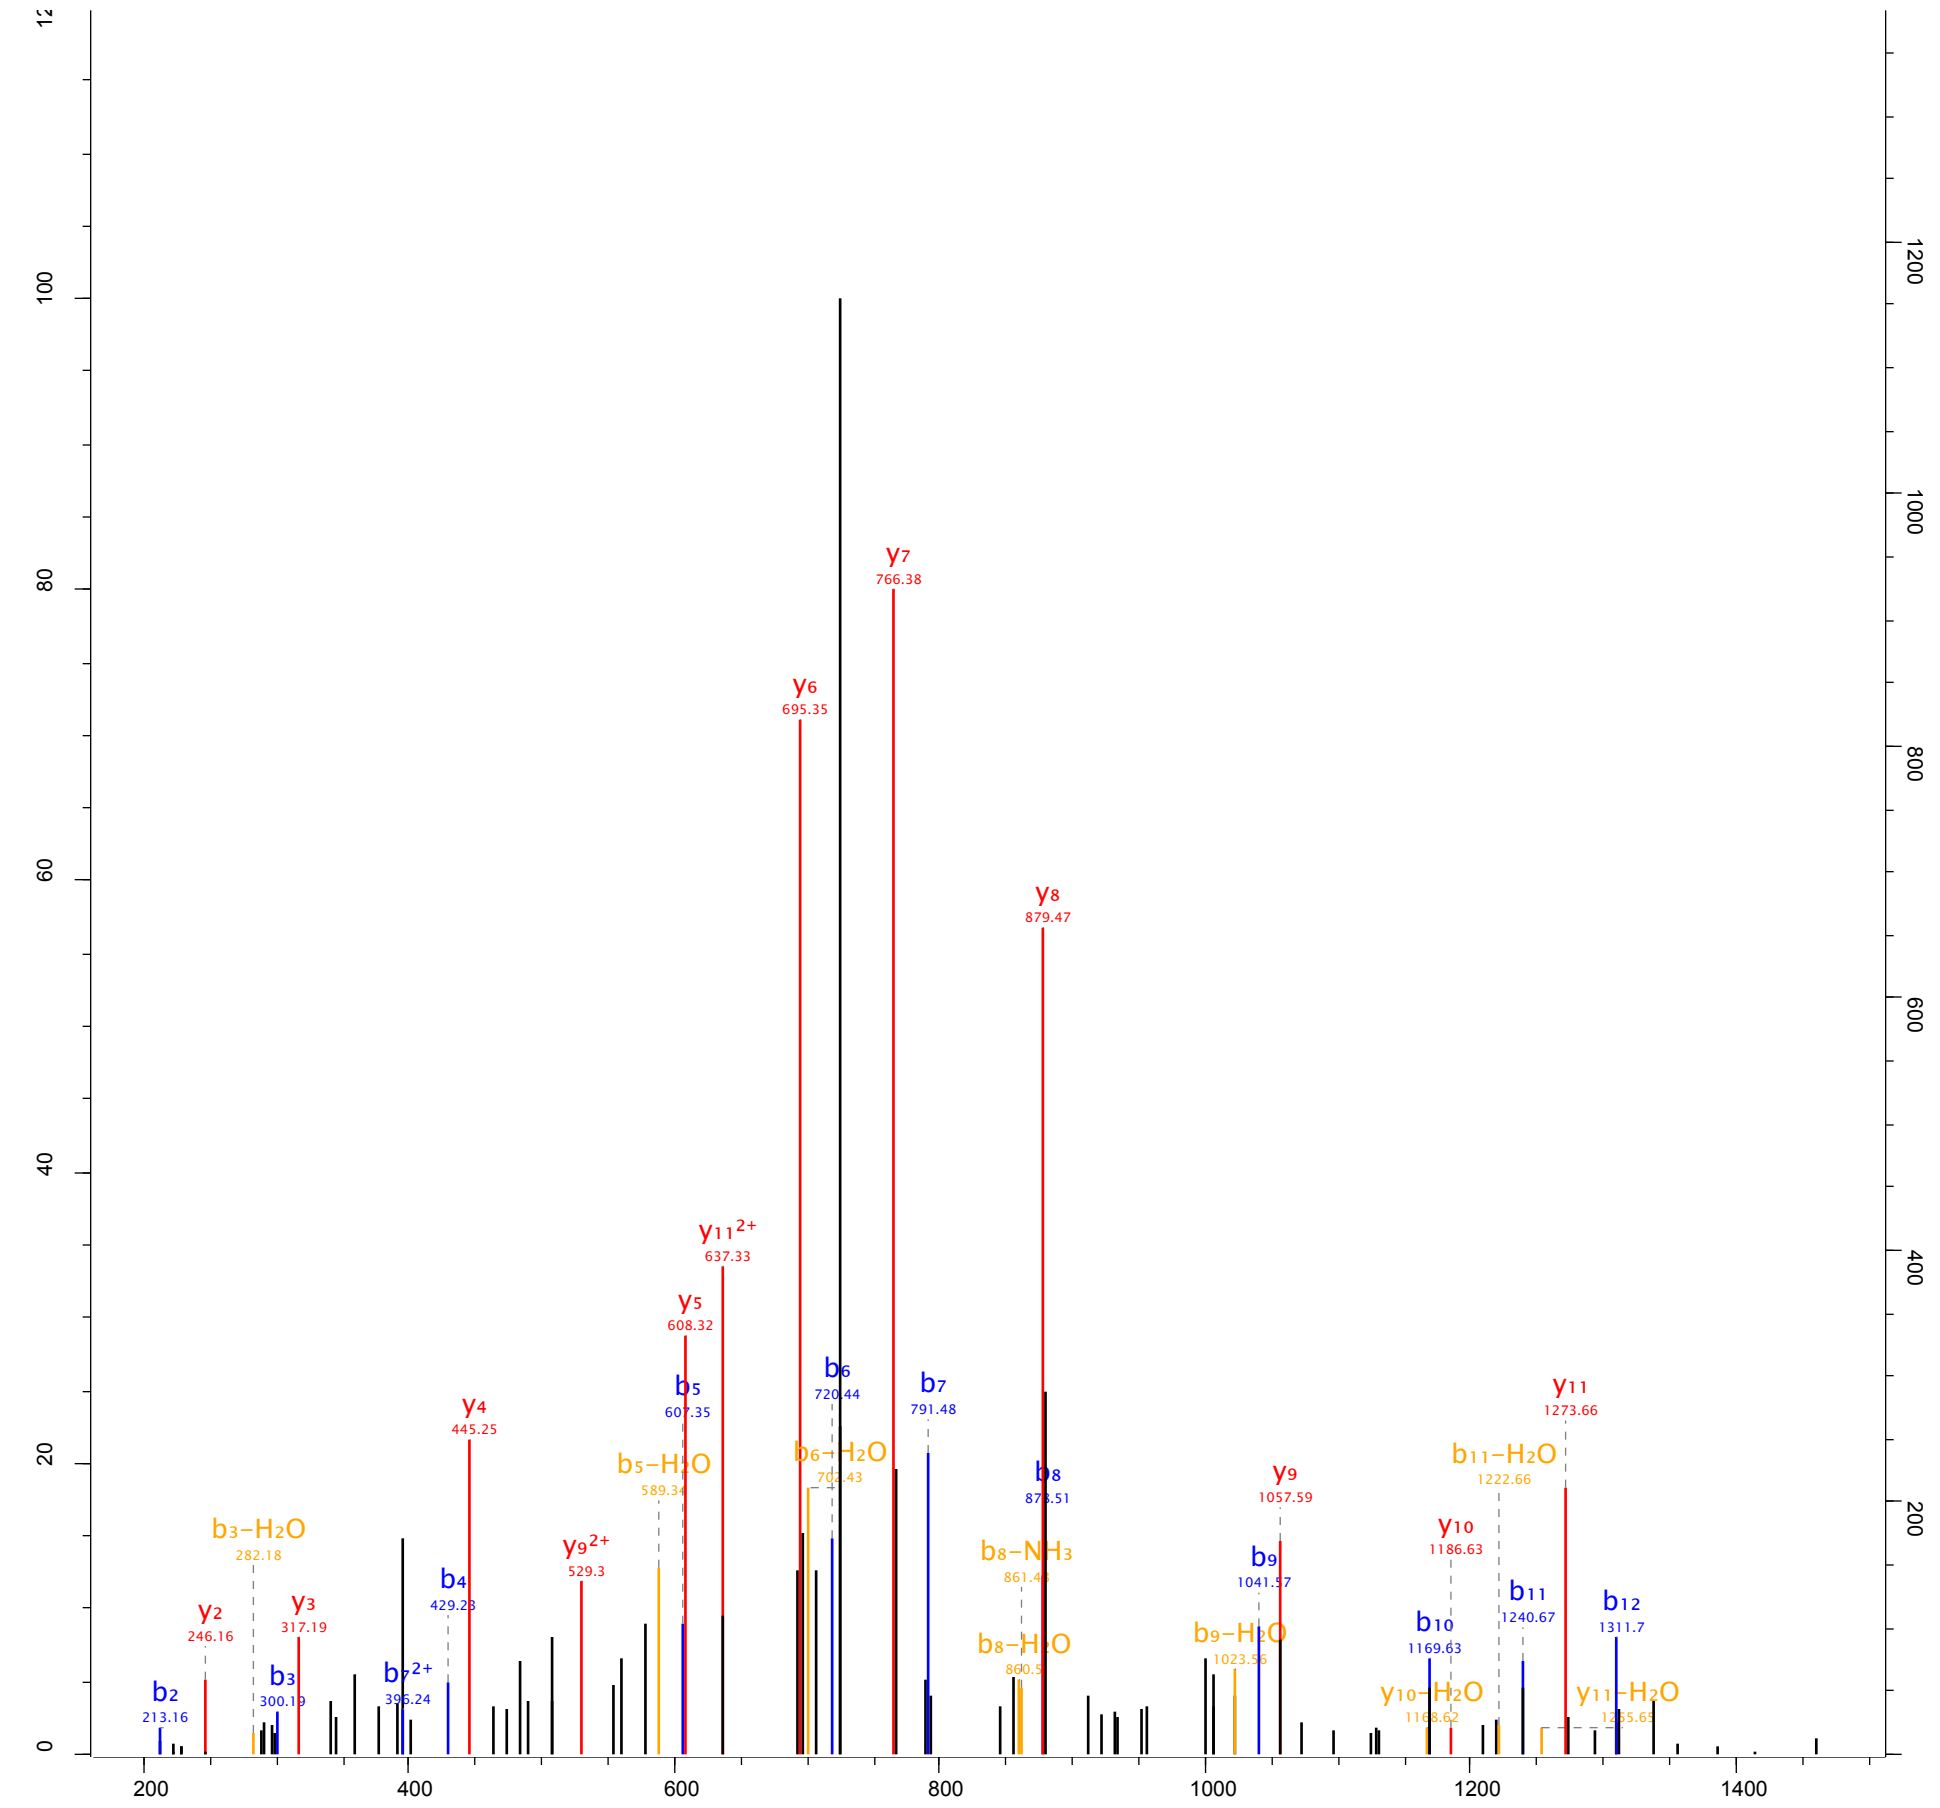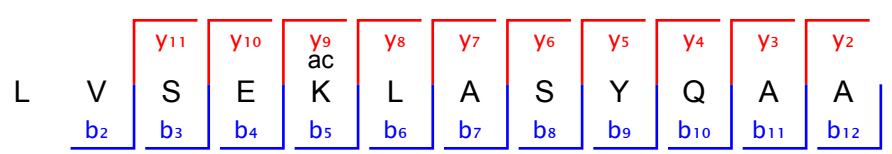

Raw file: 022714\_SCW\_II\_53\_4\_2ndZT  
 Scan: 19756 Method: ITMS; CID Score: 196.37 m/z: 845.42 Gene names: Hsp90ab1

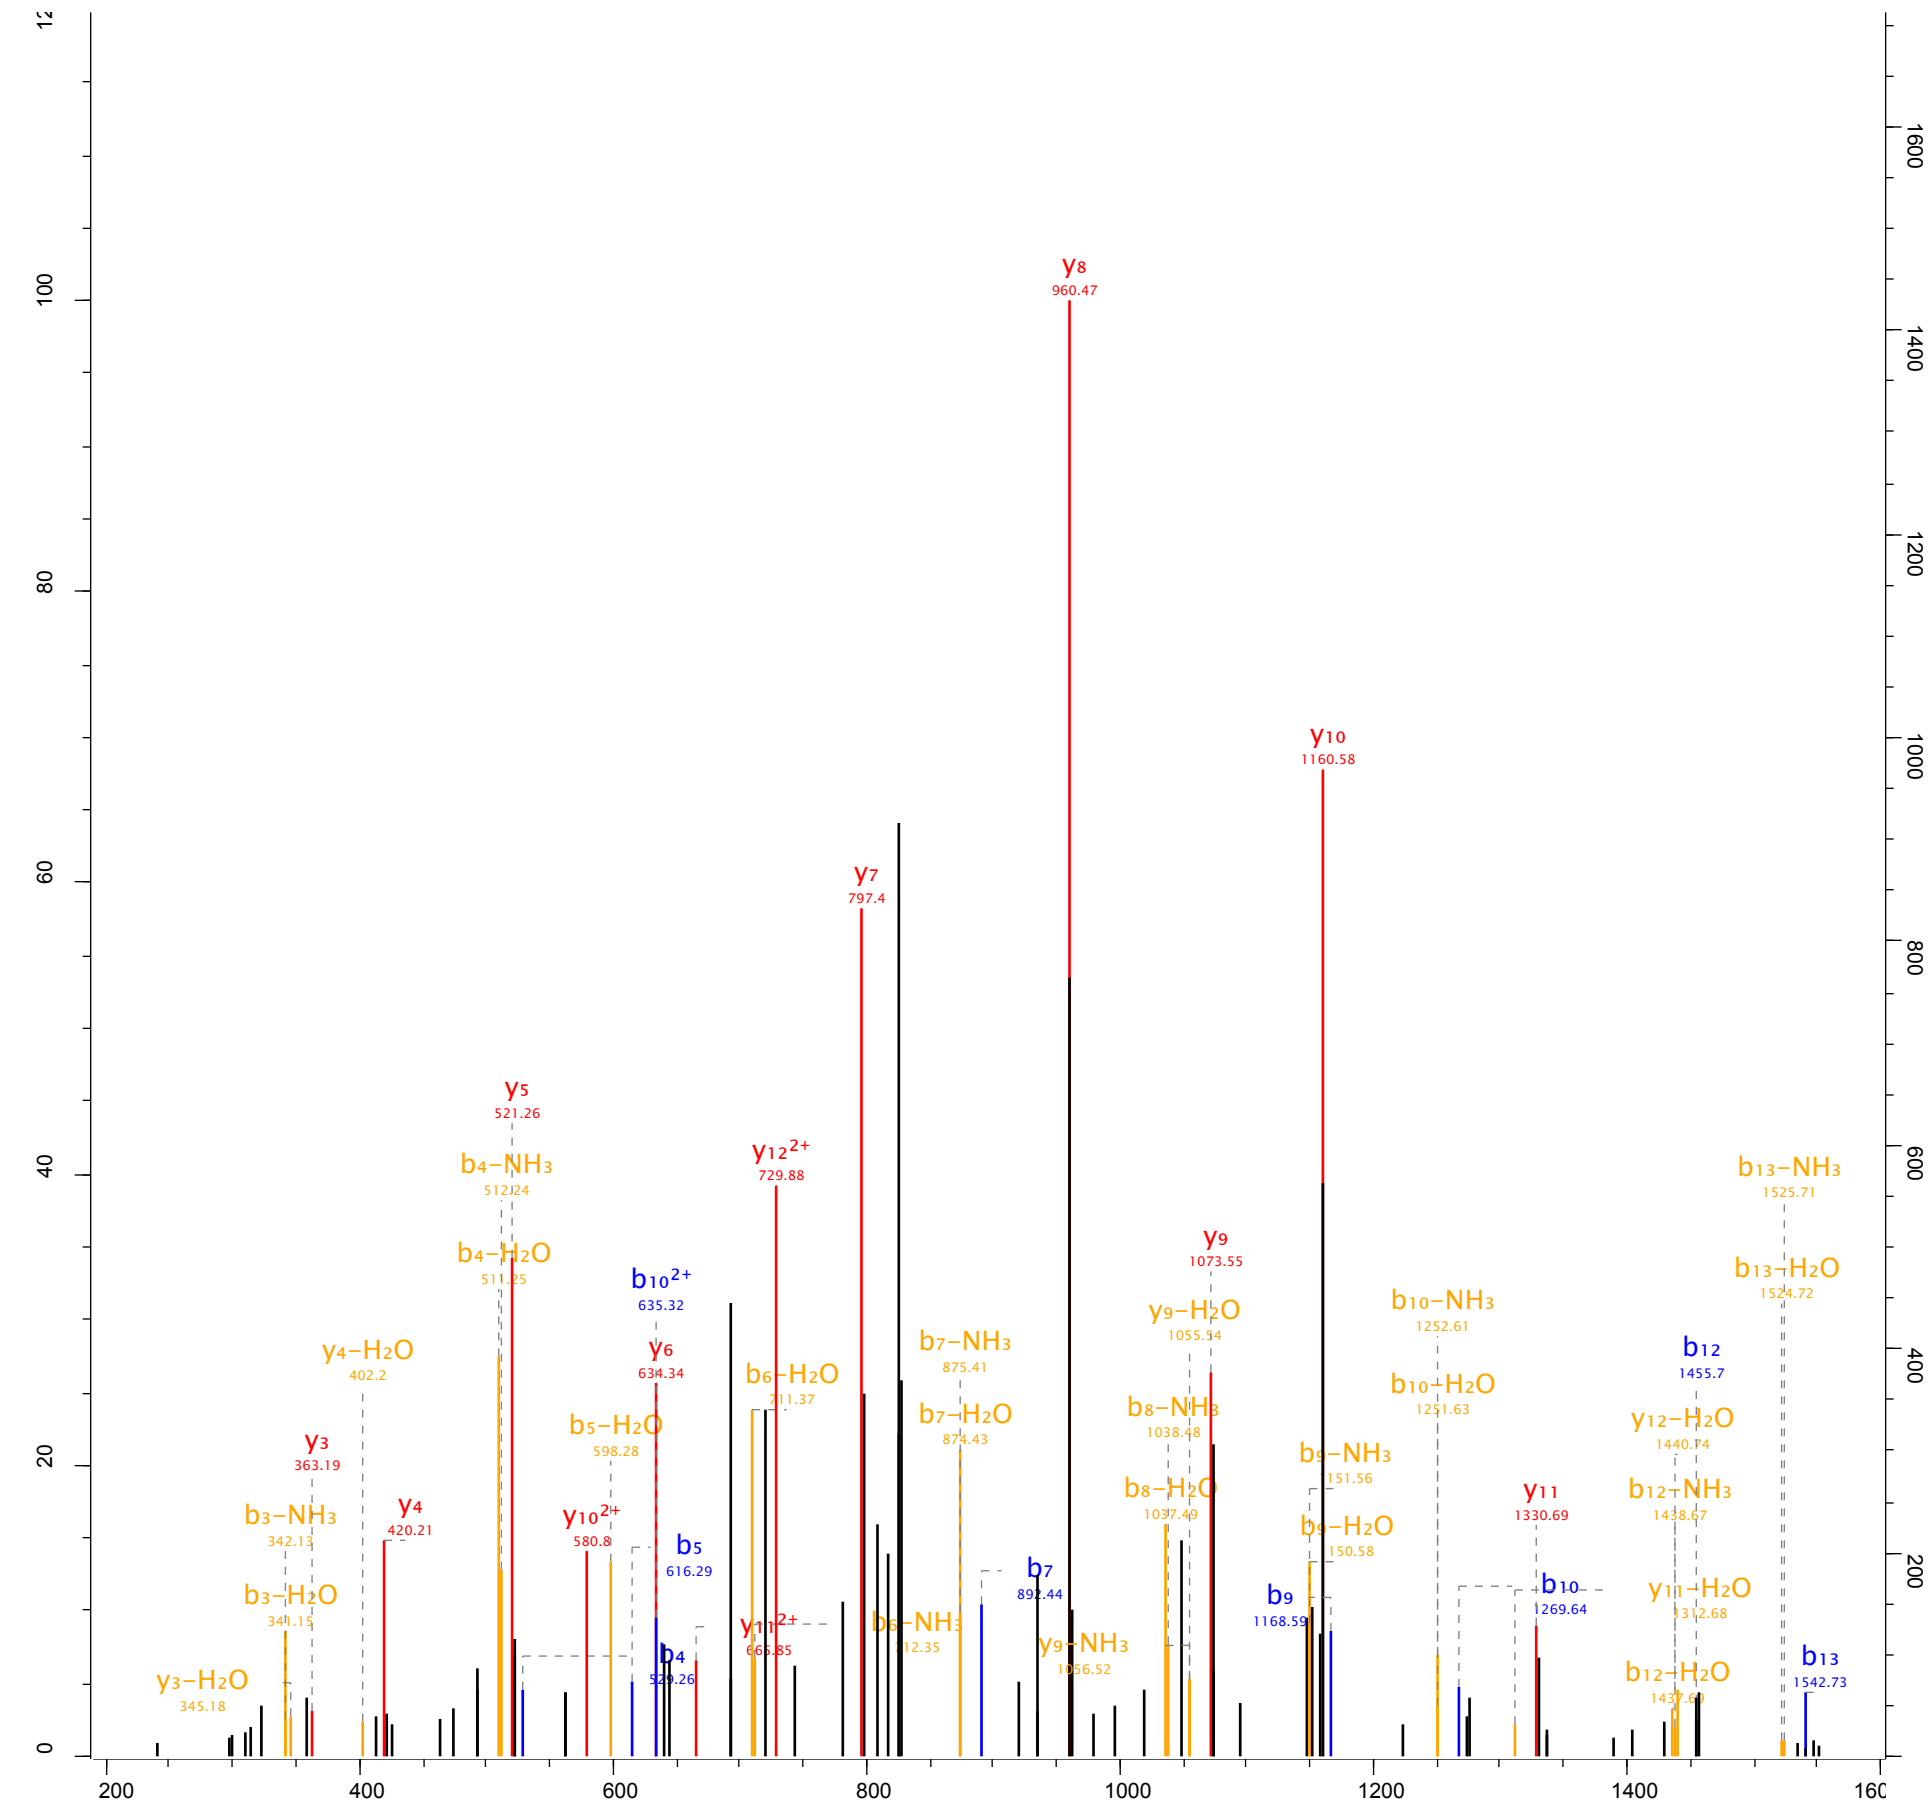

- E T Q y<sub>12</sub><sup>2+</sup> y<sub>11</sub>  
ac y<sub>10</sub> y<sub>9</sub> y<sub>8</sub> y<sub>7</sub> y<sub>6</sub> y<sub>5</sub> y<sub>4</sub> y<sub>3</sub>  
b<sub>4</sub> b<sub>5</sub> b<sub>7</sub> b<sub>9</sub> b<sub>10</sub> b<sub>12</sub> b<sub>13</sub> K -

Raw file 022714\_SCW\_II\_53\_4\_2ndZT Scan 21356 Method ITMS; CID Score 119.77 m/z 831.41 Gene names Acad12;Acad10

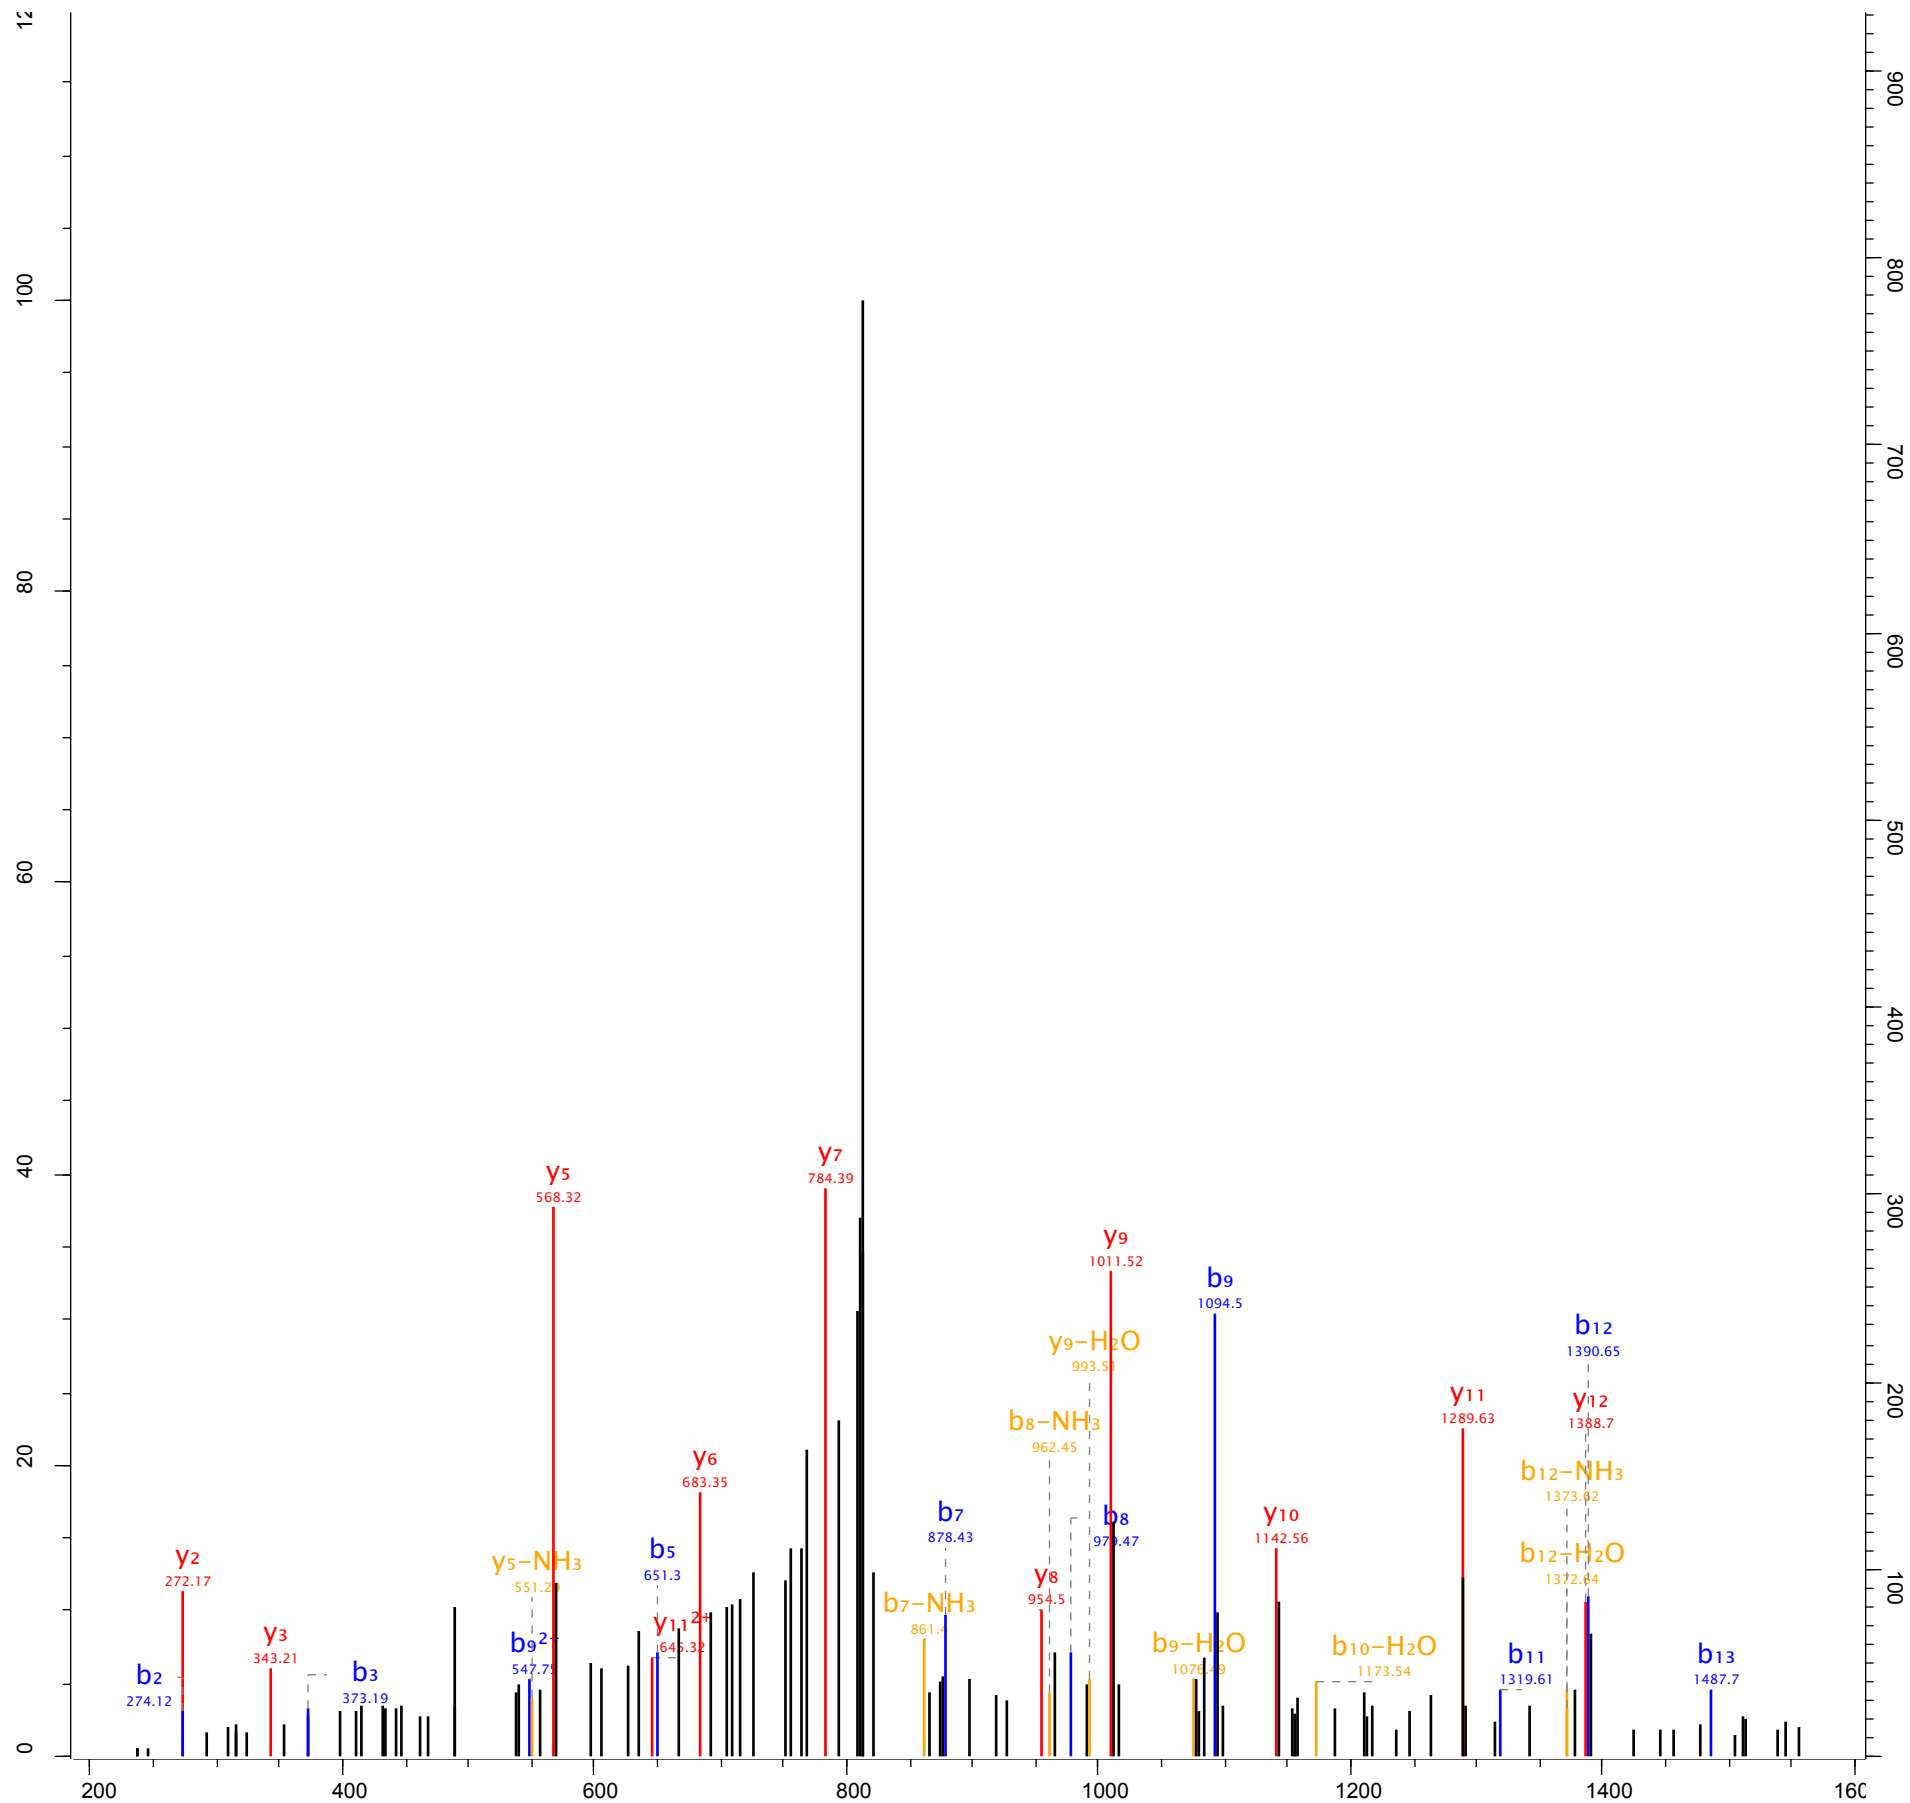

- L C V F M G K T D P Q A P R -

b<sub>2</sub>
b<sub>3</sub>
b<sub>5</sub>
b<sub>7</sub>
b<sub>8</sub>
b<sub>9</sub>
b<sub>11</sub>
b<sub>12</sub>
b<sub>13</sub>

y<sub>12</sub>
y<sub>11</sub>
y<sub>10</sub>
y<sub>9</sub>
y<sub>8</sub> ac
y<sub>7</sub>
y<sub>6</sub>
y<sub>5</sub>
y<sub>3</sub>
y<sub>2</sub>

022714\_SCW\_II\_53\_4\_2ndZT

22353

ITMS; CID

190.18

853.92

Atp5j

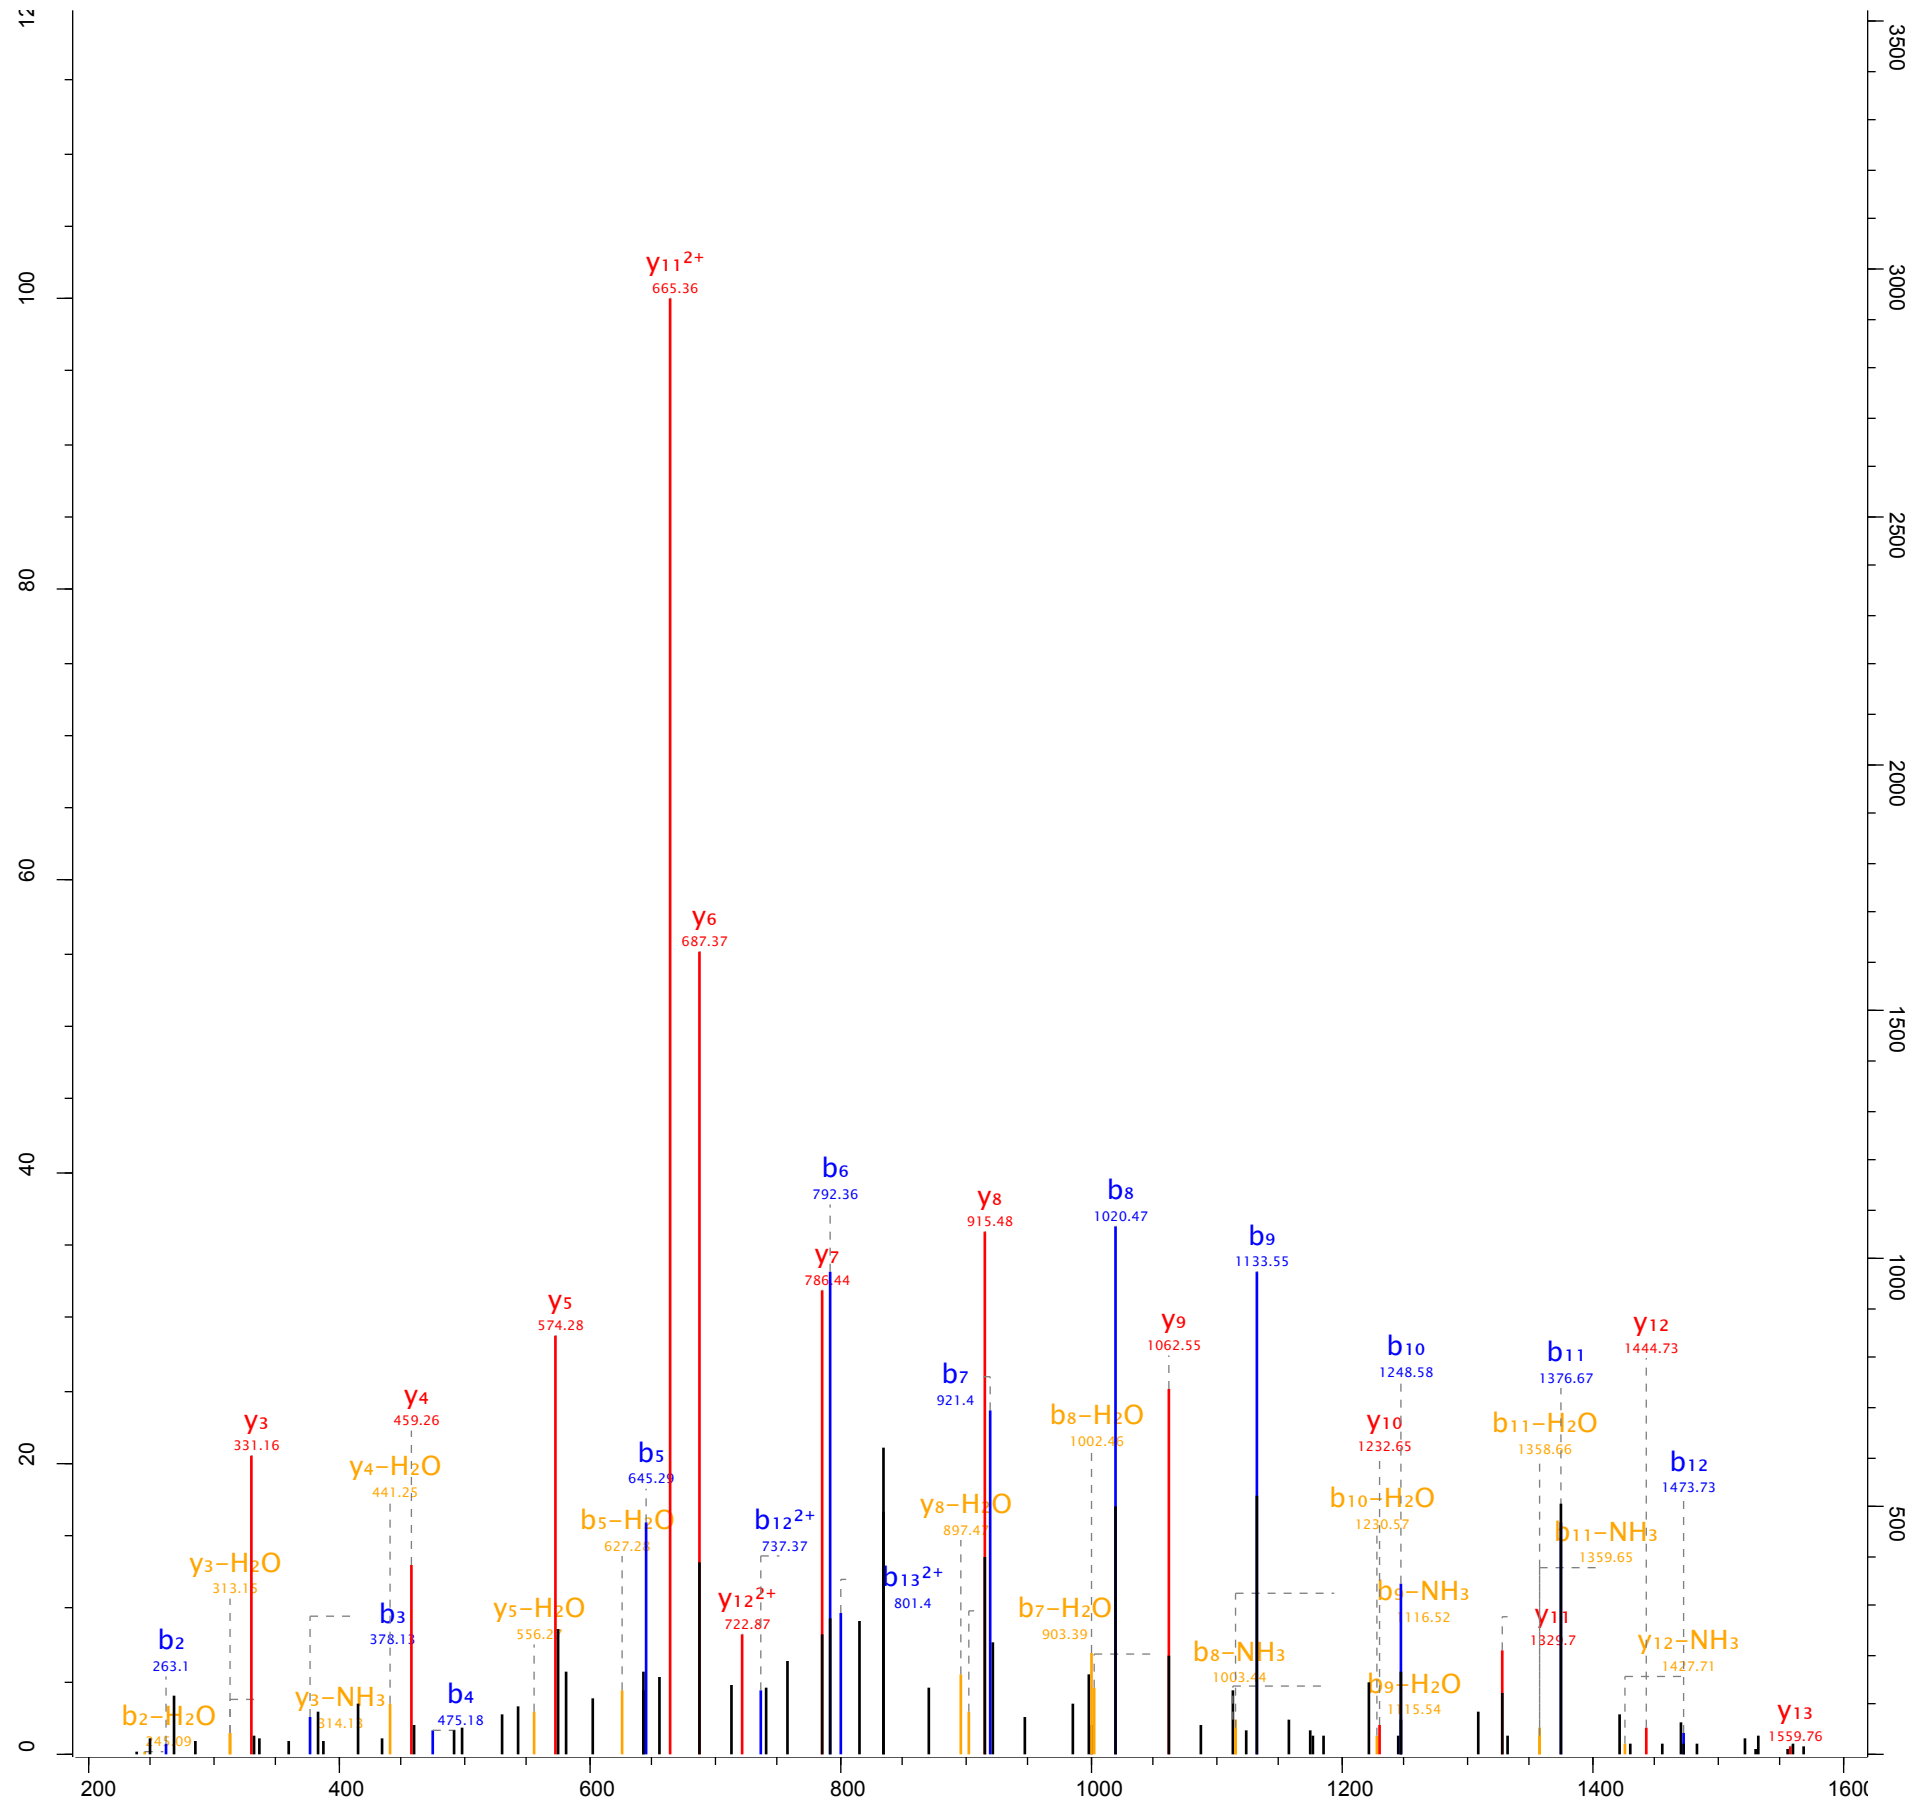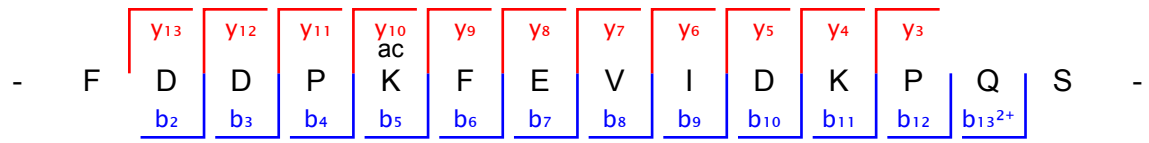

022714\_SCW\_II\_53\_4\_2ndZT

22914 ITMS; CID 119.74 642.4 Ugp2

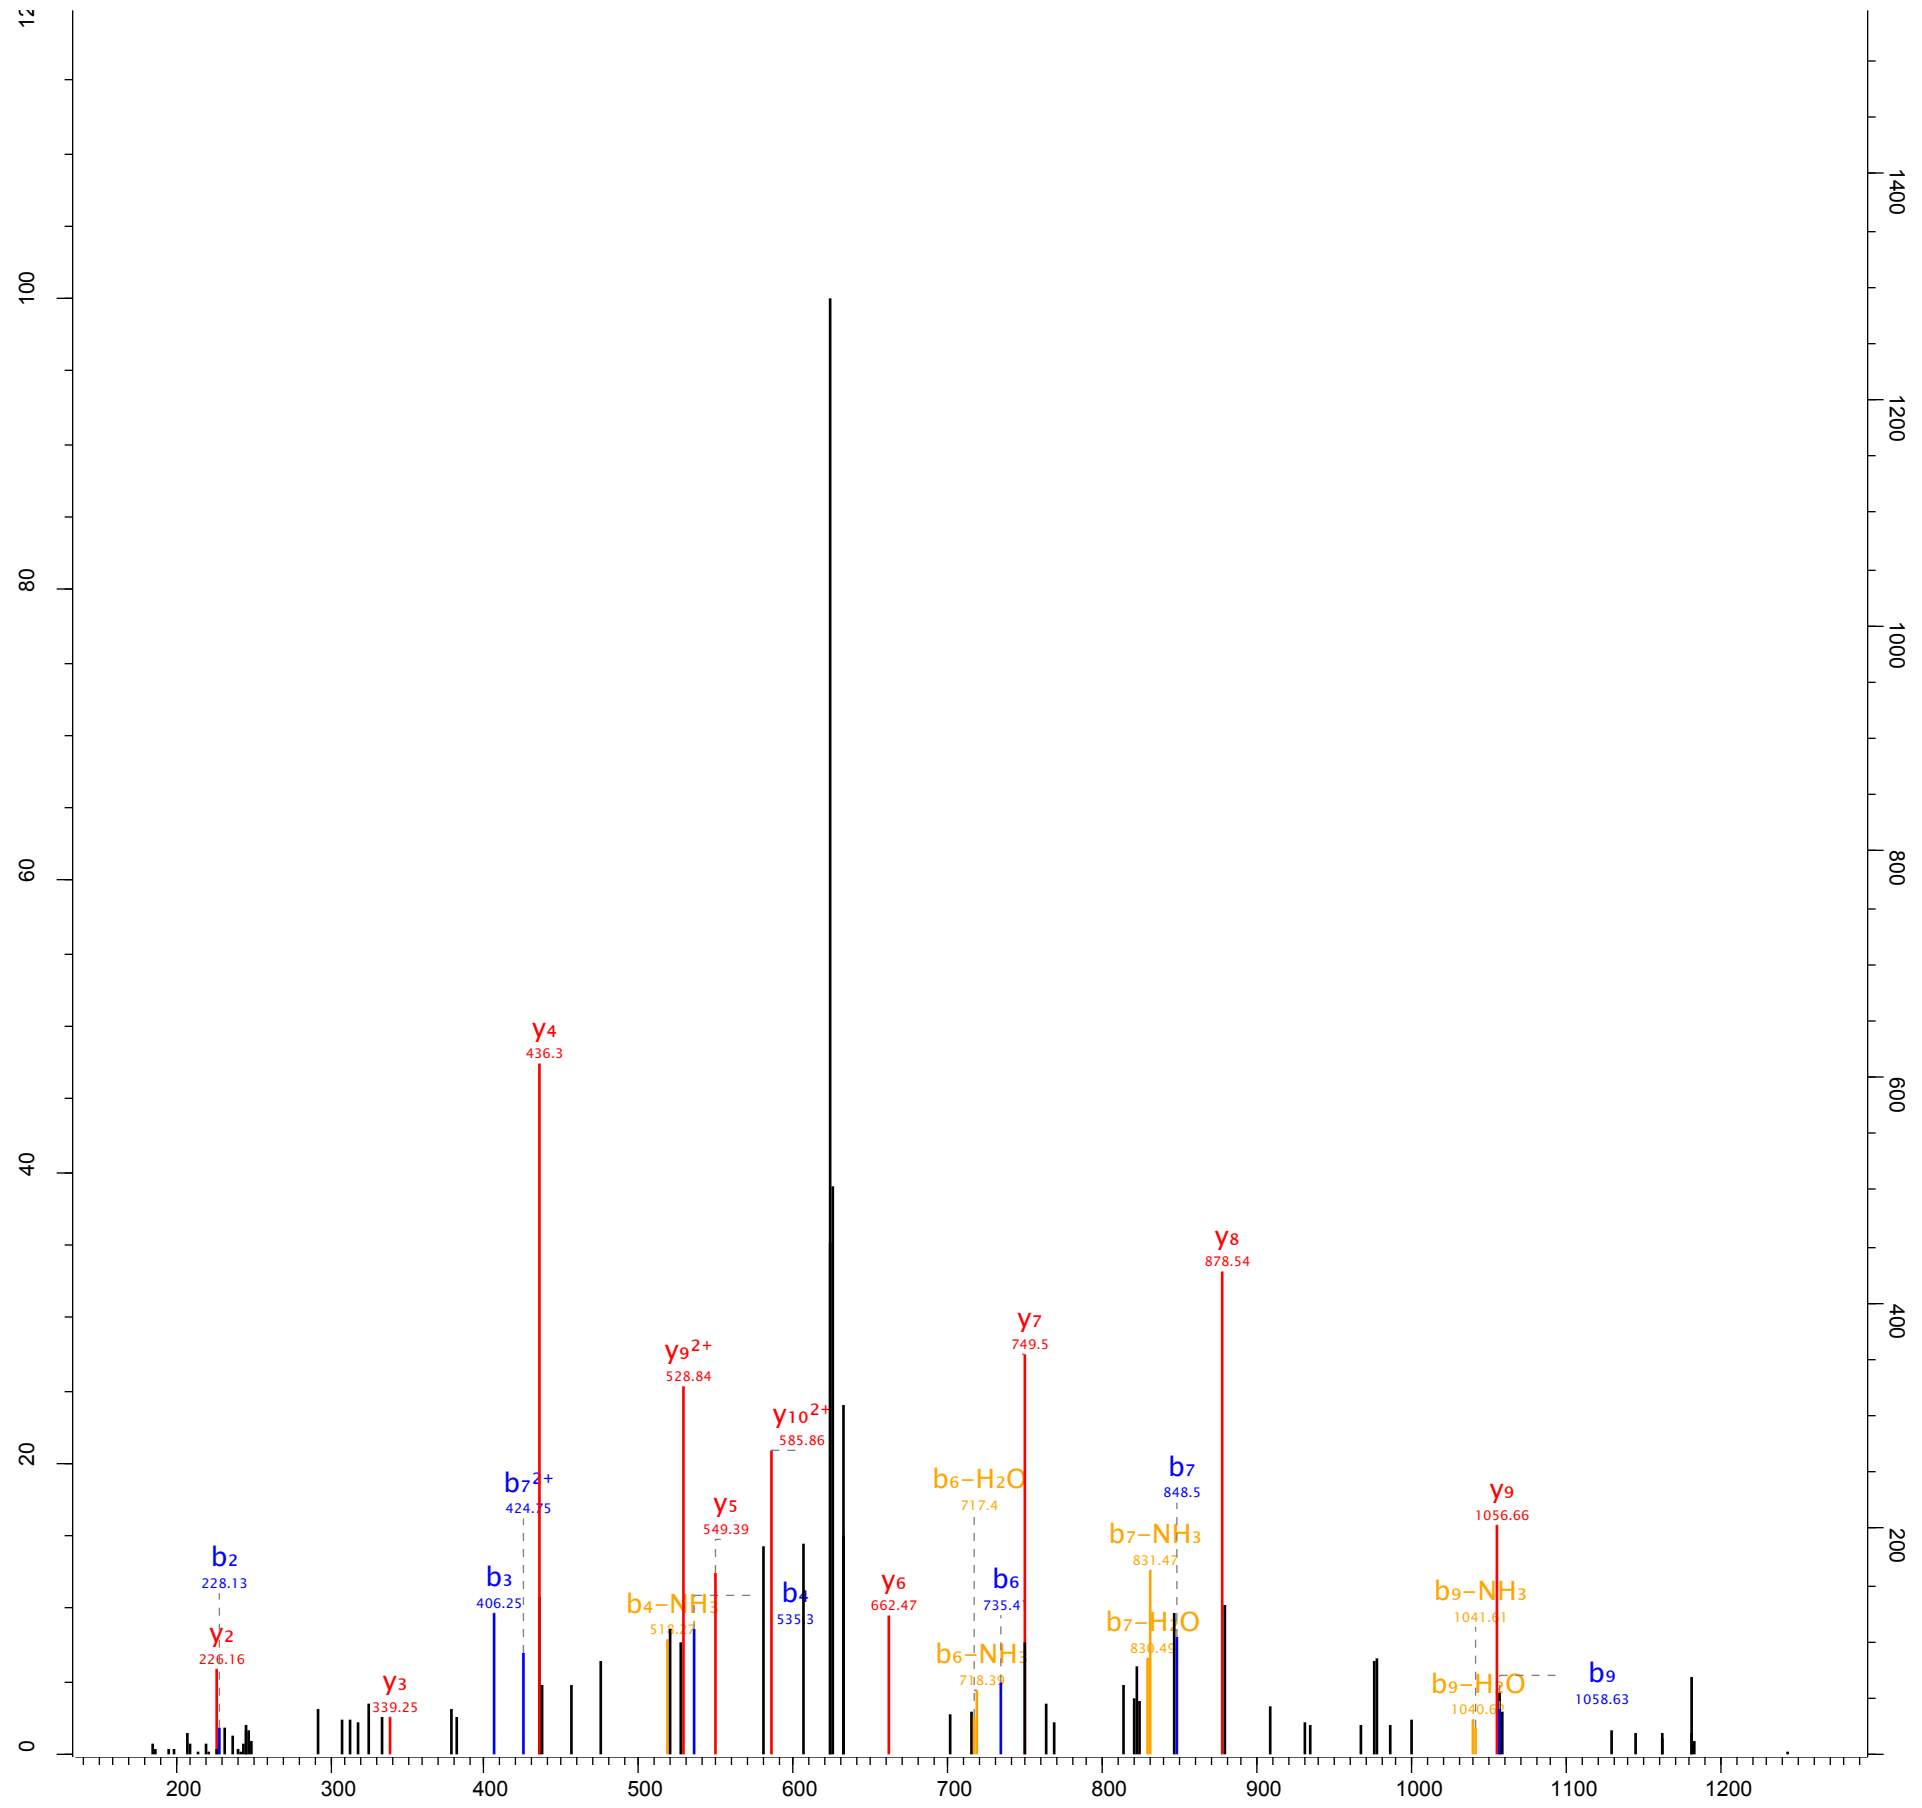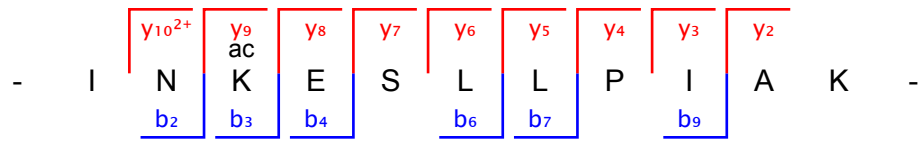



022714\_SCW\_II\_53\_4\_2ndZT

24781

ITMS; CID

339.81

944.45

Calm1

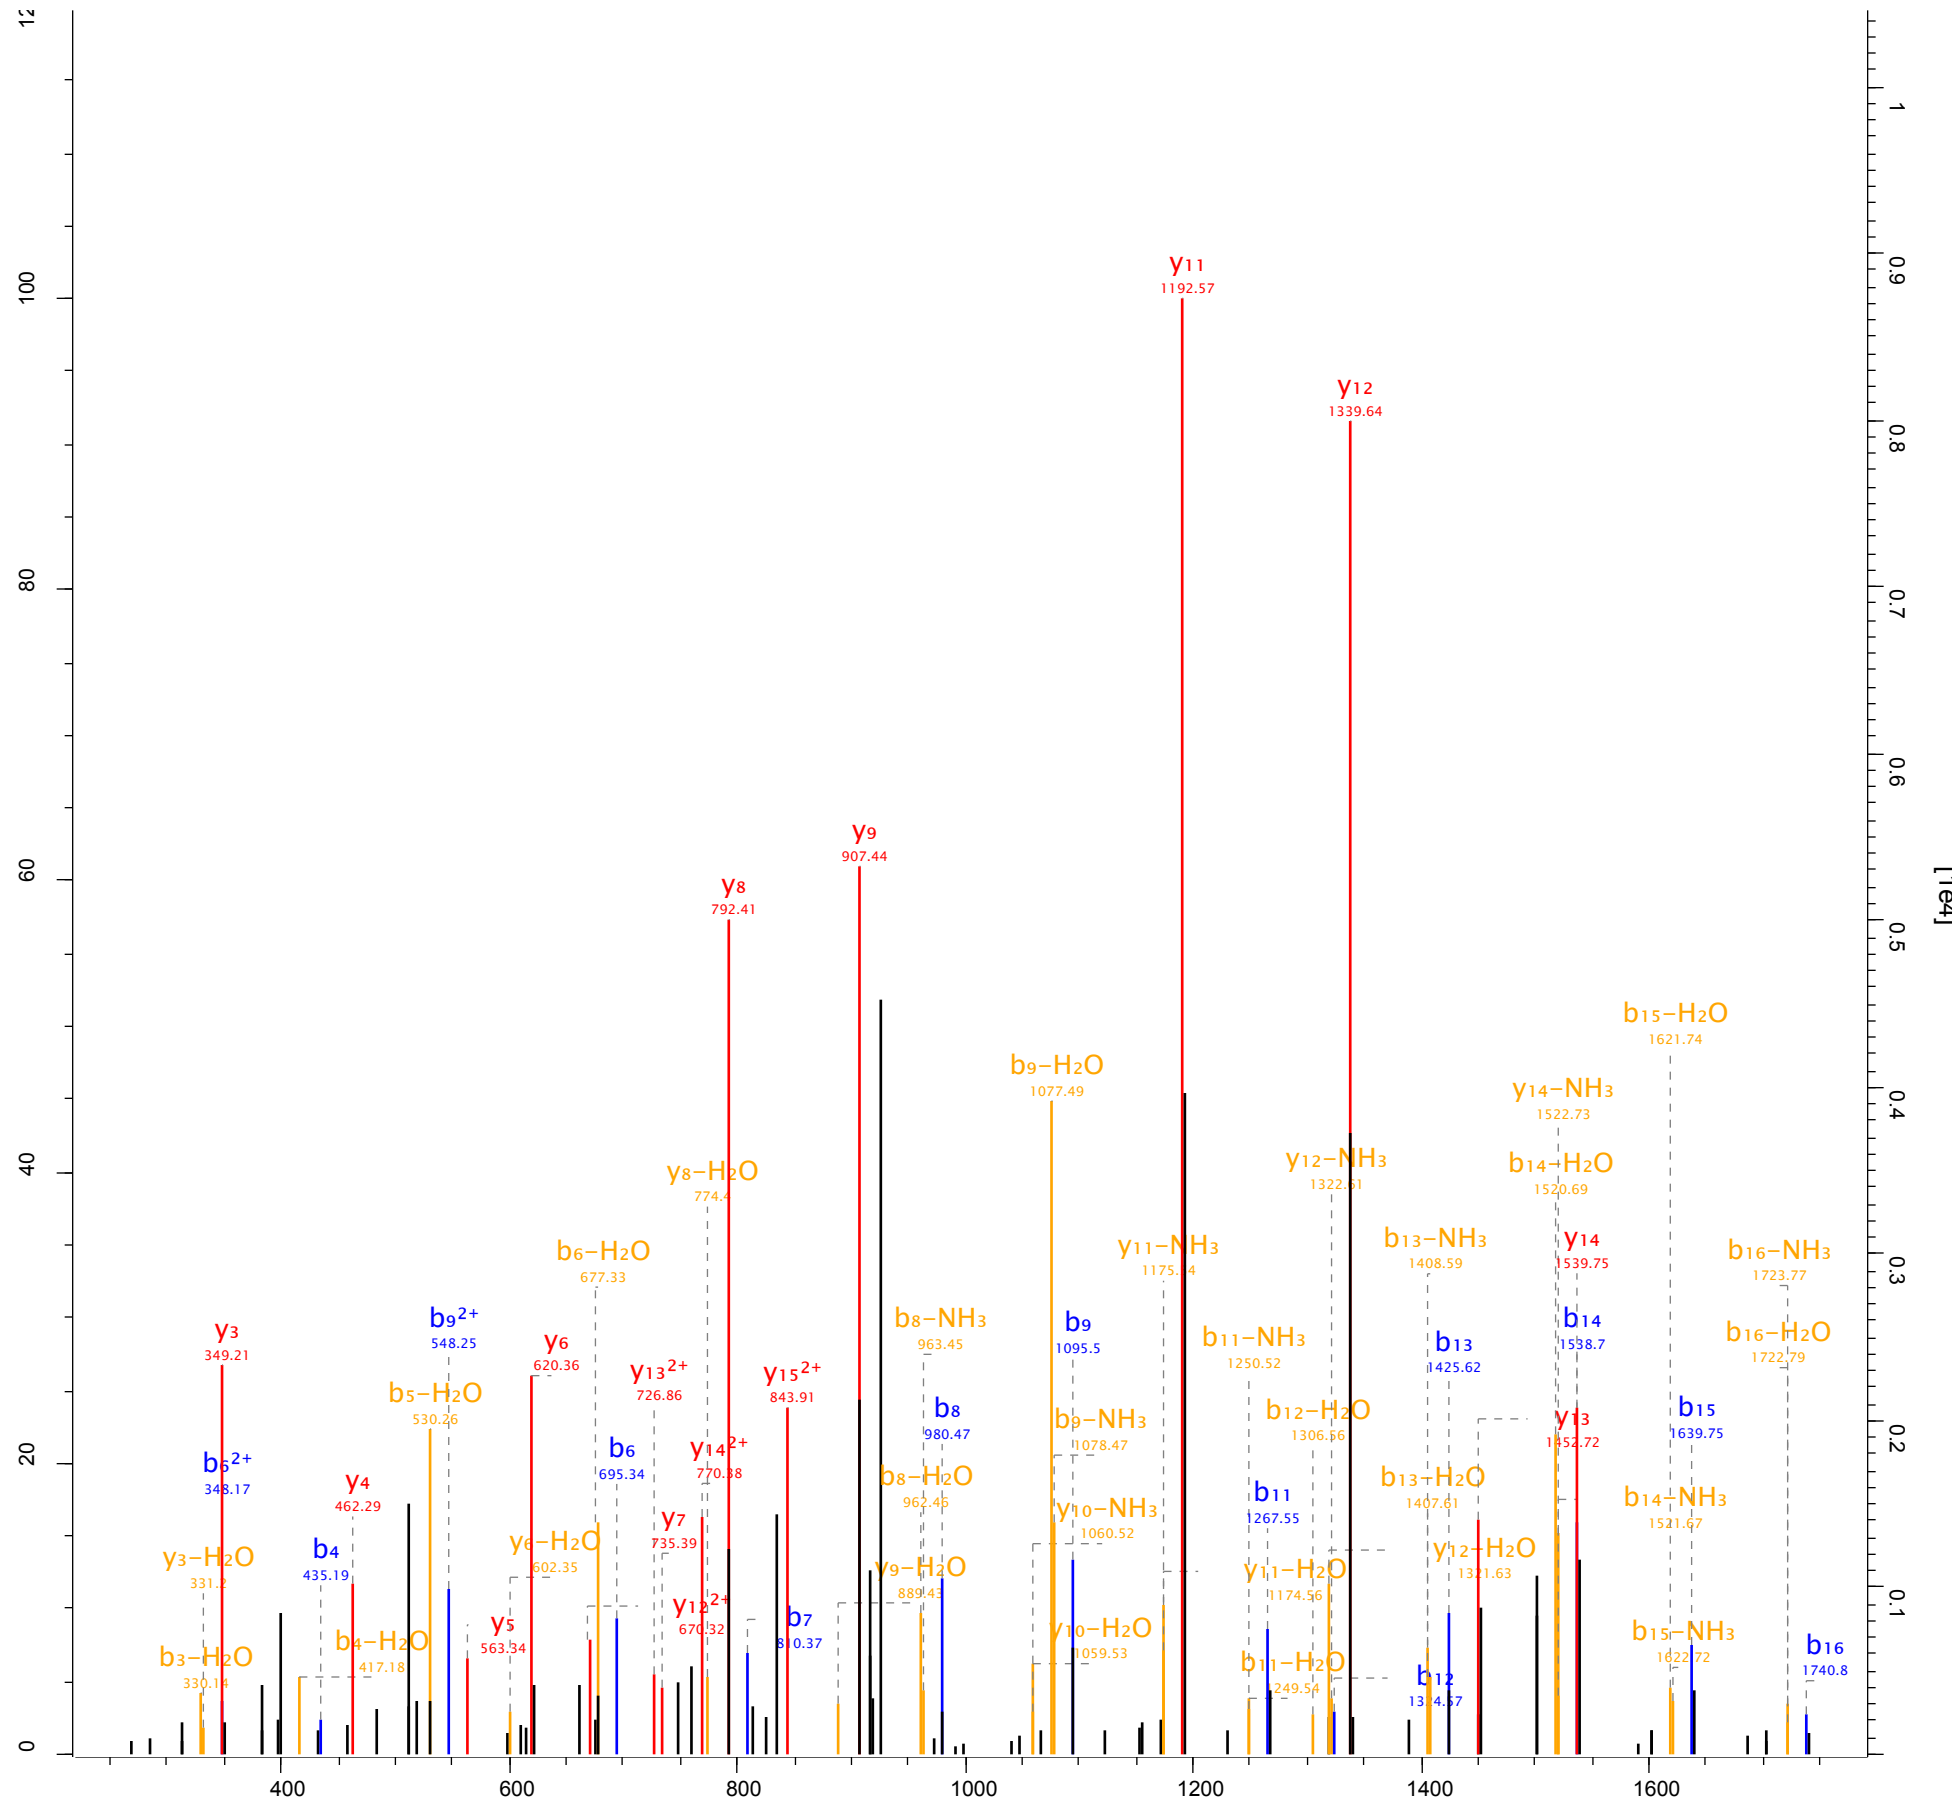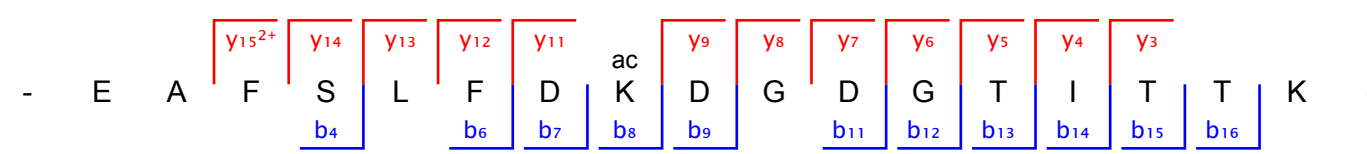

Raw file 022714\_SCW\_II\_53\_4\_2ndZT Scan 24790 Method ITMS; CID 118.16 m/z 723.9 Gene names Pabpc1;Pabpc5

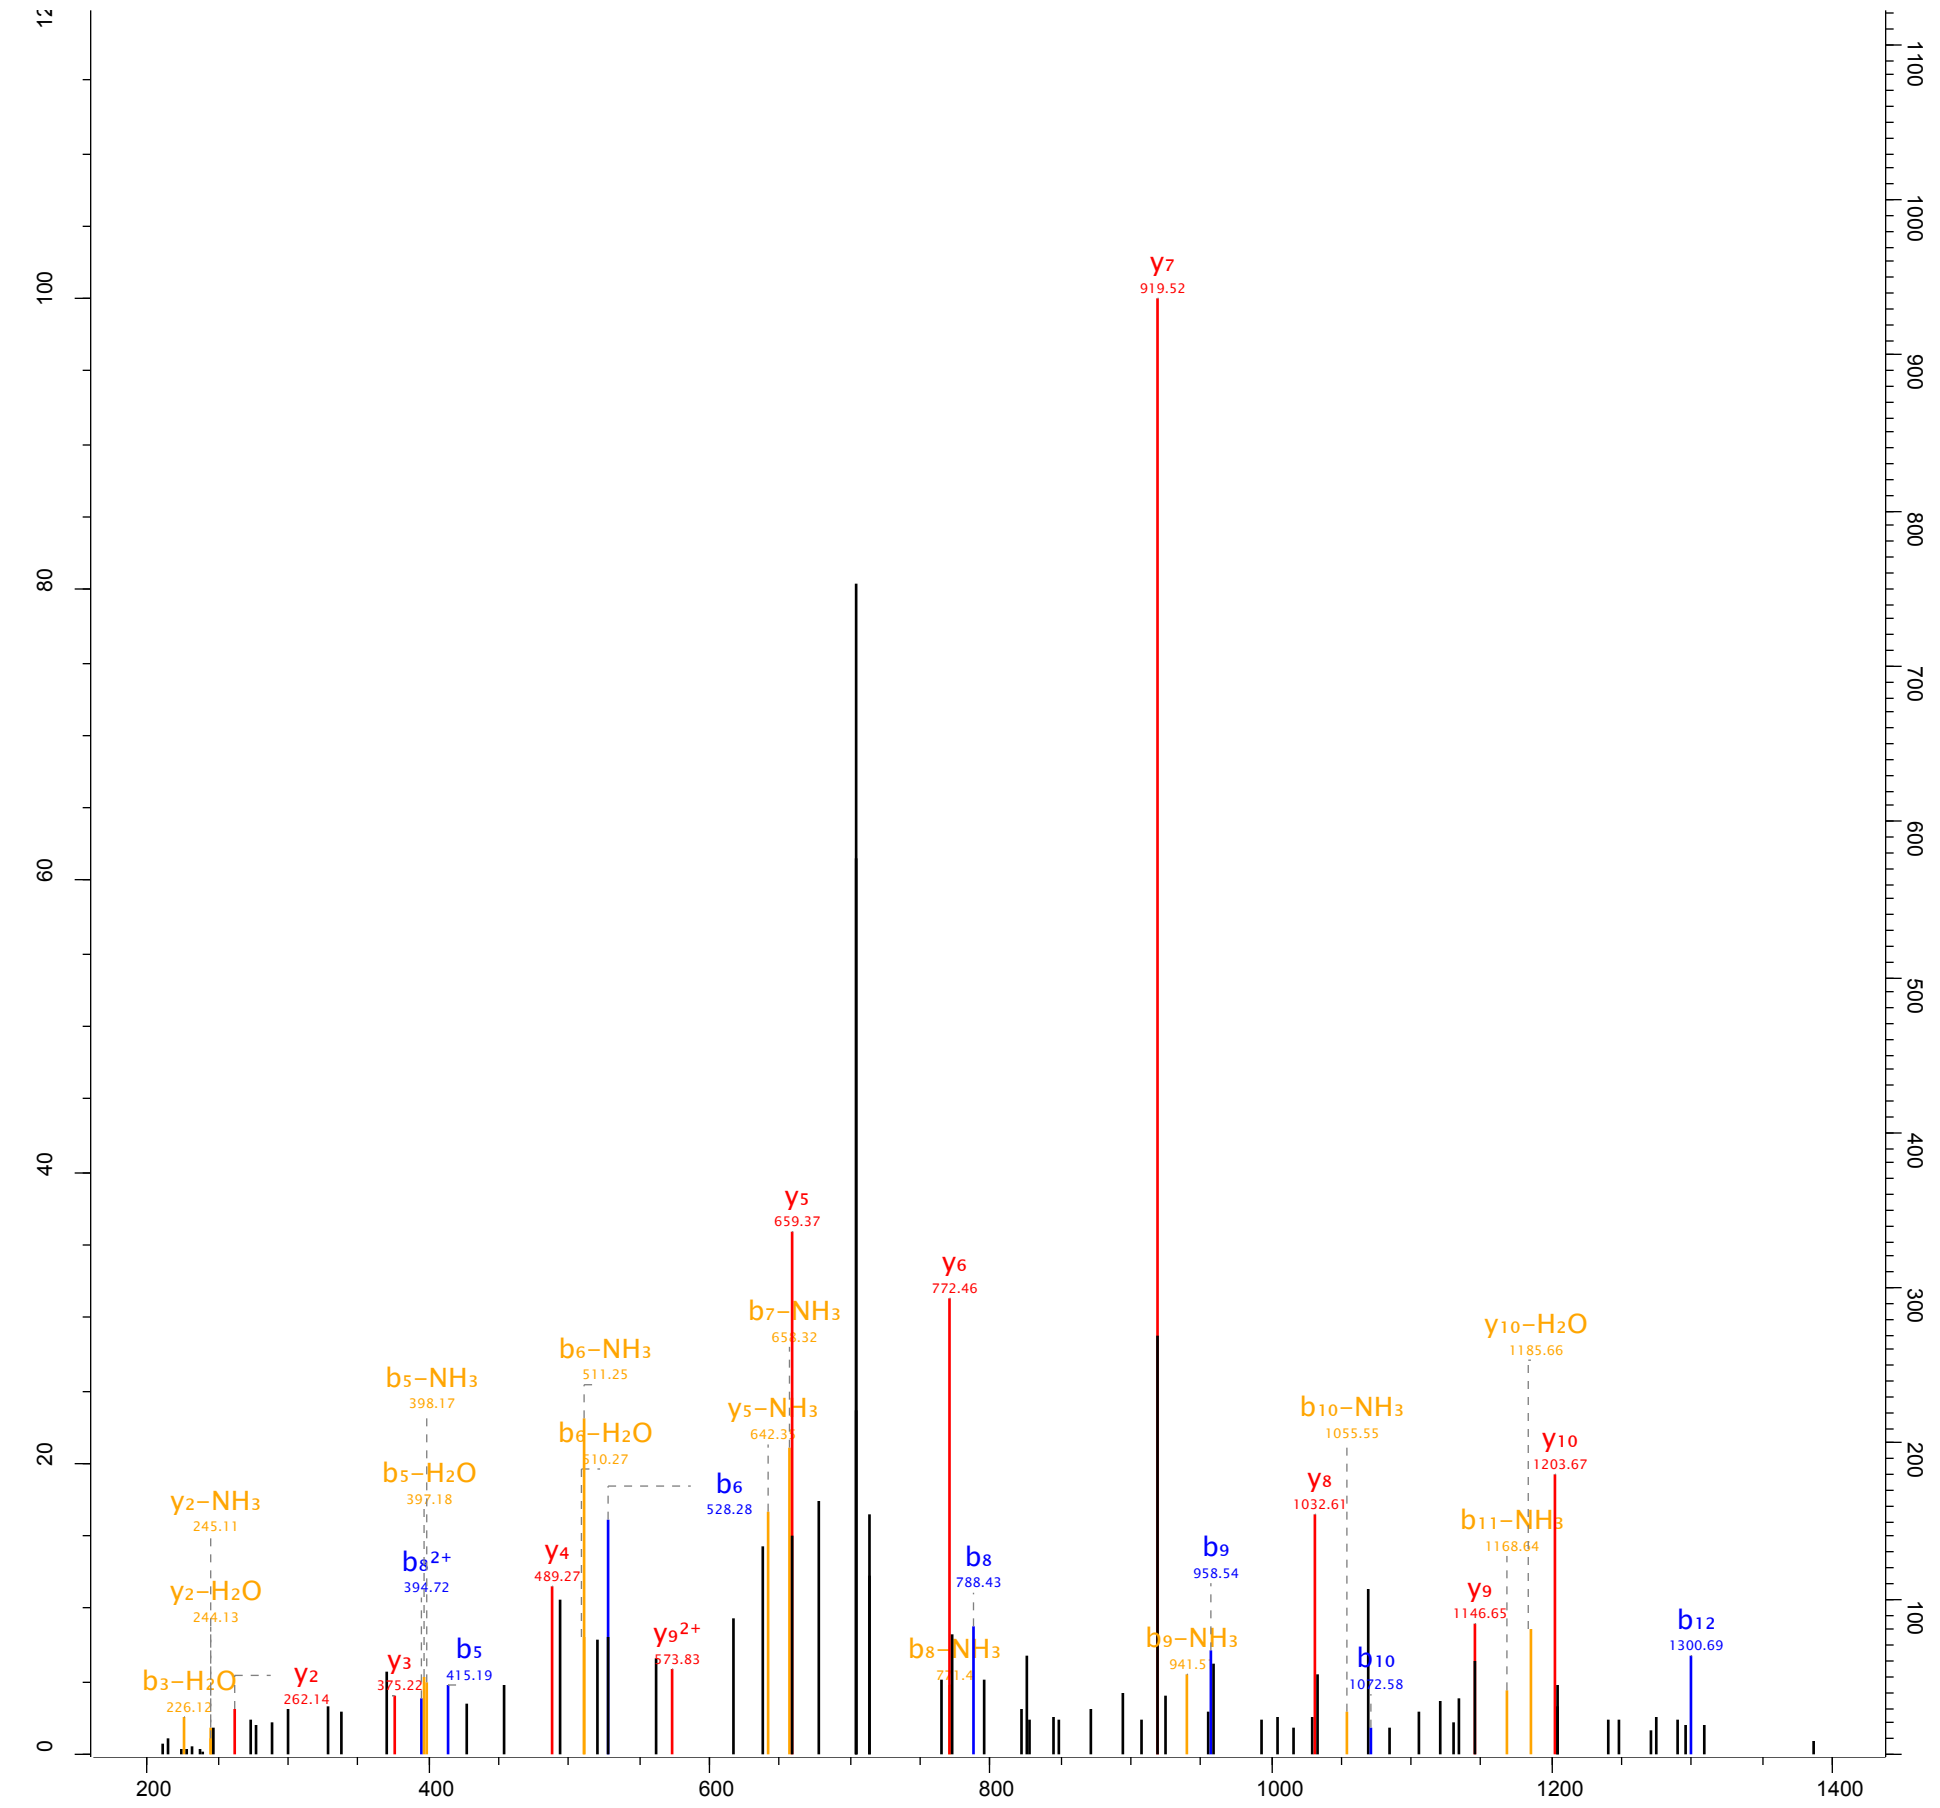

- S G V y10 y9 y8 y7 y6 y5 ac y4 y3 y2   
b5 b6 b8 b9 b10 b12 K -

022714\_SCW\_II\_53\_5\_2ndZT

11024

ITMS; CID

156.16

501.79

Hadhb

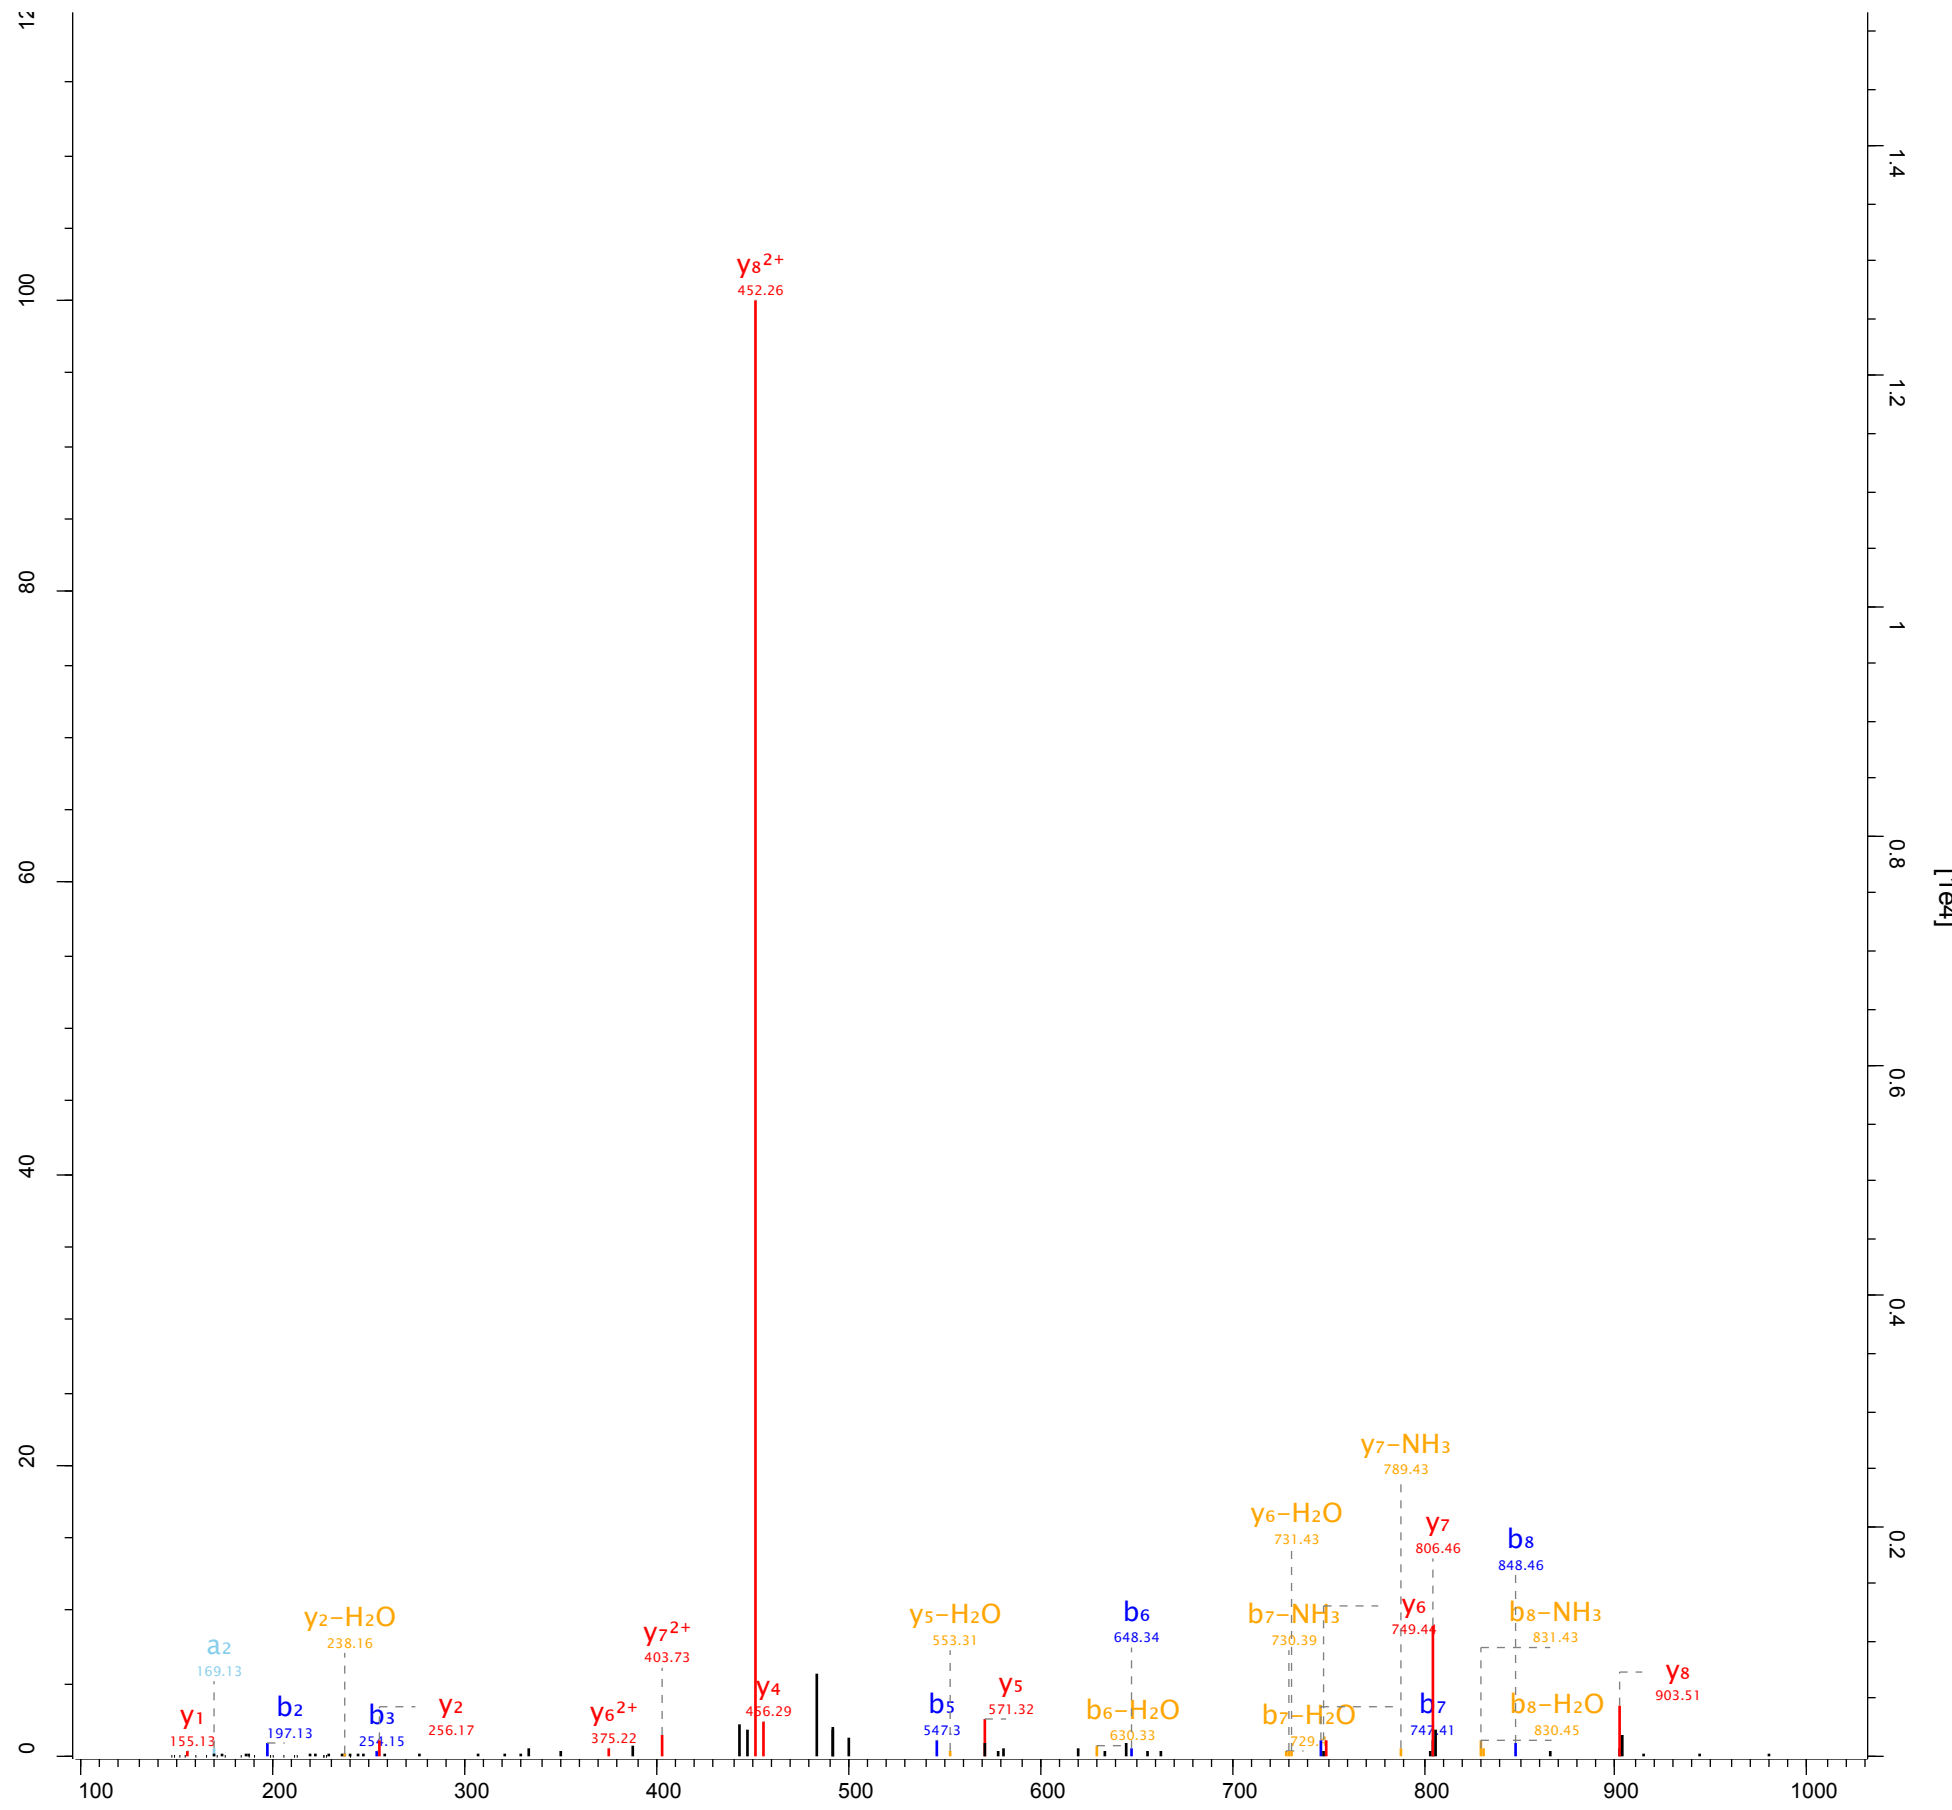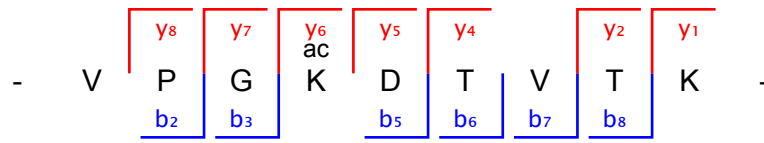

Raw file 022714\_SCW\_II\_53\_5\_2ndZT Scan 11308 Method ITMS; CID Score 147.62 m/z 523.8 Gene names Fscn1

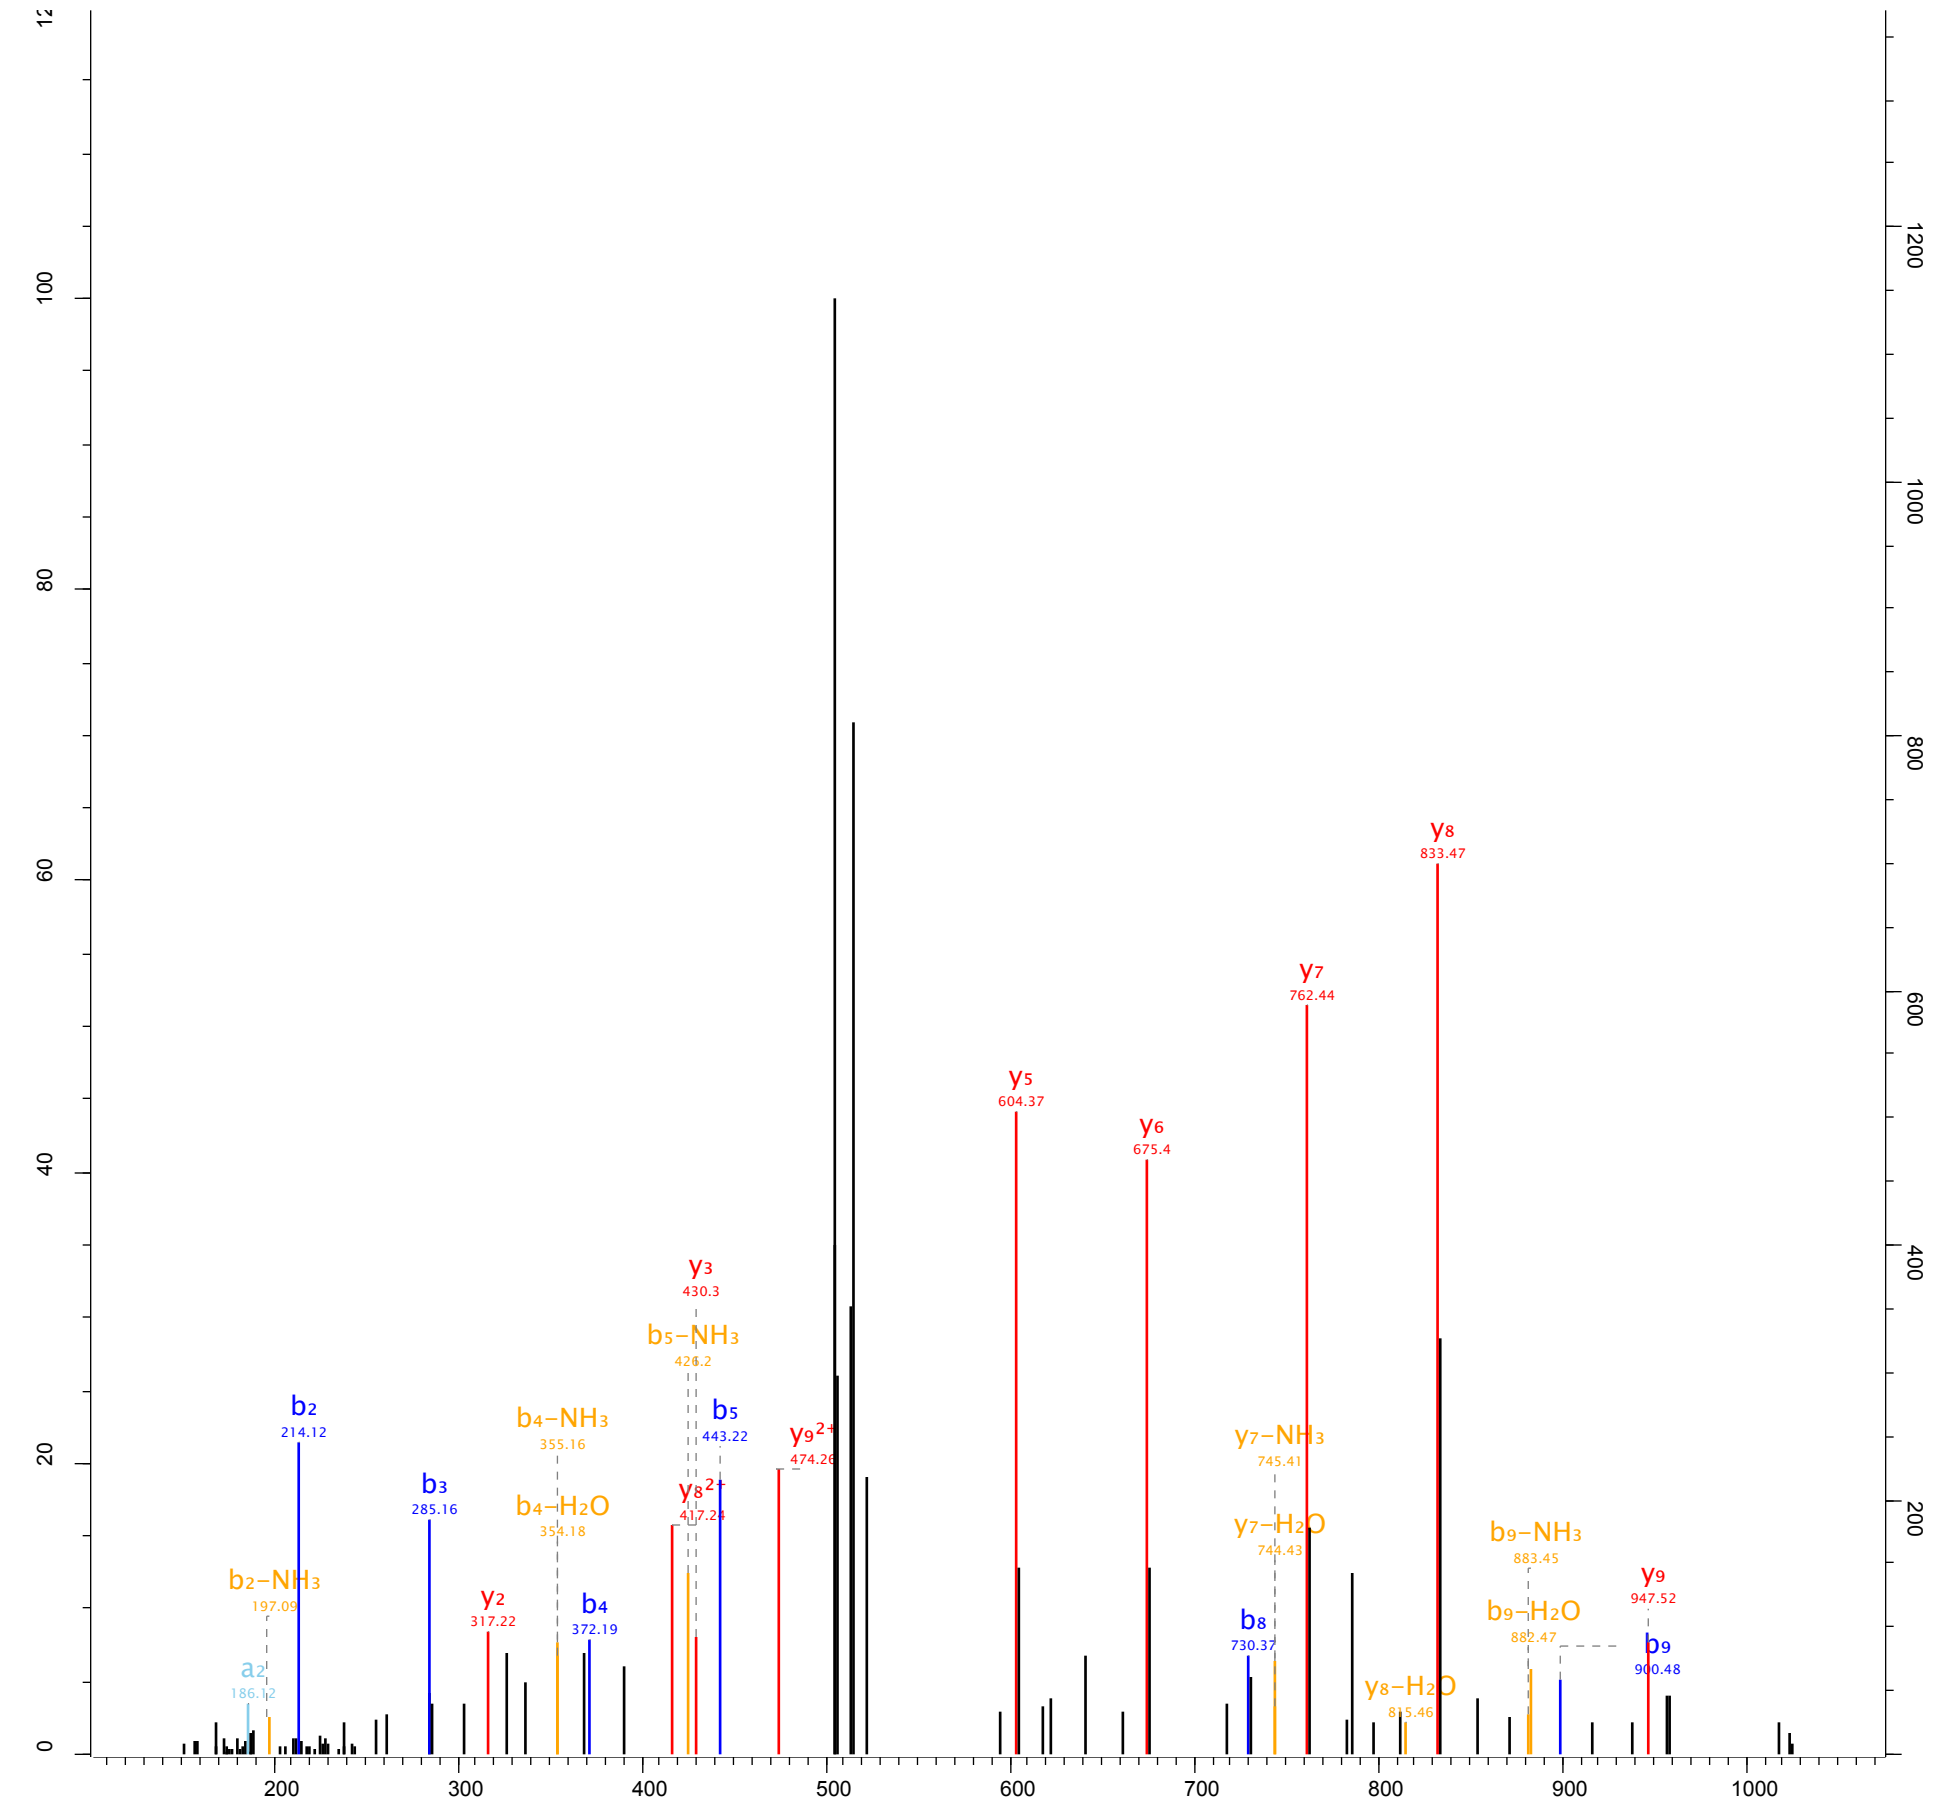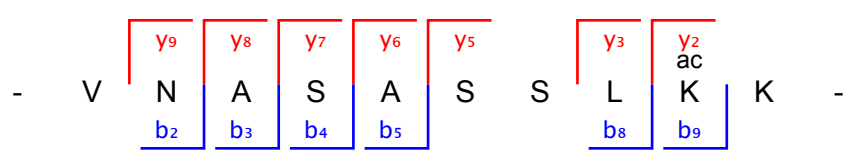

Raw file 022714\_SCW\_II\_53\_5\_2ndZT Scan 13018 Method ITMS; CID Score 238.51 m/z 569.79 Gene names Gbp2;Gbp1;Gbp2b

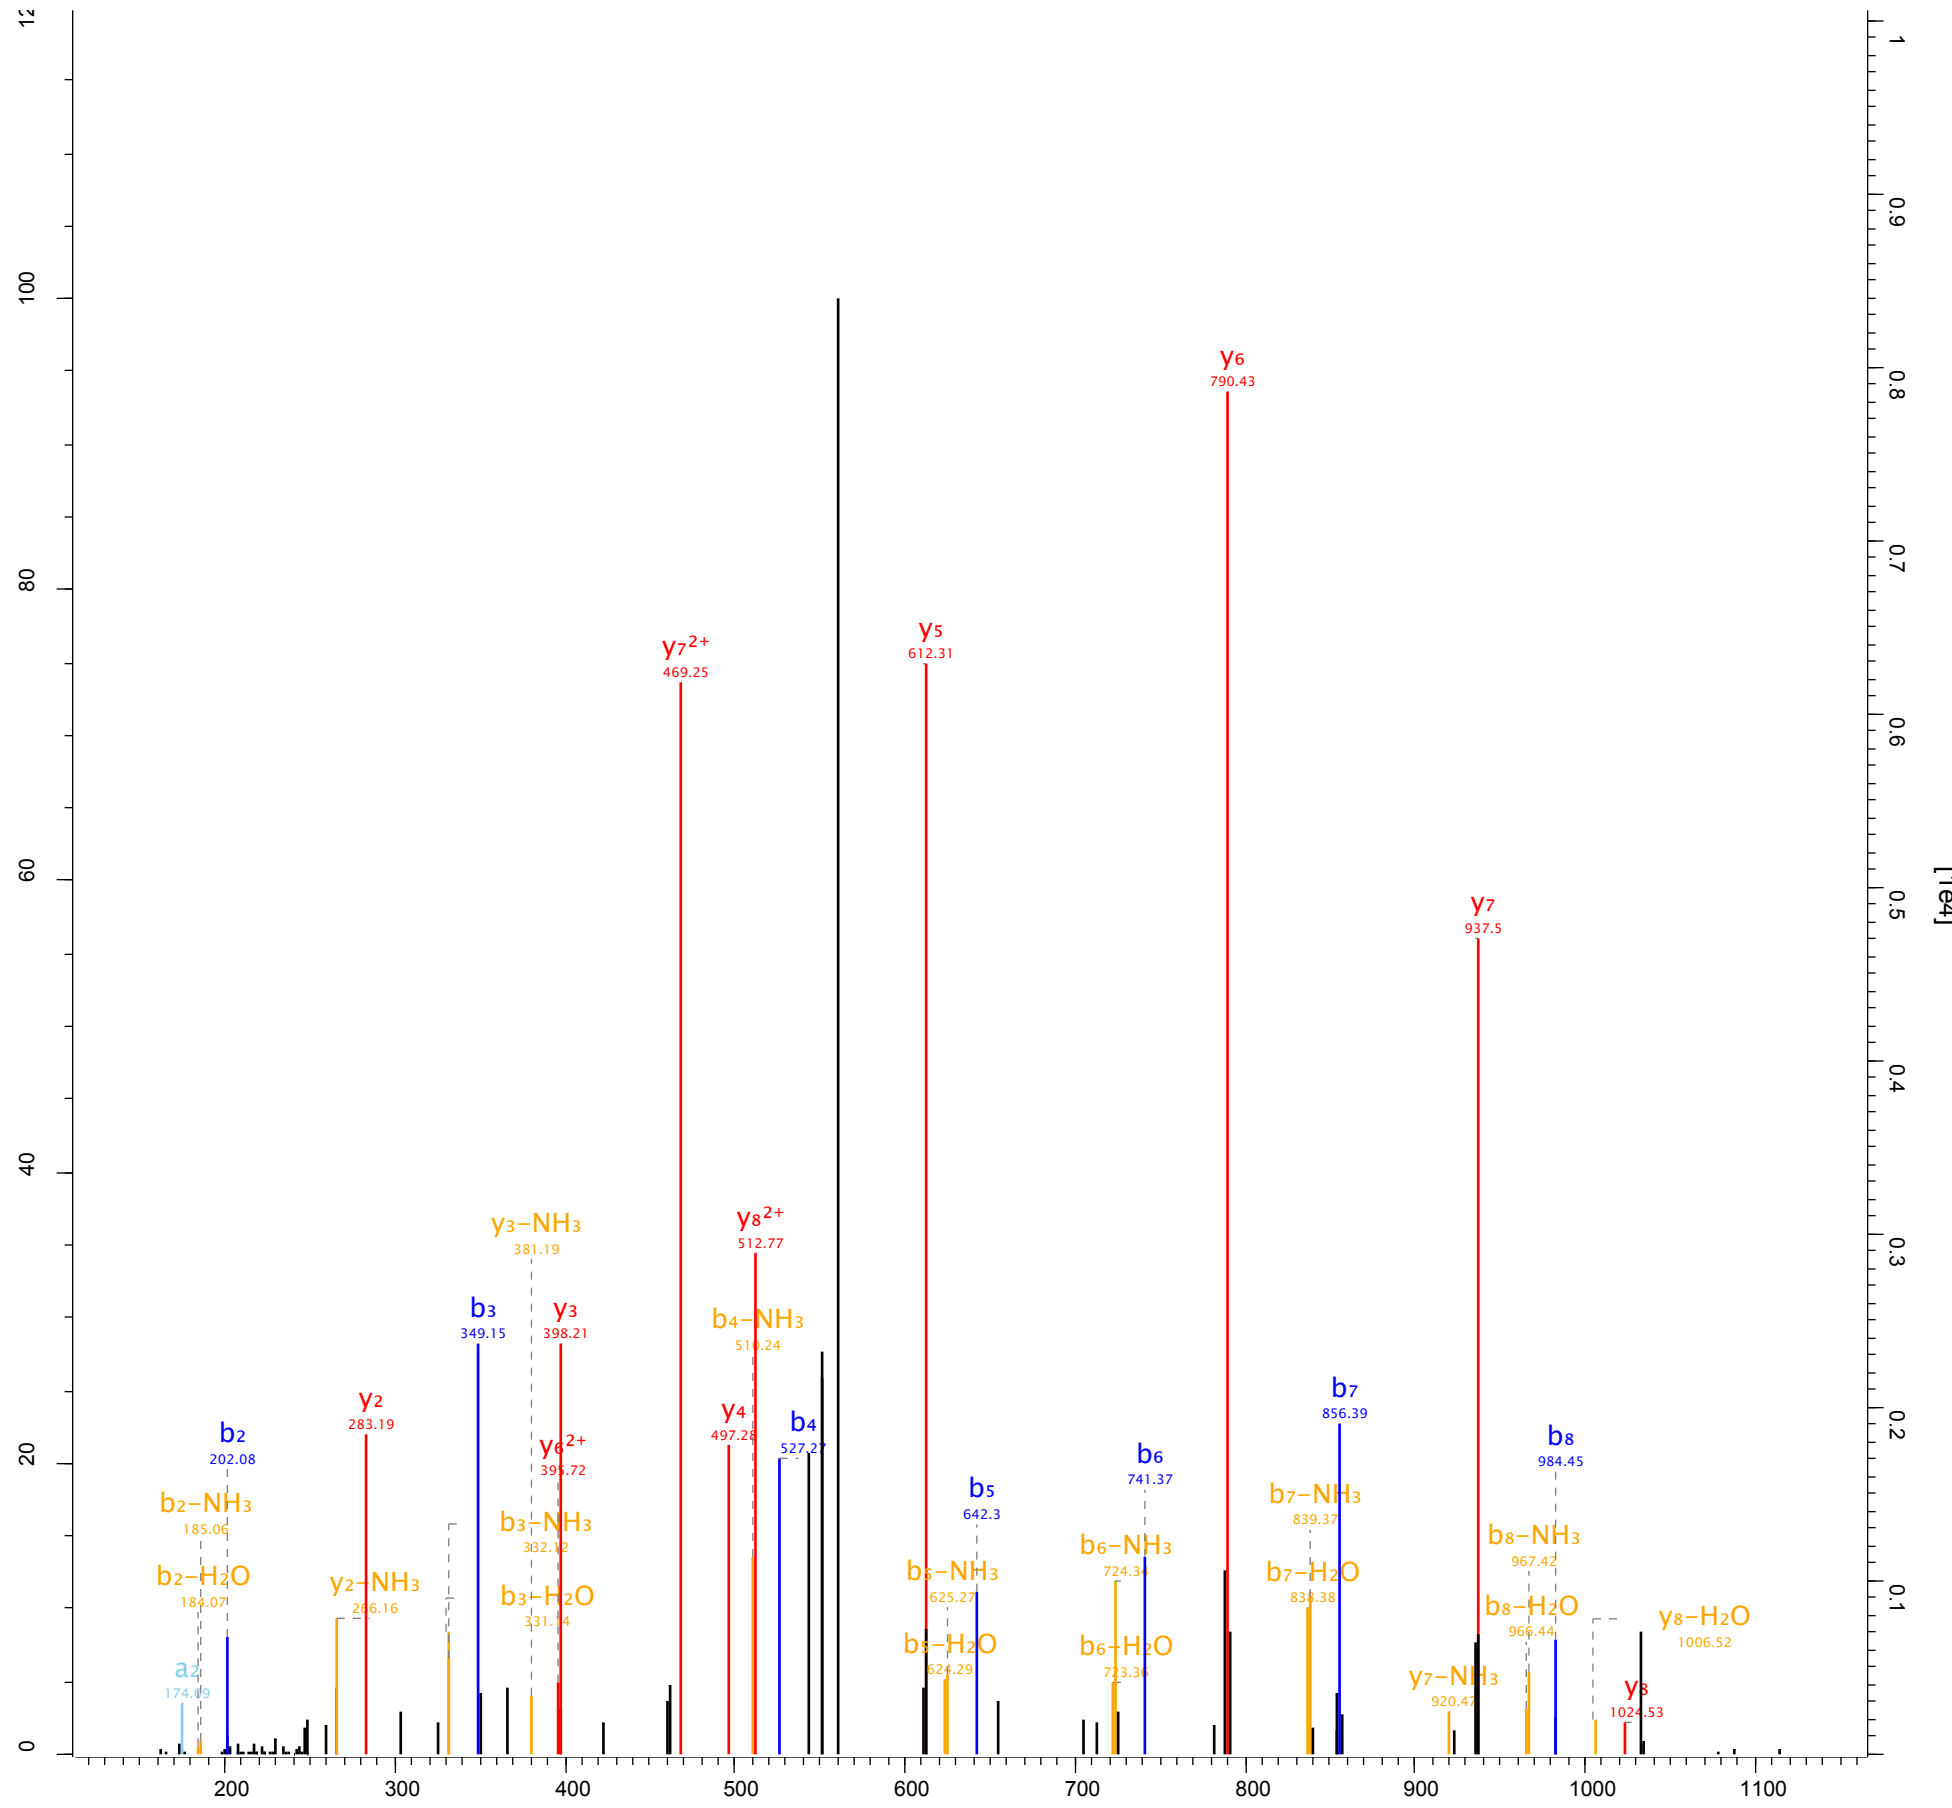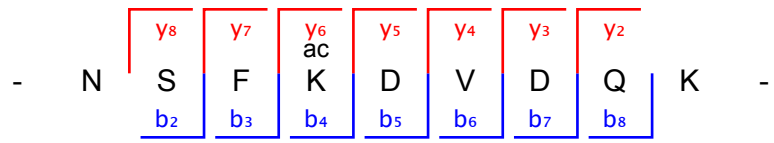

Raw file: 022714\_SCW\_II\_53\_5\_2ndZT  
 Scan: 13855 Method: ITMS; CID Score: 124.98 m/z: 505.28 Gene names: Eef1a1

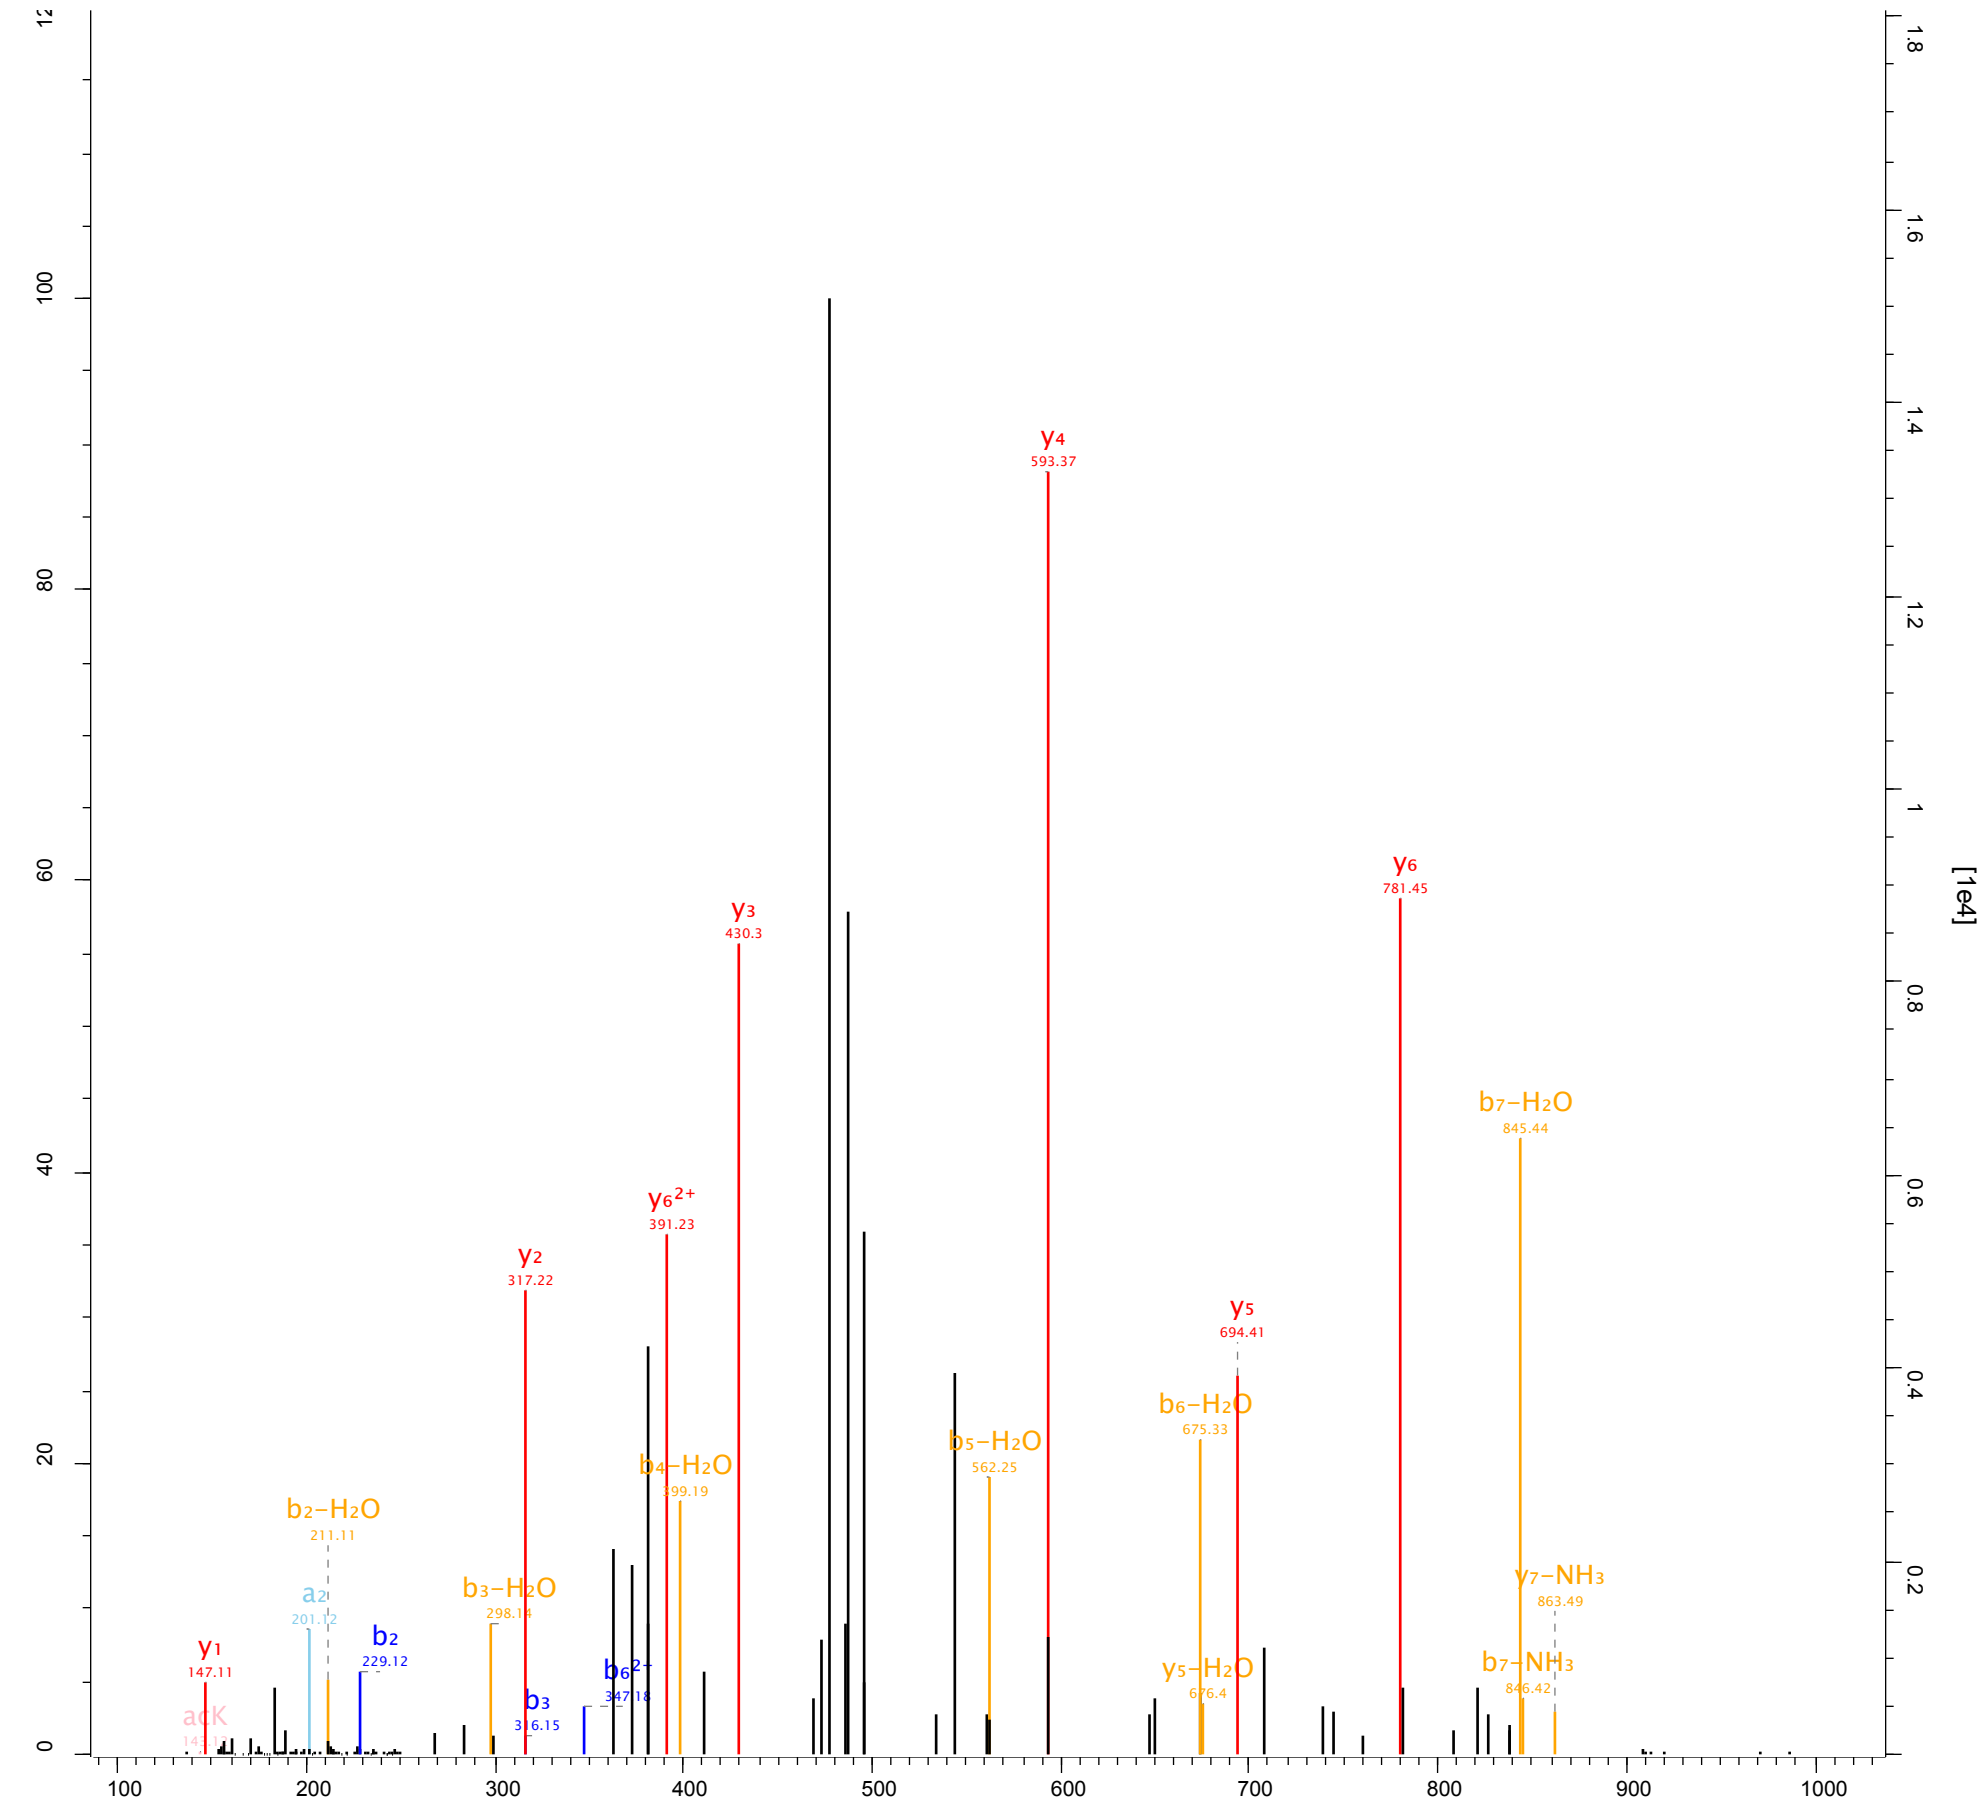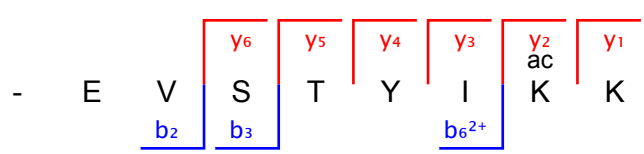

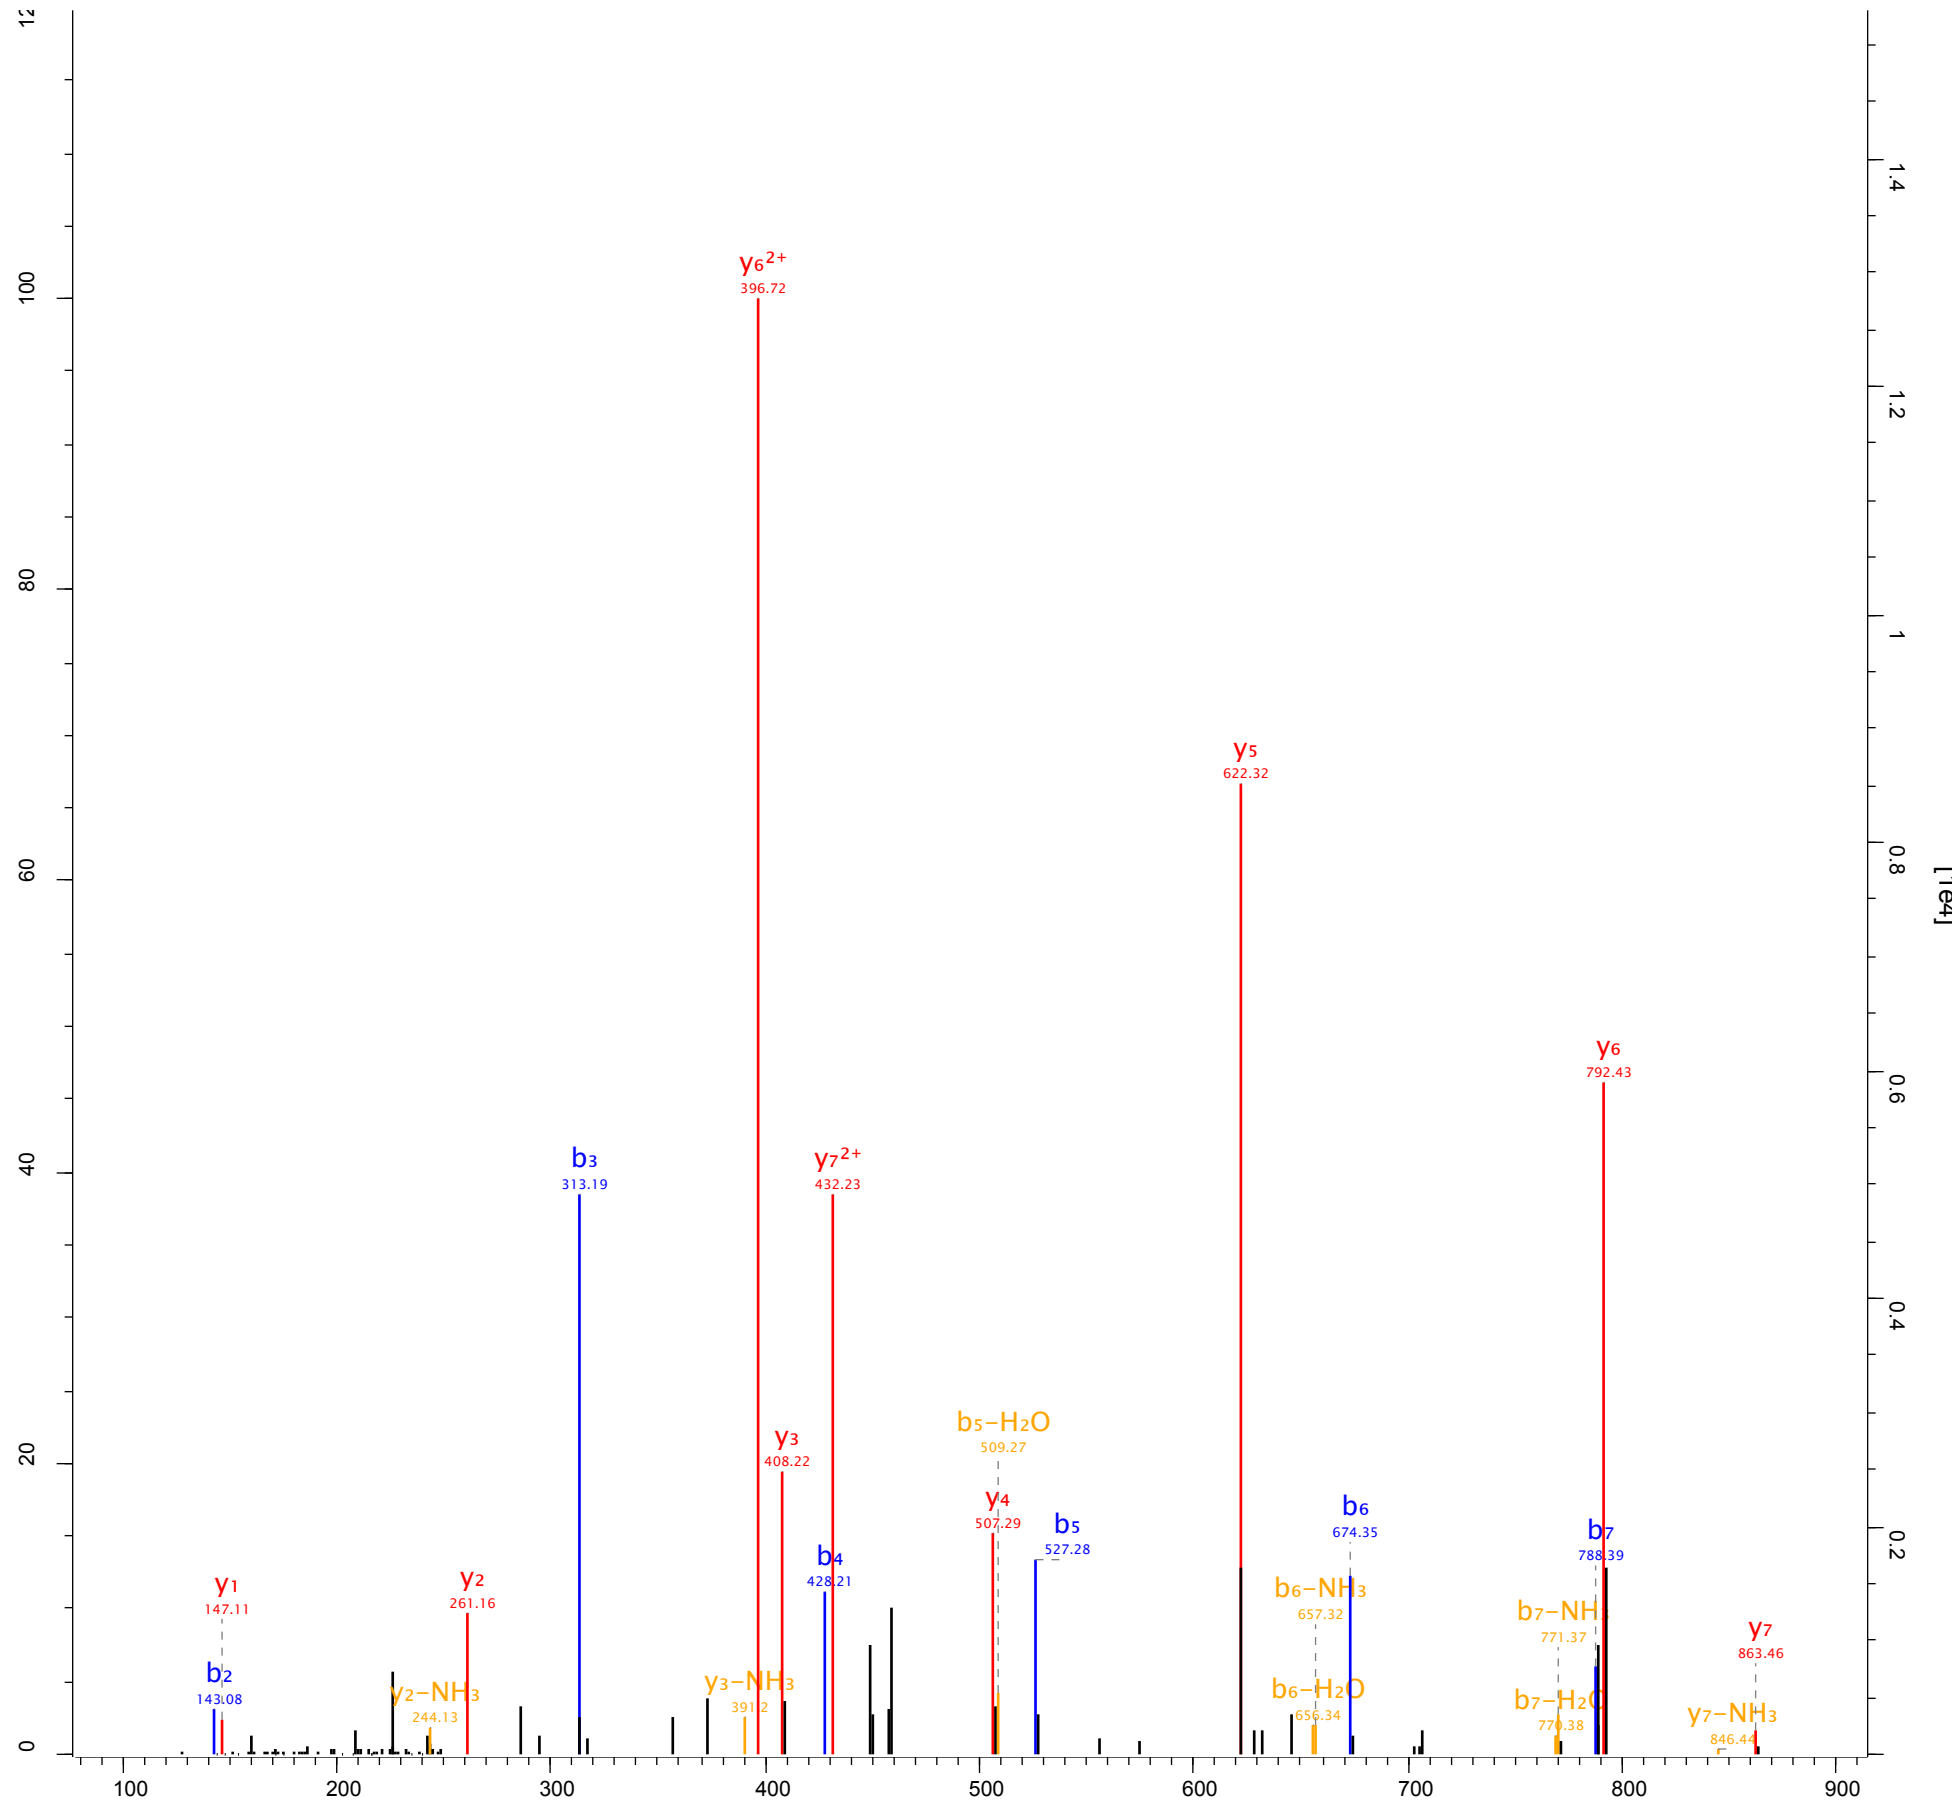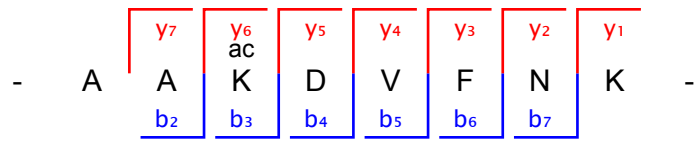

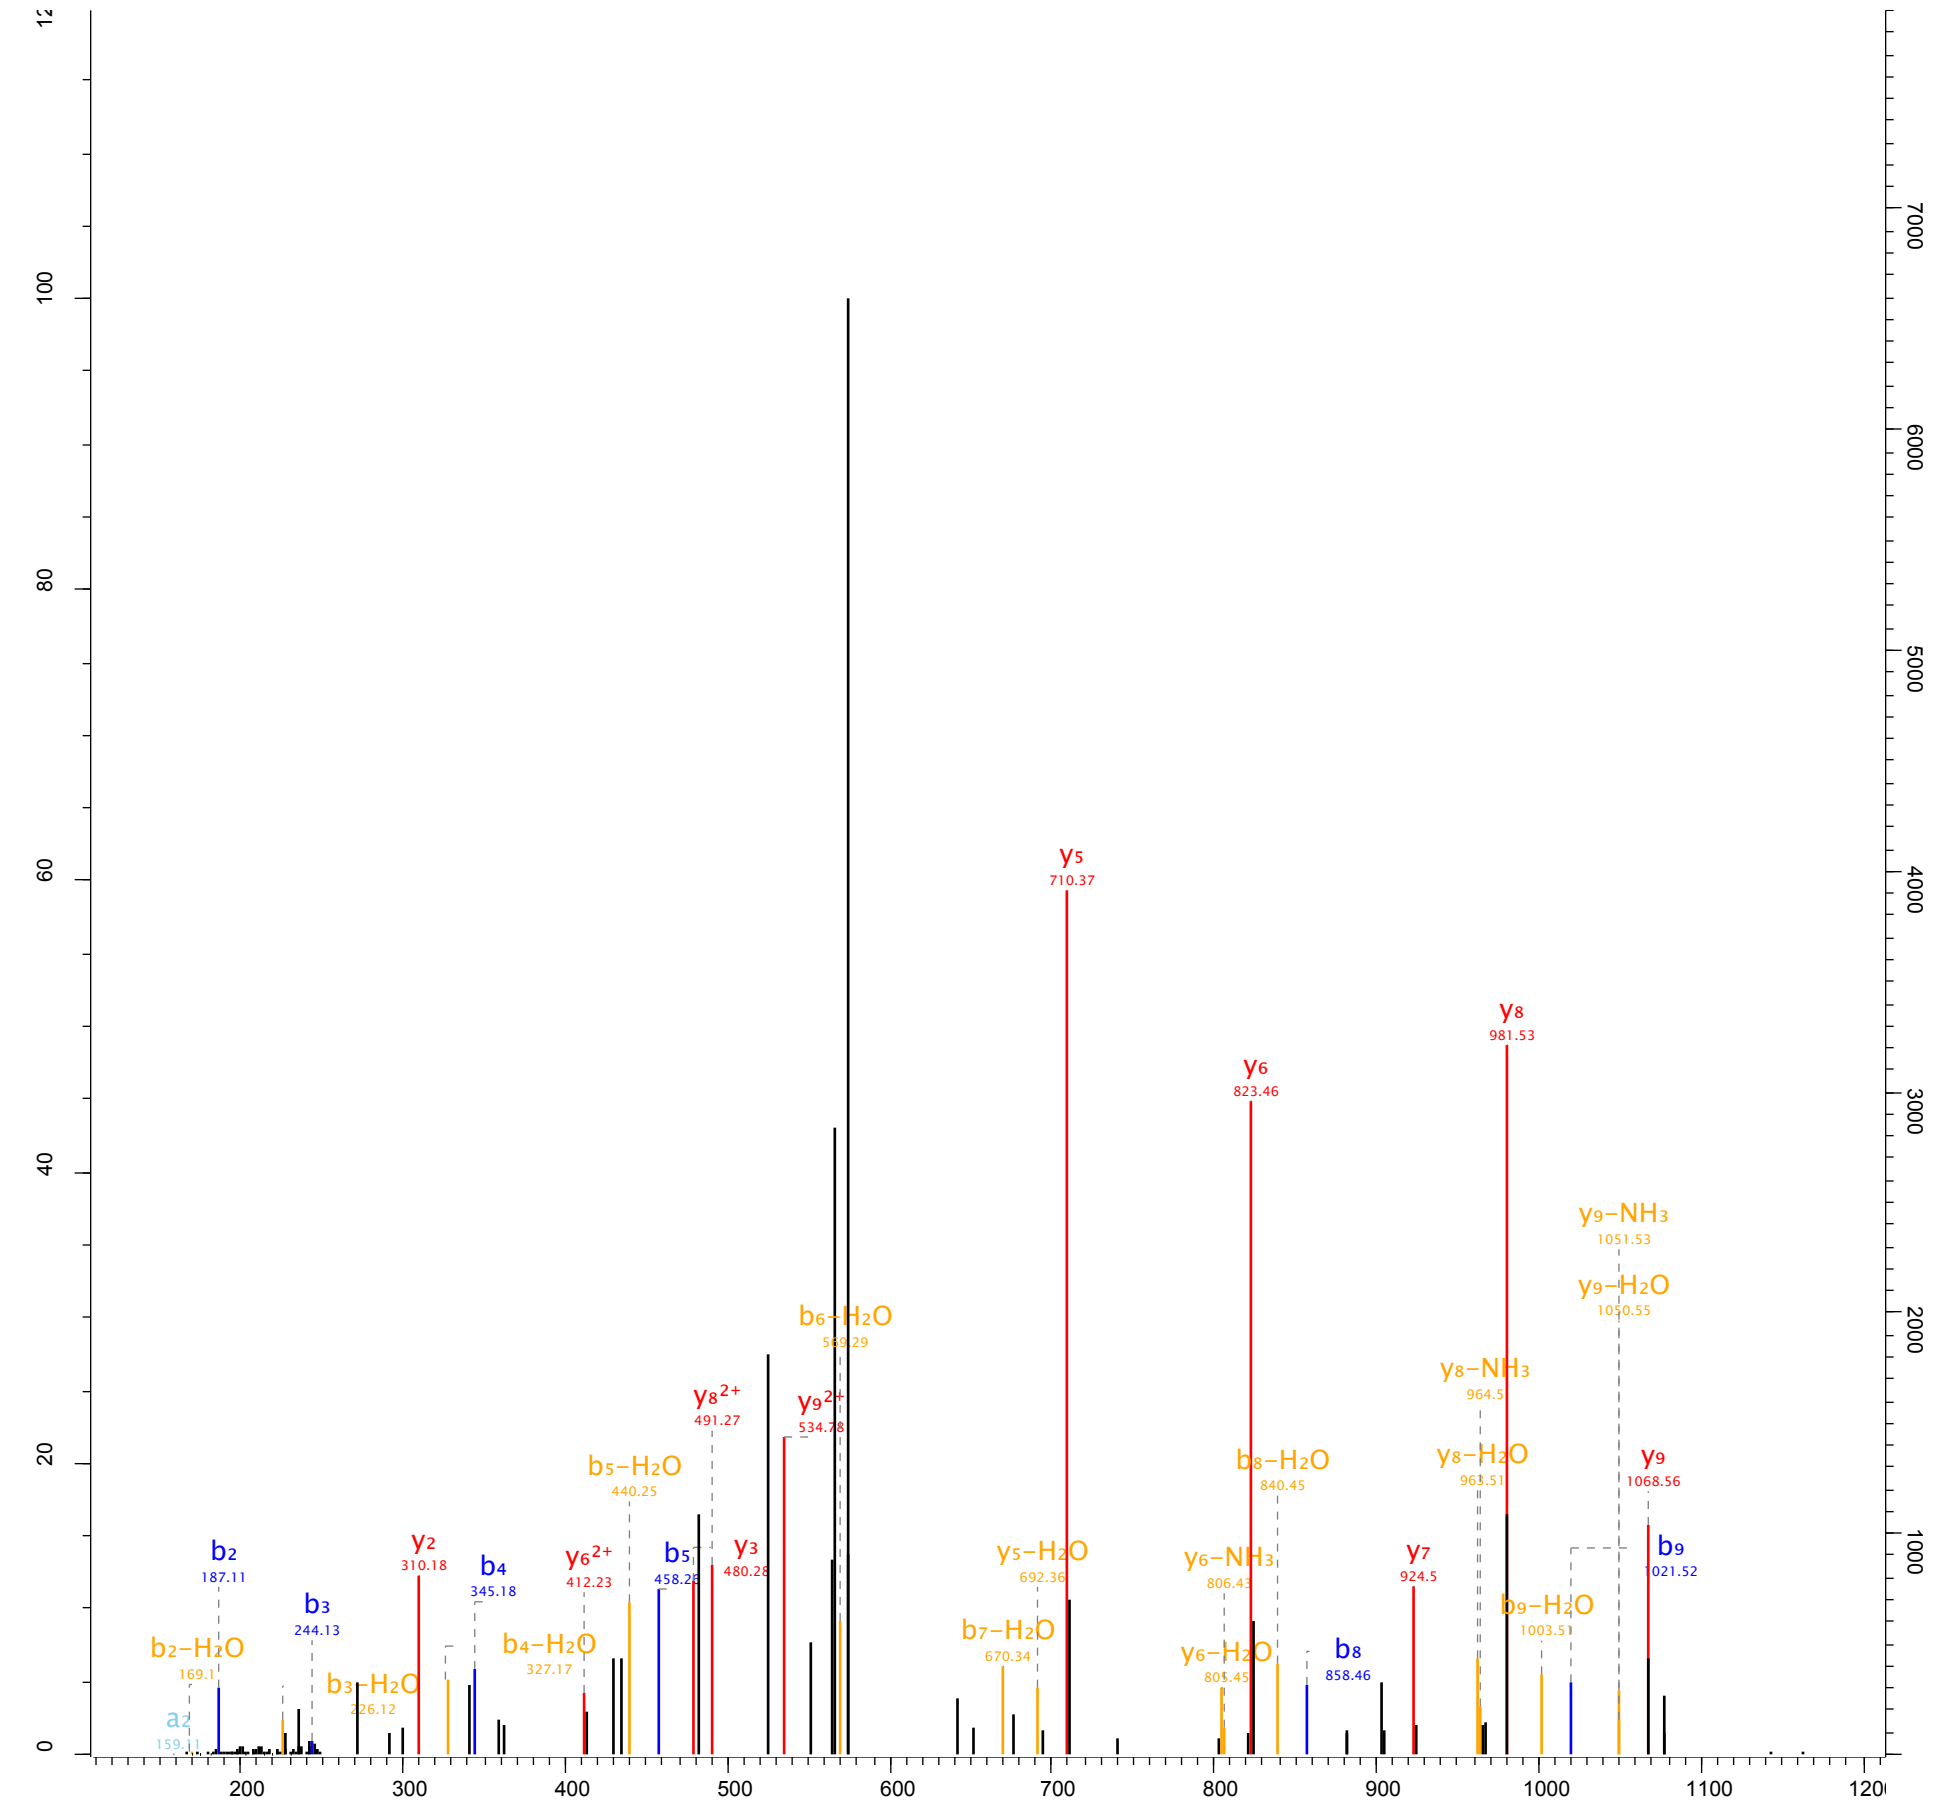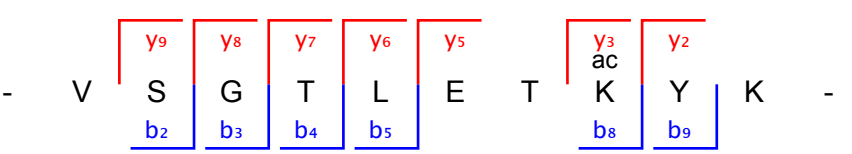



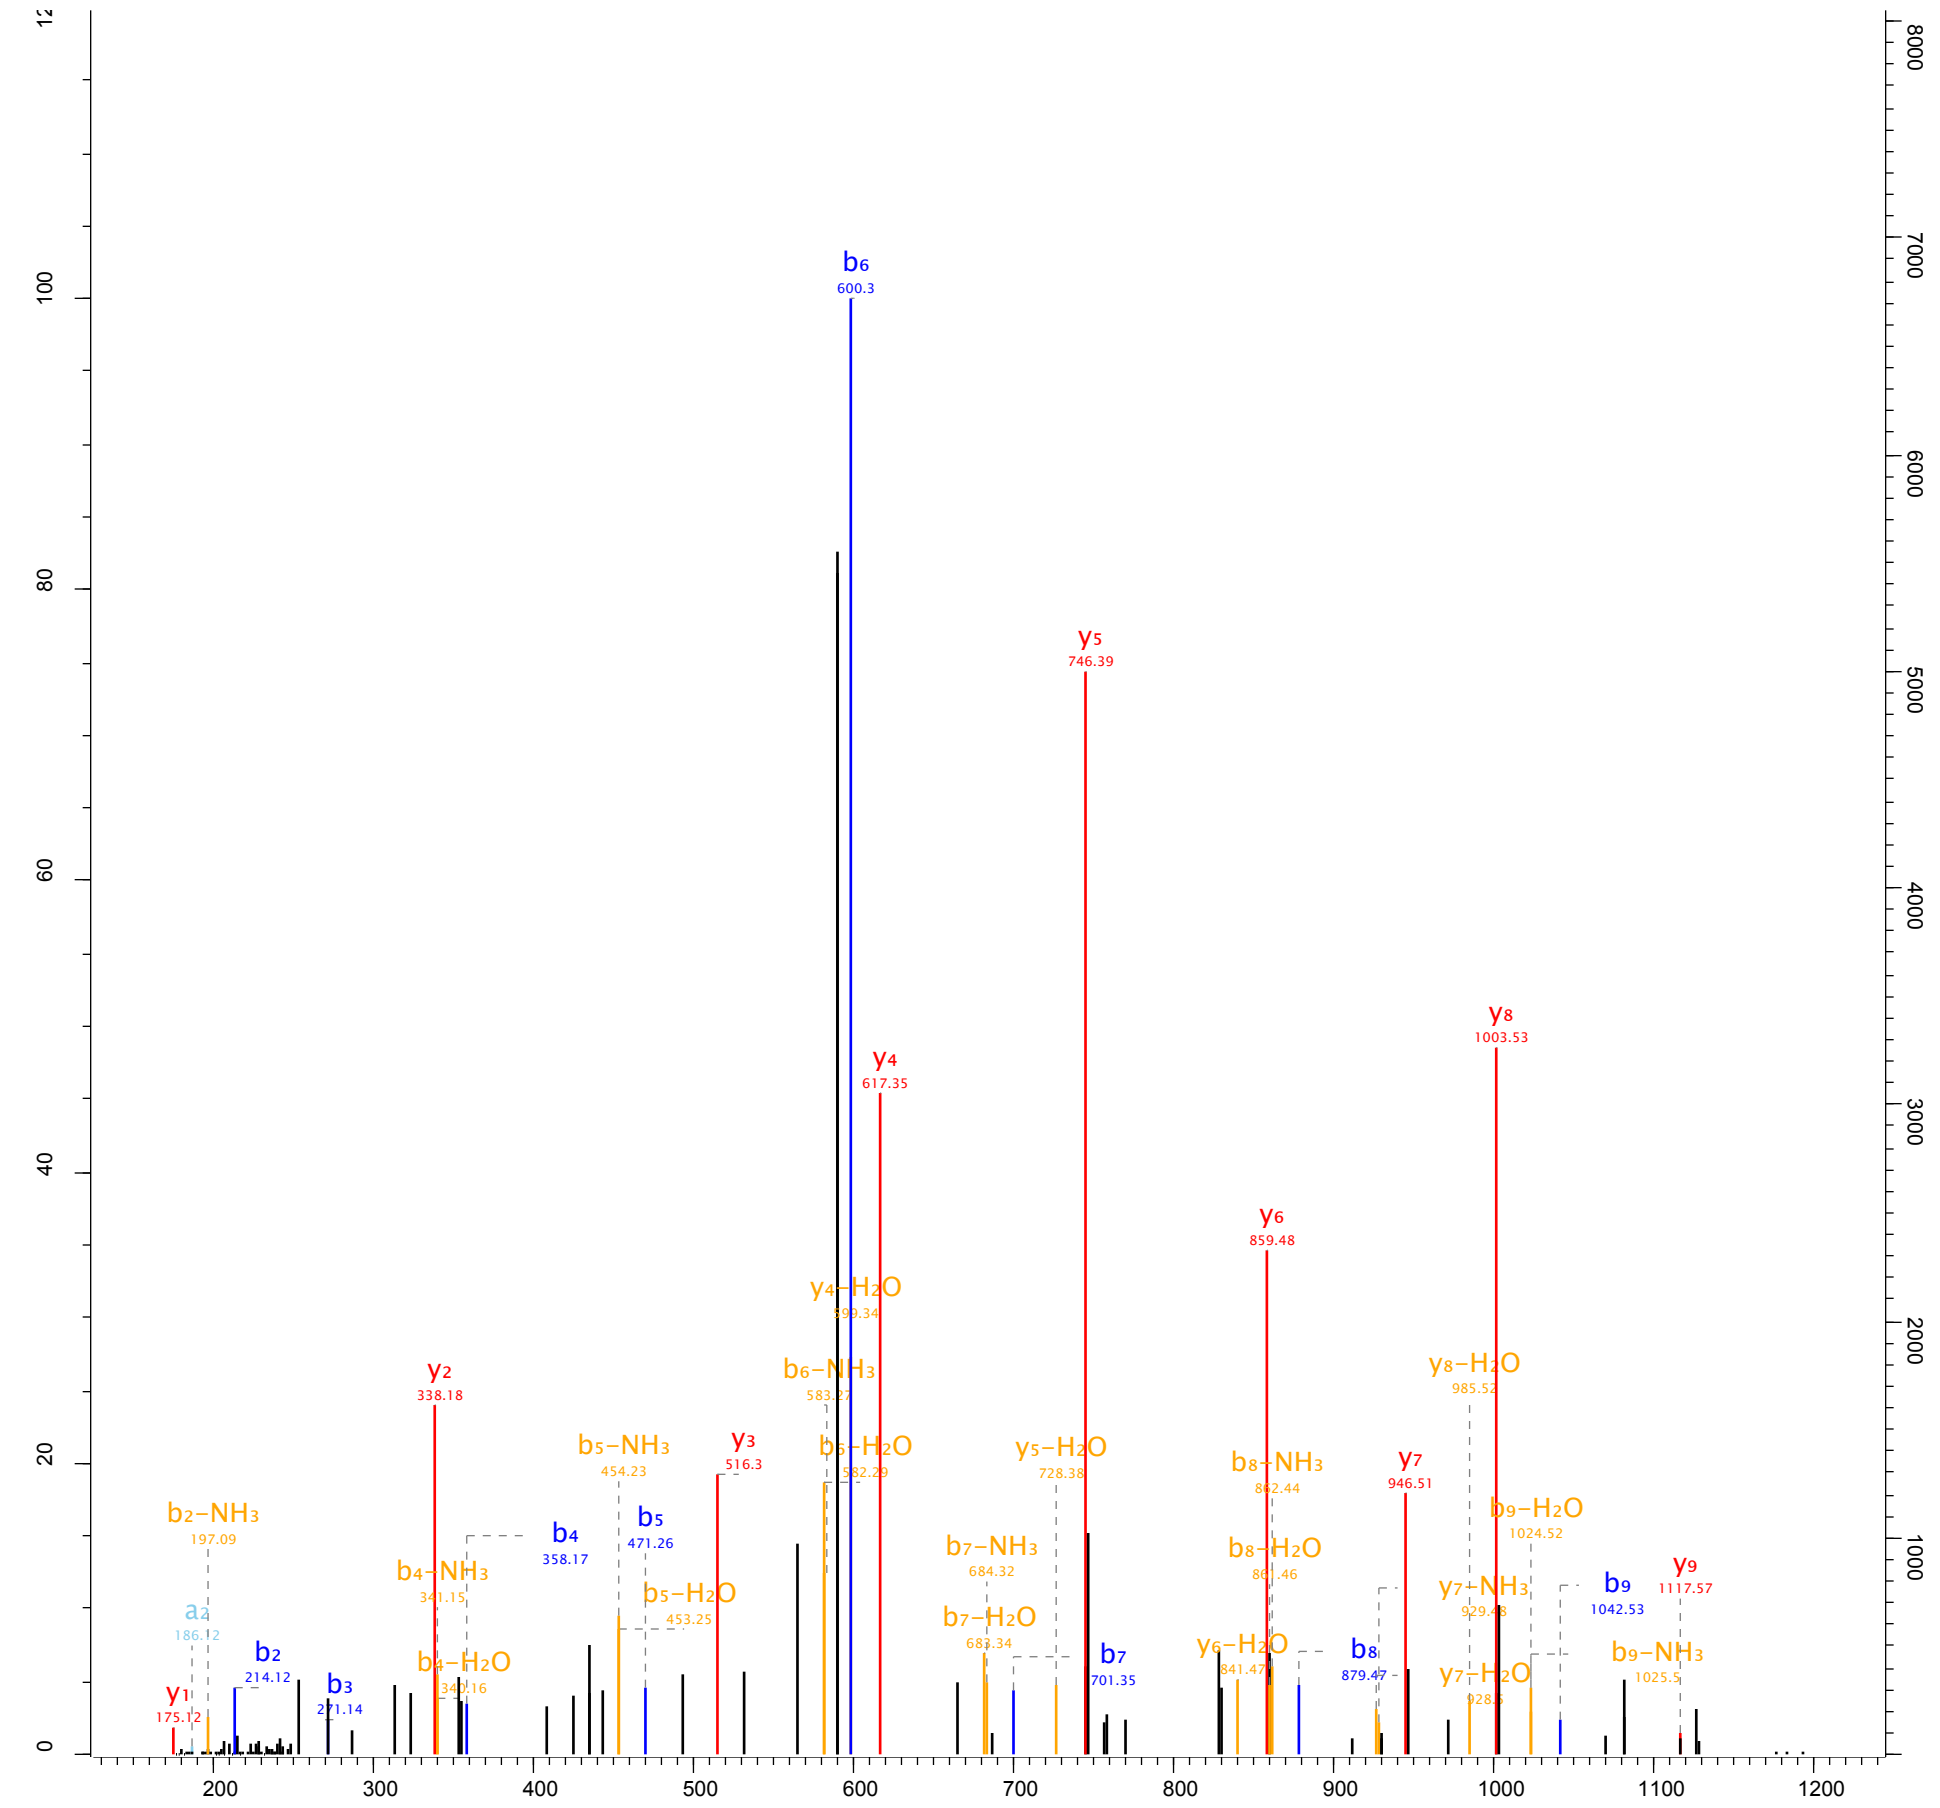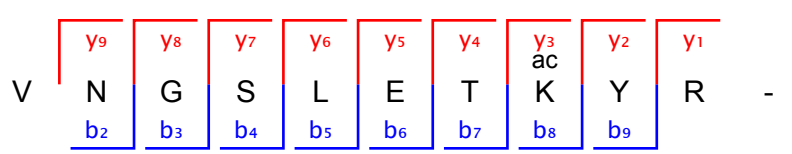

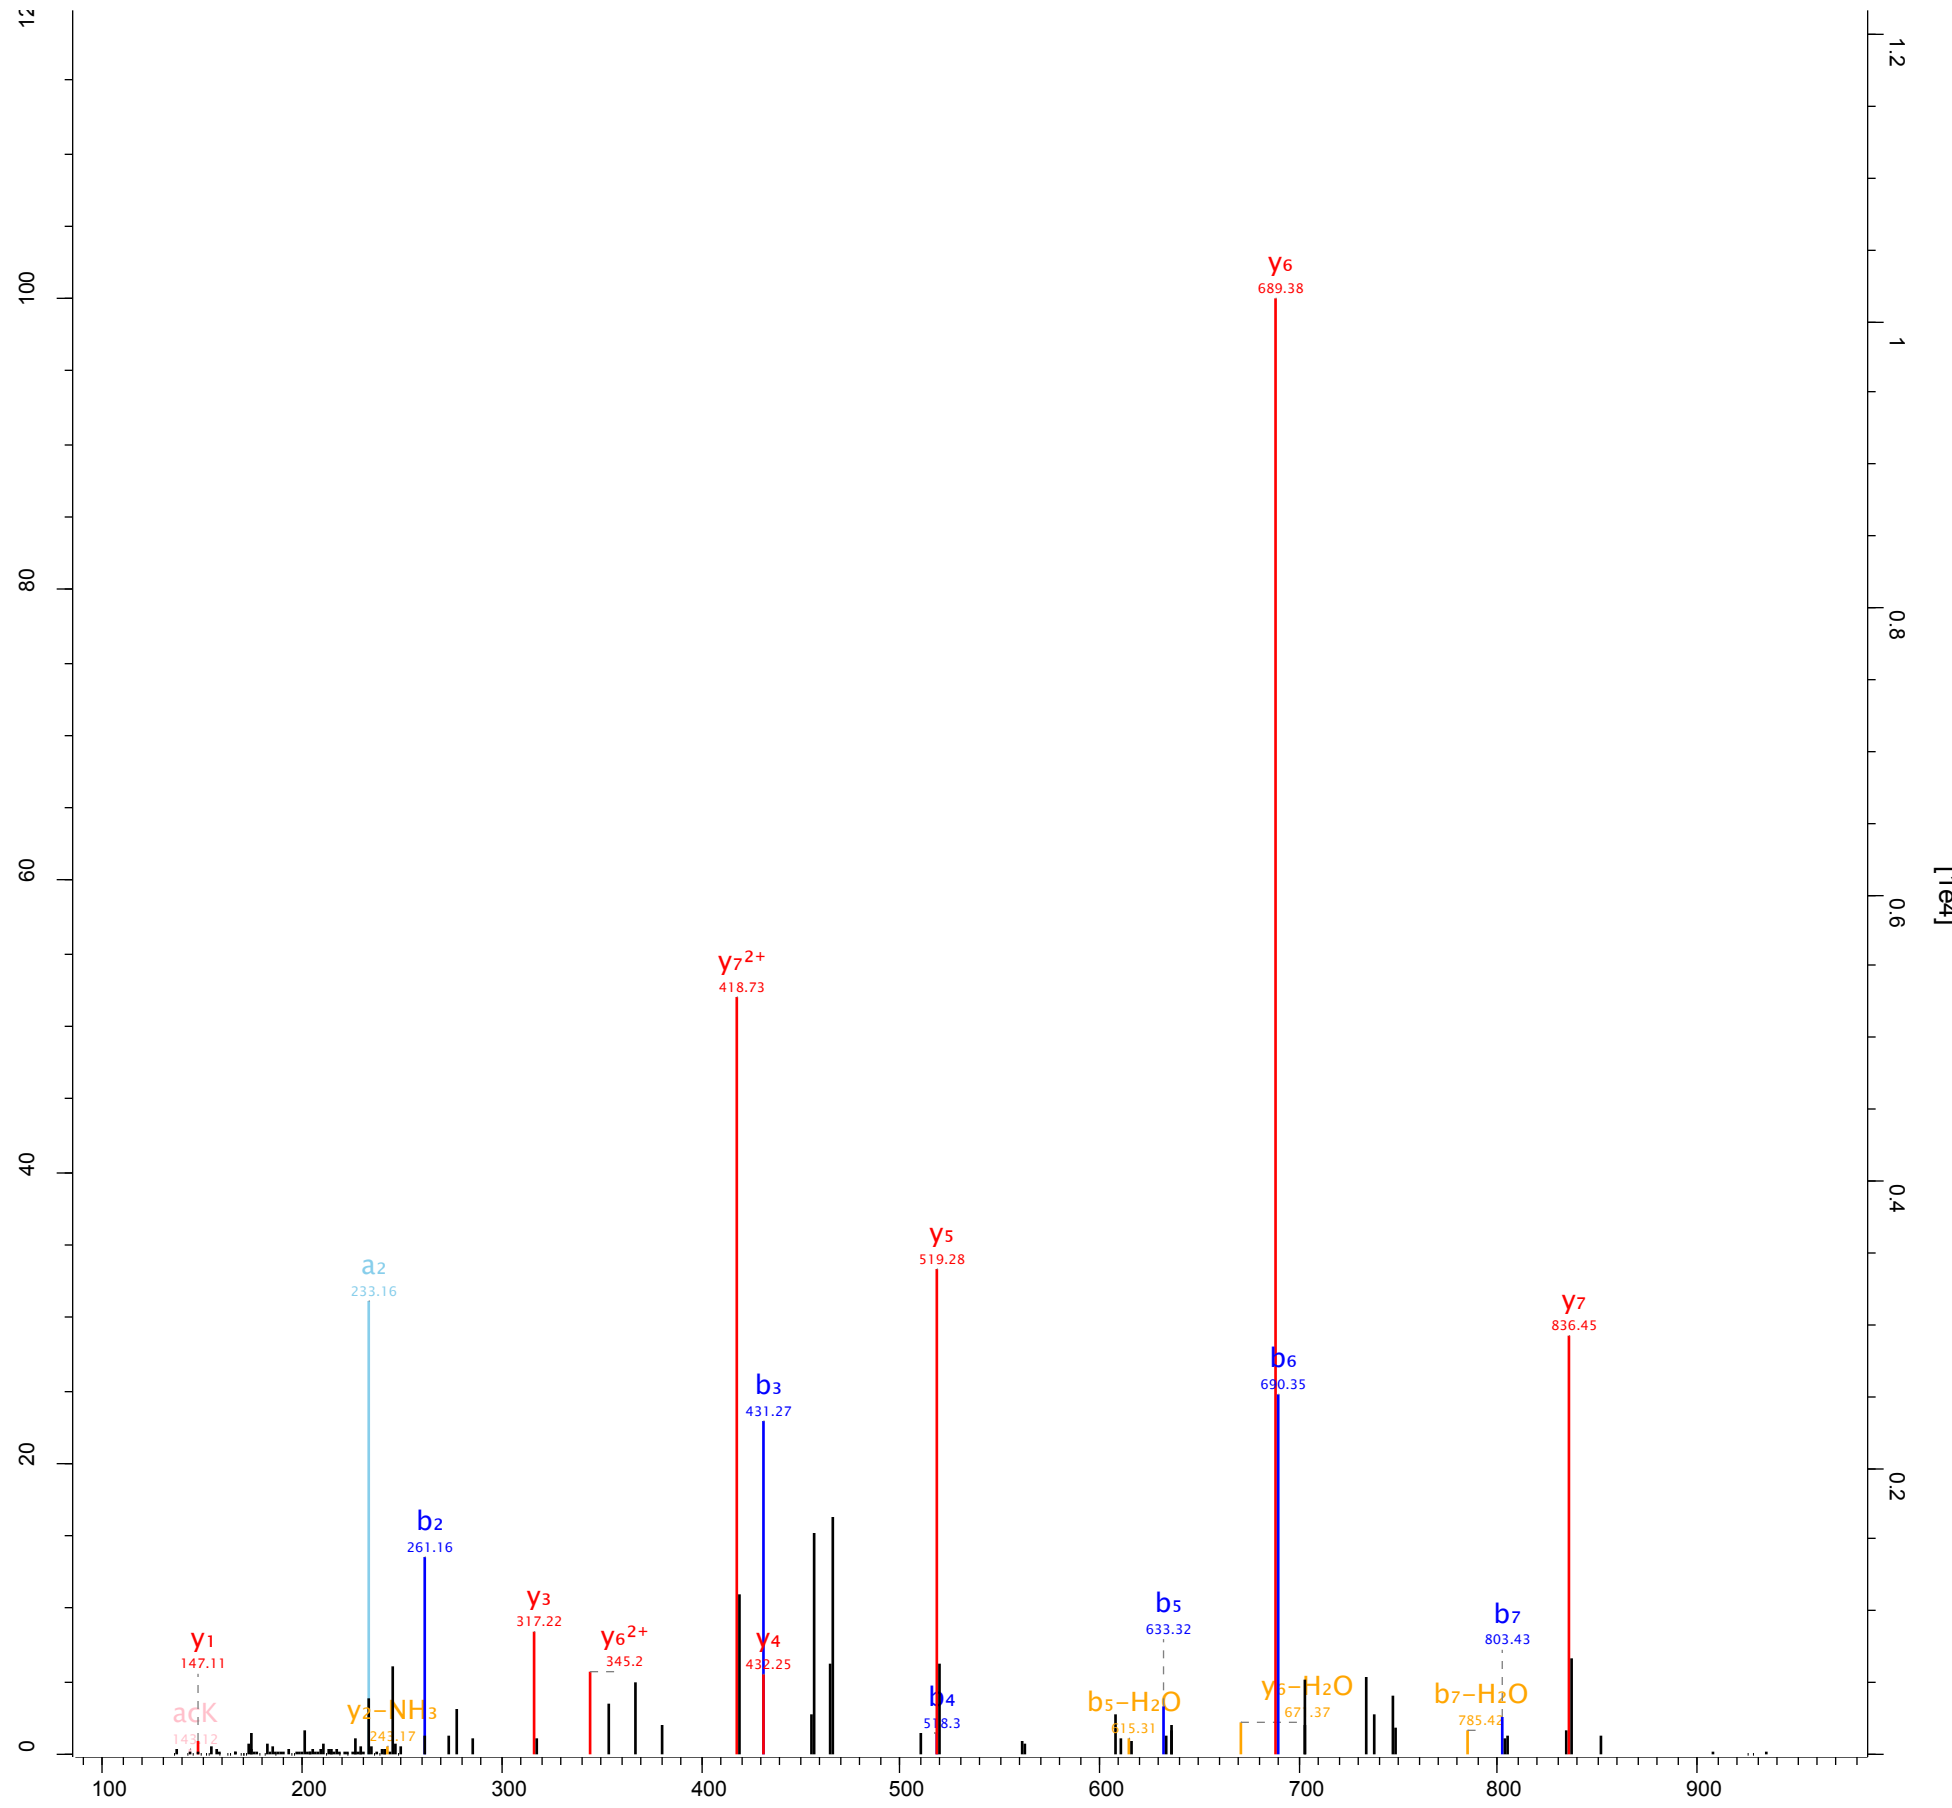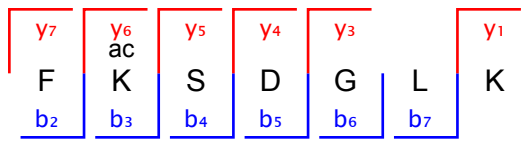

Raw file 022714\_SCW\_II\_53\_5\_2ndZT Scan 15964 Method ITMS; CID Score 109.15 m/z 685.37 Gene names Hint2

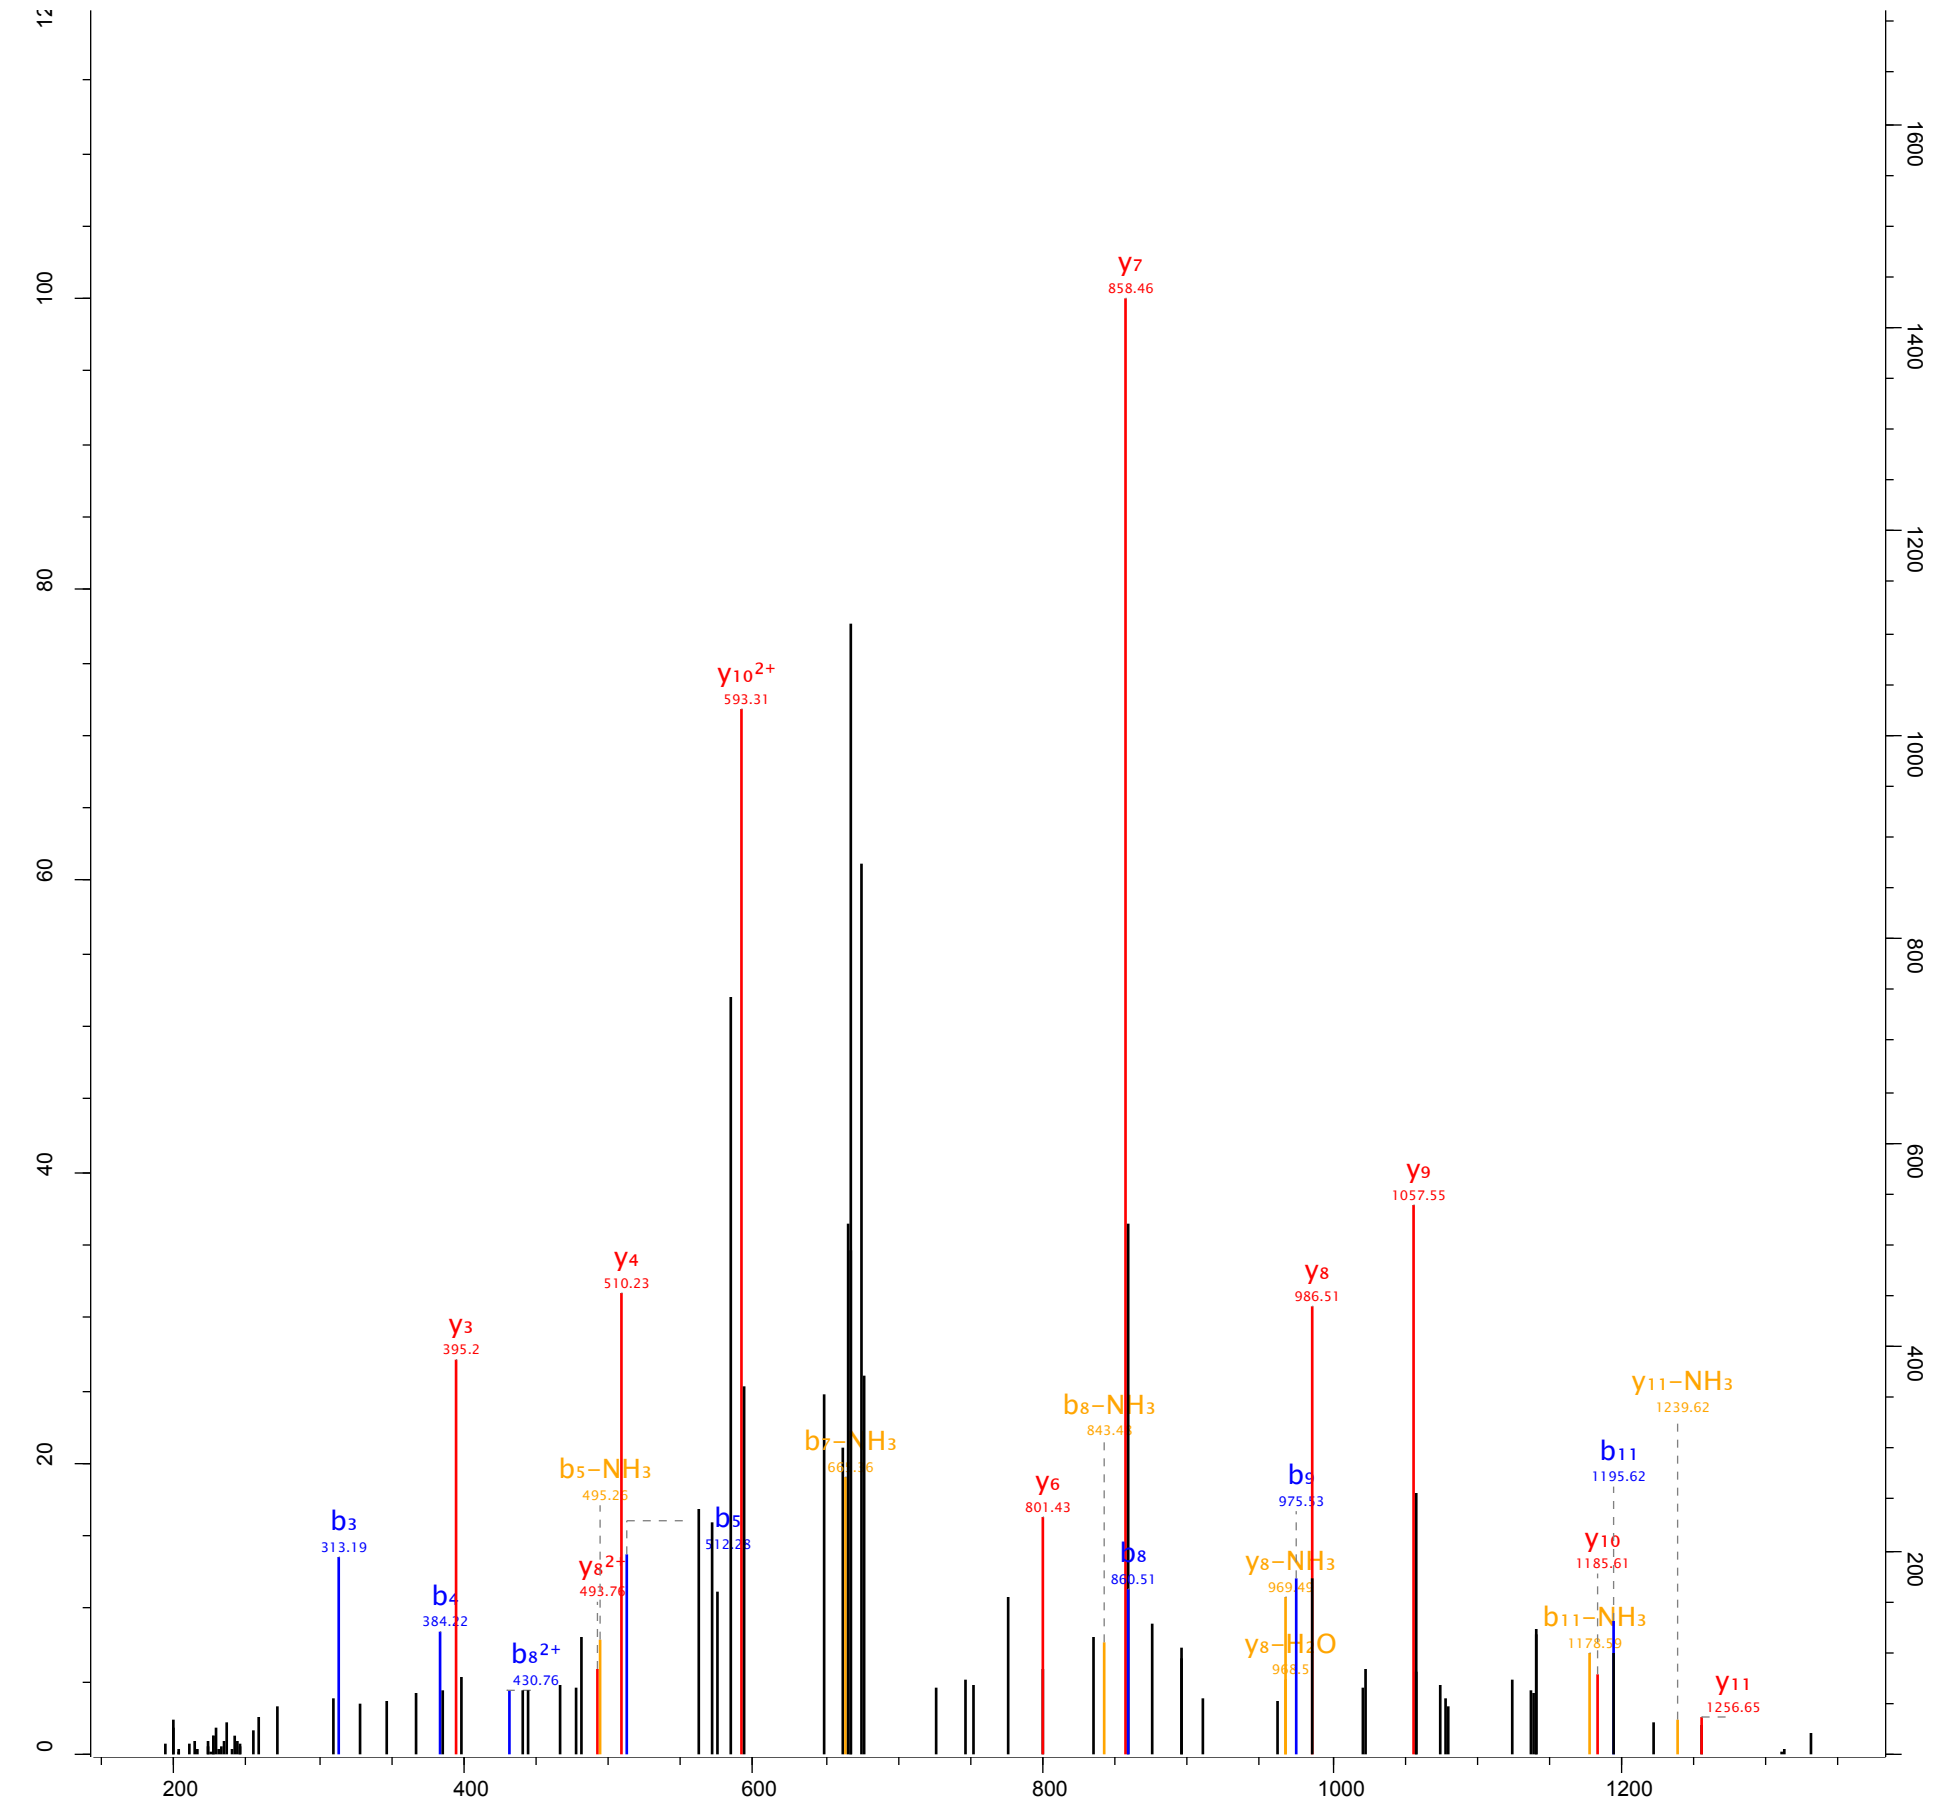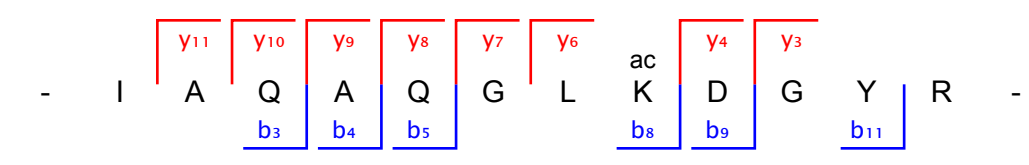

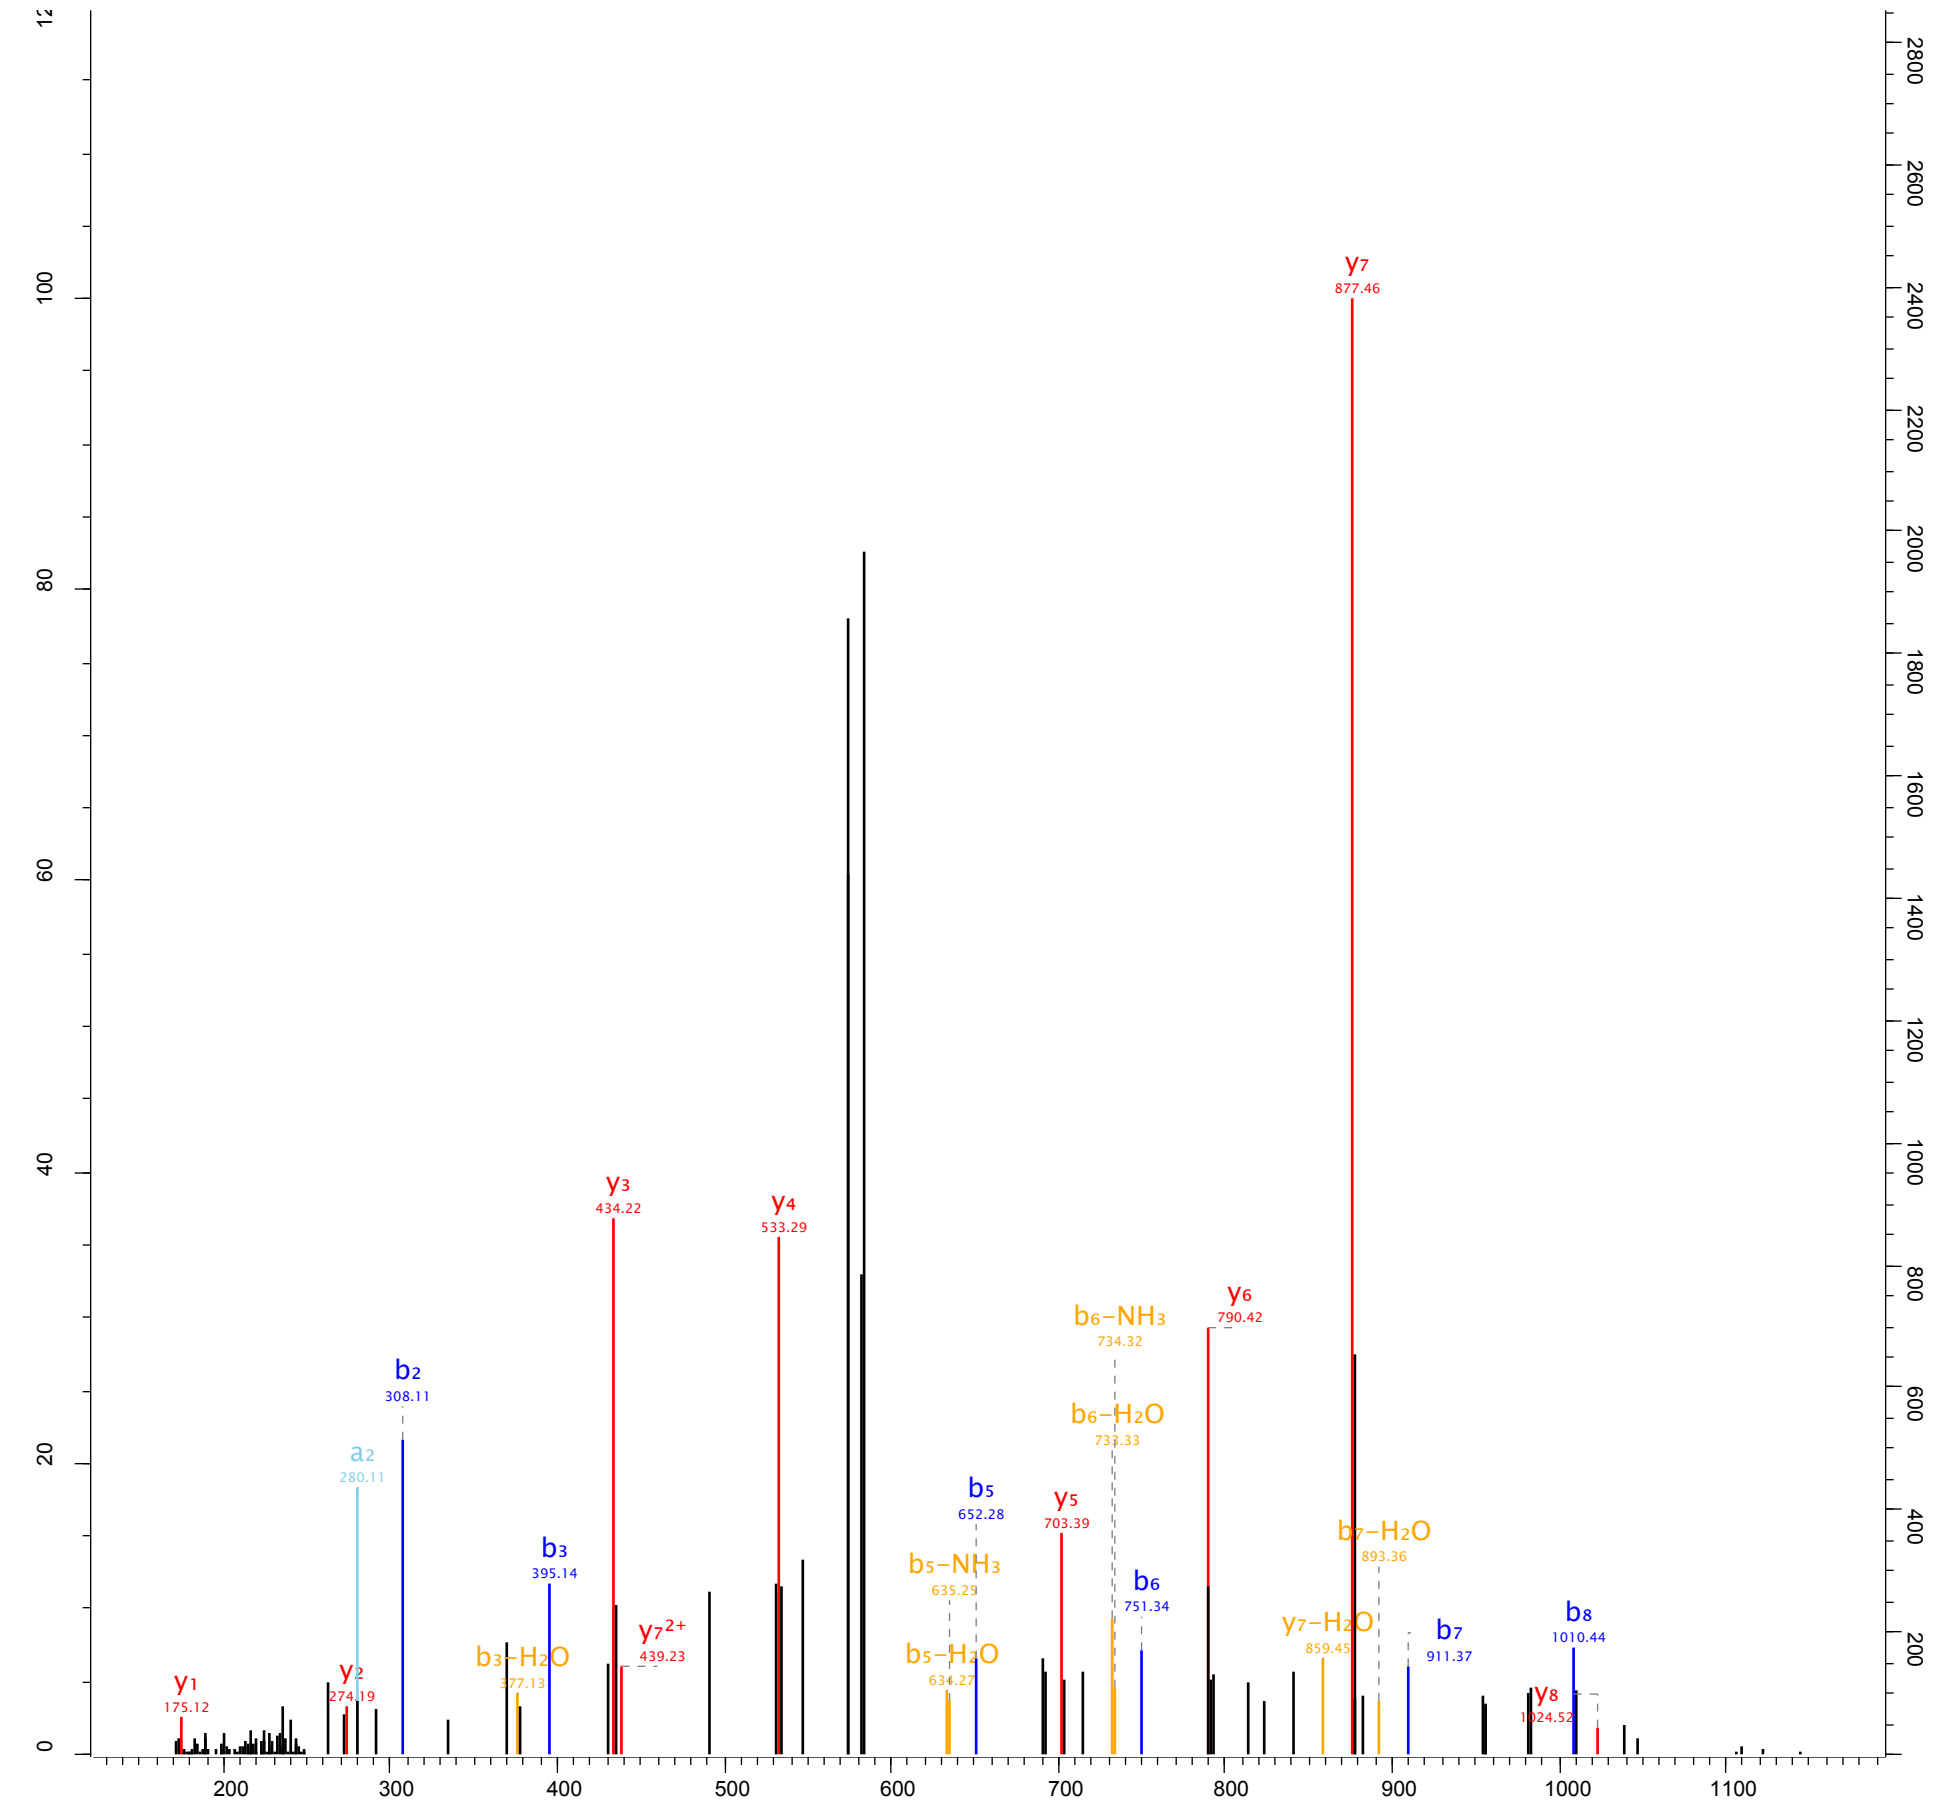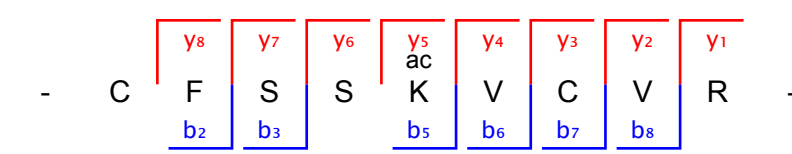

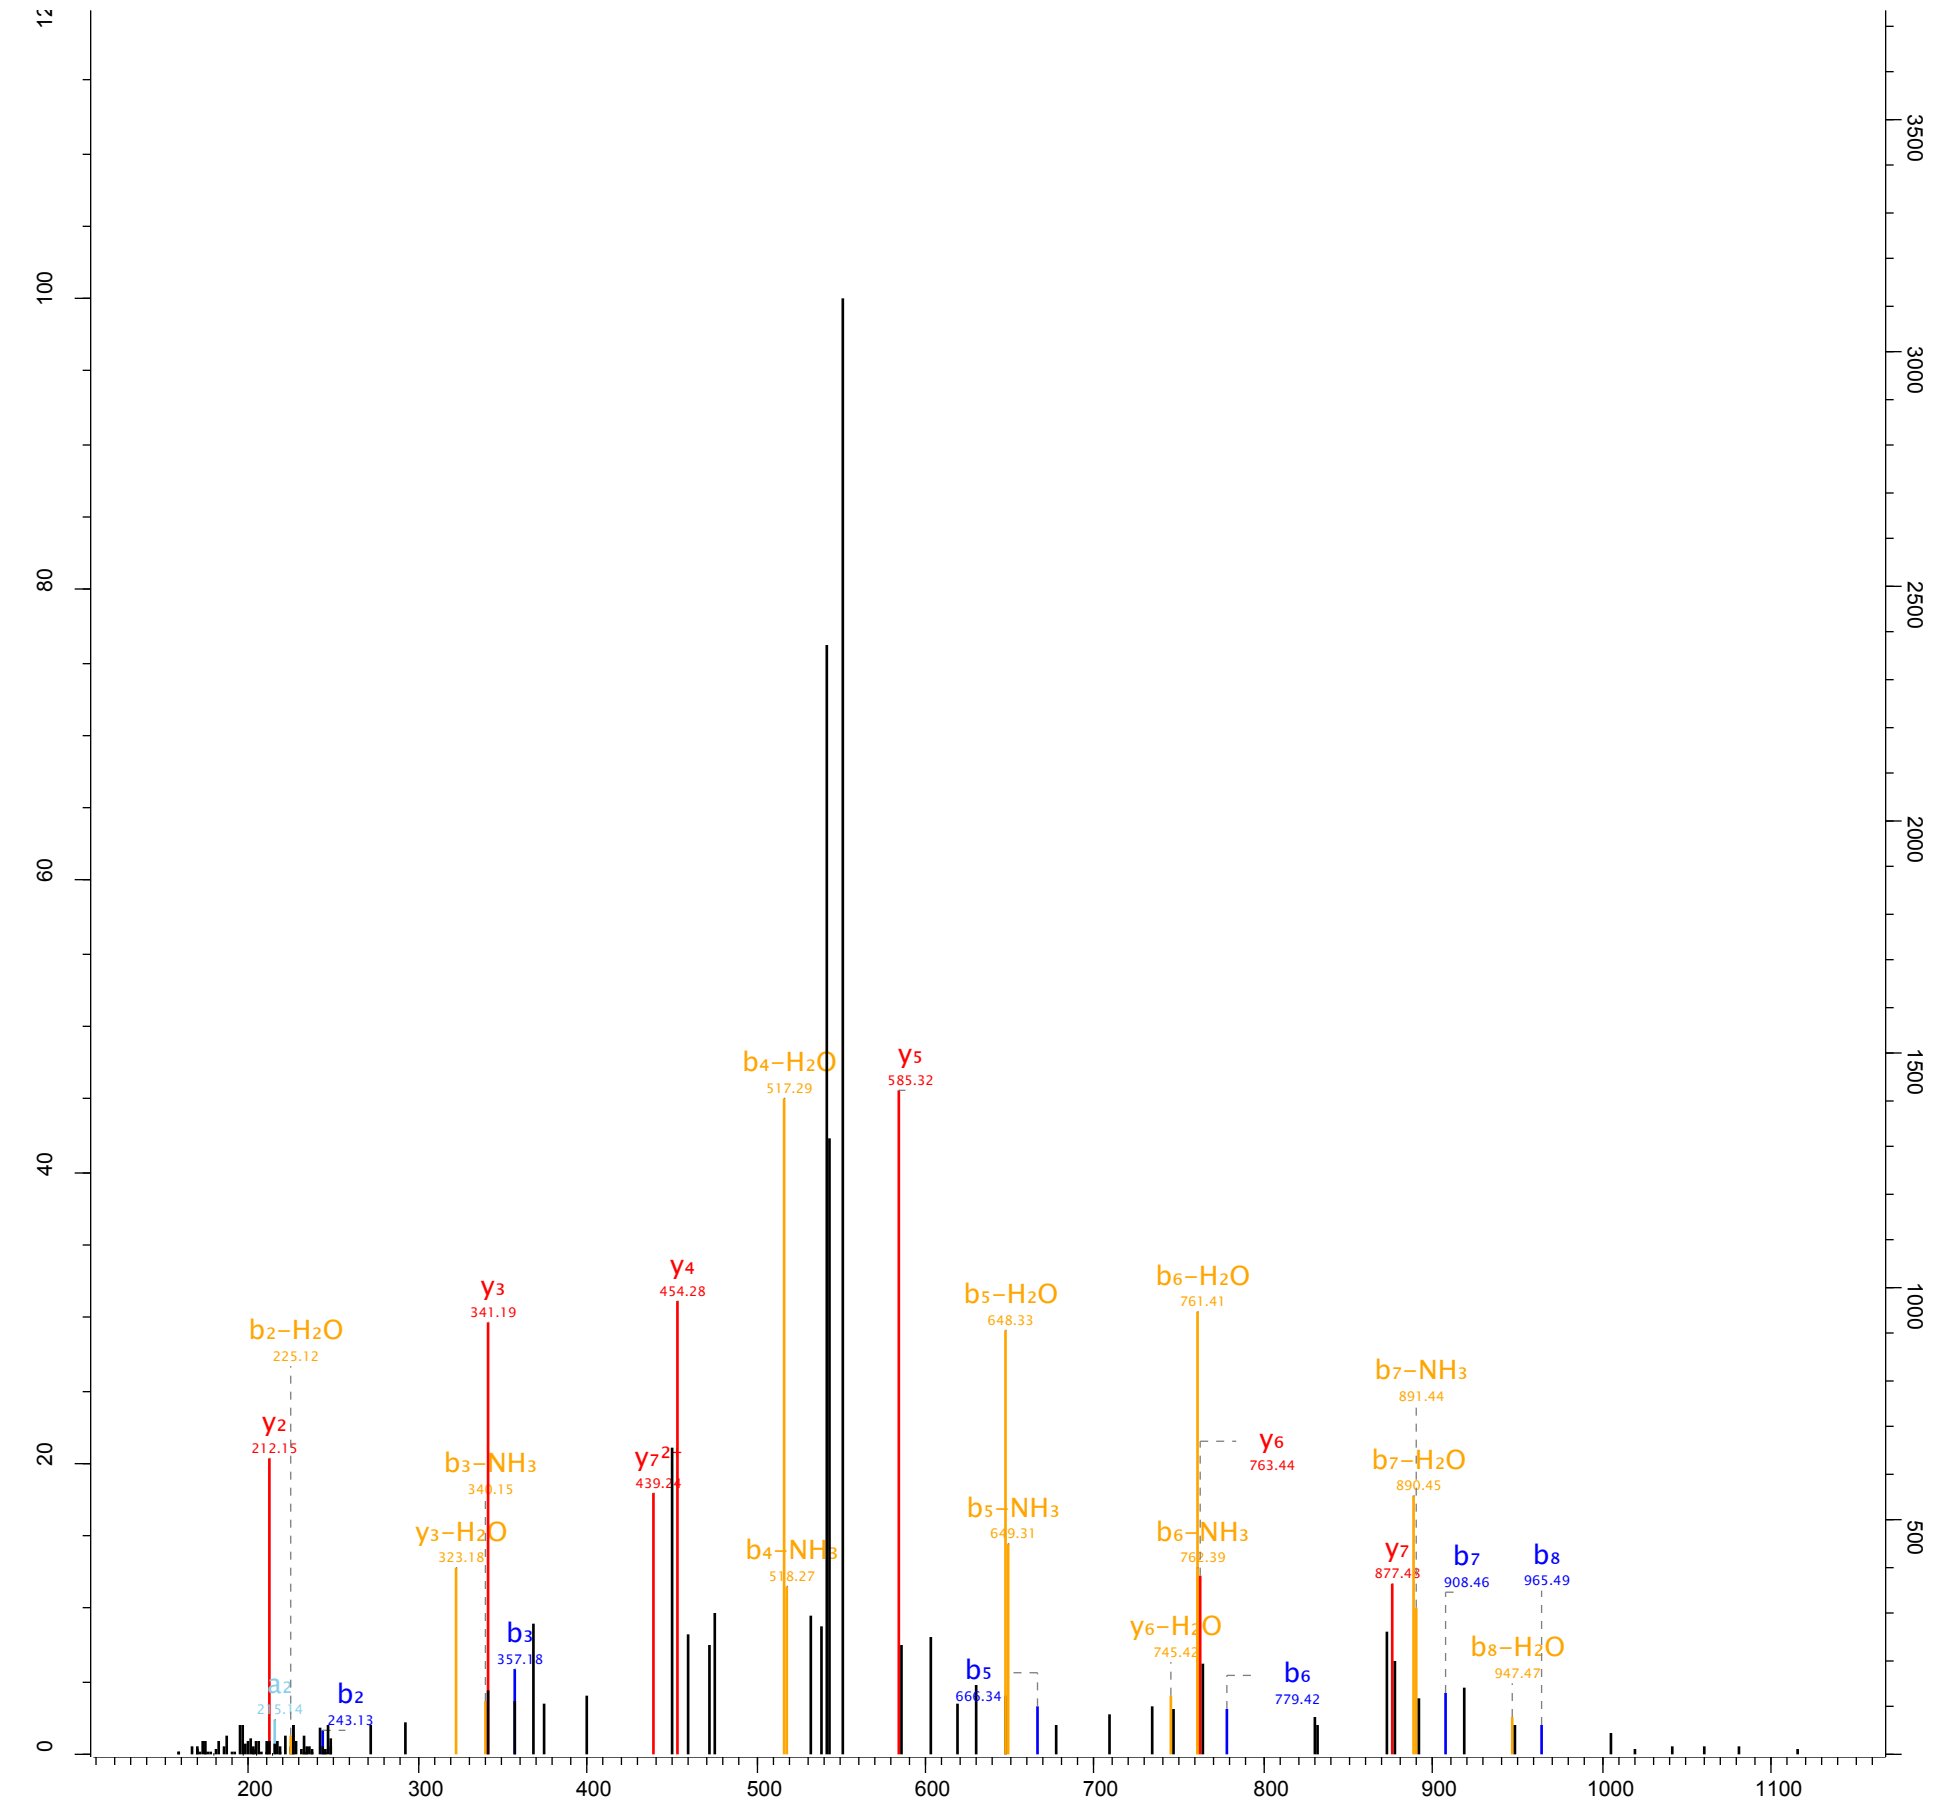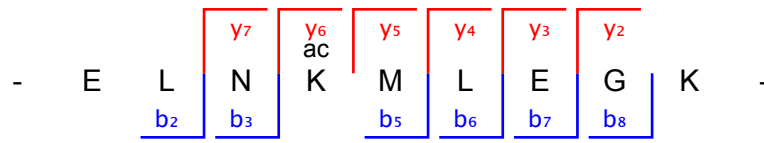

Raw file 022714\_SCW\_II\_53\_5\_2ndZT Scan 18331 Method ITMS; CID Score 238.01 m/z 635.84 Gene names ldh2

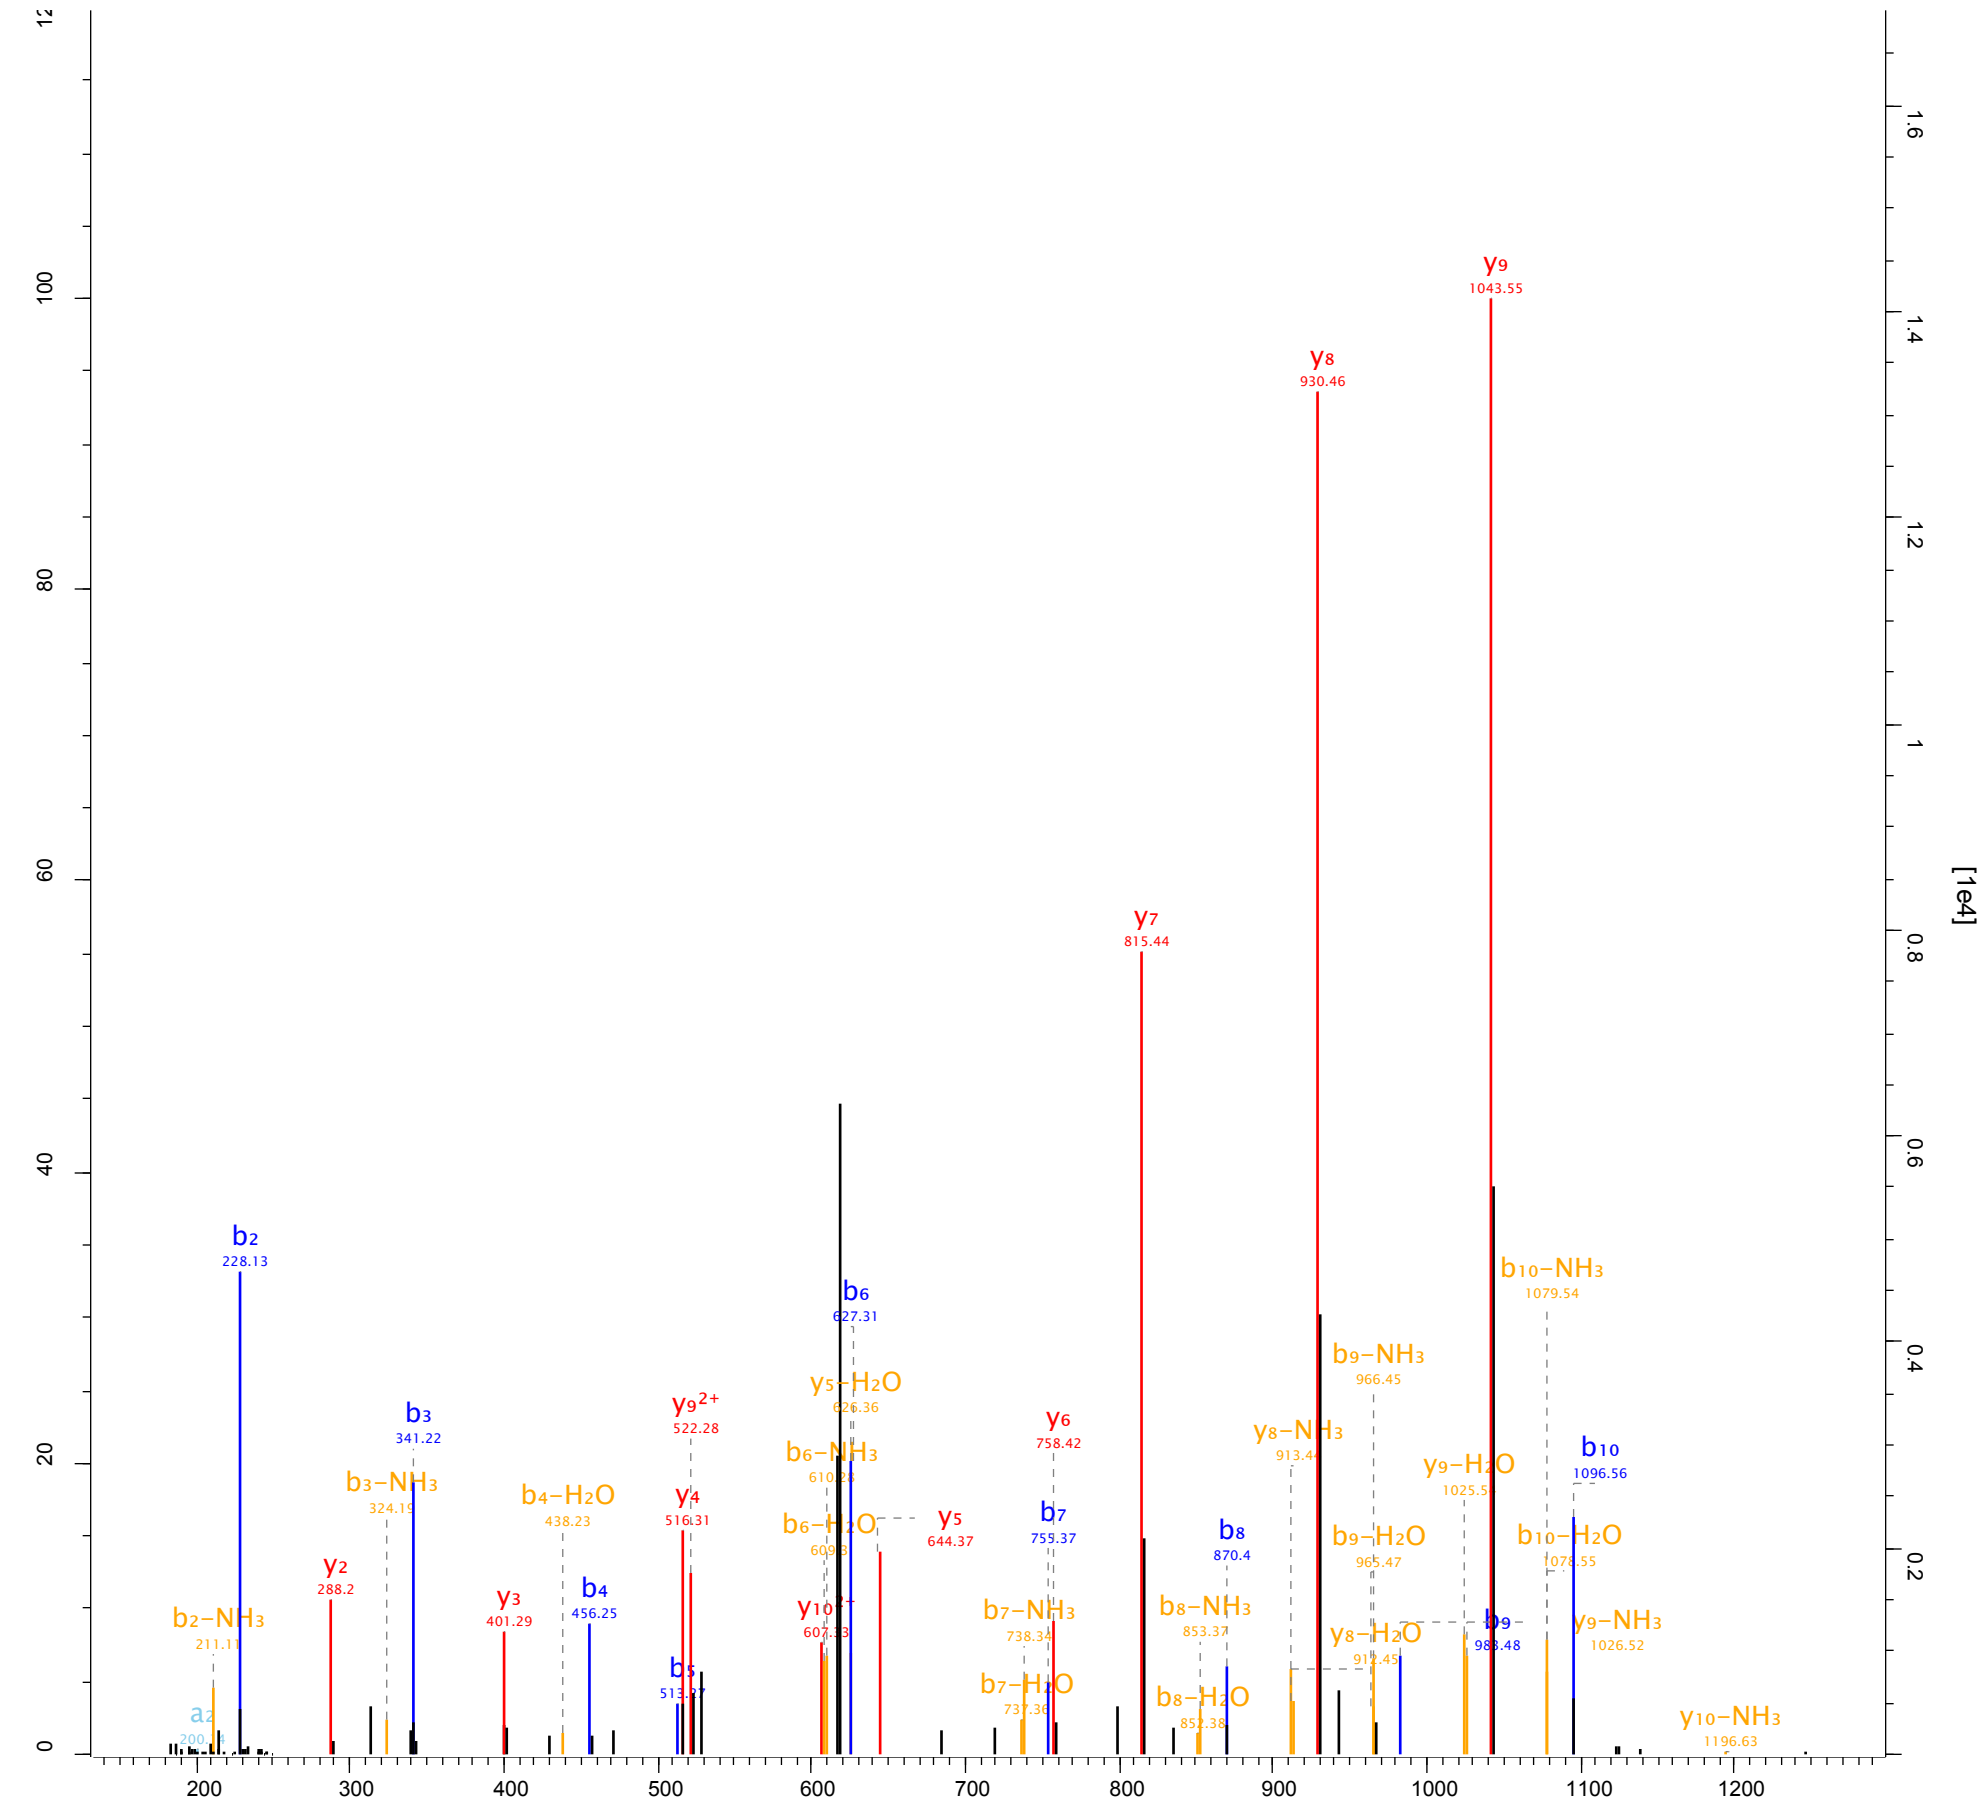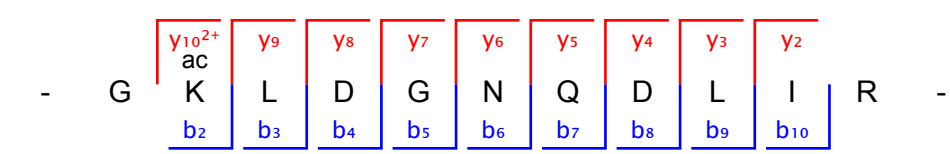

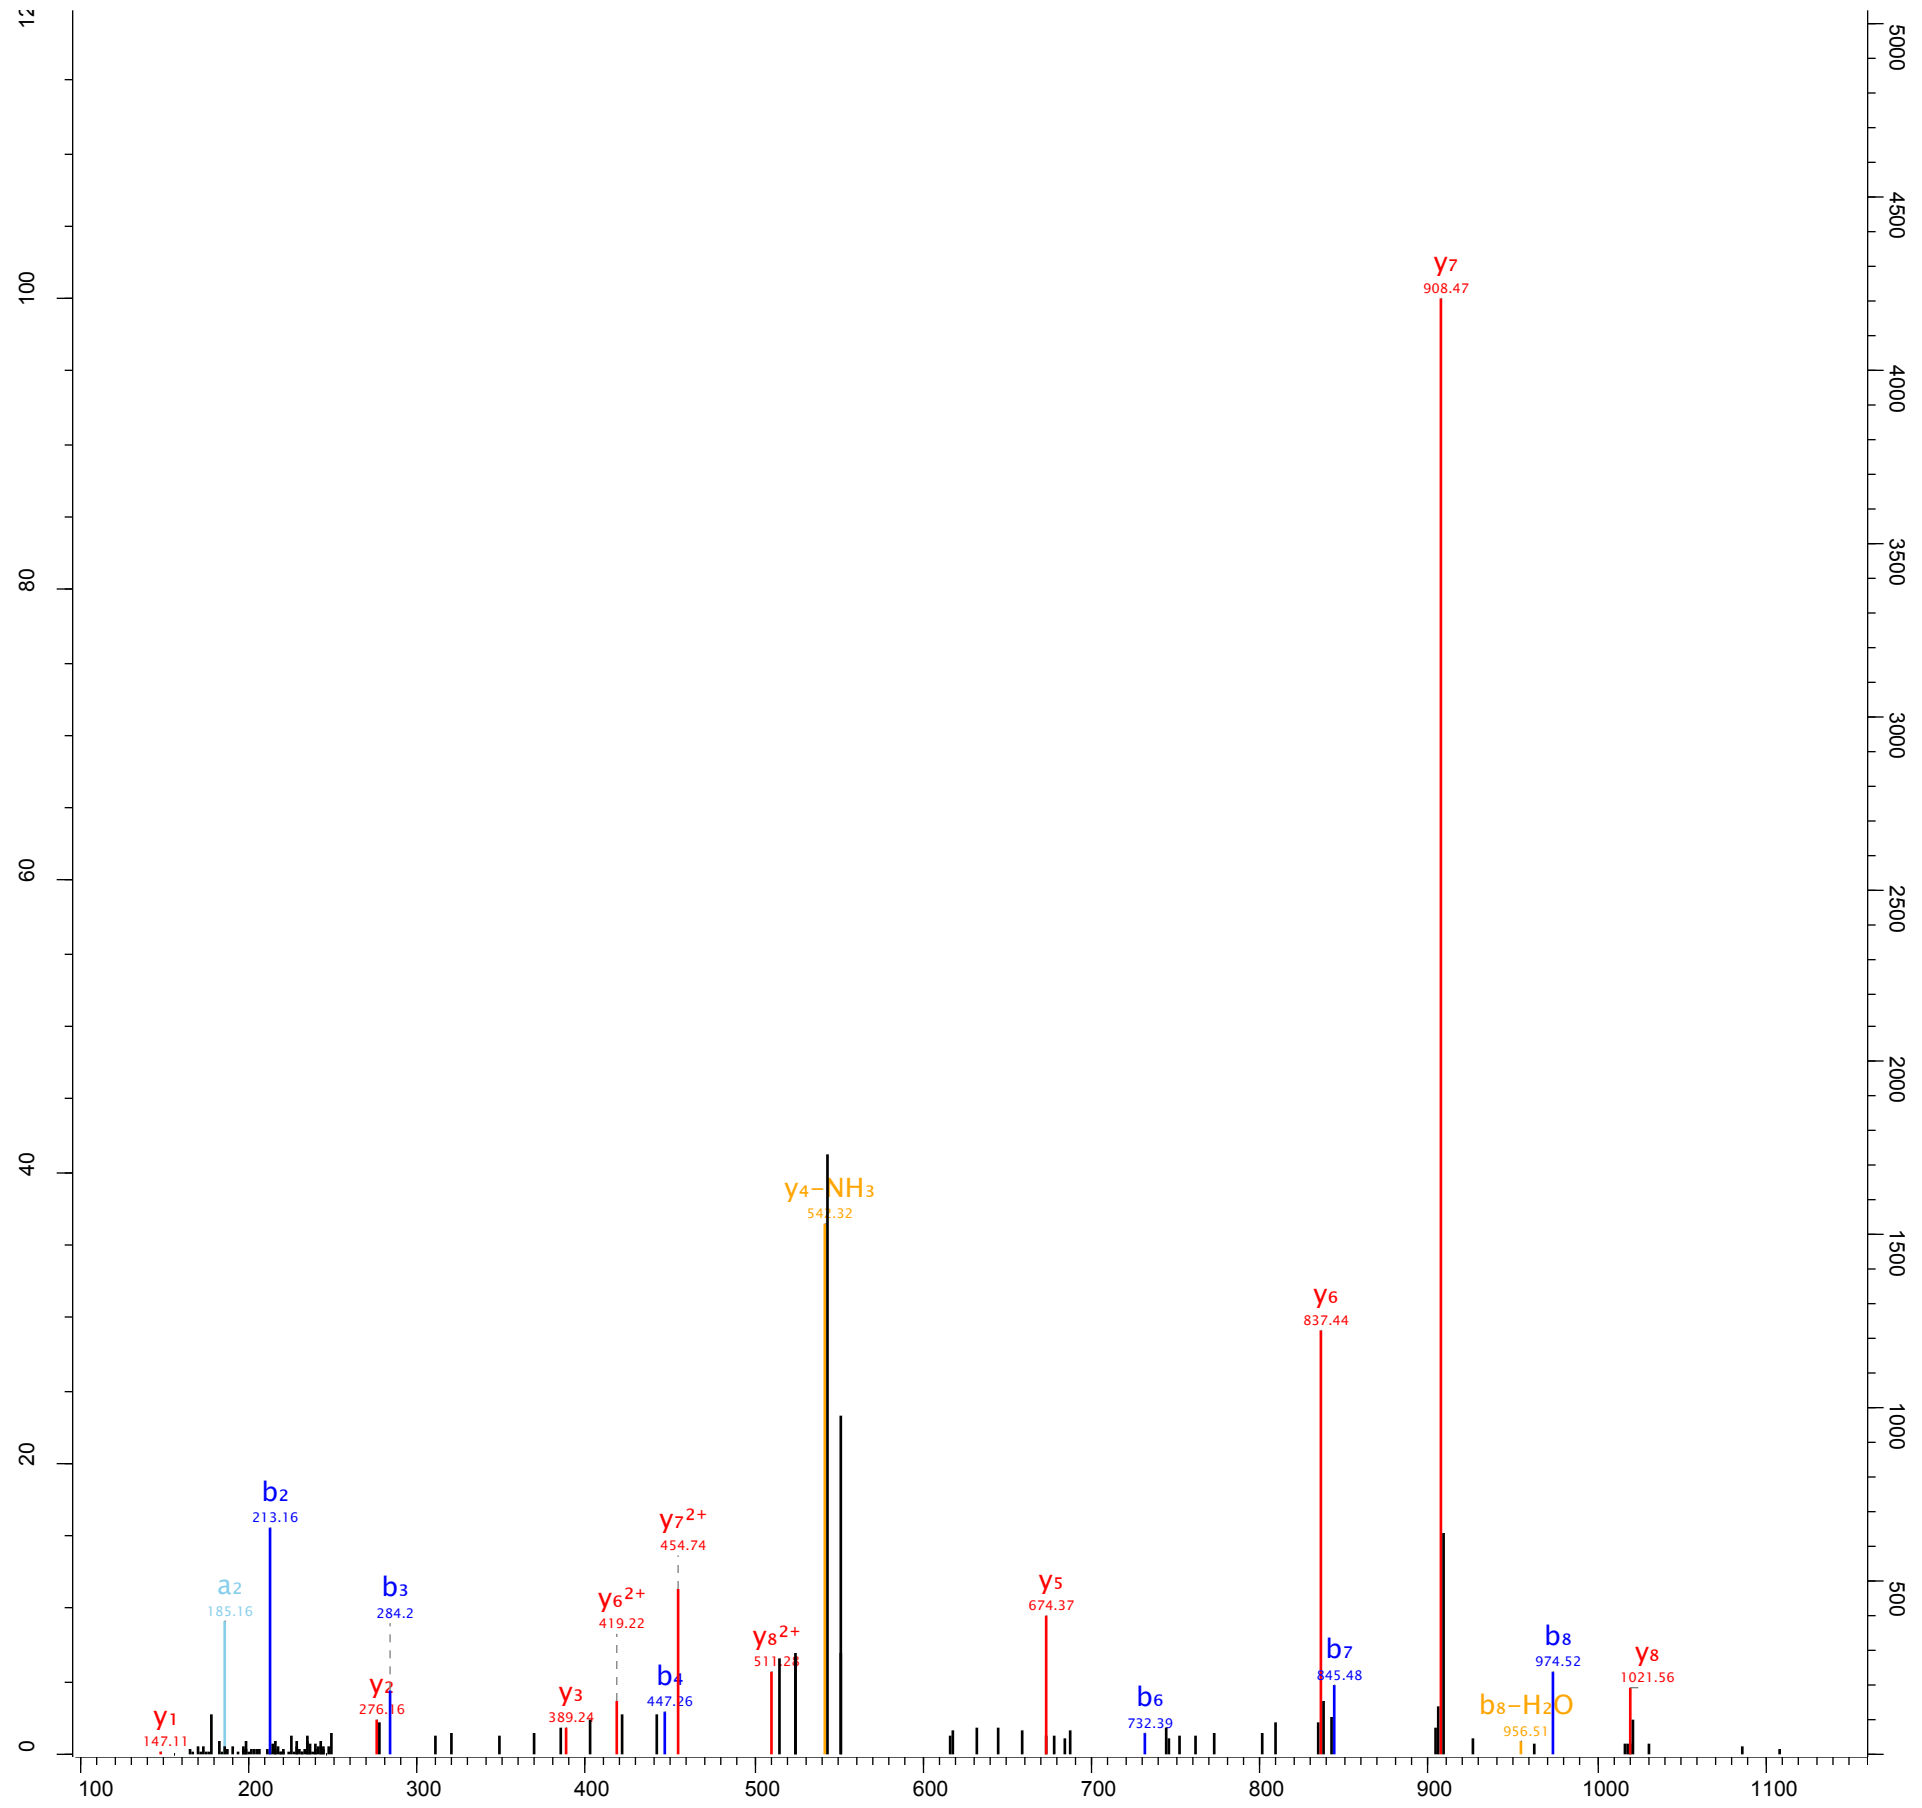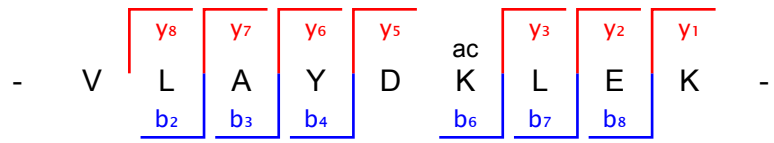

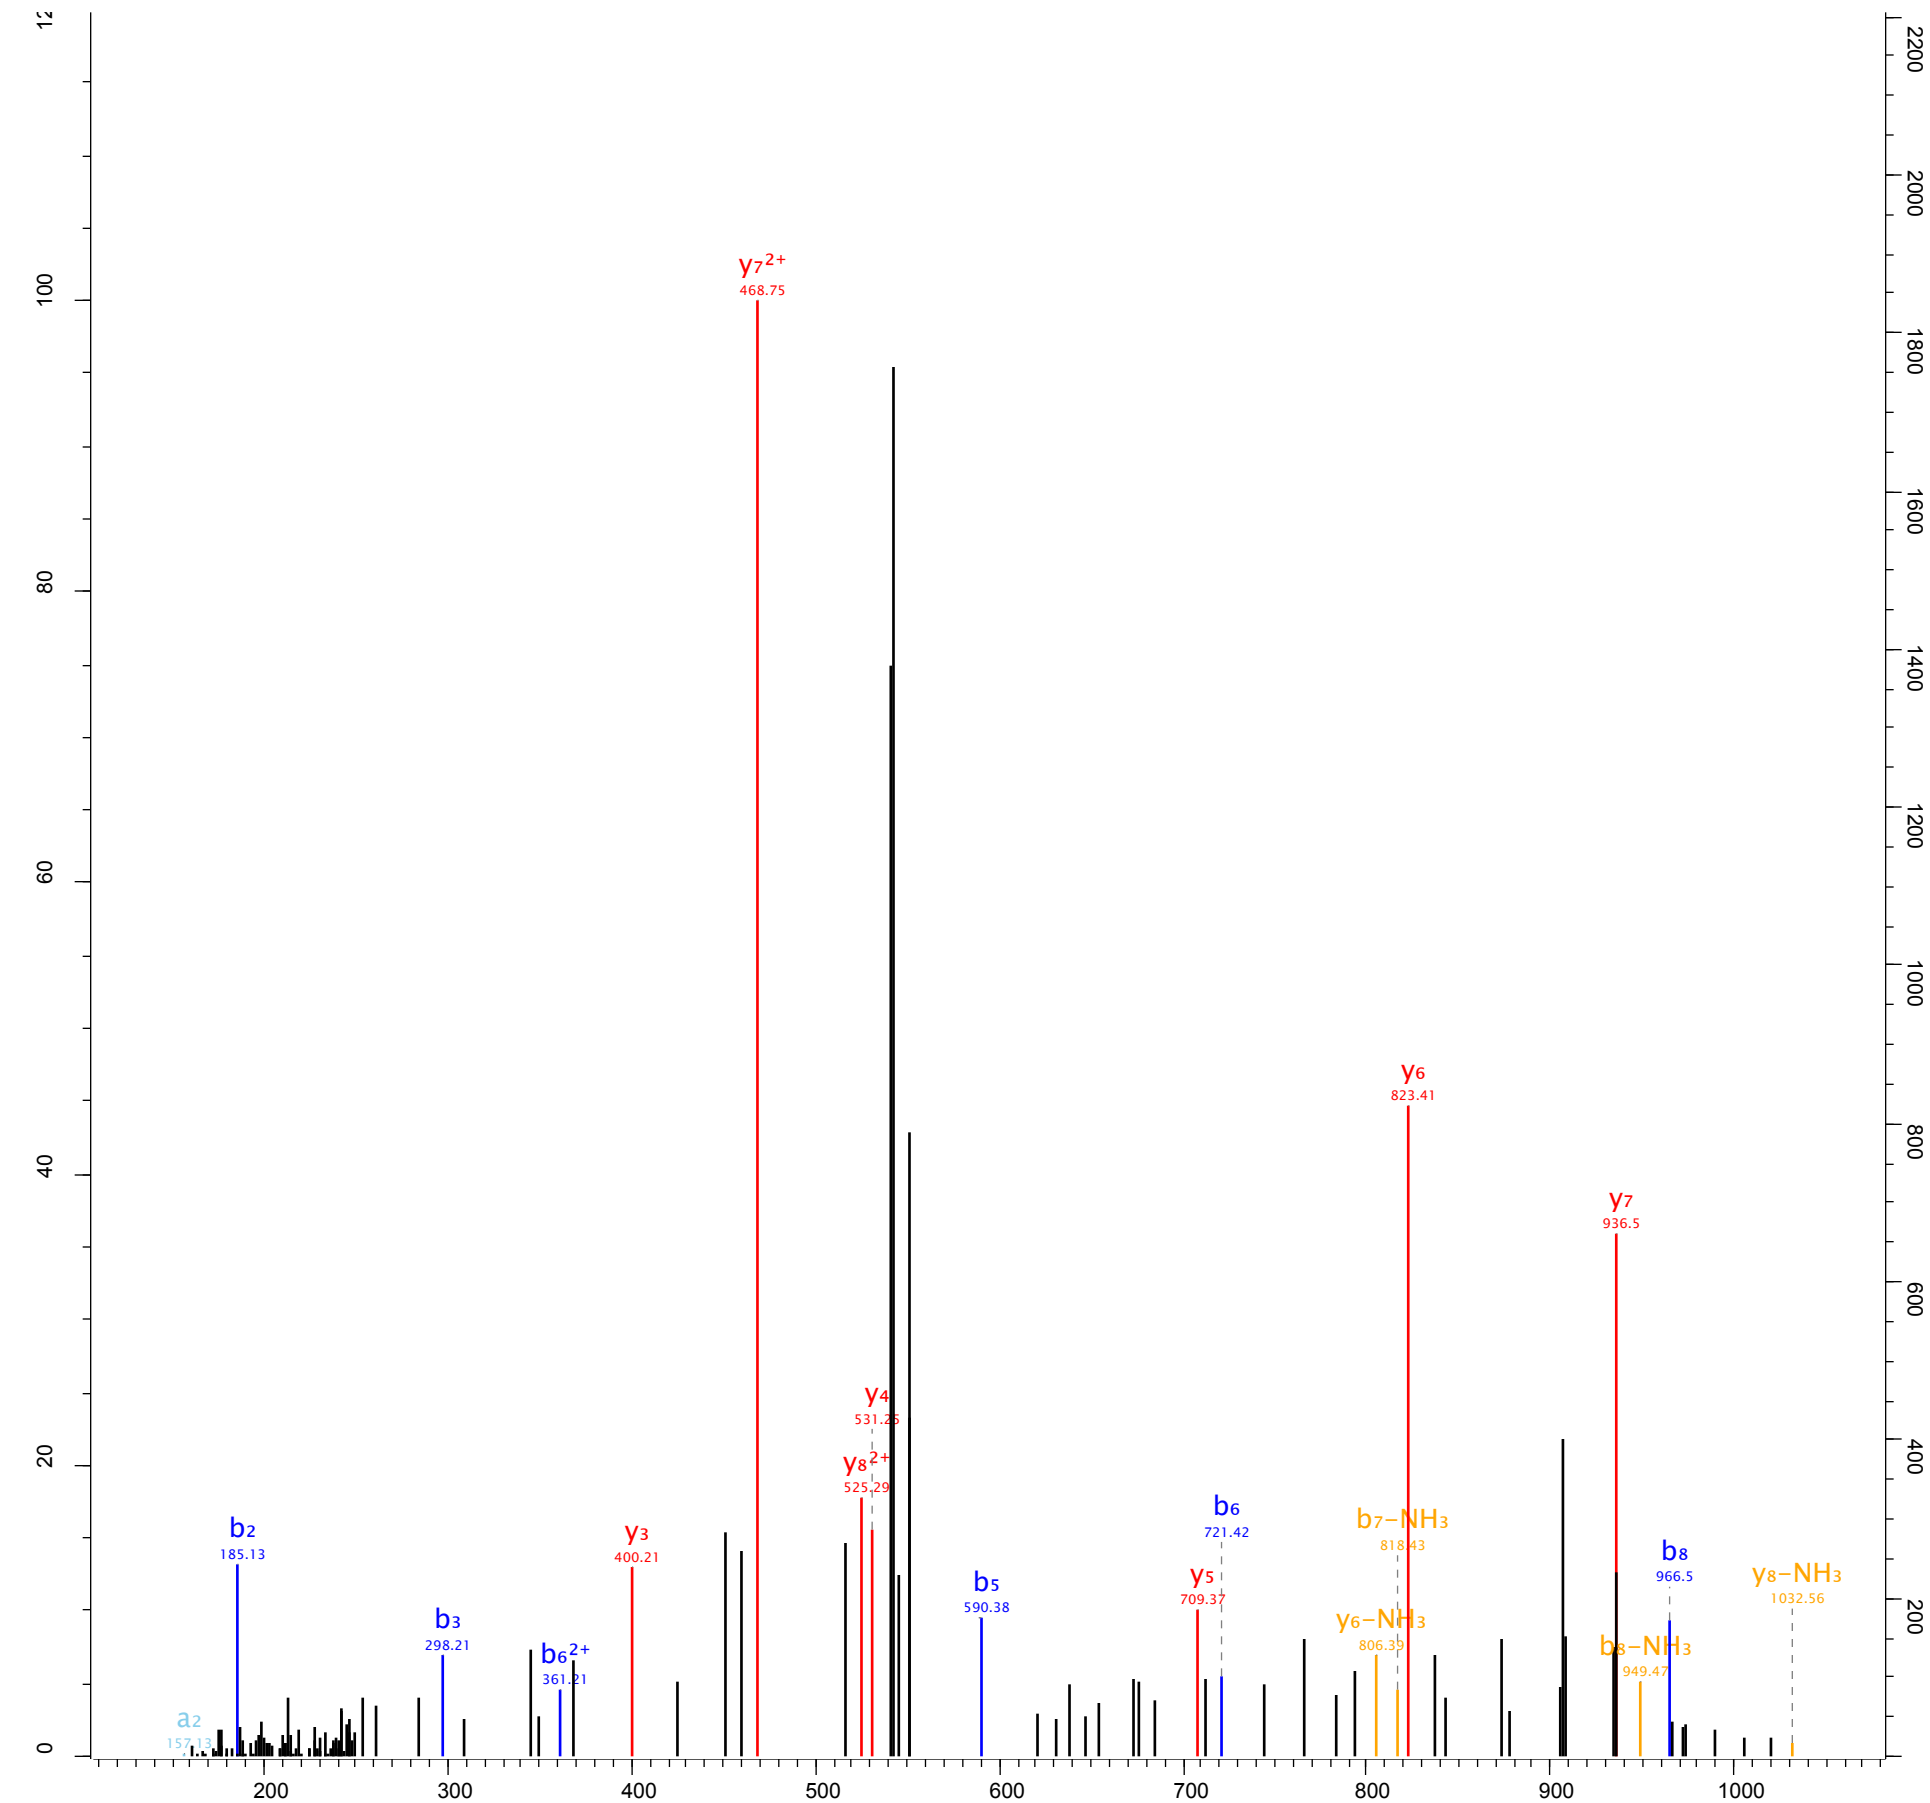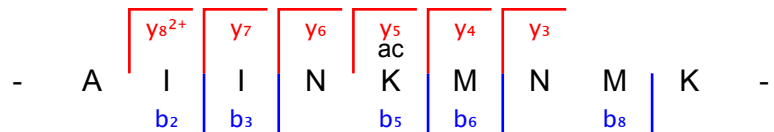



Raw file: 022714\_SCW\_II\_53\_5\_2ndZT  
 Scan: 19414  
 Method: ITMS; CID  
 Score: 99.16  
 m/z: 668.85  
 Gene names: Ppa1

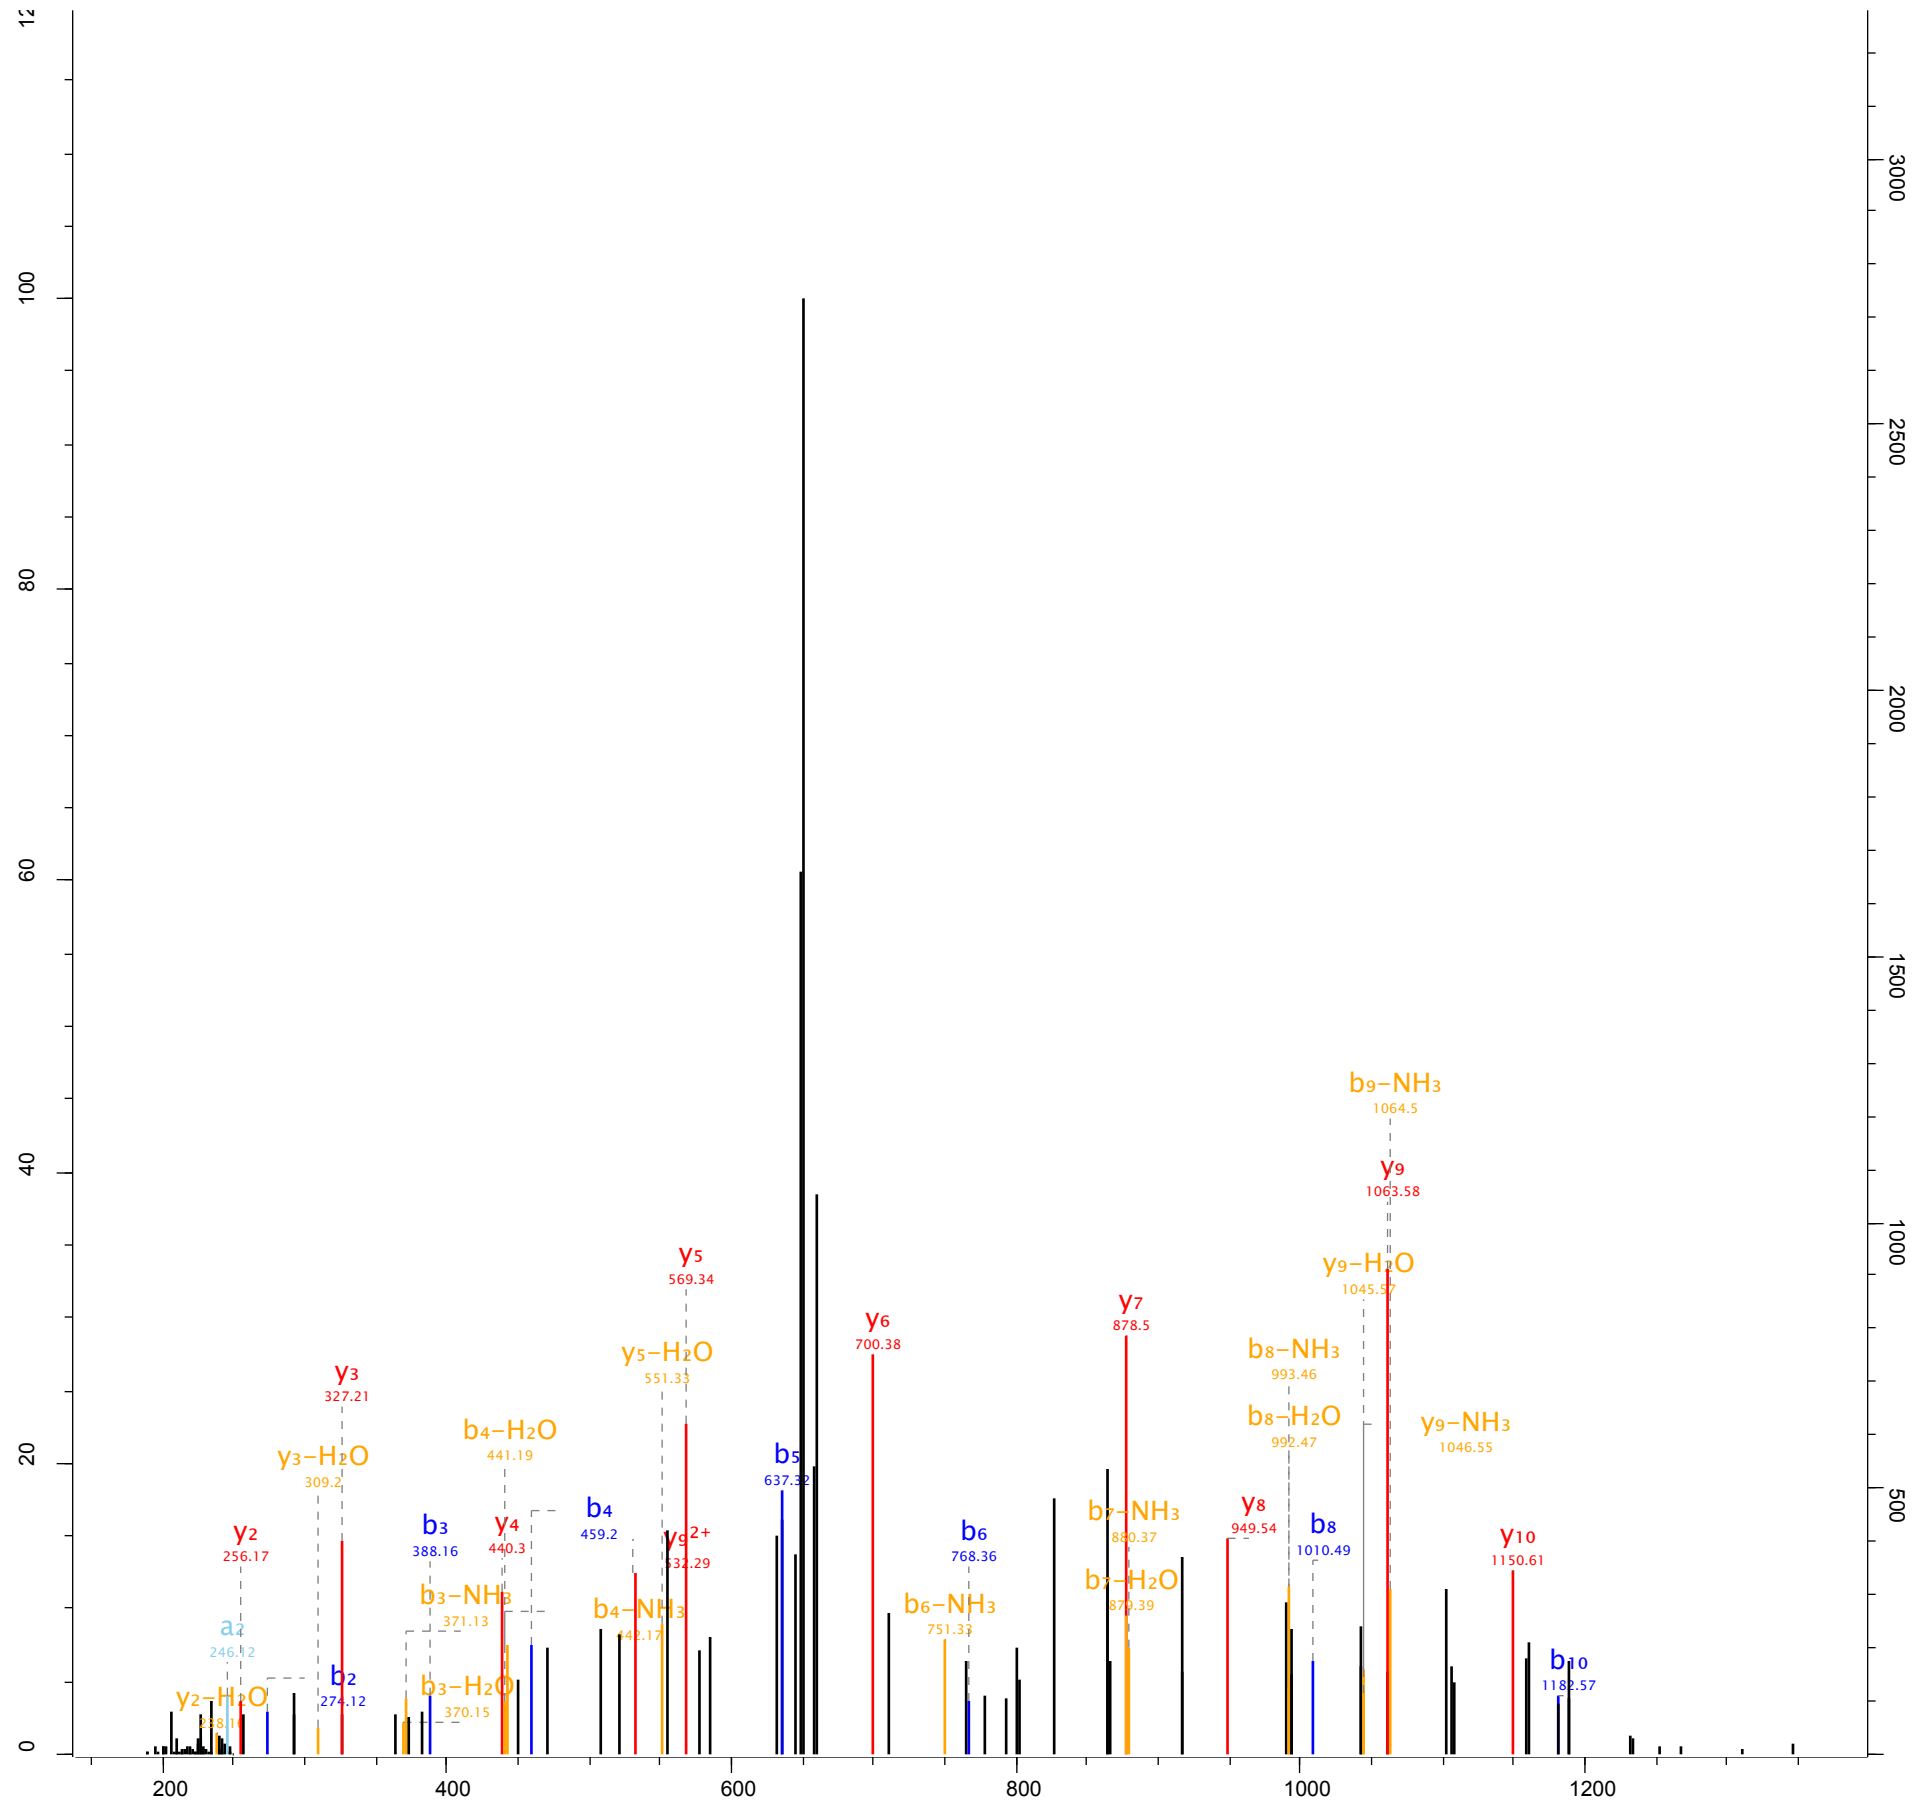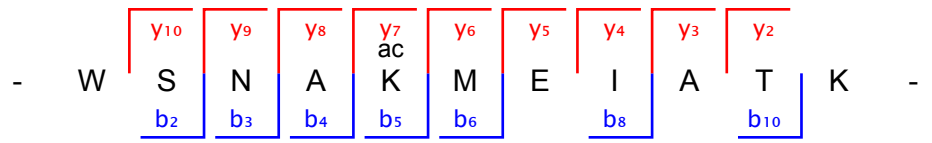

022714\_SCW\_II\_53\_5\_2ndZT

19633

ITMS; CID

93.16

500.82

Eif3e

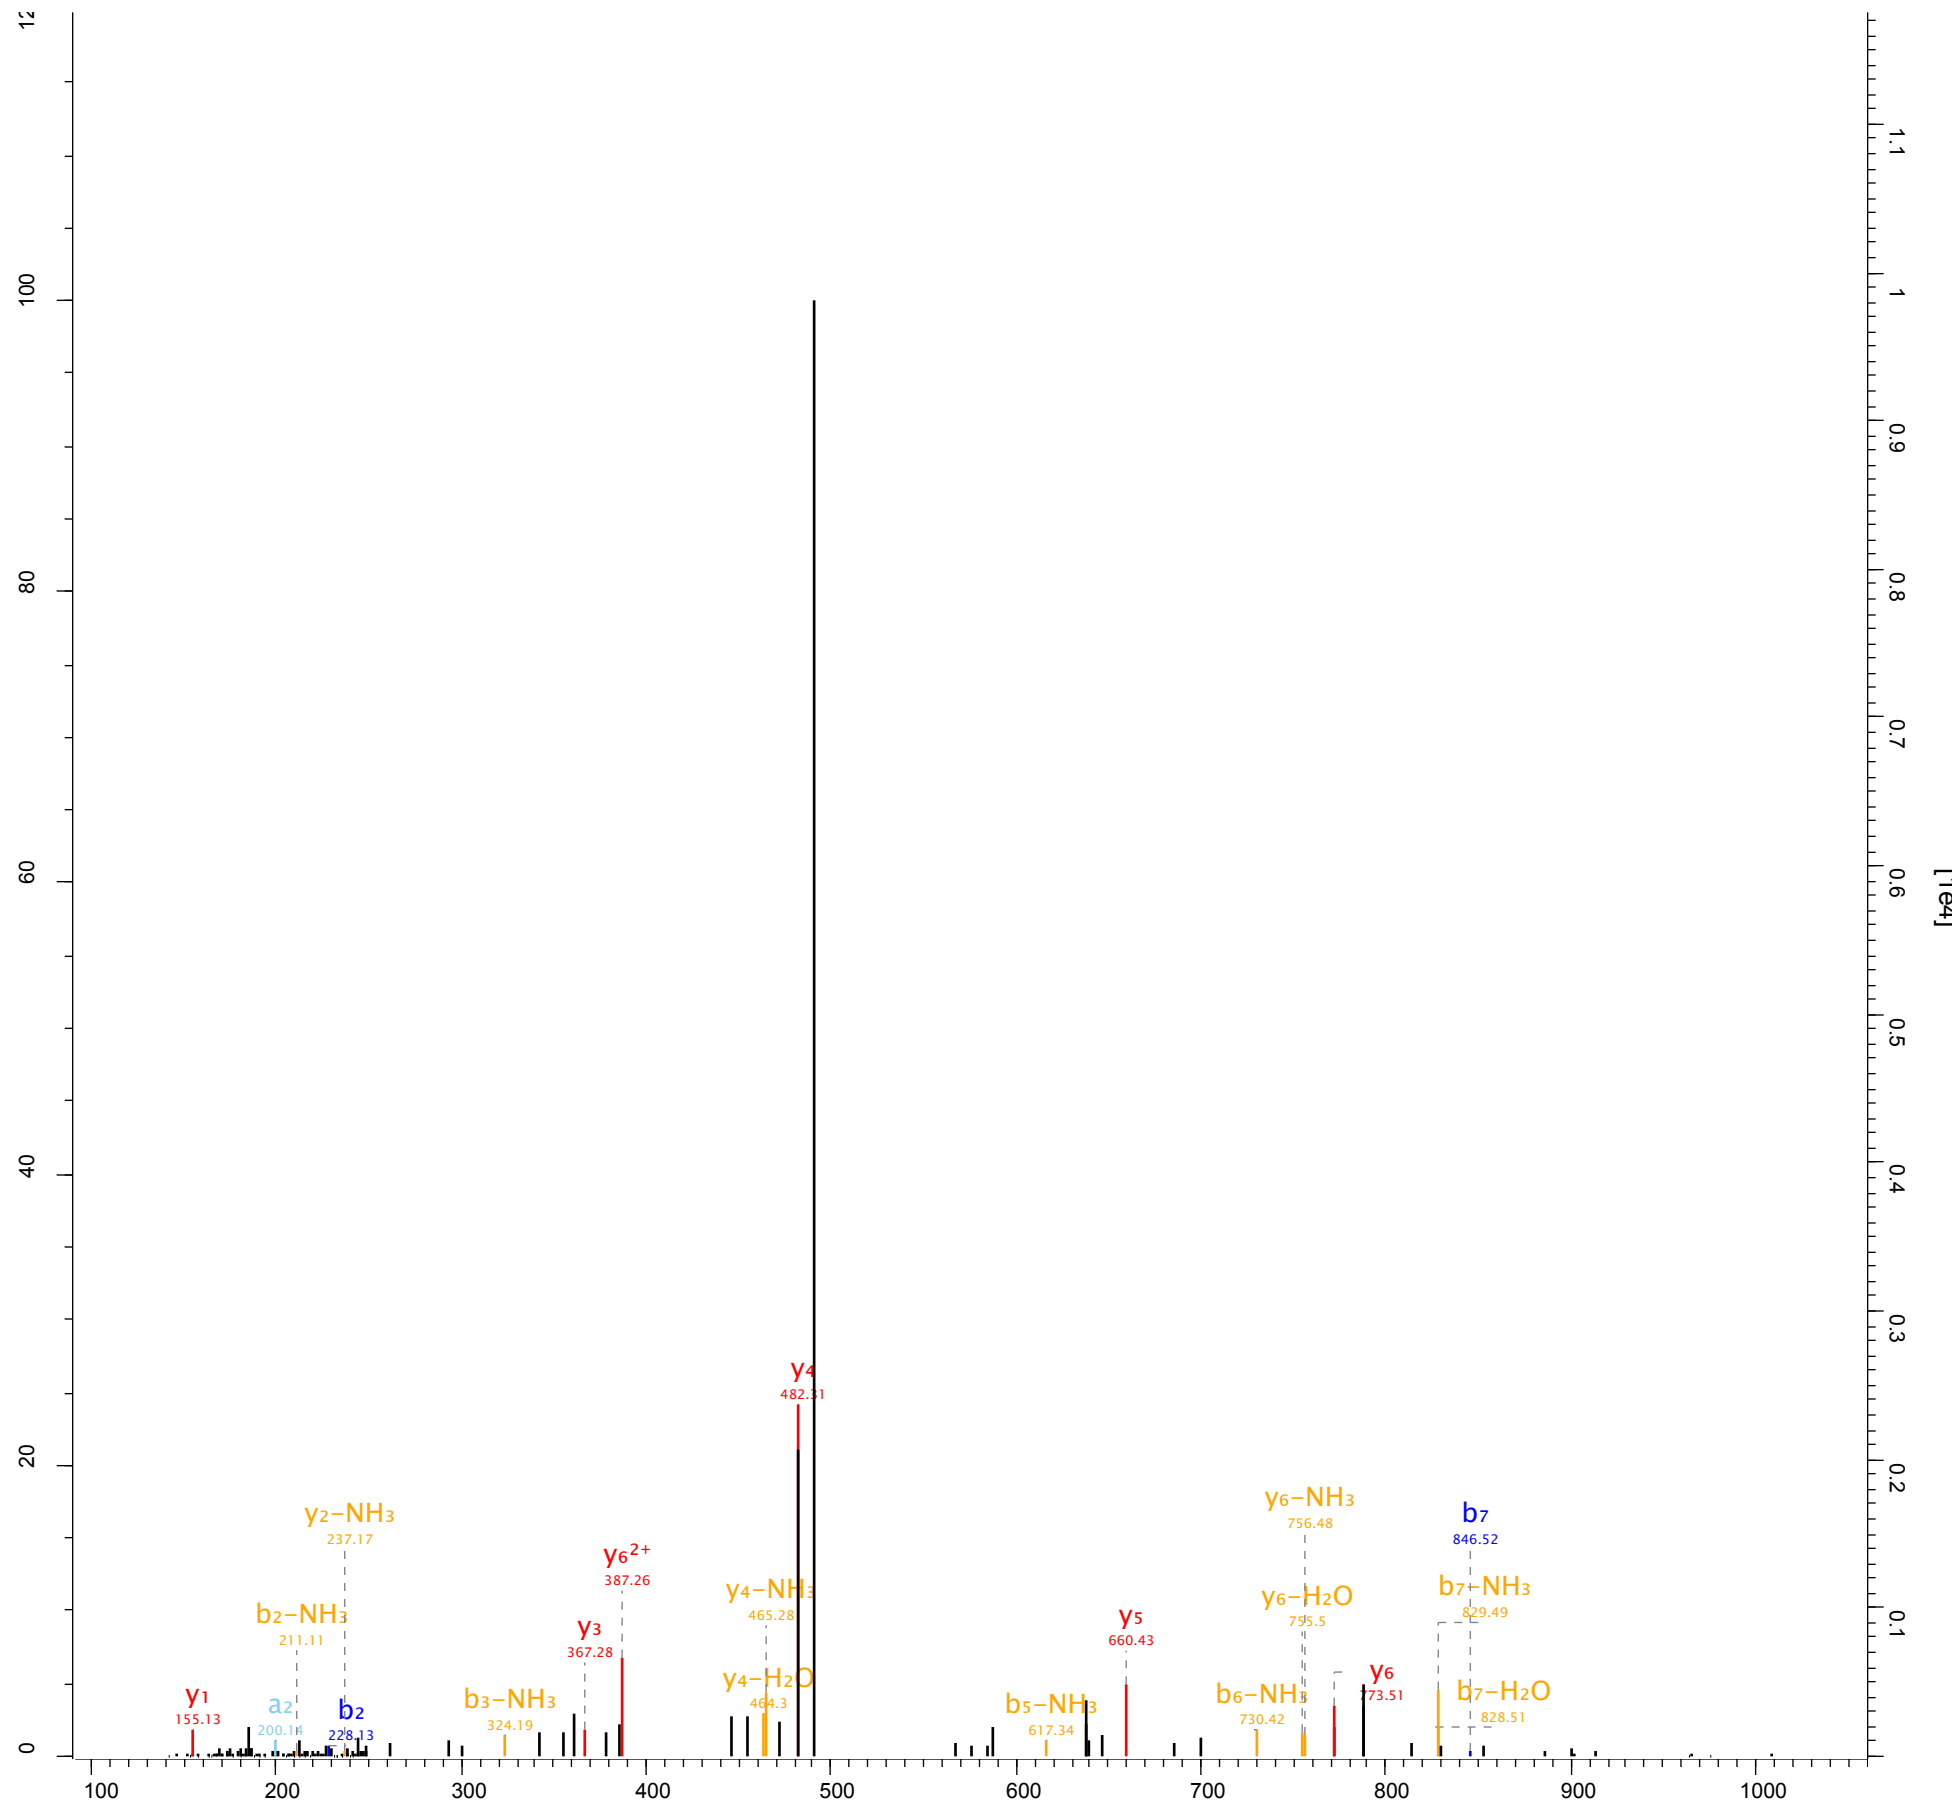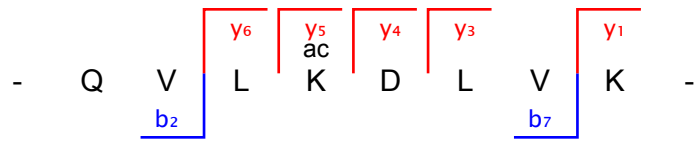

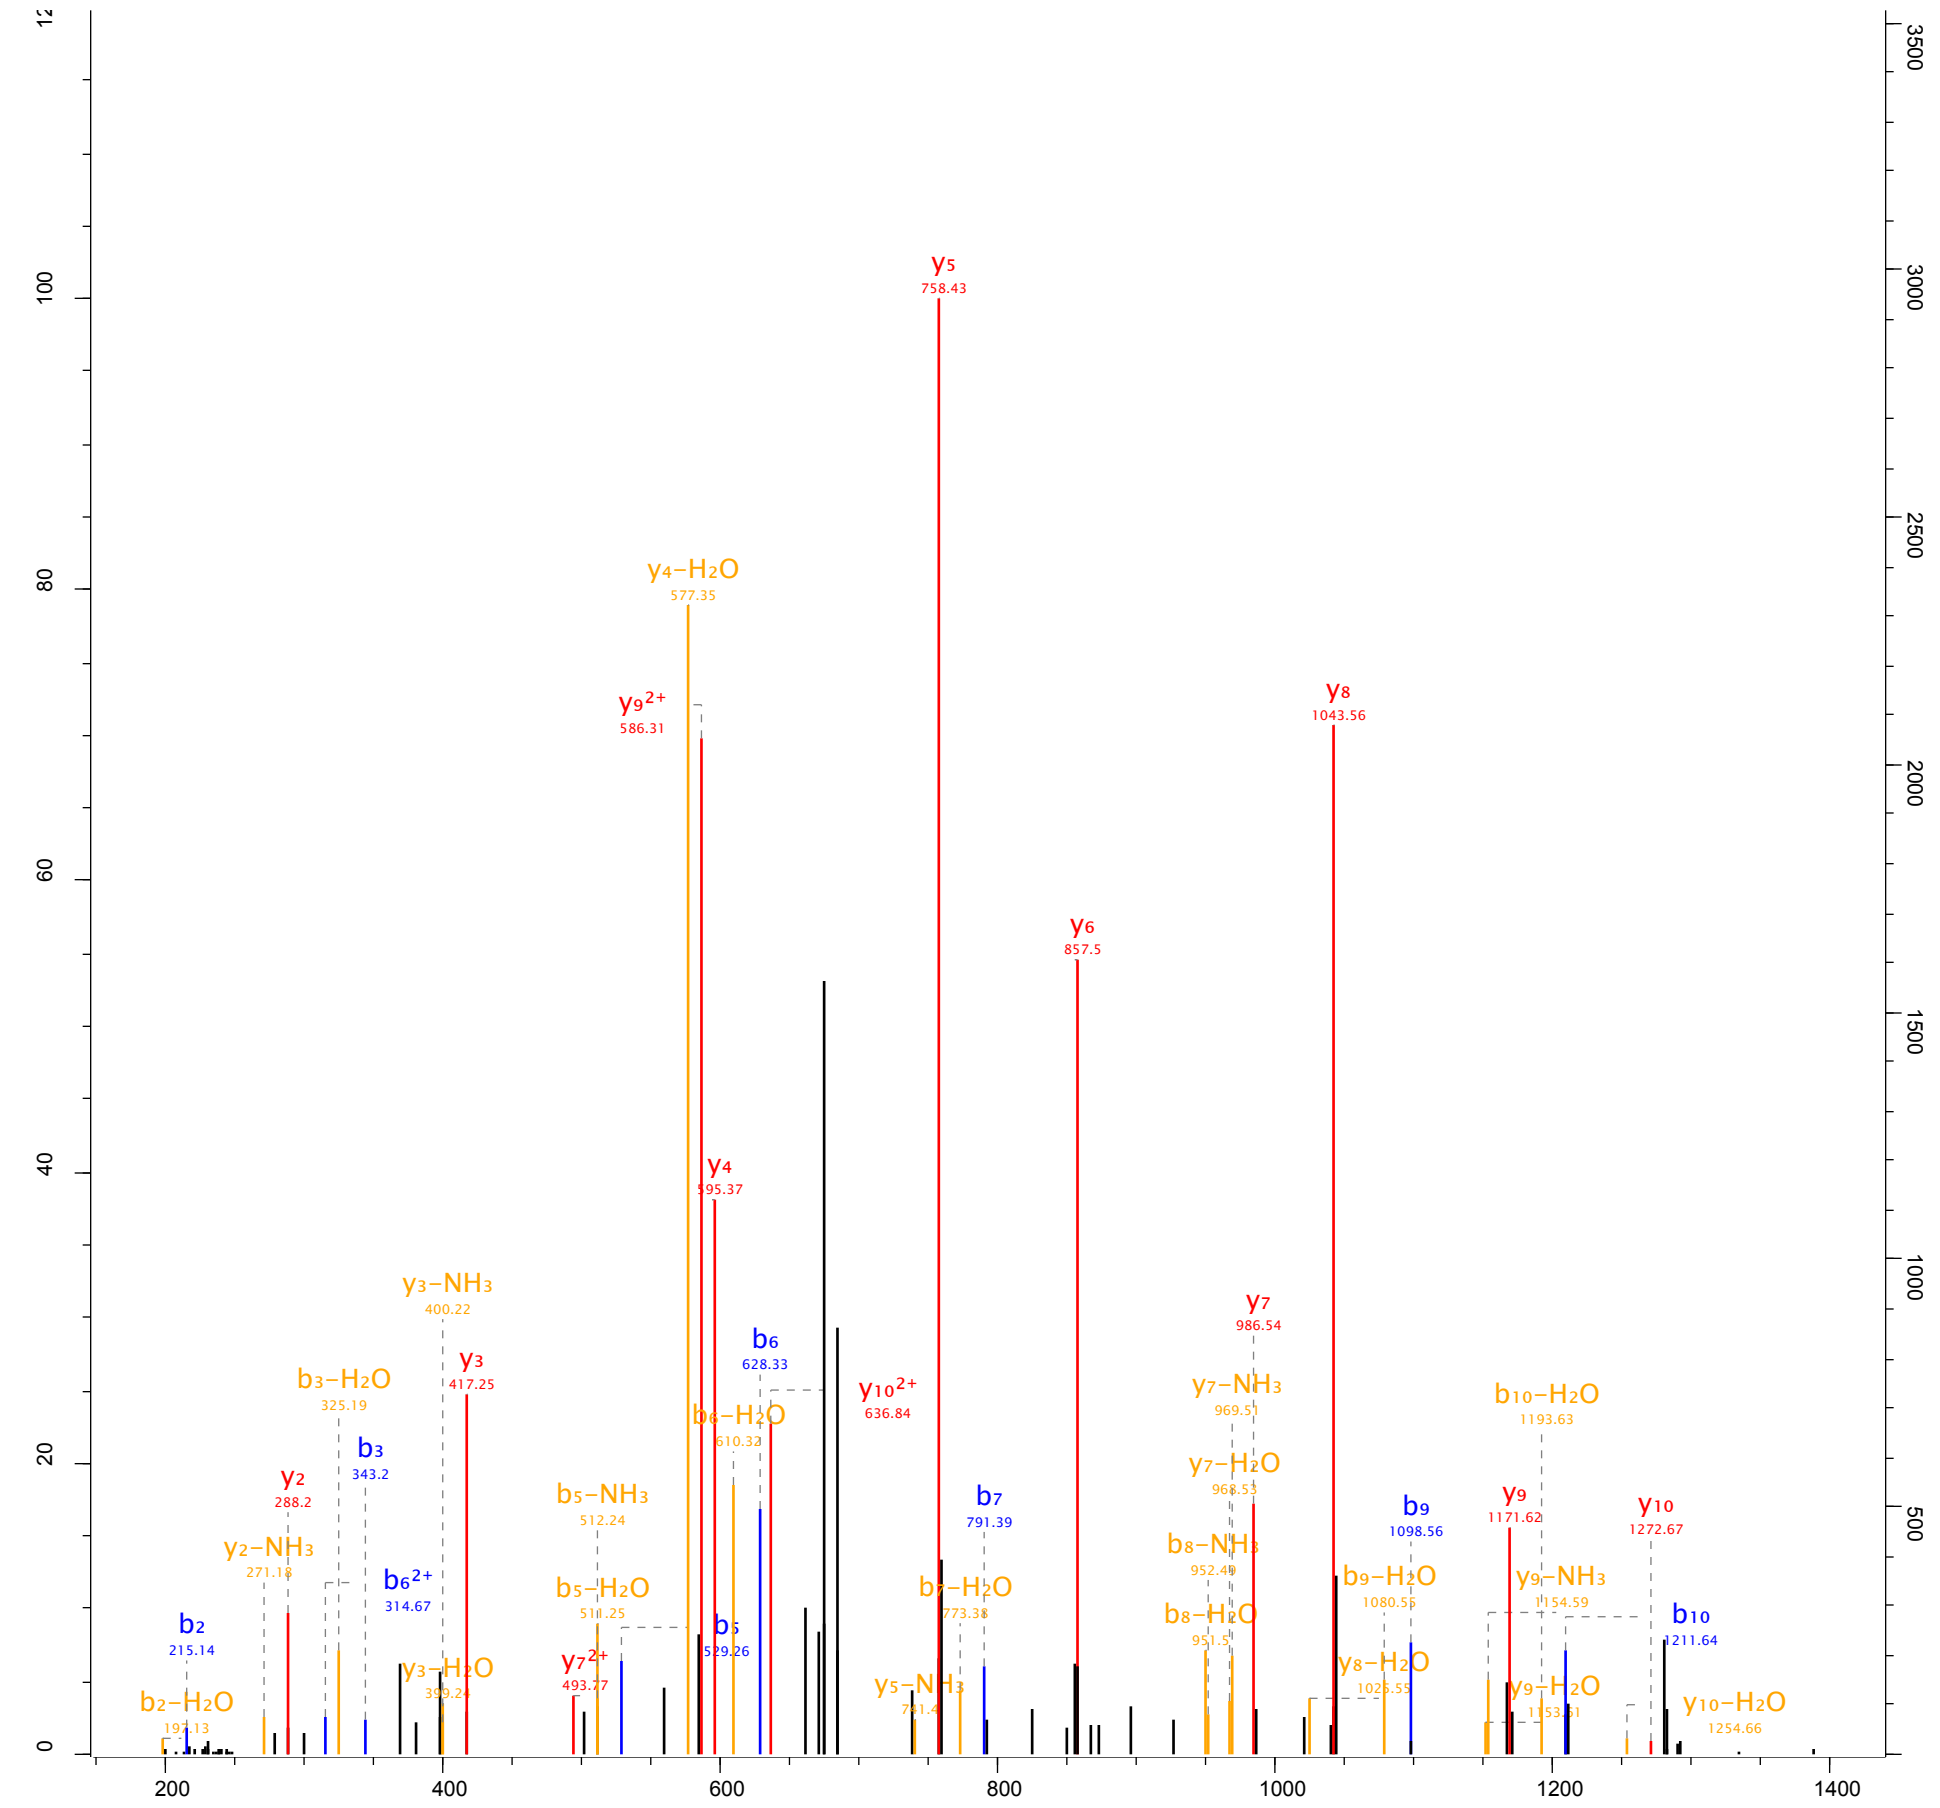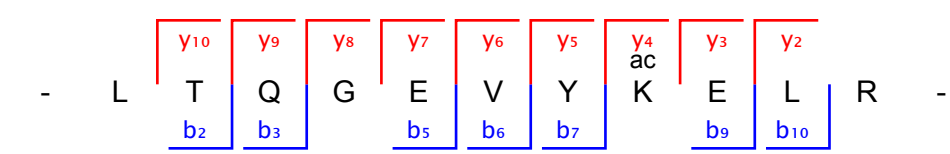

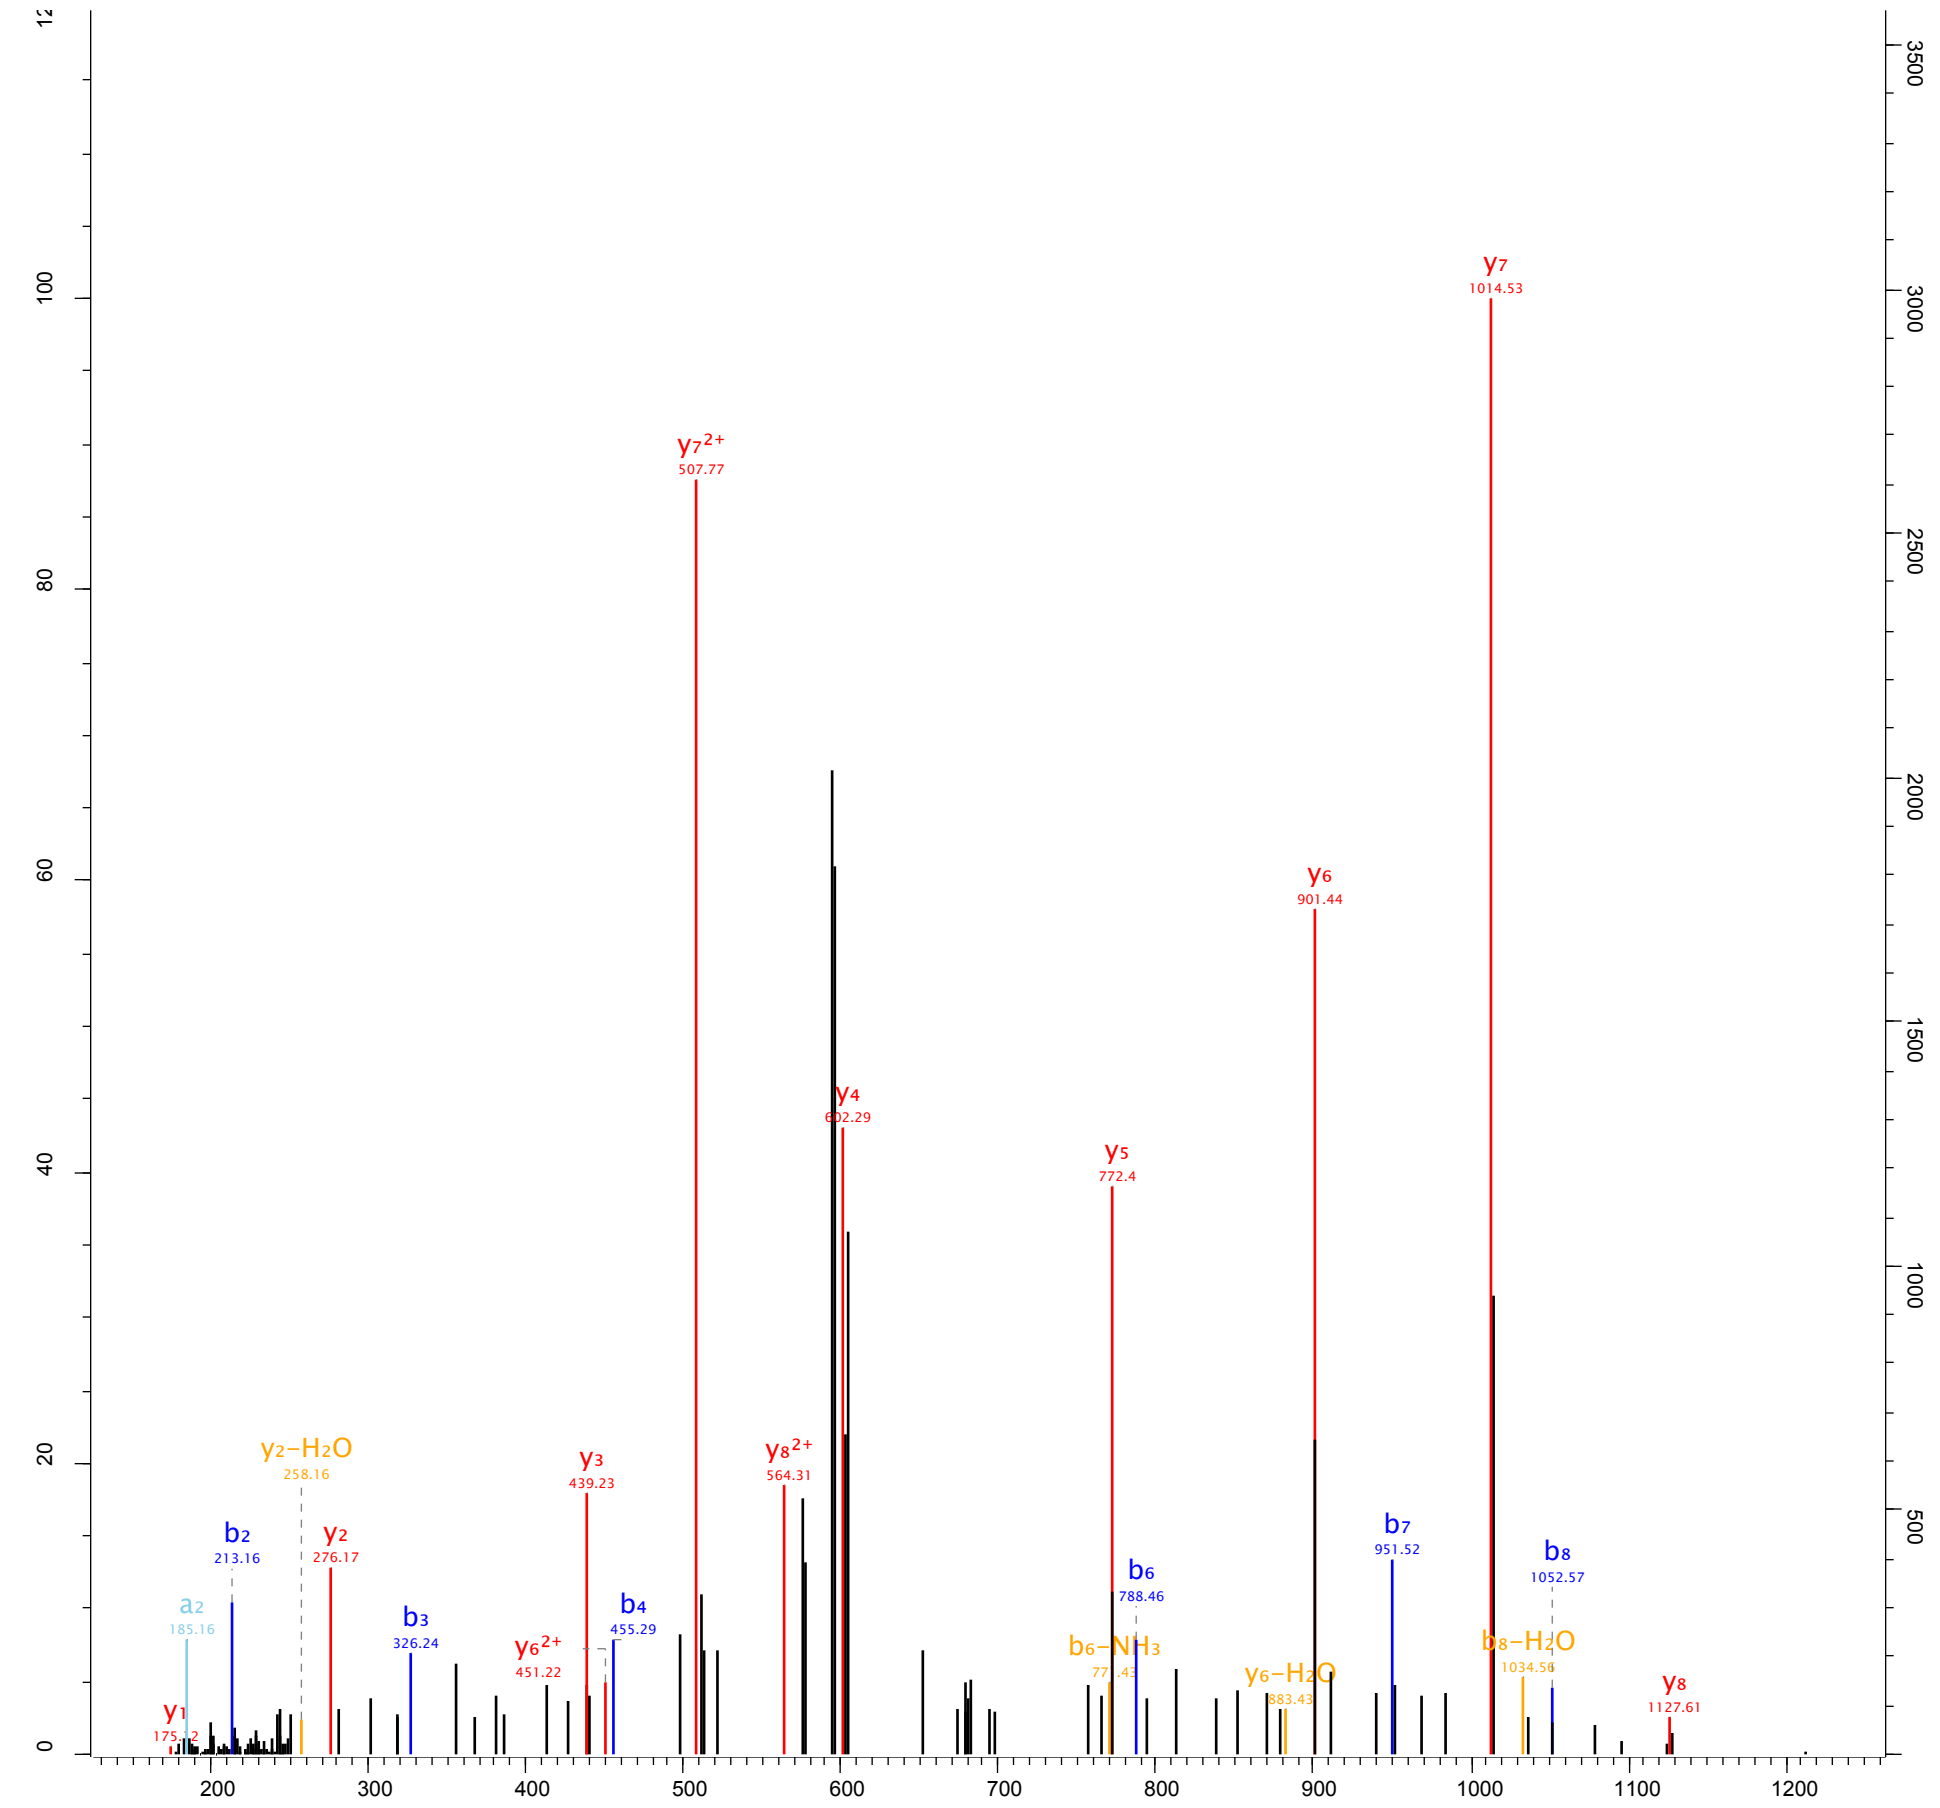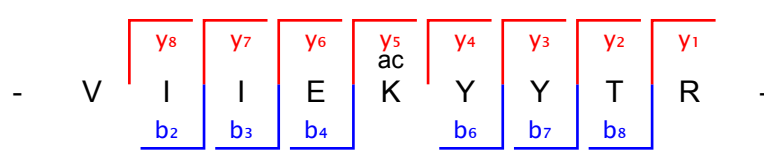

022714\_SCW\_II\_53\_5\_2ndZT

20061

ITMS; CID

102.95

549.3

Cltc

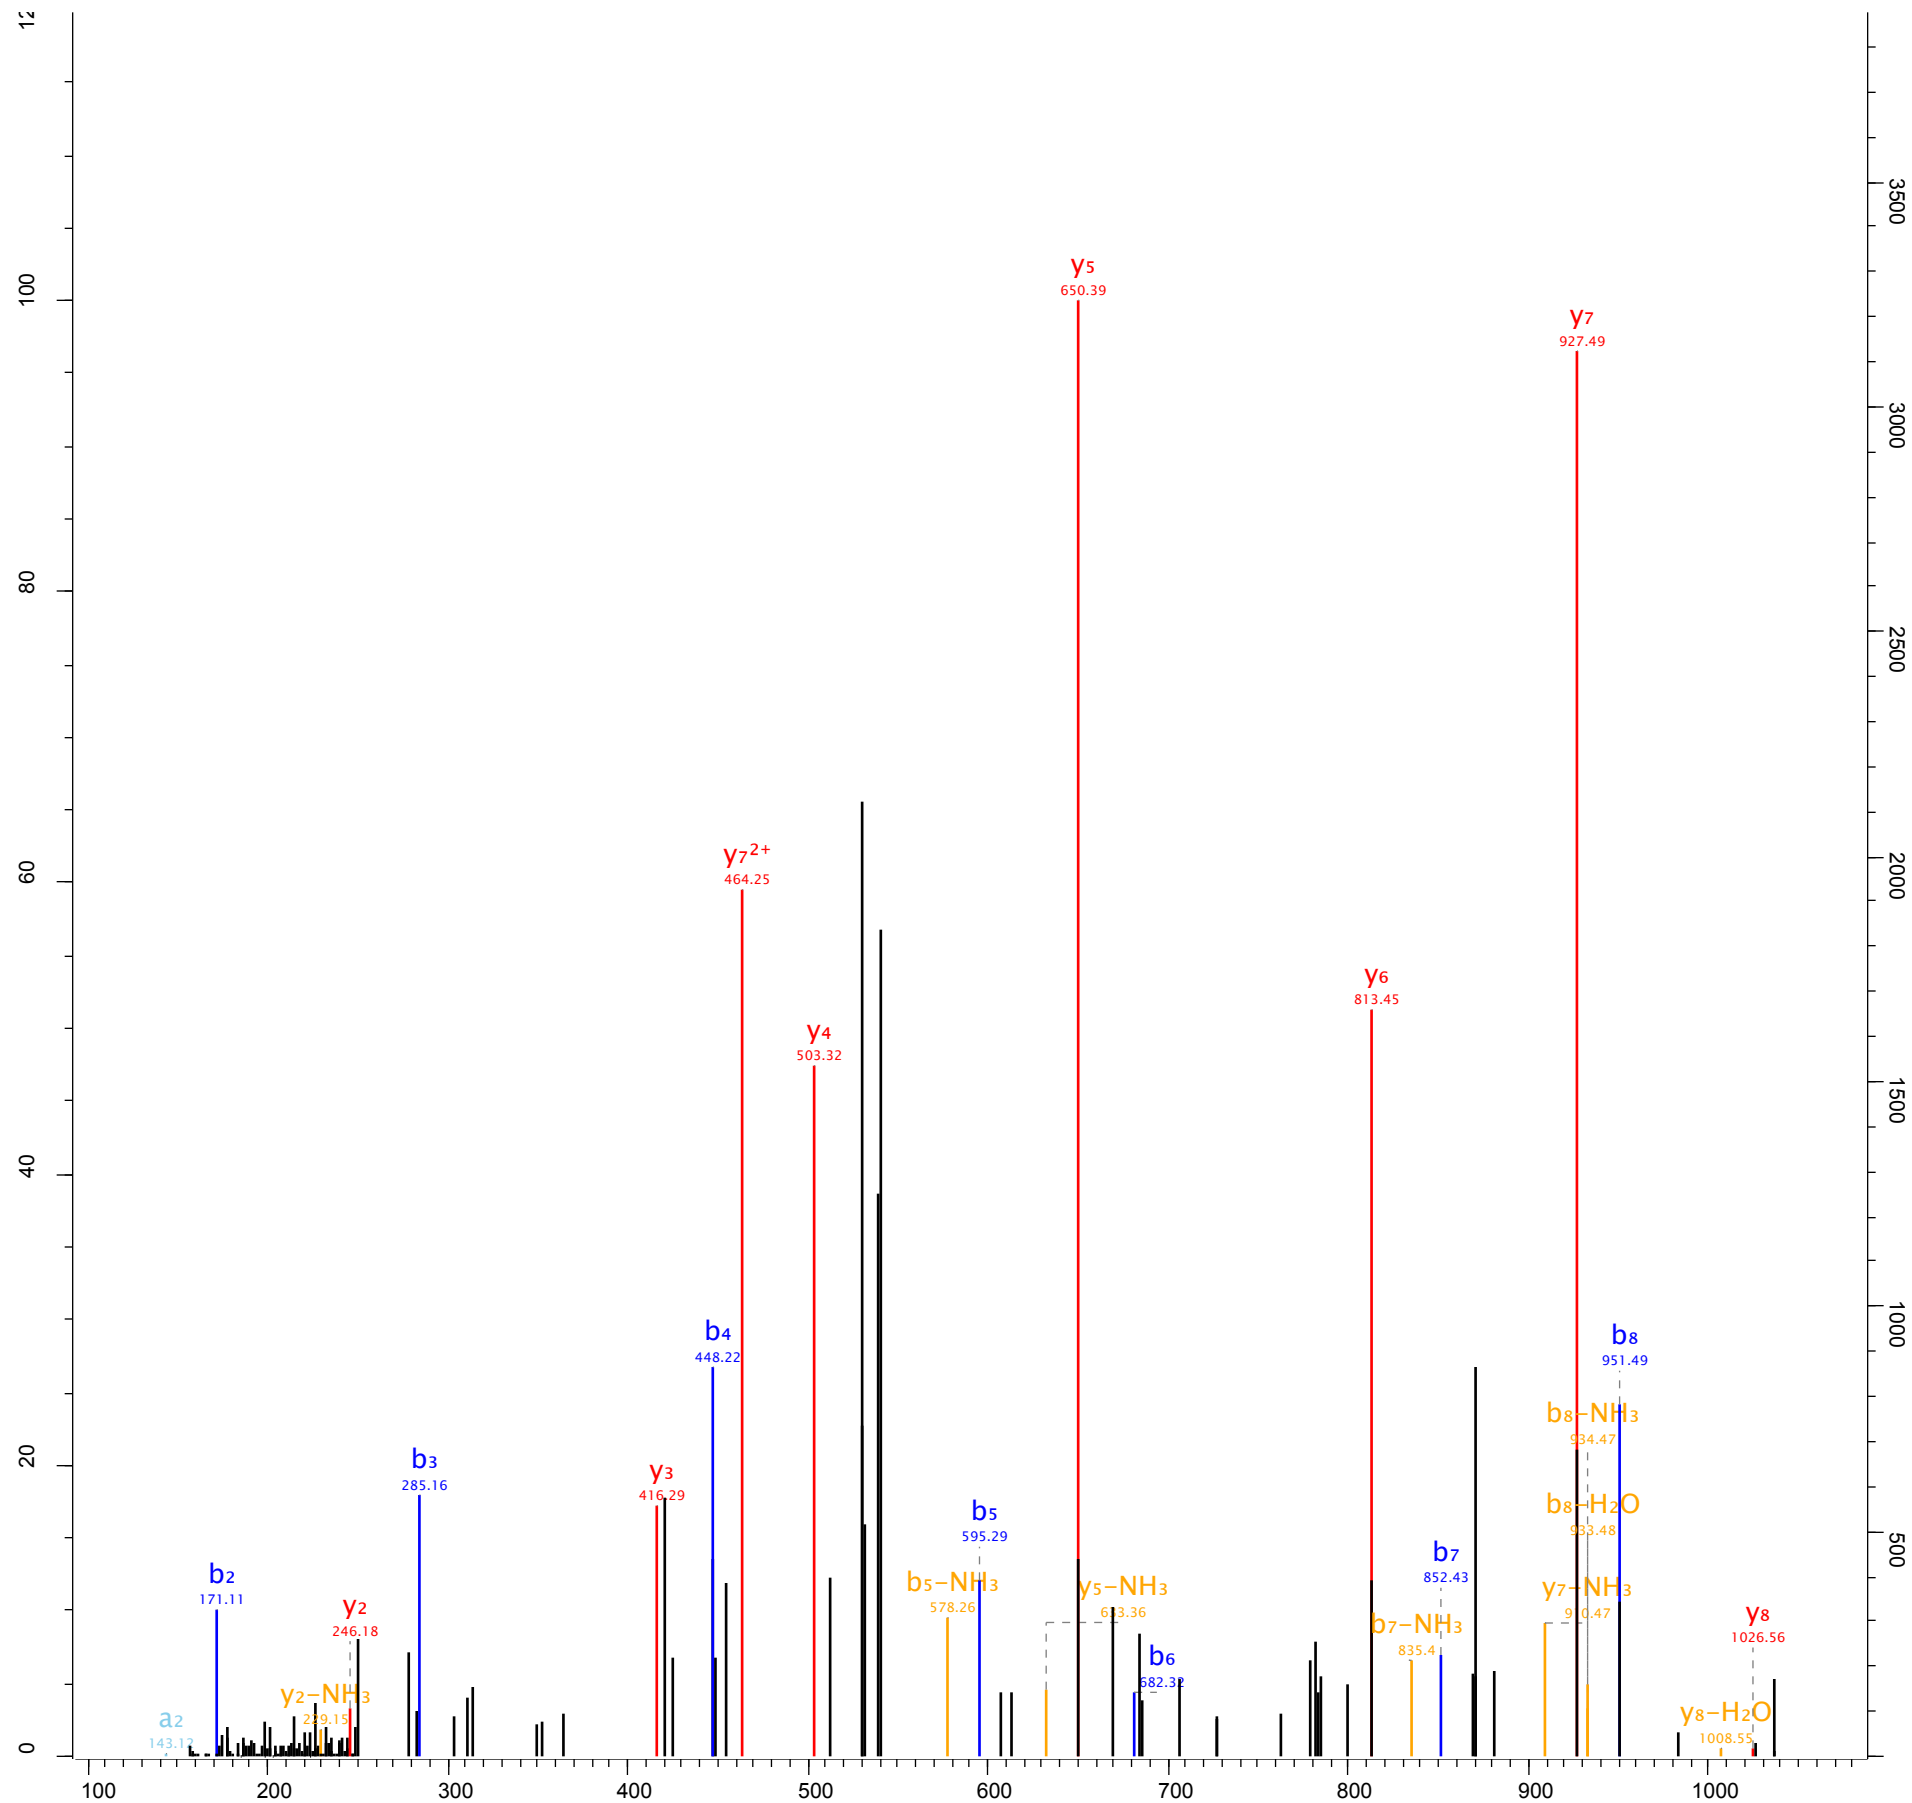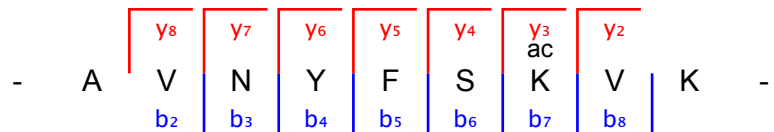

022714\_SCW\_II\_53\_5\_2ndZT

21117

ITMS; CID

134.84

654.86

Cltc

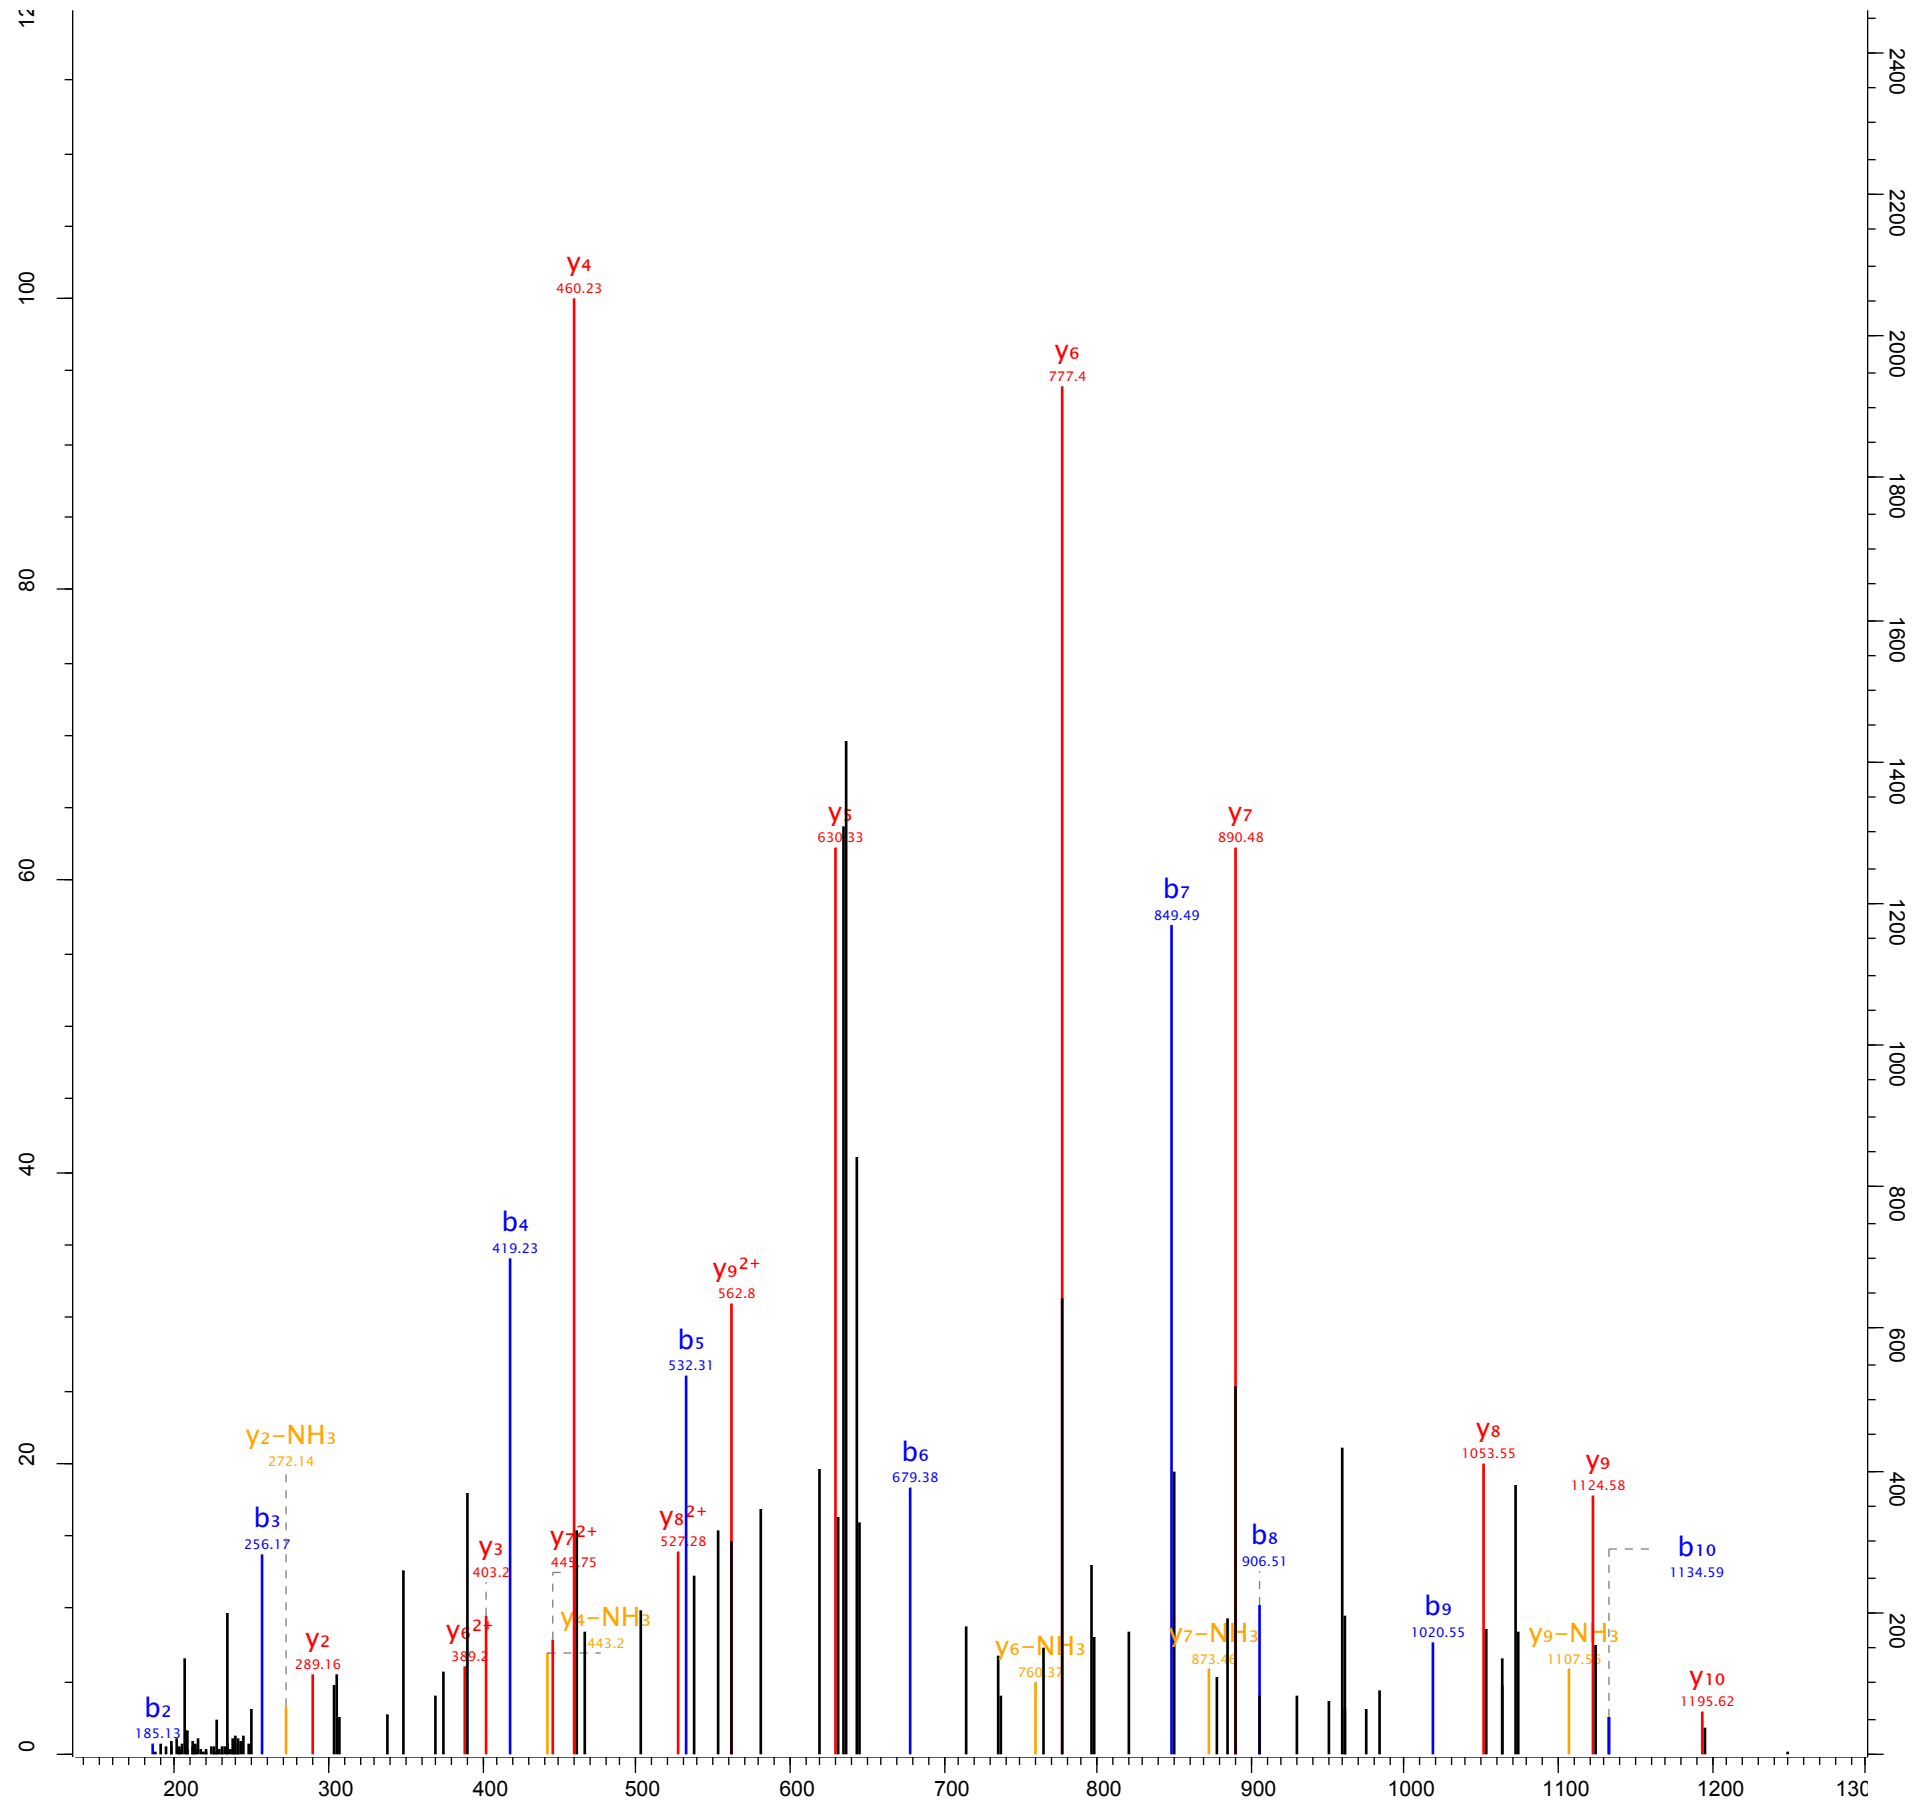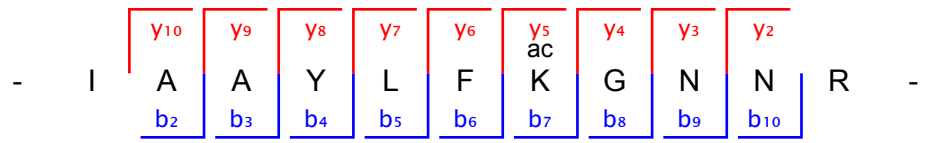

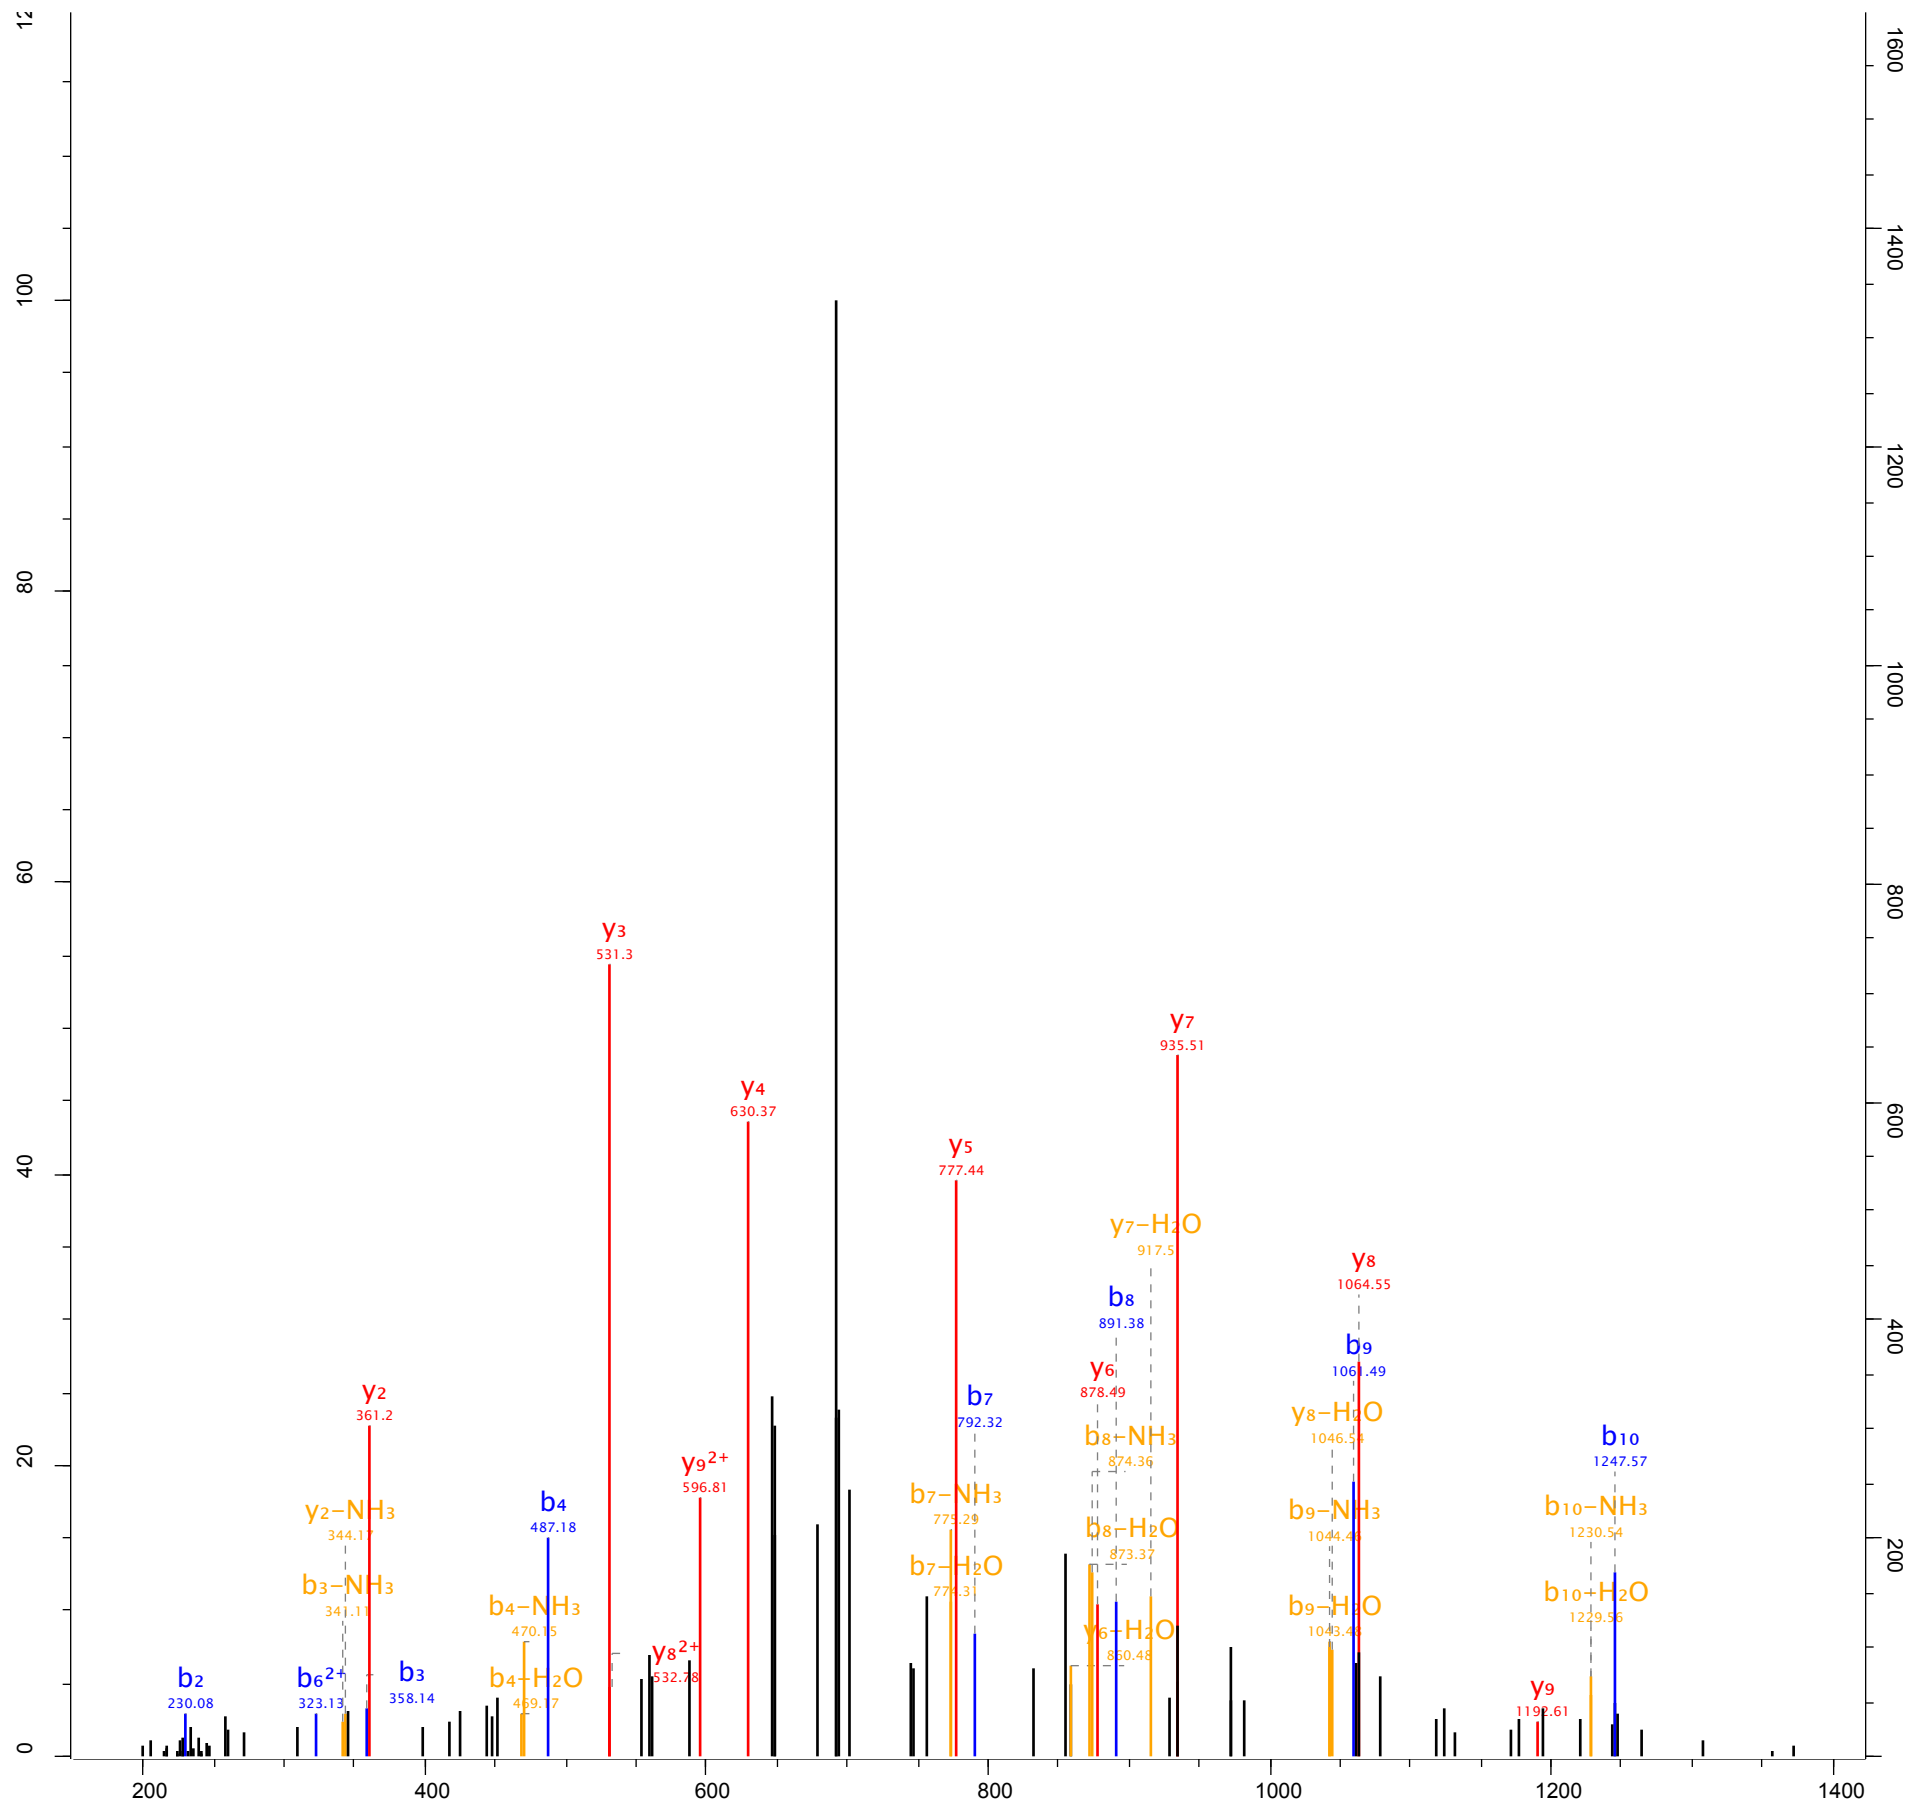

- D N Q E G T F V K W R -

b2
y9
y8
y7
y6
y5
y4
y3
ac
y2

b3
b4
b6<sup>2+</sup>
b7
b8
b9
b10

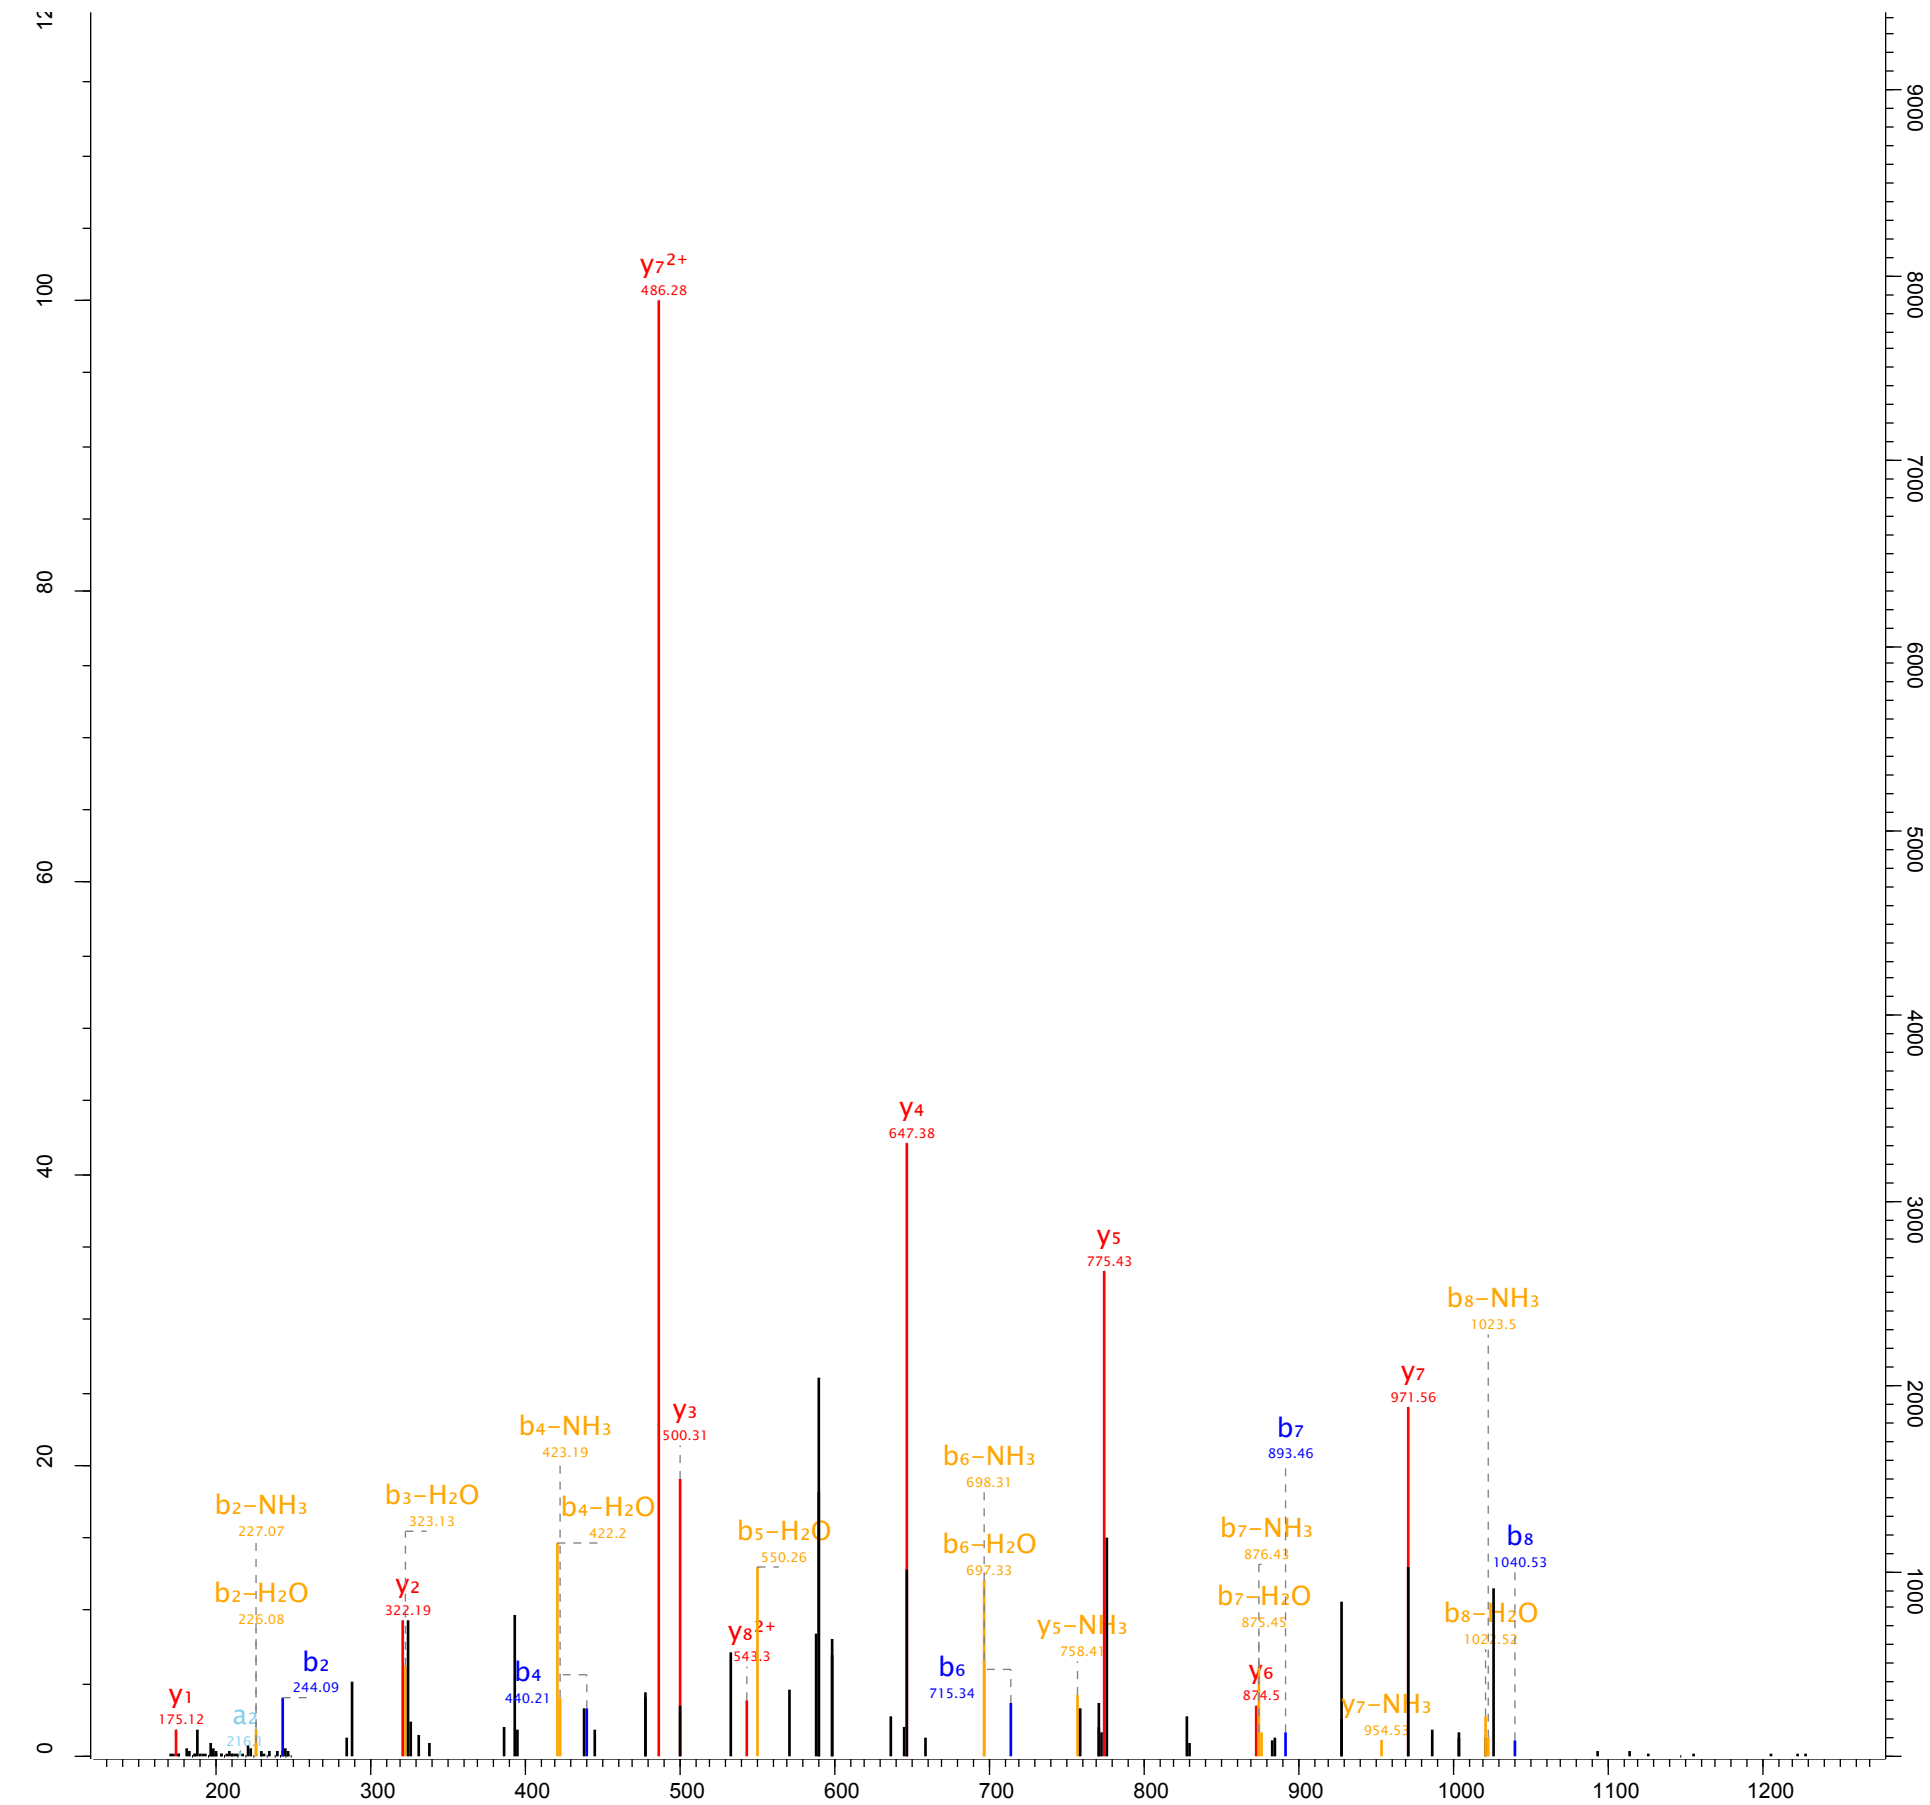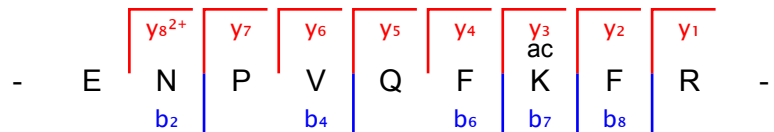



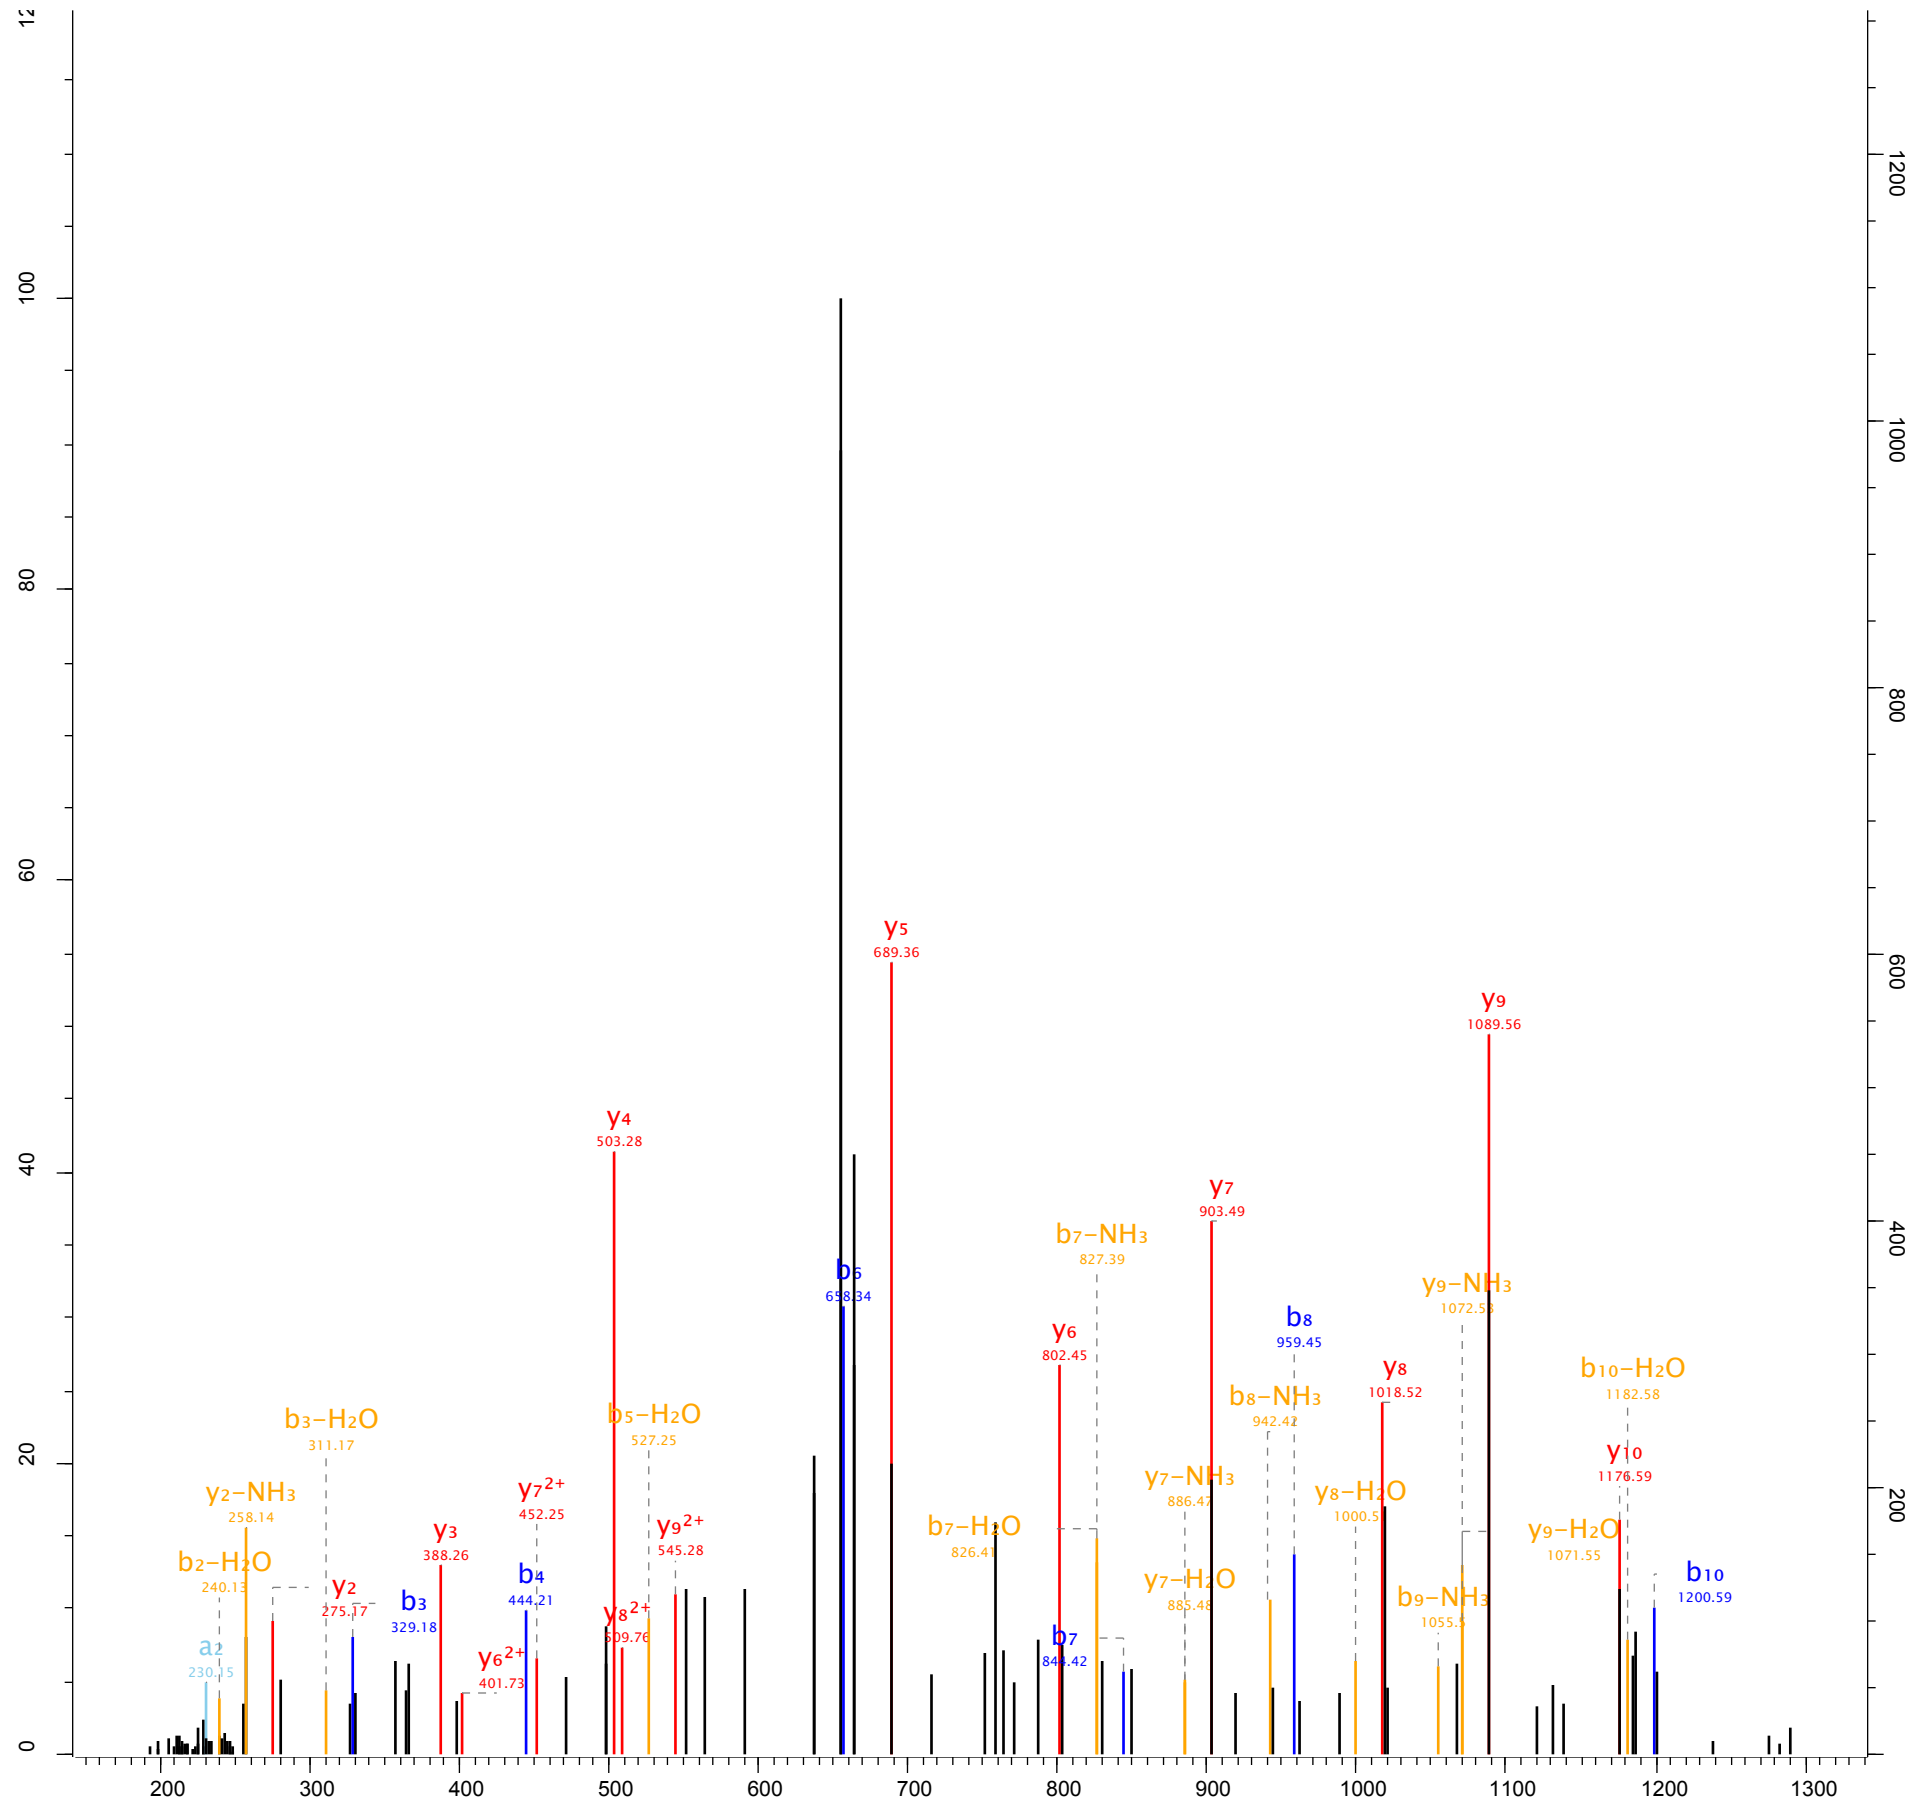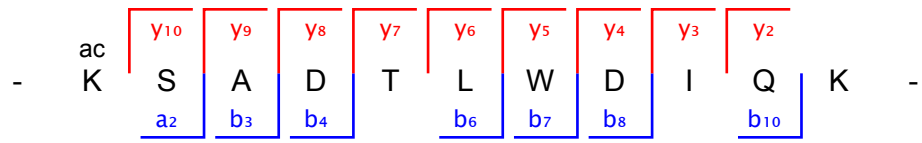

022714\_SCW\_II\_53\_5\_2ndZT

22161 ITMS; CID 99.75 693.86 Wdr1

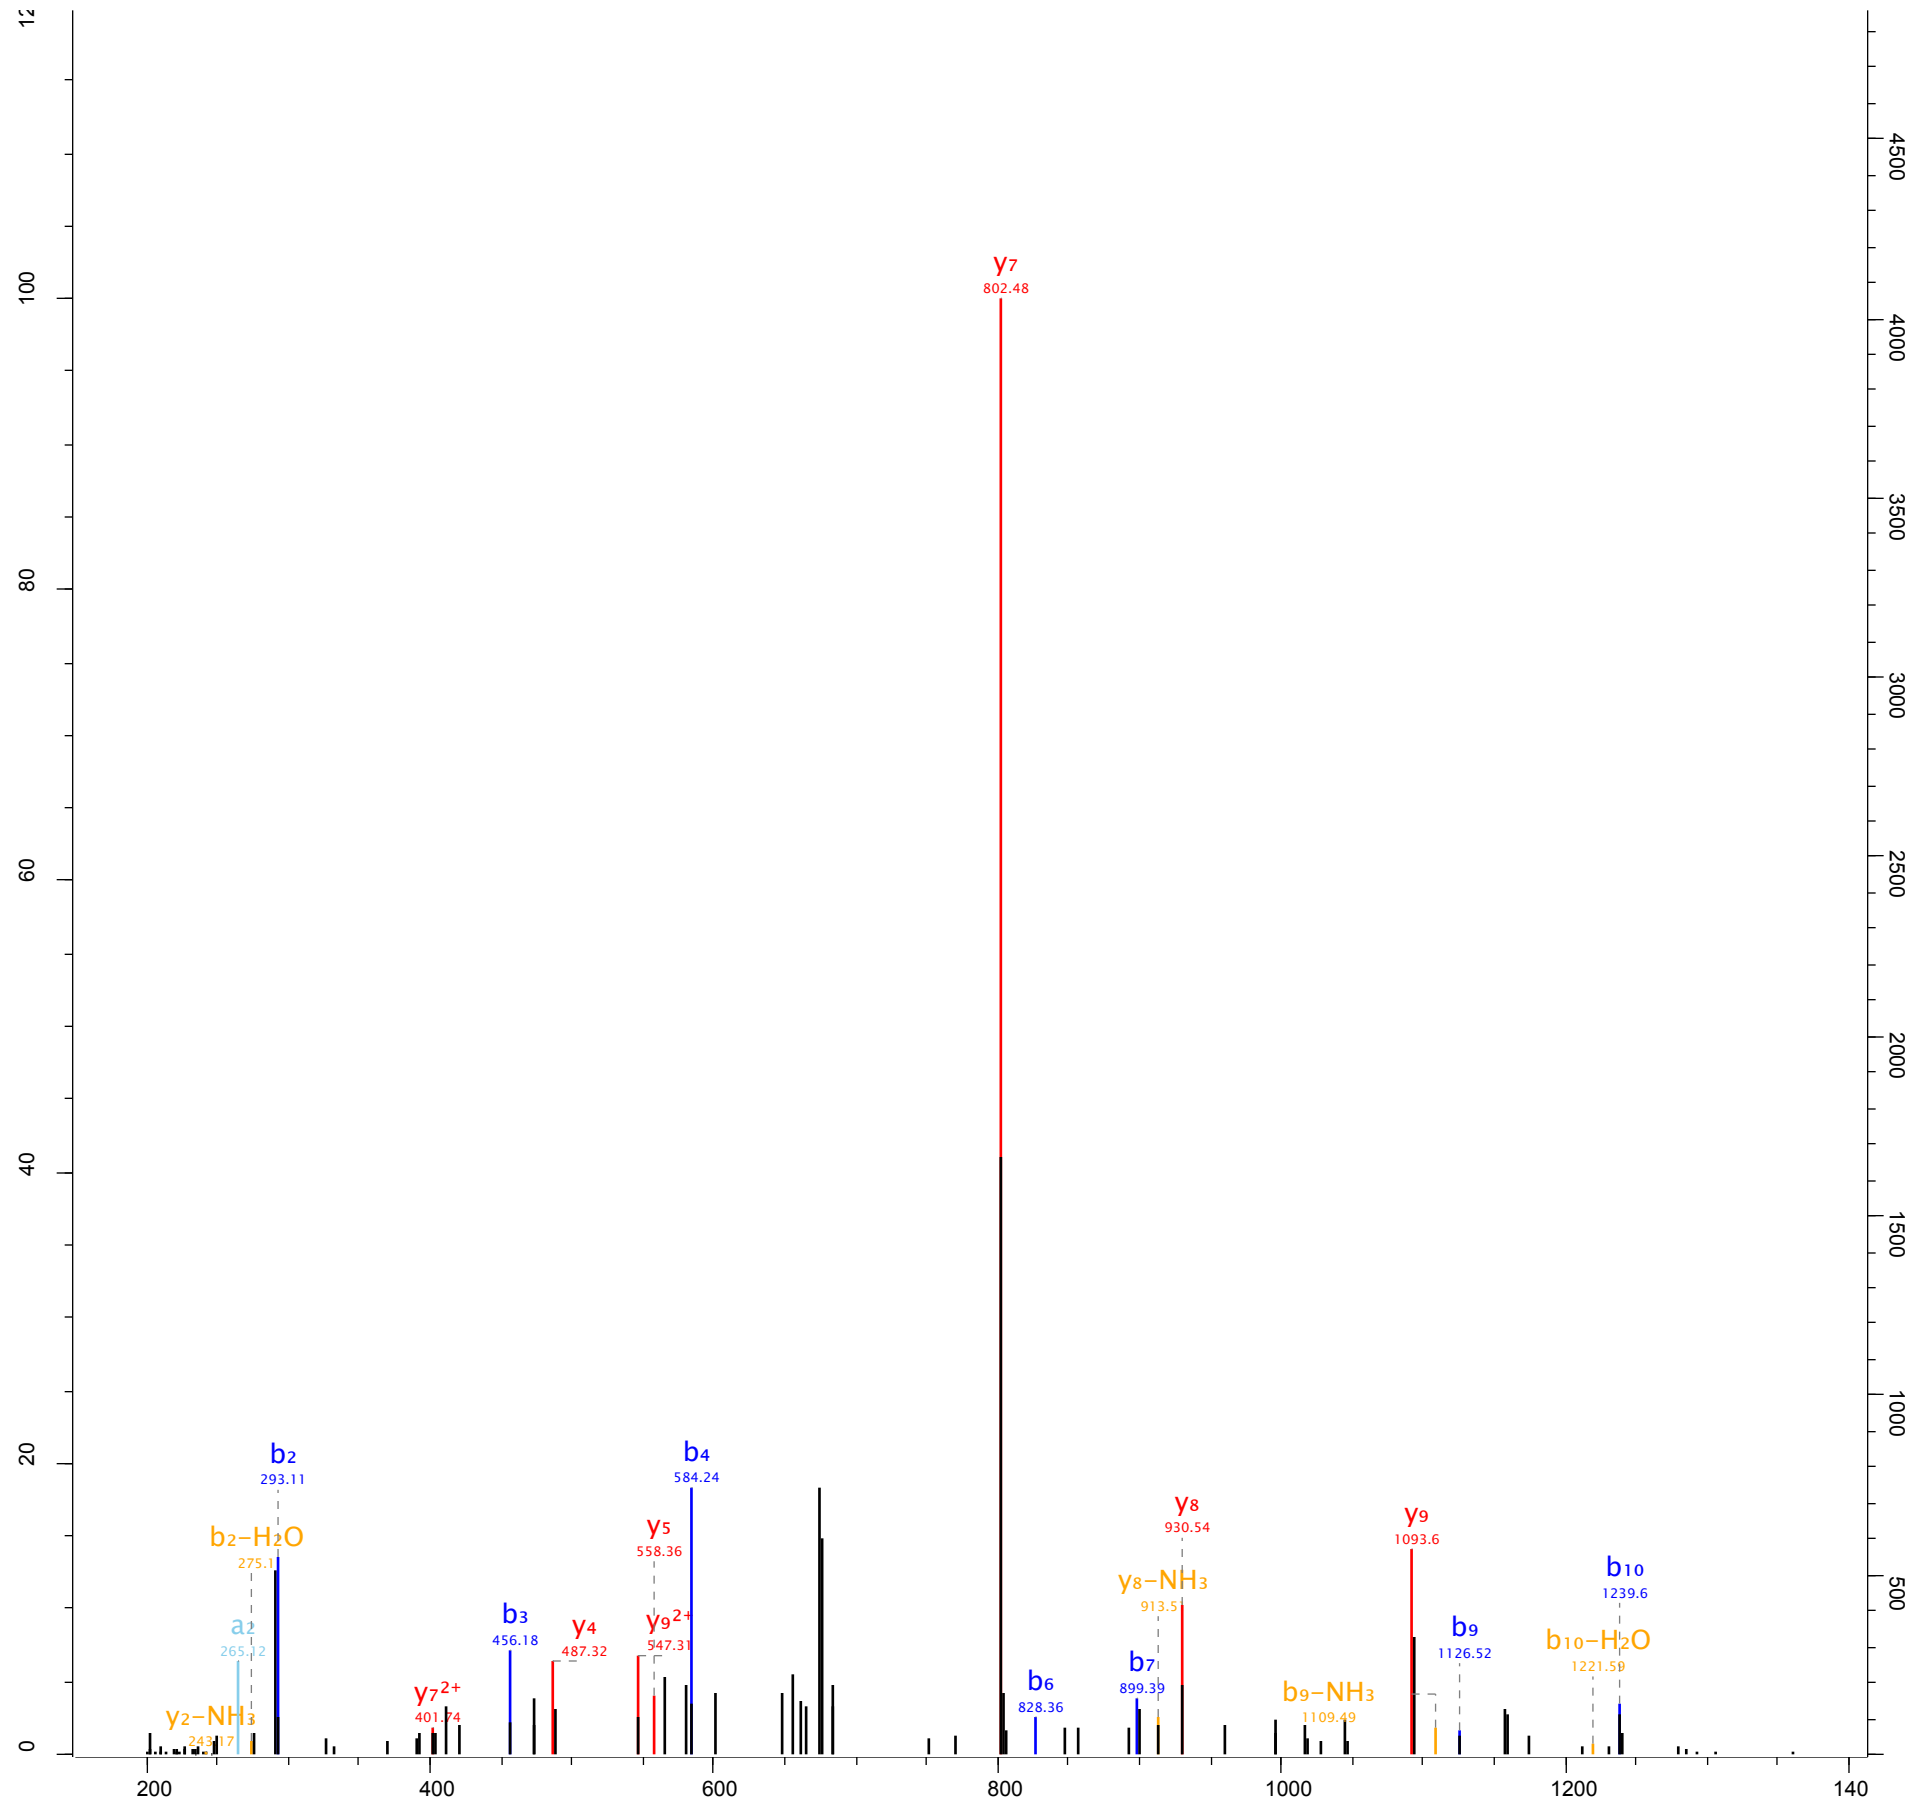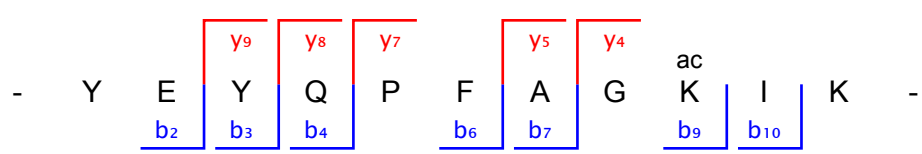

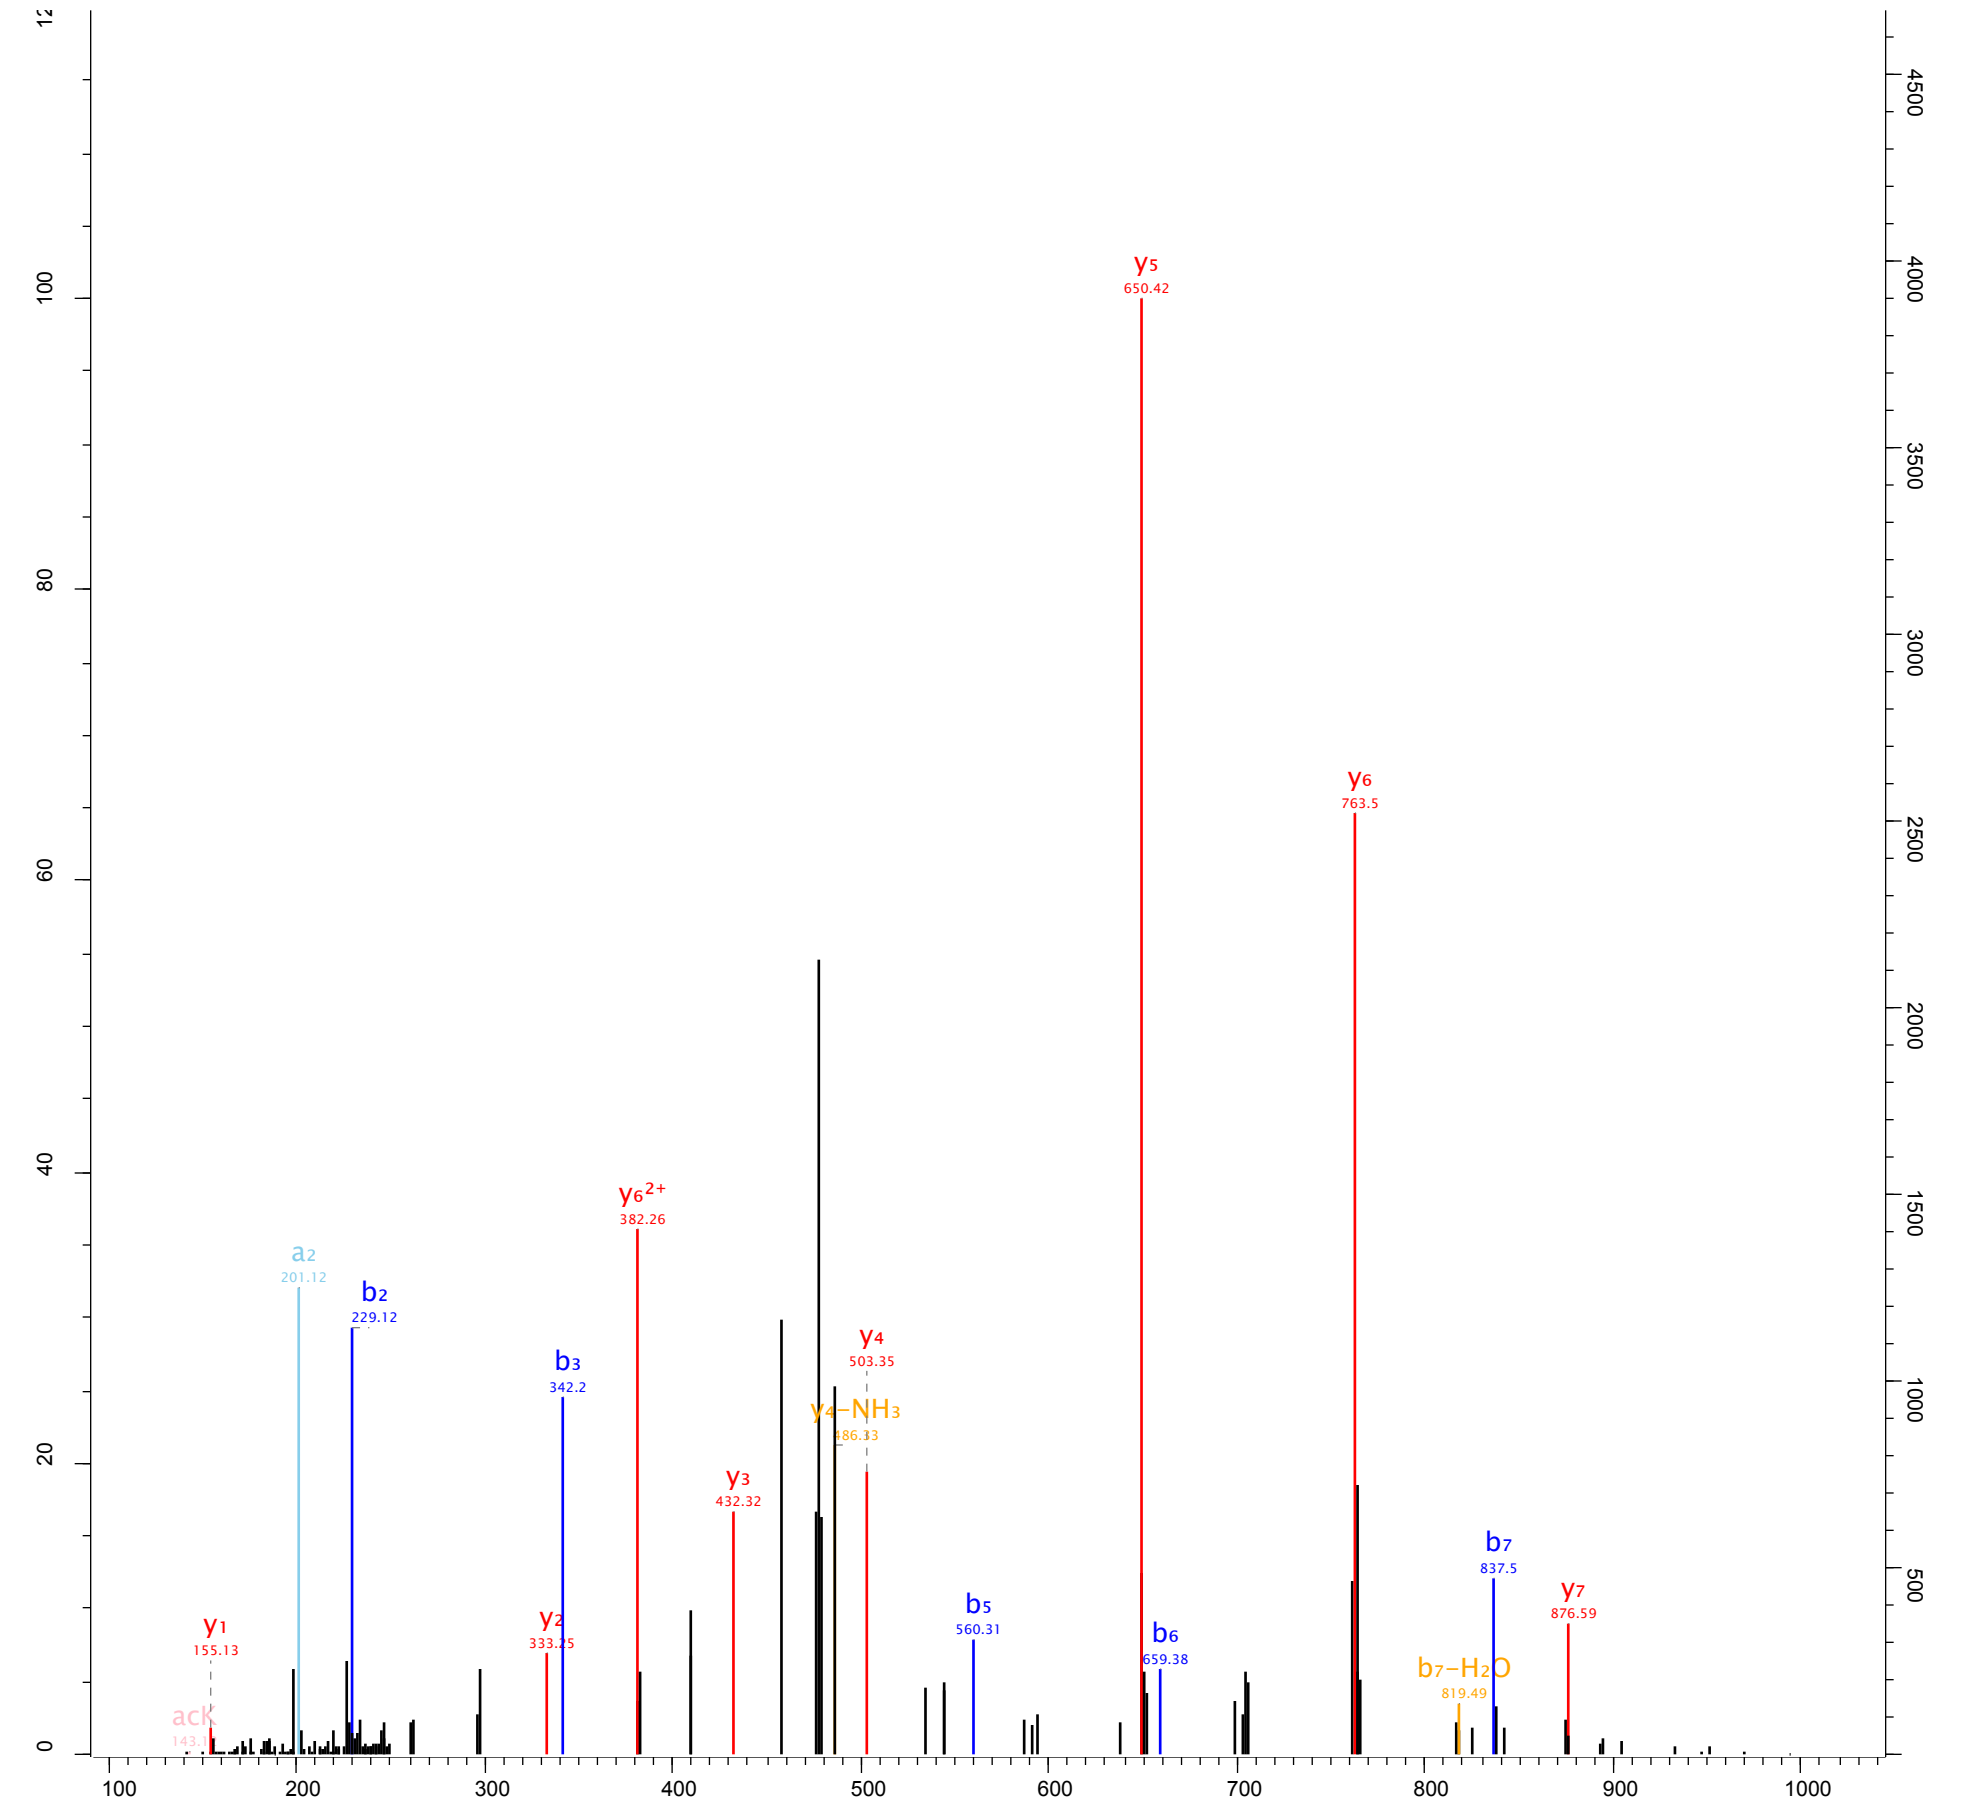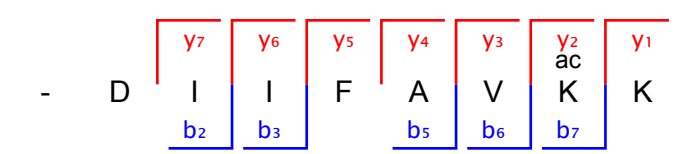

Raw file  
022714\_SCW\_II\_53\_5\_2ndZT

Scan 22281 Method ITMS; CID Score 184.44 m/z 687.32 Gene names Dync1h1

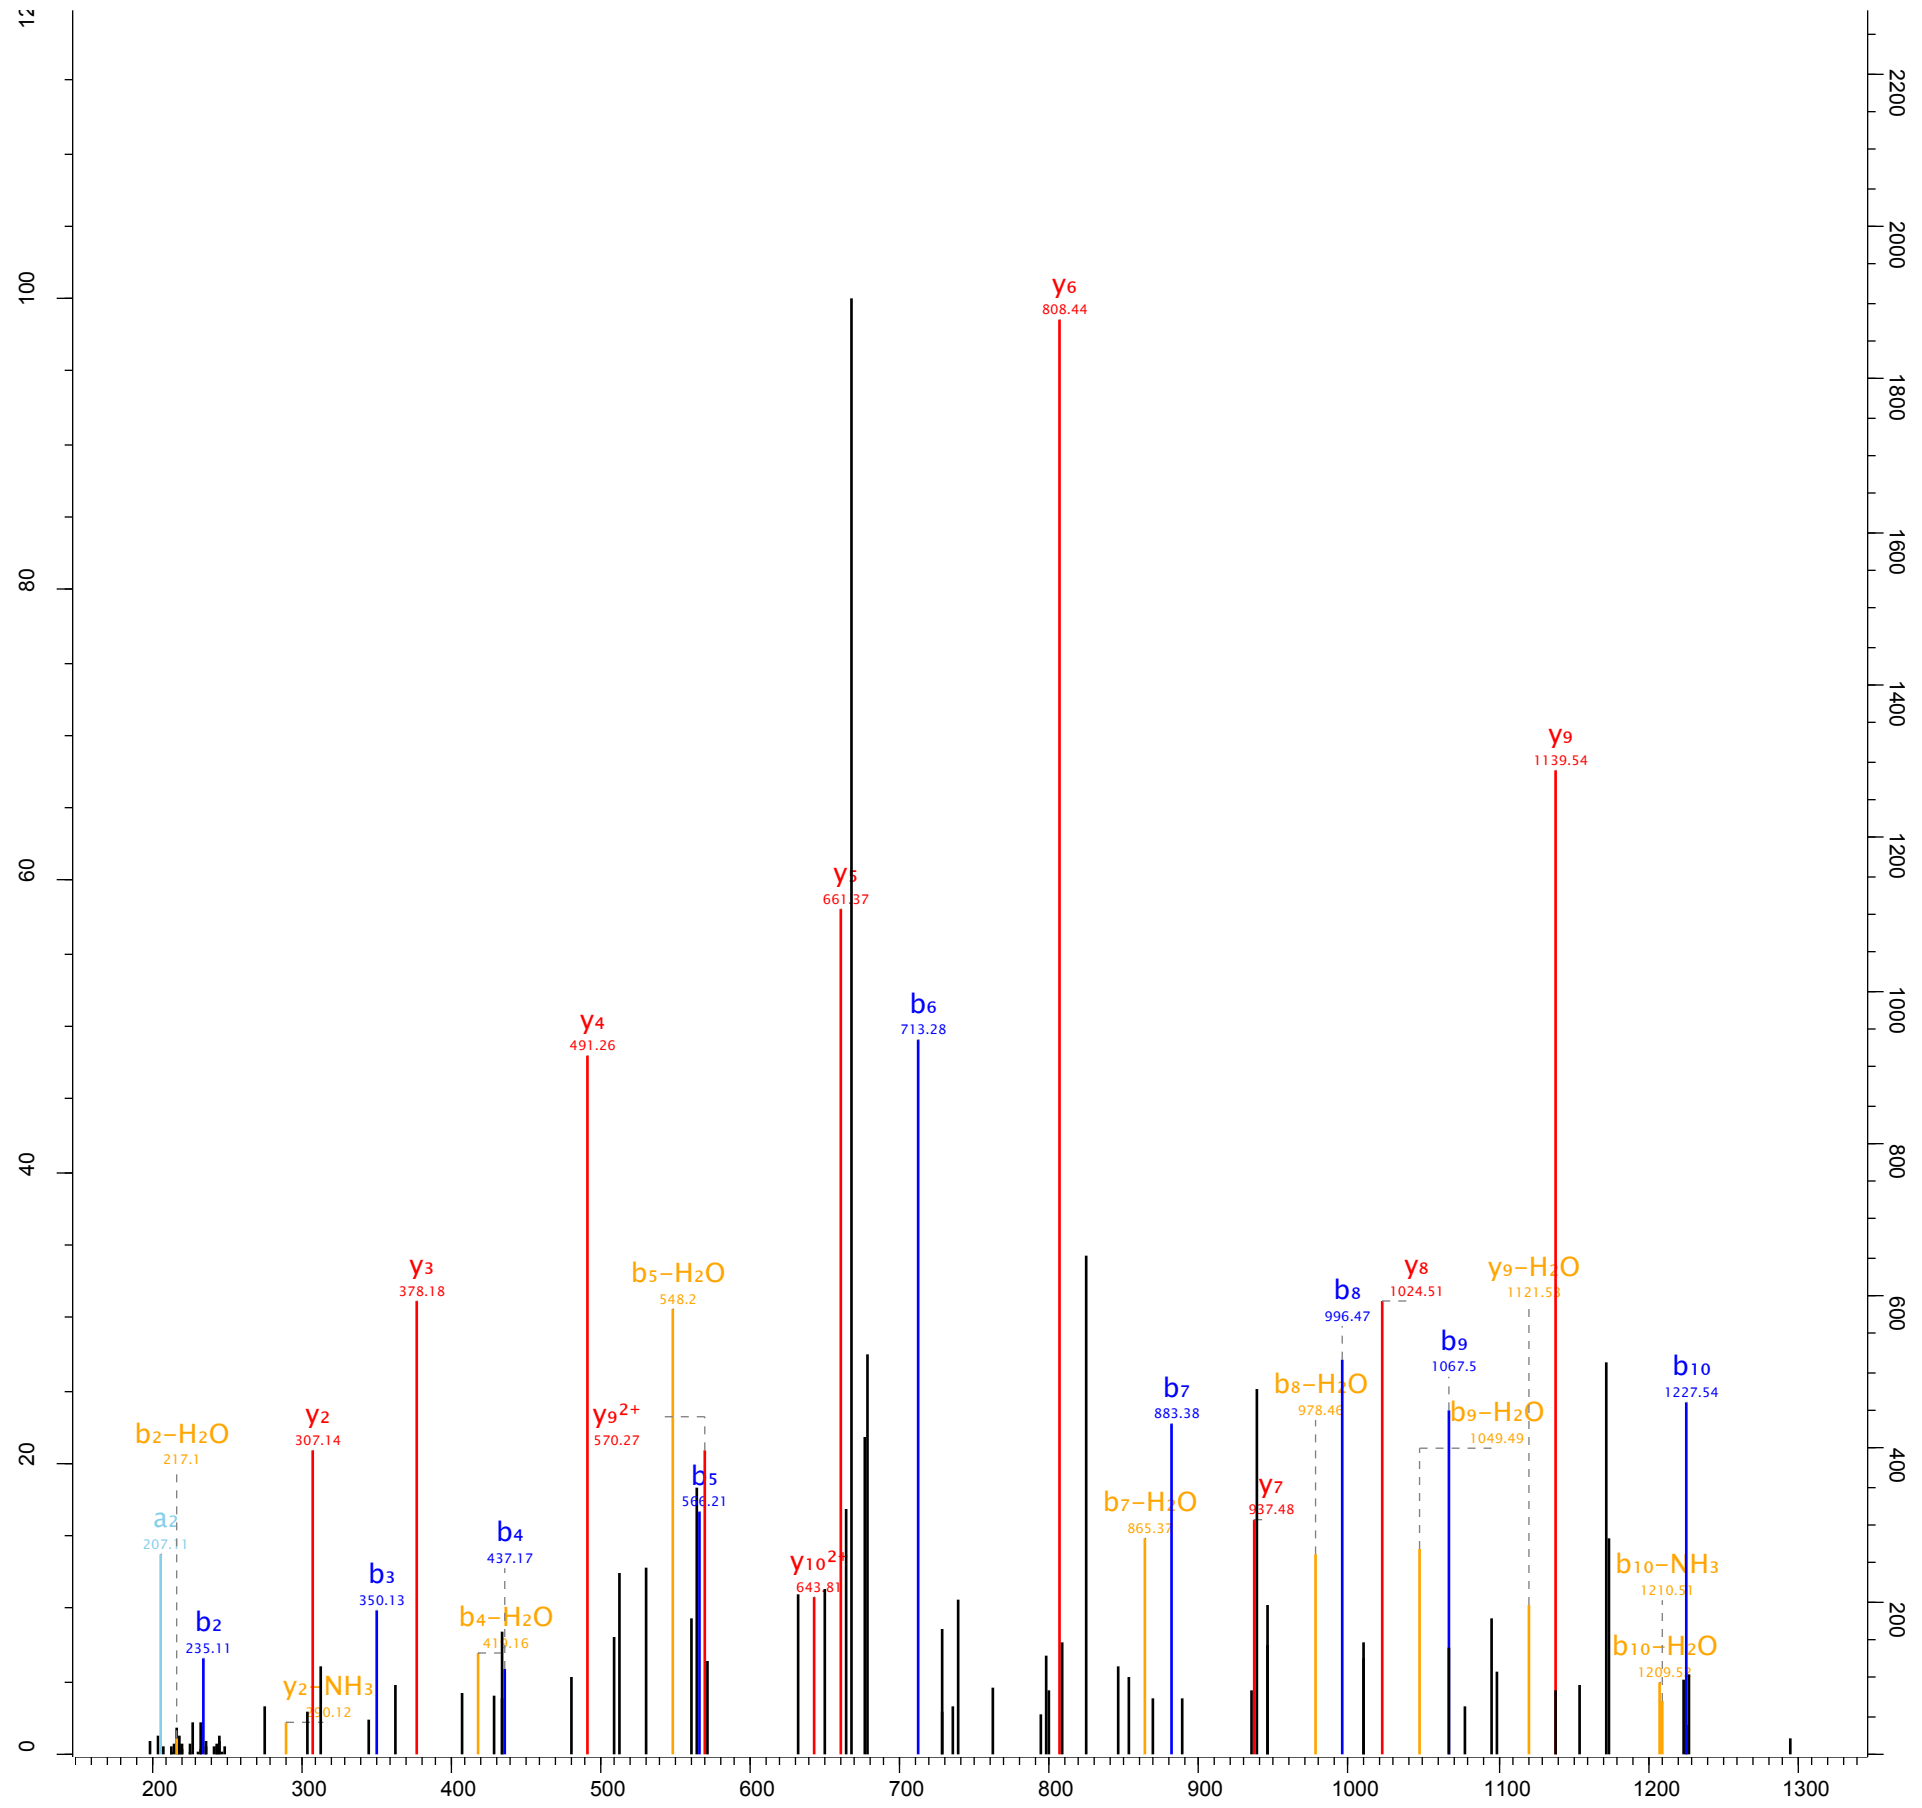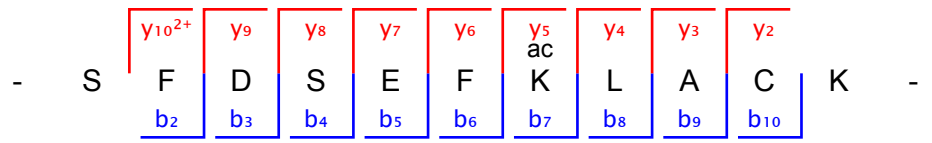

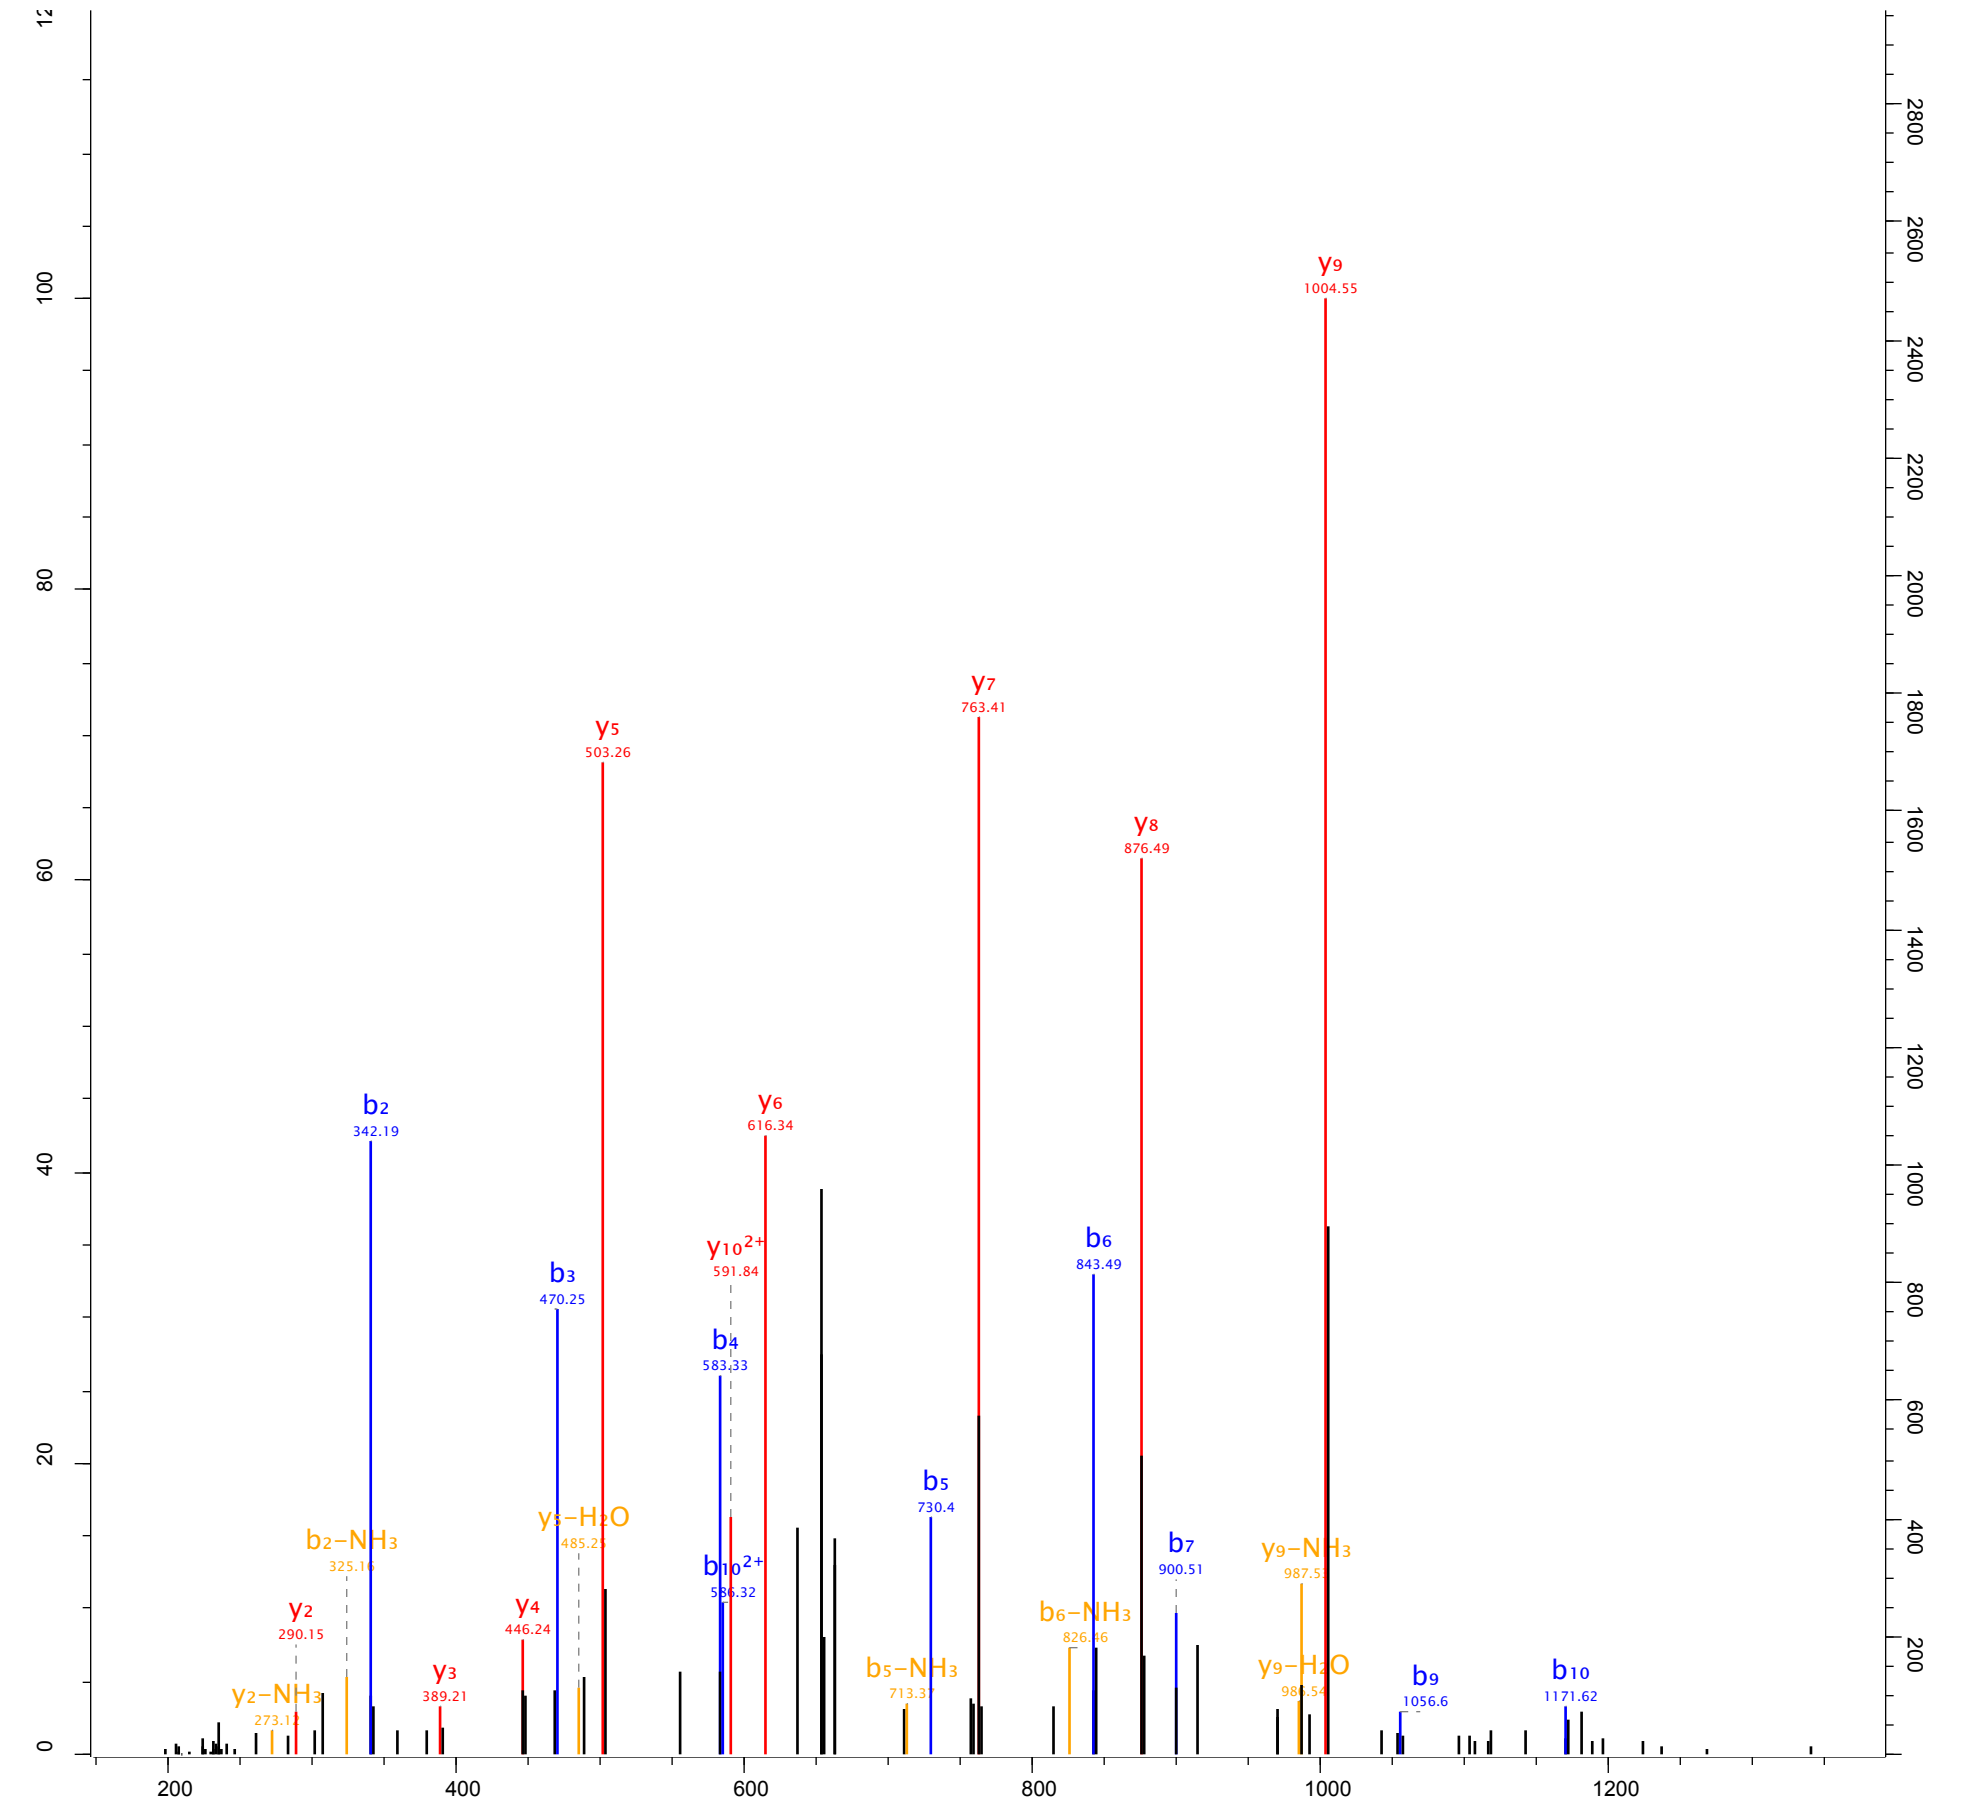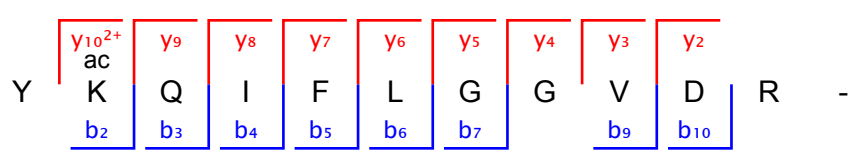

Raw file 022714\_SCW\_II\_53\_6\_2ndZT Scan 14662 Method ITMS; CID Score 182.92 m/z 570.77 Gene names Gpi;Gpi1

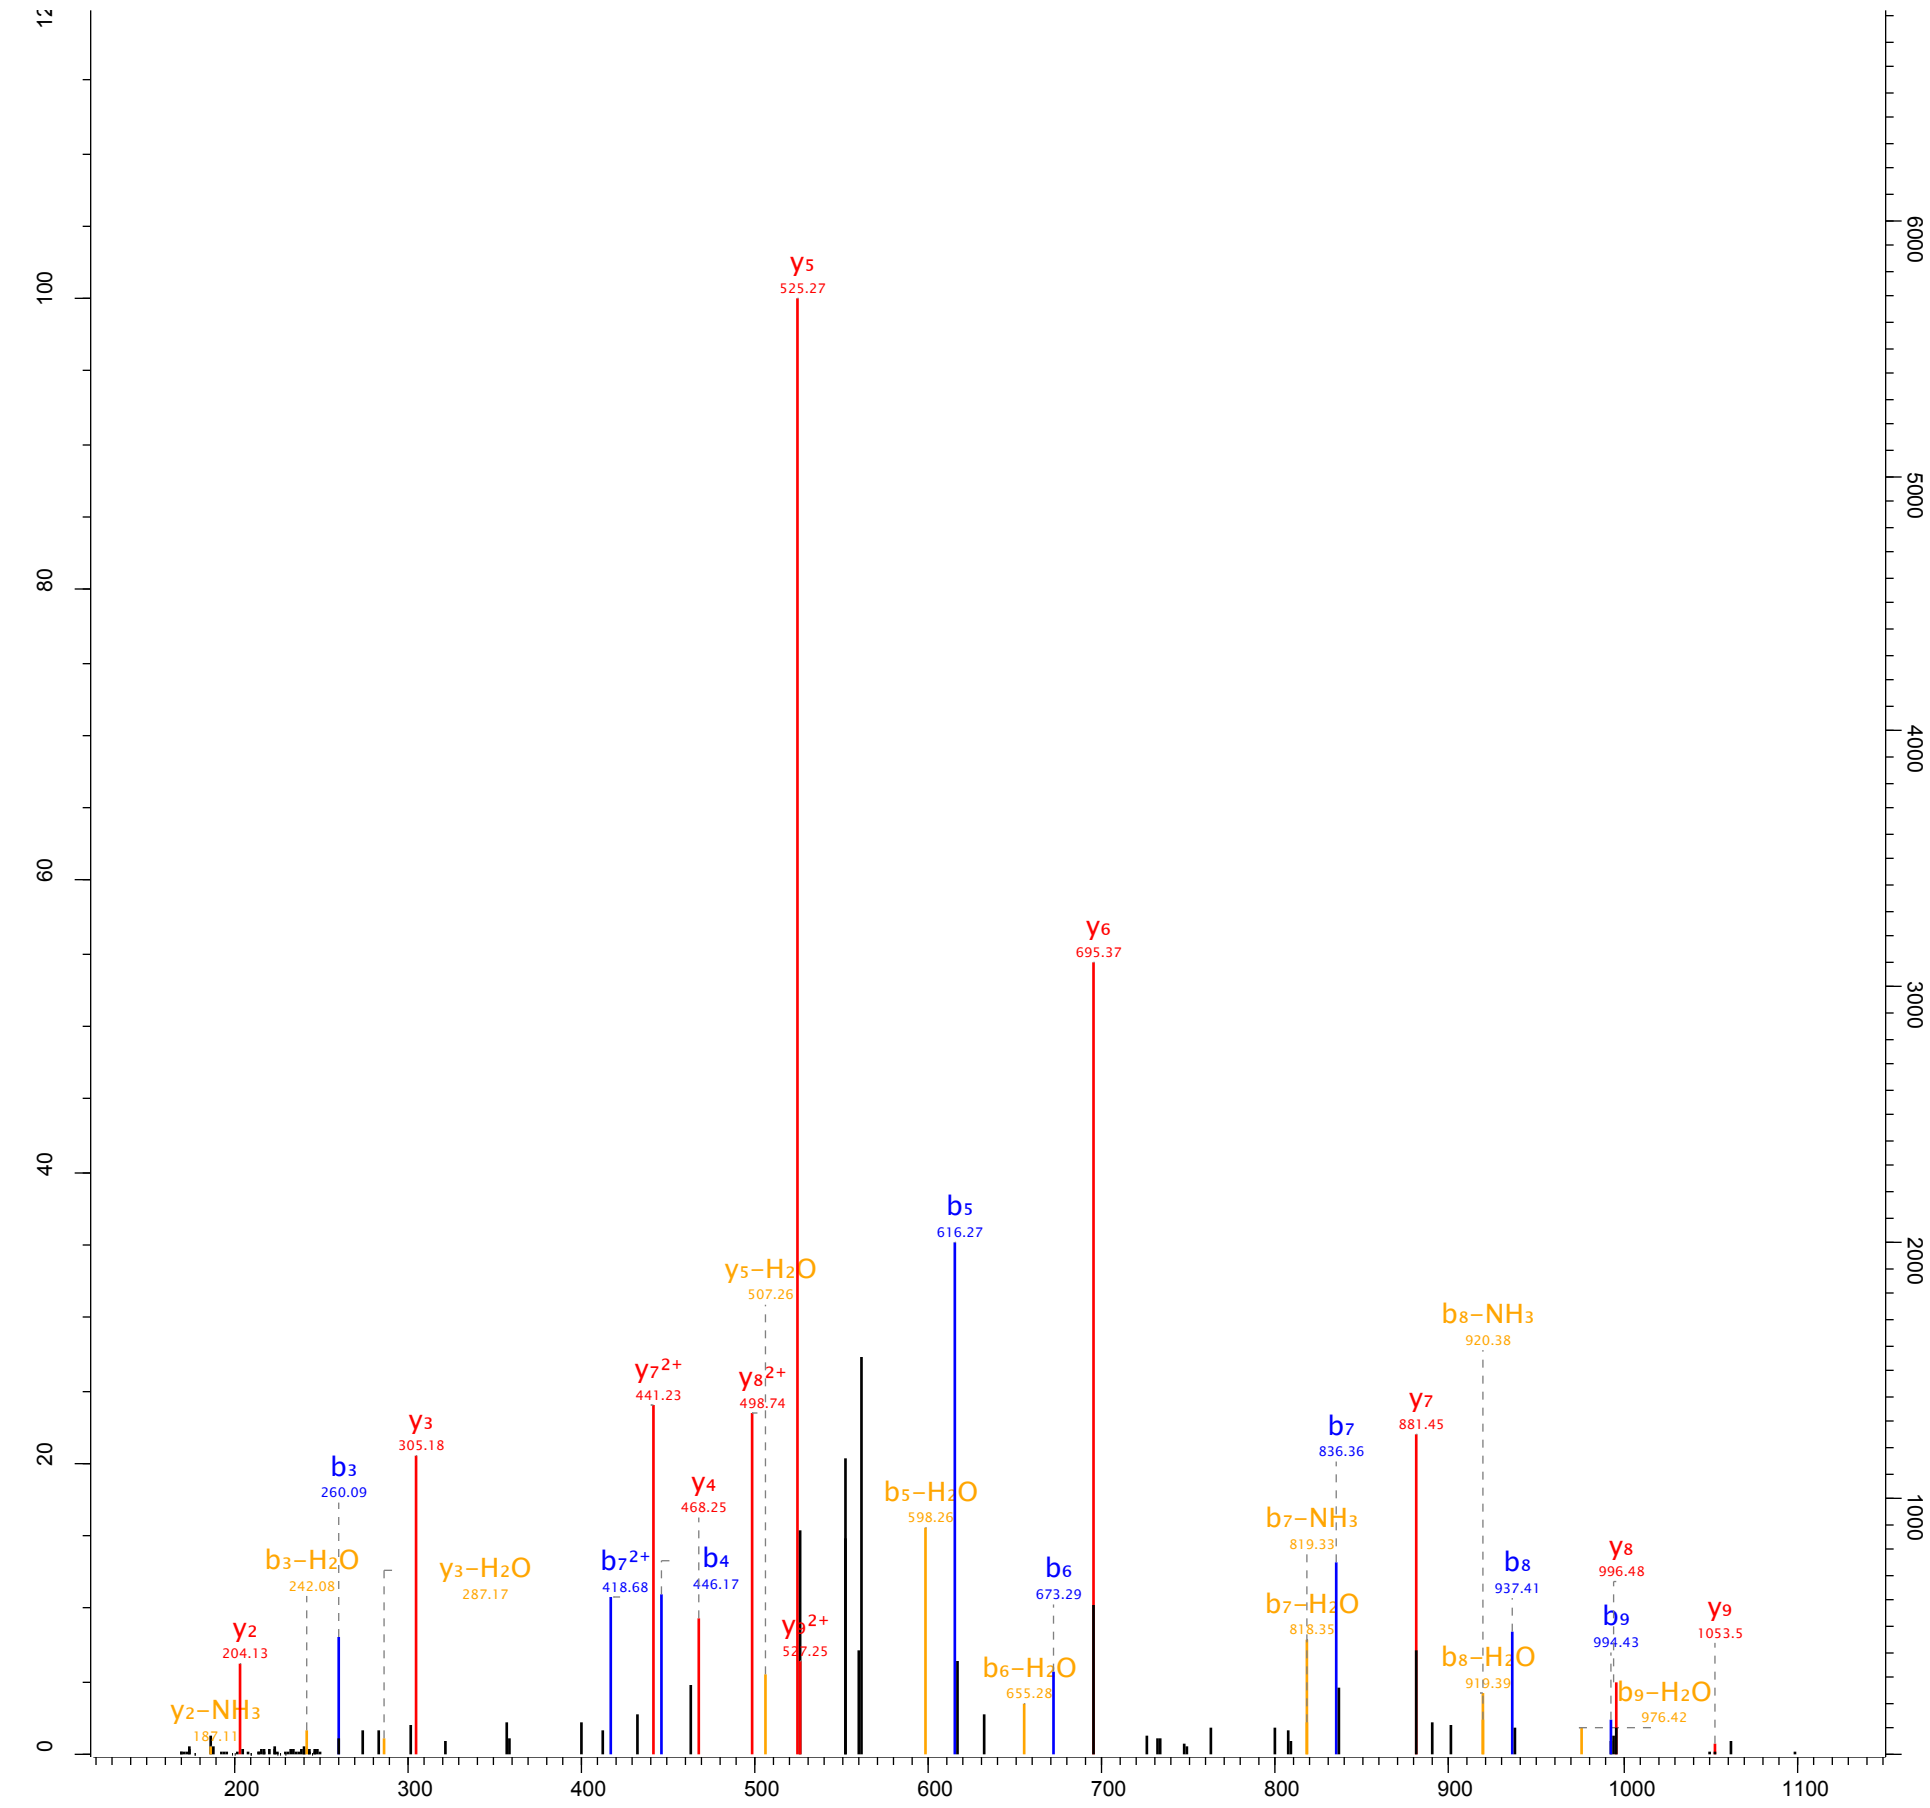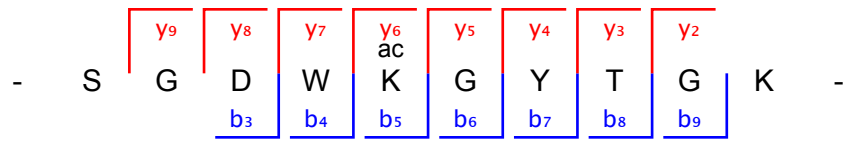

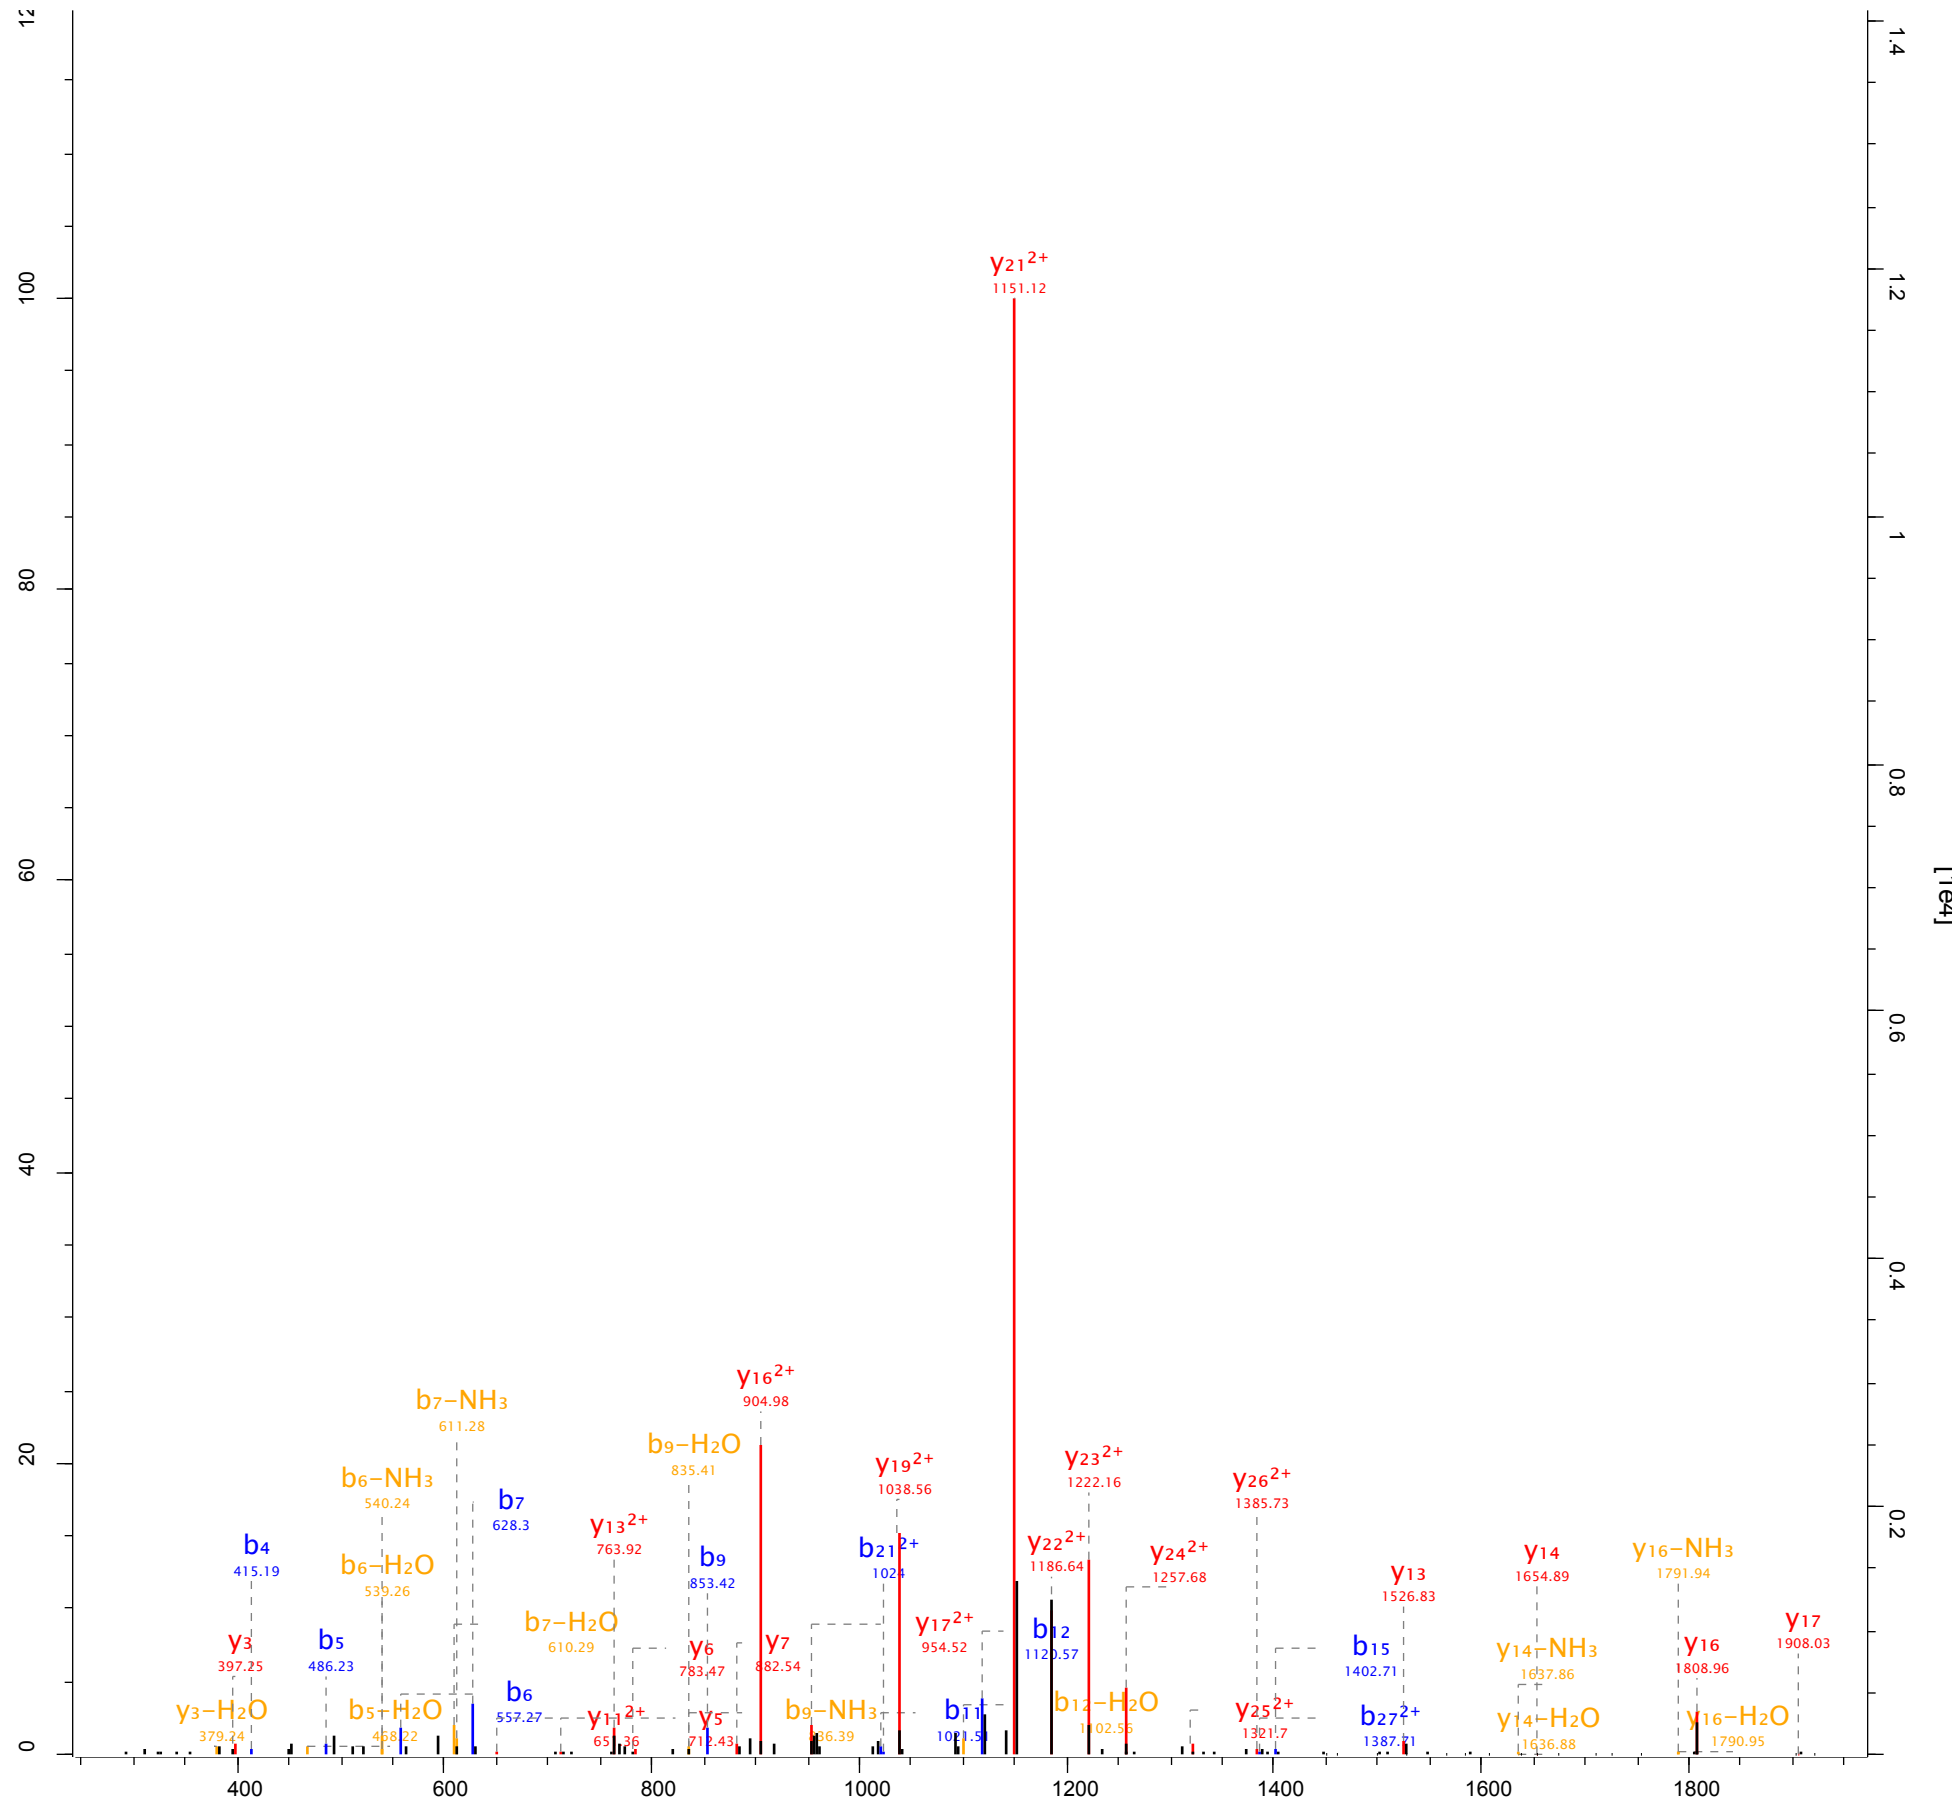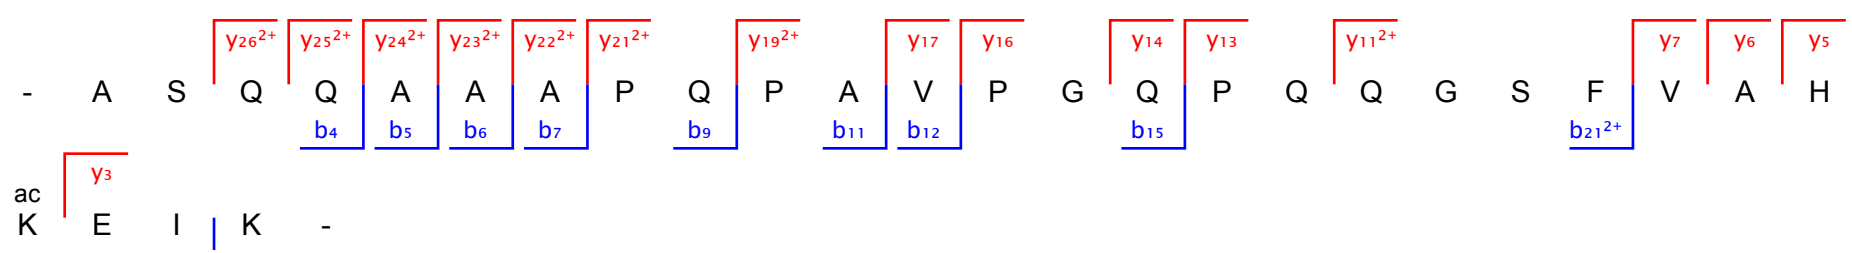

ac K E I K -

022714\_SCW\_II\_53\_6\_2ndZT

19711

ITMS; CID

110.7

1166.22

Dido1

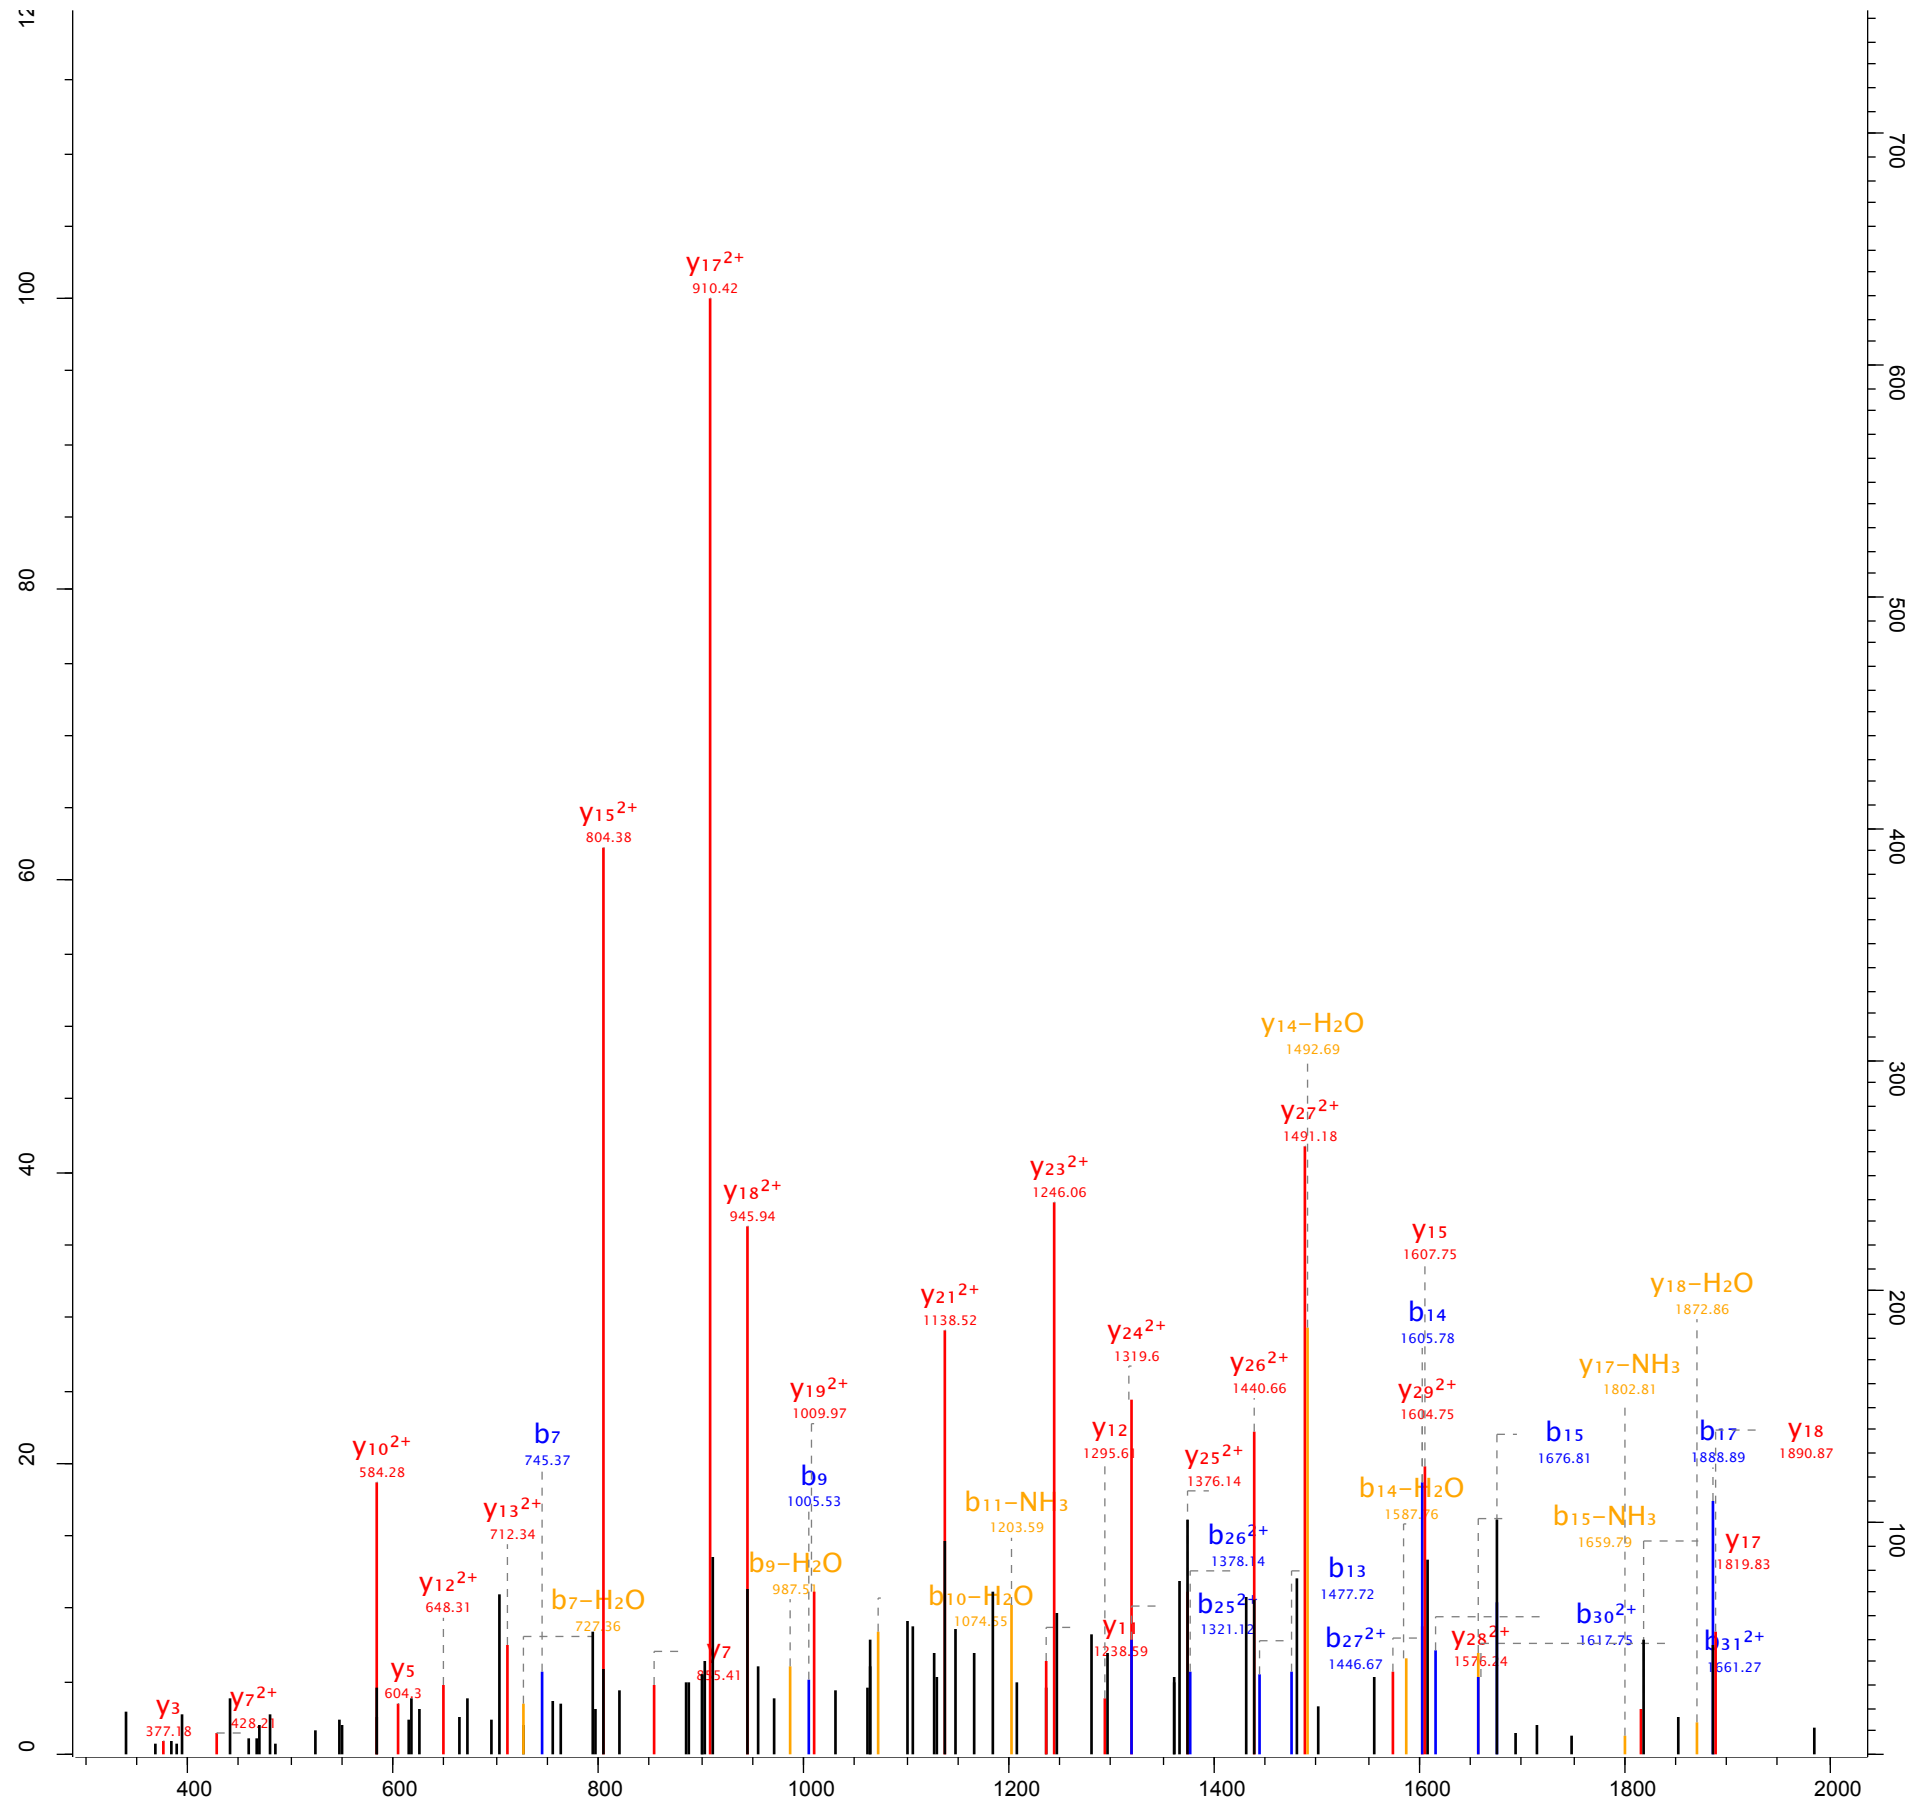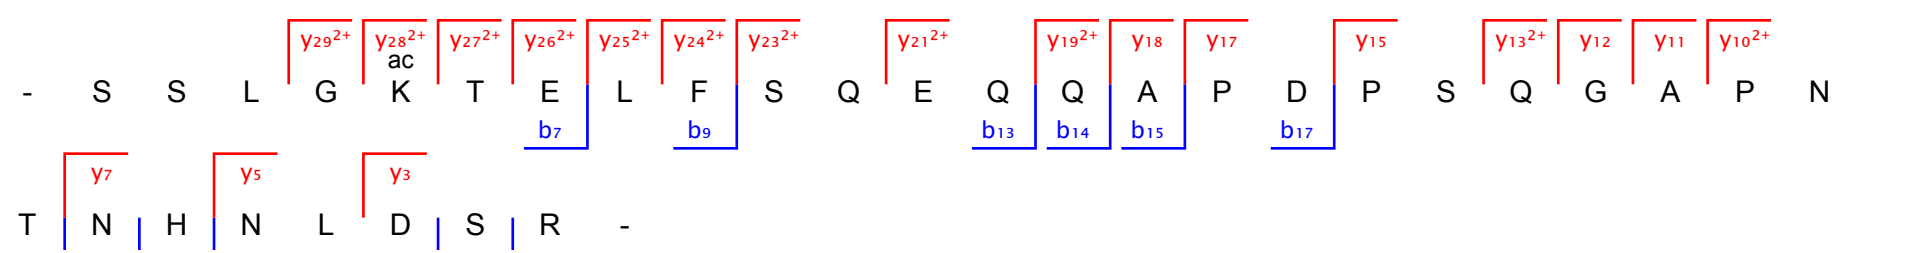



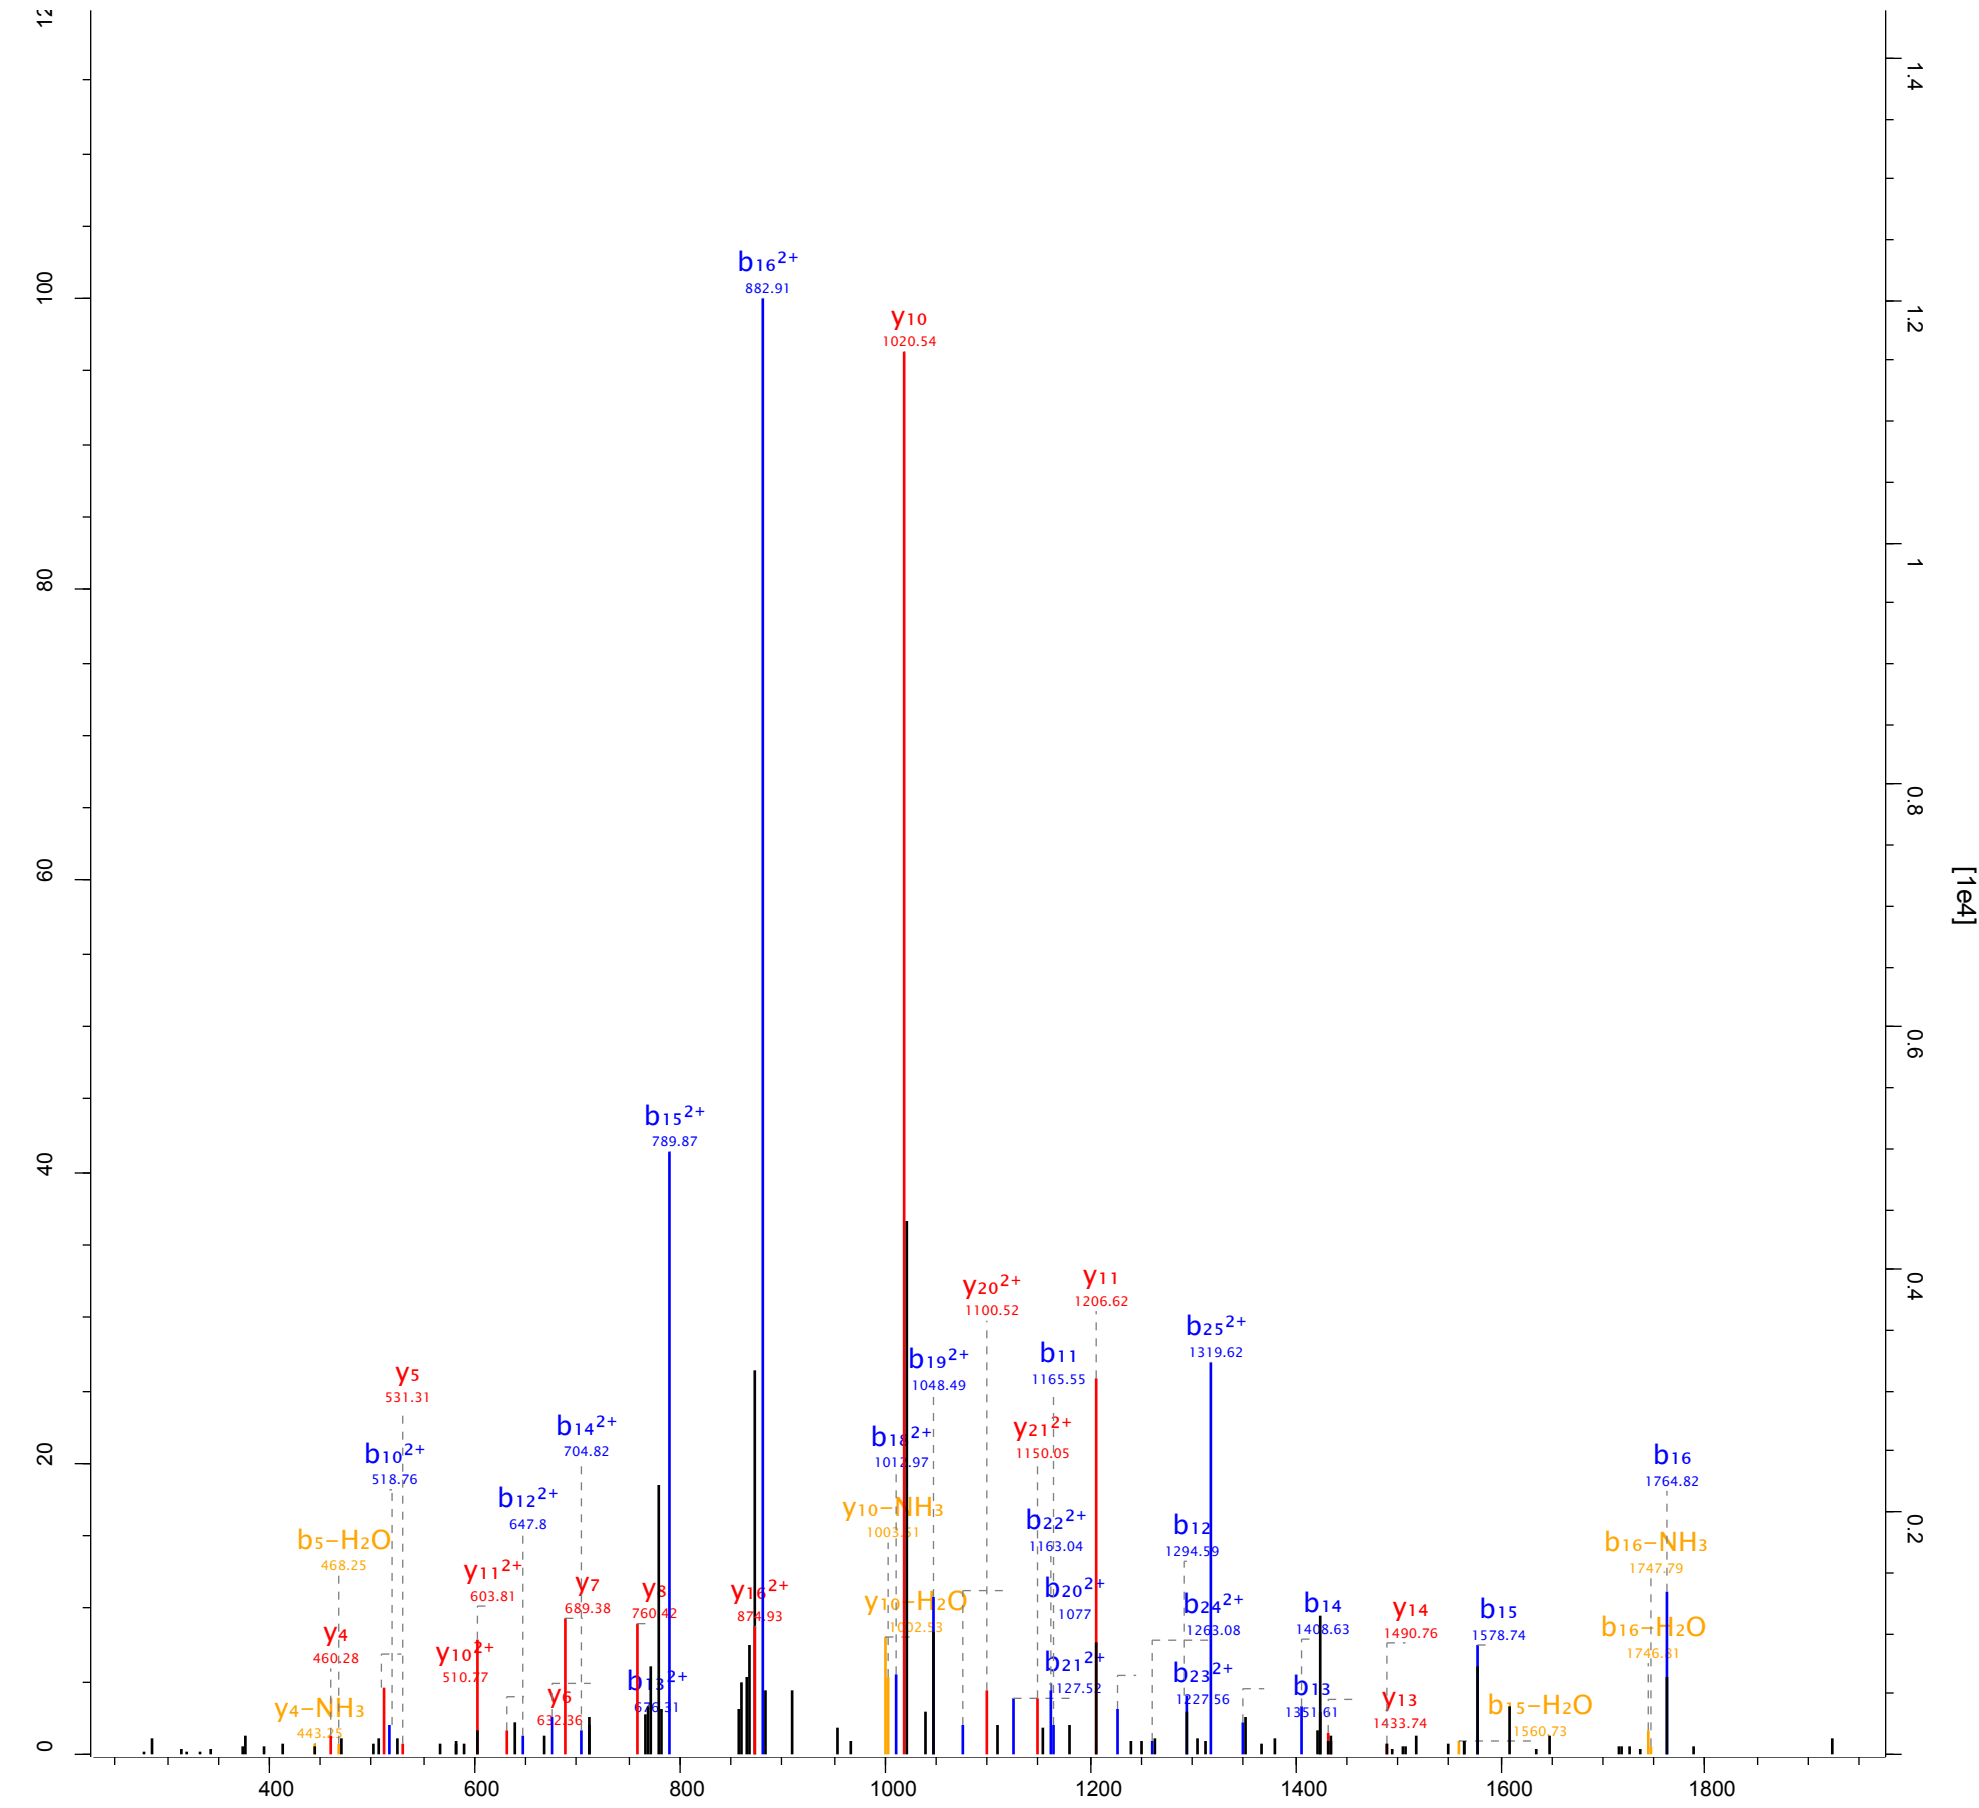

- G V E V T V G H E Q E G G K W P Y A G T A E A  
b10^2+ b11 b12 b13 b14 b15 b16 b18^2+ b19^2+ b20^2+ b21^2+ b22^2+ b23^2+ b24^2+  
 I | K -

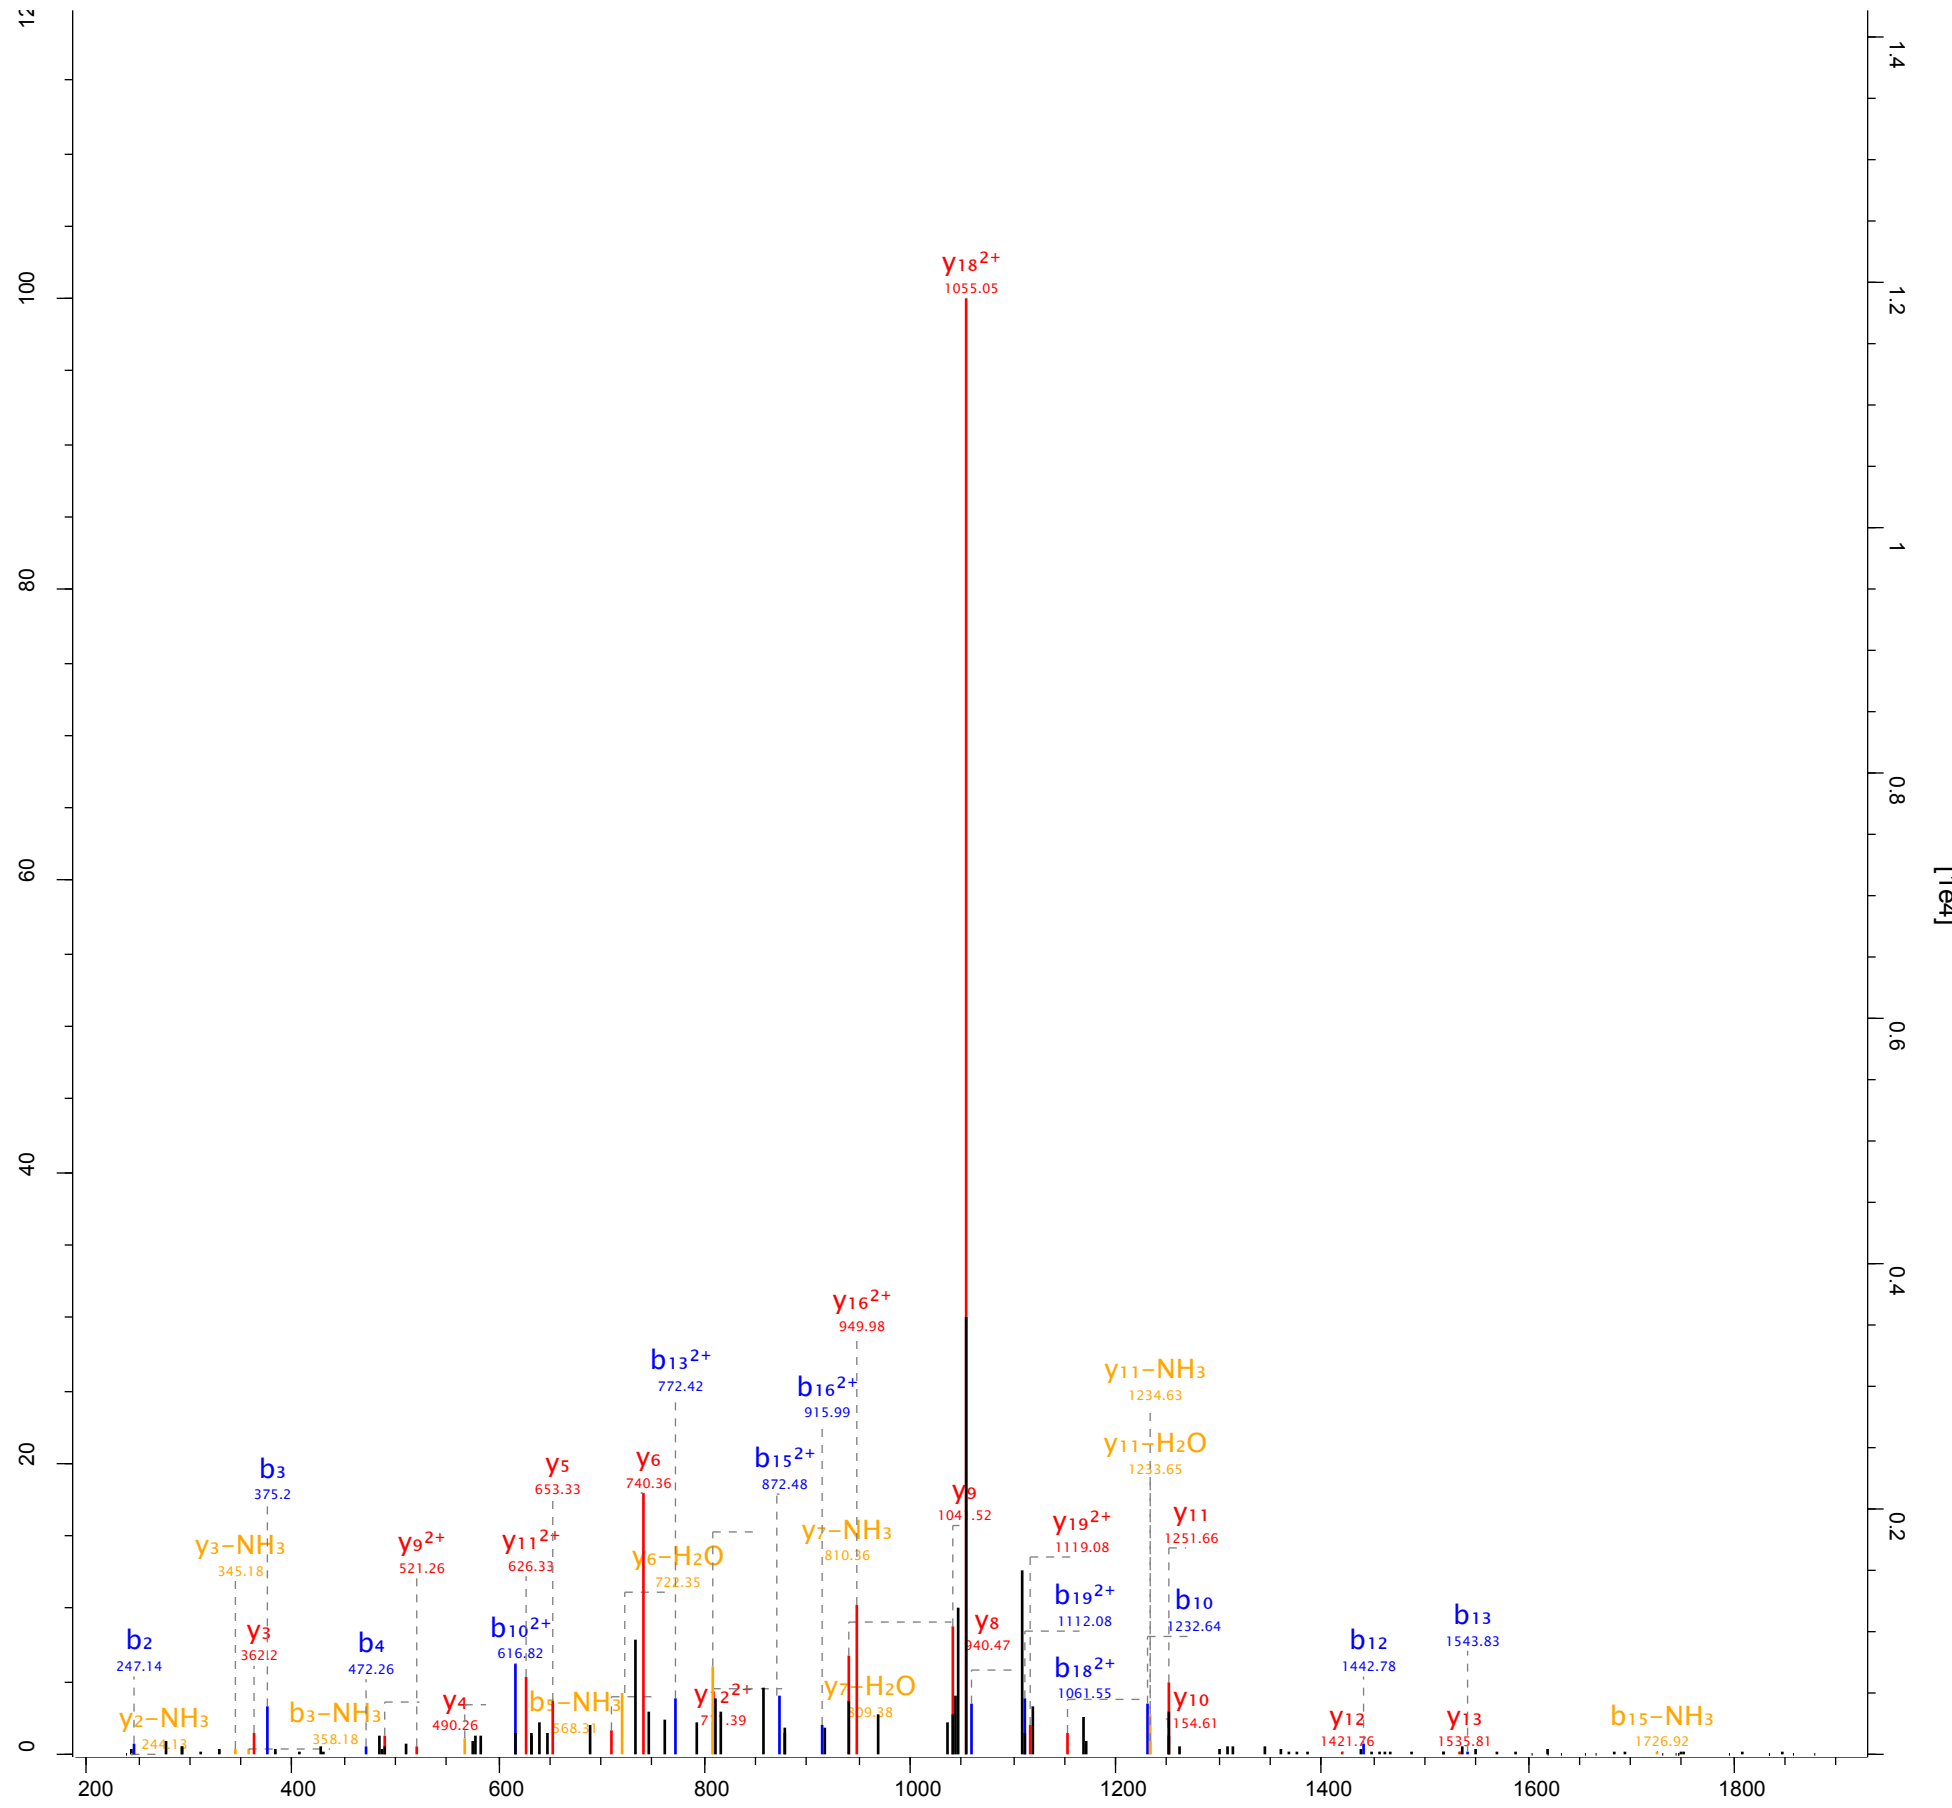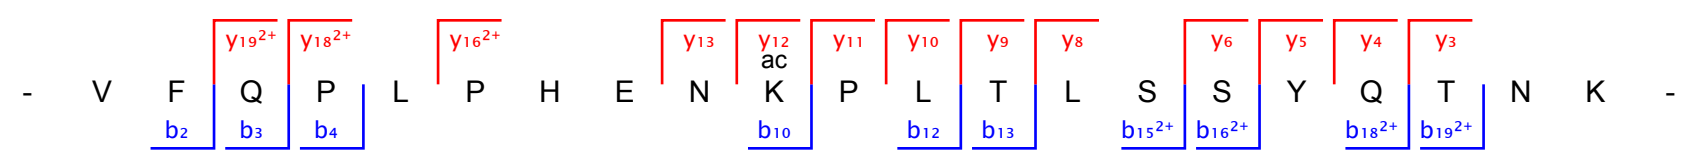

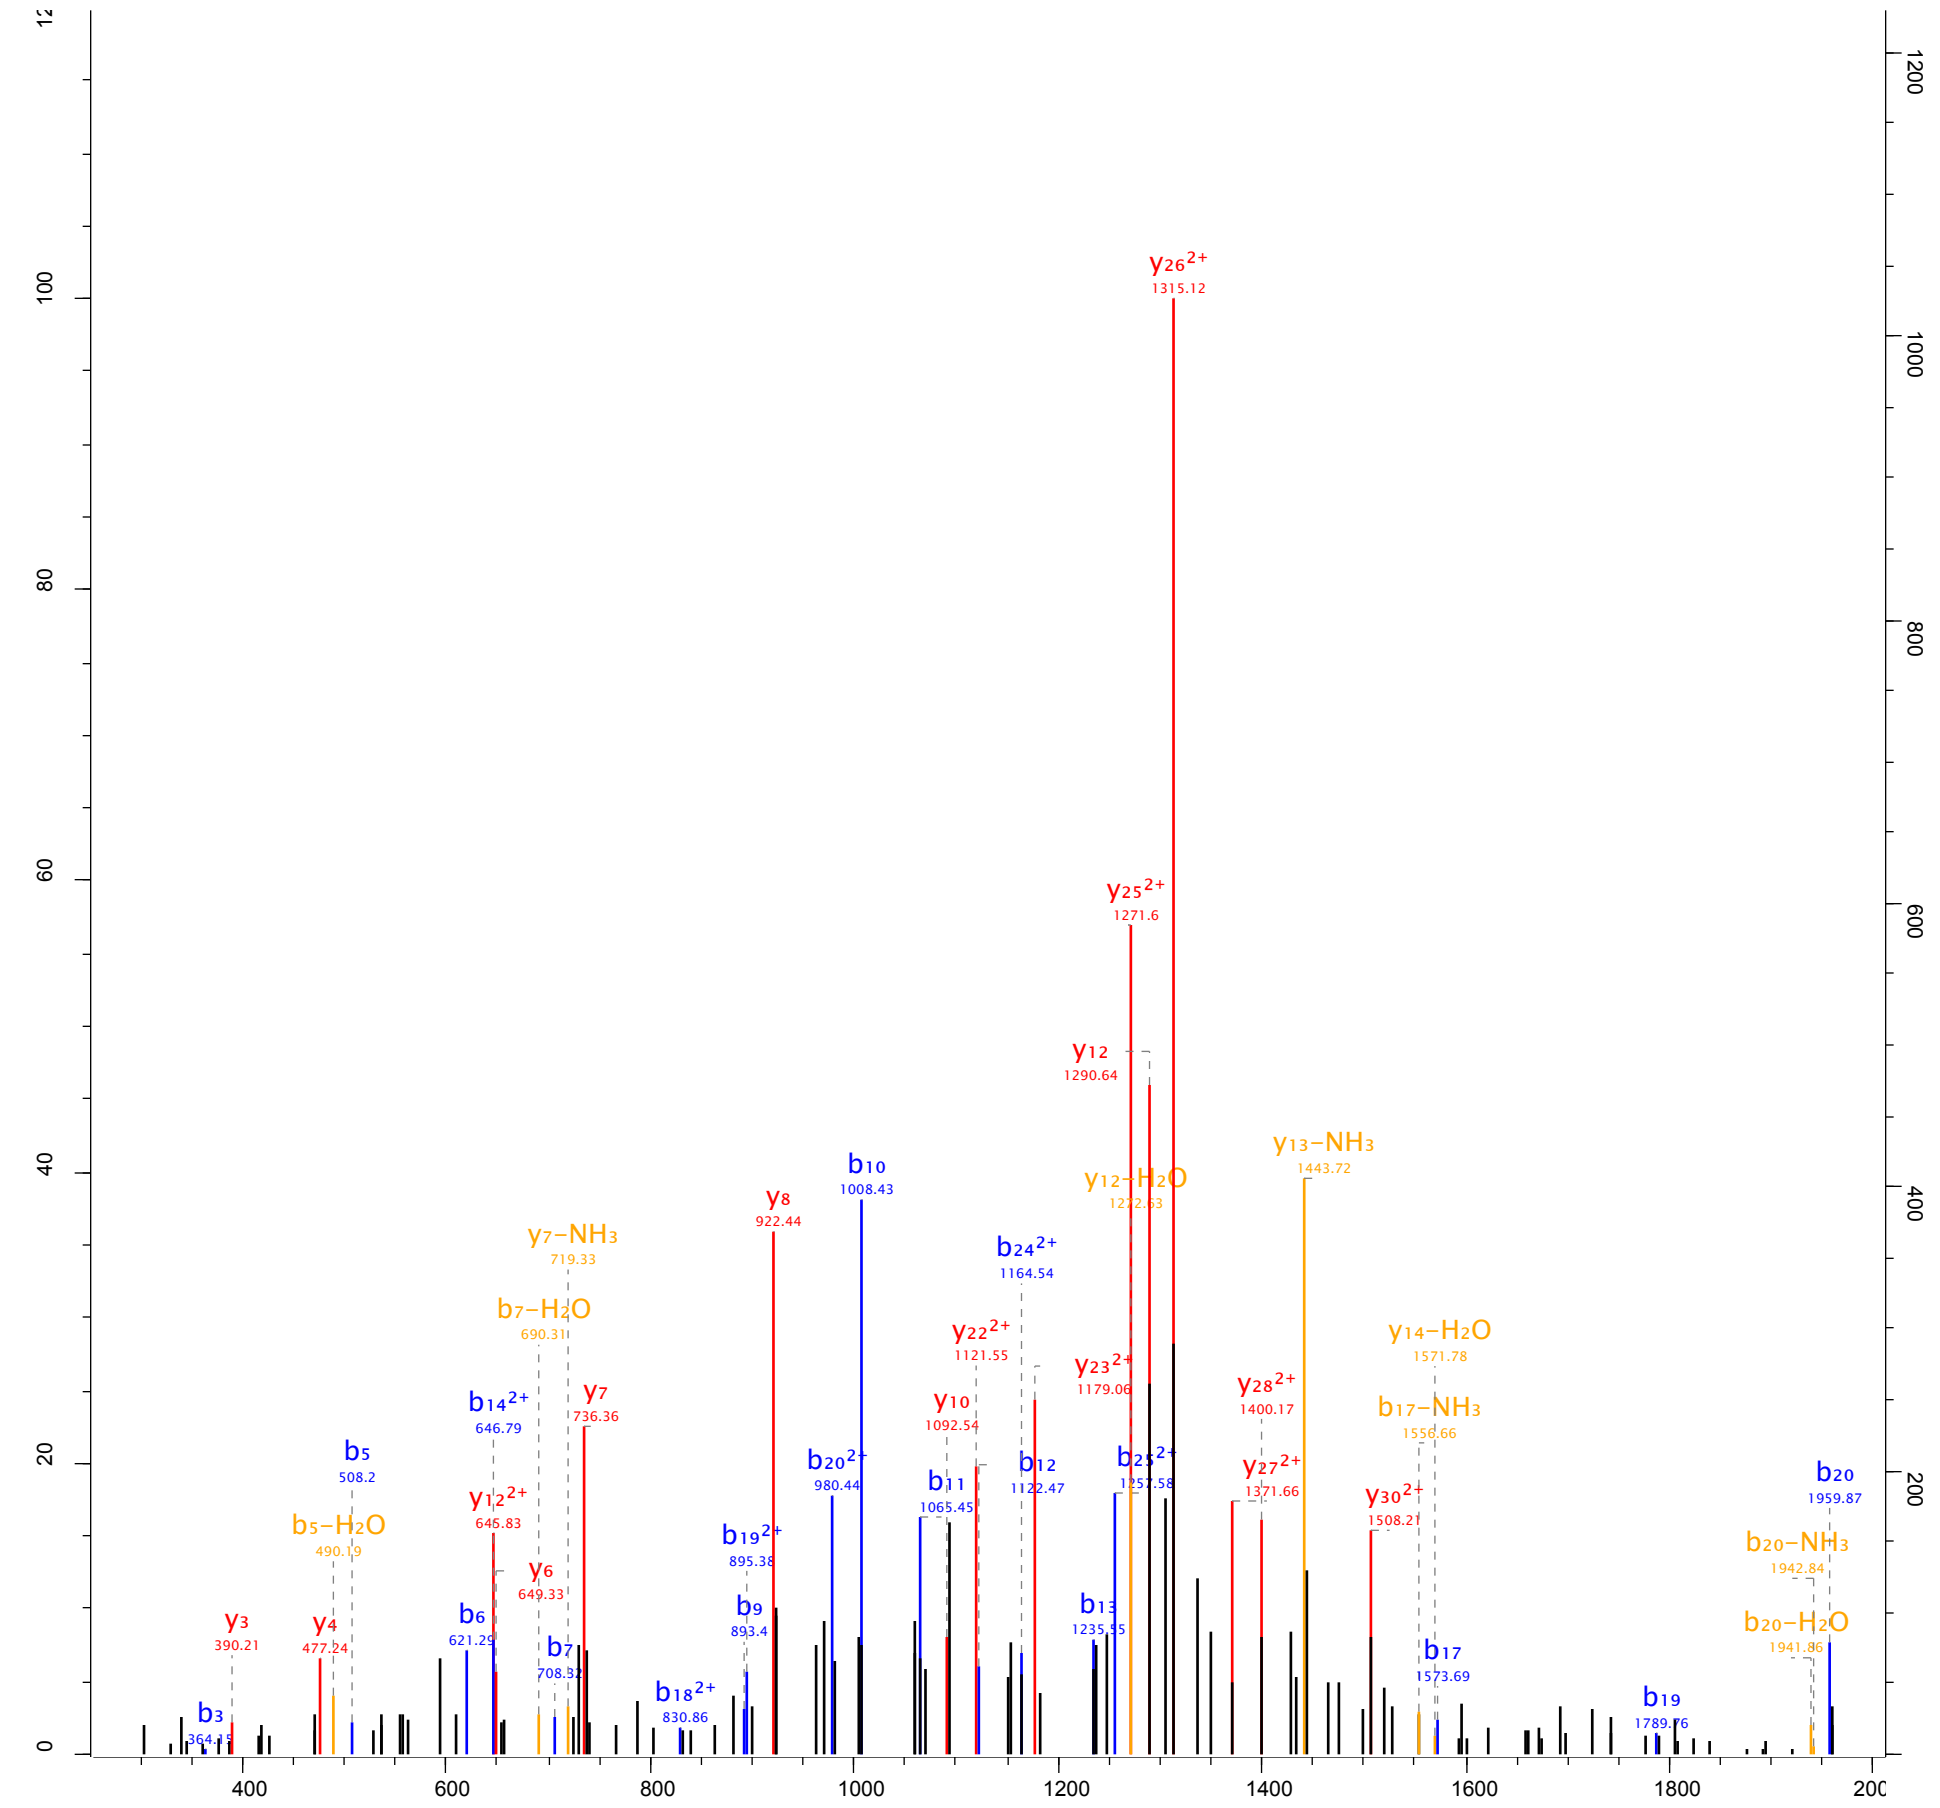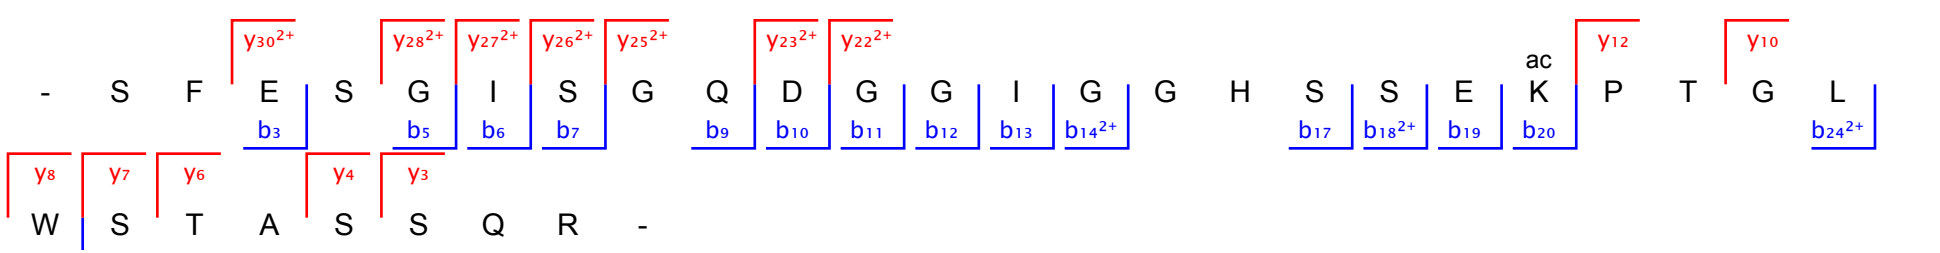

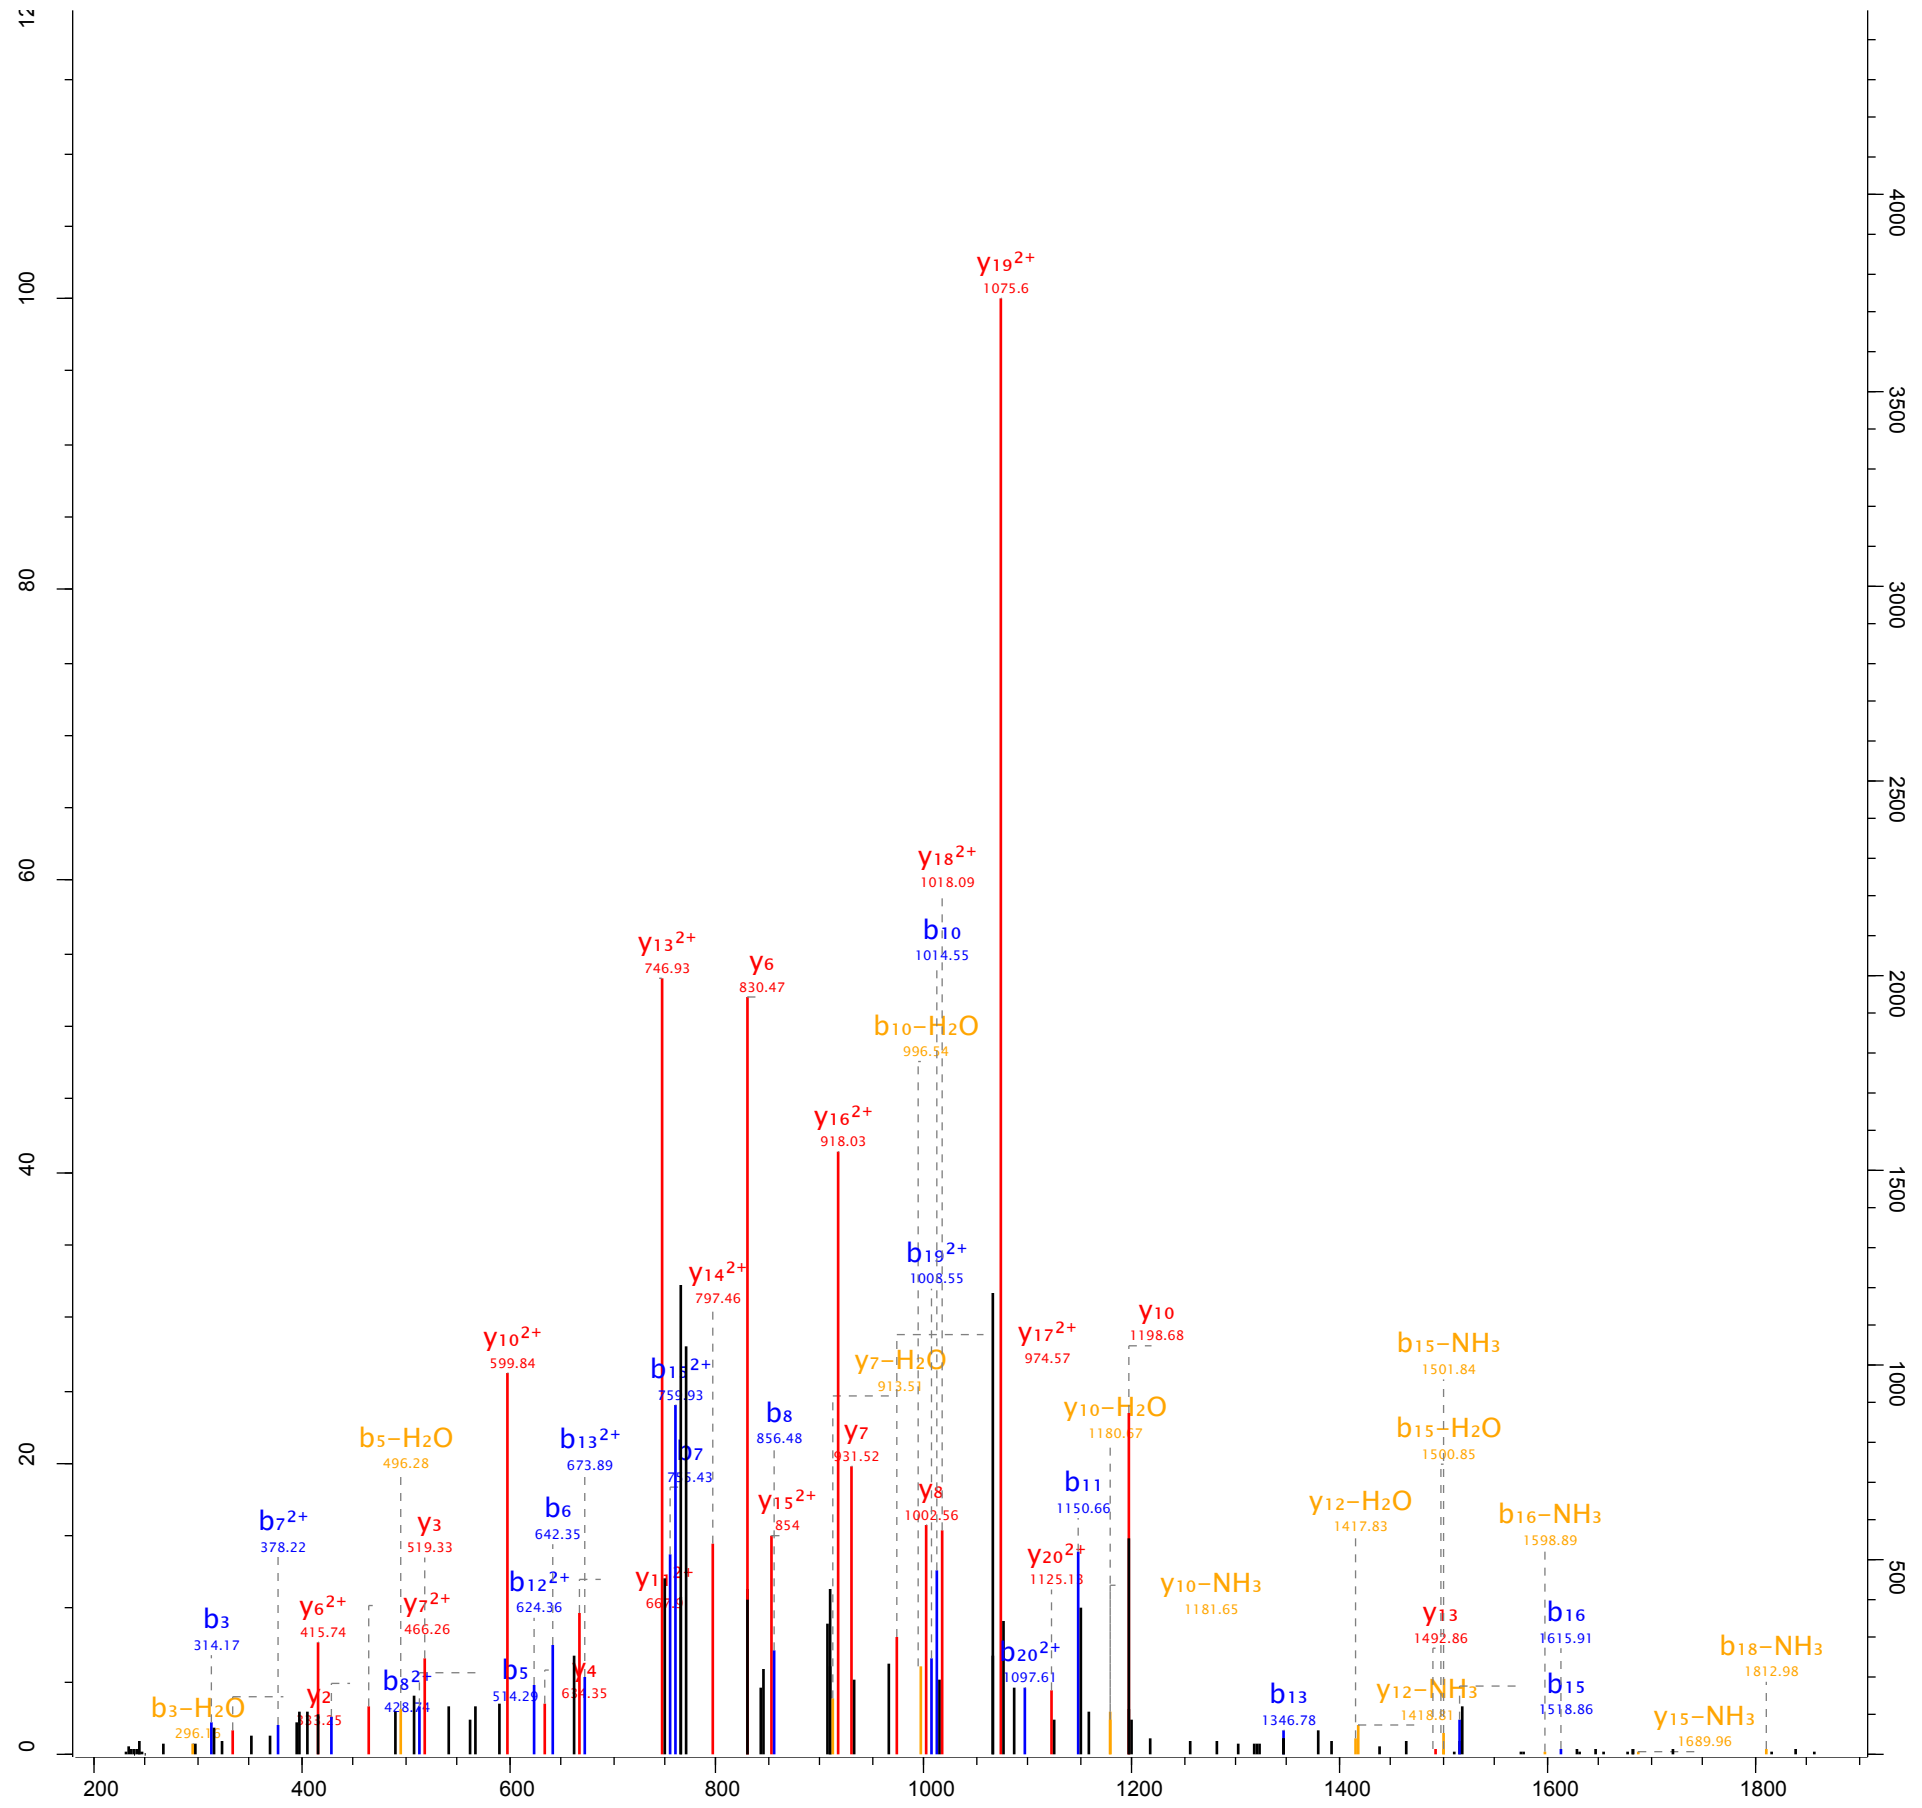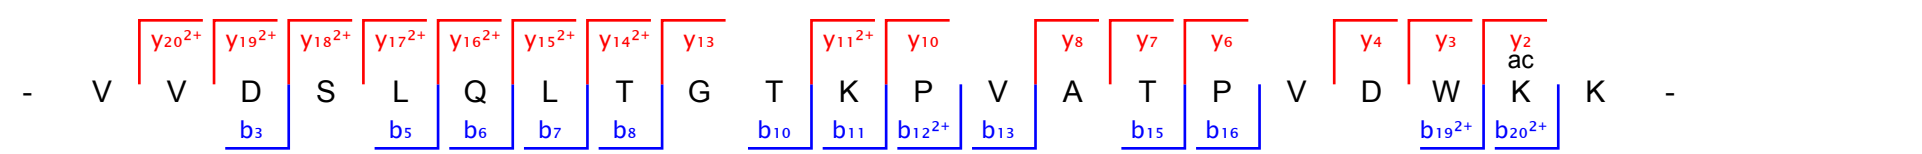

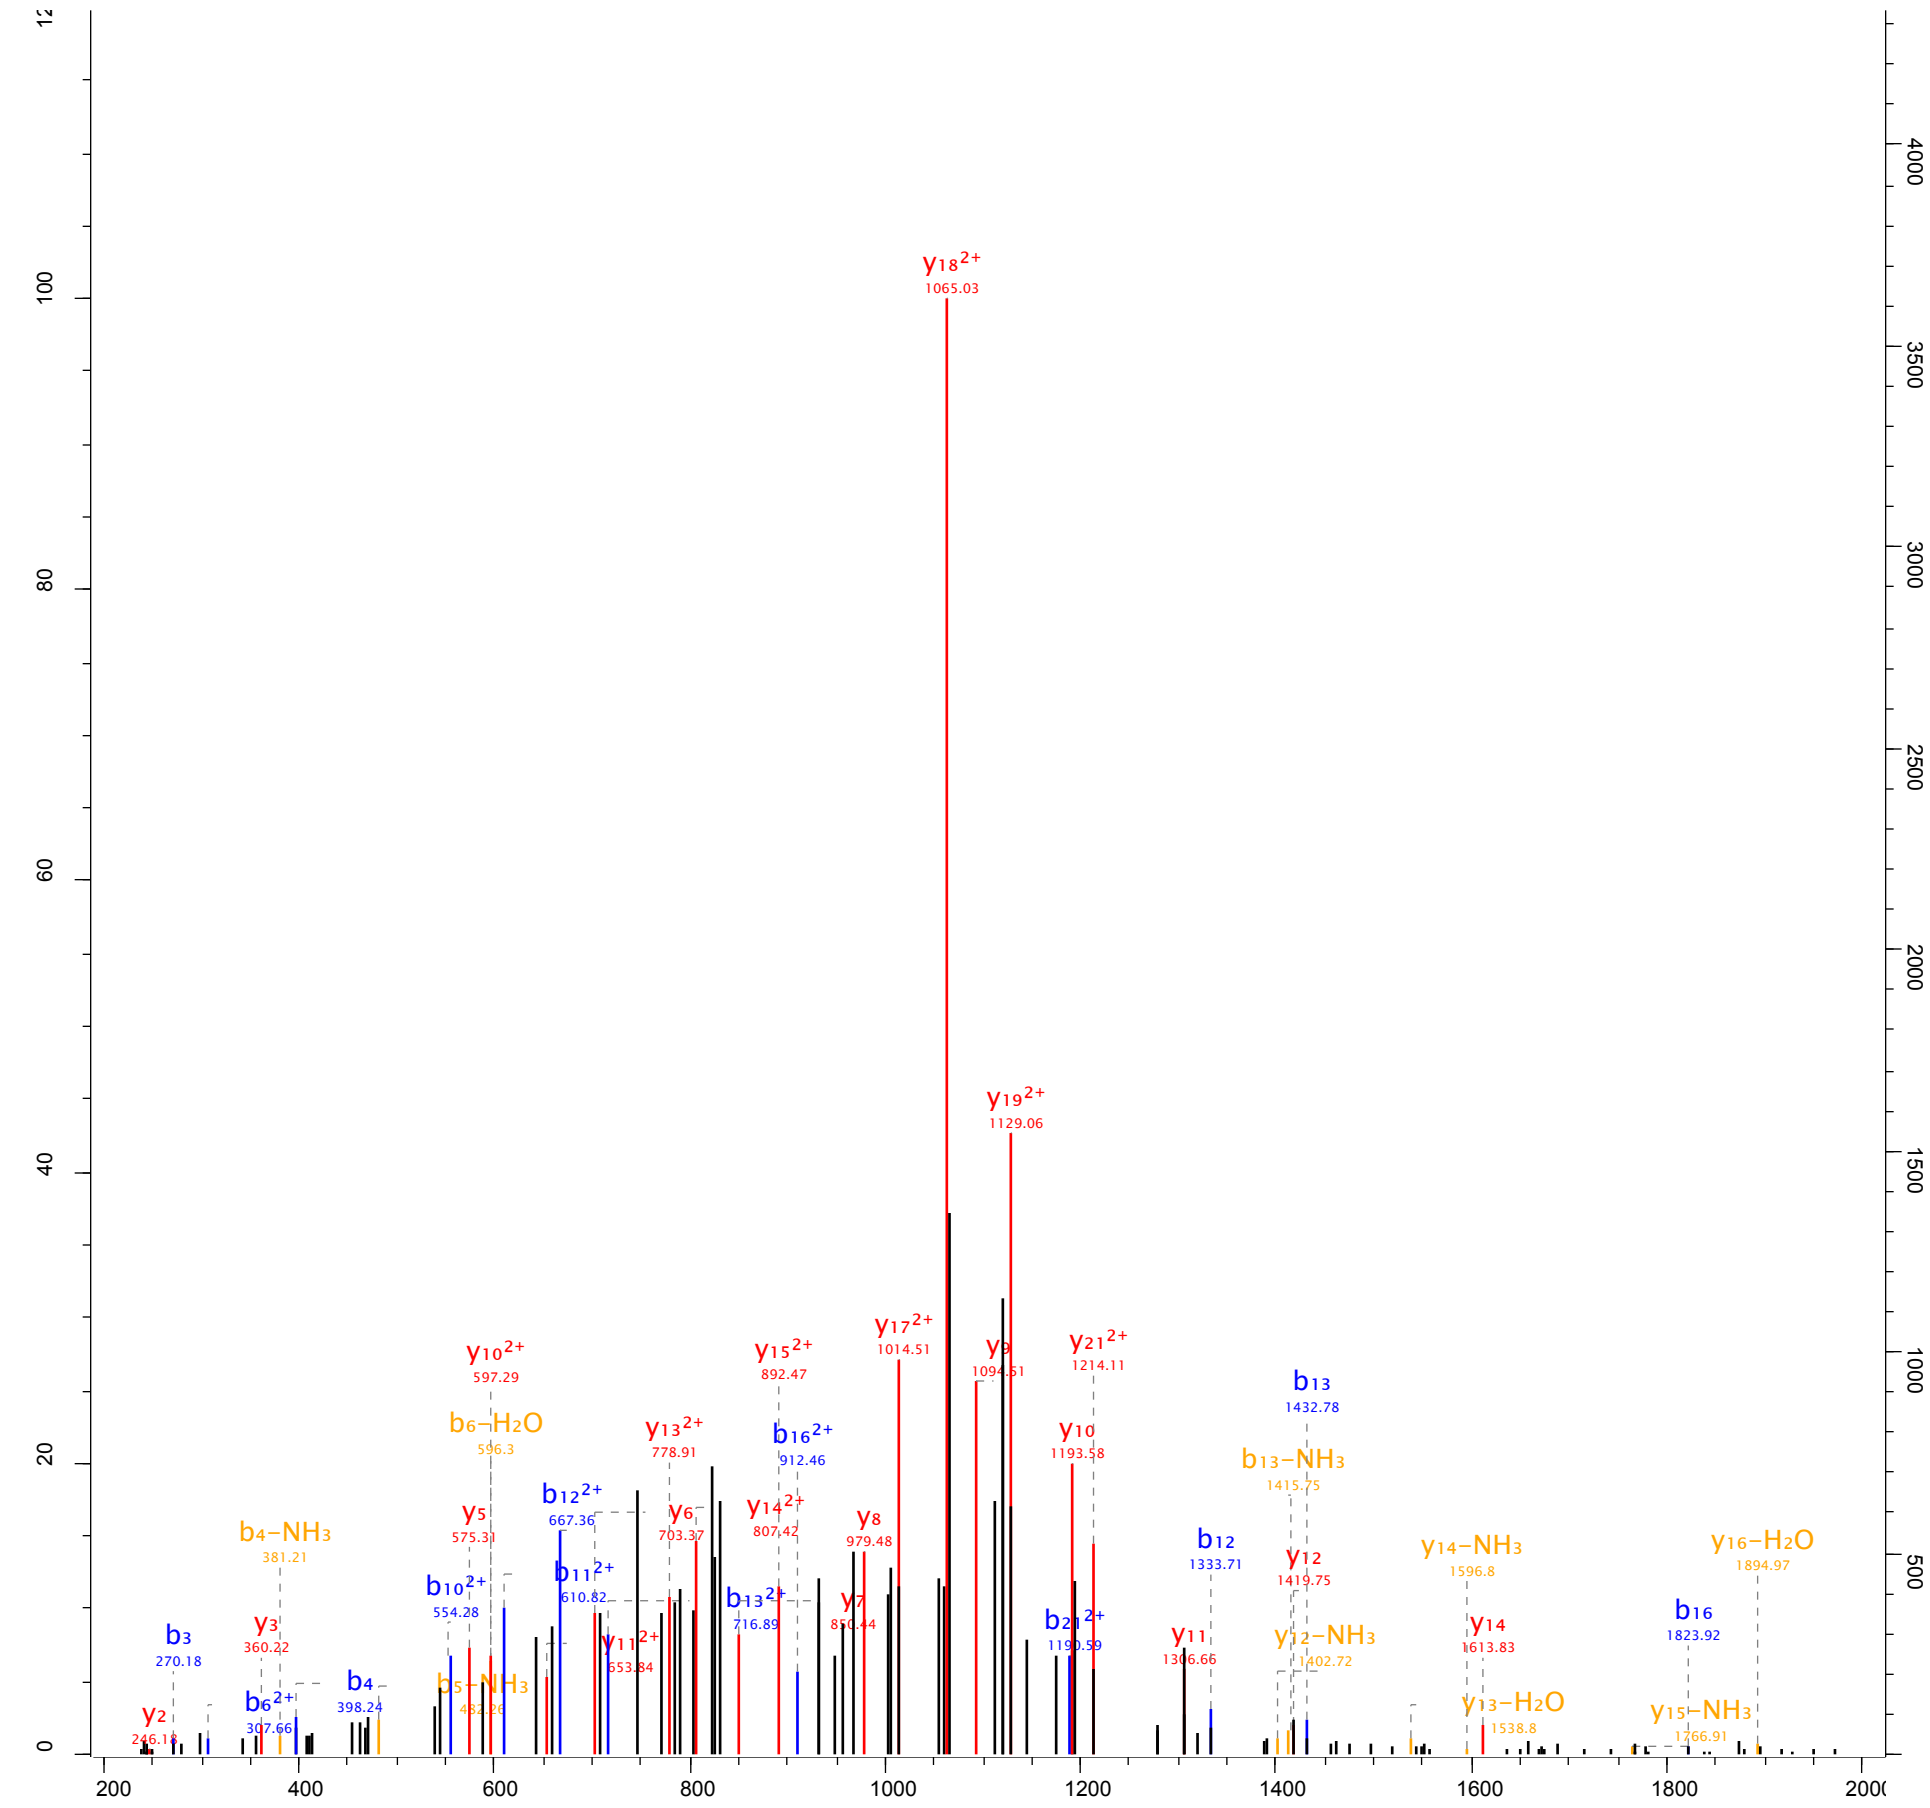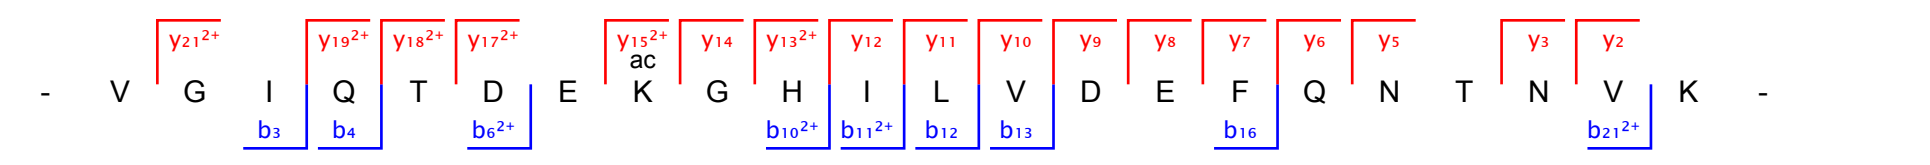

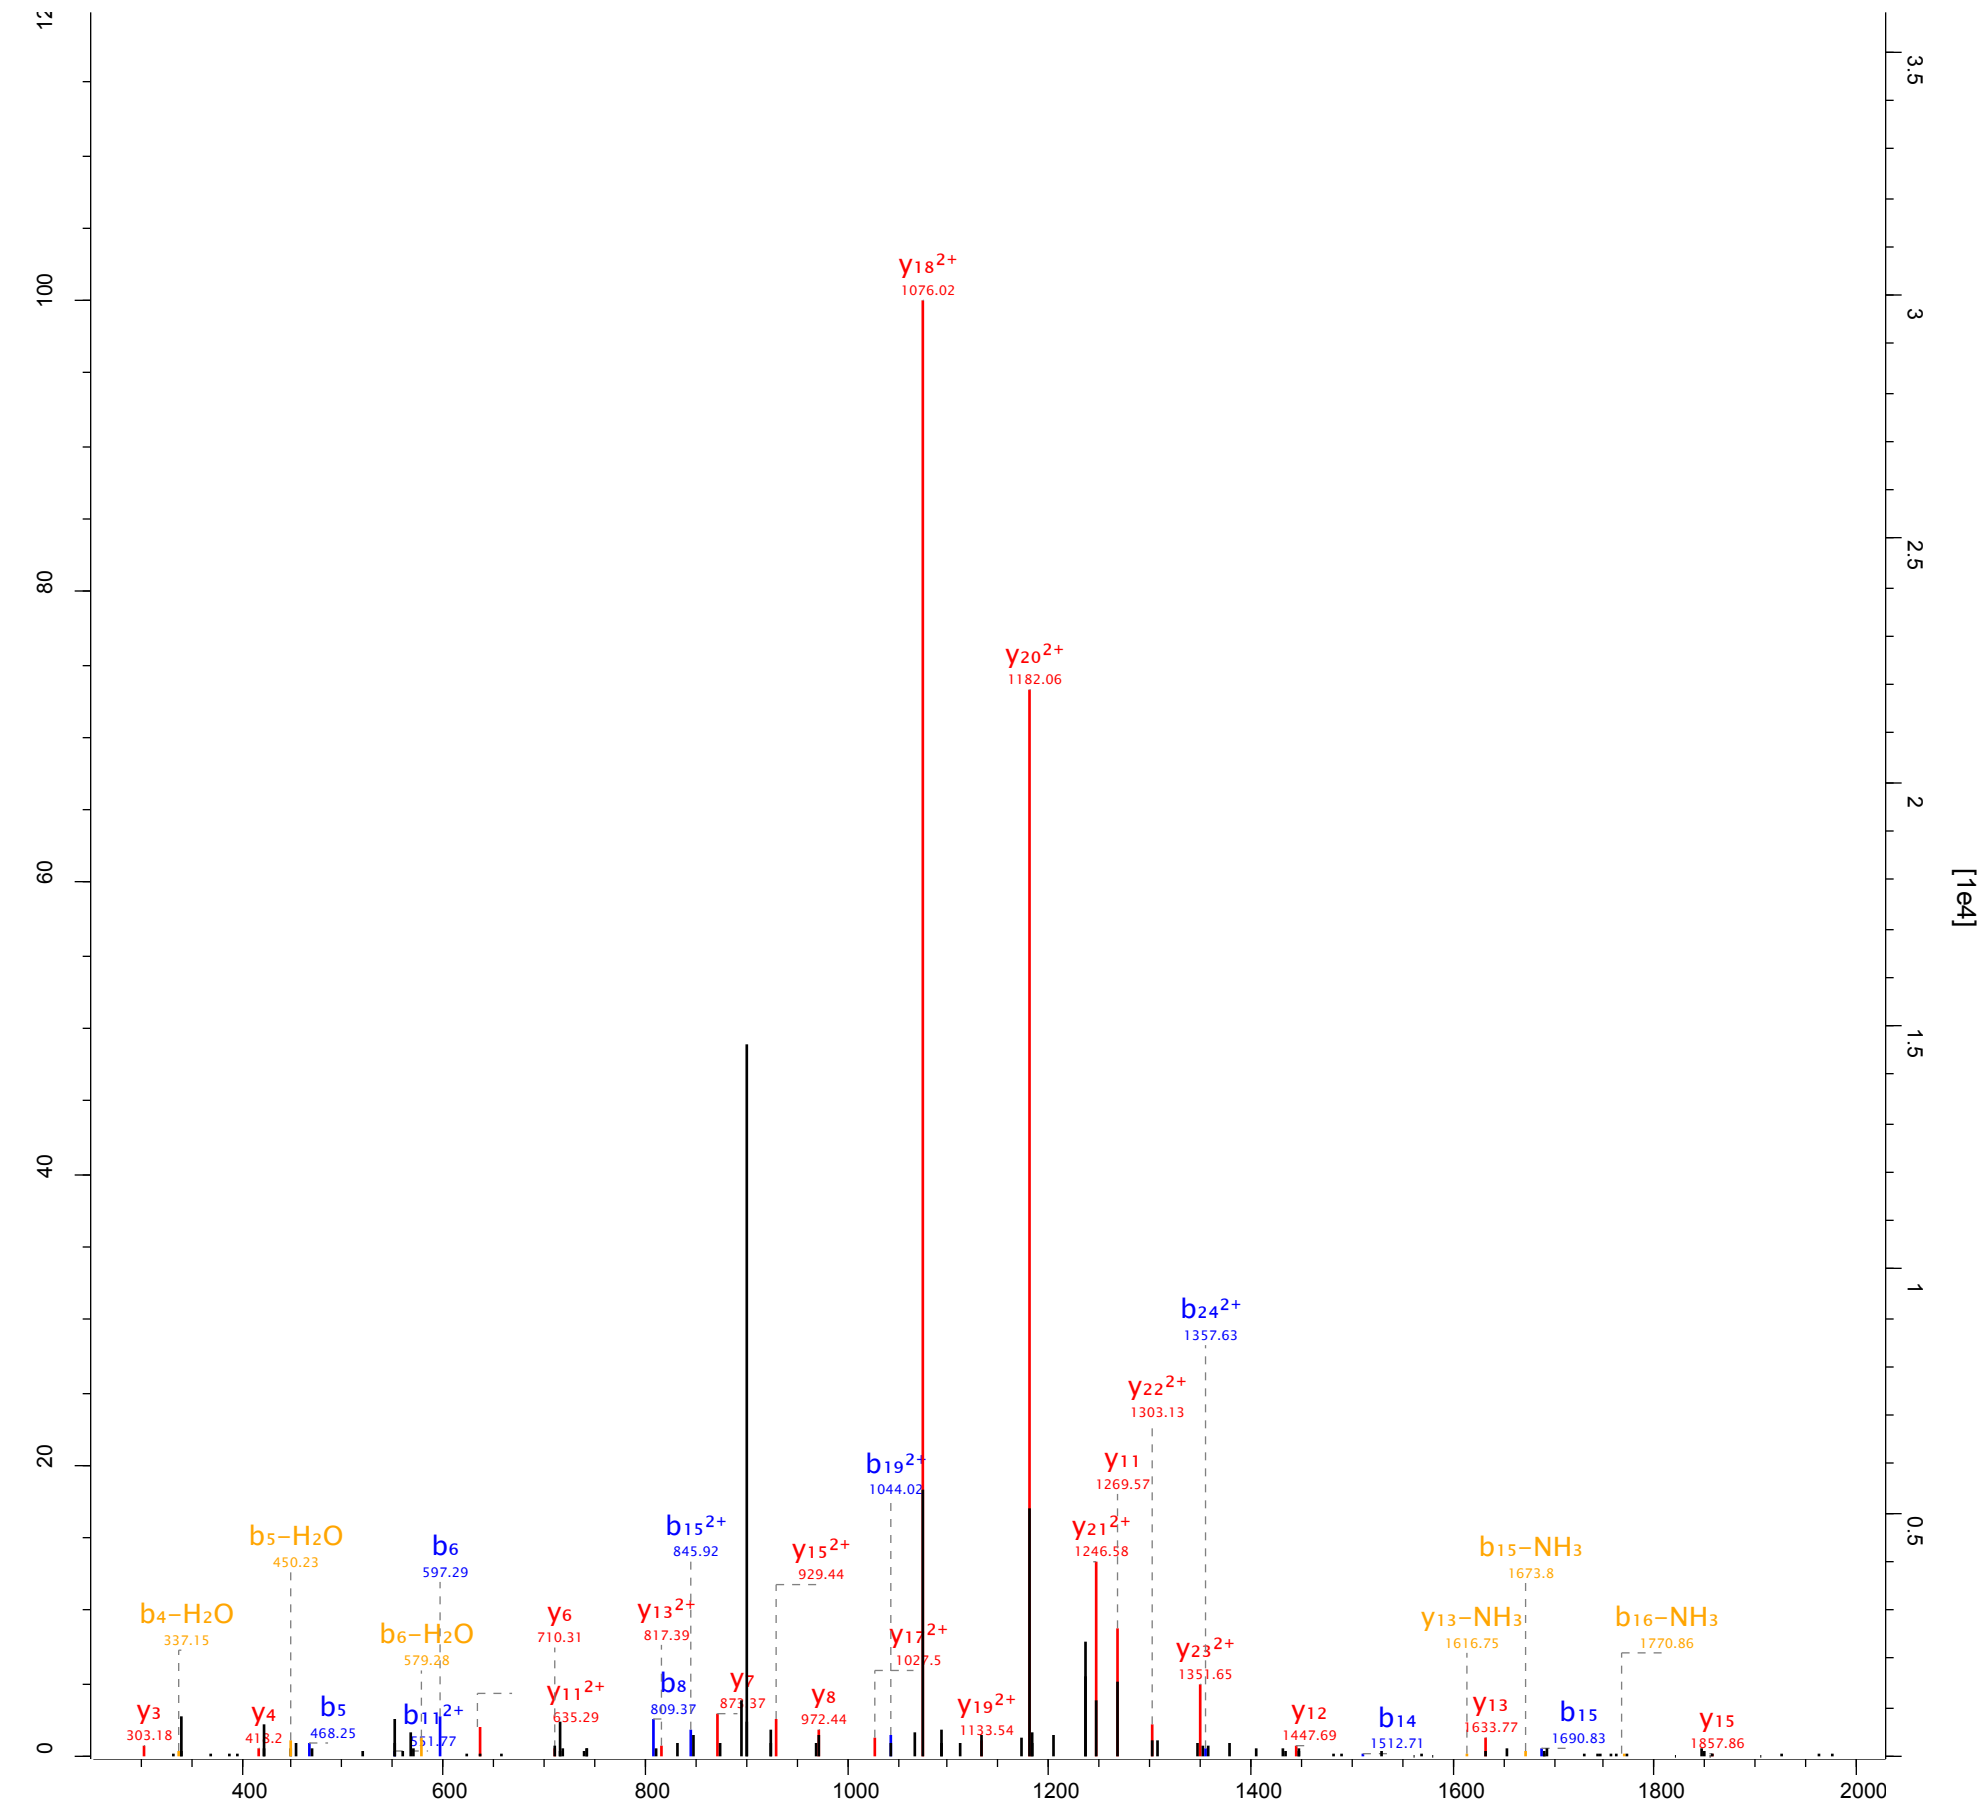

- E G A P I E P D P V S H W K P E A V Y Y E D G

$y_{23}^{2+}$ 
 $y_{22}^{2+}$ 
 $y_{21}^{2+}$ 
 $y_{20}^{2+}$ 
 $y_{19}^{2+}$ 
 $y_{18}^{2+}$ 
 $y_{17}^{2+}$ 
 $y_{15}$ 
 $y_{13}$ 
 $y_{12}$  ac
 $y_{11}$ 
 $y_8$ 
 $y_7$ 
 $y_6$ 
 $y_4$ 
 $y_3$

$b_5$ 
 $b_6$ 
 $b_8$ 
 $b_{11}^{2+}$ 
 $b_{14}$ 
 $b_{15}$ 
 $b_{19}^{2+}$ 
 $b_{24}^{2+}$

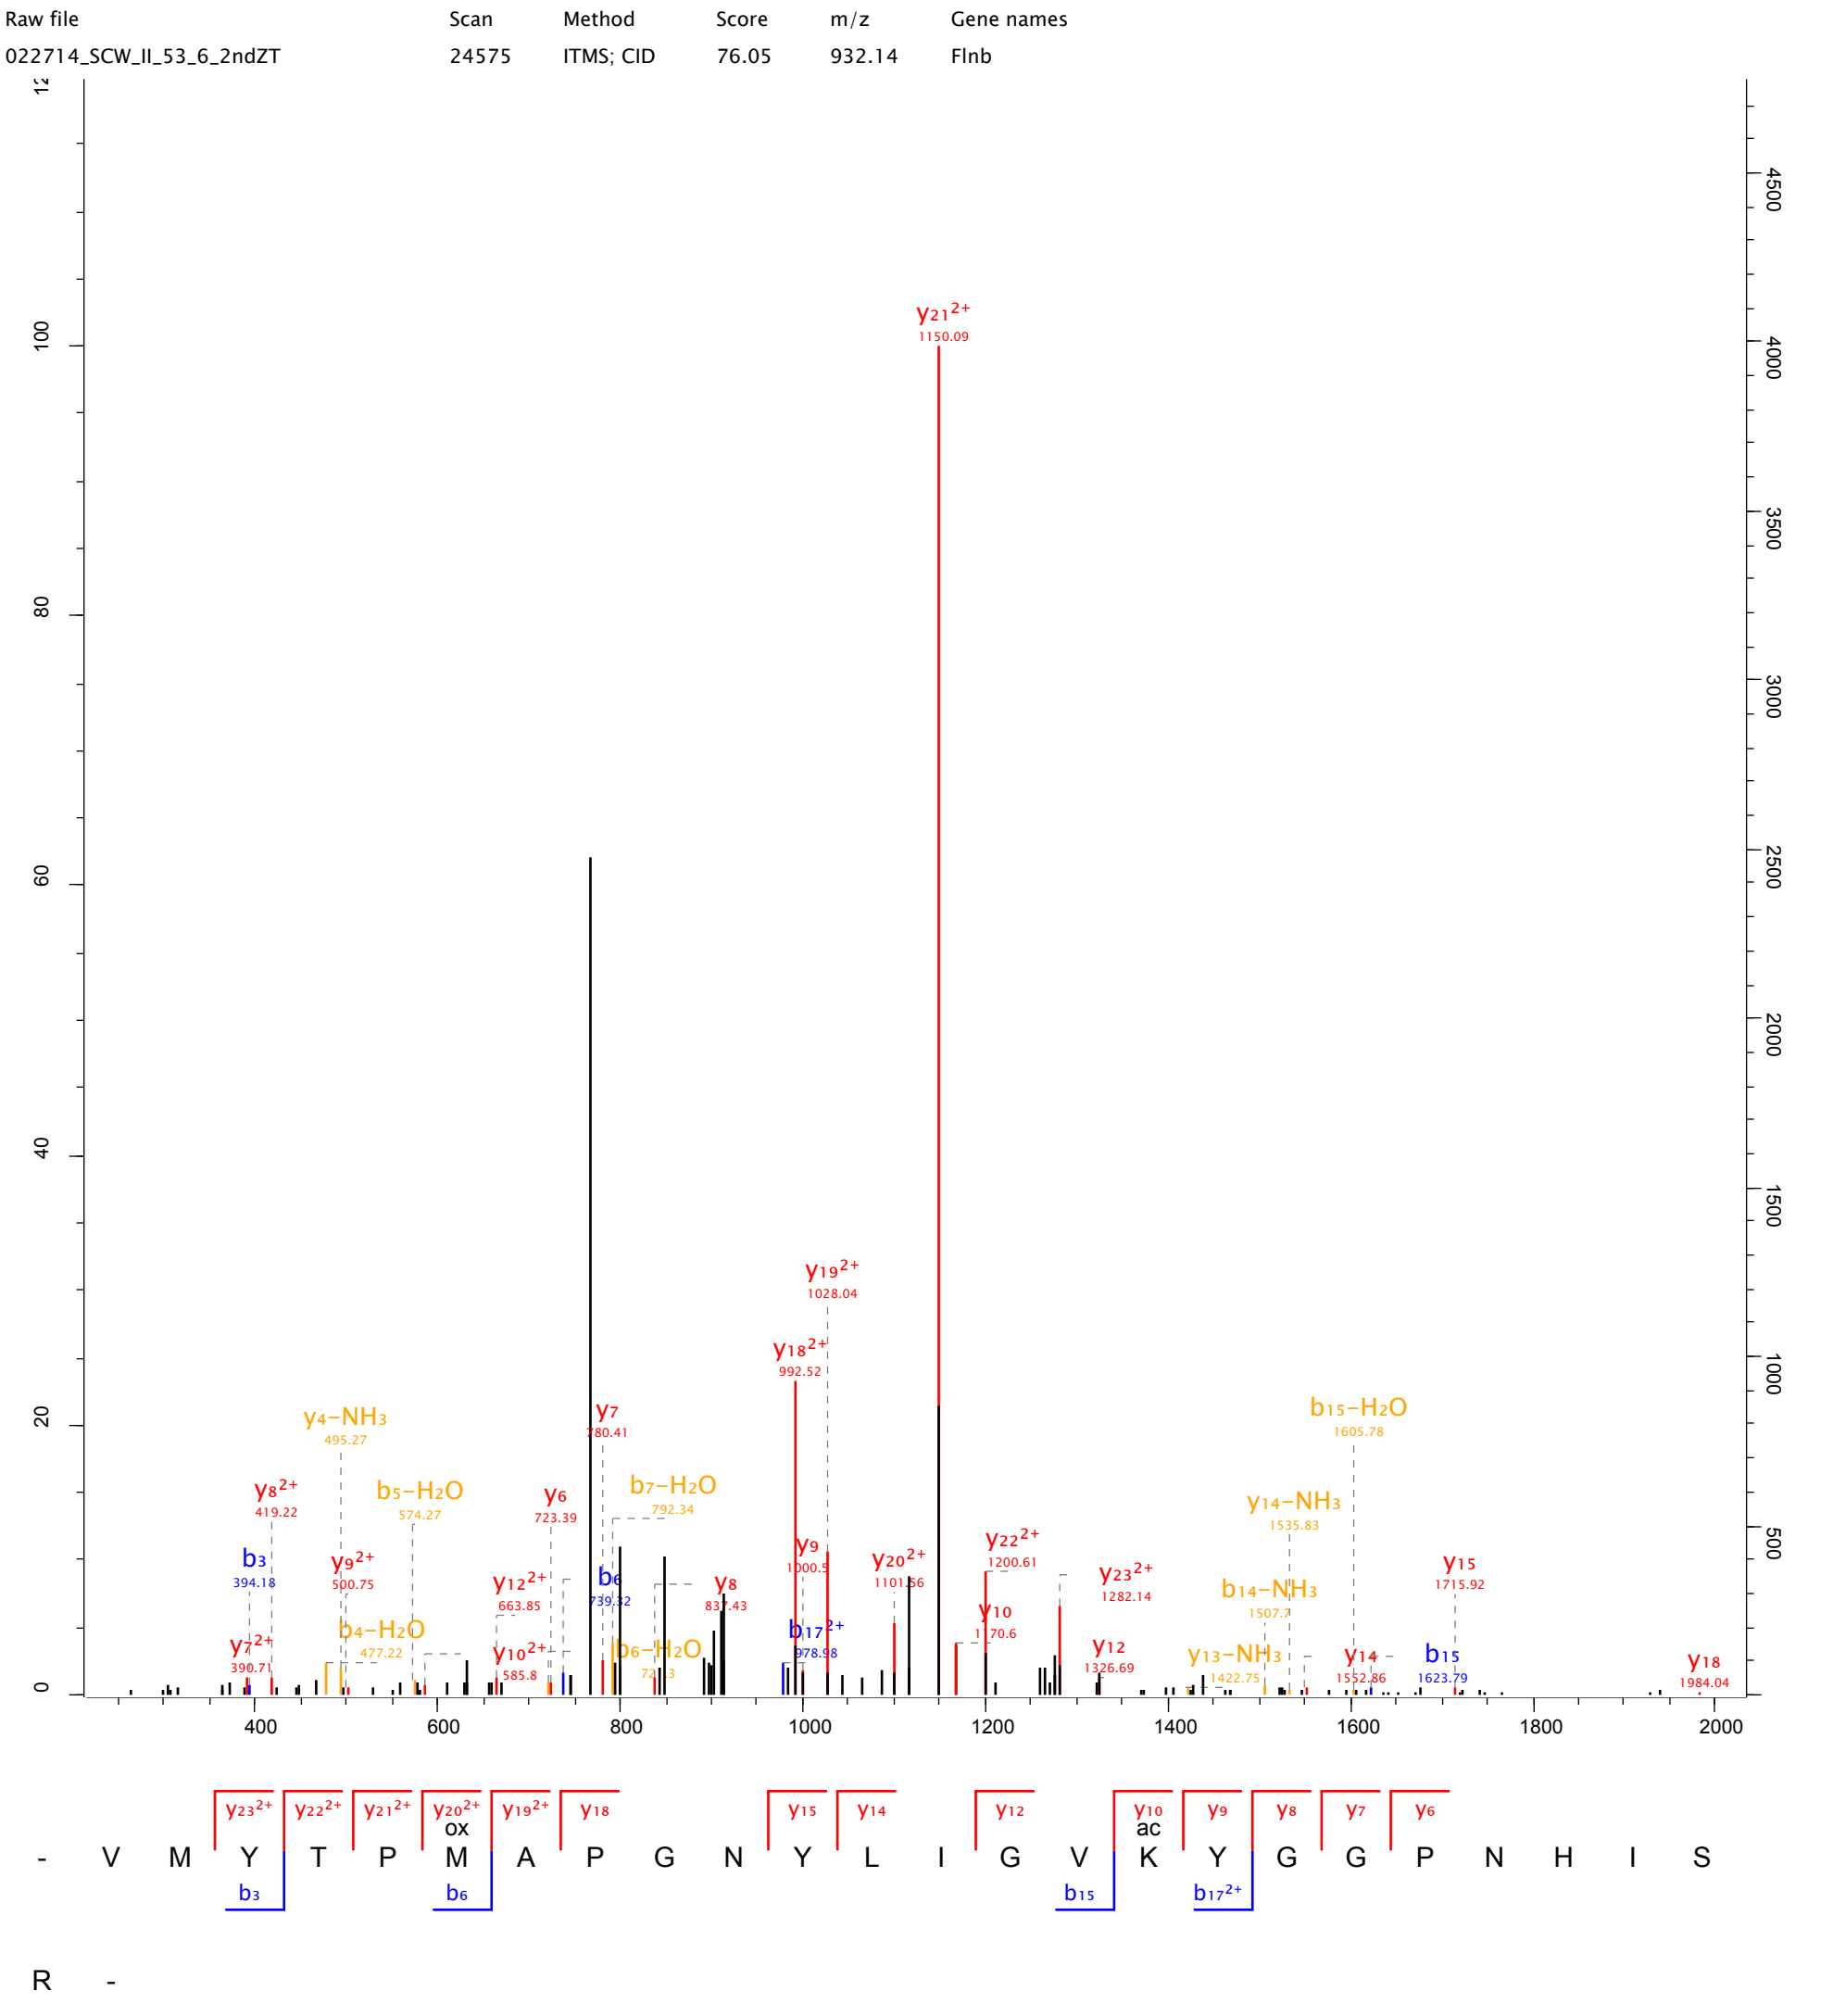

Raw file  
022714\_SCW\_II\_53\_6\_2ndZT

Scan 24685 Method ITMS; CID Score 154.87 m/z 949.82 Gene names Capza2

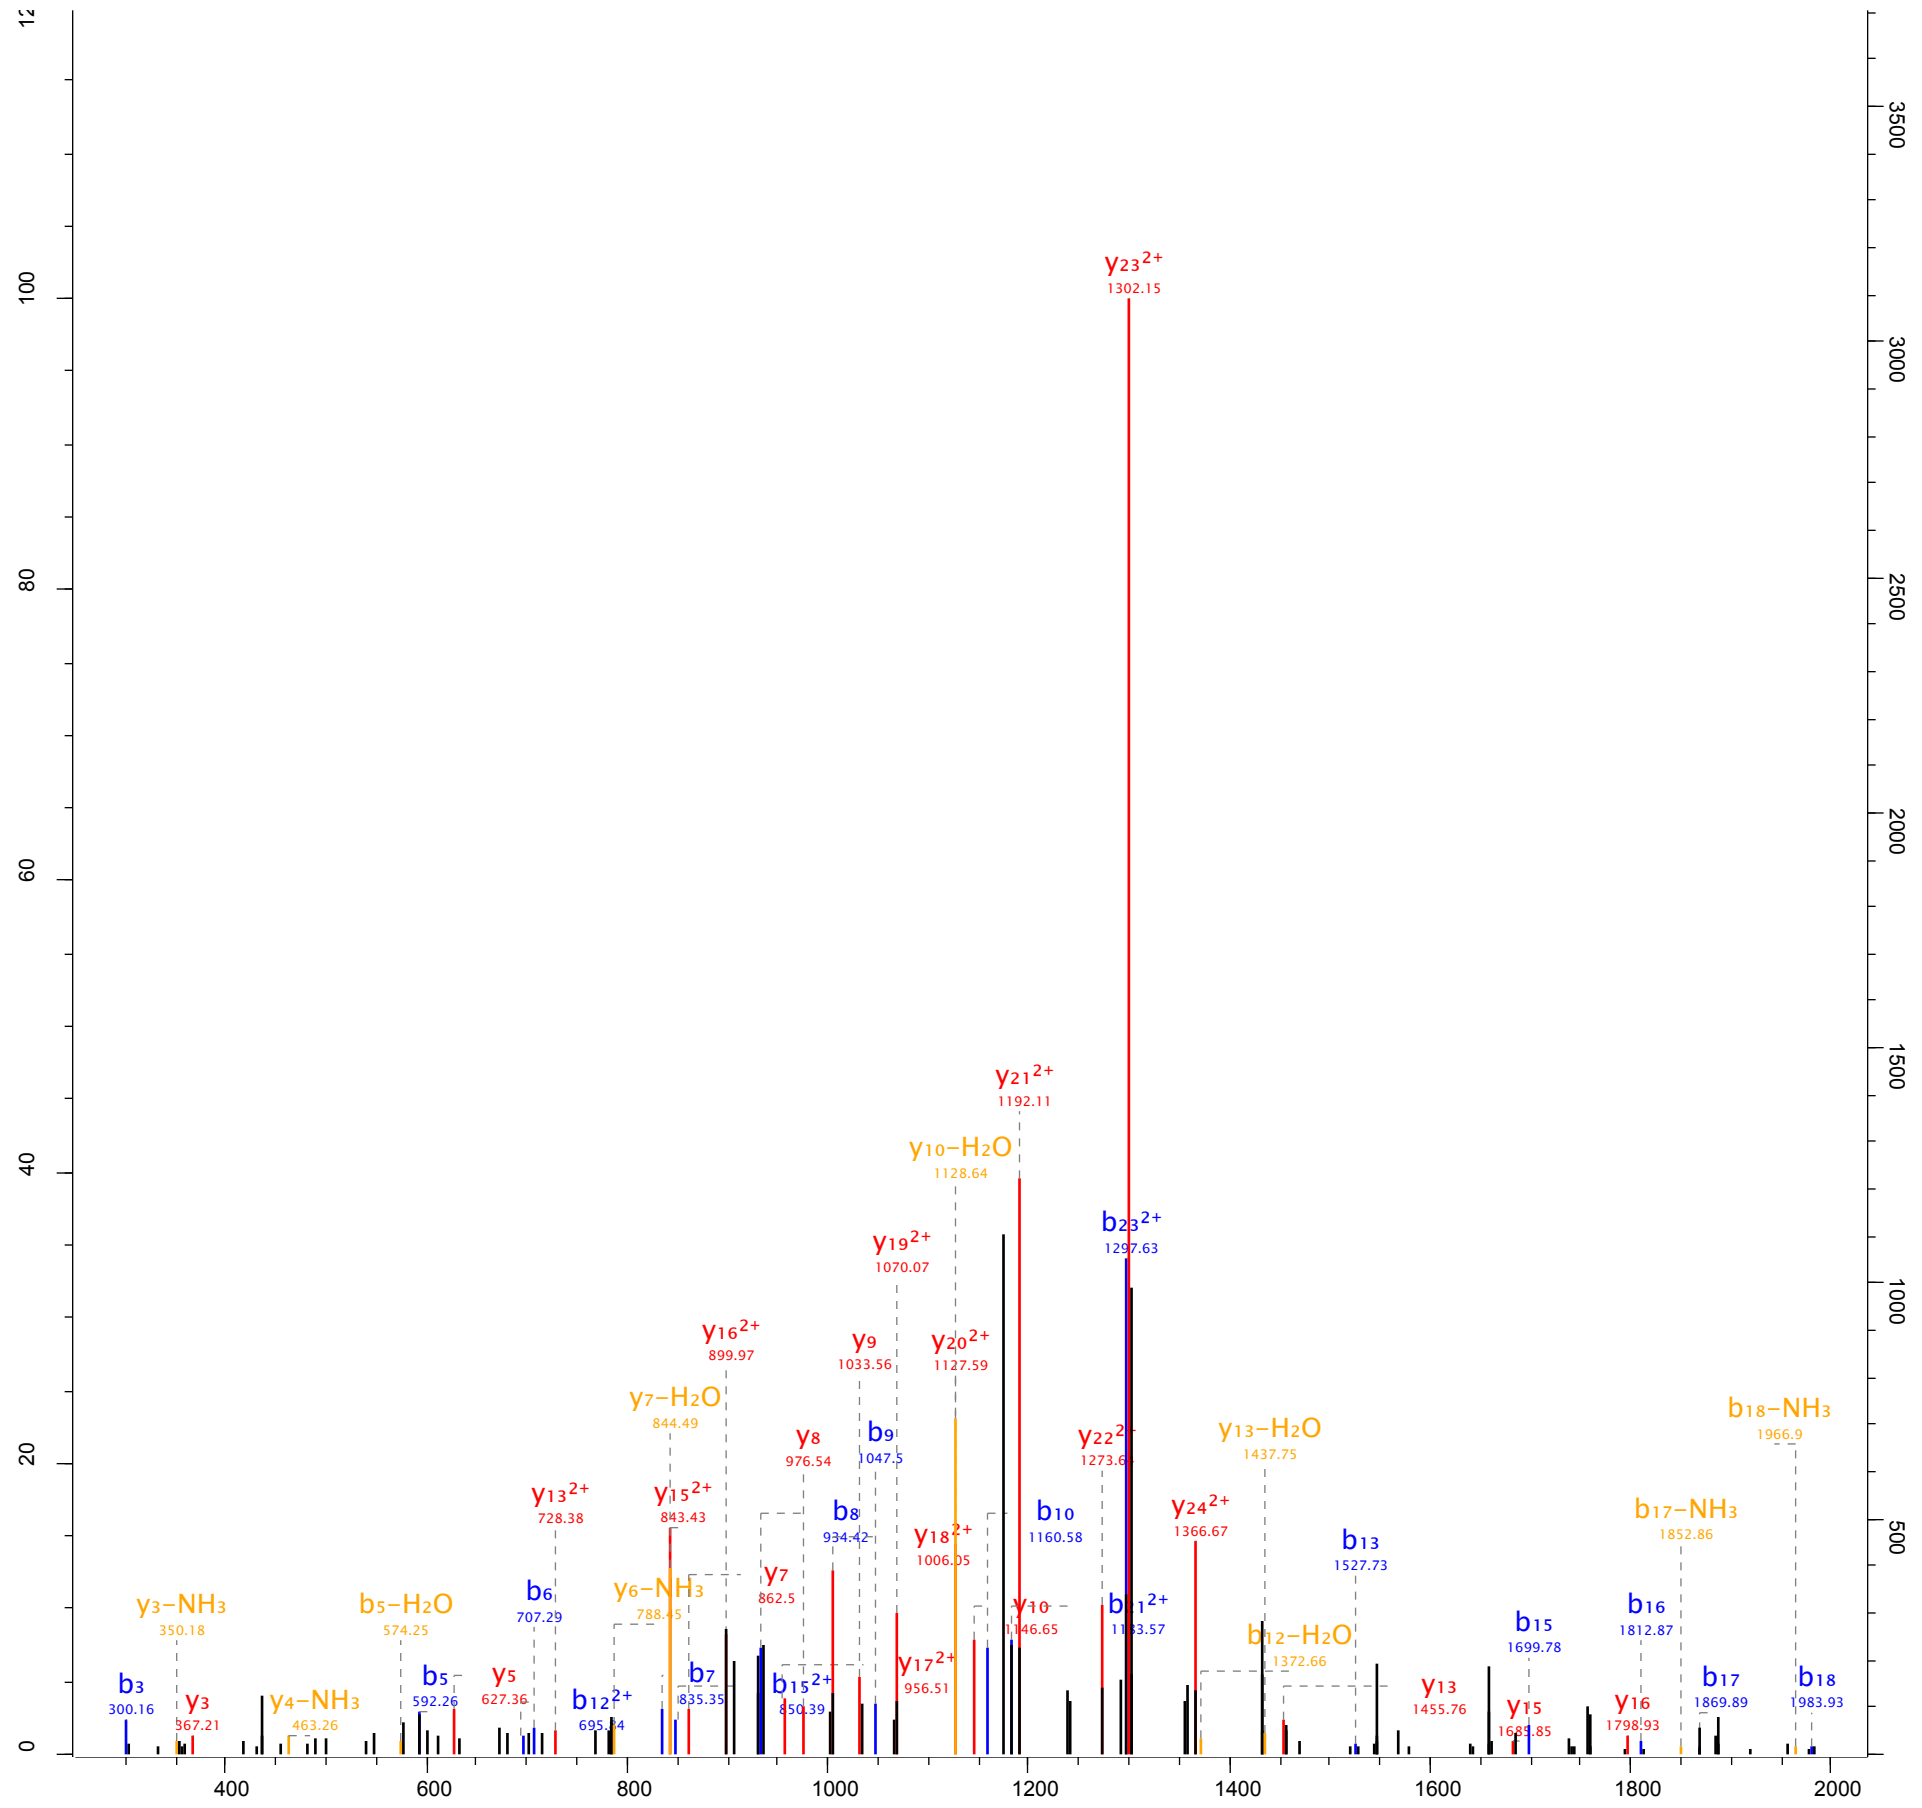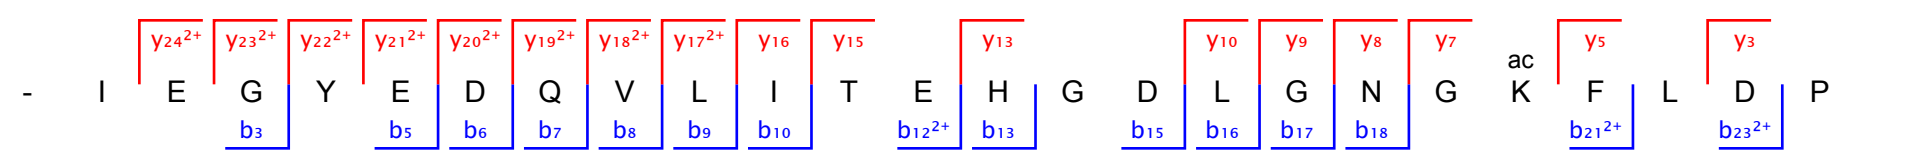

K -



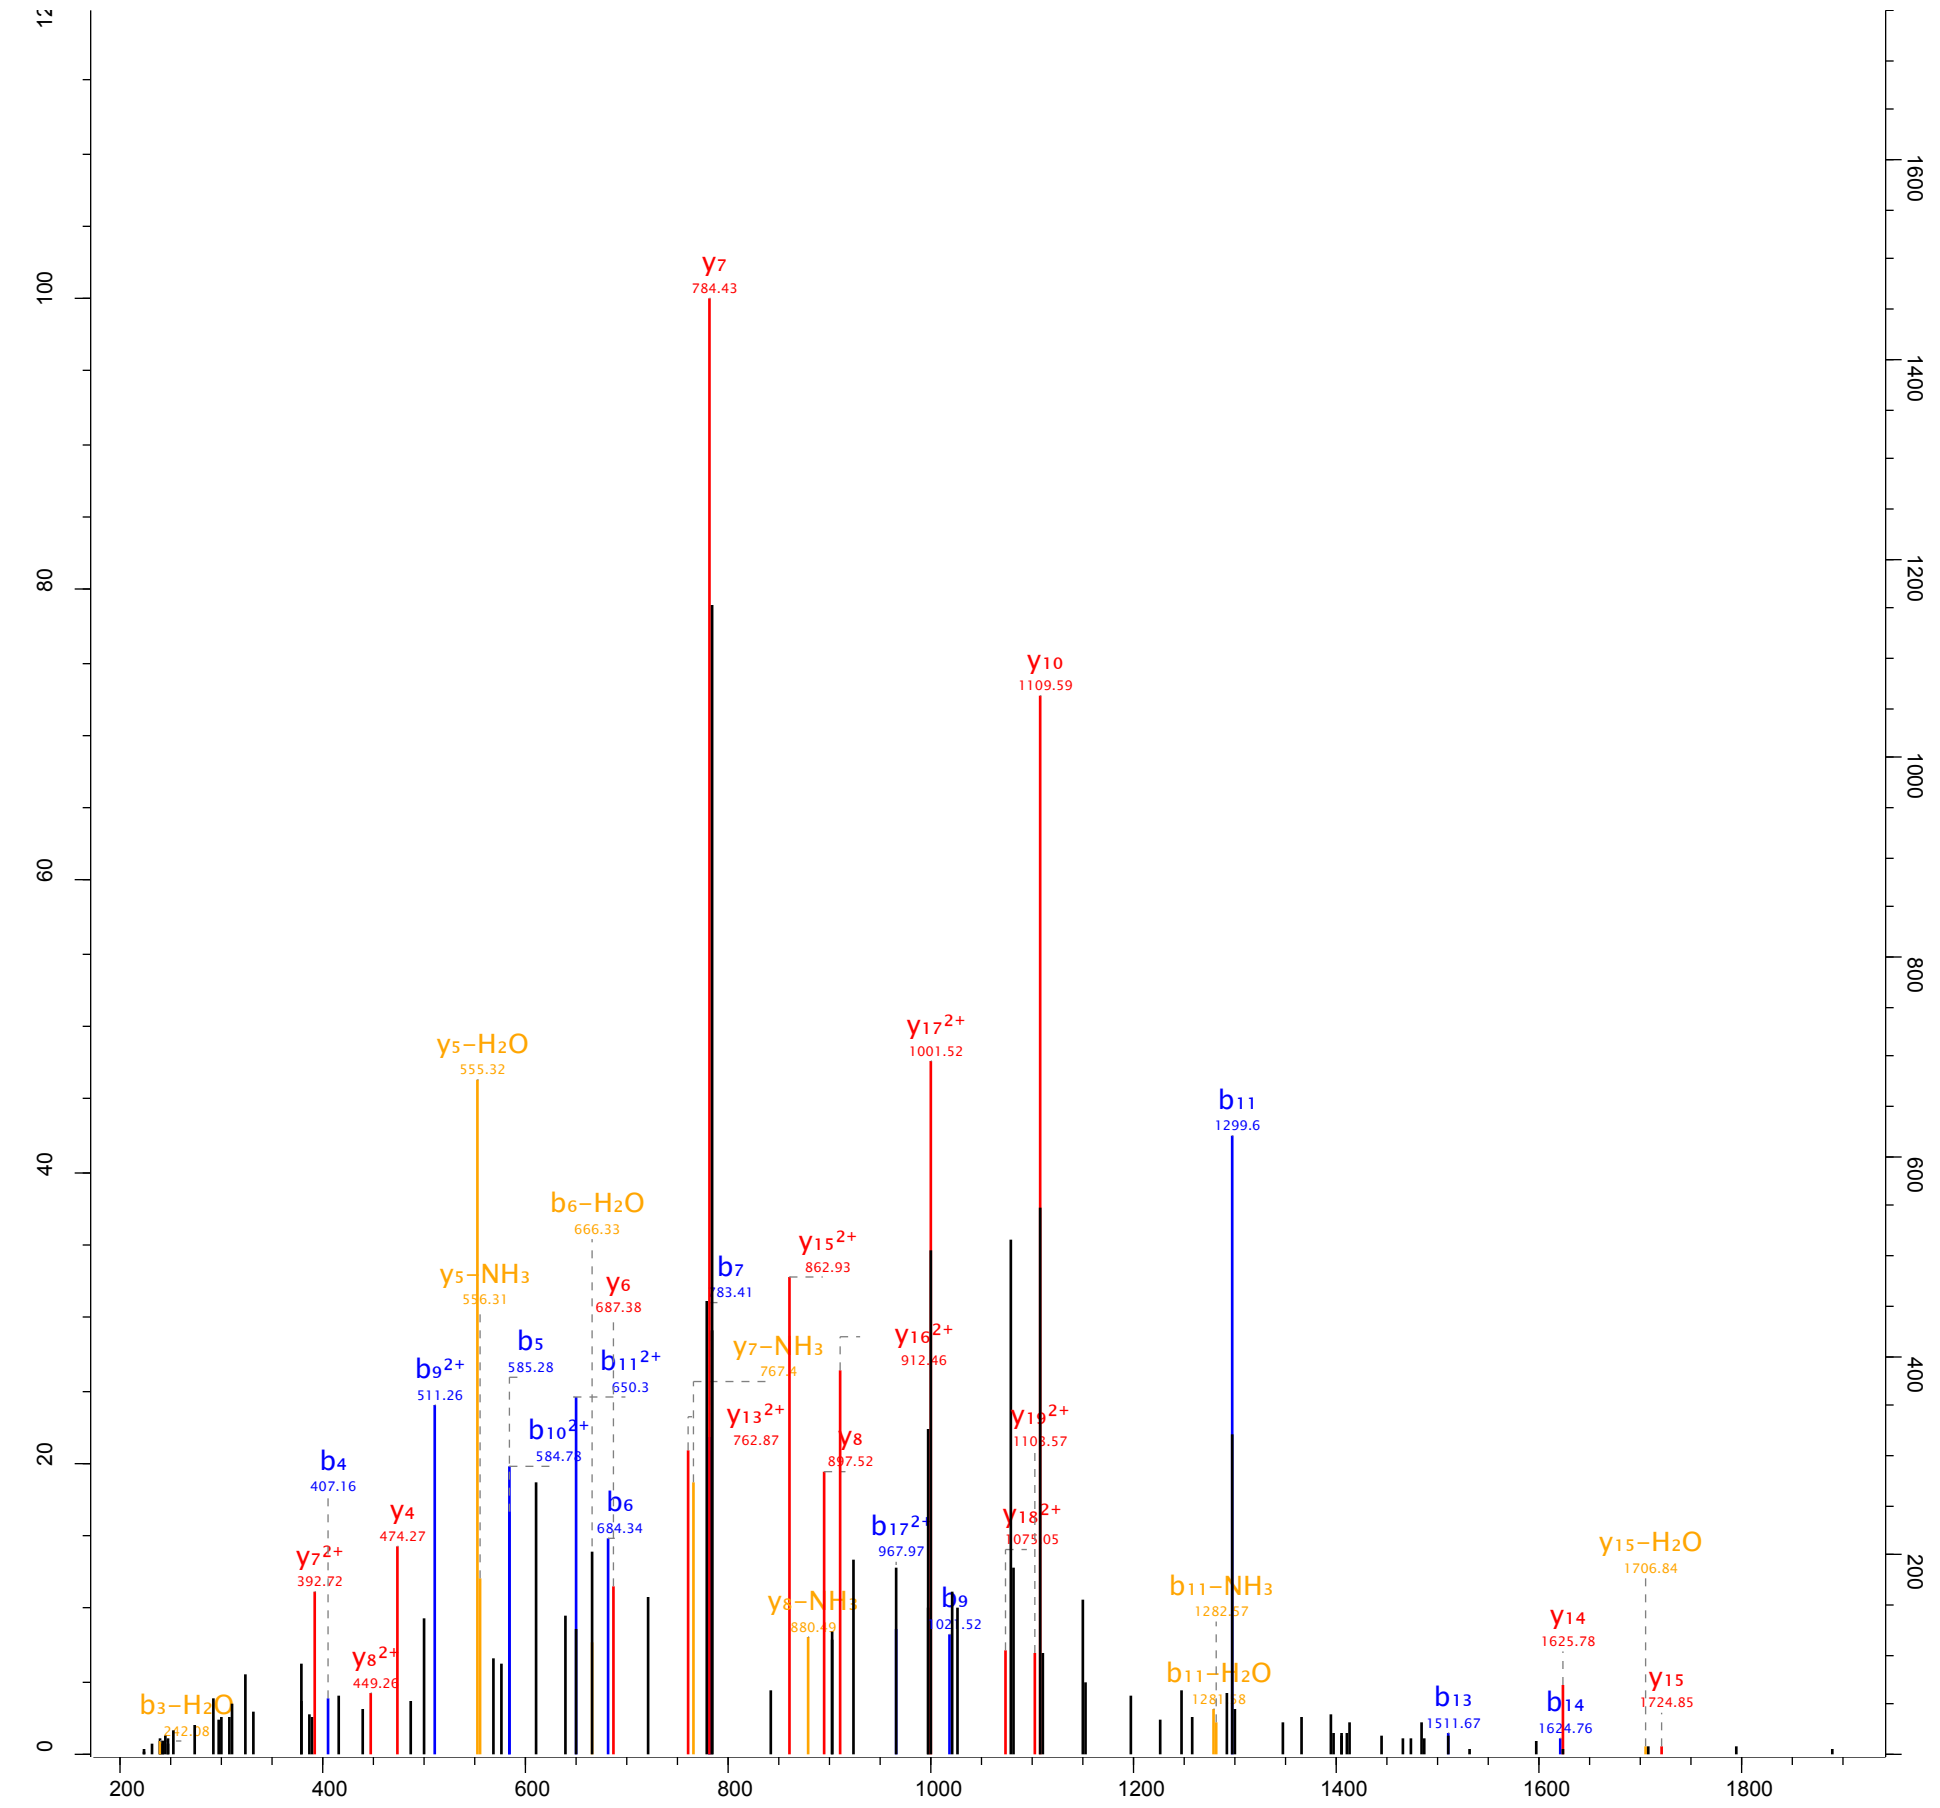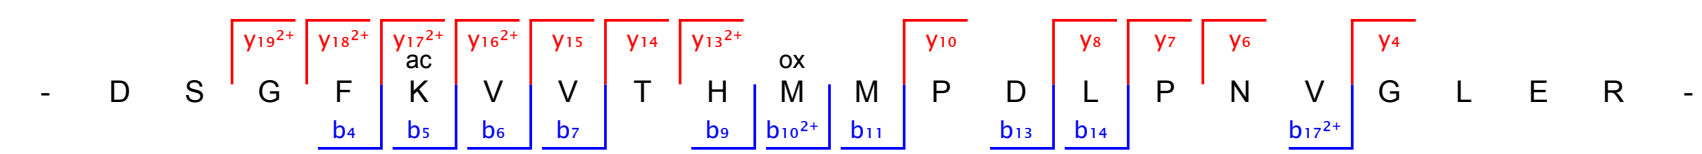

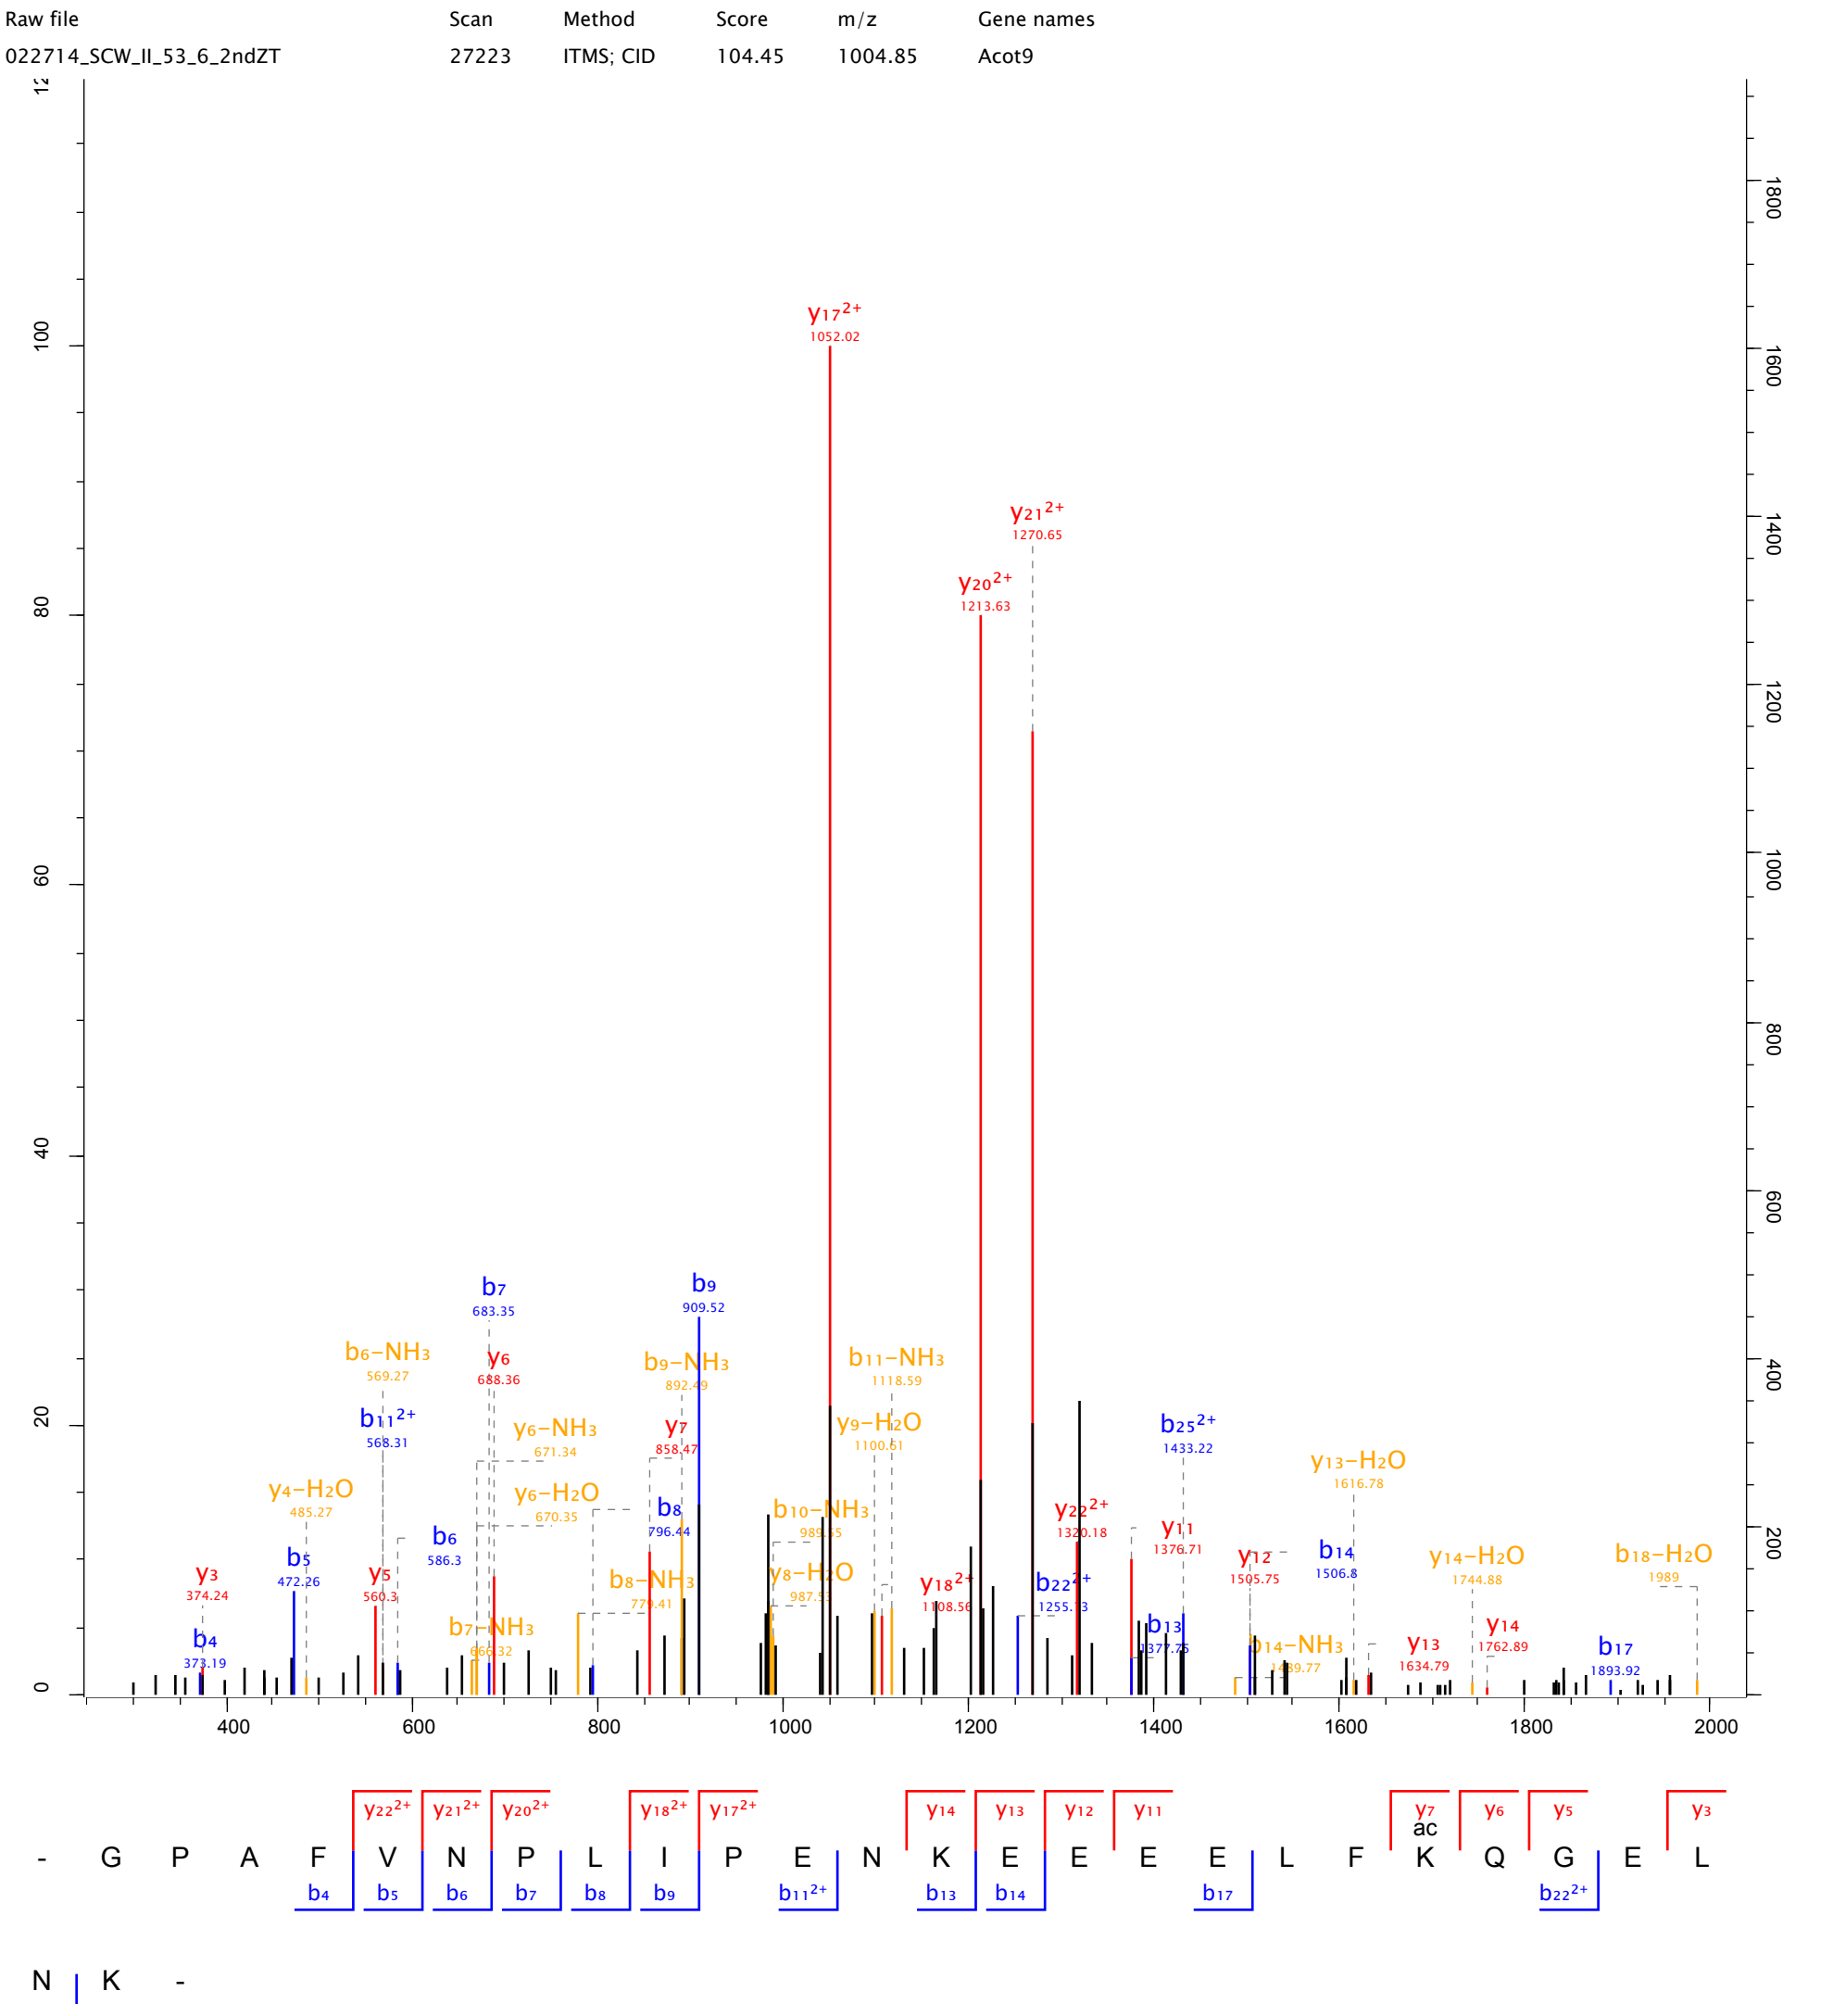

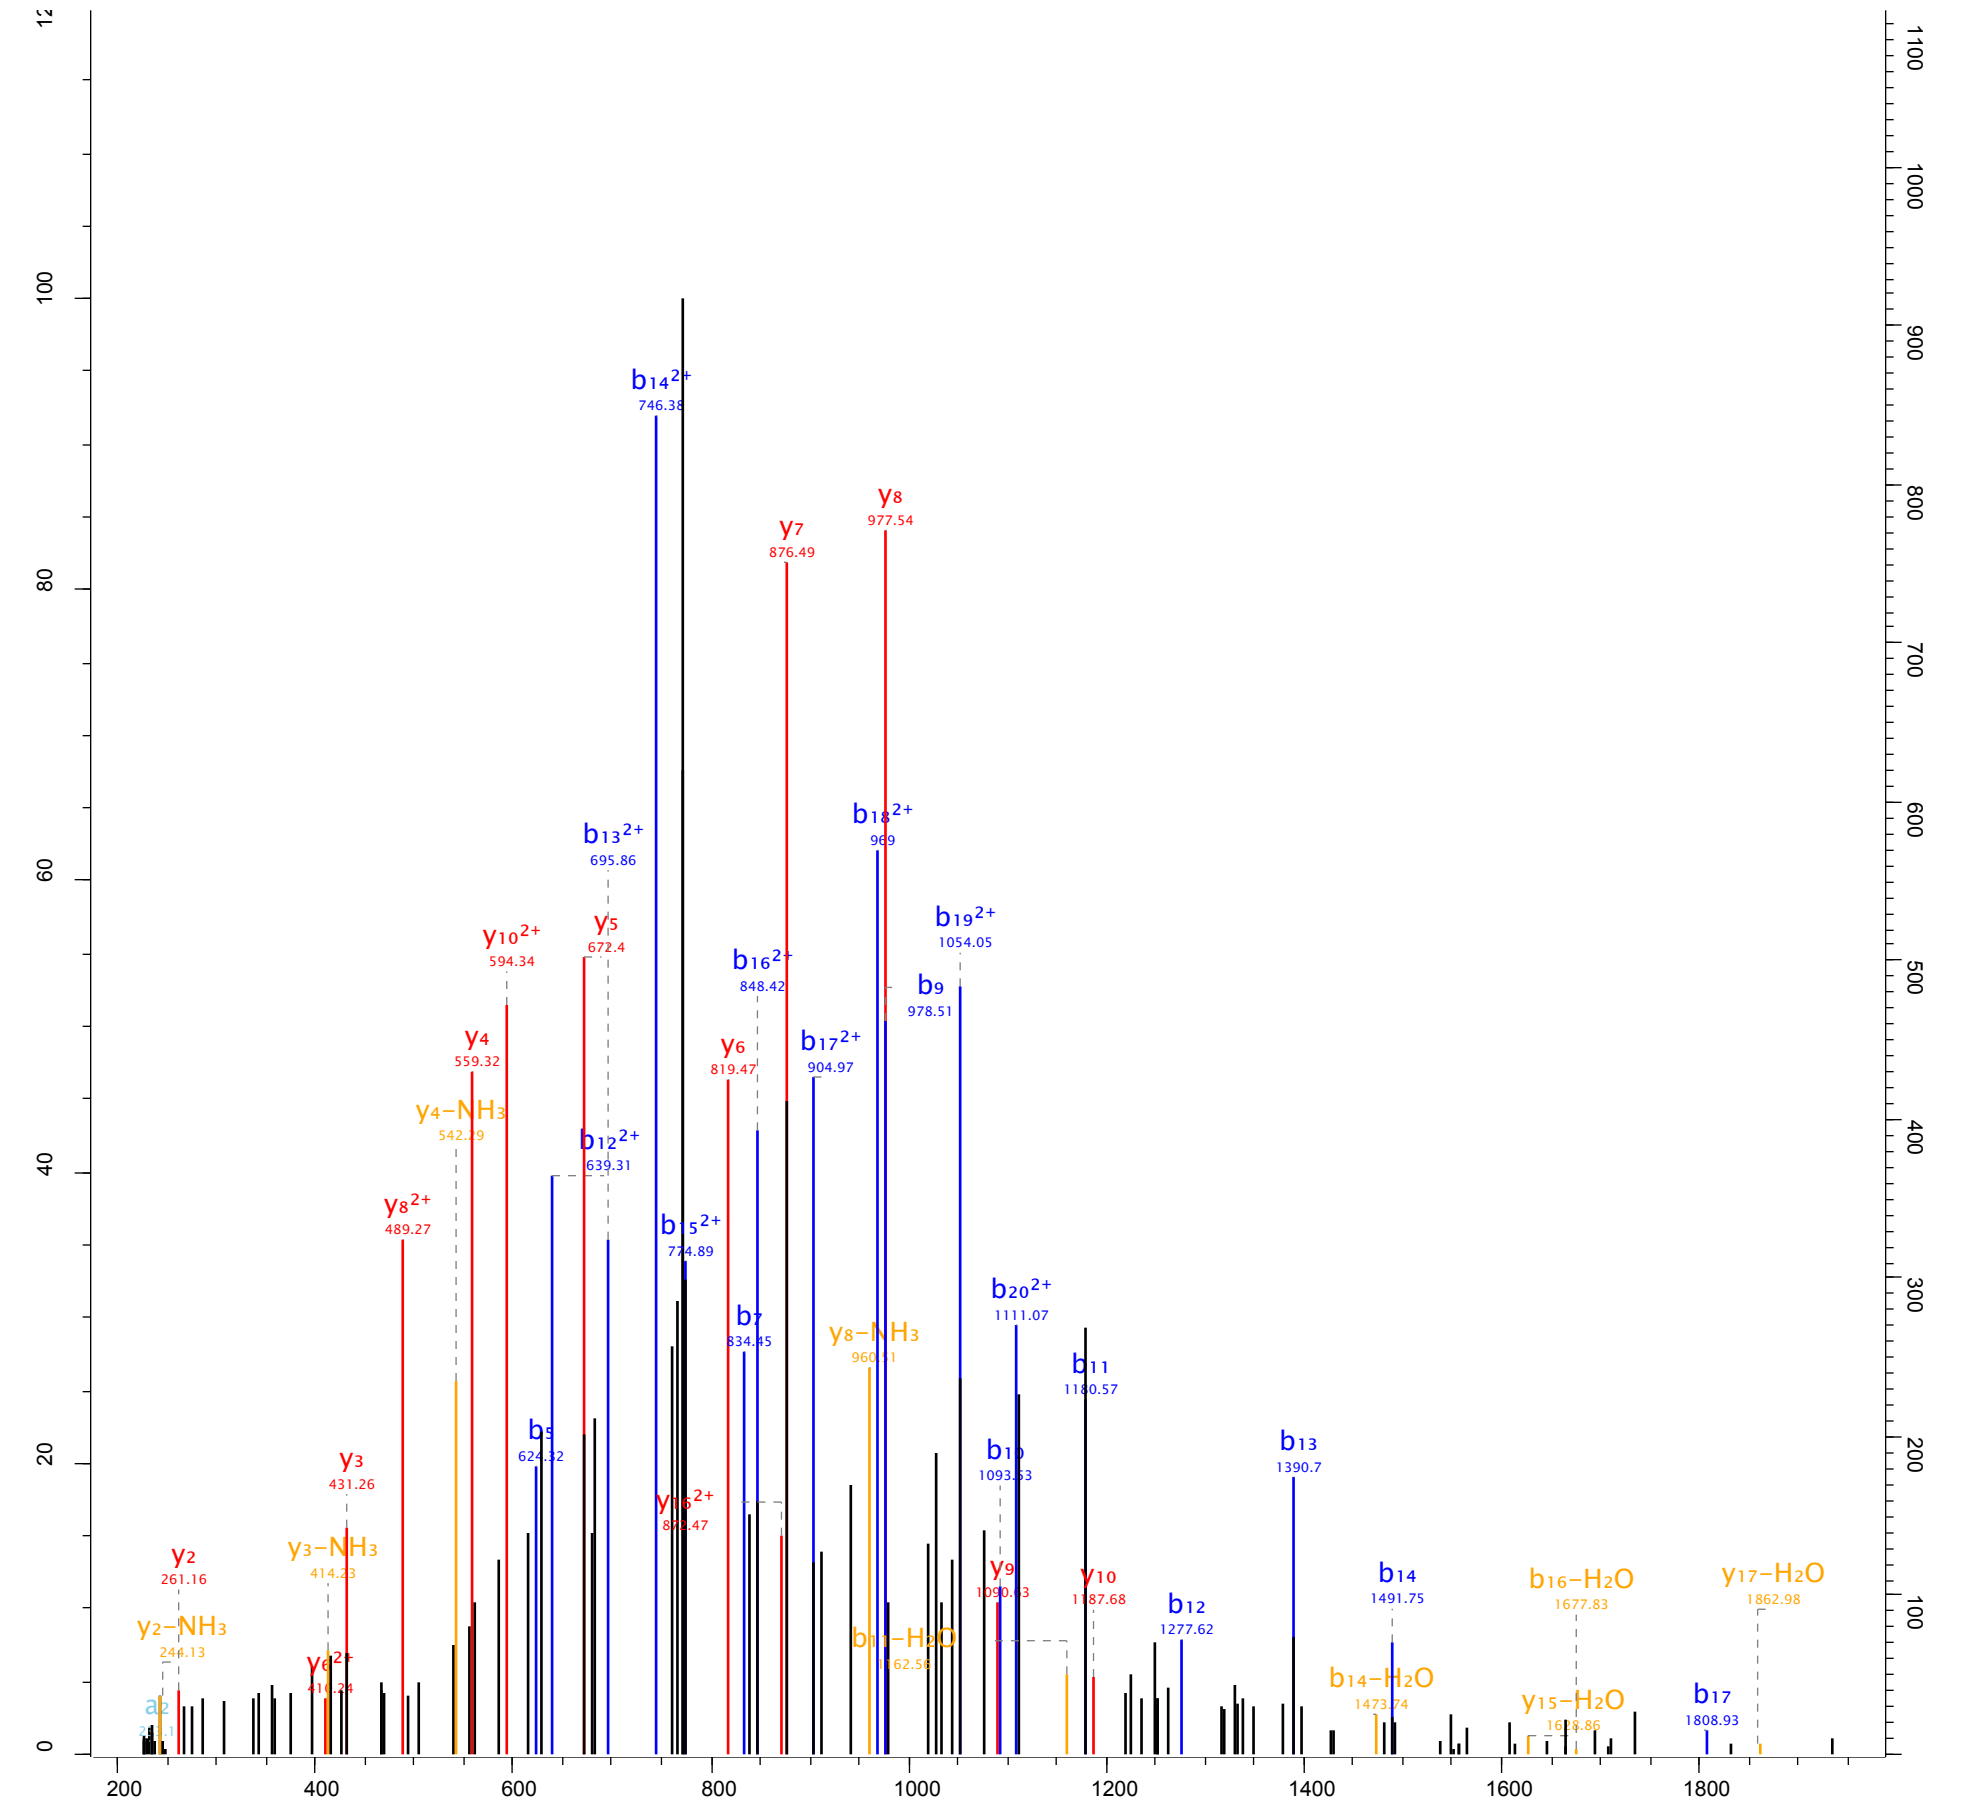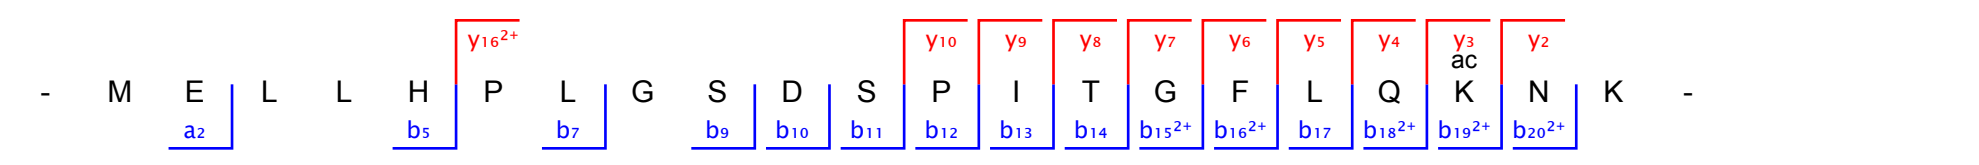

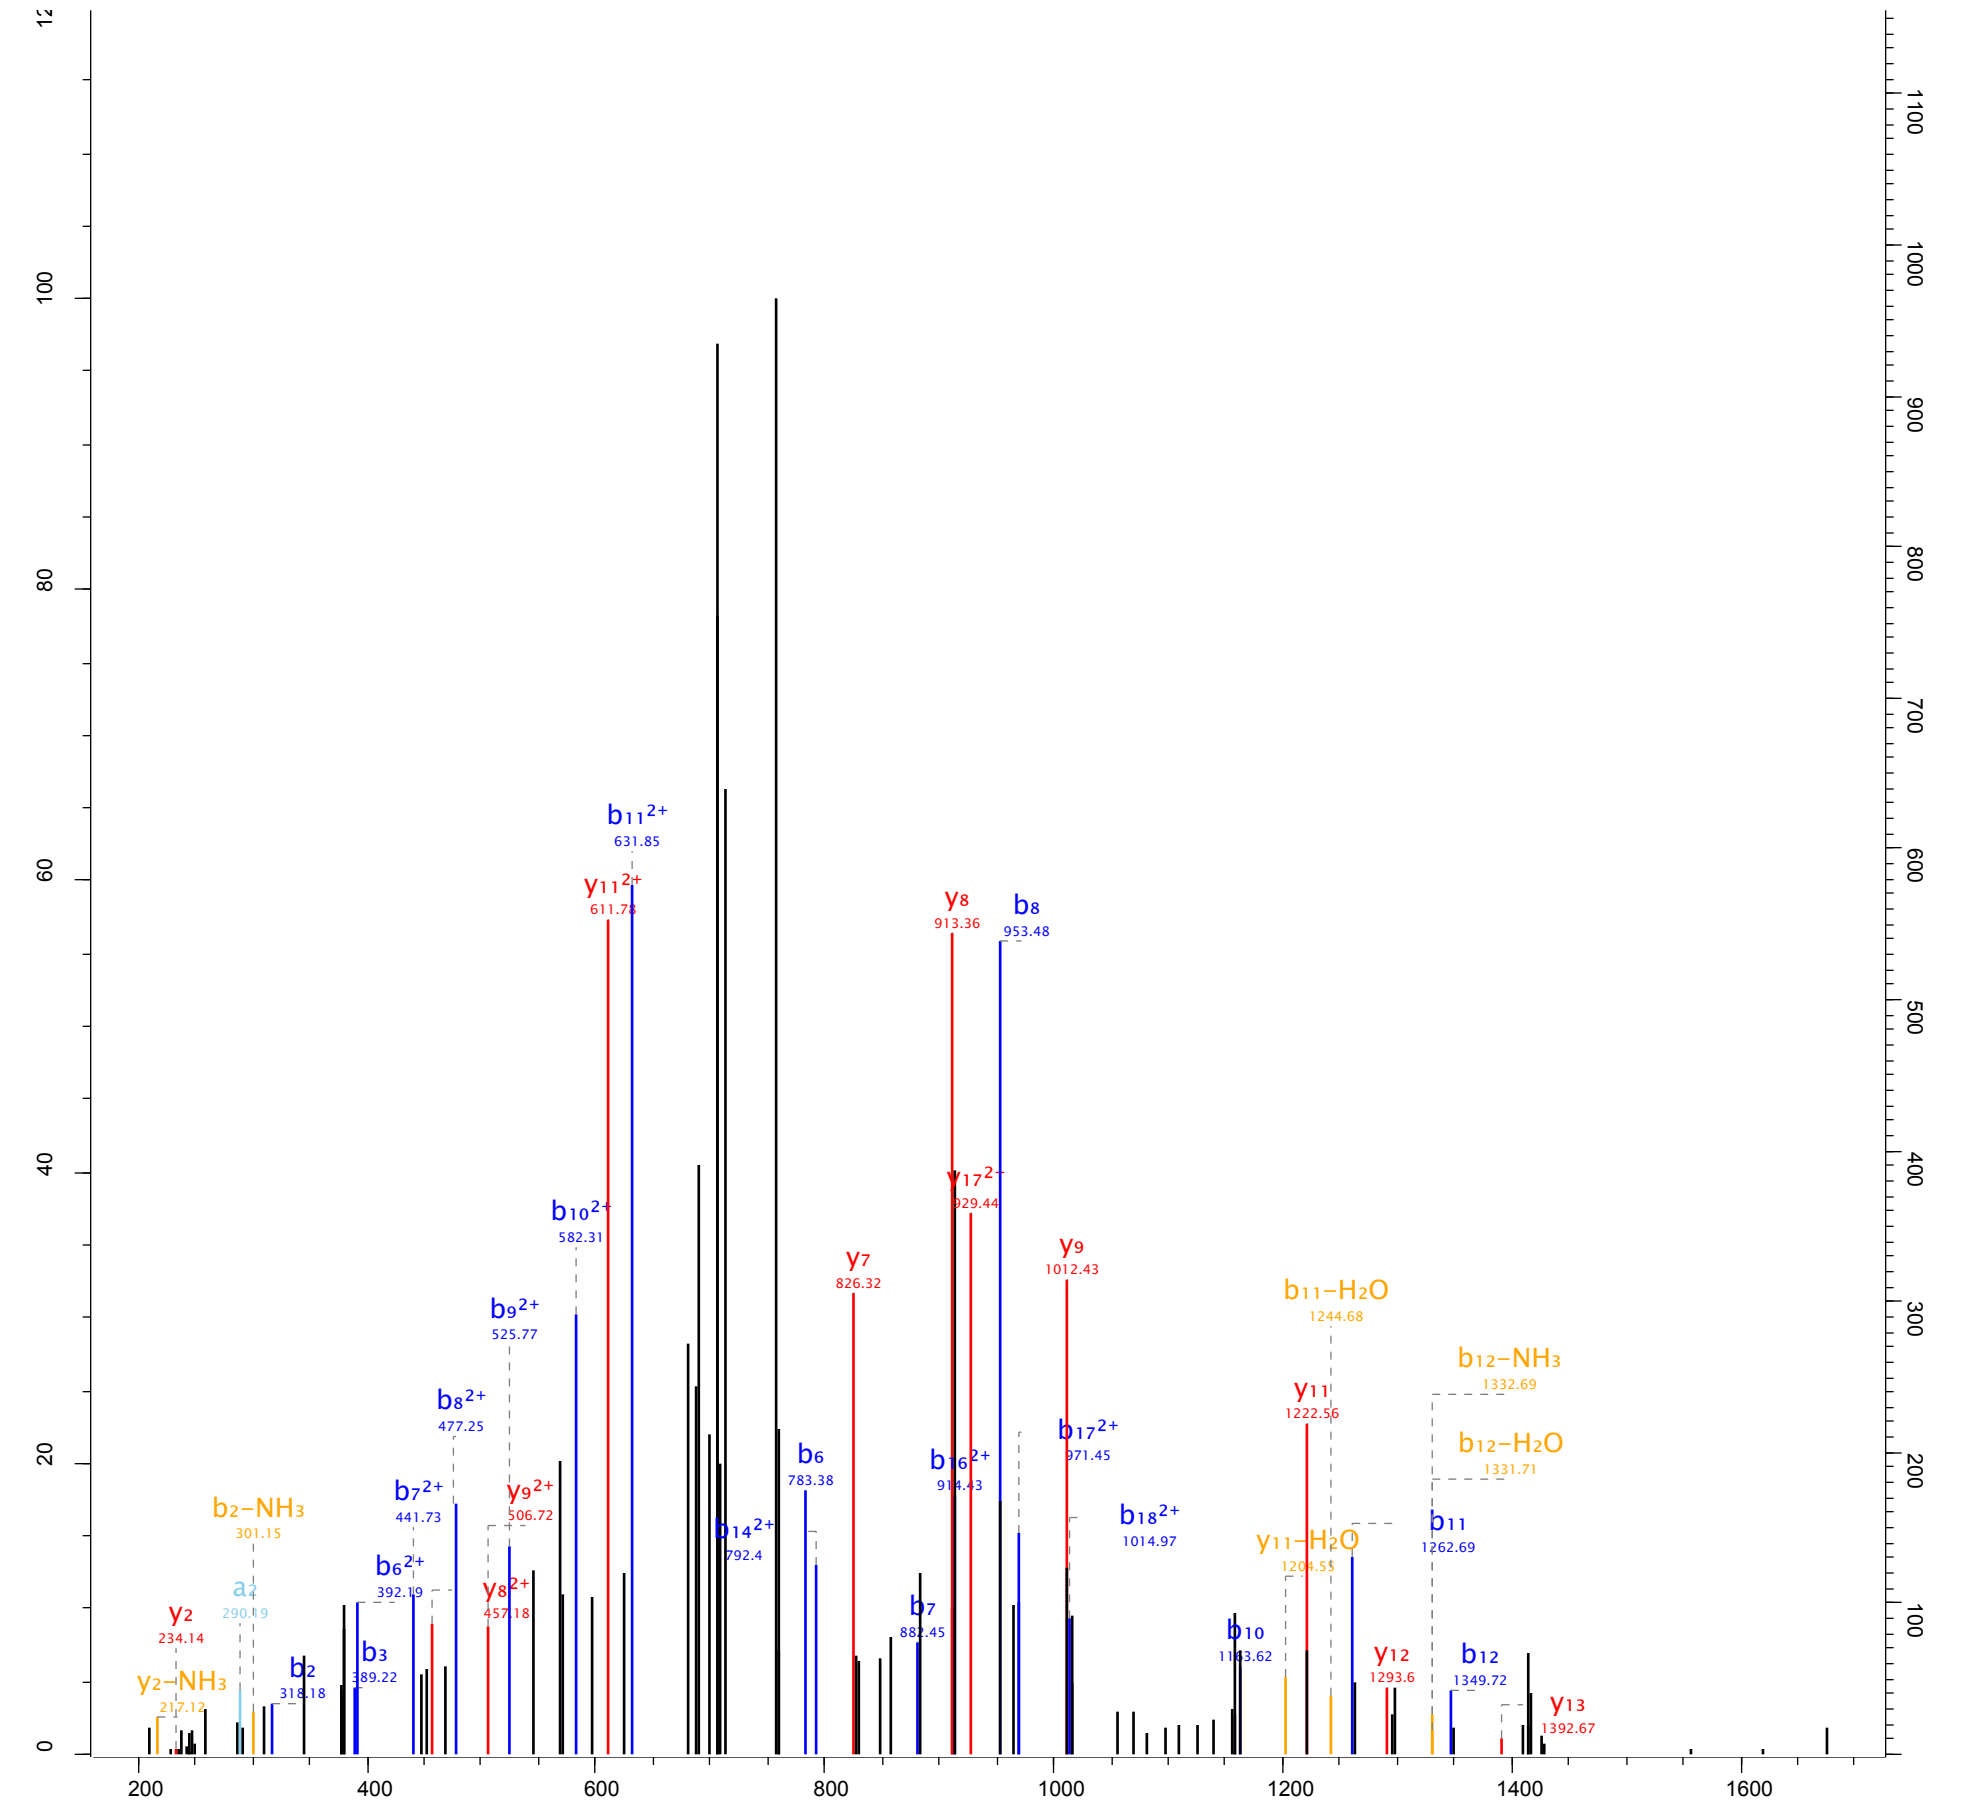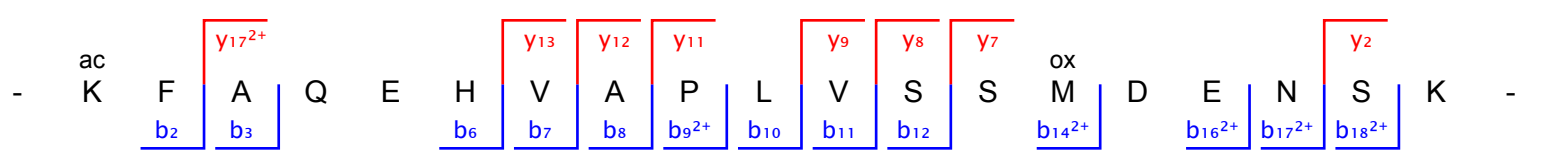

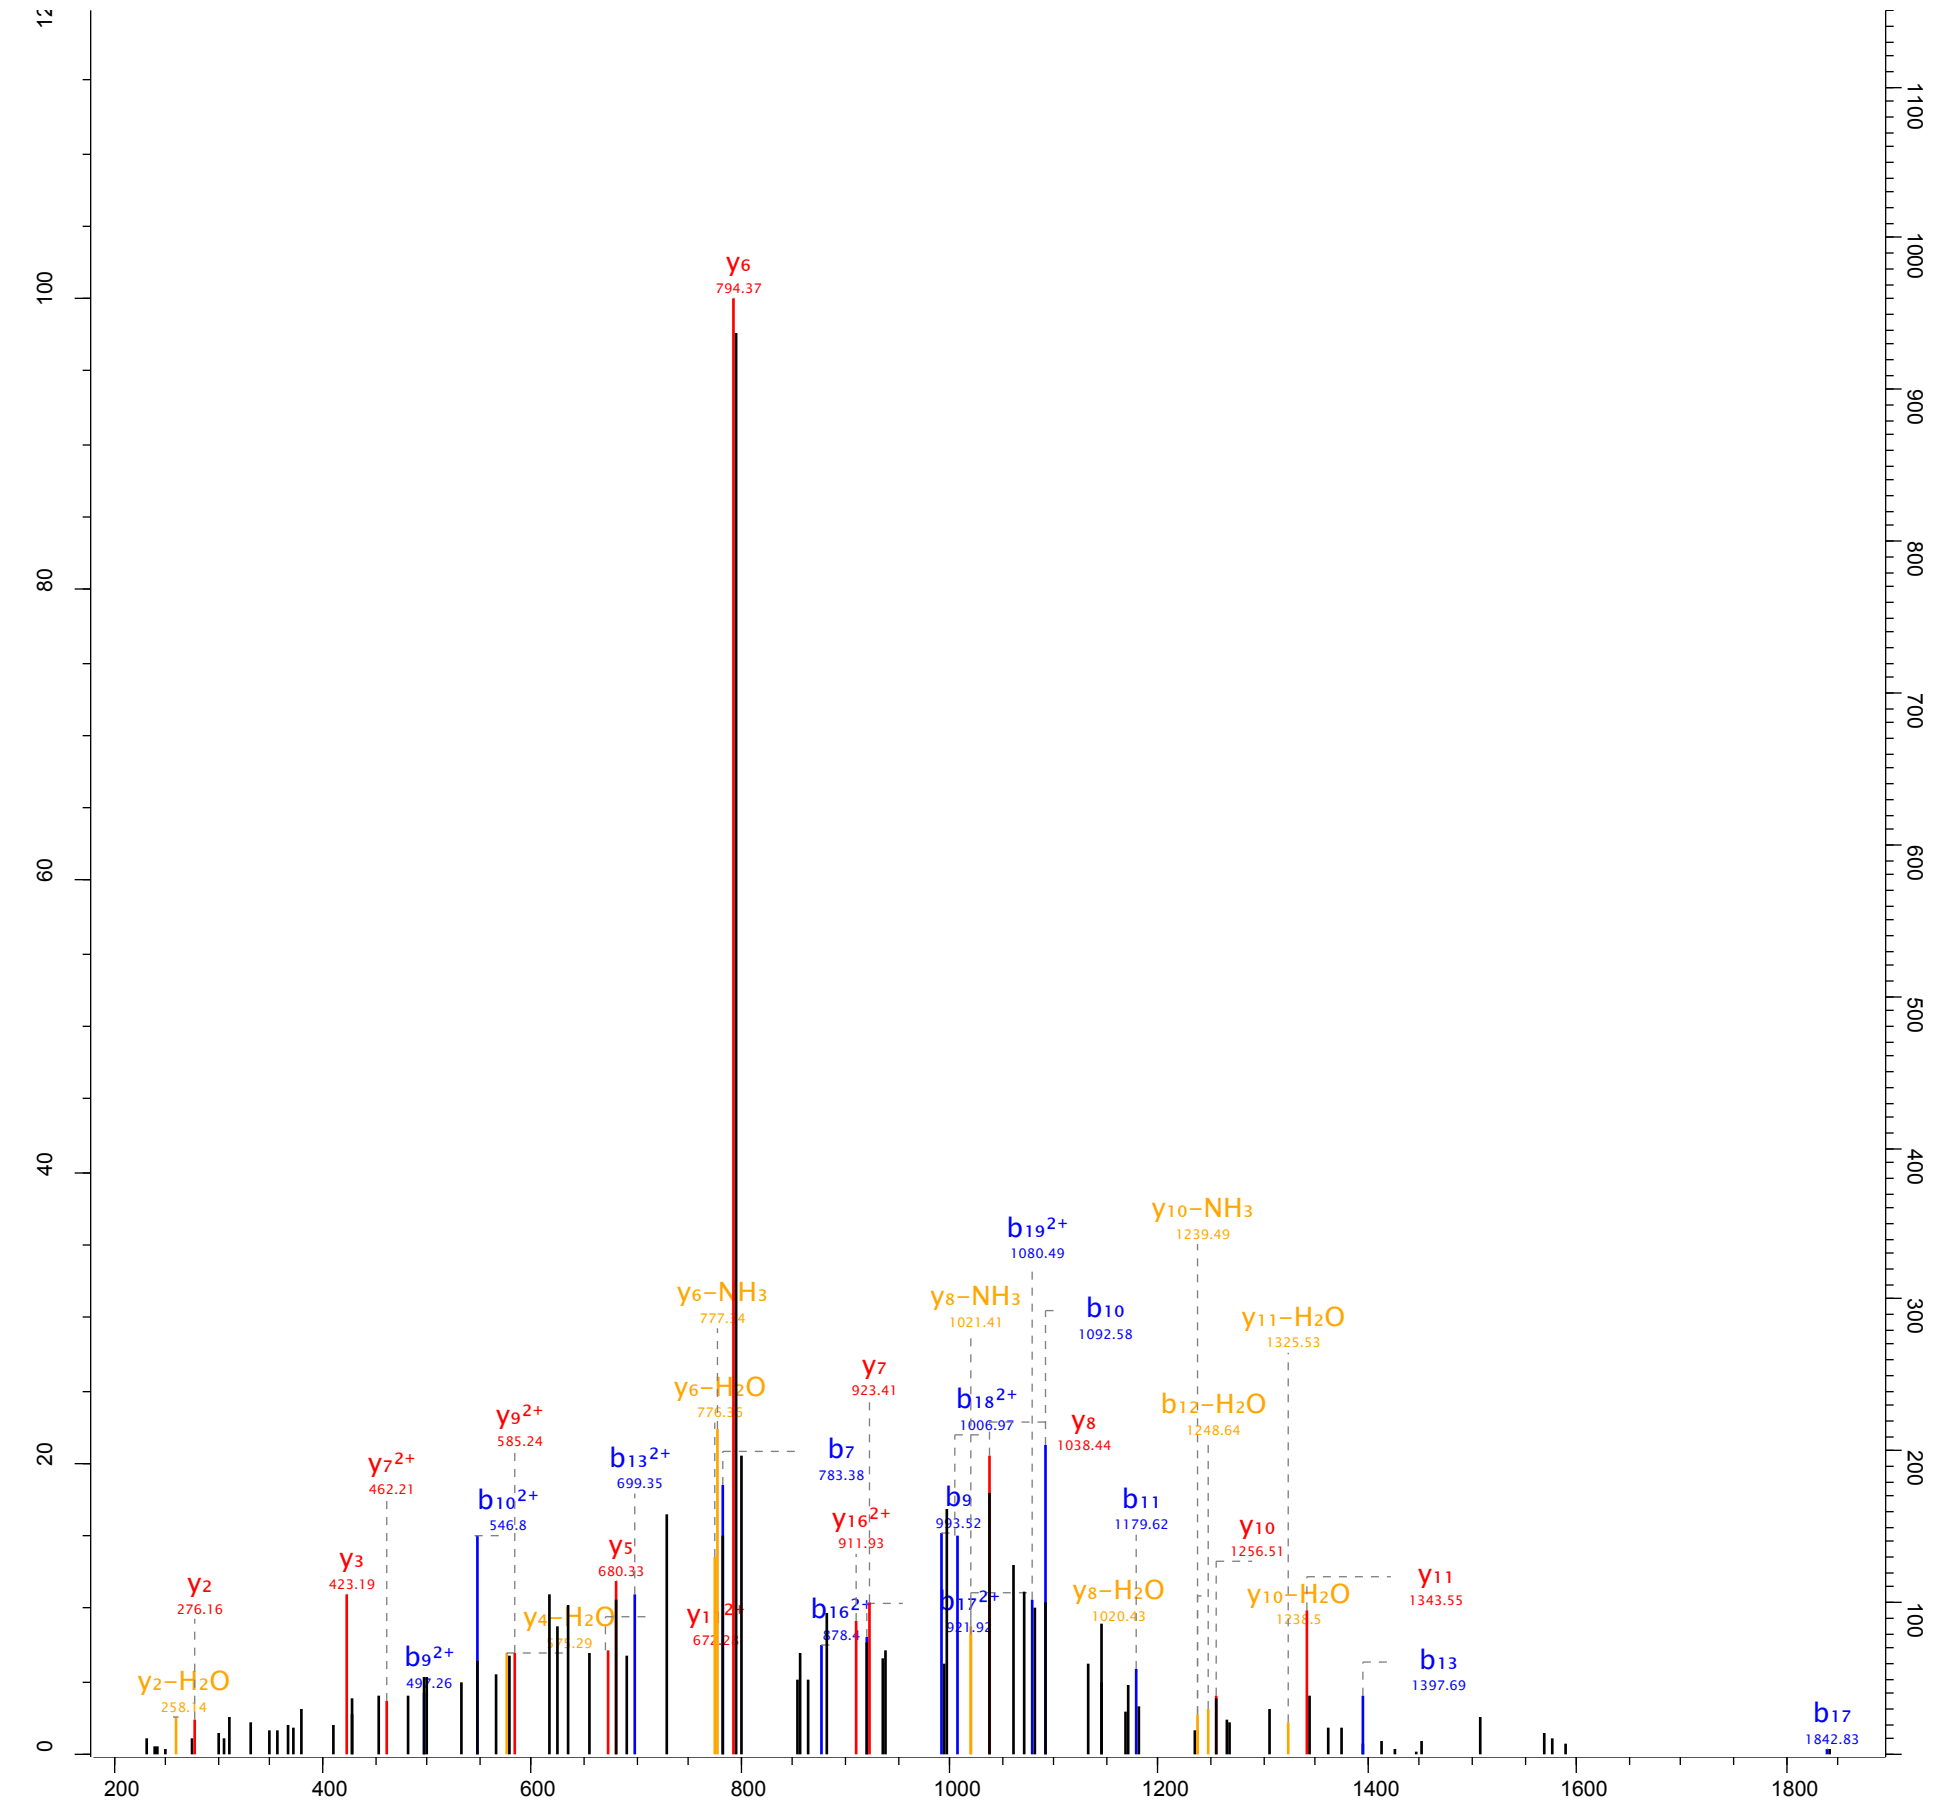

- F A Q E H V A P L V S S M D E N S ac K M E K -

Annotations below the sequence:

- Red boxes: y16<sup>2+</sup> (V), y11 (S), y10 (S), y9<sup>2+</sup> (M), y8 (D), y7 (E), y6 (N), y5 (S), y3 OX (M), y2 (E)
- Blue boxes: b7 (A), b9 (L), b10 (V), b11 (S), b13 (M), b16<sup>2+</sup> (N), b17 (S), b18<sup>2+</sup> (K), b19<sup>2+</sup> (M)

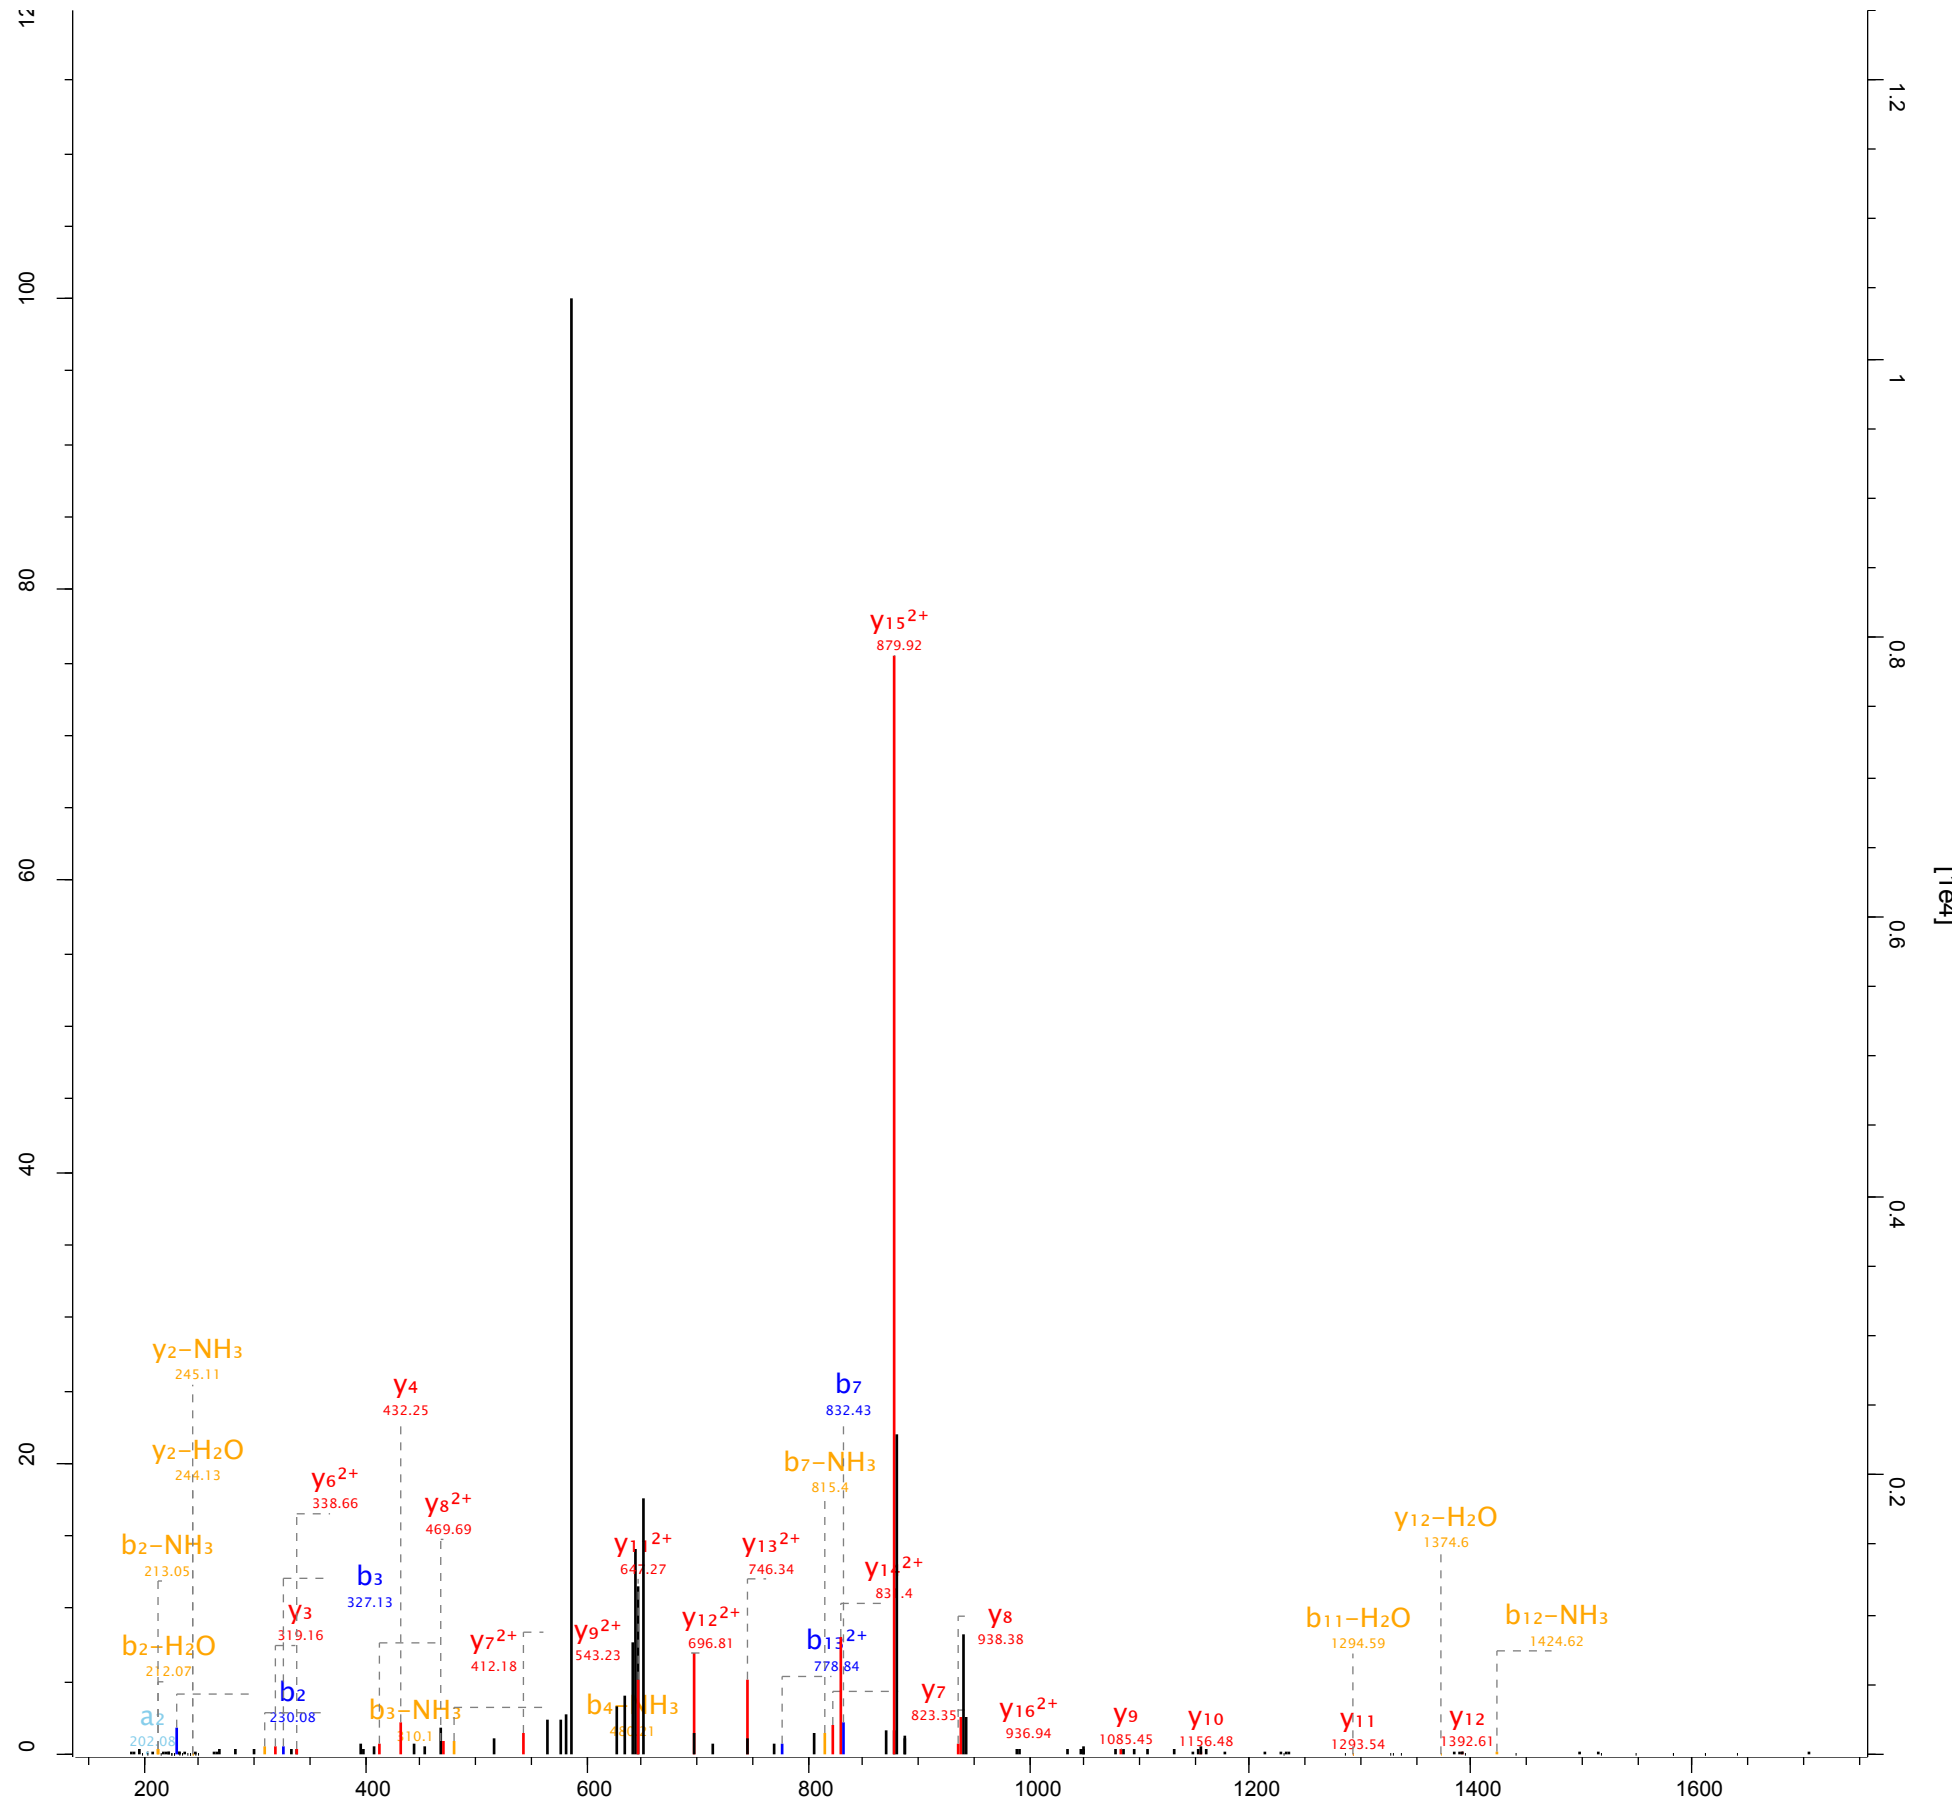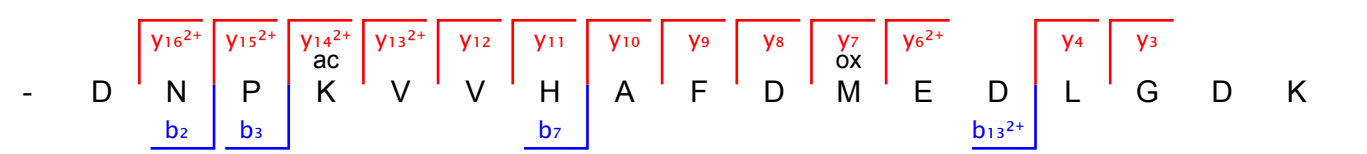

Raw file: 022714\_SCW\_II\_53\_8\_2ndZT  
 Scan: 10960 Method: ITMS; CID Score: 189.99 m/z: 601.63 Gene names: Myh10

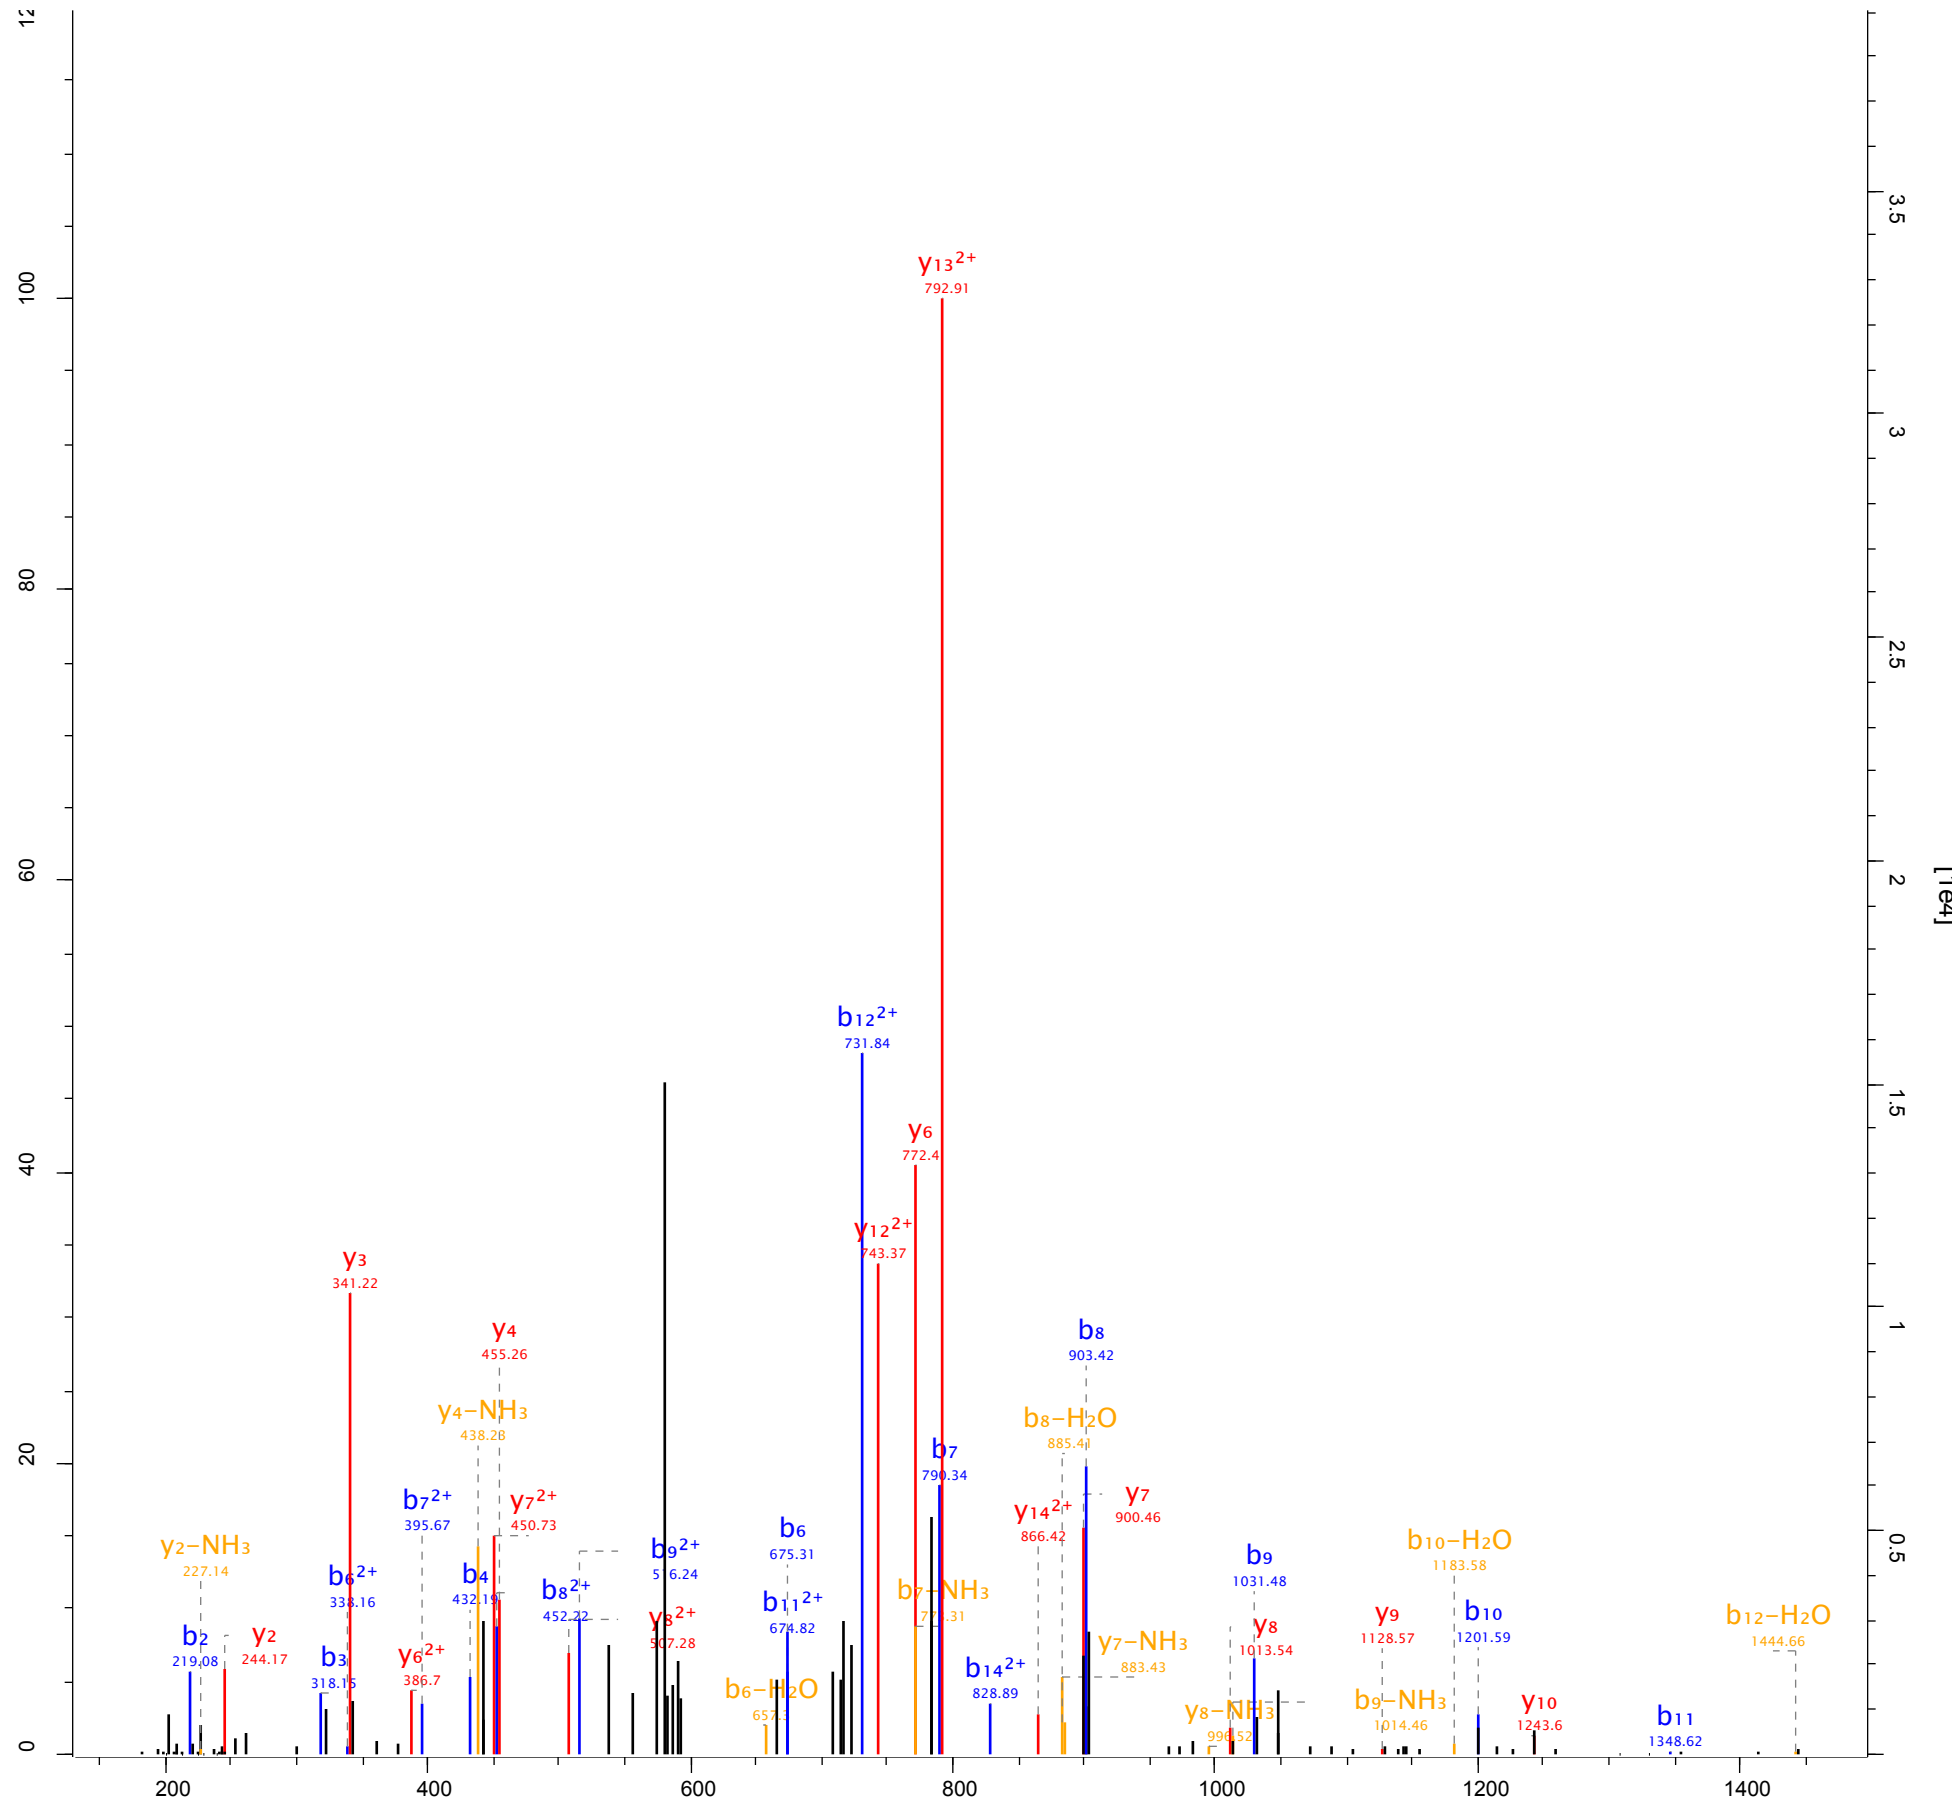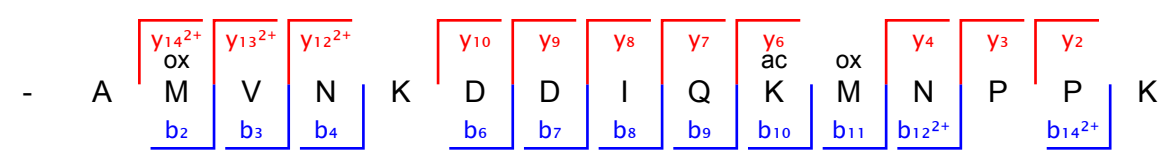

Raw file: 022714\_SCW\_II\_53\_8\_2ndZT  
 Scan: 14468 Method: ITMS; CID Score: 198.97 m/z: 474.6 Gene names: Myh10

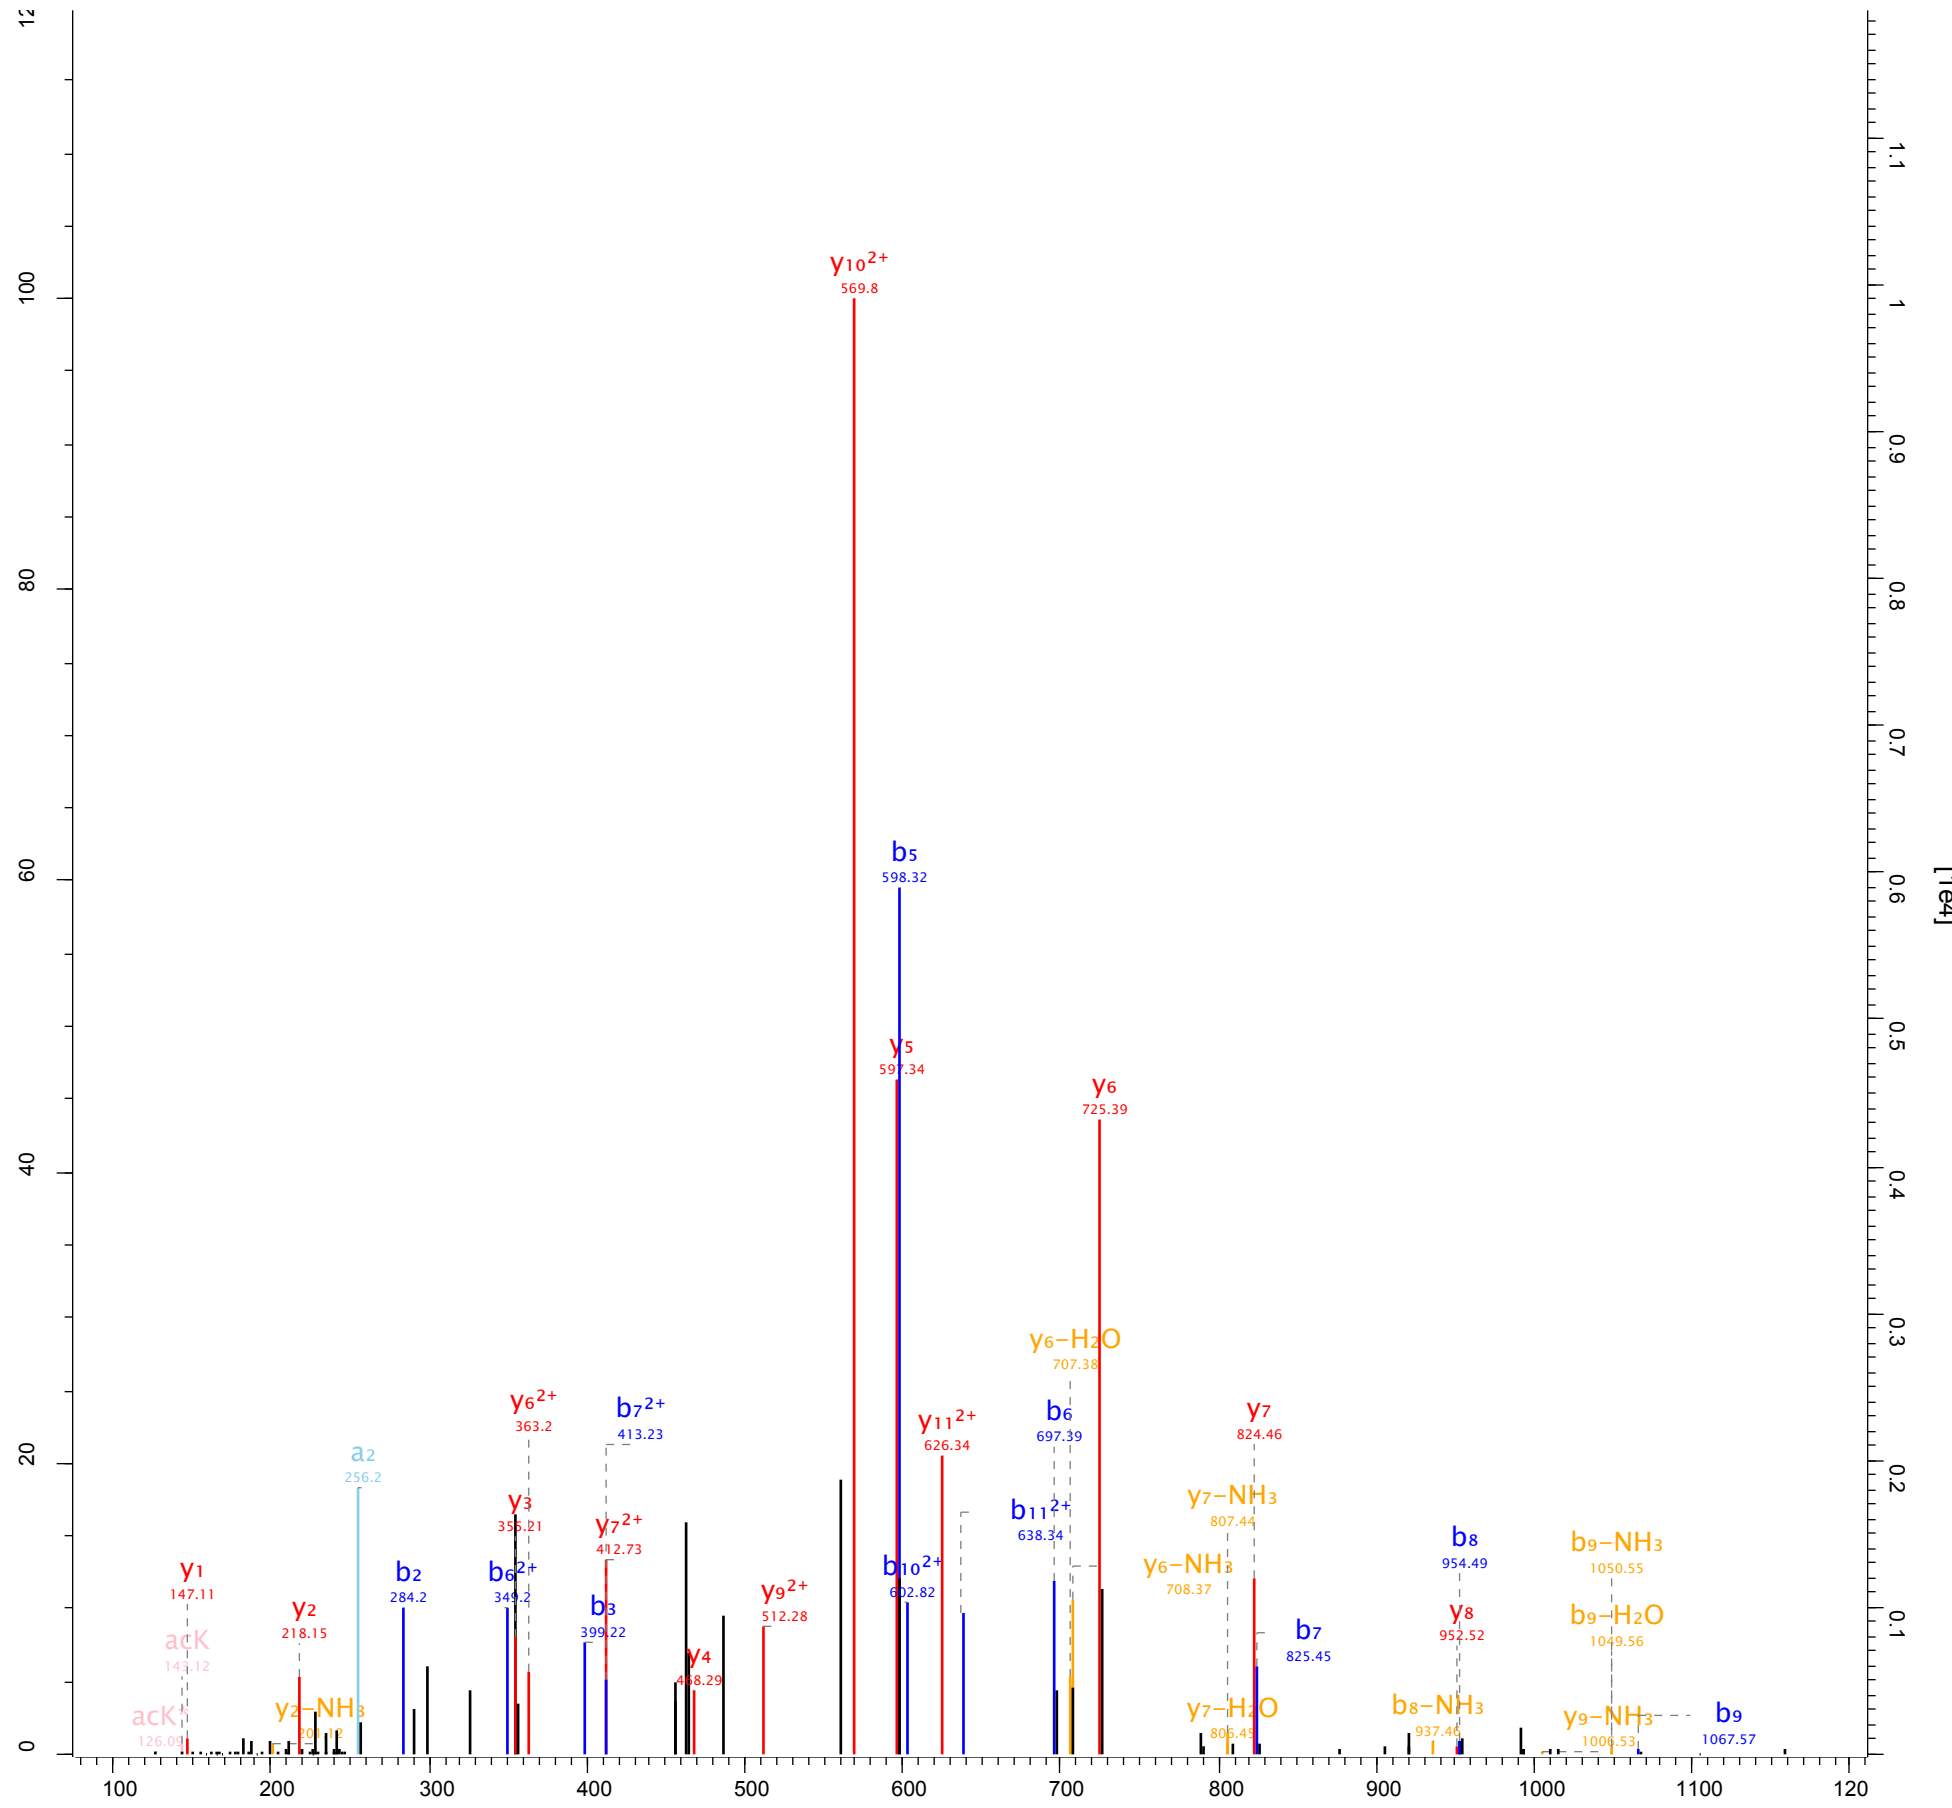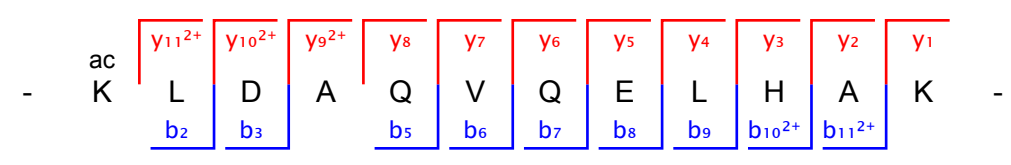



022714\_SCW\_II\_53\_8\_2ndZT

14548

ITMS; CID

71.35

714.99

Rpl4

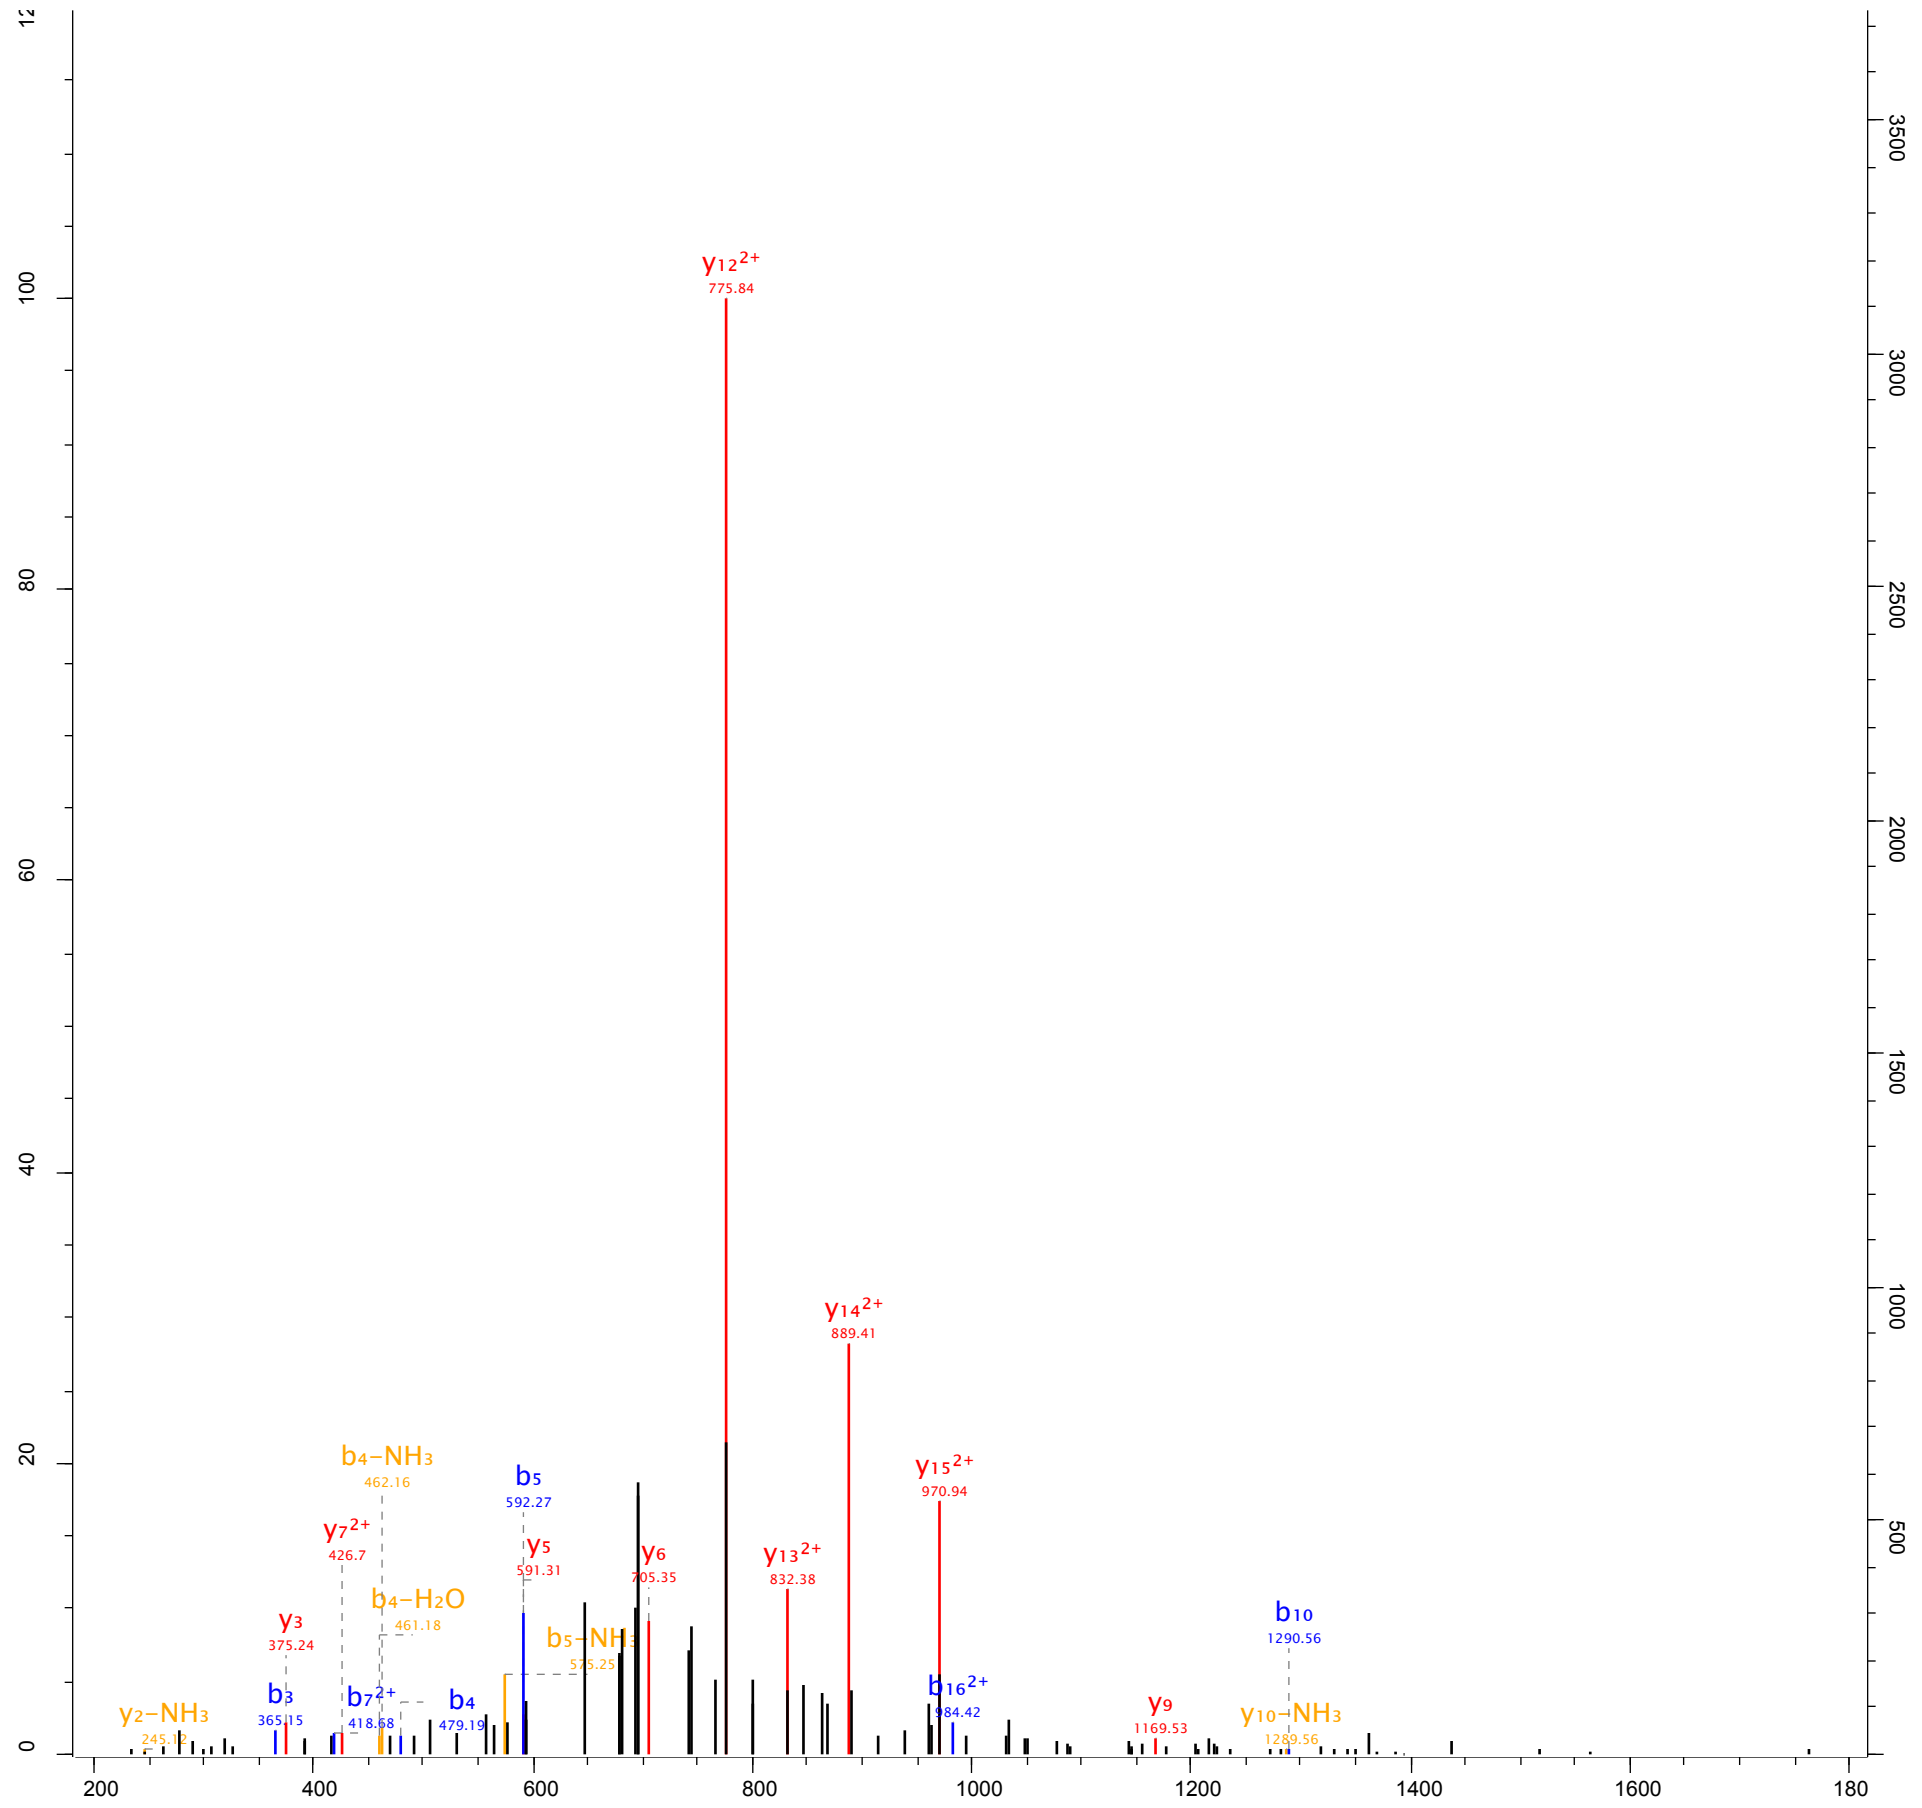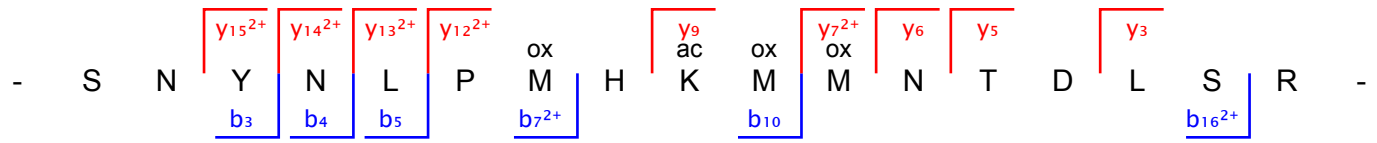

022714\_SCW\_II\_53\_8\_2ndZT

15290

ITMS; CID

139.15

402.92

Actb;Actg1;Actc1;Acta1;Actbl2;Acta2;Actg2

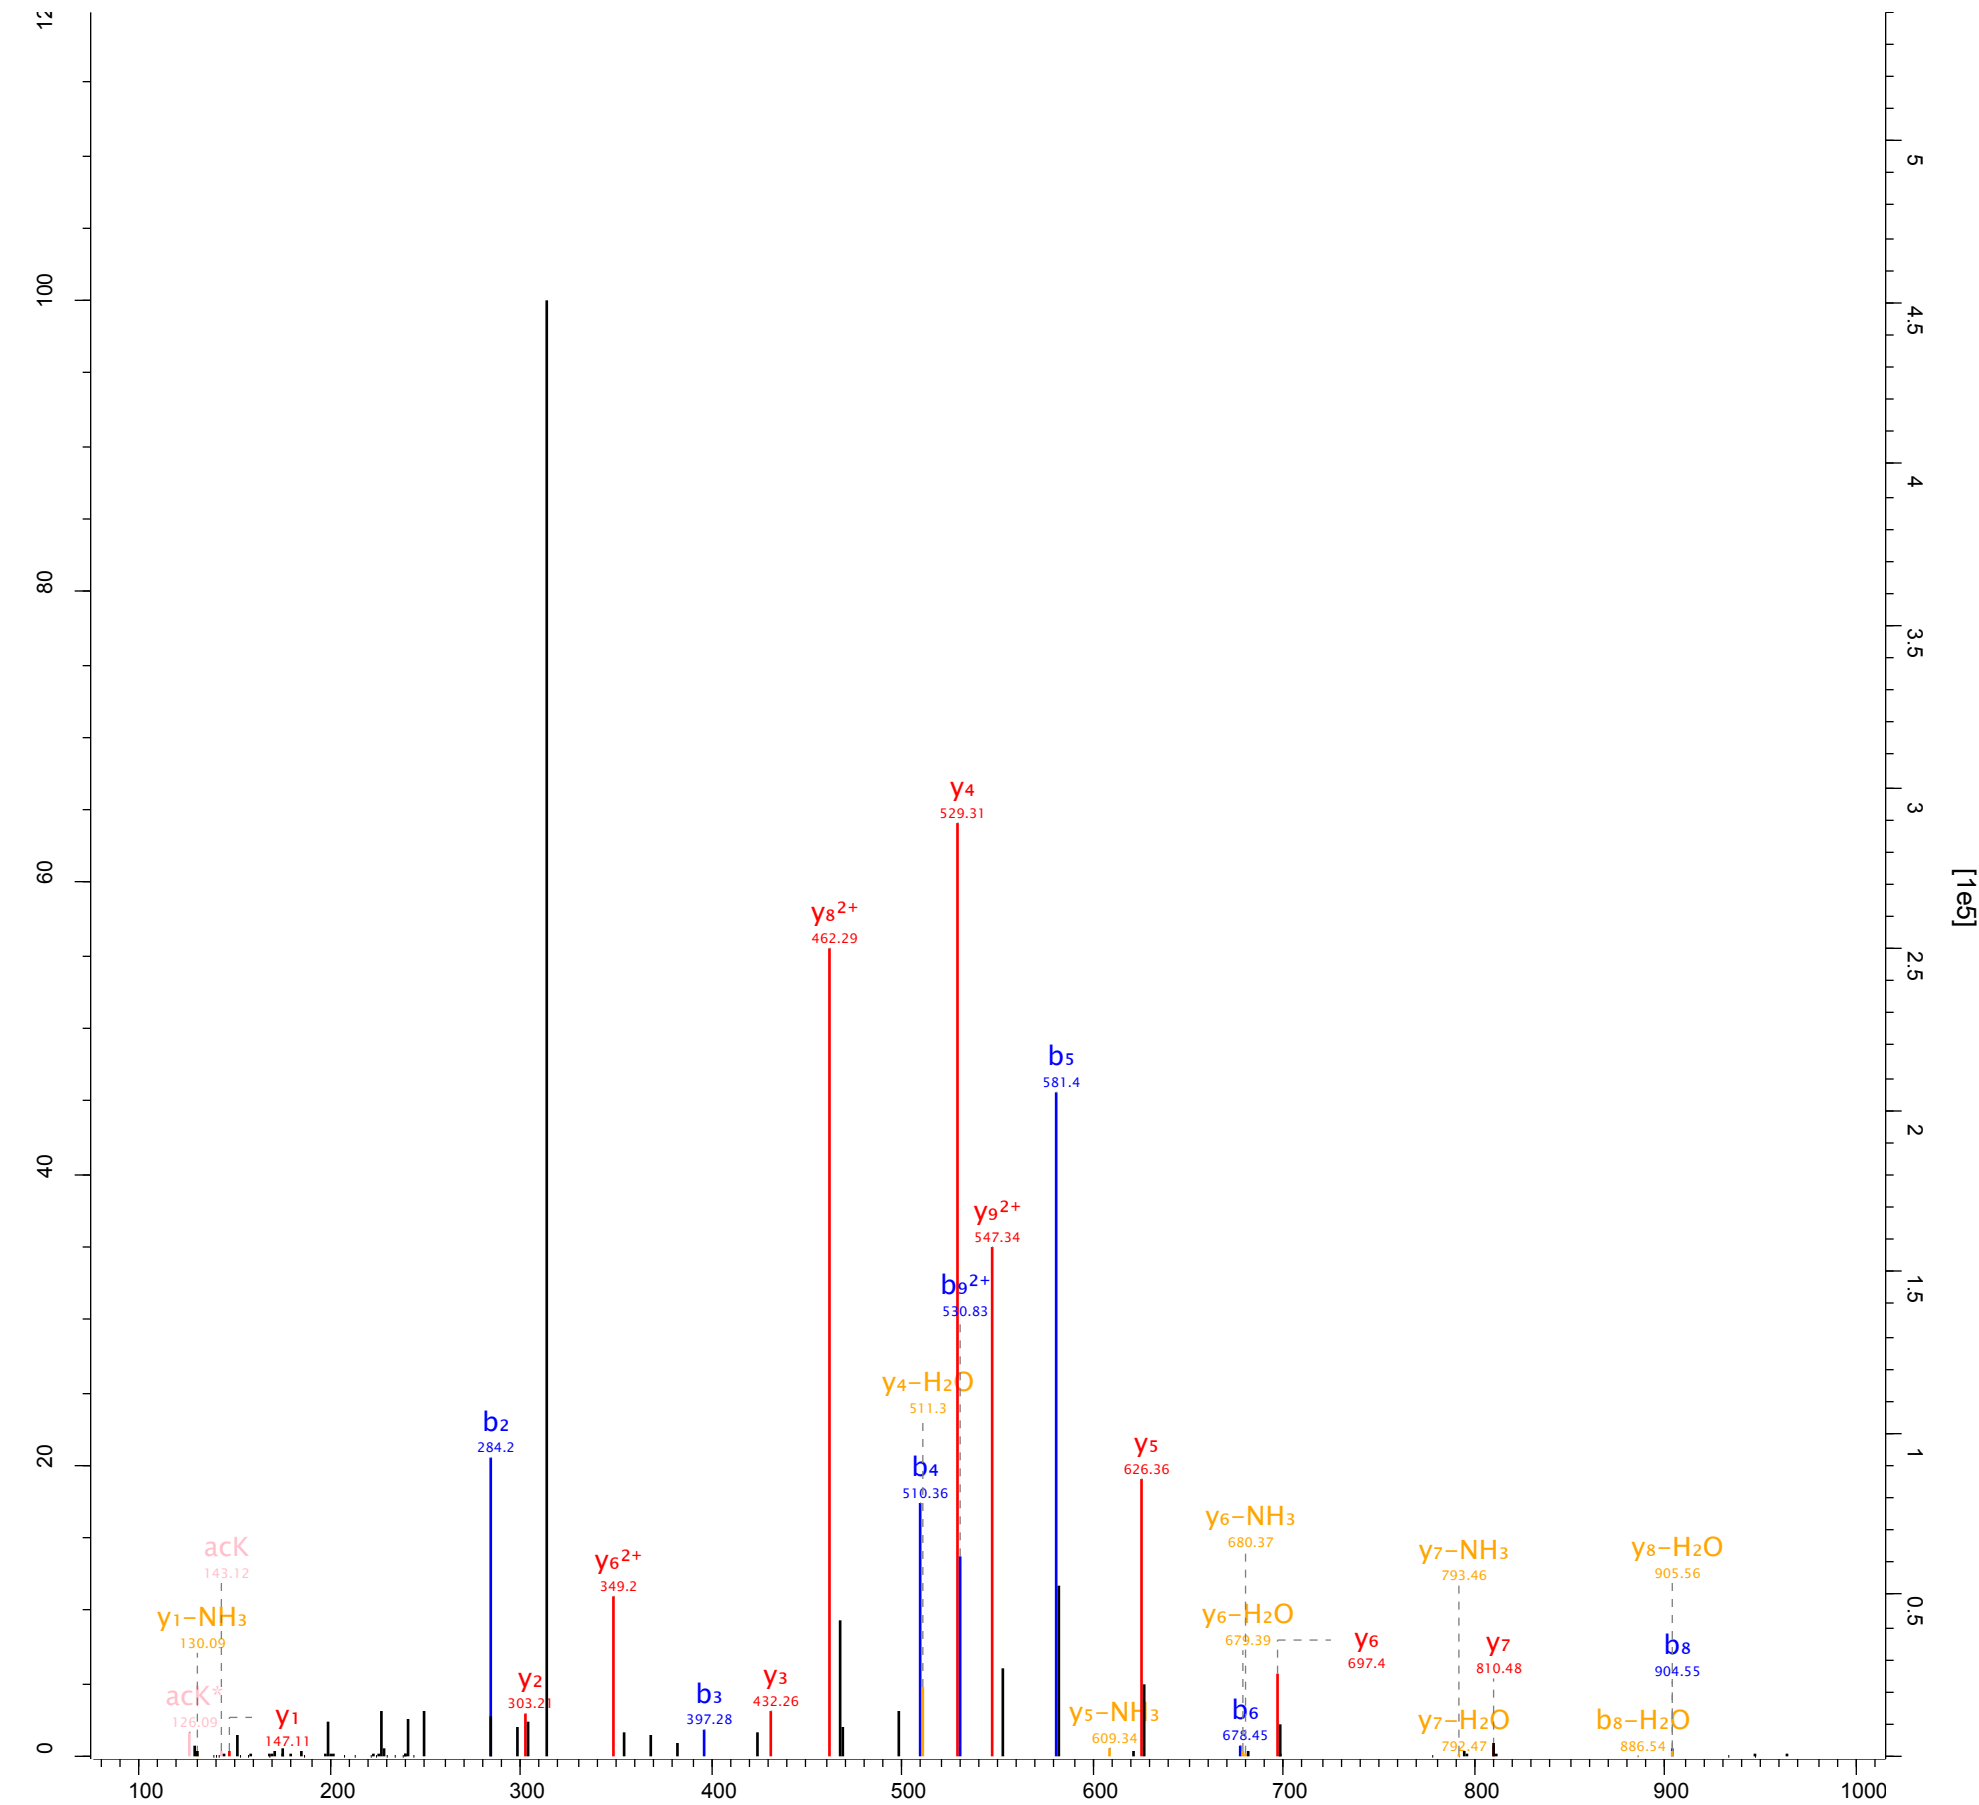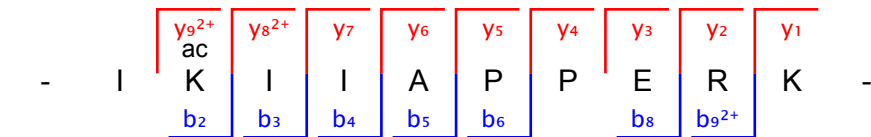

Raw file: 022714\_SCW\_II\_53\_8\_2ndZT  
 Scan: 15364  
 Method: ITMS; CID  
 Score: 112.67  
 m/z: 711.66  
 Gene names: Ywhae

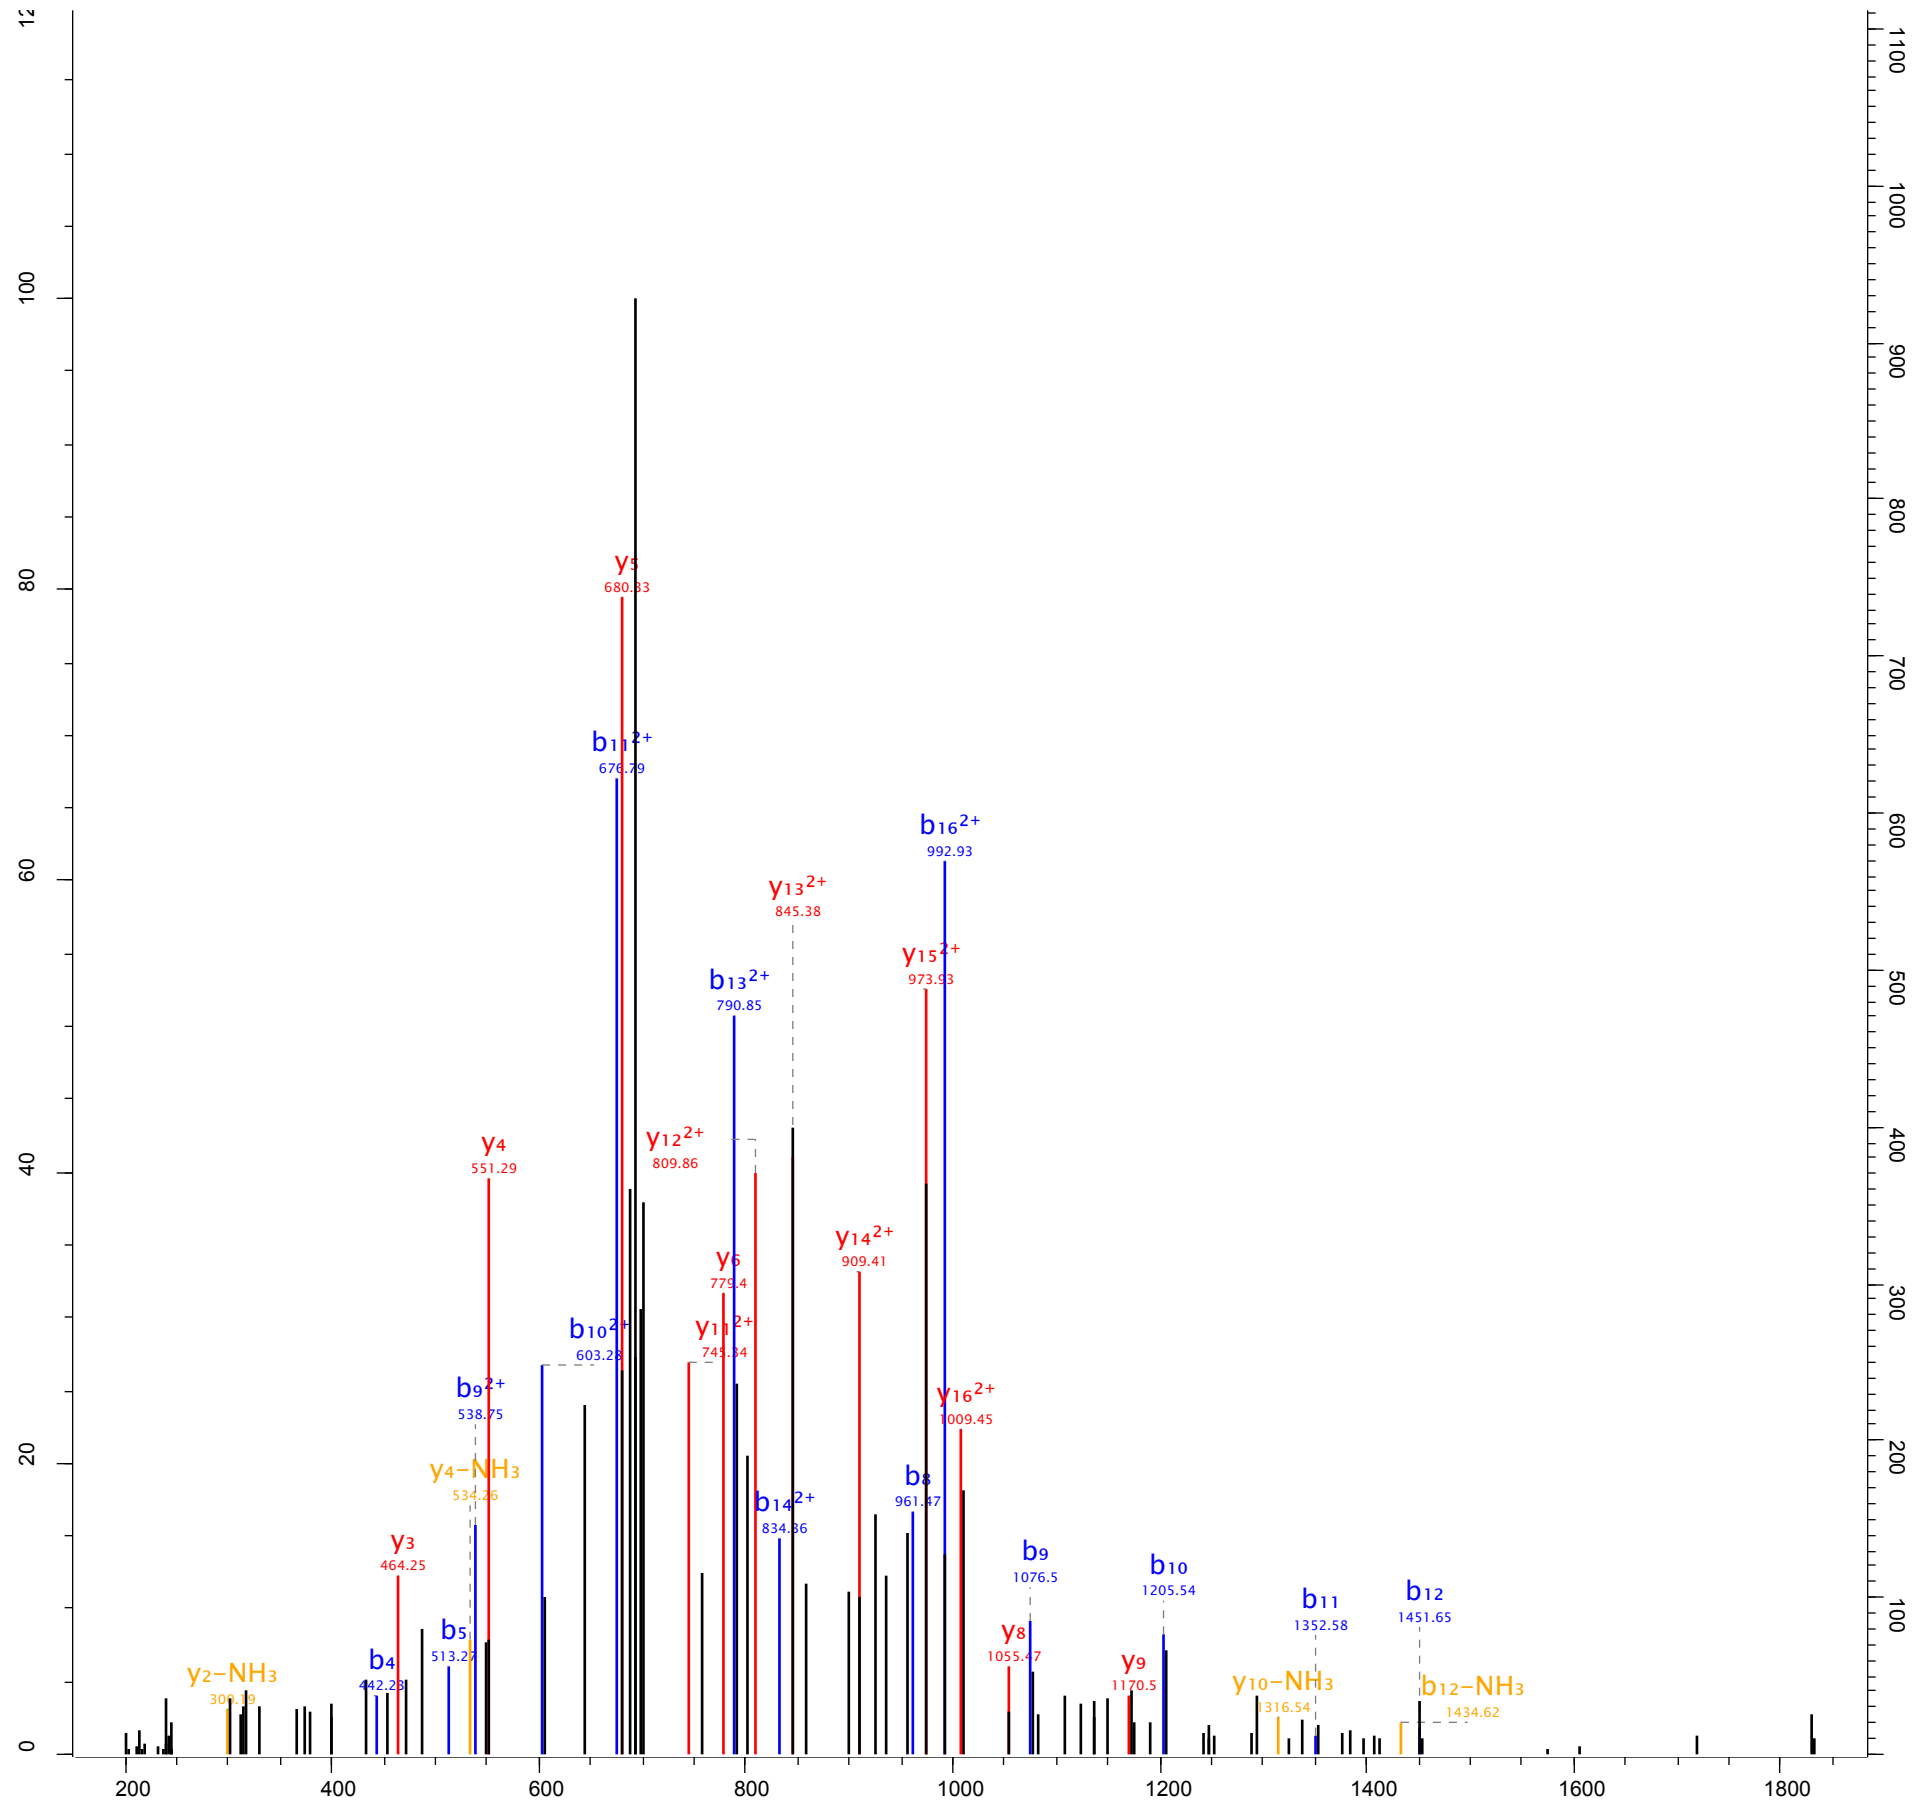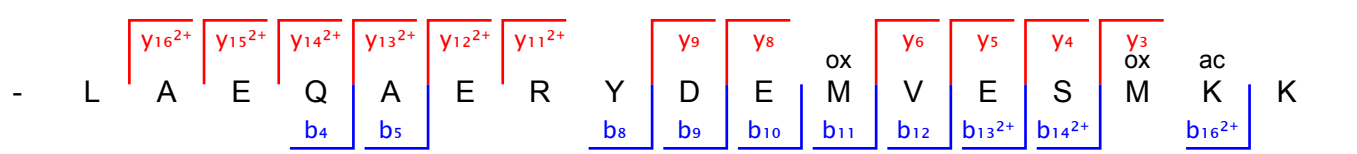

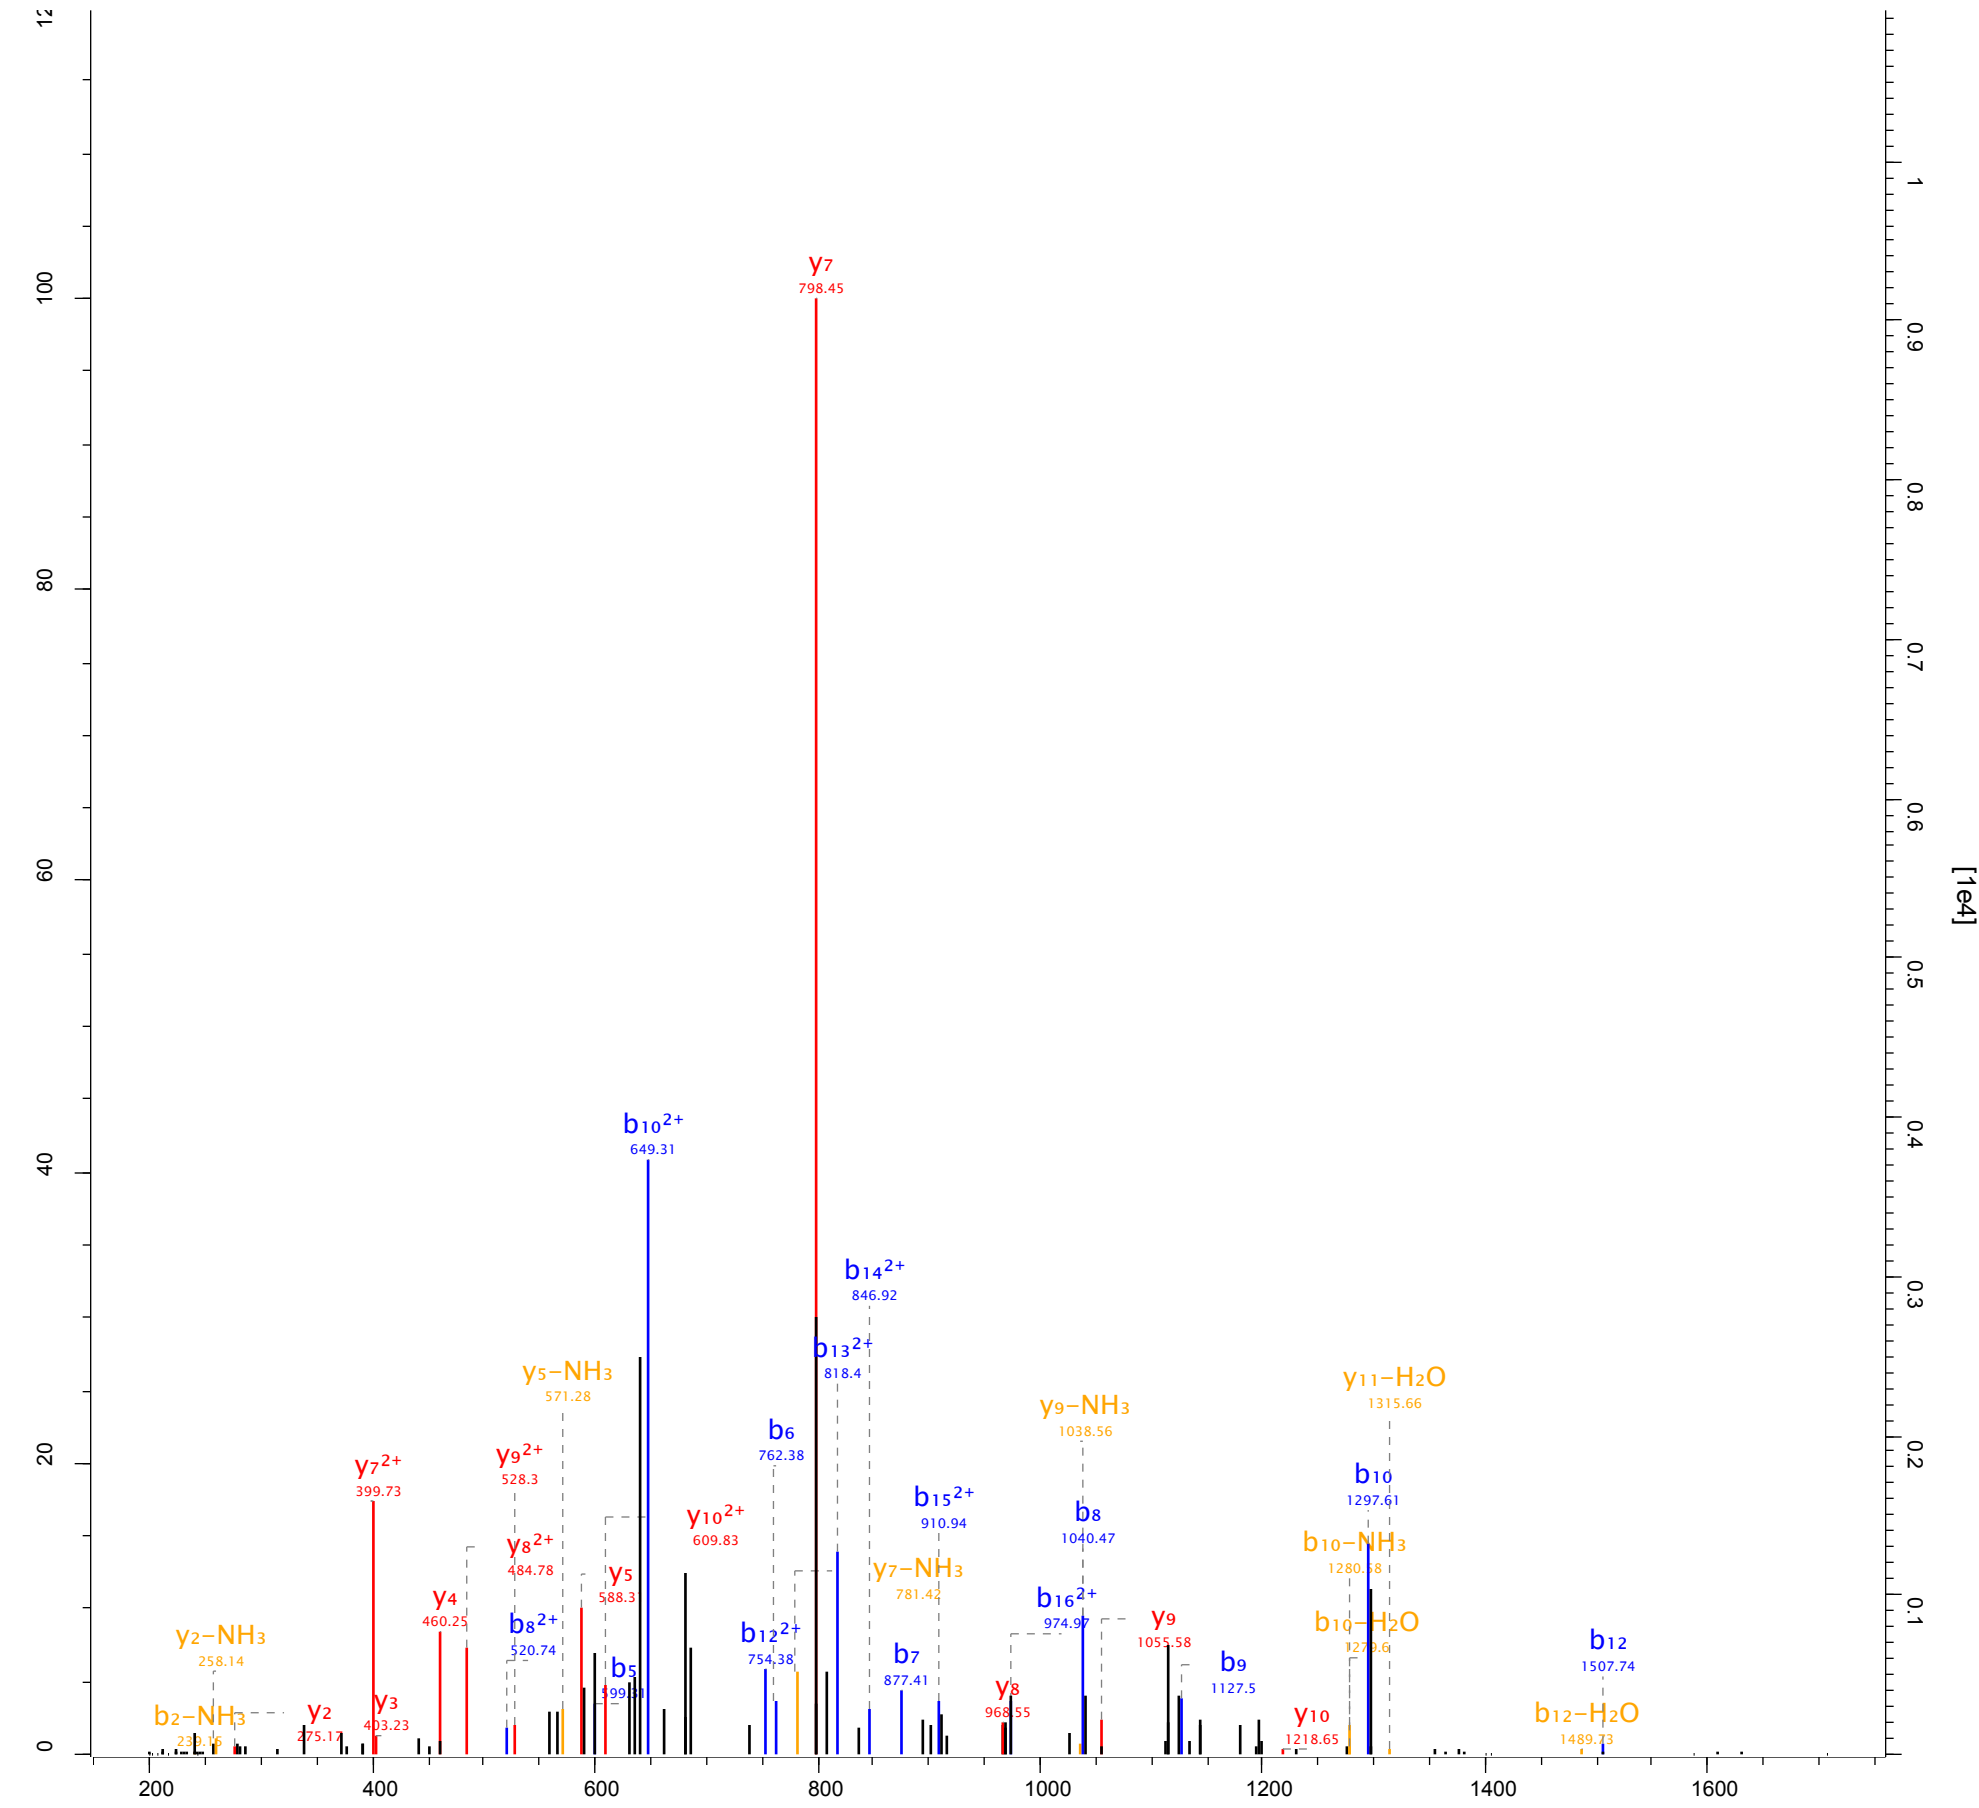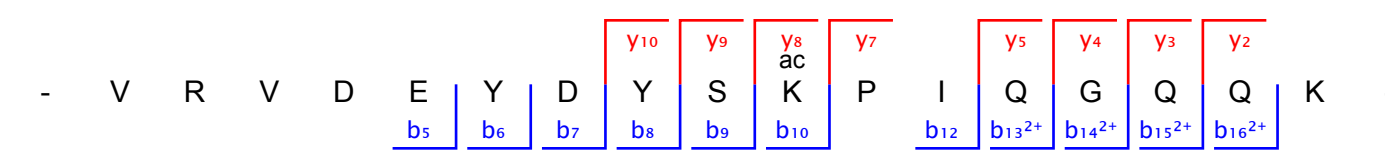

022714\_SCW\_II\_53\_8\_2ndZT

16846

ITMS; CID

122.1

731.71

Ugdh

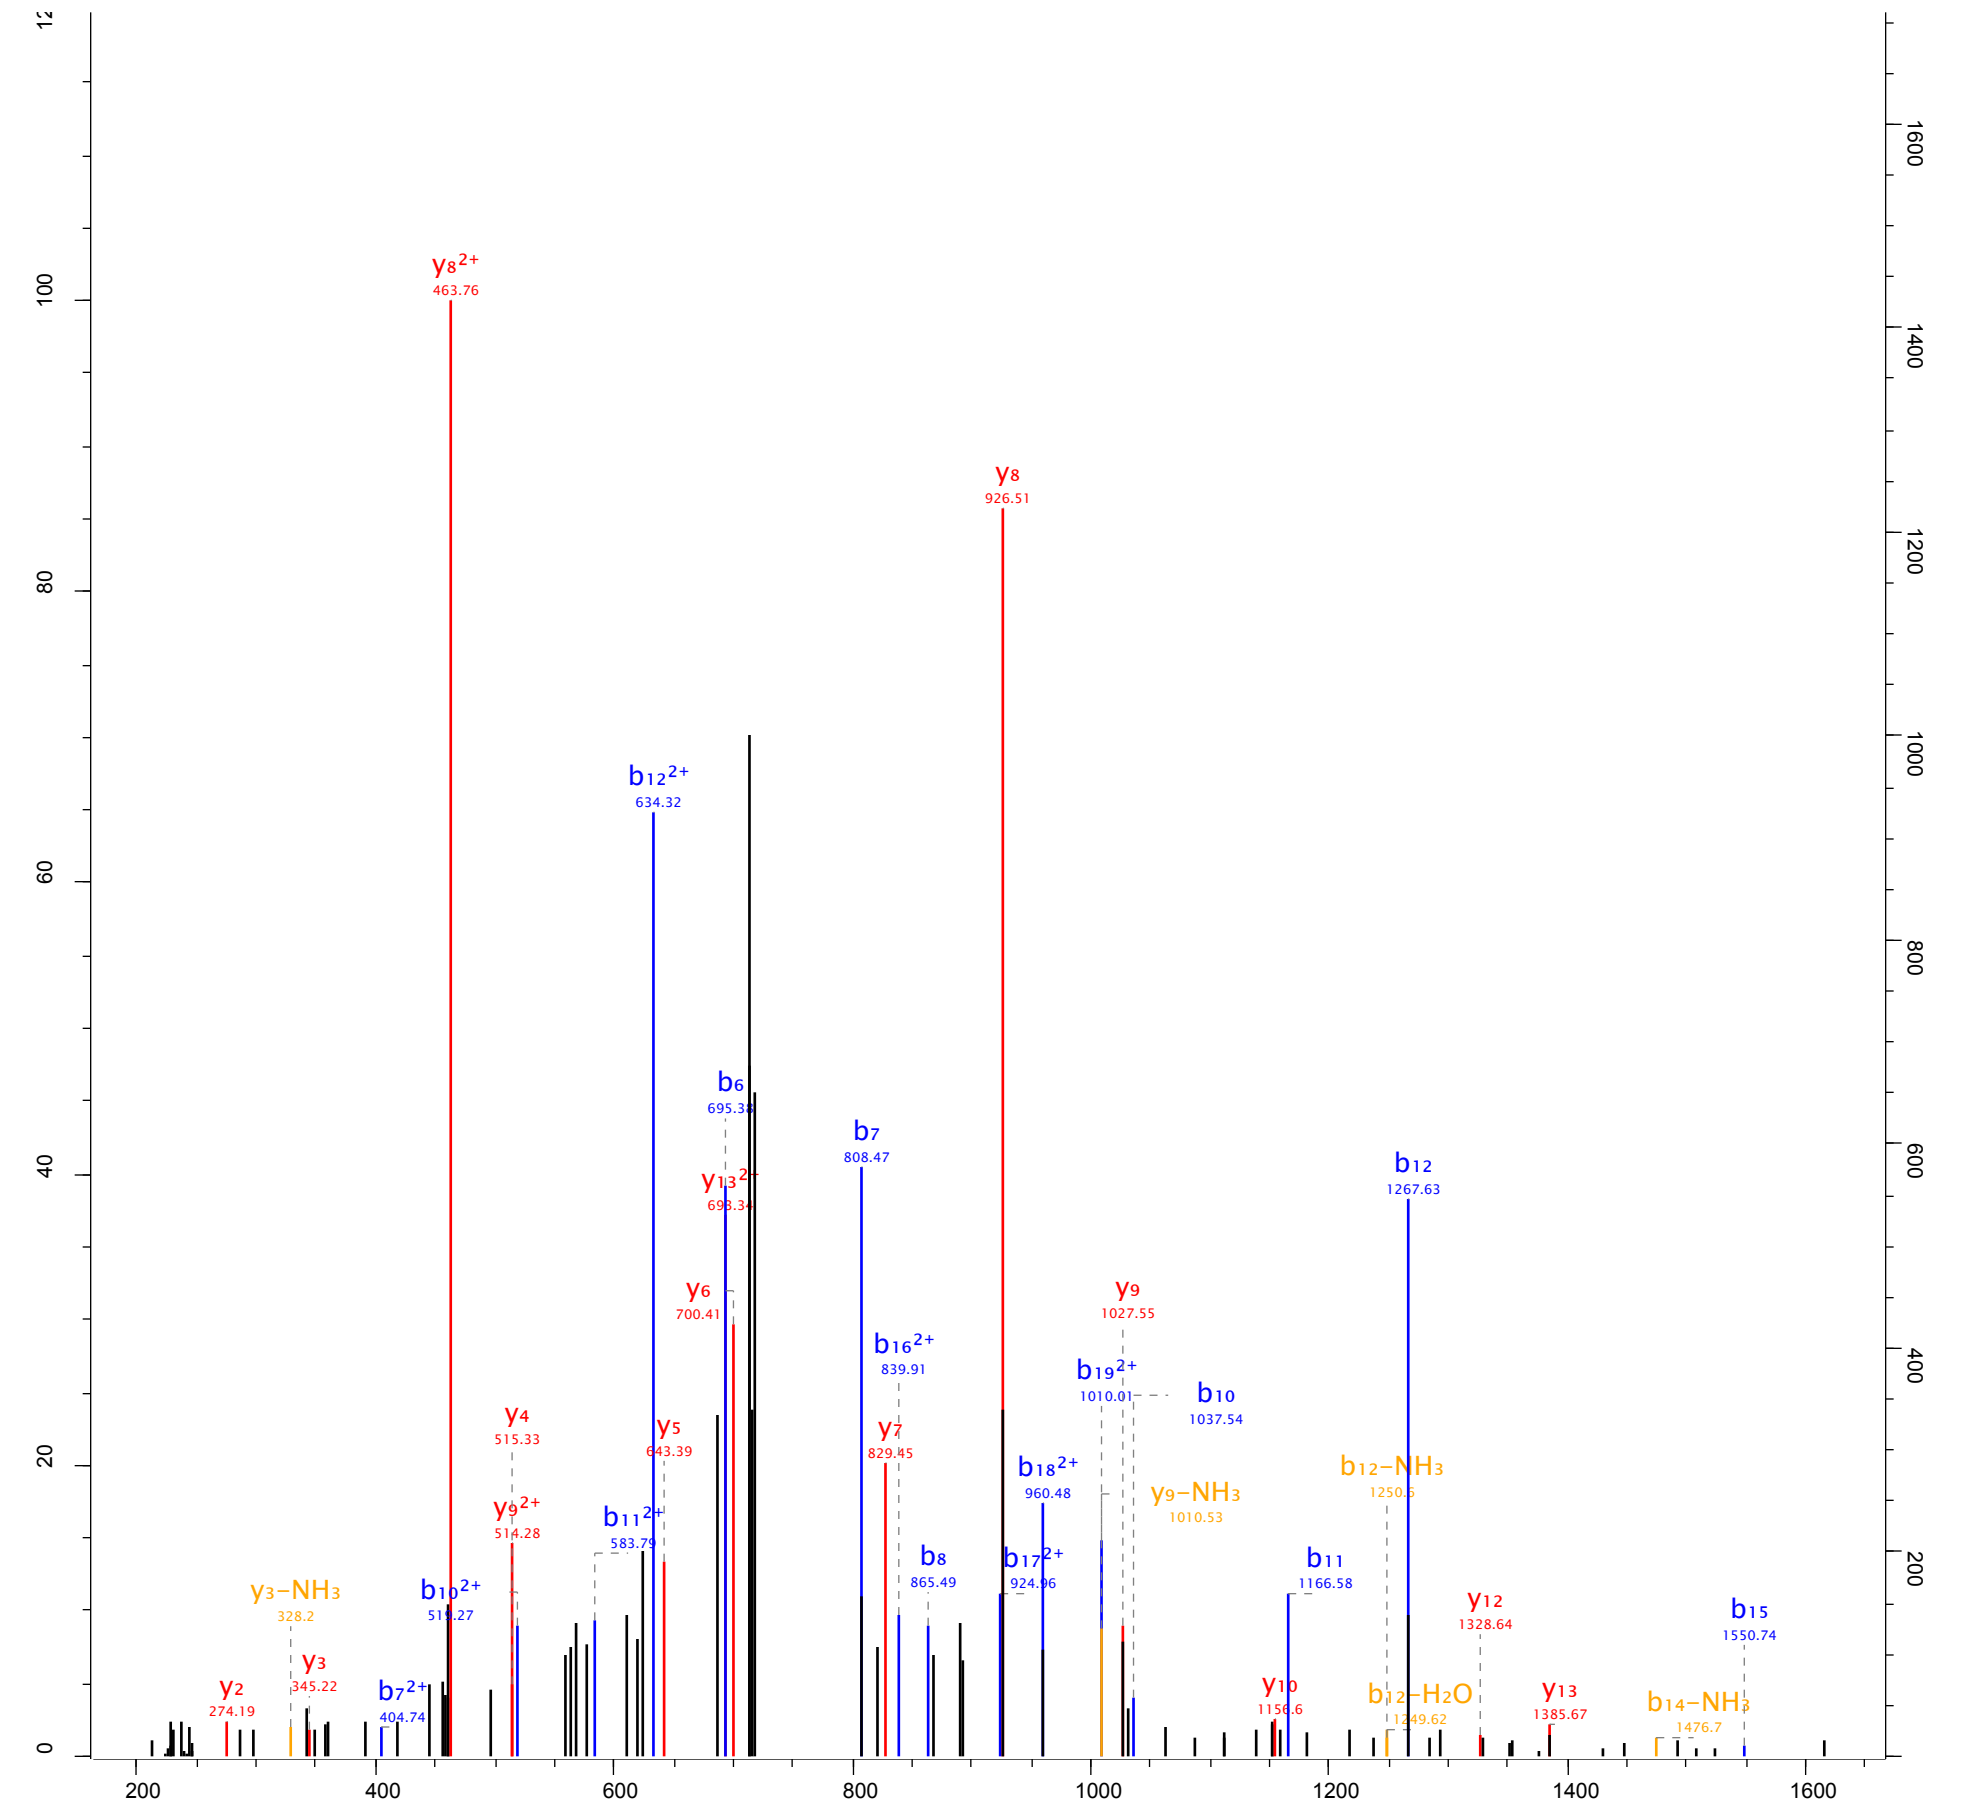

- N P D R V L I G G D E T P E G Q K A V R -

b<sub>6</sub> b<sub>7</sub> b<sub>8</sub> b<sub>10</sub> b<sub>11</sub> b<sub>12</sub> b<sub>15</sub> b<sub>16</sub><sup>2+</sup> b<sub>17</sub><sup>2+</sup> b<sub>18</sub><sup>2+</sup> b<sub>19</sub><sup>2+</sup>

y<sub>13</sub> y<sub>12</sub> y<sub>10</sub> y<sub>9</sub> y<sub>8</sub> y<sub>7</sub> y<sub>6</sub> y<sub>5</sub> y<sub>4</sub> ac y<sub>3</sub> y<sub>2</sub>

022714\_SCW\_II\_53\_8\_2ndZT

17064 ITMS; CID 185.2 732.38 Ddx1

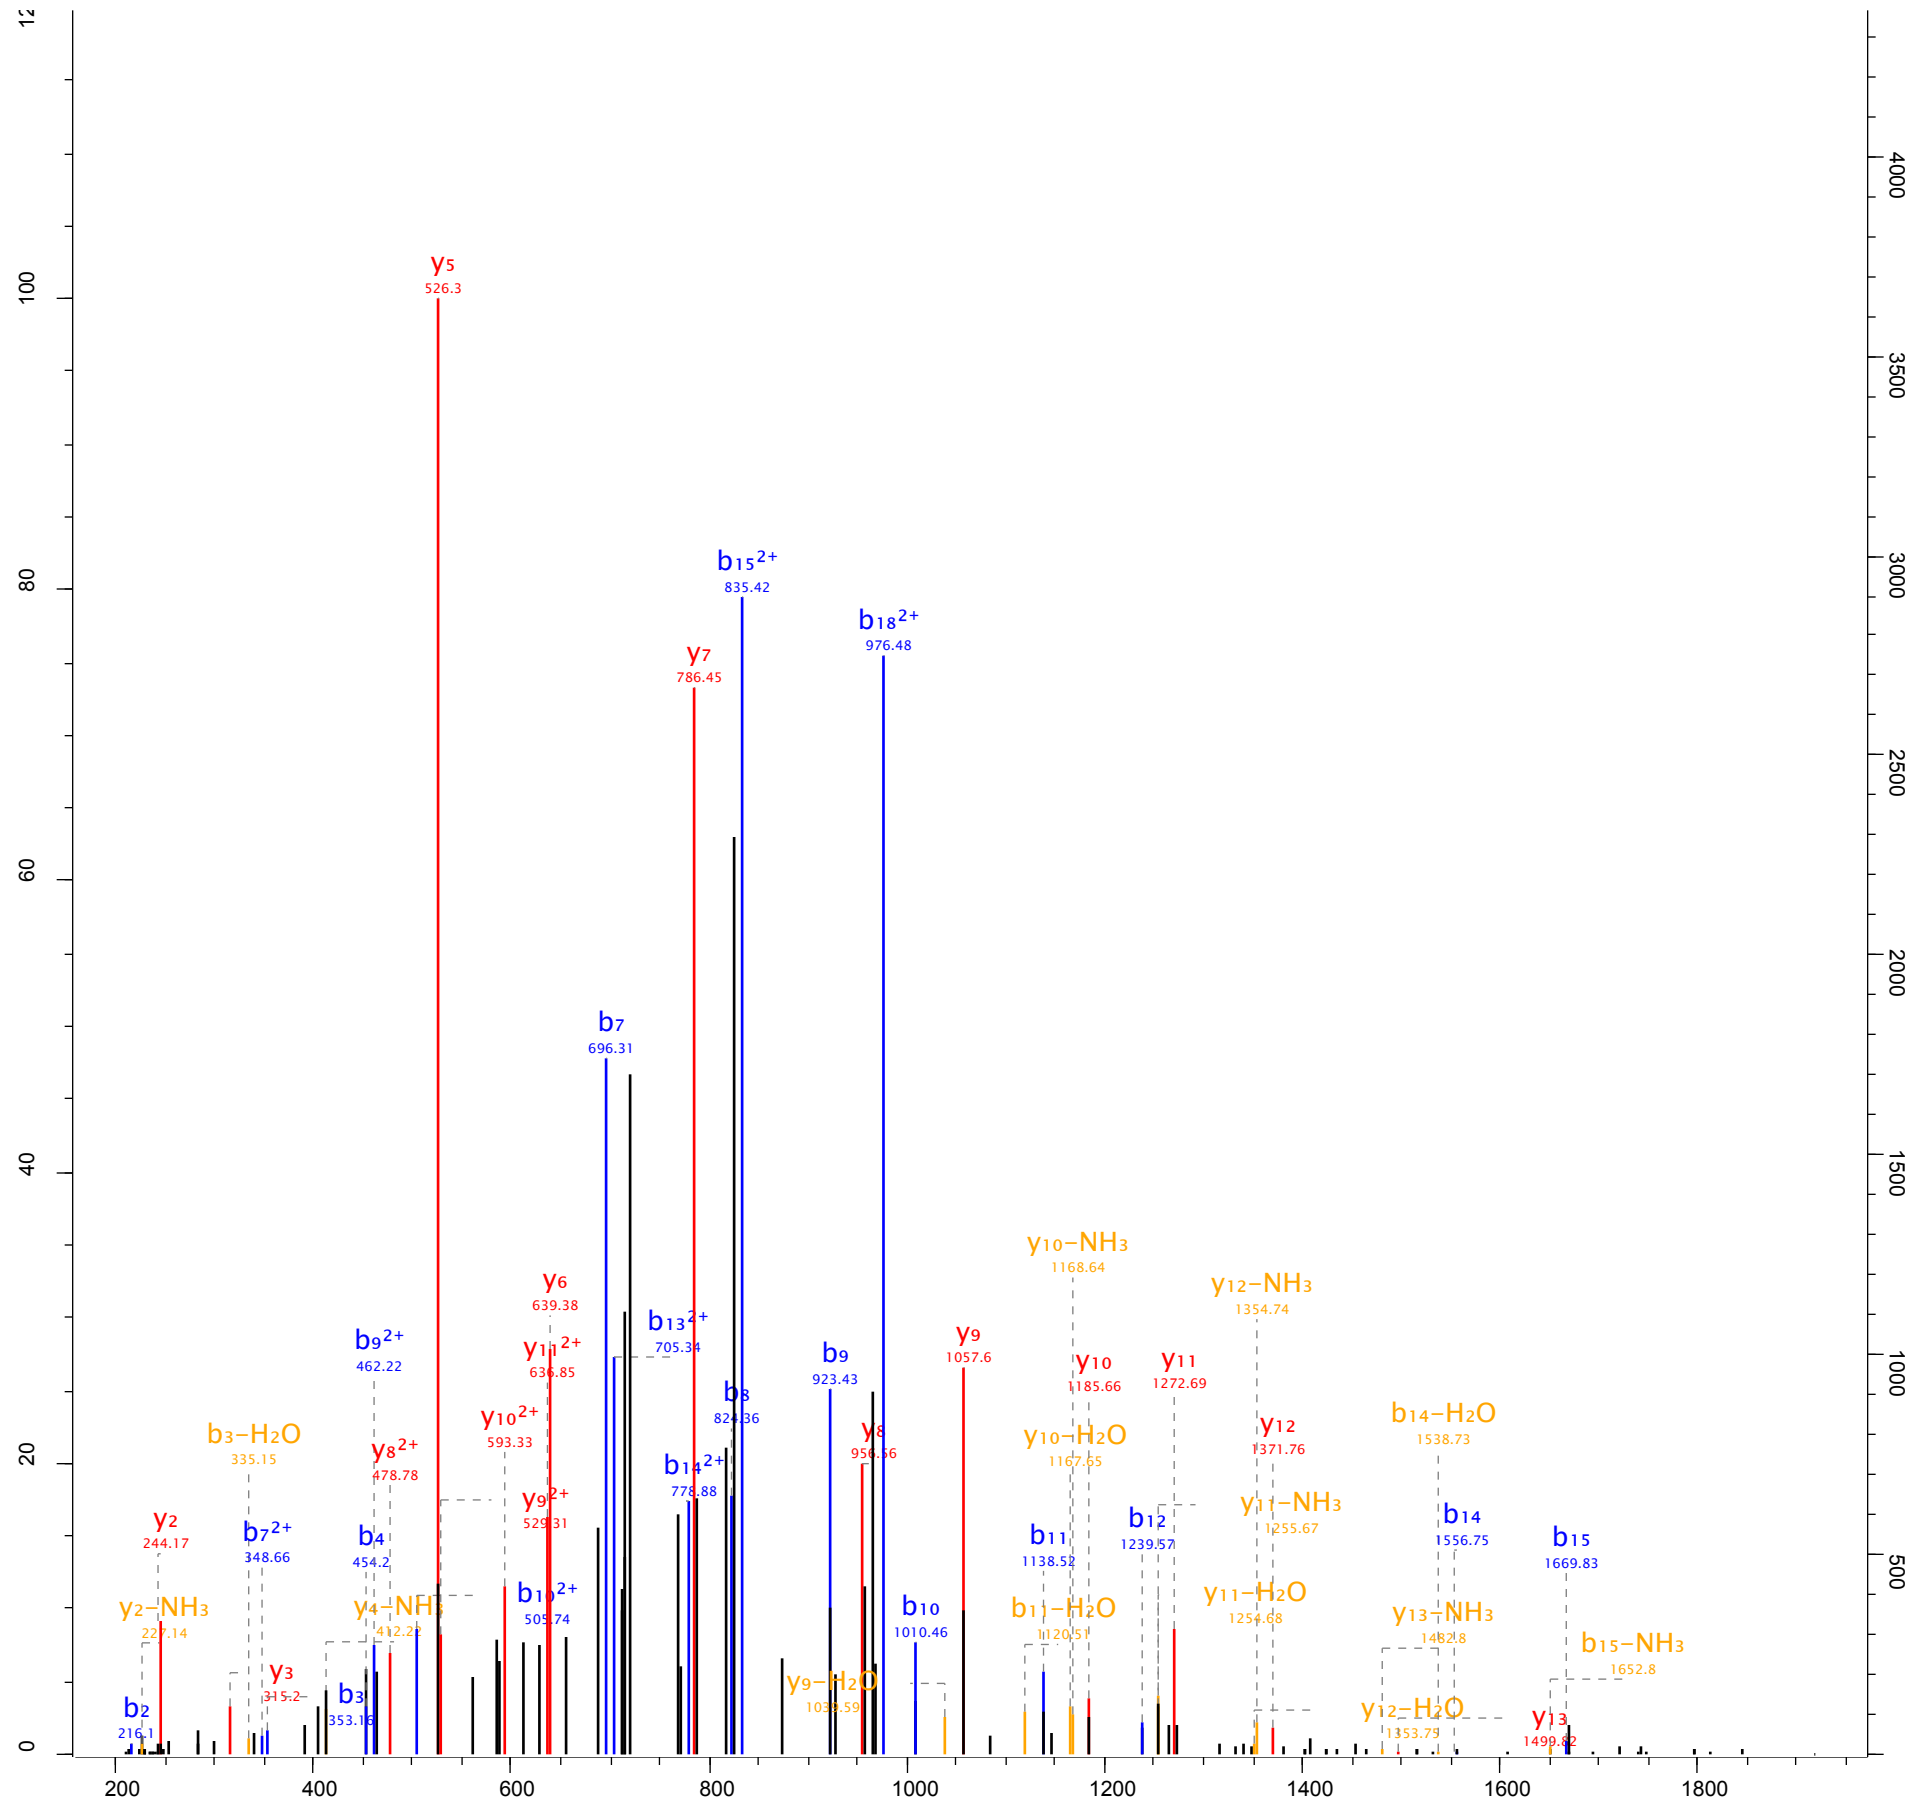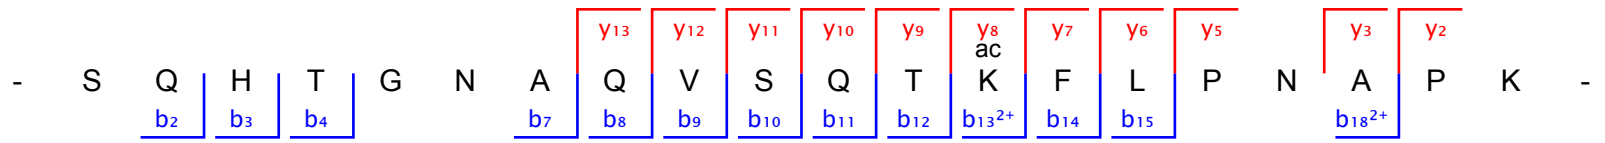

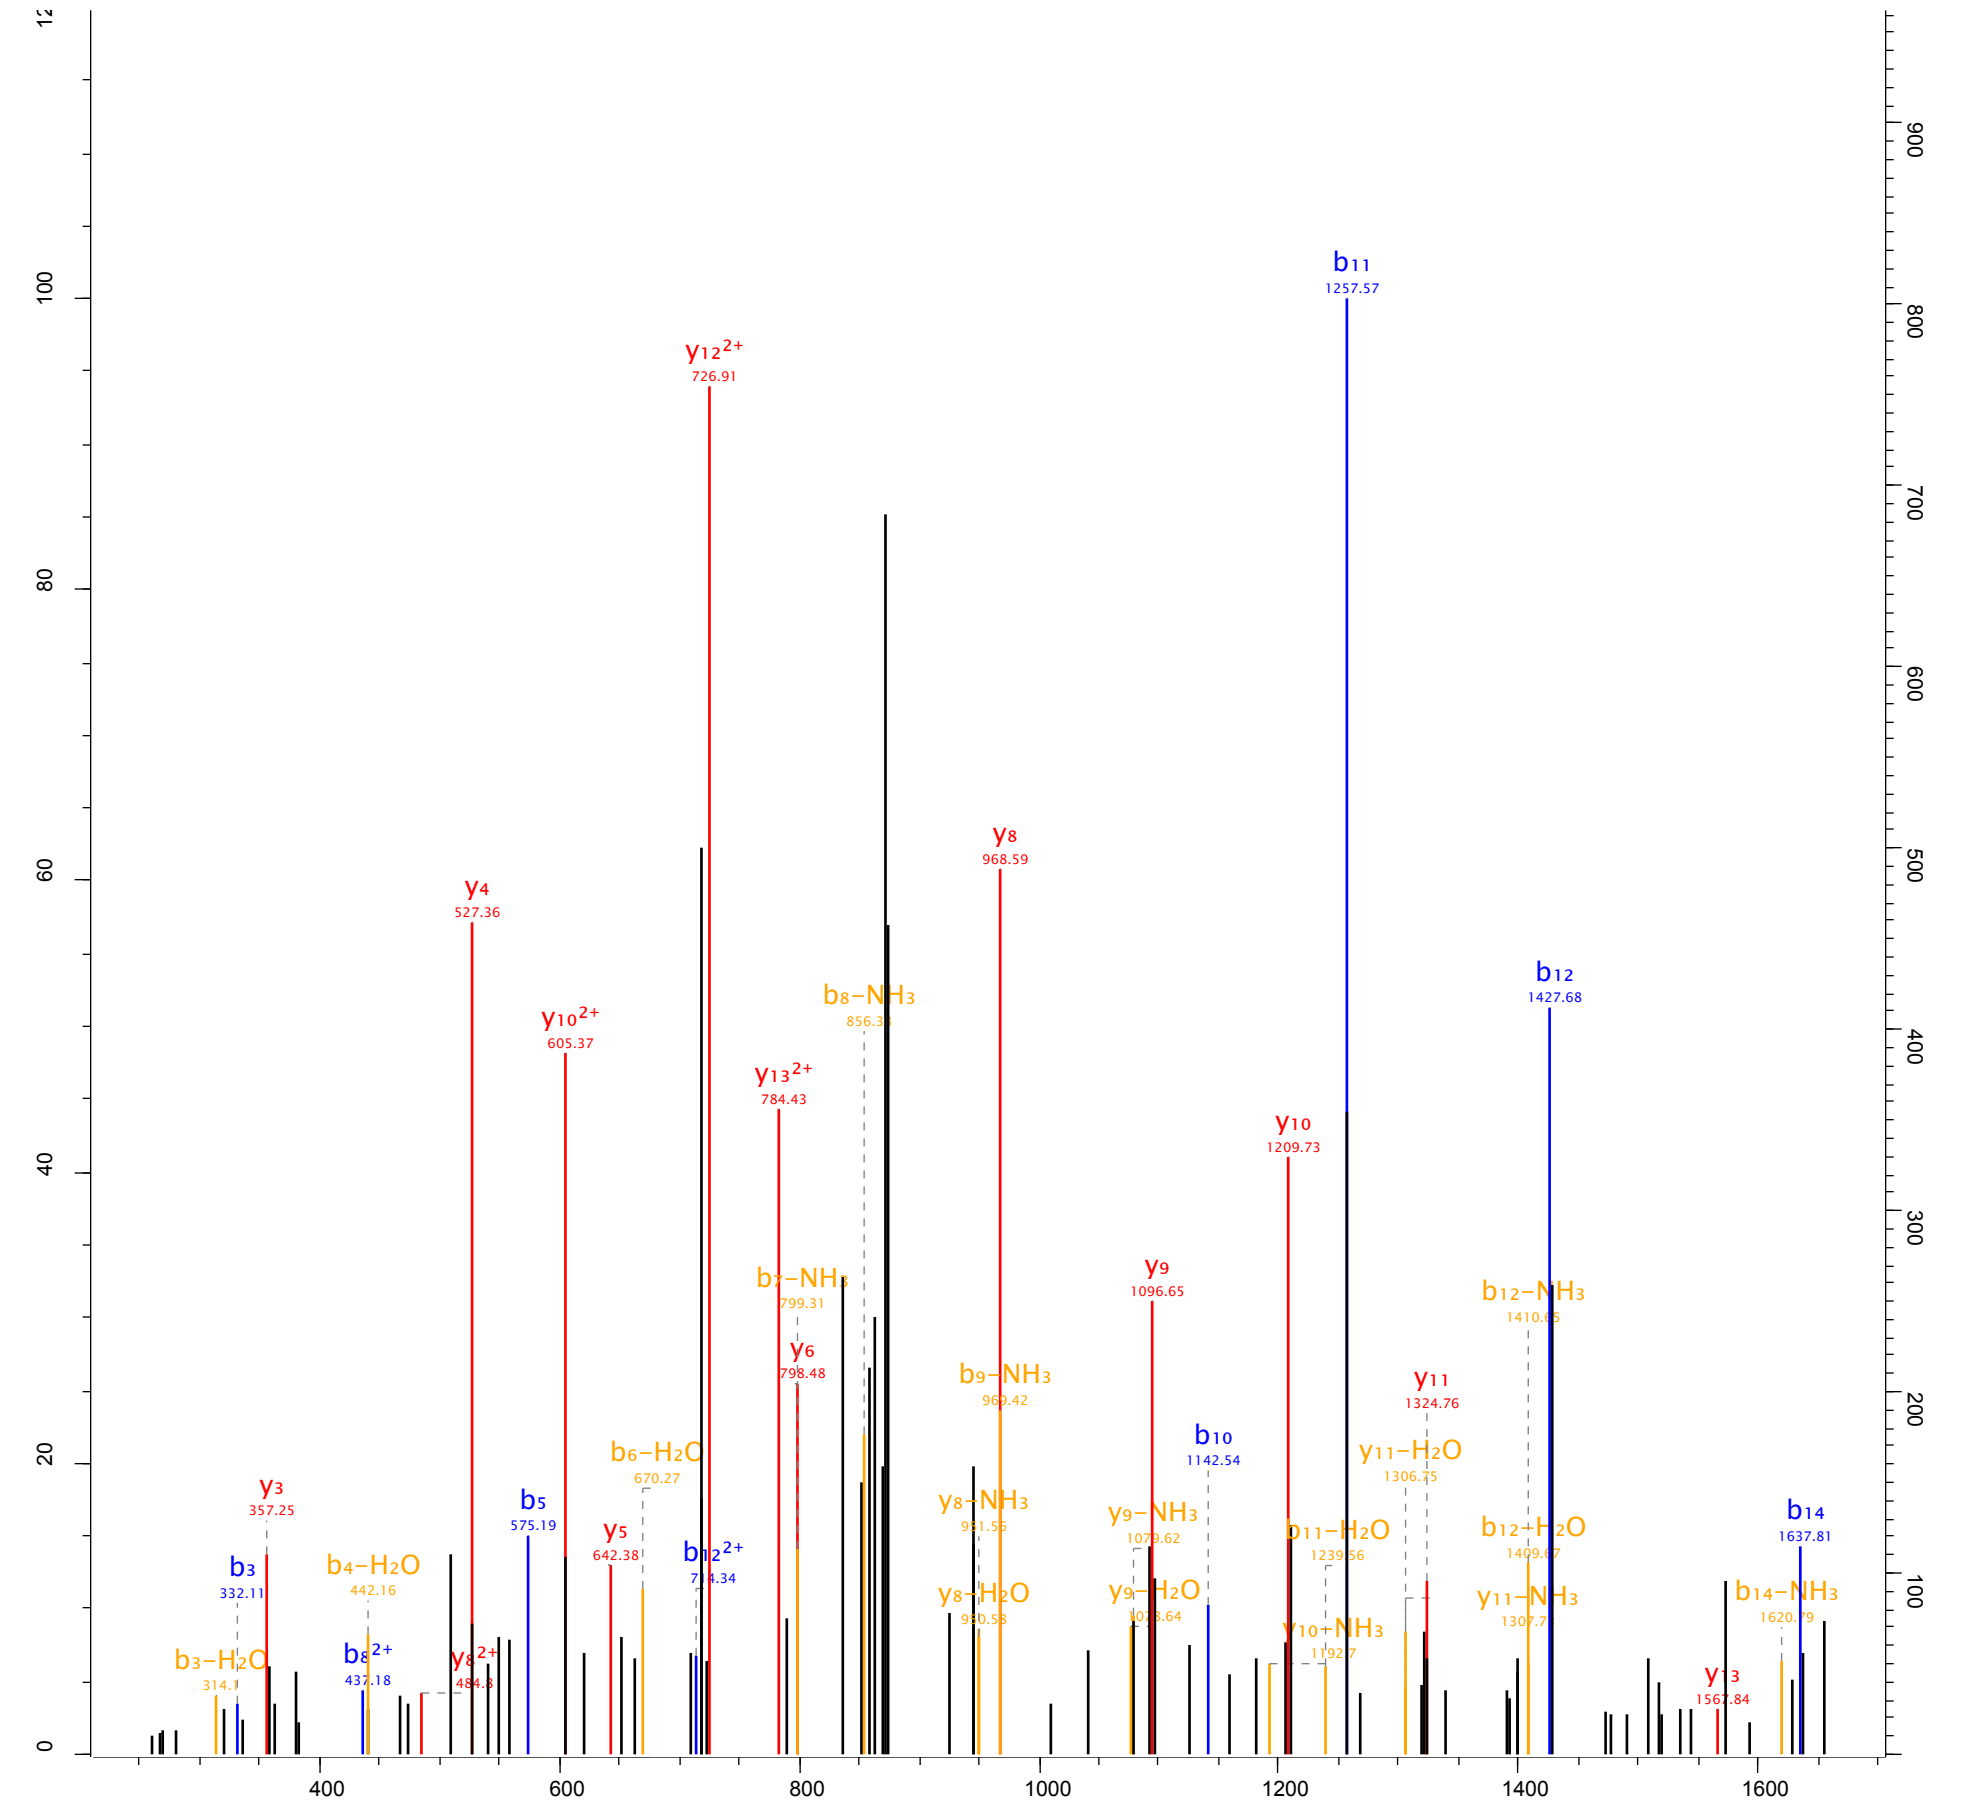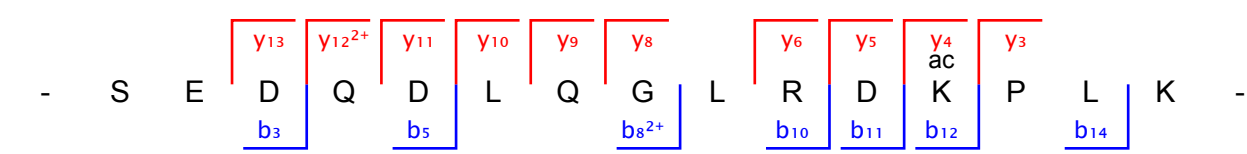

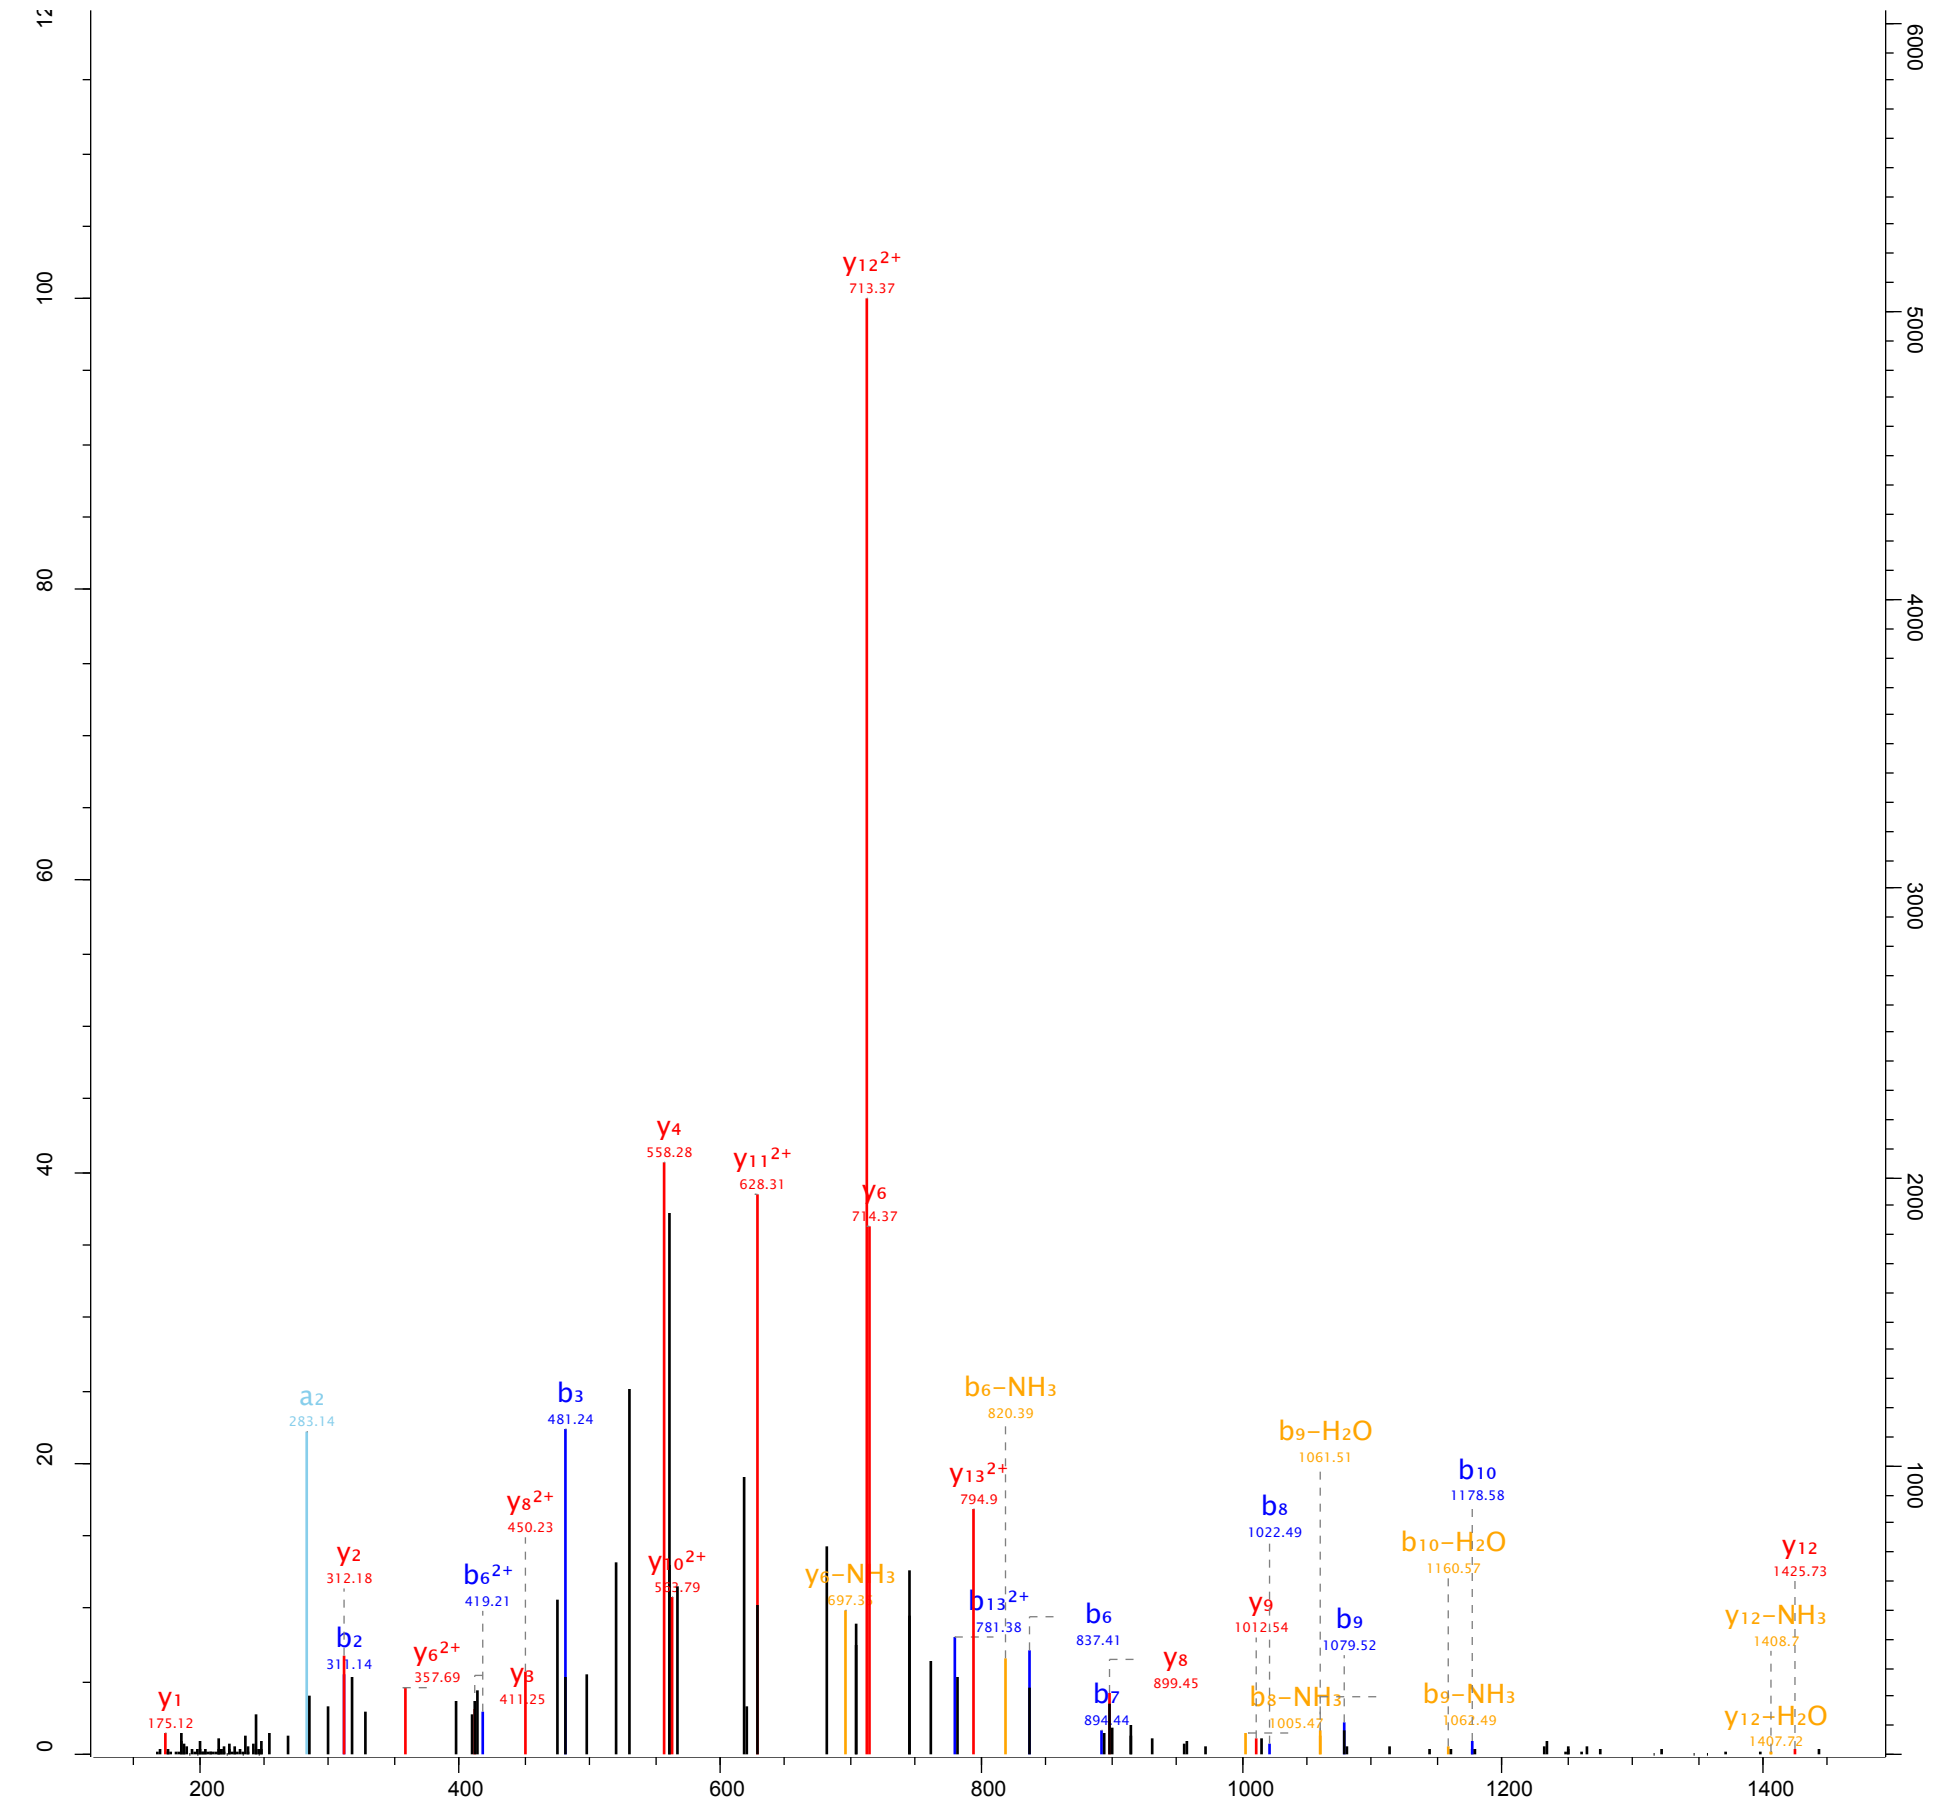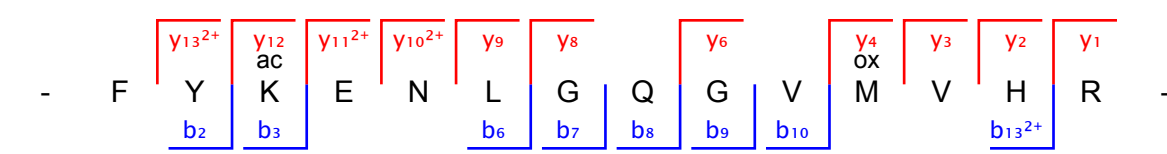



022714\_SCW\_II\_53\_8\_2ndZT

17630

ITMS; CID

121.14

856.11

Slc1a3

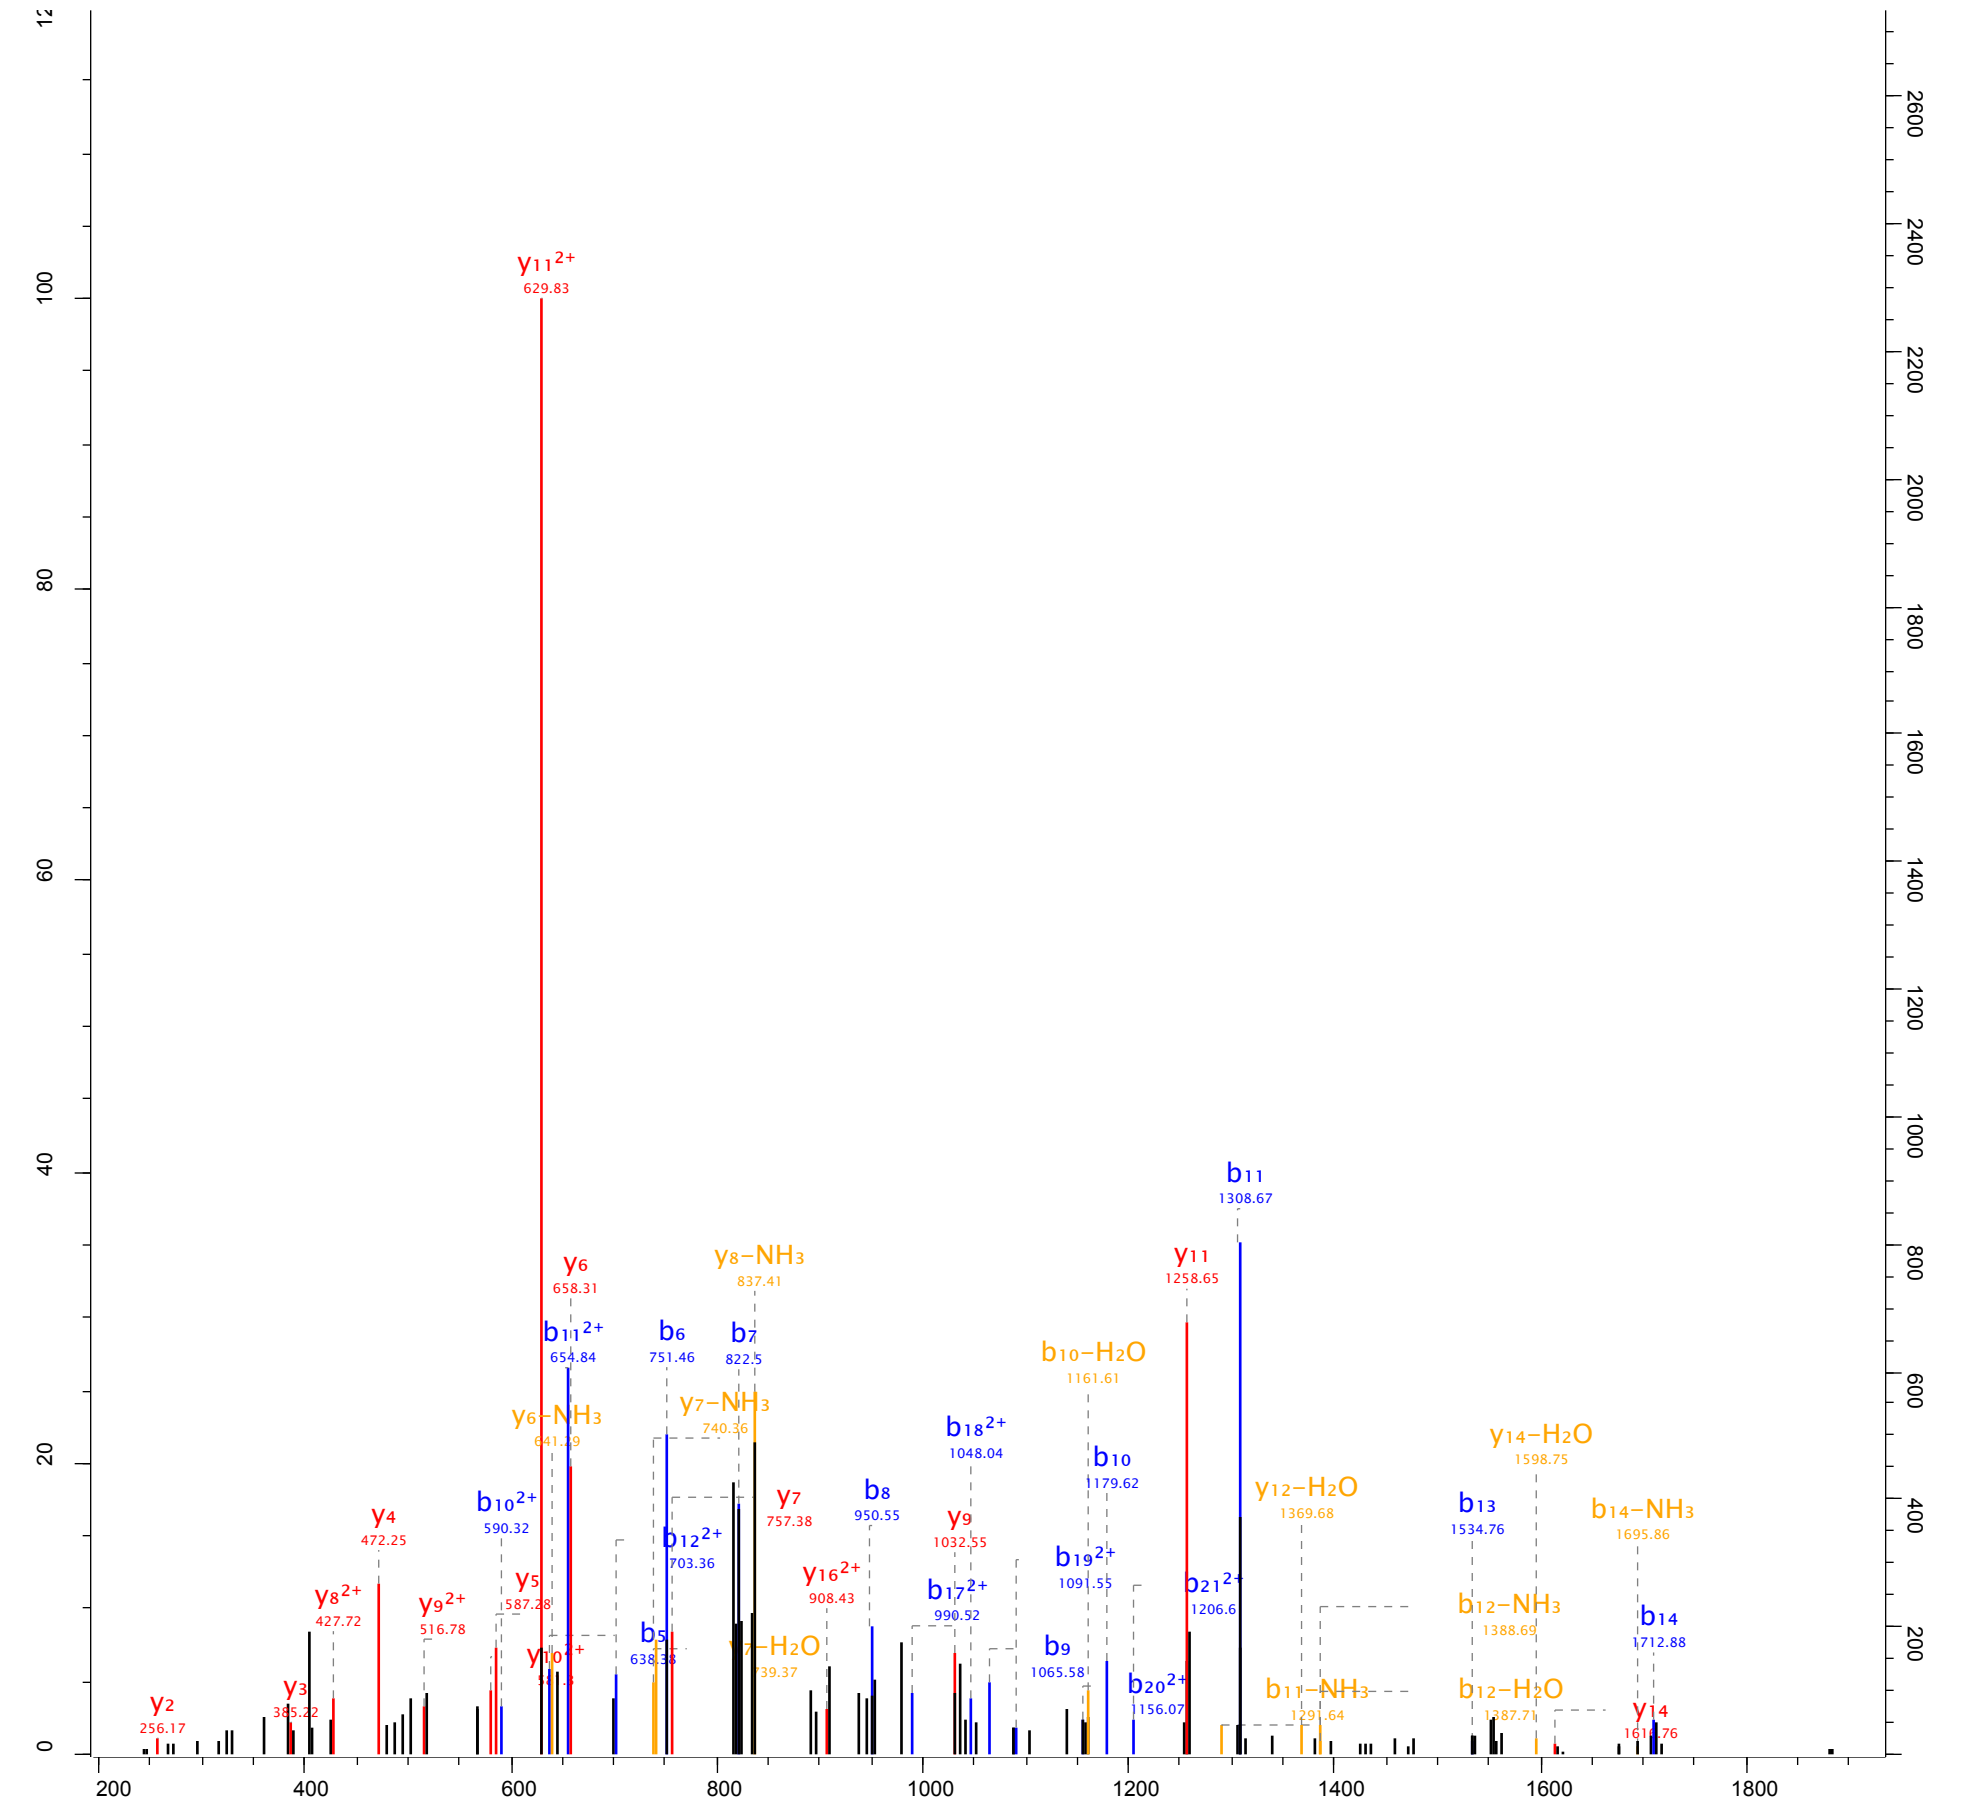

- K P Y Q L I A Q D N E P E K P V A D S E T K -

b5 b6 b7 b8 b9 b10 b11 b12 2+ b13 b14 b17 2+ b18 2+ b19 2+ b20 2+ b21 2+

y16 2+ y14 y11 y10 2+ y9 ac y8 2+ y7 y6 y5 y4 y3 y2

022714\_SCW\_II\_53\_8\_2ndZT

19032

ITMS; CID

115.37

511.96

Oxct1

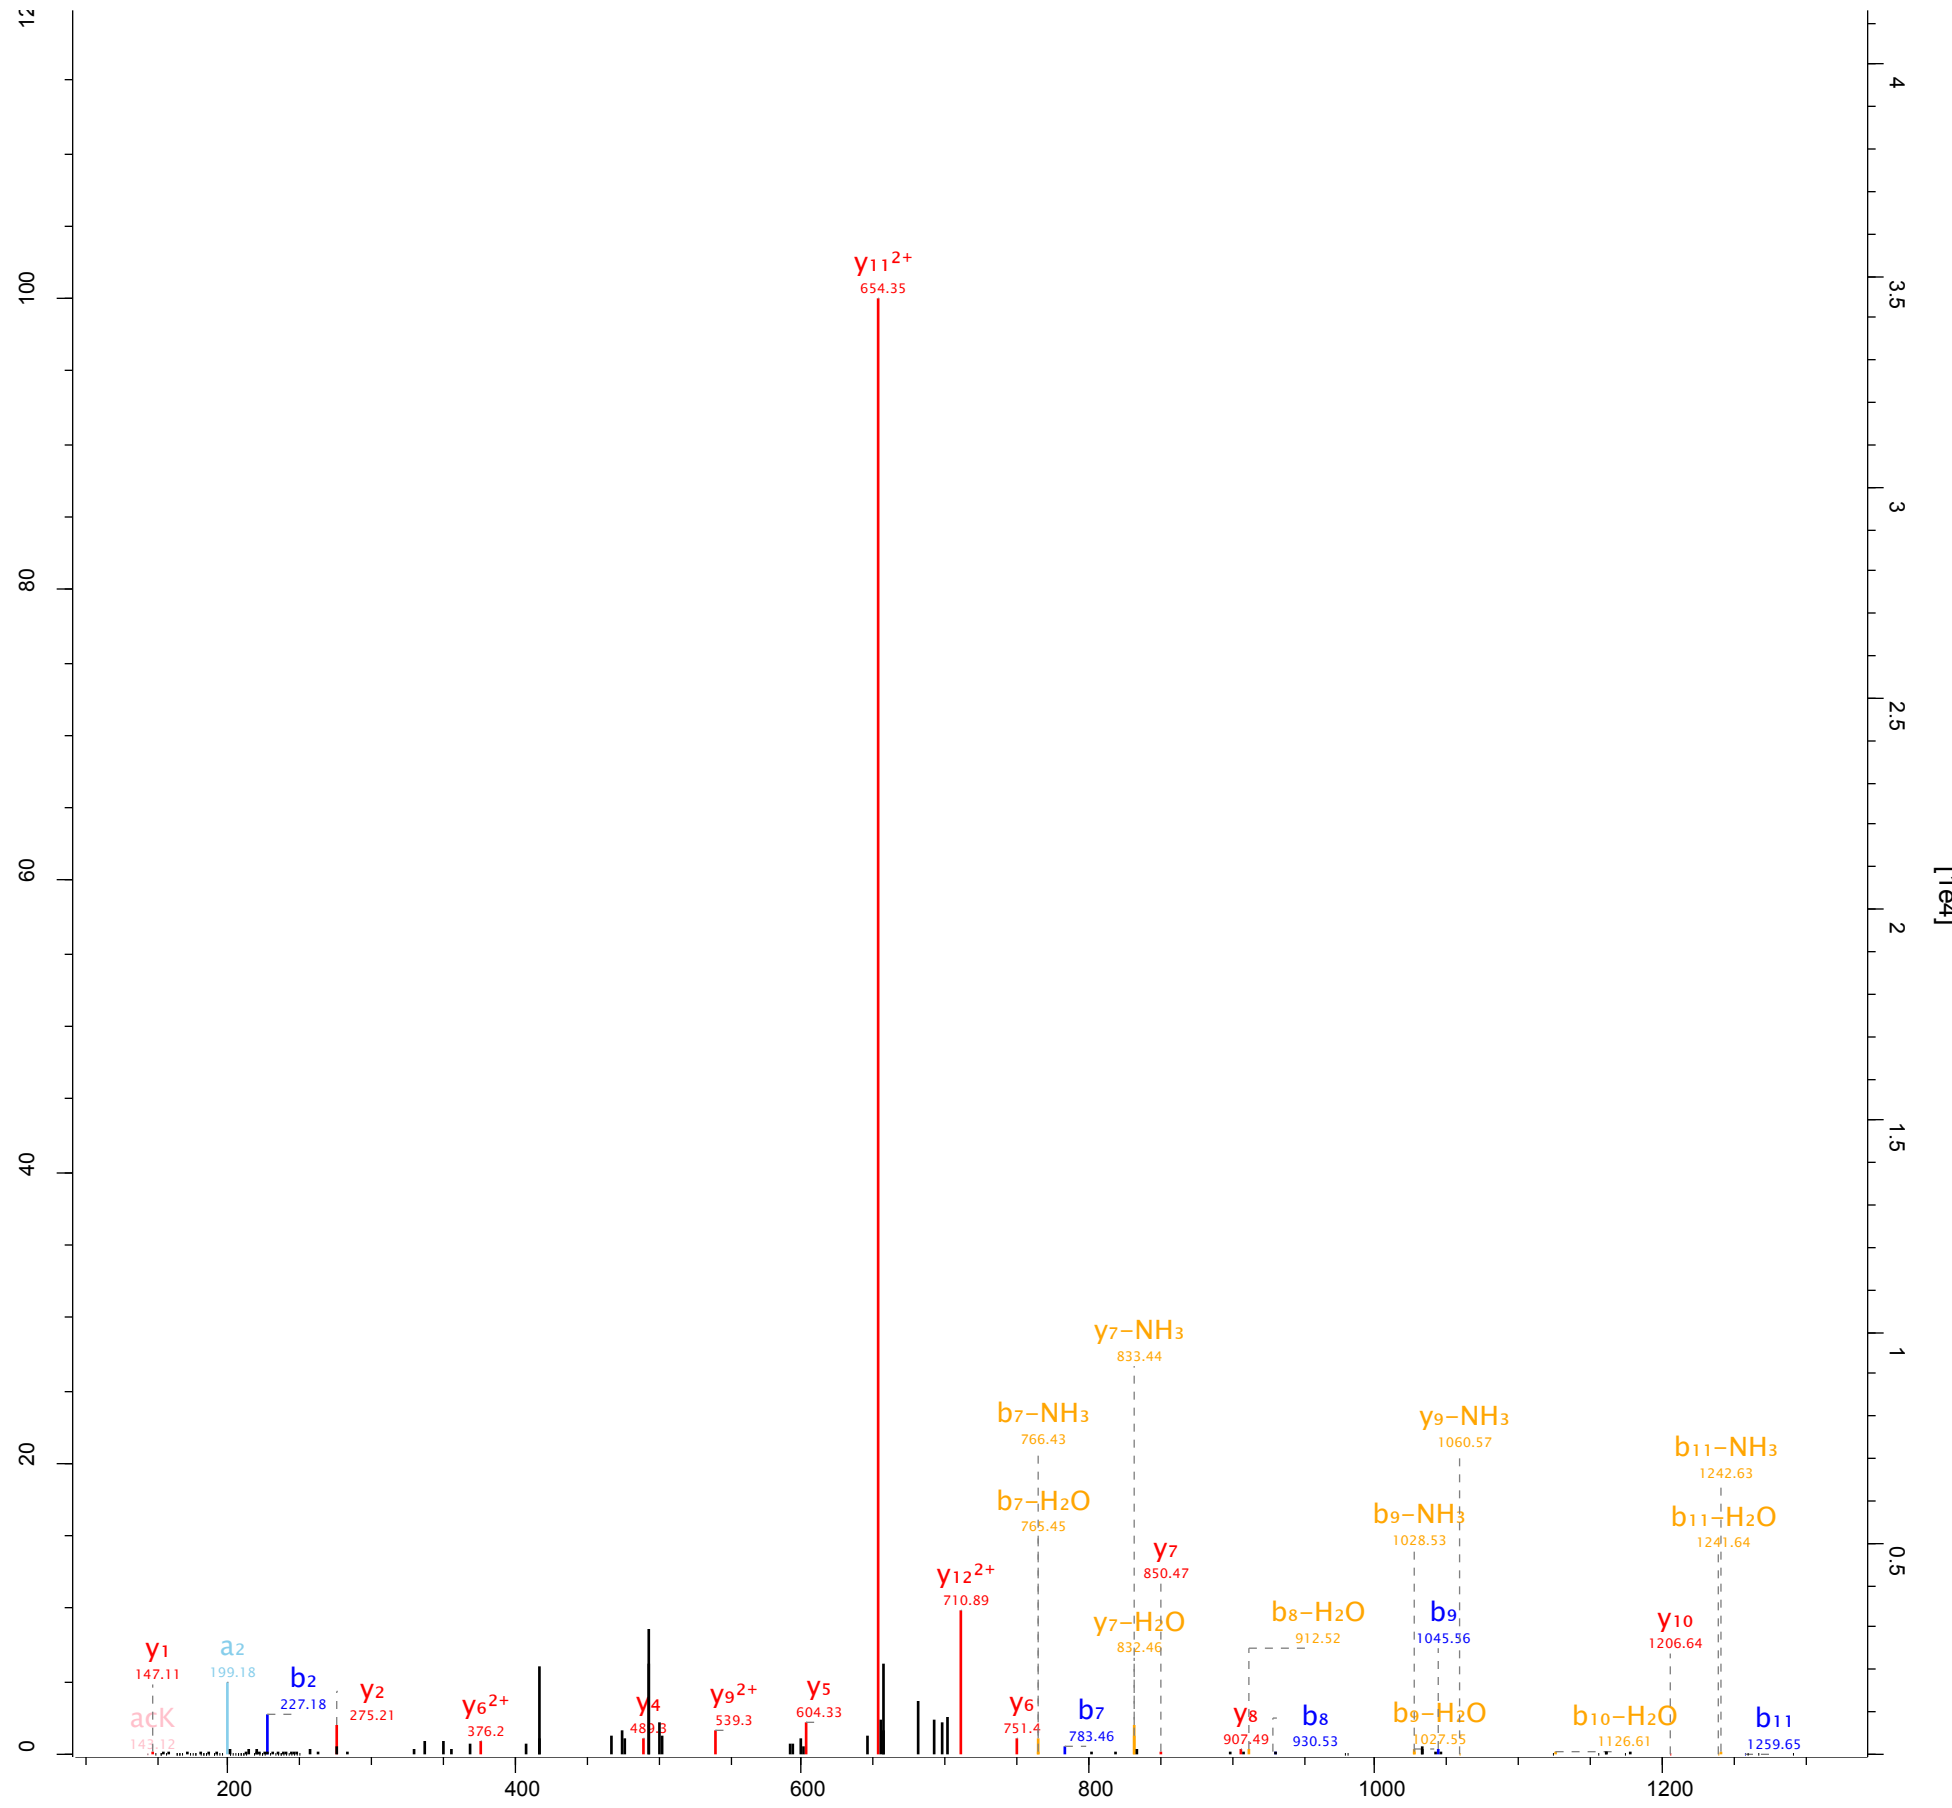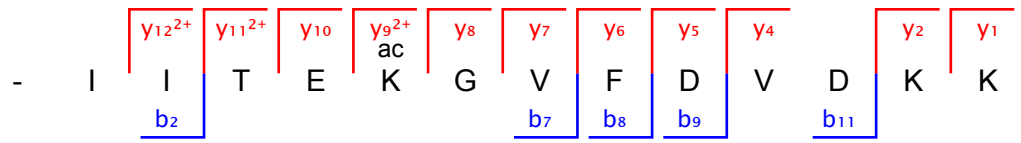

022714\_SCW\_II\_53\_8\_2ndZT

20458

ITMS; CID

85.36

697.37

Hspa41

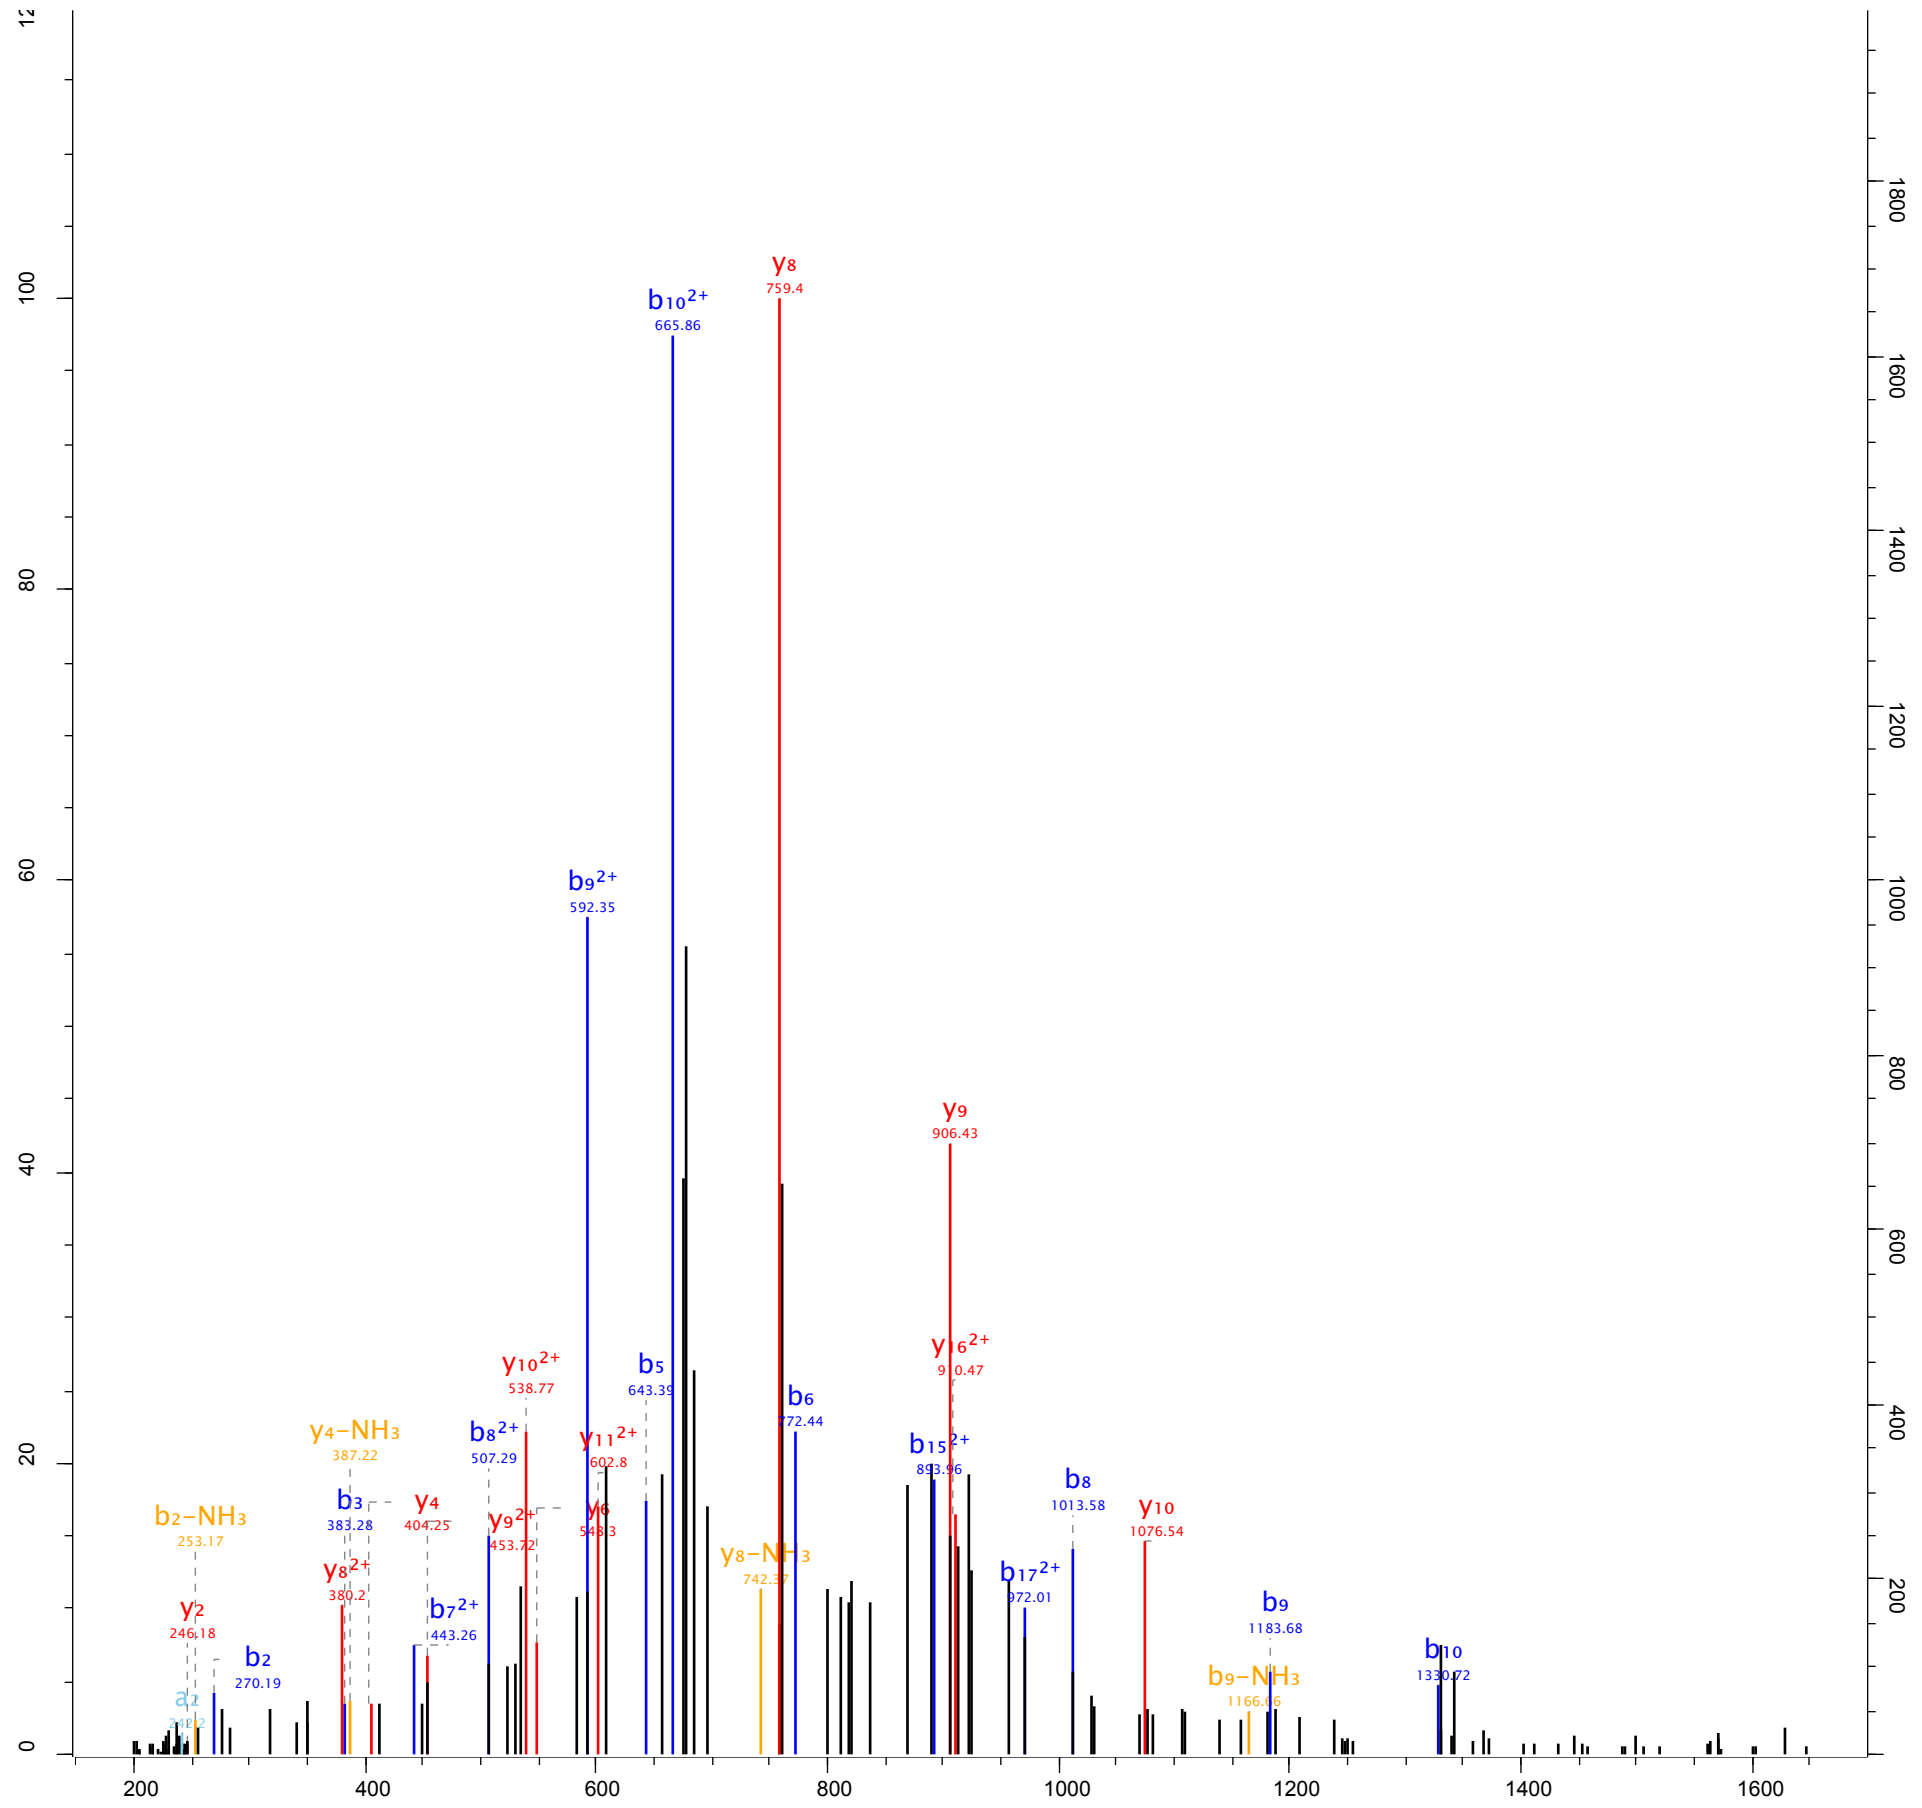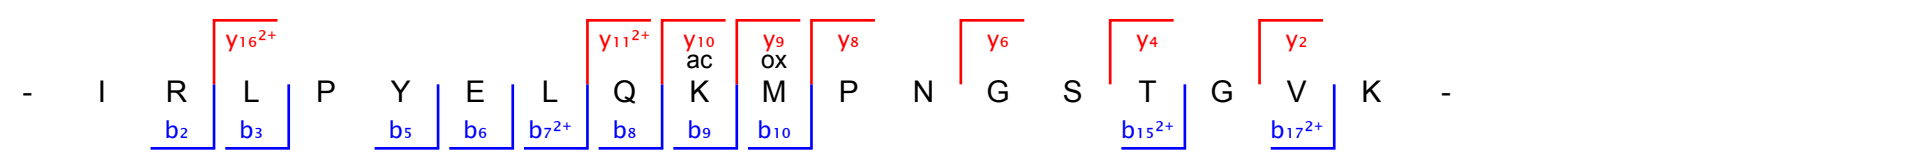

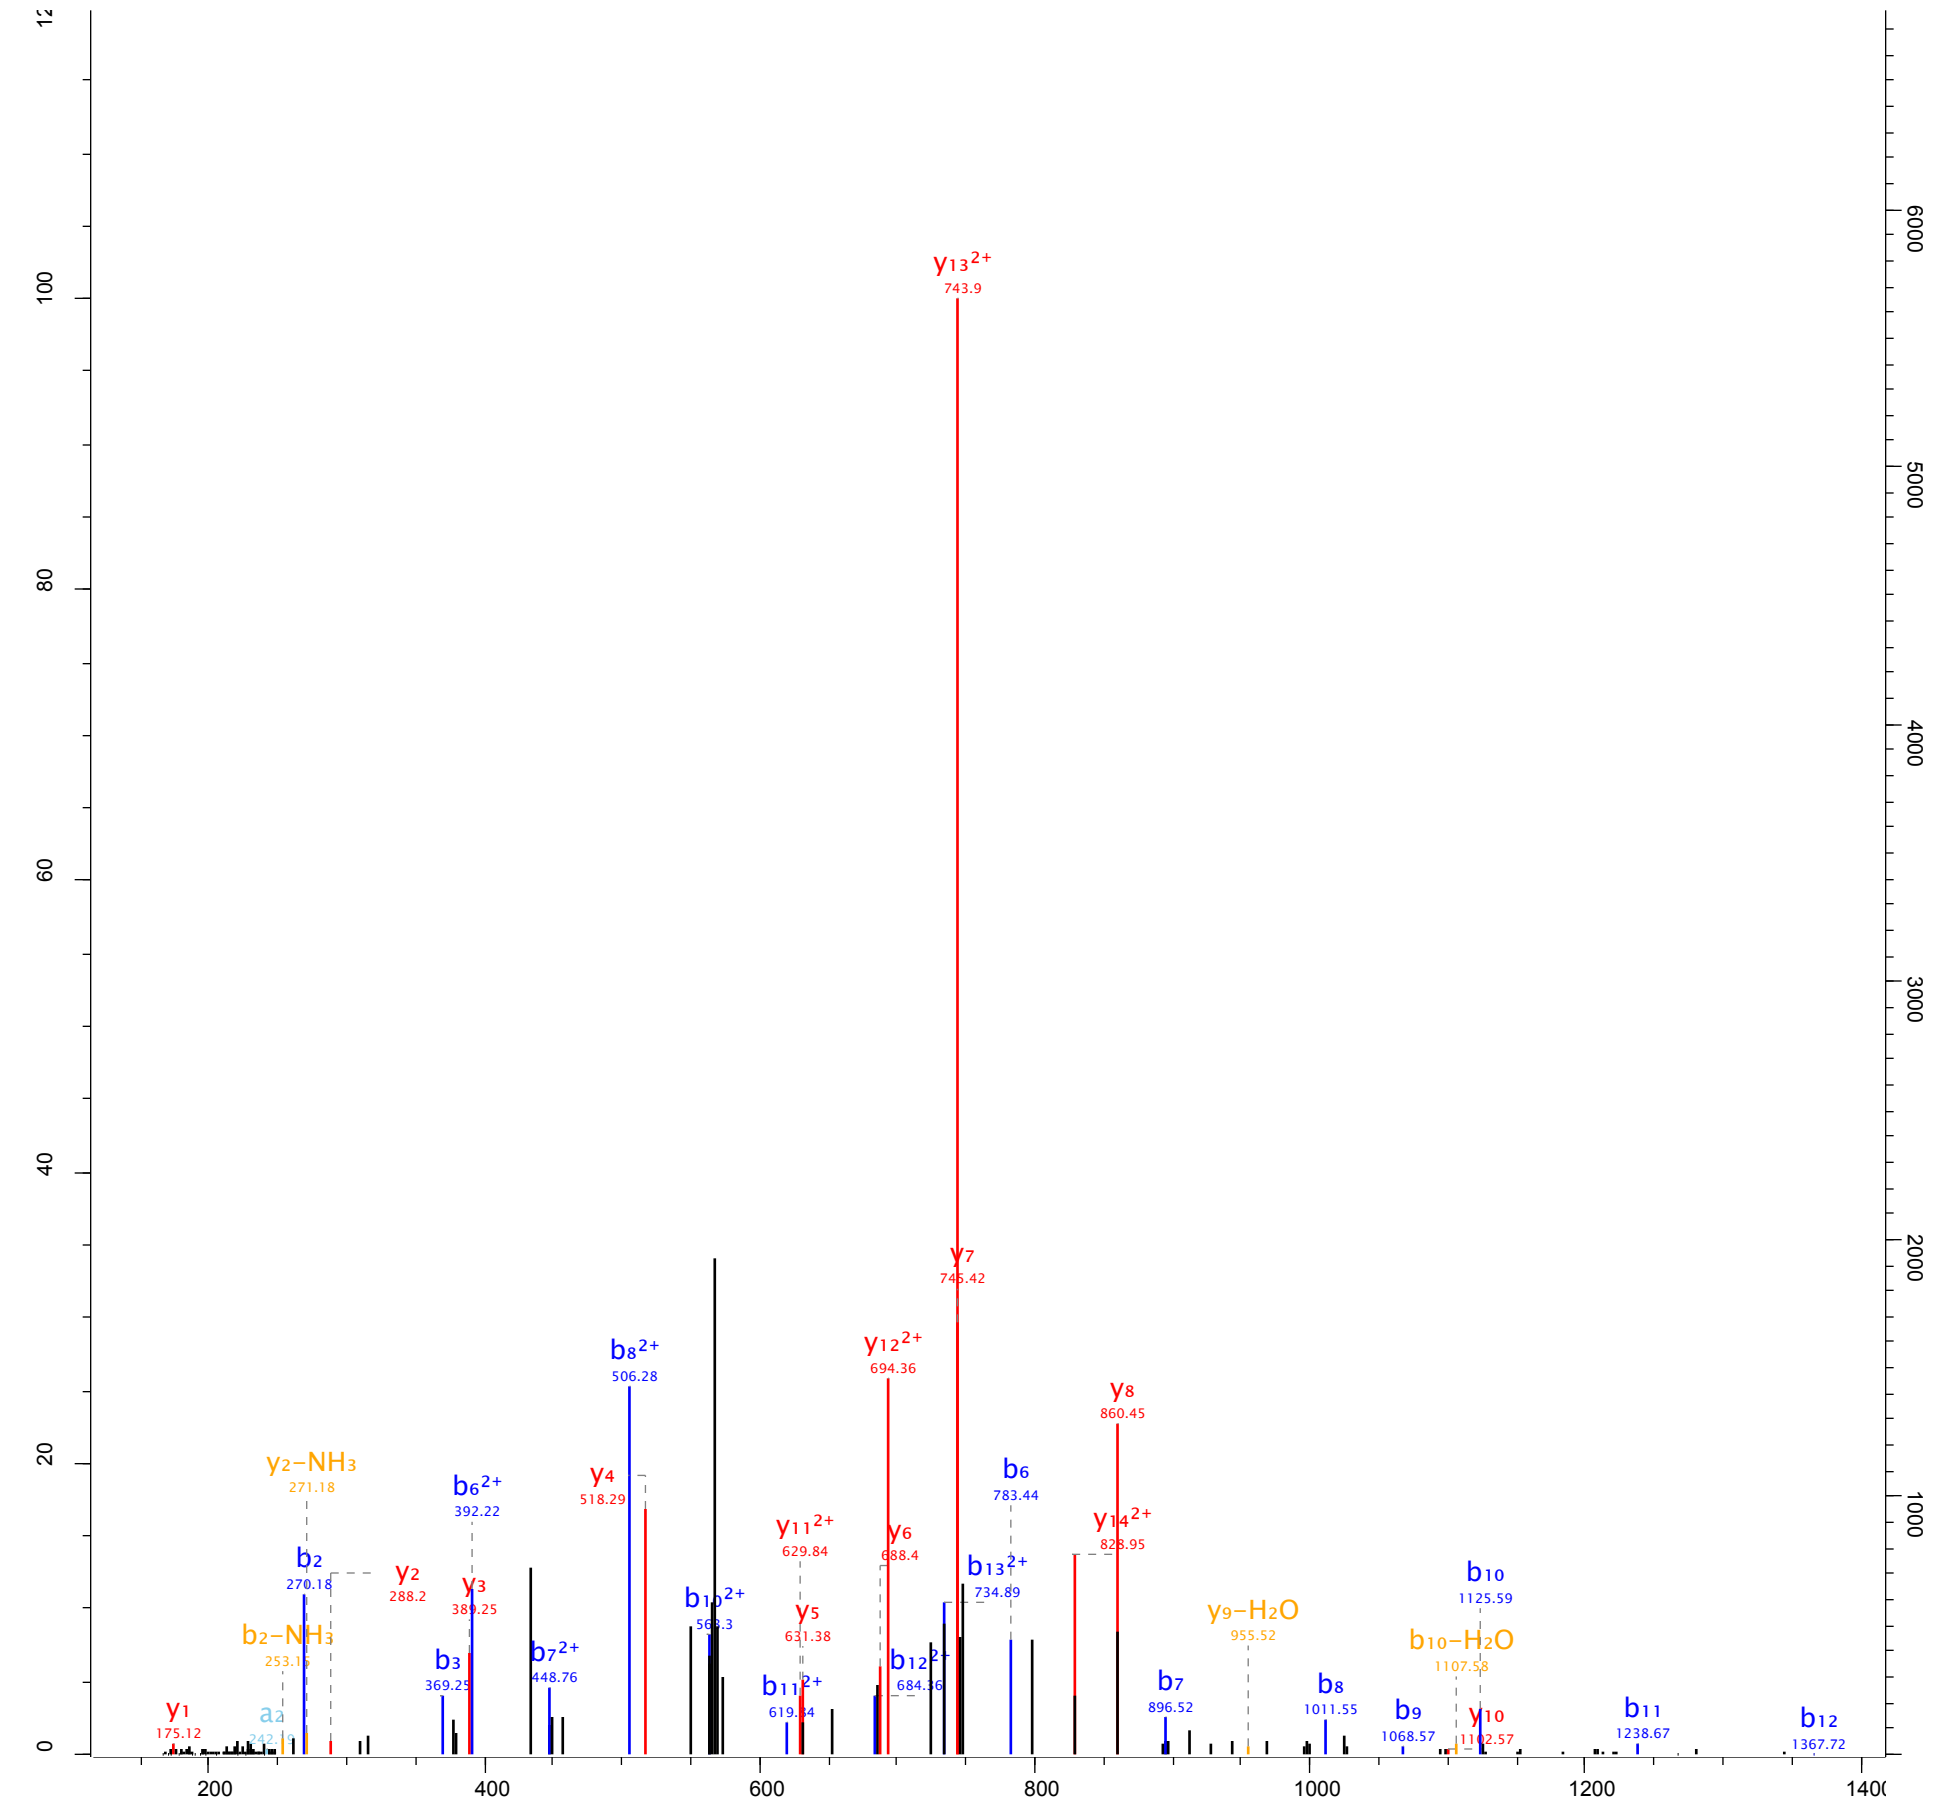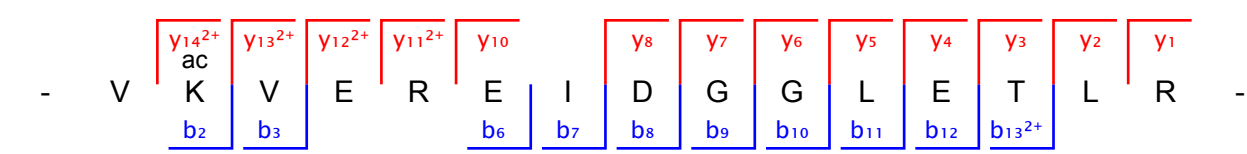

022714\_SCW\_II\_53\_8\_2ndZT

20746

ITMS; CID

183.75

757.73

Ak3

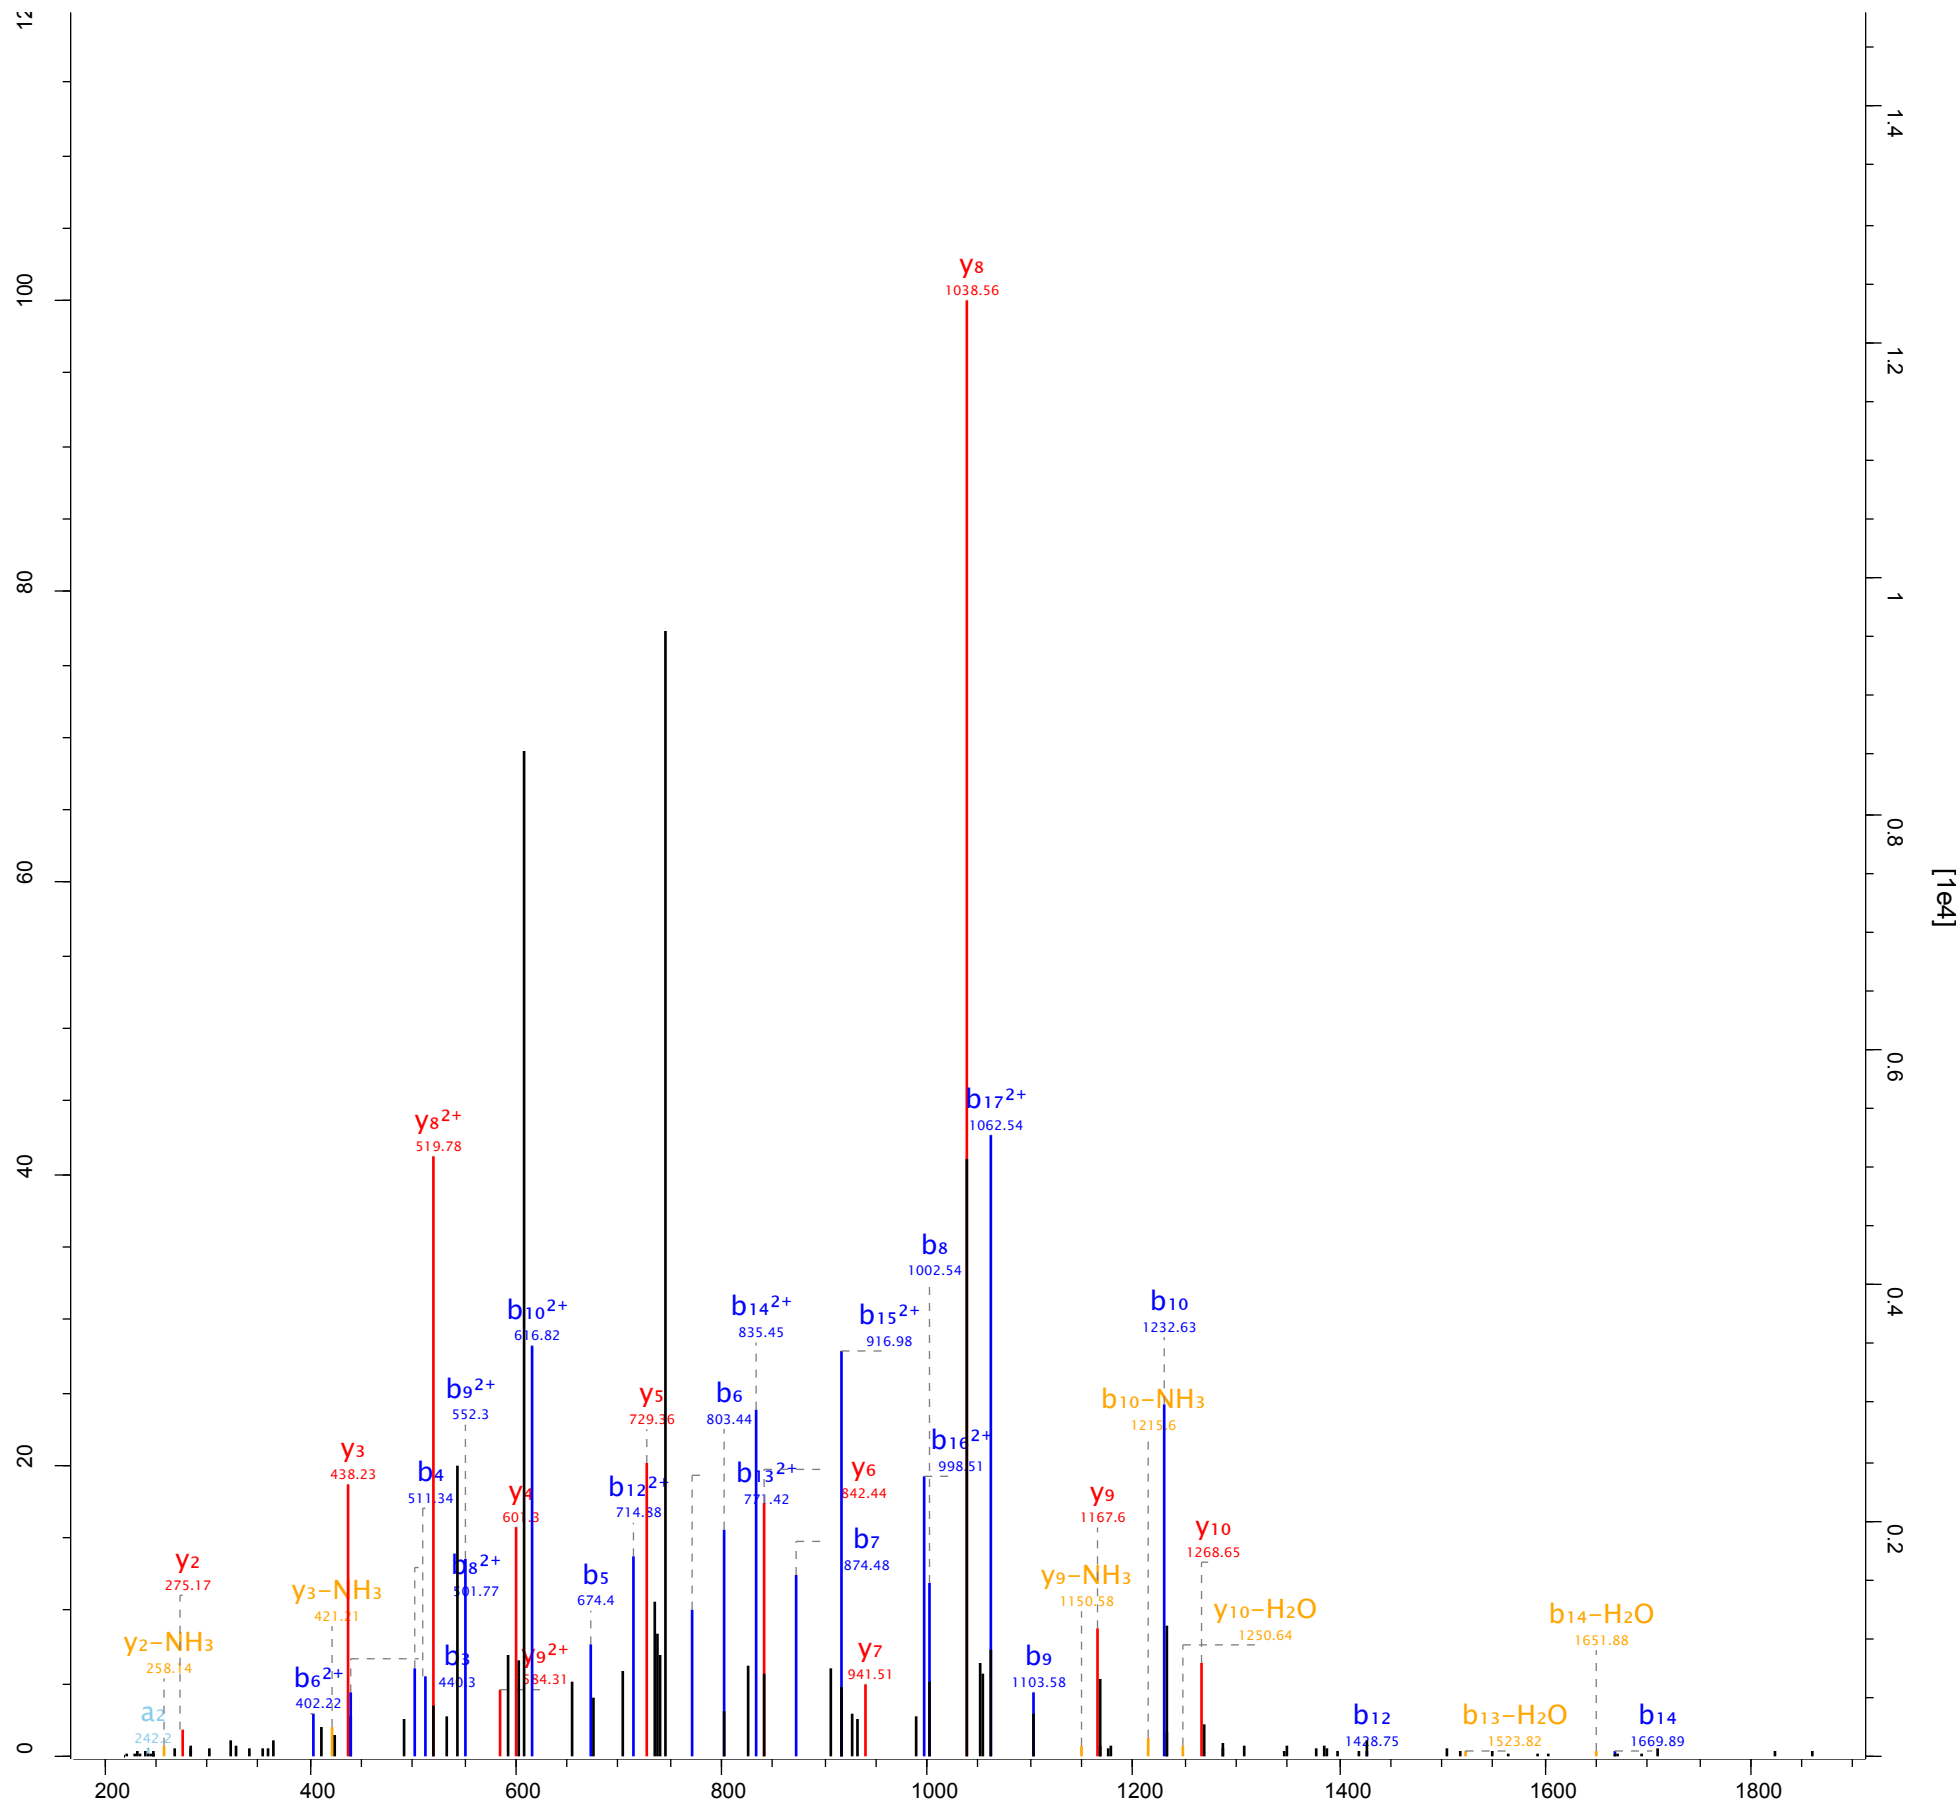

- R L K ac A Y E A Q T E P V L Q Y Y Q K -

a2 b3 b4 b5 b6 b7 b8 b9 b10 b12 b13<sup>2+</sup> b14 b15<sup>2+</sup> b16<sup>2+</sup> b17<sup>2+</sup>

y10 y9 y8 y7 y6 y5 y4 y3 y2

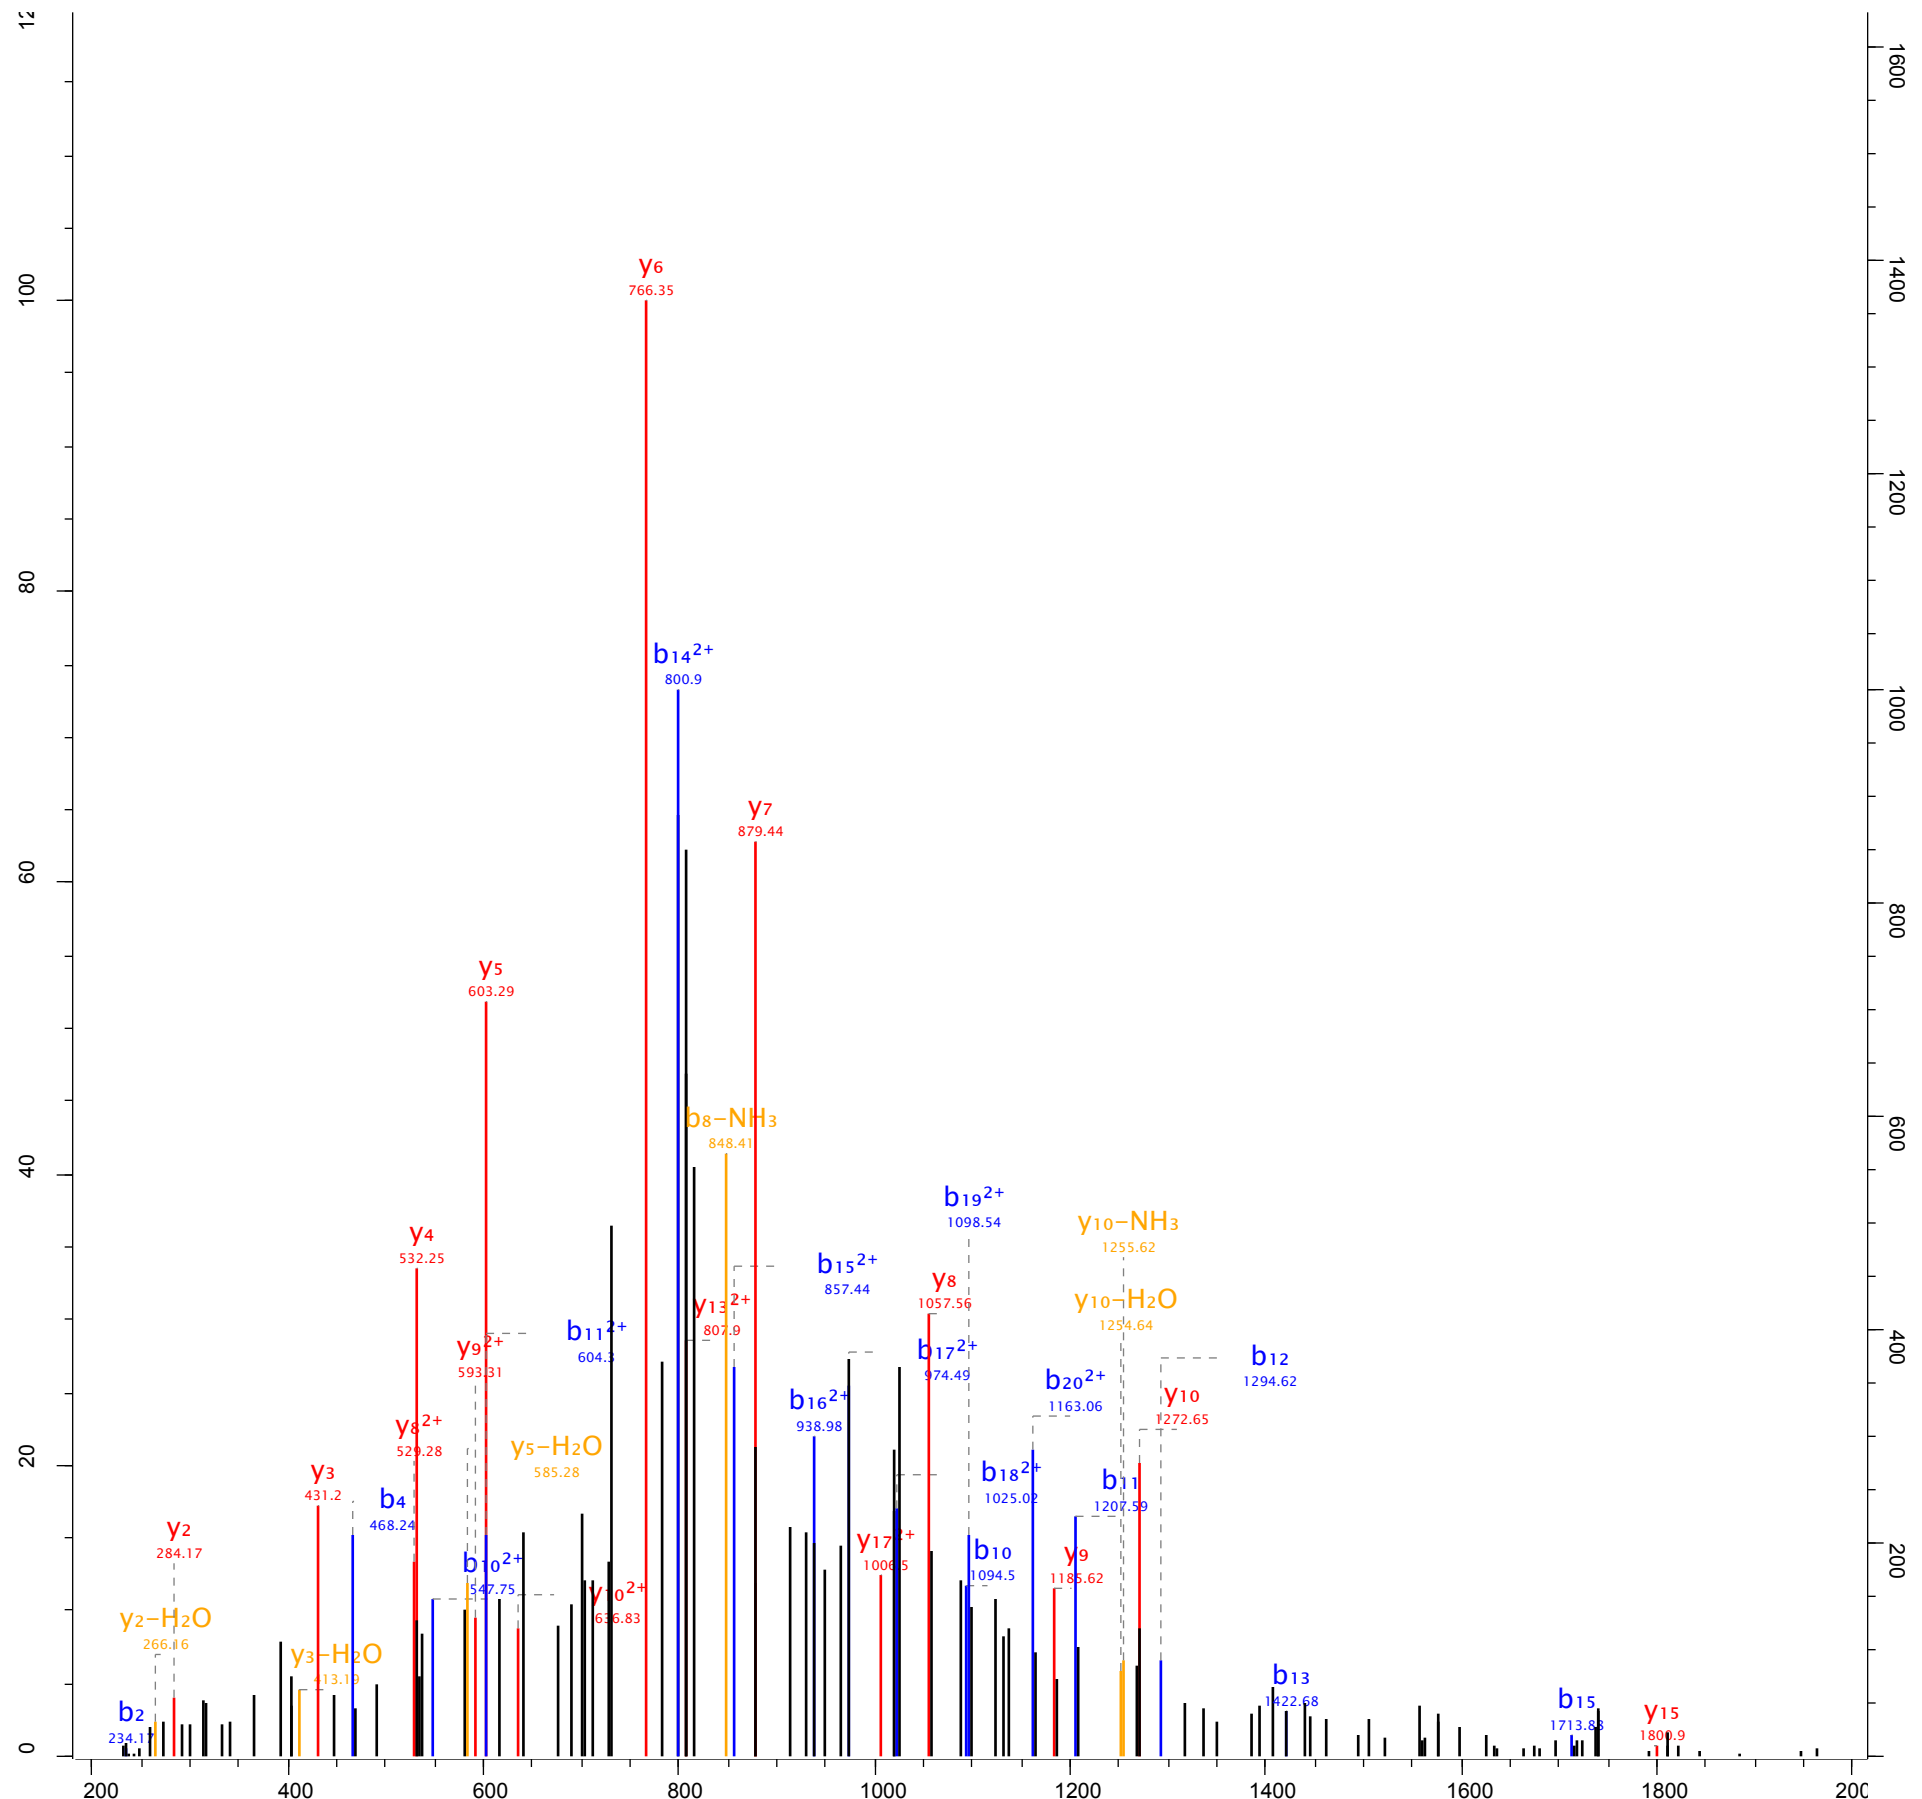

- K P S ox M P N V S N D L S Q K L Y A T M E K -

b<sub>2</sub> b<sub>4</sub> b<sub>10</sub> b<sub>11</sub> b<sub>12</sub> b<sub>13</sub> b<sub>14</sub><sup>2+</sup> b<sub>15</sub> b<sub>16</sub><sup>2+</sup> b<sub>17</sub><sup>2+</sup> b<sub>18</sub><sup>2+</sup> b<sub>19</sub><sup>2+</sup> b<sub>20</sub><sup>2+</sup>

y<sub>17</sub><sup>2+</sup> y<sub>15</sub> y<sub>13</sub><sup>2+</sup> y<sub>10</sub> y<sub>9</sub> y<sub>8</sub> ac y<sub>7</sub> y<sub>6</sub> y<sub>5</sub> y<sub>4</sub> y<sub>3</sub> ox y<sub>2</sub>

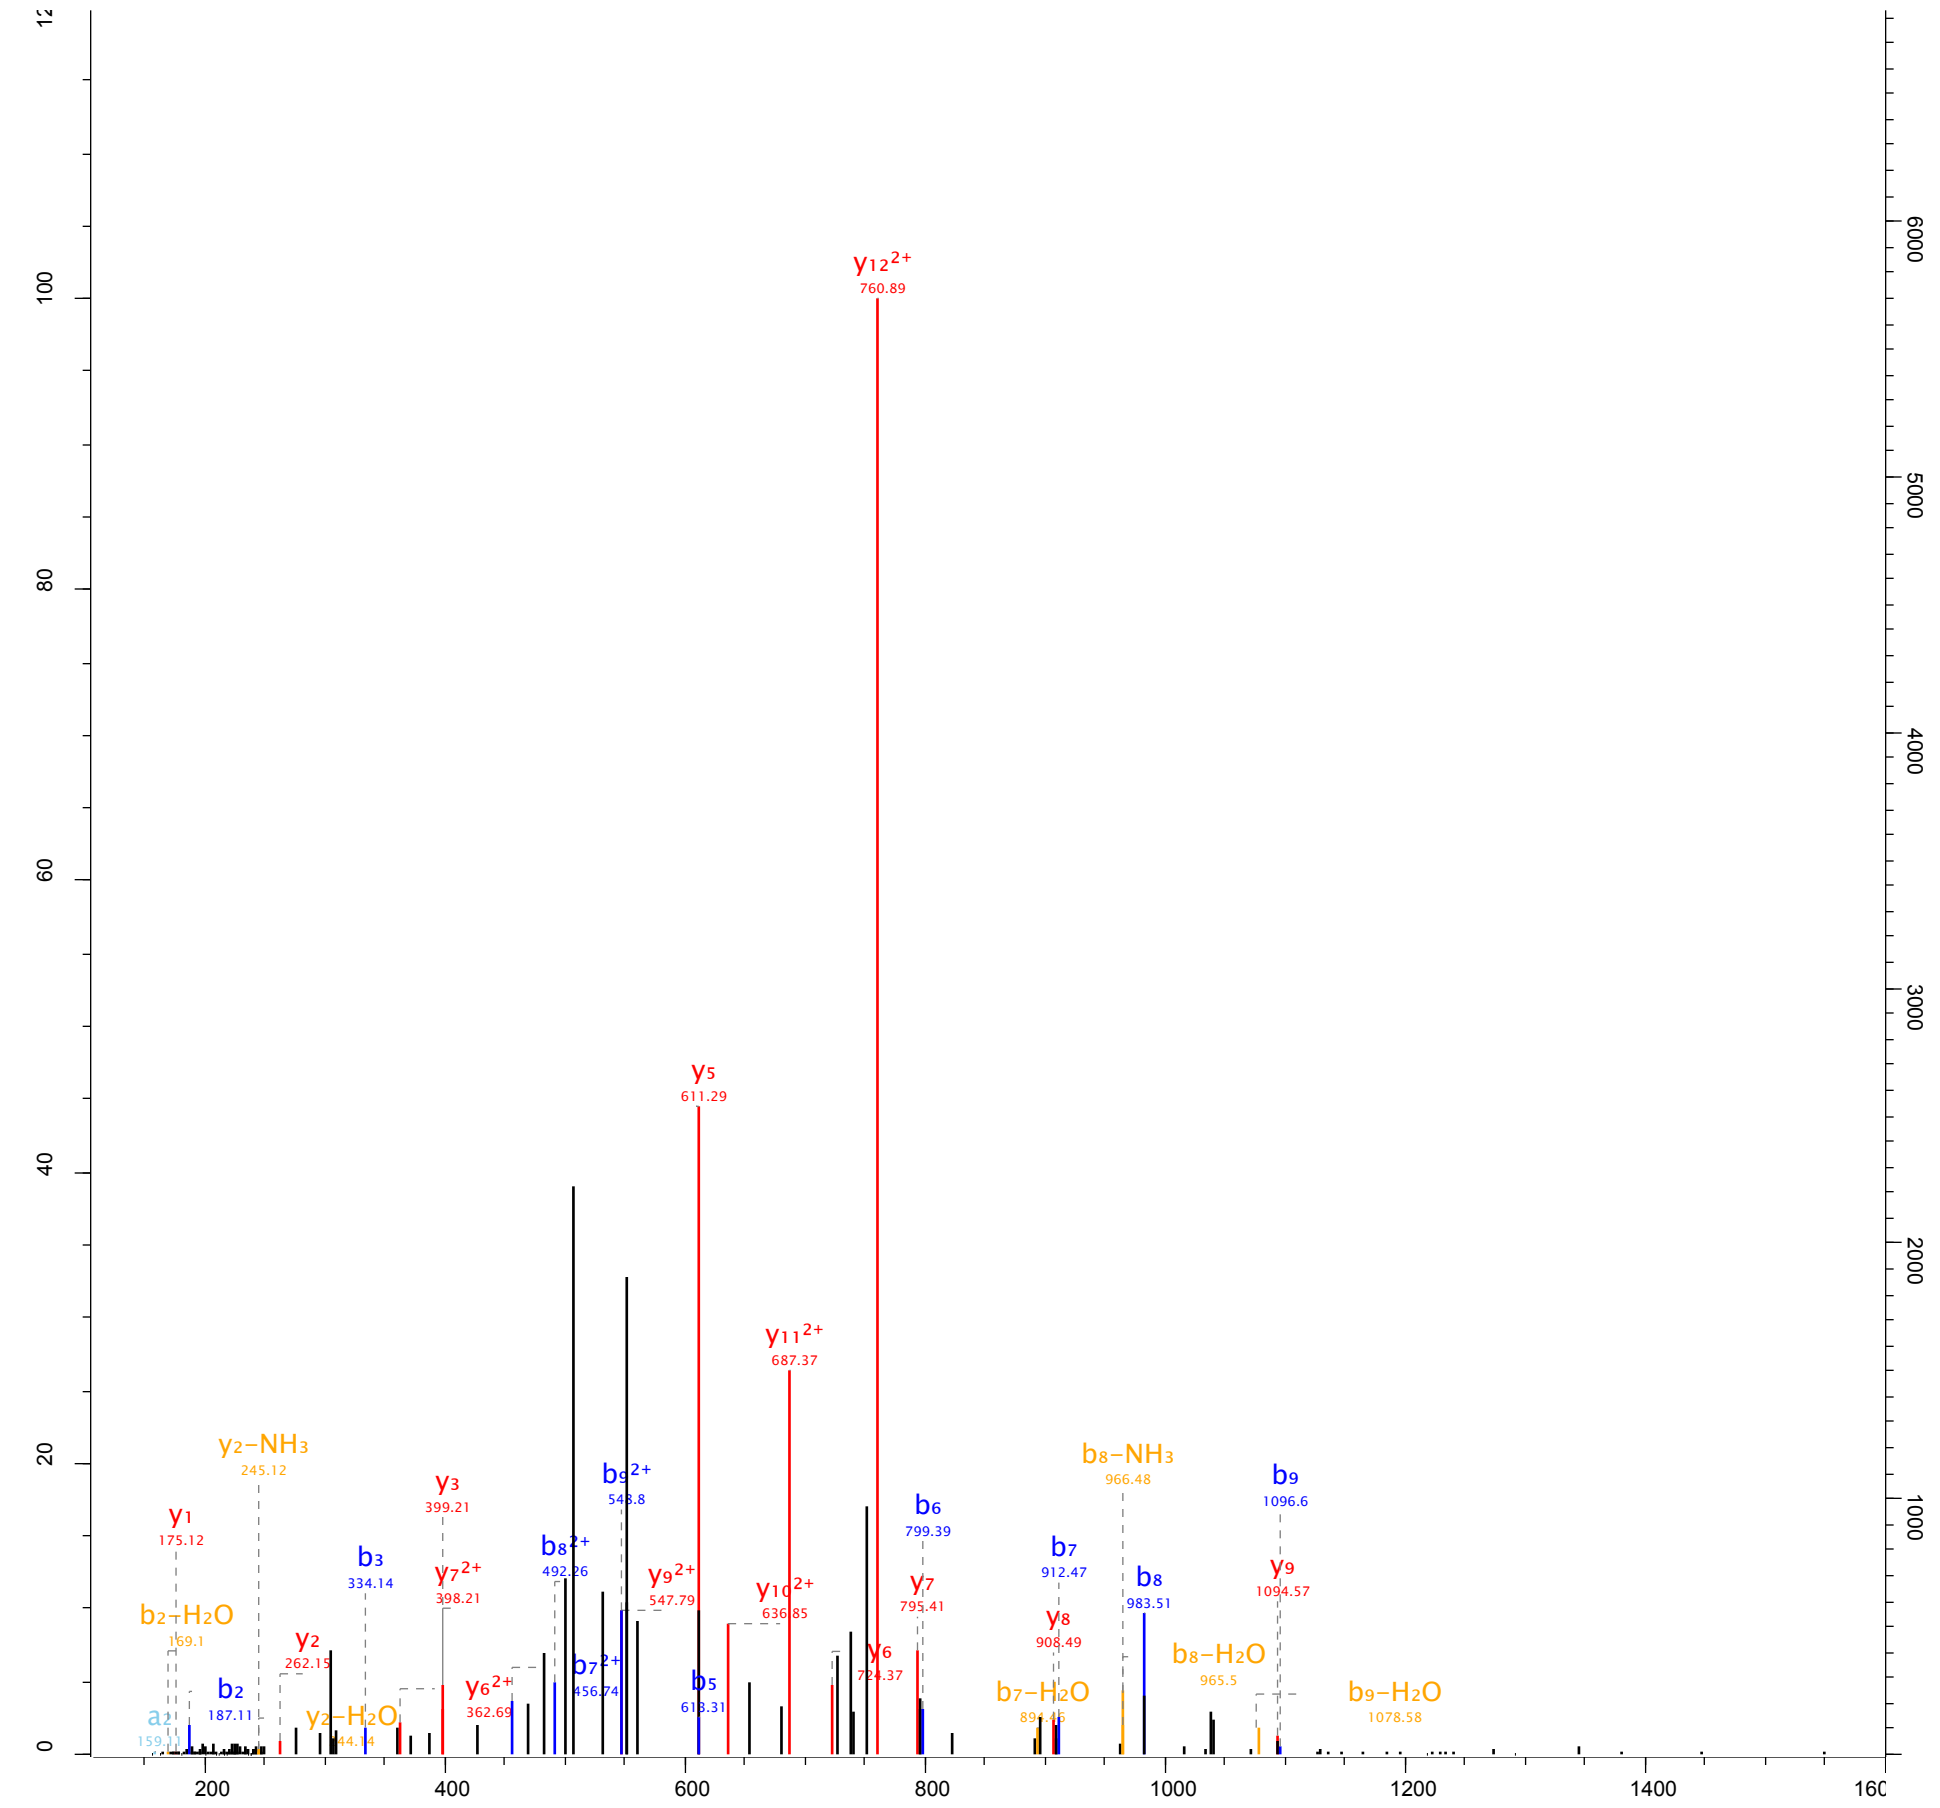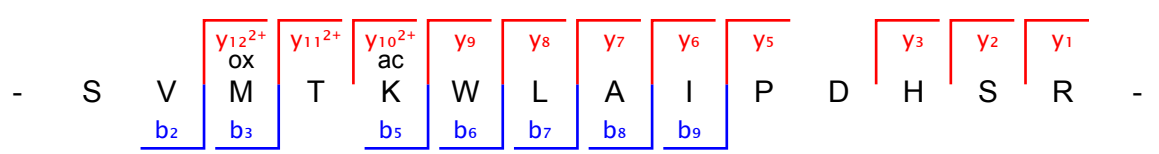

022714\_SCW\_II\_53\_8\_2ndZT

22146

ITMS; CID

219.58

934.97

Aldh1l1

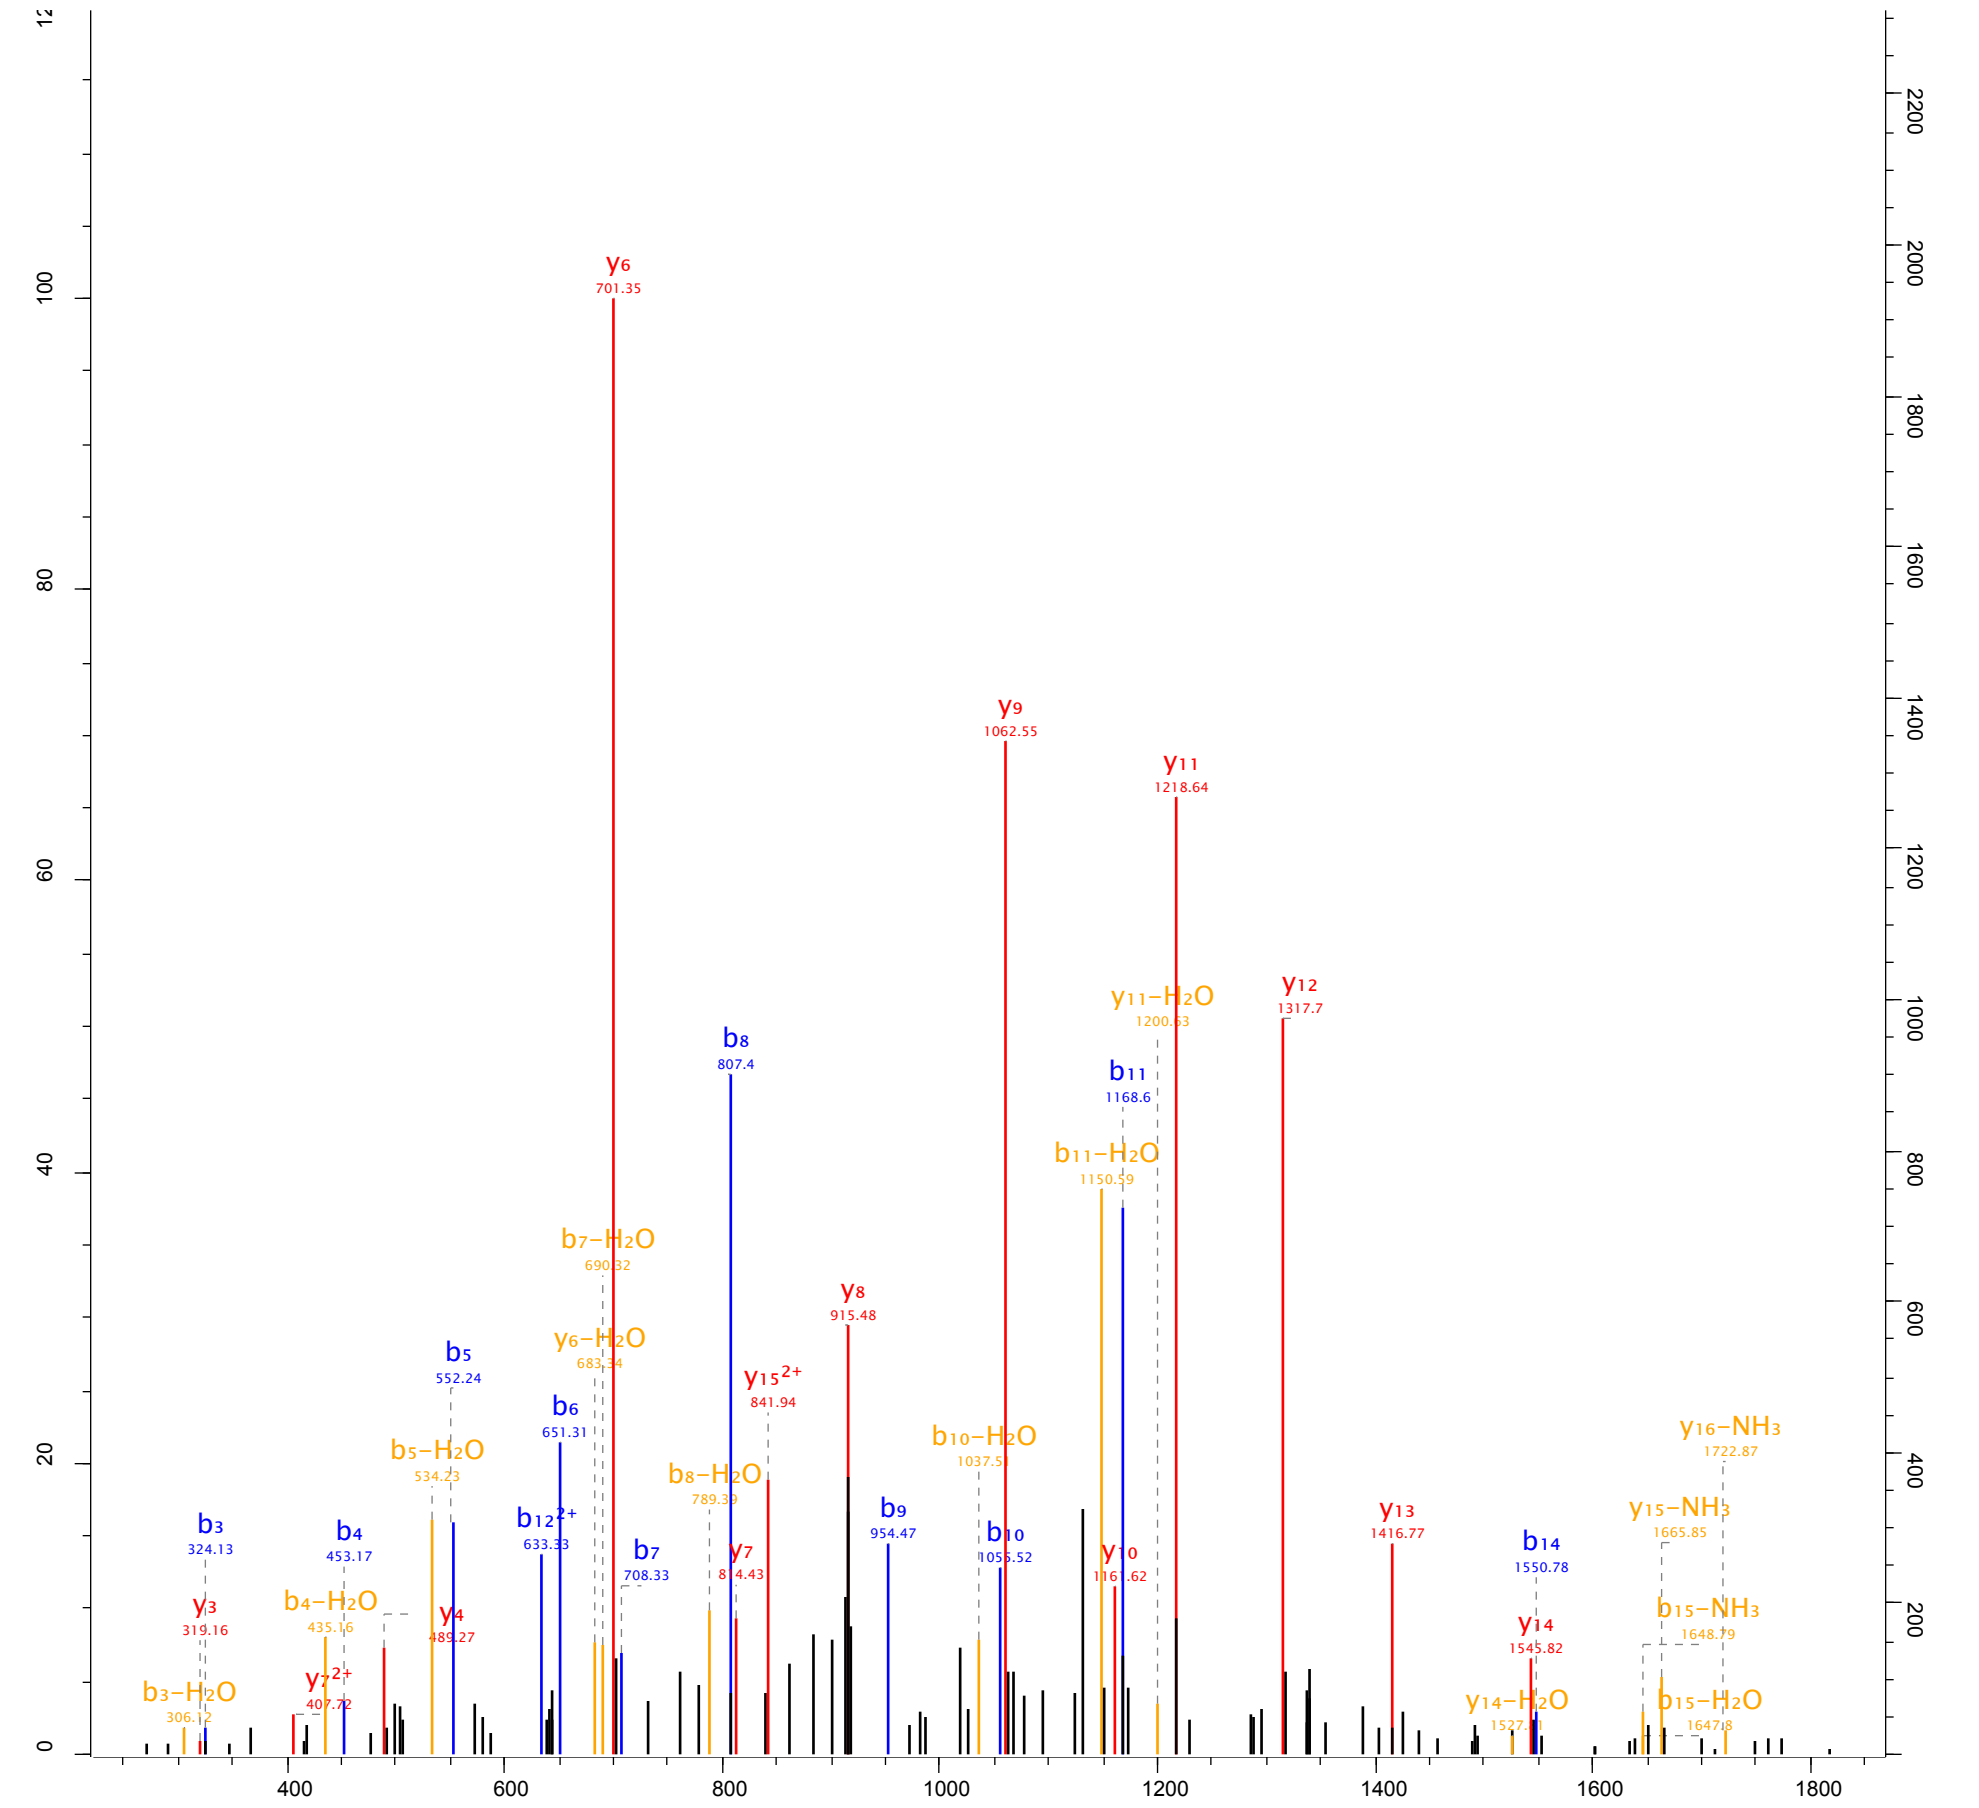

- E G y15+2 y14 y13 y12 y11 y10 y9 y8 y7 y6 D y4 ac y3 D G K -

b3 b4 b5 b6 b7 b8 b9 b10 b11 b12+2 b14



Raw file  
022714\_SCW\_II\_53\_8\_2ndZT

Scan 22212 Method ITMS; CID Score 252.37 m/z 770.44 Gene names DId

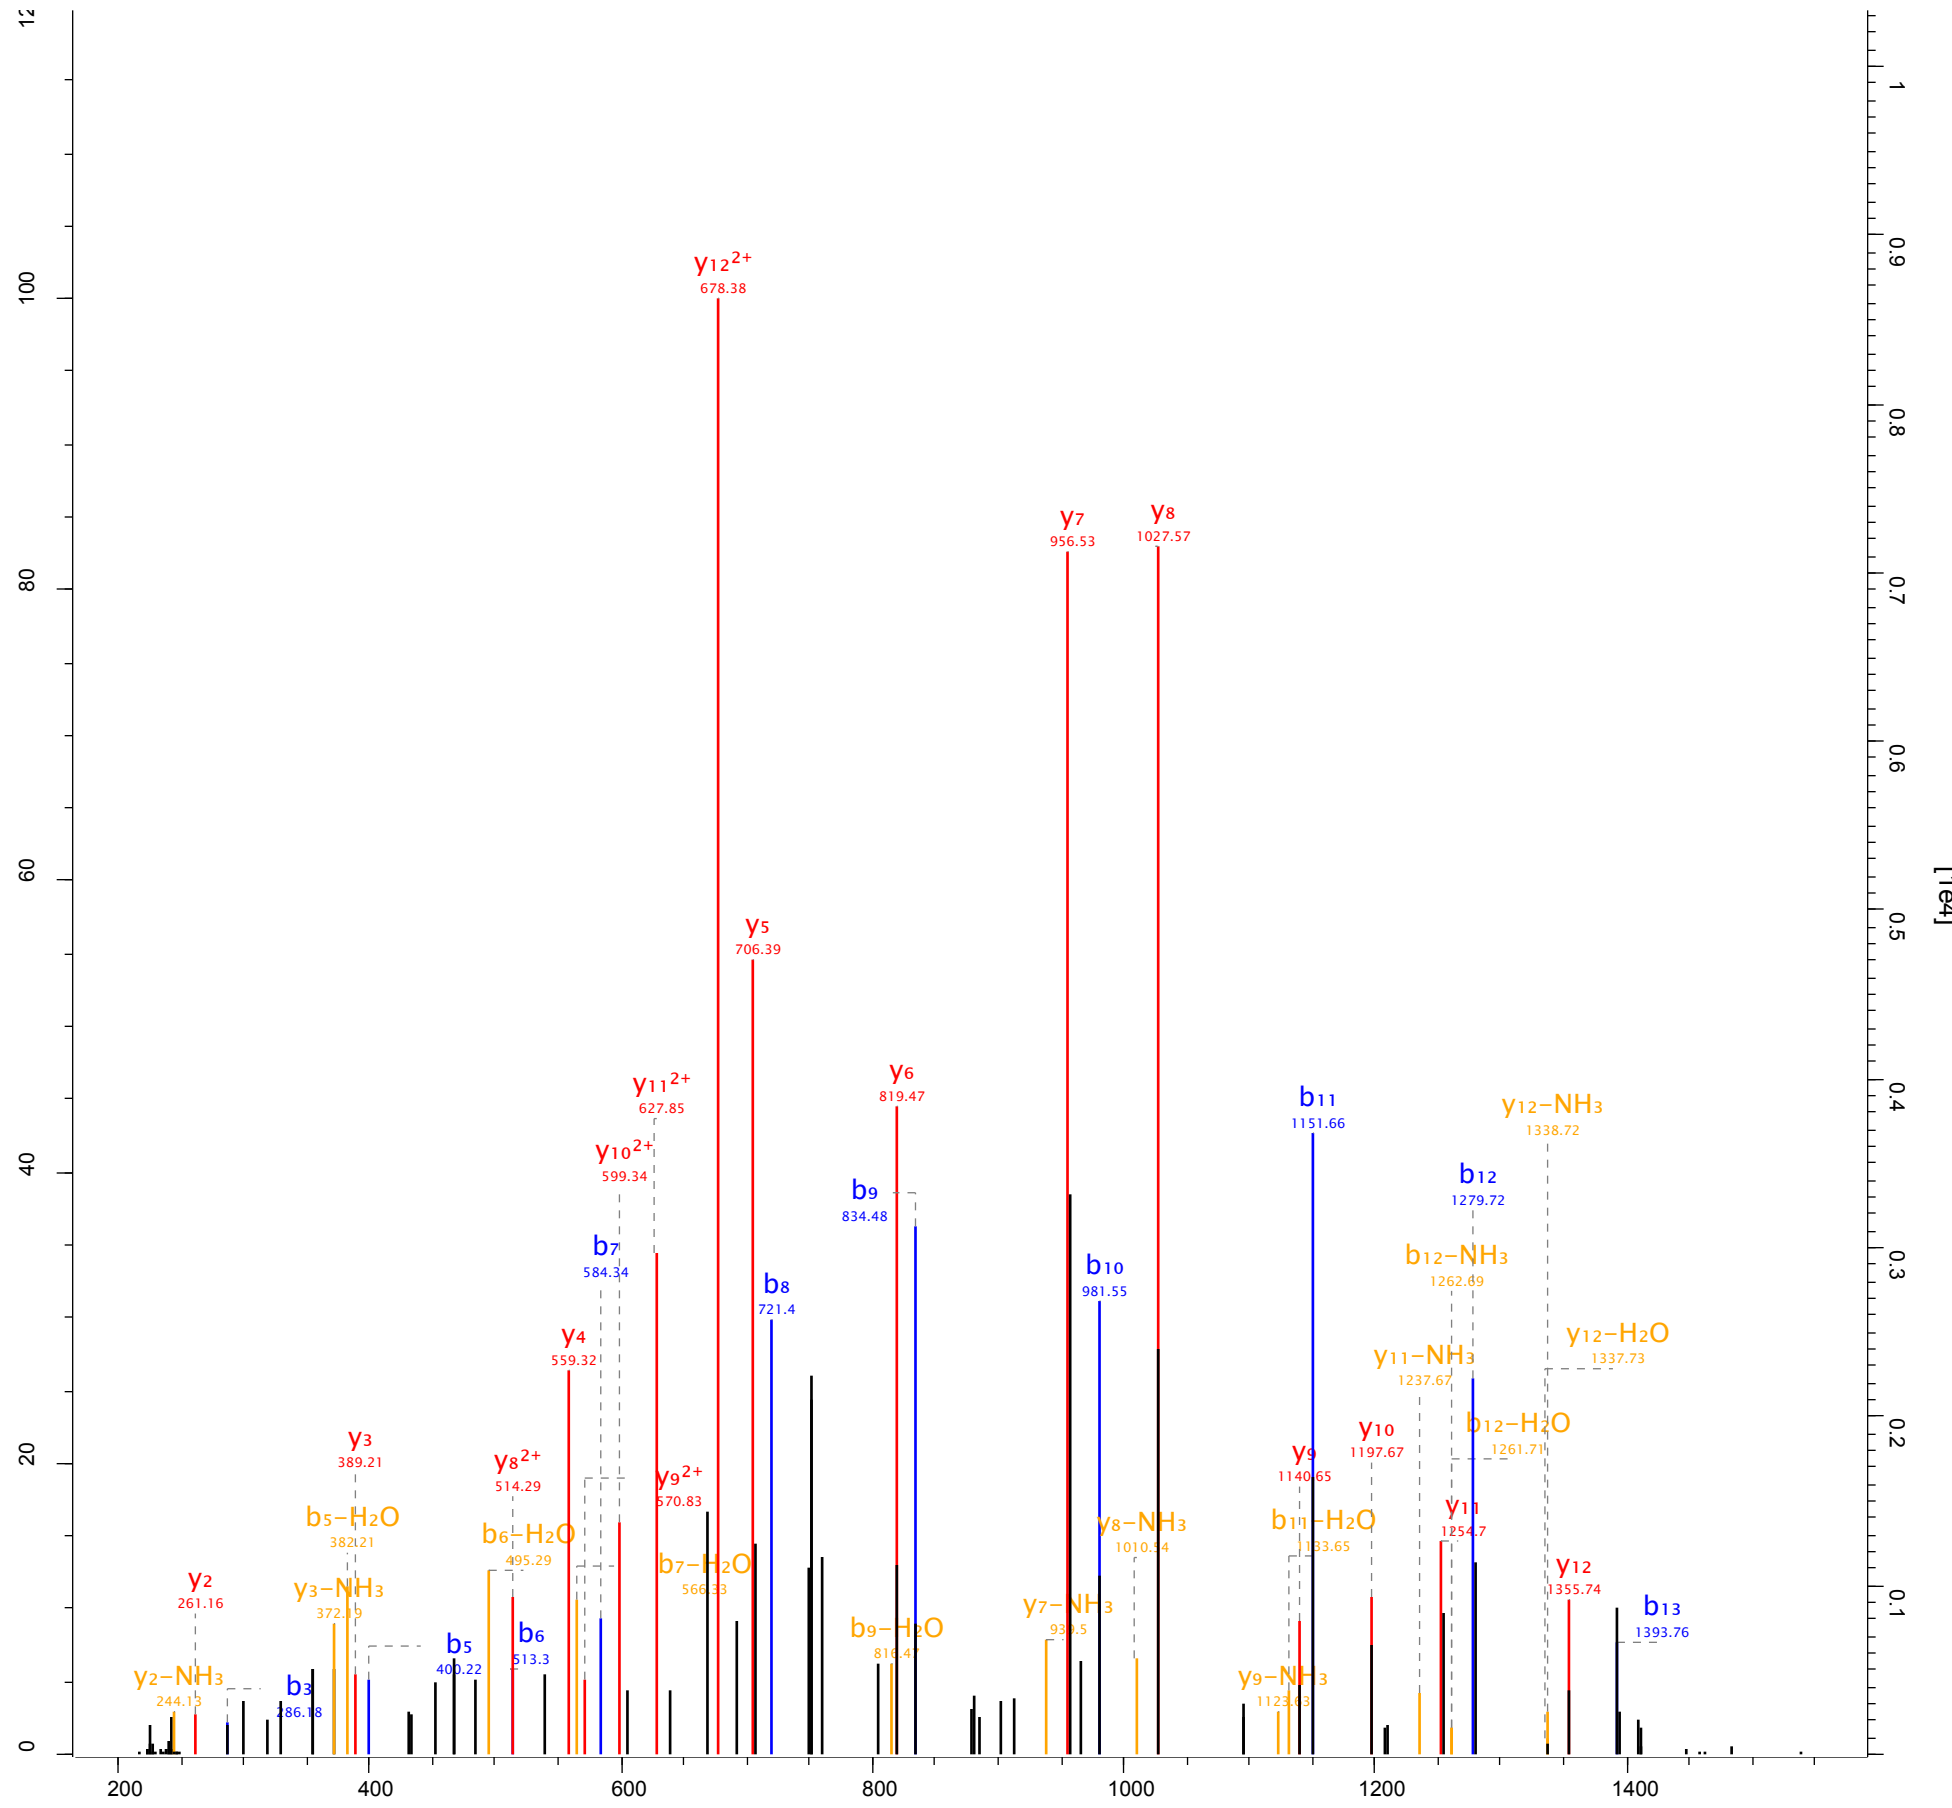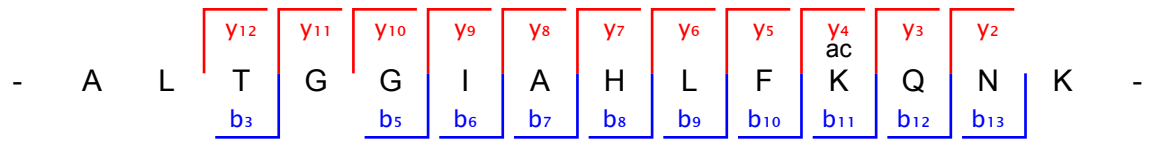

Raw file 022714\_SCW\_II\_53\_8\_2ndZT Scan 24435 Method ITMS; CID 147.75 m/z 617.68 Gene names Vdac1

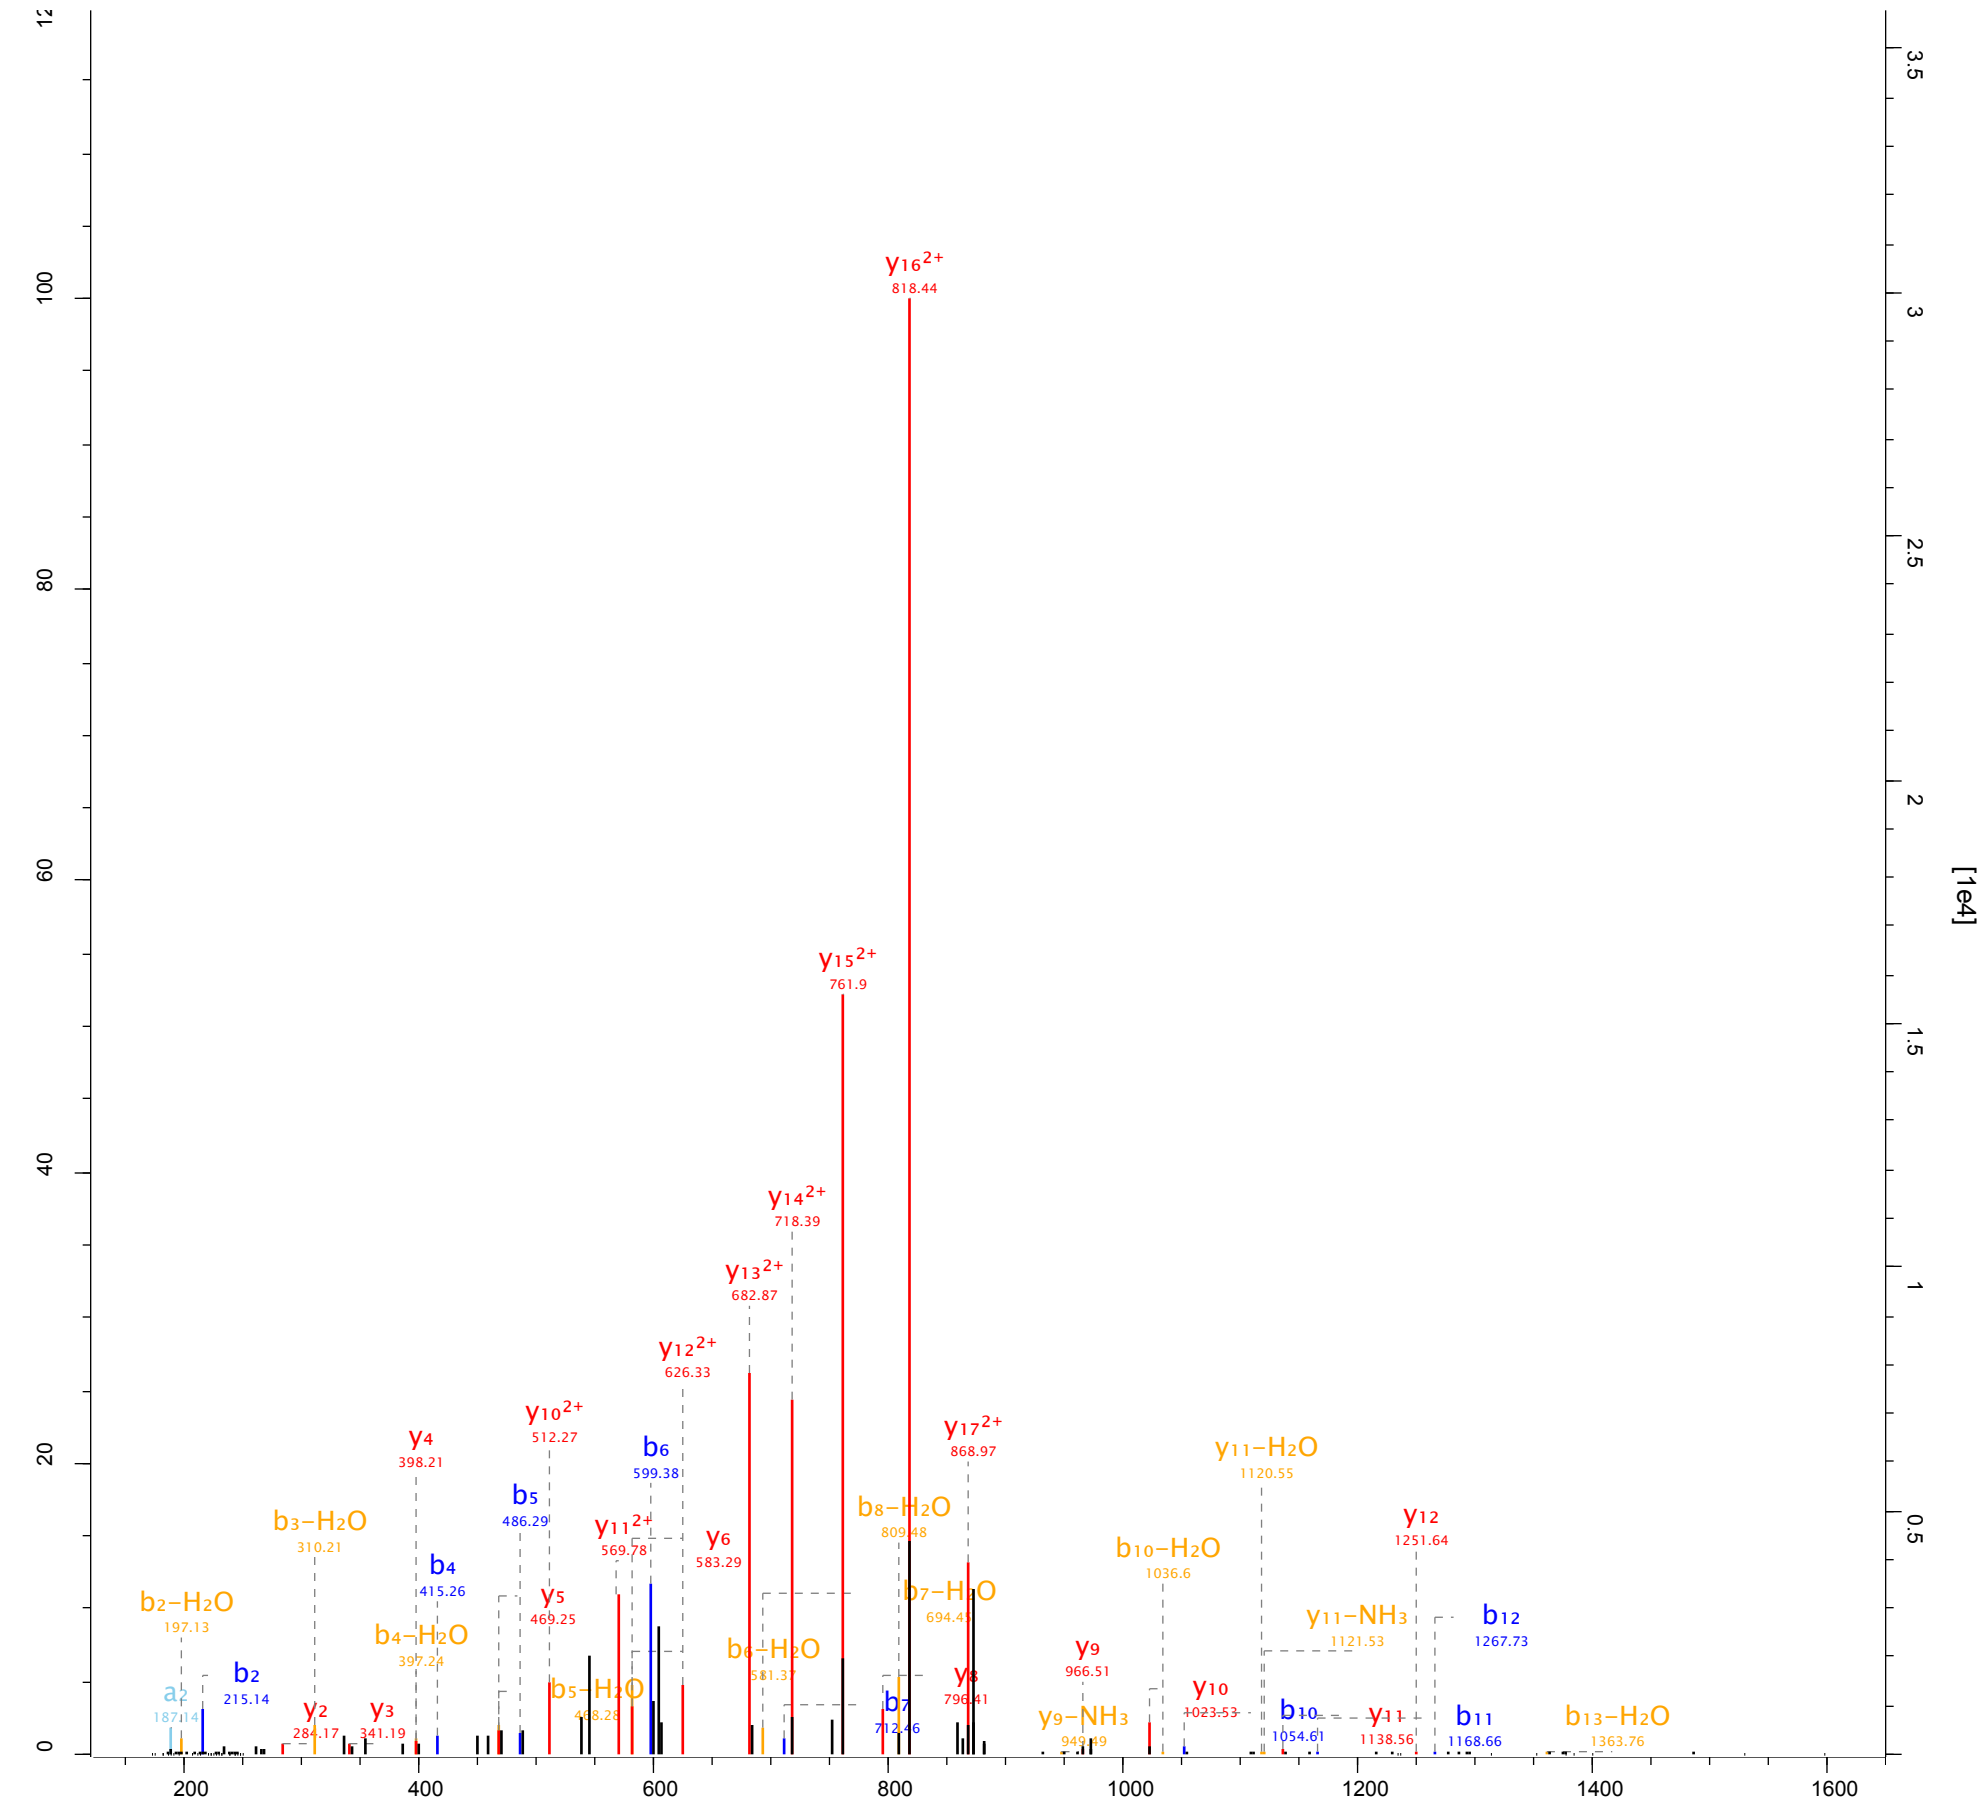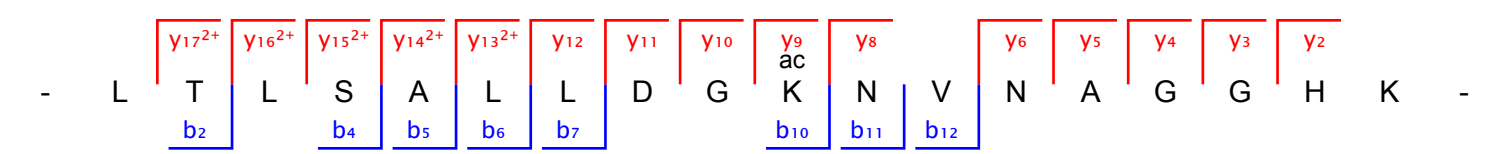

022714\_SCW\_II\_53\_8\_2ndZT

25033

ITMS; CID

147.39

602.67

Gfap

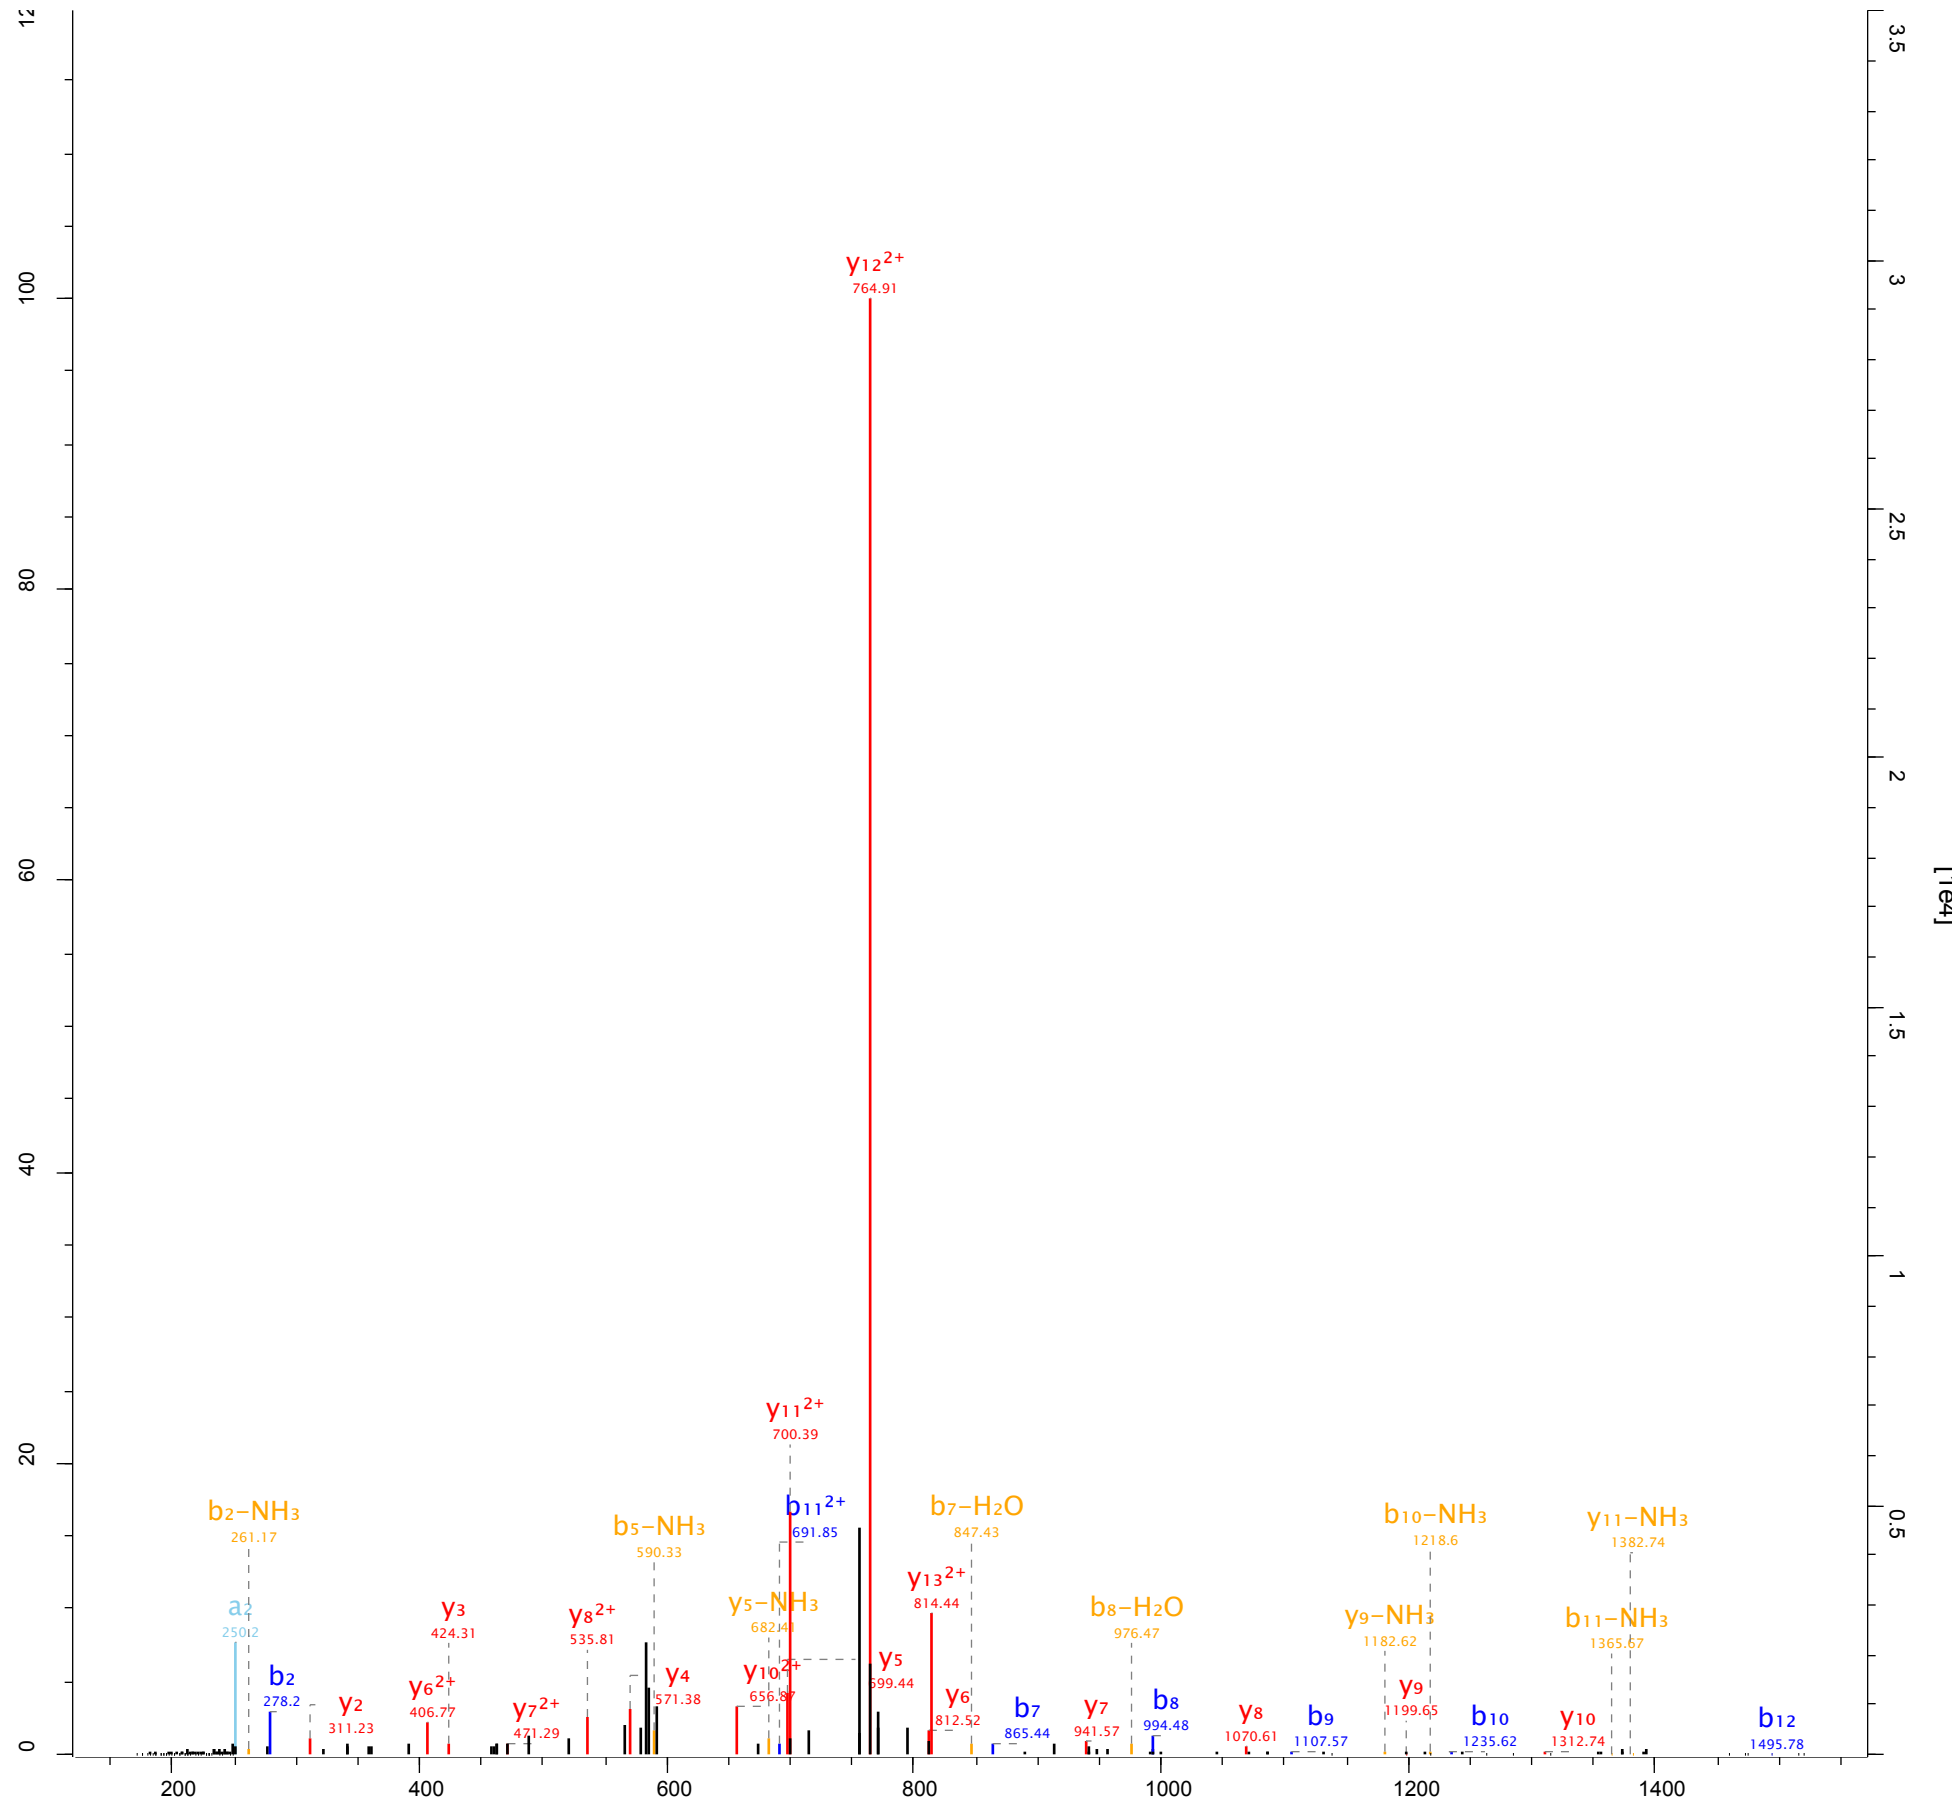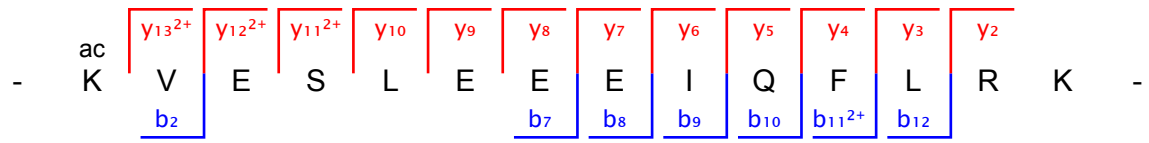

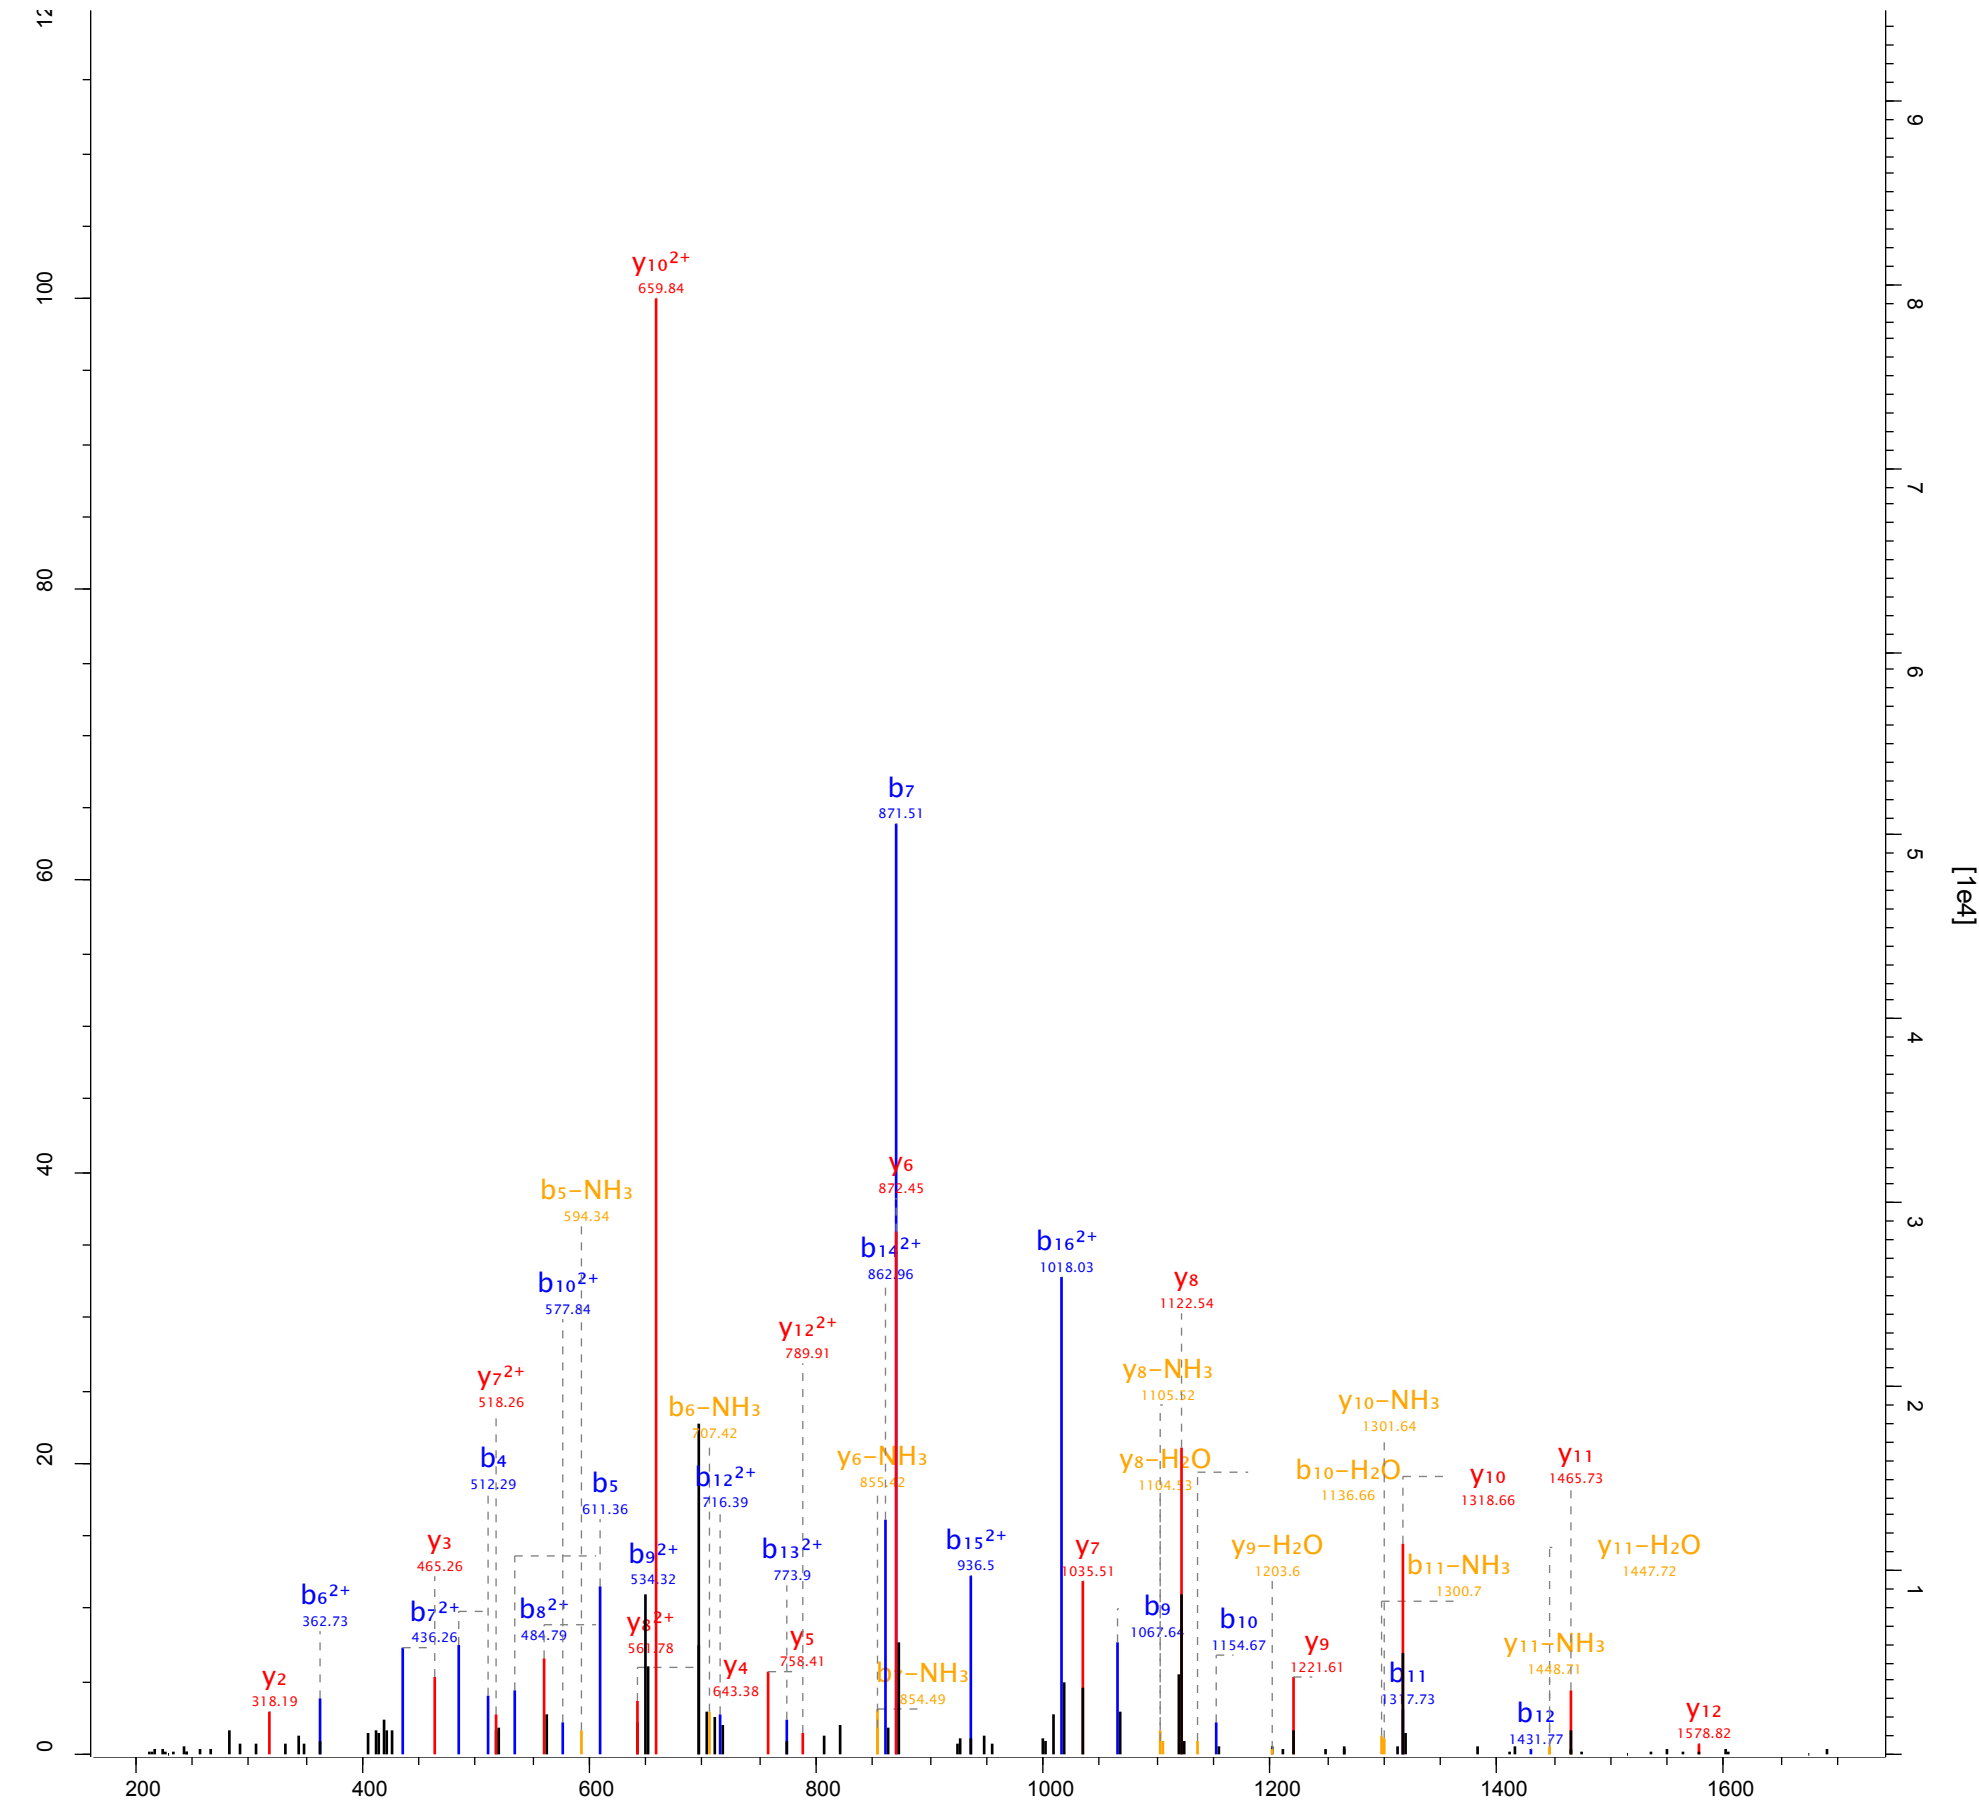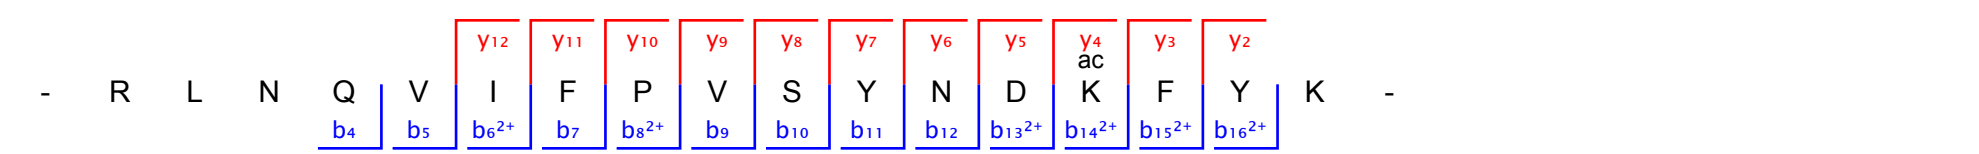

022714\_SCW\_II\_53\_8\_2ndZT

26153

ITMS; CID

143.25

639.69

Uvrq

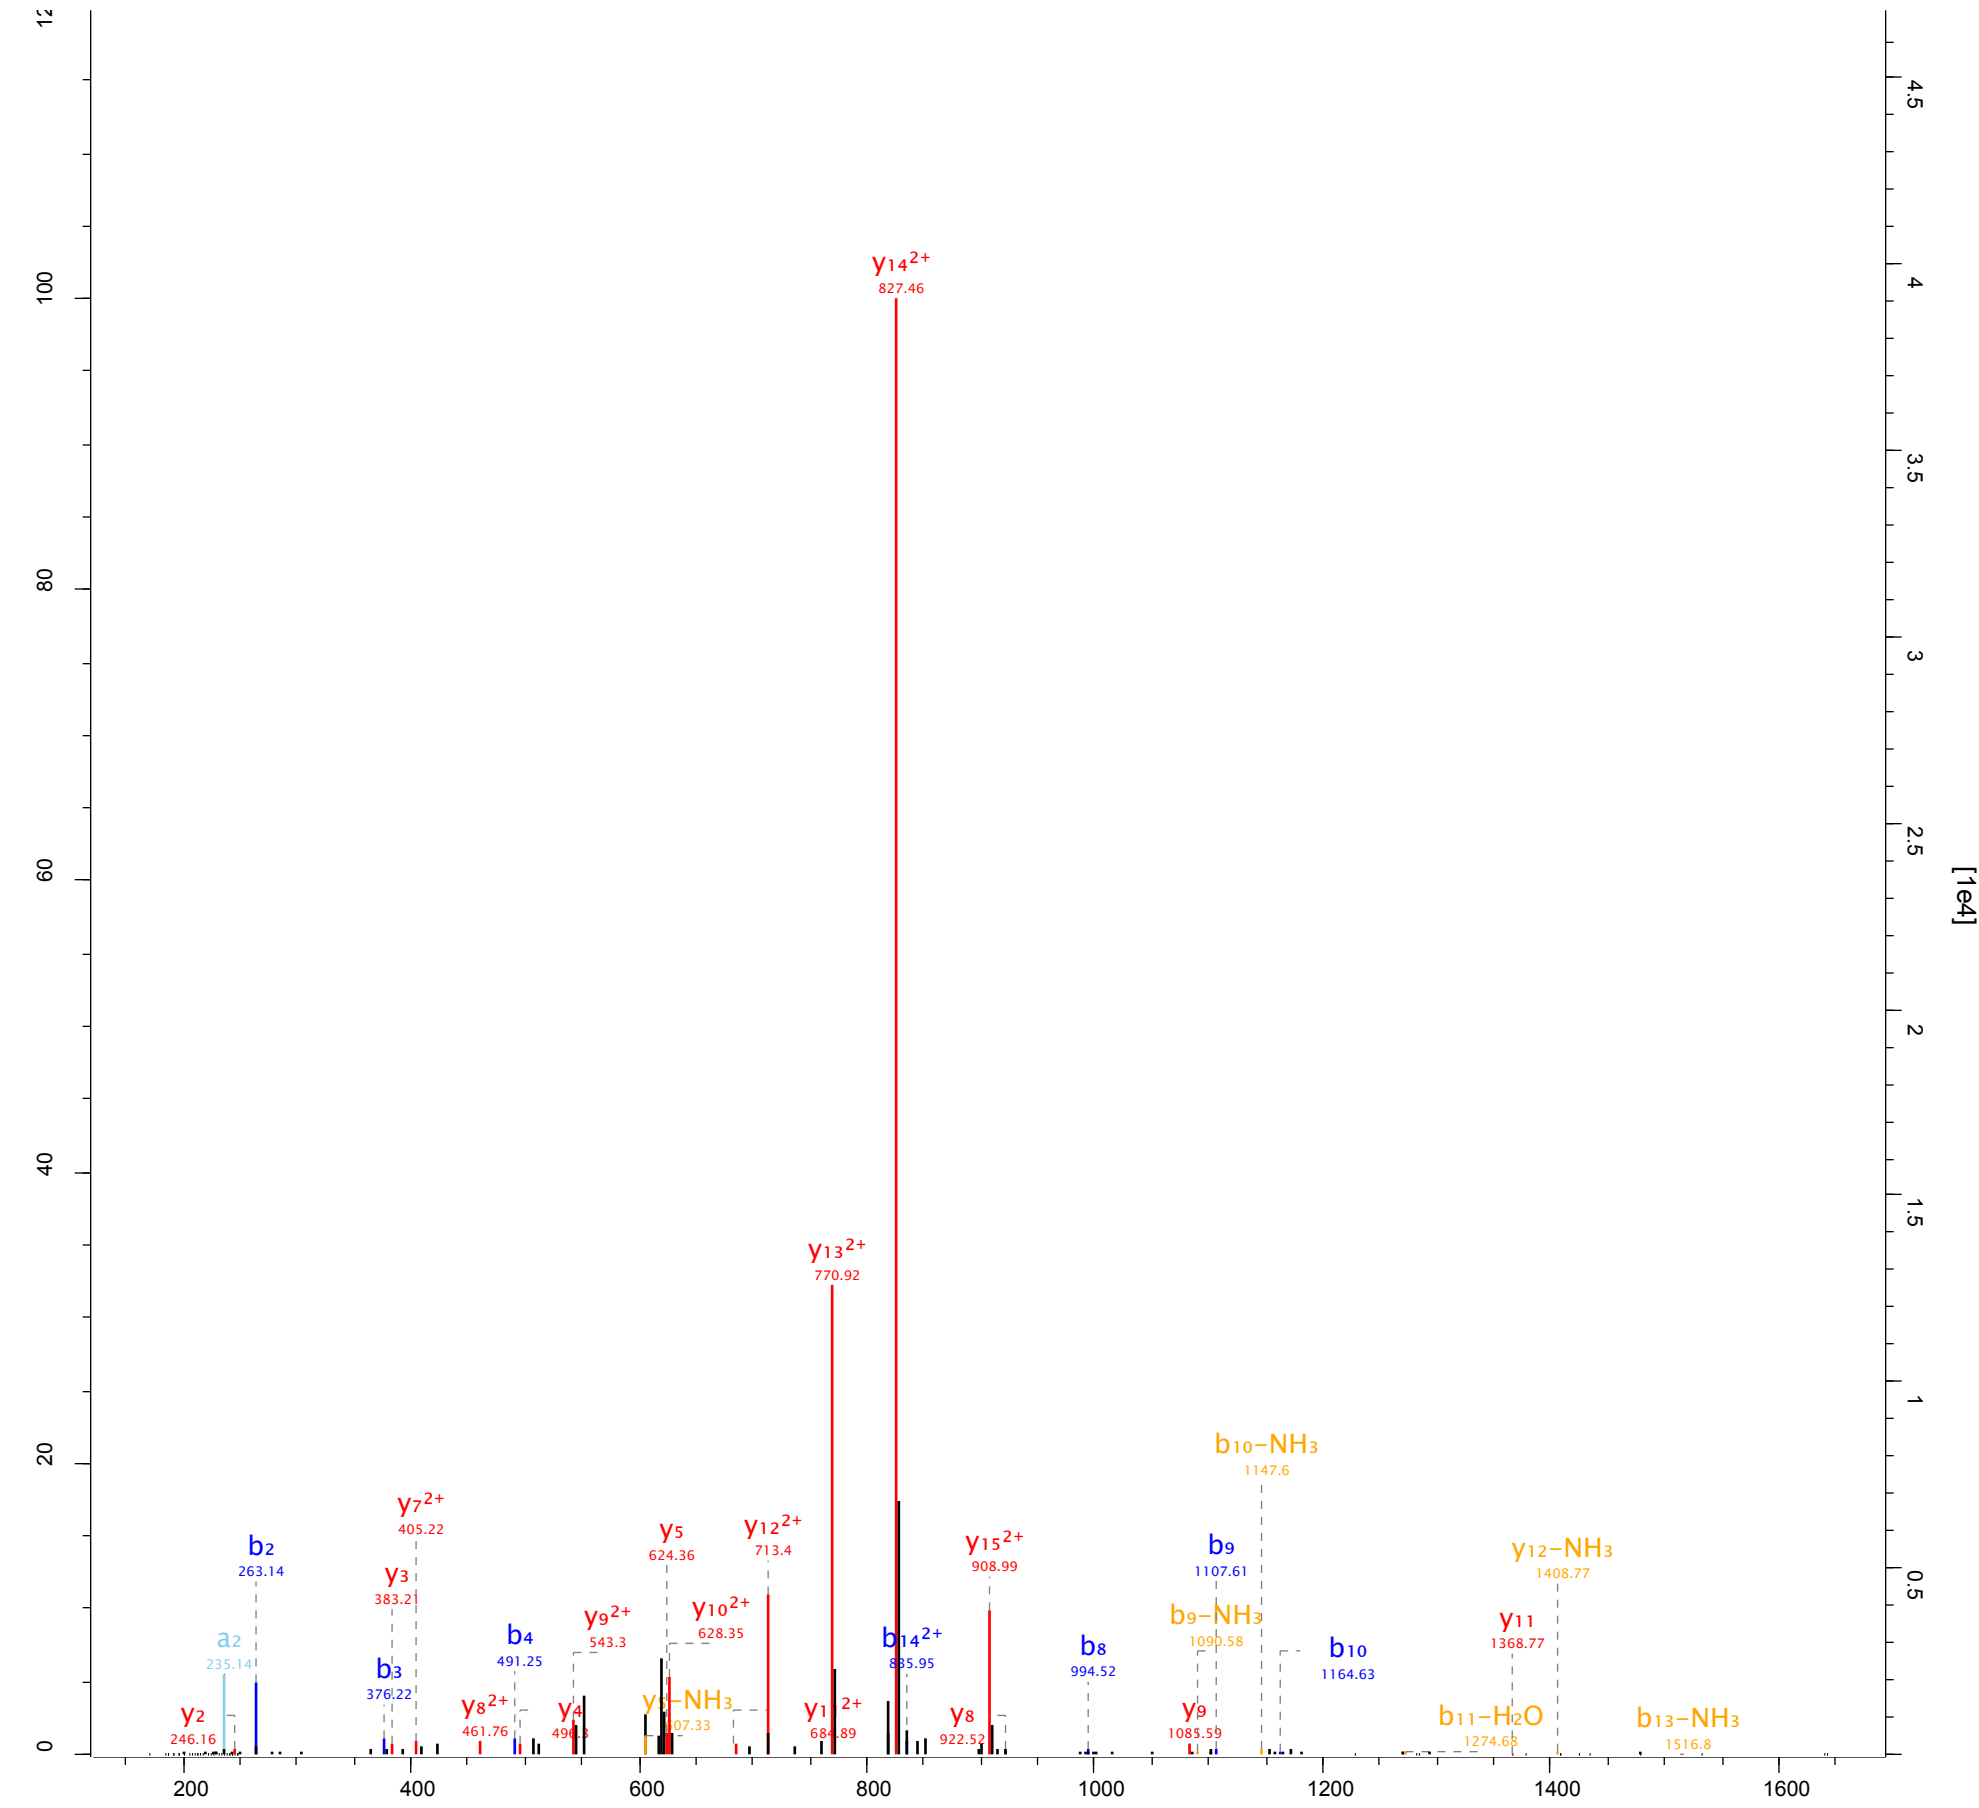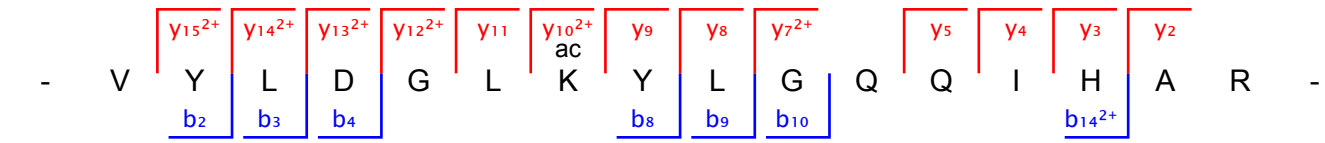

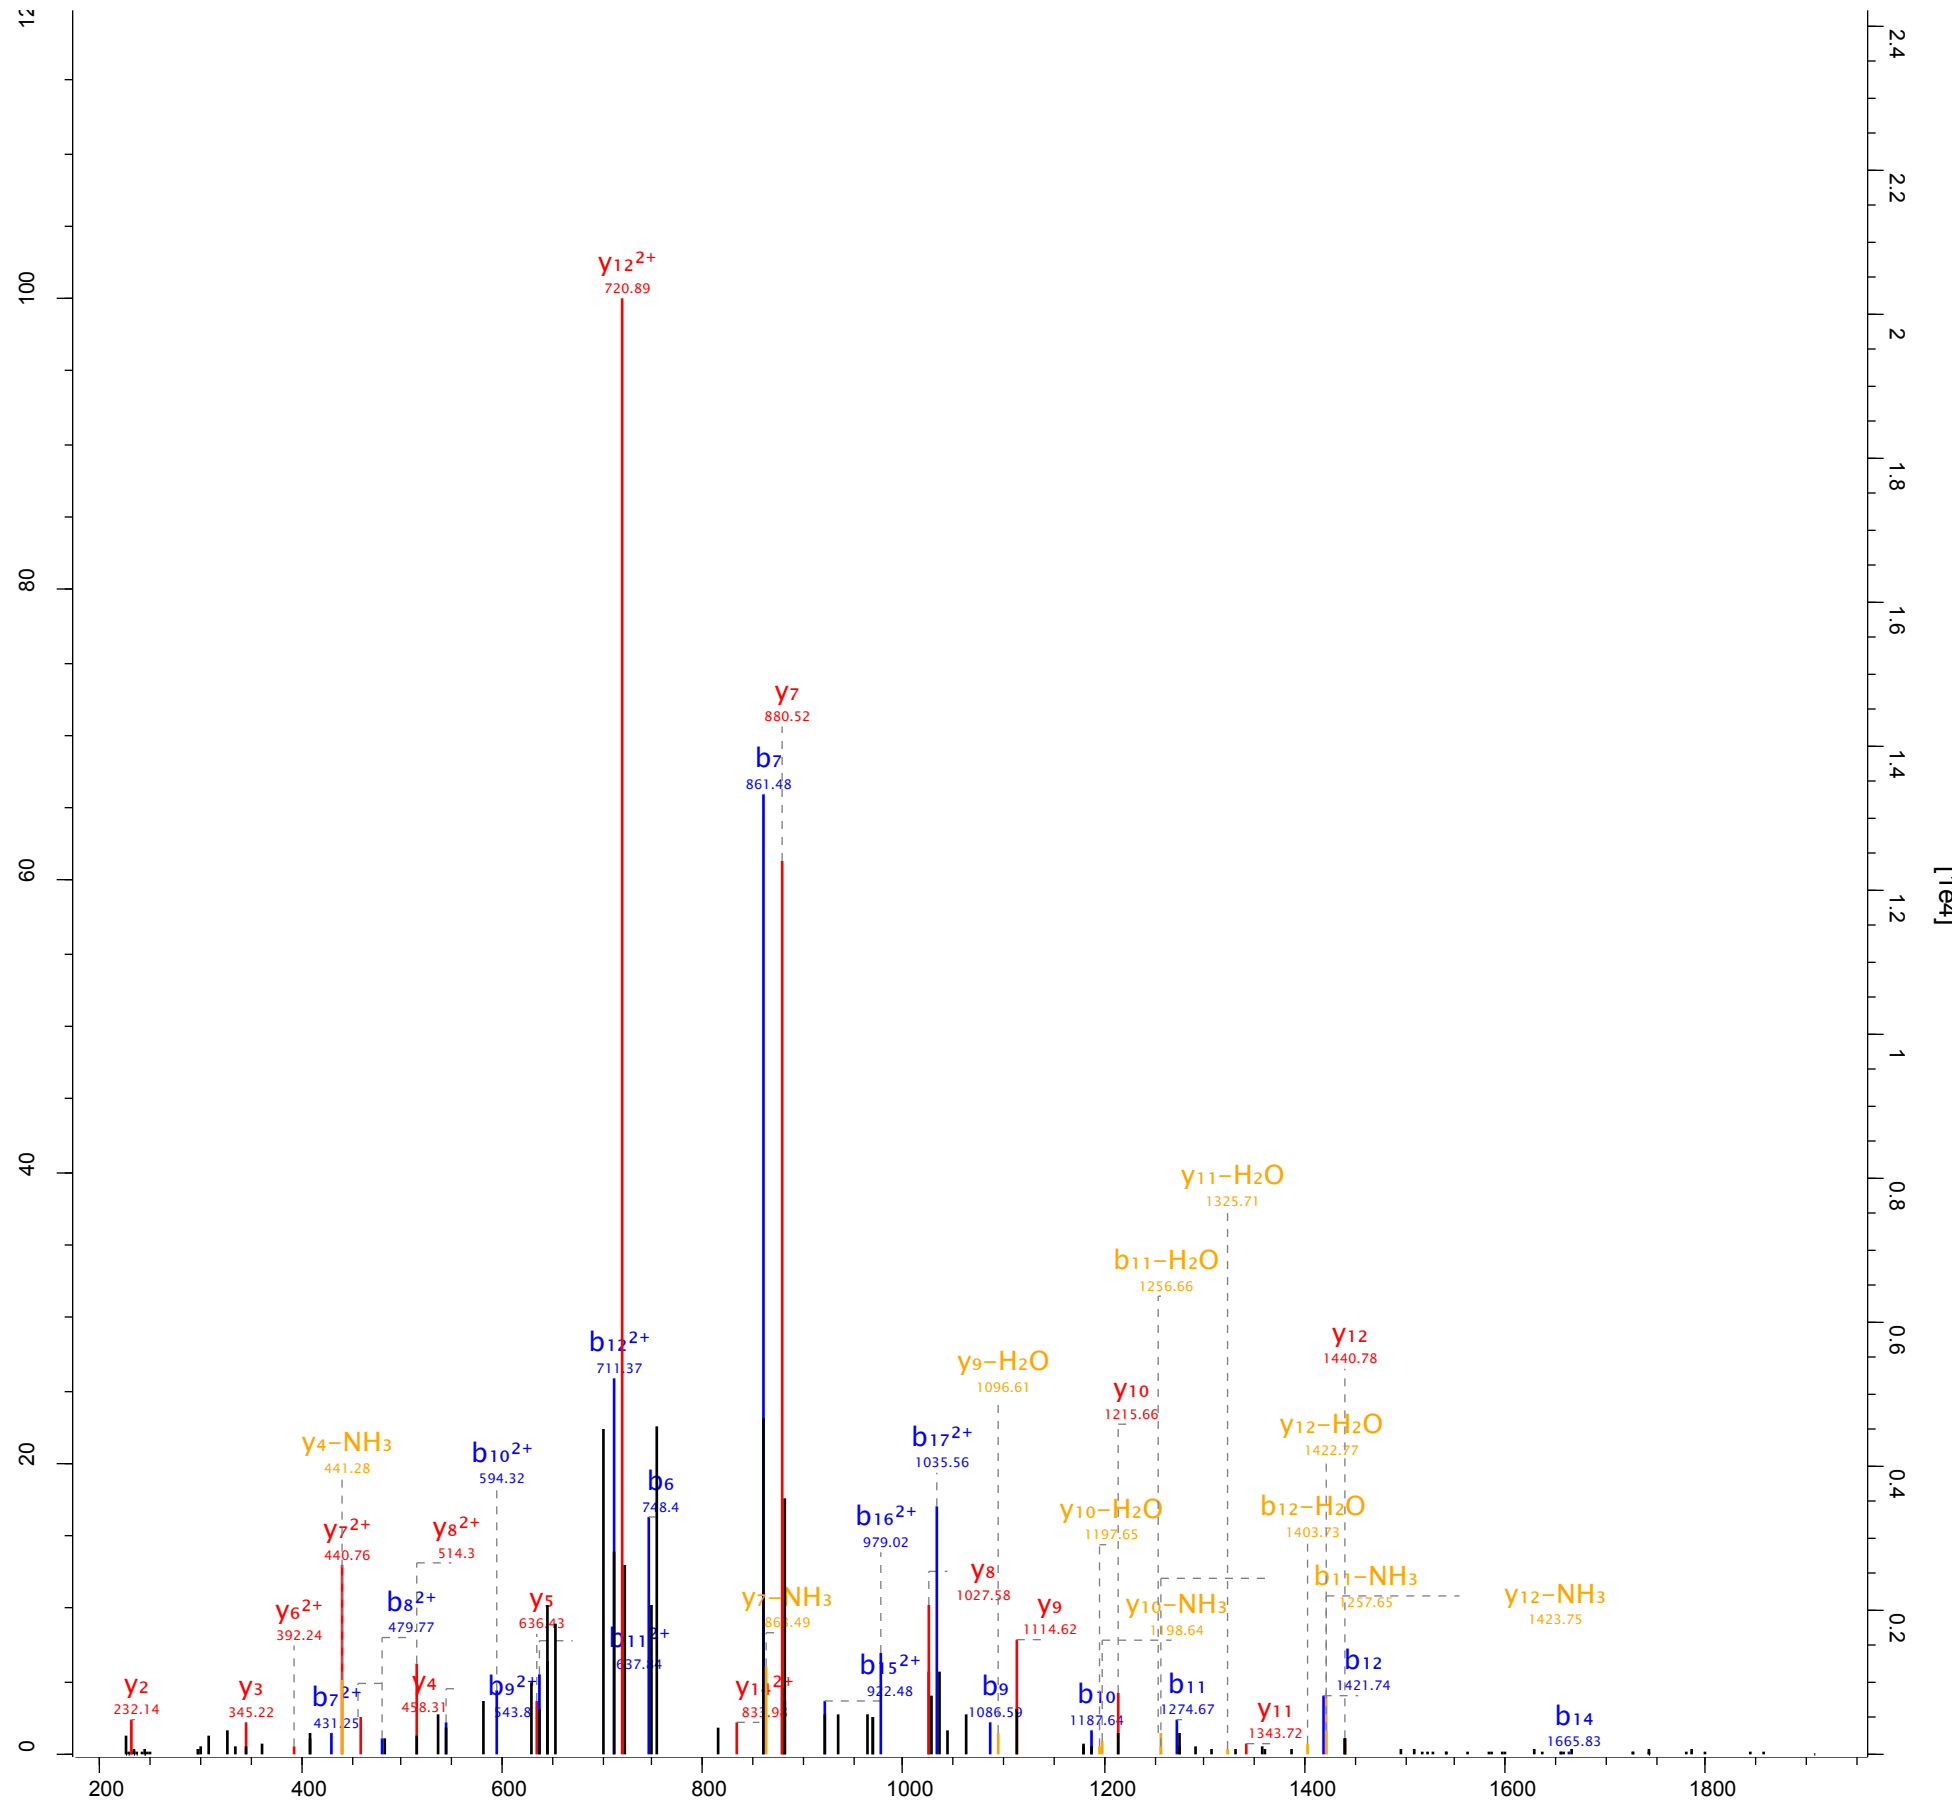

- Y R D T V L L P Q T S F P M K L L G R -

b<sub>6</sub> b<sub>7</sub> b<sub>8</sub><sup>2+</sup> b<sub>9</sub> b<sub>10</sub> b<sub>11</sub> b<sub>12</sub> b<sub>14</sub> b<sub>15</sub><sup>2+</sup> b<sub>16</sub><sup>2+</sup> b<sub>17</sub><sup>2+</sup>

022714\_SCW\_II\_53\_9\_2ndZT

10898 ITMS; CID 120.84 544.6 Cox17

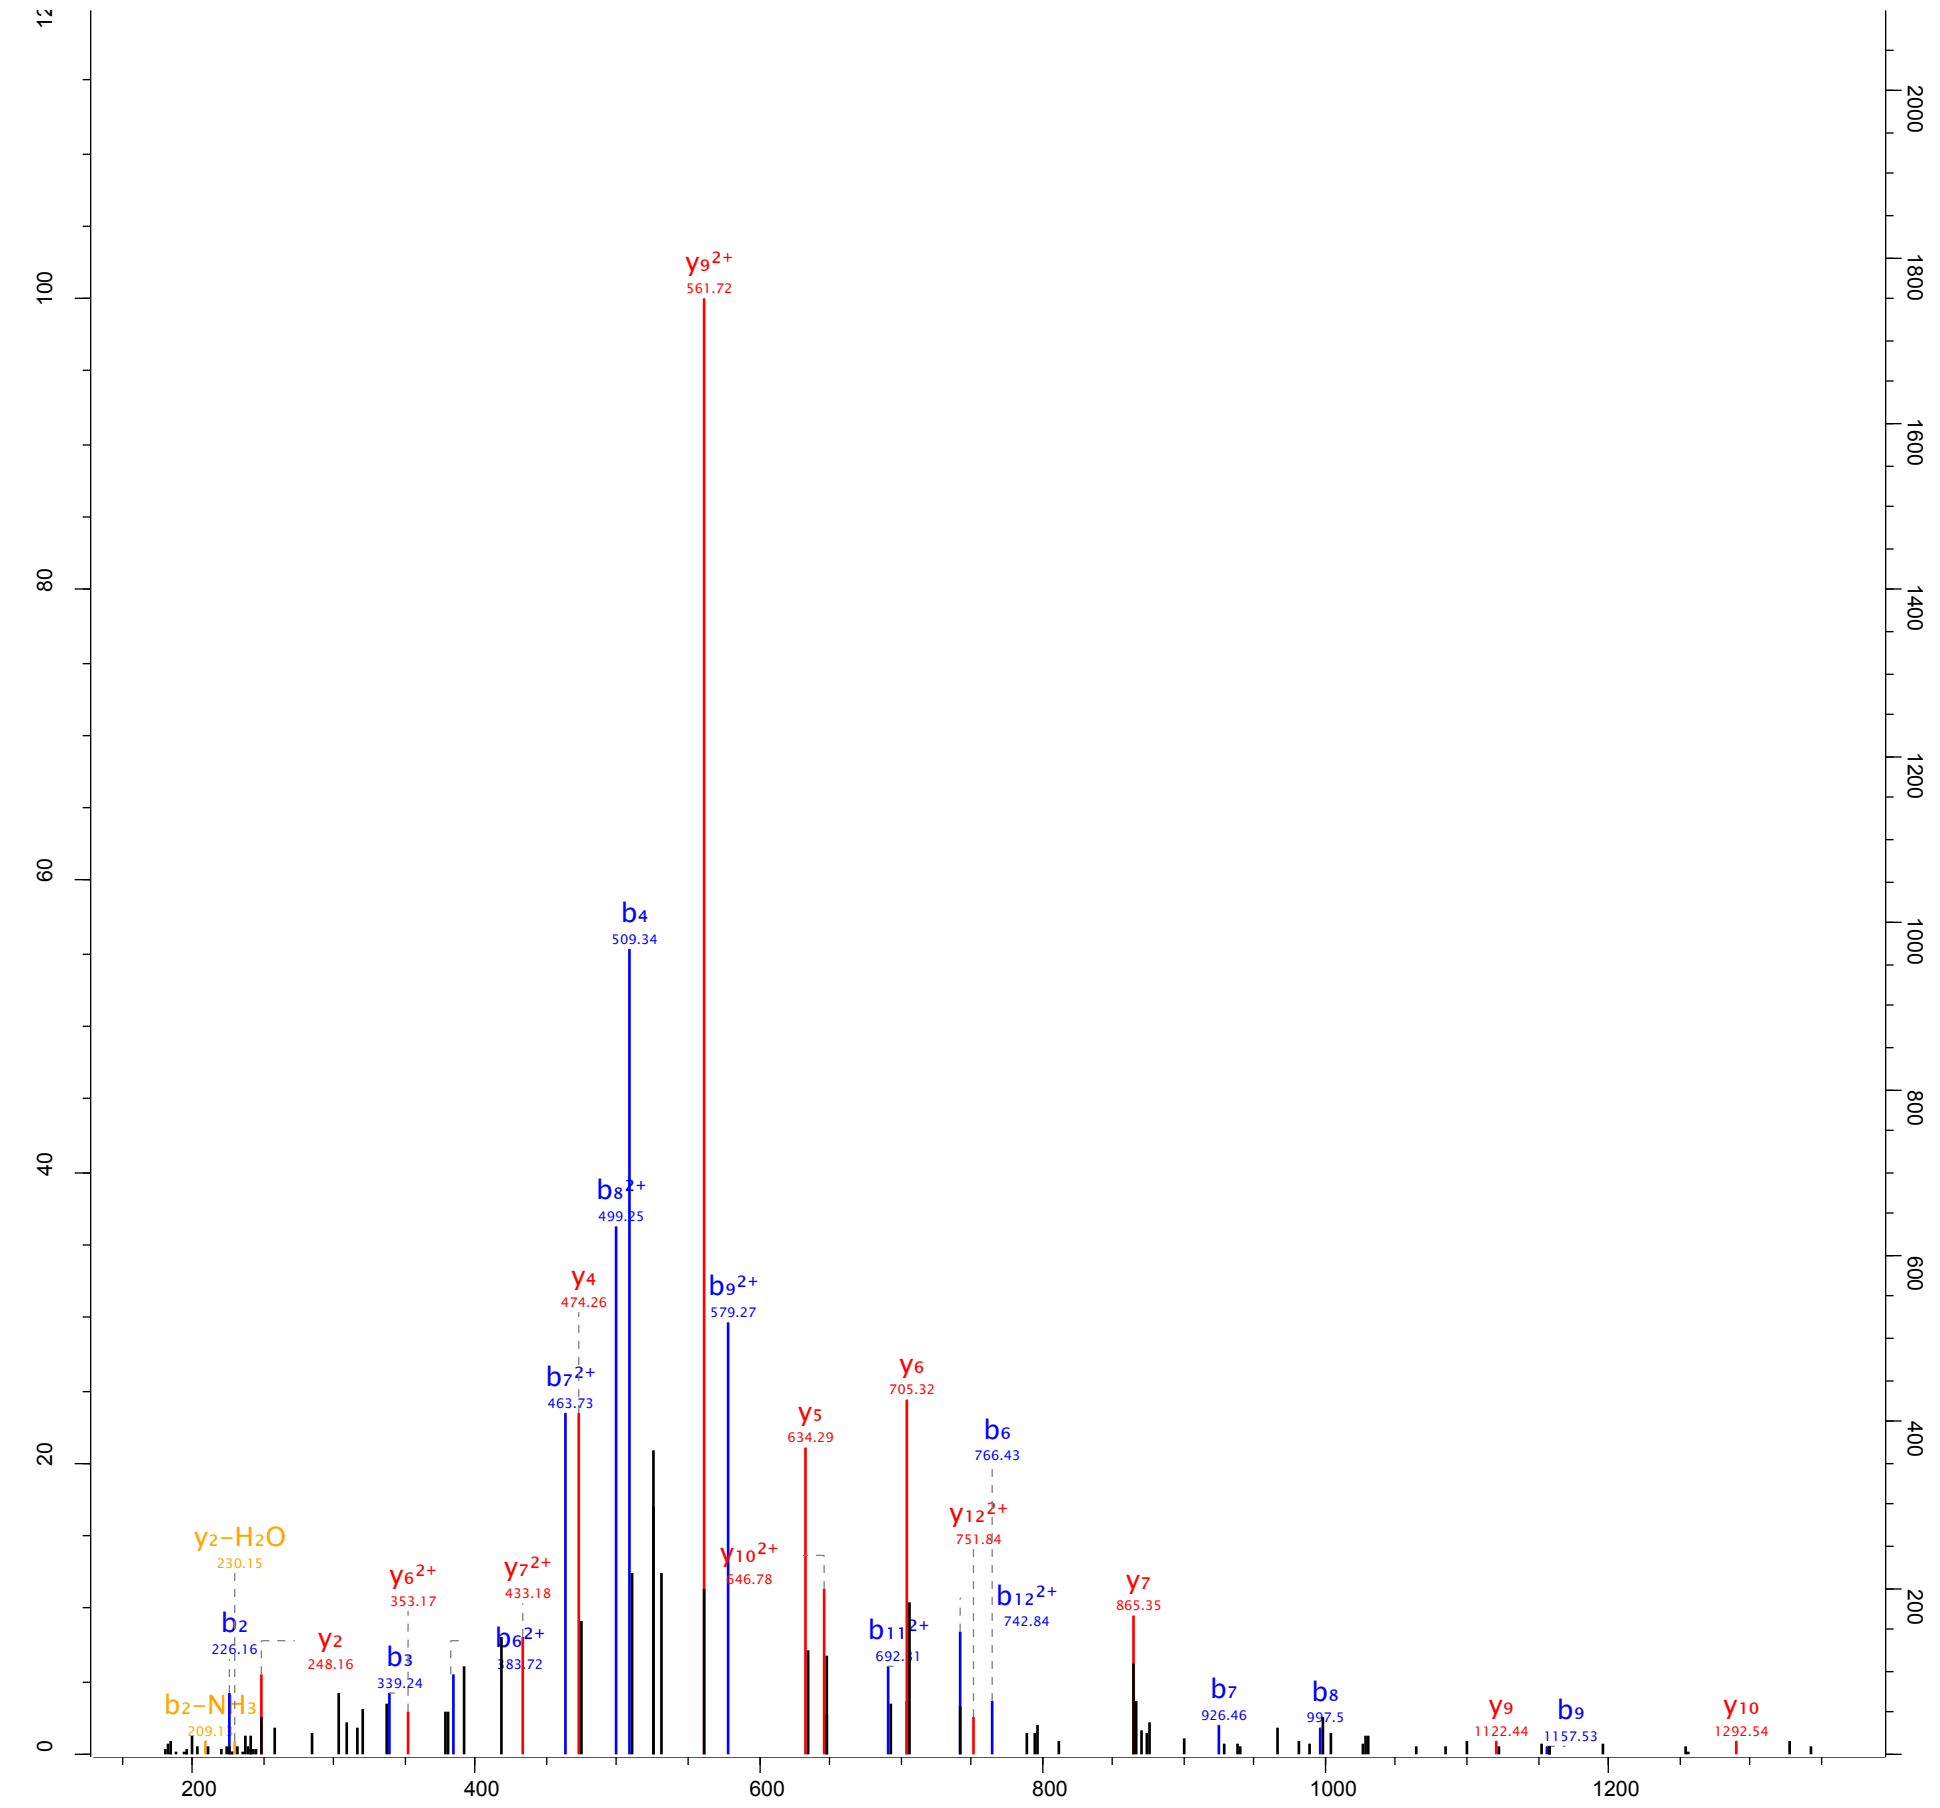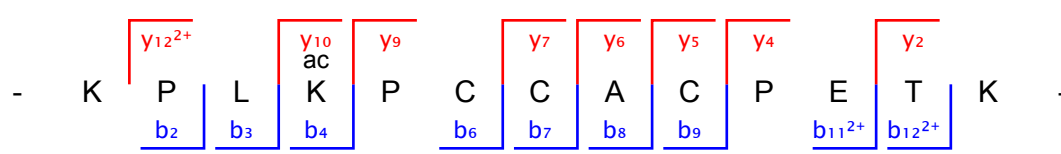

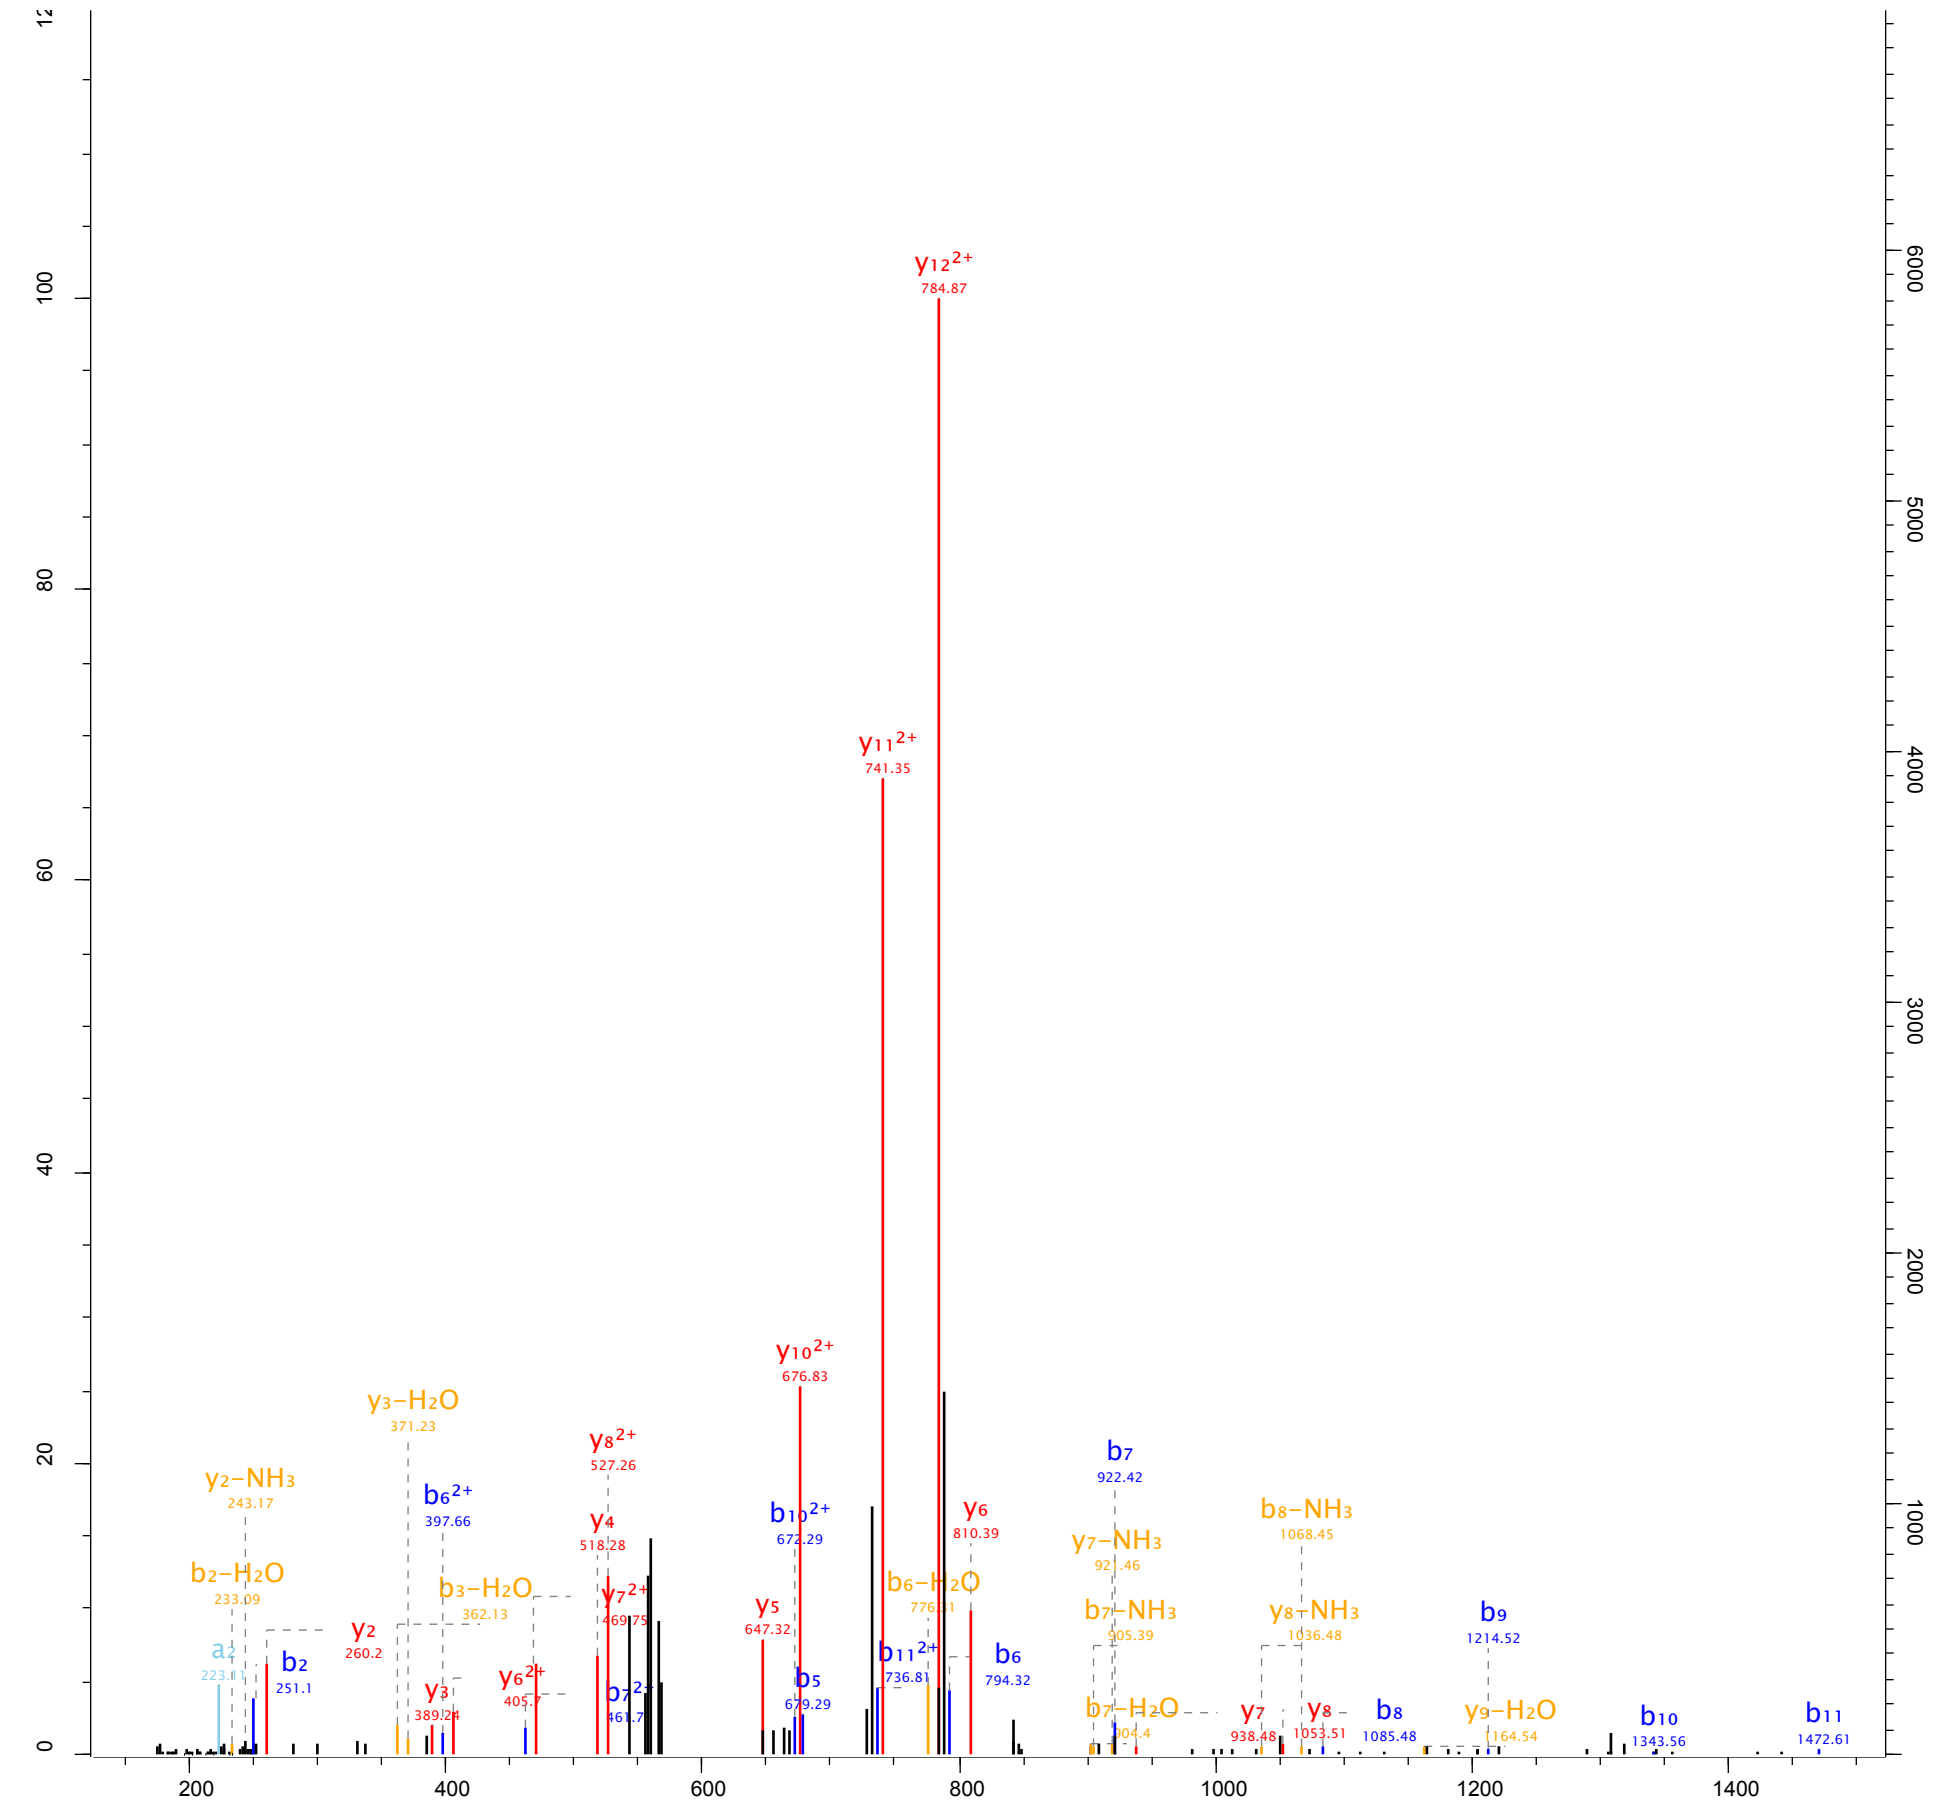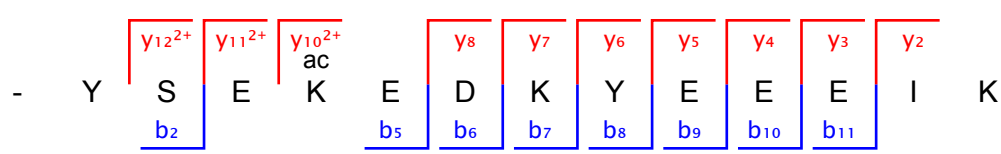



Raw file 022714\_SCW\_II\_53\_9\_2ndZT Scan 15219 Method ITMS; CID Score 174.18 m/z 695 Gene names Dars

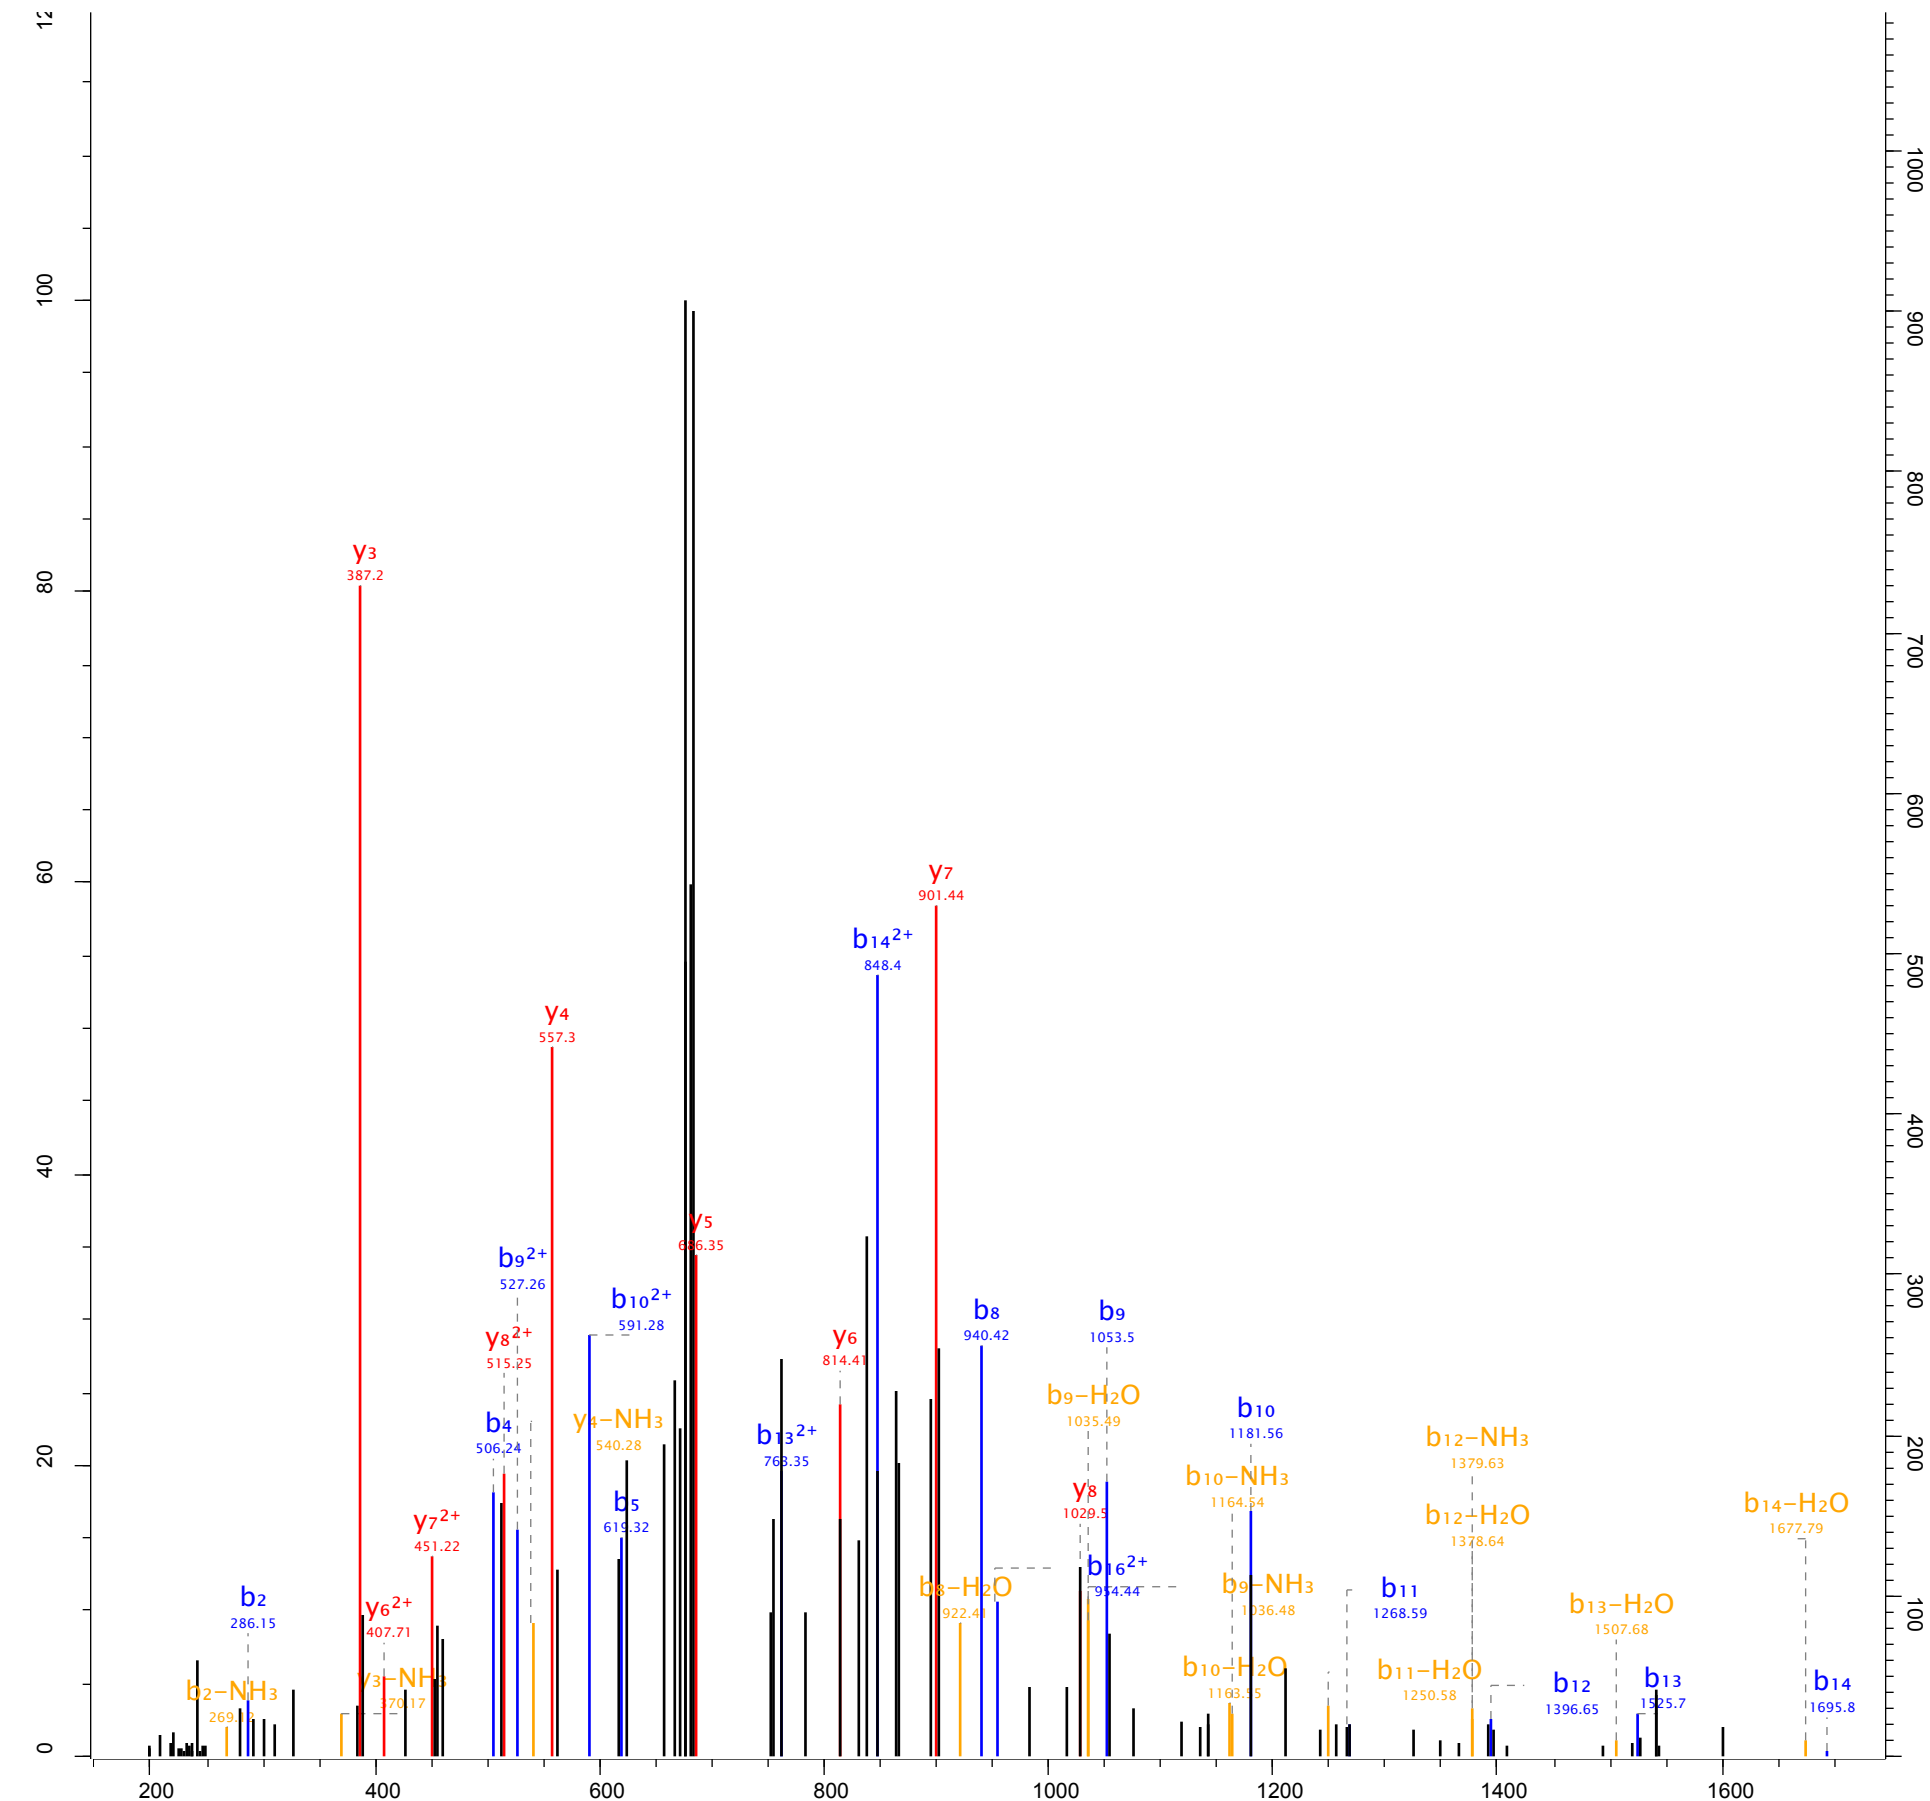

- E R Y G I S S ox M I Q S Q E K P D R -

b<sub>2</sub>
b<sub>4</sub>
b<sub>5</sub>
b<sub>8</sub>
b<sub>9</sub>
y<sub>8</sub>
y<sub>7</sub>
y<sub>6</sub>
y<sub>5</sub>
y<sub>4</sub>
y<sub>3</sub>
b<sub>10</sub>
b<sub>11</sub>
b<sub>12</sub>
b<sub>13</sub>
b<sub>14</sub>
b<sub>16</sub><sup>2+</sup>

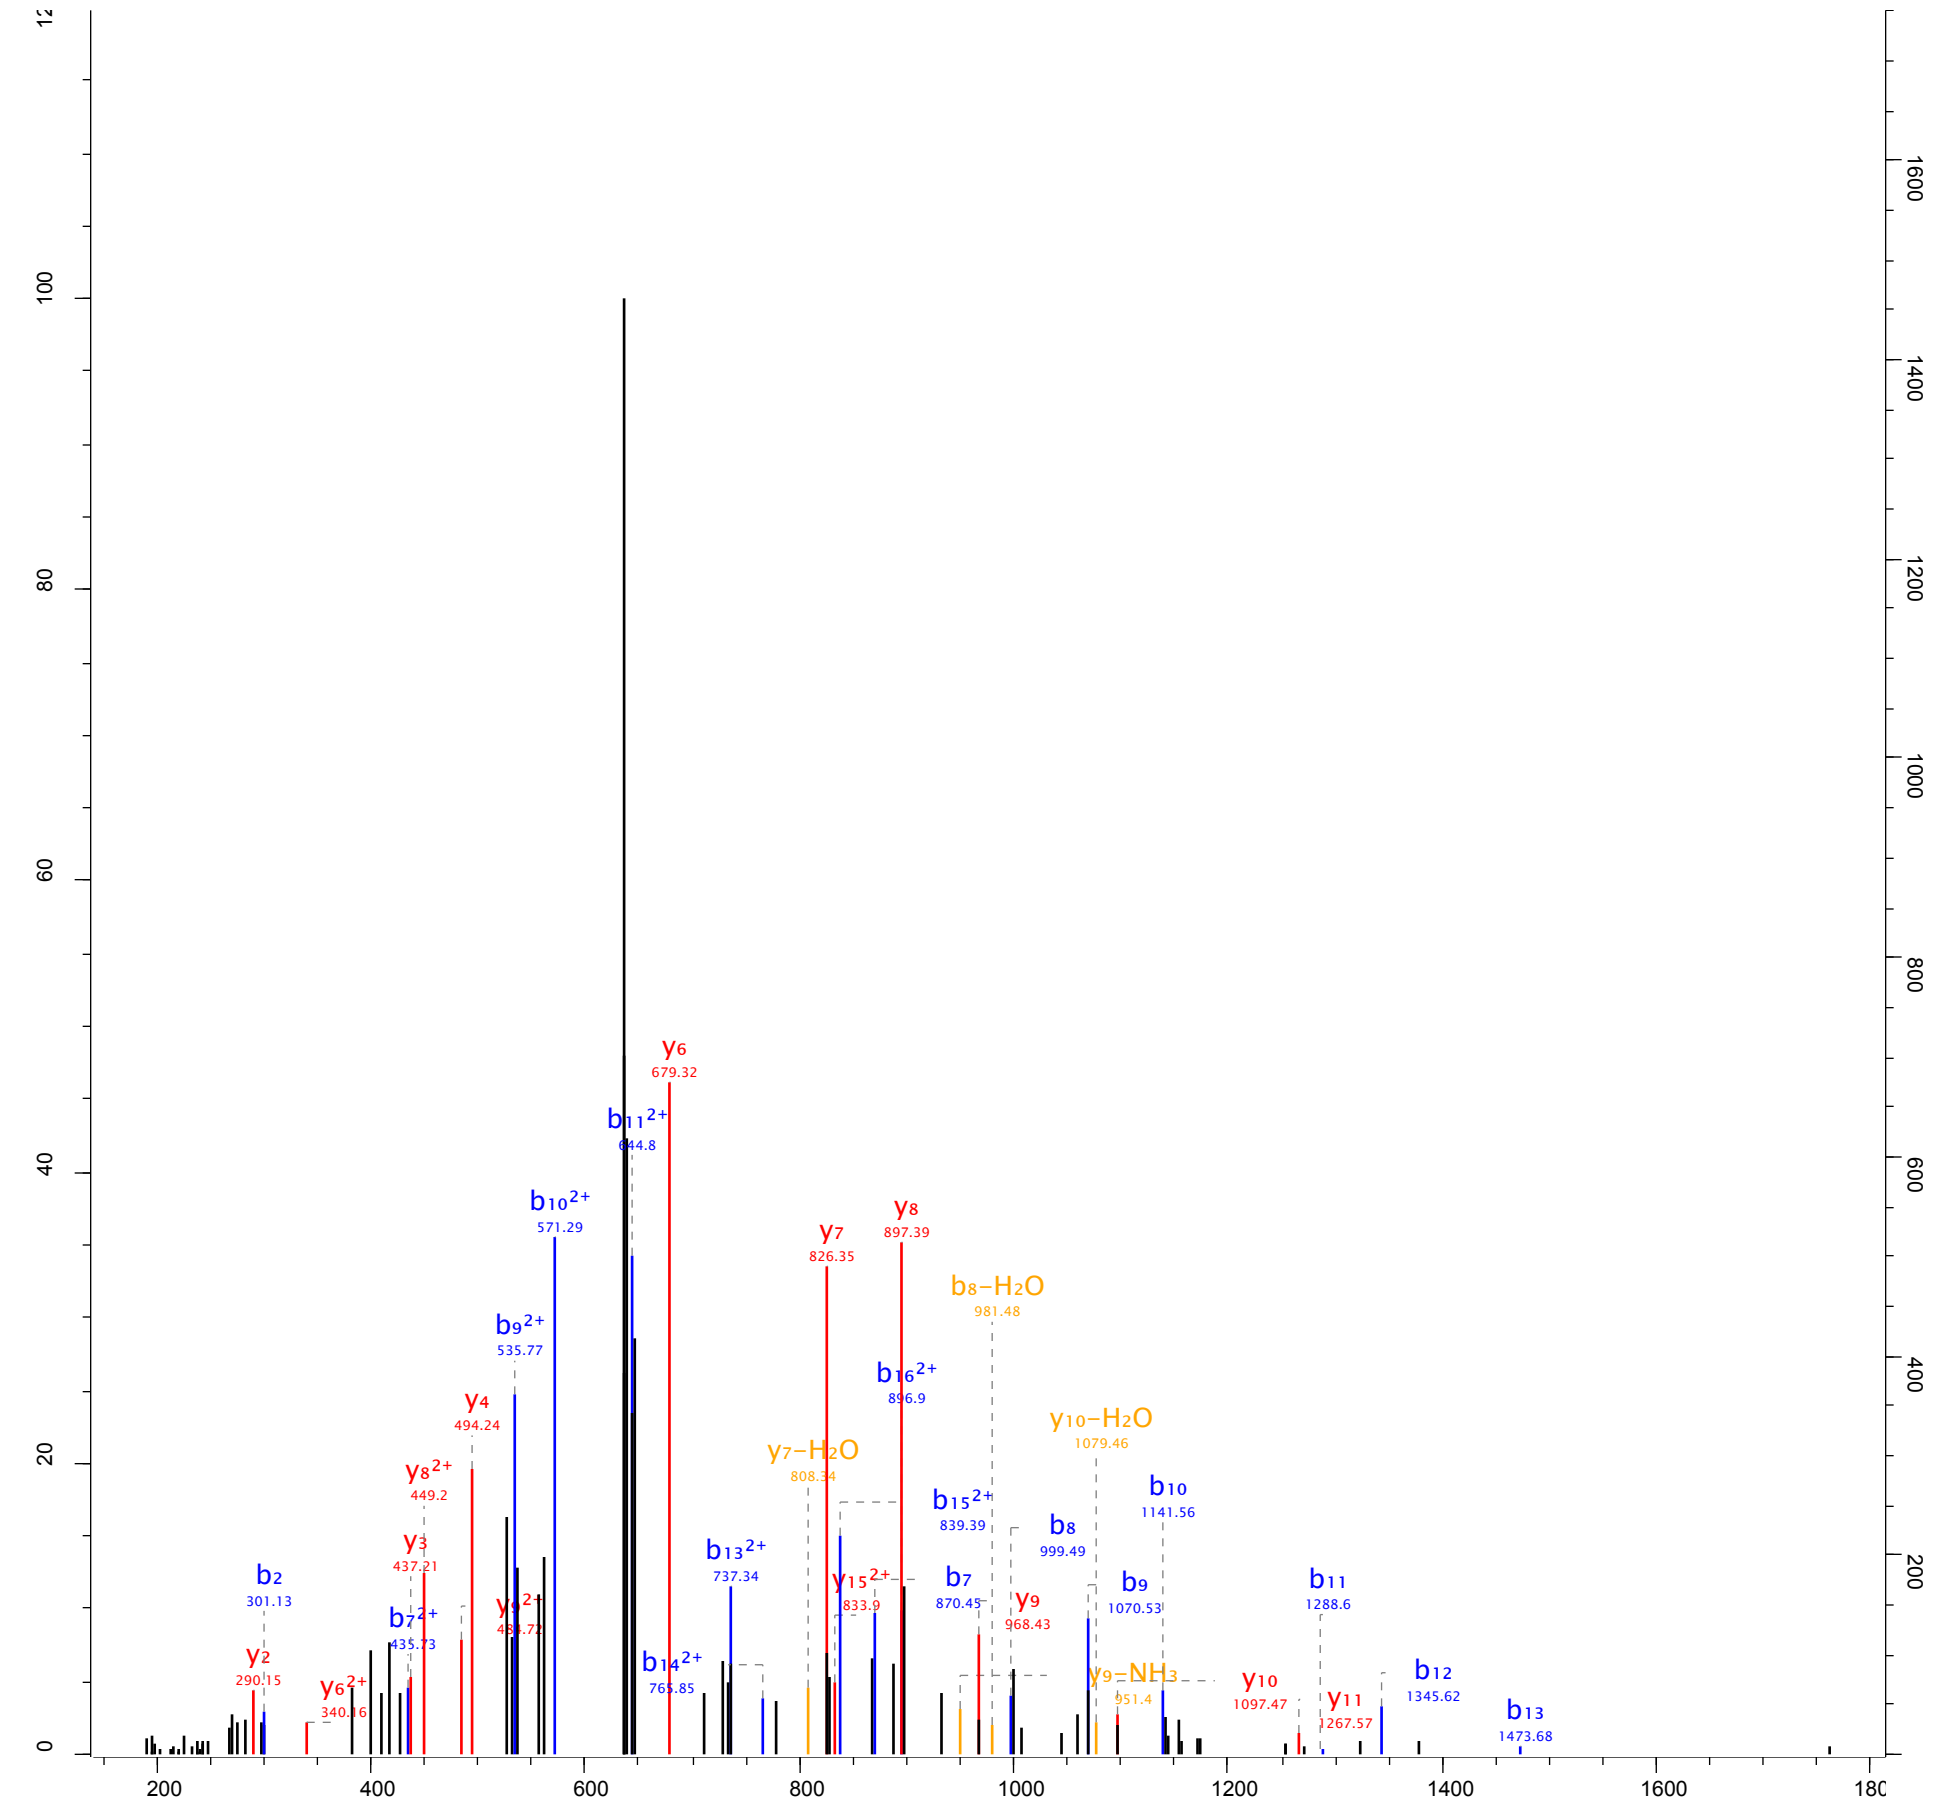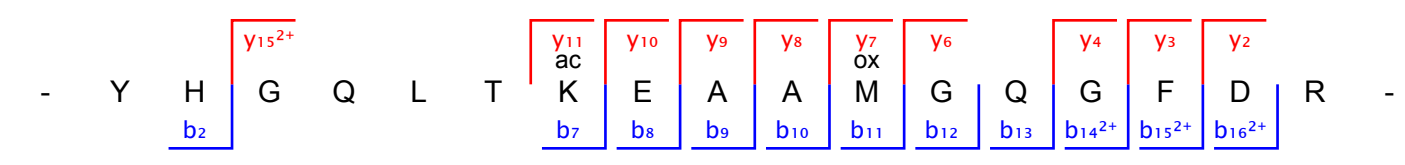

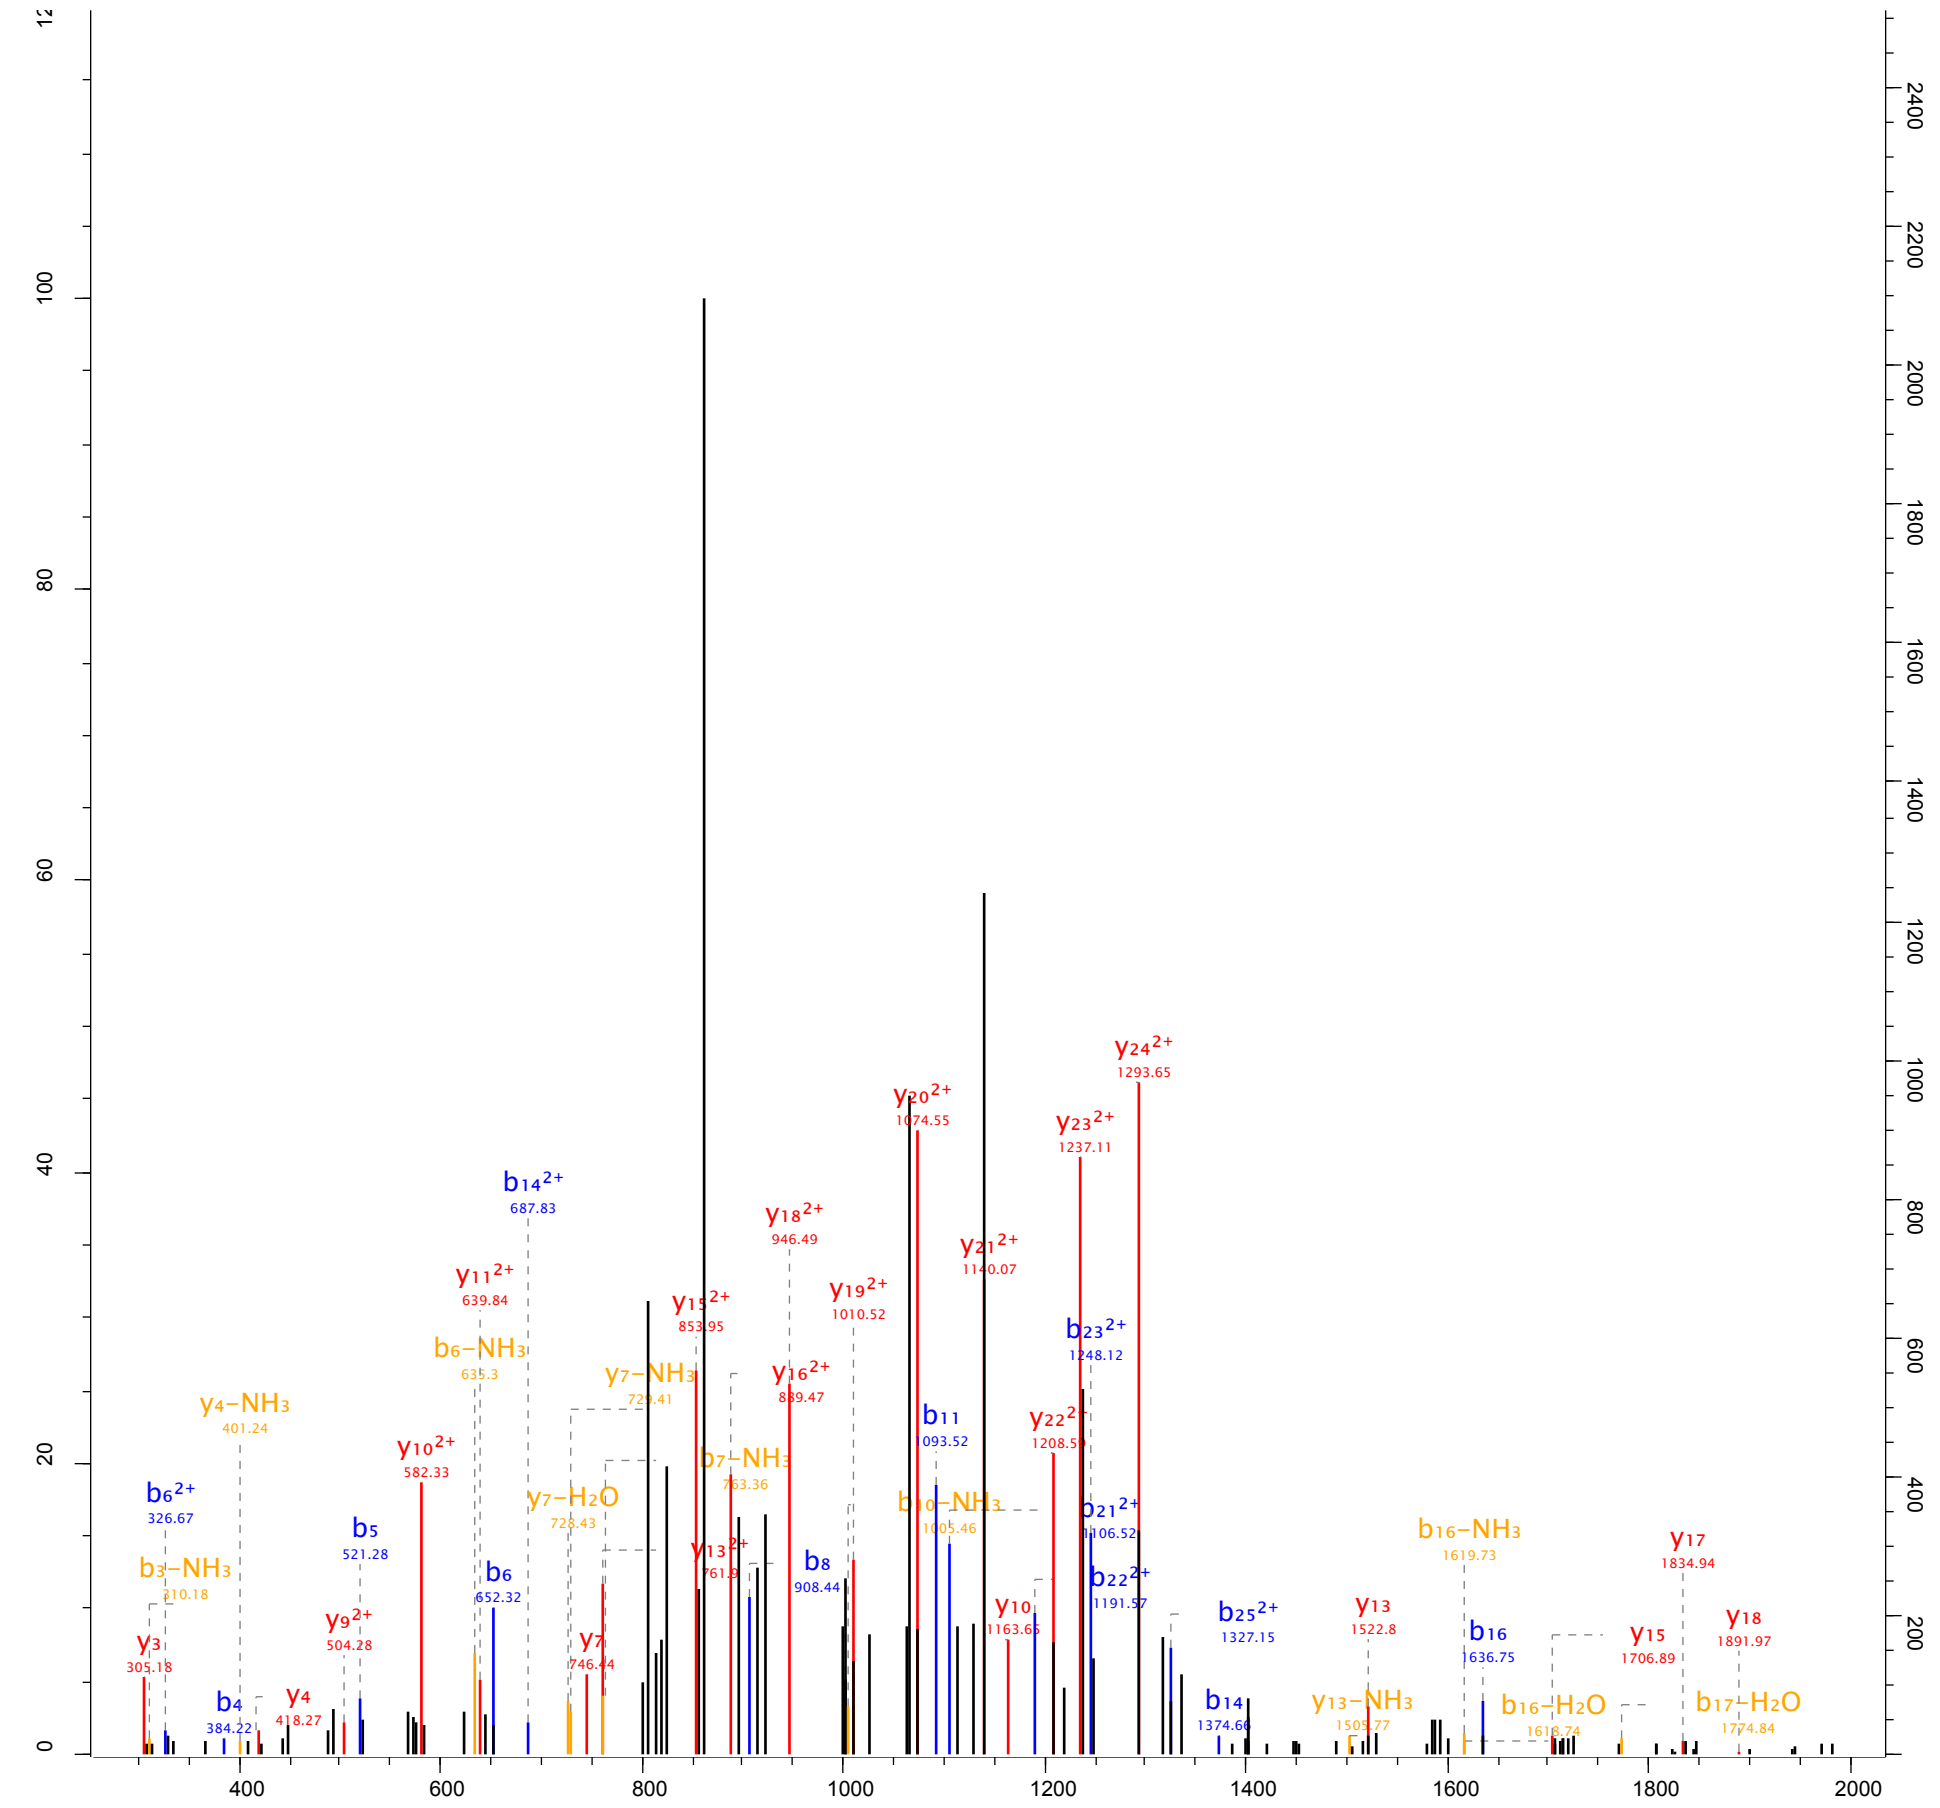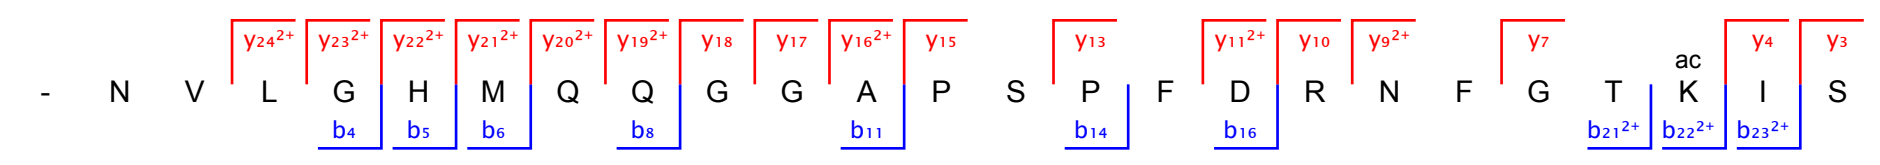

A | K -

Raw file  
022714\_SCW\_II\_53\_10\_2ndZT

Scan 10936 Method ITMS; CID Score 169.58 m/z 601.3 Gene names Pgk1;Pgk2

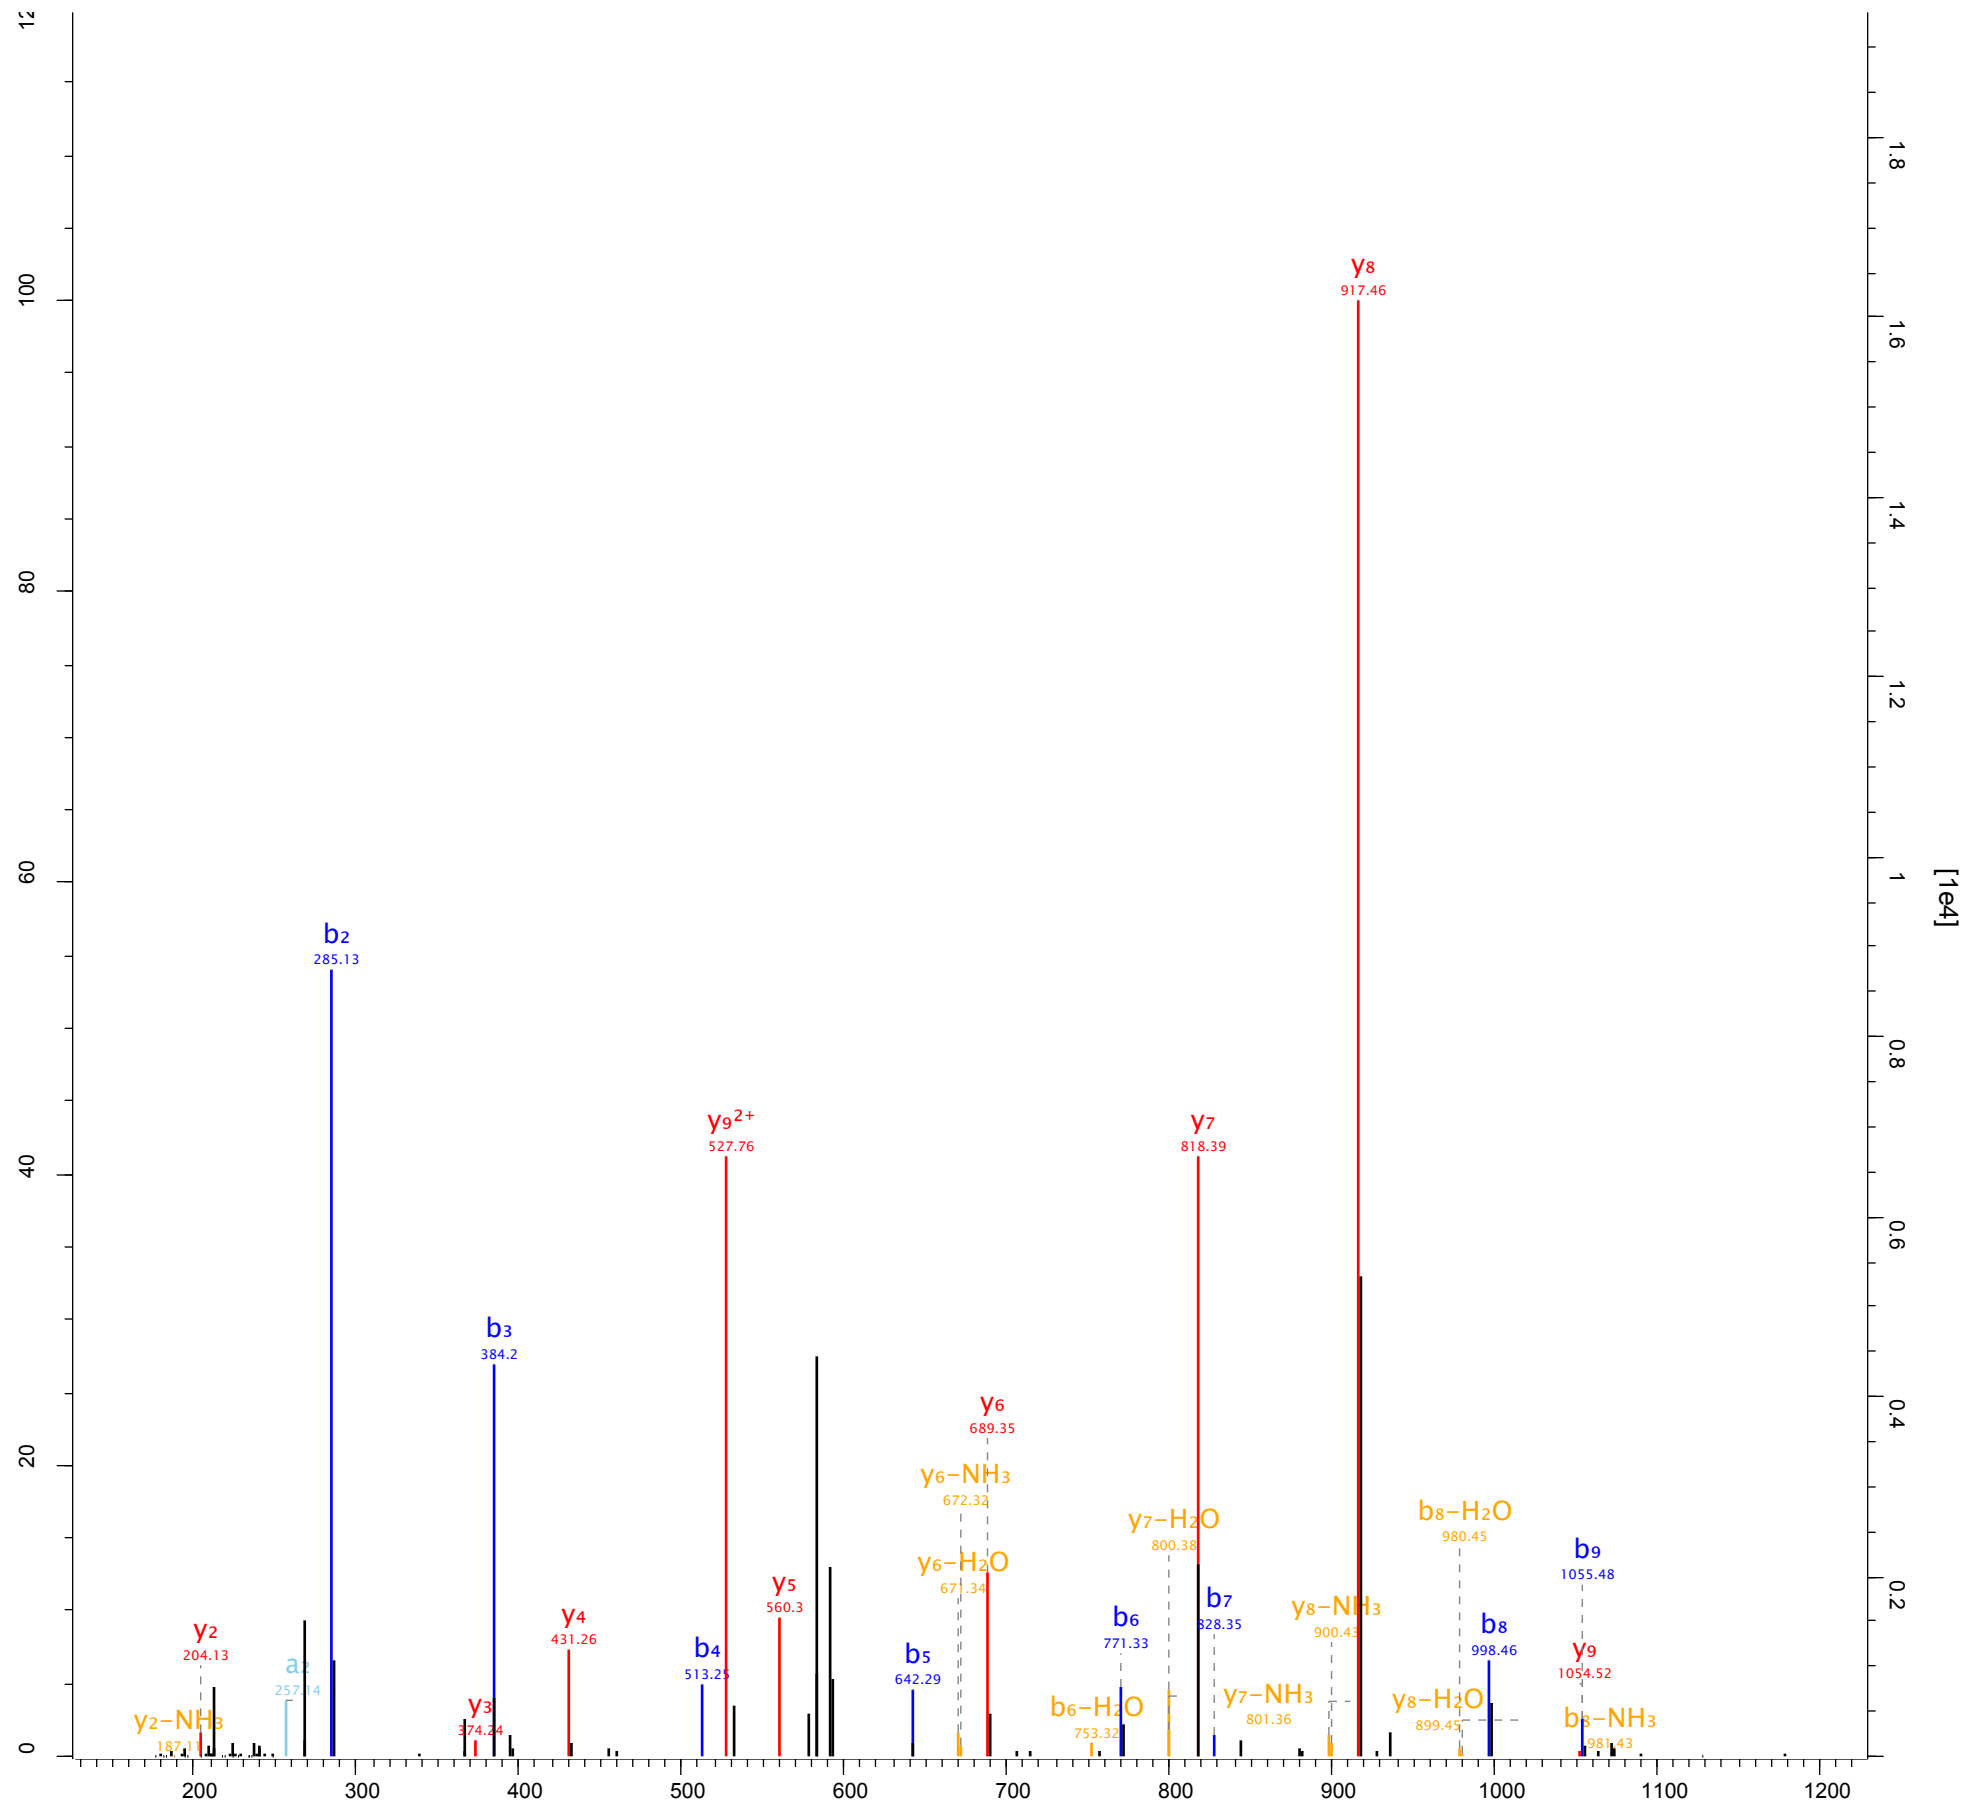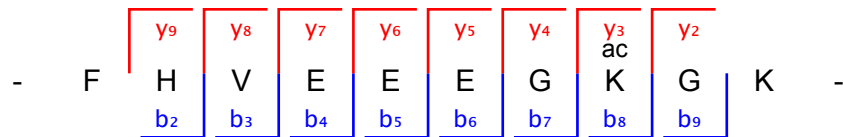

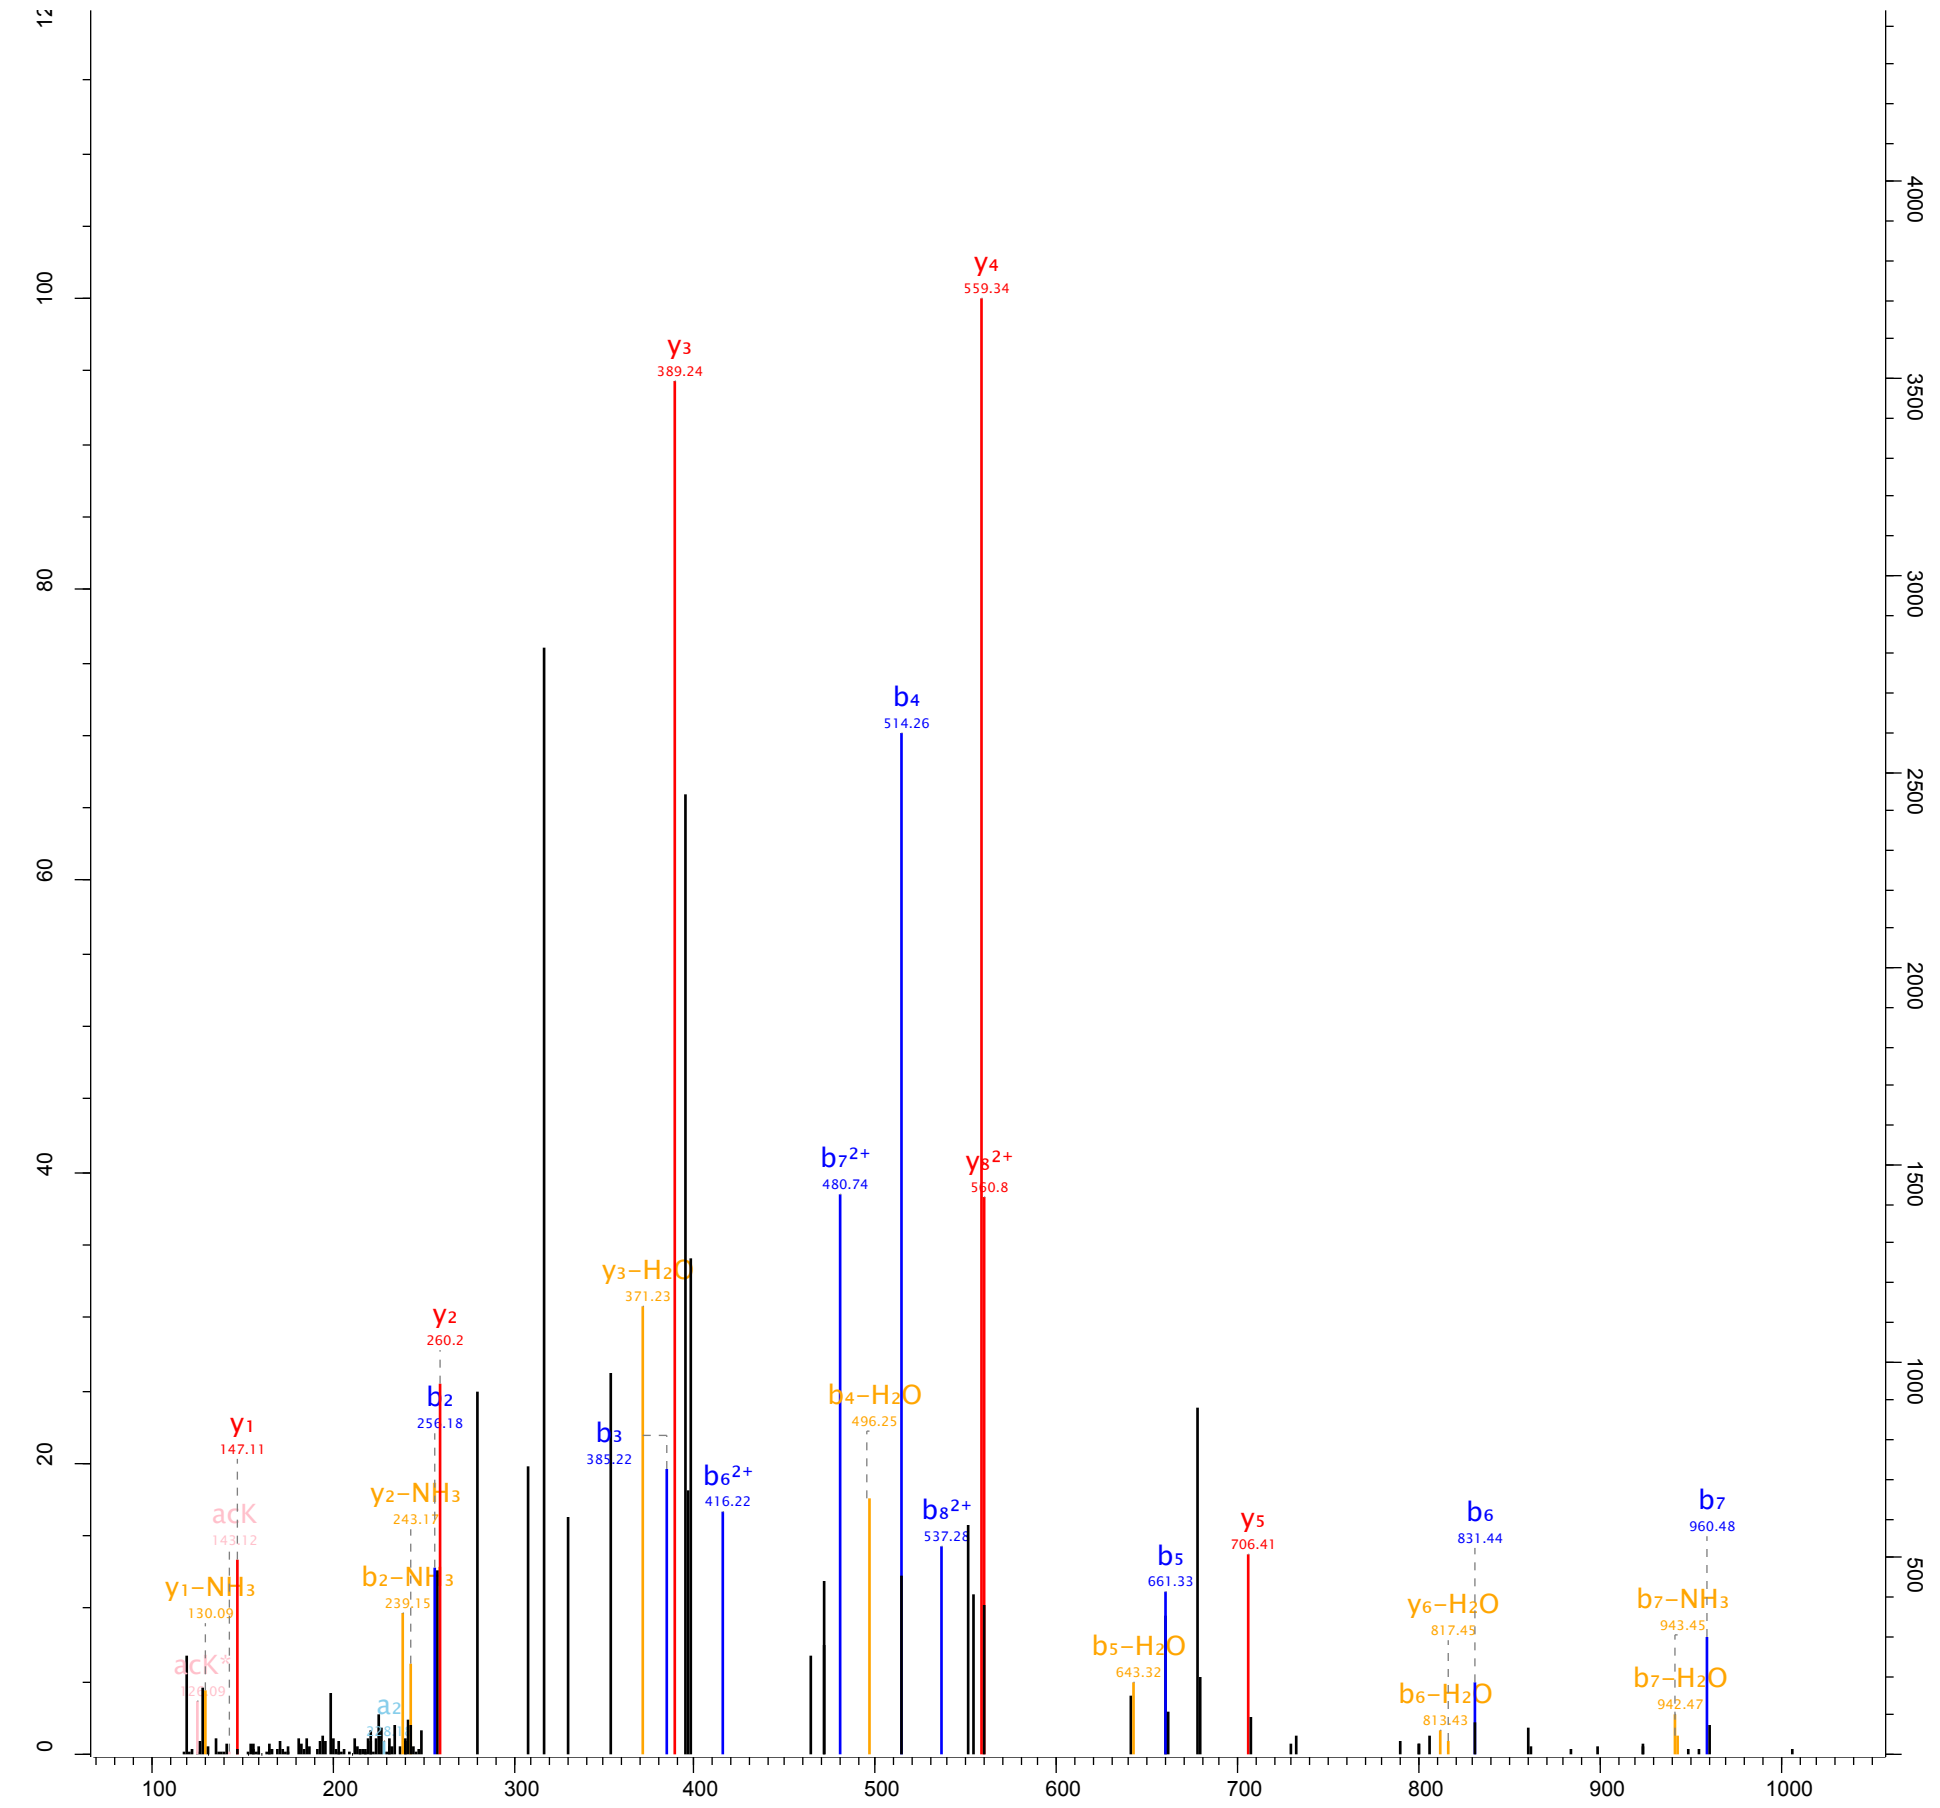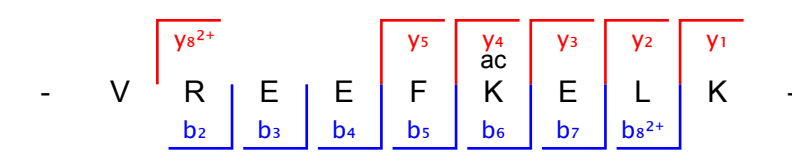

Raw file: 022714\_SCW\_II\_53\_10\_2ndZT  
 Scan: 15615 Method: ITMS; CID Score: 100.09 m/z: 643.81 Gene names: Ppia;Gm5160

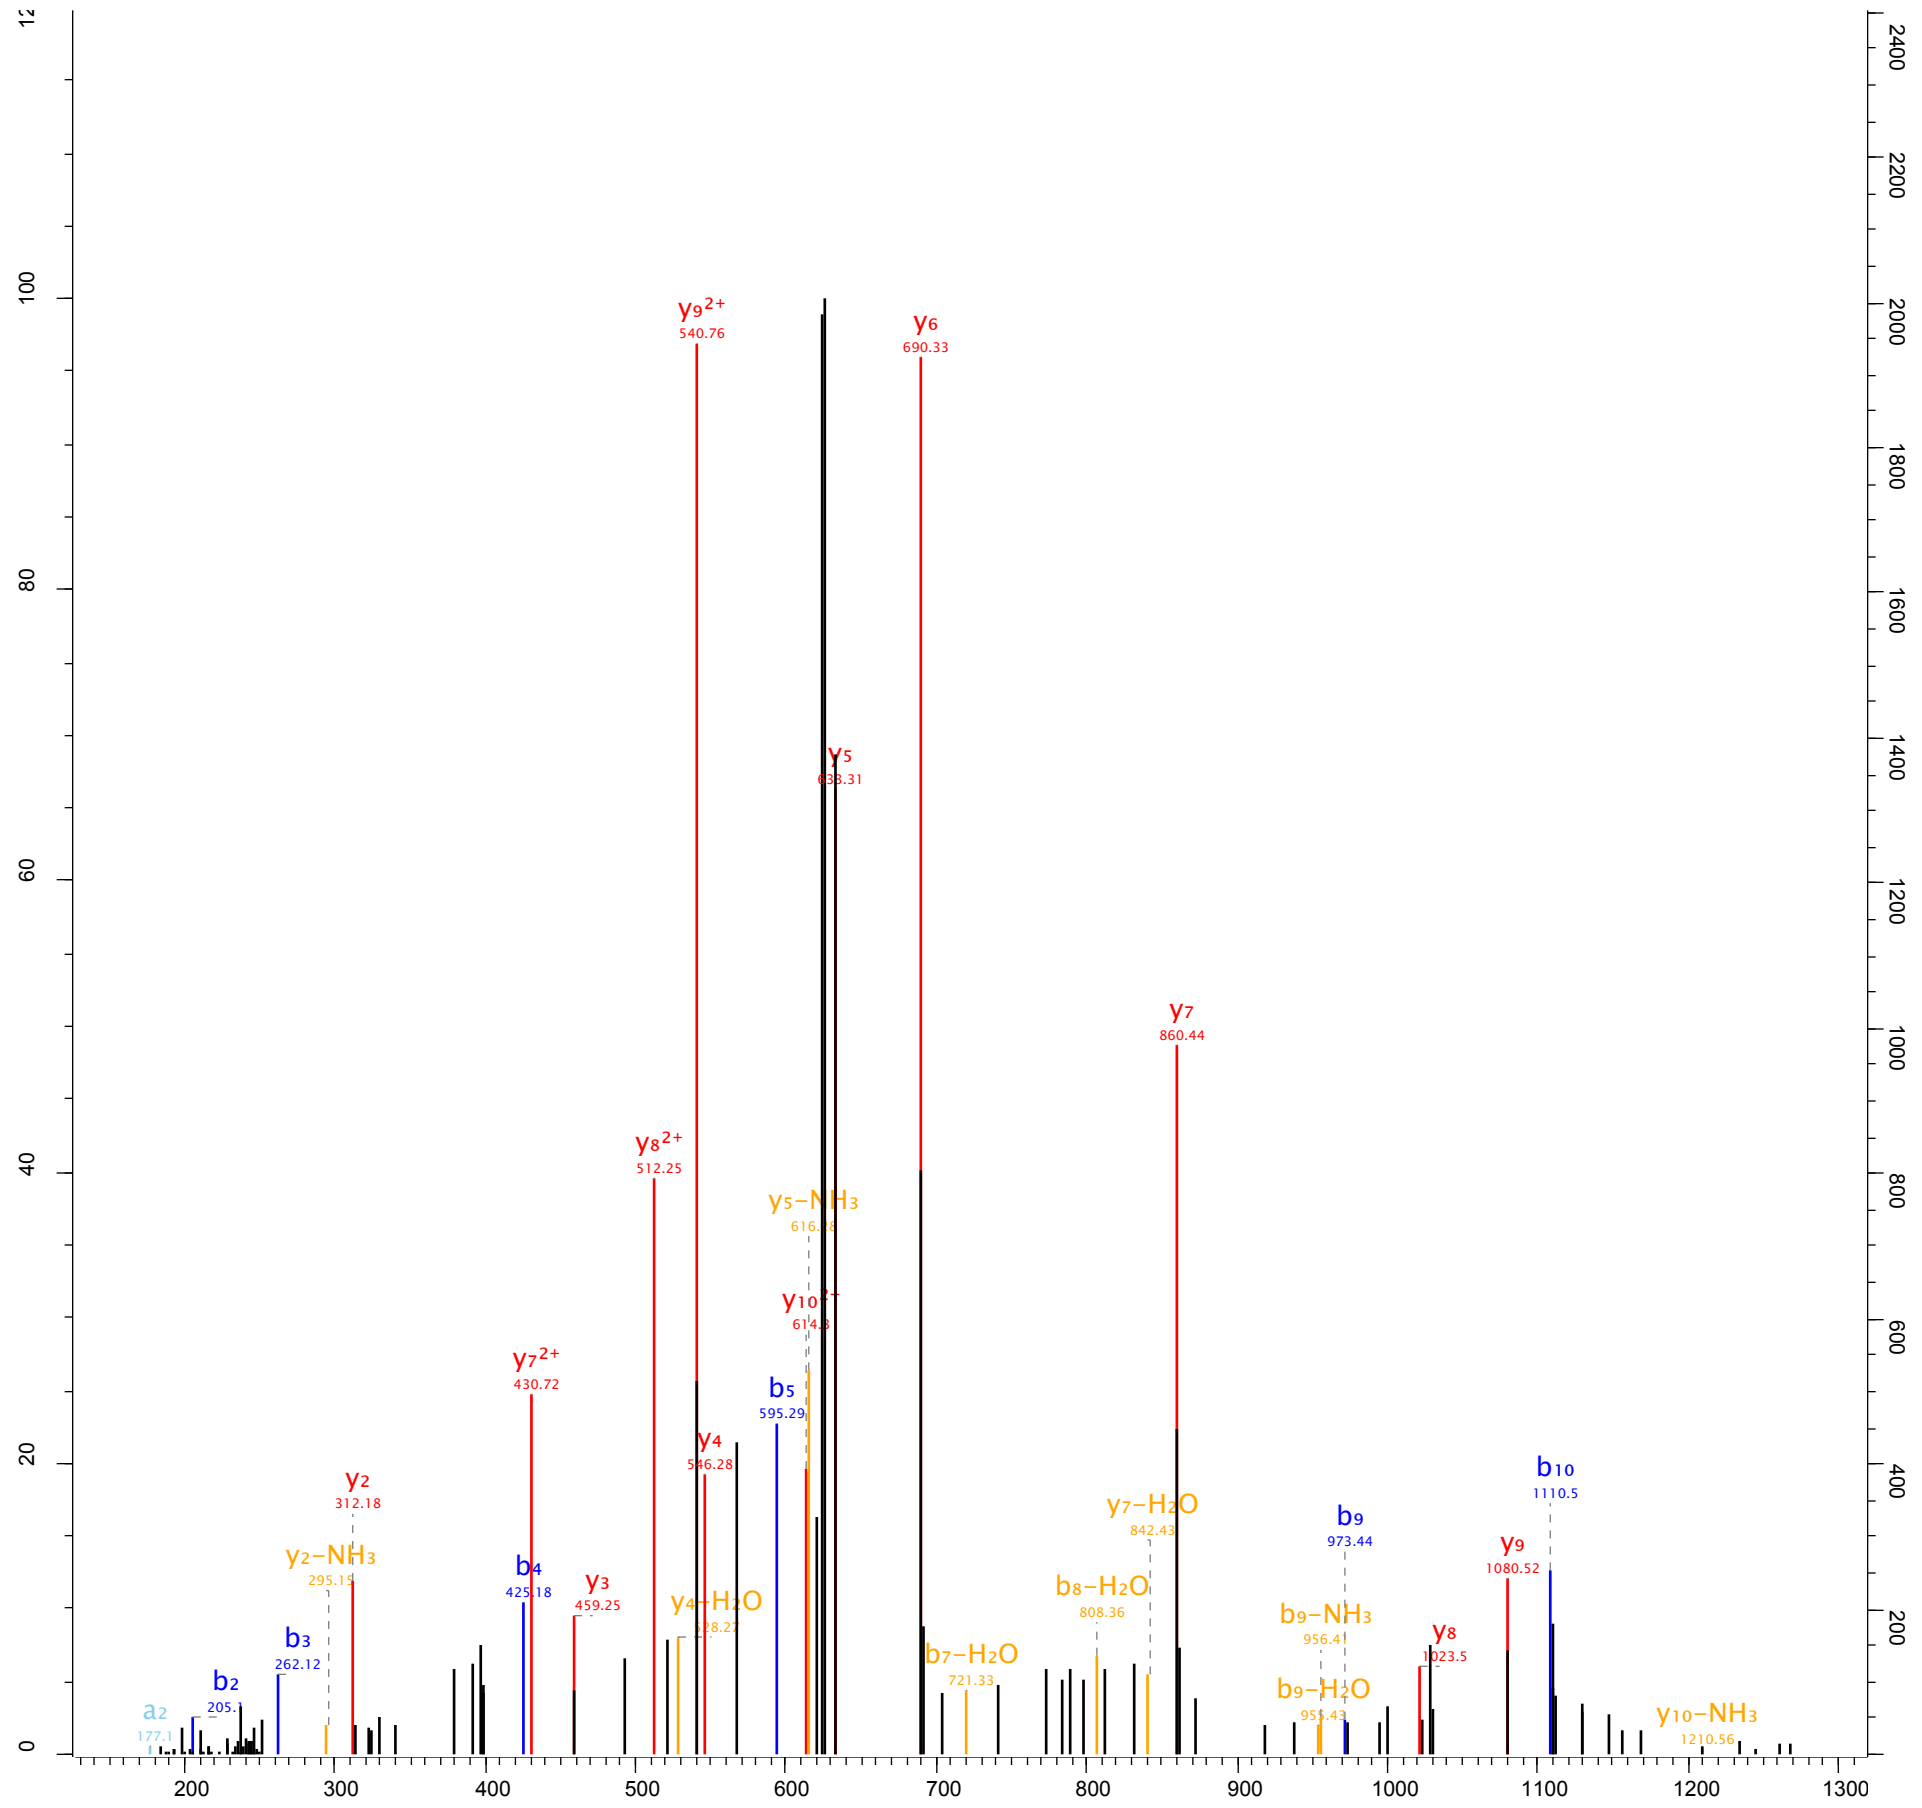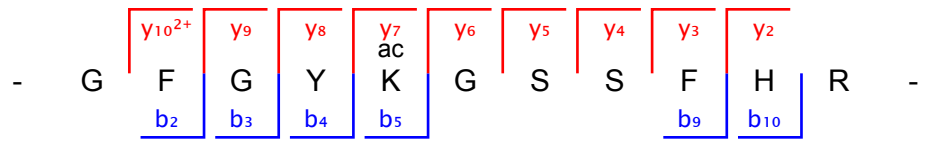

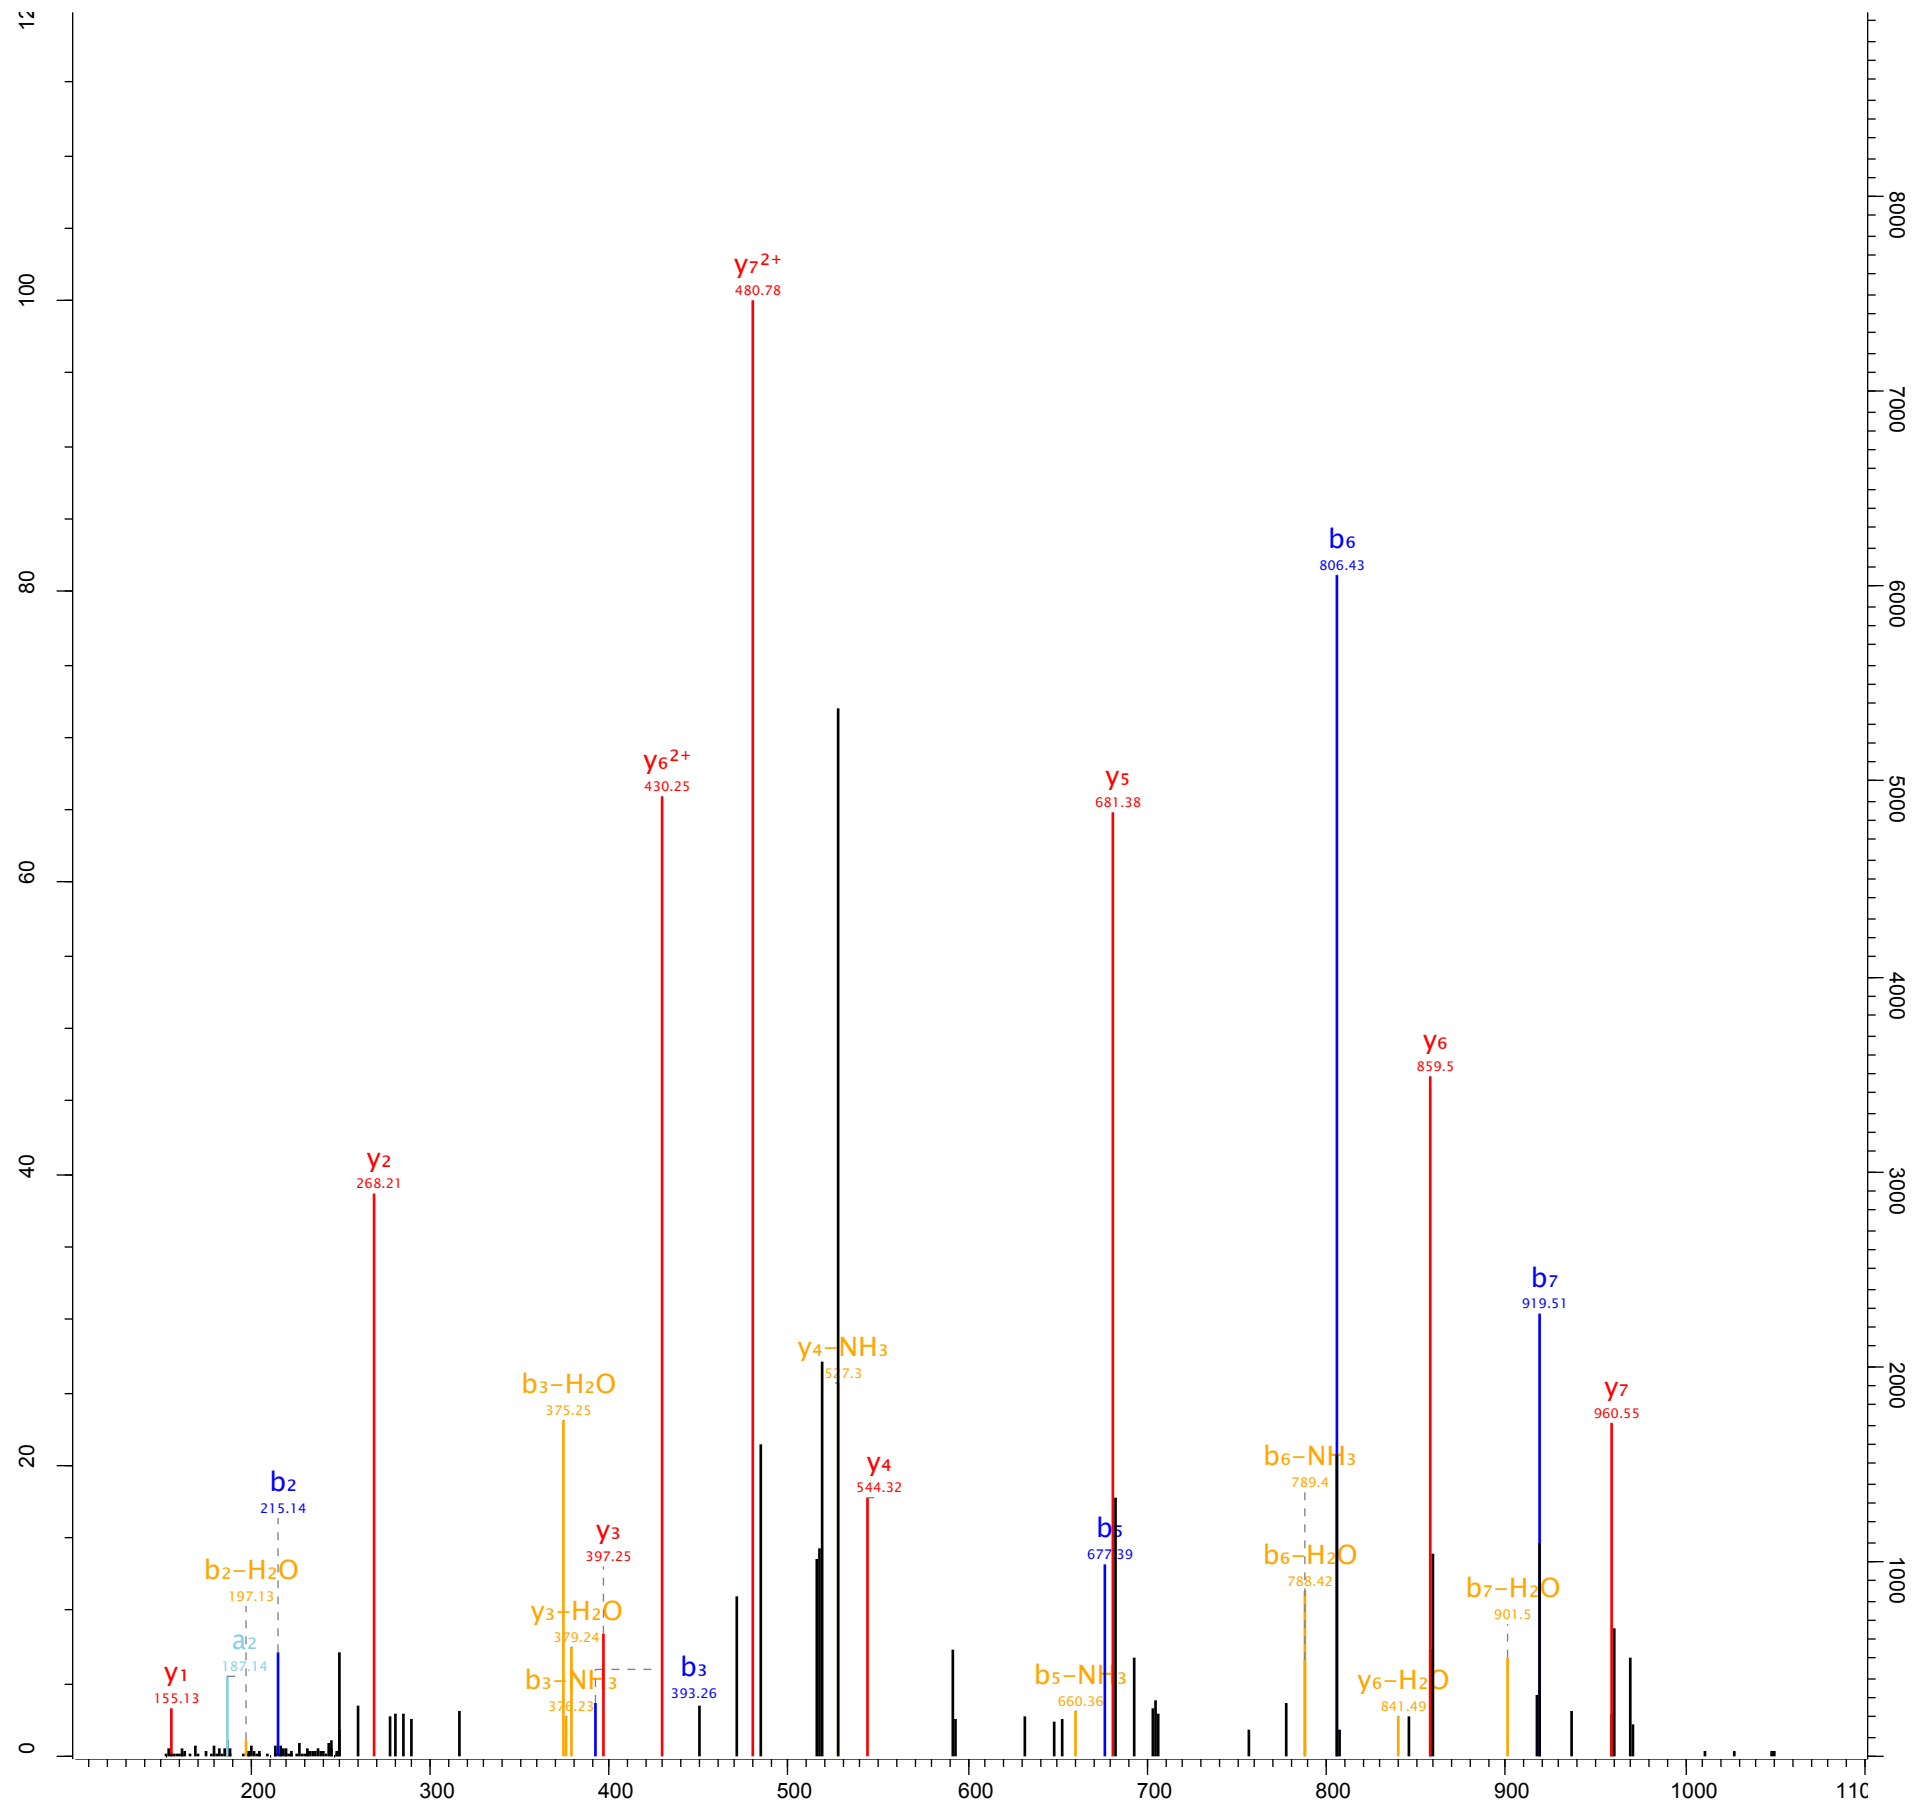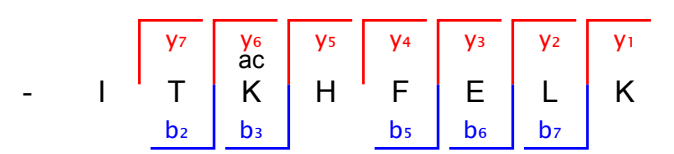

Raw file 022714\_SCW\_II\_53\_10\_2ndZT Scan 16337 Method ITMS; CID Score 210.43 m/z 694.7 Gene names Flna

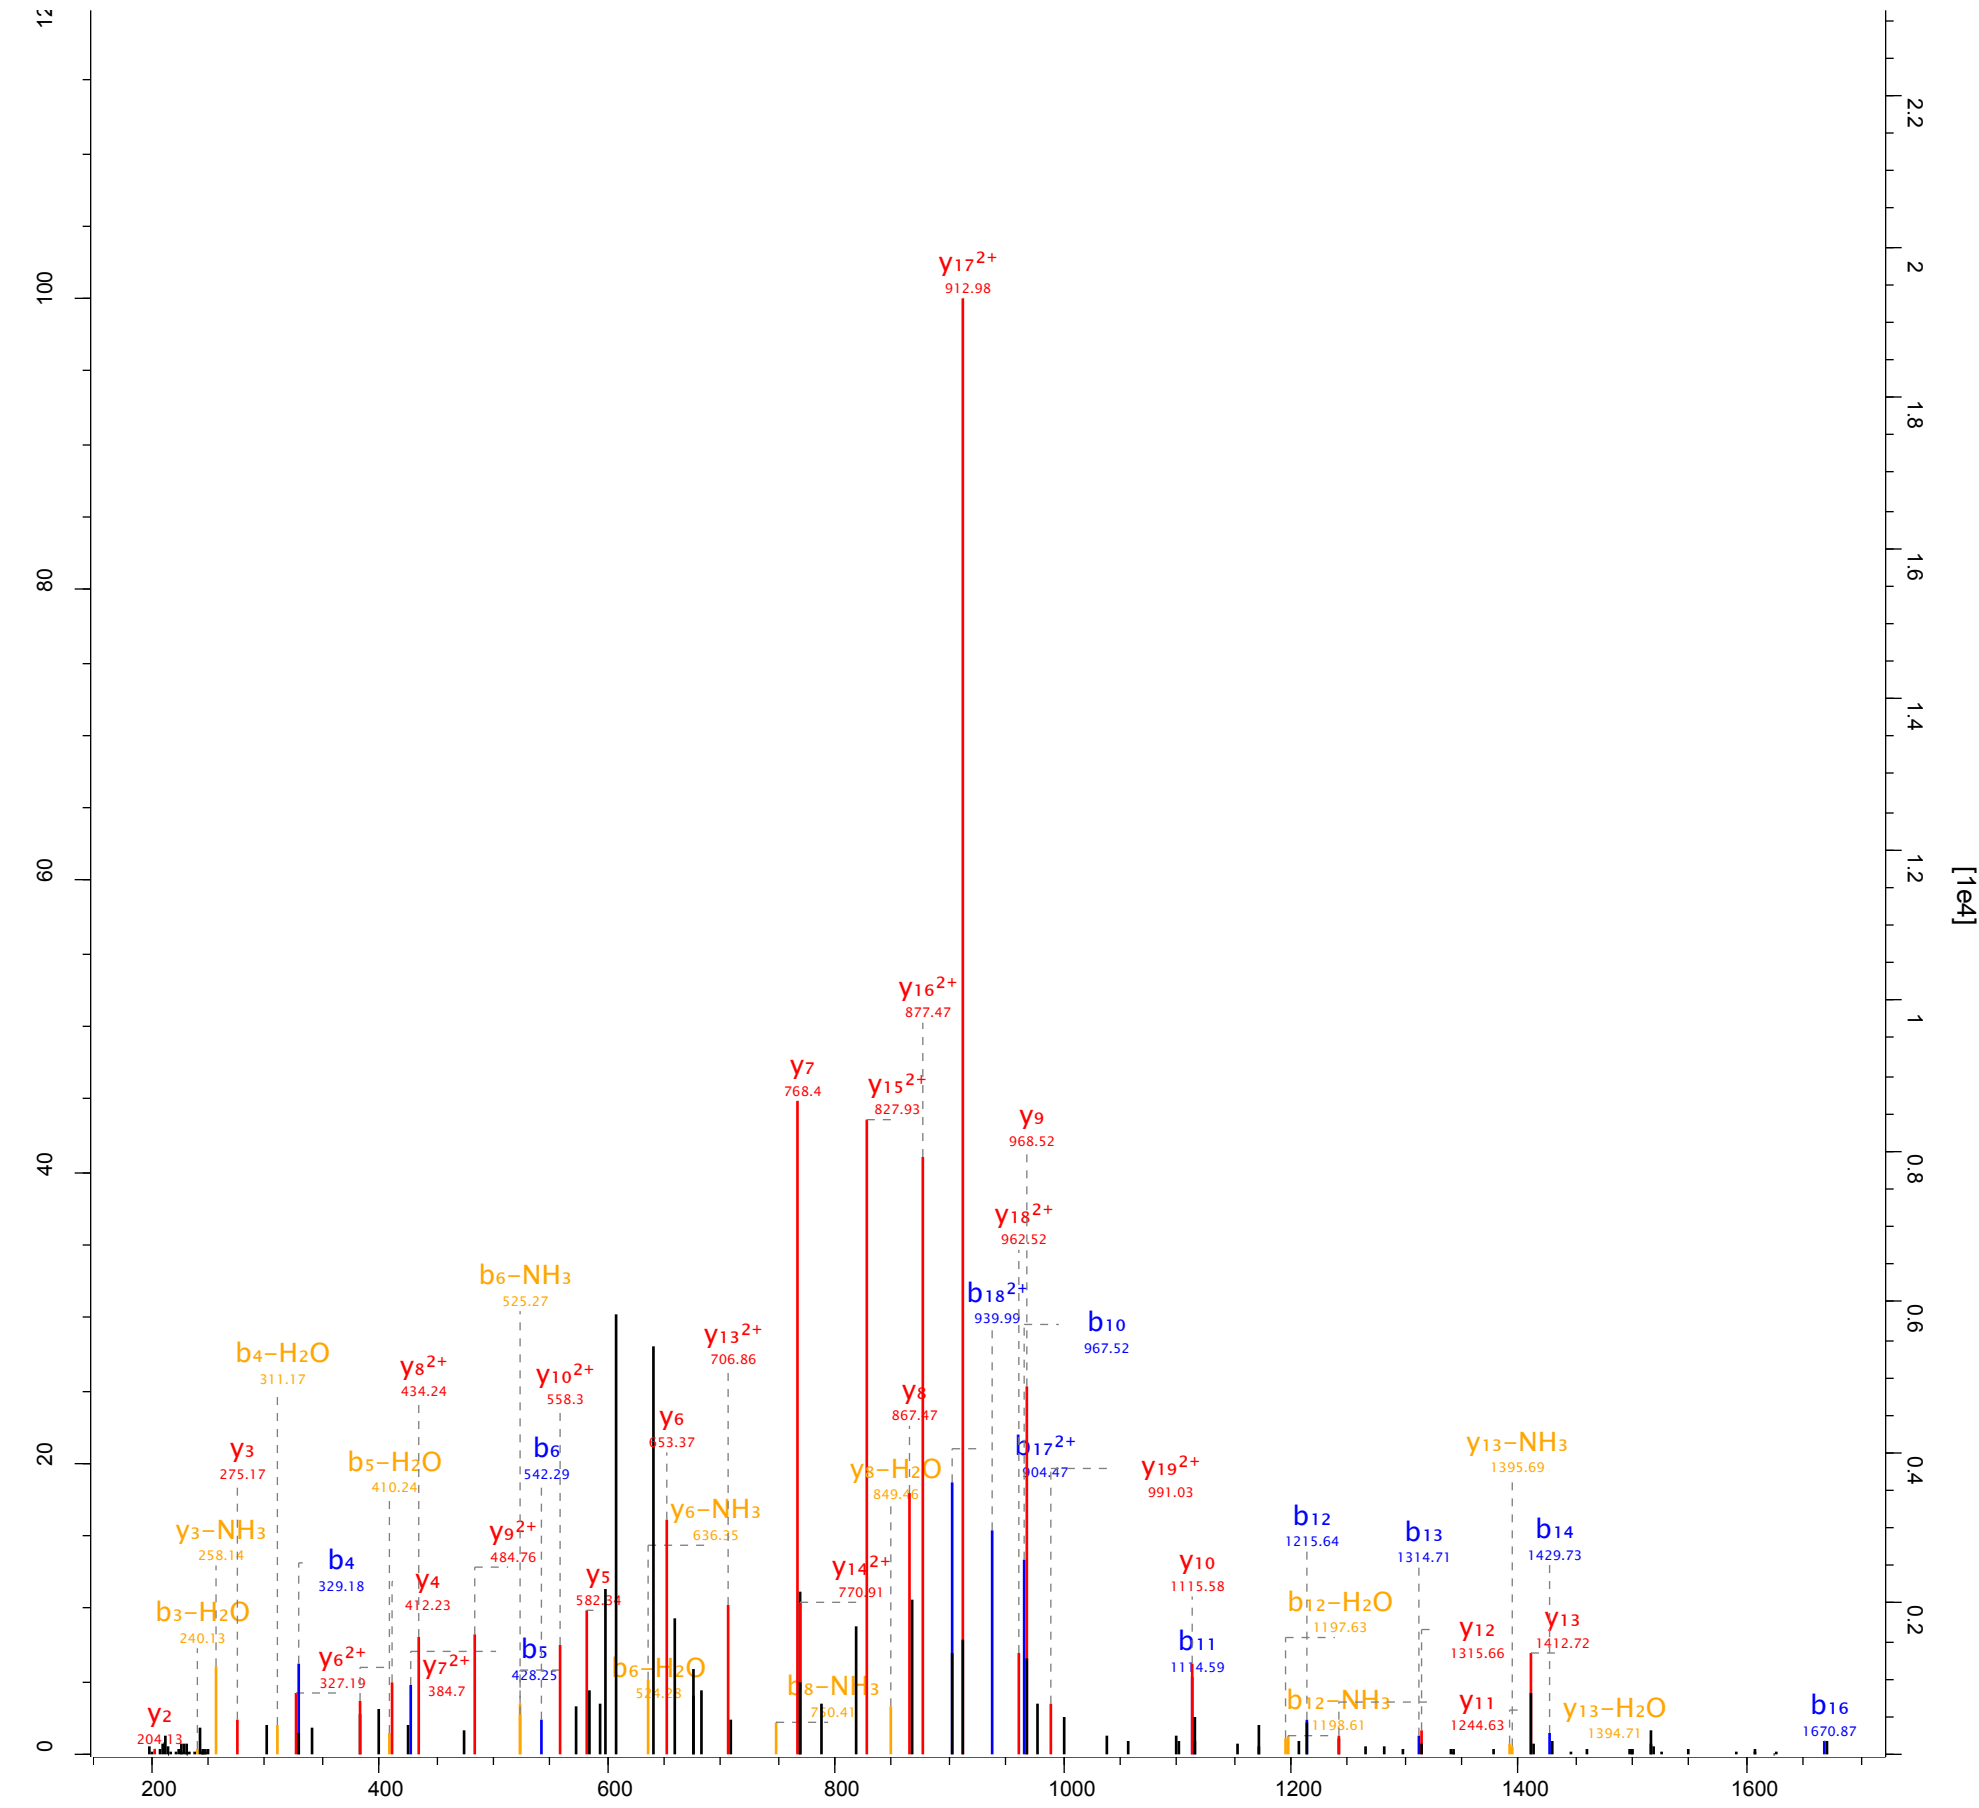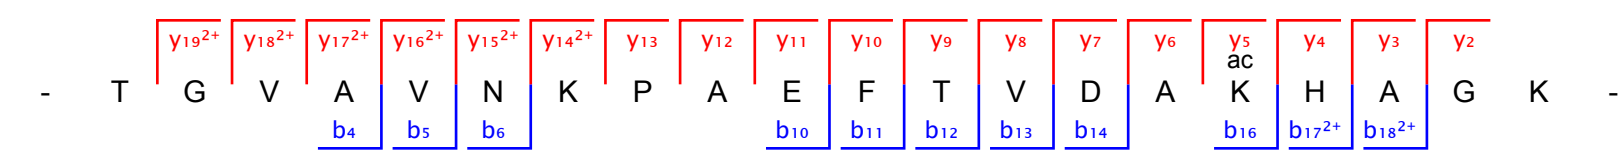



Raw file 022714\_SCW\_II\_53\_10\_2ndZT Scan 17189 Method ITMS; CID Score 126.71 m/z 565.35 Gene names Msn;Ezr;Rdx

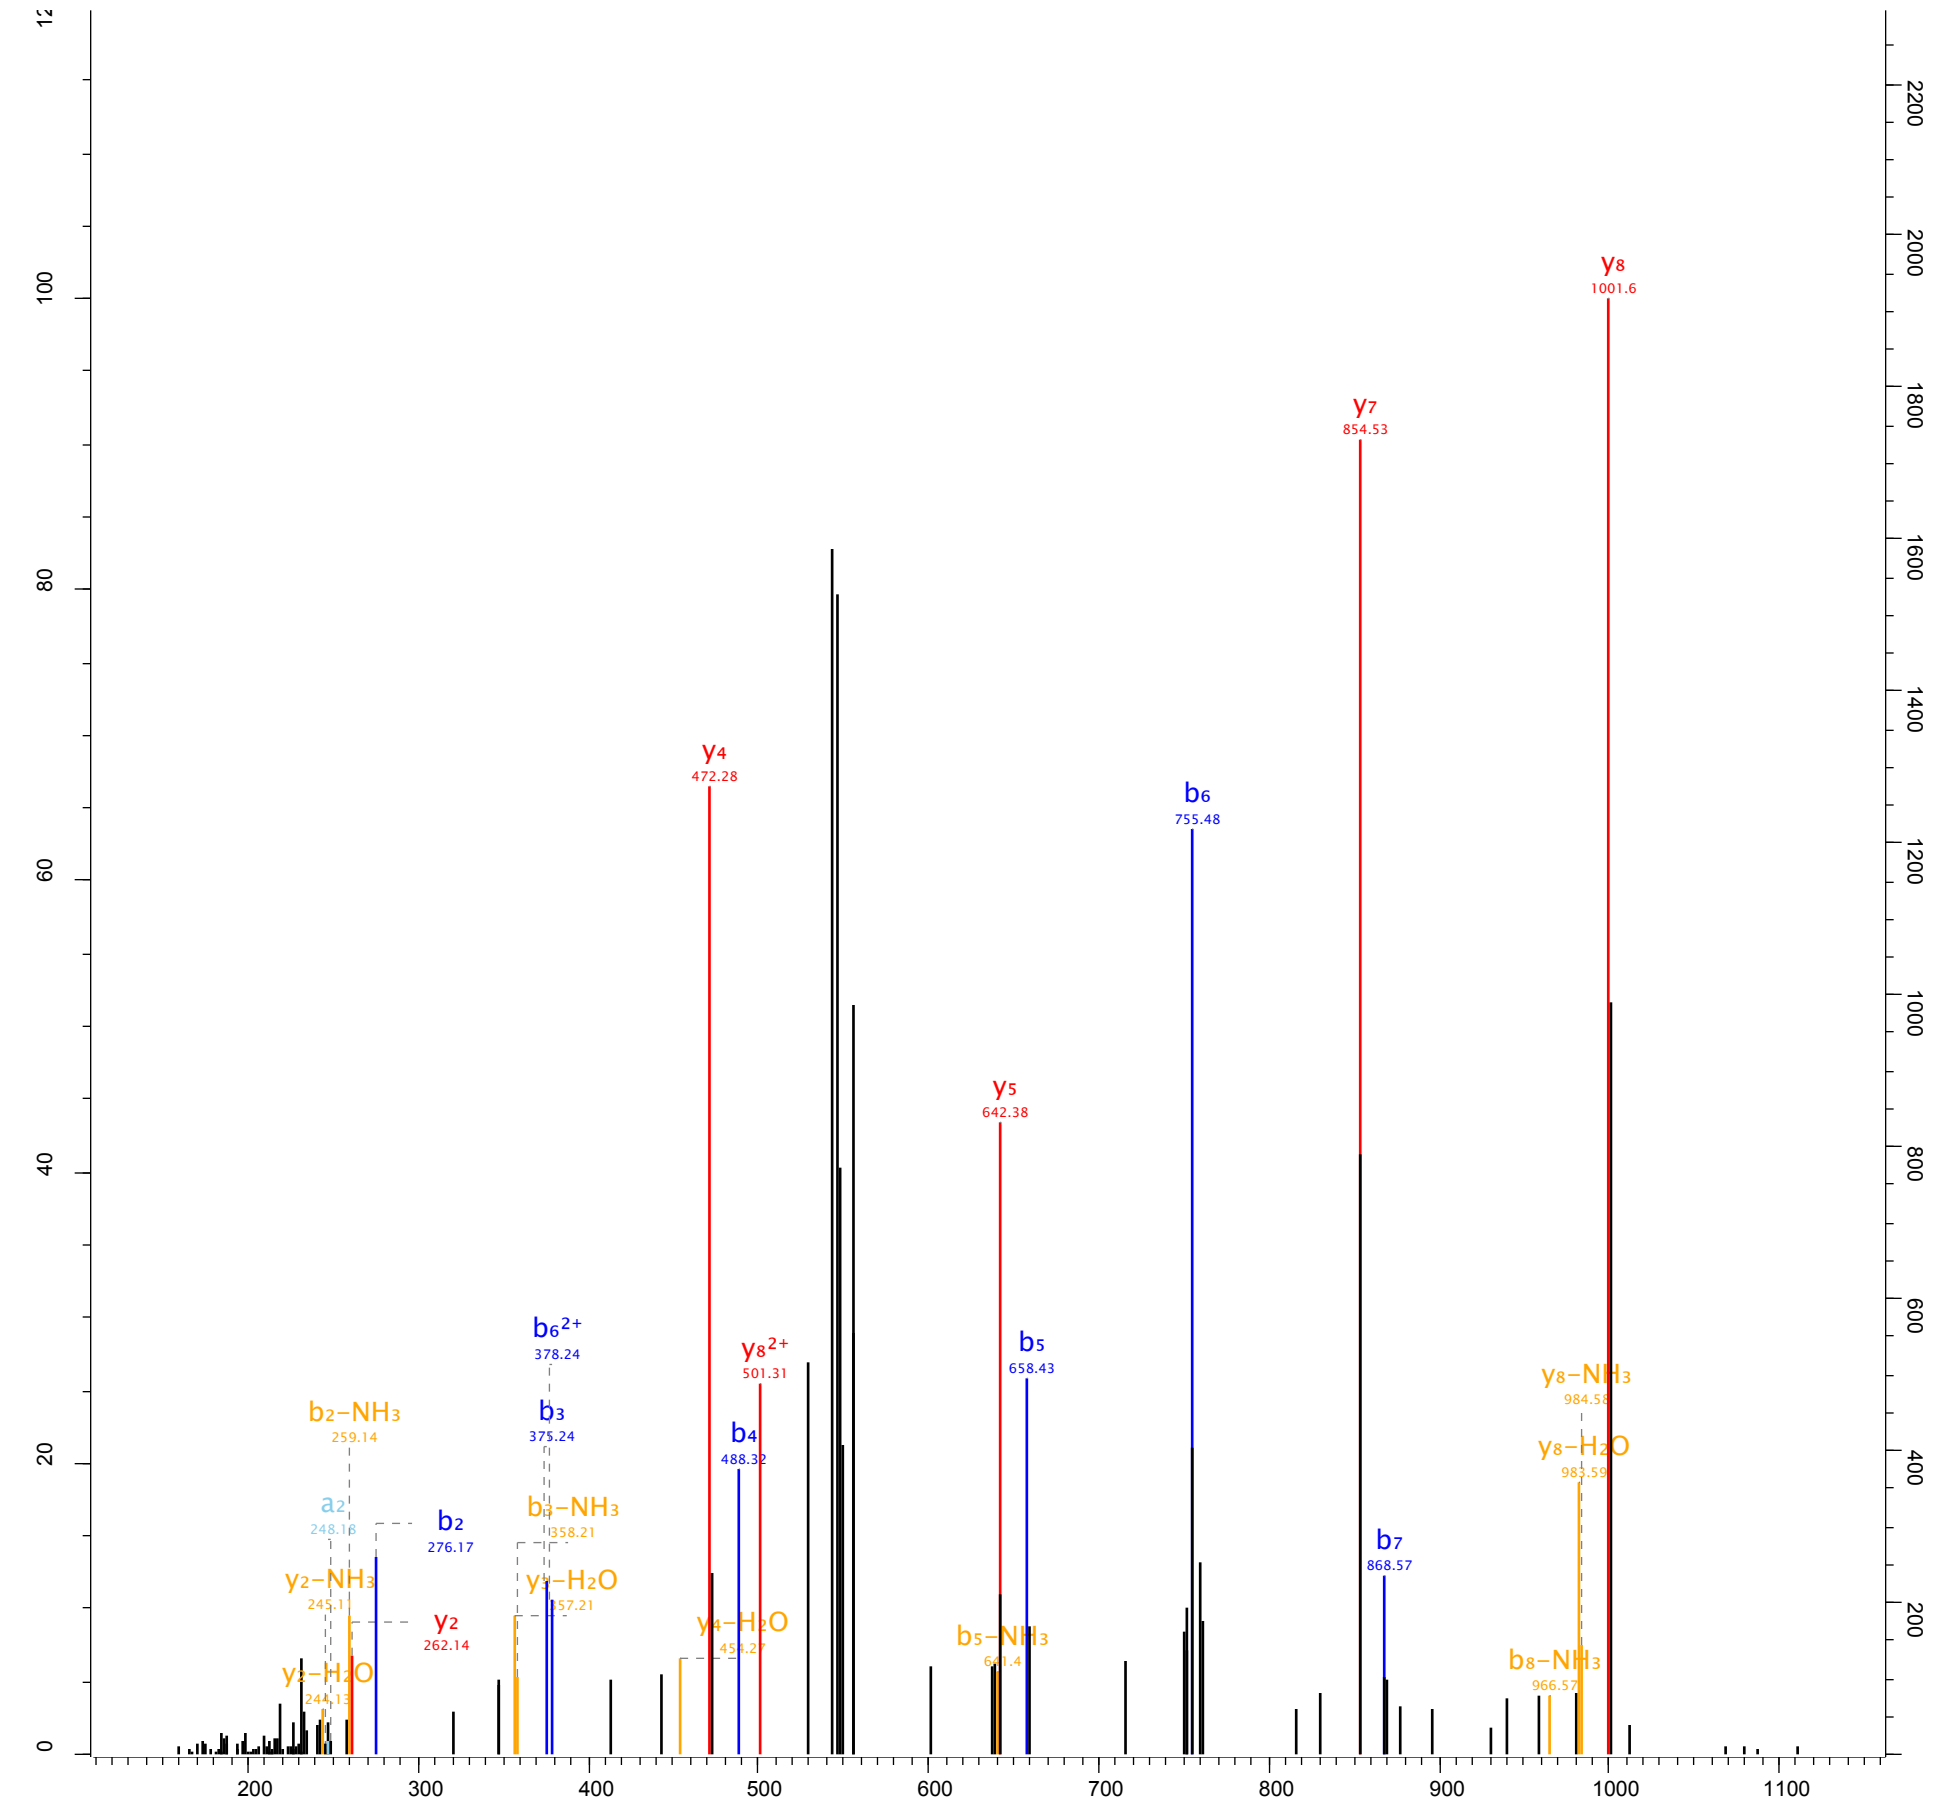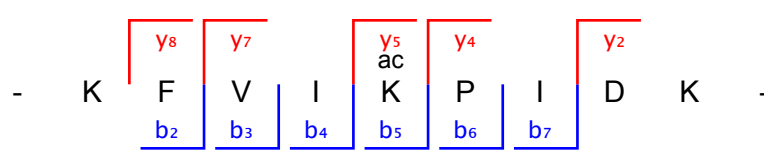

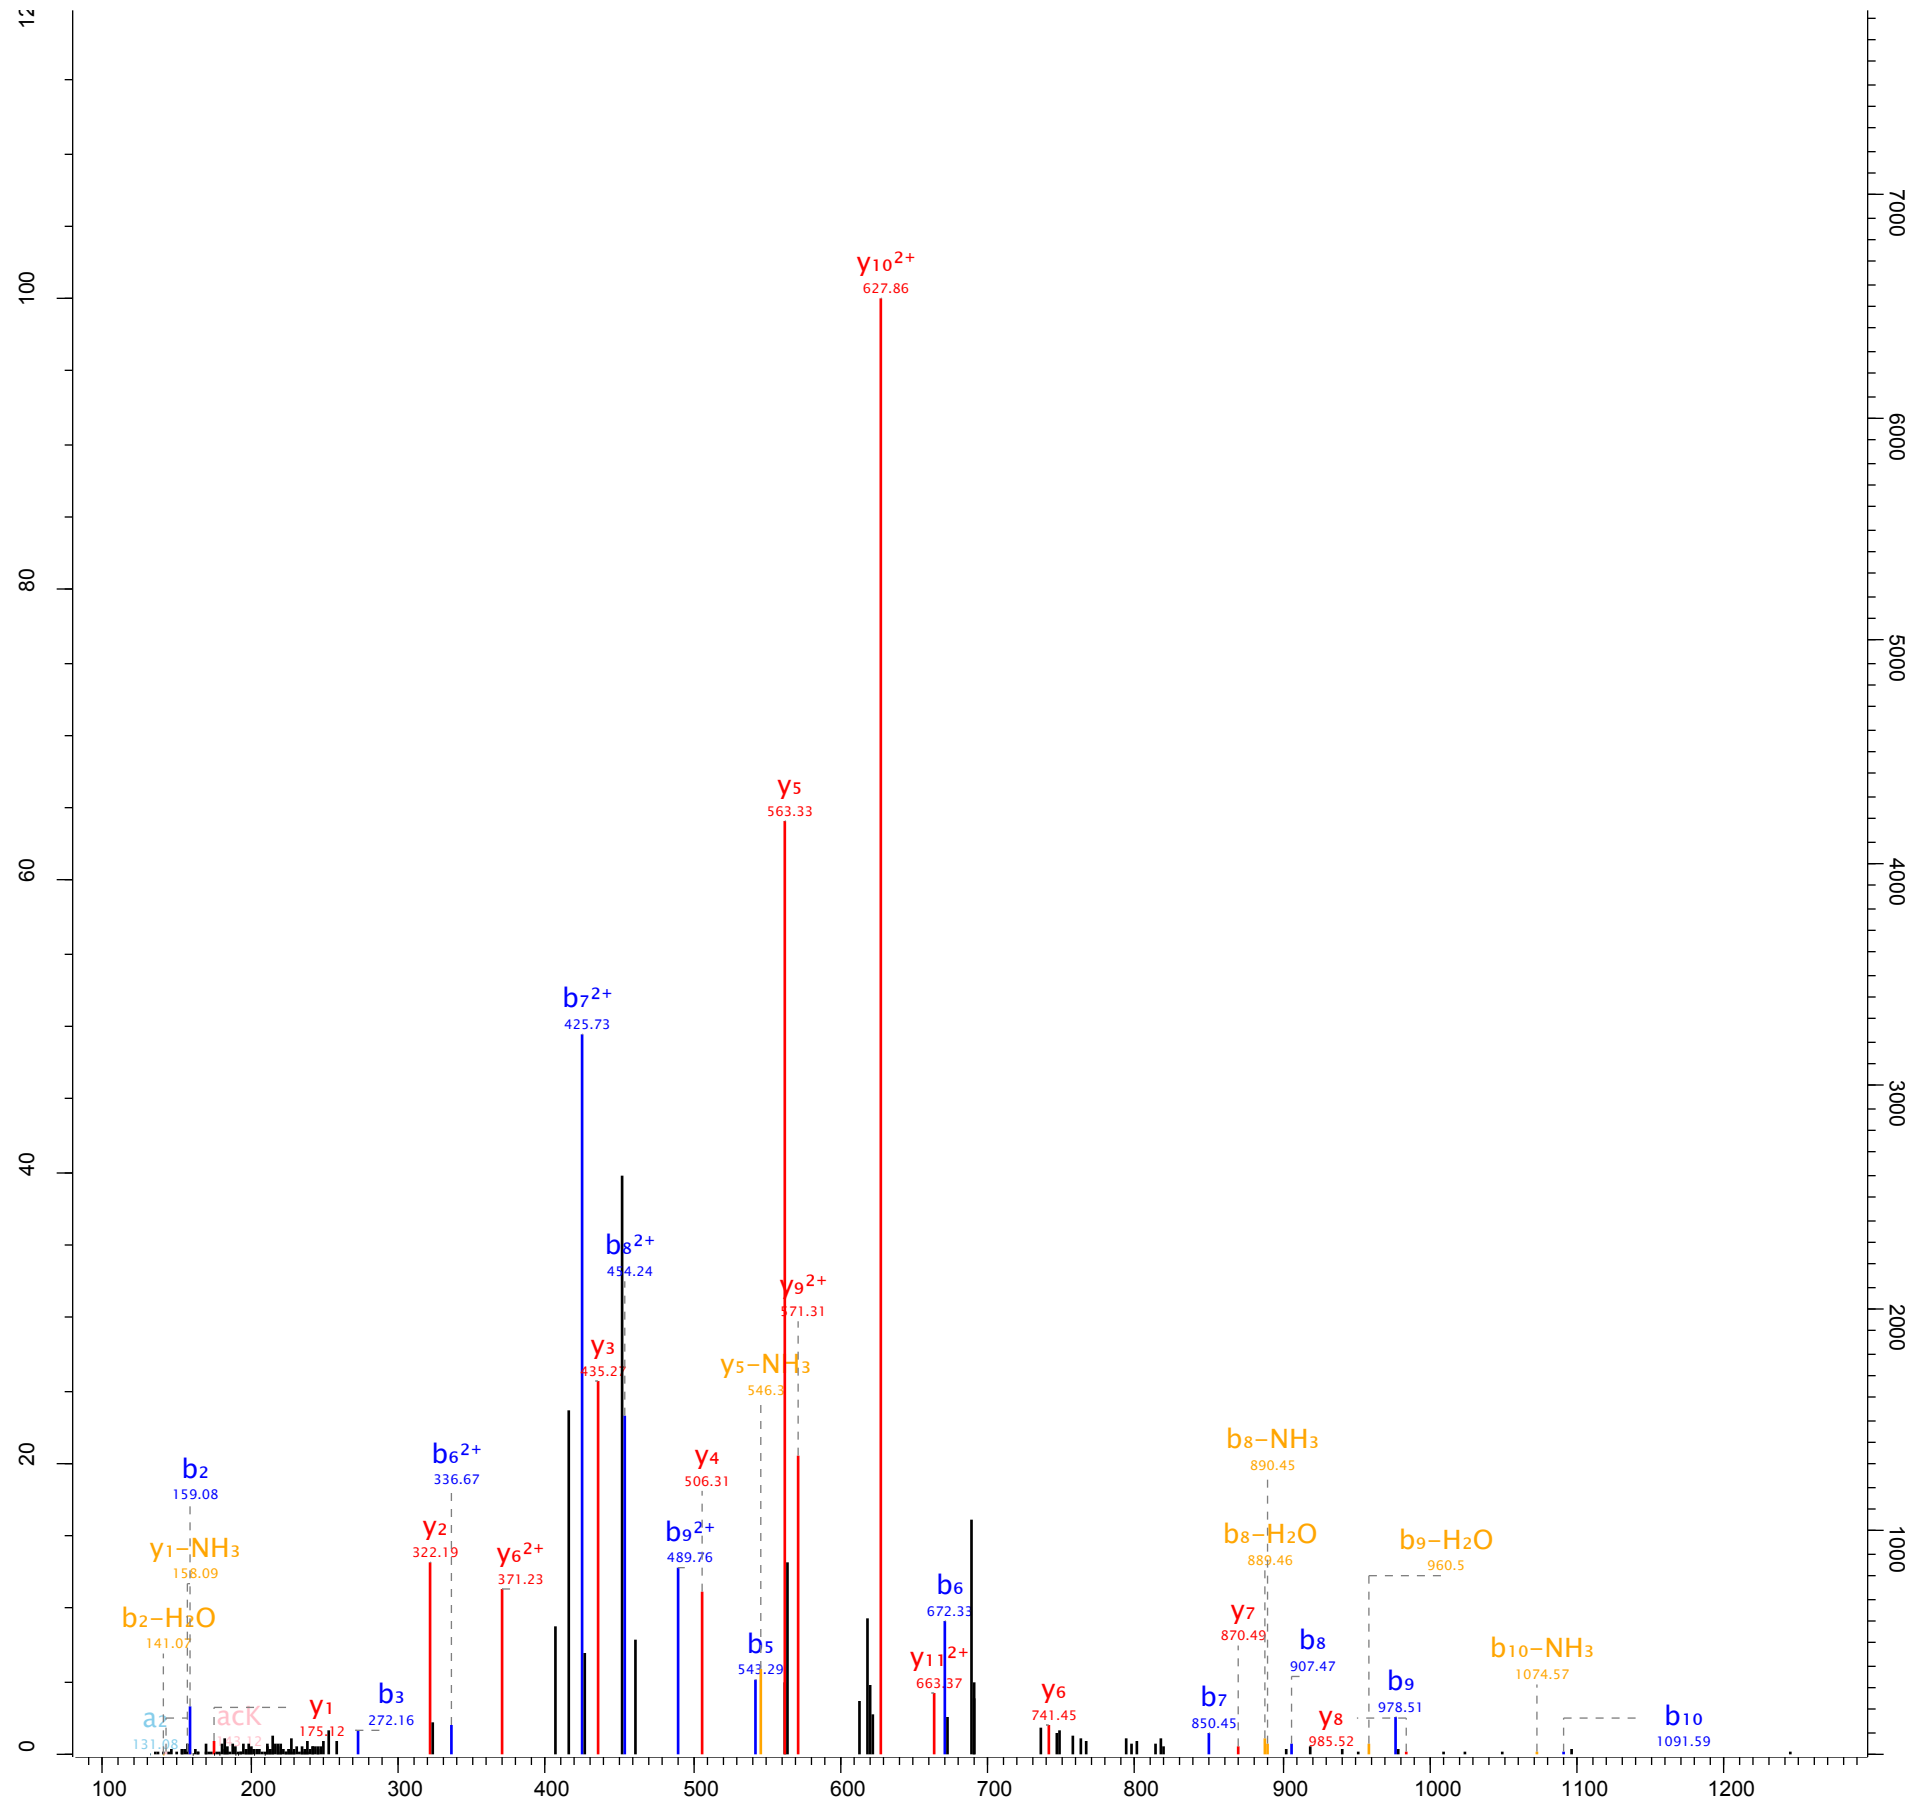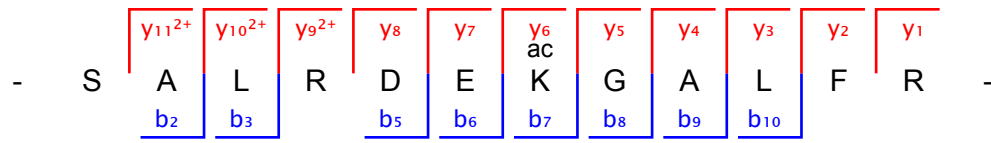

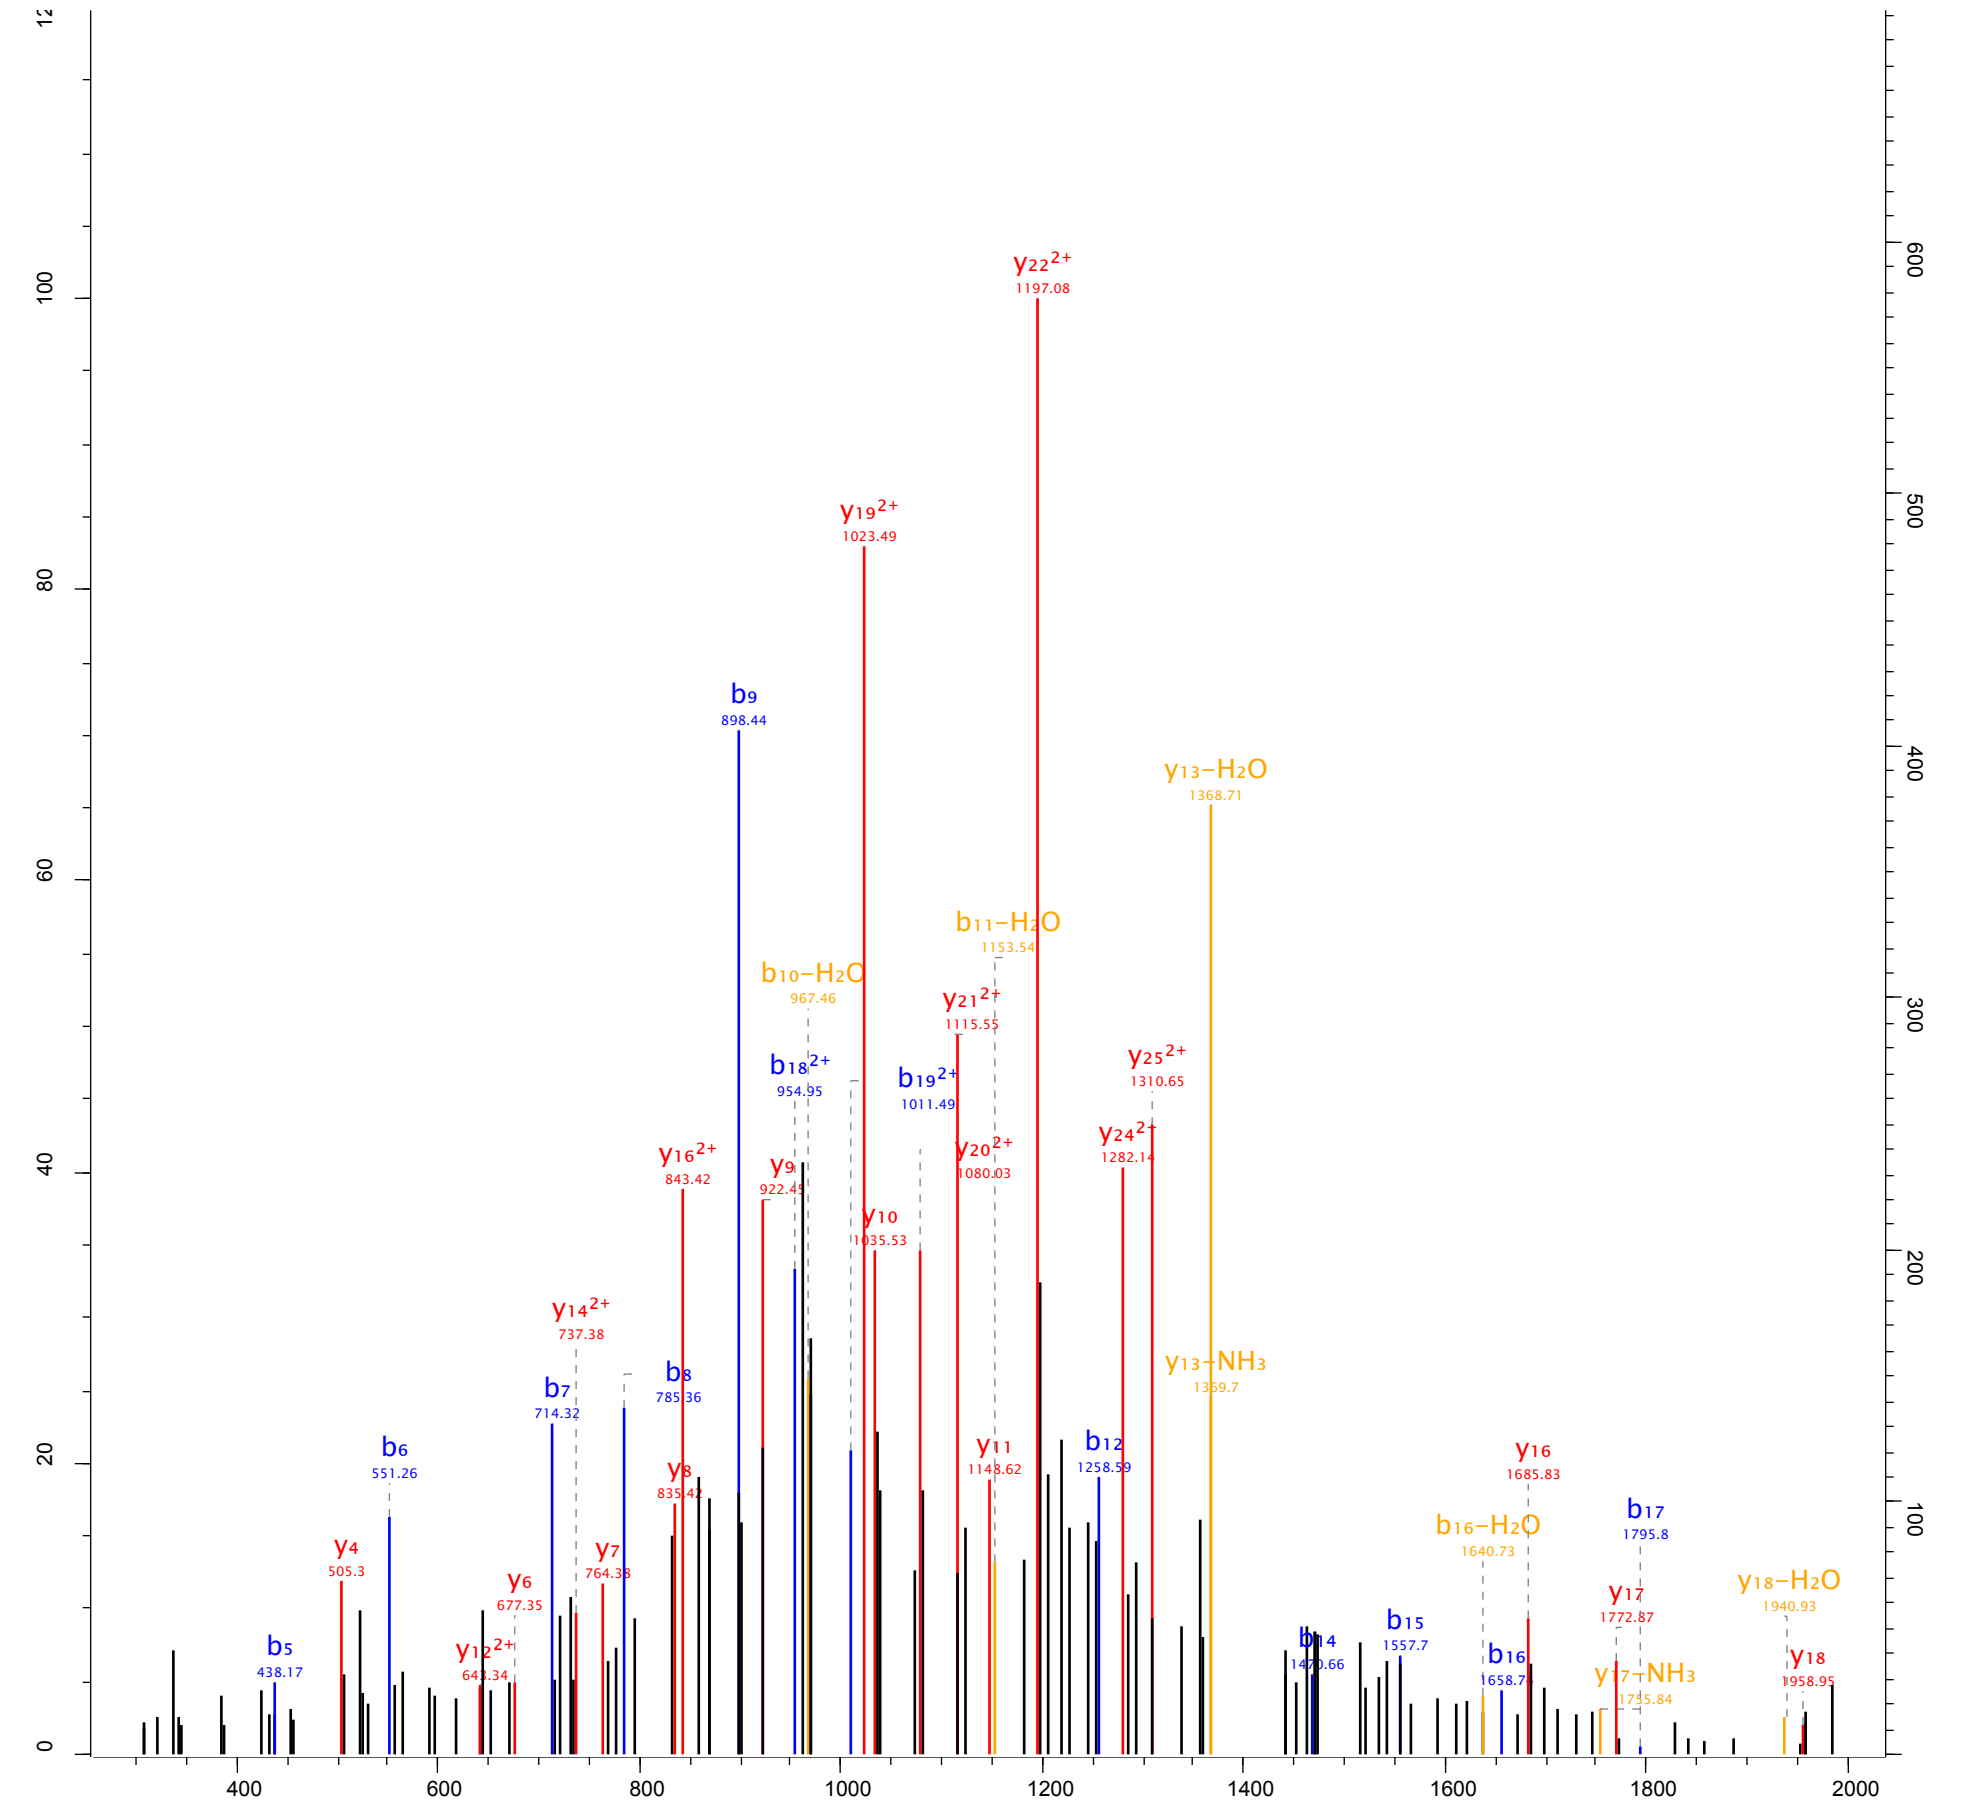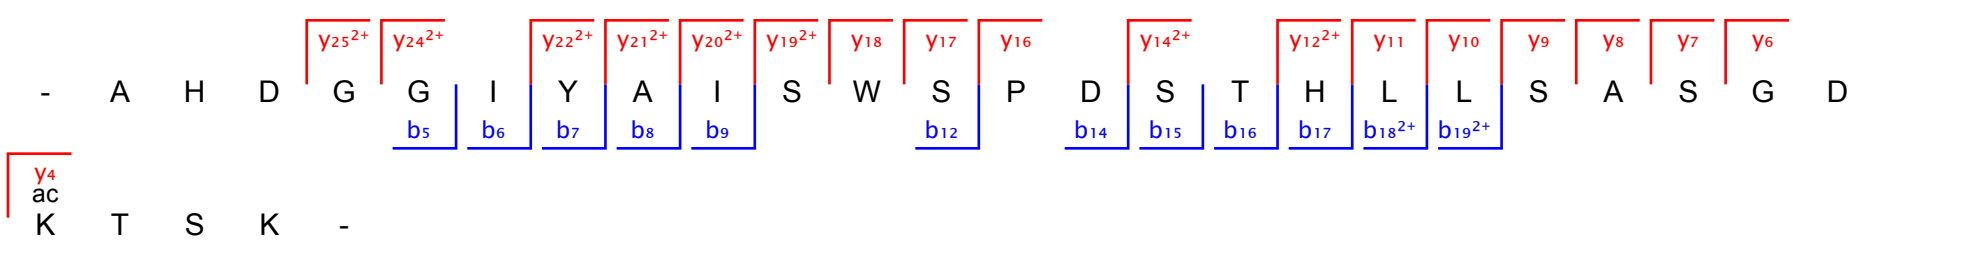

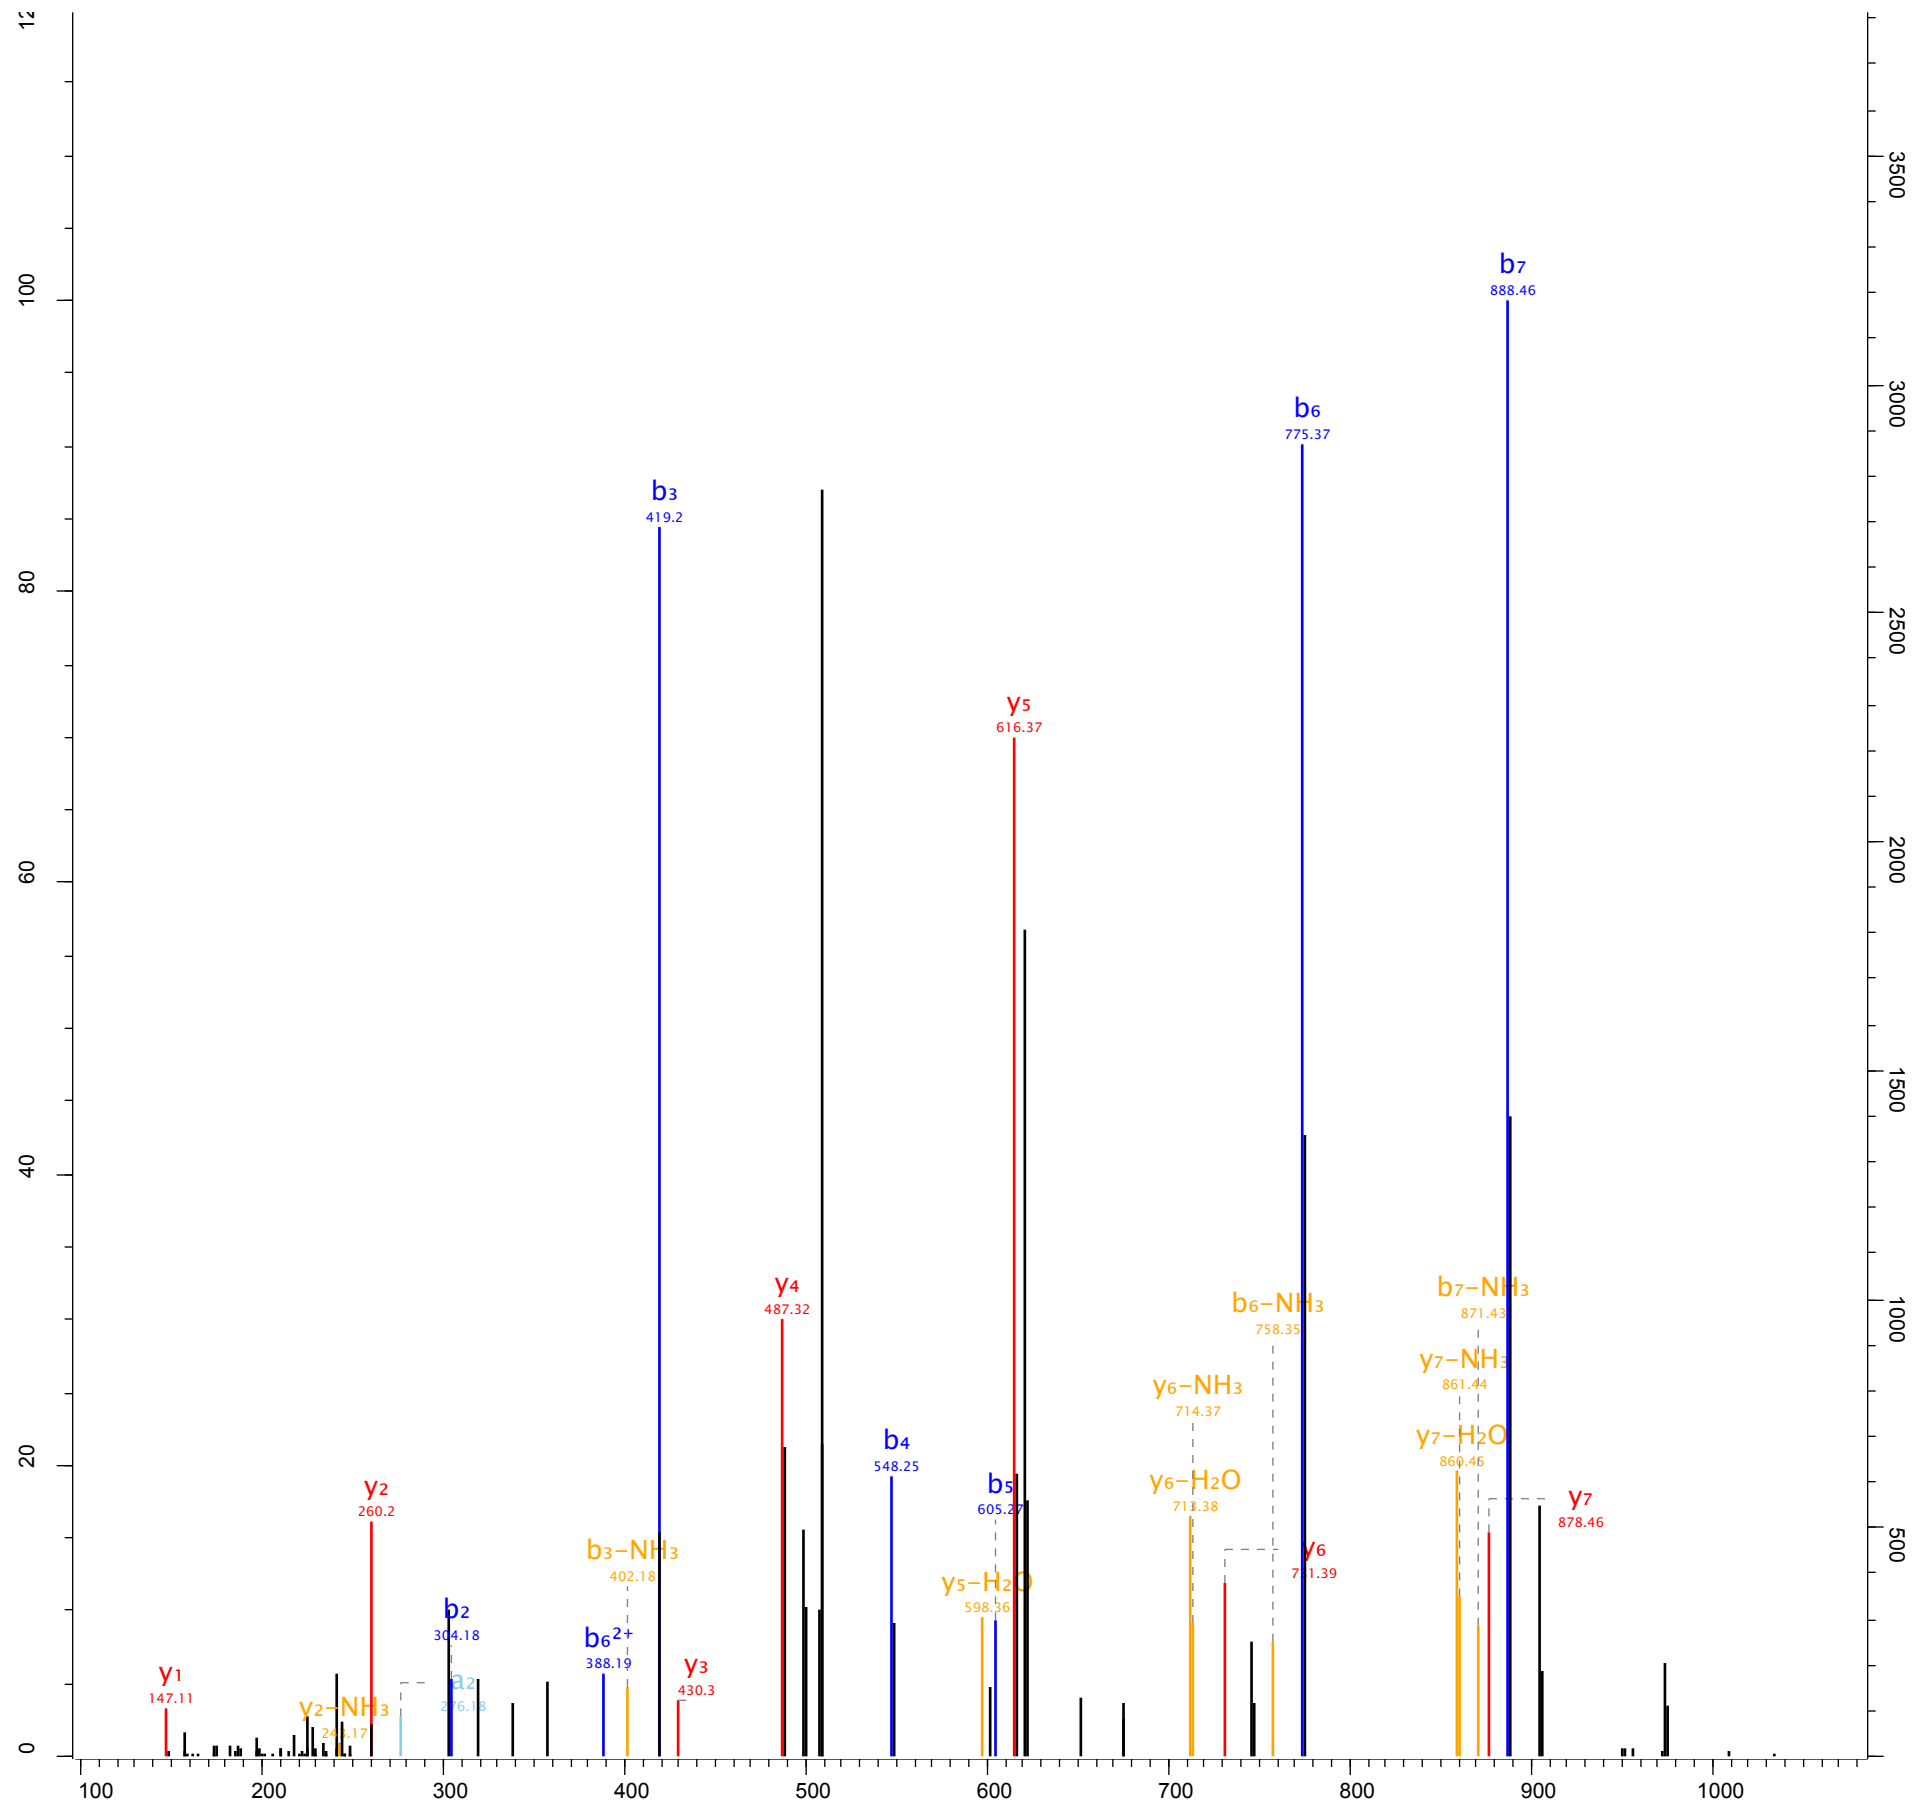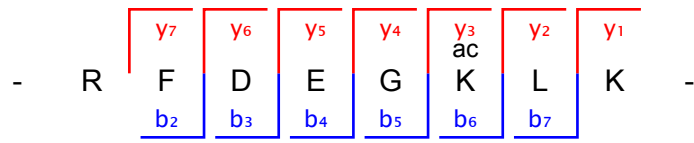

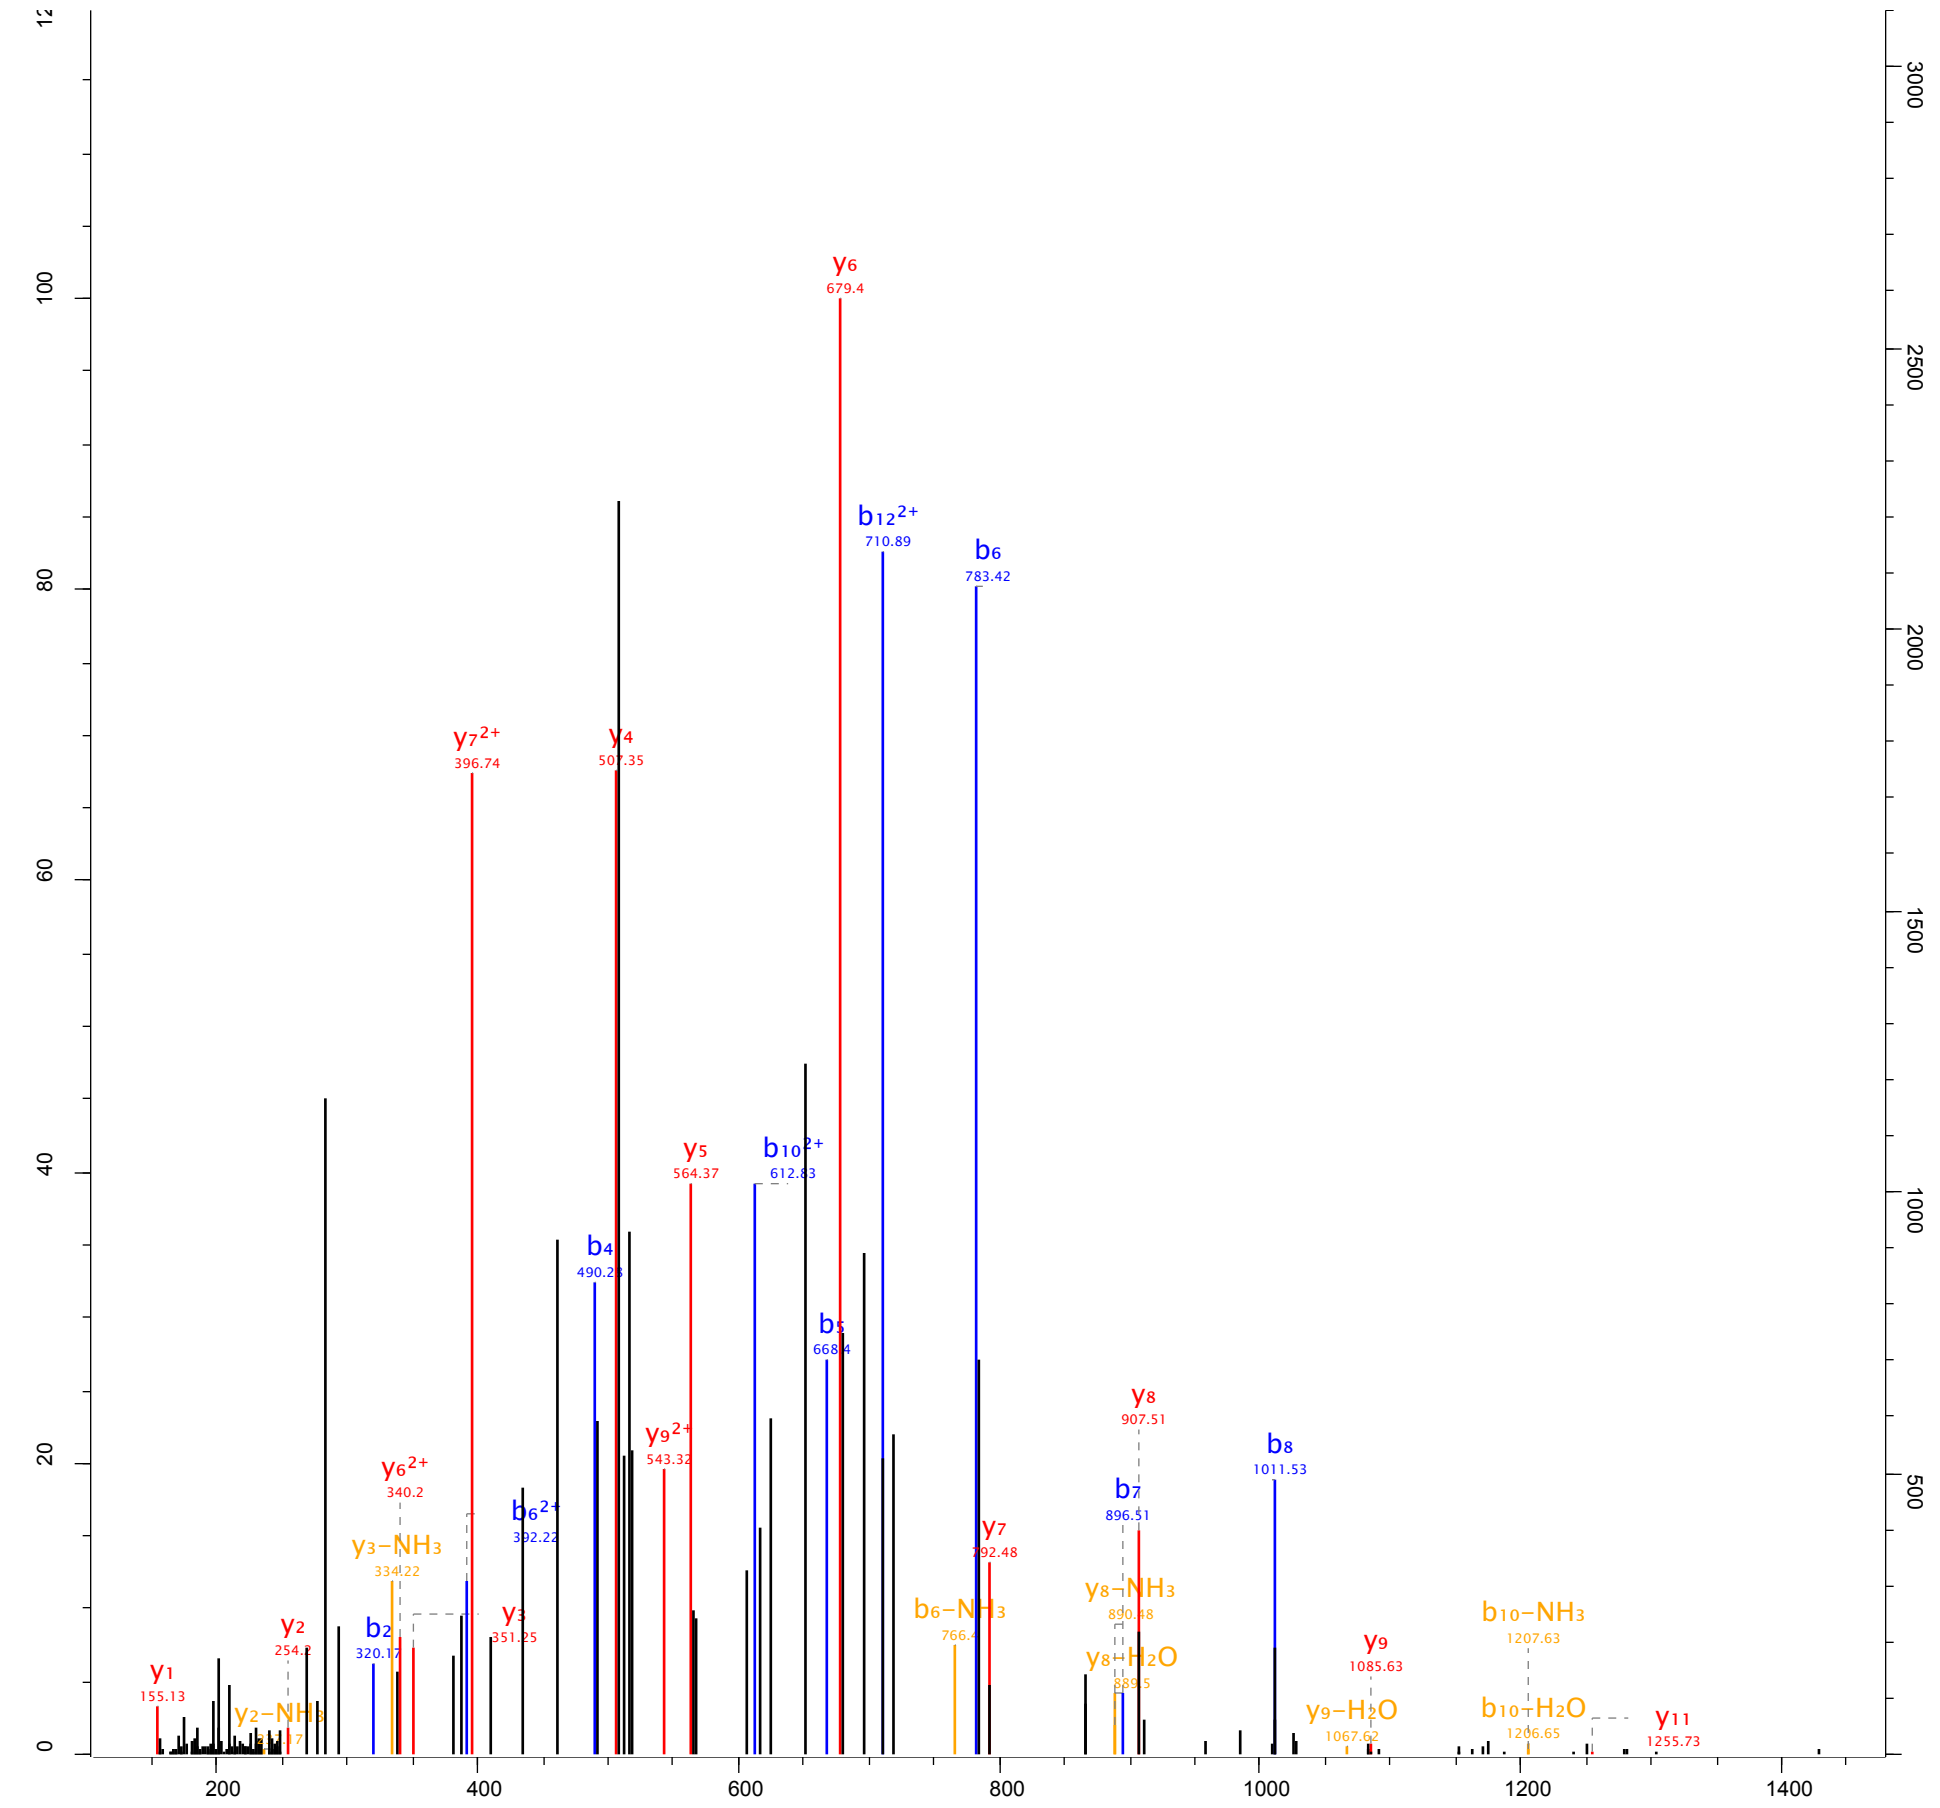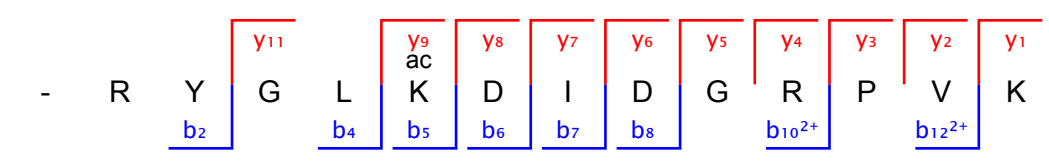

Raw file: 022714\_SCW\_II\_53\_11\_2ndZT  
 Scan: 17443  
 Method: ITMS; CID  
 Score: 130.95  
 m/z: 725.7  
 Gene names: Idh2

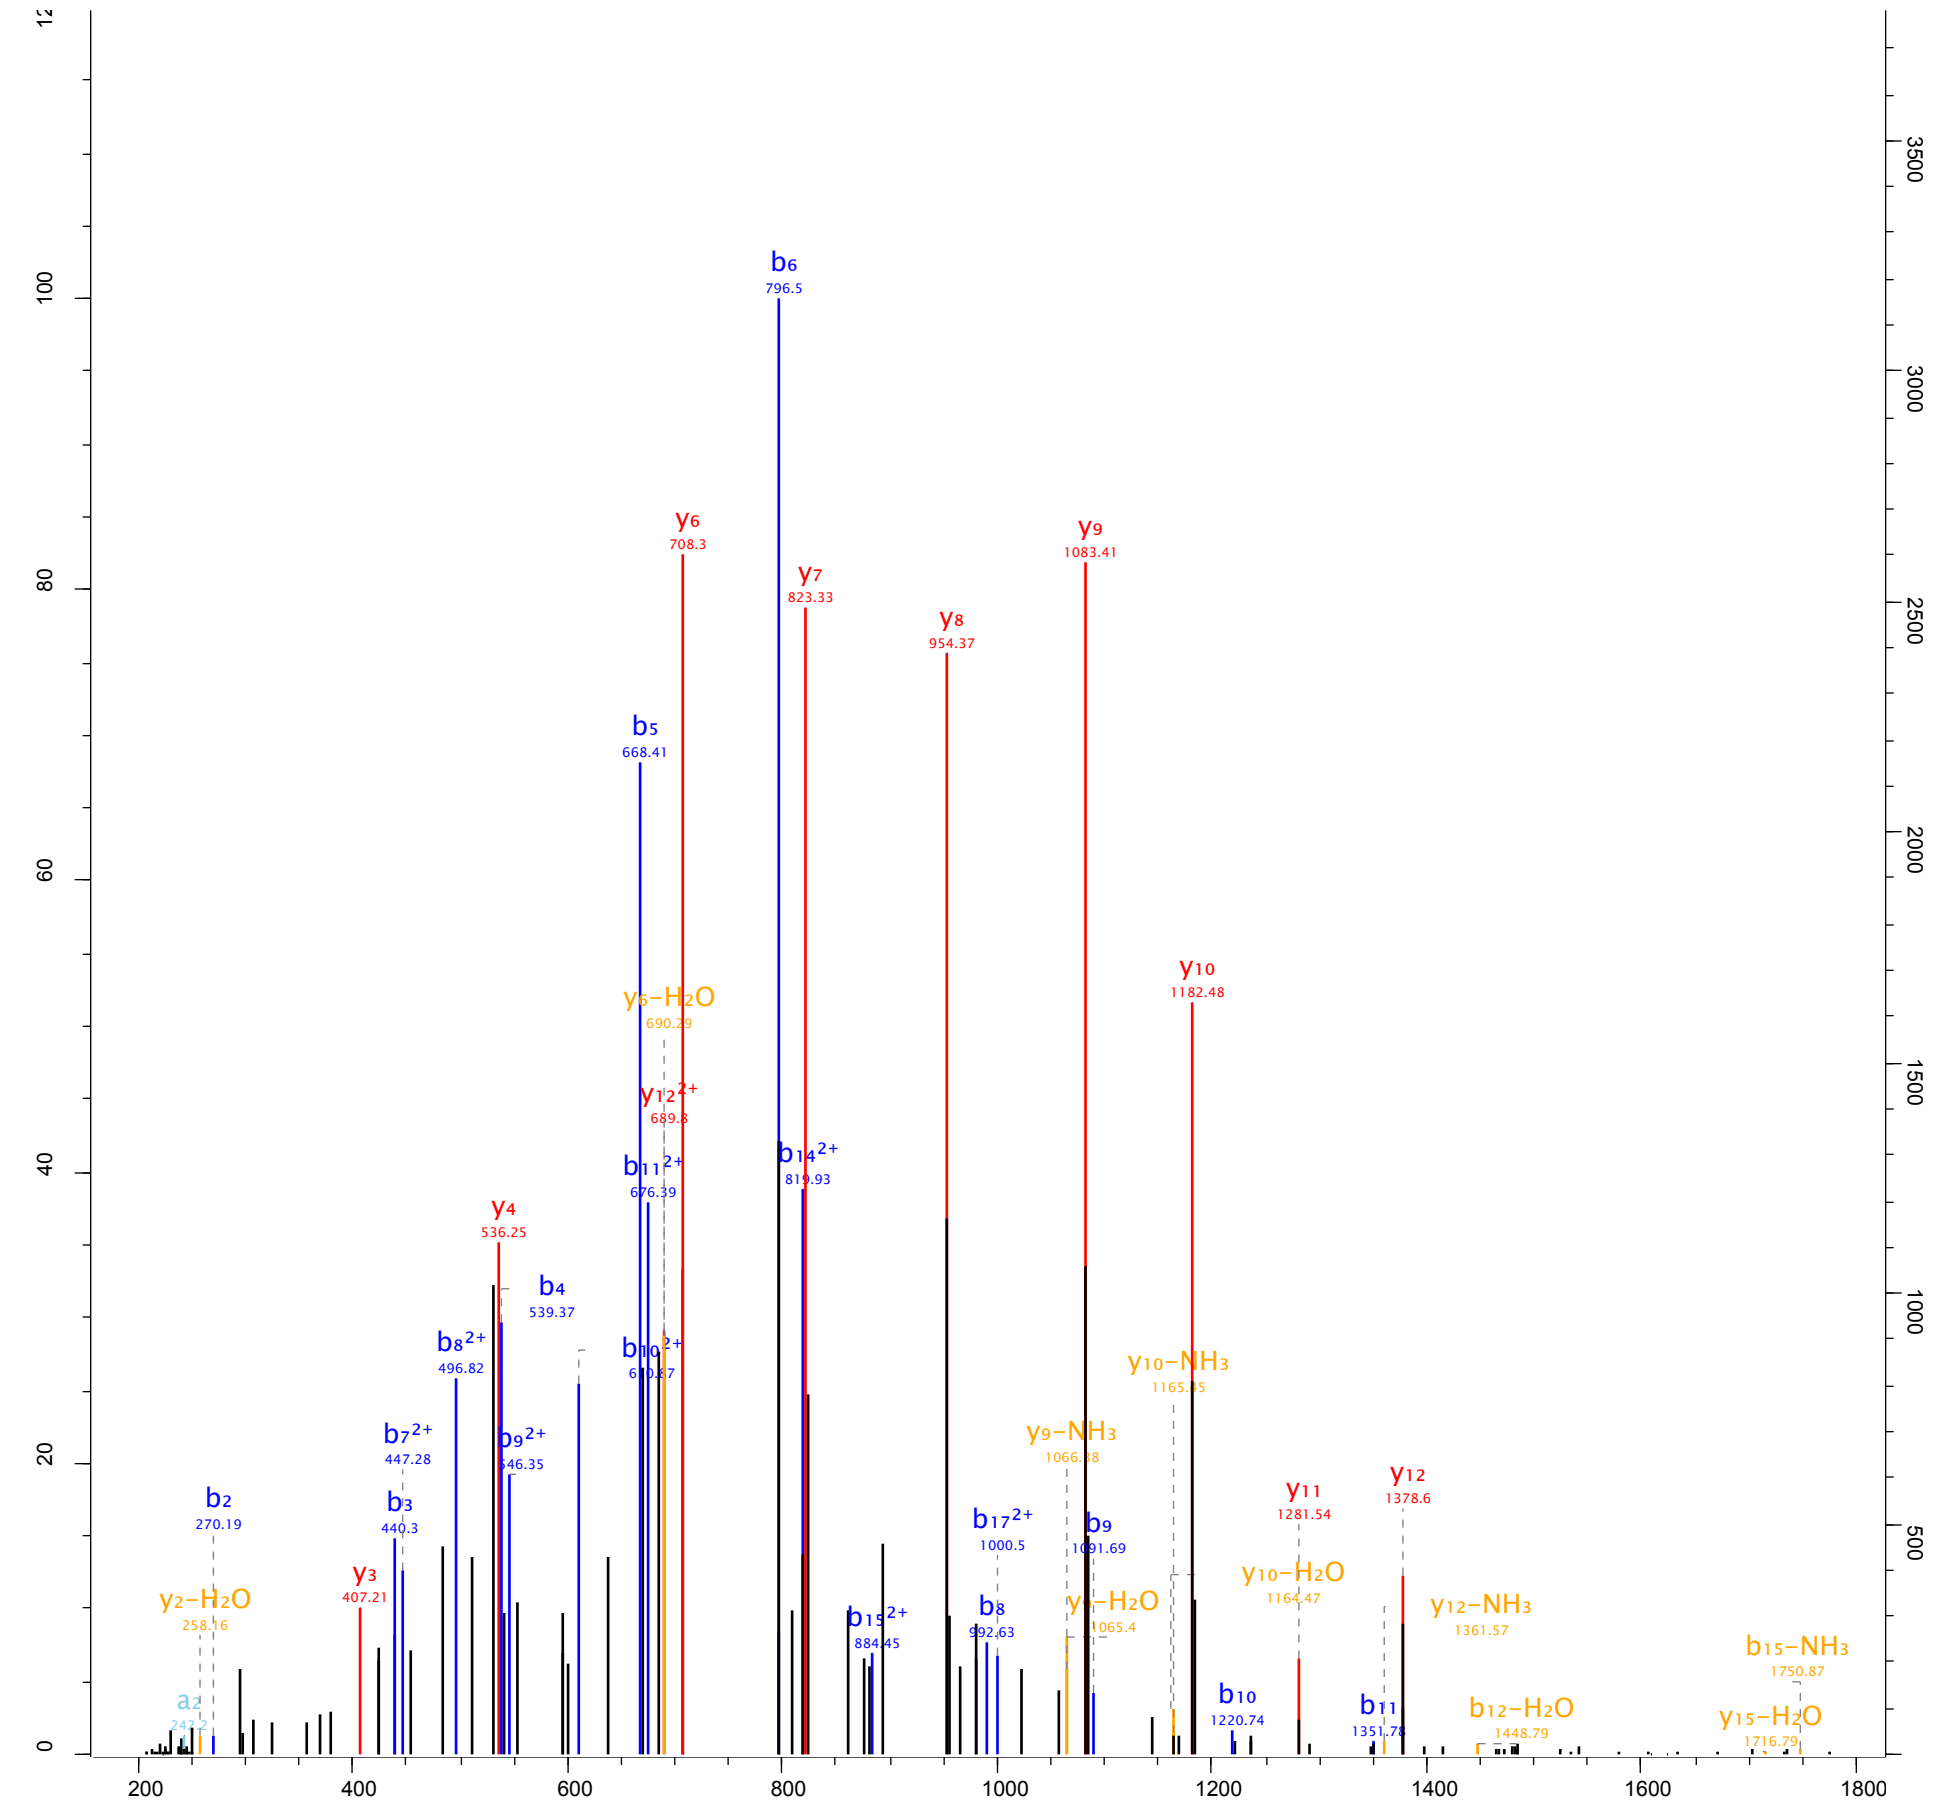

Sequence: R I K V E K P V V E M D G D E M T R -

Fragmentation sites (b and y ions):

- b2 (I), b3 (K), b4 (V), b5 (E), b6 (K), b7<sup>2+</sup> (P), b8 (V), b9 (V), b10 (E), b11 (M), b14<sup>2+</sup> (D), b15<sup>2+</sup> (D), b17<sup>2+</sup> (M)
- y3 (E), y4 (E), y6 (E), y7 (D), y8 (M), y9 (E), y10 (V), y11 (V), y12 (P)

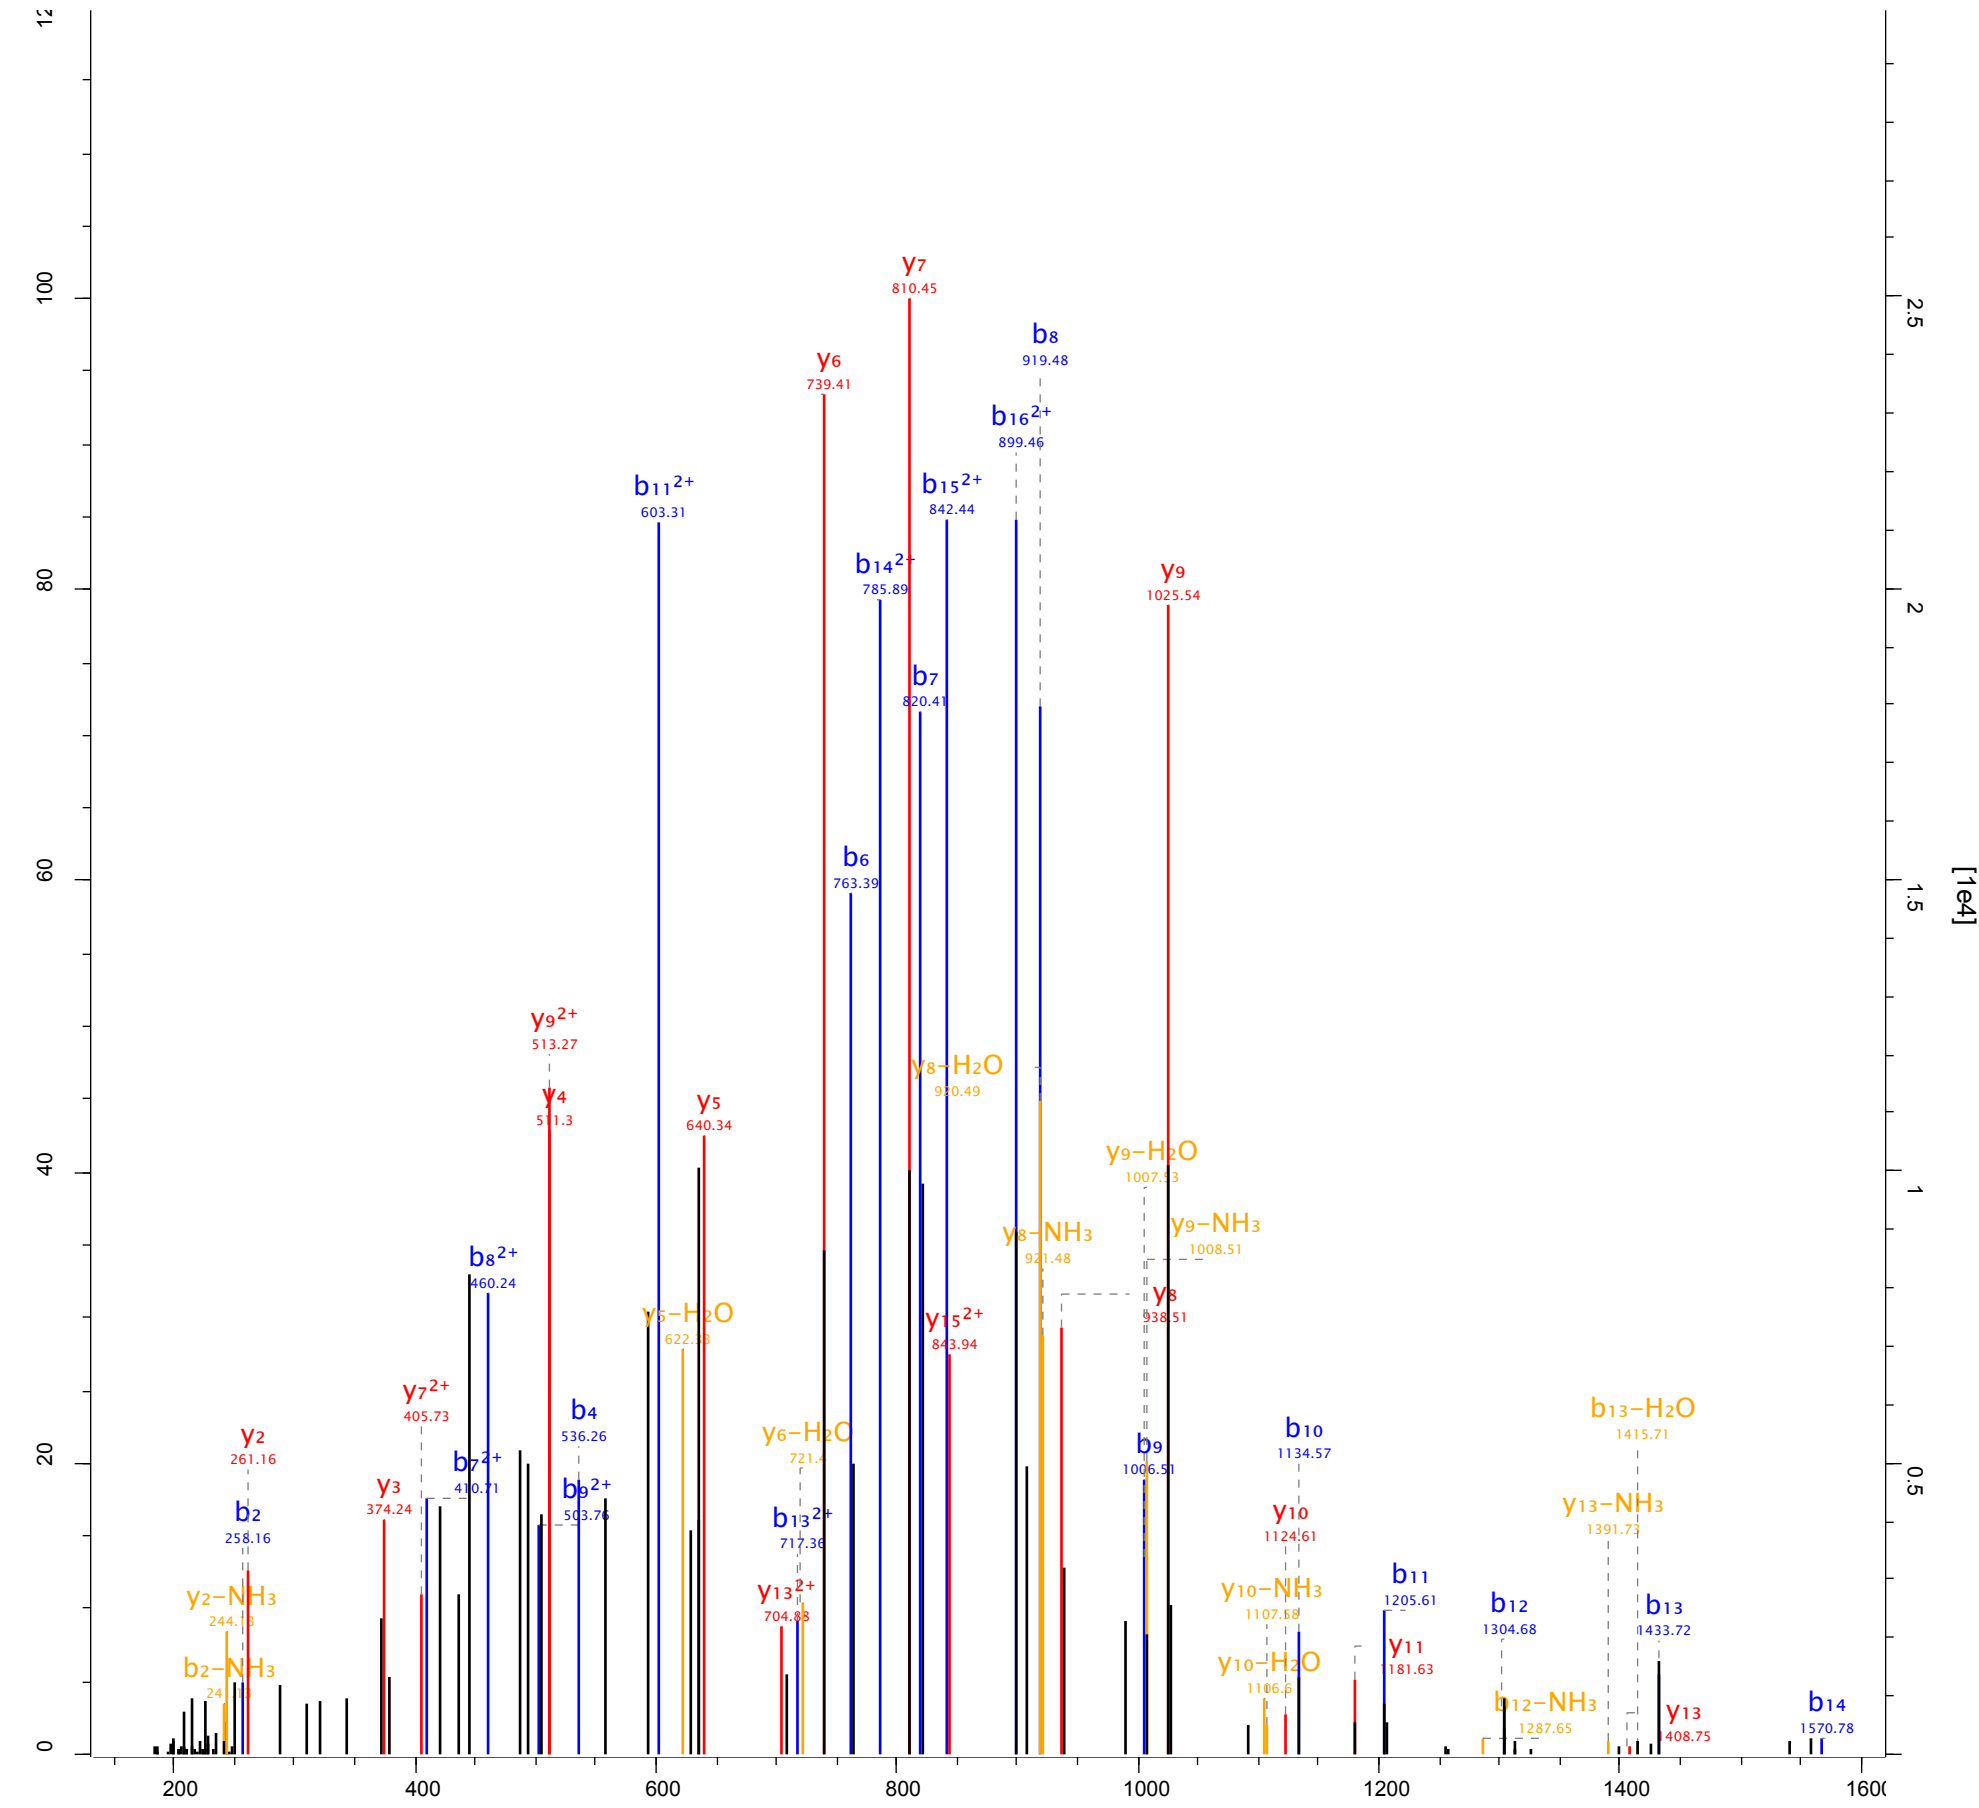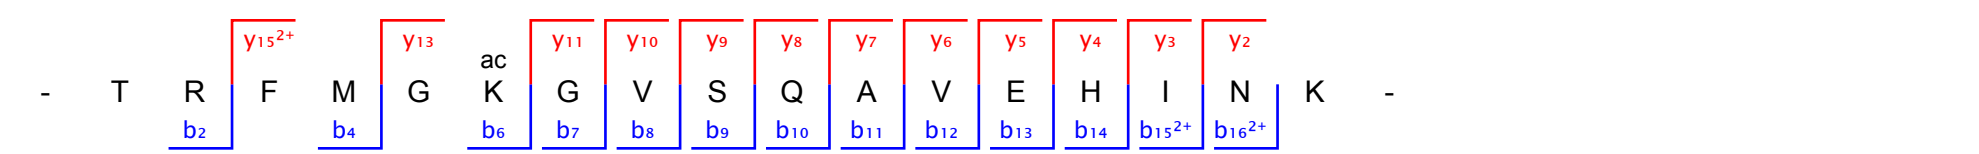

Raw file: 022714\_SCW\_II\_53\_11\_2ndZT  
 Scan: 19709 Method: ITMS; CID Score: 128.51 m/z: 437.93 Gene names: Ckb

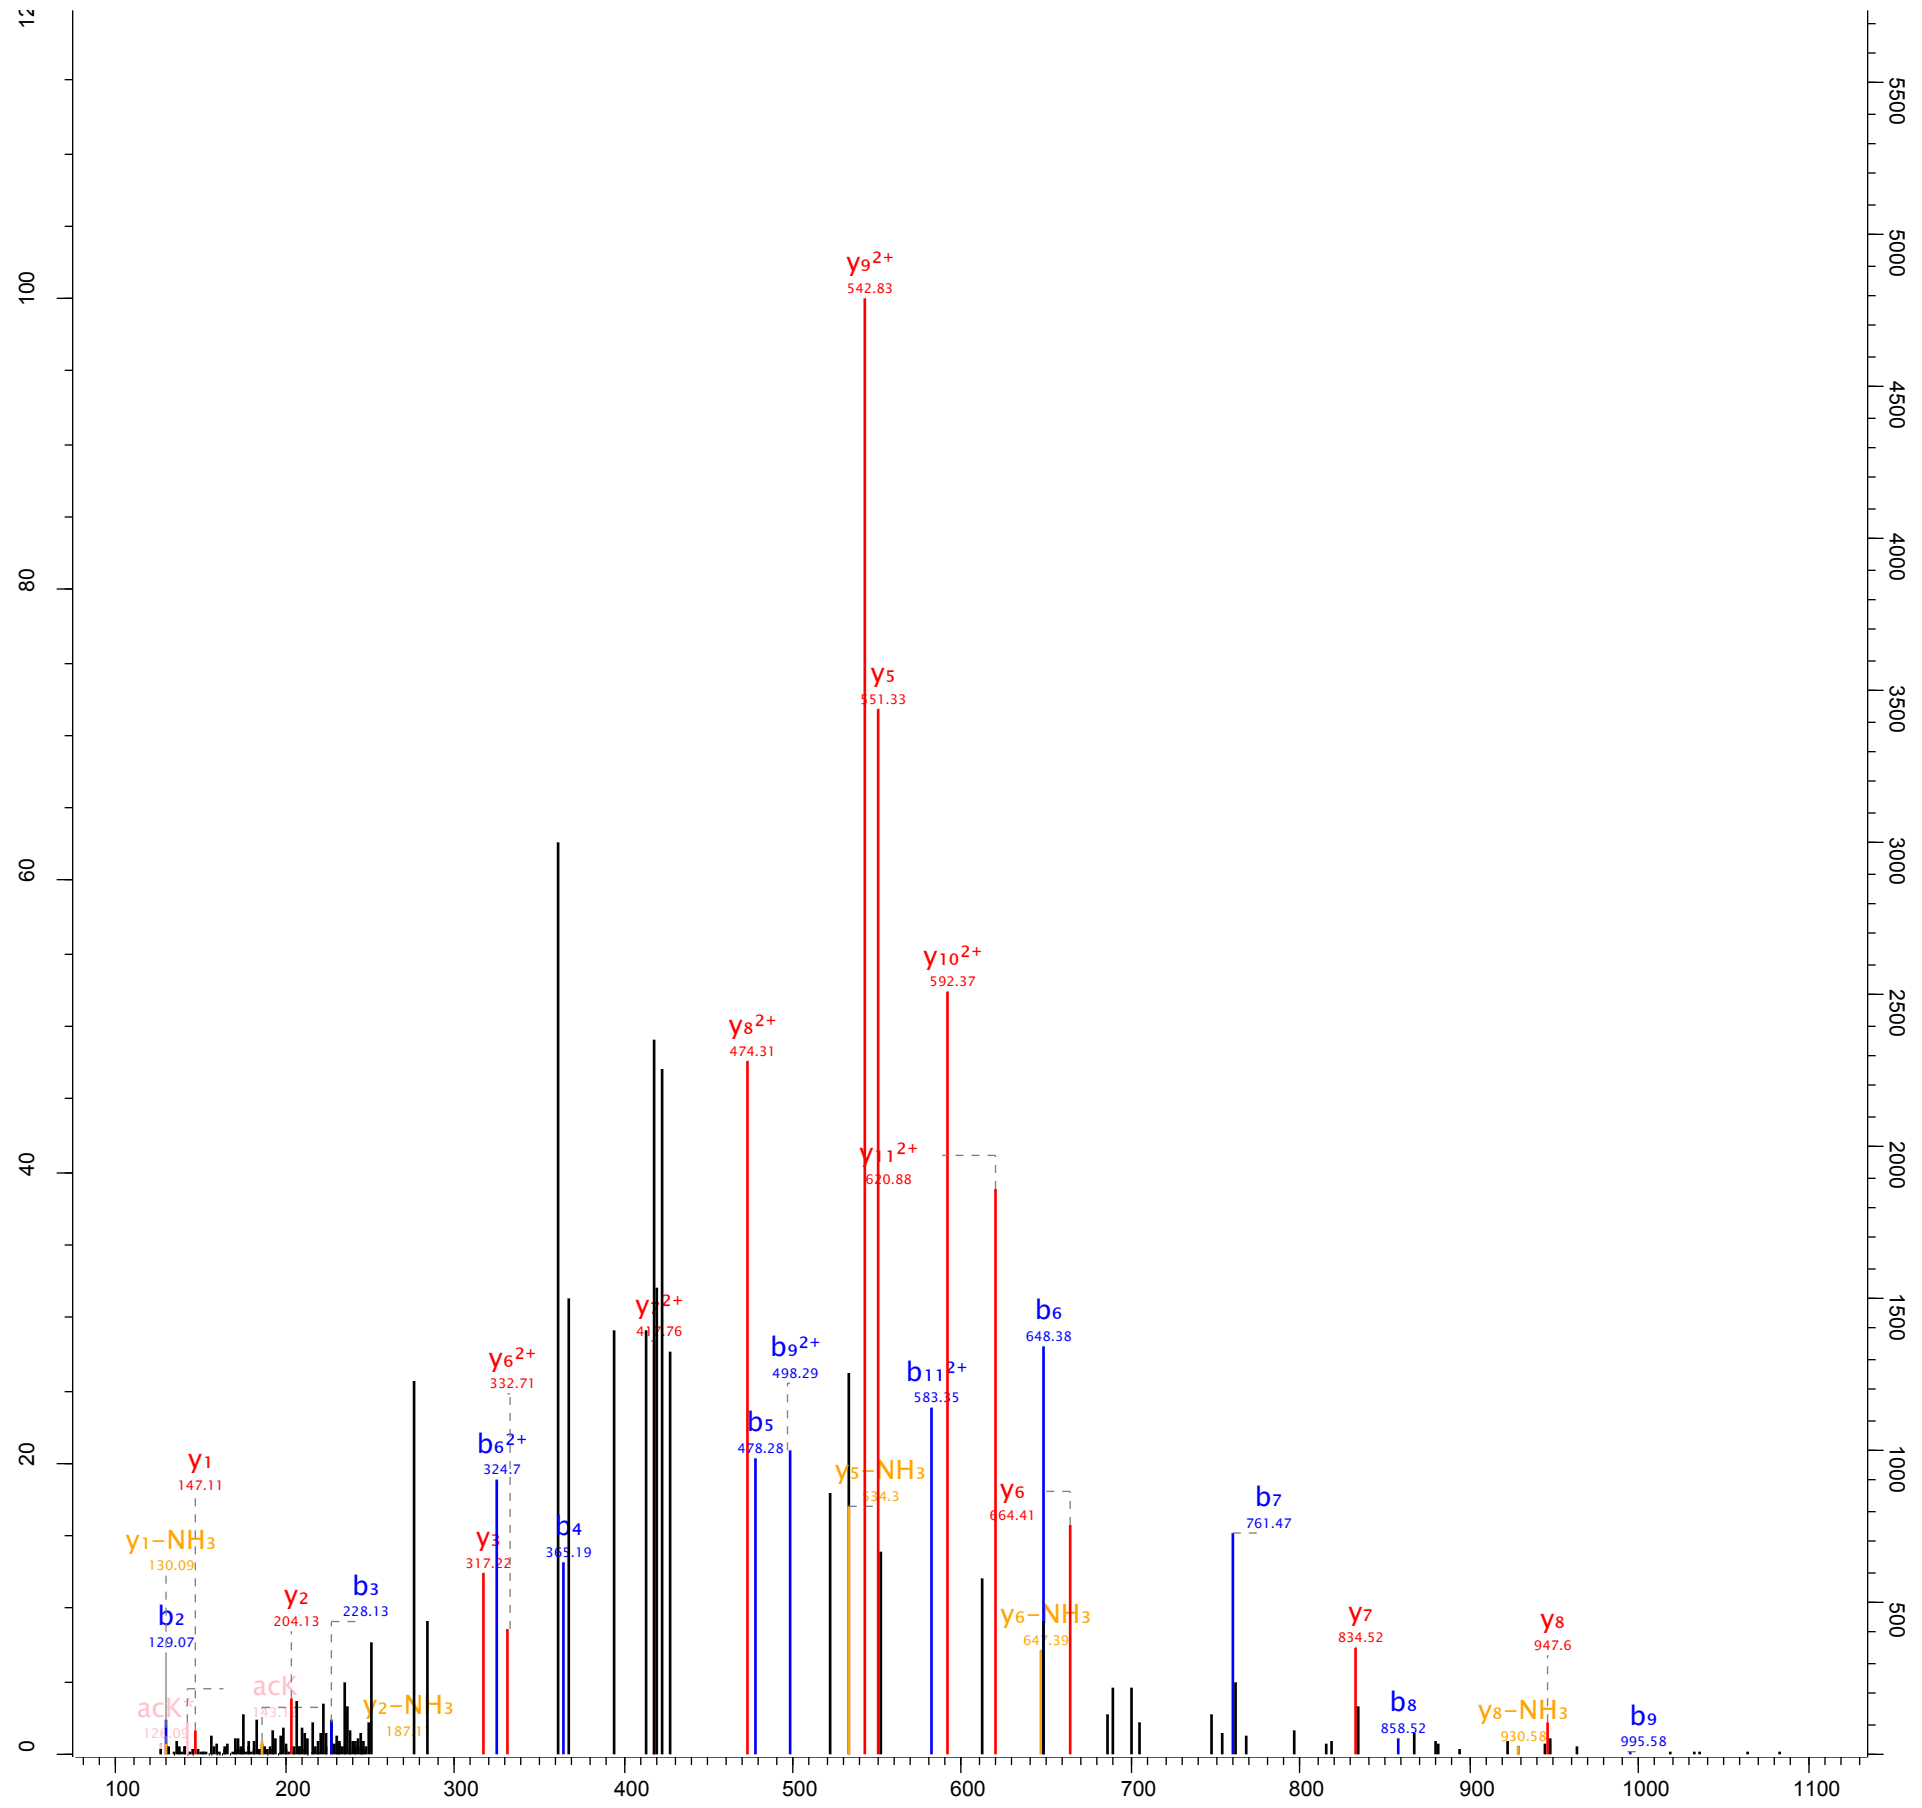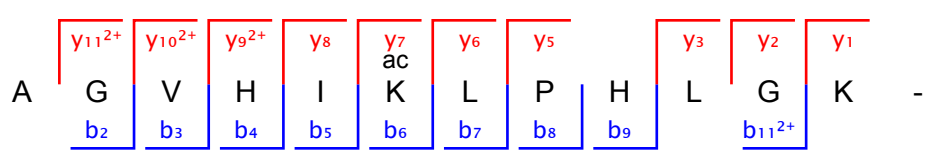



Raw file 022714\_SCW\_II\_53\_11\_2ndZT

Scan 20920 Method ITMS; CID Score 151.3 m/z 529.33 Gene names Eef1g

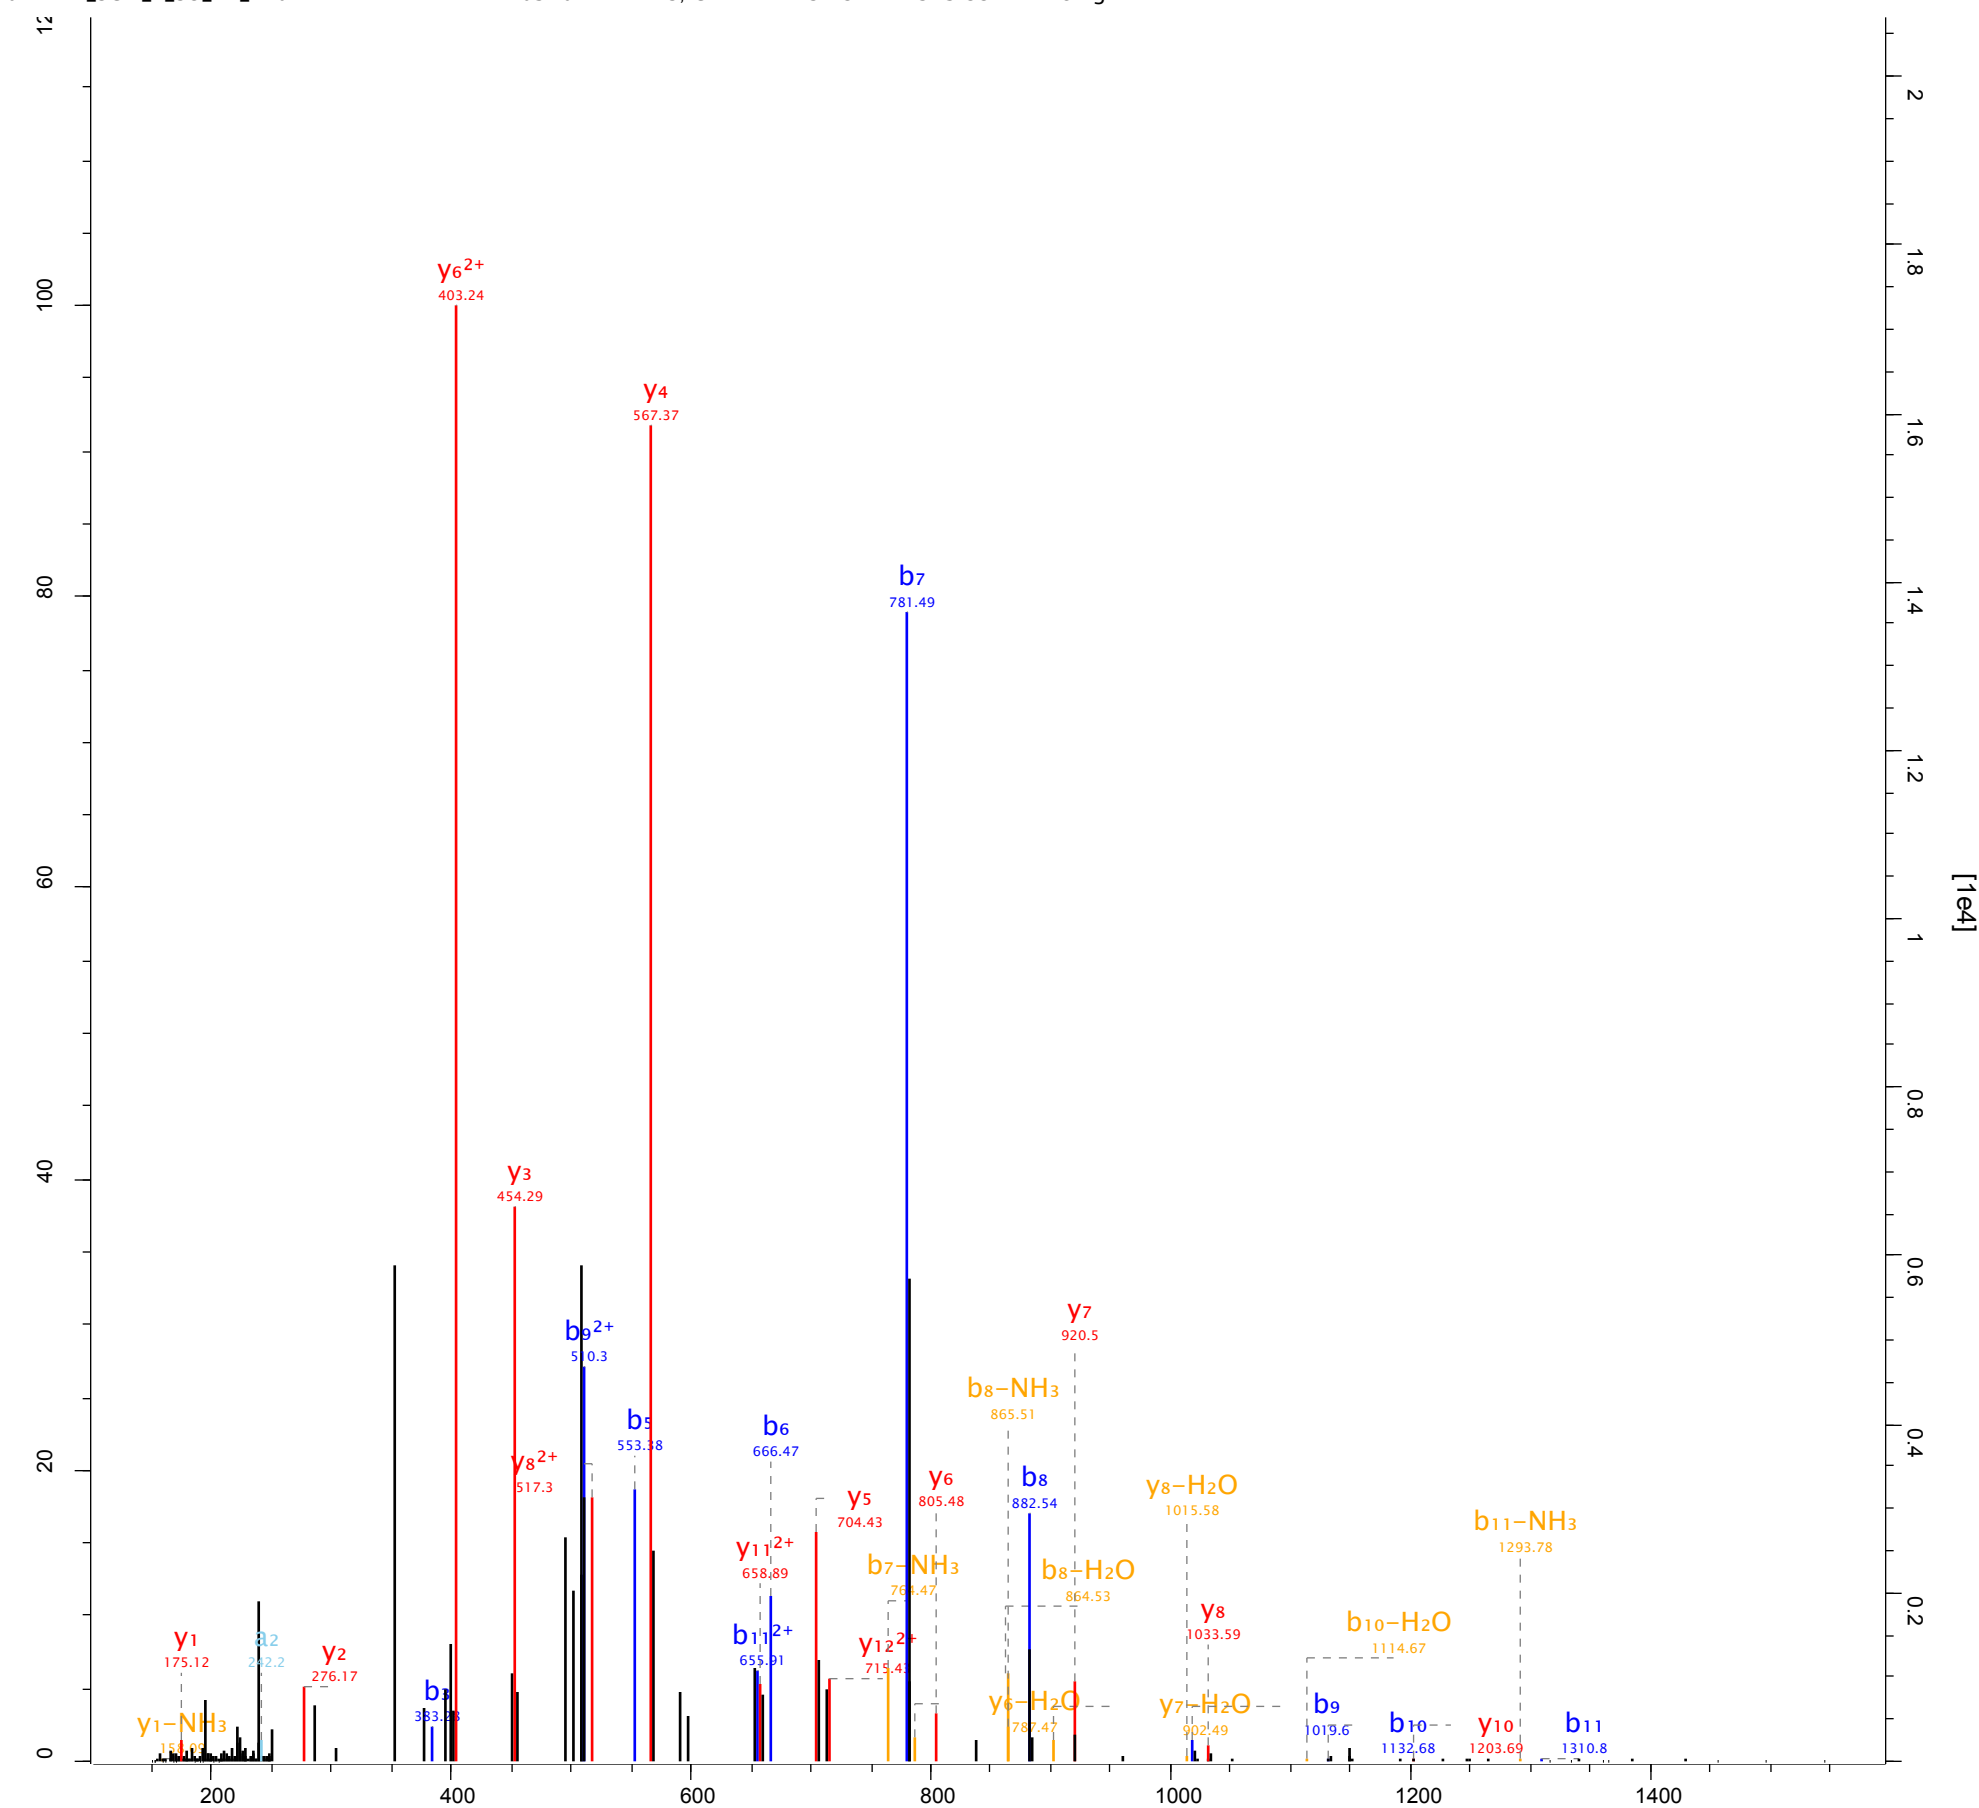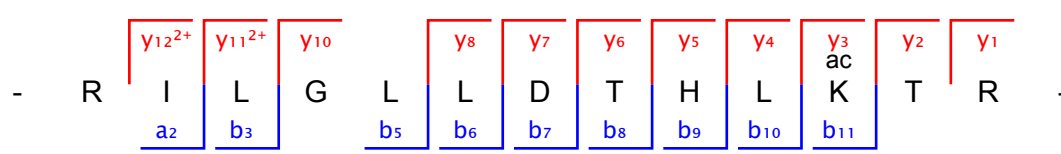

022714\_SCW\_II\_53\_11\_2ndZT

21885 ITMS; CID 218.2 847.46 Ak3

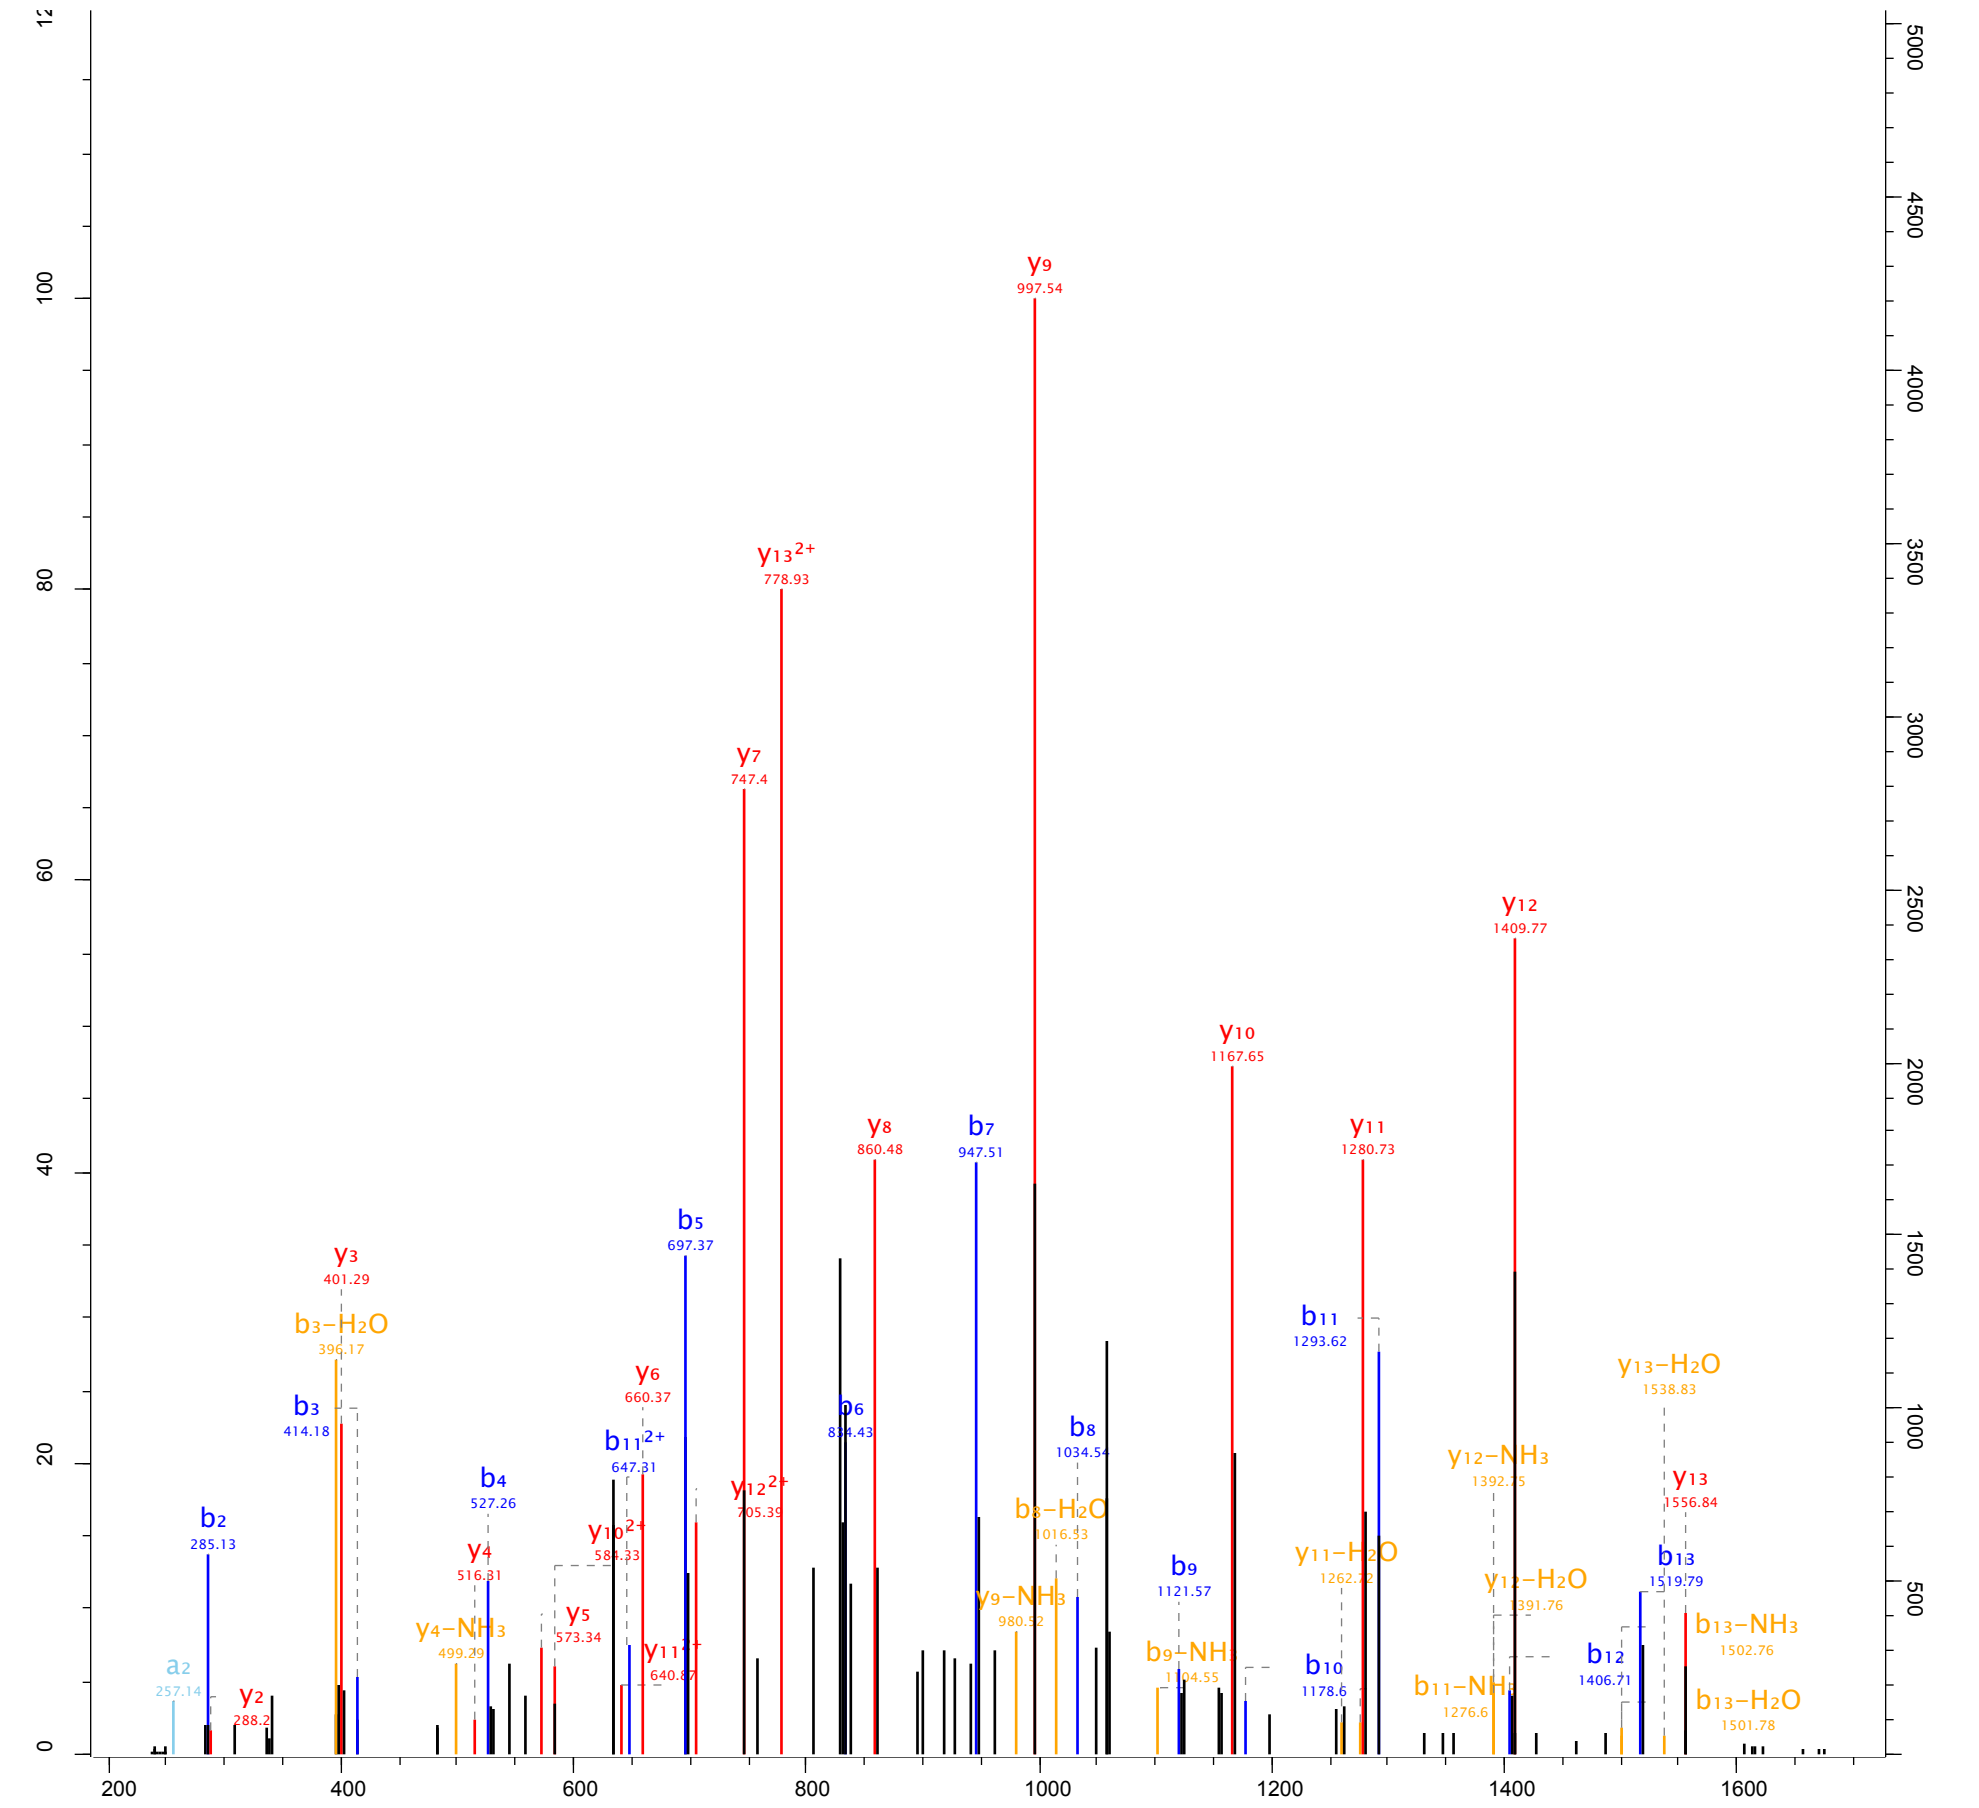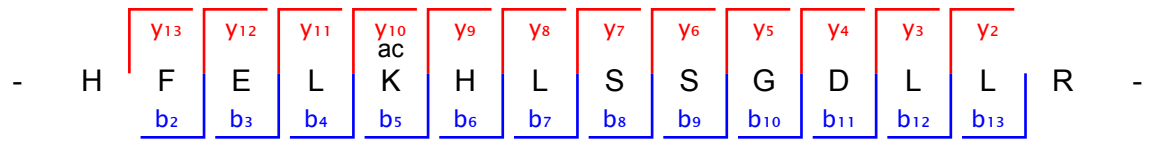

Raw file  
022714\_SCW\_II\_53\_11\_2ndZT

Scan 27664 Method ITMS; CID Score 141.6 m/z 770.71 Gene names Myg1

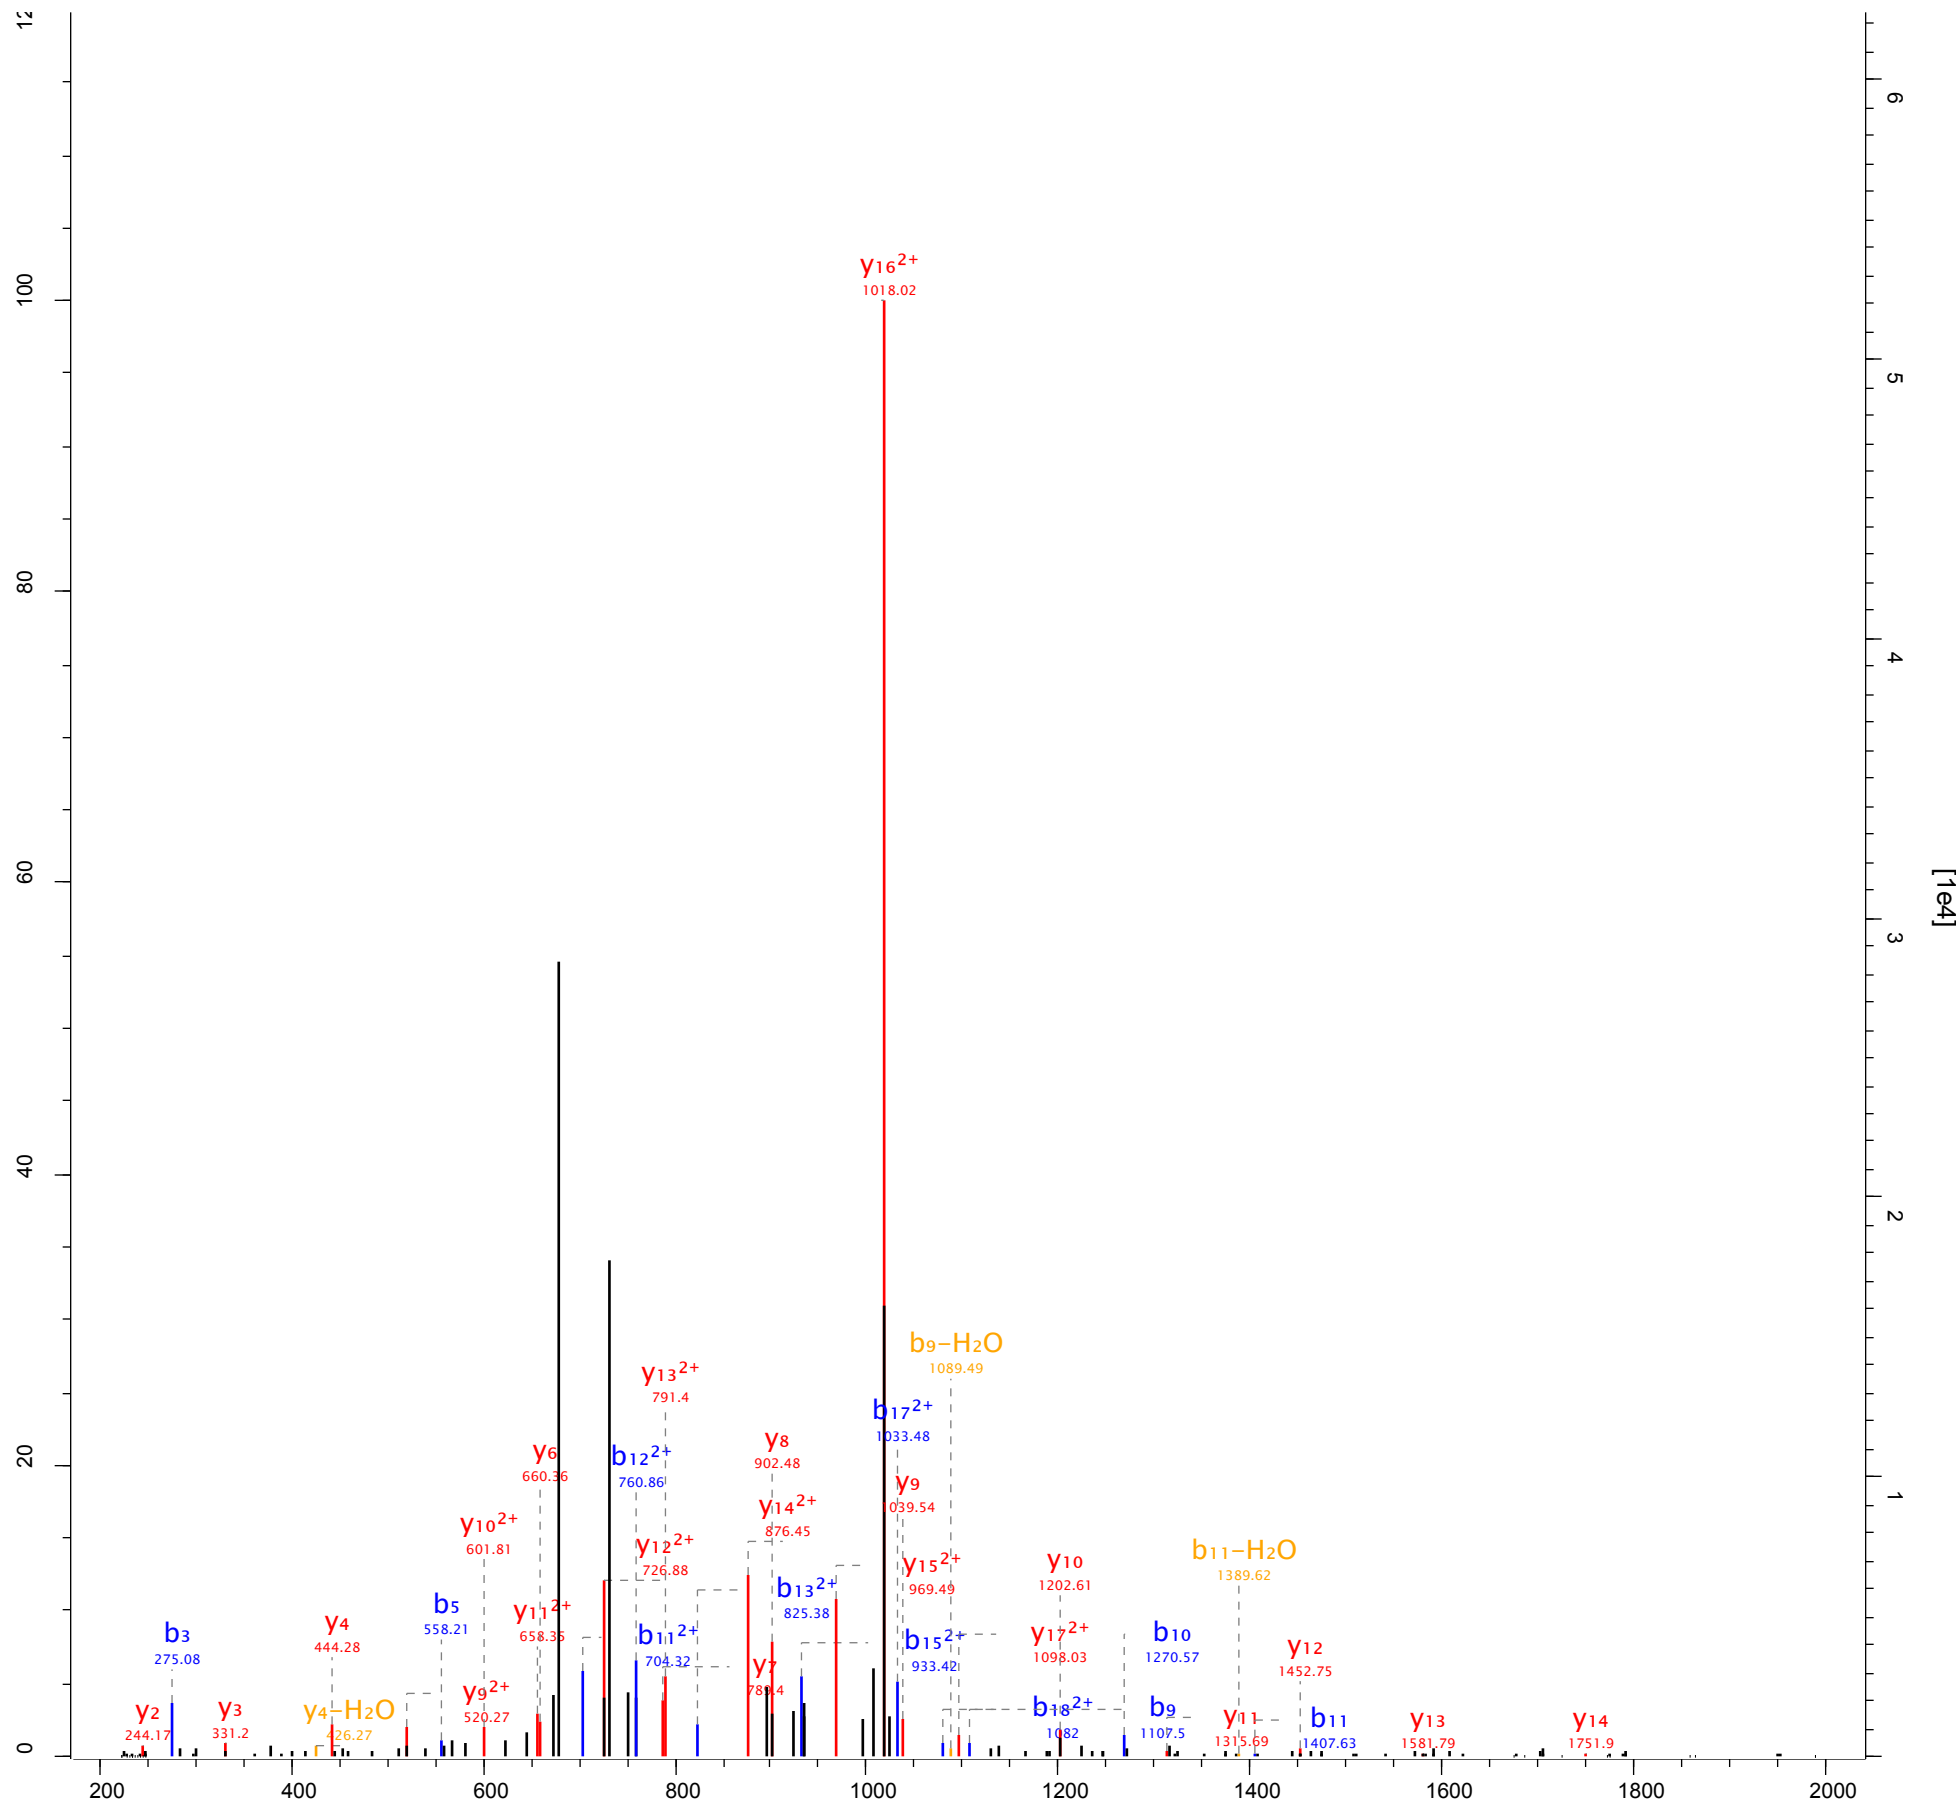

- G G C P W K E H L Y H L E S E L S P K -

$y_{17}^{2+}$   $y_{16}^{2+}$   $y_{15}^{2+}$   $y_{14}^{ac}$   $y_{13}$   $y_{12}$   $y_{11}$   $y_{10}$   $y_9$   $y_8$   $y_7$   $y_6$   $y_4$   $y_3$   $y_2$

$b_3$   $b_5$   $b_9$   $b_{10}$   $b_{11}$   $b_{12}^{2+}$   $b_{13}^{2+}$   $b_{15}^{2+}$   $b_{17}^{2+}$   $b_{18}^{2+}$

022714\_SCW\_II\_53\_11\_2ndZT

28762

ITMS; CID

173.89

955.14

Atp5b

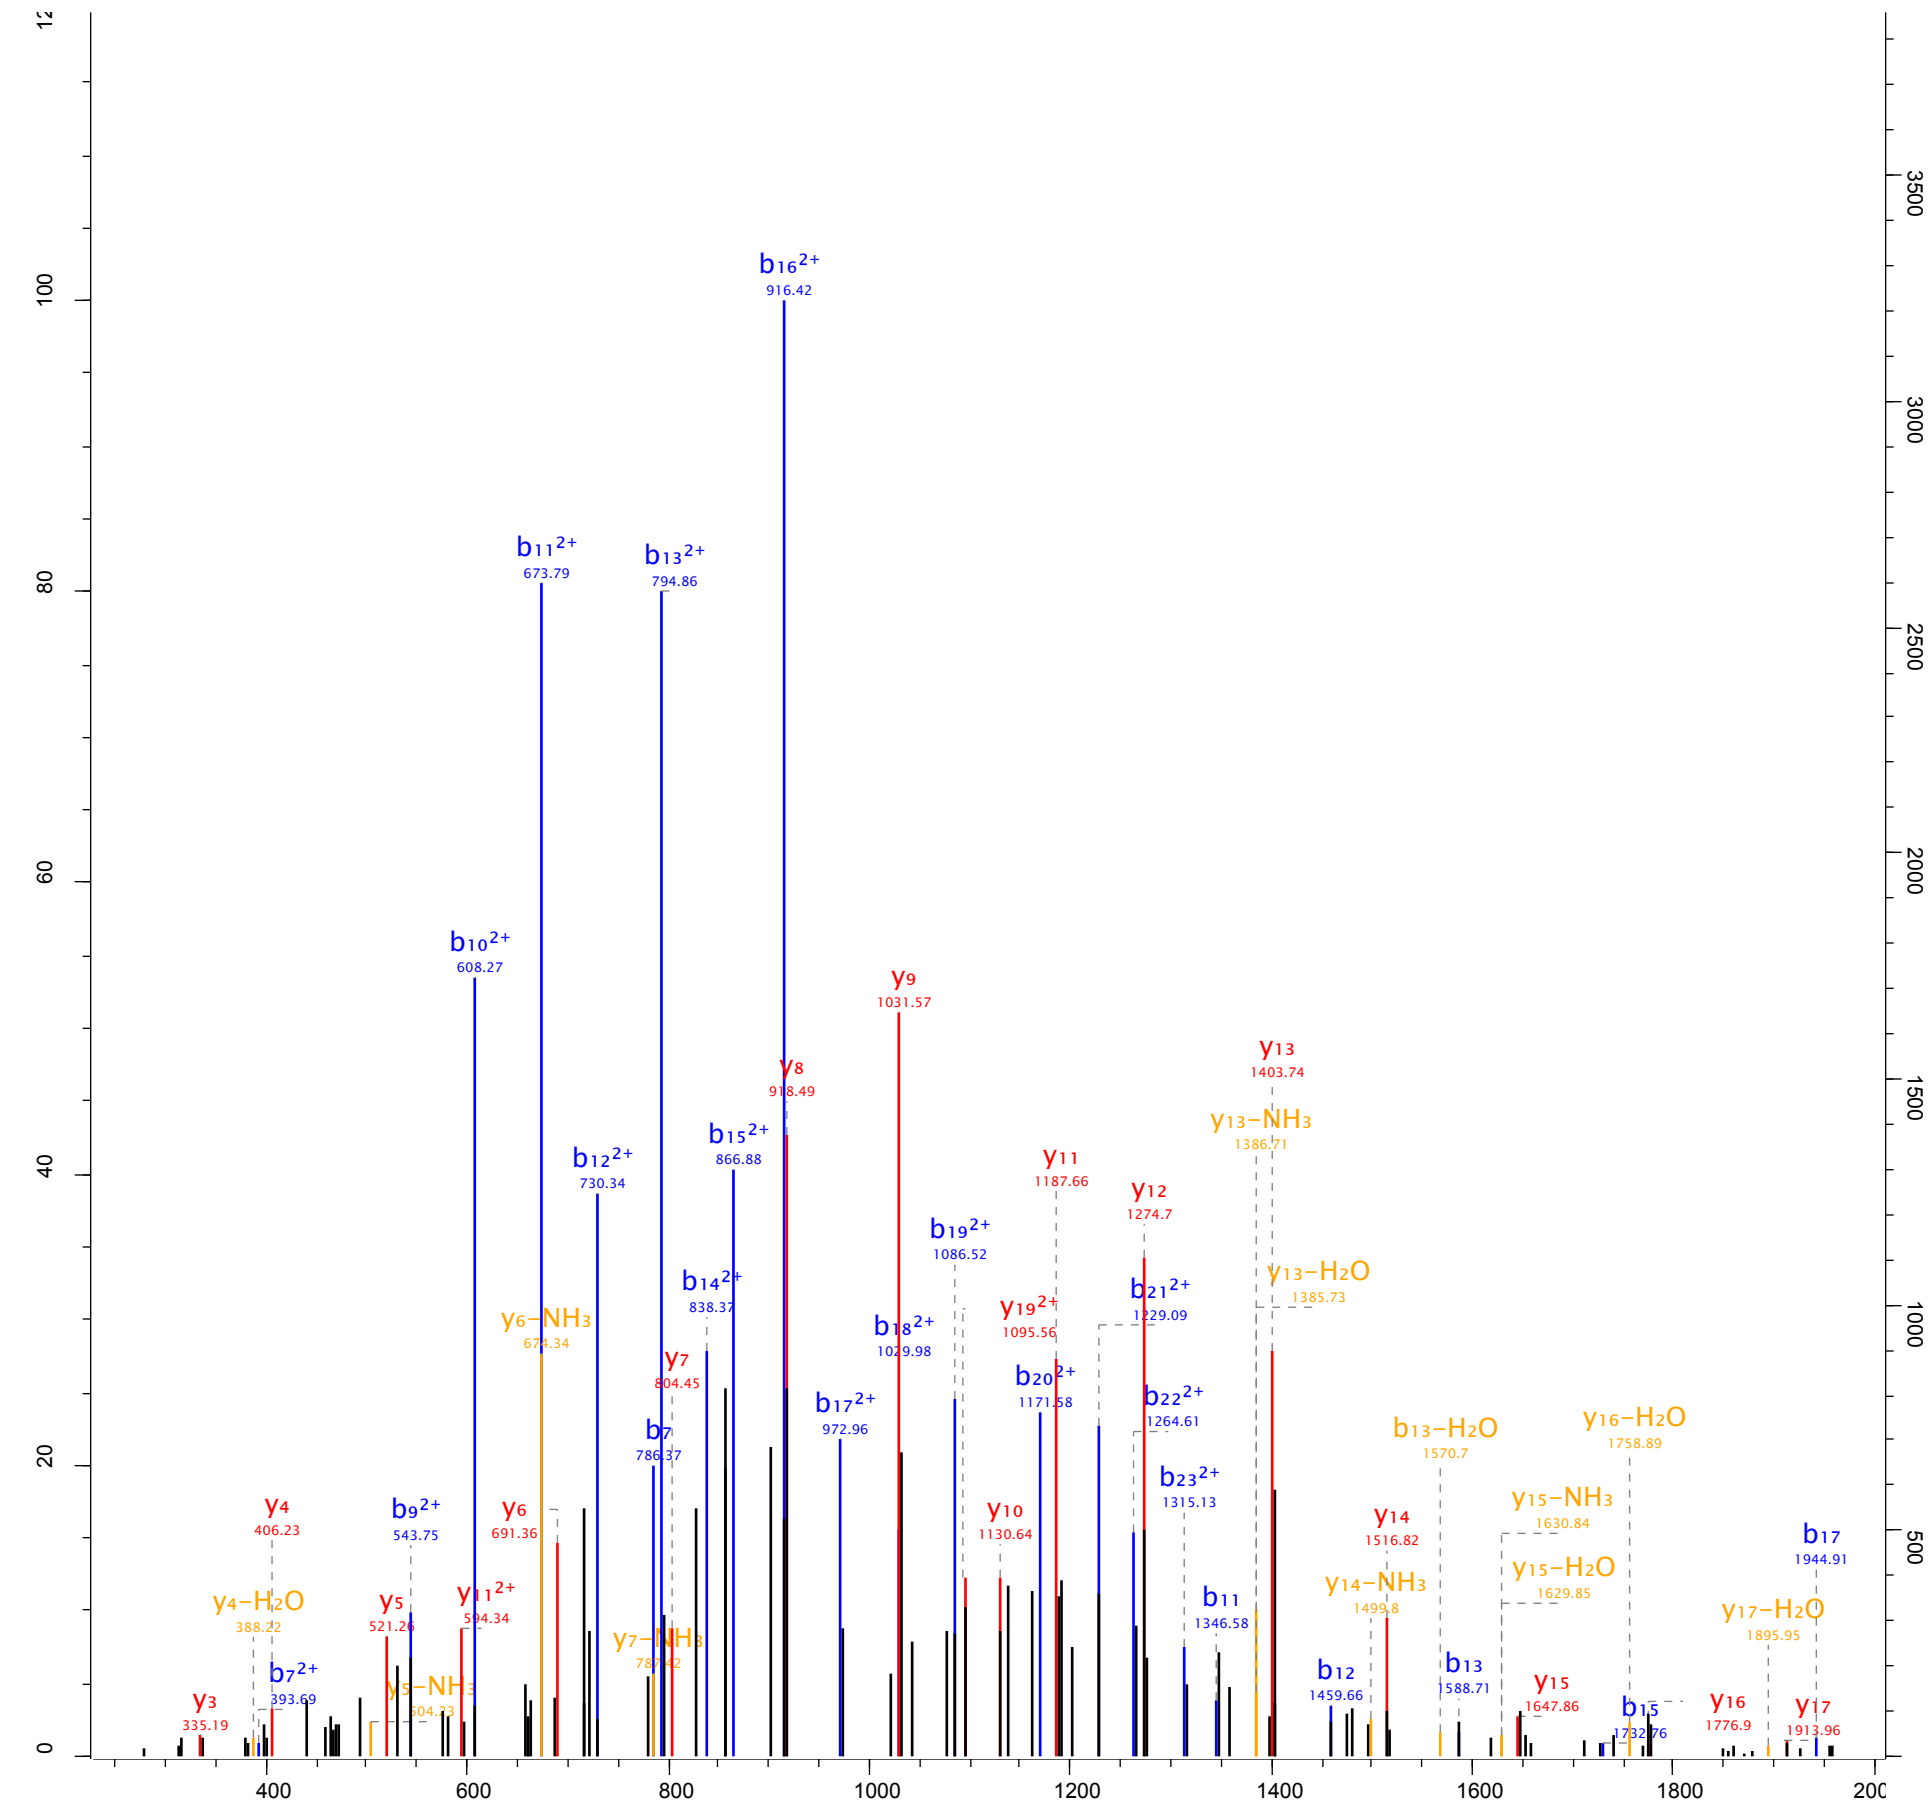

- T R E G N D L Y H E M I E S G V I N L K D A T S

y<sub>19</sub><sup>2+</sup>
y<sub>17</sub>
y<sub>16</sub>
y<sub>15</sub>
y<sub>14</sub>
y<sub>13</sub>
y<sub>12</sub>
y<sub>11</sub>
y<sub>10</sub>
y<sub>9</sub>
y<sub>8</sub>
y<sub>7</sub>
y<sub>6</sub> ac
y<sub>5</sub>
y<sub>4</sub>
y<sub>3</sub>

b<sub>7</sub>
b<sub>9</sub><sup>2+</sup>
b<sub>10</sub><sup>2+</sup>
b<sub>11</sub>
b<sub>12</sub>
b<sub>13</sub>
b<sub>14</sub><sup>2+</sup>
b<sub>15</sub>
b<sub>16</sub><sup>2+</sup>
b<sub>17</sub>
b<sub>18</sub><sup>2+</sup>
b<sub>19</sub><sup>2+</sup>
b<sub>20</sub><sup>2+</sup>
b<sub>21</sub><sup>2+</sup>
b<sub>22</sub><sup>2+</sup>
b<sub>23</sub><sup>2+</sup>

K -

022714\_SCW\_II\_53\_12\_2ndZT

10687

ITMS; CID

107.69

659

Ing3

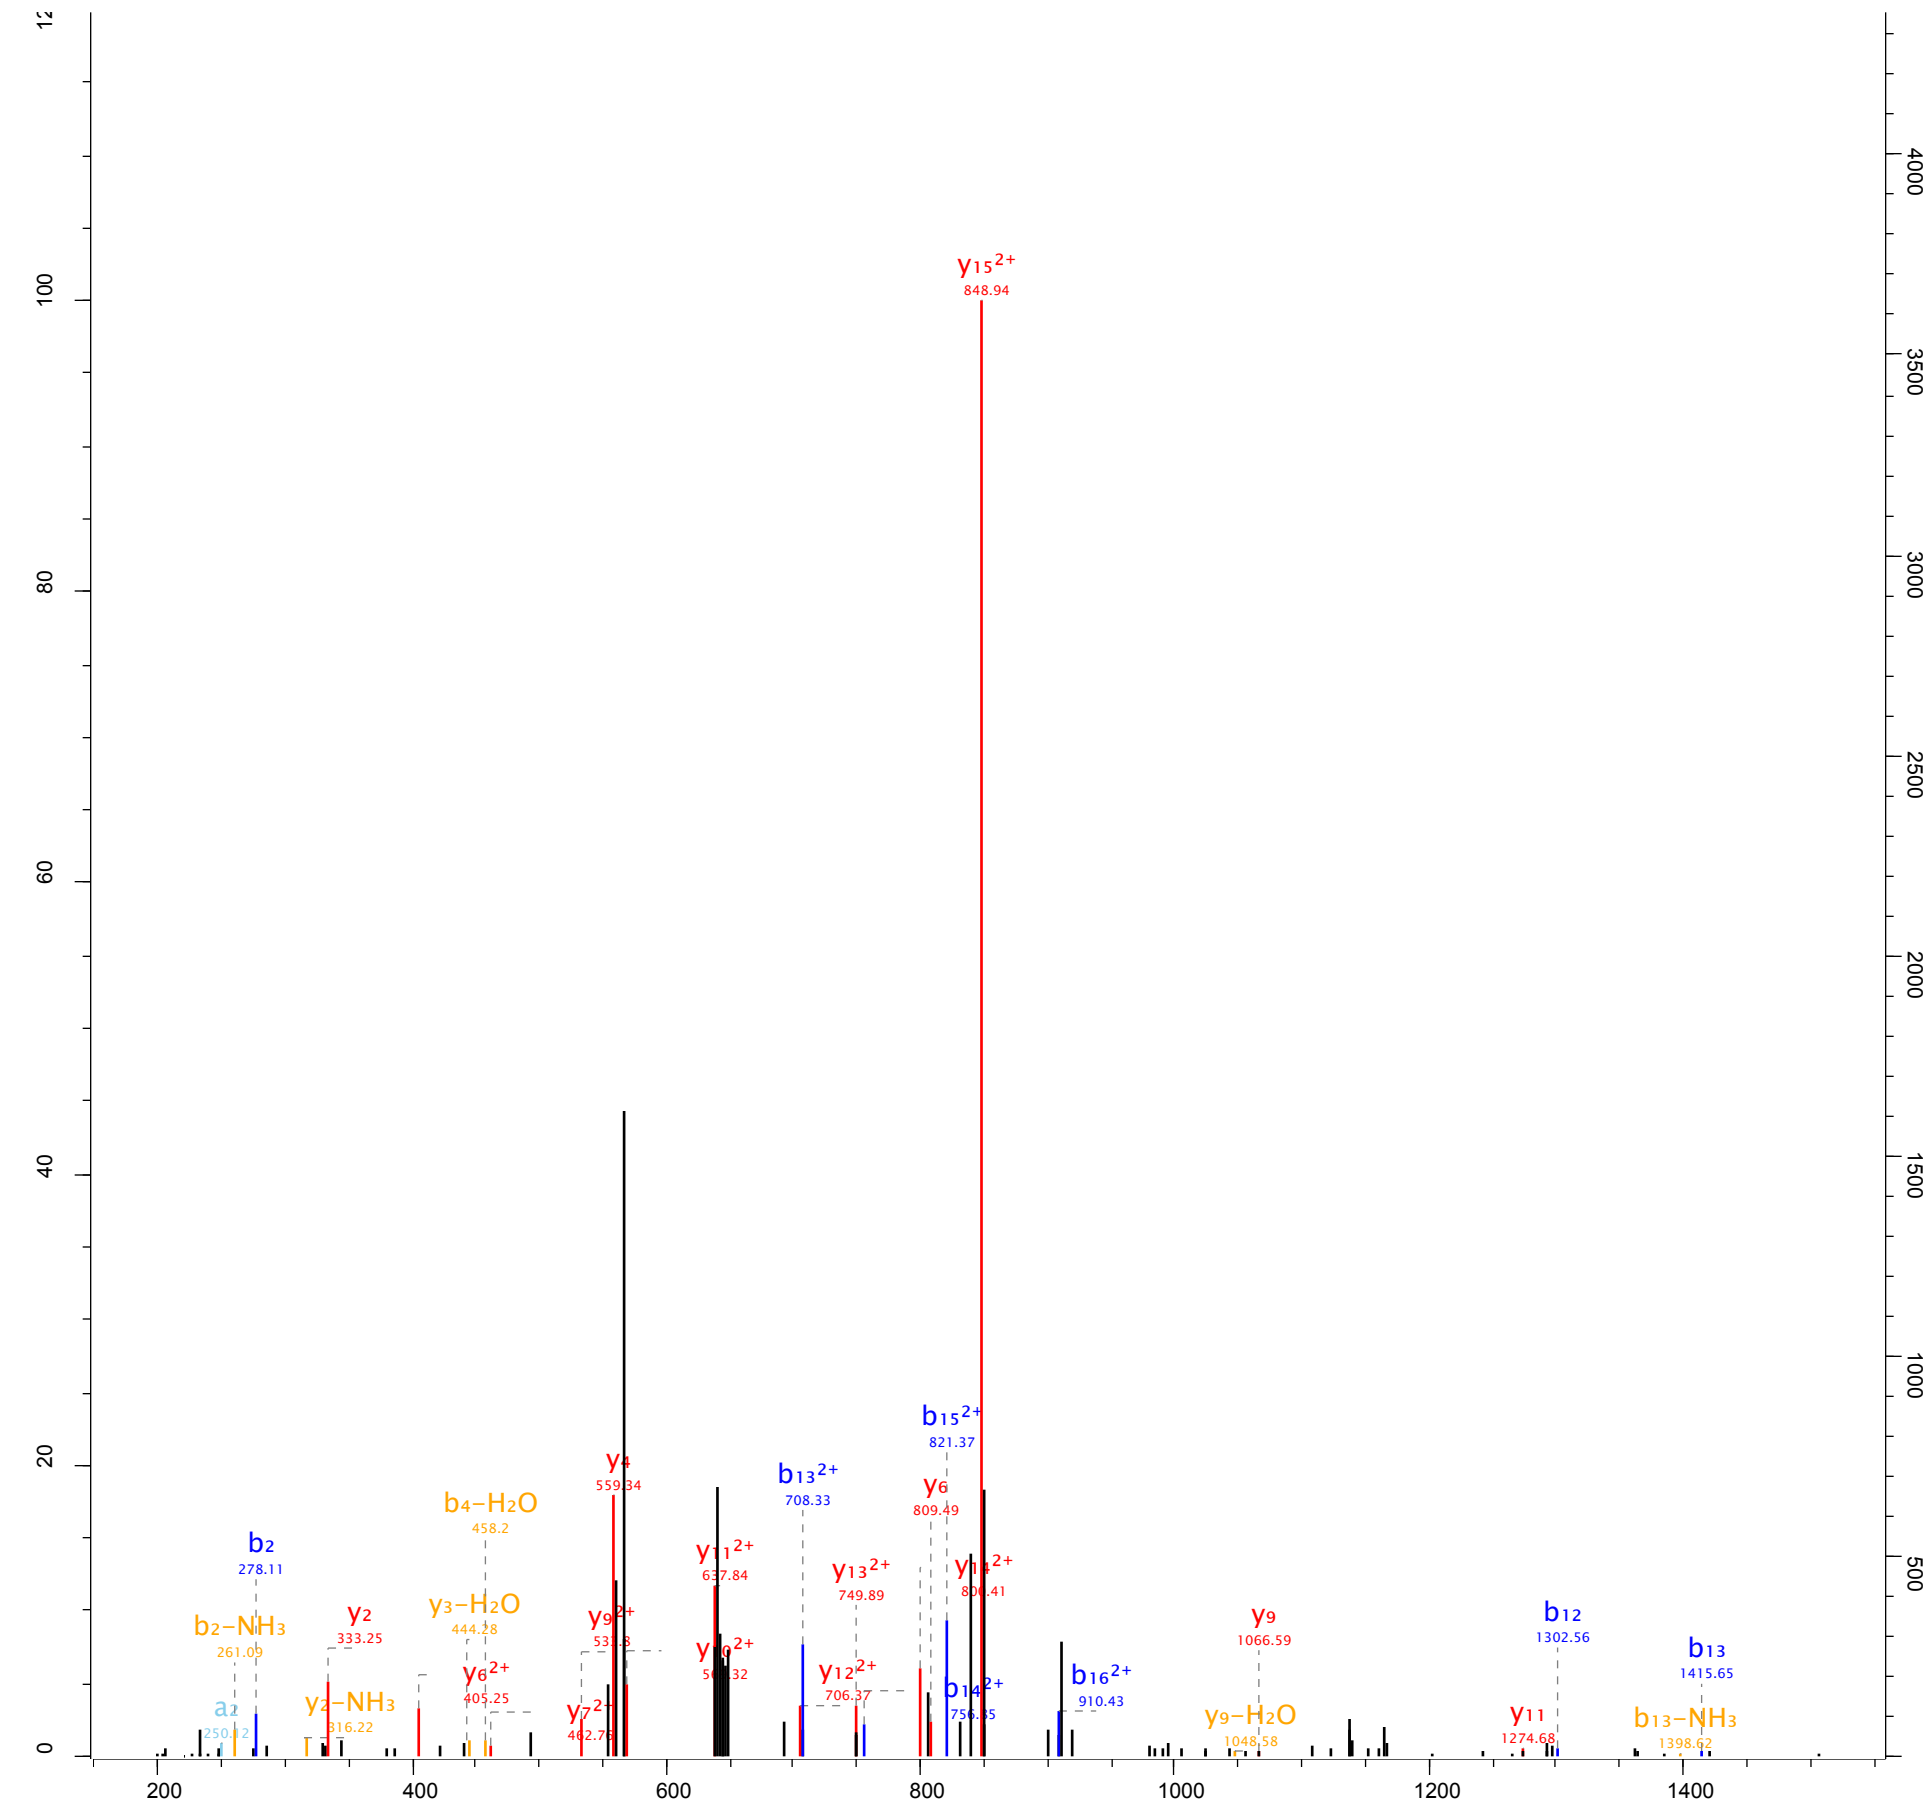

- Y N P T S H H A A A D H I P E K K -

$b_2$ 
 $b_{12}$ 
 $b_{13}$ 
 $b_{14}^{2+}$ 
 $b_{15}^{2+}$ 
 $b_{16}^{2+}$

$y_{15}^{2+}$ 
 $y_{14}^{2+}$ 
 $y_{13}^{2+}$ 
 $y_{12}^{2+}$ 
 $y_{11}$ 
 $y_{10}^{2+}$ 
 $y_9$ 
 $y_7^{2+}$ 
 $y_6$ 
 $y_4$ 
 $y_2$ 
 $ac$

Raw file: 022714\_SCW\_II\_53\_12\_2ndZT  
 Scan: 33397  
 Method: ITMS; CID  
 Score: 130.29  
 m/z: 737.43  
 Gene names: Eef1a1;Eef1a2

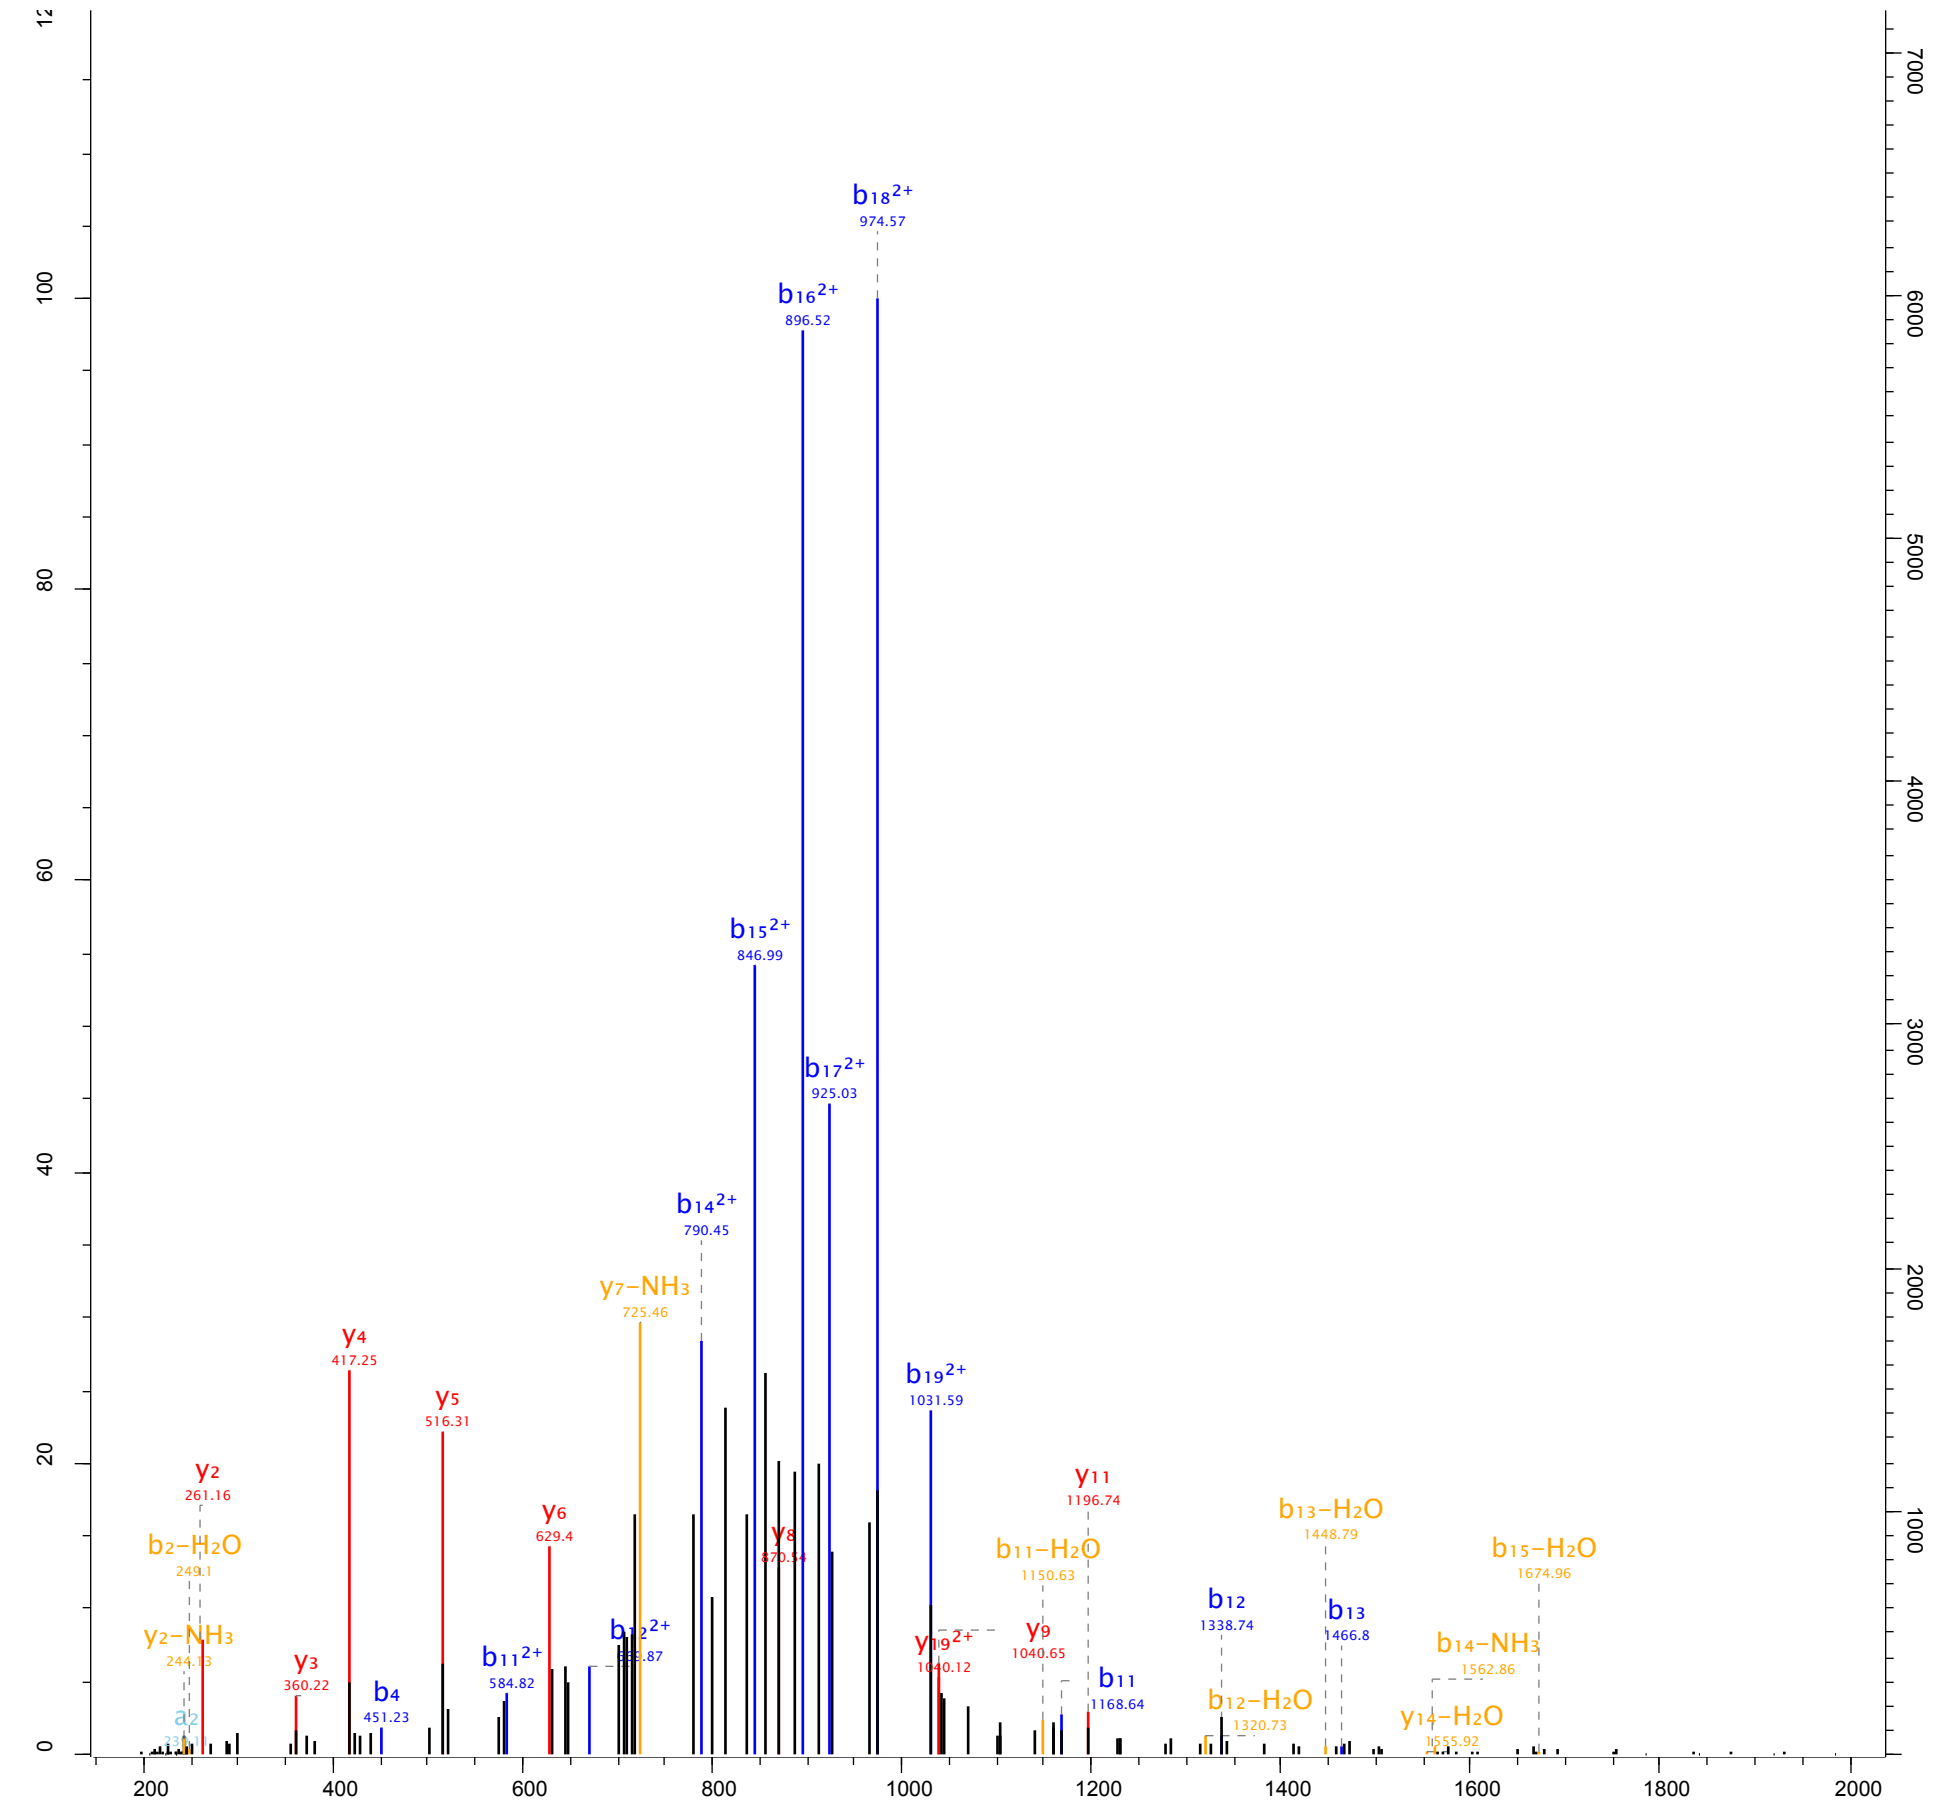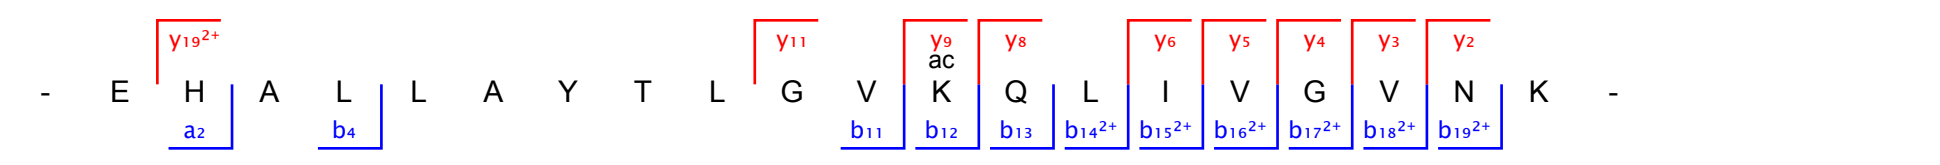

Raw file 022814\_SCW\_II\_68\_1\_2ndZT Scan 16108 Method ITMS; CID Score 193.98 m/z 774.4 Gene names Fh

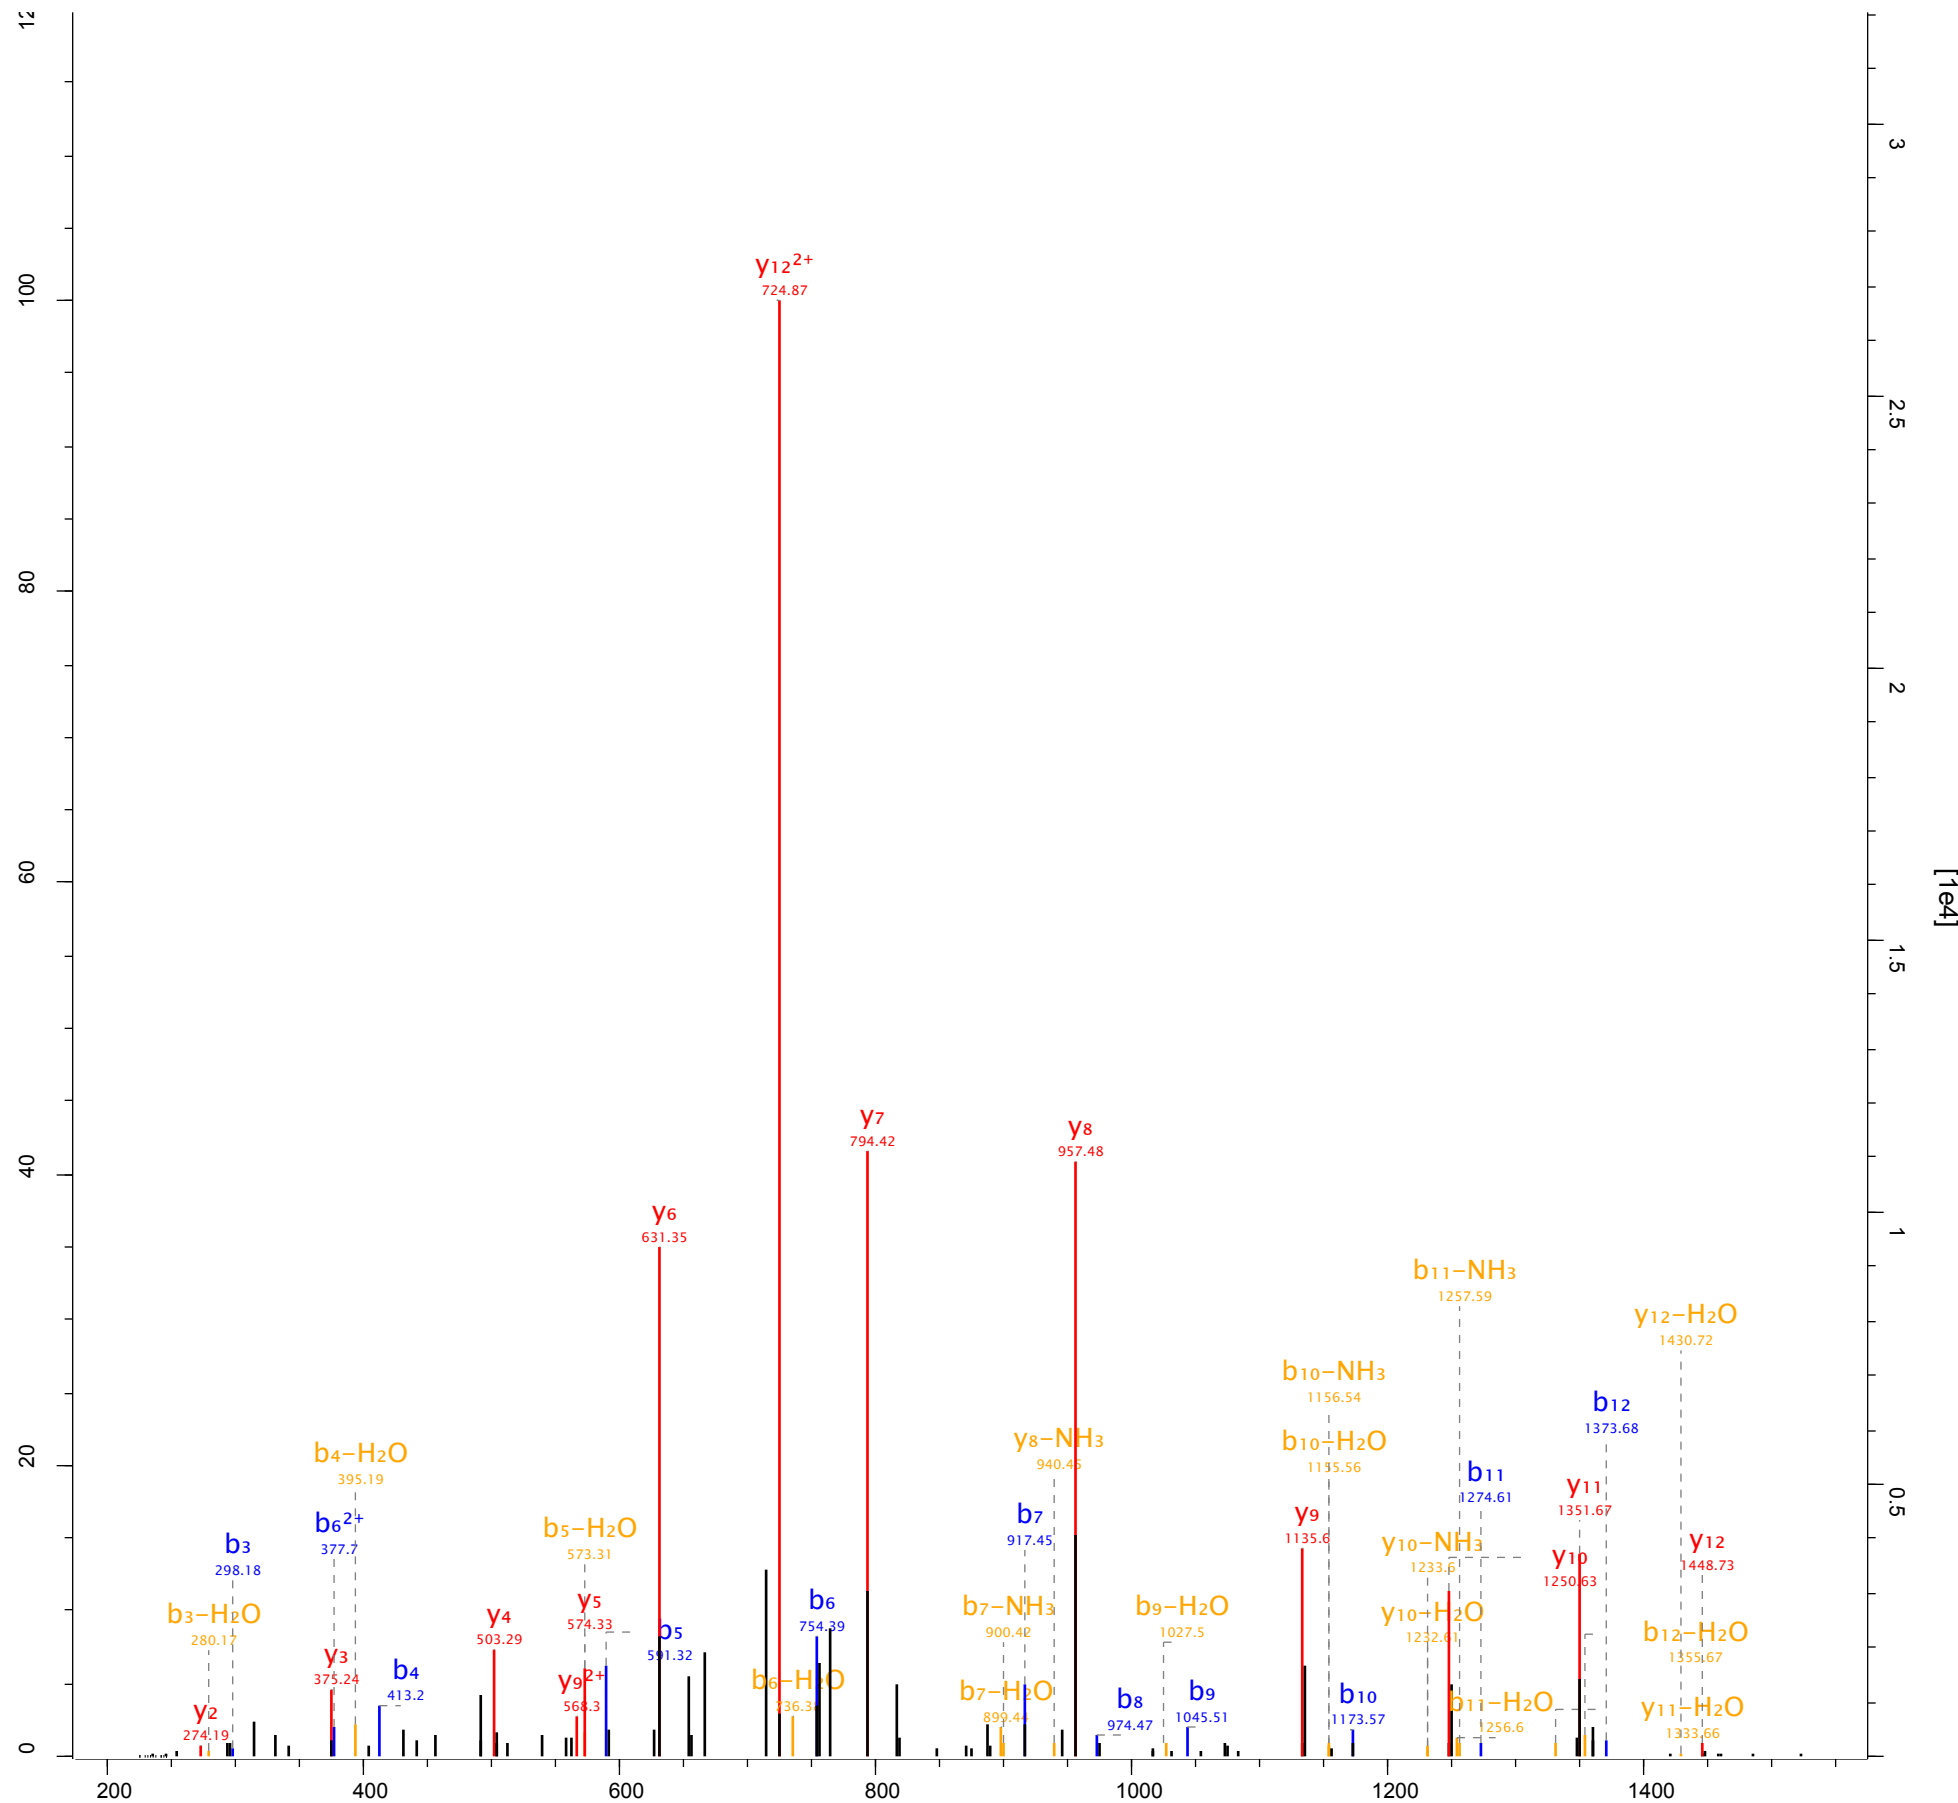

- V P T D K Y Y G A Q T V R -

y12
y11
y10
y9 ac
y8
y7
y6
y5
y4
y3
y2

b3
b4
b5
b6
b7
b8
b9
b10
b11
b12

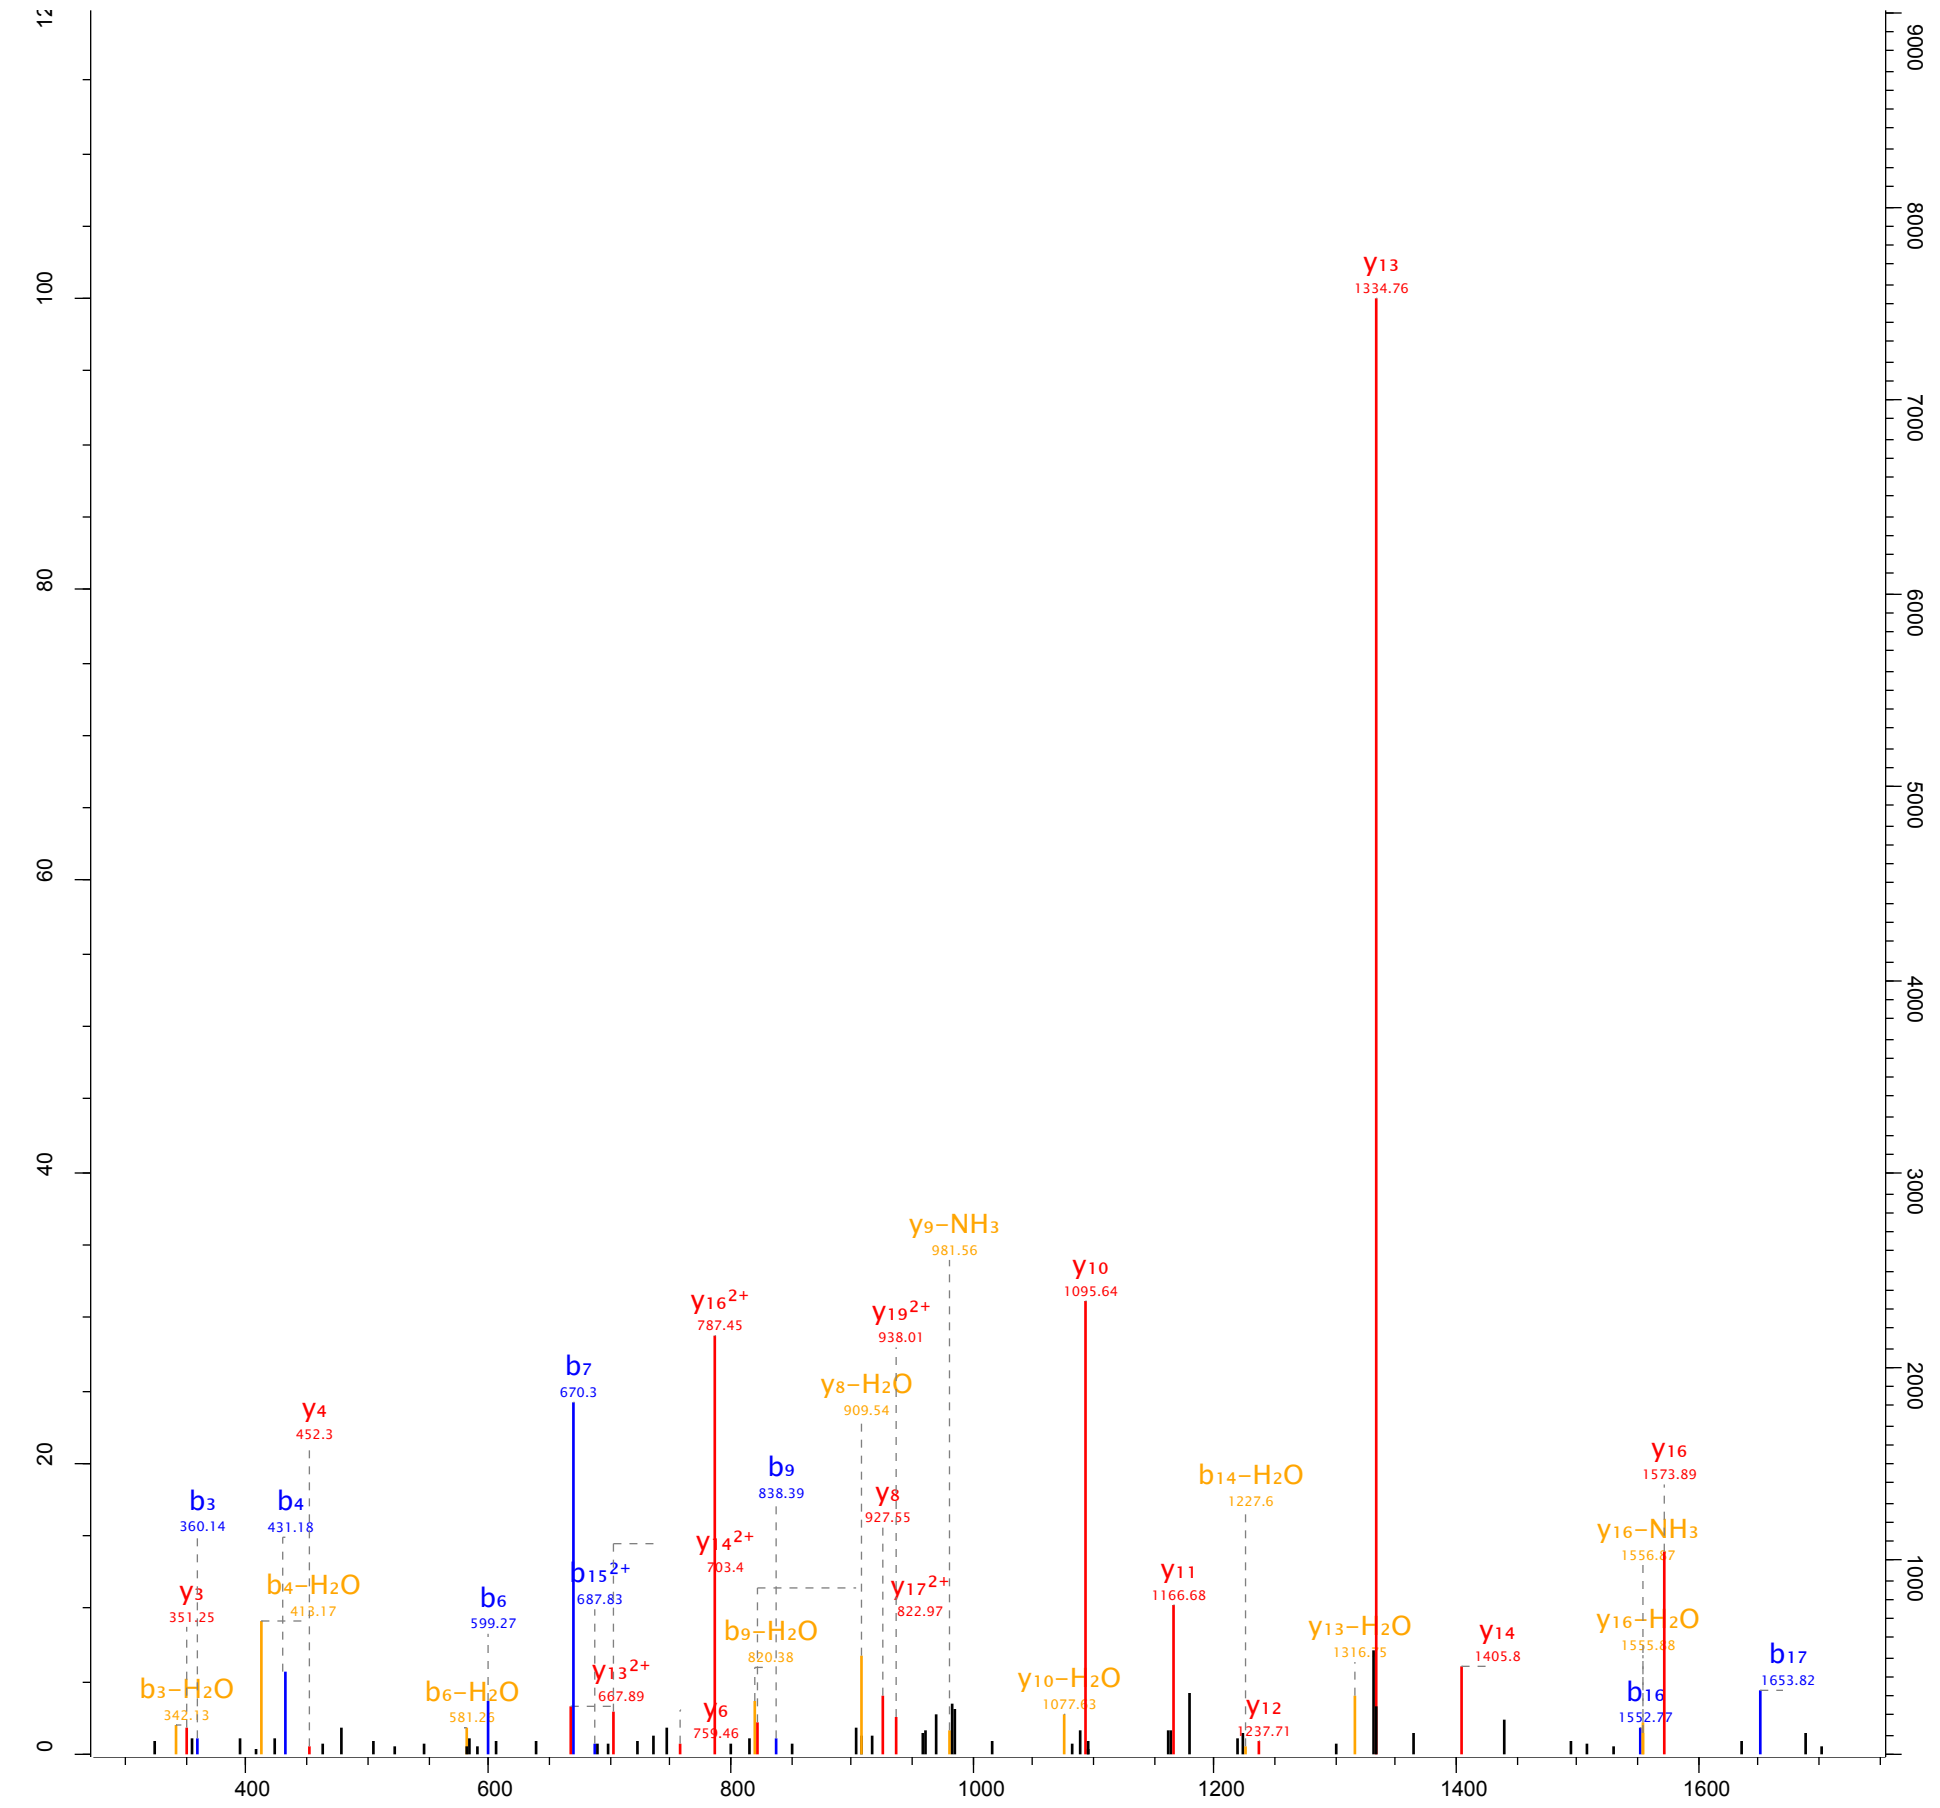

ac - S E T A P A A P A A P A P A E K T P V K -

b3 b4 b6 b7 b9 b15<sup>2+</sup> b16 b17 y19<sup>2+</sup> y17<sup>2+</sup> y16 y14 y13 y12 y11 y10 y8 y6 ac y4 y3



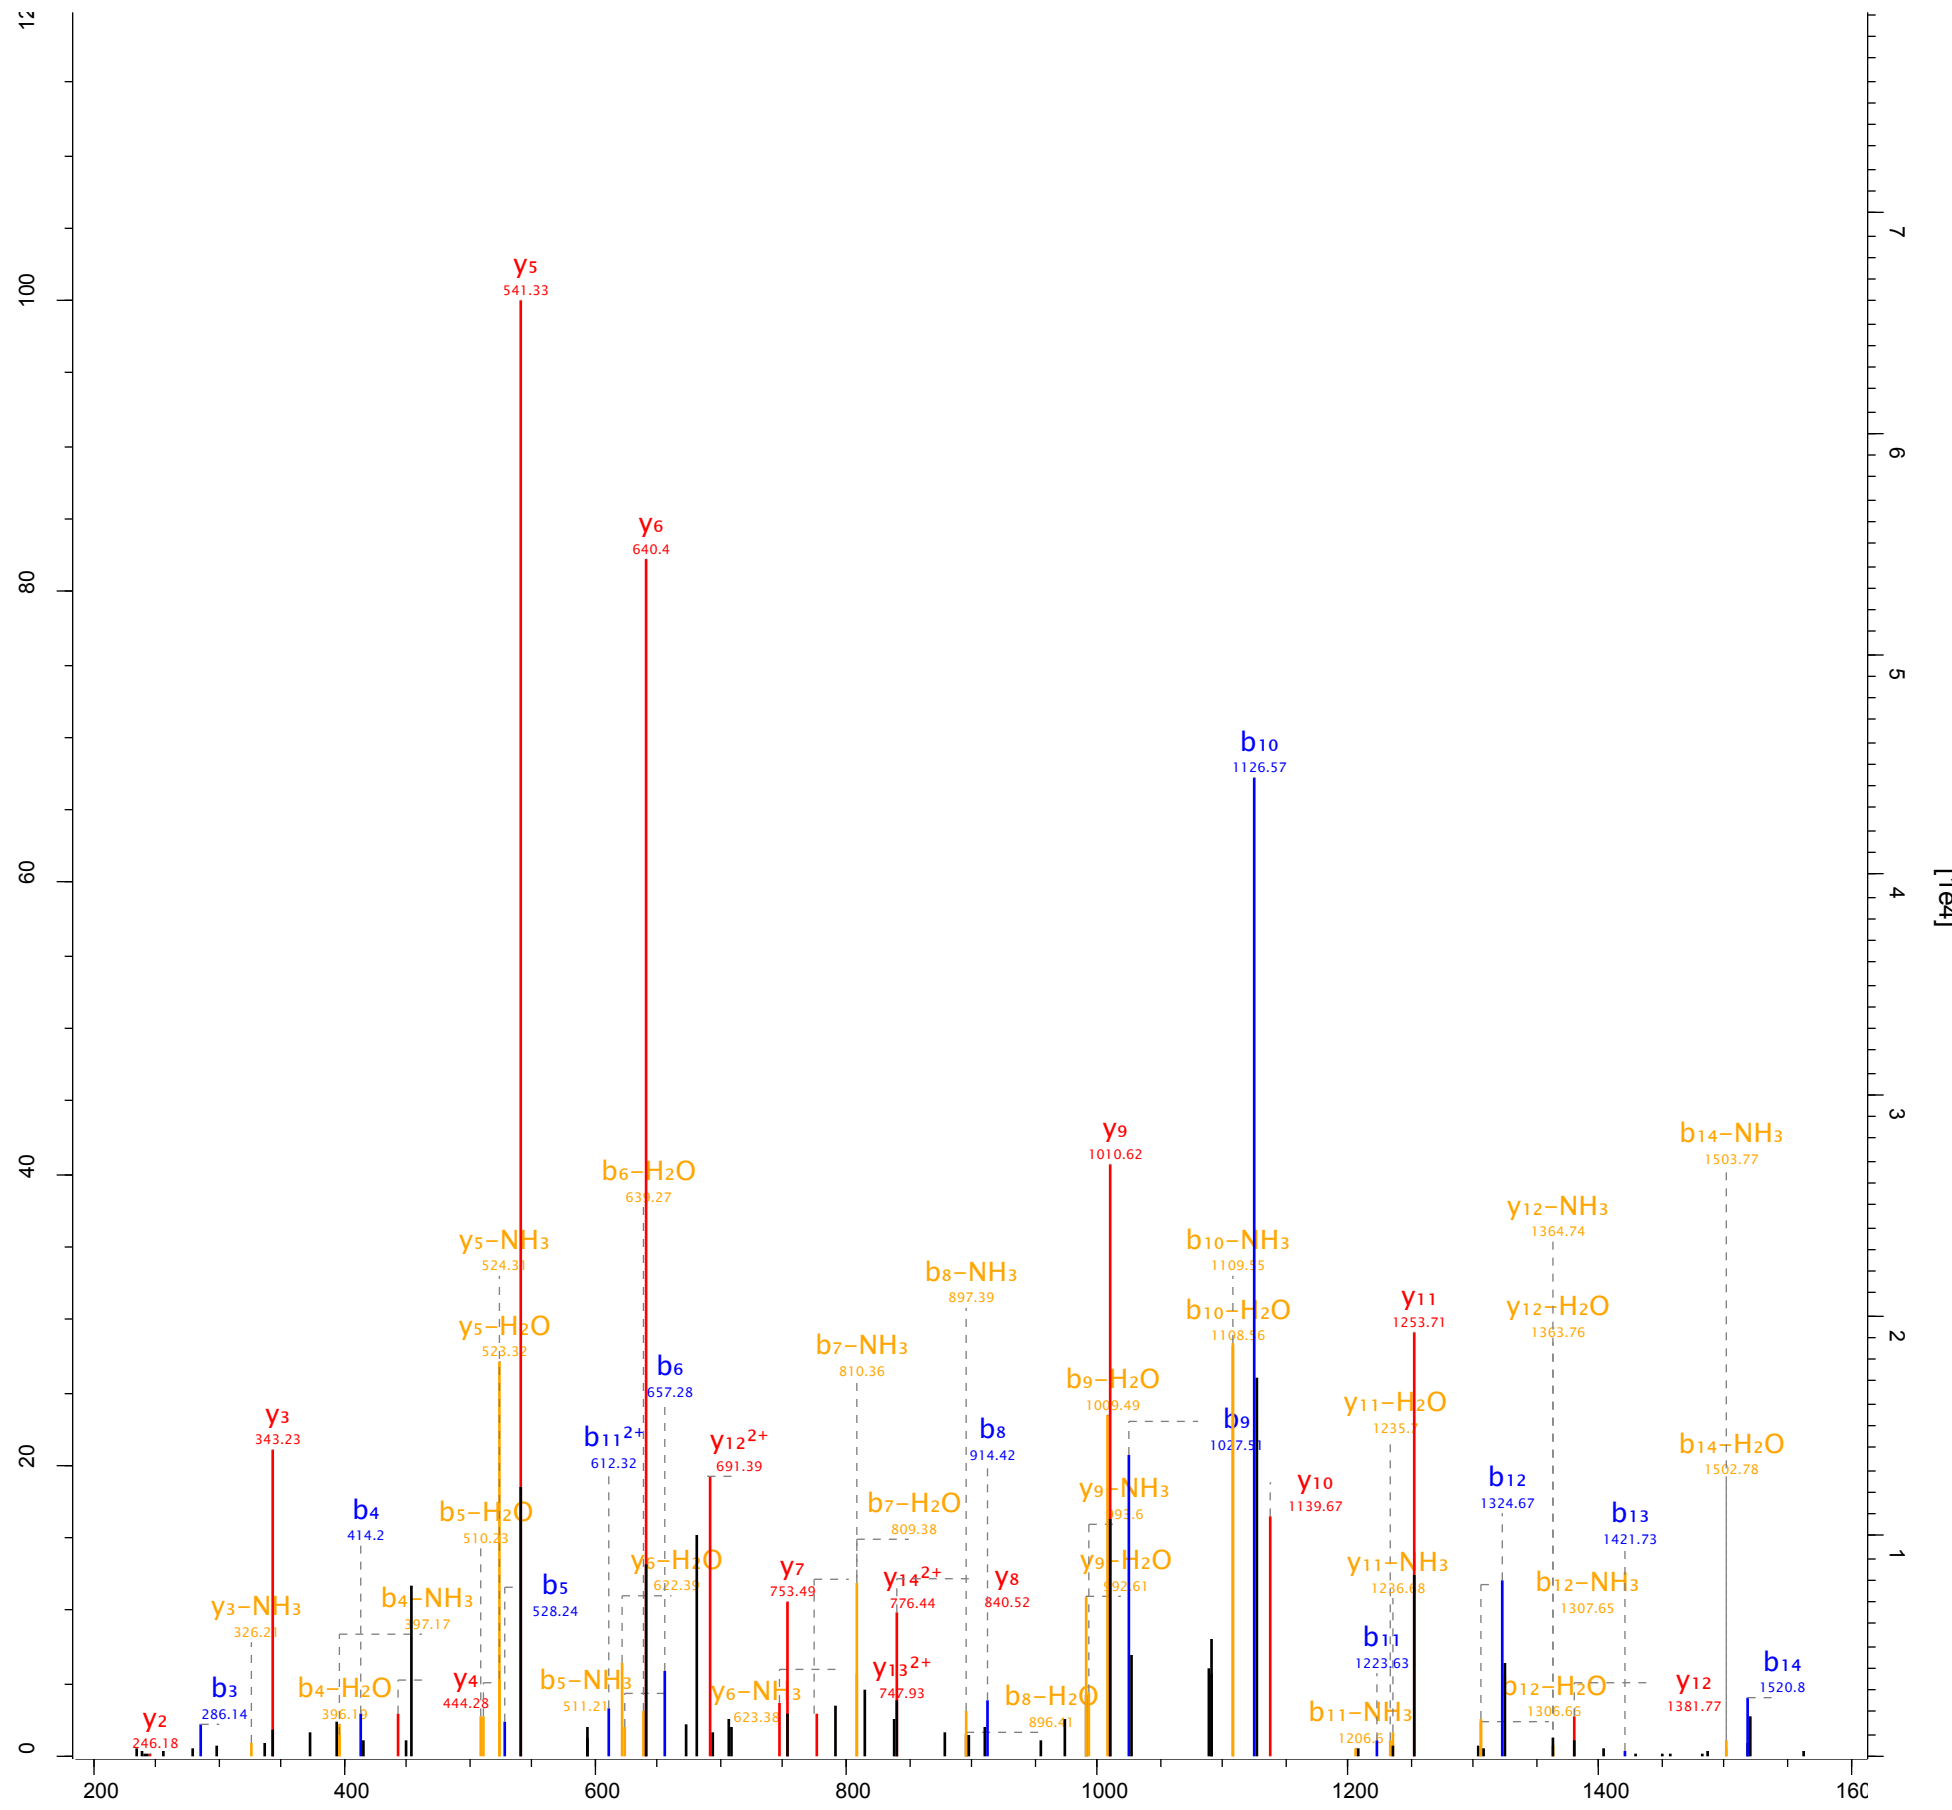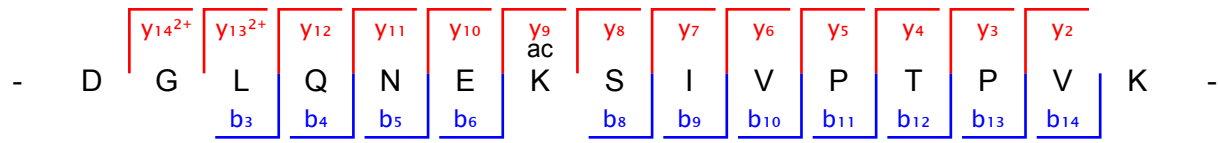

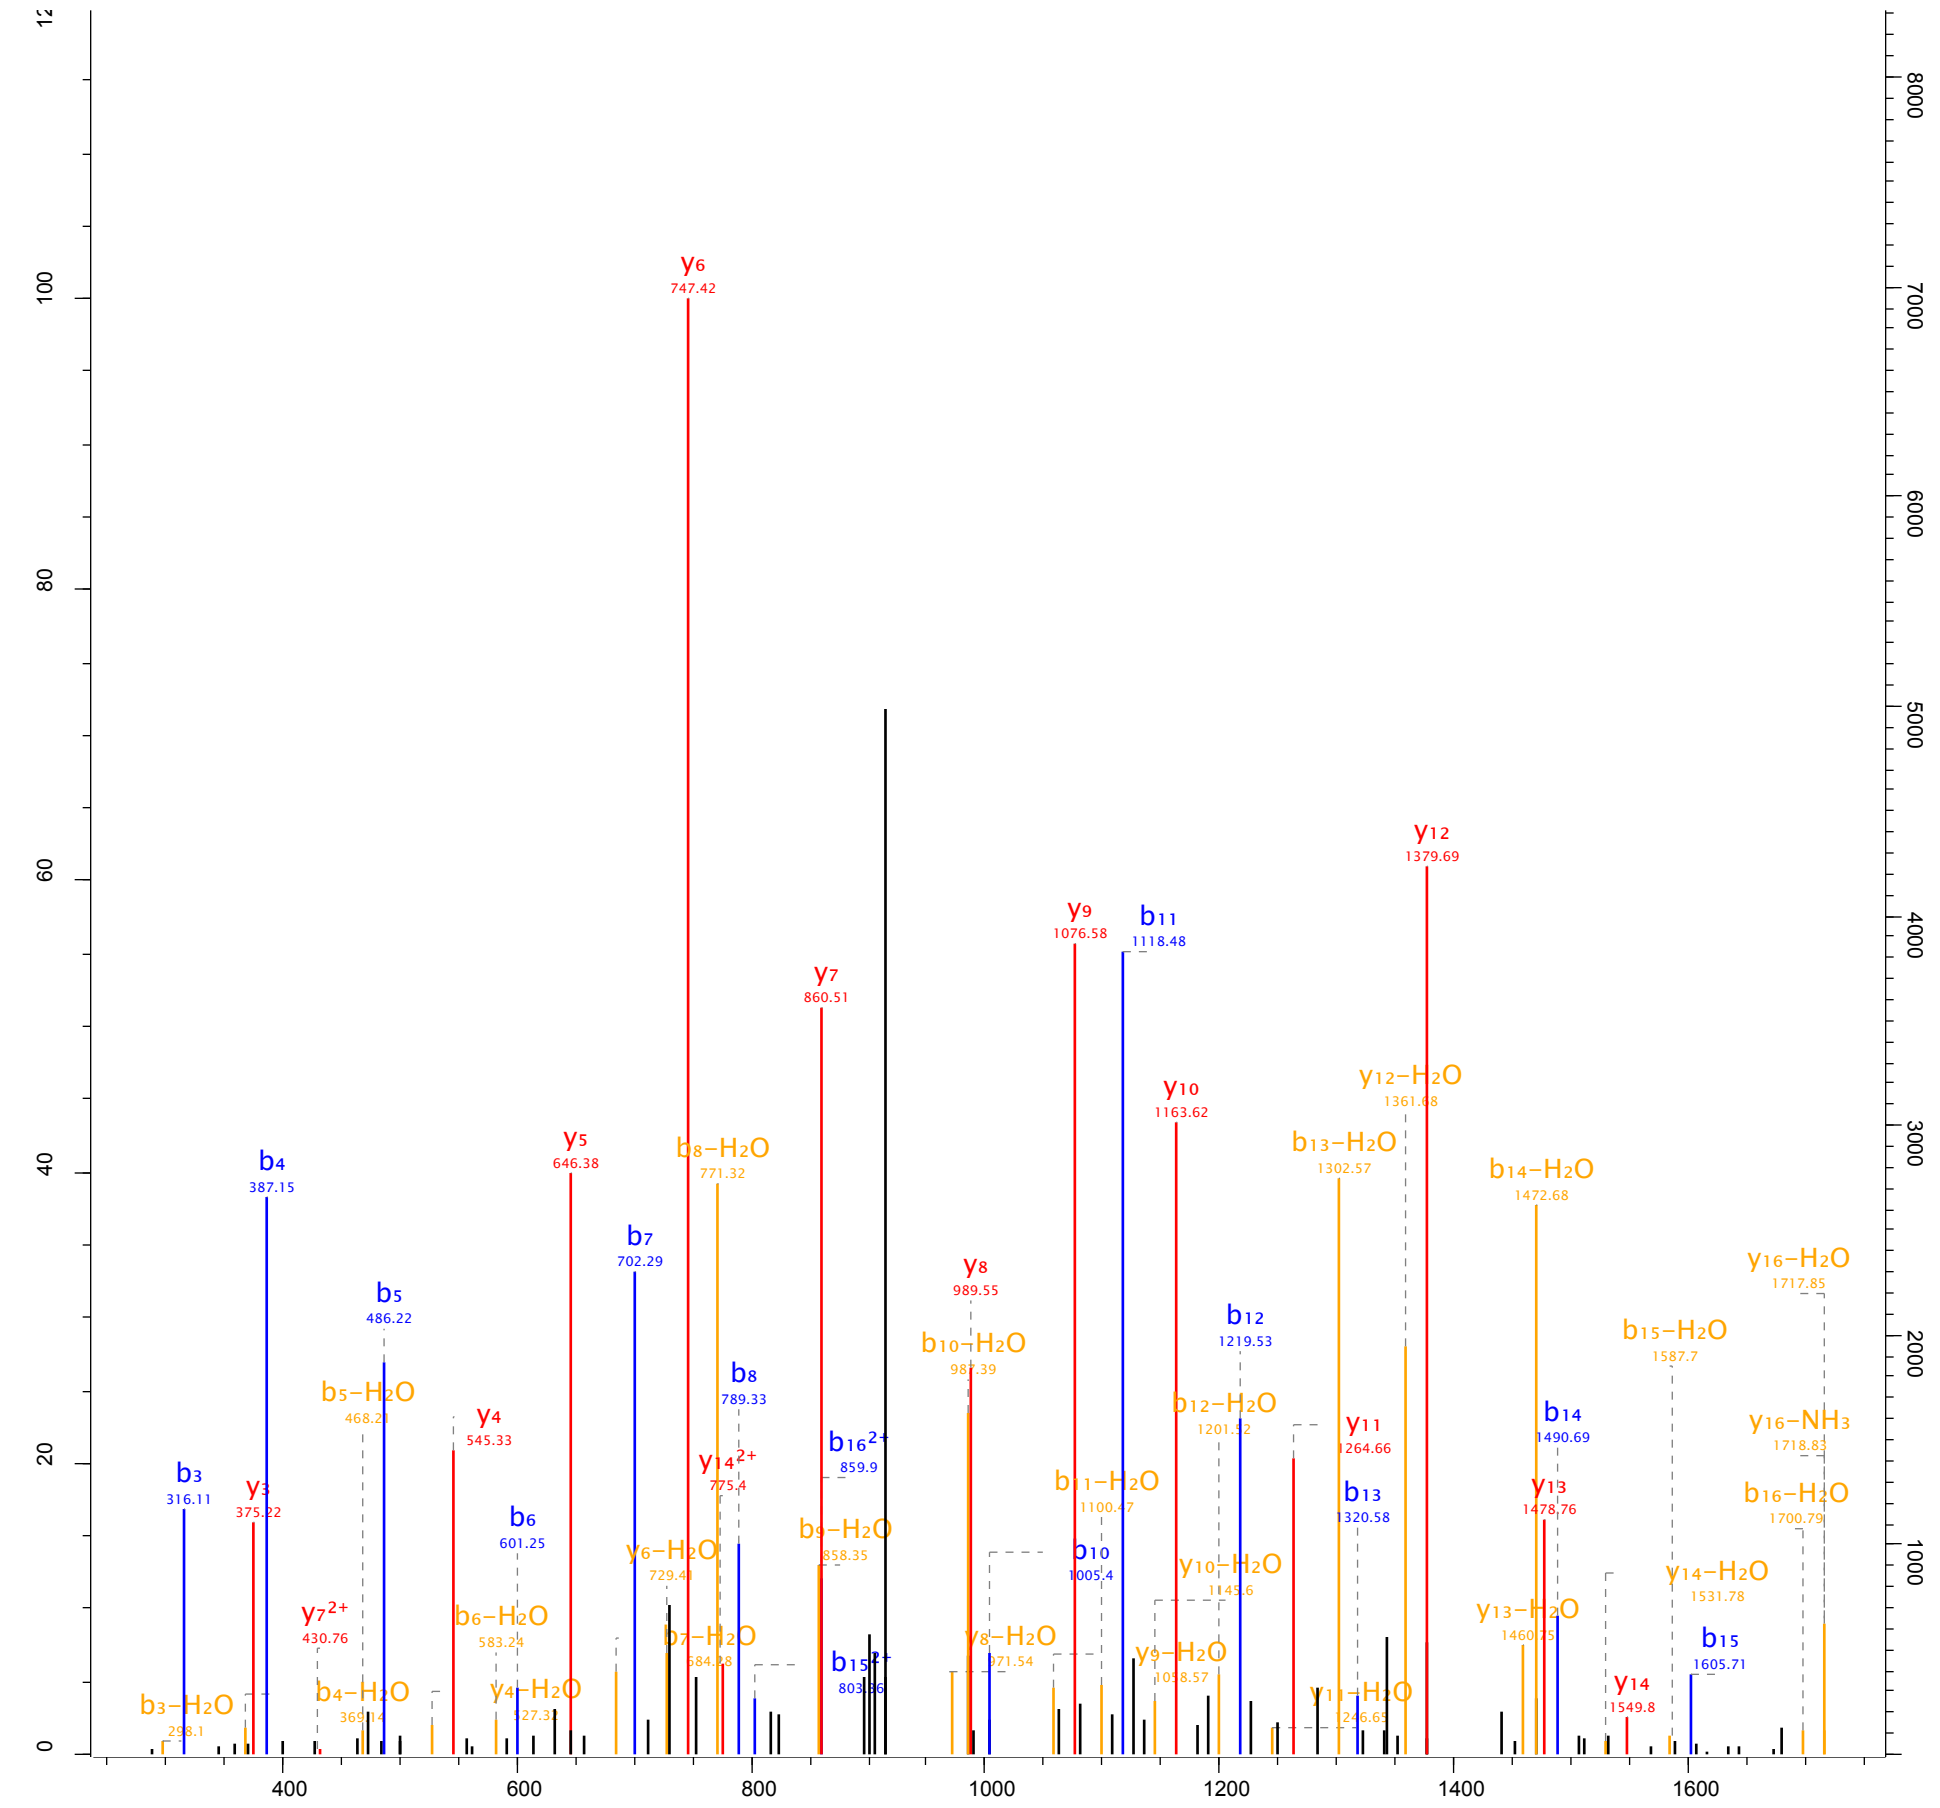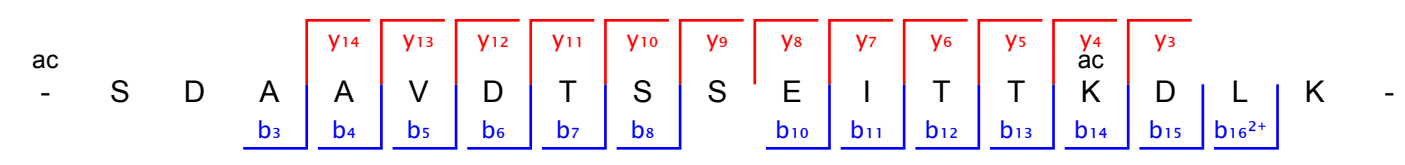

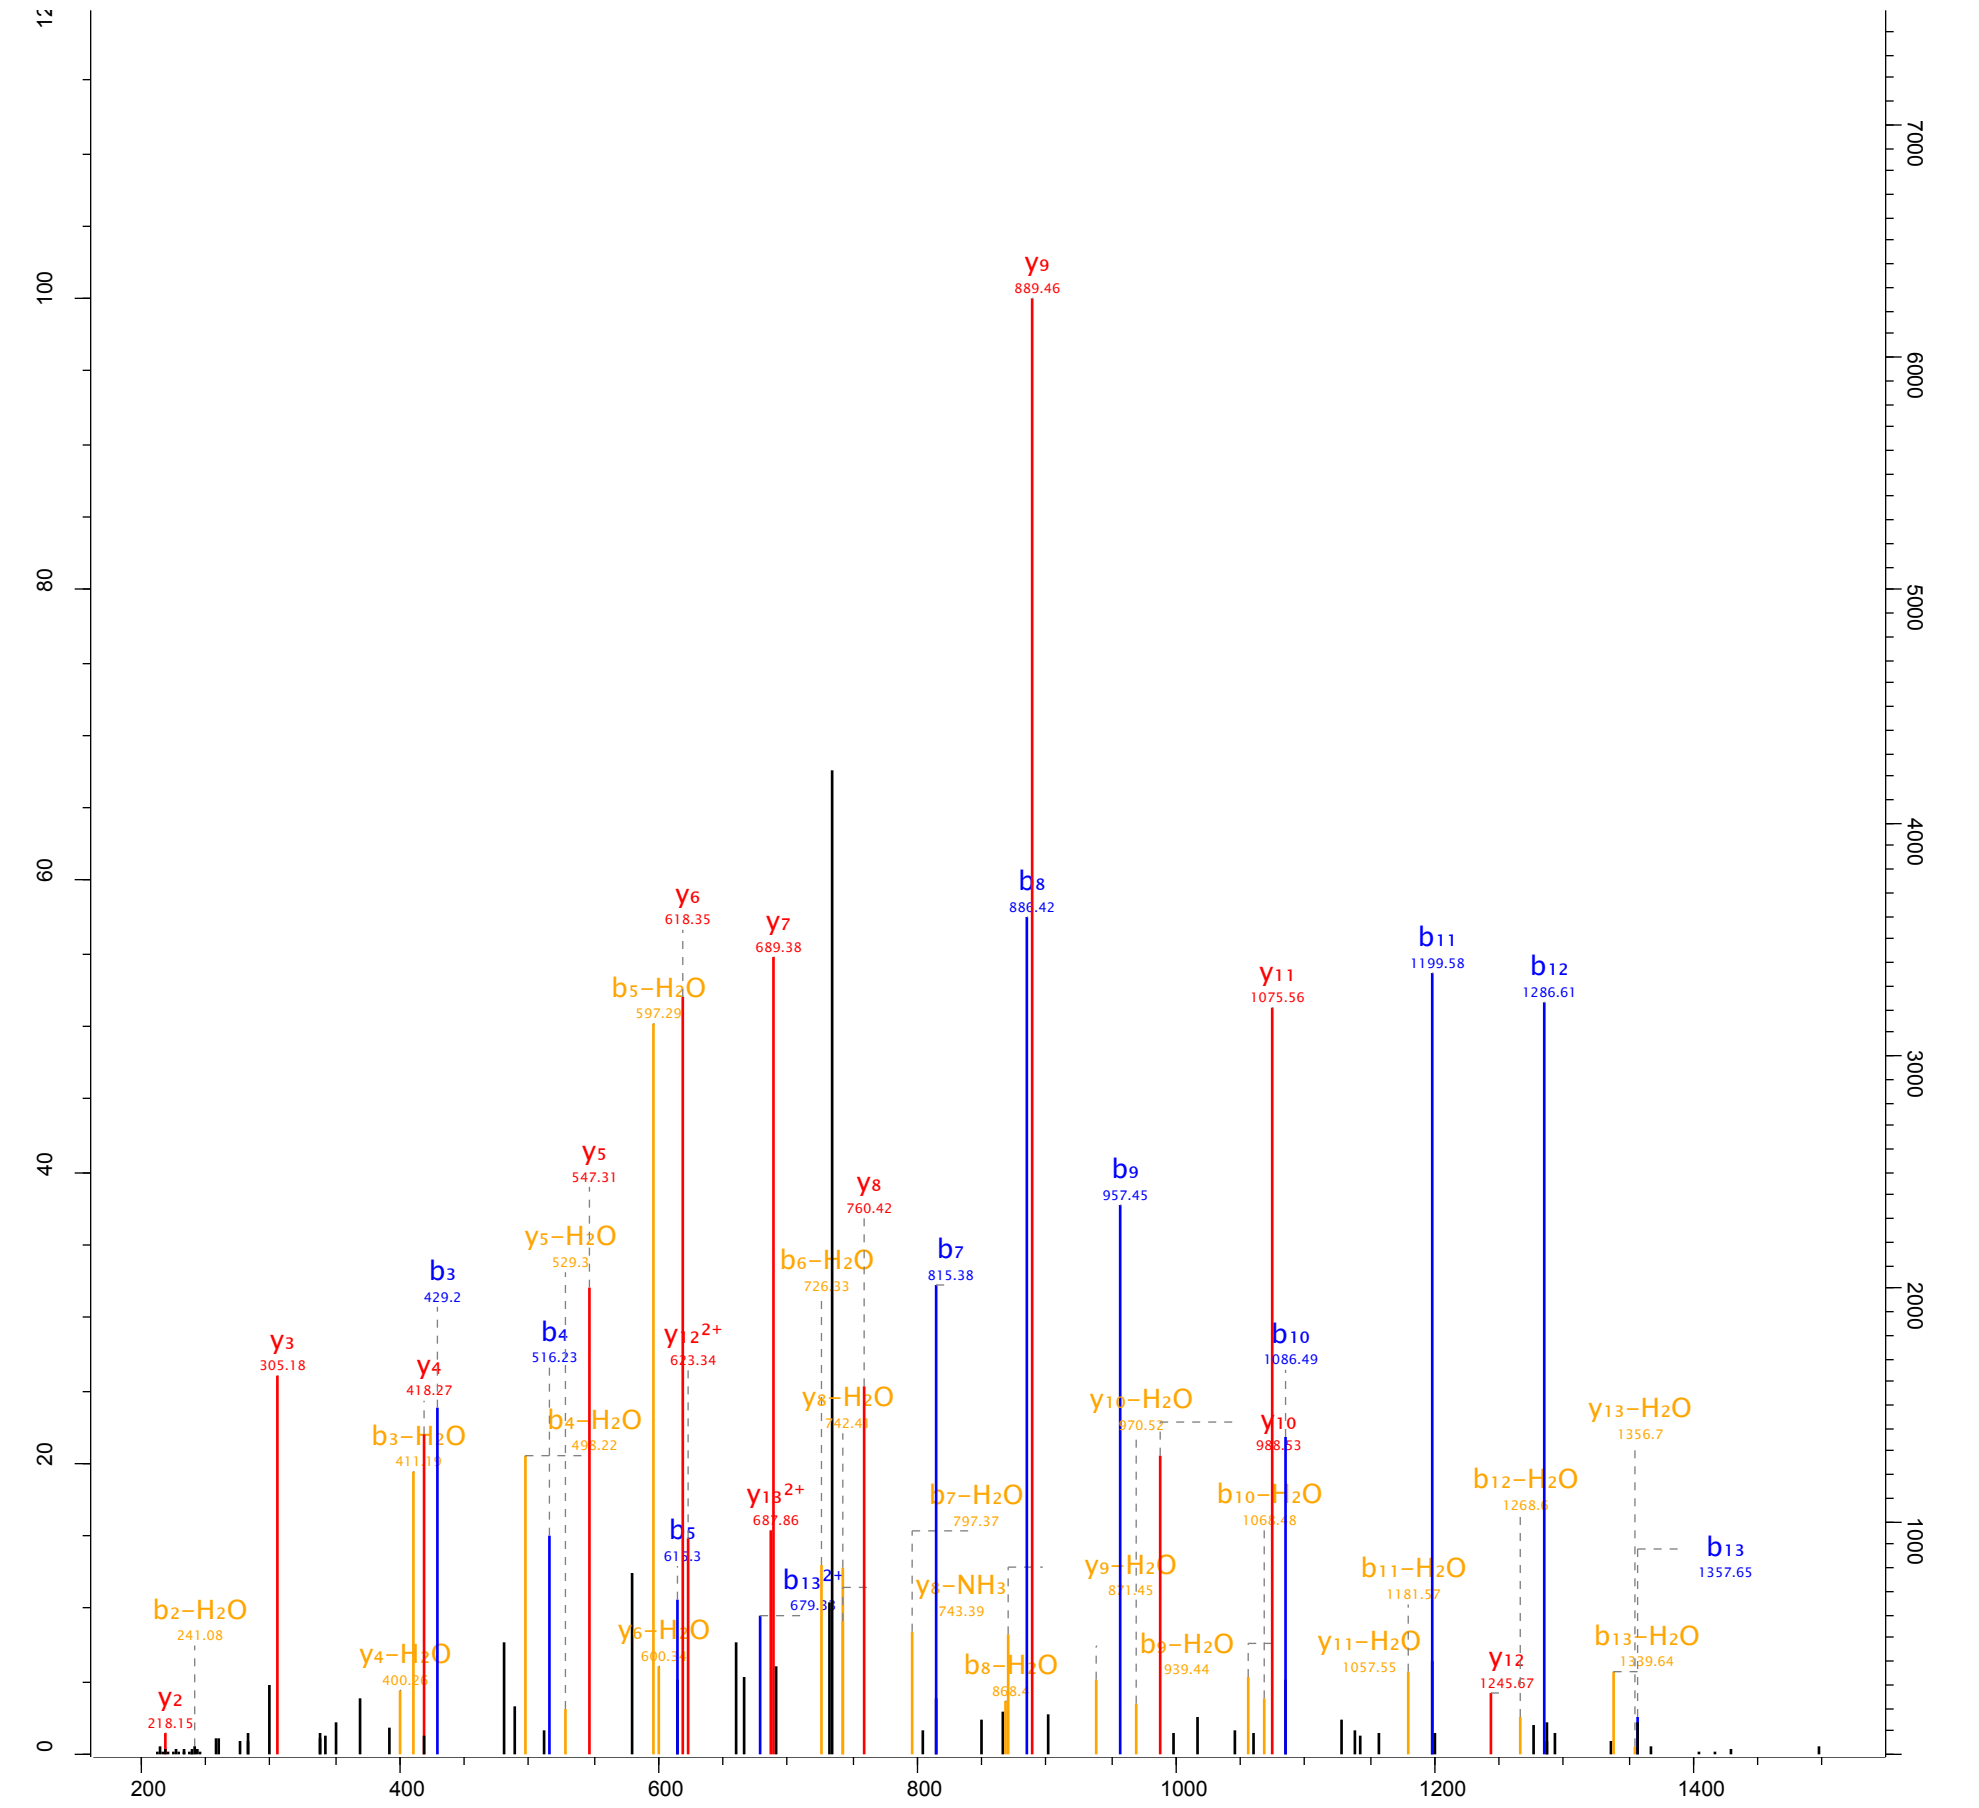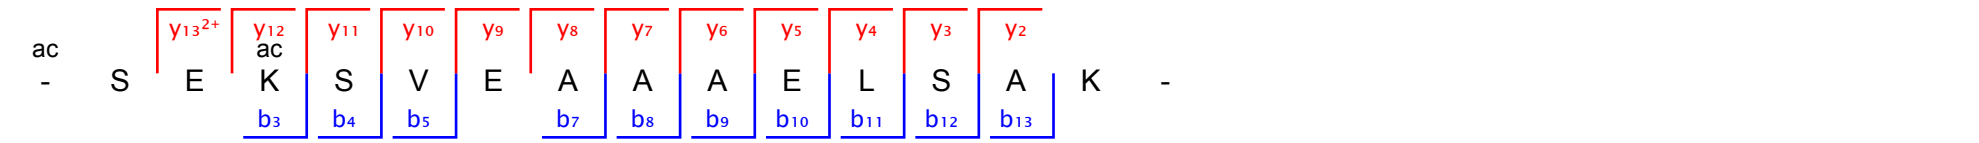

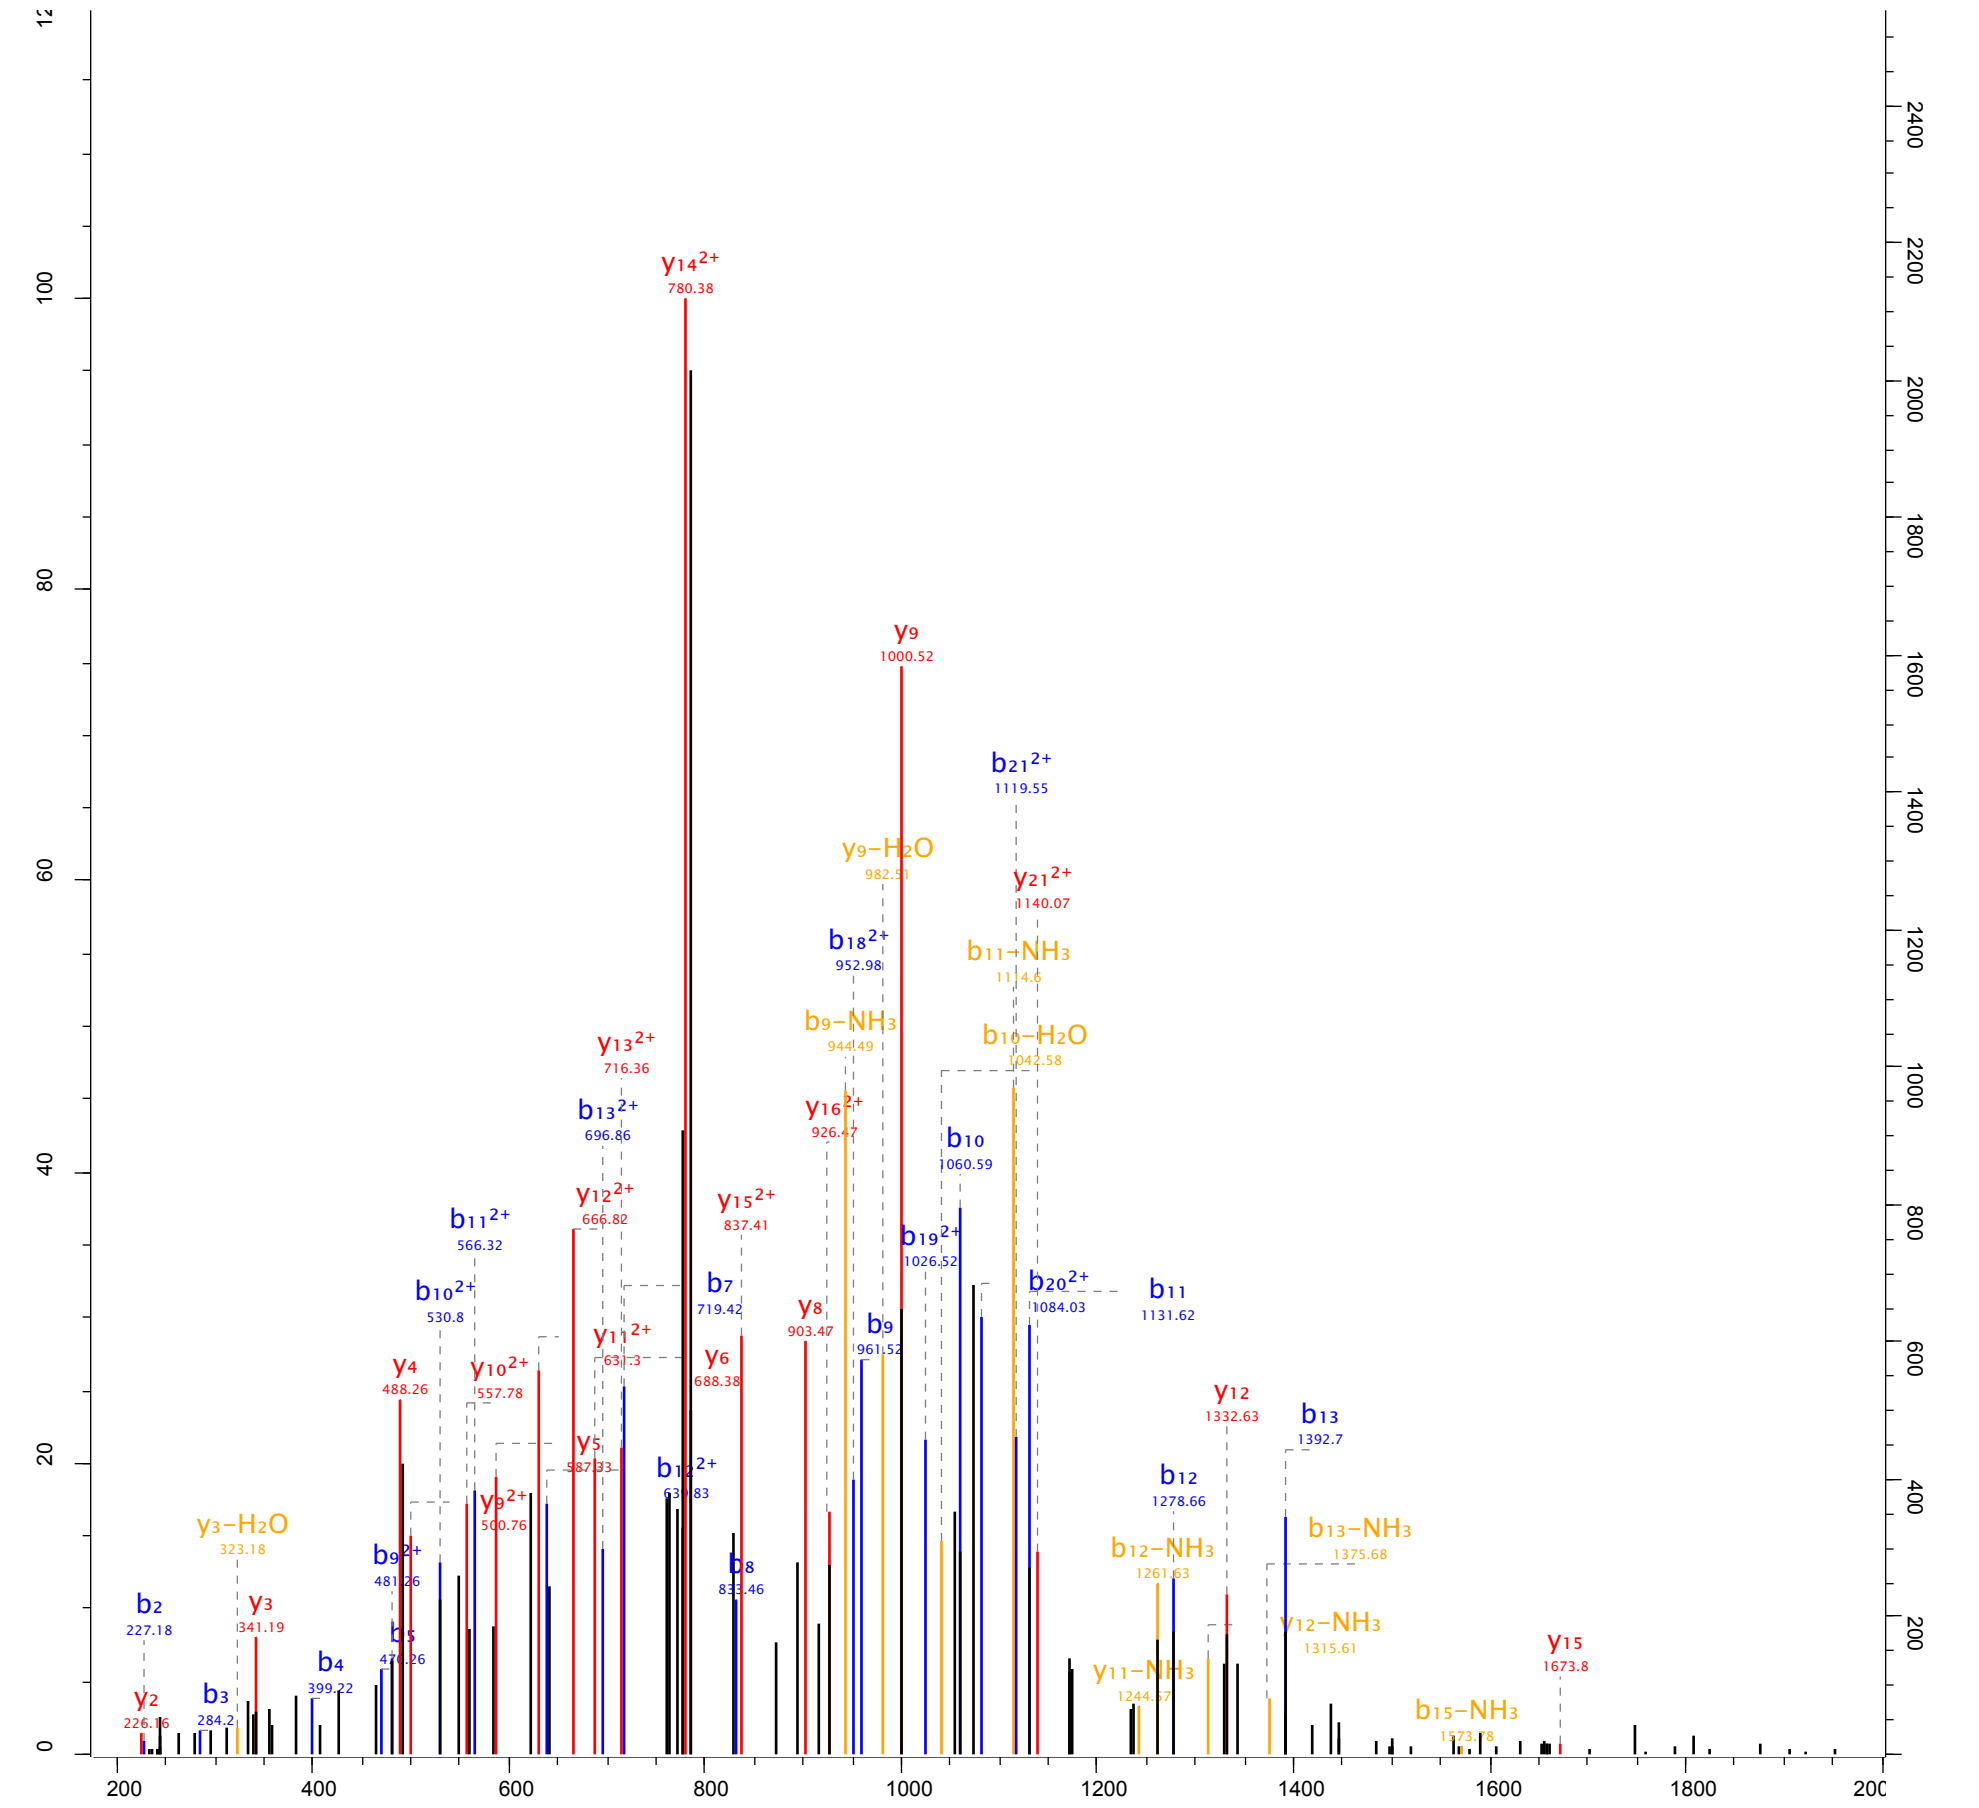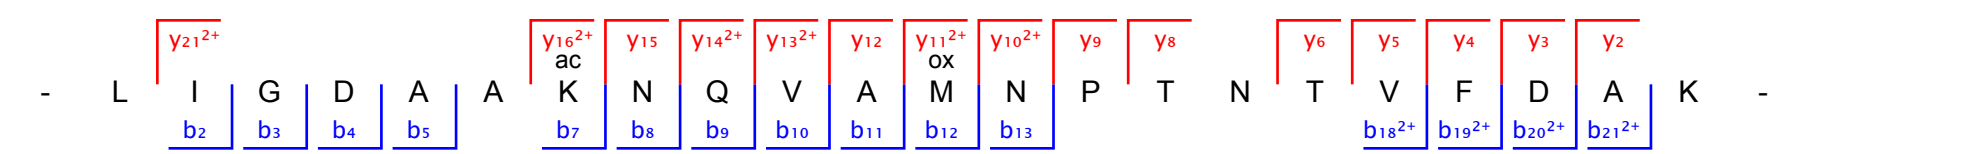

022814\_SCW\_II\_68\_1\_2ndZT

23248 ITMS; CID 323.87 1176.06 Eno1

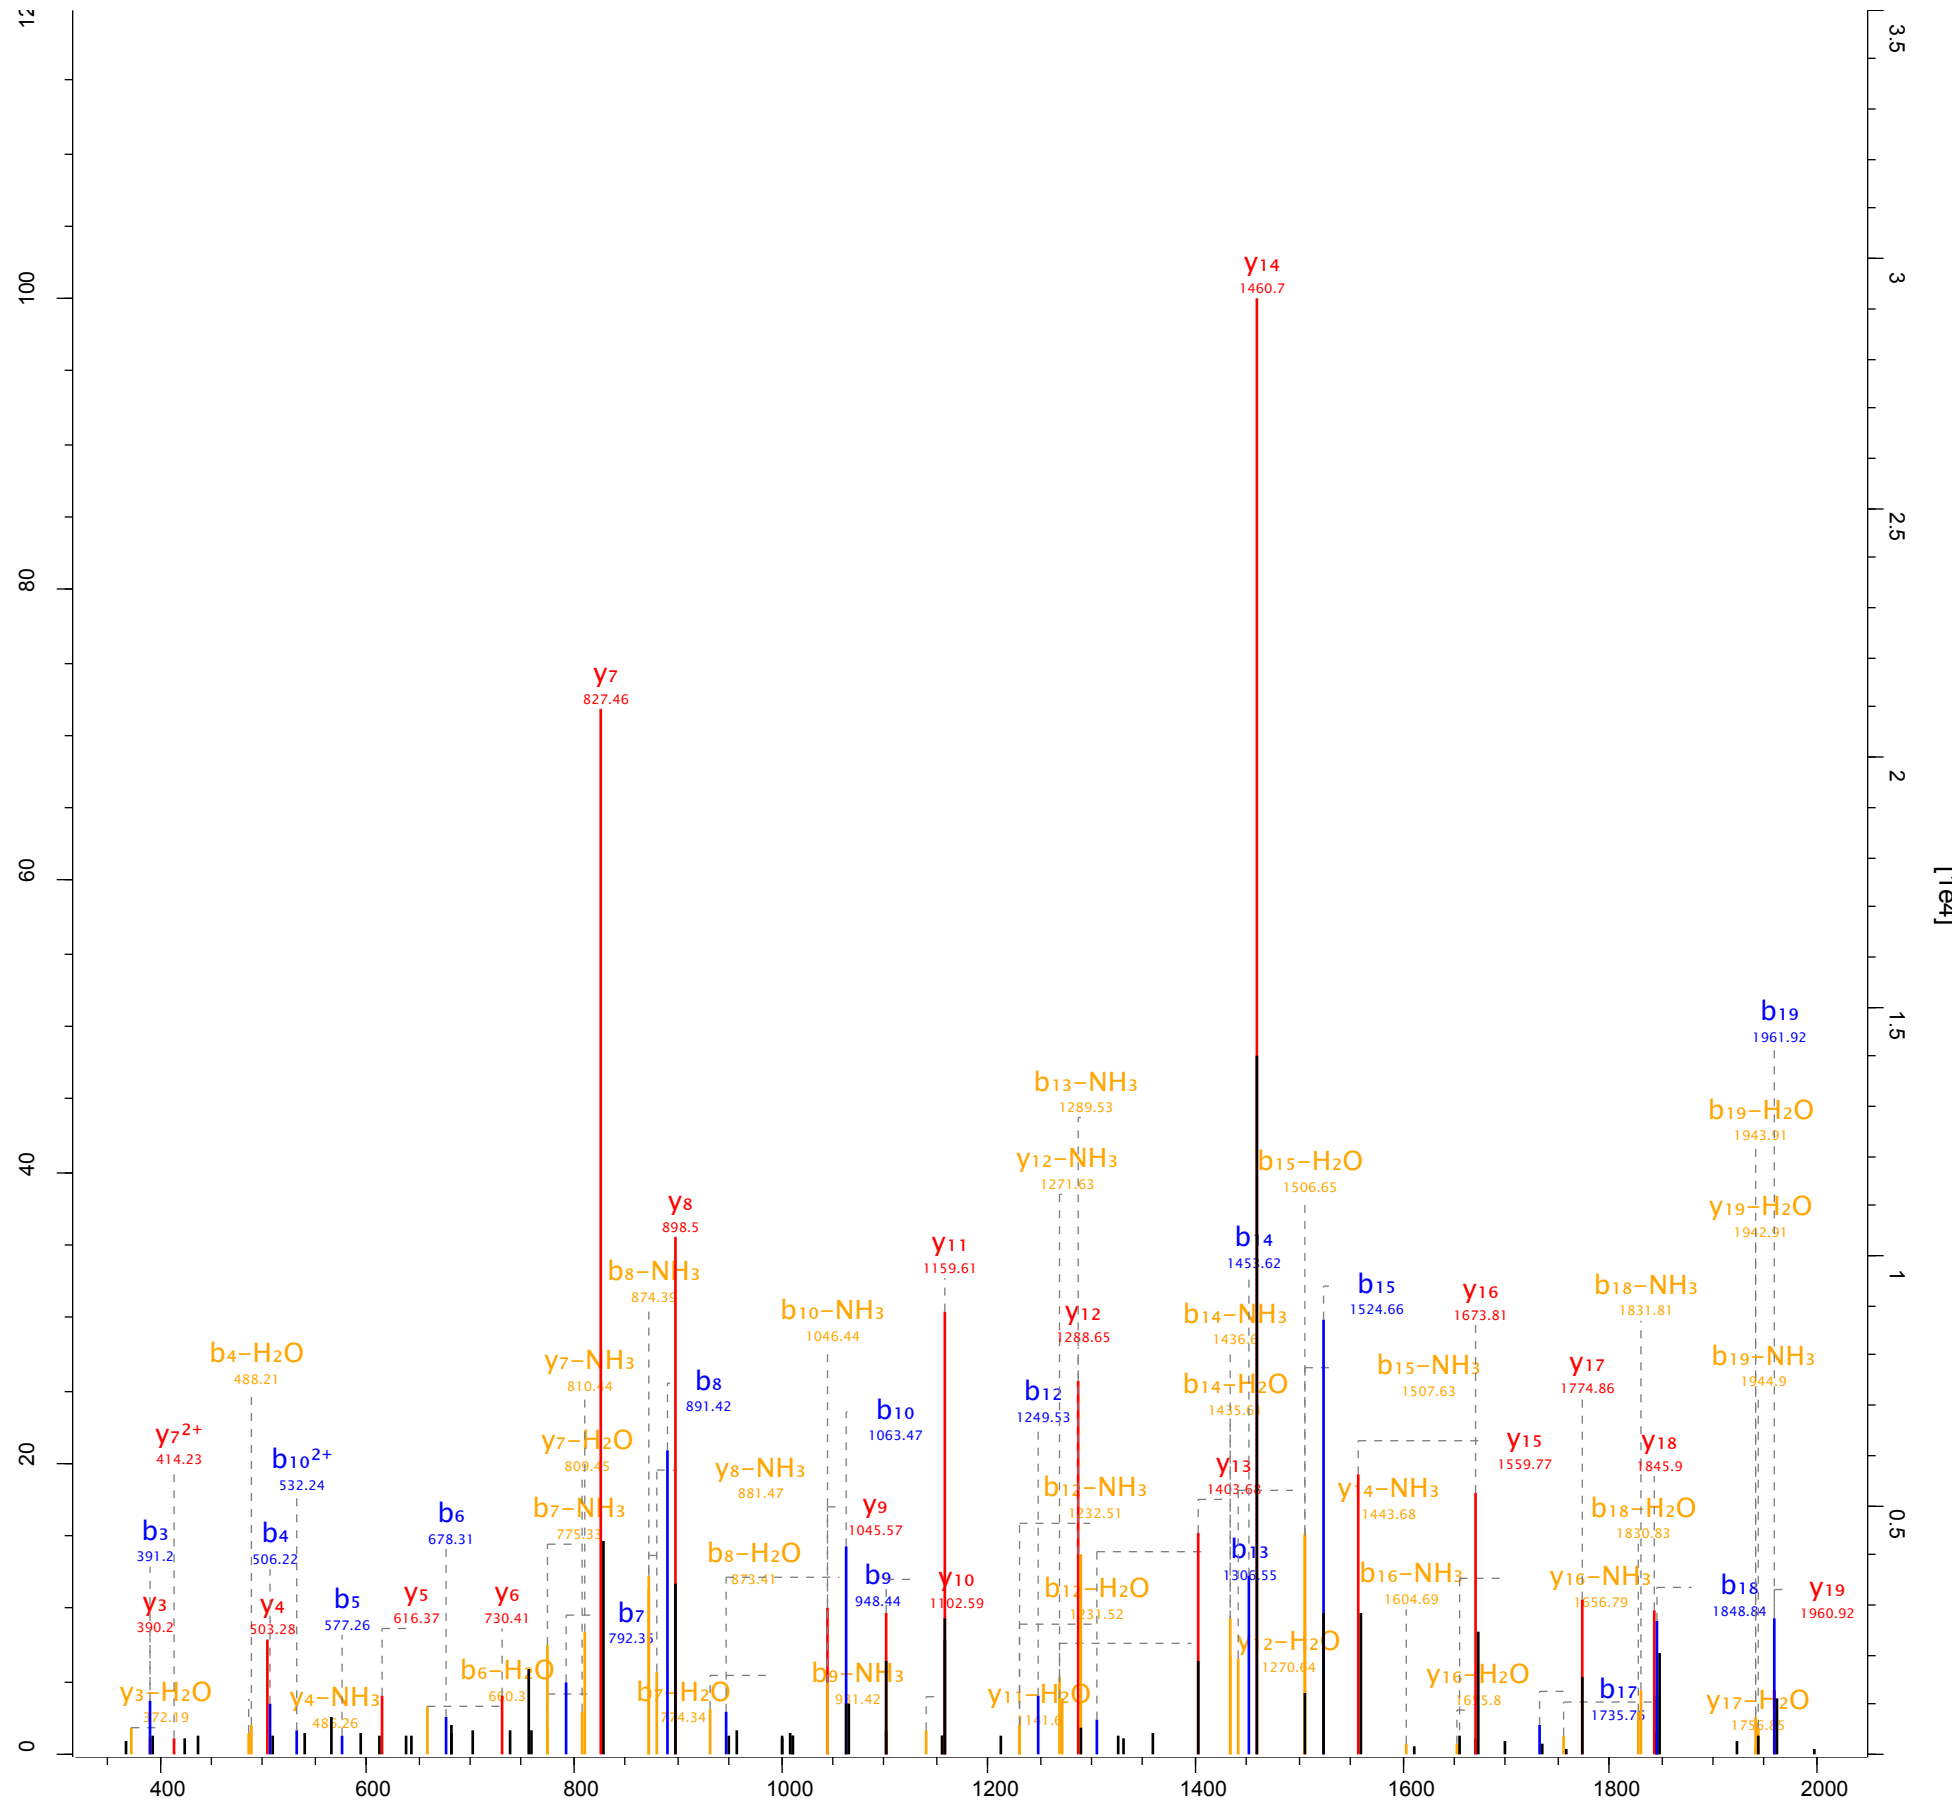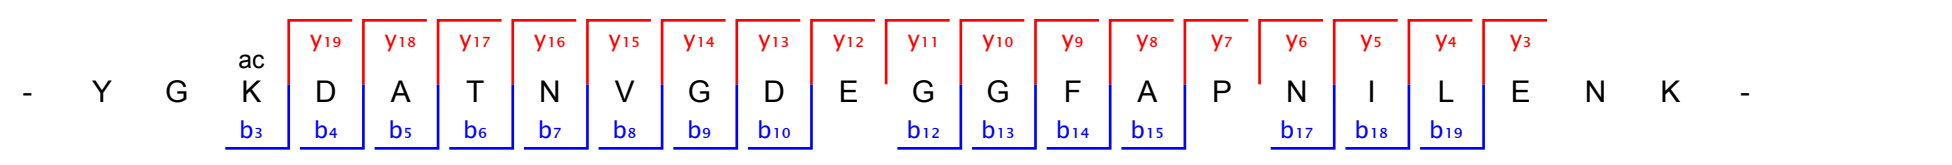

022814\_SCW\_II\_68\_1\_2ndZT

26096

ITMS; CID

236.05

776.92

Naa50

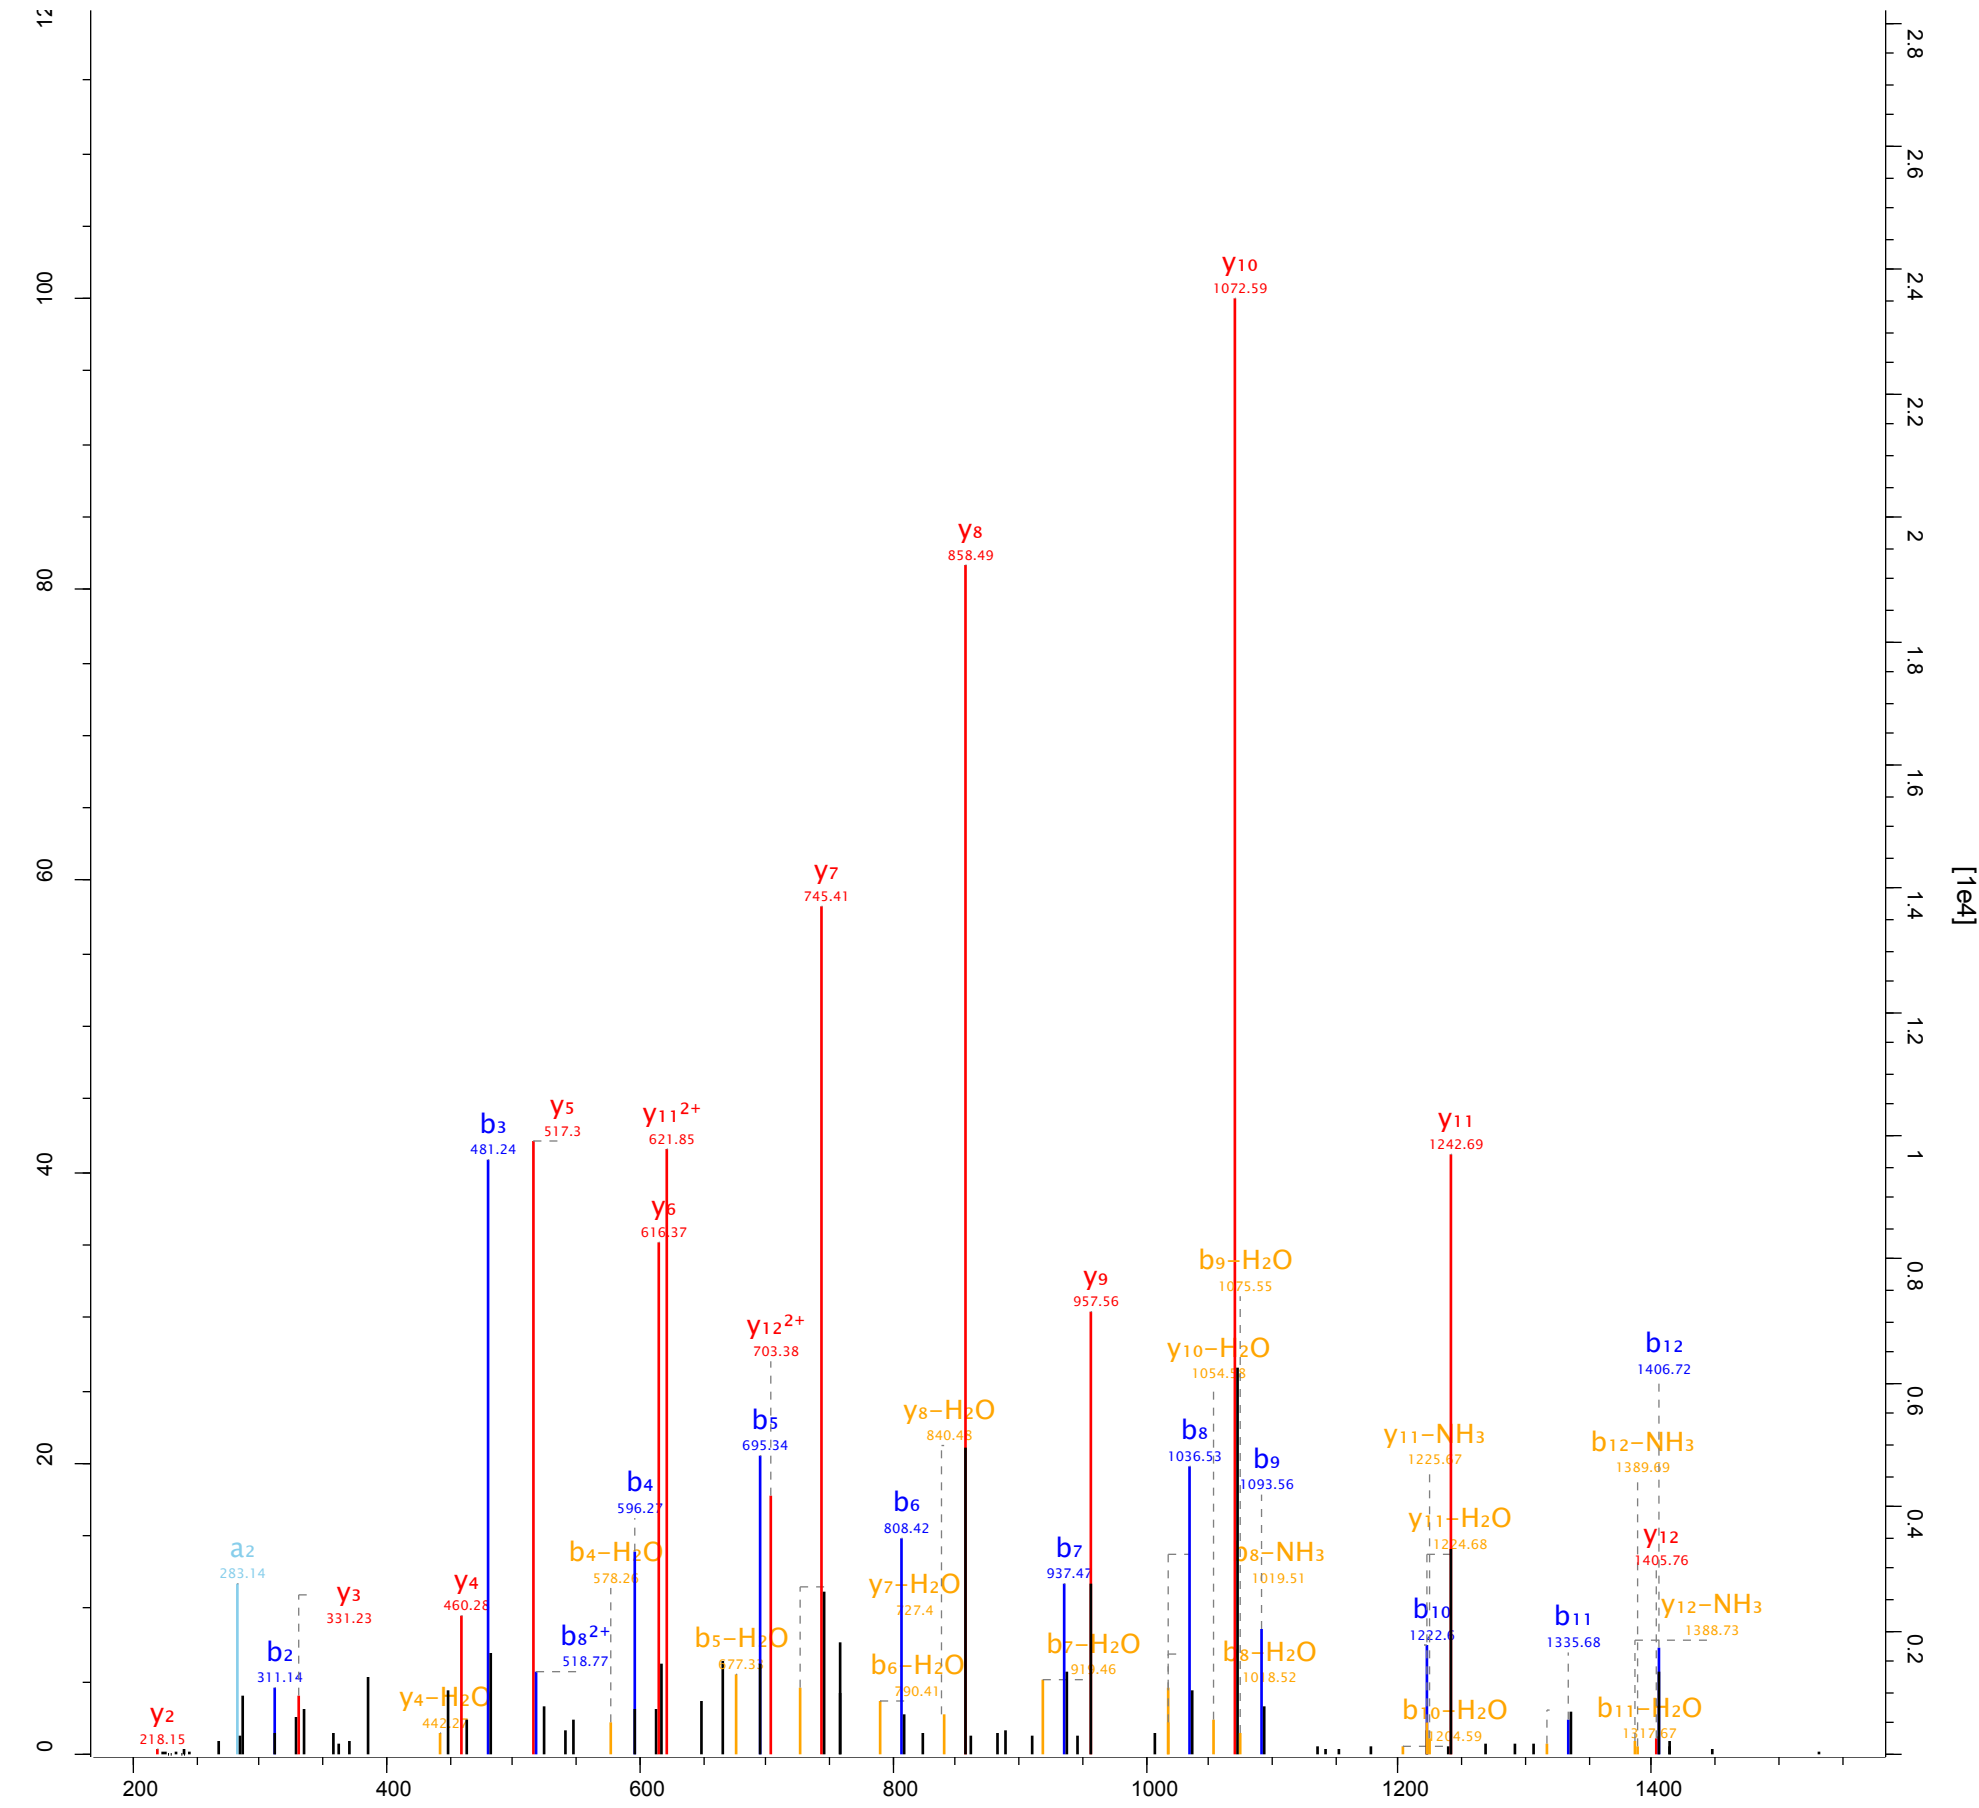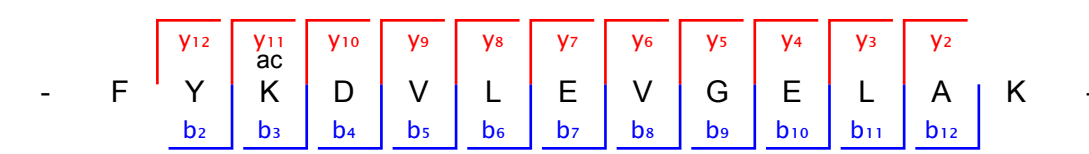

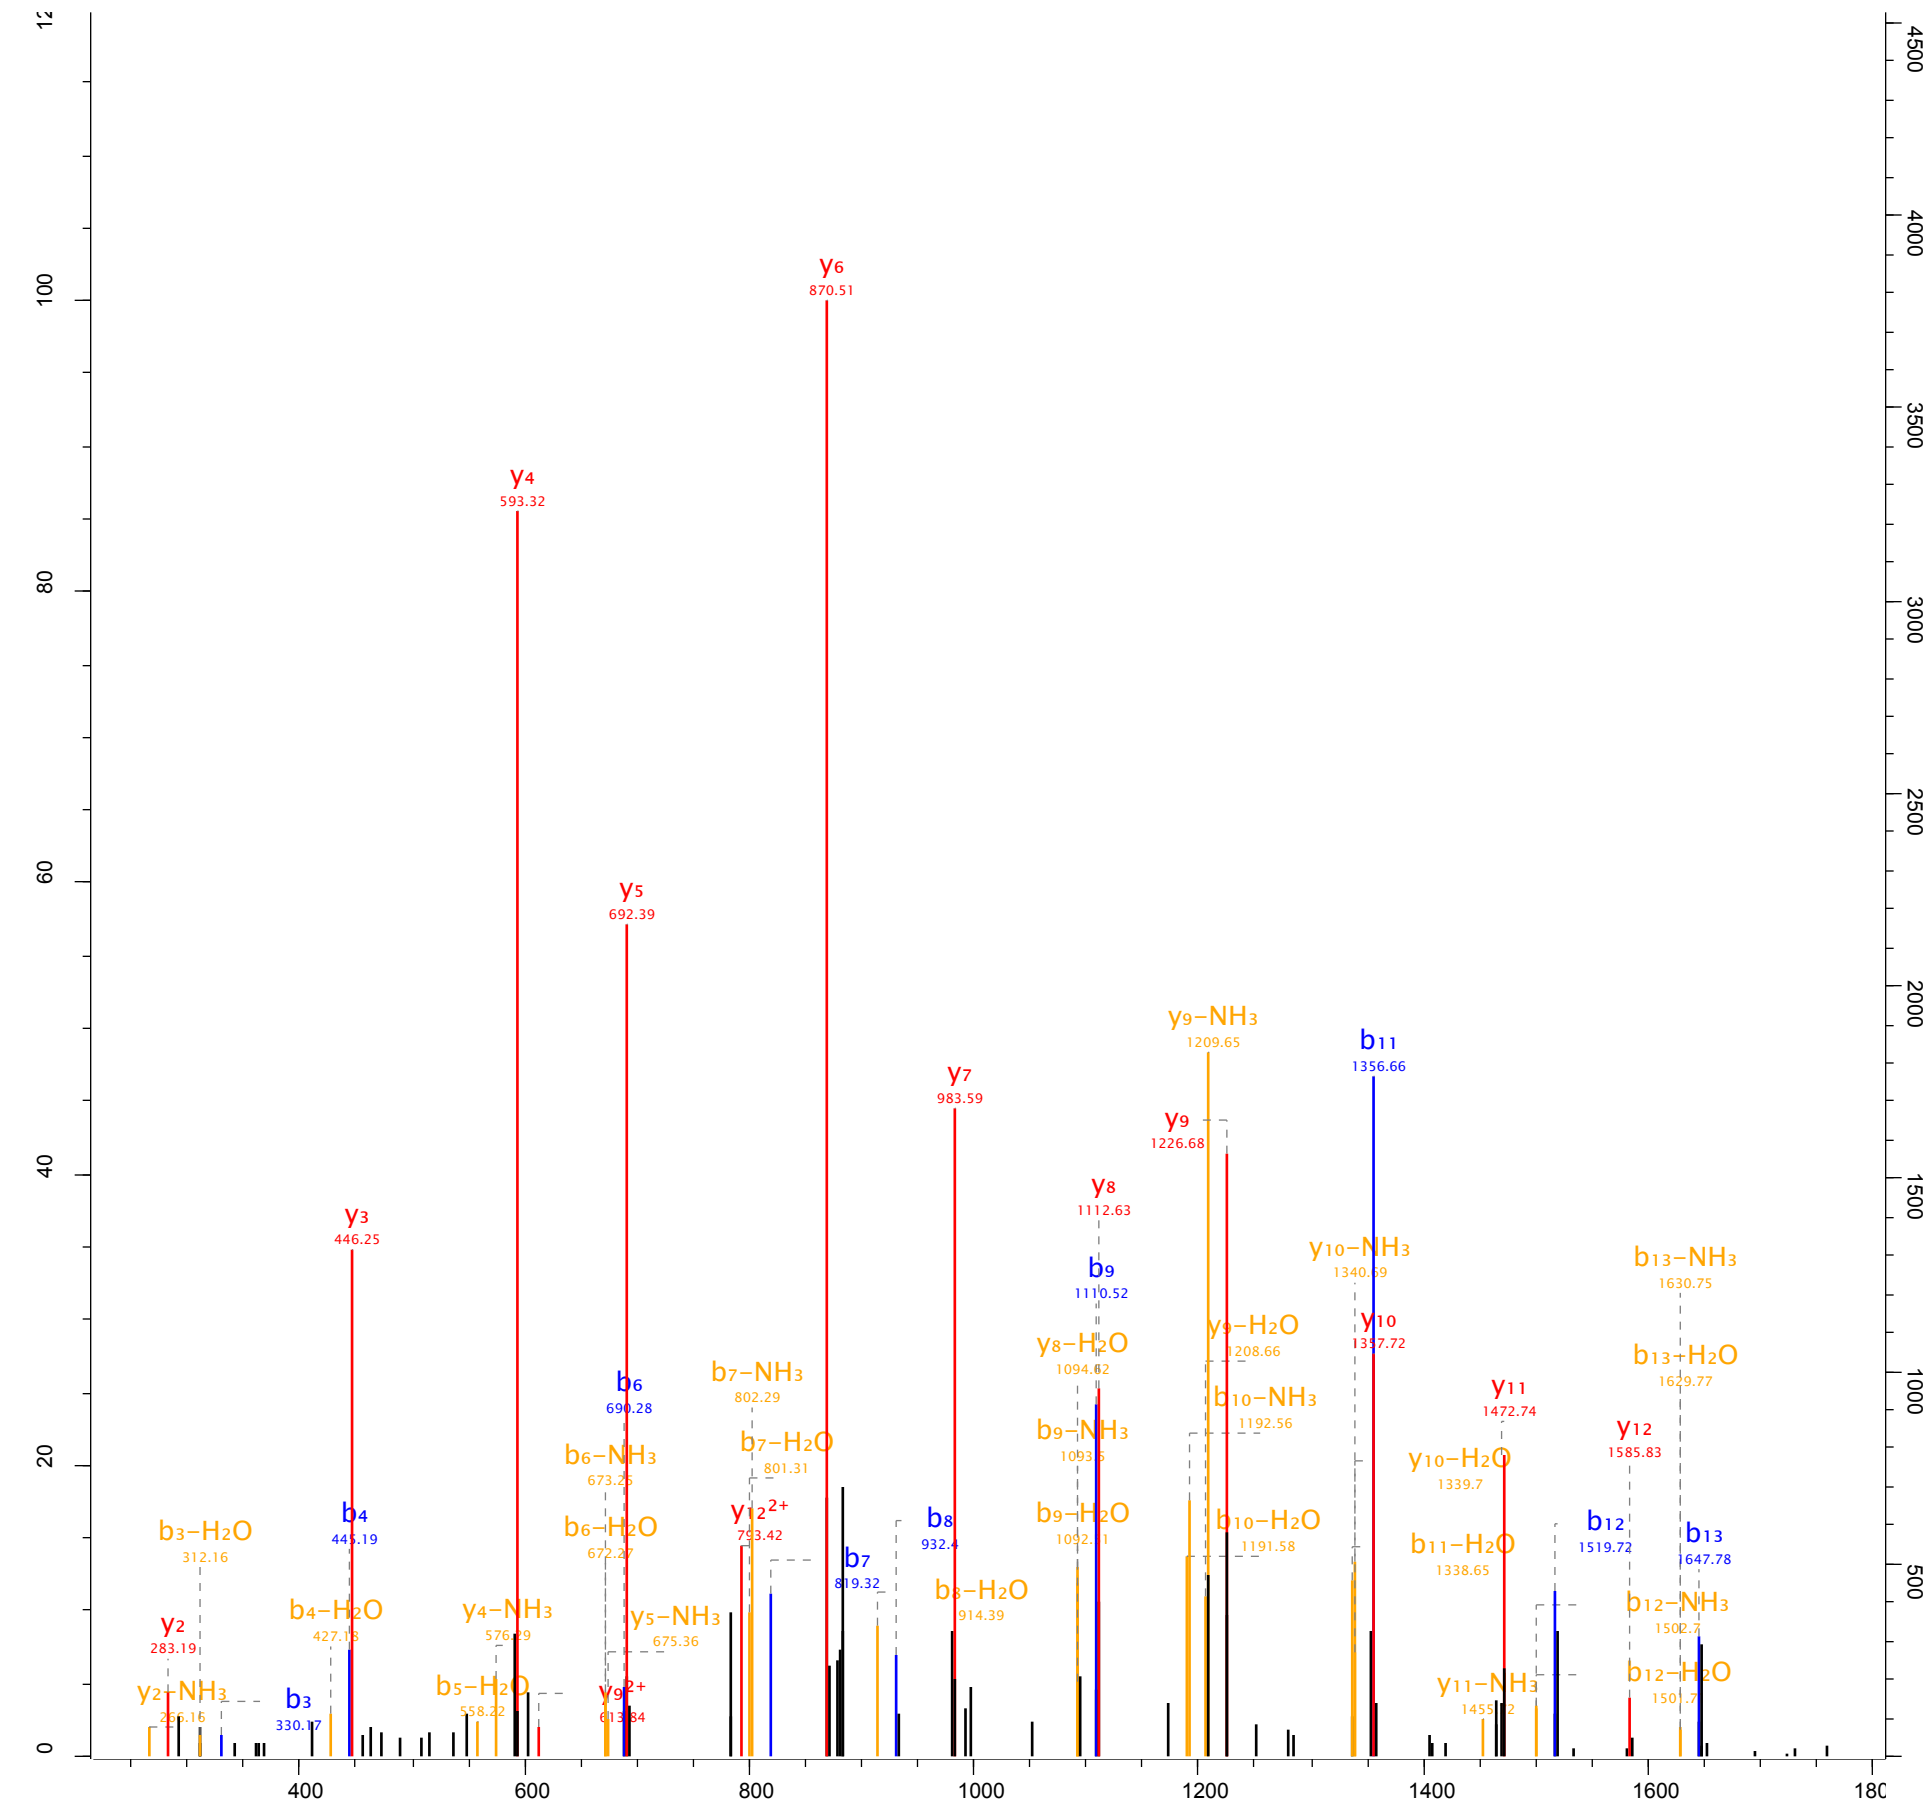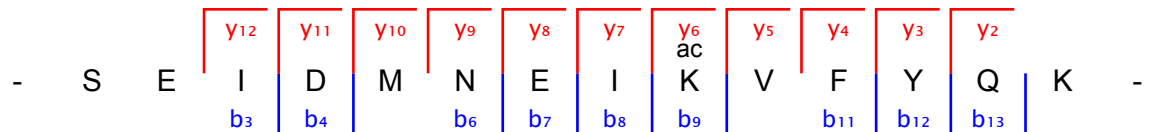

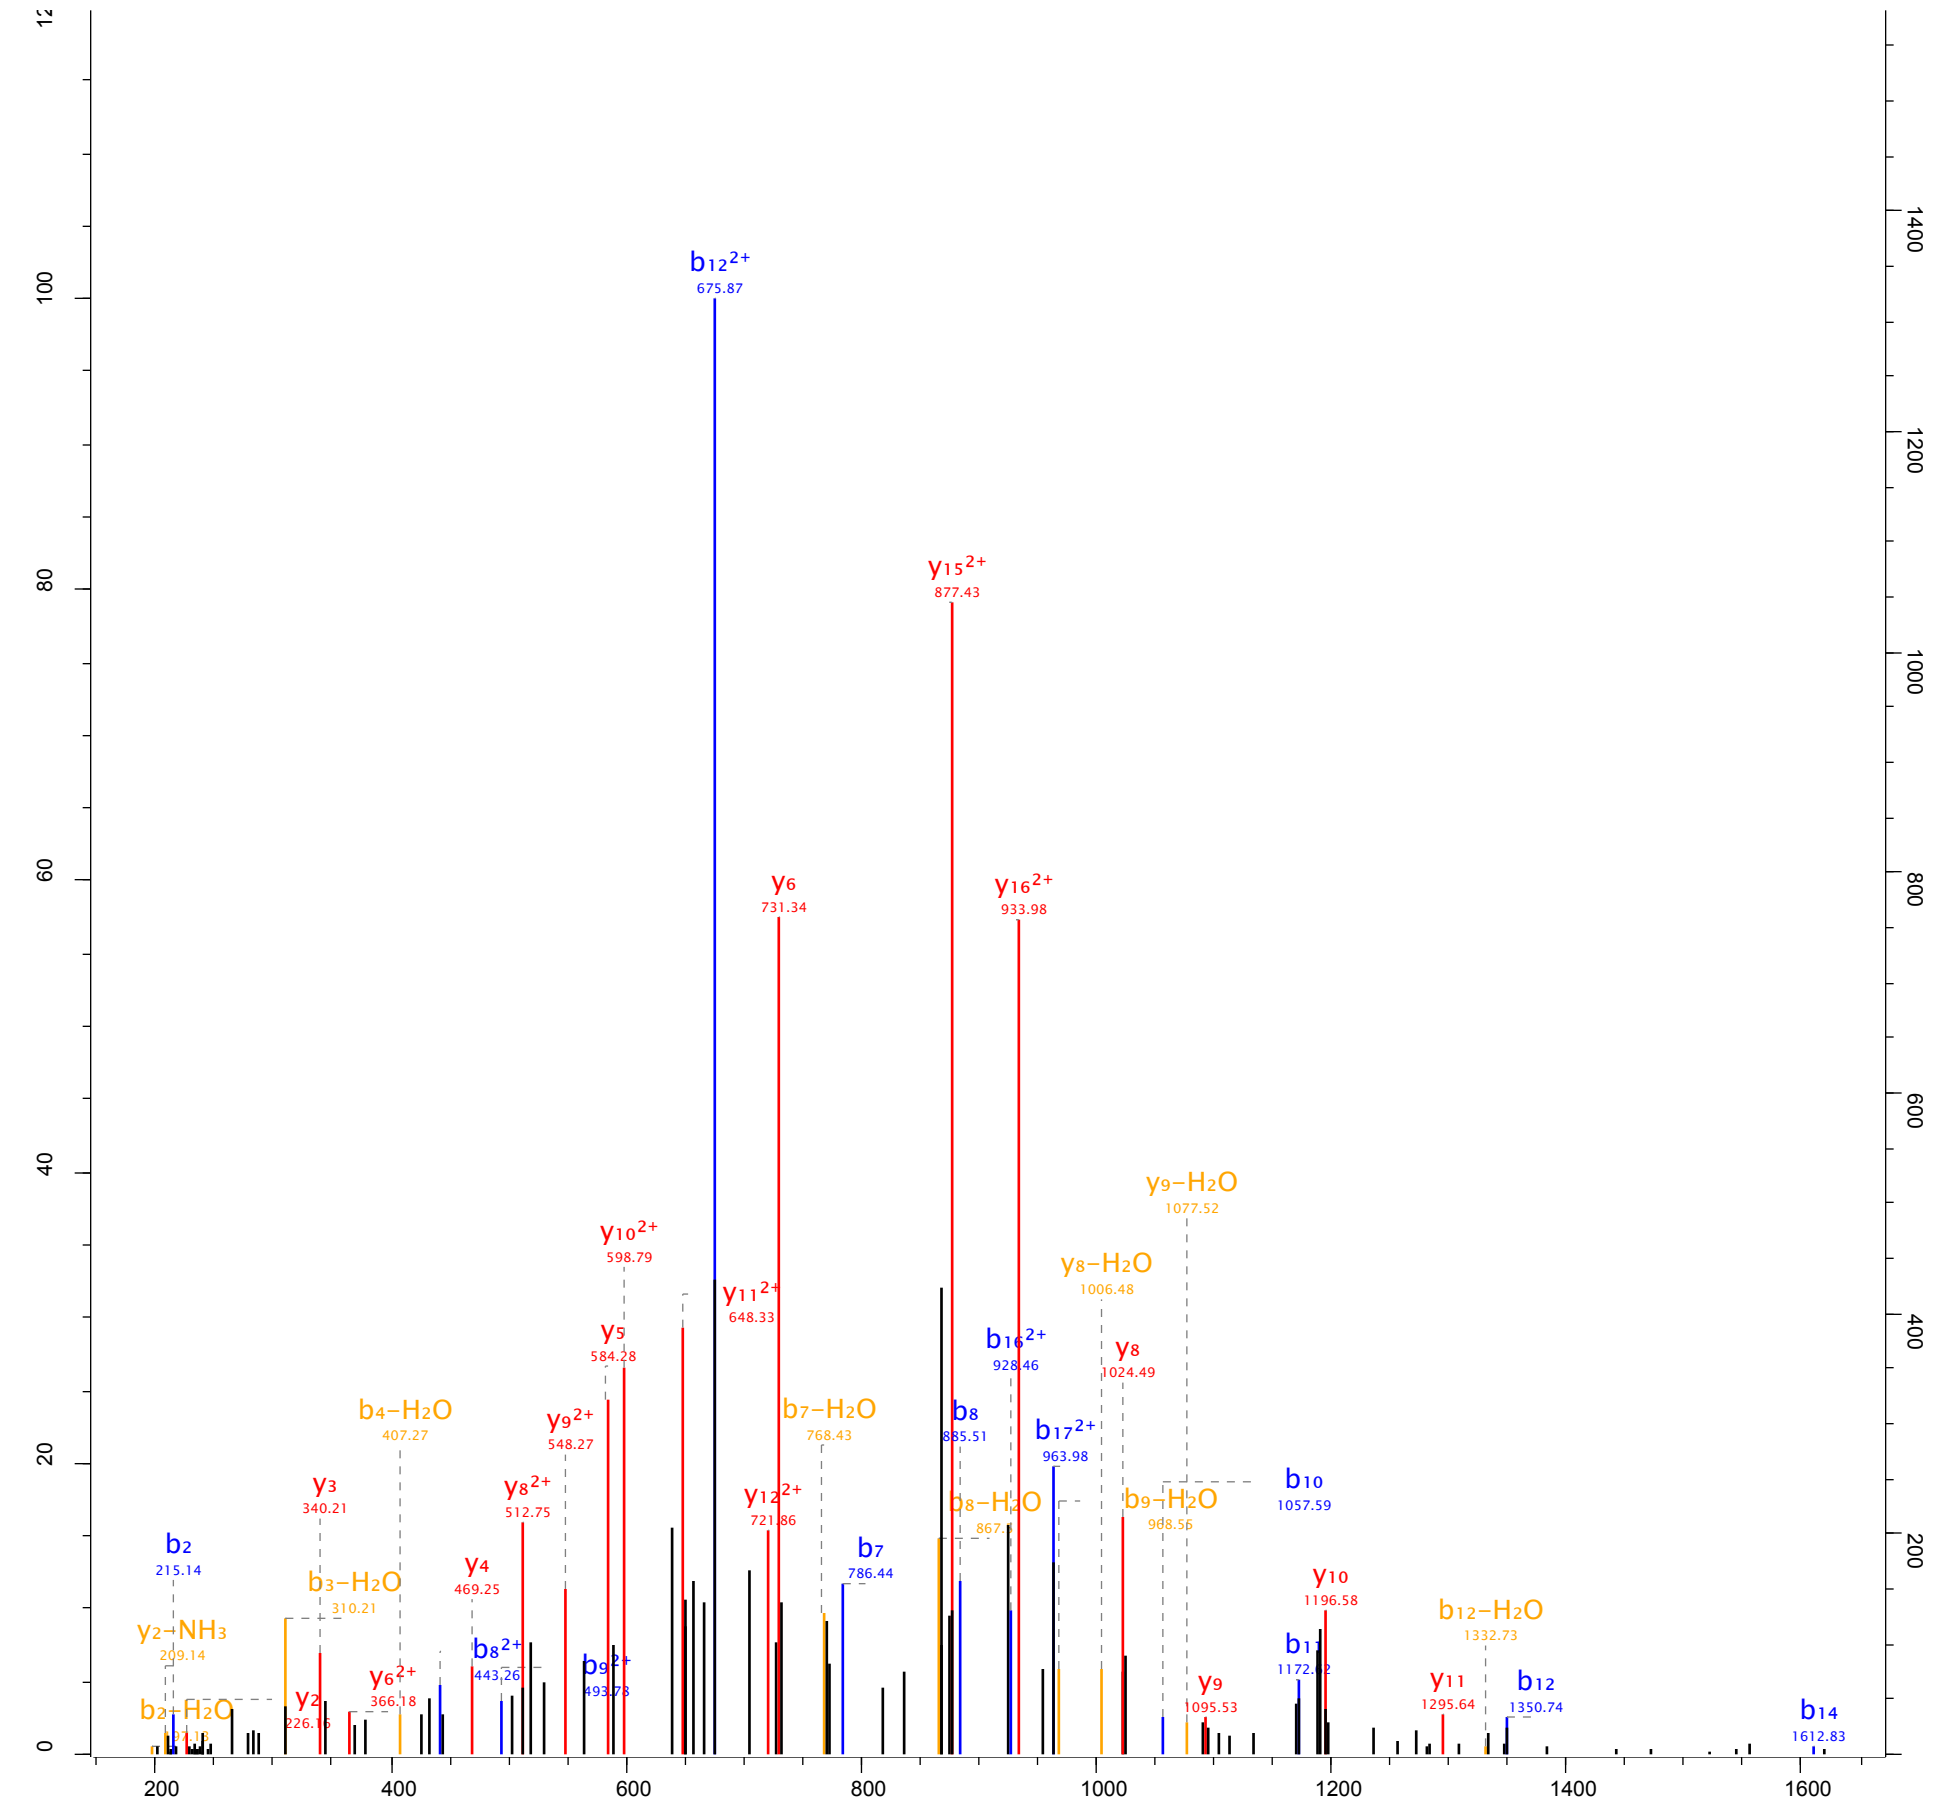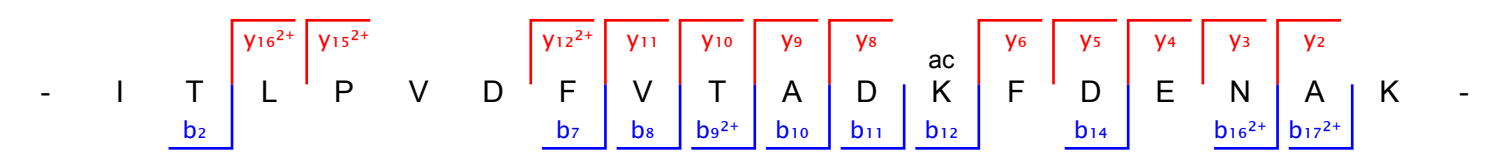



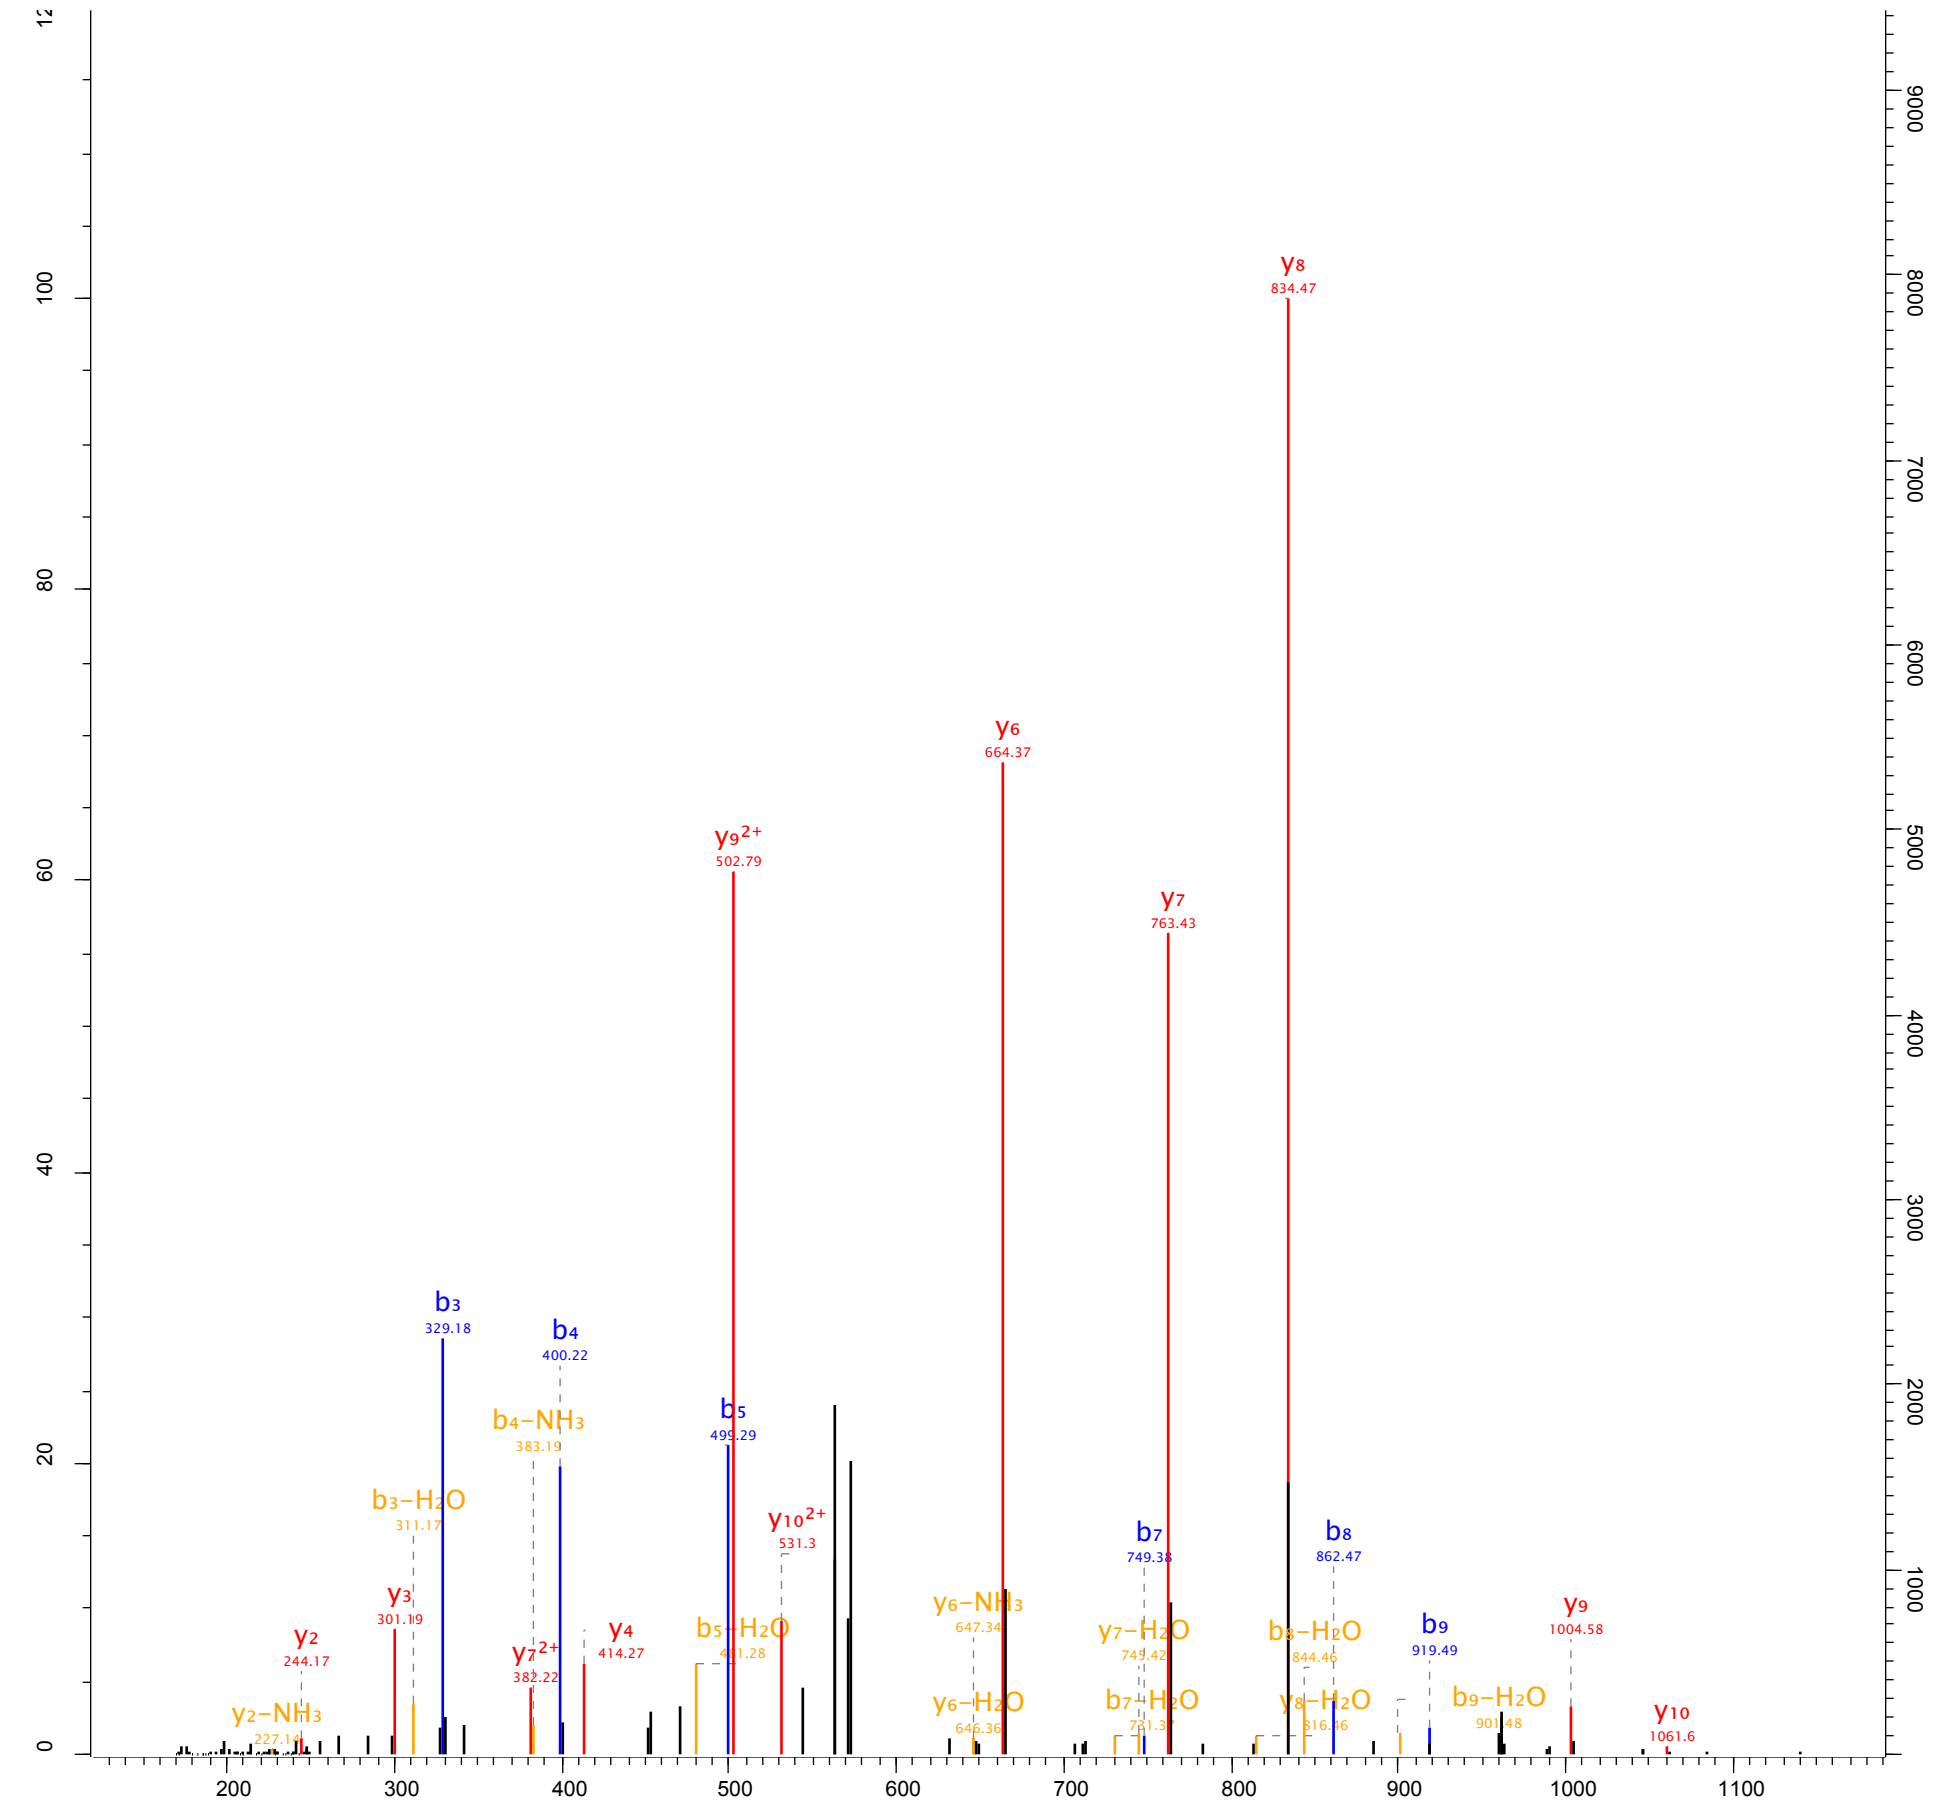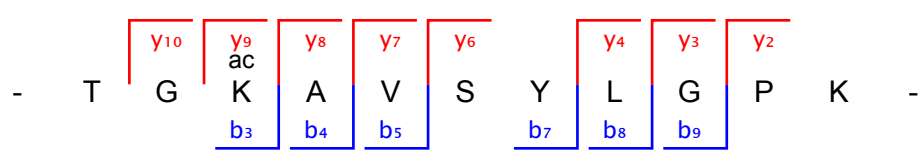

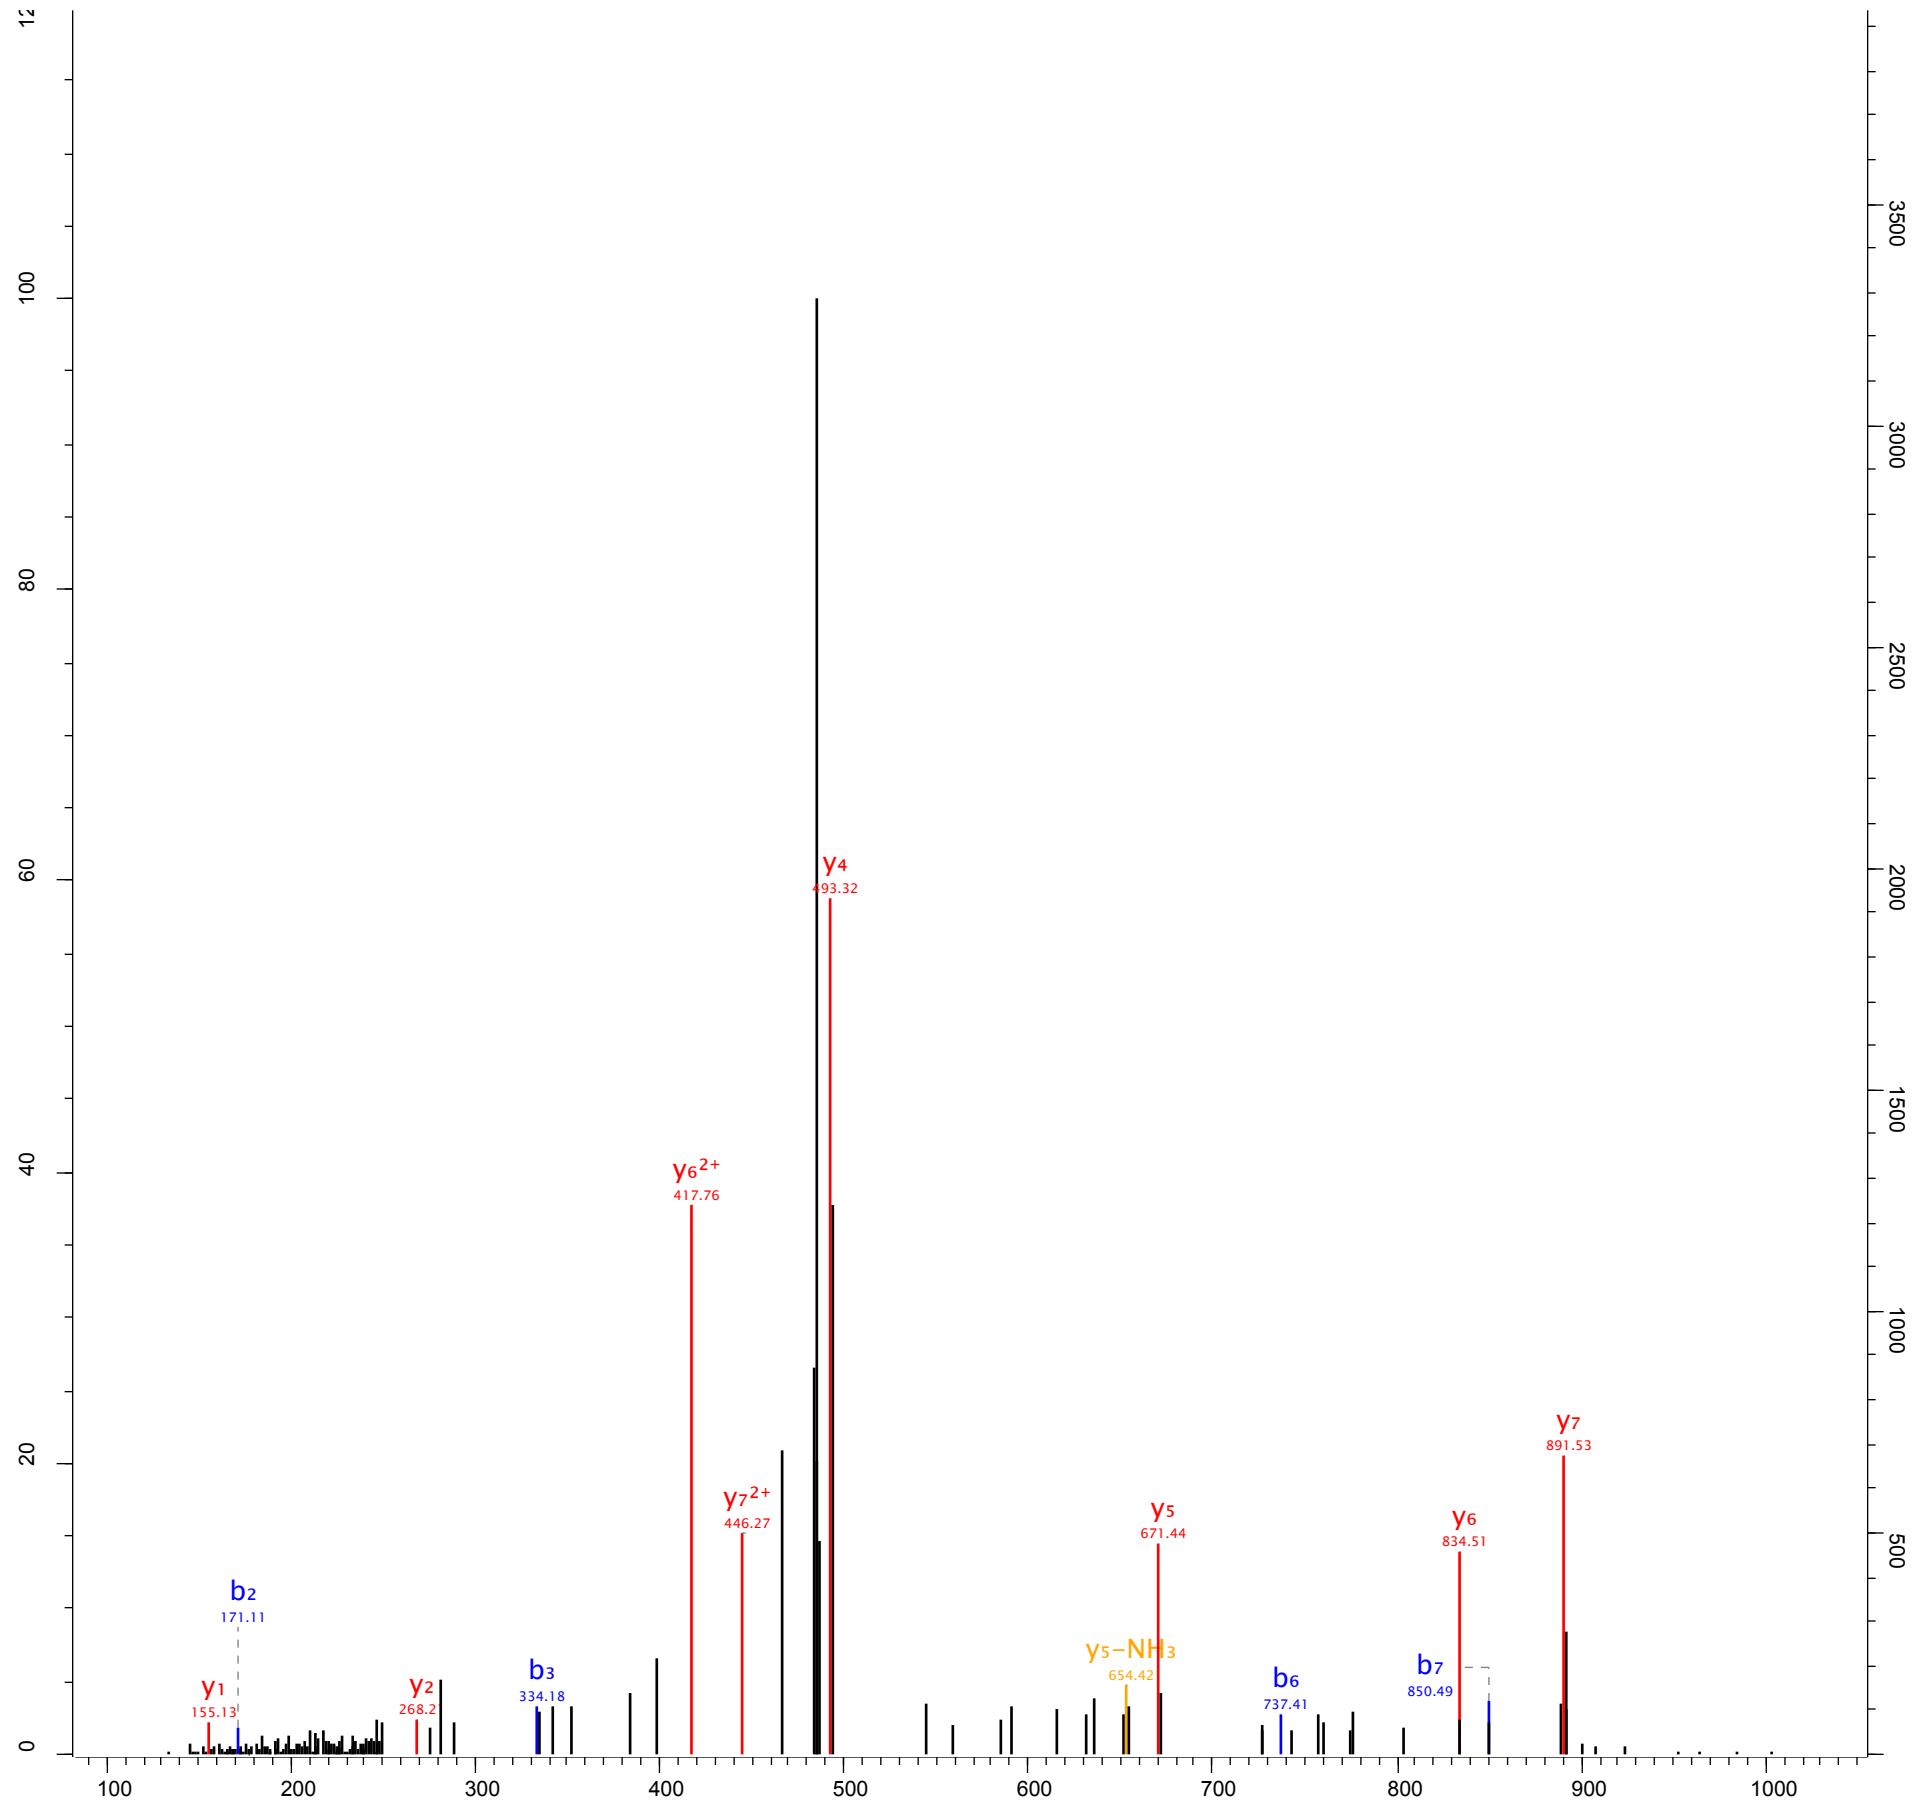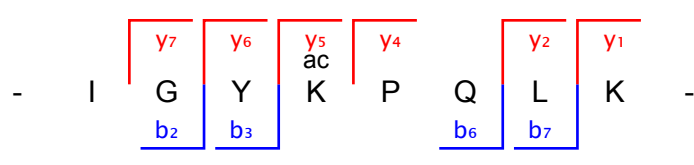

022814\_SCW\_II\_68\_4\_2ndZT

24660

ITMS; CID

201.9

1015.49

Vdac1

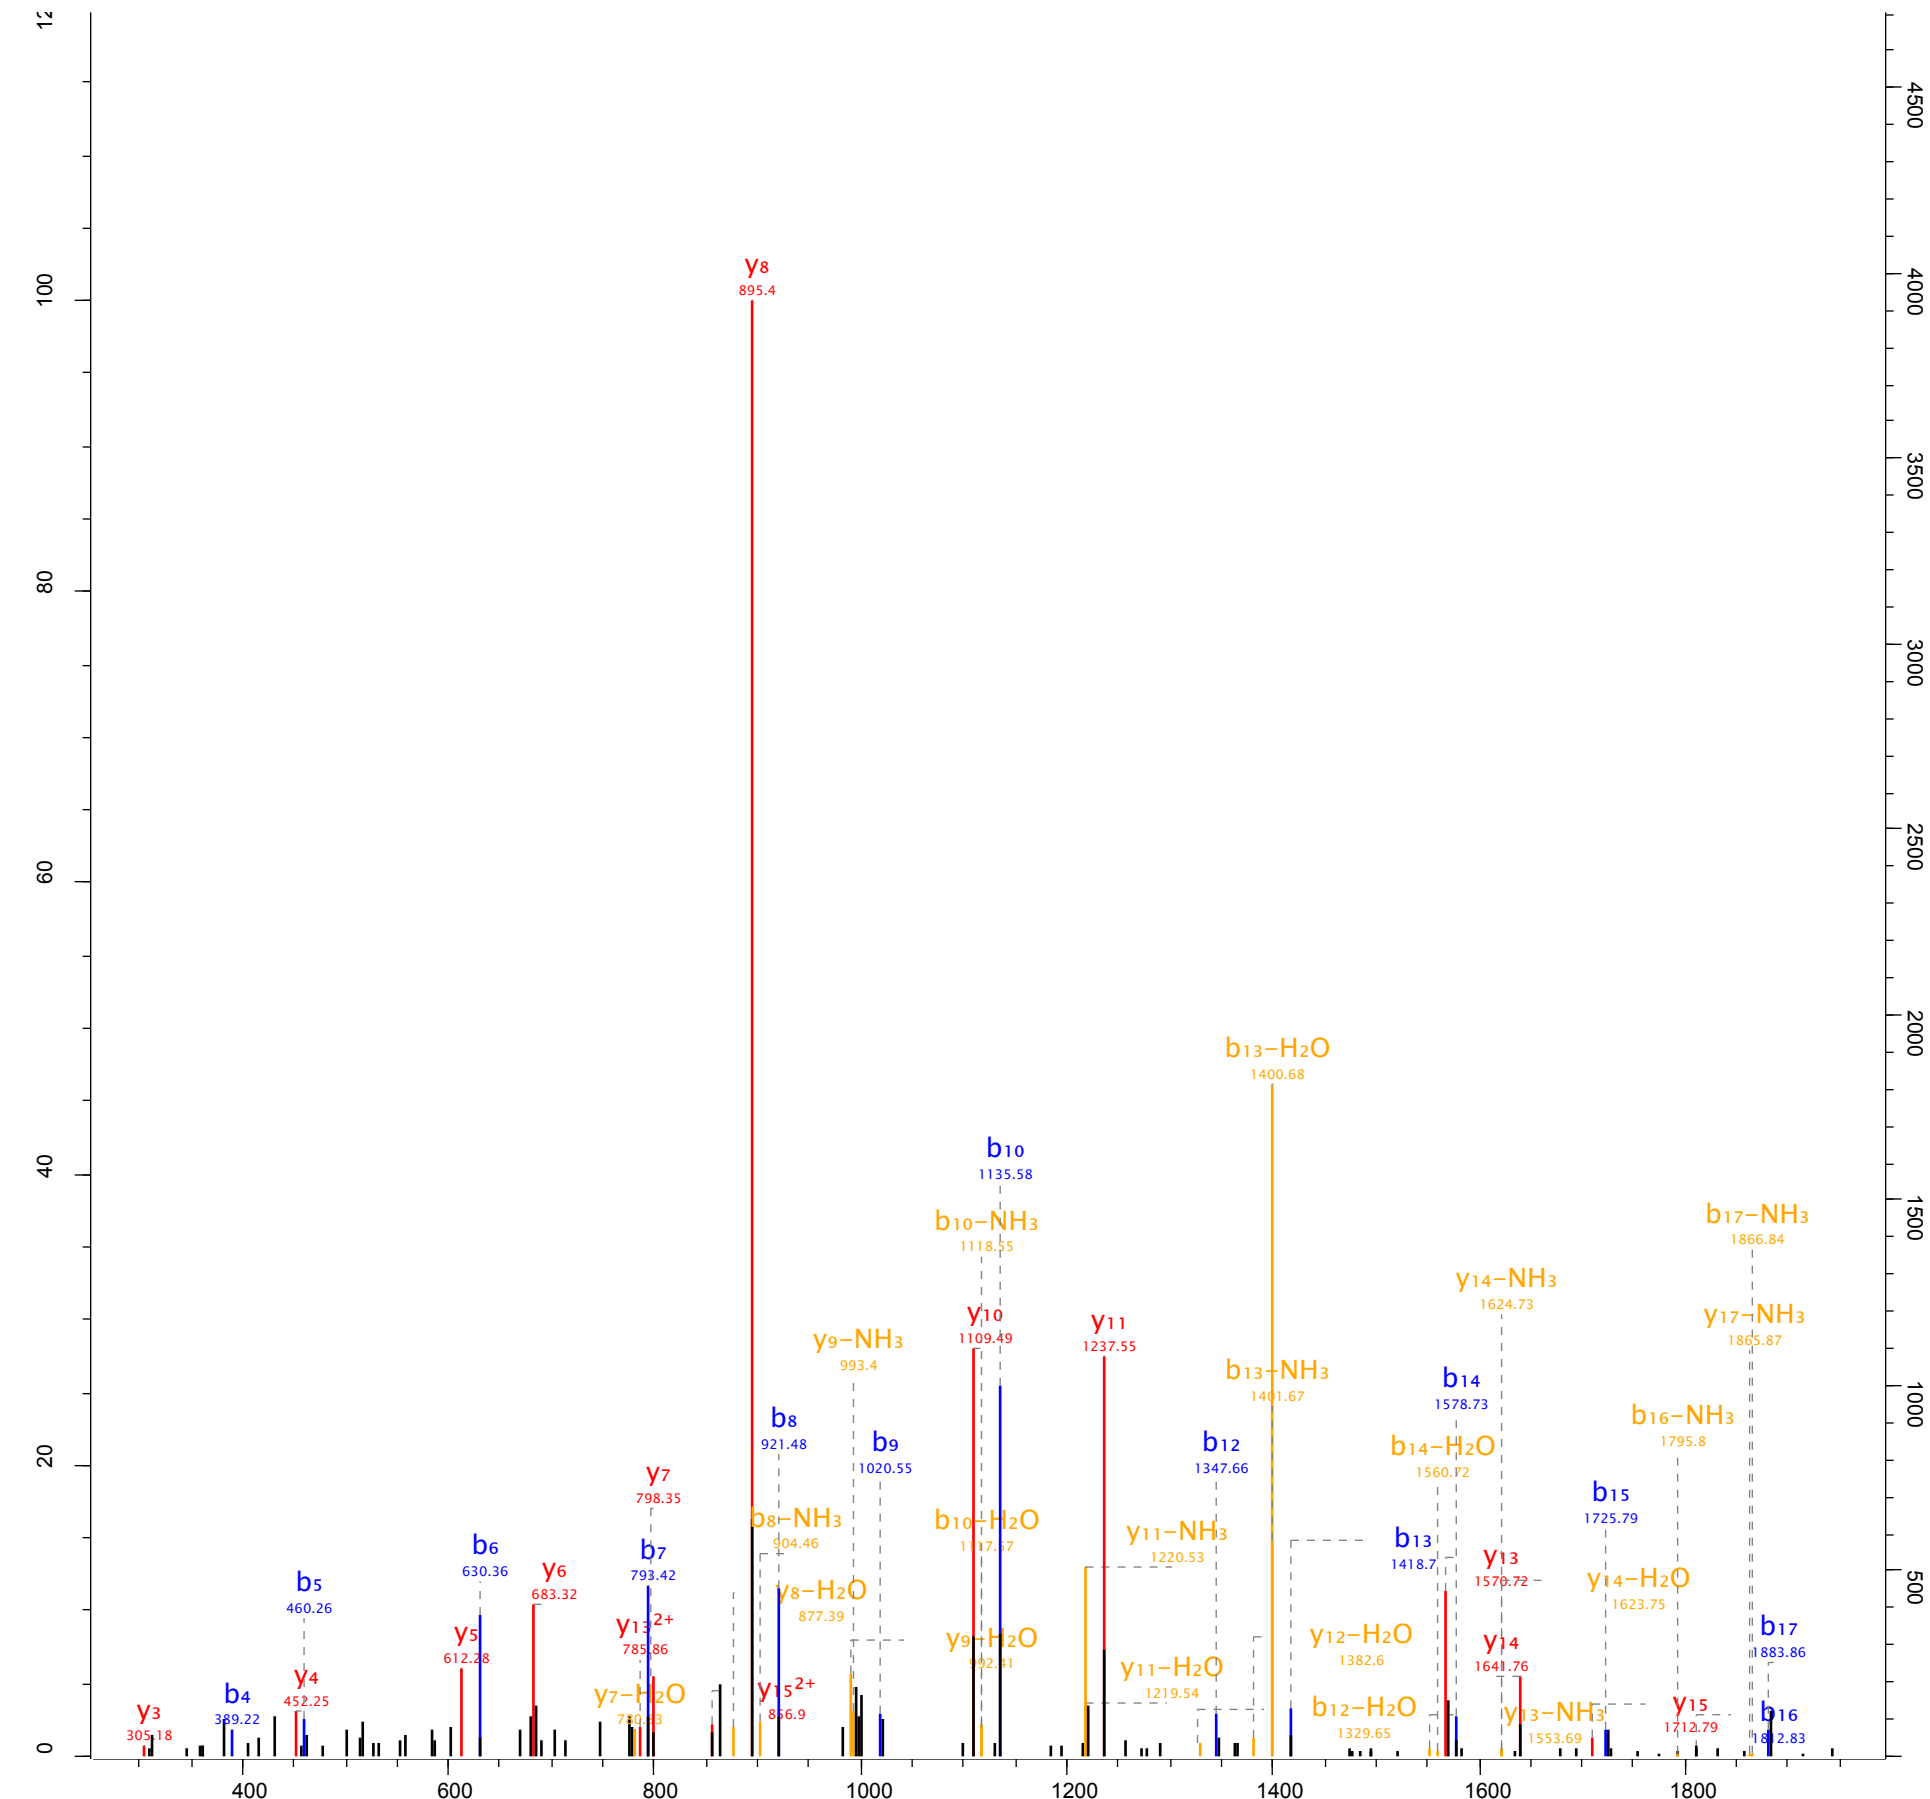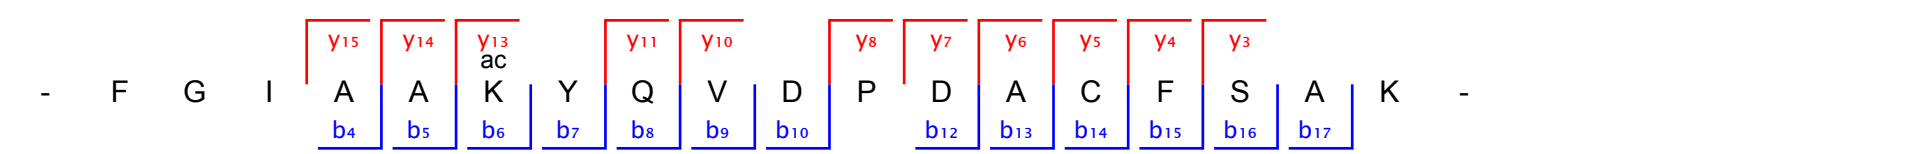

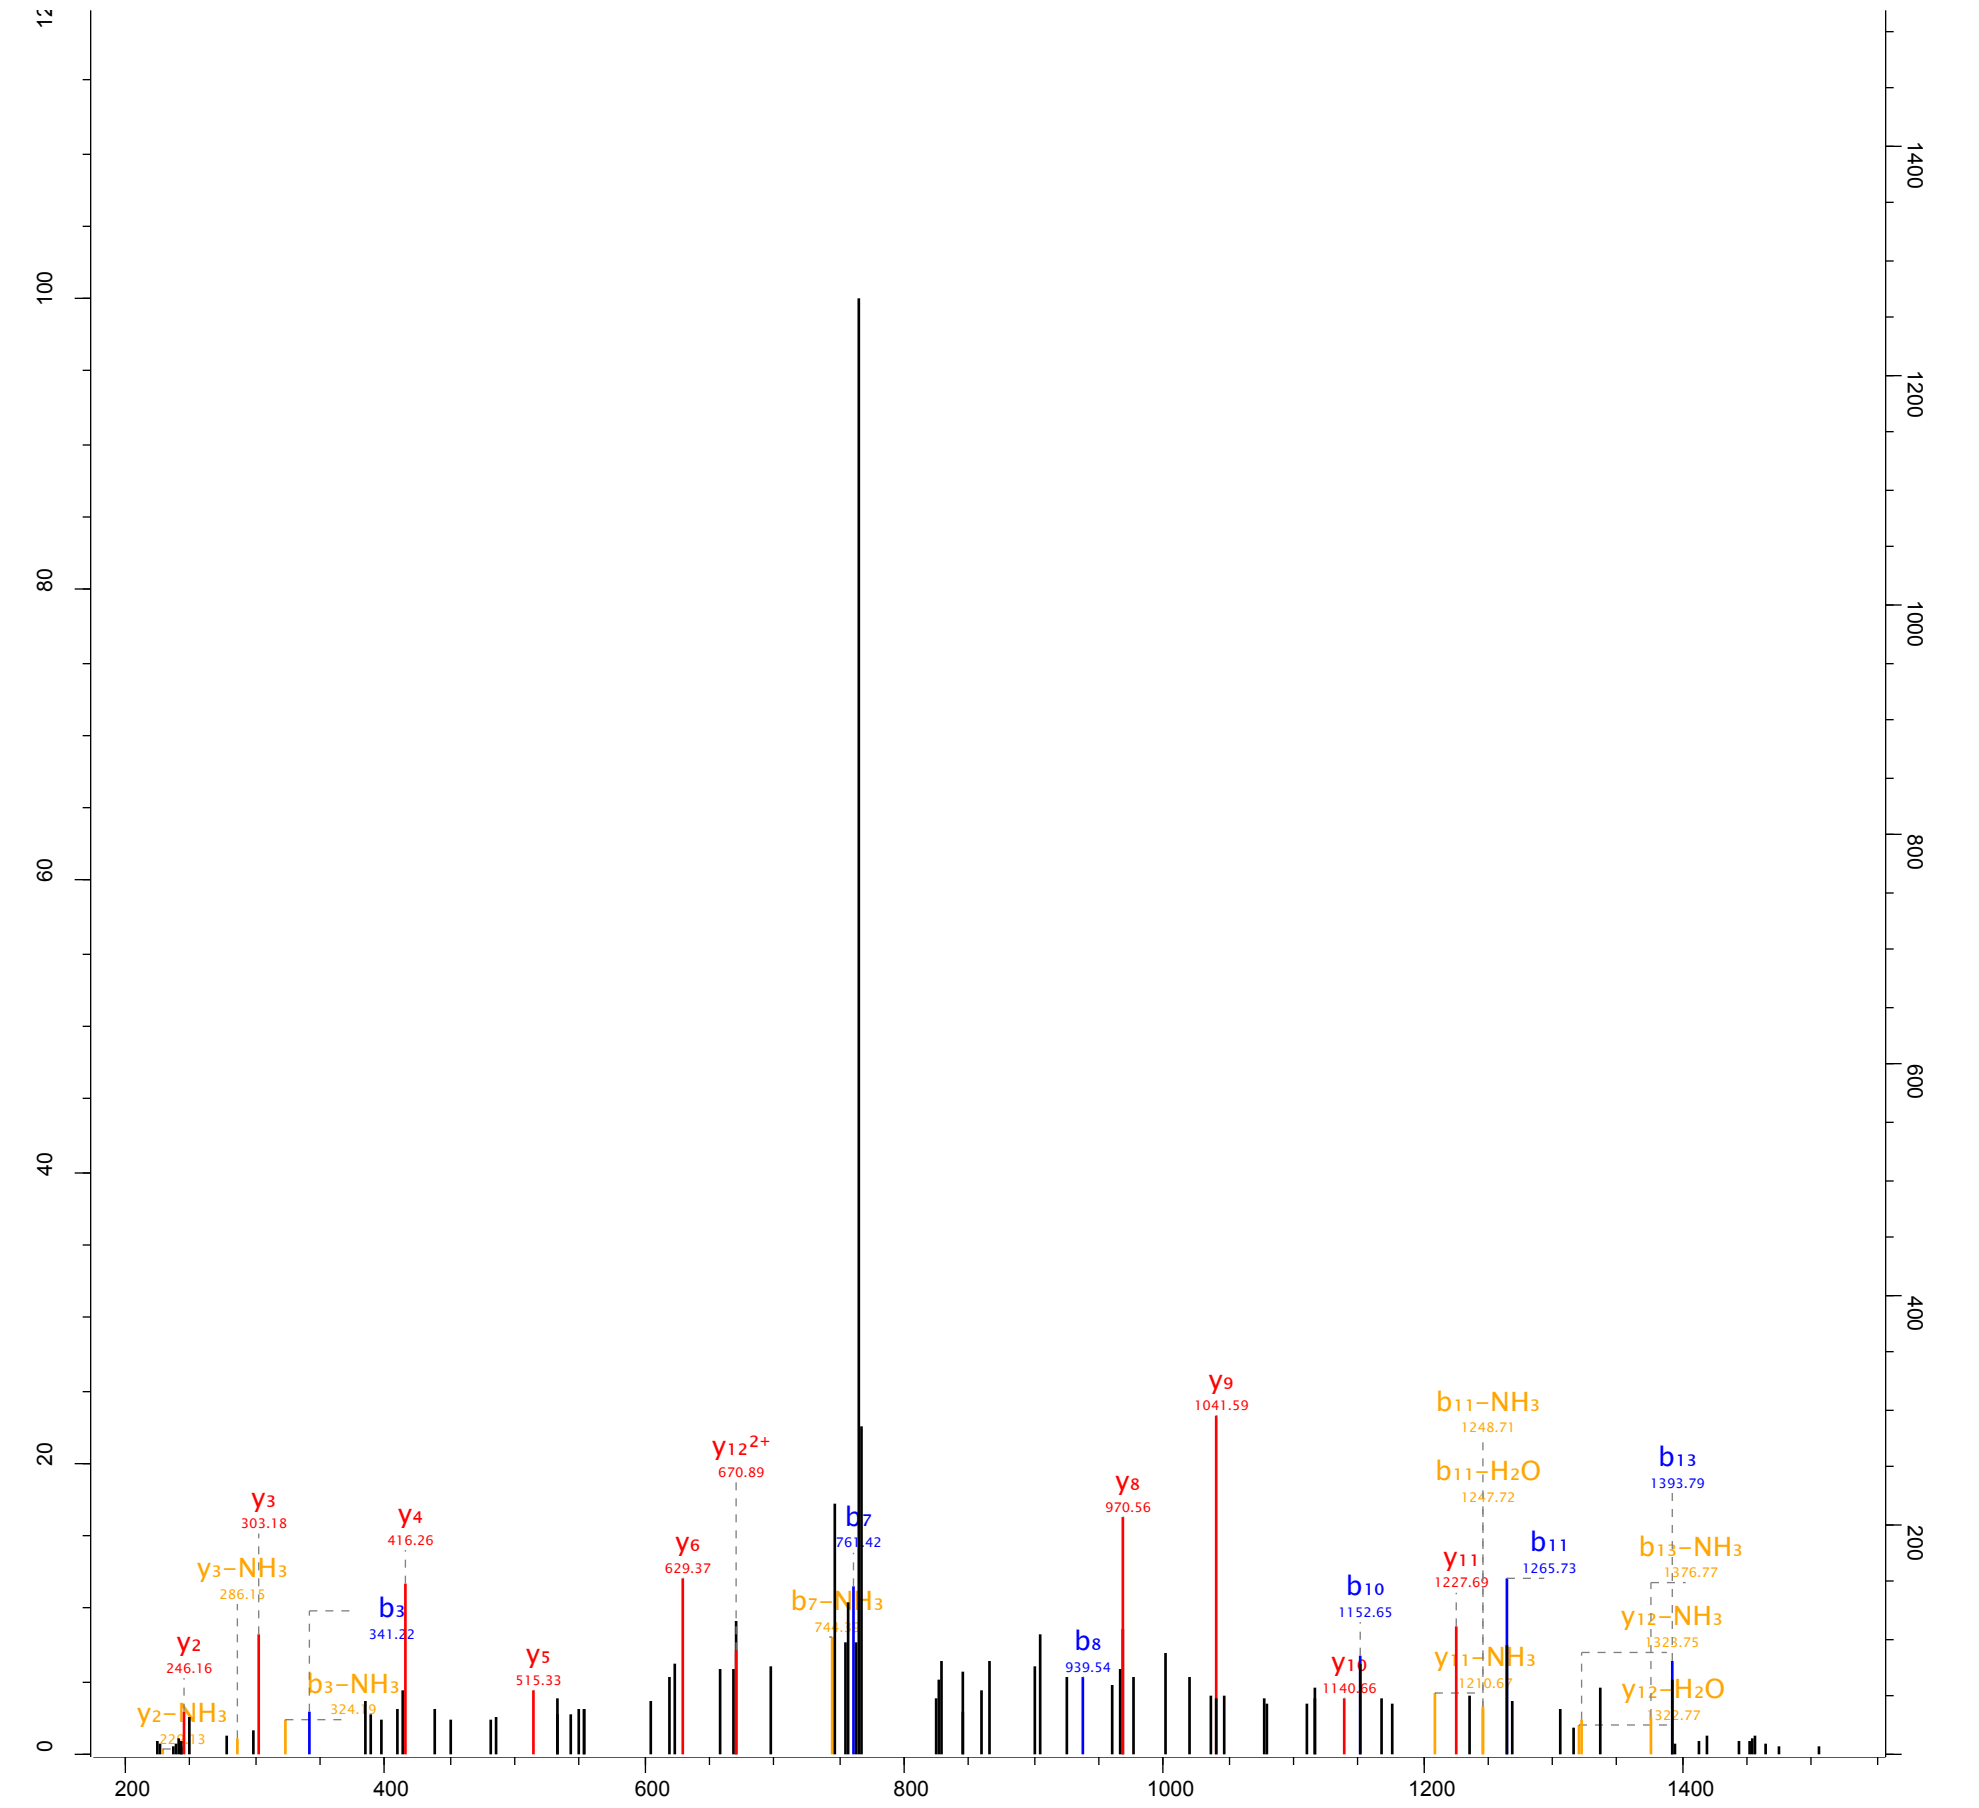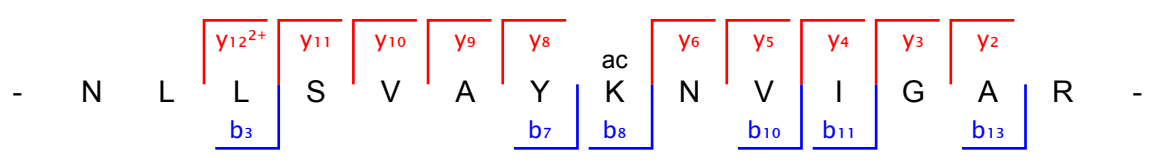

- N L L S V A Y K N V I G A R -

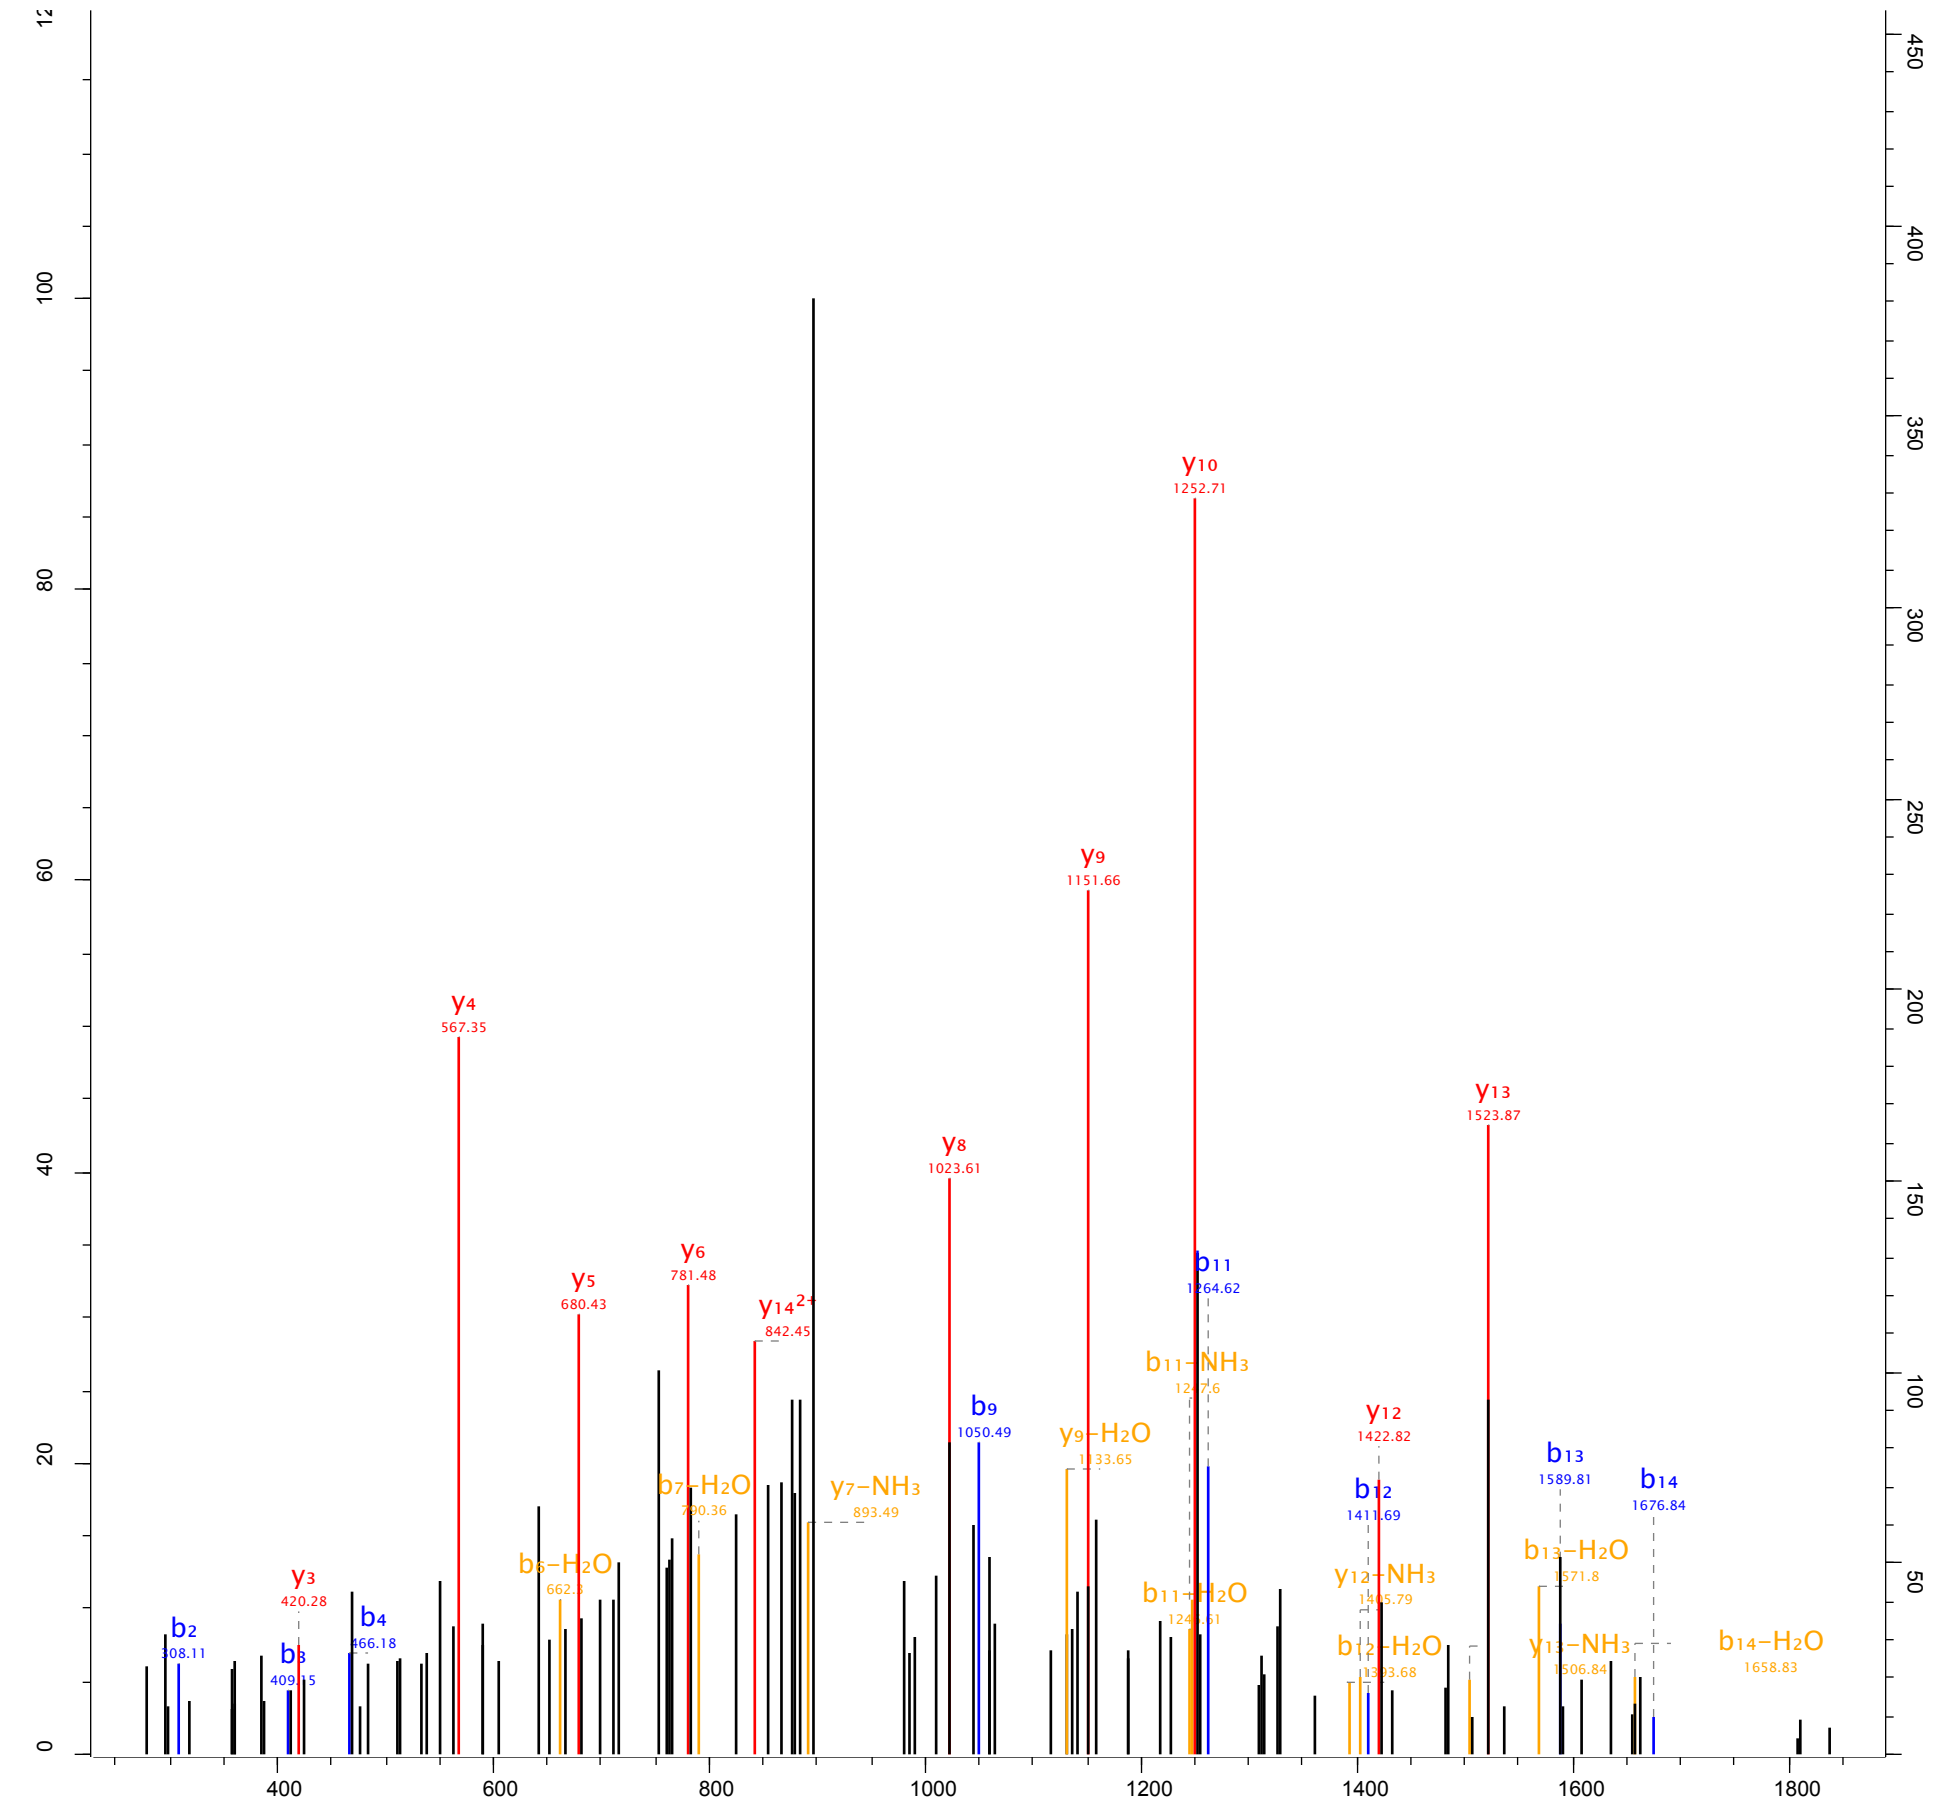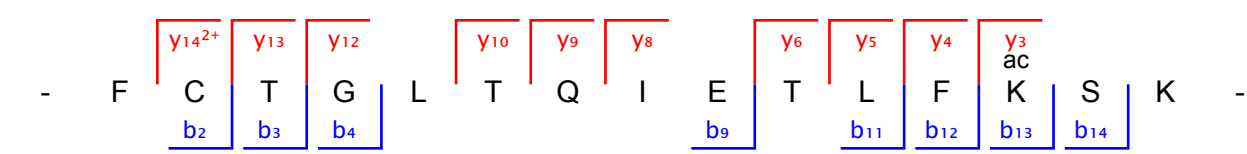

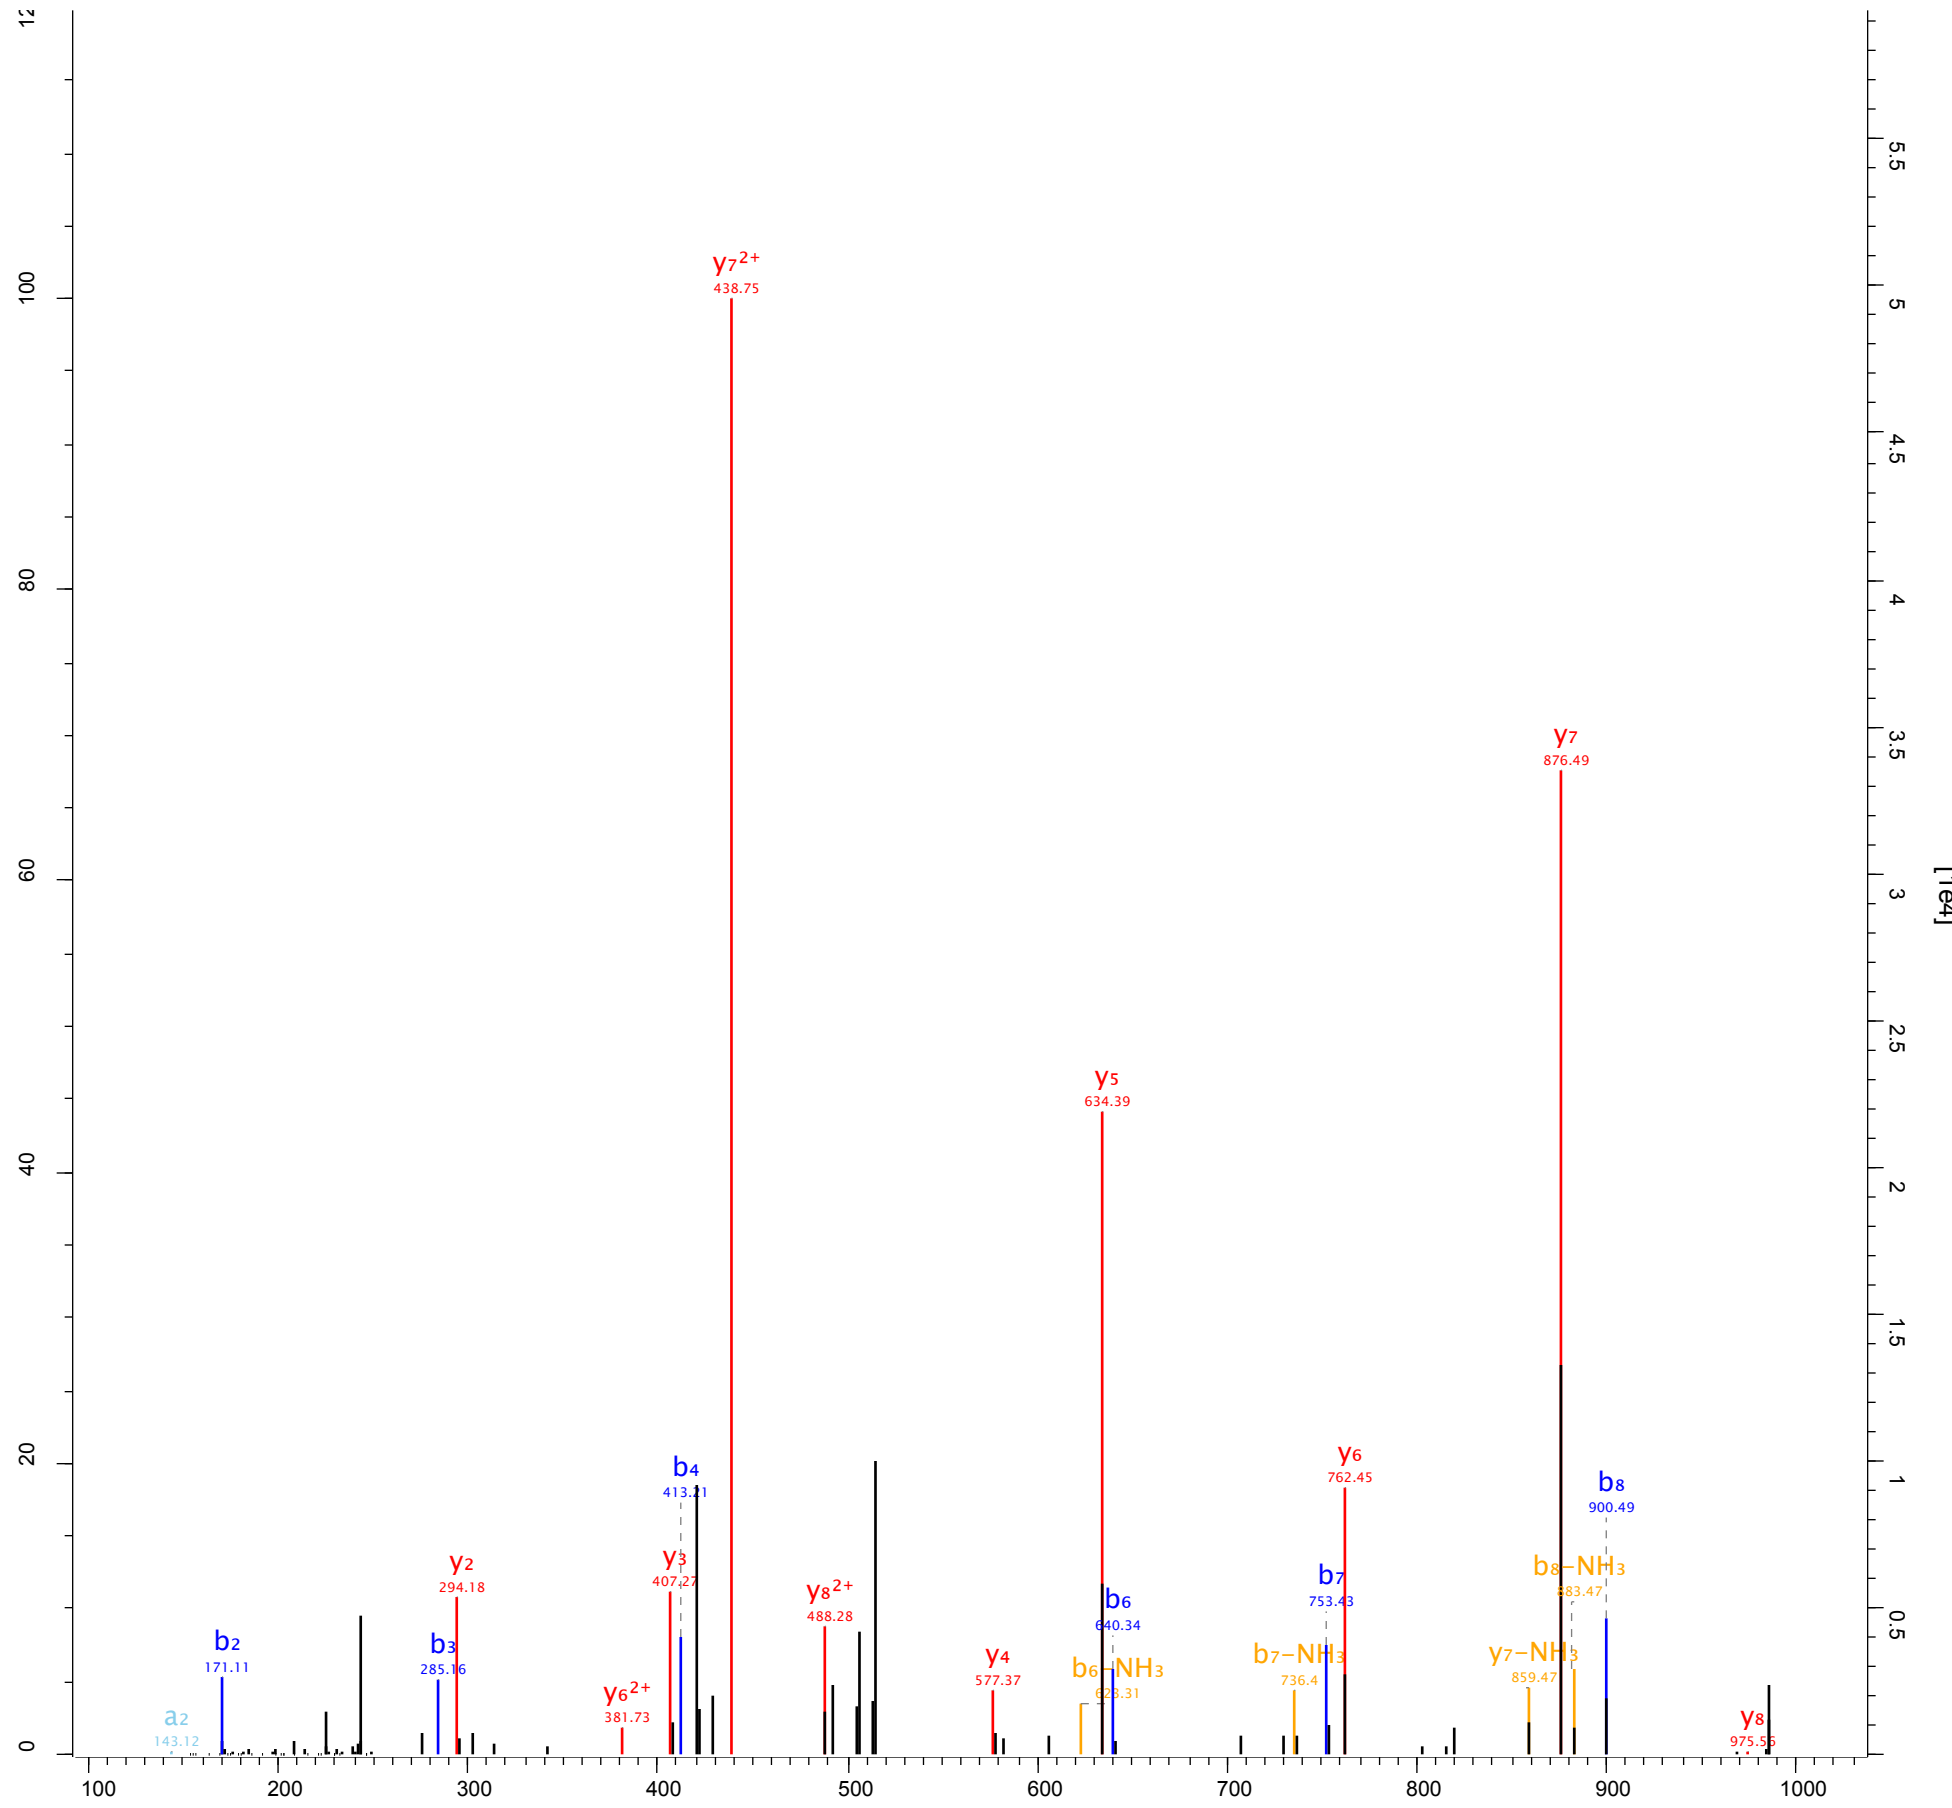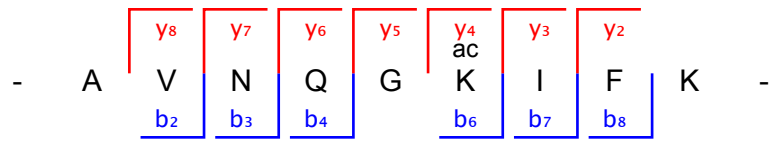

Raw file 022814\_SCW\_II\_68\_5\_2ndZT Scan 15387 Method ITMS; CID Score 157.21 m/z 464.77 Gene names Ckb

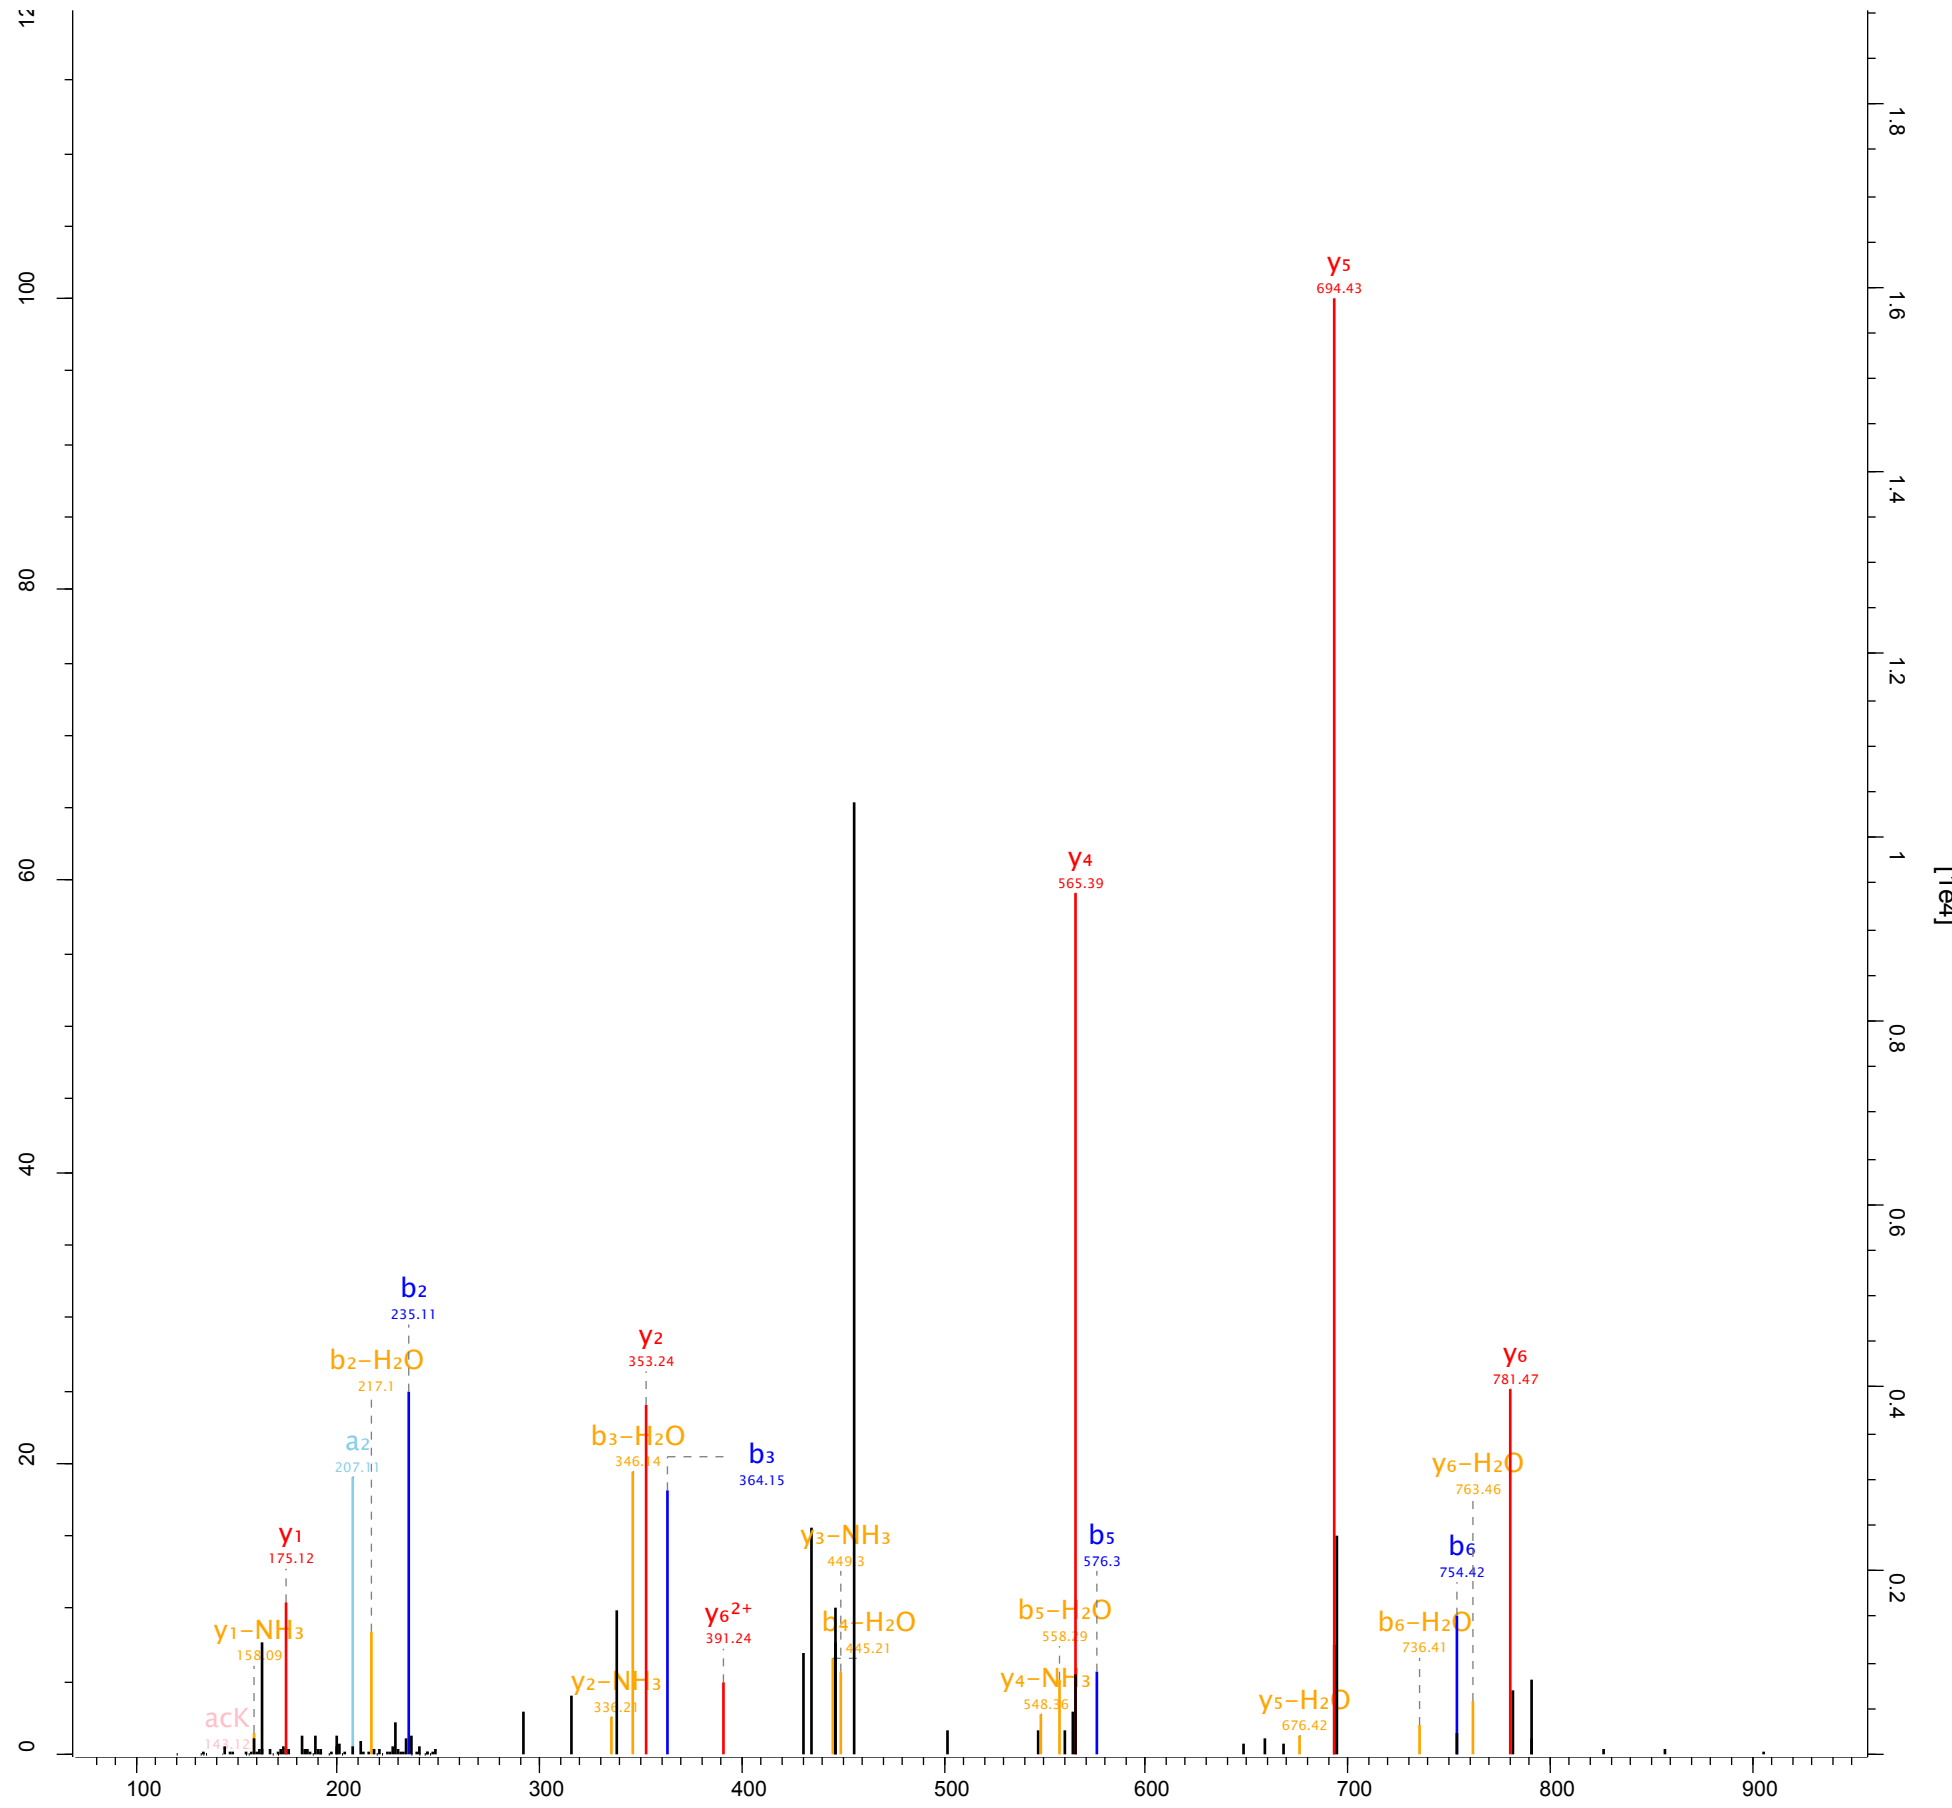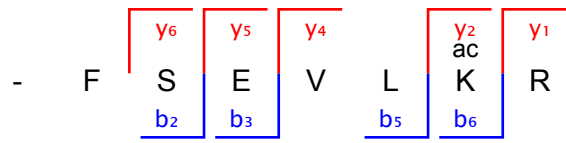

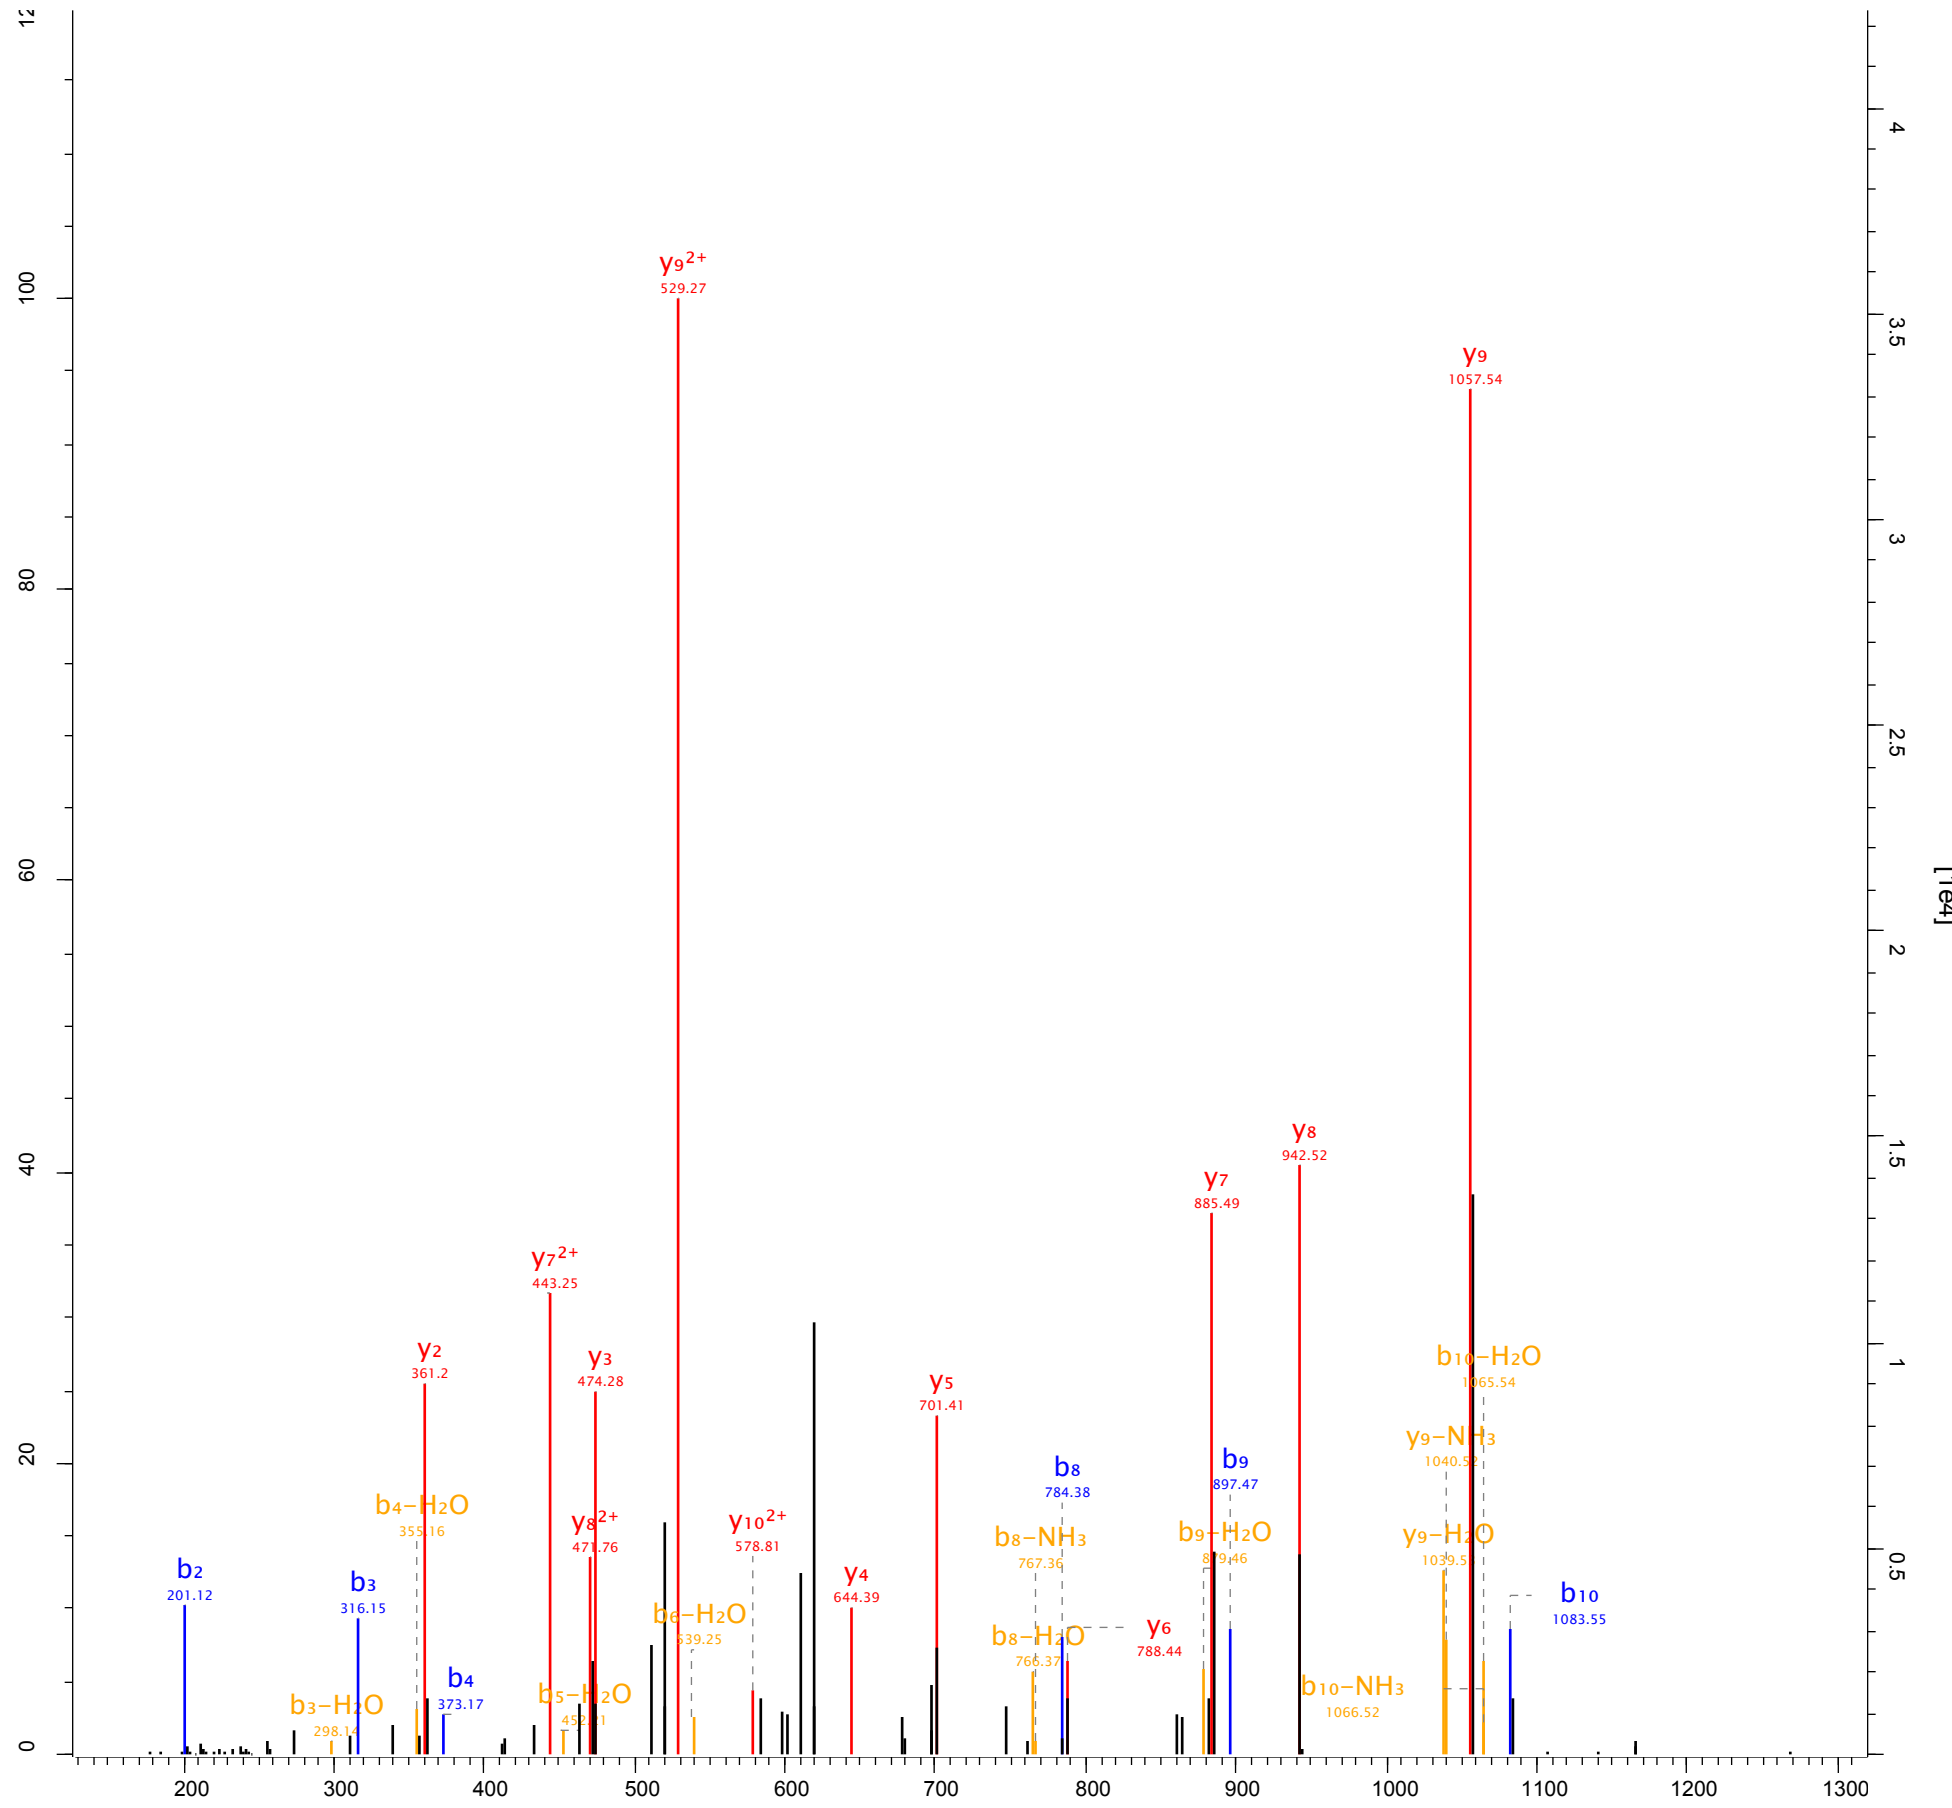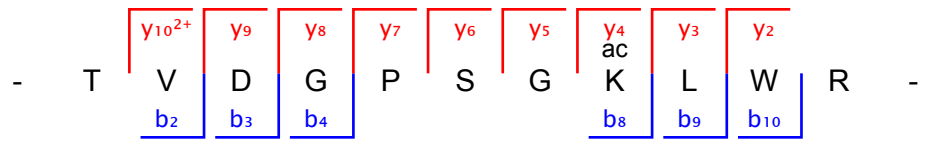



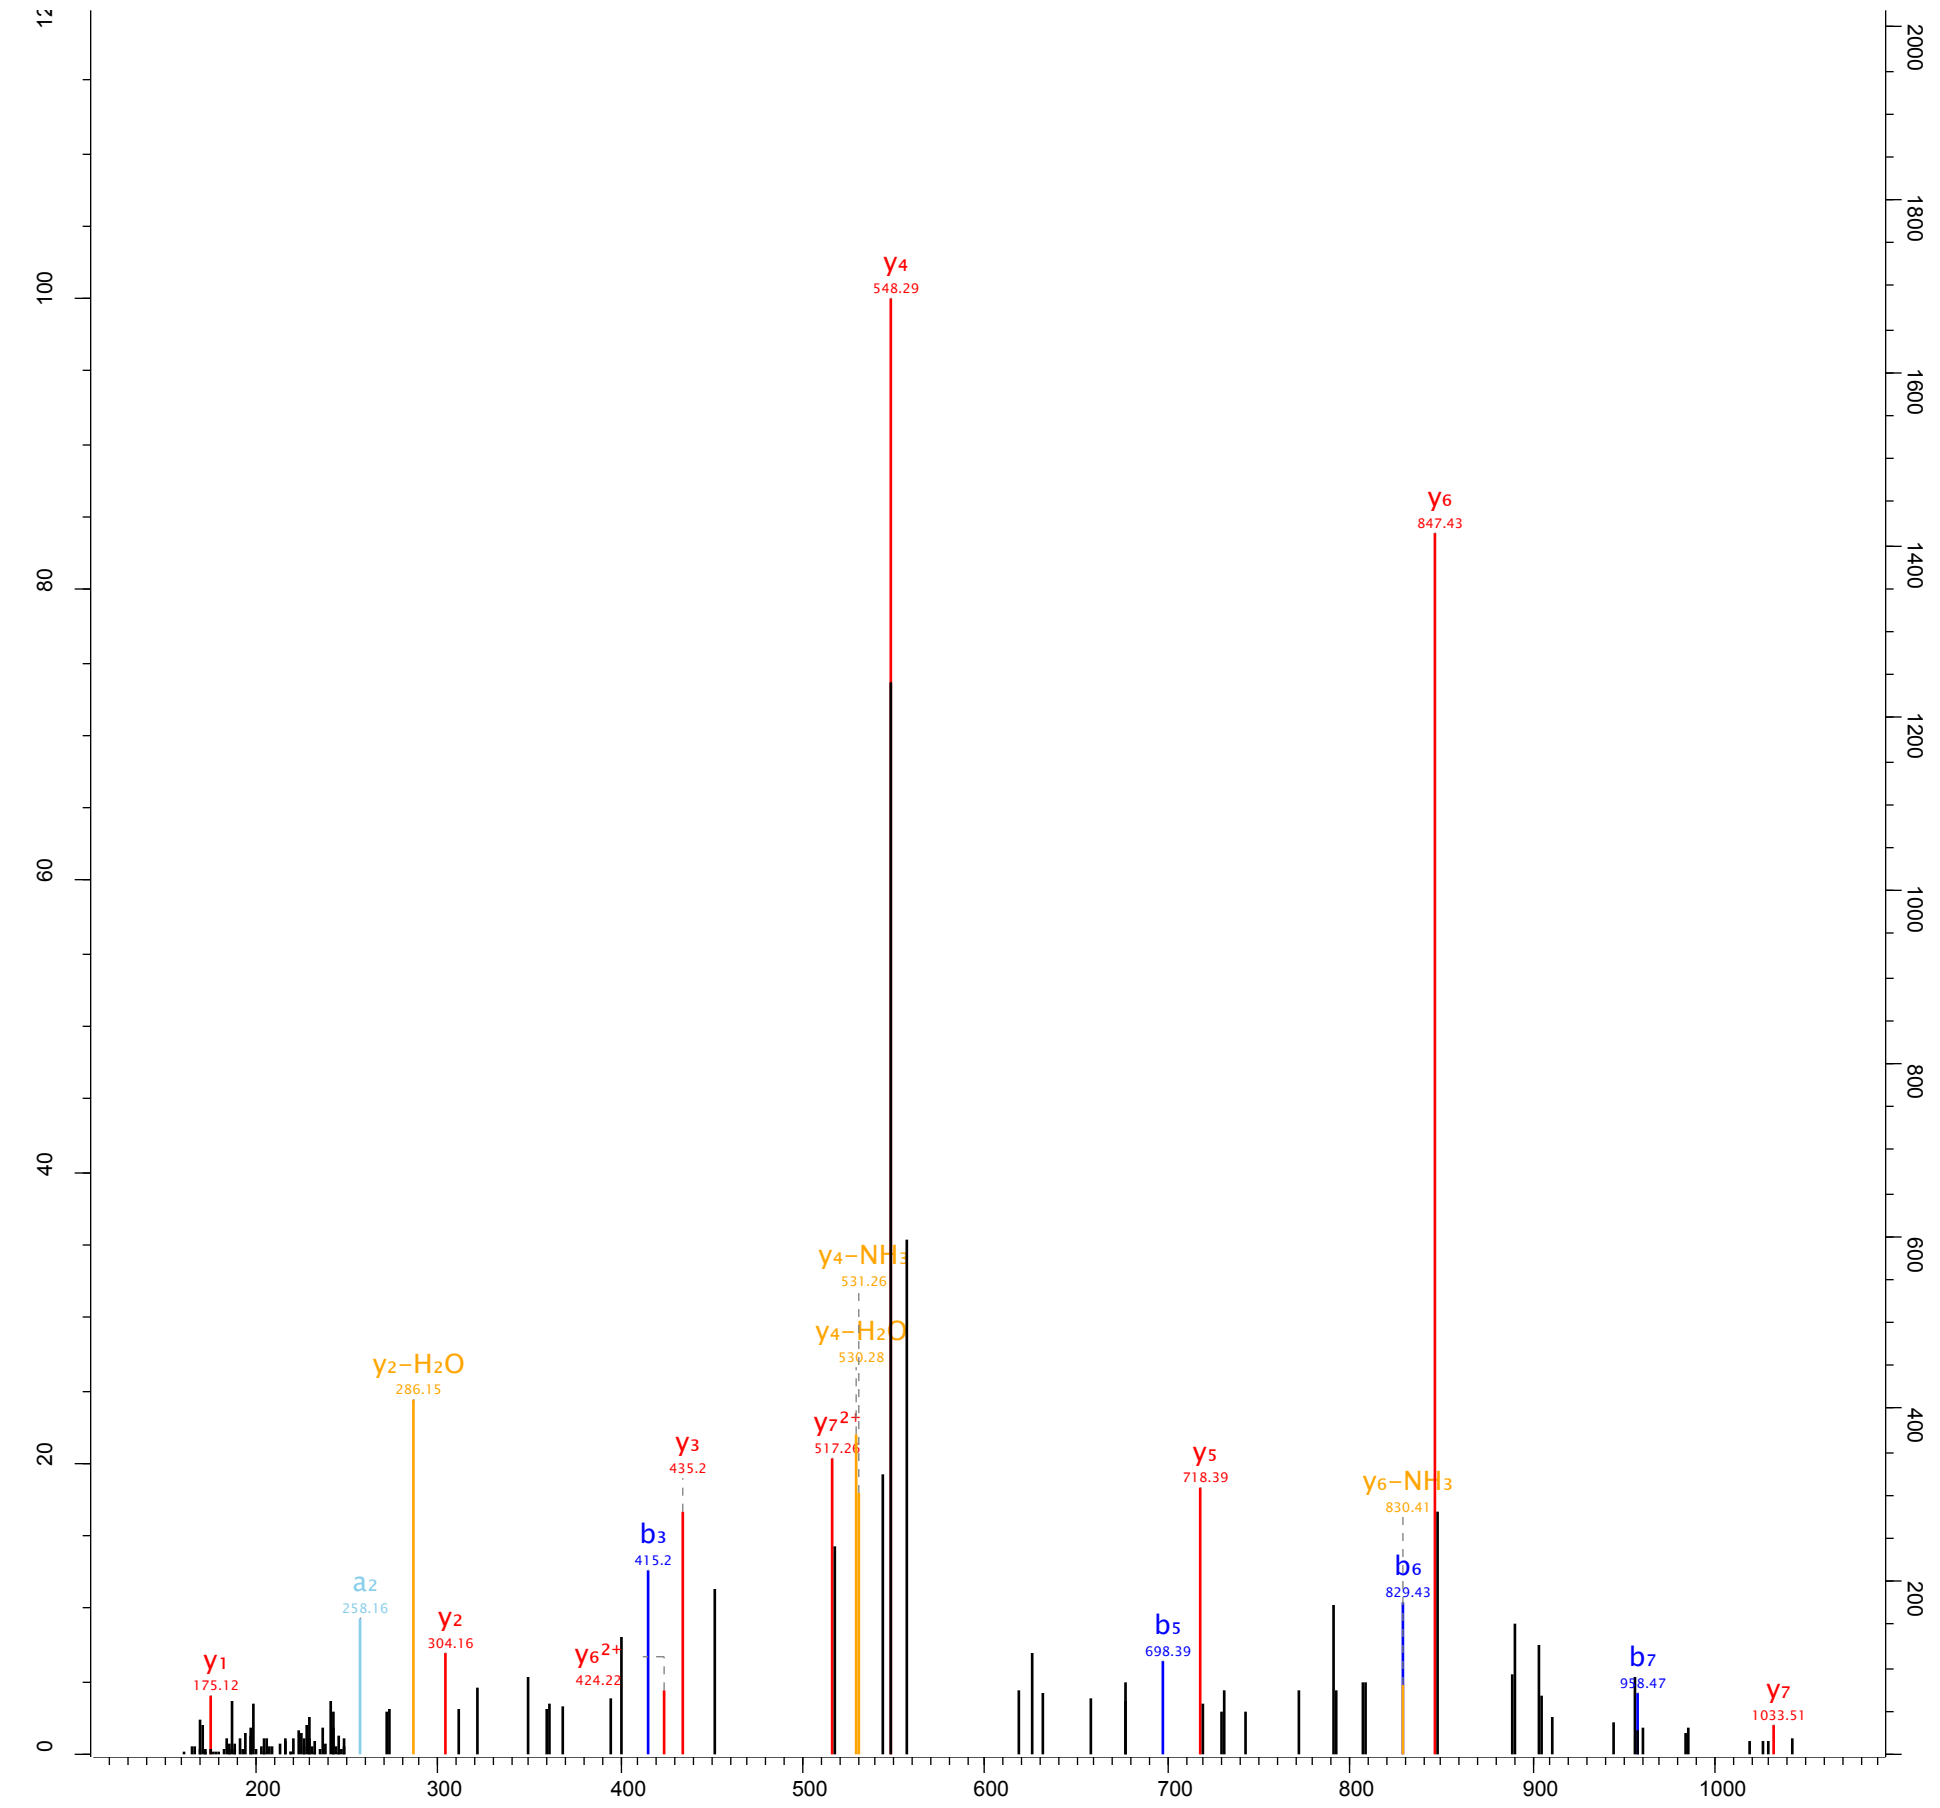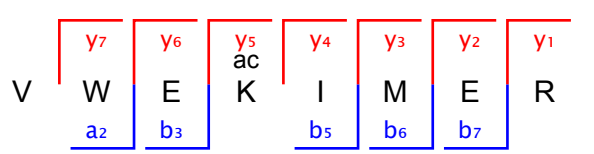

022814\_SCW\_II\_68\_5\_2ndZT

20192

ITMS; CID

241.39

688.32

Got2

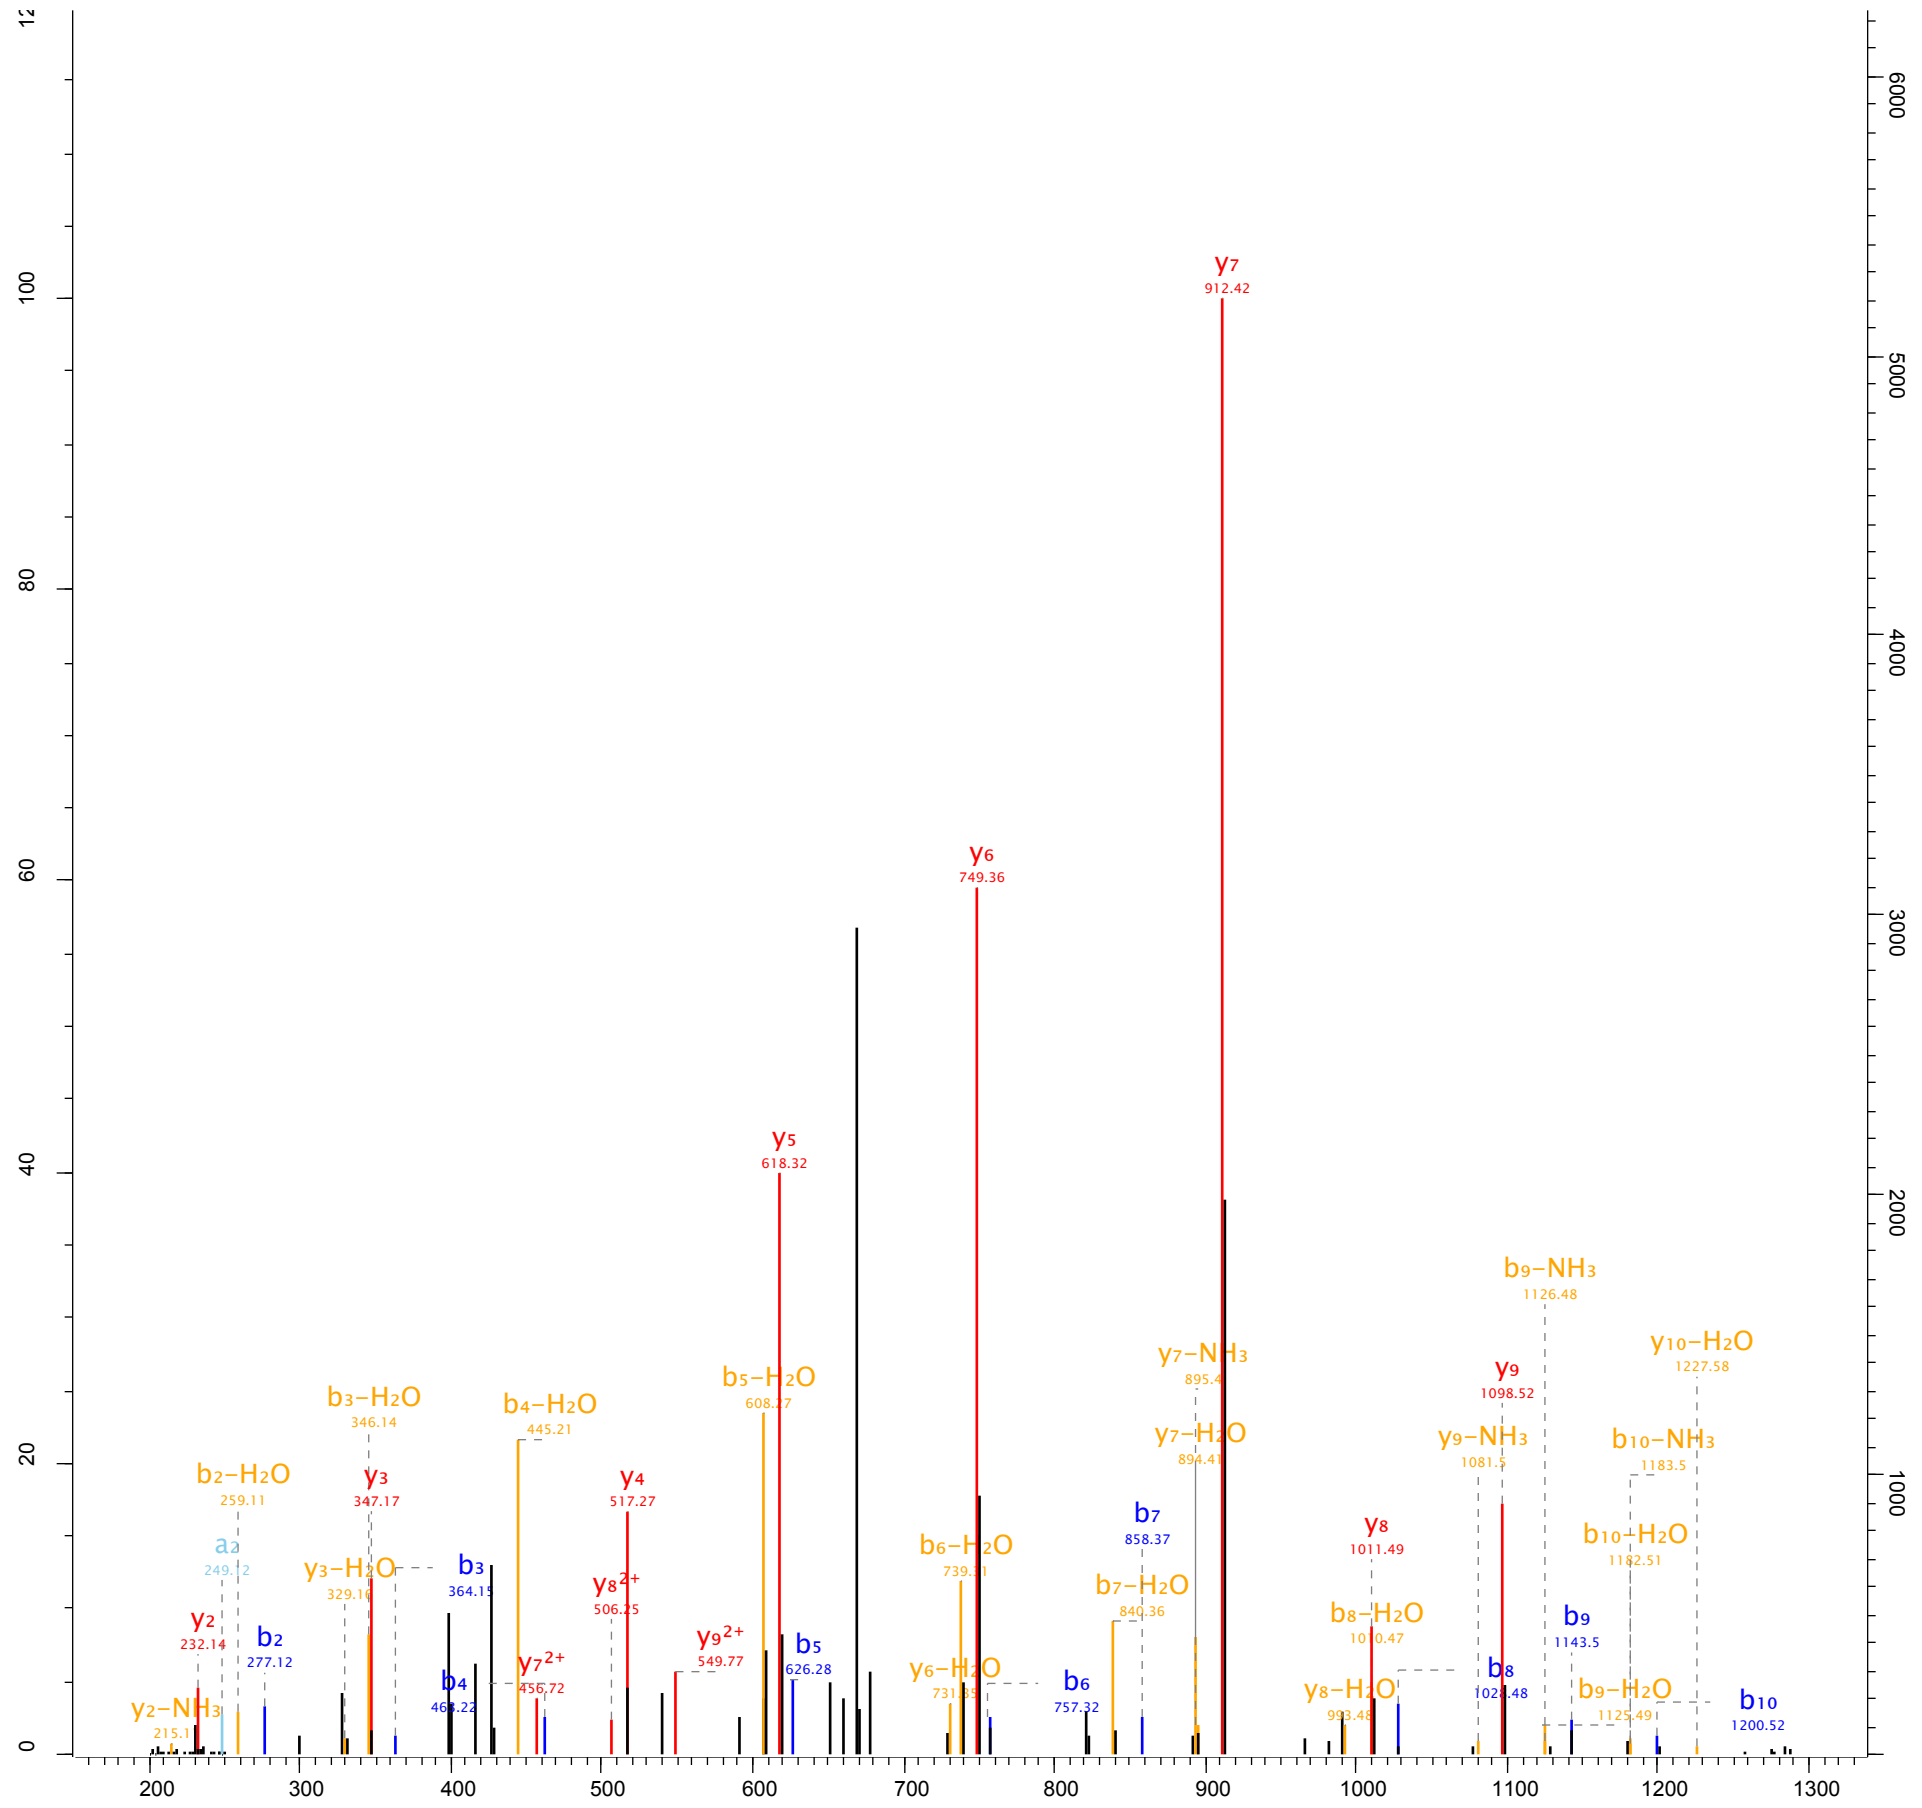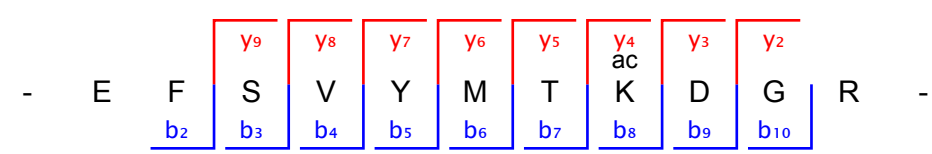

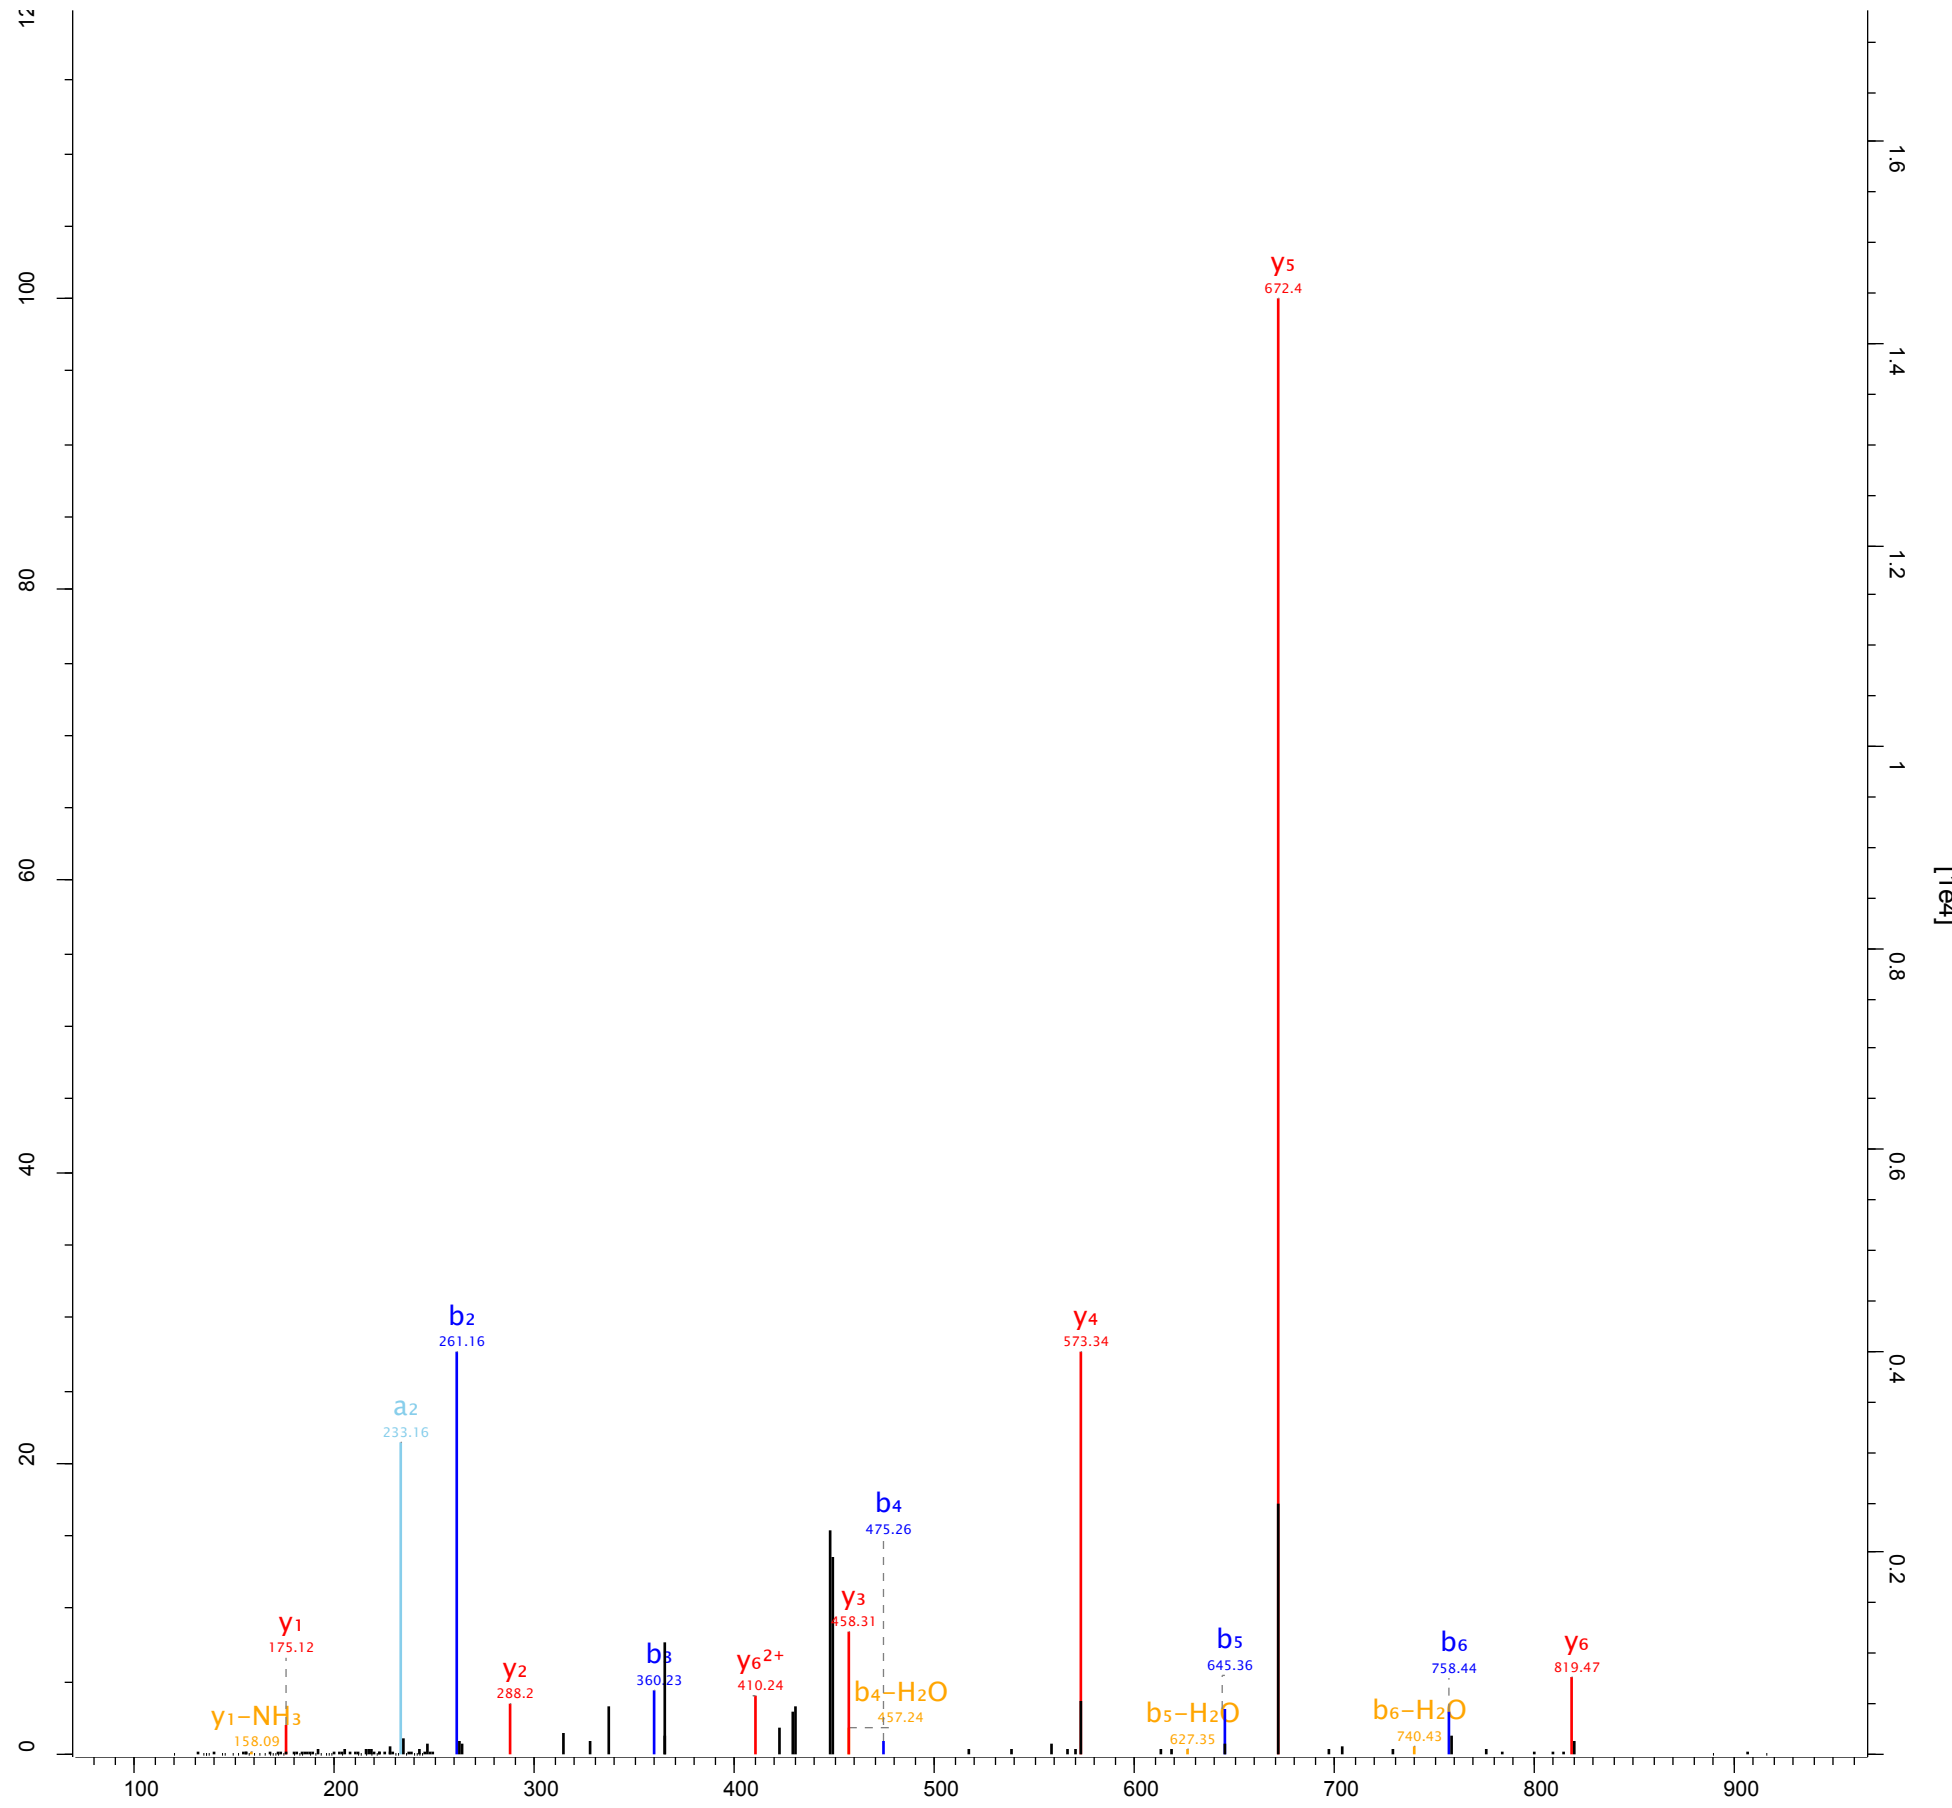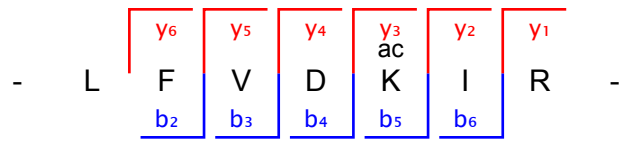

- L F V D K I R -

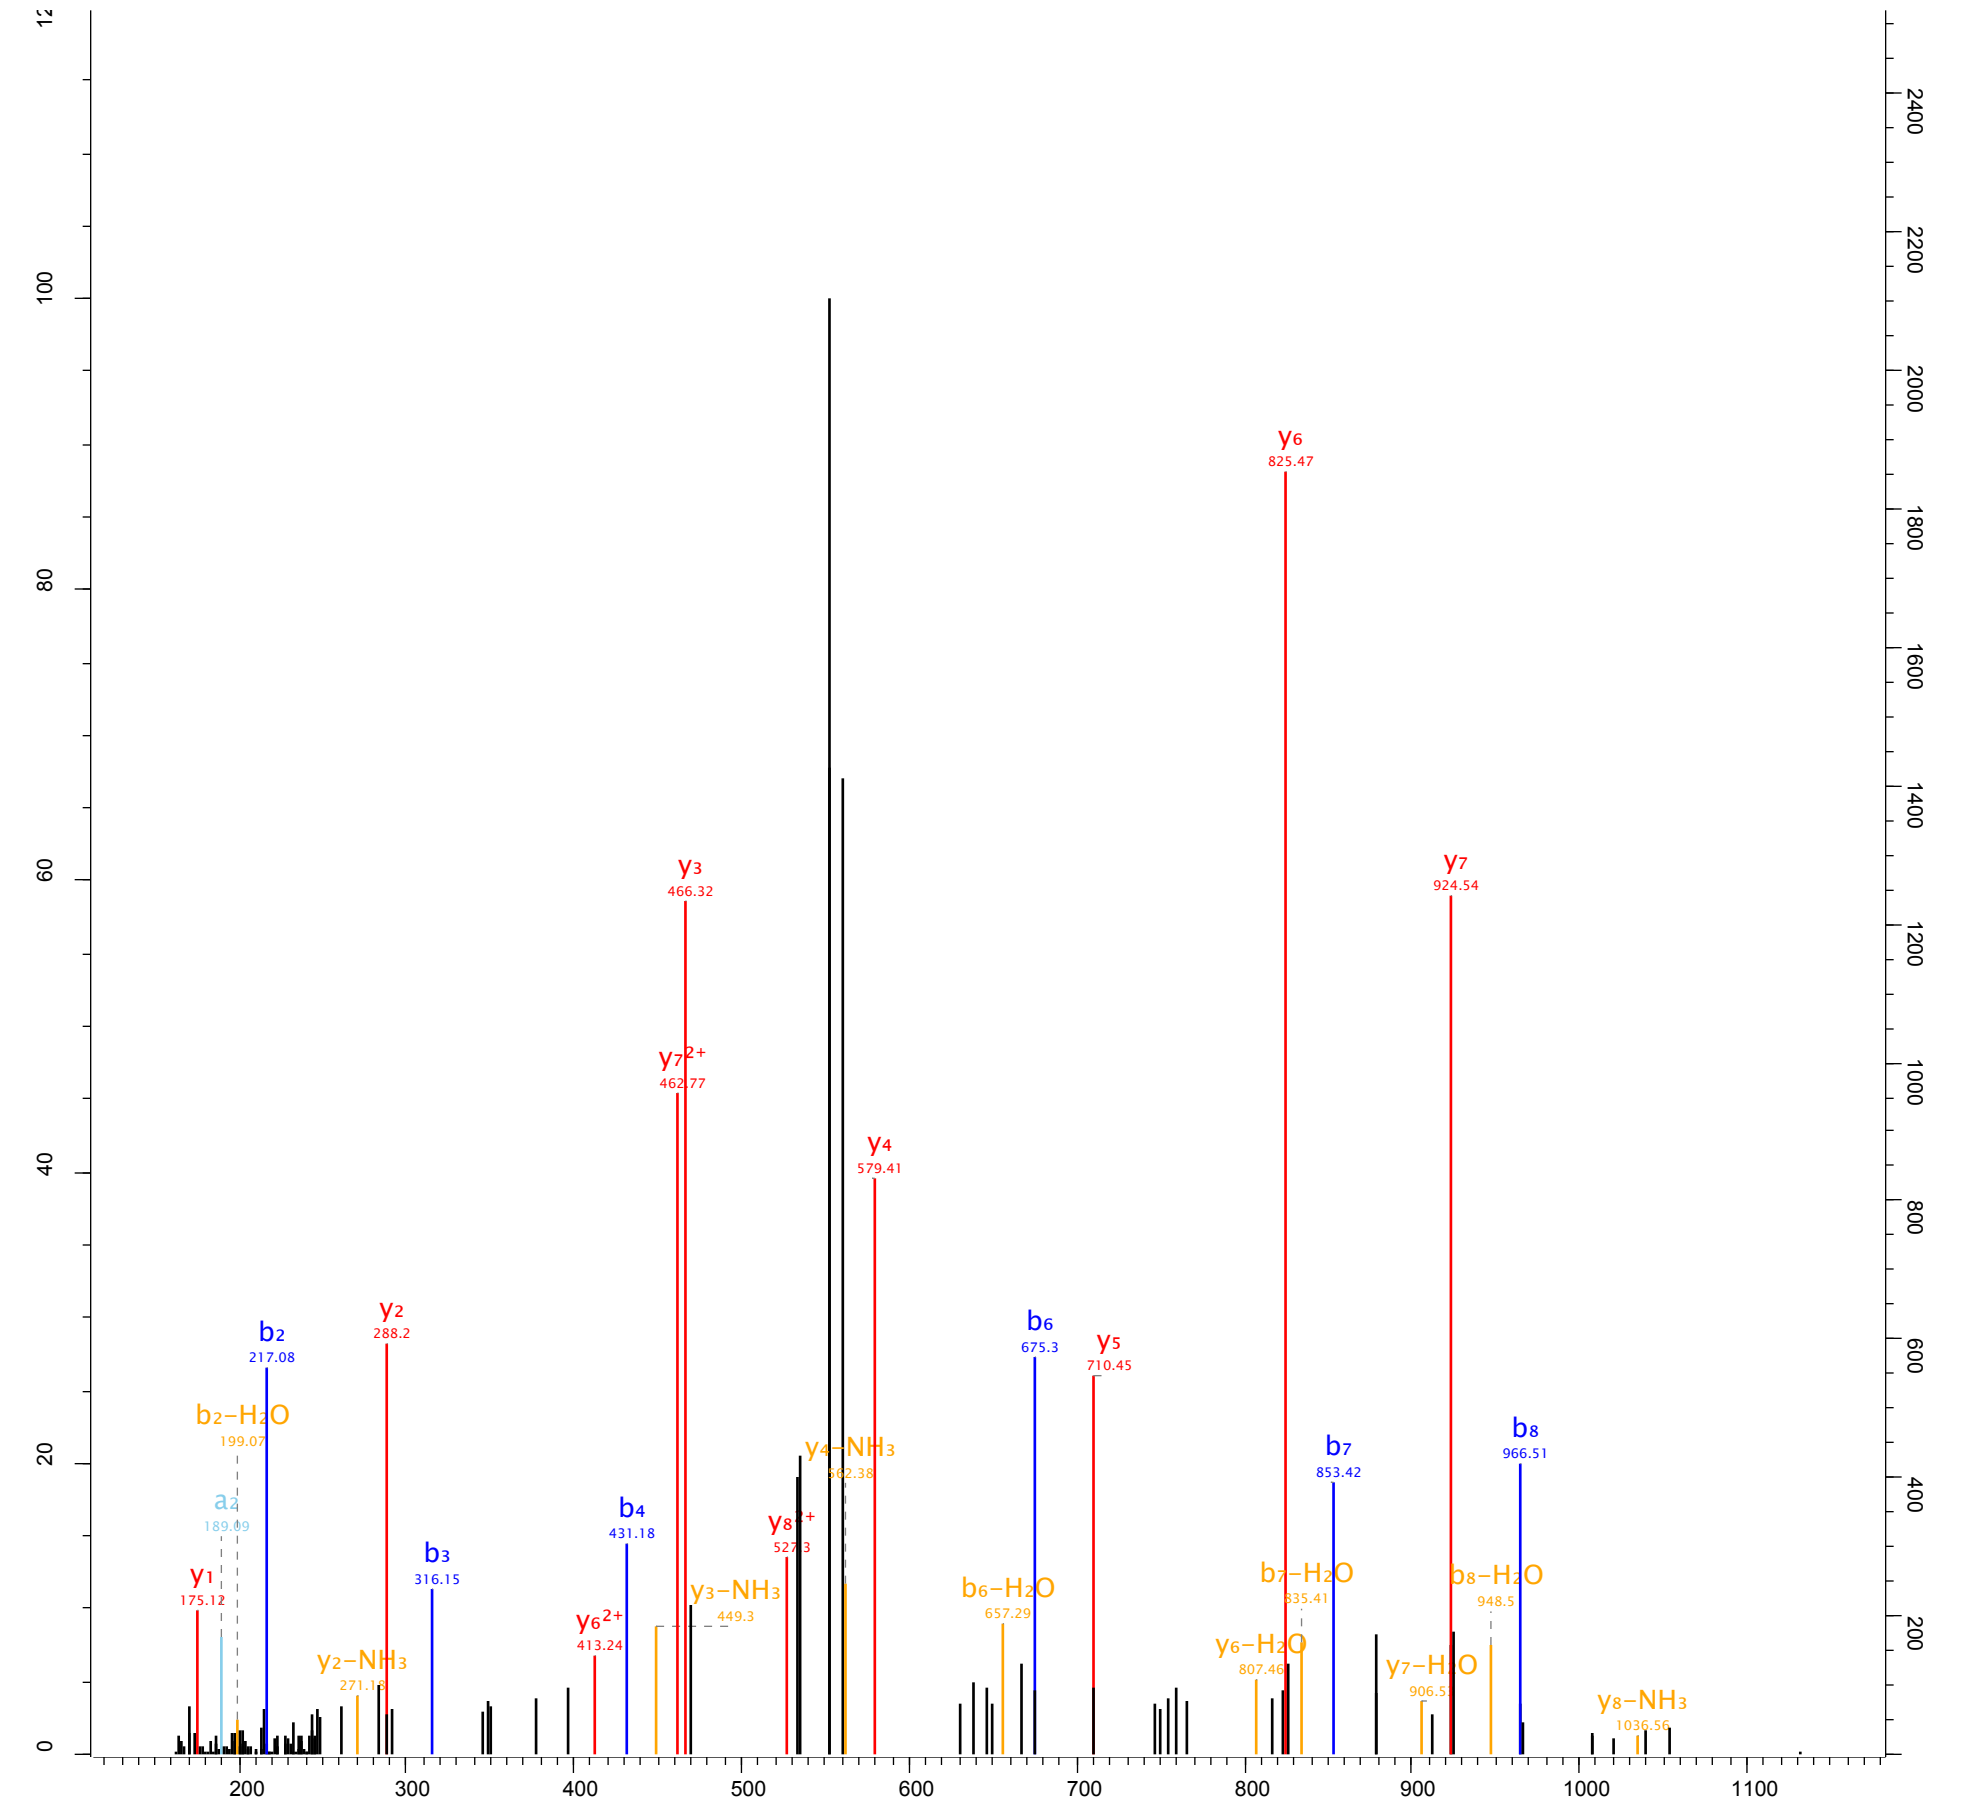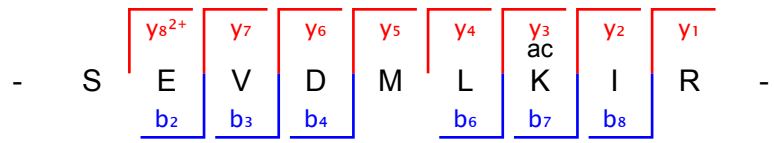

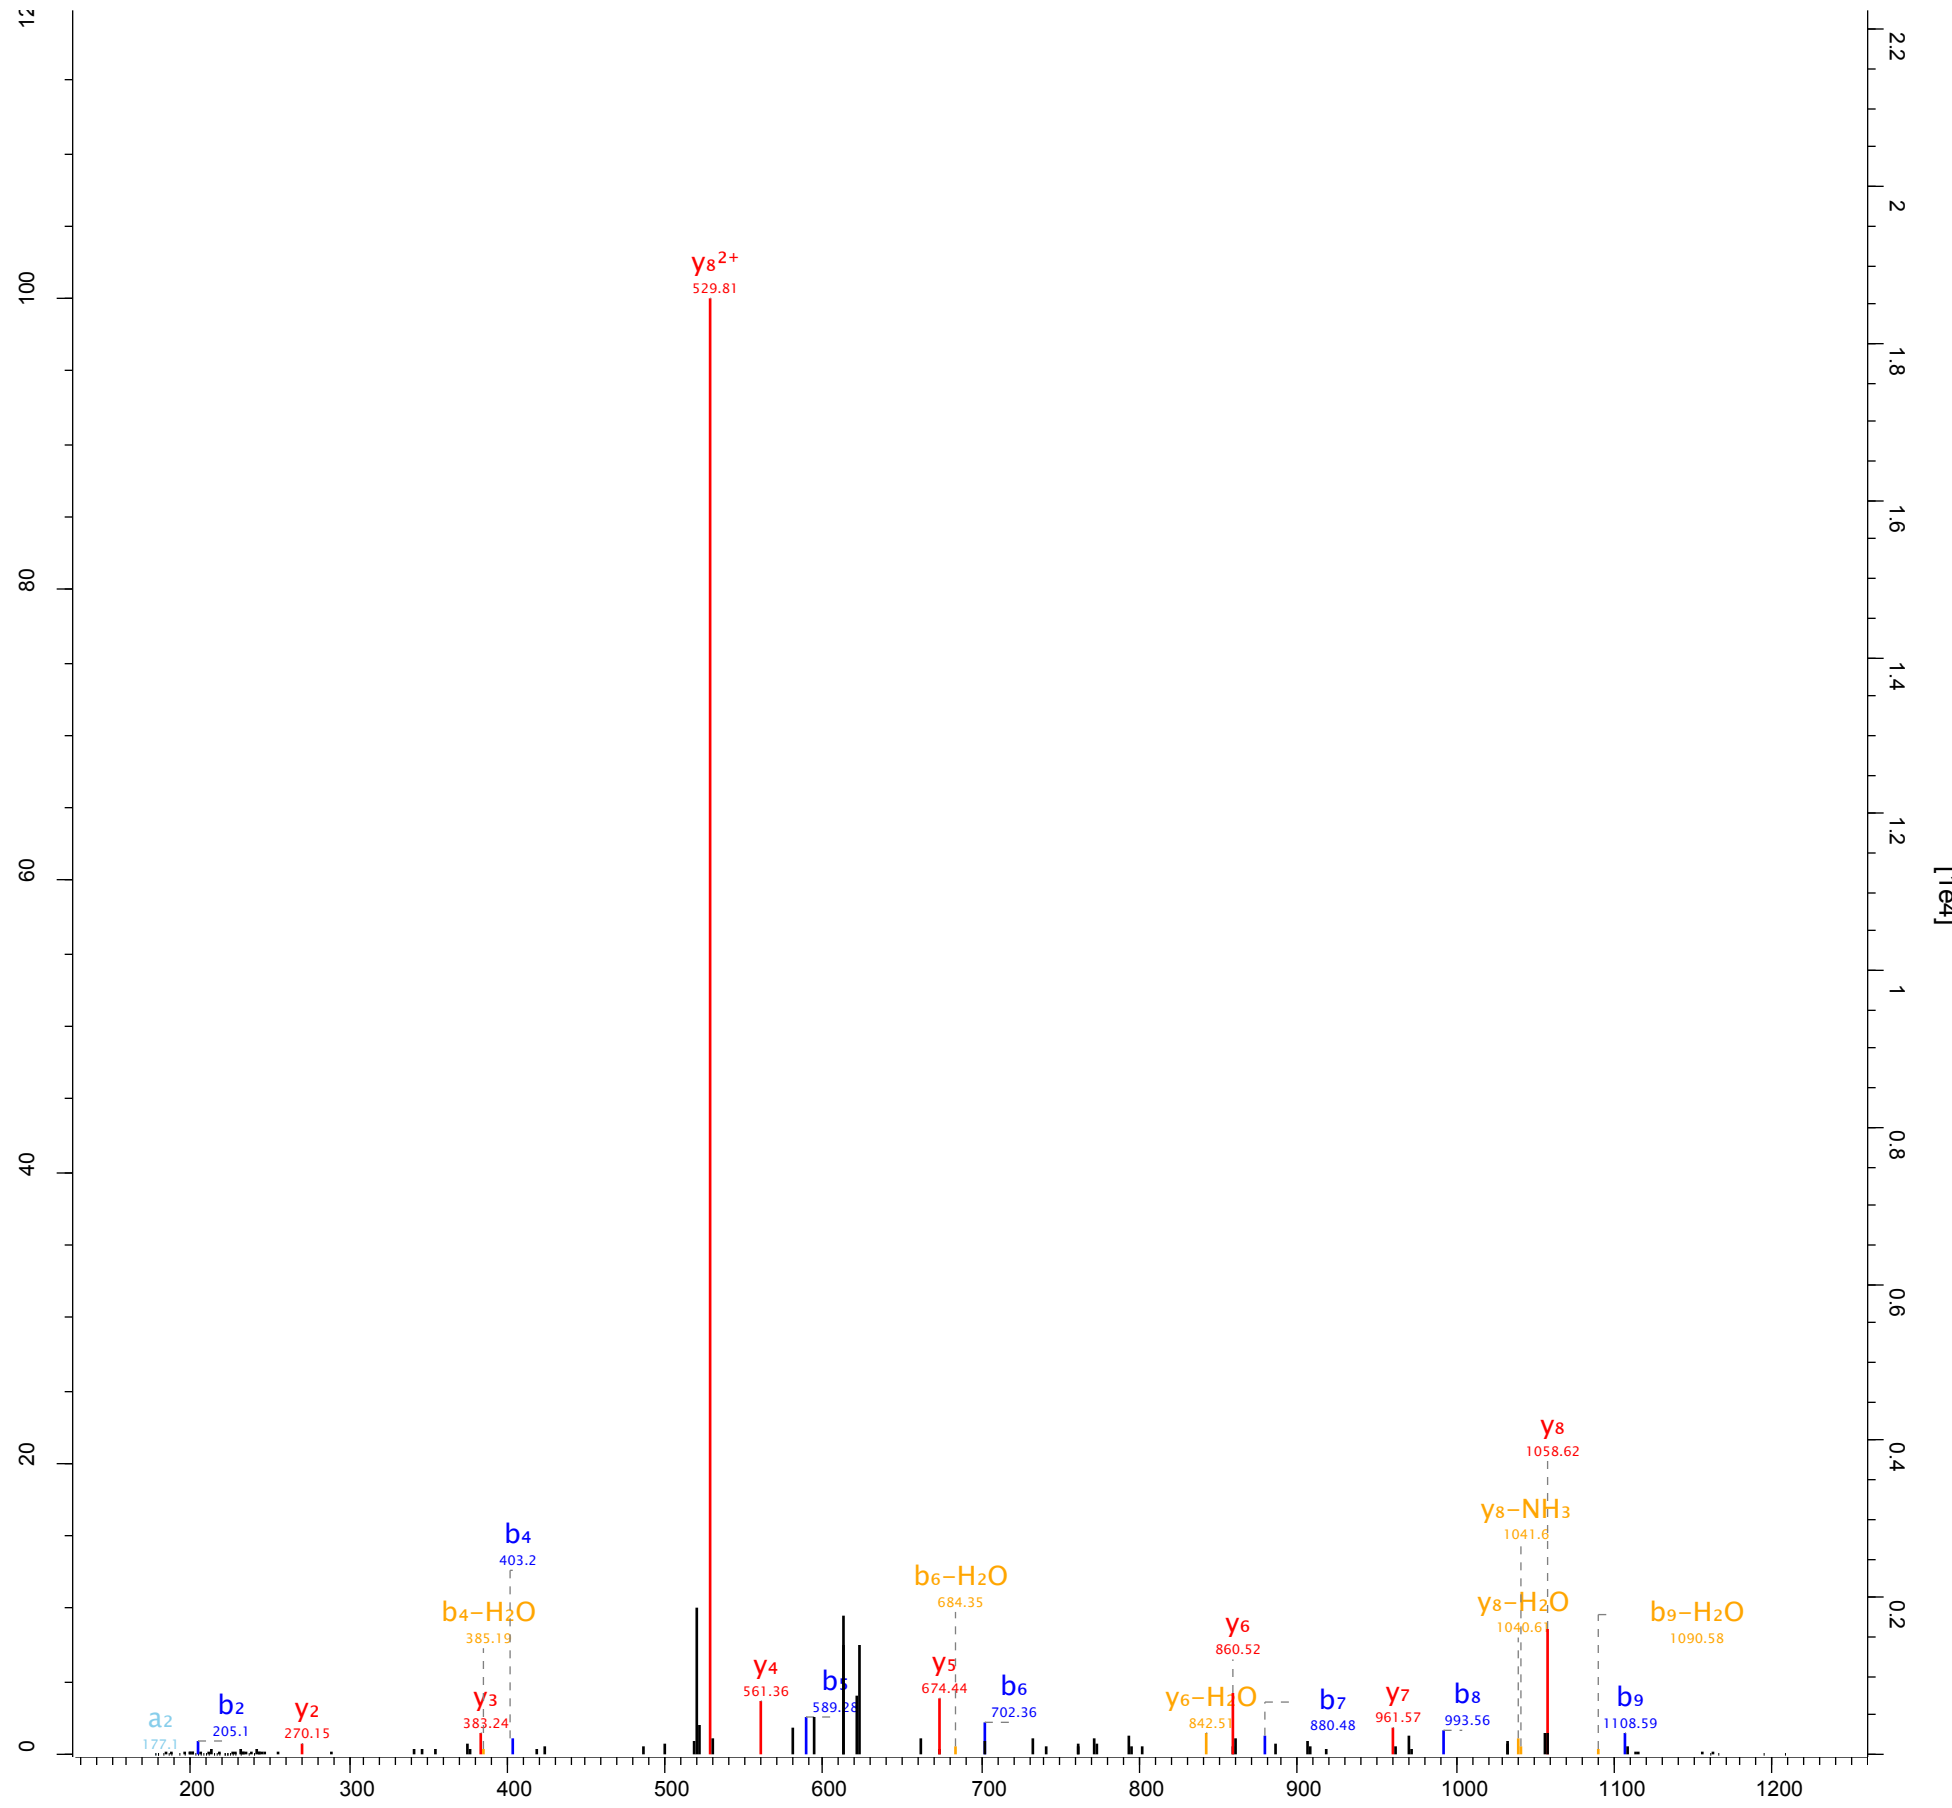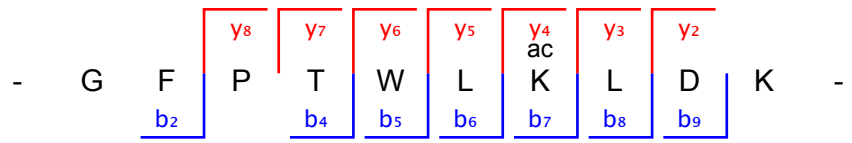

022814\_SCW\_II\_68\_5\_2ndZT

28221

ITMS; CID

177.16

723.39

Slc25a5

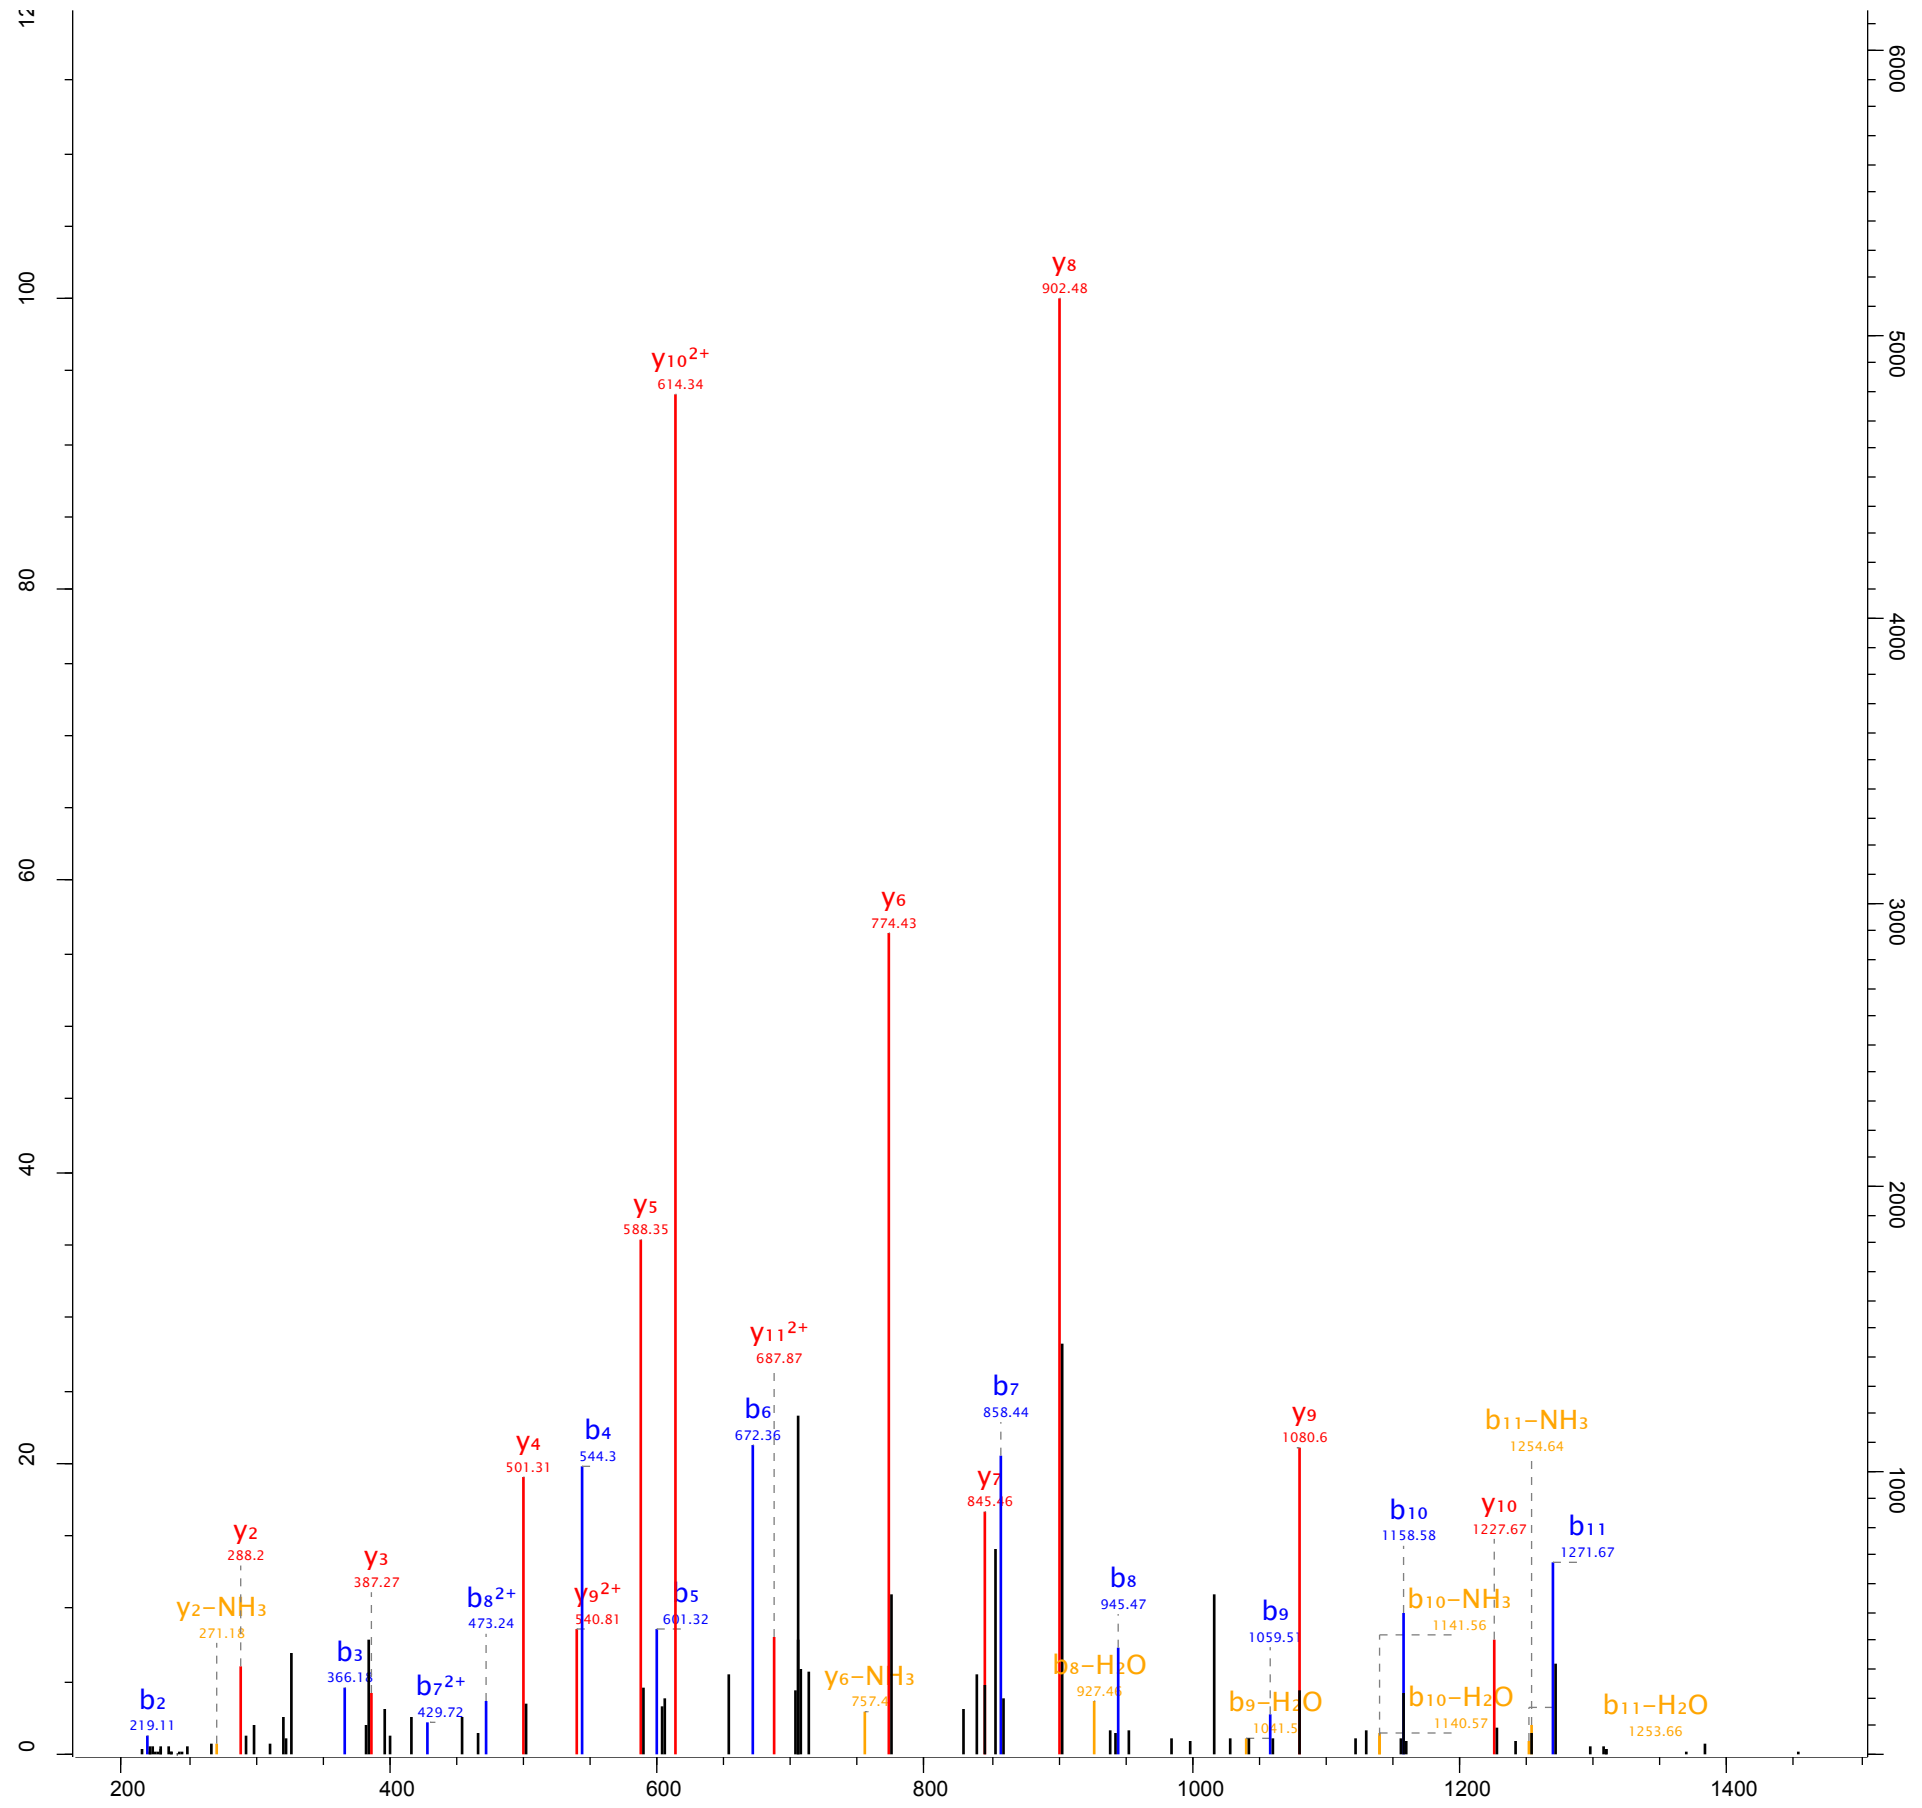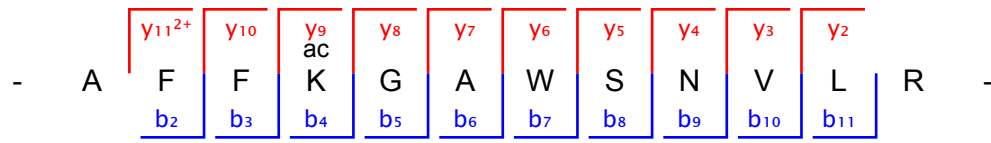

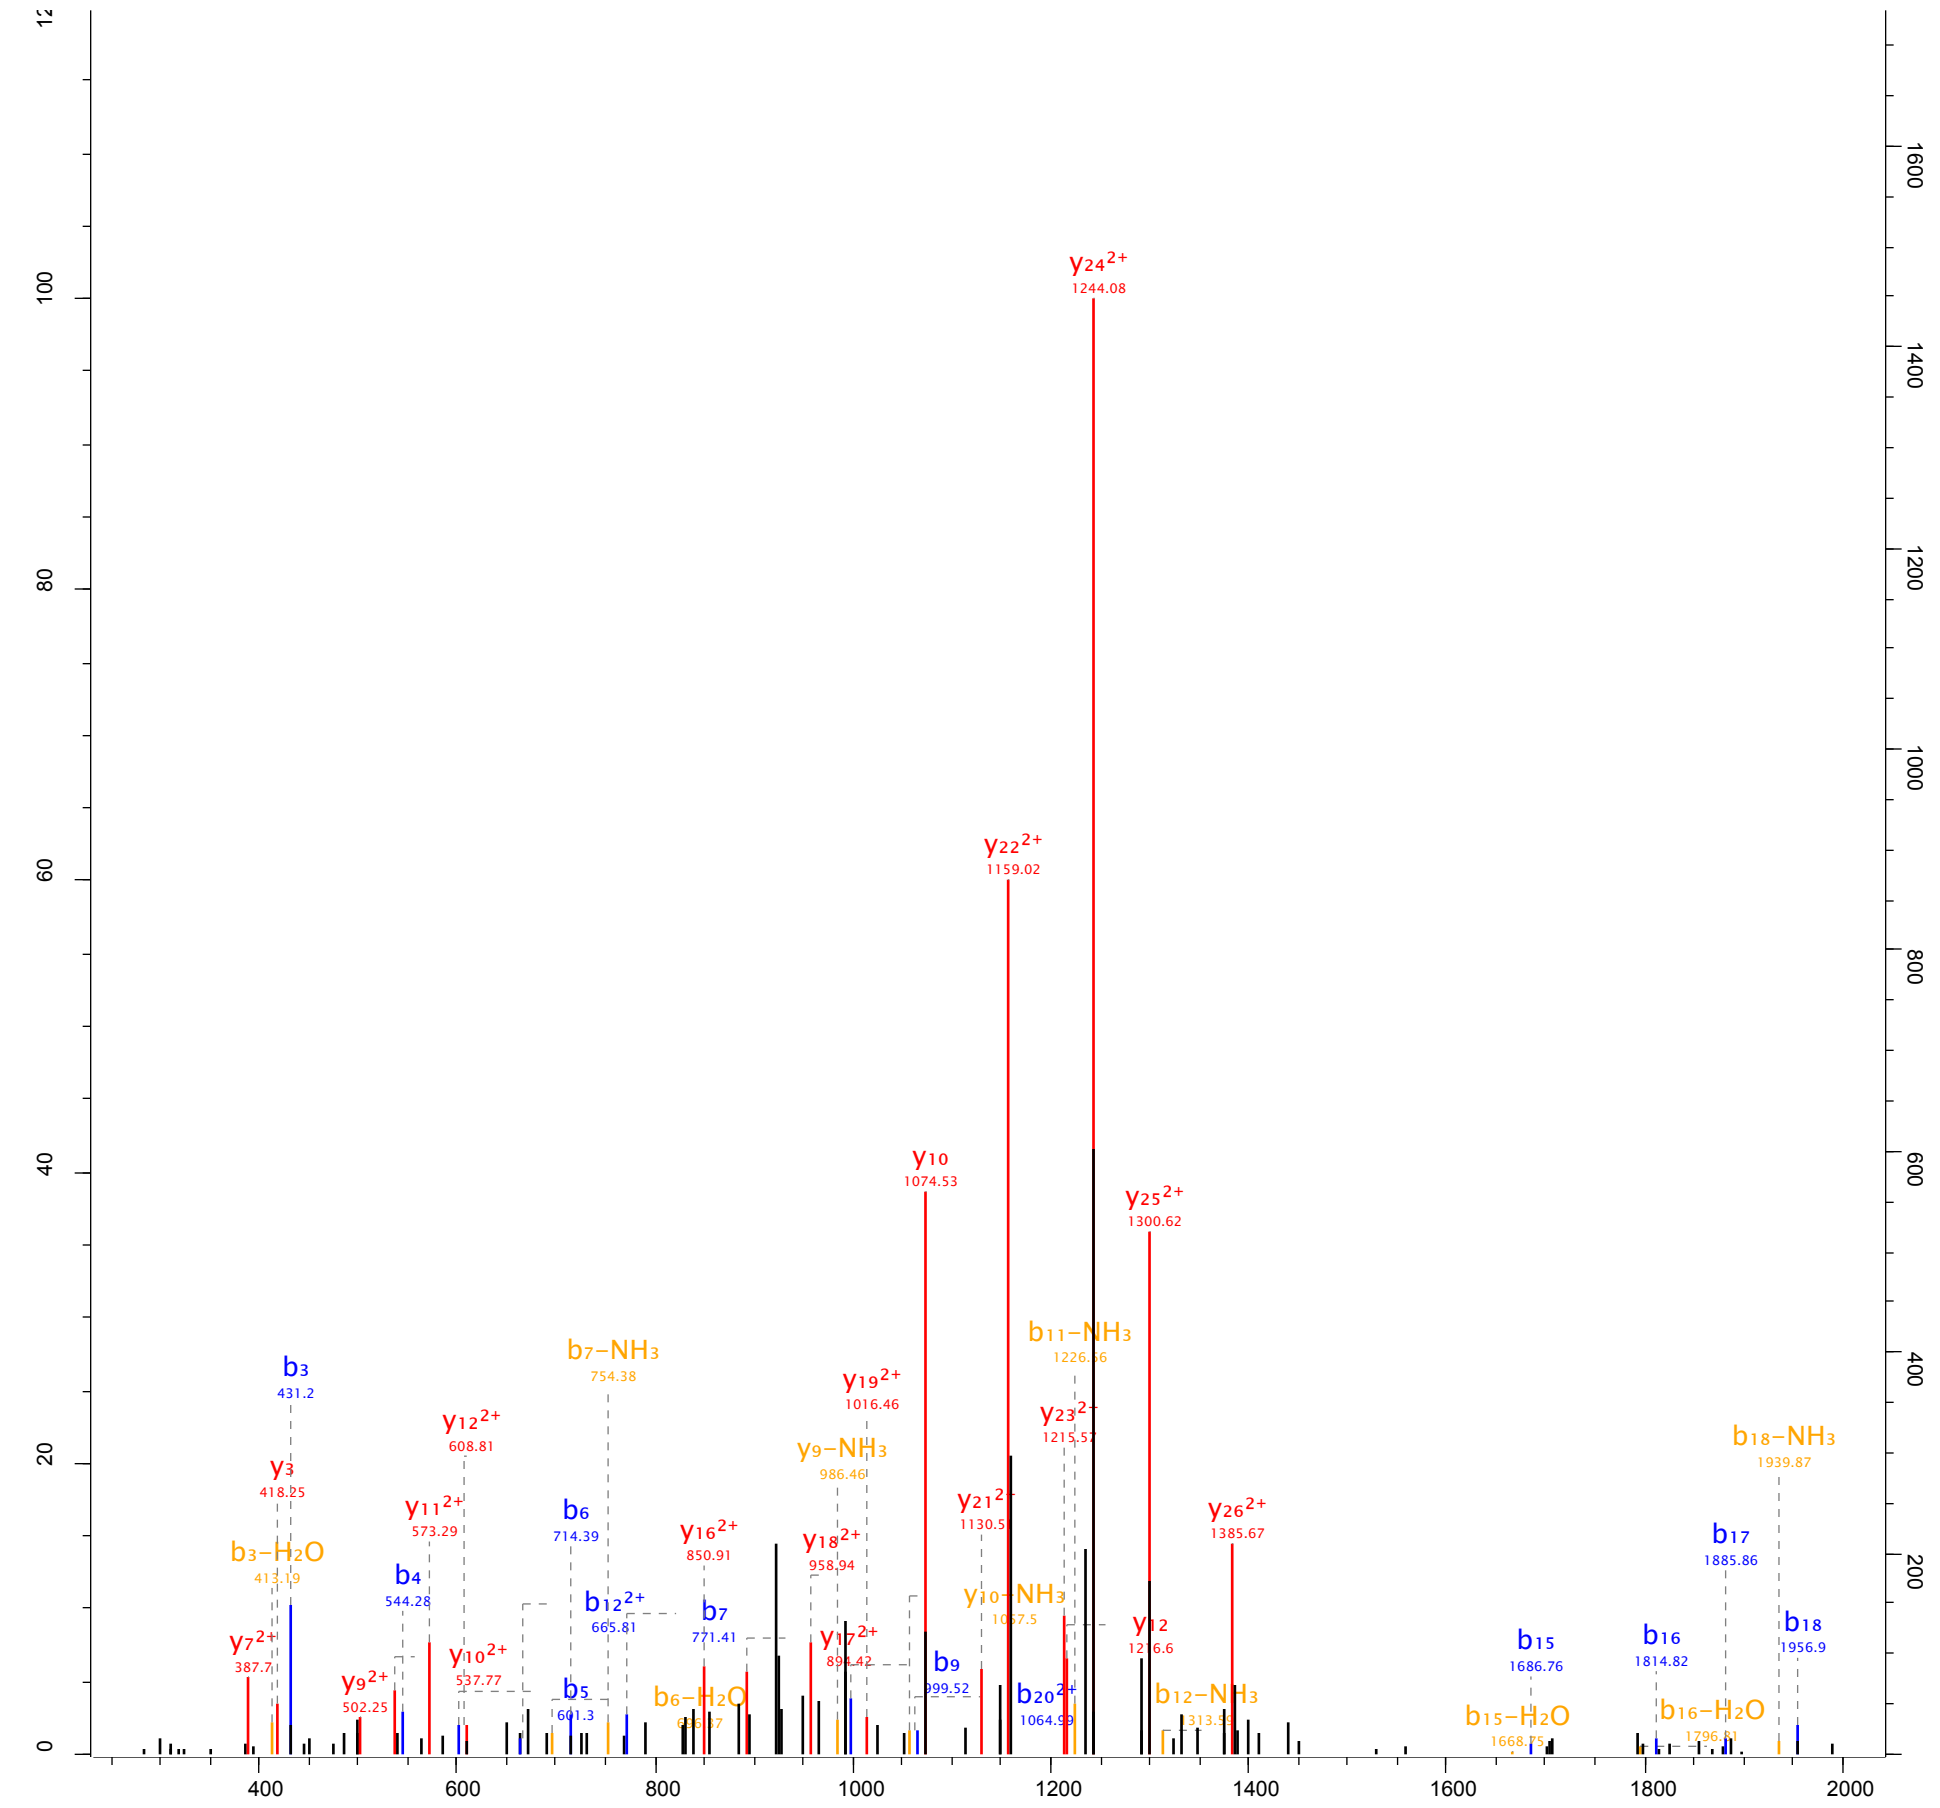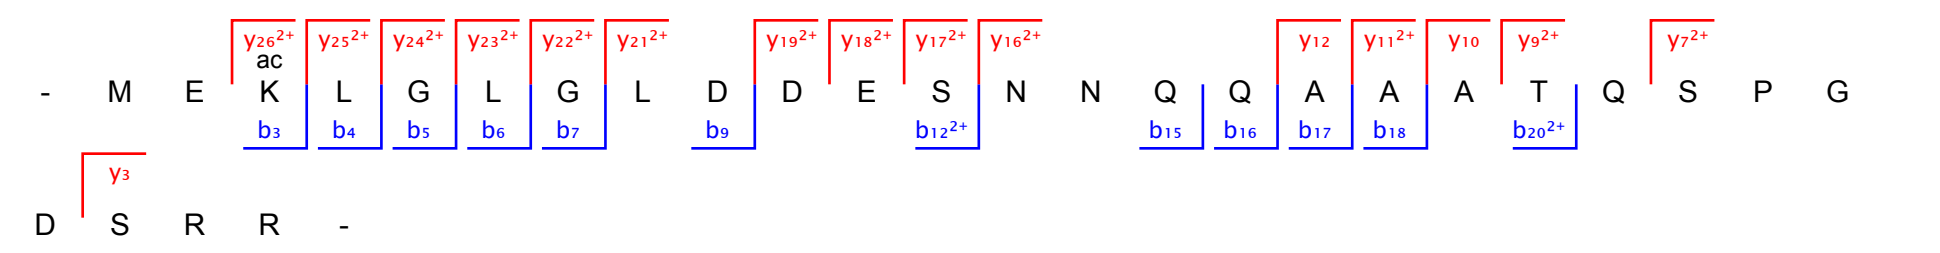

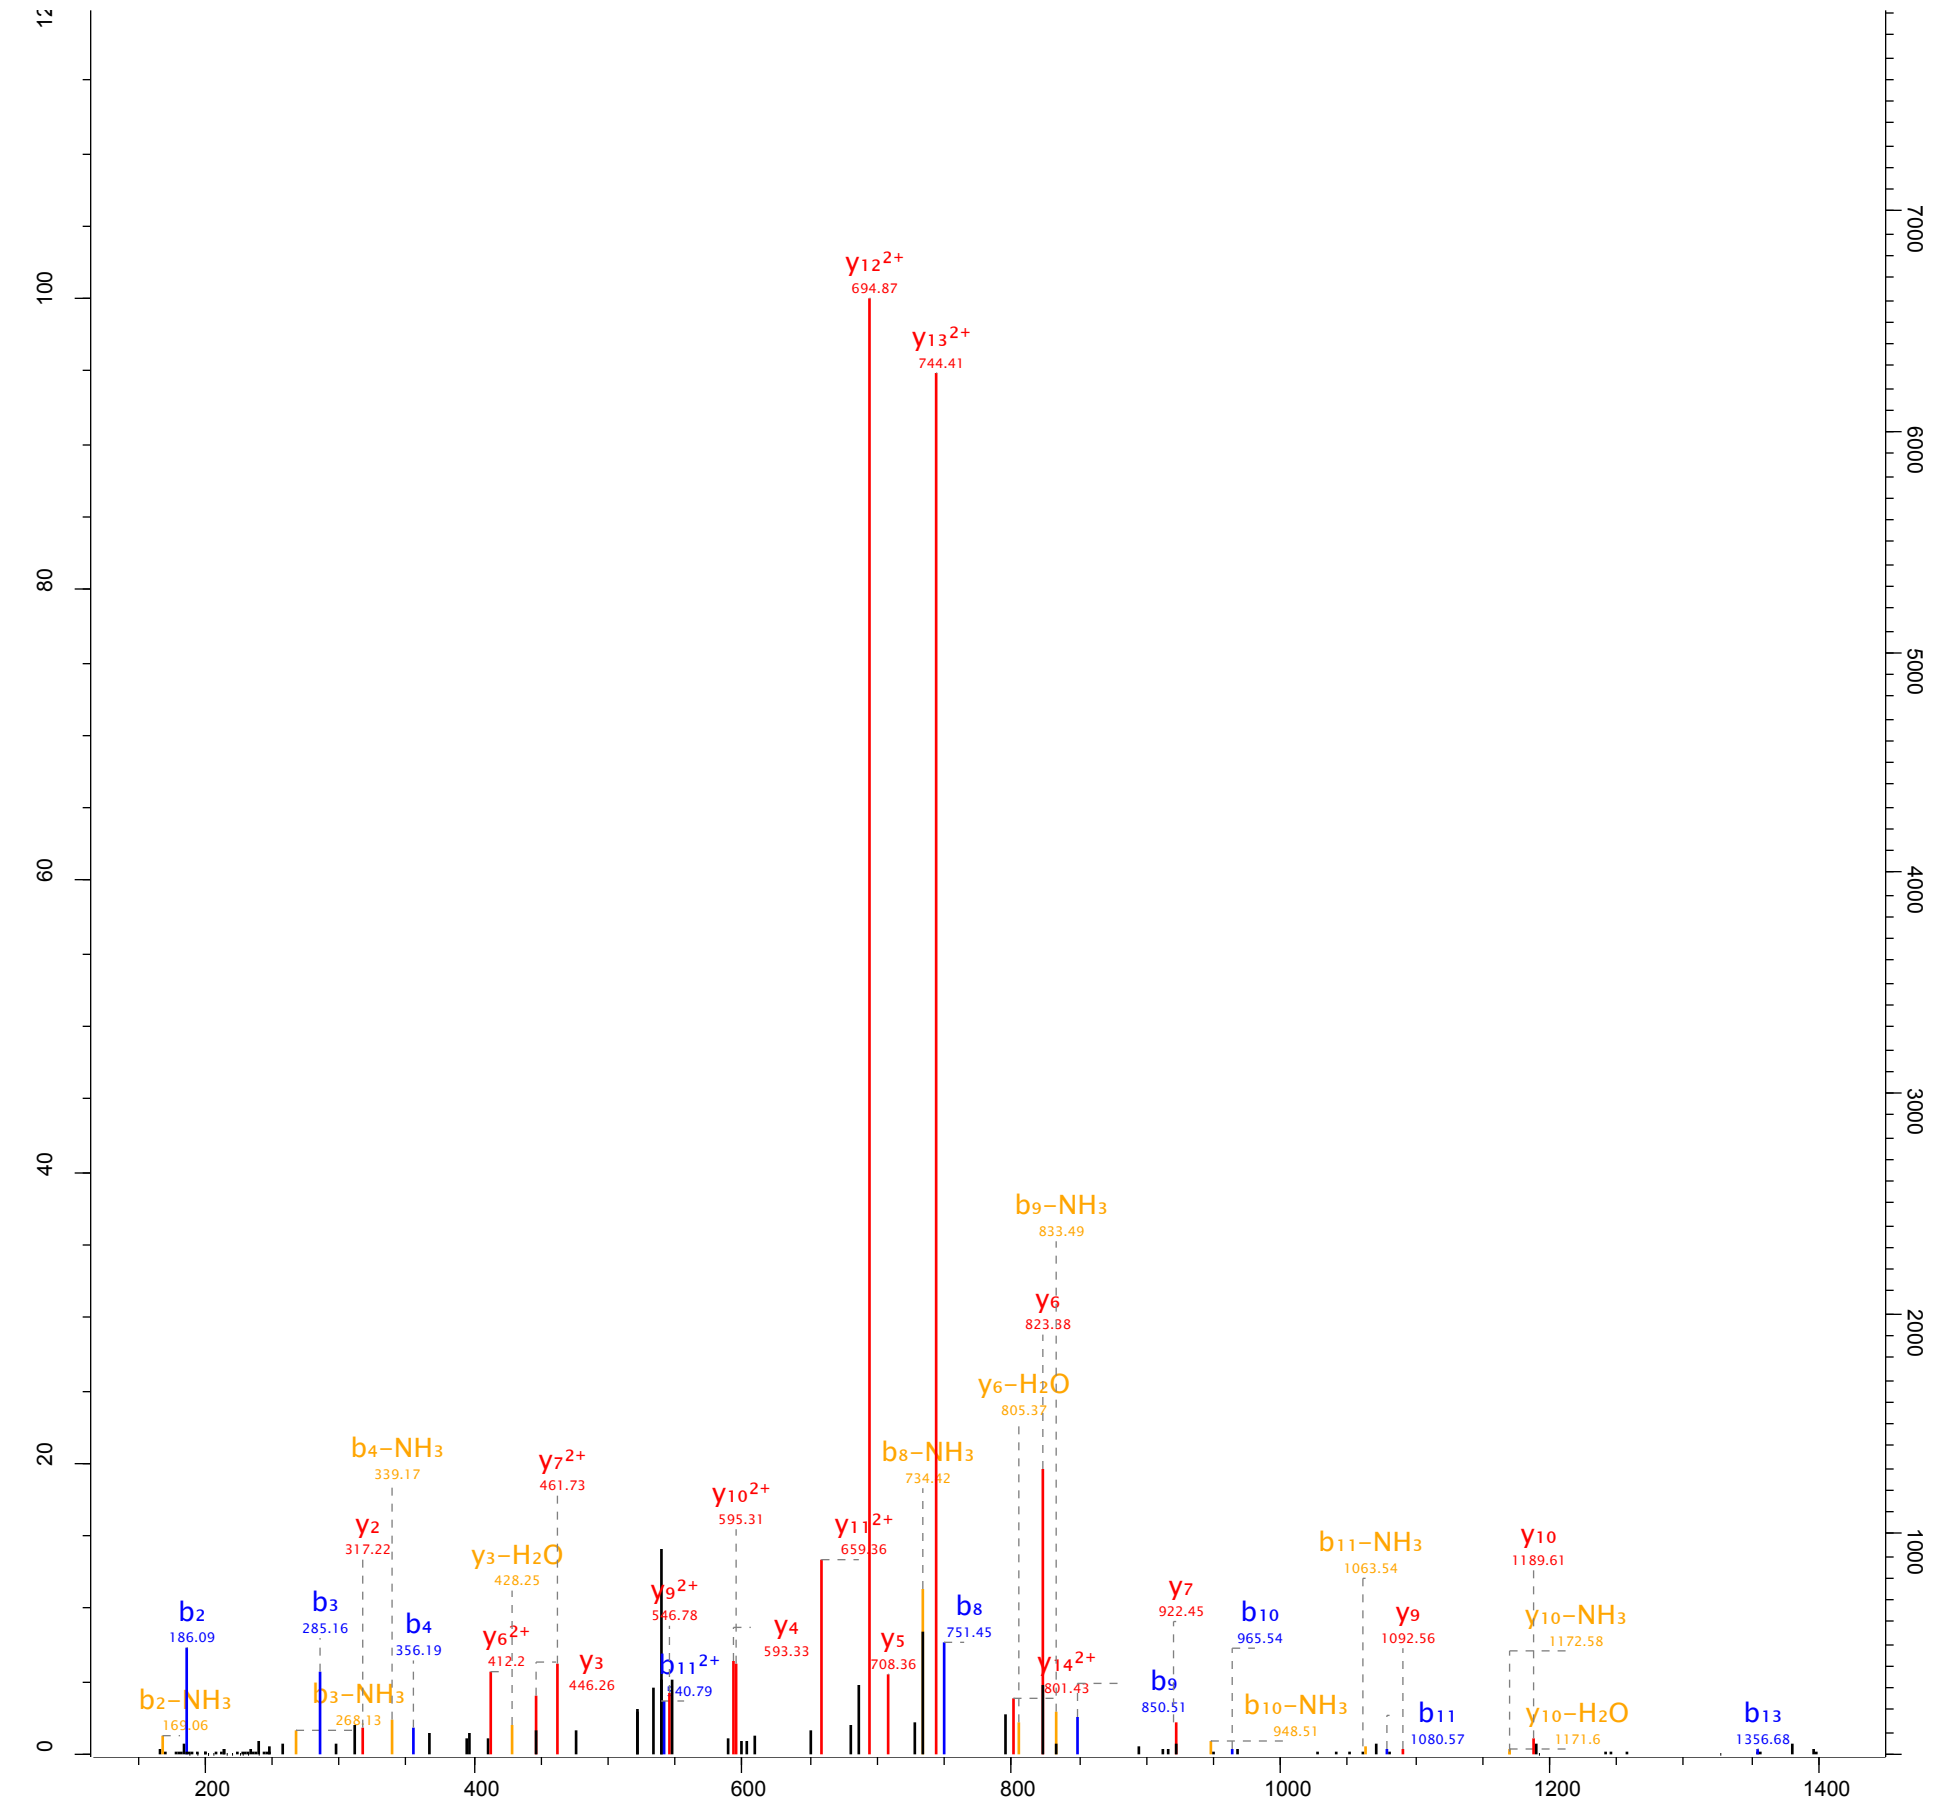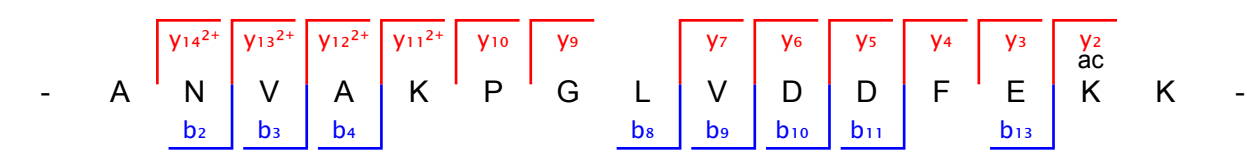



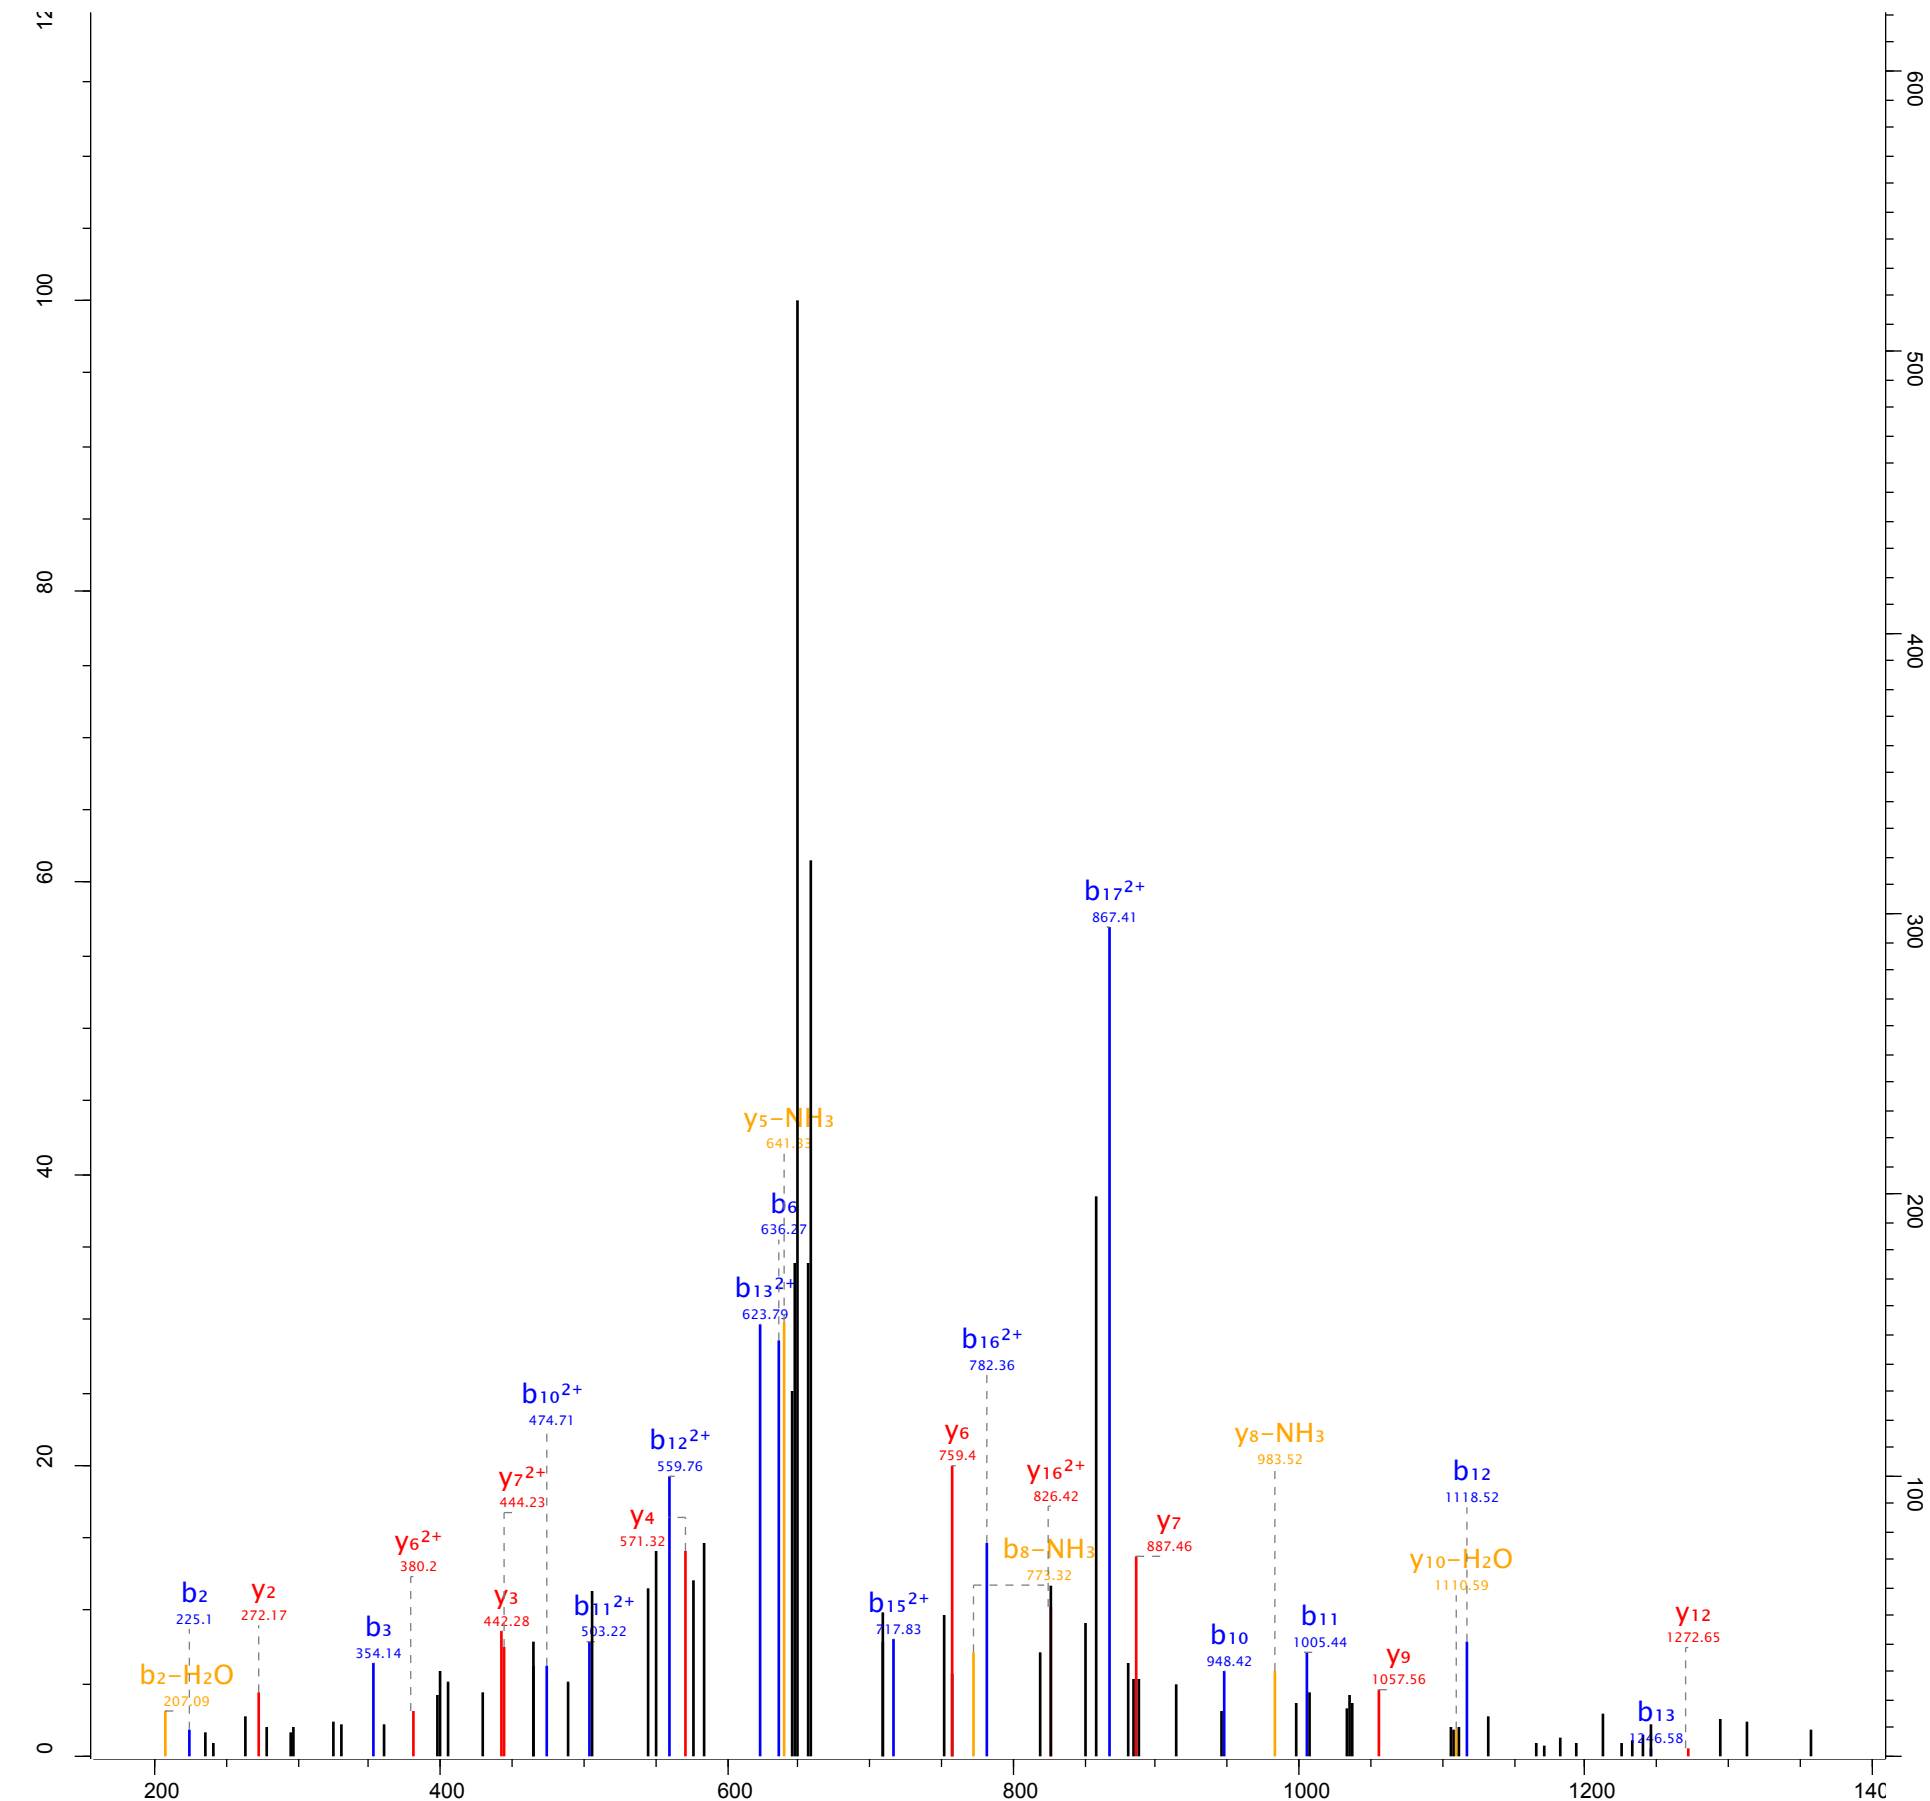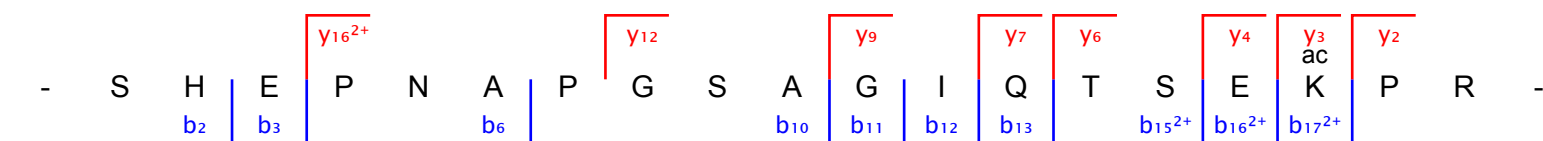

Raw file 022814\_SCW\_II\_68\_8\_2ndZT Scan 12963 Method ITMS; CID Score 184.98 m/z 531.62 Gene names Myh9

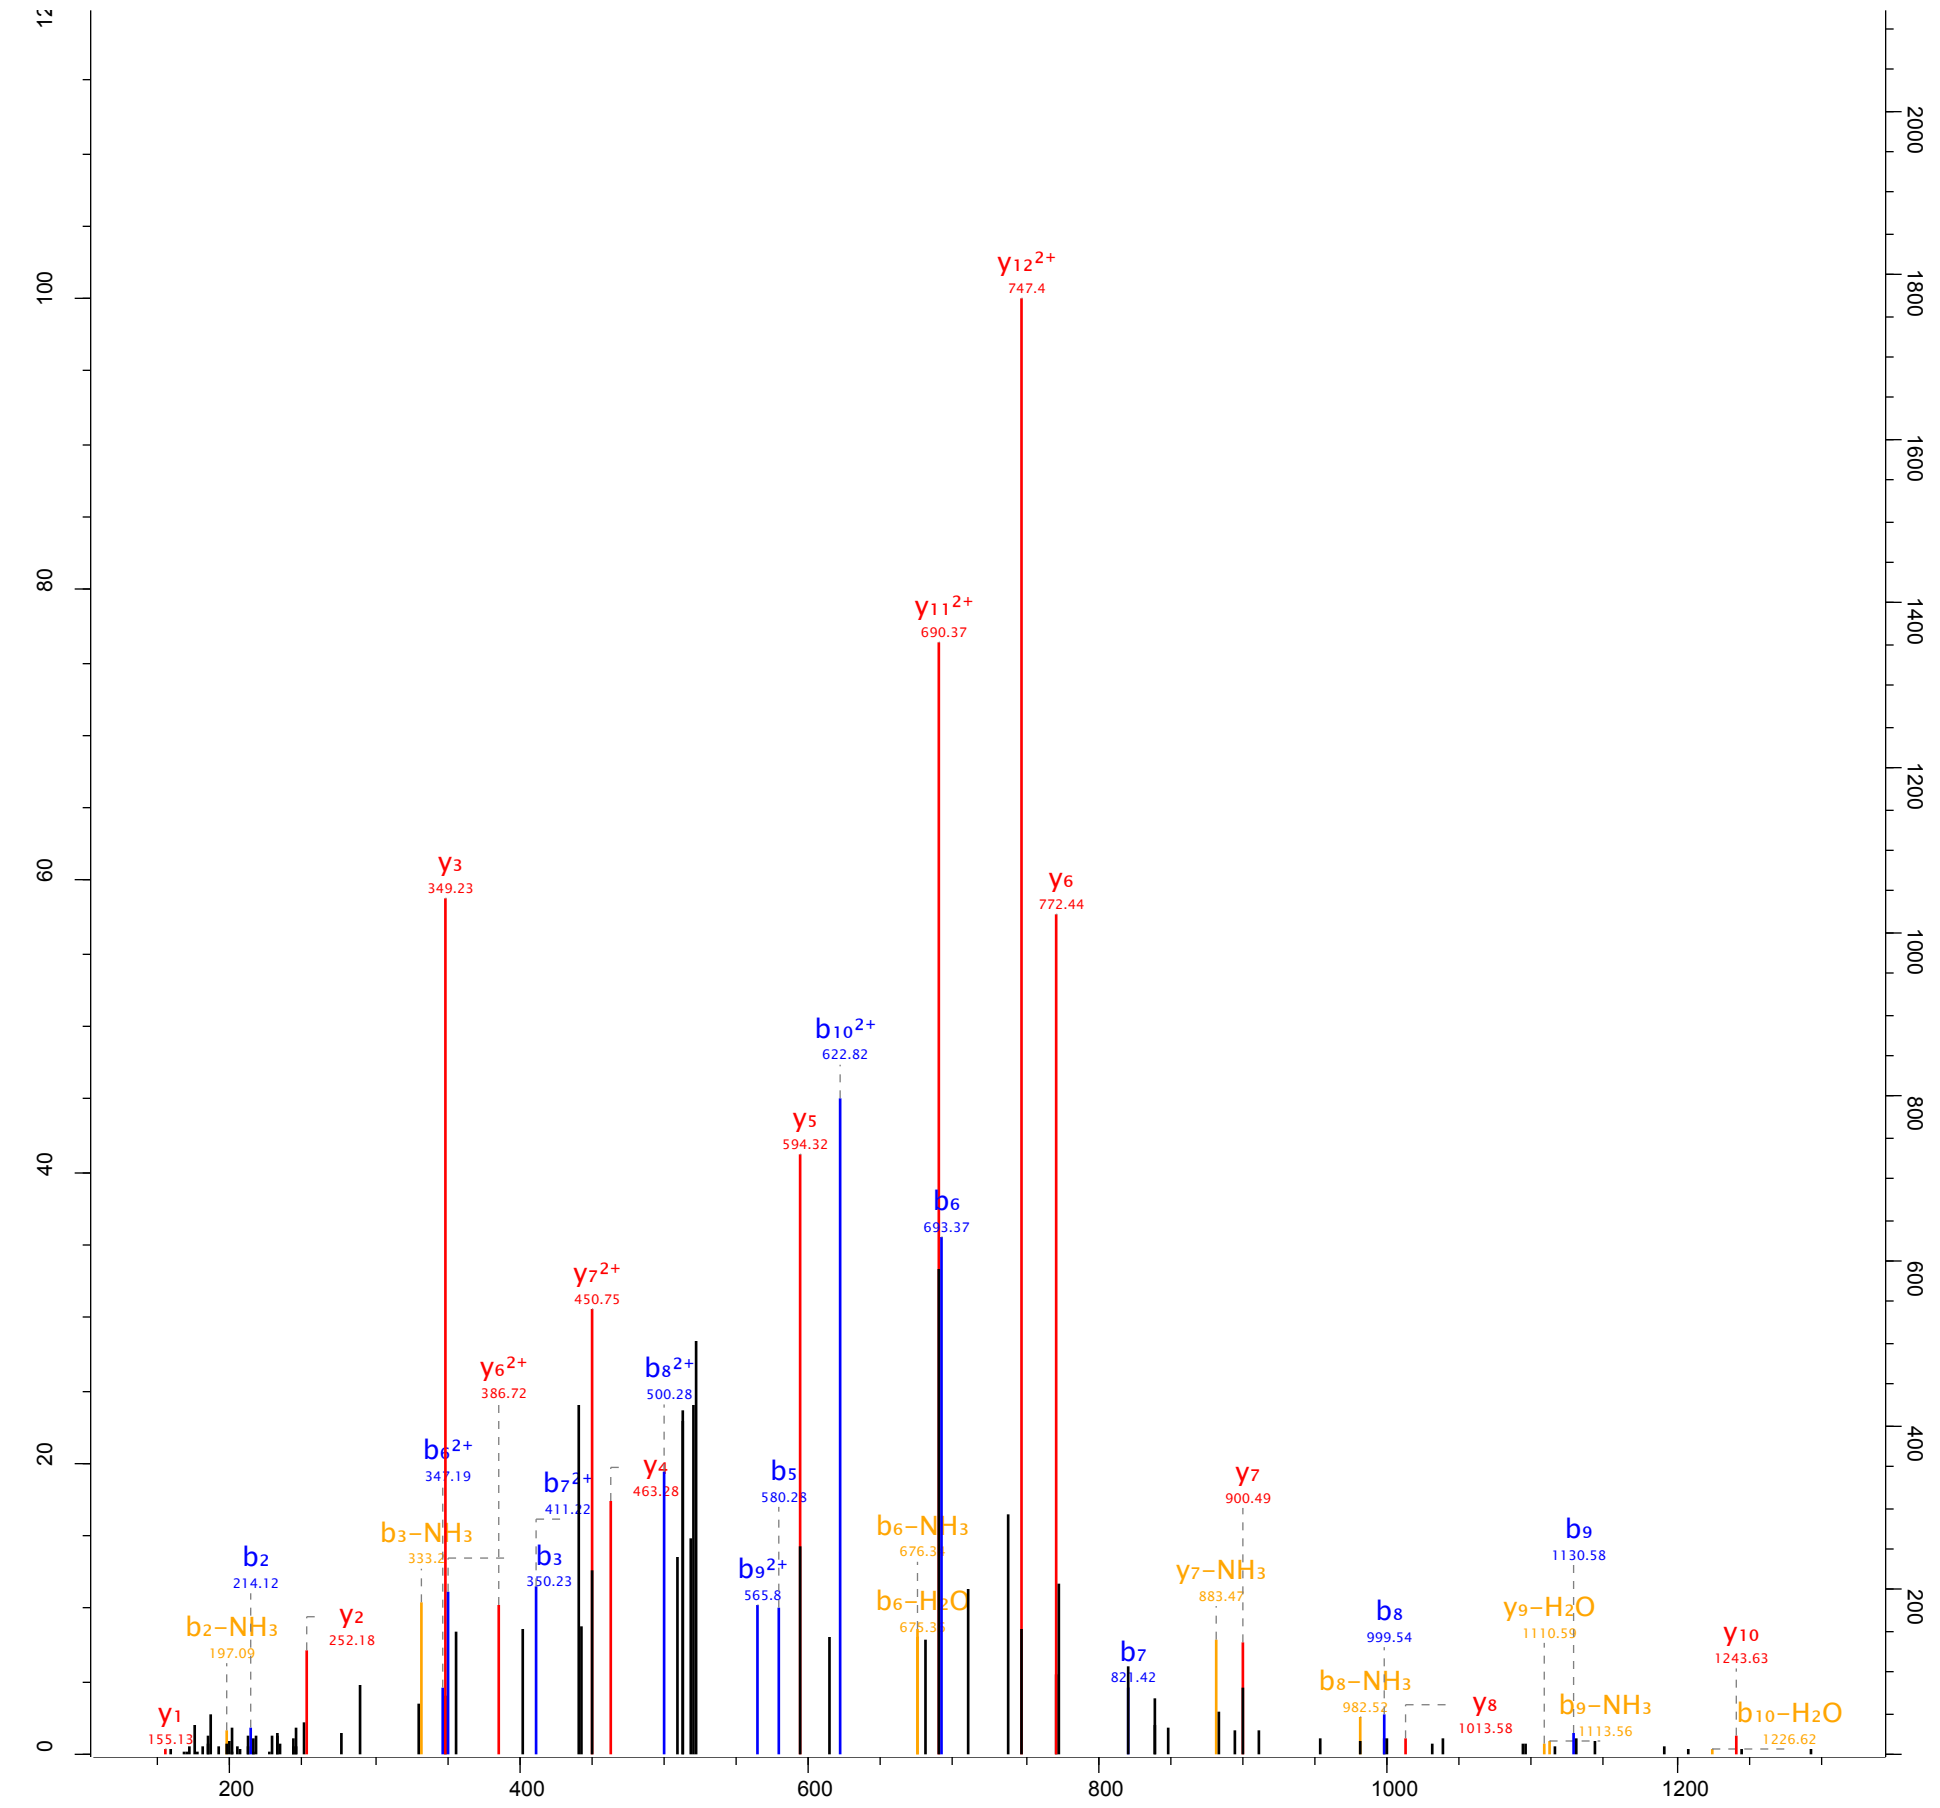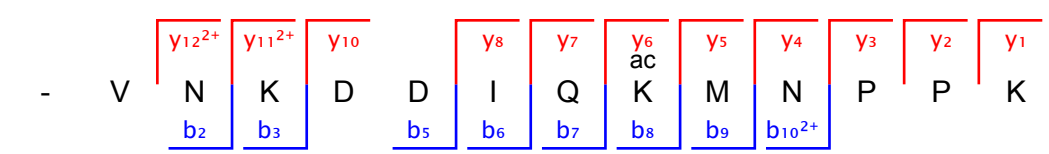

022814\_SCW\_II\_68\_8\_2ndZT

15316

ITMS; CID

267.23

772.9

Got2

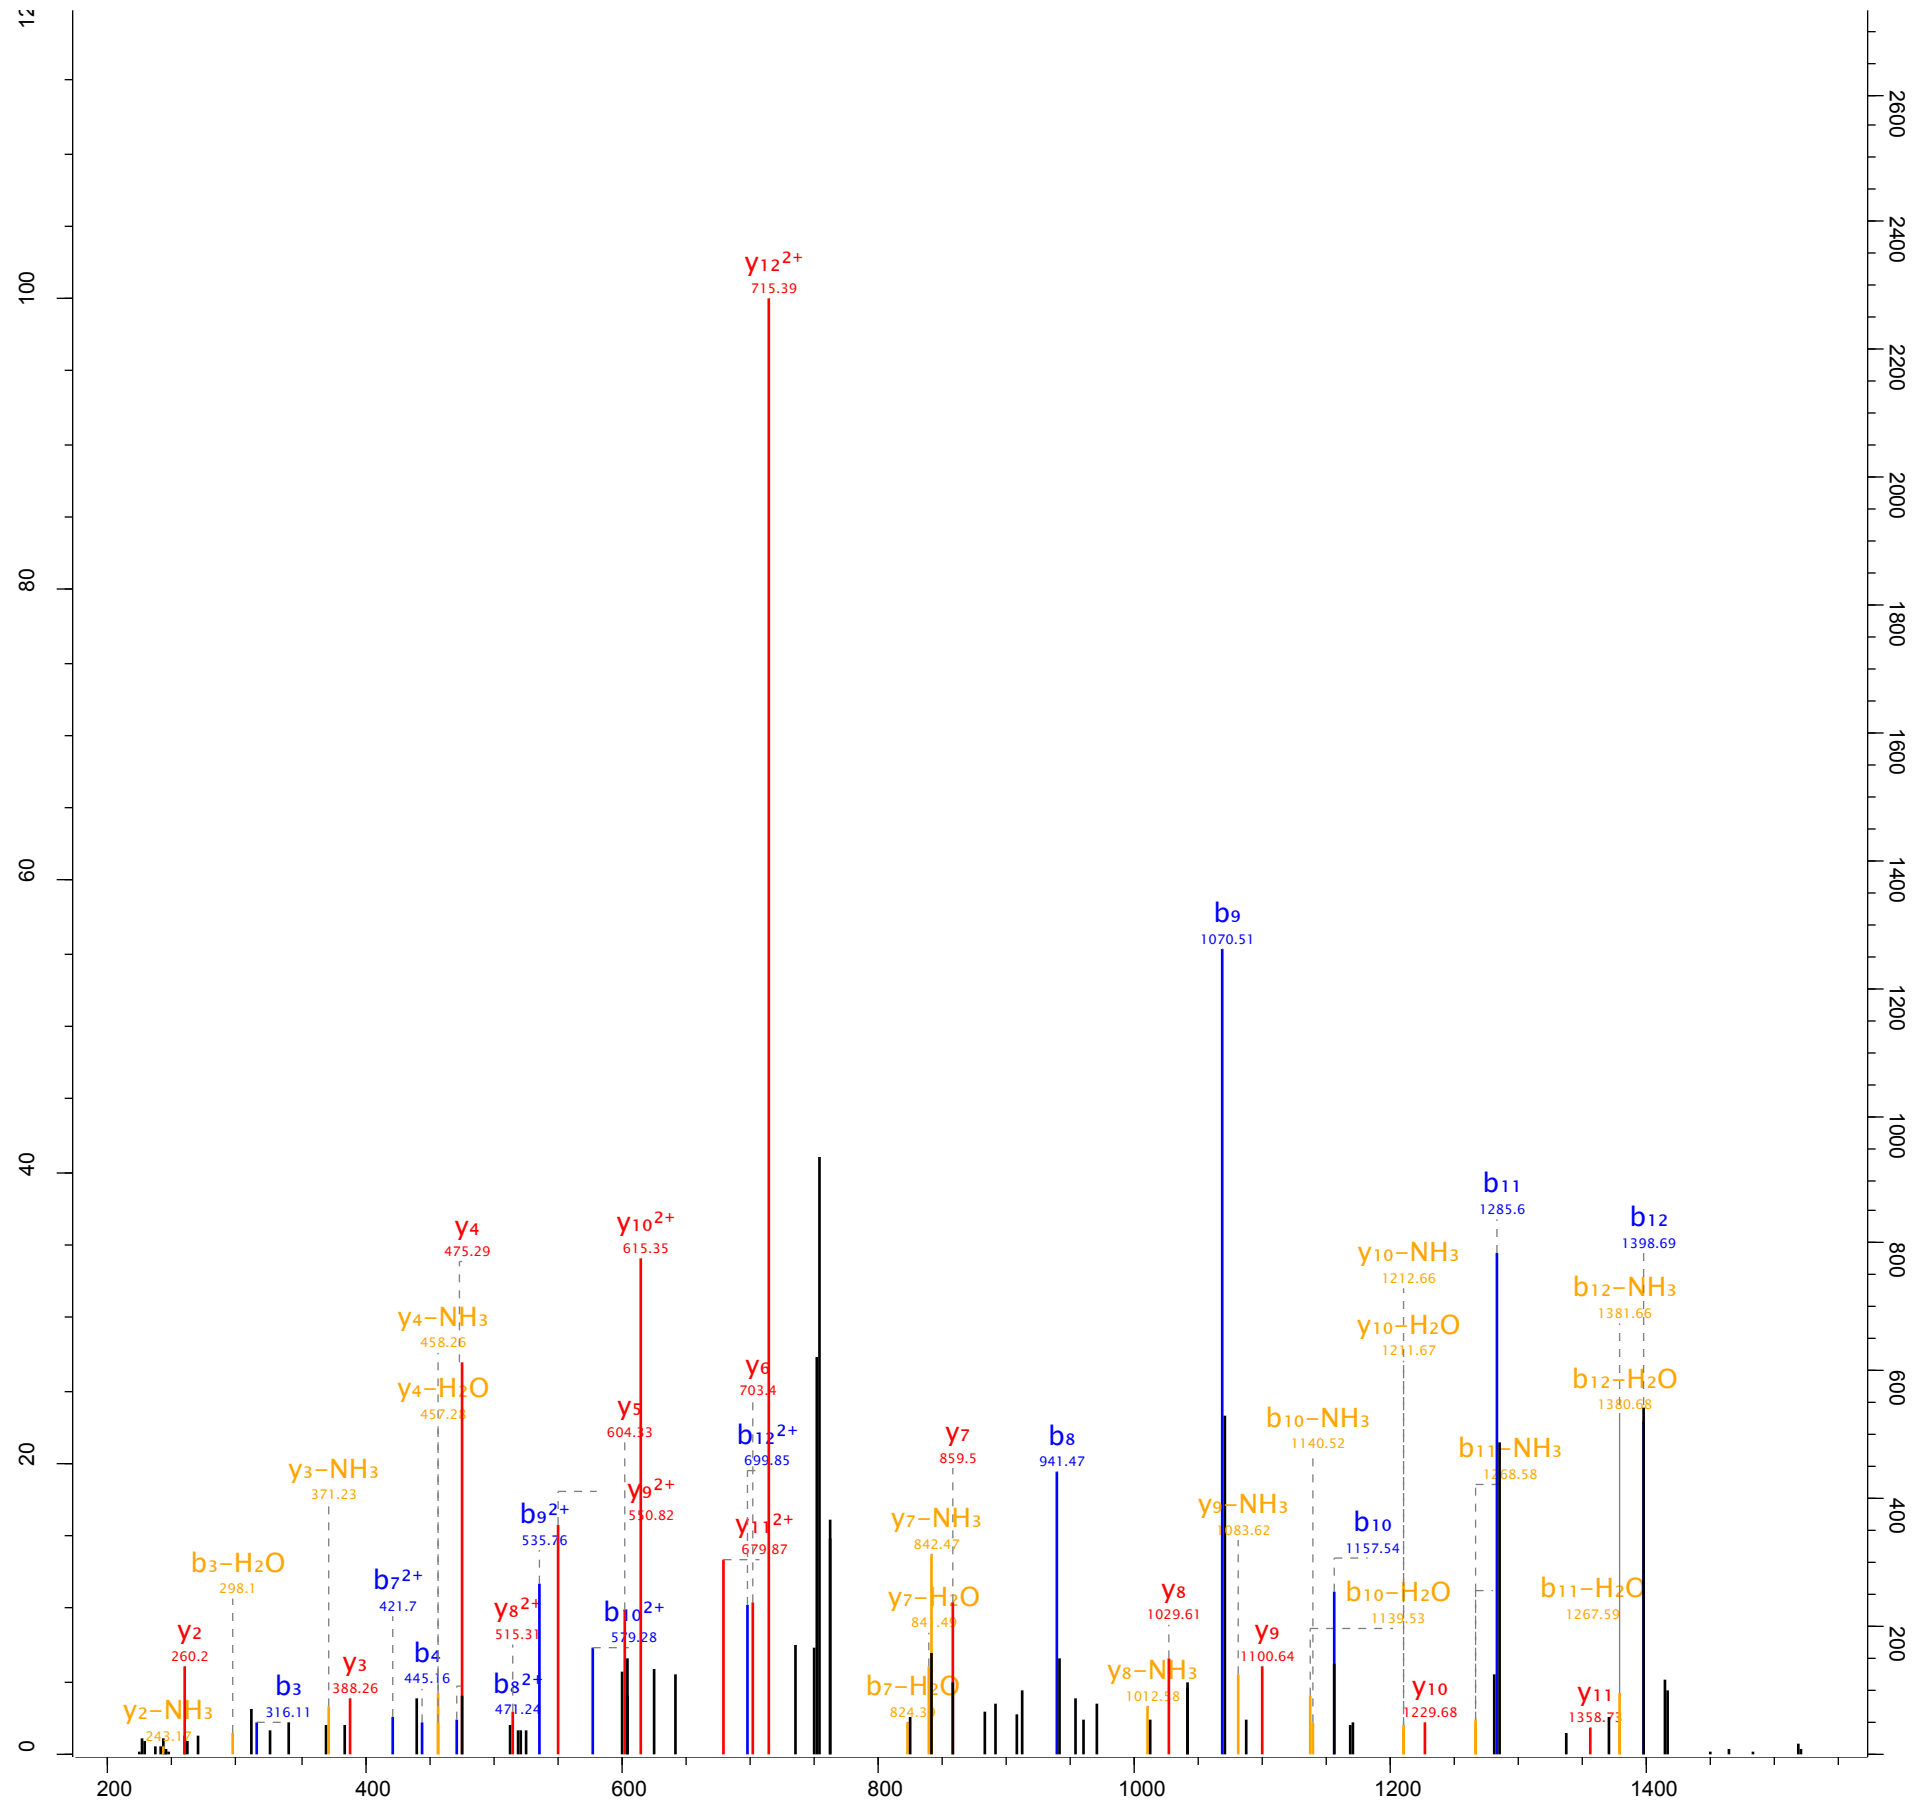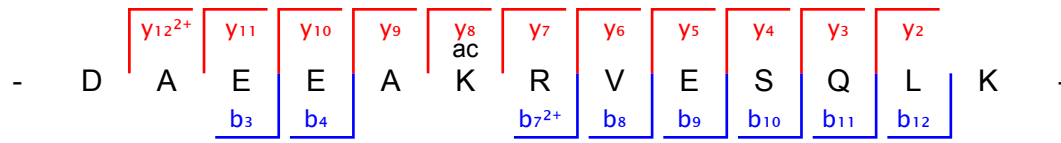

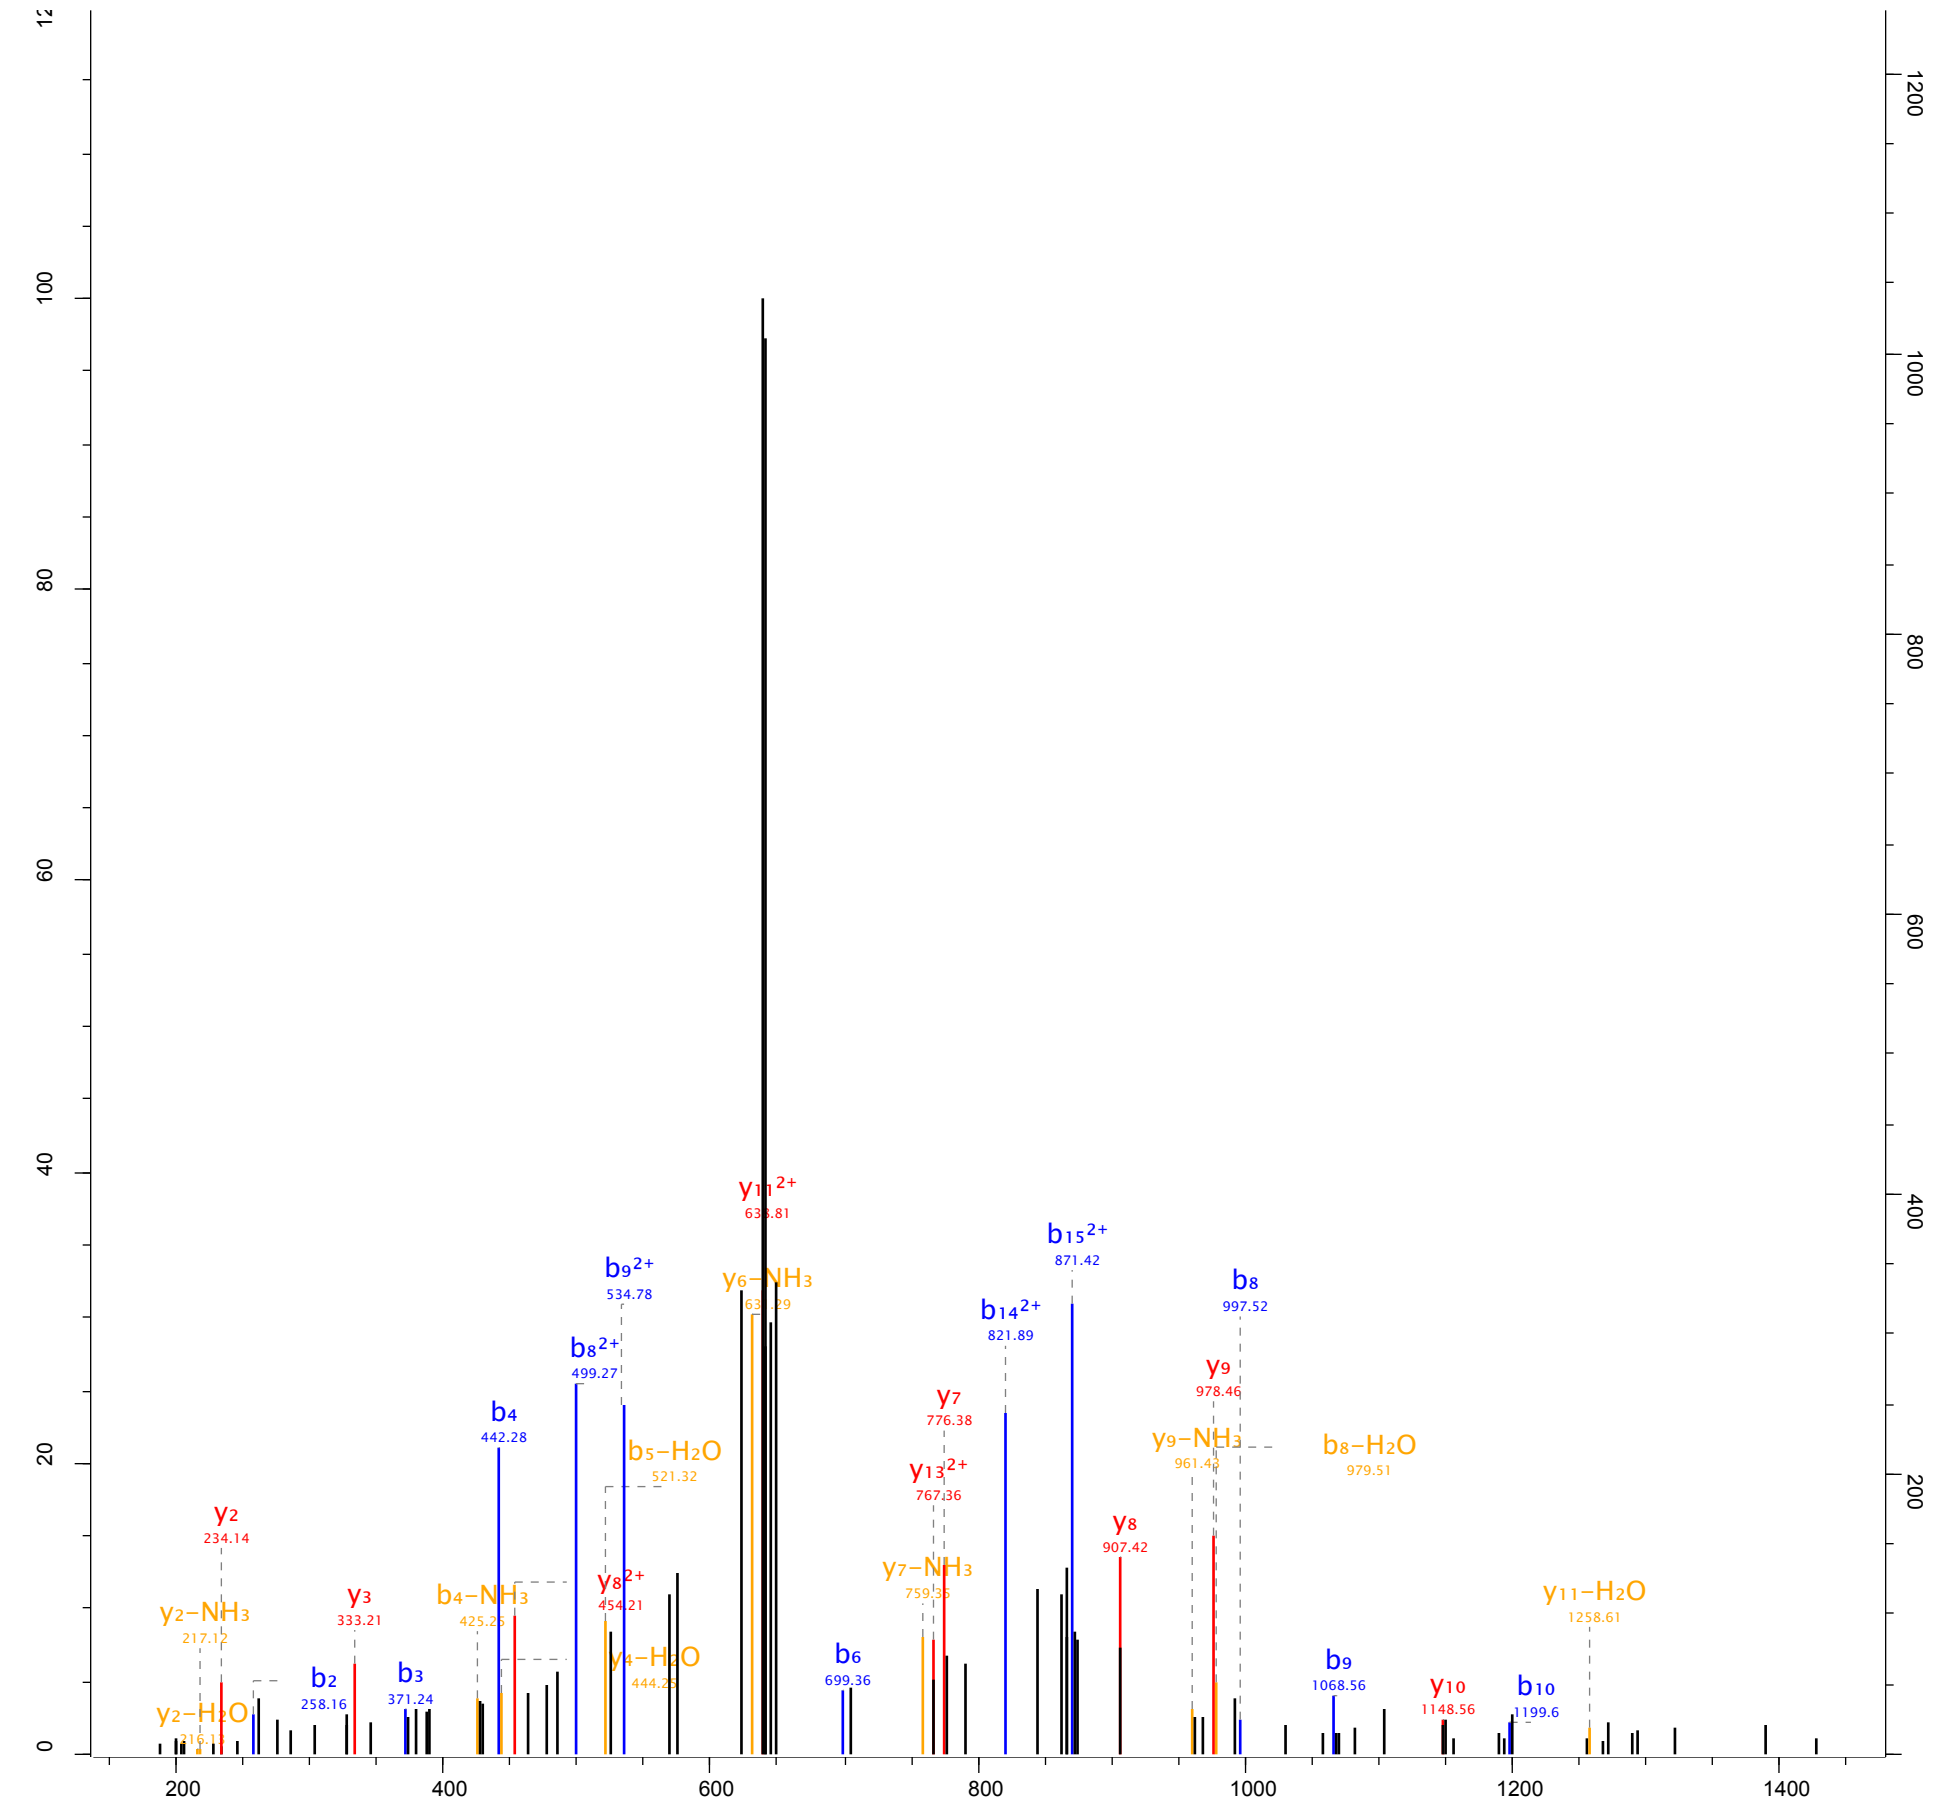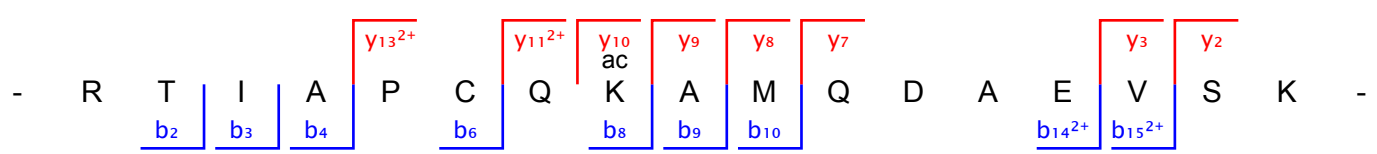

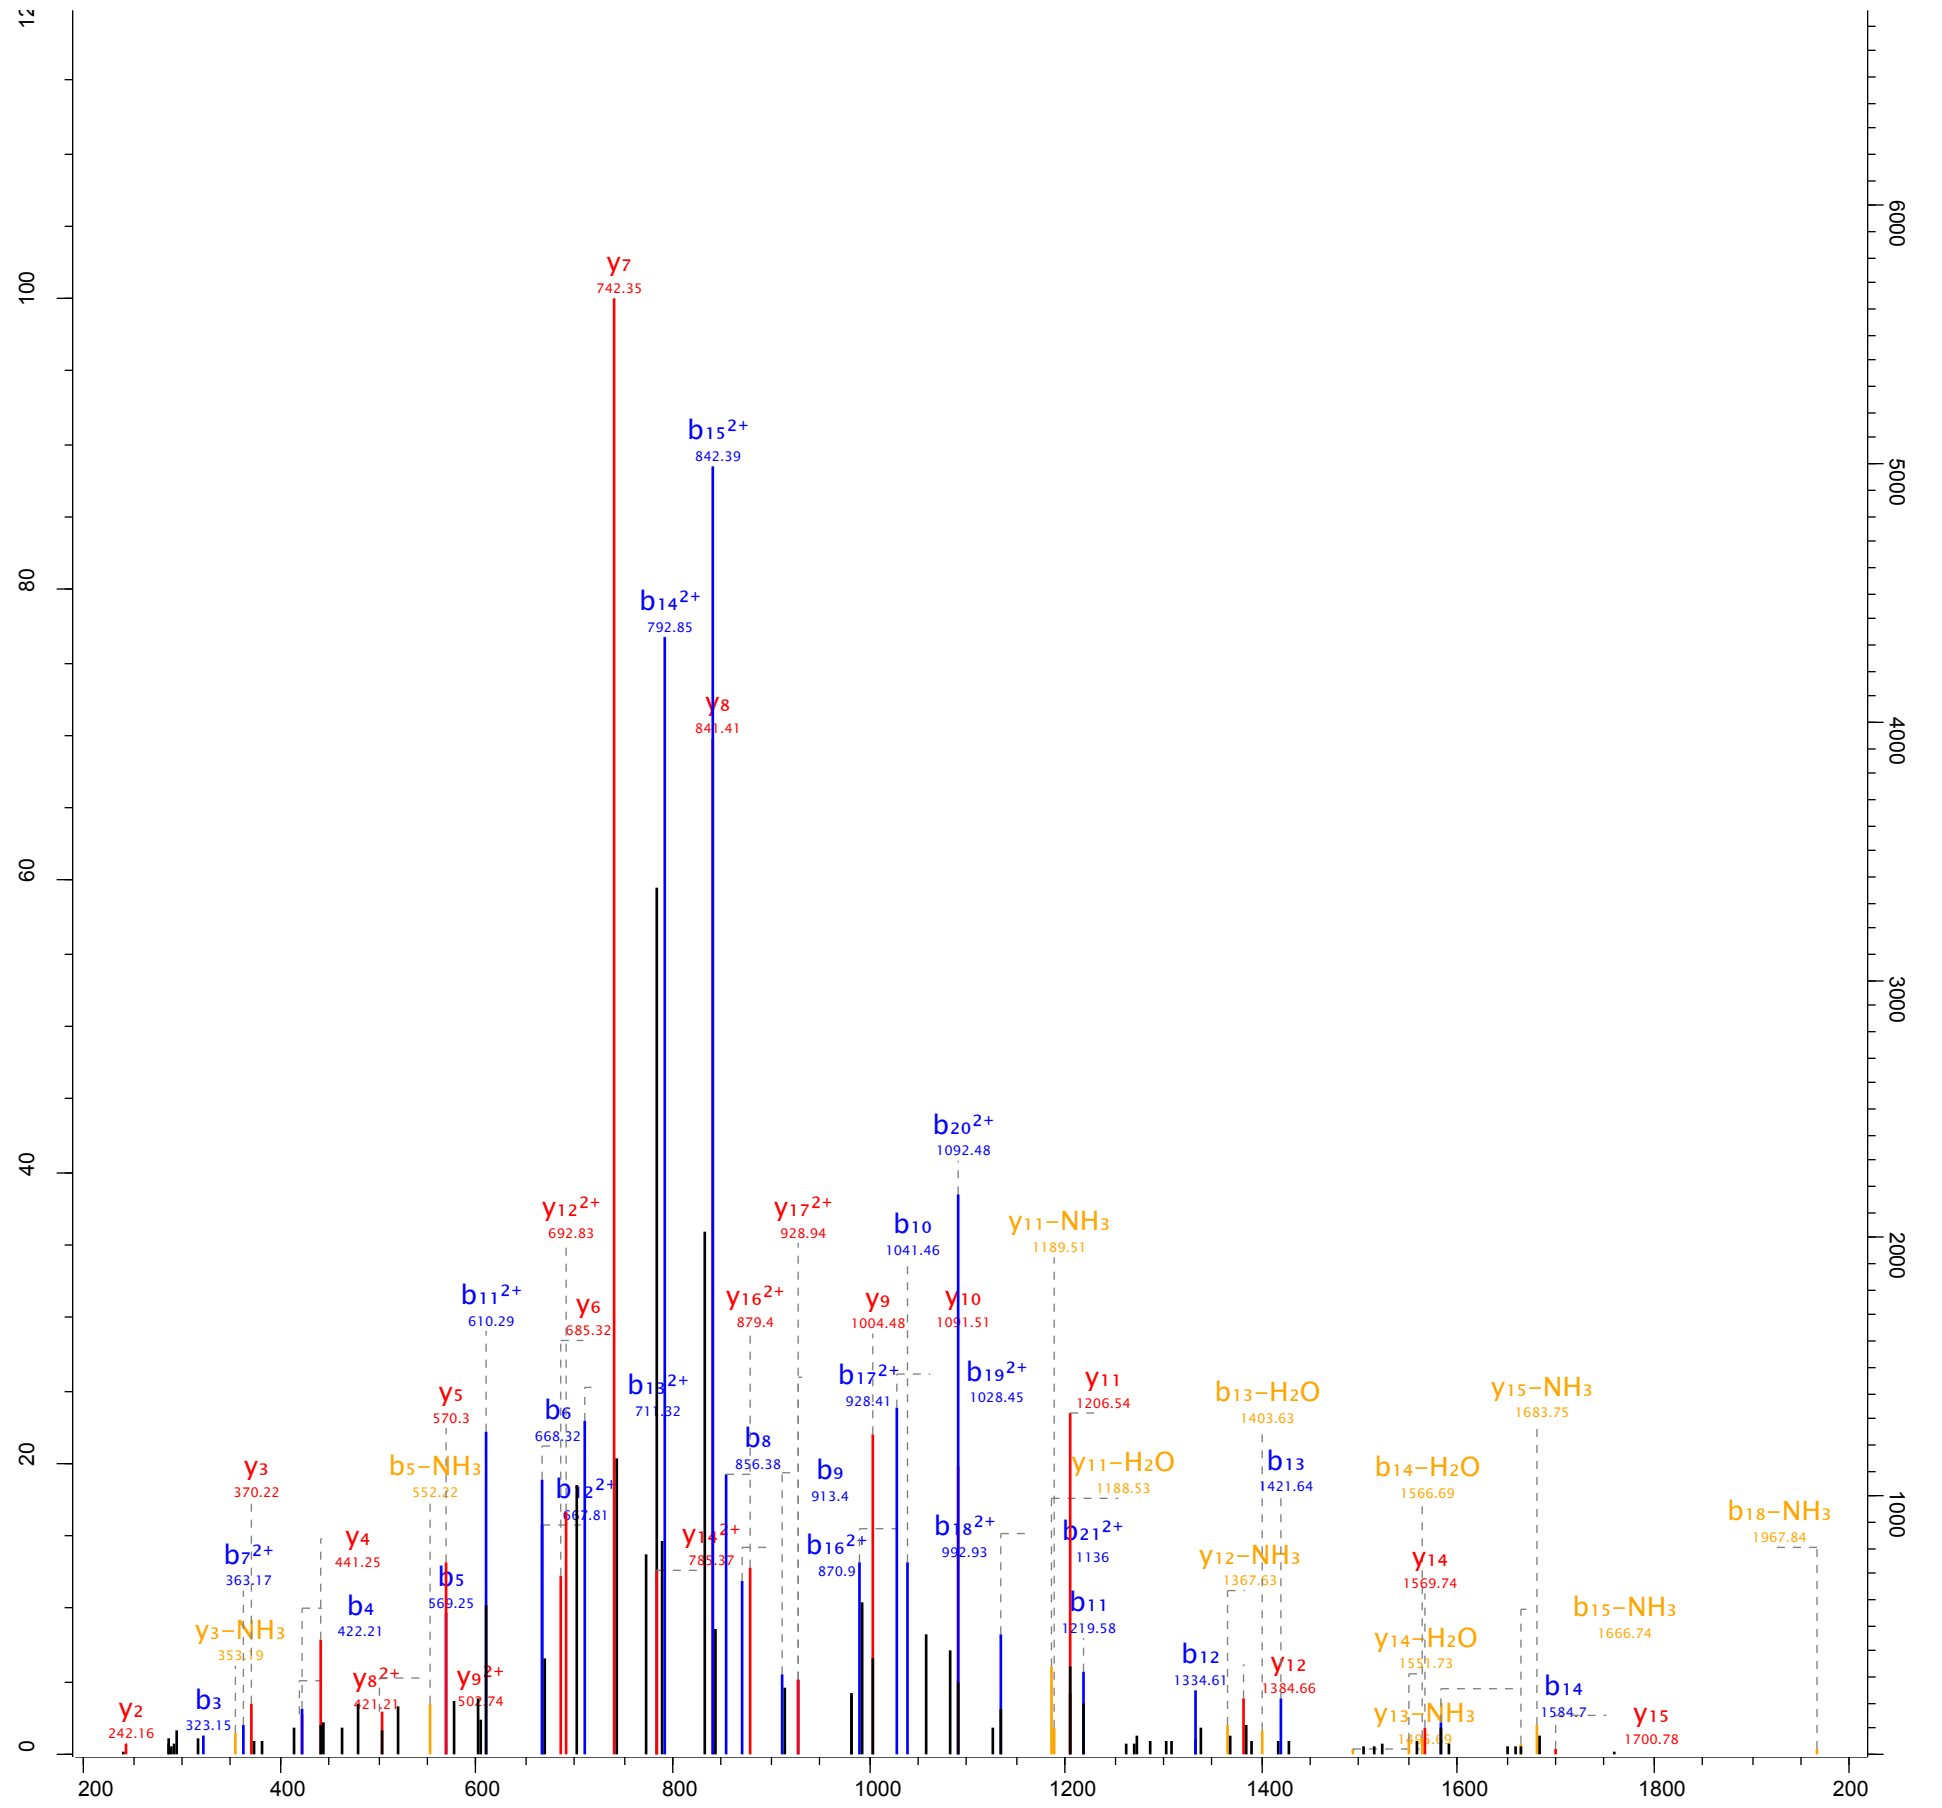

- H Q G V M ox V G M G Q K D S Y V G D E A Q S K -  
 b<sub>3</sub> b<sub>4</sub> b<sub>5</sub> b<sub>6</sub> b<sub>7</sub><sup>2+</sup> b<sub>8</sub> b<sub>9</sub> b<sub>10</sub> b<sub>11</sub> b<sub>12</sub> b<sub>13</sub> b<sub>14</sub> b<sub>15</sub><sup>2+</sup> b<sub>16</sub><sup>2+</sup> b<sub>17</sub><sup>2+</sup> b<sub>18</sub><sup>2+</sup> b<sub>19</sub><sup>2+</sup> b<sub>20</sub><sup>2+</sup> b<sub>21</sub><sup>2+</sup>

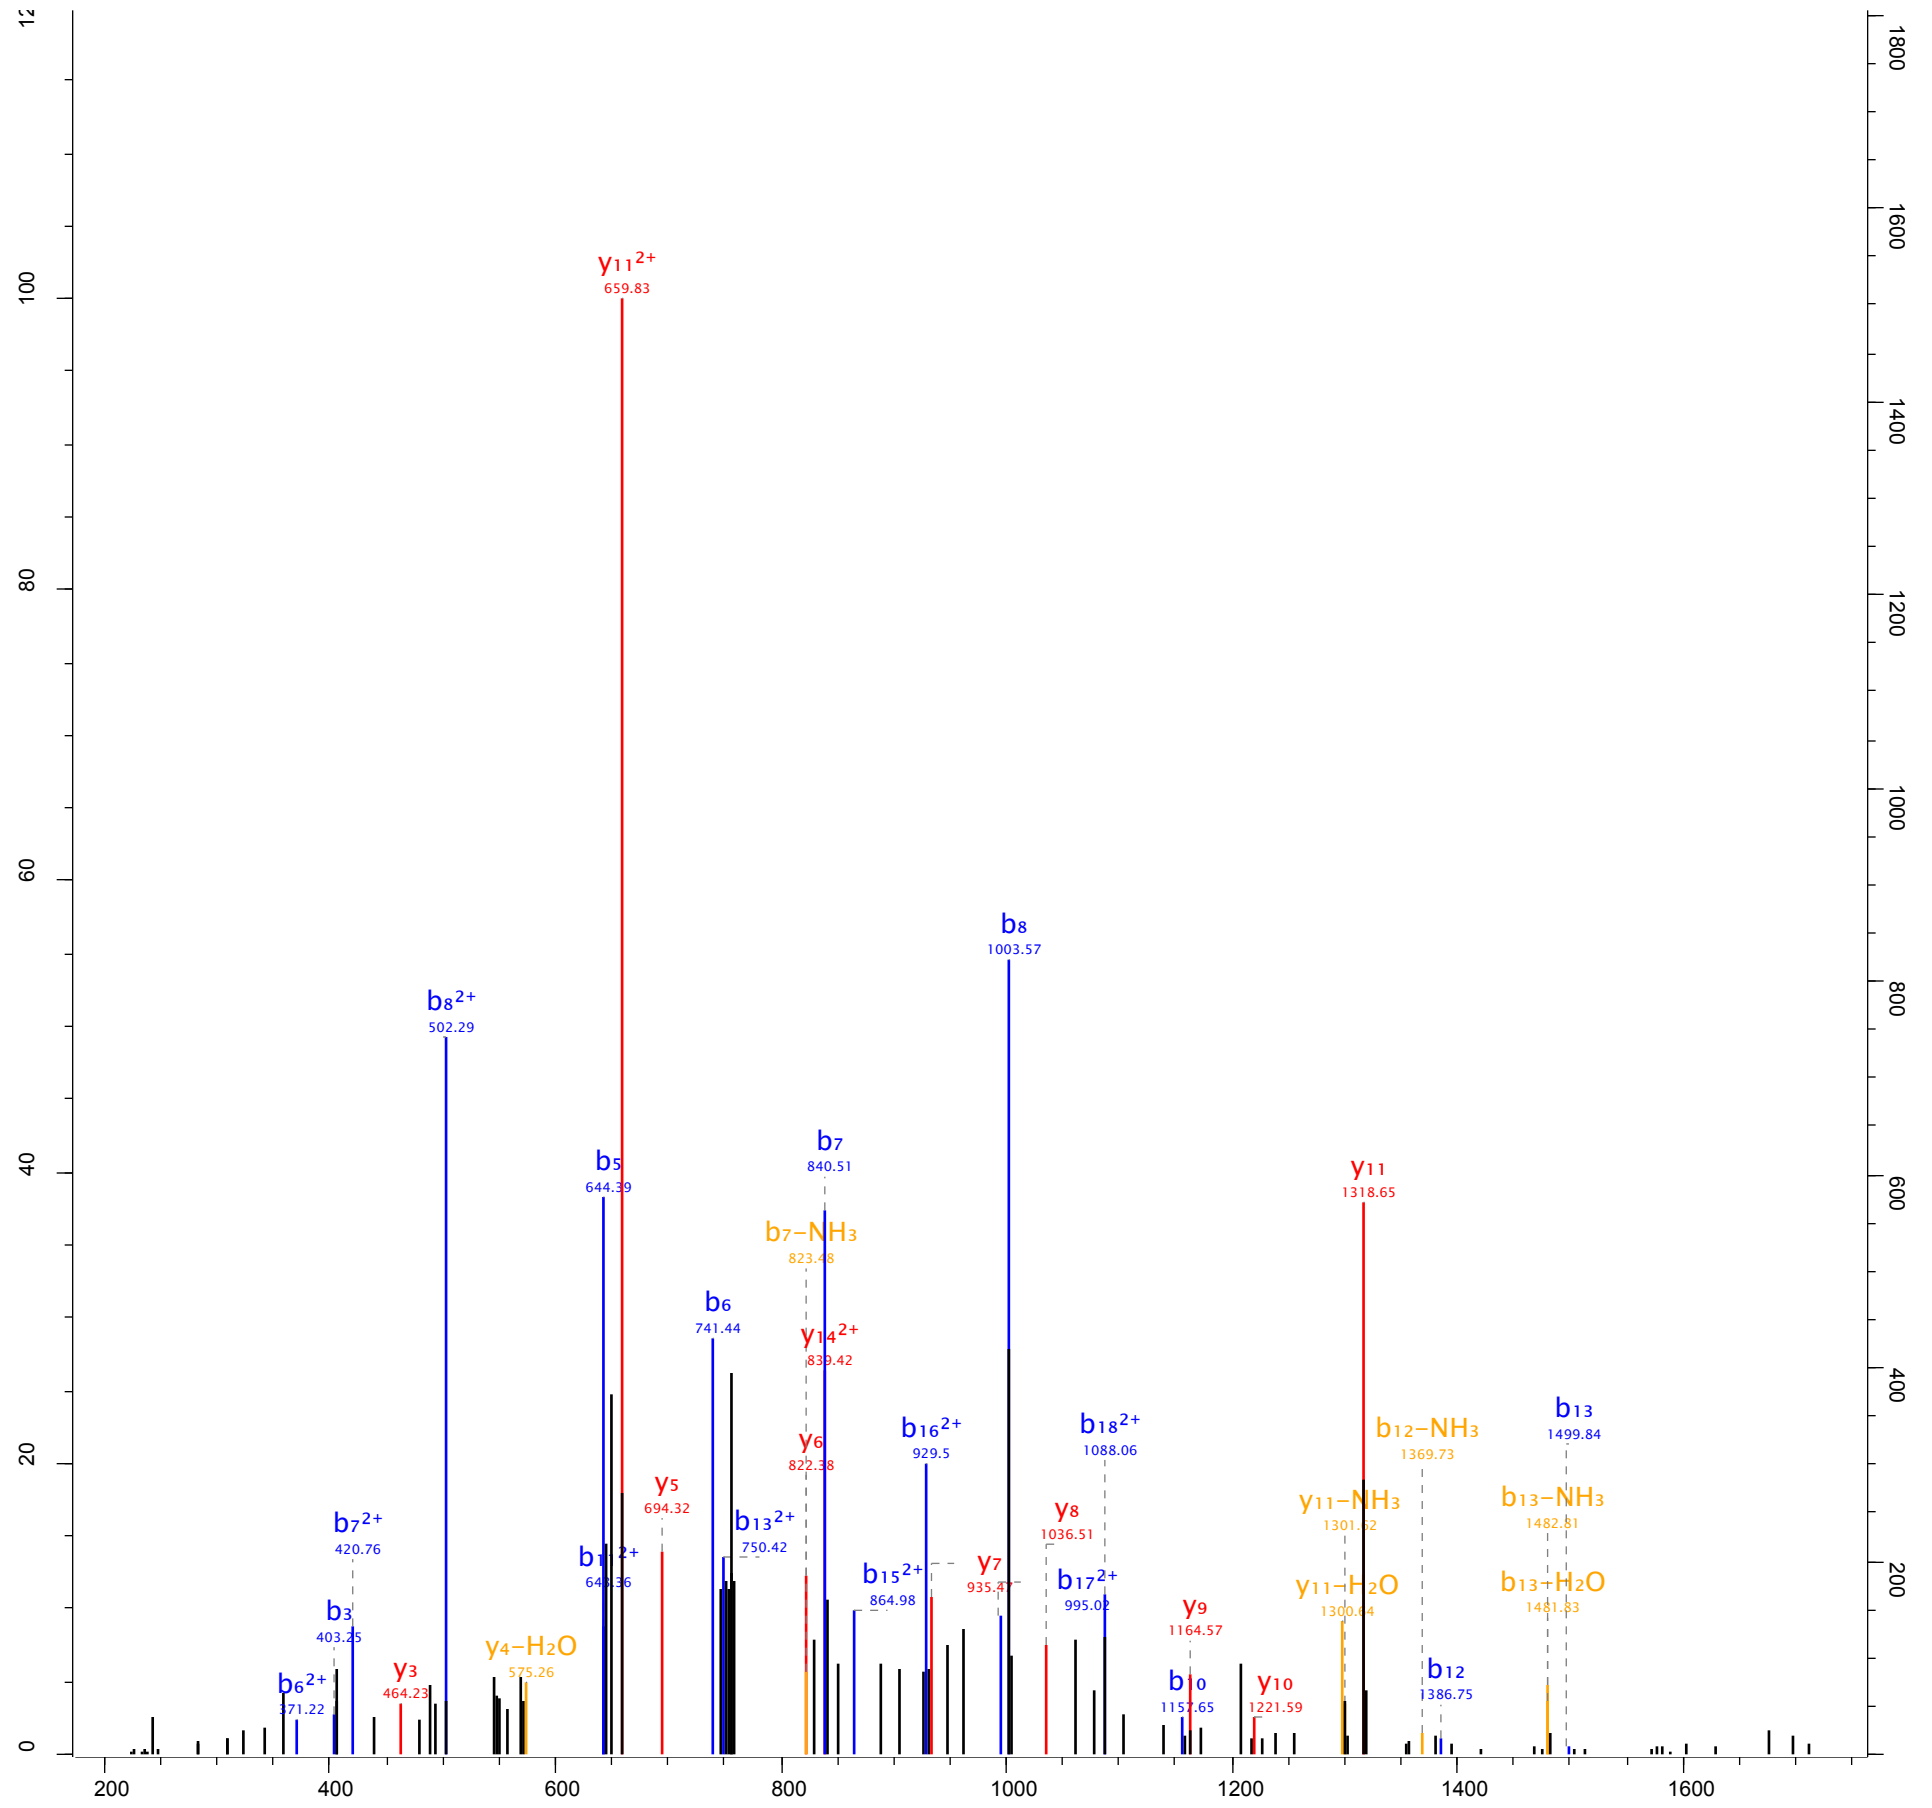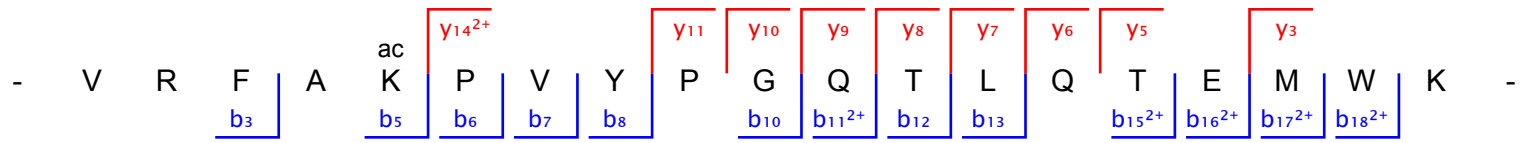

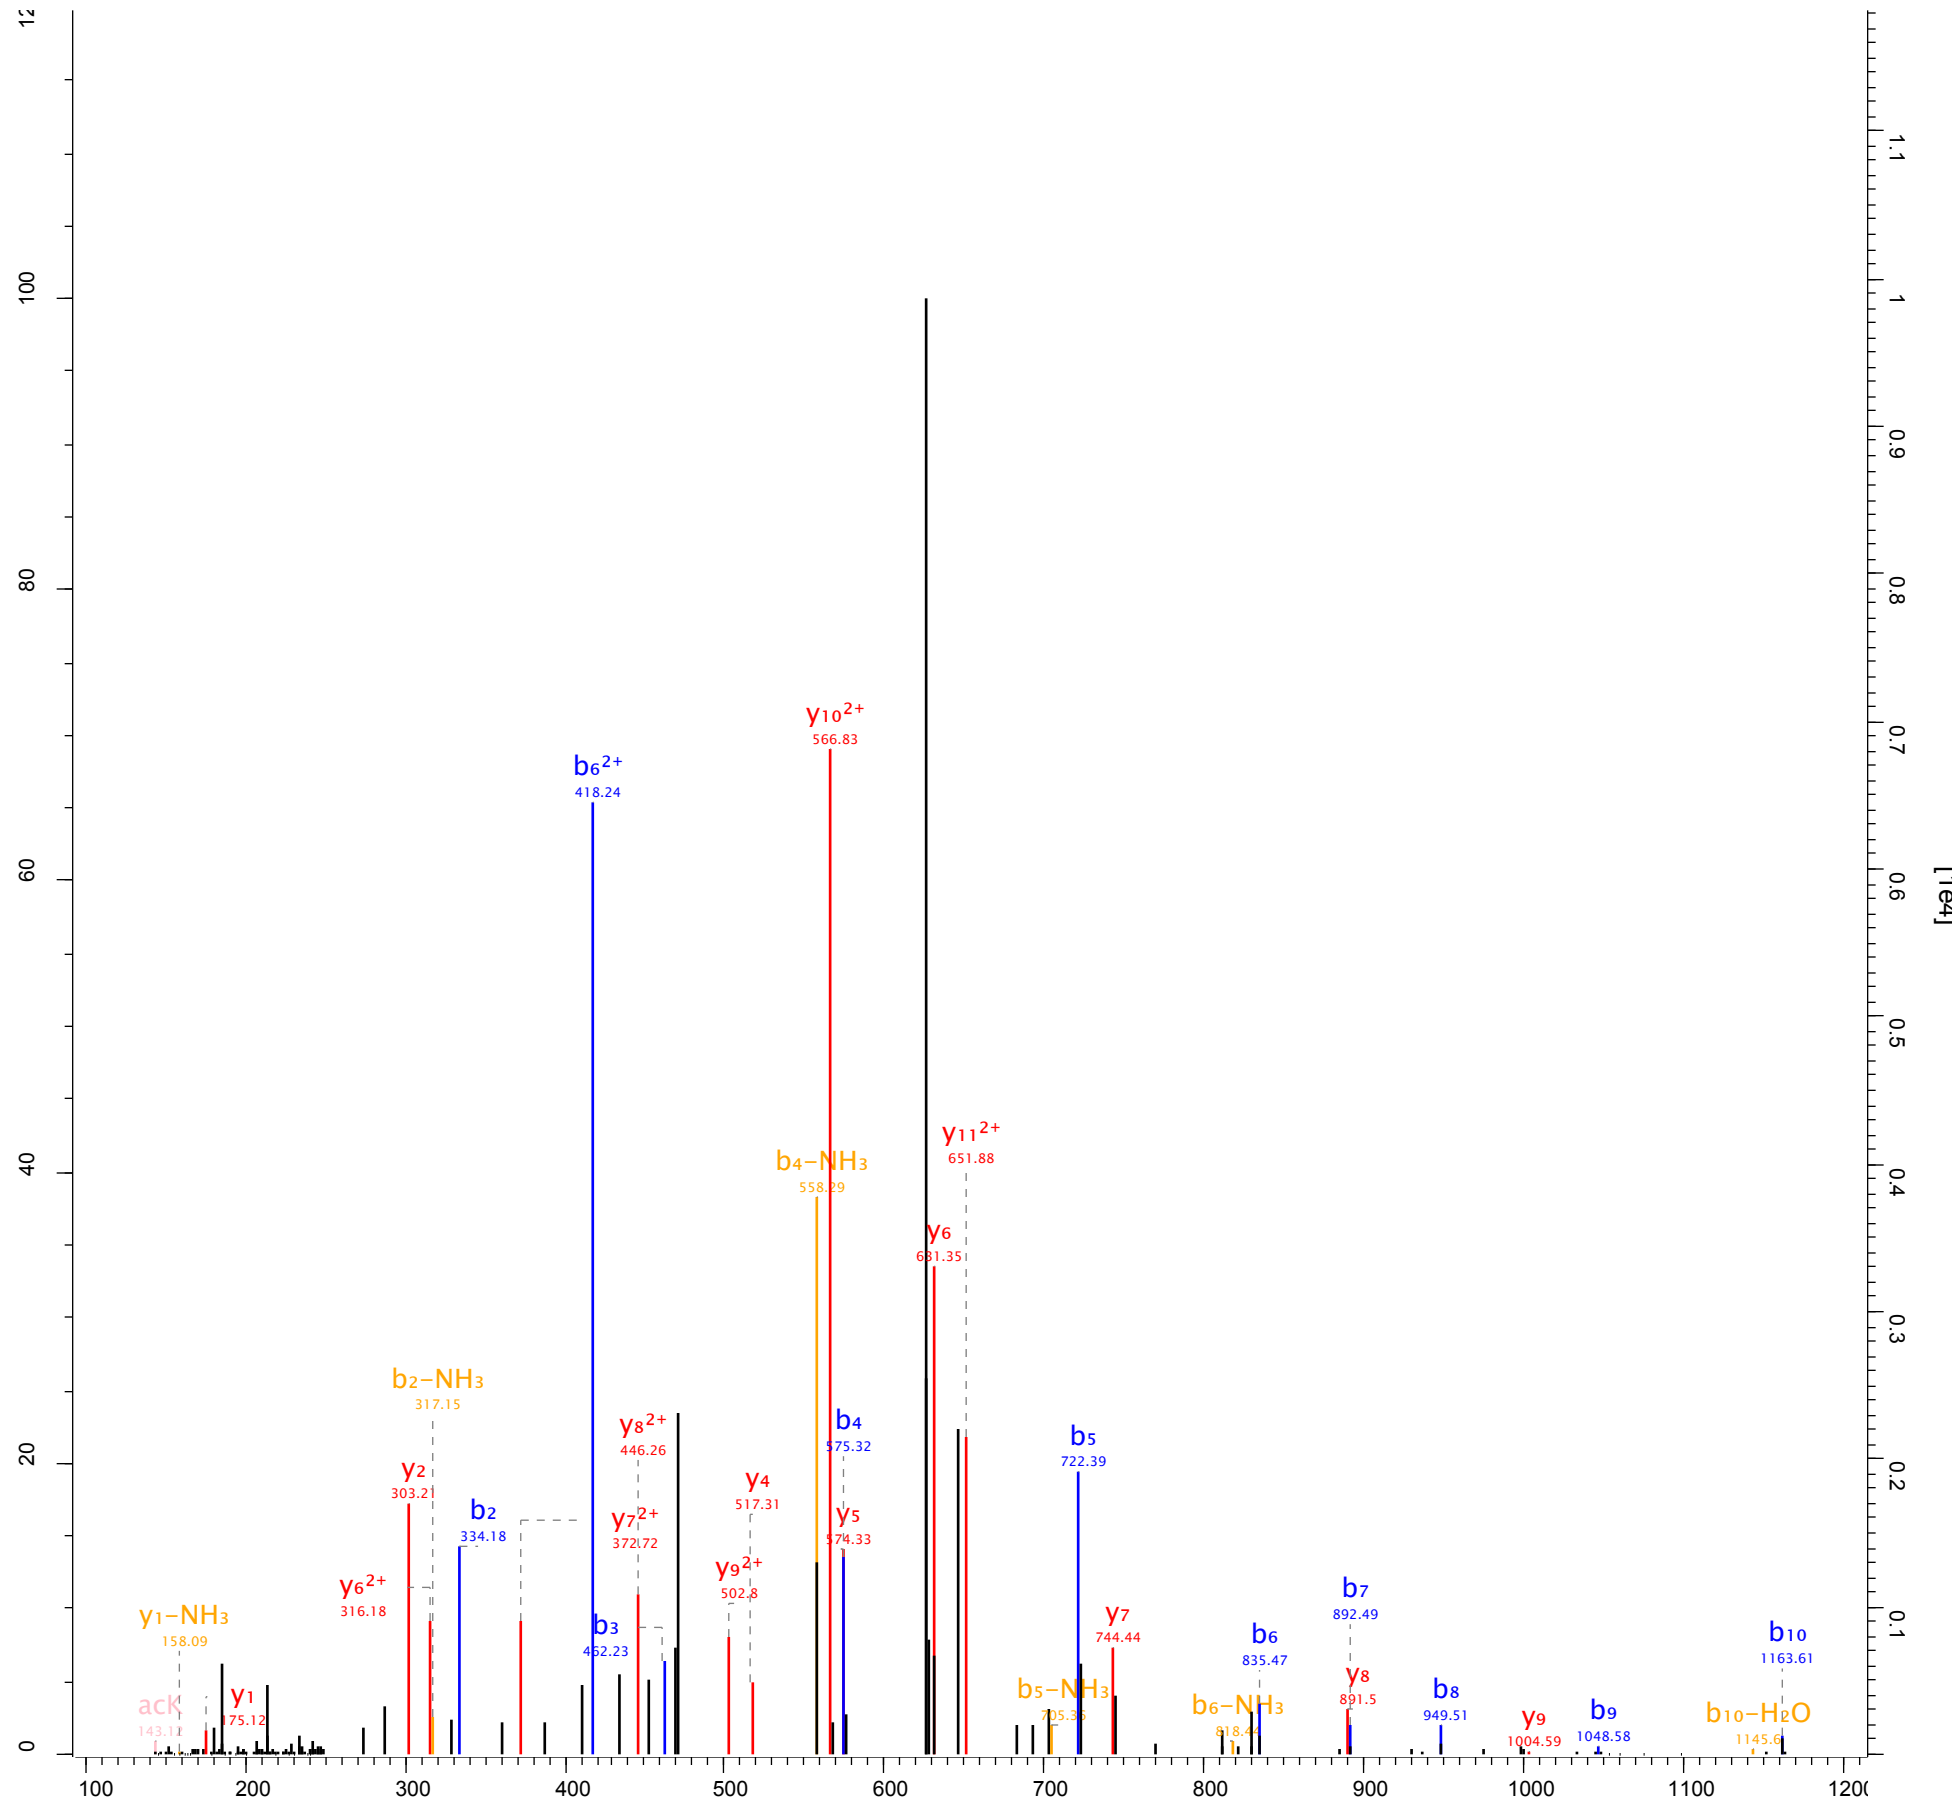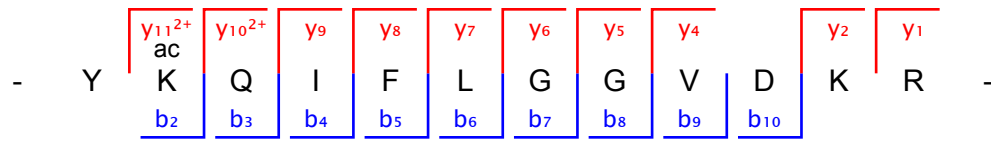

Raw file  
022814\_SCW\_II\_68\_10\_2ndZT

Scan 23007 Method ITMS; CID Score 143.99 m/z 824.74 Gene names Fasn

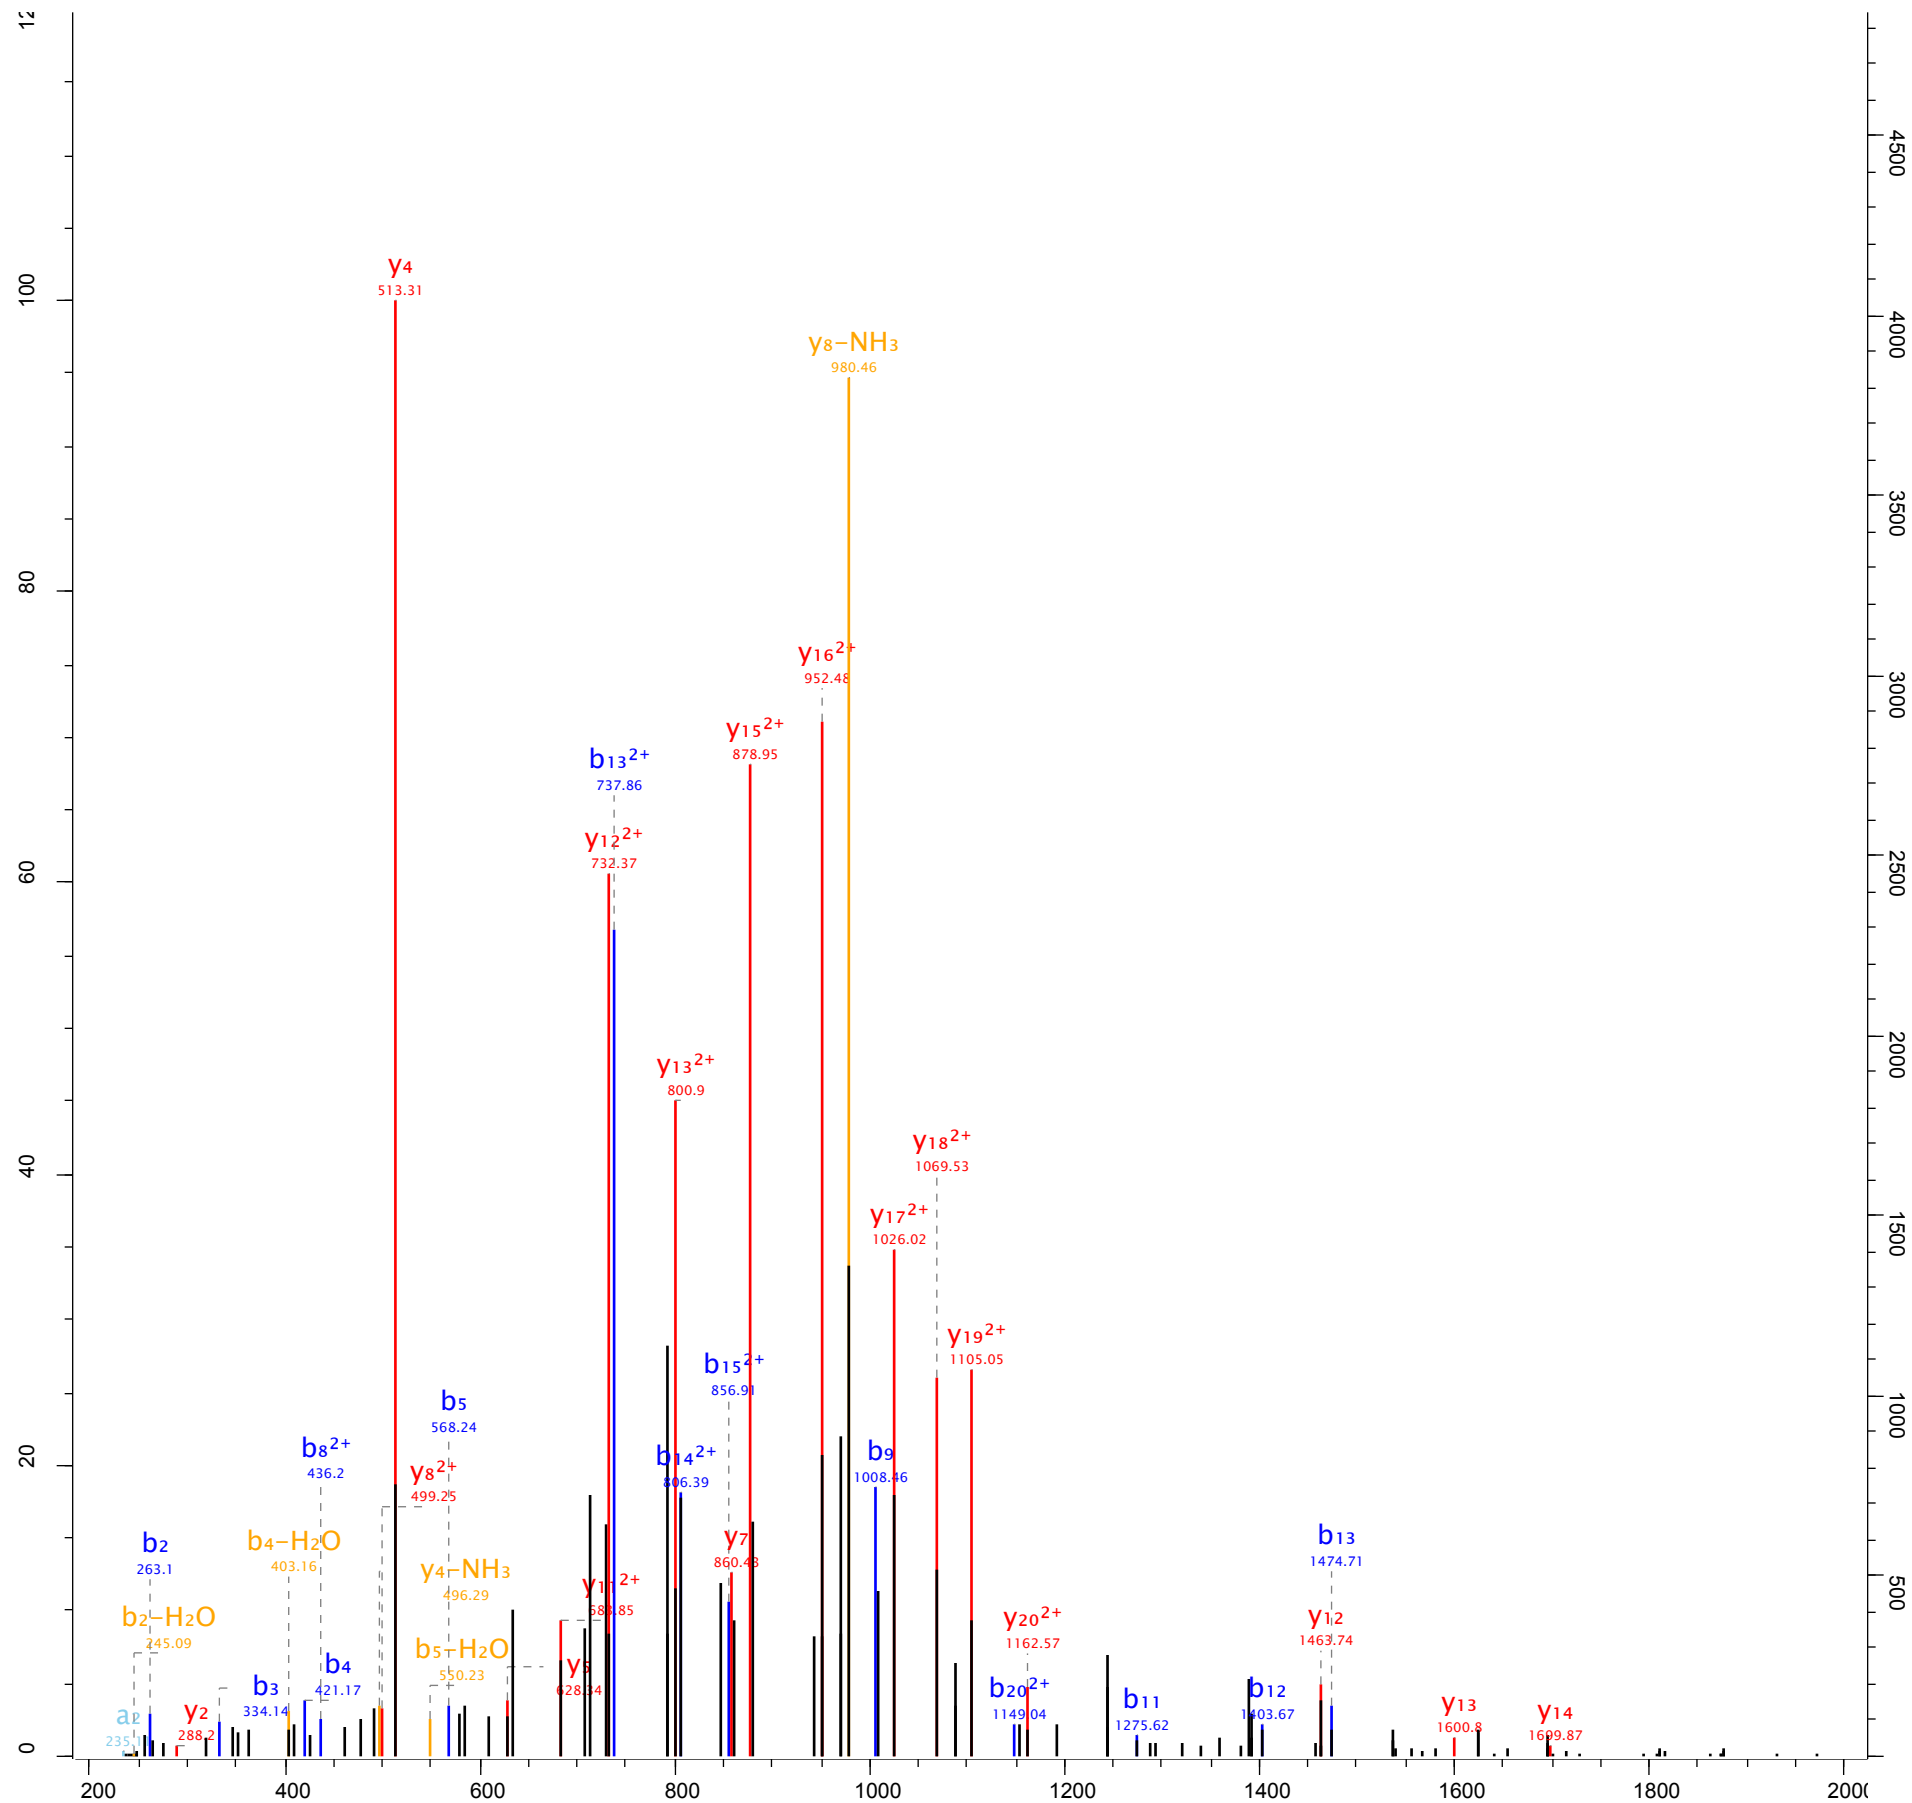

- F y<sub>20</sub><sup>2+</sup> y<sub>19</sub><sup>2+</sup> y<sub>18</sub><sup>2+</sup> y<sub>17</sub><sup>2+</sup> y<sub>16</sub><sup>2+</sup> y<sub>15</sub><sup>2+</sup> y<sub>14</sub> y<sub>13</sub> y<sub>12</sub> y<sub>11</sub><sup>2+</sup> ac y<sub>8</sub><sup>2+</sup> y<sub>7</sub> y<sub>5</sub> y<sub>4</sub> y<sub>2</sub>  
- F b<sub>2</sub> b<sub>3</sub> b<sub>4</sub> b<sub>5</sub> b<sub>8</sub><sup>2+</sup> b<sub>9</sub> b<sub>11</sub> b<sub>12</sub> b<sub>13</sub> b<sub>14</sub><sup>2+</sup> b<sub>15</sub><sup>2+</sup> b<sub>20</sub><sup>2+</sup> -



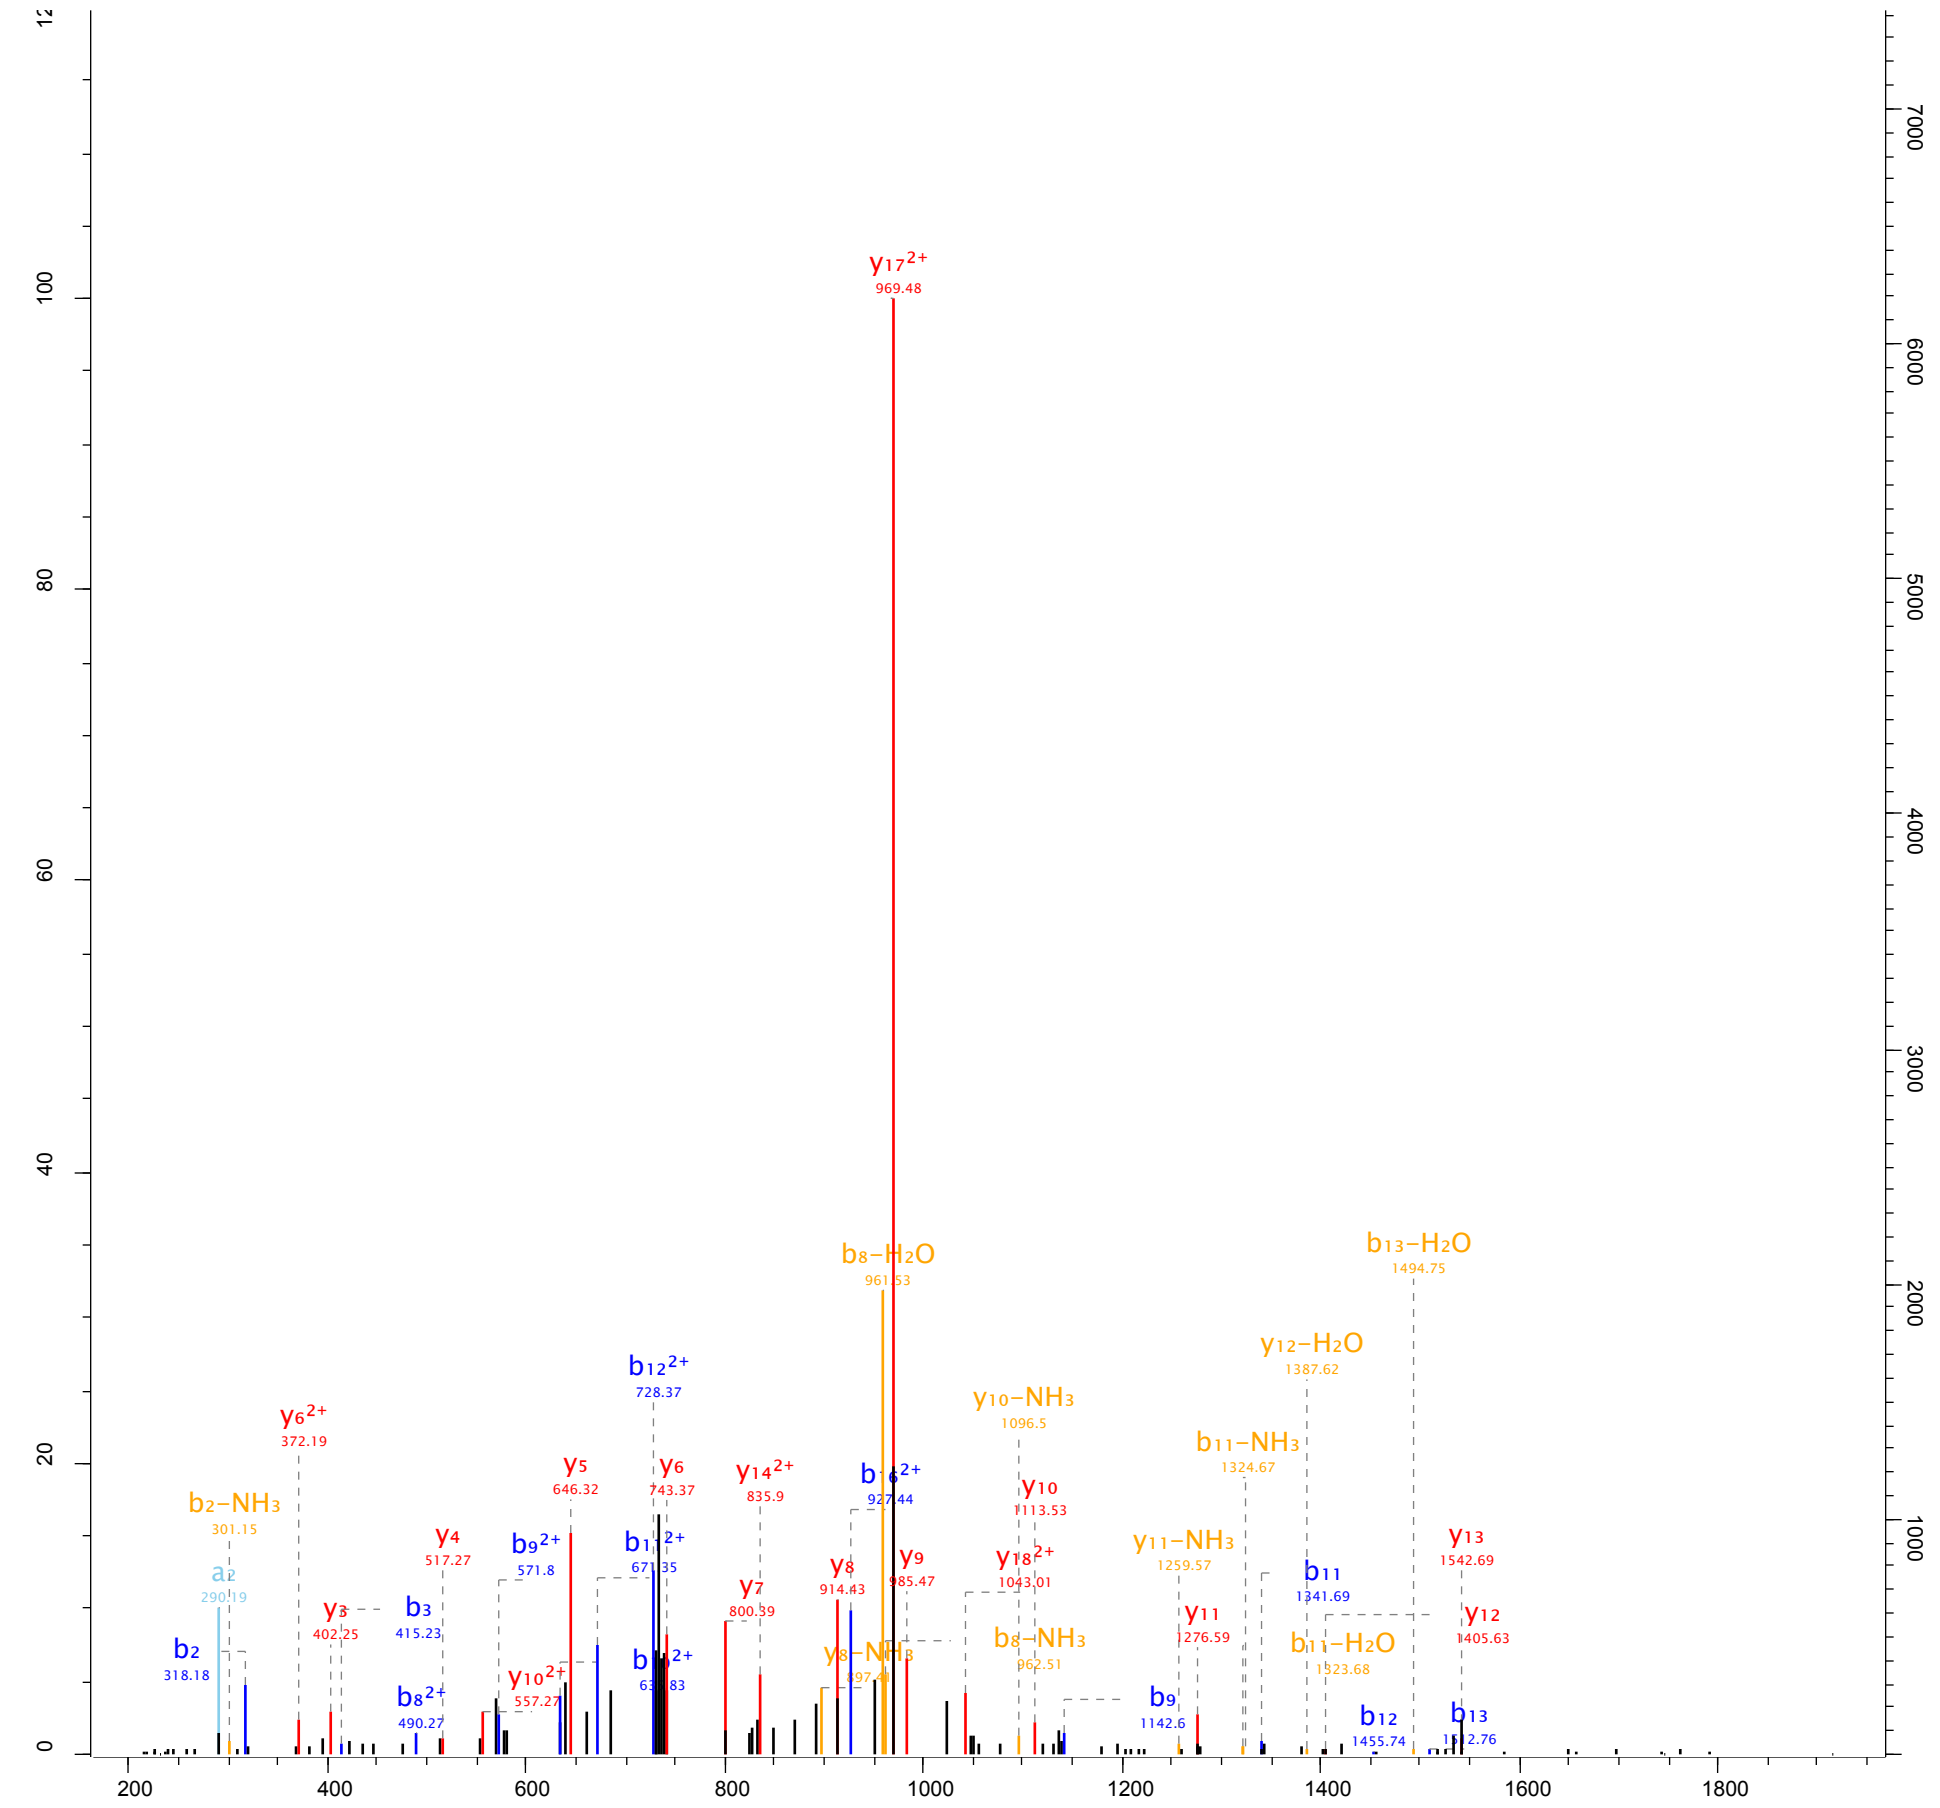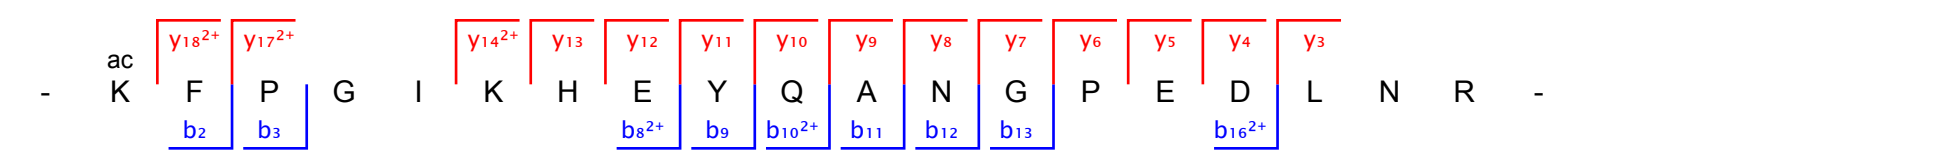

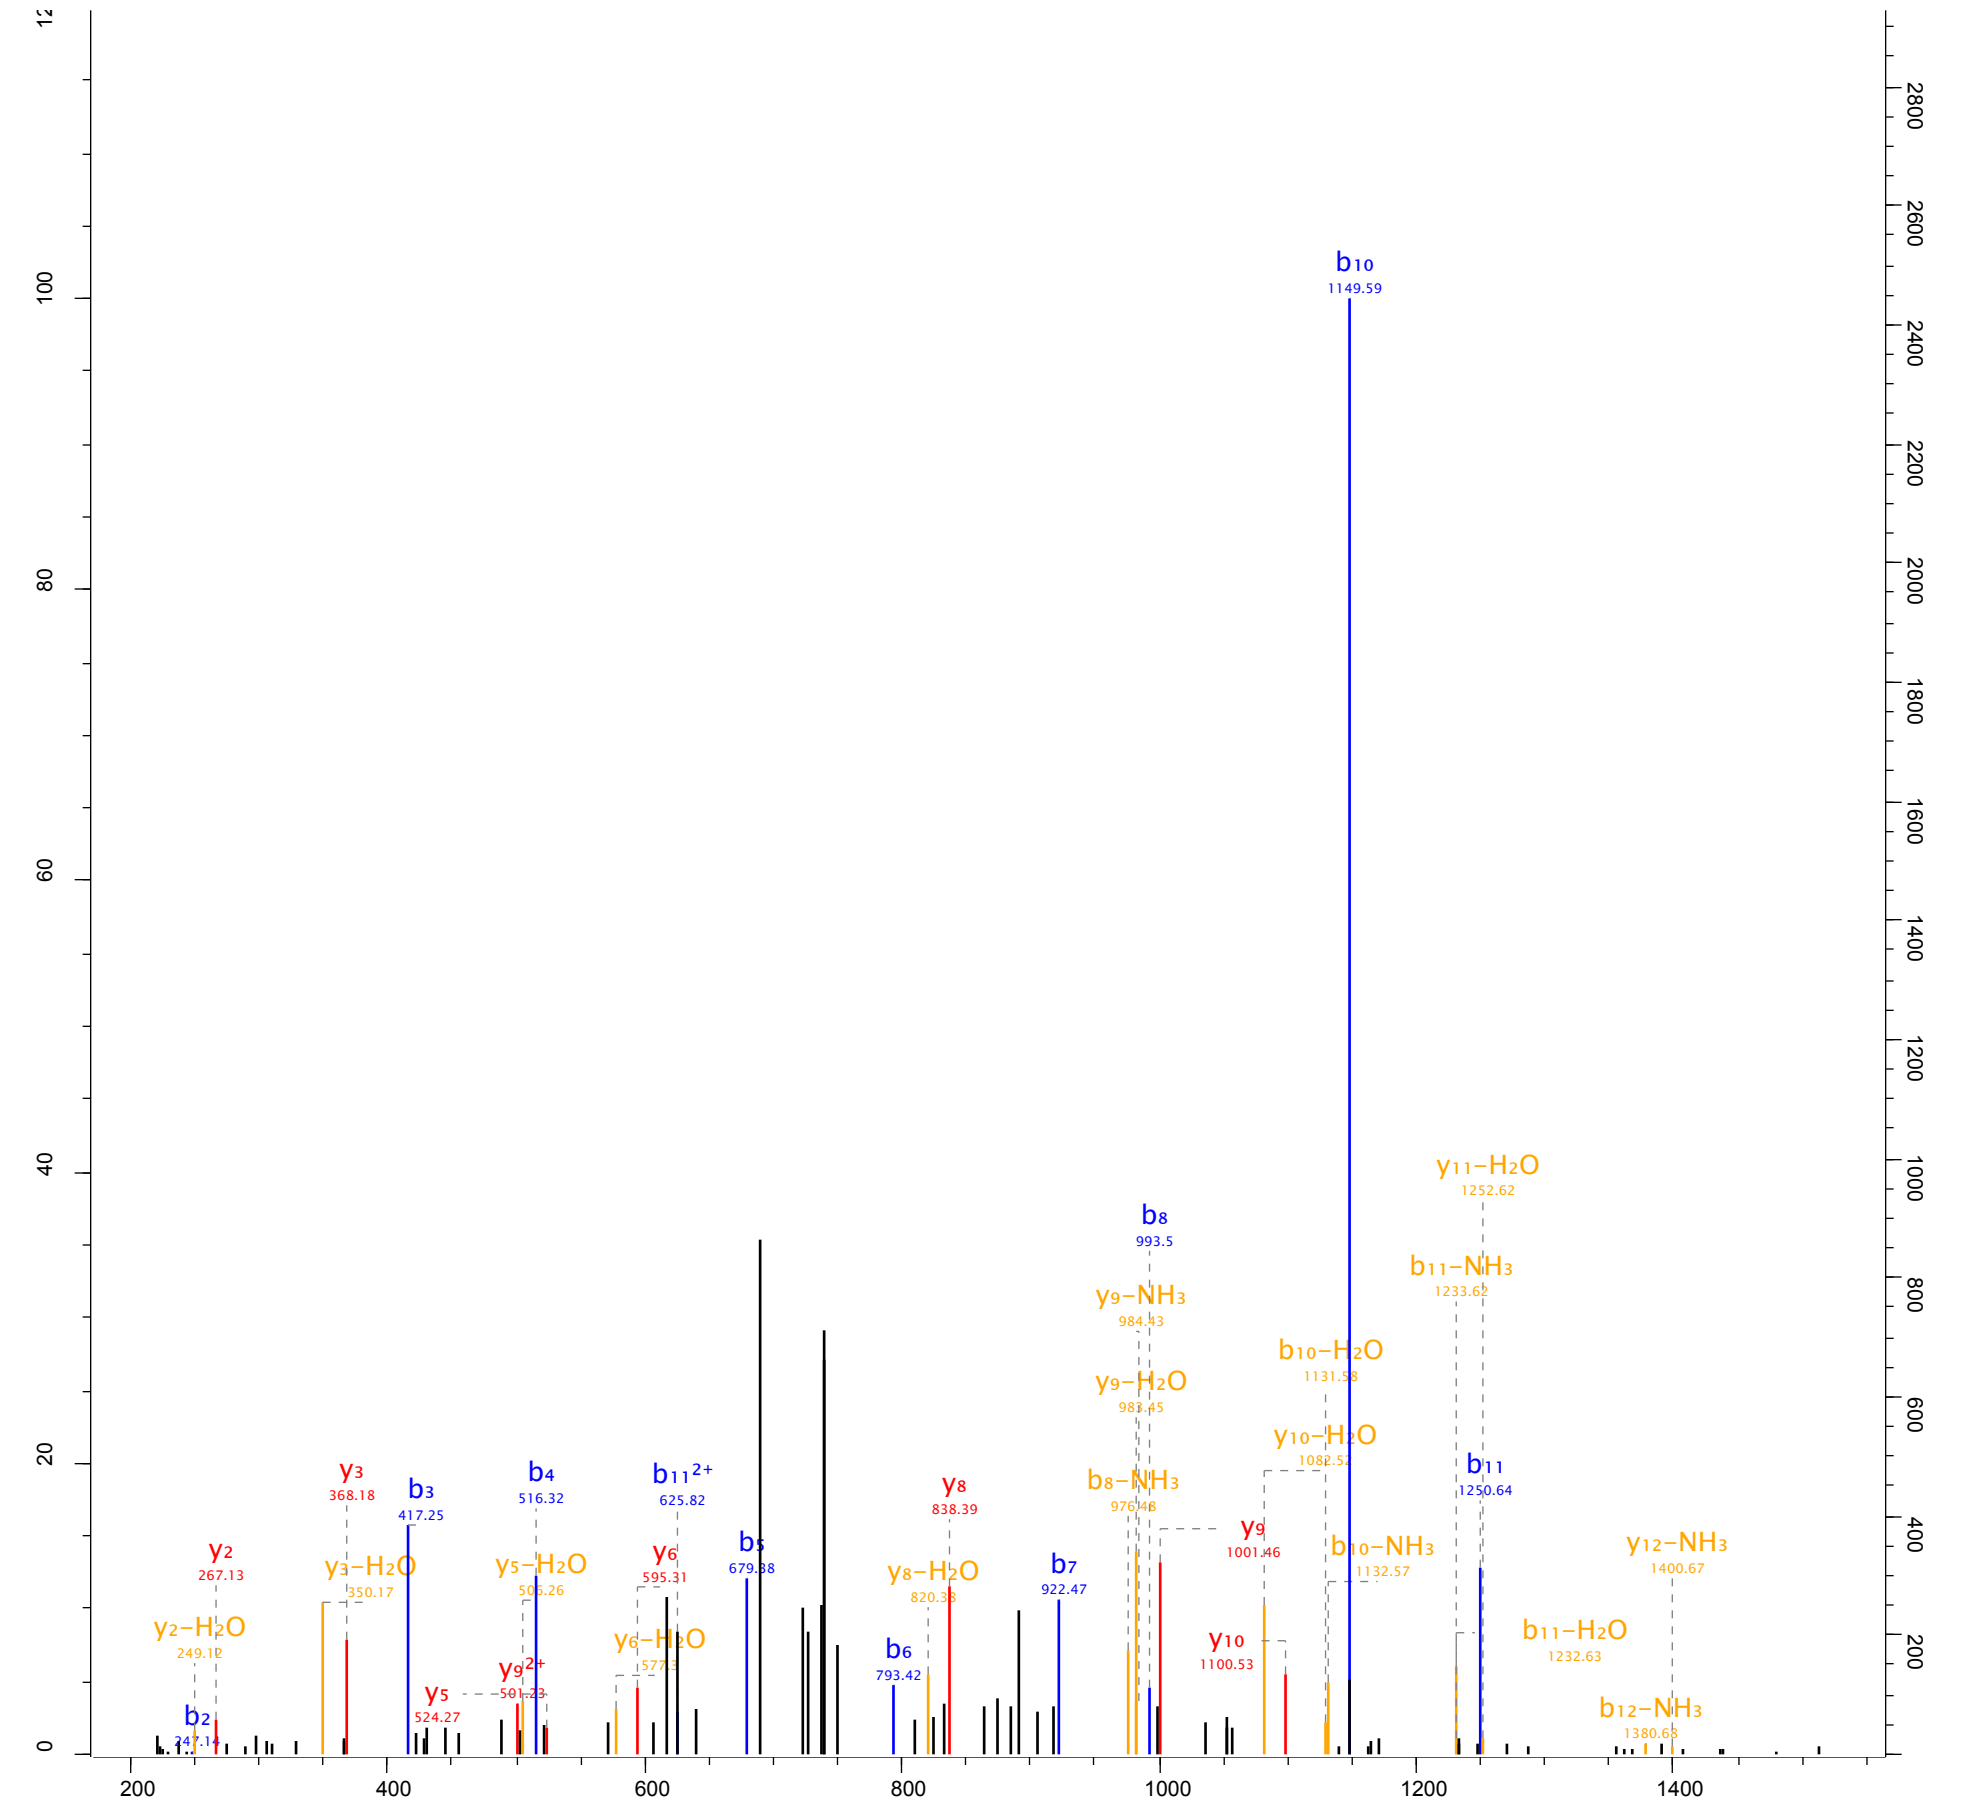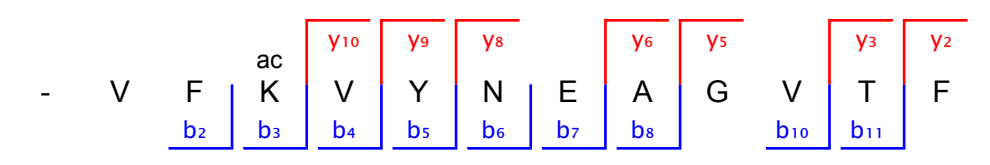

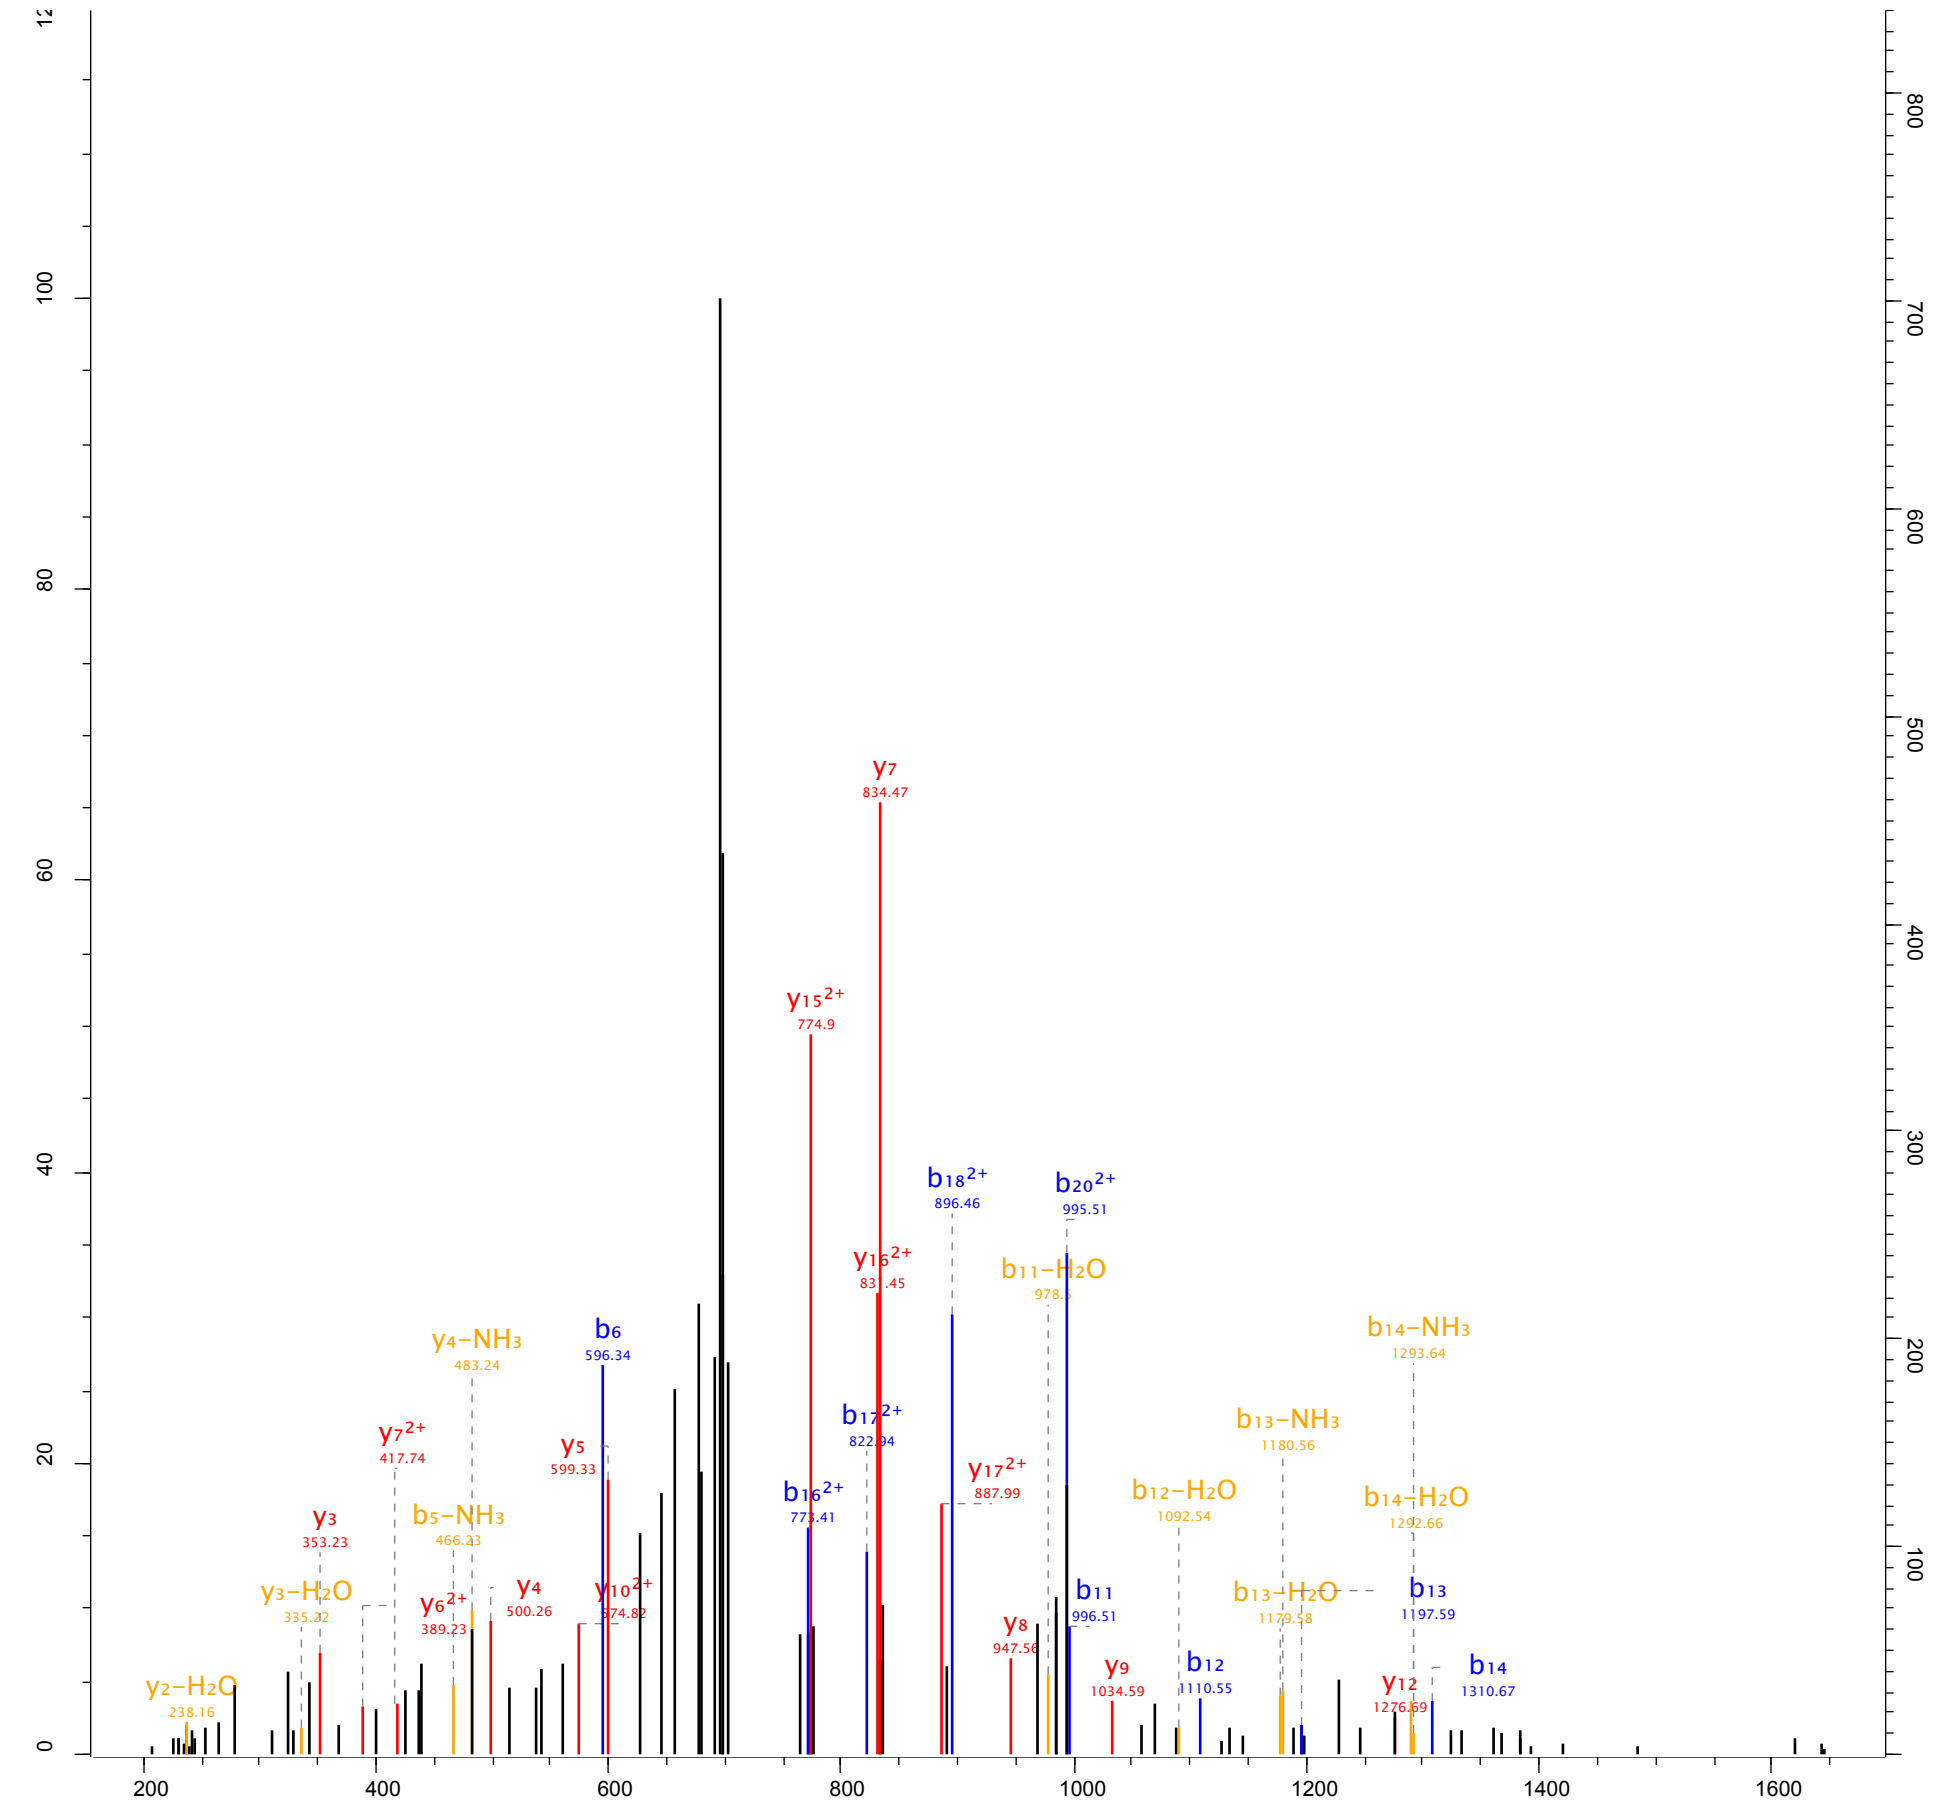

- A S P N L I G N T G A N S L G K V M P T K -

Fragmentation labels: y<sub>17</sub><sup>2+</sup>, y<sub>16</sub><sup>2+</sup>, y<sub>15</sub><sup>2+</sup>, y<sub>12</sub>, y<sub>10</sub><sup>2+</sup>, y<sub>9</sub>, y<sub>8</sub>, y<sub>7</sub>, y<sub>6</sub><sup>2+</sup> ac, y<sub>5</sub>, y<sub>4</sub> ox, y<sub>3</sub>, b<sub>6</sub>, b<sub>11</sub>, b<sub>12</sub>, b<sub>13</sub>, b<sub>14</sub>, b<sub>16</sub><sup>2+</sup>, b<sub>17</sub><sup>2+</sup>, b<sub>18</sub><sup>2+</sup>, b<sub>20</sub><sup>2+</sup>

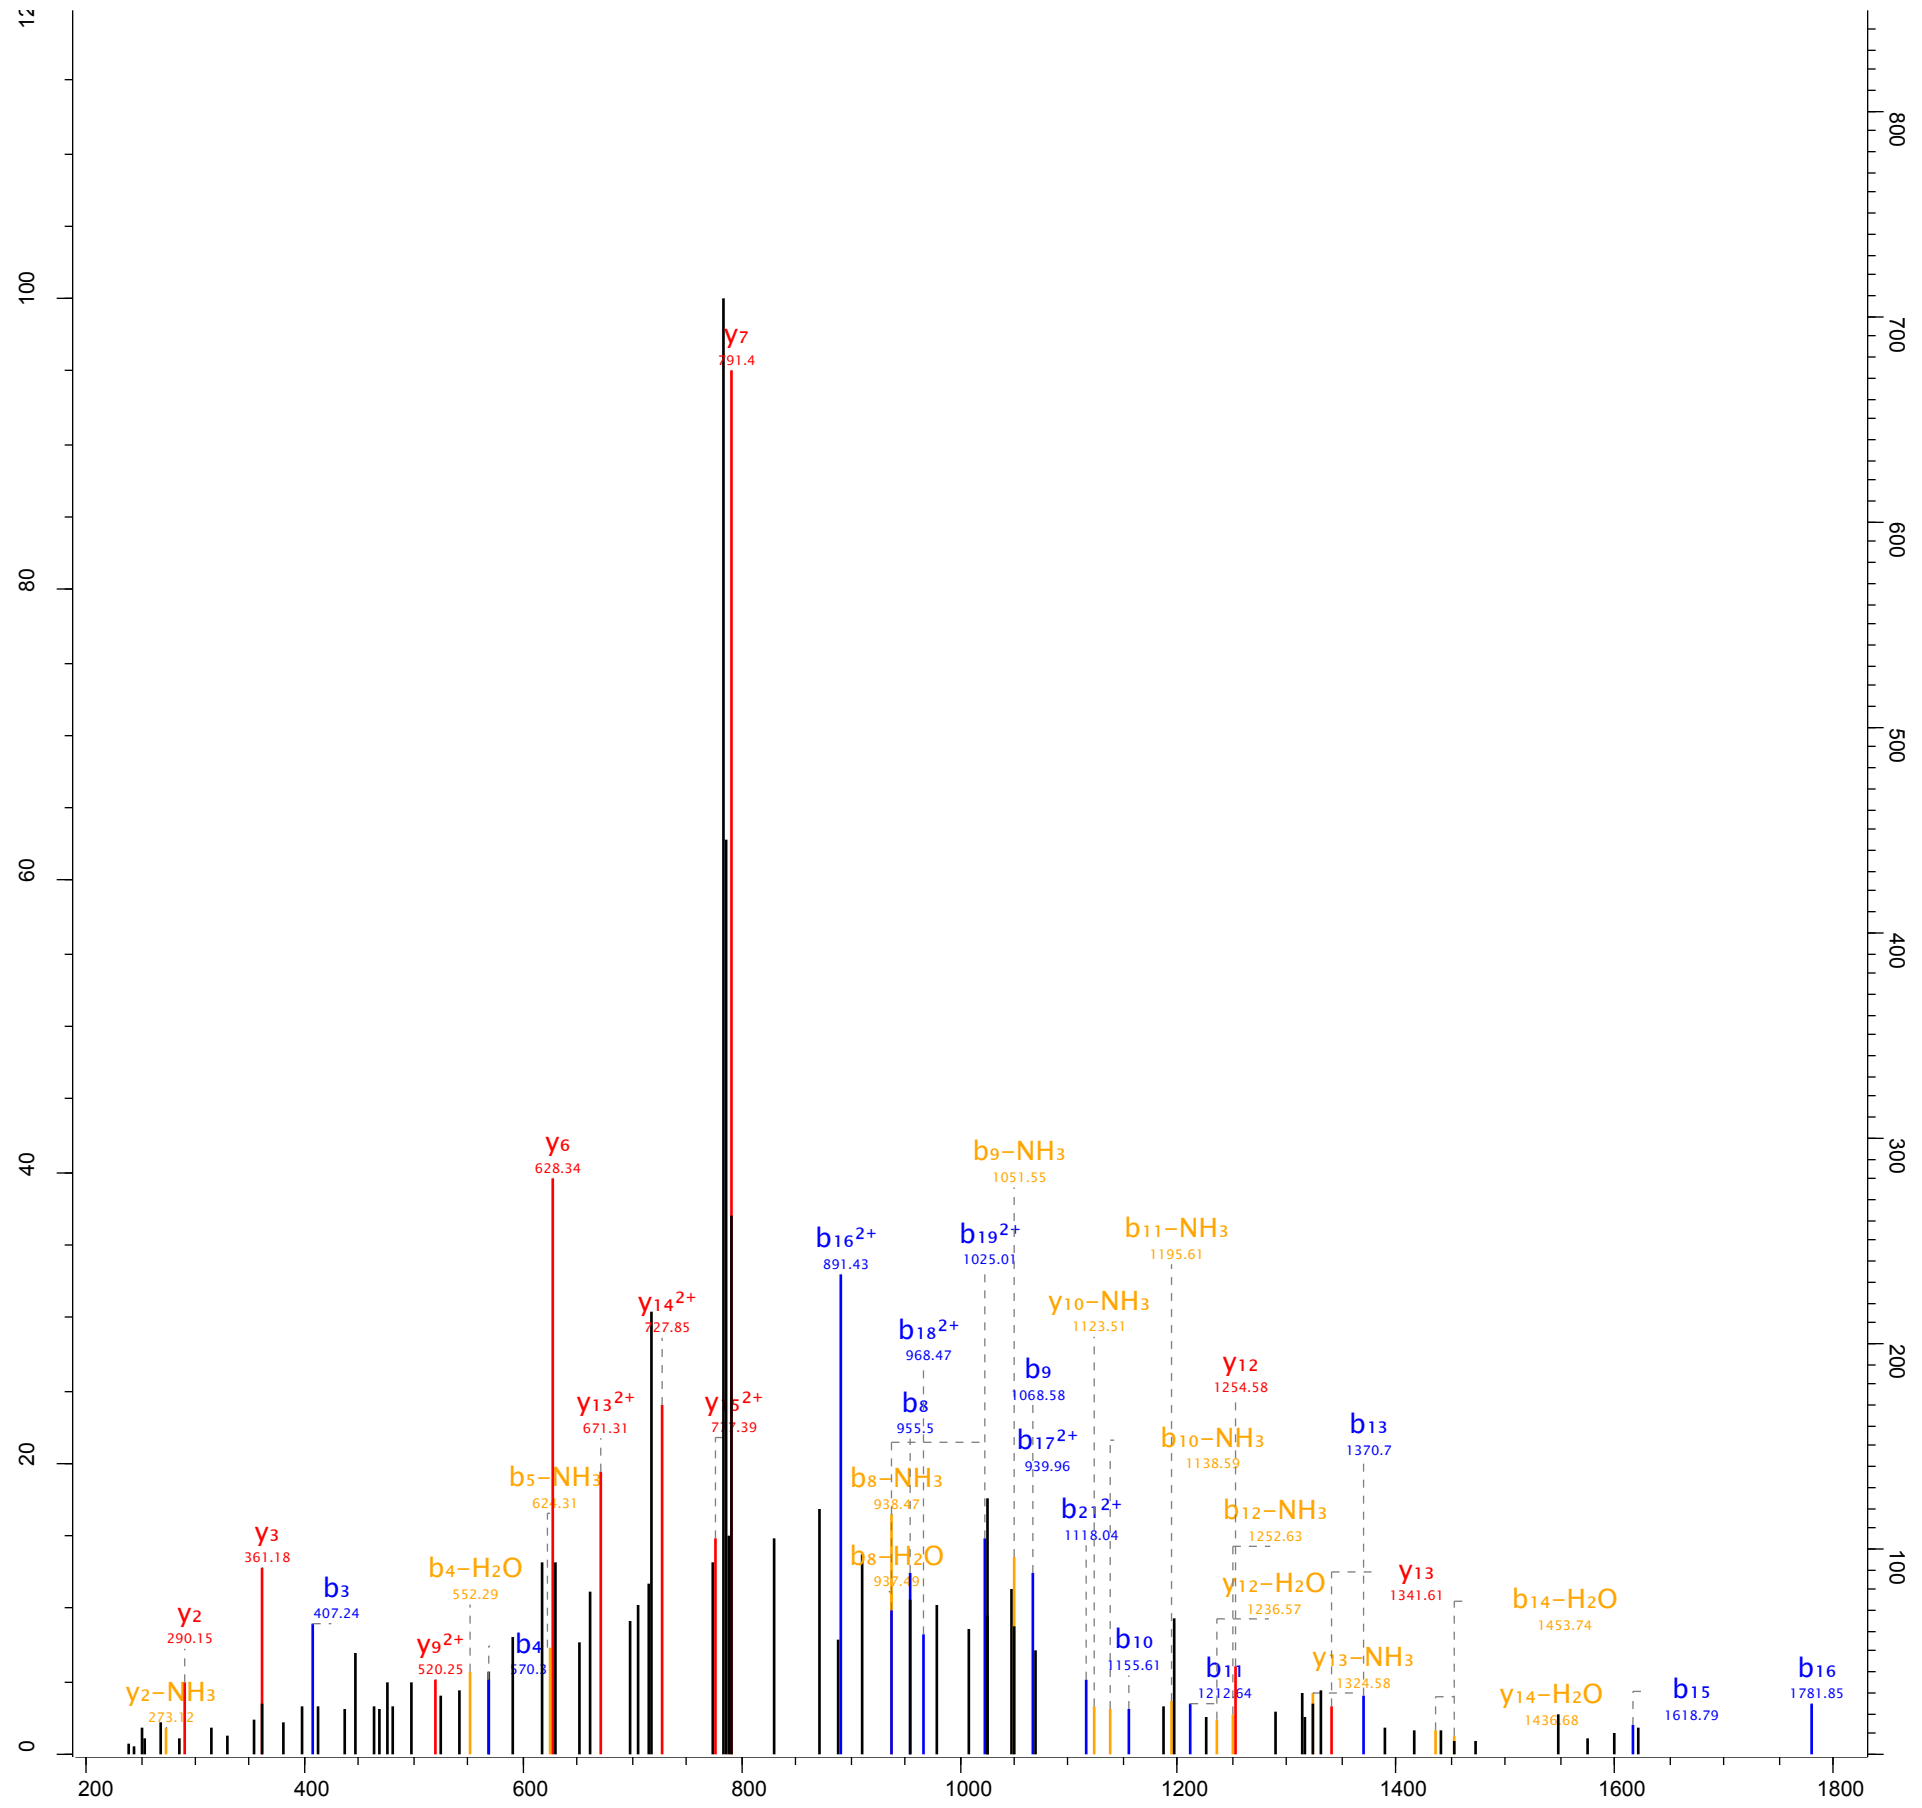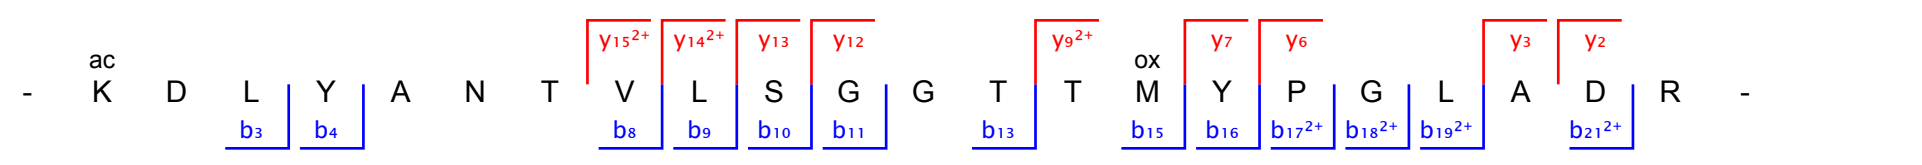

030314\_SCW\_II\_29\_3\_2ndZT

28882 ITMS; CID 144.95 847.43 Vim

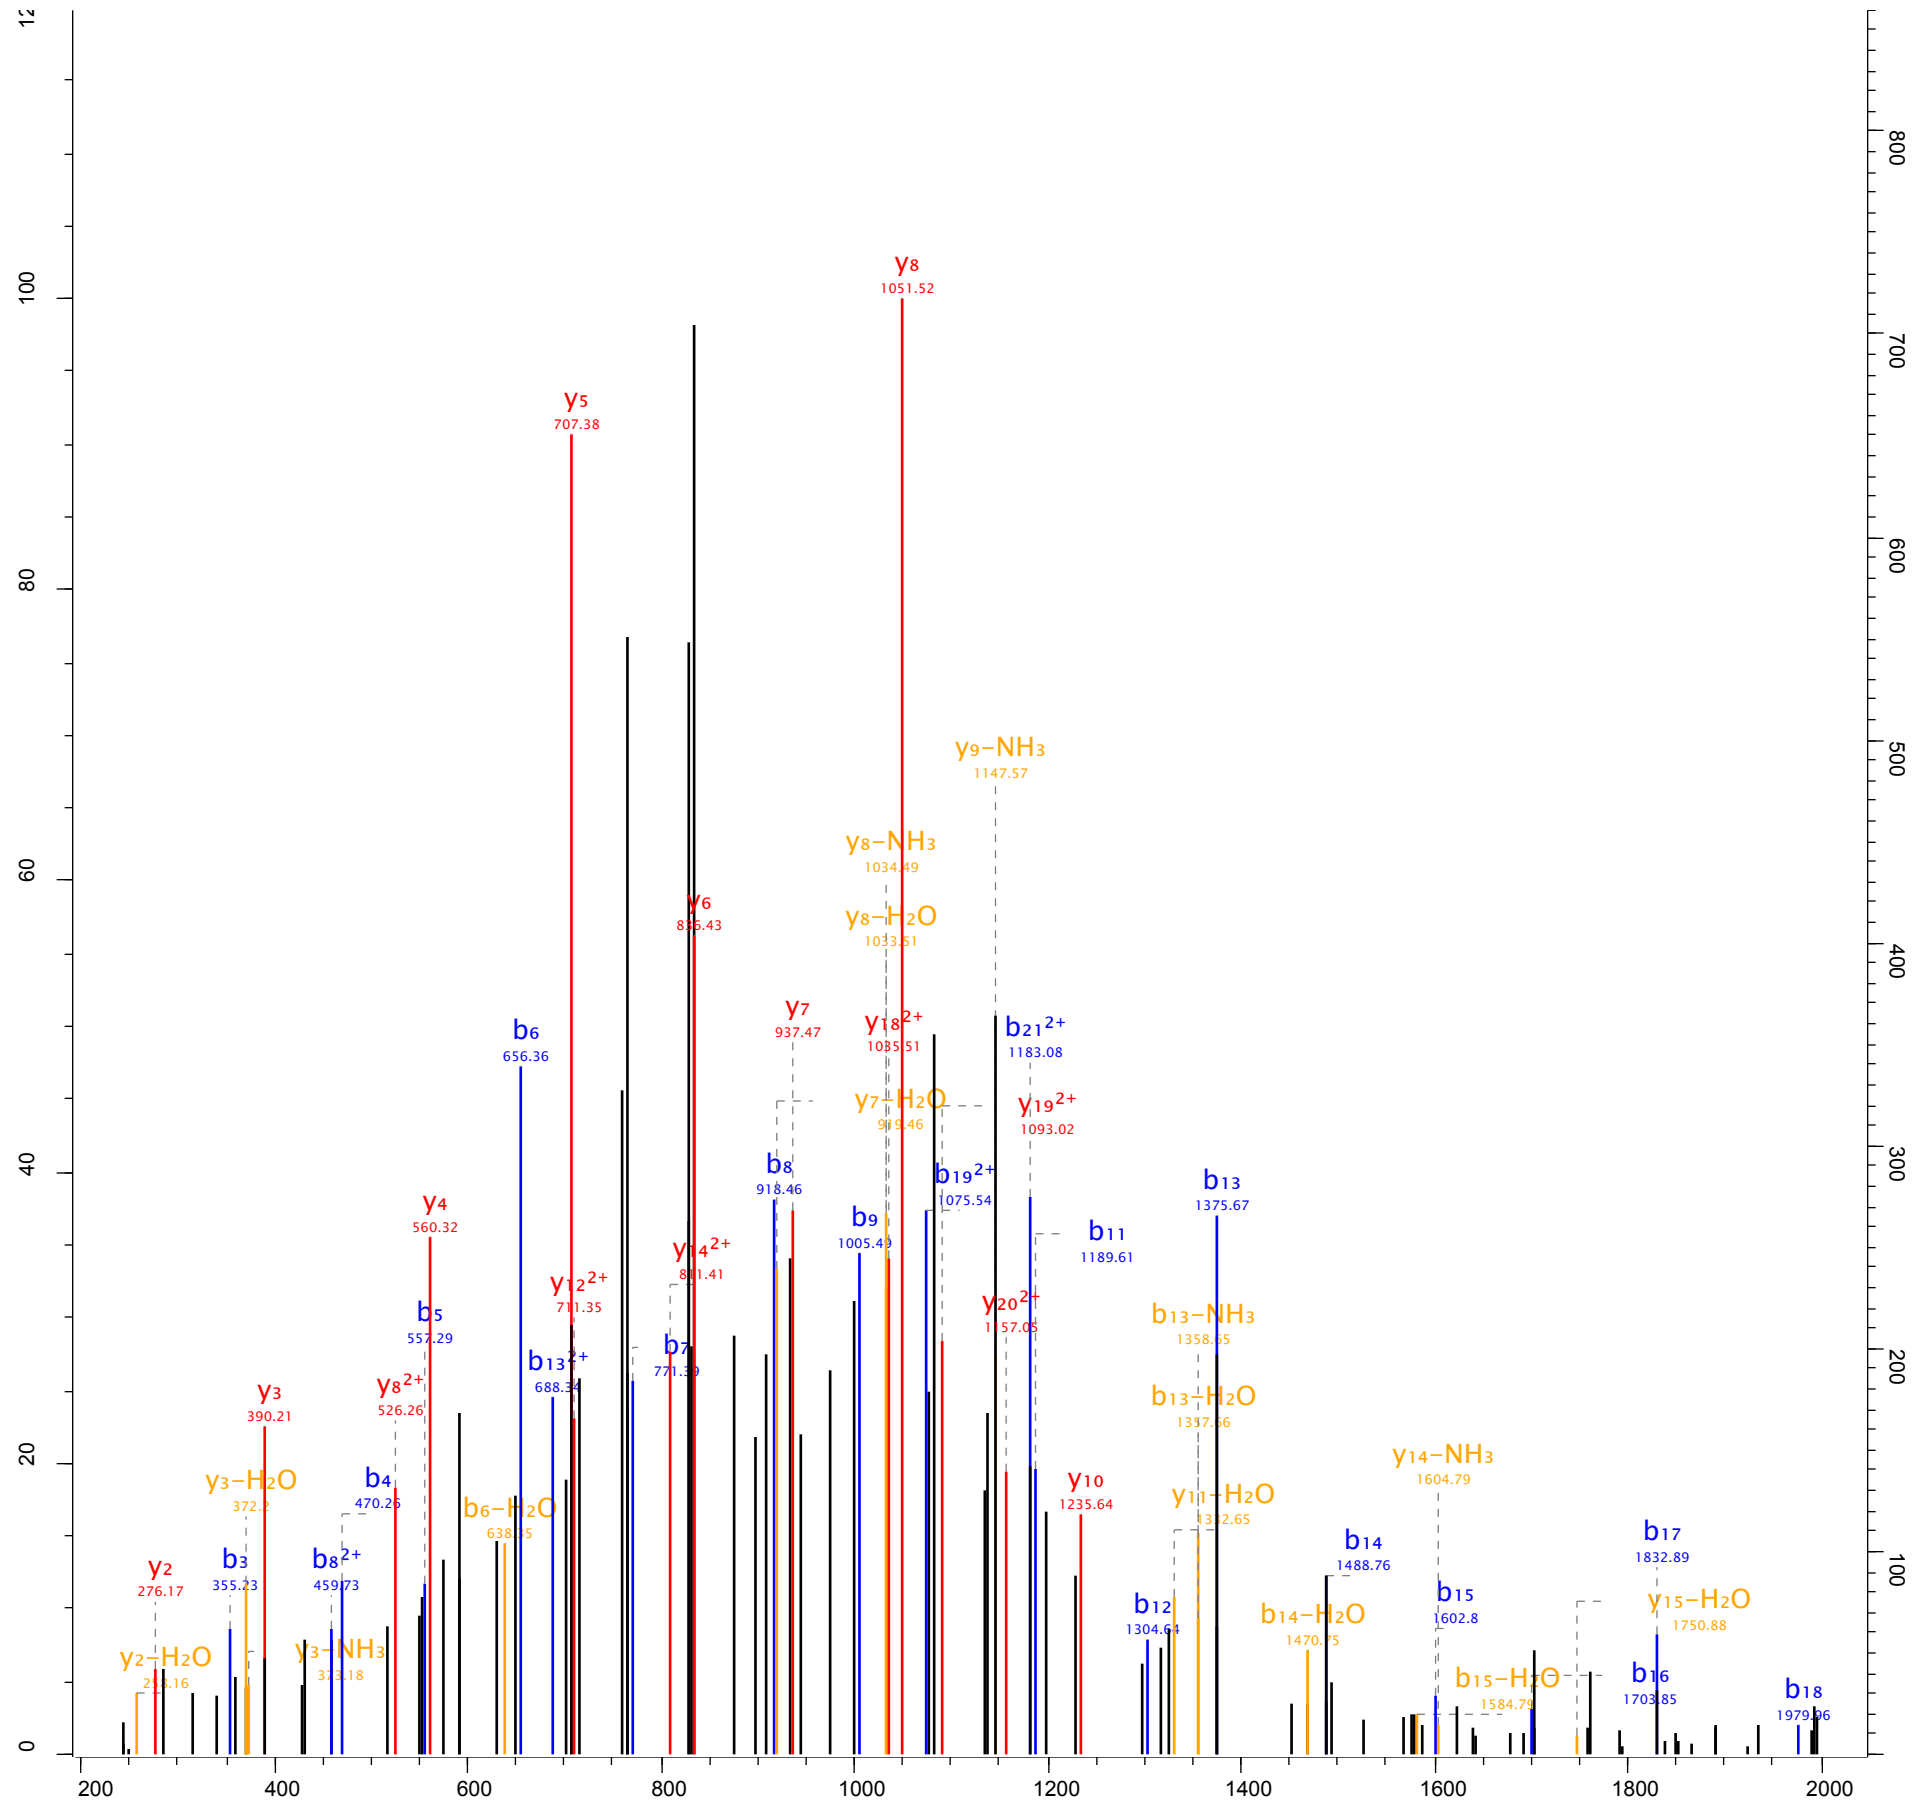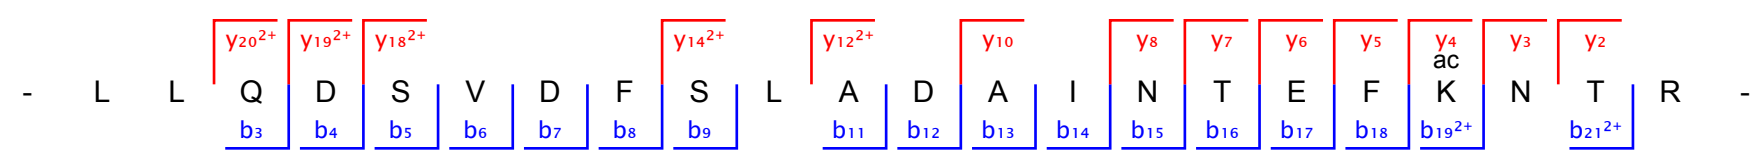

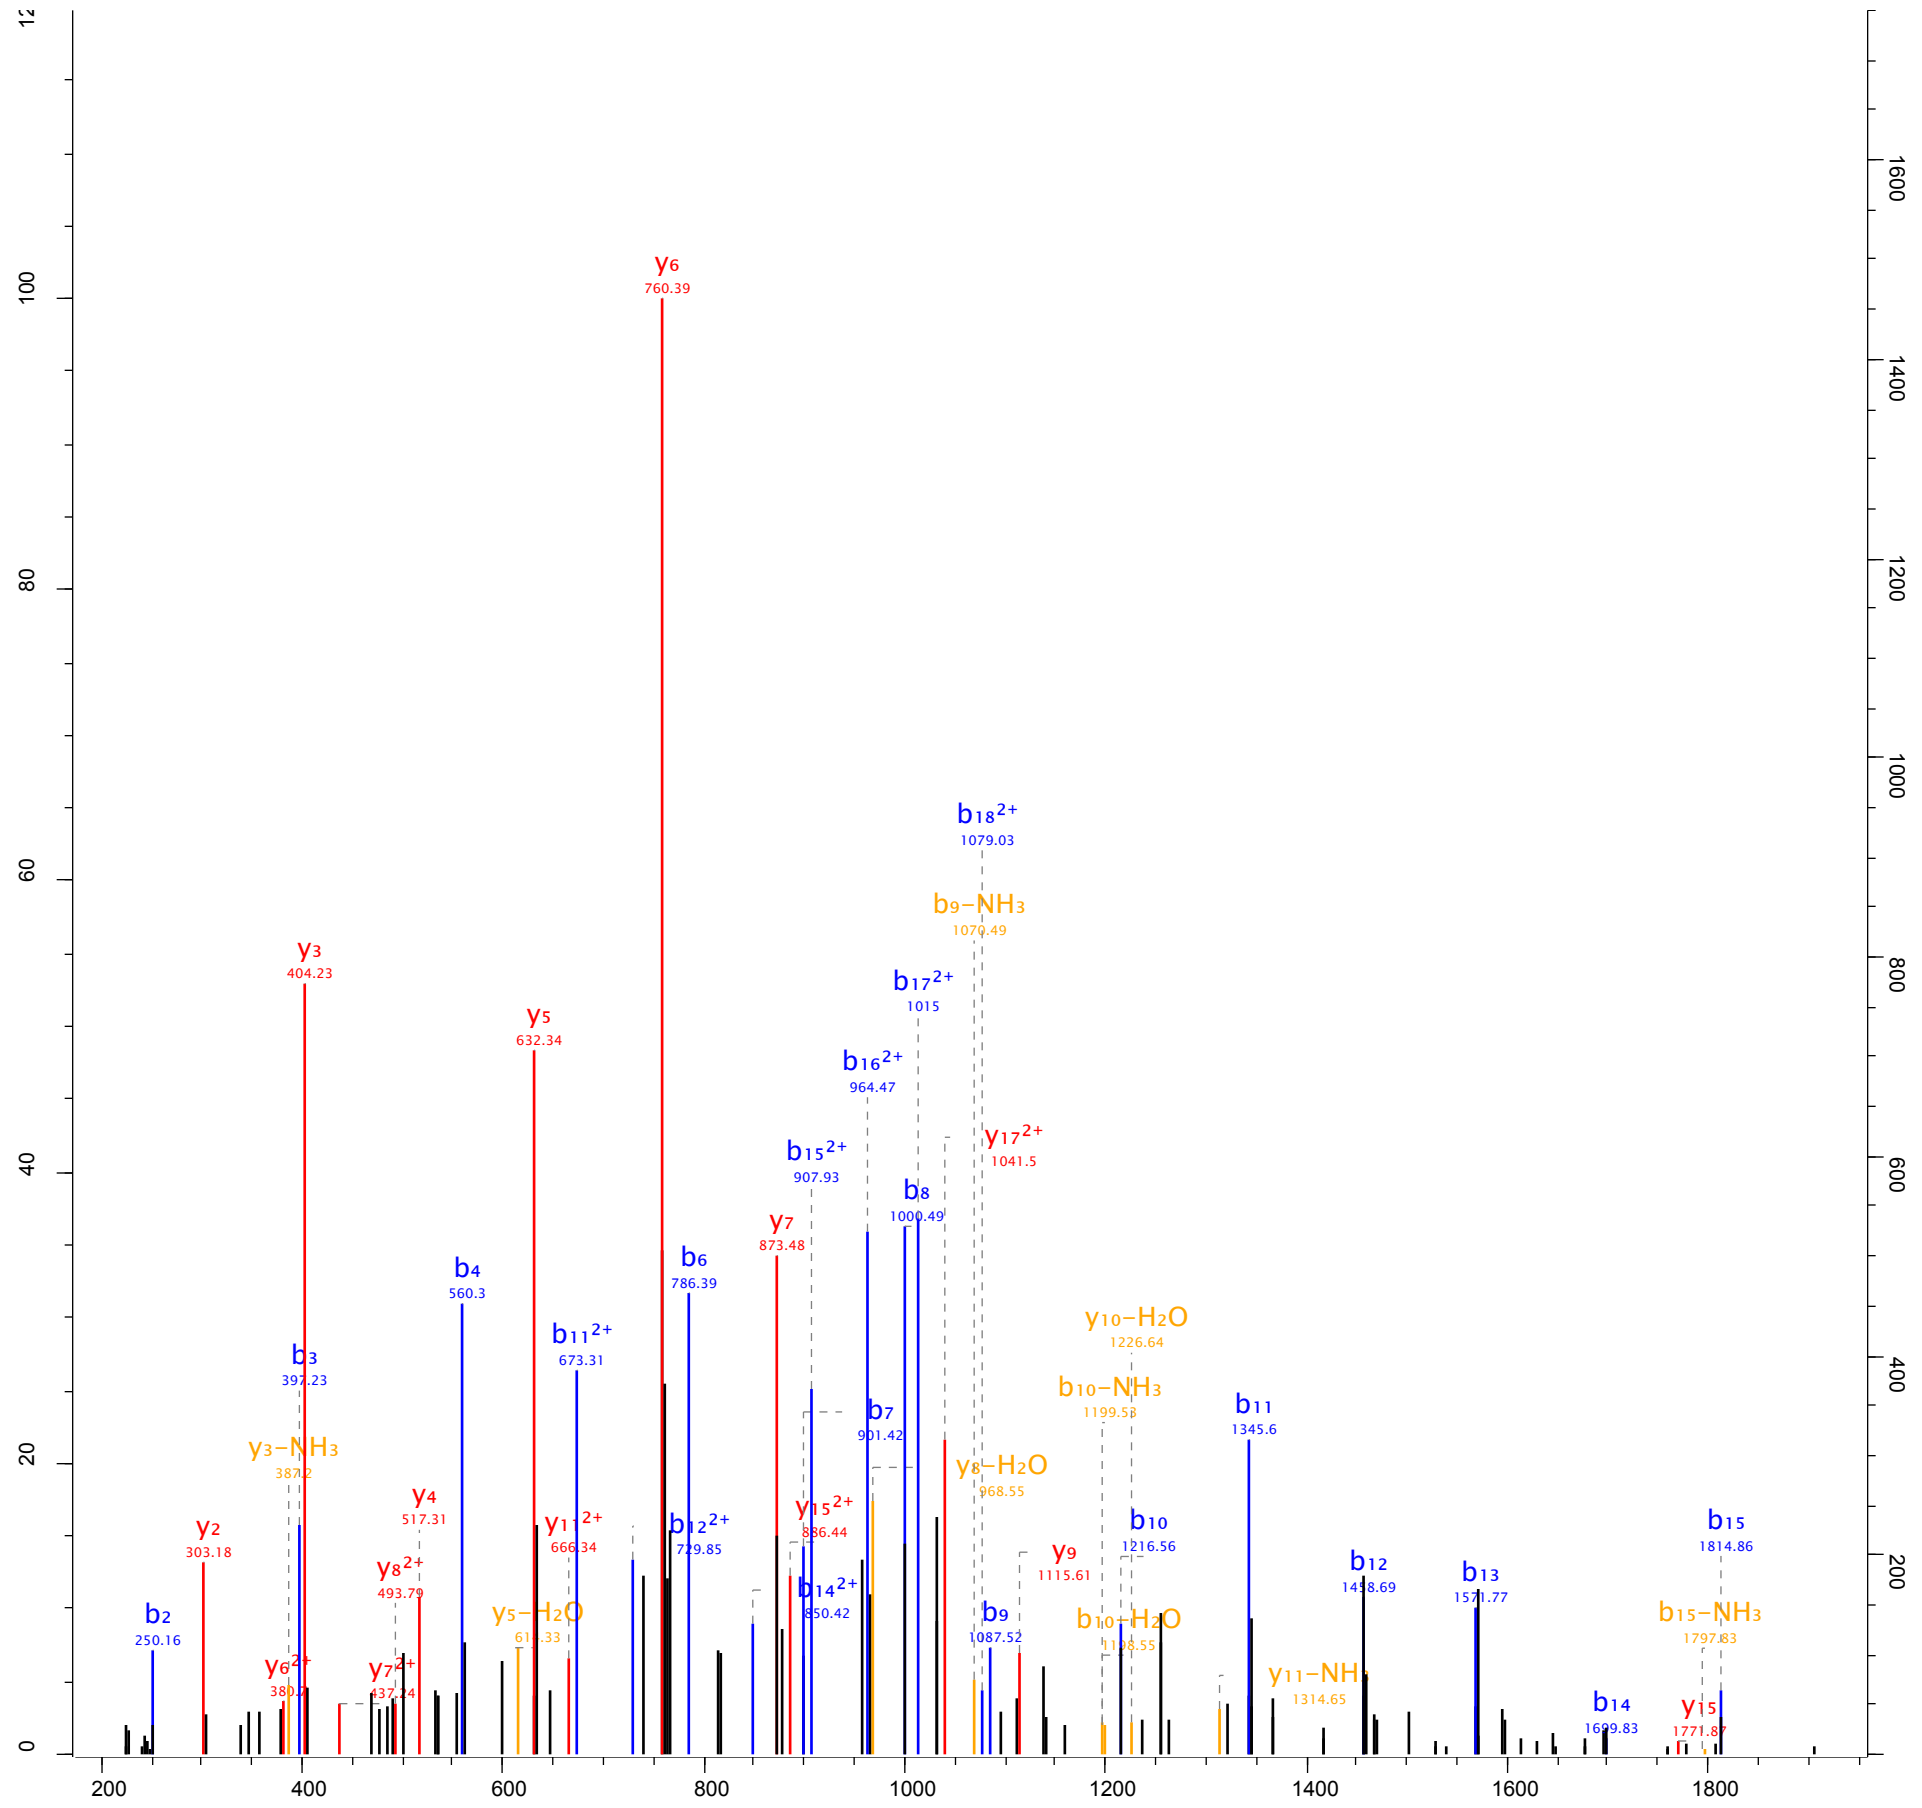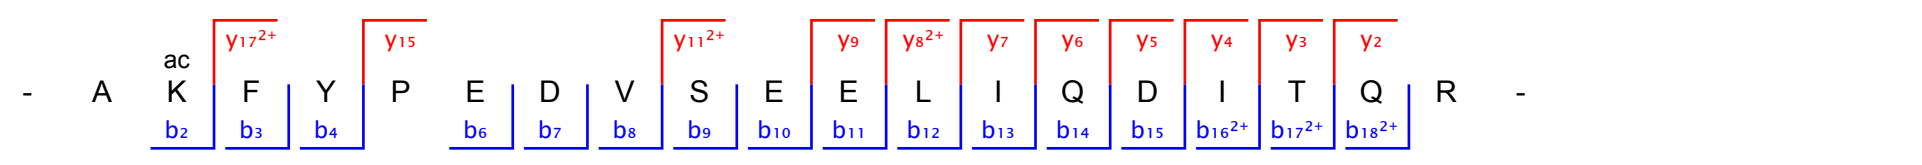

Raw file  
030314\_SCW\_II\_29\_4\_2ndZT

Scan 14748 Method ITMS; CID Score 158.06 m/z 642.83 Gene names Cfl1;Dstn;Cfl2

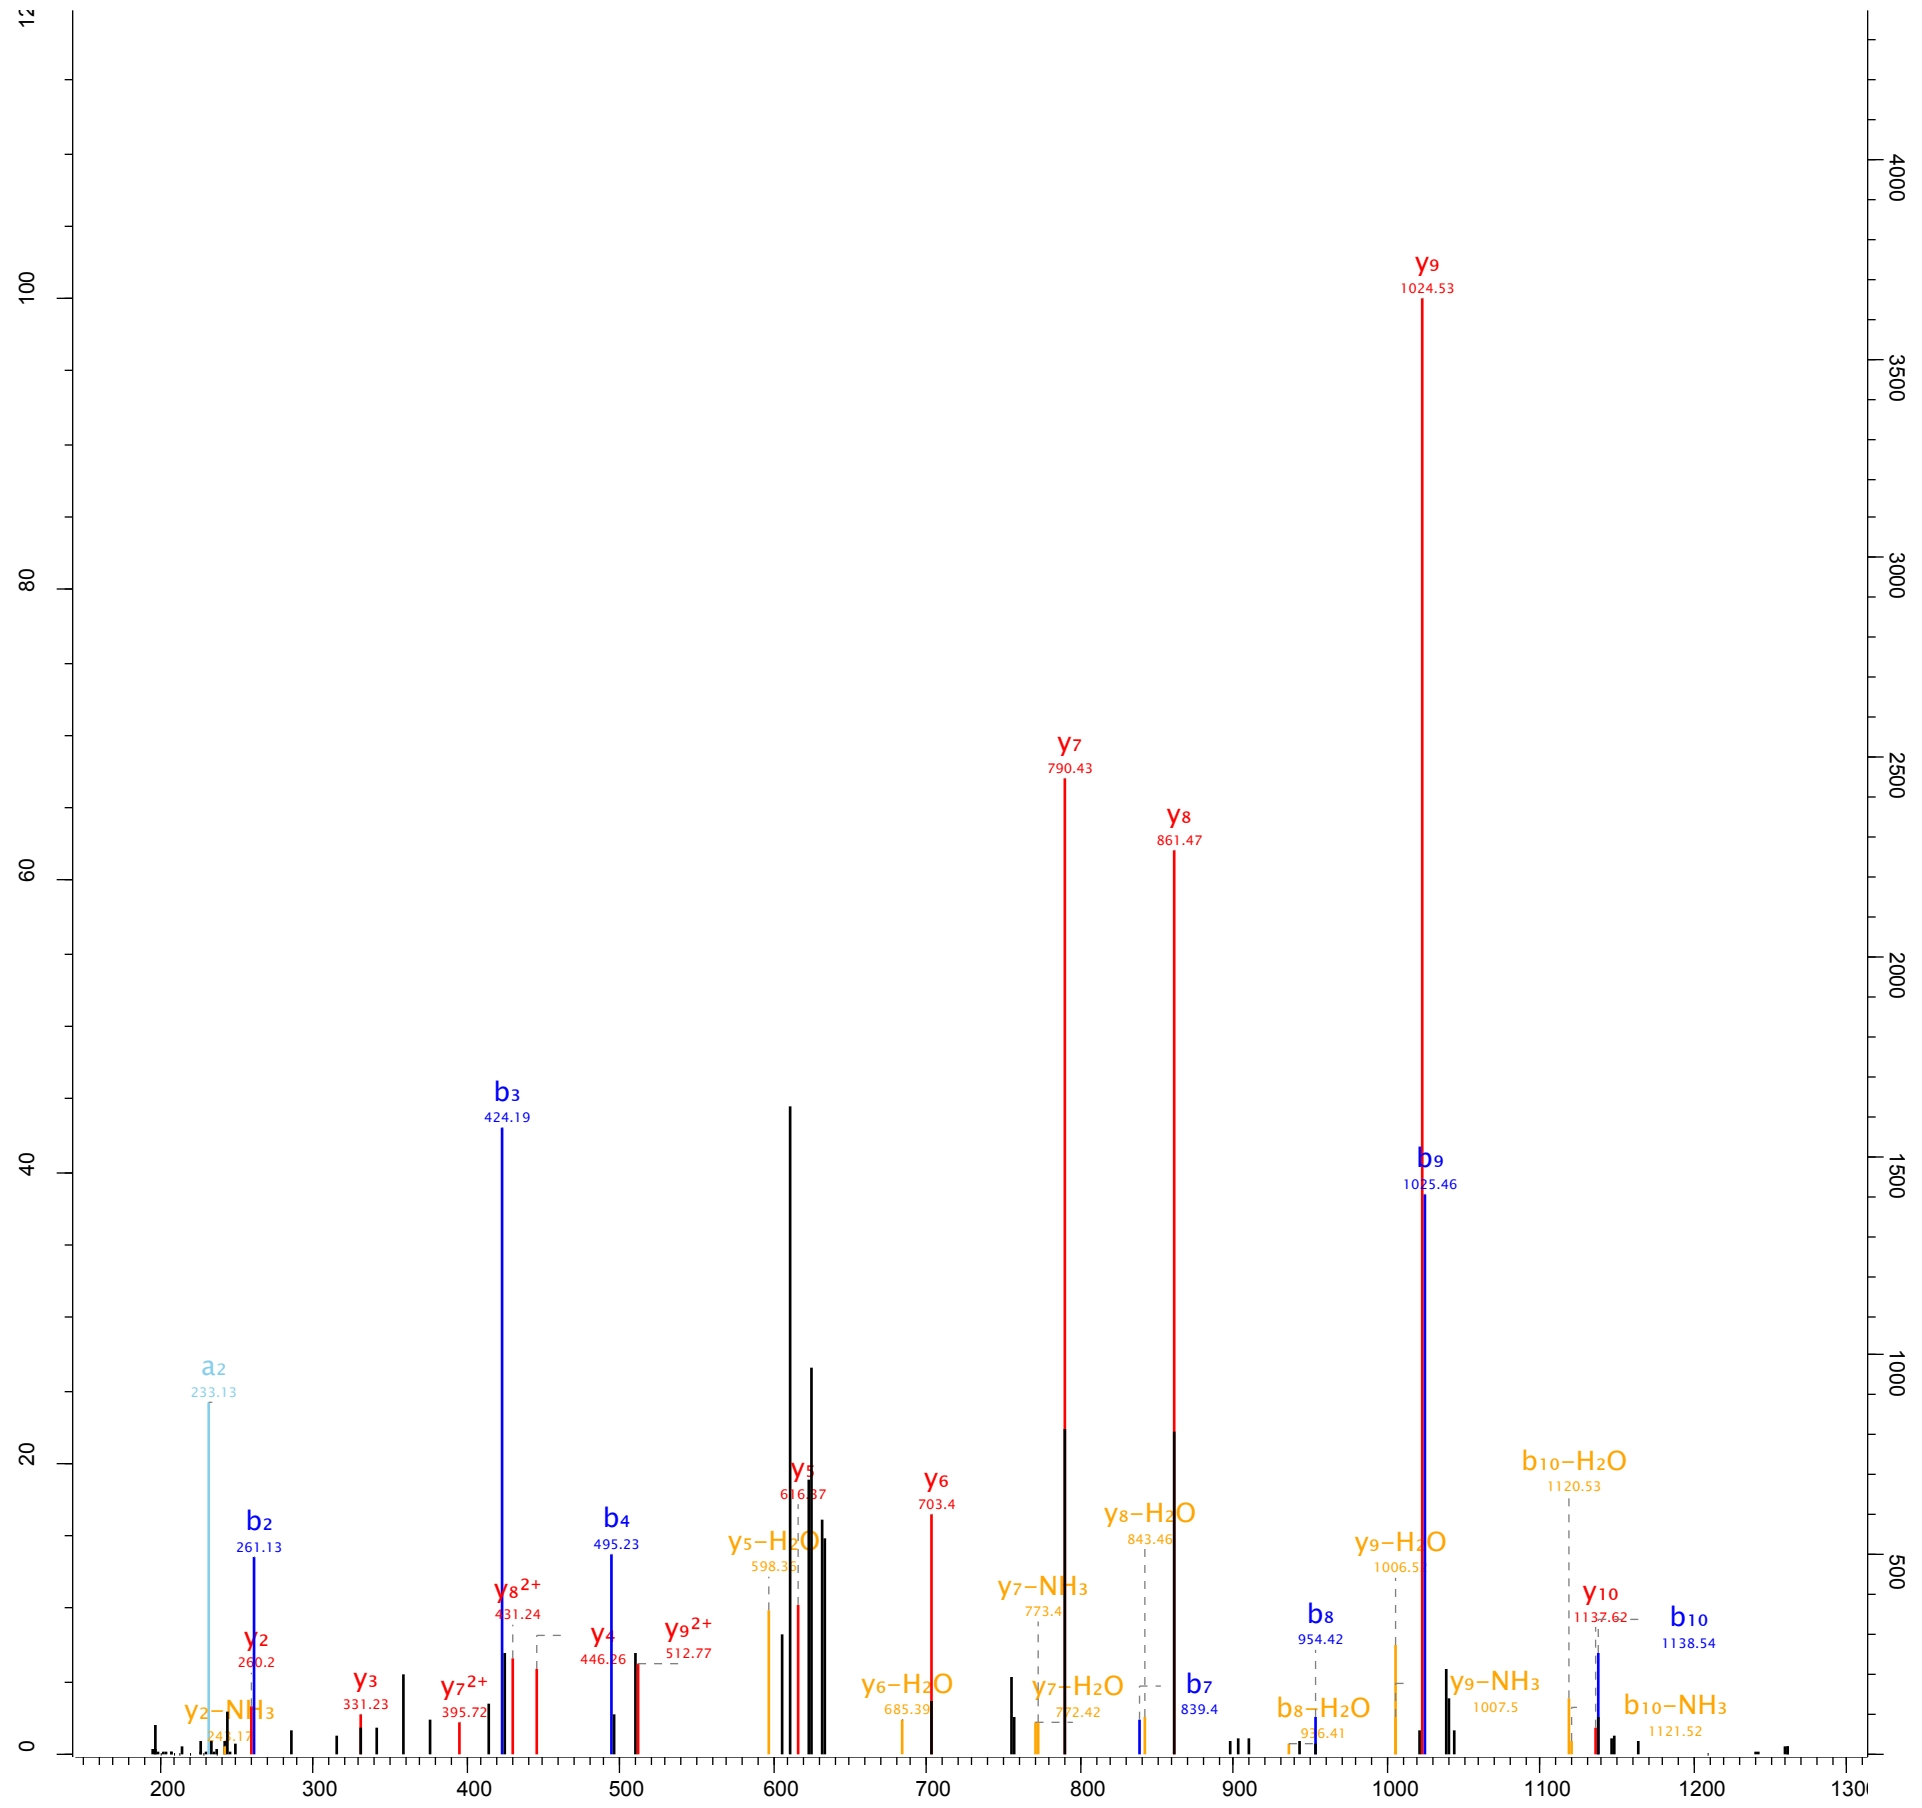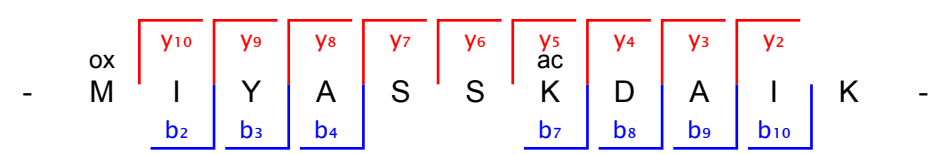

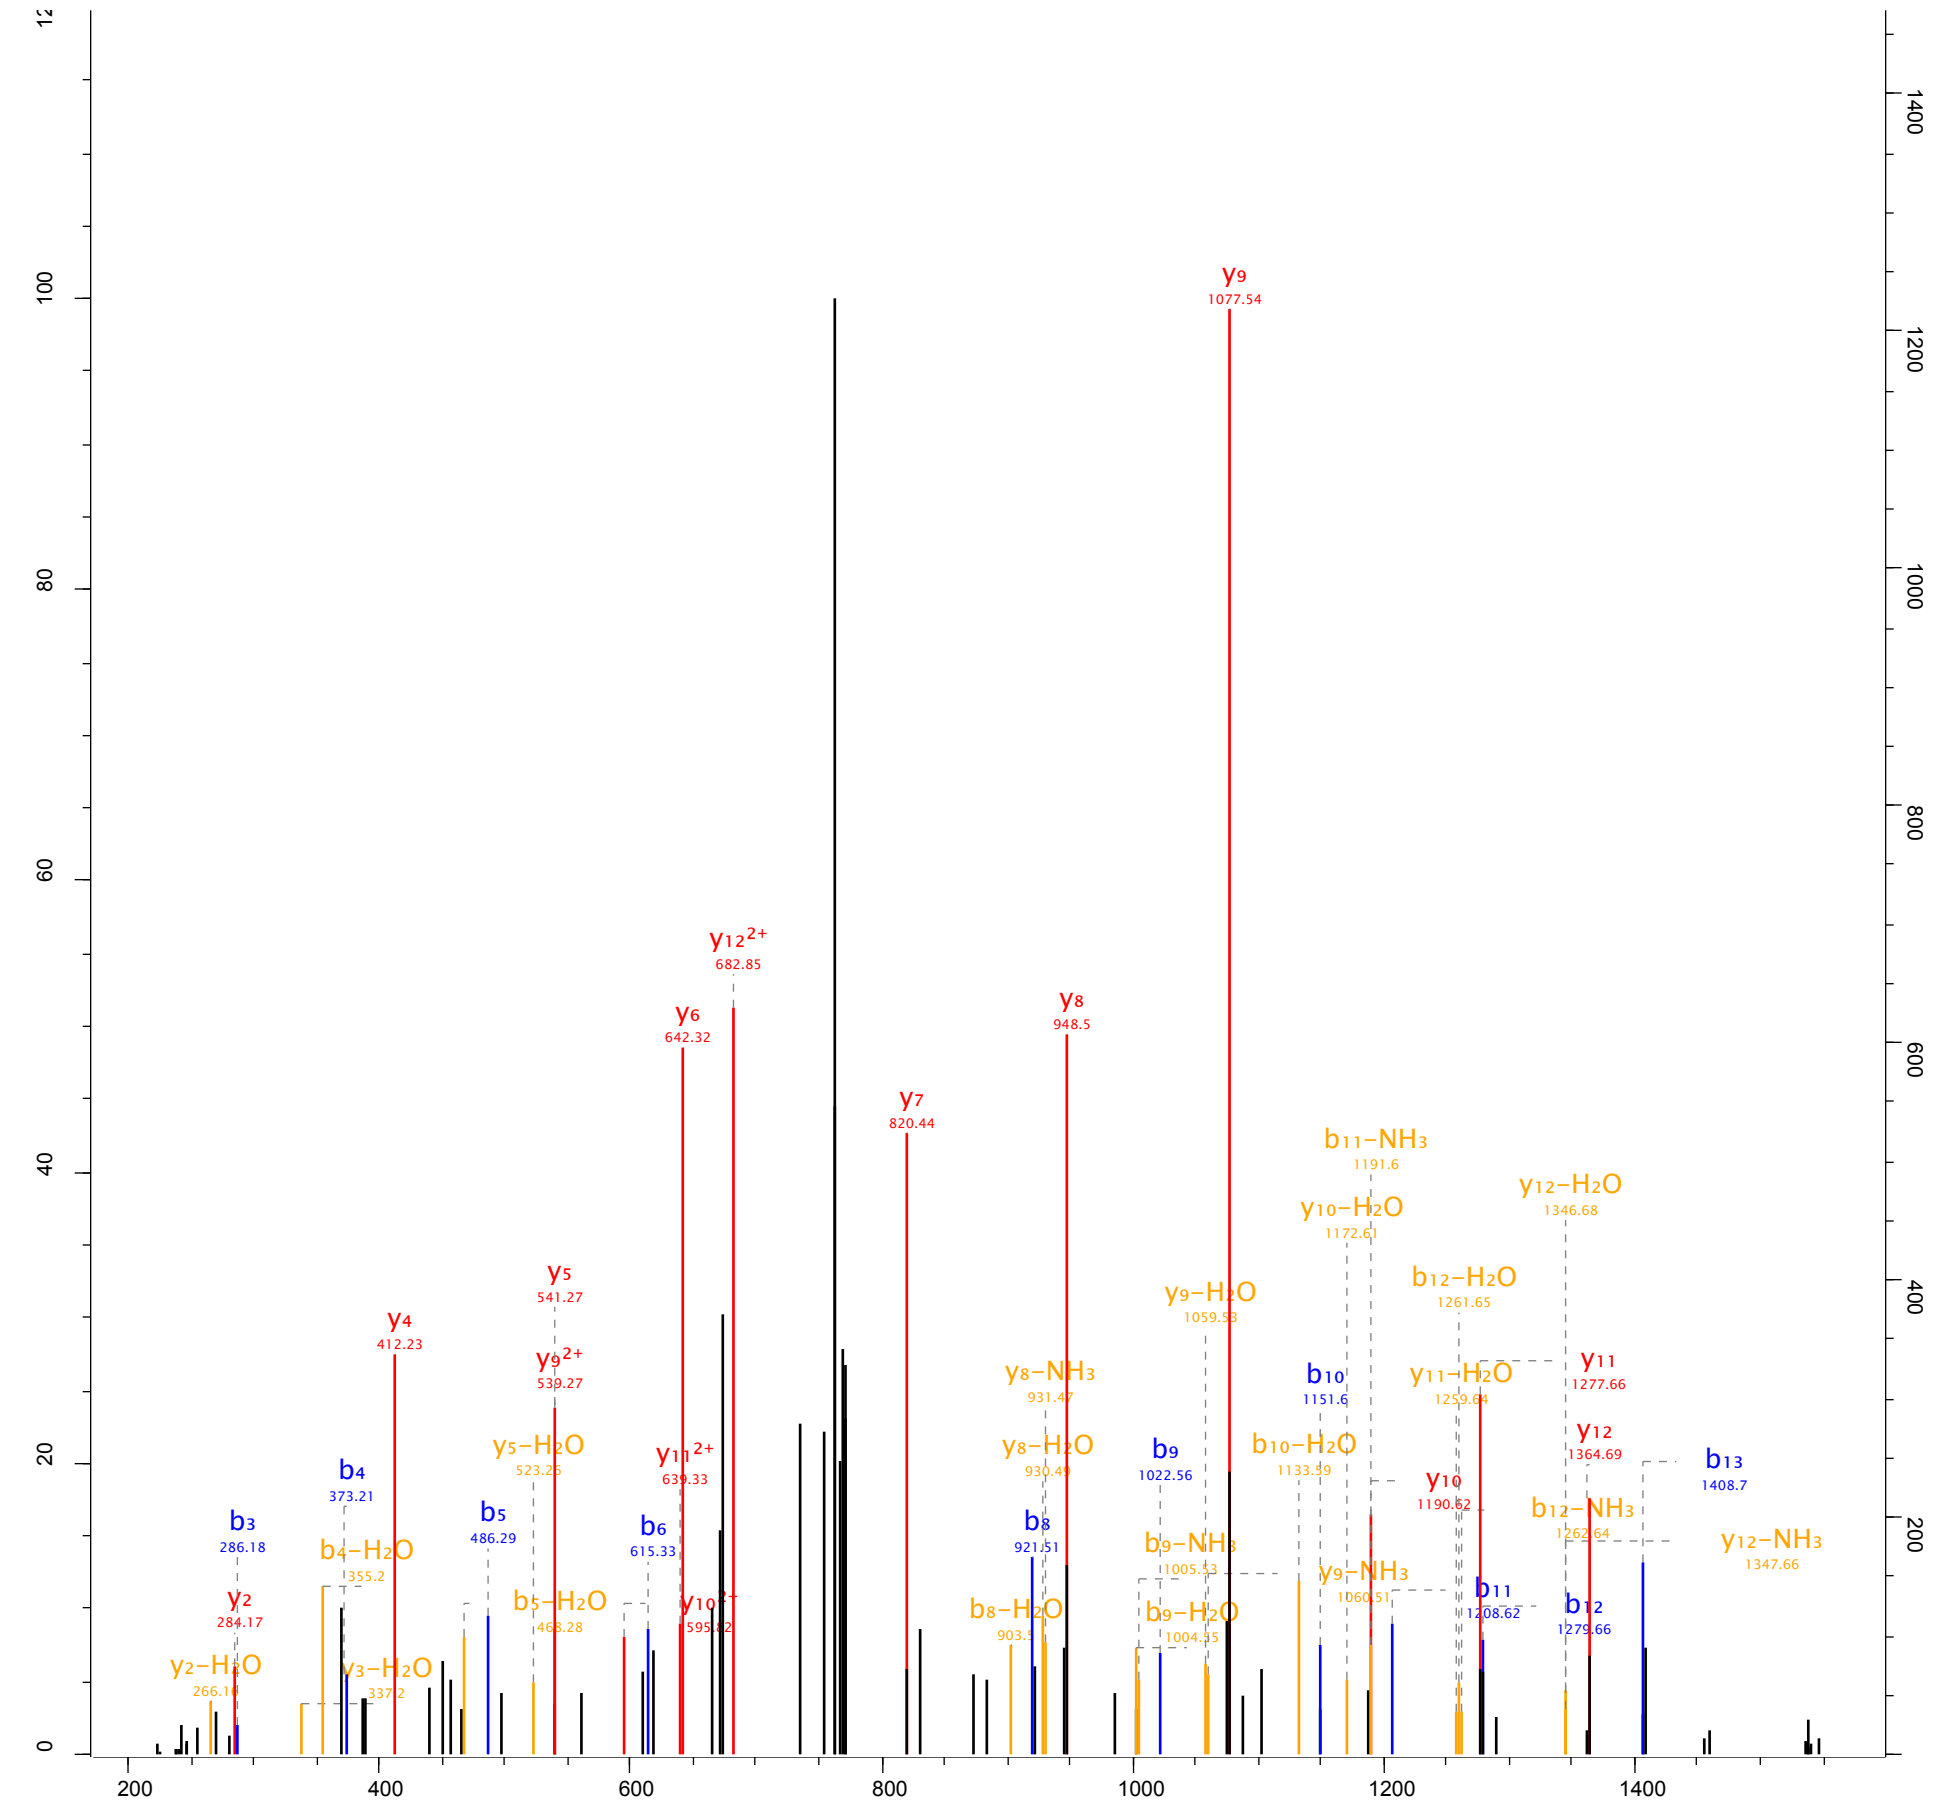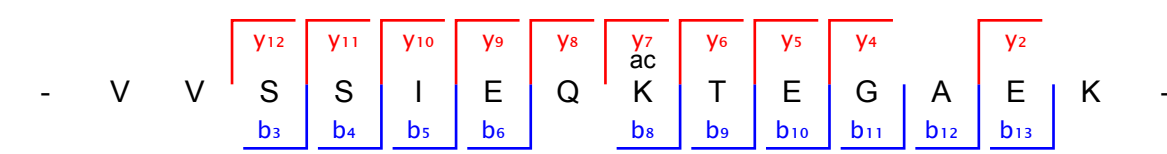



Raw file 030314\_SCW\_II\_29\_4\_2ndZT Scan 17645 Method ITMS; CID Score 185.72 m/z 529.82 Gene names S100a6

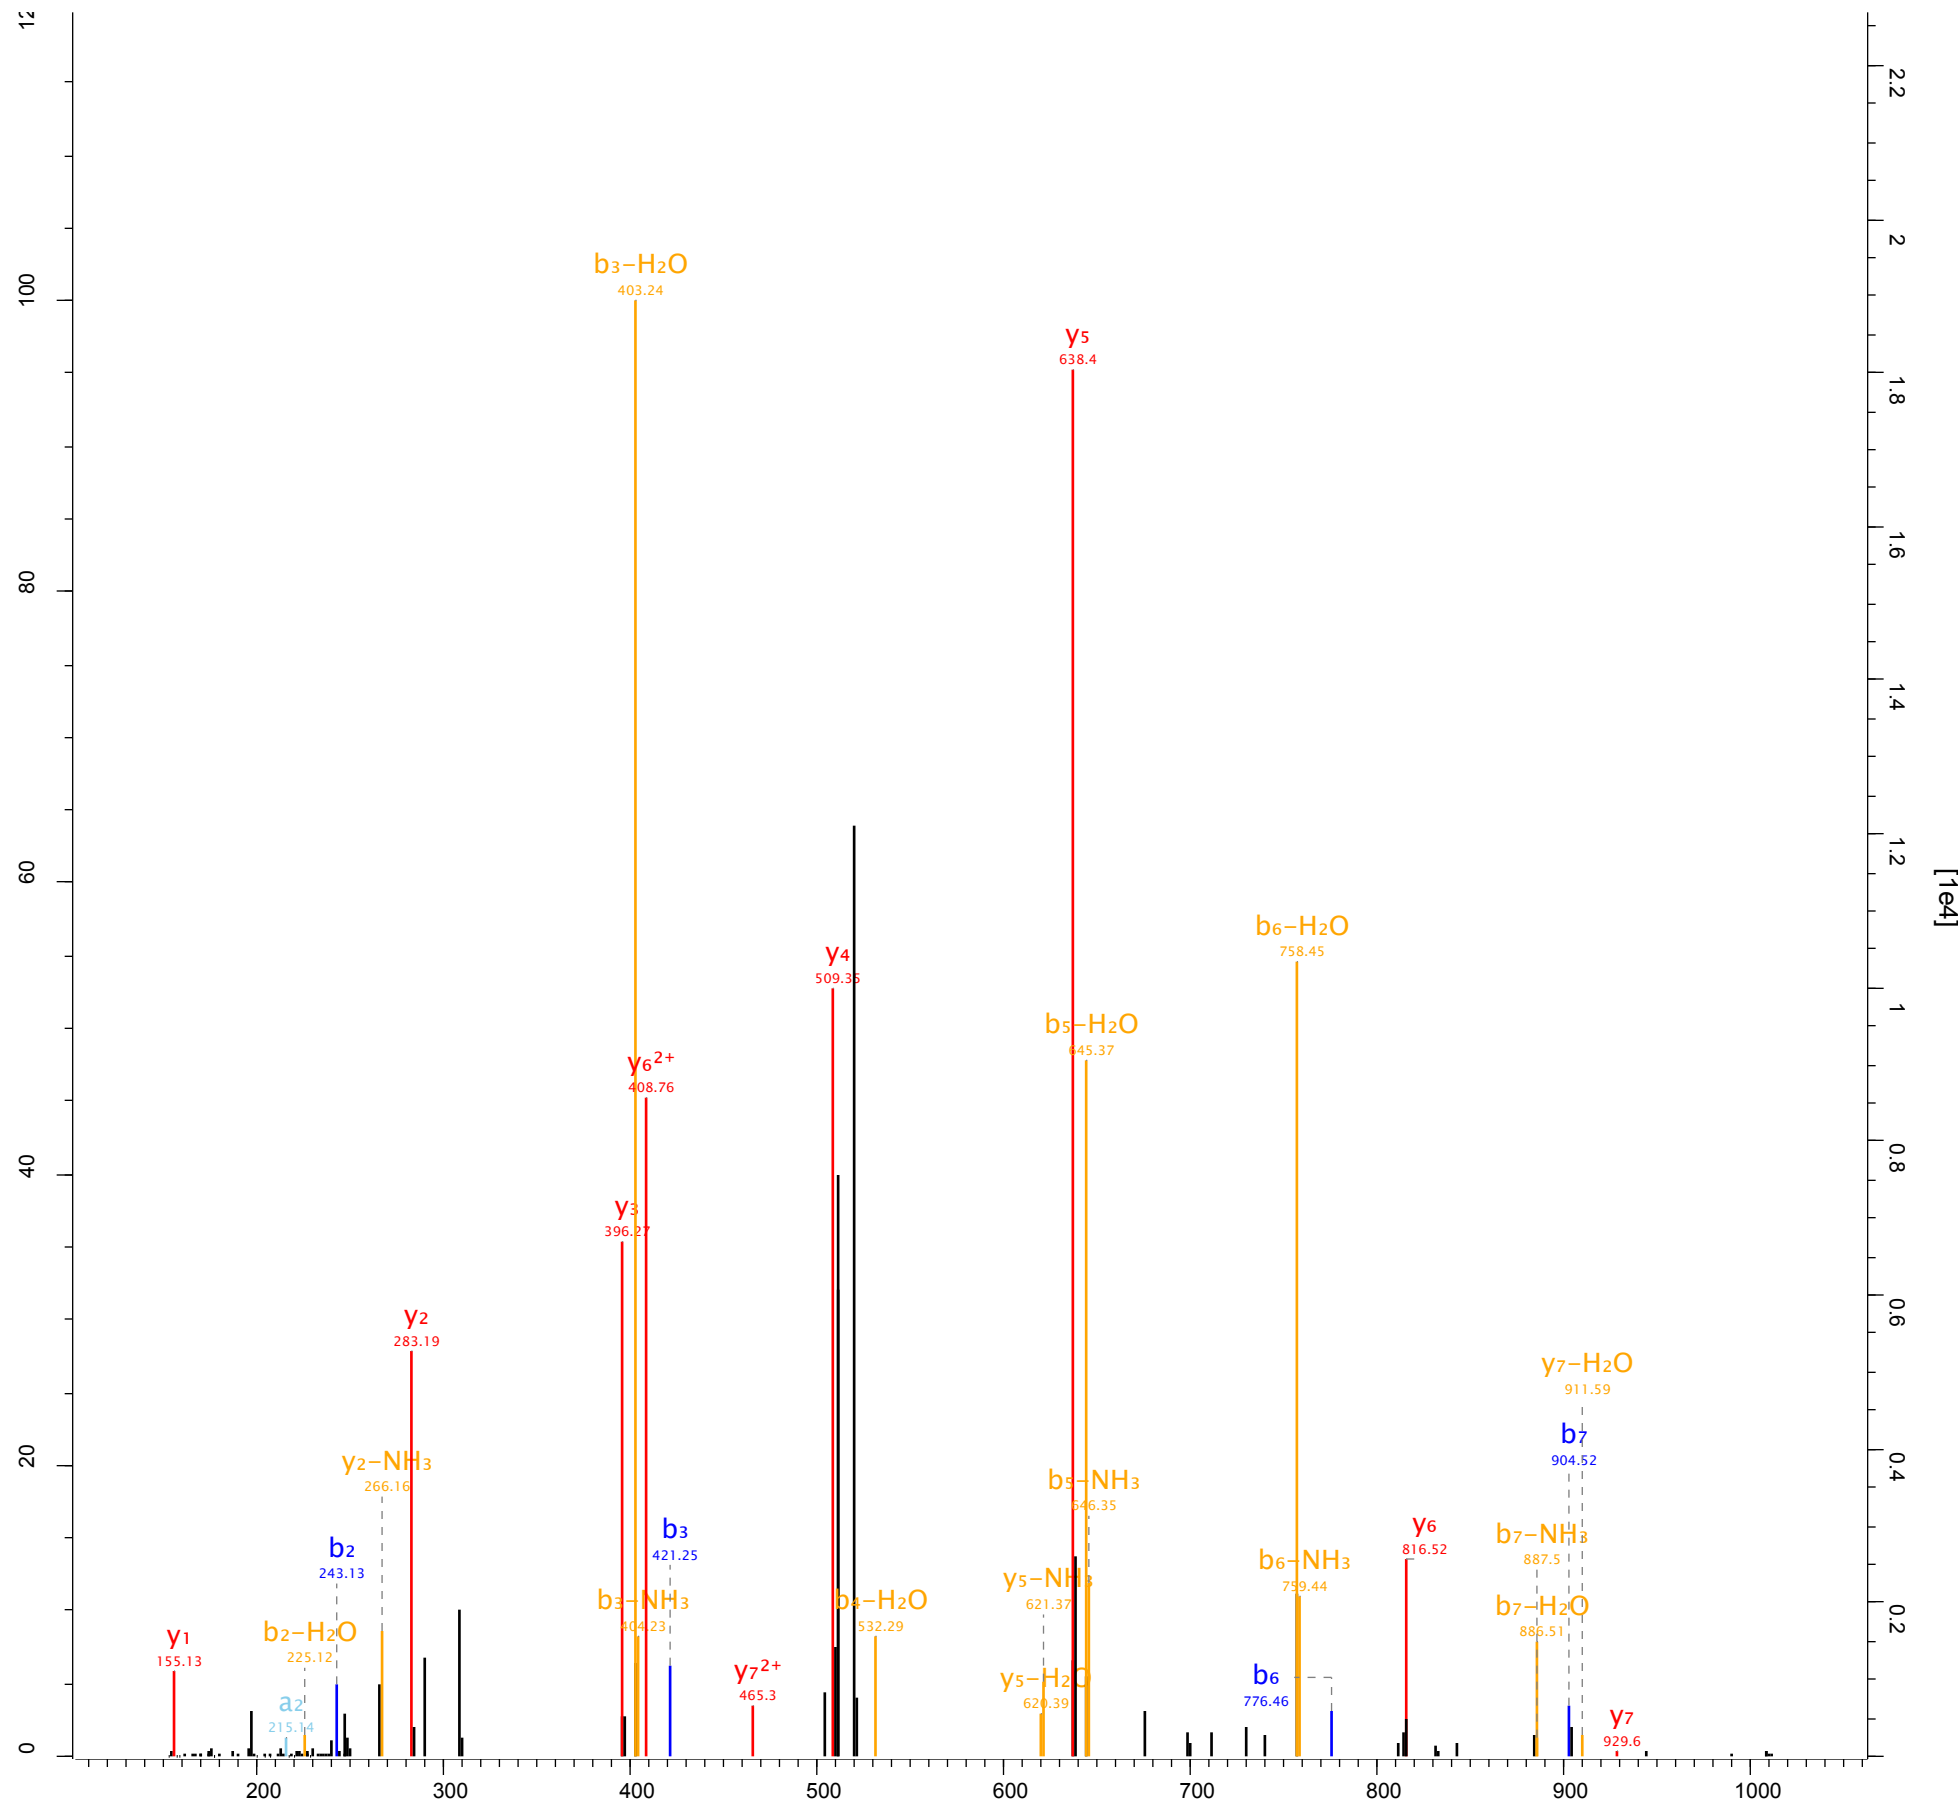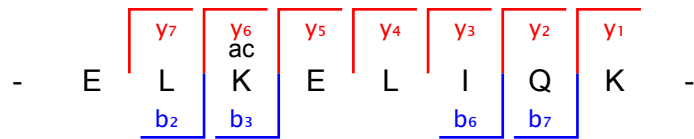

030314\_SCW\_II\_29\_4\_2ndZT

17722 ITMS; CID 112.03 728.4 Uqcr2

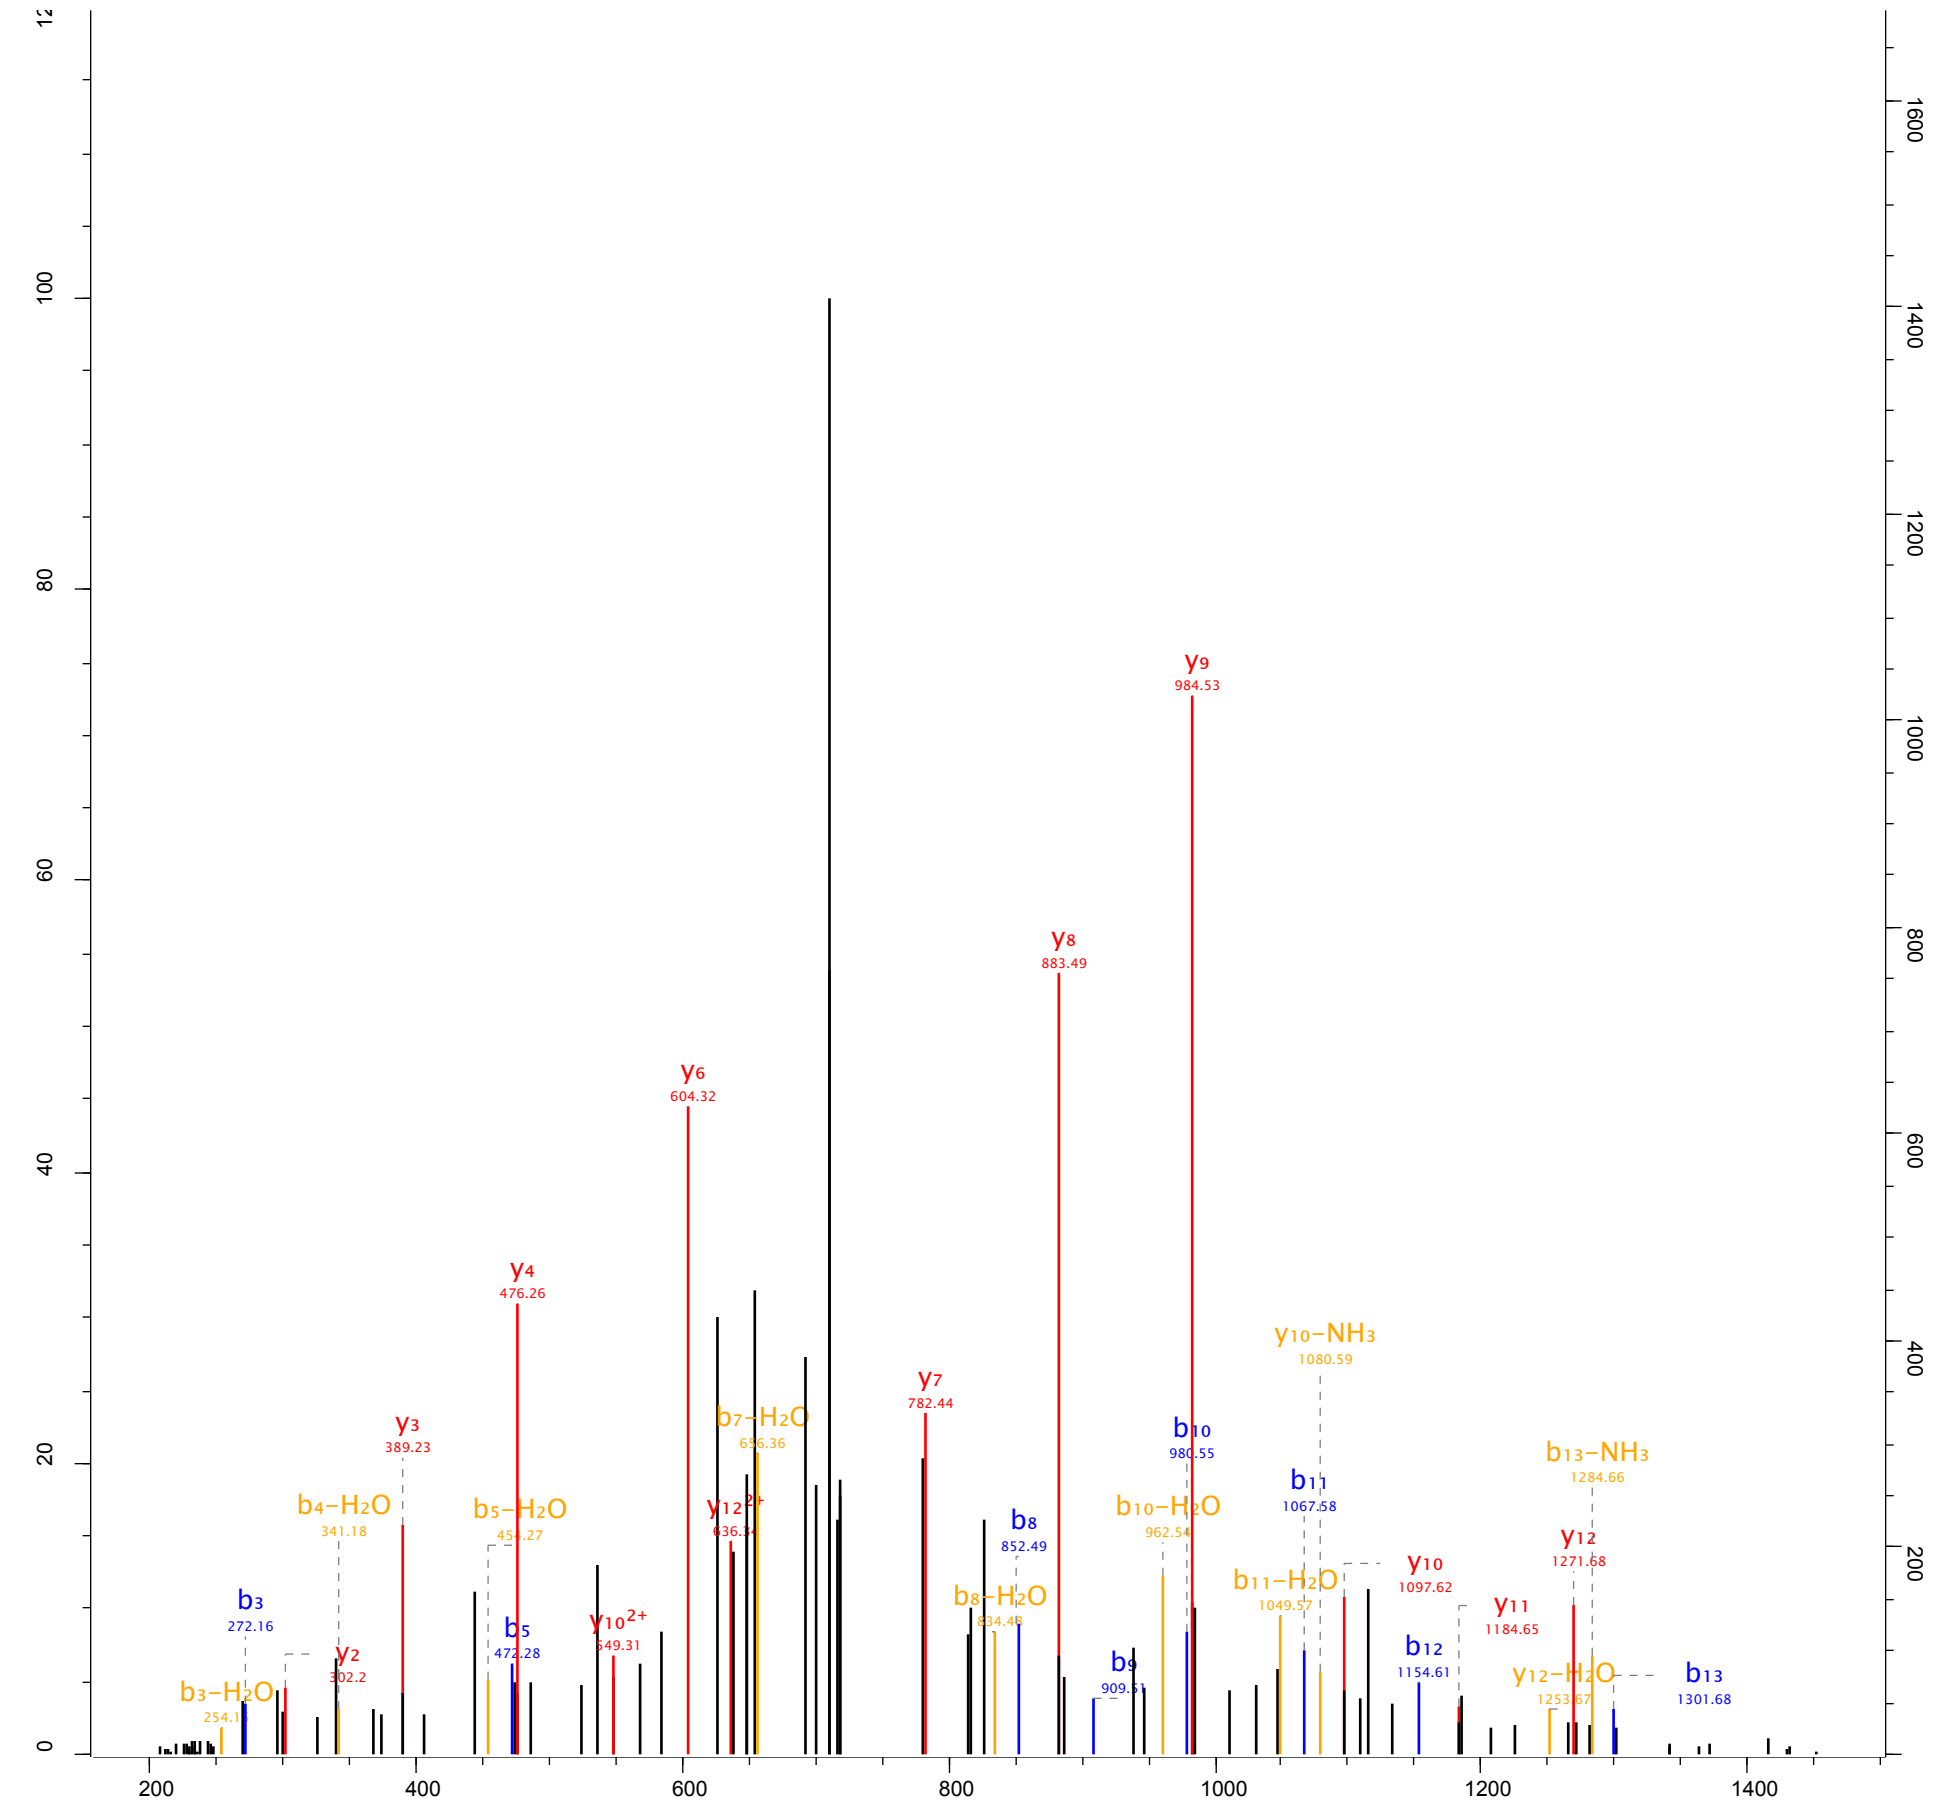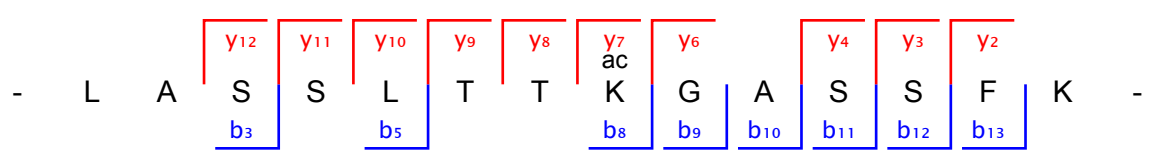

Raw file 030314\_SCW\_II\_29\_4\_2ndZT Scan 18341 Method ITMS; CID Score 98 m/z 676.37 Gene names Csrp2bp

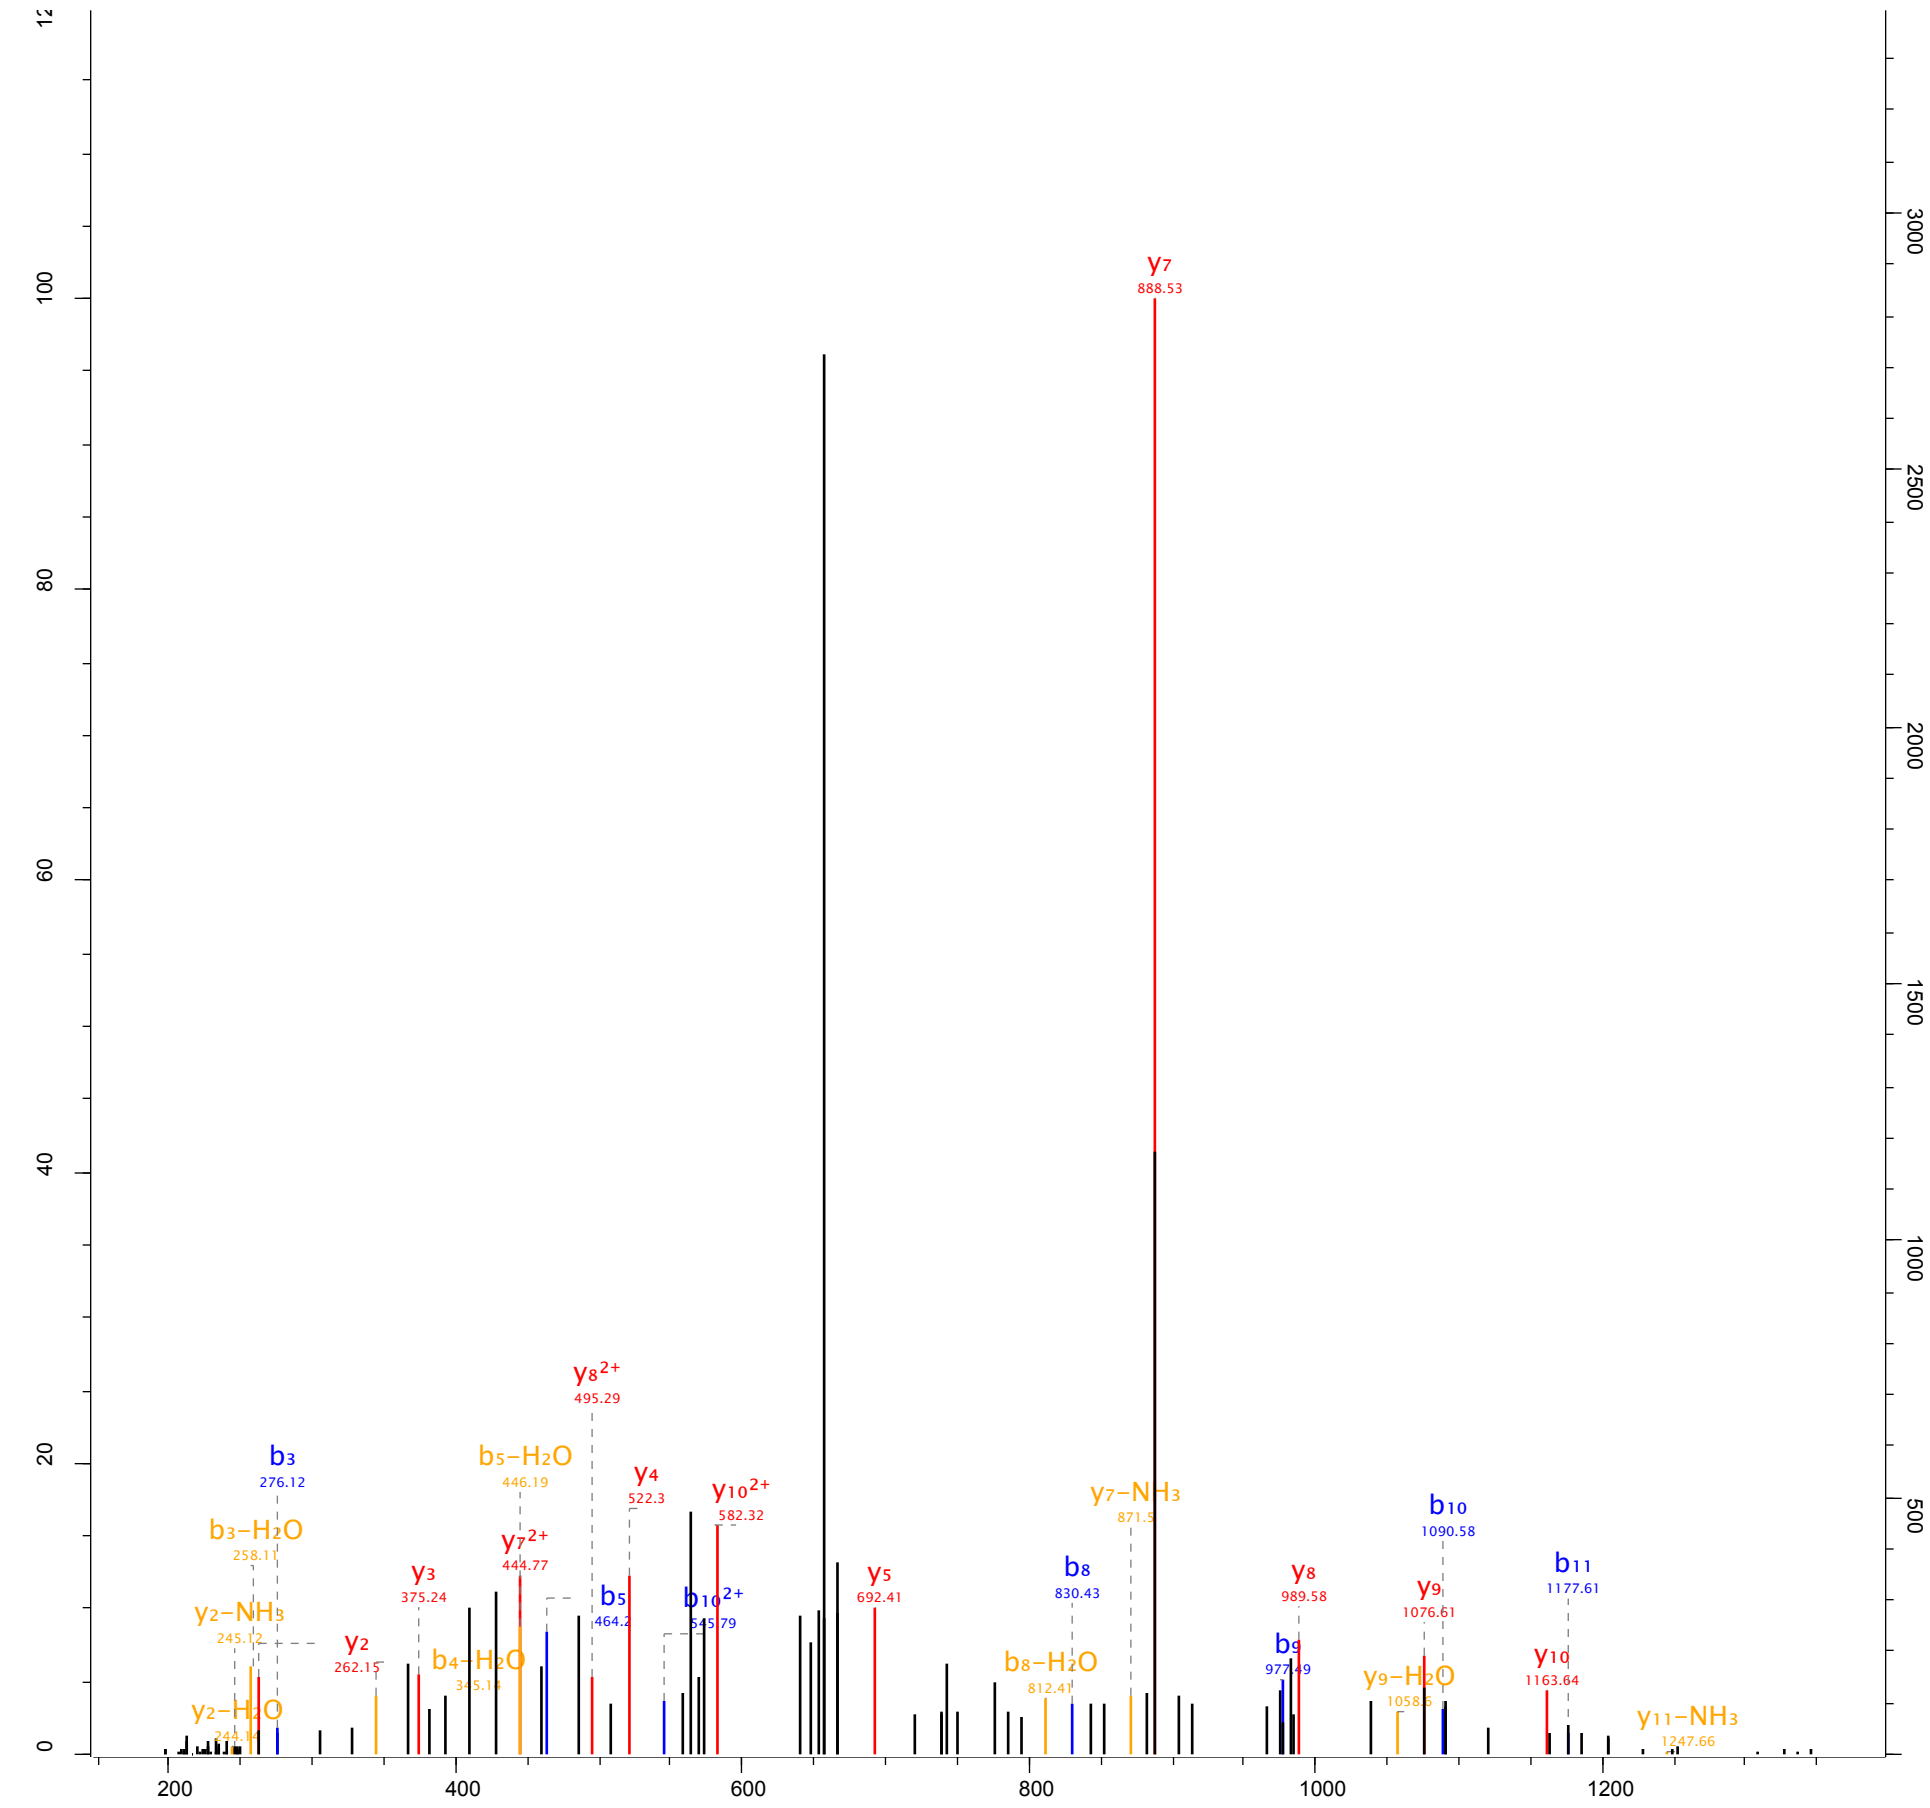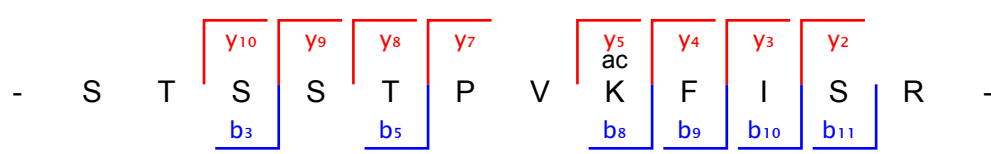

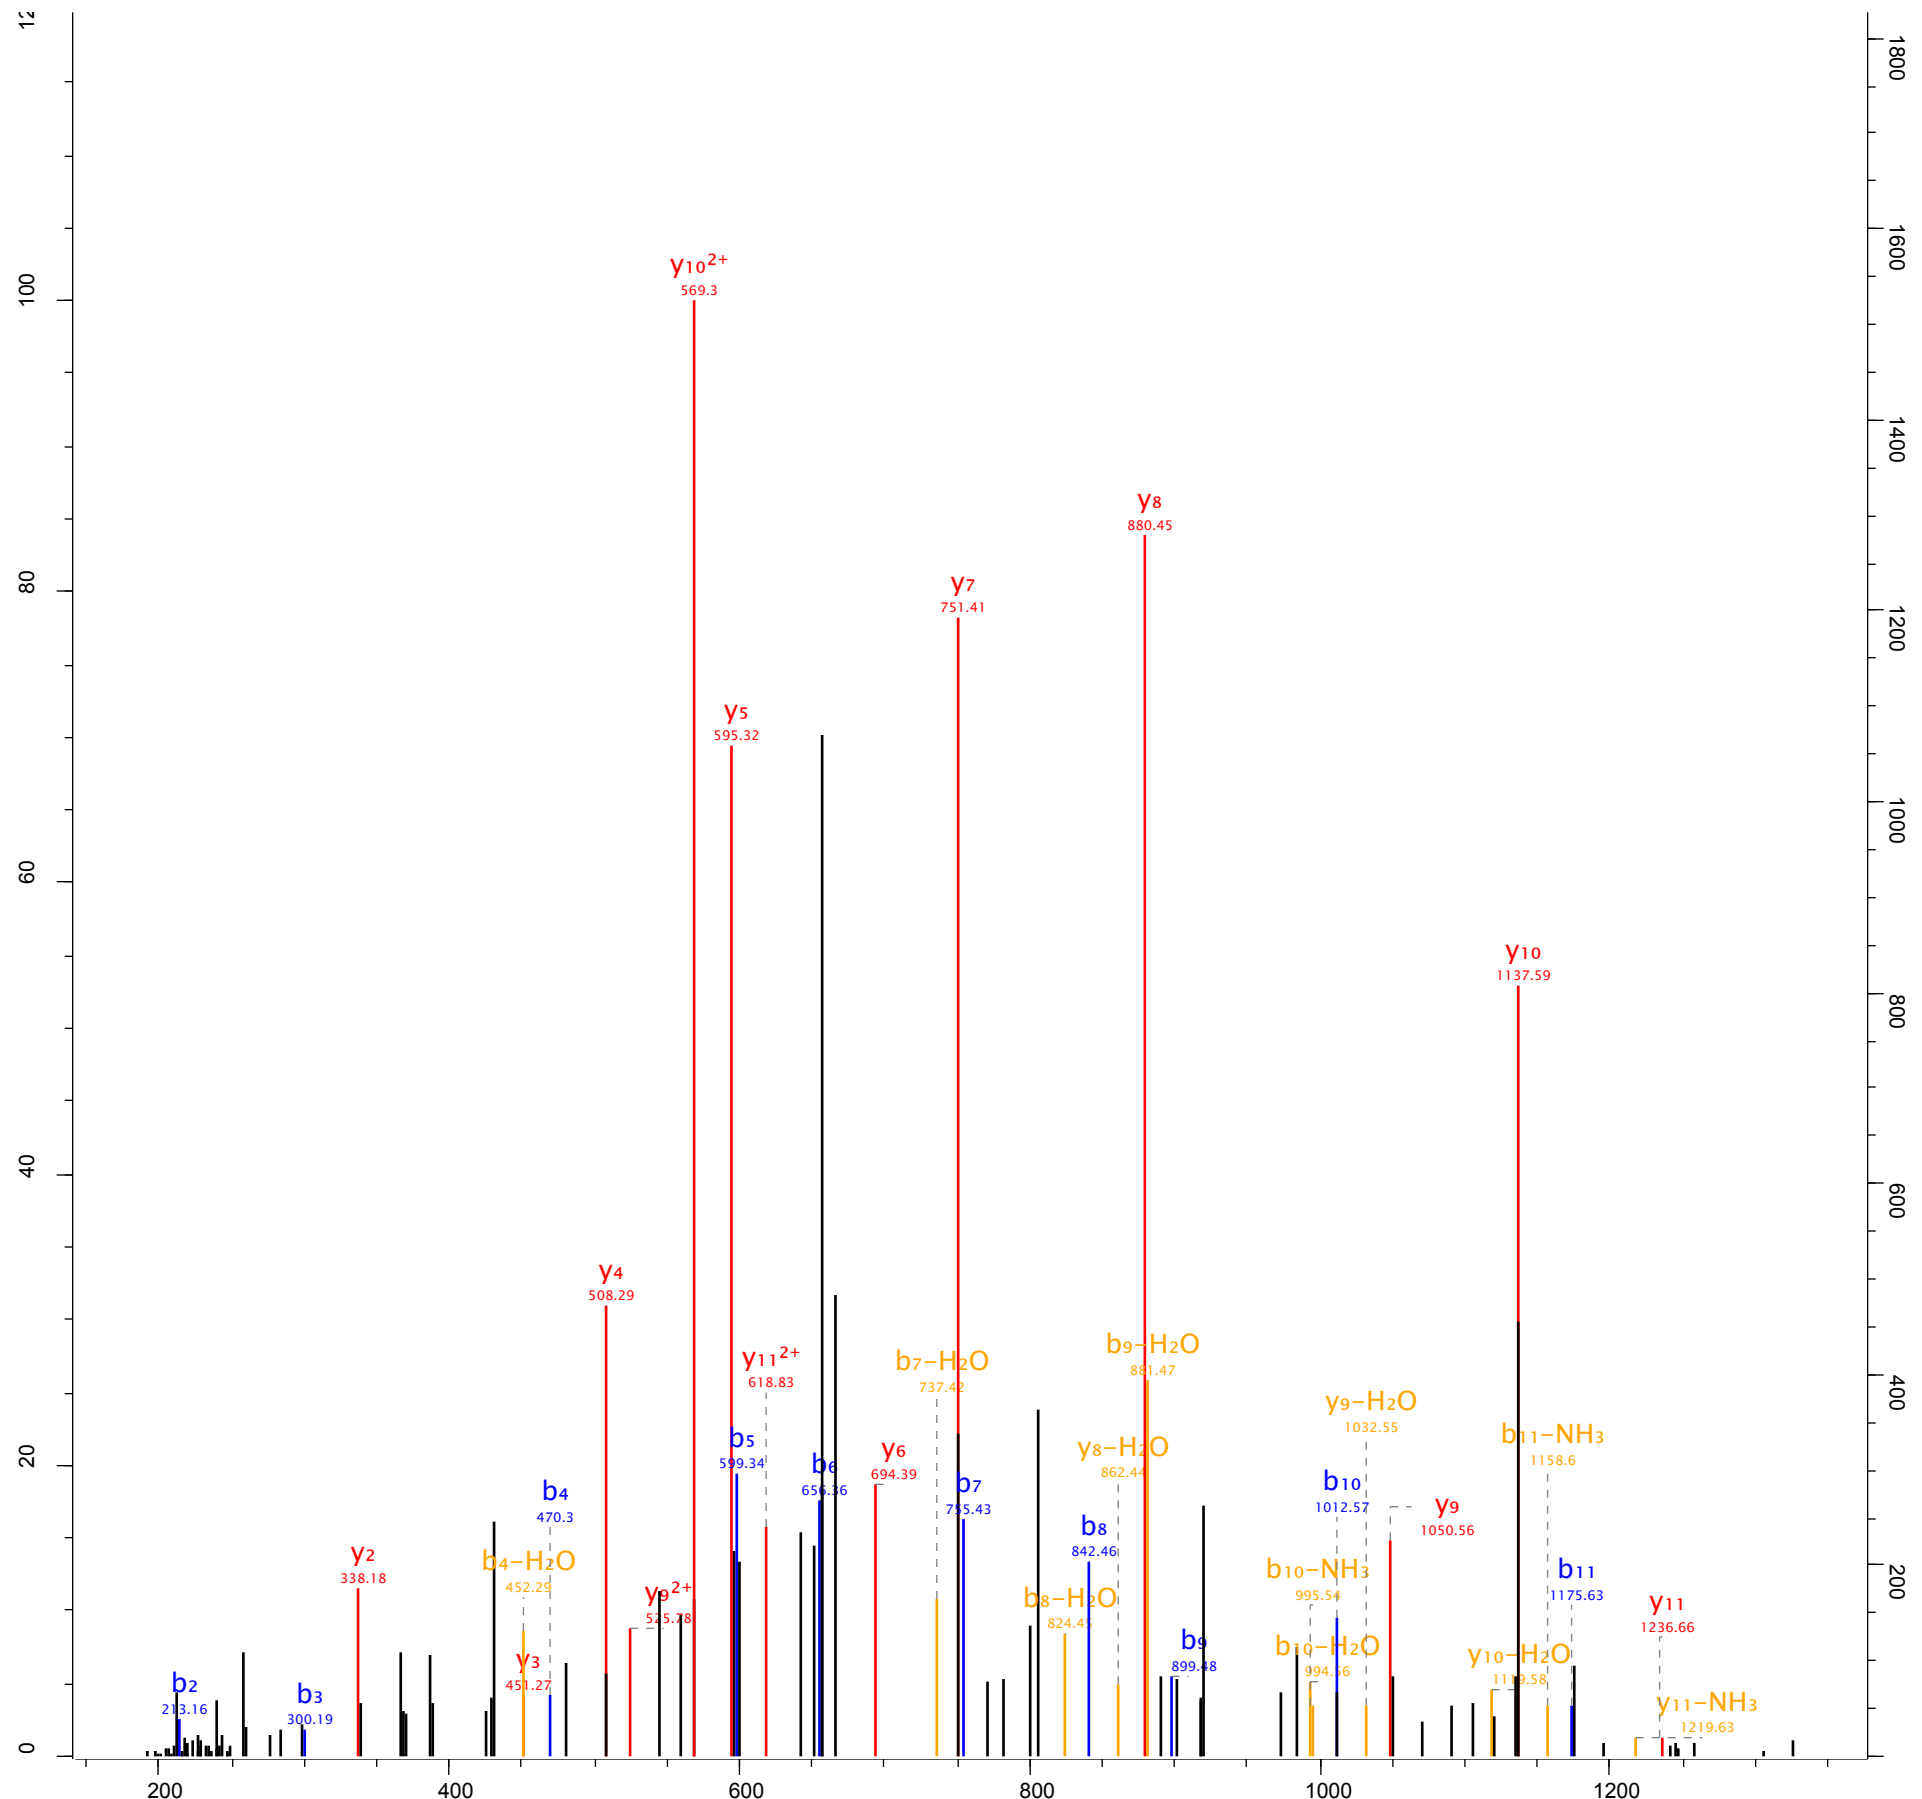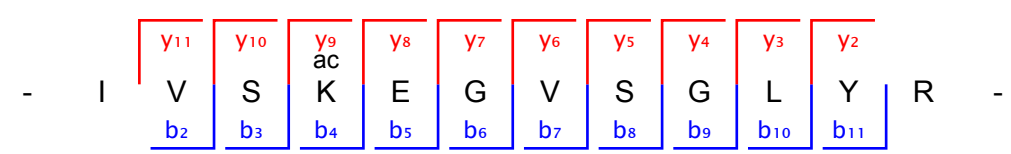

Raw file 030314\_SCW\_II\_29\_4\_2ndZT Scan 19005 Method ITMS; CID Score 91.87 m/z 513.34 Gene names Rtn4

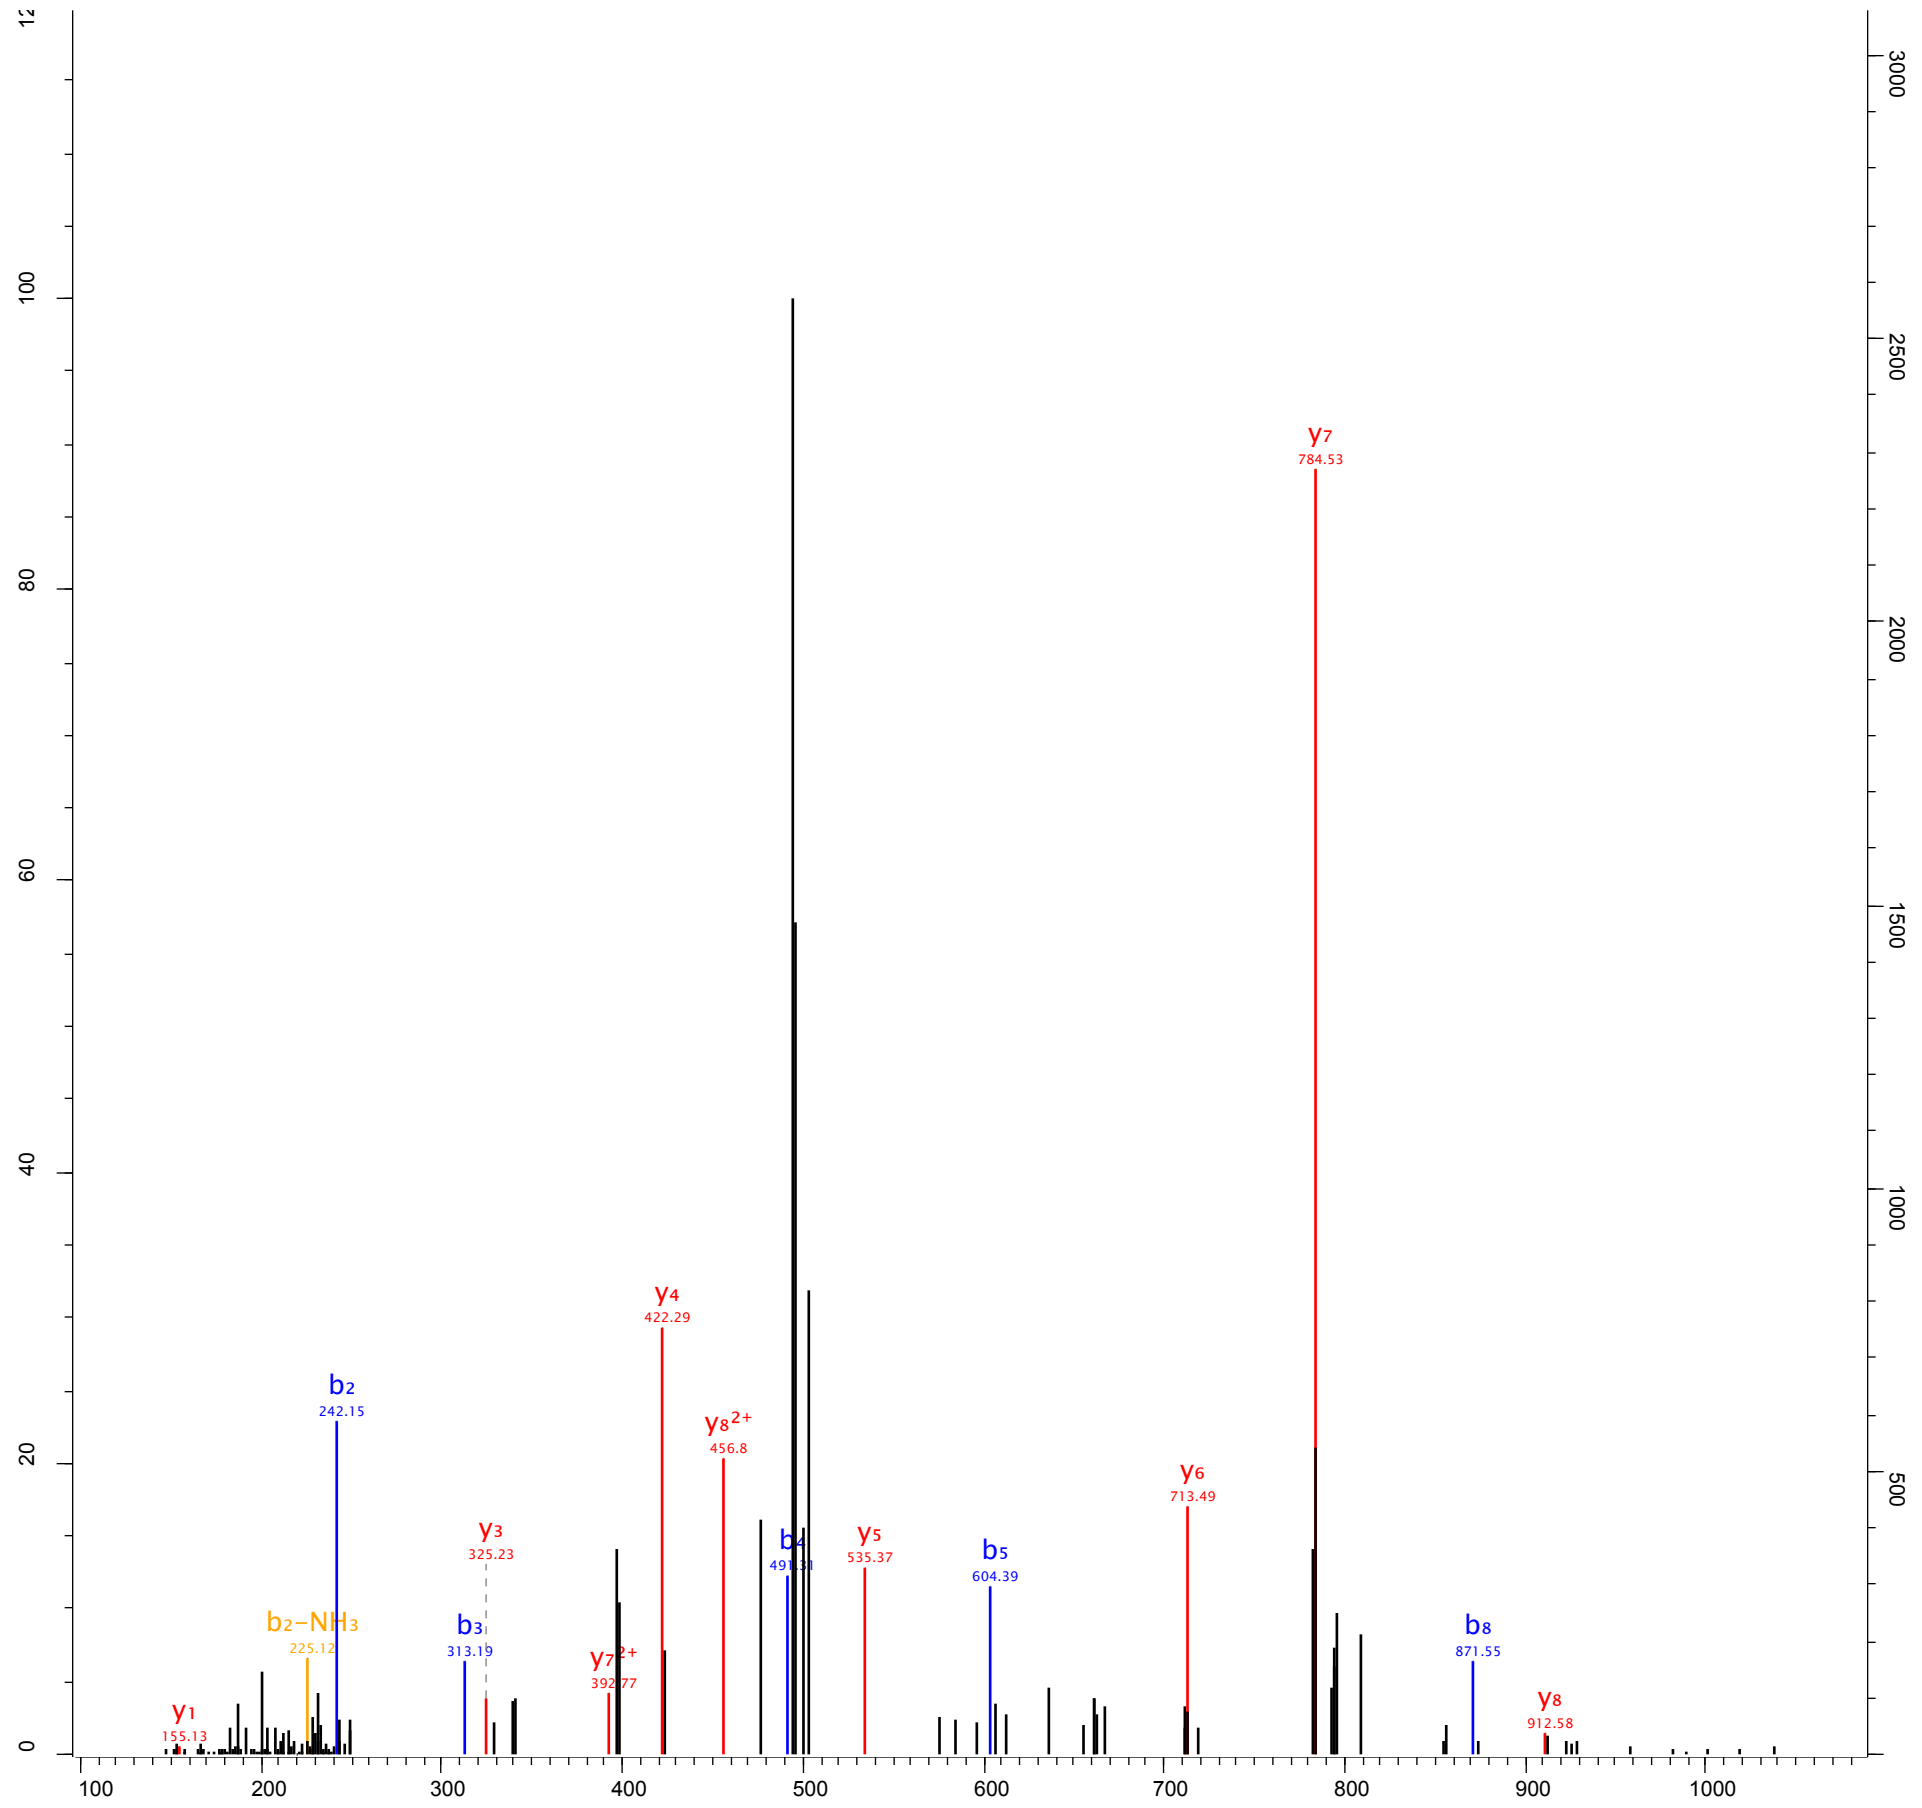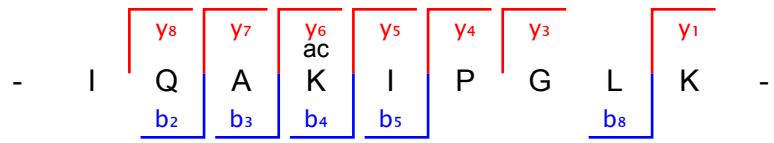

Raw file 030314\_SCW\_II\_29\_4\_2ndZT Scan 20139 Method ITMS; CID Score 138.24 m/z 639.85 Gene names Myh9;Myh14;Myh10;Myh11

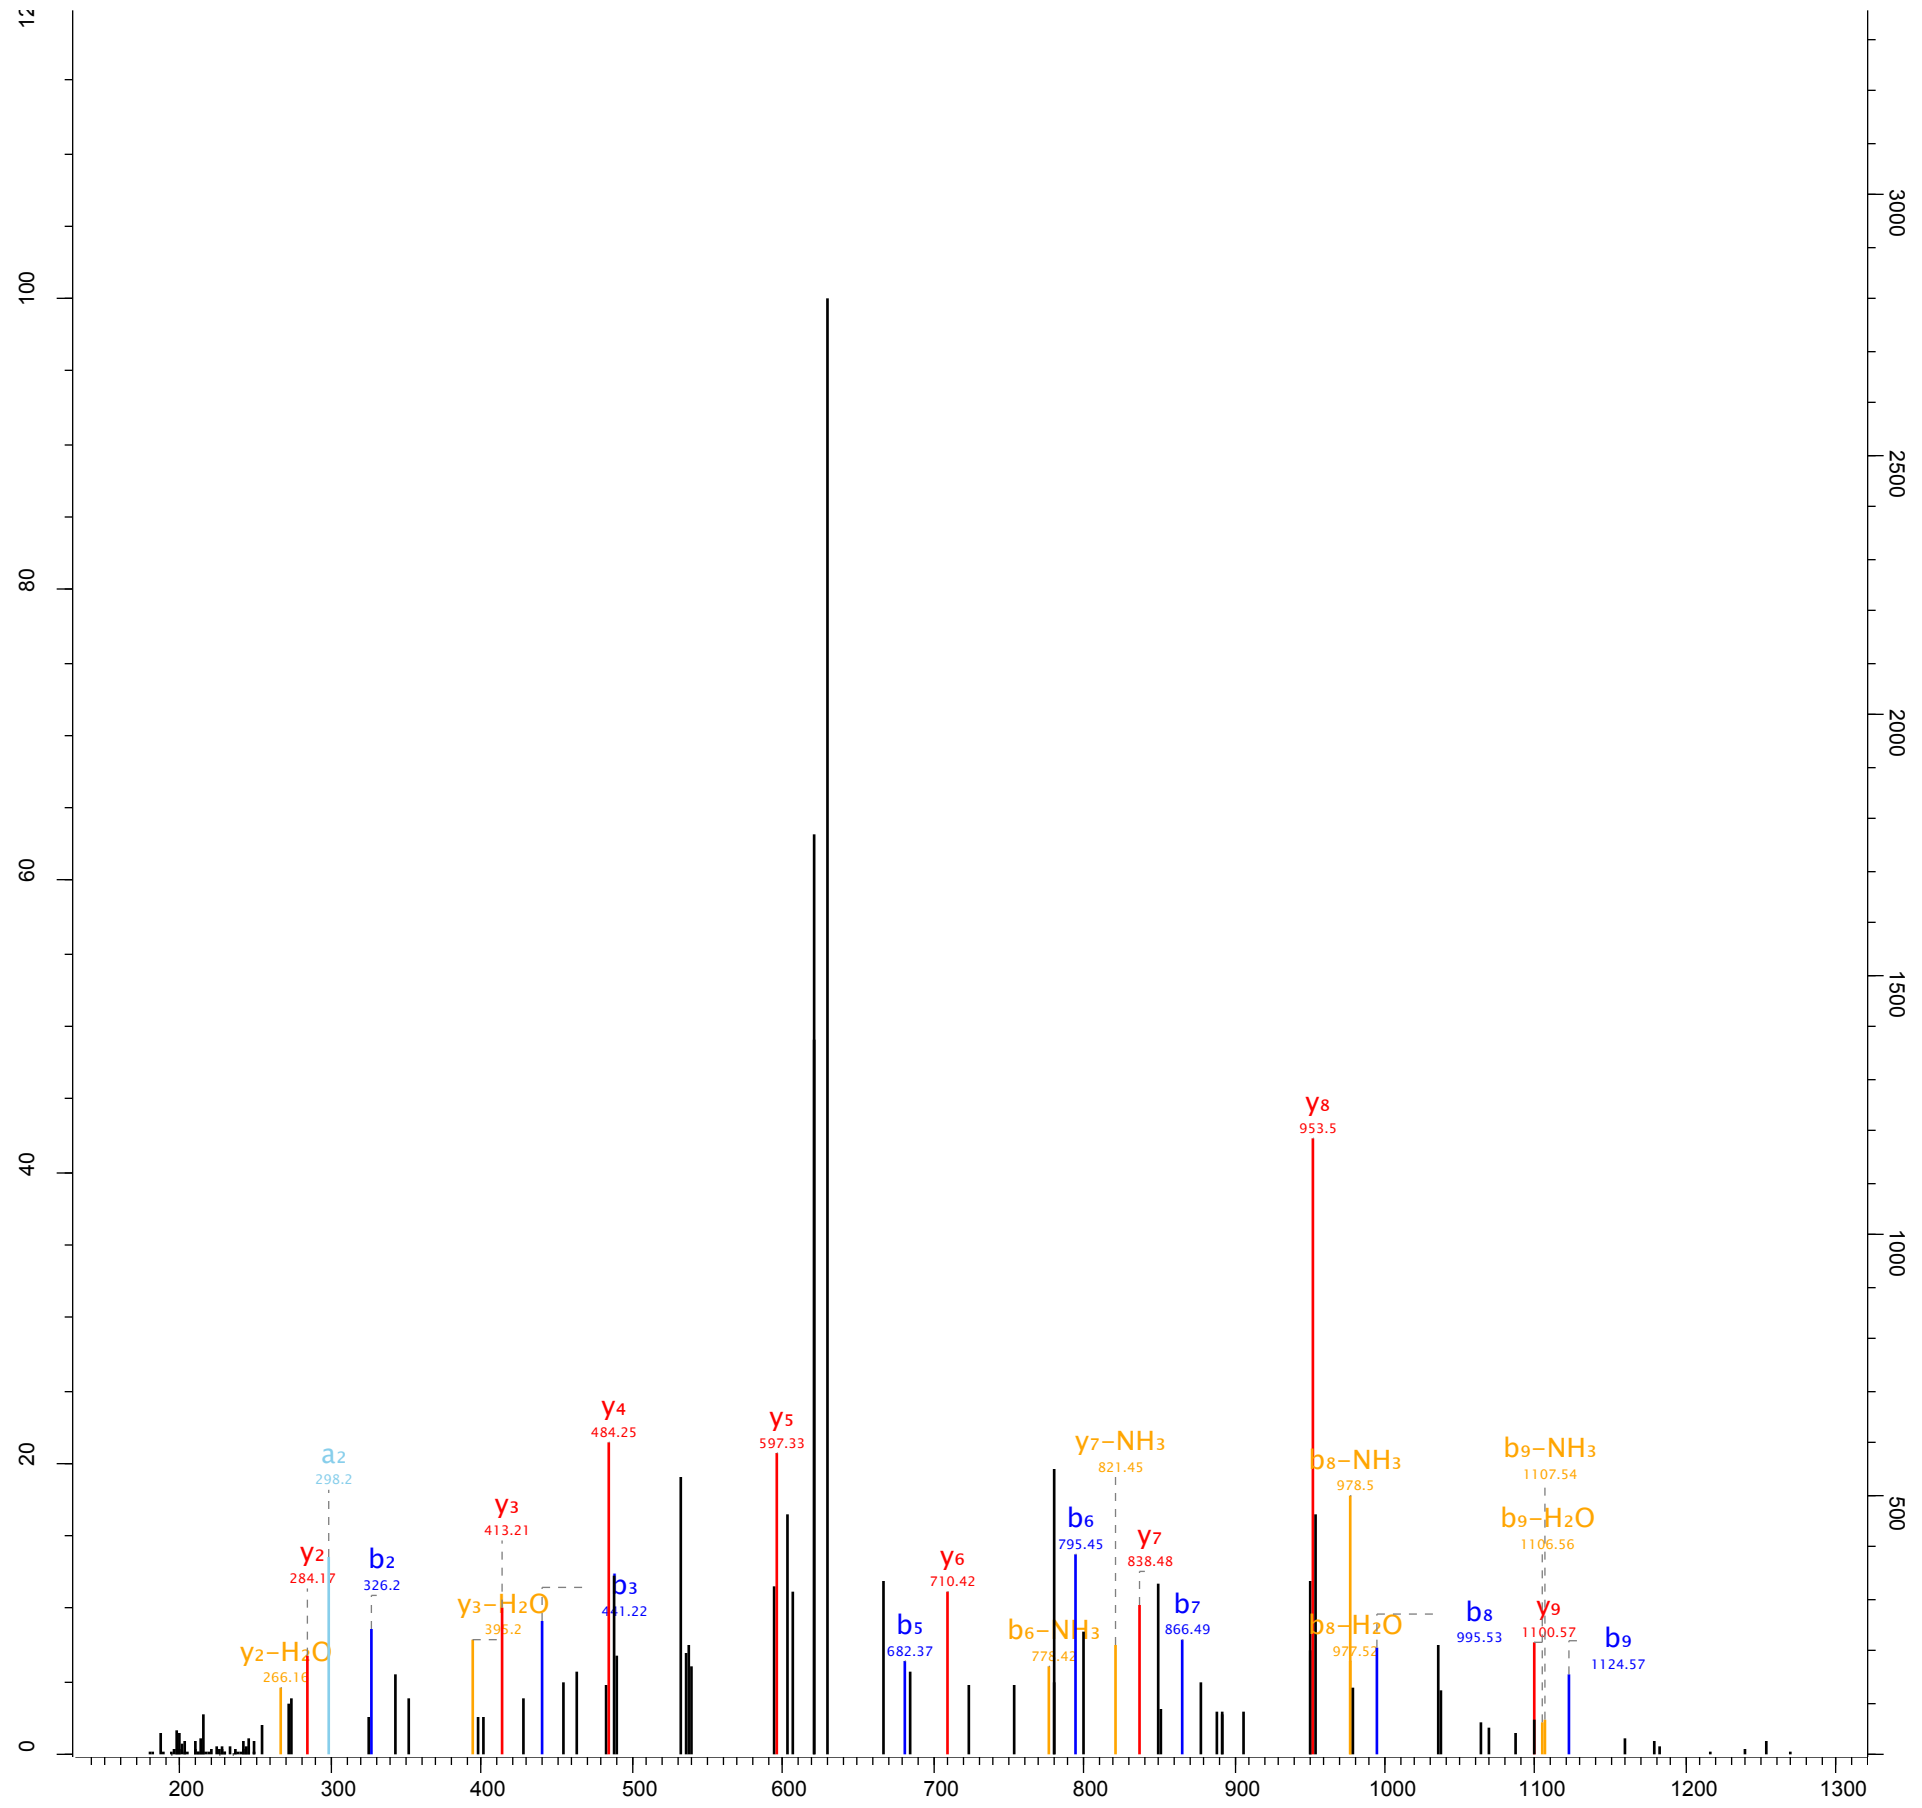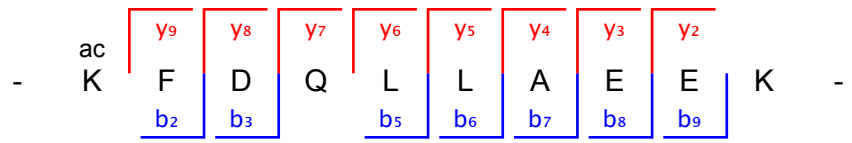

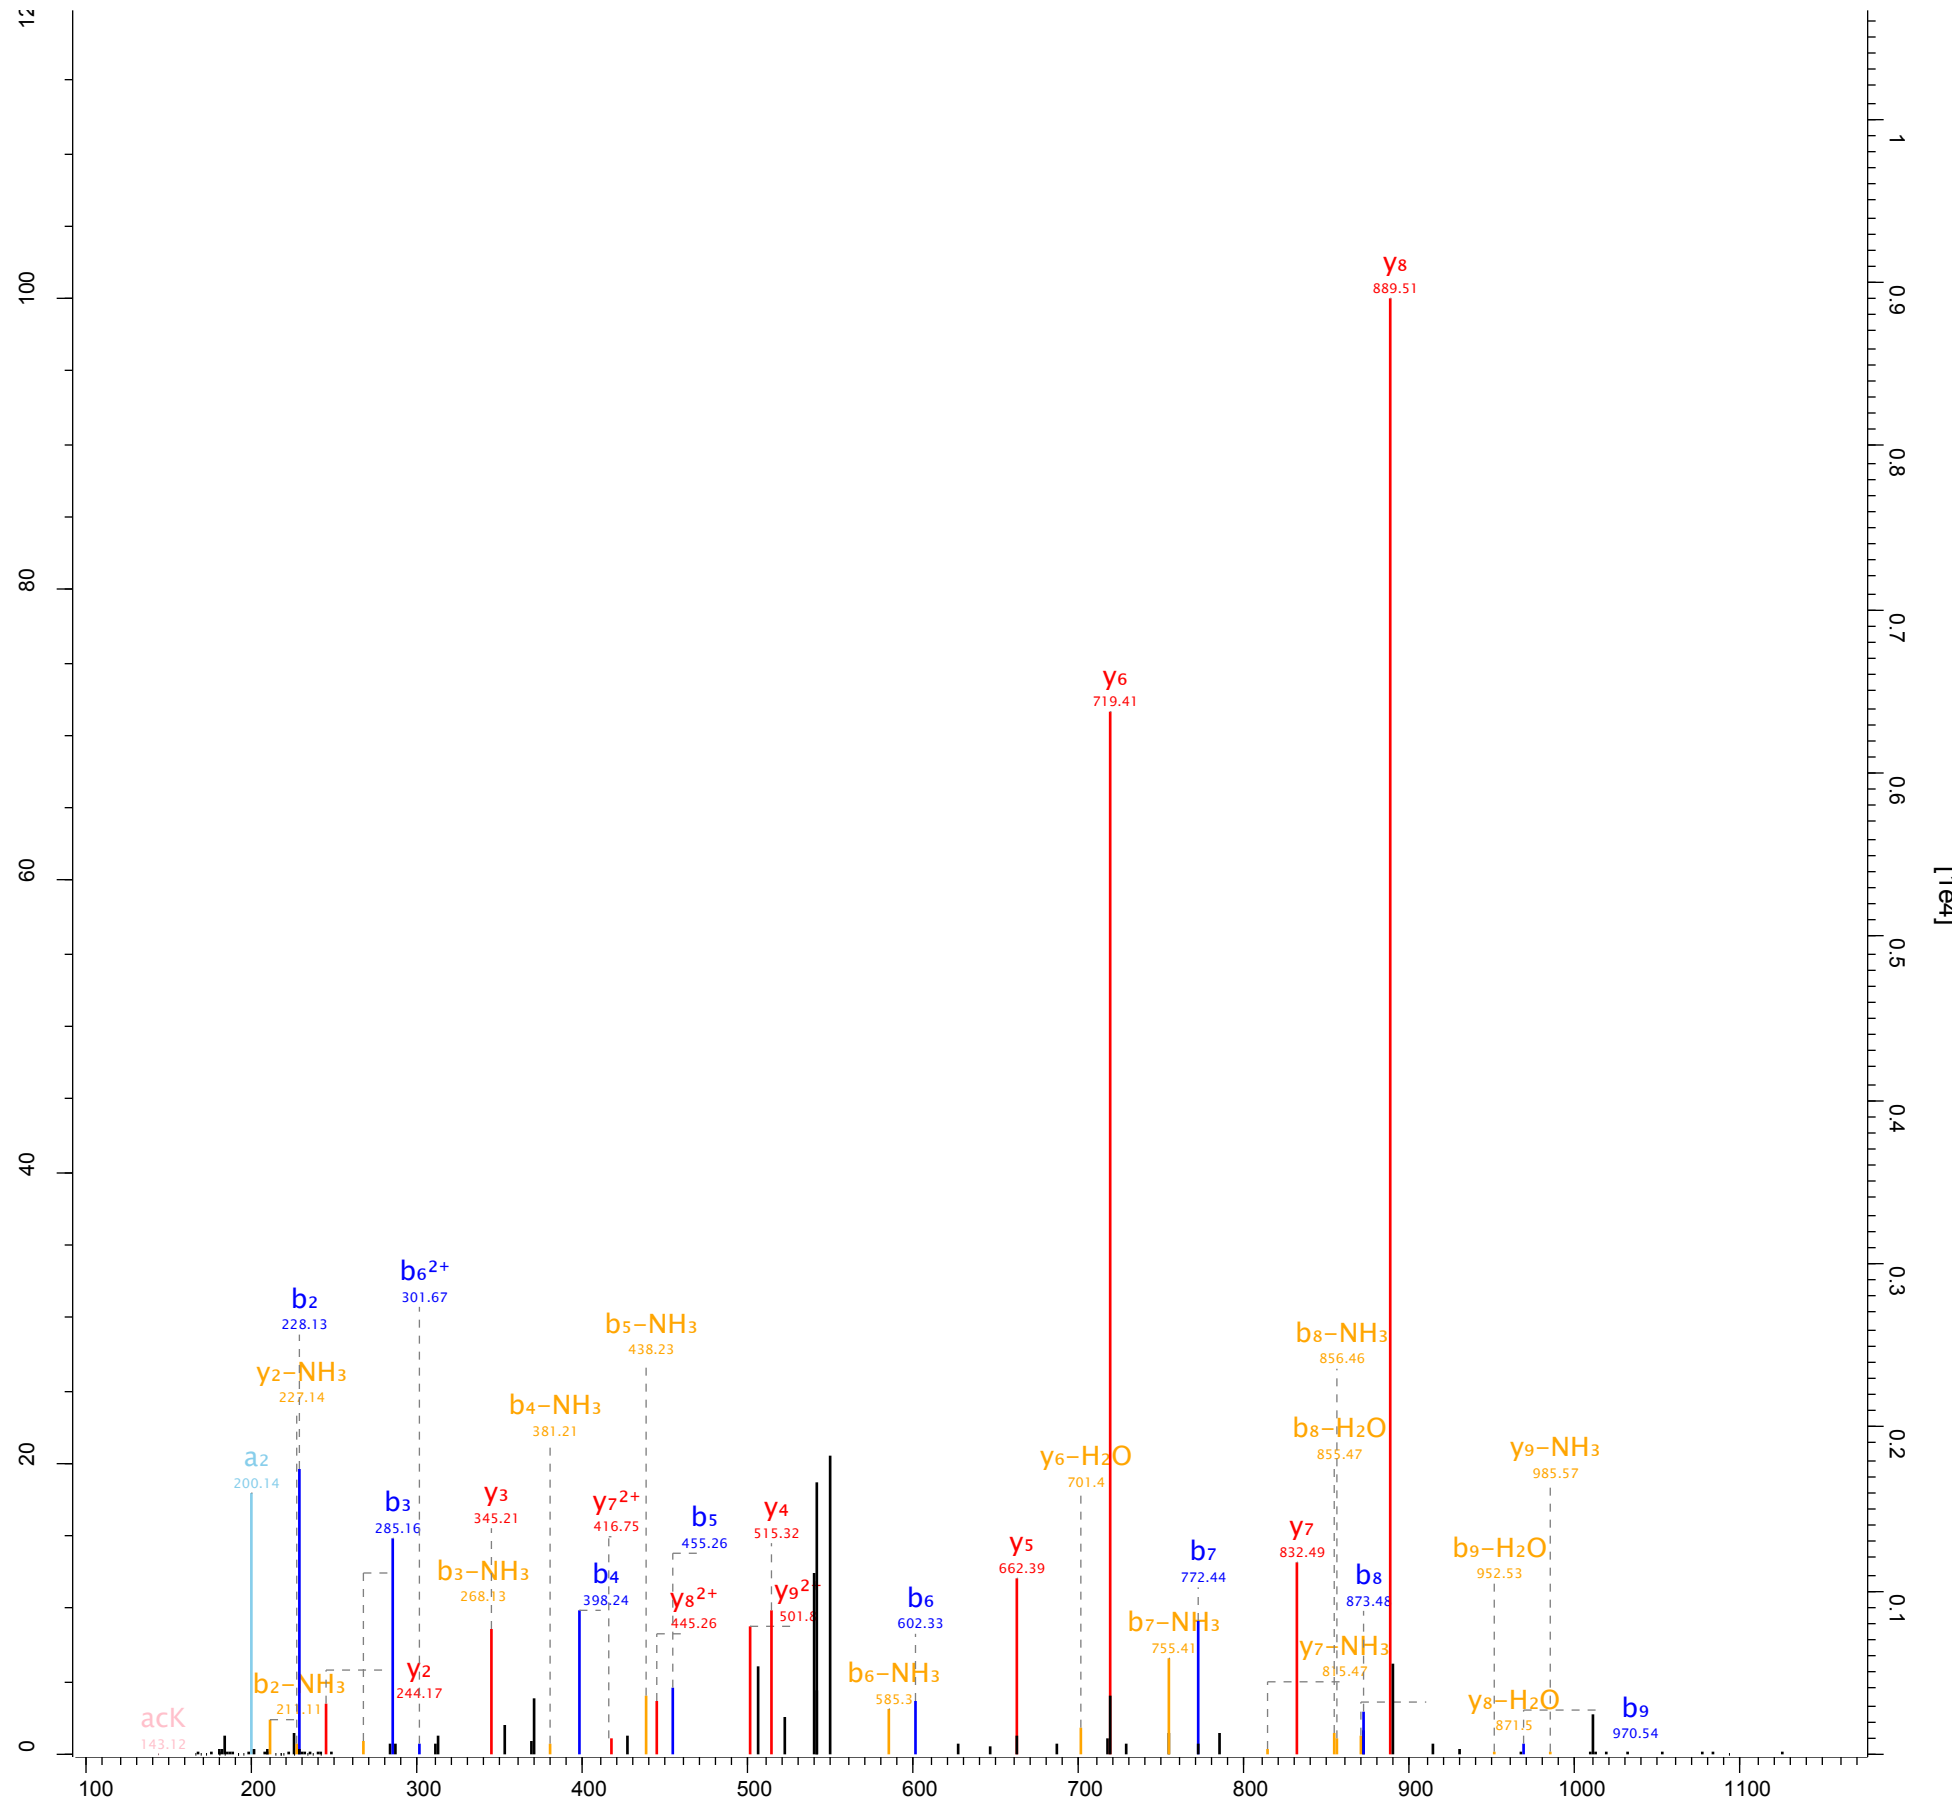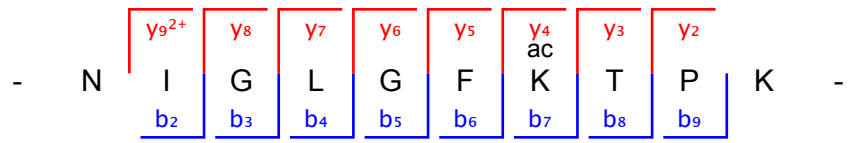

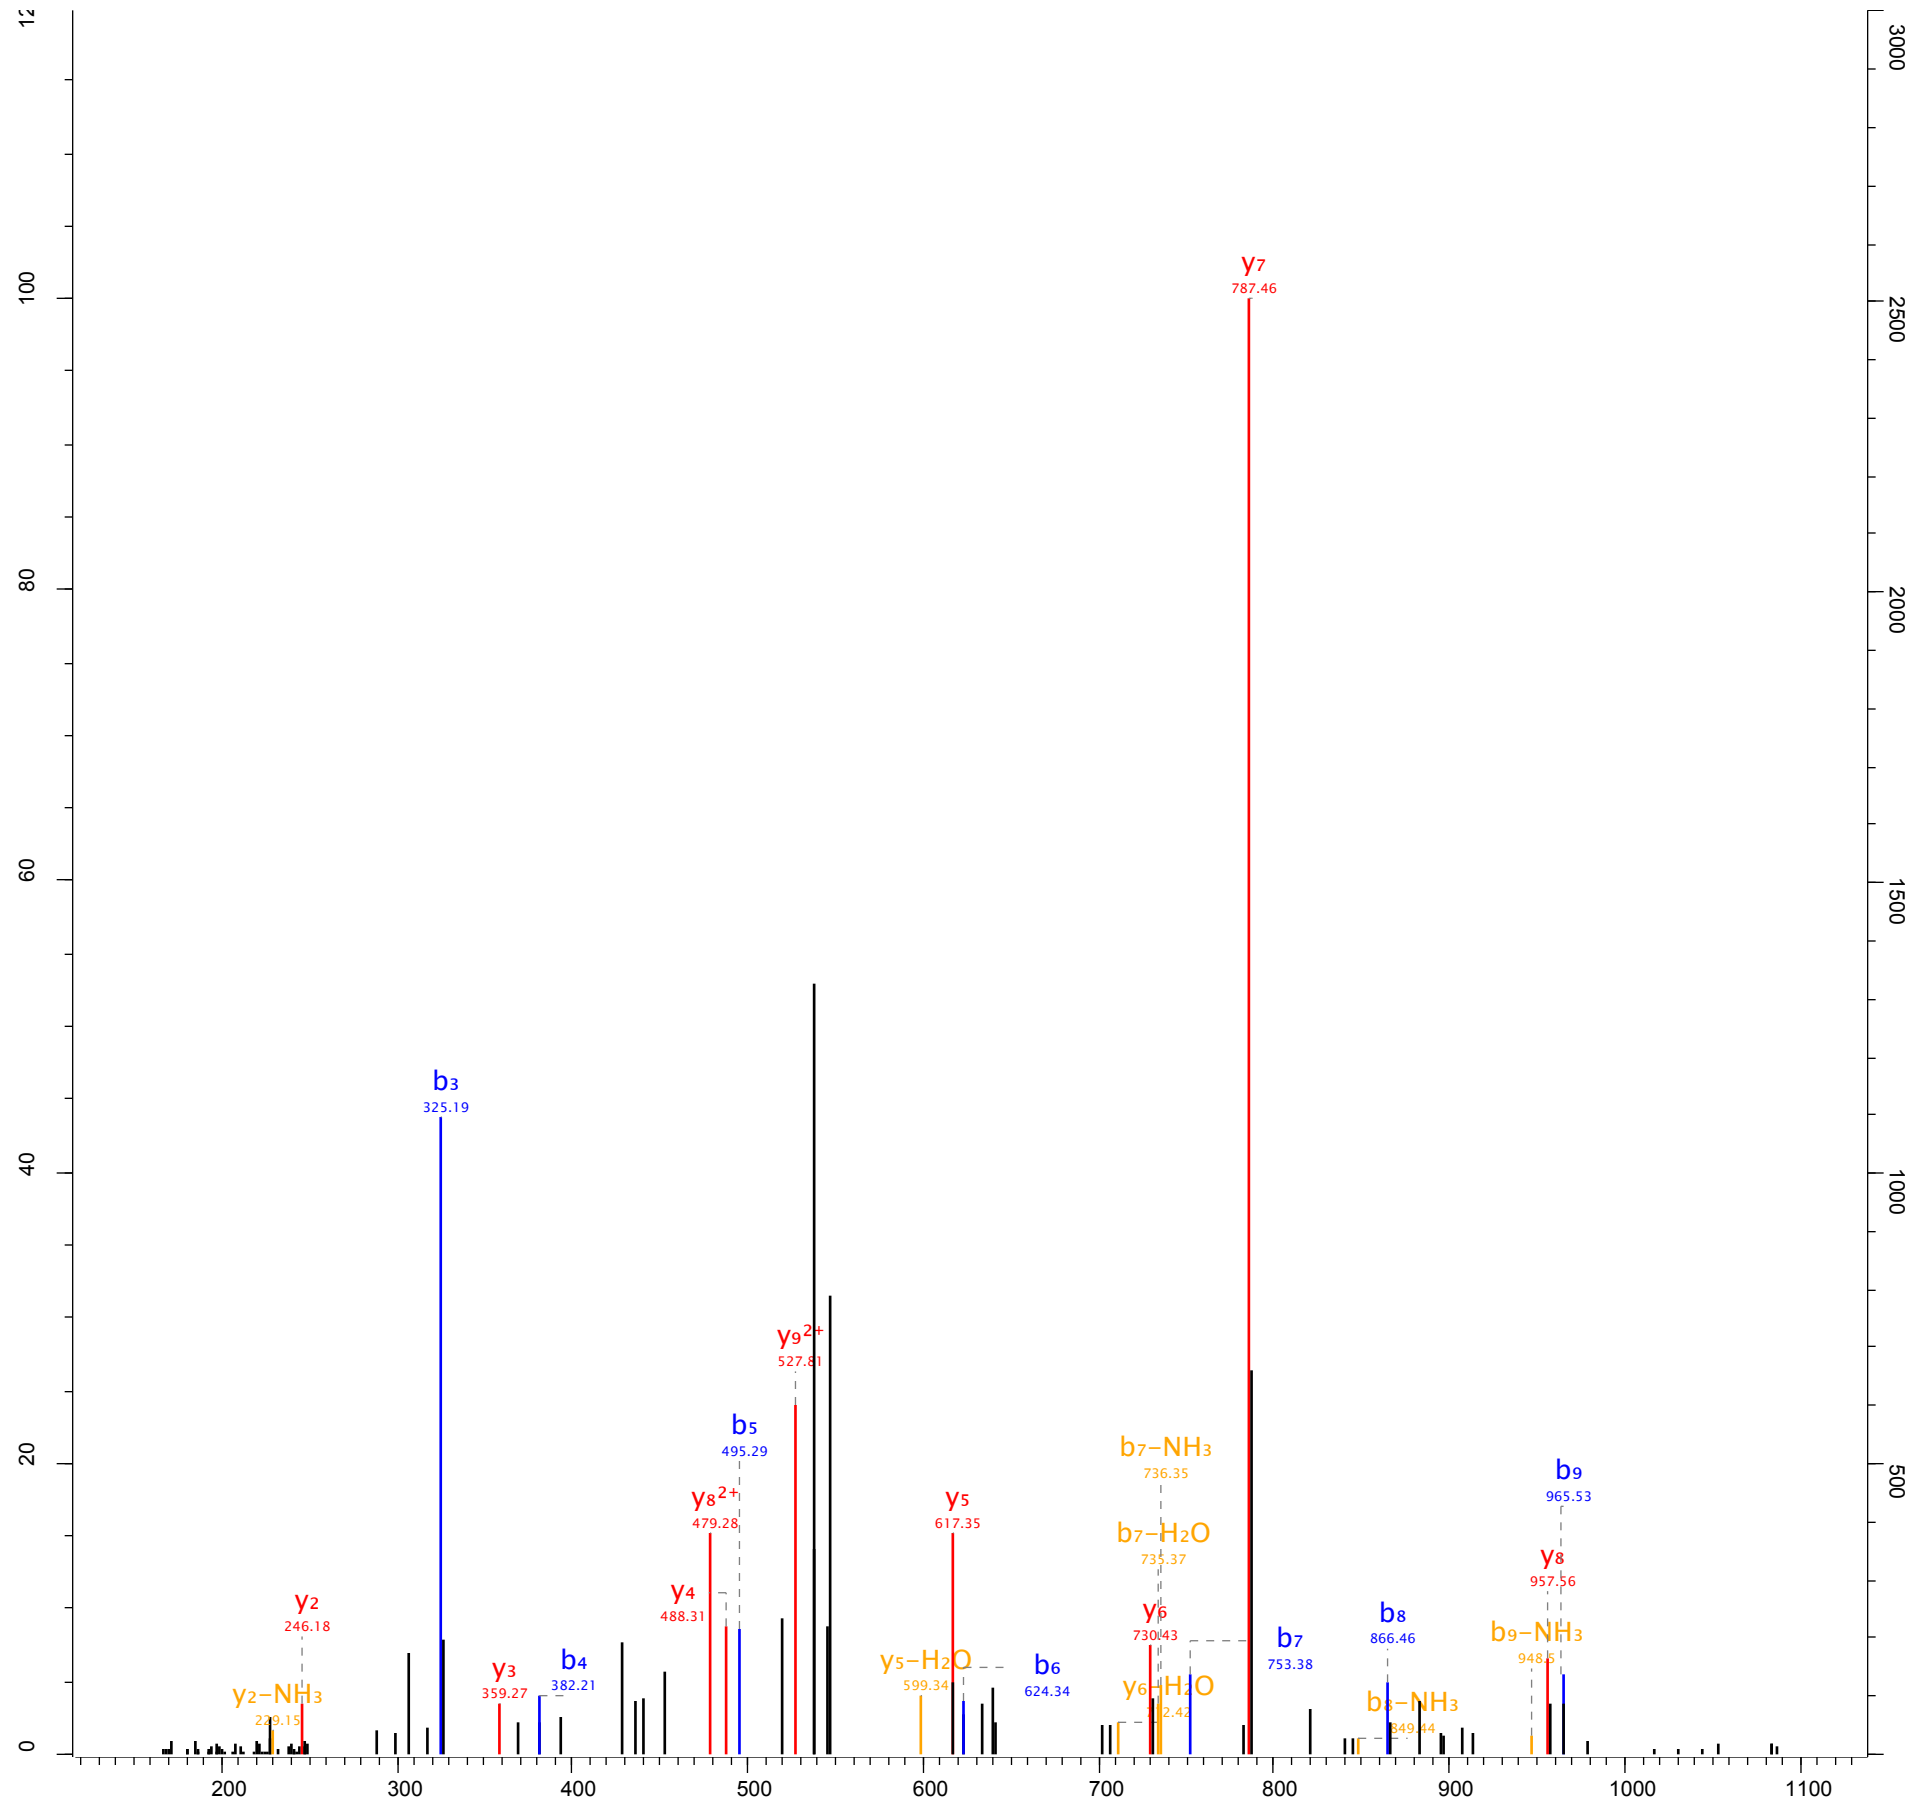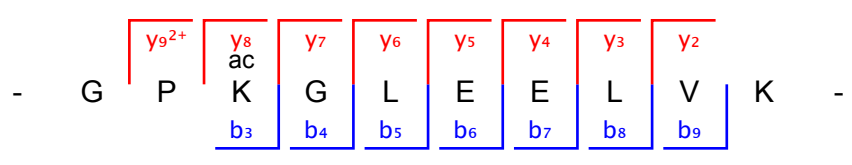



Raw file 030314\_SCW\_II\_29\_4\_2ndZT Scan 21583 Method ITMS; CID Score 220.82 m/z 634.86 Gene names Npm1;Gm5611

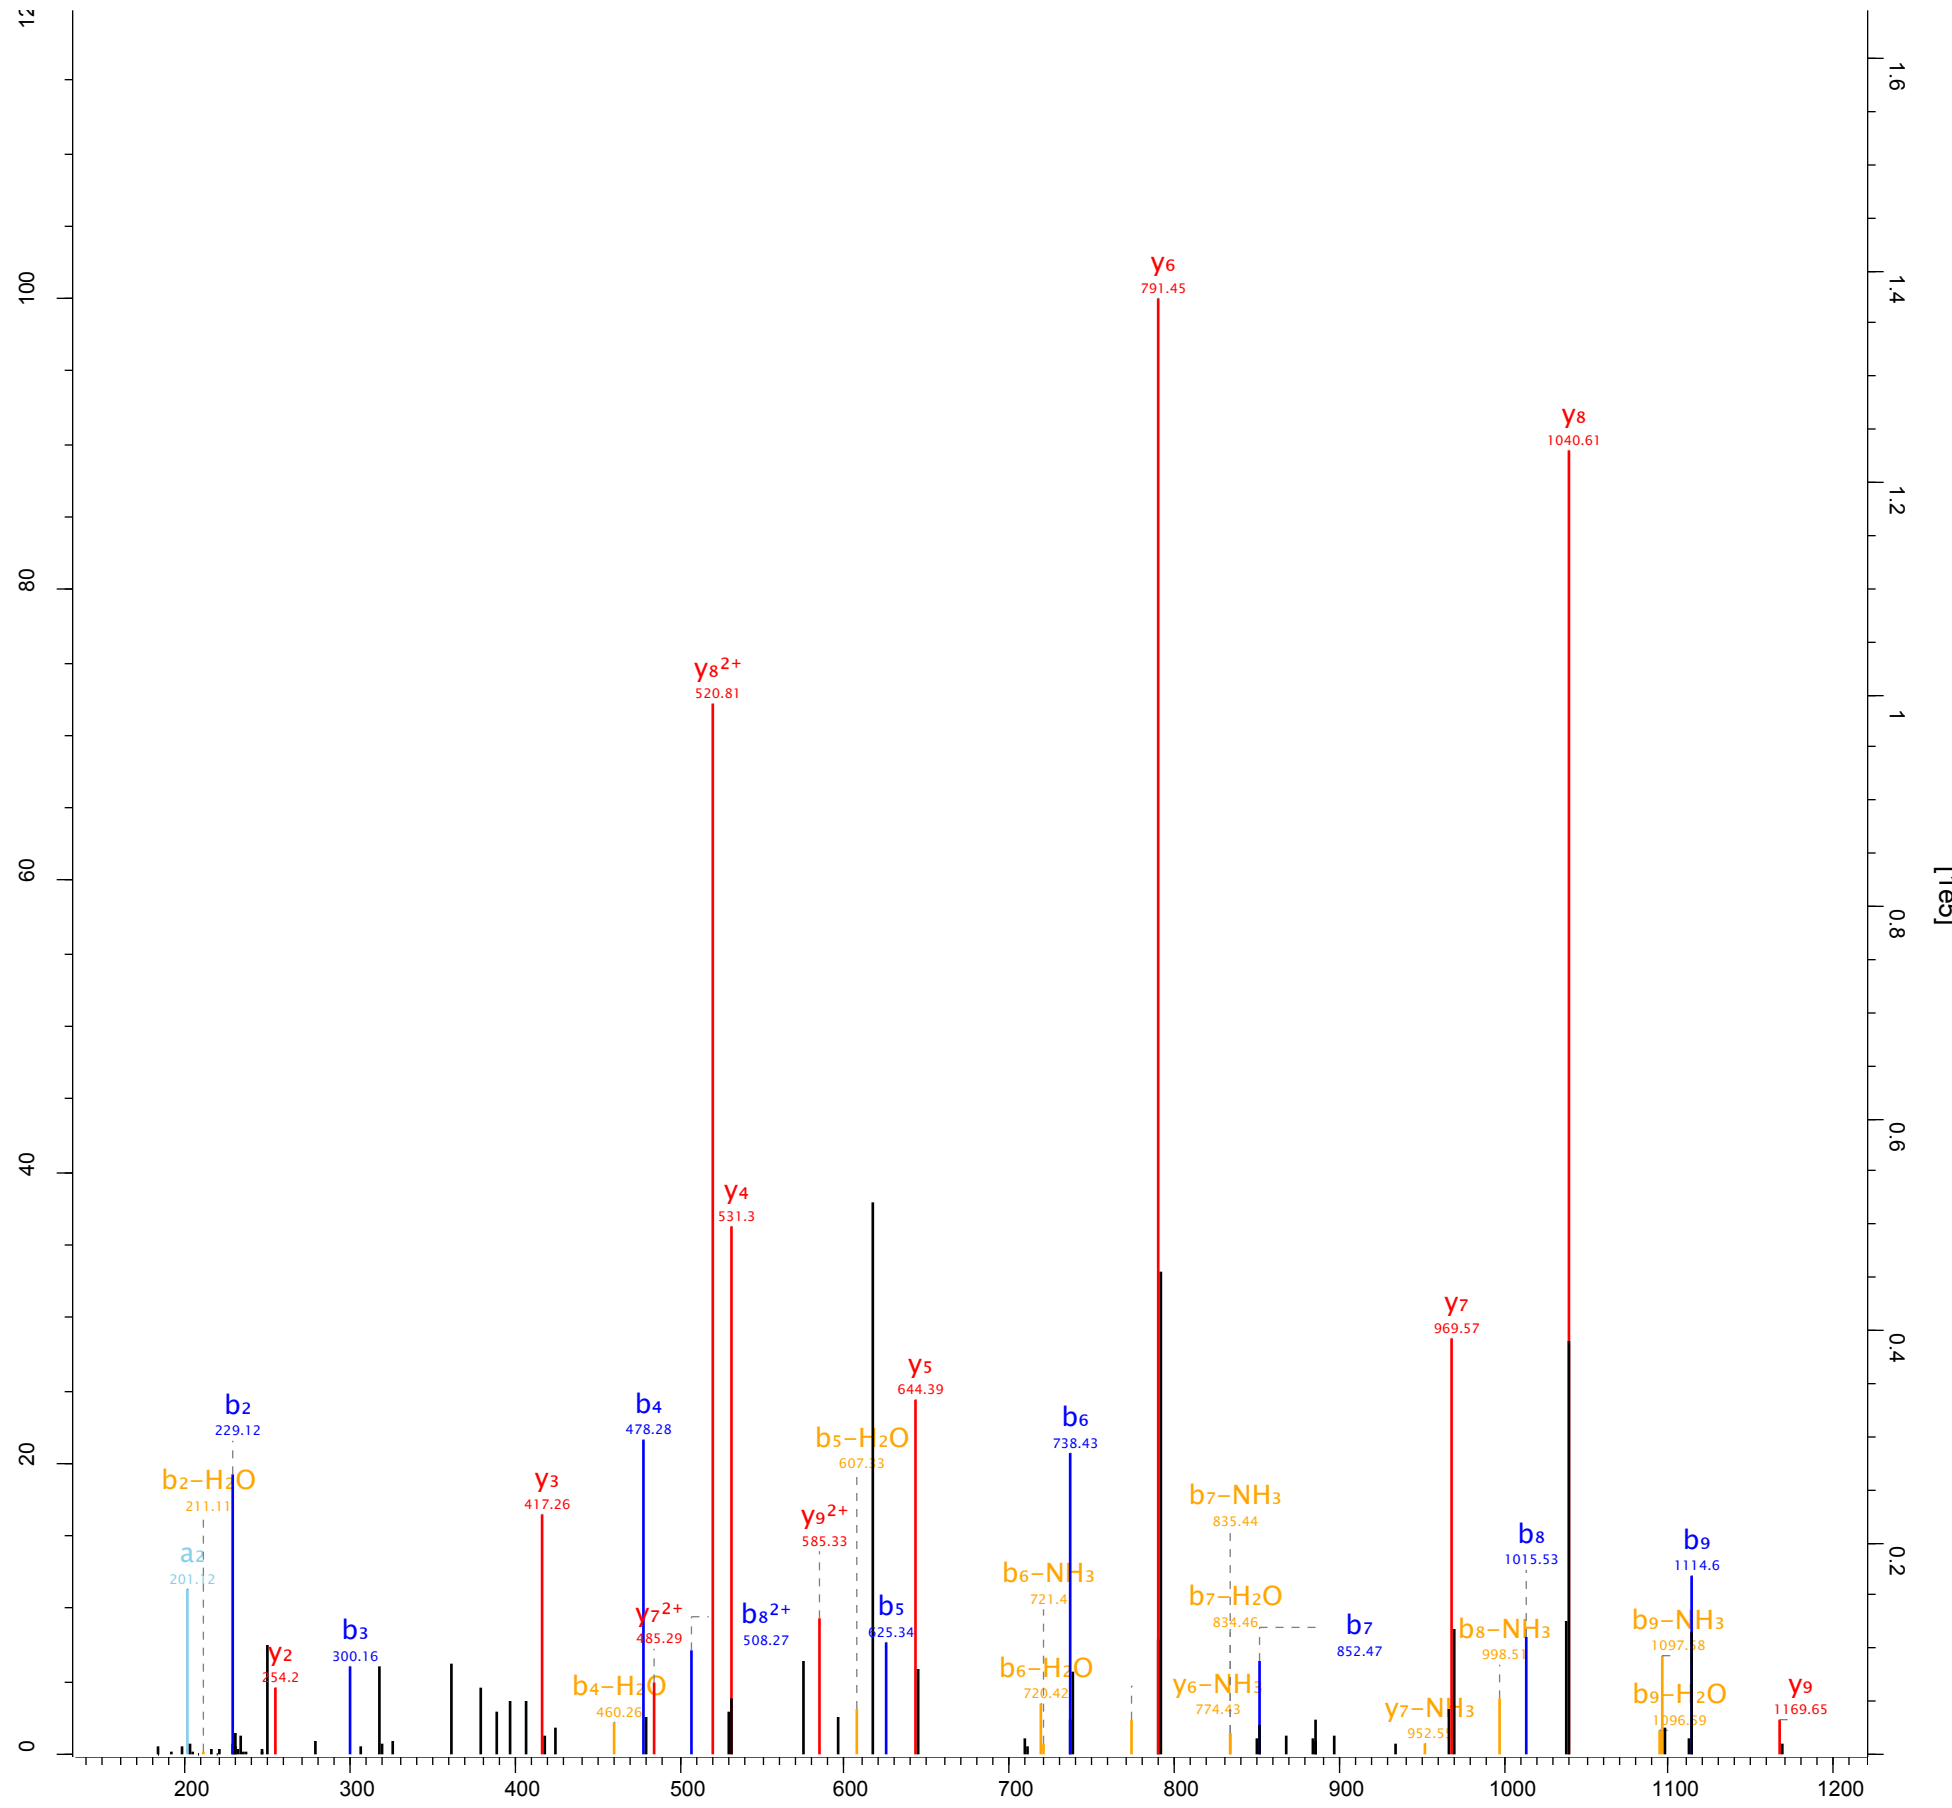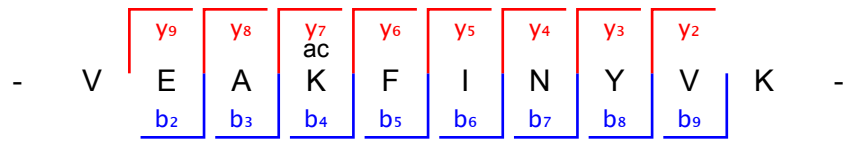

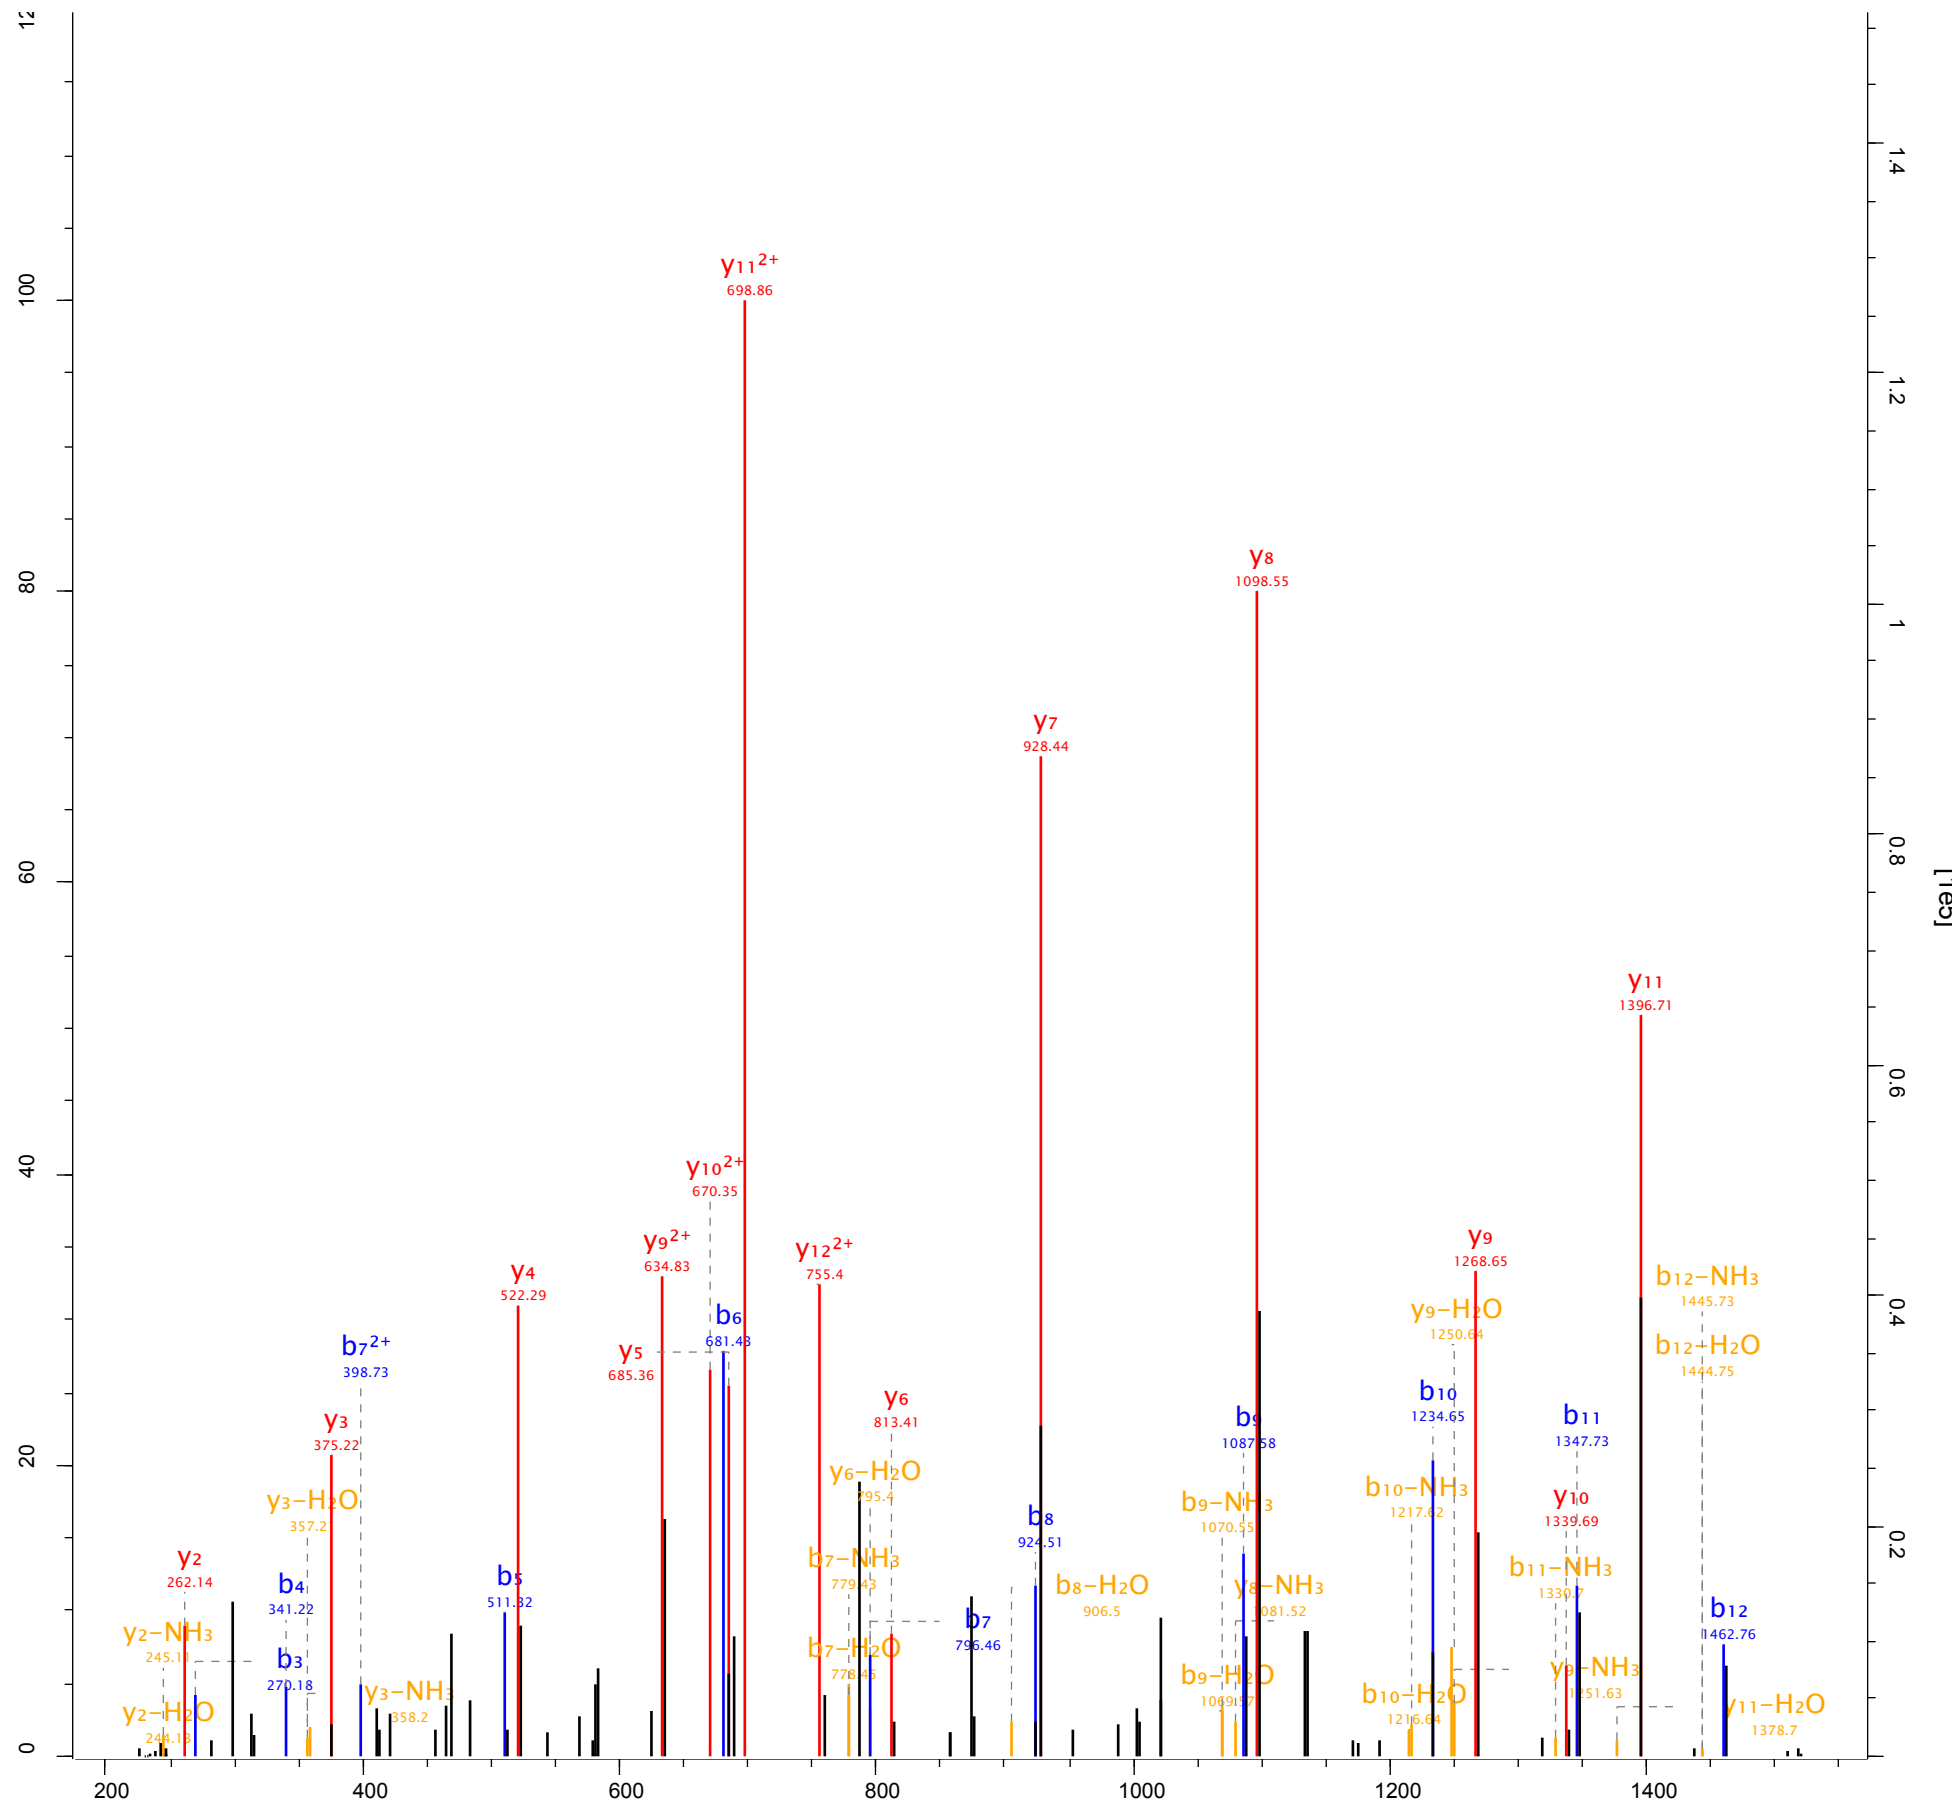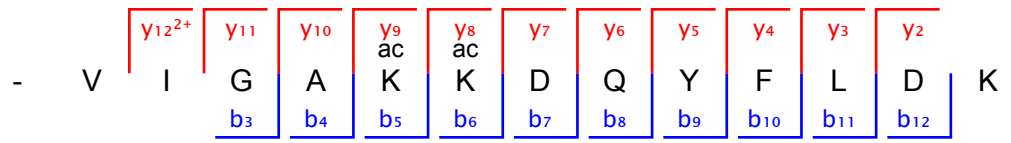

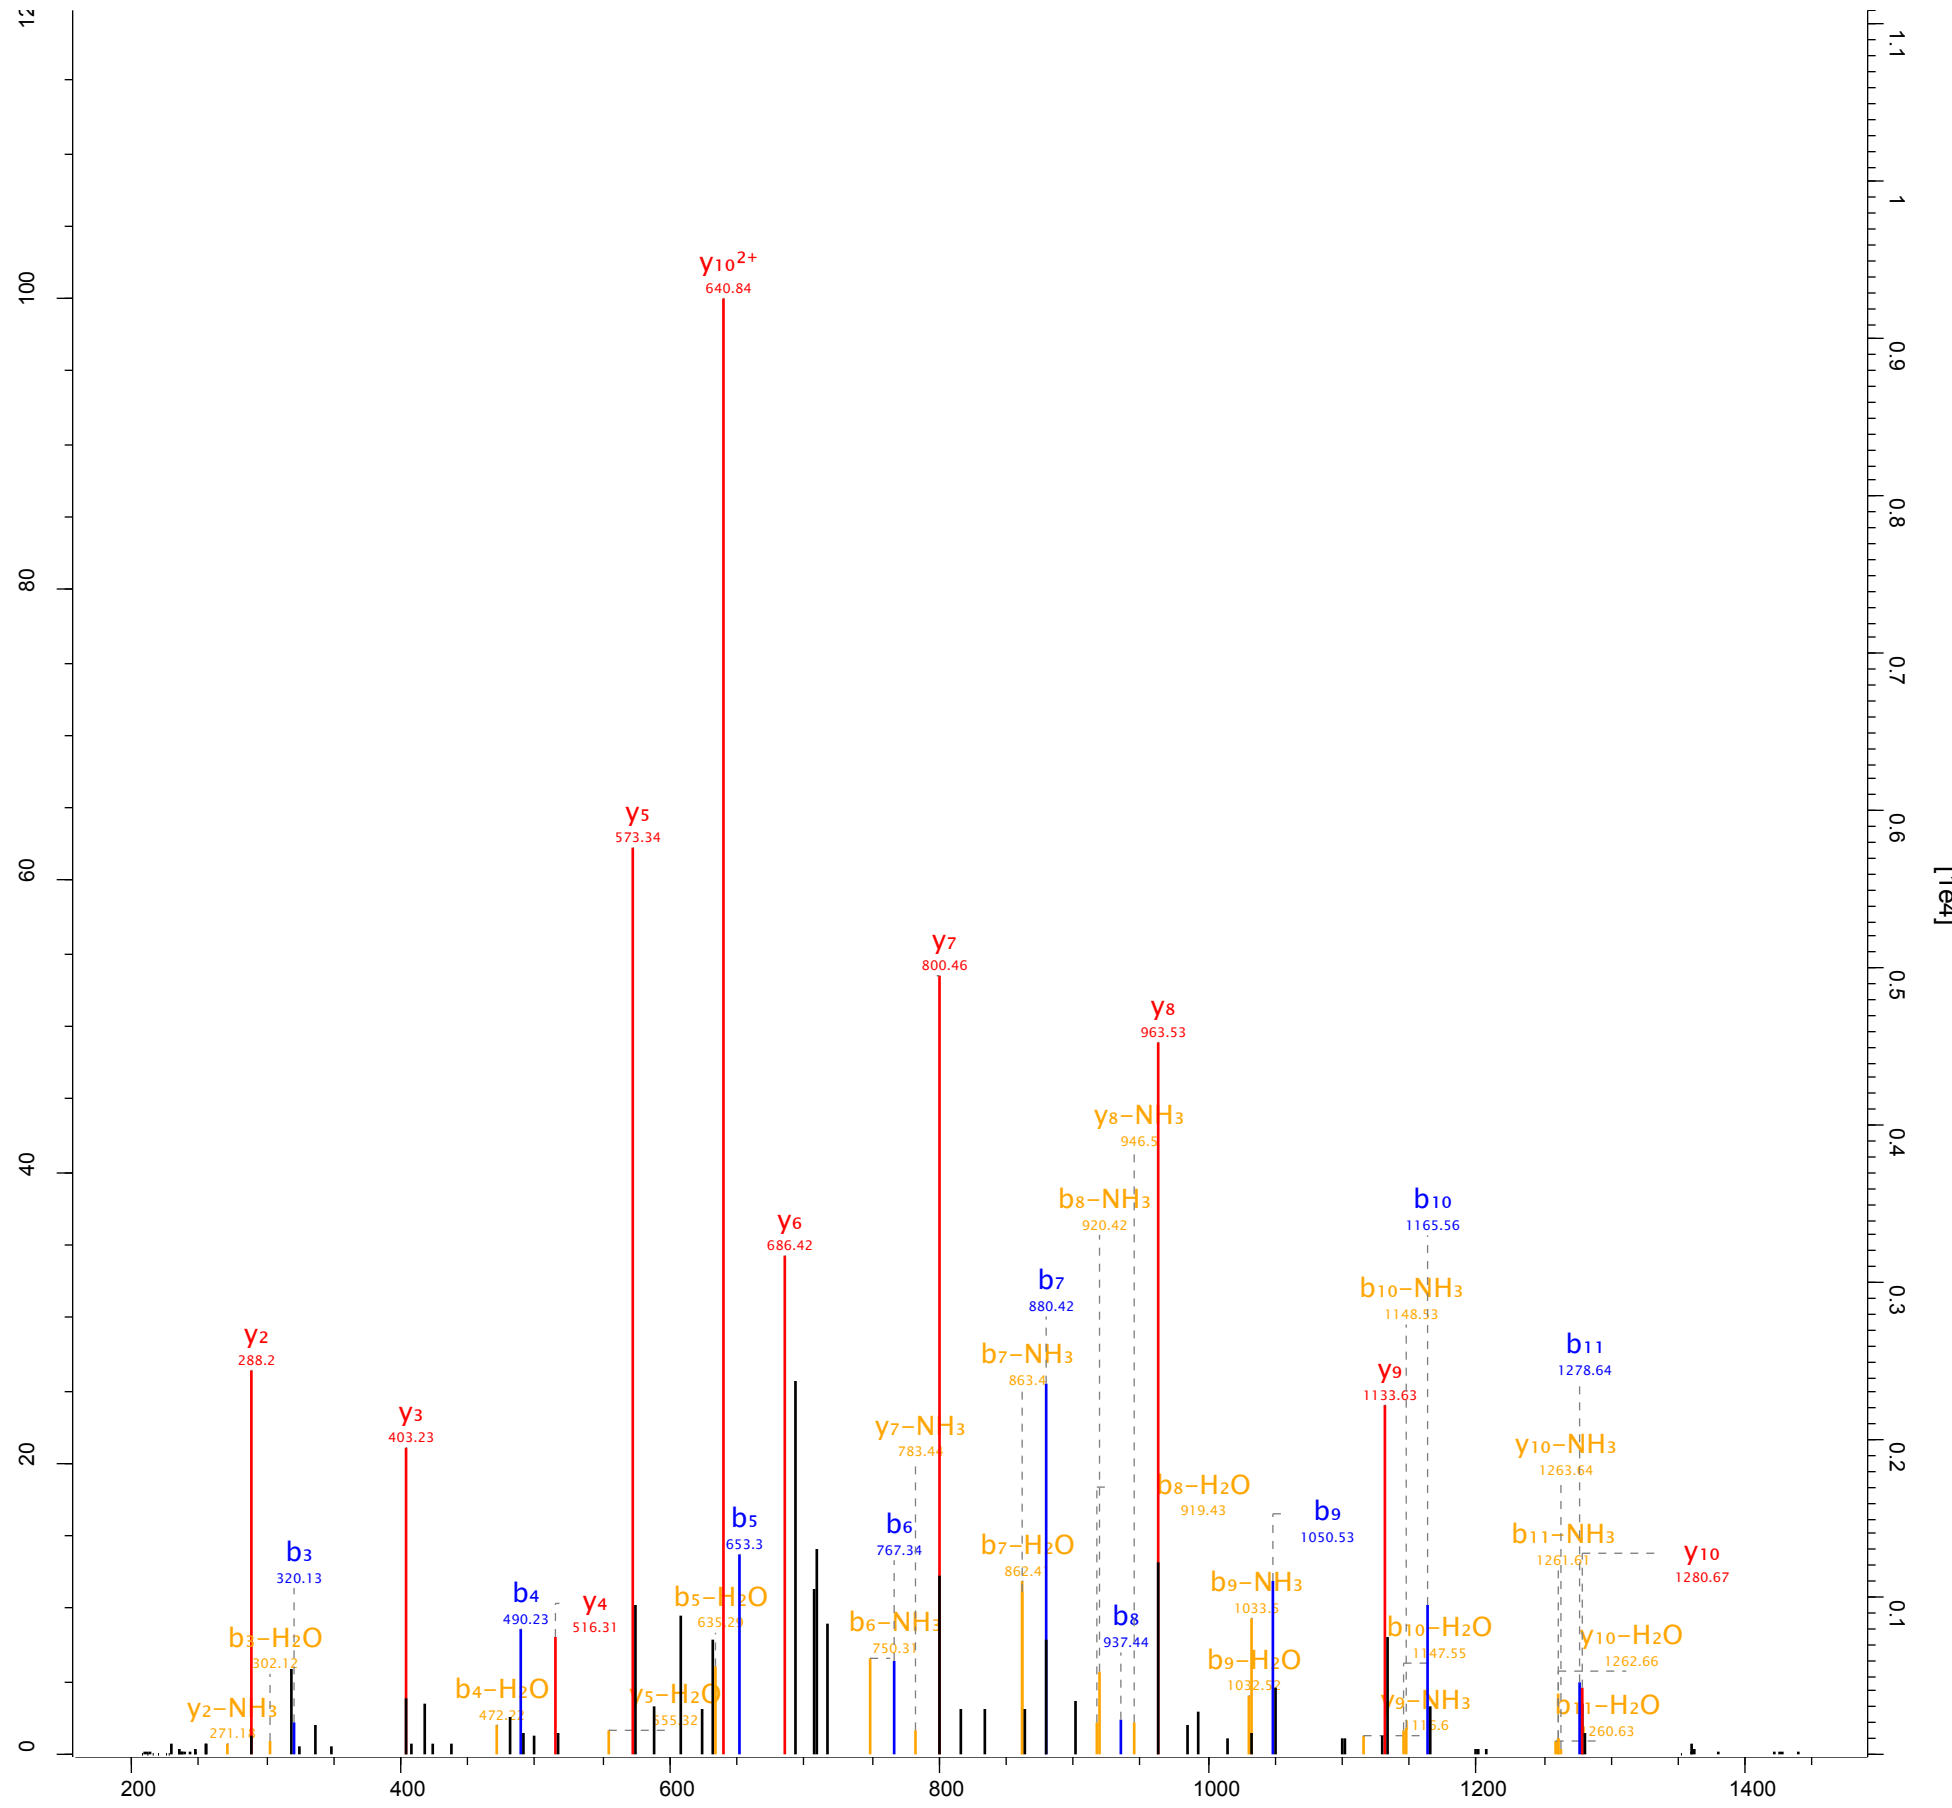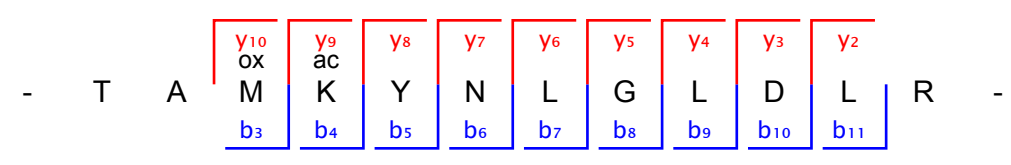

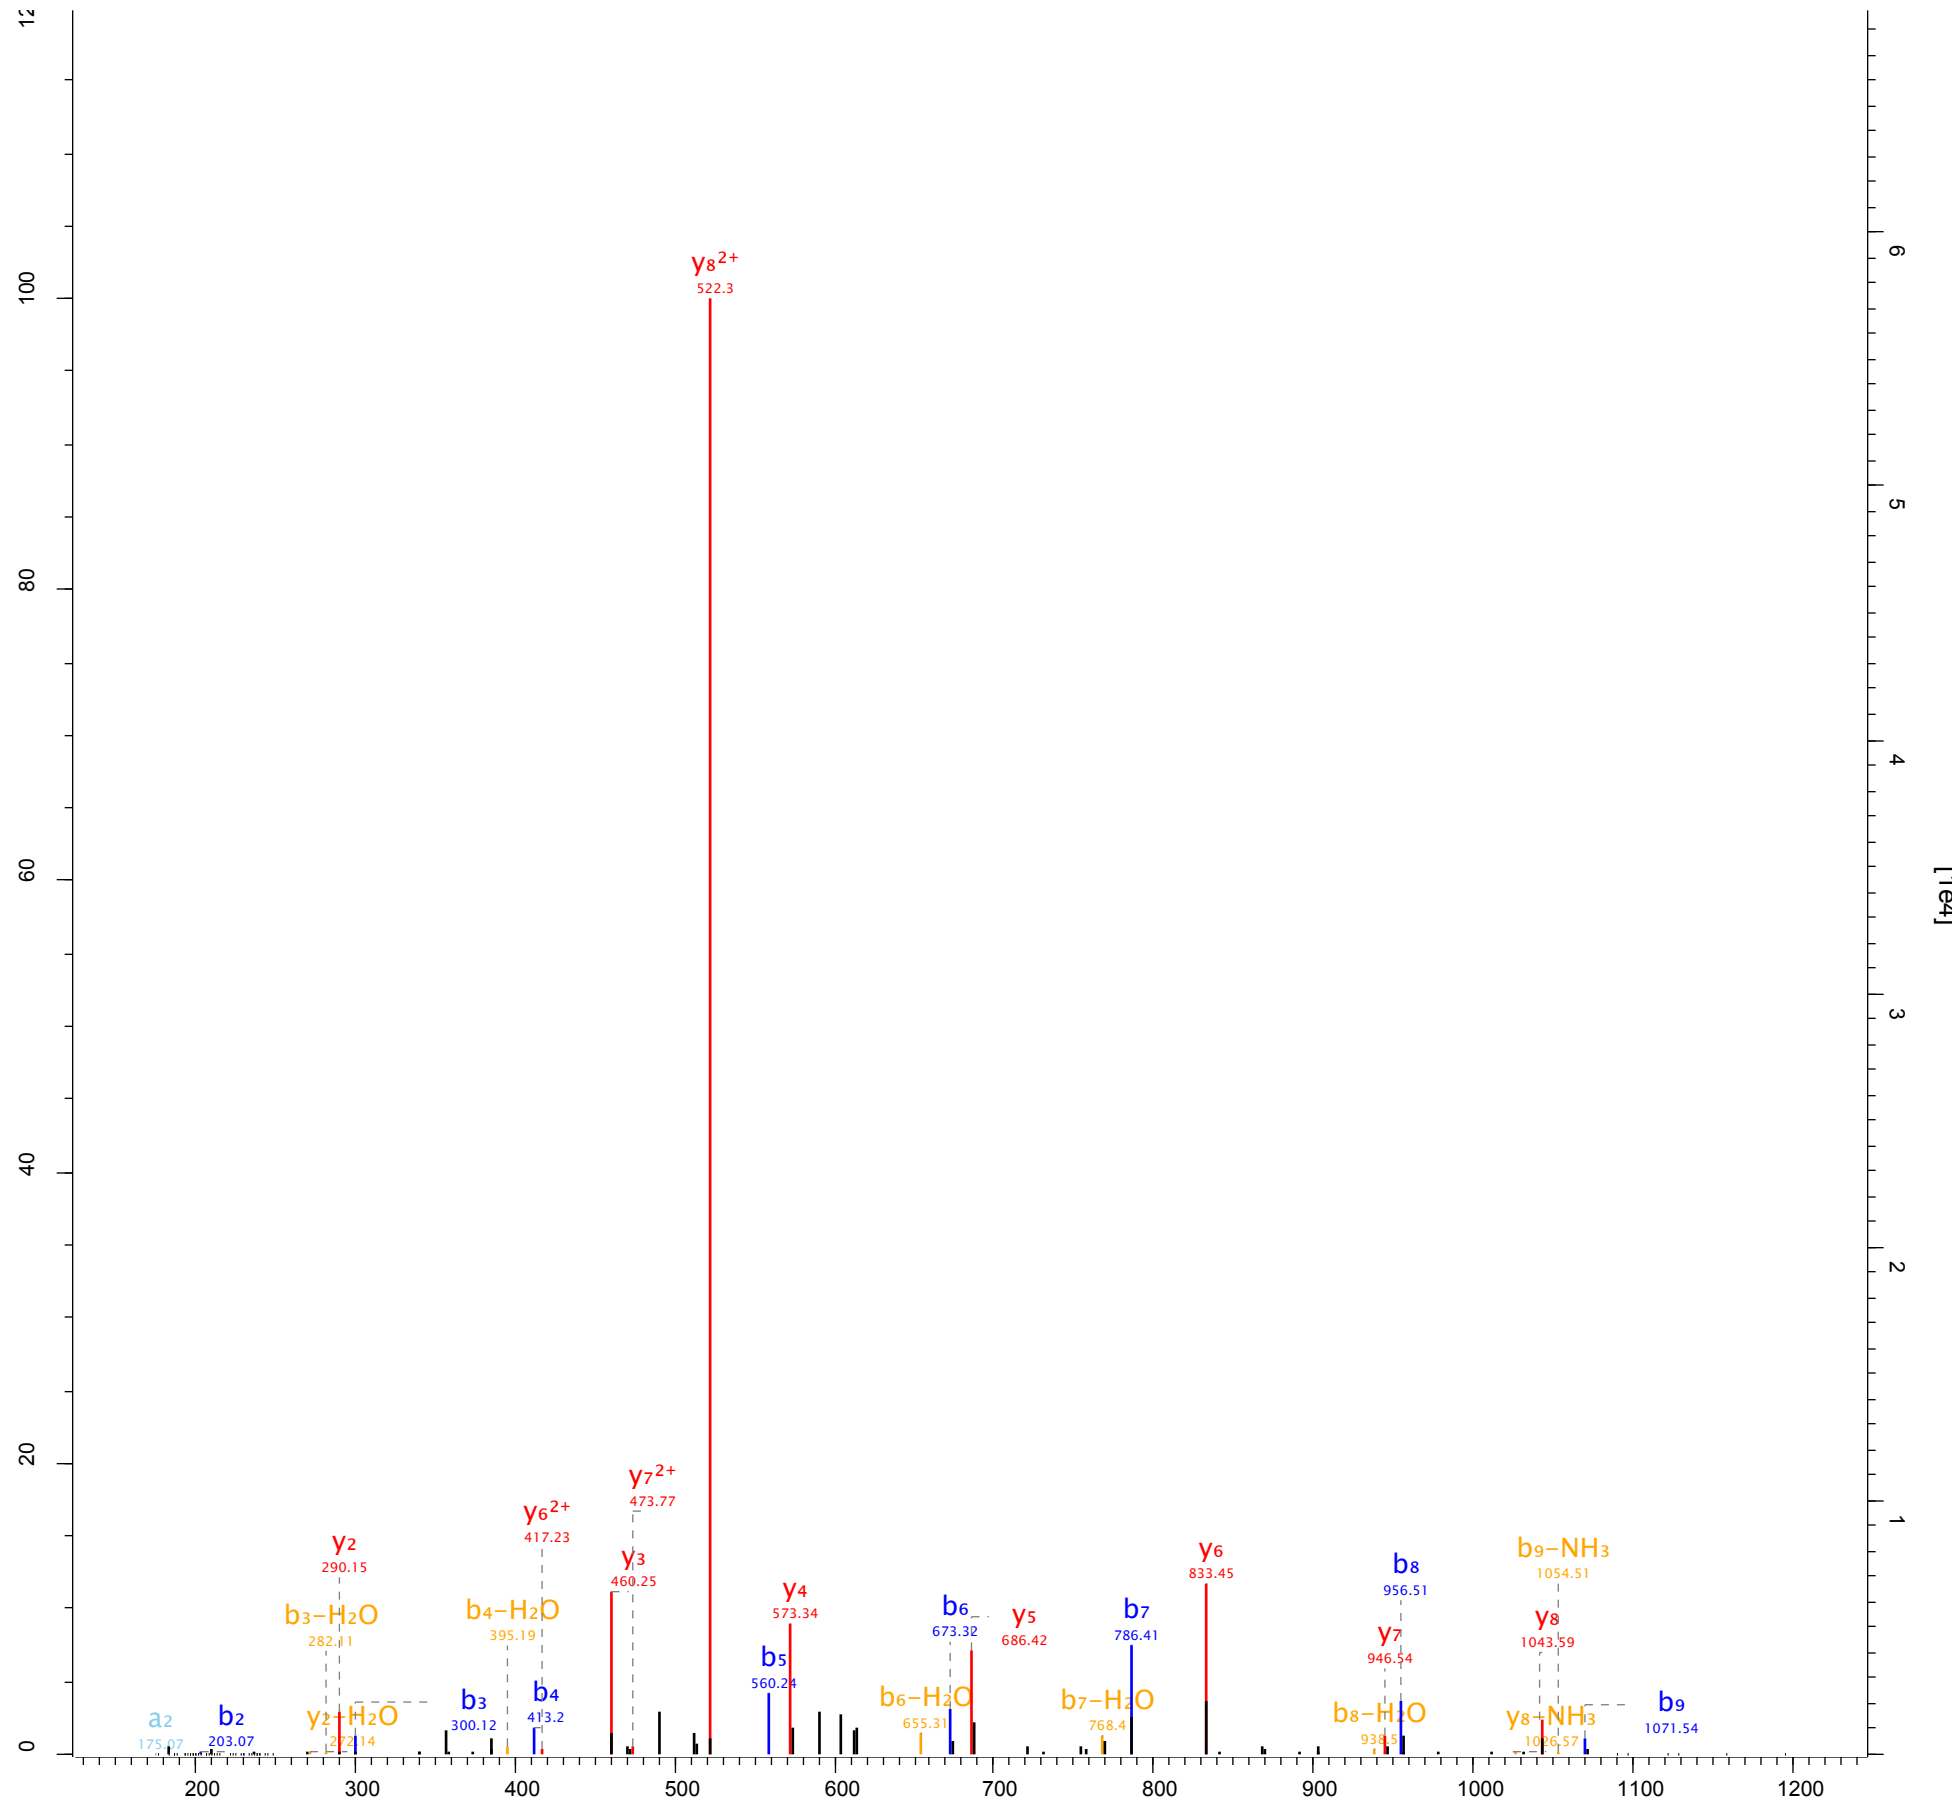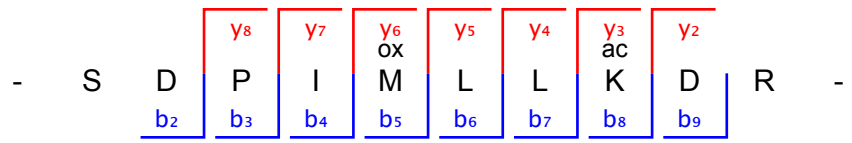

030314\_SCW\_II\_29\_4\_2ndZT

23346

ITMS; CID

129.43

730.36

Uba1

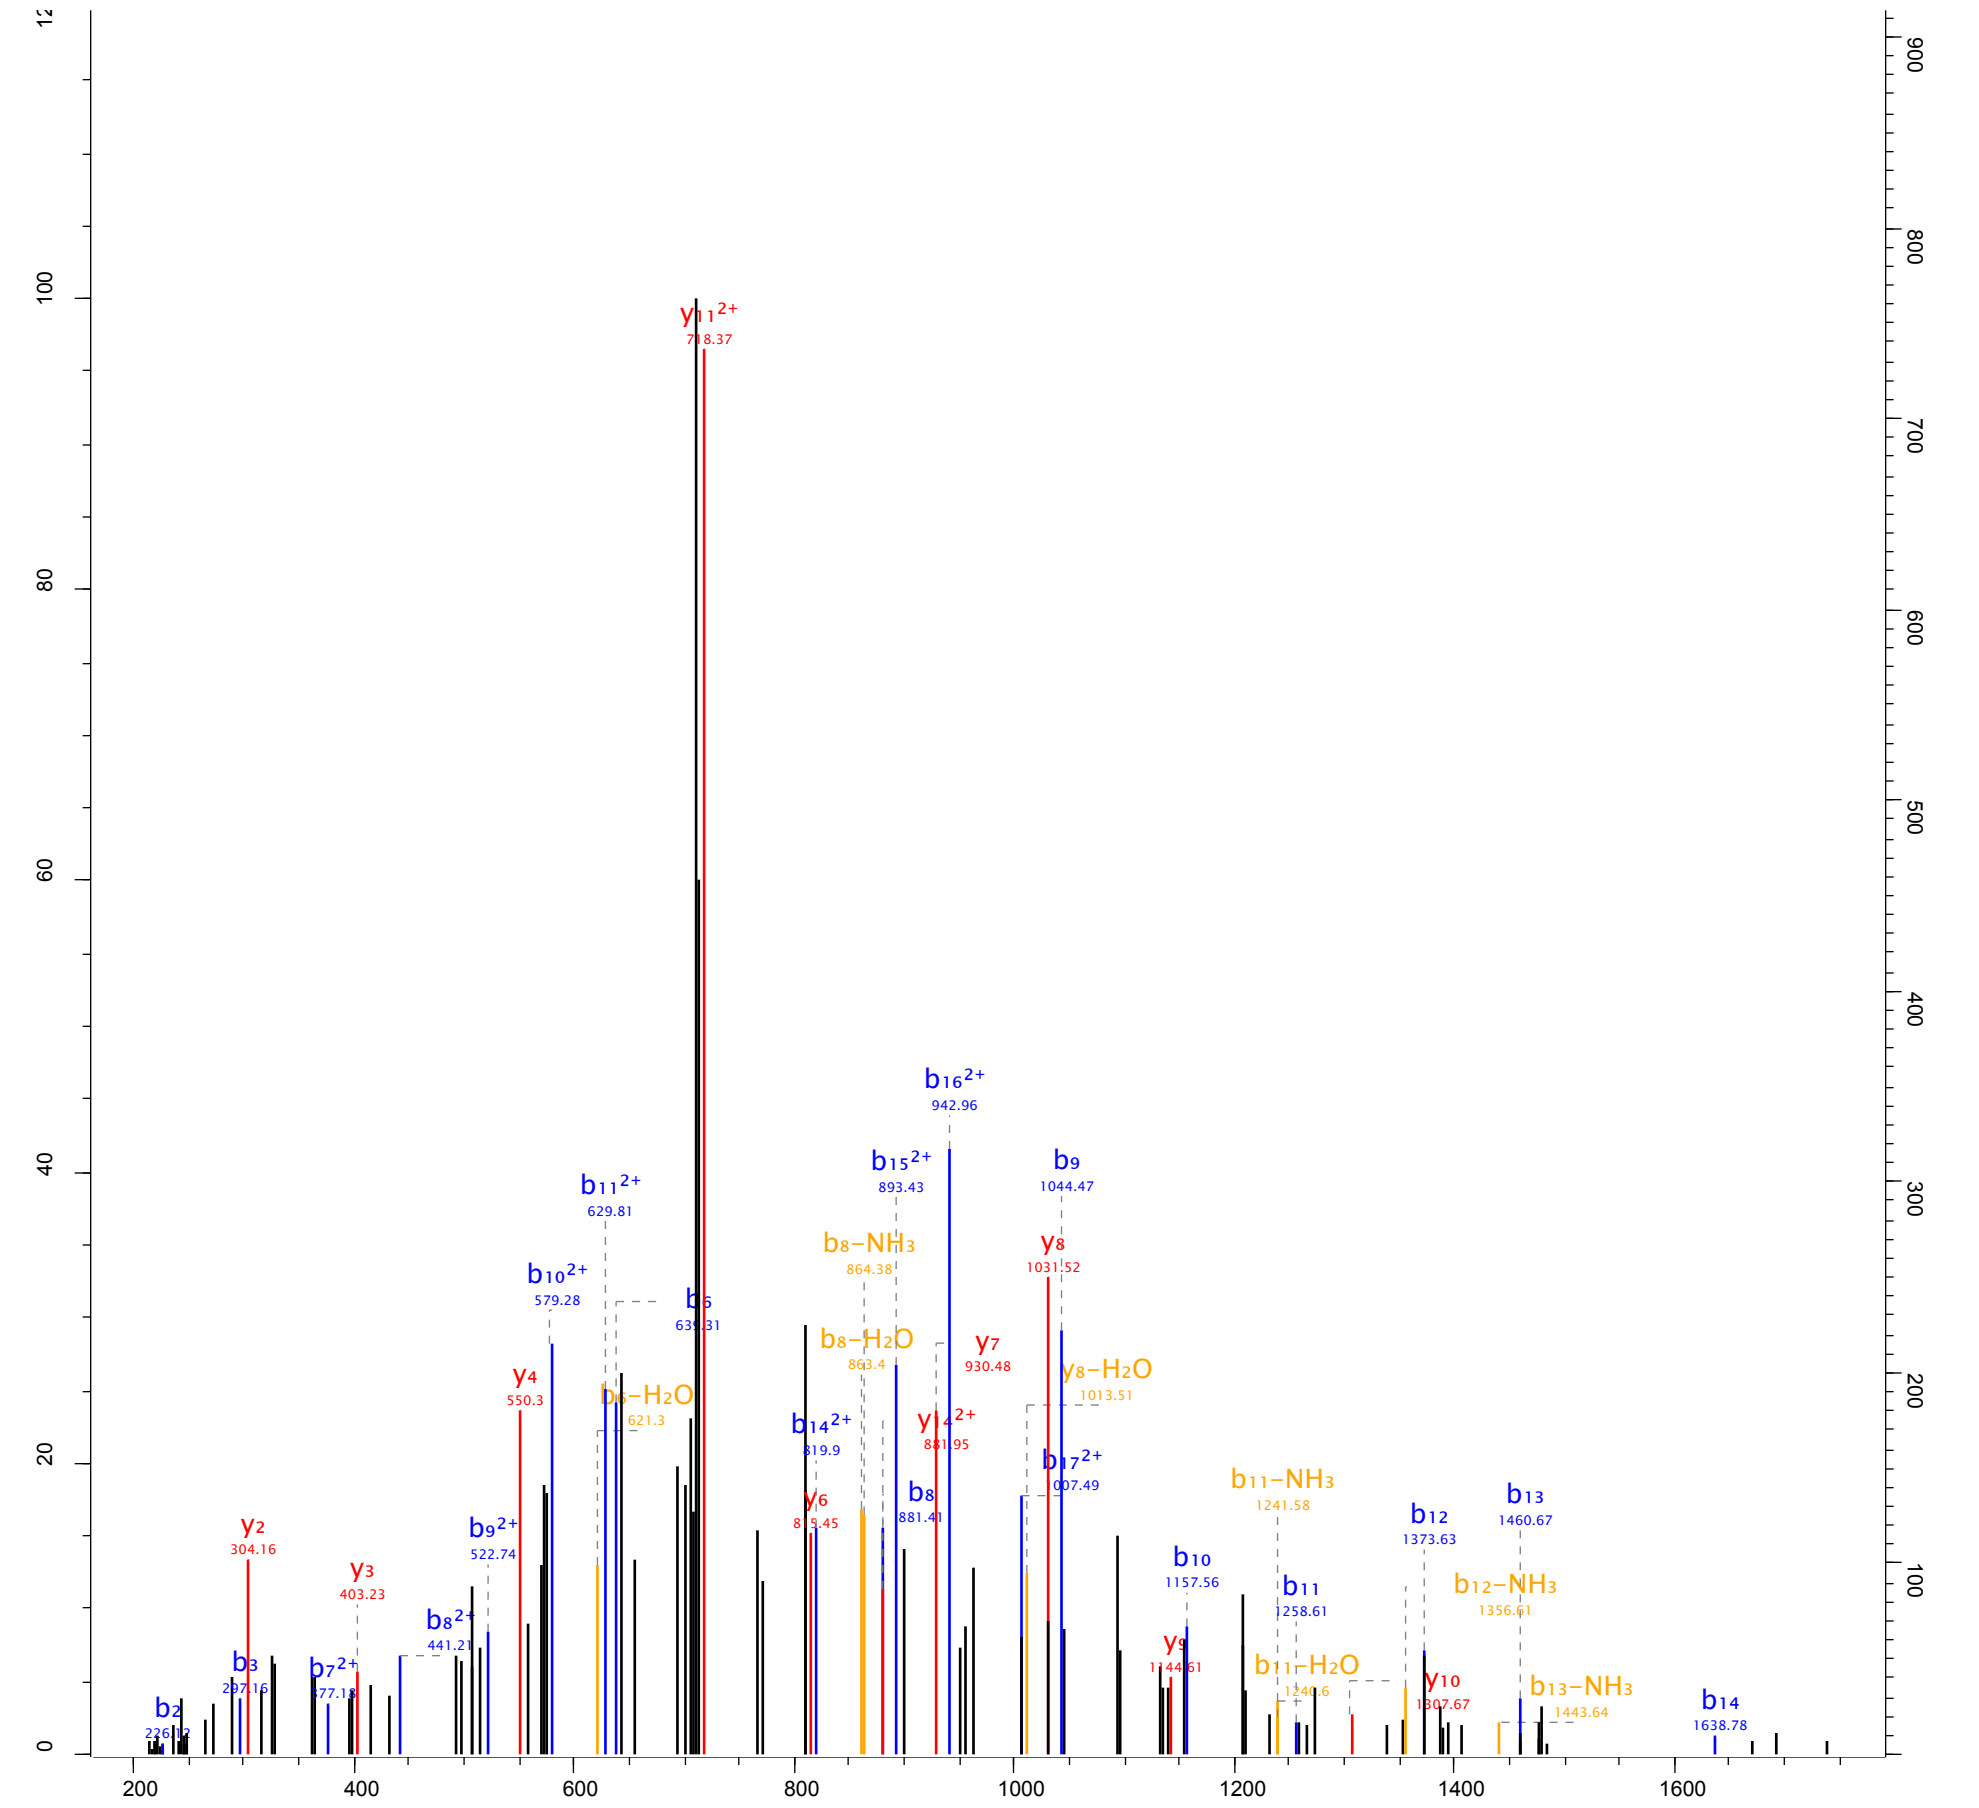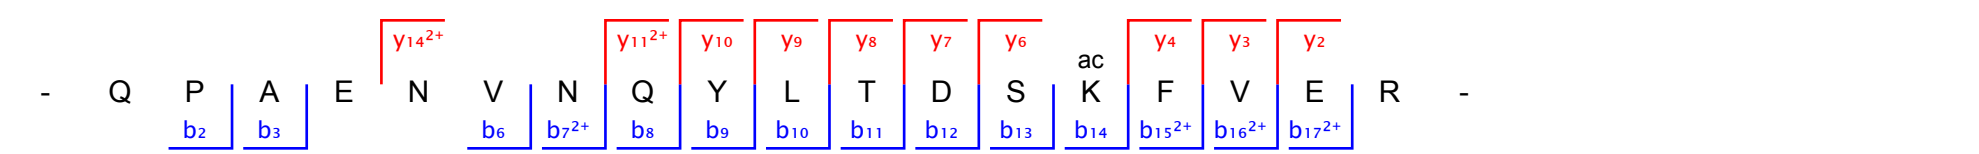

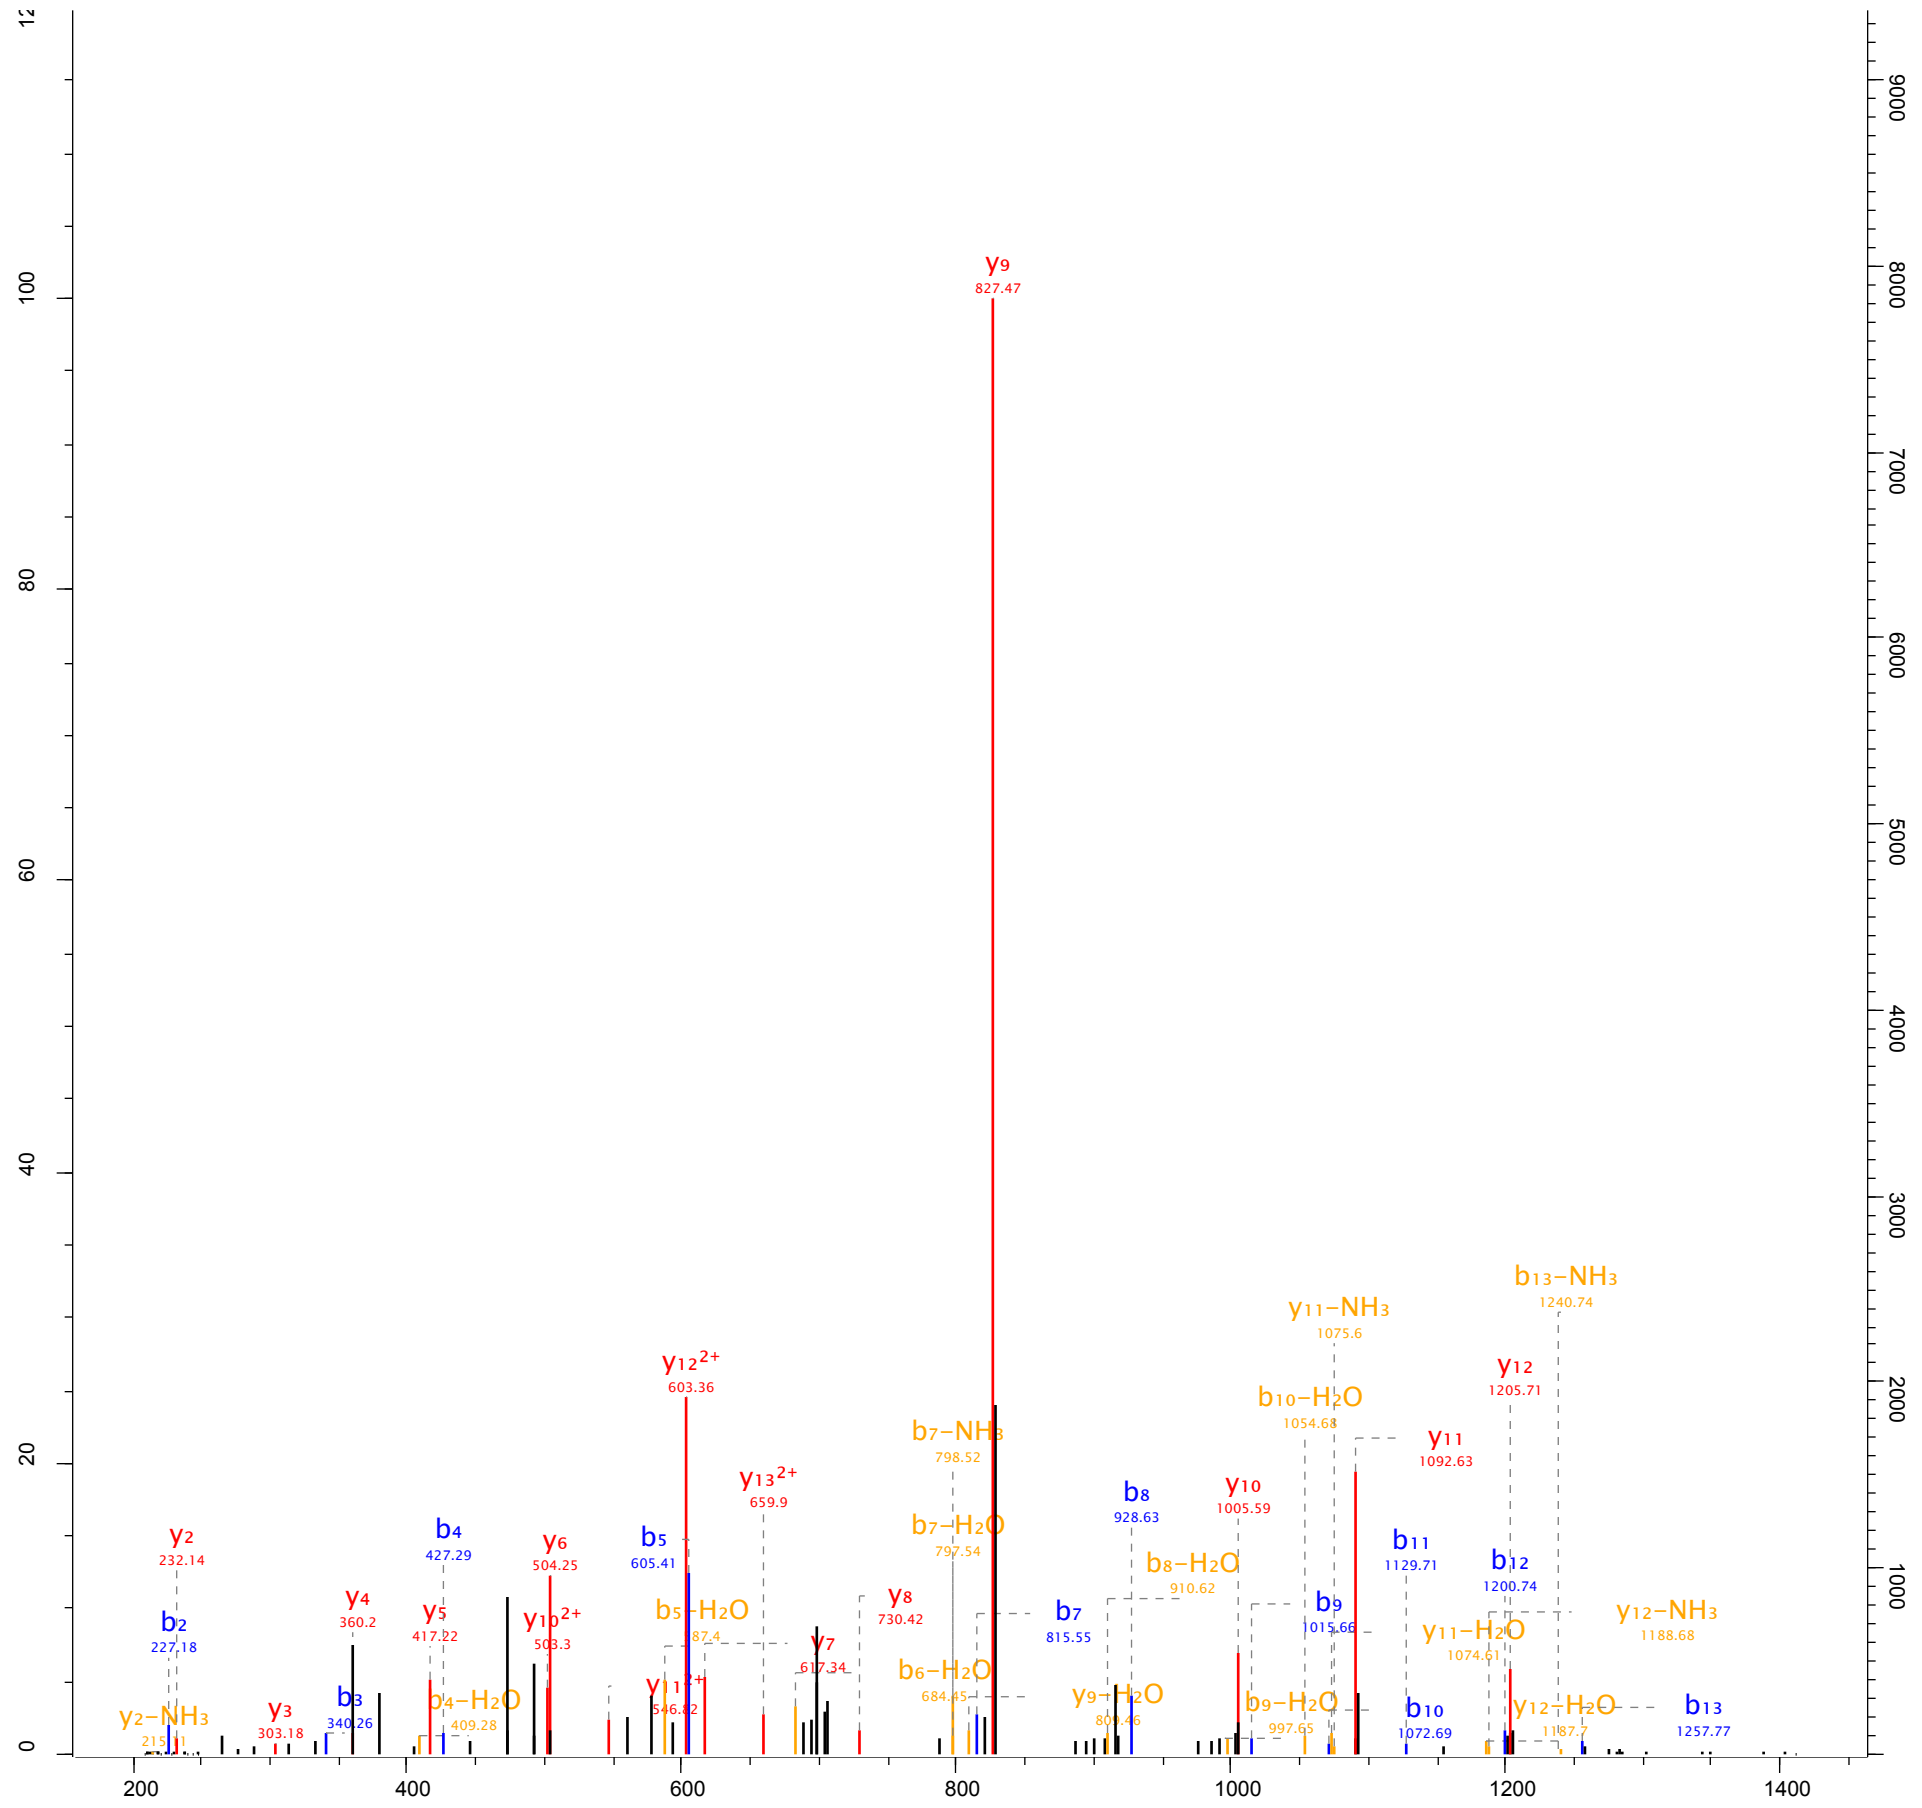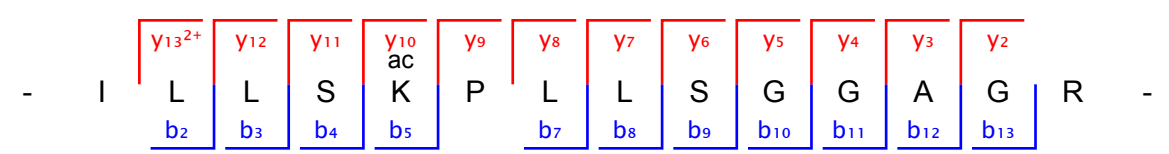

Raw file 030314\_SCW\_II\_29\_4\_2ndZT Scan 25213 Method ITMS; CID 167.22 m/z 863.93 Gene names Gm10250;Atp5h

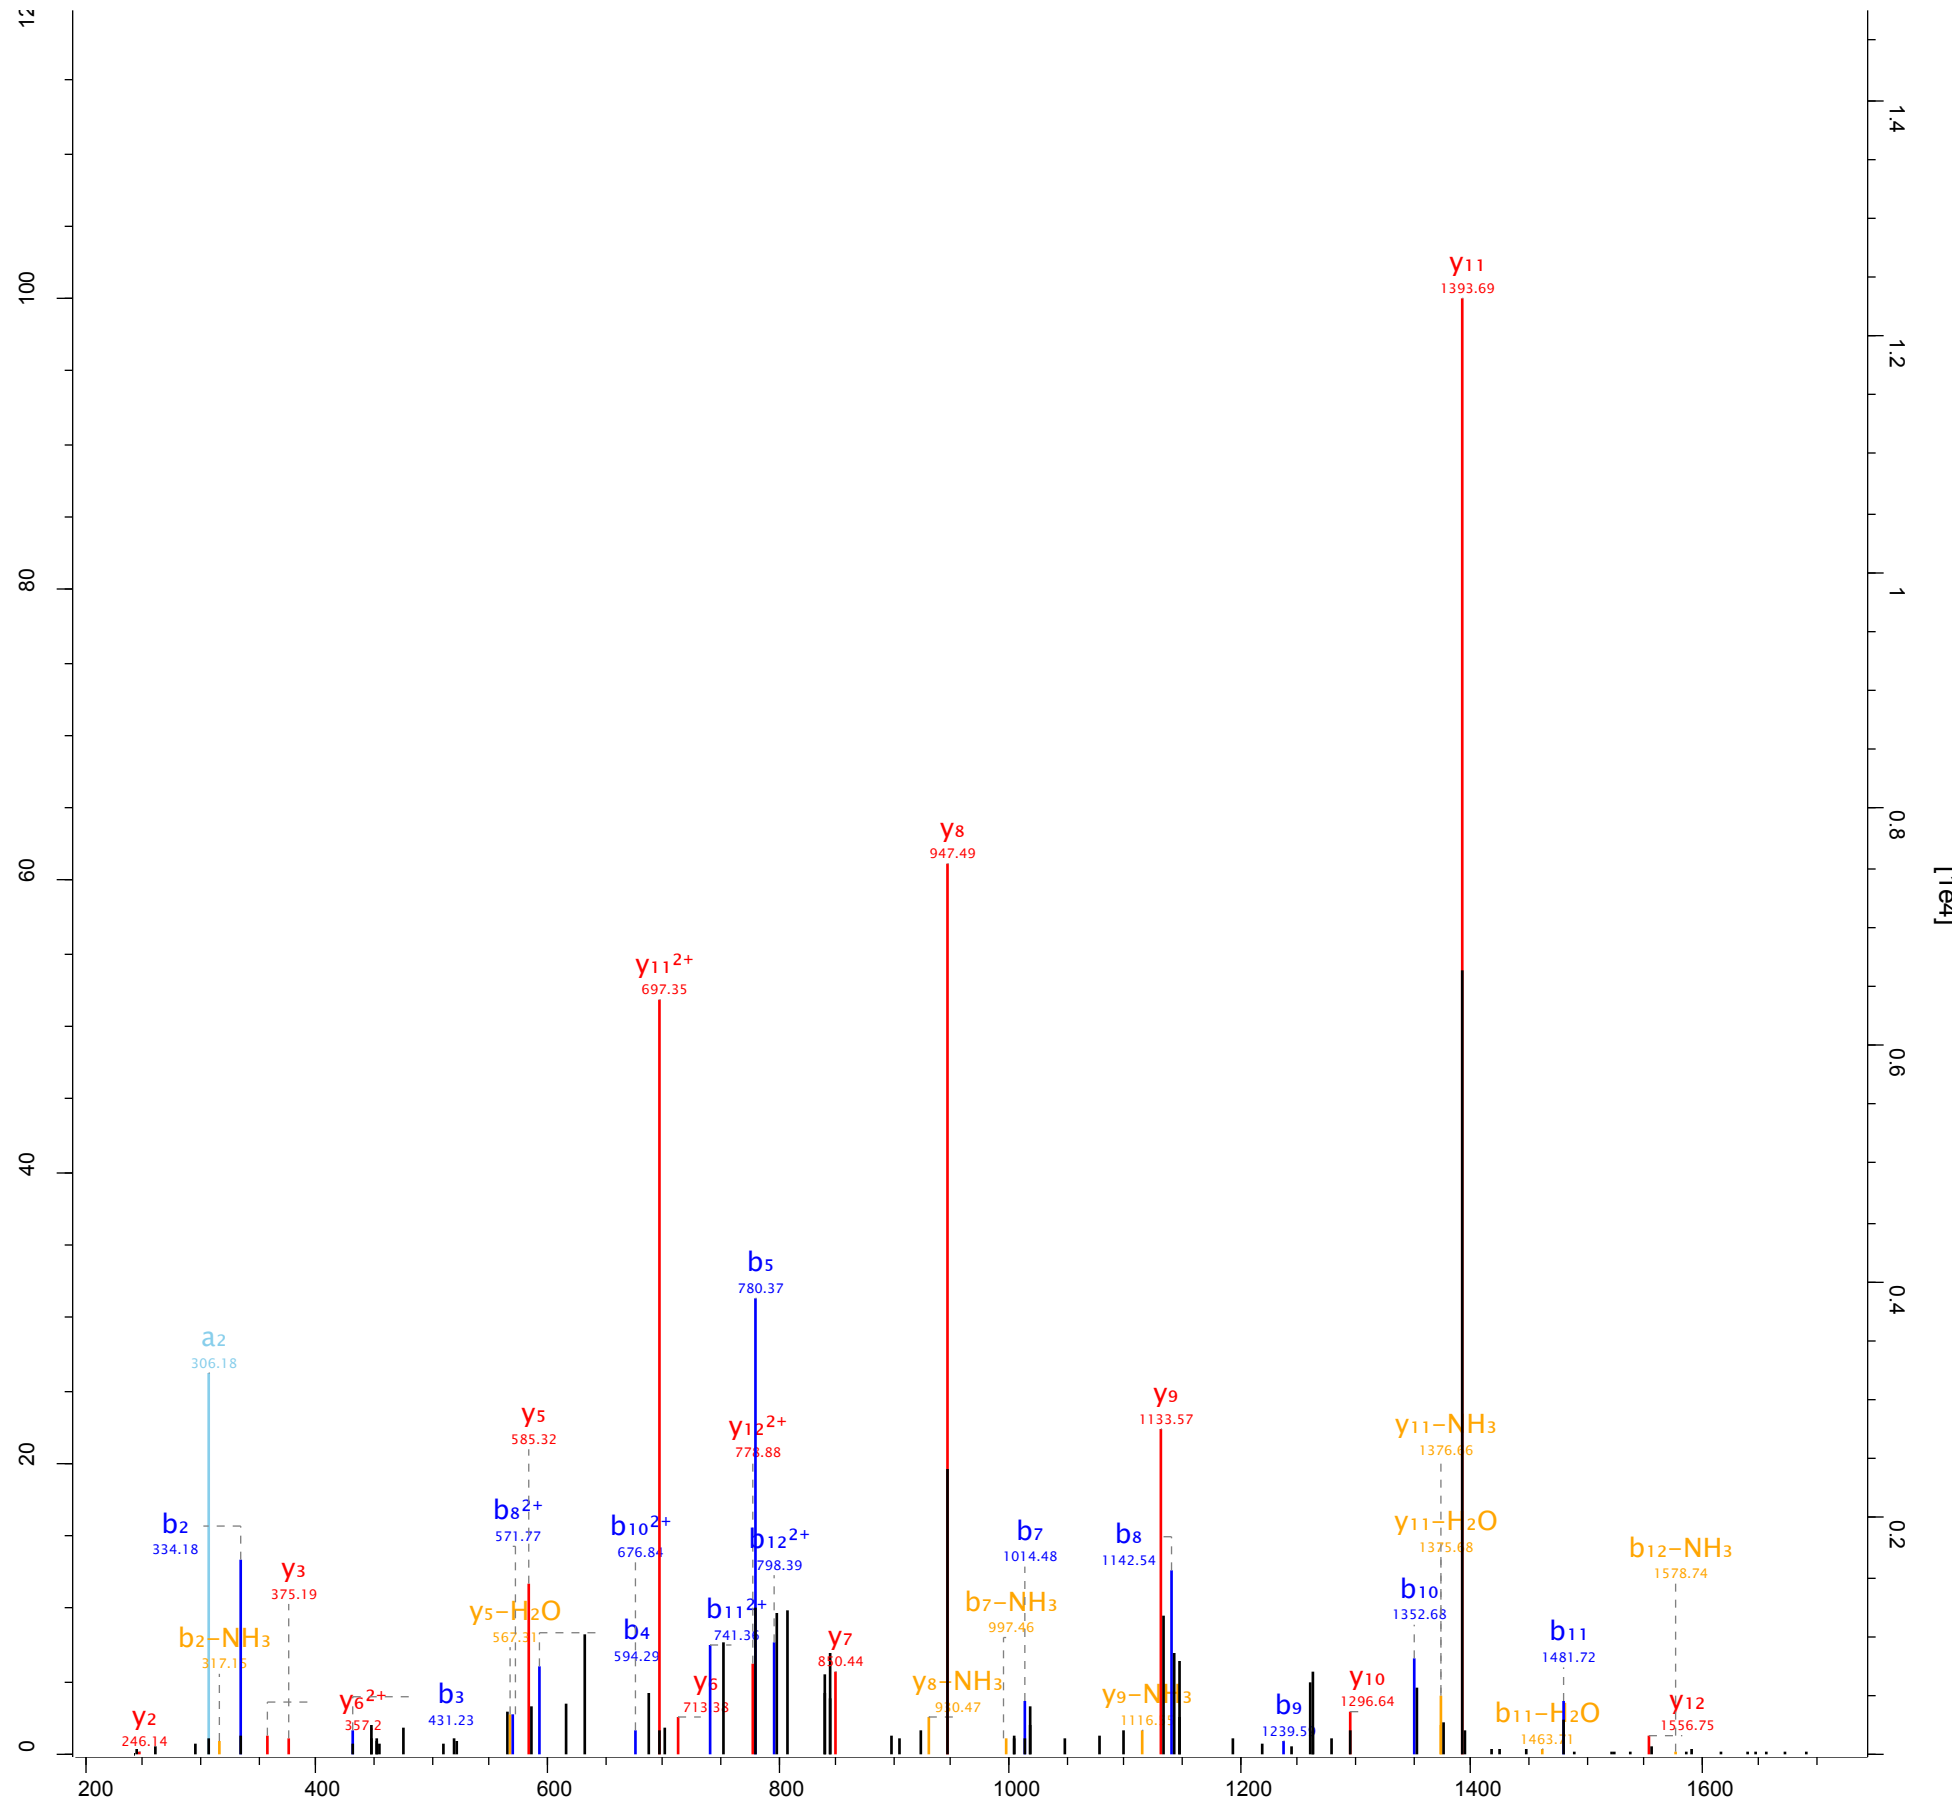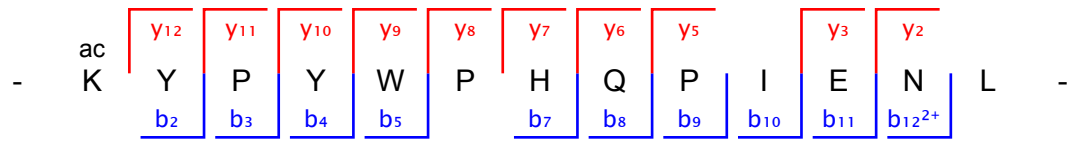

030314\_SCW\_II\_29\_4\_2ndZT

26148

ITMS; CID

263.98

779.42

Glud1

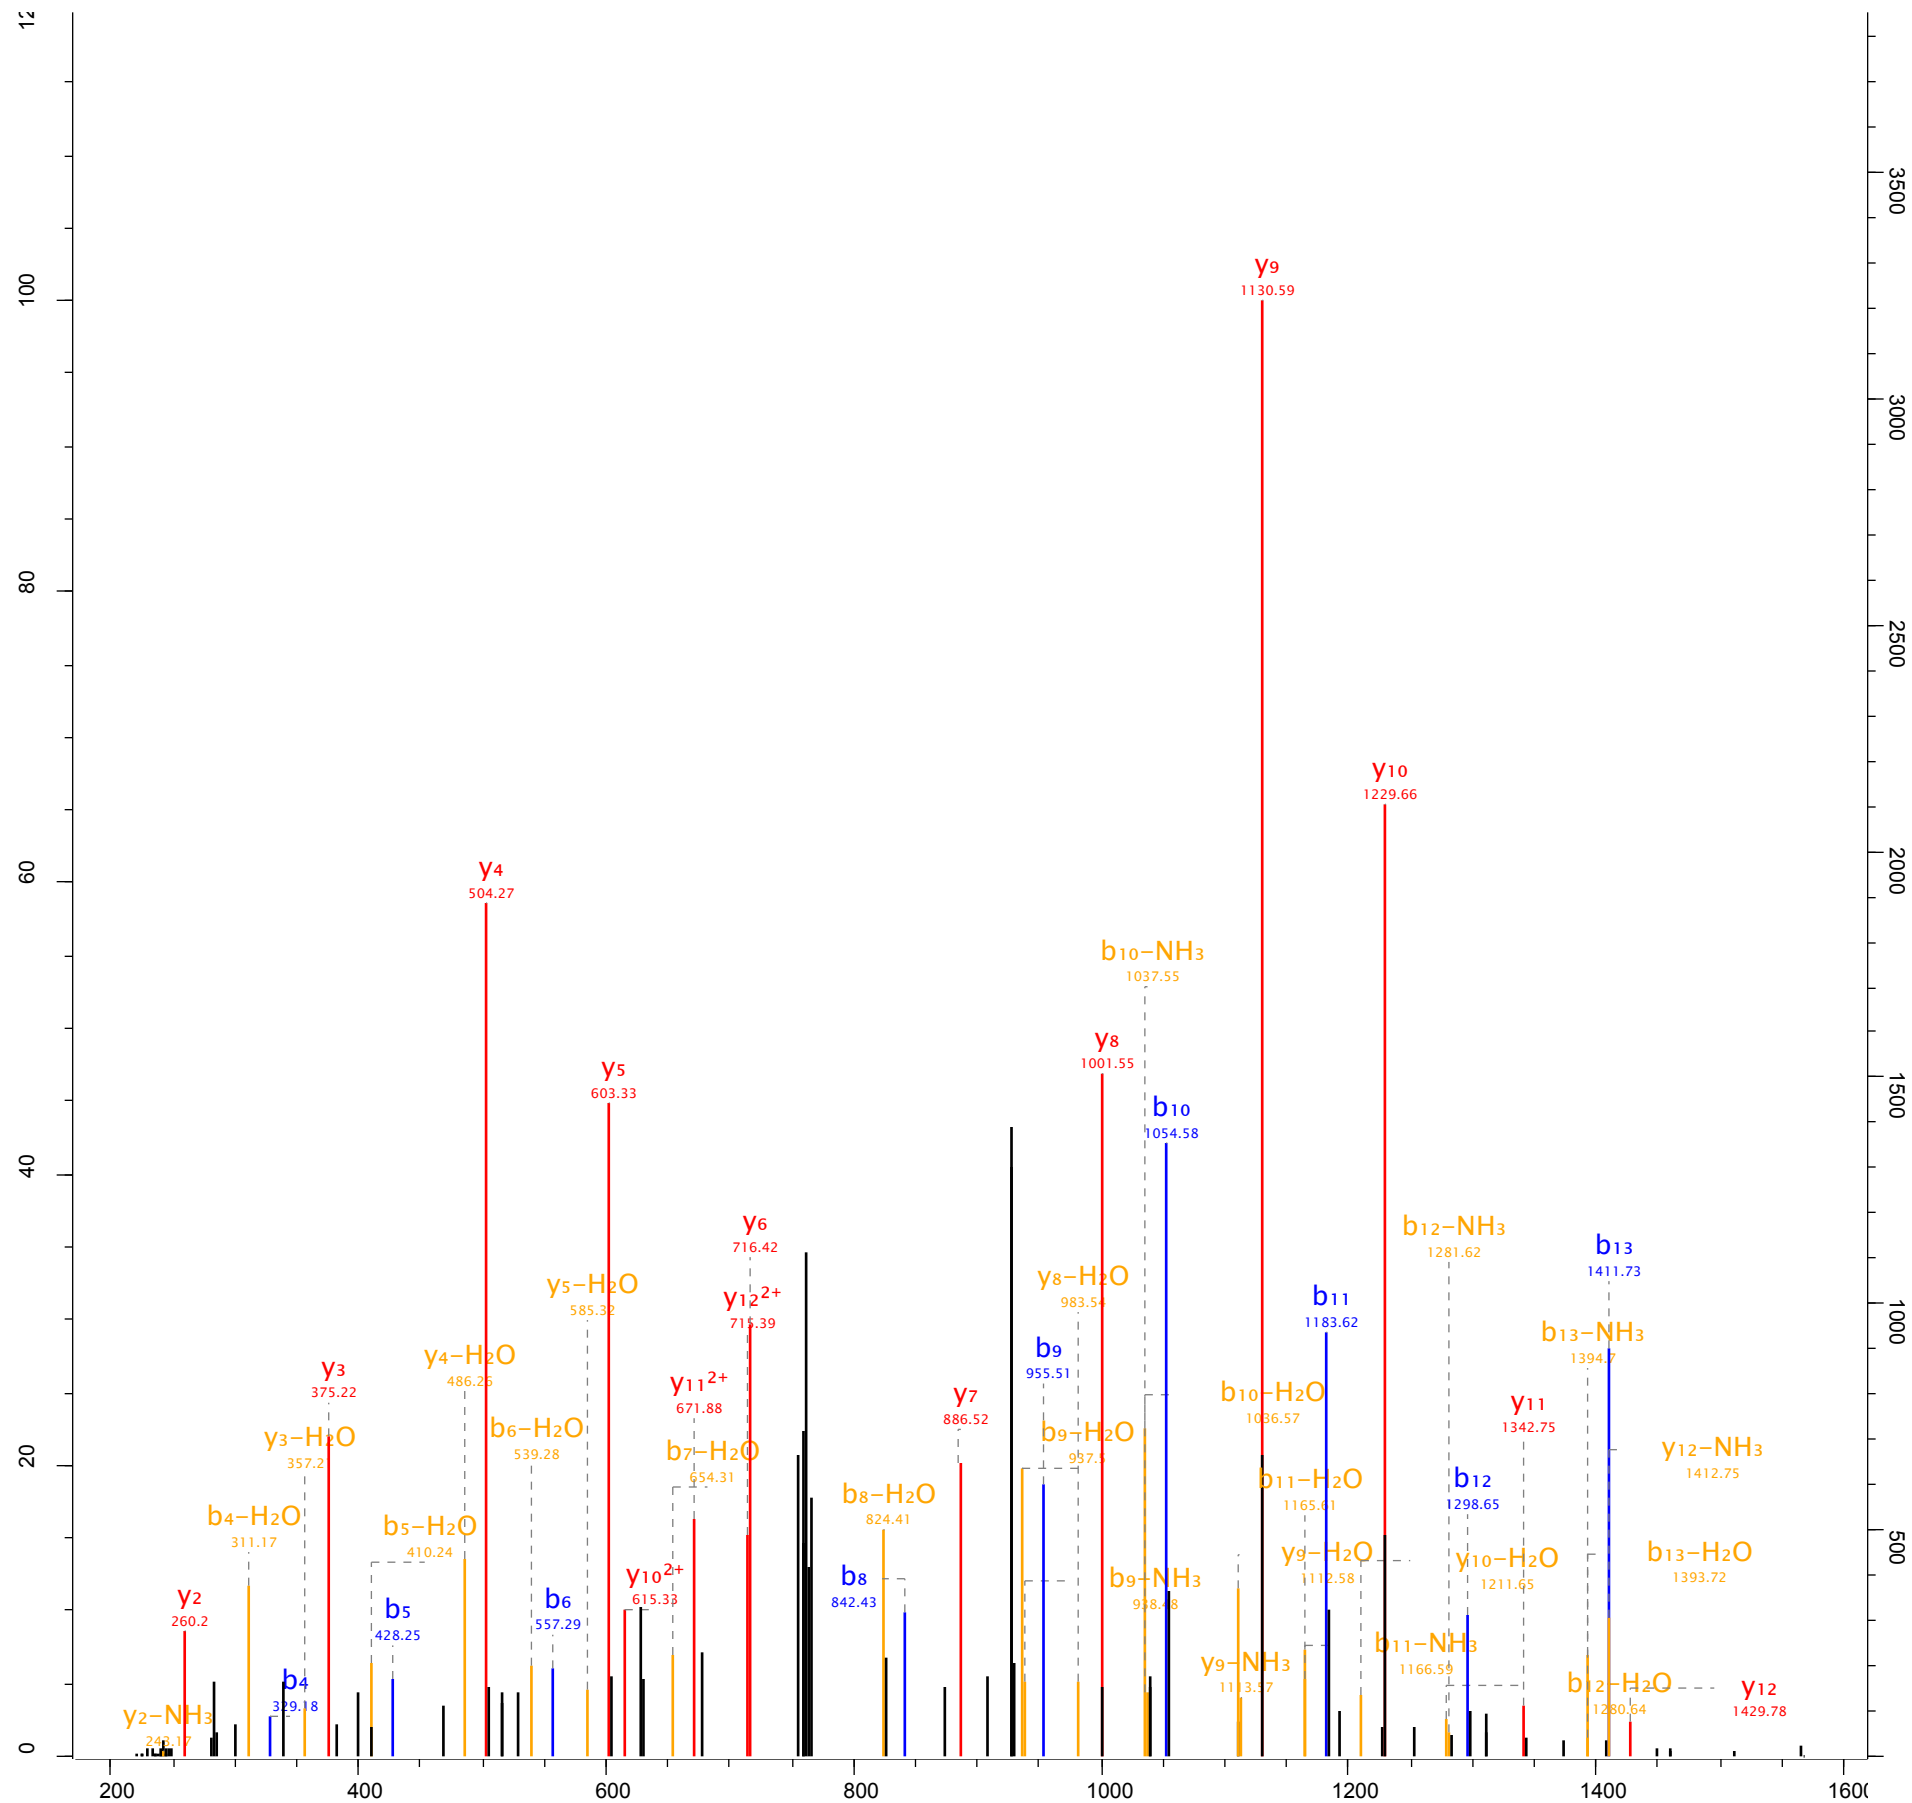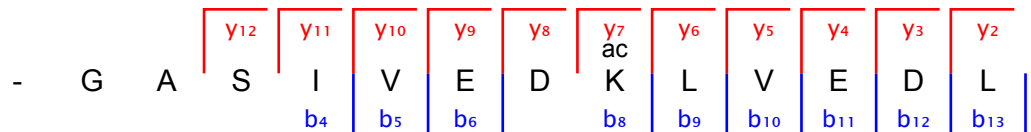



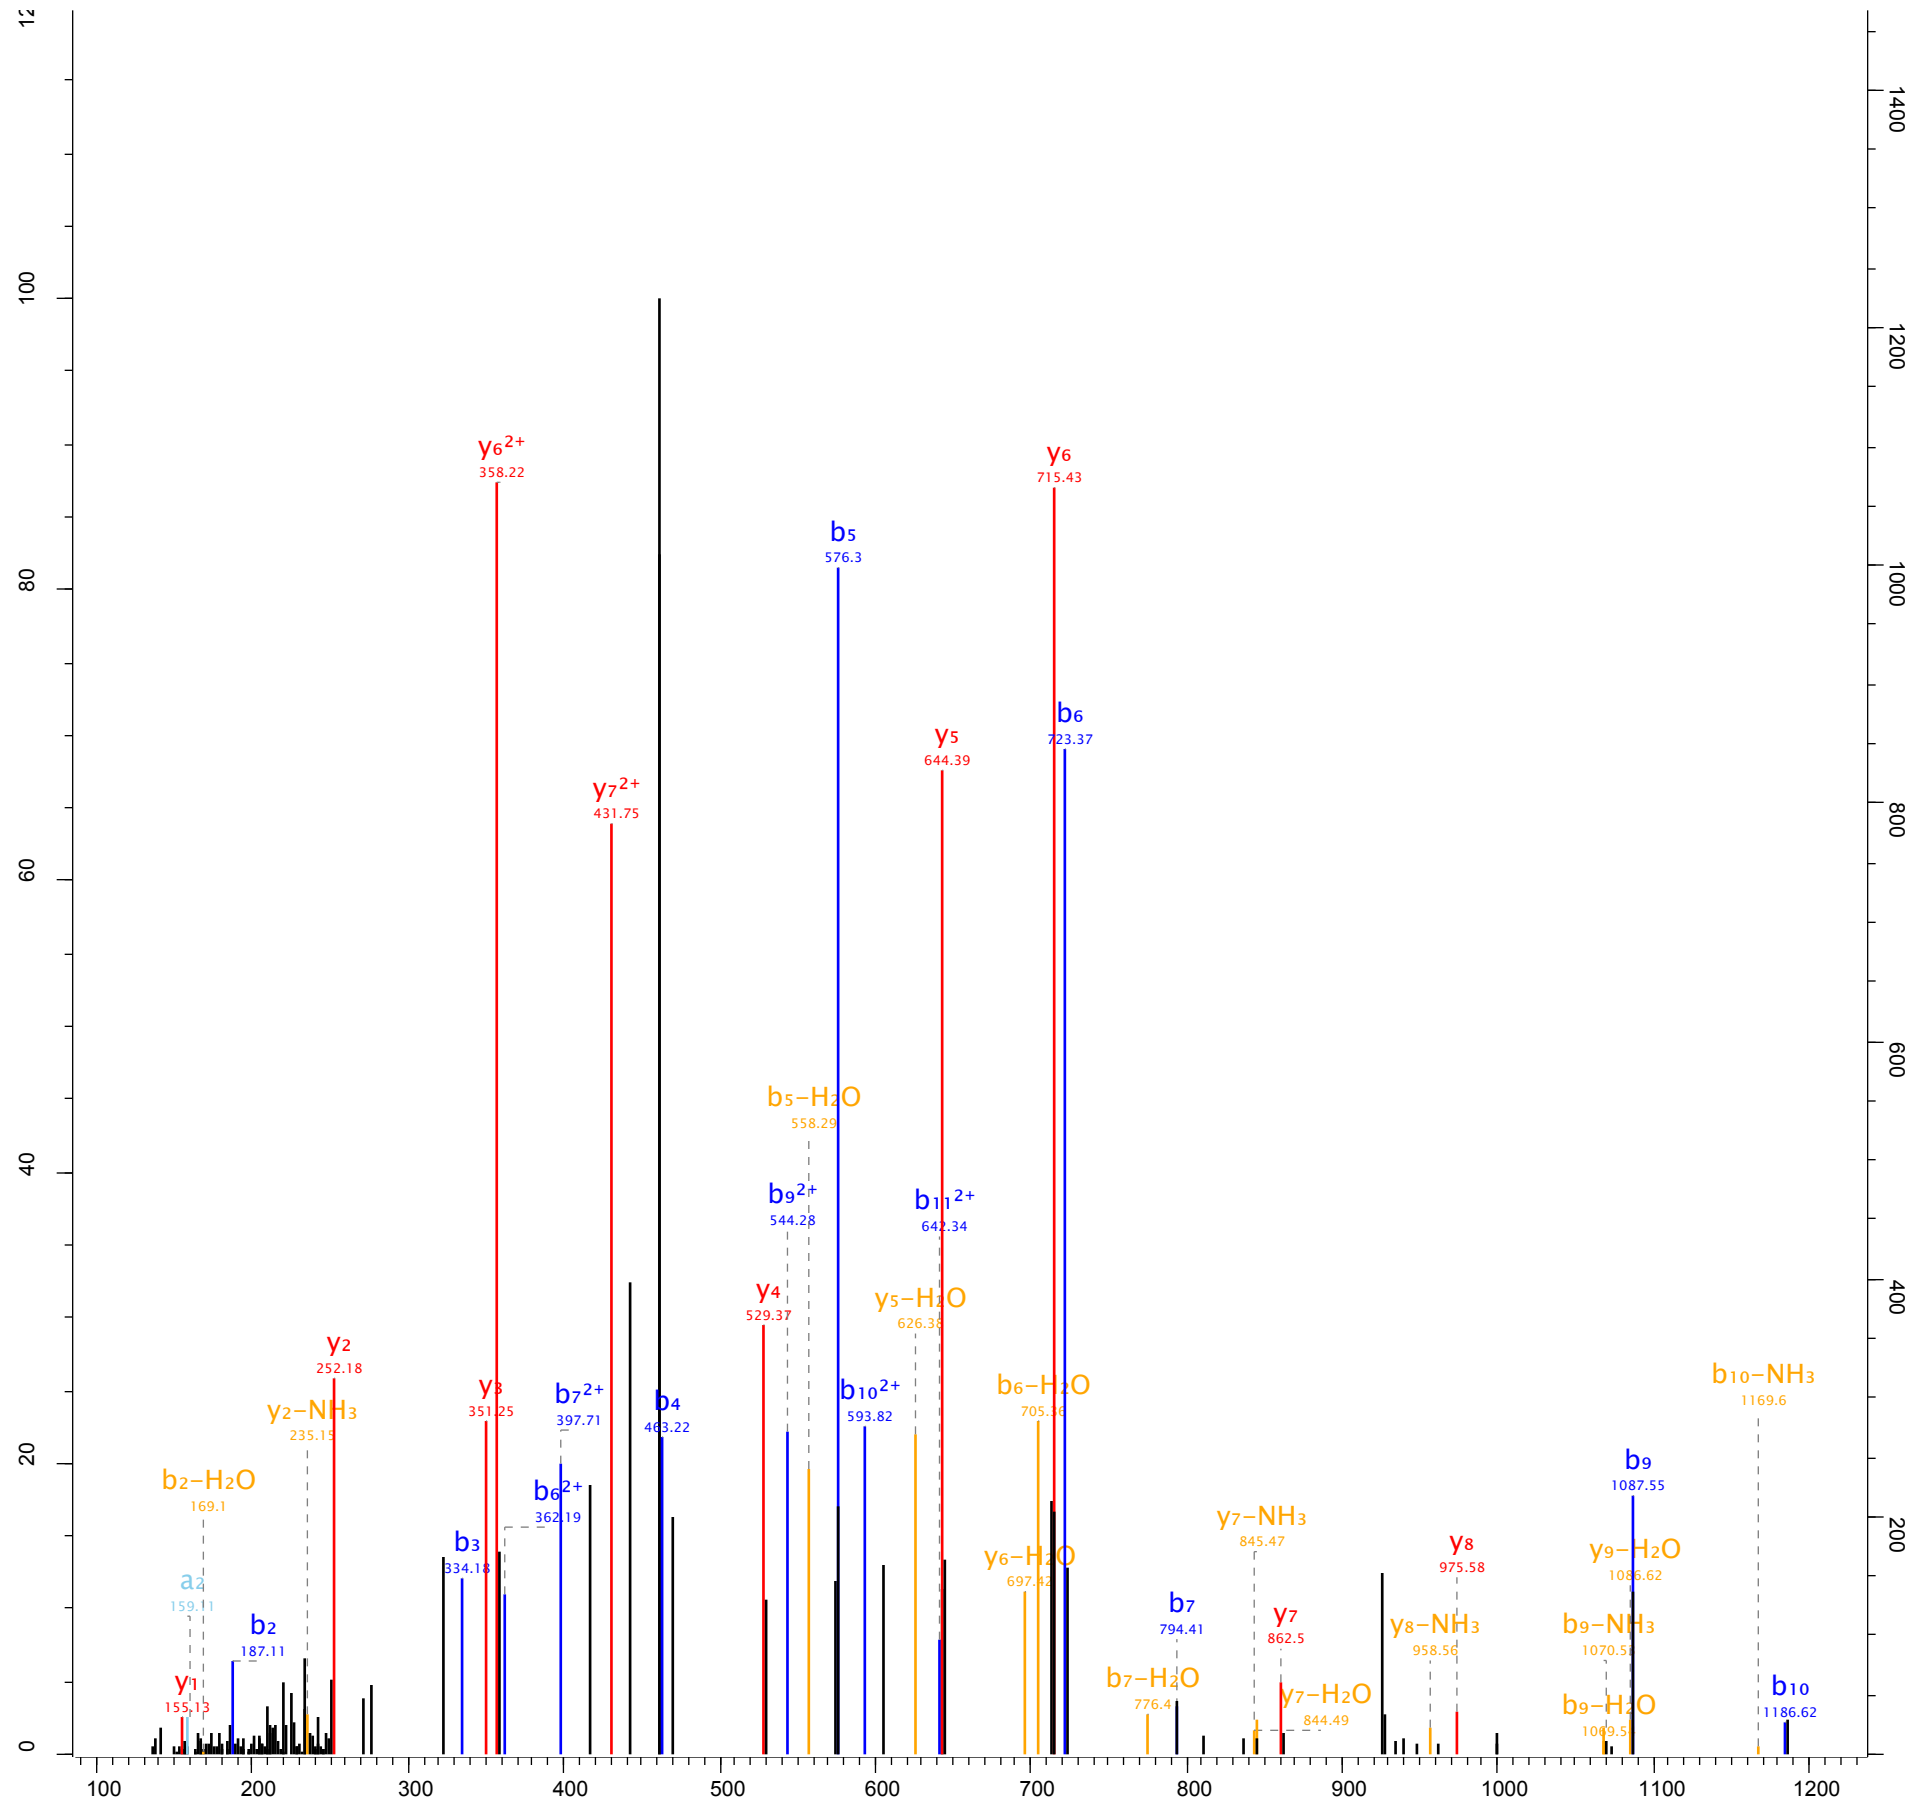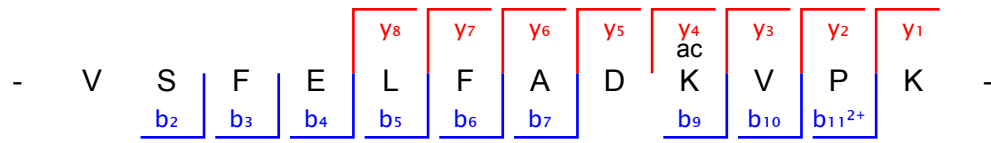

Raw file 030314\_SCW\_II\_29\_4\_2ndZT Scan 28095 Method ITMS; CID 215.93 m/z 866.44 Gene names Slc25a4;Slc25a5;Slc25a31

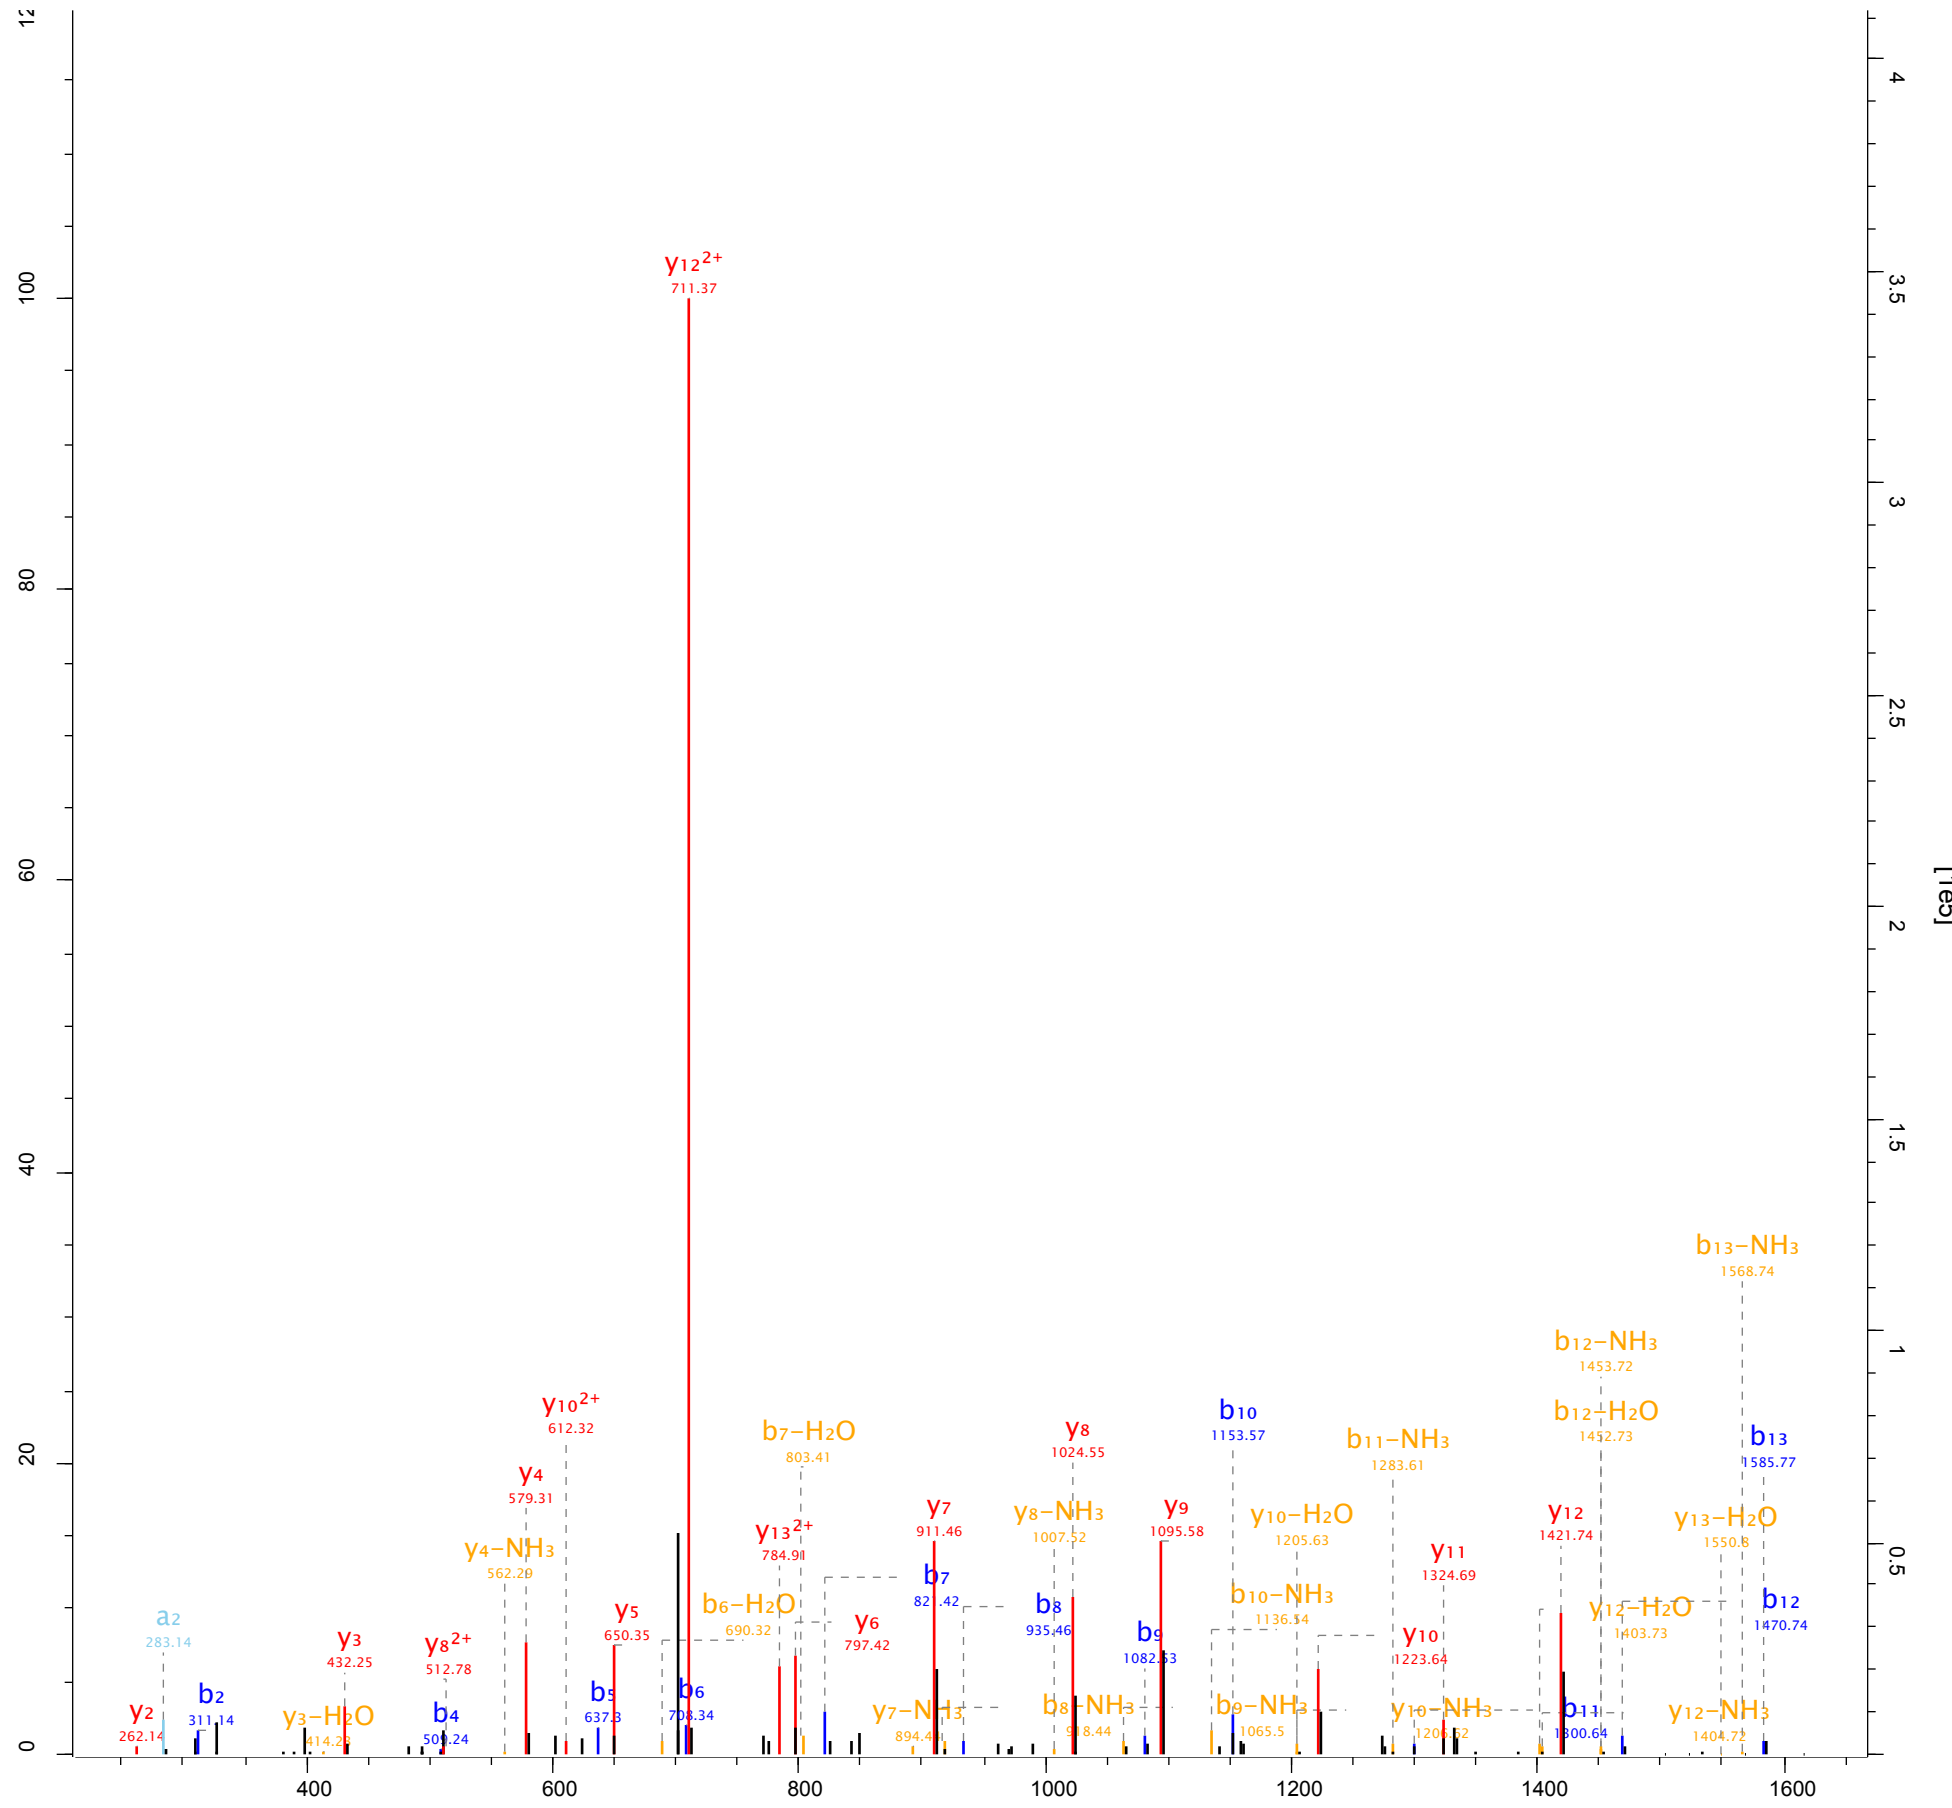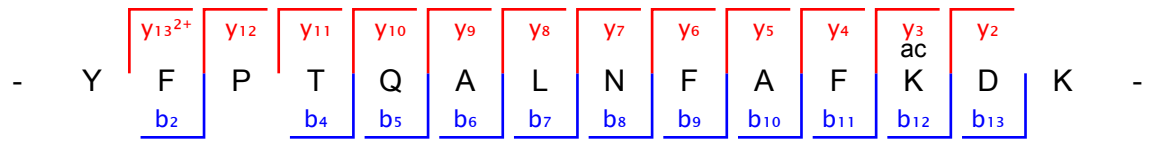

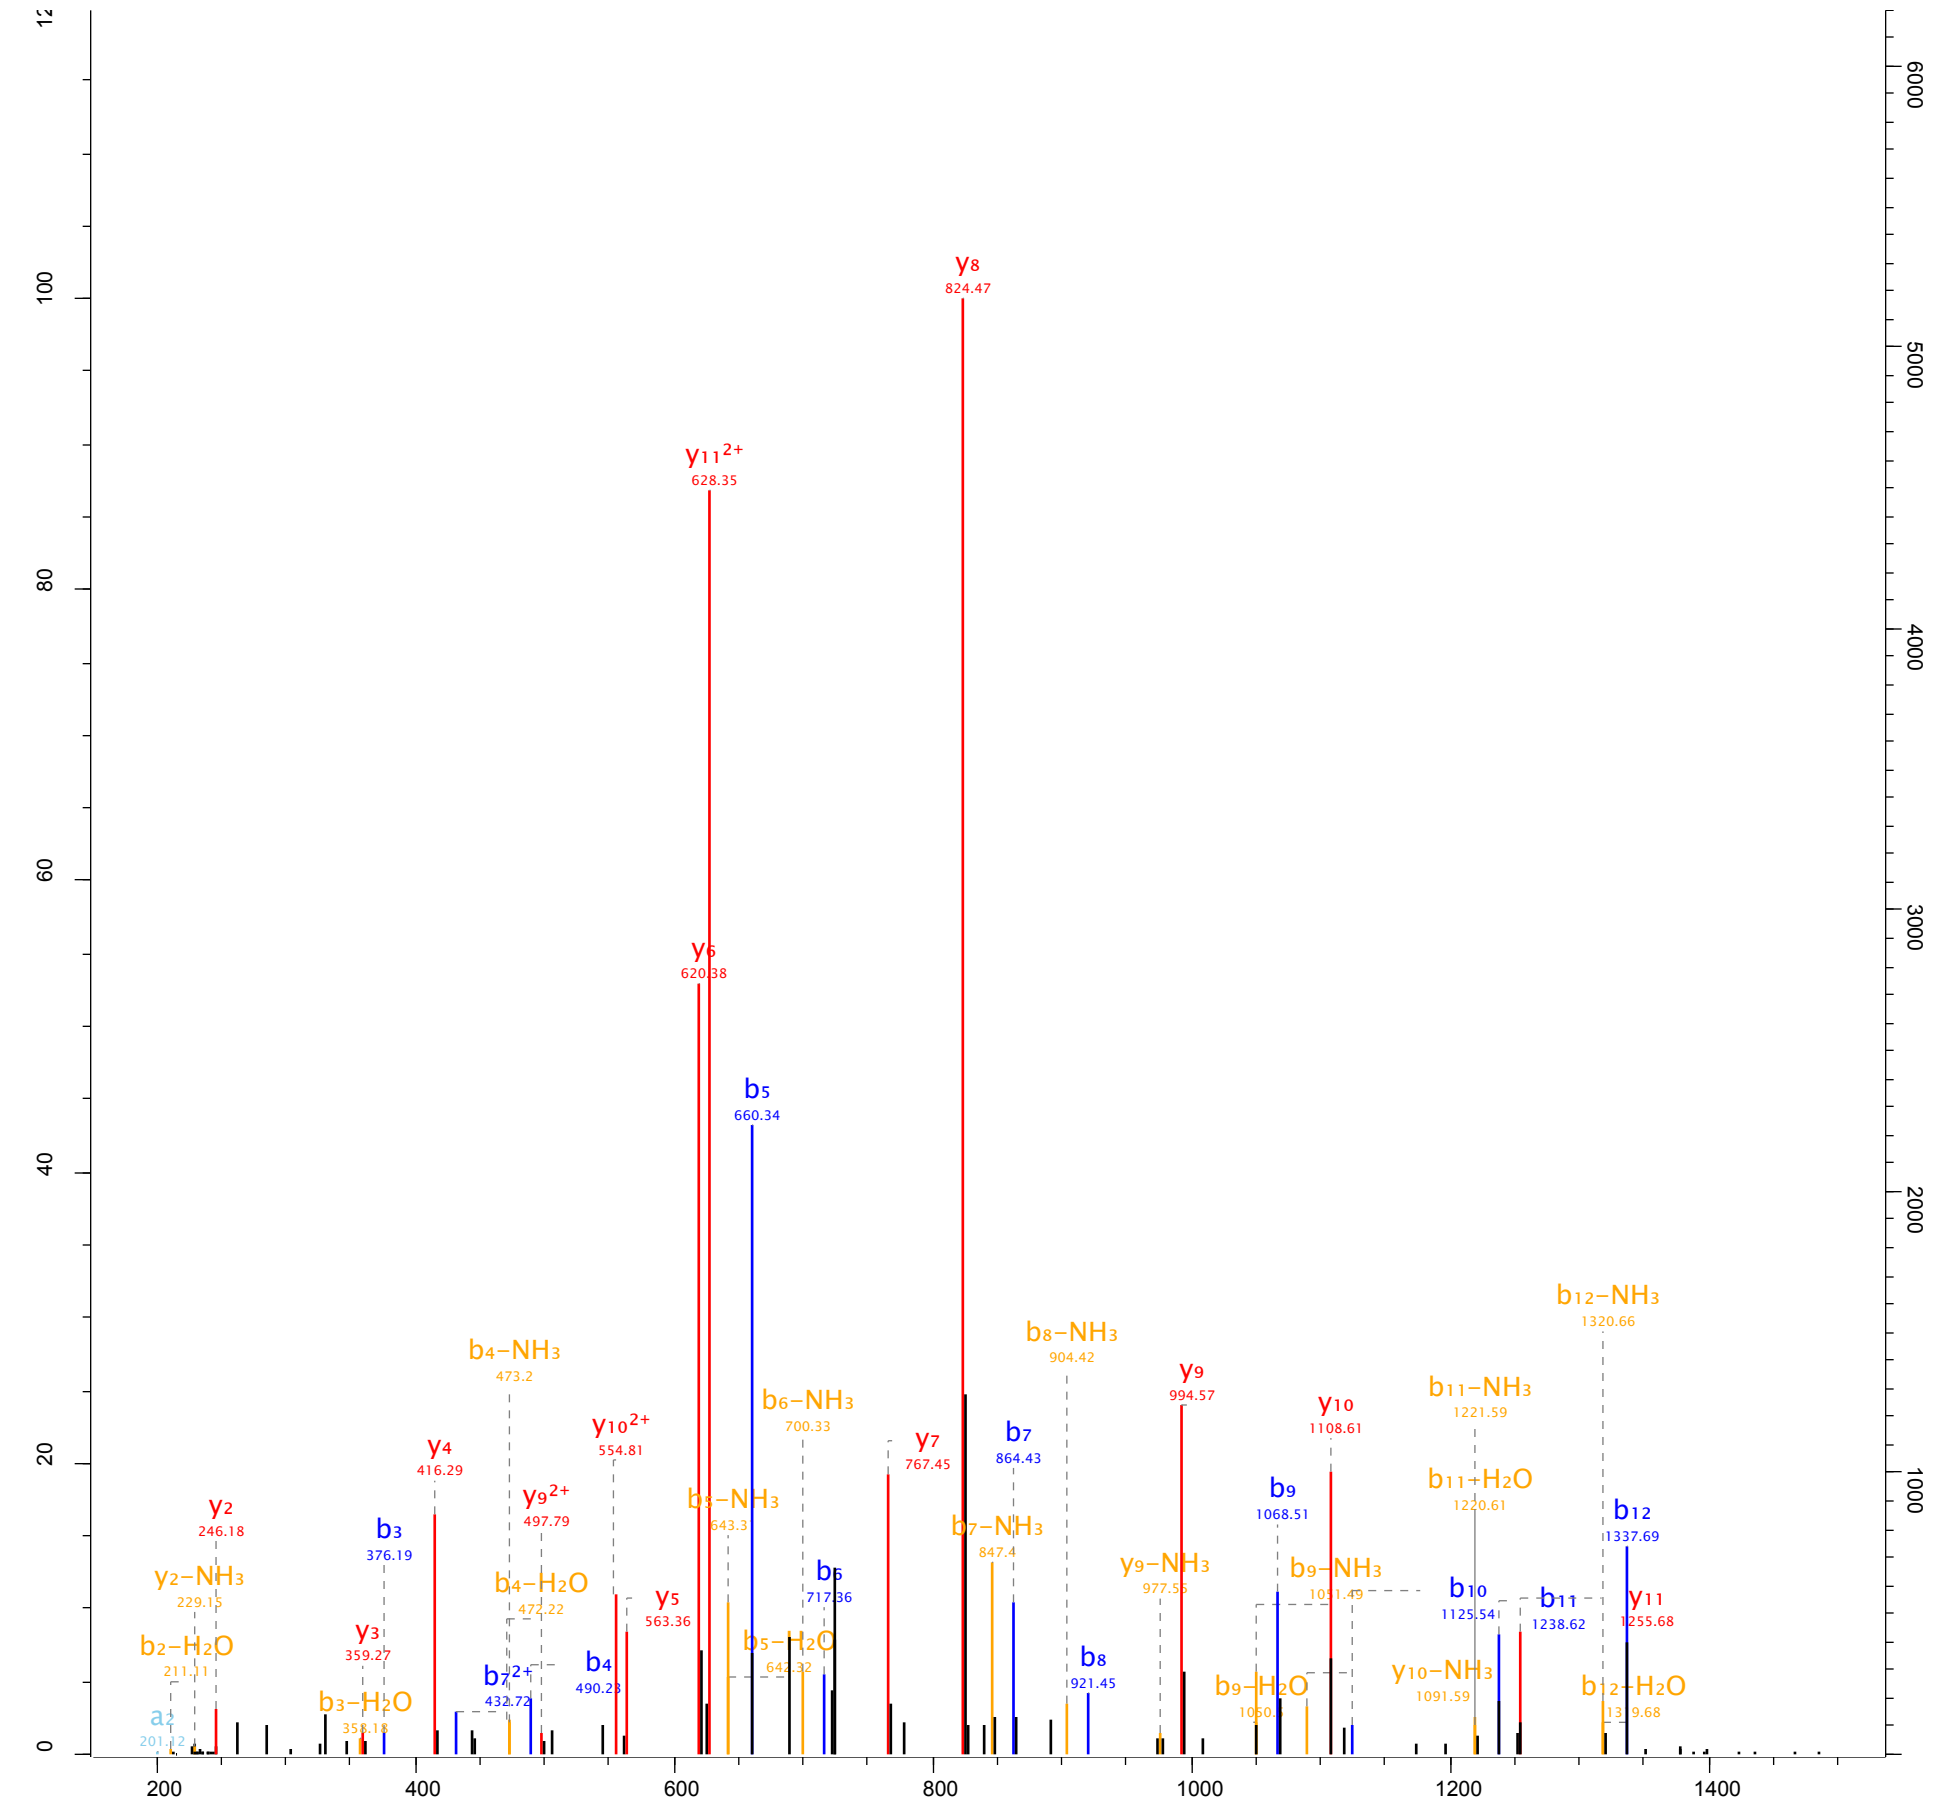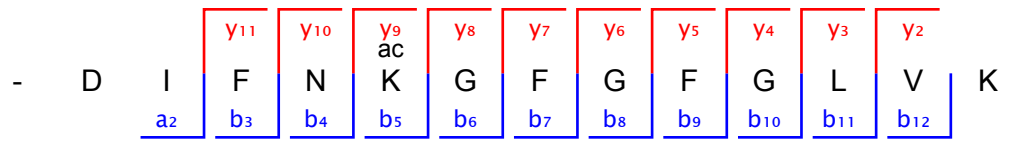

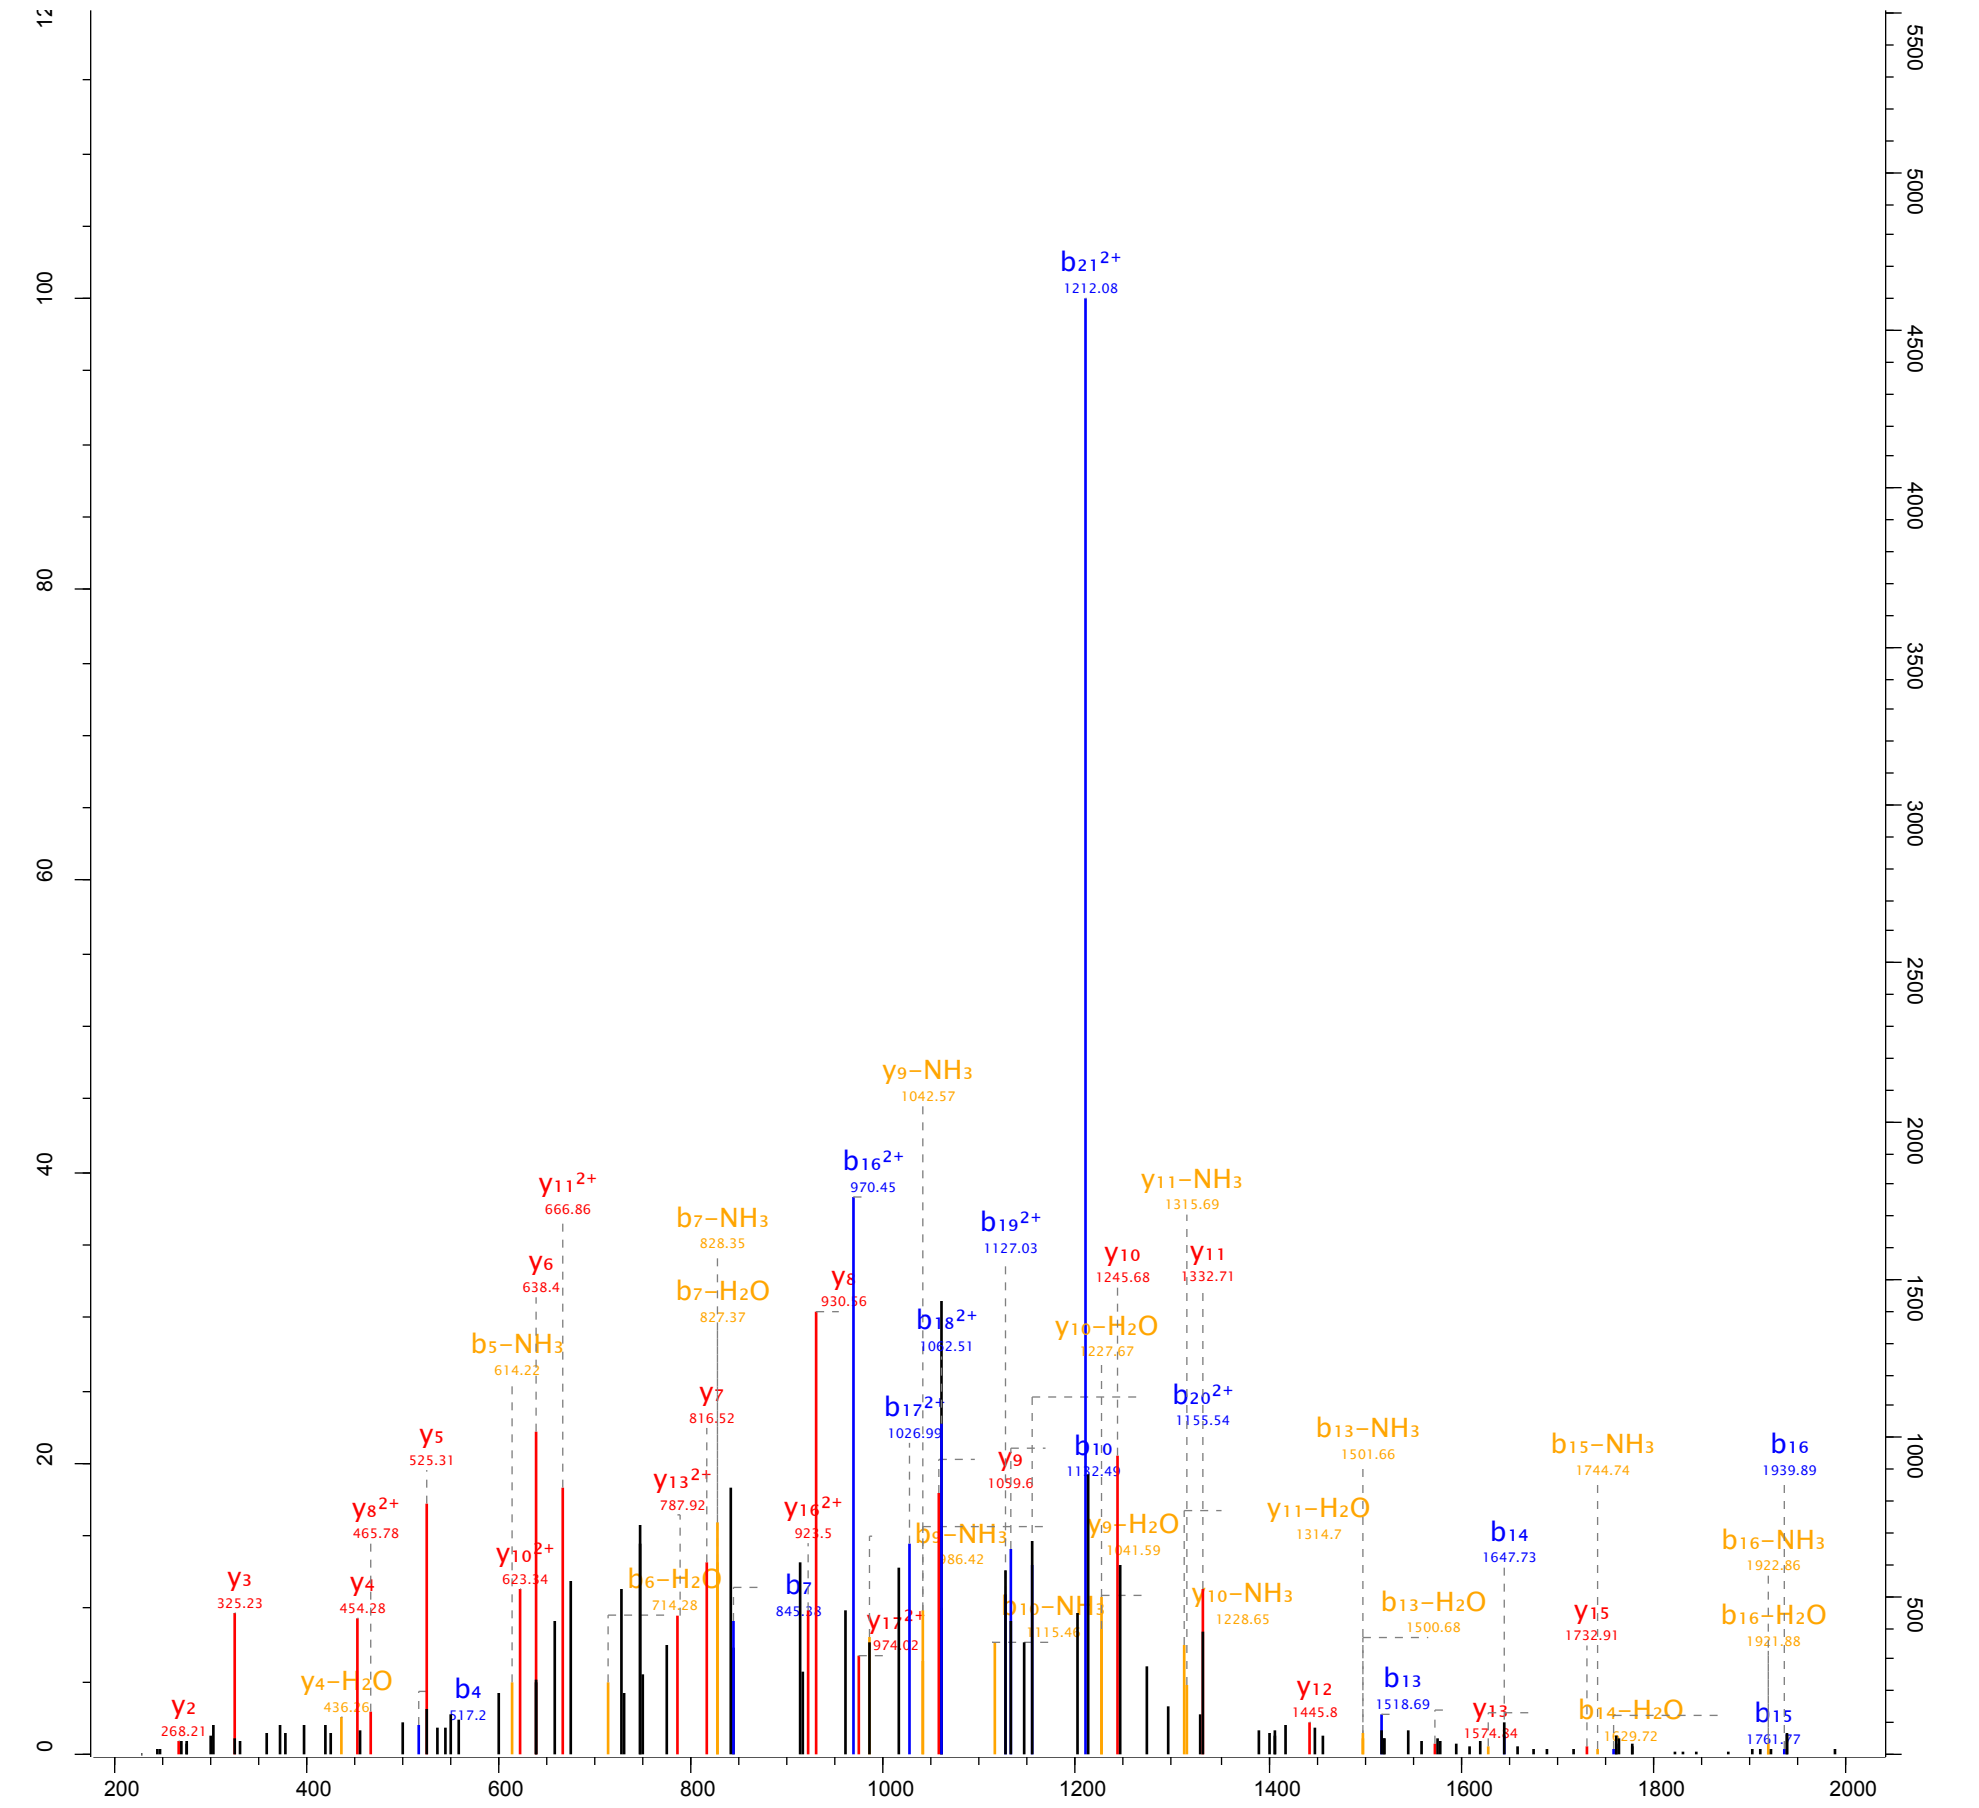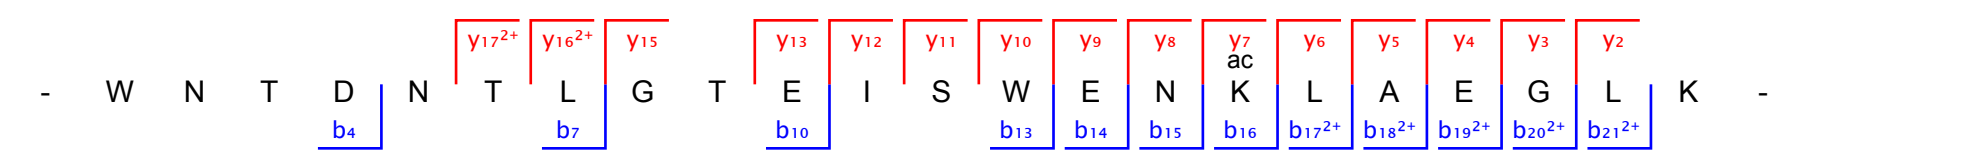

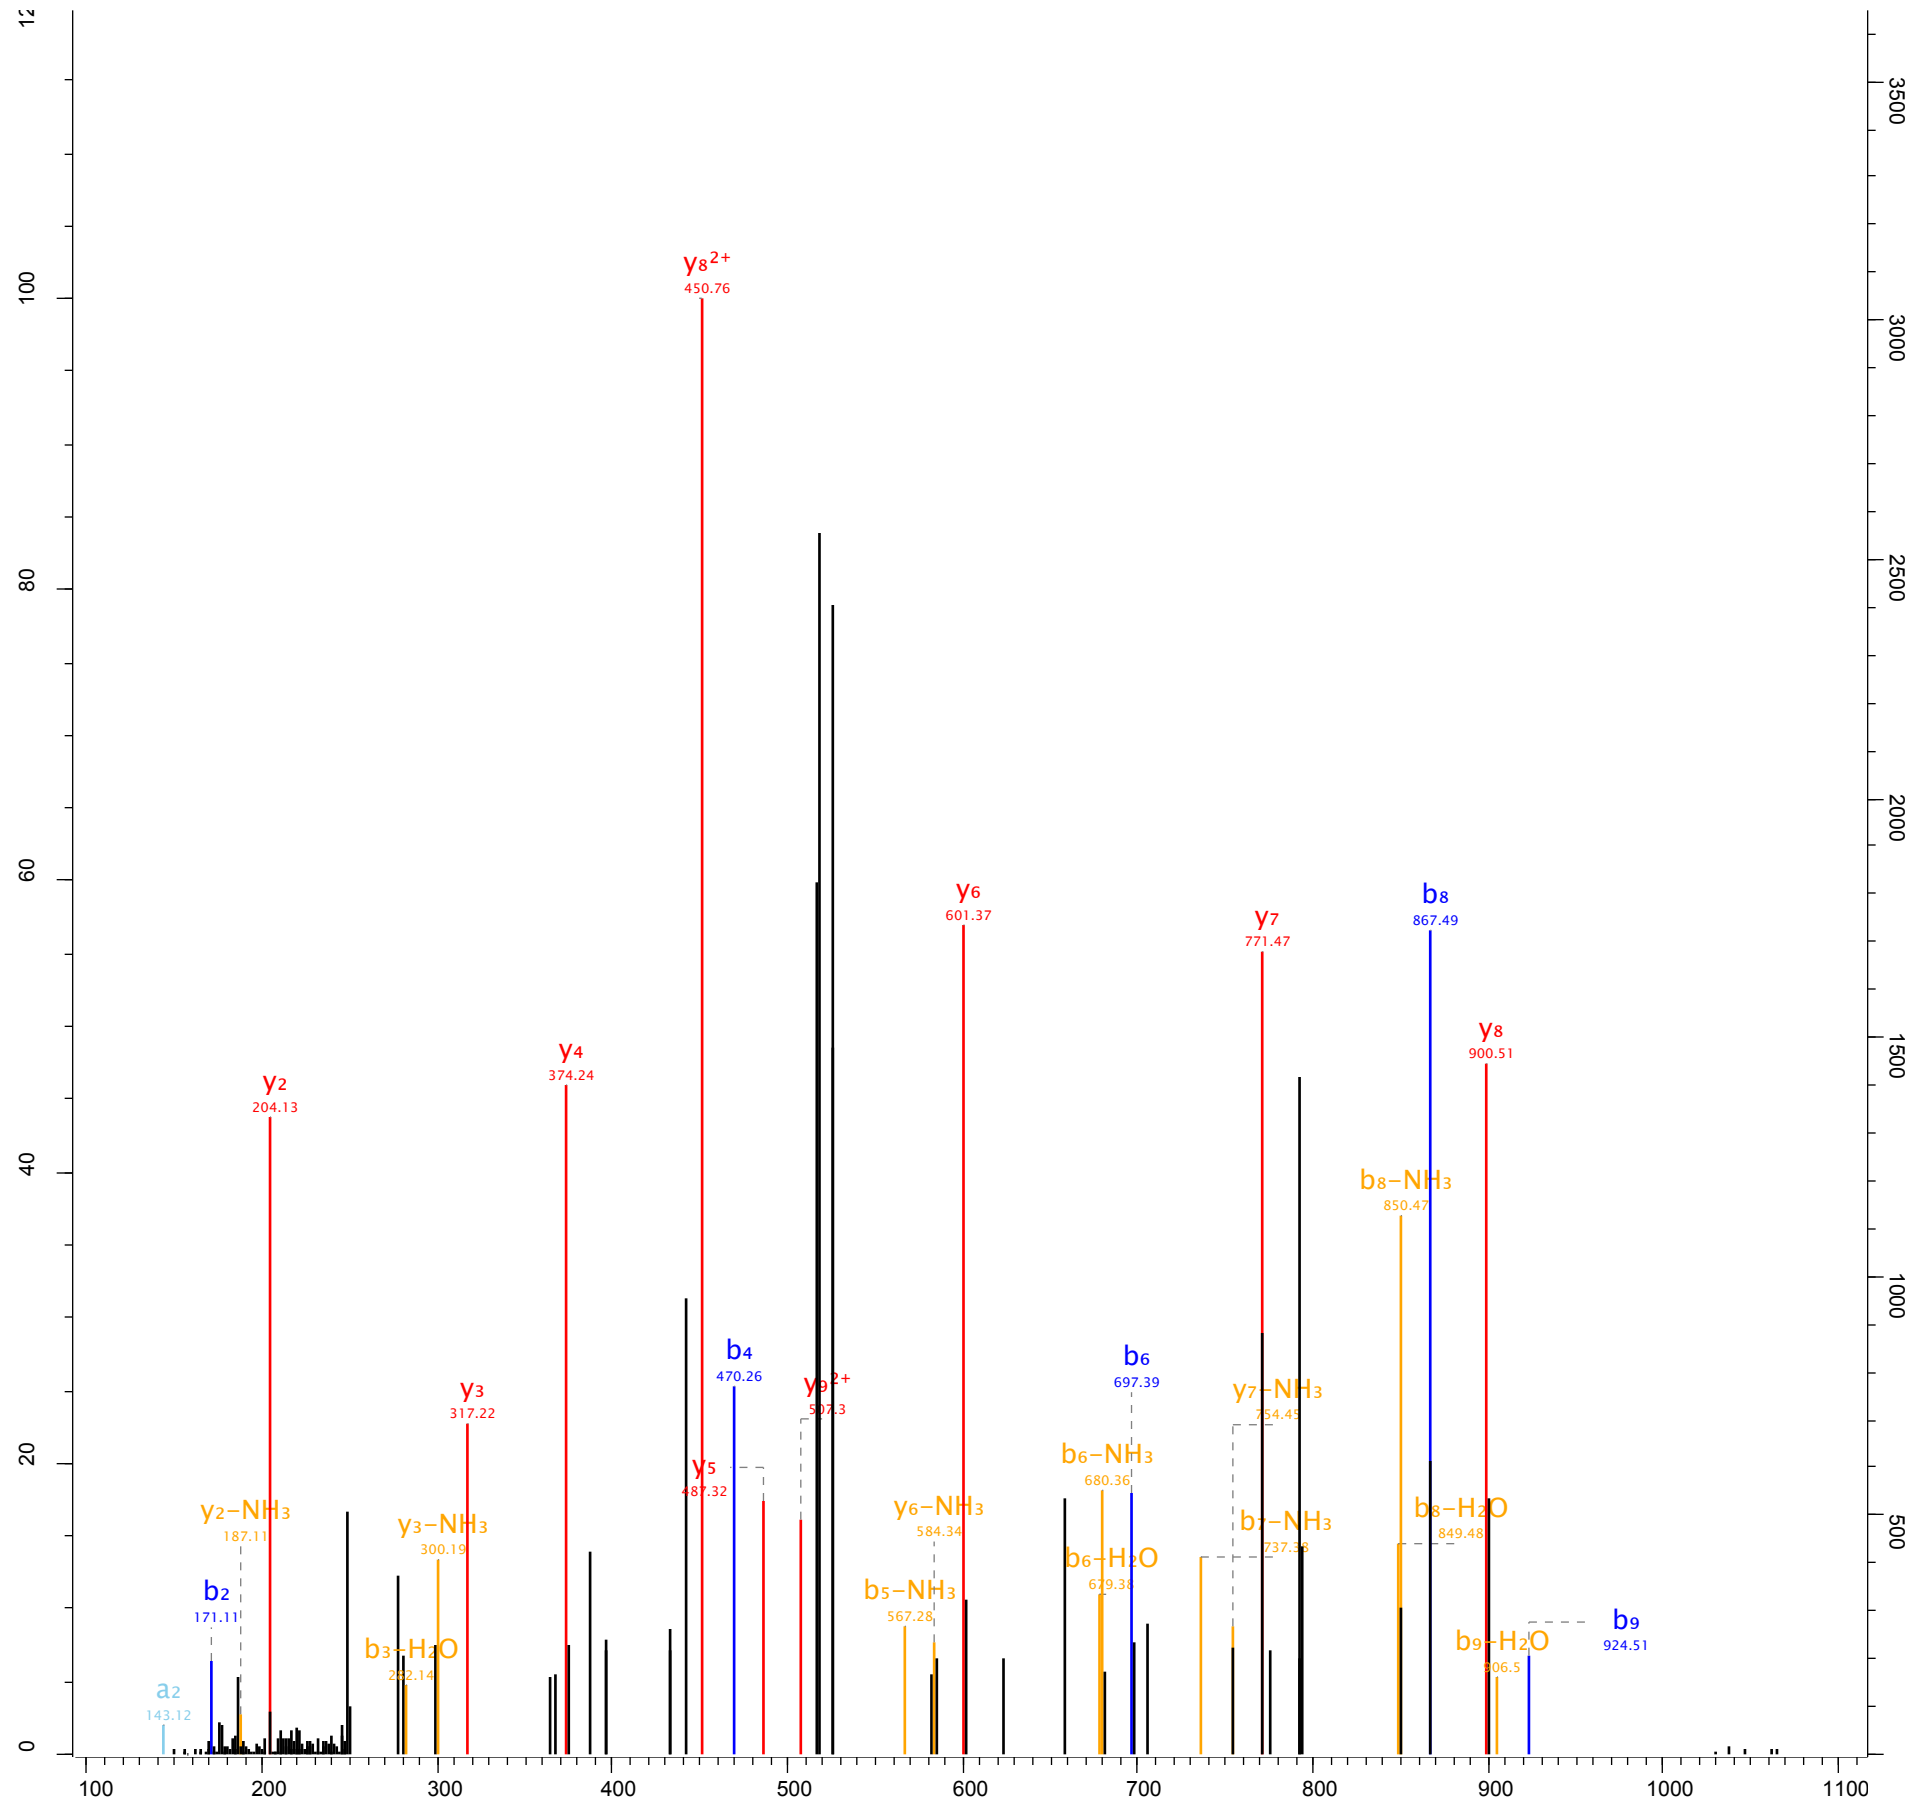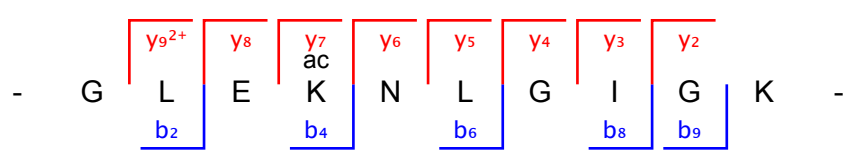

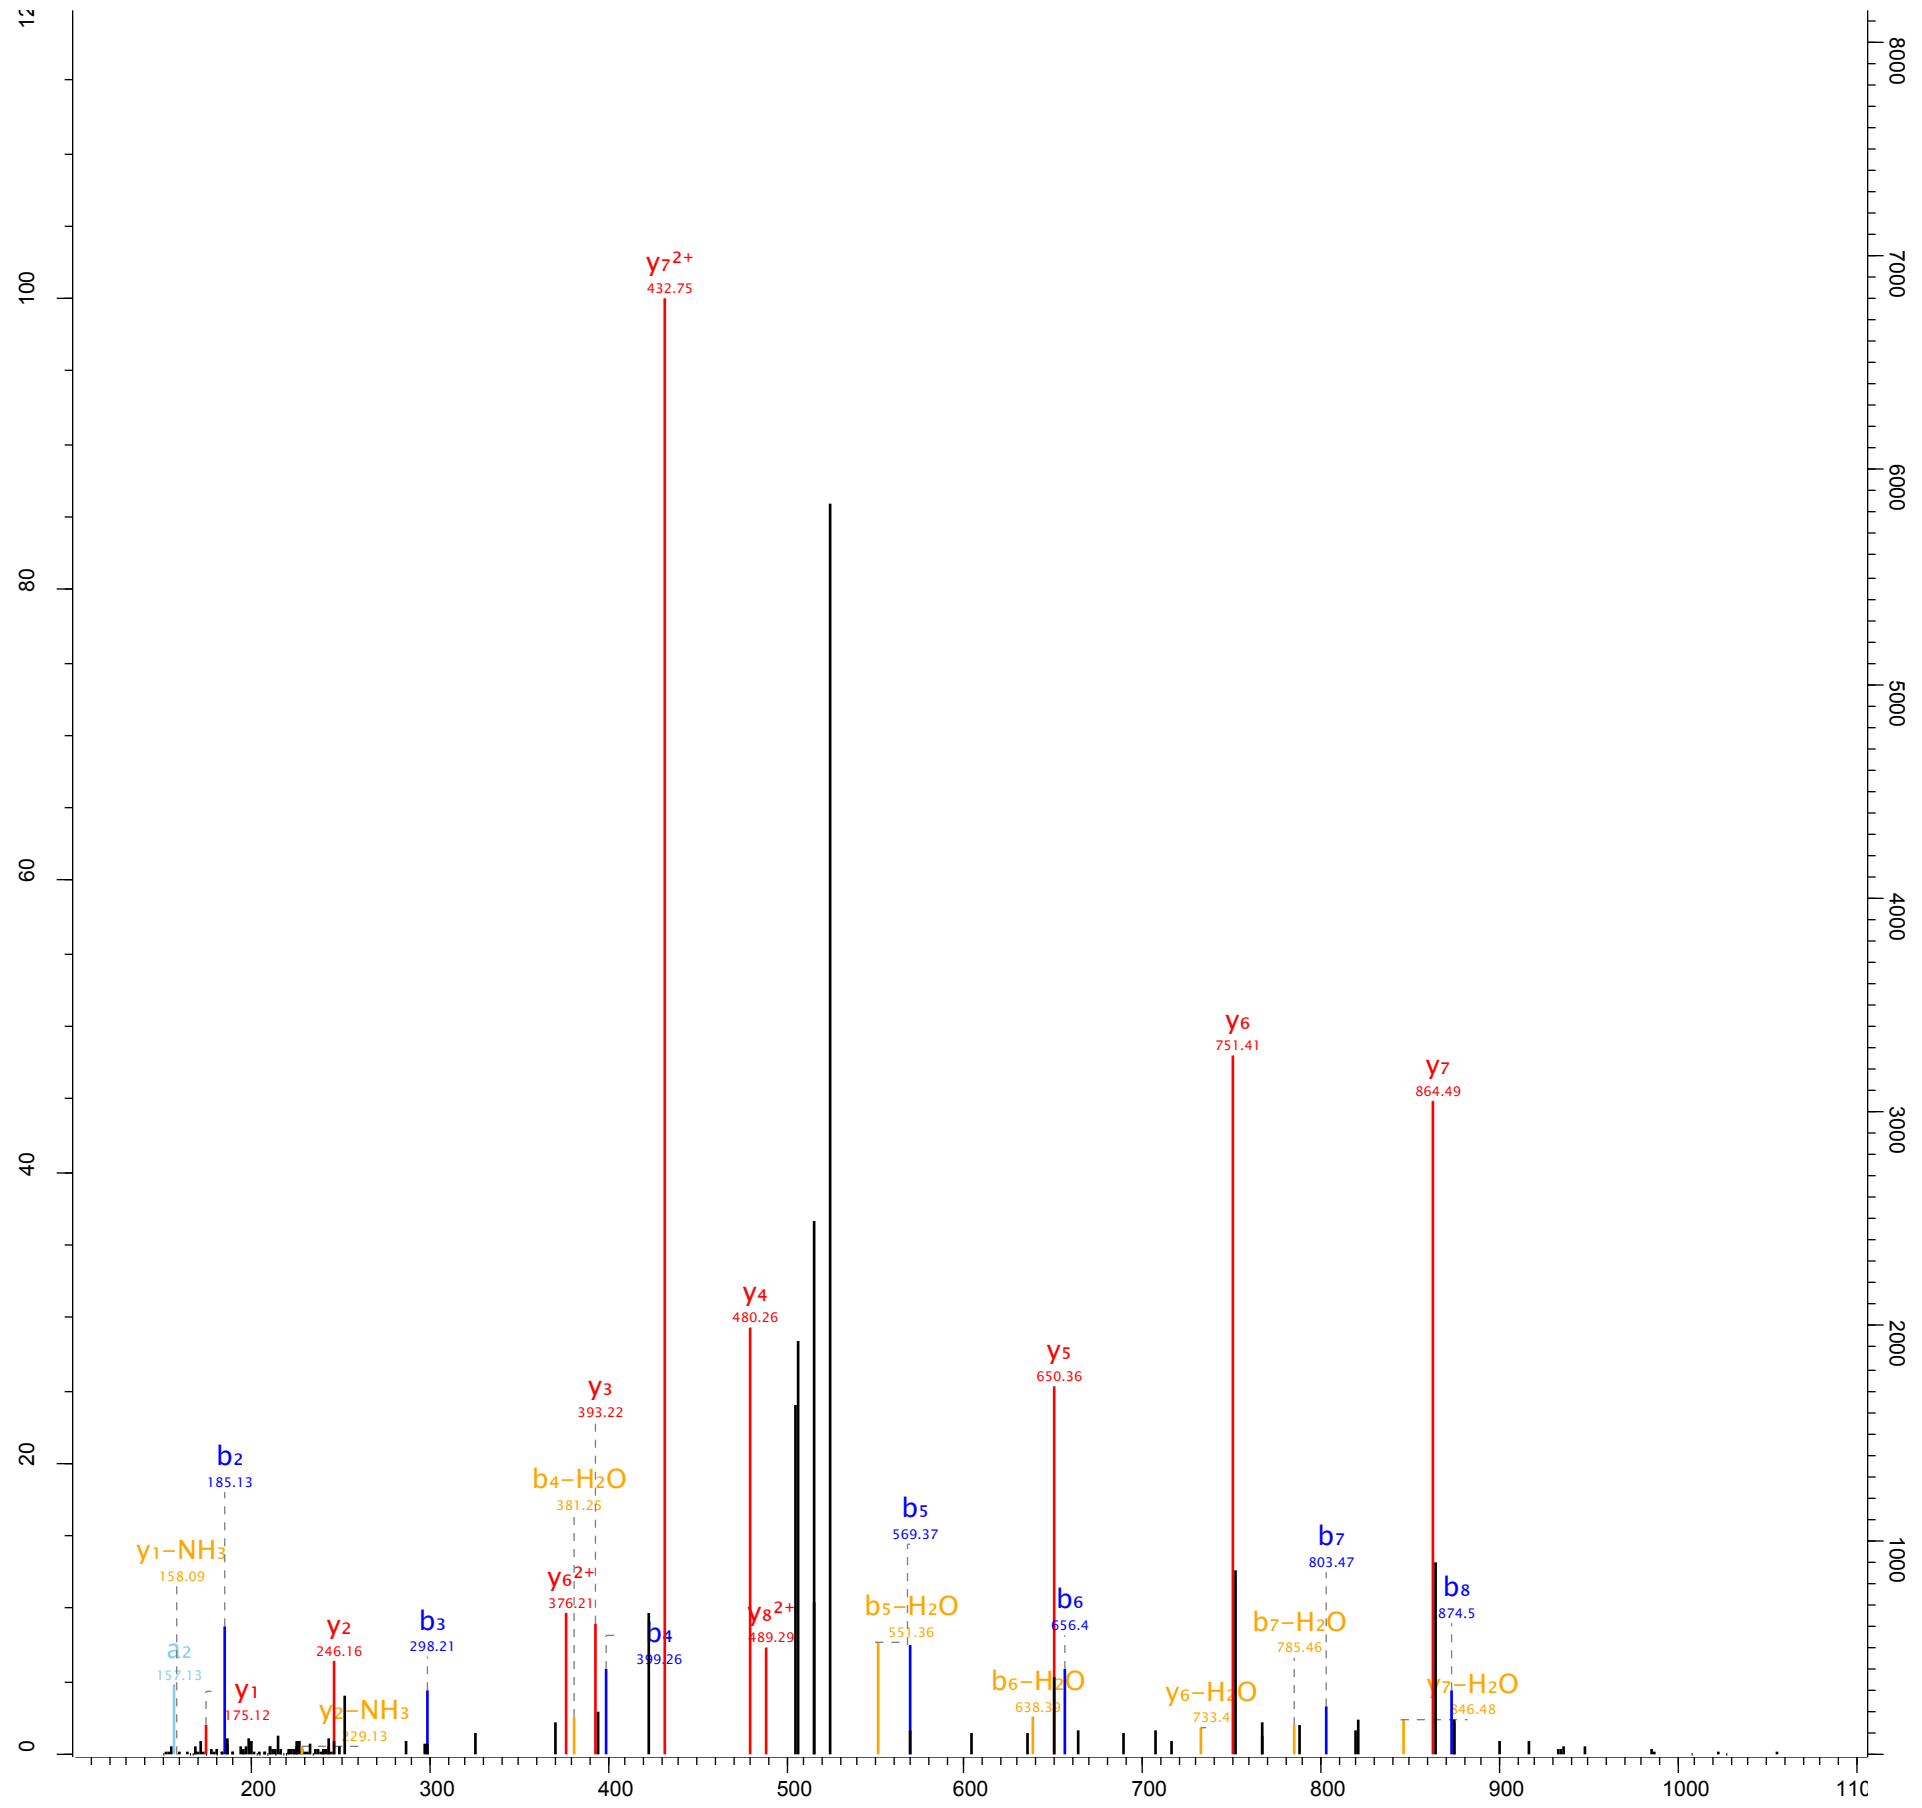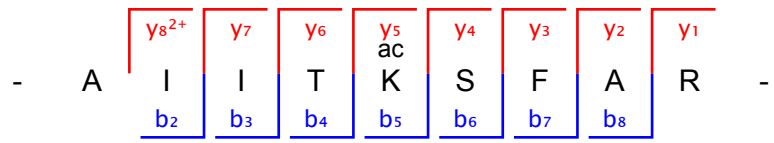

030314\_SCW\_II\_29\_5\_2ndZT

27380

ITMS; CID

170.58

1076.55

Aldoa;Aldoc

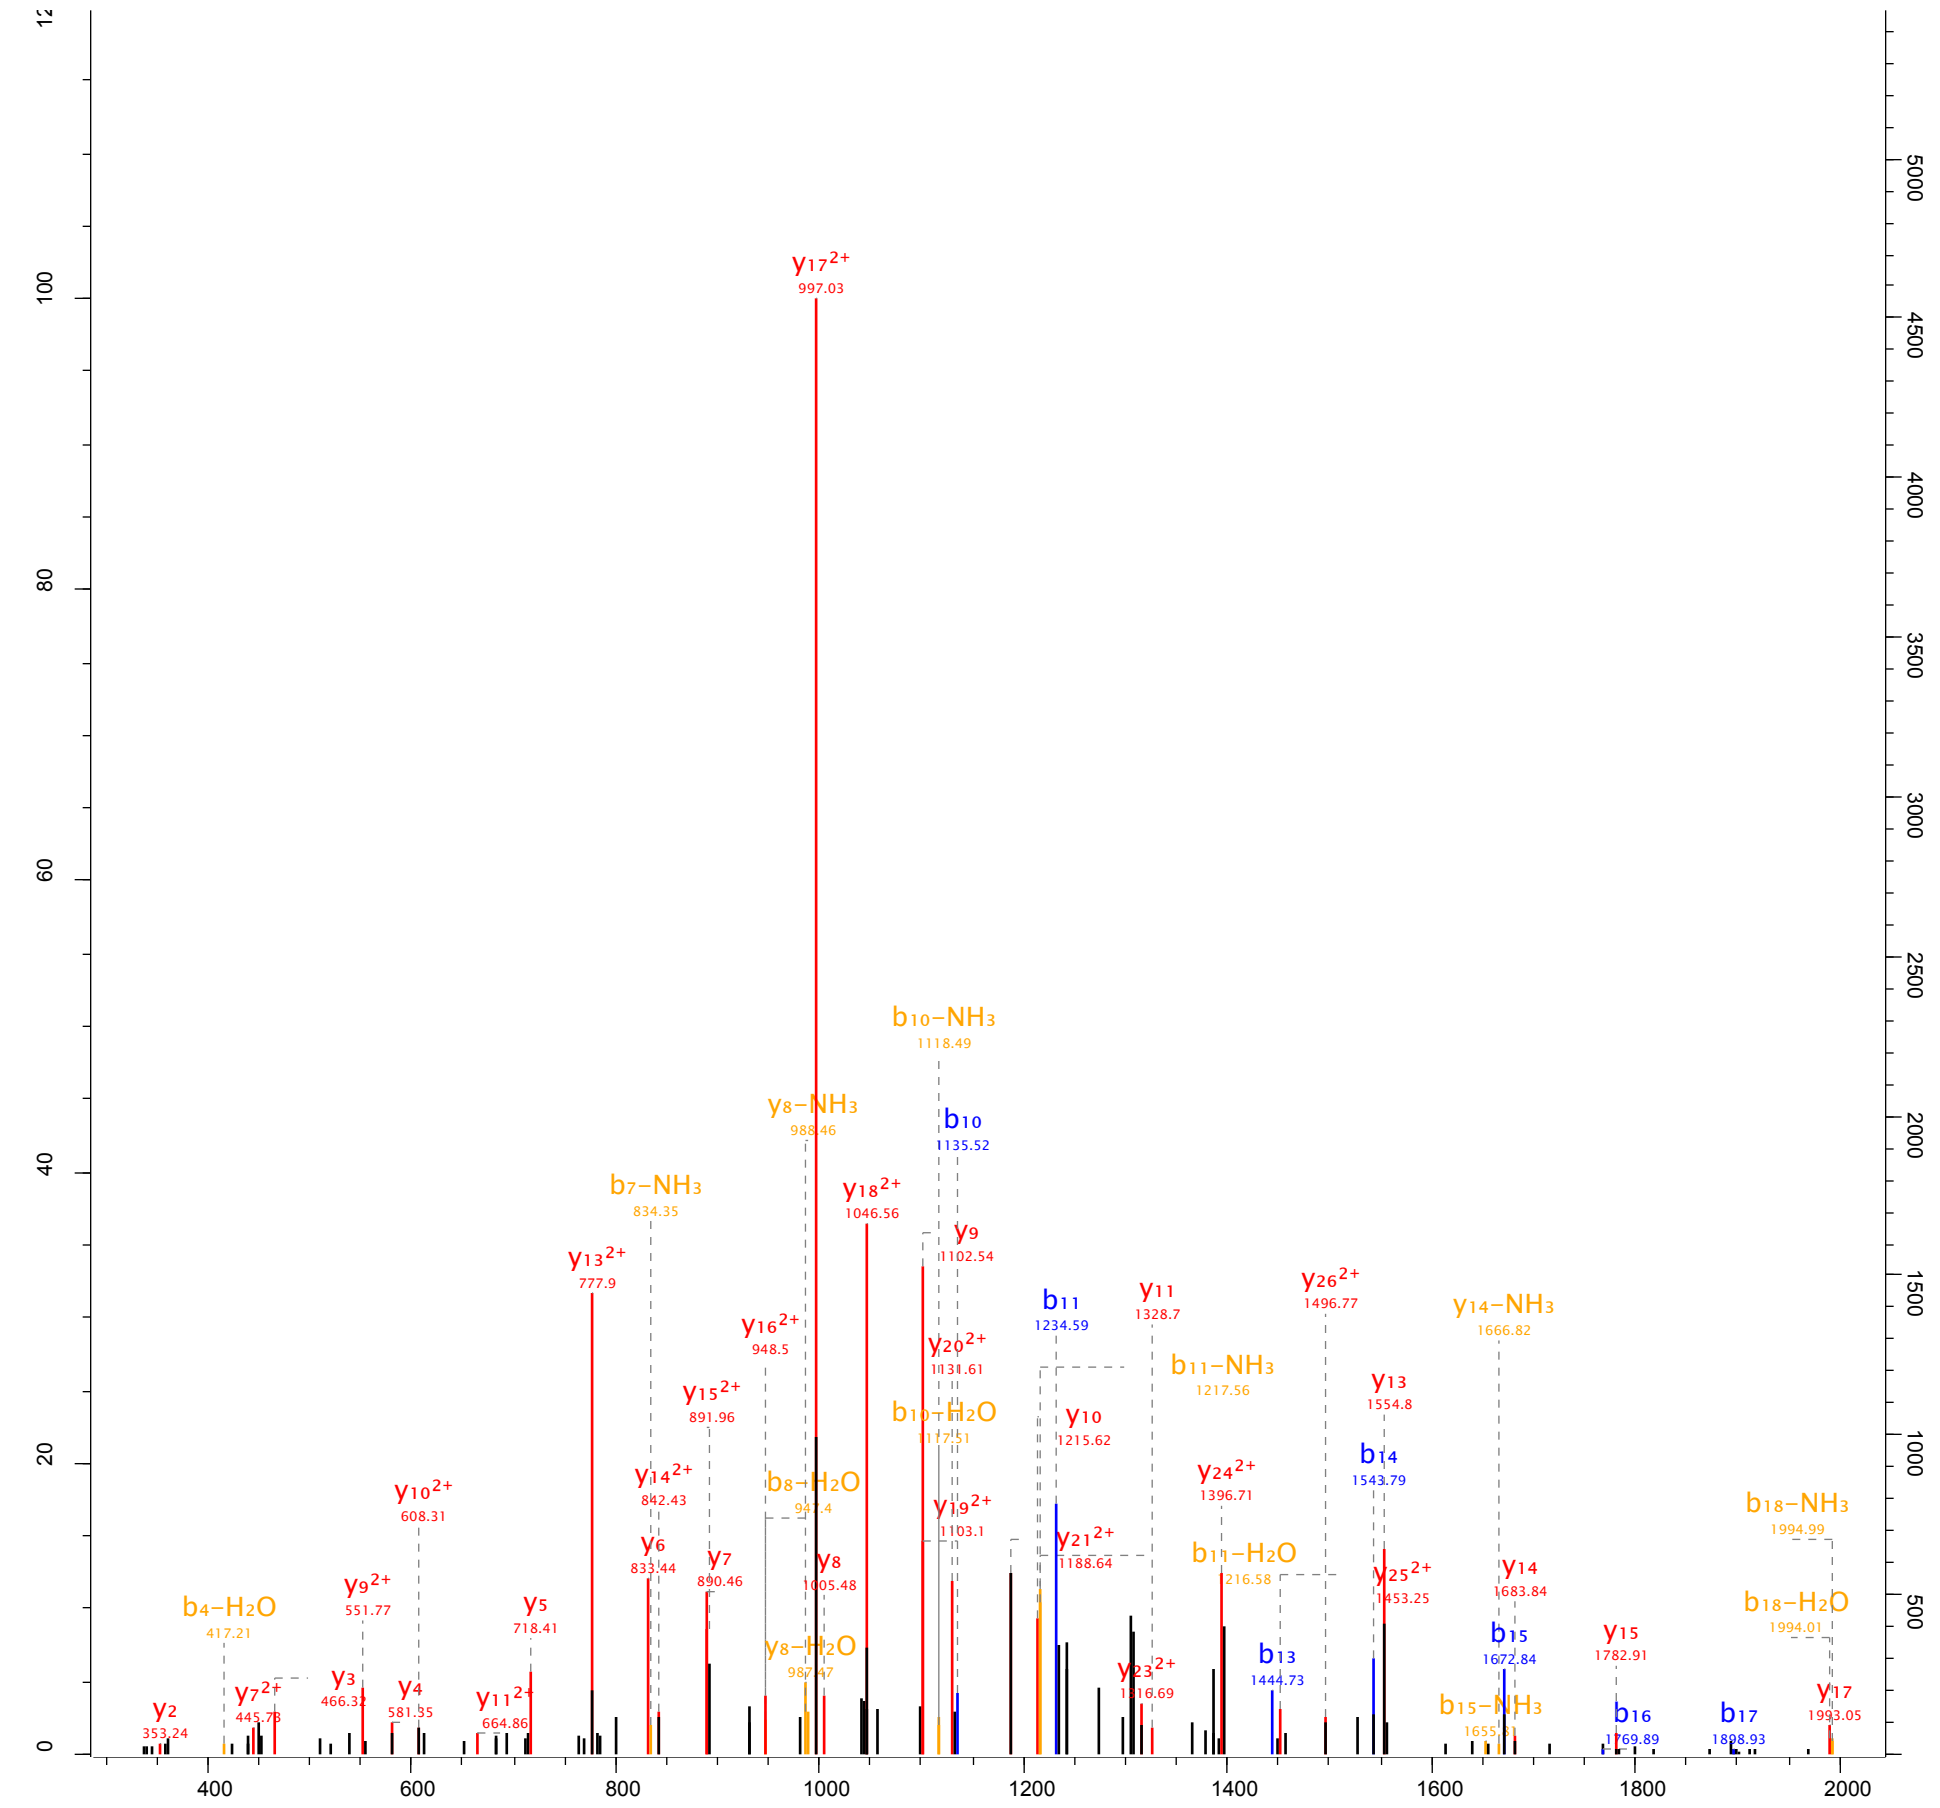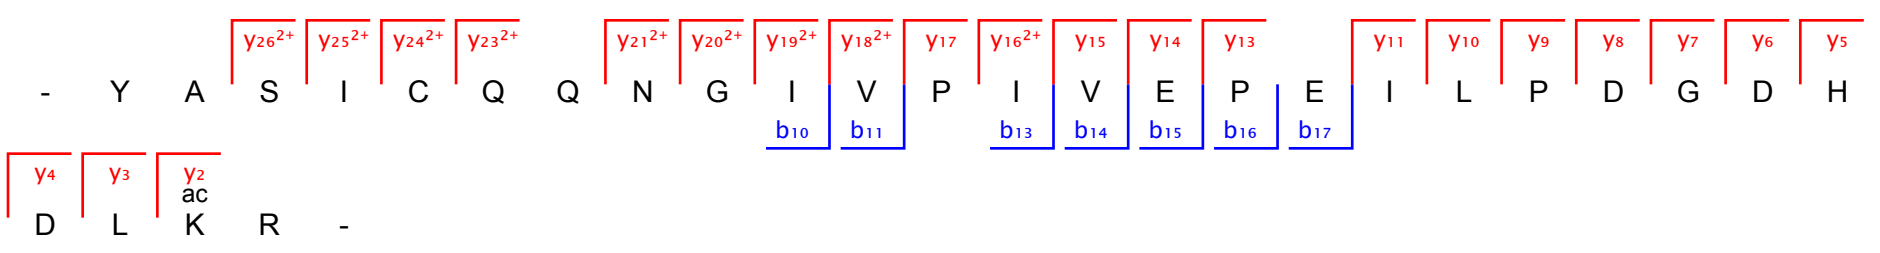

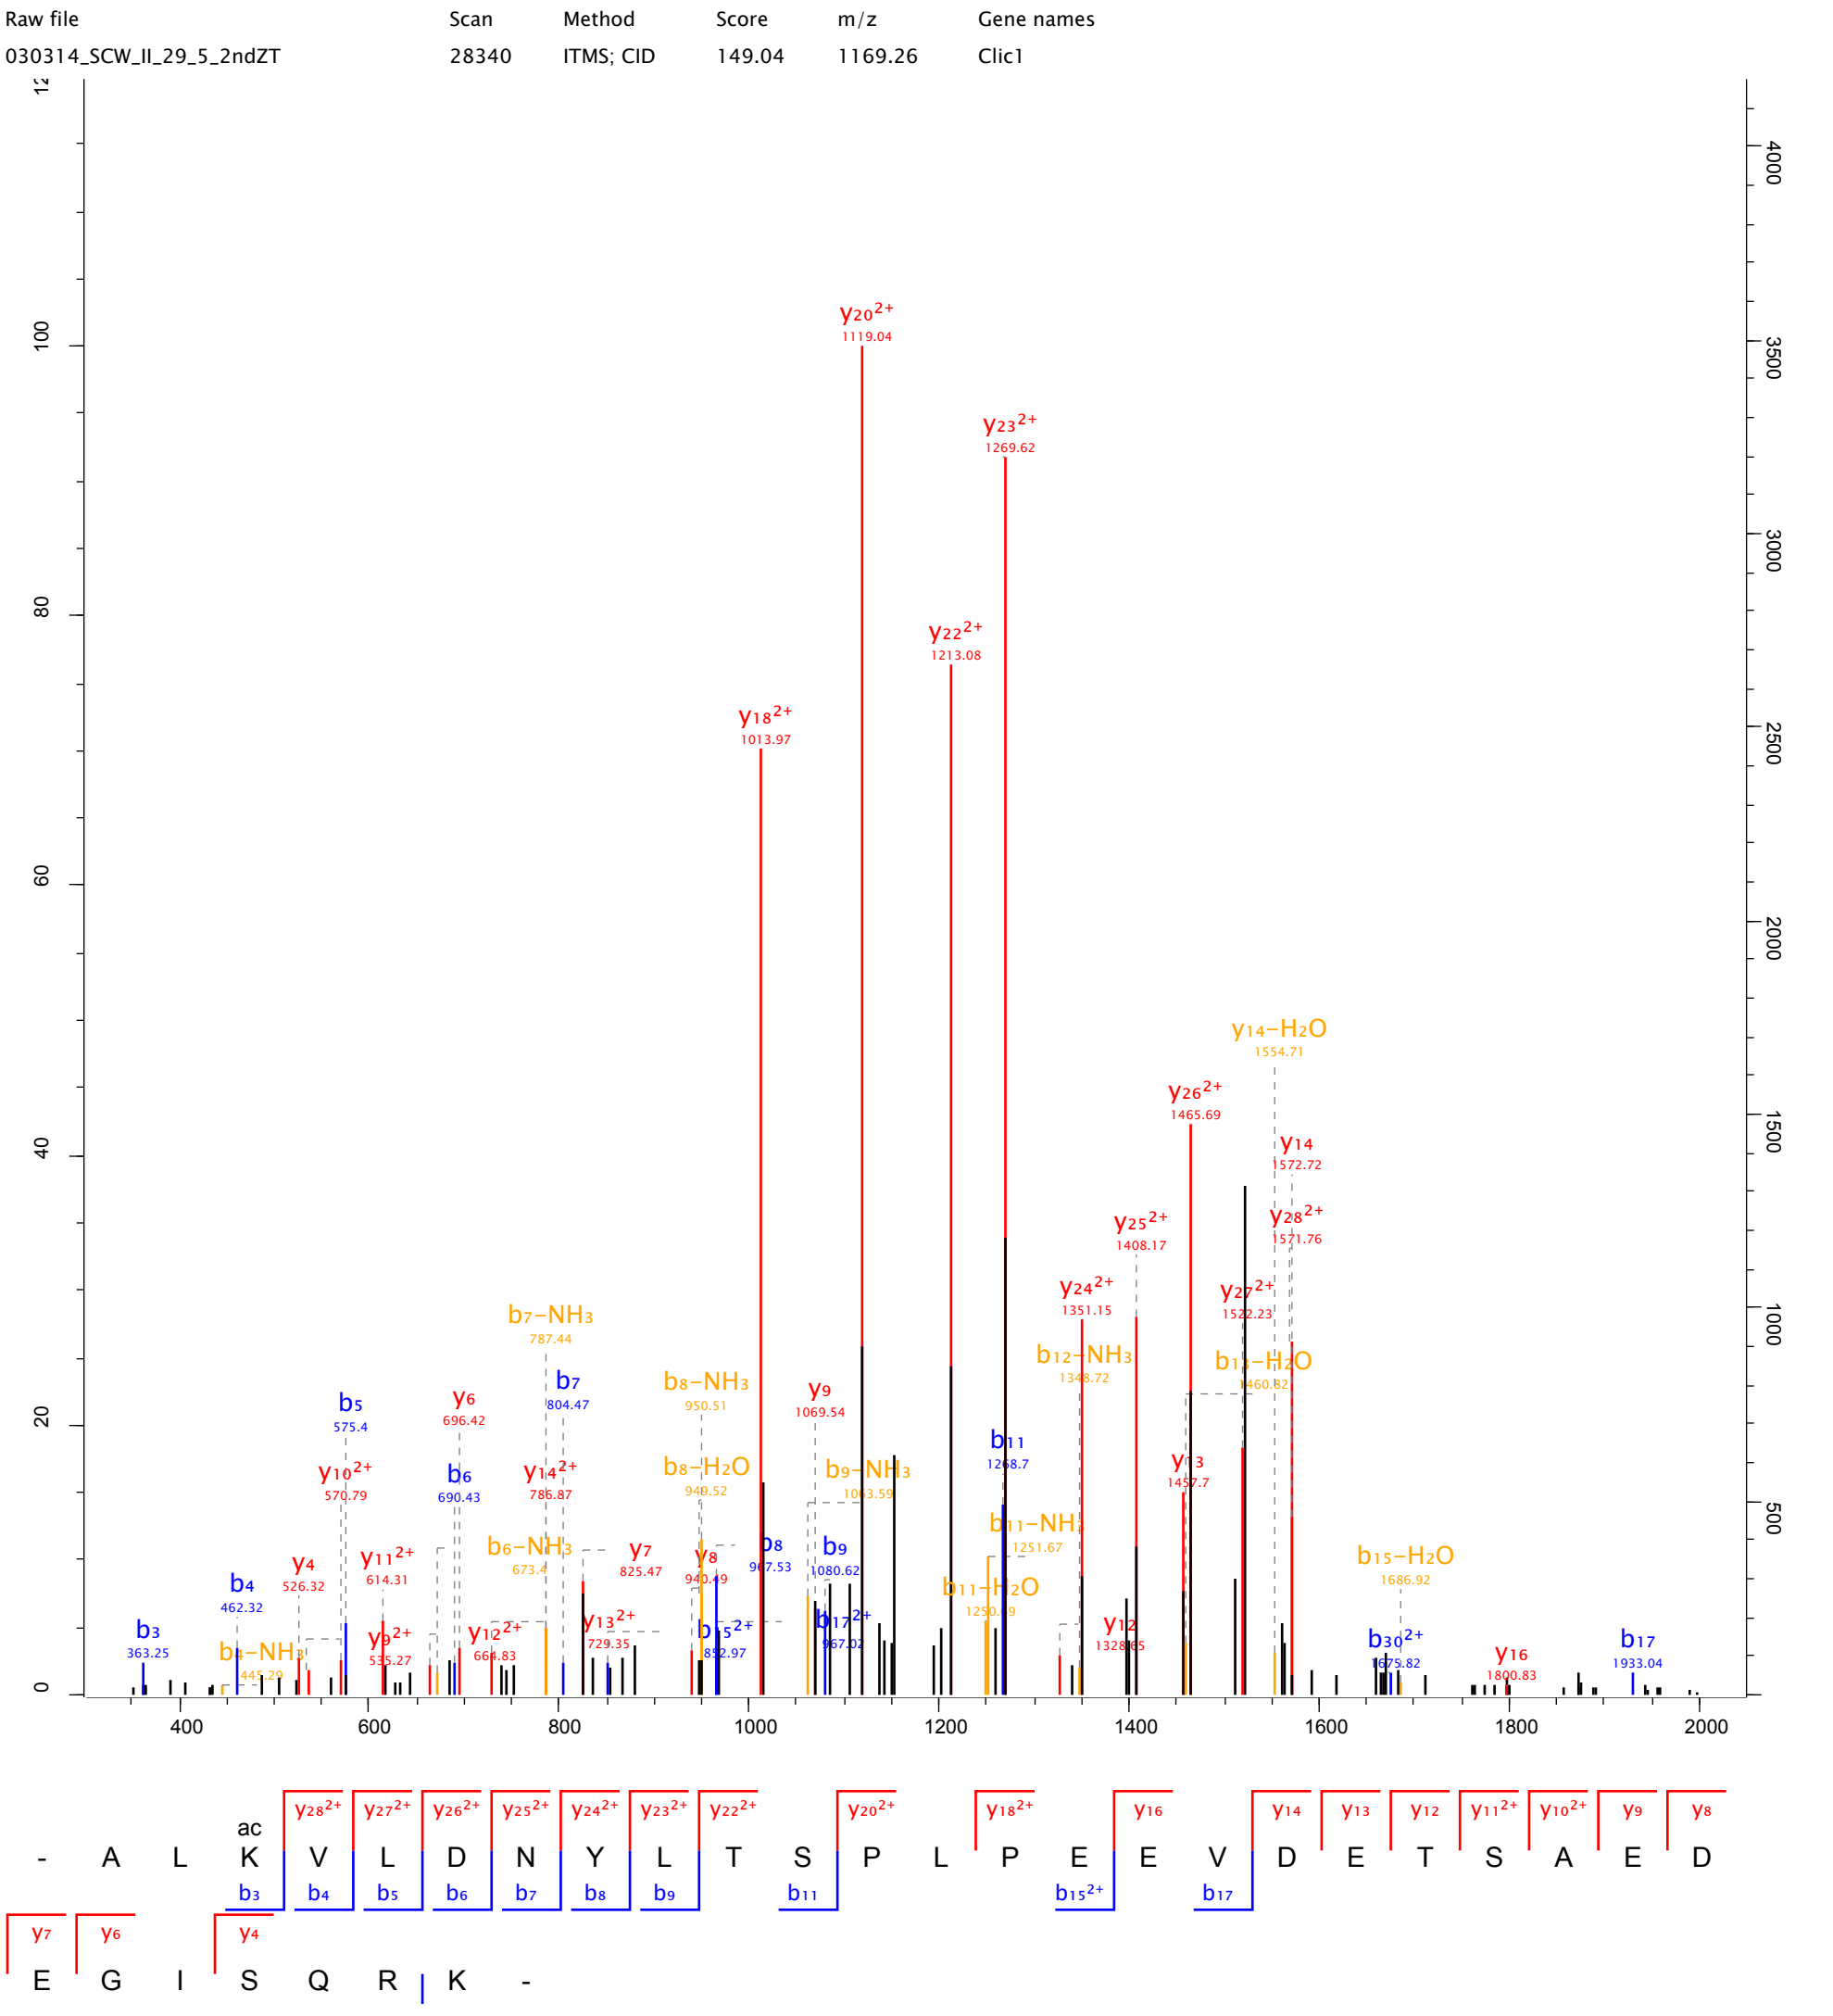



Raw file: 030314\_SCW\_II\_29\_5\_2ndZT  
 Scan: 32650  
 Method: ITMS; CID  
 Score: 94.15  
 m/z: 1209.95  
 Gene names: Hspd1

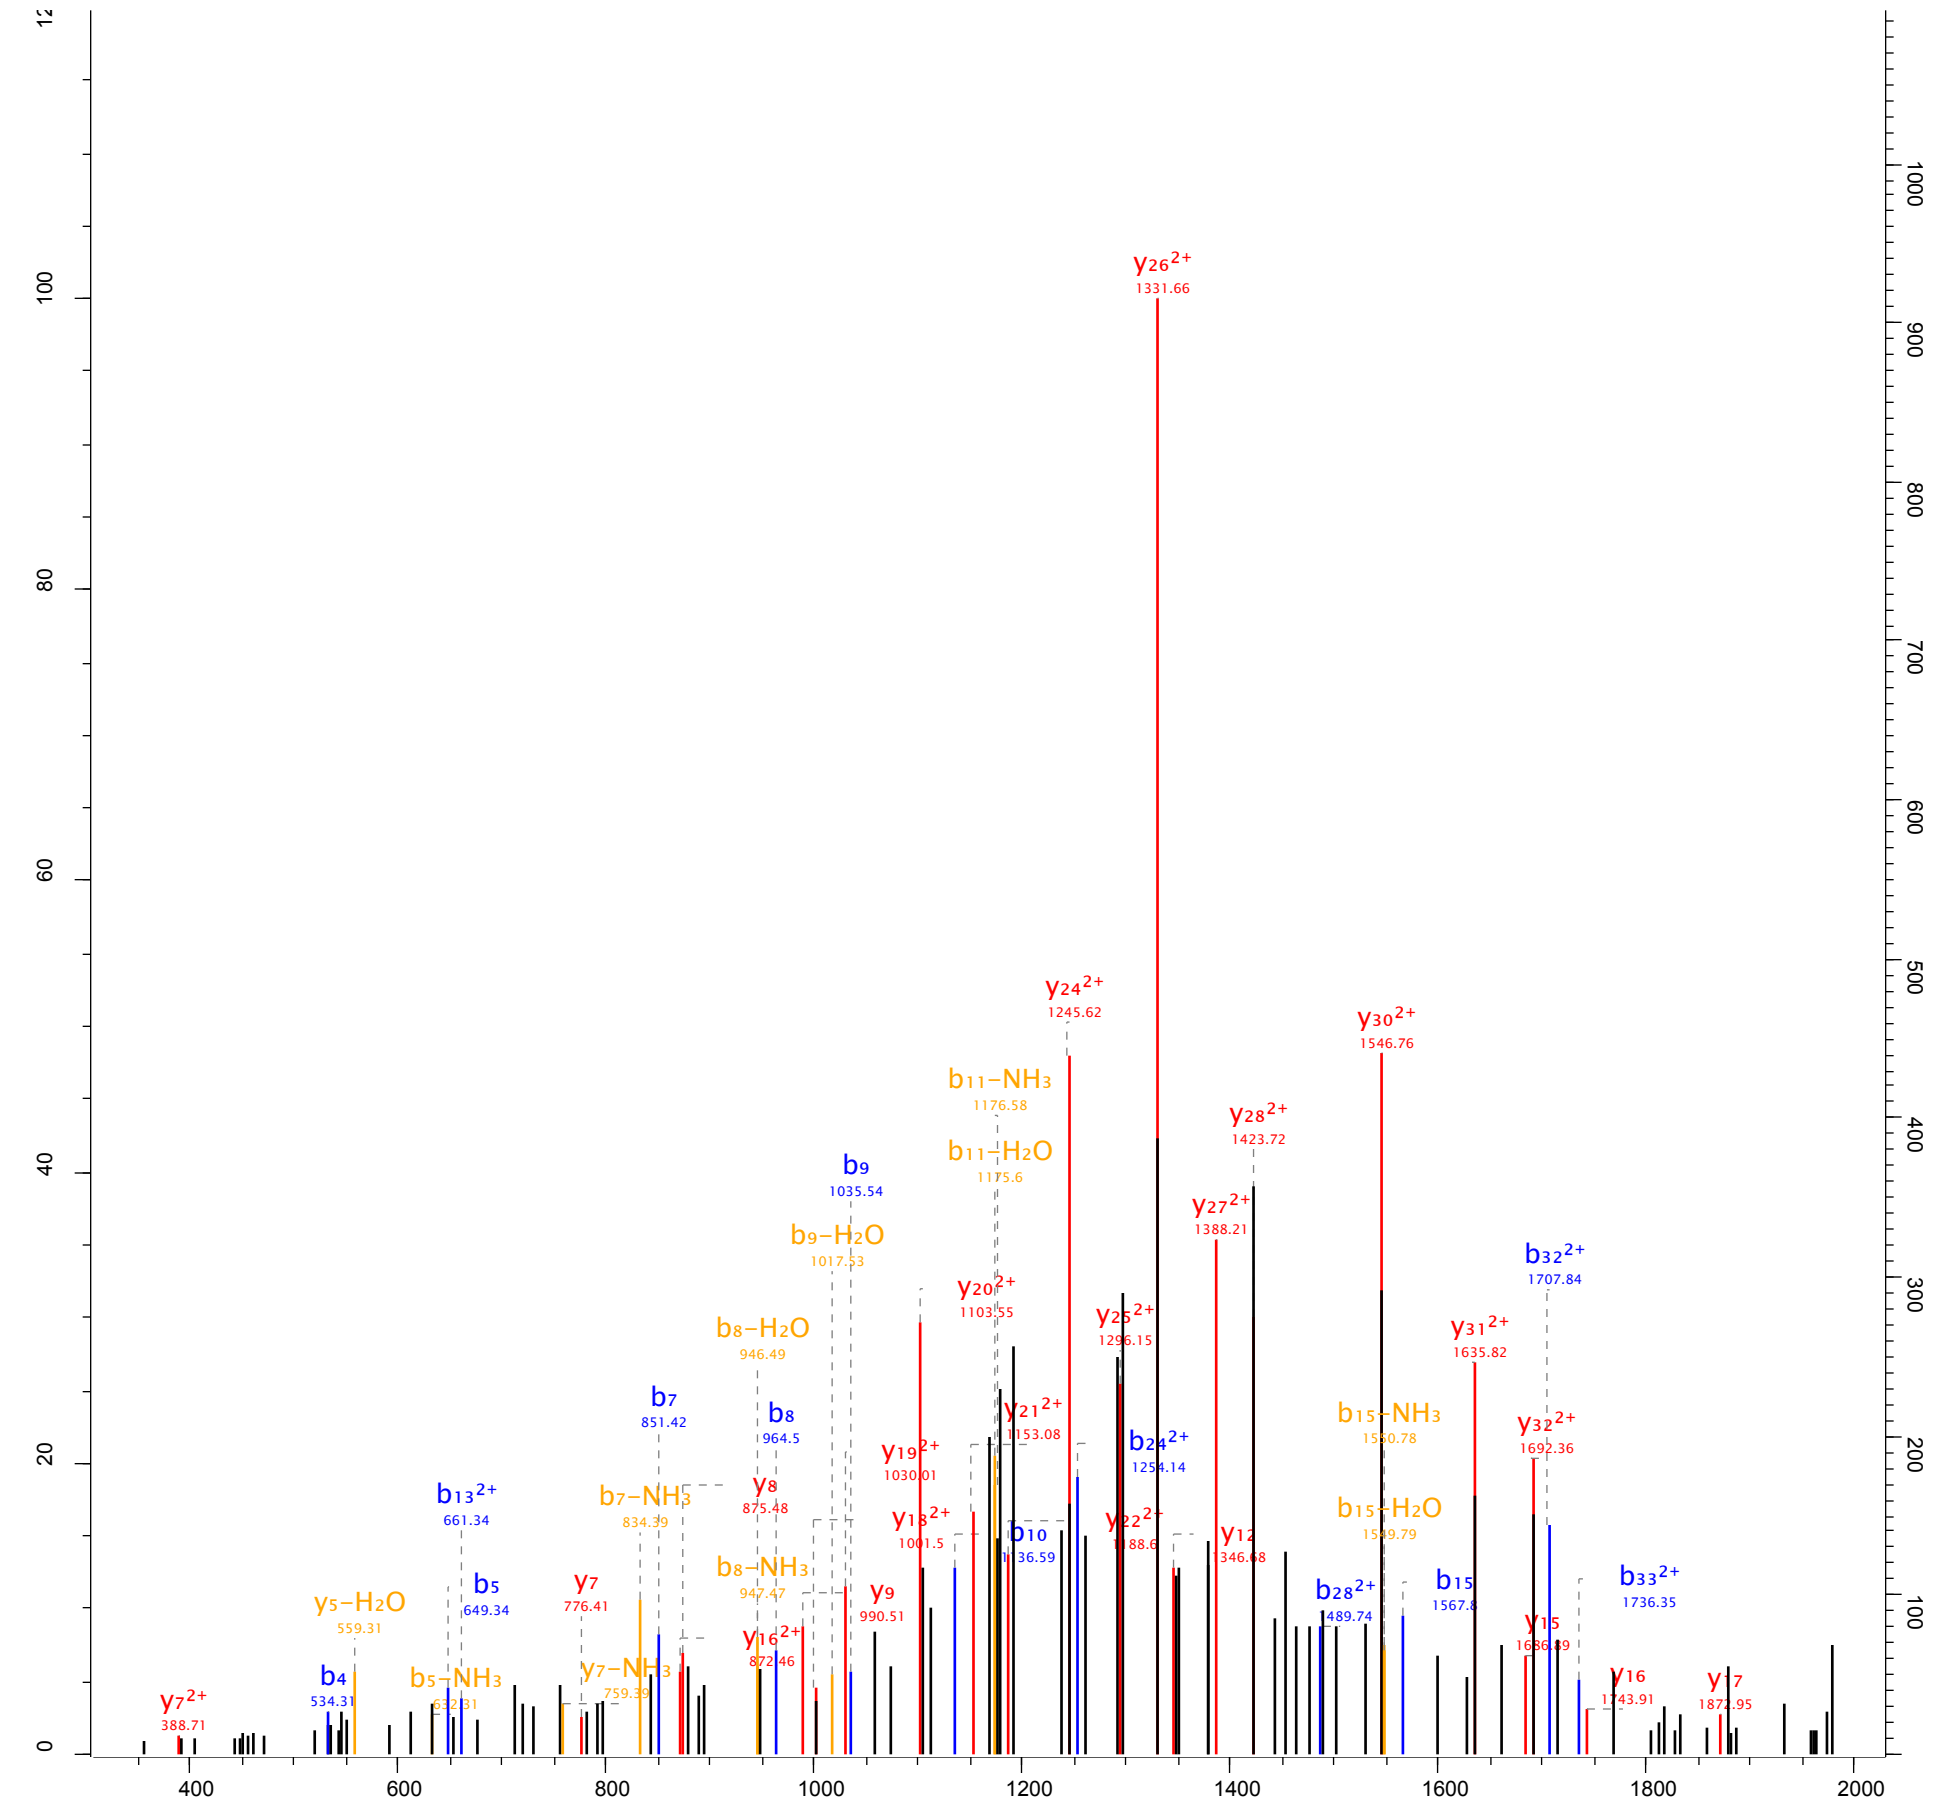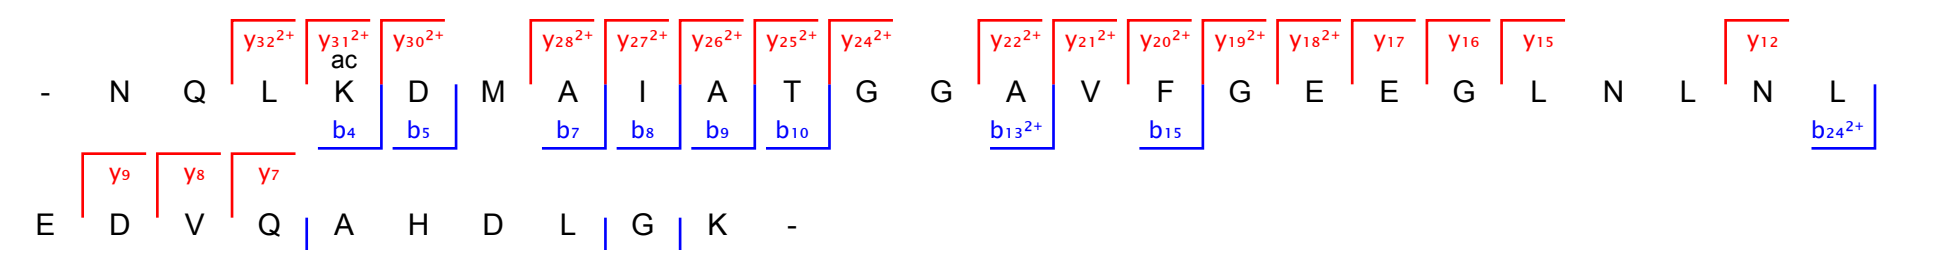

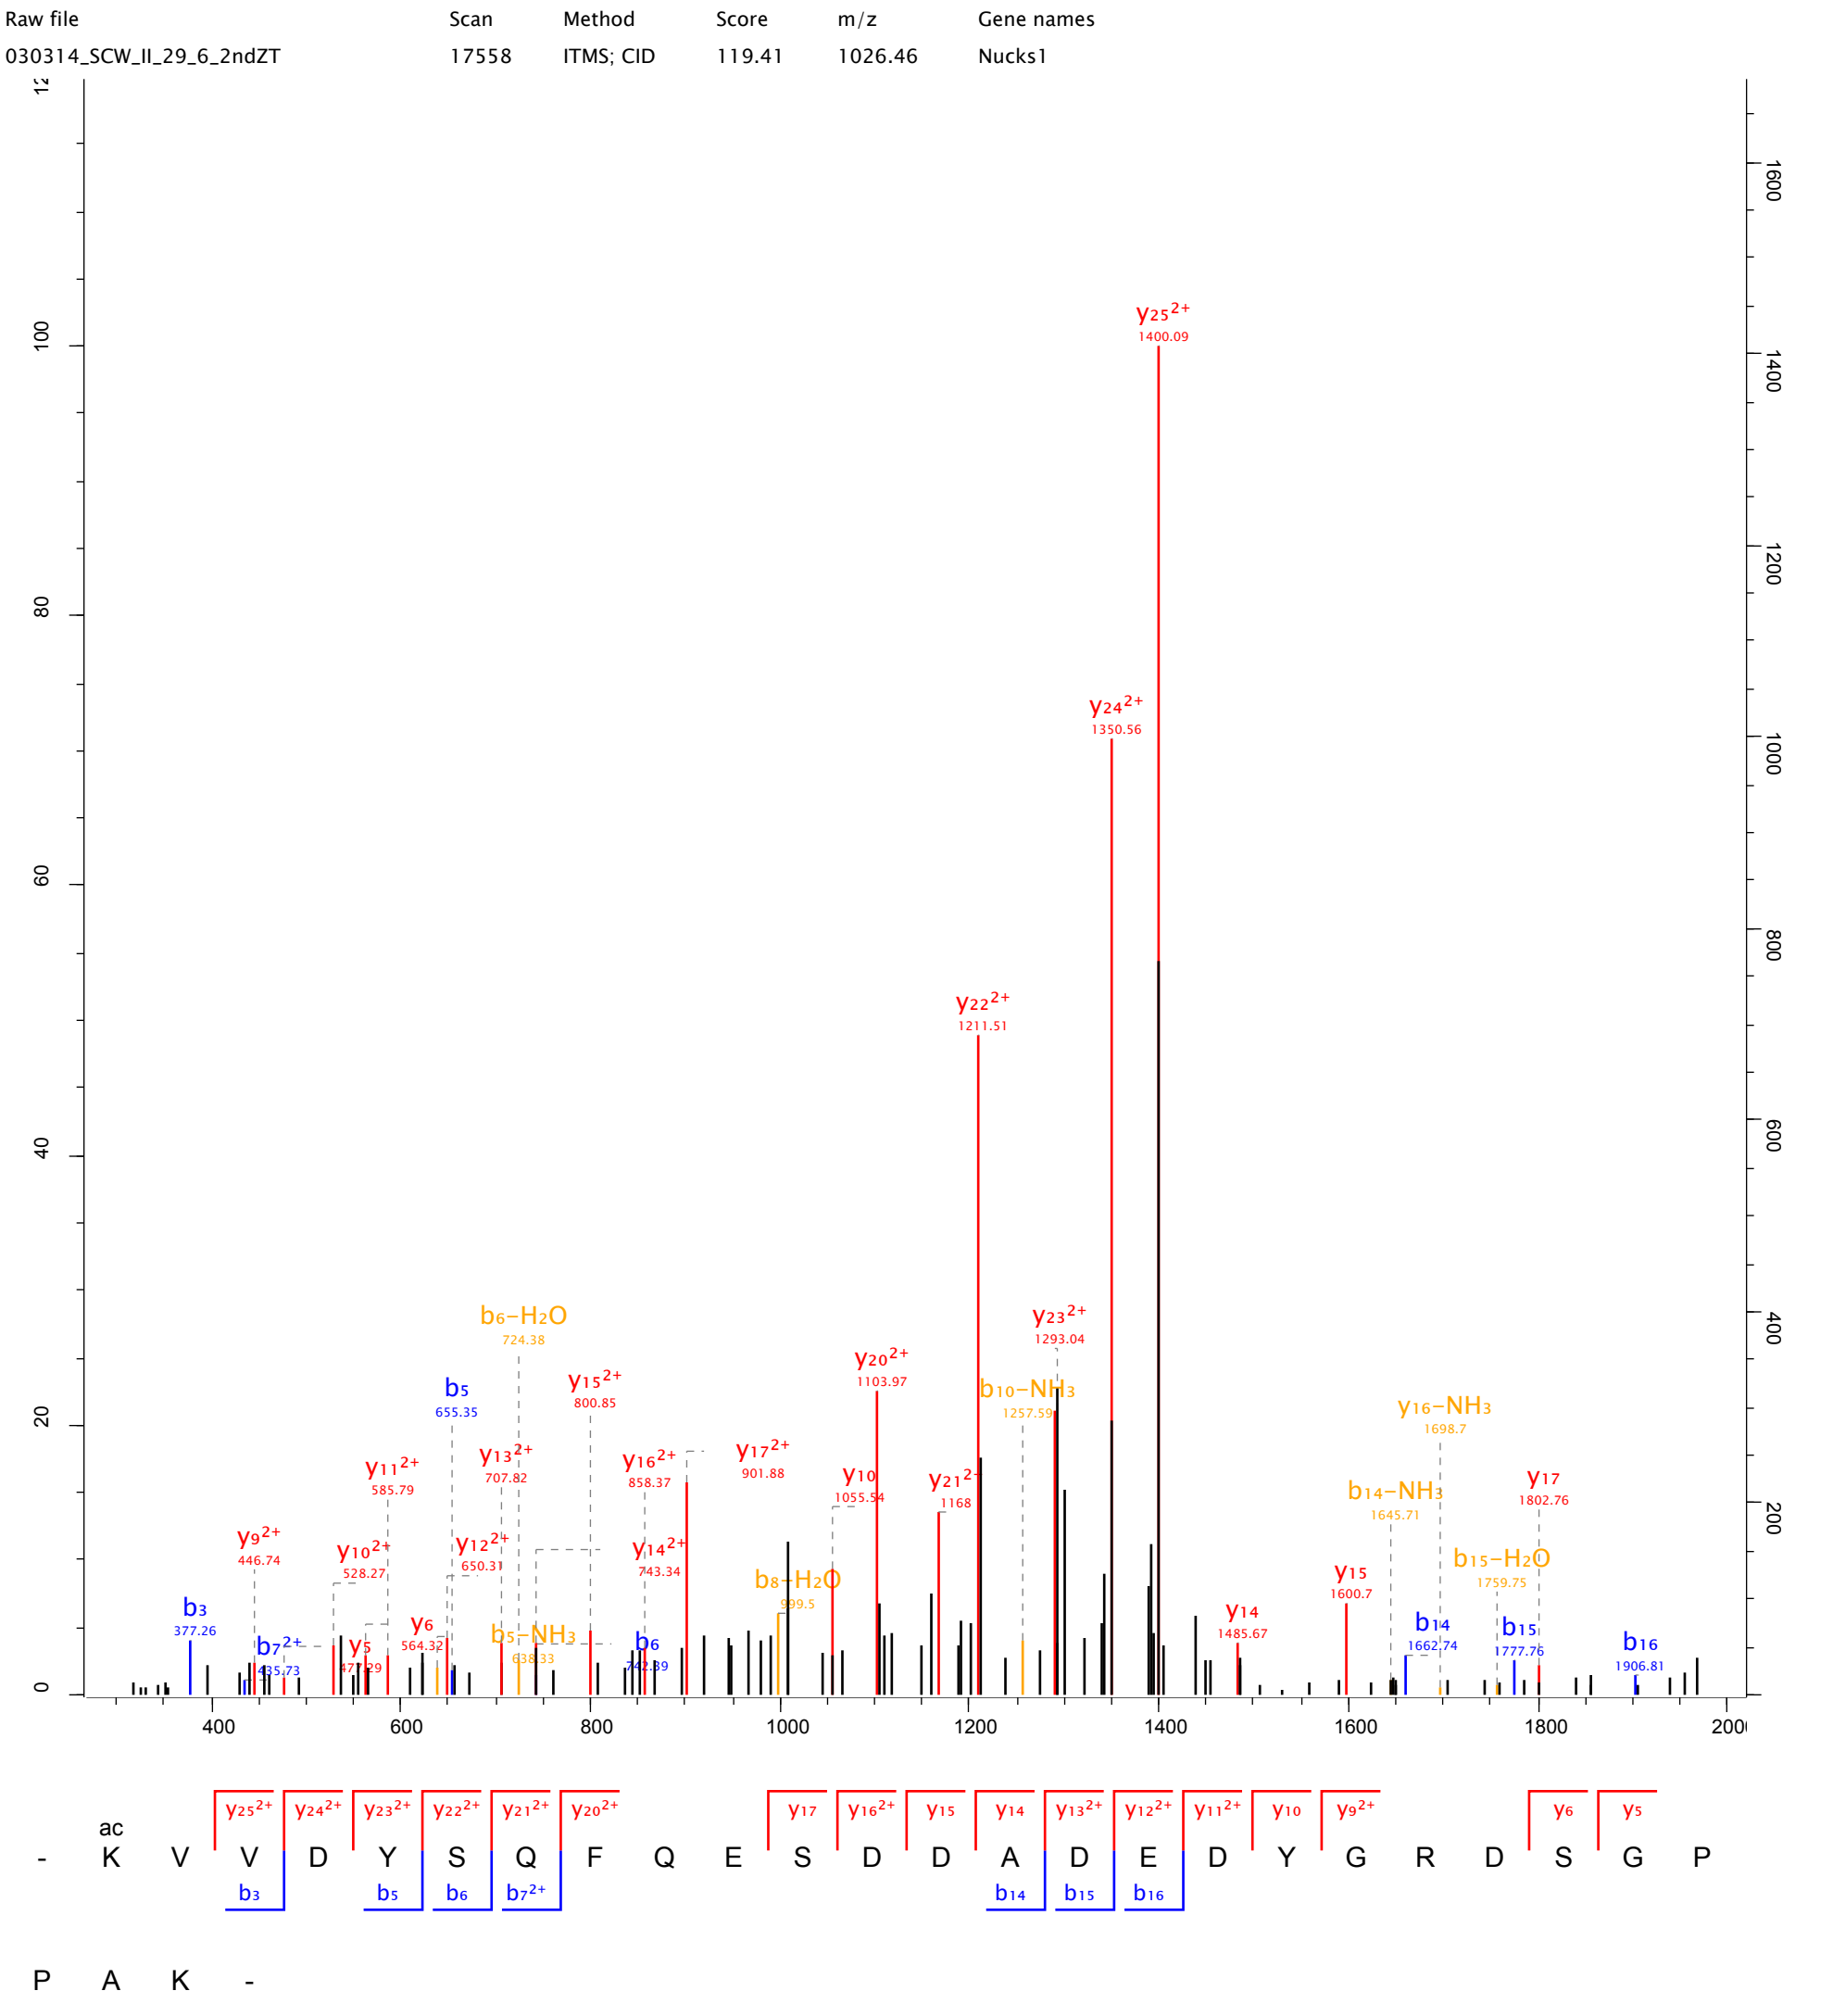

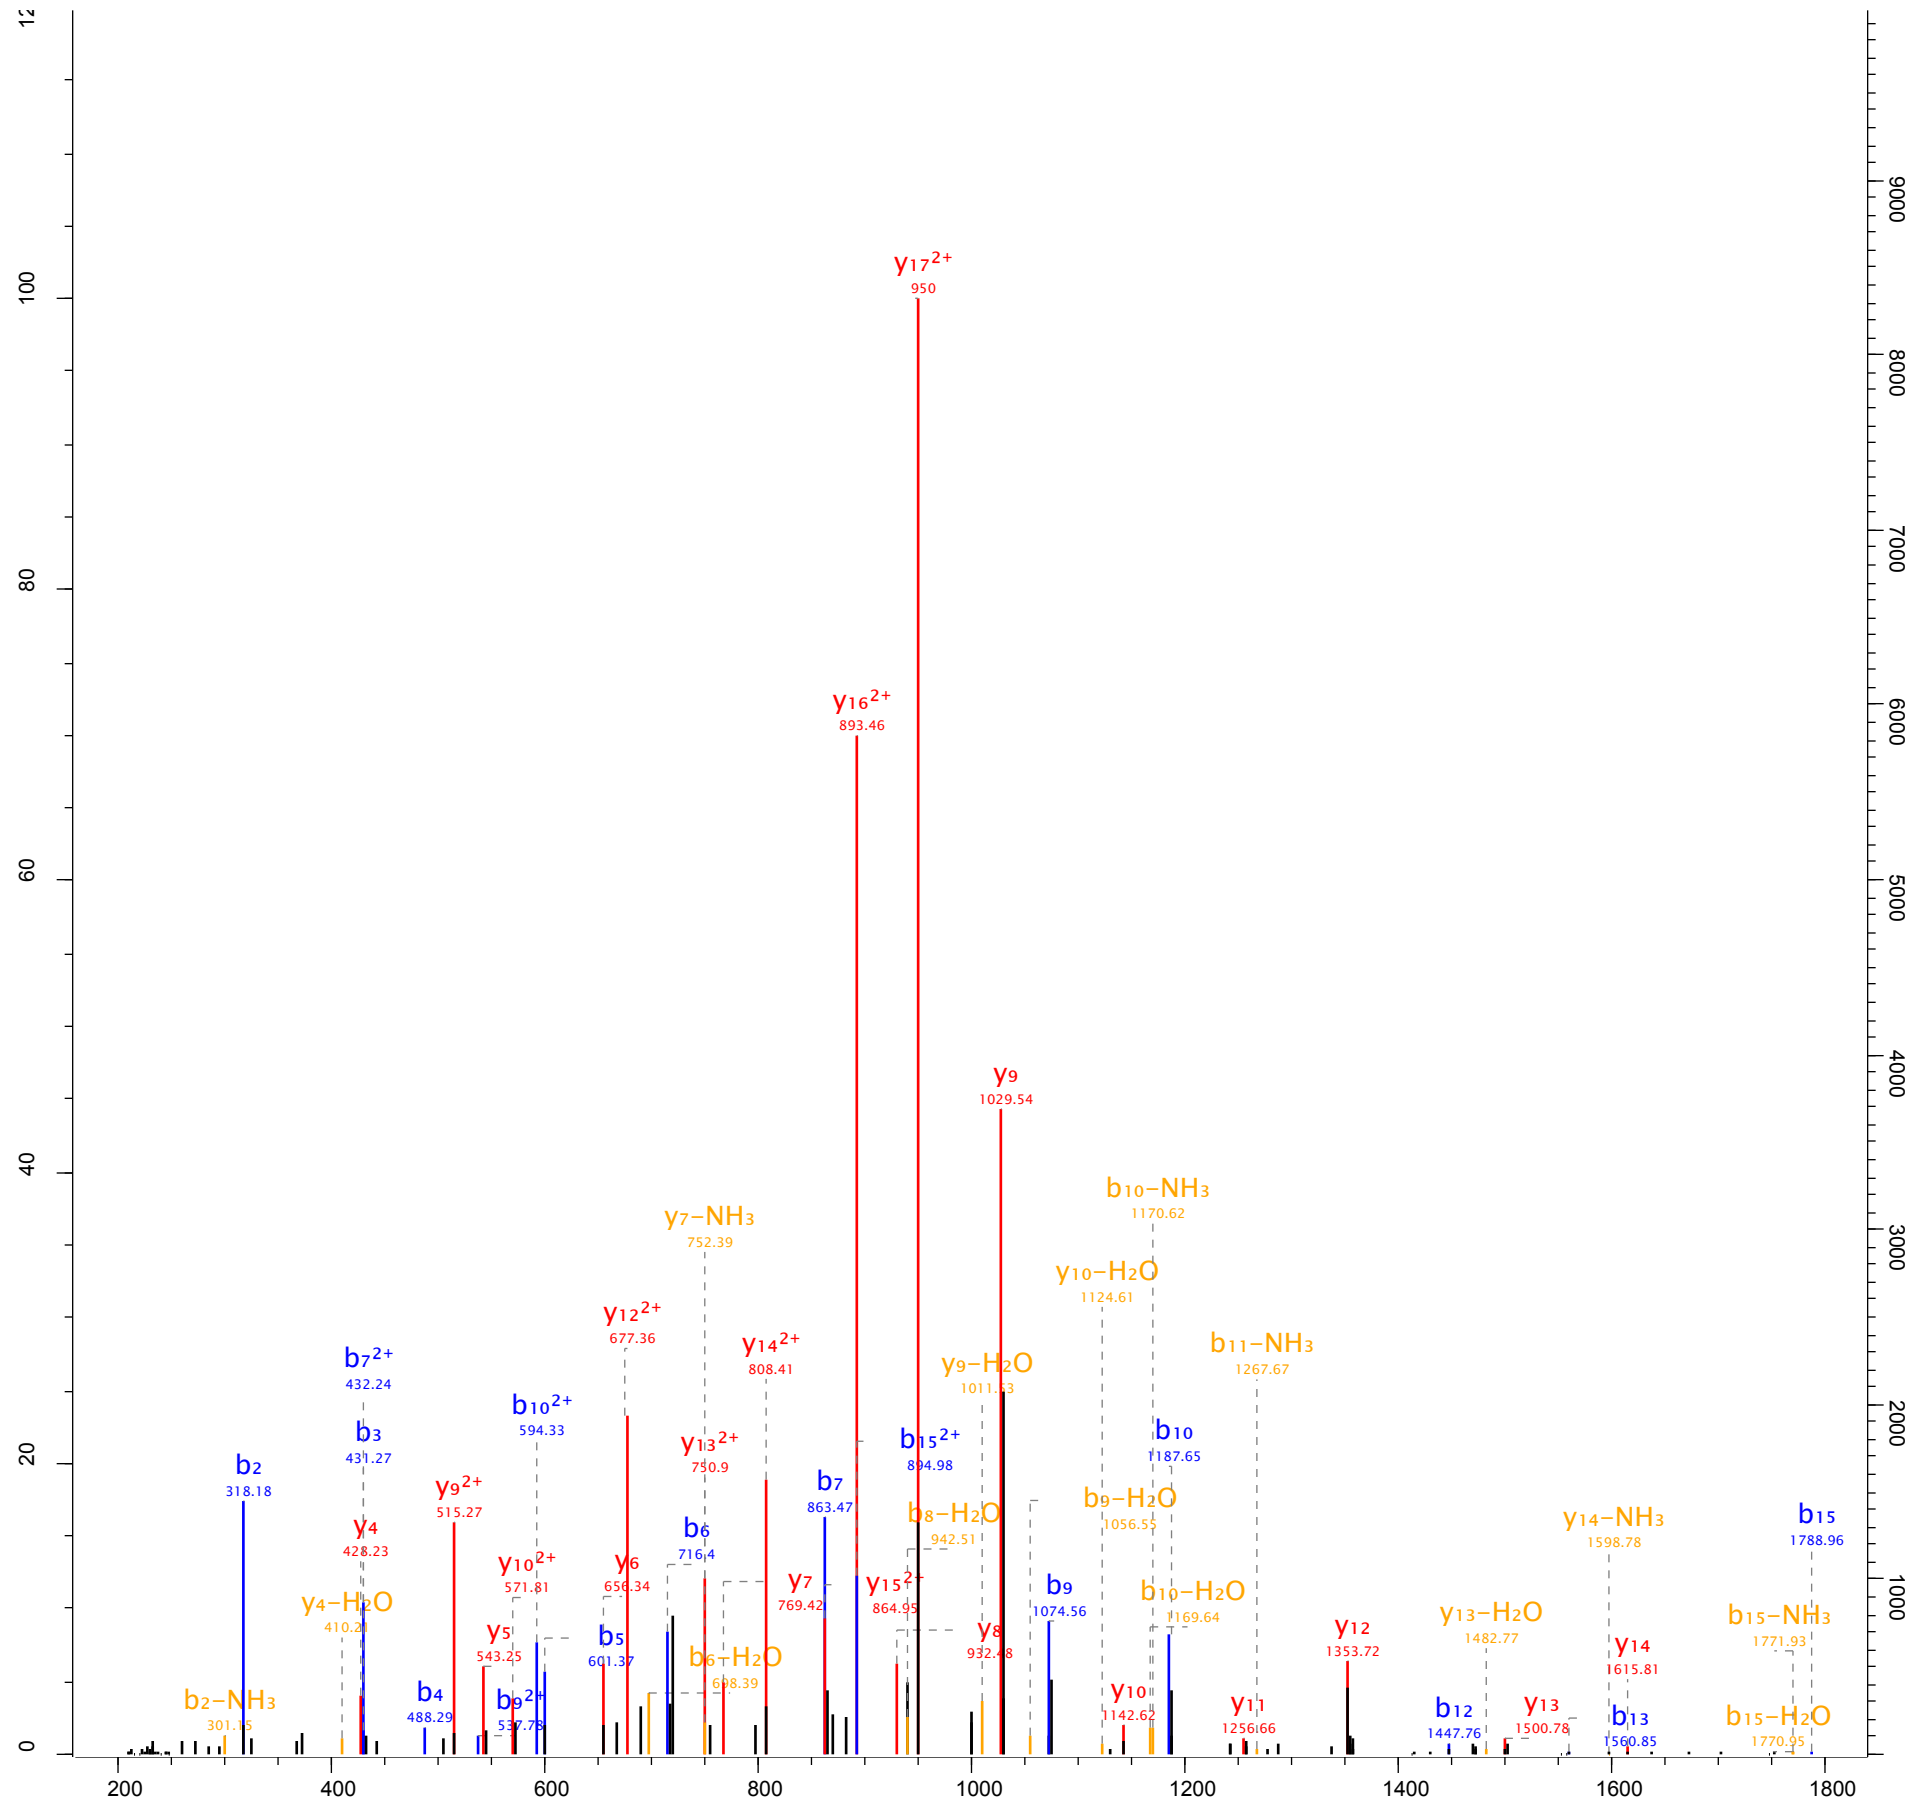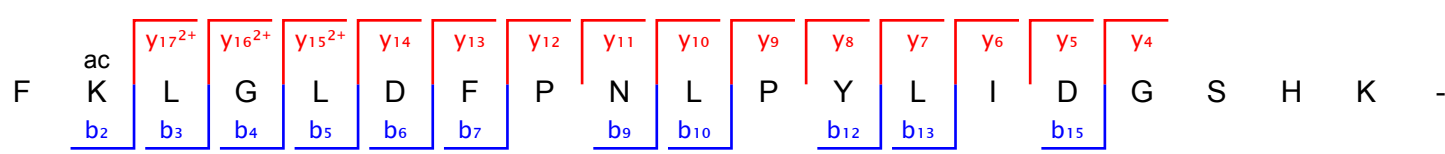

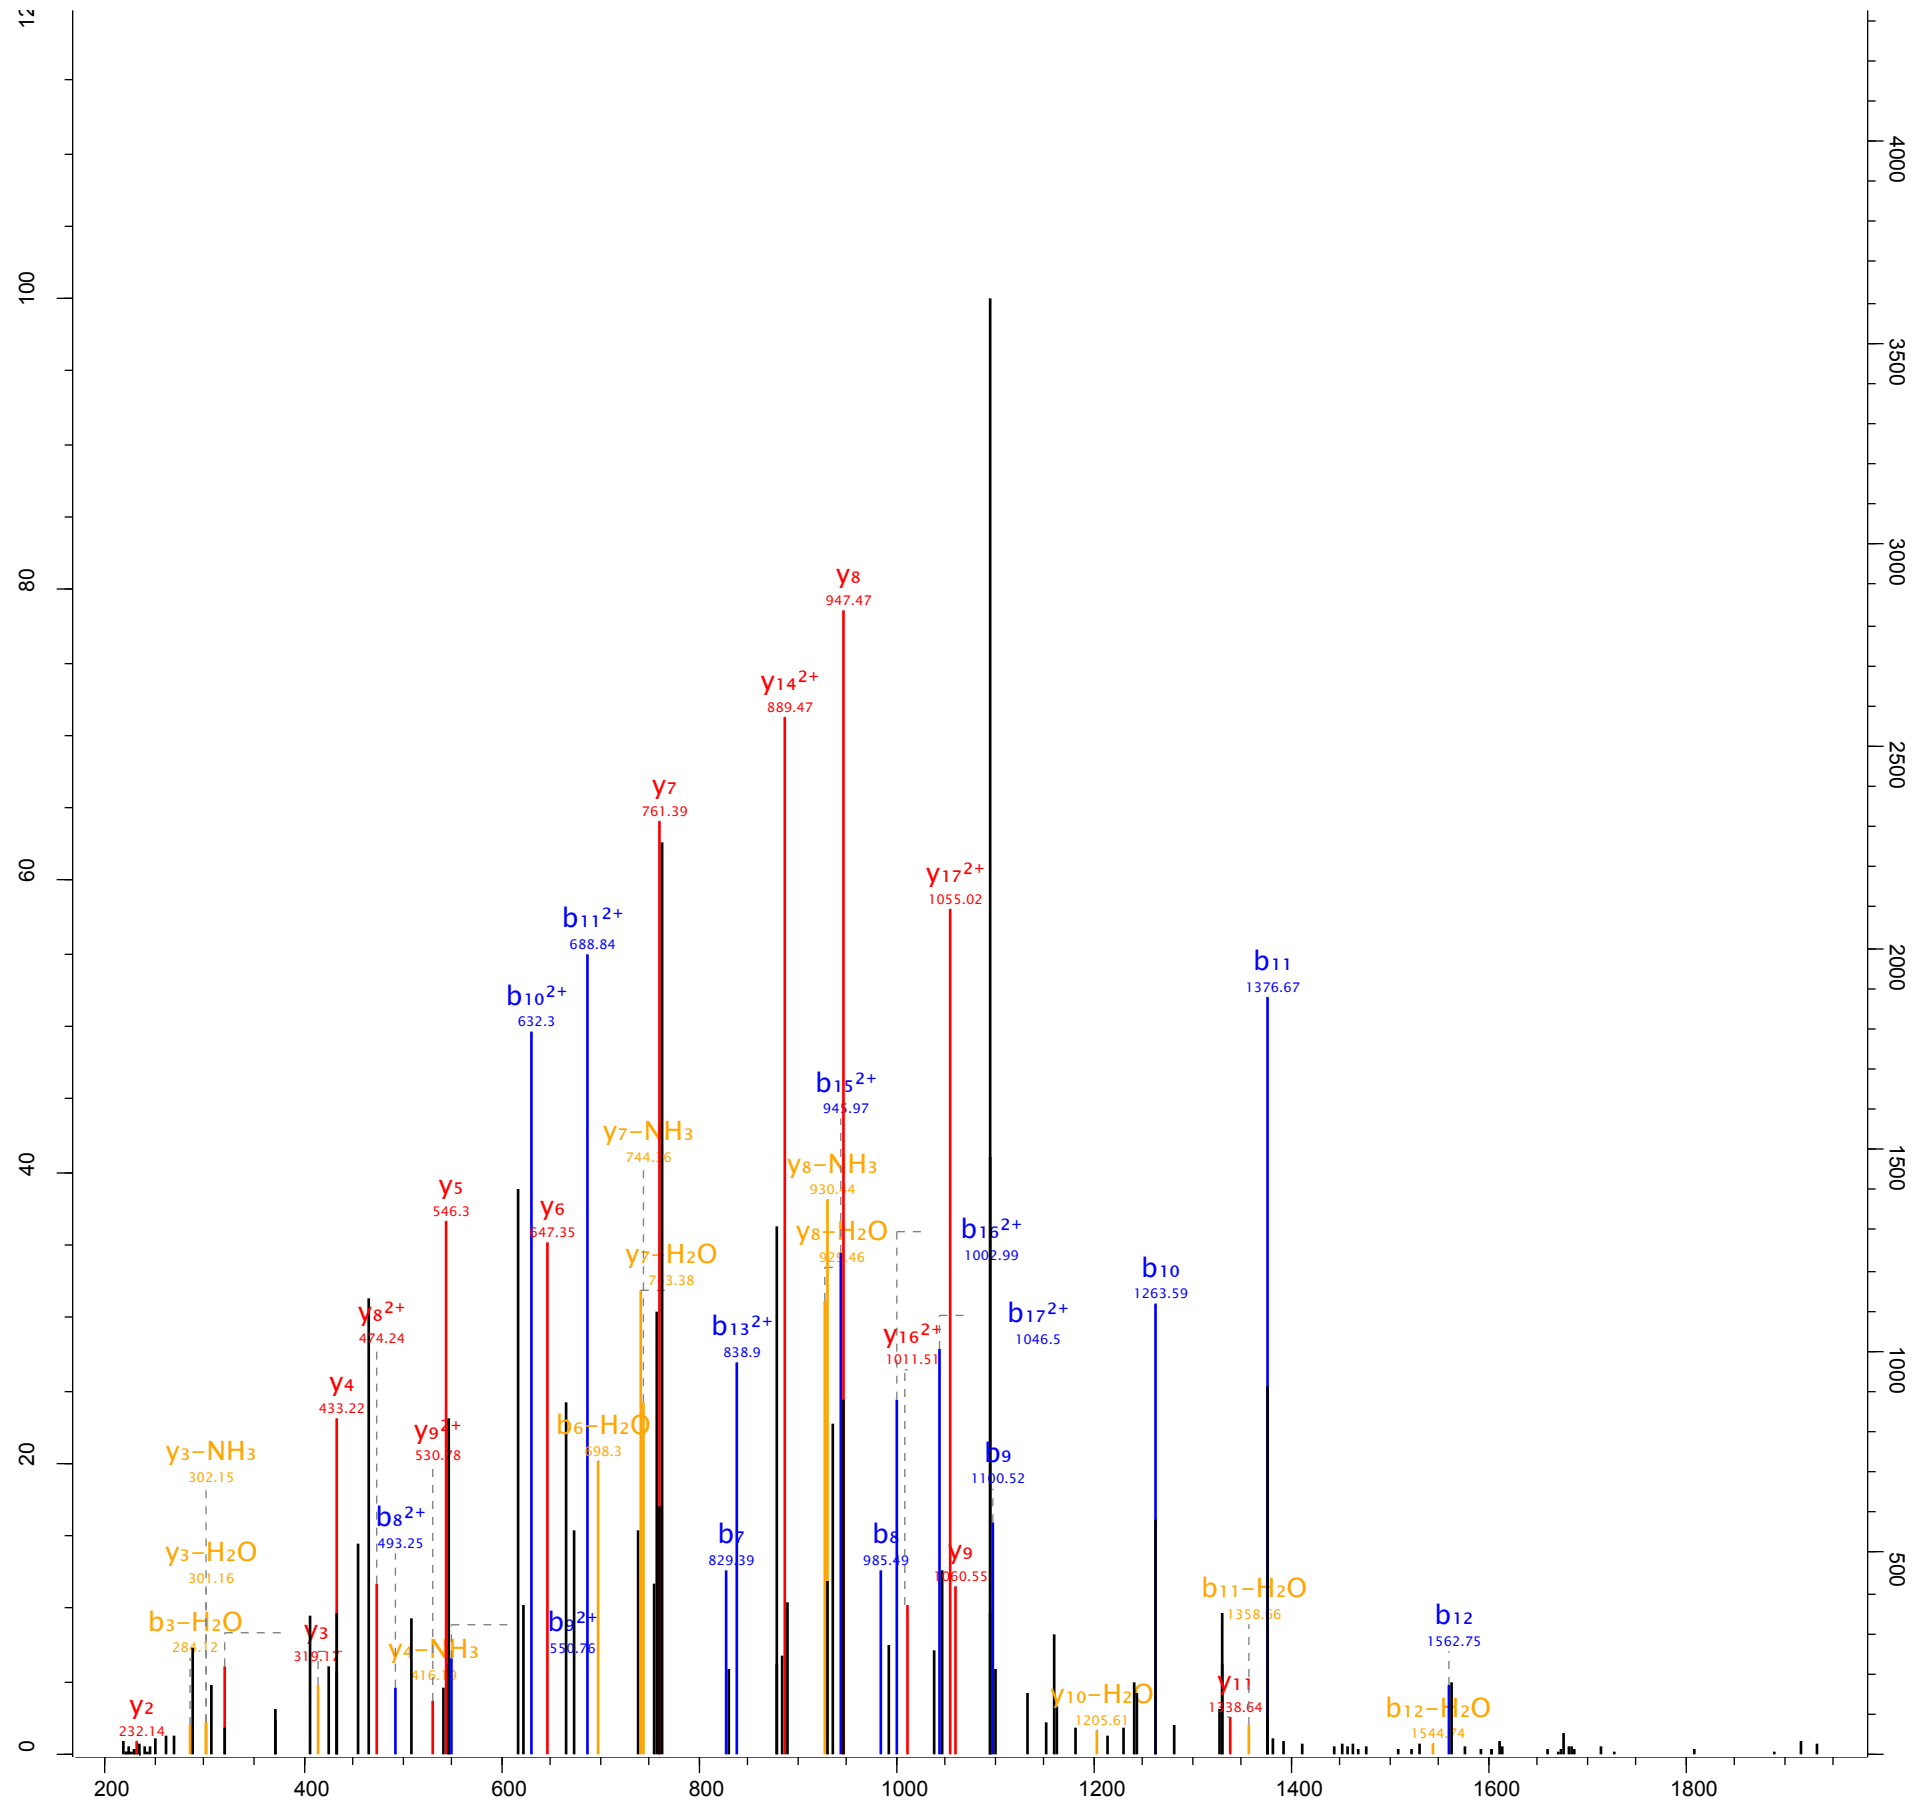

- D V S D E K L R D Y I W N T L N S G R -

Fragmentation labels below the sequence:

- y<sub>17</sub><sup>2+</sup> (S), y<sub>16</sub><sup>2+</sup> (D), y<sub>14</sub><sup>2+</sup> ac (E), y<sub>11</sub> (D), y<sub>9</sub> (I), y<sub>8</sub> (W), y<sub>7</sub> (N), y<sub>6</sub> (T), y<sub>5</sub> (L), y<sub>4</sub> (N), y<sub>3</sub> (S), y<sub>2</sub> (G)
- b<sub>7</sub> (L), b<sub>8</sub> (R), b<sub>9</sub> (D), b<sub>10</sub> (Y), b<sub>11</sub> (I), b<sub>12</sub> (W), b<sub>13</sub><sup>2+</sup> (N), b<sub>15</sub><sup>2+</sup> (L), b<sub>16</sub><sup>2+</sup> (N), b<sub>17</sub><sup>2+</sup> (S)

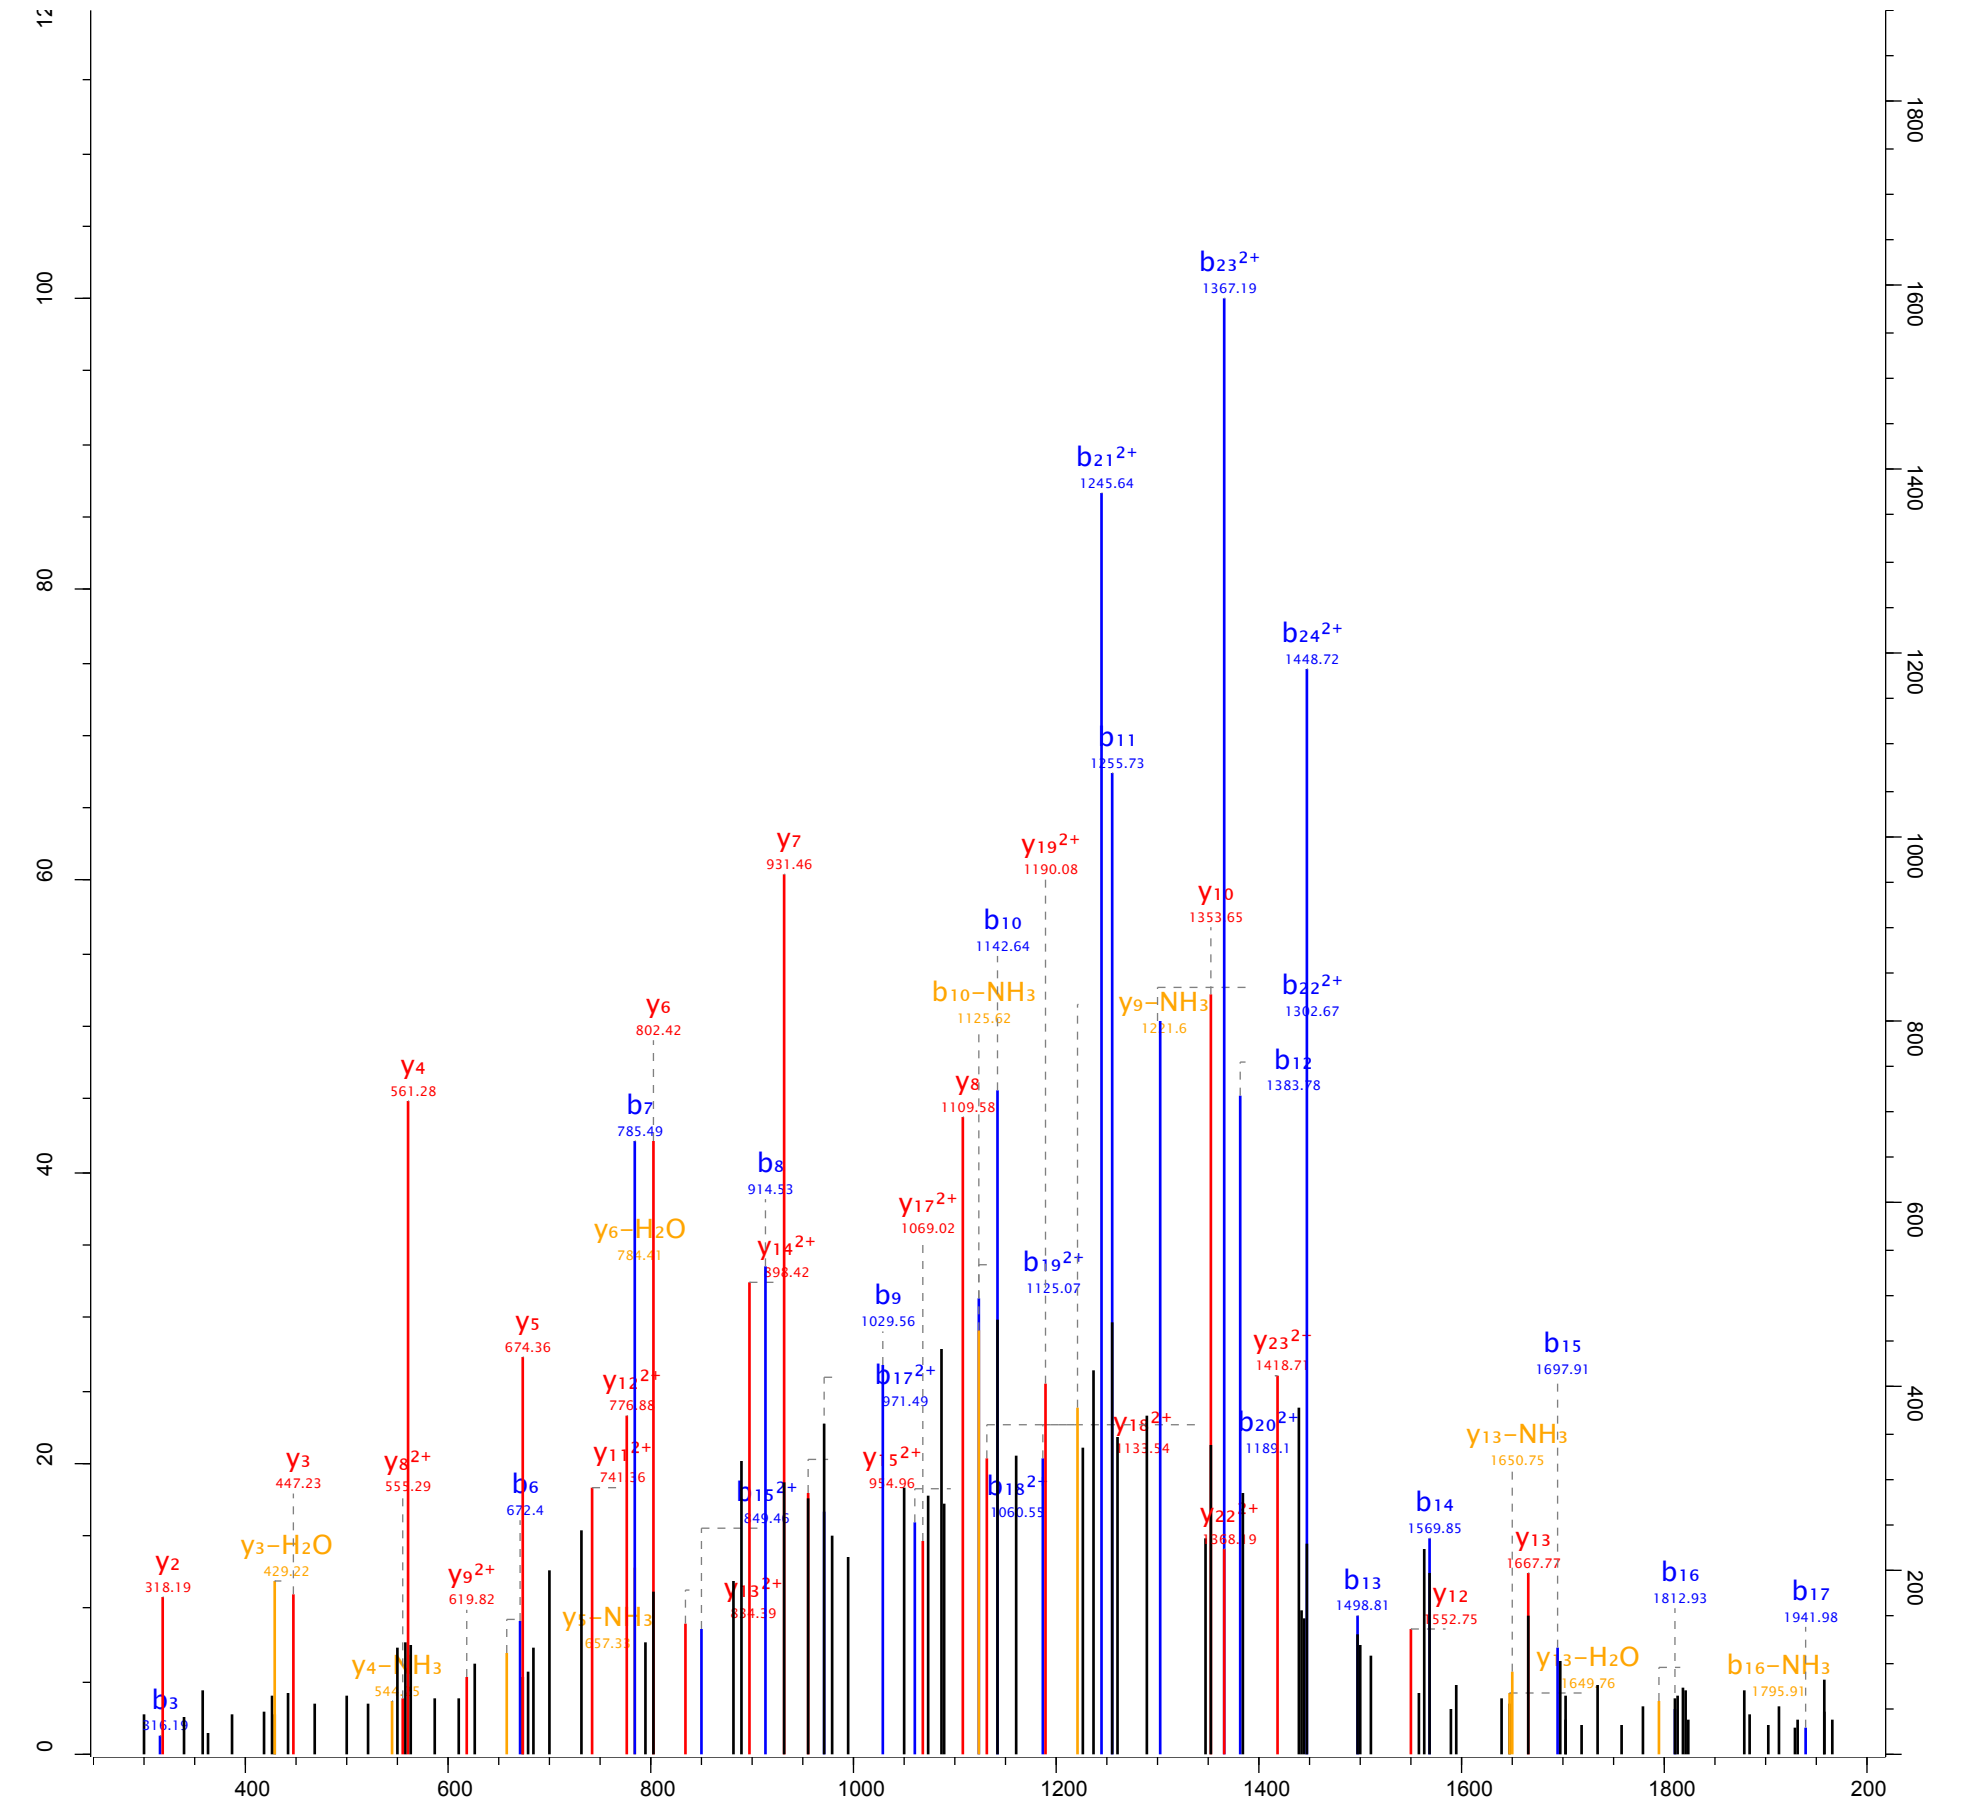

- T I T V T R L E D L L Q D A Q D E K E Q L N E Y  
 b<sub>3</sub> b<sub>6</sub> b<sub>7</sub> b<sub>8</sub> b<sub>9</sub> b<sub>10</sub> b<sub>11</sub> b<sub>12</sub> b<sub>13</sub> b<sub>14</sub> b<sub>15</sub> b<sub>16</sub> b<sub>17</sub> b<sub>18</sub><sup>2+</sup> b<sub>19</sub><sup>2+</sup> b<sub>20</sub><sup>2+</sup> b<sub>21</sub><sup>2+</sup> b<sub>22</sub><sup>2+</sup> b<sub>23</sub><sup>2+</sup> b<sub>24</sub><sup>2+</sup>  
 y<sub>23</sub><sup>2+</sup> y<sub>22</sub><sup>2+</sup> y<sub>19</sub><sup>2+</sup> y<sub>18</sub><sup>2+</sup> y<sub>17</sub><sup>2+</sup> y<sub>15</sub><sup>2+</sup> y<sub>14</sub><sup>2+</sup> y<sub>13</sub> y<sub>12</sub> y<sub>11</sub><sup>2+</sup> y<sub>10</sub> y<sub>9</sub><sup>2+</sup> y<sub>8</sub> ac y<sub>7</sub> y<sub>6</sub> y<sub>5</sub> y<sub>4</sub> y<sub>3</sub> y<sub>2</sub>

030314\_SCW\_II\_29\_8\_2ndZT

15845

ITMS; CID

162.48

574.95

Flna

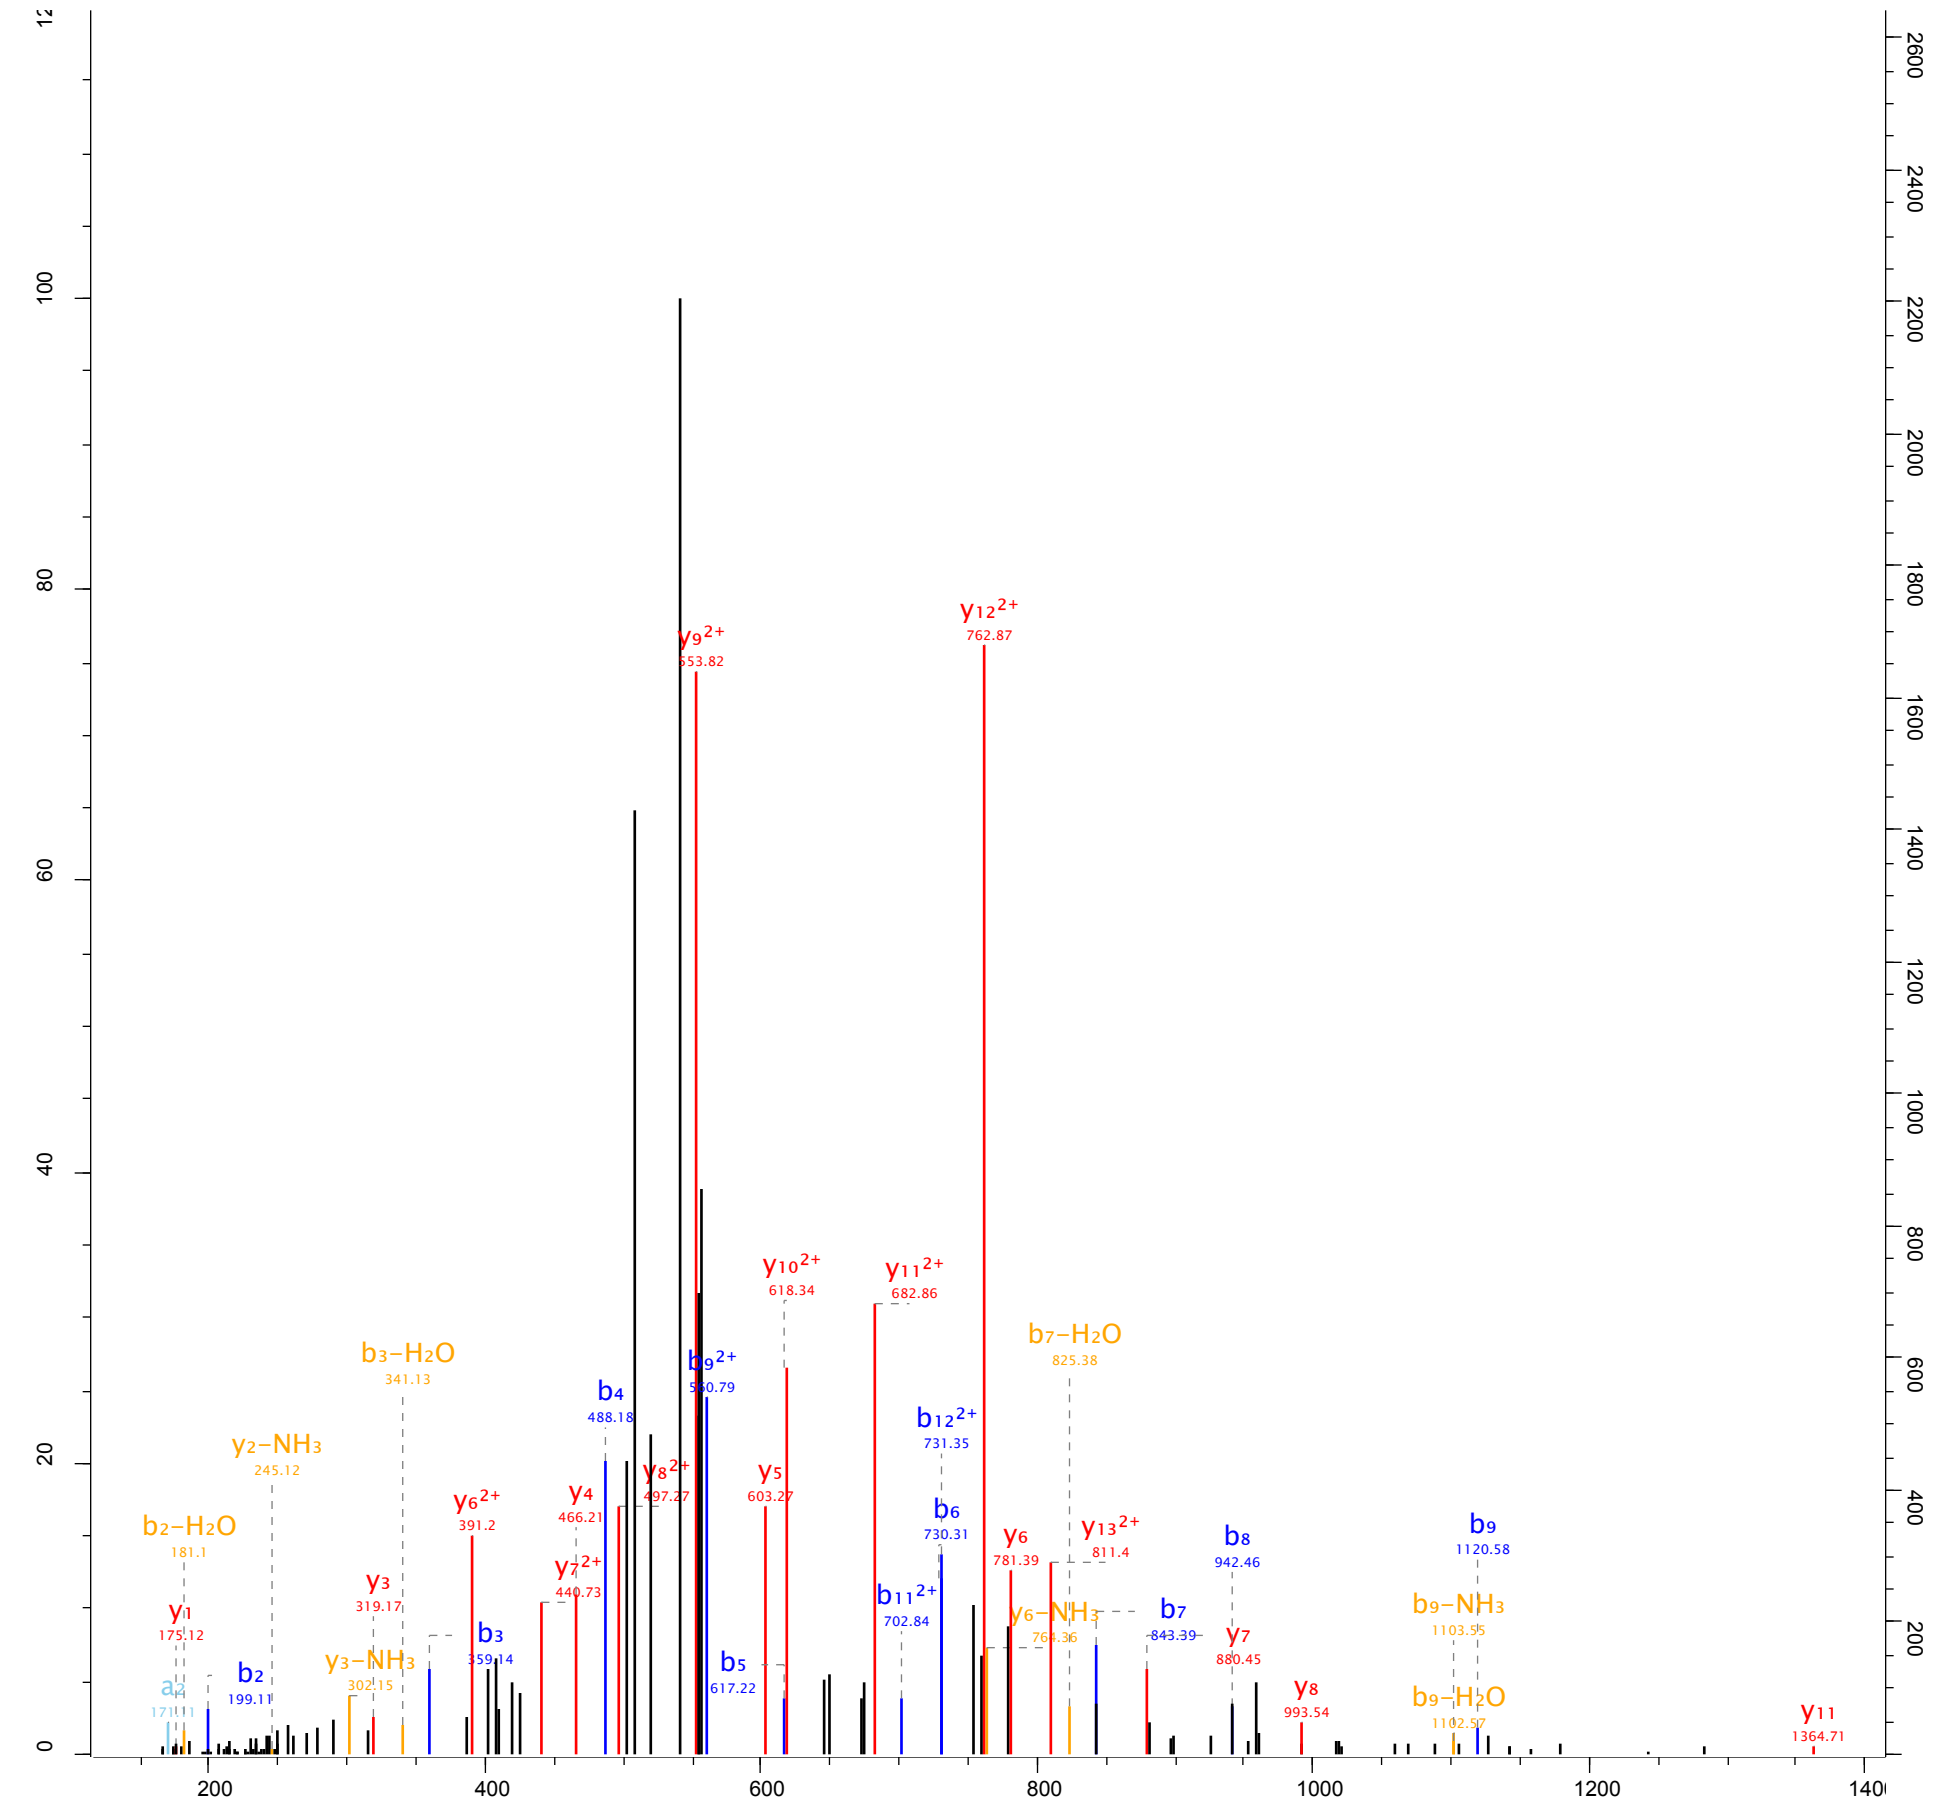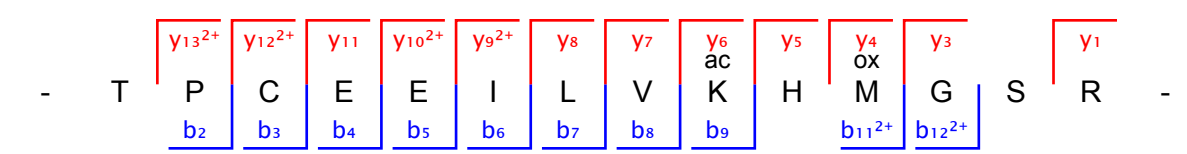

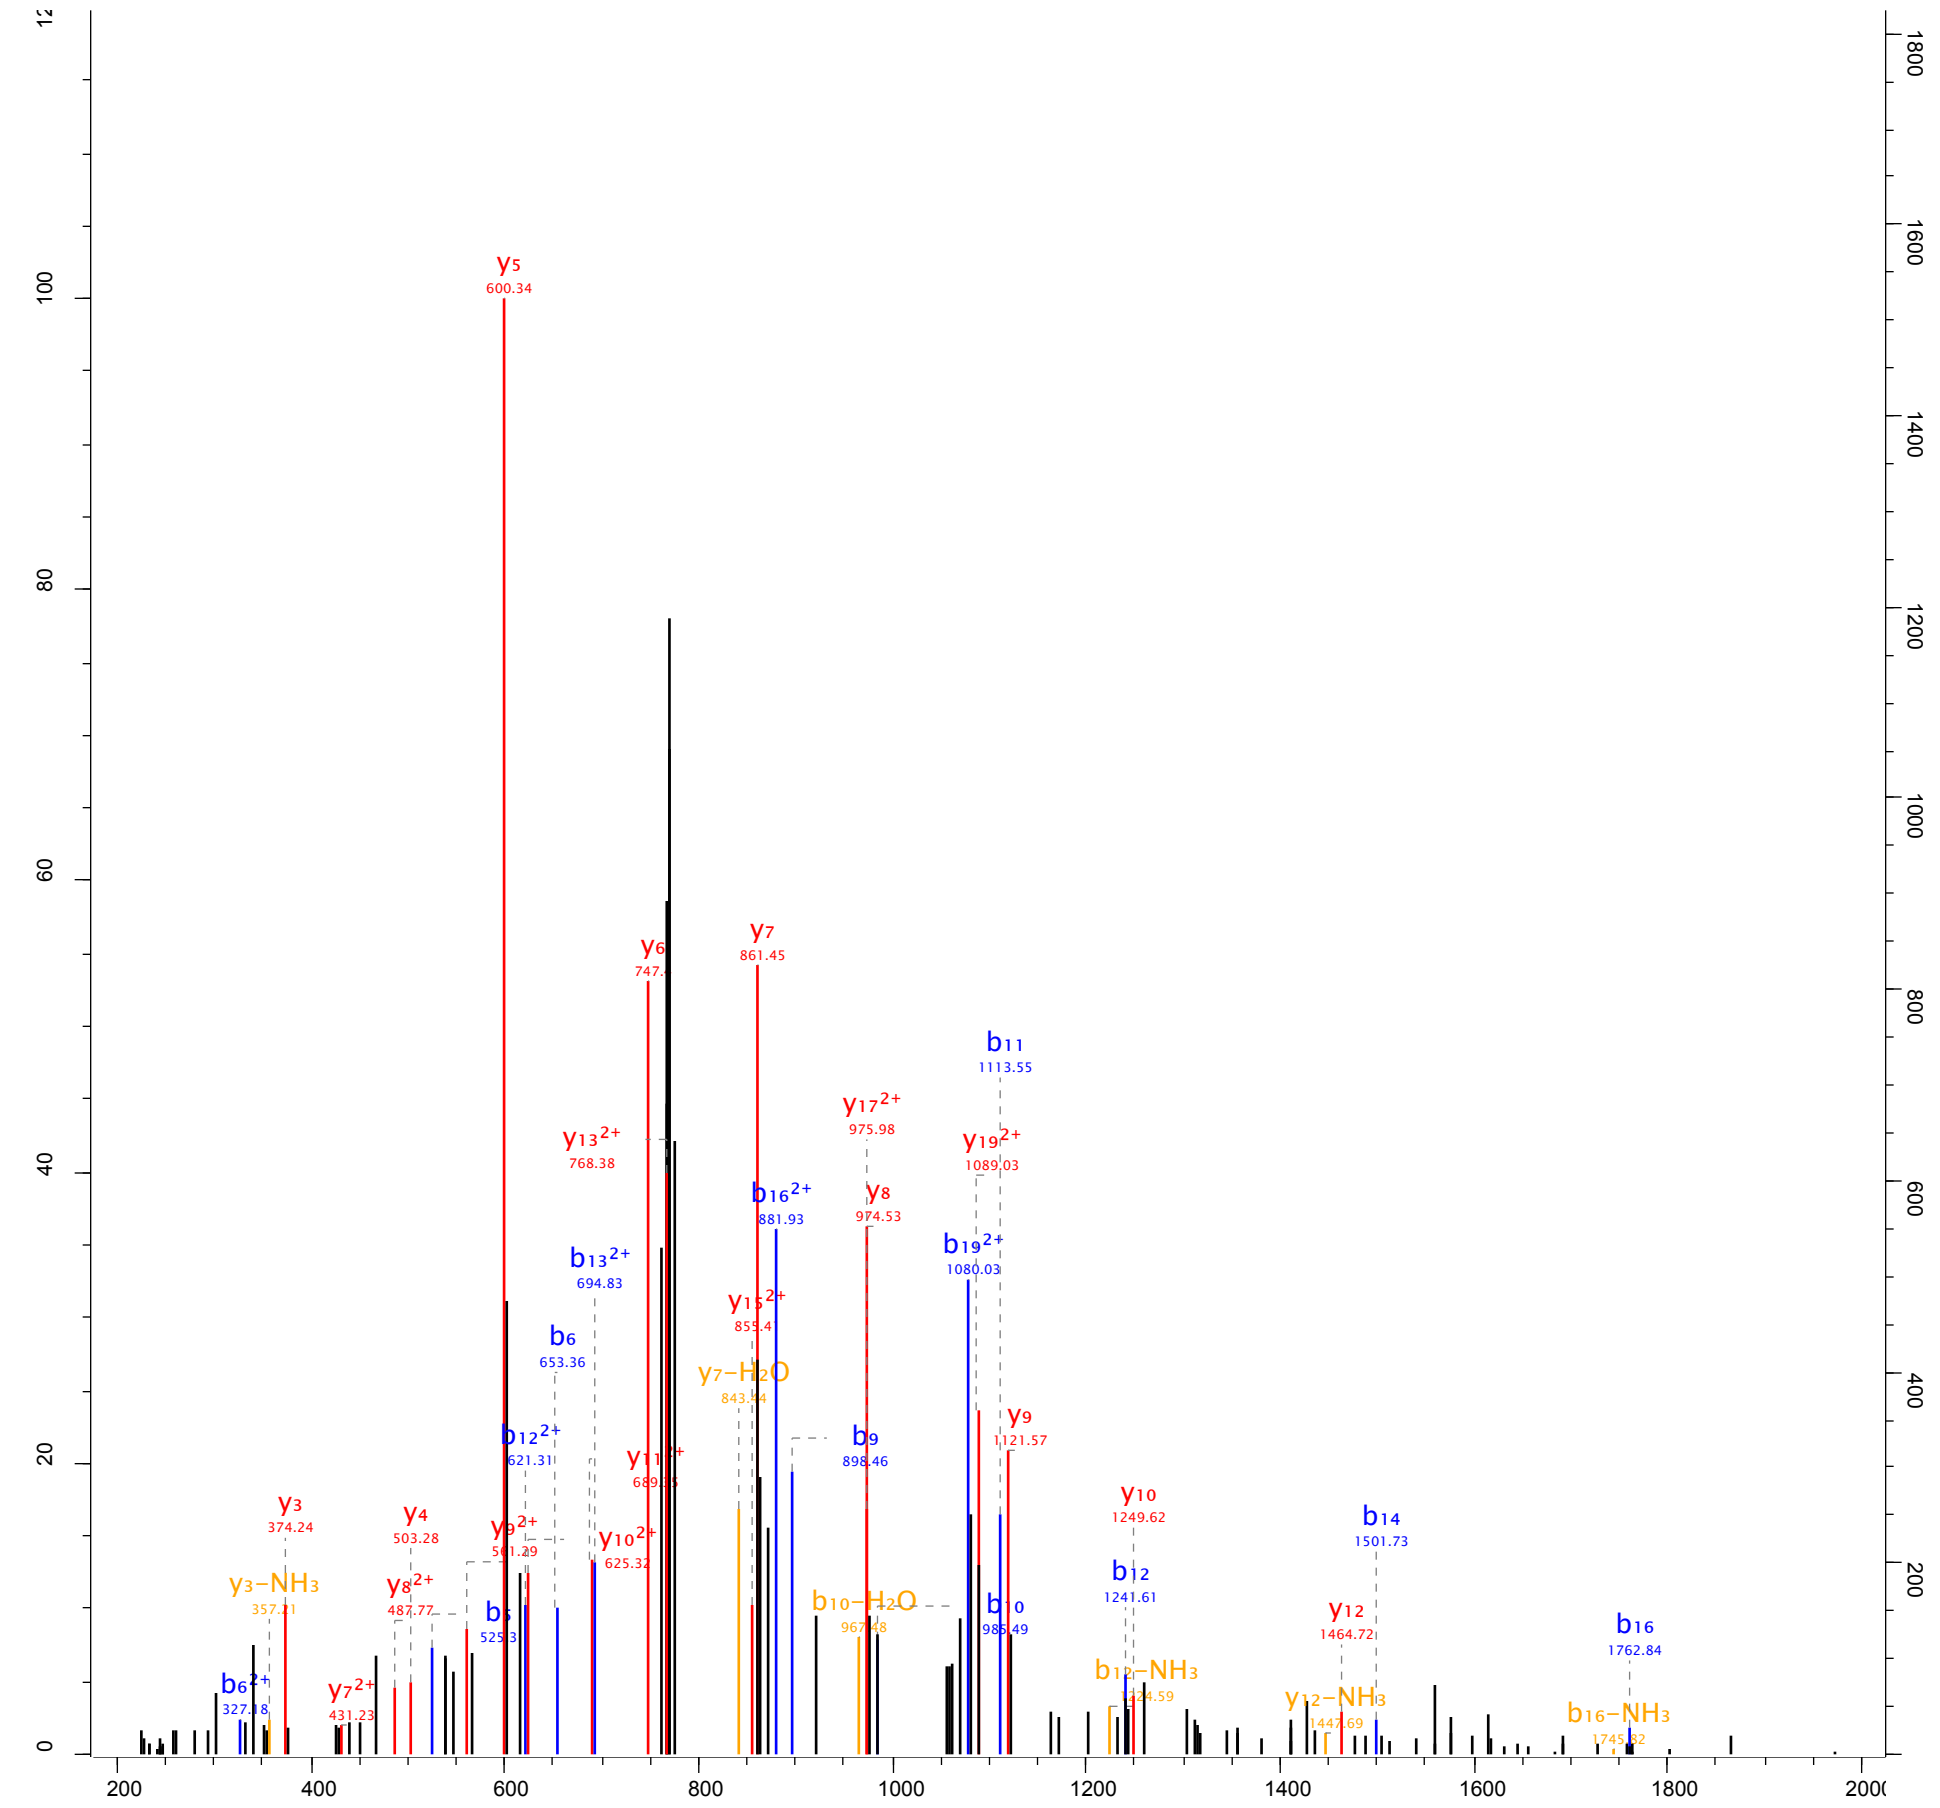

- G K P E L Q S S A S Q Q M L N F P E K G K -

y19<sup>2+</sup>
y17<sup>2+</sup>
y15<sup>2+</sup>
y13<sup>2+</sup>
y12
y11<sup>2+</sup>
y10
y9  
ox
y8
y7
y6
y5
y4
y3  
ac

b5
b6
b9
b10
b11
b12
b13<sup>2+</sup>
b14
b16
b19<sup>2+</sup>

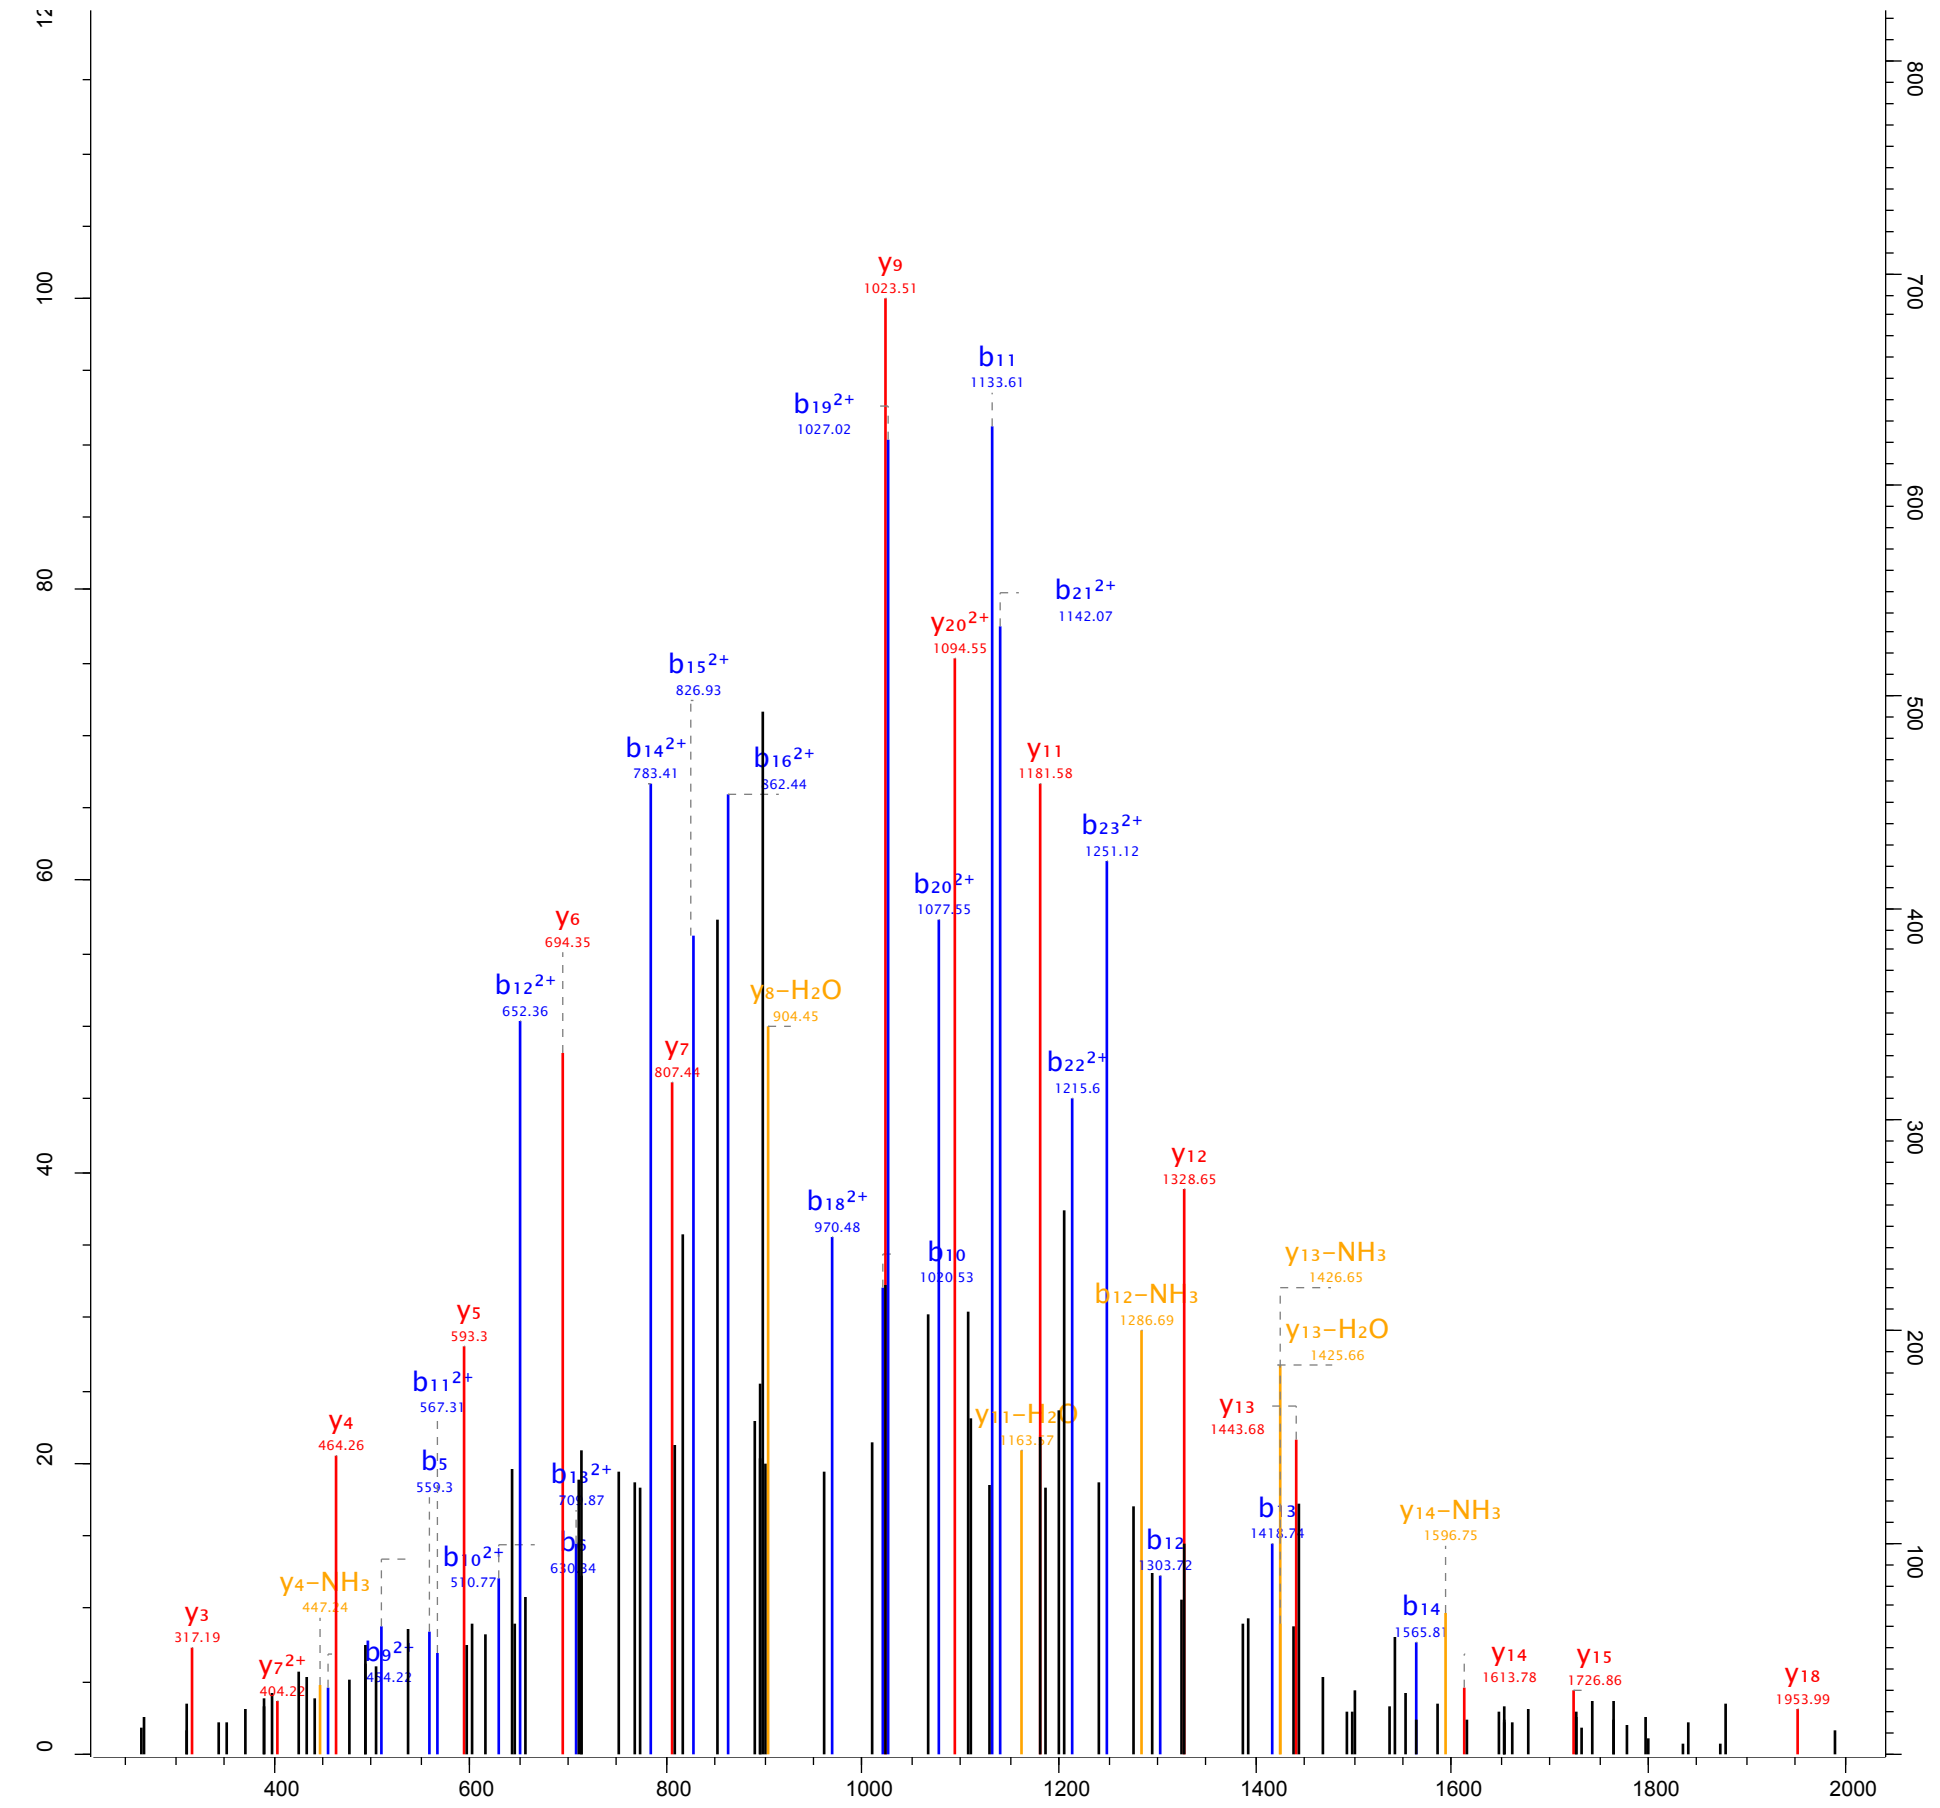

- R T P F G A Y G G L L K D F S A T D L T E F A A

b<sub>5</sub> b<sub>6</sub> b<sub>9</sub><sup>2+</sup> b<sub>10</sub> b<sub>11</sub> b<sub>12</sub> b<sub>13</sub> b<sub>14</sub> b<sub>15</sub><sup>2+</sup> b<sub>16</sub><sup>2+</sup> b<sub>18</sub><sup>2+</sup> b<sub>19</sub><sup>2+</sup> b<sub>20</sub><sup>2+</sup> b<sub>21</sub><sup>2+</sup> b<sub>22</sub><sup>2+</sup> b<sub>23</sub><sup>2+</sup>

y<sub>20</sub><sup>2+</sup> y<sub>18</sub> y<sub>15</sub> y<sub>14</sub> ac y<sub>13</sub> y<sub>12</sub> y<sub>11</sub> y<sub>9</sub> y<sub>7</sub> y<sub>6</sub> y<sub>5</sub> y<sub>4</sub> y<sub>3</sub>

R -



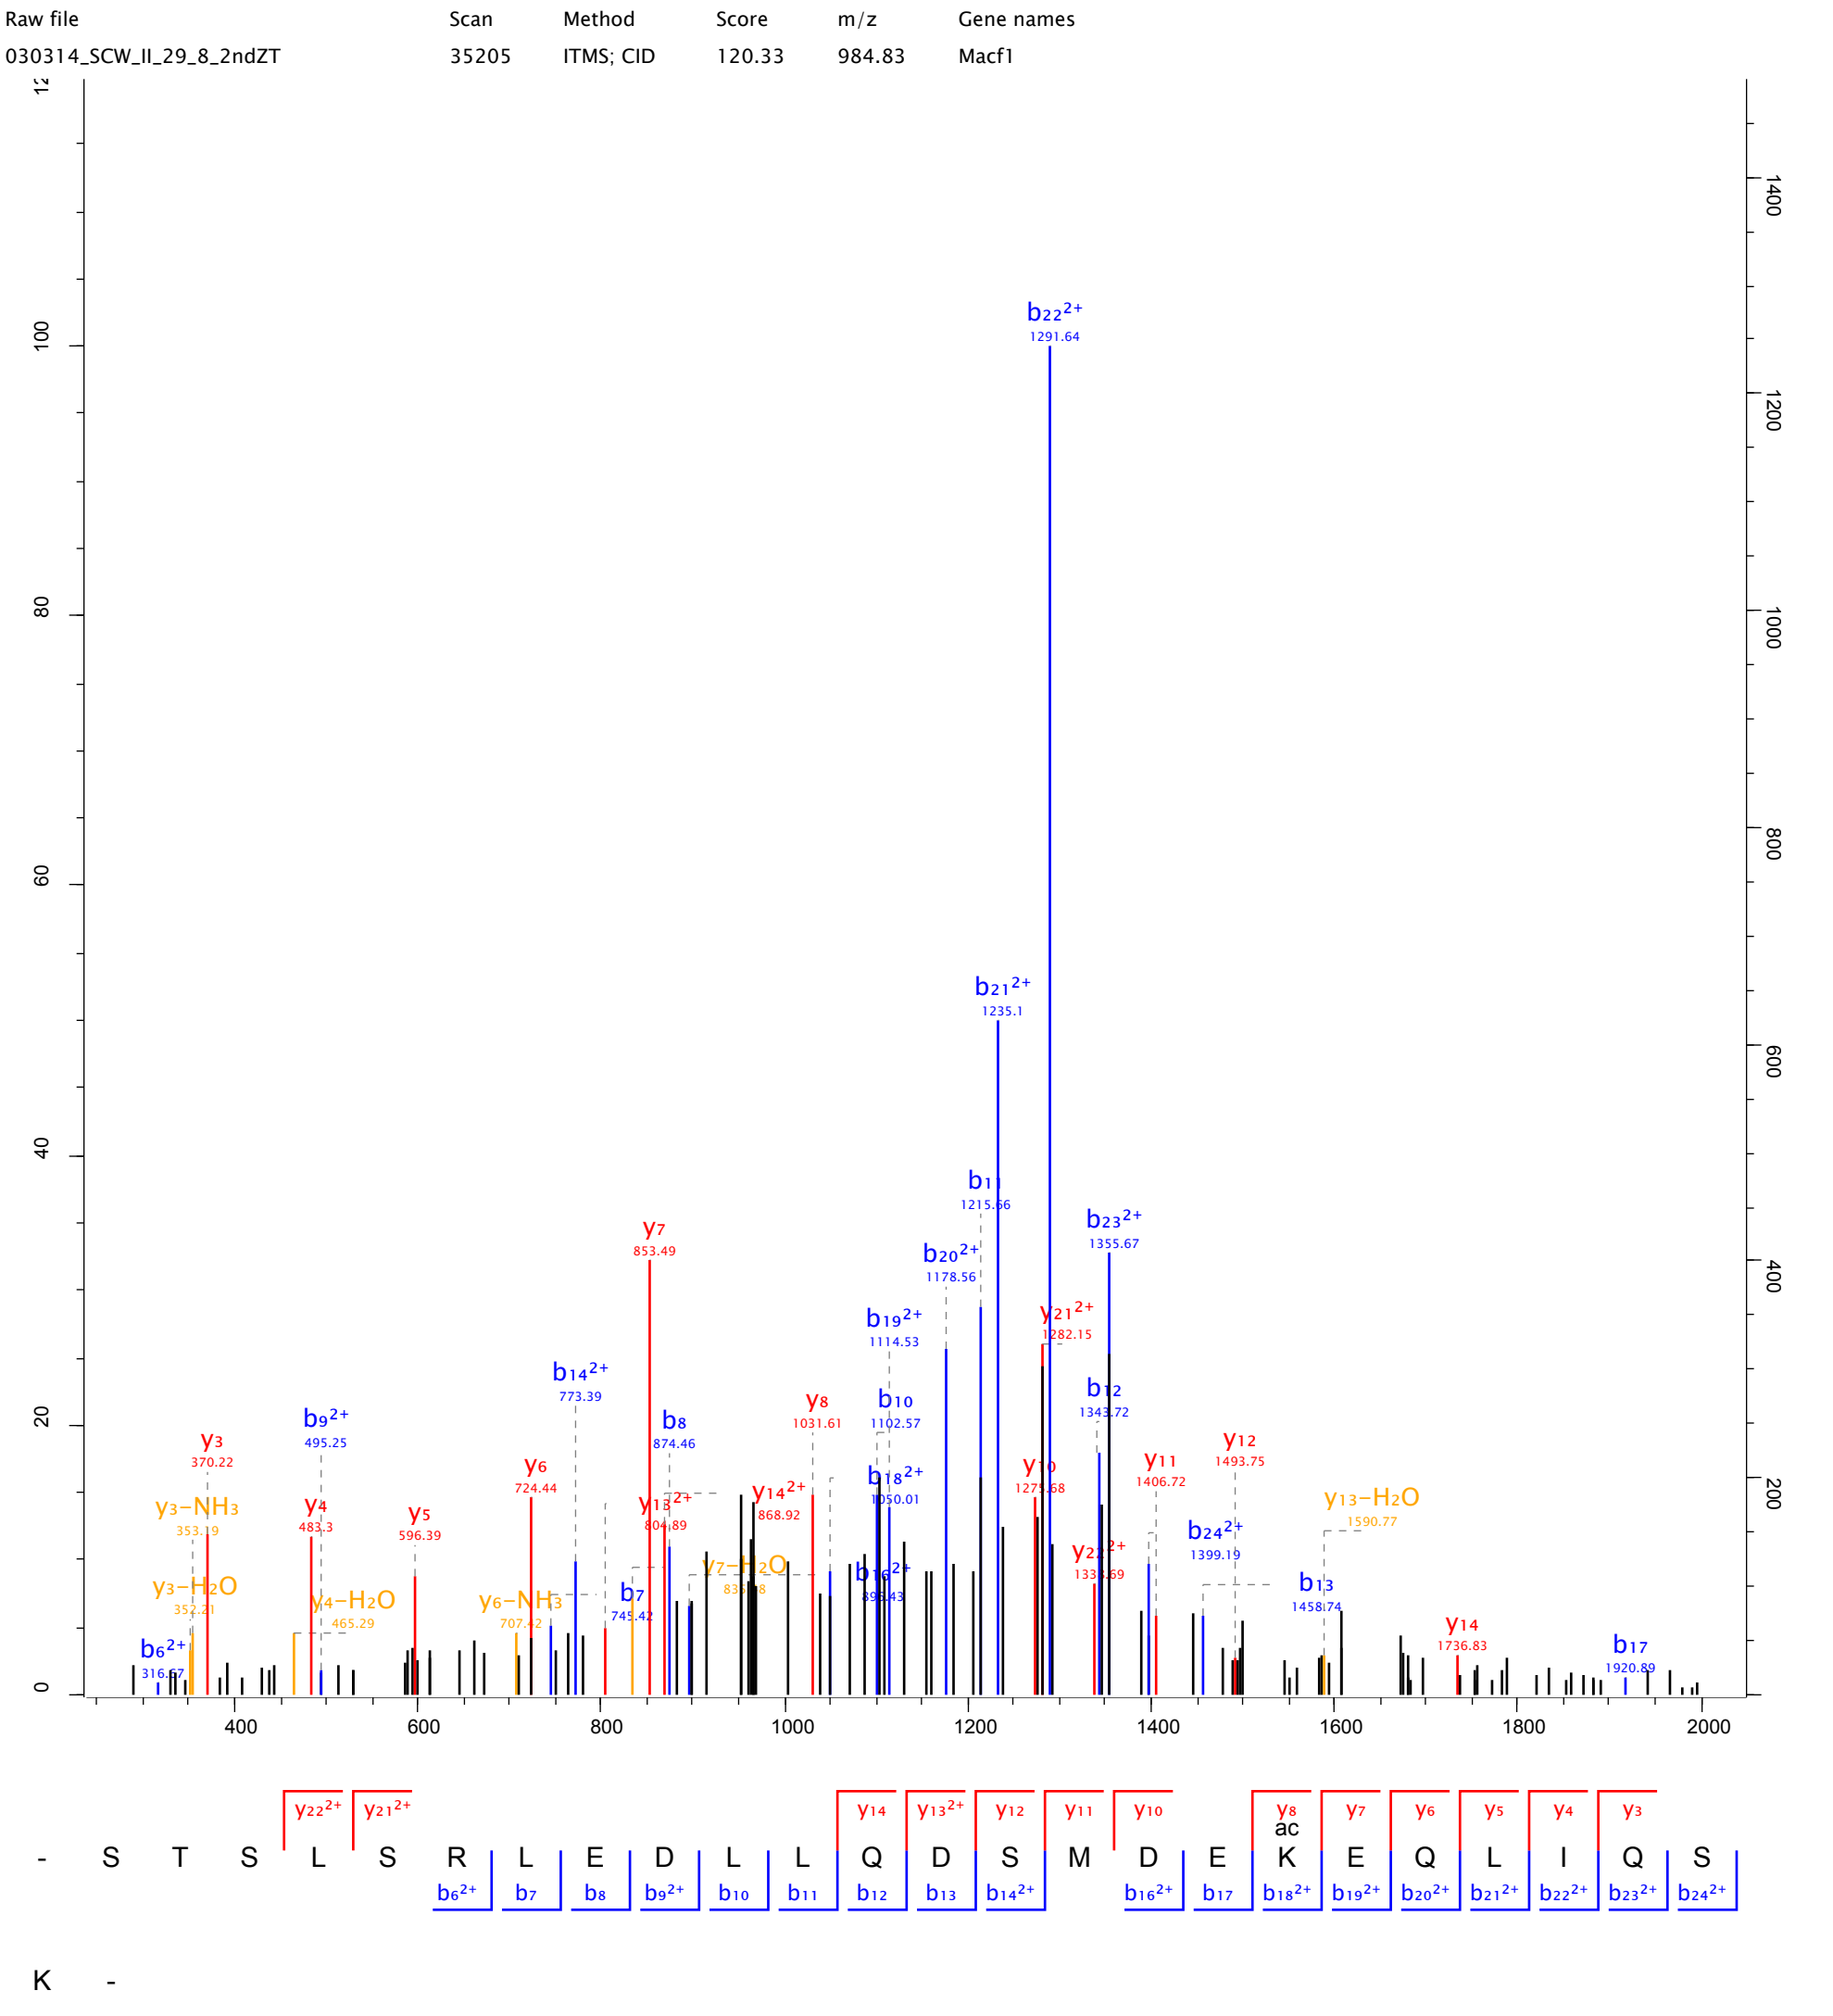

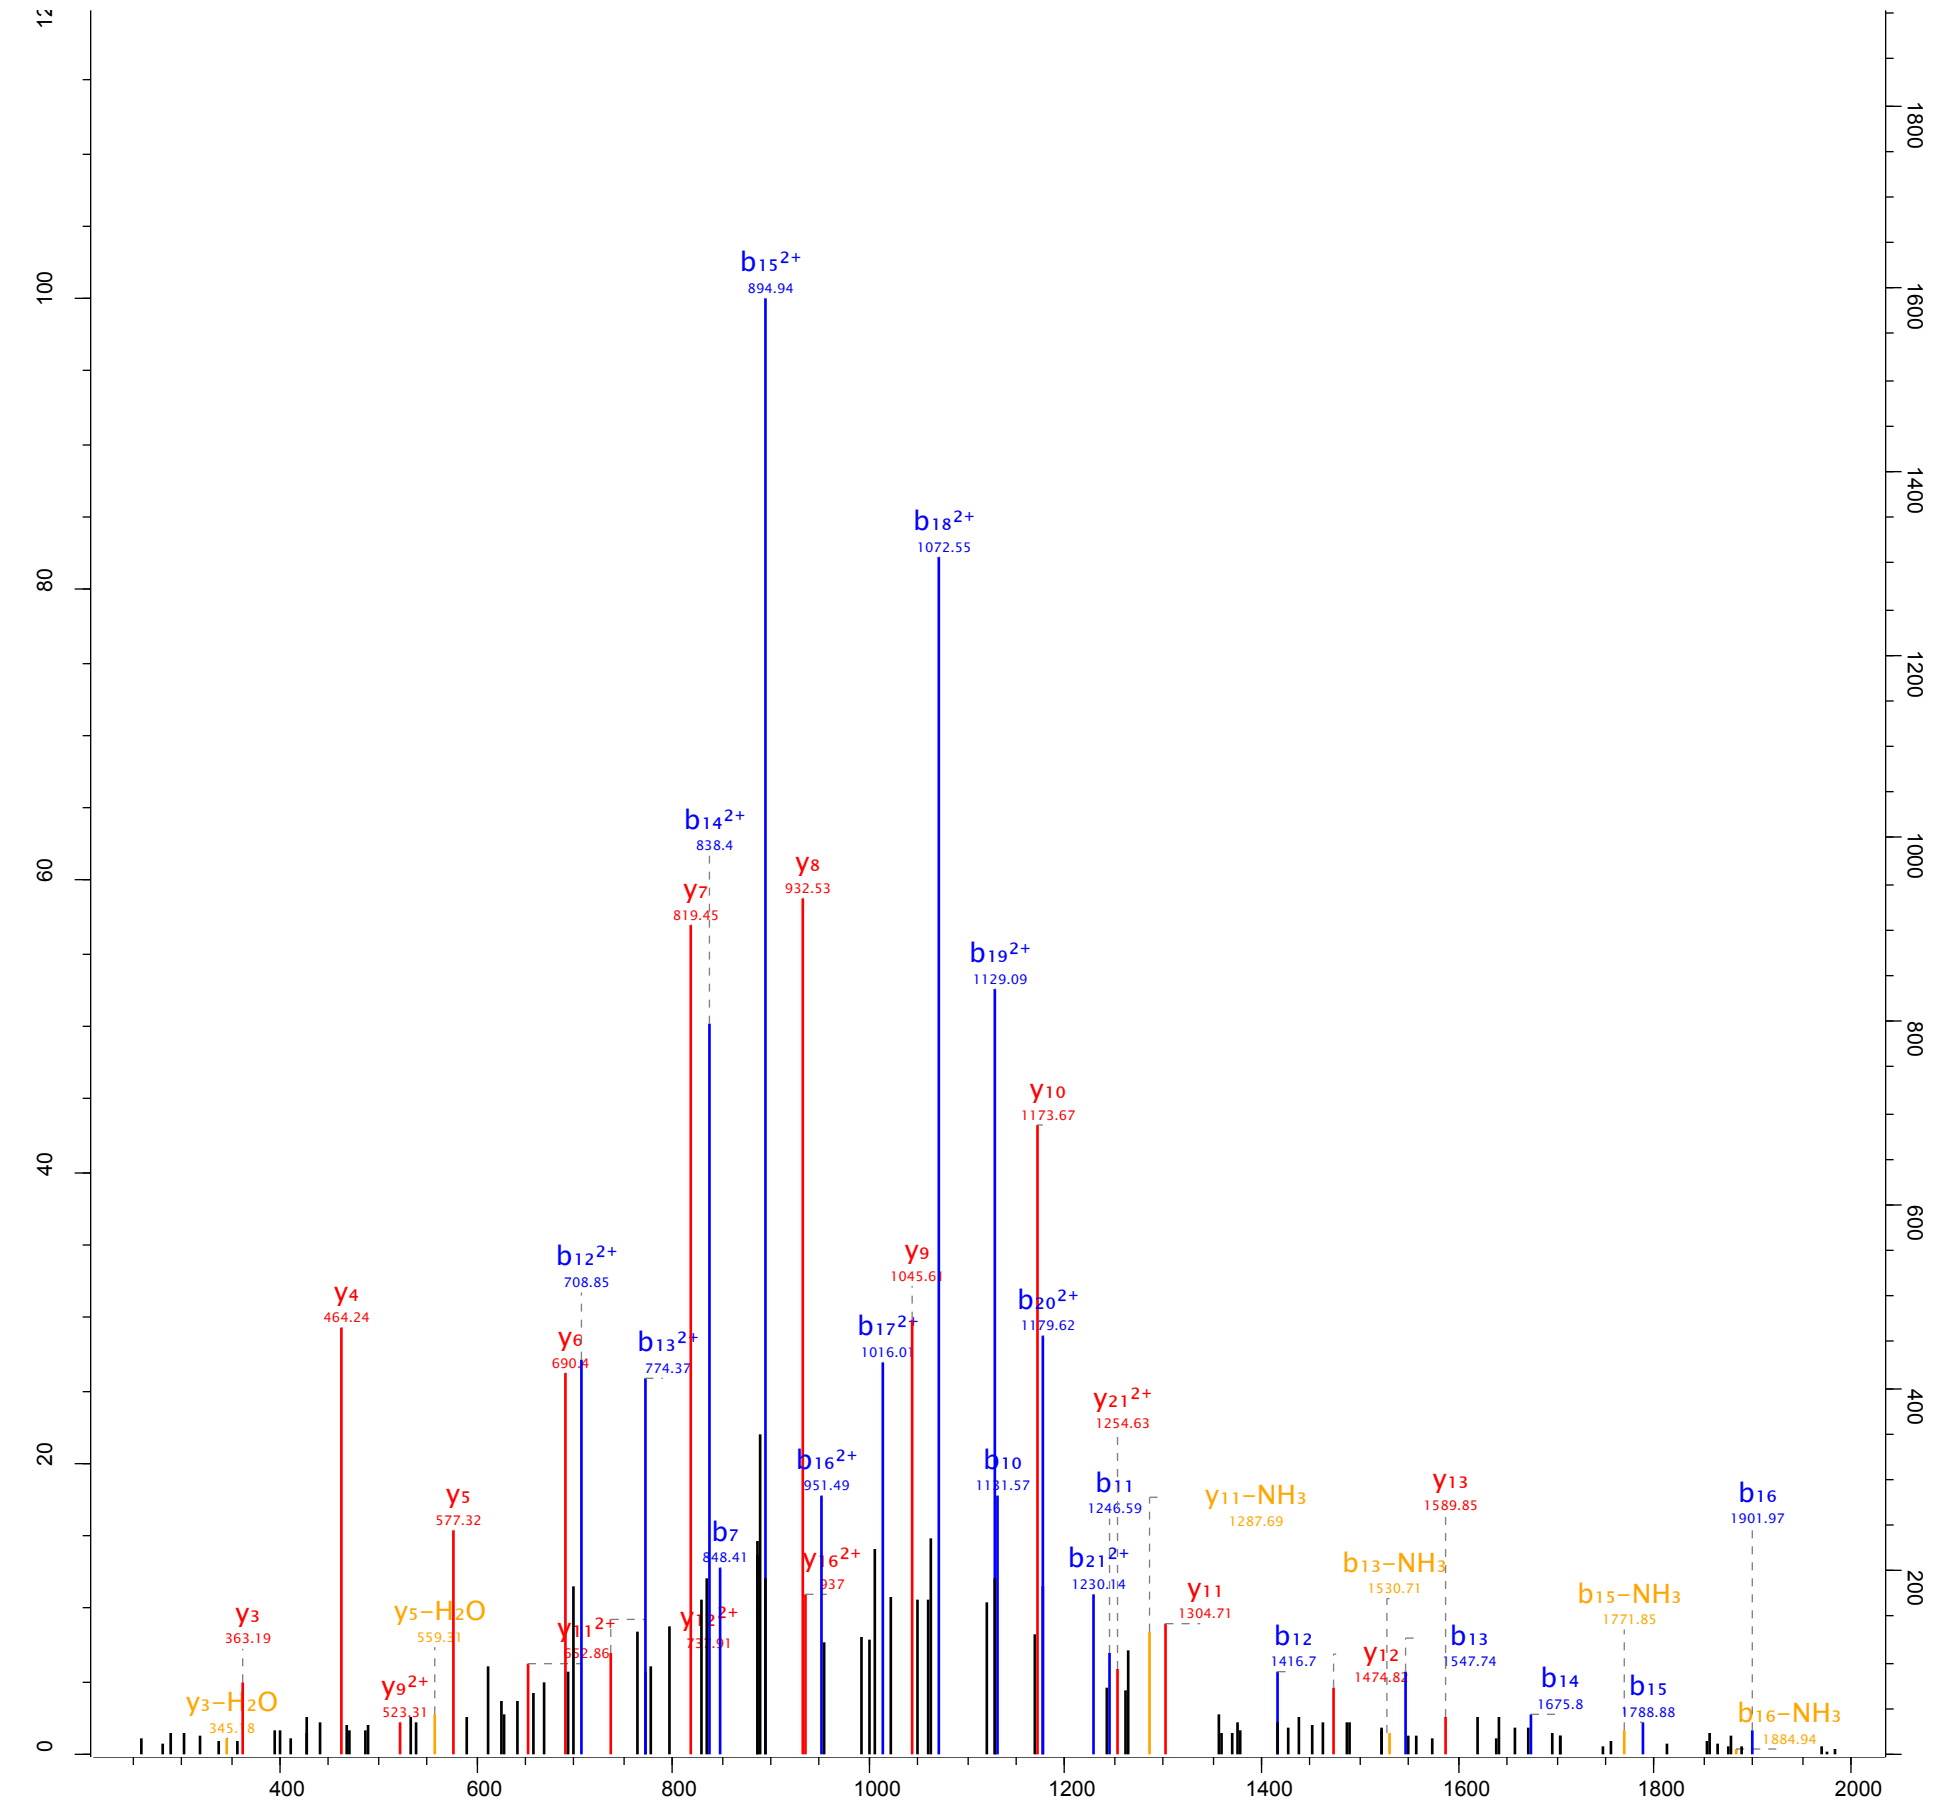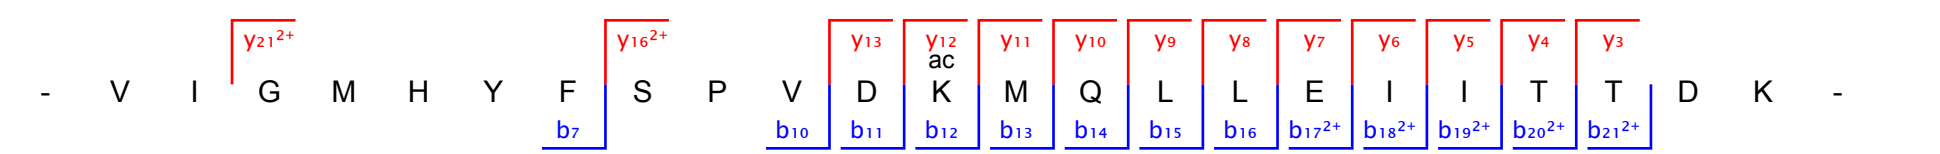

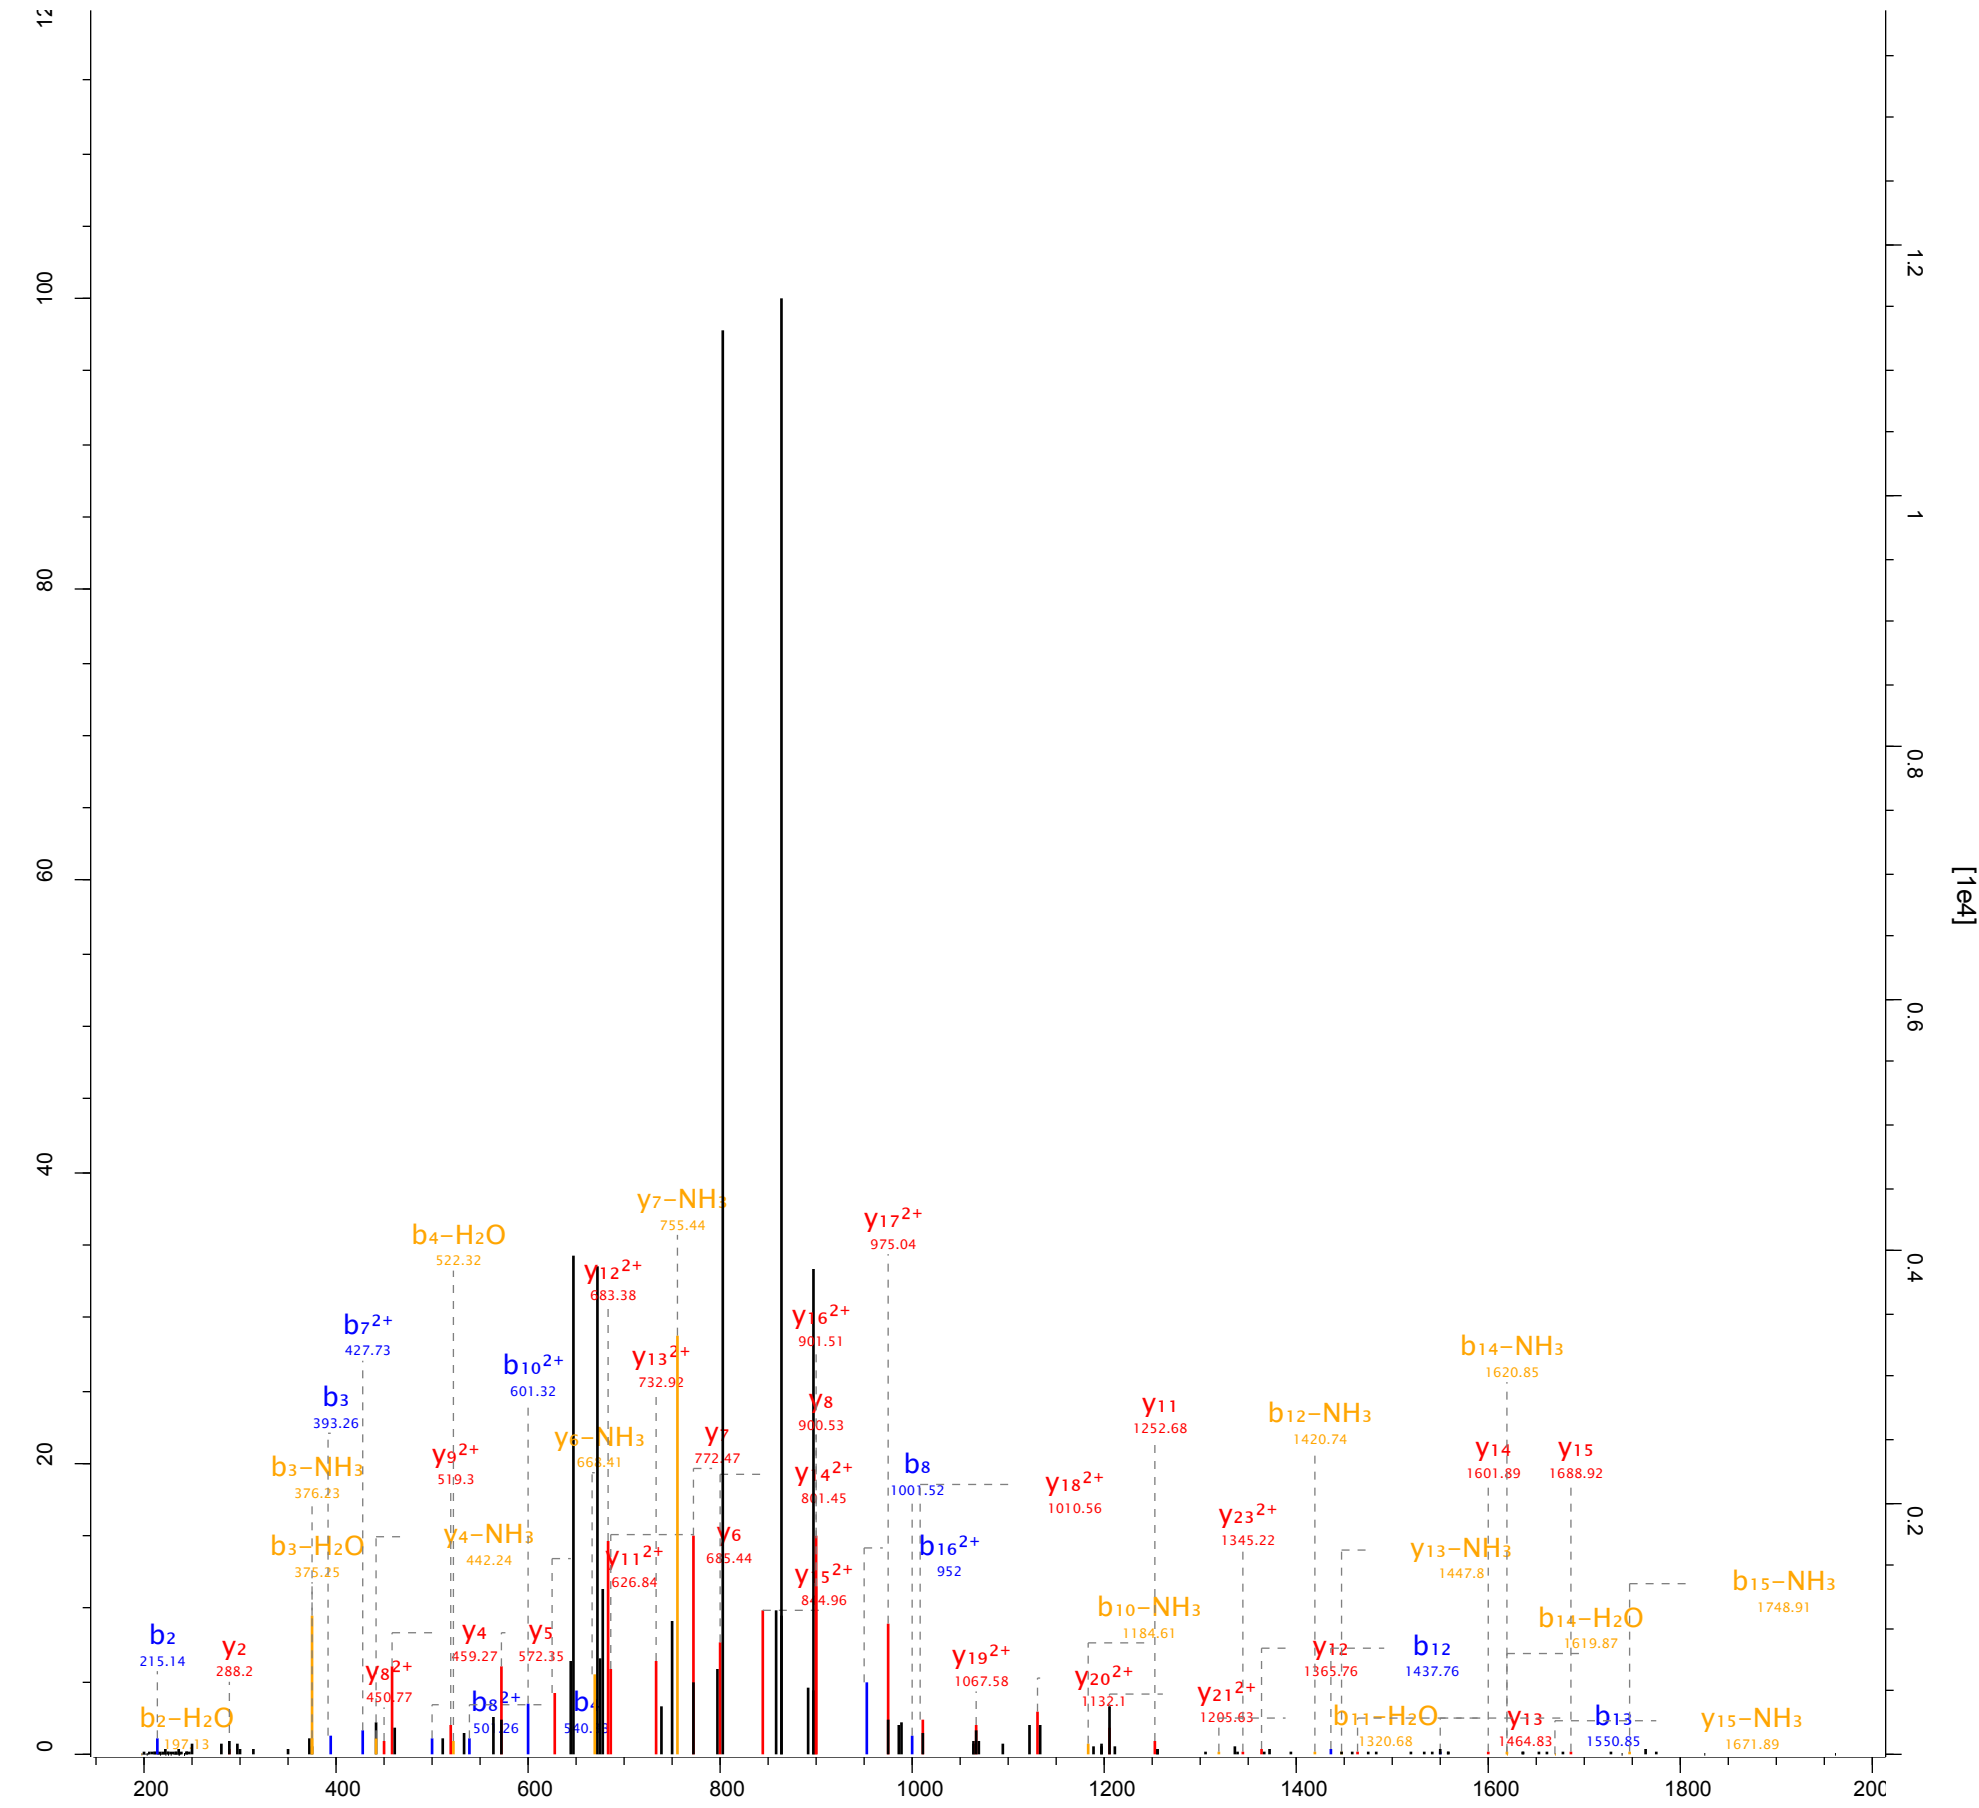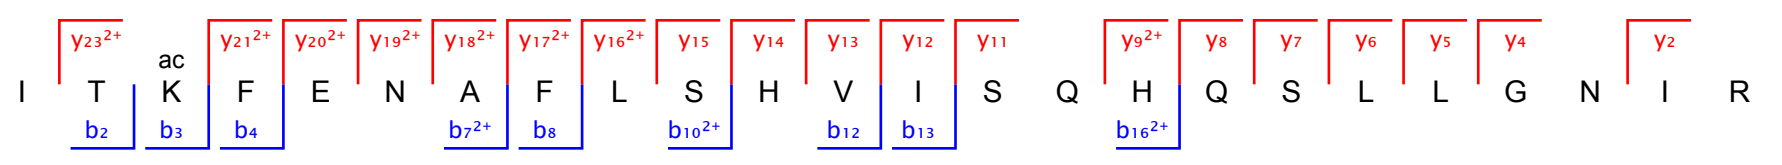

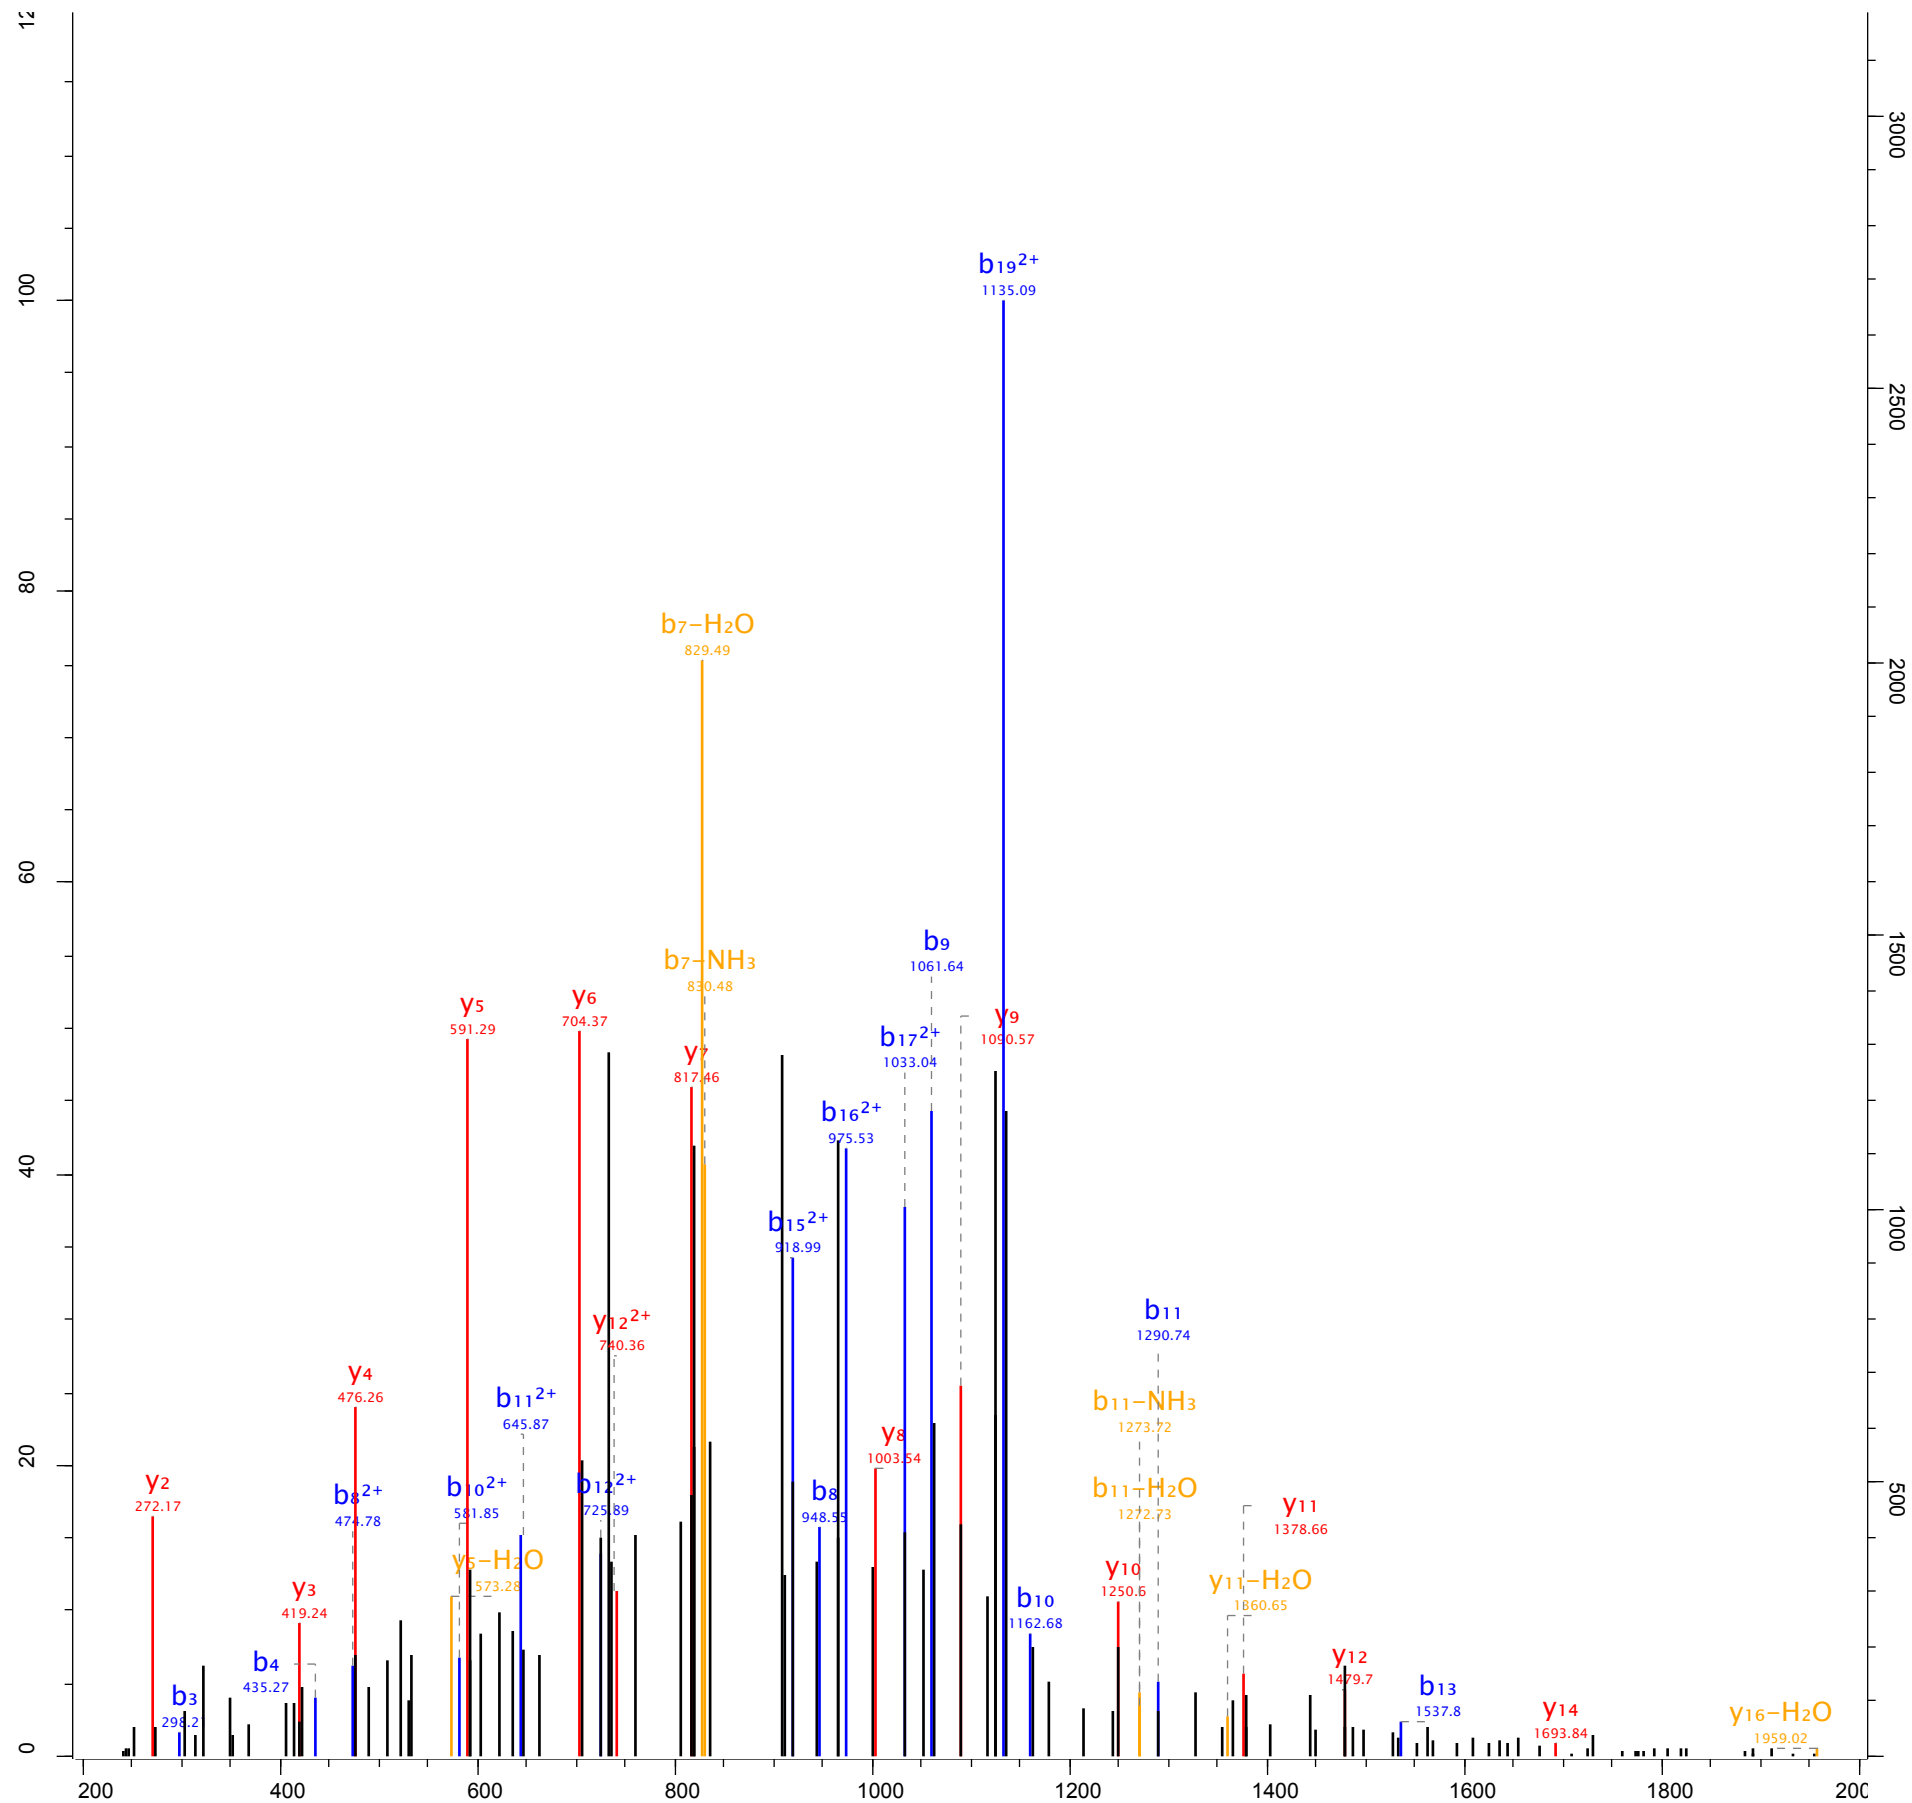

- L A L H E L K T L T Q C S W L L D G F P R -

b3
b4
y14
y12
y11
y10
y9
y8
y7
y6
y5
y4
y3
y2
b8
b9
b10
b11
b12^2+
b13
b15^2+
b16^2+
b17^2+
b19^2+

Raw file 030314\_SCW\_II\_29\_10\_2ndZT Scan 14884 Method ITMS; CID Score 126.71 m/z 490.26 Gene names Pdha1;Pdha2

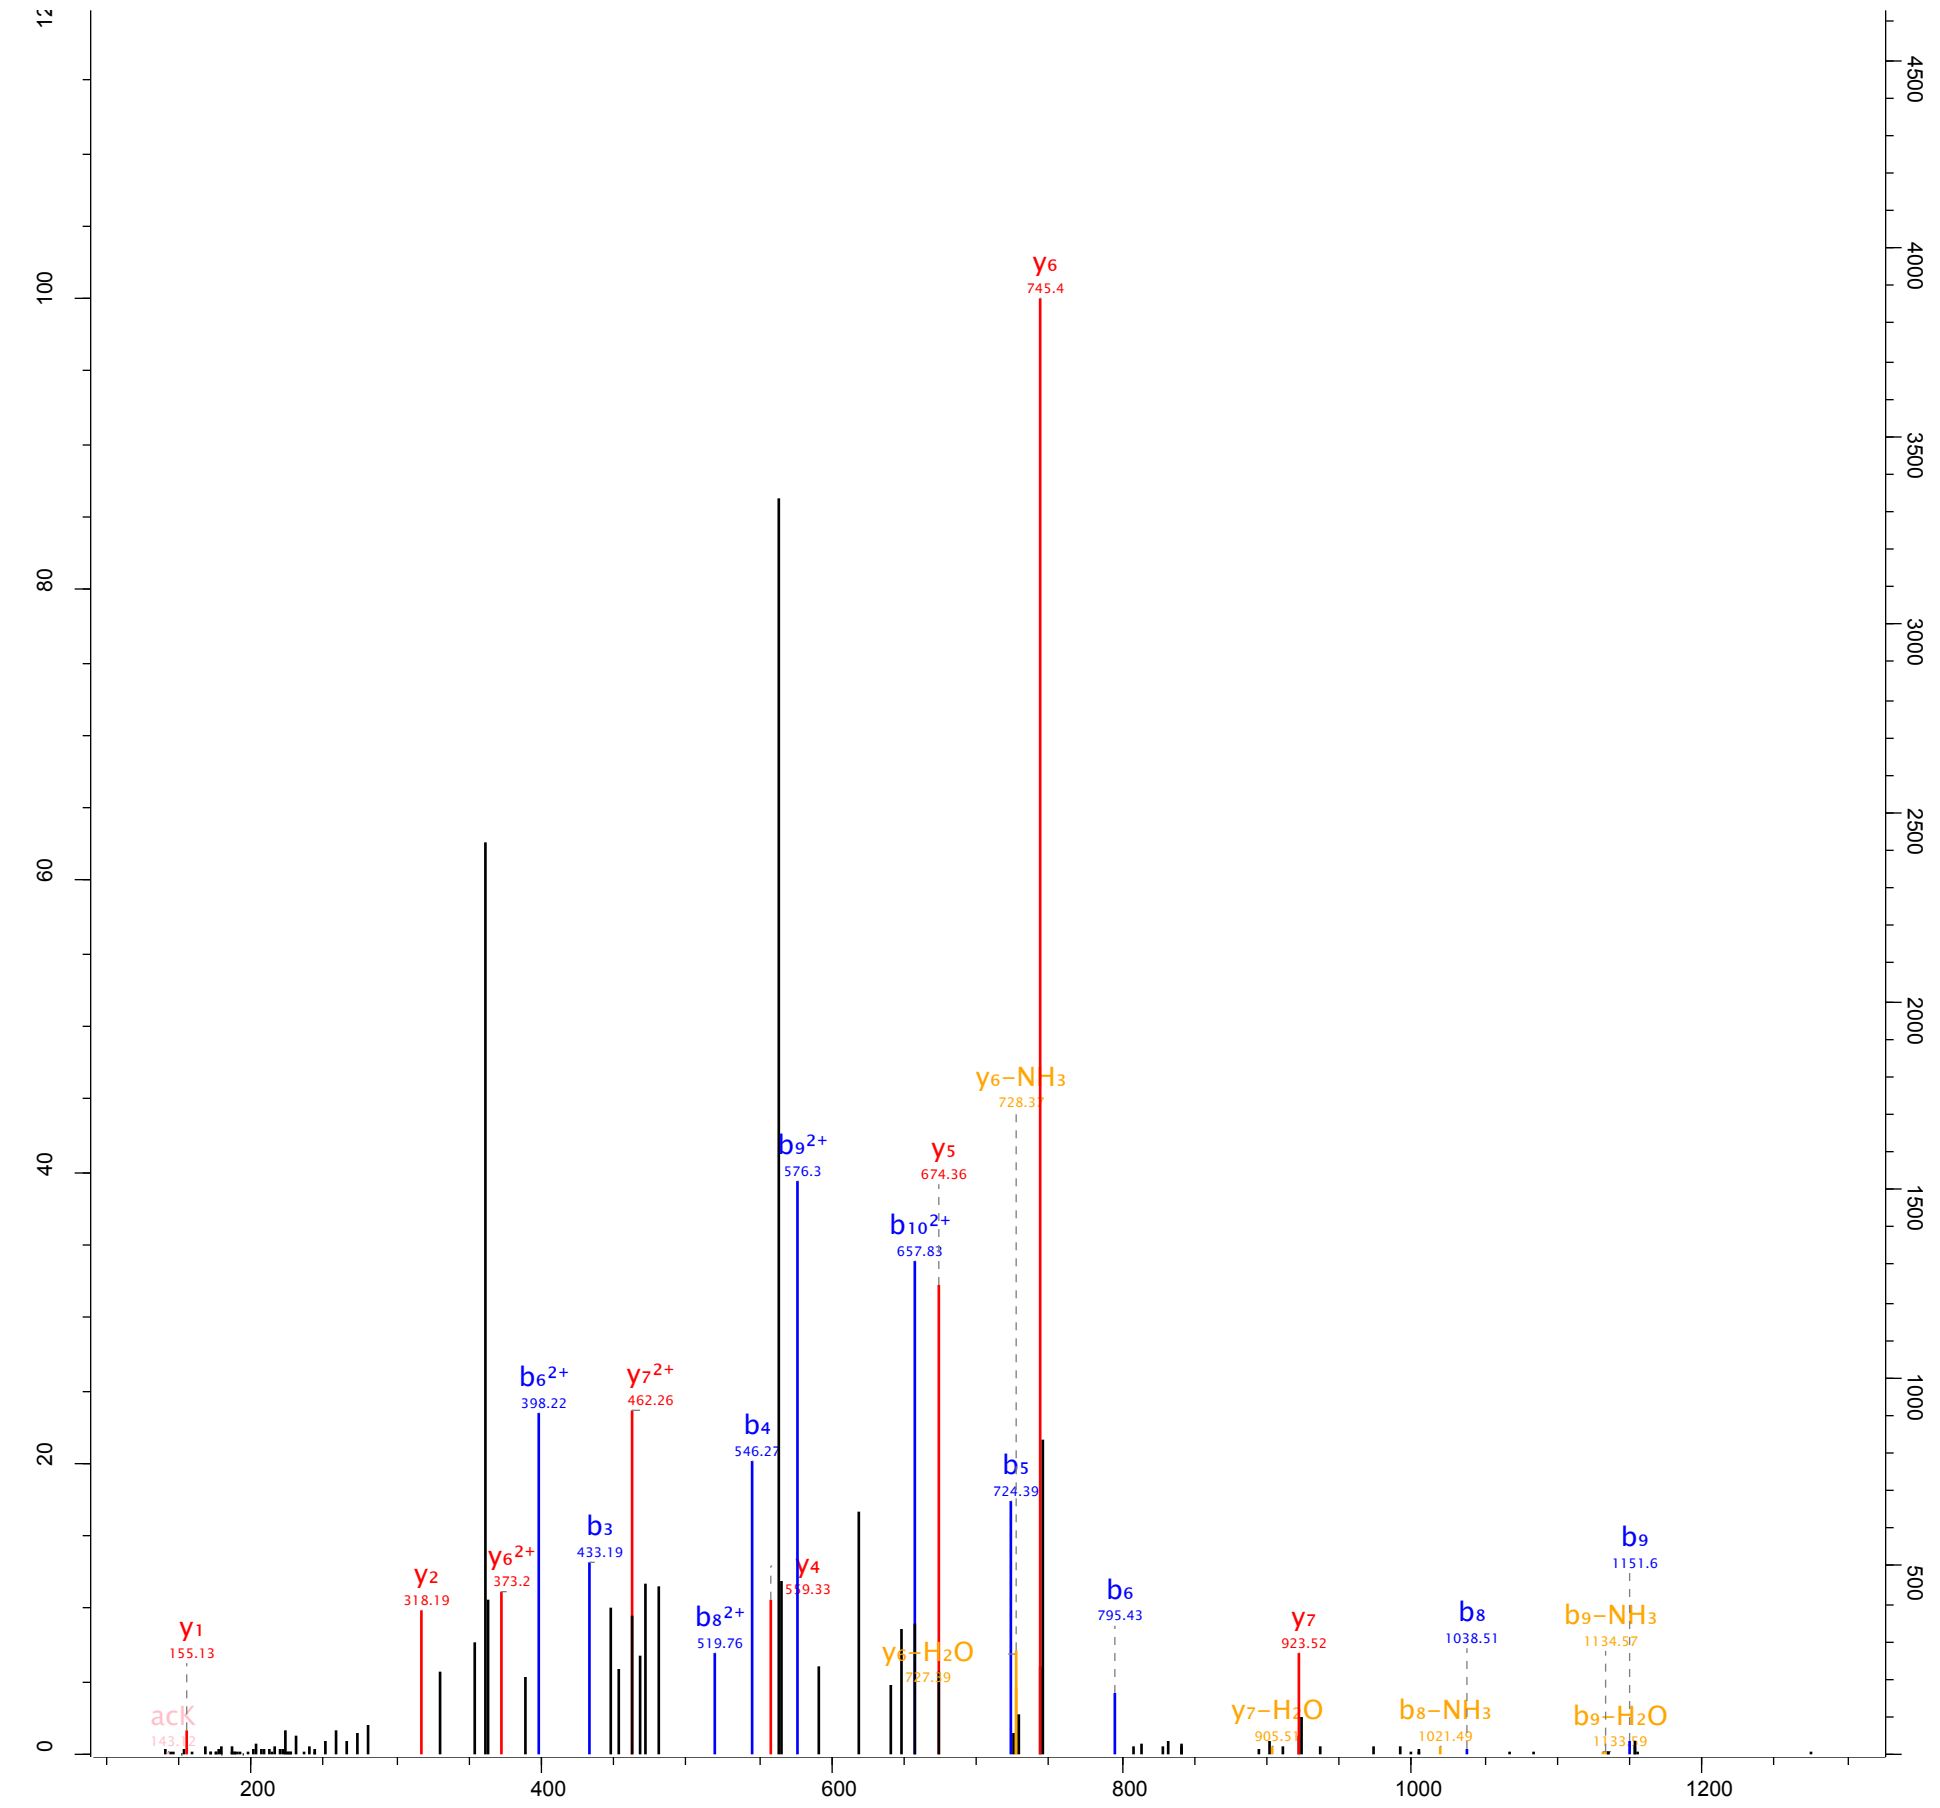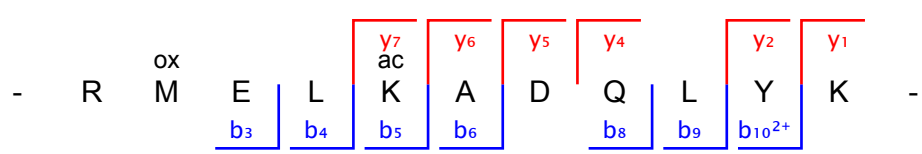

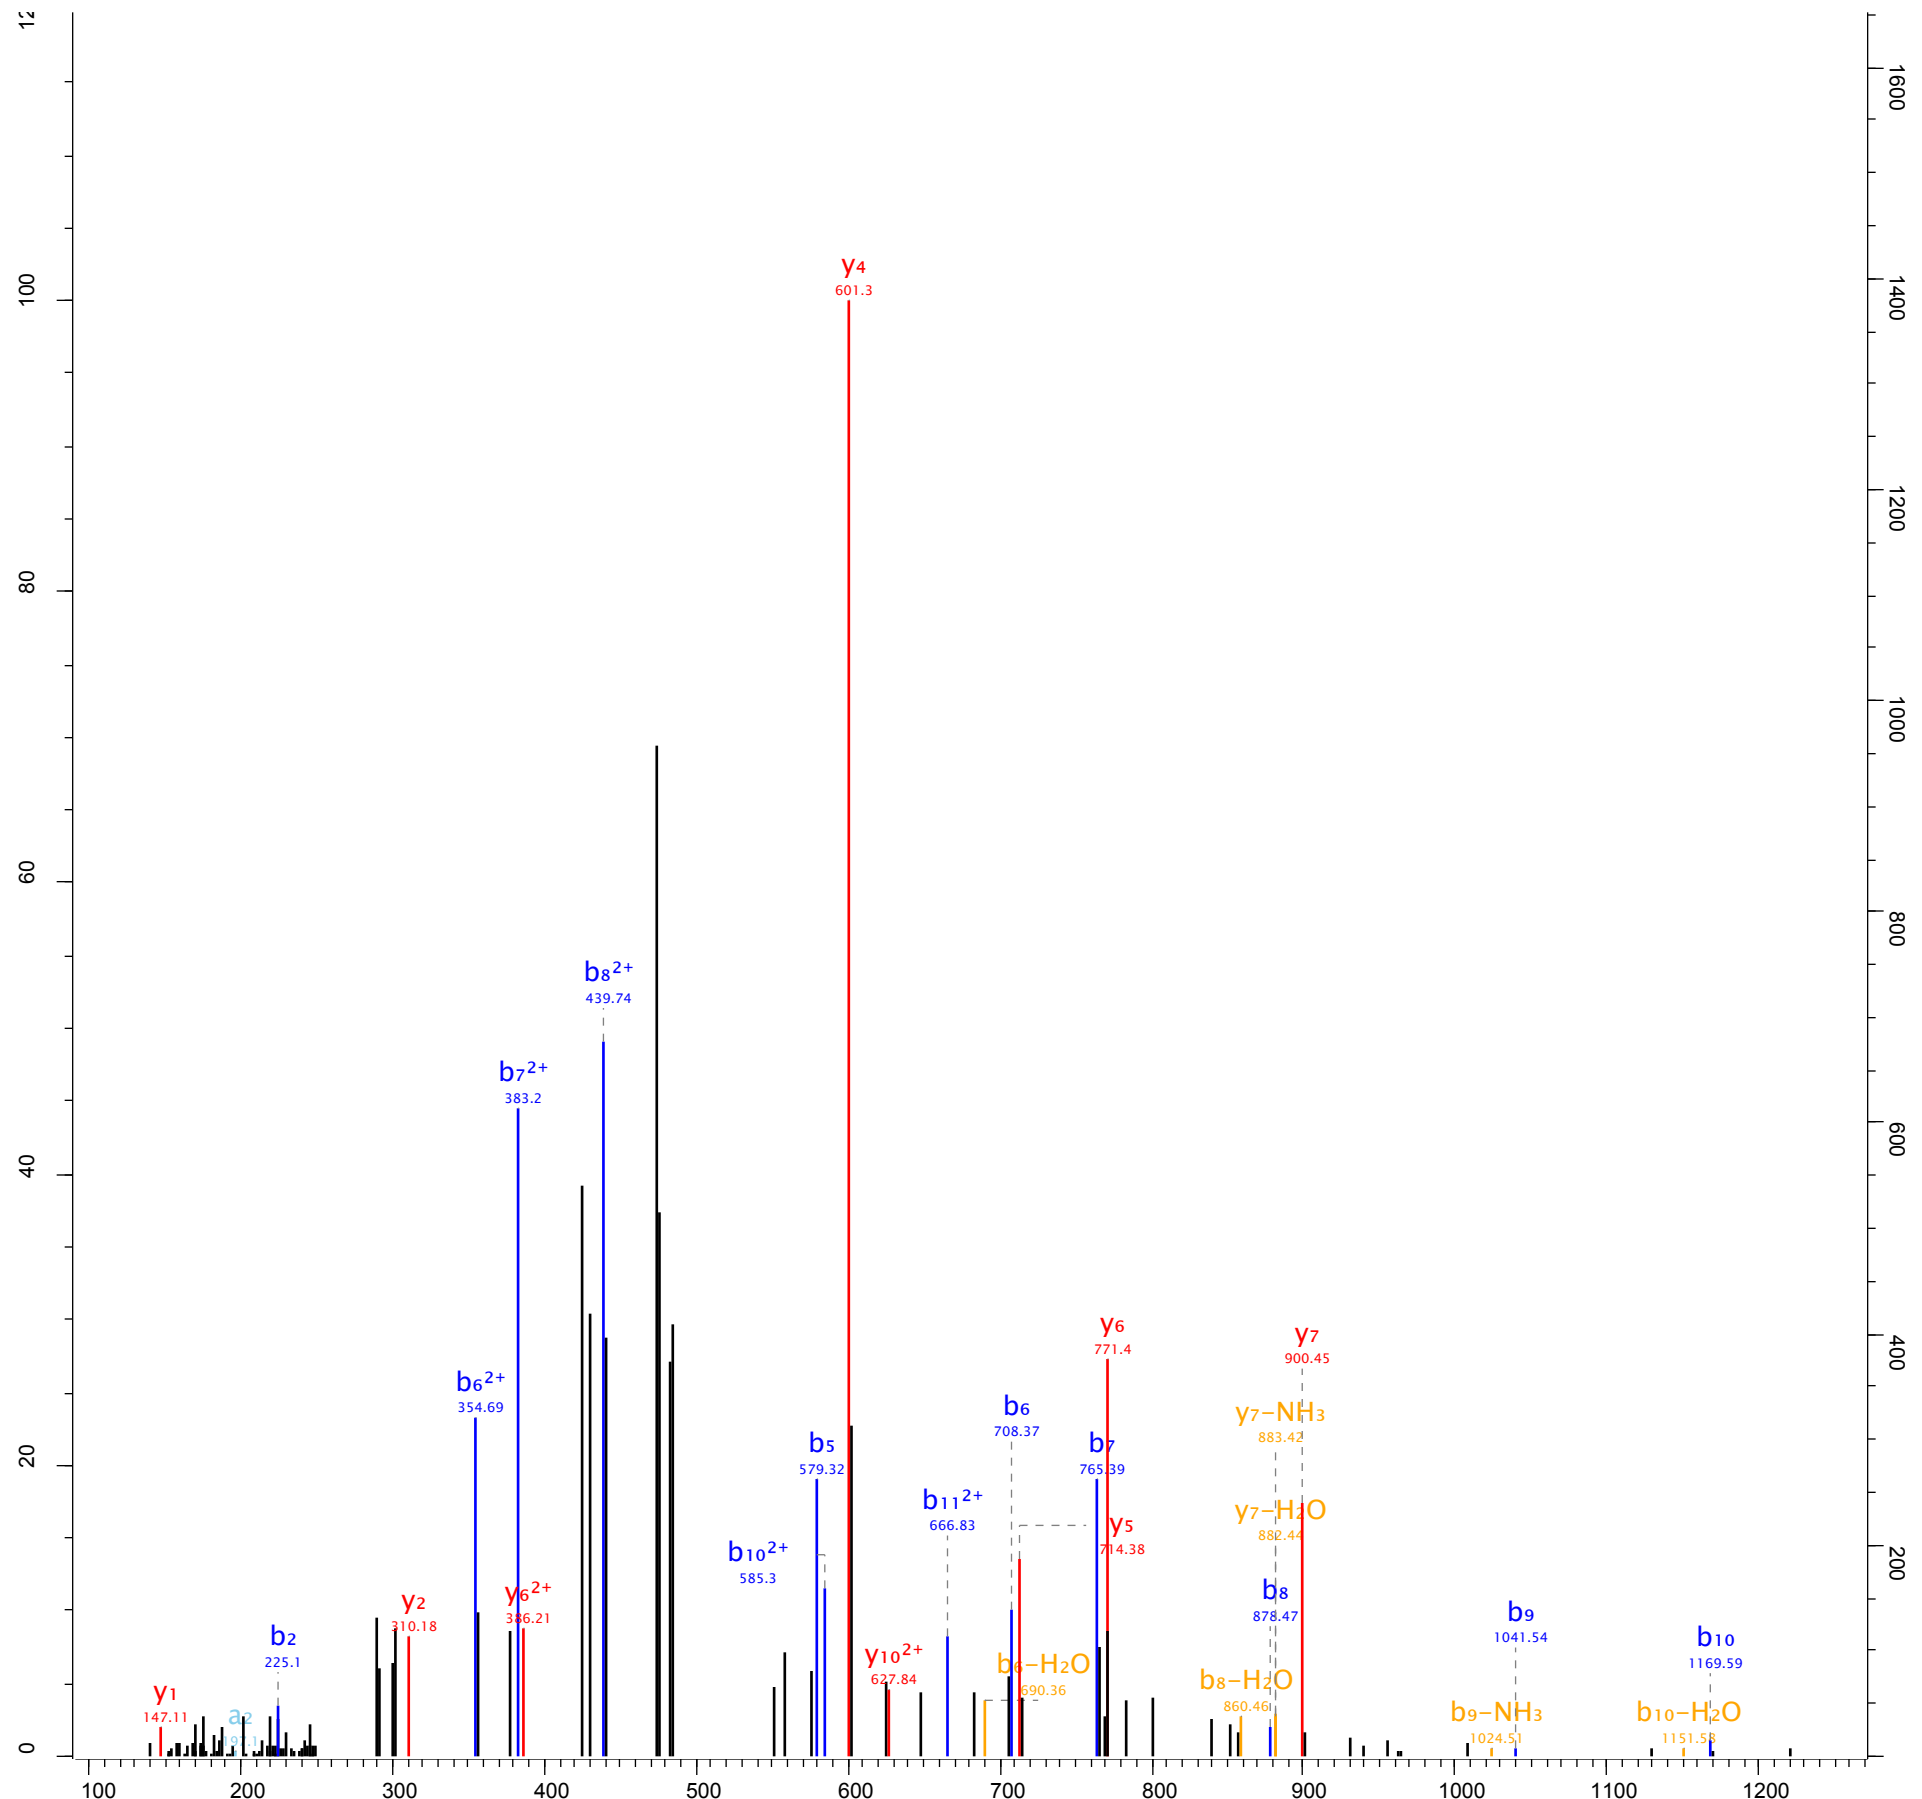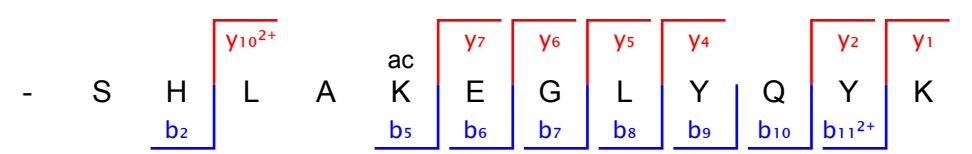

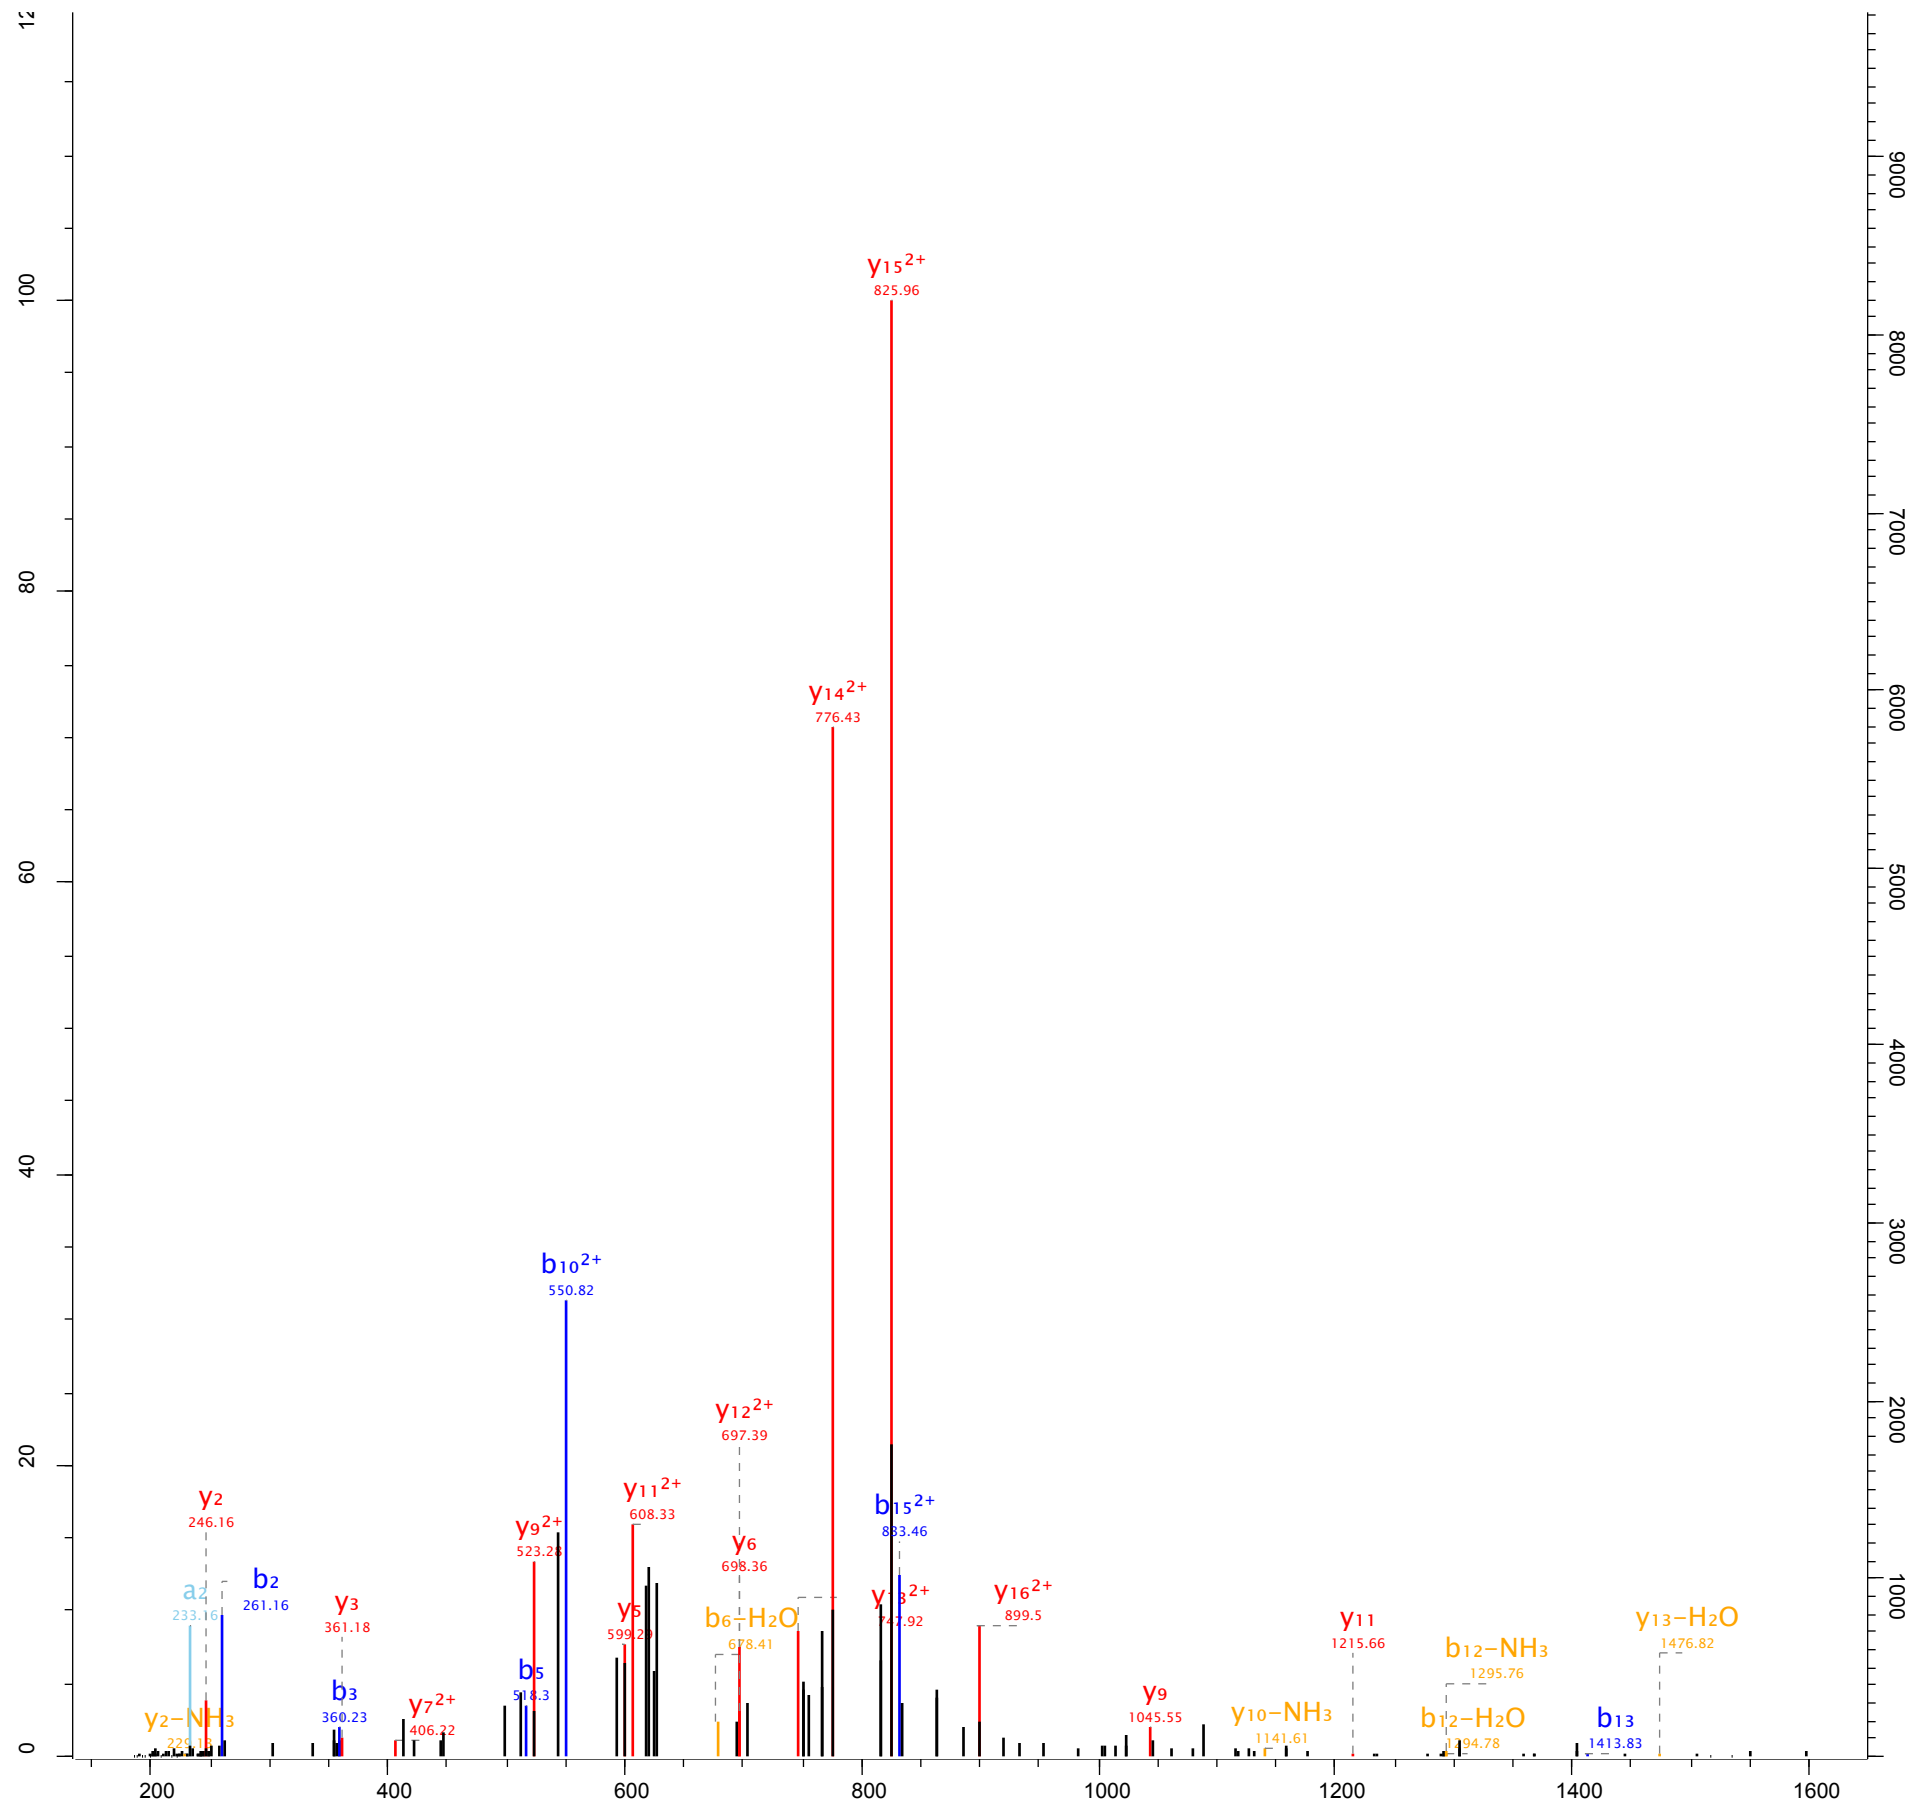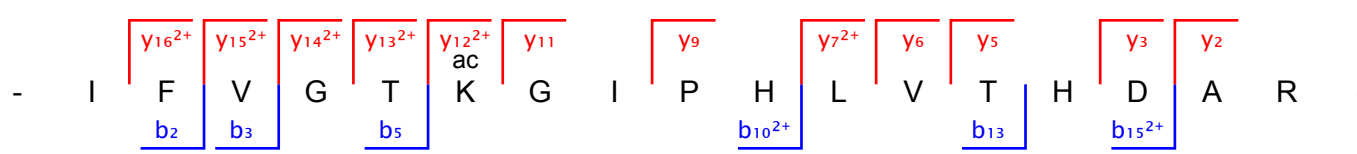

Raw file 030314\_SCW\_II\_29\_11\_2ndZT Scan 12393 Method ITMS; CID Score 103.97 m/z 536.64 Gene names Tpt1

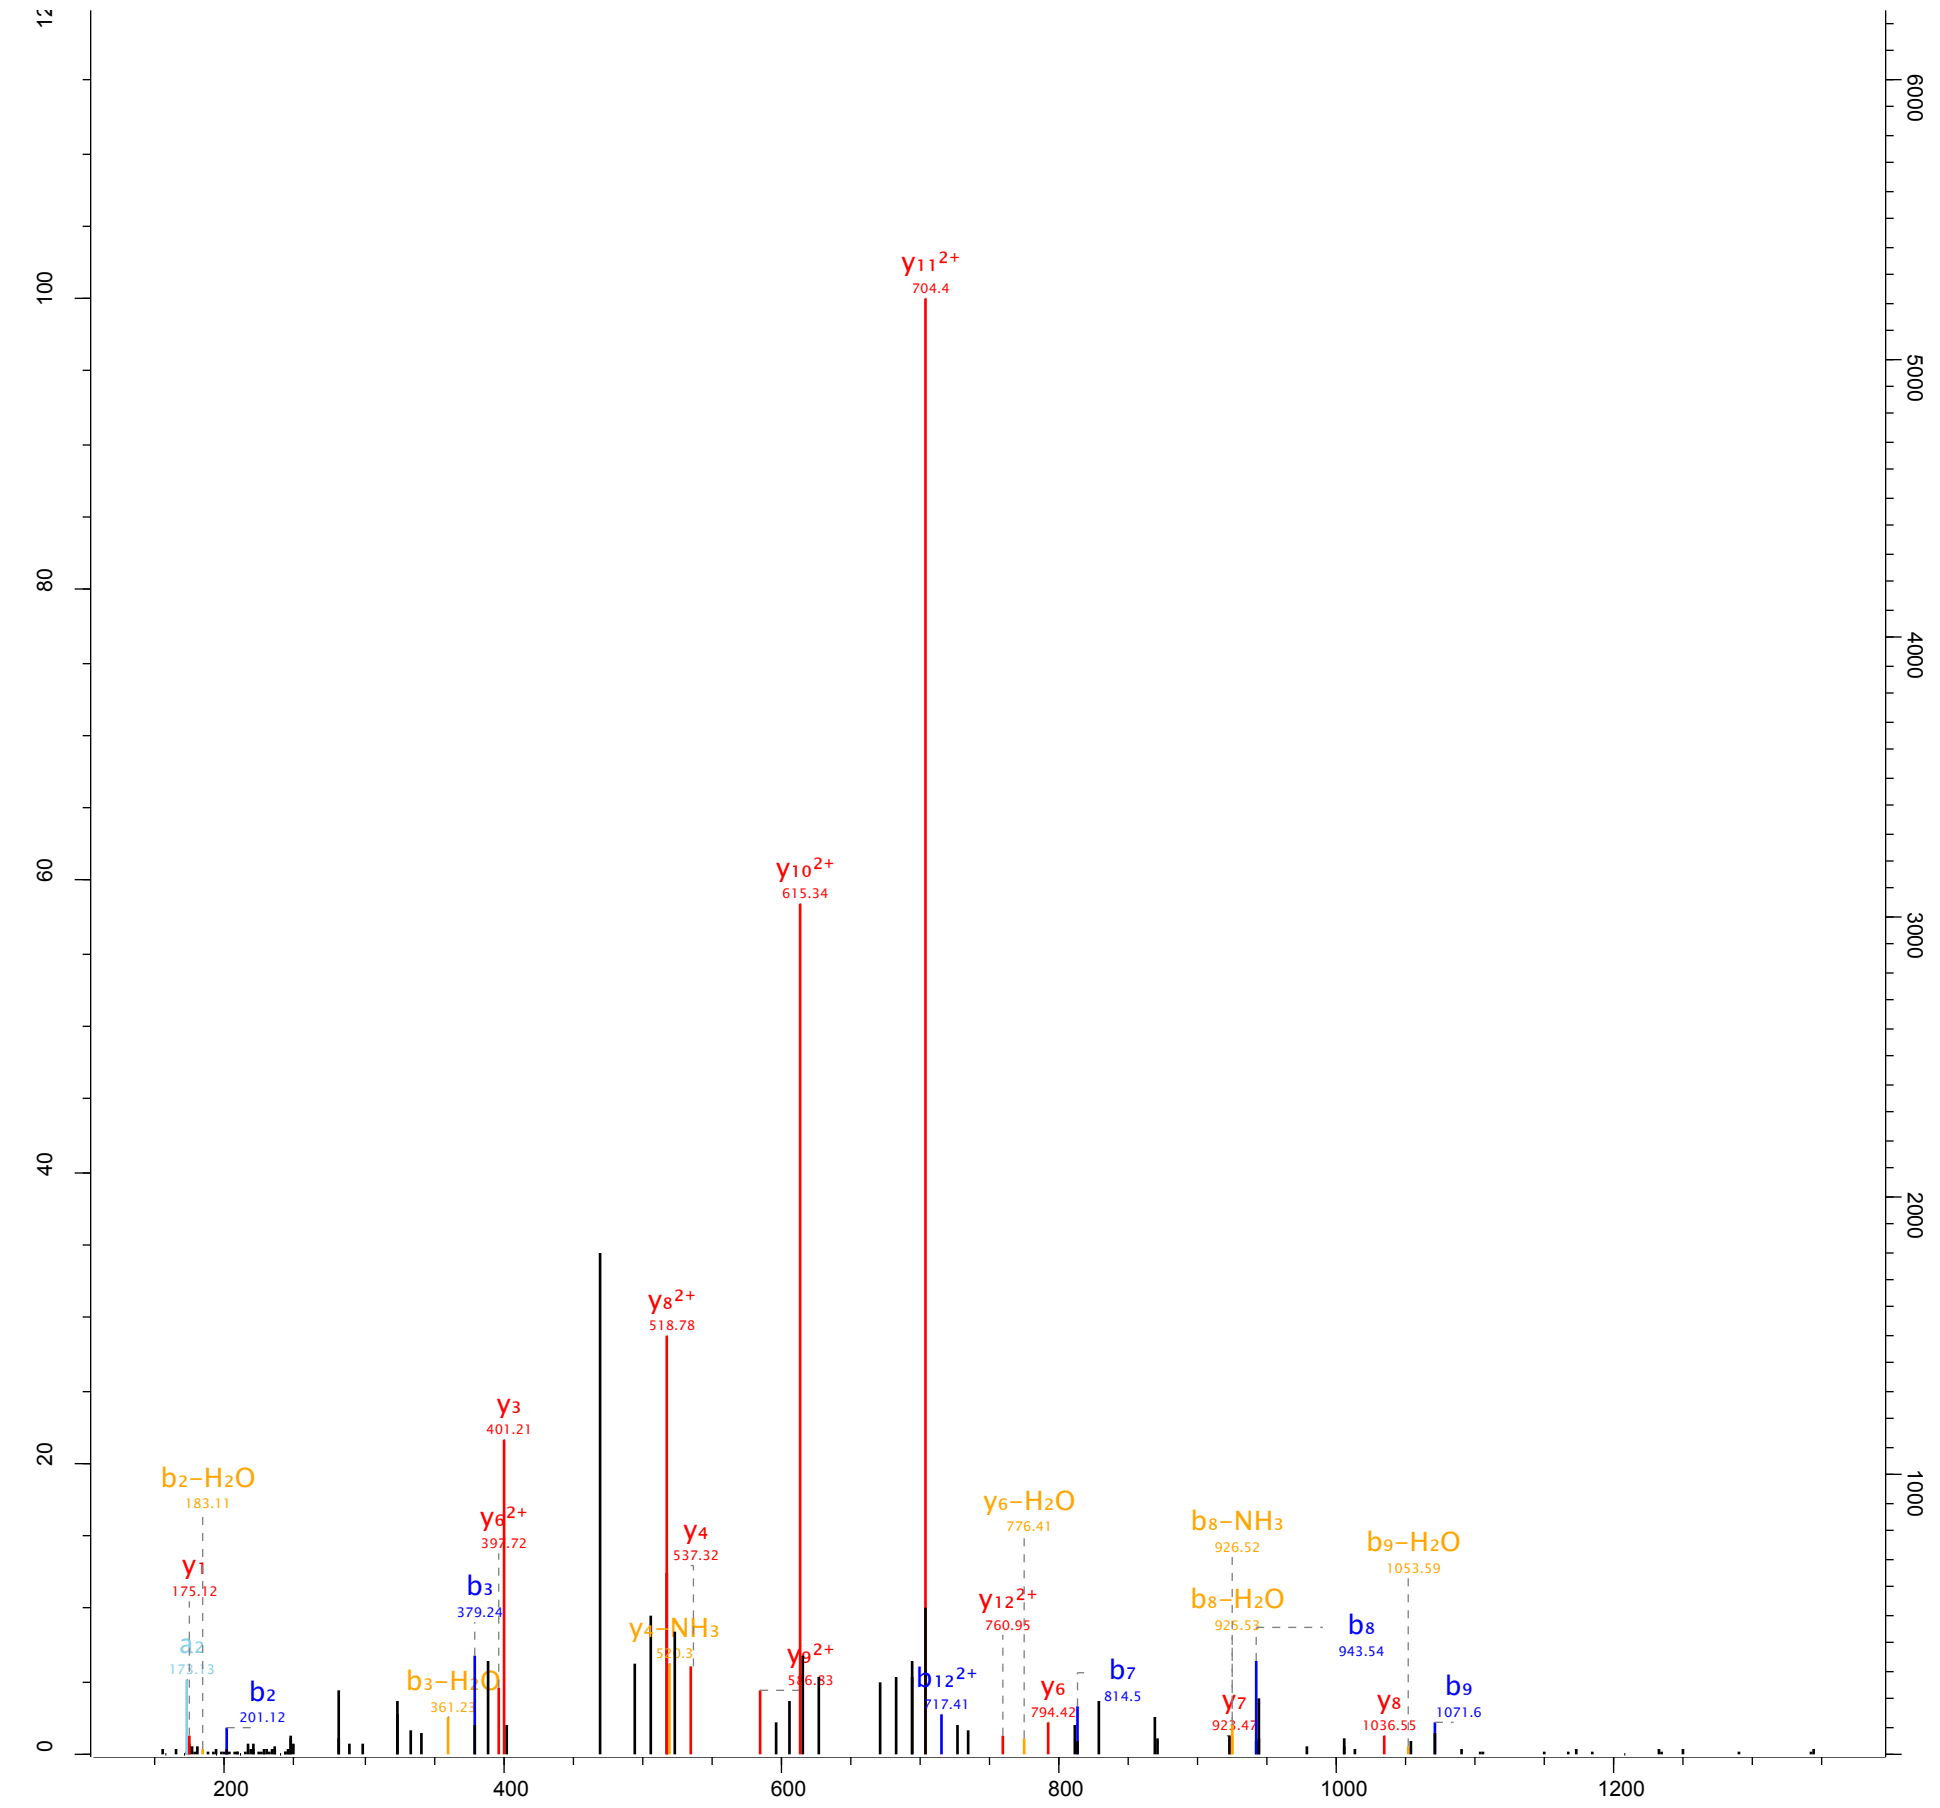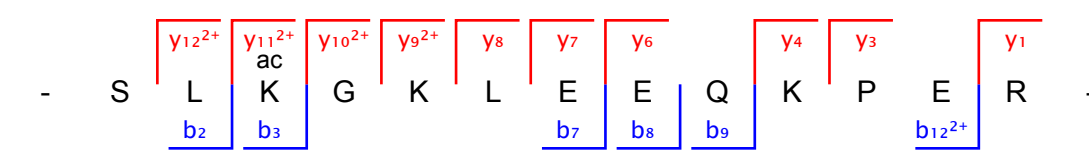



Raw file Scan Method Score m/z Gene names  
 050713\_SCW\_II\_29\_4\_1 11002 ITMS; CID 171.26 638.3 TagIn

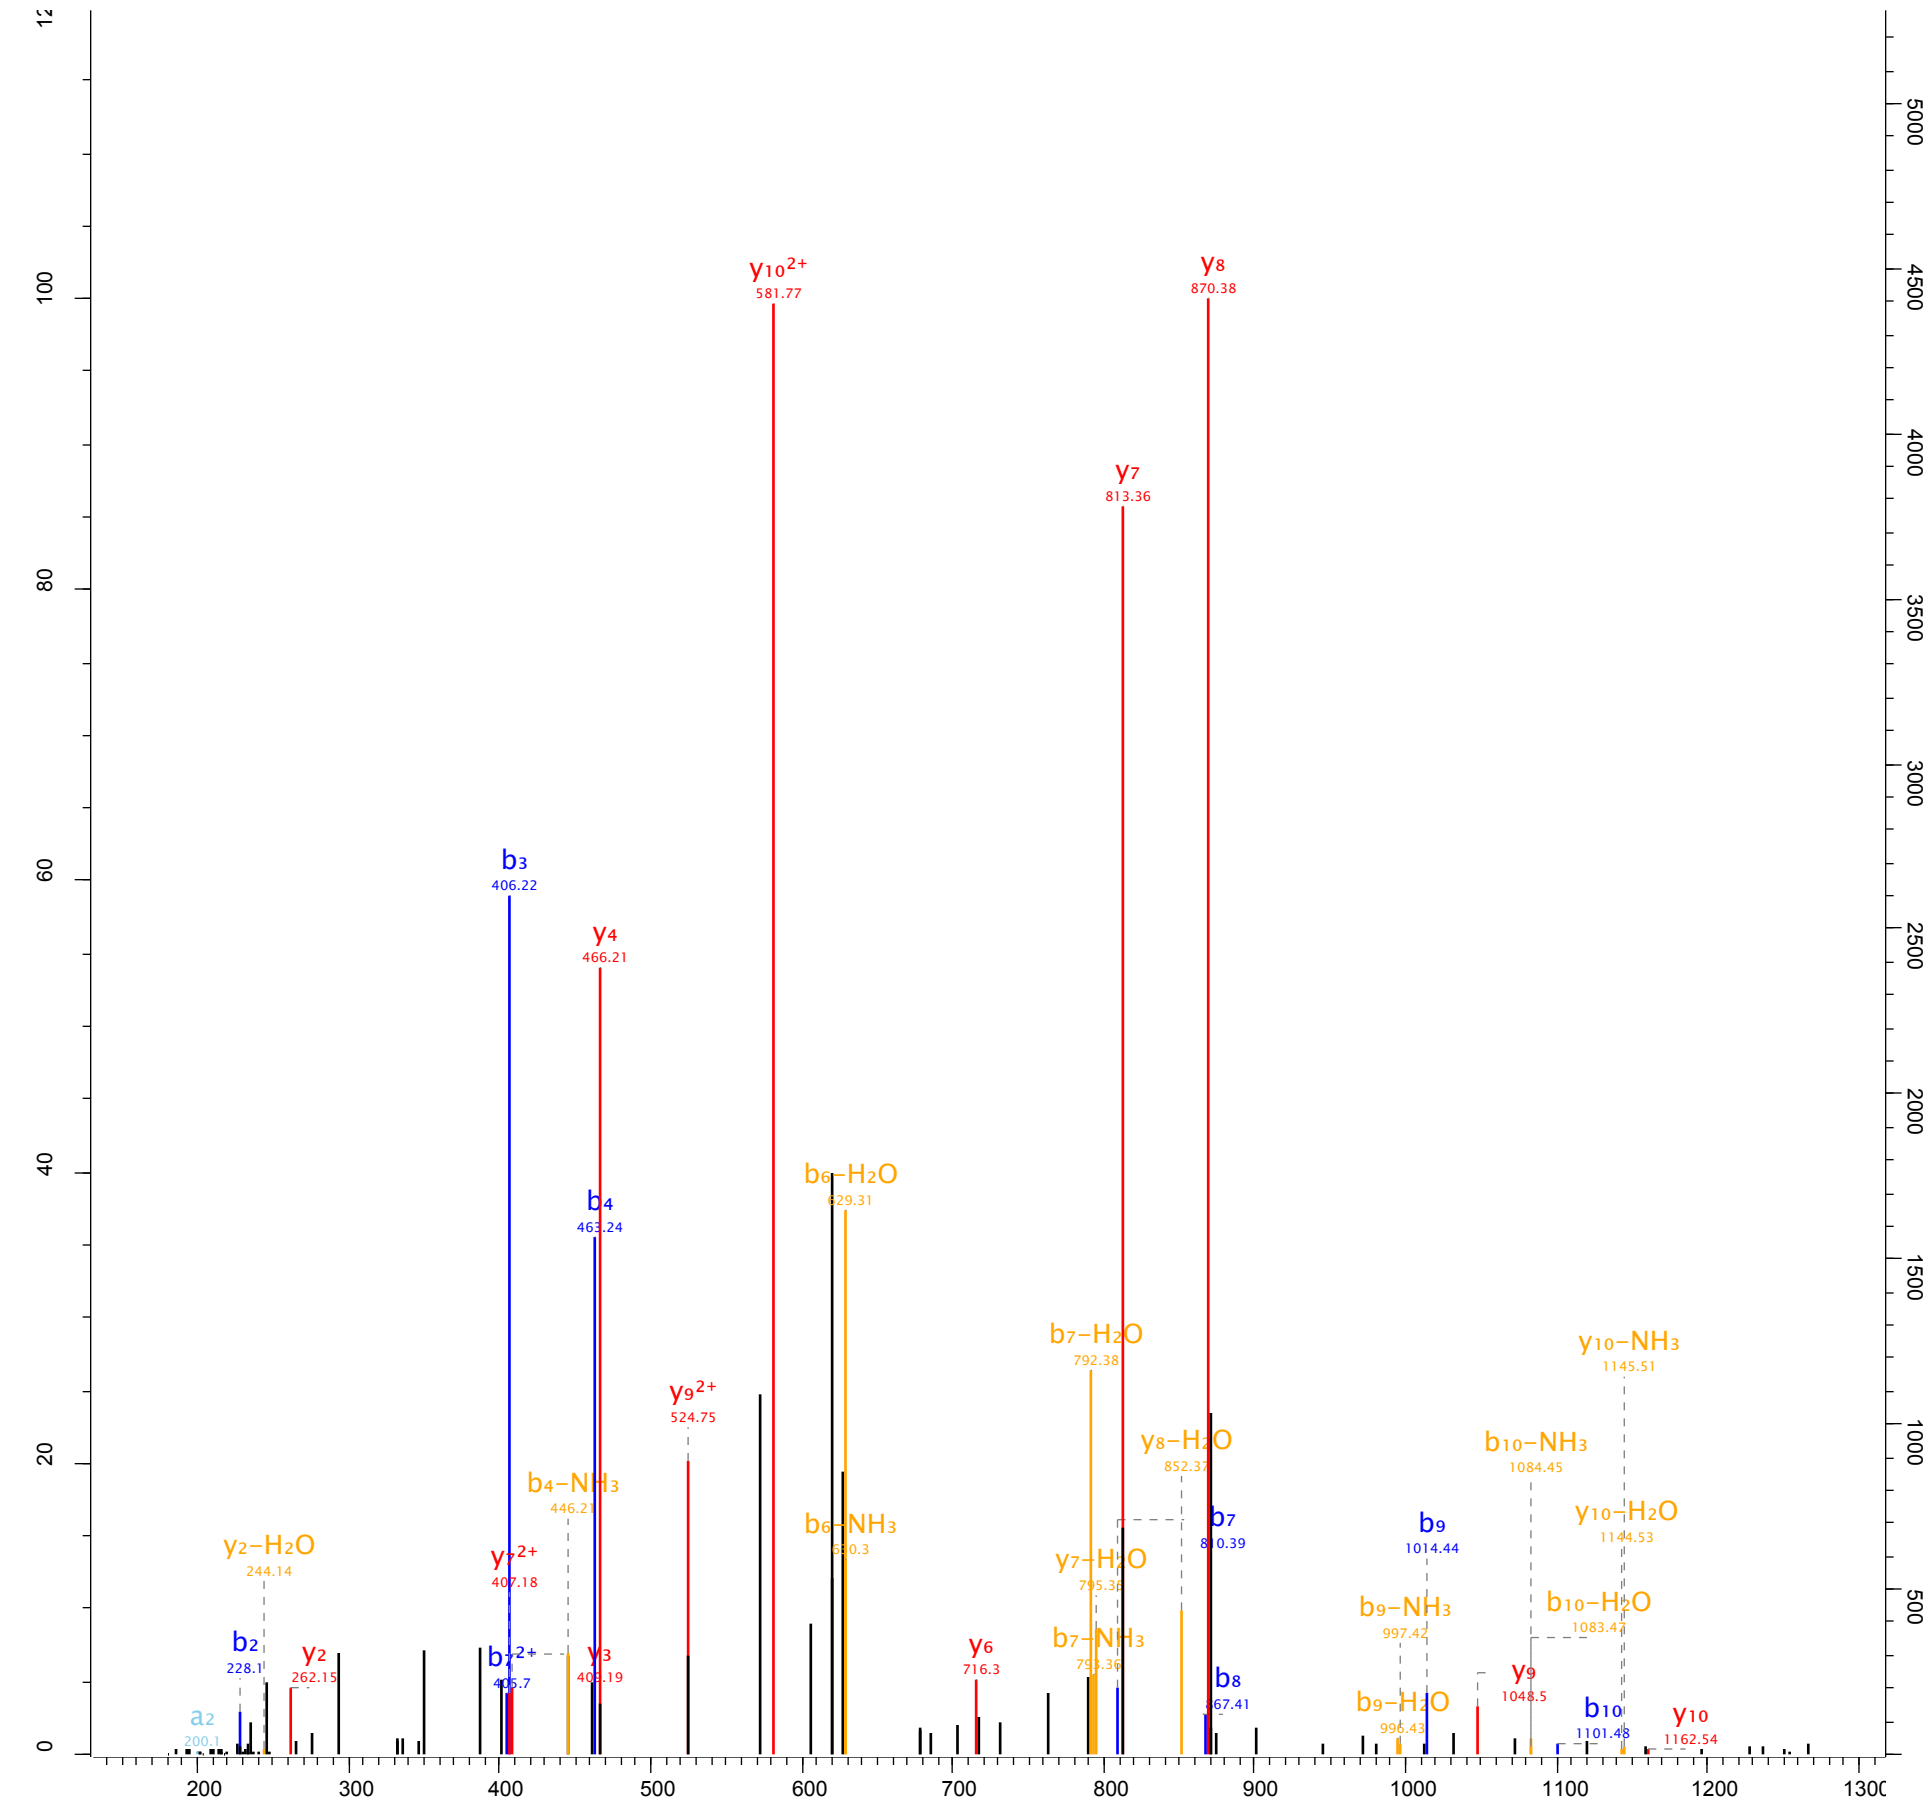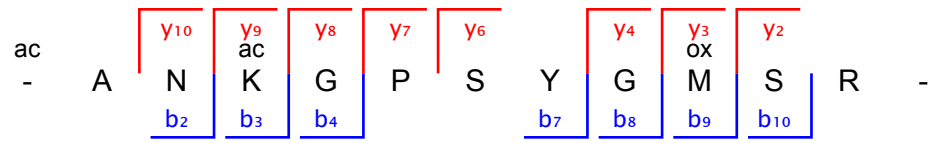

Raw file 050713\_SCW\_II\_29\_4\_1 Scan 12171 Method ITMS; CID Score 135.02 m/z 699.83 Gene names Tmsb4x

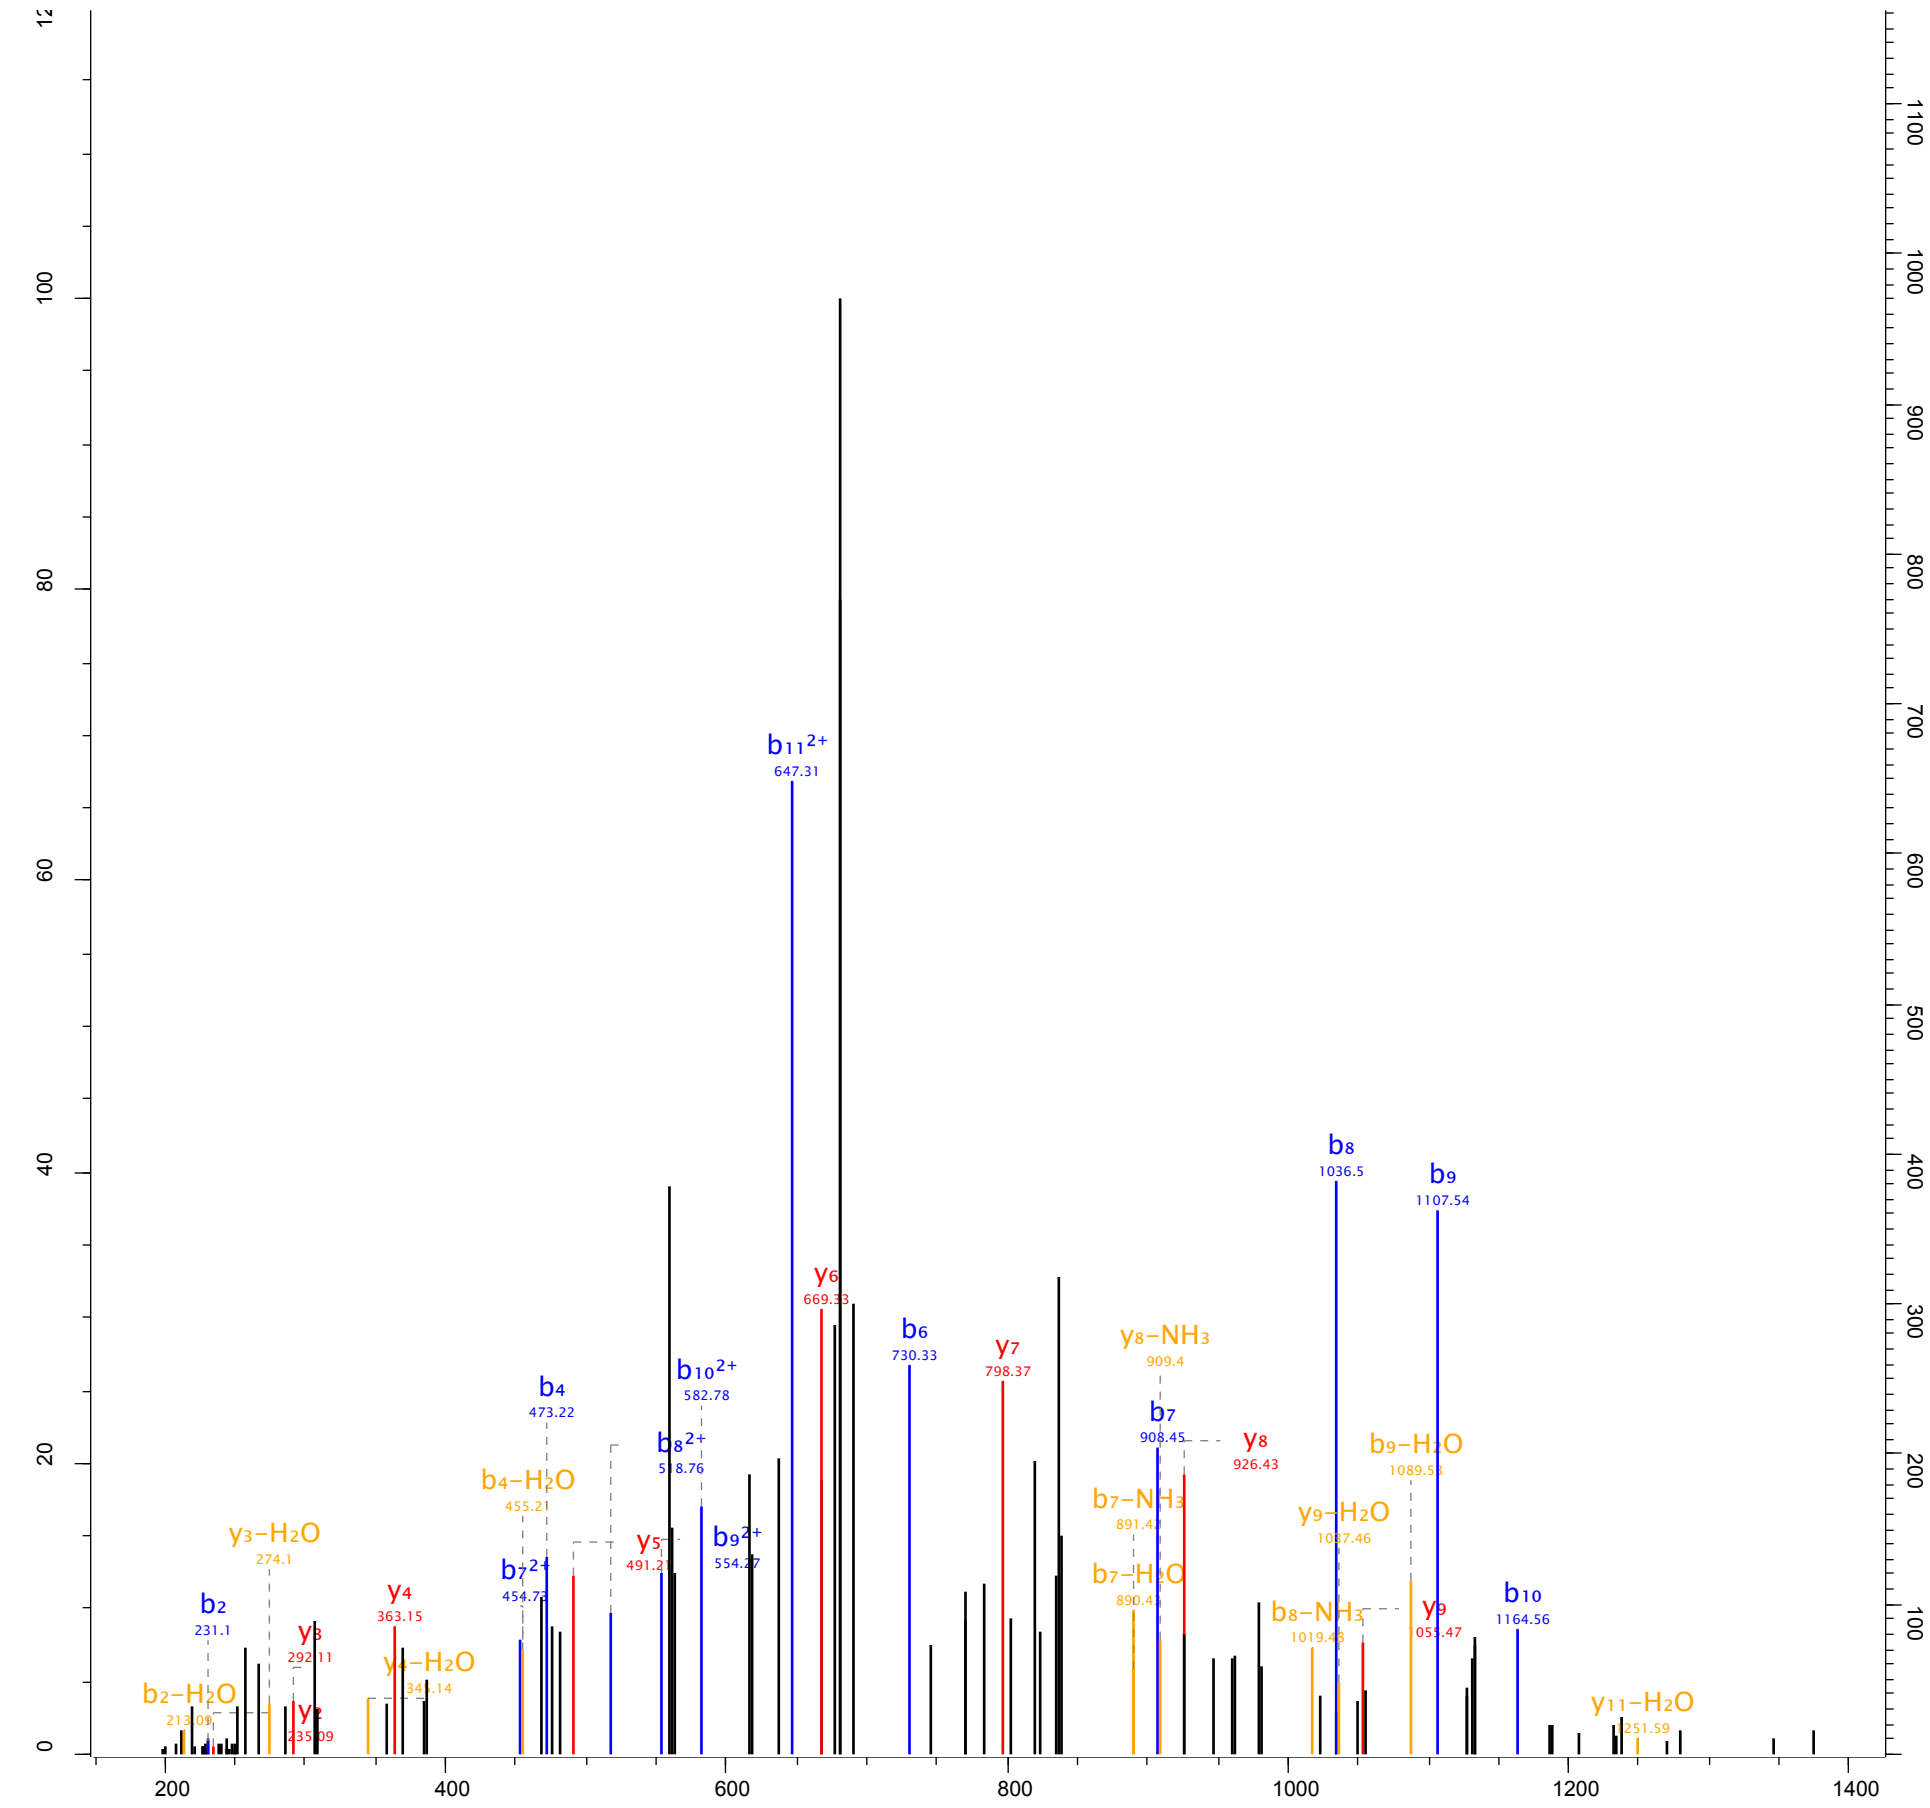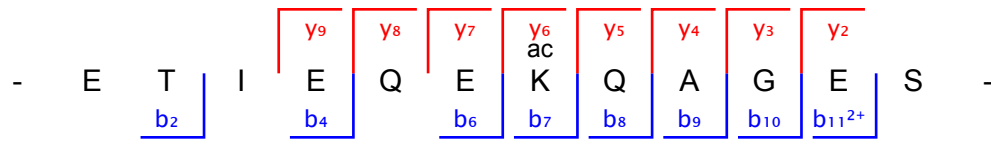

Raw file: 050713\_SCW\_II\_29\_4\_1  
 Scan: 12364 Method: ITMS; CID Score: 139.46 m/z: 964.49 Gene names: Hmga1

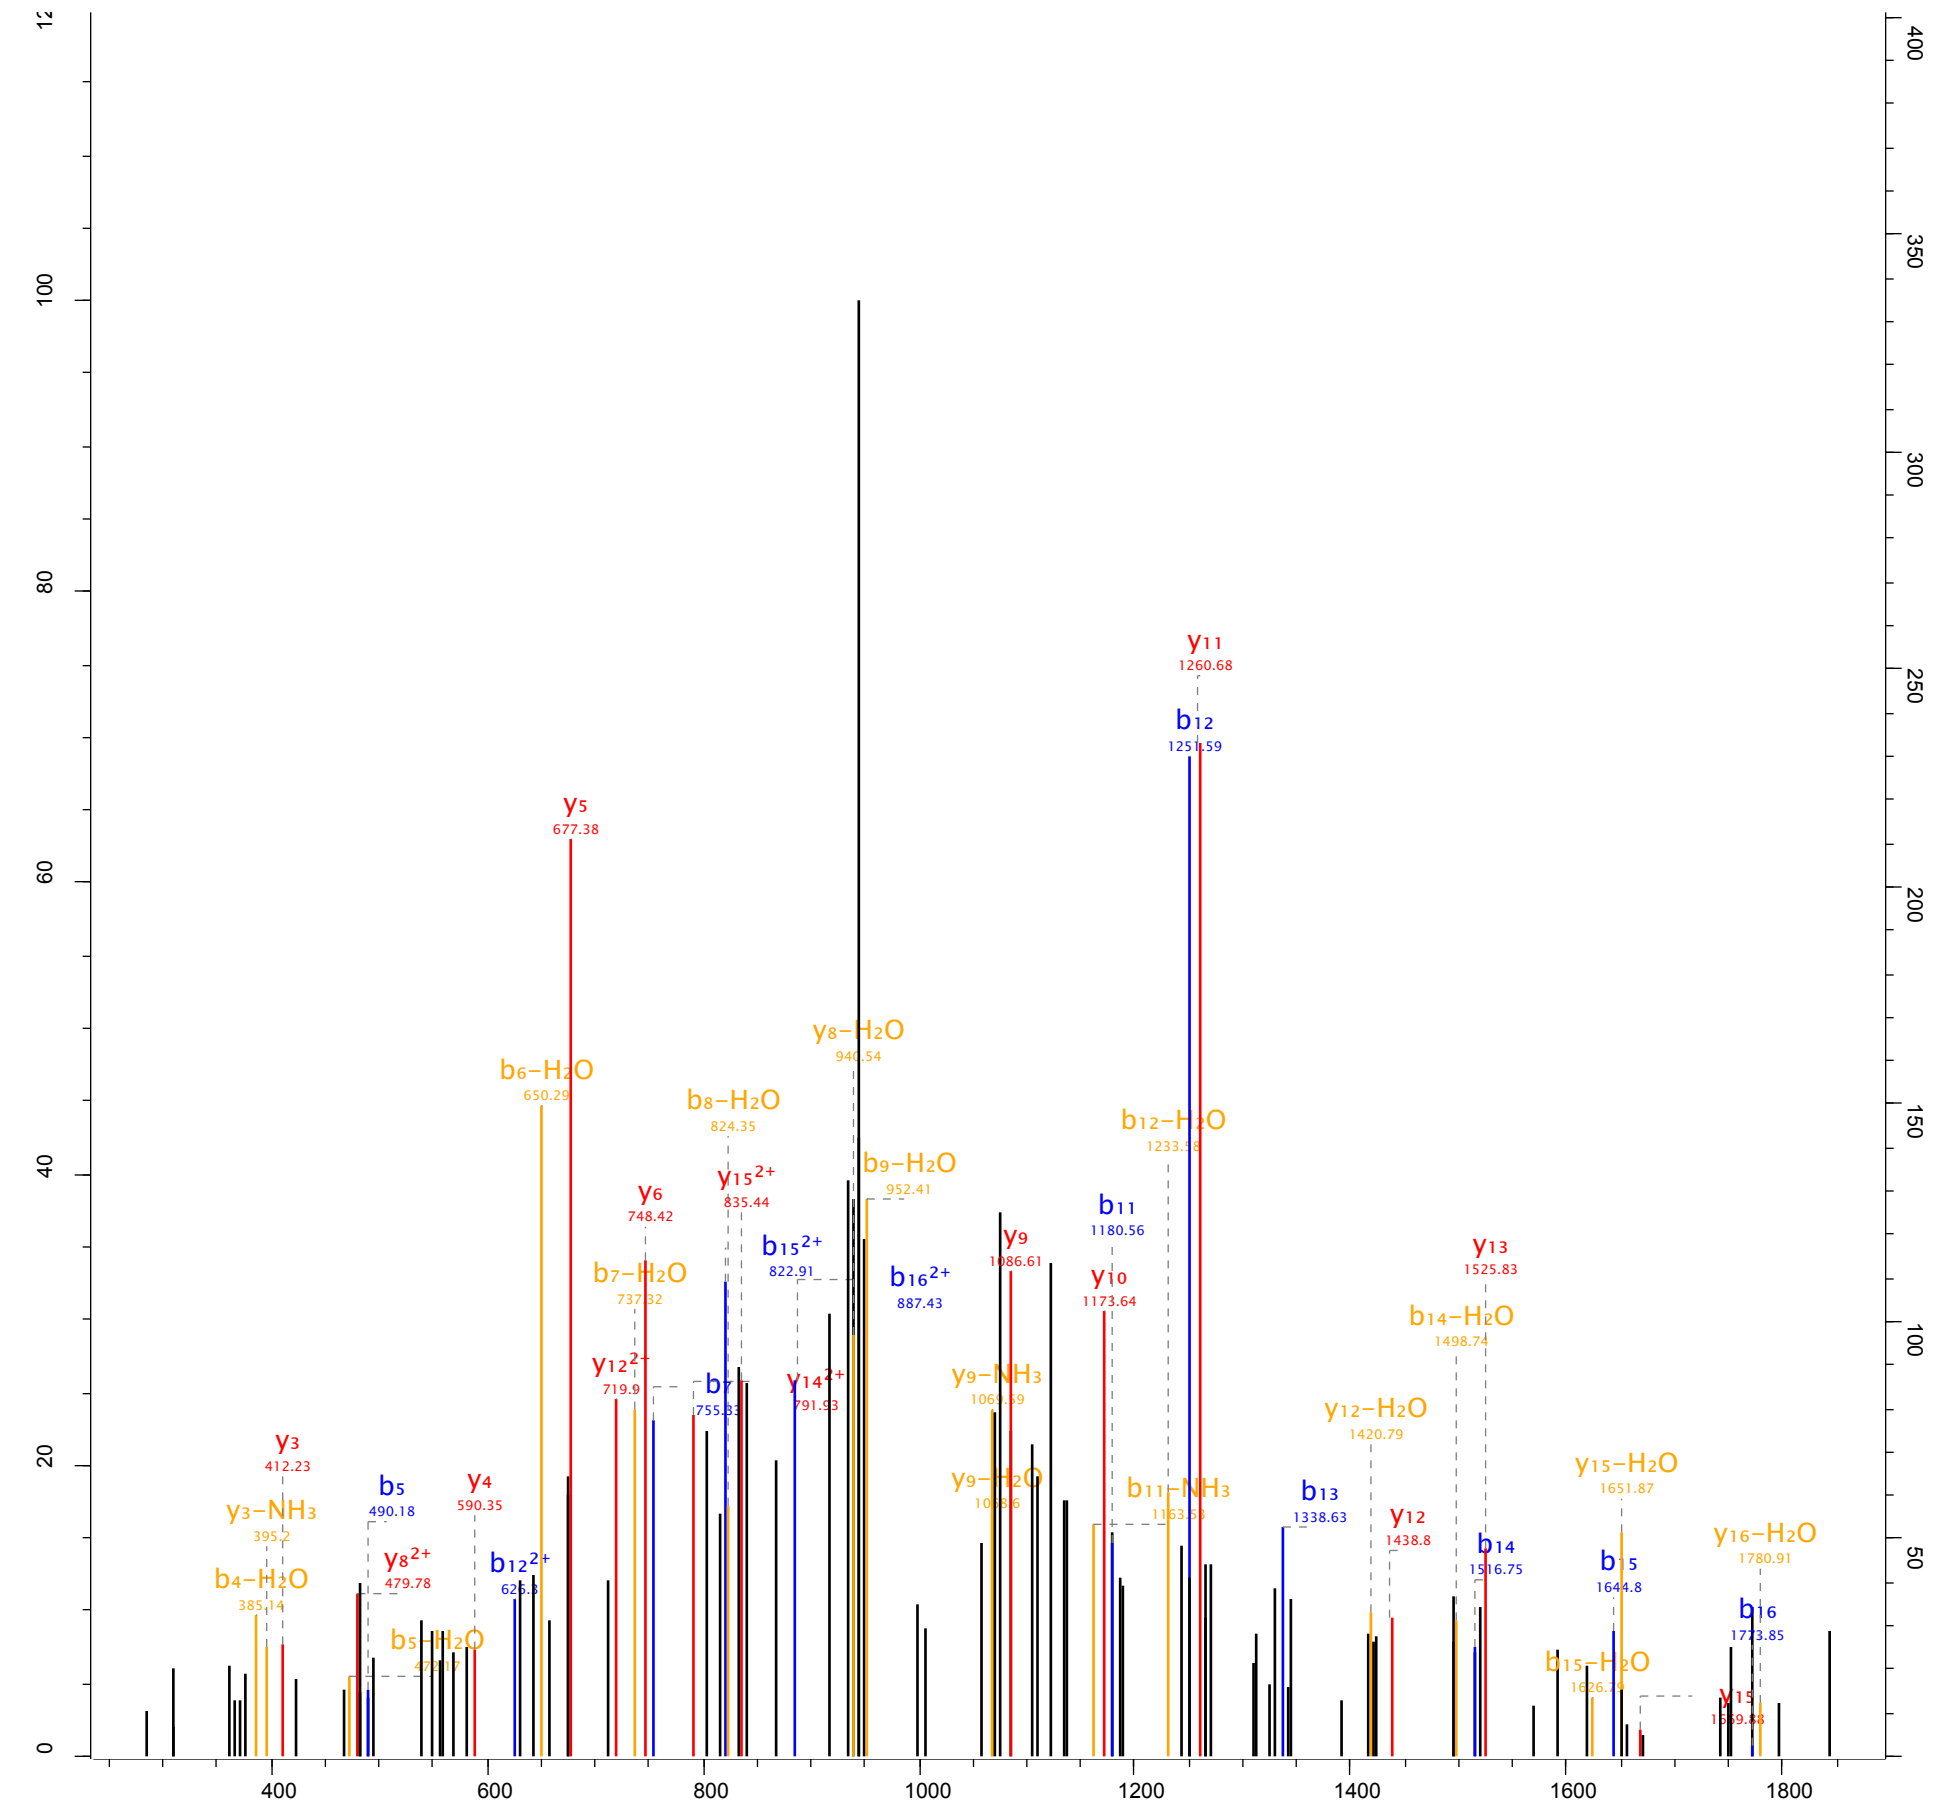

ac - S E S G S K S S Q P L A S K Q E K -

Fragmentation mapping (red boxes): y15, y14<sup>2+</sup>, y13, y12 ac, y11, y10, y9, y8<sup>2+</sup>, y6, y5, y4 ac, y3

Fragmentation mapping (blue boxes): b5, b7, b11, b12, b13, b14, b15, b16

Raw file Scan Method Score m/z Gene names  
 050713\_SCW\_II\_29\_4\_1 13801 ITMS; CID 101.49 1019.02 Hist1h1b

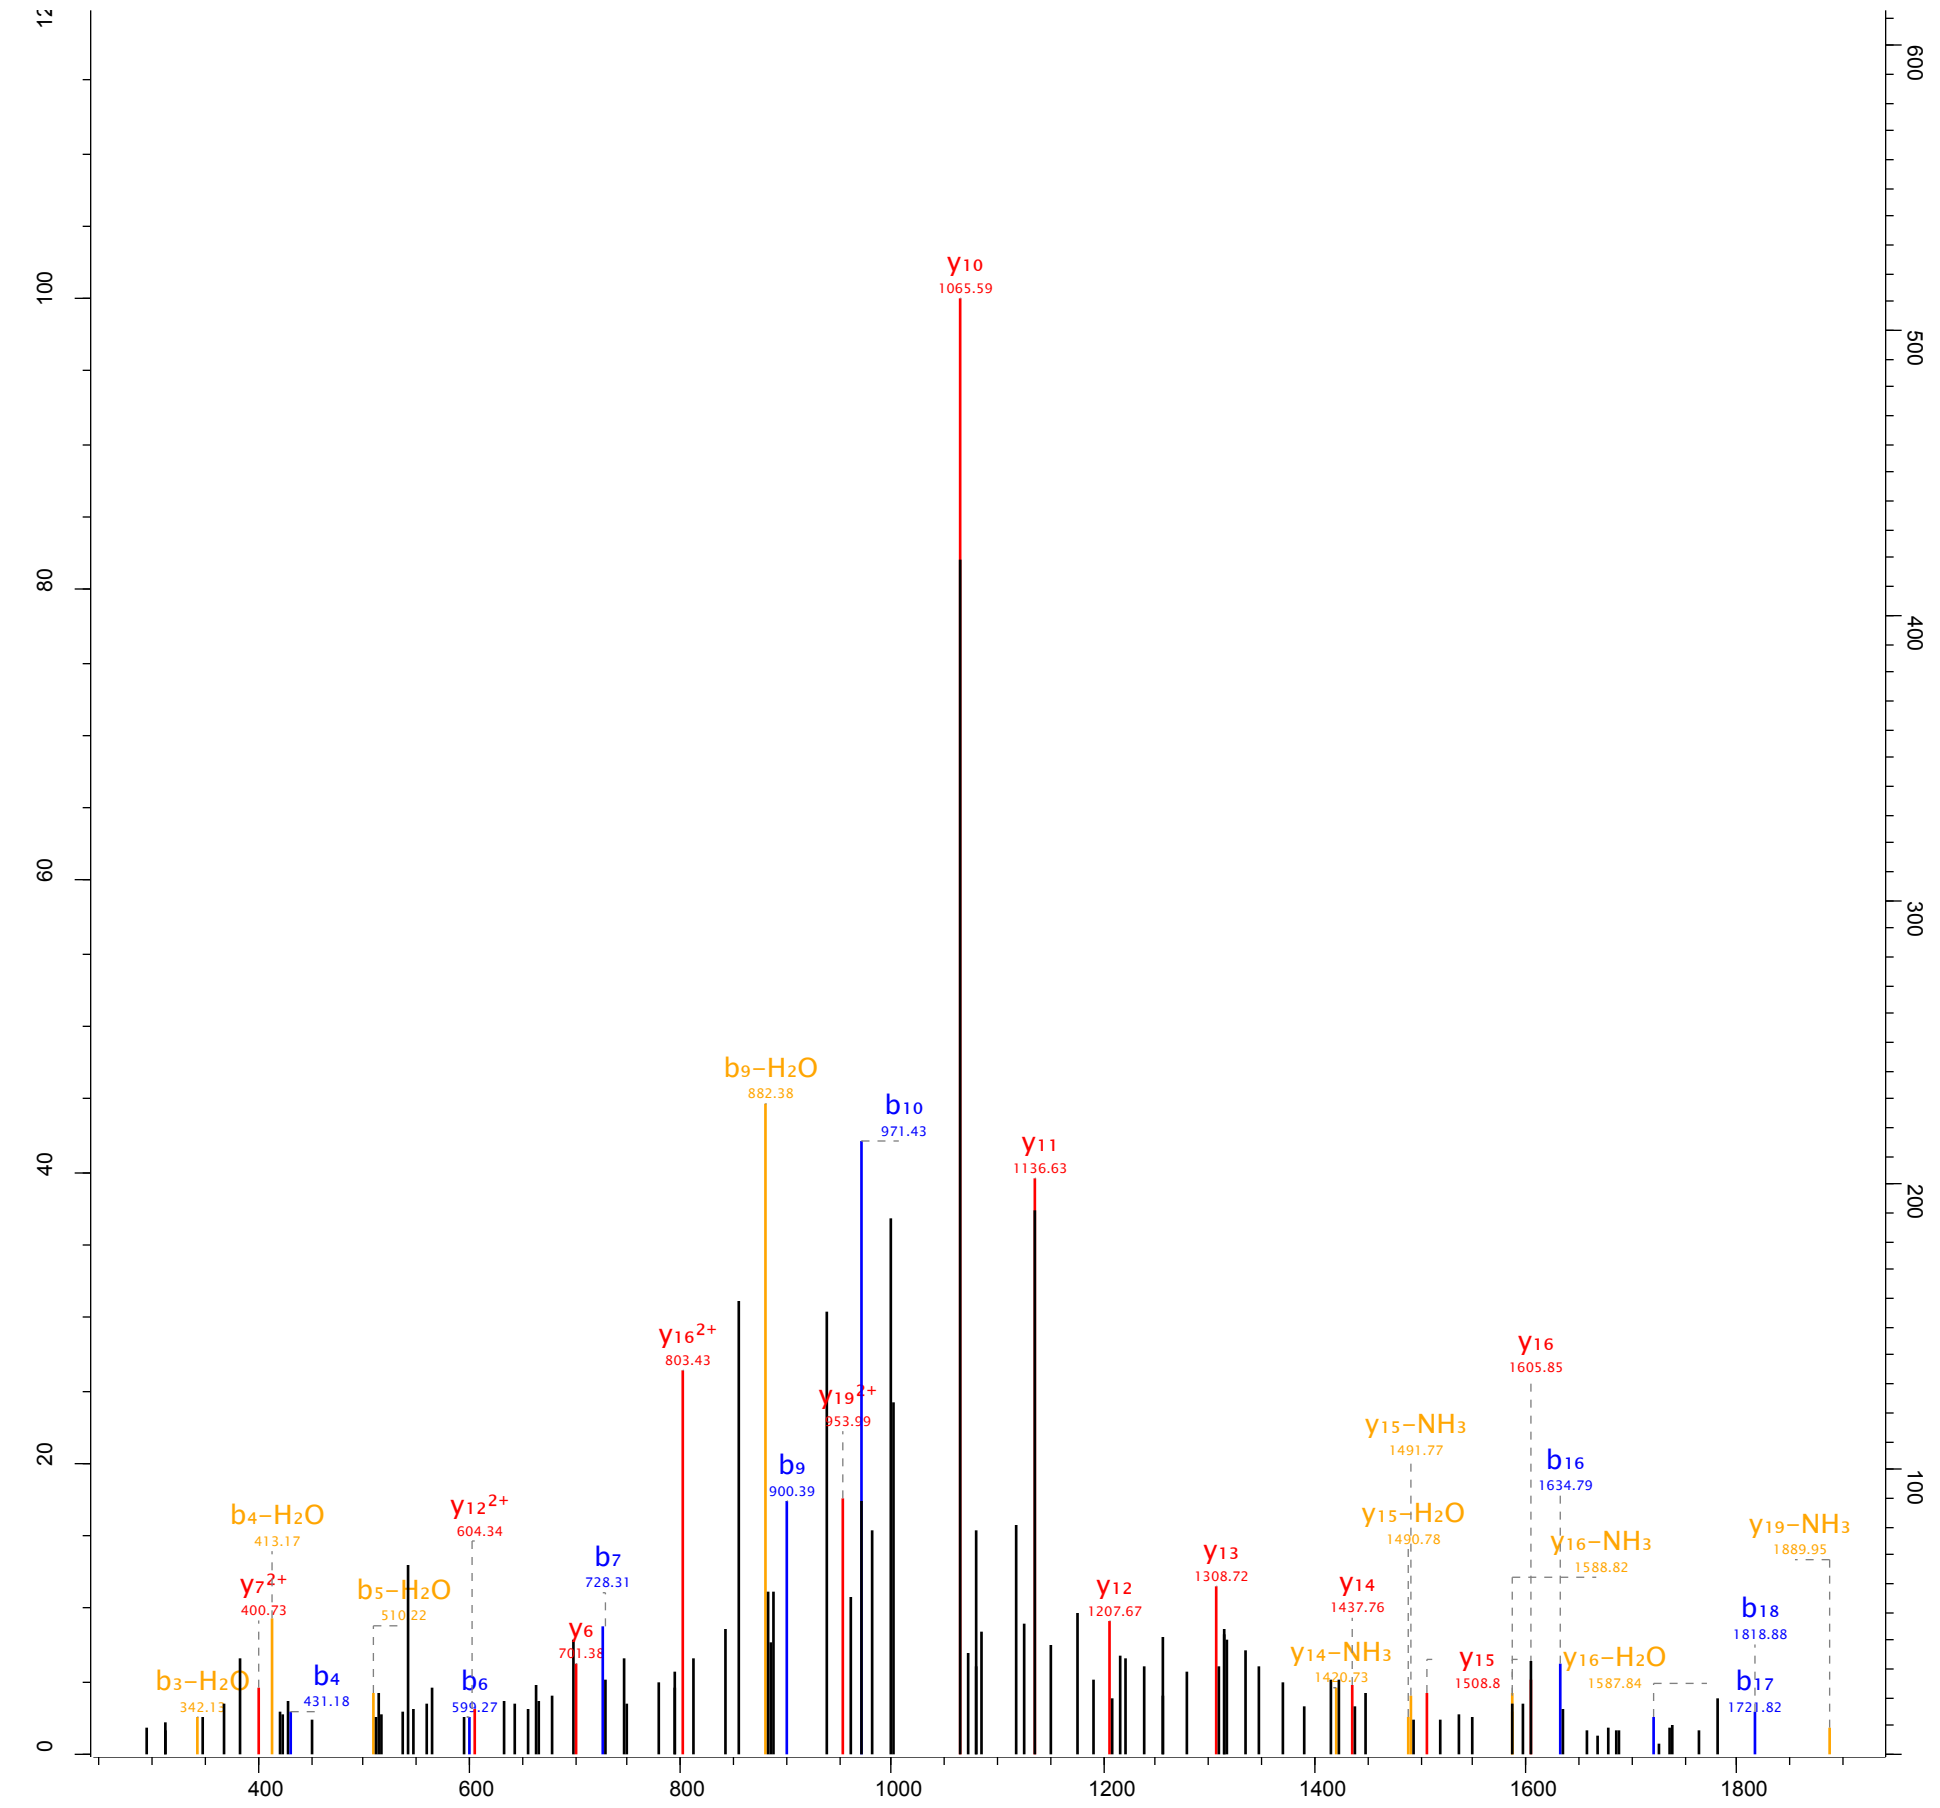

ac - S E T A P A E T A A P A P V E K S P A K -

Fragmentation sites (b and y ions) are indicated by brackets below the amino acid sequence:

- Red brackets (y ions): y19<sup>2+</sup> (S-E), y16 (P-A), y15 (A-E), y14 (E-T), y13 (T-A), y12 (A-A), y11 (A-P), y10 (P-A), y7<sup>2+</sup> (S-E), y6 (V-E).
- Blue brackets (b ions): b4 (A), b6 (A), b7 (E), b9 (A), b10 (A), b16 (K-S), b17 (S-P), b18 (P-A).

Raw file Scan Method Score m/z Gene names  
 050713\_SCW\_II\_29\_4\_1 14230 ITMS; CID 132.23 809.91 H2afx

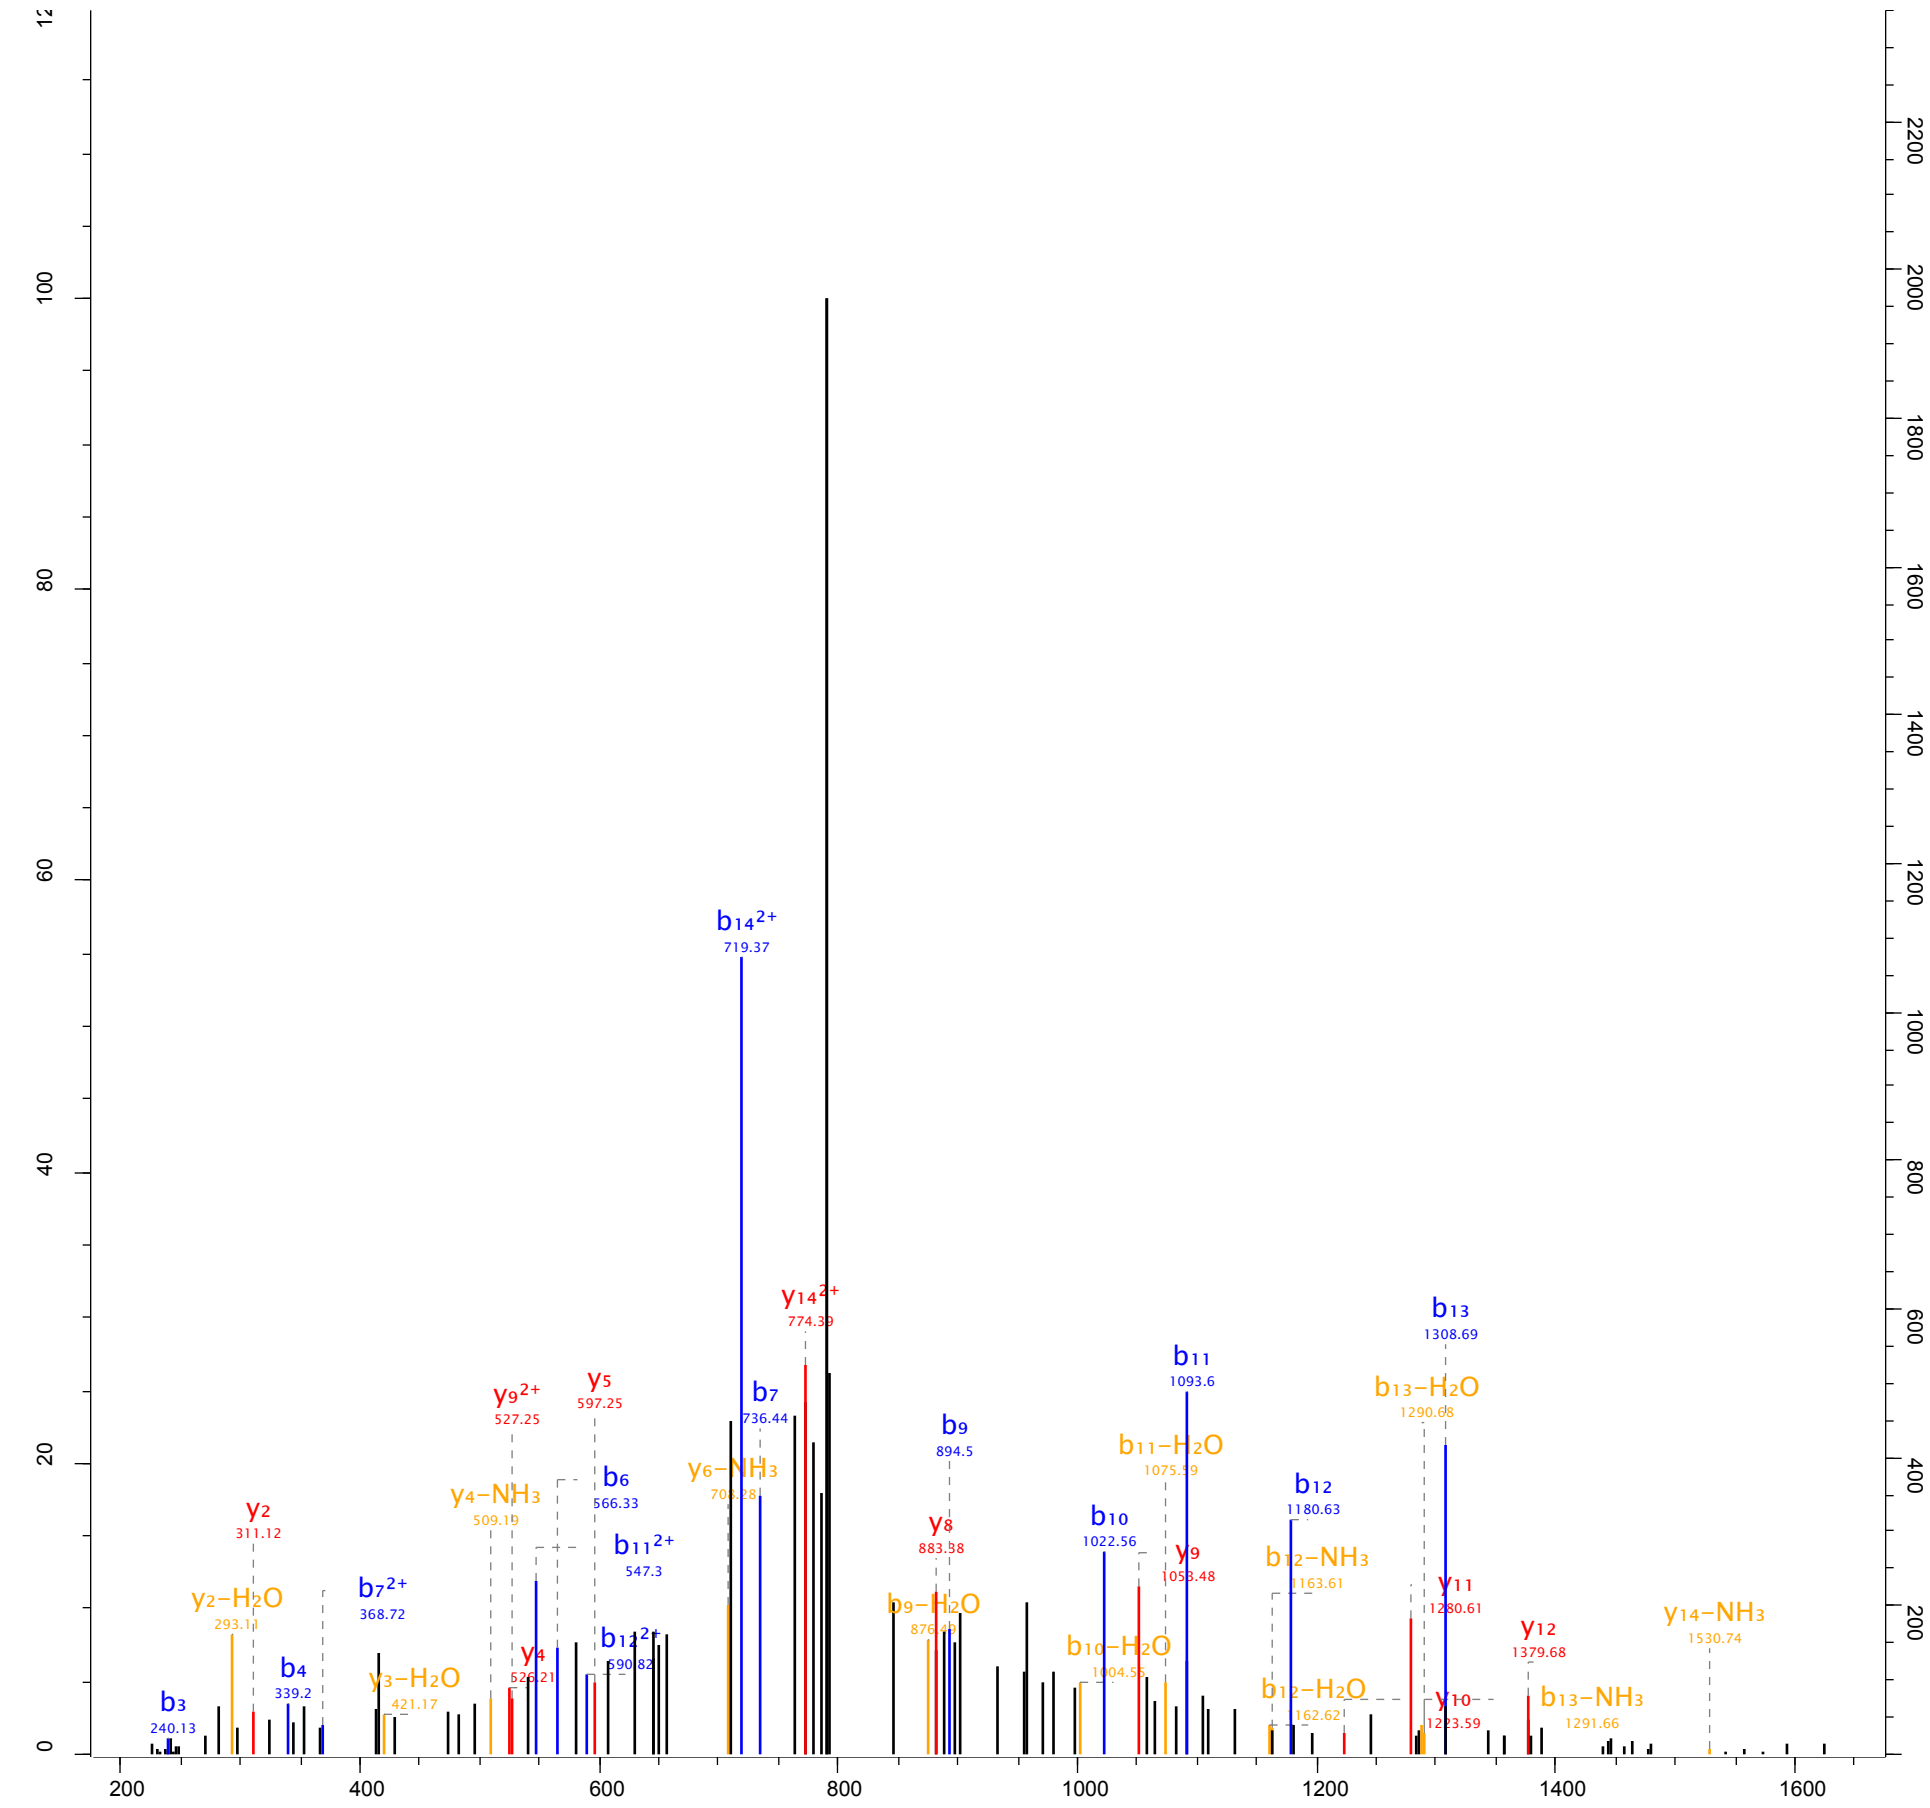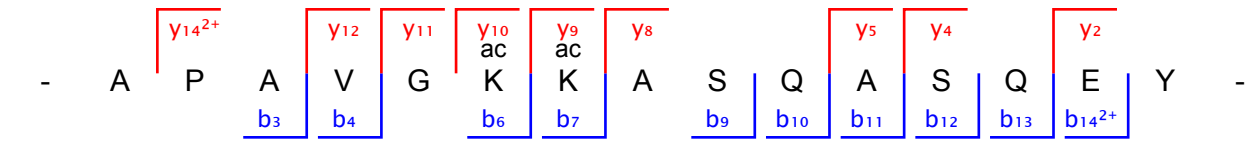

Raw file Scan Method Score m/z Gene names

050713\_SCW\_II\_29\_4\_1

15411

ITMS; CID

178.22

713.35

Nono

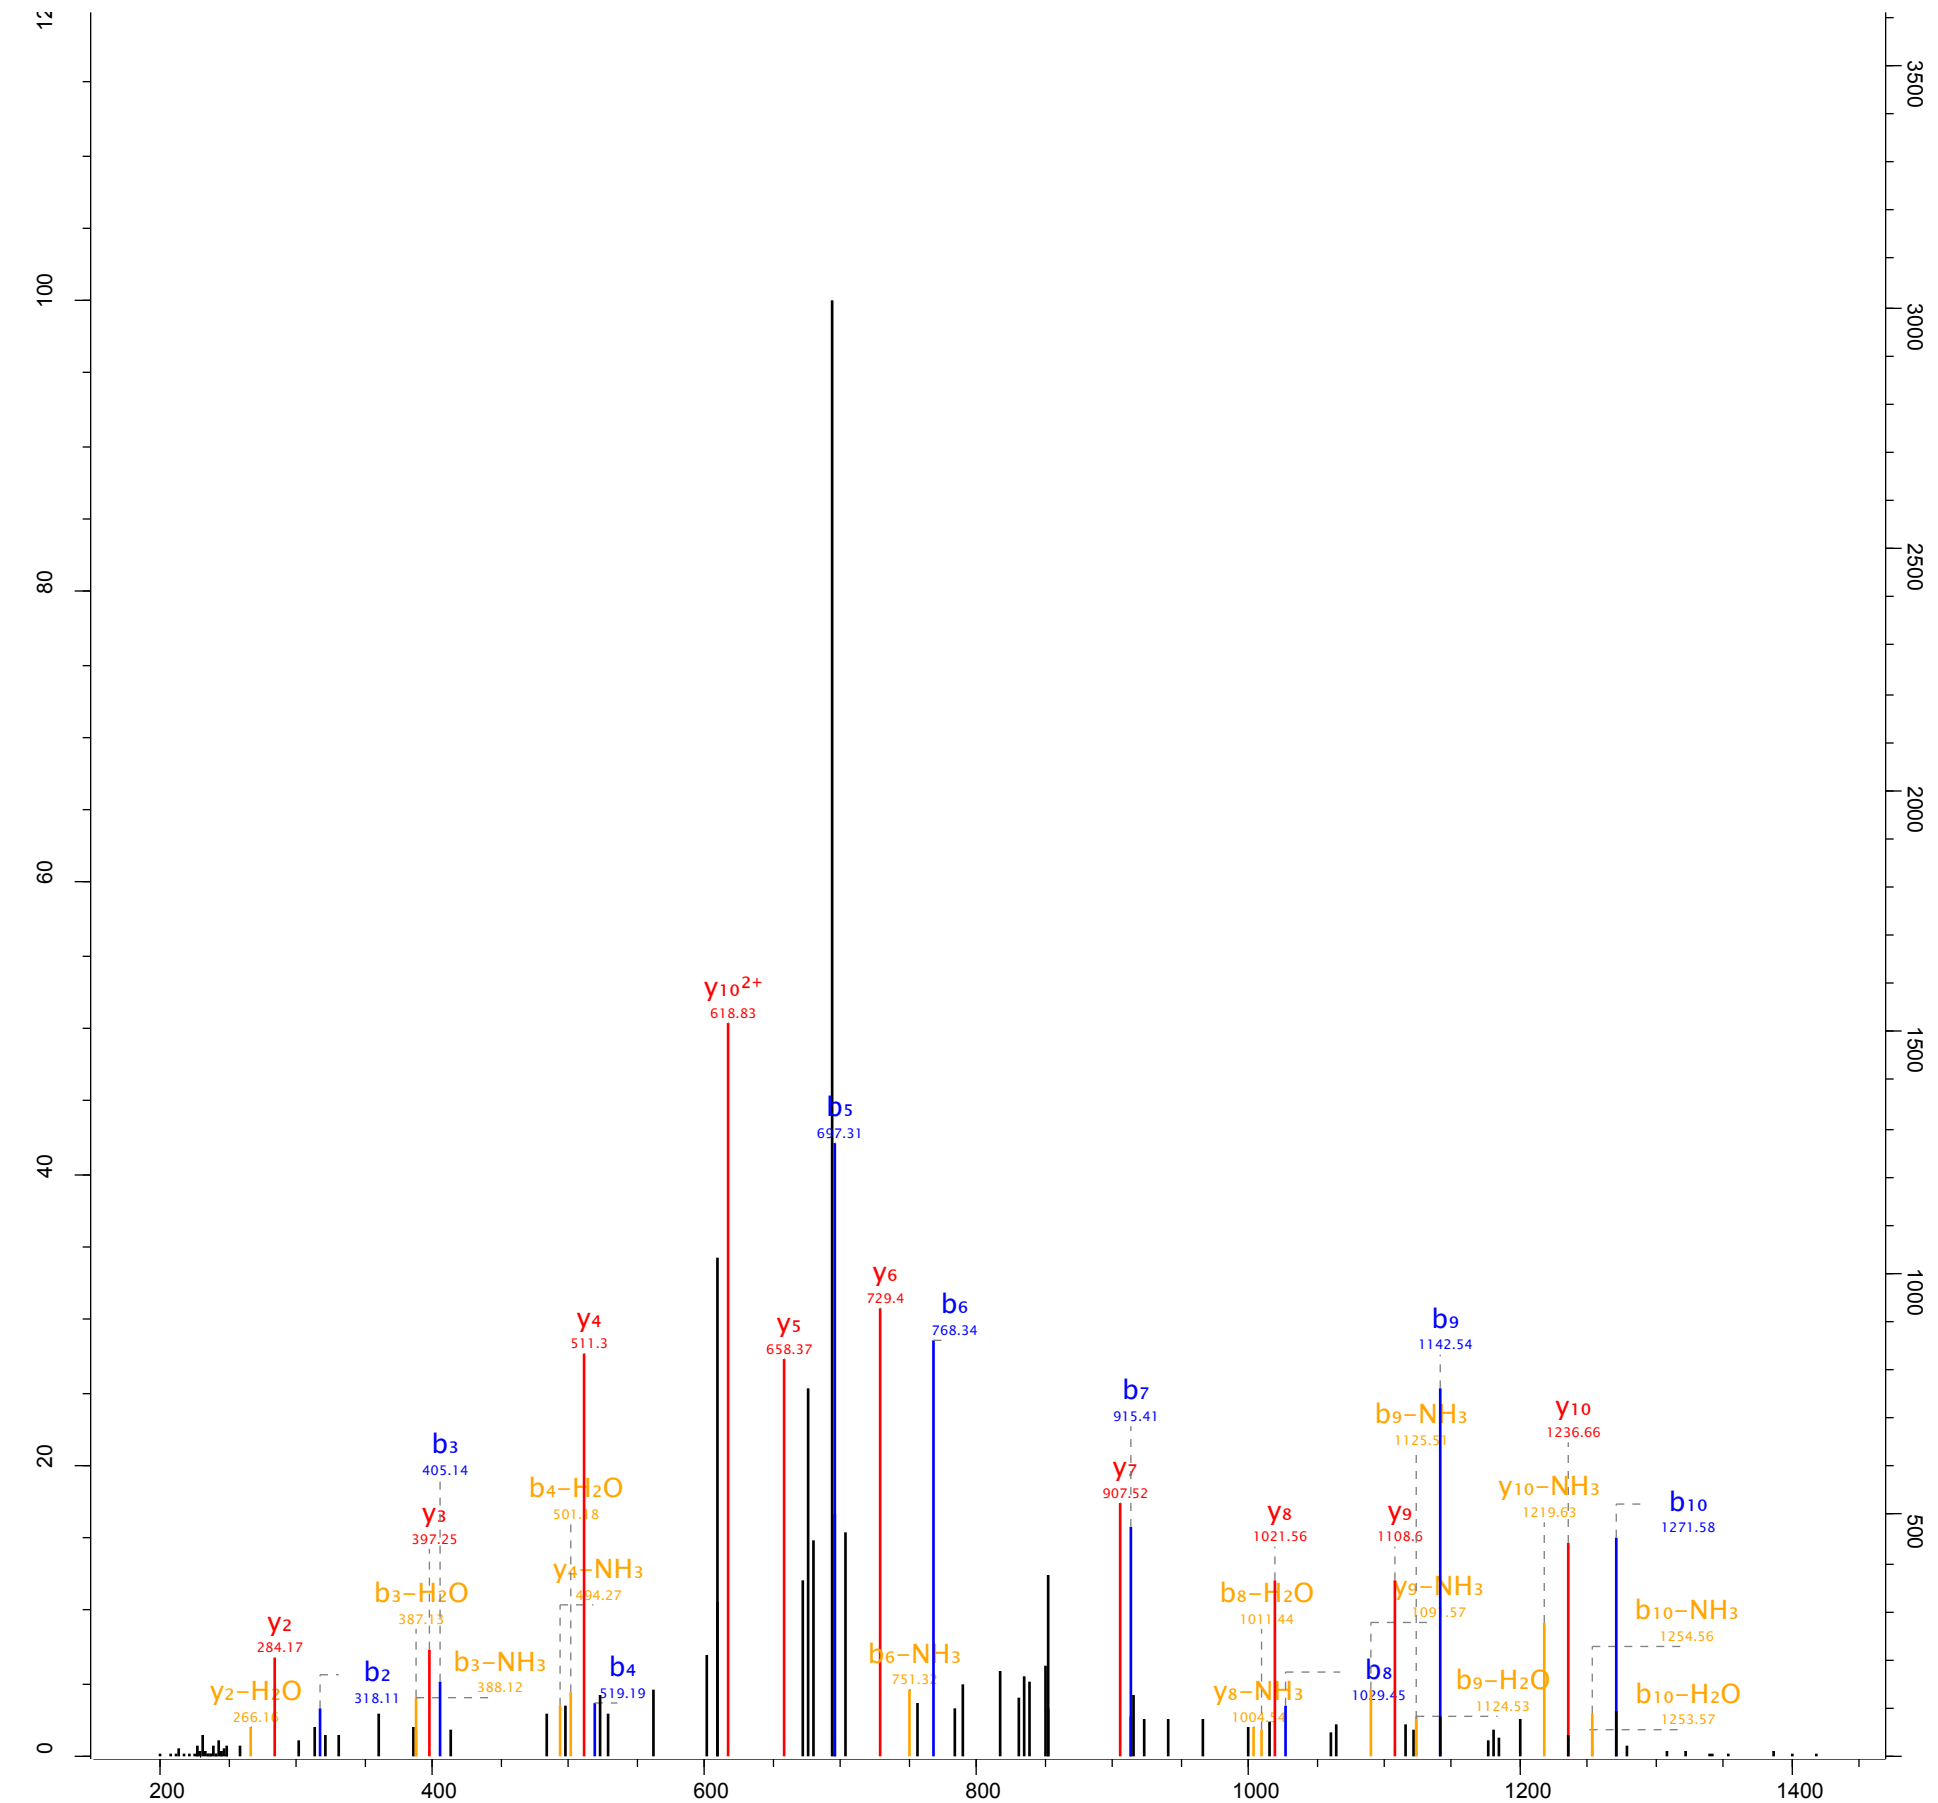

ac ox M

|                 |                |                |                |                |                |                |                |                 |   |   |
|-----------------|----------------|----------------|----------------|----------------|----------------|----------------|----------------|-----------------|---|---|
| y <sub>10</sub> | y <sub>9</sub> | y <sub>8</sub> | y <sub>7</sub> | y <sub>6</sub> | y <sub>5</sub> | y <sub>4</sub> | y <sub>3</sub> | y <sub>2</sub>  |   |   |
| Q               | S              | N              | K              | A              | F              | N              | L              | E               | K | - |
| b <sub>2</sub>  | b <sub>3</sub> | b <sub>4</sub> | b <sub>5</sub> | b <sub>6</sub> | b <sub>7</sub> | b <sub>8</sub> | b <sub>9</sub> | b <sub>10</sub> |   |   |

Raw file Scan Method Score m/z Gene names  
 050713\_SCW\_II\_29\_4\_1 17000 ITMS; CID 120.45 496.76 Rps21

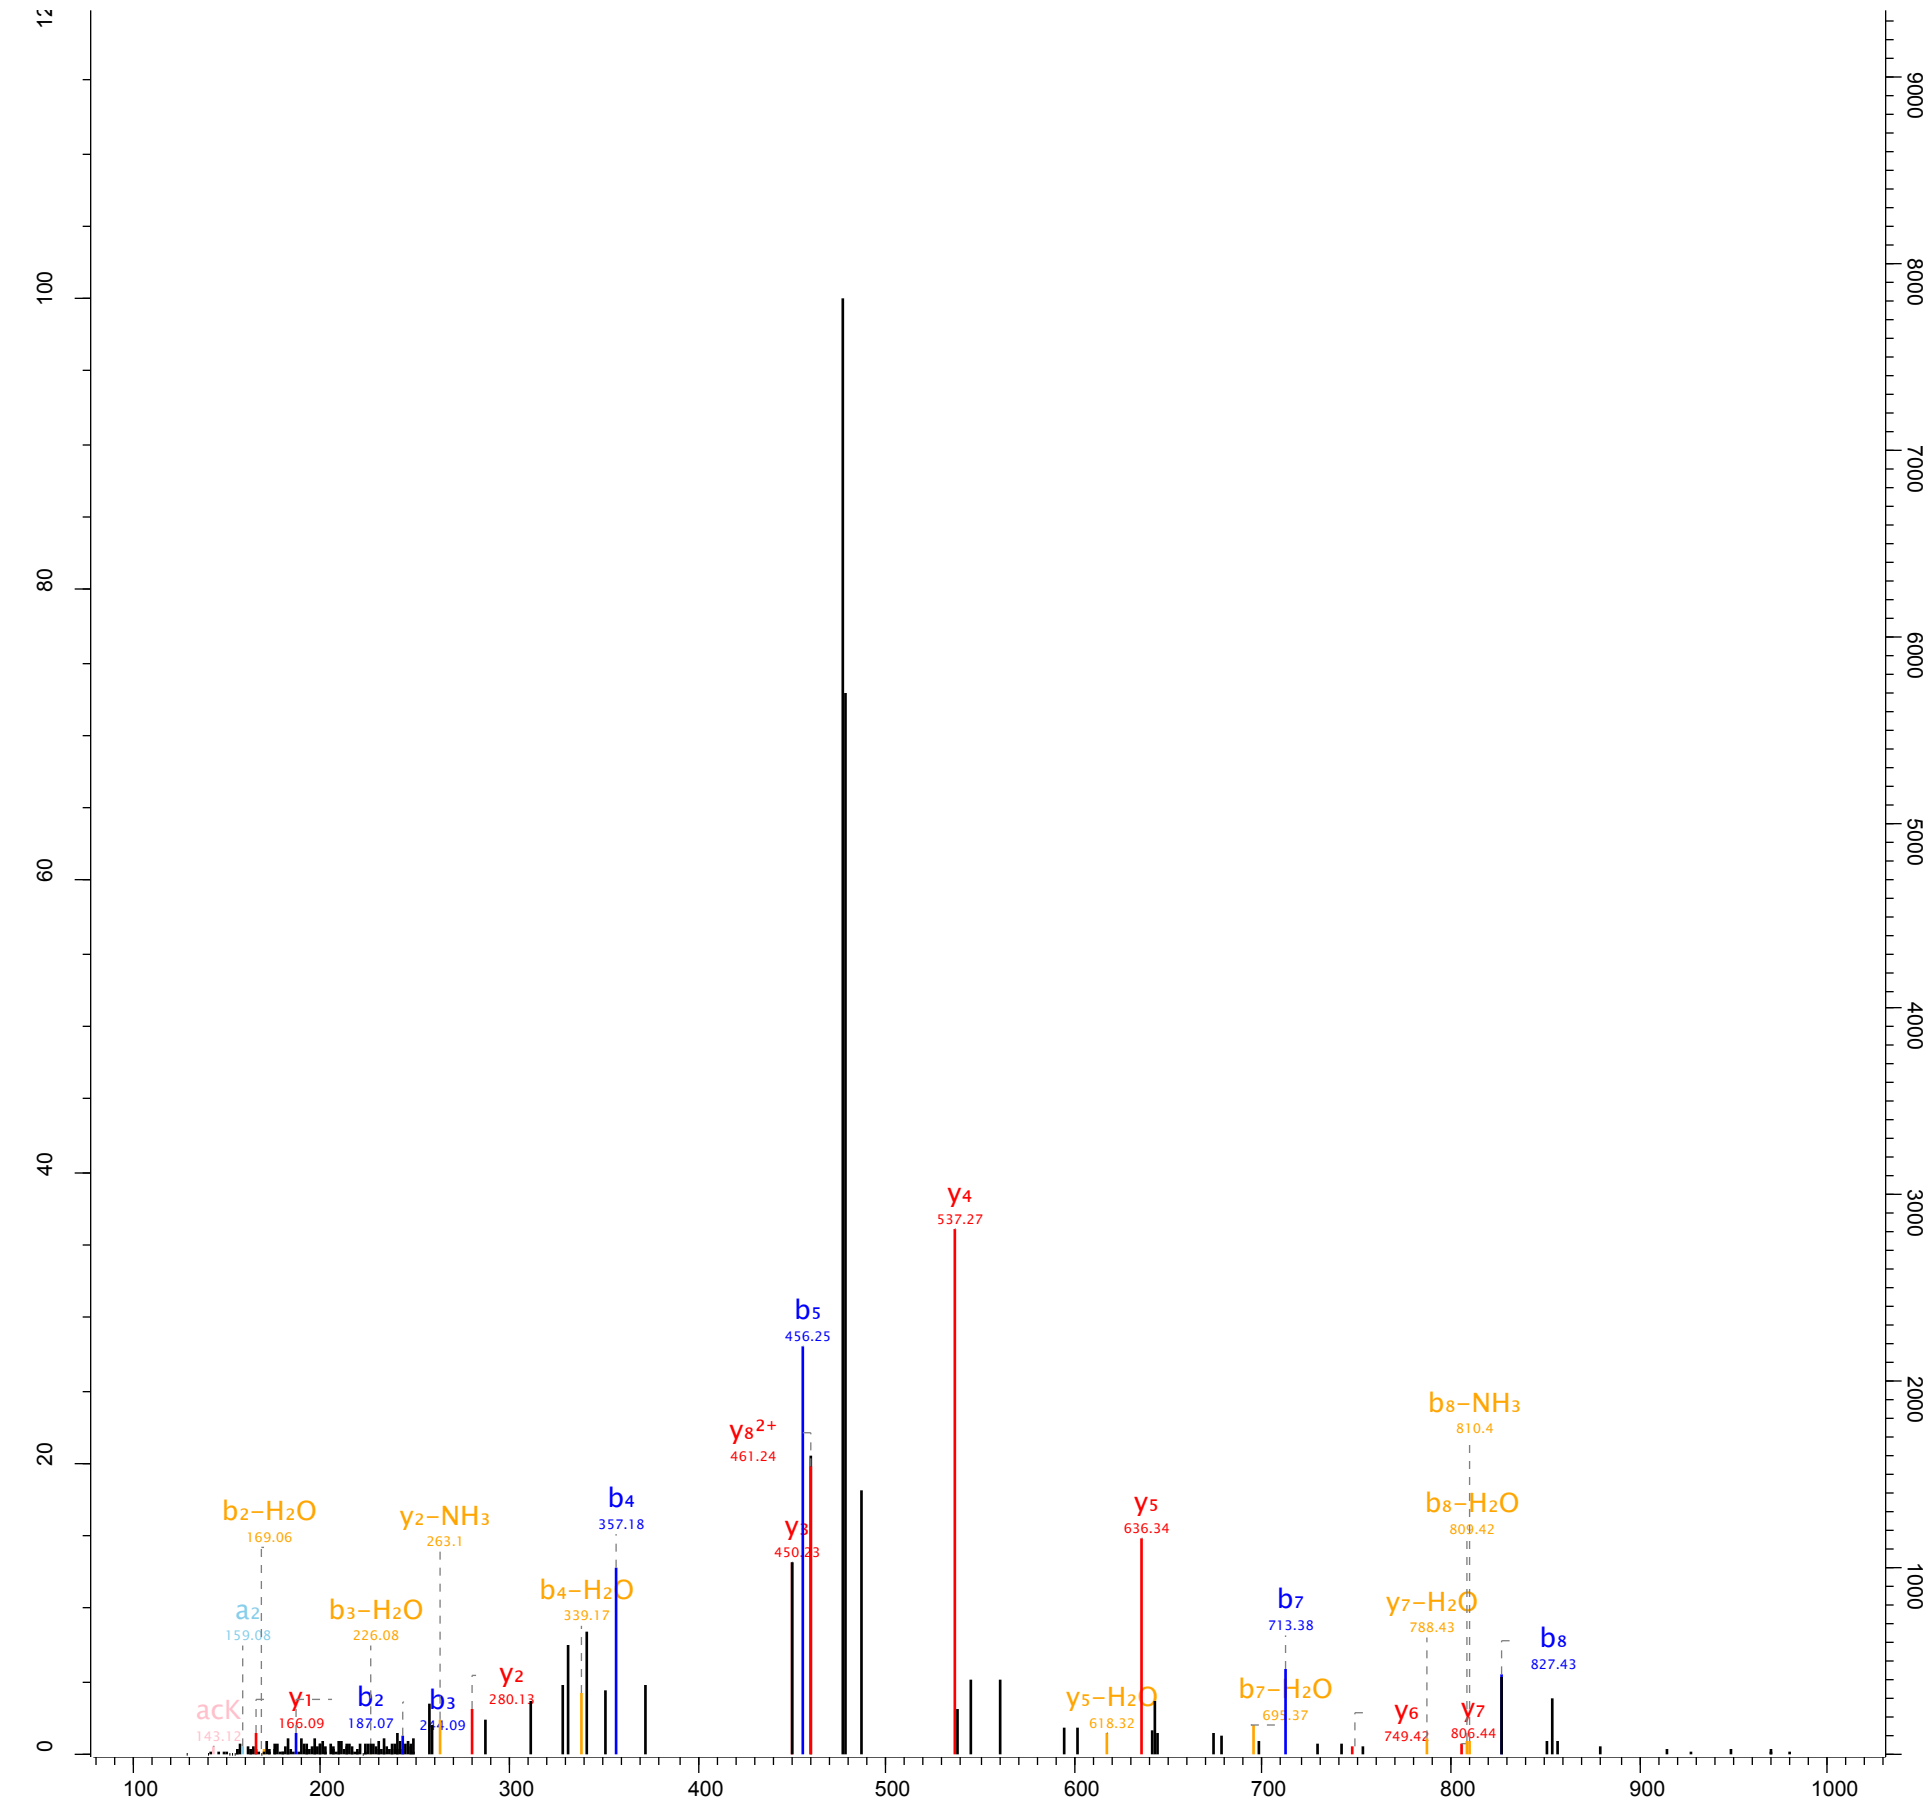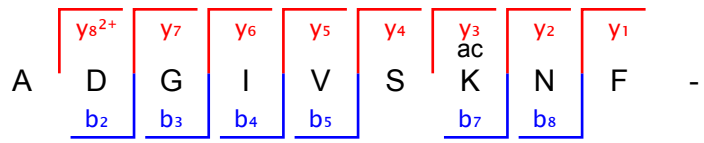

Raw file Scan Method Score m/z Gene names  
 050713\_SCW\_II\_29\_4\_1 18115 ITMS; CID 101.53 799.4 Myh9

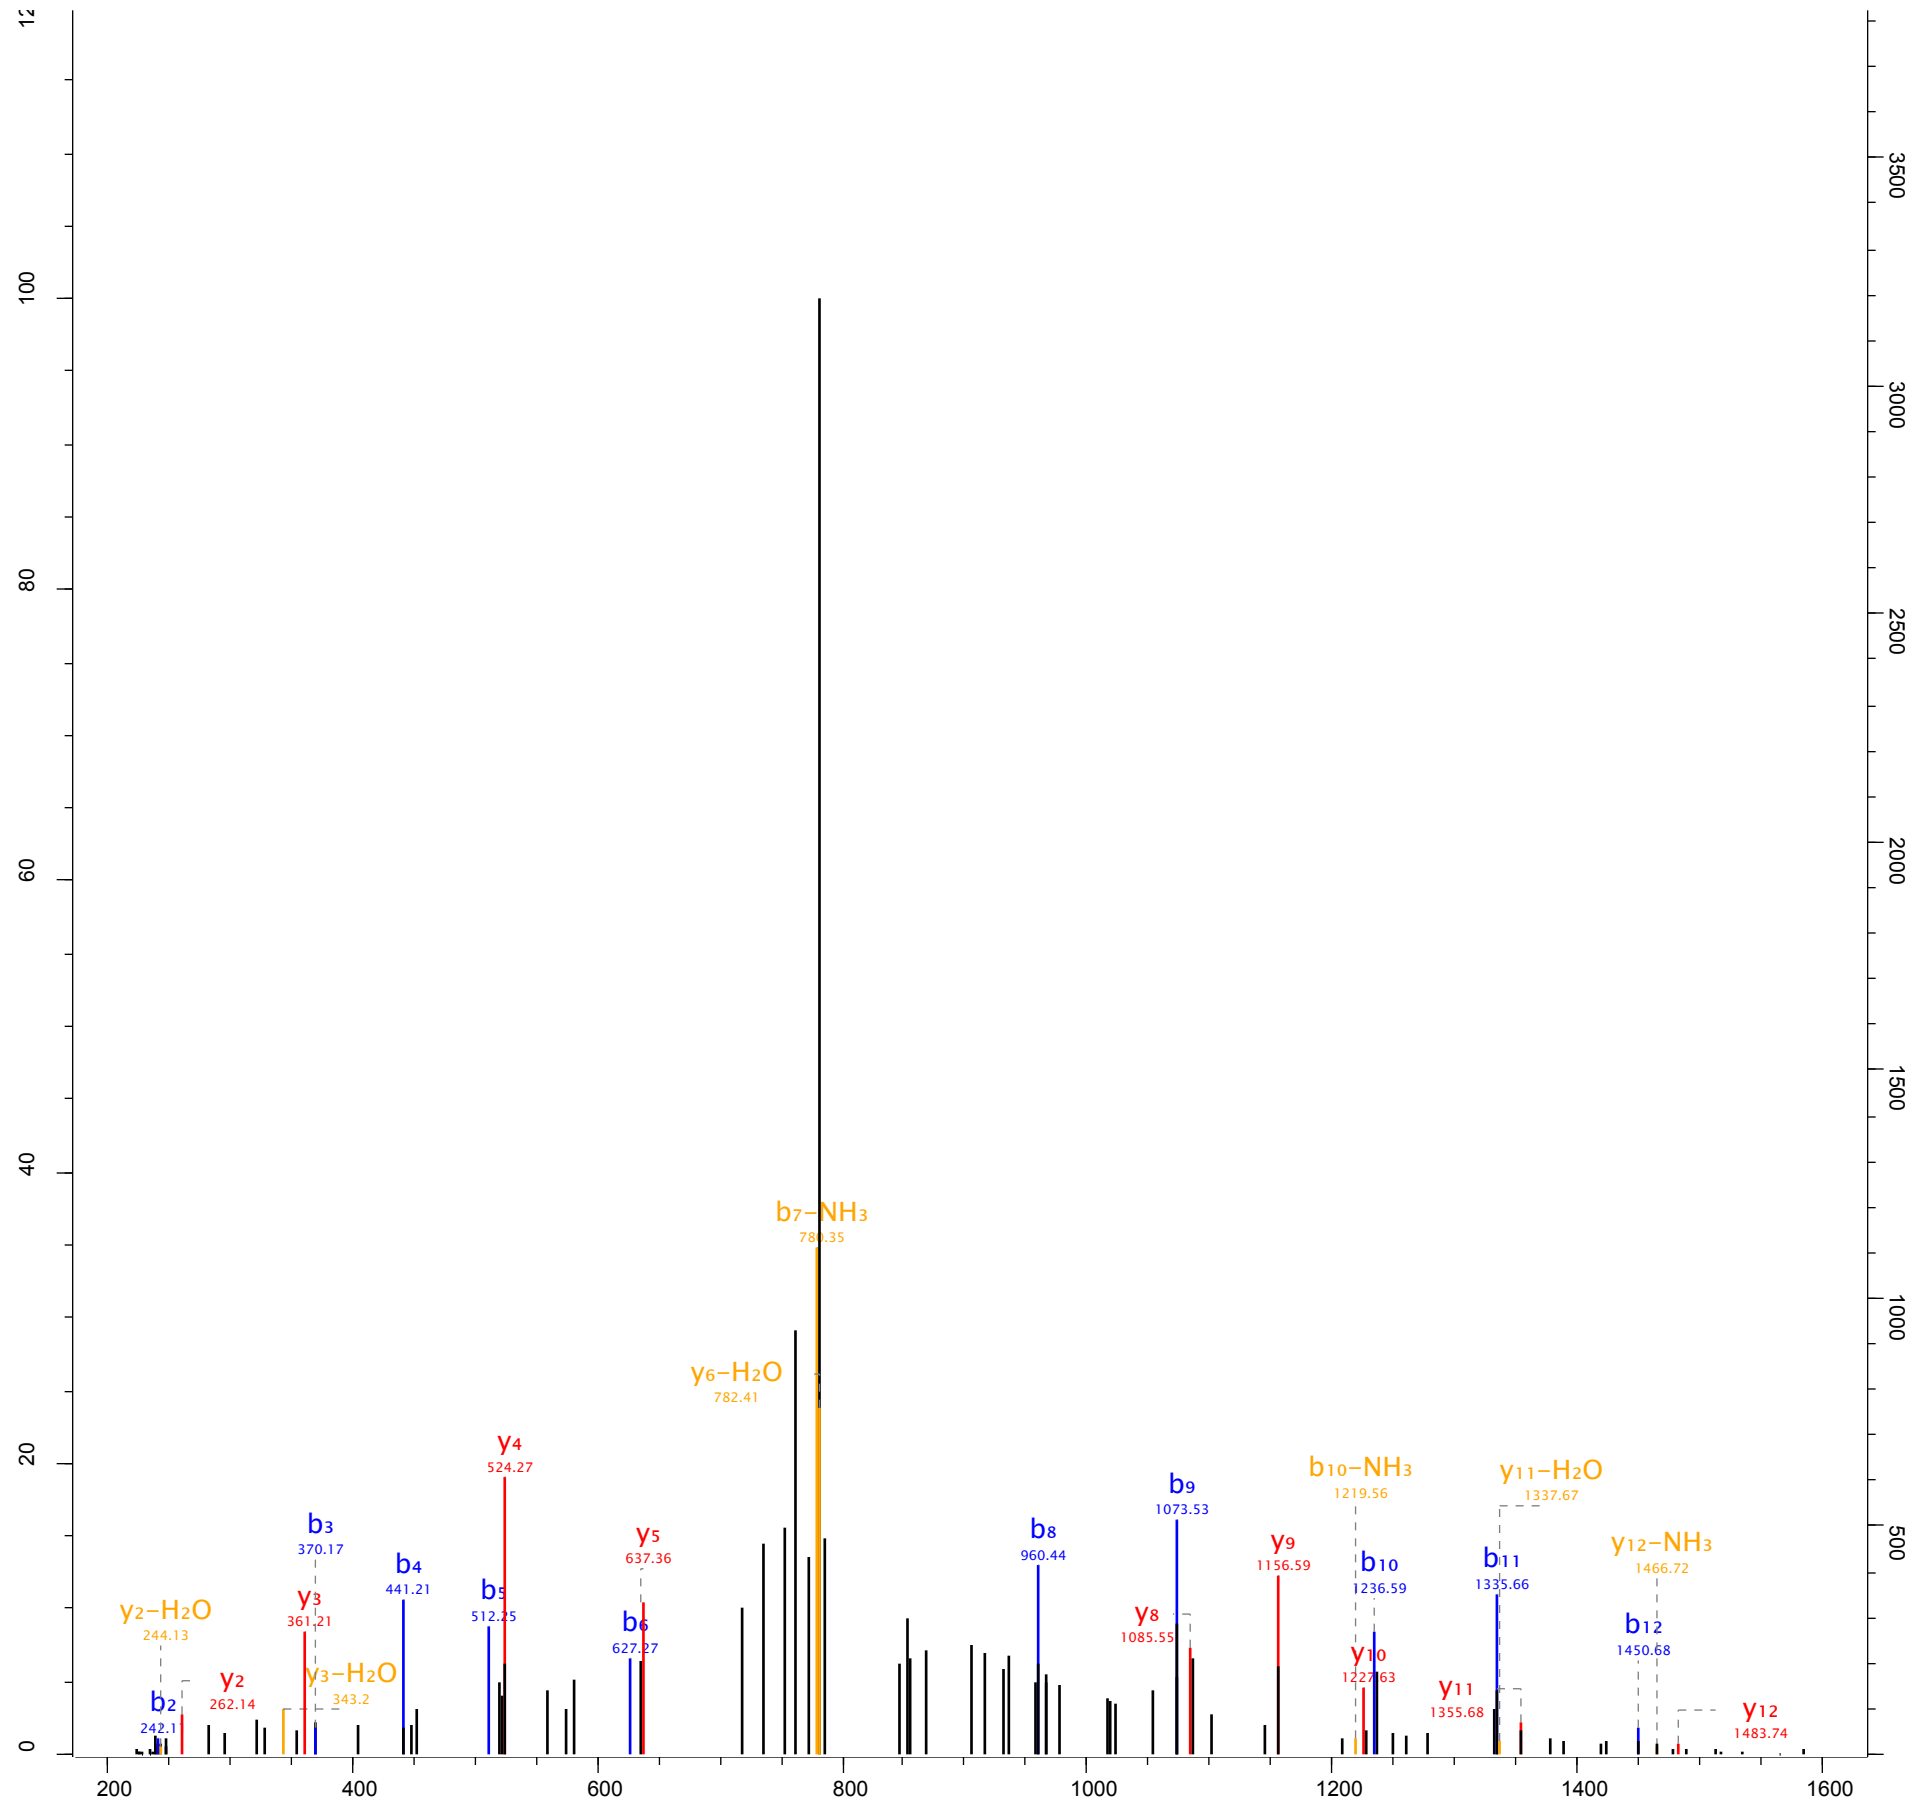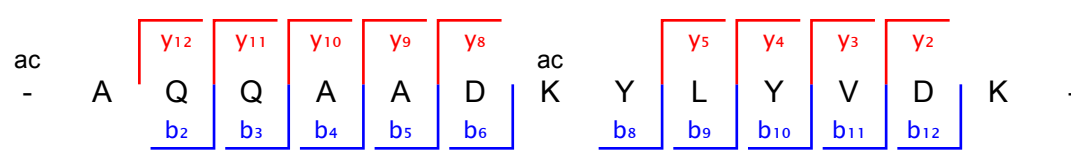



050713\_SCW\_II\_29\_4\_1

18924

ITMS; CID

126.9

1155.55

Crip2

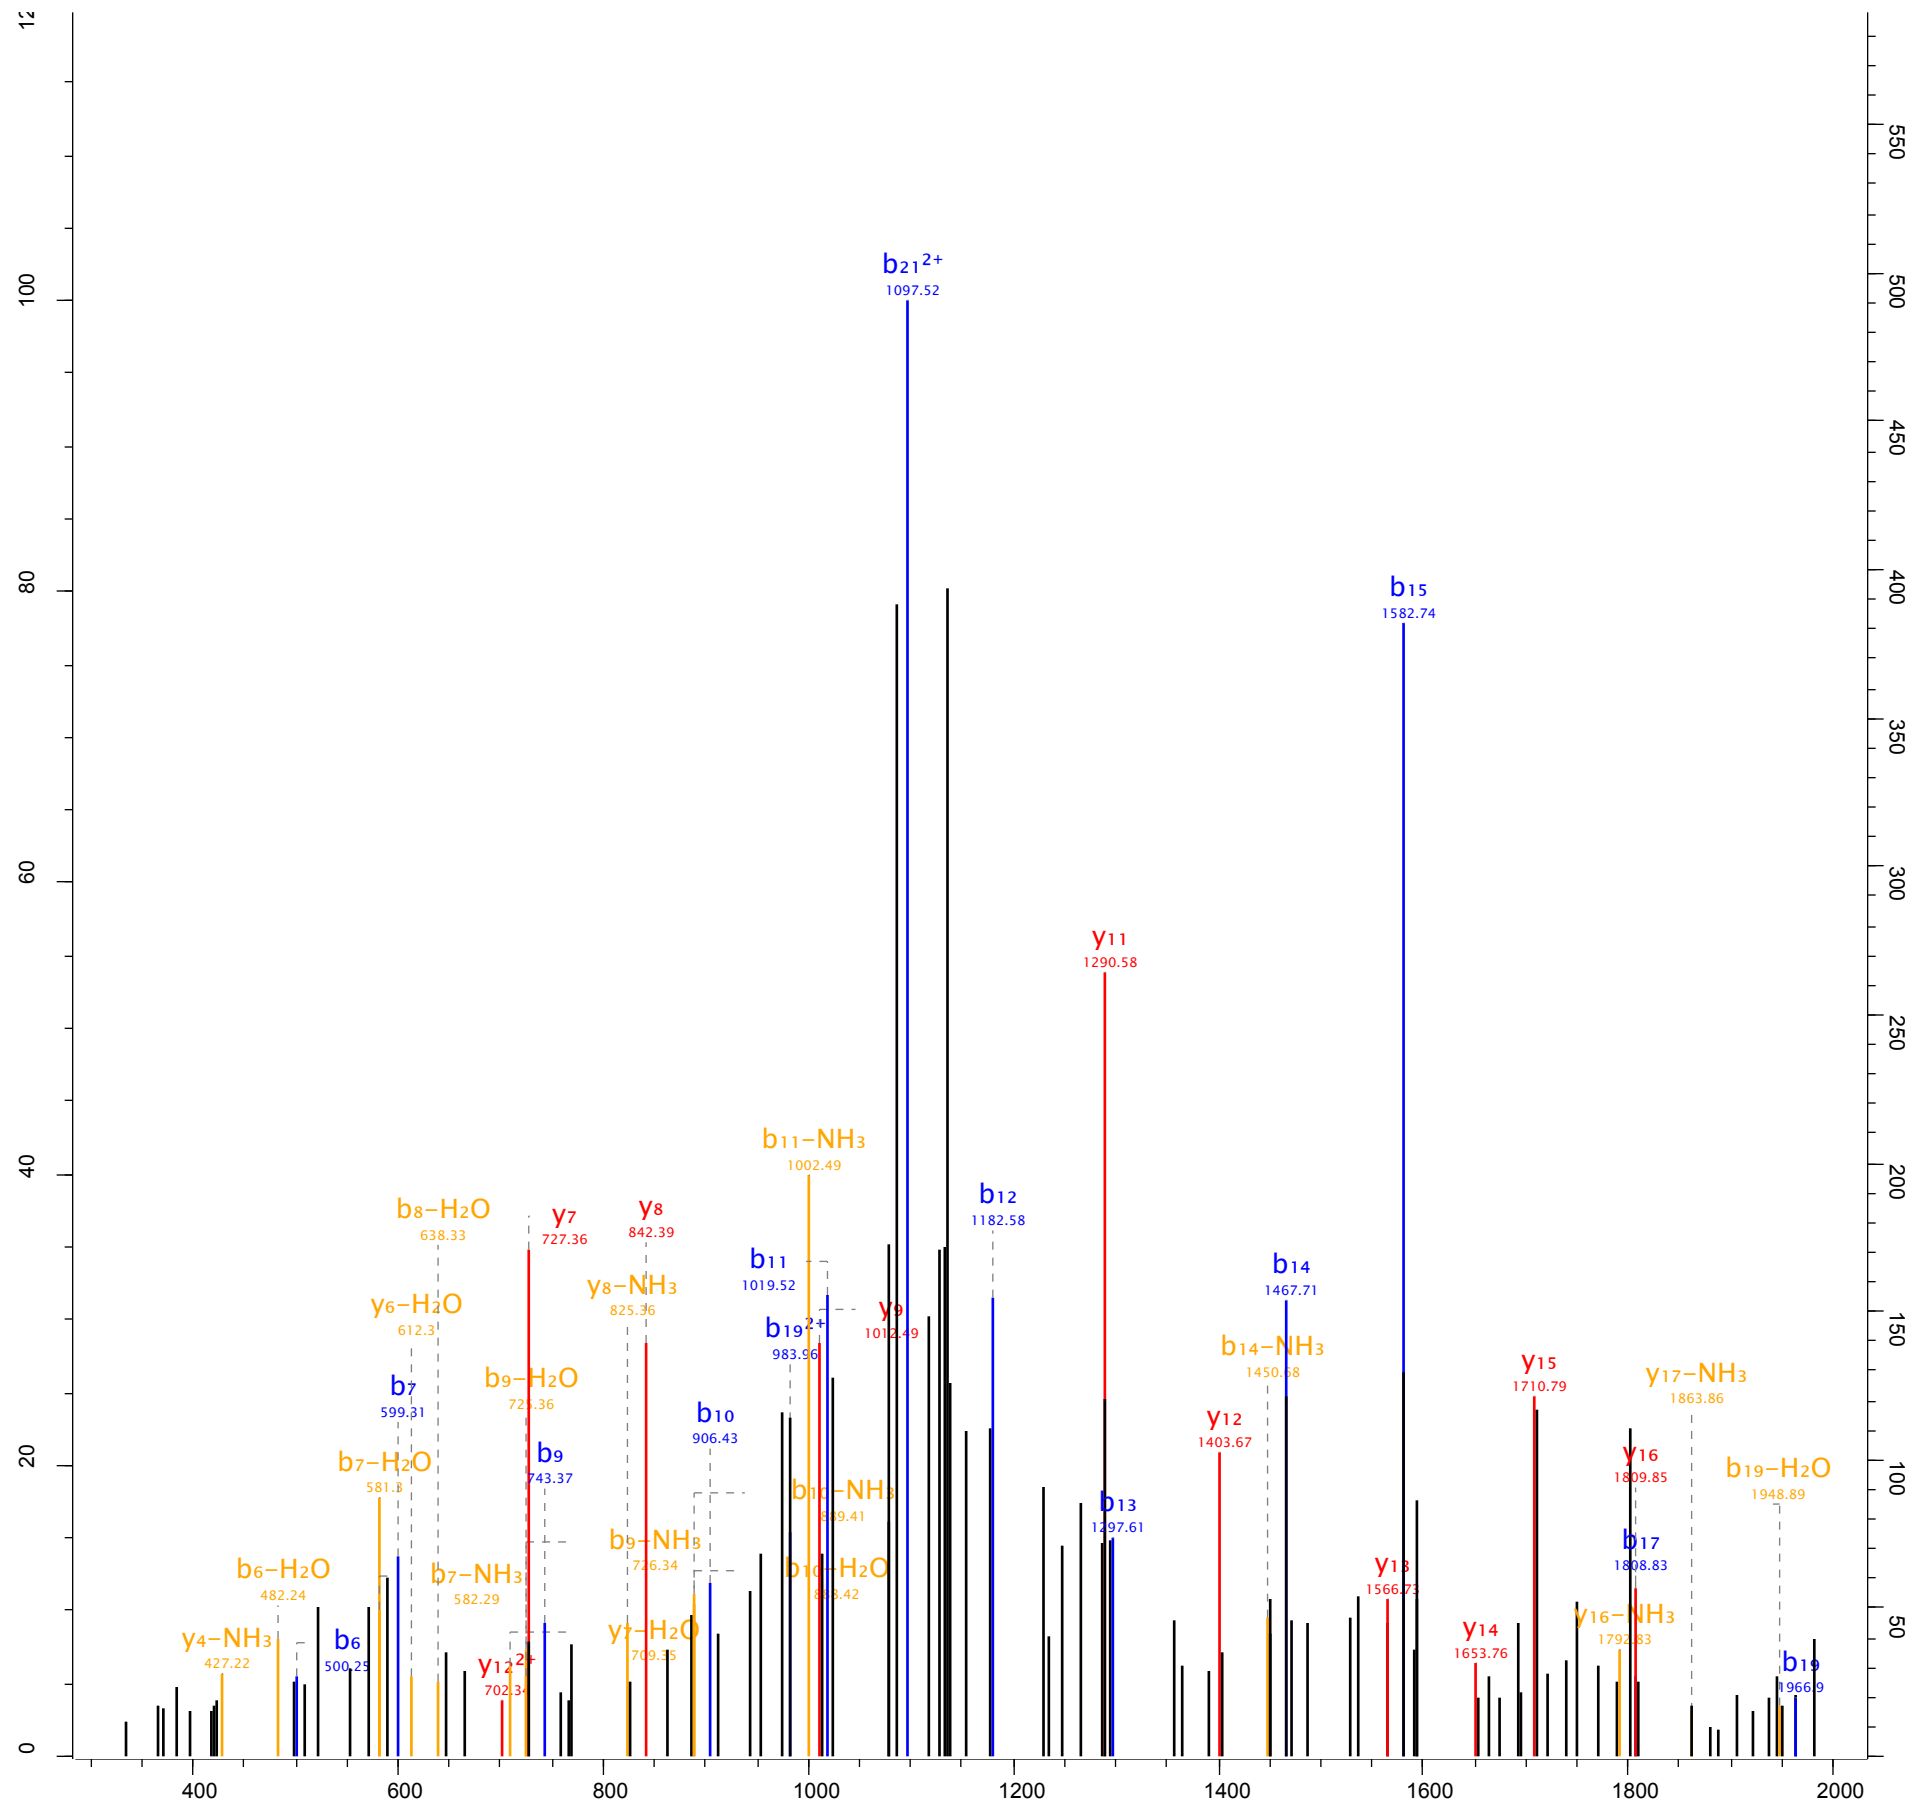

- G V N T G A V G S Y I Y D K D P E G T V Q P -

b<sub>6</sub>
b<sub>7</sub>
b<sub>9</sub>
b<sub>10</sub>
b<sub>11</sub>
b<sub>12</sub>
b<sub>13</sub>
b<sub>14</sub>
b<sub>15</sub>
b<sub>17</sub>
b<sub>19</sub>
b<sub>21</sub><sup>2+</sup>

y<sub>16</sub>
y<sub>15</sub>
y<sub>14</sub>
y<sub>13</sub>
y<sub>12</sub>
y<sub>11</sub>
y<sub>9</sub>
y<sub>8</sub>
y<sub>7</sub>

Raw file 050713\_SCW\_II\_29\_4\_1 Scan 19084 Method ITMS; CID Score 146.97 m/z 877.06 Gene names Rbm33

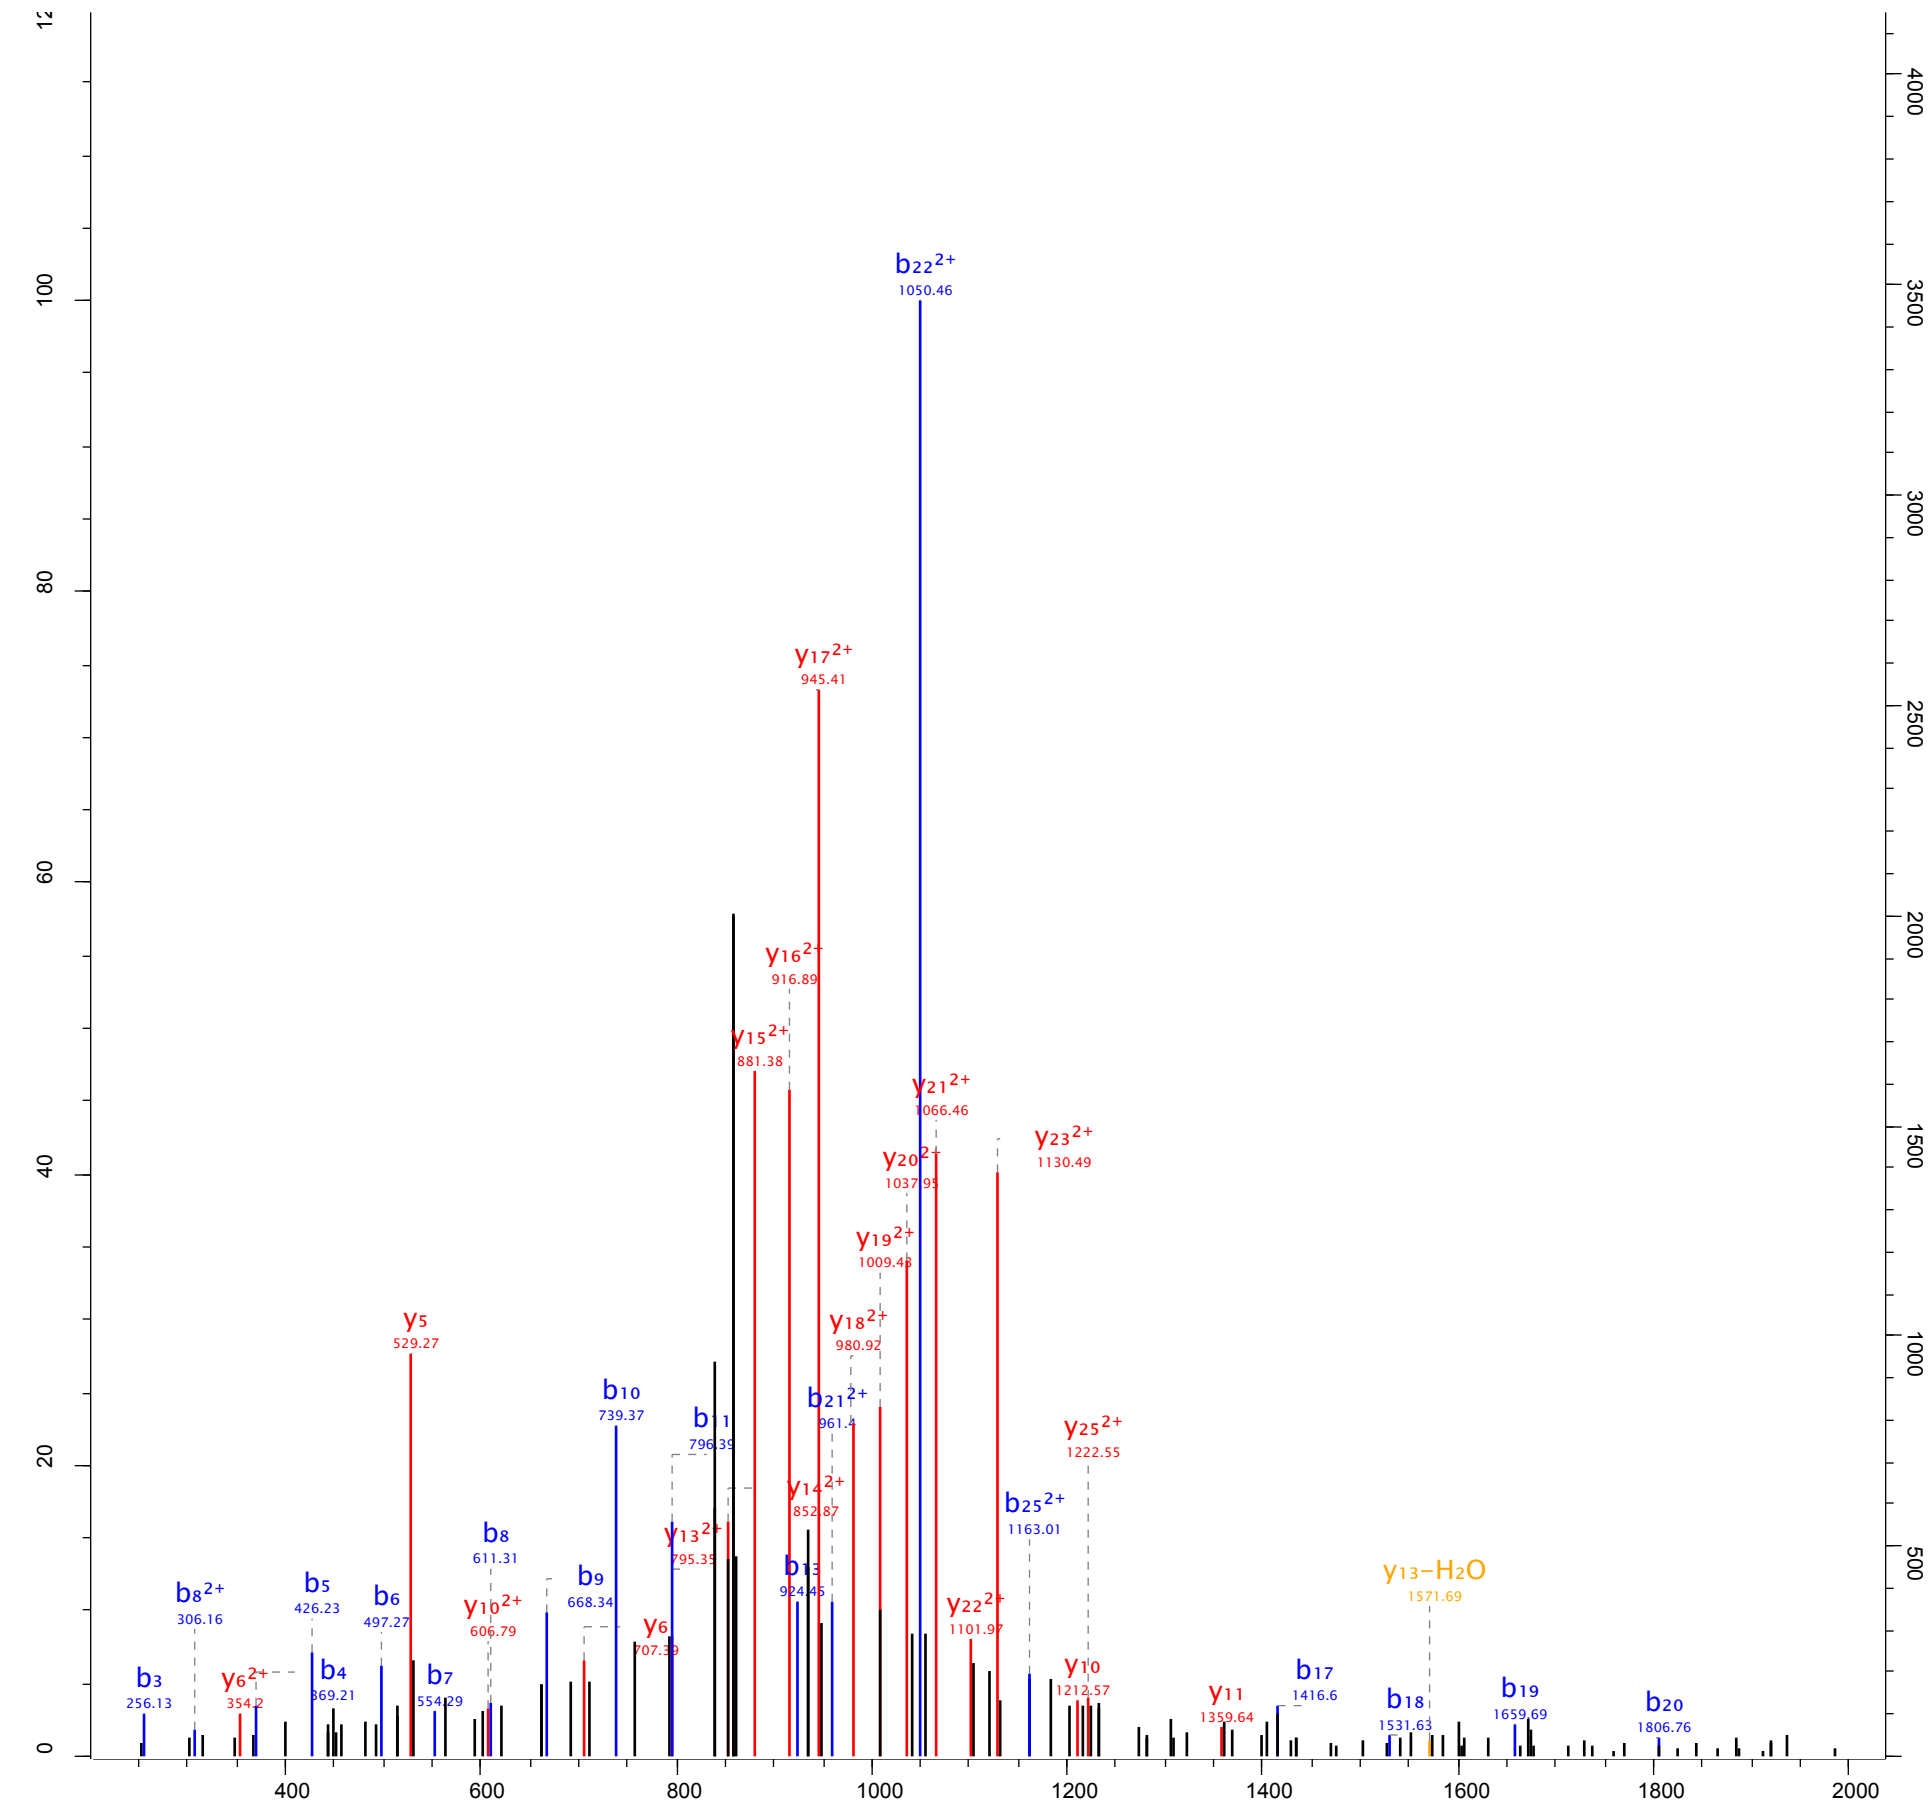

ac - A A A L G A G G G A G A G D D D F D Q F D K P G

A | E R -

Fragmentation map showing b and y ion series for the peptide sequence: A A A L G A G G G A G A G D D D F D Q F D K P G. The map indicates the m/z values of the b and y ions for each amino acid position, with b ions in blue and y ions in red. The y6 ac and y5 ions are highlighted in orange.

Raw file: 050713\_SCW\_II\_29\_4\_1  
 Scan: 20418 Method: ITMS; CID Score: 178.84 m/z: 1044.52 Gene names: Clic1

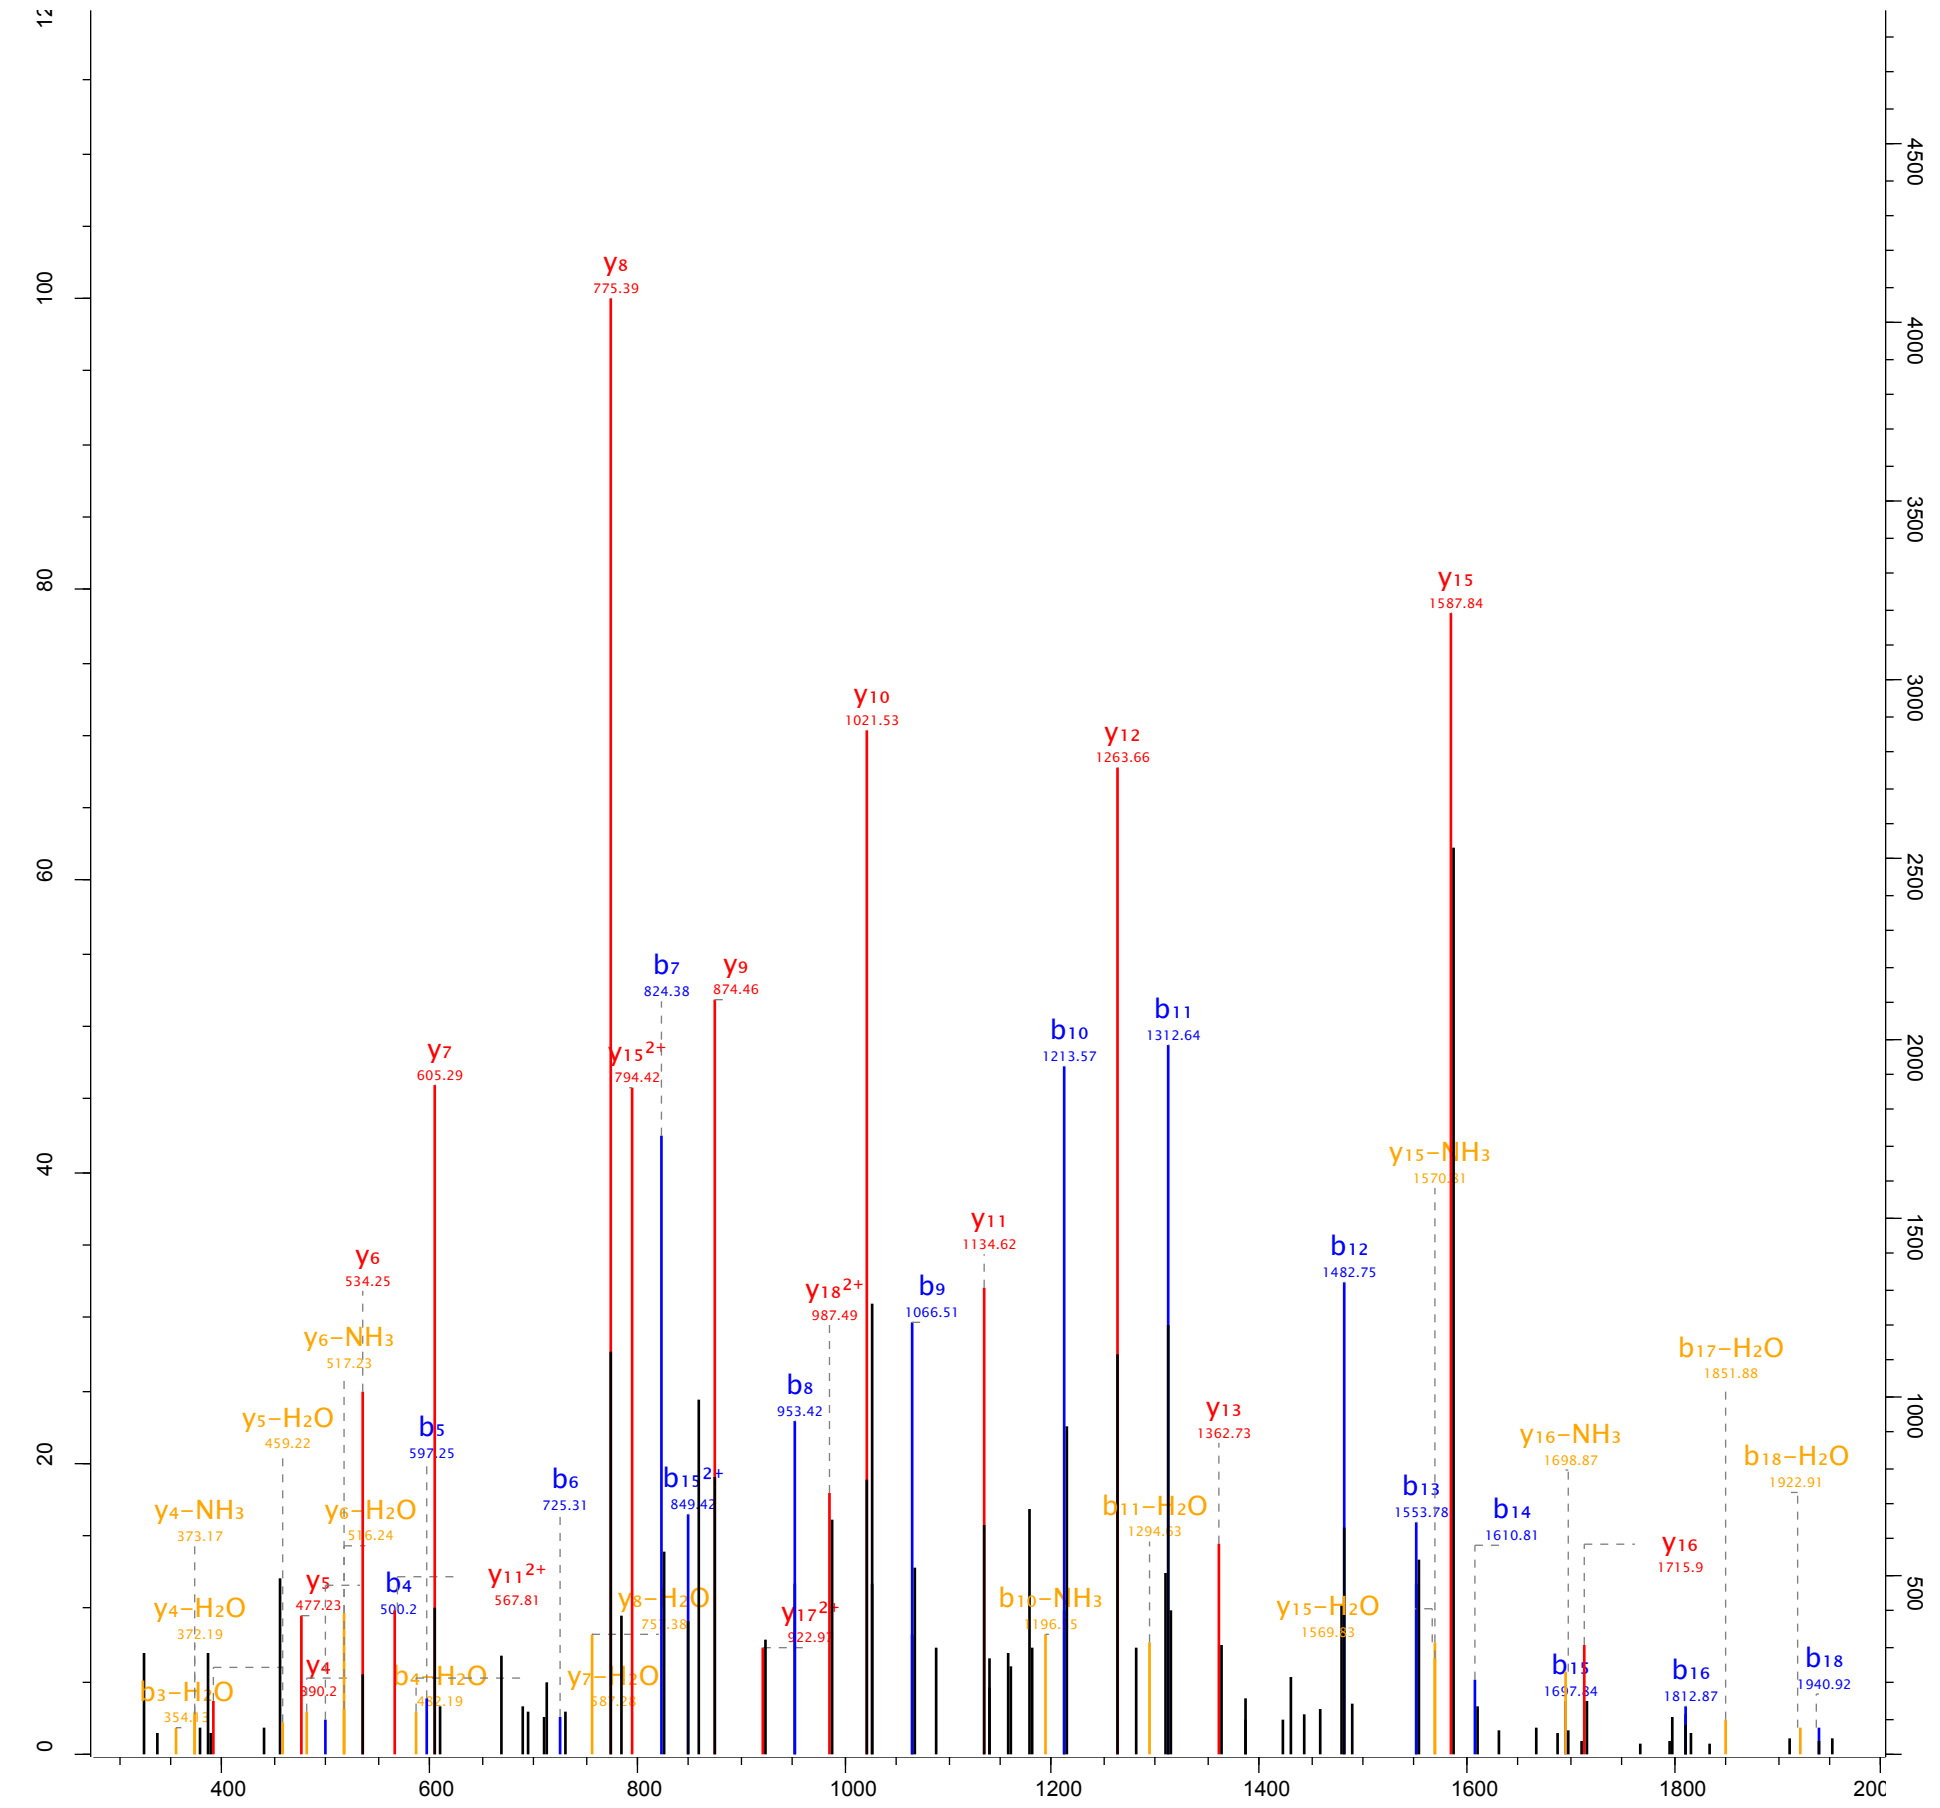

ac - A E E Q P Q V E L F V K A G S D G A K -

y18<sup>2+</sup>
y17<sup>2+</sup>
y16
y15
y13
y12
y11
y10
y9
y<sup>ac</sup>
y7
y6
y5
y4

b4
b5
b6
b7
b8
b9
b10
b11
b12
b13
b14
b15
b16
b18

Raw file: 050713\_SCW\_II\_29\_4\_1  
 Scan: 20938  
 Method: ITMS; CID  
 Score: 208.89  
 m/z: 1263.59  
 Gene names: Rbbp4

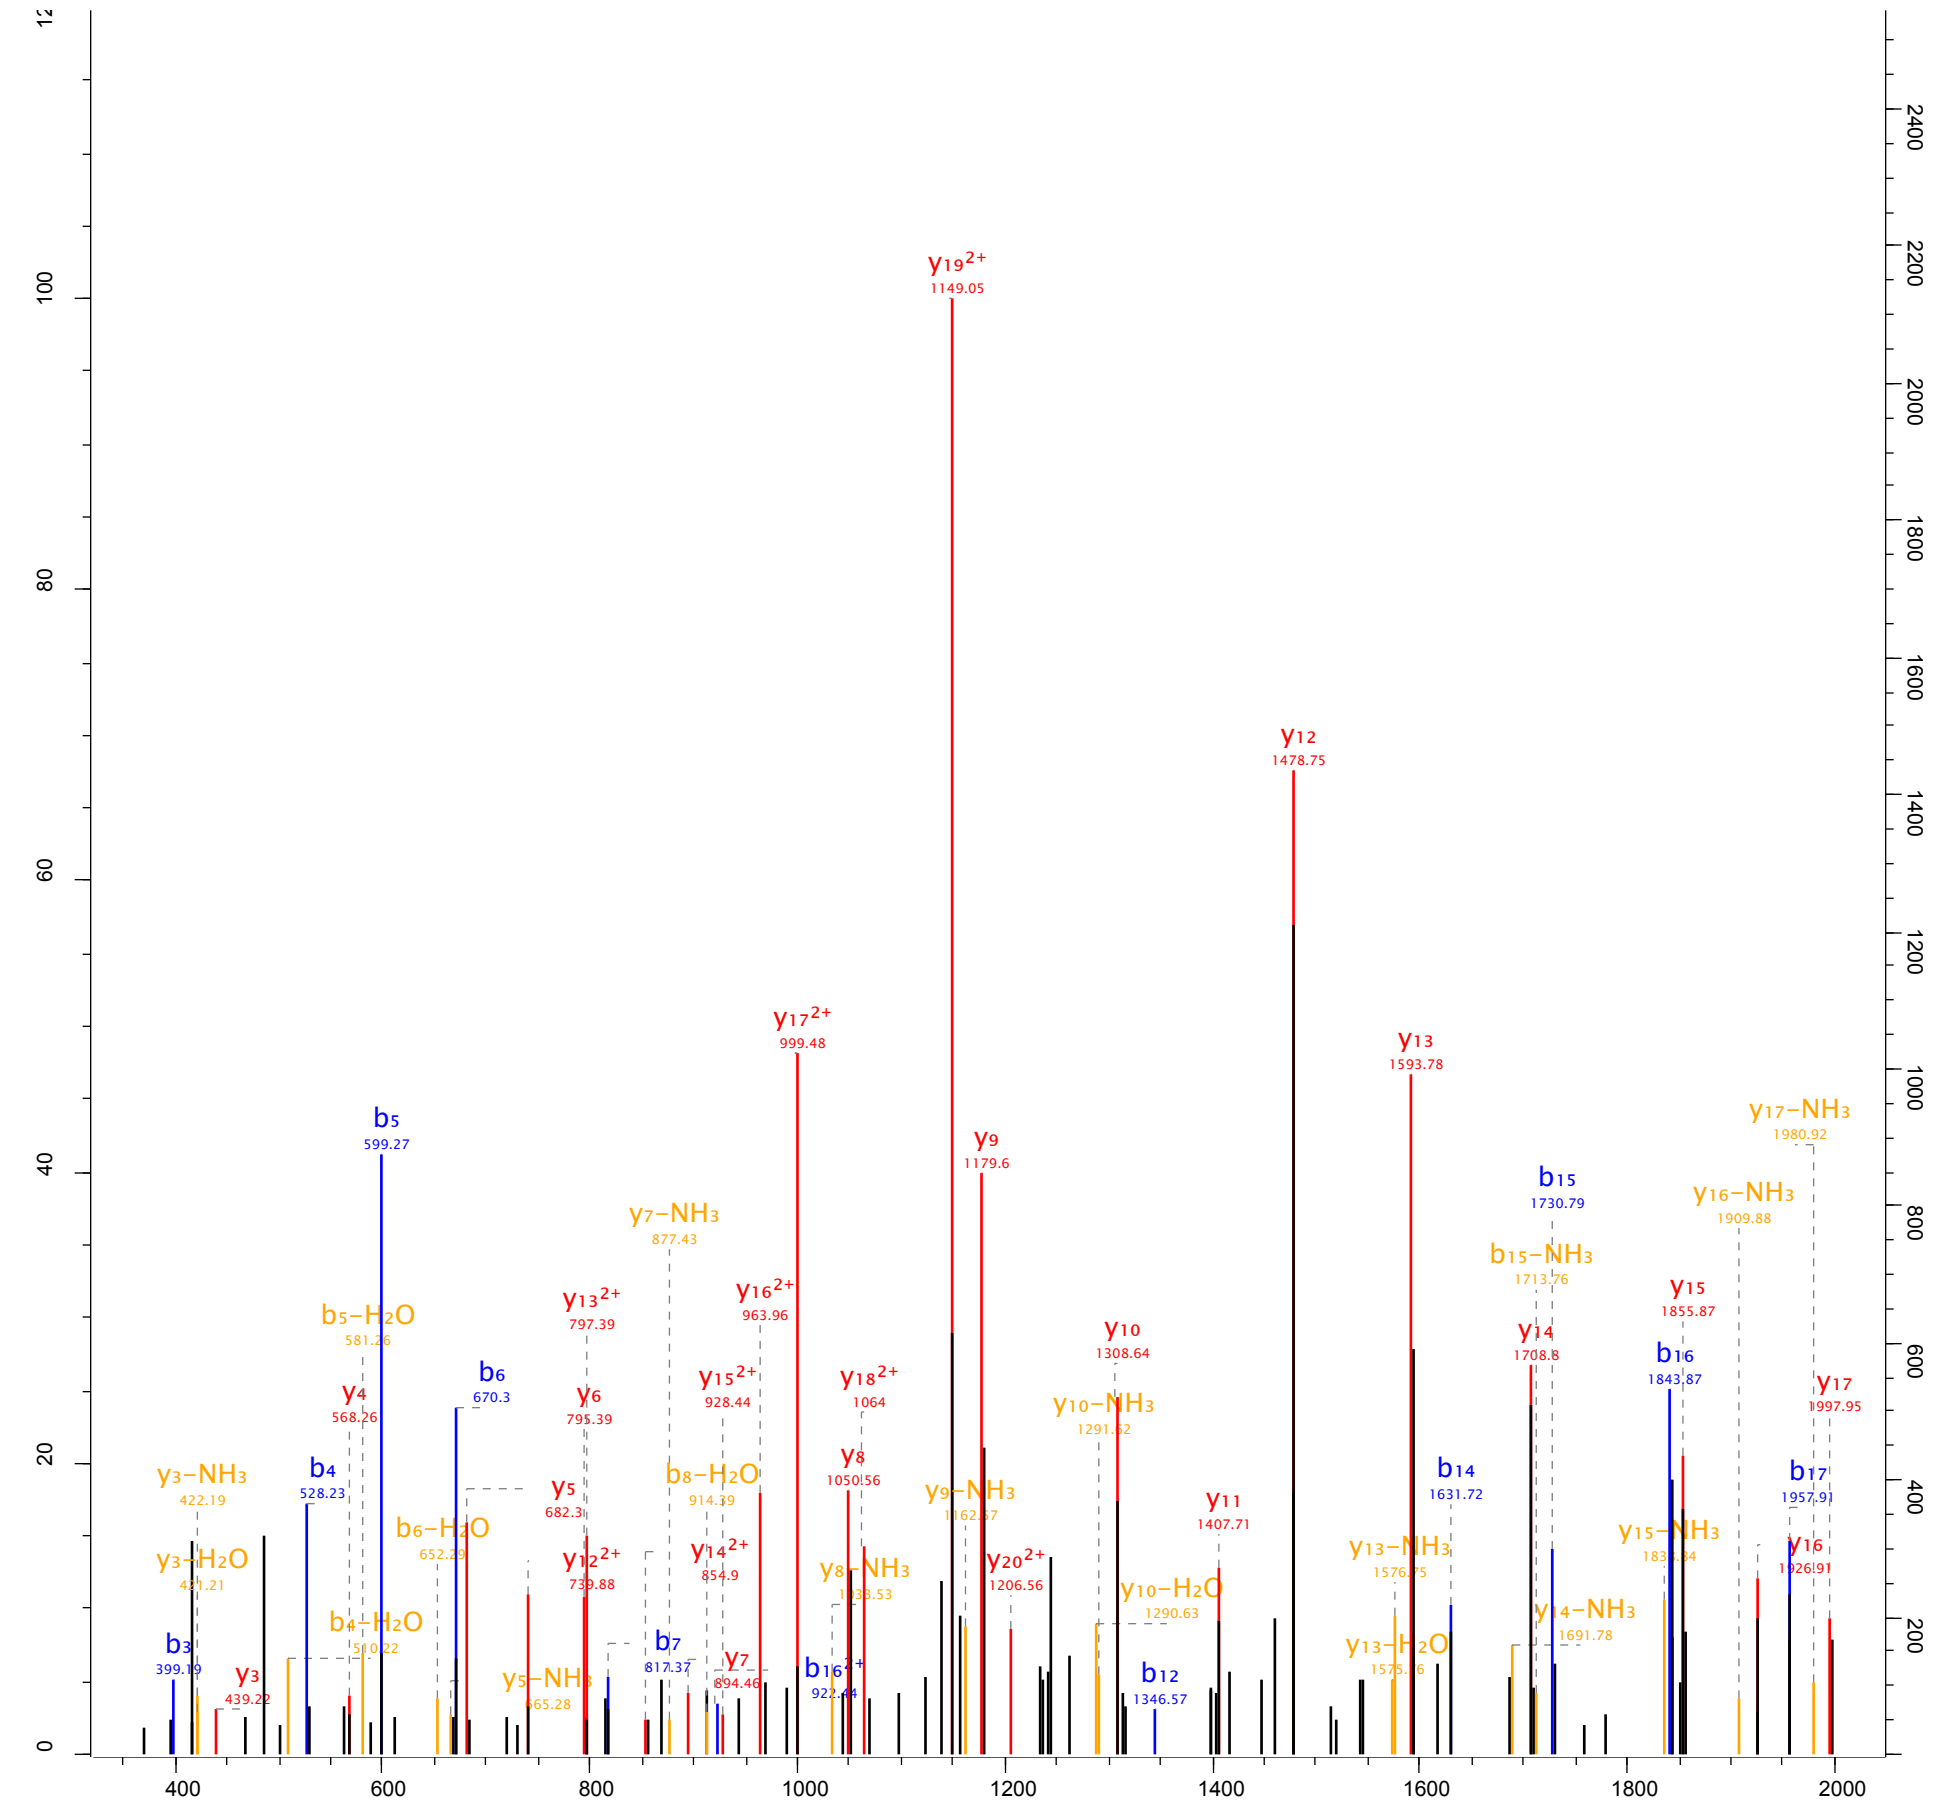

ac: A D K E A A F D D A V E E R V I N E E Y K -  
 b3 b4 b5 b6 b7 b12 b14 b15 b16 b17

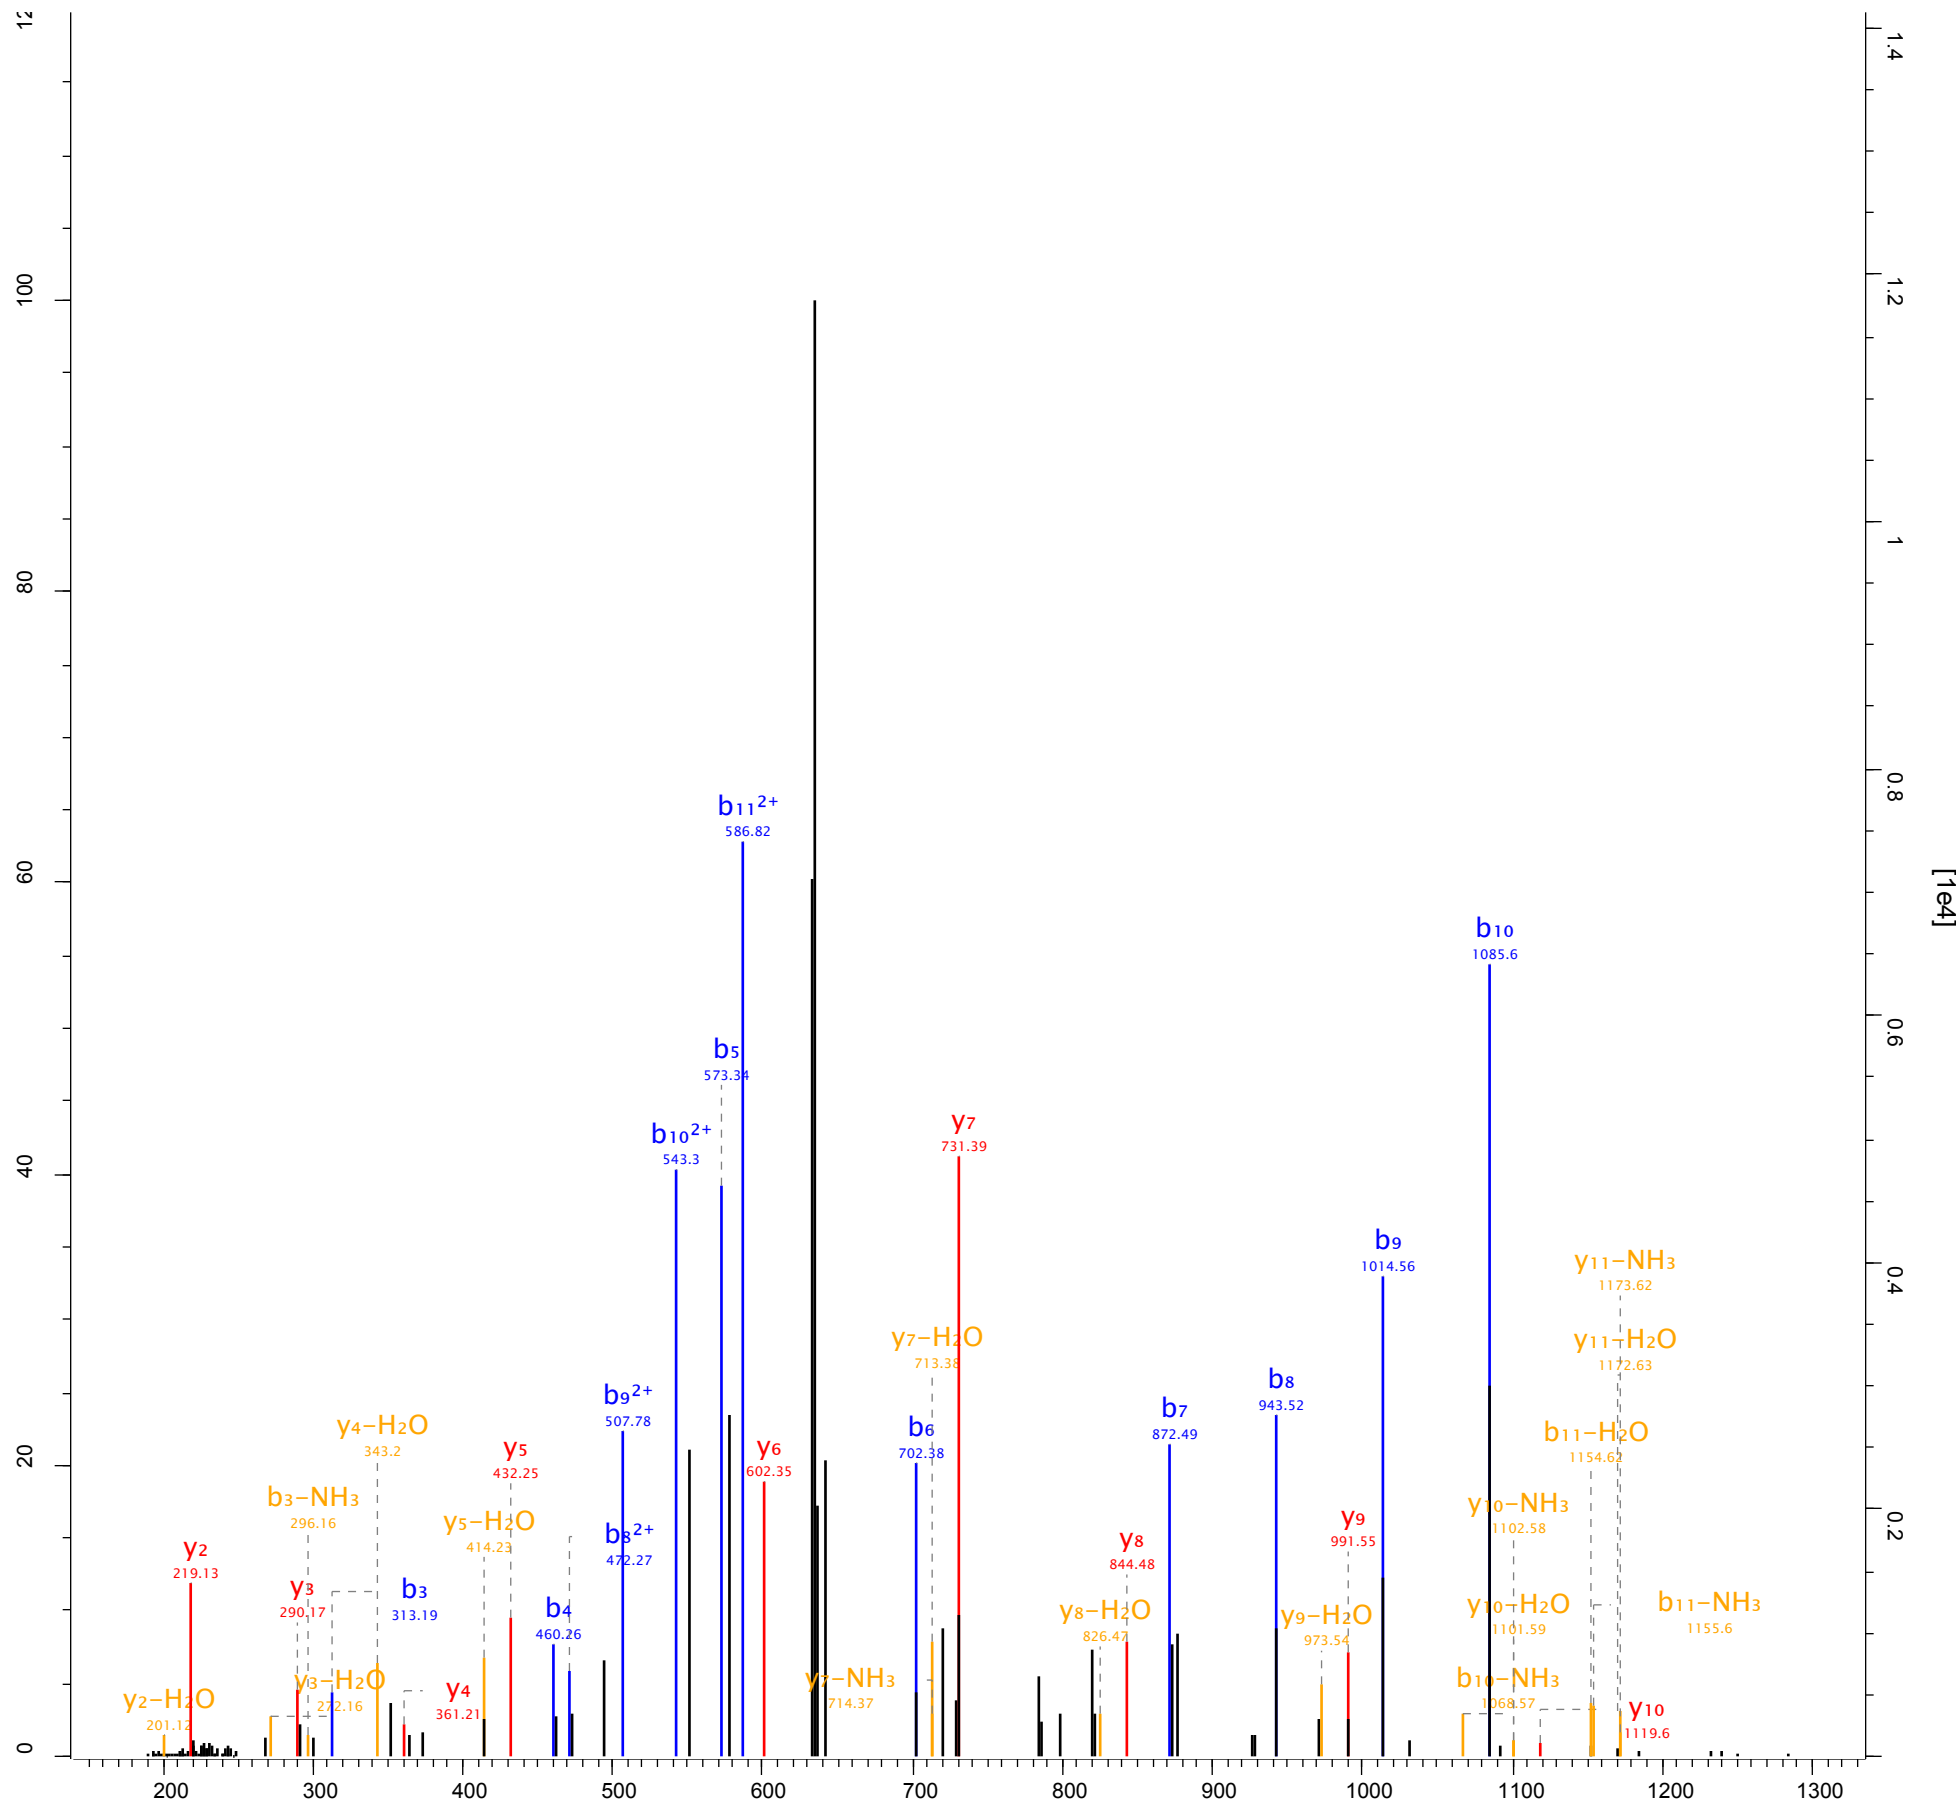

- L A Q F I E K A A A S L -

y<sub>10</sub>
y<sub>9</sub>
y<sub>8</sub>
y<sub>7</sub>
y<sub>6</sub>  
ac
y<sub>5</sub>
y<sub>4</sub>
y<sub>3</sub>
y<sub>2</sub>

b<sub>3</sub>
b<sub>4</sub>
b<sub>5</sub>
b<sub>6</sub>
b<sub>7</sub>
b<sub>8</sub>
b<sub>9</sub>
b<sub>10</sub>
b<sub>11</sub>2+

Raw file Scan Method Score m/z Gene names  
 050713\_SCW\_II\_29\_4\_1 24155 ITMS; CID 140.2 903.79 Zfyve21

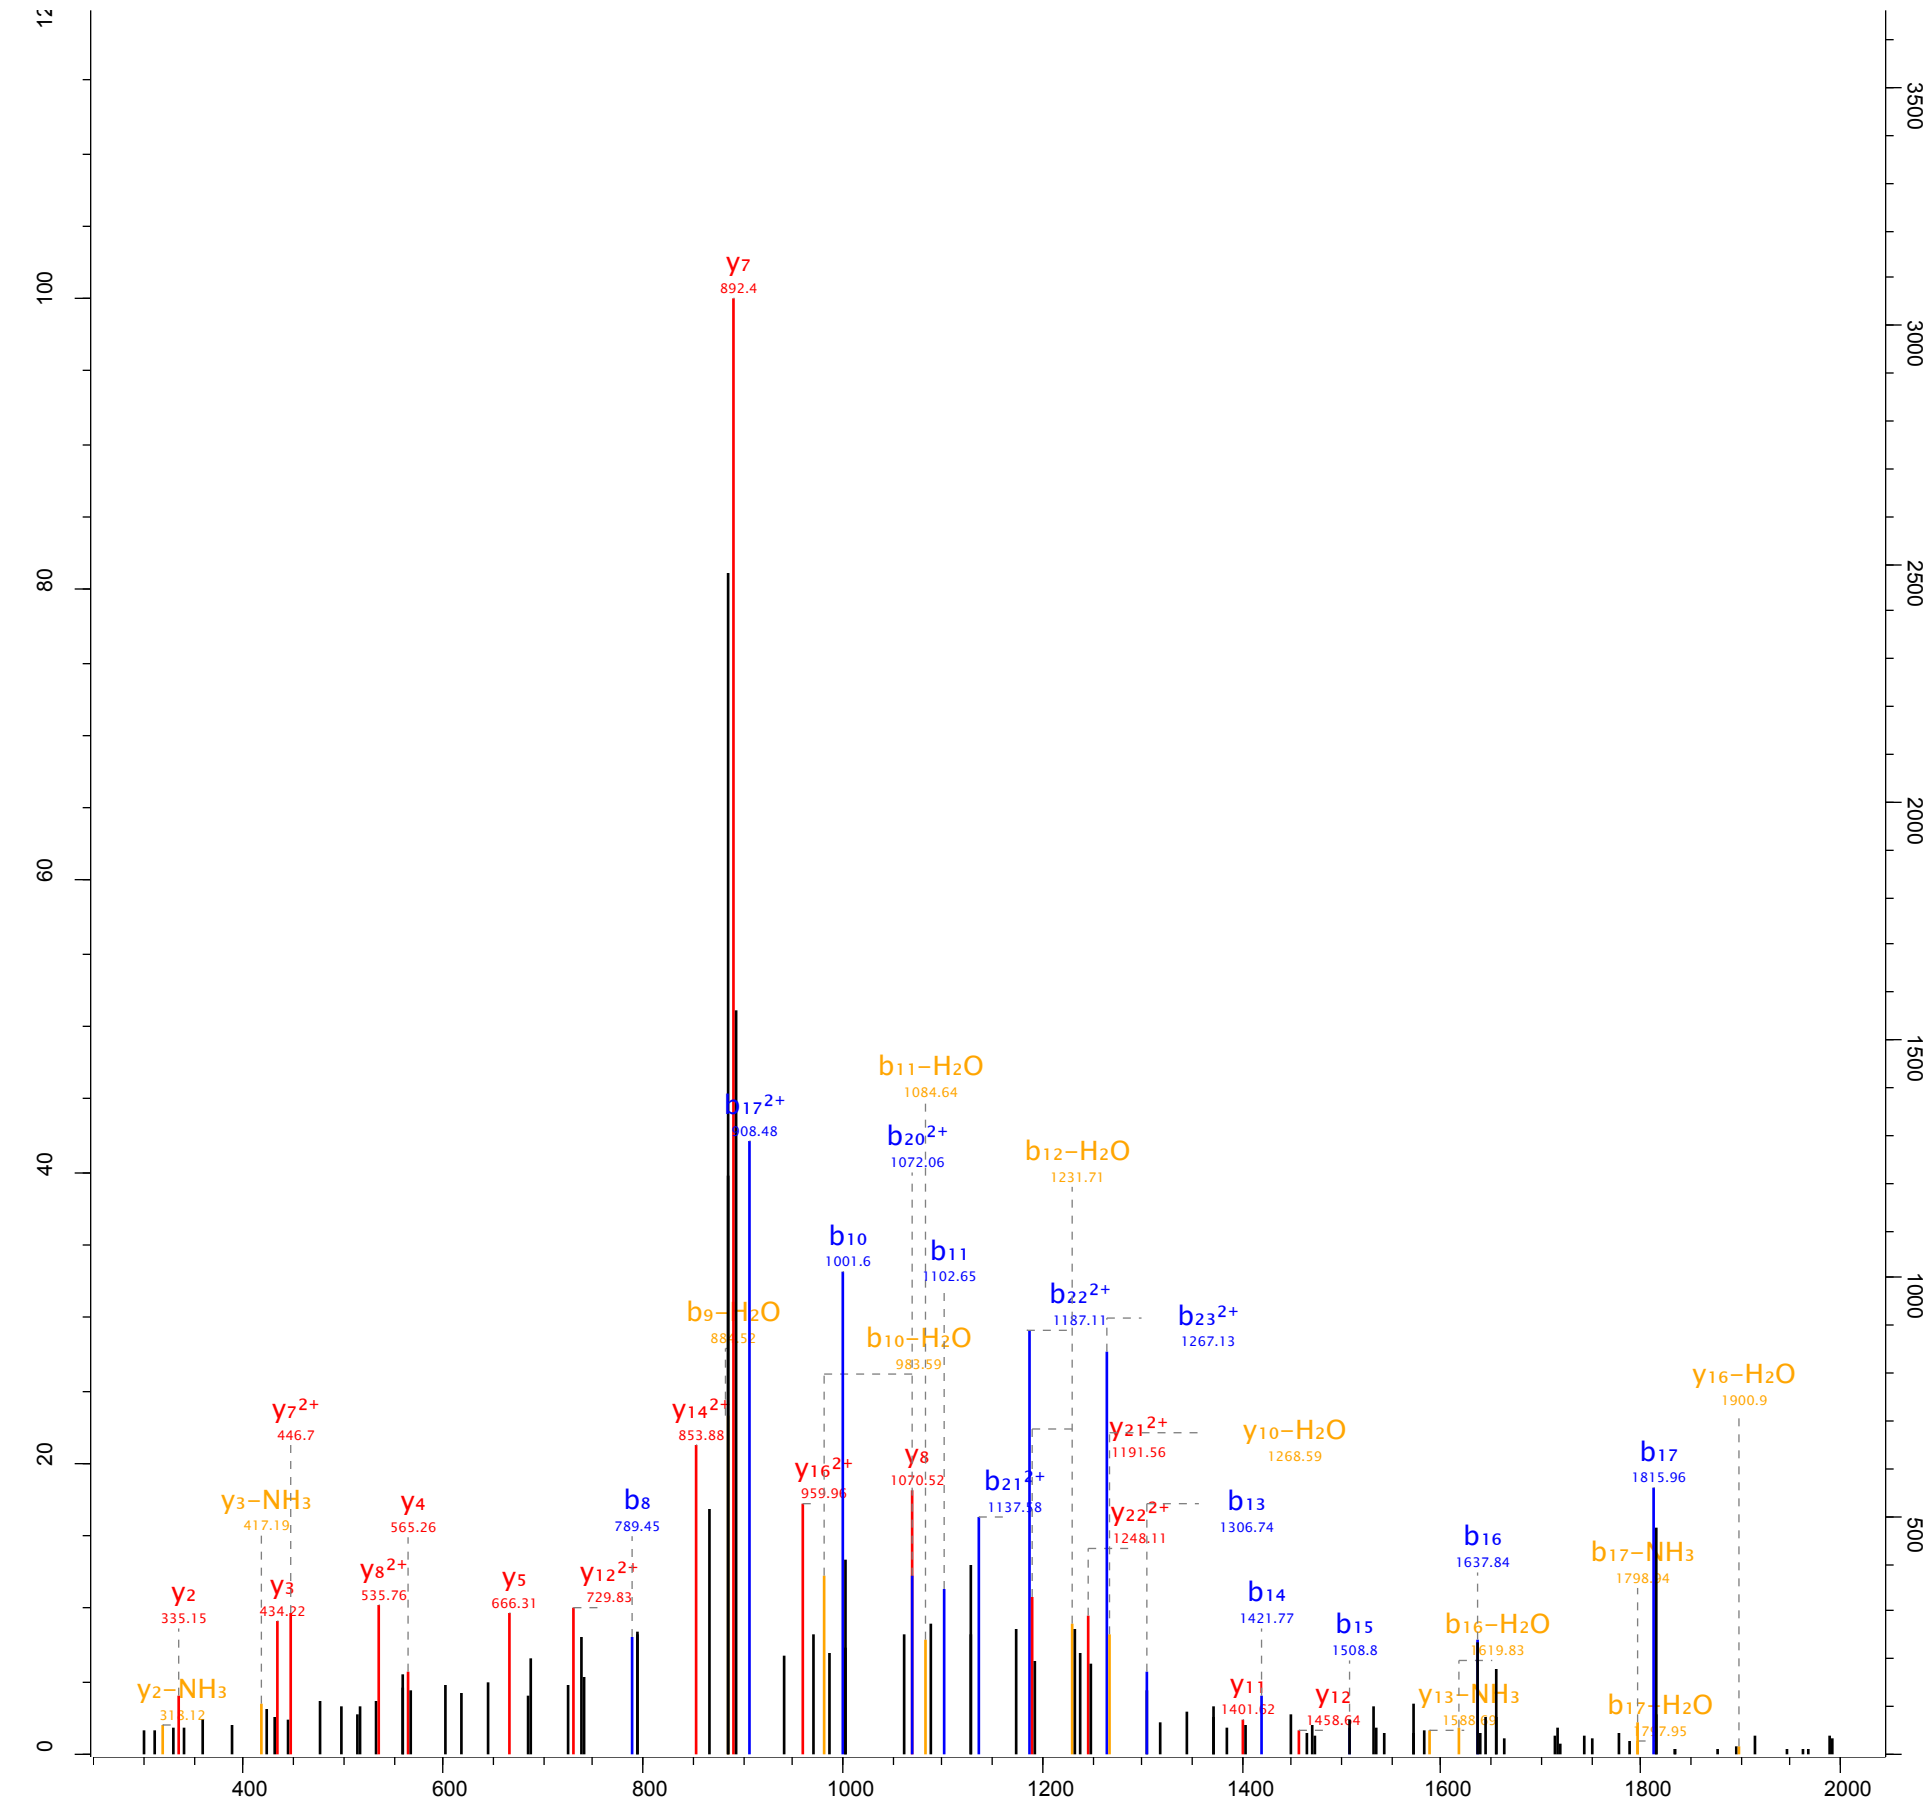

- V L L S G A T F L V T F G D S E K P E T M V C R

y<sub>22</sub><sup>2+</sup>
y<sub>21</sub><sup>2+</sup>
y<sub>16</sub><sup>2+</sup>
y<sub>14</sub><sup>2+</sup>
y<sub>12</sub>
y<sub>11</sub>
y<sub>8</sub>
ac
y<sub>7</sub>
y<sub>5</sub>
y<sub>4</sub>
y<sub>3</sub>
y<sub>2</sub>

b<sub>8</sub>
b<sub>10</sub>
b<sub>11</sub>
b<sub>13</sub>
b<sub>14</sub>
b<sub>15</sub>
b<sub>16</sub>
b<sub>17</sub>
b<sub>20</sub><sup>2+</sup>
b<sub>21</sub><sup>2+</sup>
b<sub>22</sub><sup>2+</sup>
b<sub>23</sub><sup>2+</sup>

Raw file Scan Method Score m/z Gene names  
 050713\_SCW\_II\_29\_4\_1 24966 ITMS; CID 89.04 863.13 Oxct1

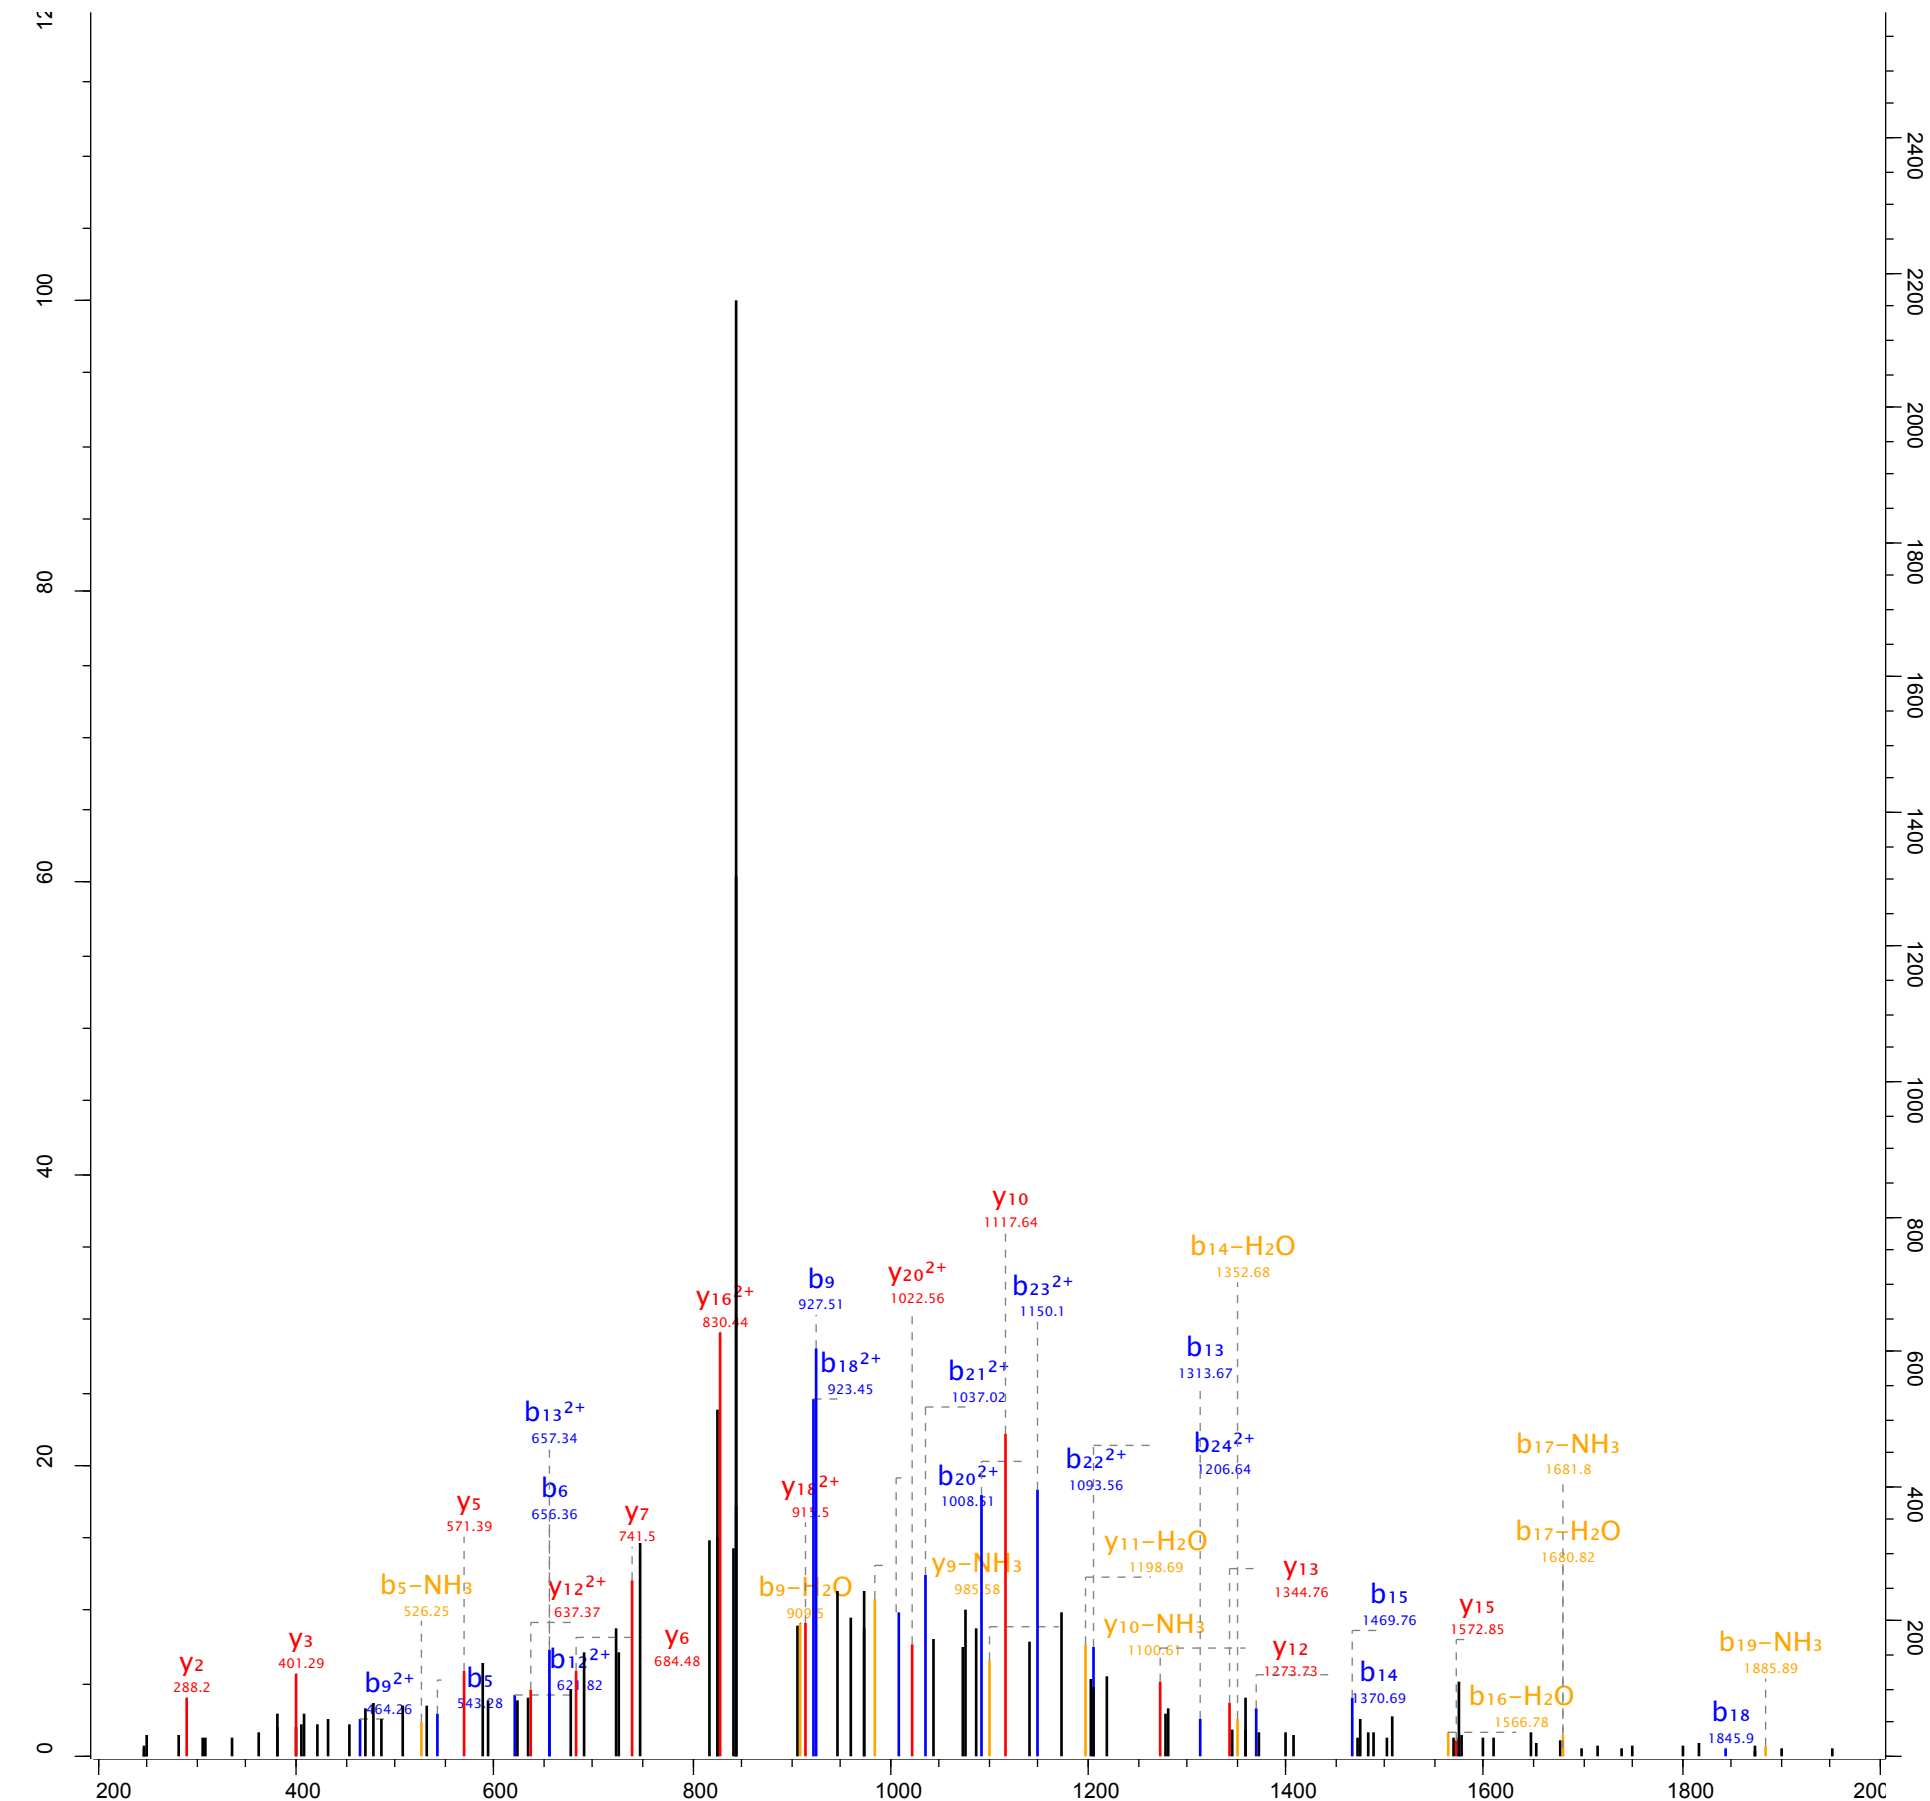

- T G V K ac D L T A V S N N A G V D N F G L G L L L  
 b5 b6 b9 b12<sup>2+</sup> b13 b14 b15 b18 b20<sup>2+</sup> b21<sup>2+</sup> b22<sup>2+</sup> b23<sup>2+</sup> b24<sup>2+</sup>  
 y20<sup>2+</sup> y18<sup>2+</sup> y16<sup>2+</sup> y15 y13 y12 y10 y7 y6 y5 y3 y2

R -

Raw file Scan Method Score m/z Gene names

050713\_SCW\_II\_29\_4\_1

26745 ITMS; CID 137.84 697.88 Hat1

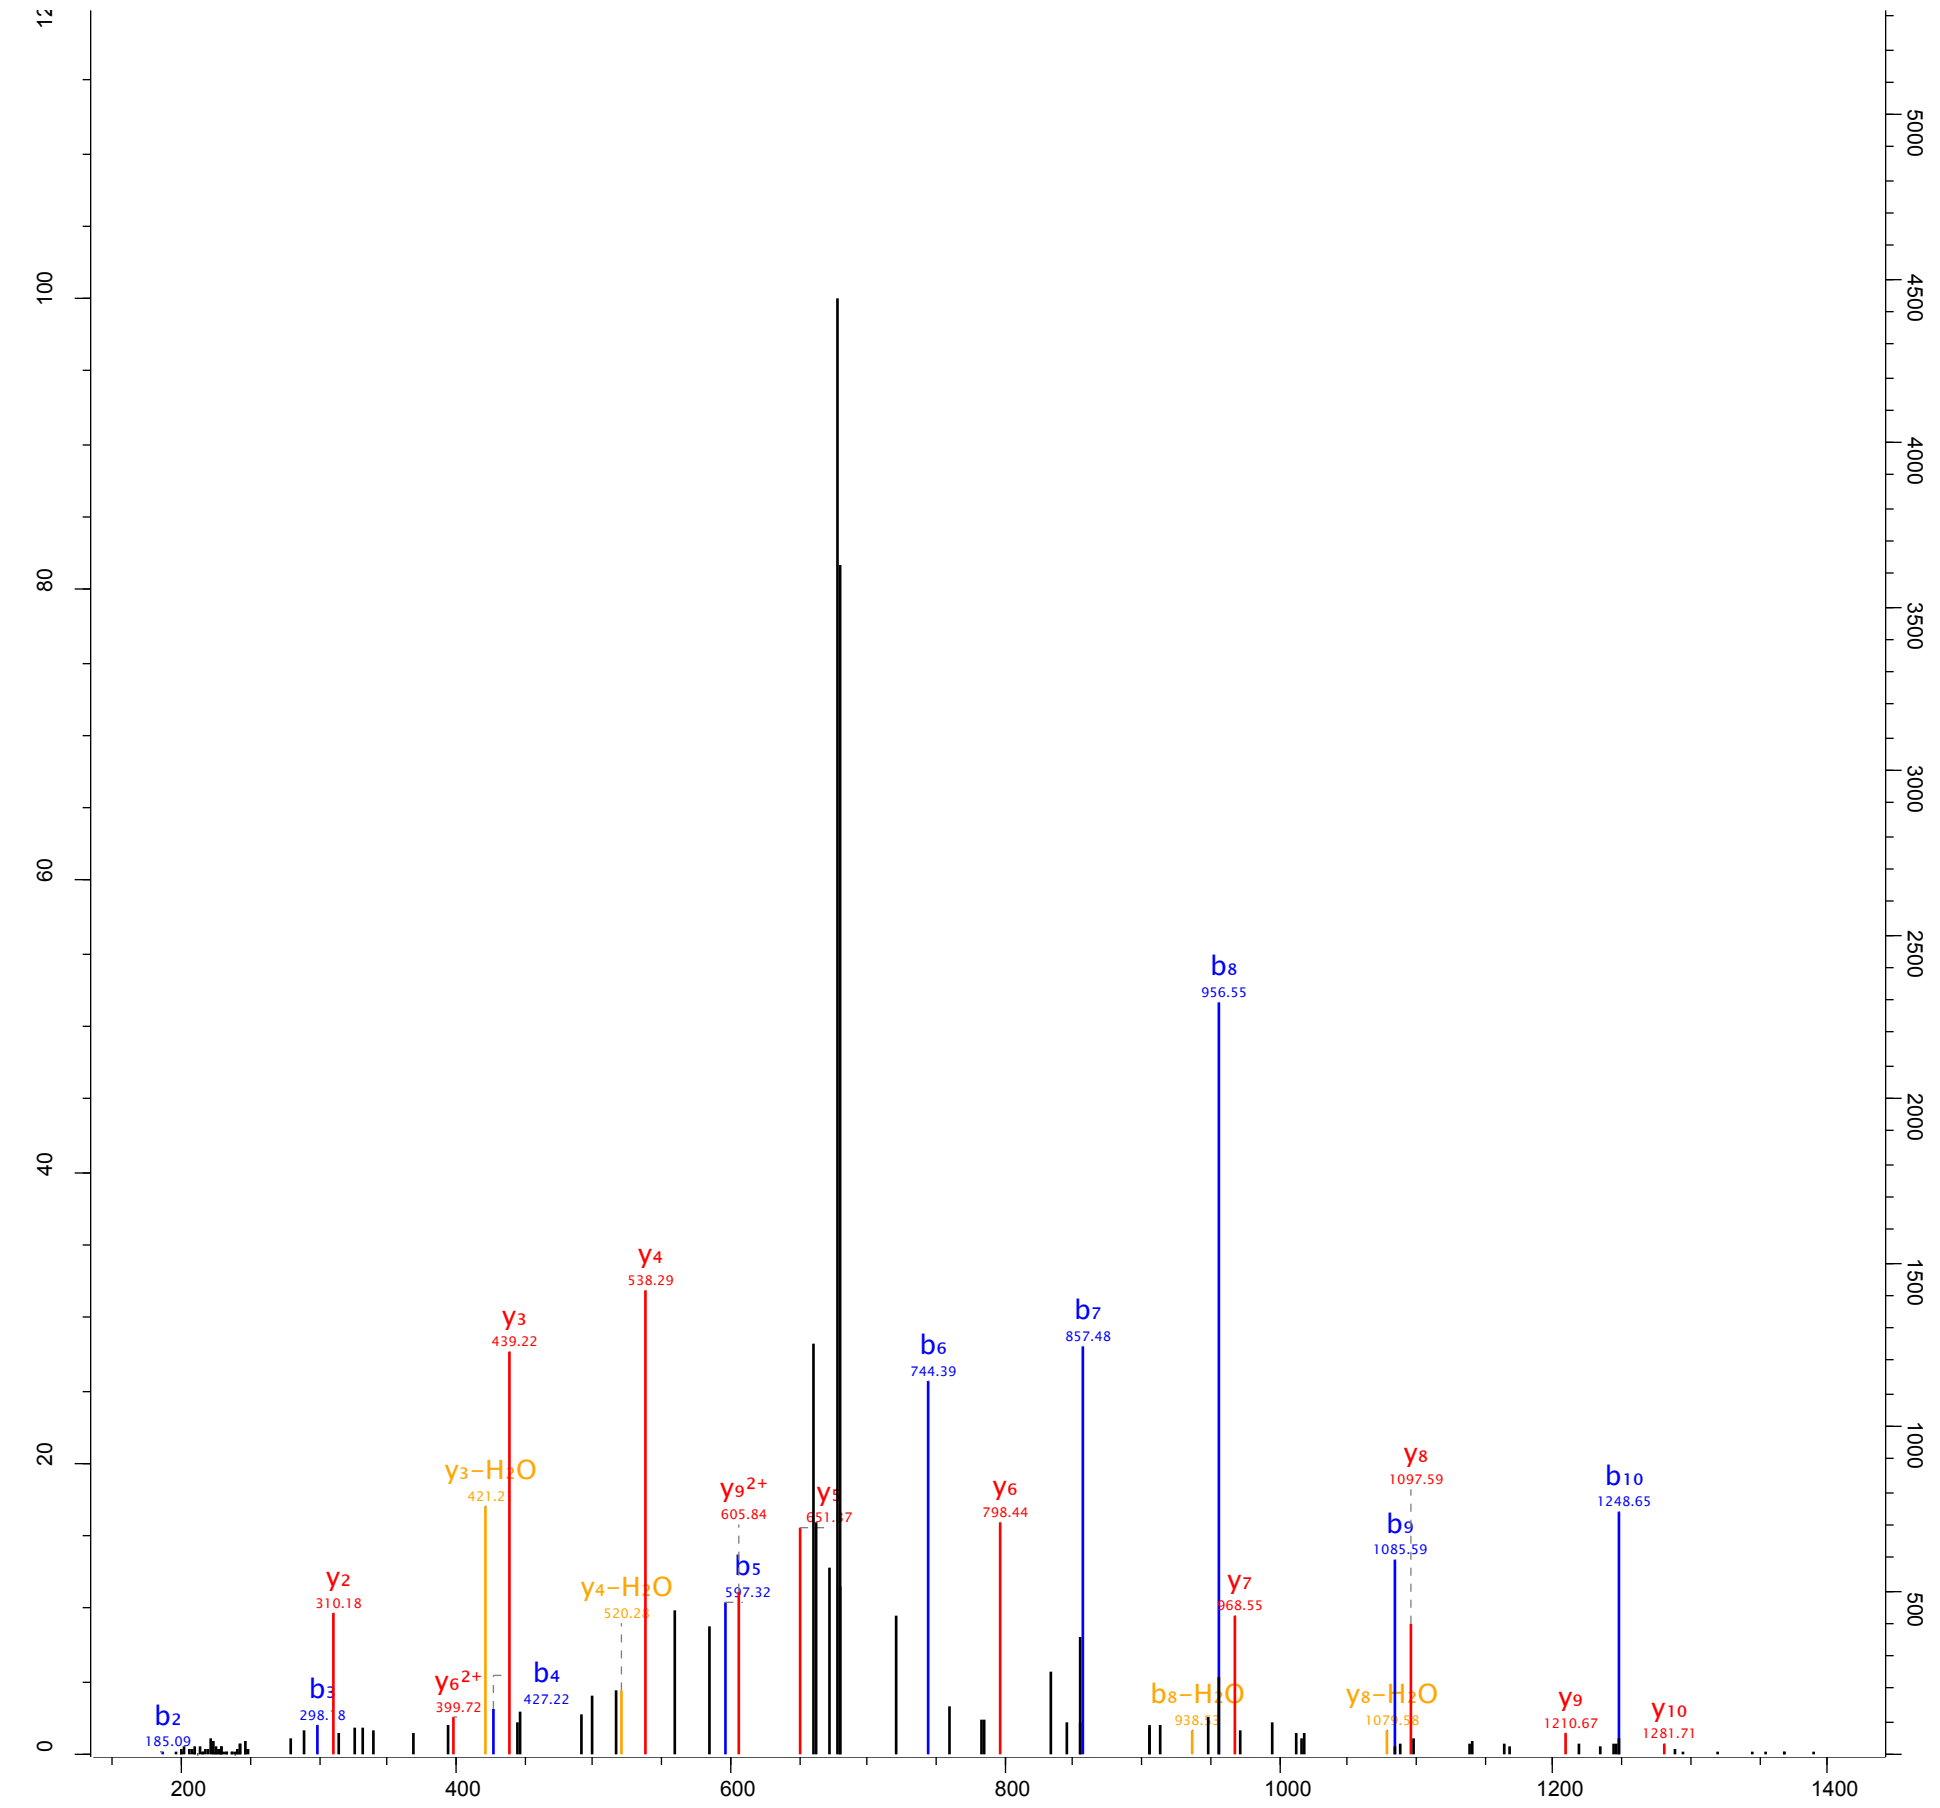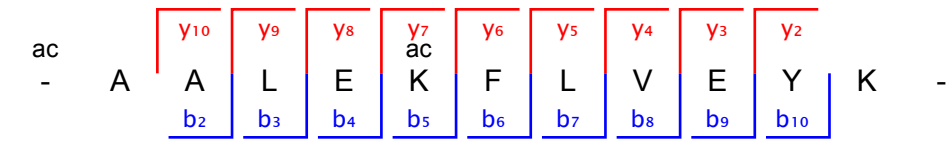



Raw file Scan Method Score m/z Gene names

050713\_SCW\_II\_29\_4\_1

26947 ITMS; CID 164.66 810.94 Atp5a1

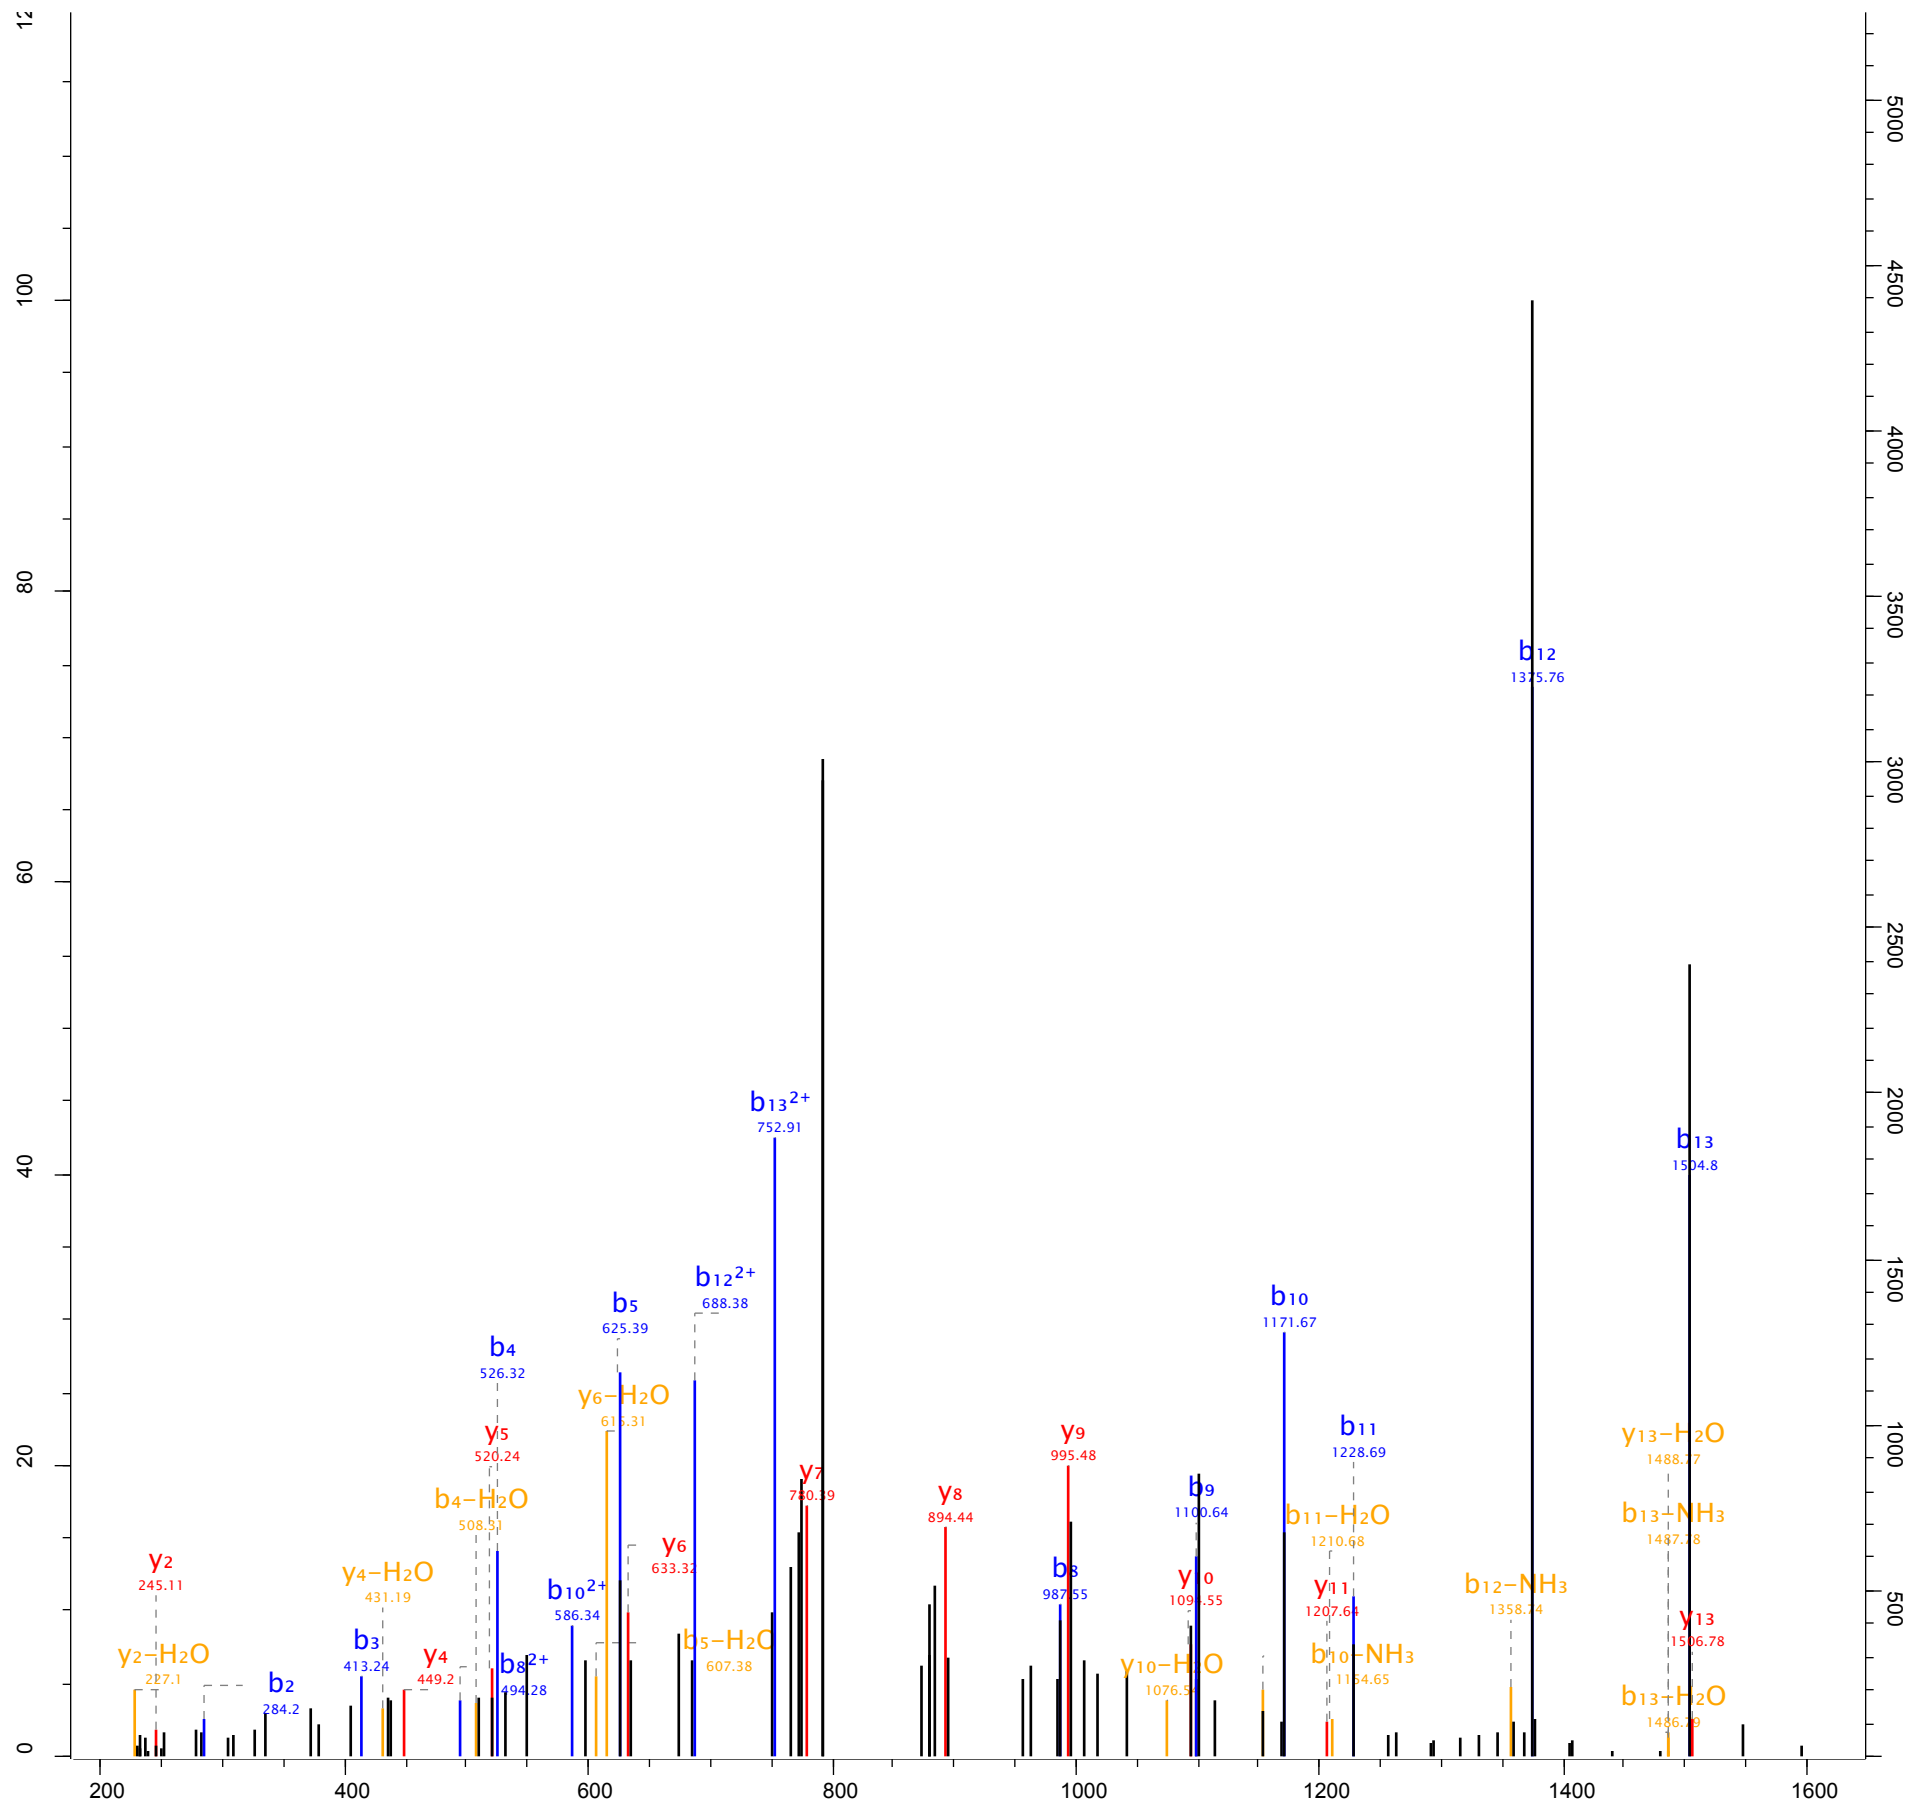

- L y13  
ac  
K b2 | E b3 | I y11 b4 | V y10 b5 | T y9 | N y8 | F y7 b8 | L y6 b9 | A y5 b10 | G y4 b11 | F b12 | E y2 b13 | P -



Raw file Scan Method Score m/z Gene names

050713\_SCW\_II\_29\_4\_1

28461

ITMS; CID

162.61

1002.88

Etfa

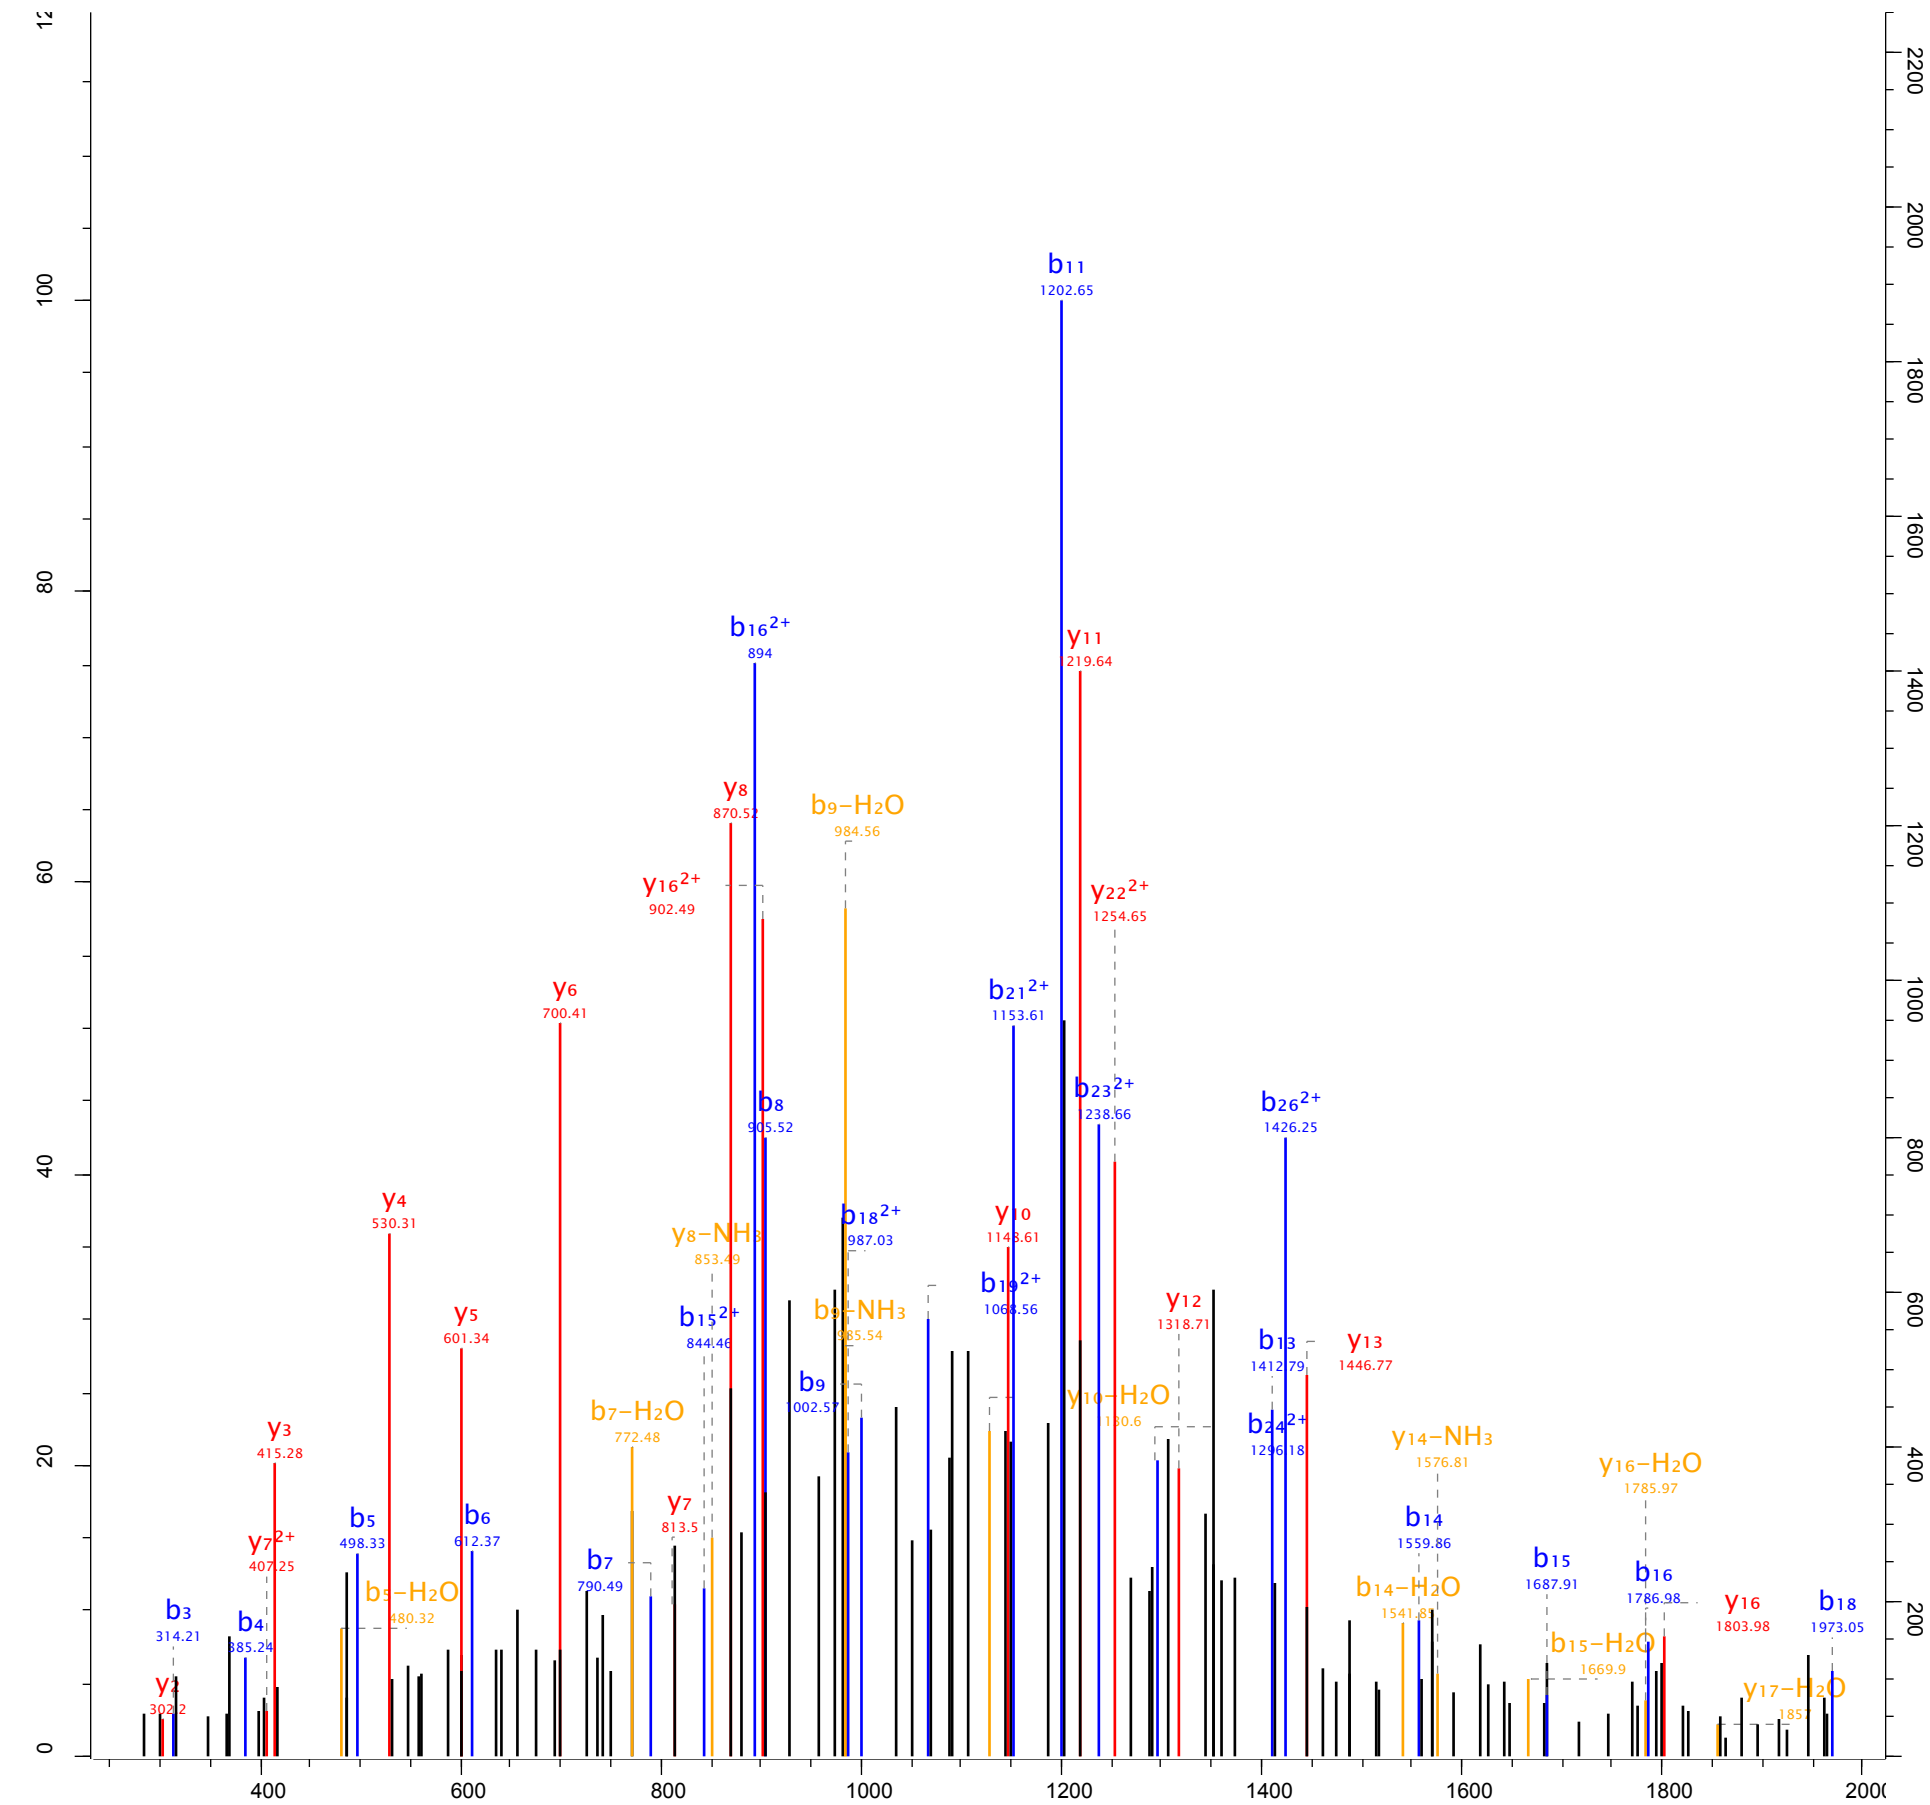

- T I V A I N K D P E A P I F Q V A D Y G I V A D

y3
y2
b3
b4
b5
y22<sup>2+</sup>
b6
b7
b8
b9
b11
y16
b13
b14
y13
y12
y11
y10
b18
b19<sup>2+</sup>
y8
y7
y6
y5
y4
b21<sup>2+</sup>
b23<sup>2+</sup>
b24<sup>2+</sup>

L F K -

050713\_SCW\_II\_29\_4\_1

28605

ITMS; CID

252.08

776.97

Ldha

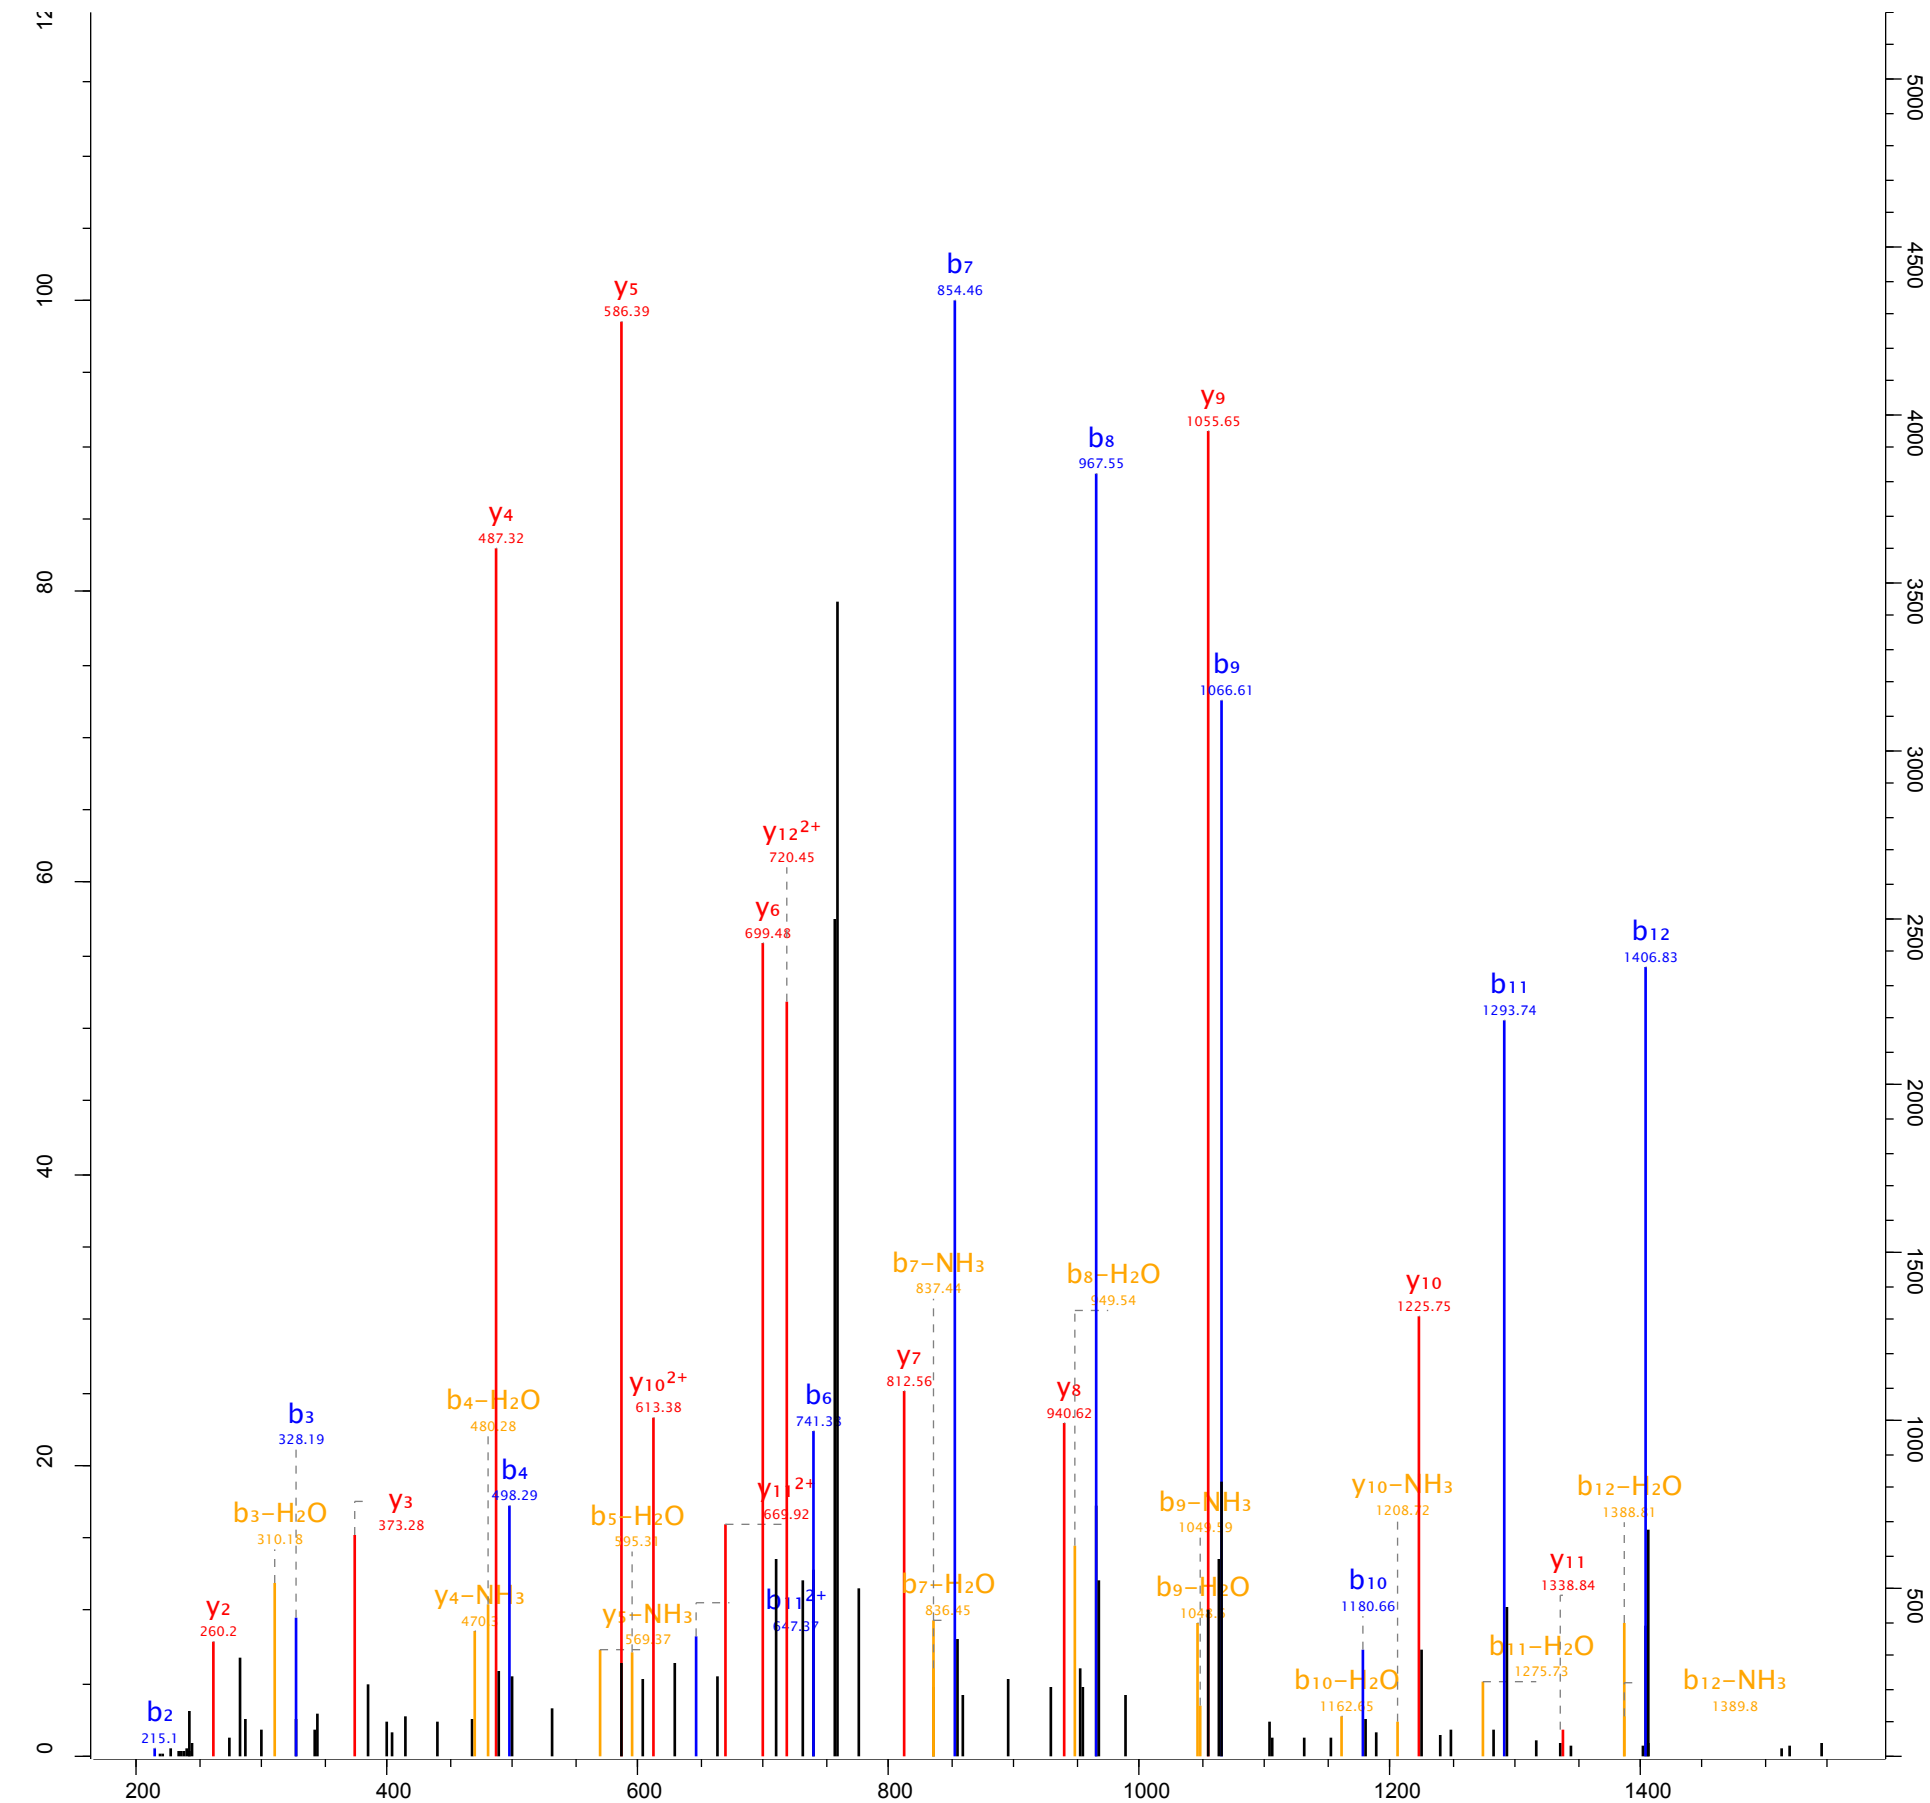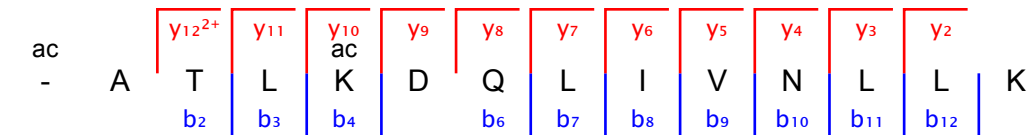

Raw file 050713\_SCW\_II\_29\_4\_1 Scan 30982 Method ITMS; CID Score 156.58 m/z 737.73 Gene names Slc25a5

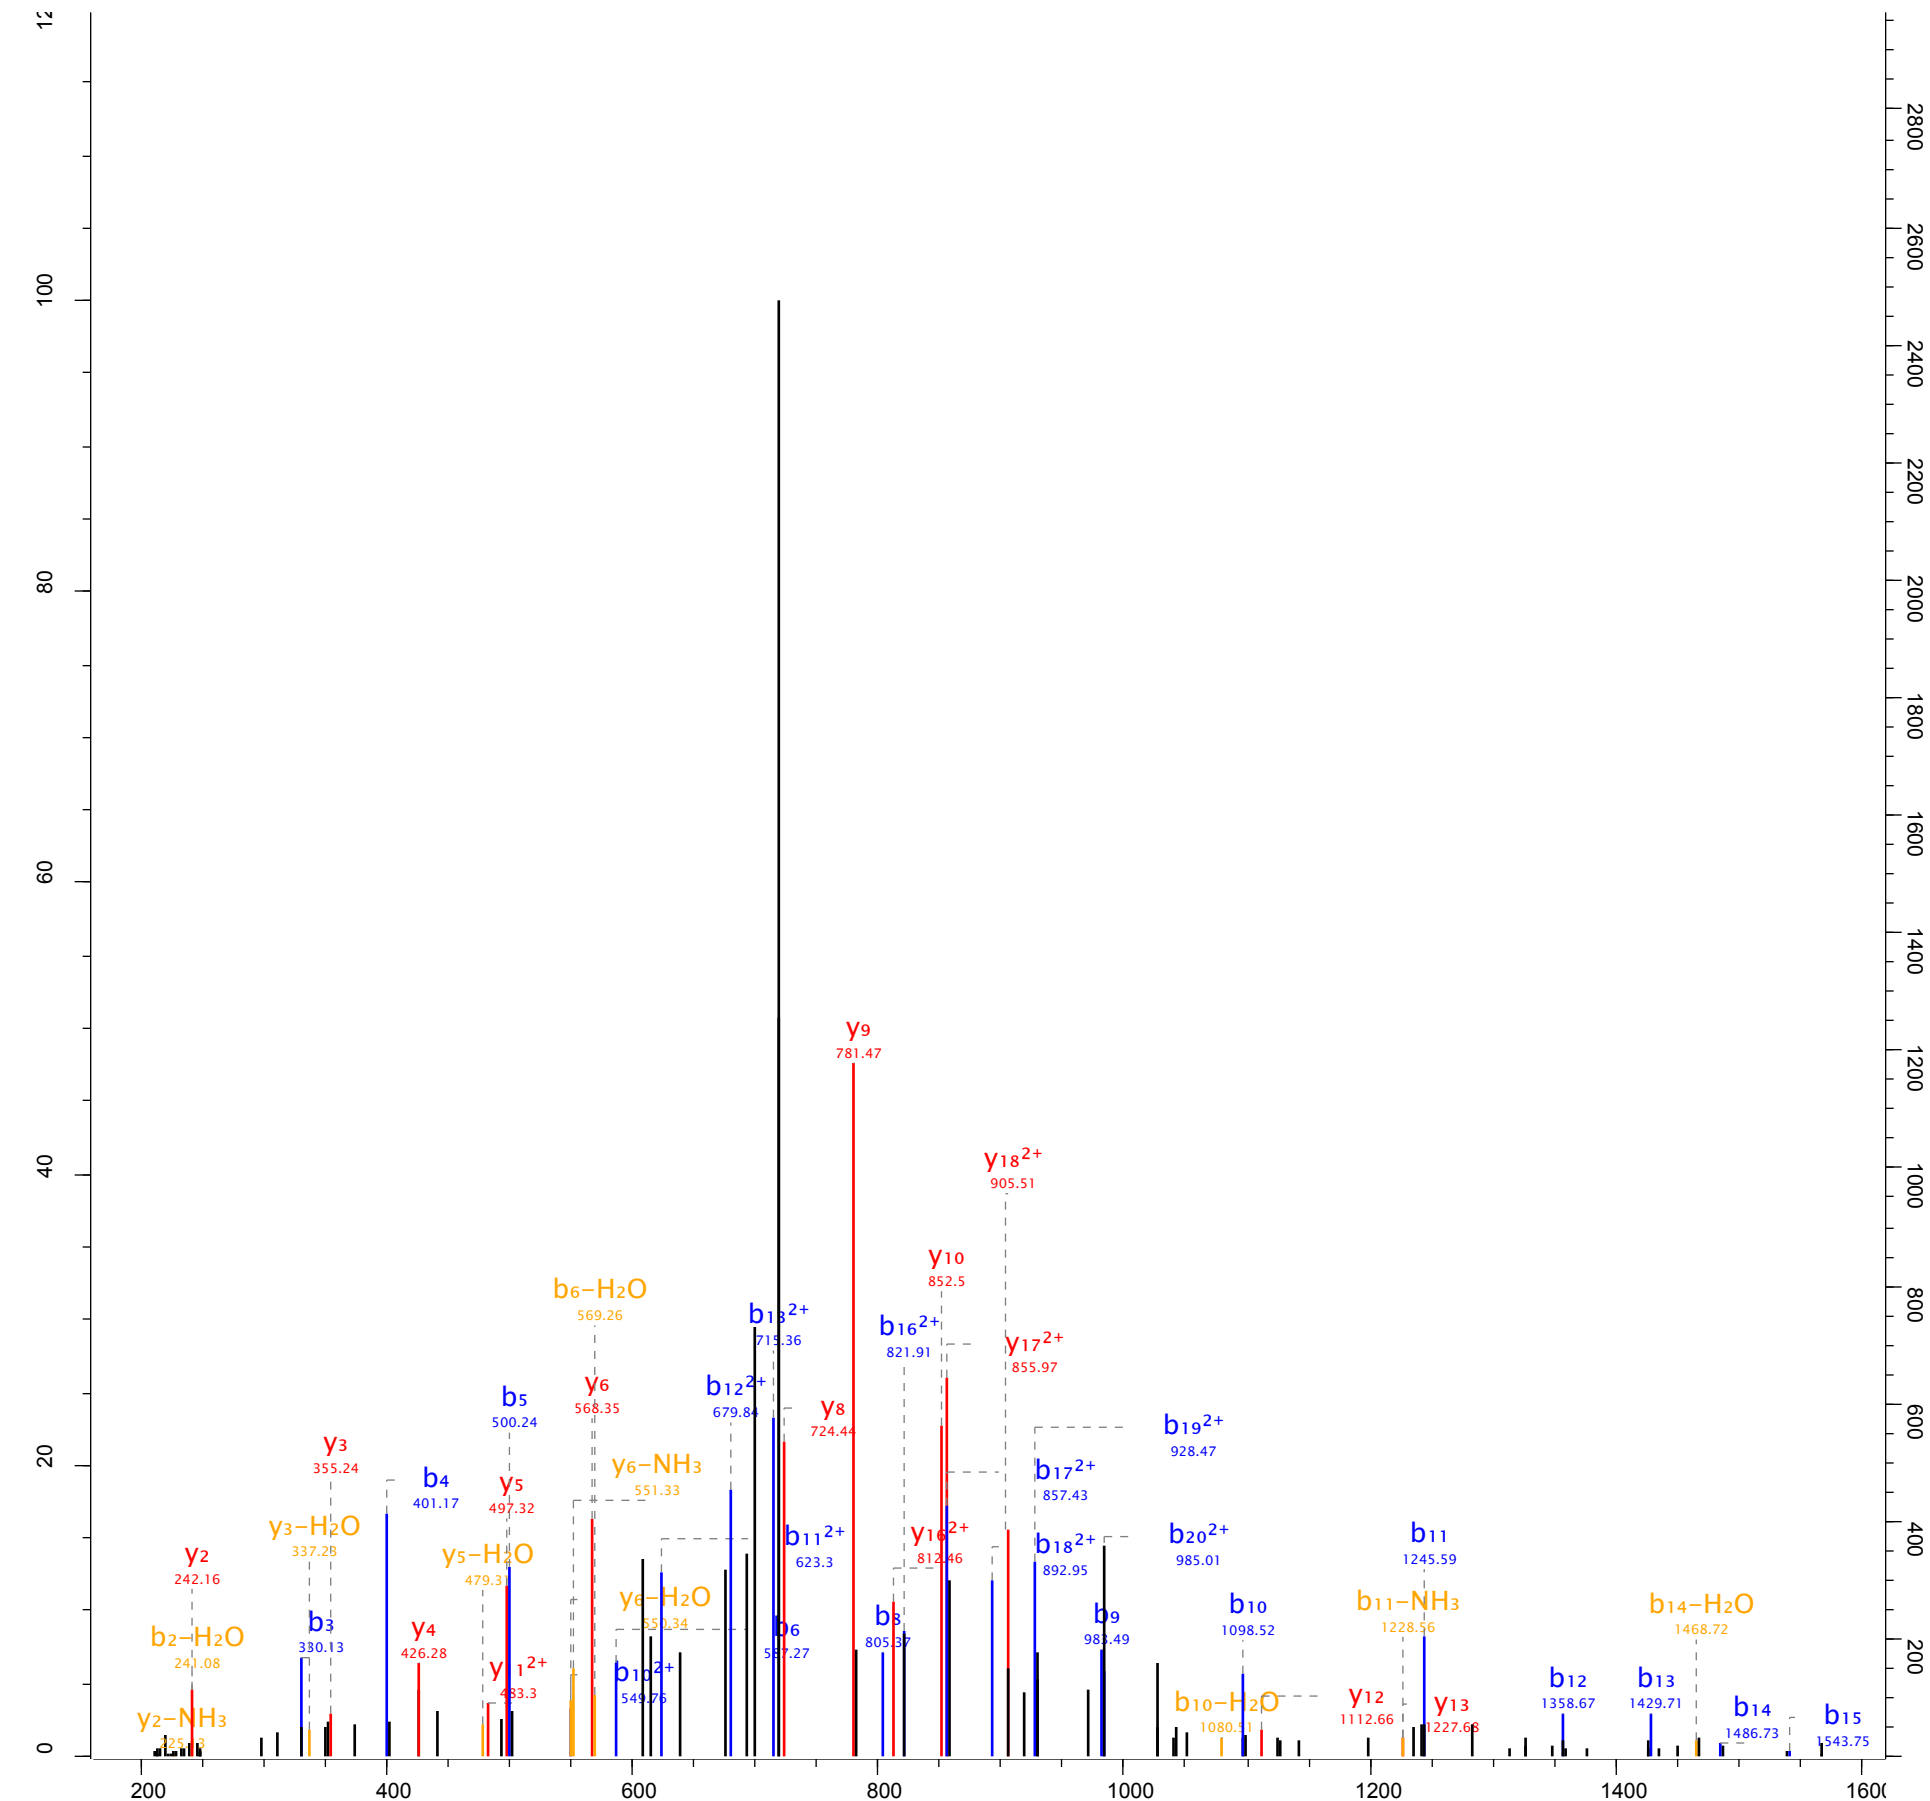

ac - T D A A V S F A K D F L A G G V A A A I S K -

Fragmentation sites (b and y ions) are indicated by boxes below the sequence:

- b3 (A), b4 (A), b5 (V), b6 (S), b8 (A), b9 (K), b10 (D), b11 (F), b12 (L), b13 (A), b14 (G), b15 (G), b16+ (V), b17+ (A), b18+ (A), b19+ (A), b20+ (I)
- y2 (S), y3 (A), y4 (A), y5 (A), y6 (V), y8 (F), y9 (G), y10 (A), y11+ (L), y12 (F), y13 (D), y16+ (F), y17+ (S), y18+ (V)

Raw file Scan Method Score m/z Gene names  
 050713\_SCW\_II\_29\_4\_1 34324 ITMS; CID 120.33 755.07 Slc25a4

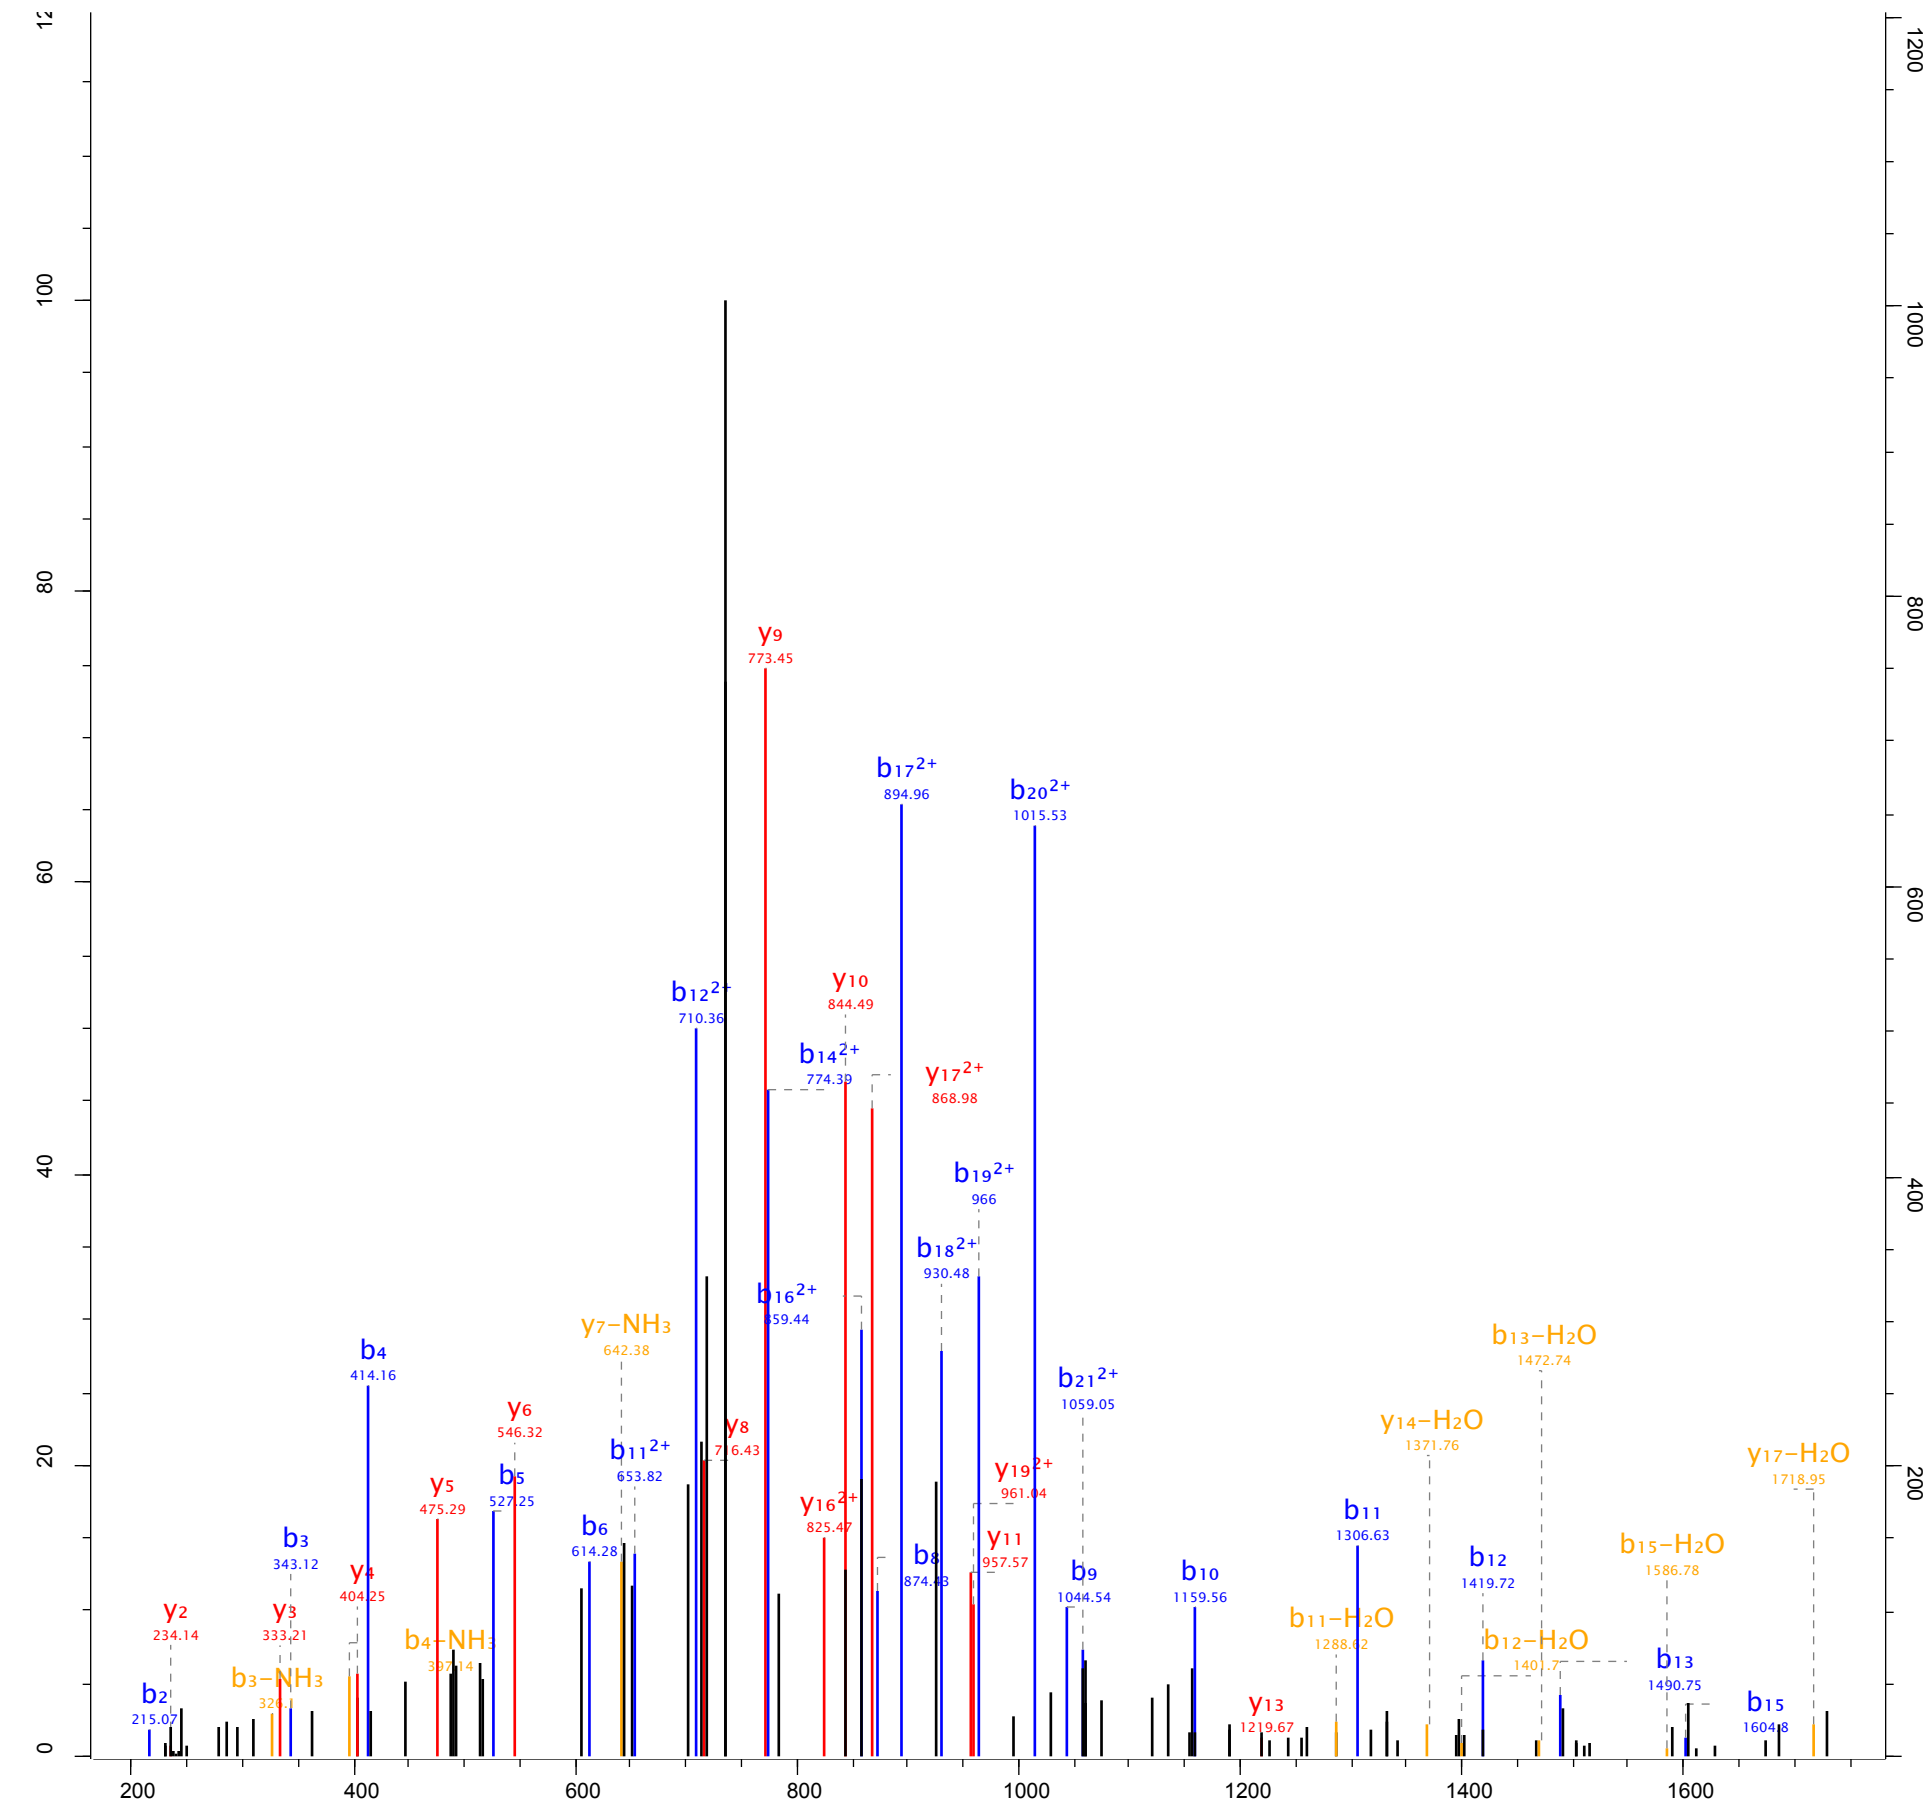

ac  
 - G D Q A L S F L K D F L A G G I A A A V S K -

b<sub>2</sub> b<sub>3</sub> b<sub>4</sub> b<sub>5</sub> b<sub>6</sub> b<sub>8</sub> b<sub>9</sub> b<sub>10</sub> b<sub>11</sub> b<sub>12</sub> b<sub>13</sub> b<sub>14</sub><sup>2+</sup> b<sub>15</sub> b<sub>16</sub><sup>2+</sup> b<sub>17</sub><sup>2+</sup> b<sub>18</sub><sup>2+</sup> b<sub>19</sub><sup>2+</sup> b<sub>20</sub><sup>2+</sup> b<sub>21</sub><sup>2+</sup>

y<sub>19</sub><sup>2+</sup> y<sub>17</sub><sup>2+</sup> y<sub>16</sub><sup>2+</sup> y<sub>13</sub> y<sub>11</sub> y<sub>10</sub> y<sub>9</sub> y<sub>8</sub> y<sub>6</sub> y<sub>5</sub> y<sub>4</sub> y<sub>3</sub> y<sub>2</sub>

050713\_SCW\_II\_29\_25\_6

16335 ITMS; CID 145.83 858.12 Rpa1

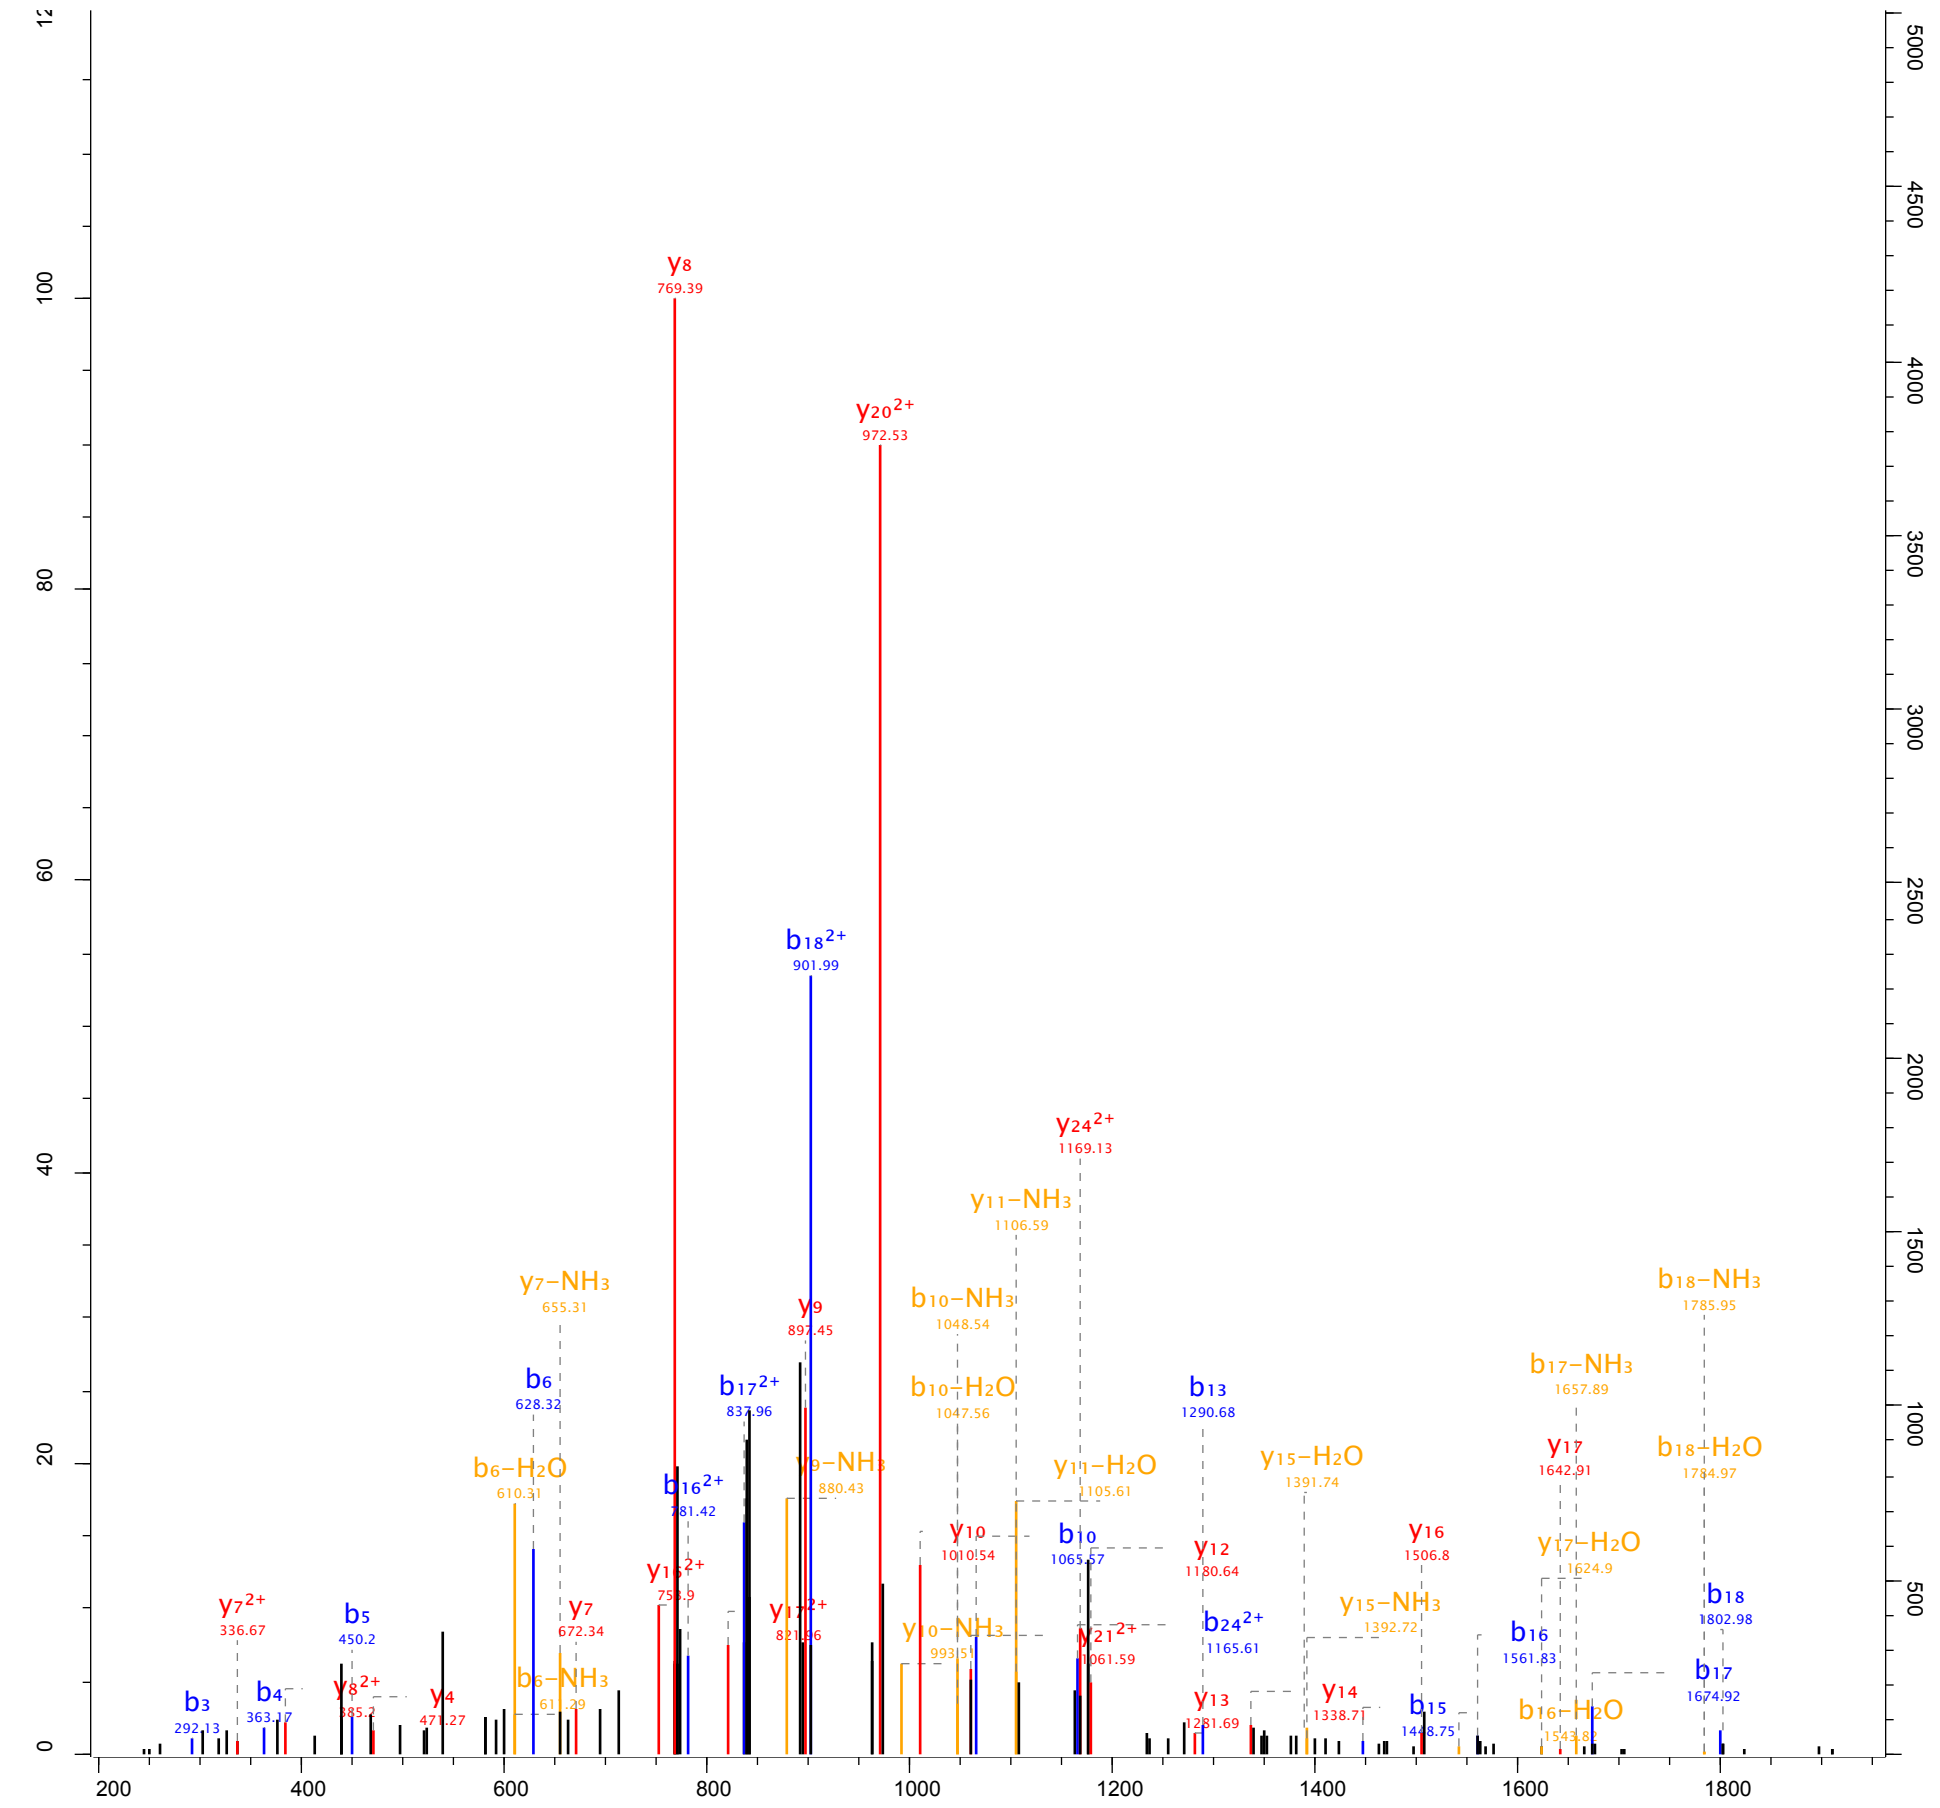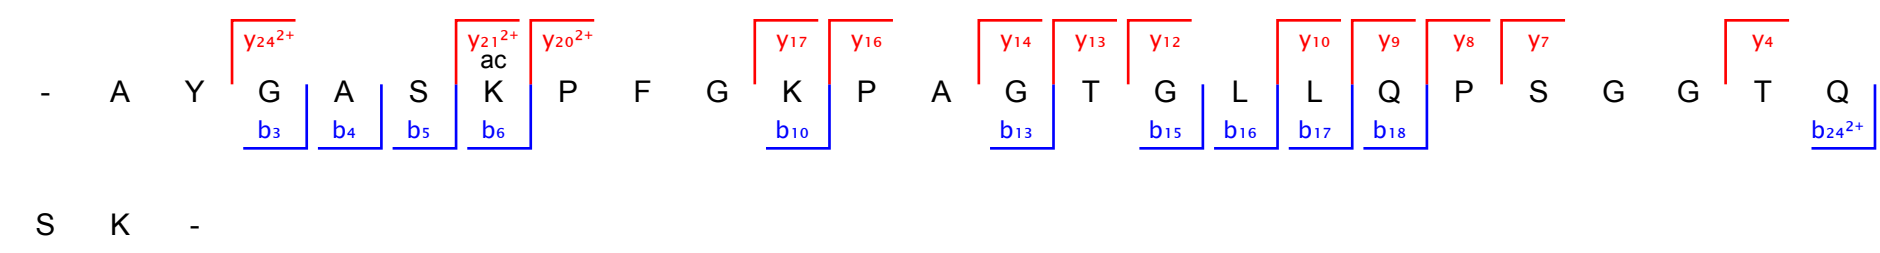

Raw file 050713\_SCW\_II\_29\_25\_6 Scan 17006 Method ITMS; CID Score 186.78 m/z 558.27 Gene names Aldoa;Aldoart1;Aldoart2;Aldoc

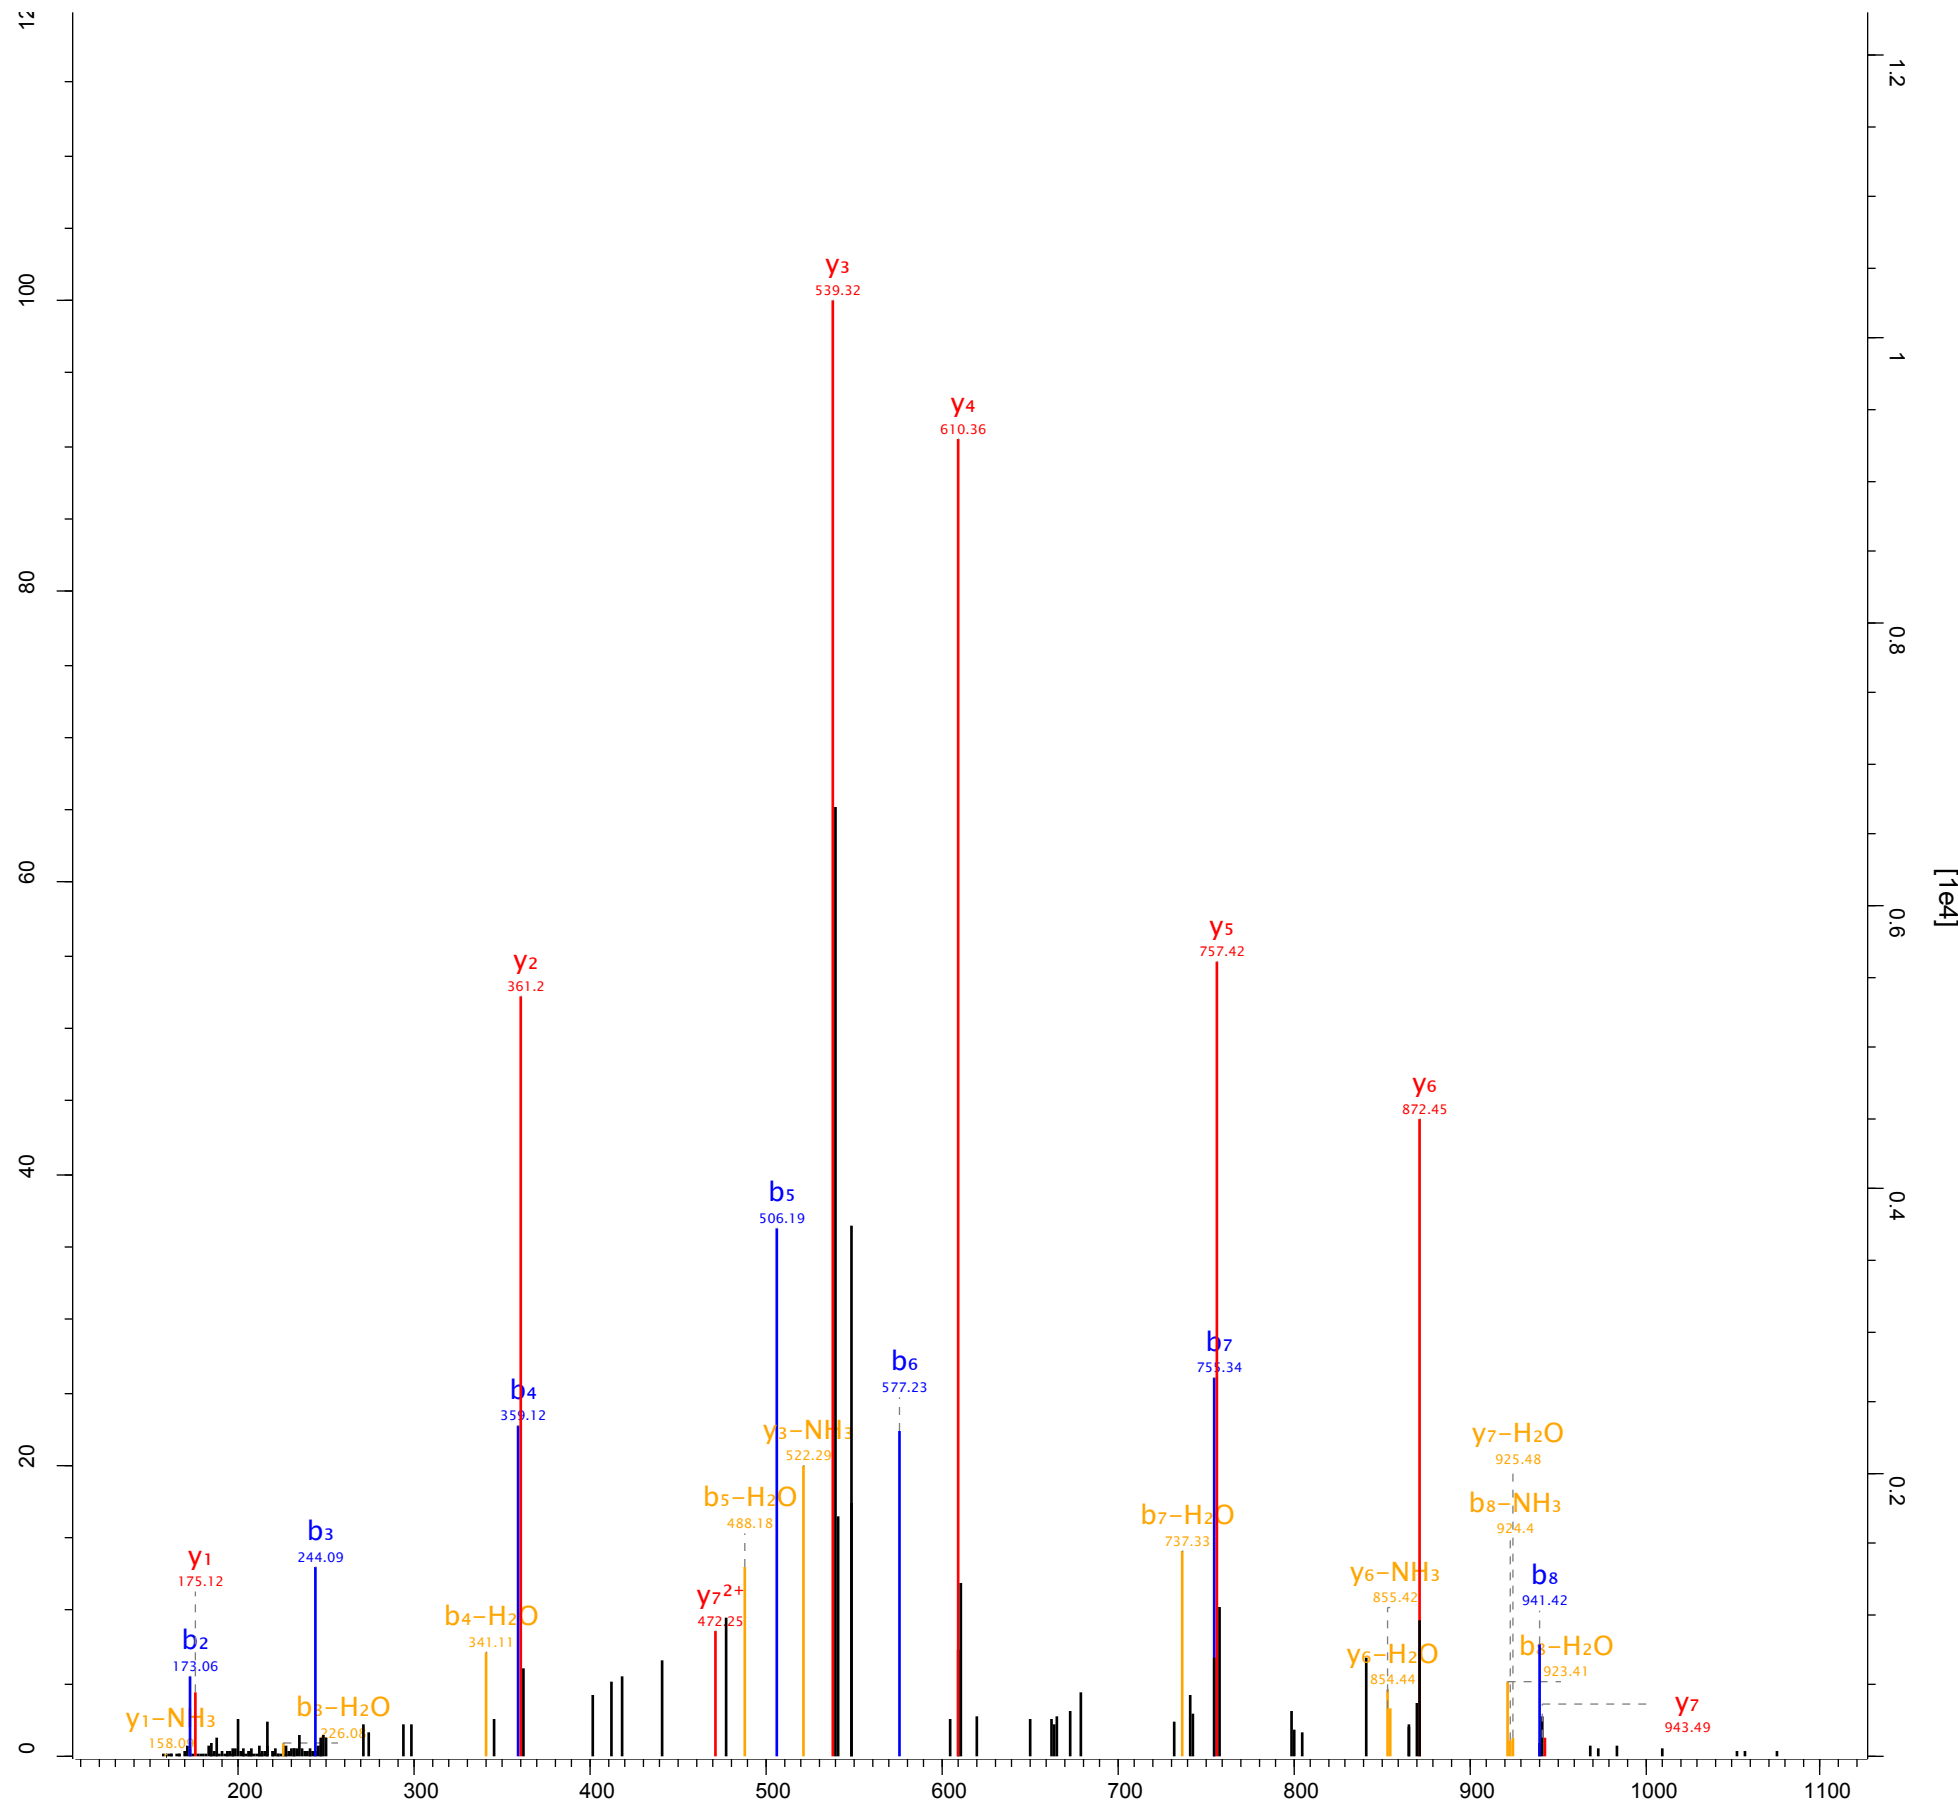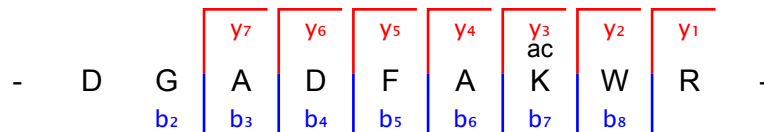



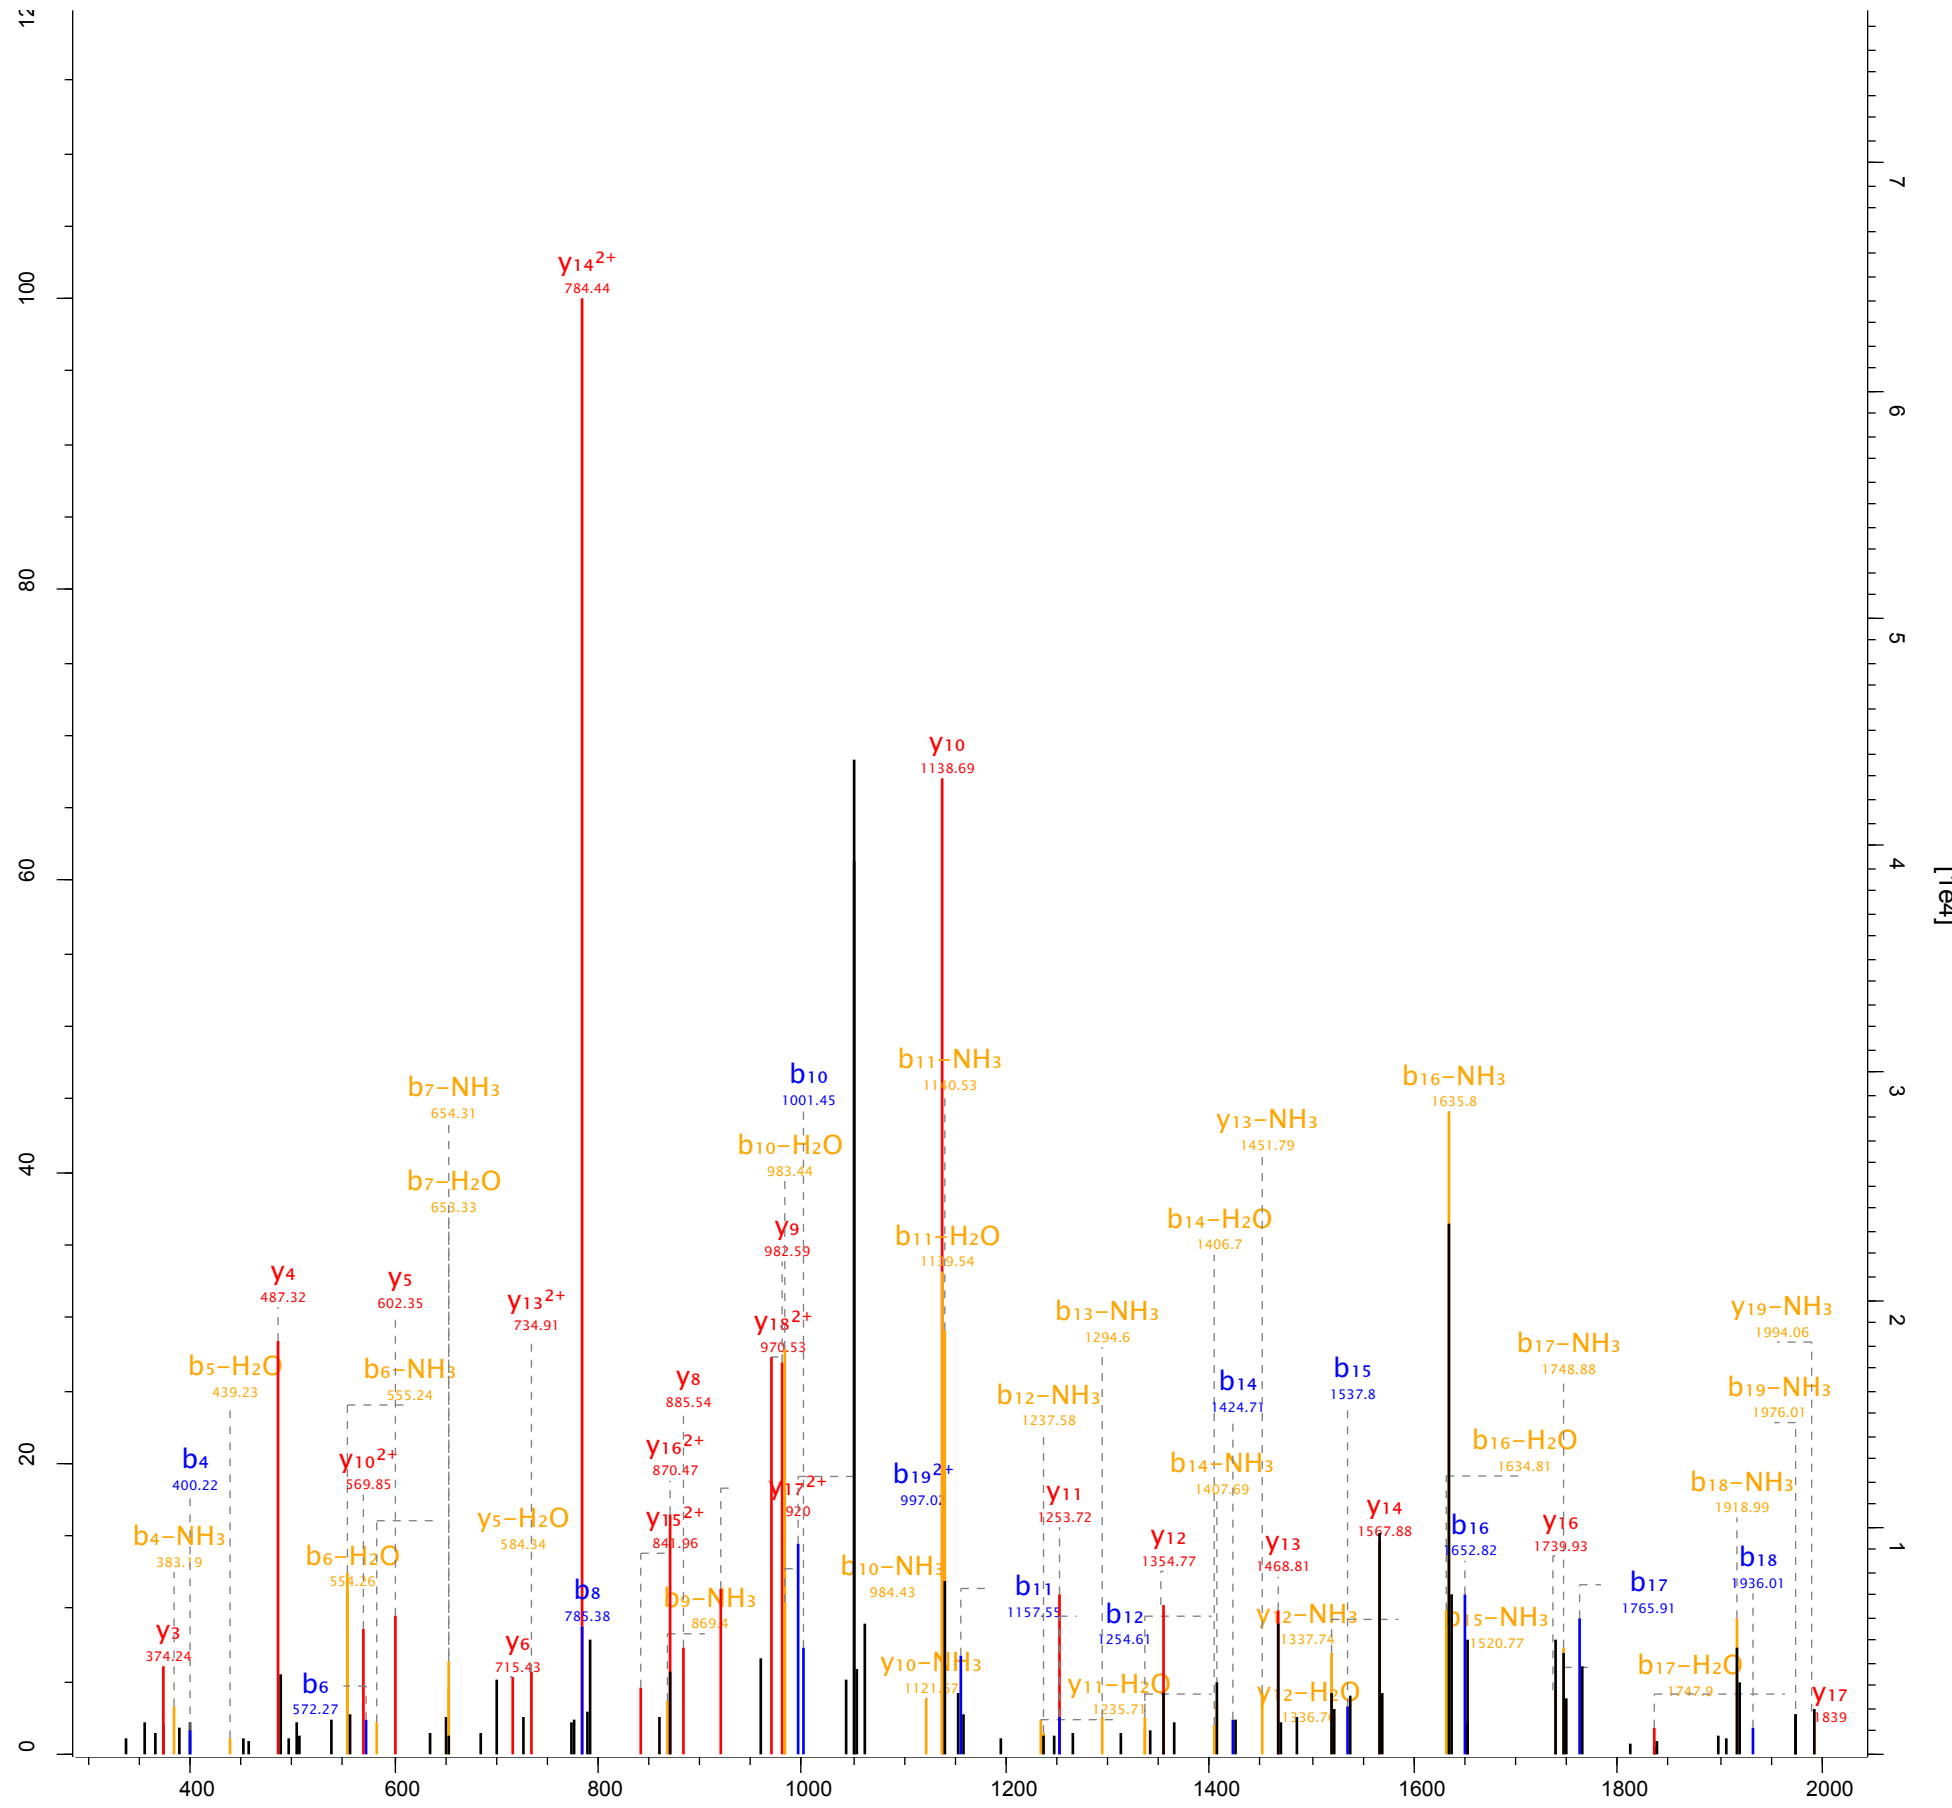

- Q A T V G D V N T D R P G L L D L K G K -

y18<sup>2+</sup>
y17
y16
y15<sup>2+</sup>
y14
y13
y12
y11
y10
y9
y8
b4
b6
b8
b10
b11
b12
b14
b15
b16
b17
b18
b19<sup>2+</sup>
y3
y4
y5
y6
y13
y16
y19-NH3

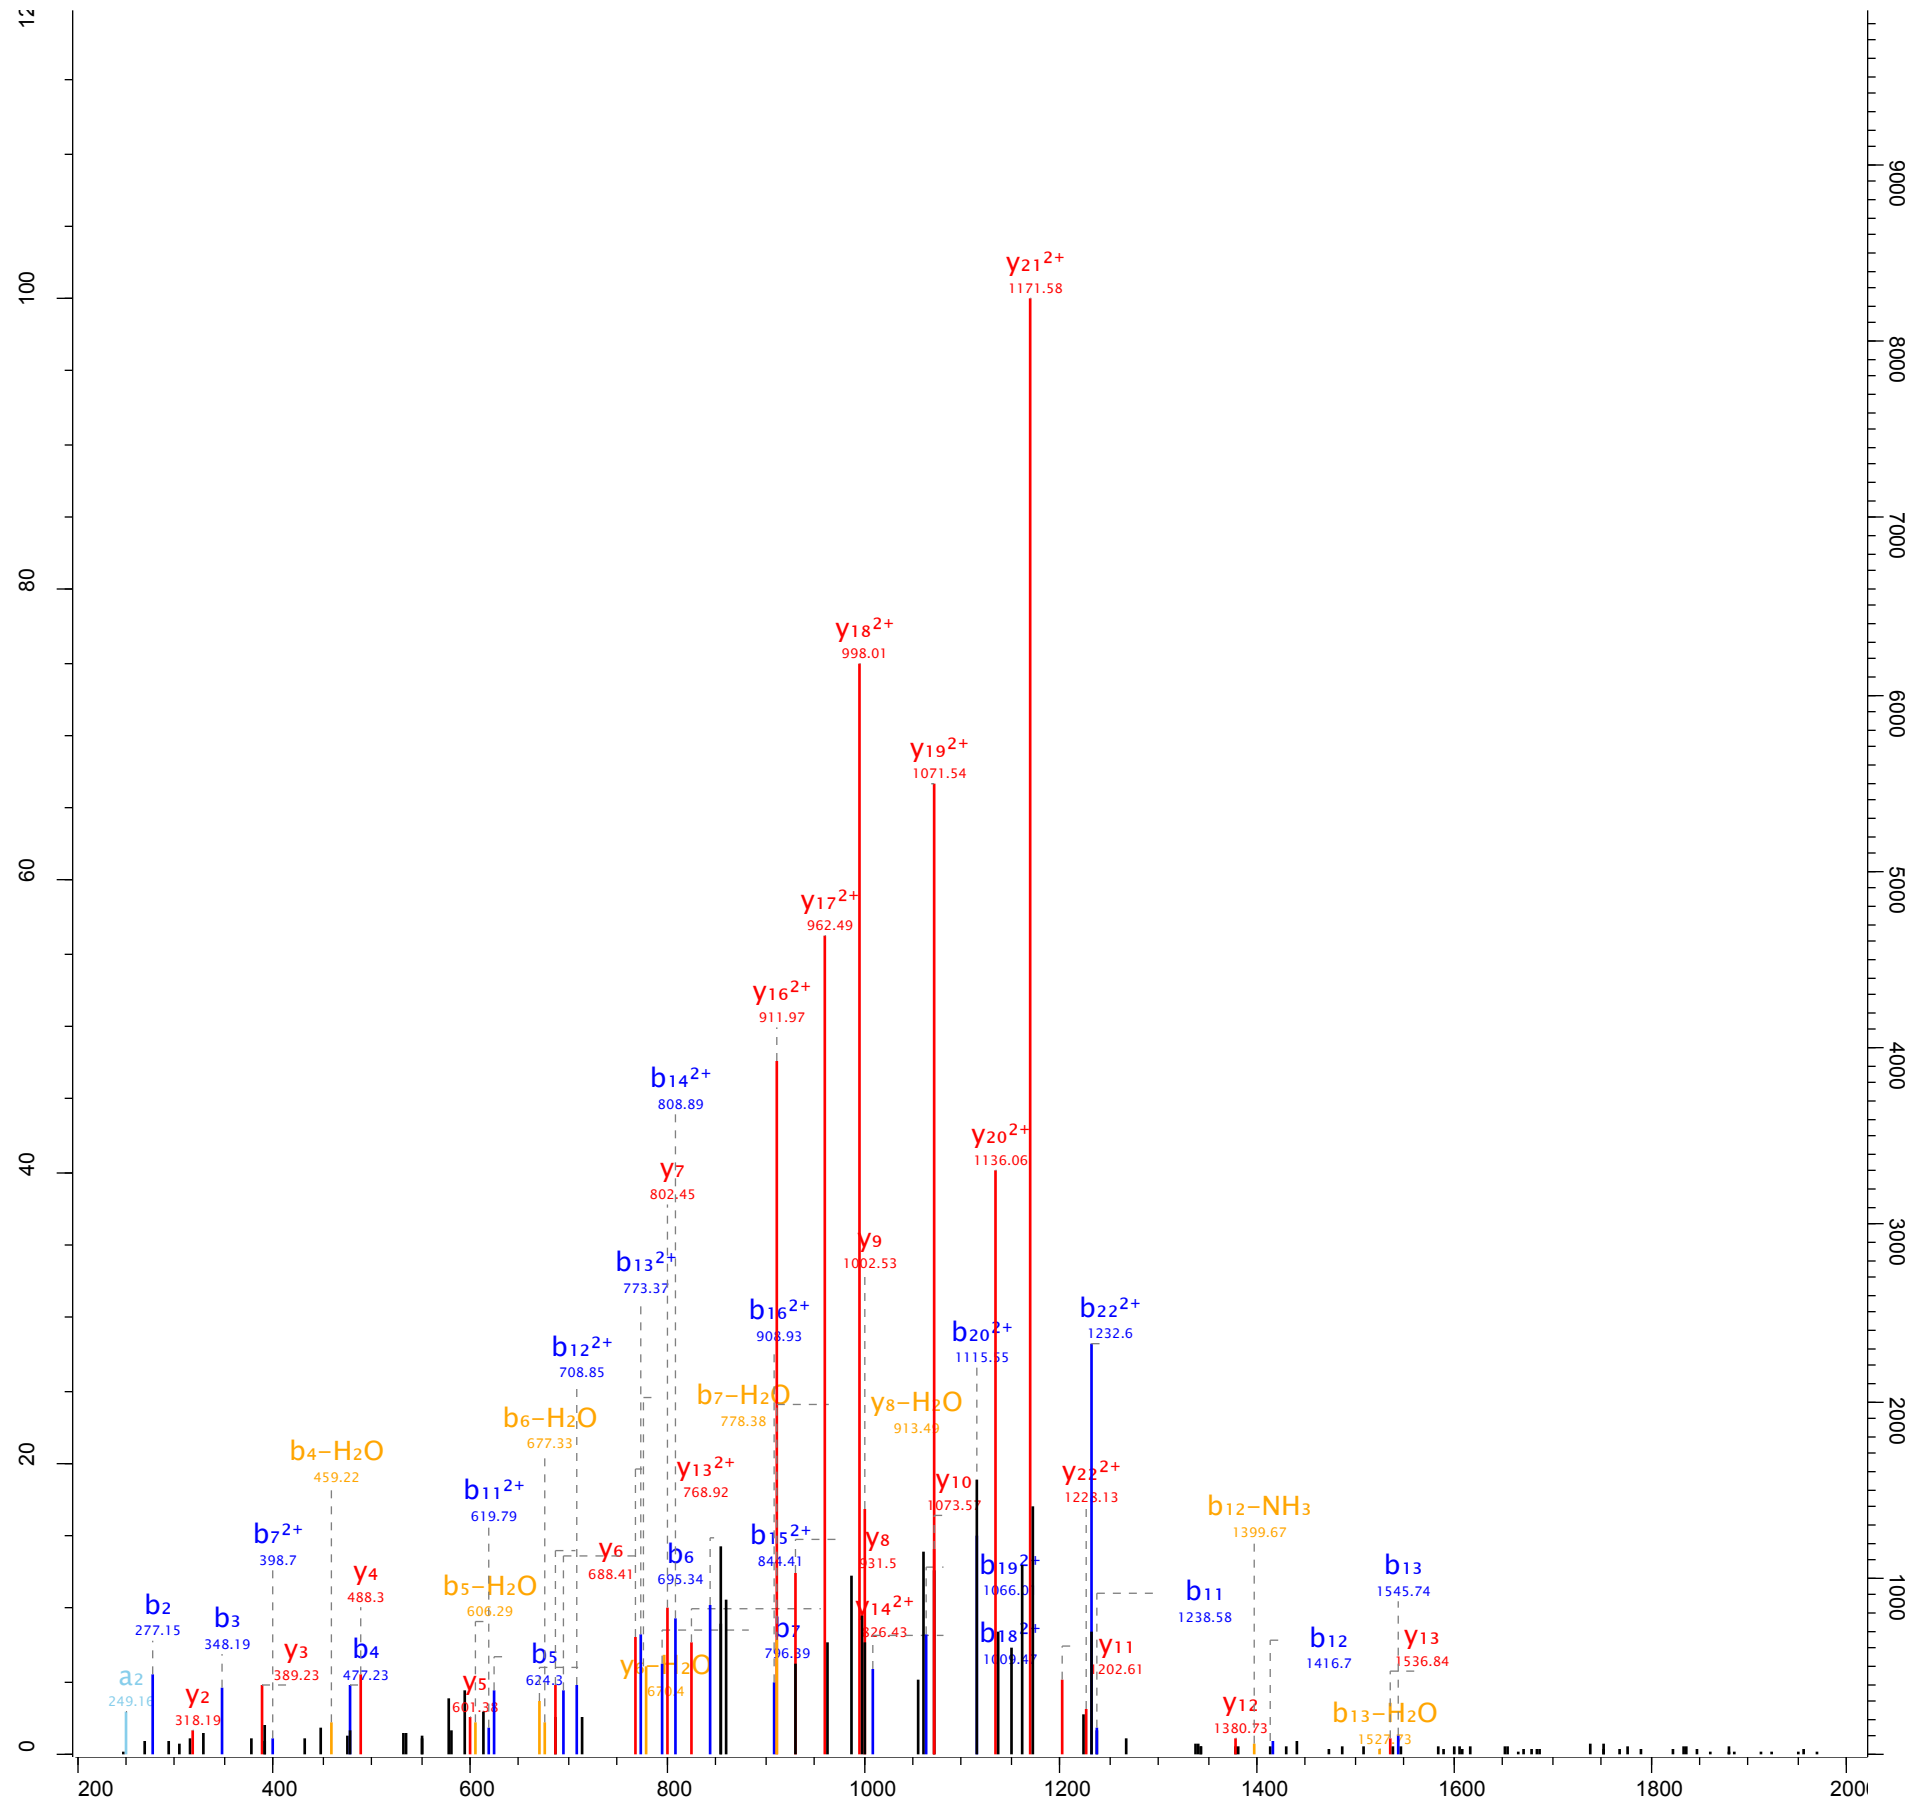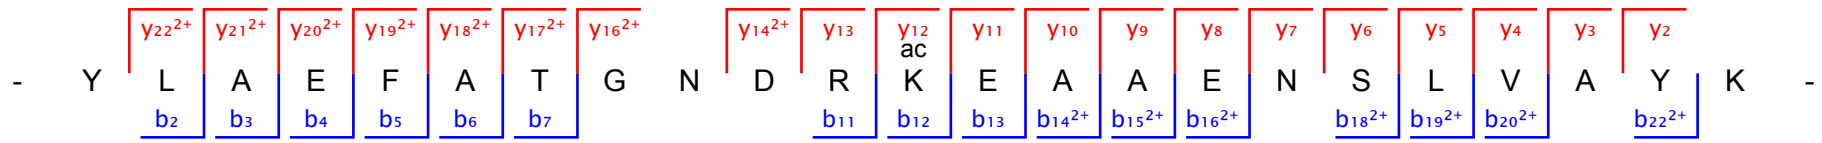

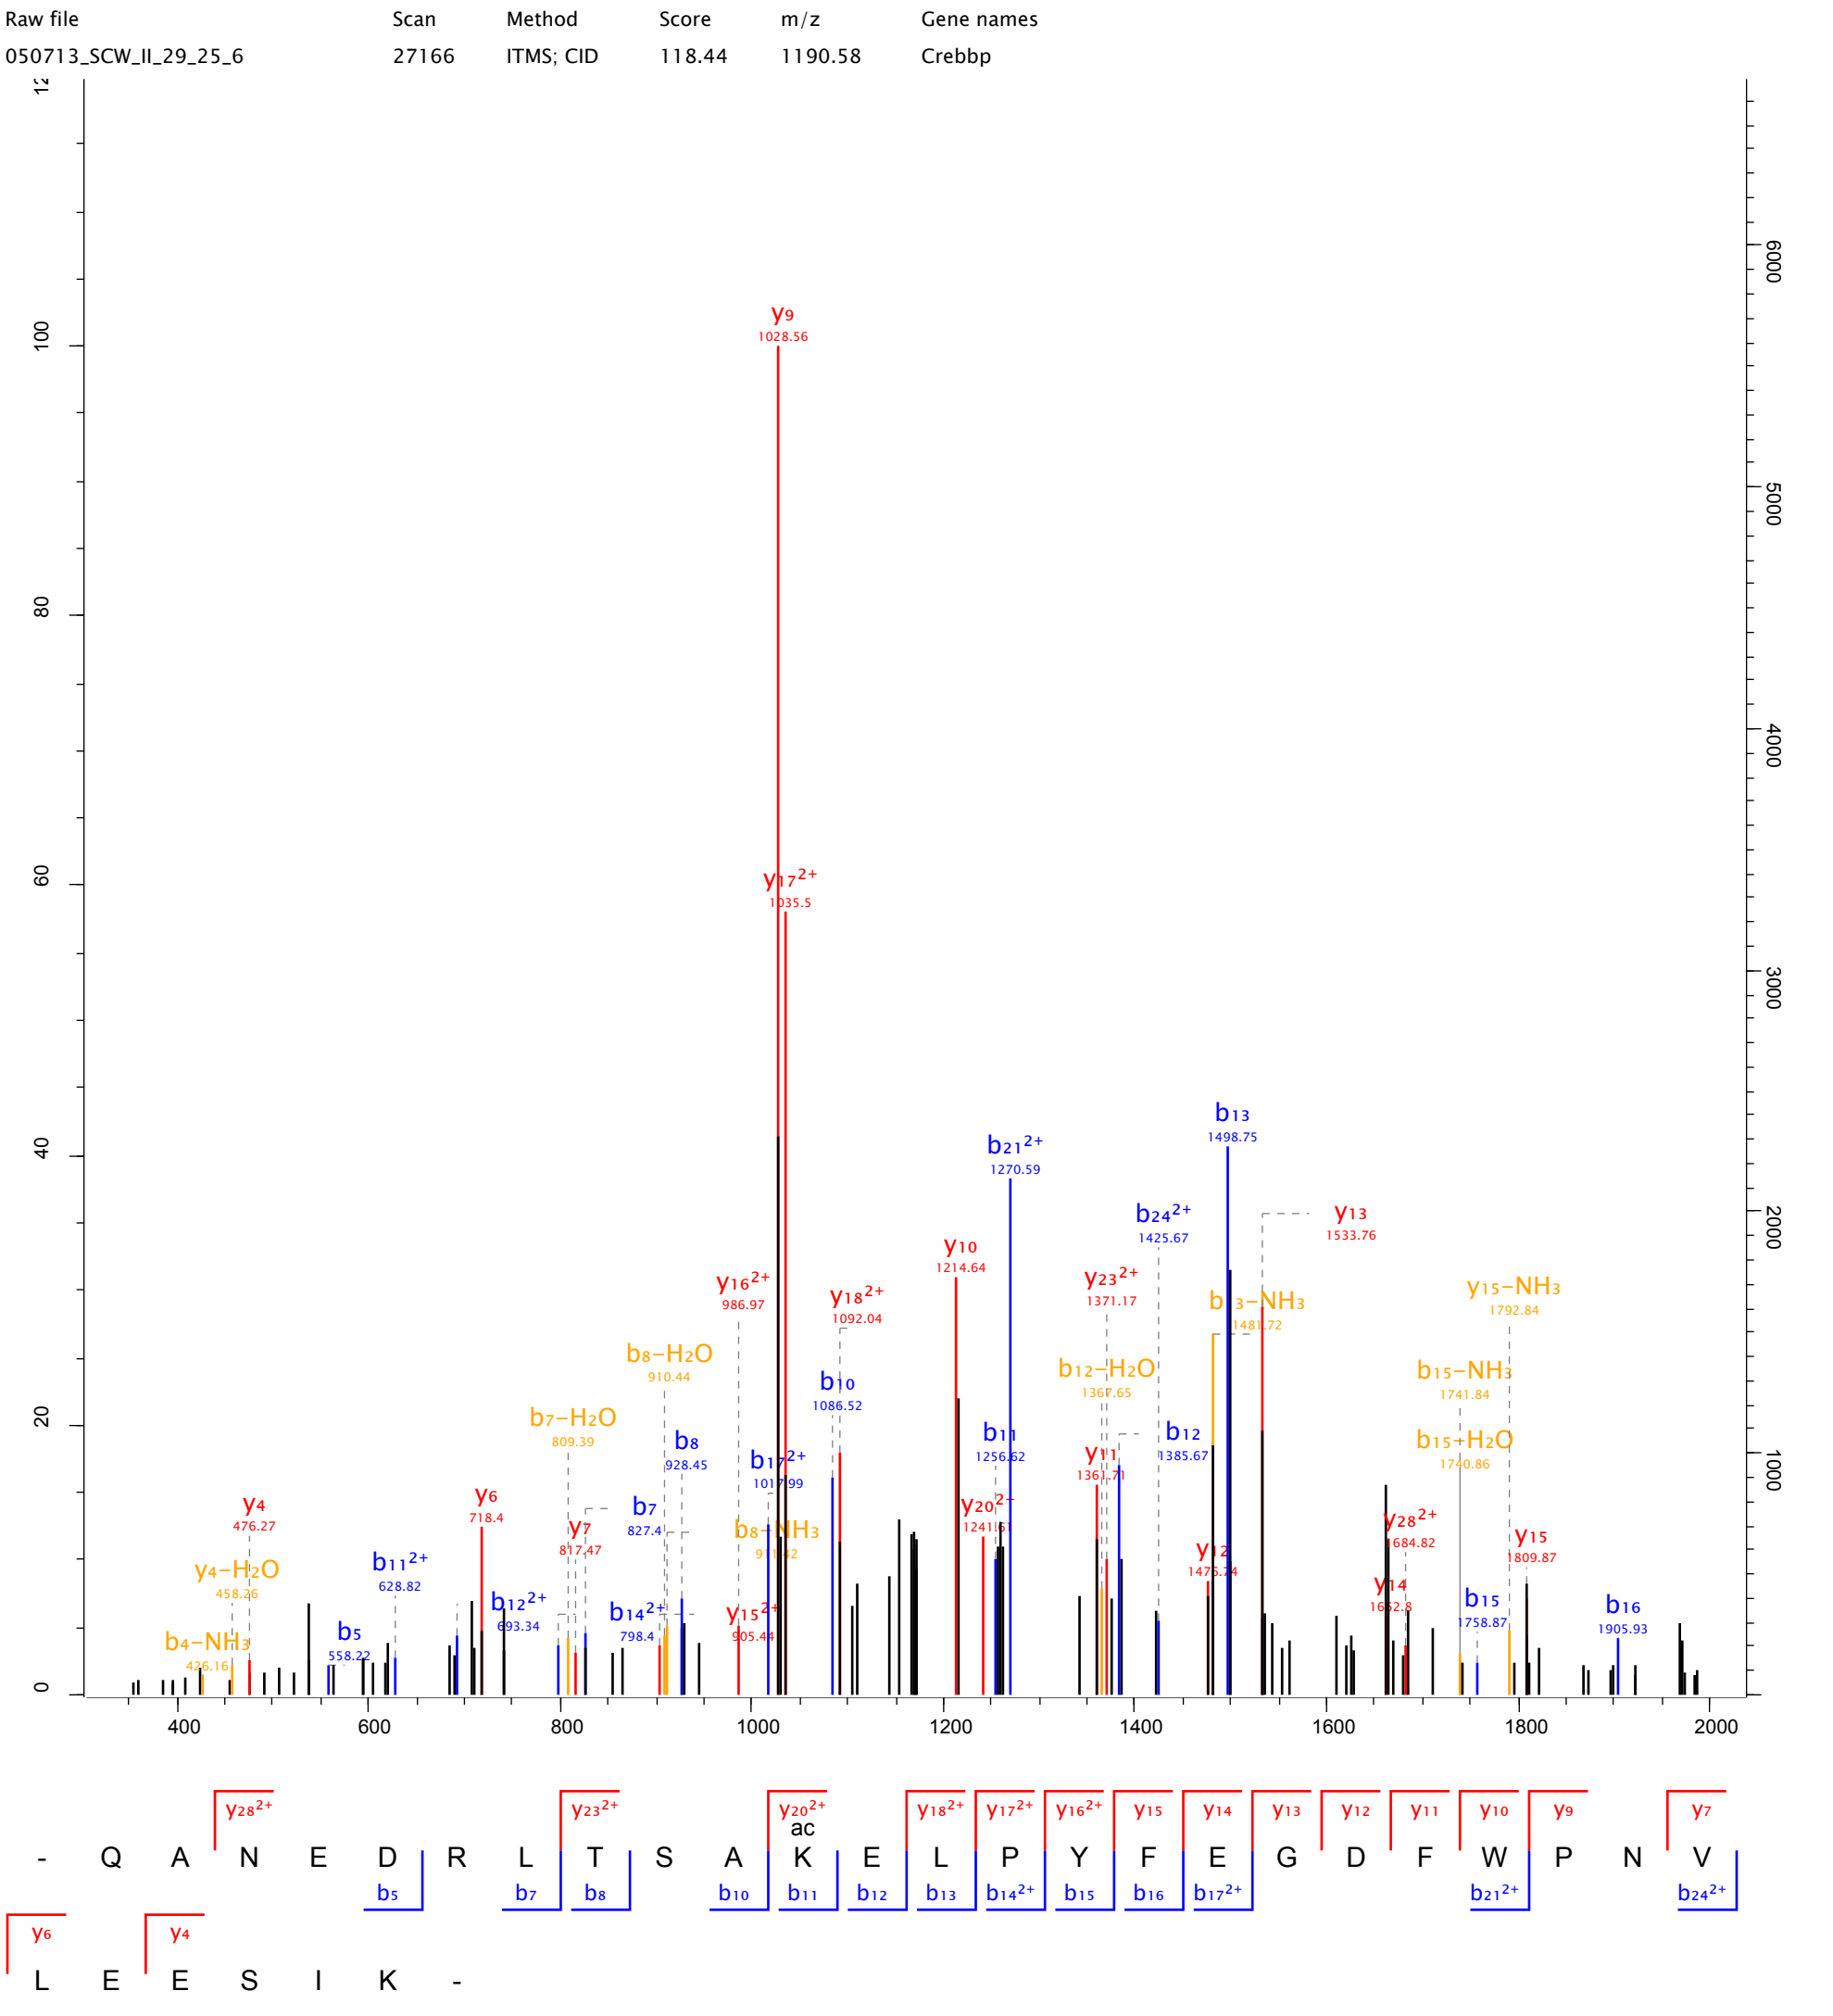

050713\_SCW\_II\_29\_25\_6

28248 ITMS; CID 151.96 938.18 Aco2

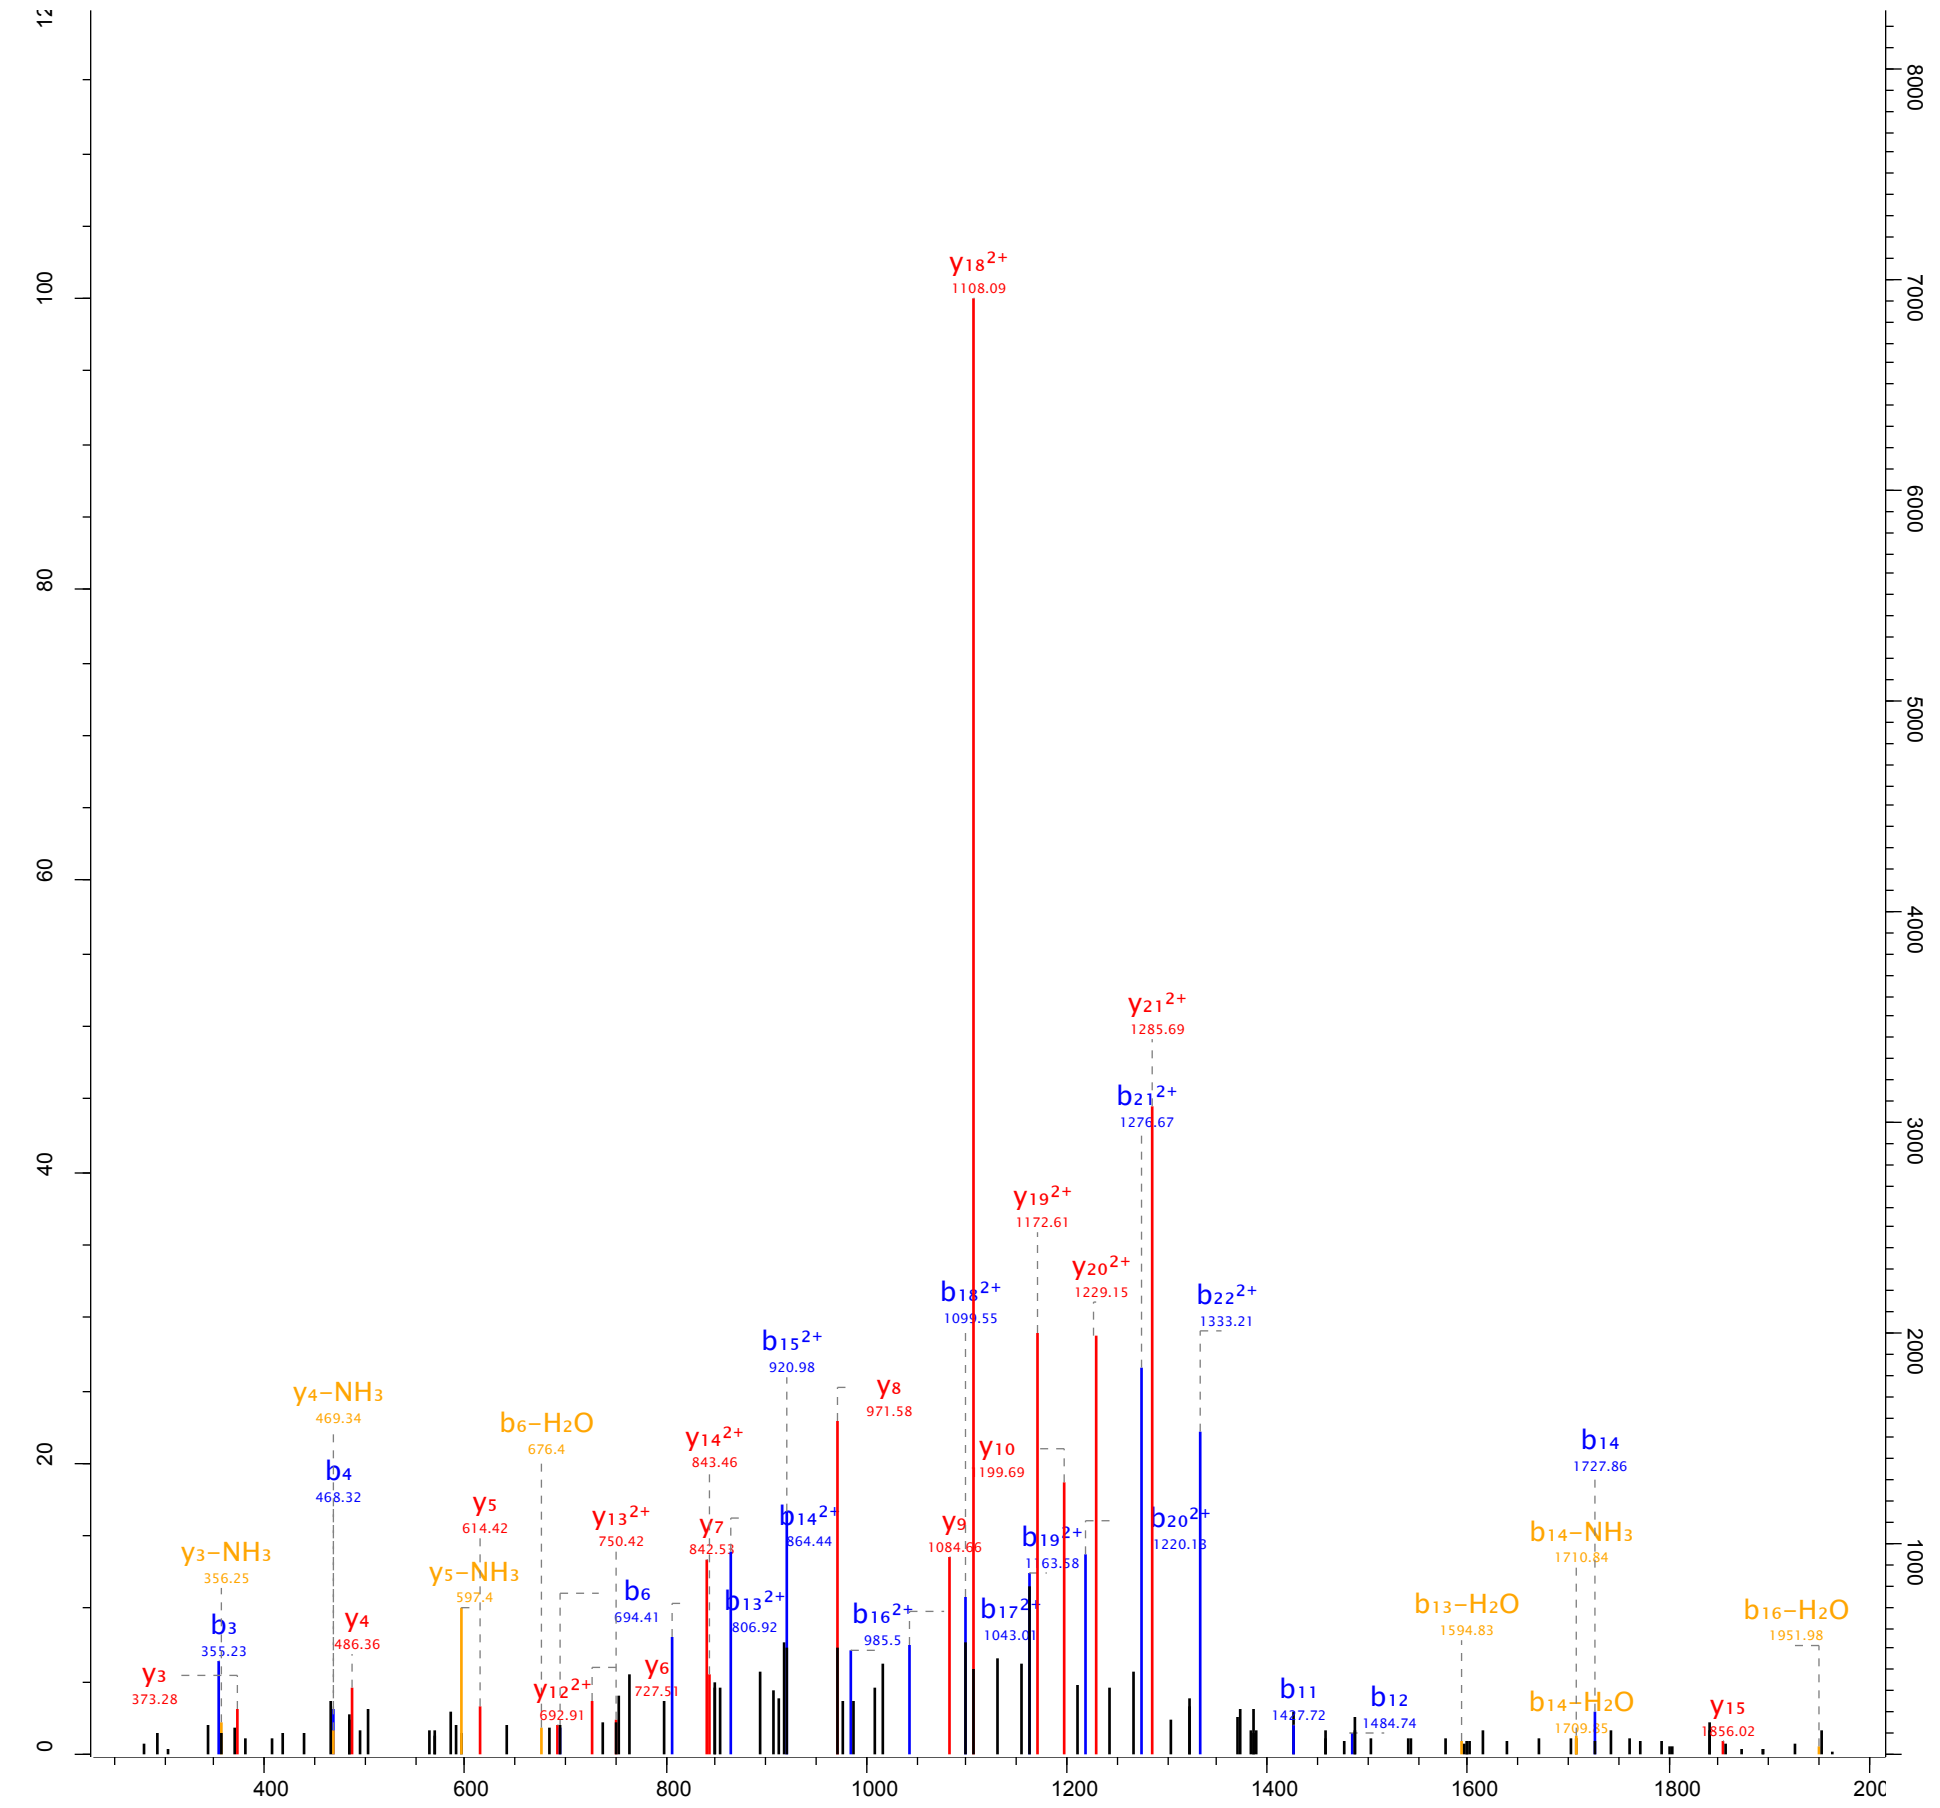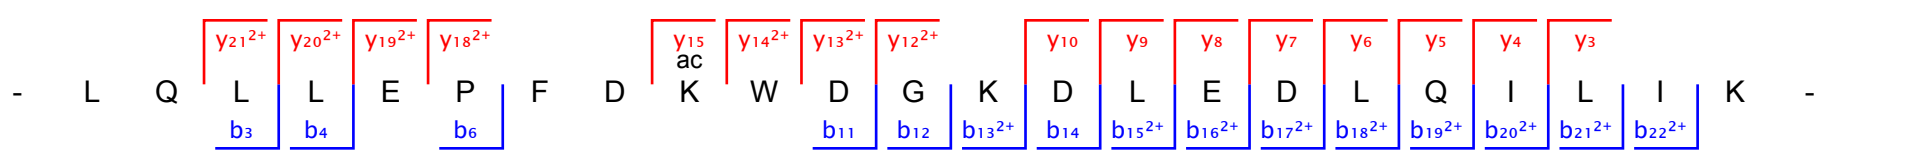

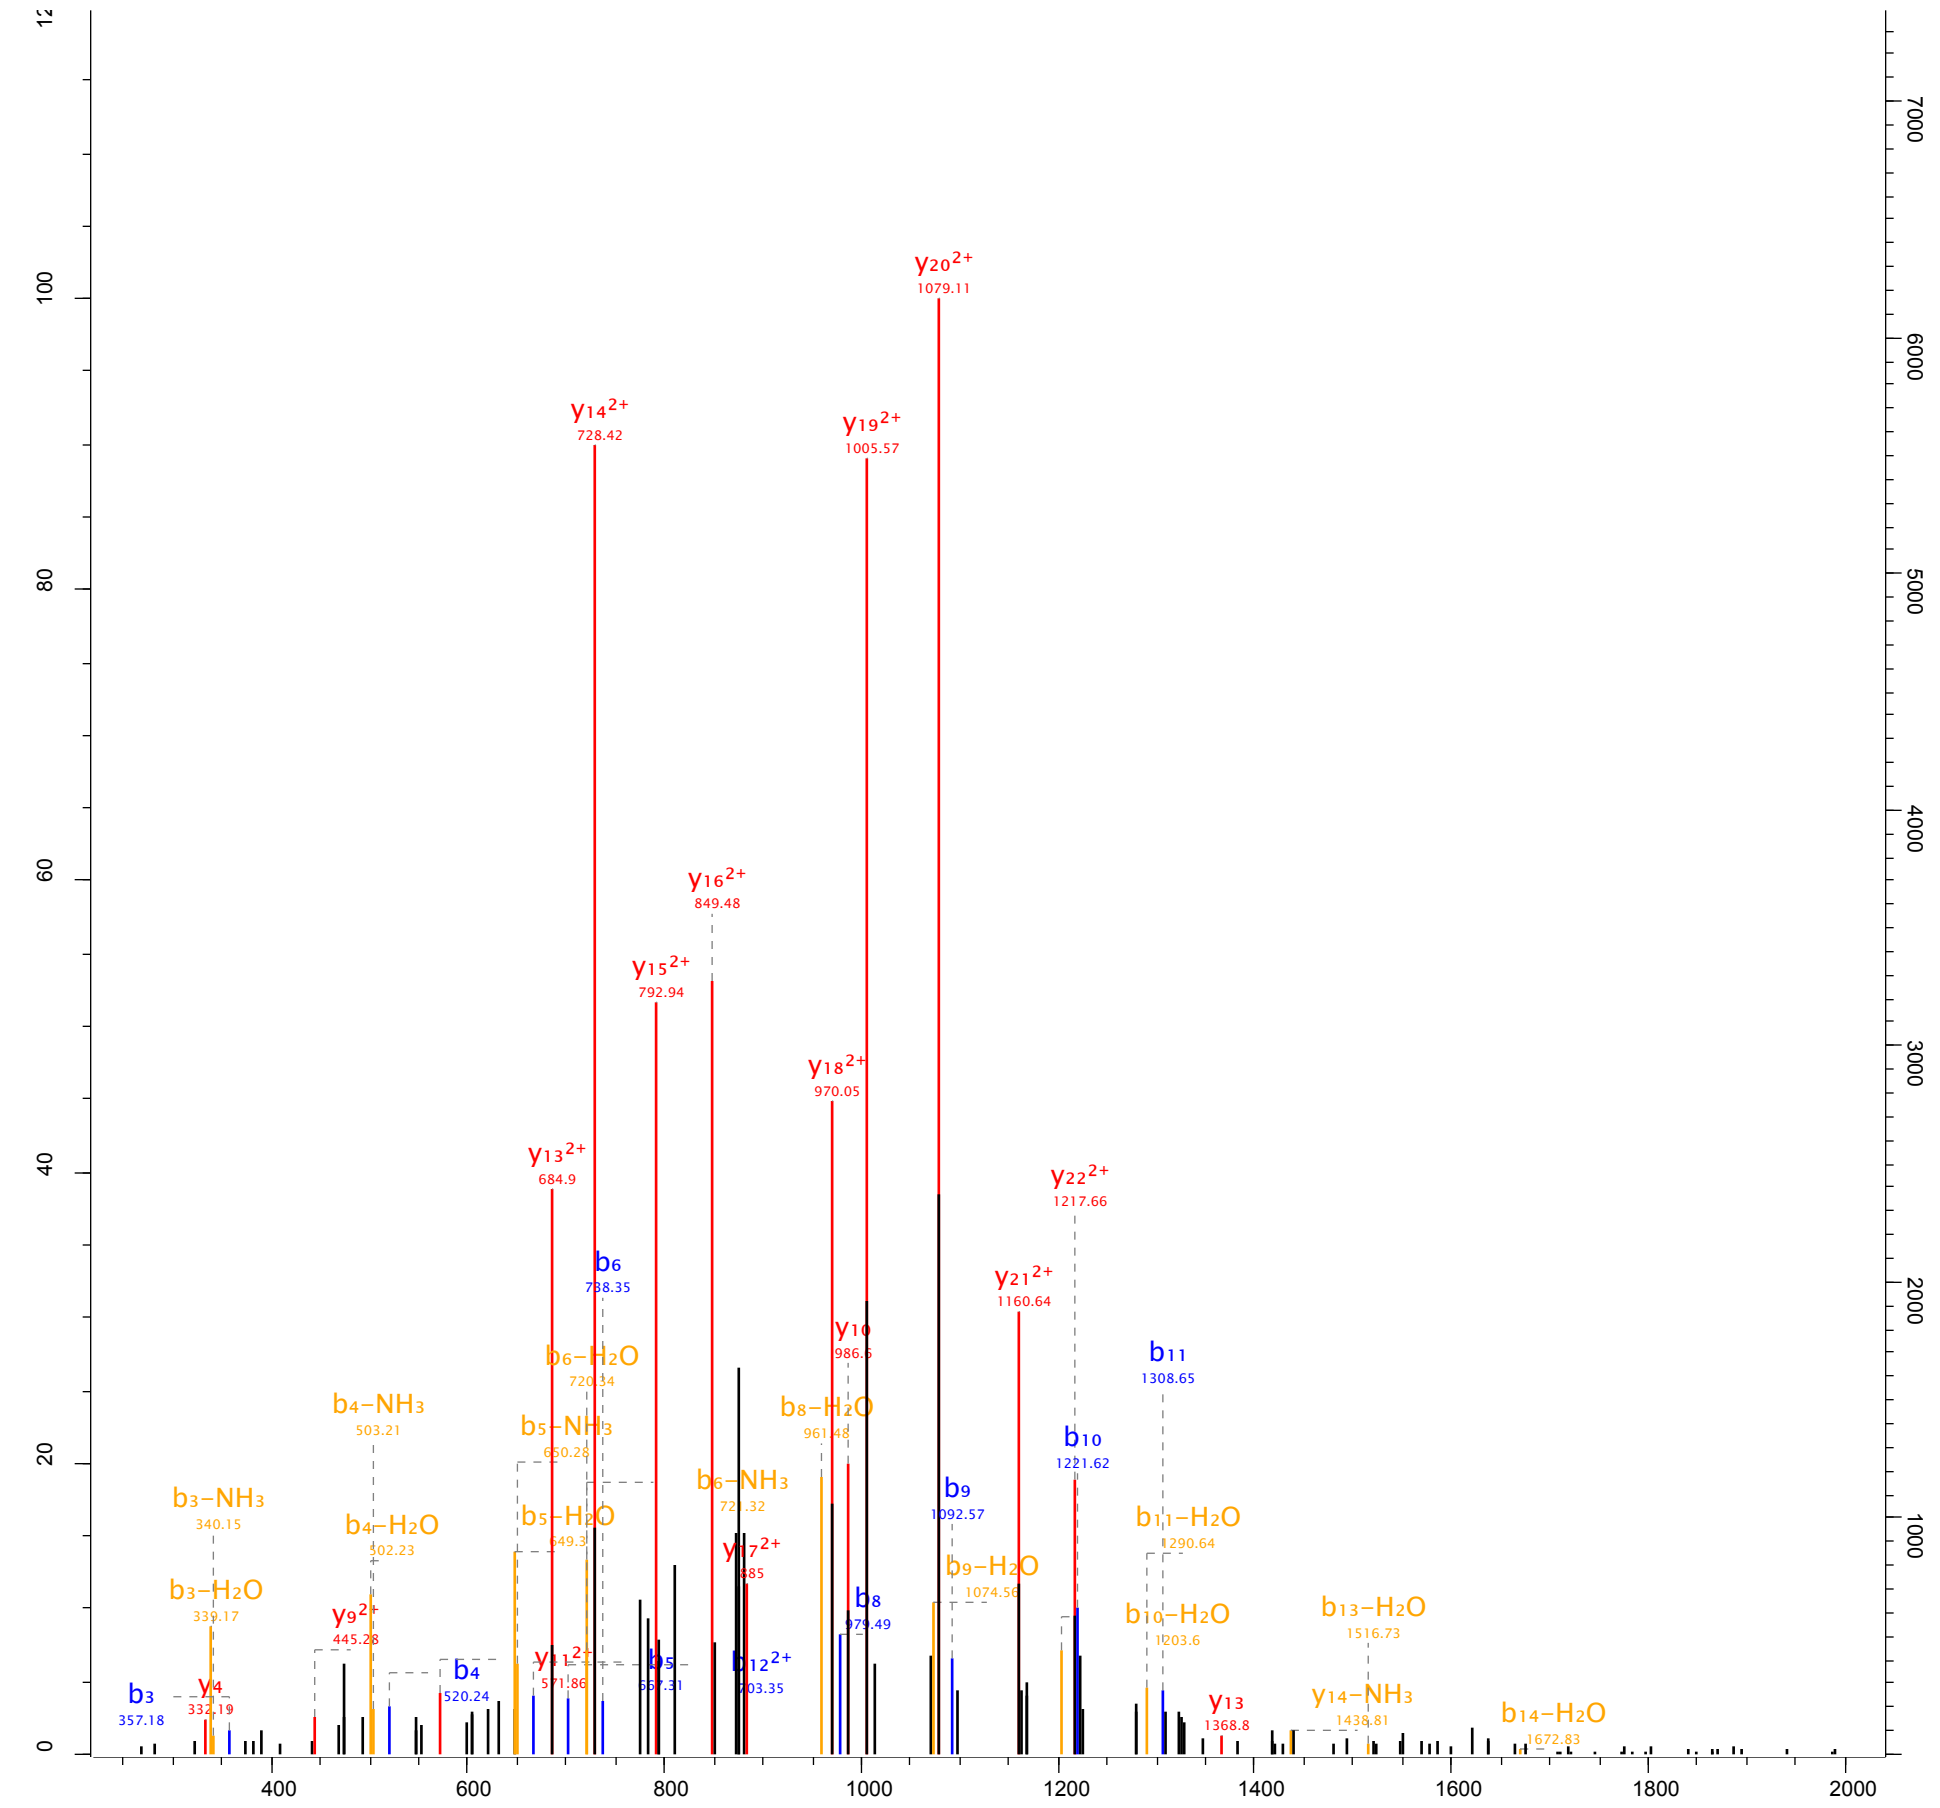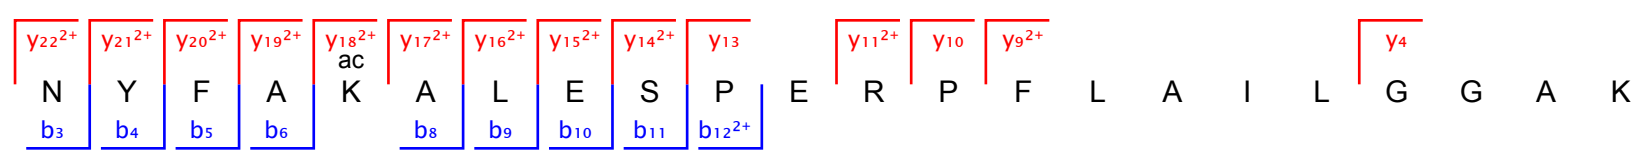

050713\_SCW\_II\_29\_25\_6

29257 ITMS; CID 140.95 912.46 Myl6

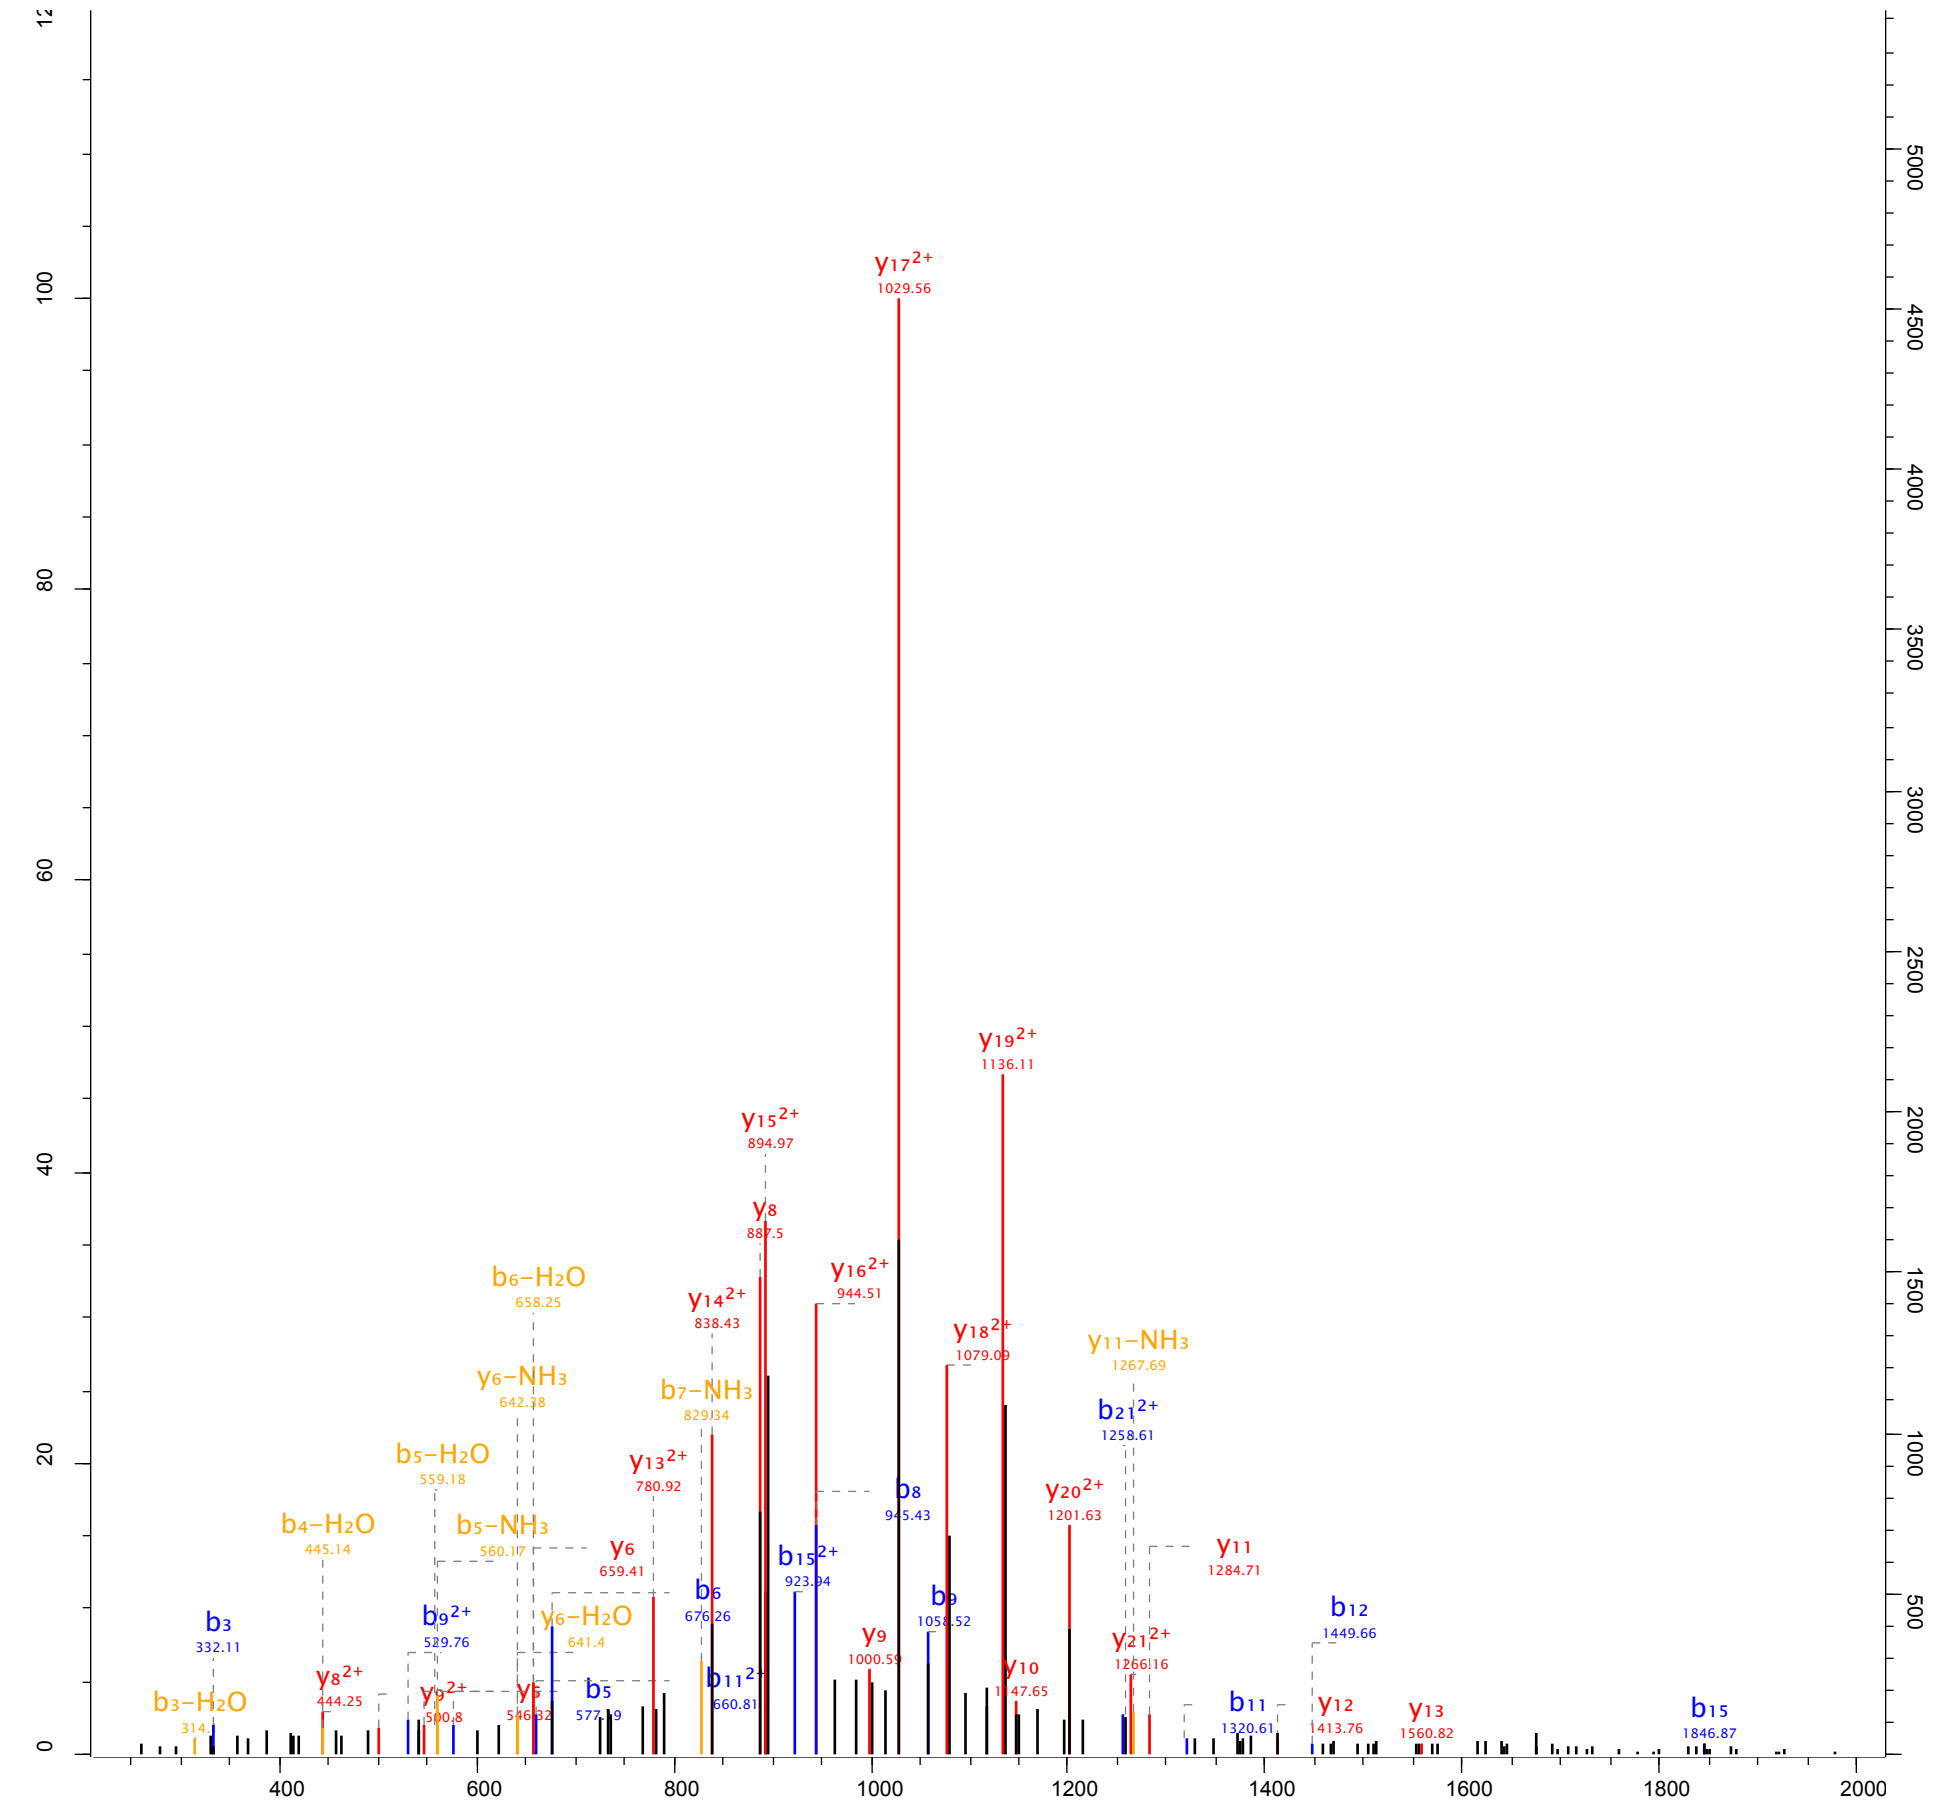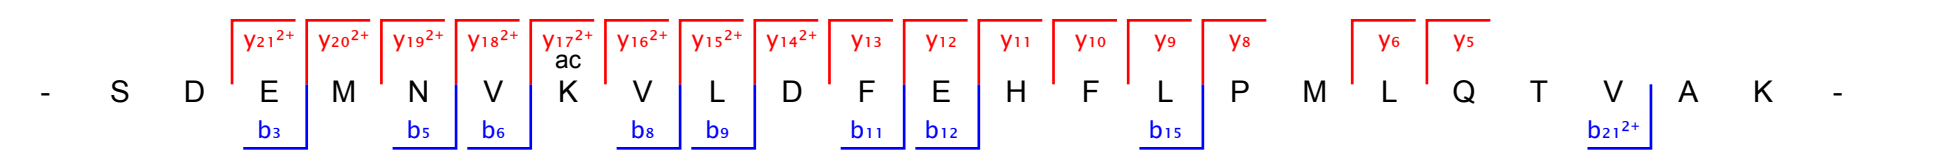

050713\_SCW\_II\_29\_25\_6

30974 ITMS; CID 162.82 1088.56 Kat6a

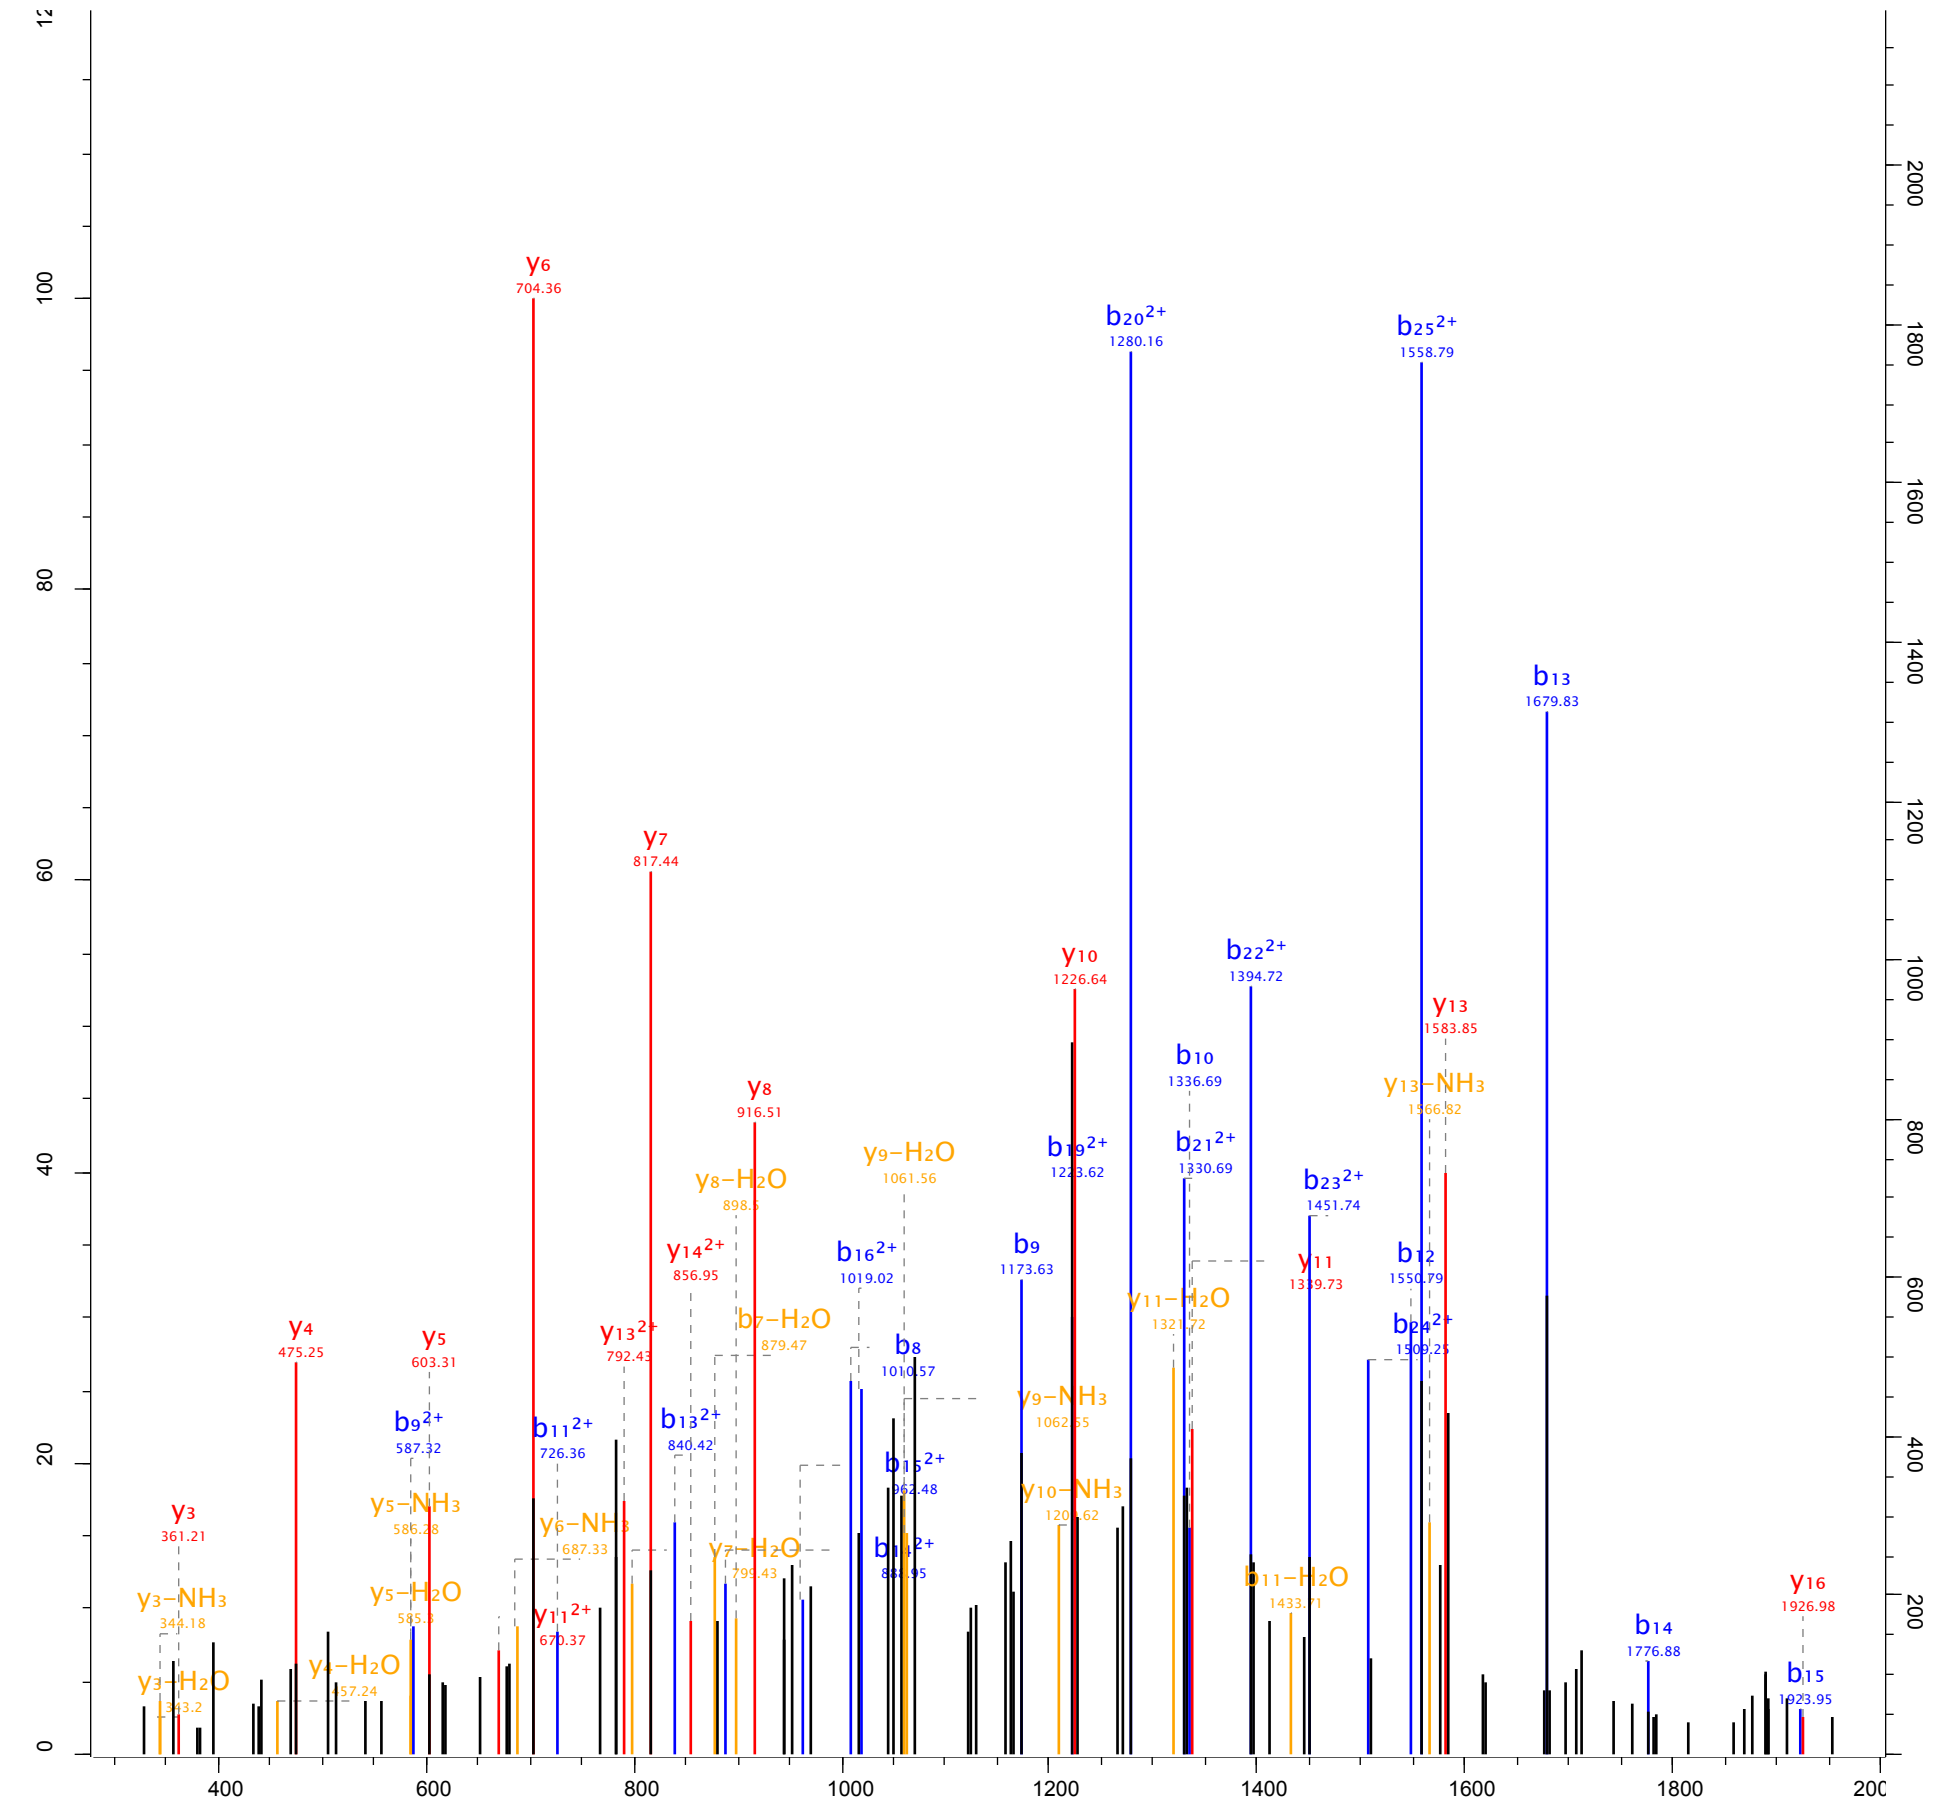

- L F L D H K T L Y Y D V E P F L F Y V L T Q N D

b8 b9 b10 b11<sup>2+</sup> b12 b13 b14 b15 b16<sup>2+</sup> b19<sup>2+</sup> b20<sup>2+</sup> b21<sup>2+</sup> b22<sup>2+</sup> b23<sup>2+</sup> b24<sup>2+</sup> y16 y14<sup>2+</sup> y13 y11 y10 y8 y7 y6 y5 y4 y3

V | K -

050713\_SCW\_II\_29\_25\_6

31058 ITMS; CID 196.92 956.14 S100a11

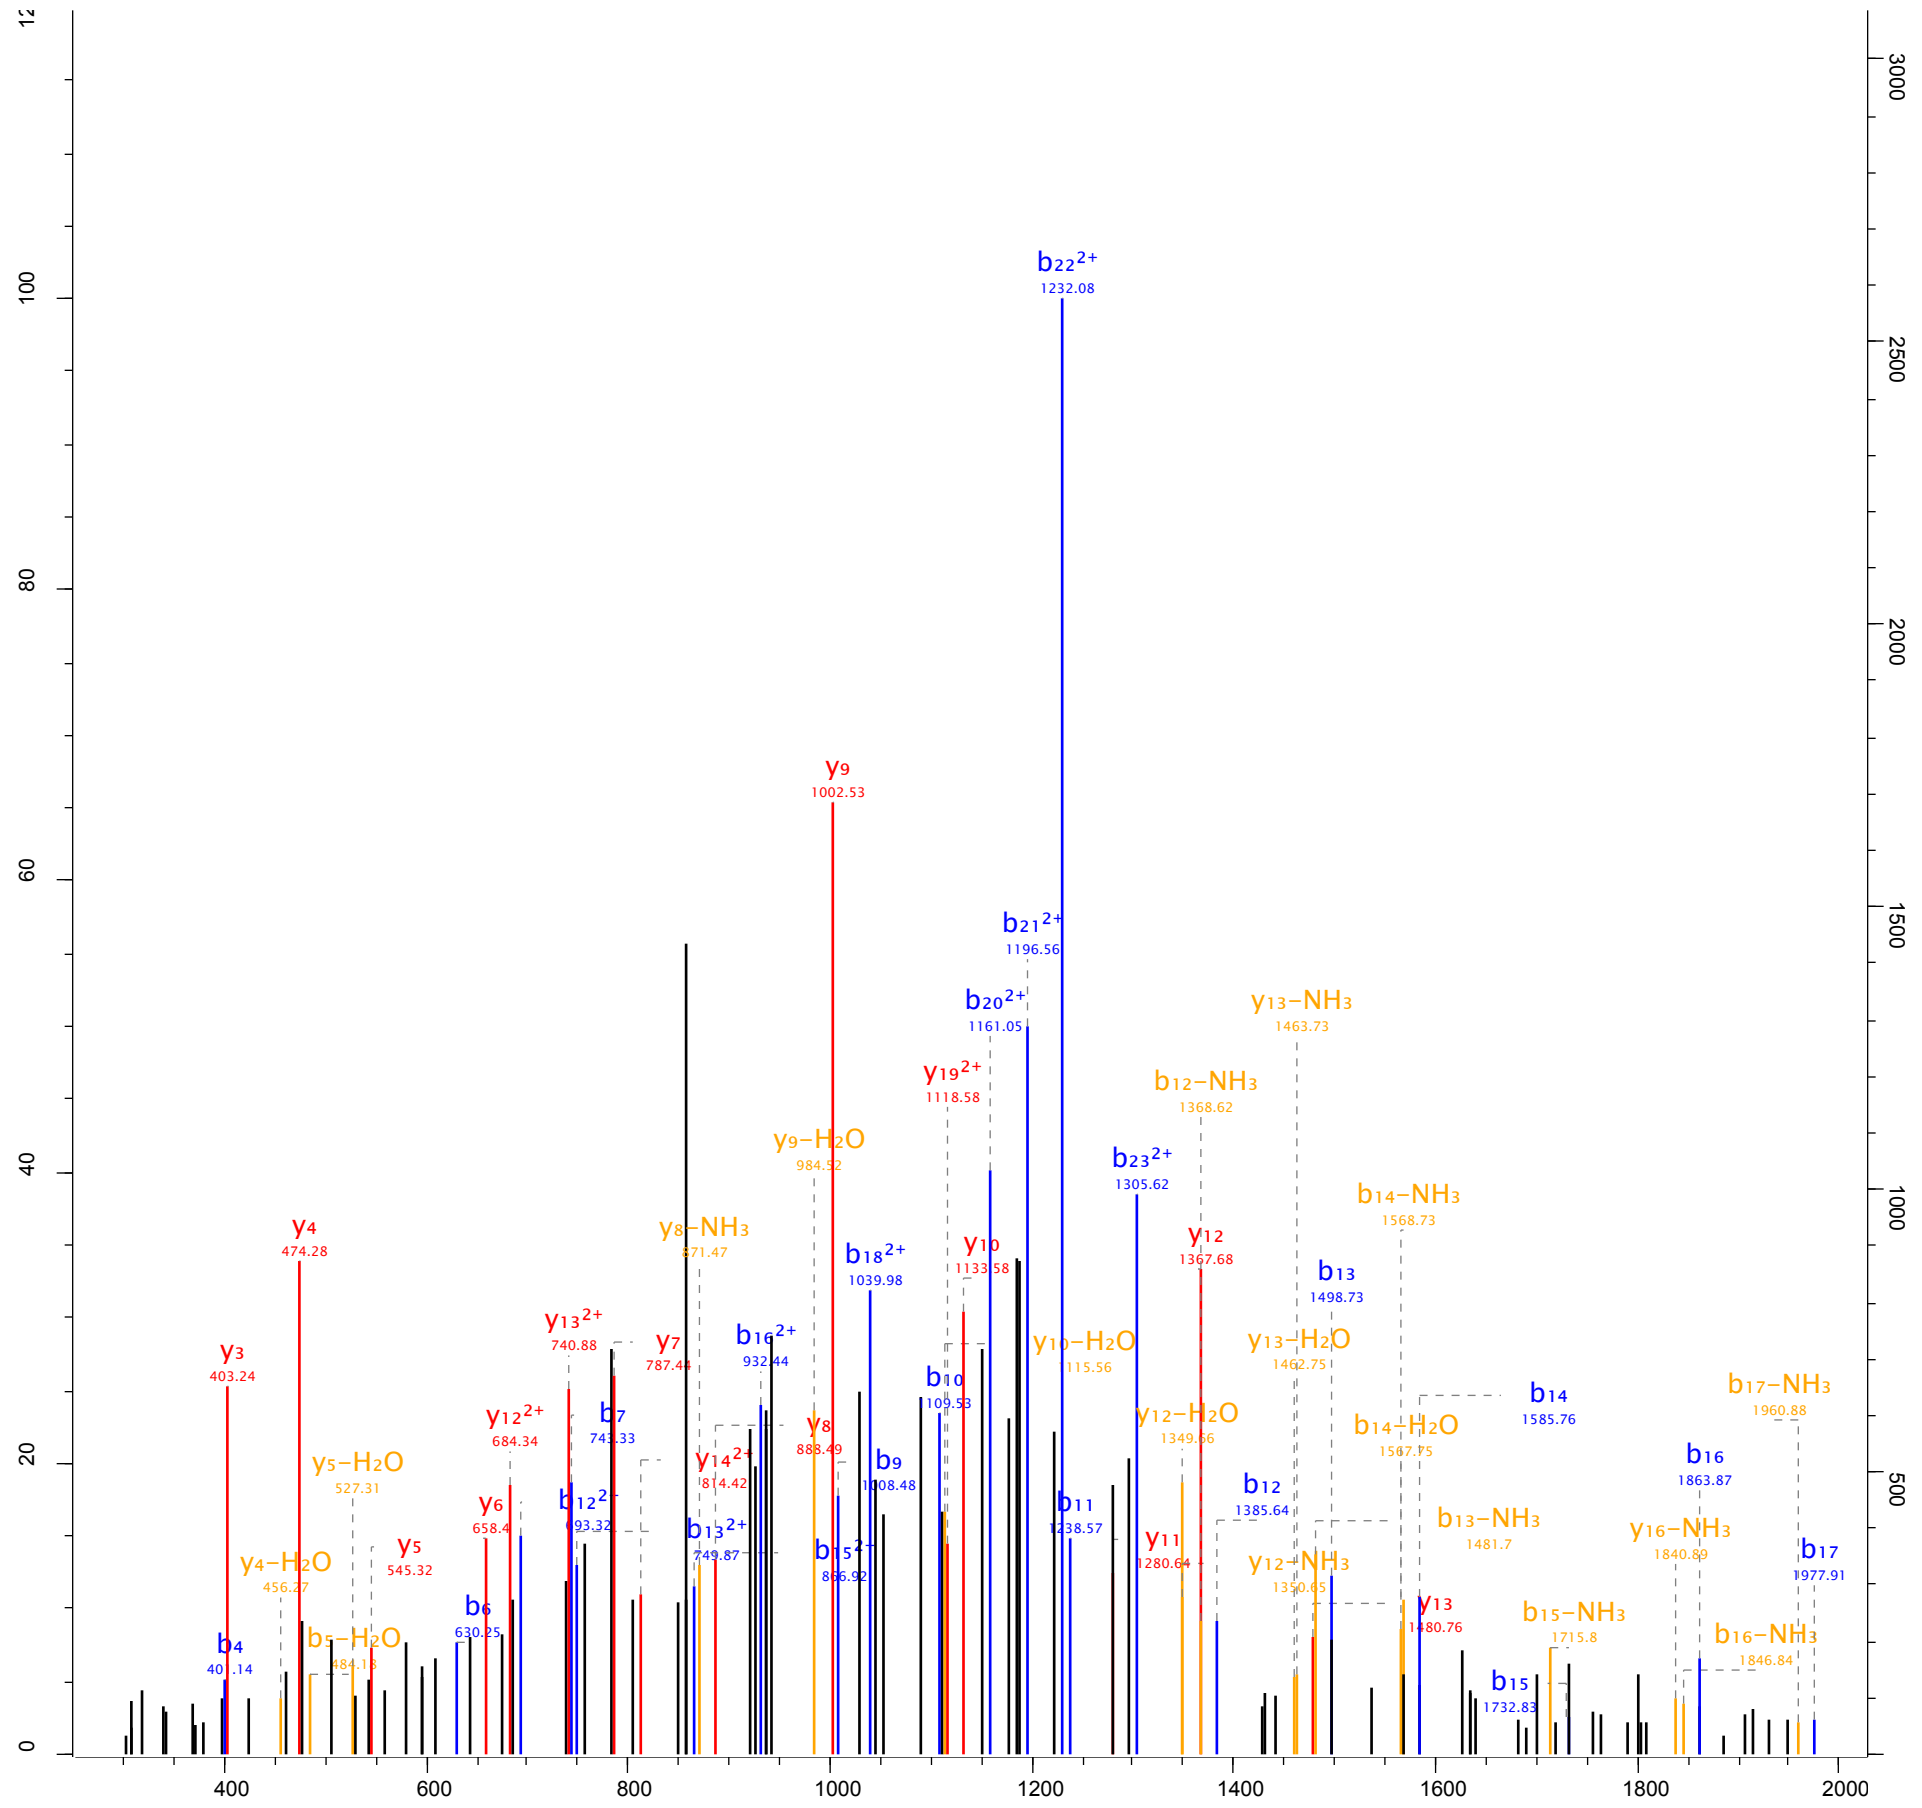

- D G N N T Q L S ac K T E F L S F M N T E L A A F T

b4 b6 b7 b9 b10 b11 b12 b13 b14 b15 b16 b17 b18<sup>2+</sup> b20<sup>2+</sup> b21<sup>2+</sup> b22<sup>2+</sup> b23<sup>2+</sup> y19<sup>2+</sup> y14<sup>2+</sup> y13 y12 y11 y10 y9 y8 y7 y6 y5 y4 y3

K -



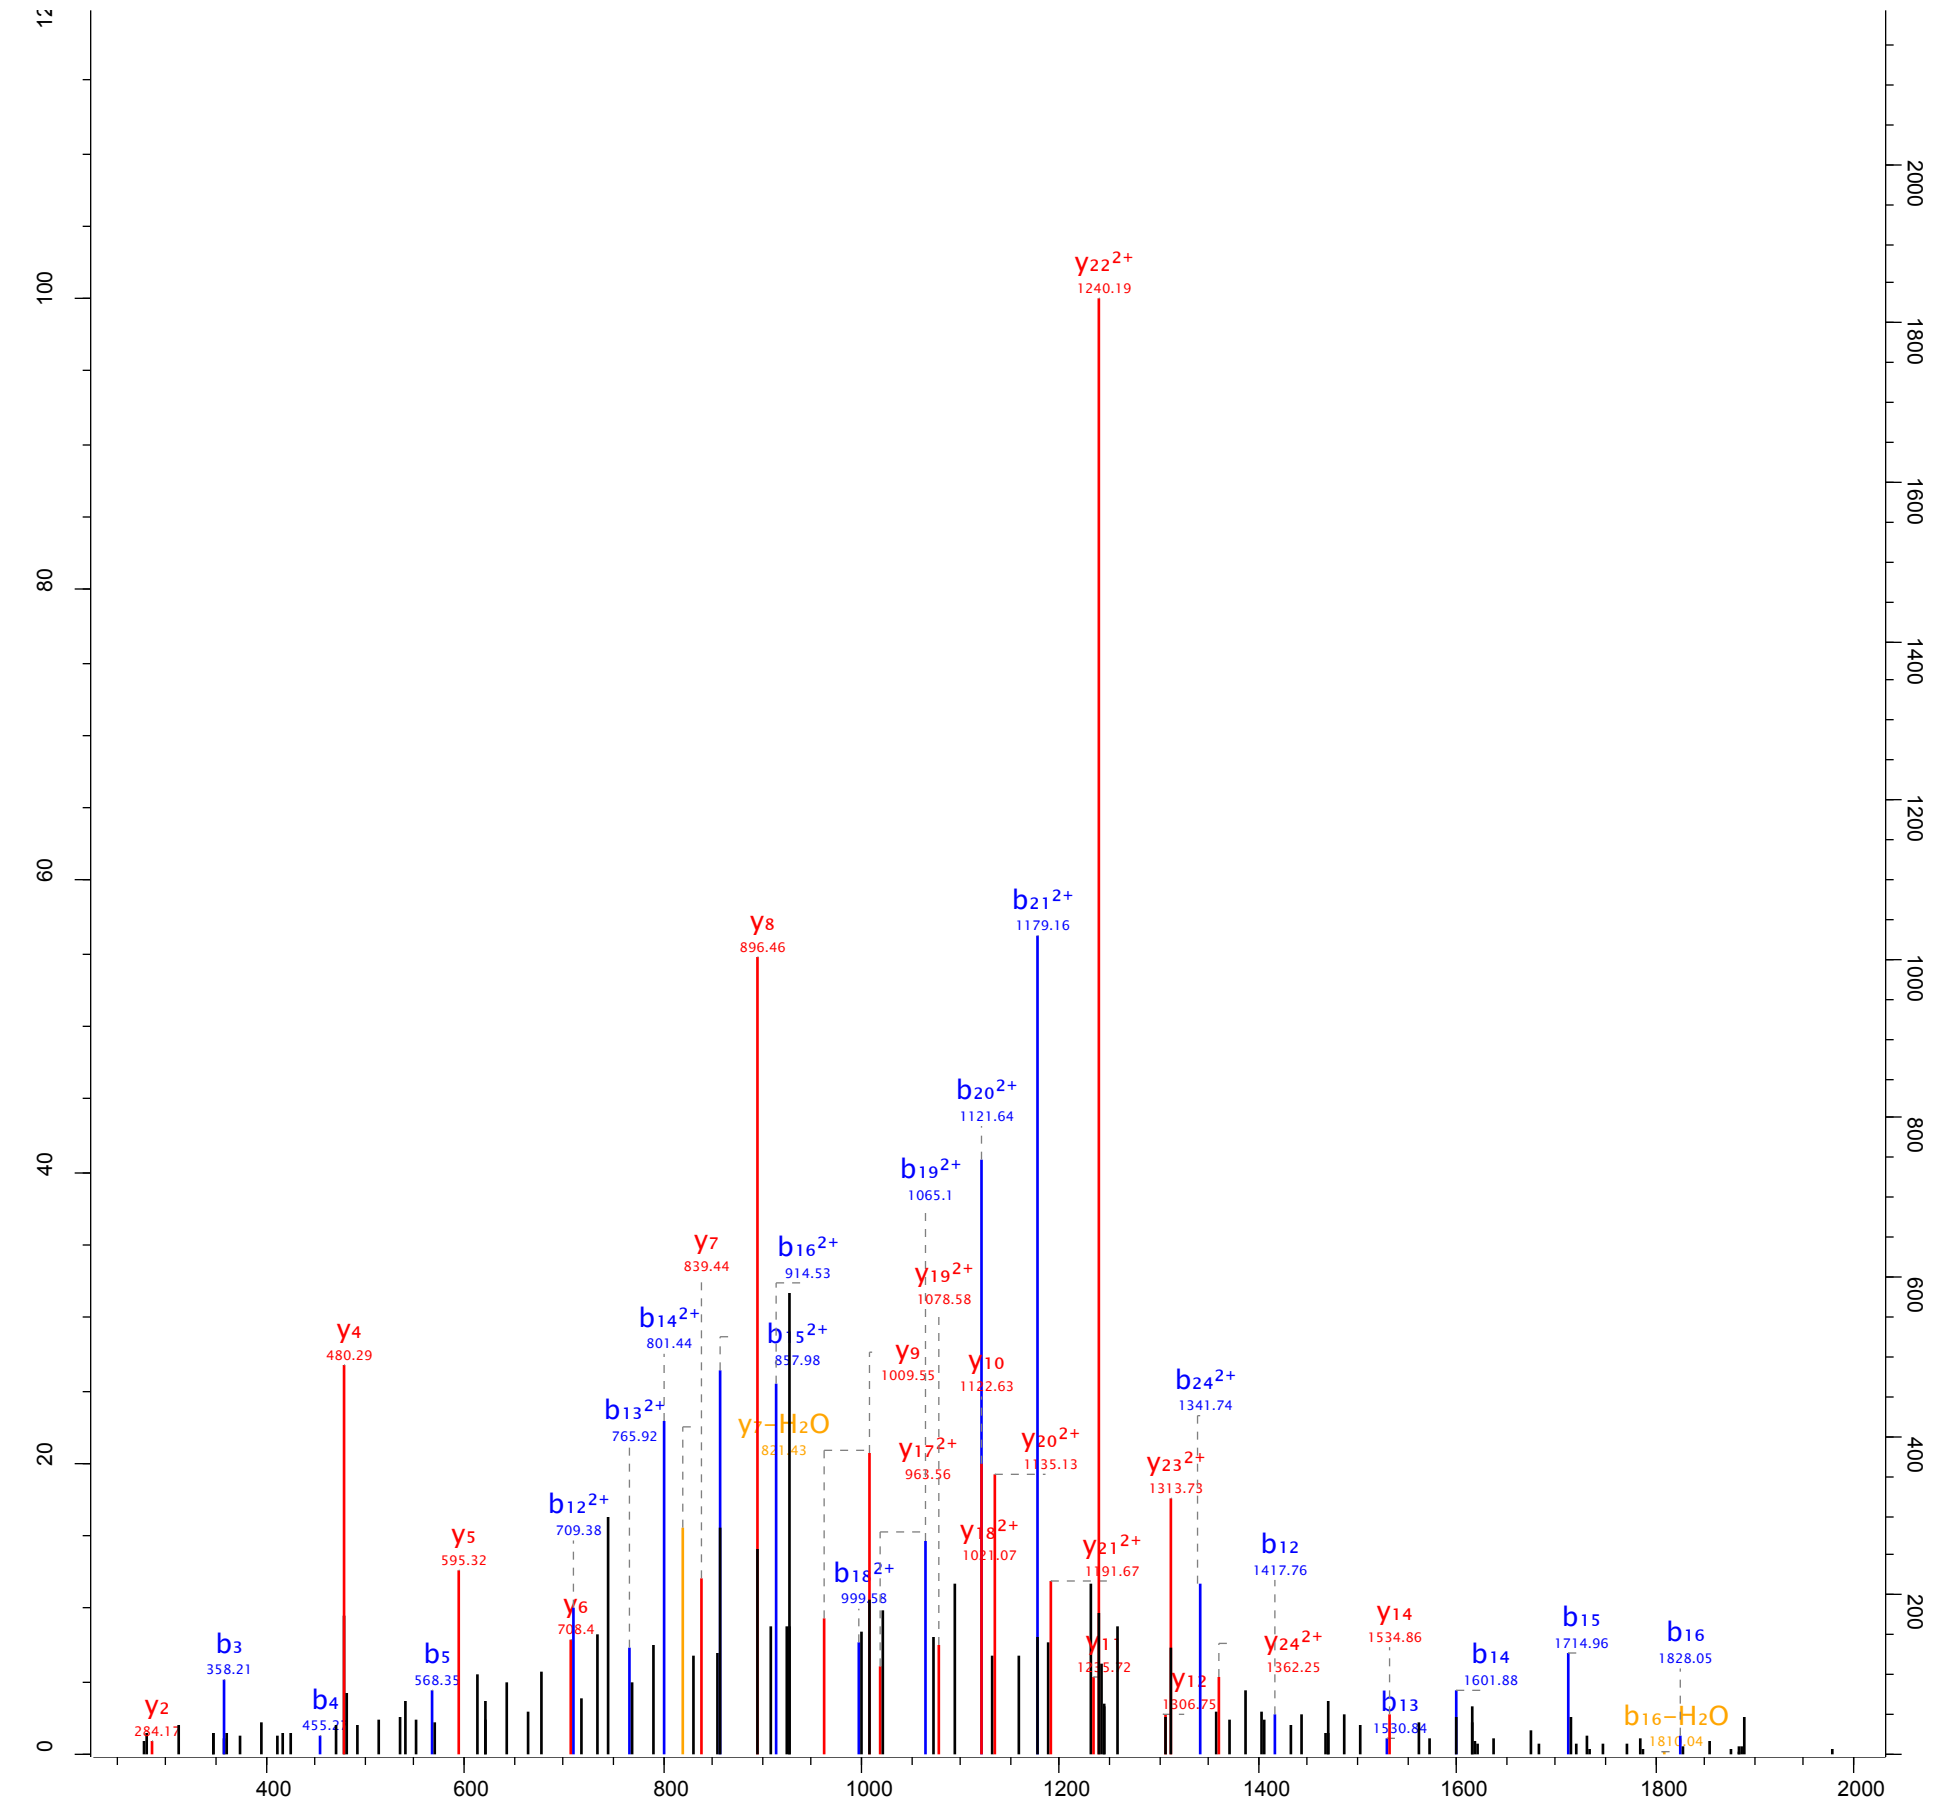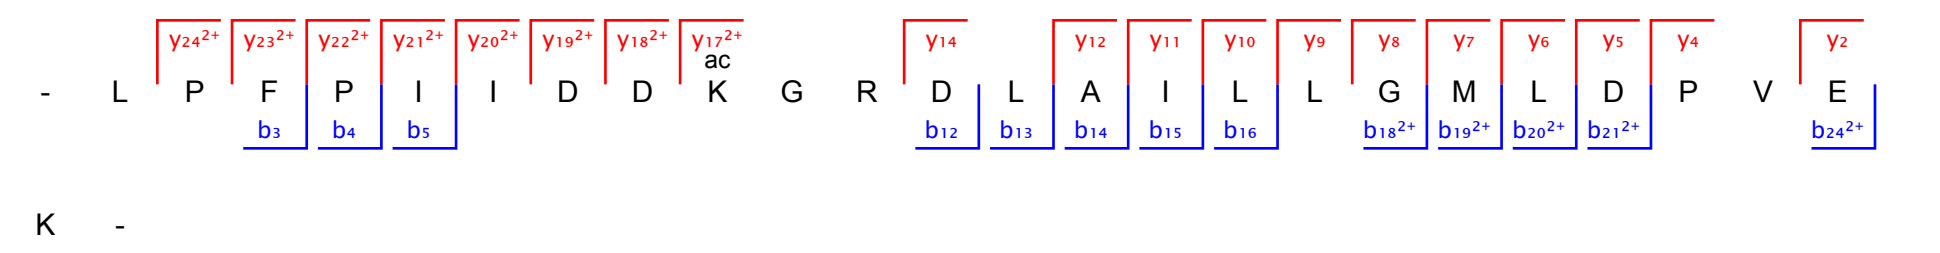

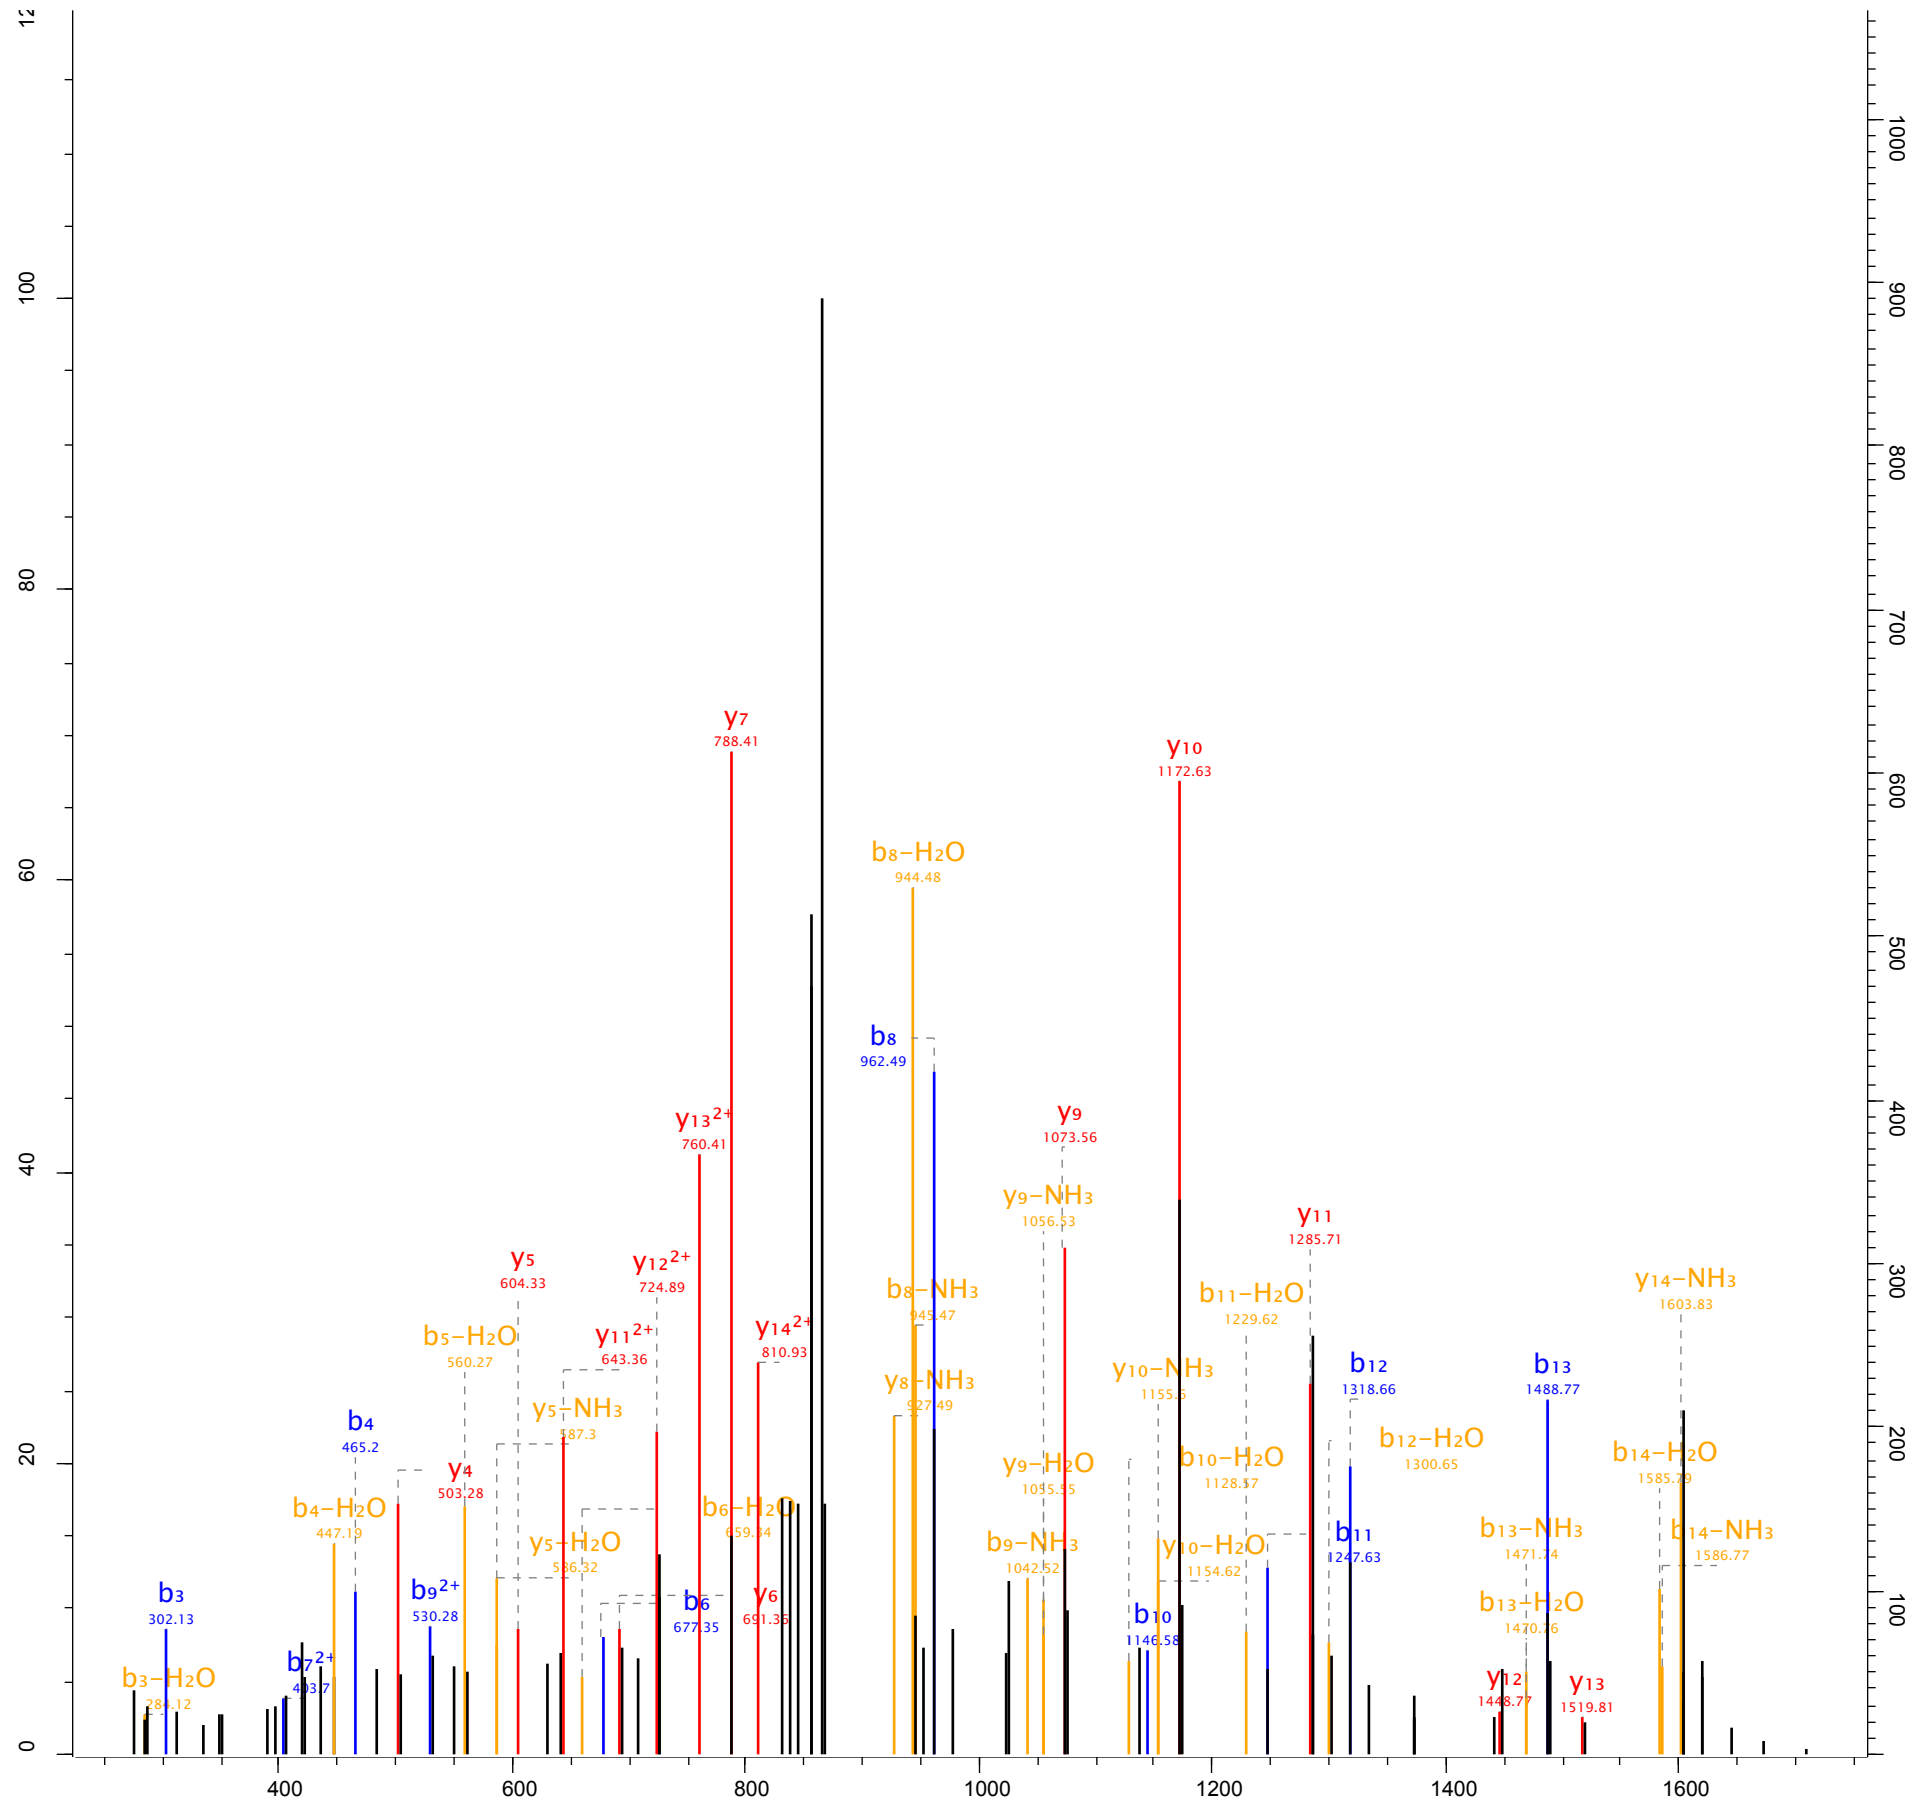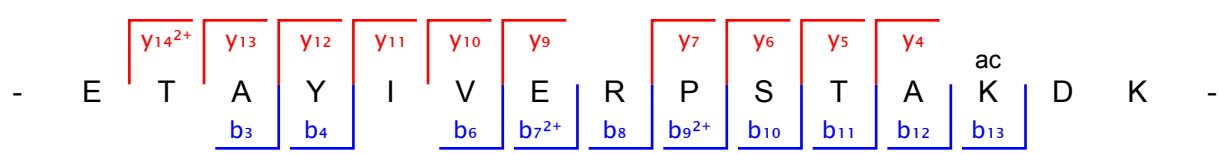

050713\_SCW\_II\_29\_28\_7

12938 ITMS; CID 165.66 940.97 Aifm1

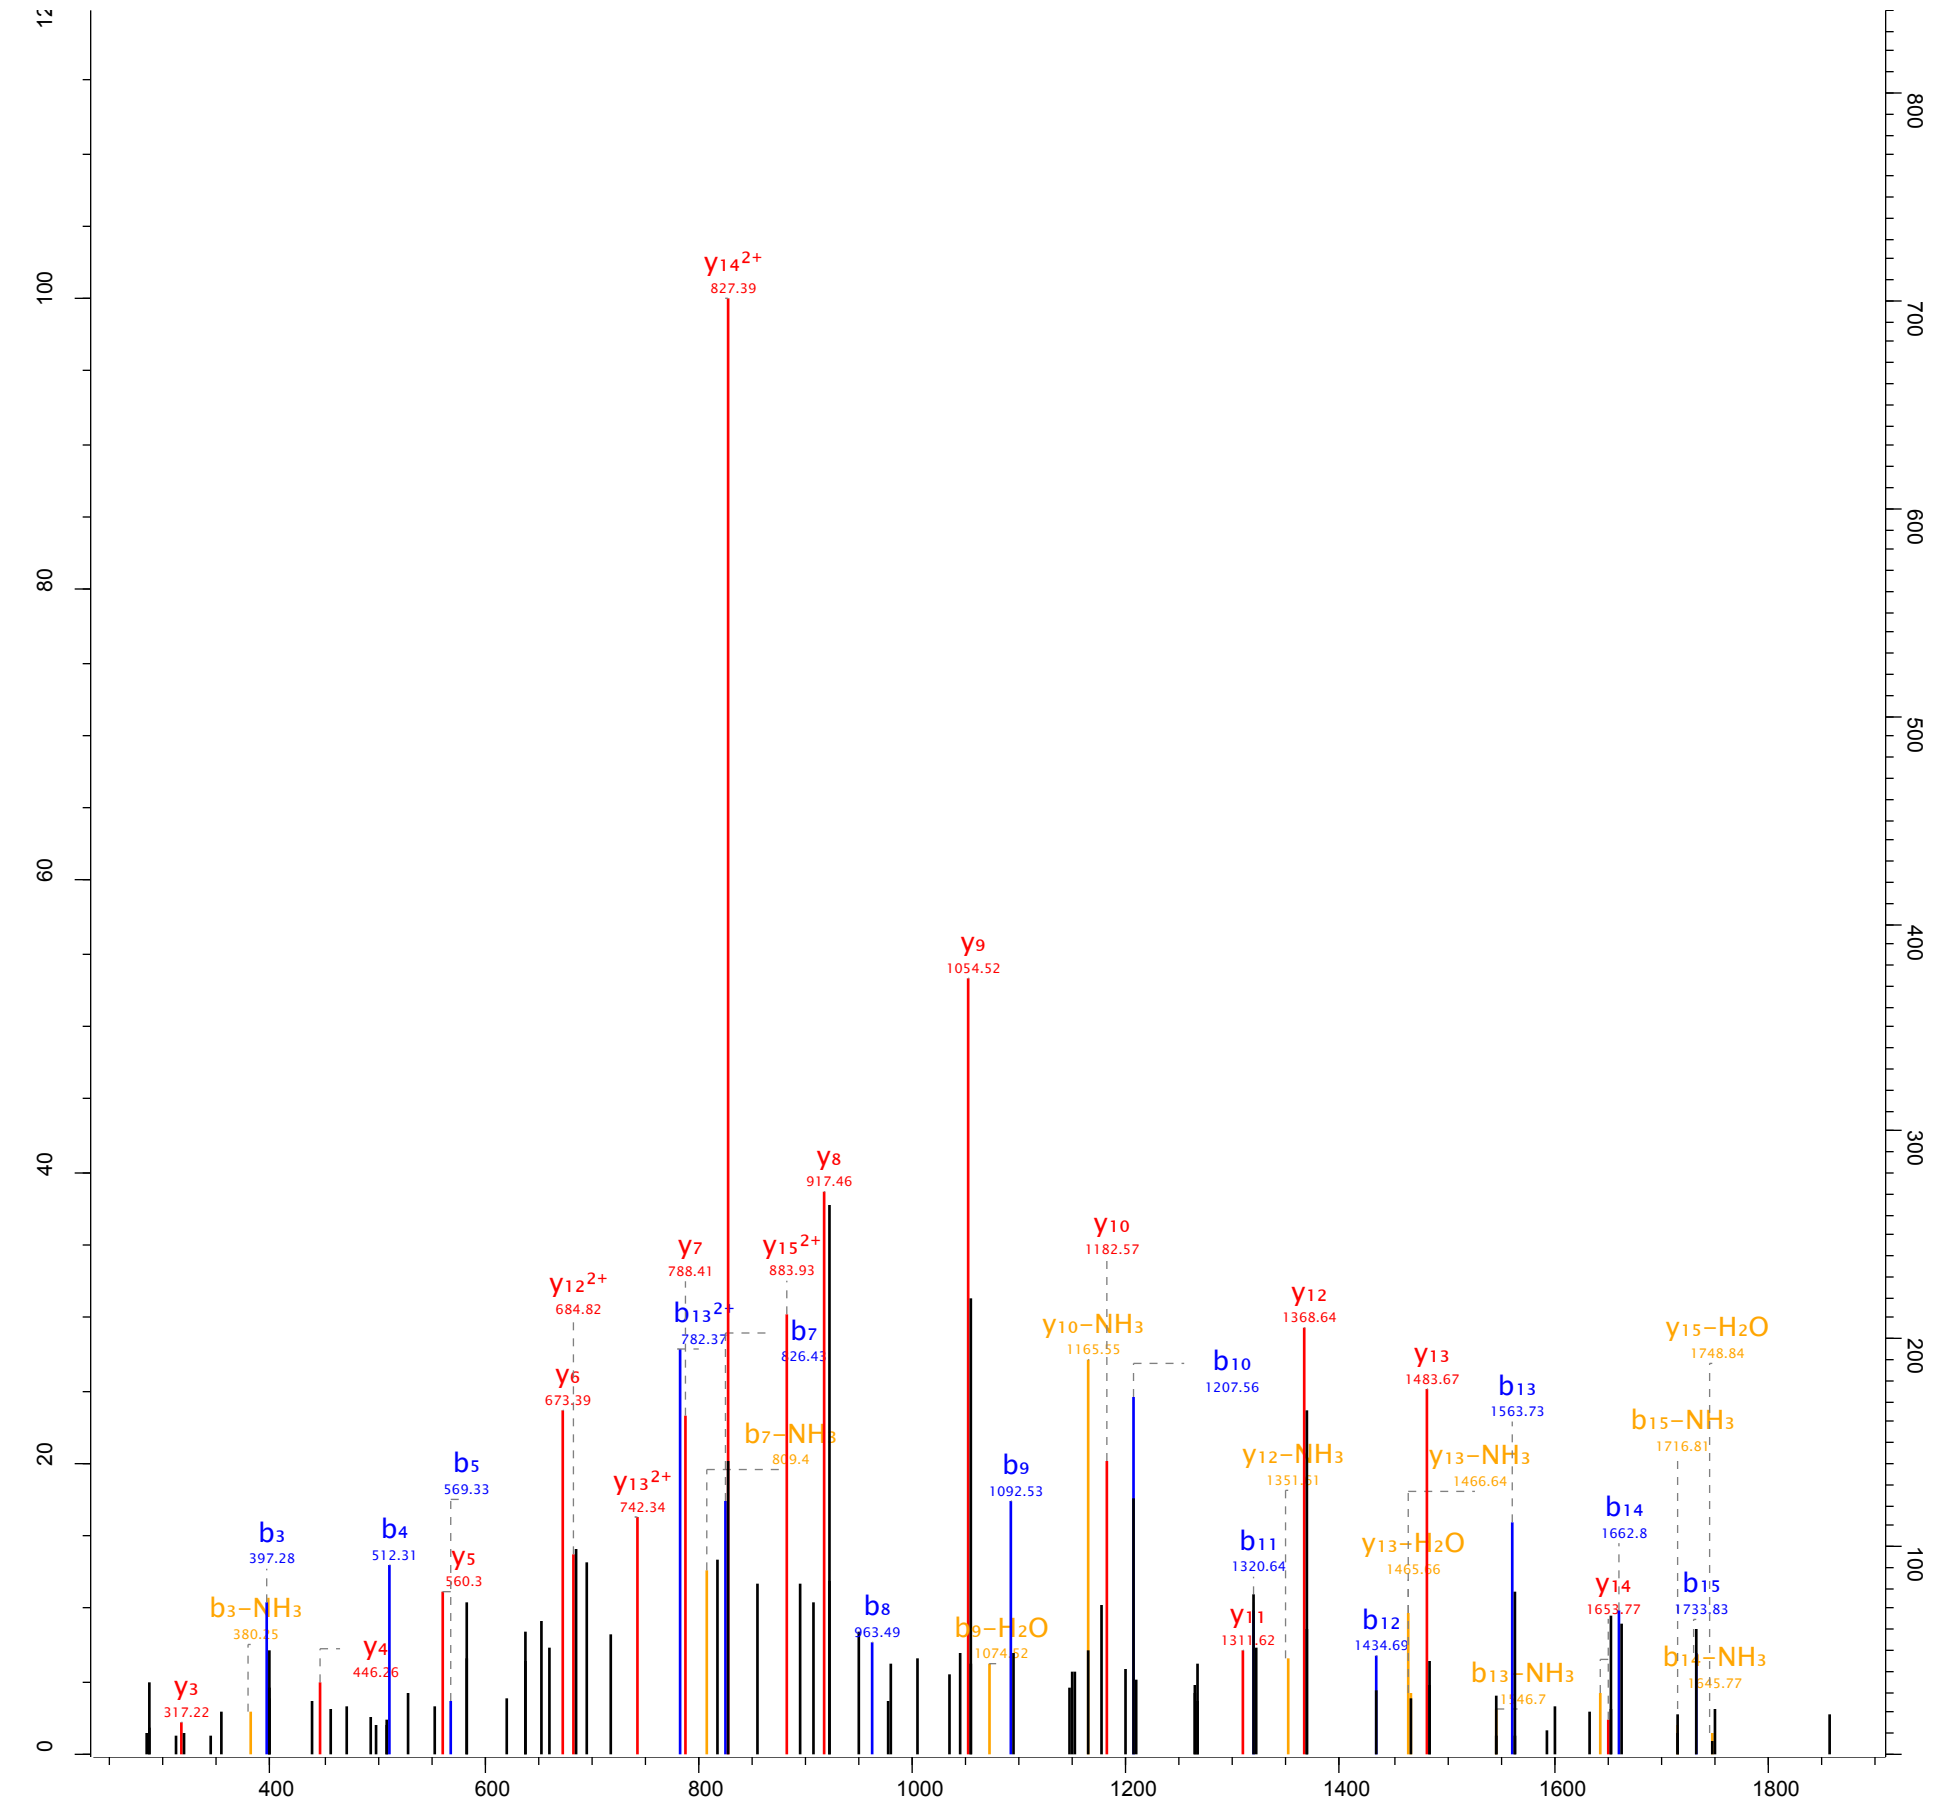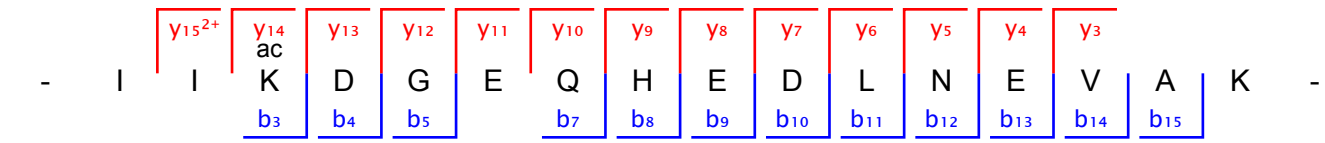

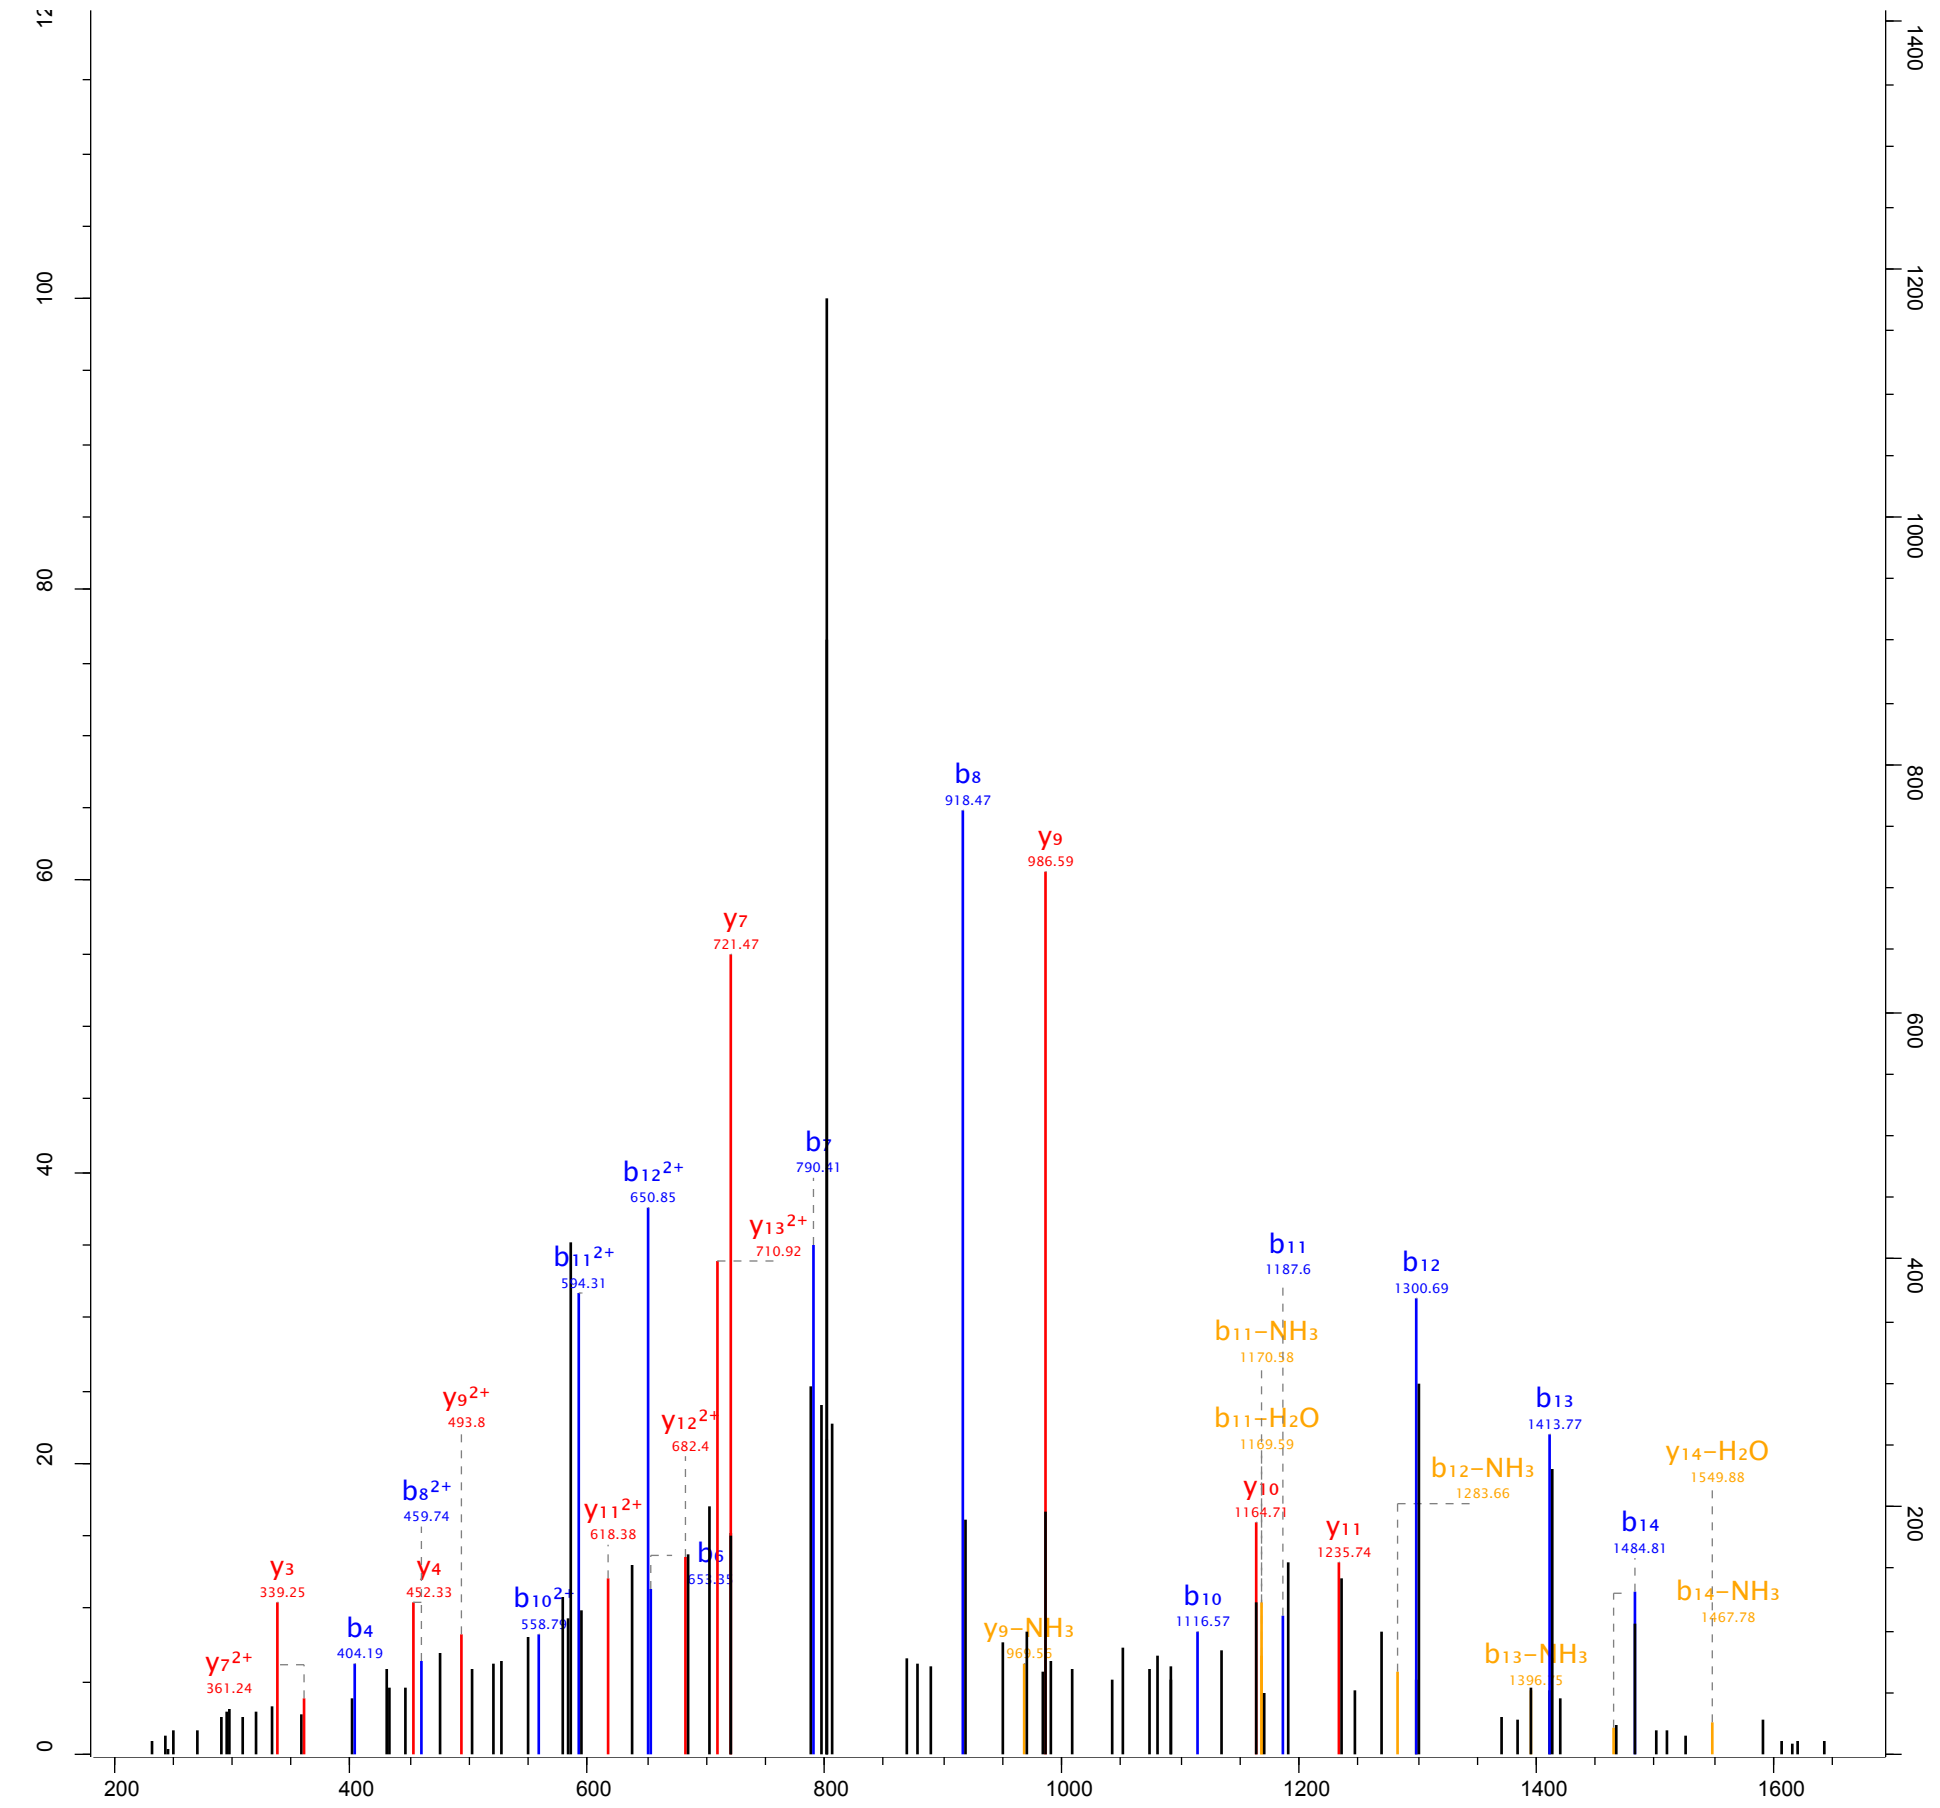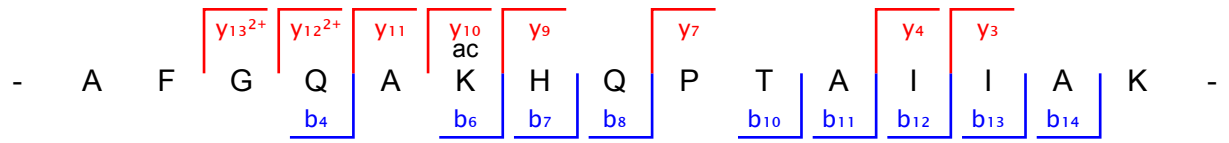

050713\_SCW\_II\_29\_28\_7

15649 ITMS; CID 141.65 708.98 Fh11

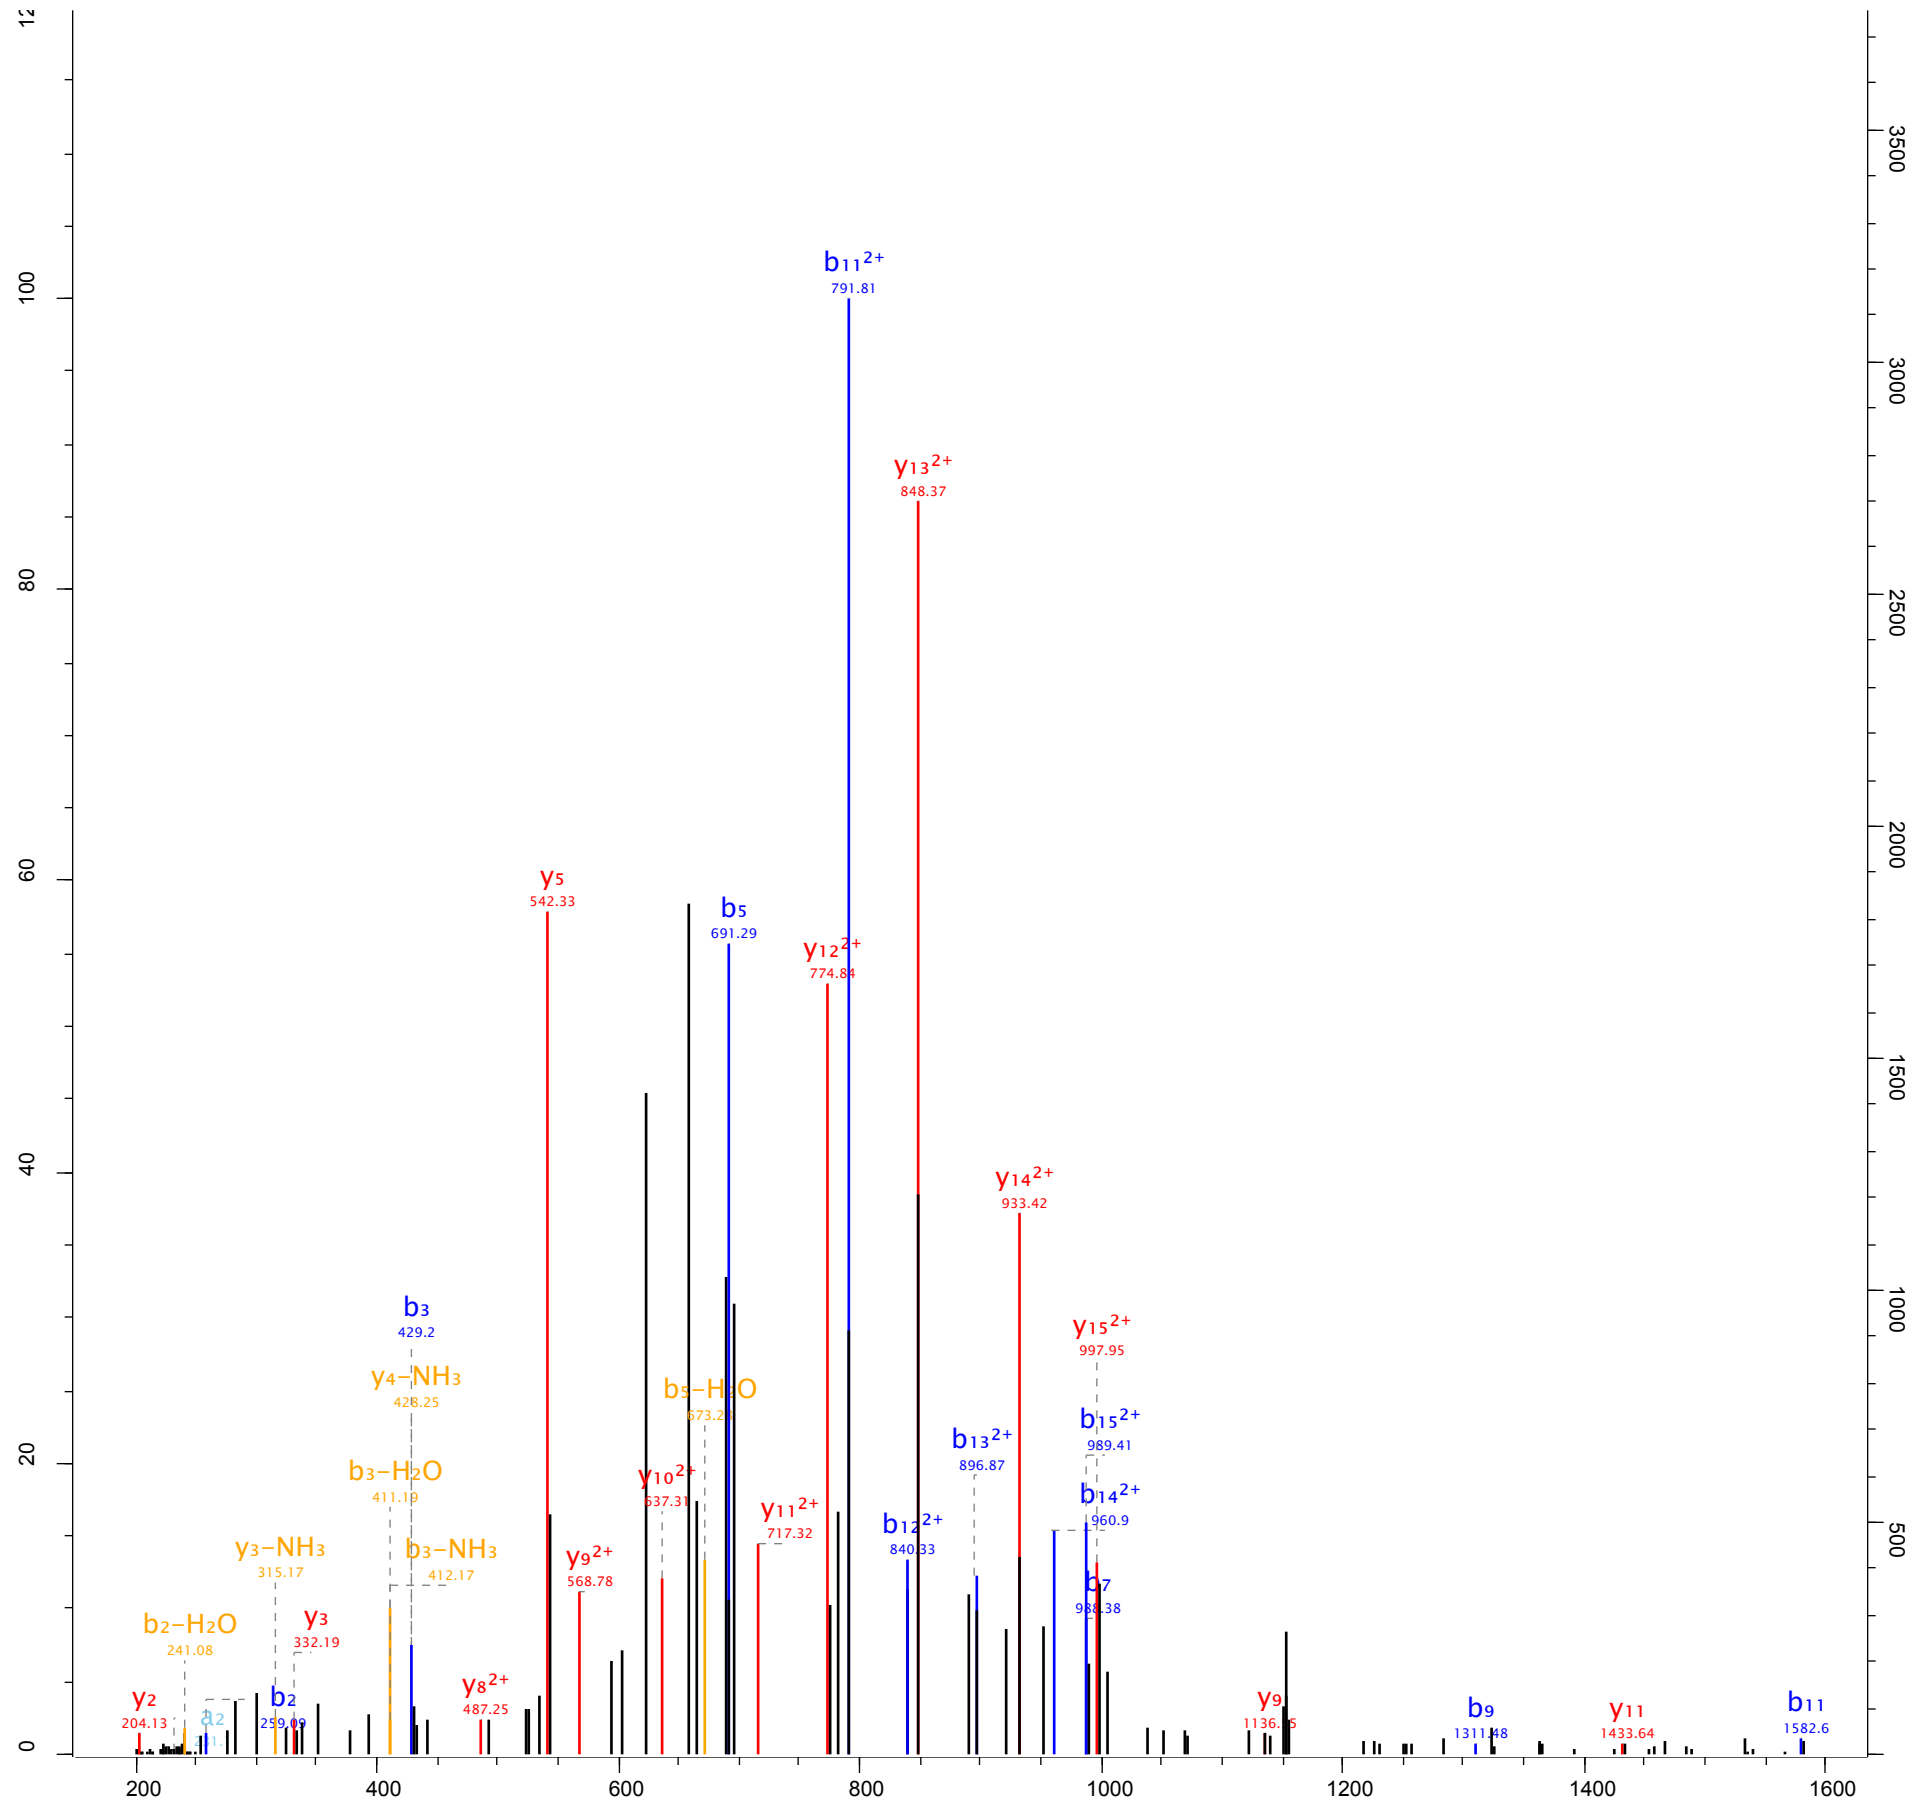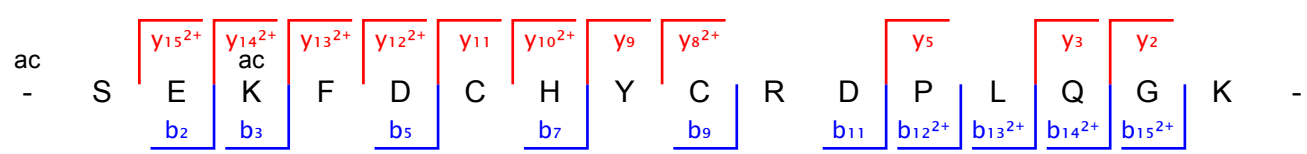

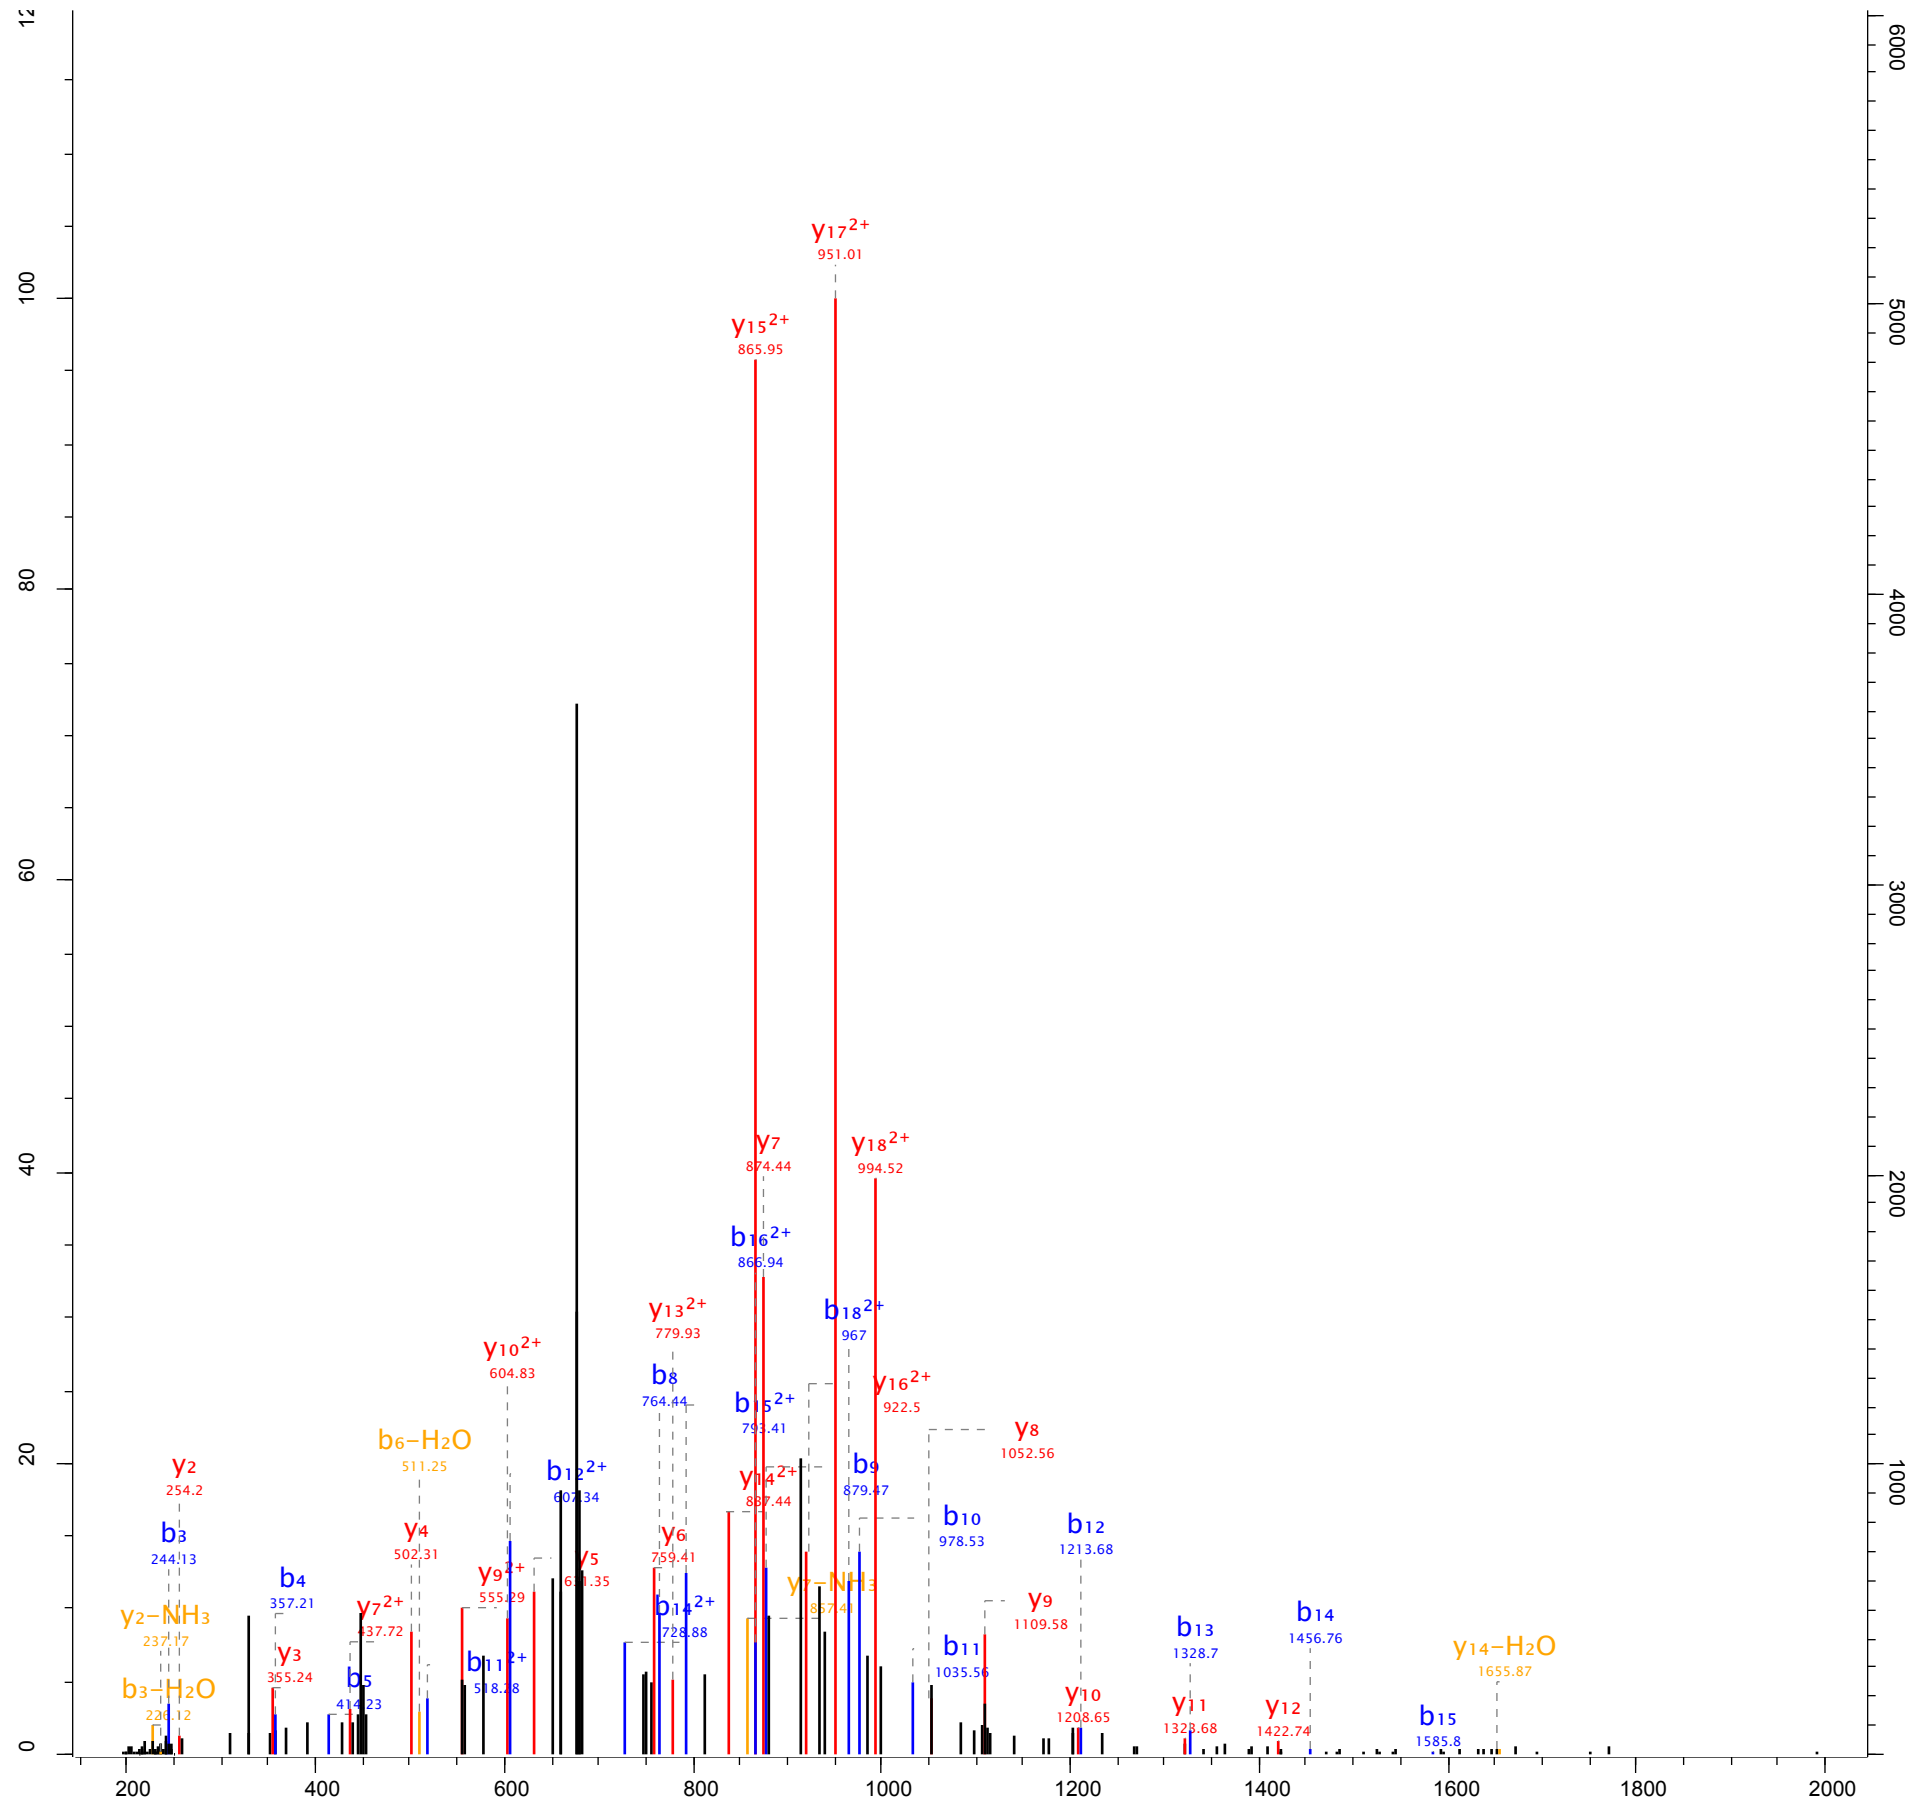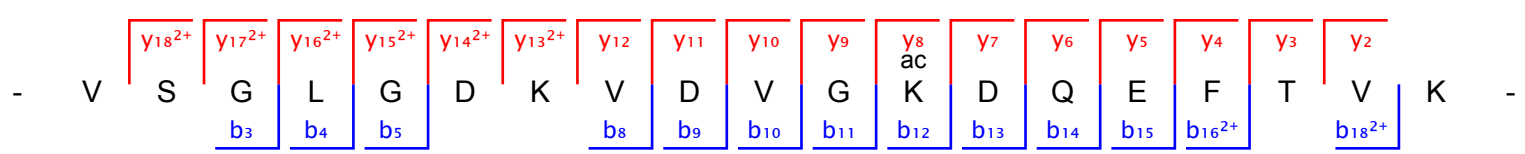

050713\_SCW\_II\_29\_28\_7

16880 ITMS; CID 153.06 735.38 Vrk1

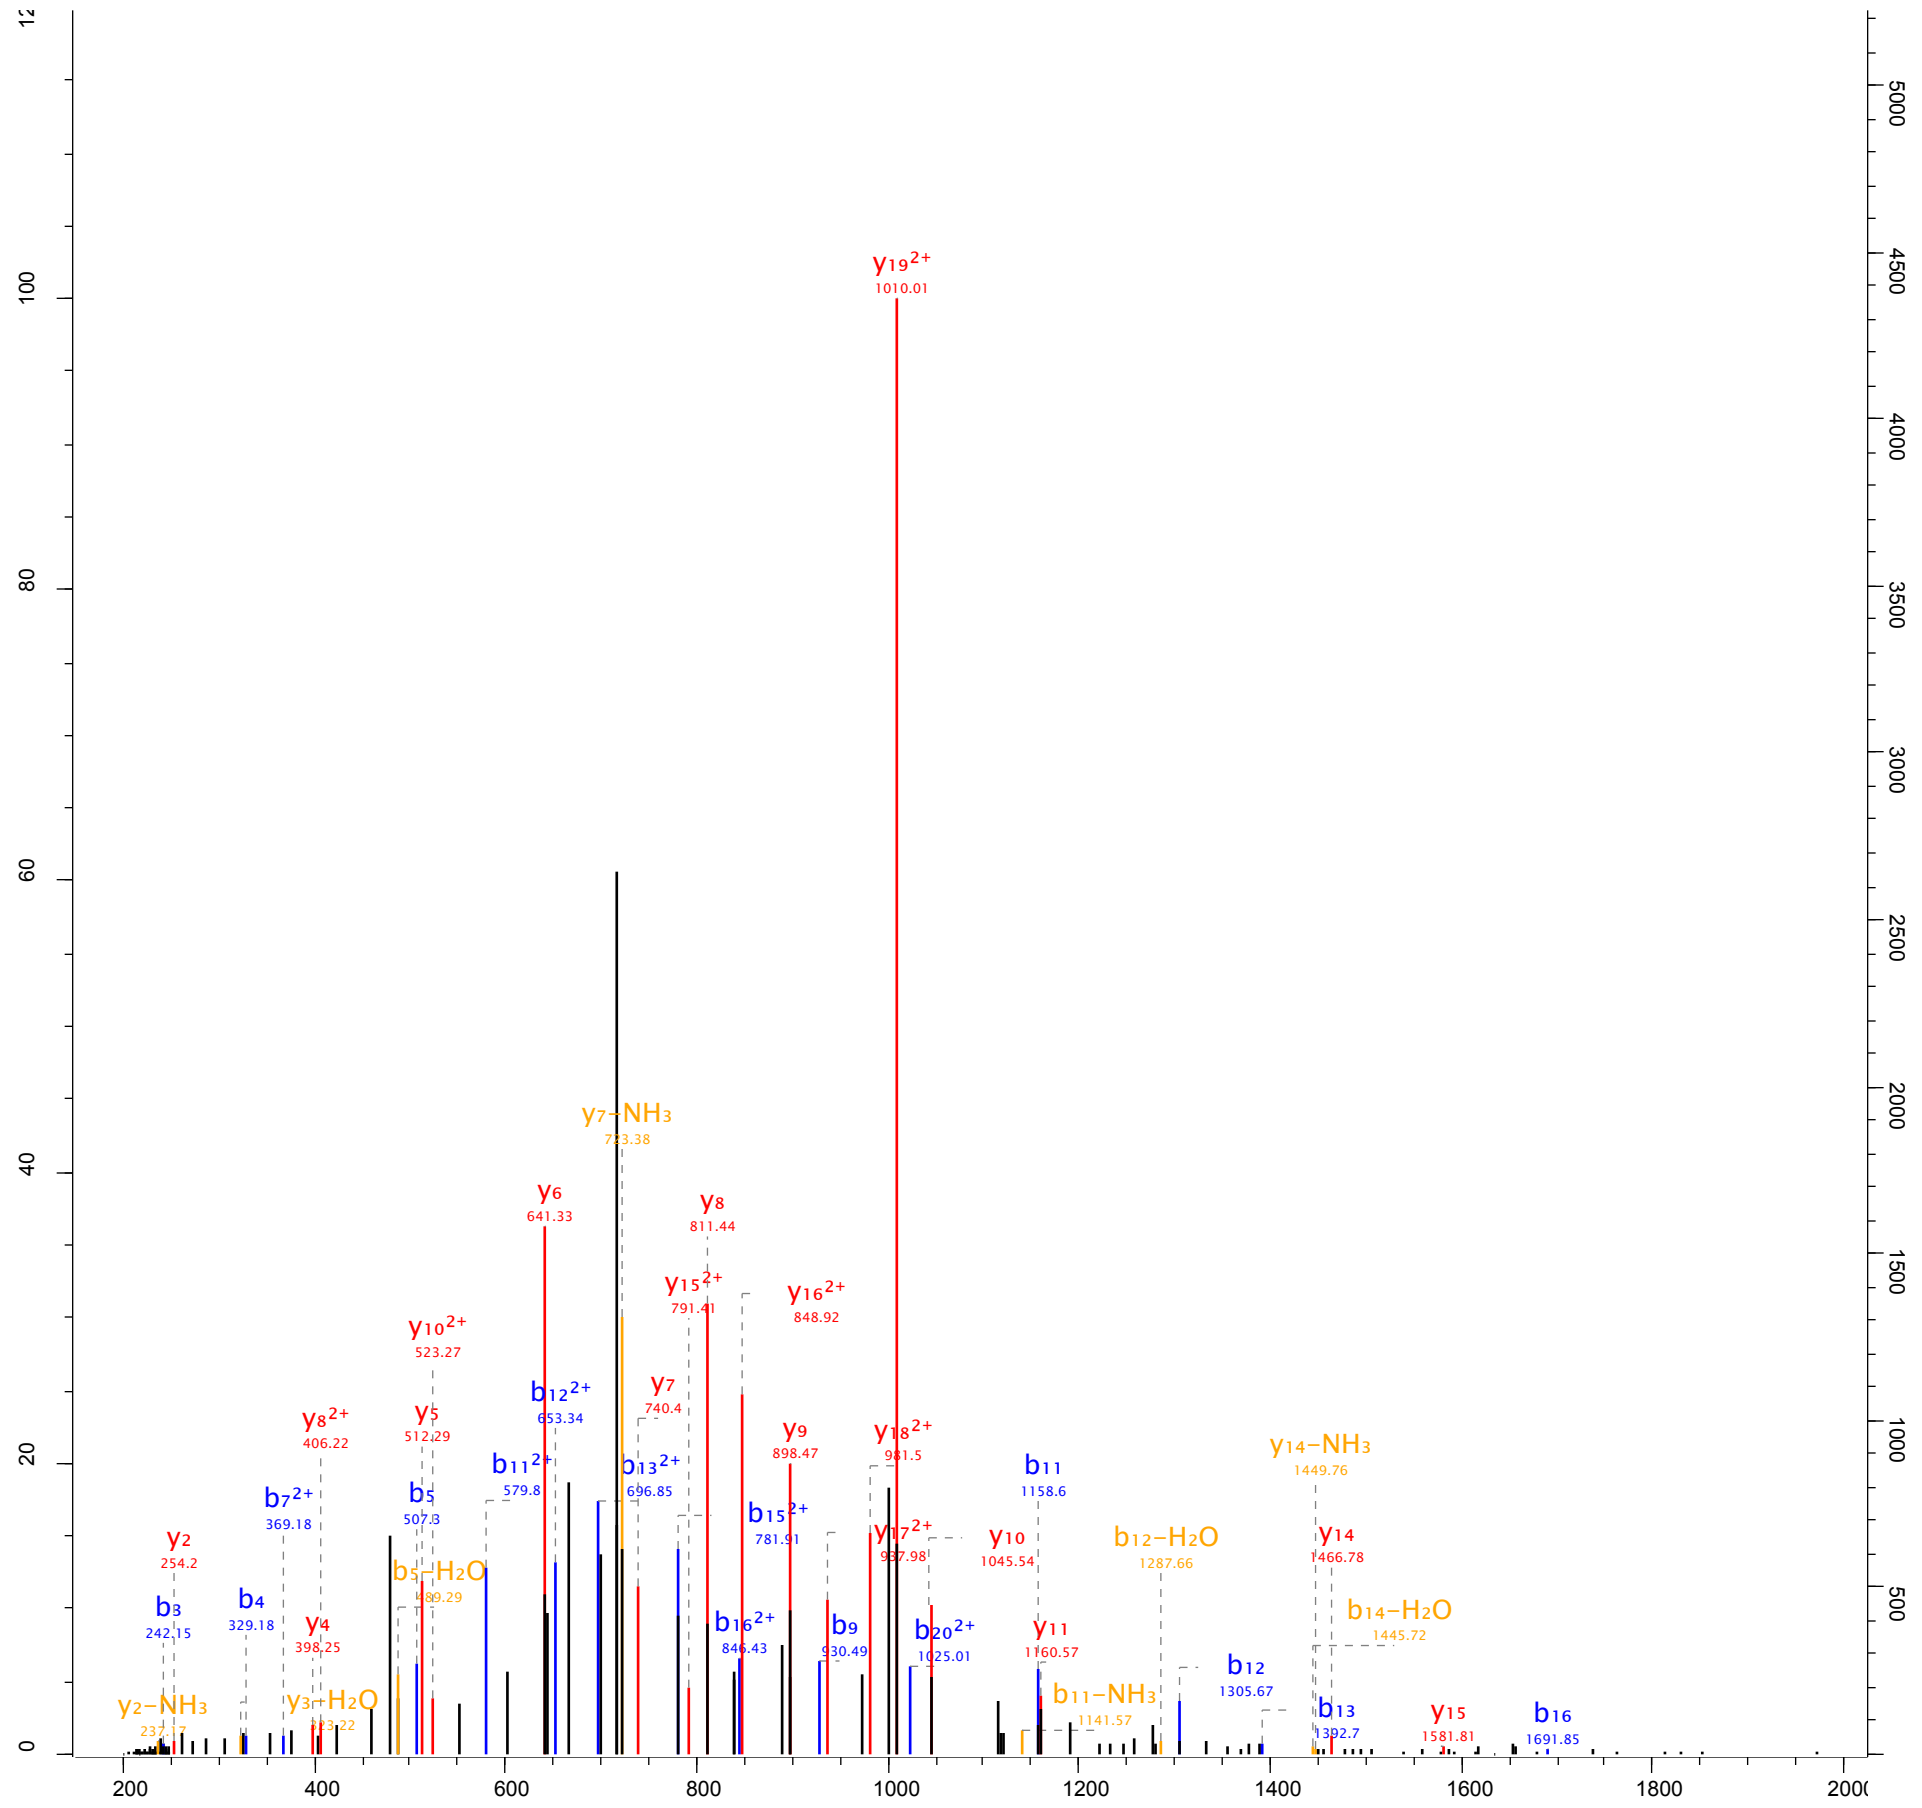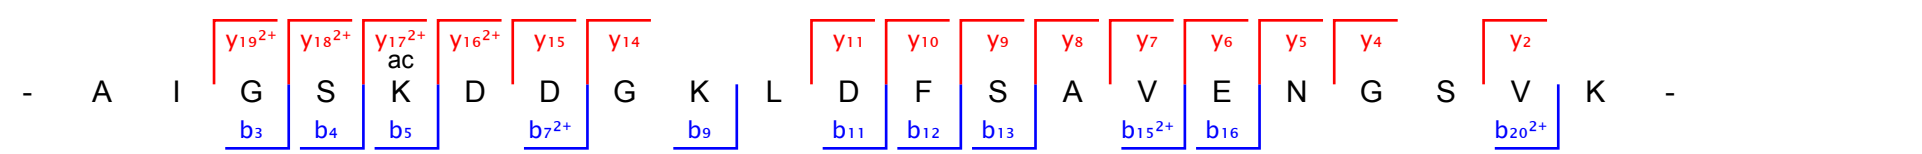

050713\_SCW\_II\_29\_28\_7

17194 ITMS; CID 139.81 729 Anxa6

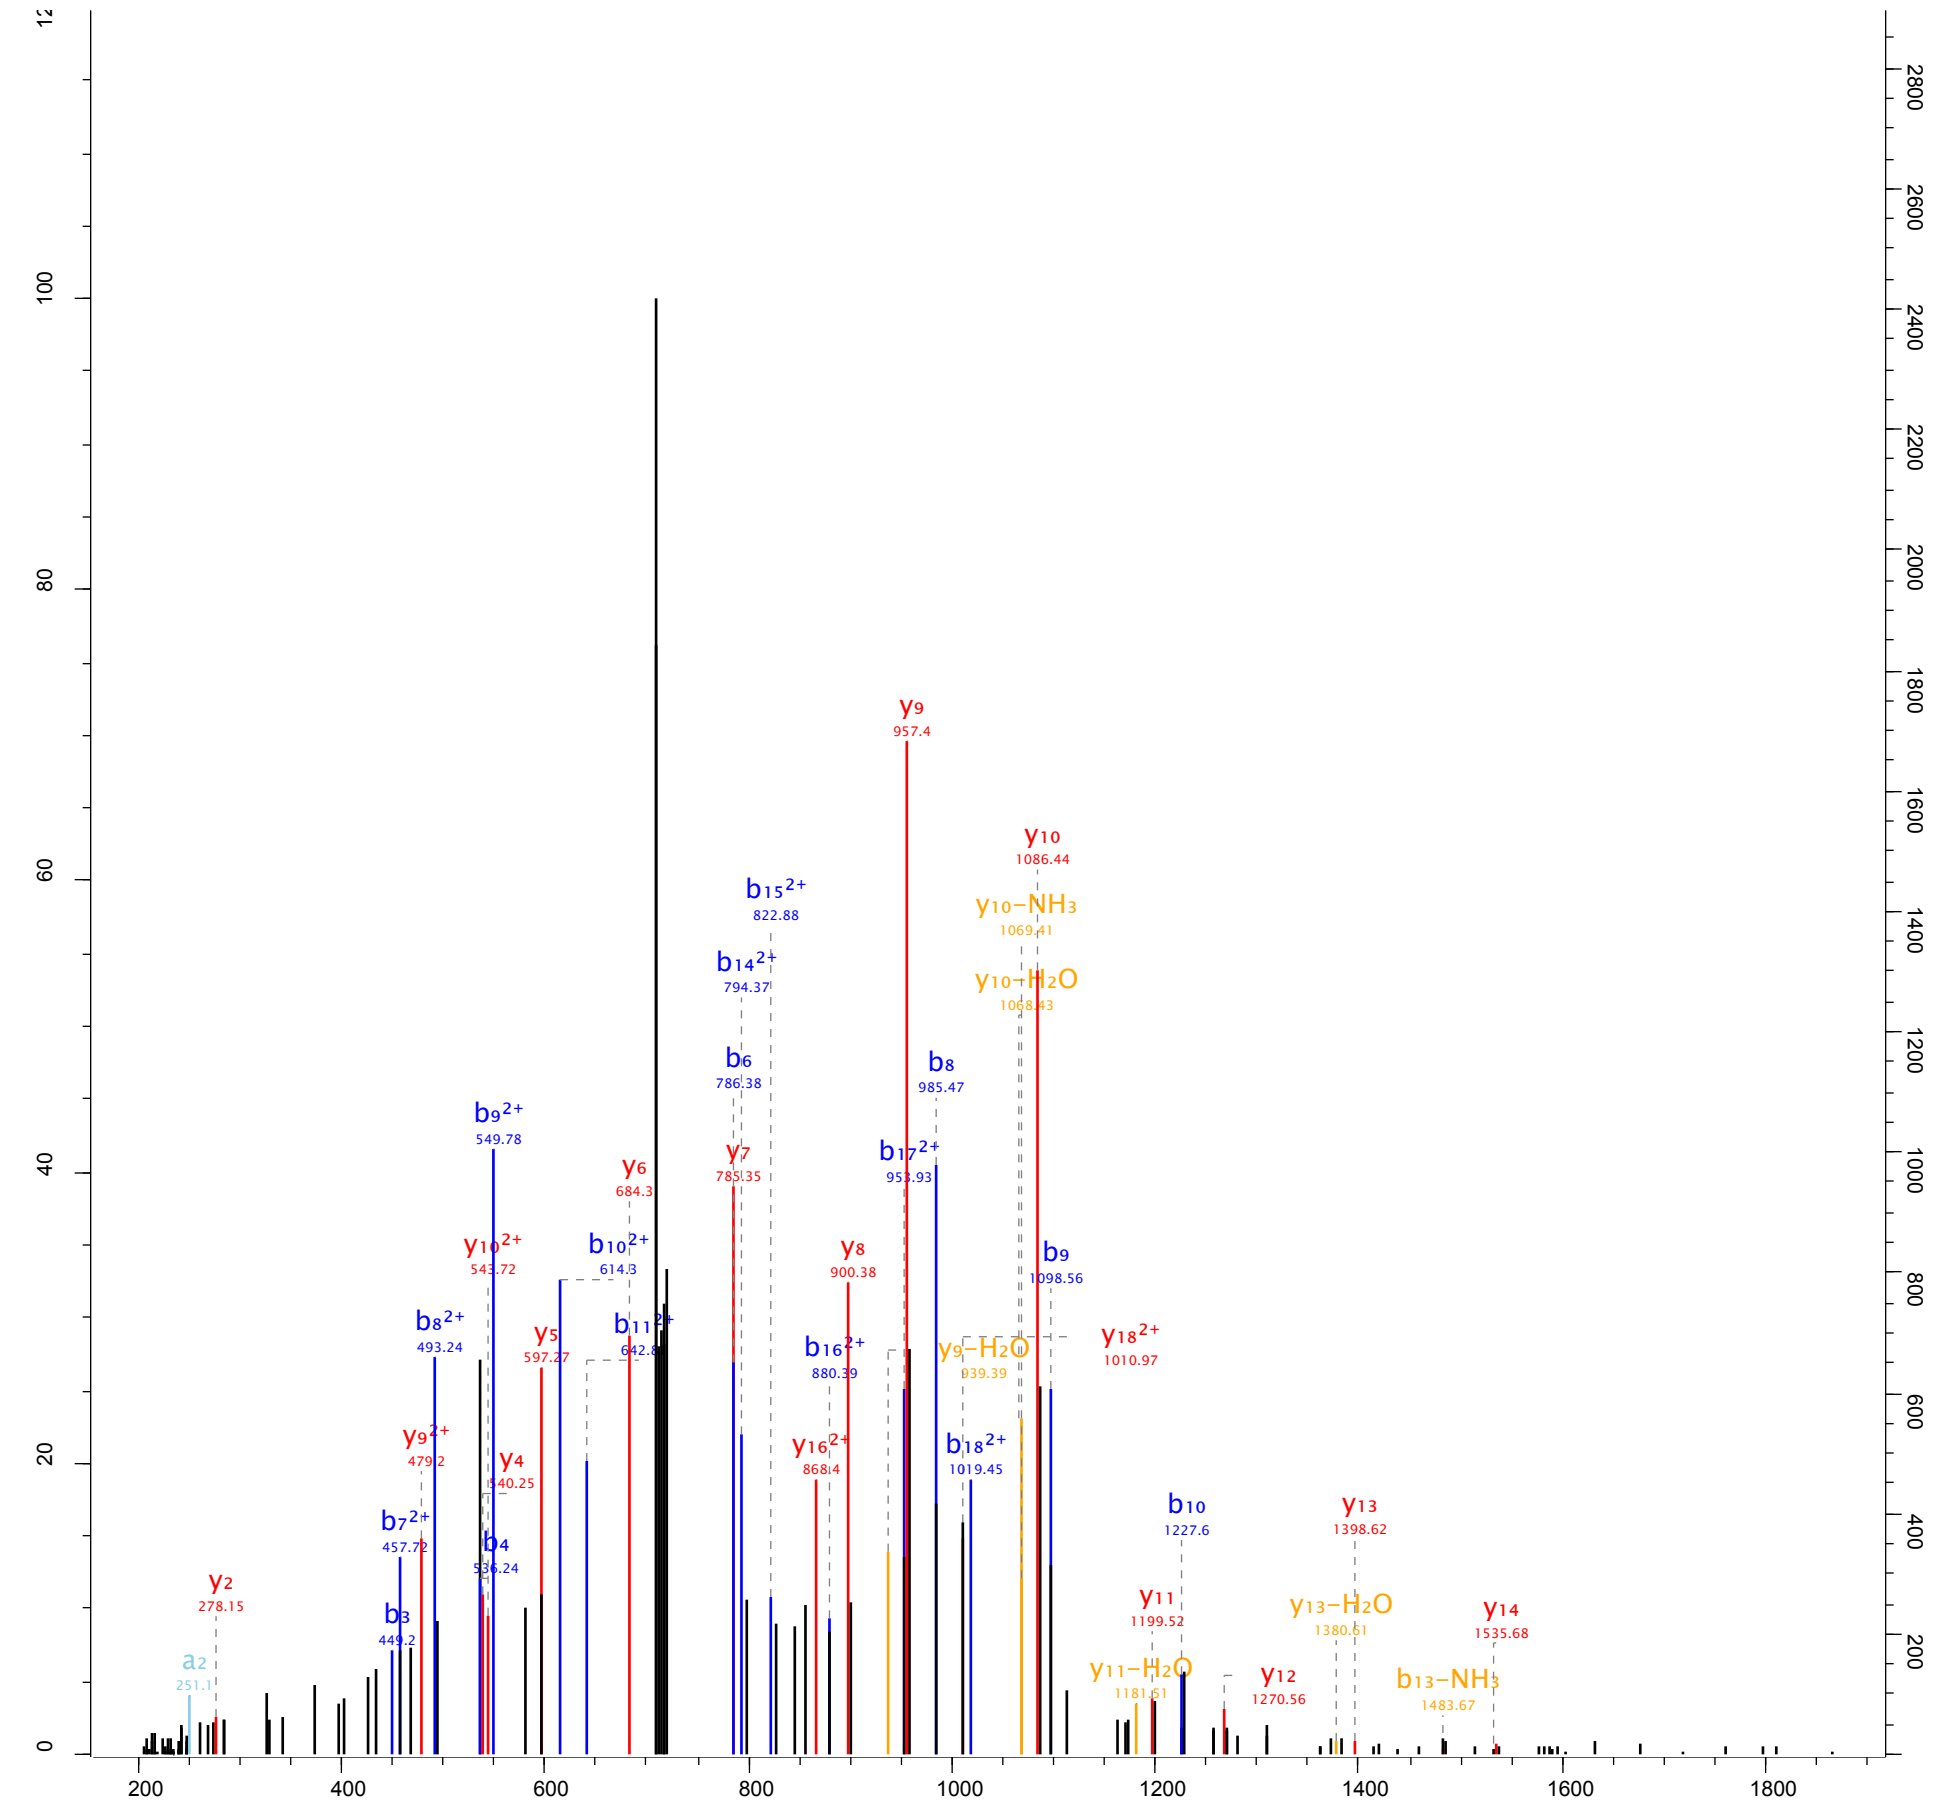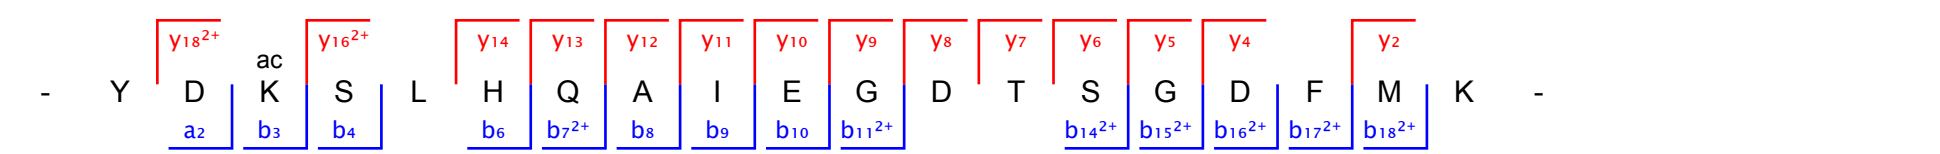



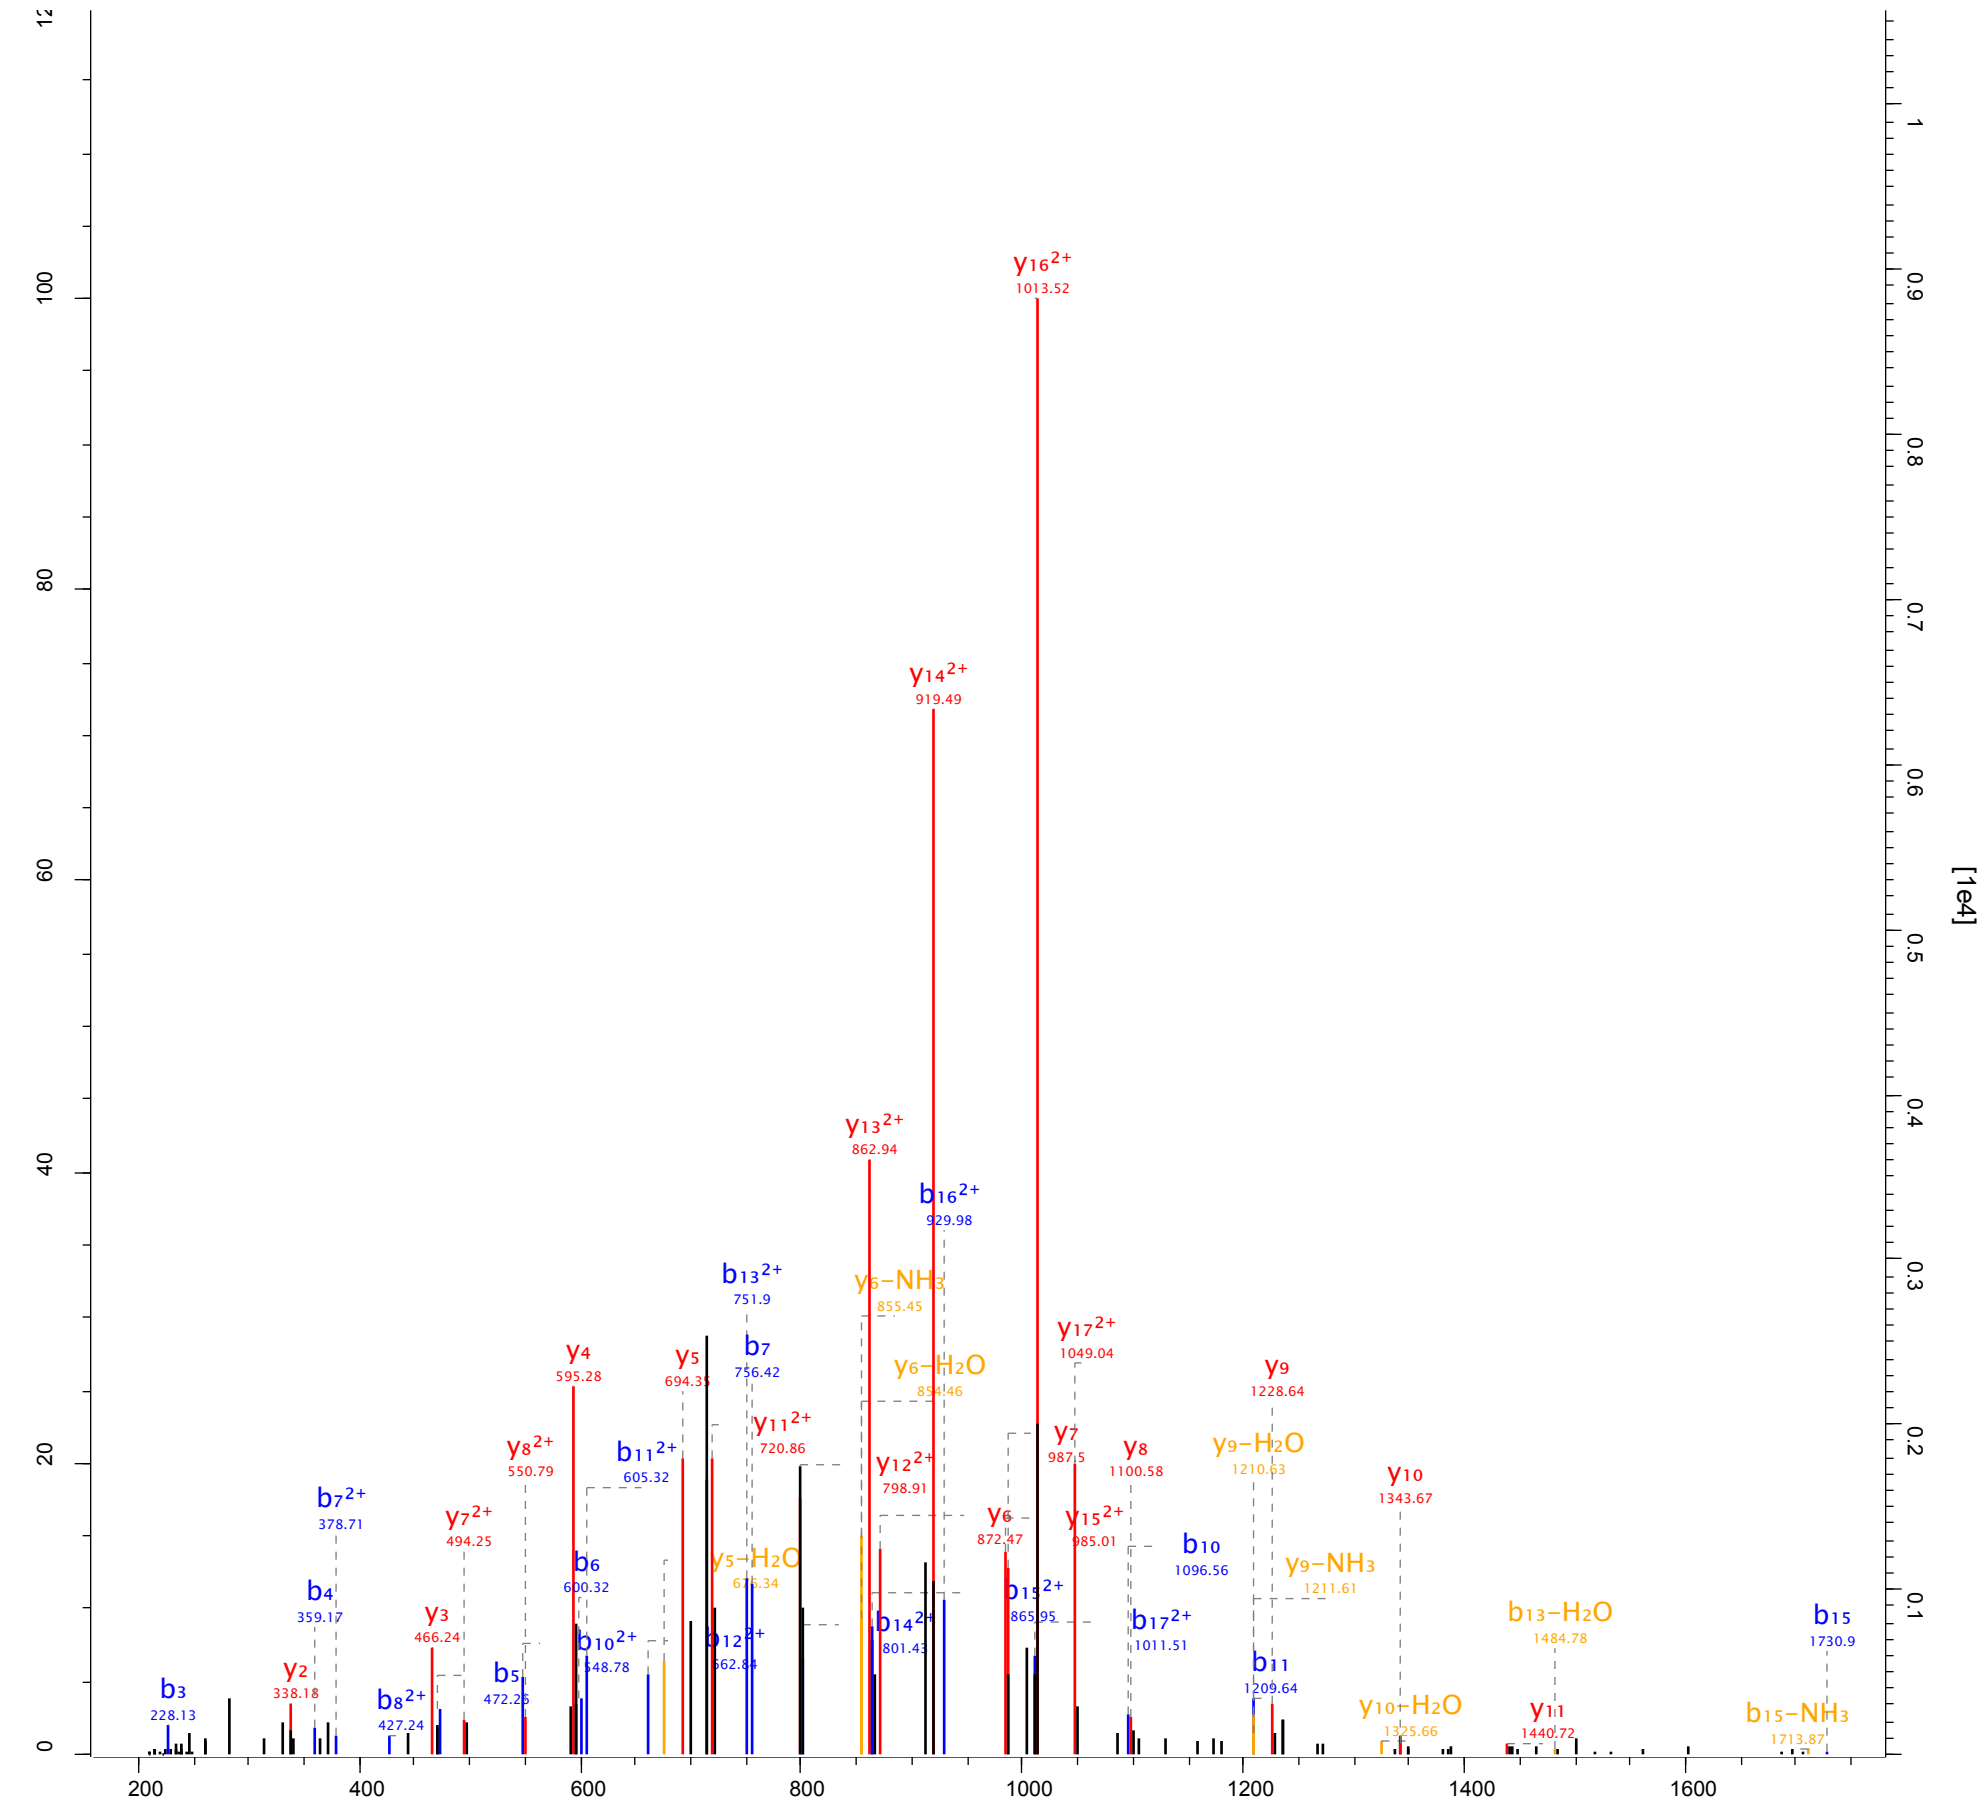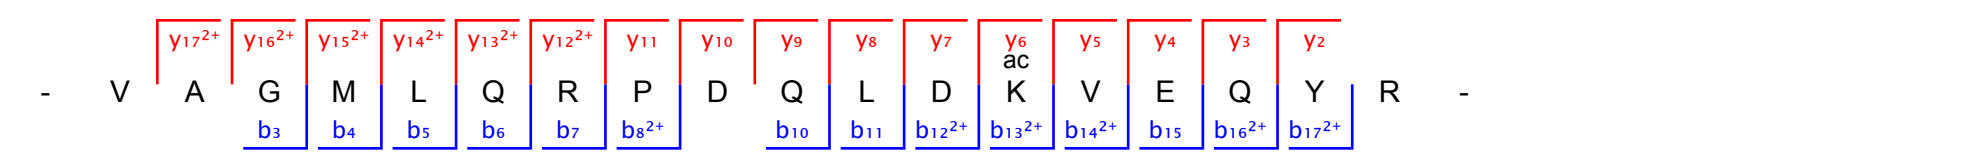

Raw file  
050713\_SCW\_II\_29\_28\_7

Scan Method Score m/z Gene names  
18133 ITMS; CID 143.76 561.65 Ctnna1

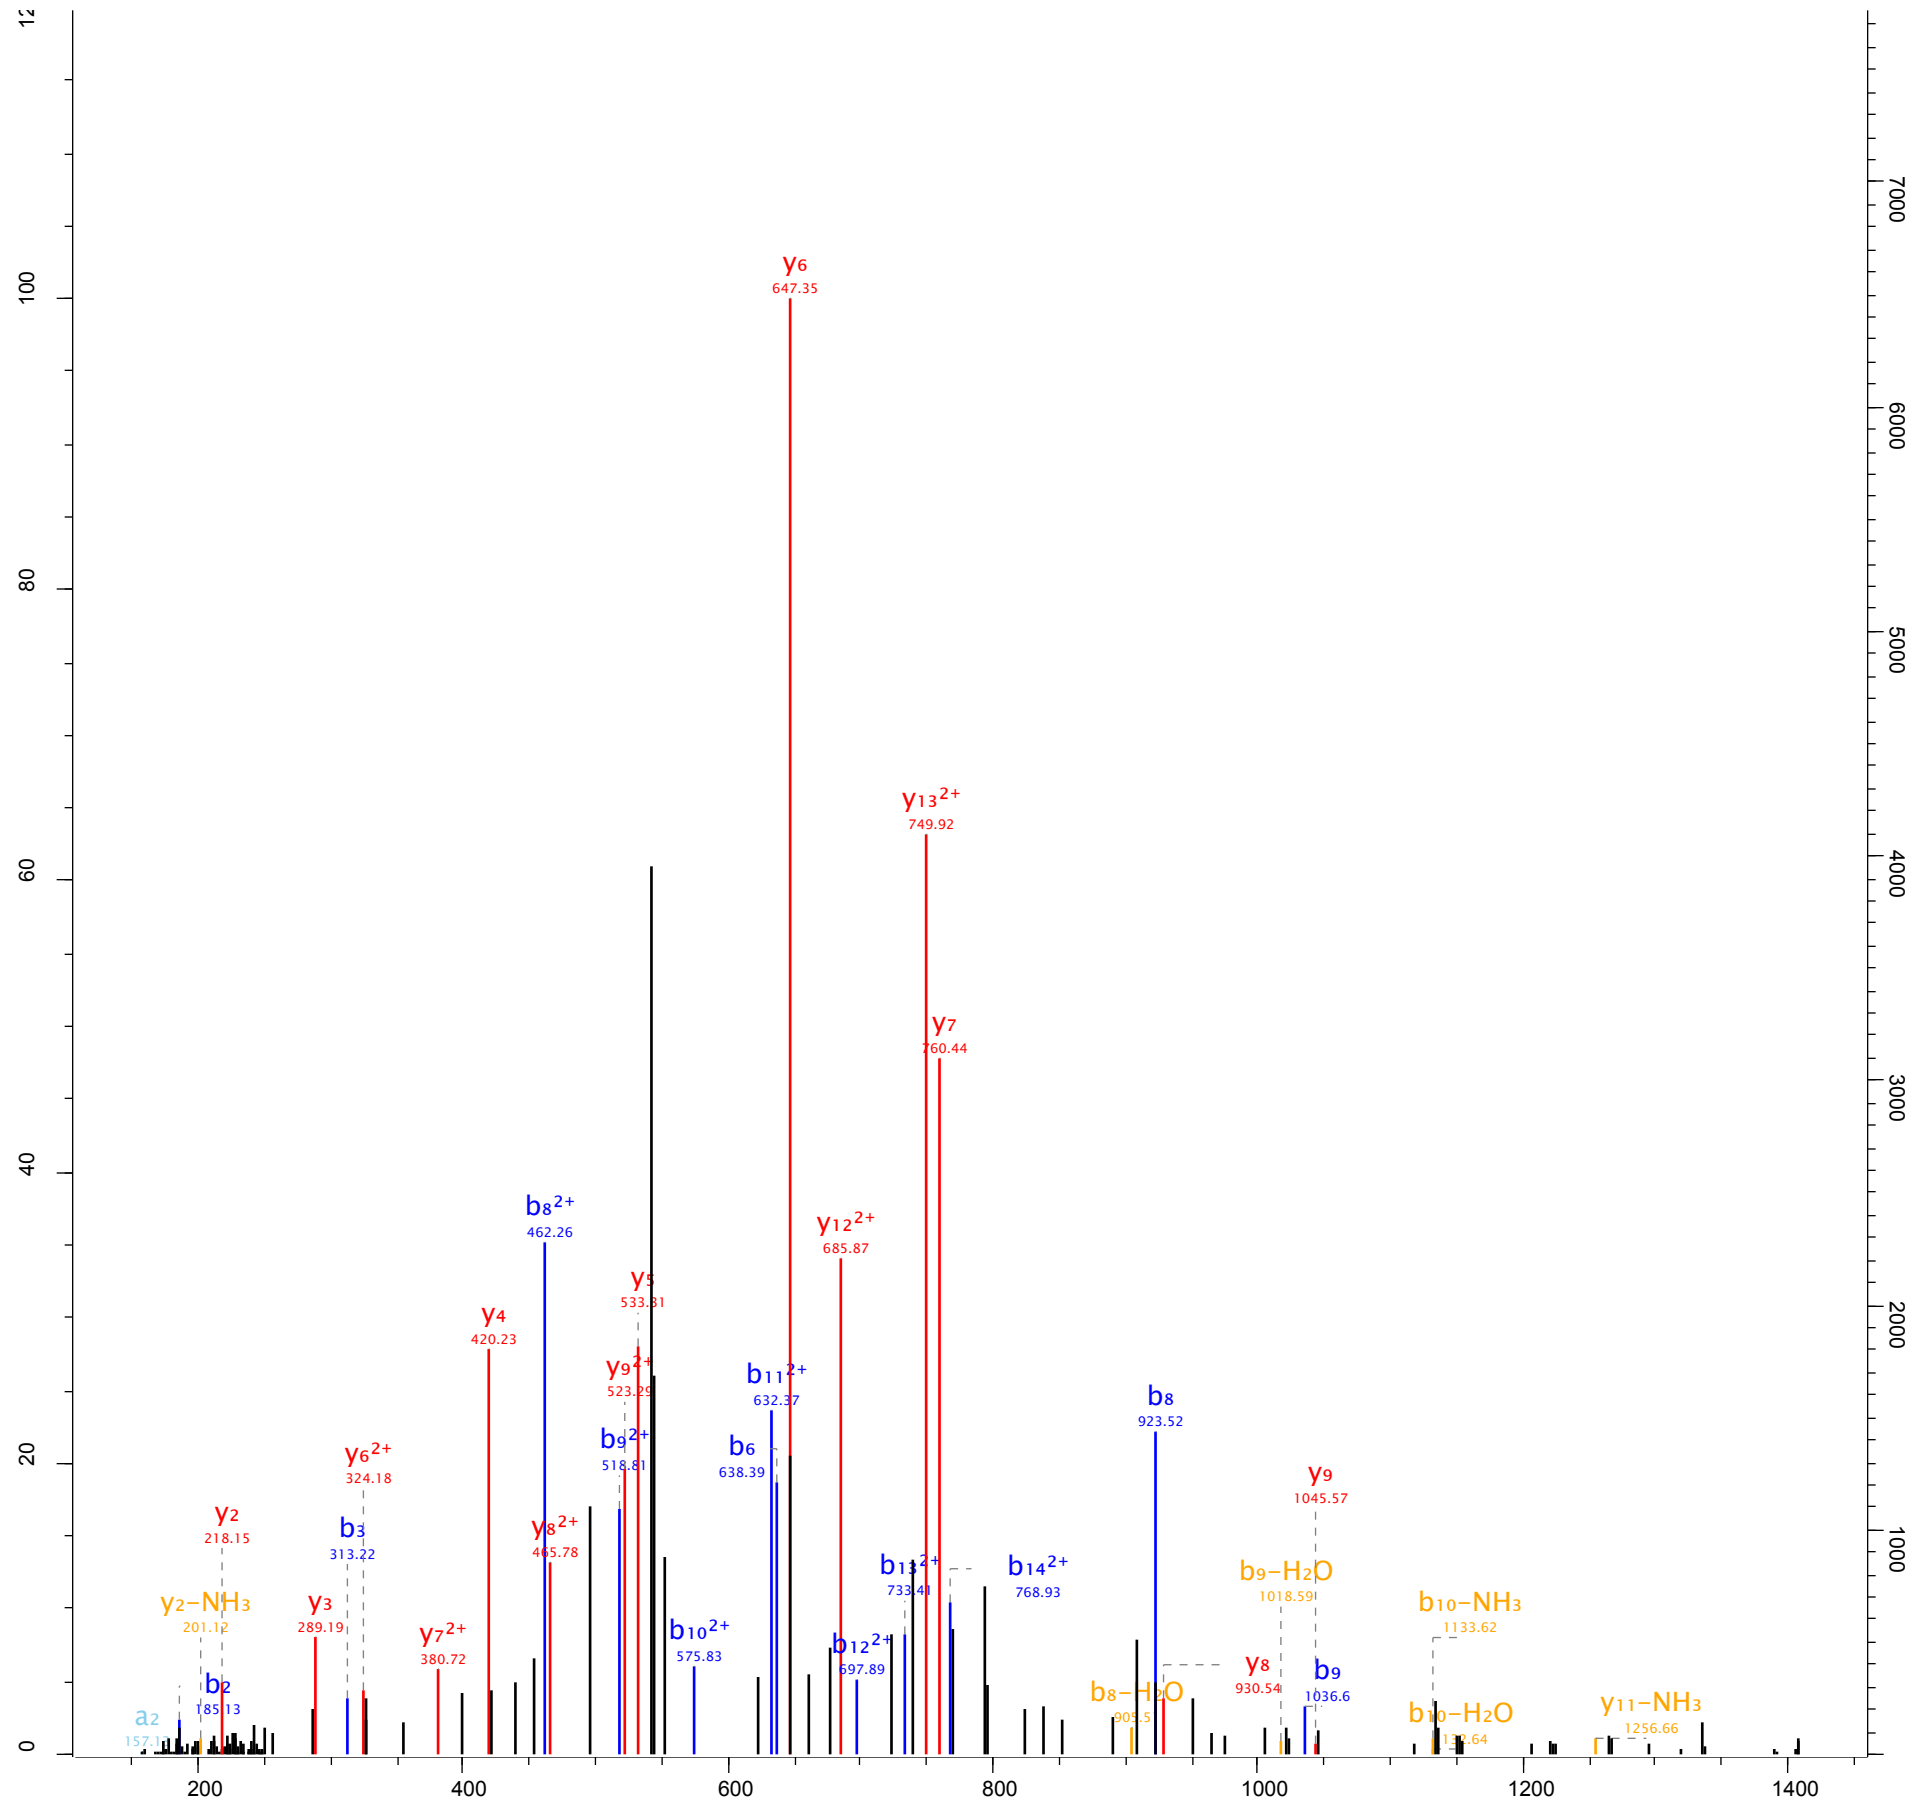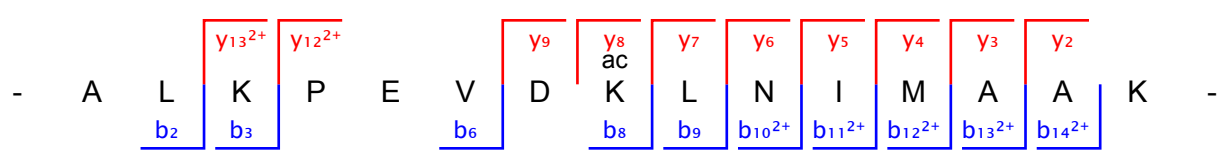

050713\_SCW\_II\_29\_28\_7

19022 ITMS; CID 109.14 677.05 Pdpr

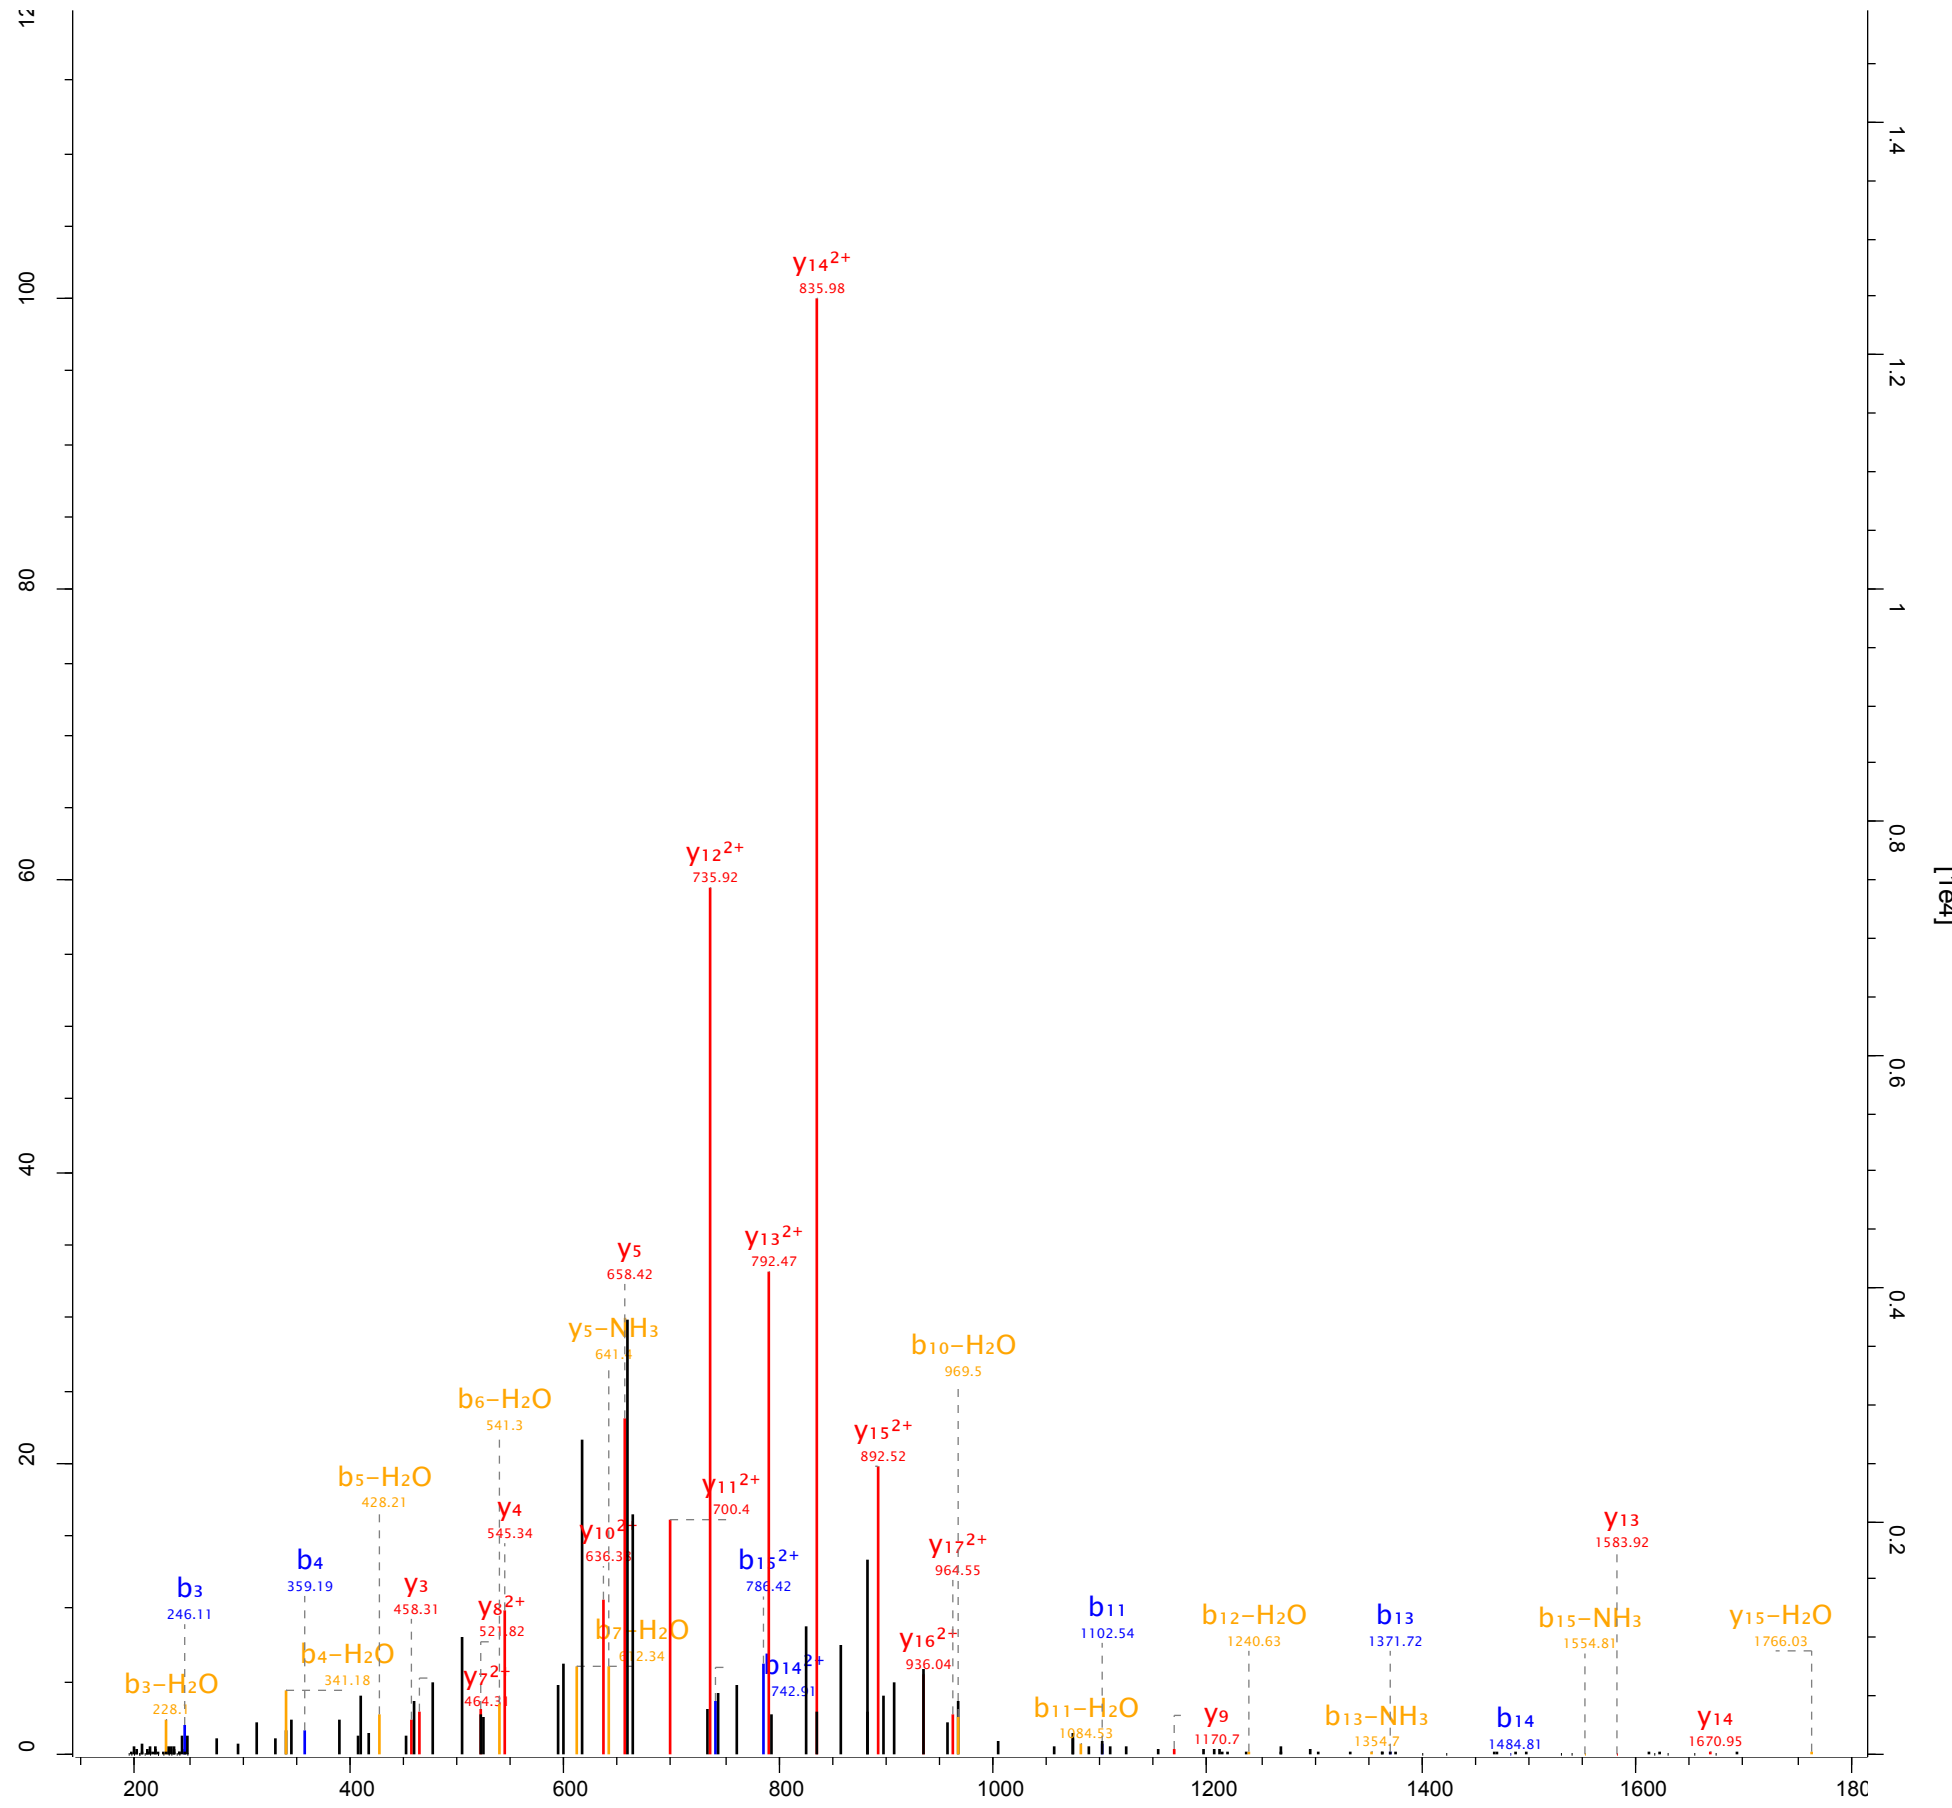

- T G S I S L A Q T Q D R L I S L ac K R -

y17<sup>2+</sup>
y16<sup>2+</sup>
y15<sup>2+</sup>
y14
y13
y12<sup>2+</sup>
y11<sup>2+</sup>
y10<sup>2+</sup>
y9
y8<sup>2+</sup>
y7<sup>2+</sup>
y5
y4
y3

b3
b4
b11
b13
b14
b15<sup>2+</sup>

Raw file: 050713\_SCW\_II\_29\_28\_7  
 Scan: 20832  
 Method: ITMS; CID  
 Score: 128.94  
 m/z: 732.07  
 Gene names: Gstp1;Gstp2

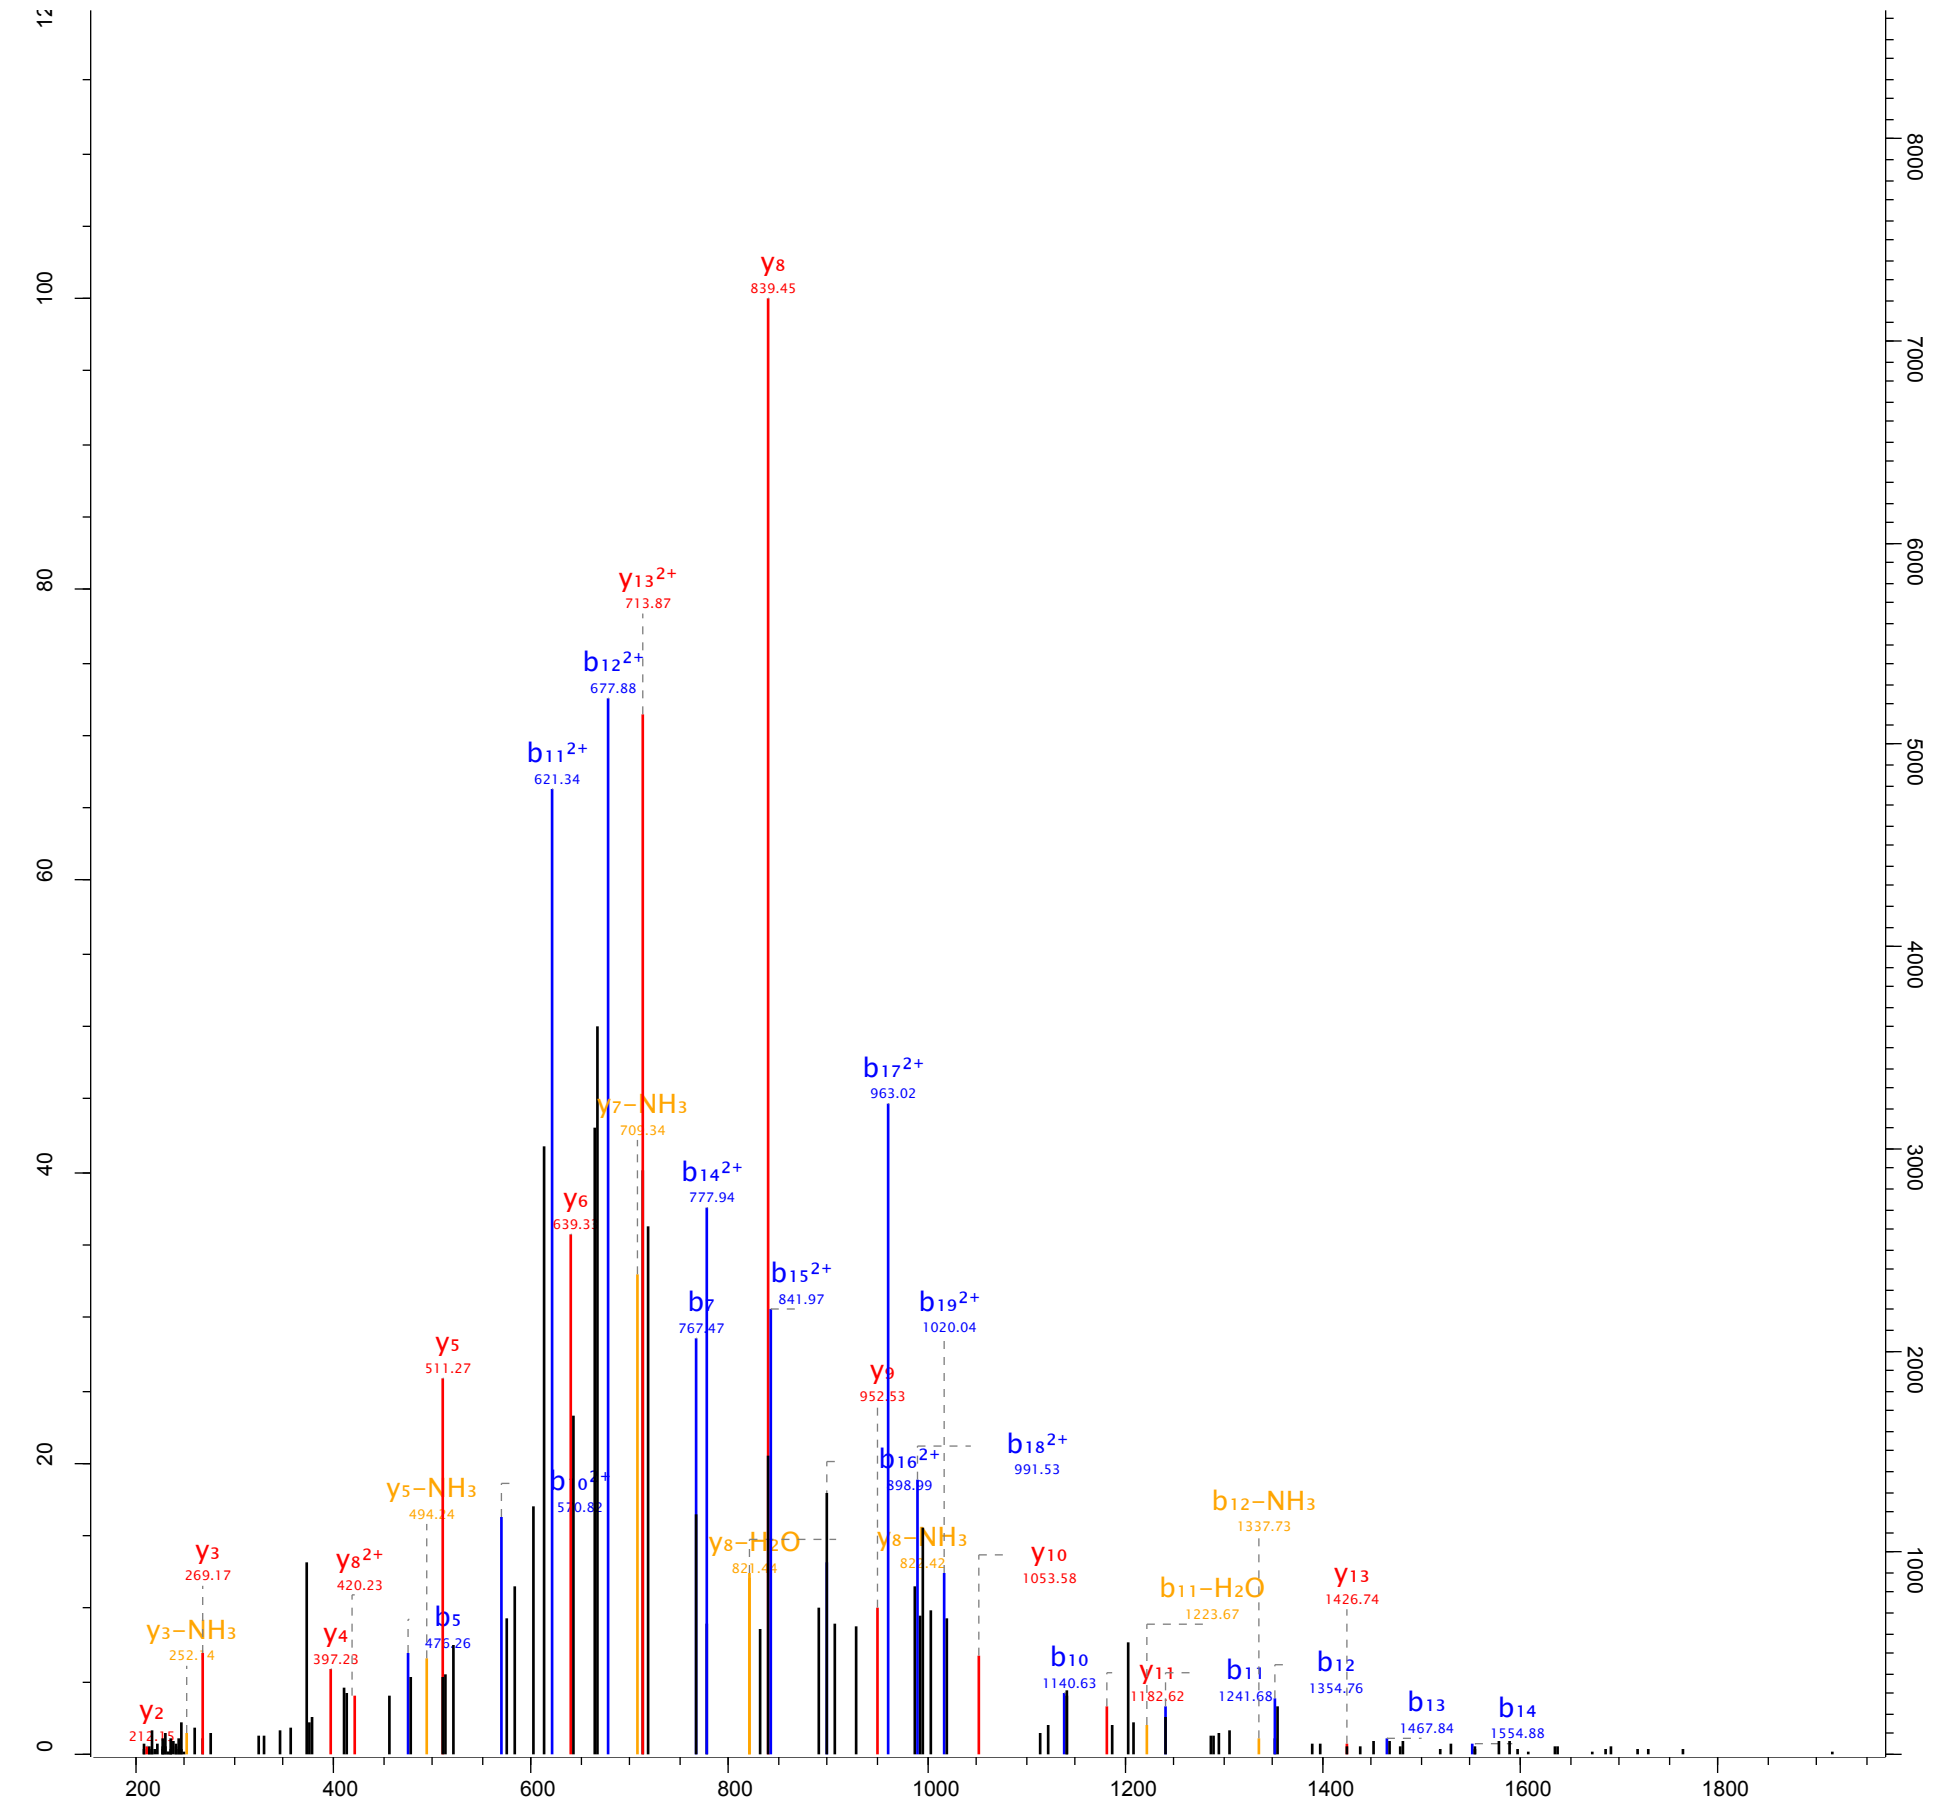

- A L P G H L ac K P F E T L L S Q N Q G G K -

b5 b7 b10 b11 b12 b13 b14 b15<sup>2+</sup> b16<sup>2+</sup> b17<sup>2+</sup> b18<sup>2+</sup> b19<sup>2+</sup>

y13 y11 y10 y9 y8 y6 y5 y4 y3 y2

Raw file  
050713\_SCW\_II\_29\_28\_7

Scan Method Score m/z Gene names  
21443 ITMS; CID 124.45 691.37 Hspa9

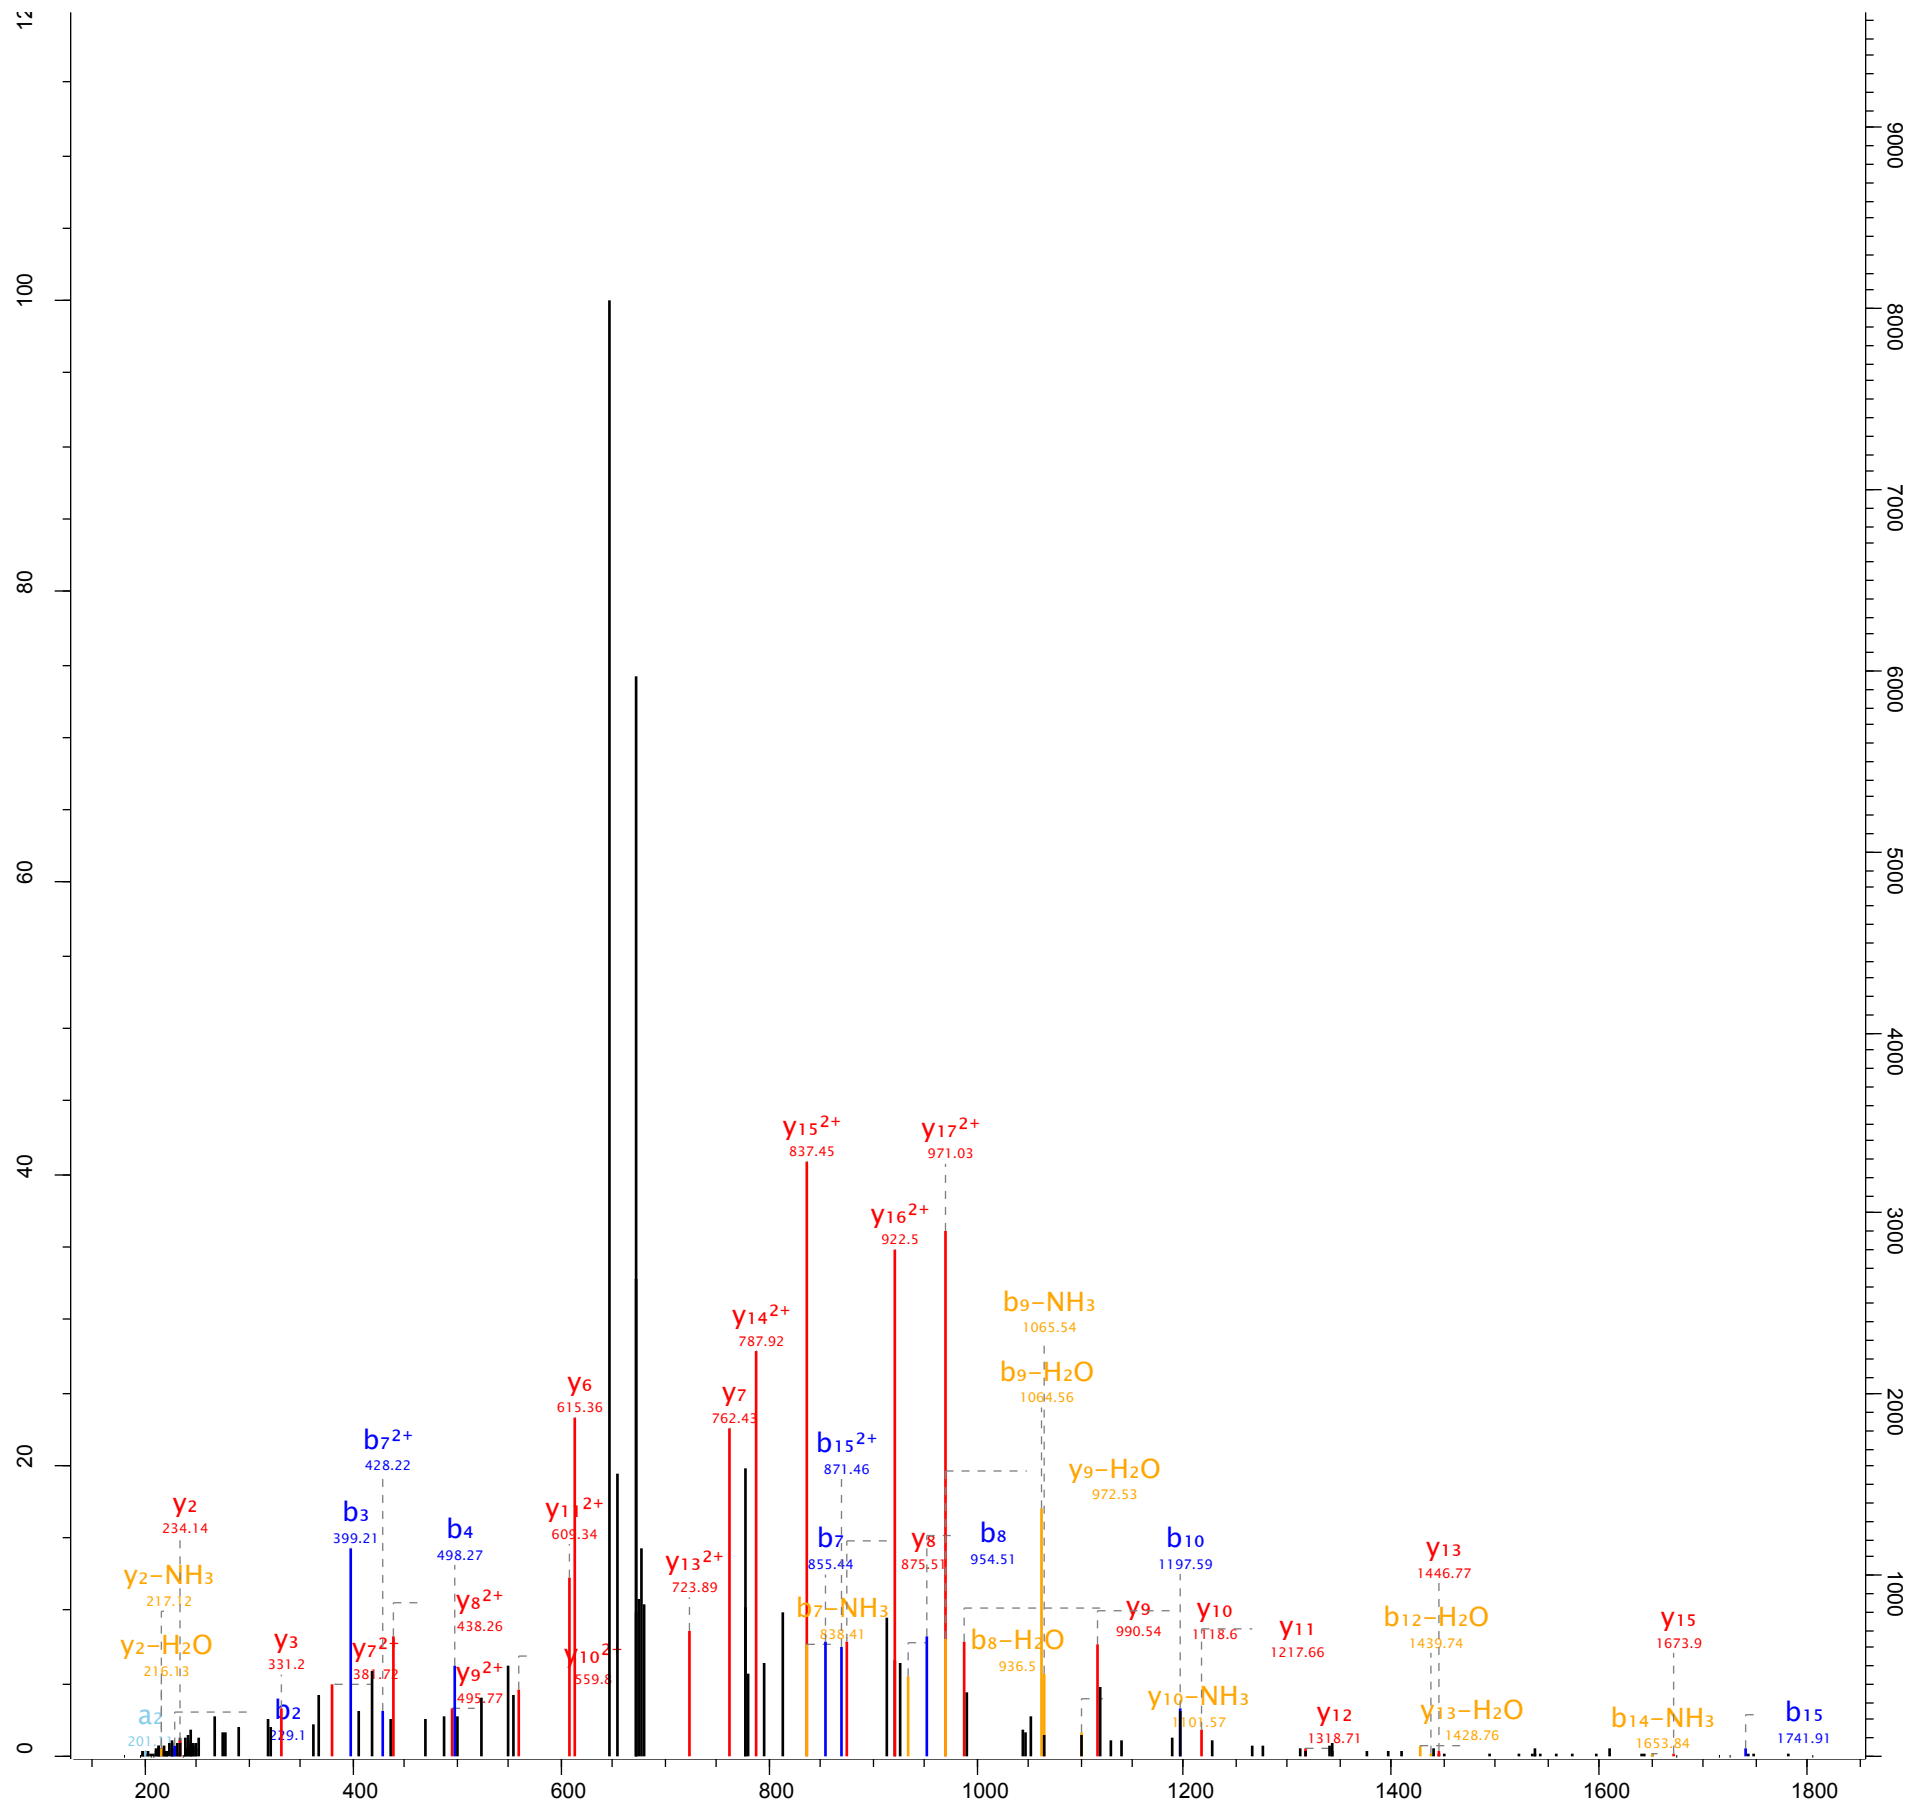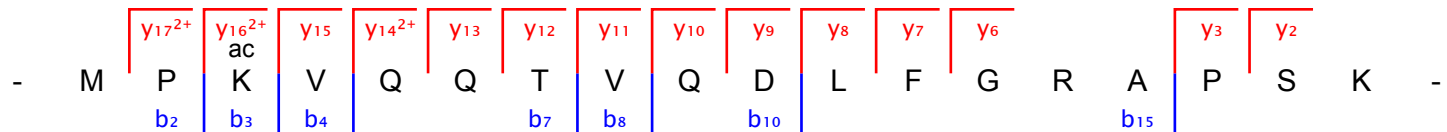

050713\_SCW\_II\_29\_28\_7

22126 ITMS; CID 195.28 758.4 Vim

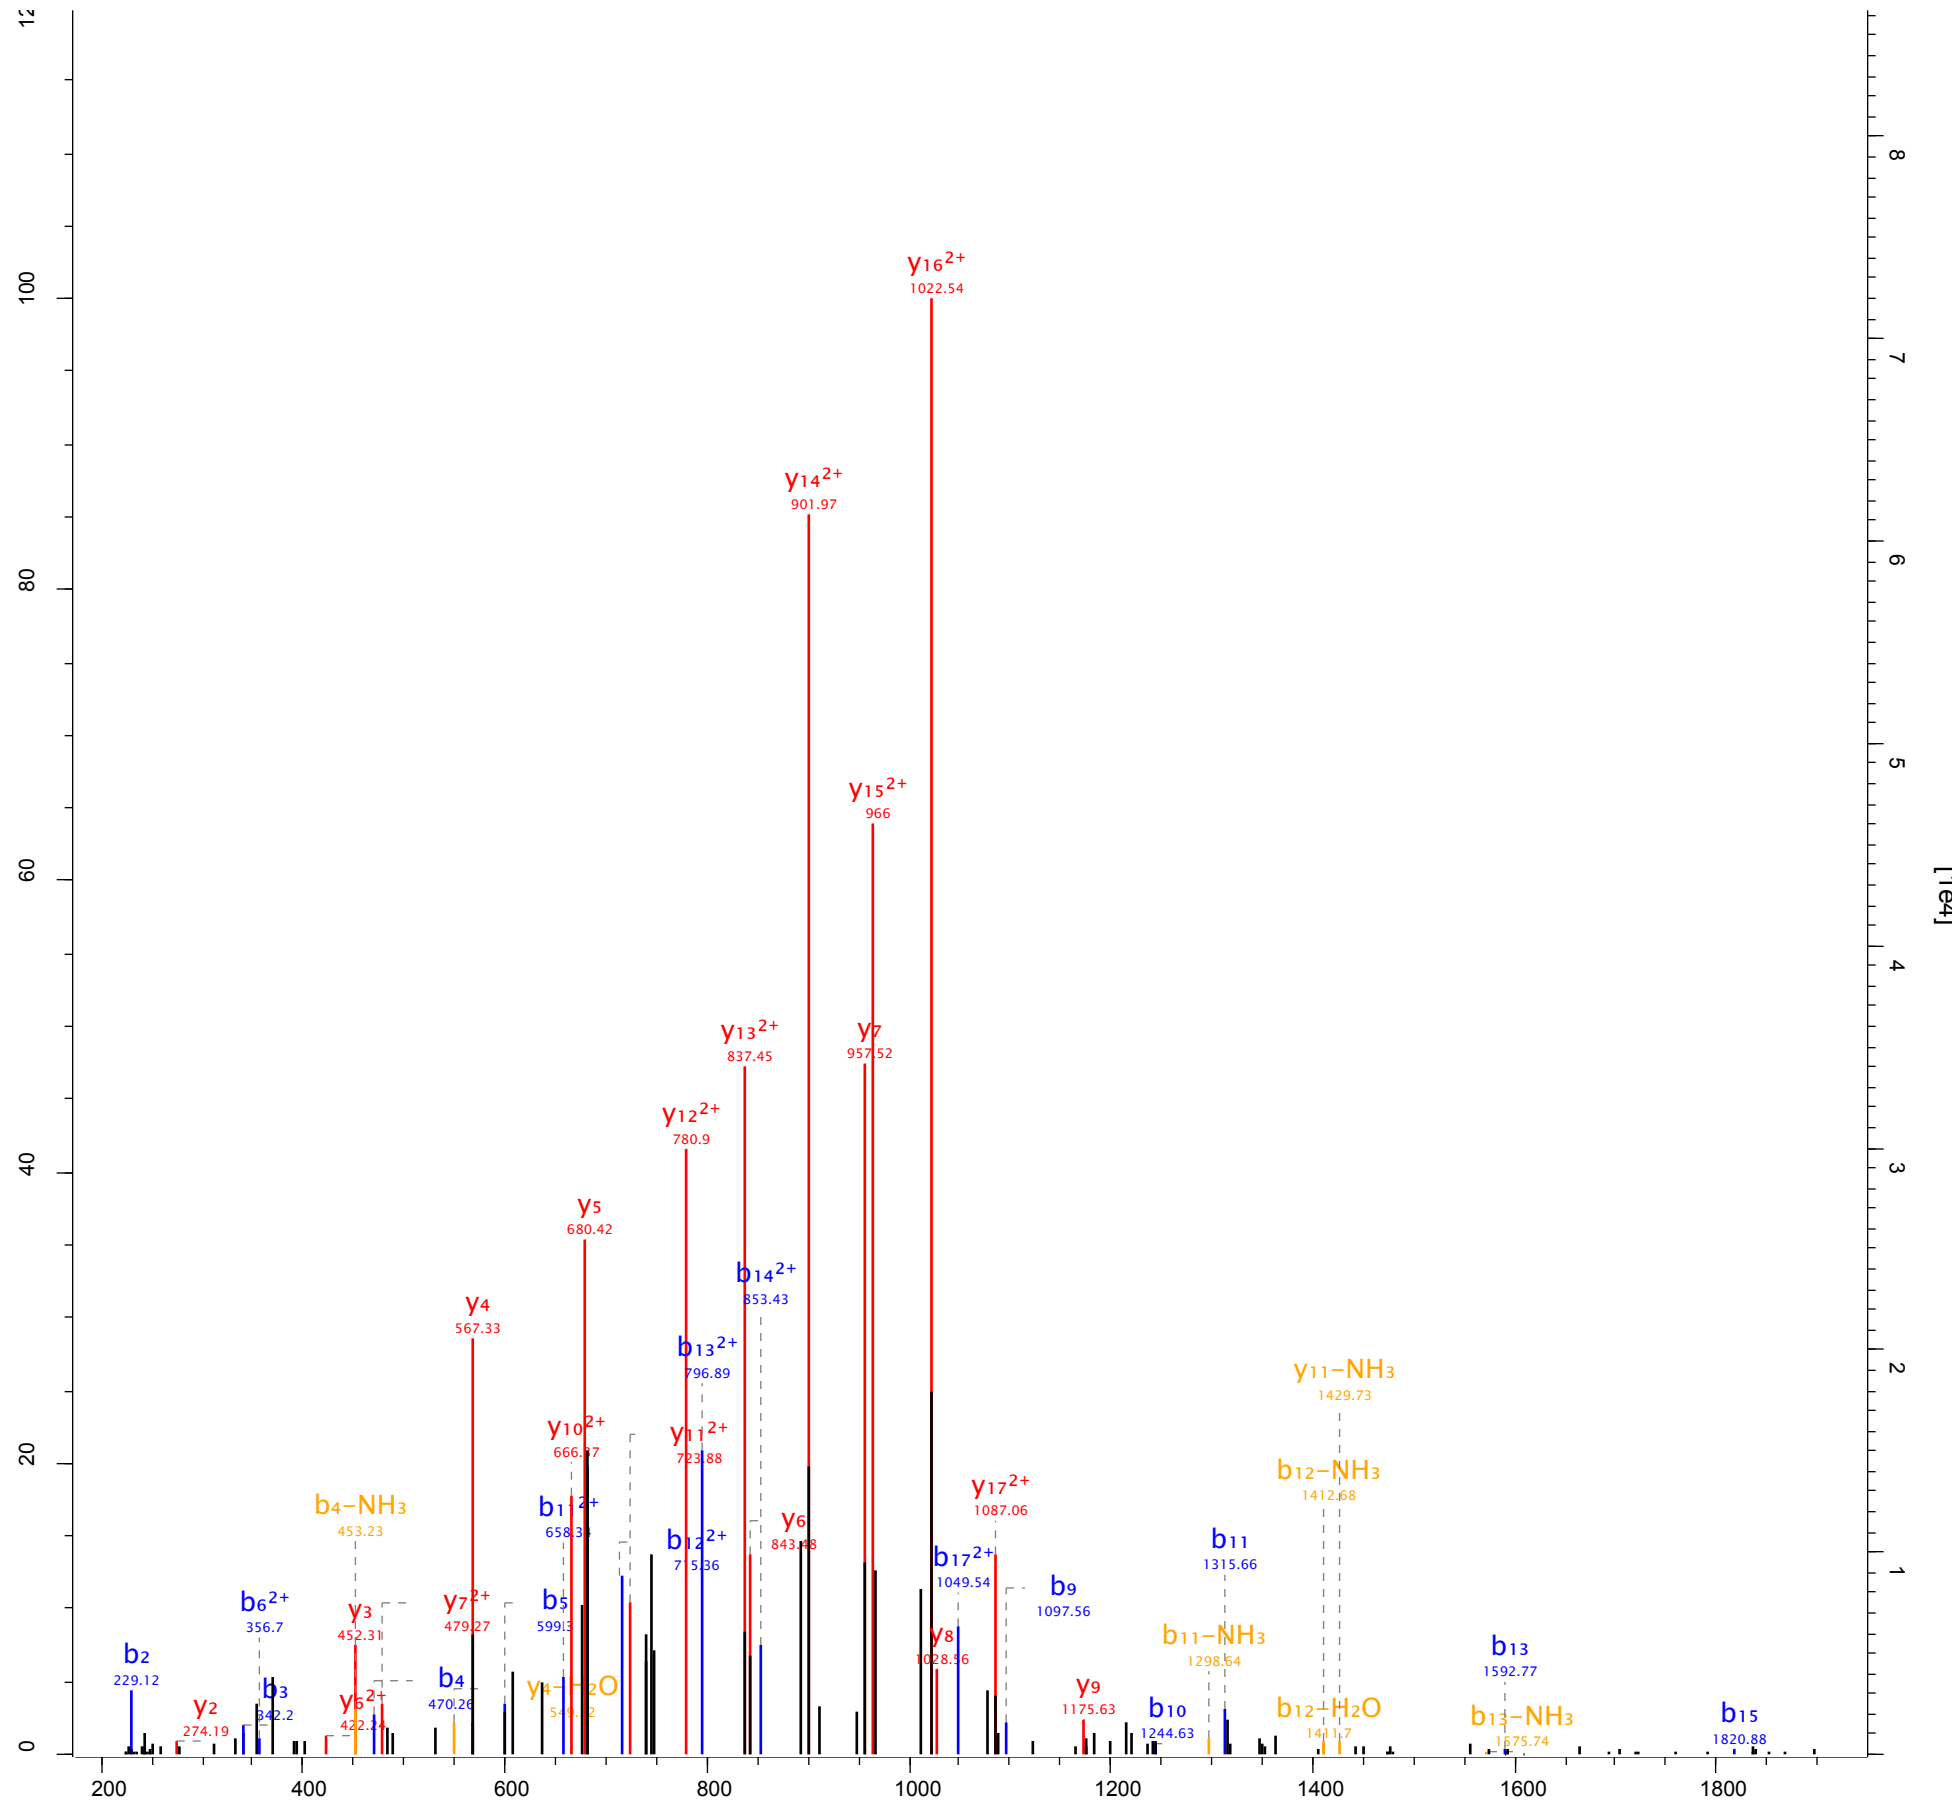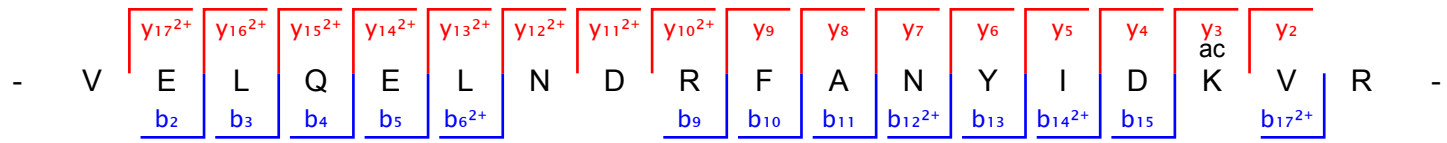

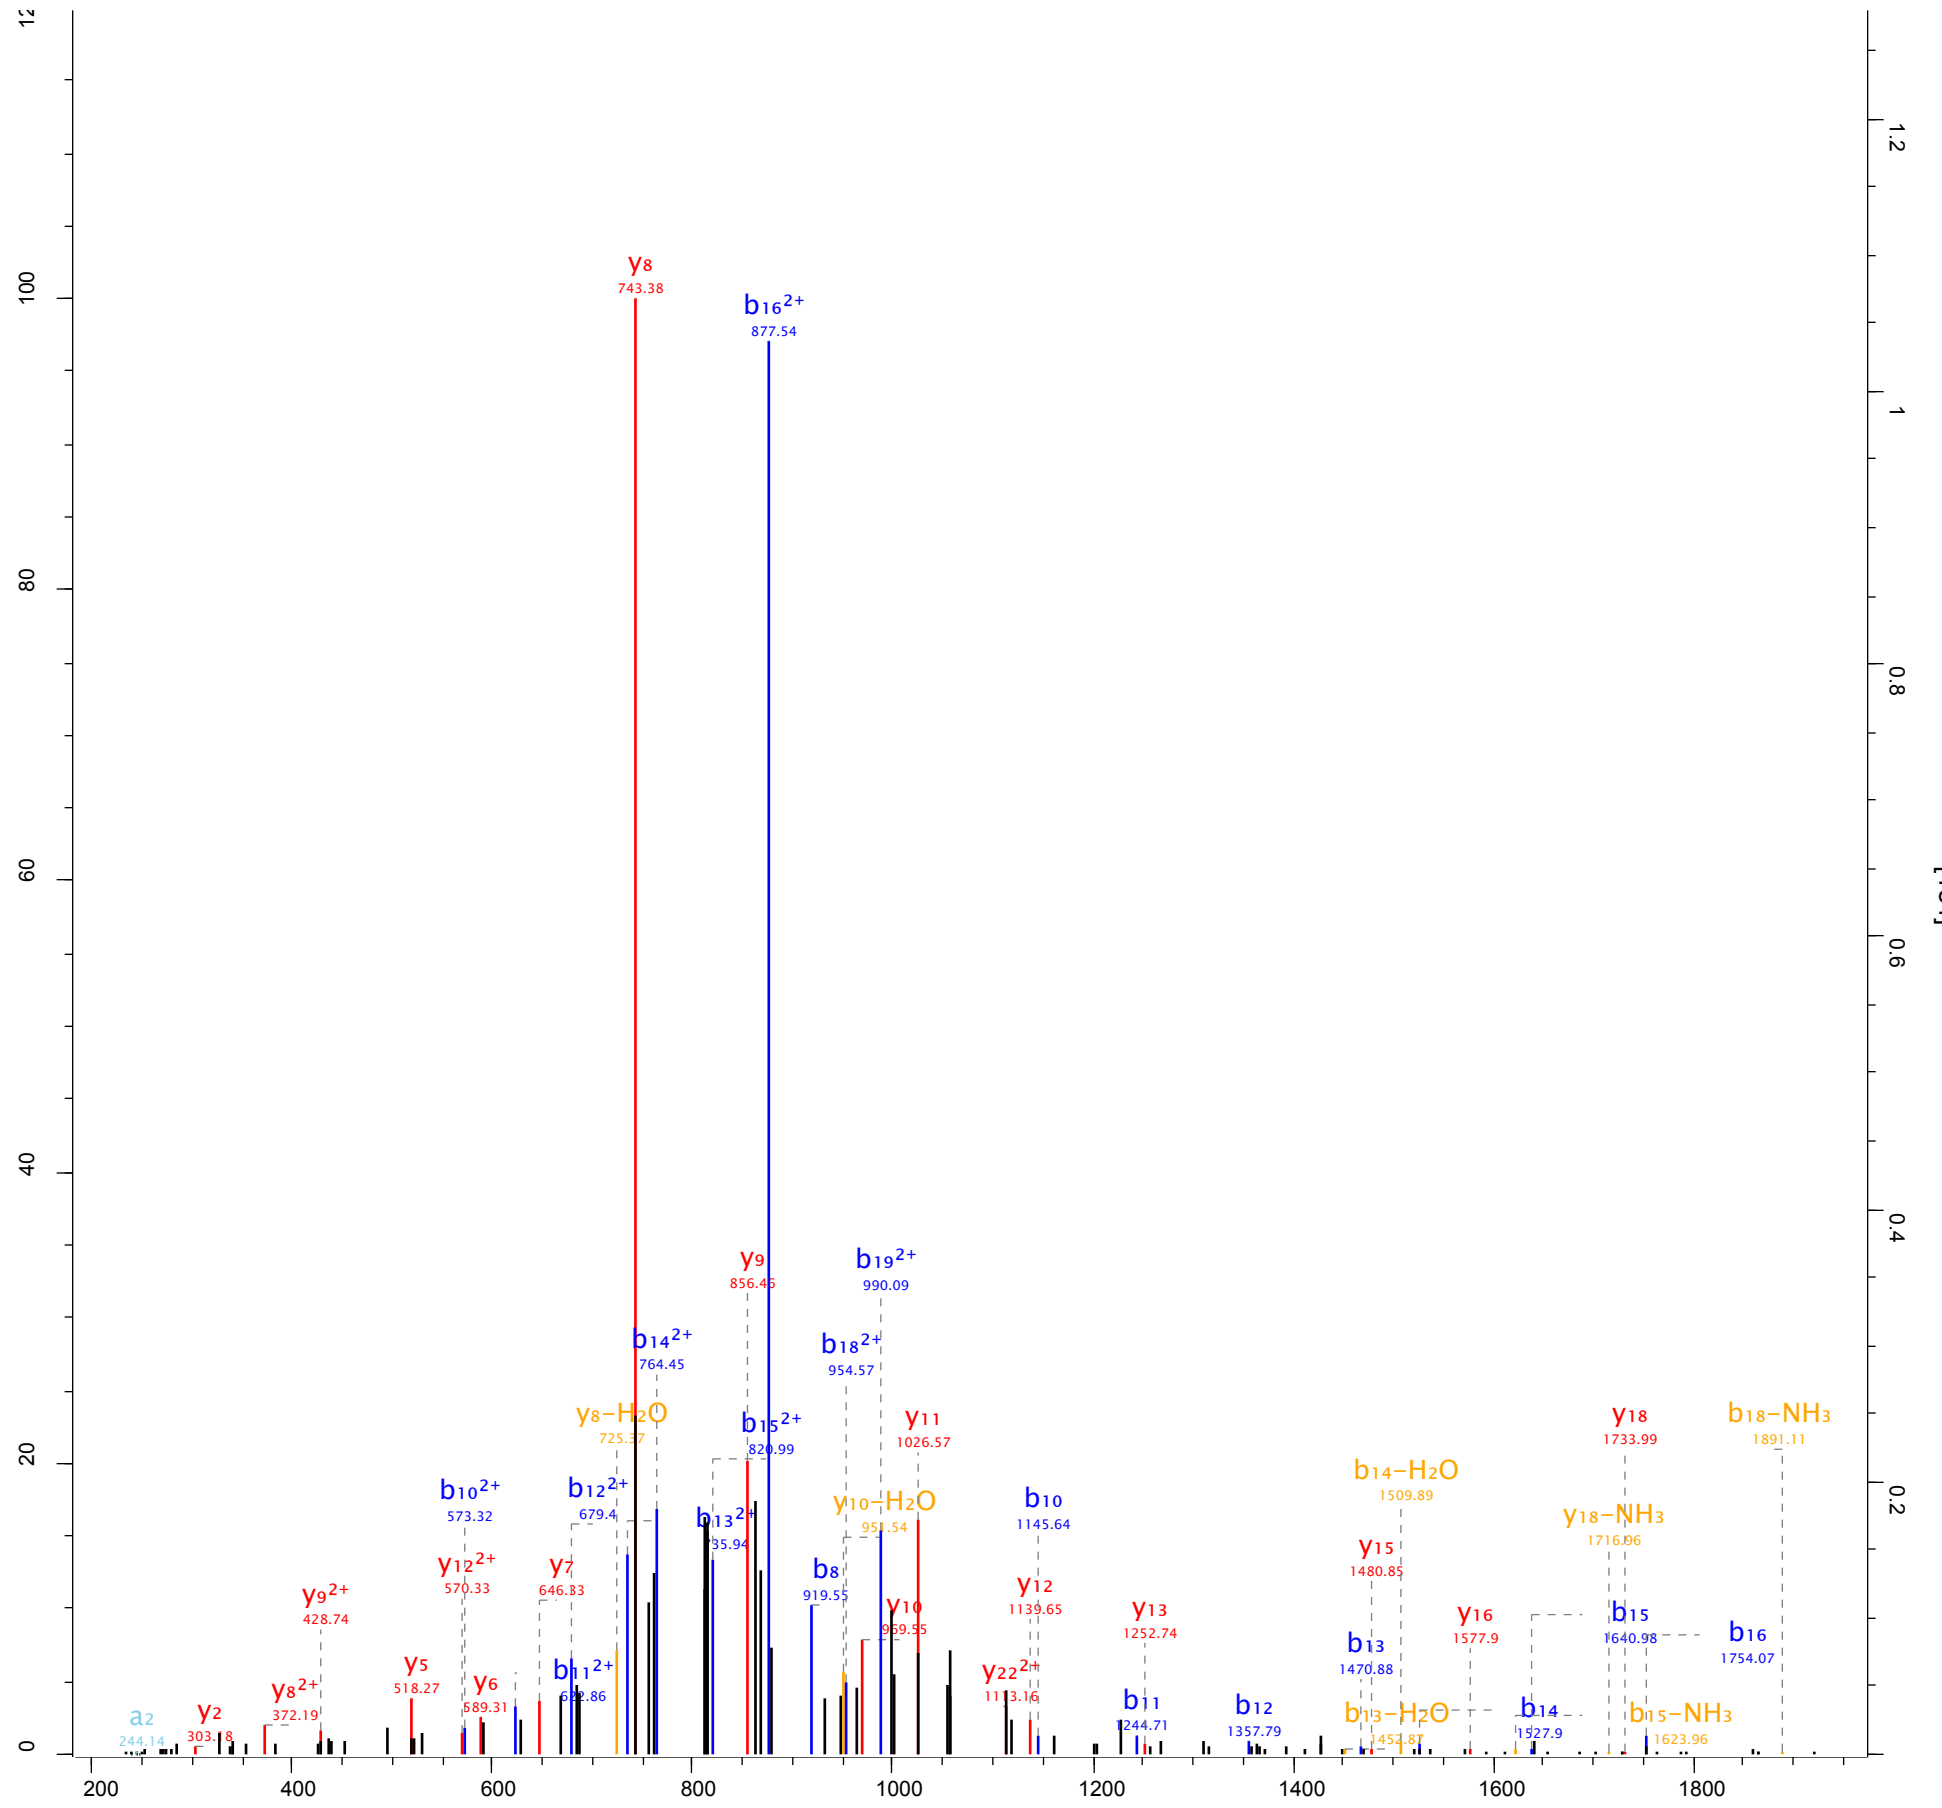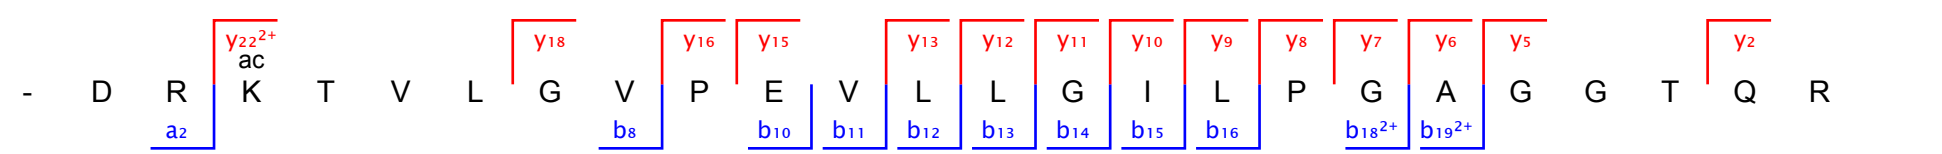

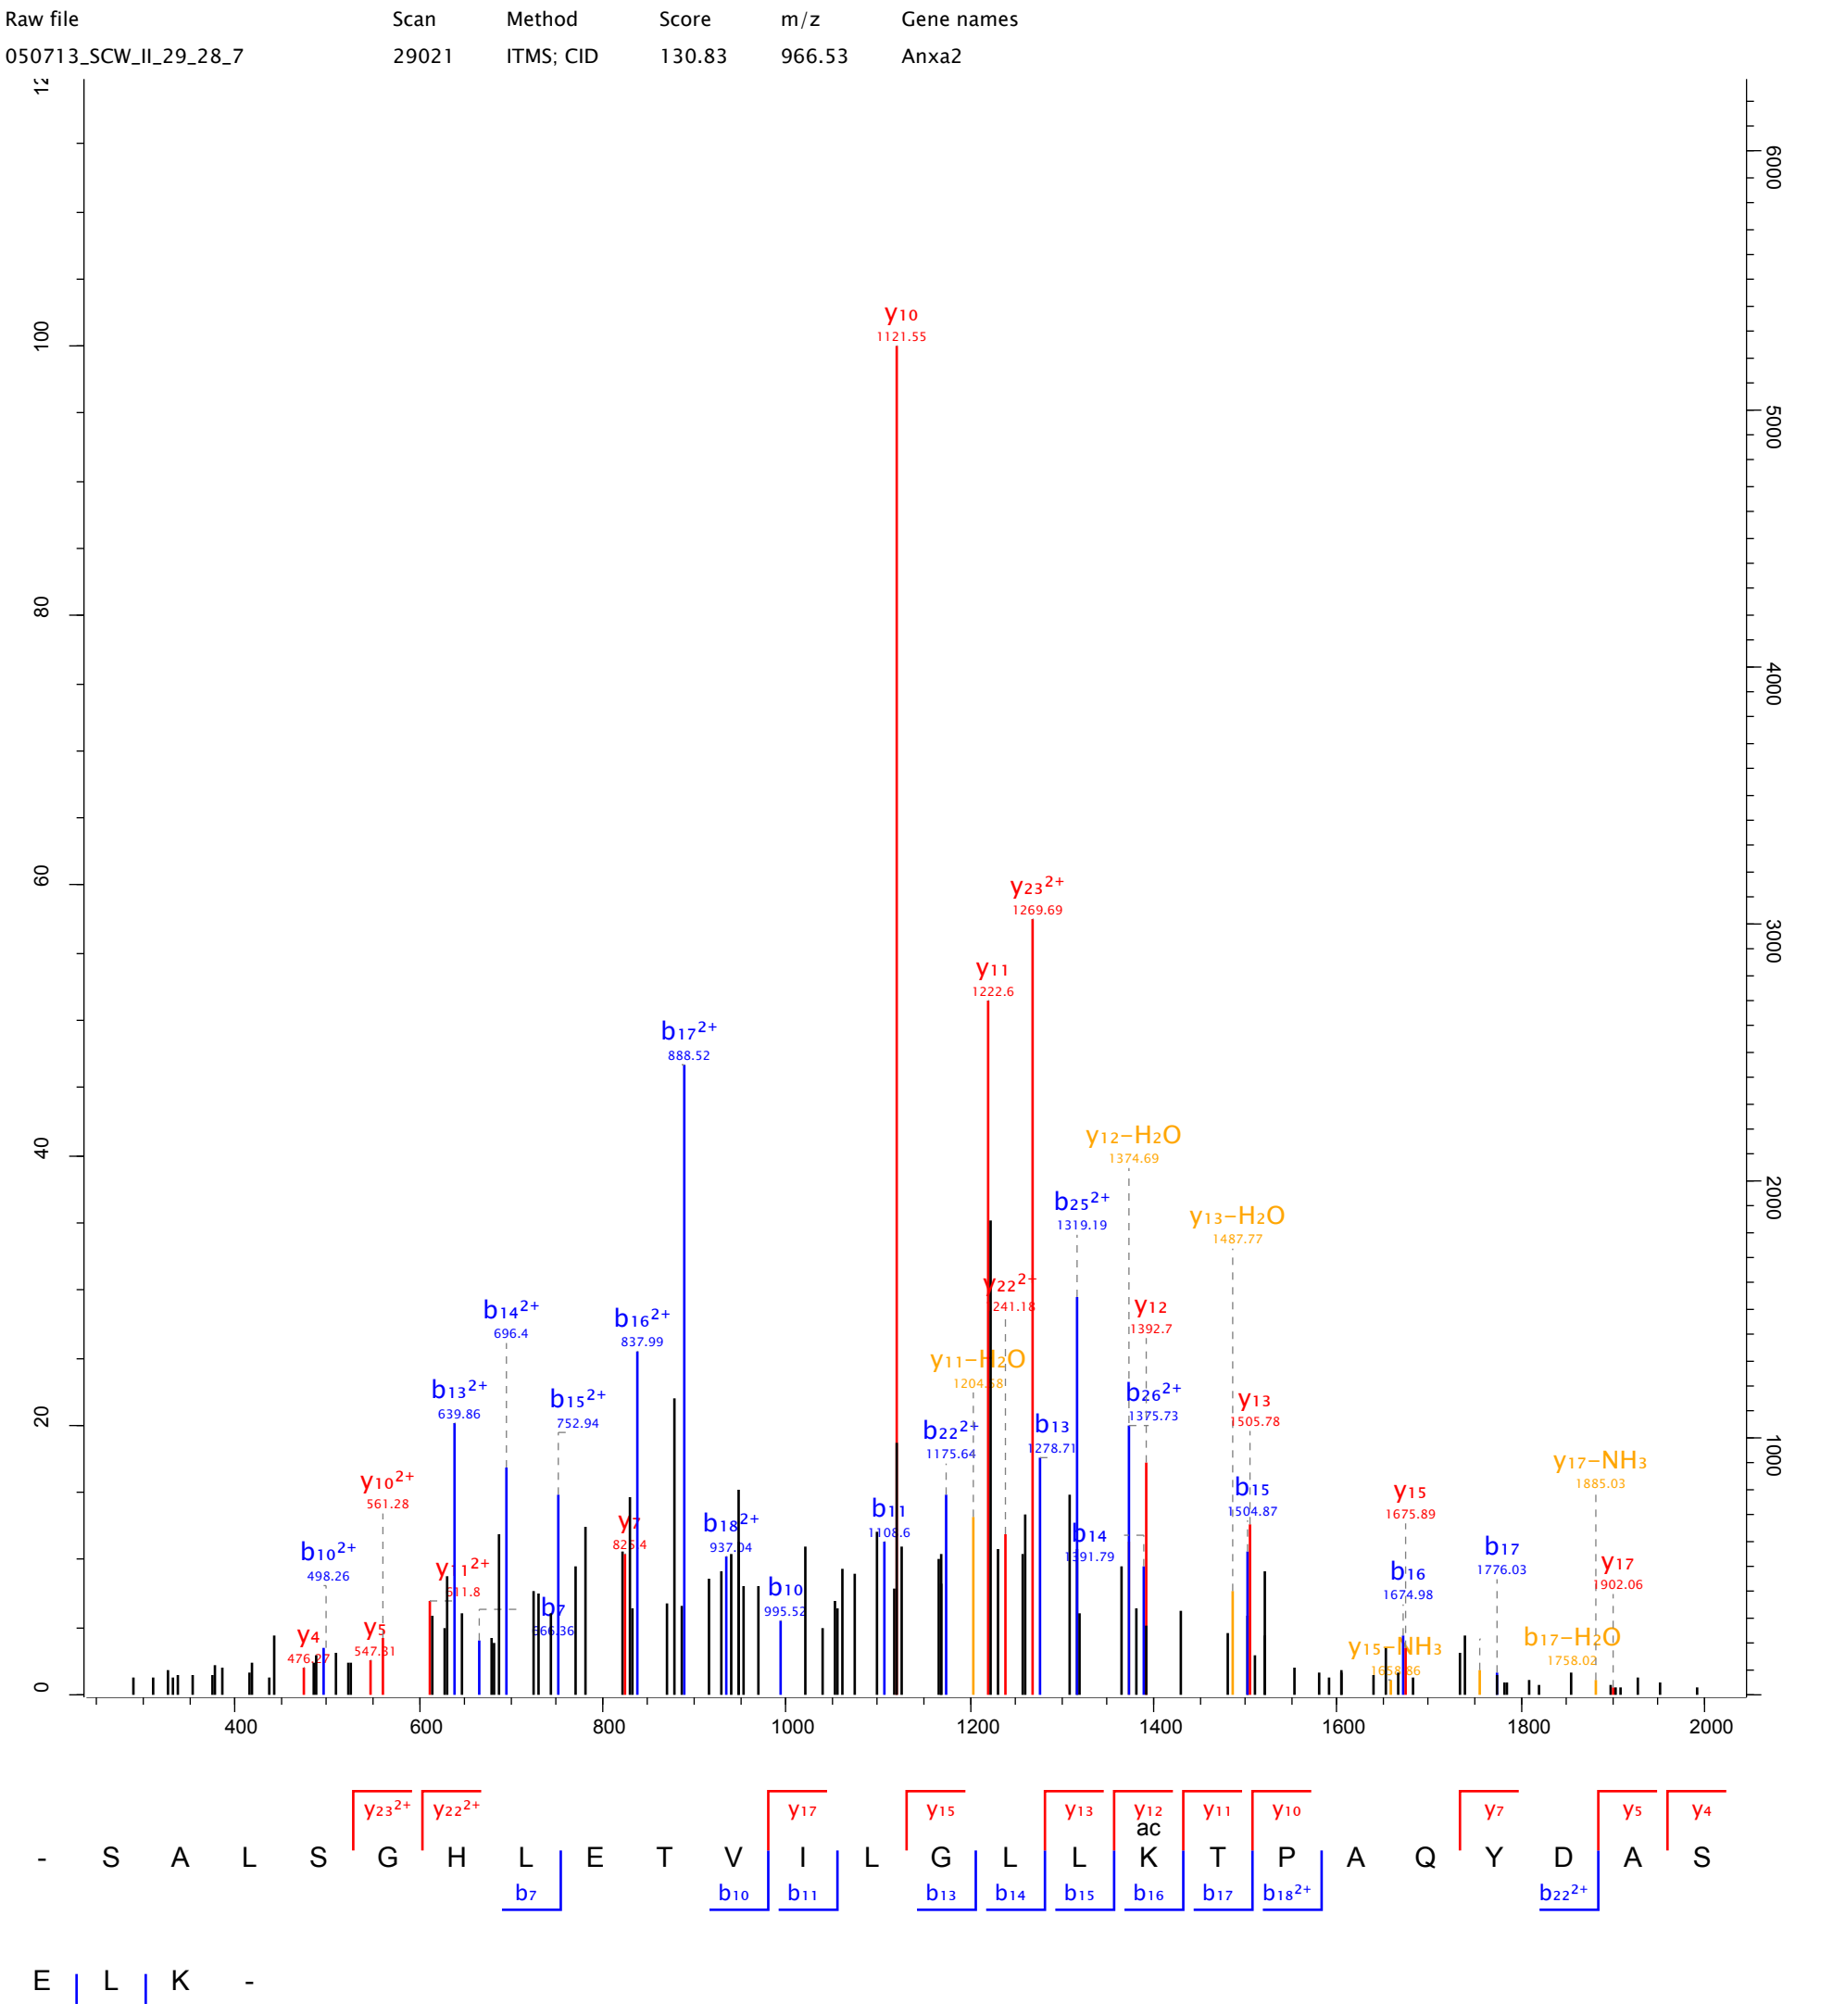



050713\_SCW\_II\_29\_28\_7

29826 ITMS; CID 217.19 887.48 Cct4

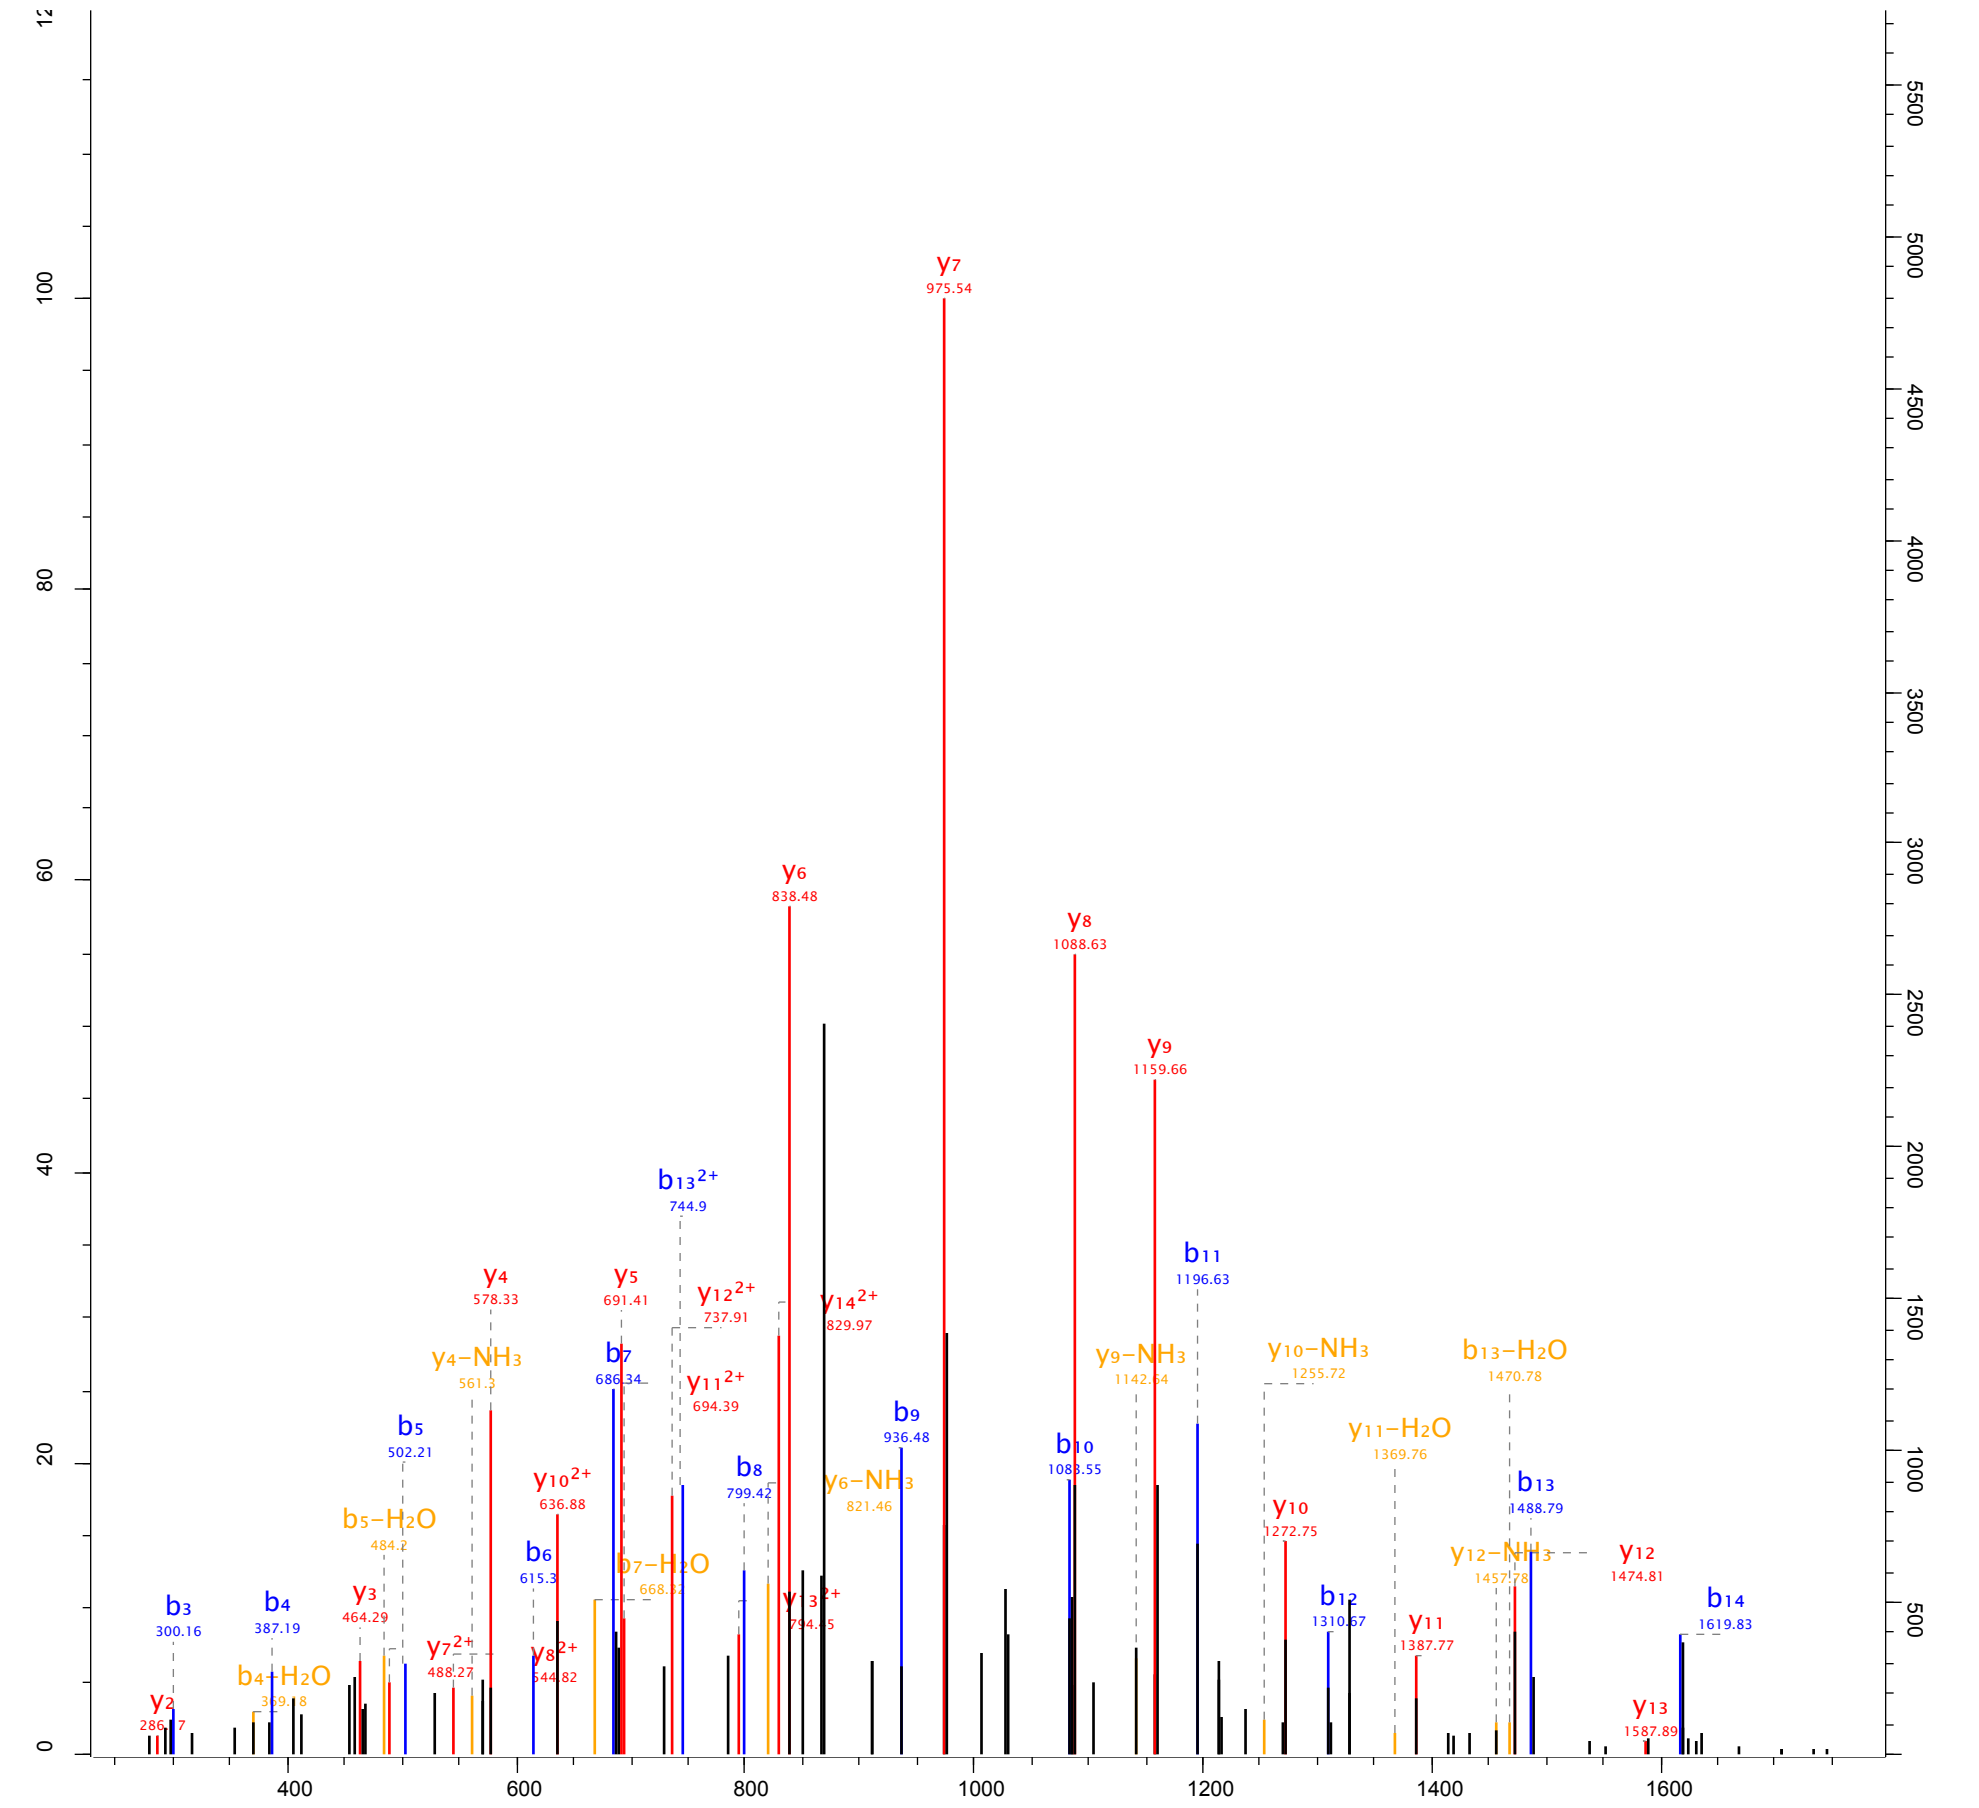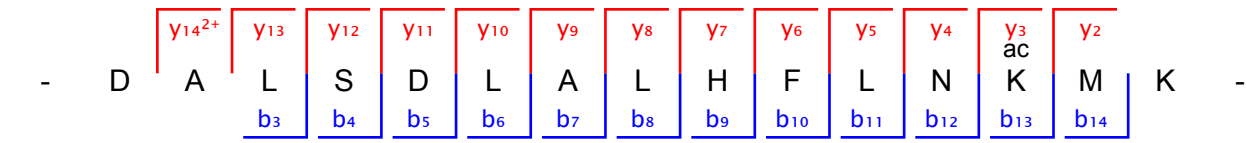

050713\_SCW\_II\_29\_28\_7

30094 ITMS; CID 124.98 1188.65 Hadh

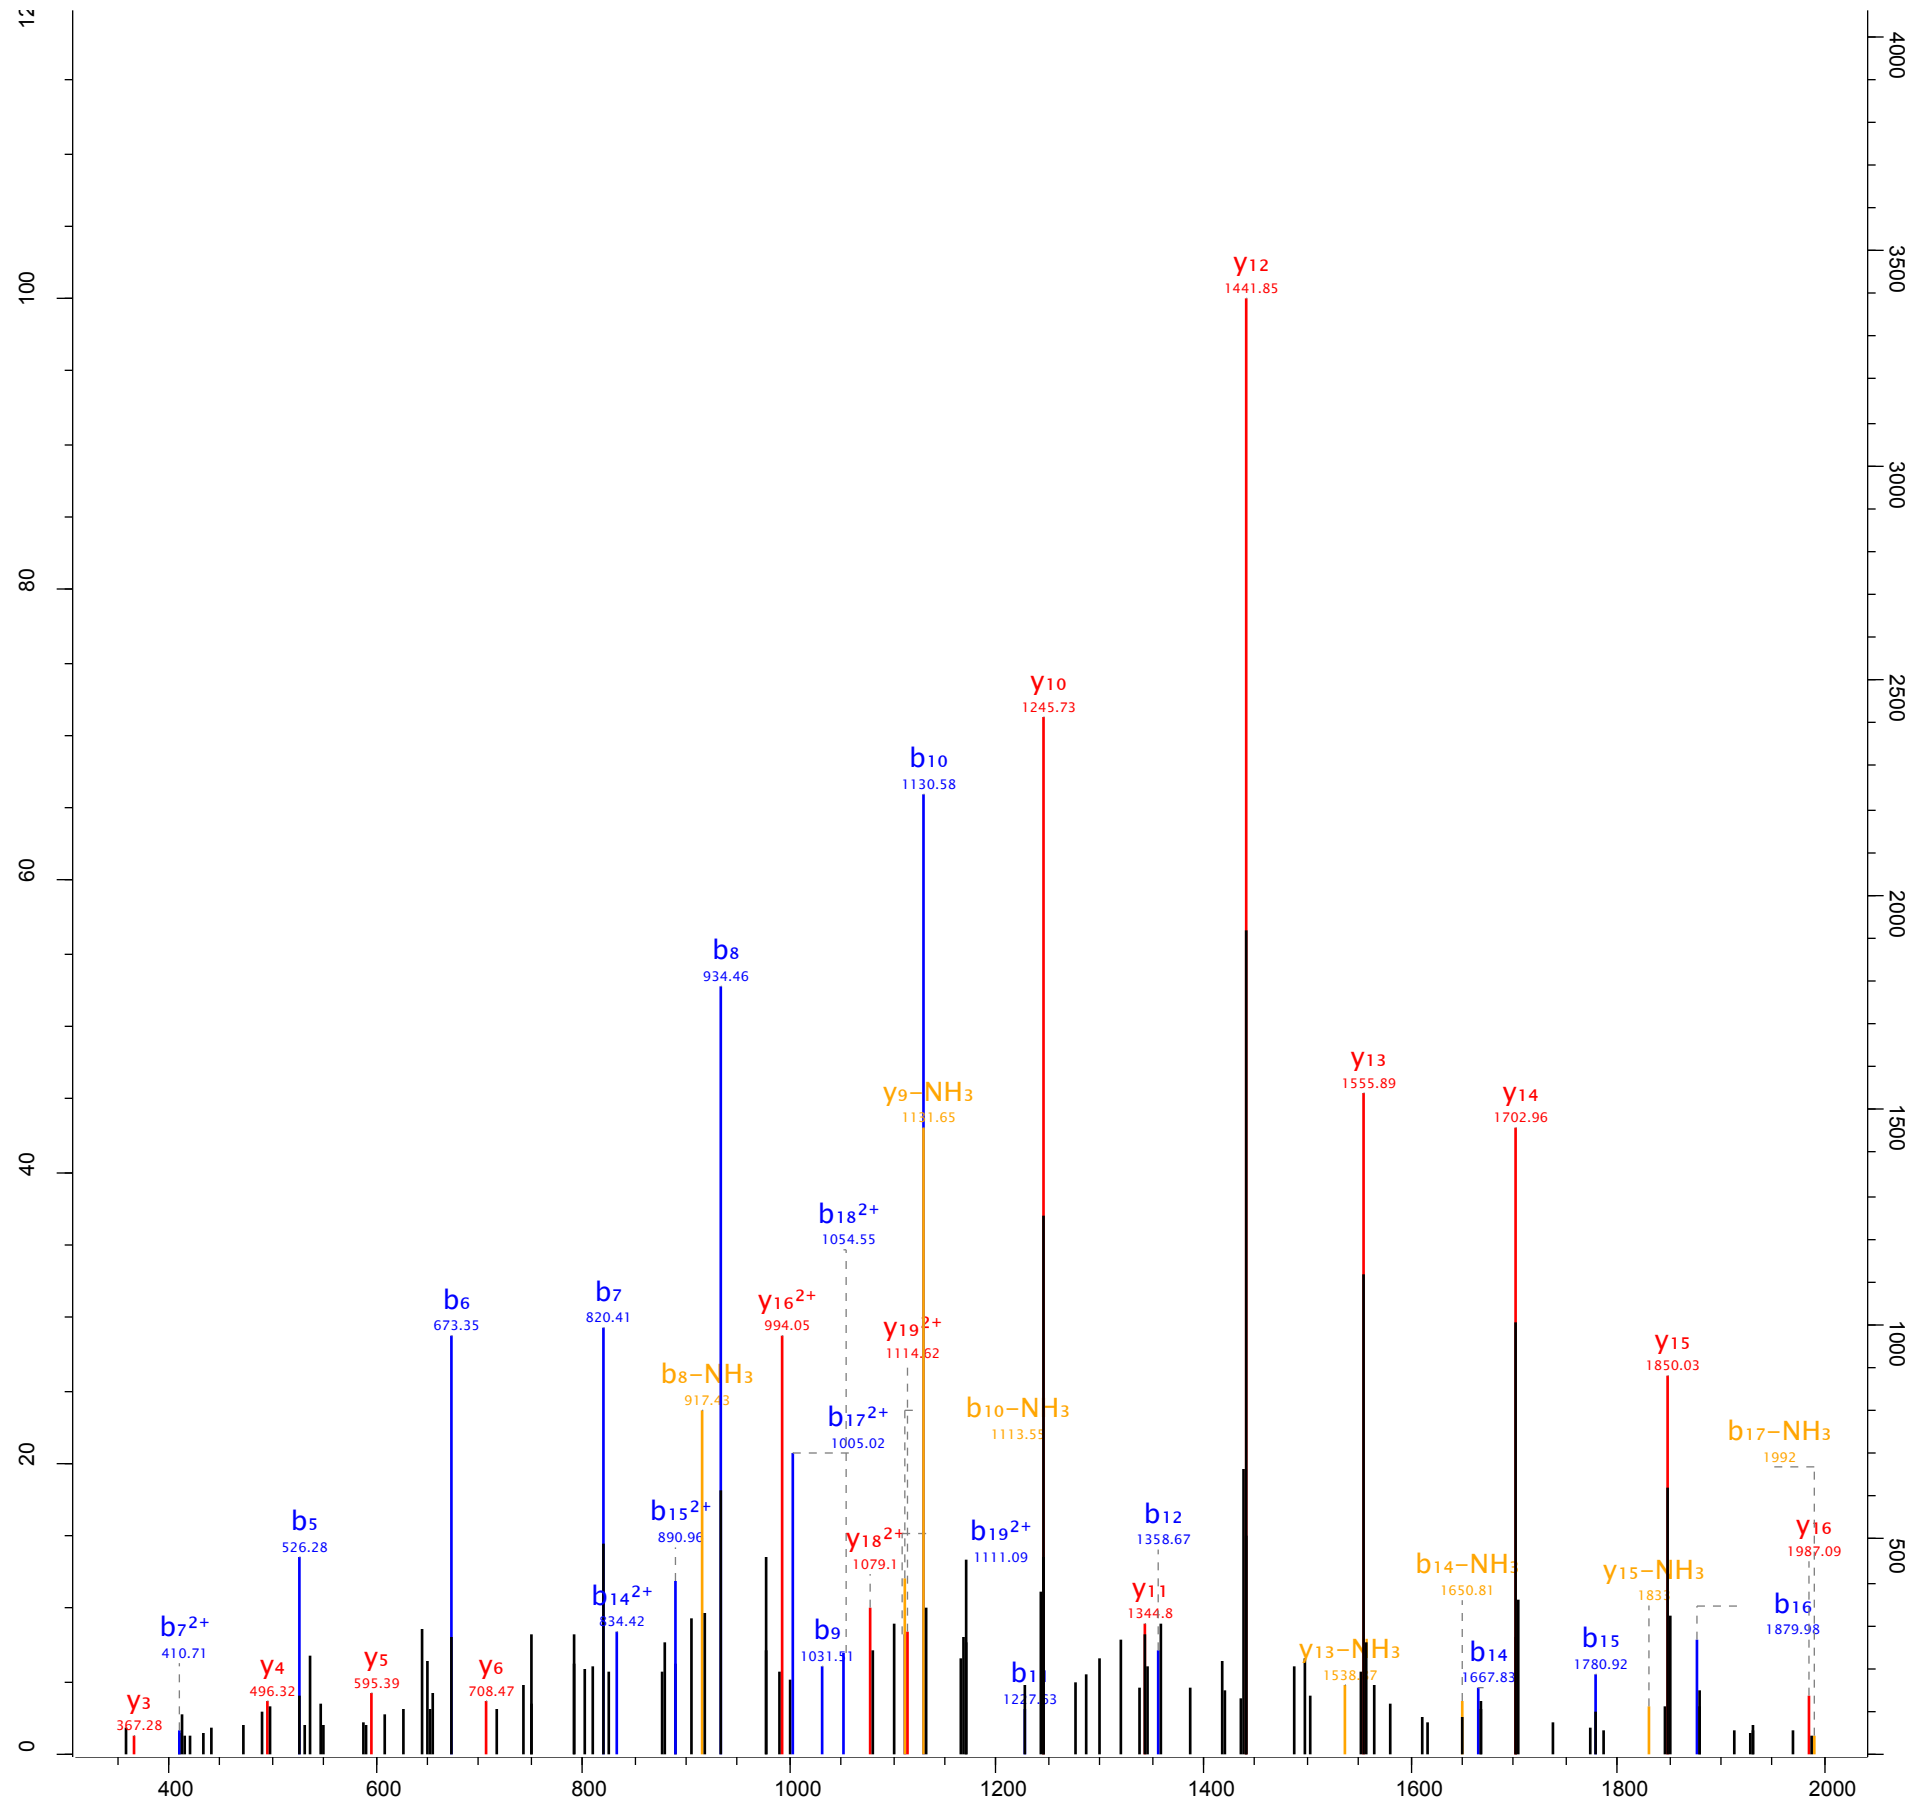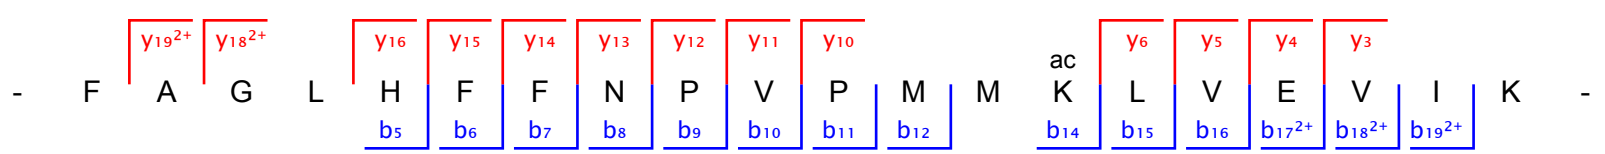

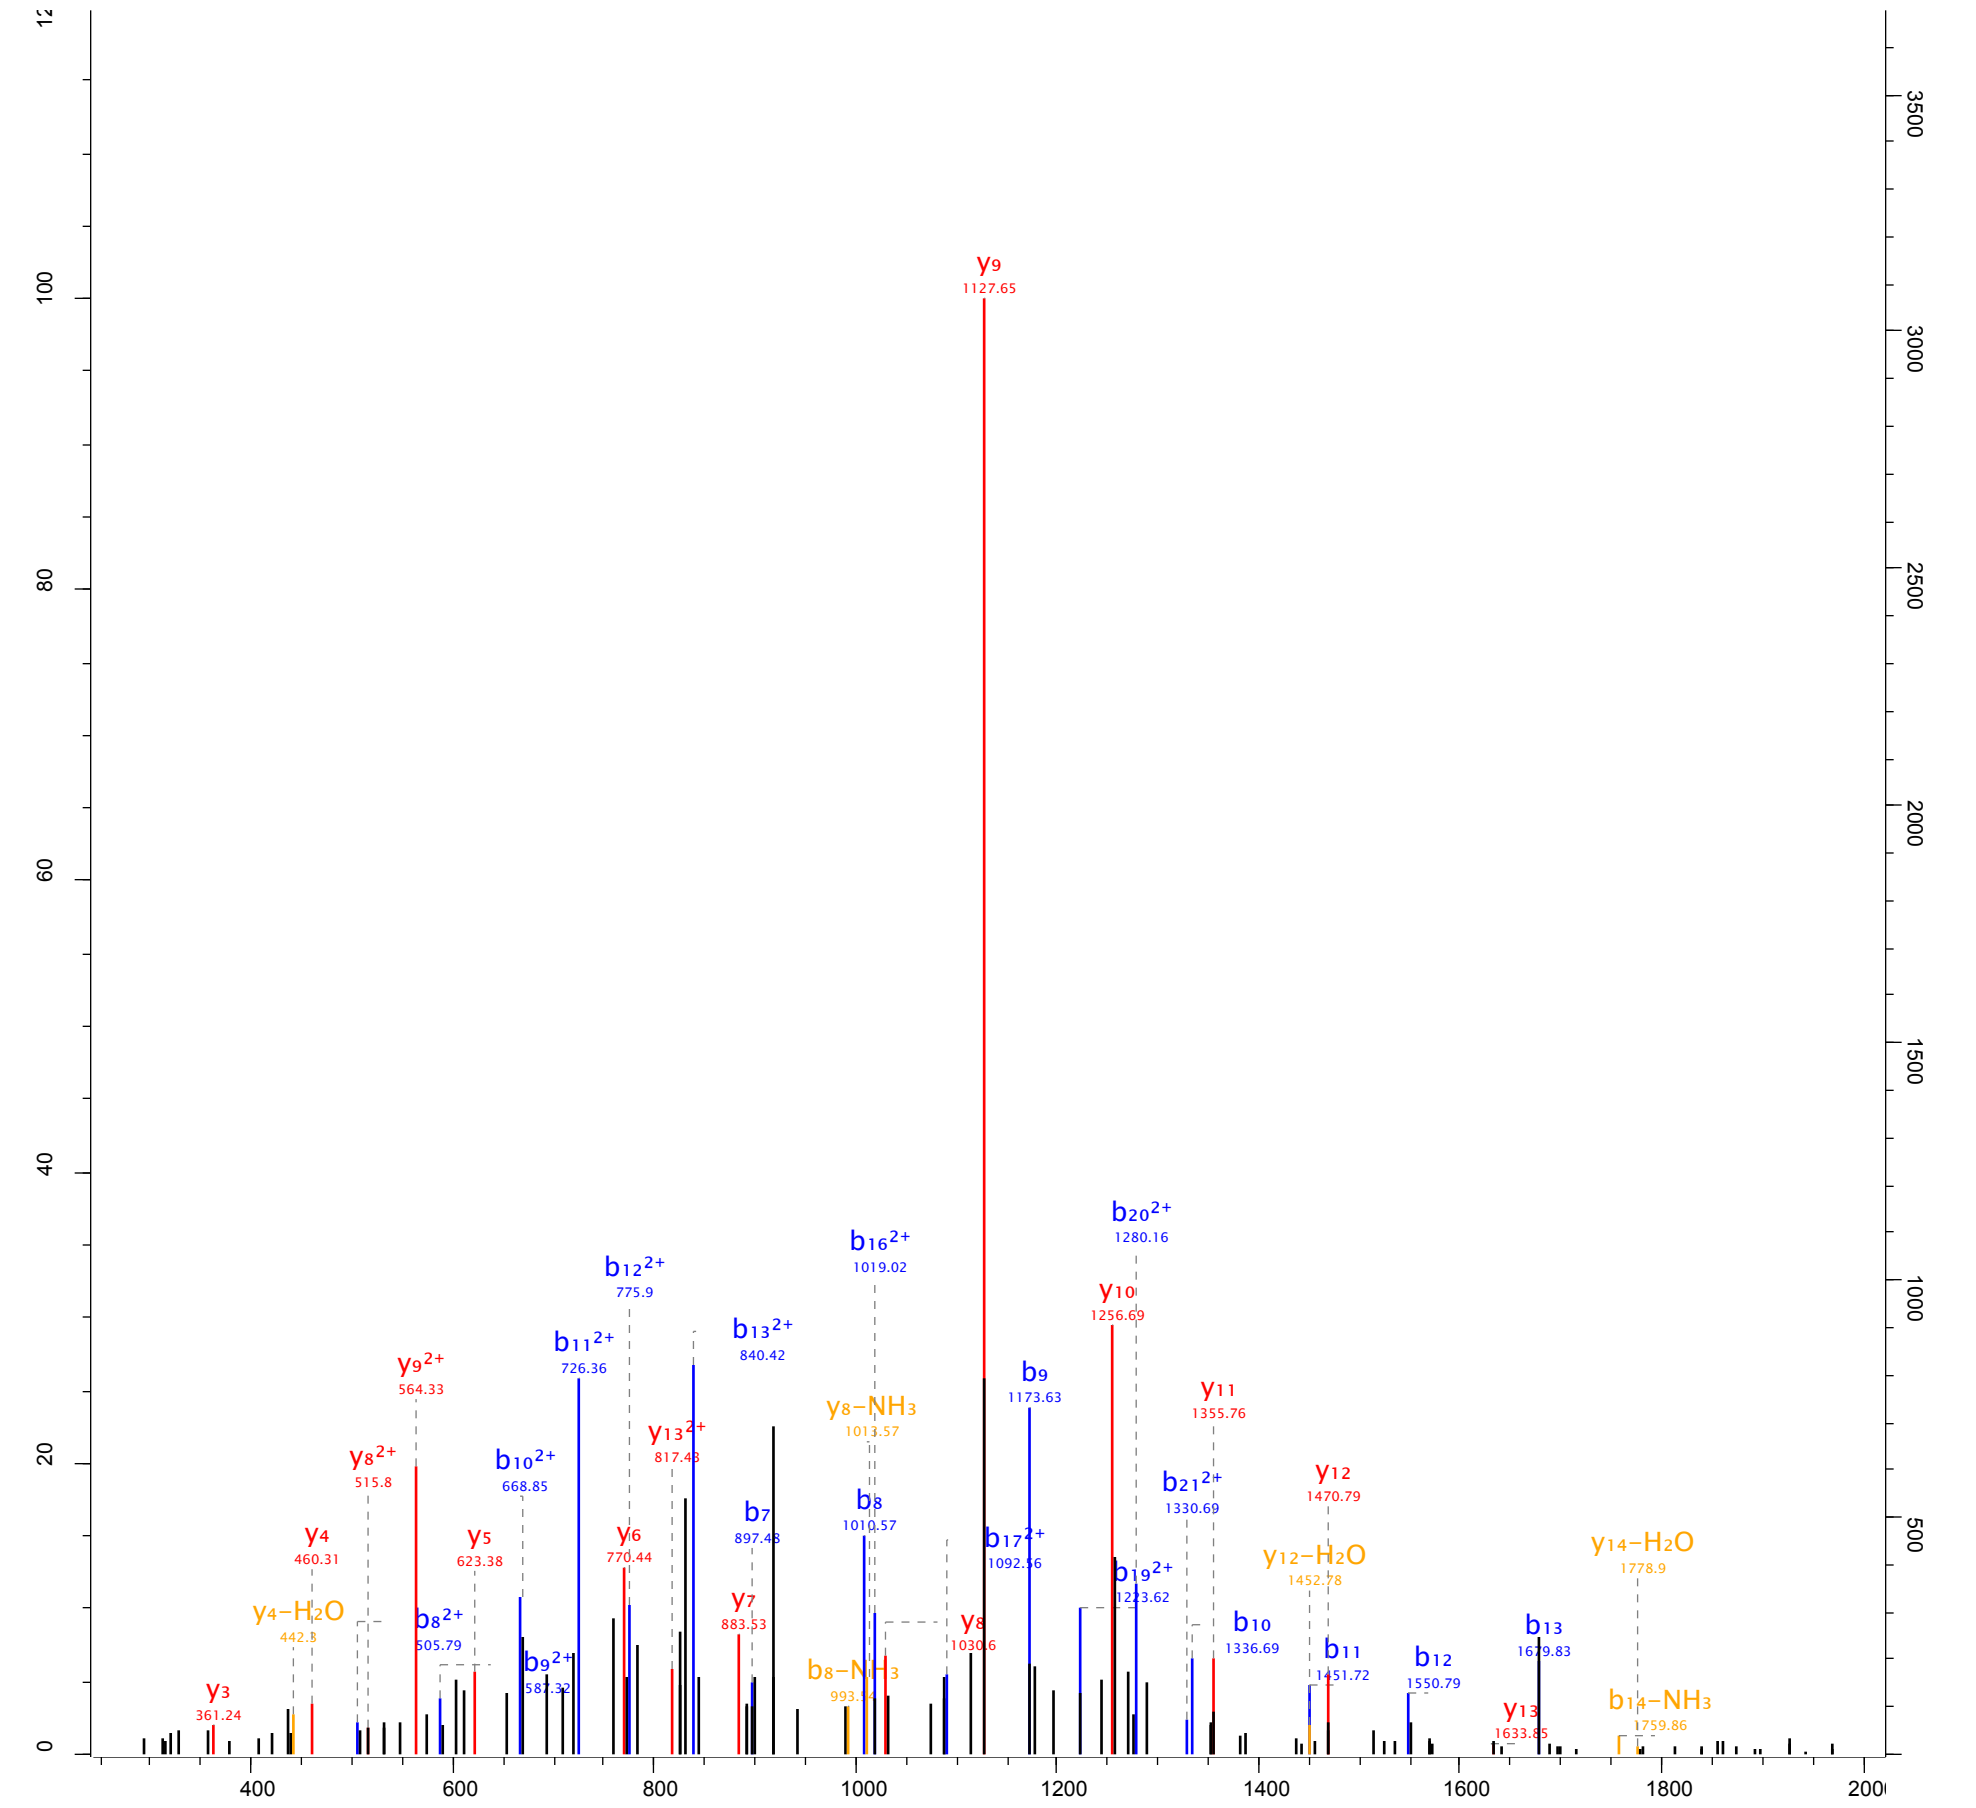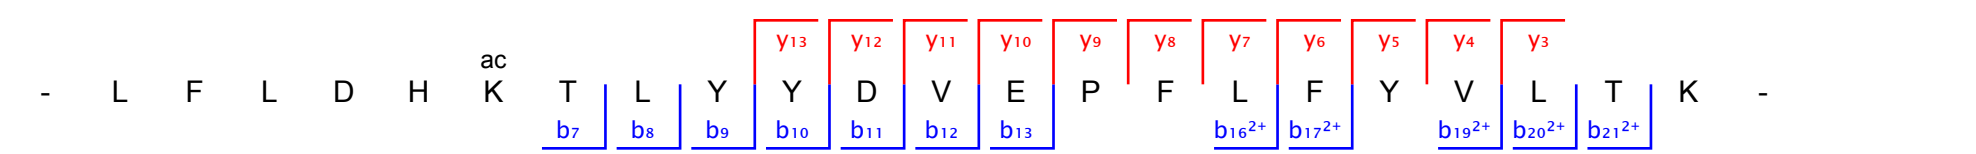

Raw file 050713\_SCW\_II\_29\_28\_7 Scan 33653 Method ITMS; CID Score 110.38 m/z 815.77 Gene names S100a4

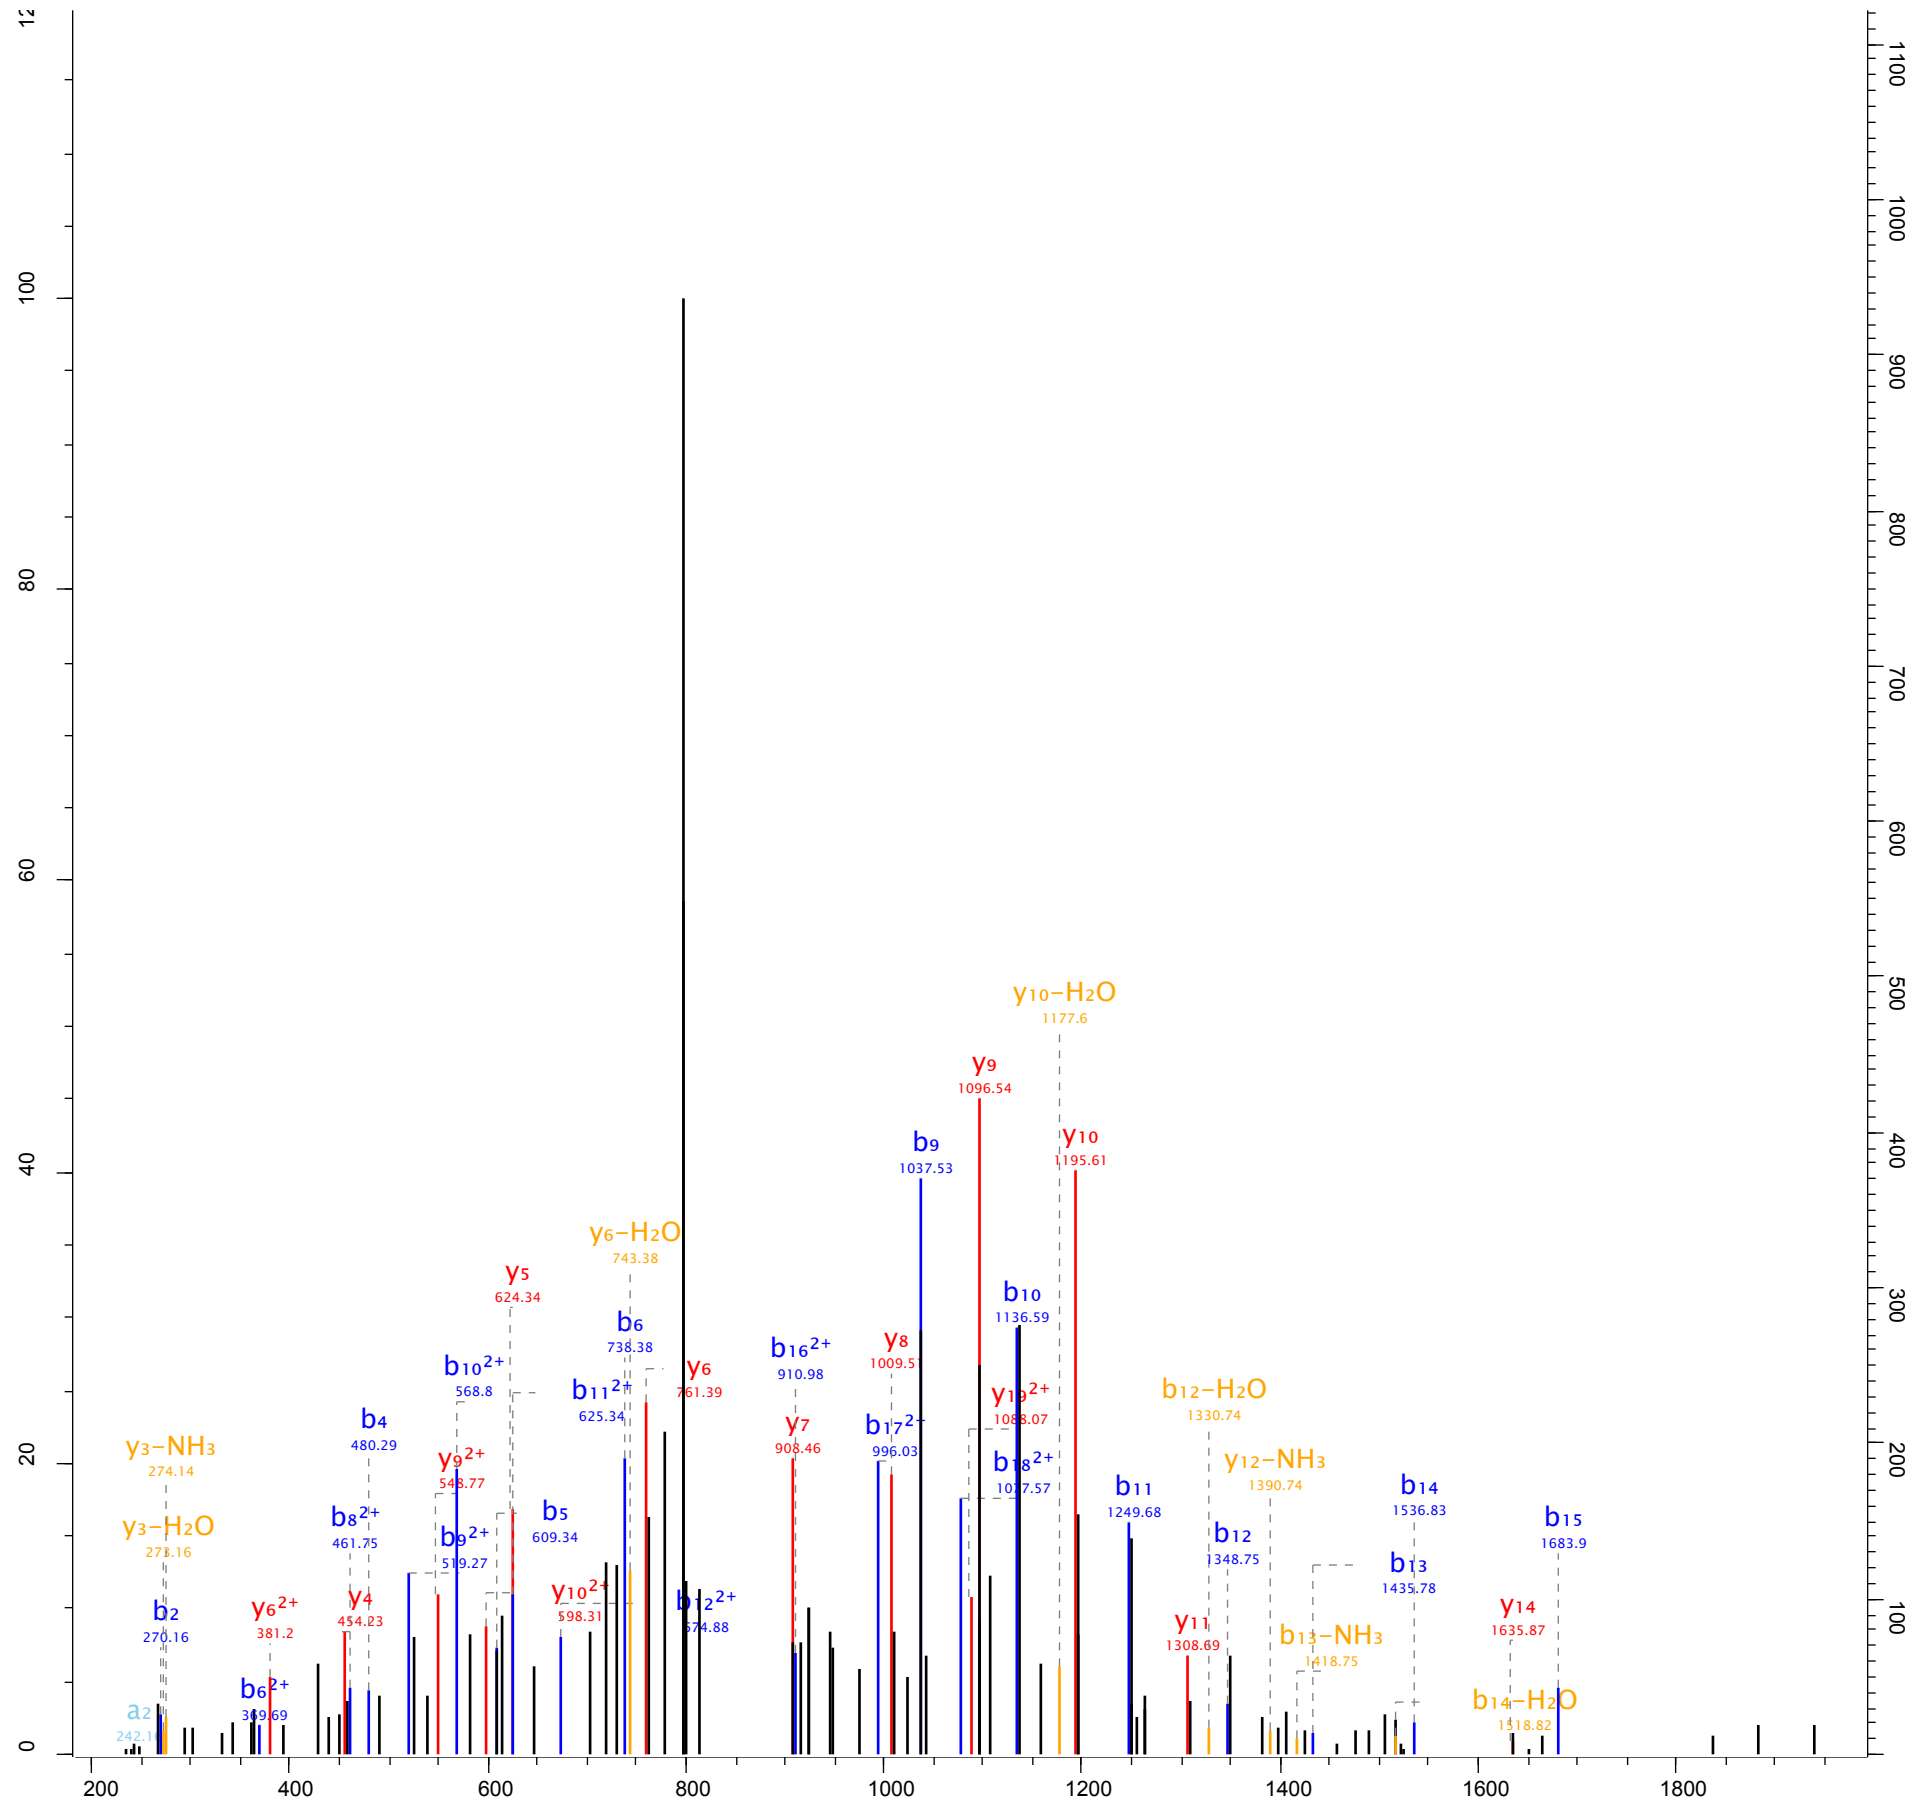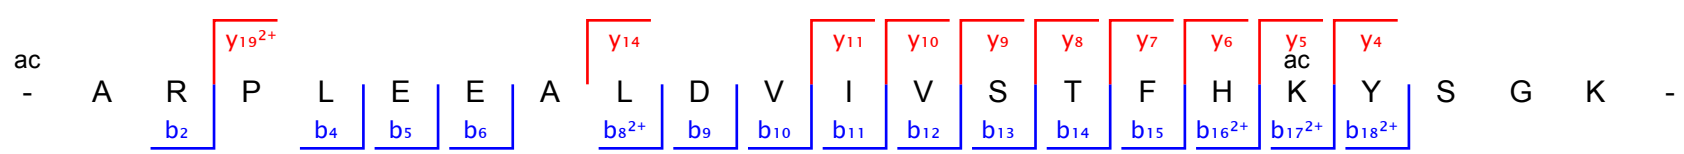

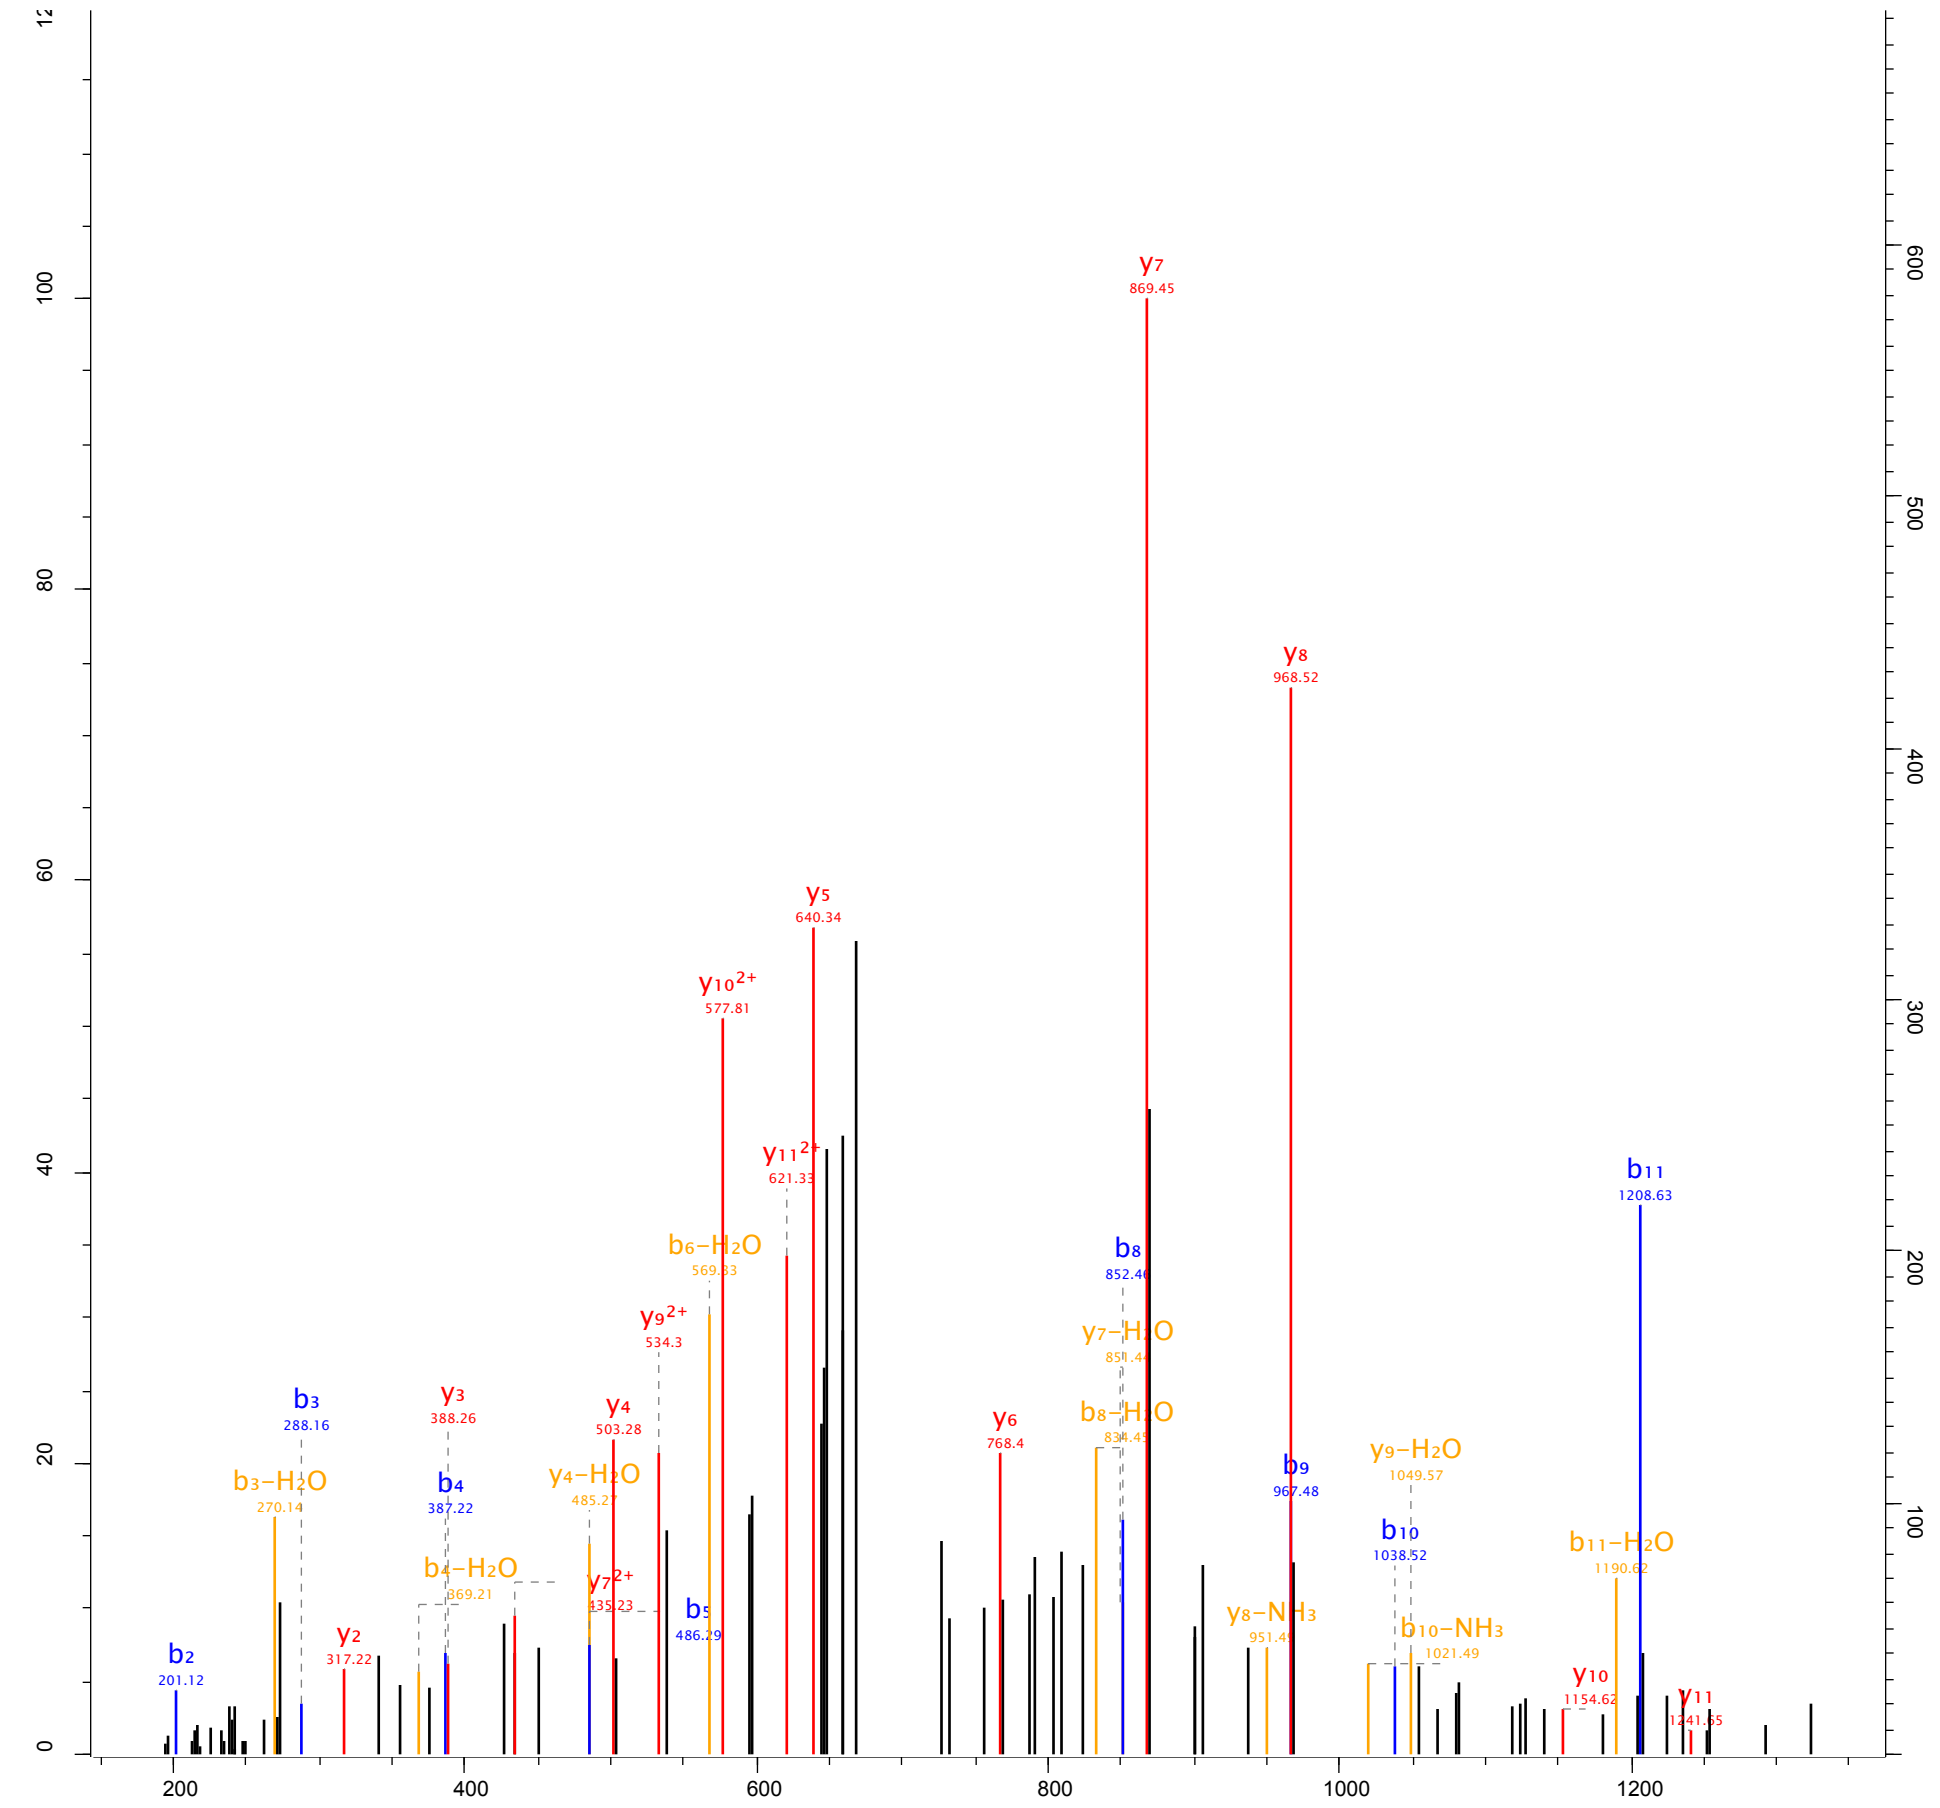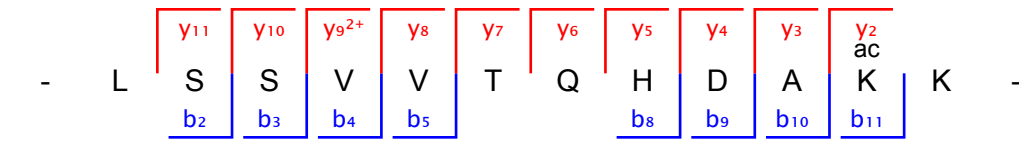

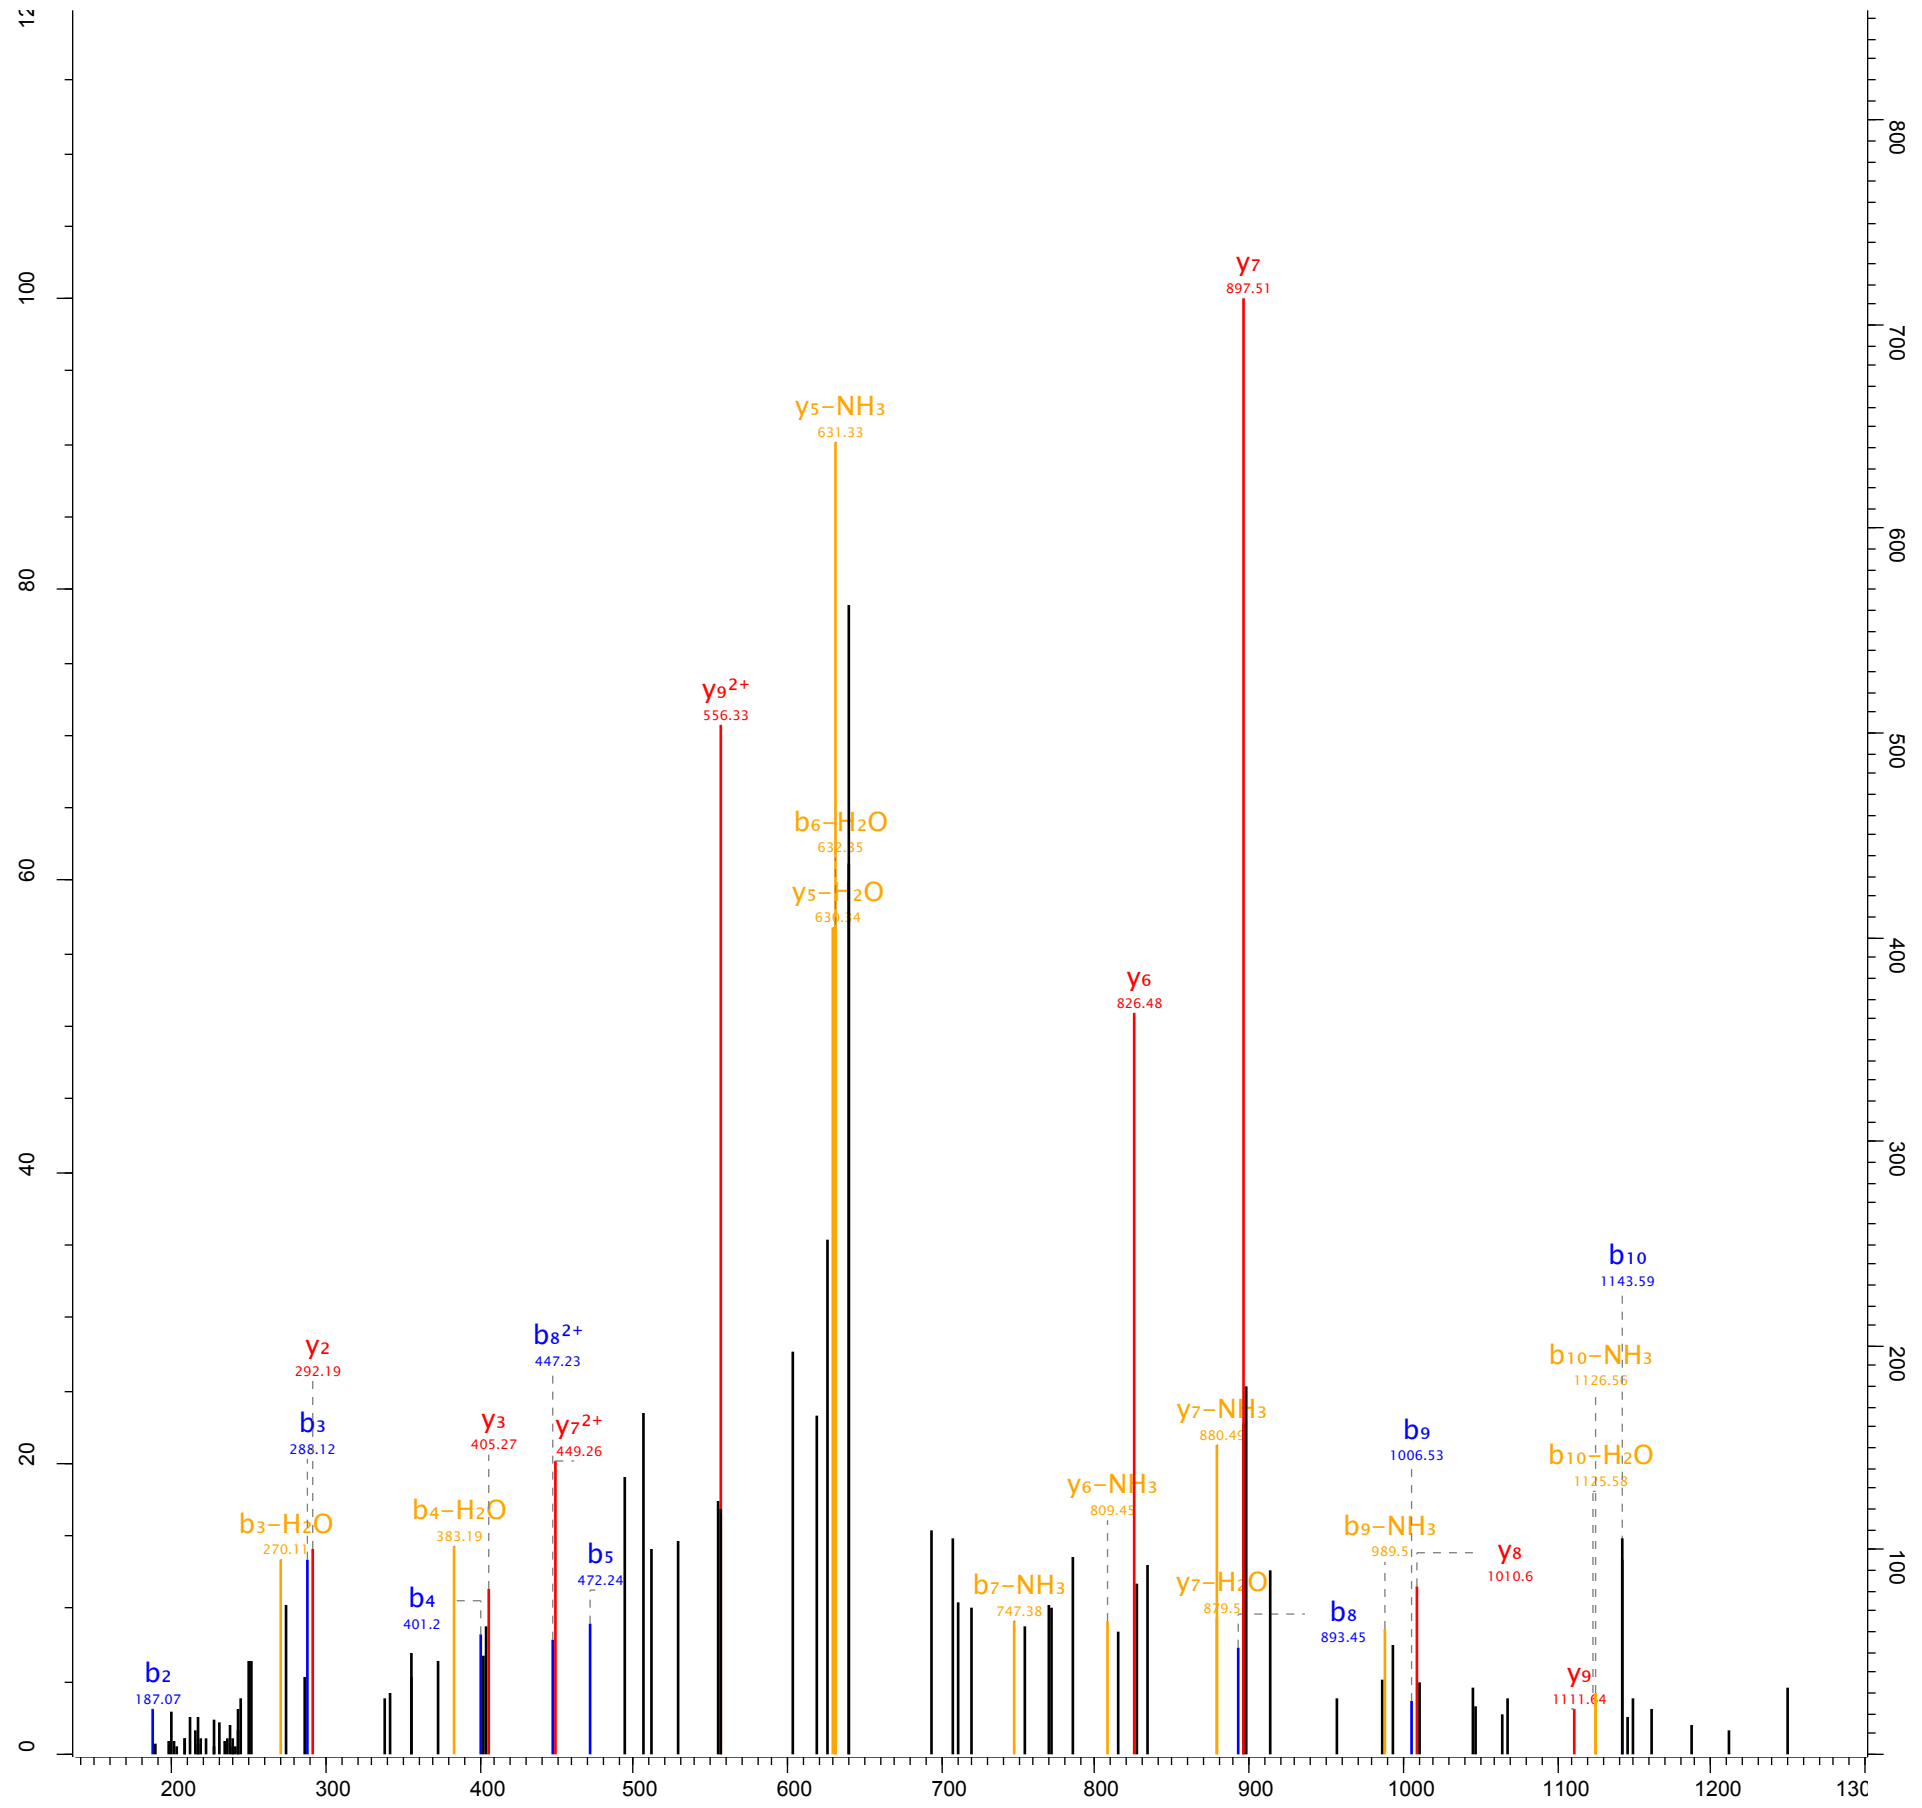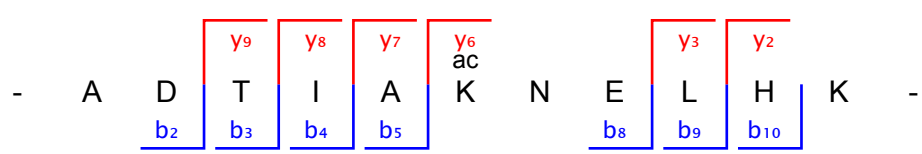

050713\_SCW\_II\_29\_31\_8

12354 ITMS; CID 241.39 865.43 Taldo1

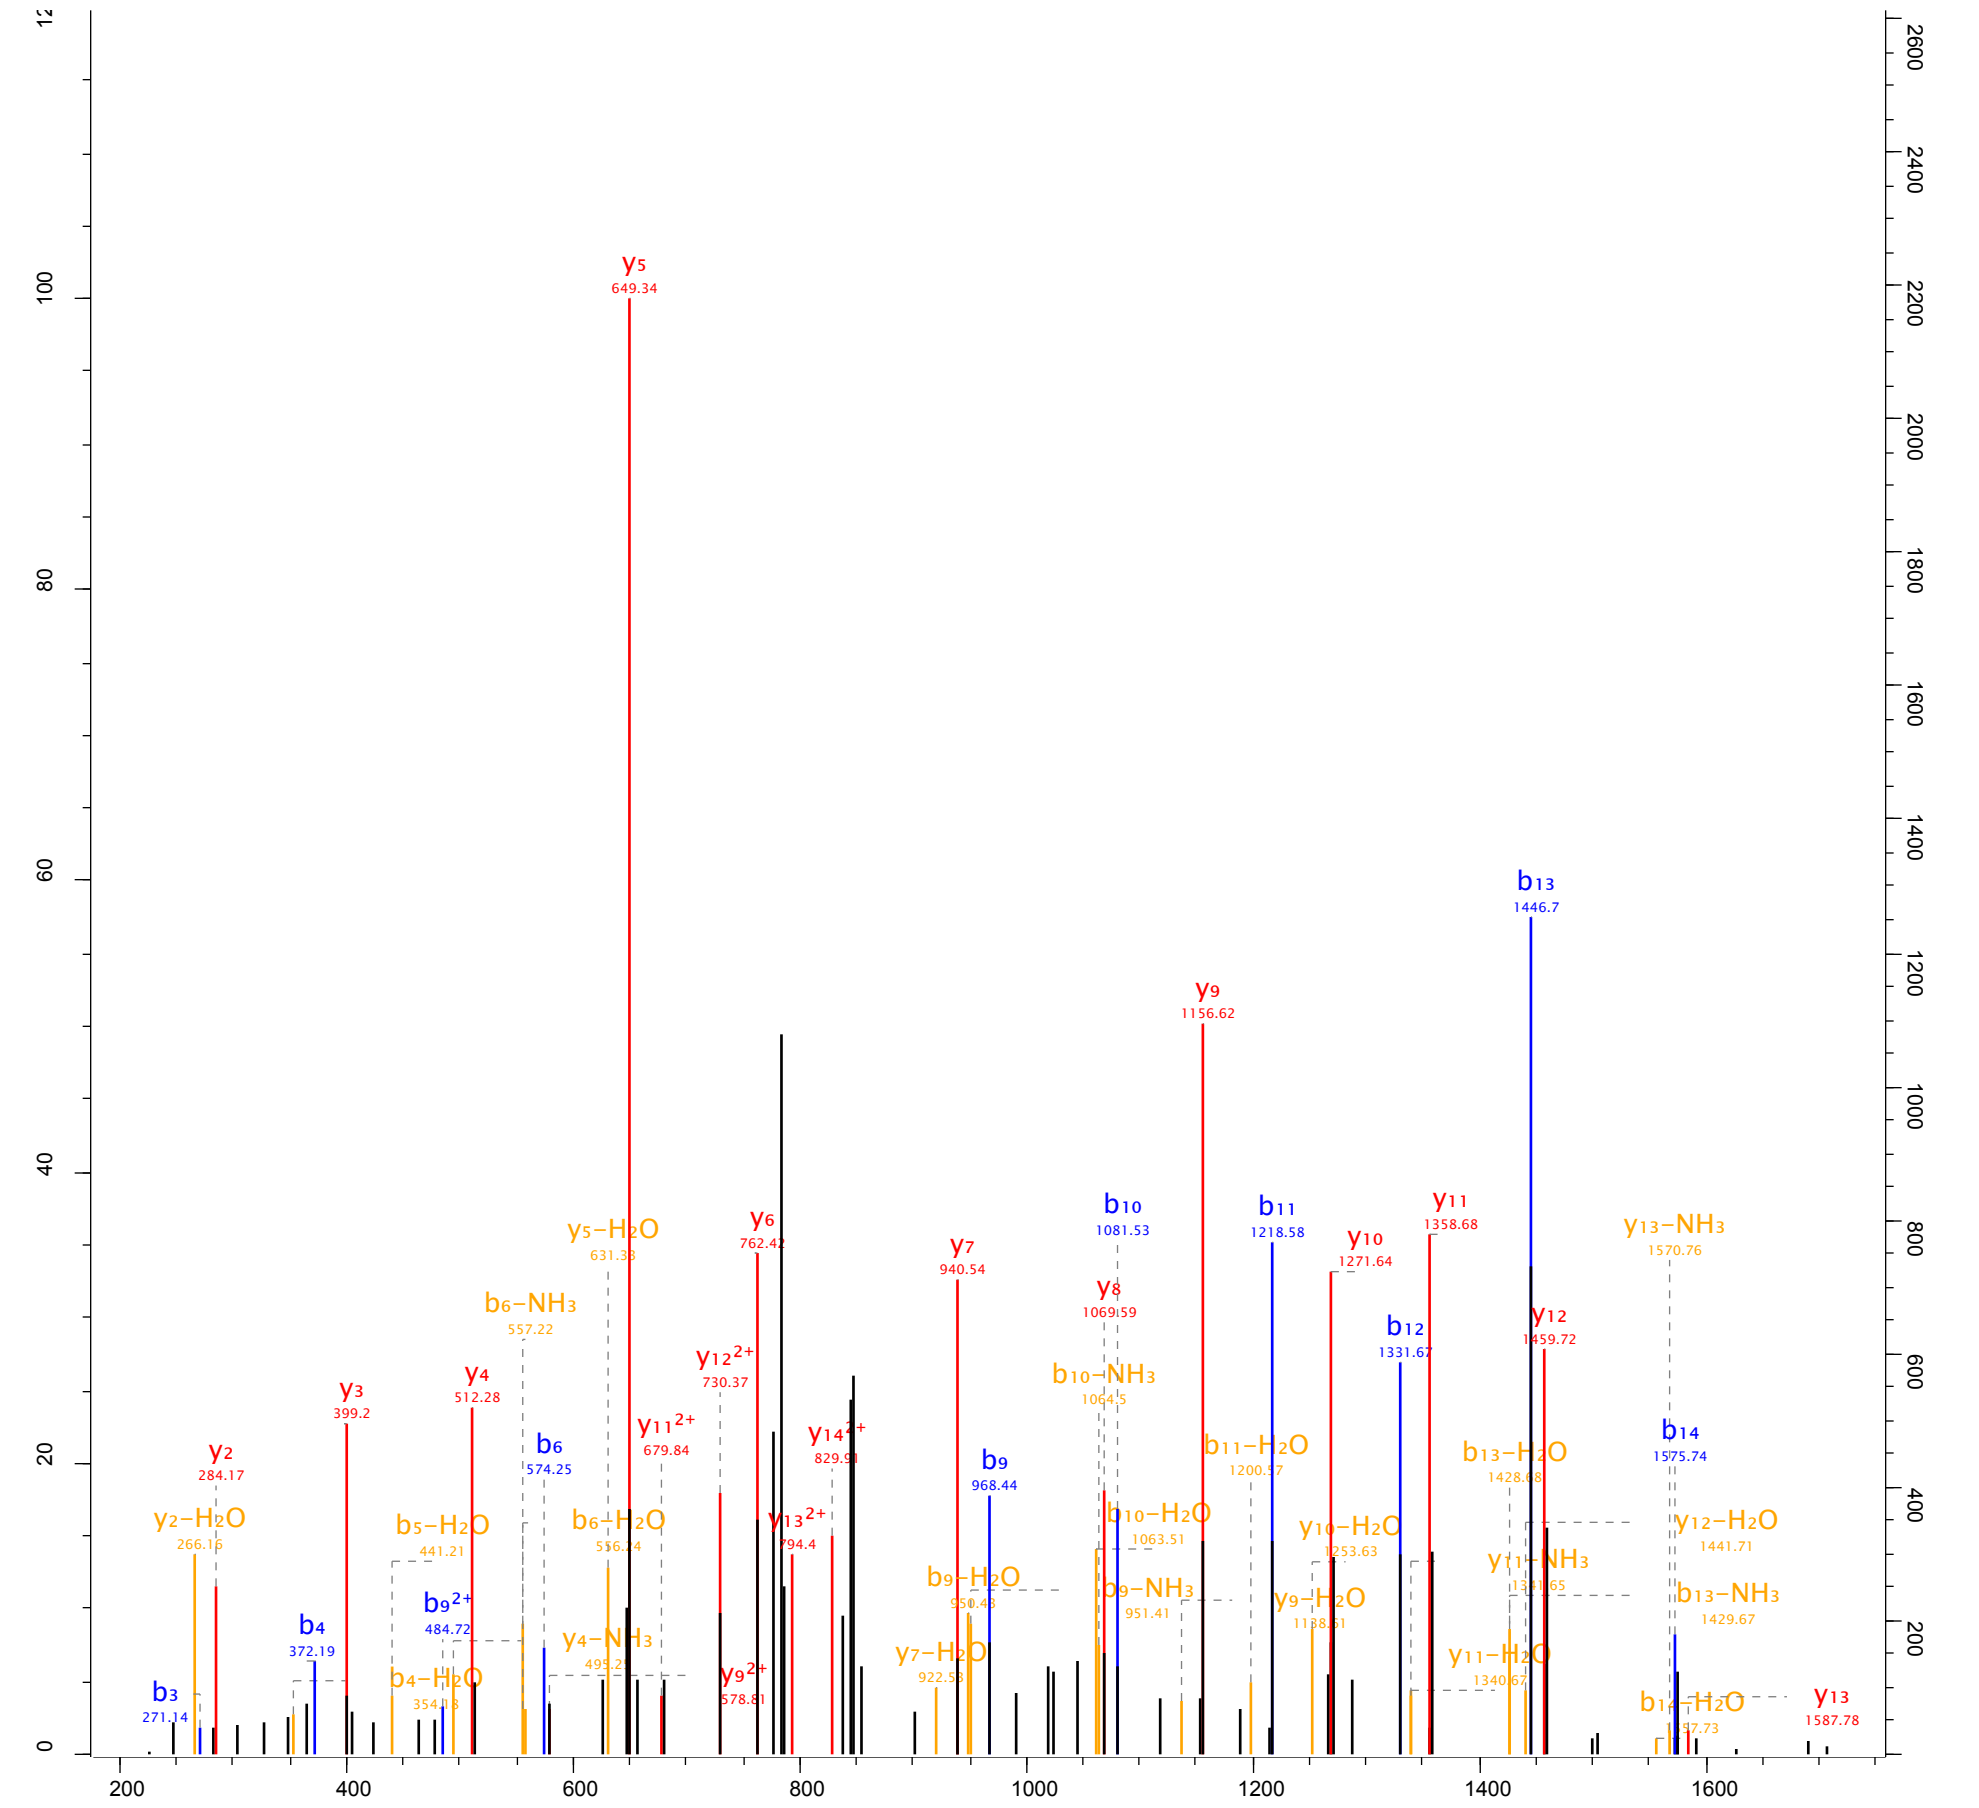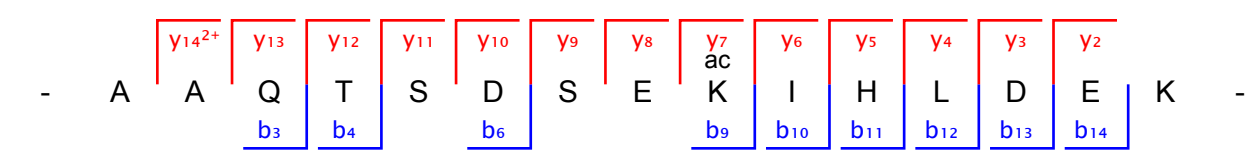

050713\_SCW\_II\_29\_31\_8

15257 ITMS; CID 128.68 570.96 Lmnb1

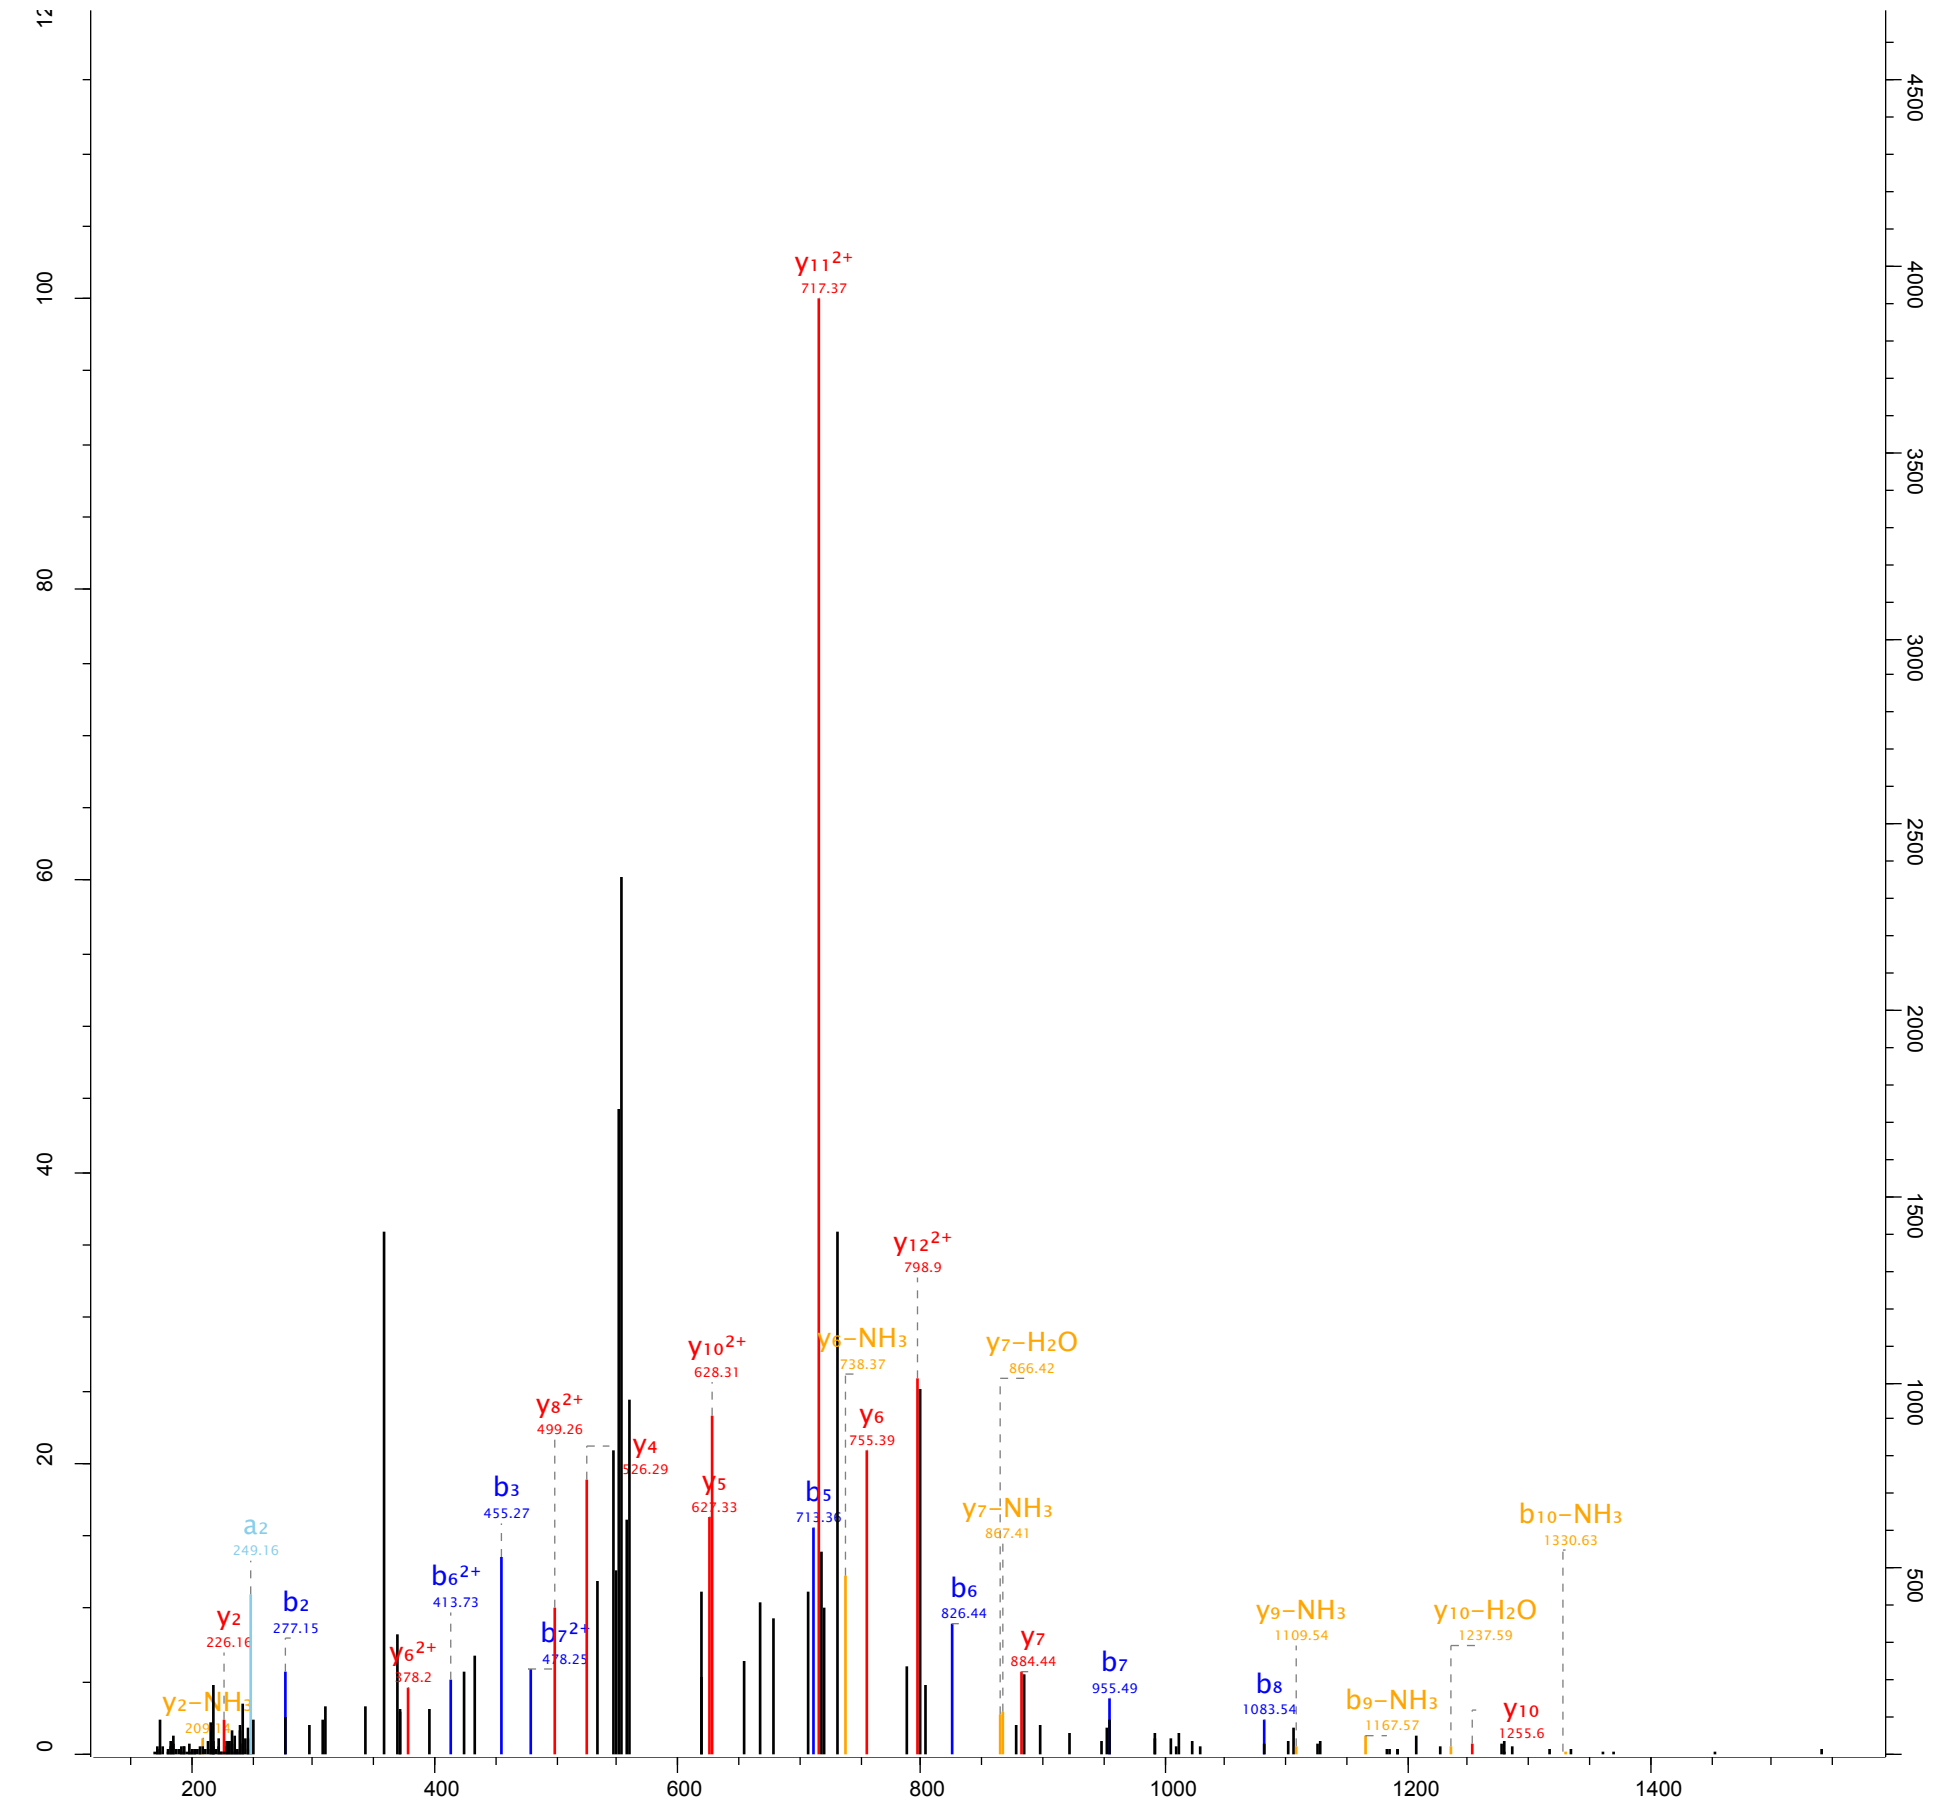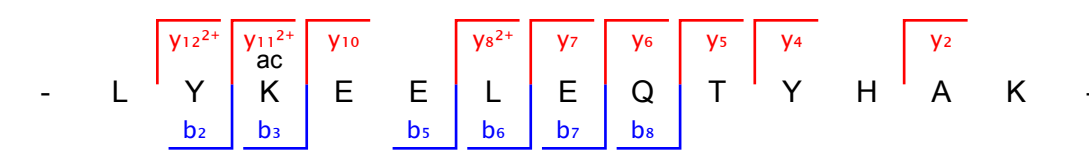



050713\_SCW\_II\_29\_31\_8

15276 ITMS; CID 178.03 900.95 Wdr19

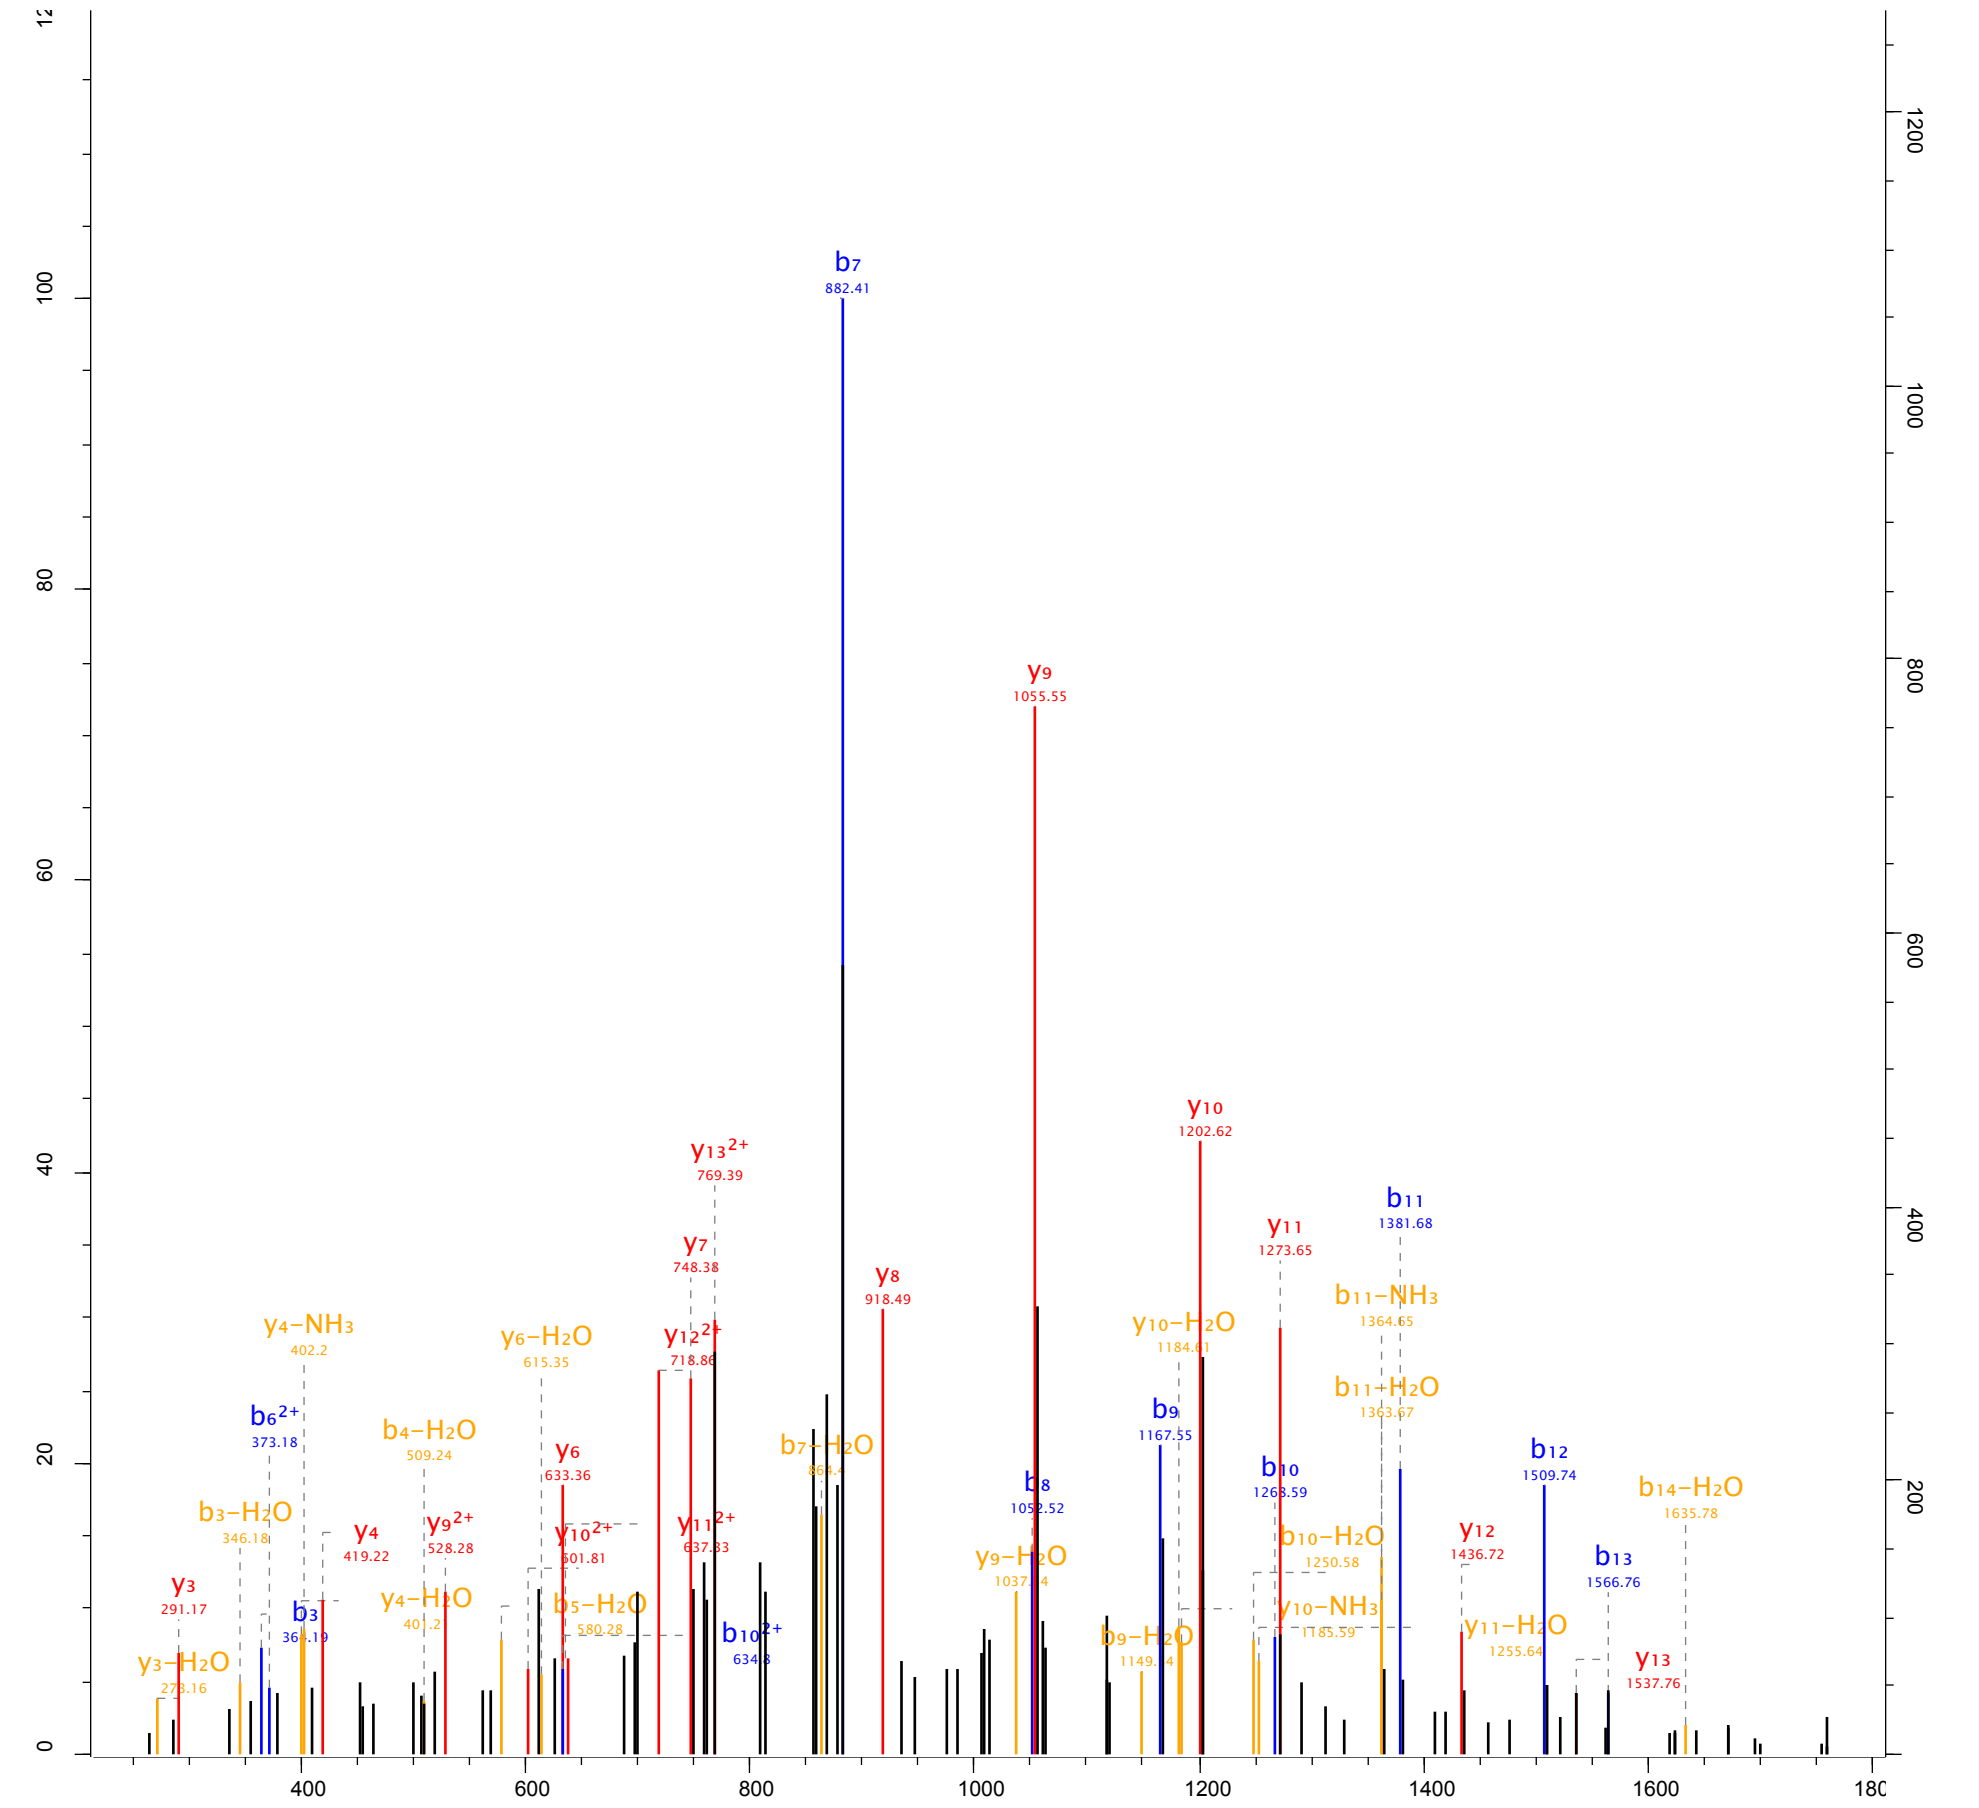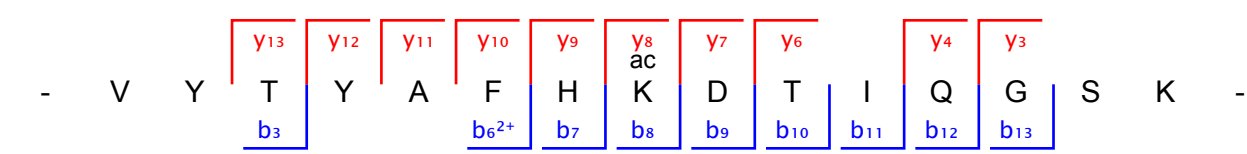

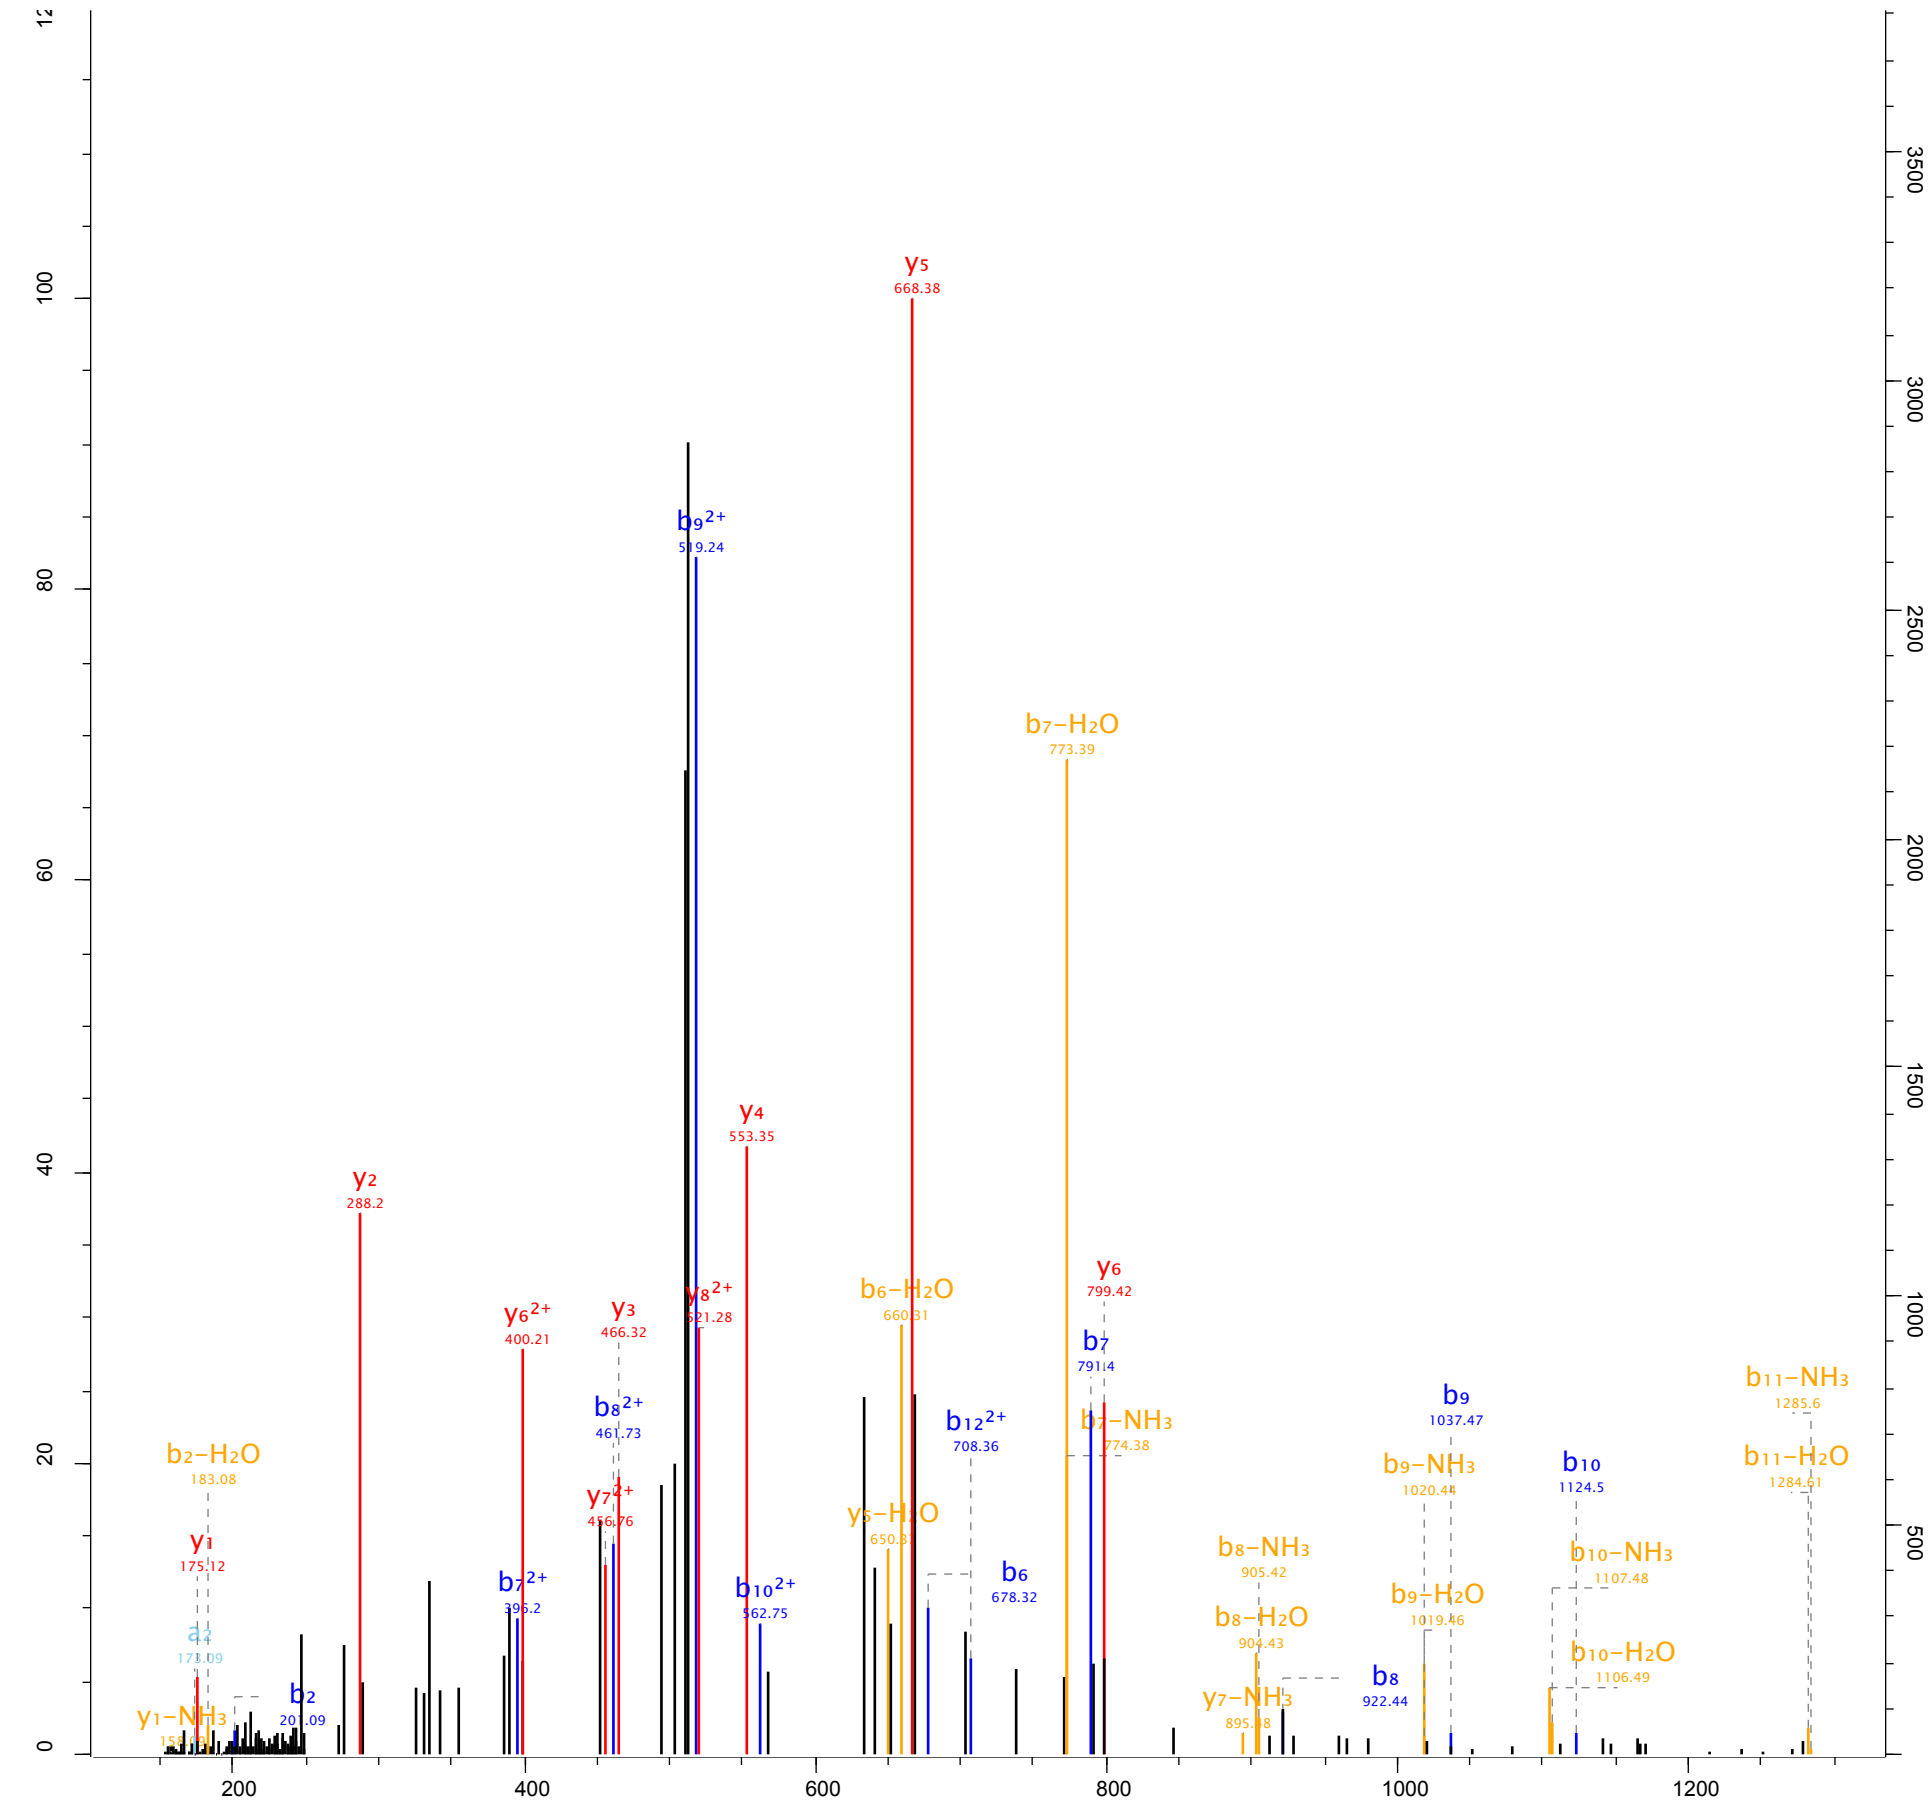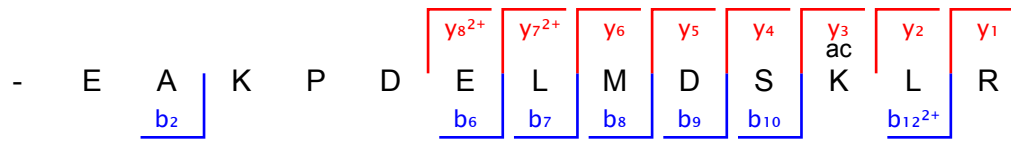

050713\_SCW\_II\_29\_31\_8

16103 ITMS; CID 128.06 635.01 Nup133

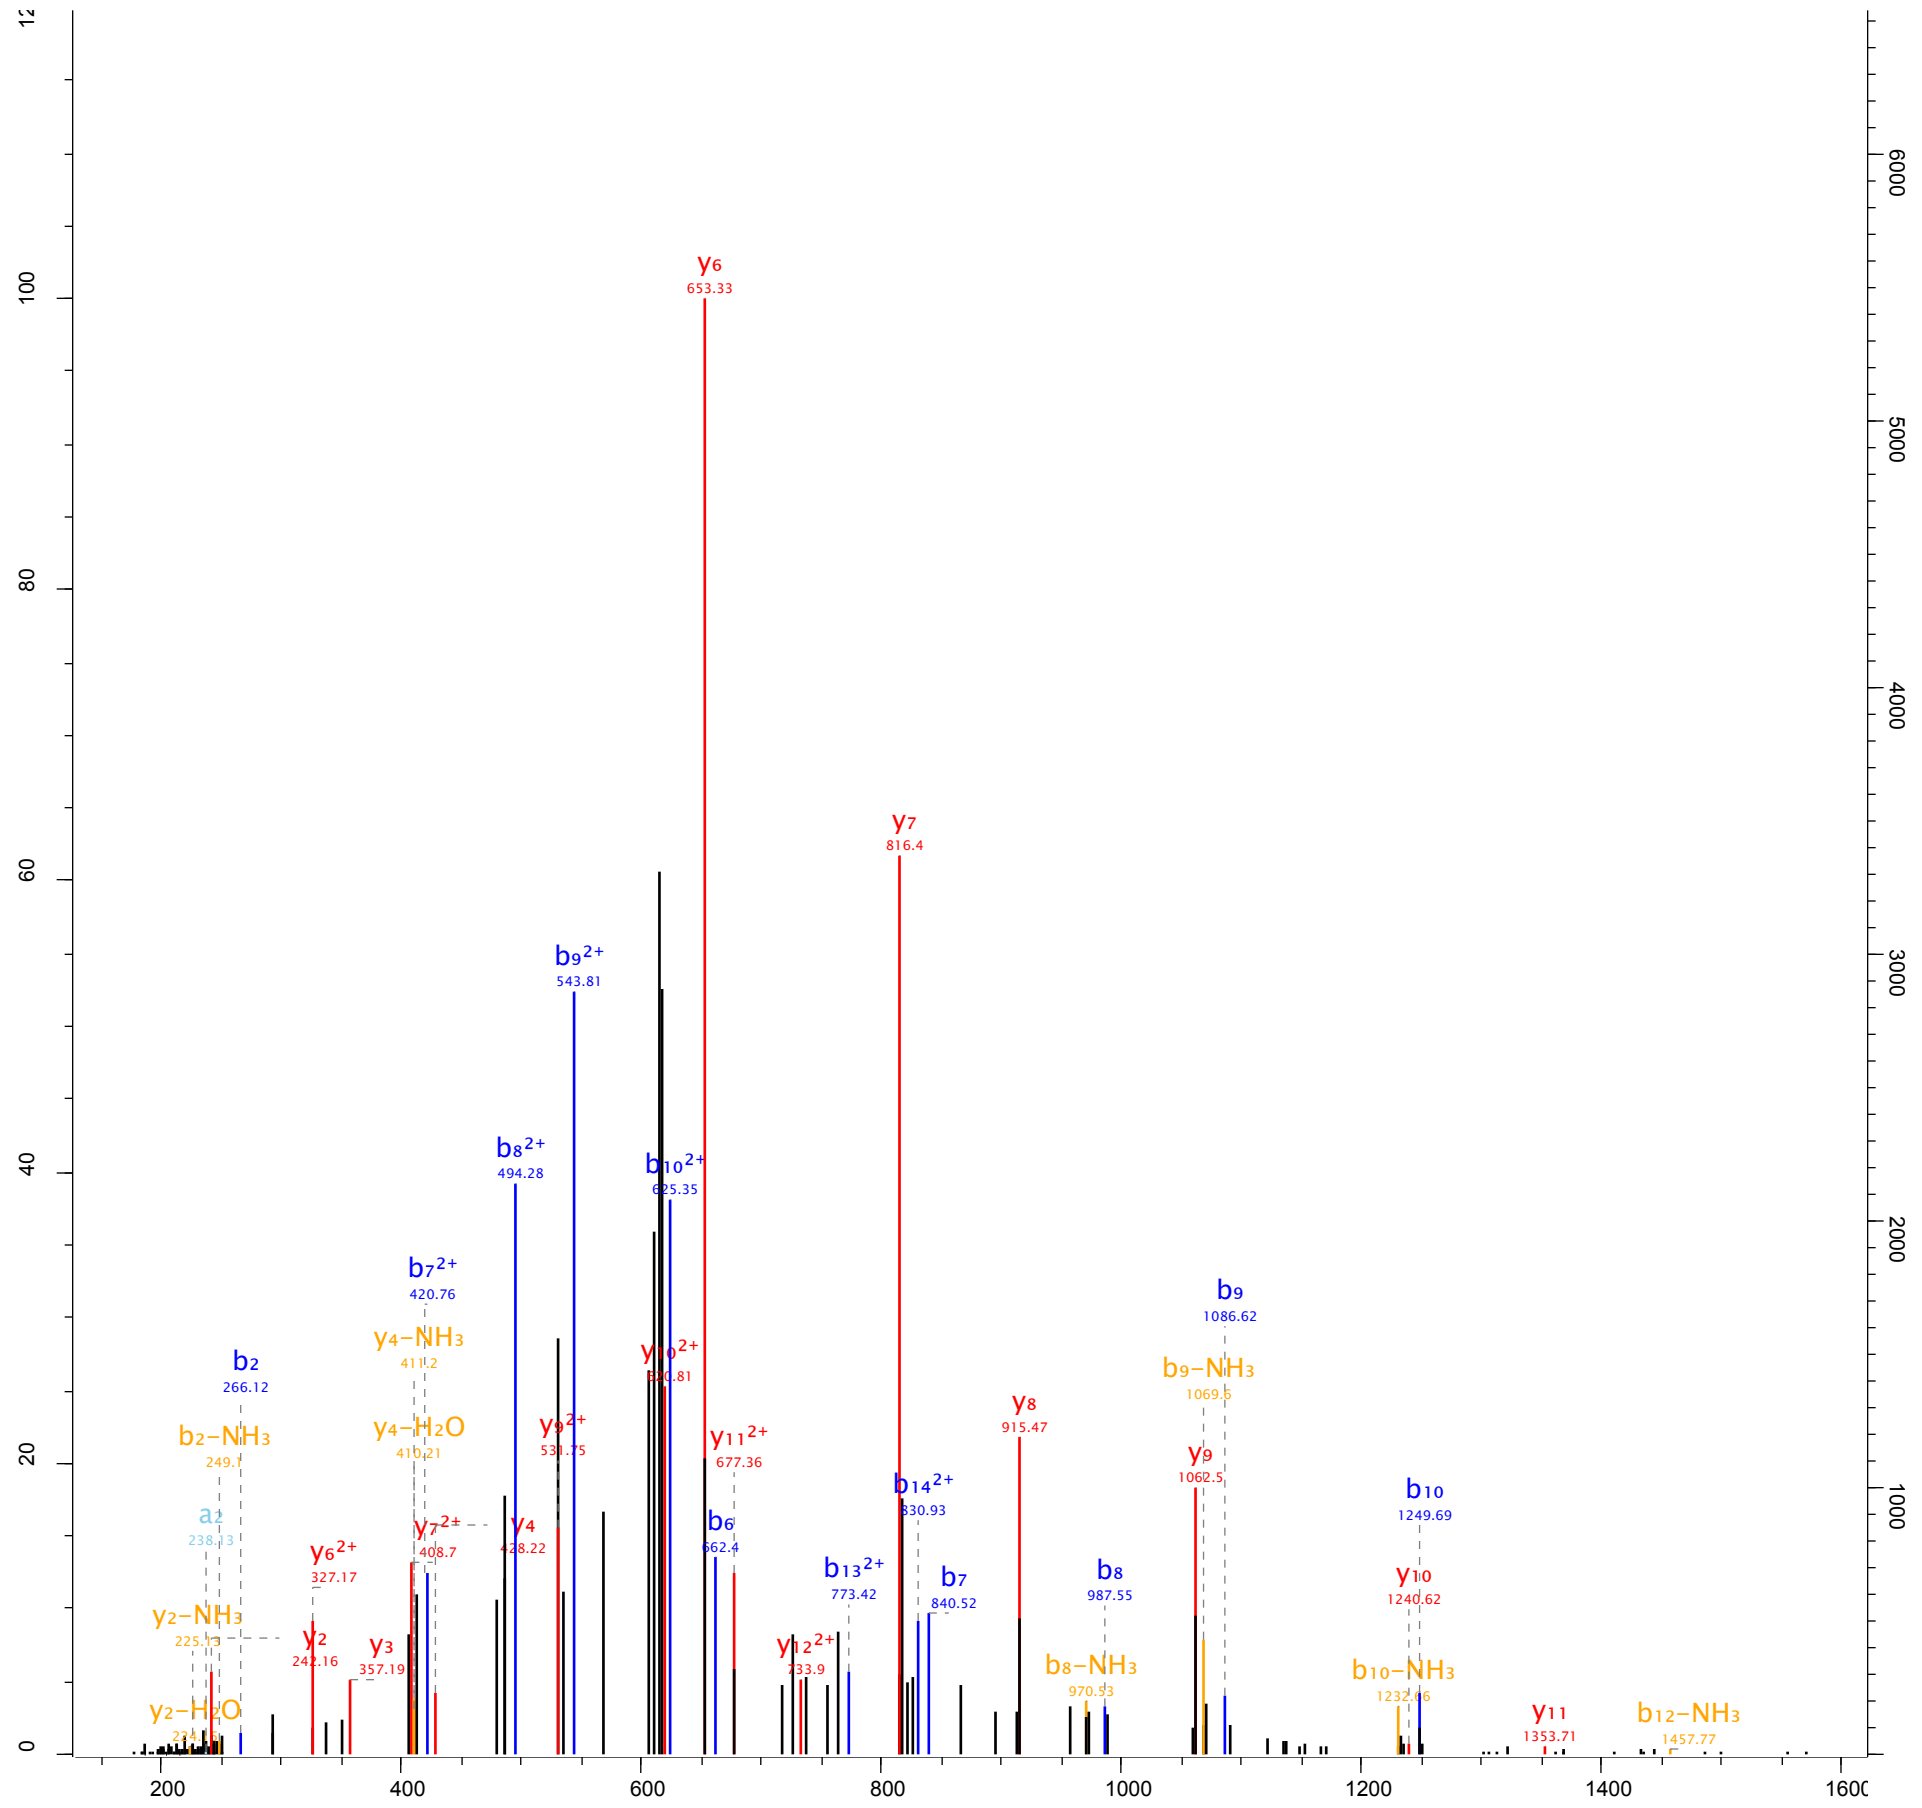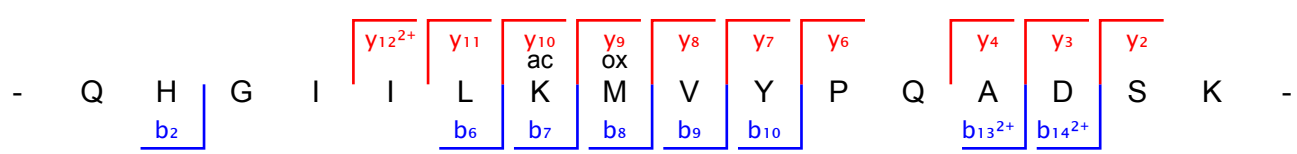

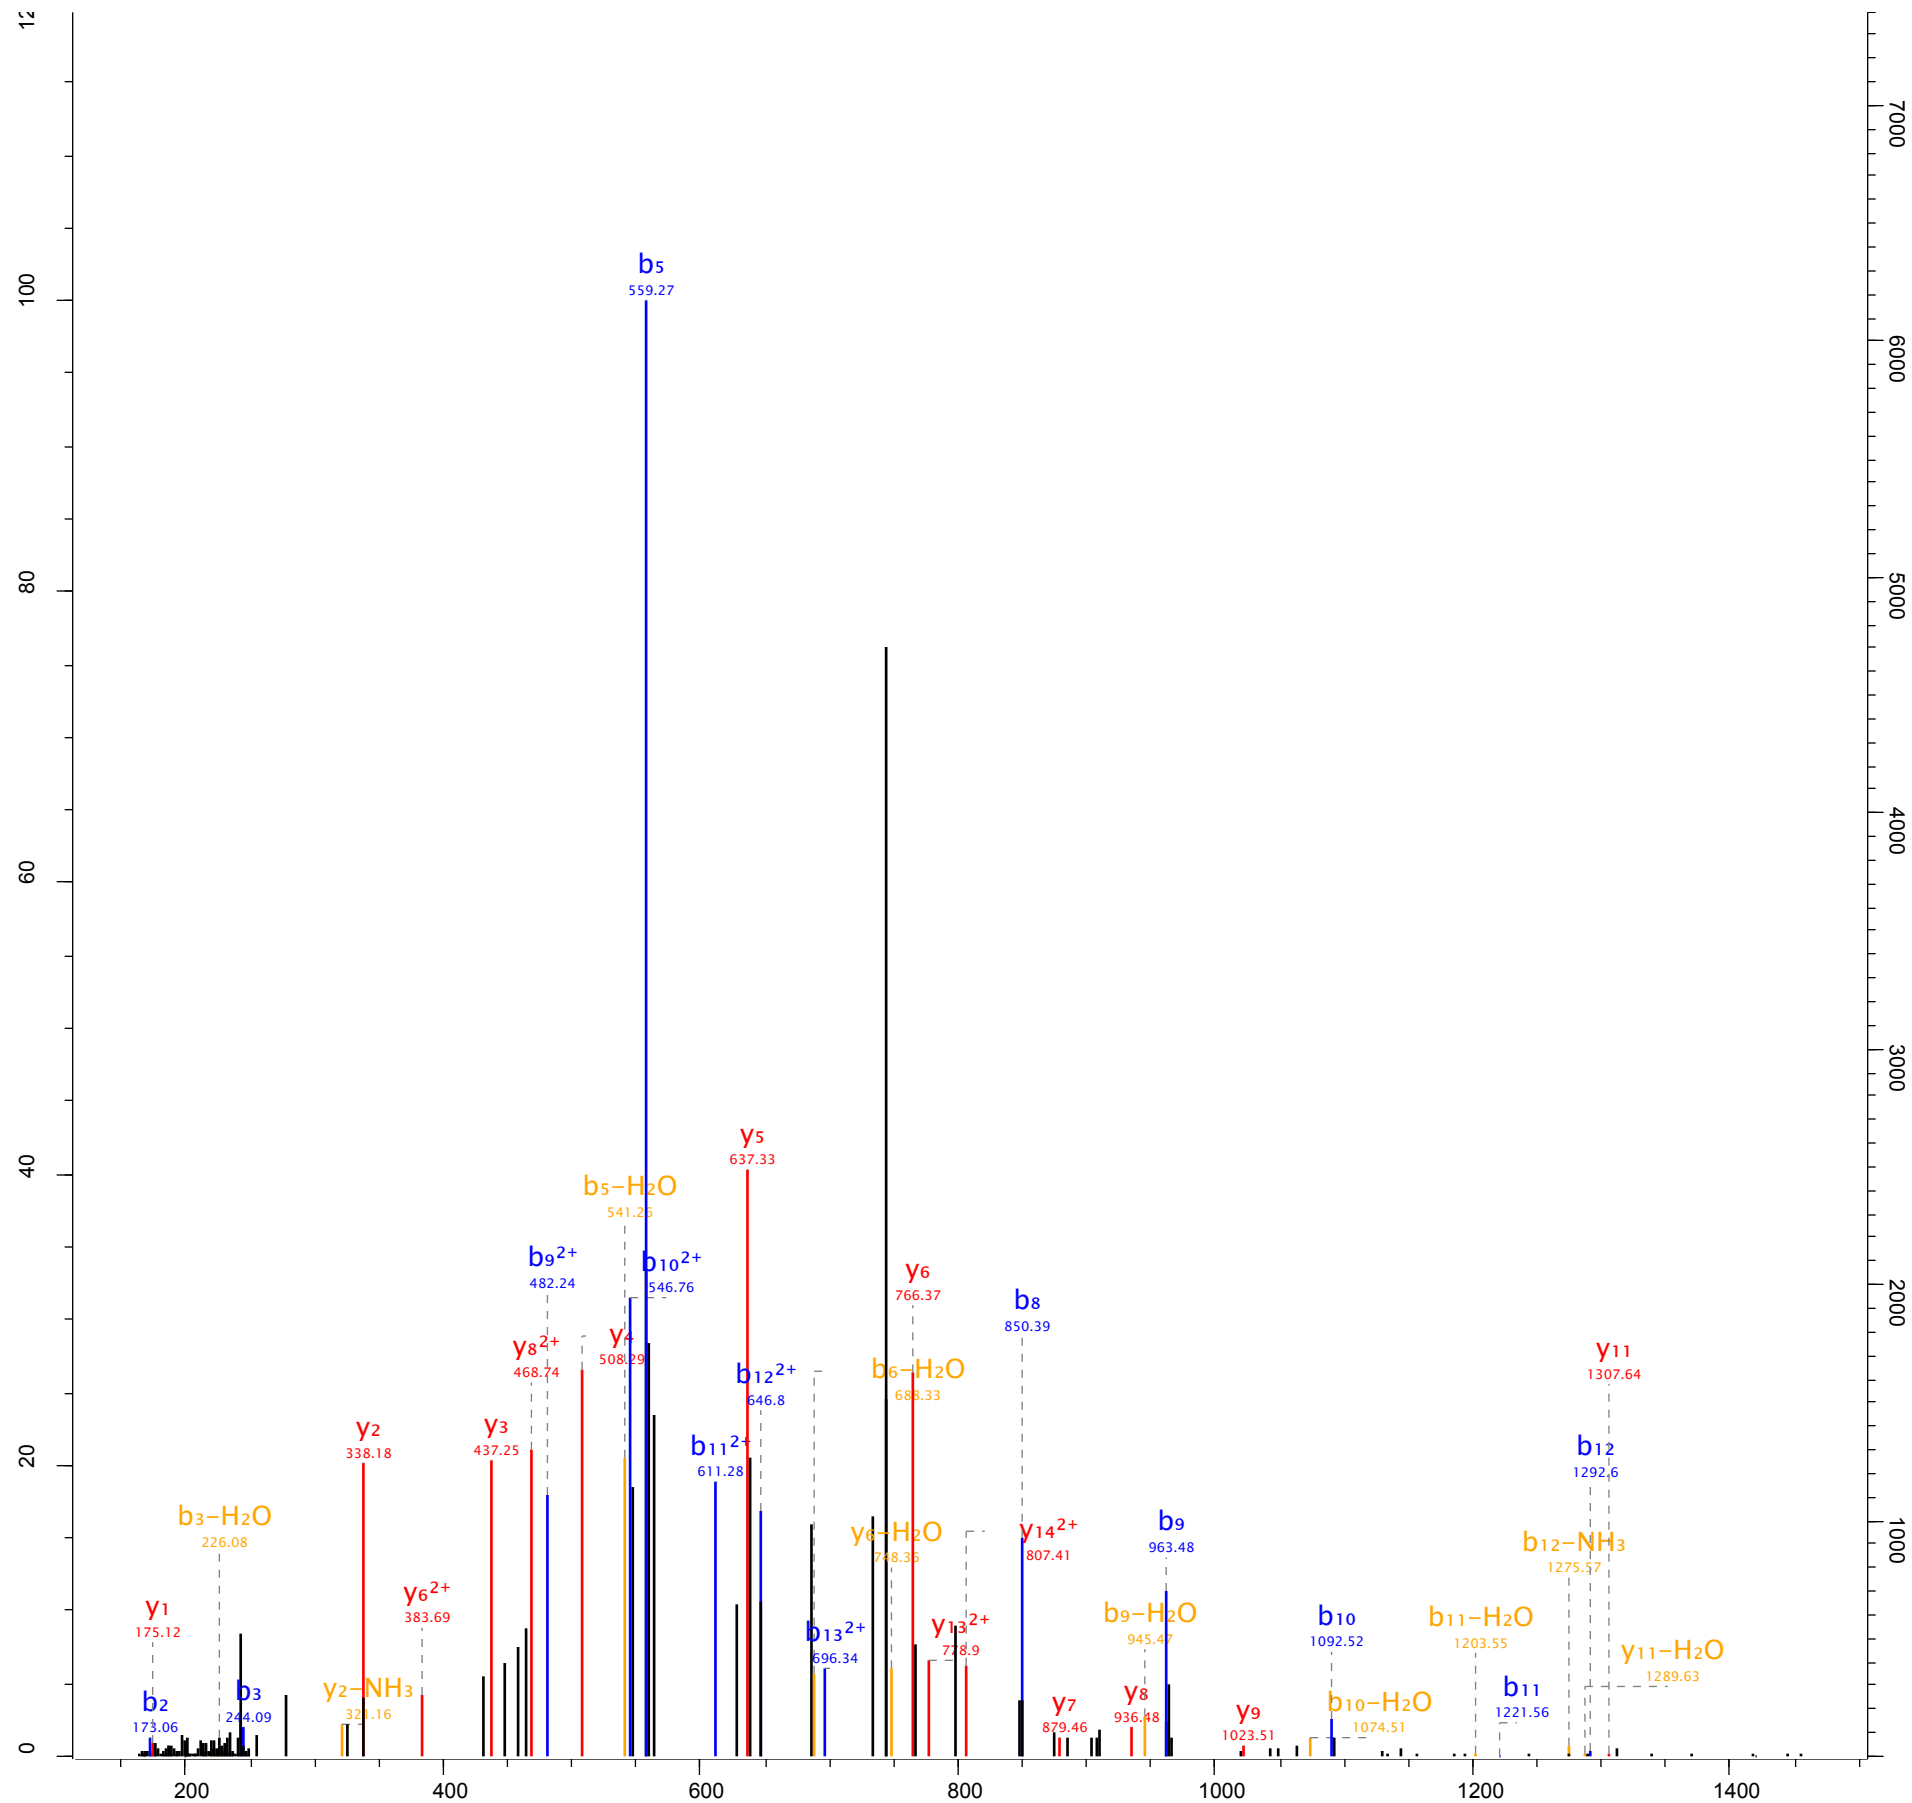

- D G A K H F S G L E E A V Y R -

y<sub>14</sub><sup>2+</sup>
y<sub>13</sub><sup>2+</sup>
ac
y<sub>11</sub>
F
y<sub>9</sub>
y<sub>8</sub>
y<sub>7</sub>
y<sub>6</sub>
y<sub>5</sub>
y<sub>4</sub>
y<sub>3</sub>
y<sub>2</sub>
y<sub>1</sub>

b<sub>2</sub>
b<sub>3</sub>
b<sub>5</sub>
b<sub>8</sub>
b<sub>9</sub>
b<sub>10</sub>
b<sub>11</sub>
b<sub>12</sub>
b<sub>13</sub><sup>2+</sup>

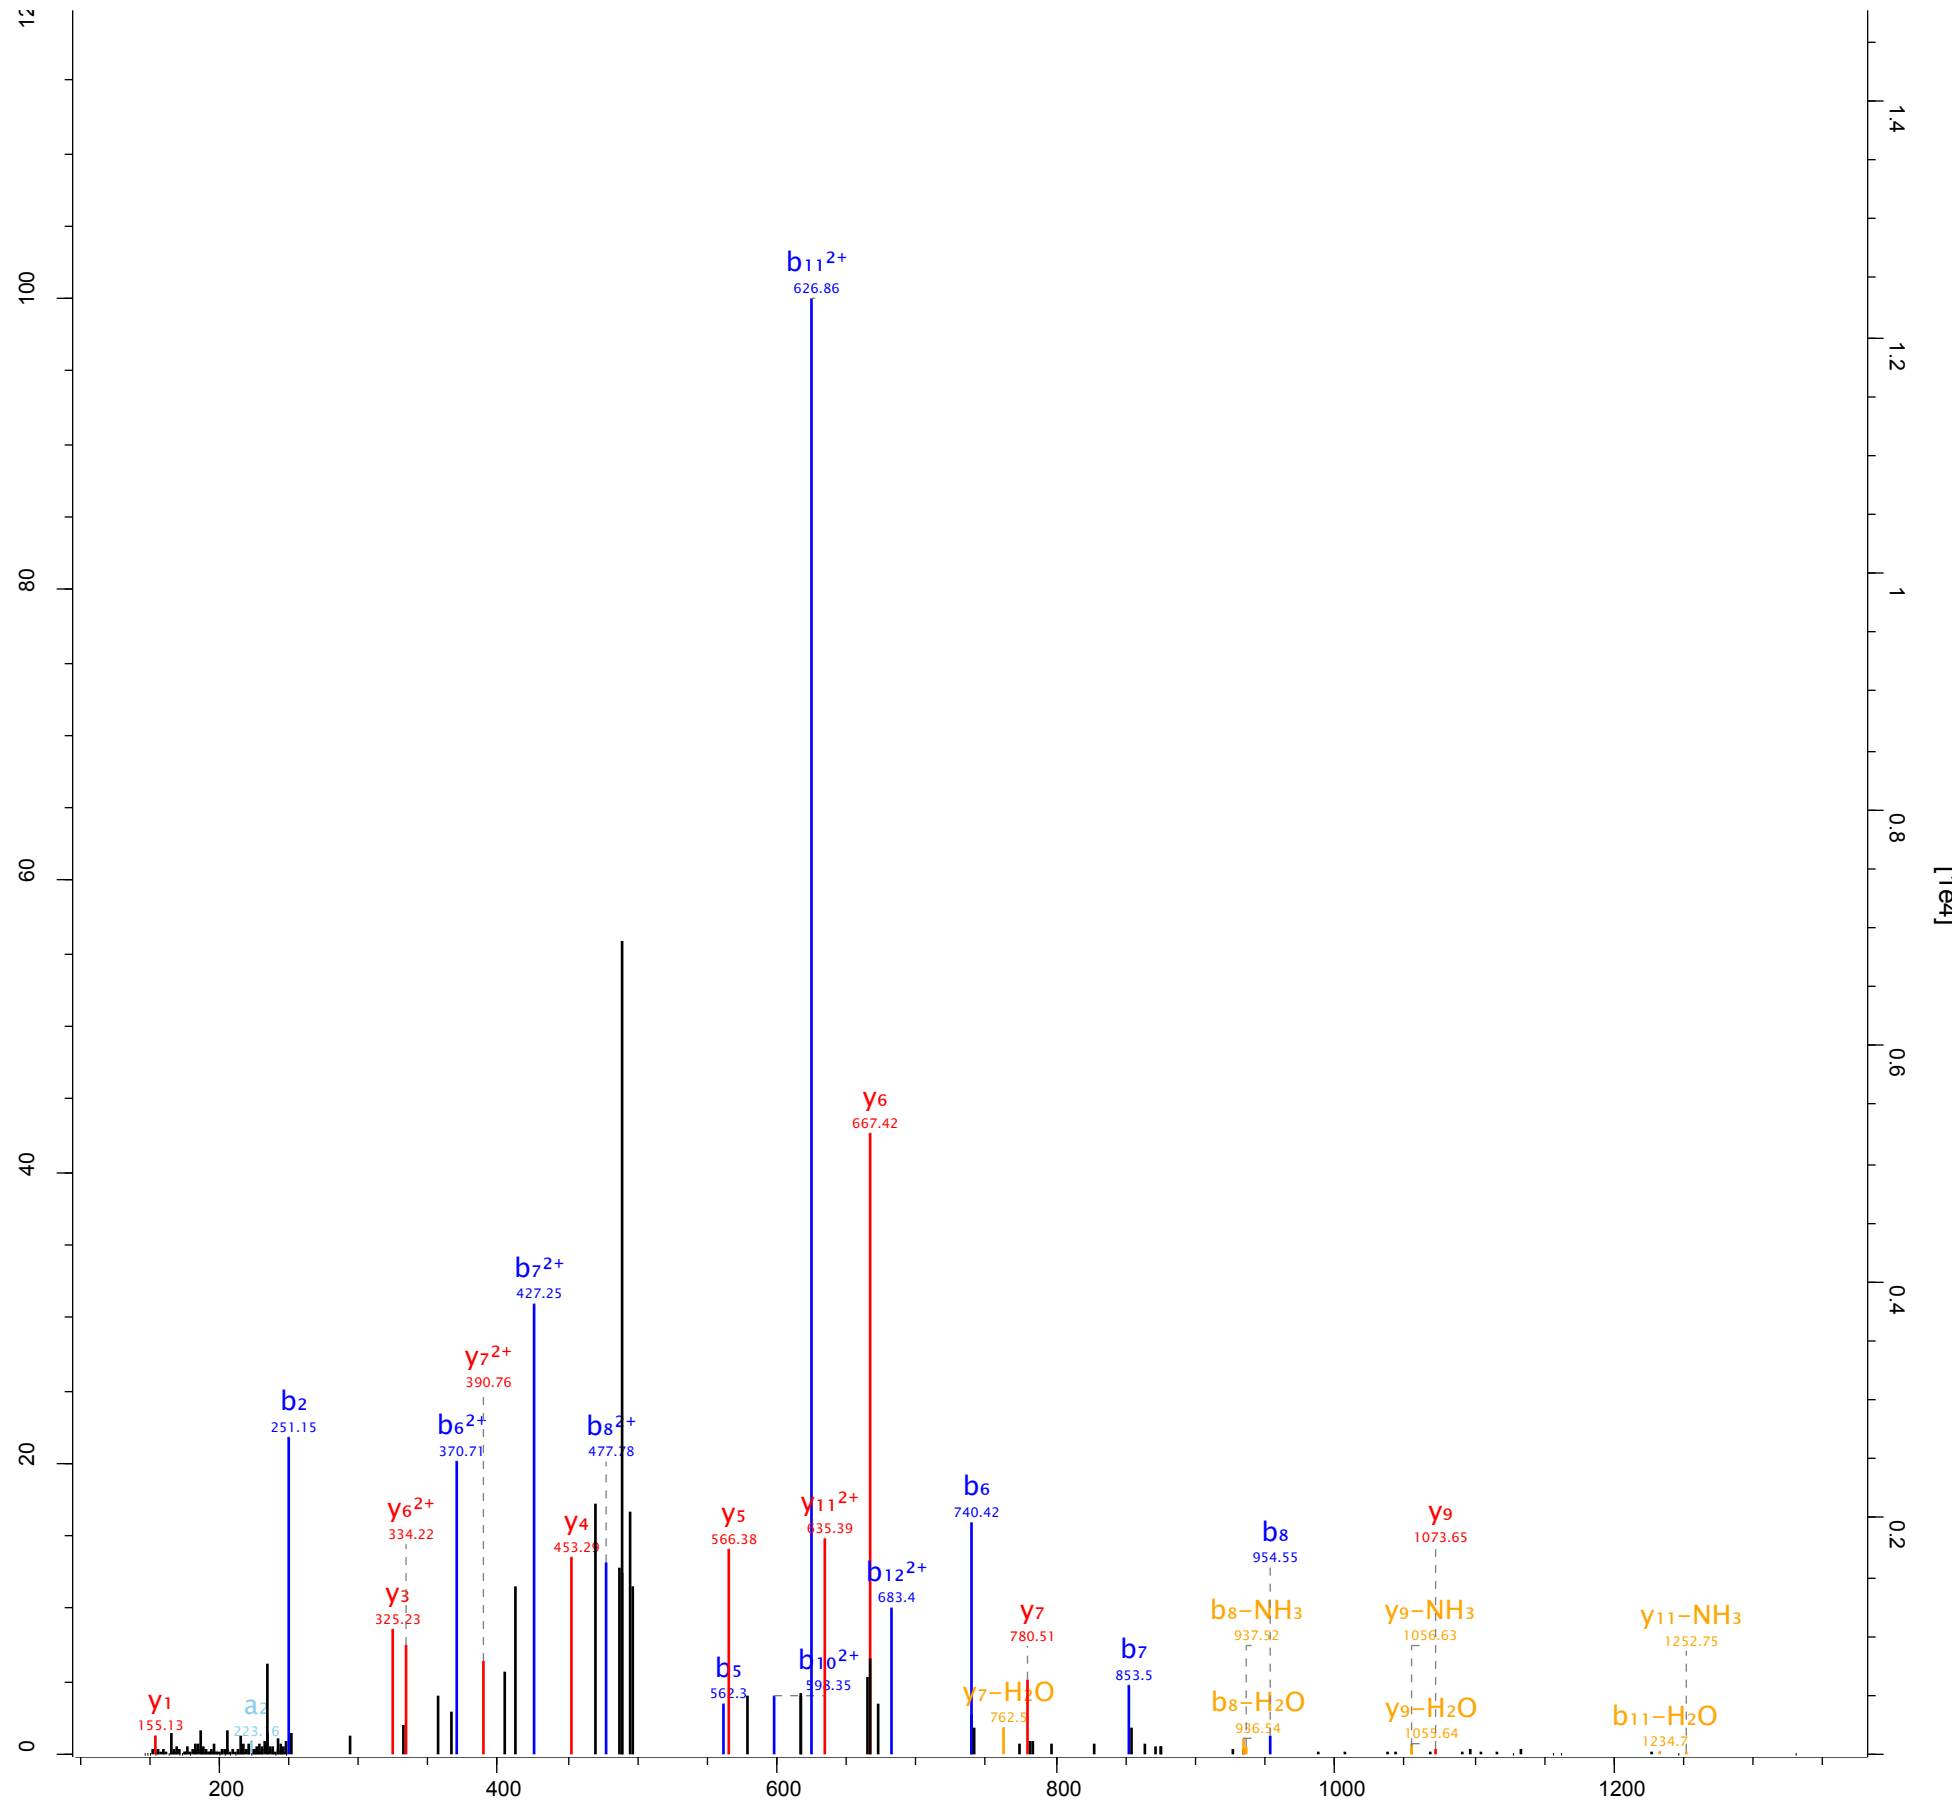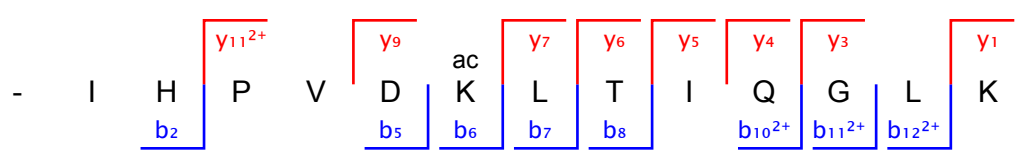

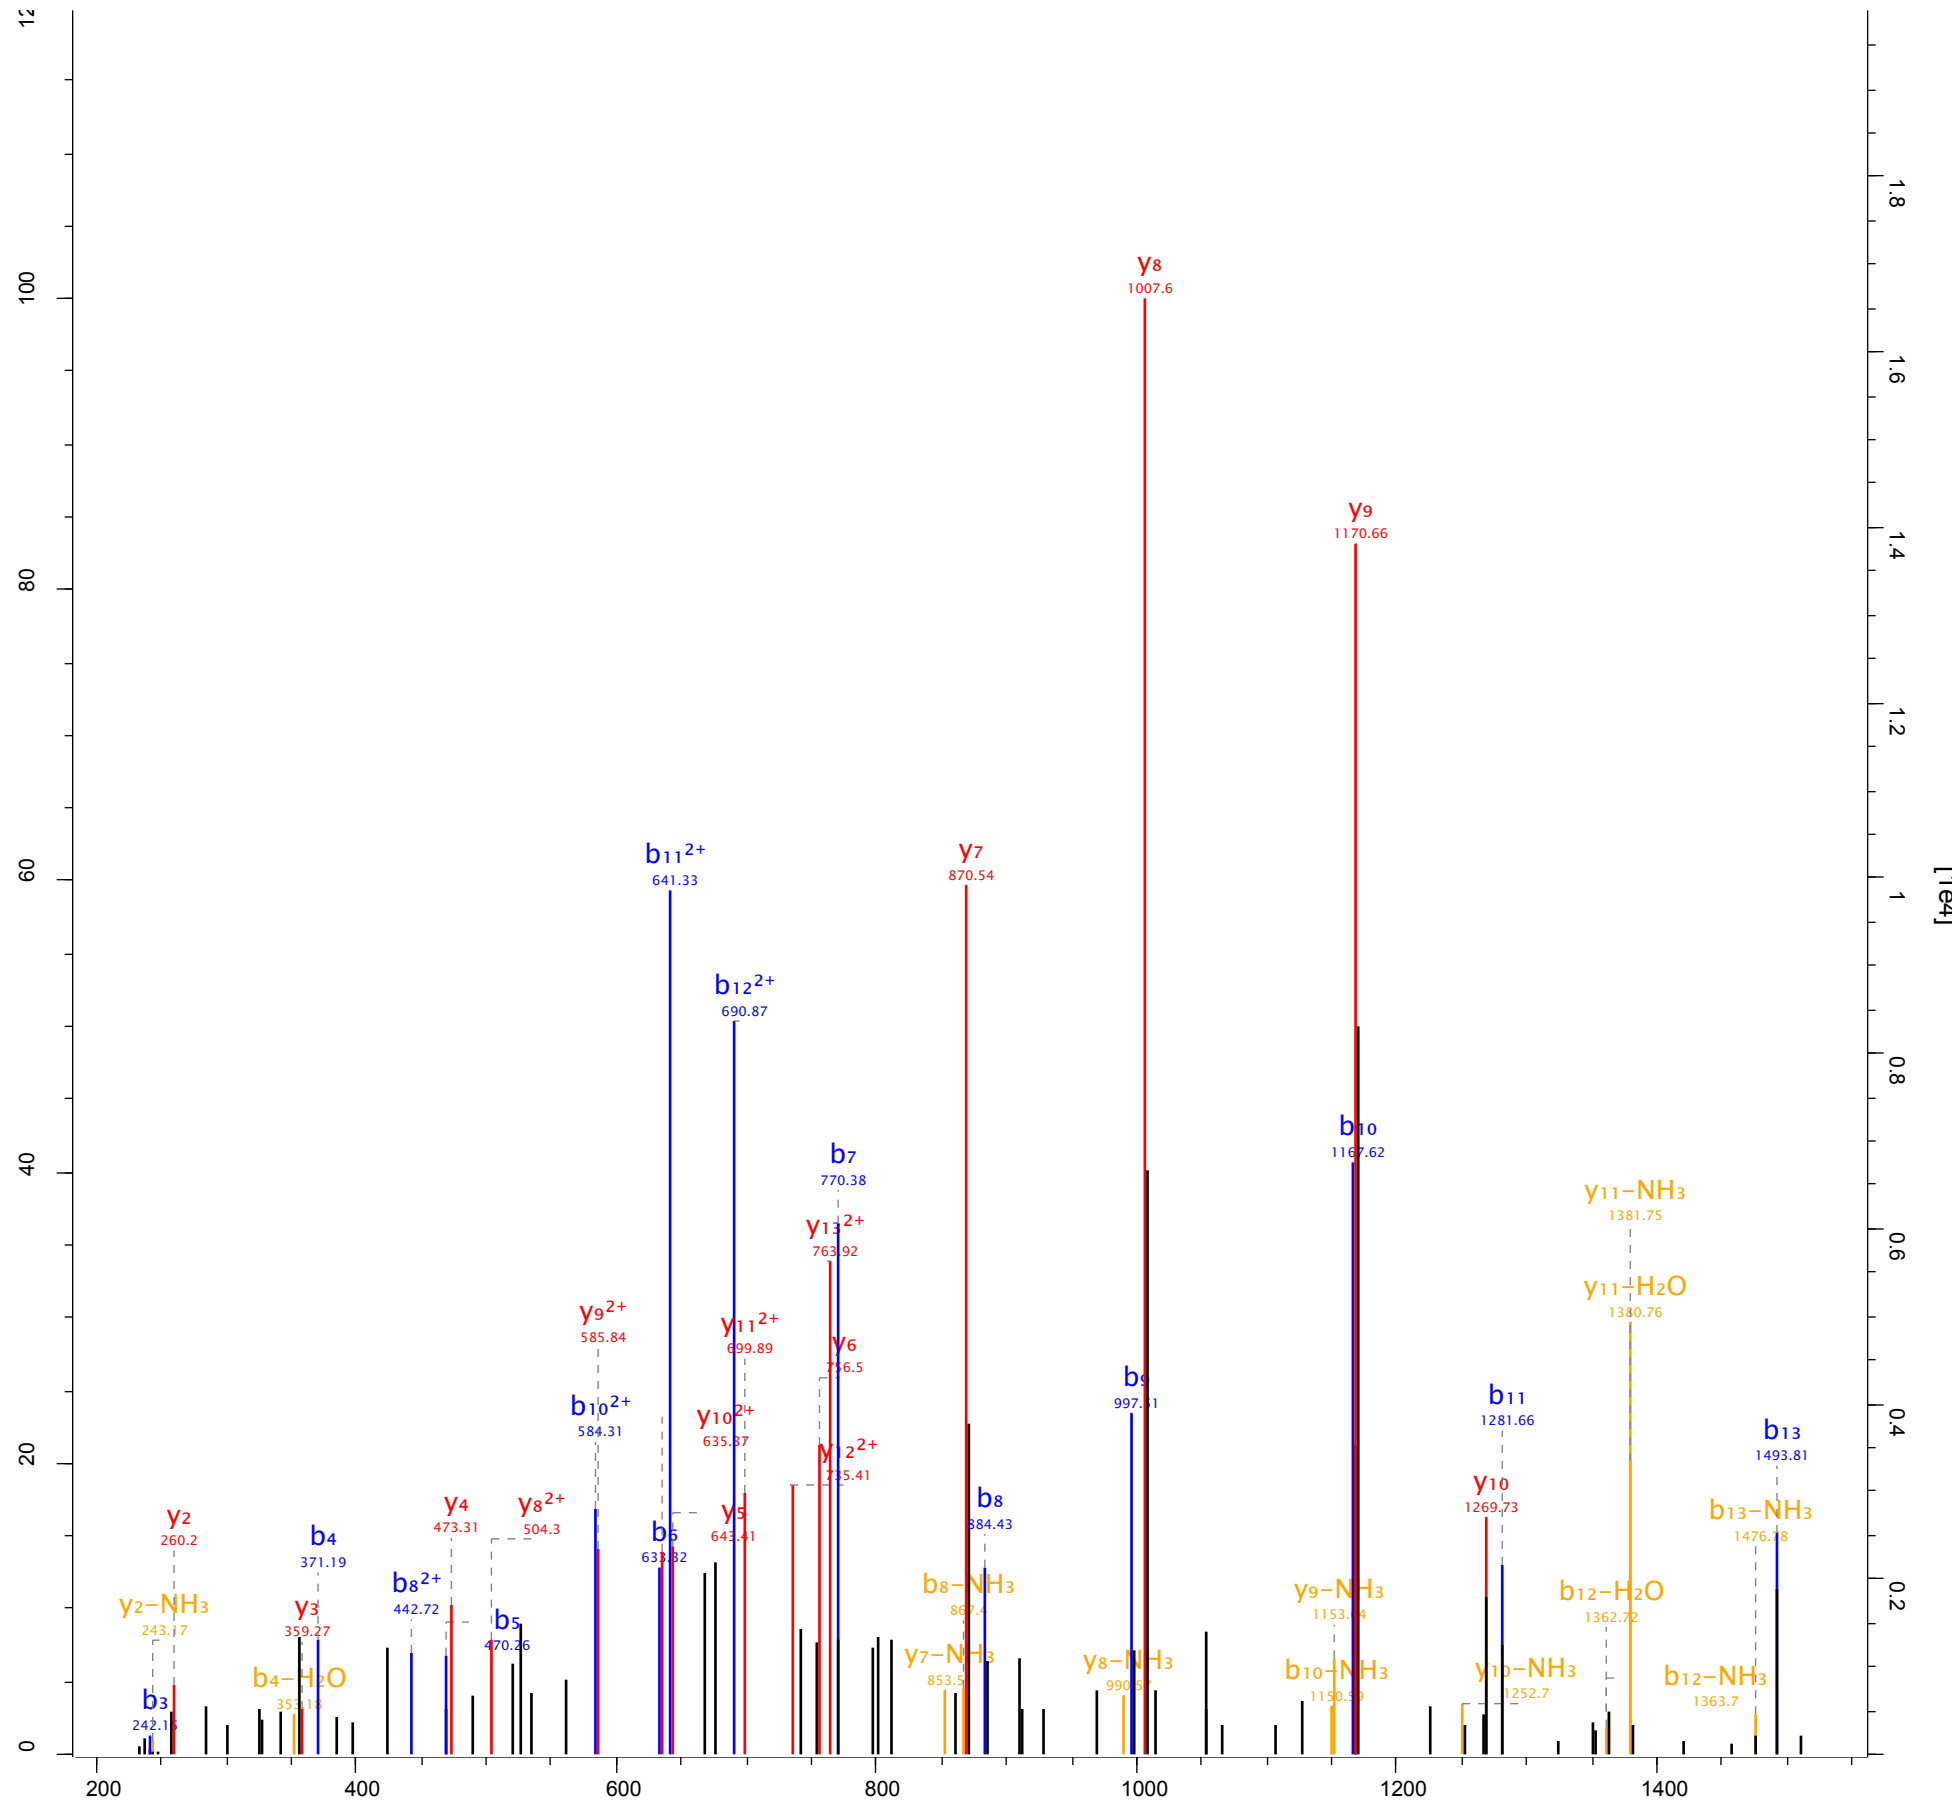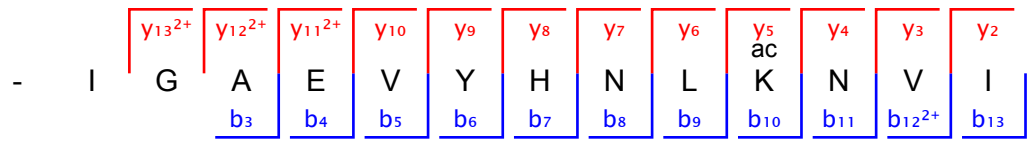

050713\_SCW\_II\_29\_31\_8

18702 ITMS; CID 106.58 819.14 Aco2

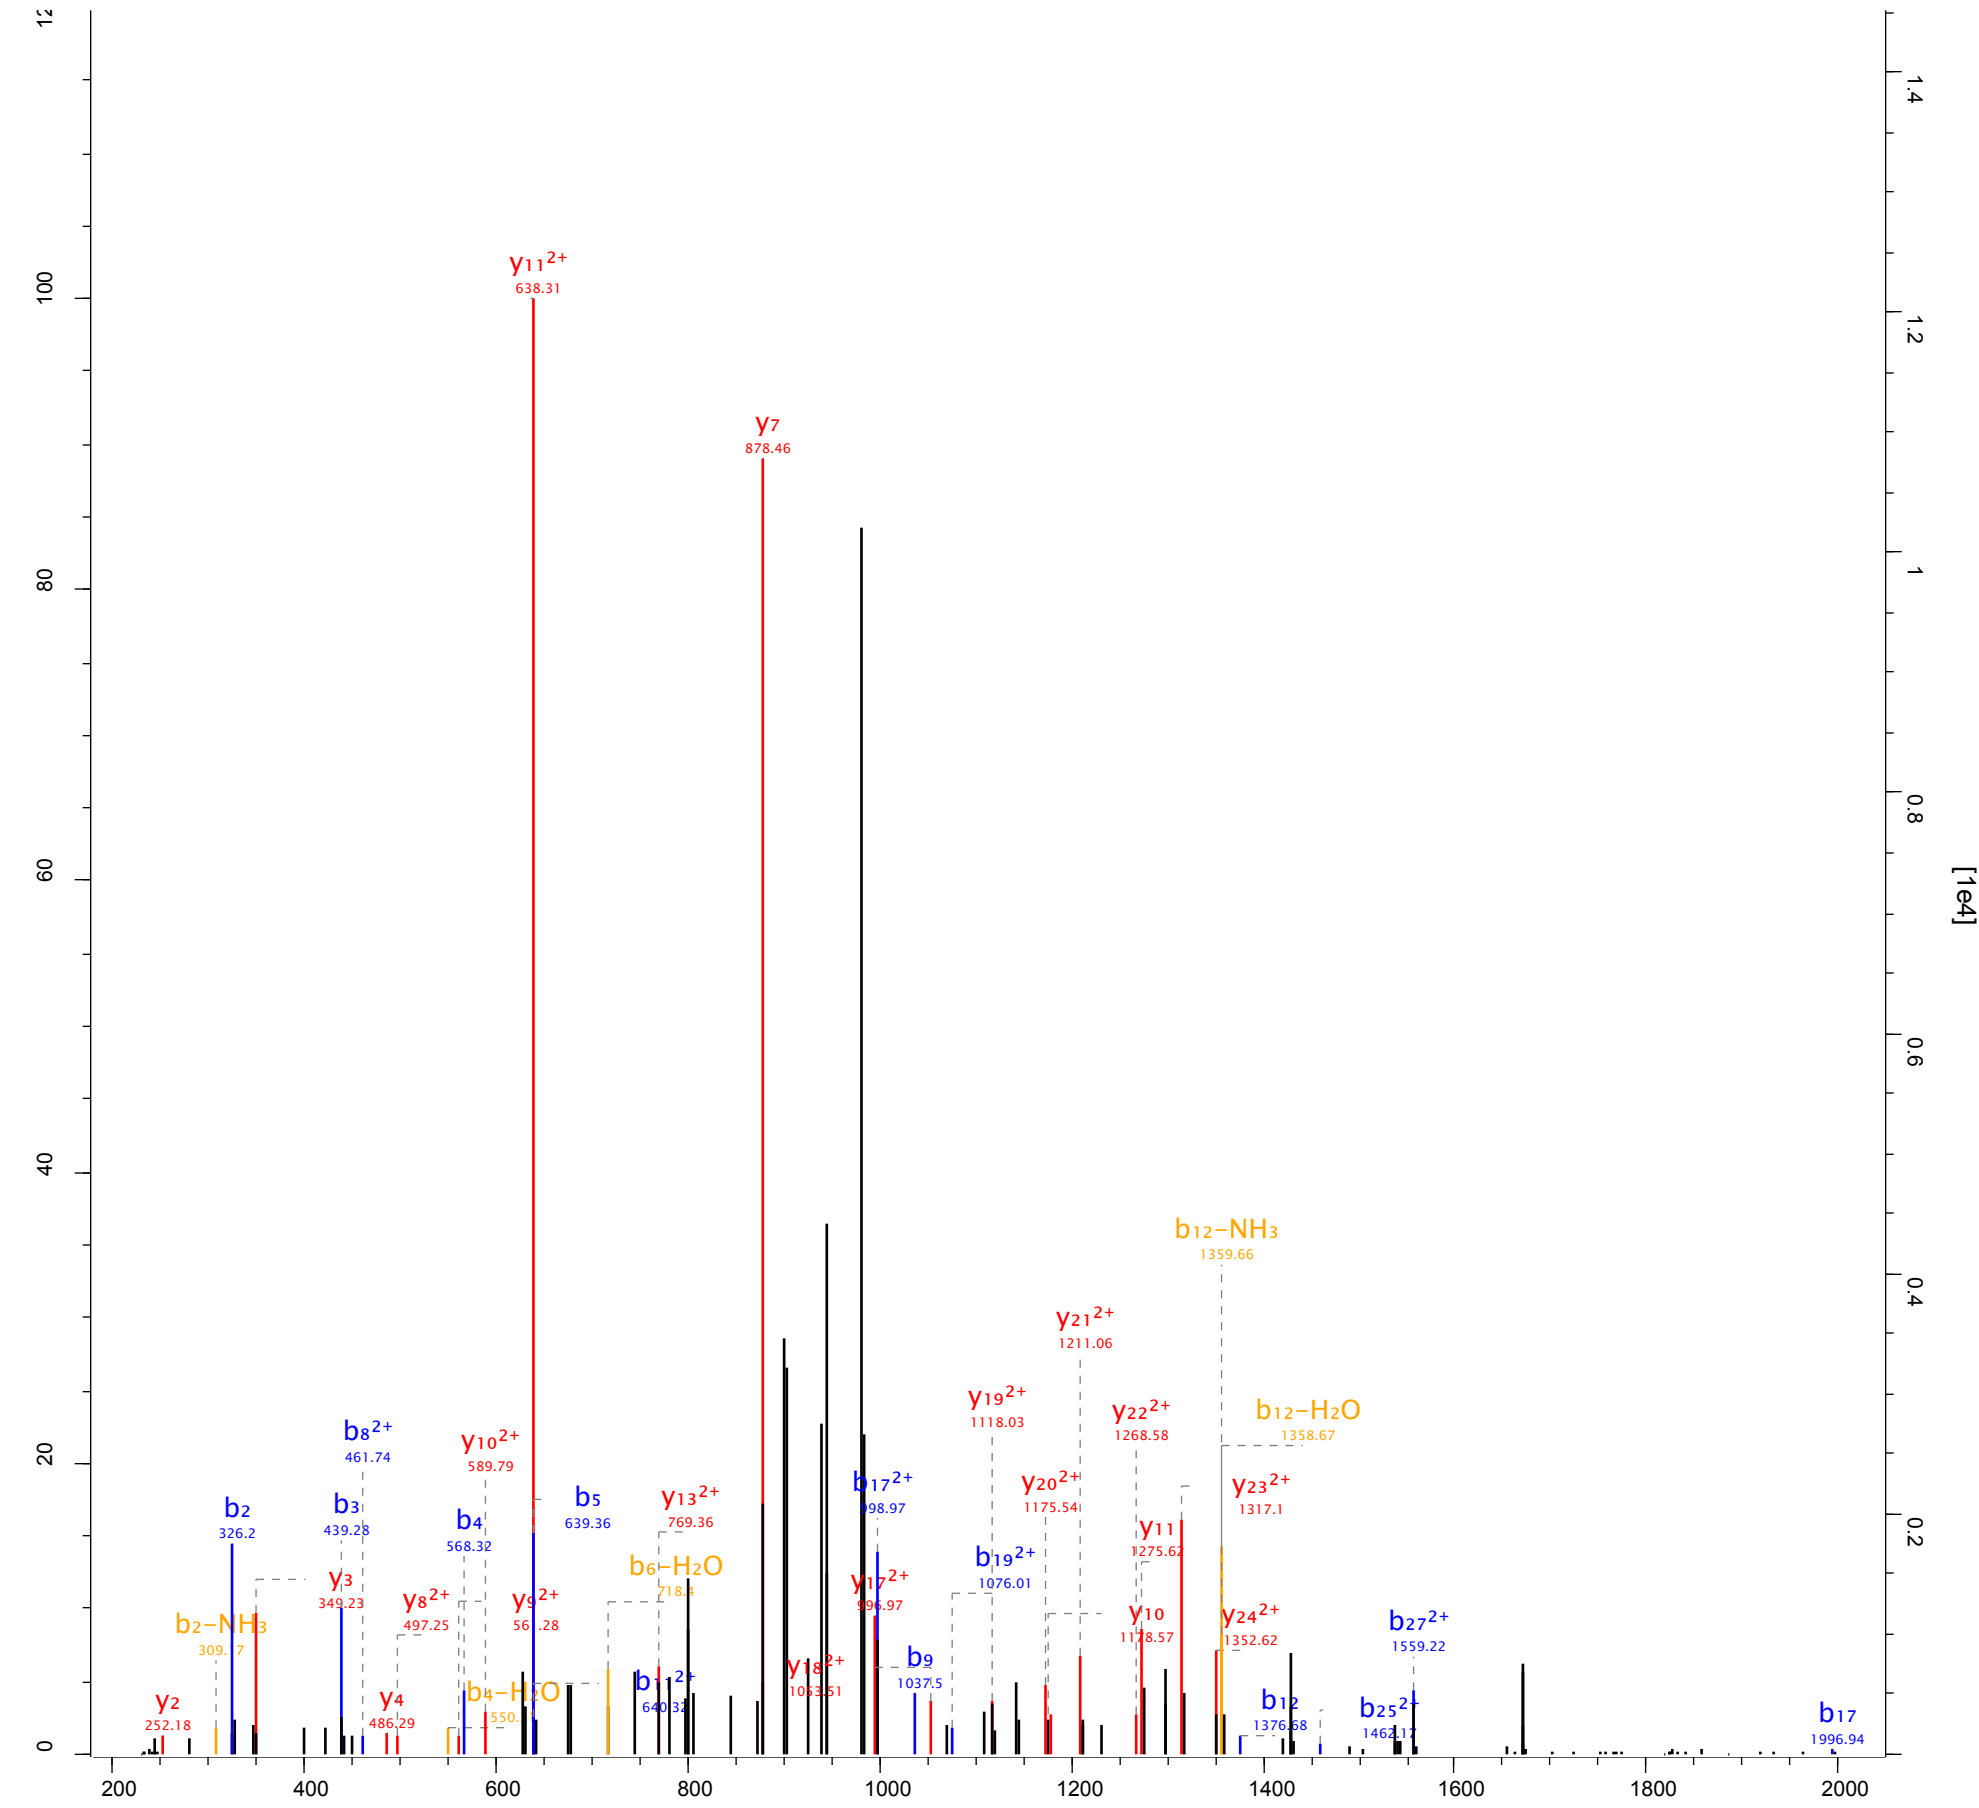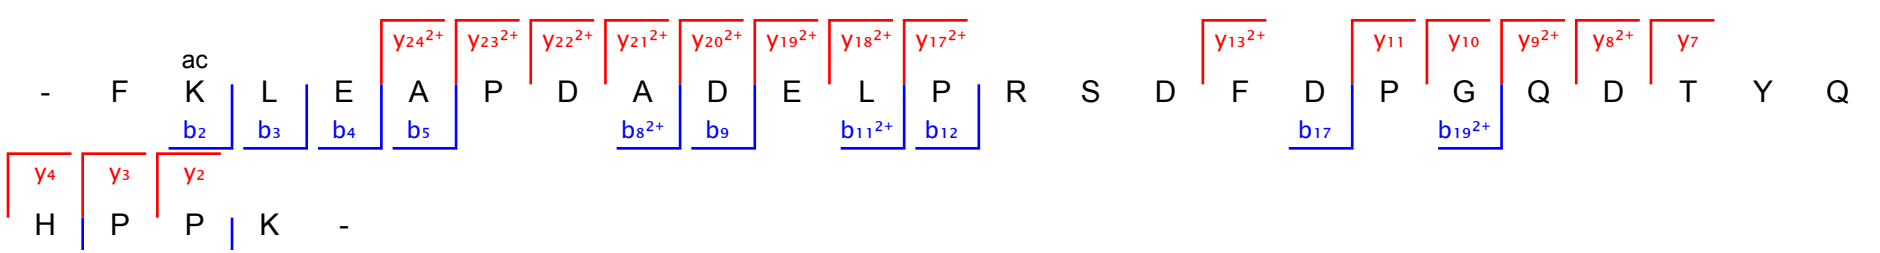

Raw file 050713\_SCW\_II\_29\_31\_8 Scan 19292 Method ITMS; CID Score 119.25 m/z 790.9 Gene names Txn

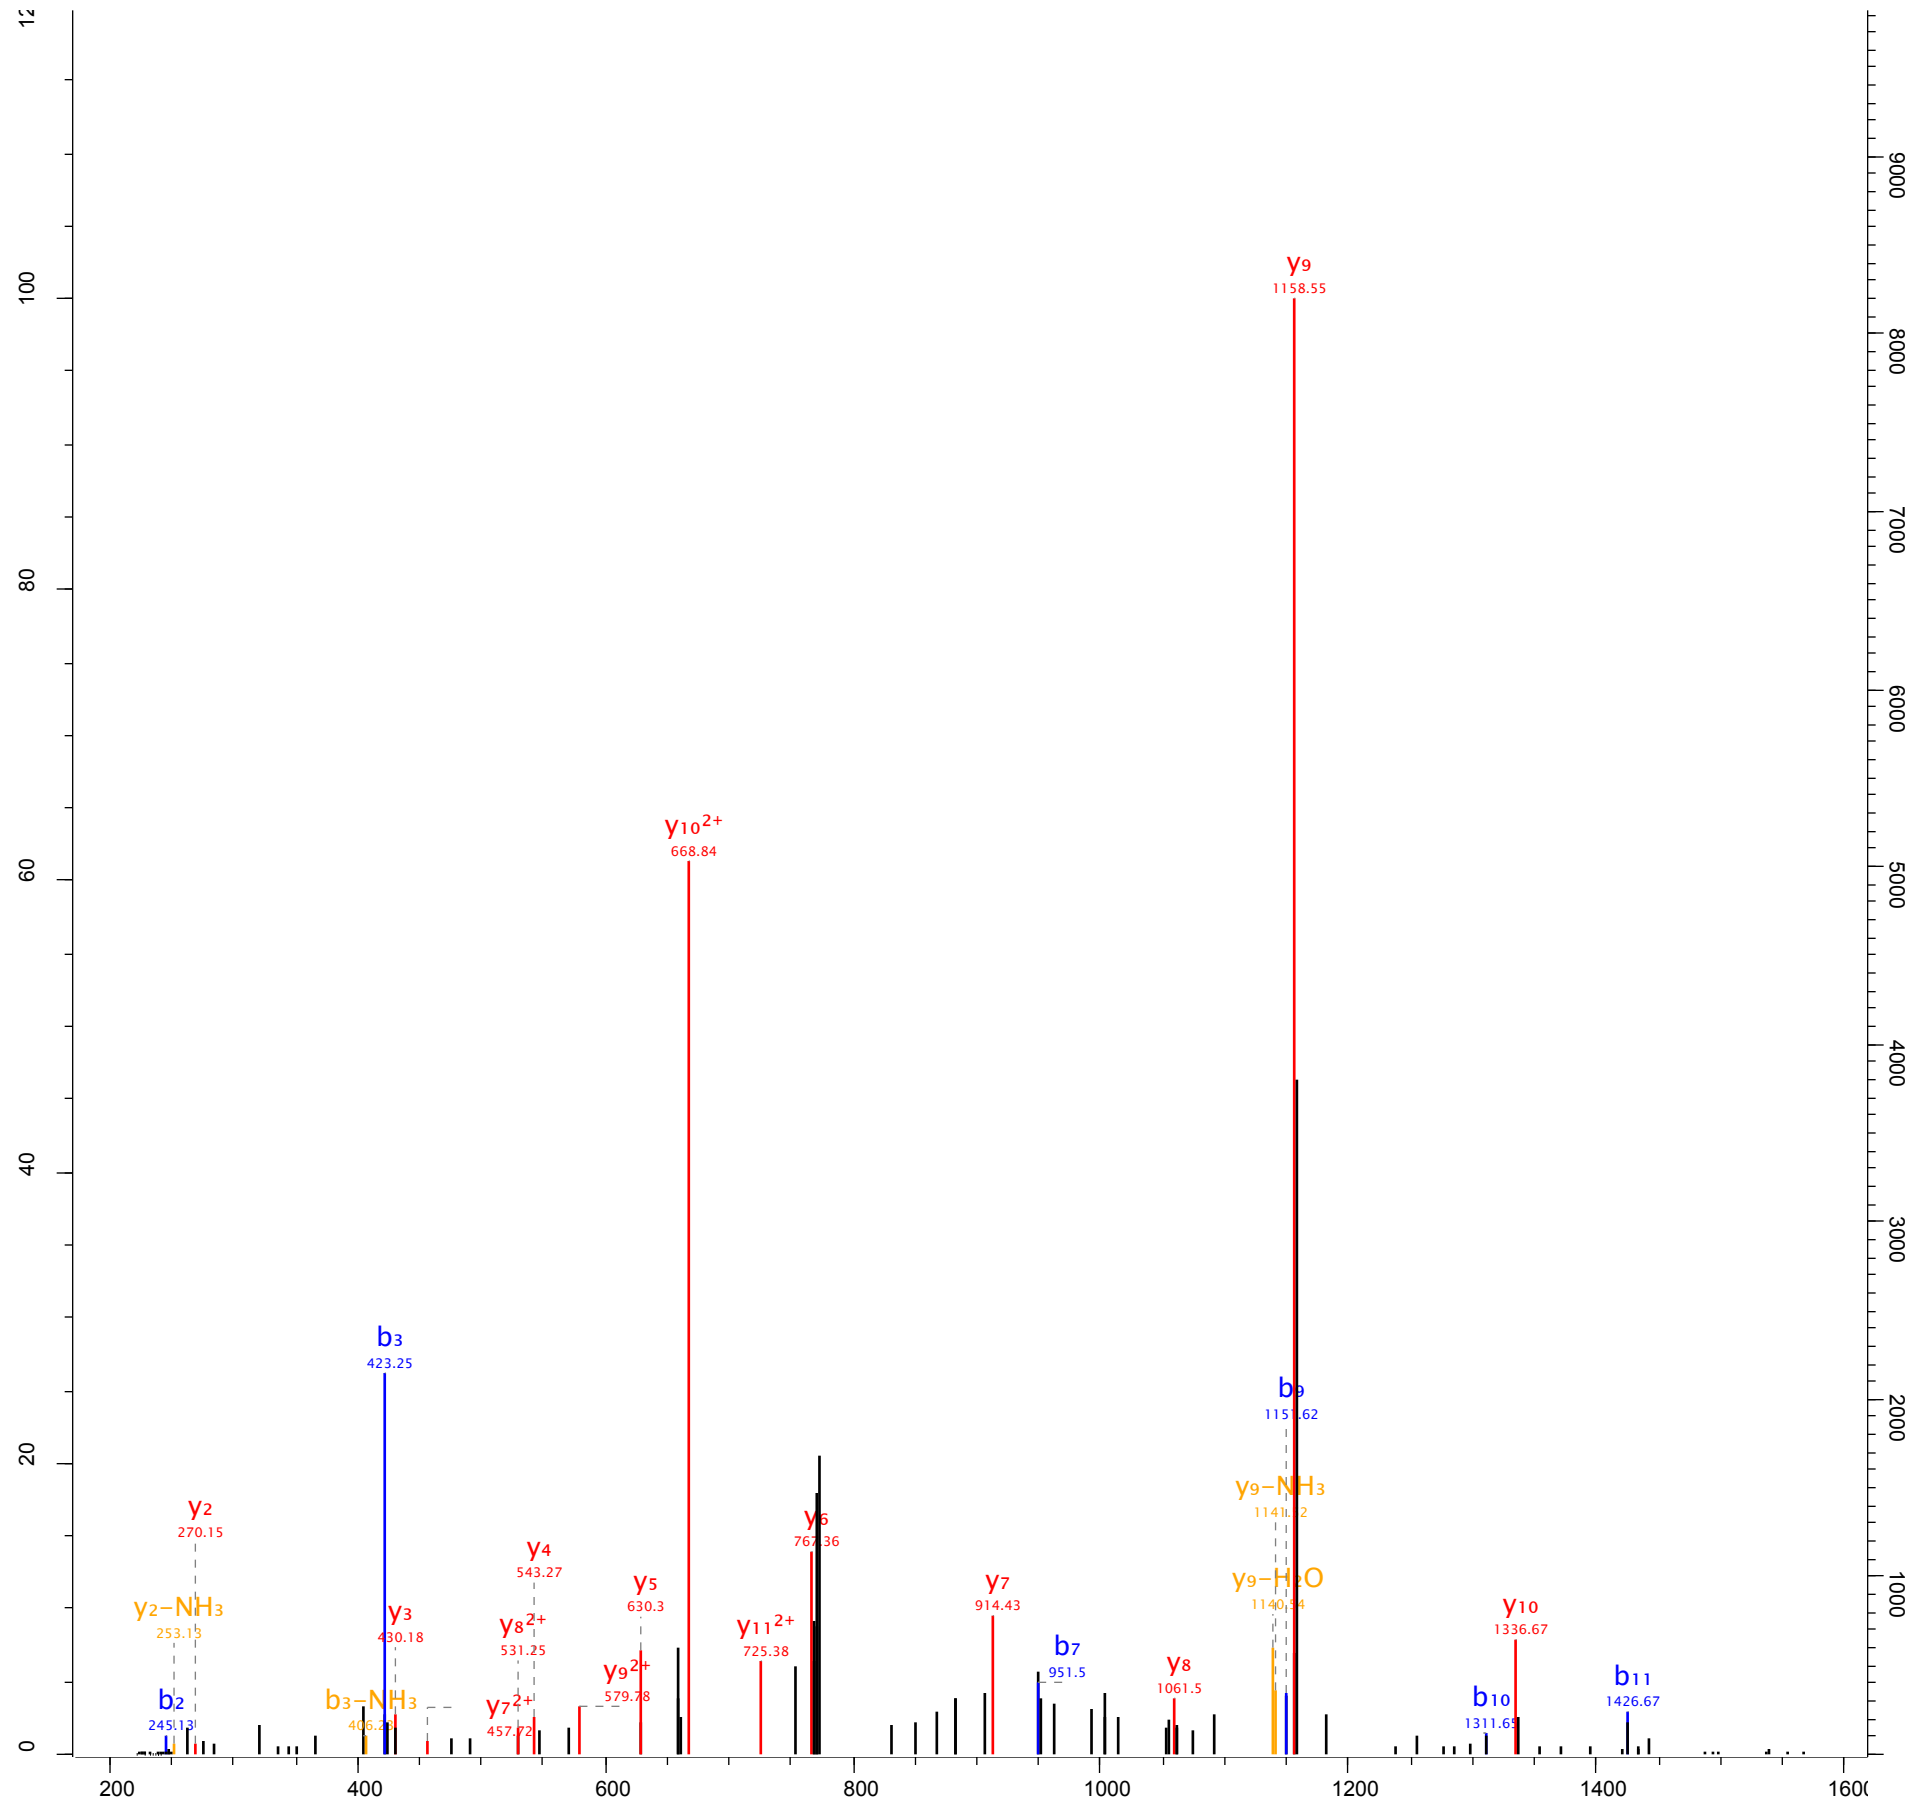

- M I K P F F H S L C D K -  
 b2 b3 b7 b9 b10 b11



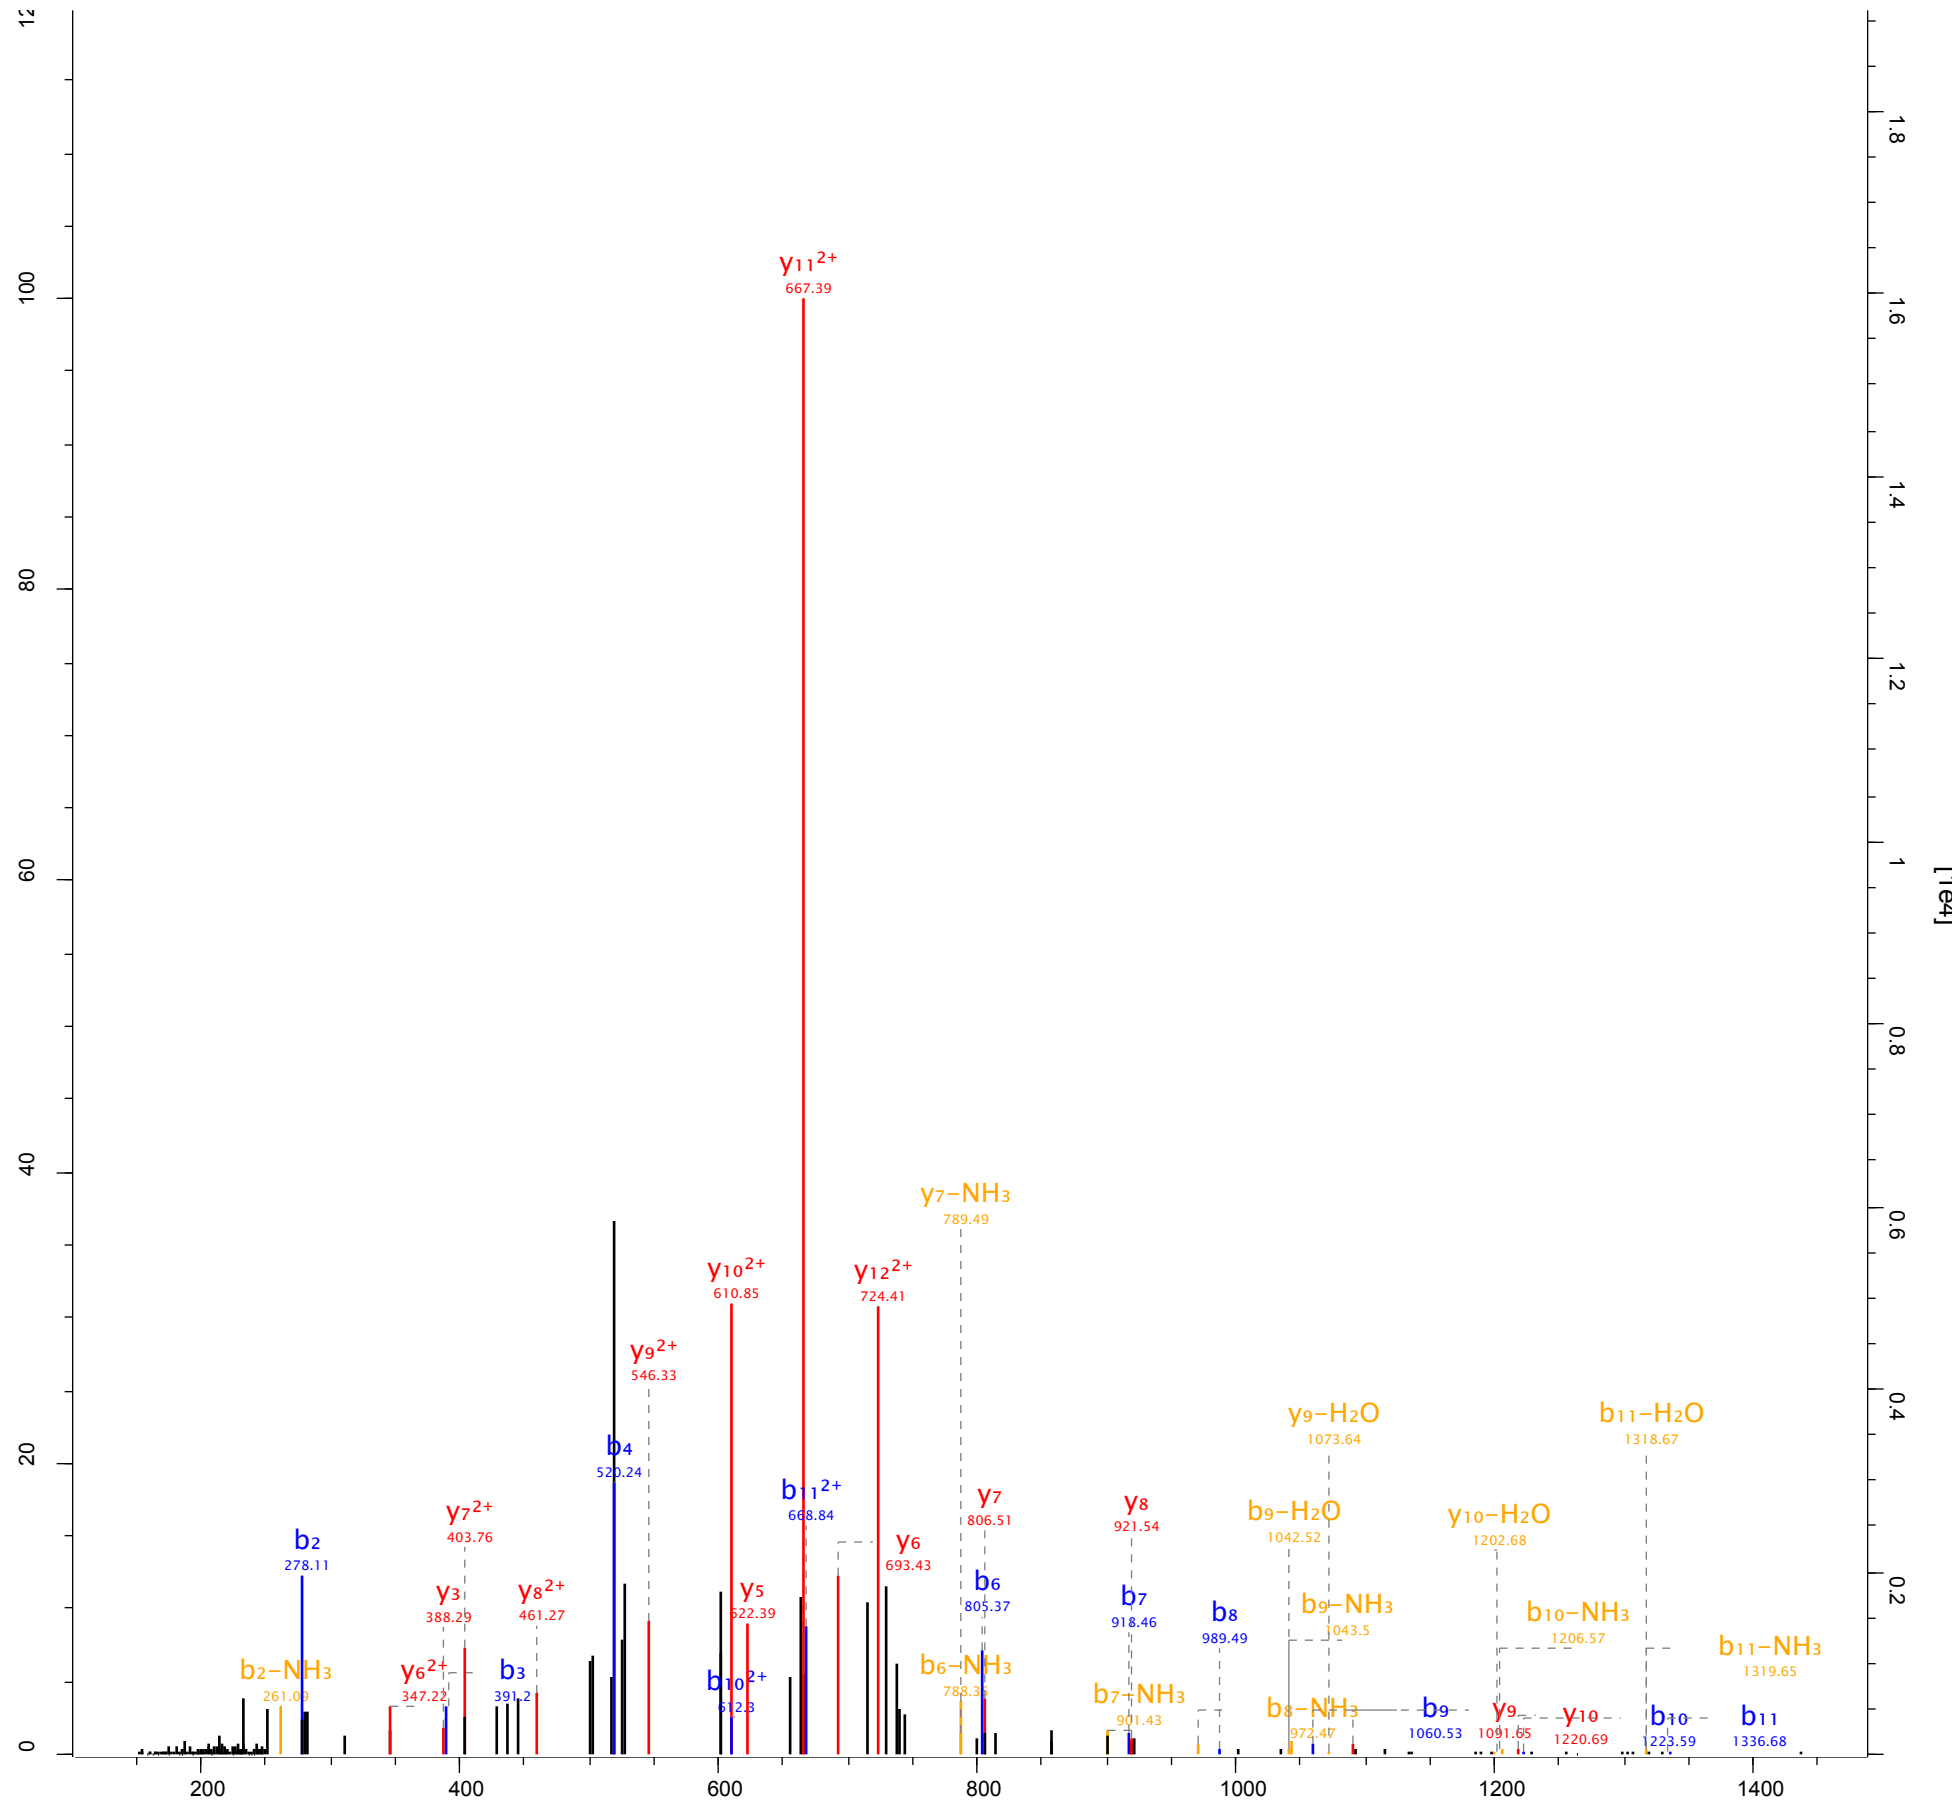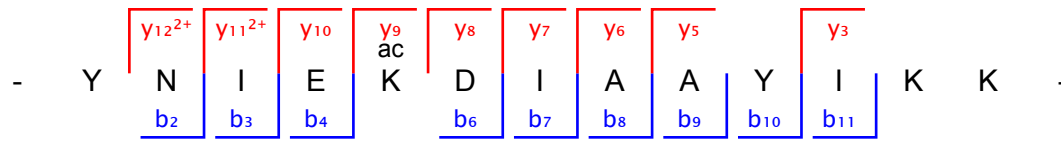

Raw file Scan Method Score m/z Gene names  
 050713\_SCW\_II\_29\_31\_8 21355 ITMS; CID 73.28 1272.28 Vdac3

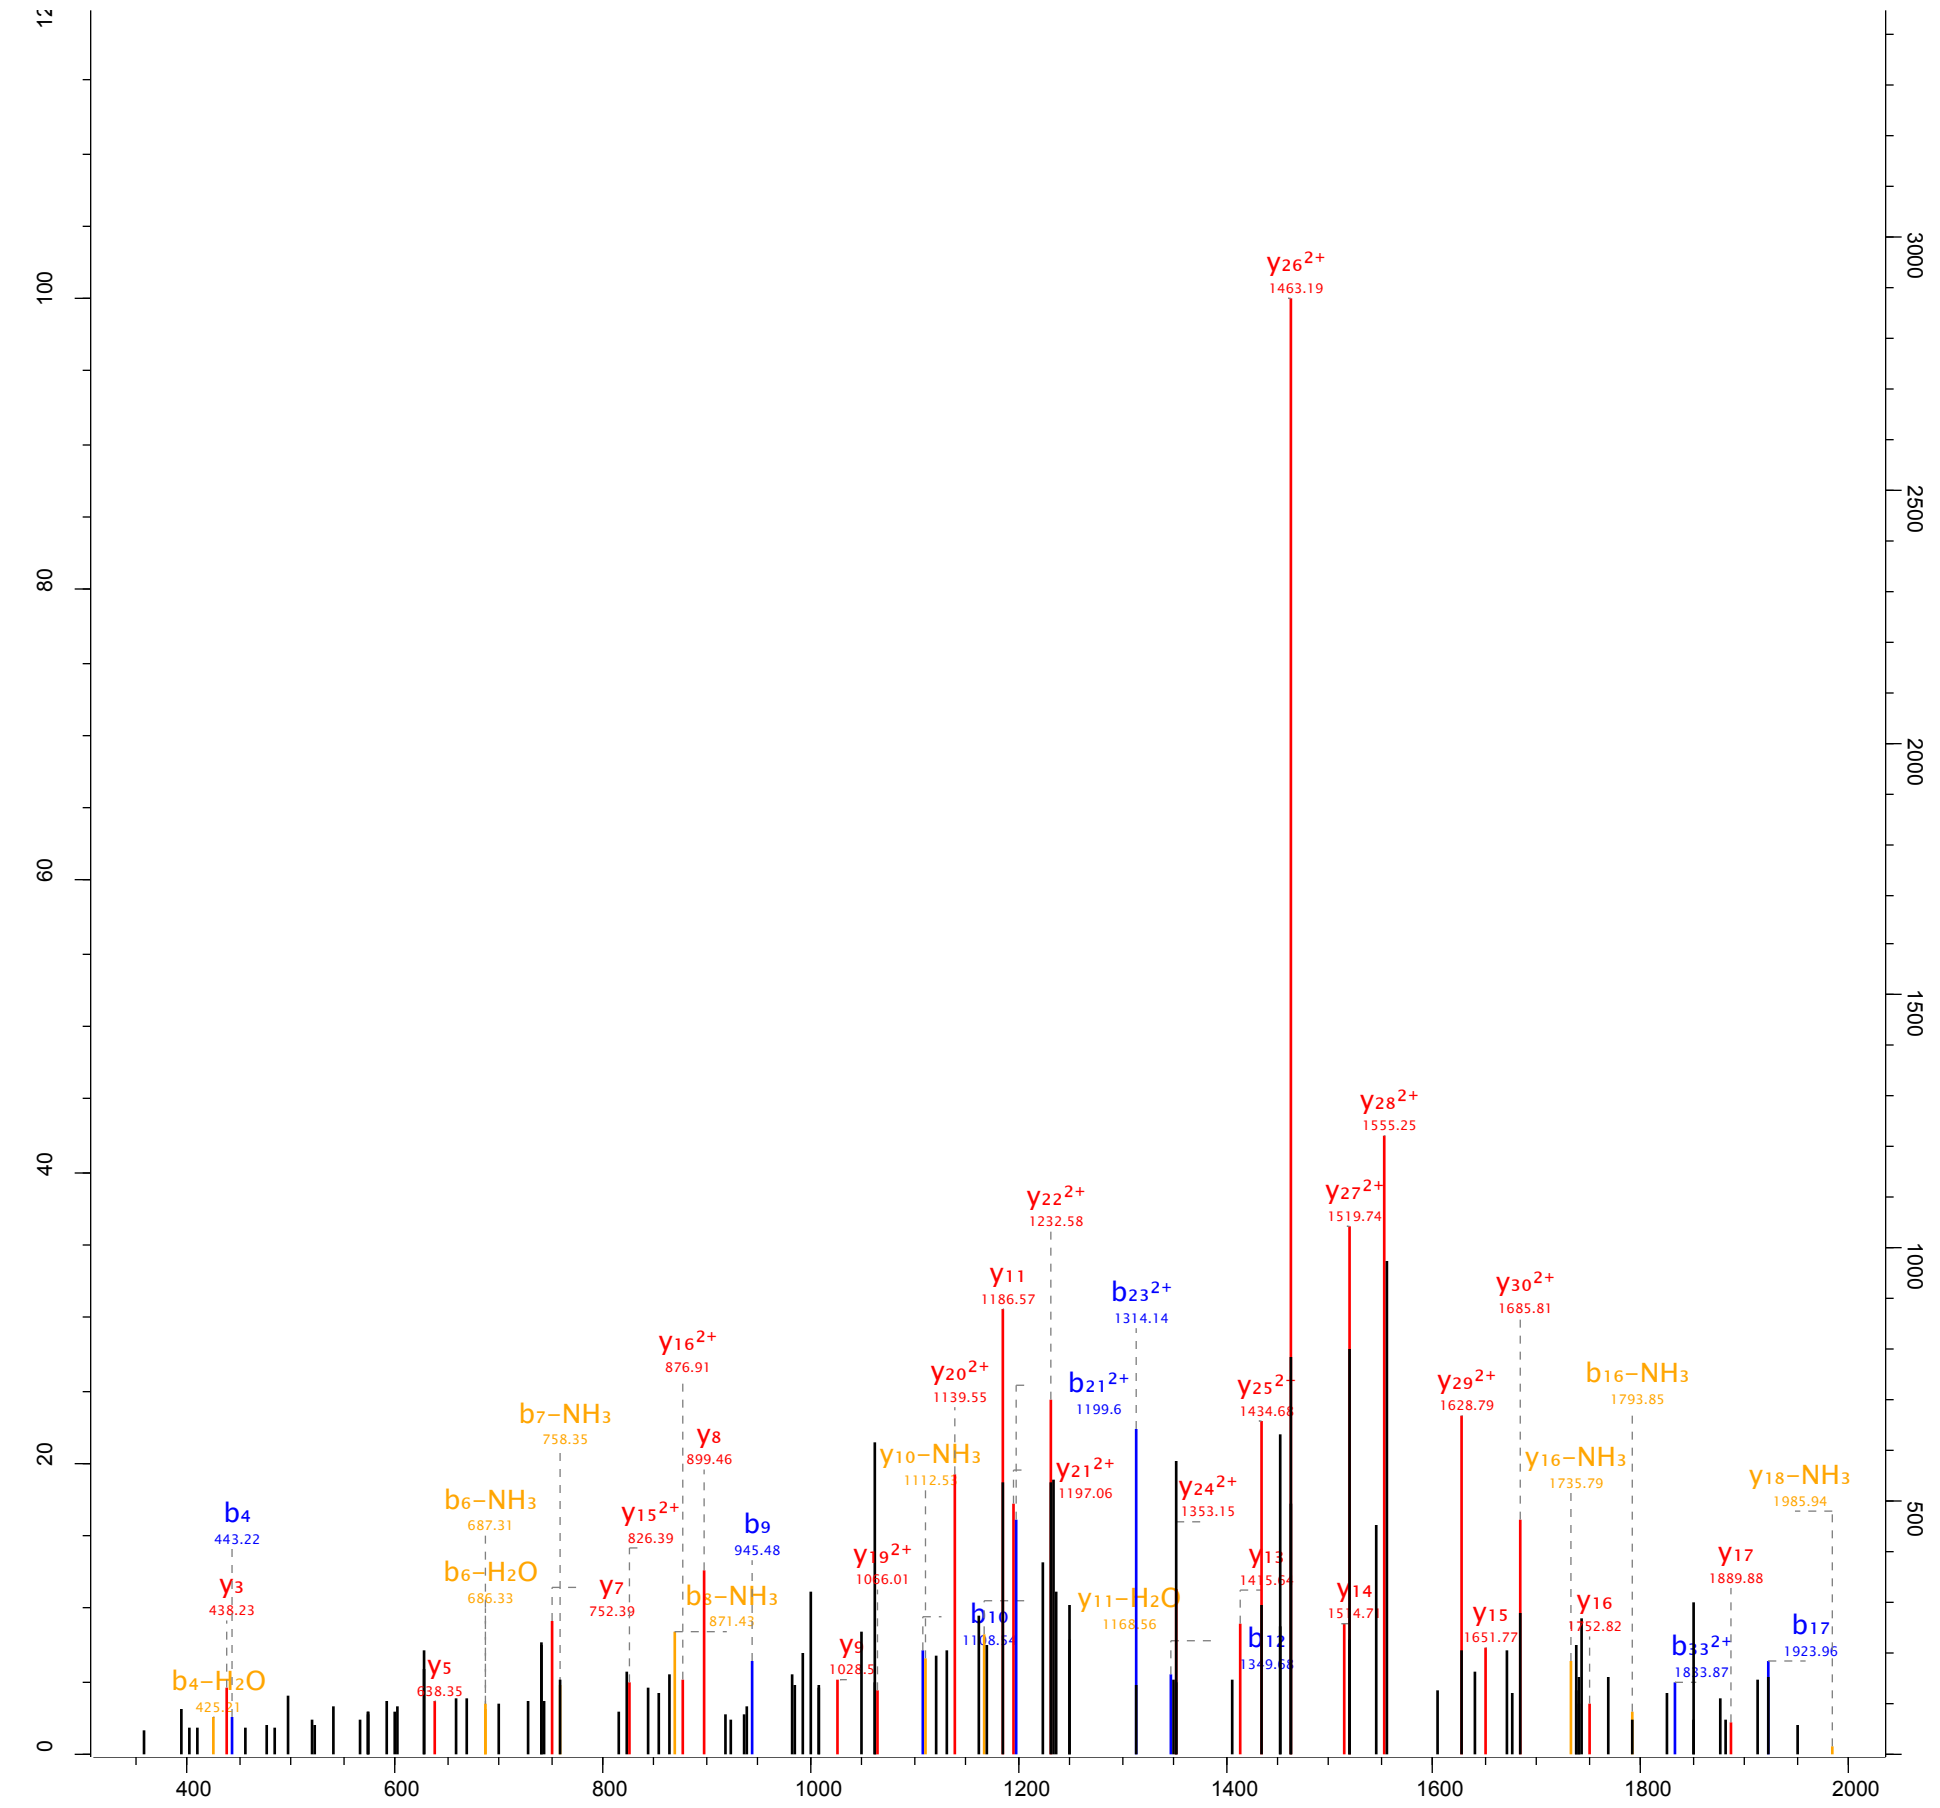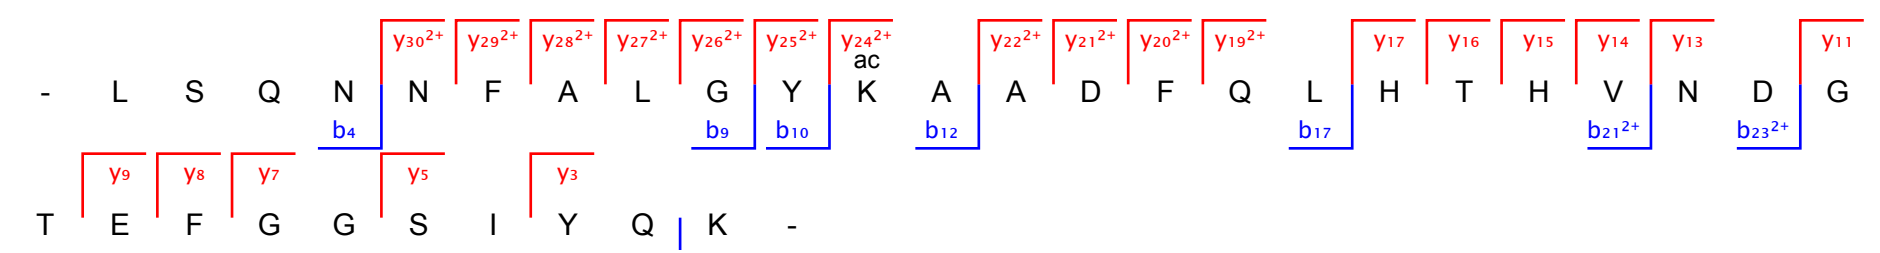

Raw file: 050713\_SCW\_II\_29\_31\_8  
 Scan: 24892 Method: ITMS; CID Score: 95.54 m/z: 1056.56 Gene names: Idh2

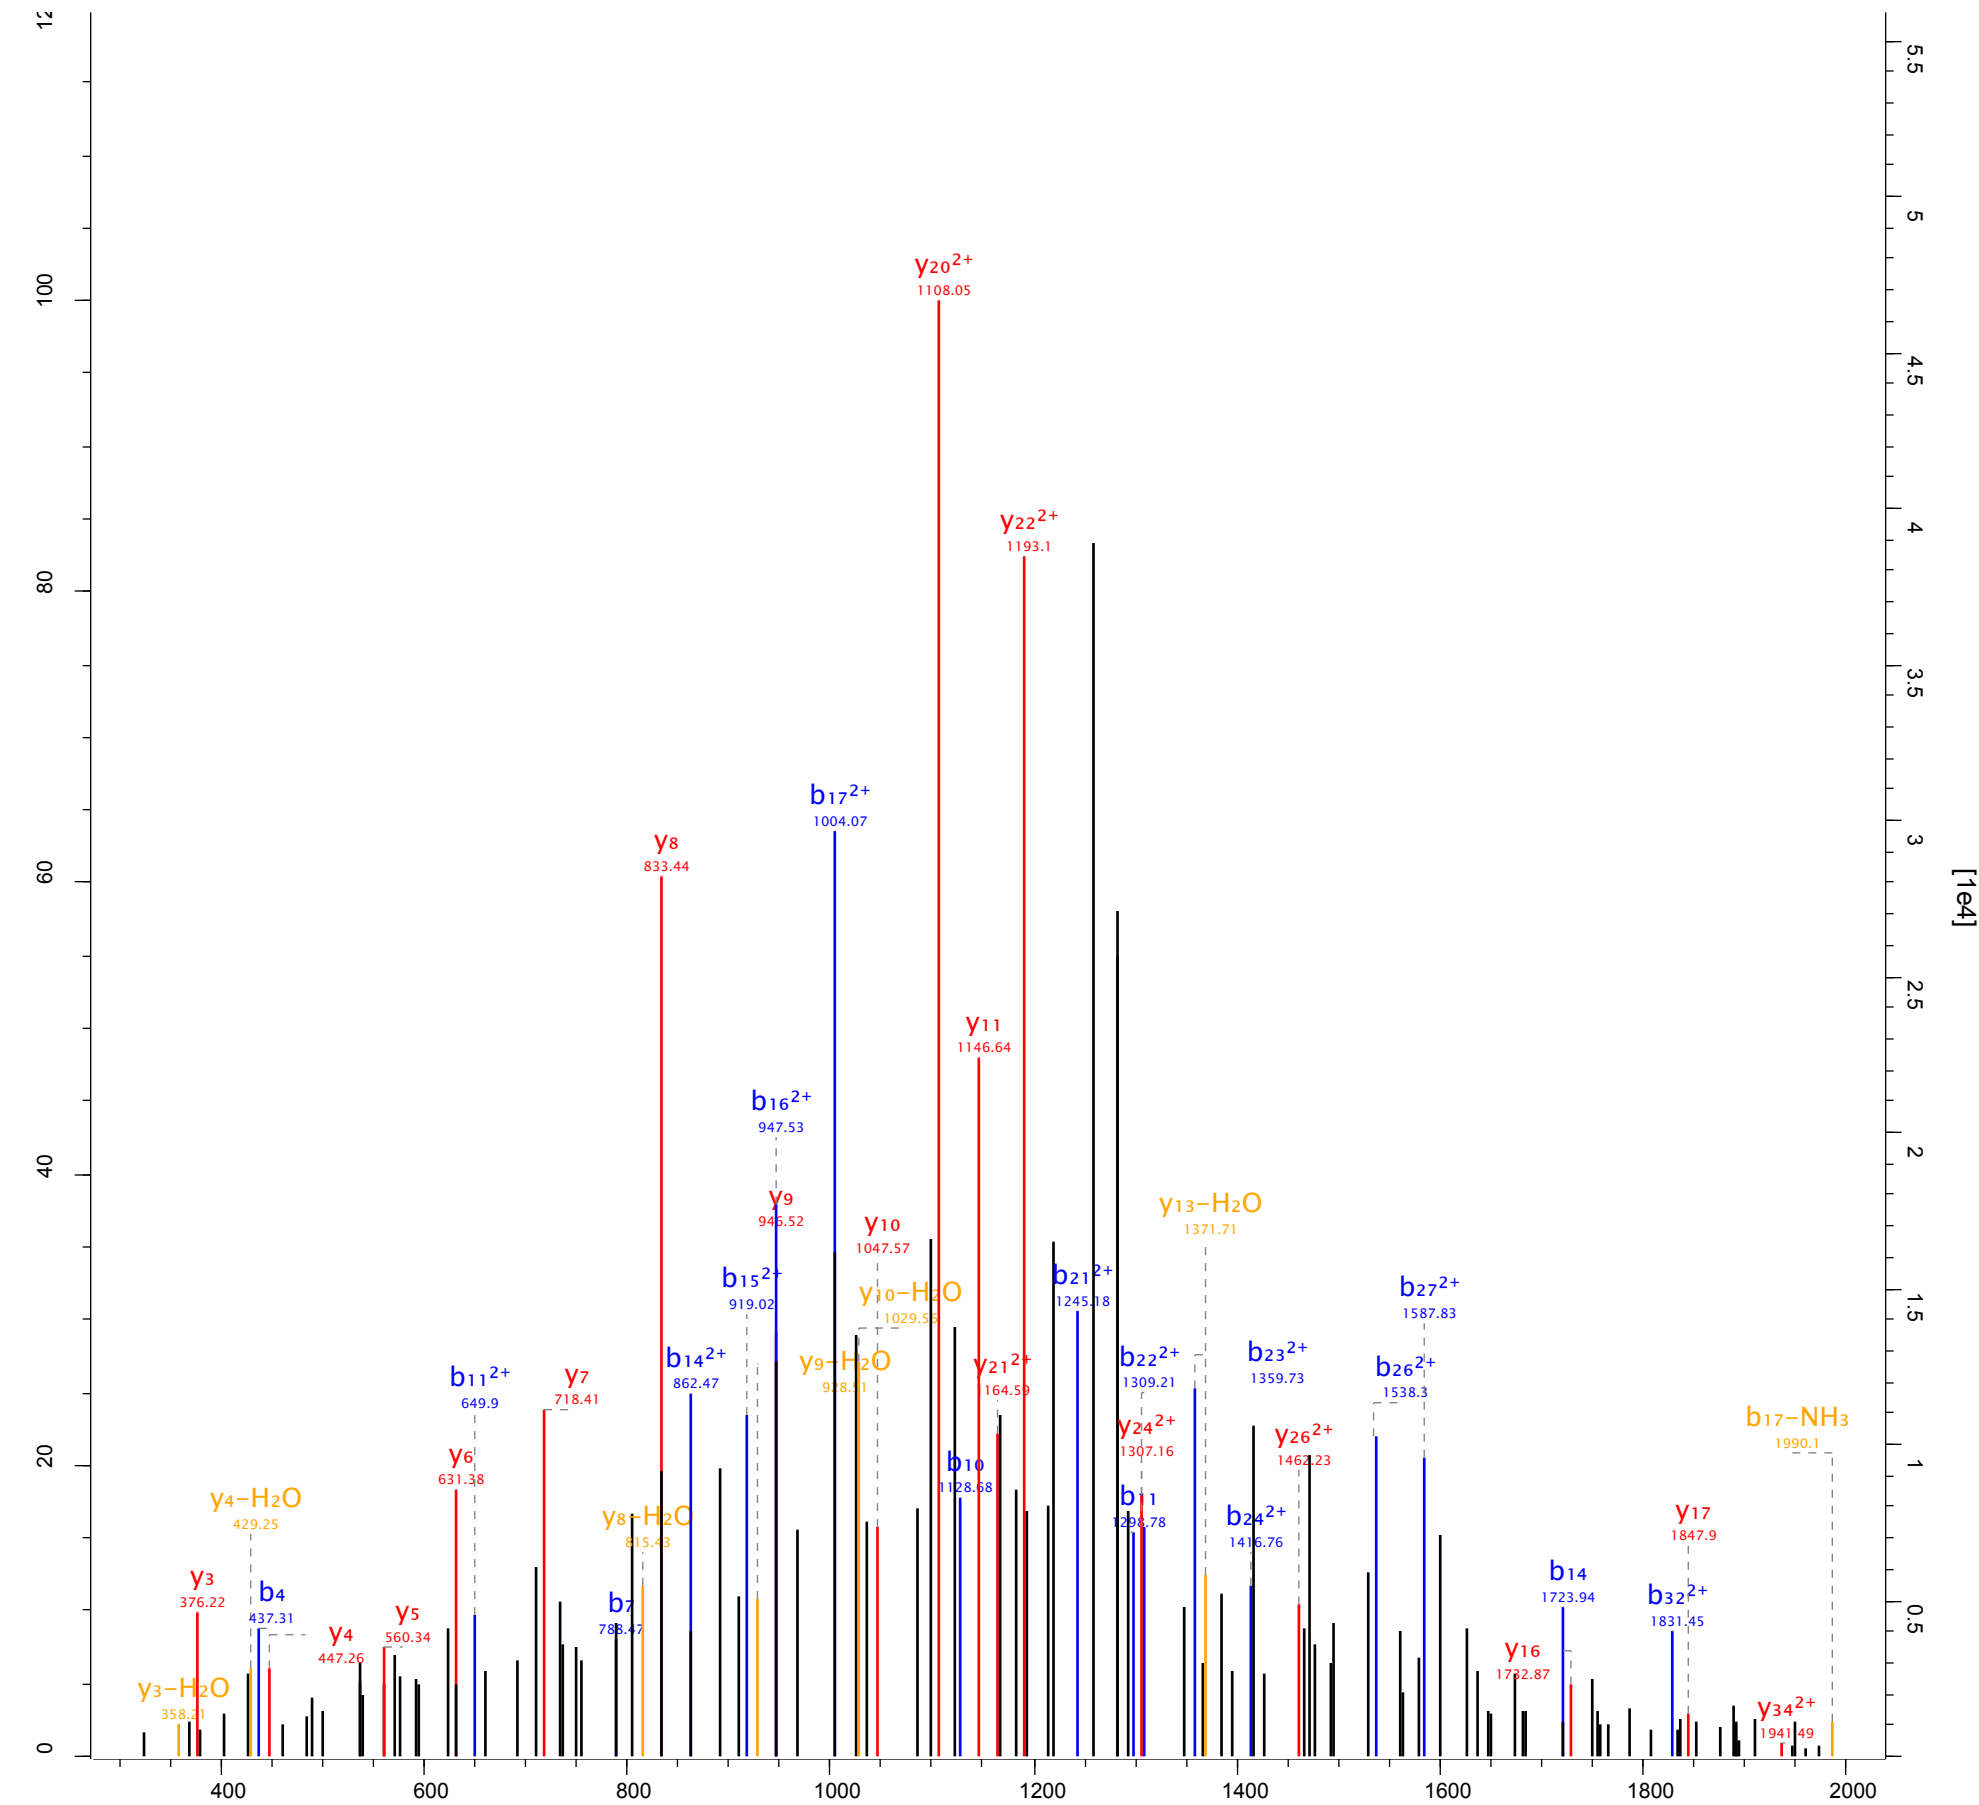

- L I L P H V D V Q L K Y F D L G L P N R D Q T N  
 ac y26<sup>2+</sup> y24<sup>2+</sup> y22<sup>2+</sup> y21<sup>2+</sup> y20<sup>2+</sup> y17 y16  
 b4 b7 b10 b11 b14 b15<sup>2+</sup> b16<sup>2+</sup> b17<sup>2+</sup> b21<sup>2+</sup> b22<sup>2+</sup> b23<sup>2+</sup> b24<sup>2+</sup>  
 y11 y10 y9 y8 y7 y6 y5 y4 y3  
 D Q V T I D S A L A T Q K -

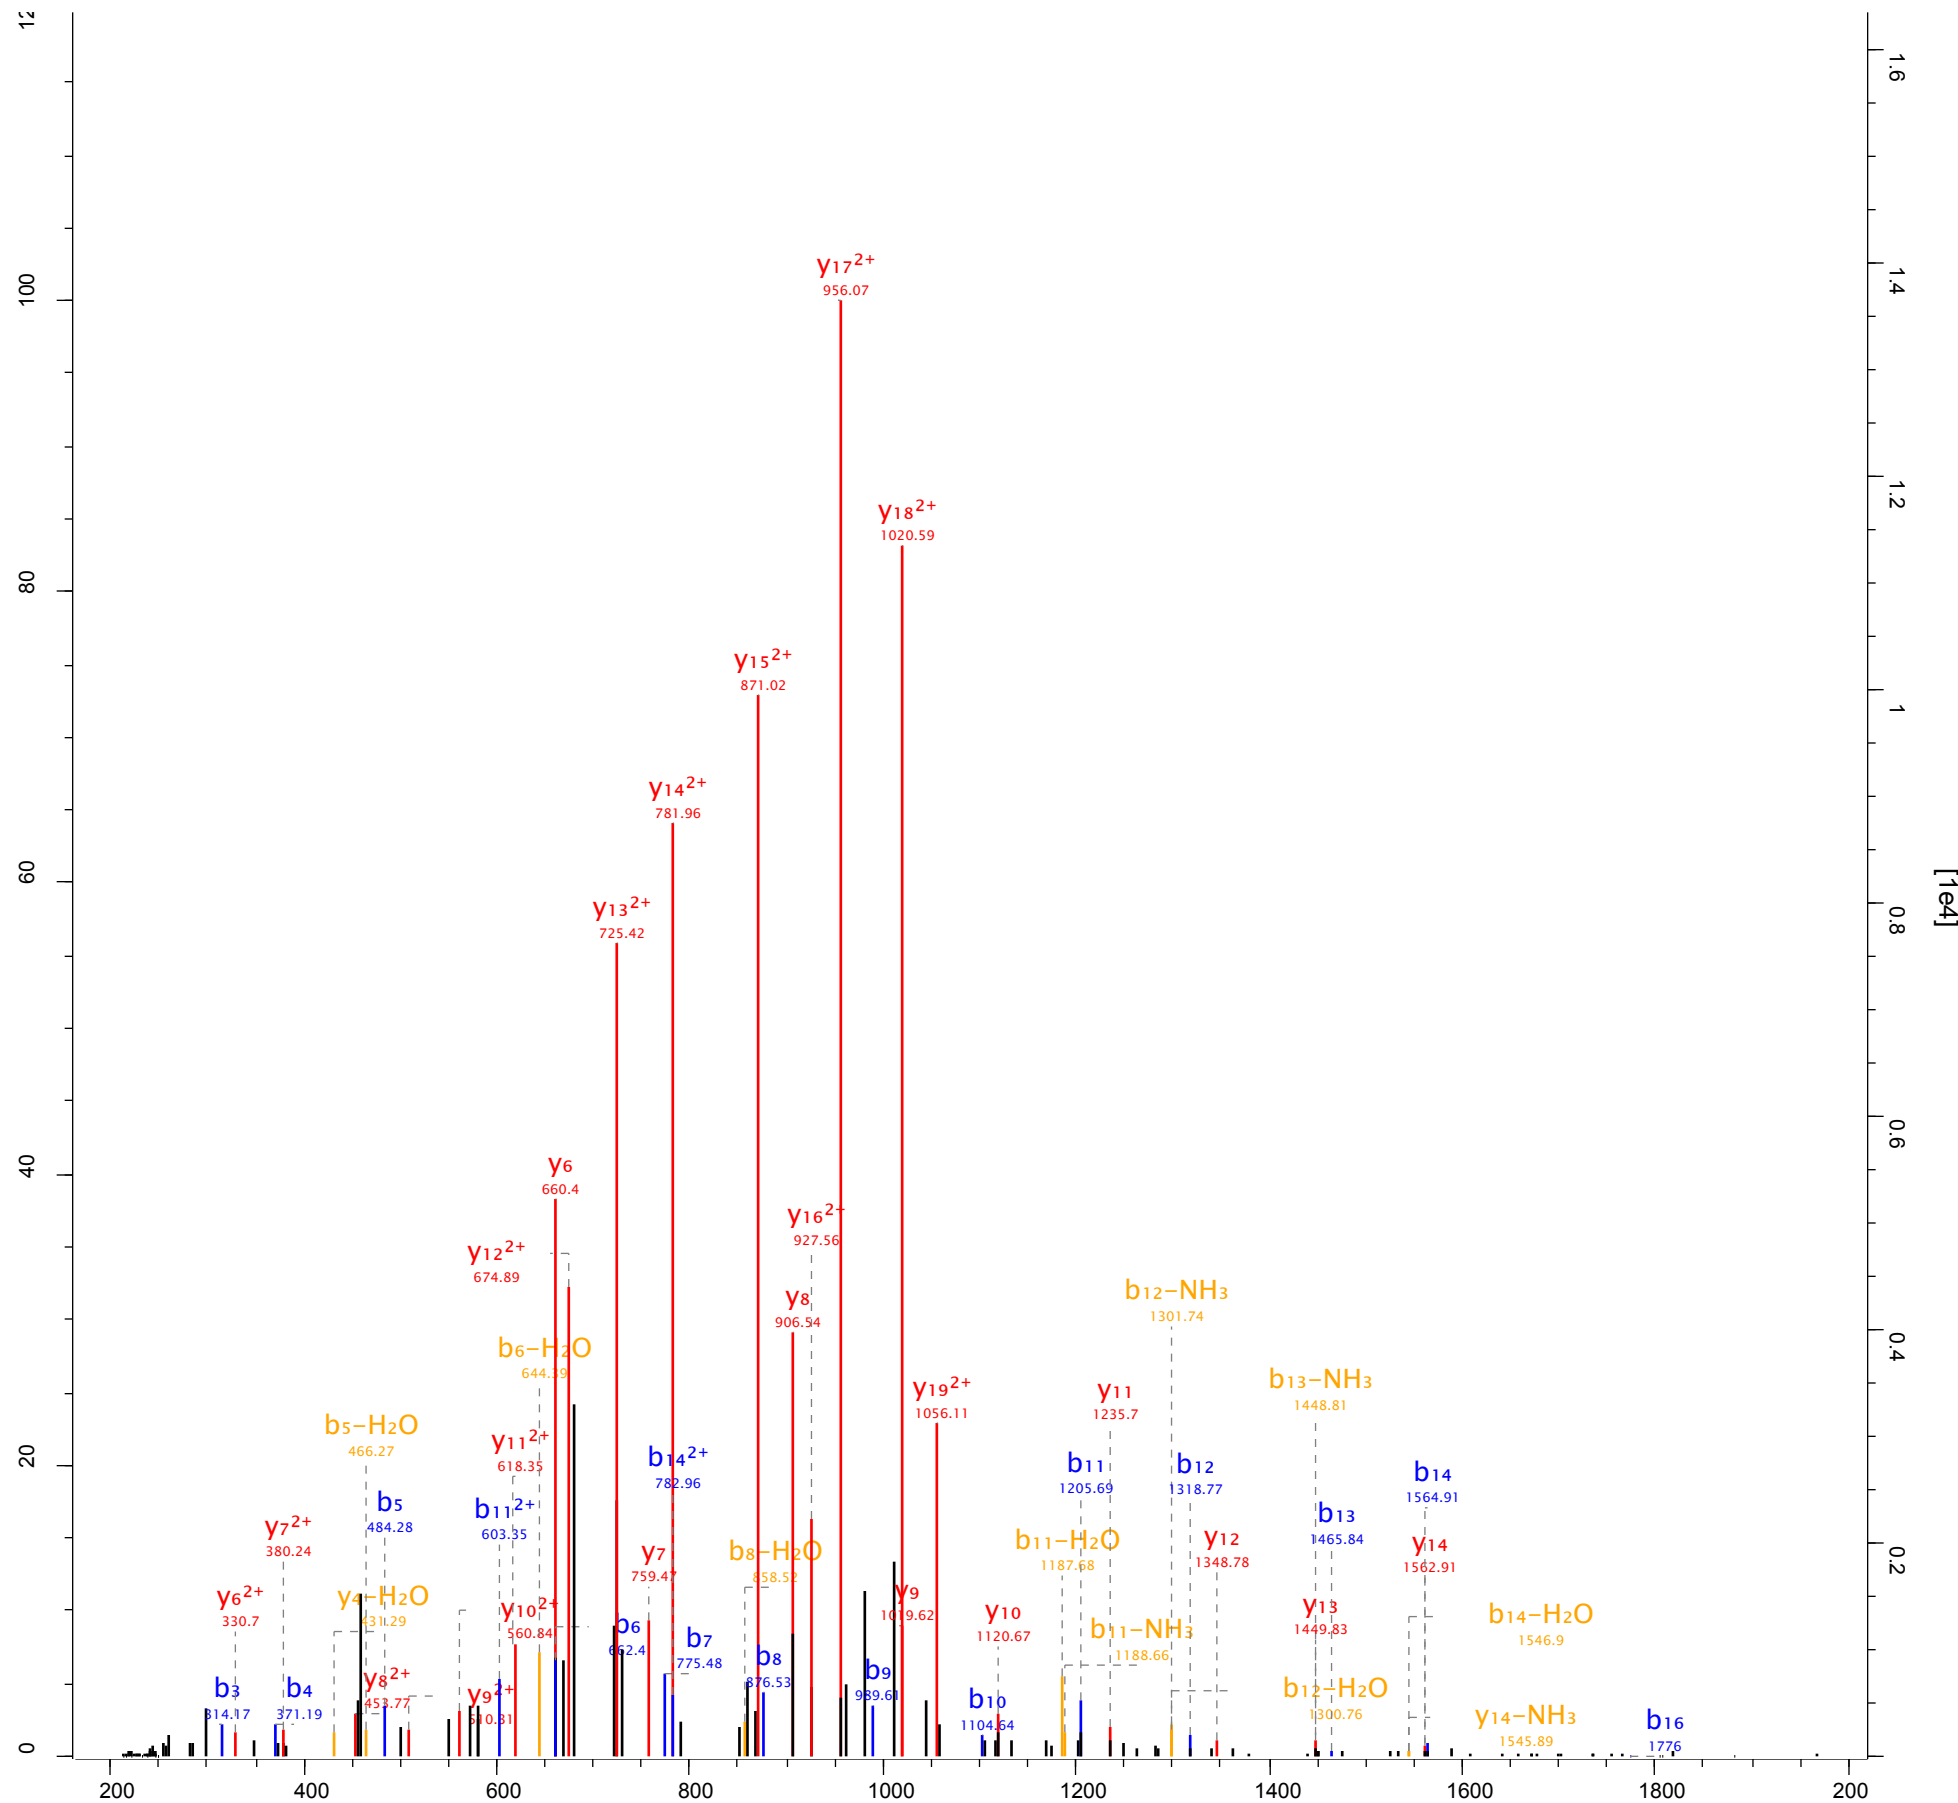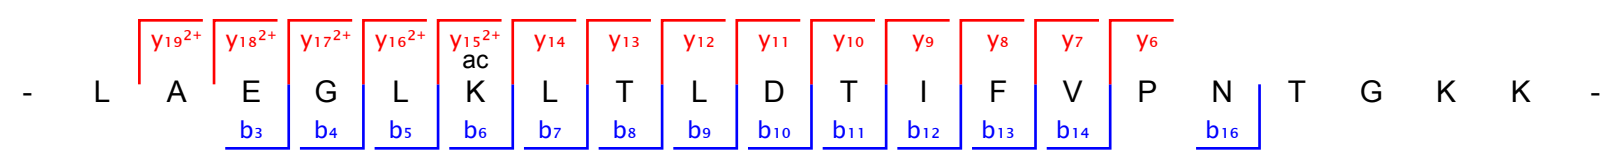

050713\_SCW\_II\_29\_31\_8

27101 ITMS; CID 132.87 849.79 Fasn

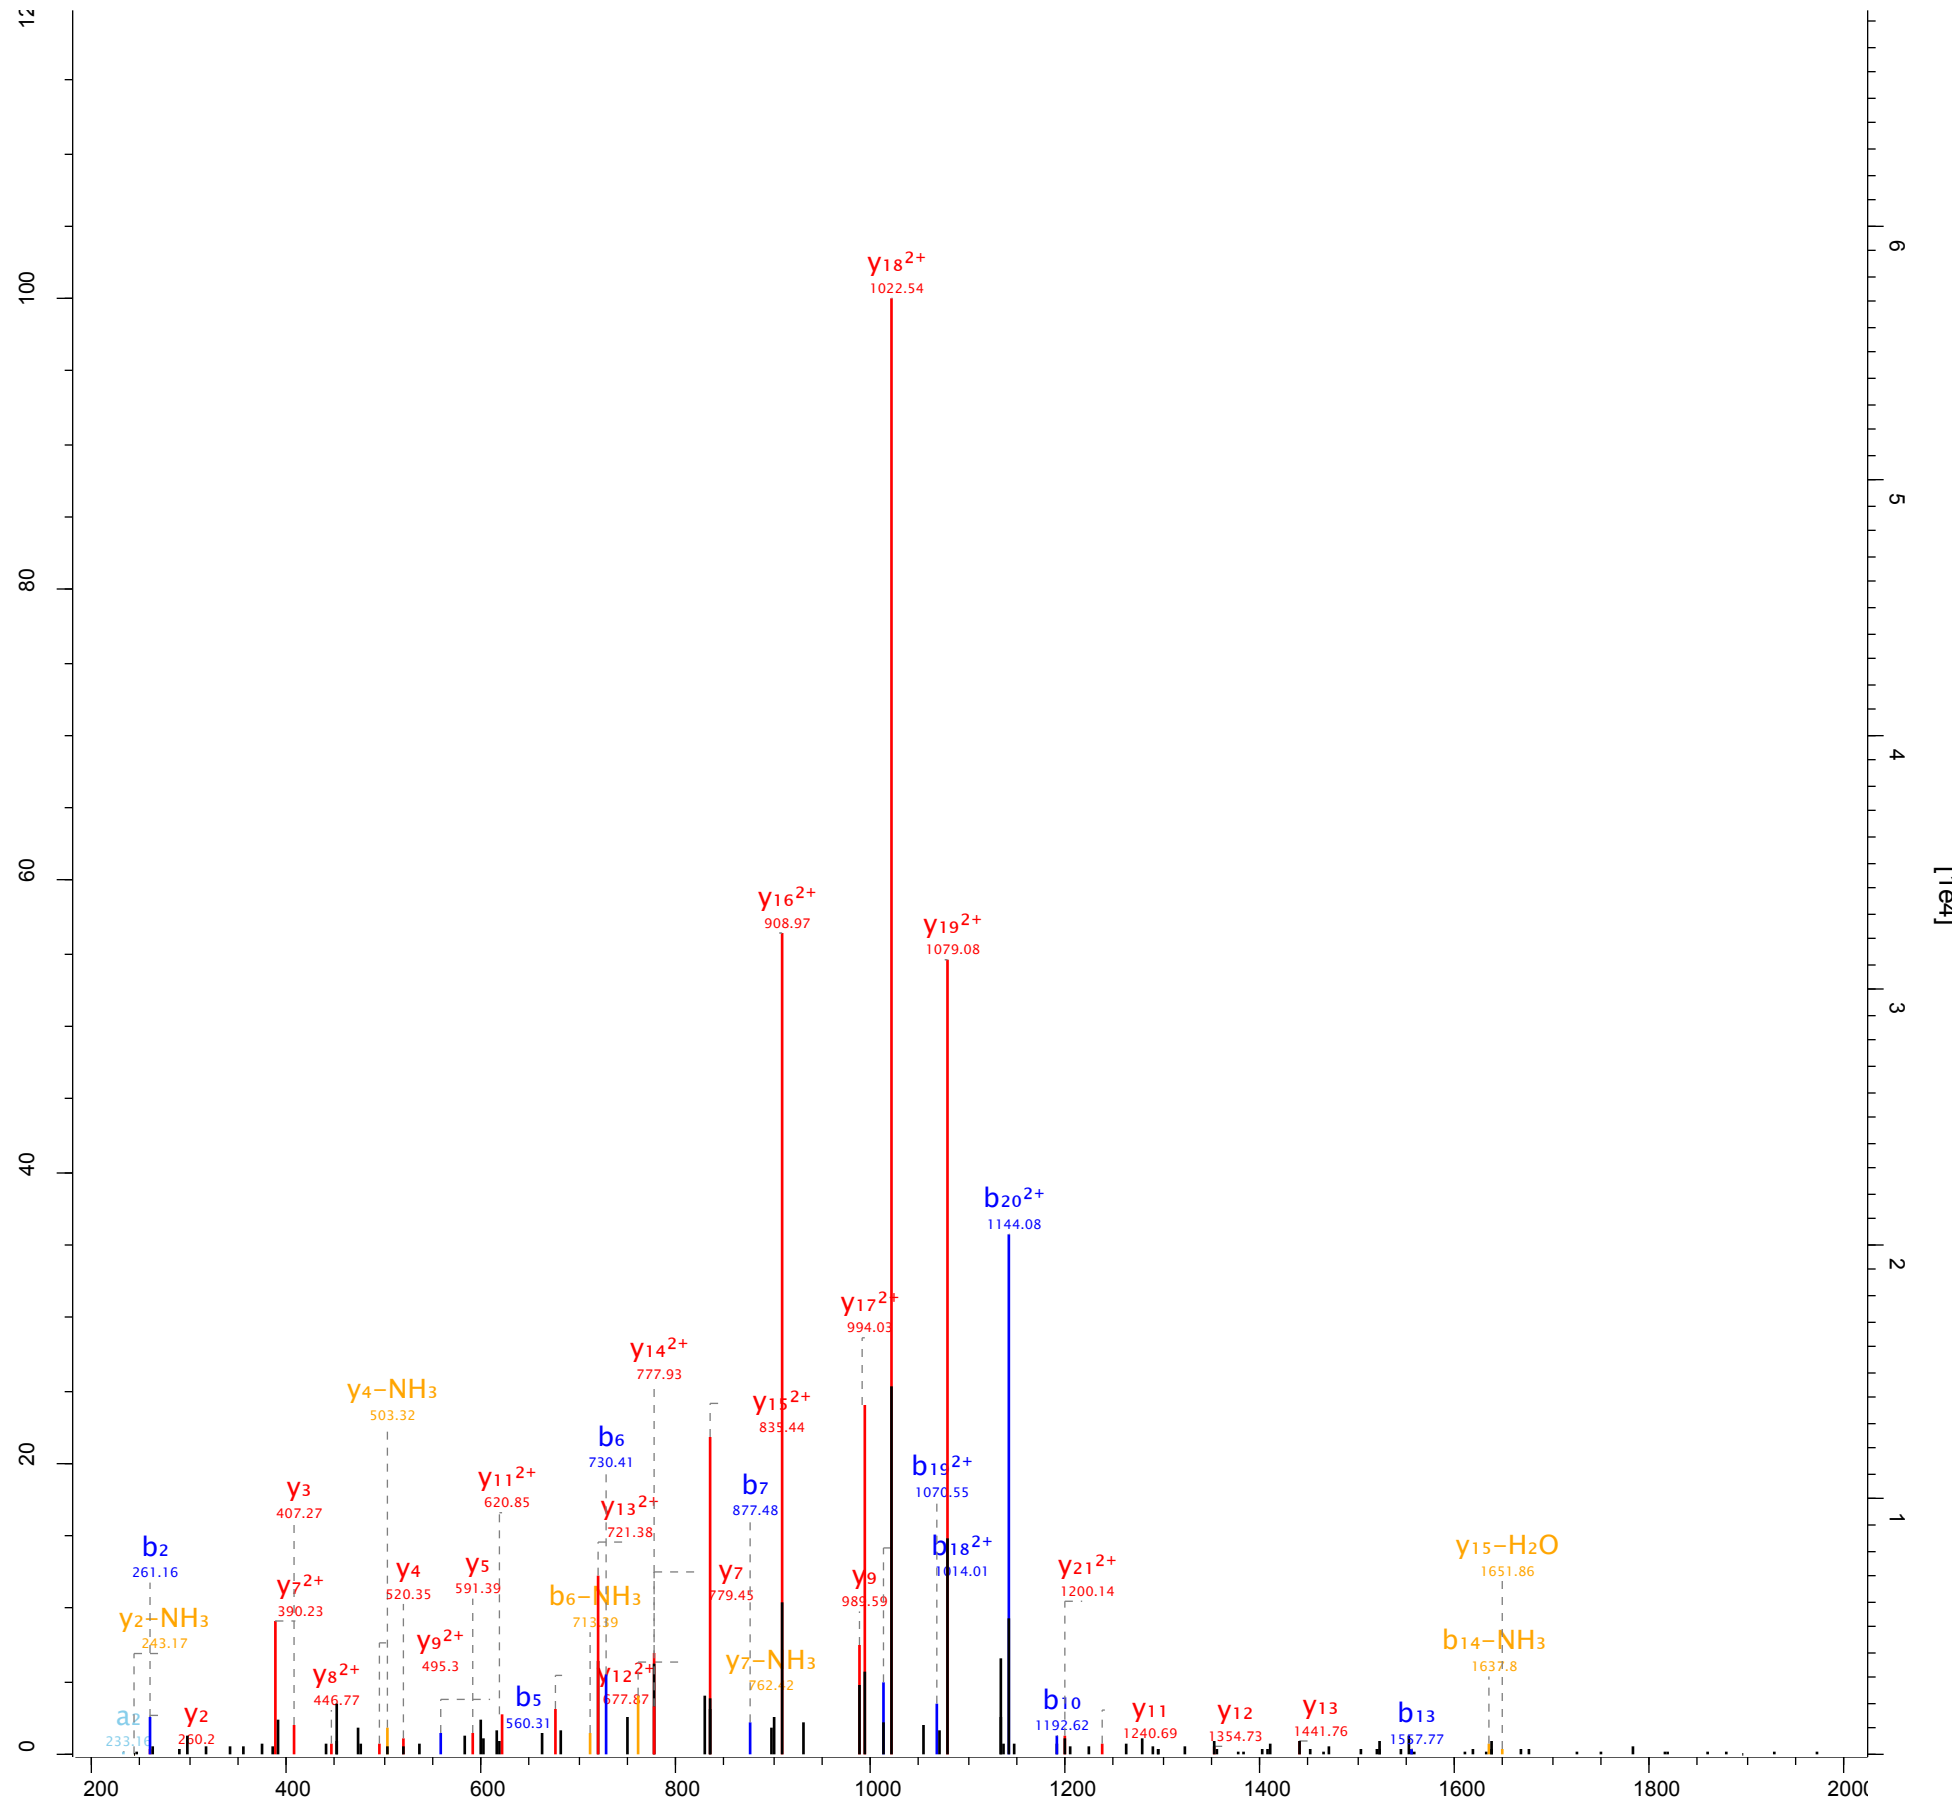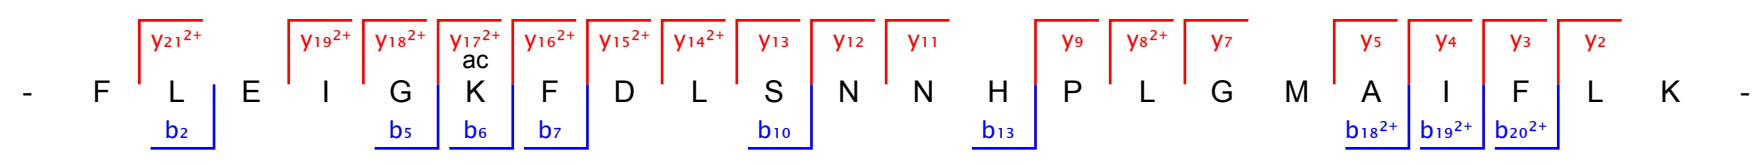

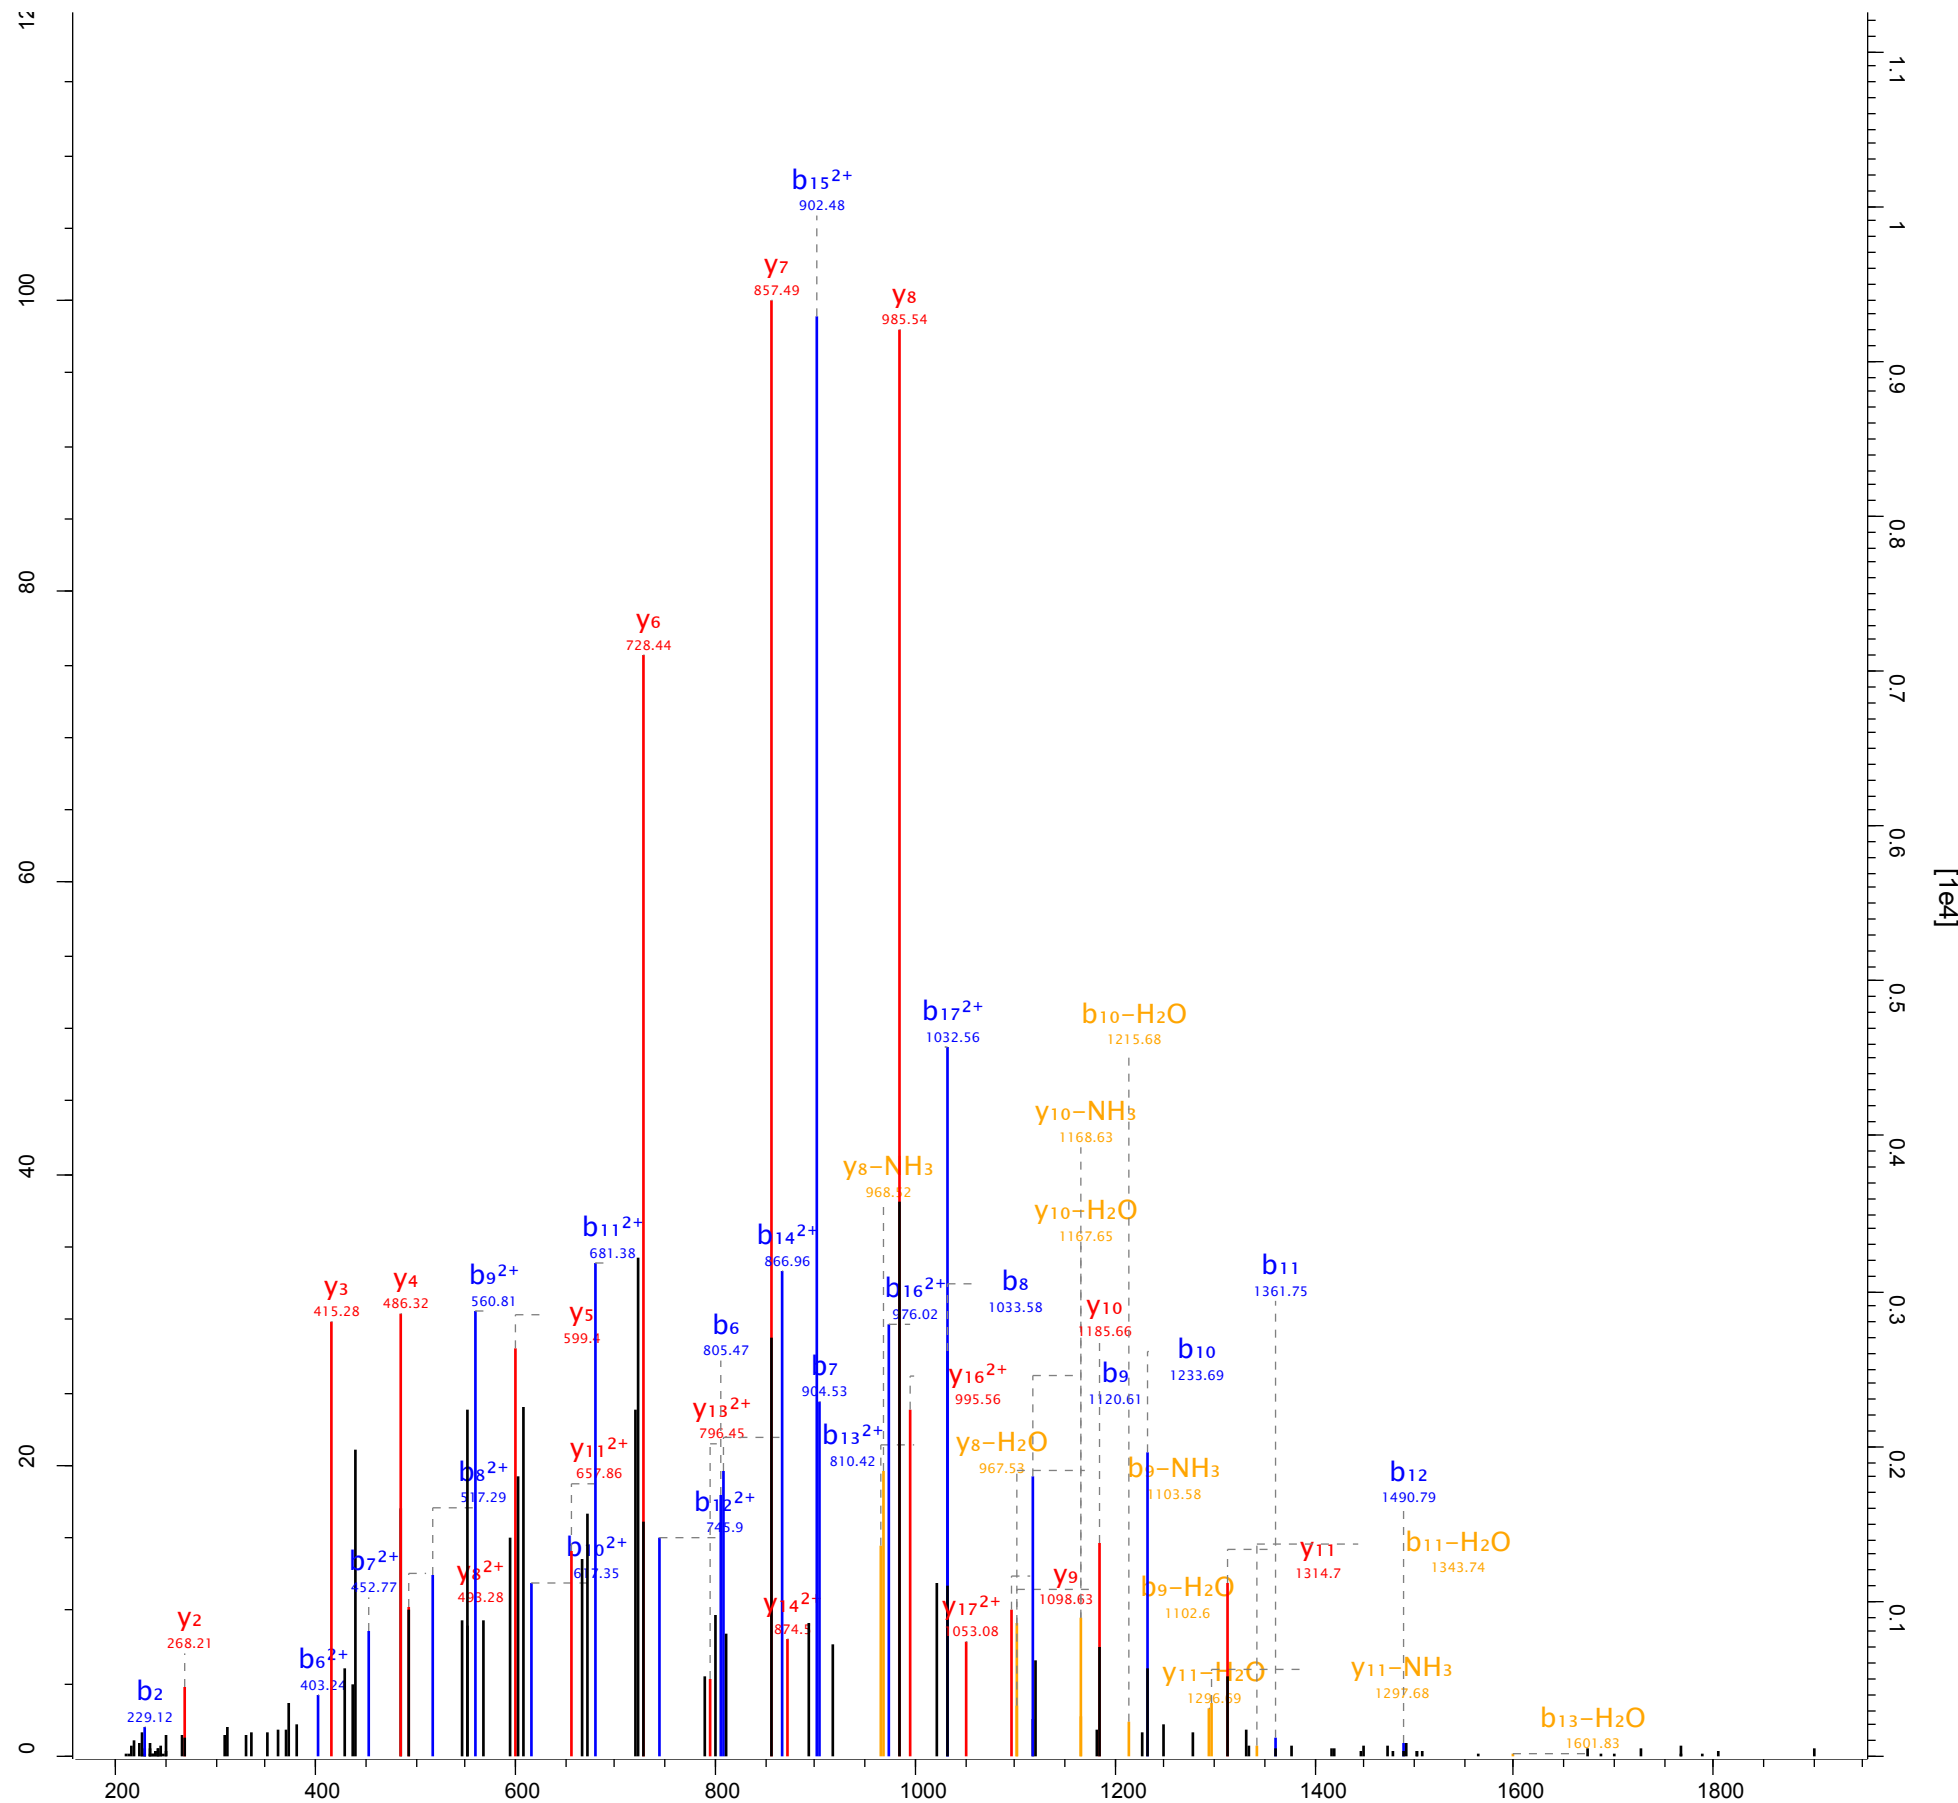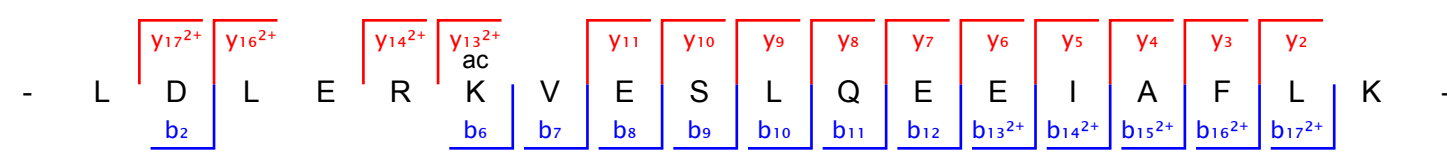

050713\_SCW\_II\_29\_35\_9

12396 ITMS; CID 180.61 617.83 Rsf1

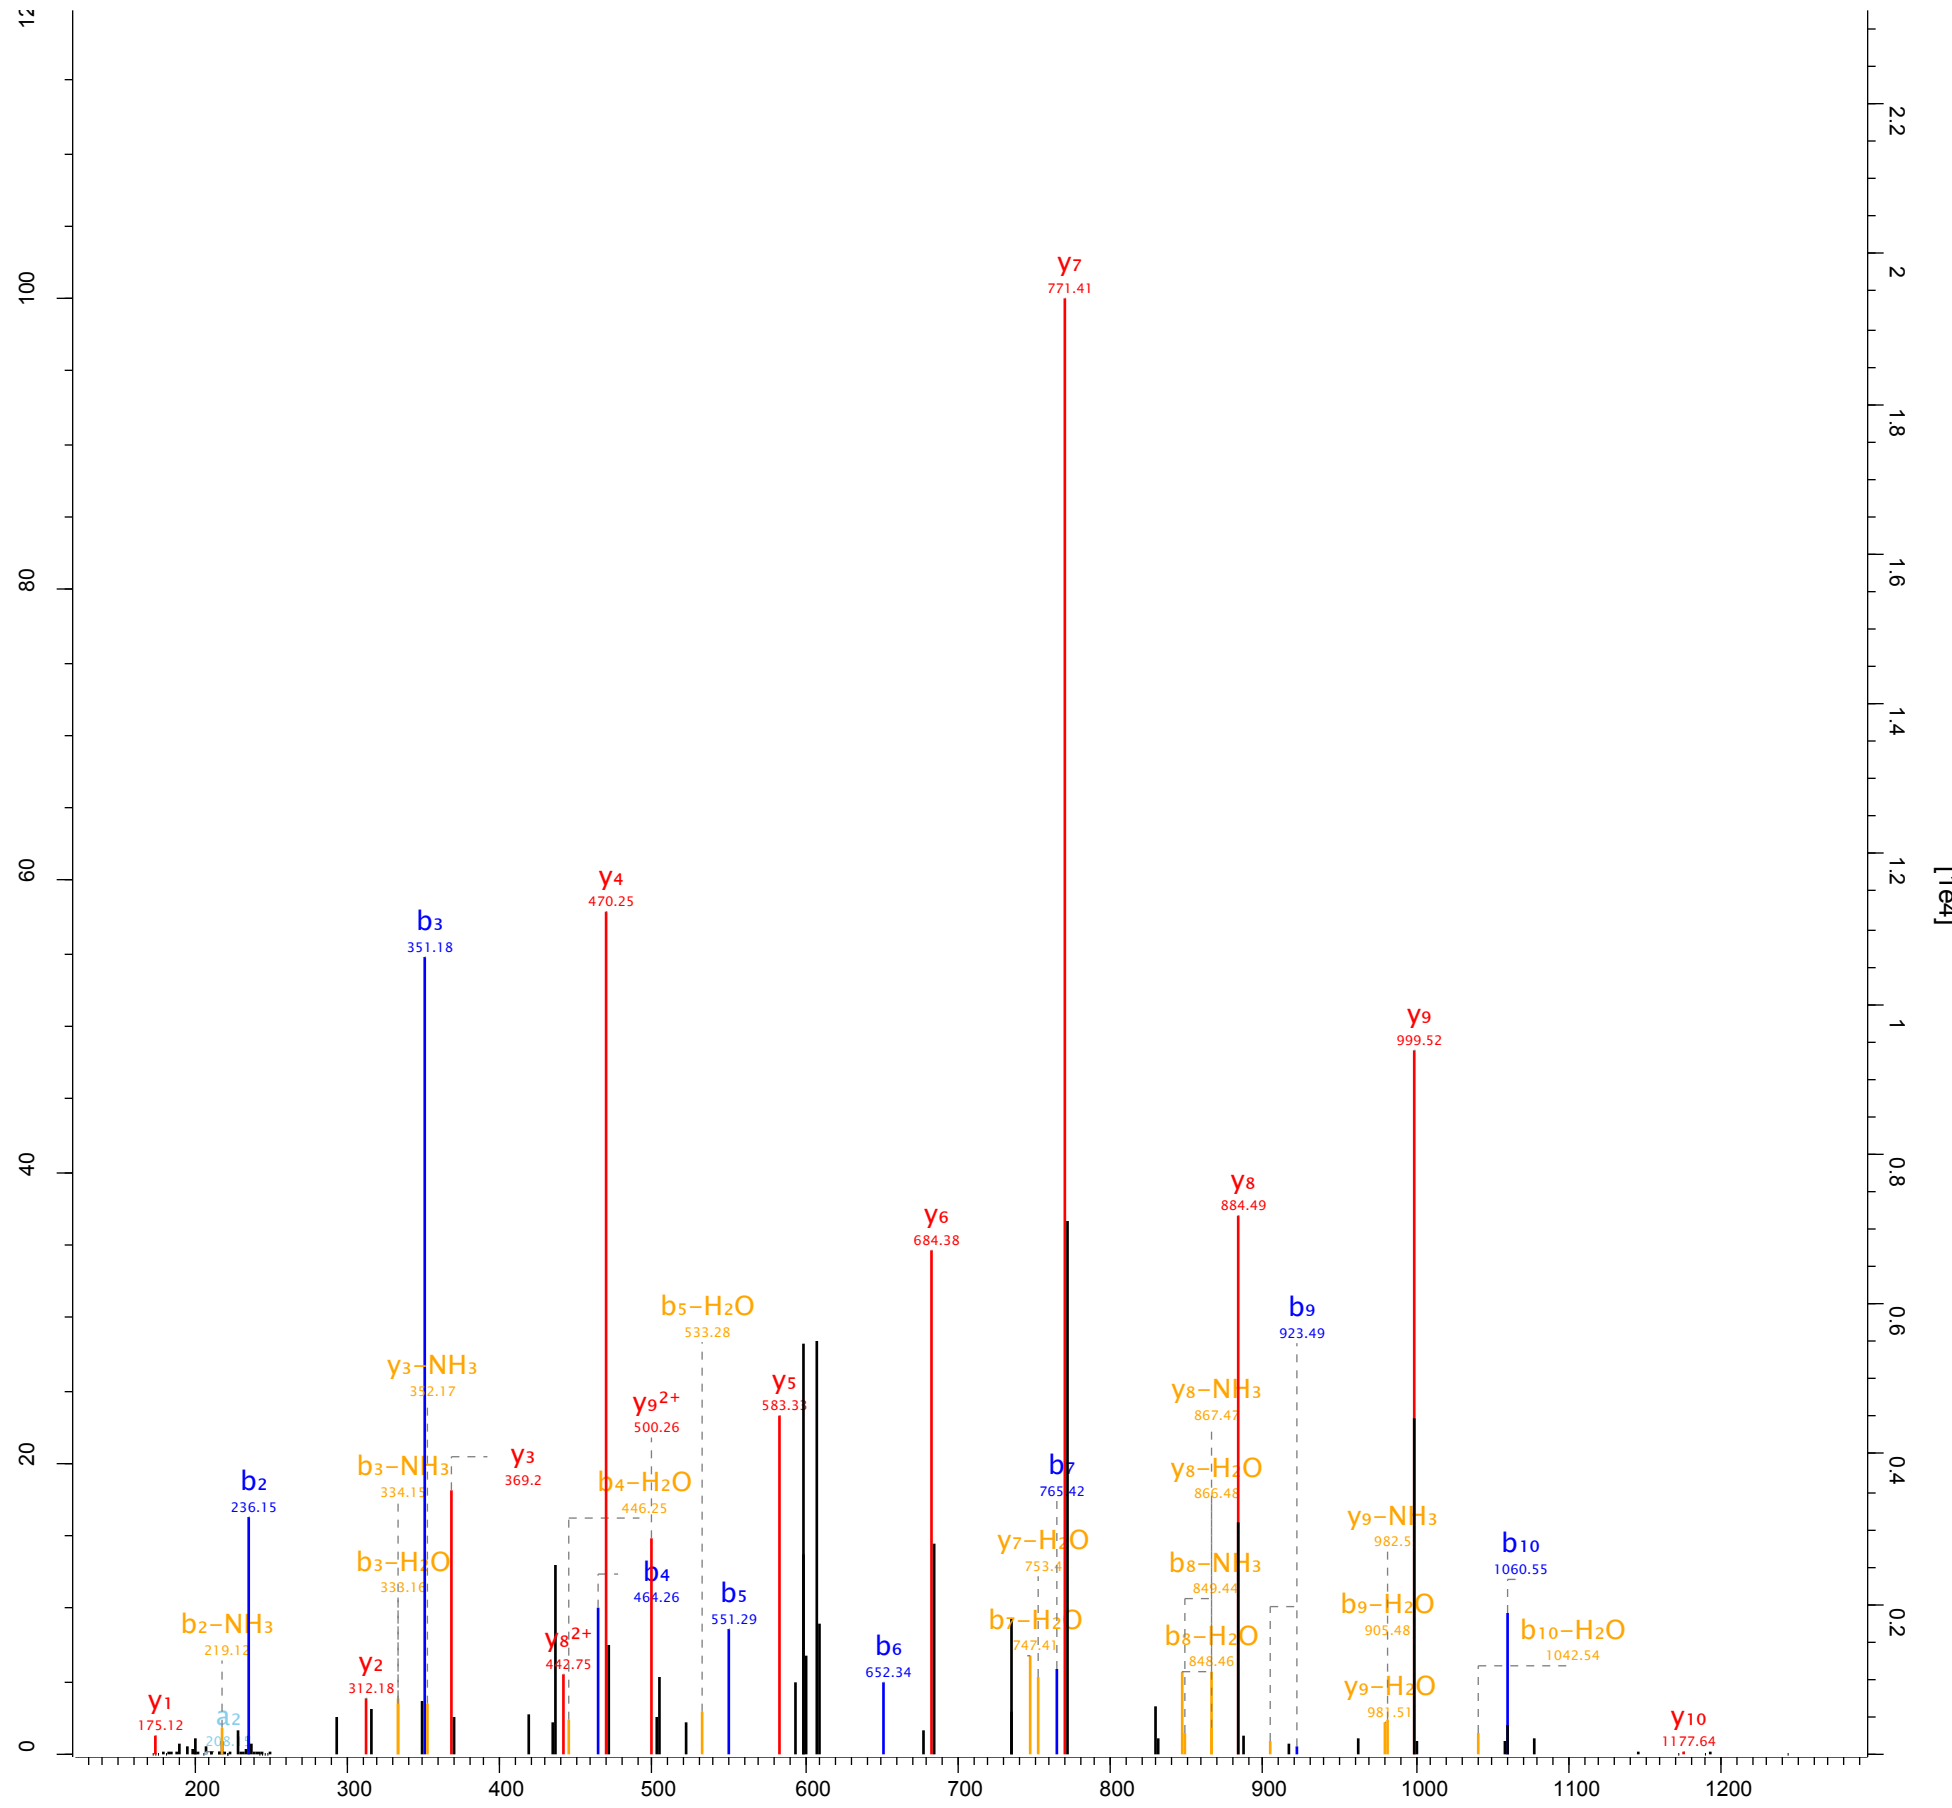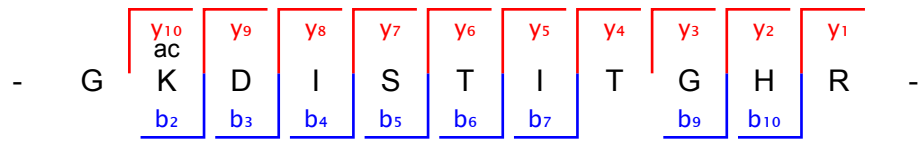

050713\_SCW\_II\_29\_35\_9

12421 ITMS; CID 123.67 599.81 Crip2

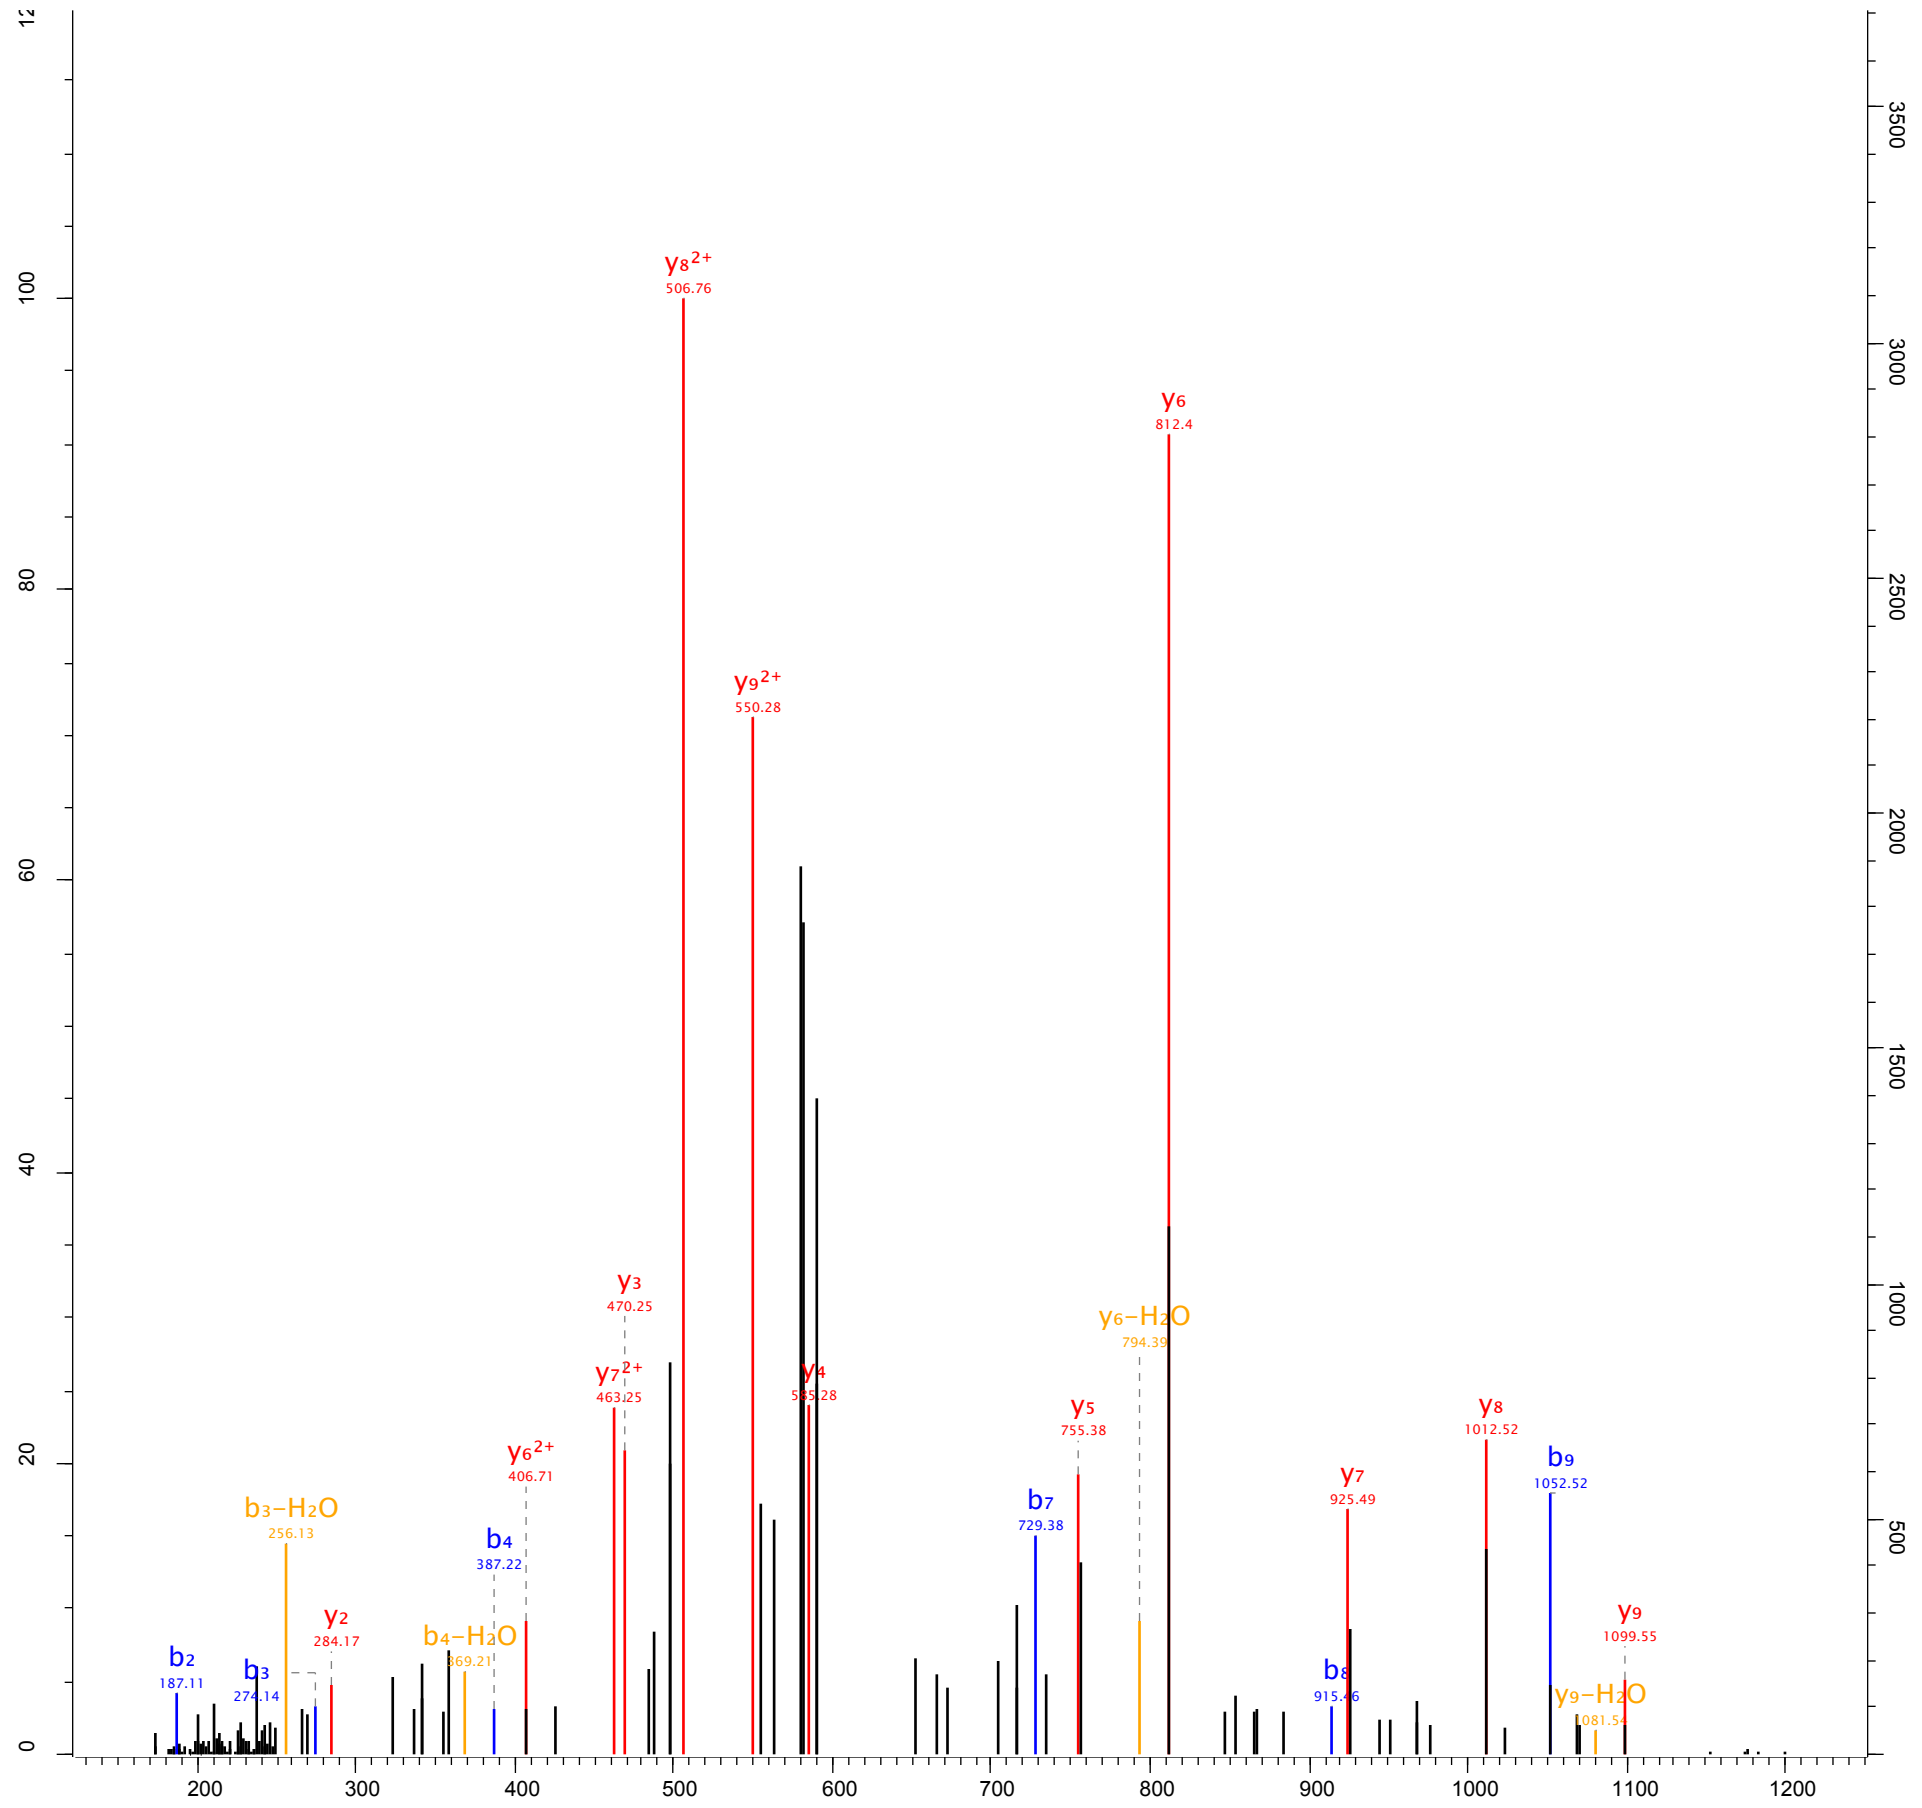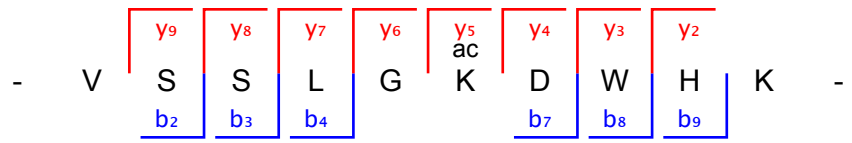



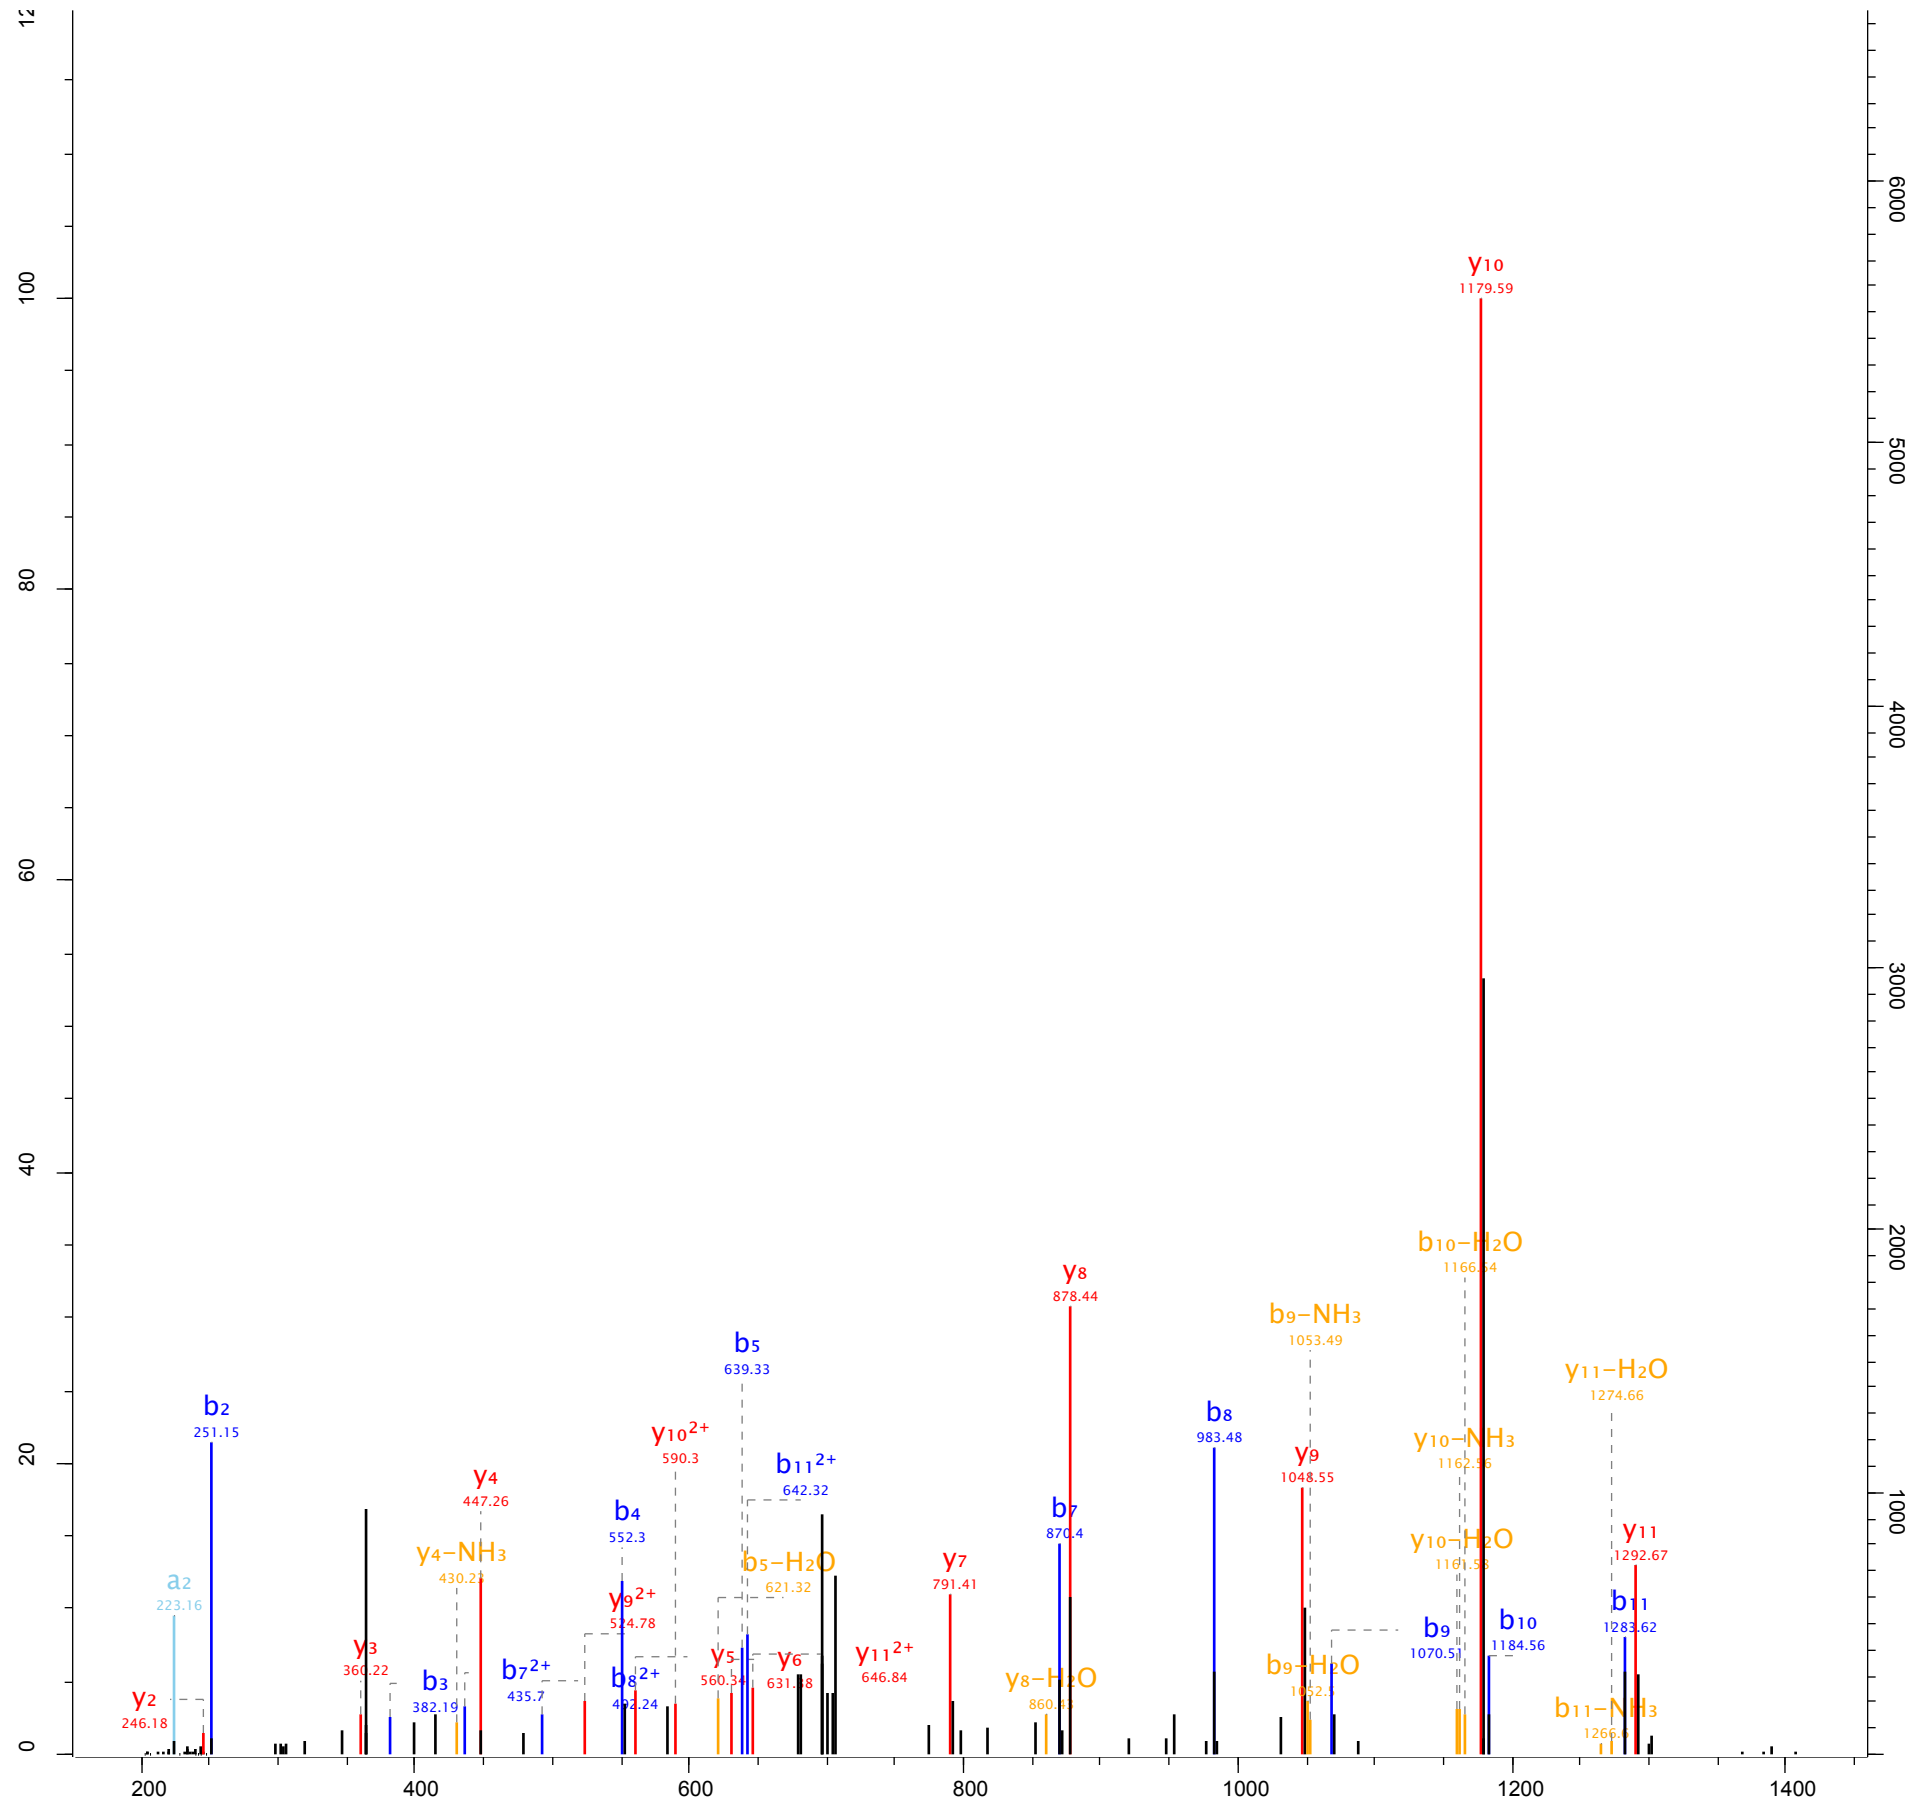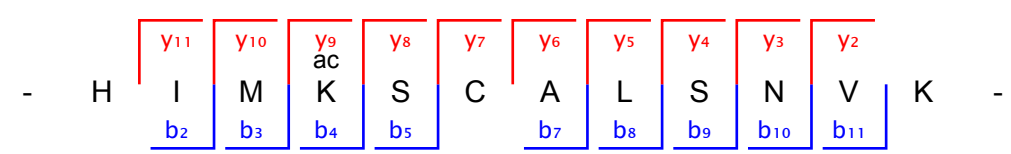

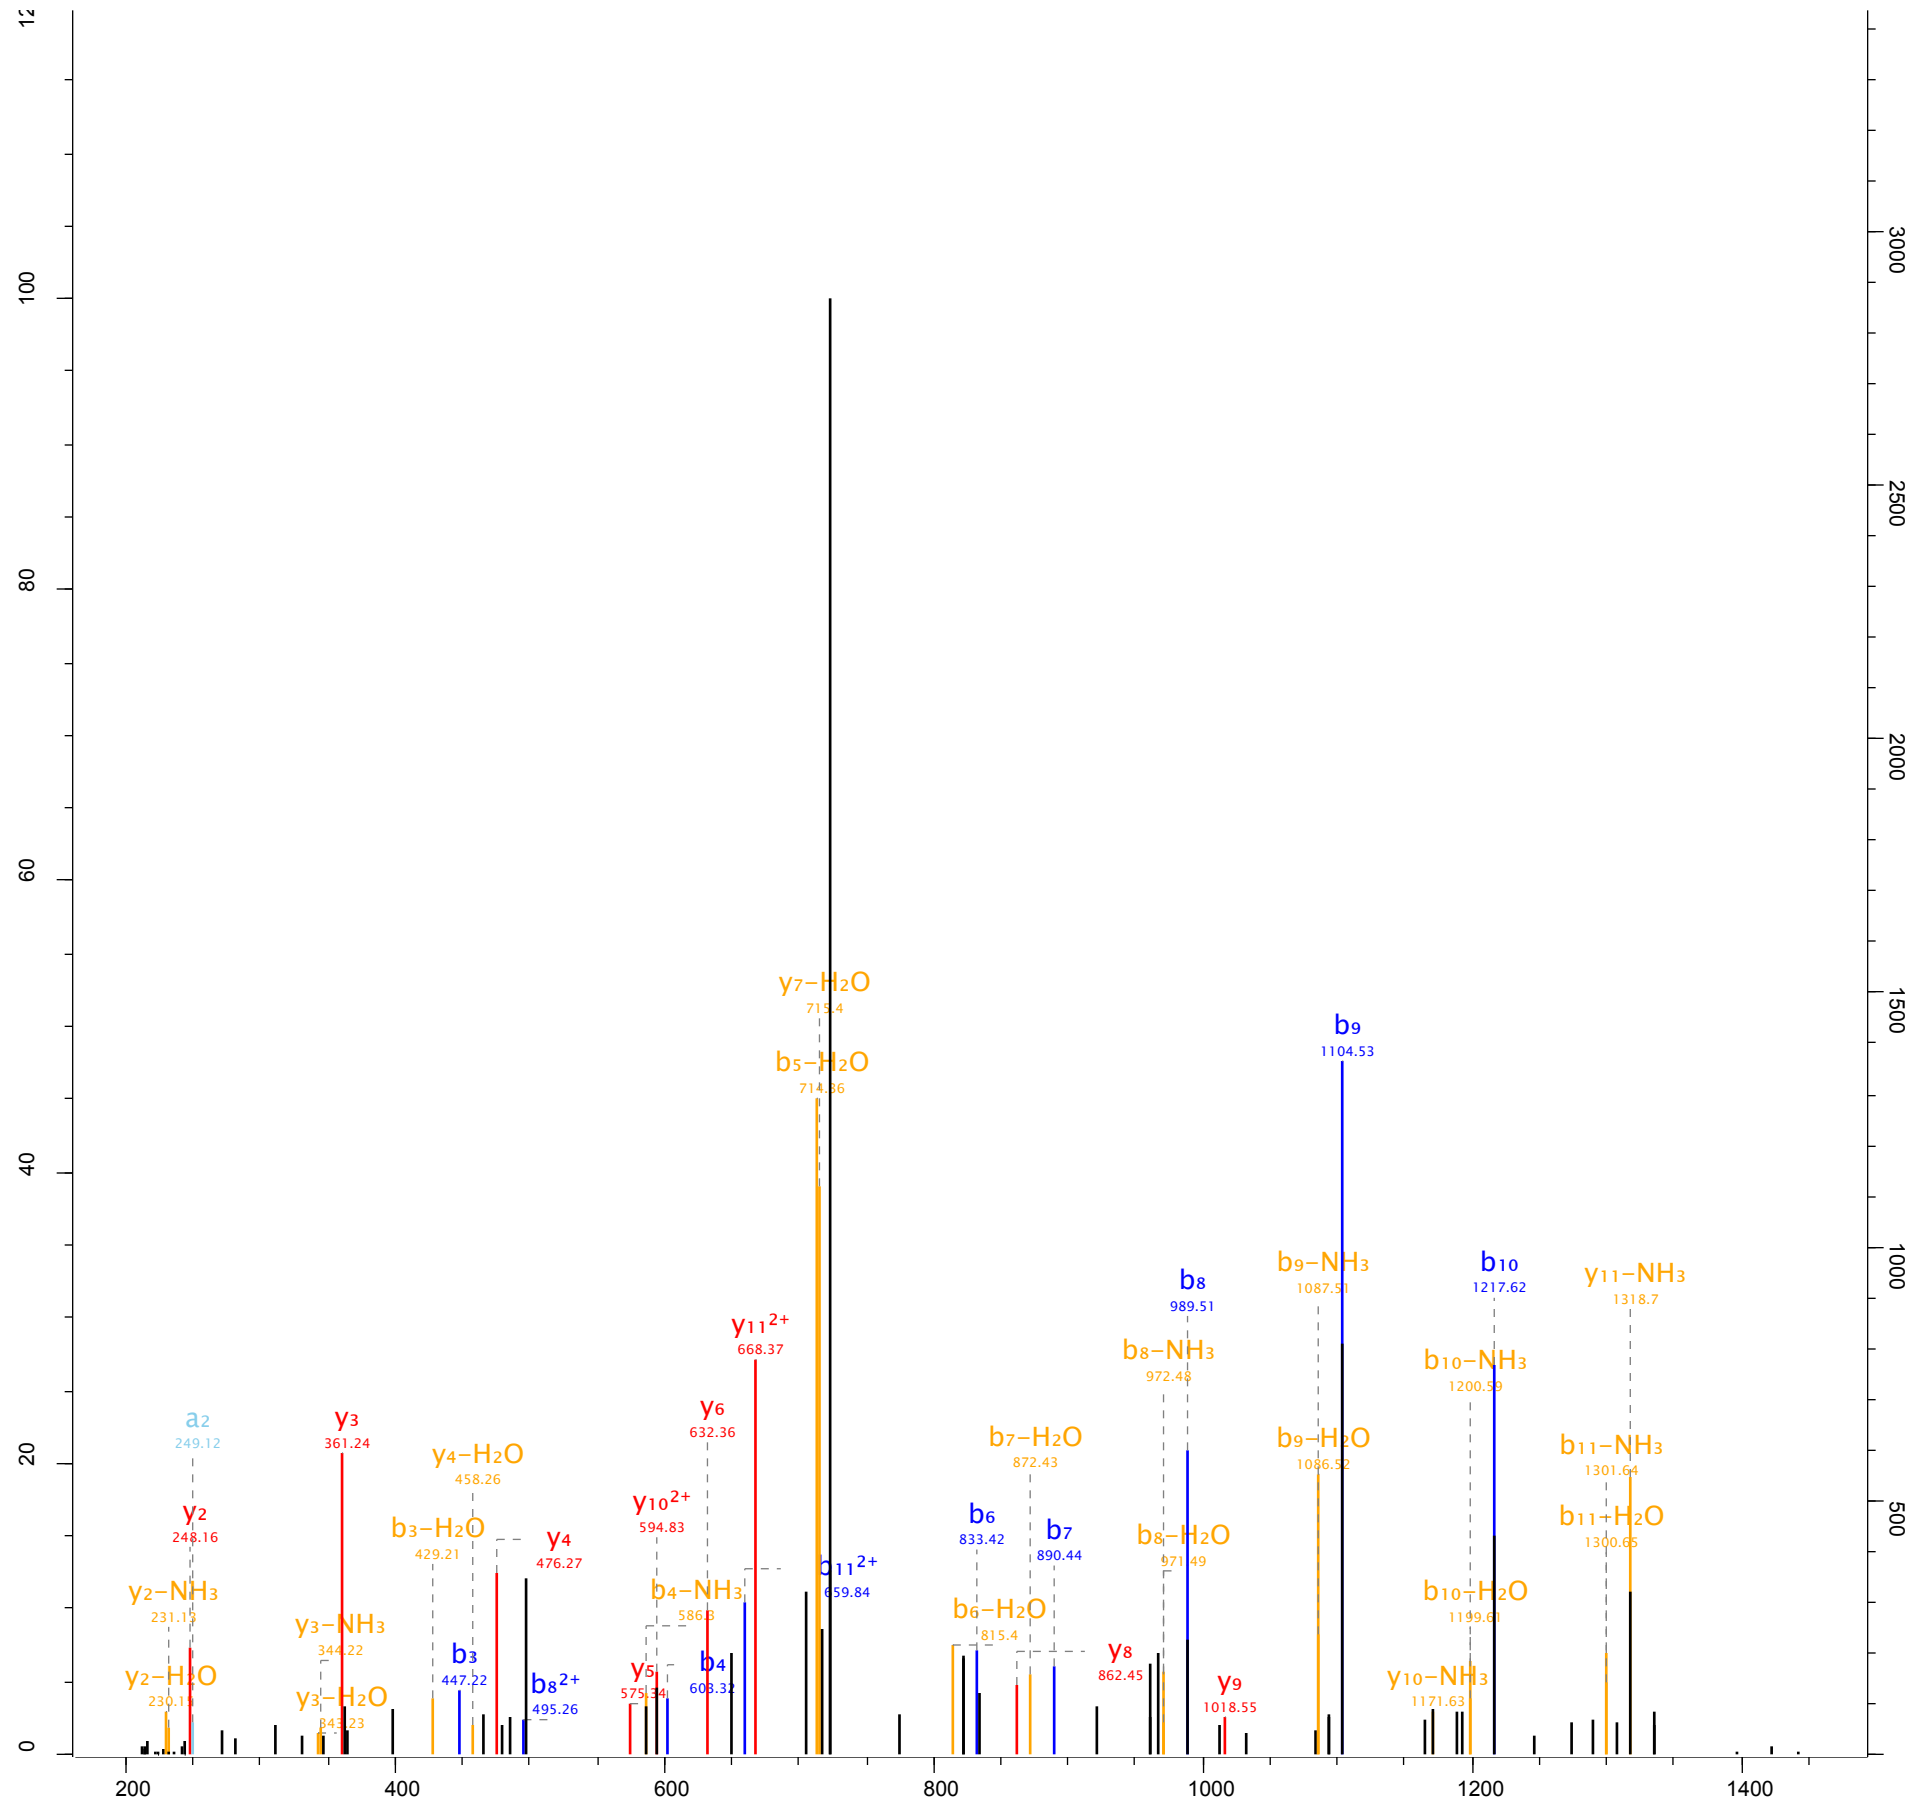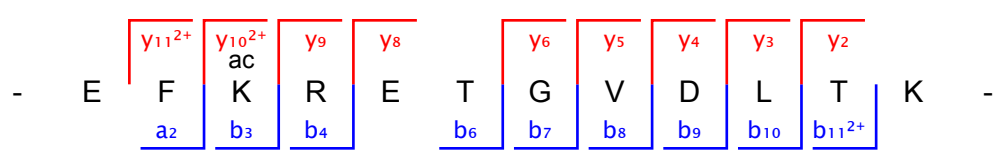

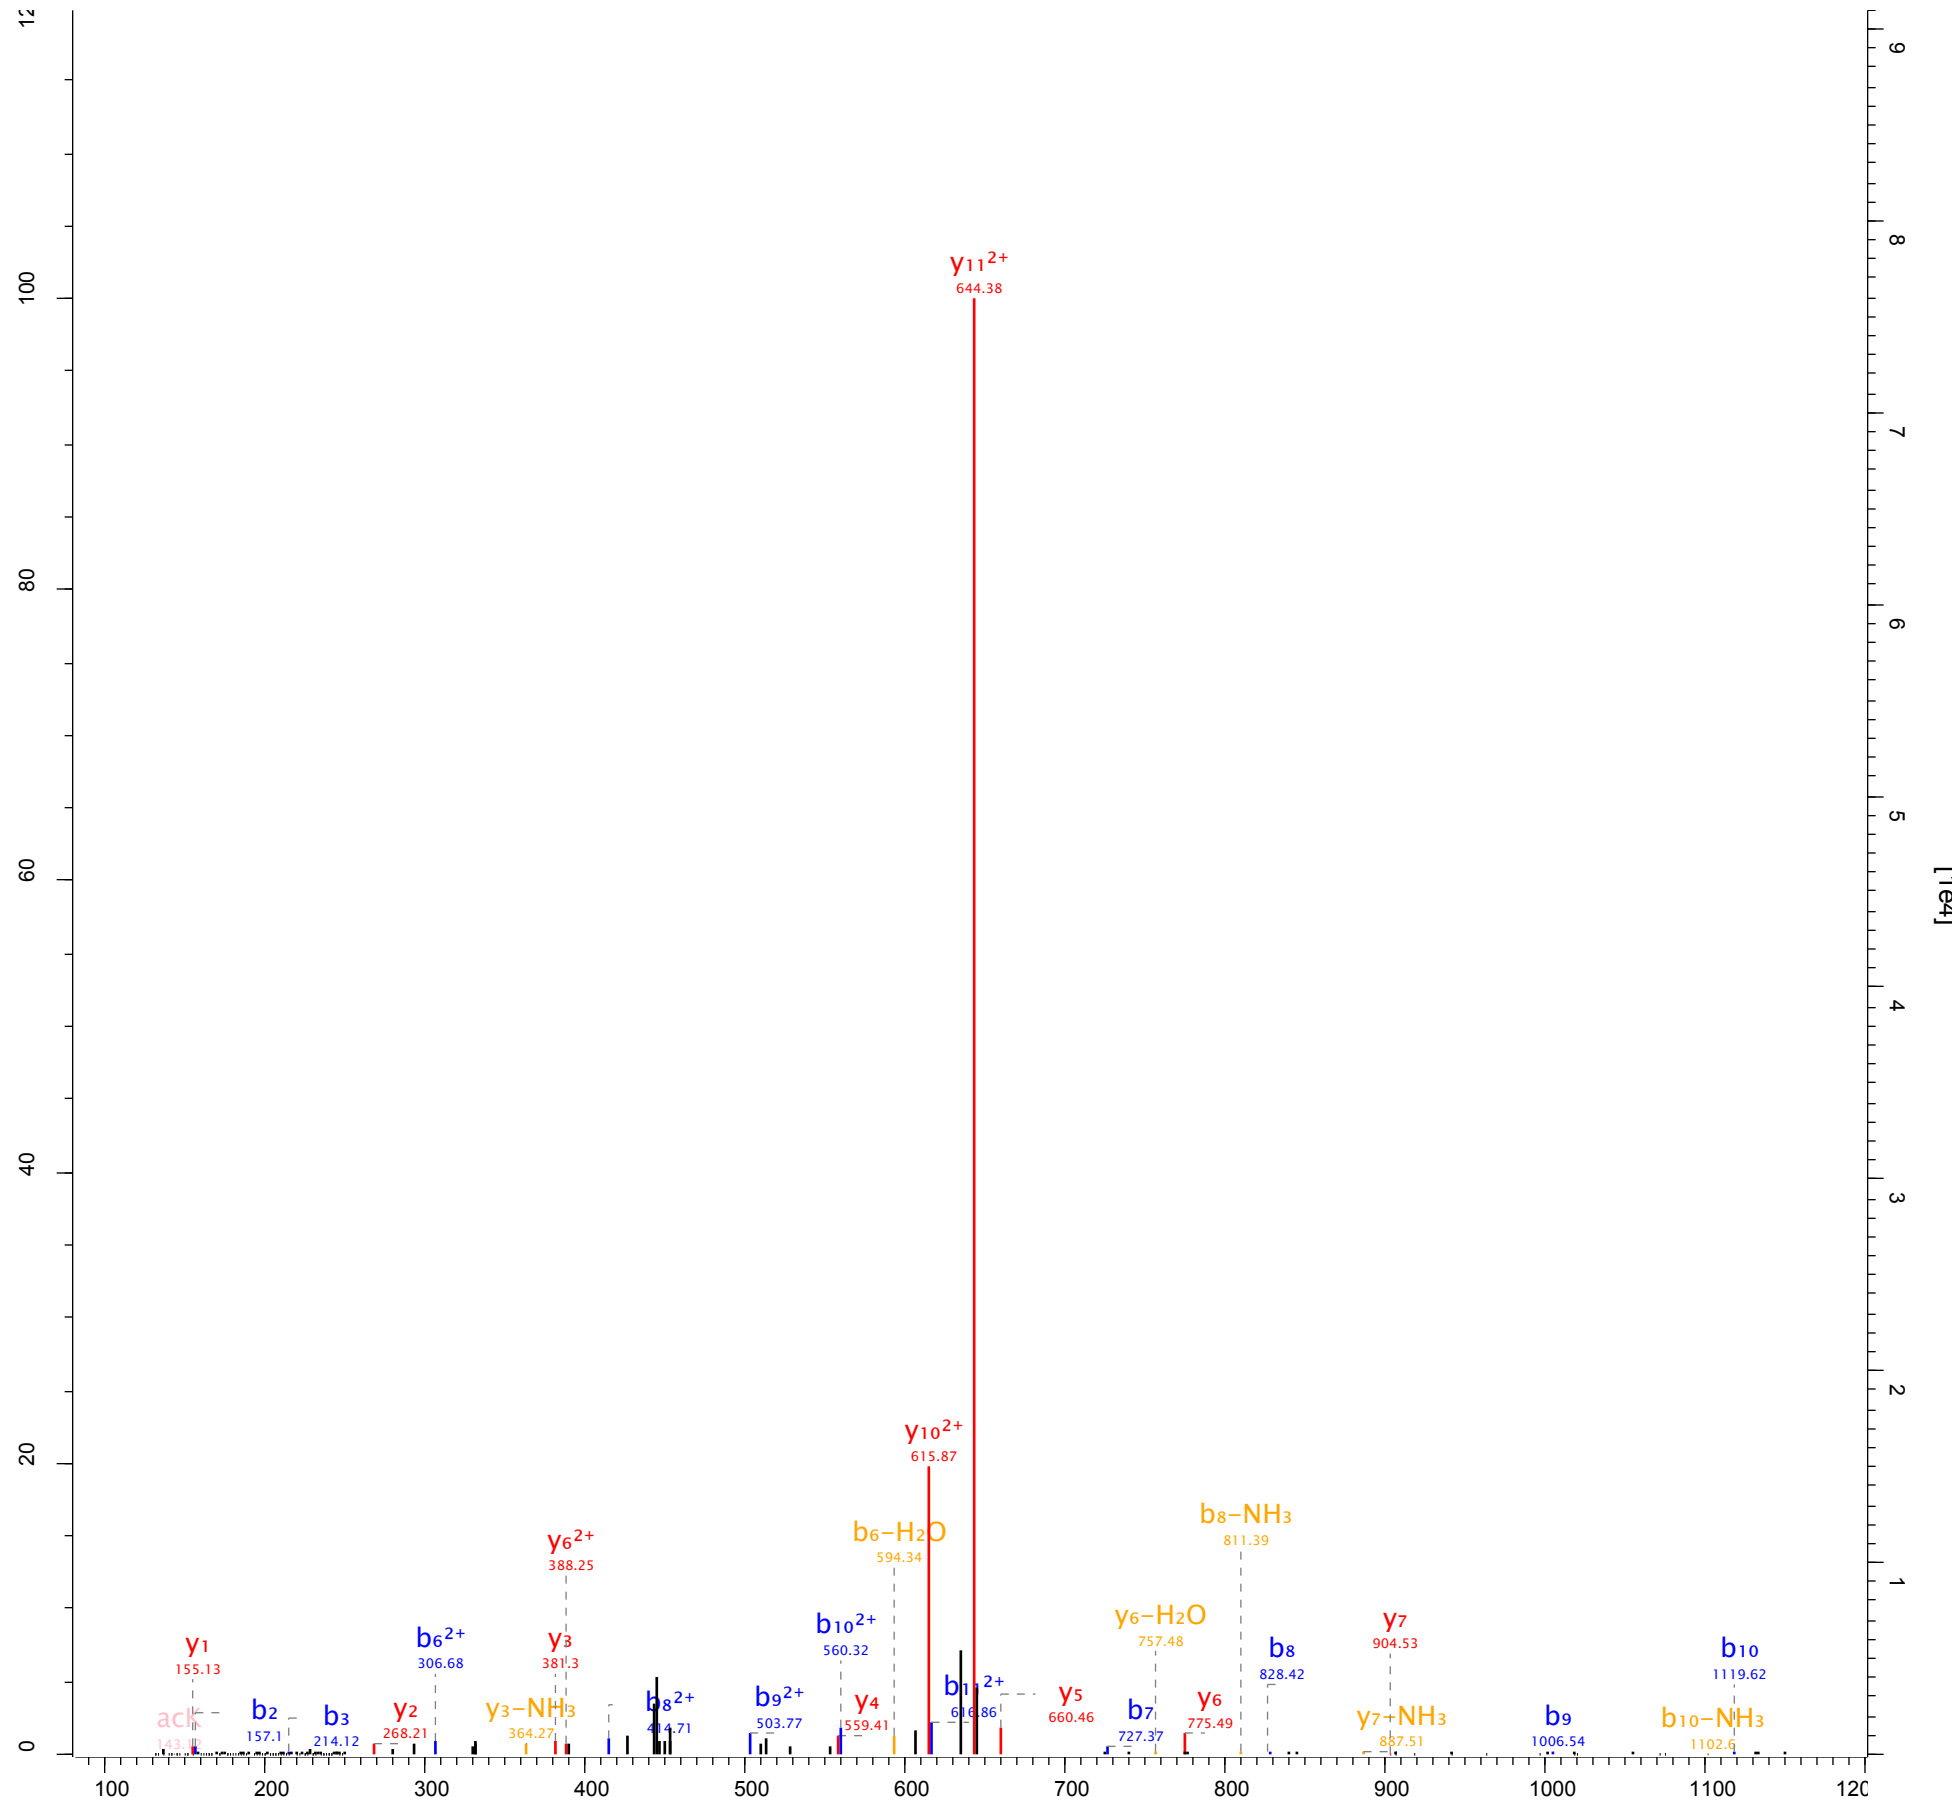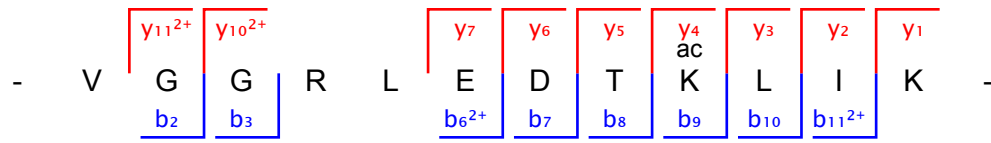

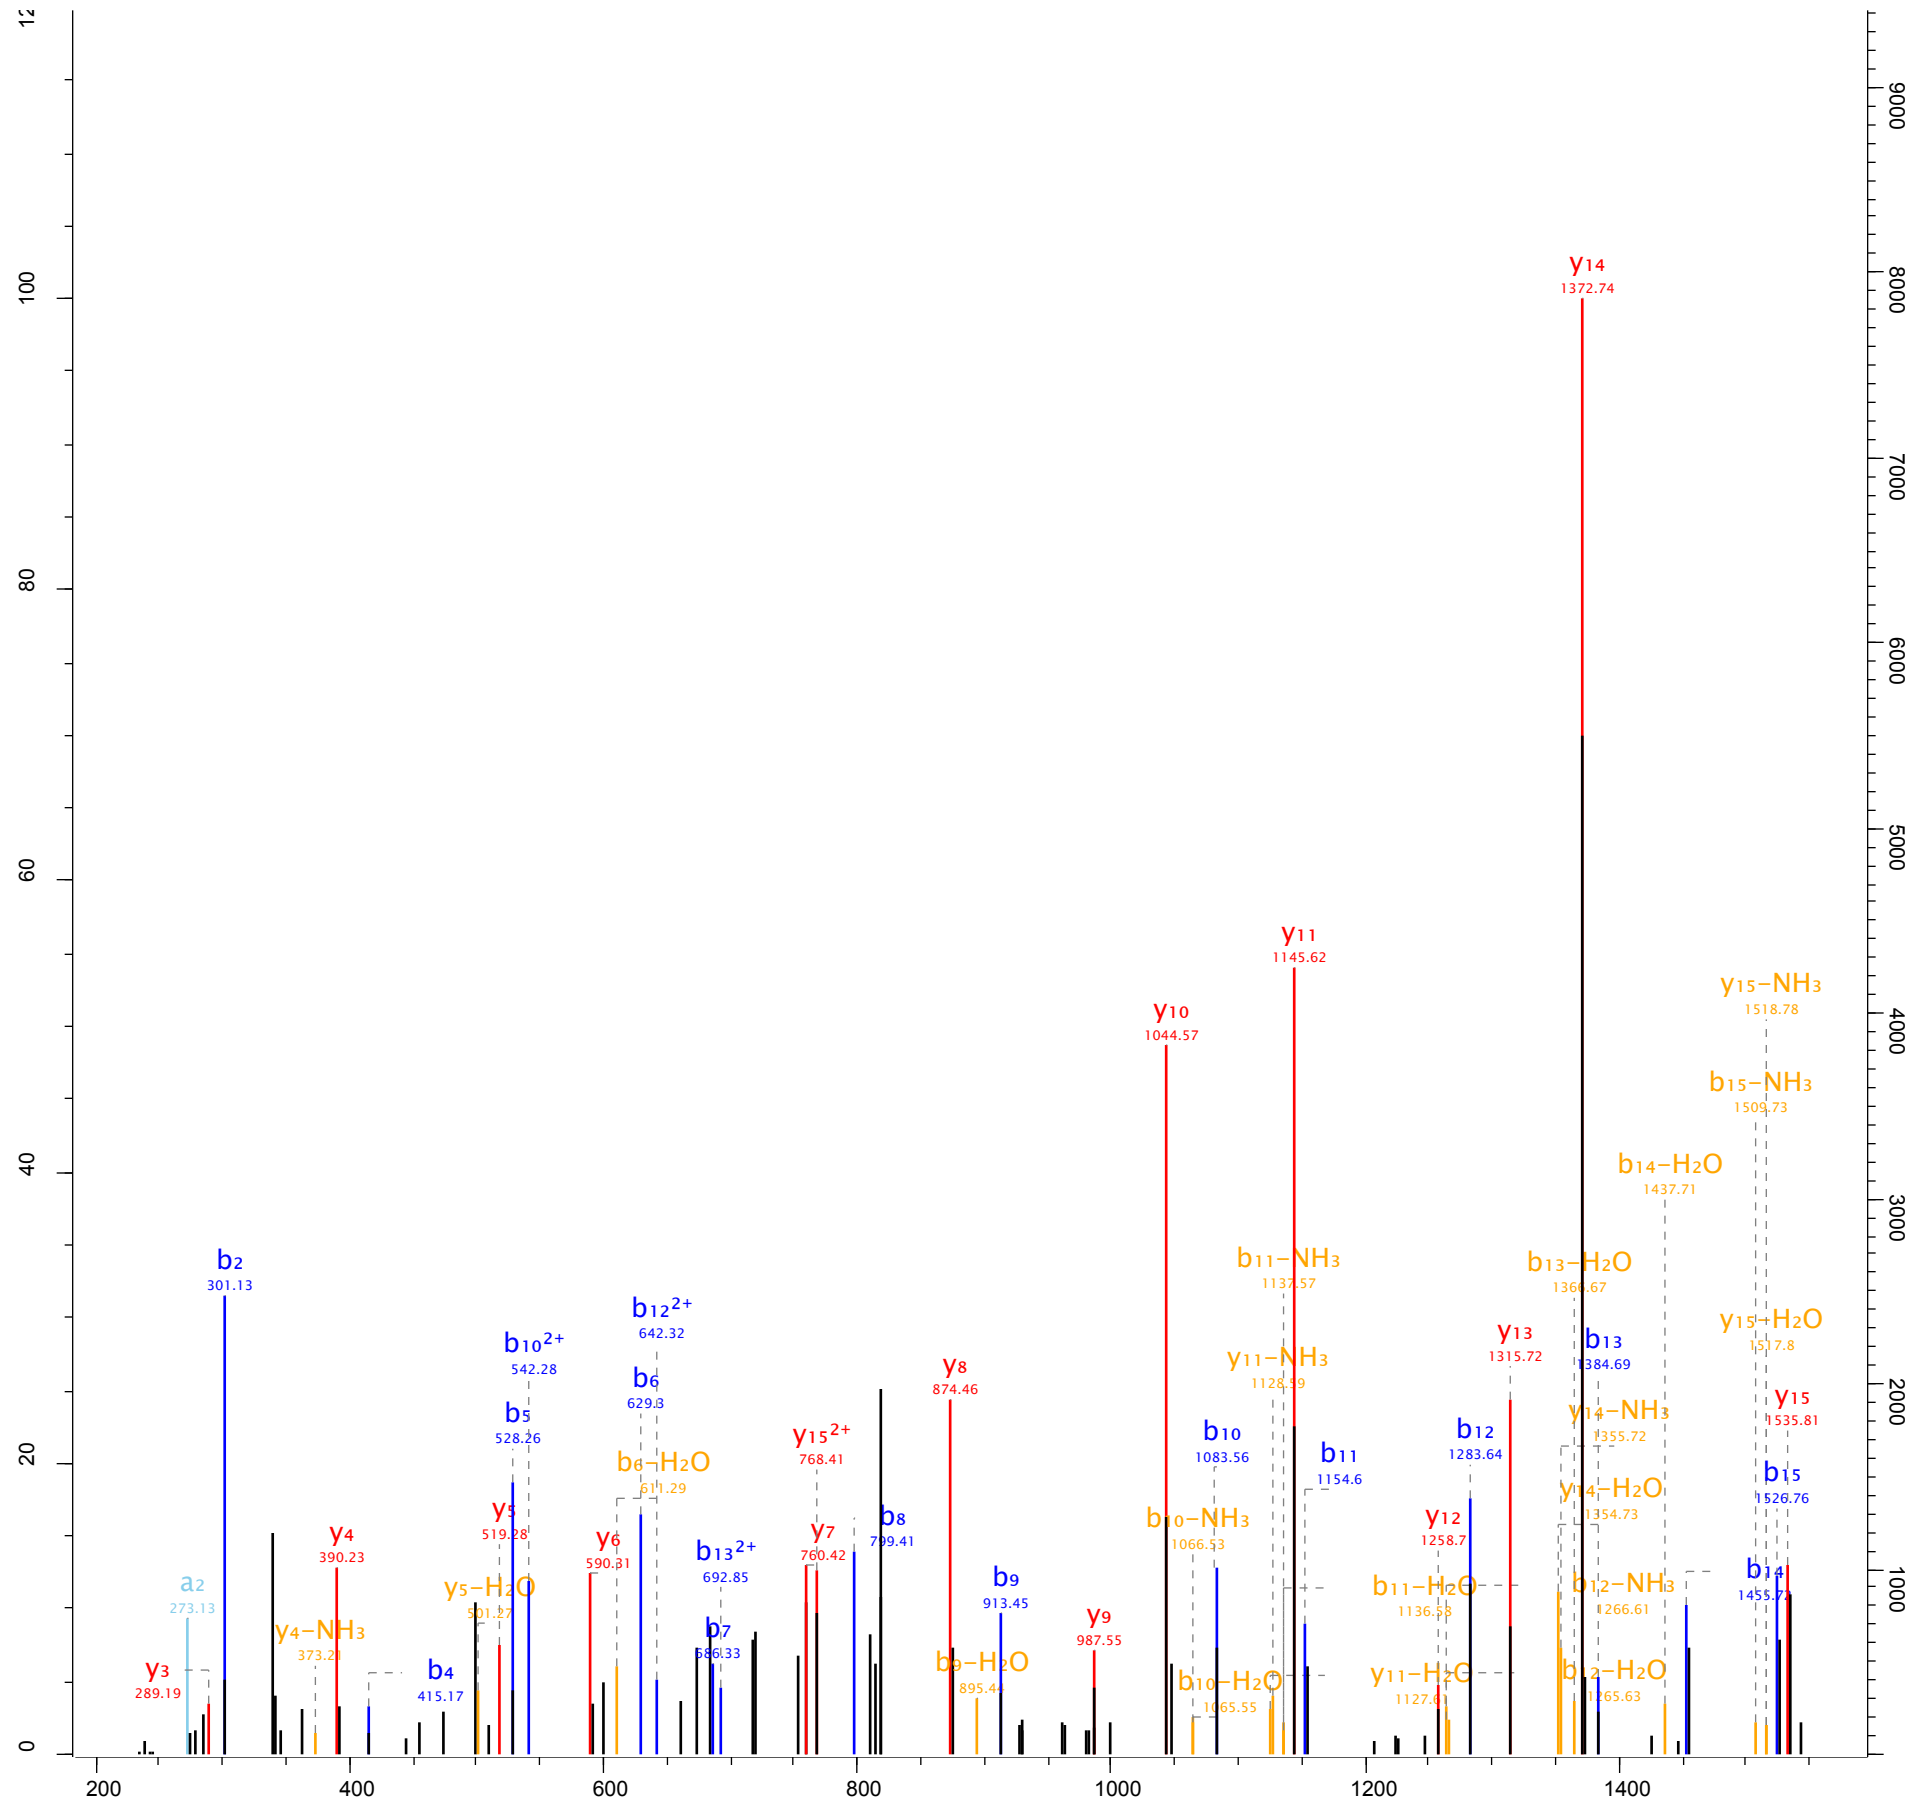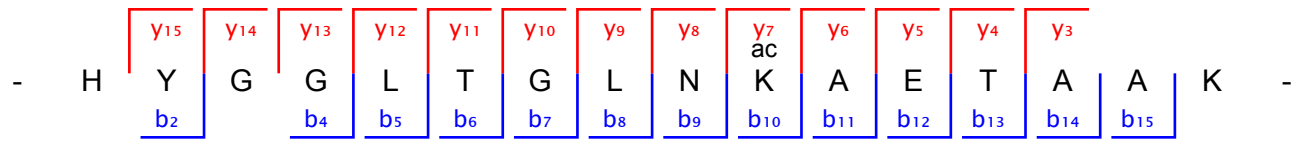

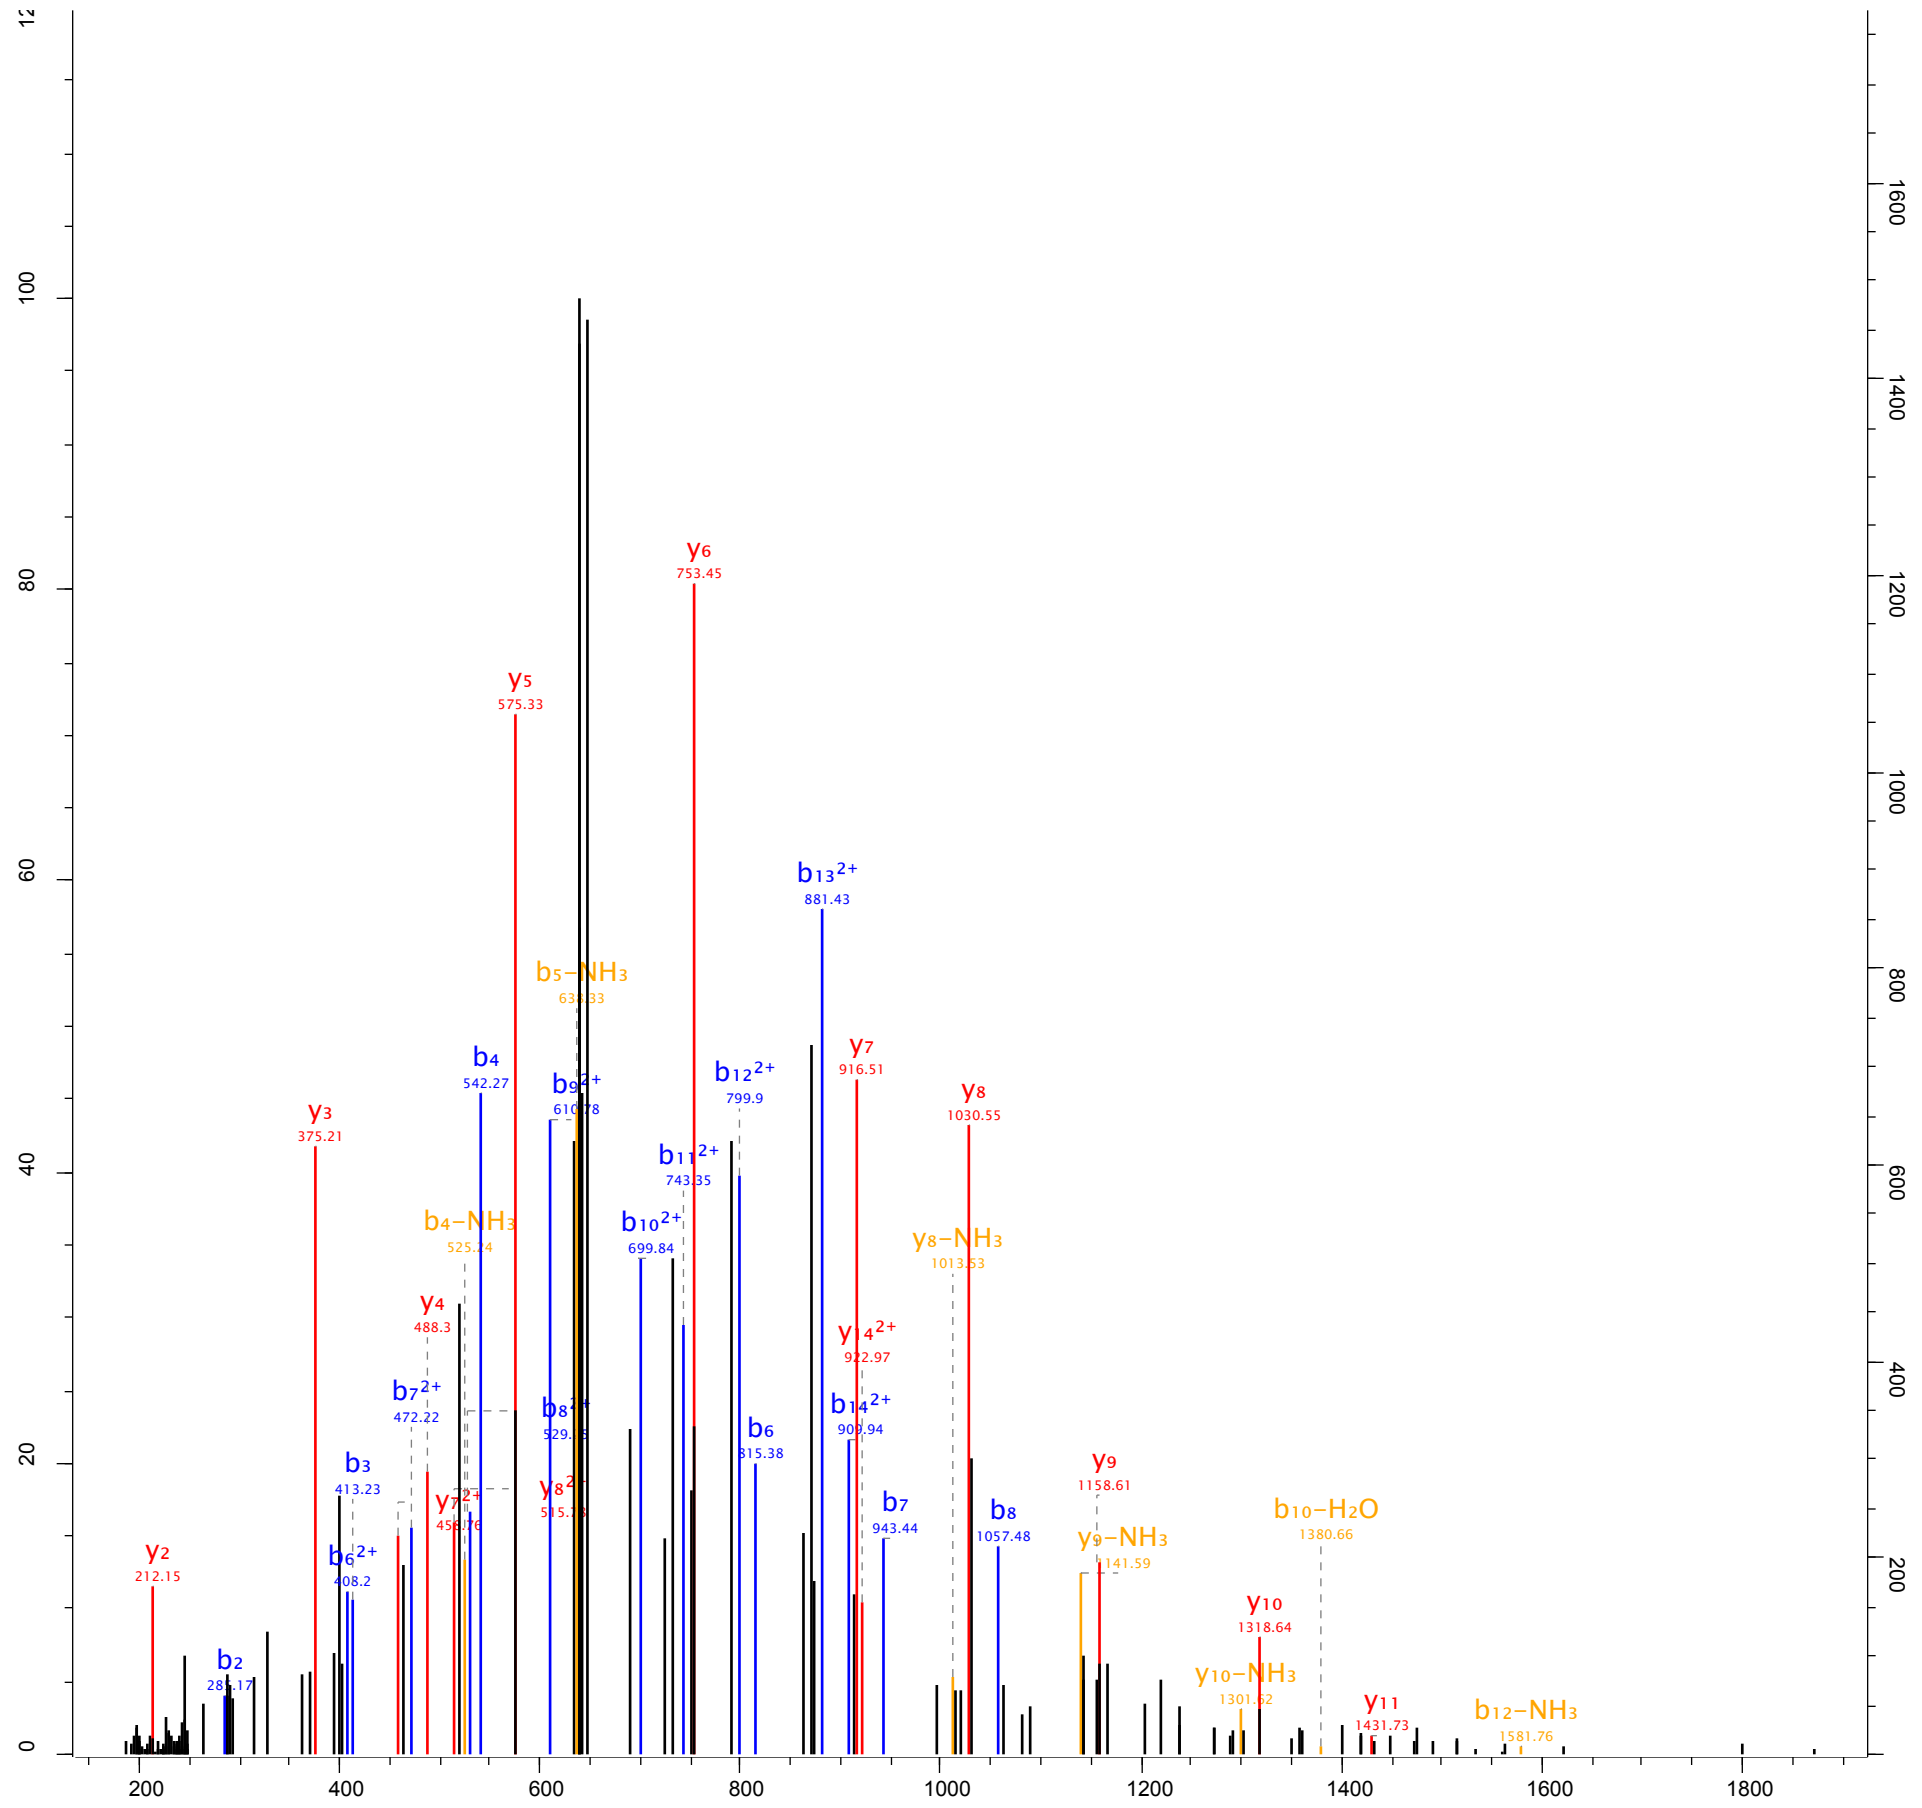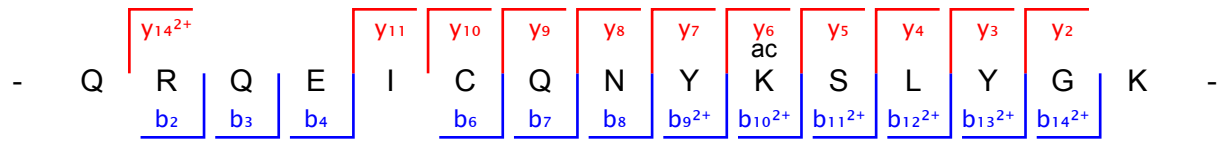

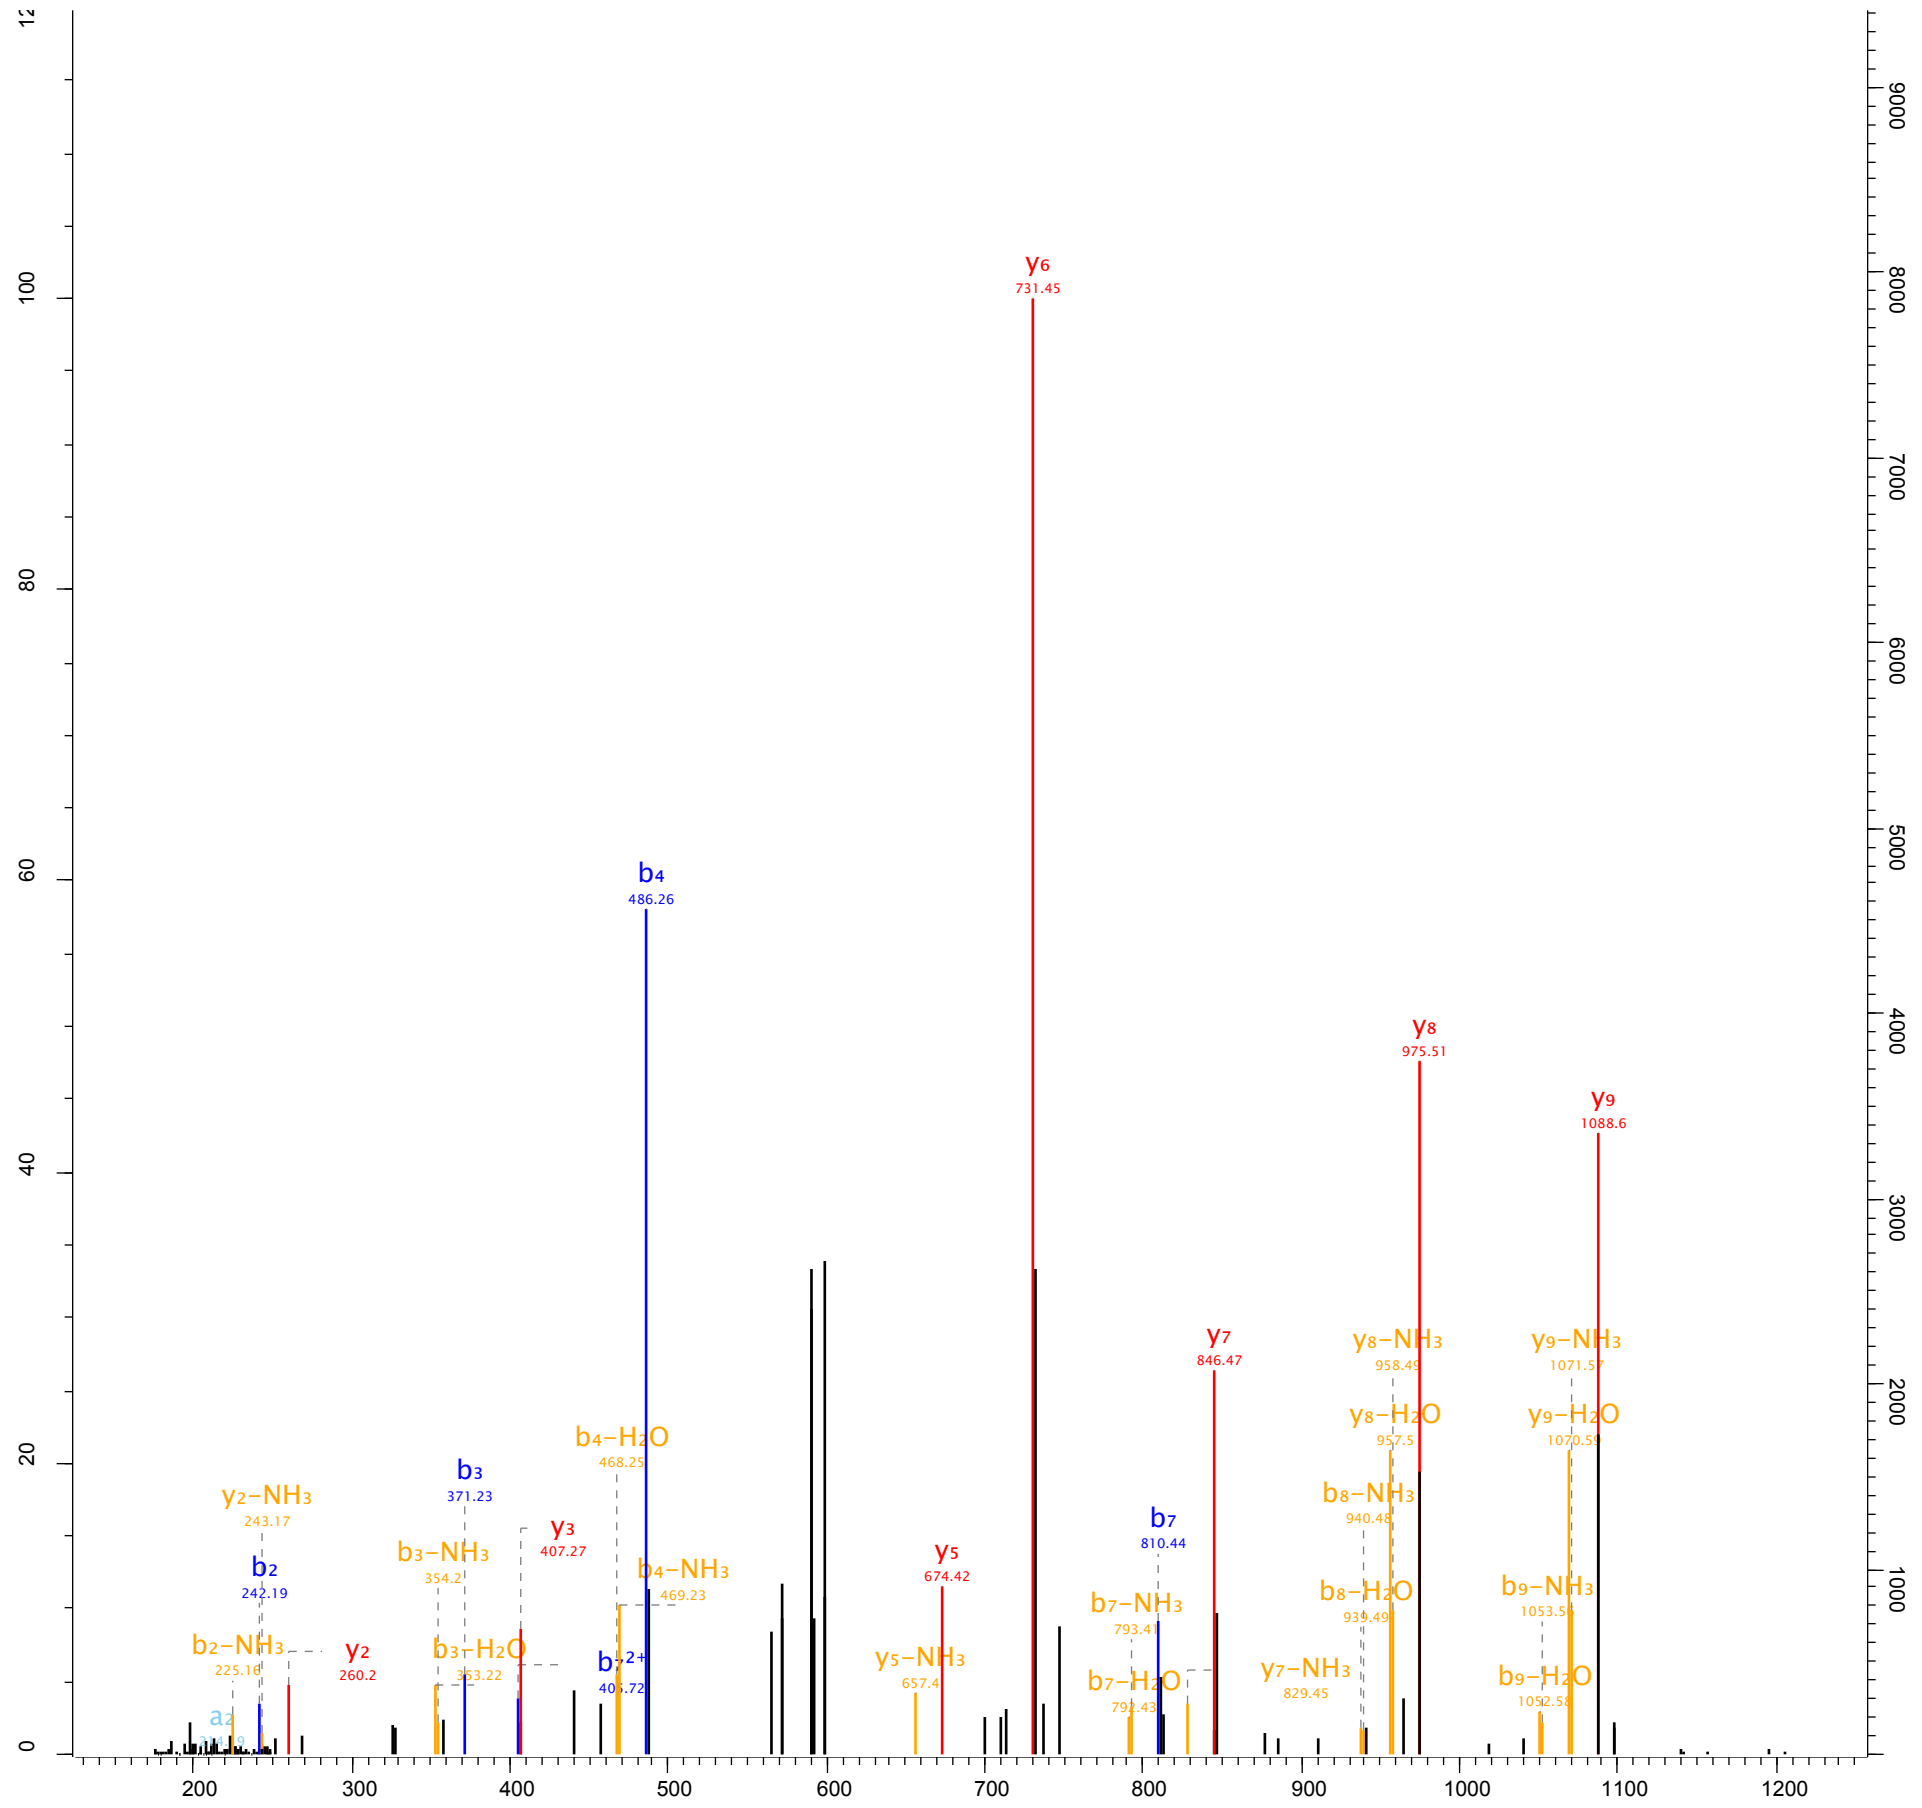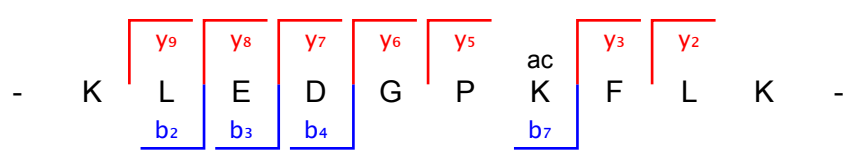

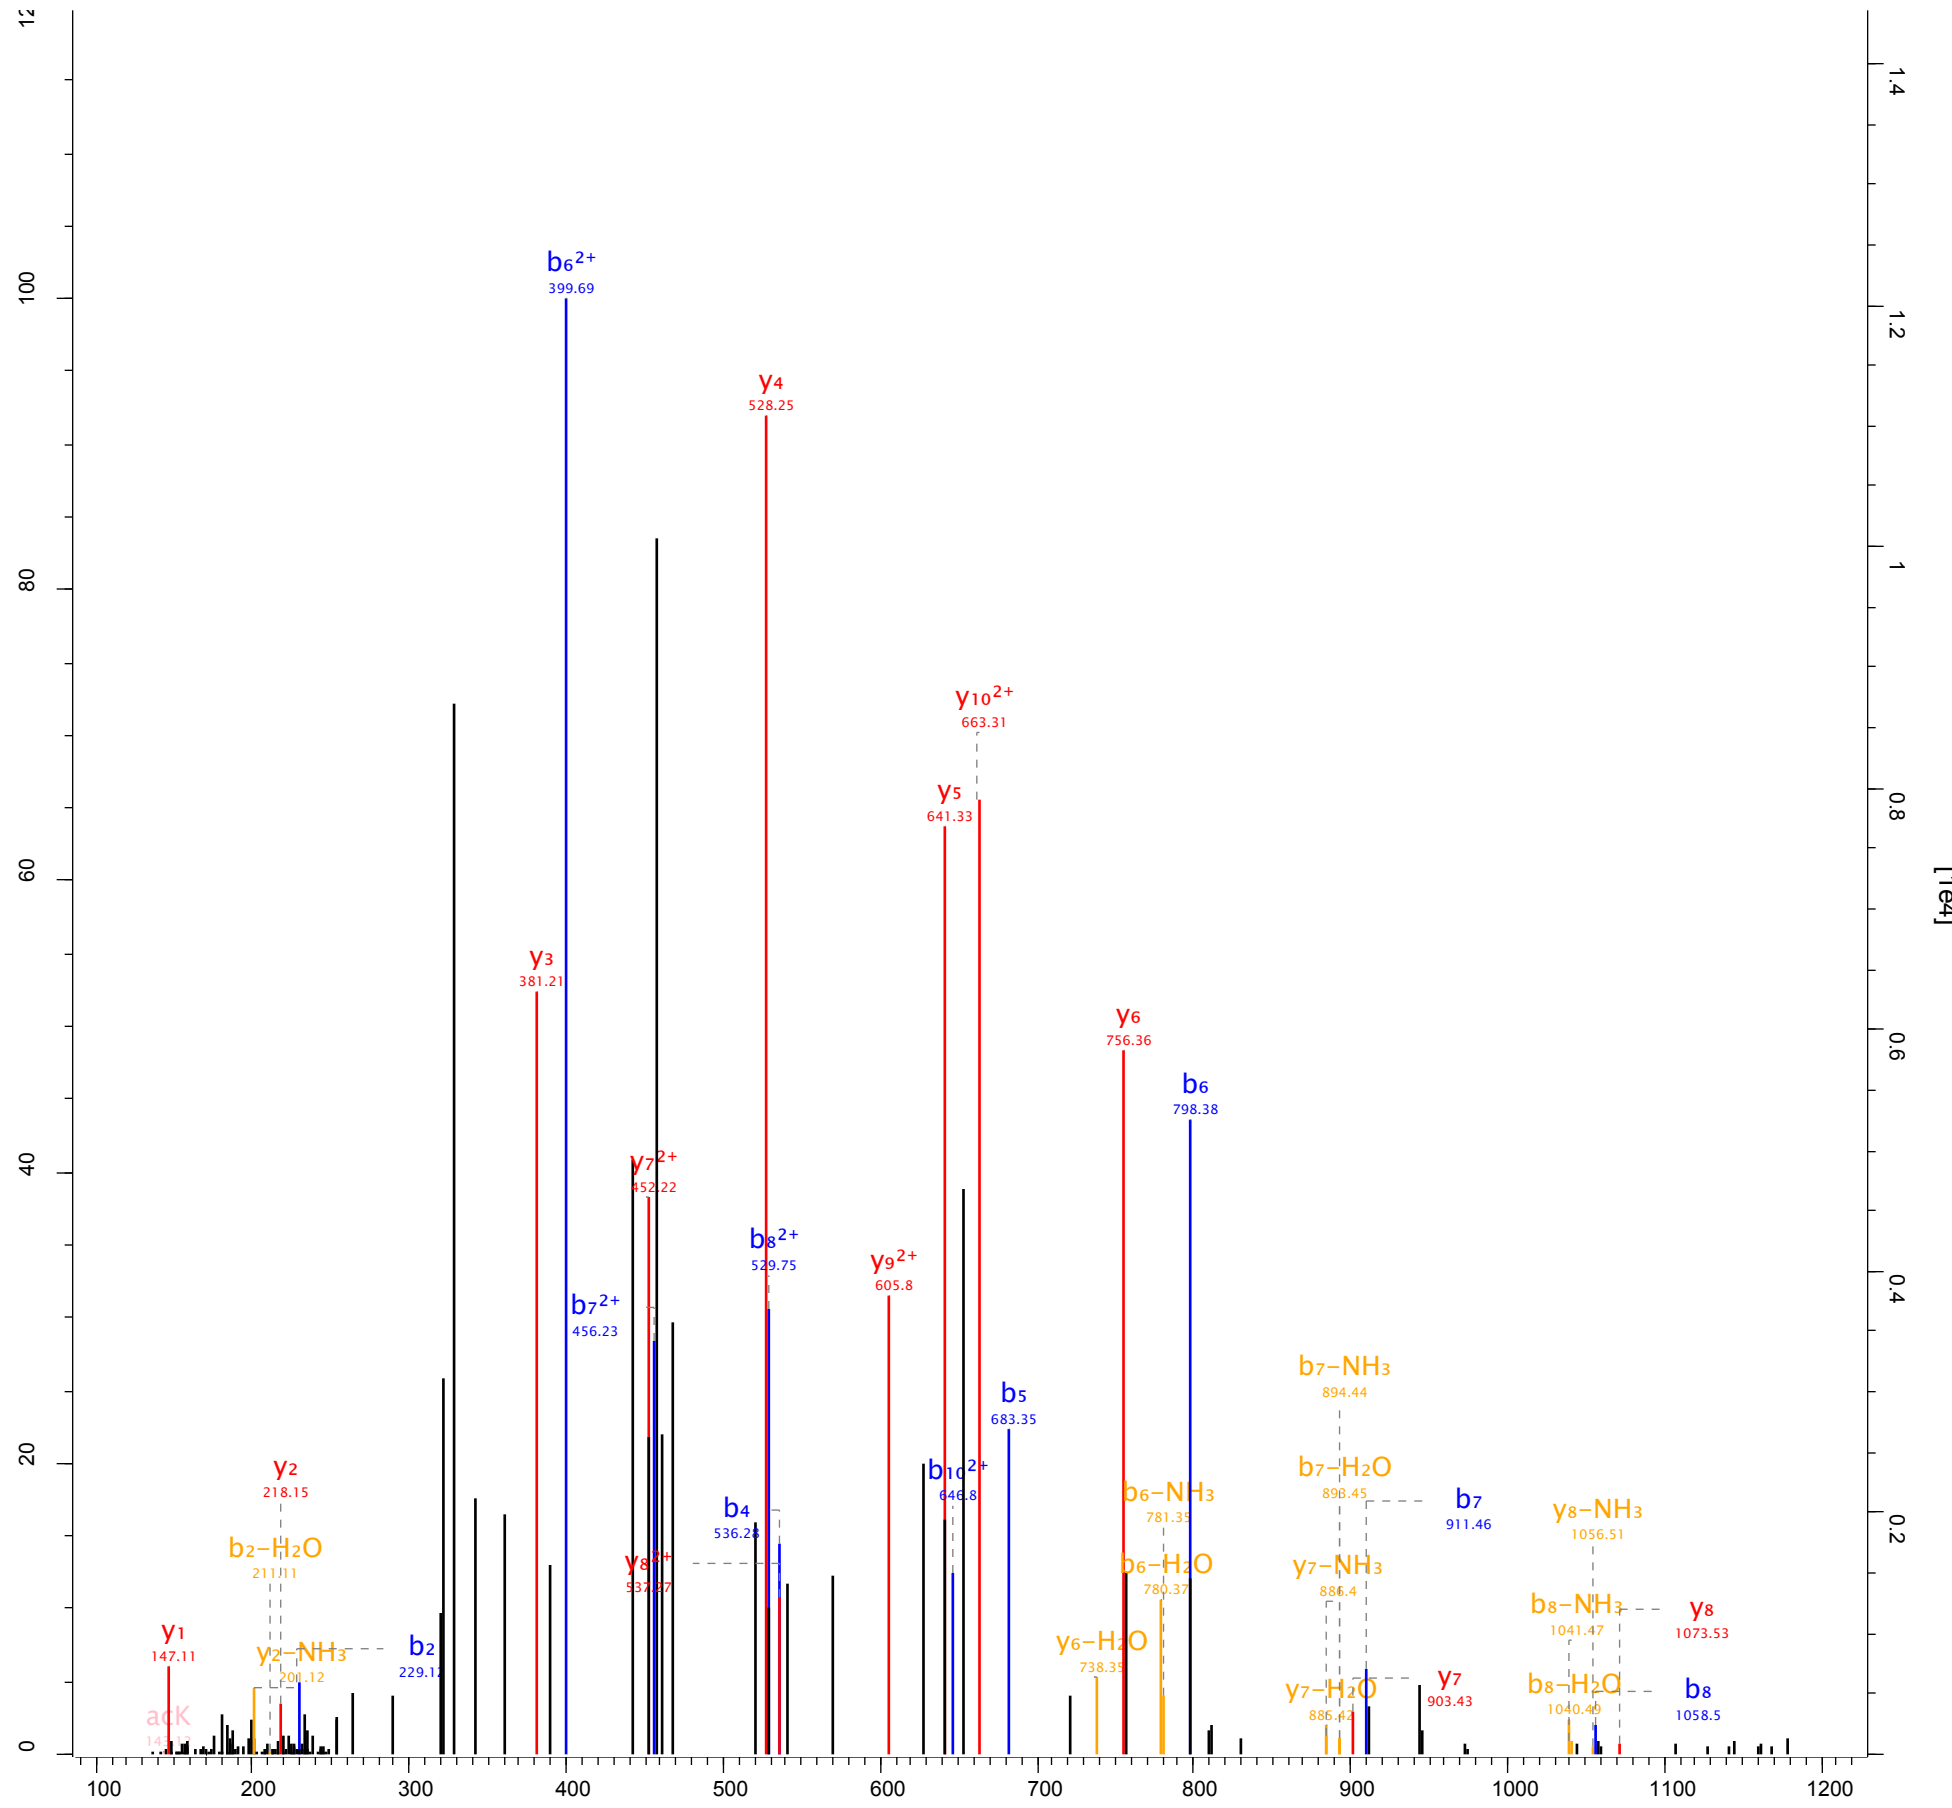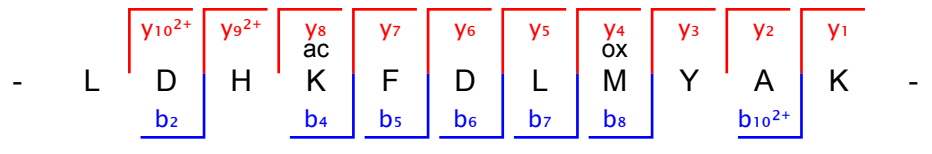

050713\_SCW\_II\_29\_35\_9

16024 ITMS; CID 164.97 684.37 Tpi1

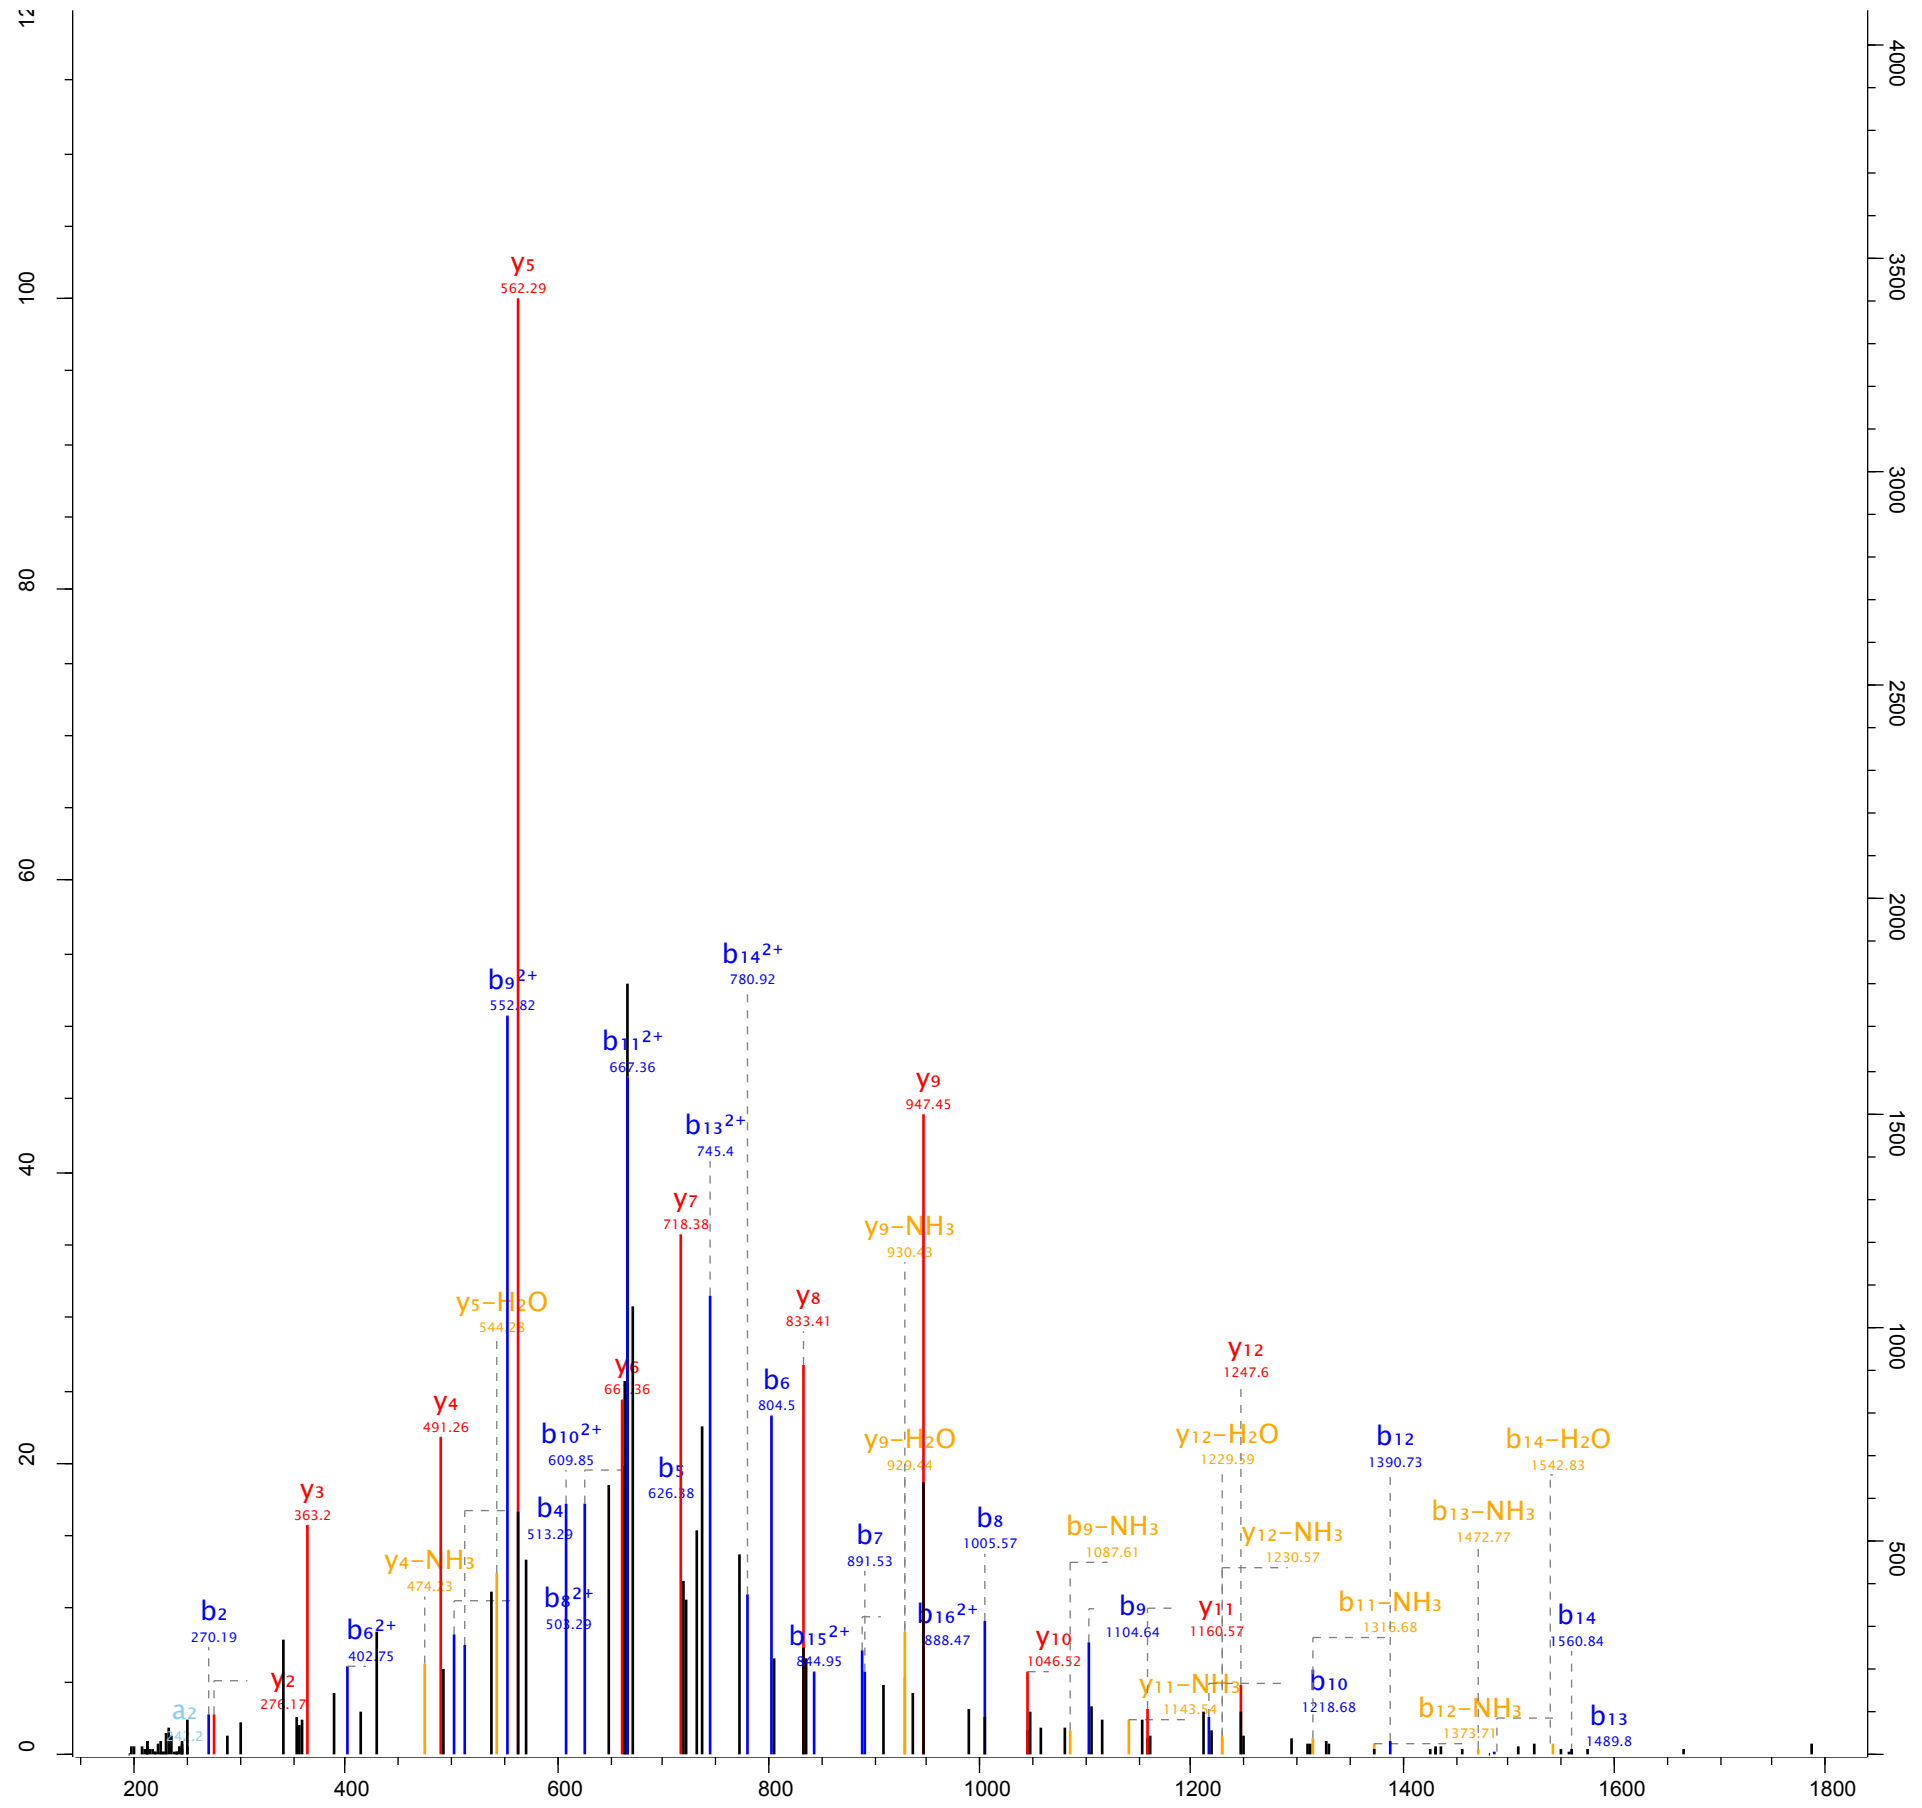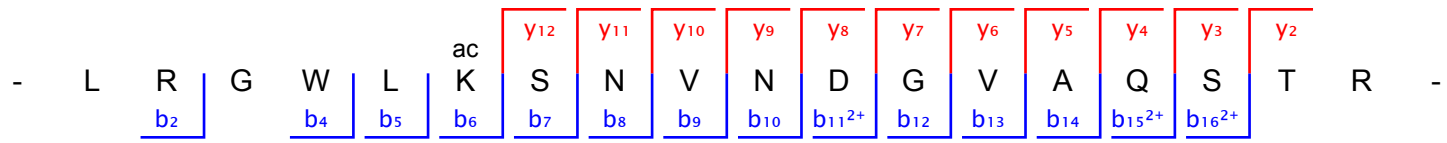



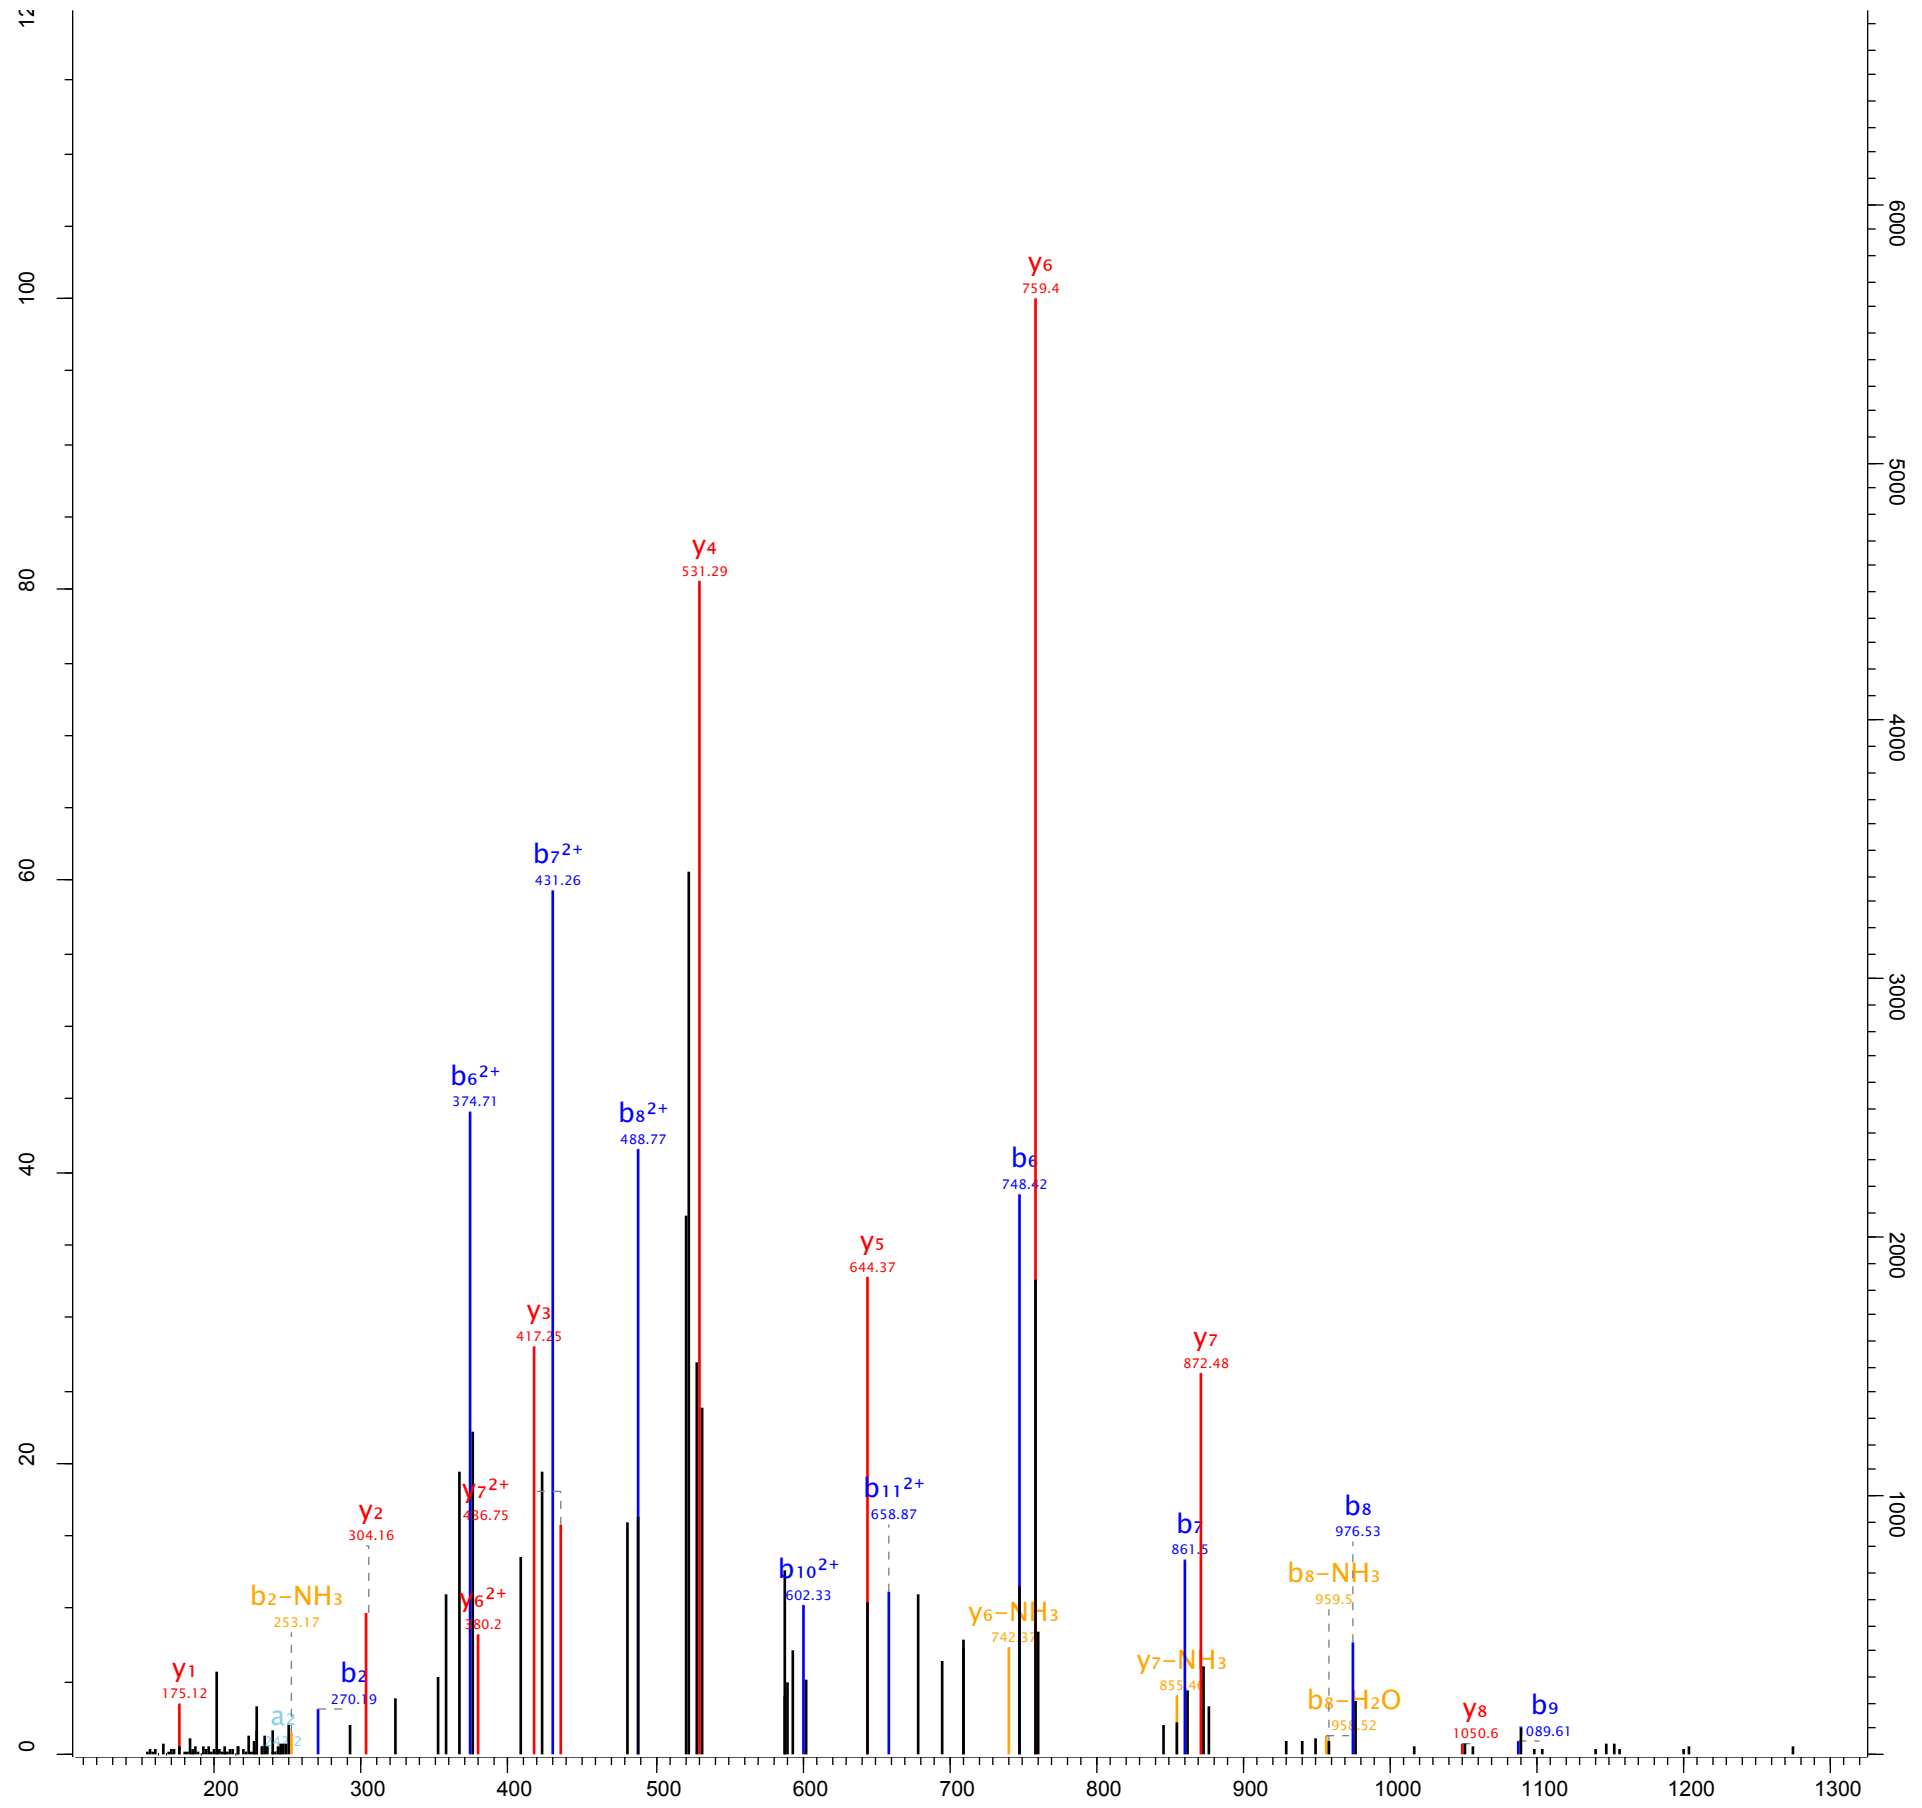

- I R A D N K L D I N L E R -

b<sub>2</sub>
y<sub>8</sub>
ac
y<sub>7</sub>
y<sub>6</sub>
y<sub>5</sub>
y<sub>4</sub>
y<sub>3</sub>
y<sub>2</sub>
y<sub>1</sub>

b<sub>6</sub>
b<sub>7</sub>
b<sub>8</sub>
b<sub>9</sub>
b<sub>10</sub><sup>2+</sup>
b<sub>11</sub><sup>2+</sup>

050713\_SCW\_II\_29\_40\_10

12779

ITMS; CID

134.38

424.55

Thrap3

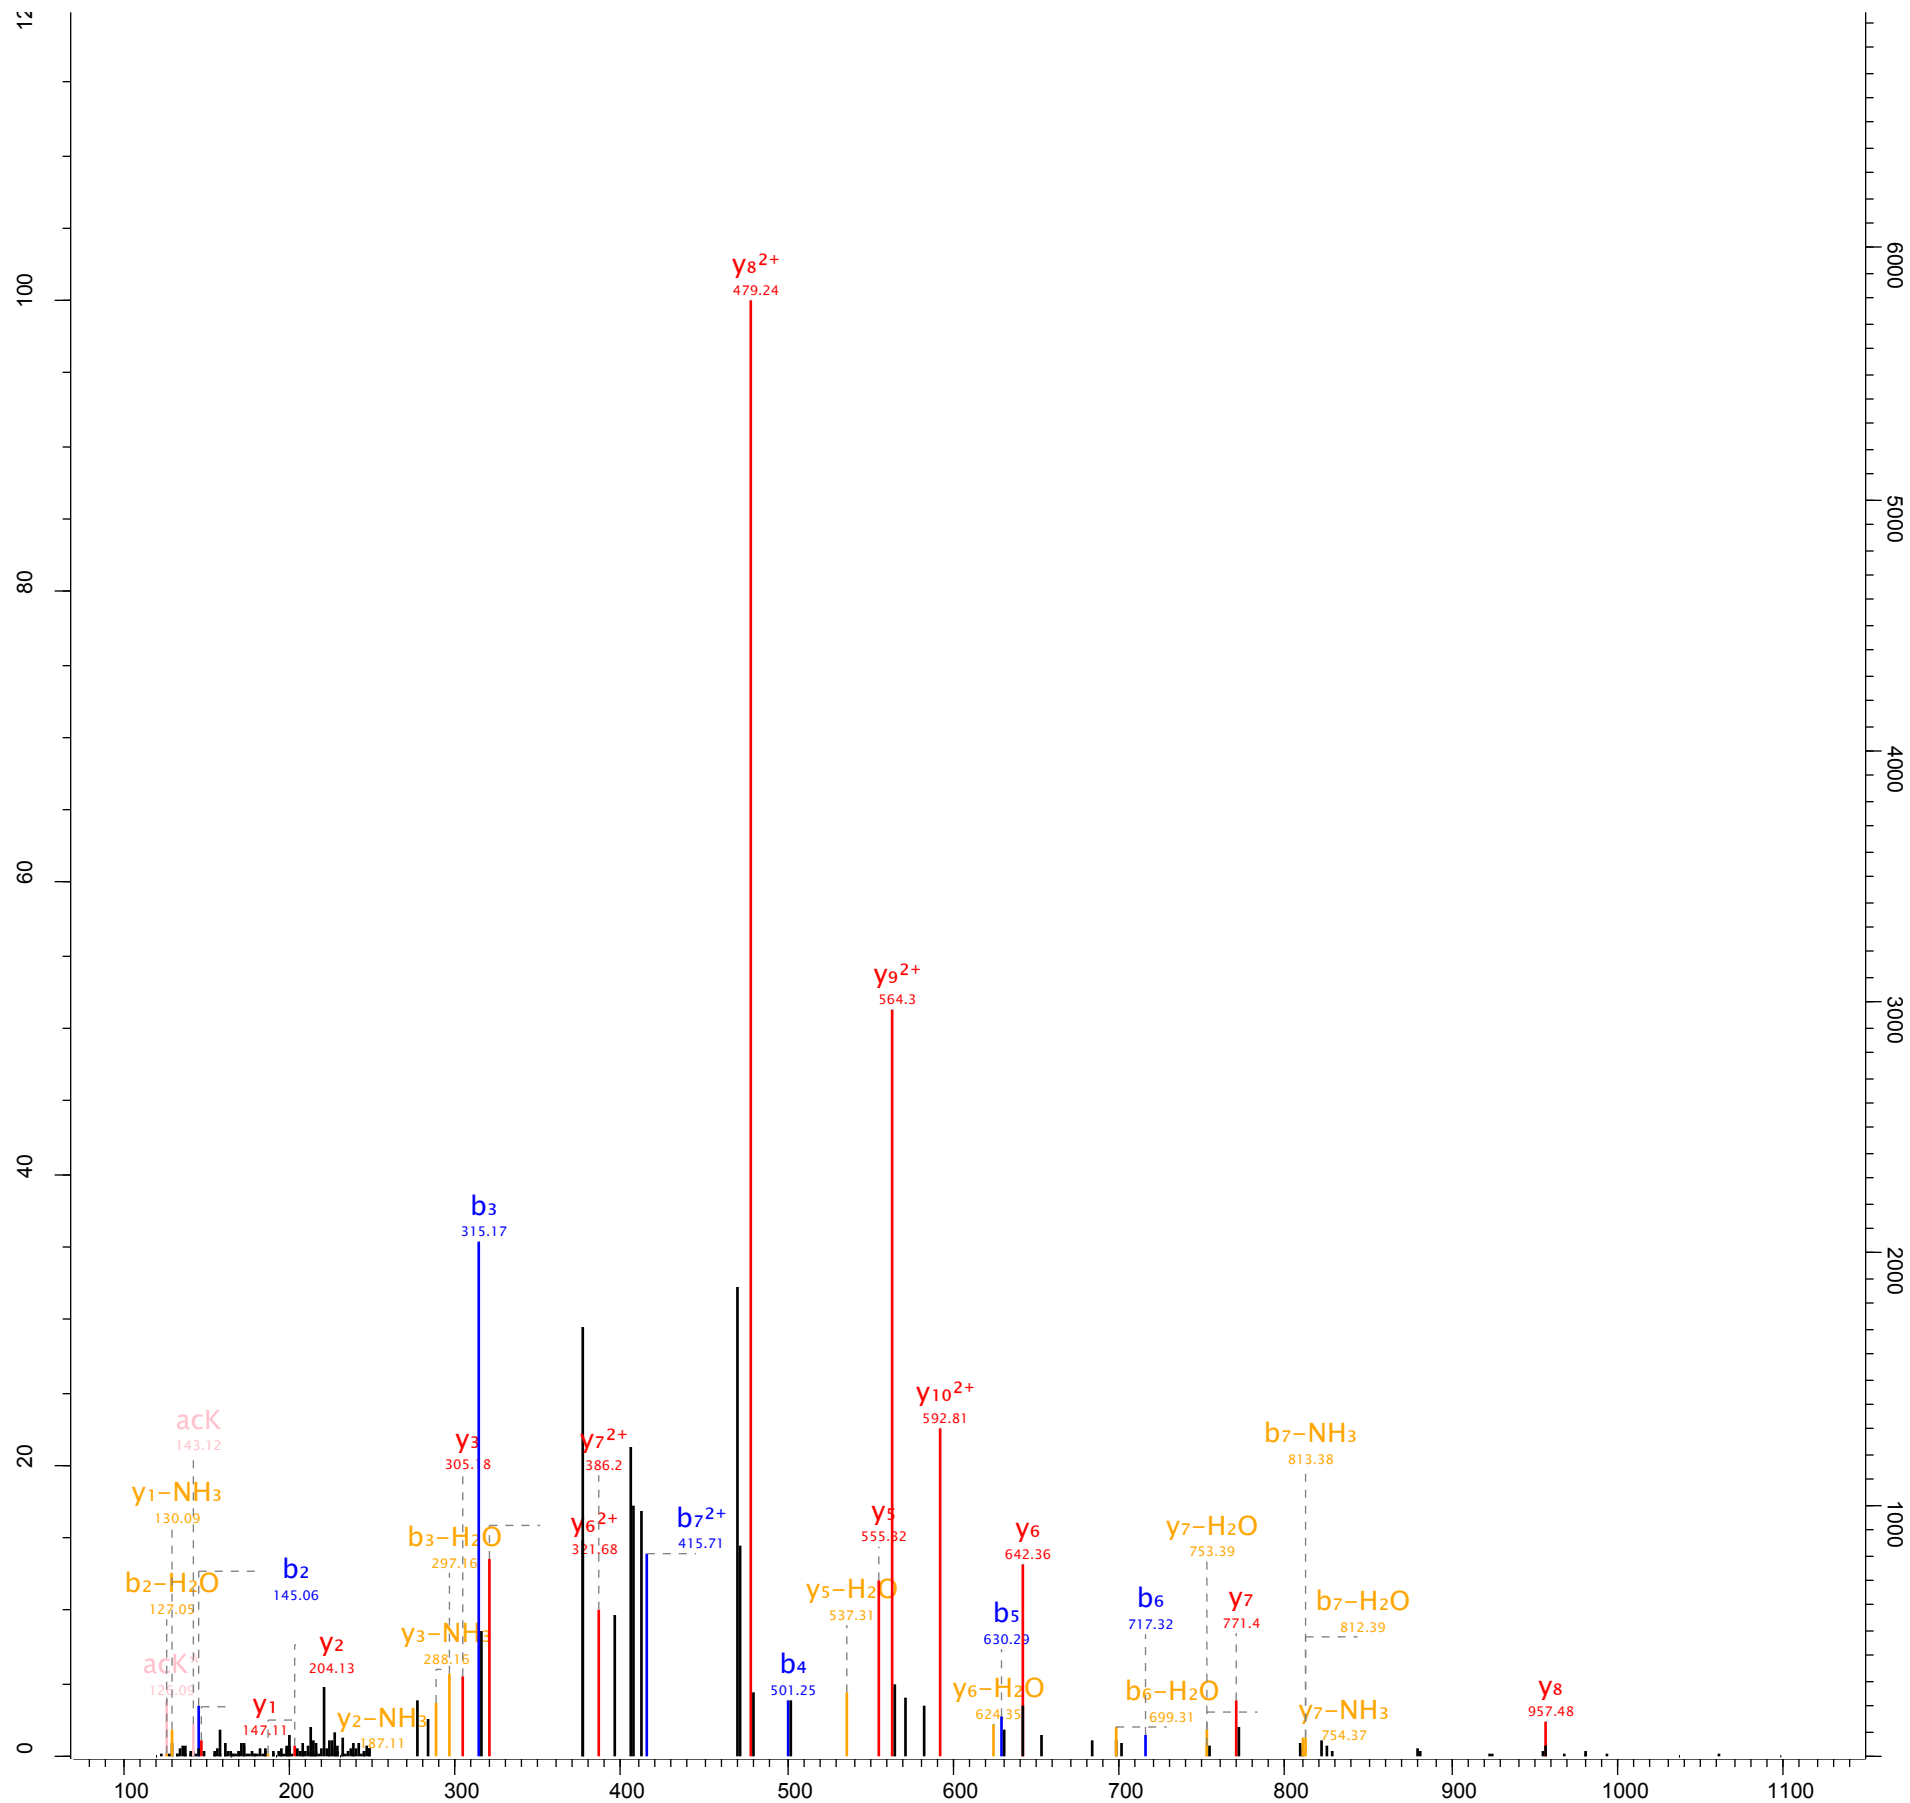

- S y10<sup>2+</sup> y9<sup>2+</sup> y8 y7 y6 y5 H y3 y2 y1 -

b2 ac b3 b4 b5 b6 b7<sup>2+</sup>

G K W E S L T G K

050713\_SCW\_II\_29\_40\_10

13282

ITMS; CID

116.05

505.82

Ddx39b

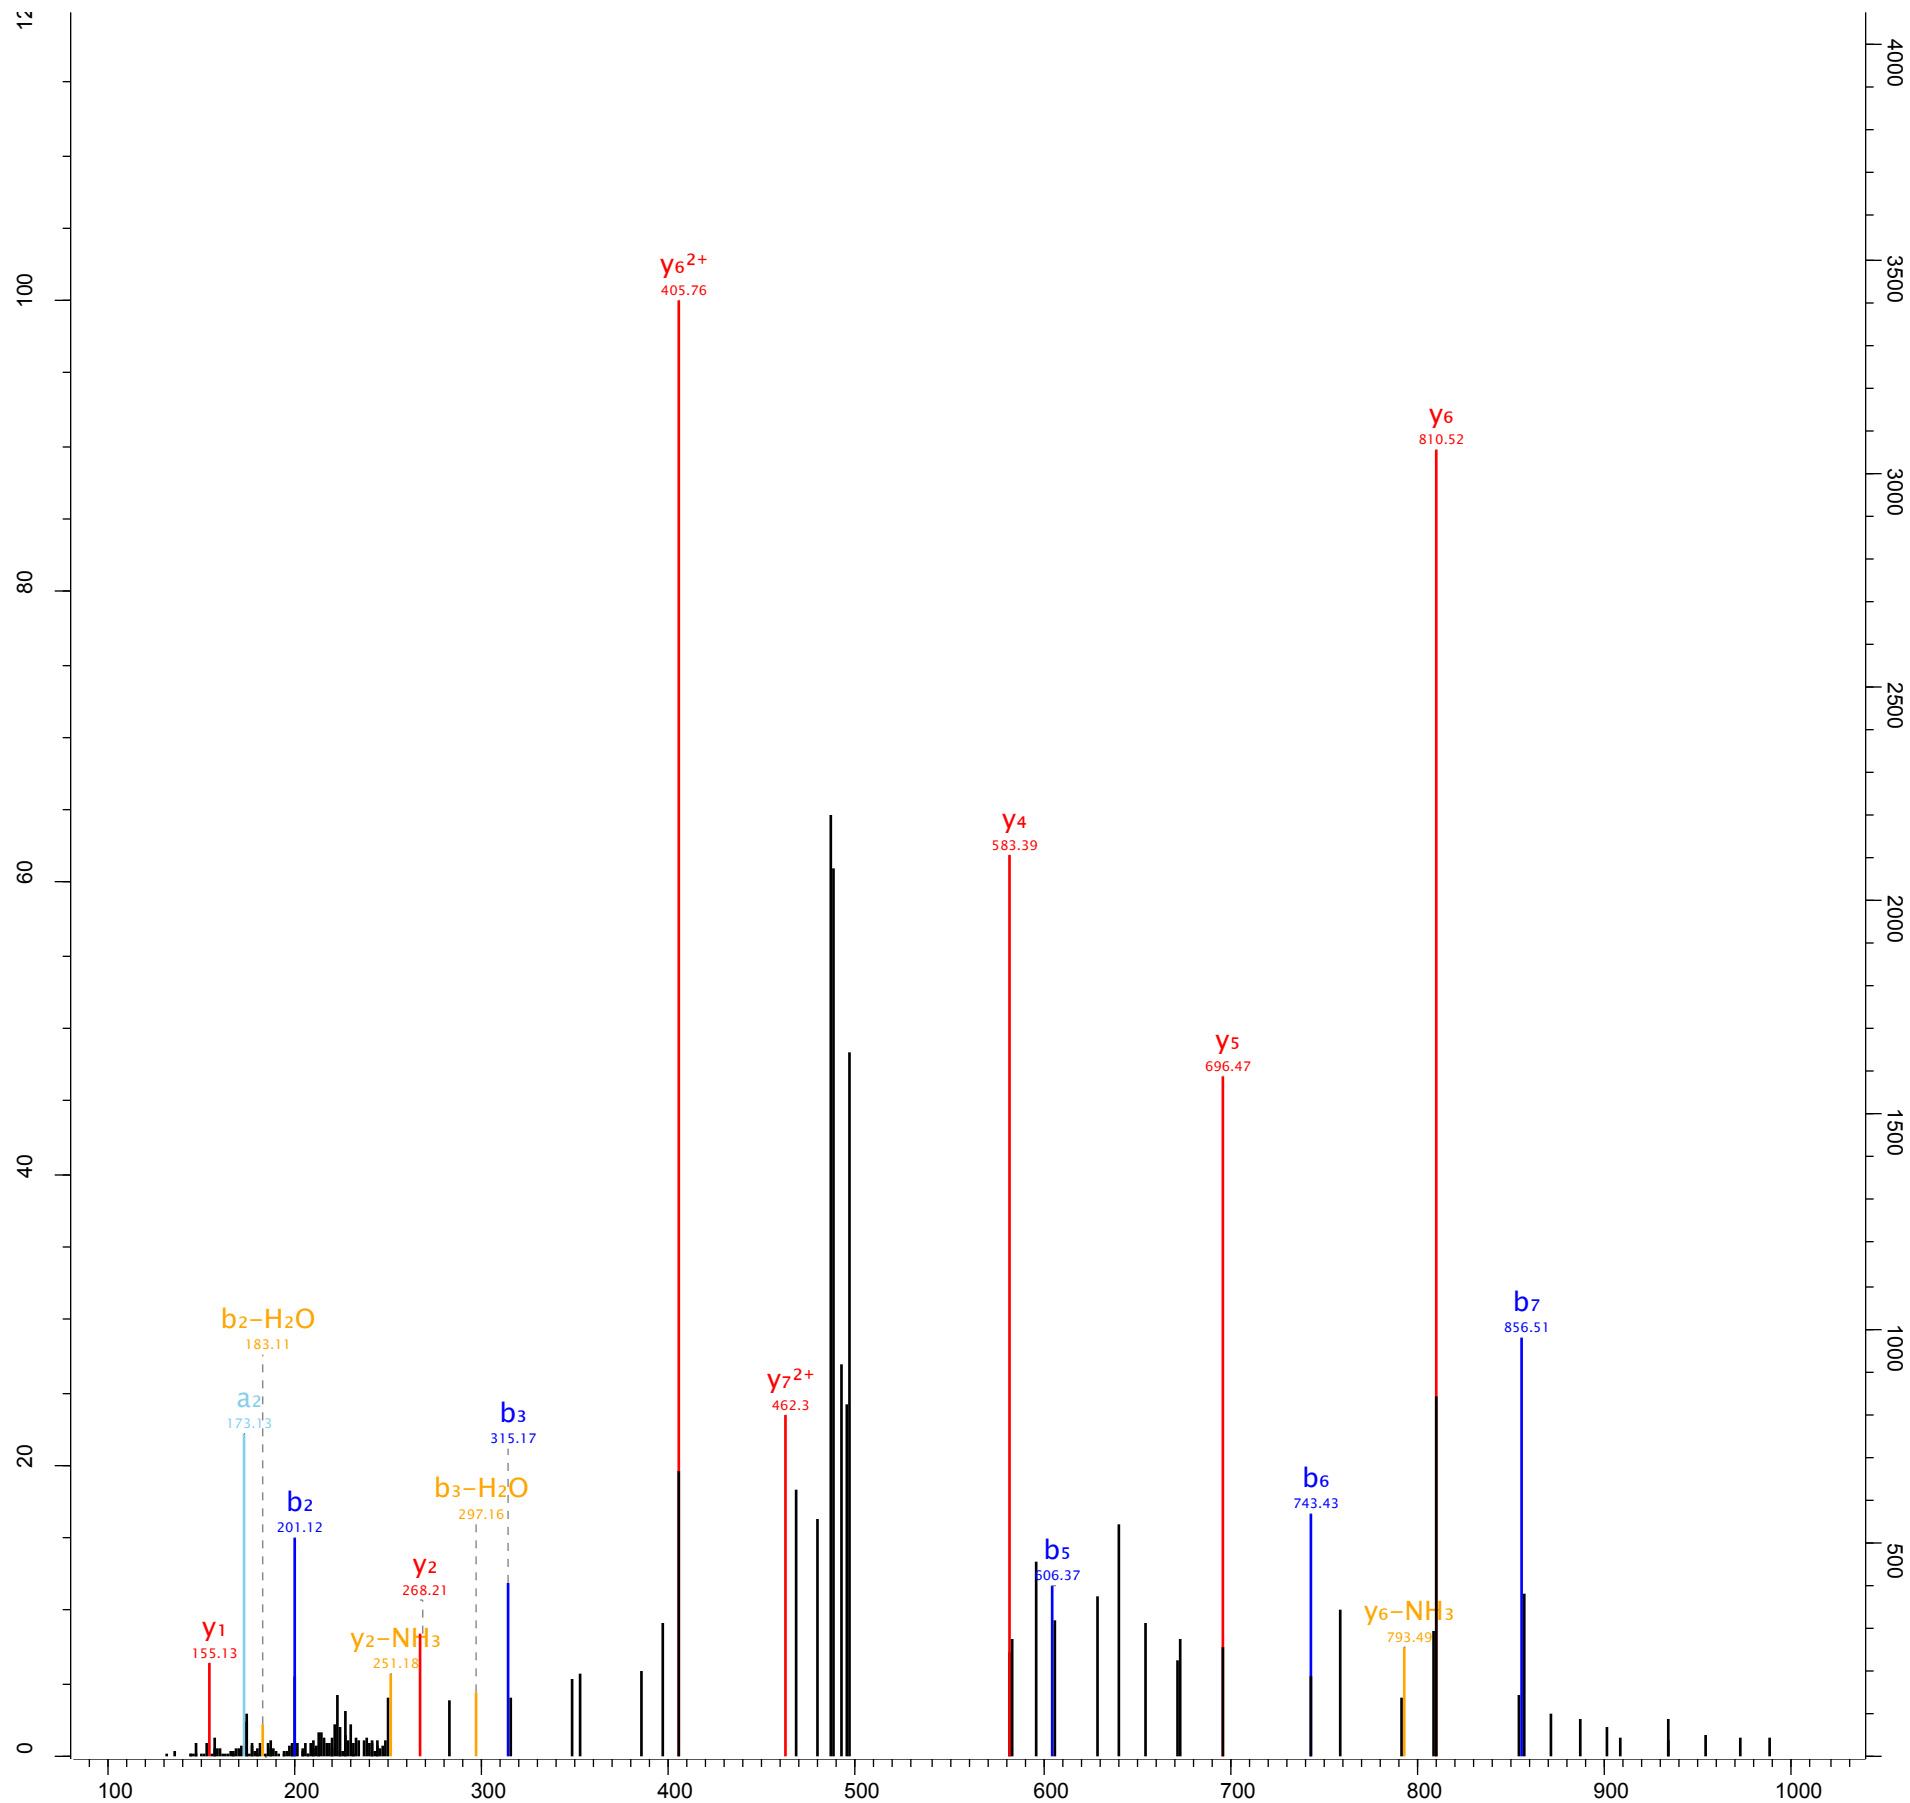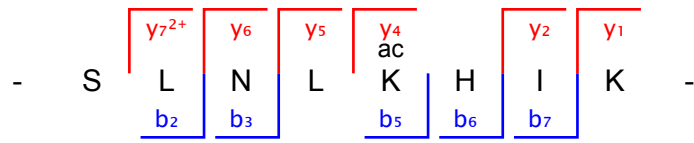

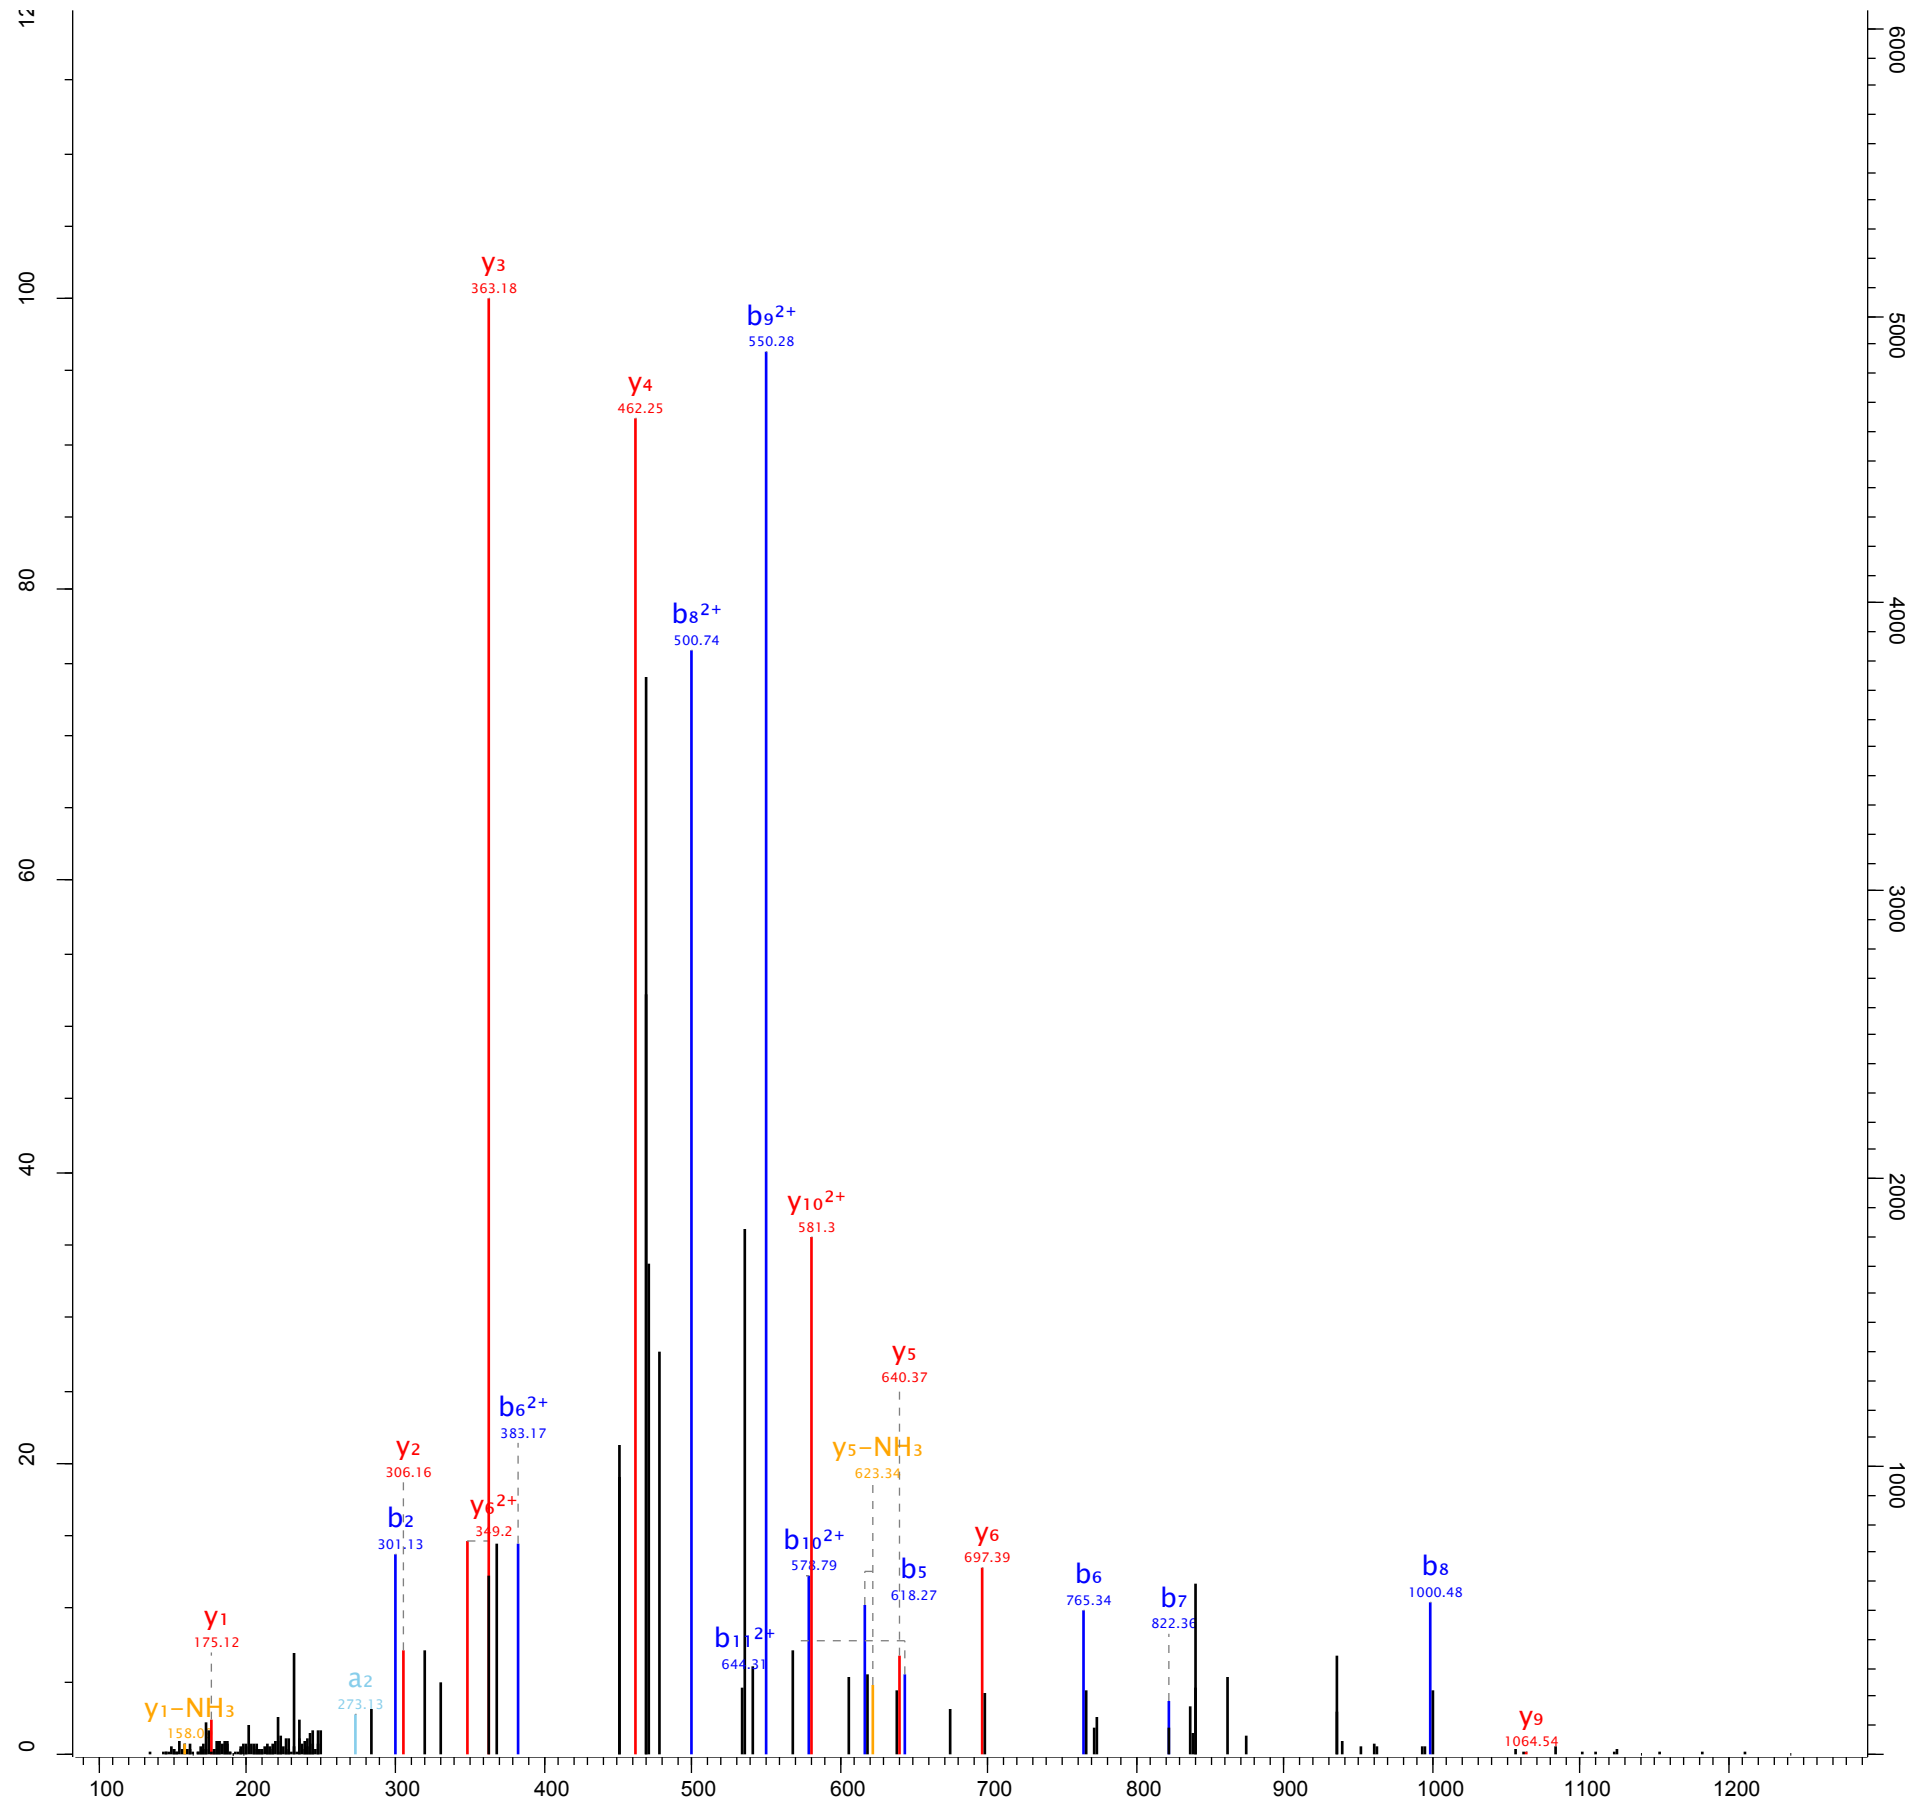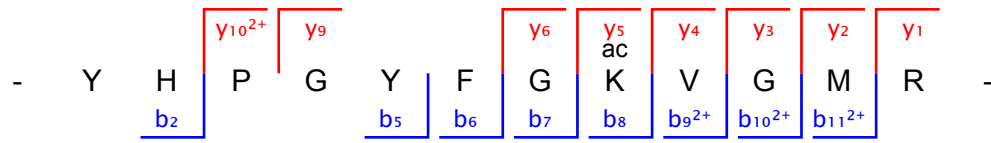

Raw file 050713\_SCW\_II\_29\_40\_10 Scan 15941 Method ITMS; CID Score 139.31 m/z 417.21 Gene names Wdr1

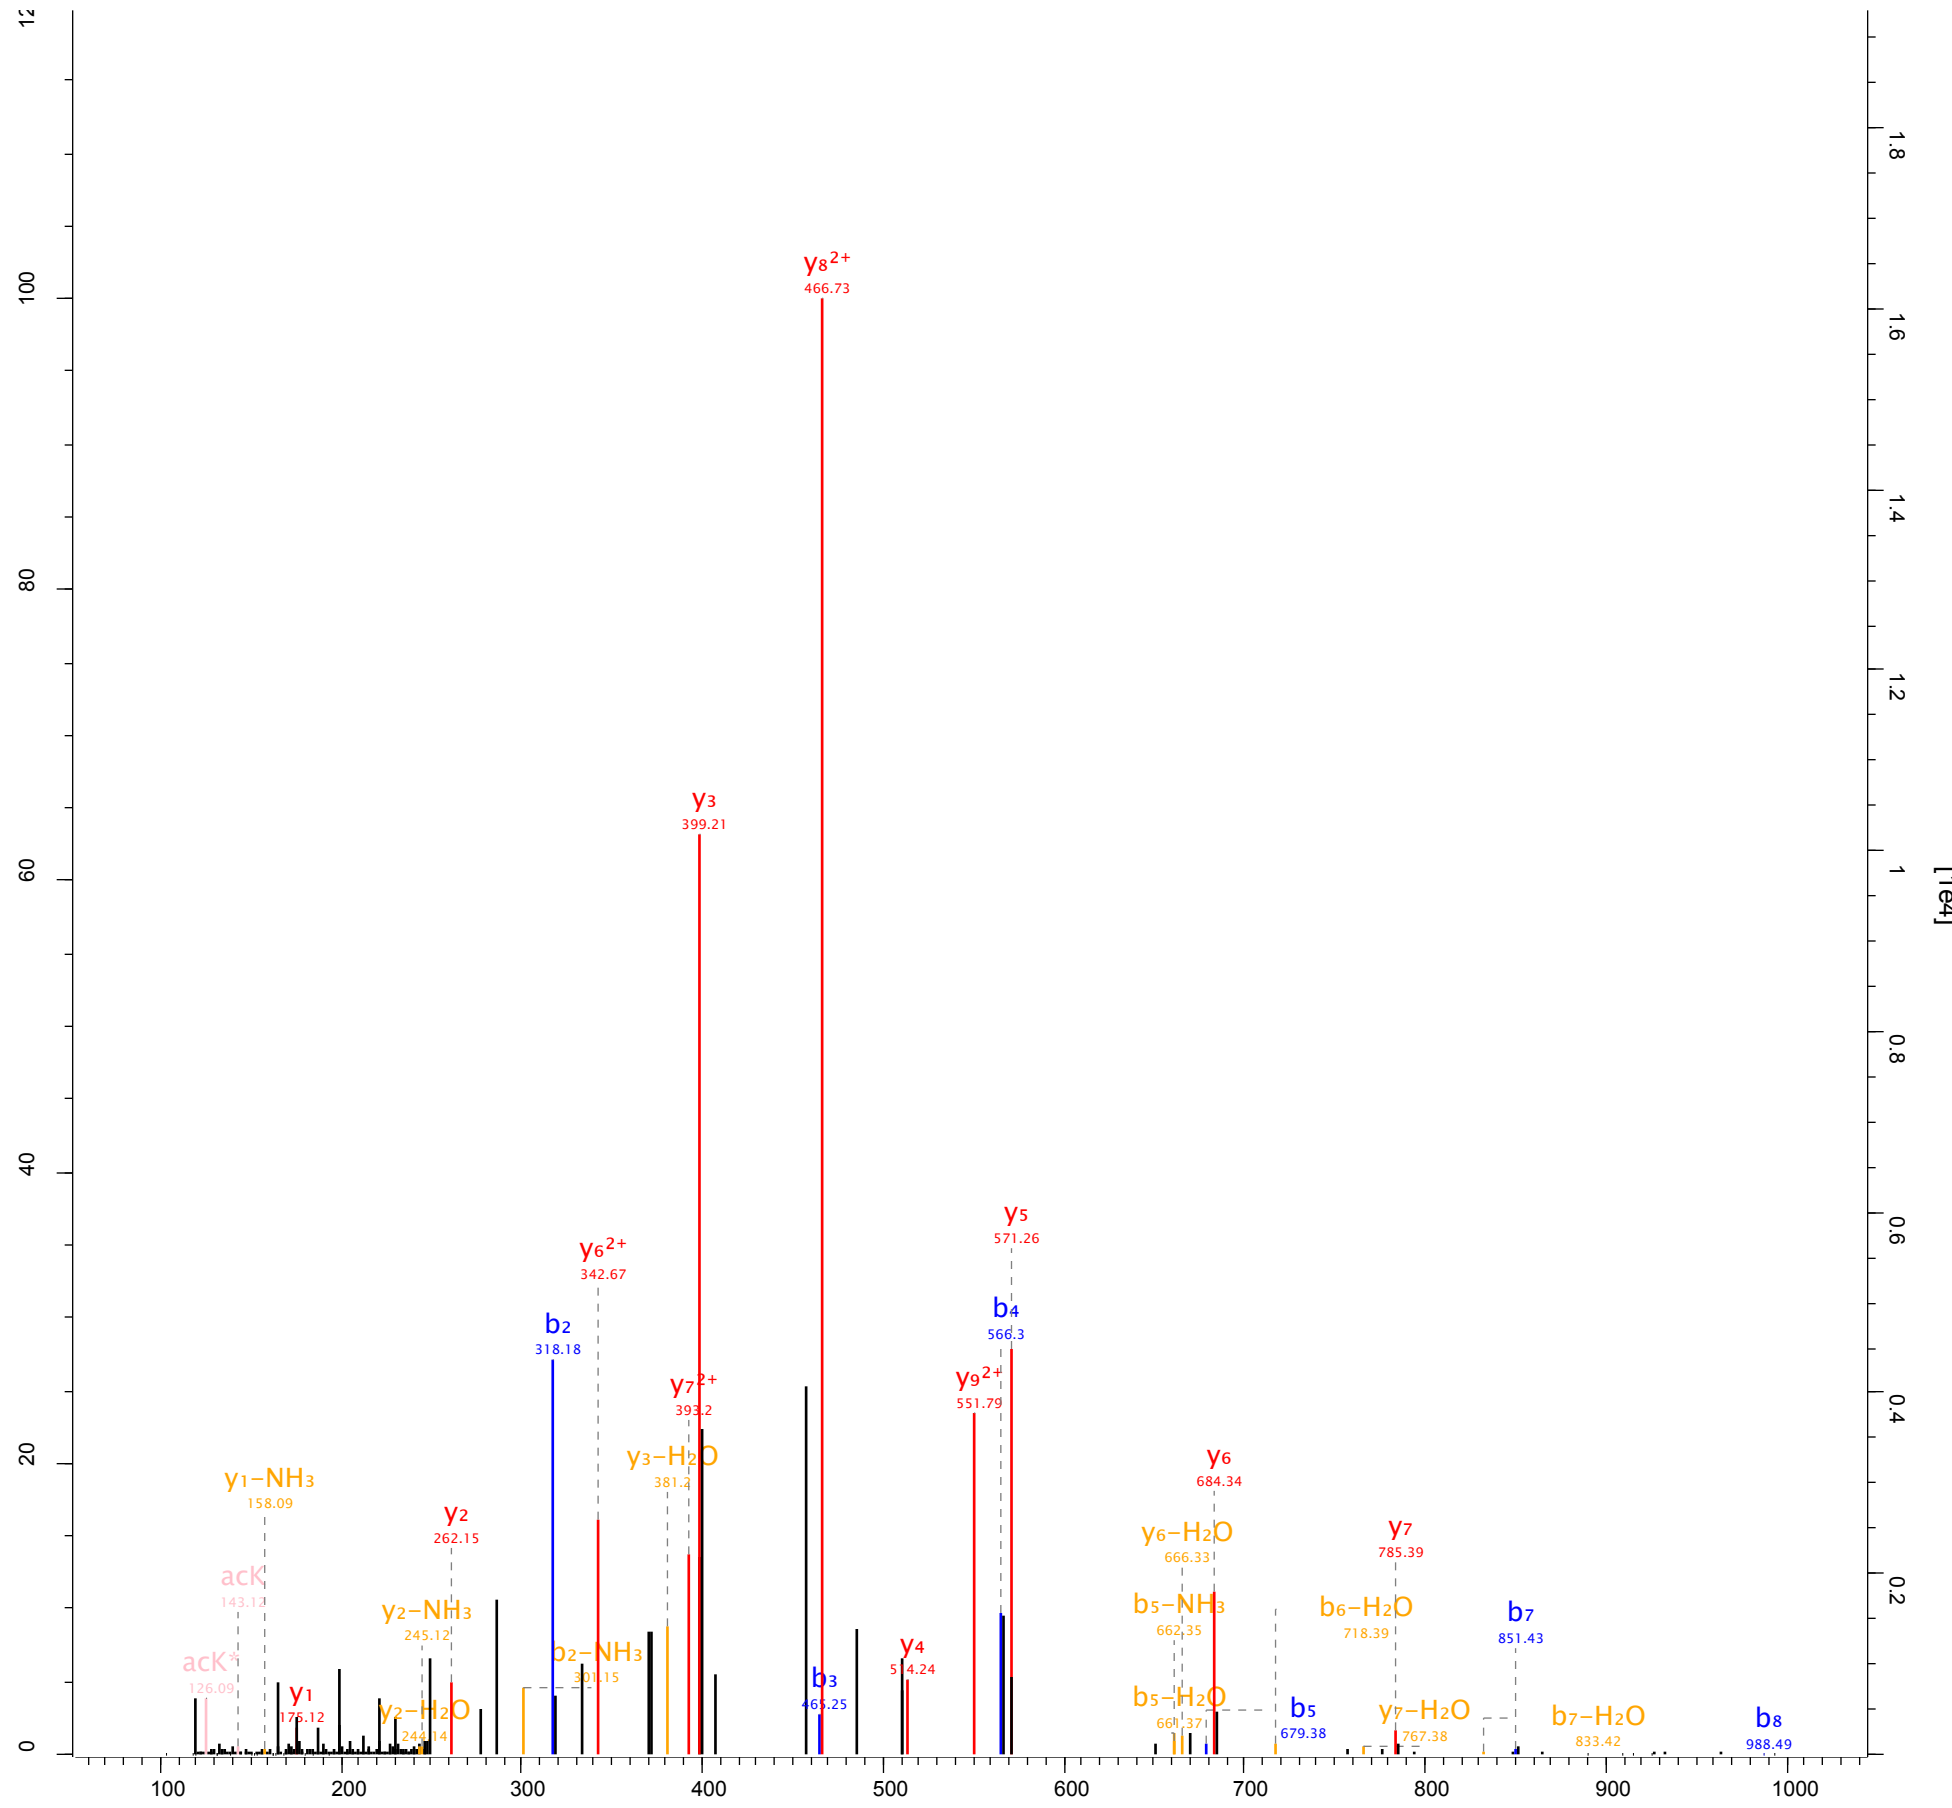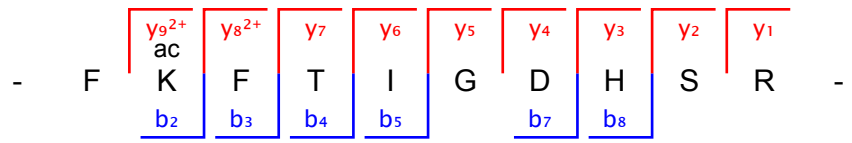

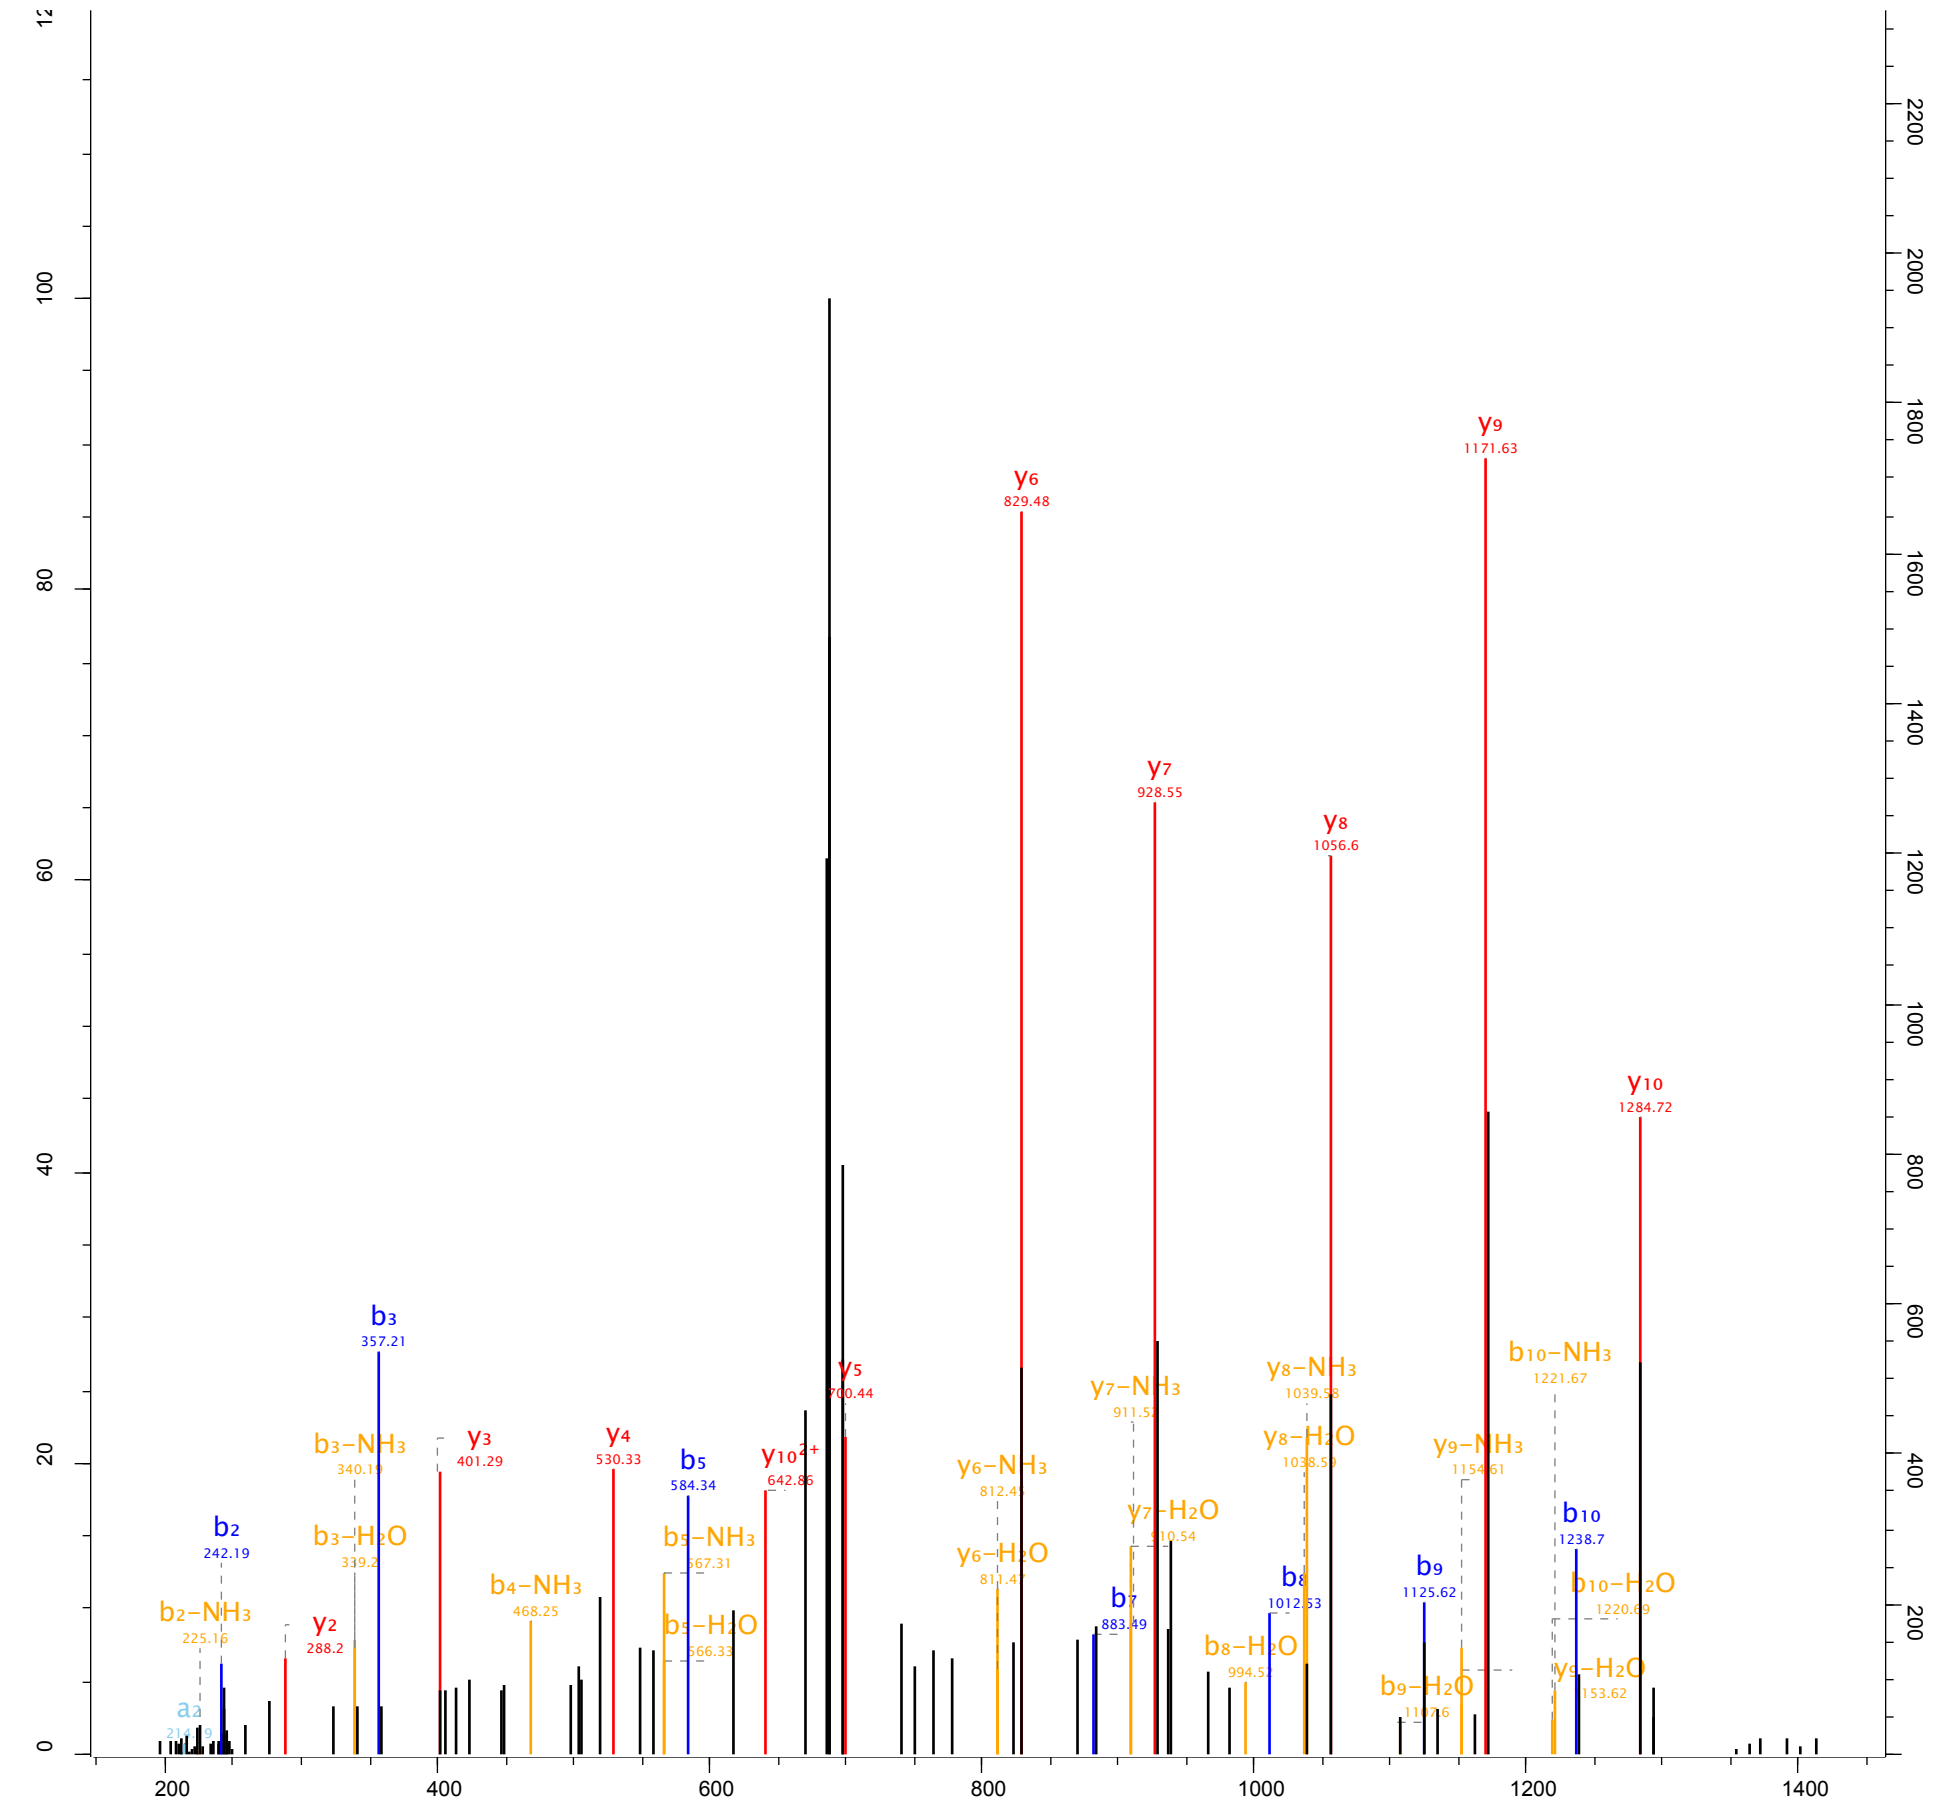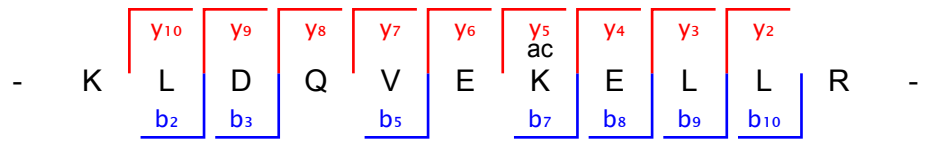

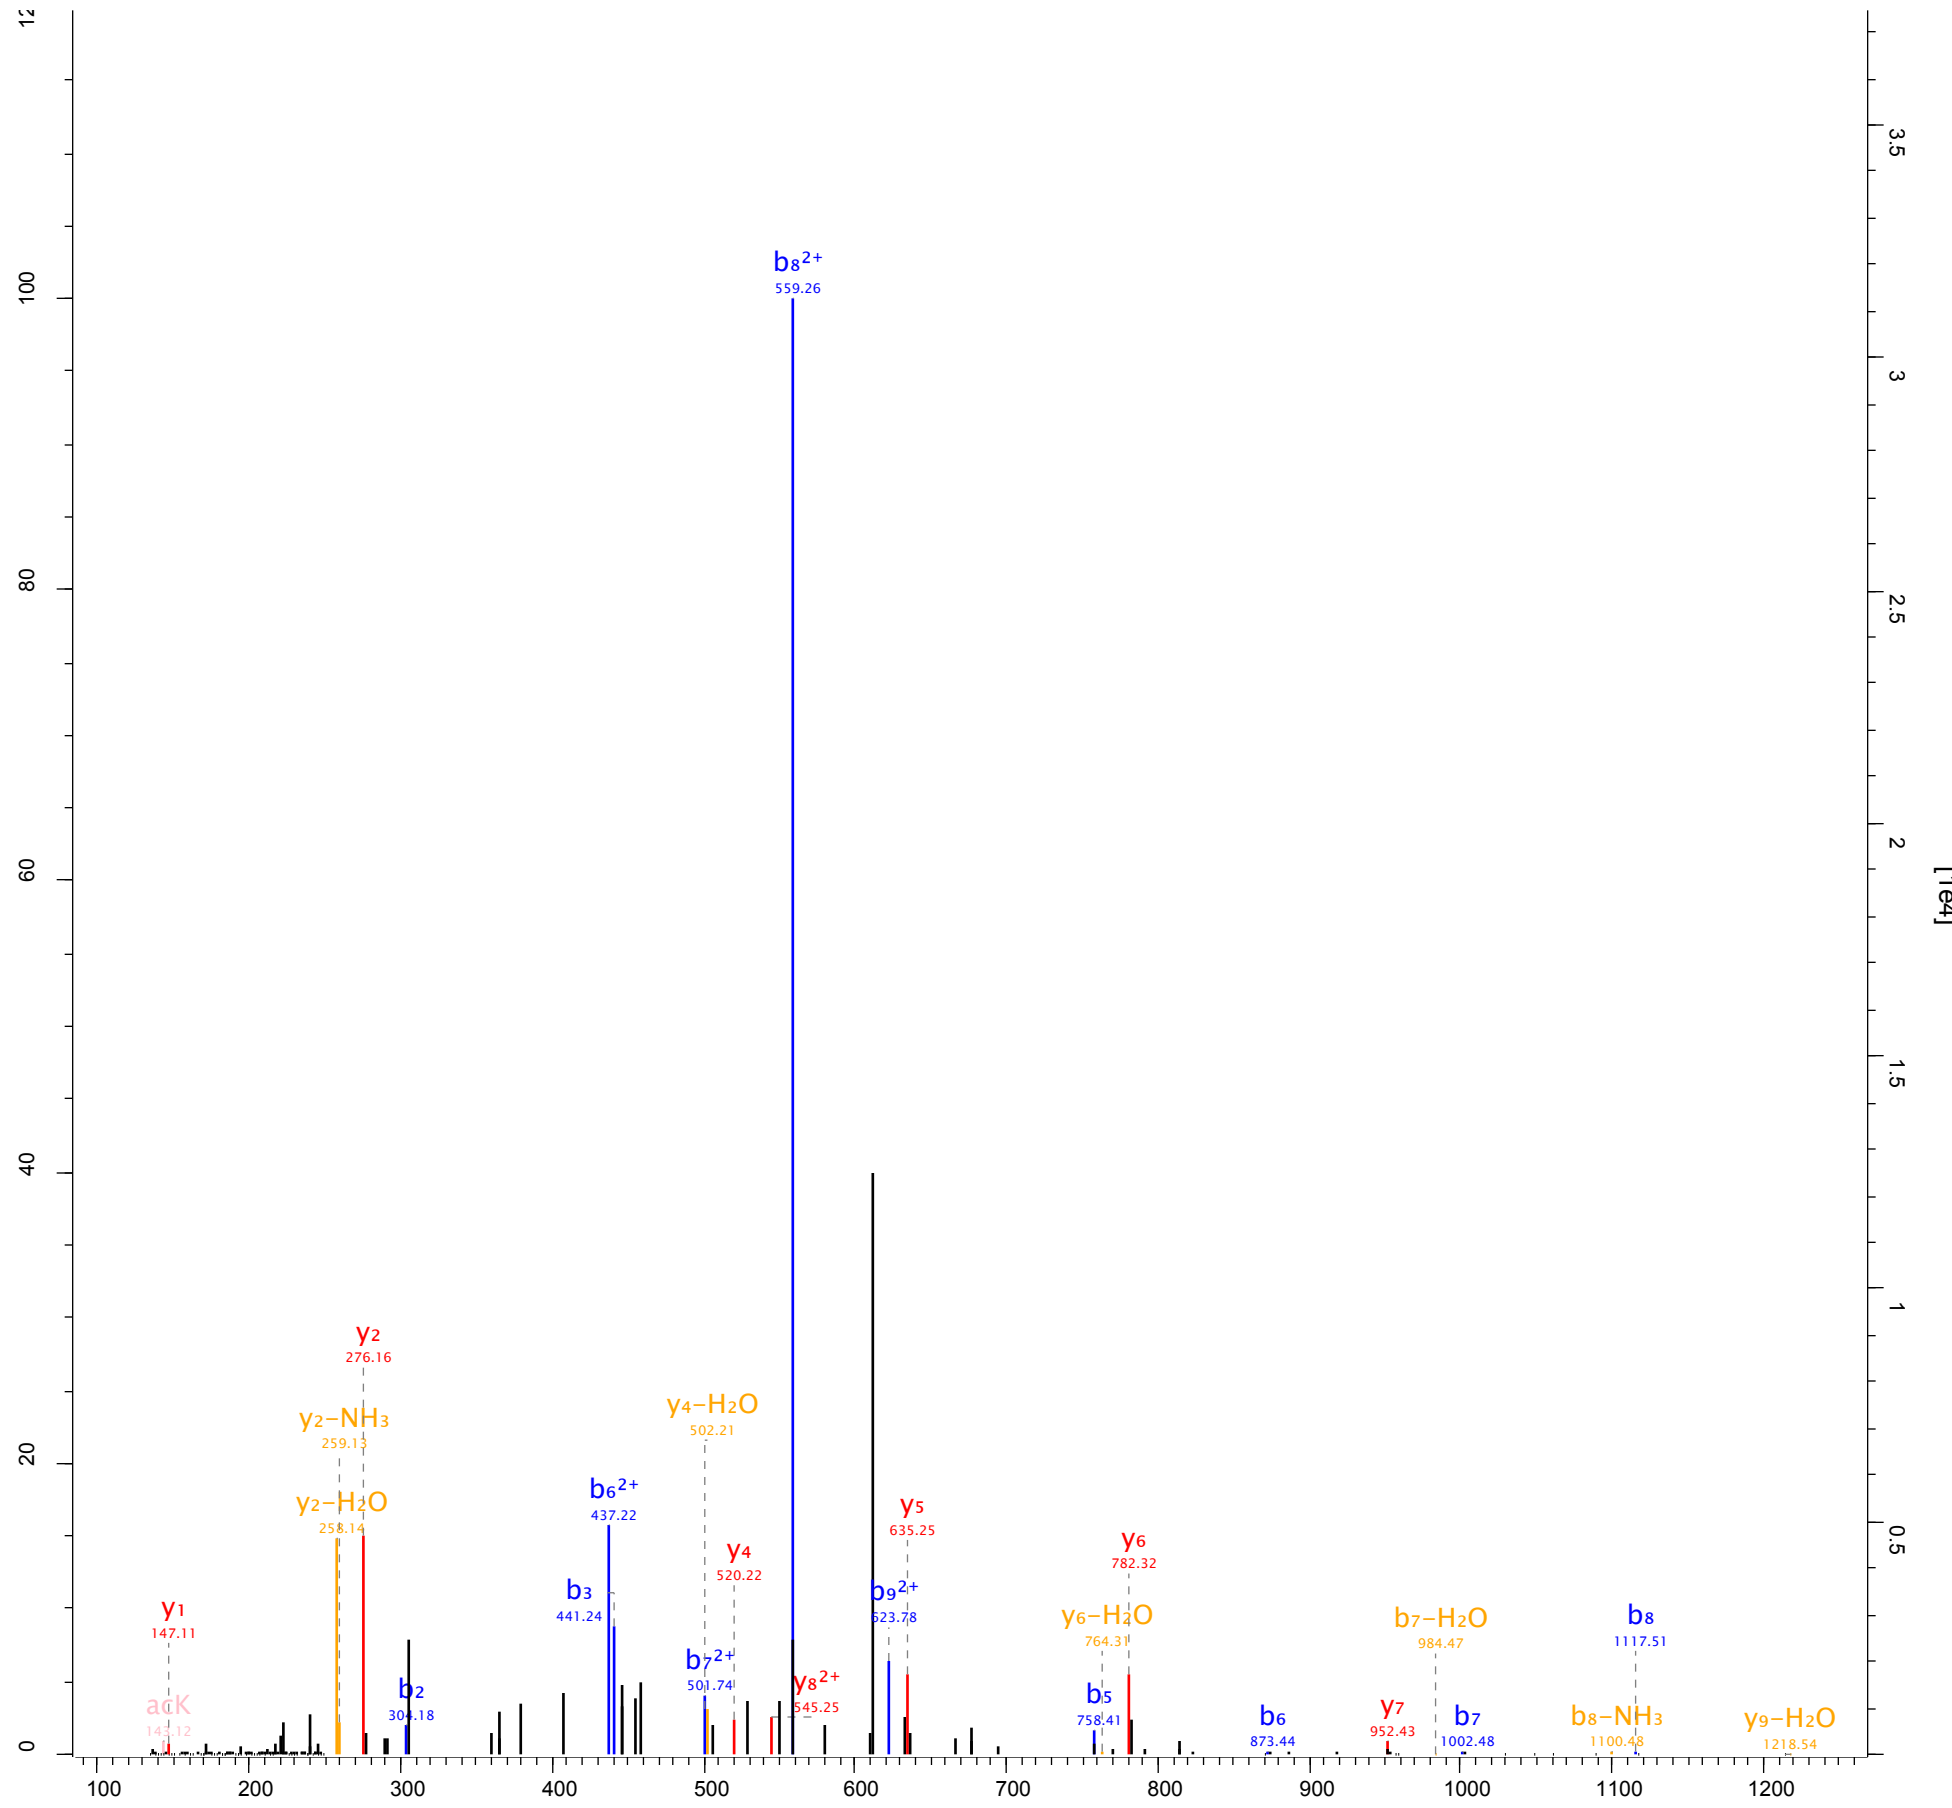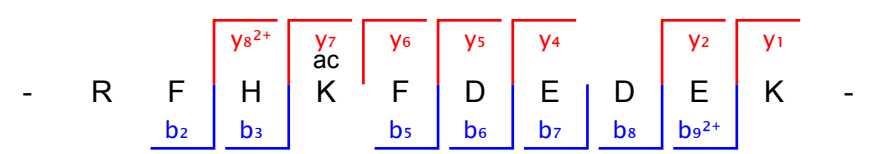

050713\_SCW\_II\_29\_50\_12

13487

ITMS; CID

109.95

439.5

Actn4

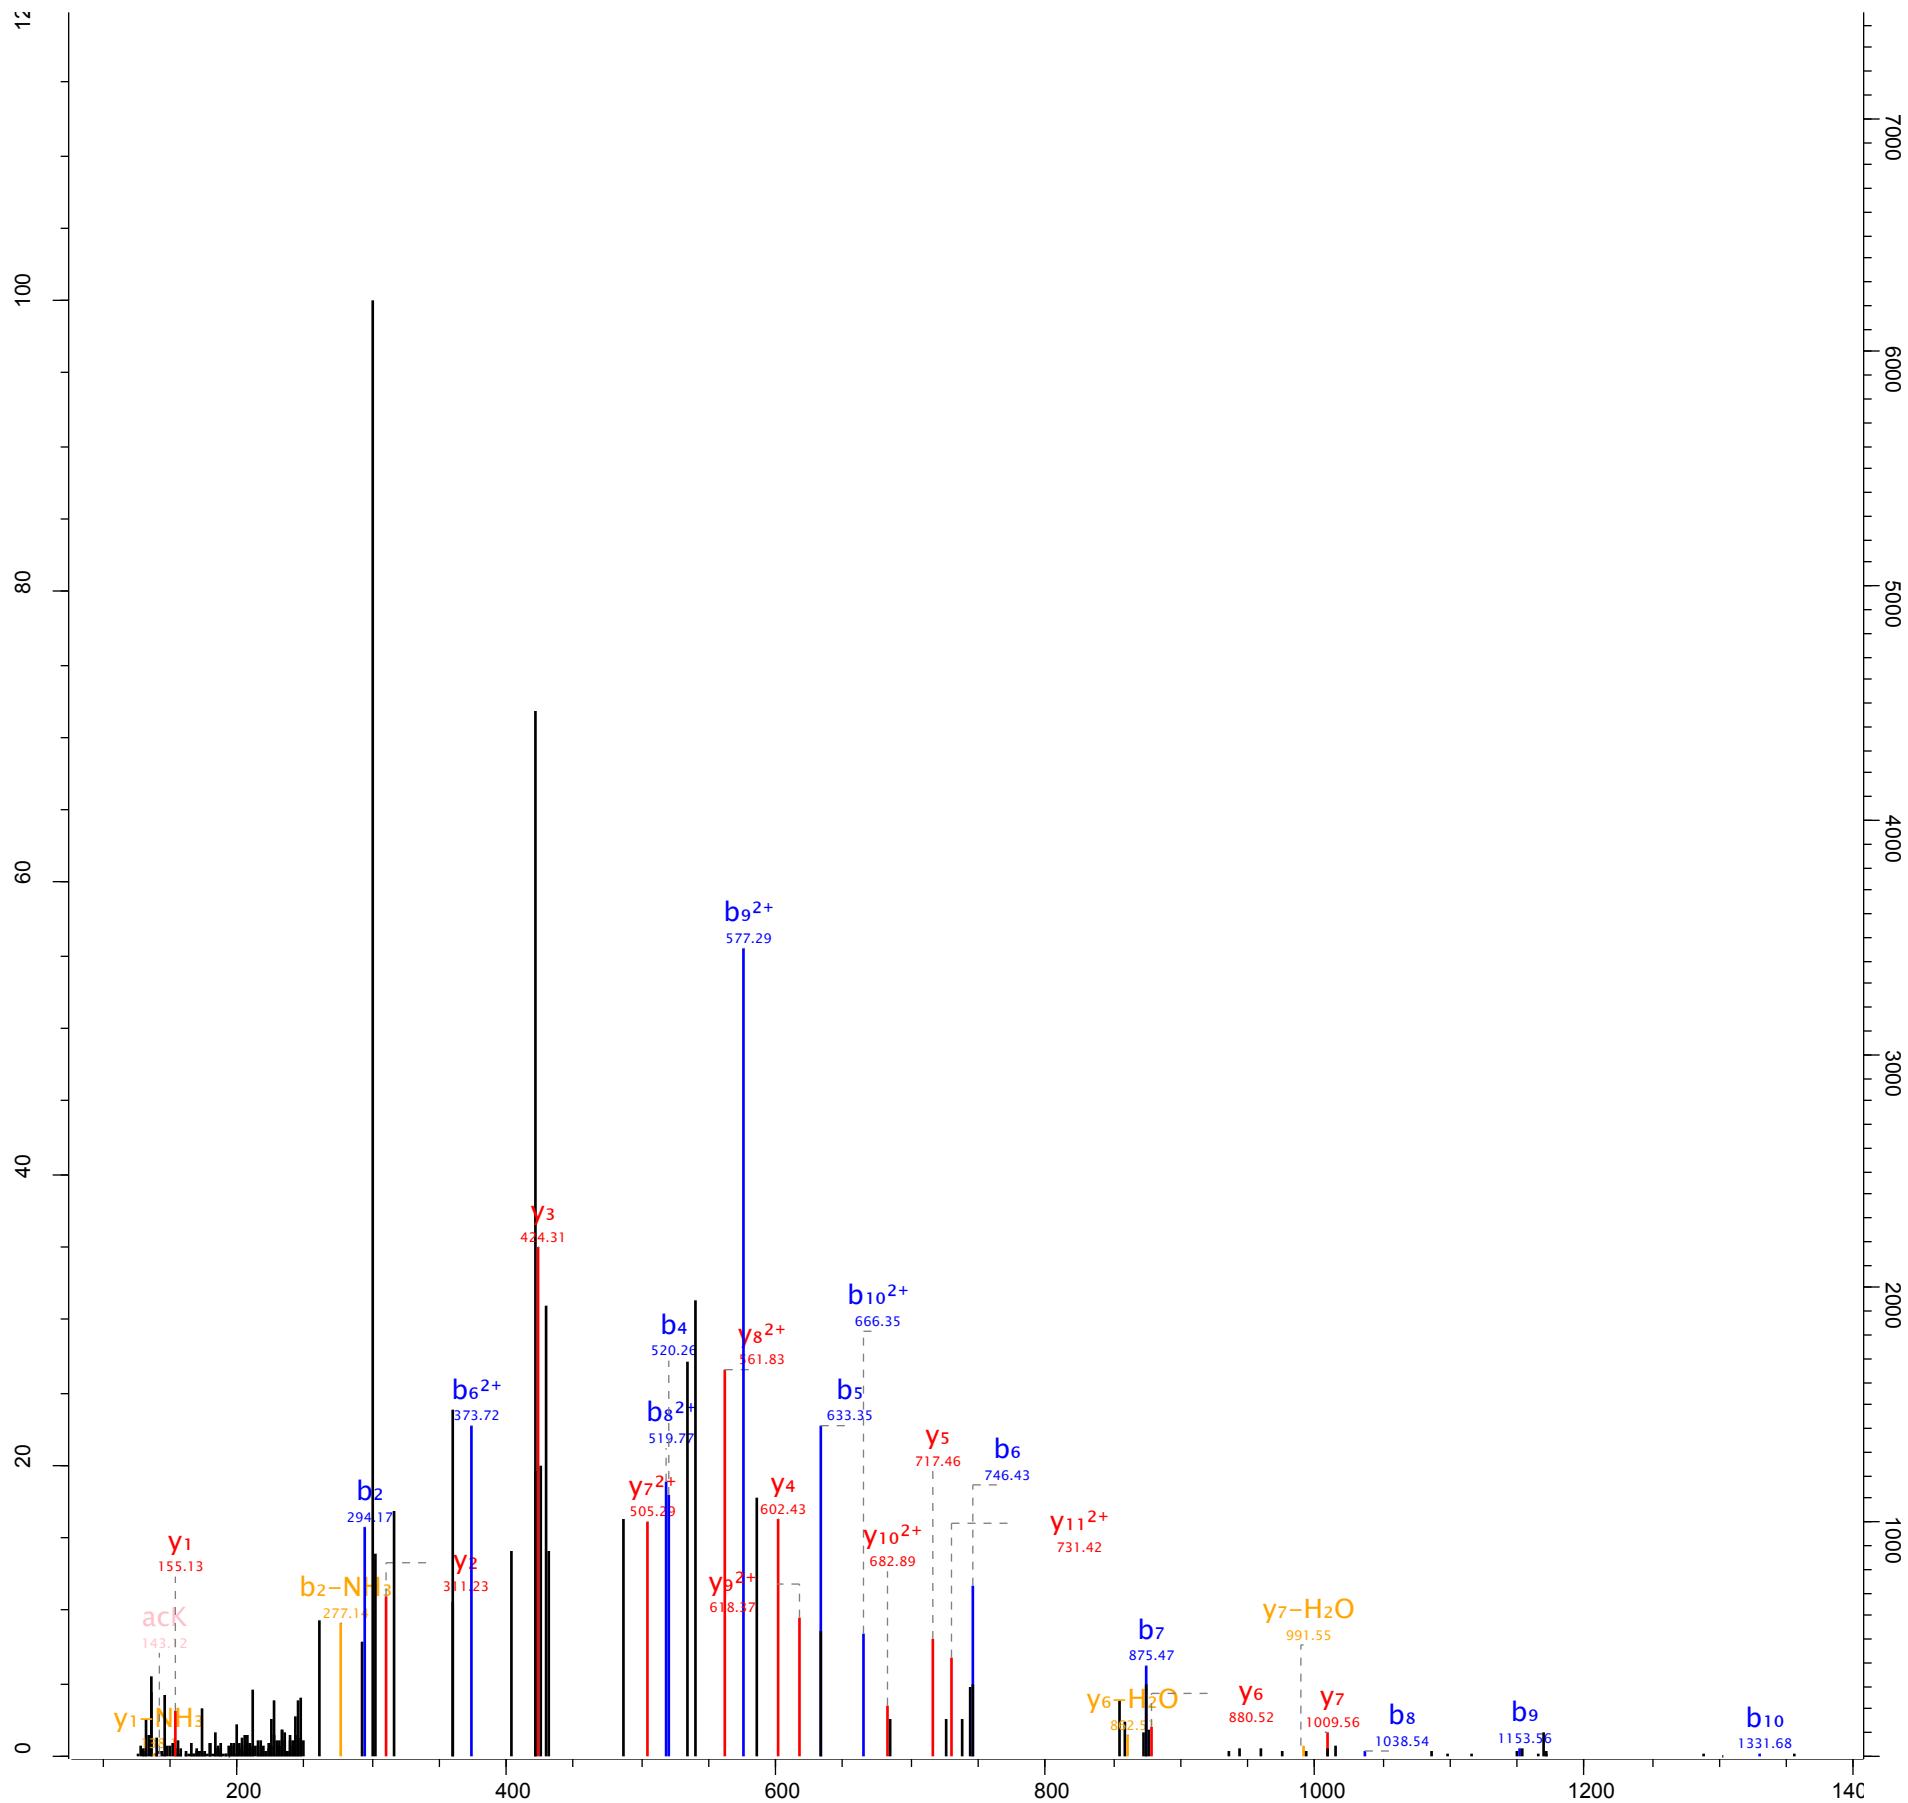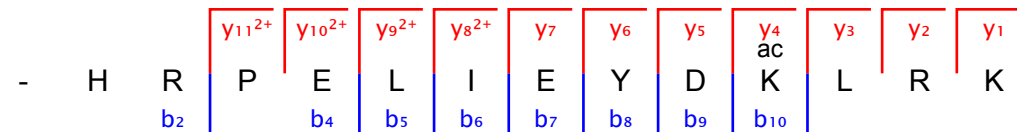



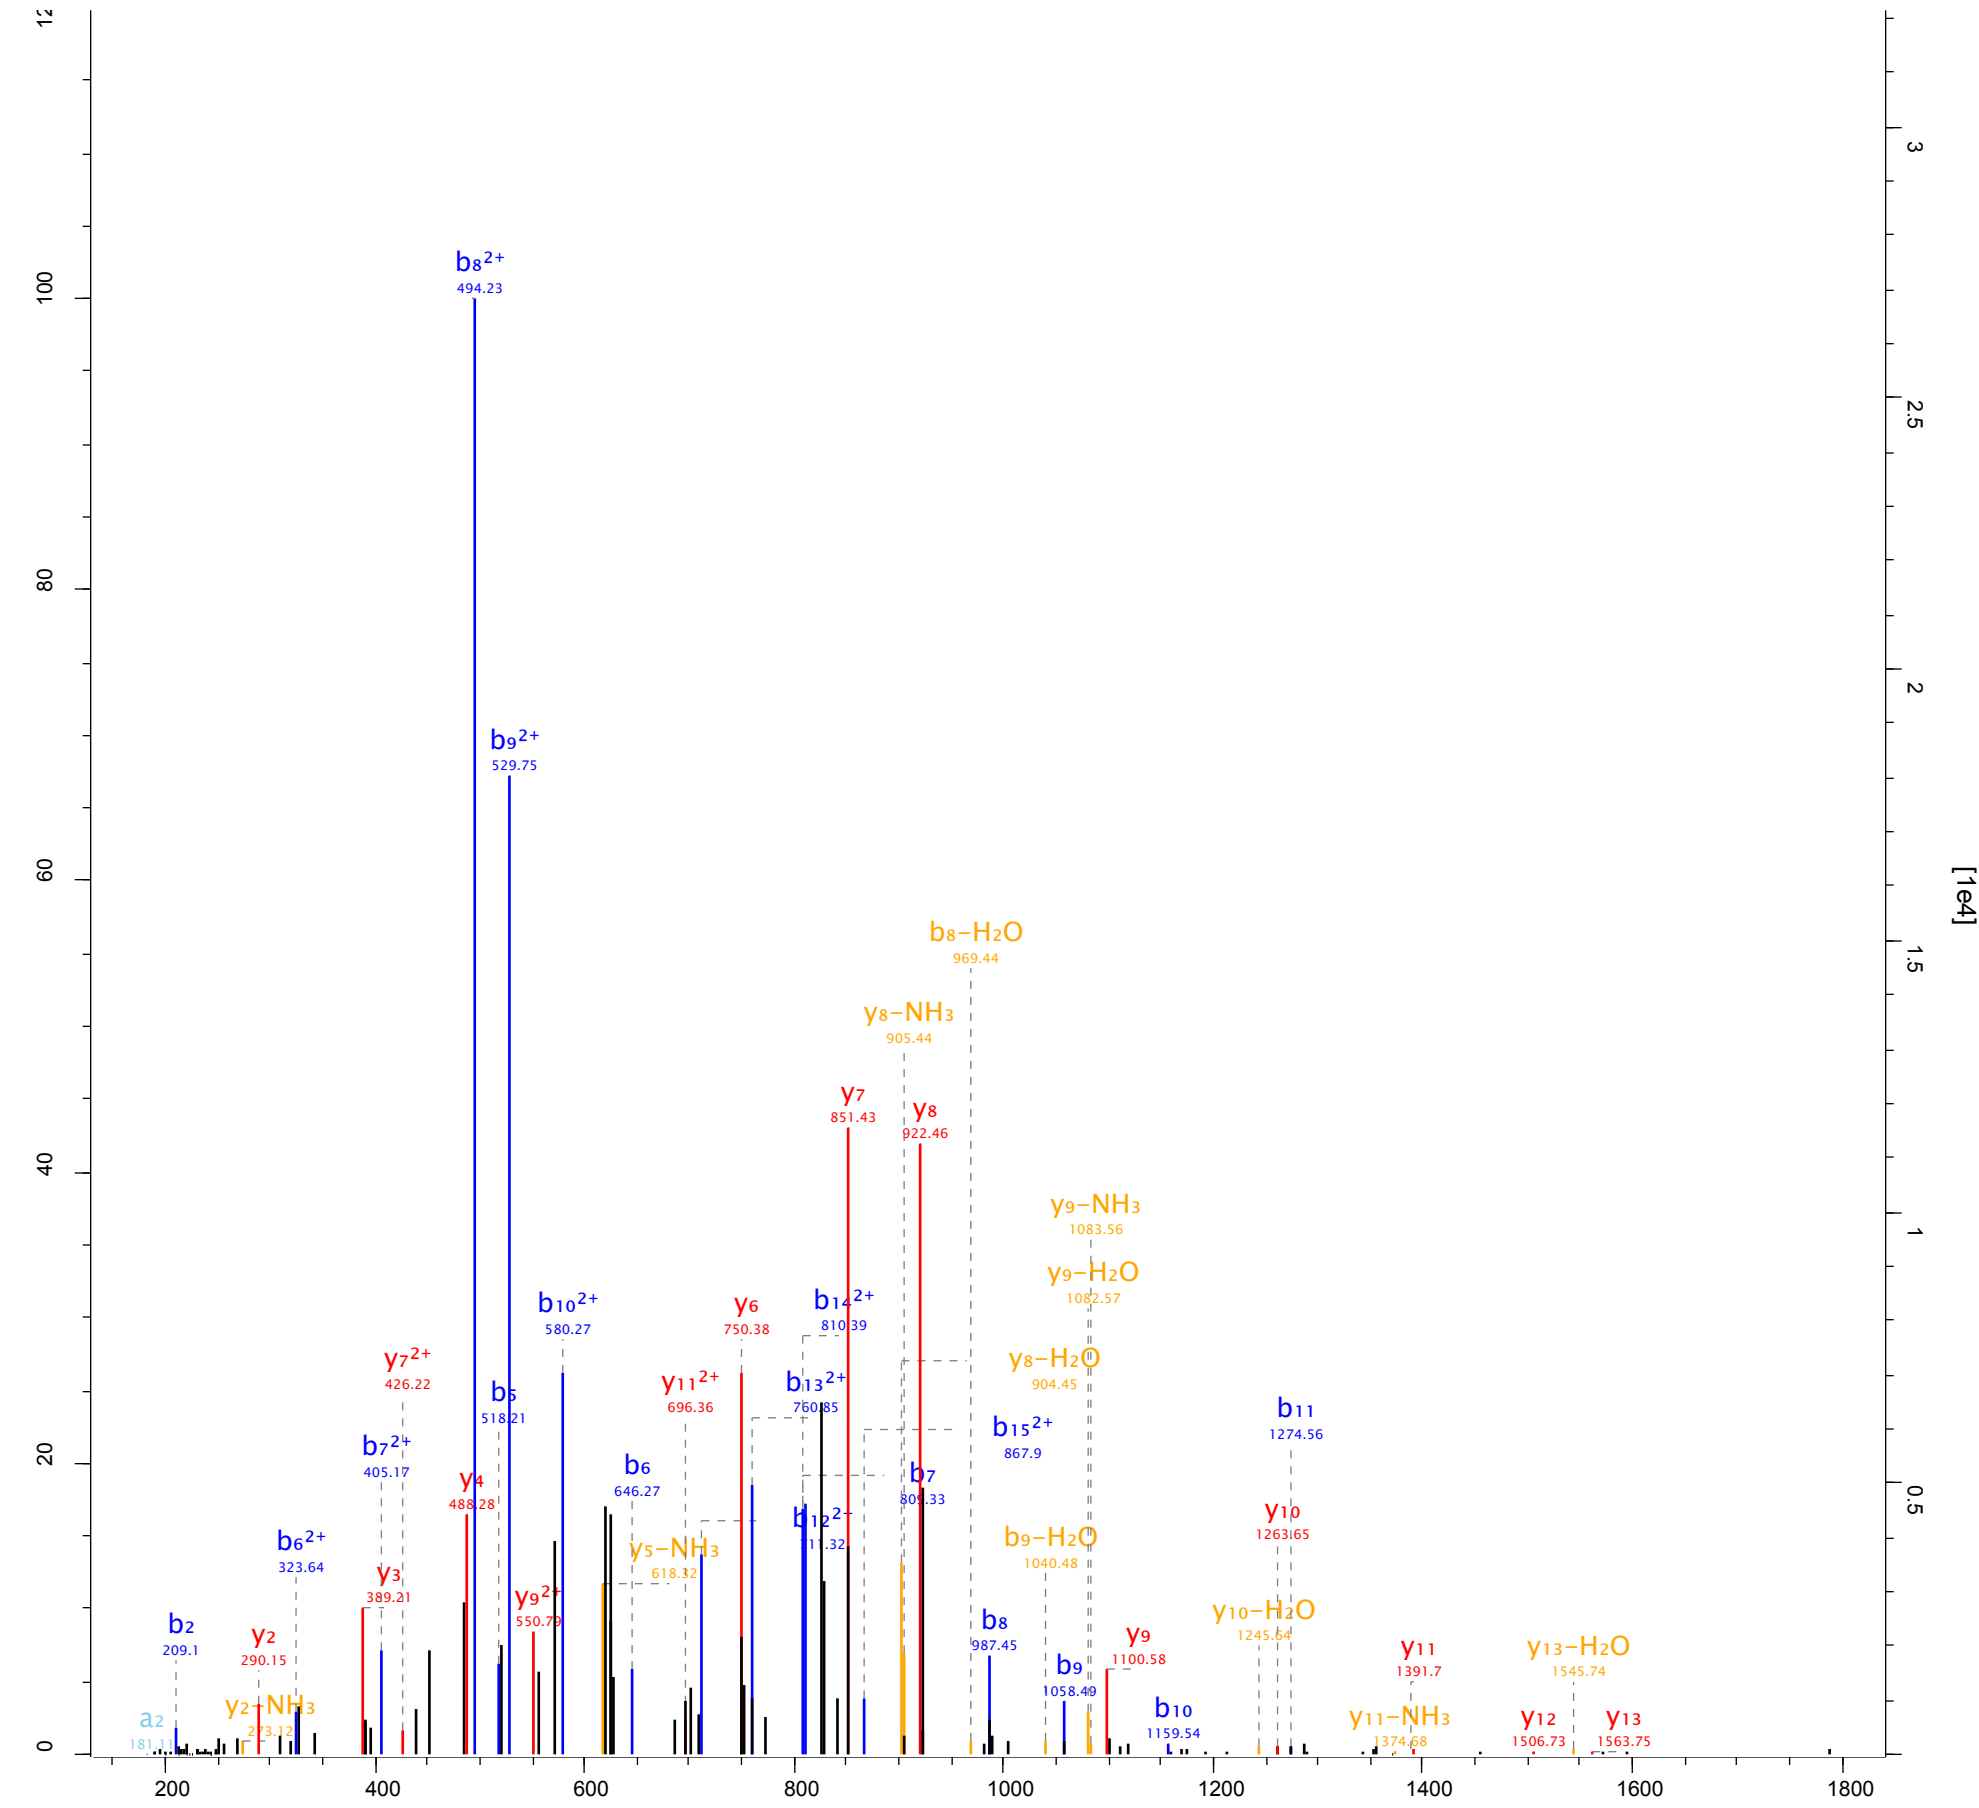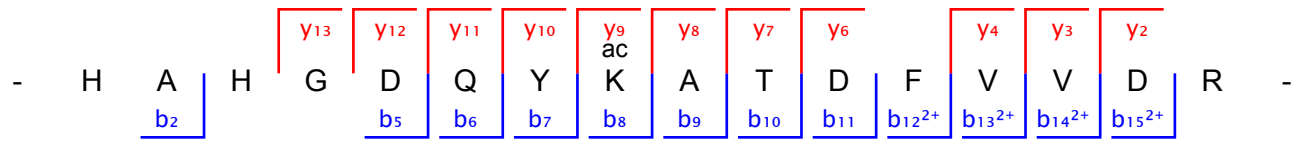

050713\_SCW\_II\_29\_50\_12

27493

ITMS; CID

75.87

888.22

Oxct1

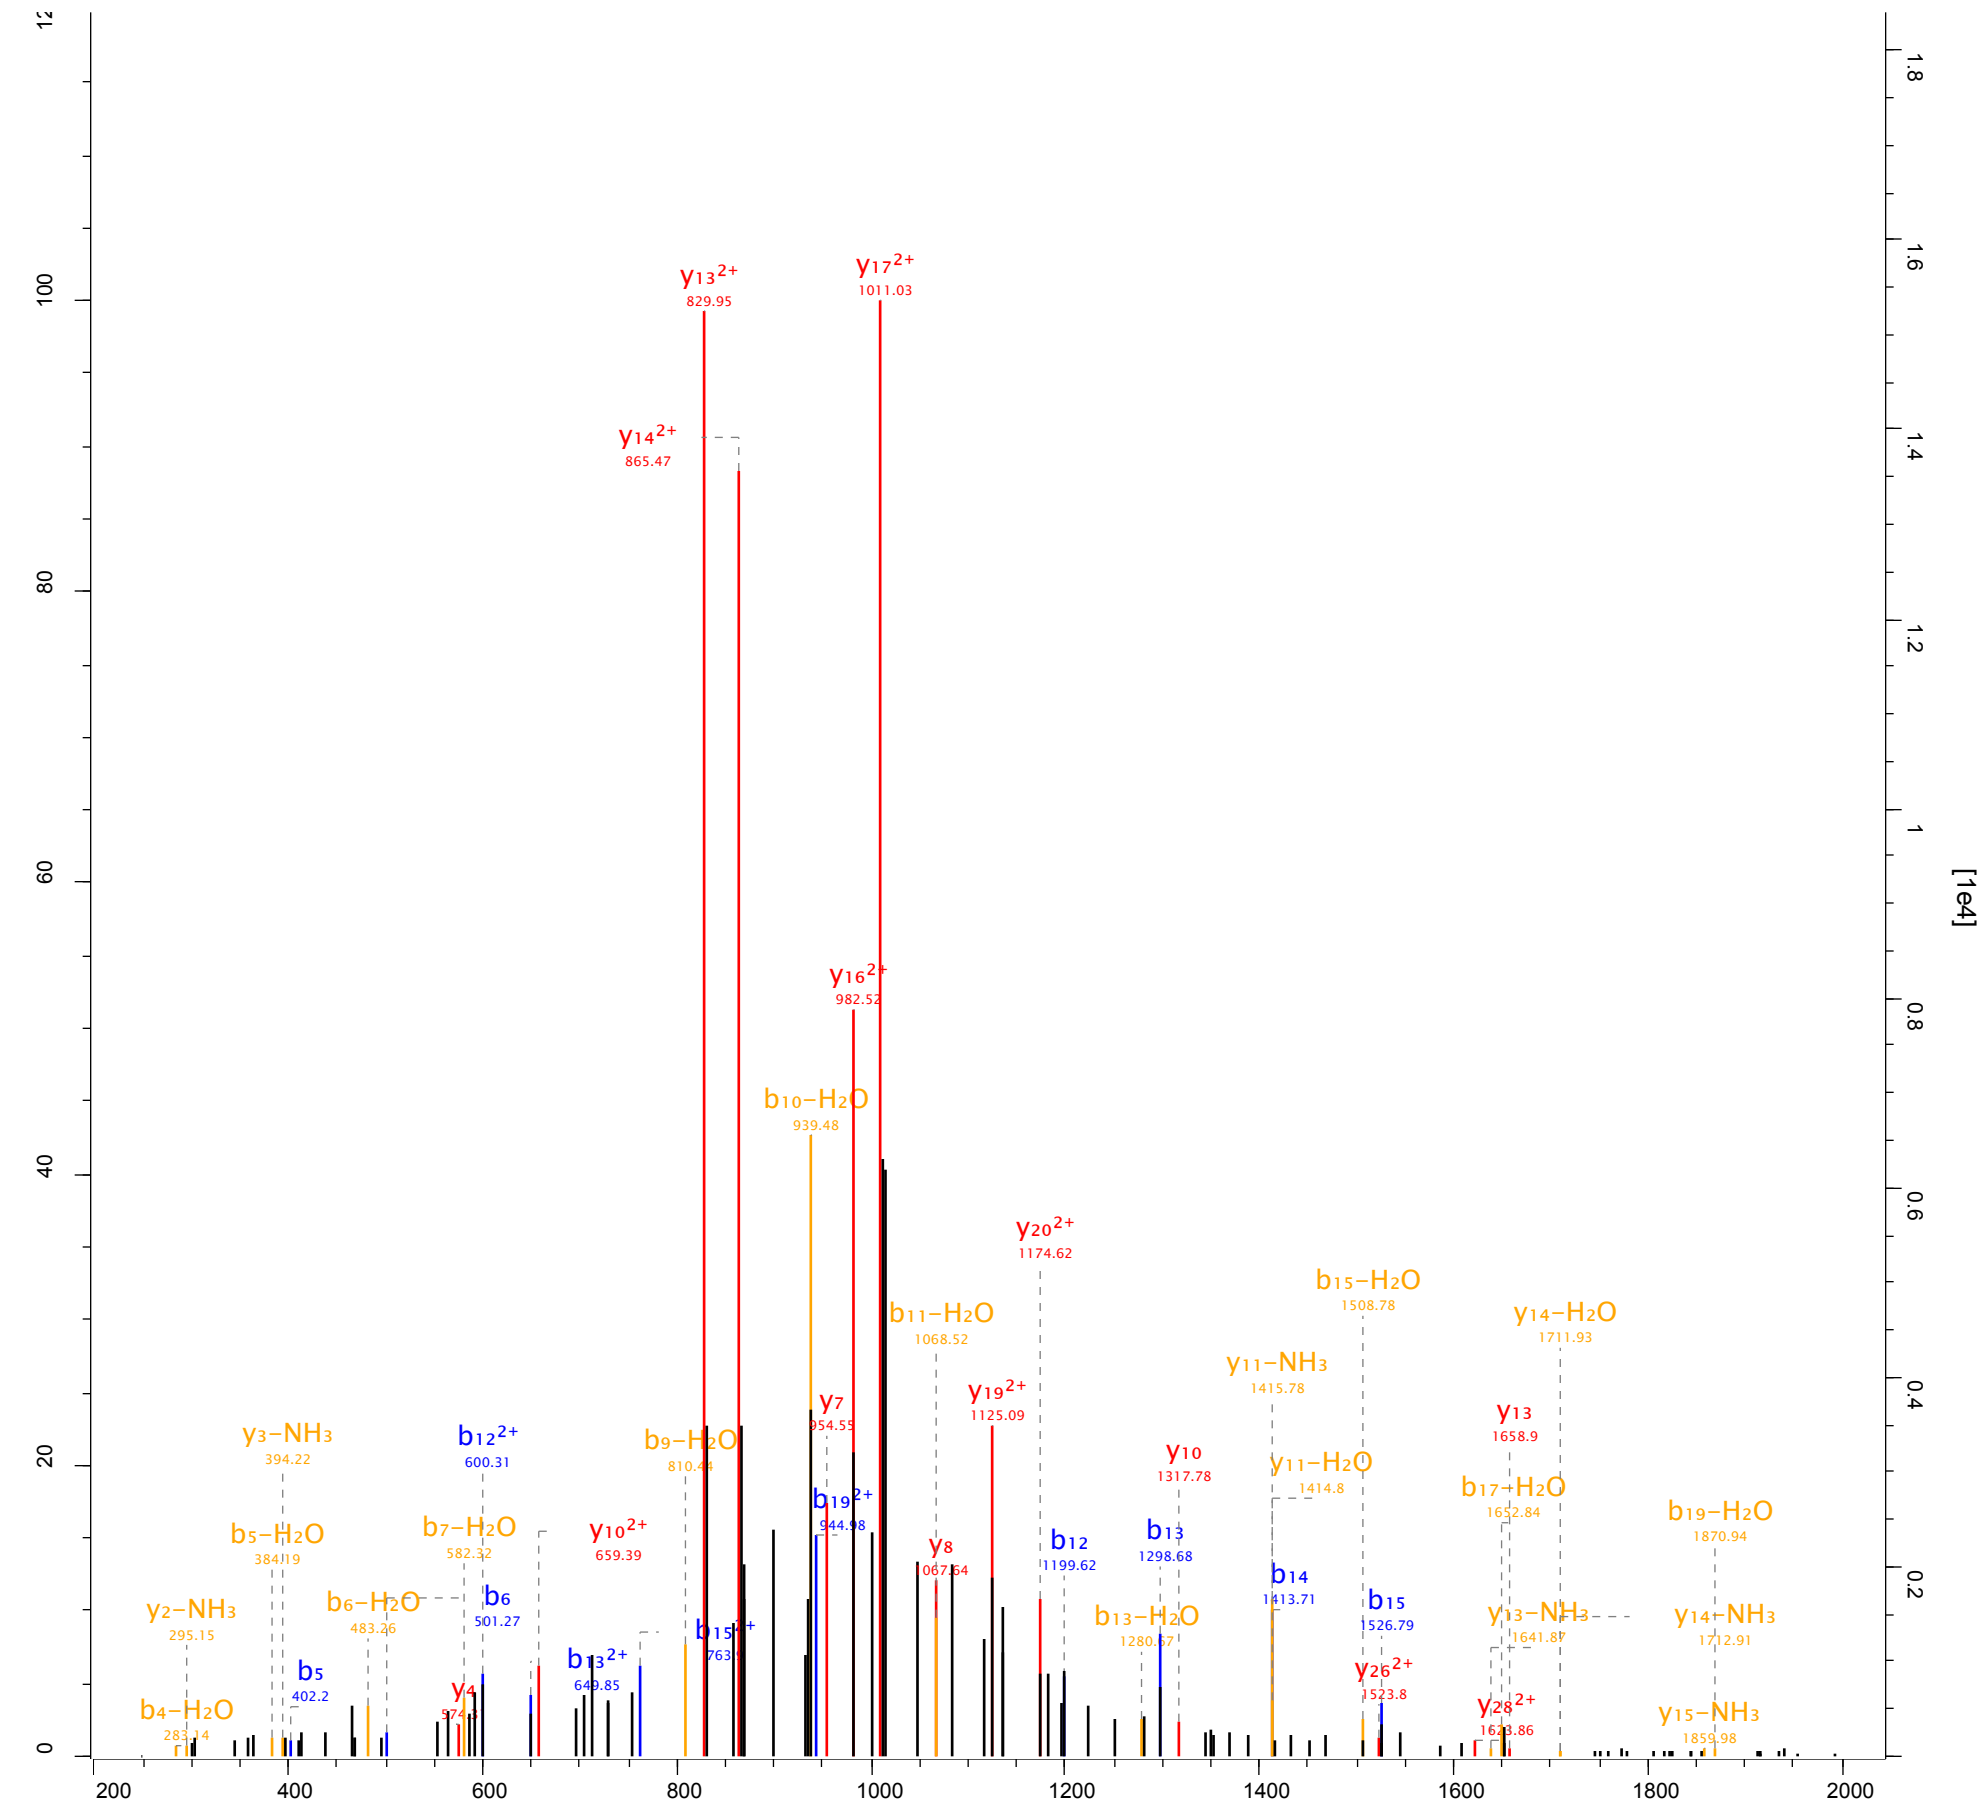

- A A G T T V V E V E E I V D I G S F A P E D I H

I P K I Y V H R -

ac

Fragmentation labels: y<sup>8</sup>, y<sup>7</sup>, y<sup>4</sup>, y<sup>28</sup><sup>2+</sup>, y<sup>26</sup><sup>2+</sup>, y<sup>20</sup><sup>2+</sup>, y<sup>19</sup><sup>2+</sup>, y<sup>17</sup><sup>2+</sup>, y<sup>16</sup><sup>2+</sup>, y<sup>14</sup><sup>2+</sup>, y<sup>13</sup>, b<sub>5</sub>, b<sub>6</sub>, b<sub>12</sub>, b<sub>13</sub>, b<sub>14</sub>, b<sub>15</sub>, b<sub>19<sup>2+</sup></sub>

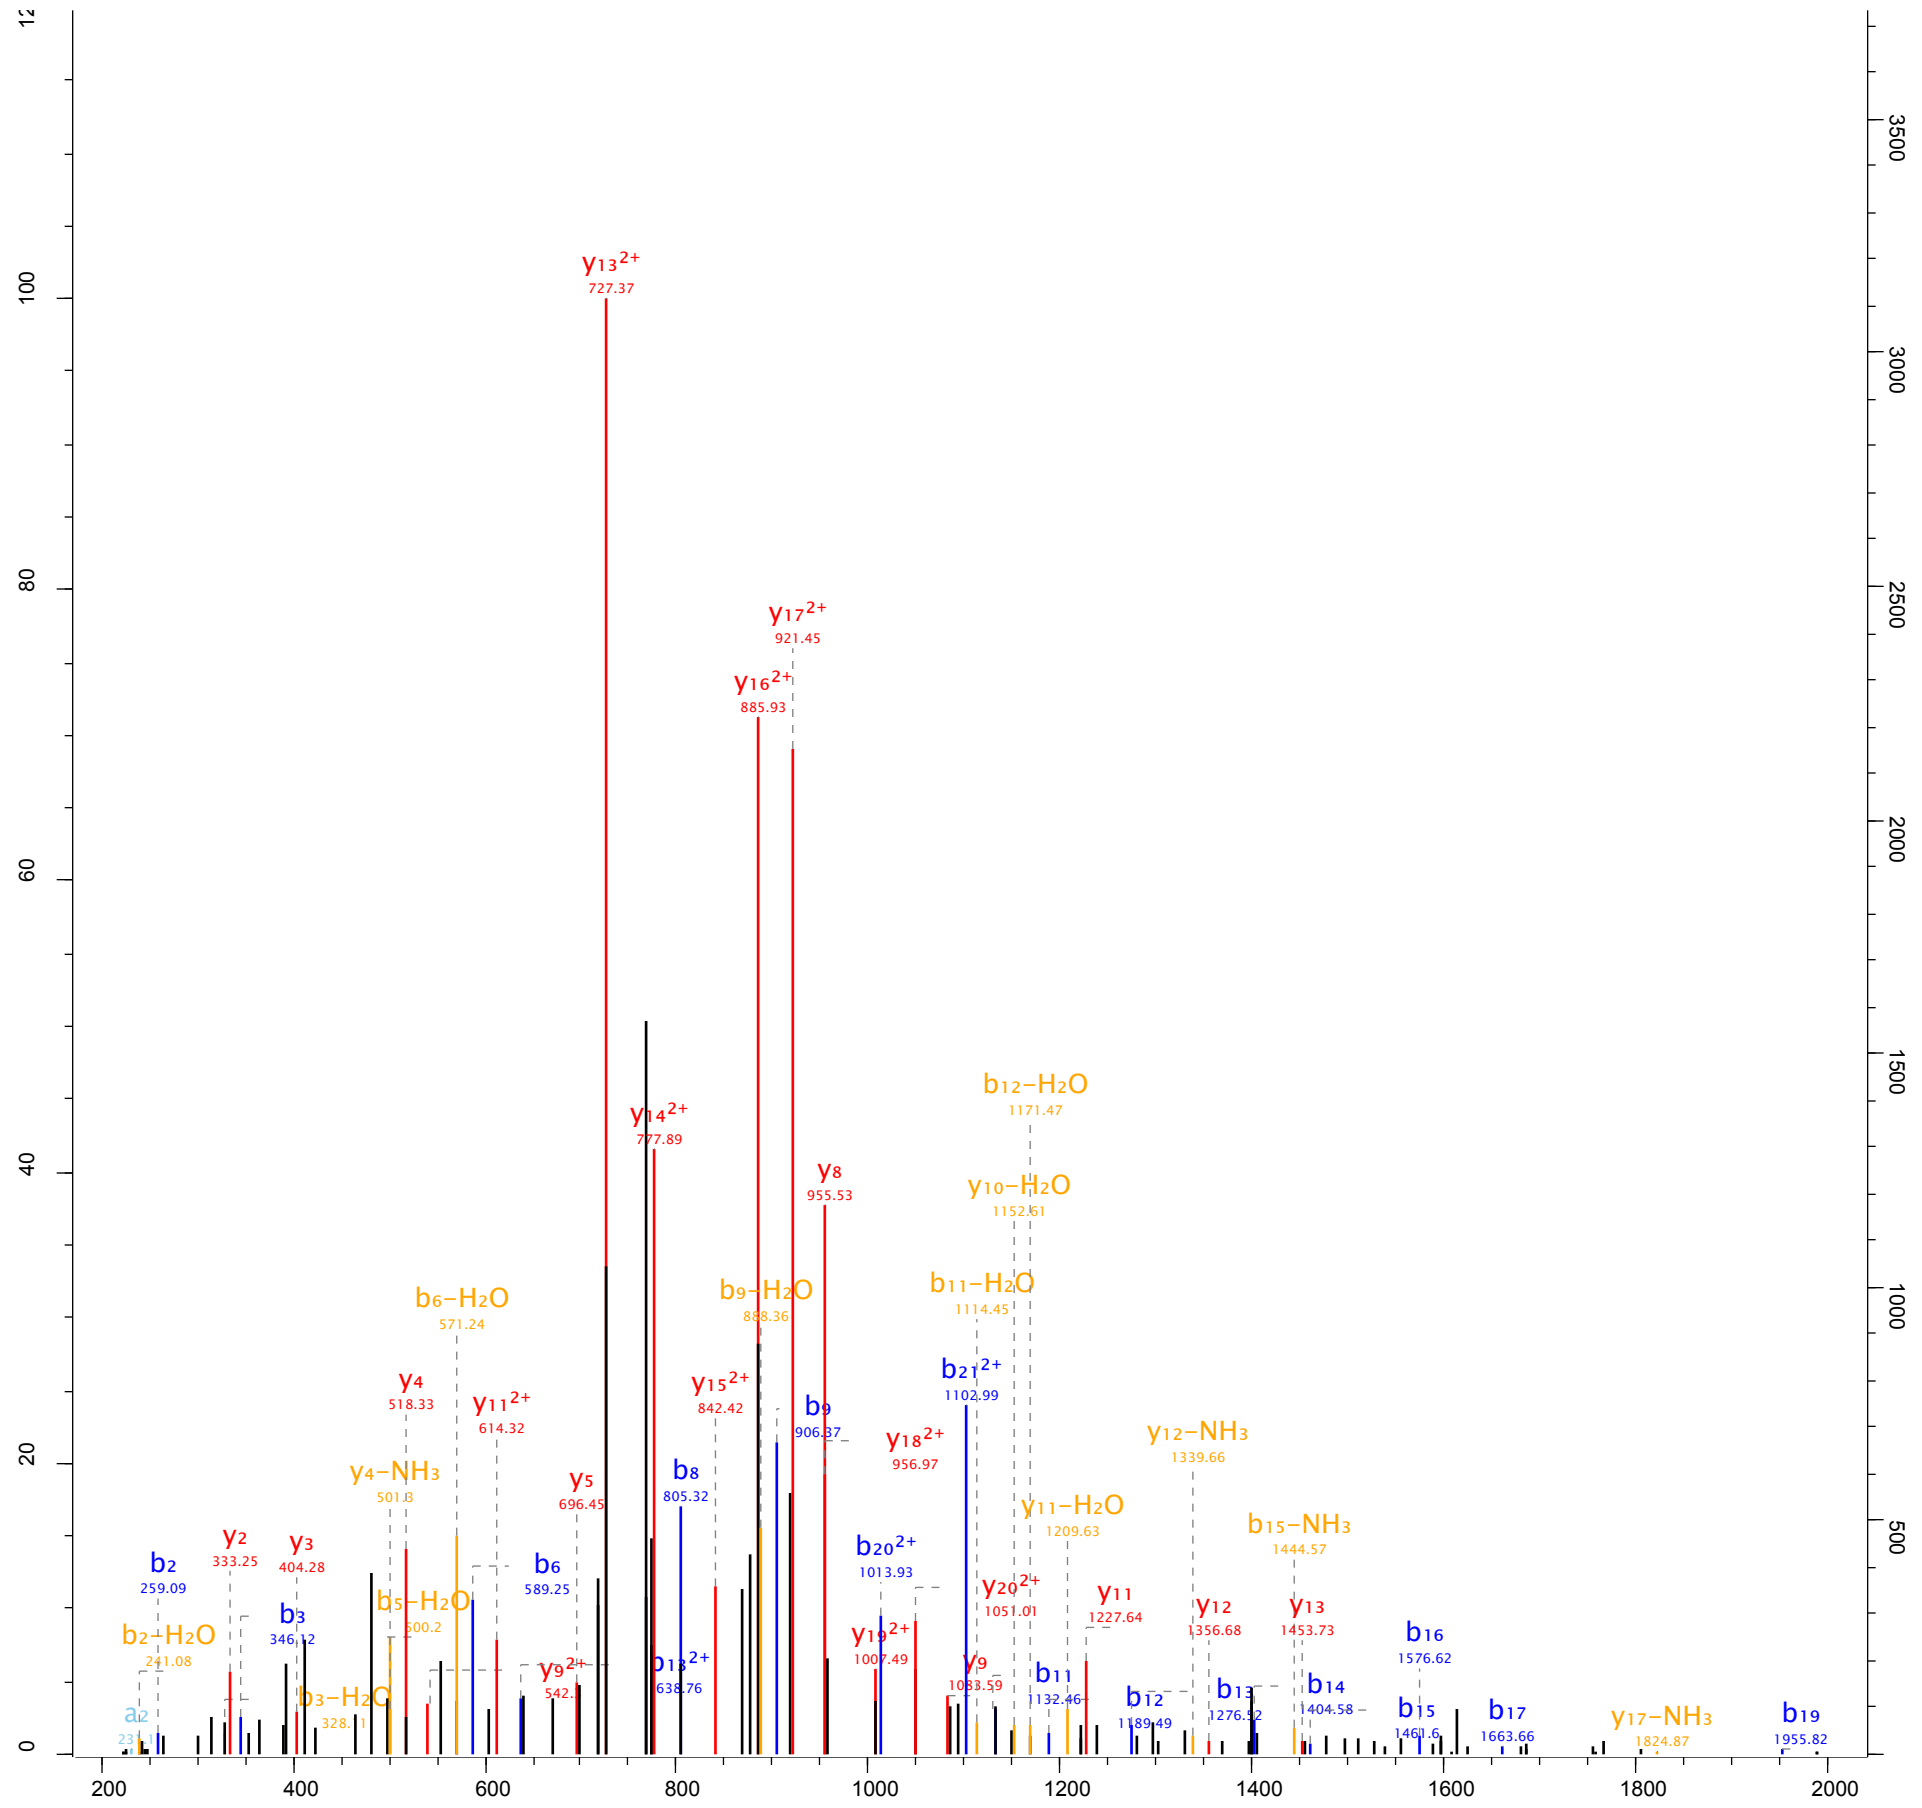

- E E S T A A S E T P E G S Q G D S K N A K K -

b<sub>2</sub>
b<sub>3</sub>
b<sub>6</sub>
b<sub>8</sub>
b<sub>9</sub>
b<sub>11</sub>
b<sub>12</sub>
b<sub>13</sub>
b<sub>14</sub>
b<sub>15</sub>
b<sub>16</sub>
b<sub>17</sub>
b<sub>19</sub>
b<sub>20</sub><sup>2+</sup>
b<sub>21</sub><sup>2+</sup>

050813\_SCW\_II\_29\_16\_3

12242

ITMS; CID

221.05

1133.51

Crebbp

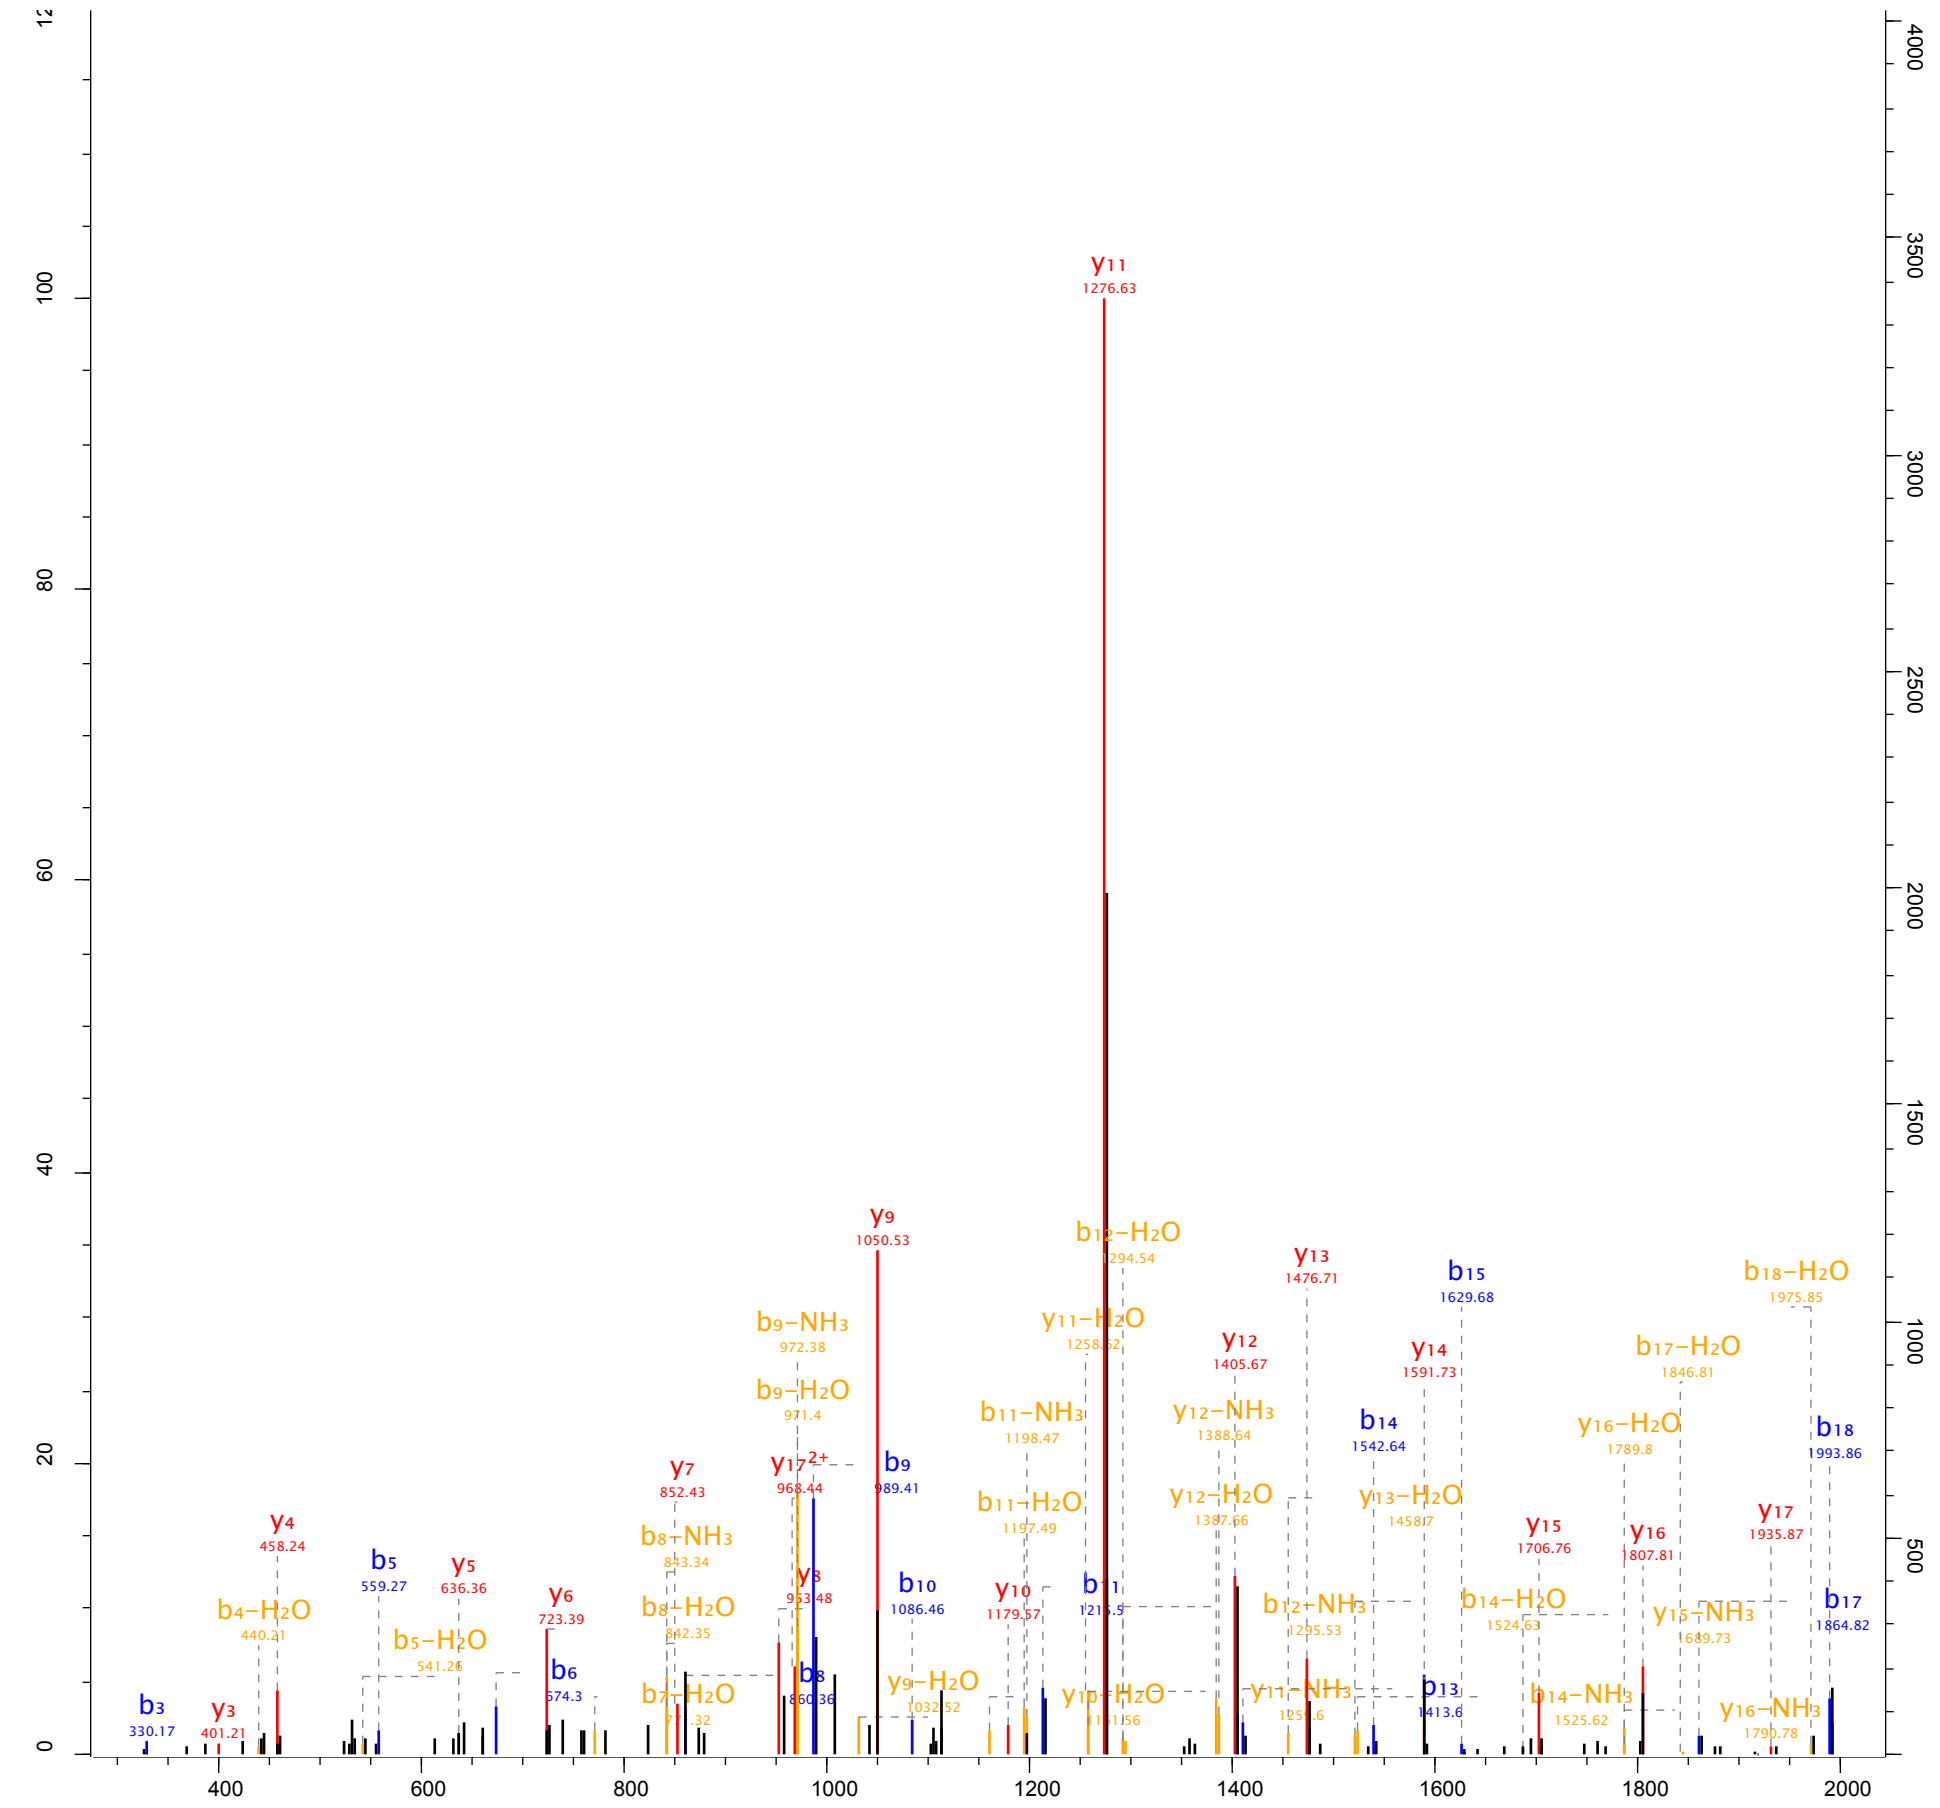

- T E V Q T D D A E P E P T E S K G E P R -

b3 b5 b6 b8 b9 b10 b11 b13 b14 b15 b17 b18

y17 y16 y15 y14 y13 y12 y11 y10 y9 y8 y7 y6 y5 ac y4 y3

050813\_SCW\_II\_29\_16\_3

13290

ITMS; CID

131.56

965.5

Mrgbp

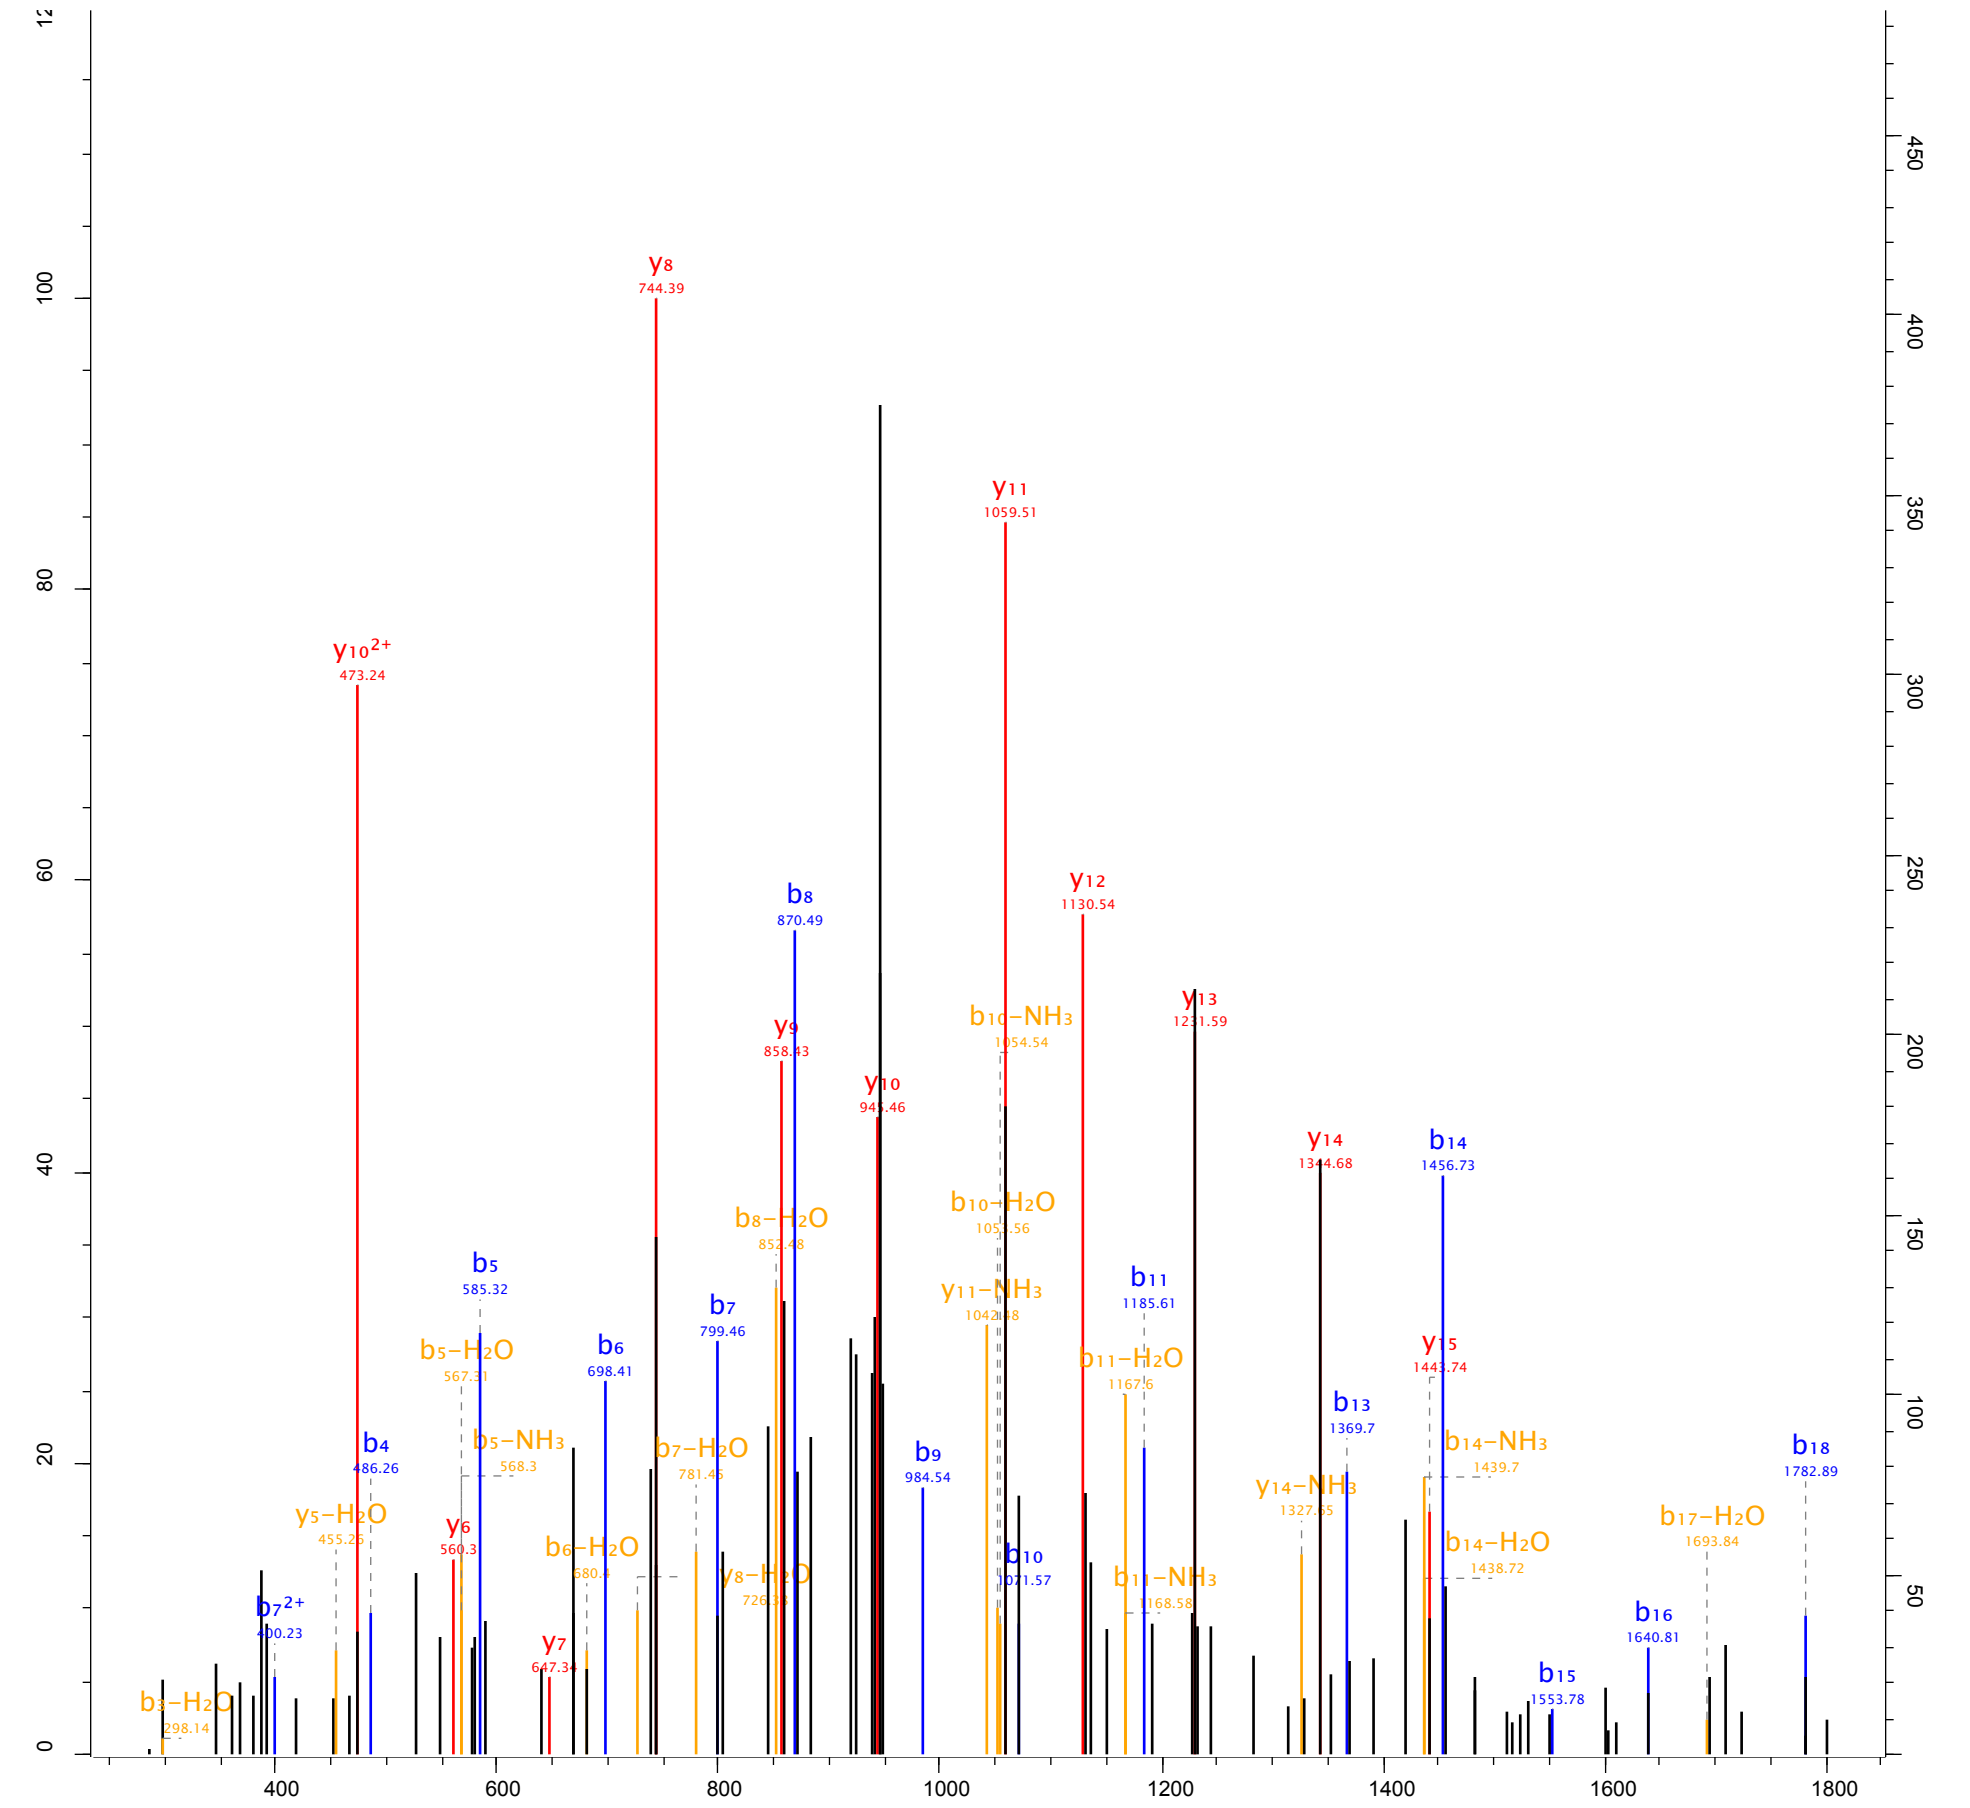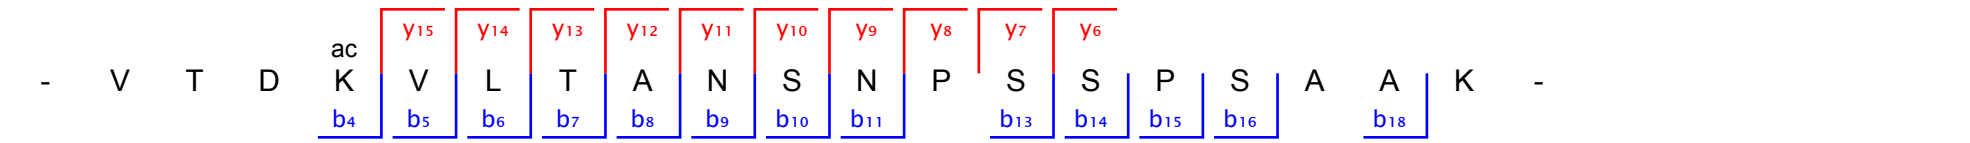

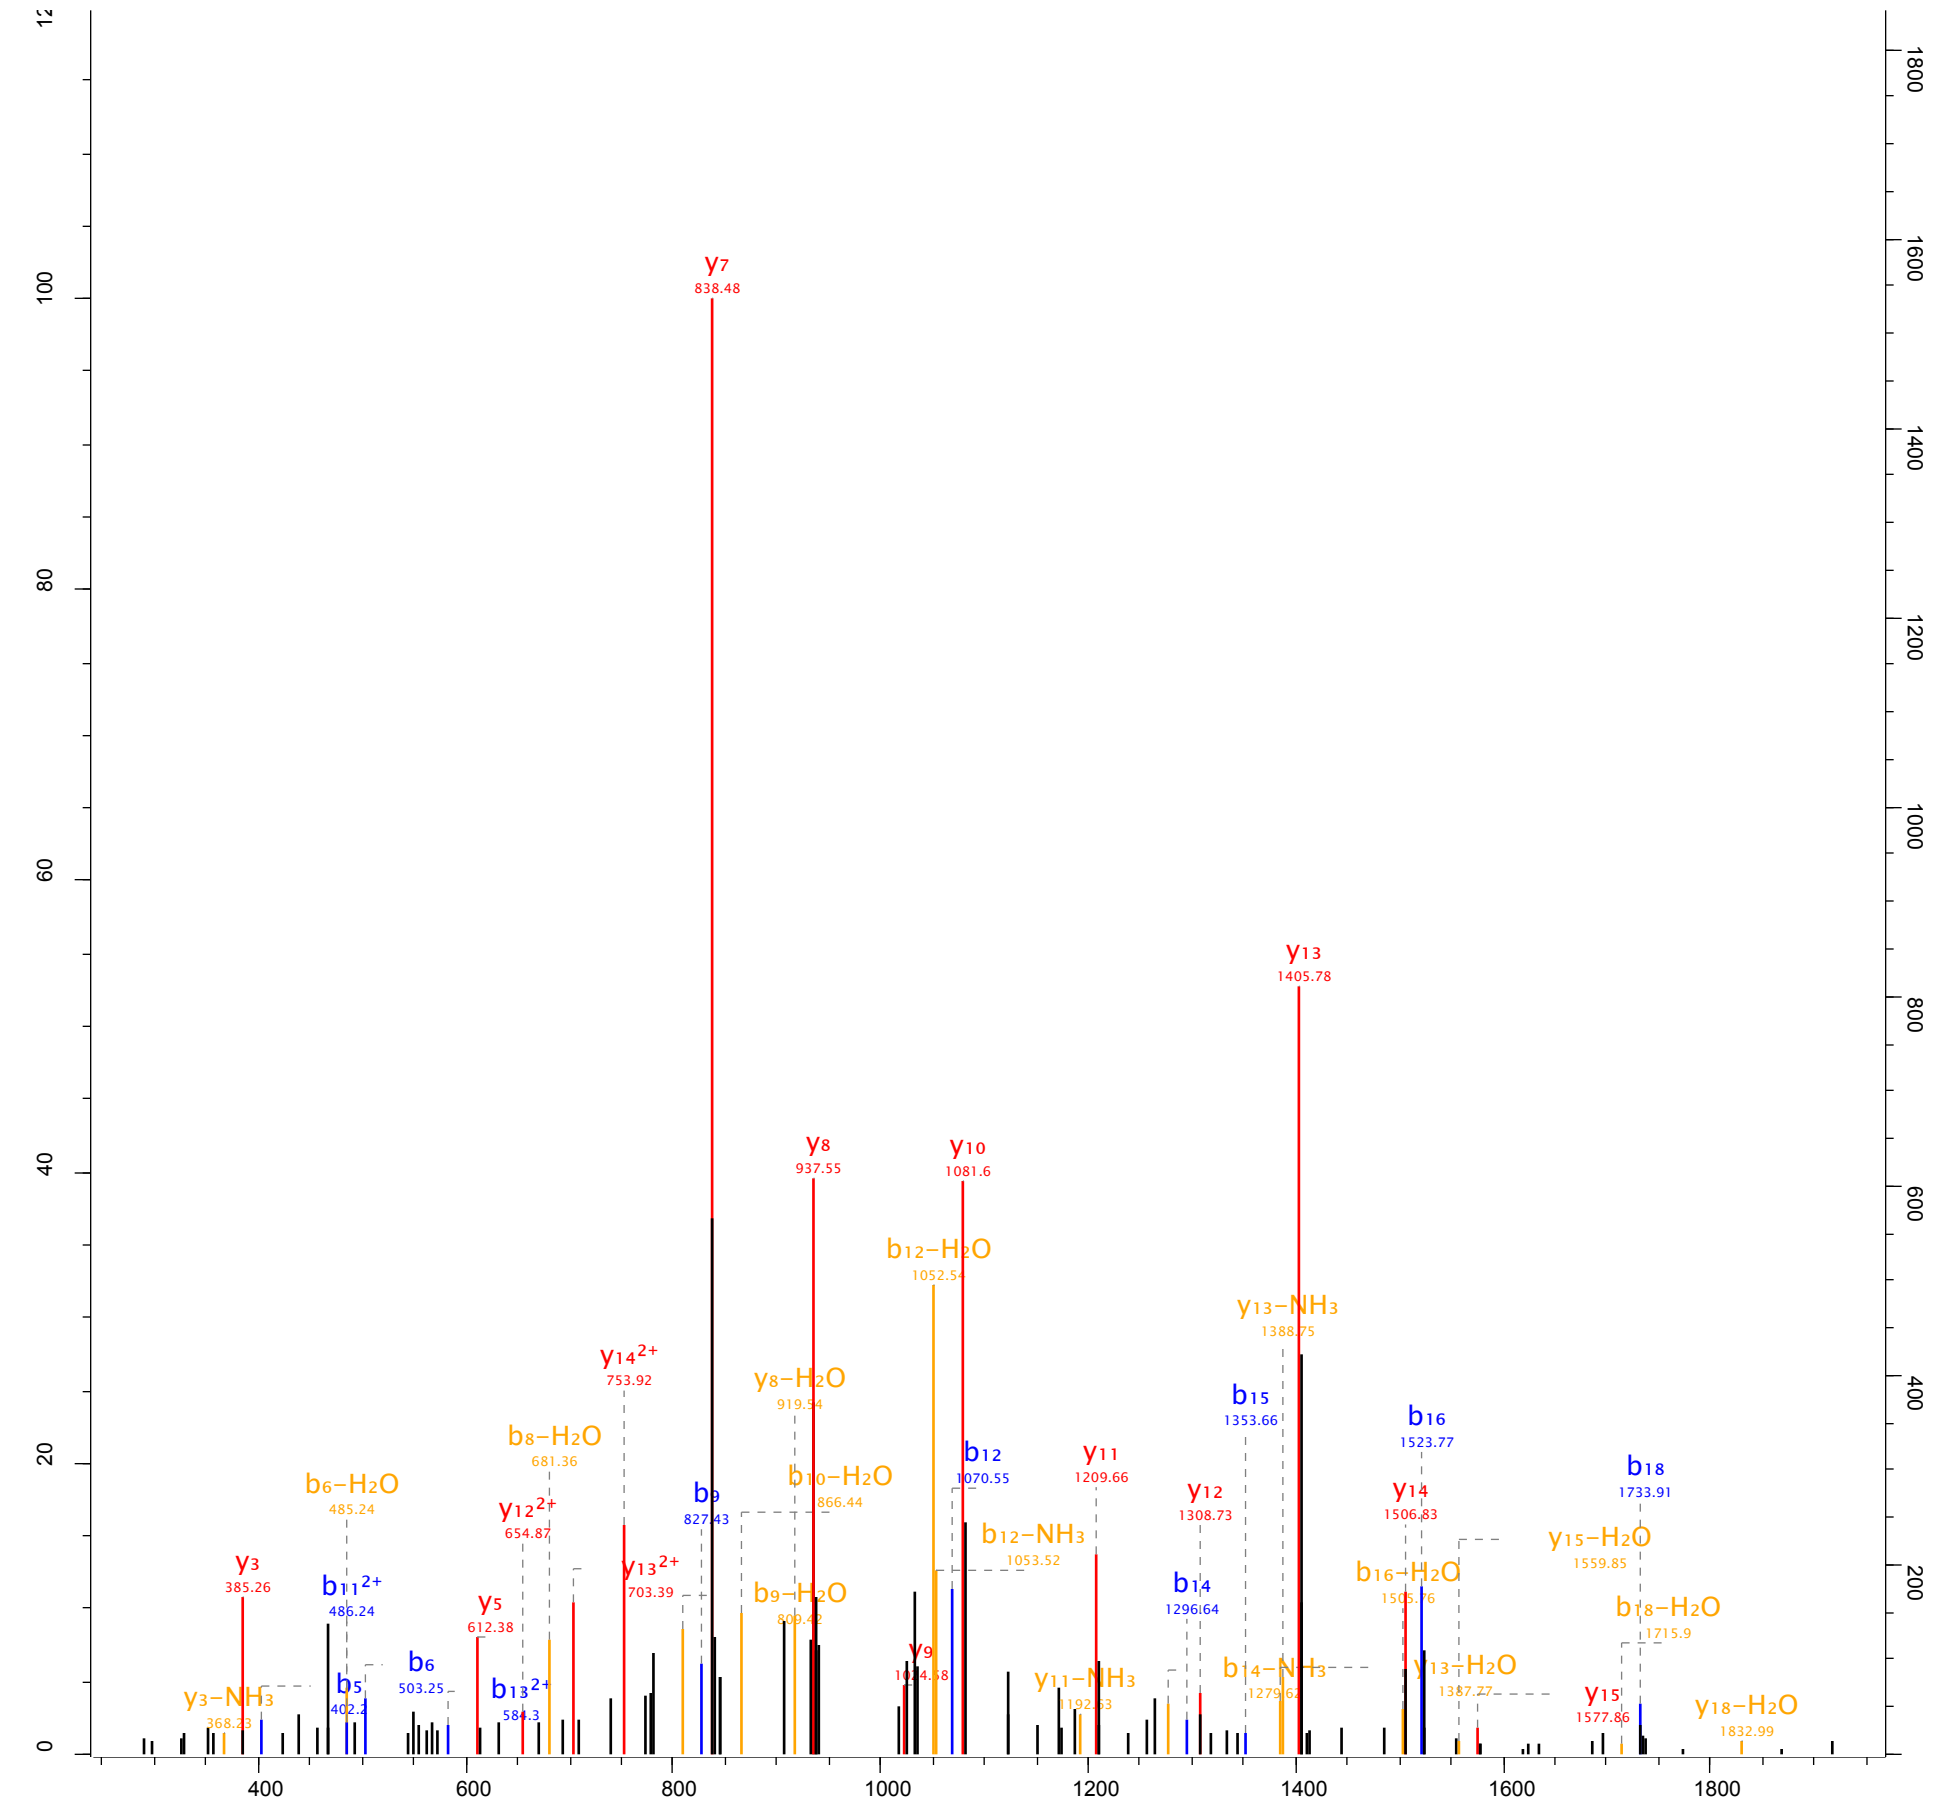

- G S V S A T P V Q G S V P E G K P I R -

y15 y14 y13 y12 y11 y10 y9 y8 y7 y5 ac y3  
b5 b6 b9 b11<sup>2+</sup> b12 b13<sup>2+</sup> b14 b15 b16 b18

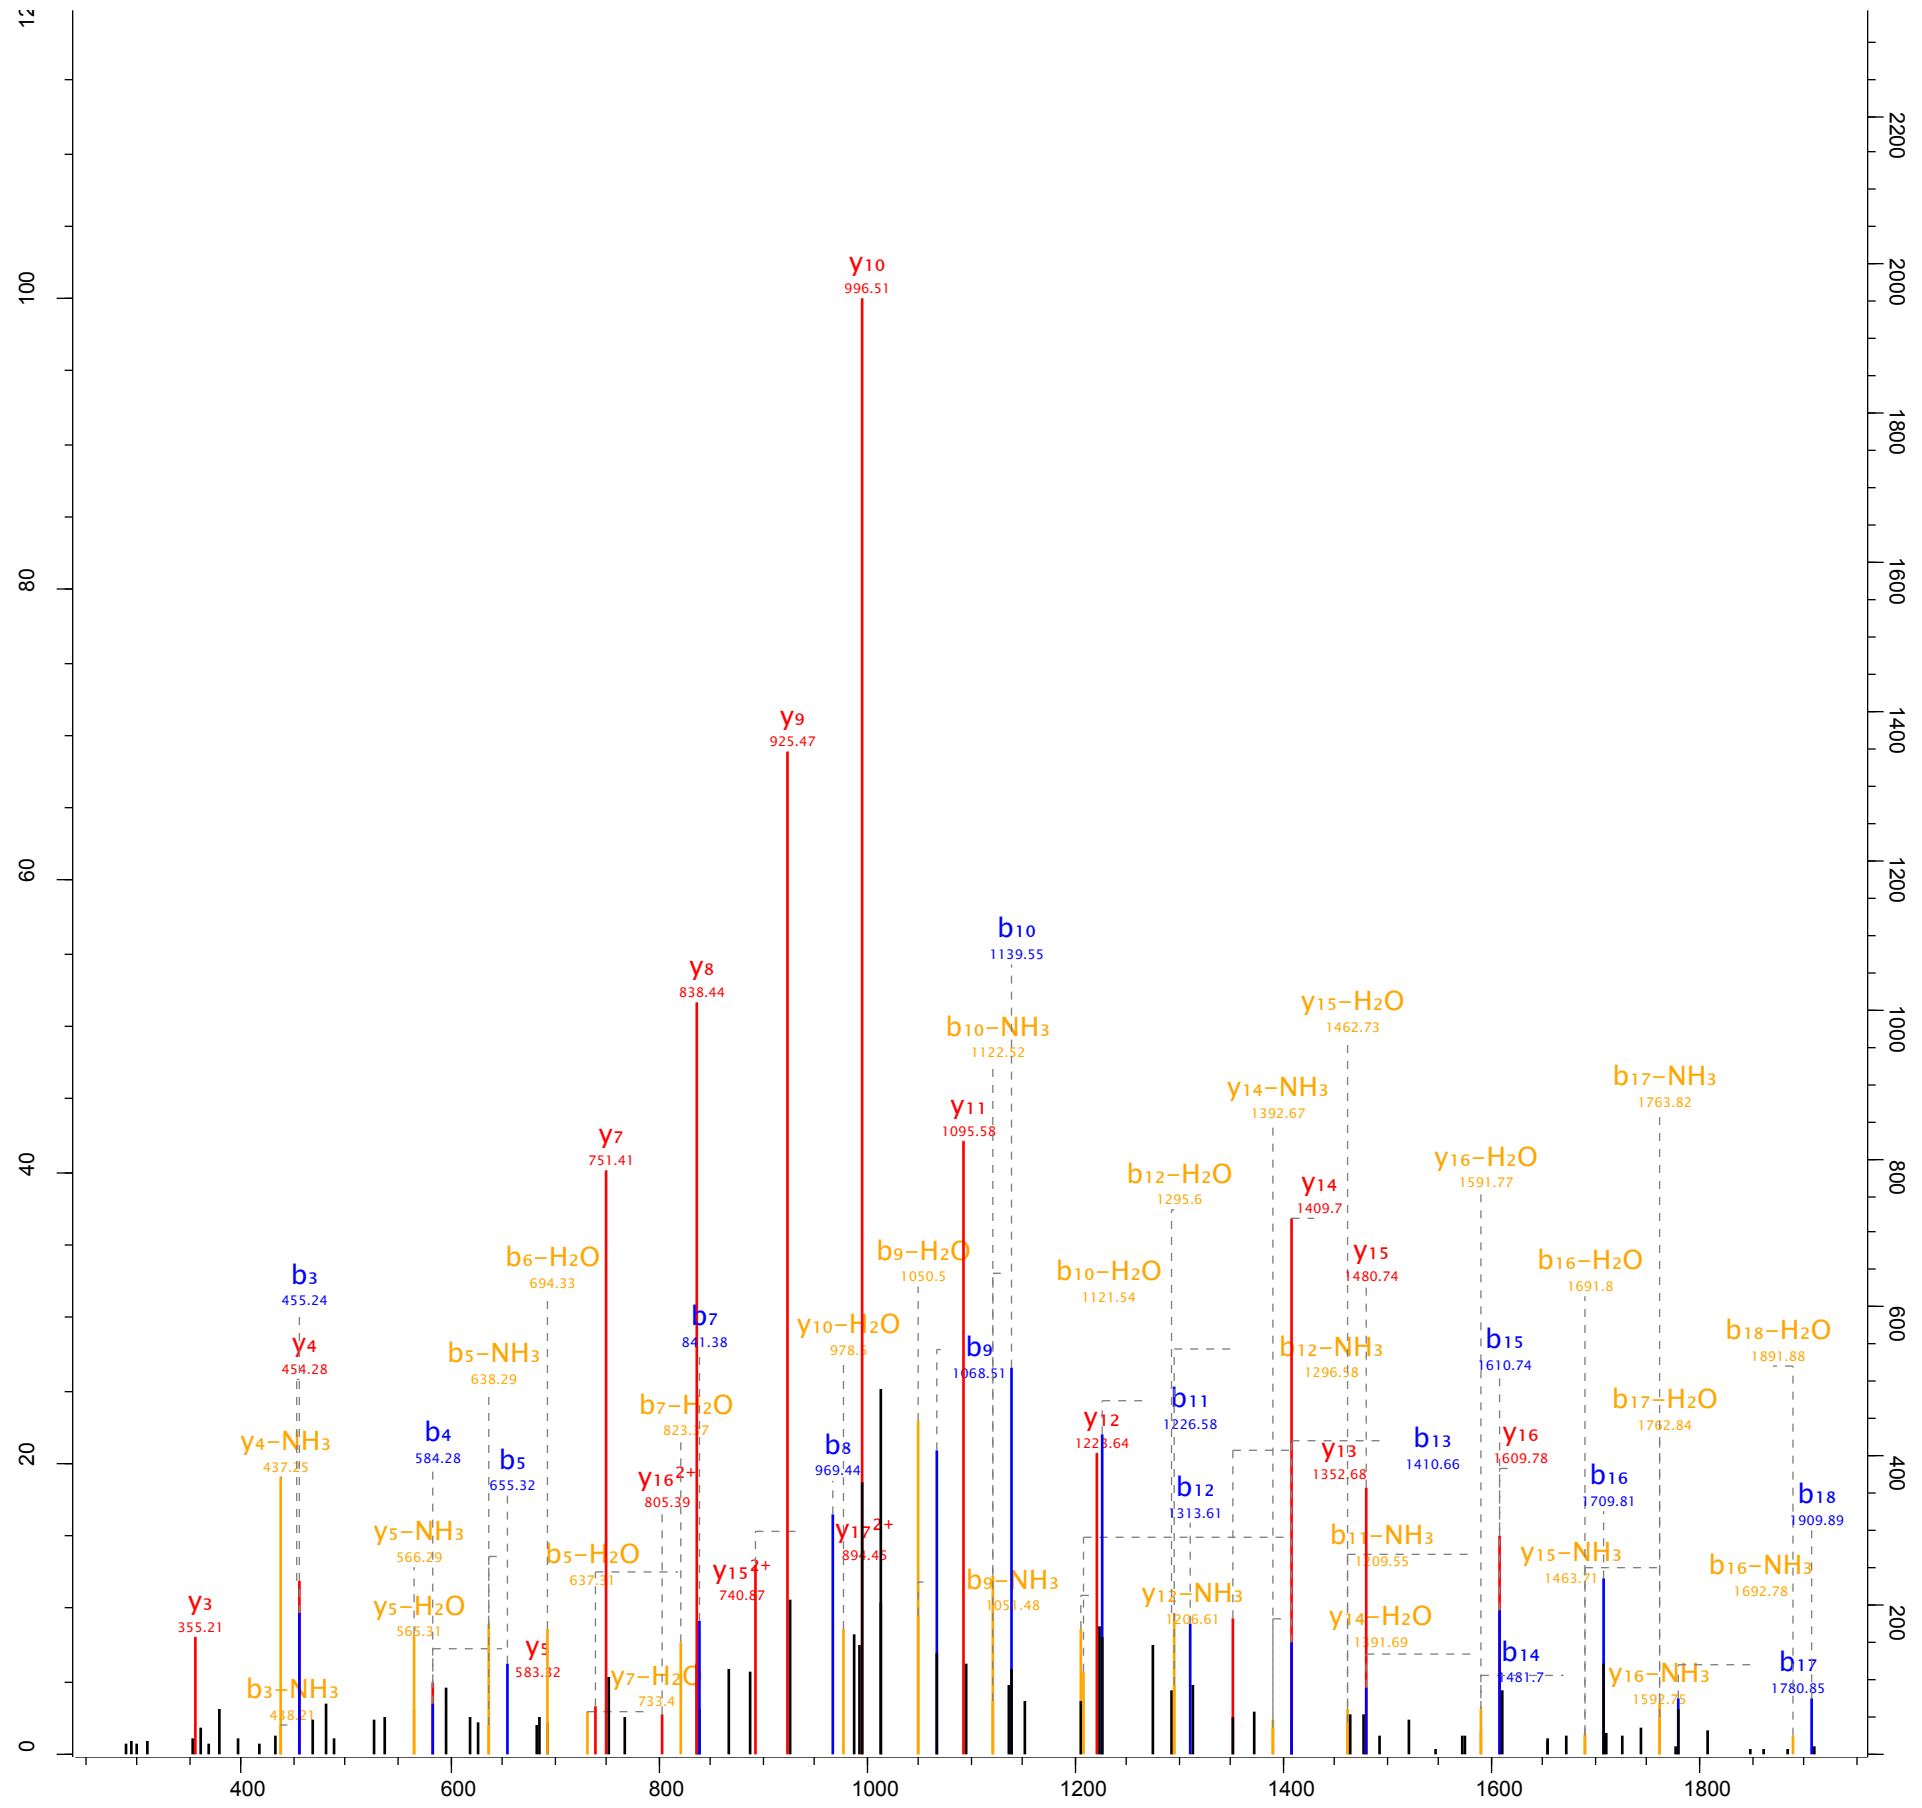

- E F y17<sup>2+</sup>  
ac y16 y15 y14 y13 y12 y11 y10 y9 y8 y7 y5 y4 y3  
 - E F K E A G E Q V A S S P A E V A E K -  
 - E F b3 b4 b5 b7 b8 b9 b10 b11 b12 b13 b14 b15 b16 b17 b18

050813\_SCW\_II\_29\_16\_3

15972 ITMS; CID 104.21 877.4 Tmsb4x

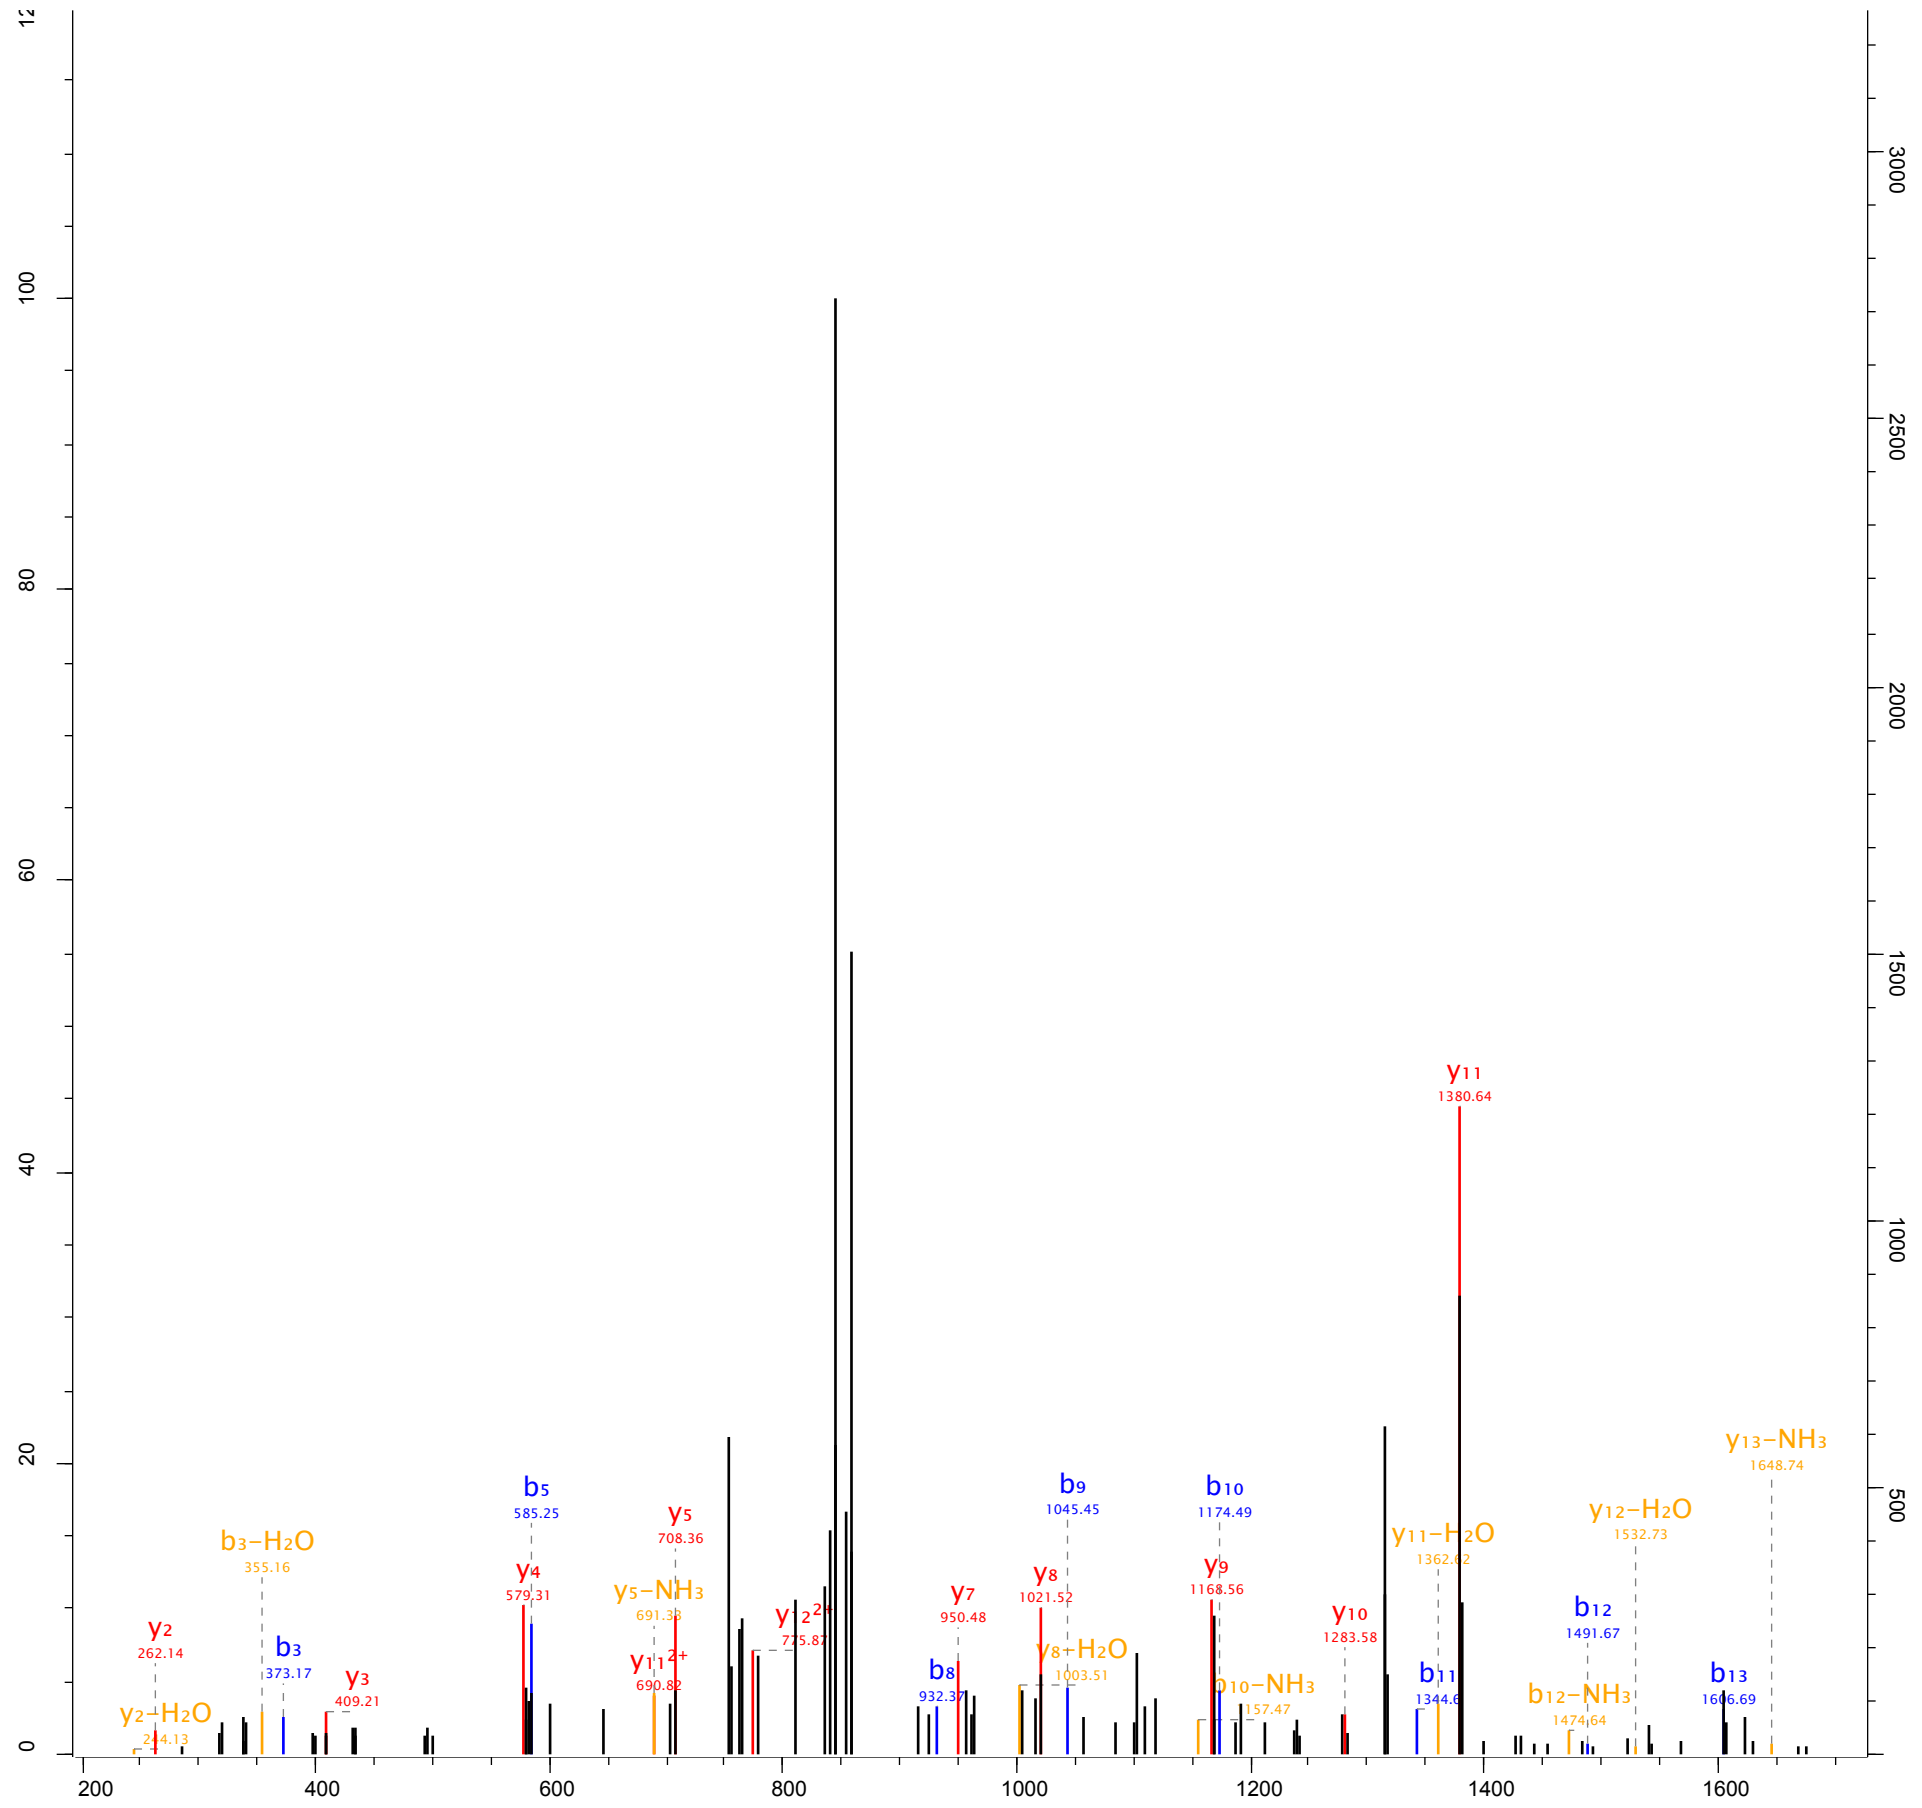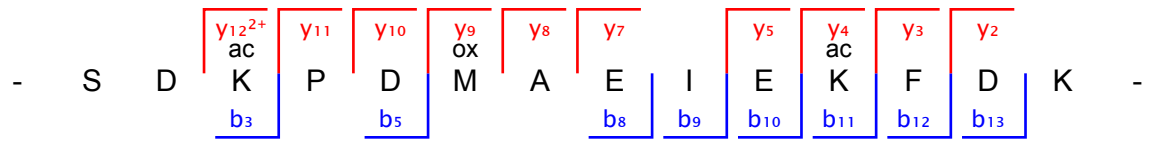



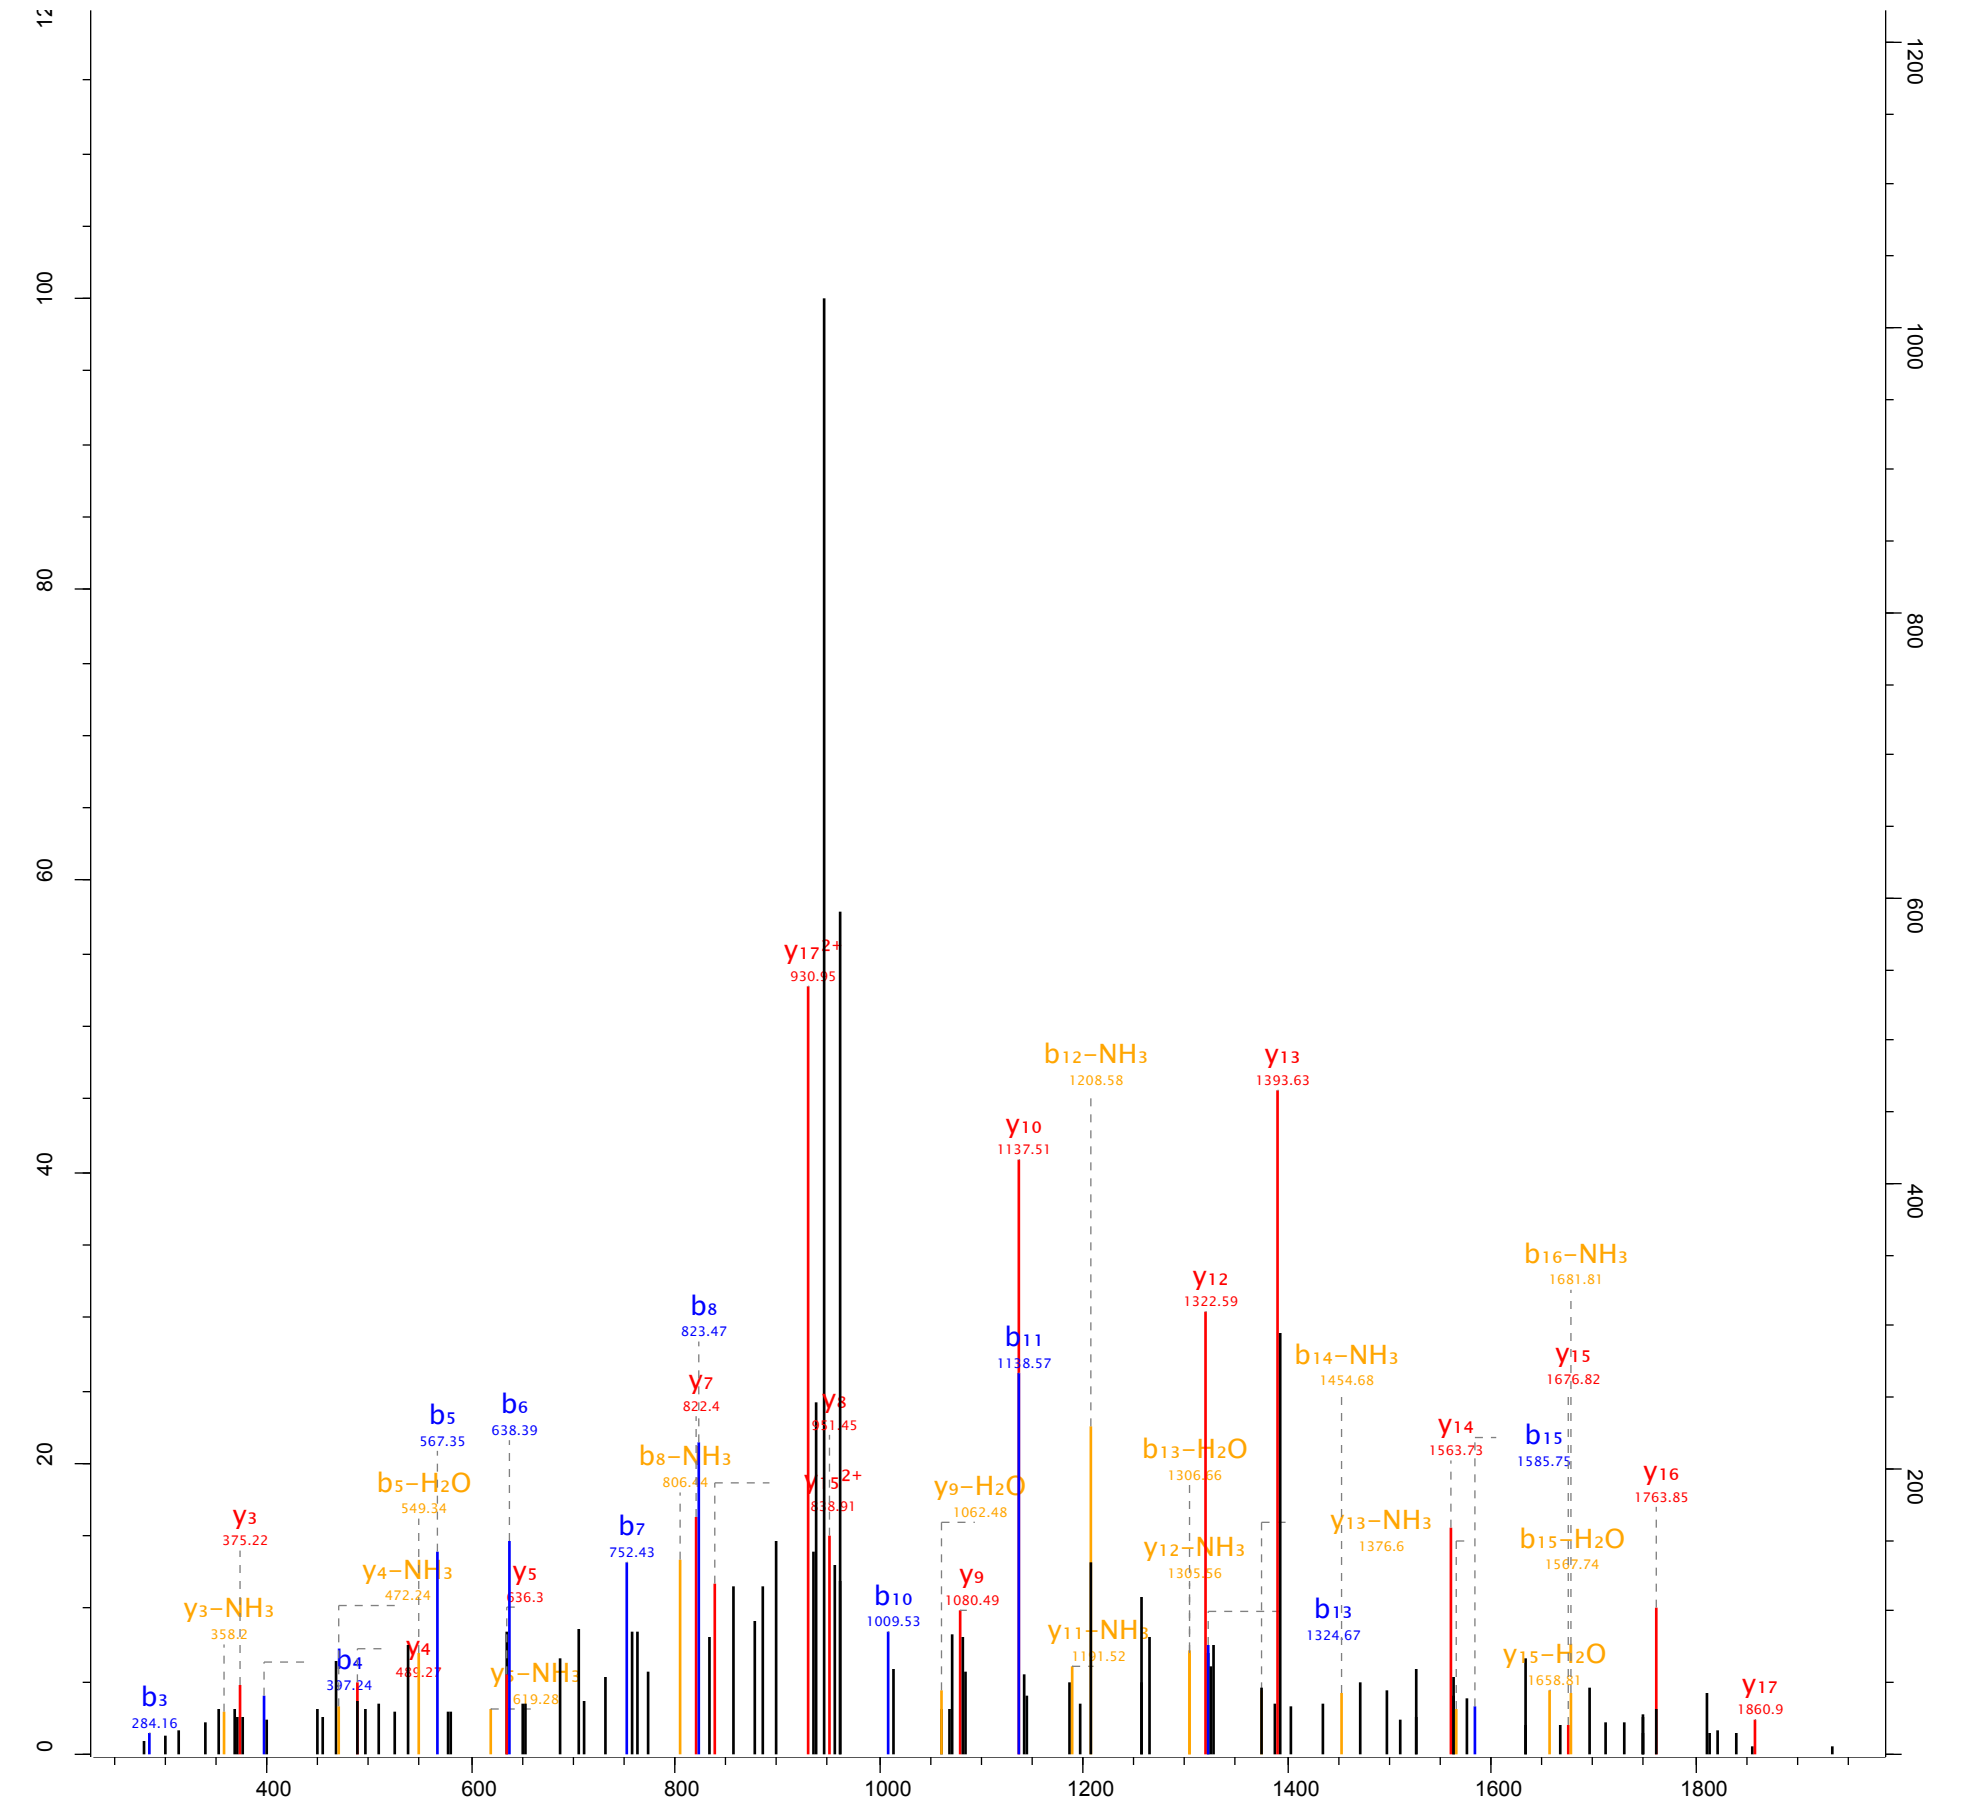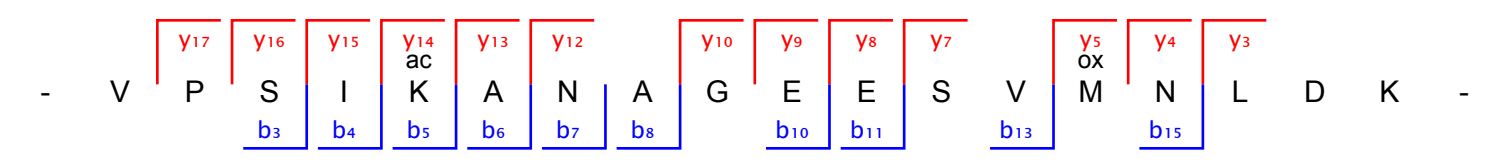

050813\_SCW\_II\_29\_16\_3

16290 ITMS; CID 132.15 804.98 Pdlim5

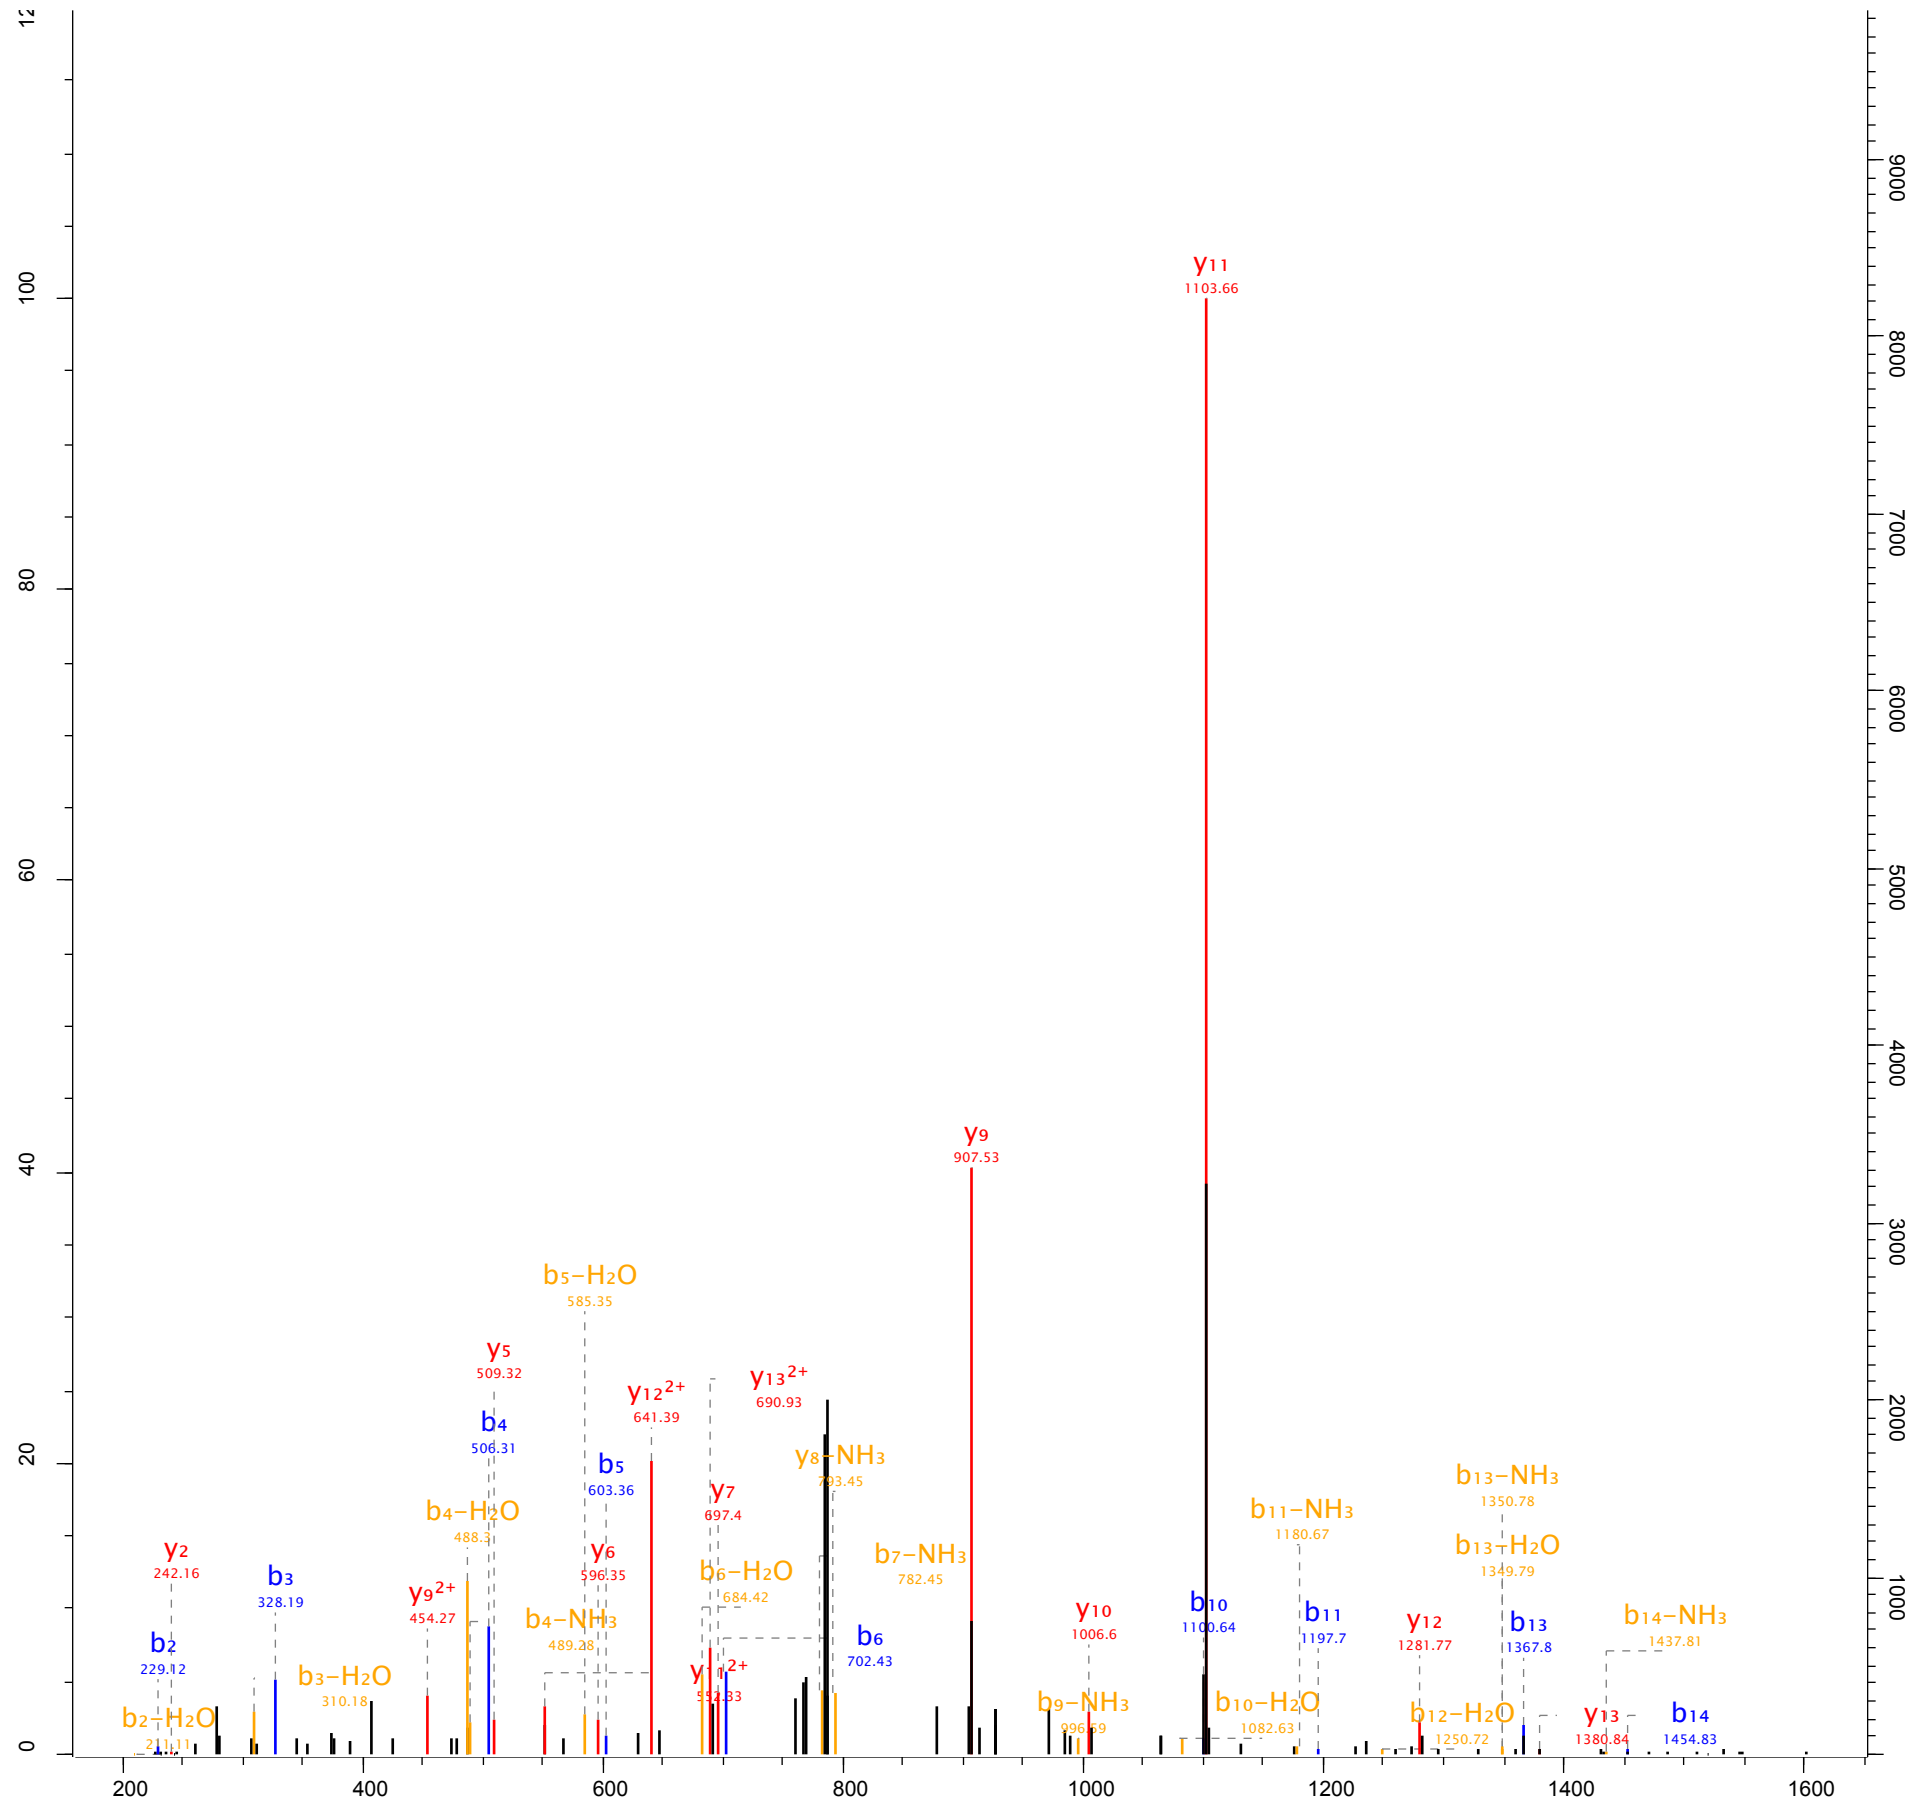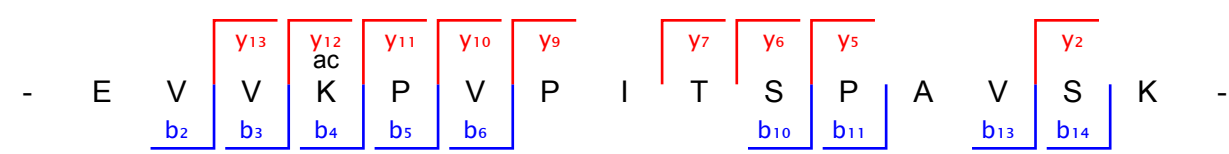

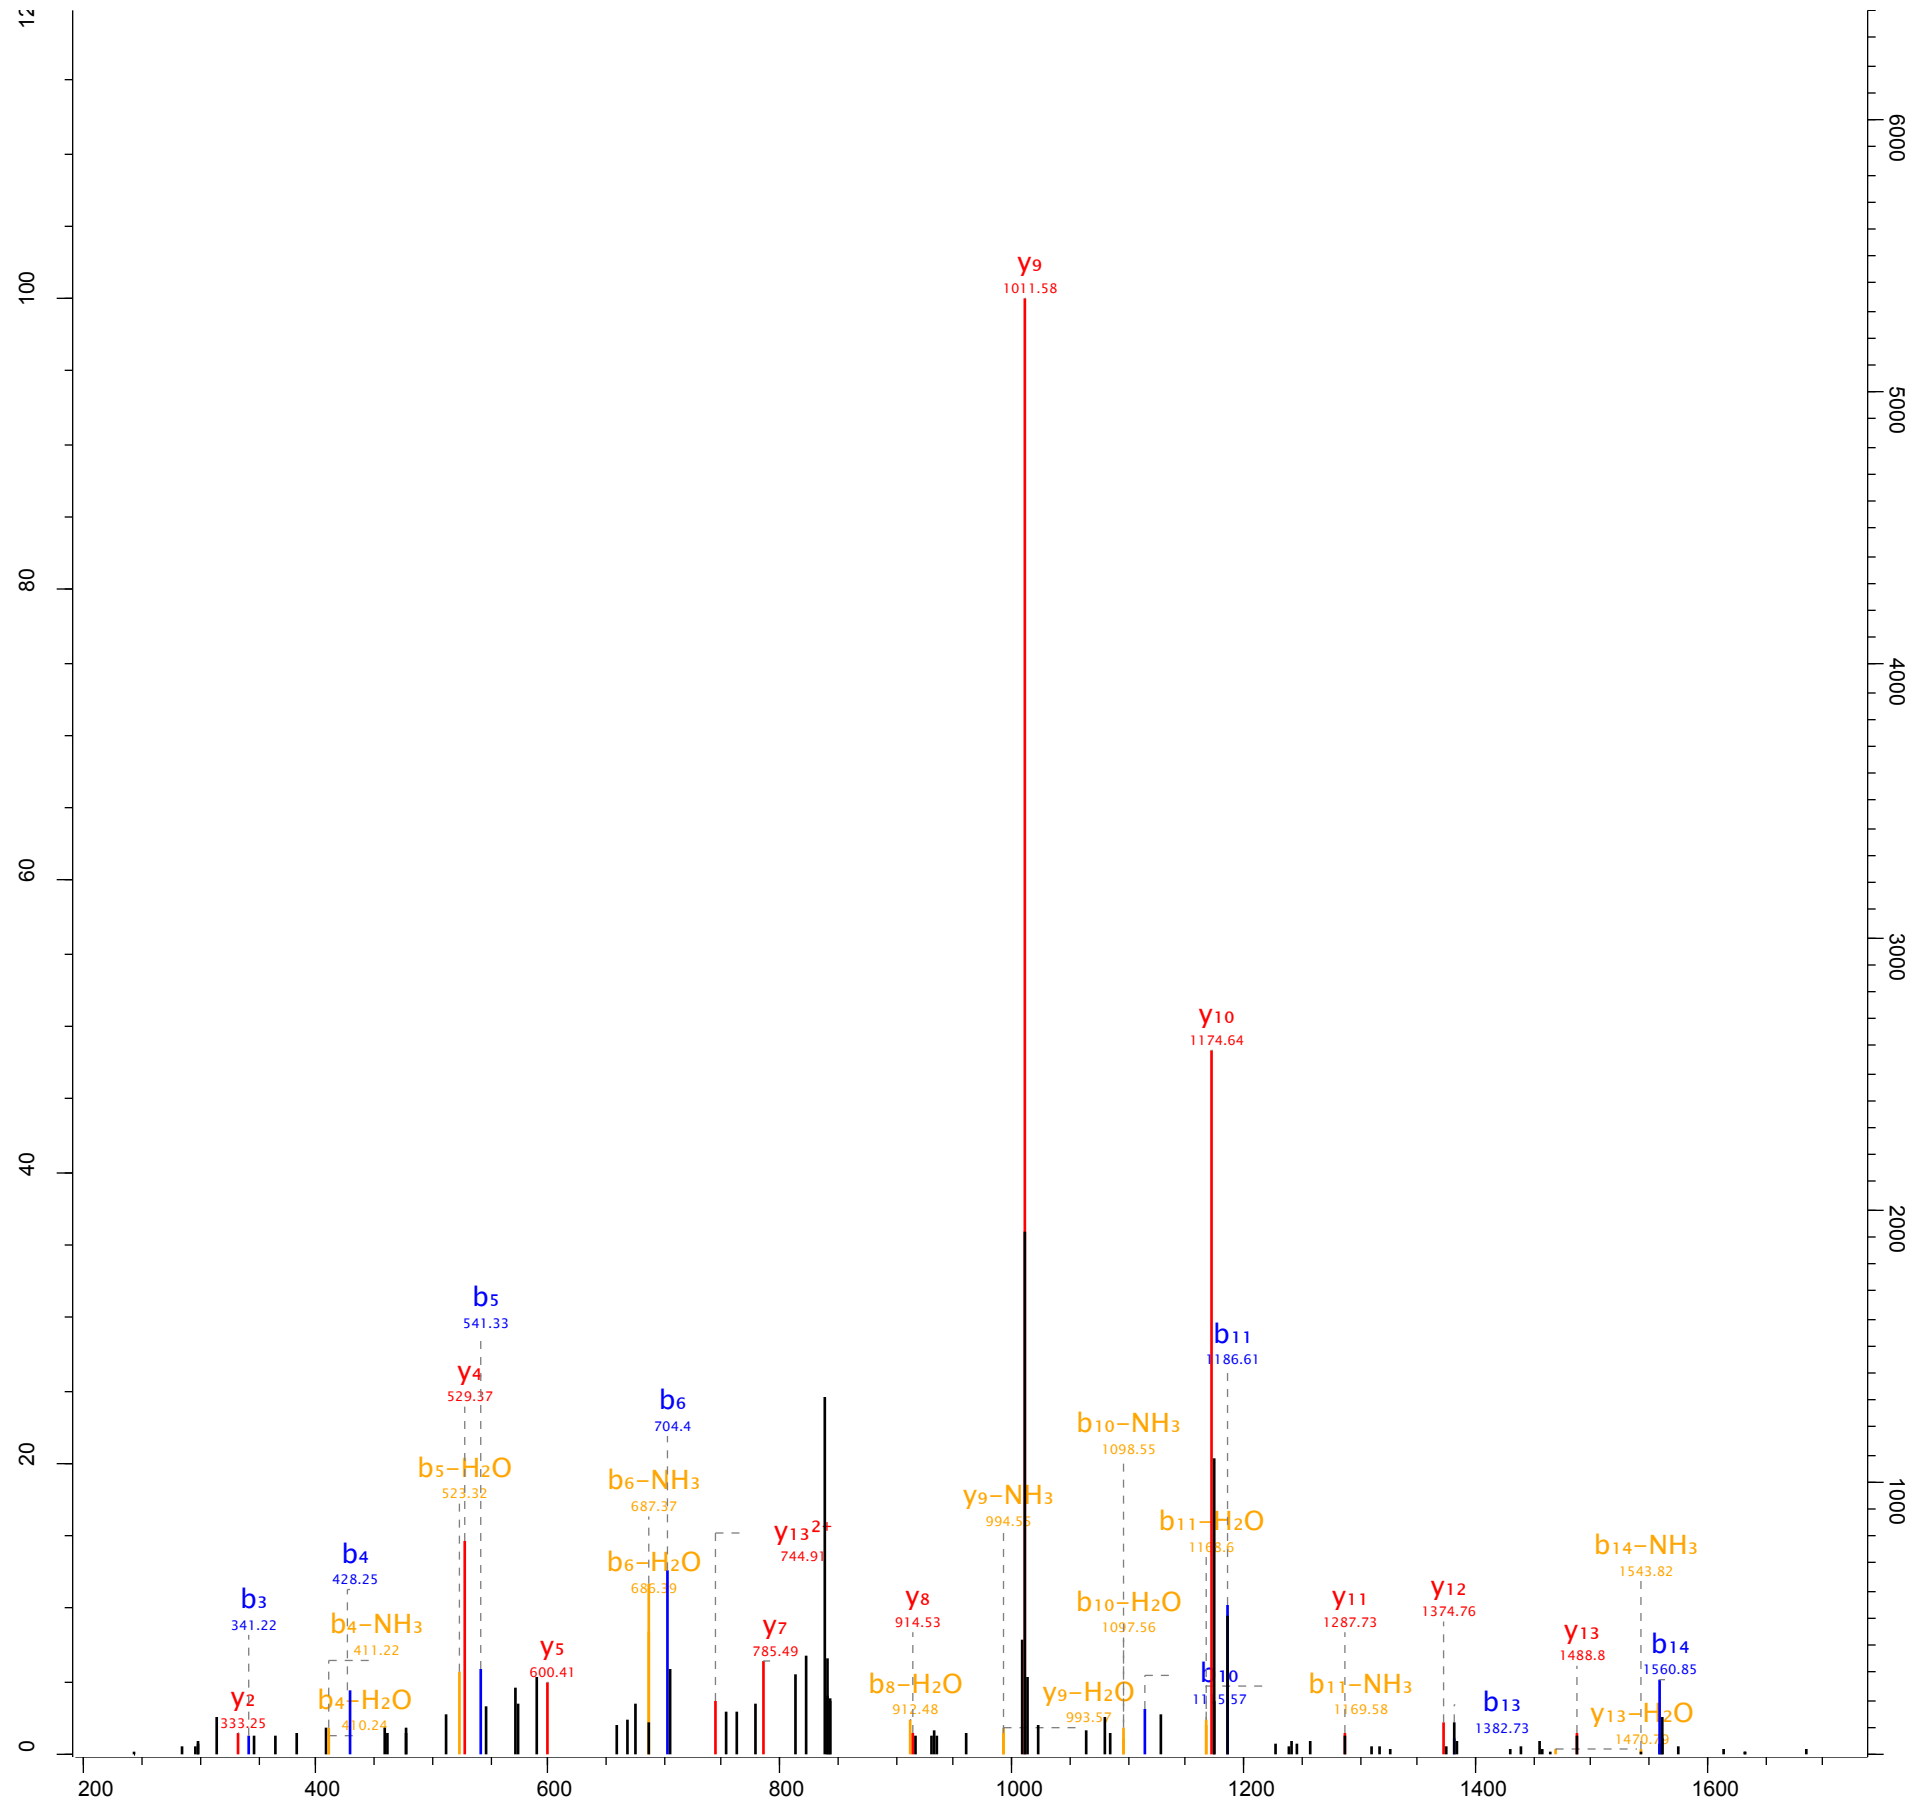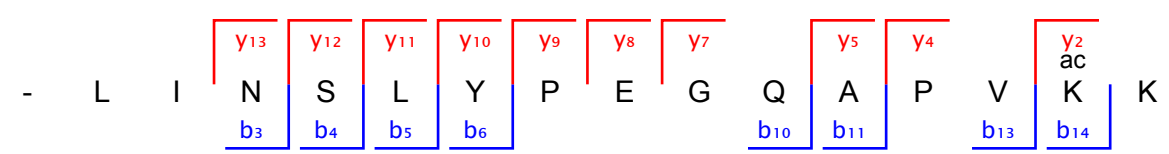

050813\_SCW\_II\_29\_16\_3

16599 ITMS; CID 188.48 843.4 Fubp1

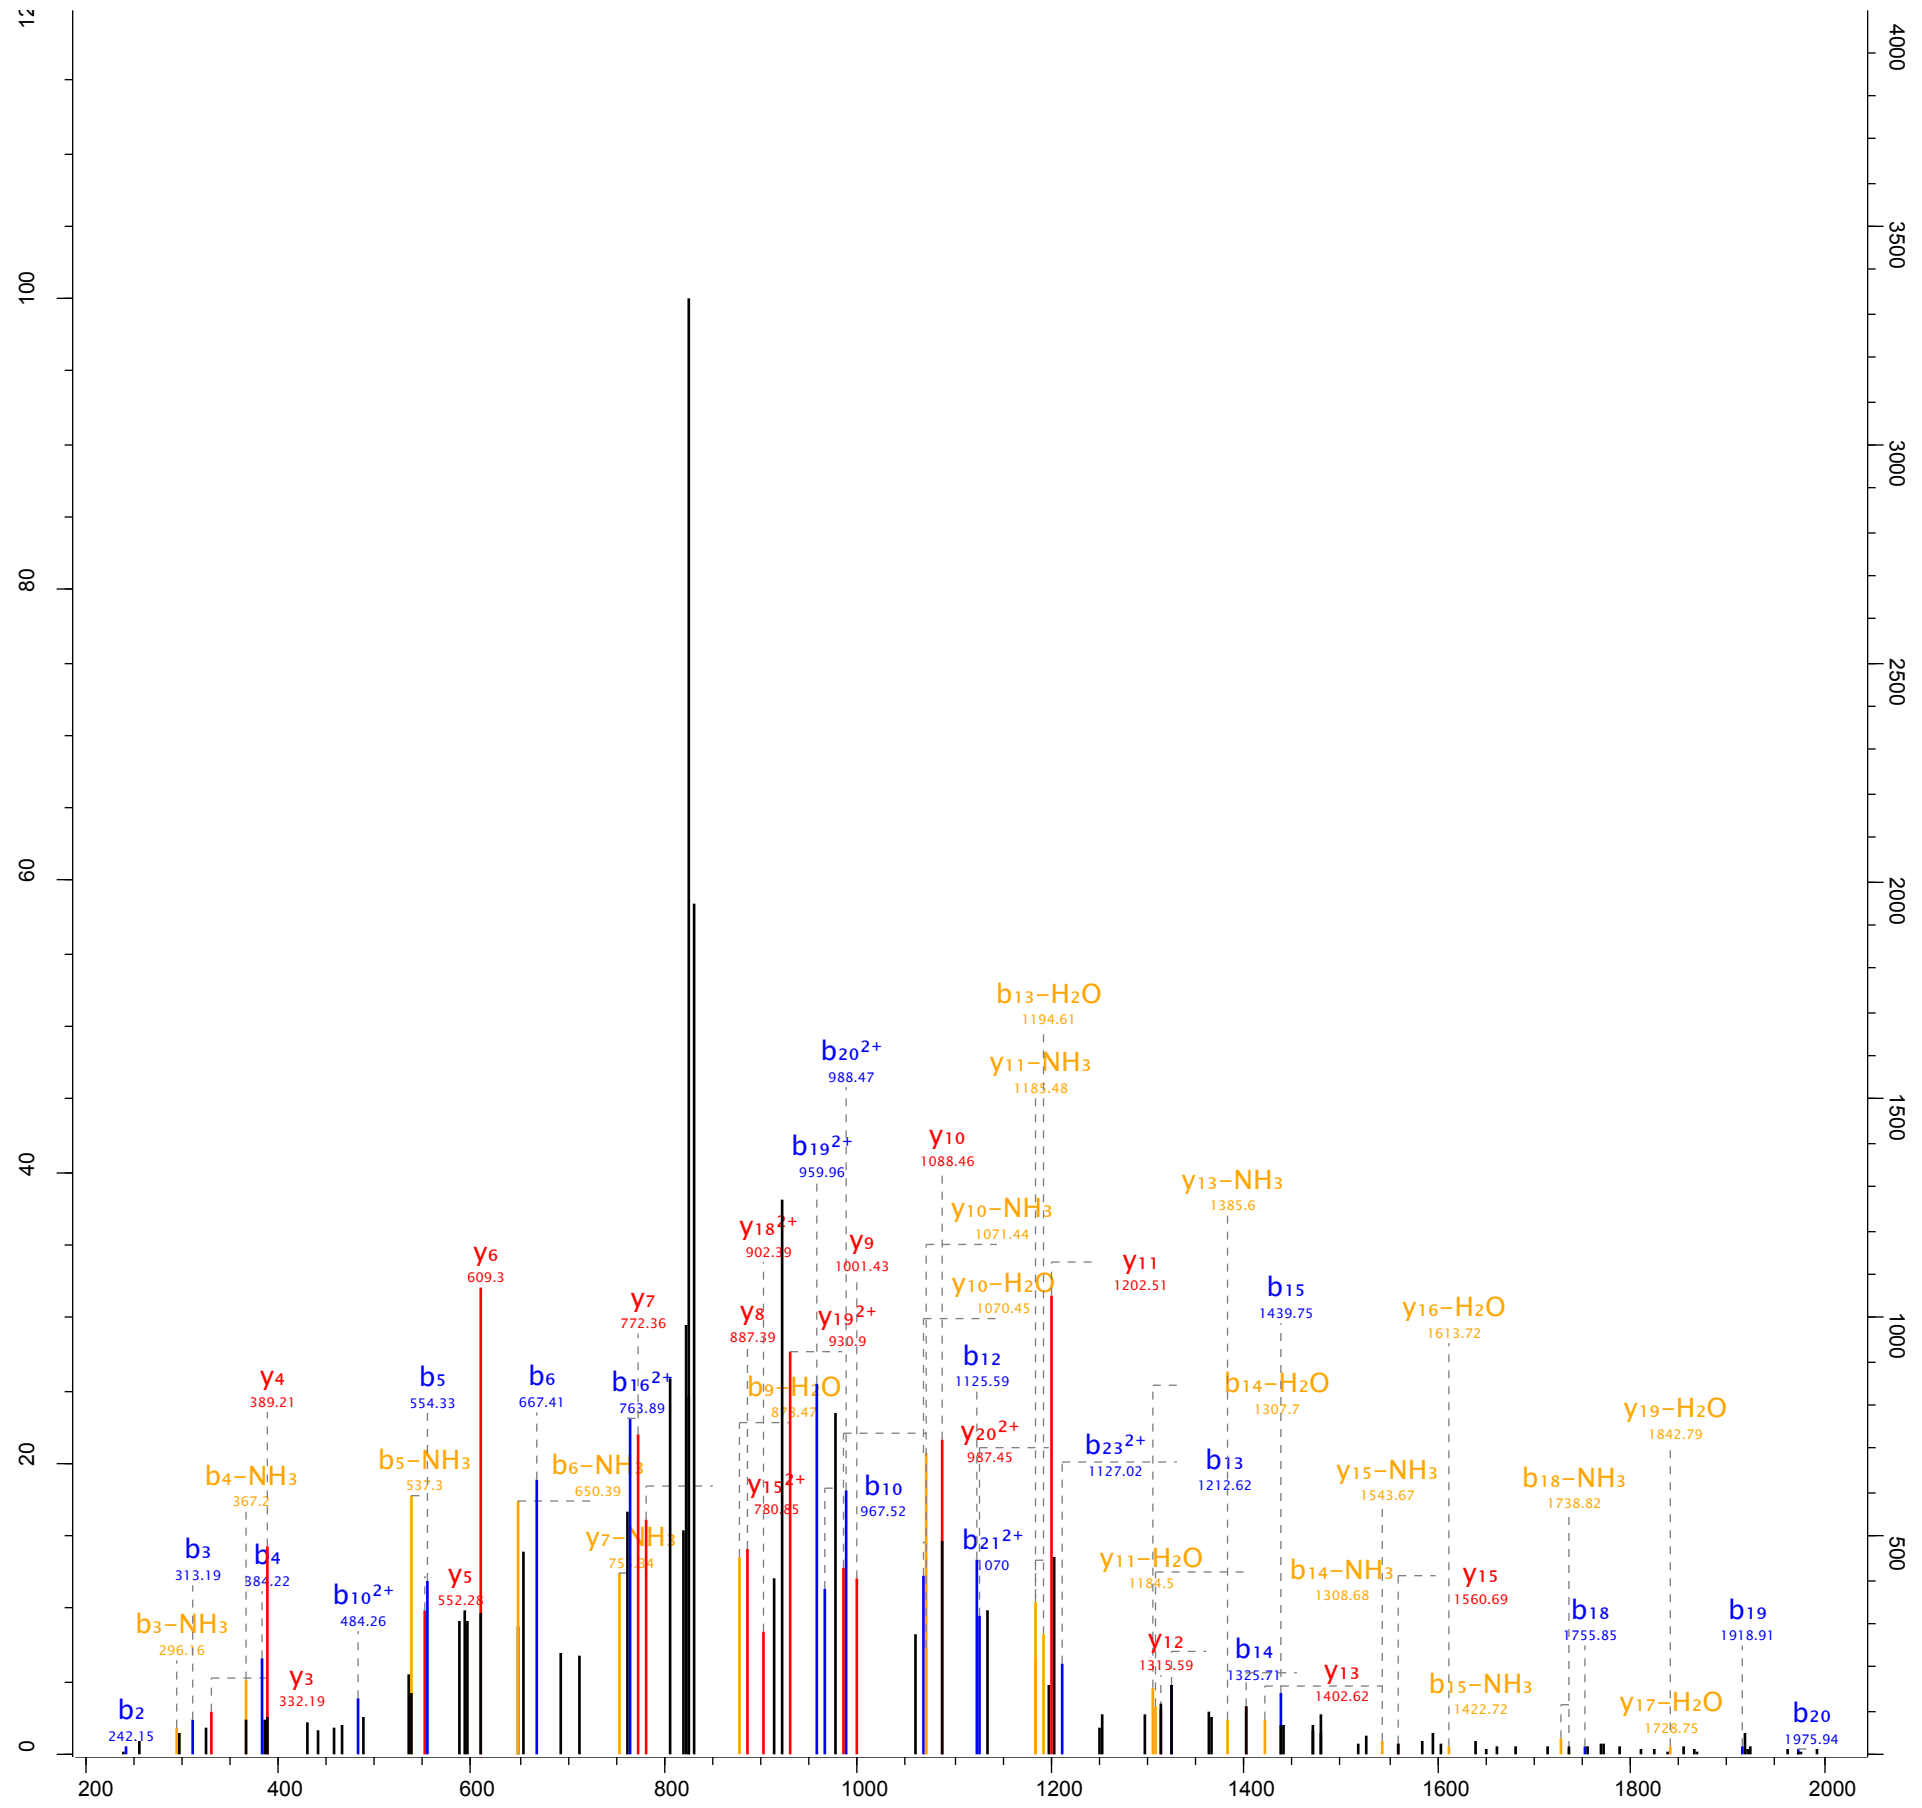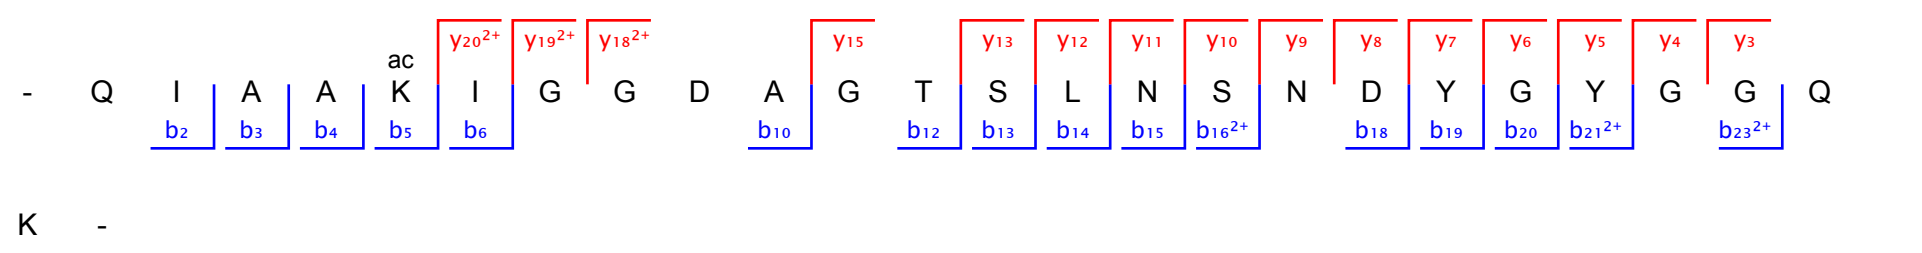

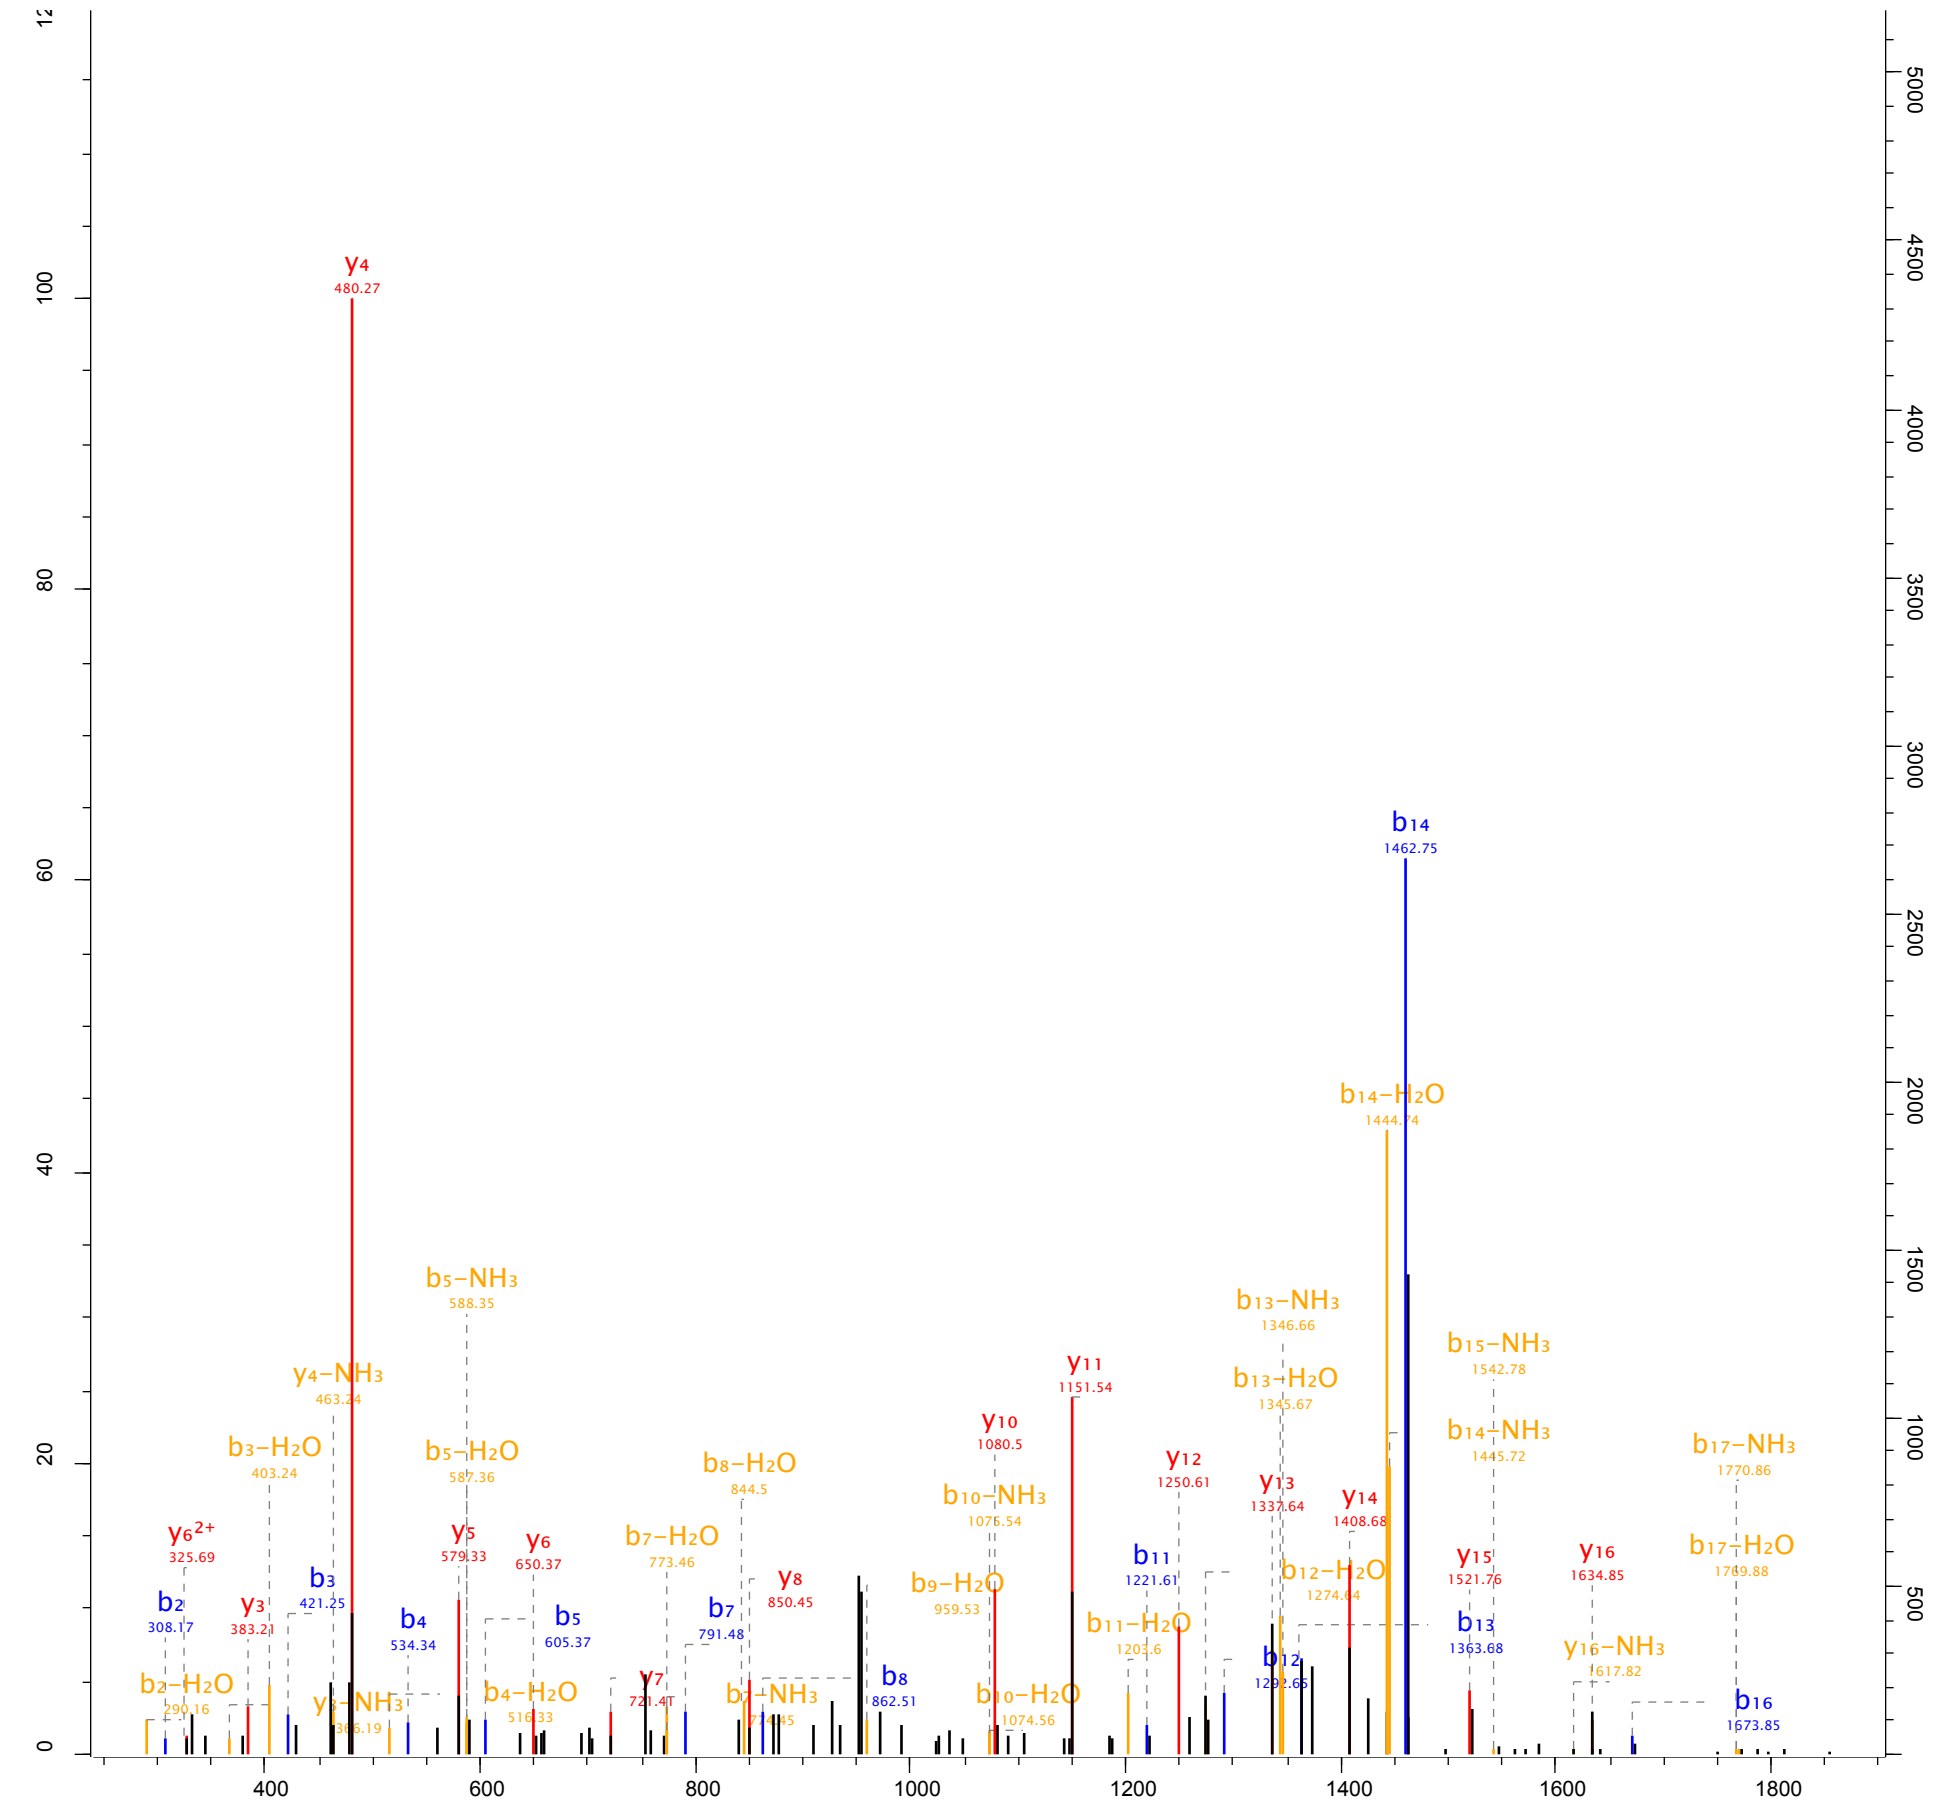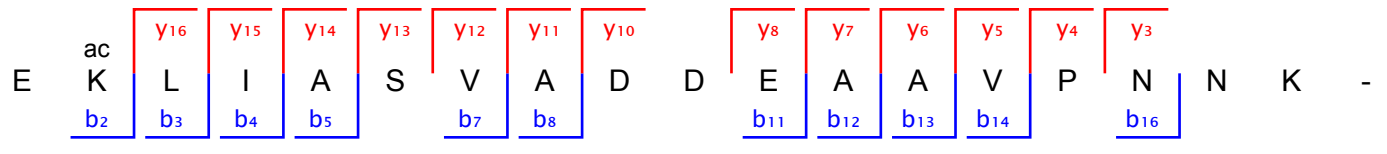

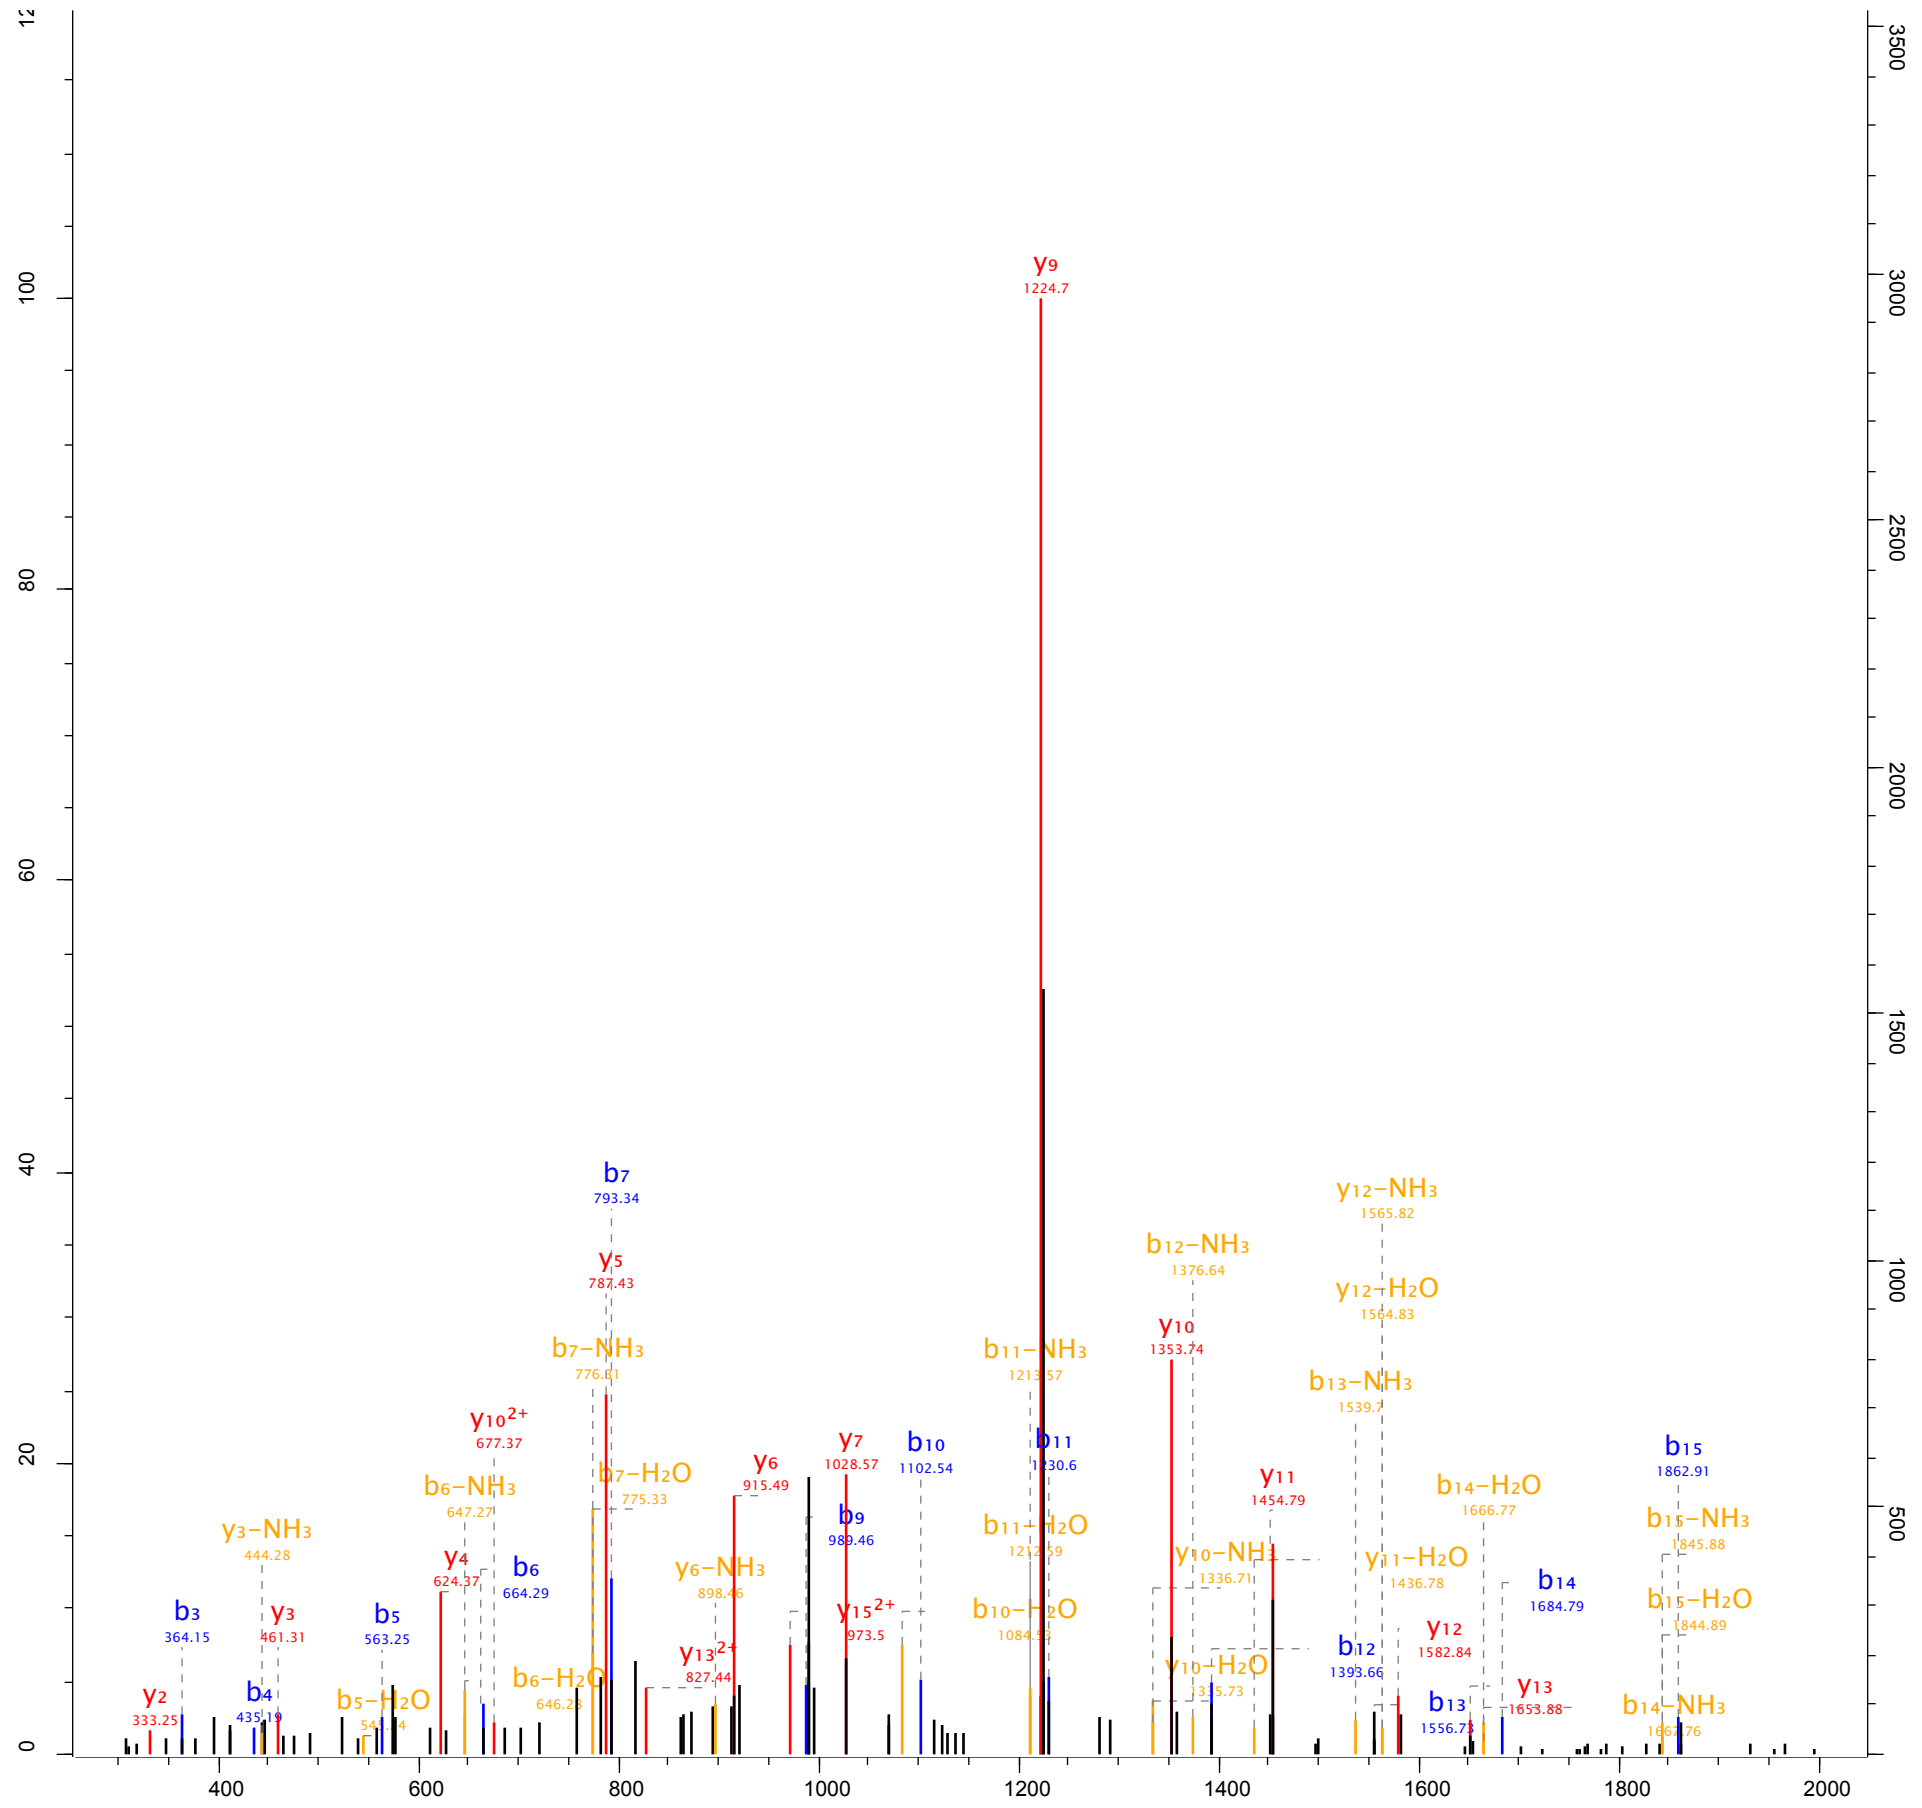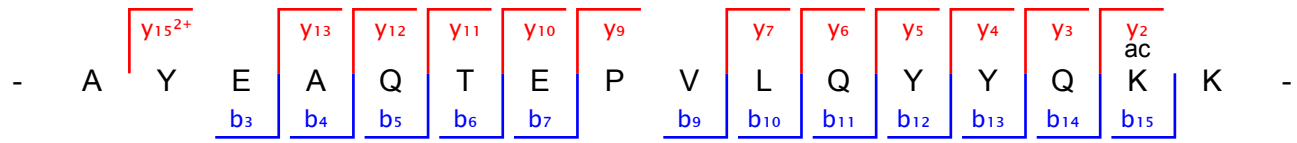

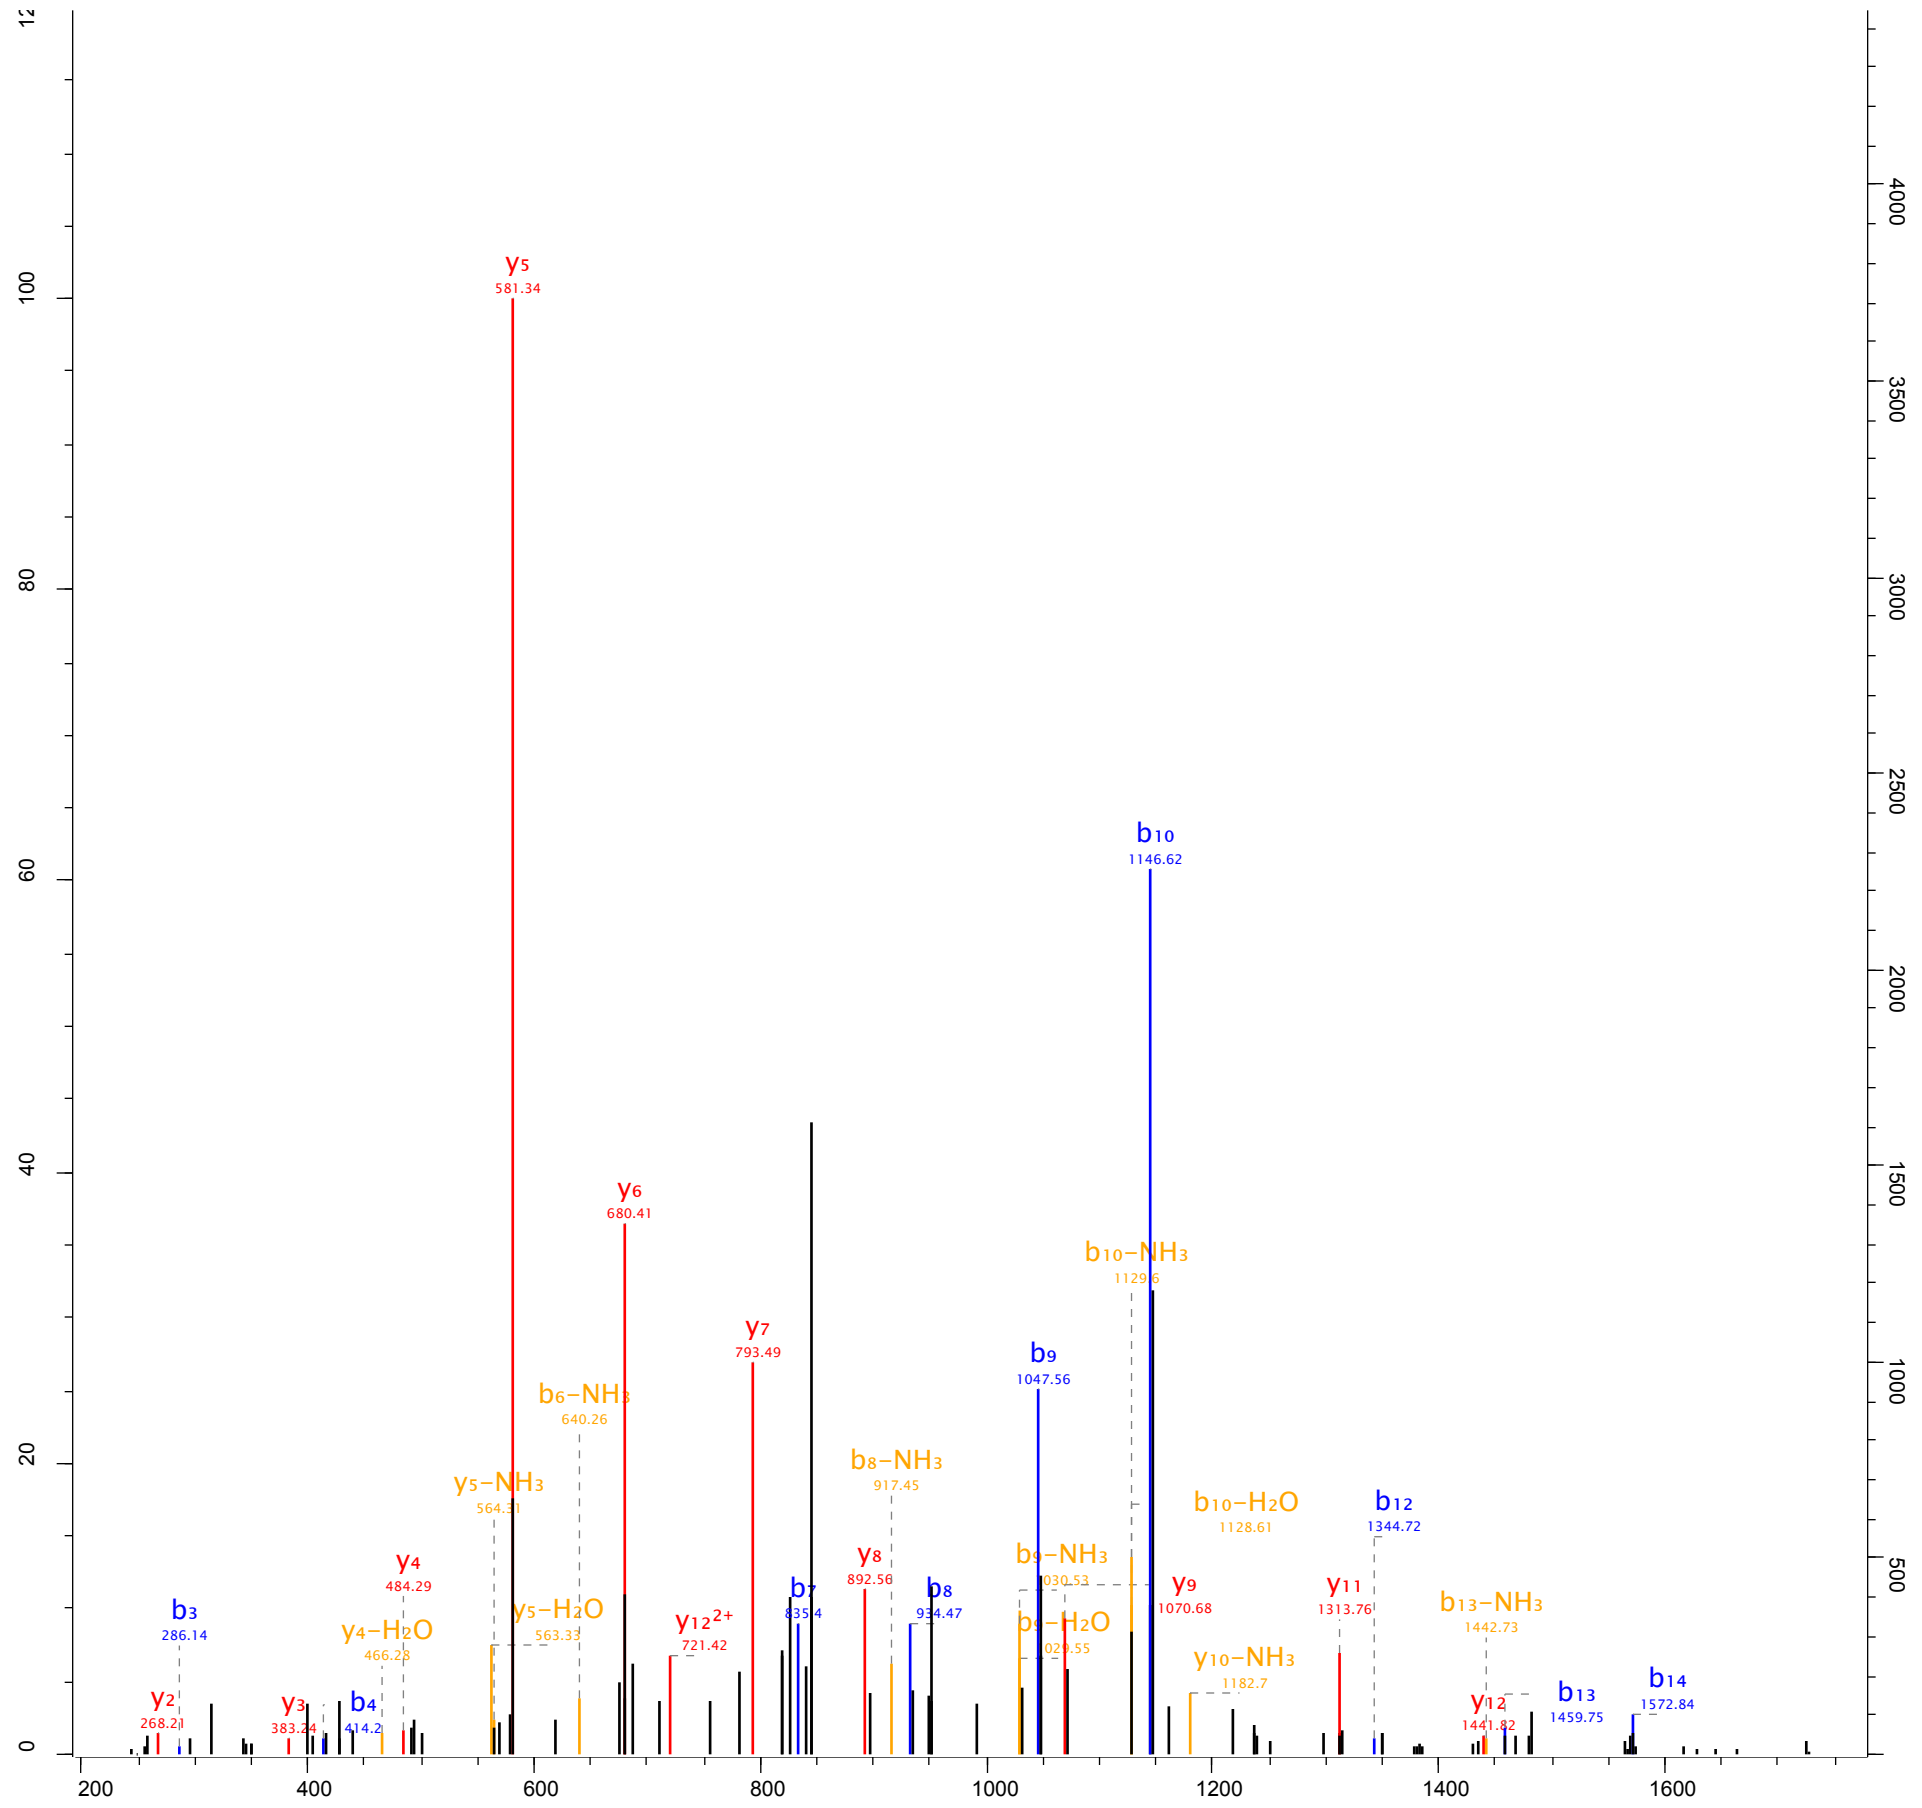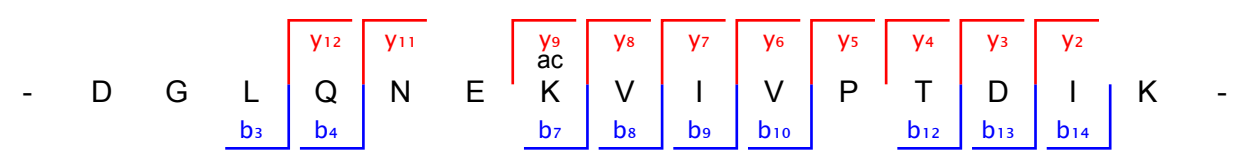

Raw file 050813\_SCW\_II\_29\_16\_3 Scan 18391 Method ITMS; CID Score 86.18 m/z 761.05 Gene names Hibadh

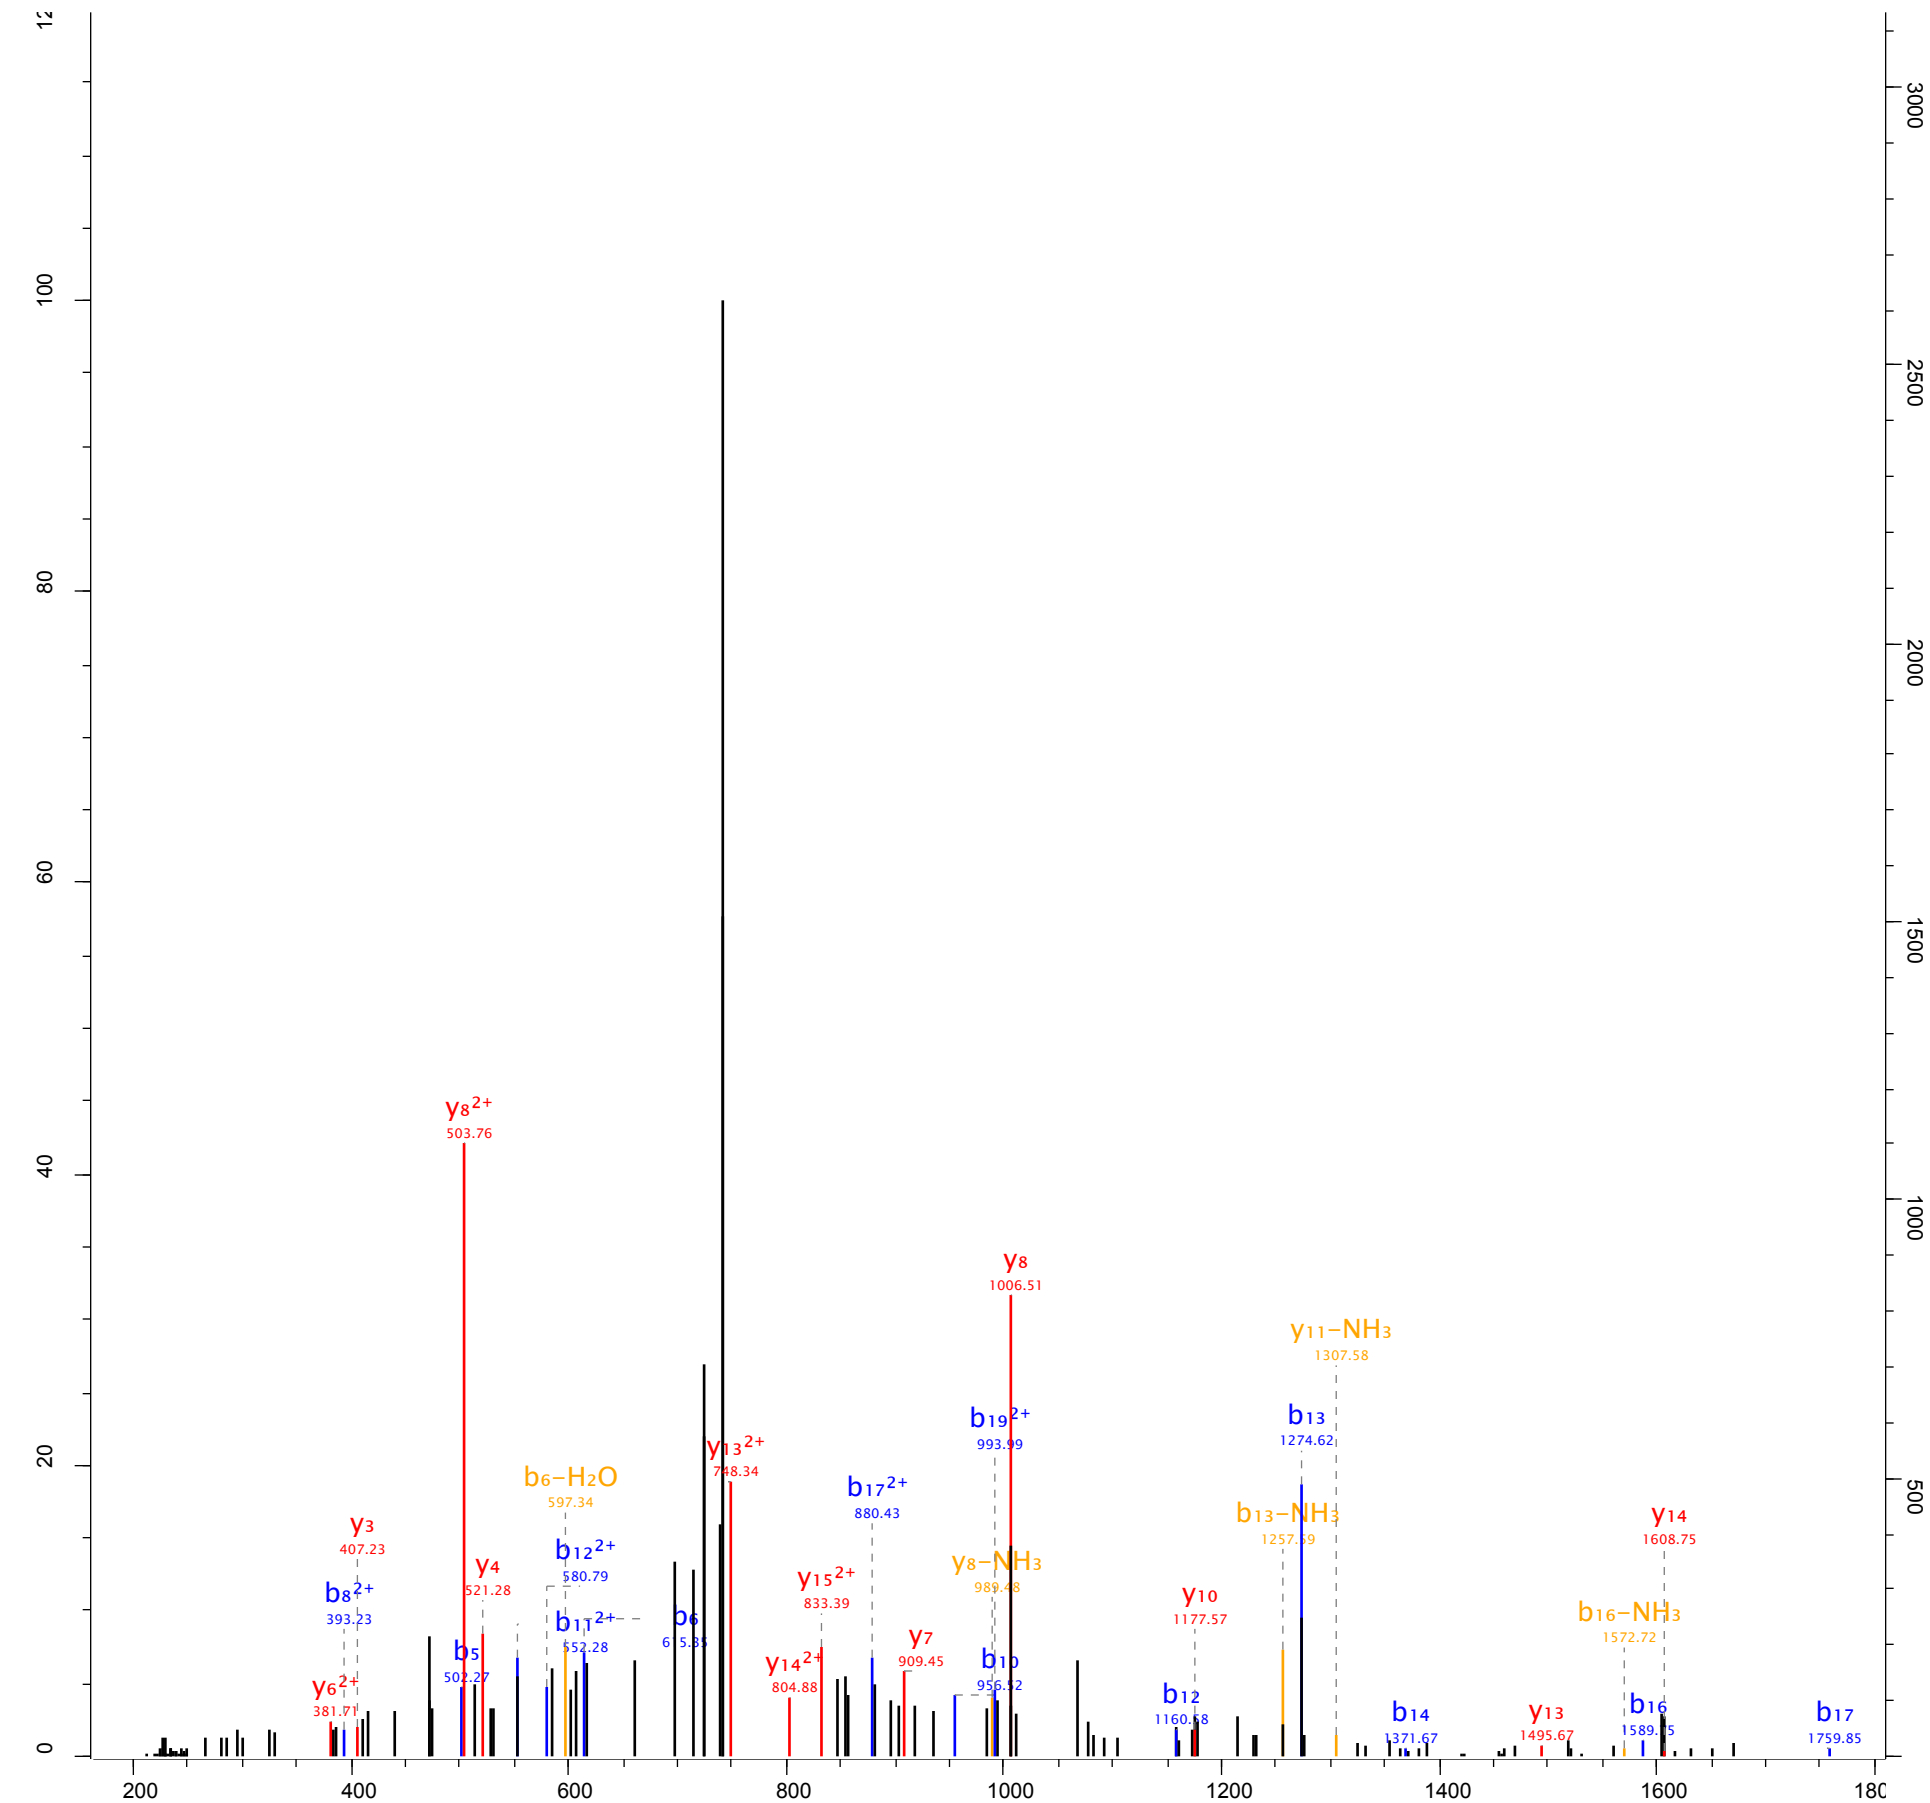

- T P V G F I G L G N M G N P M A K N L M K -

Fragmentation labels below the sequence:

- b5 (under F)
- b6 (under I)
- b8 2+ (under L)
- b10 (under N)
- b11 2+ (under M)
- b12 (under G)
- b13 (under N)
- b14 (under P)
- b16 (under A)
- b17 (under K)
- b19 2+ (under L)

Fragmentation labels above the sequence:

- y15 2+ (above G)
- y14 (above L)
- y13 (above G)
- ox (above M)
- y10 (above G)
- y8 (above P)
- y7 (above M)
- ox (above M)
- y6 2+ (above A)
- ac (above K)
- y4 (above N)
- y3 (above L)
- ox (above M)



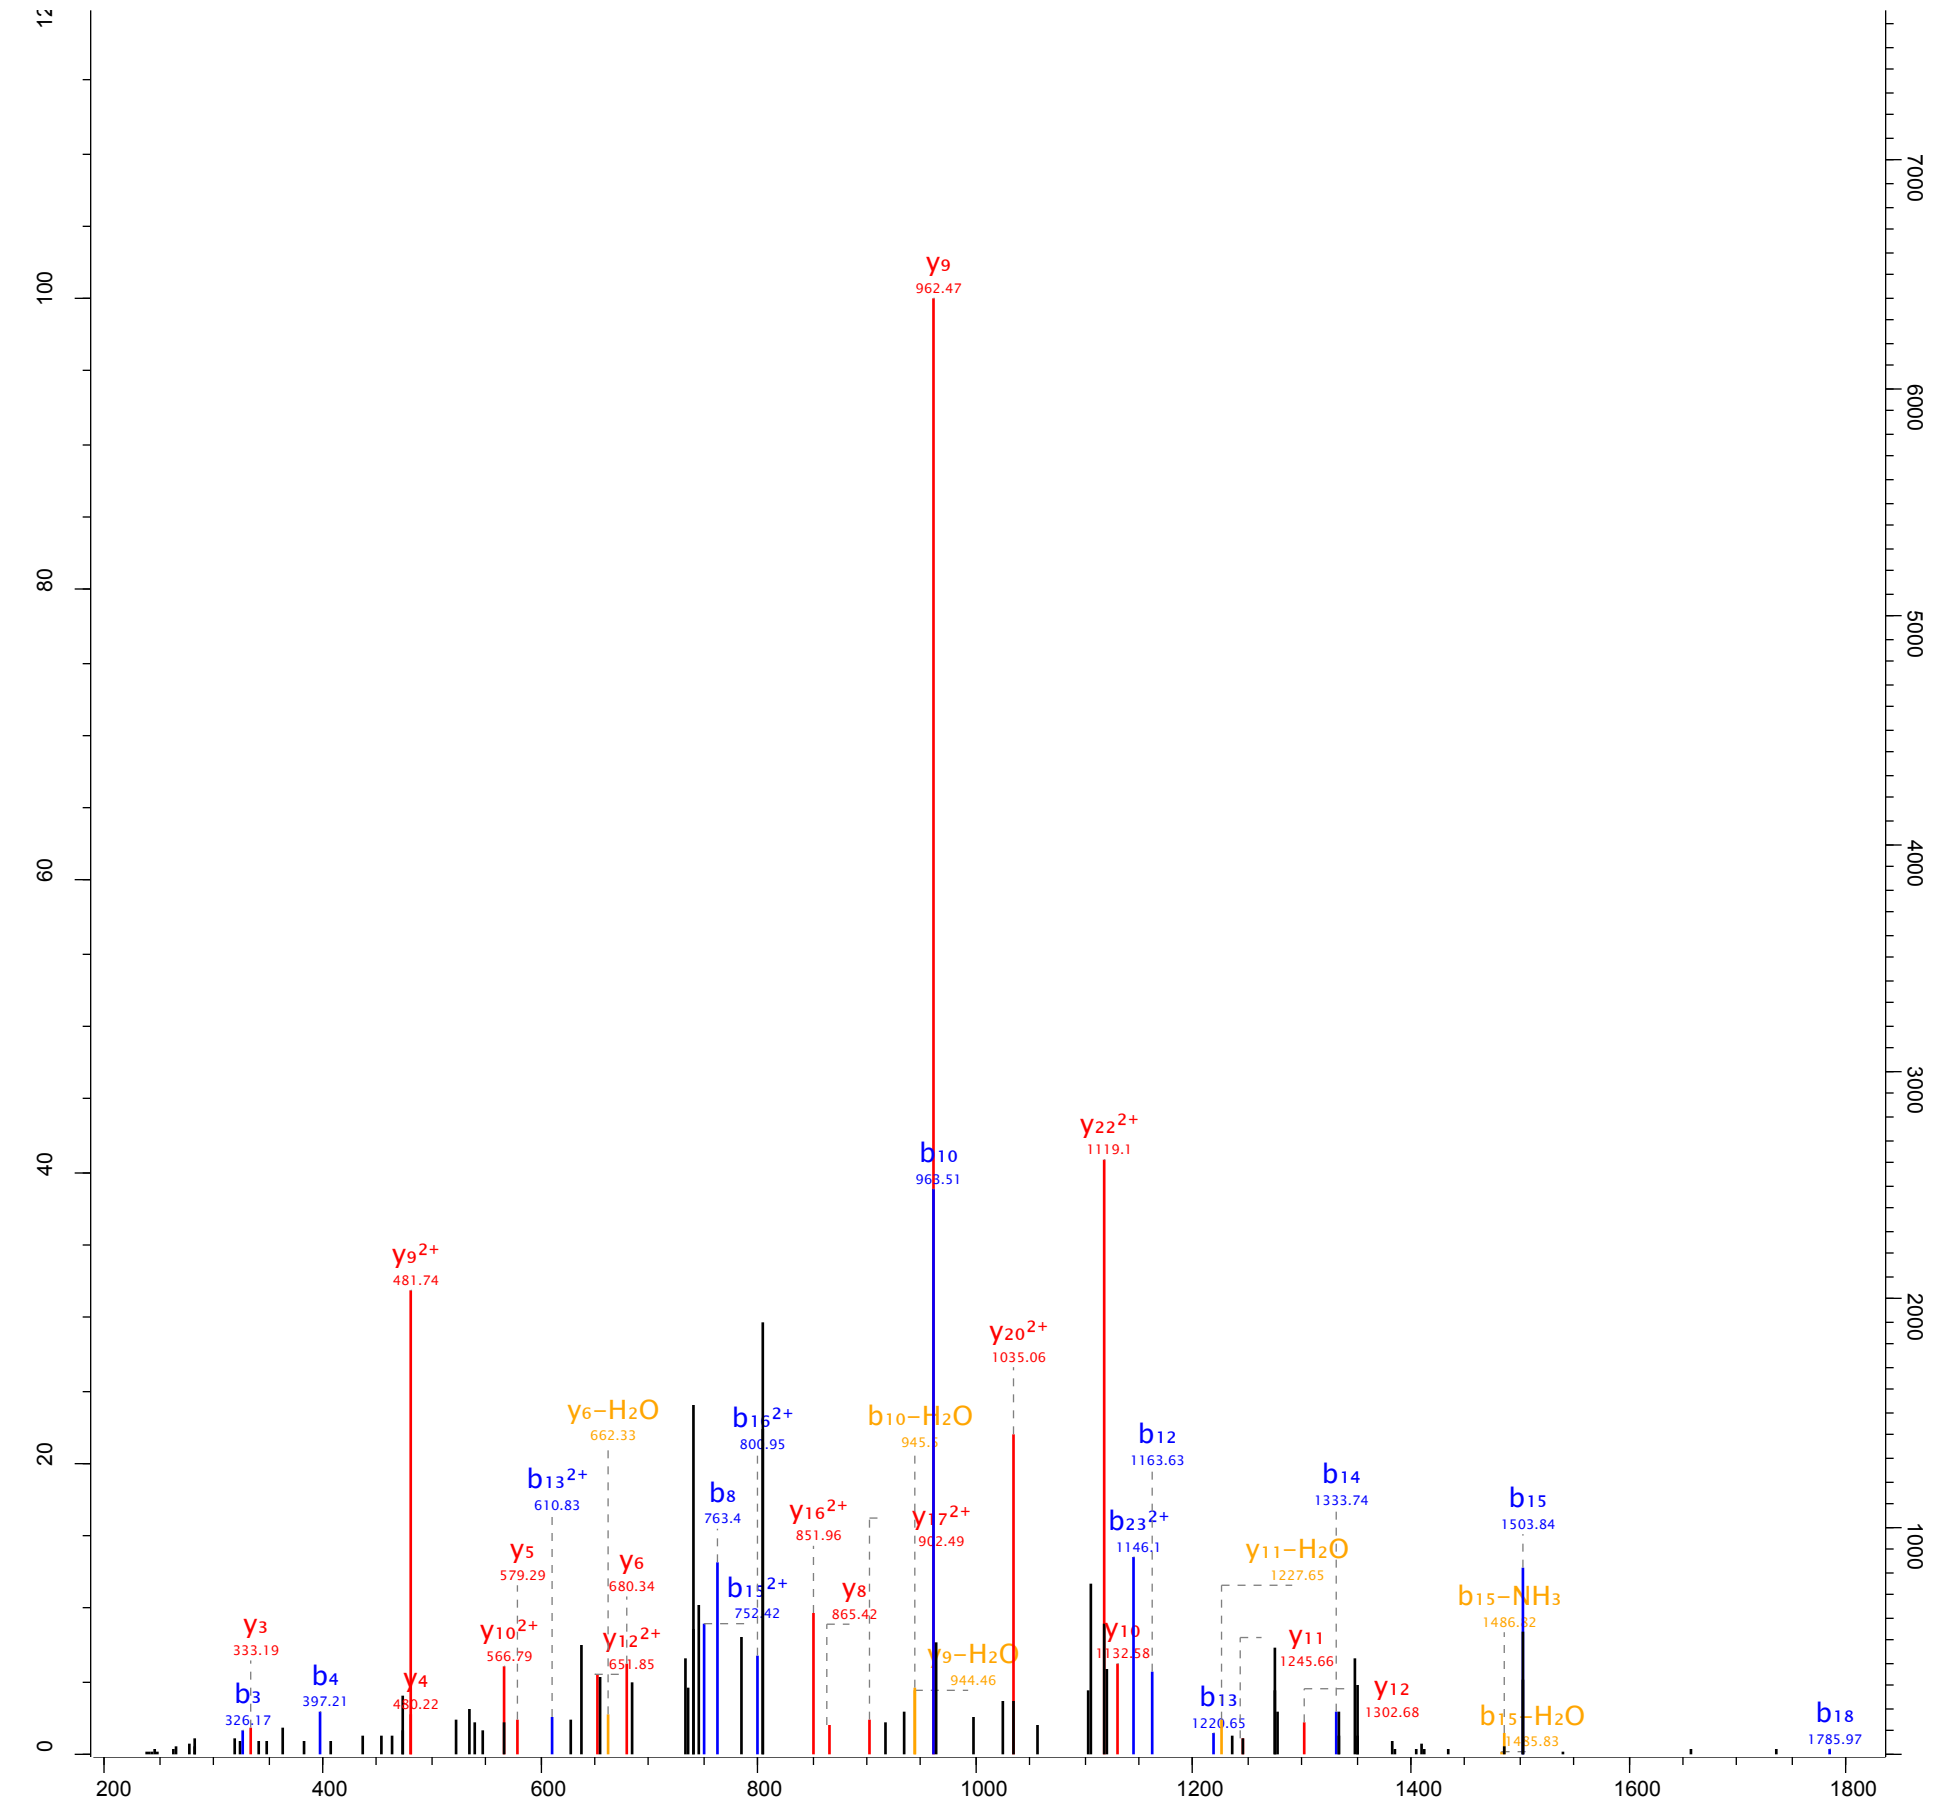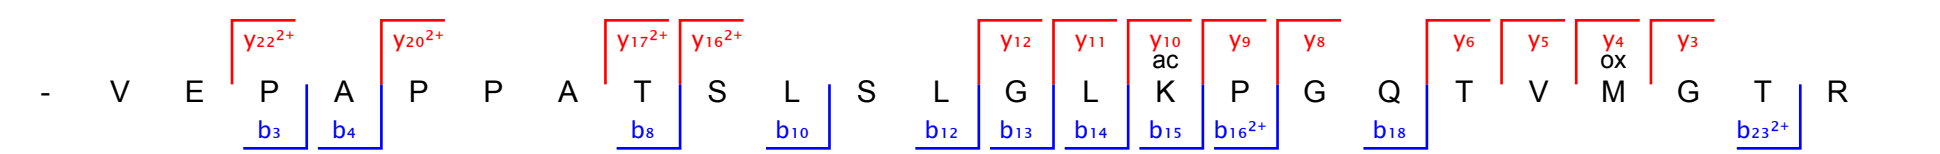

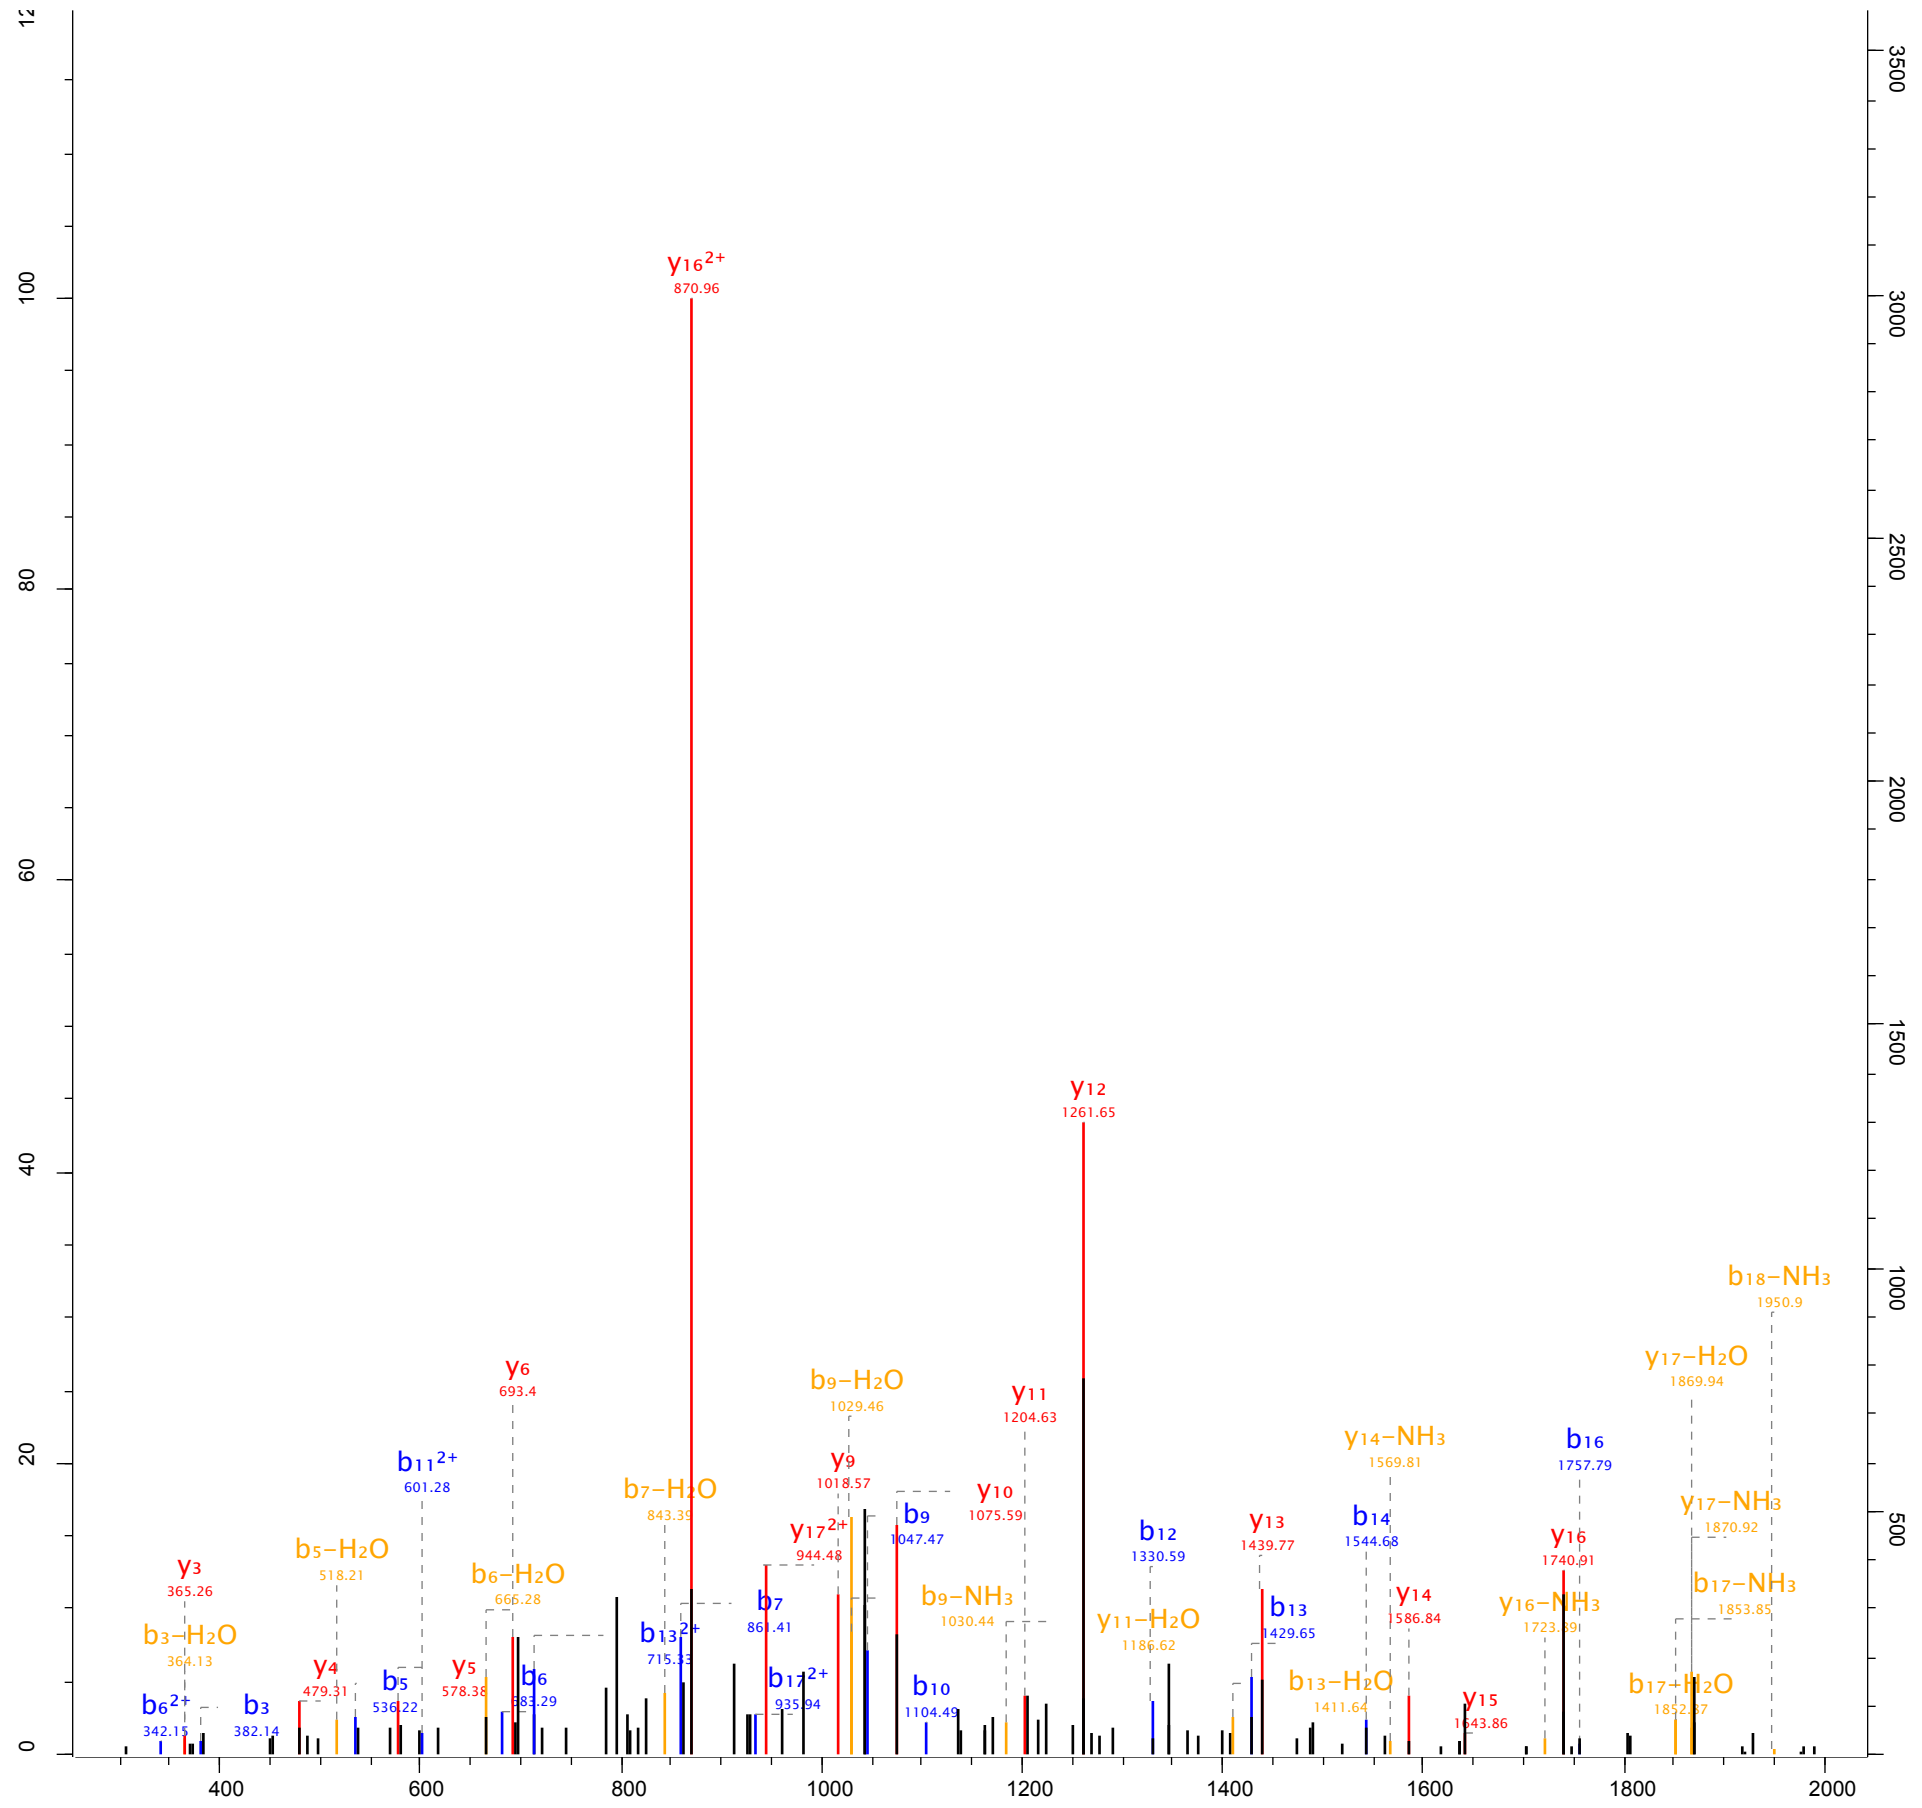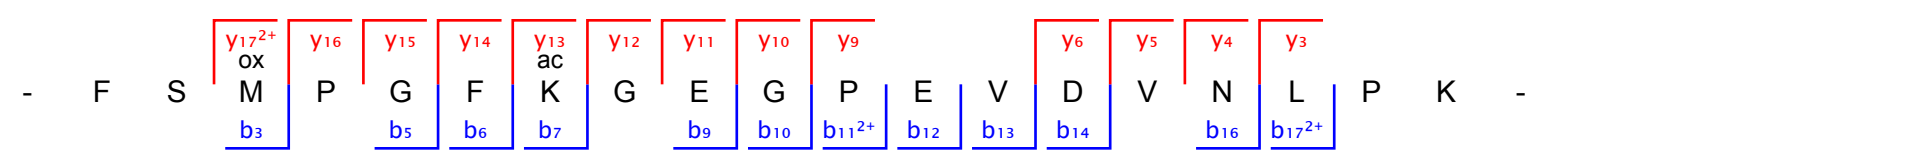

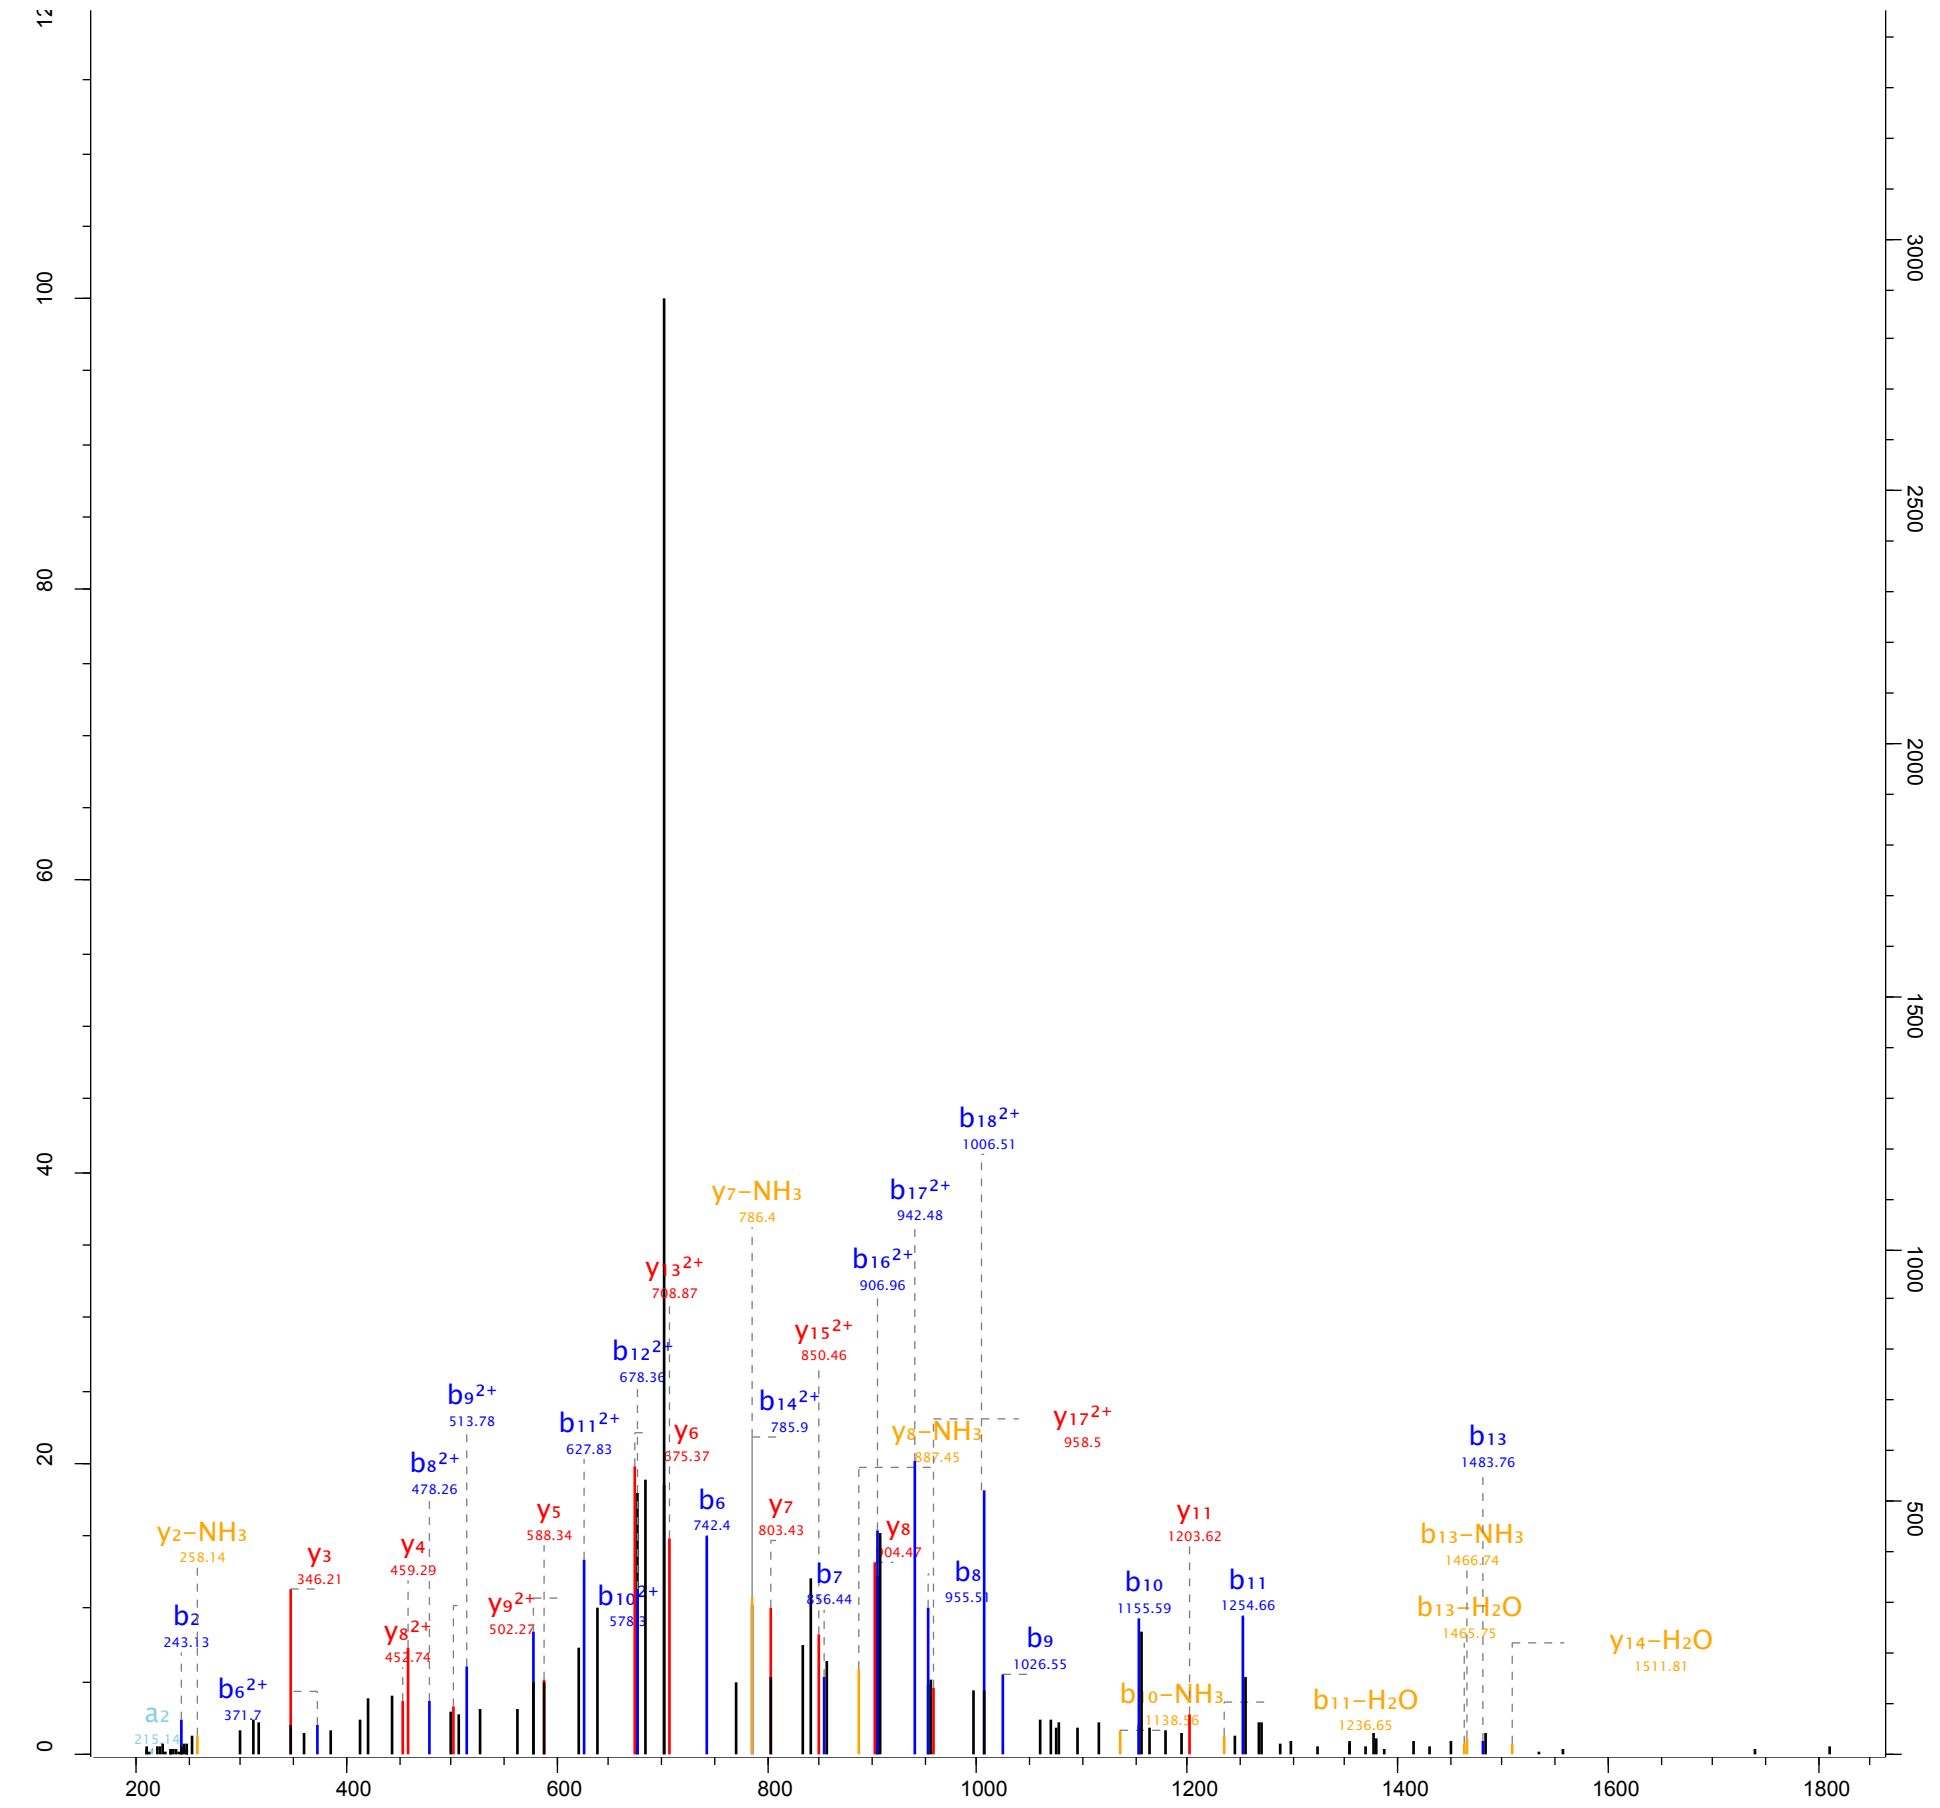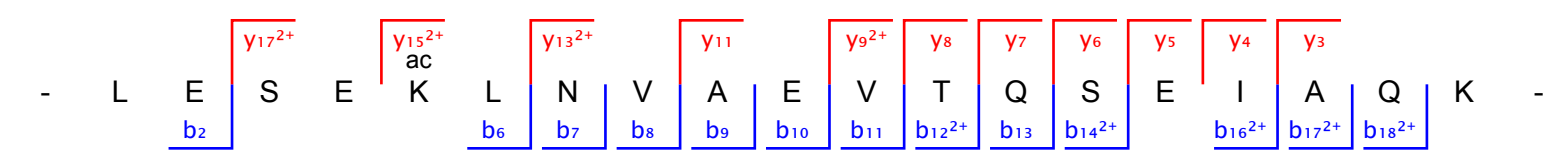

Raw file: 050813\_SCW\_II\_29\_16\_3  
 Scan: 19036 Method: ITMS; CID Score: 256.4 m/z: 1163.55 Gene names: Cnn3

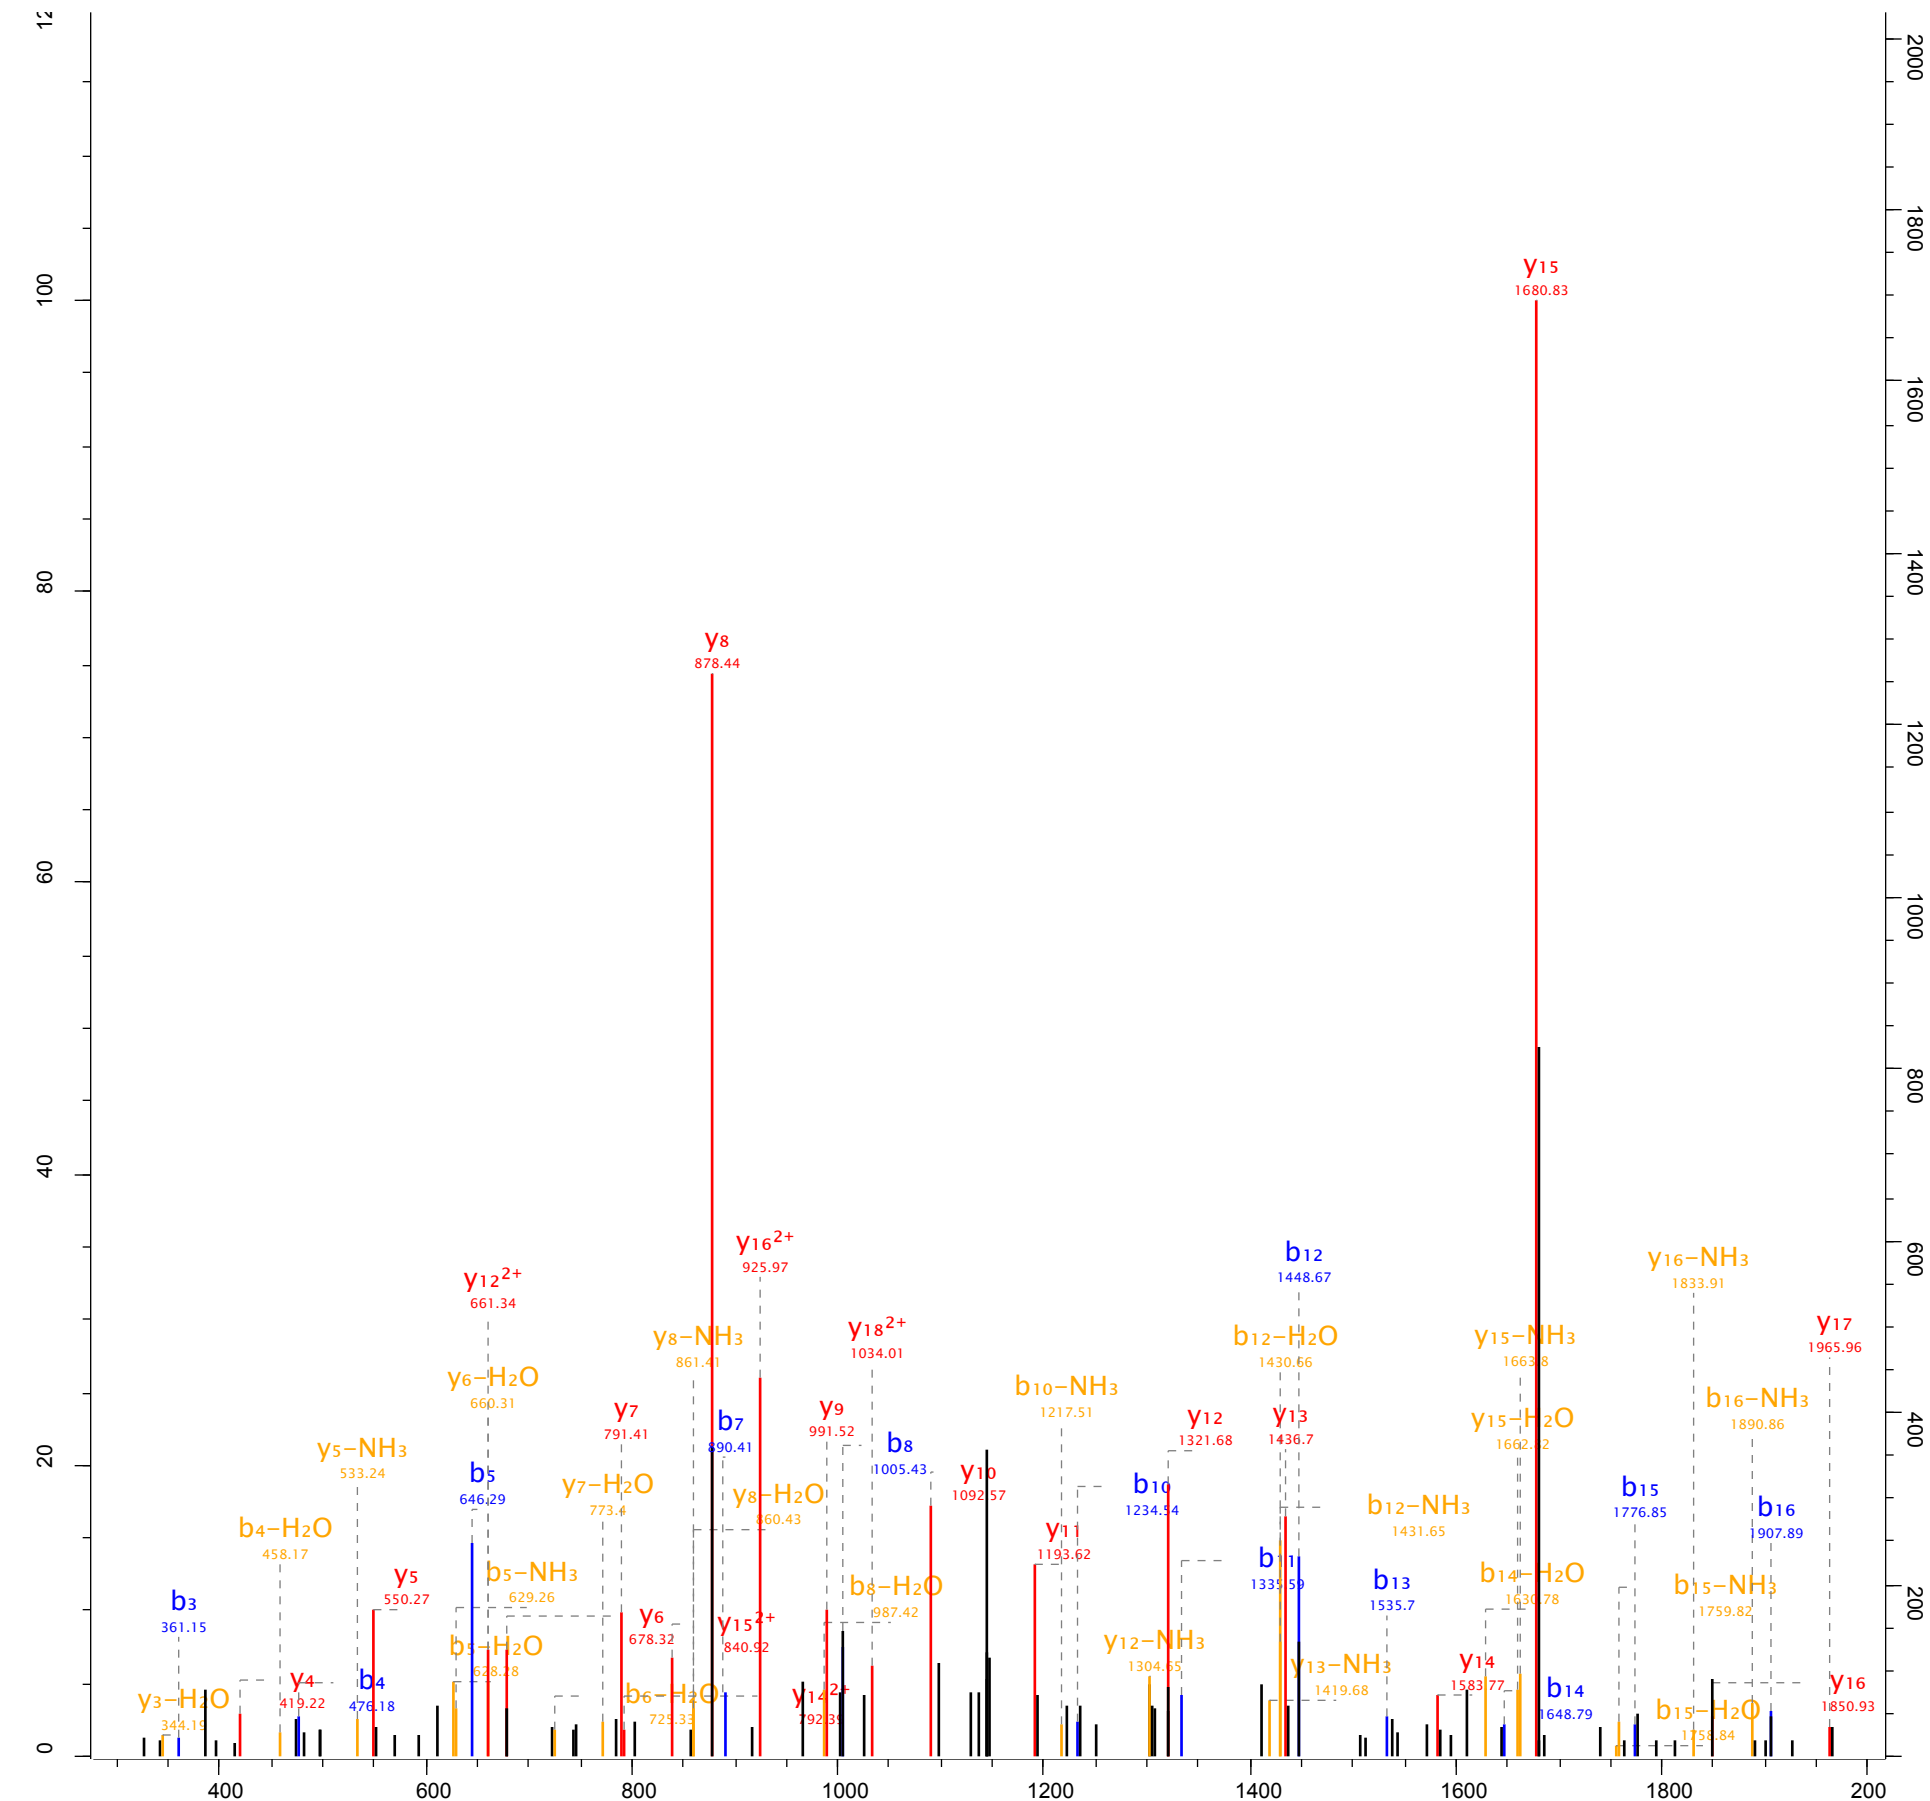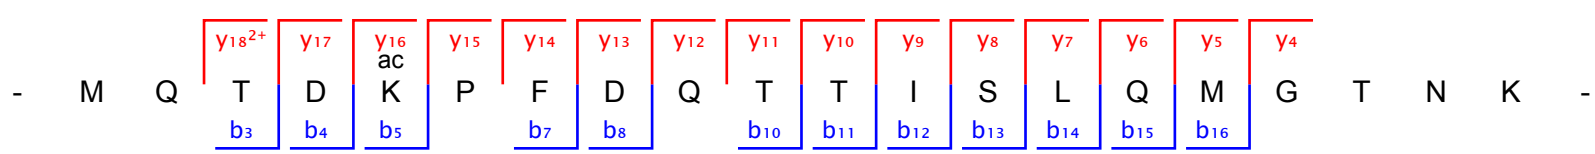

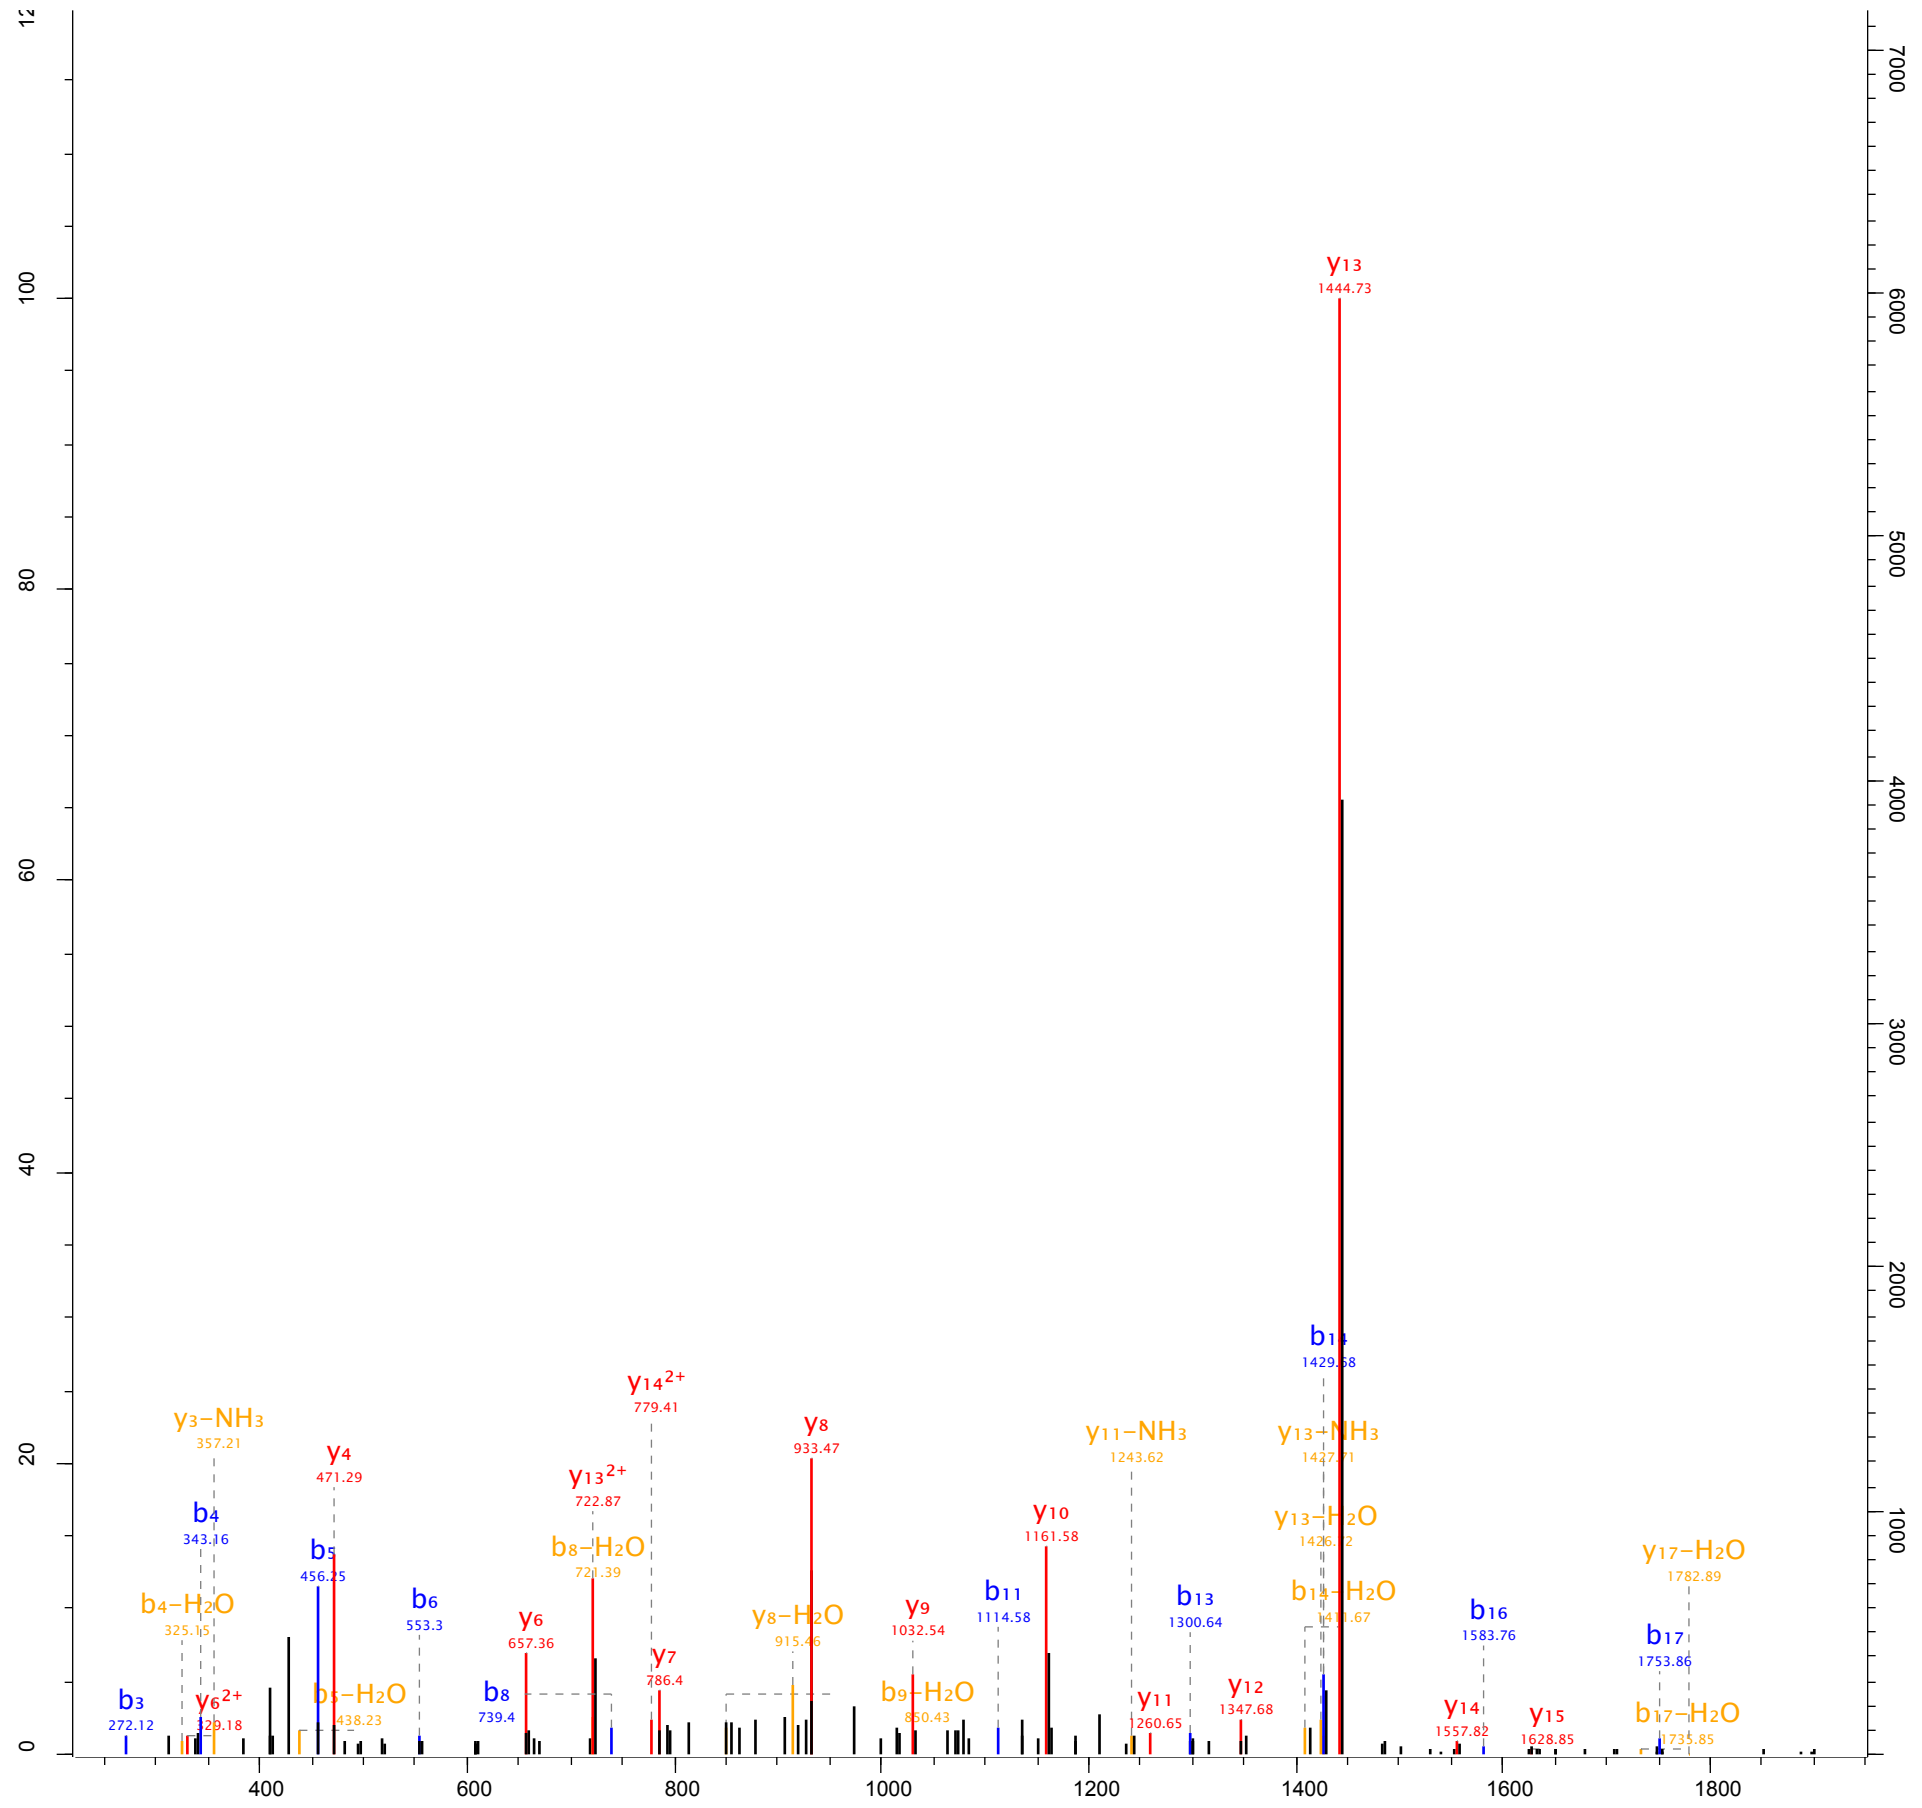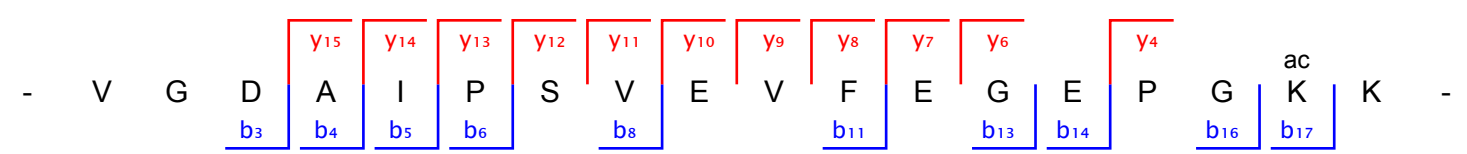

050813\_SCW\_II\_29\_16\_3

19377

ITMS; CID

141.22

974.52

Naca

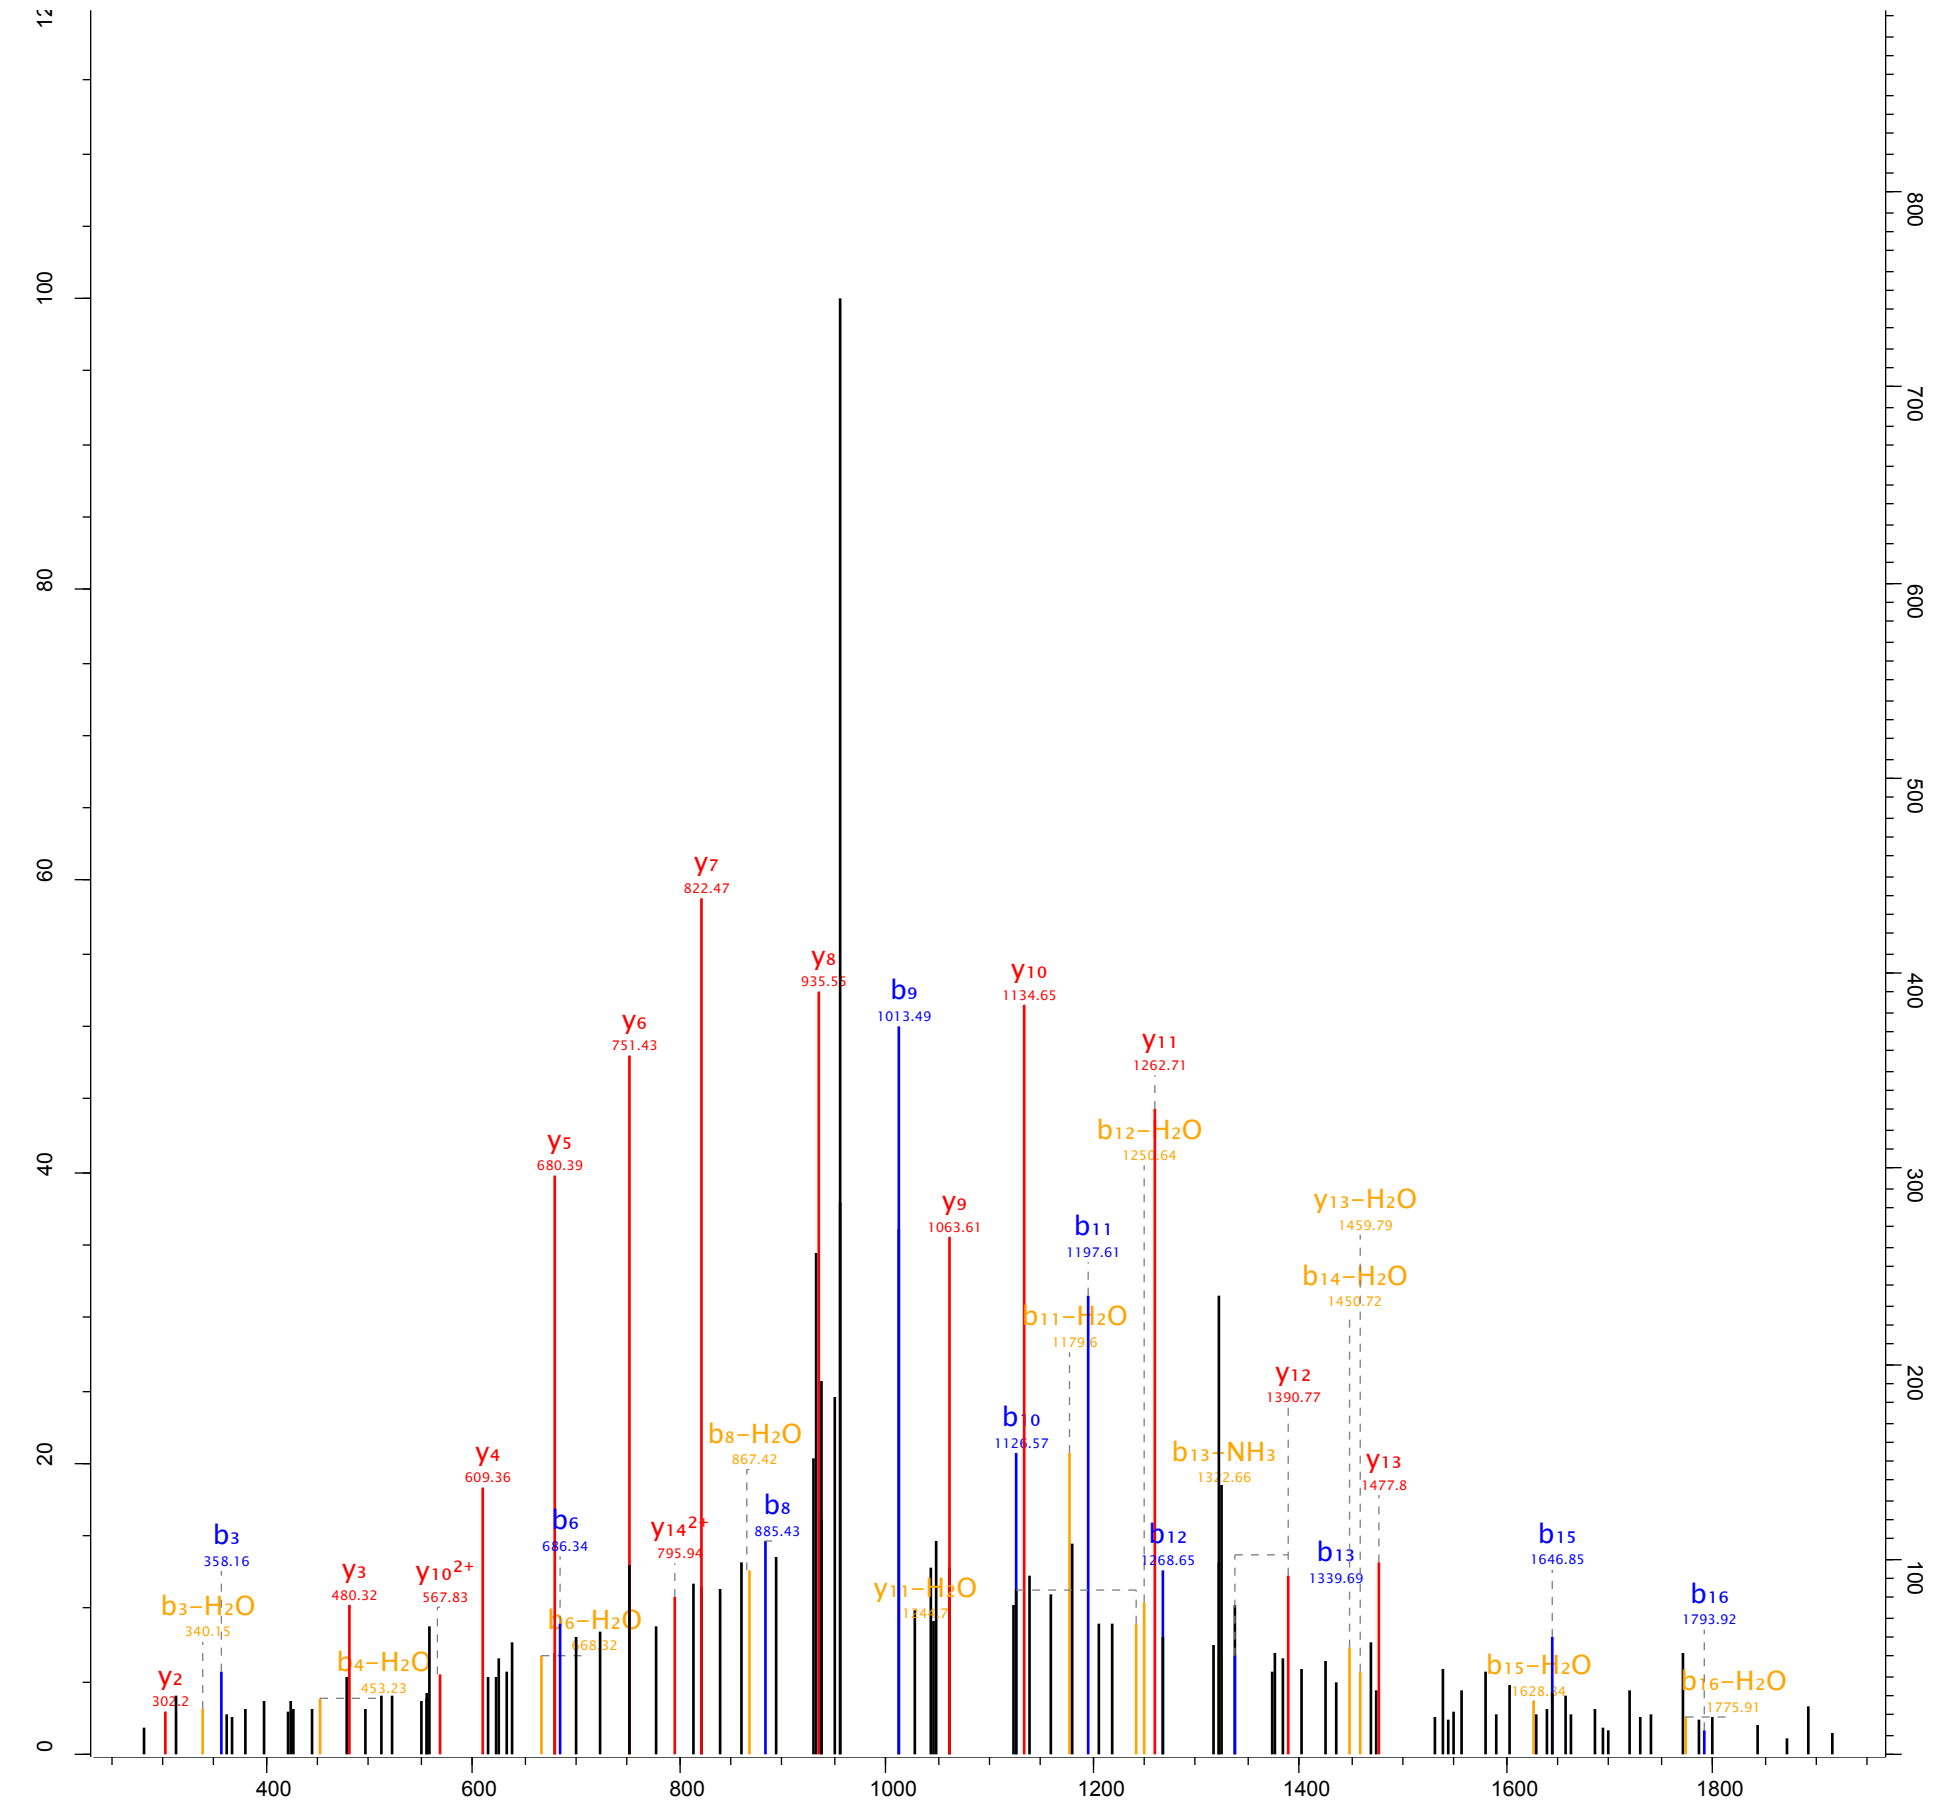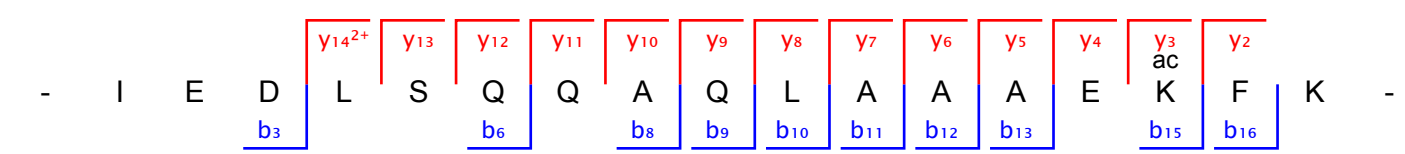

Raw file: 050813\_SCW\_II\_29\_16\_3  
 Scan: 19465 Method: ITMS; CID Score: 242.67 m/z: 1058.5 Gene names: Rnps1;Gm9825

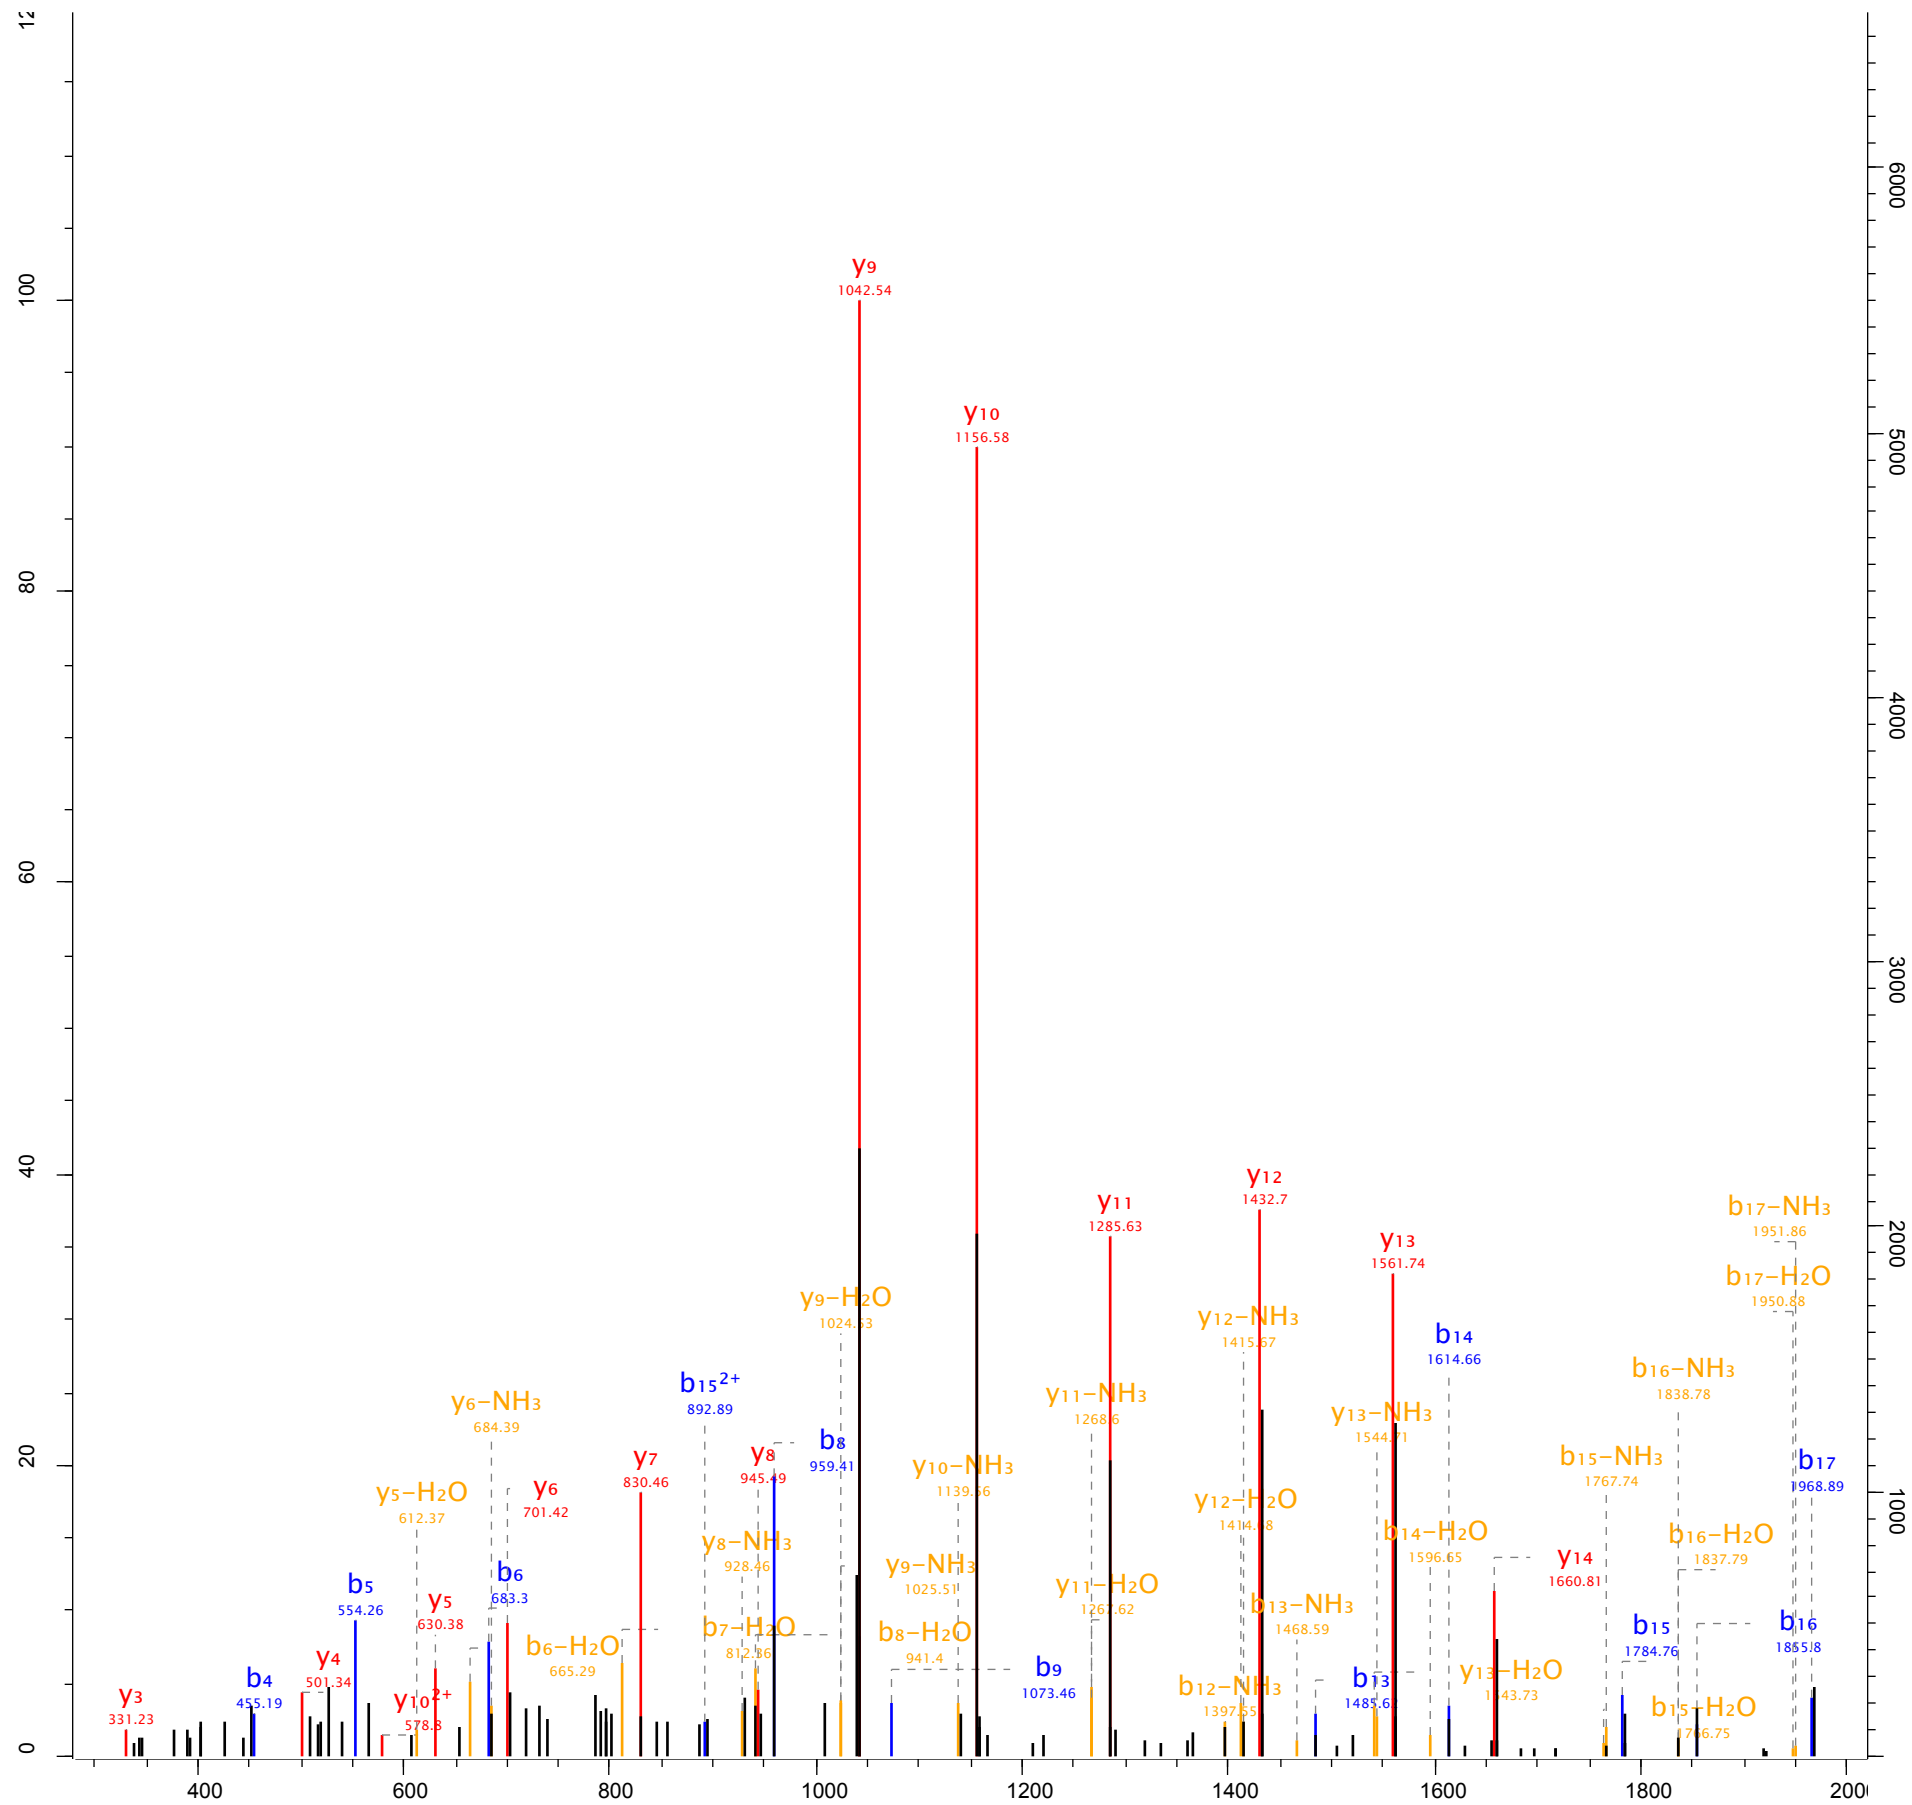

- G Y A Y V E F E N P D E A E K A L K -

Fragmentation mapping (b and y ions):

- b4: Y
- b5: V
- b6: E
- b8: E
- b9: N
- b13: A
- b14: E
- b15: K
- b16: A
- b17: L

Fragmentation mapping (y ions):

- y3: A
- y4: K
- y5: E
- y6: A
- y7: E
- y8: D
- y9: P
- y10: N
- y11: E
- y12: F
- y13: E
- y14: V

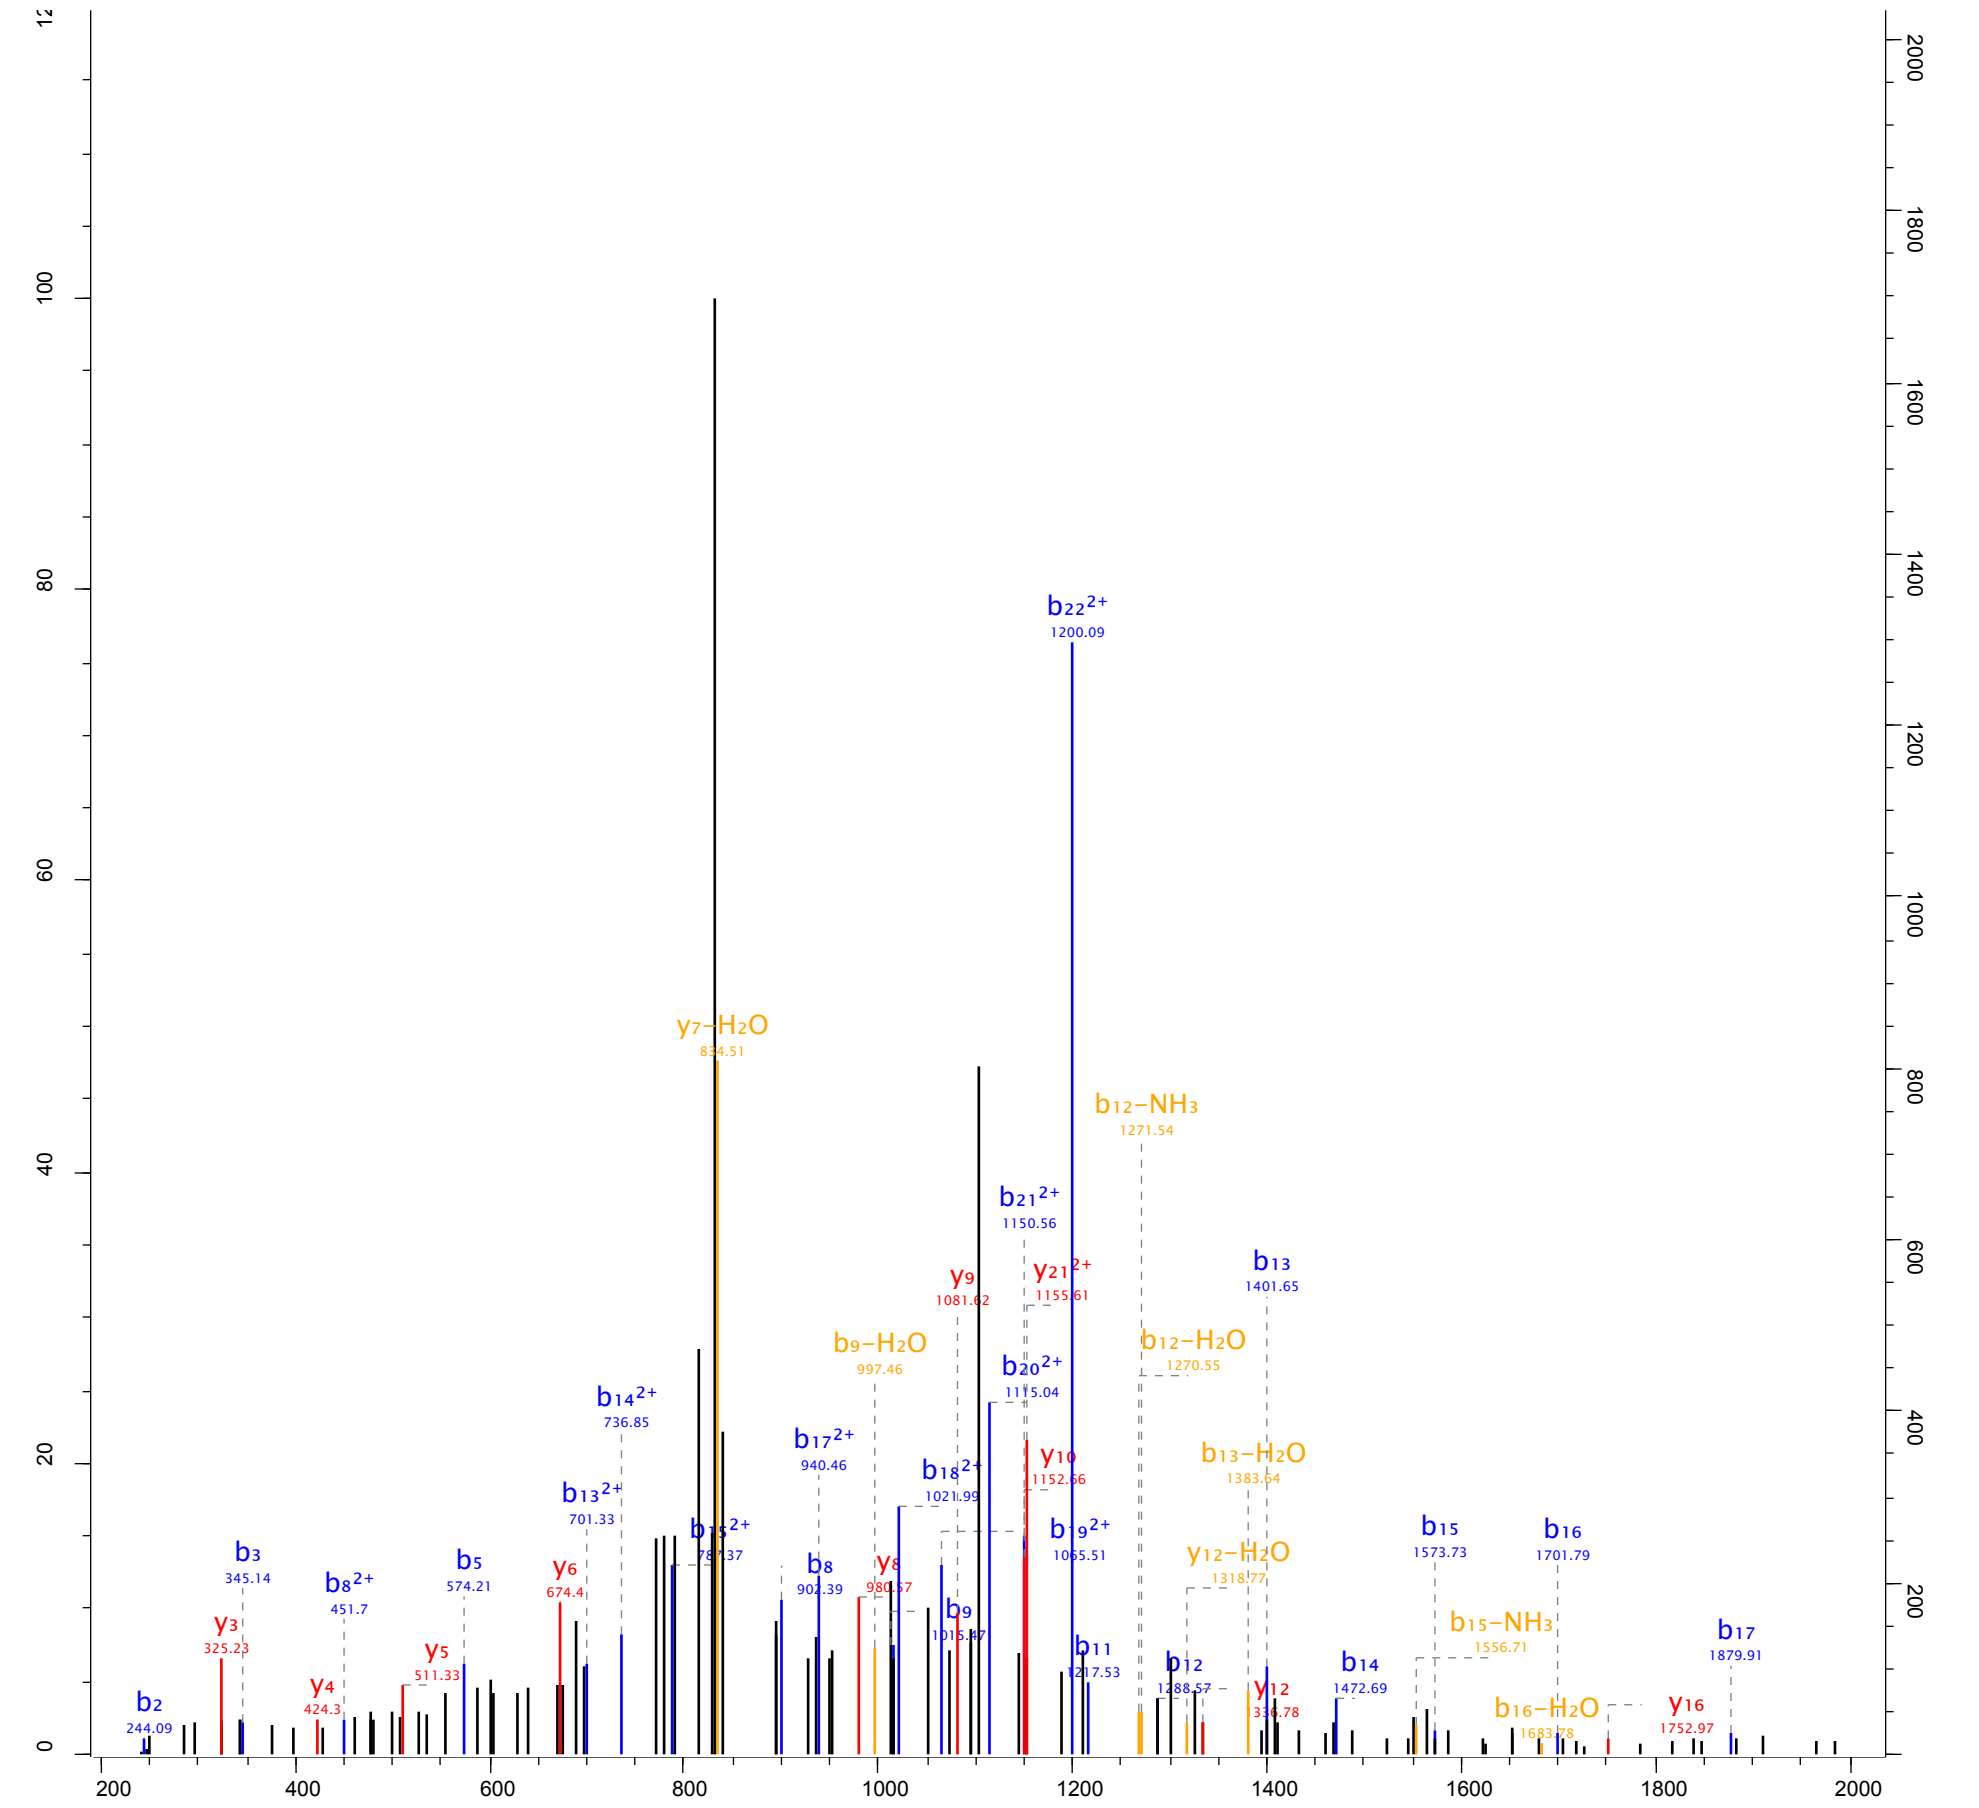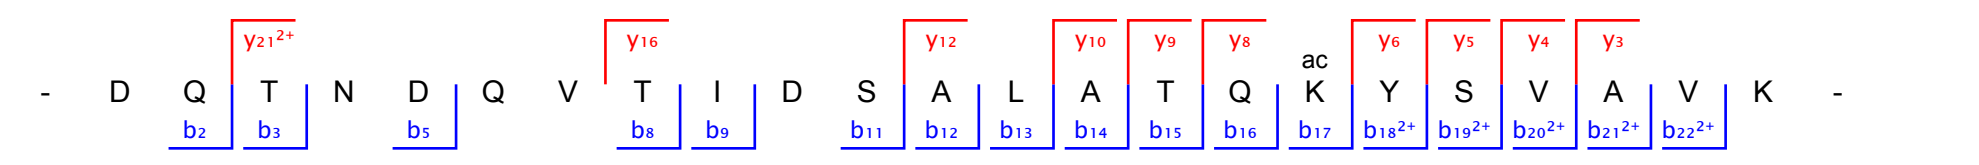



050813\_SCW\_II\_29\_16\_3

19617 ITMS; CID 225.17 914.5 Bcl9l

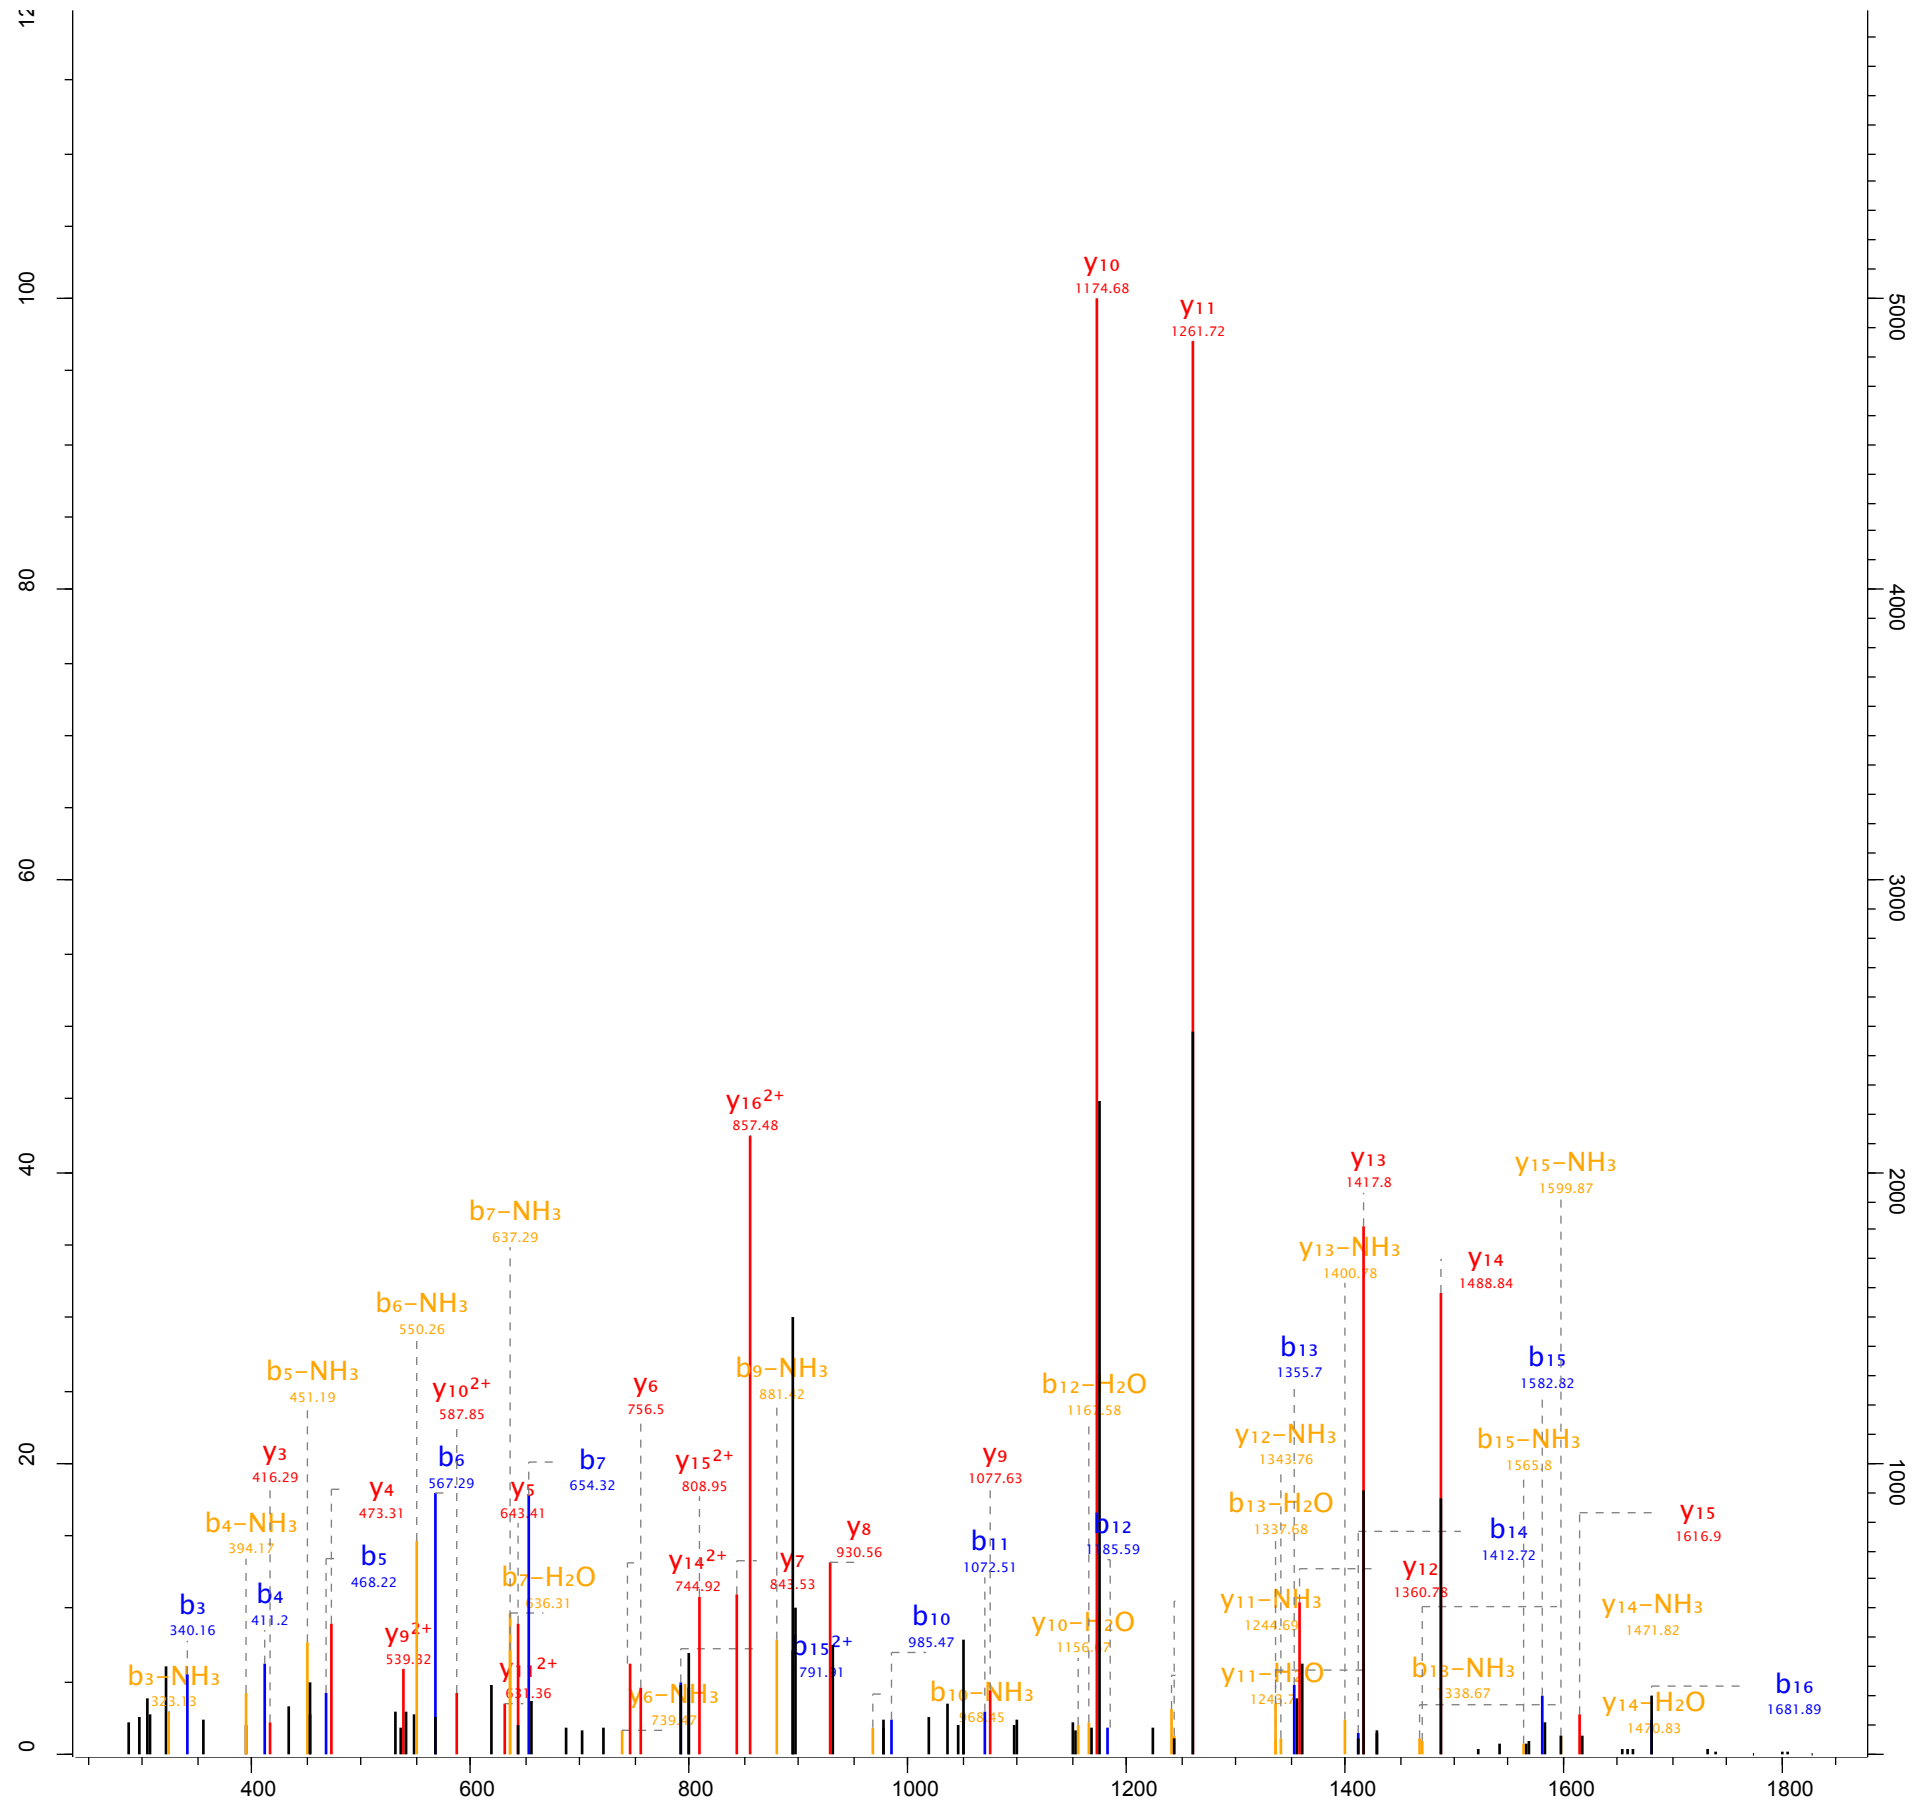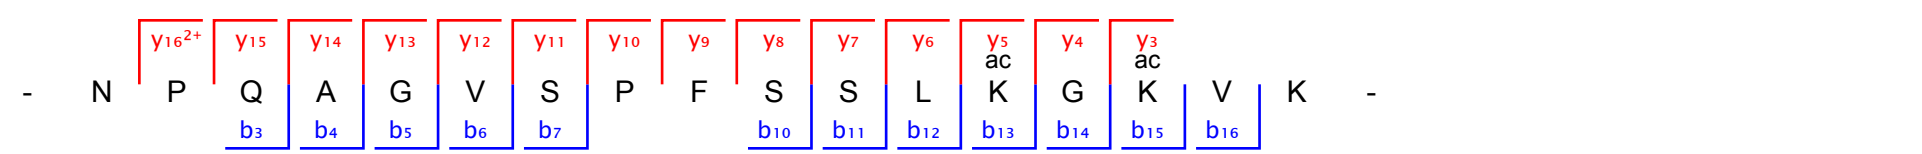

050813\_SCW\_II\_29\_16\_3

19664

ITMS; CID

132.5

929.51

Rps25

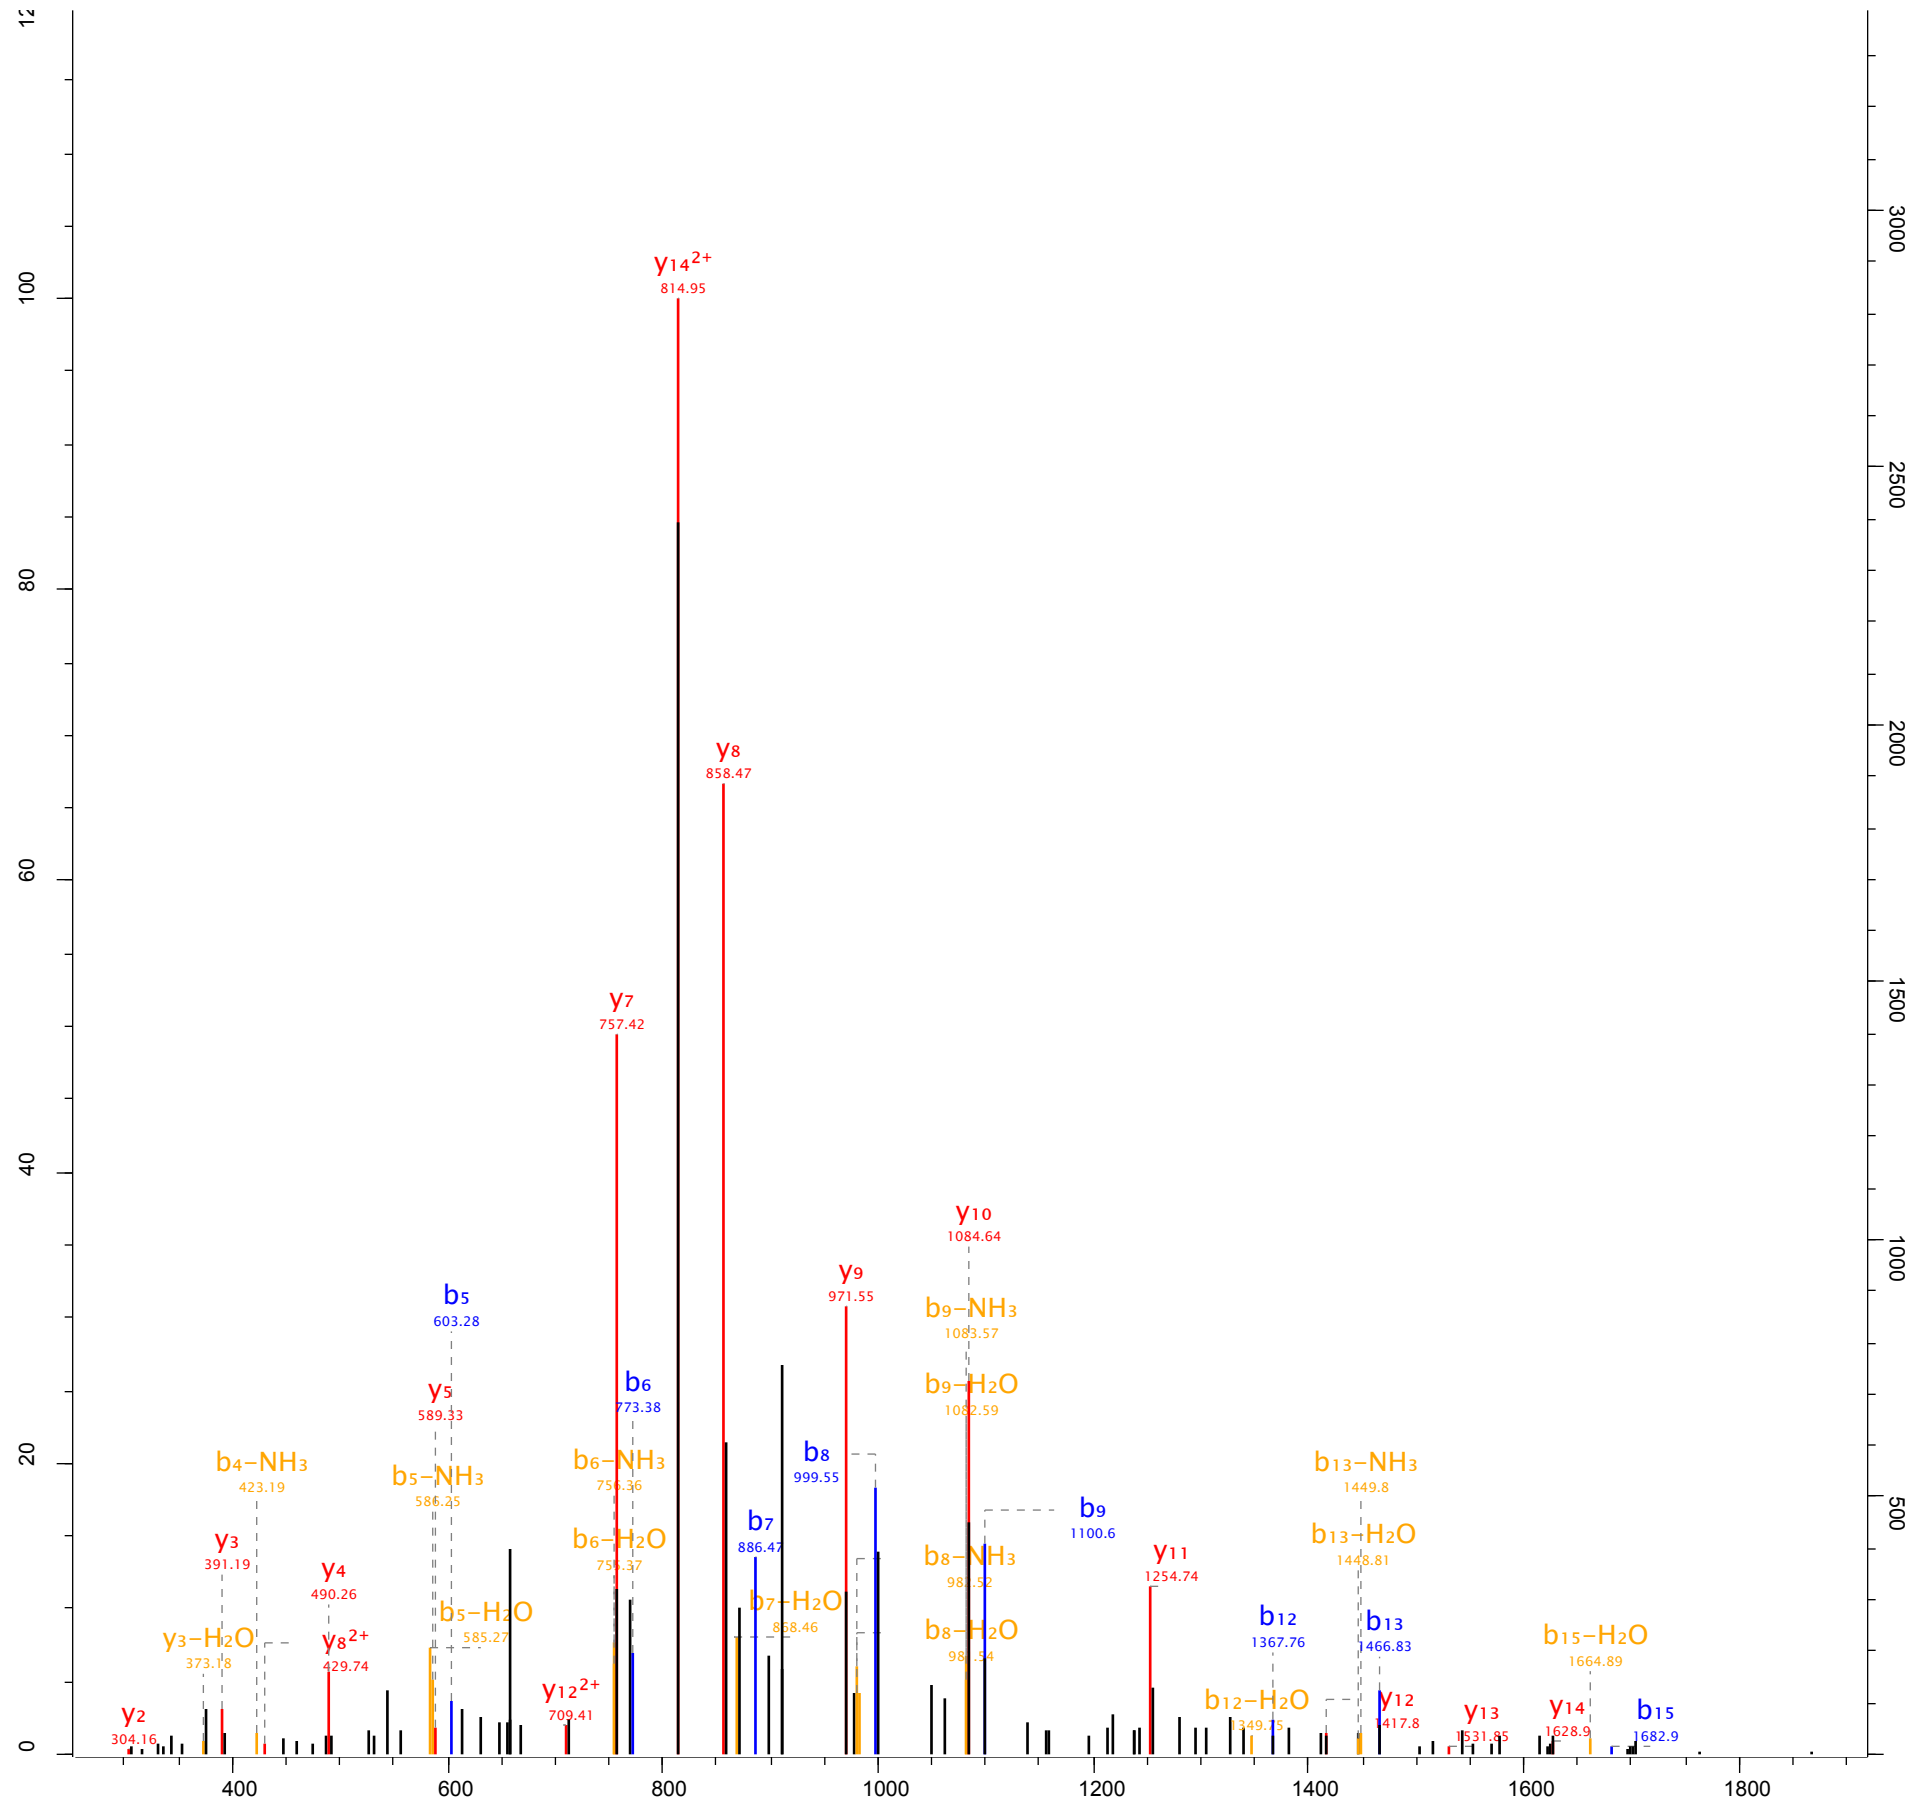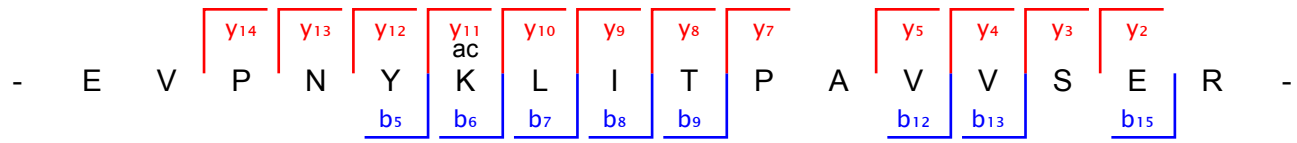

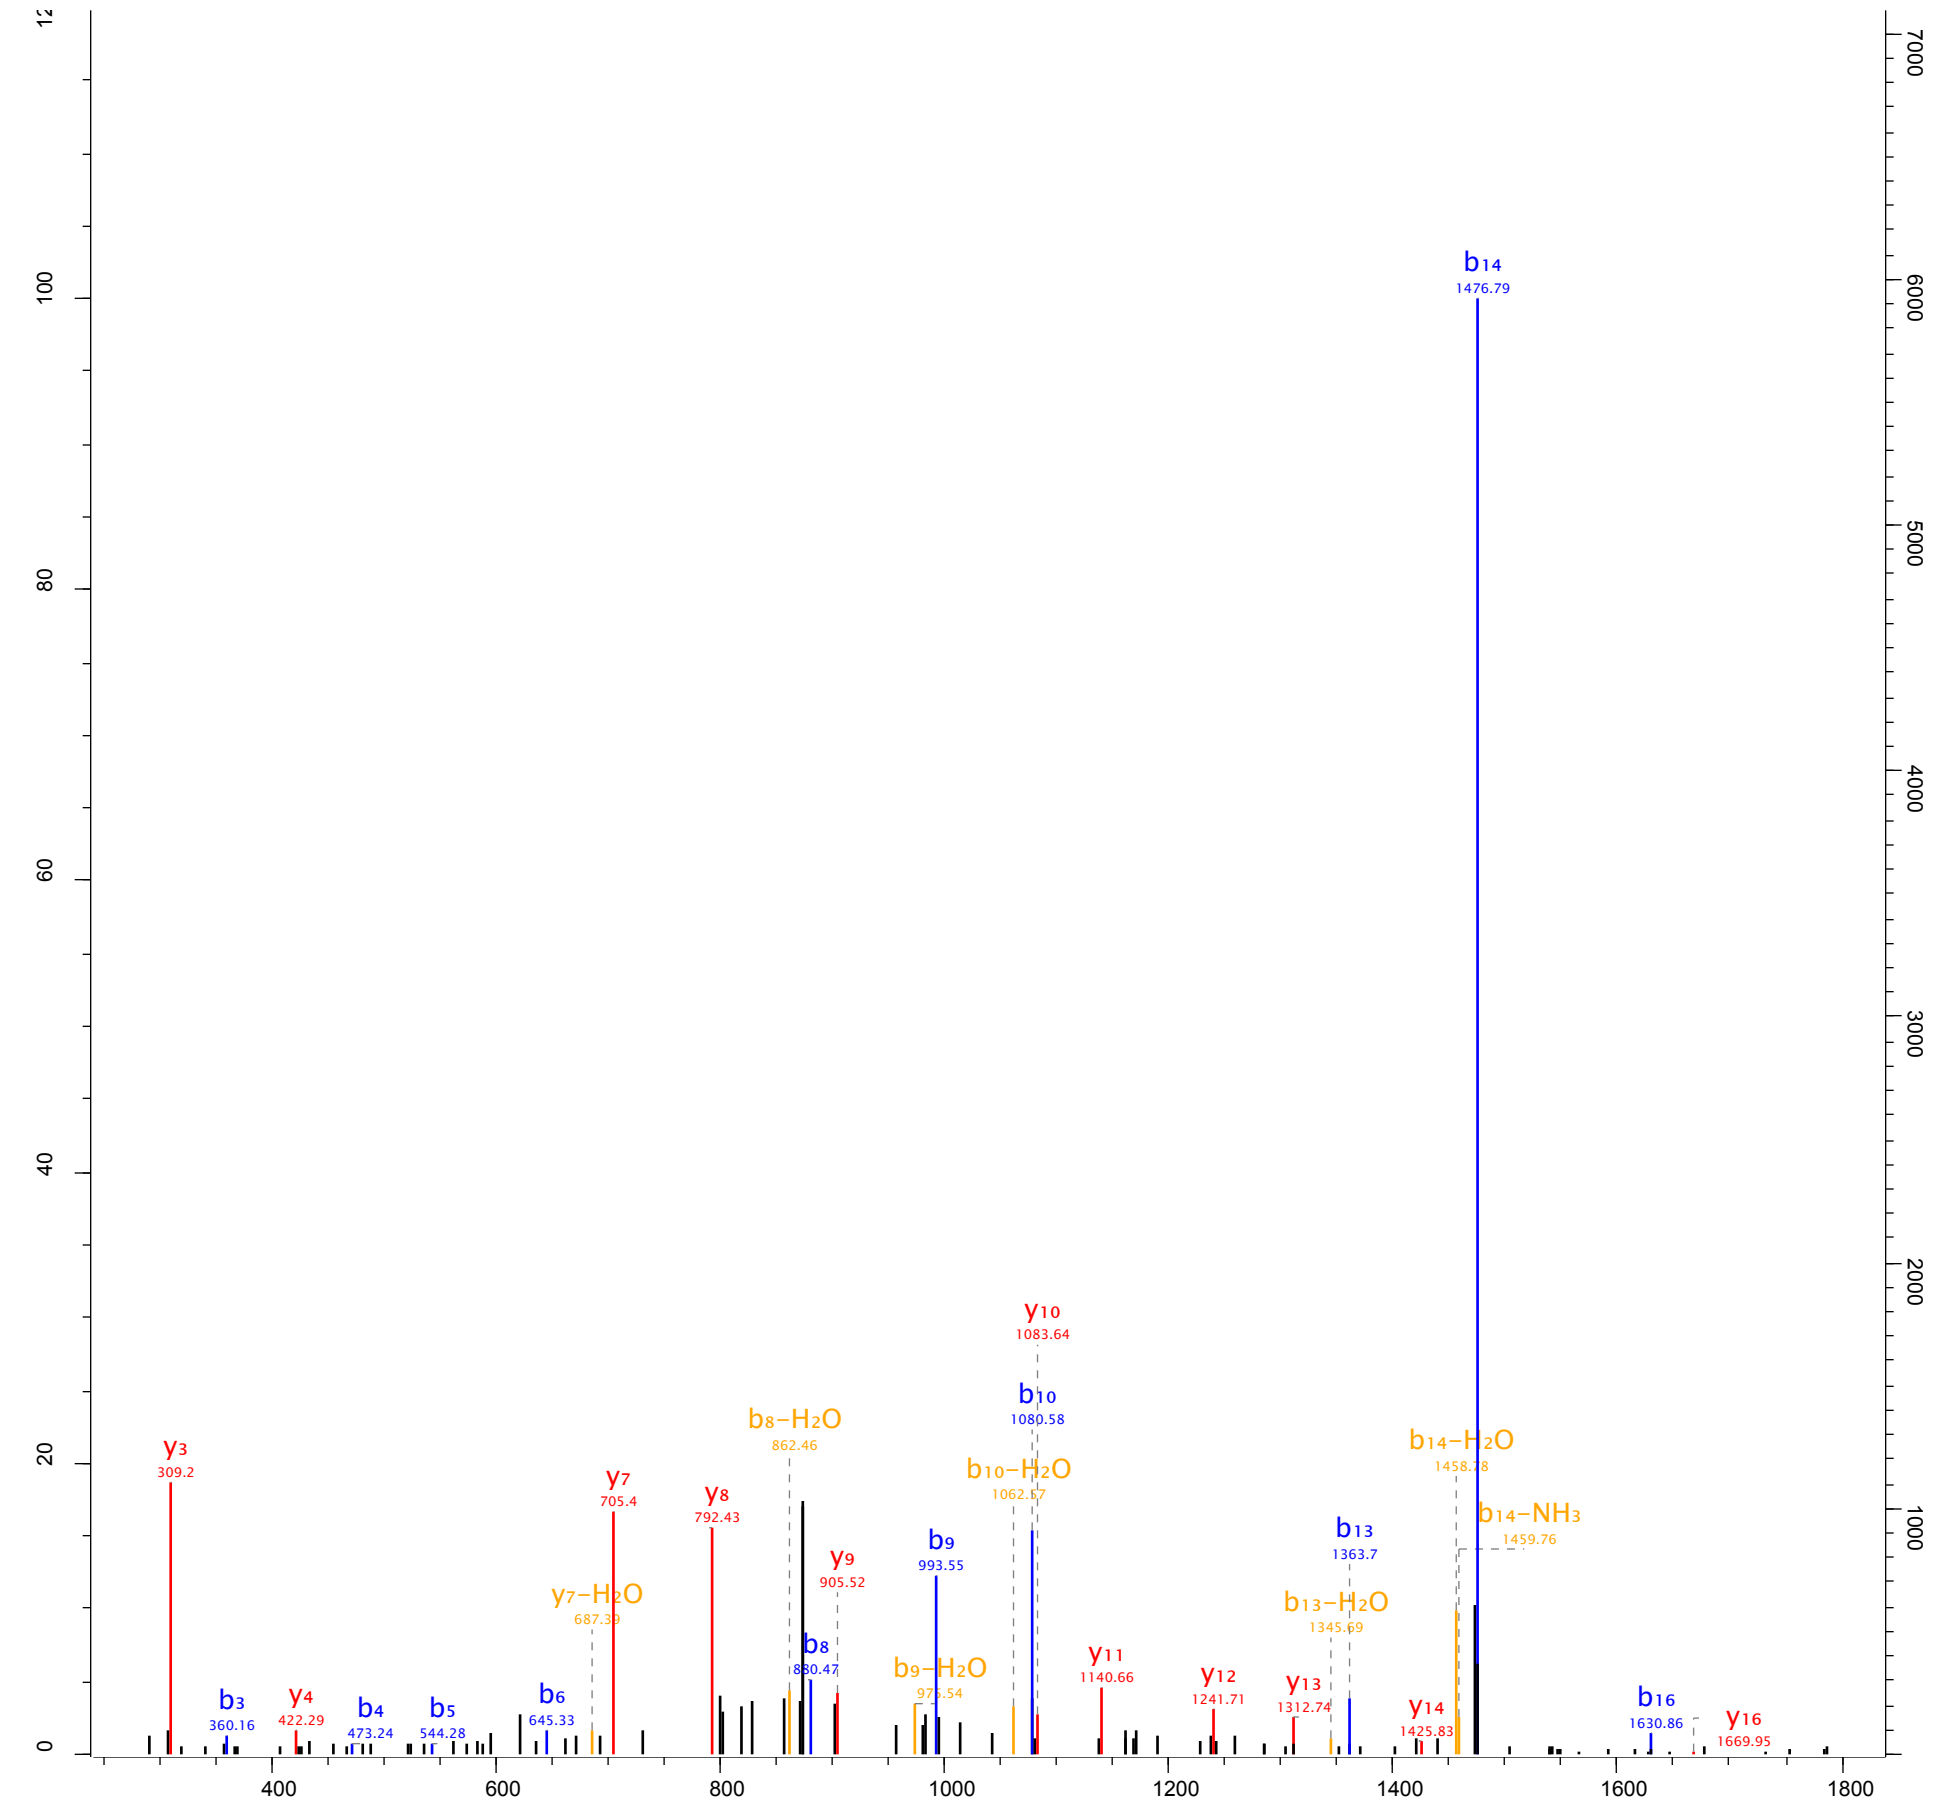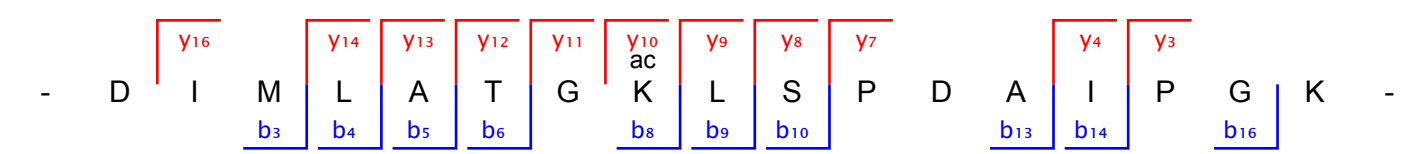

050813\_SCW\_II\_29\_16\_3

19738 ITMS; CID 164.99 743.38 Ywhaz

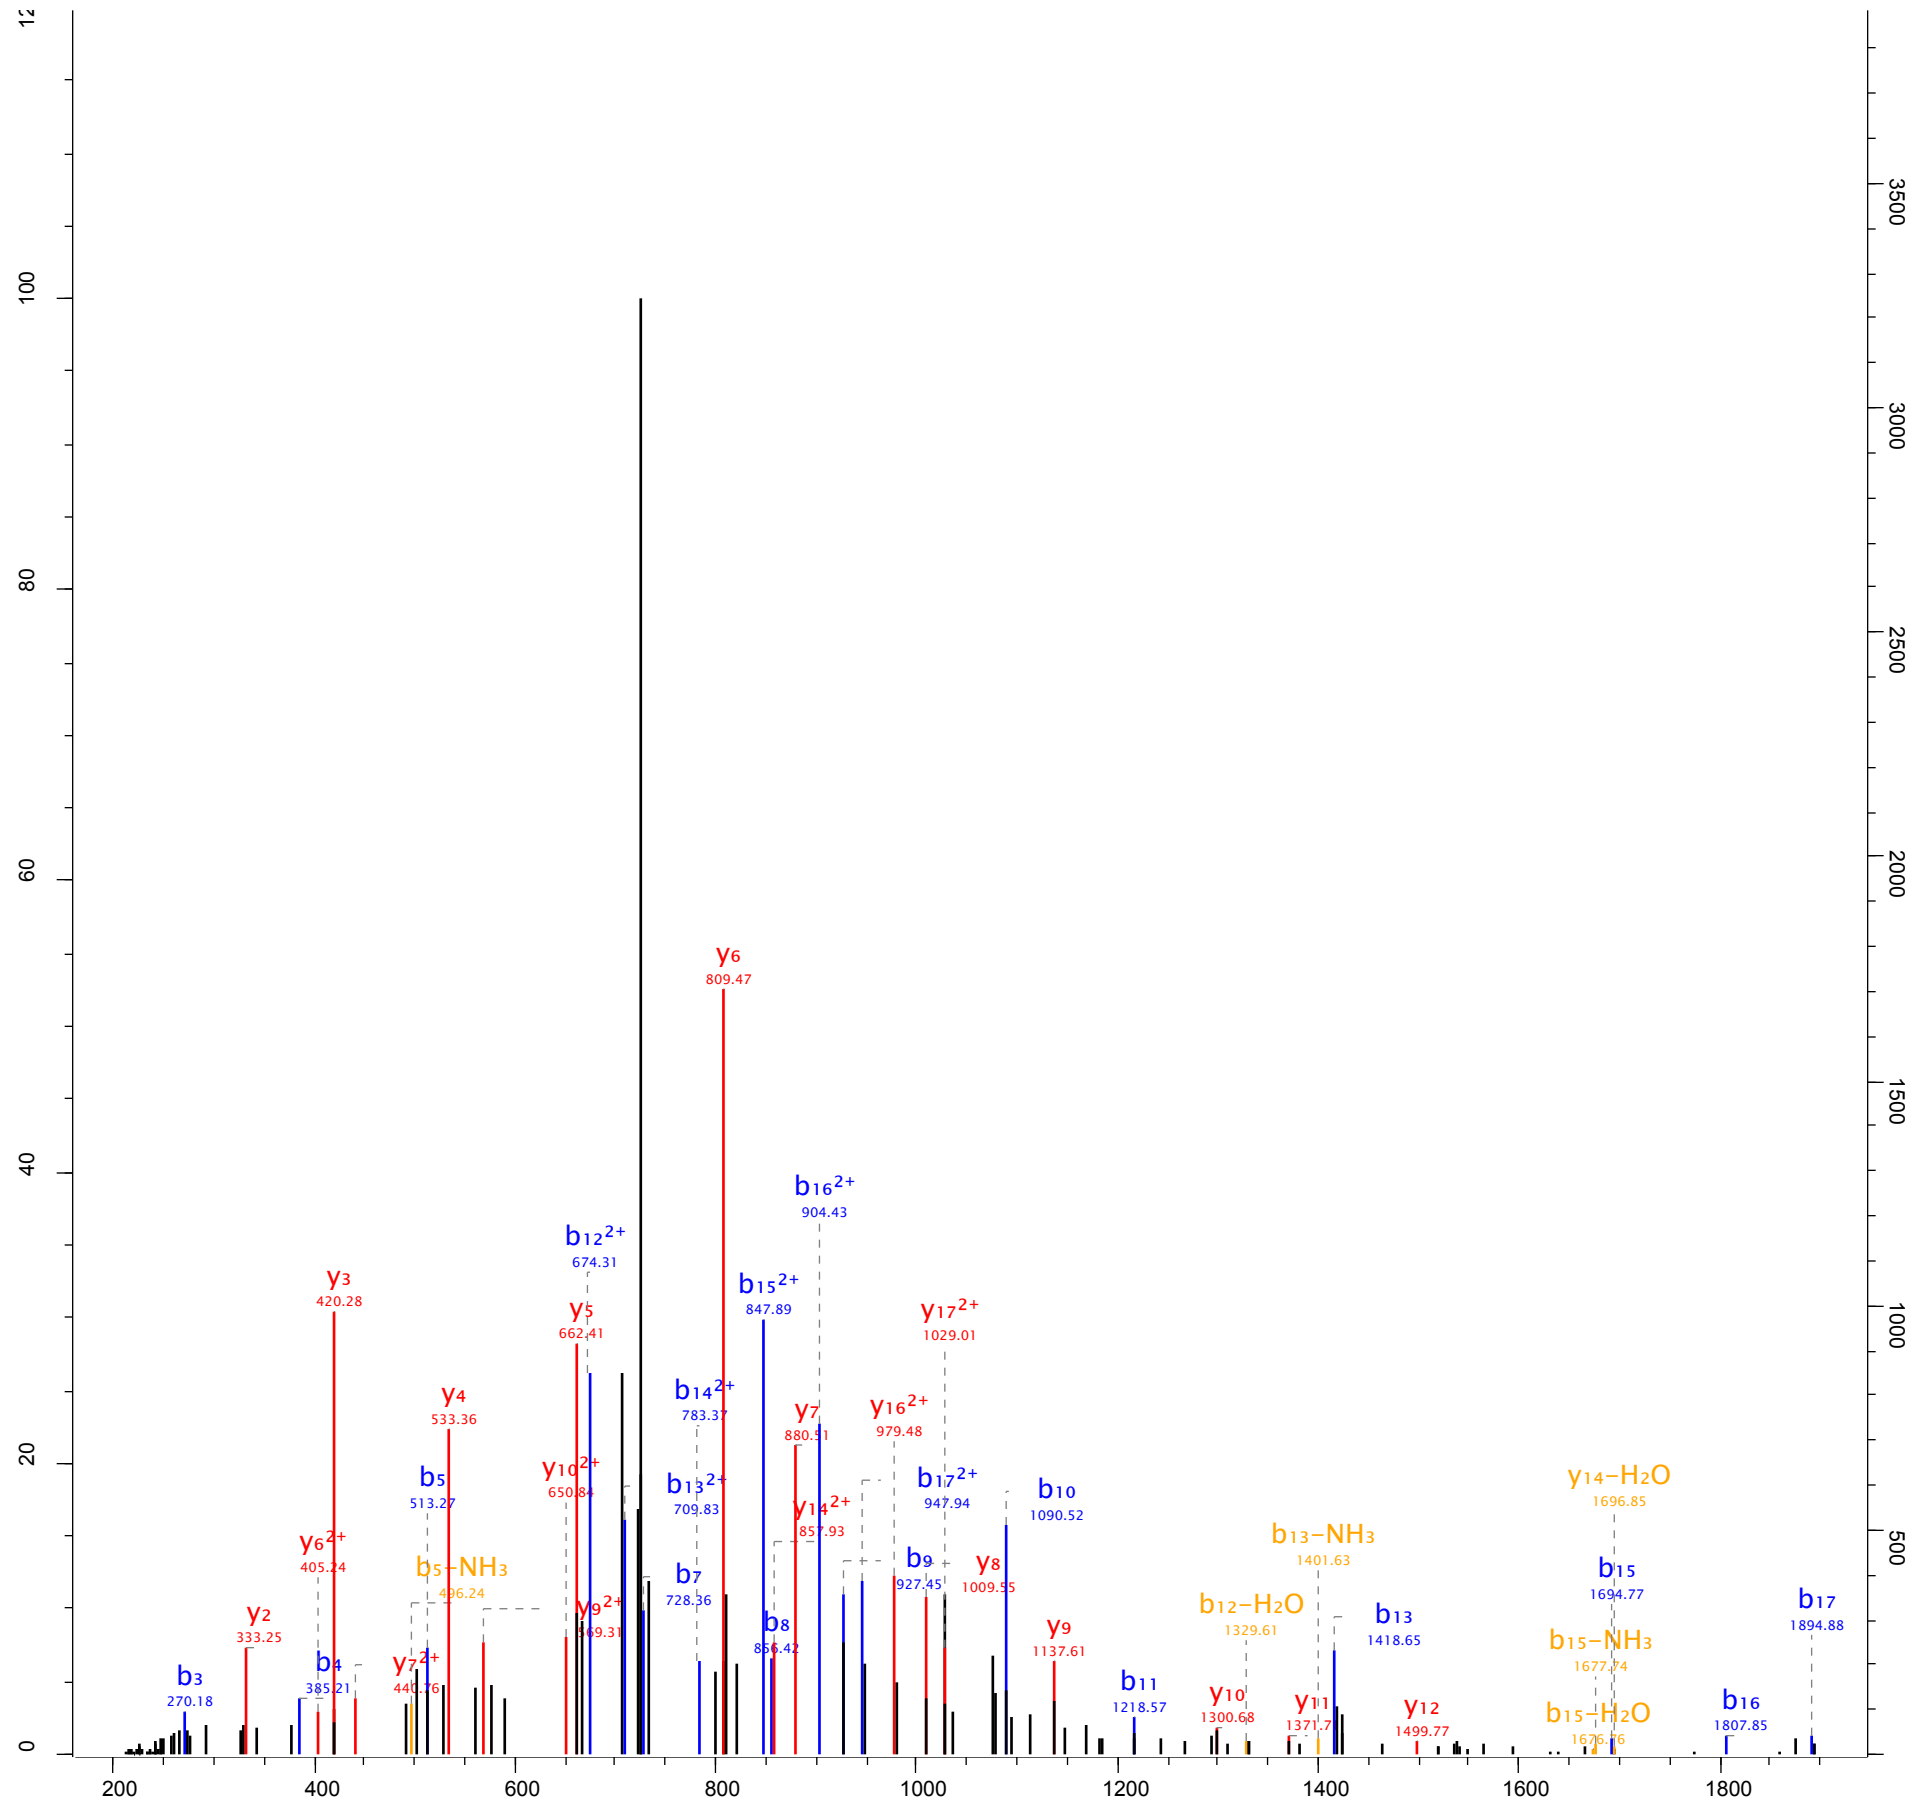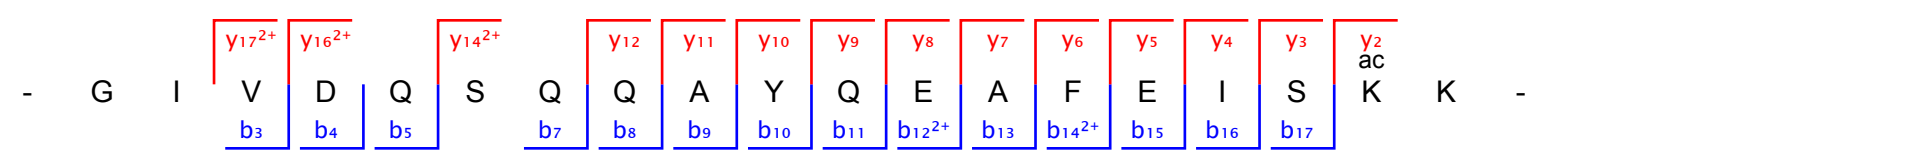

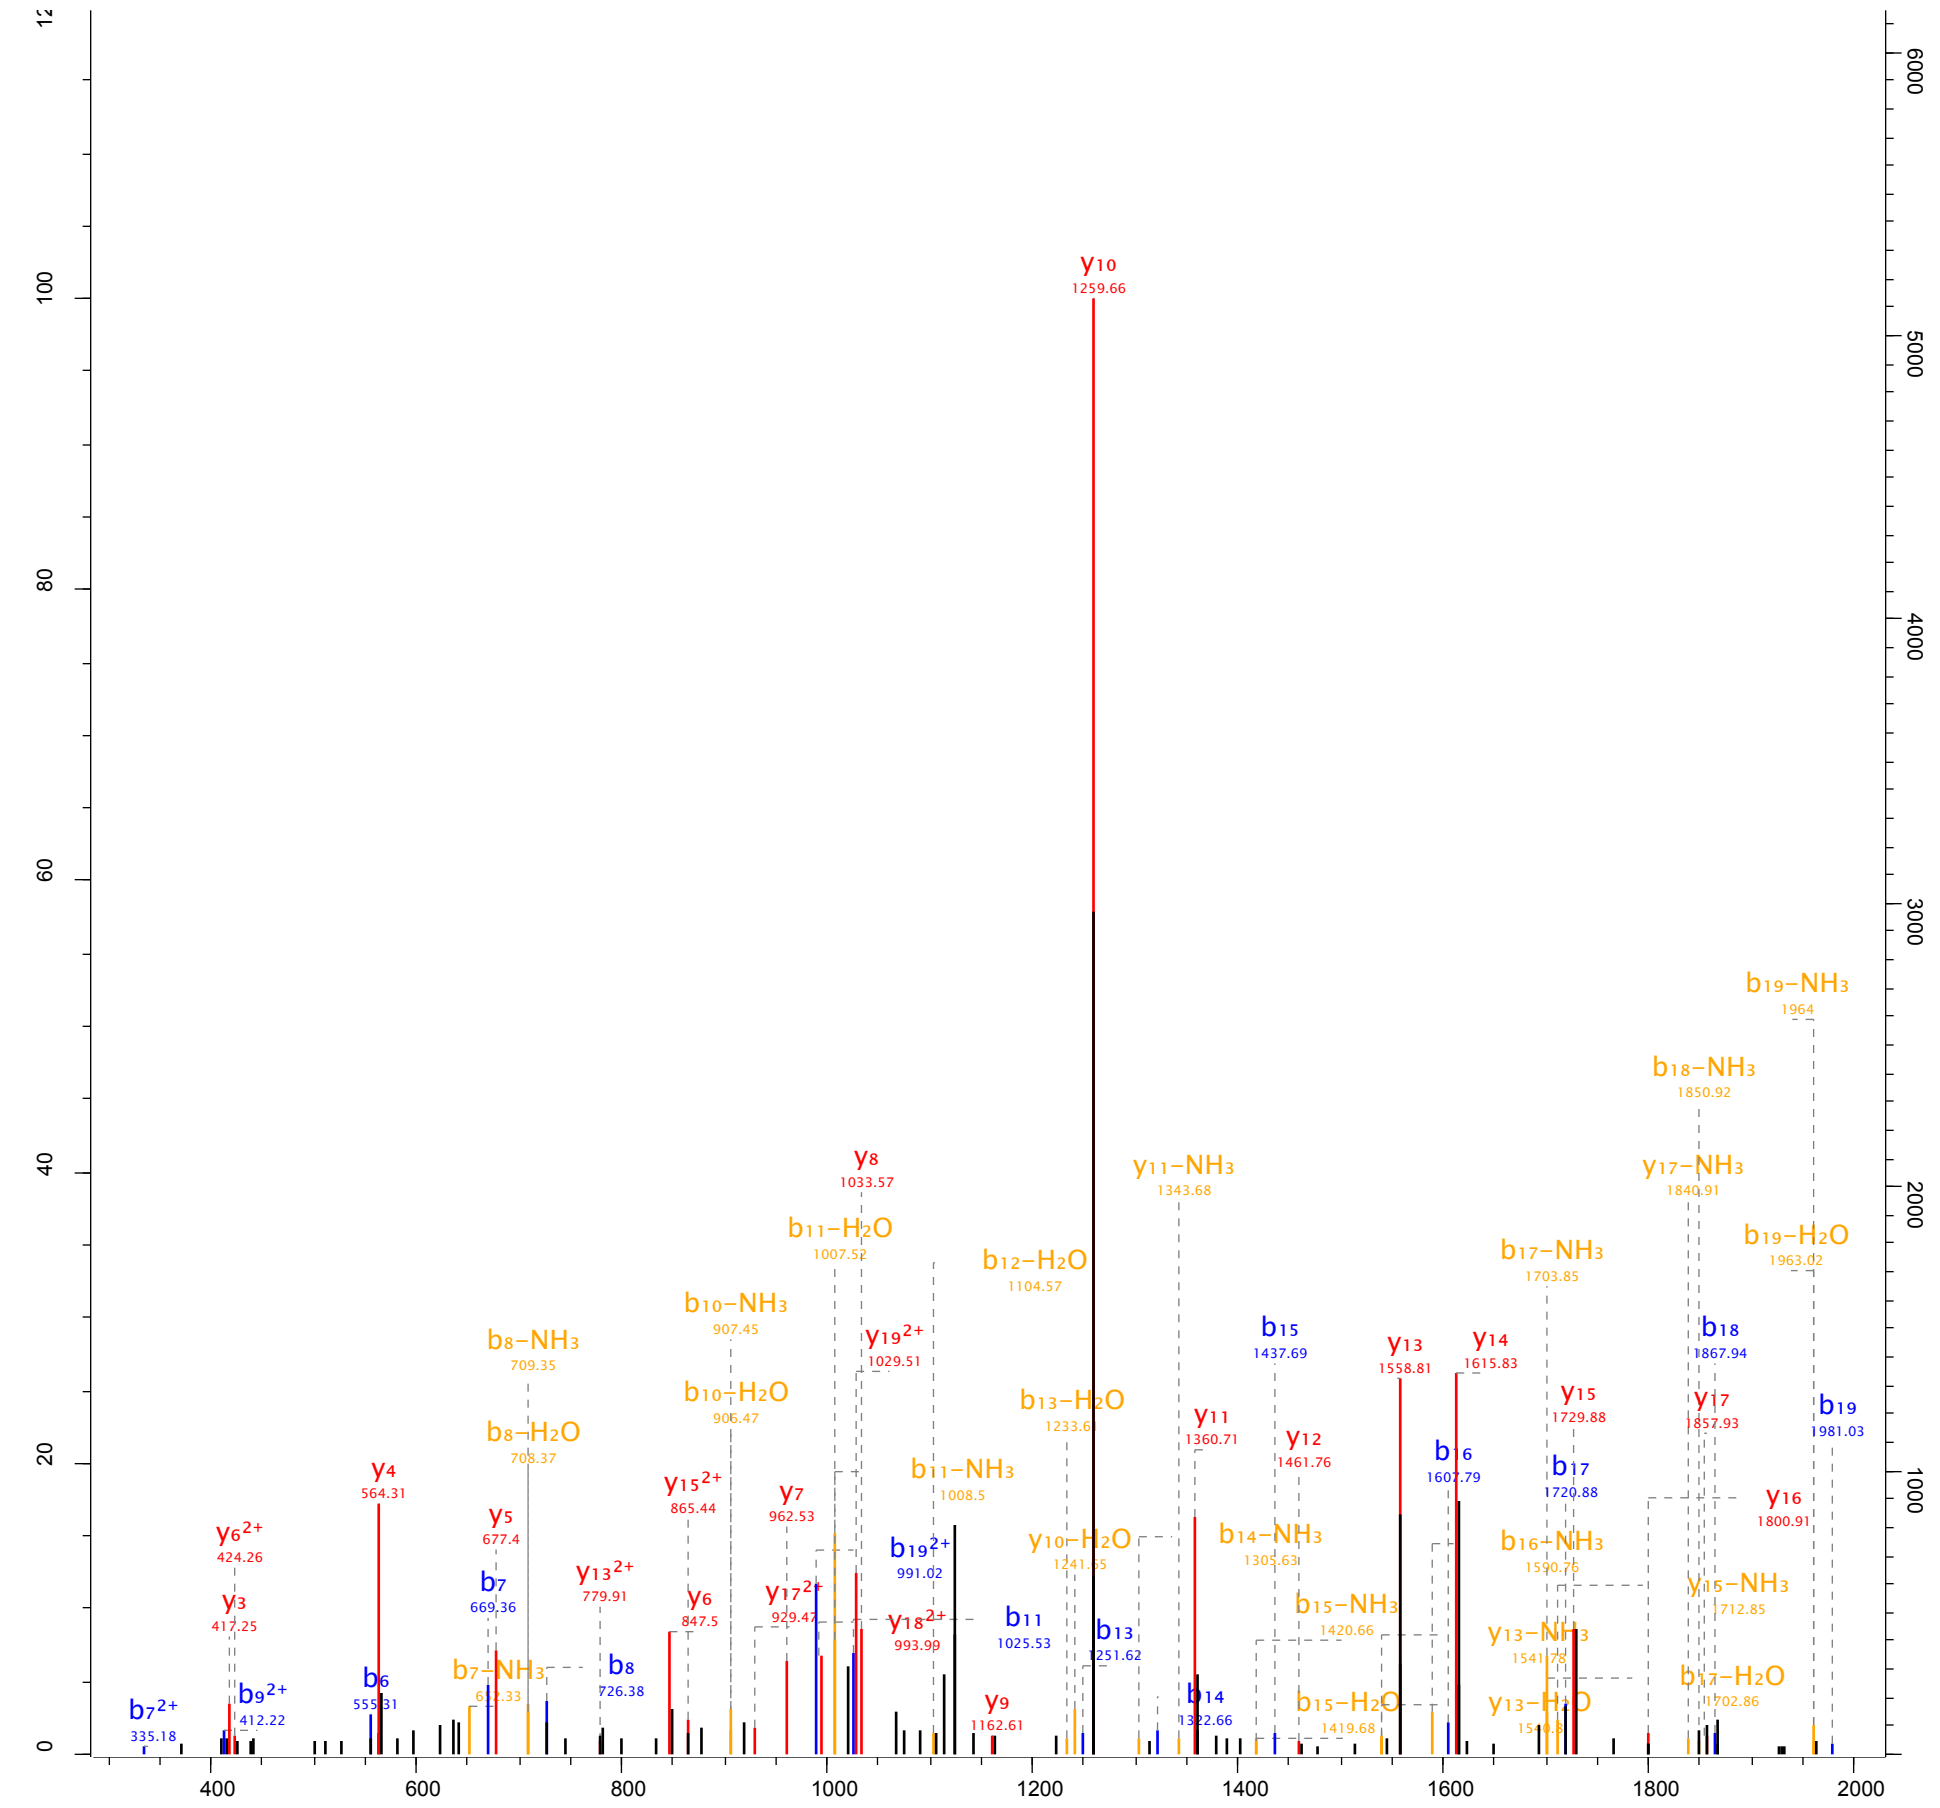

- I I A E G A N G P T T P E A D K I F L E R -

y19<sup>2+</sup>
y18<sup>2+</sup>
y17
y16
y15
y14
y13
y12
y11
y10
y9
y8
y7
y6
ac
y5
y4
y3

b6
b7
b8
b9<sup>2+</sup>
b11
b13
b14
b15
b16
b17
b18
b19

050813\_SCW\_II\_29\_16\_3

19824 ITMS; CID 255.93 977.51 Ncl

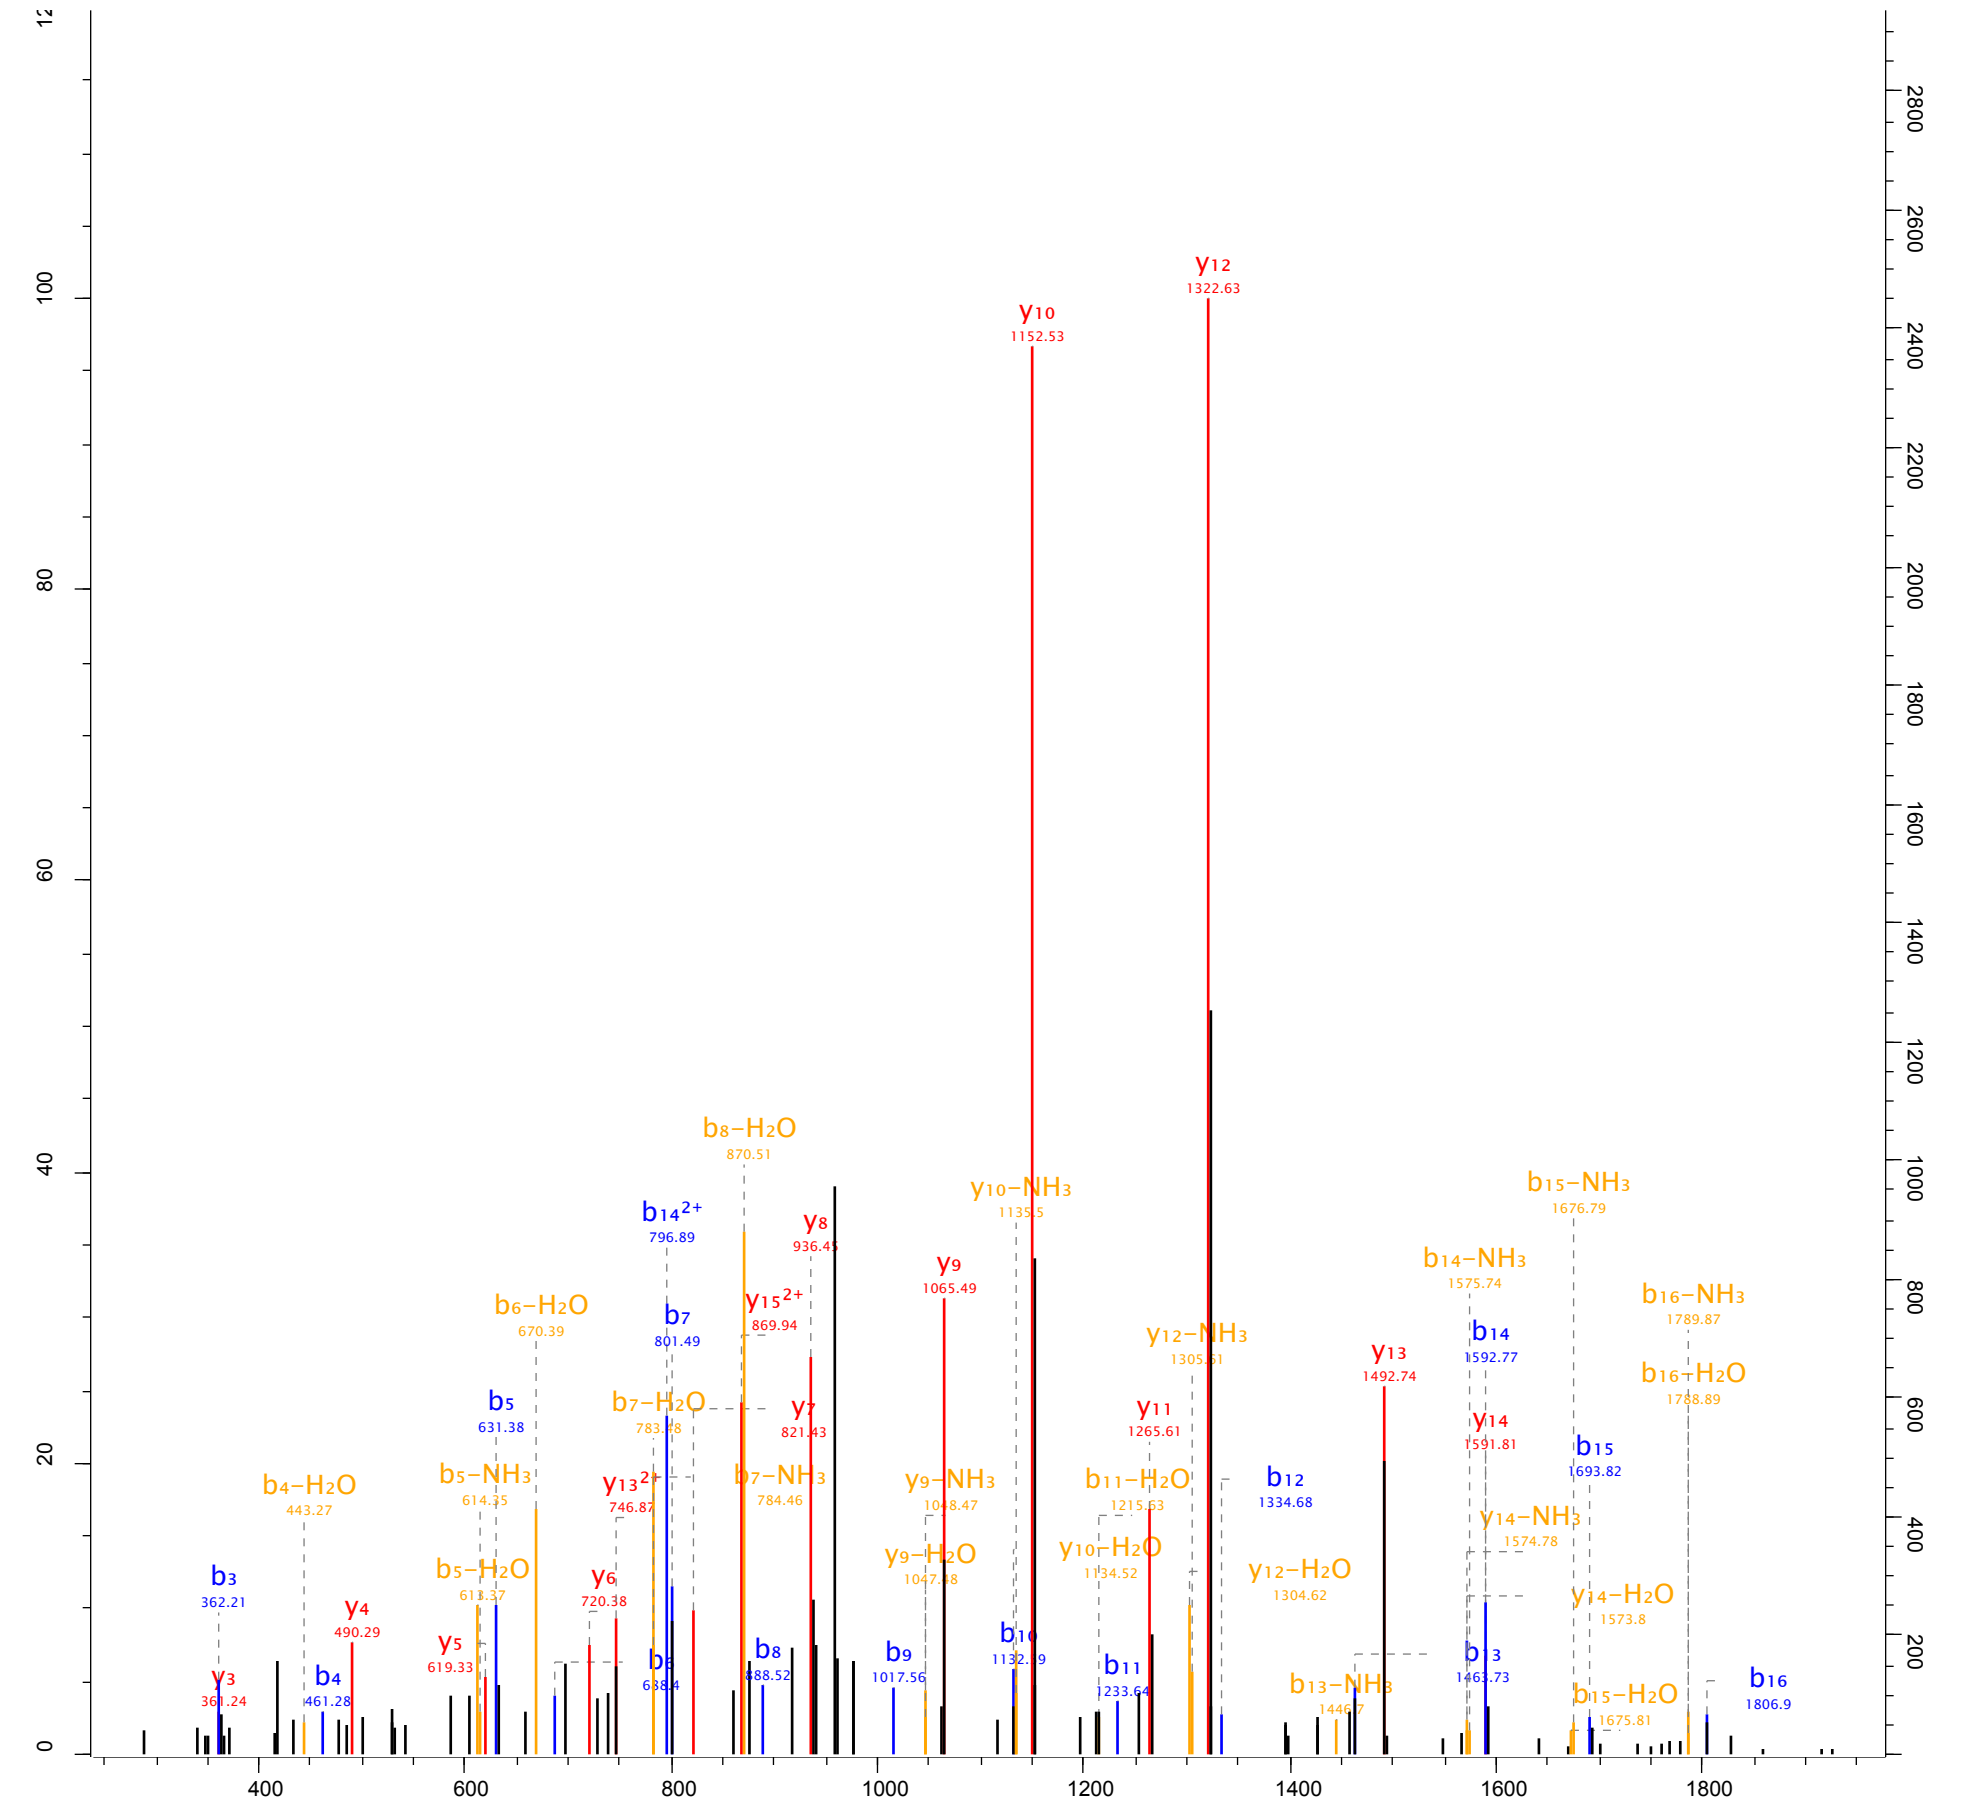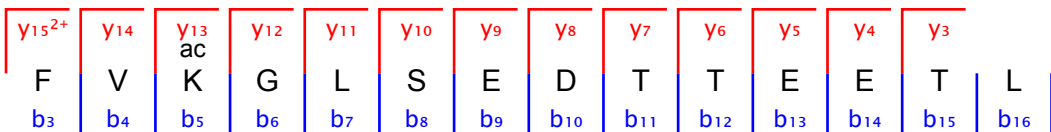

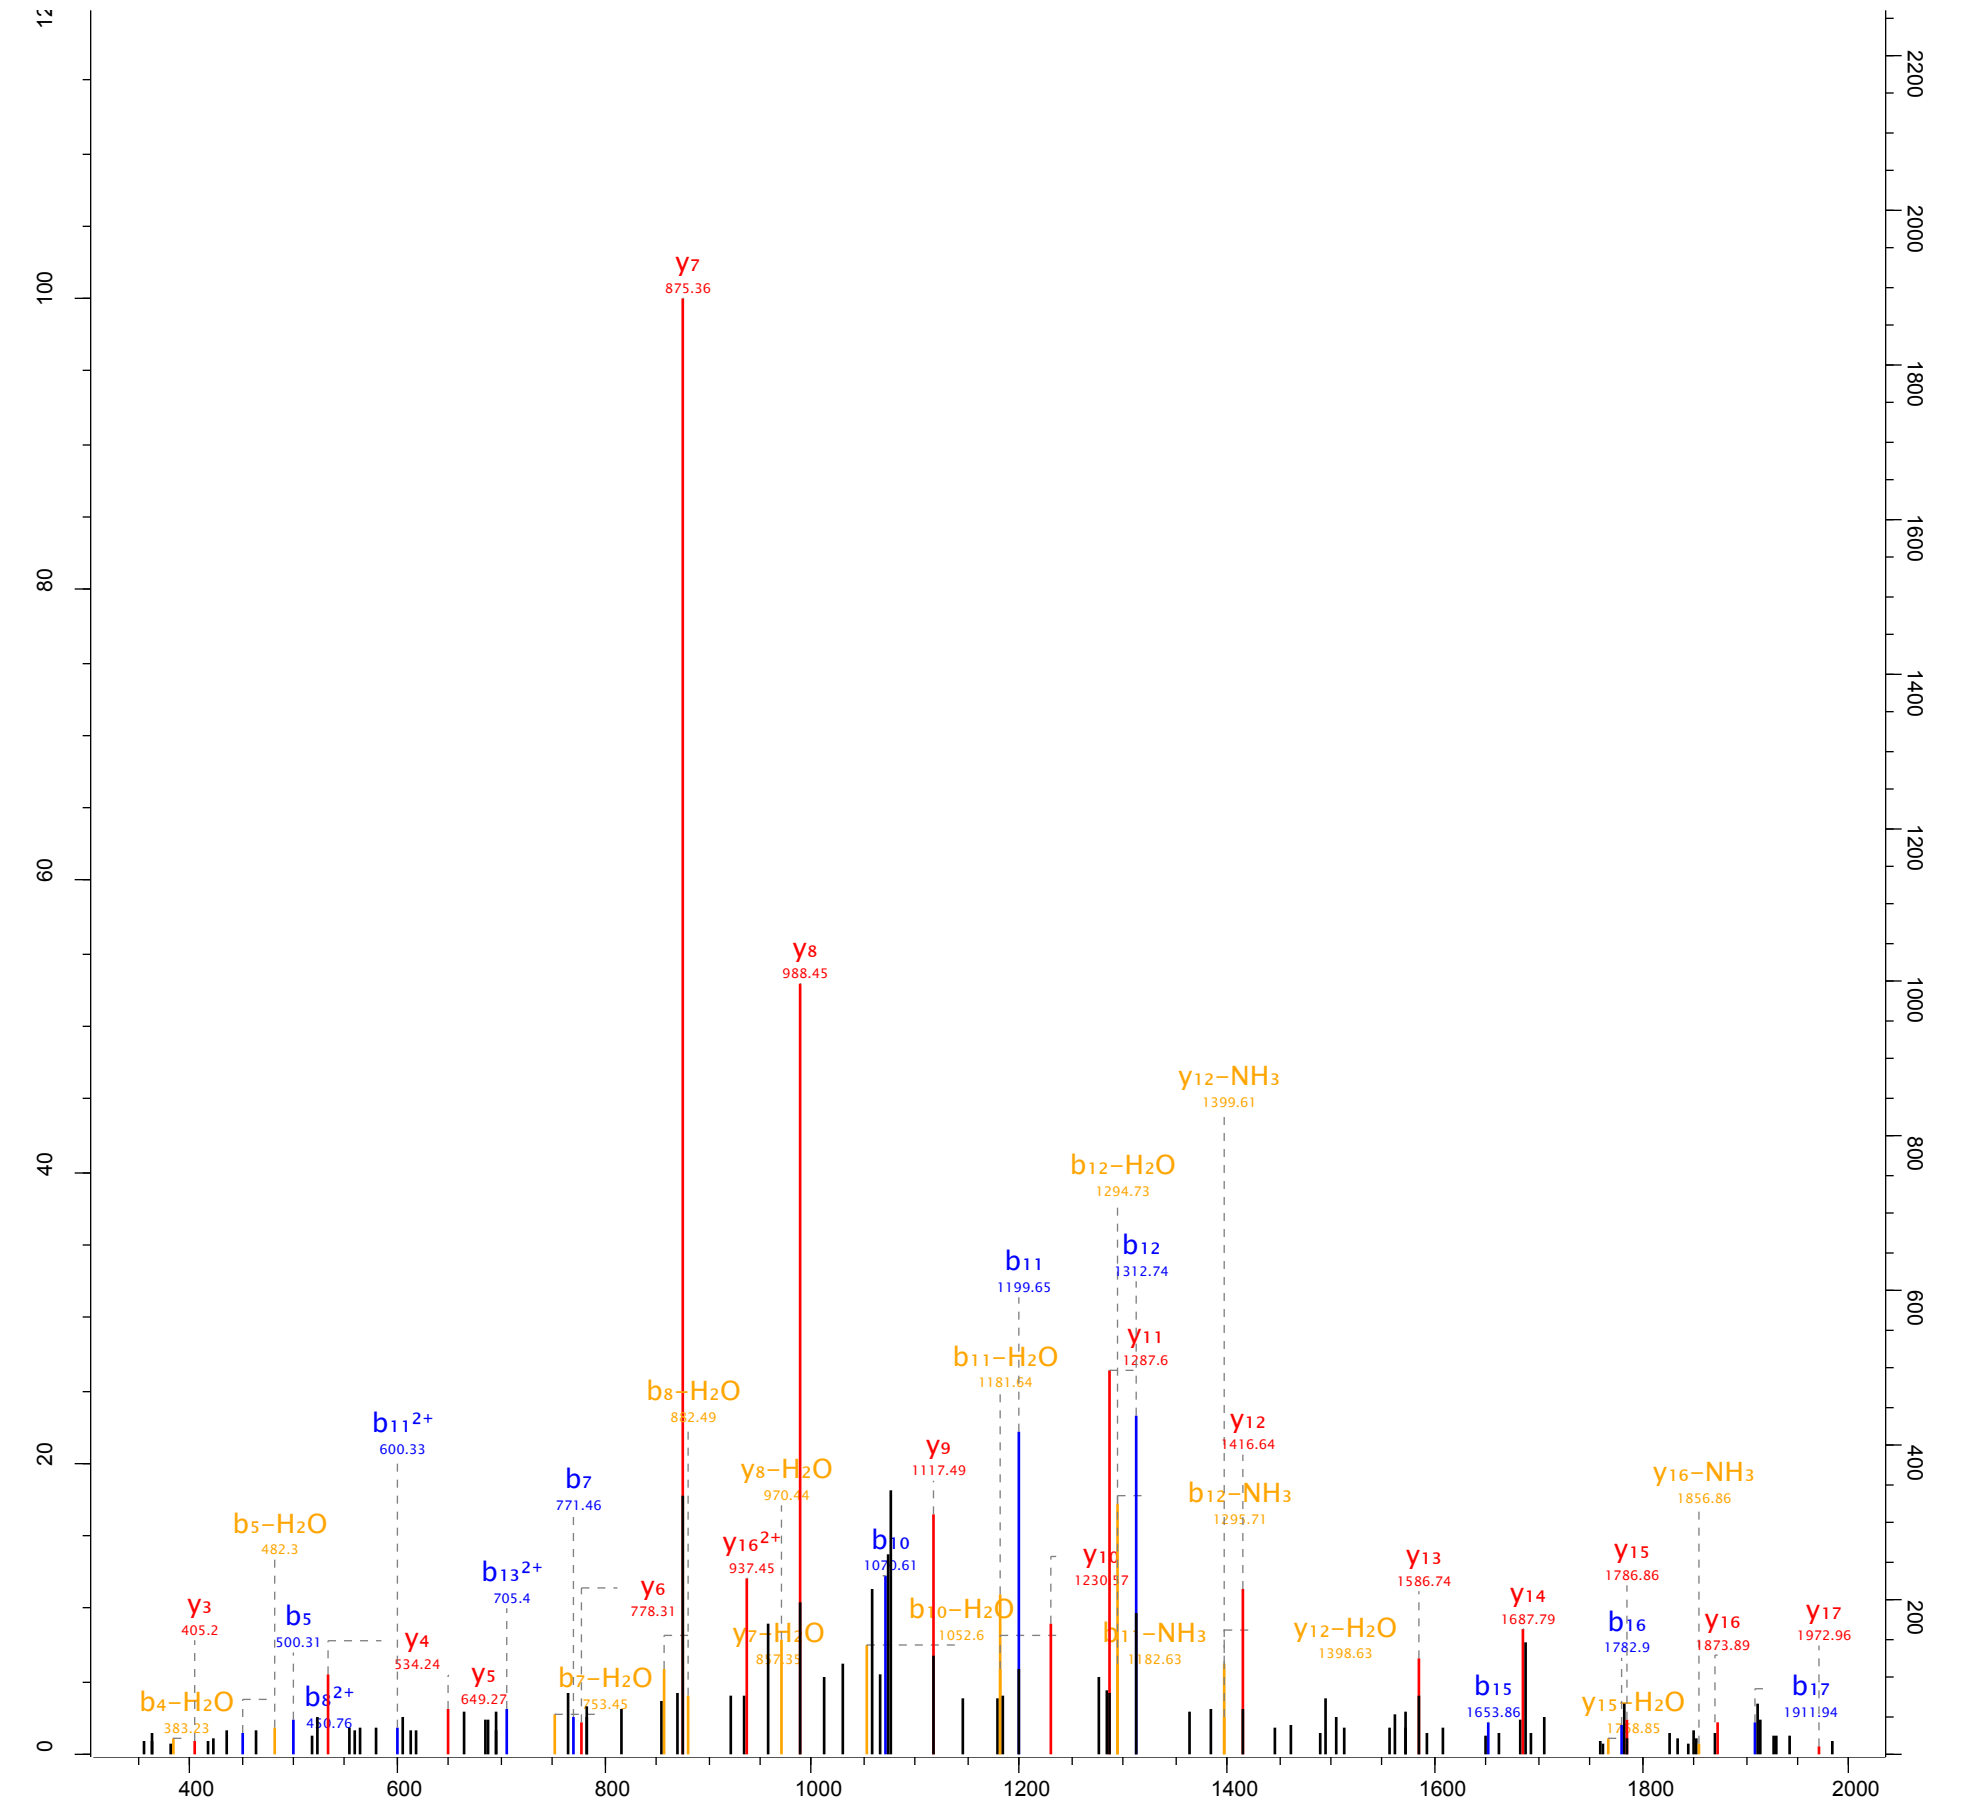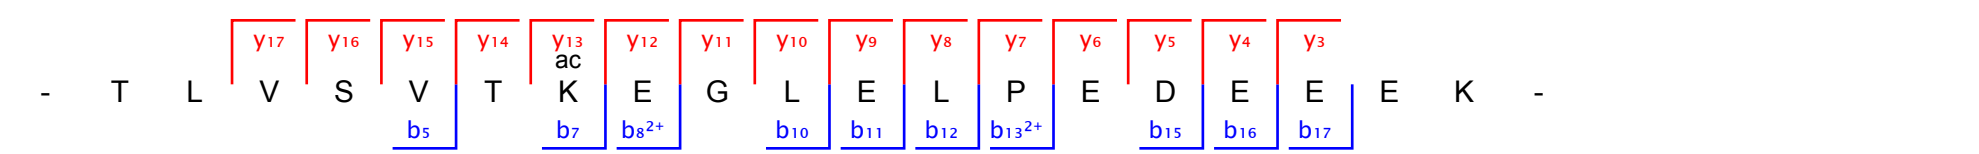

050813\_SCW\_II\_29\_16\_3

19930 ITMS; CID 204.05 1079.54 Prdx1

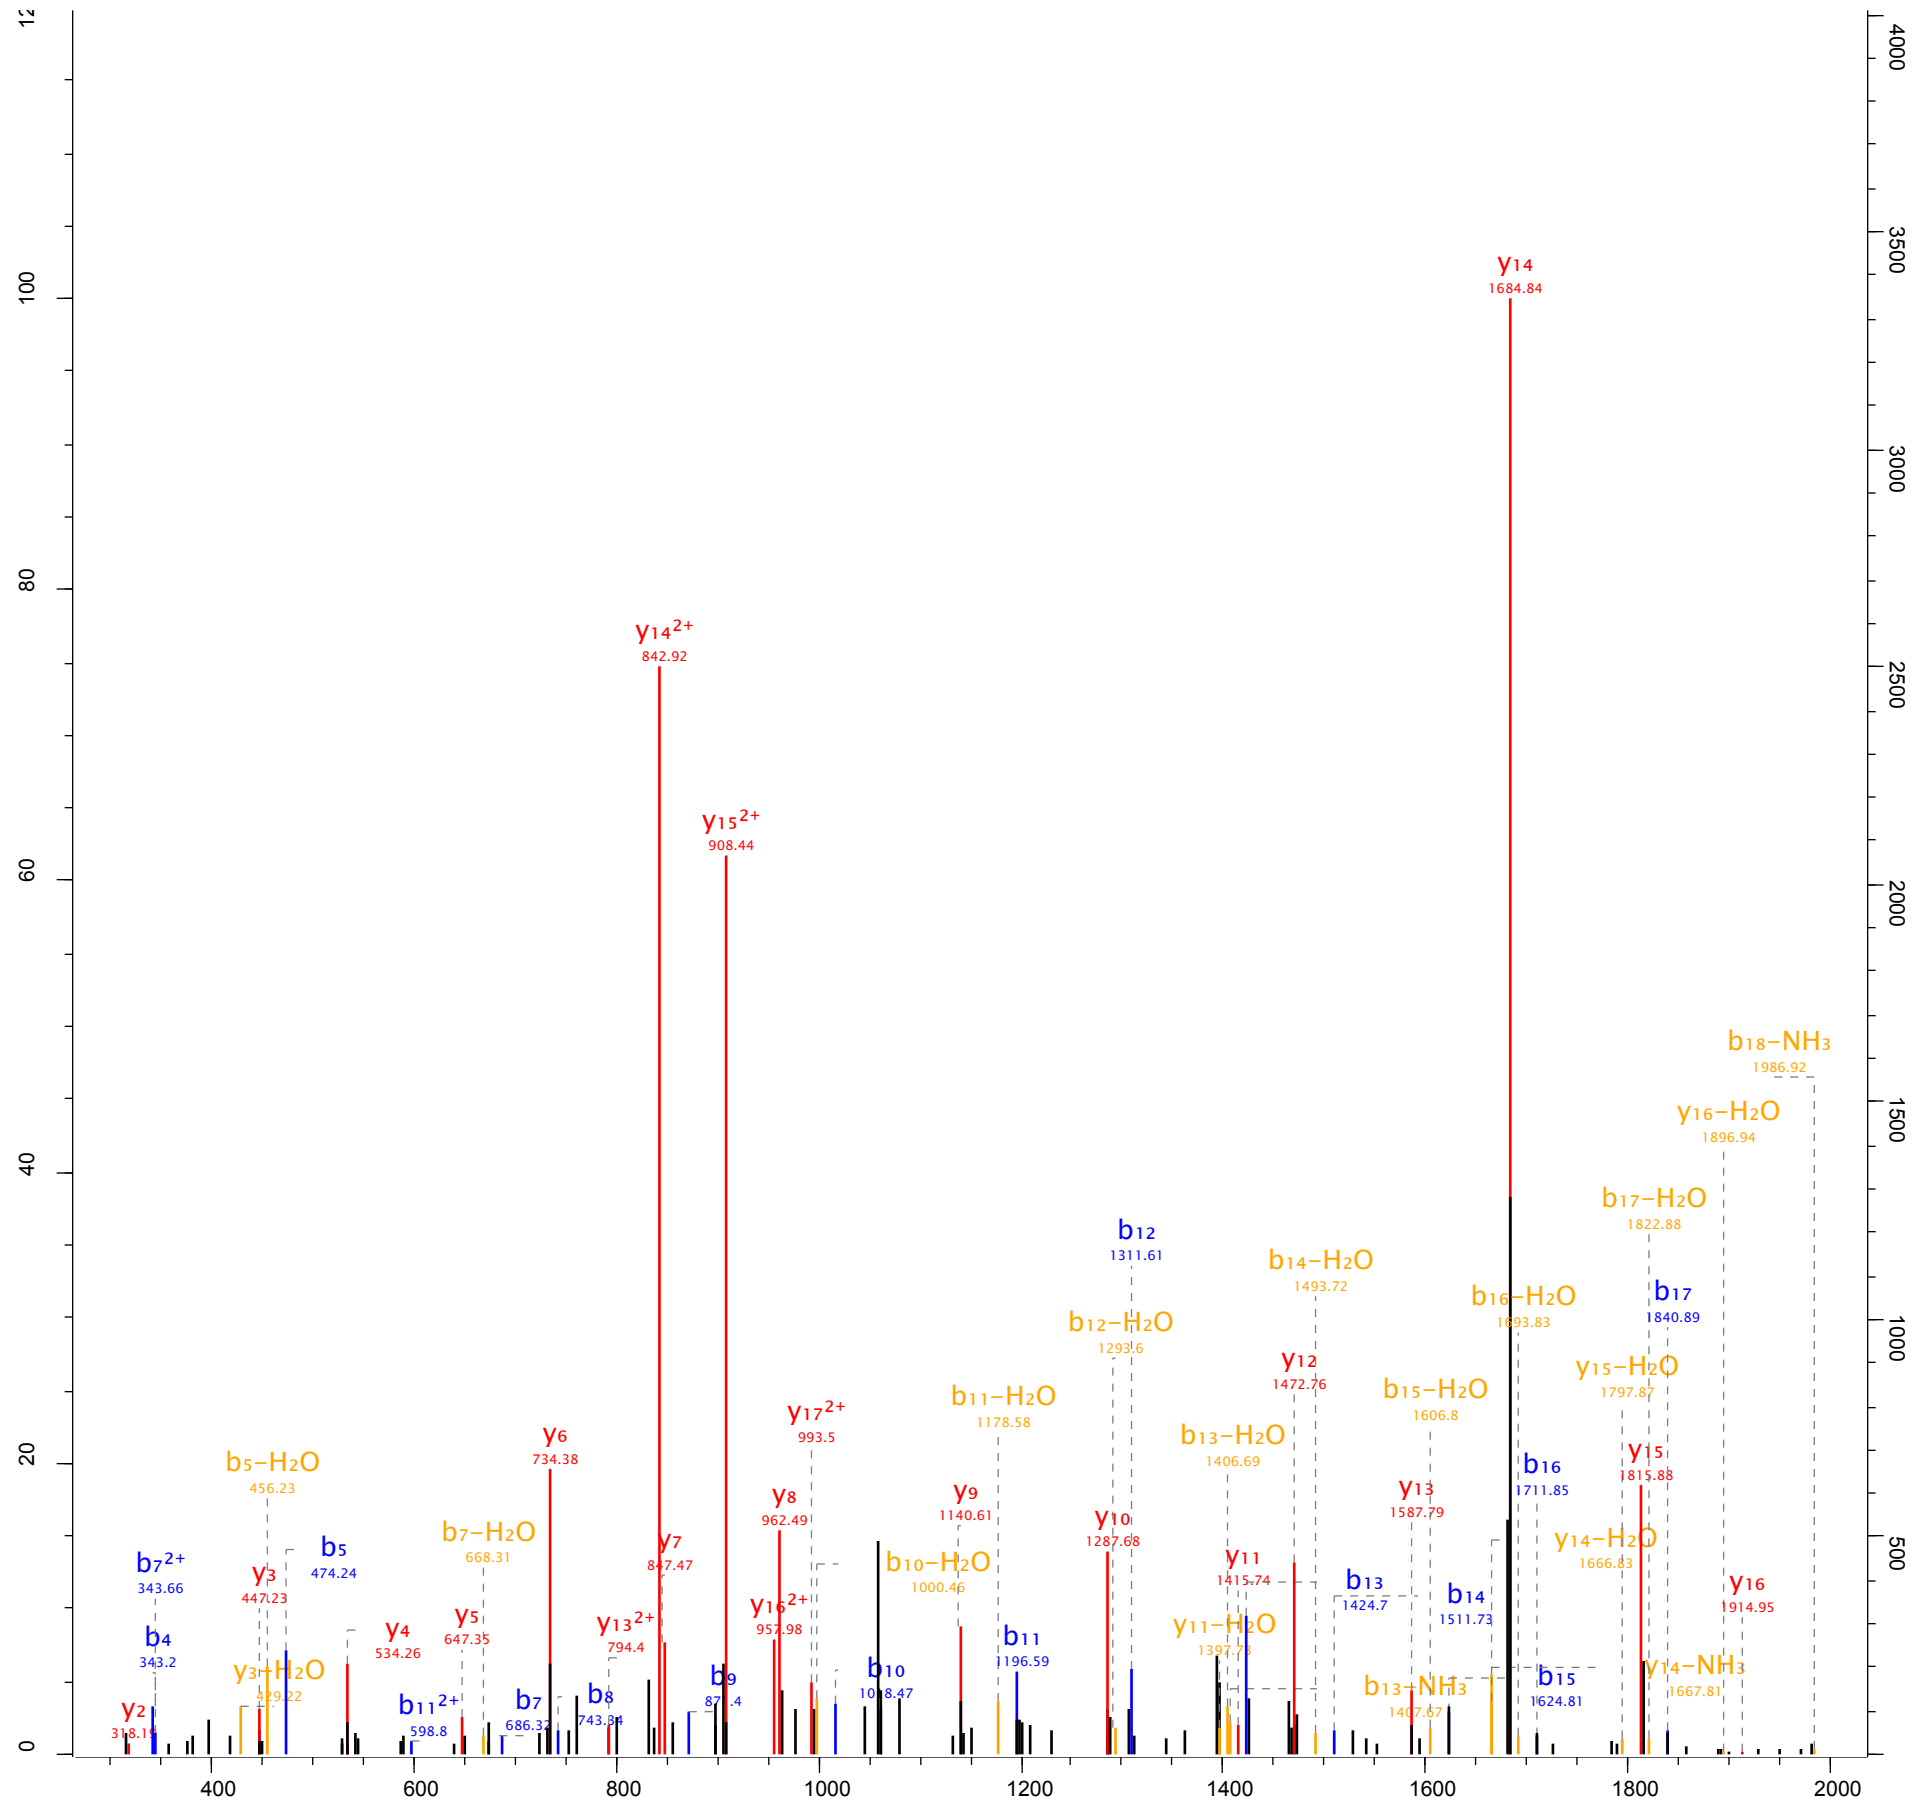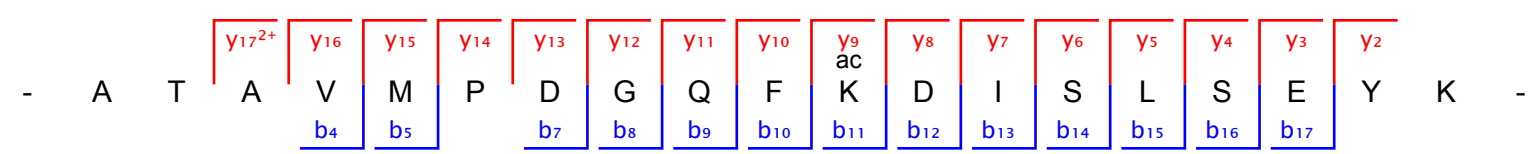



050813\_SCW\_II\_29\_16\_3

20098 ITMS; CID 216.77 1008.54 Psmd4

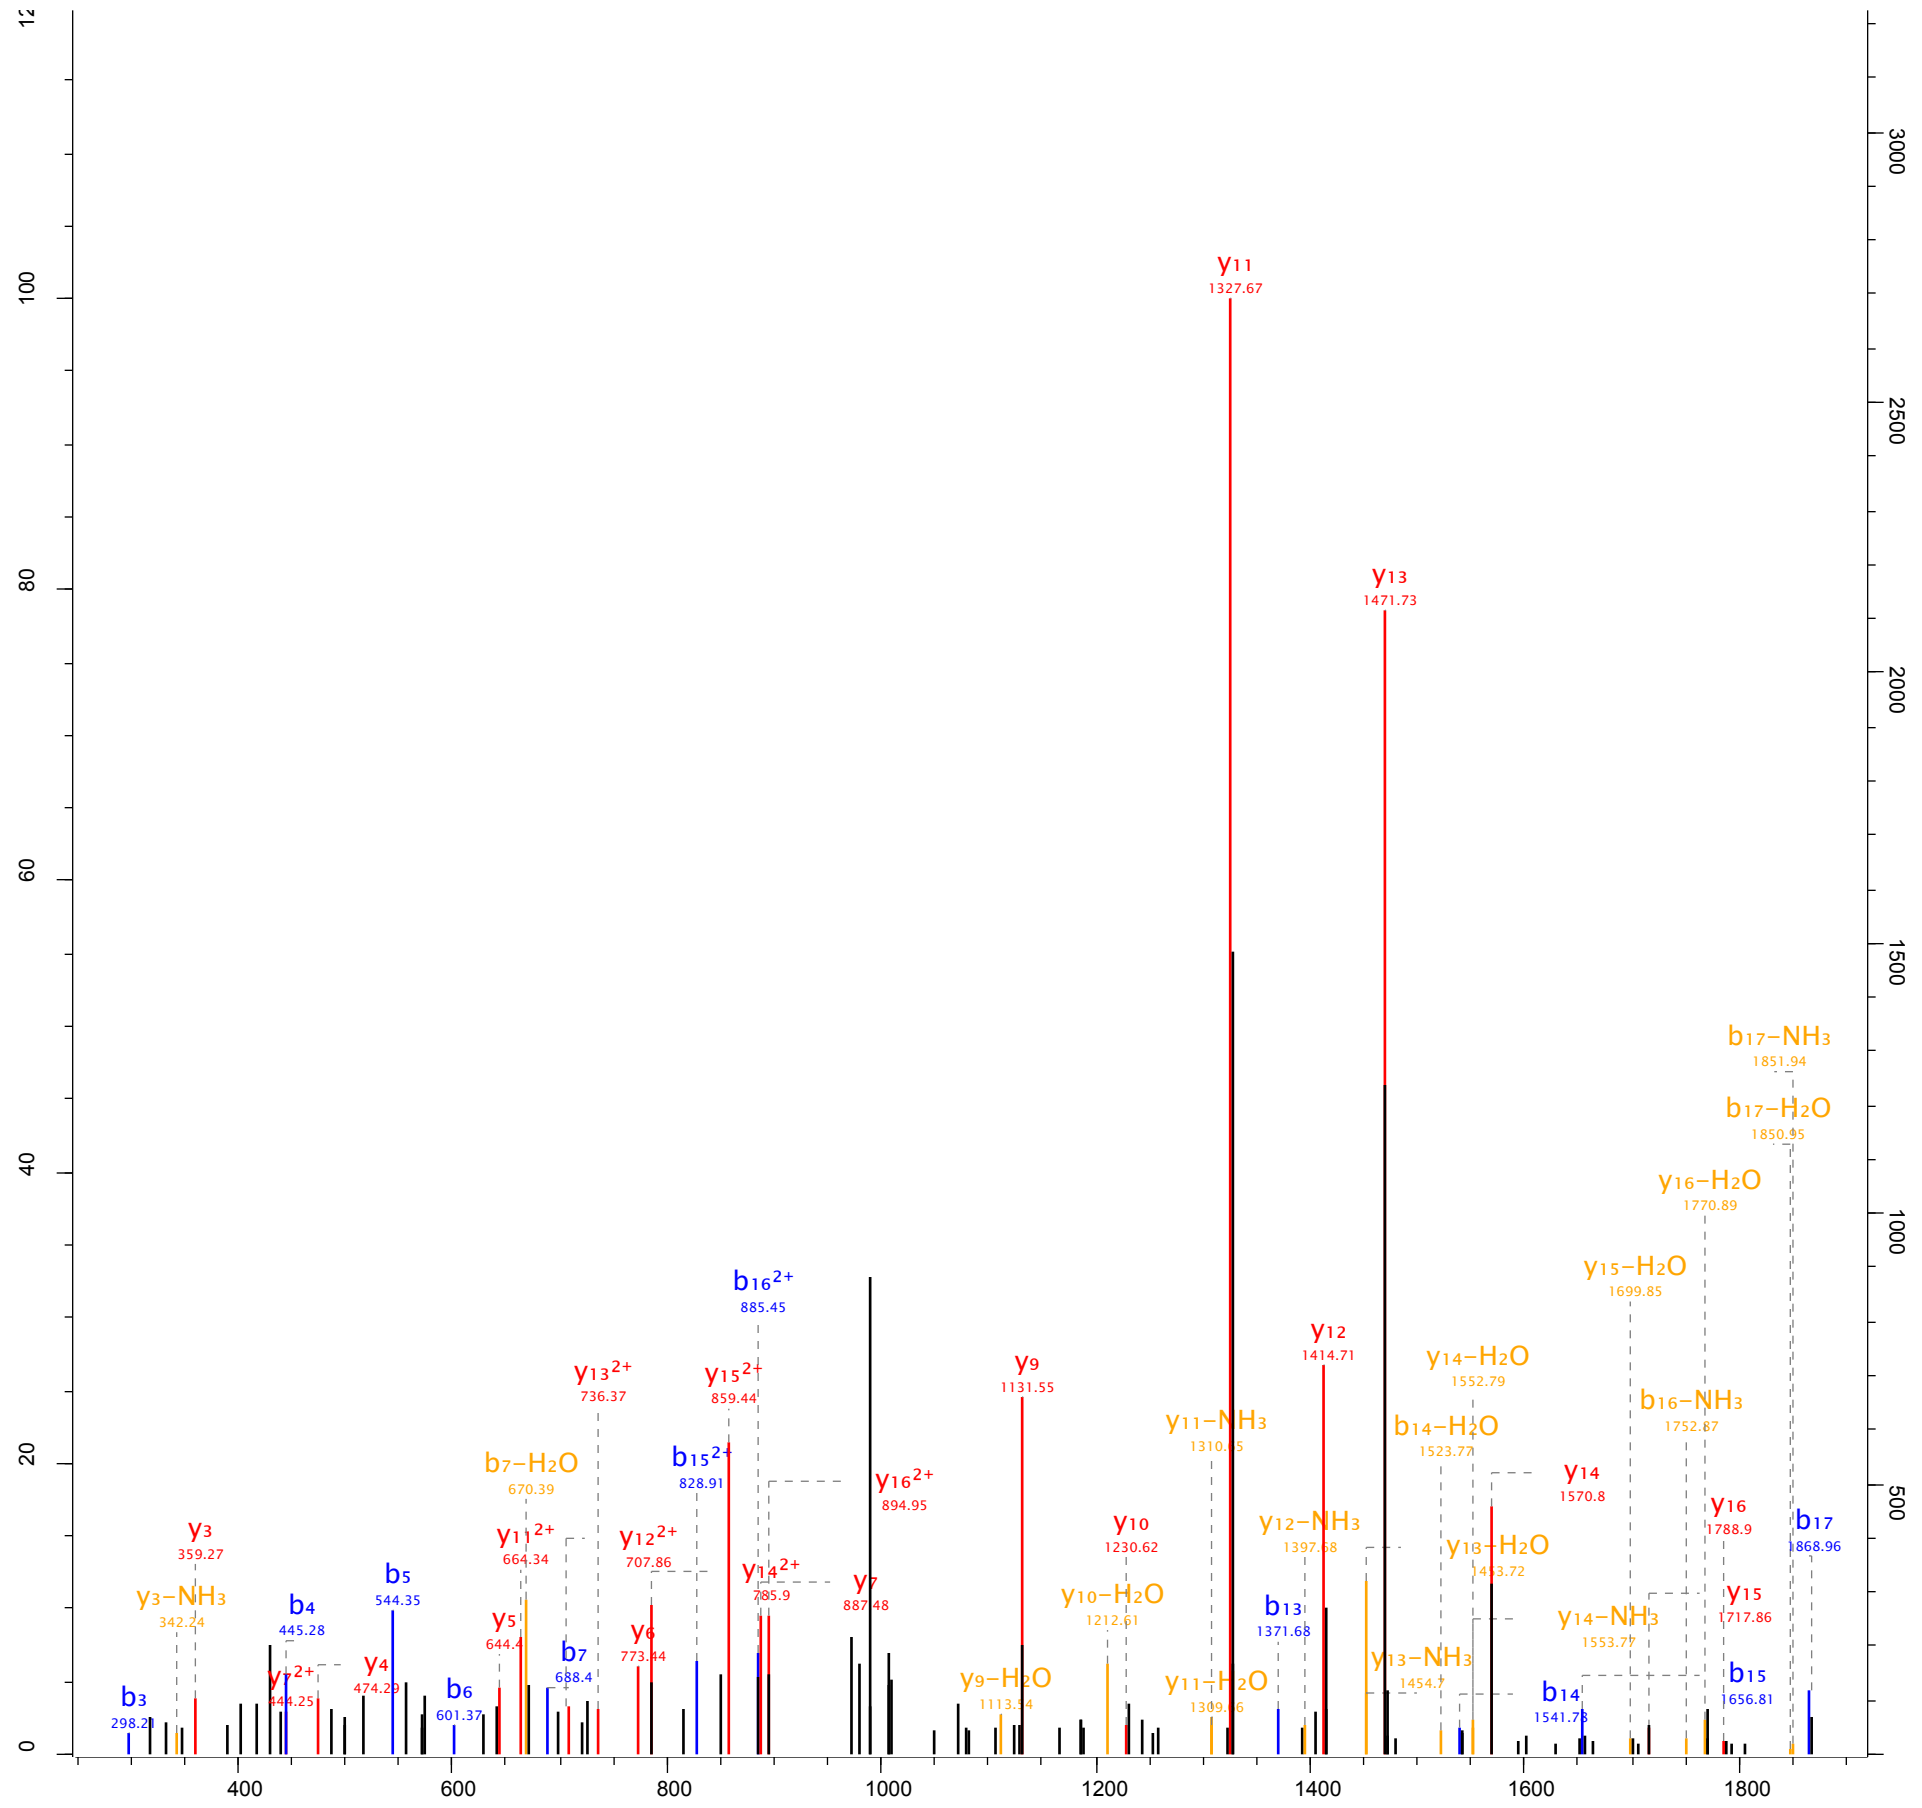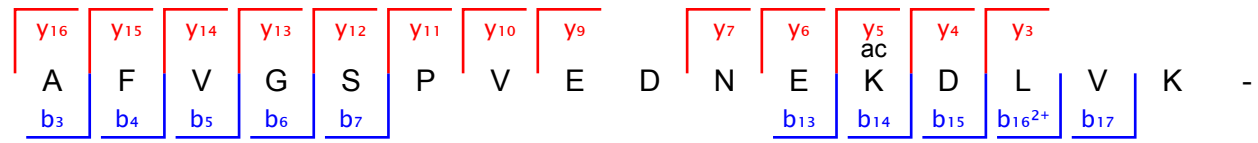

050813\_SCW\_II\_29\_16\_3

20531 ITMS; CID 181.51 852.1 Flnb

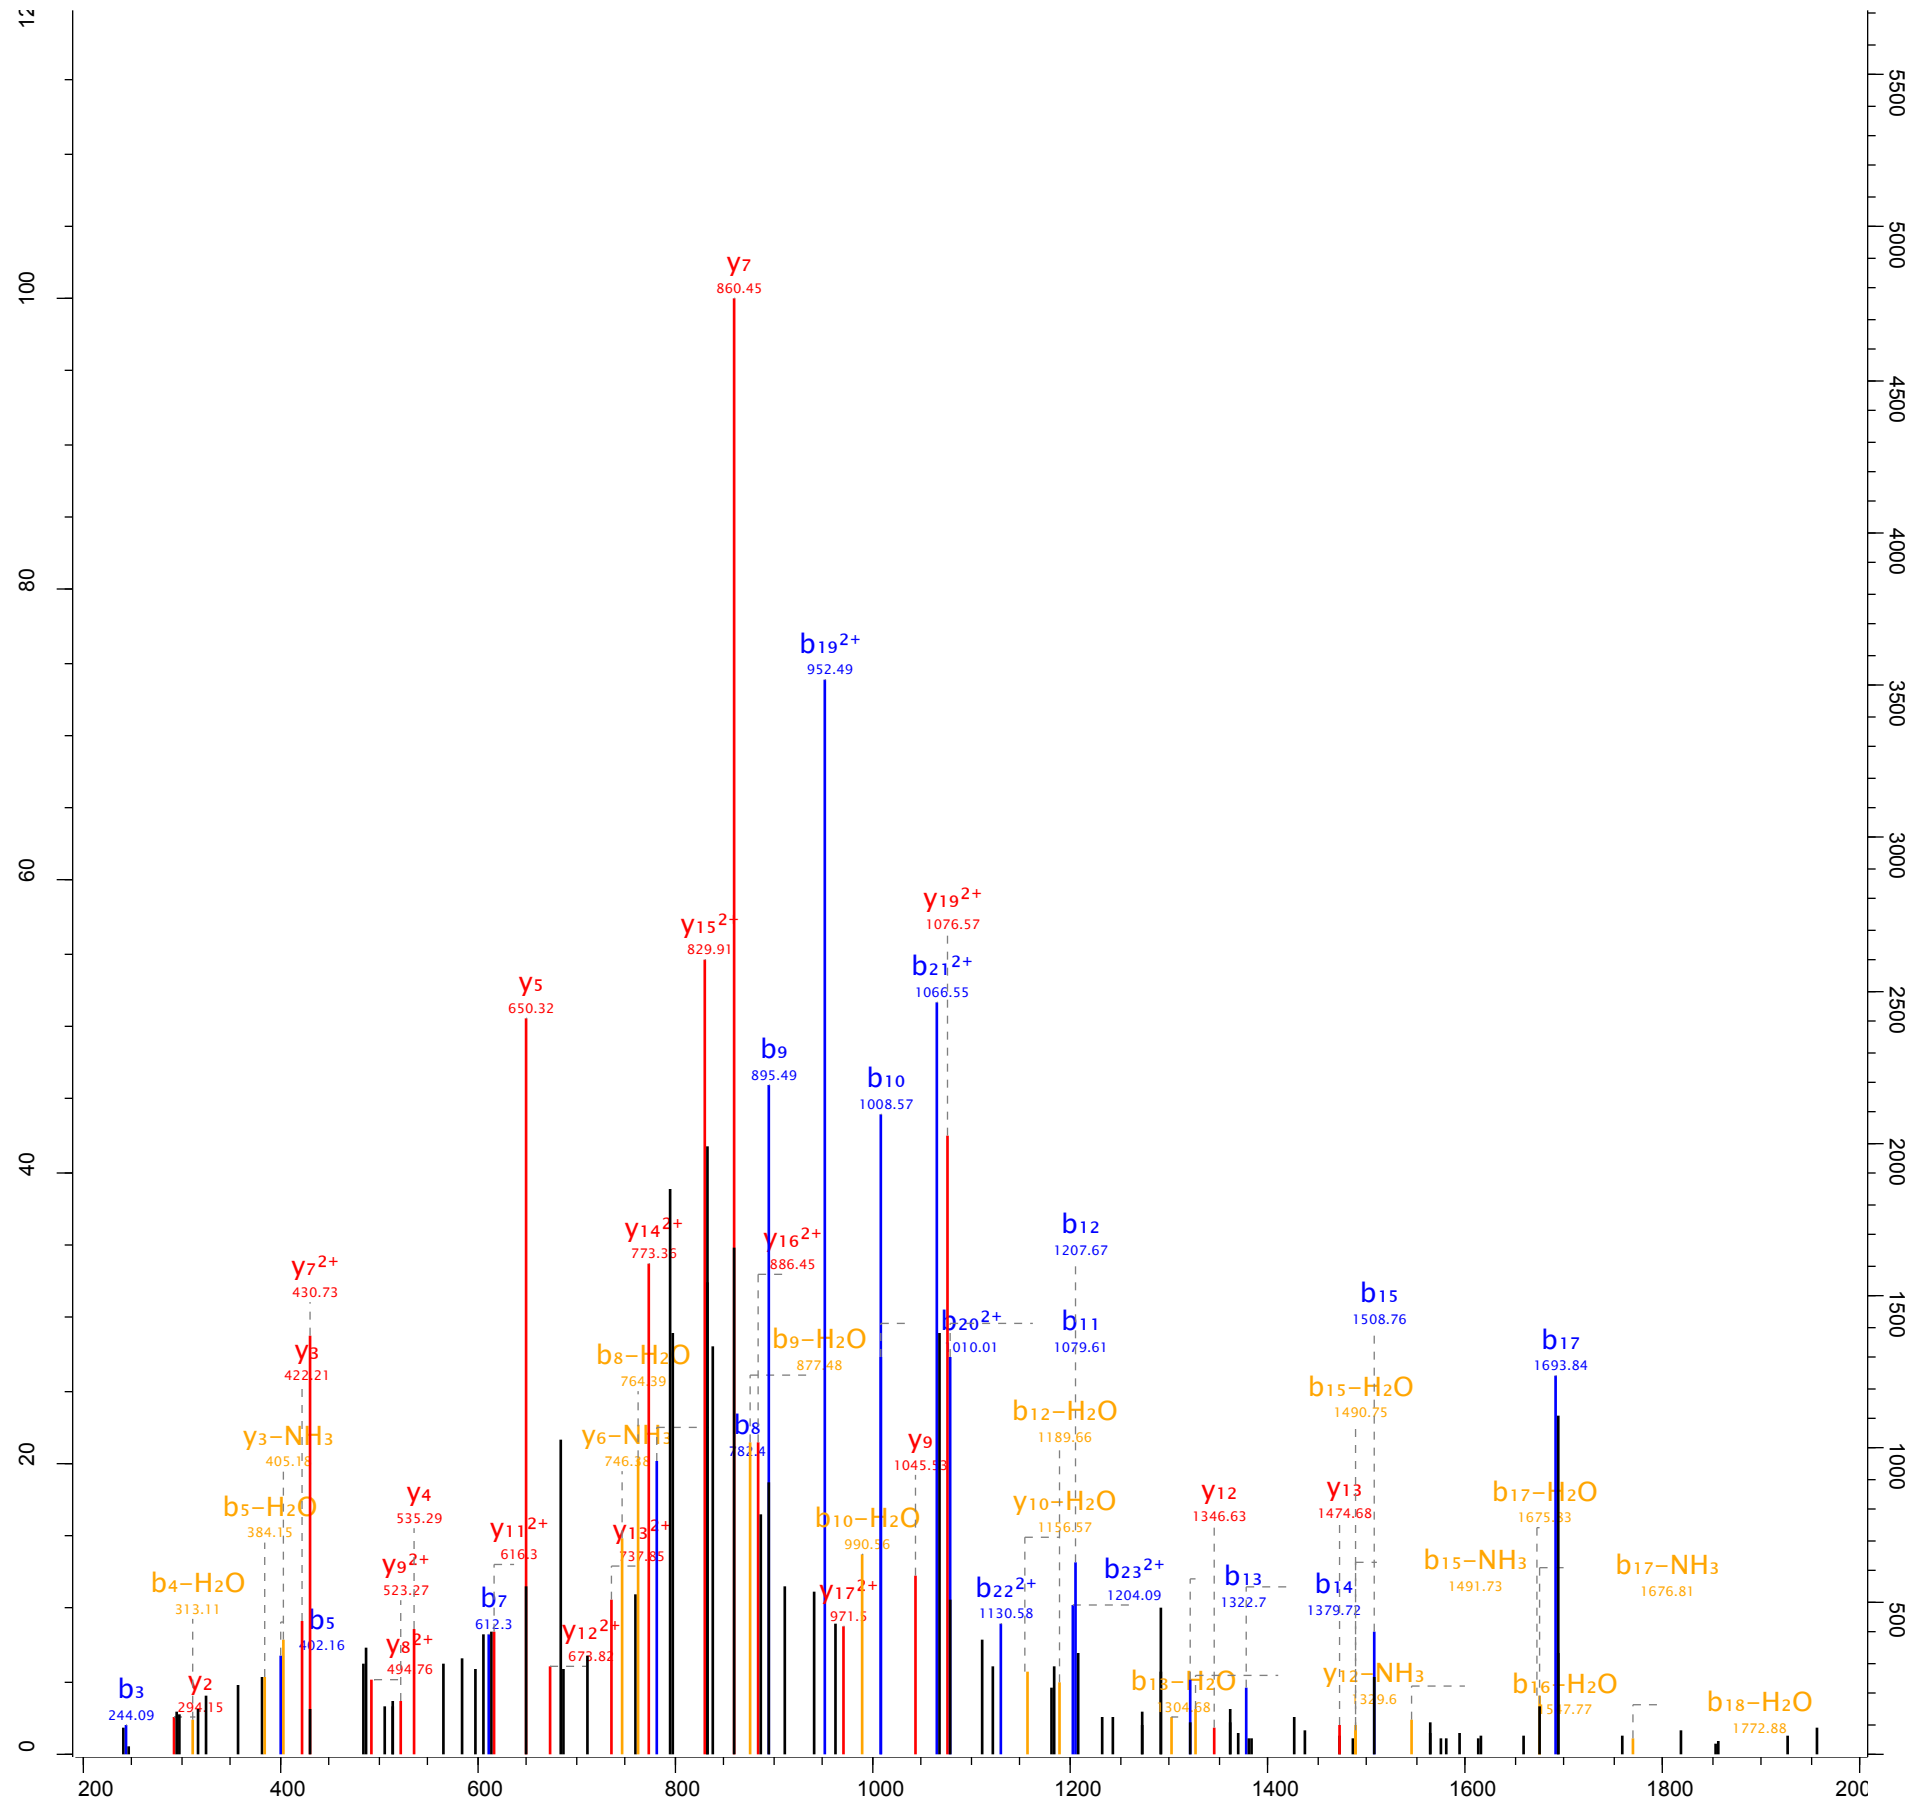

- D A G S A P L K I L A Q D G E G Q P I D I Q M K

b<sub>3</sub>
b<sub>5</sub>
b<sub>7</sub>
b<sub>8</sub>
b<sub>9</sub>
b<sub>10</sub>
b<sub>11</sub>
b<sub>12</sub>
b<sub>13</sub>
b<sub>14</sub>
b<sub>15</sub>
b<sub>17</sub>
b<sub>19</sub><sup>2+</sup>
b<sub>20</sub><sup>2+</sup>
b<sub>21</sub><sup>2+</sup>
b<sub>22</sub><sup>2+</sup>
b<sub>23</sub><sup>2+</sup>

y<sub>19</sub><sup>2+</sup>
y<sub>17</sub><sup>2+</sup>
y<sub>16</sub><sup>2+</sup>
y<sub>15</sub><sup>2+</sup>
y<sub>14</sub><sup>2+</sup>
y<sub>13</sub>
y<sub>12</sub>
y<sub>11</sub><sup>2+</sup>
y<sub>9</sub>
y<sub>8</sub><sup>2+</sup>
y<sub>7</sub>
y<sub>5</sub>
y<sub>4</sub>
y<sub>3</sub>
y<sub>2</sub><sup>OX</sup>

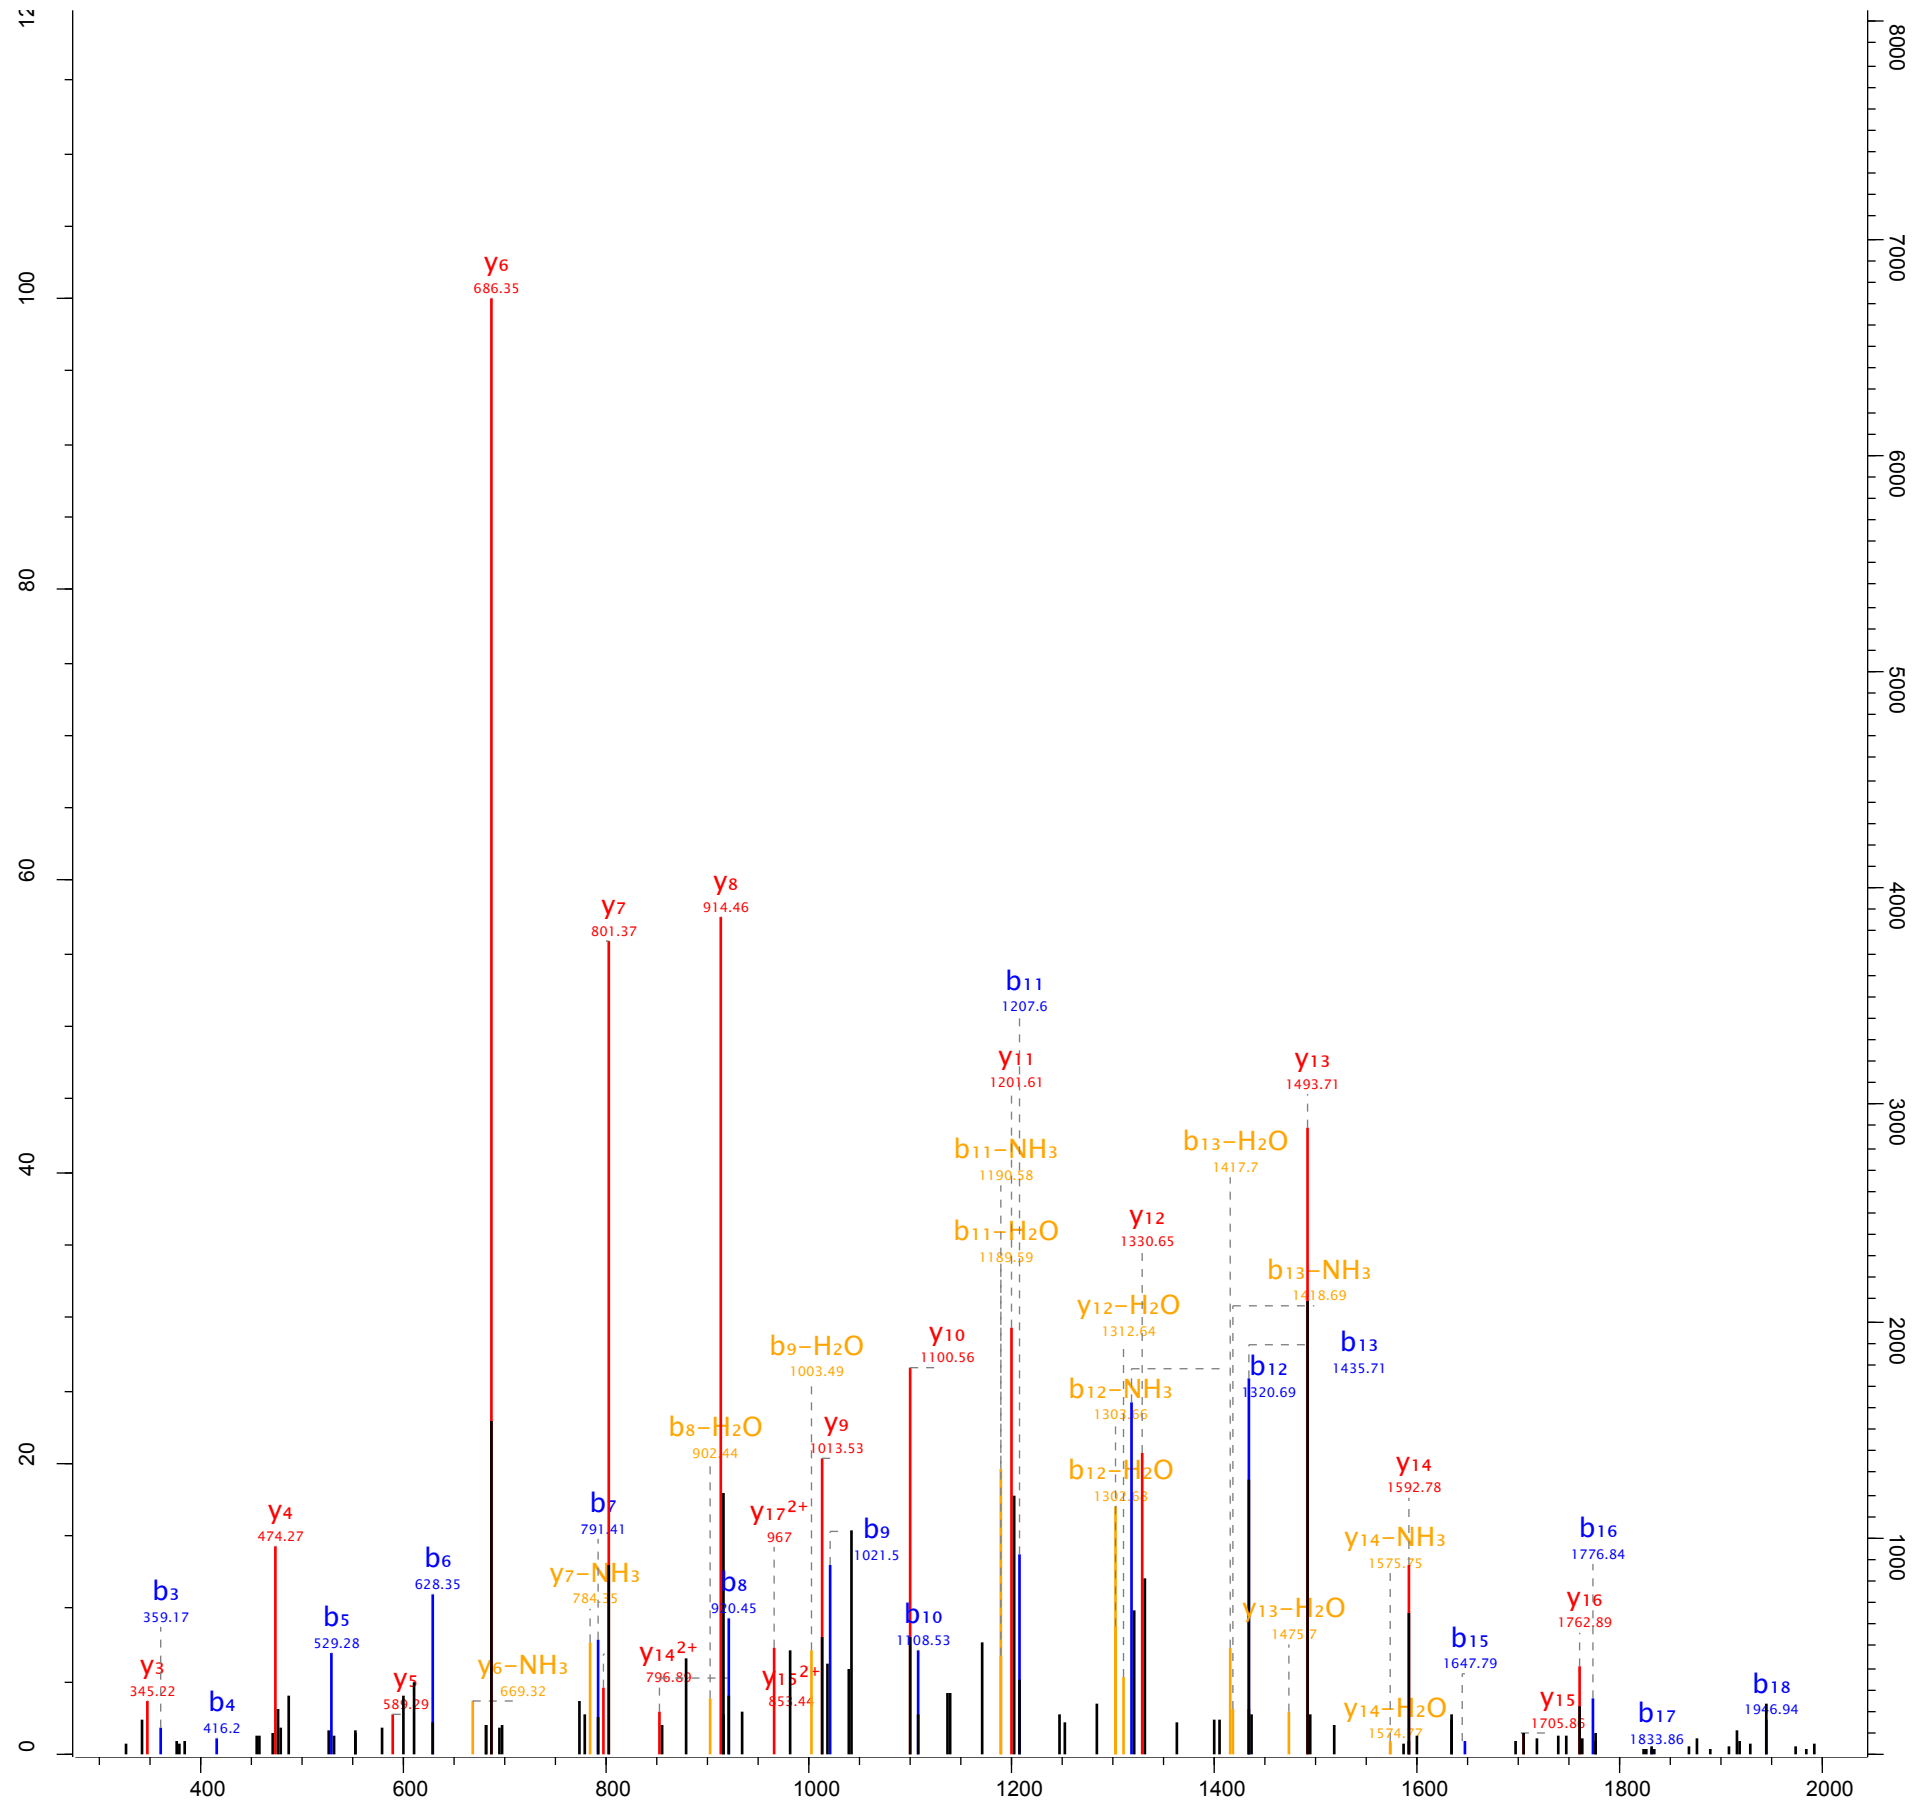

- G M y17<sup>2+</sup>  
ac y16 y15 y14 y13 y12 y11 y10 y9 y8 y7 y6 y5 y4 y3  
 - G M b3 b4 b5 b6 b7 b8 b9 b10 b11 b12 b13 b15 b16 b17 b18 I R -

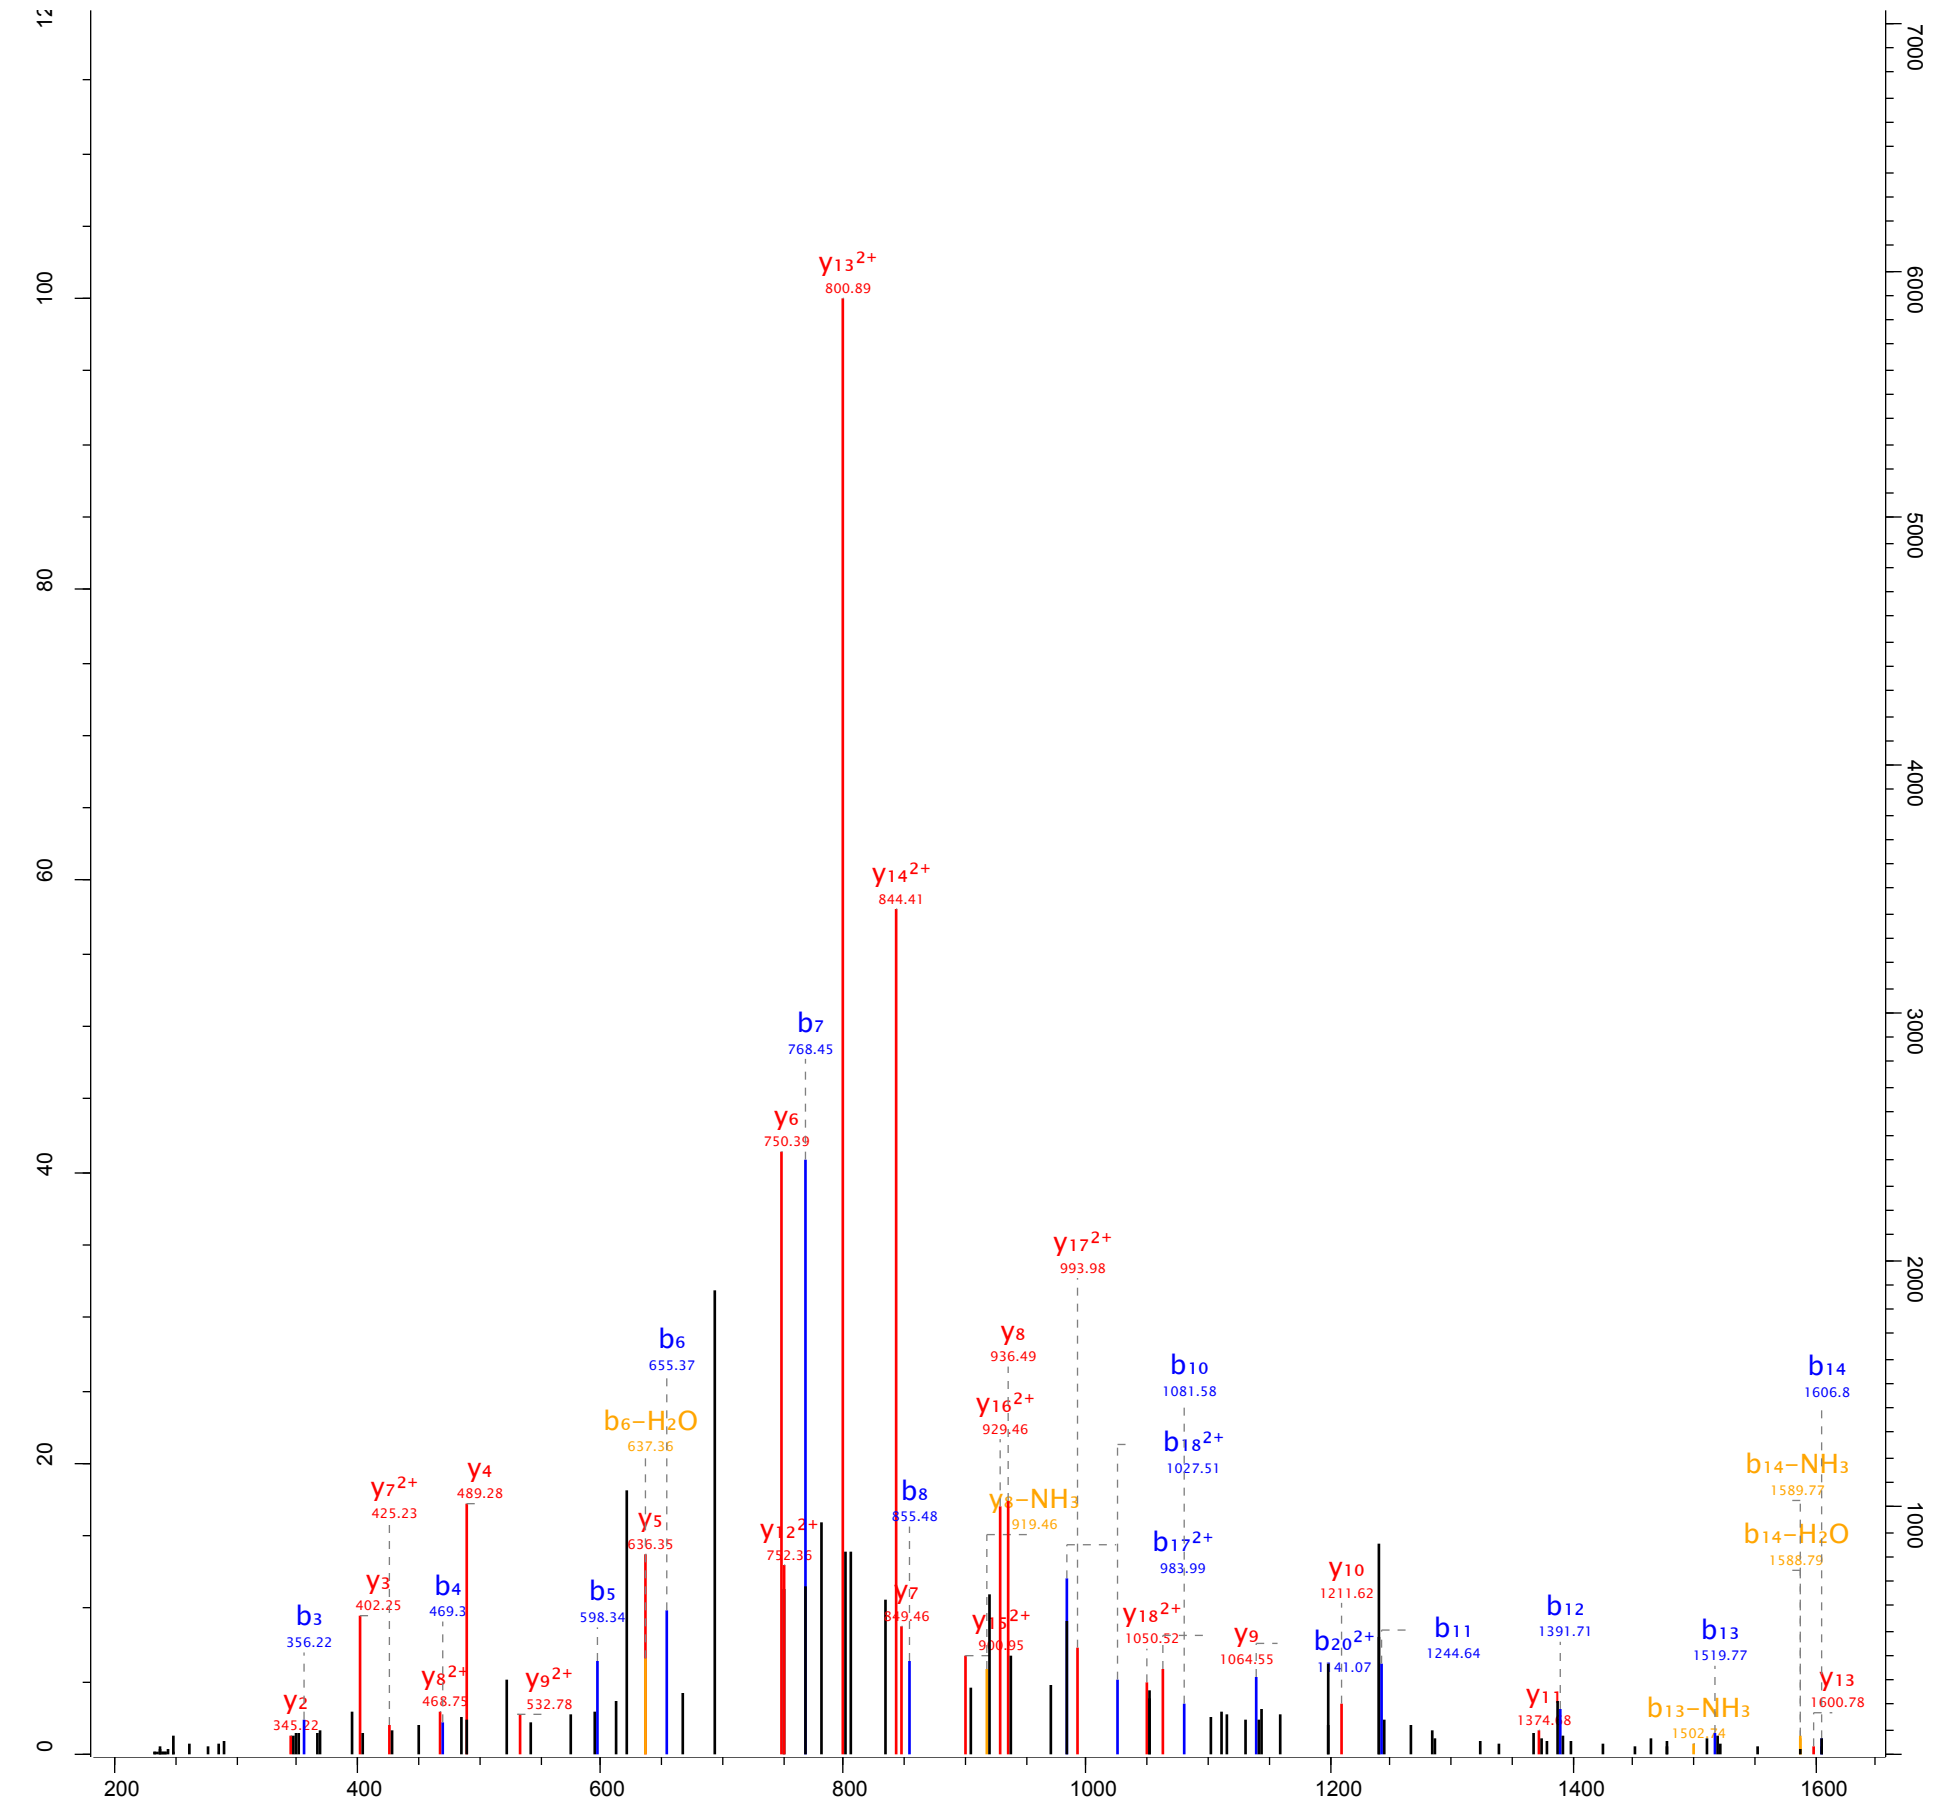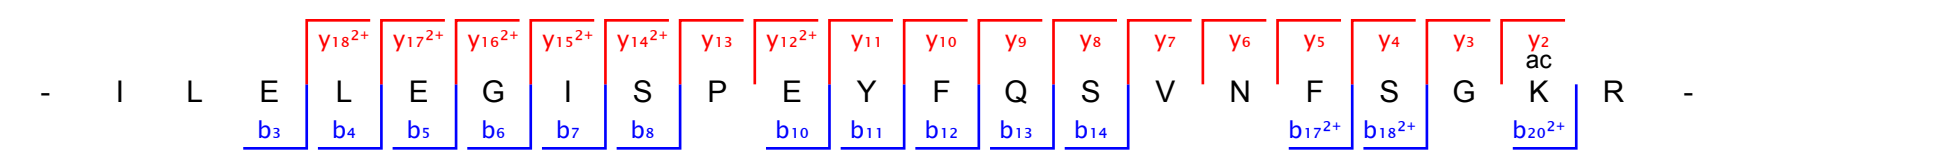

050813\_SCW\_II\_29\_16\_3

23958 ITMS; CID 216.77 910.03 Trnt1

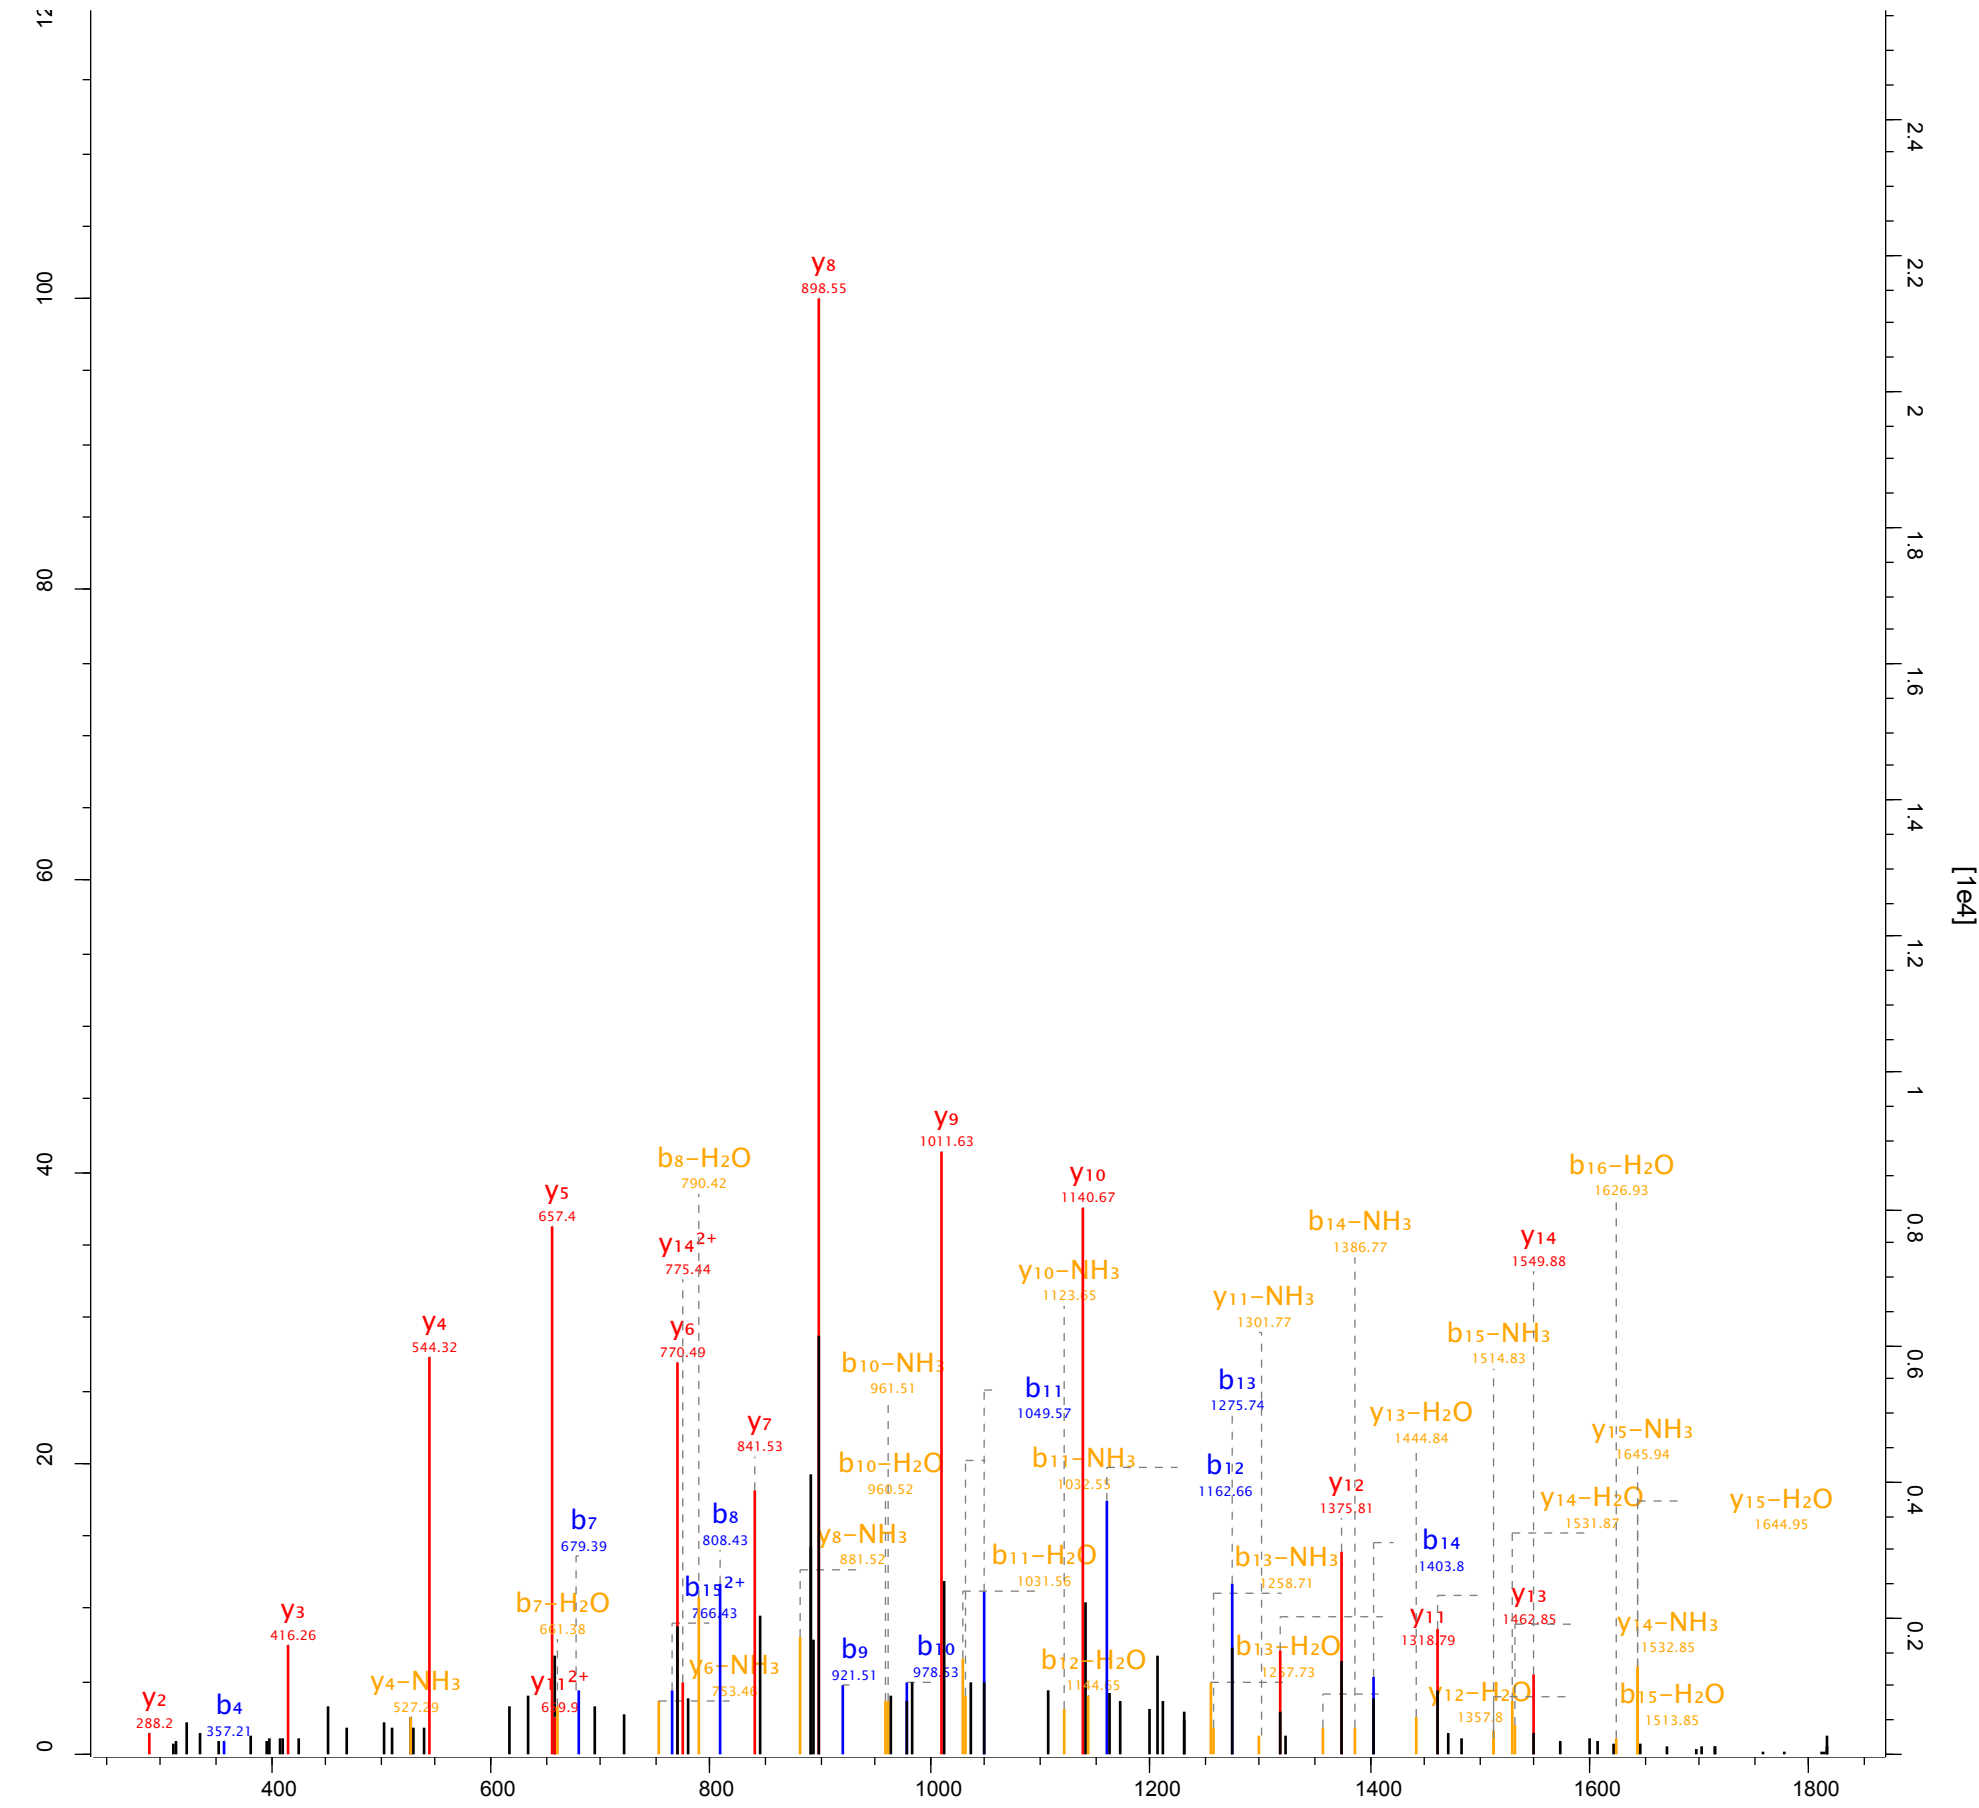

- V G I S S G K E I G A L L Q Q L R -

y14
y13
y12
y11
y10
y9
y8
y7
y6
y5
y4
y3
y2

b4
b7
b8
b9
b10
b11
b12
b13
b14
b15<sup>2+</sup>

050813\_SCW\_II\_29\_16\_3

24099 ITMS; CID 155.08 834.44 Atp5a1

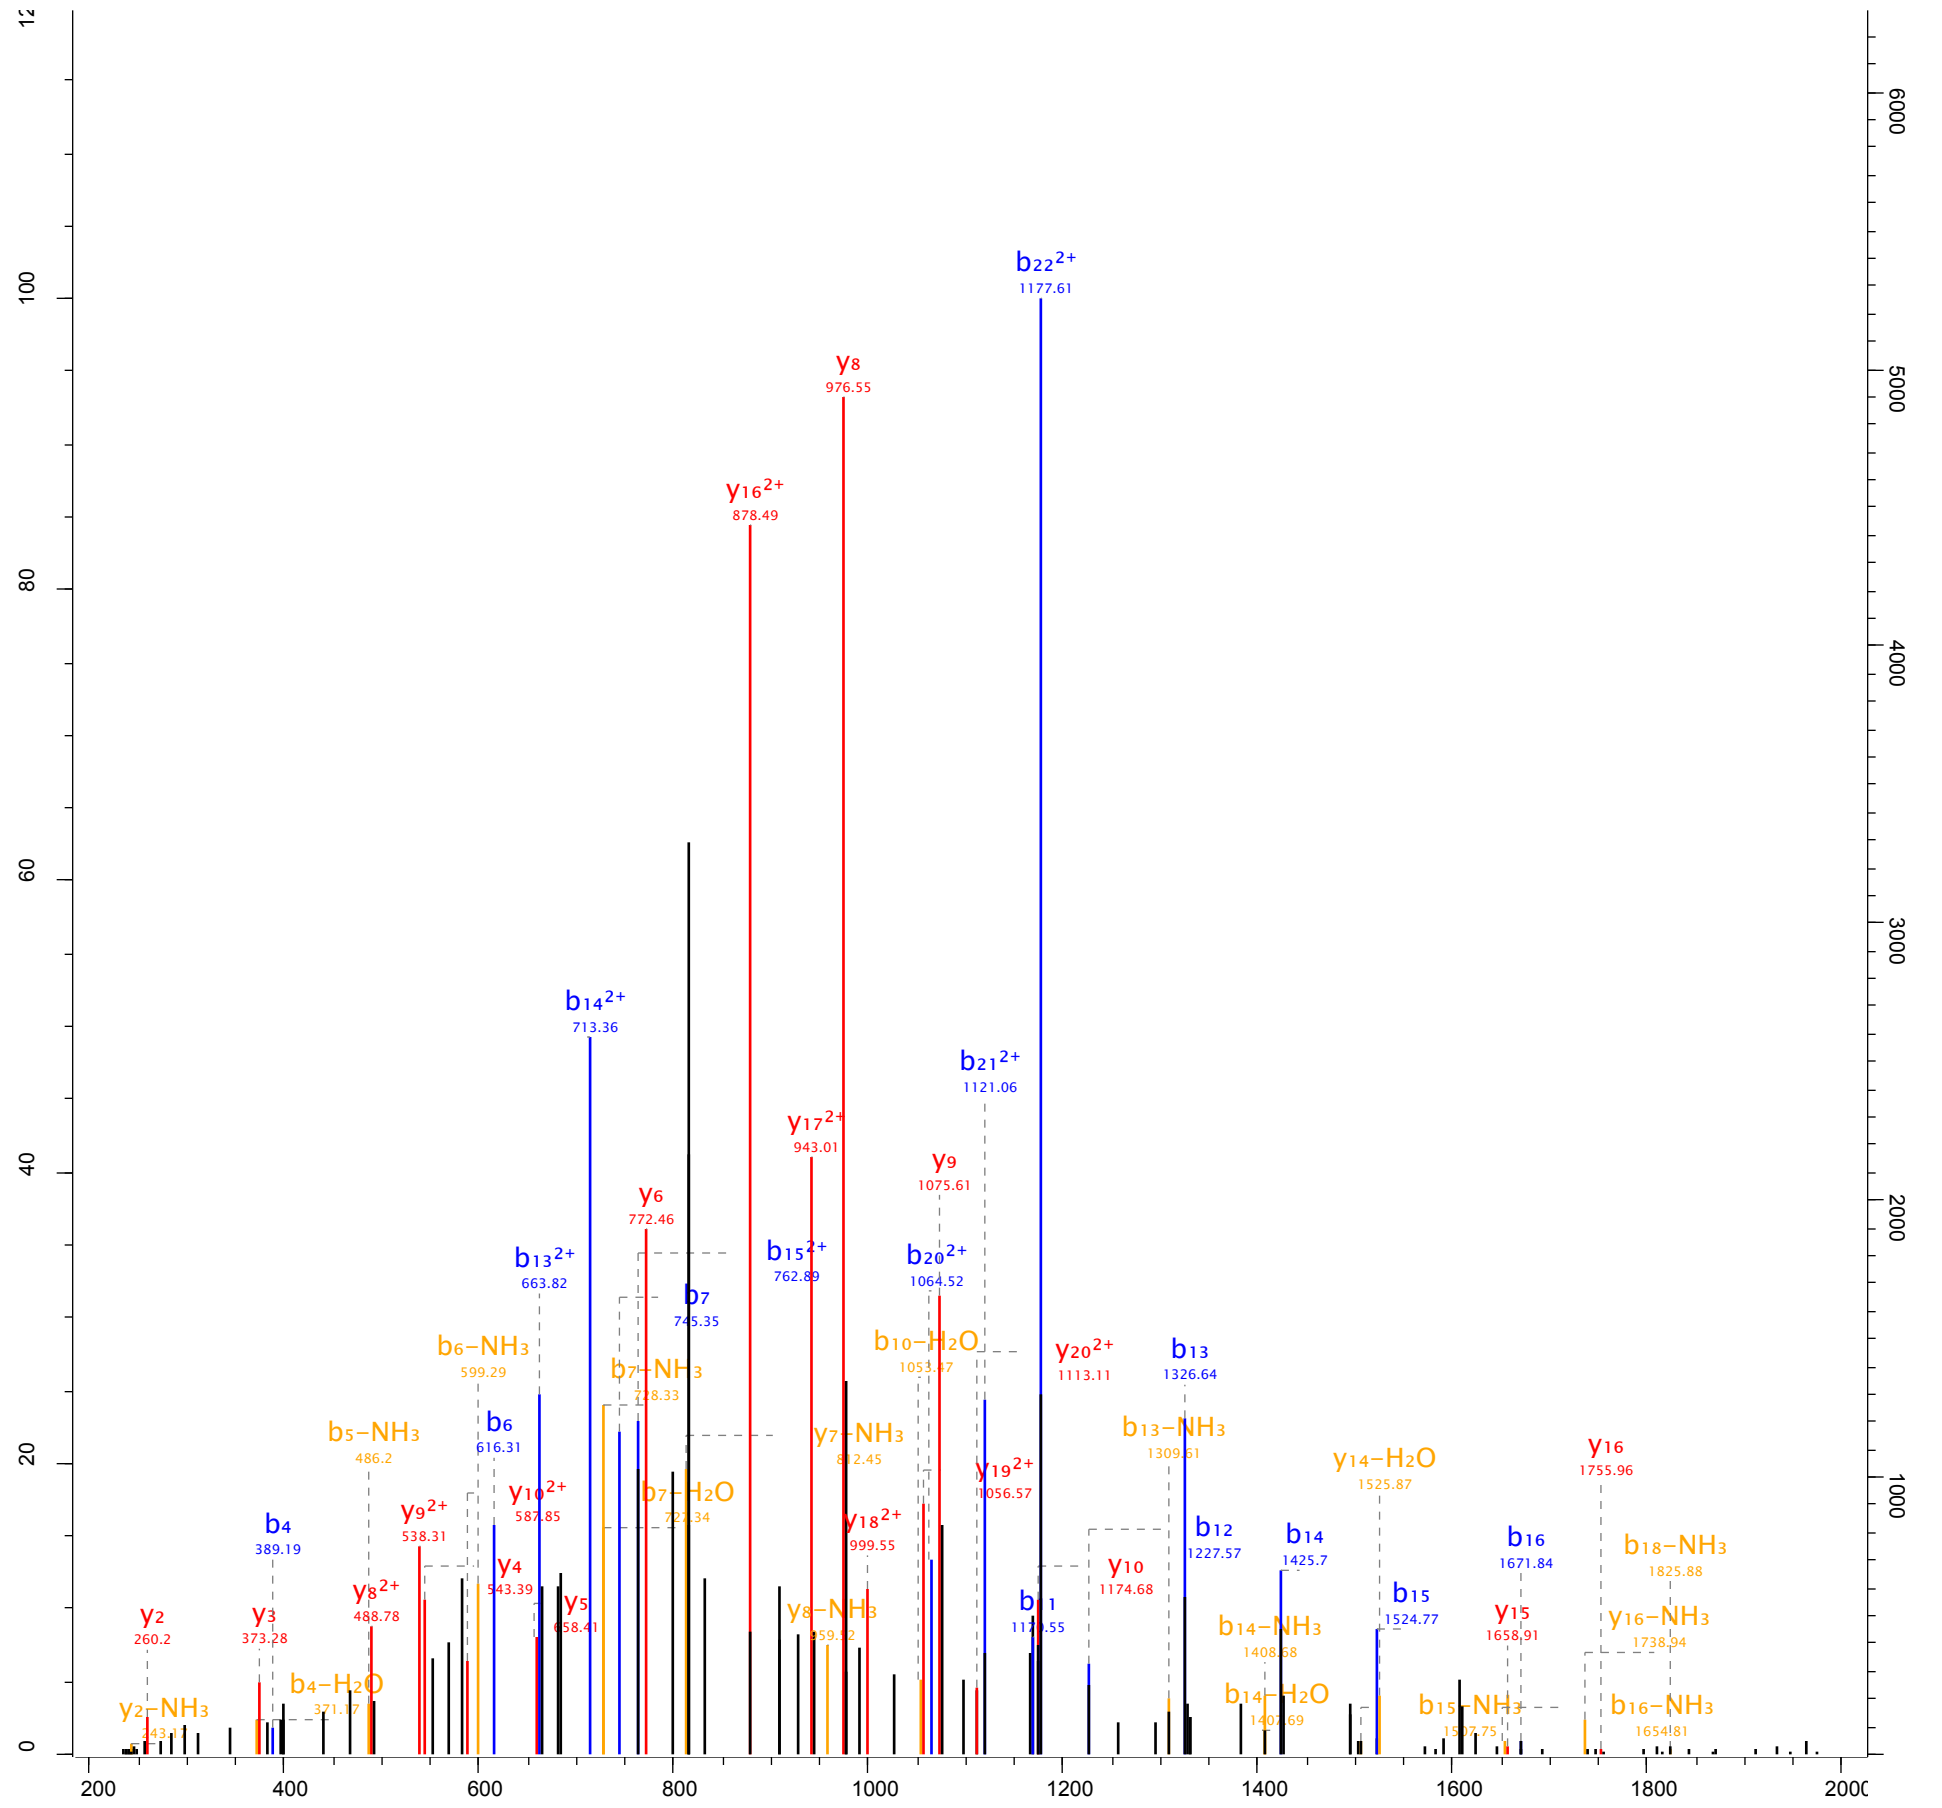

- G M S L N L E P D N V G V V V F G N D K L I K -

y20<sup>2+</sup>
y19<sup>2+</sup>
y18<sup>2+</sup>
y17<sup>2+</sup>
y16
y15

b4
b6
b7
b11
b12
b13
b14
b15
b16
b20<sup>2+</sup>
b21<sup>2+</sup>
b22<sup>2+</sup>

050813\_SCW\_II\_29\_16\_3

26066 ITMS; CID 162.09 842.1 Actn1

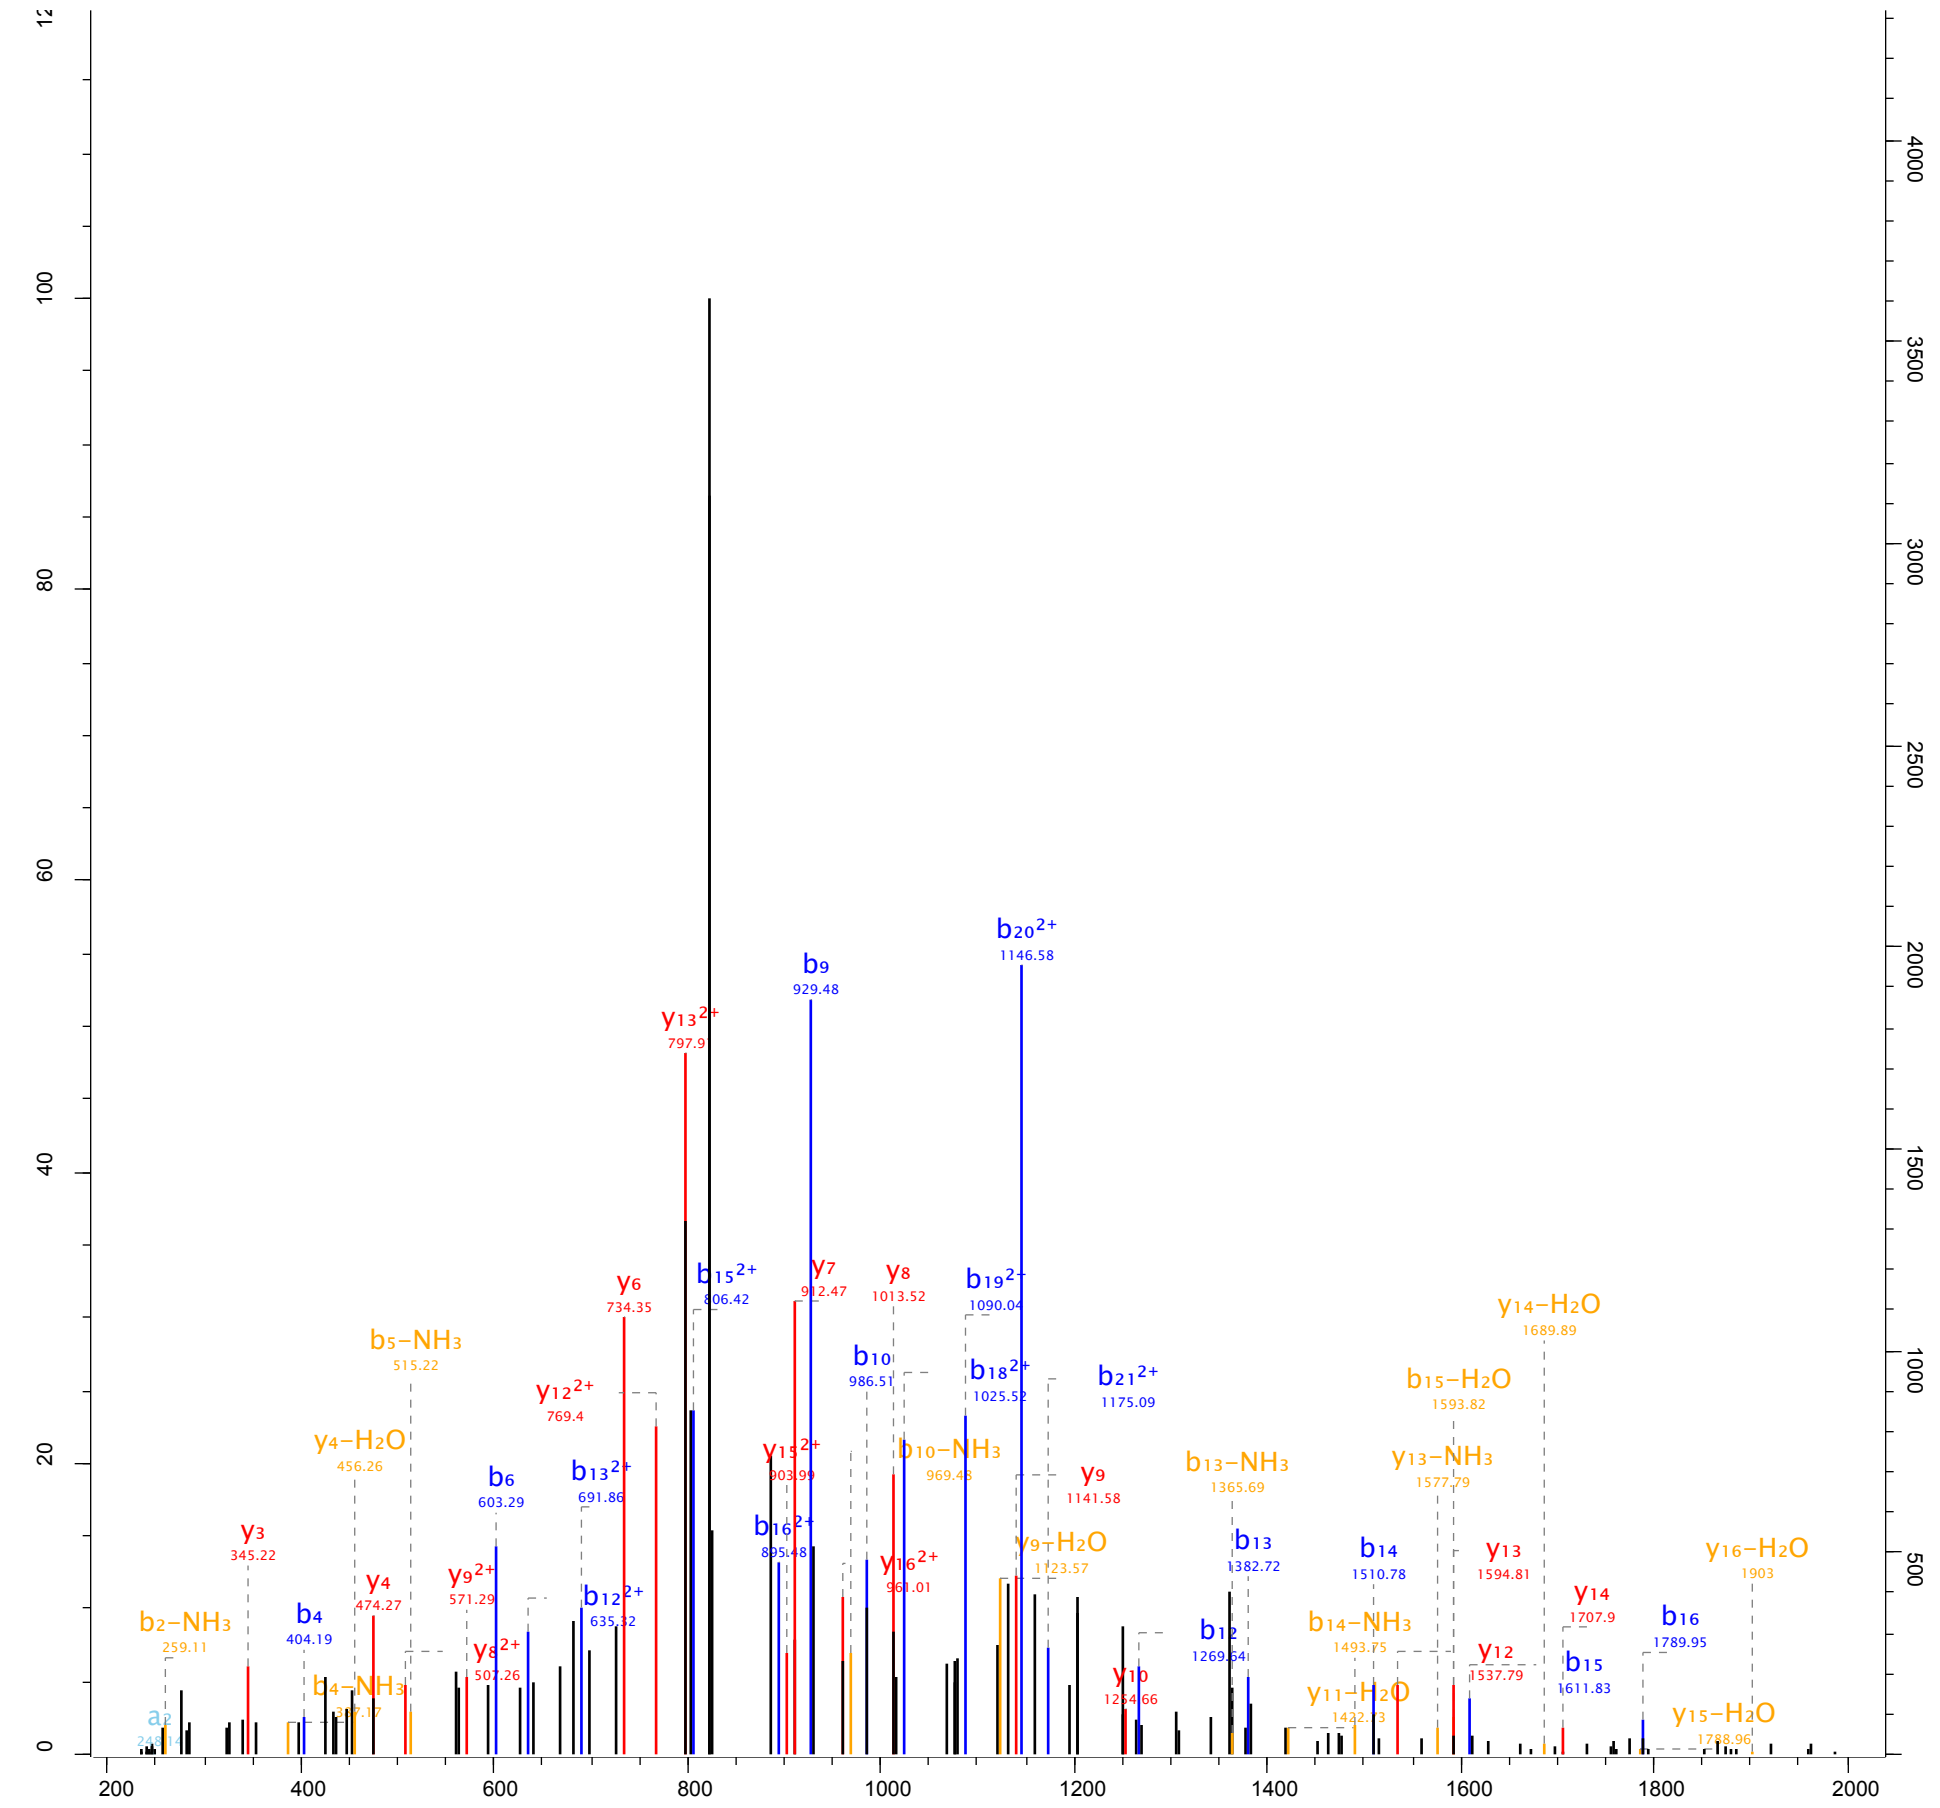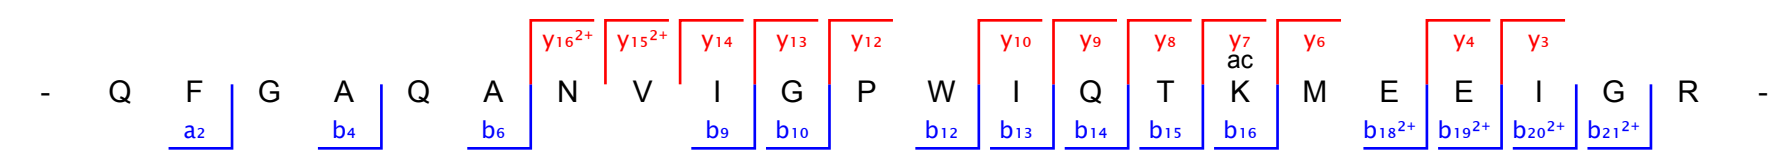

050813\_SCW\_II\_29\_16\_3

26633 ITMS; CID 108.5 1030.21 Tpi1

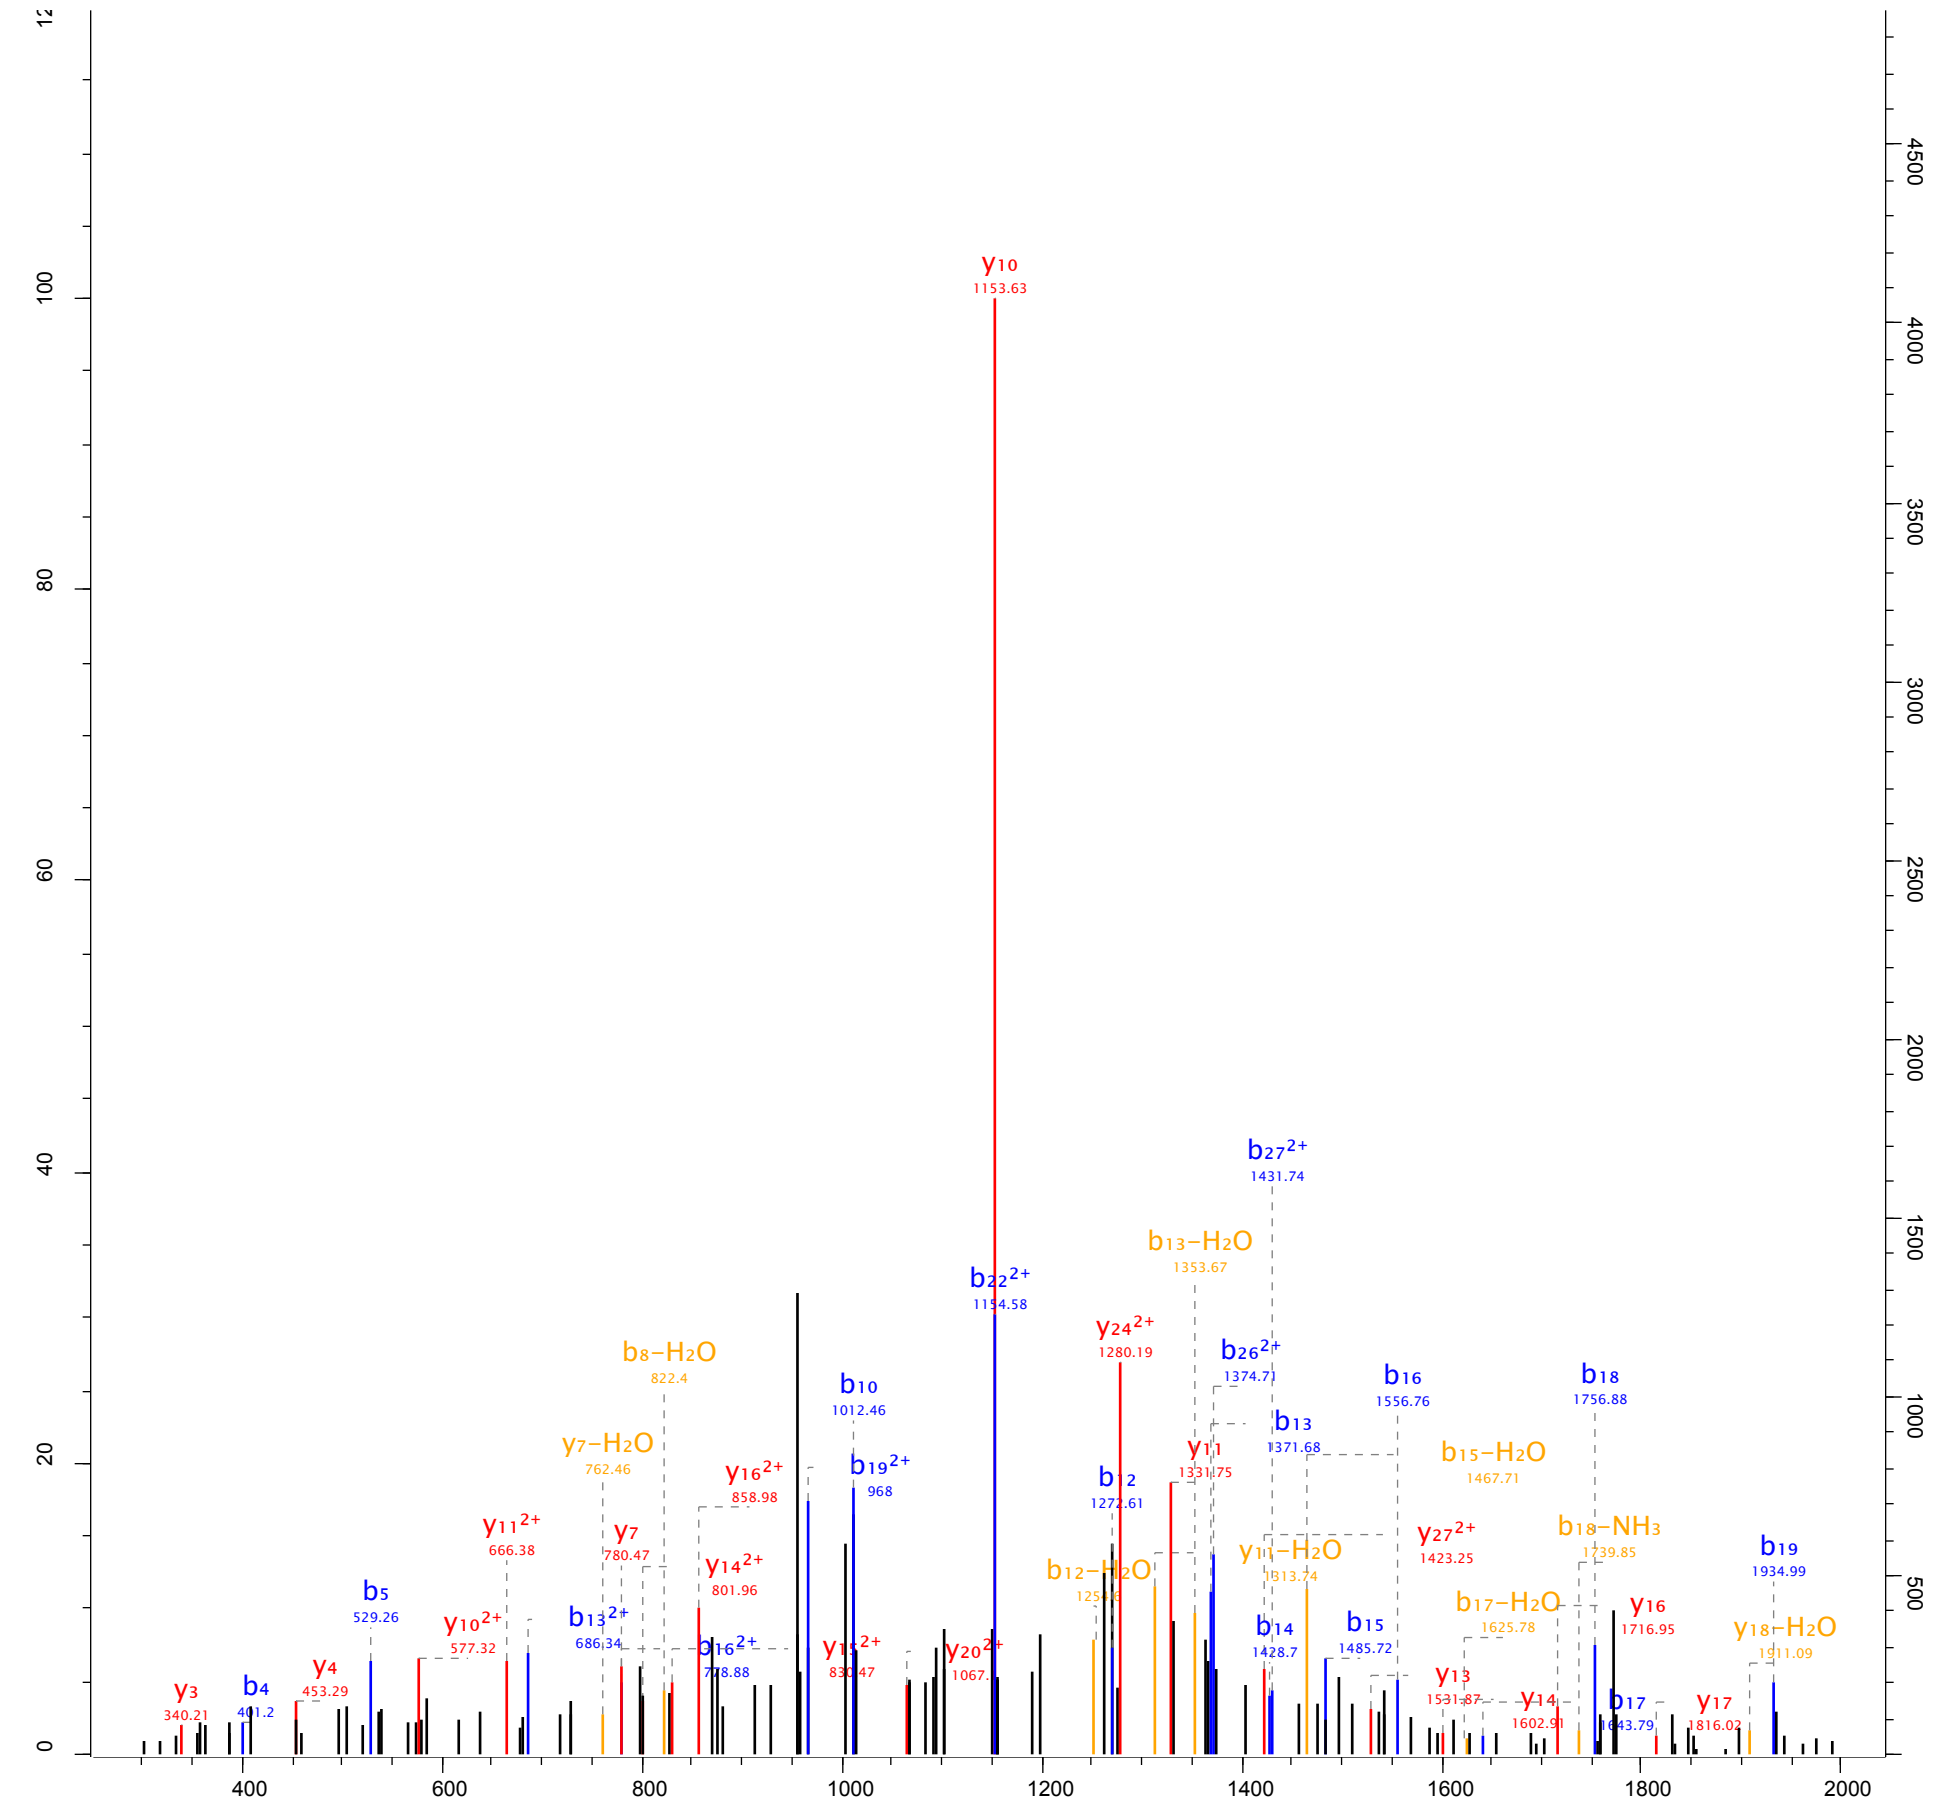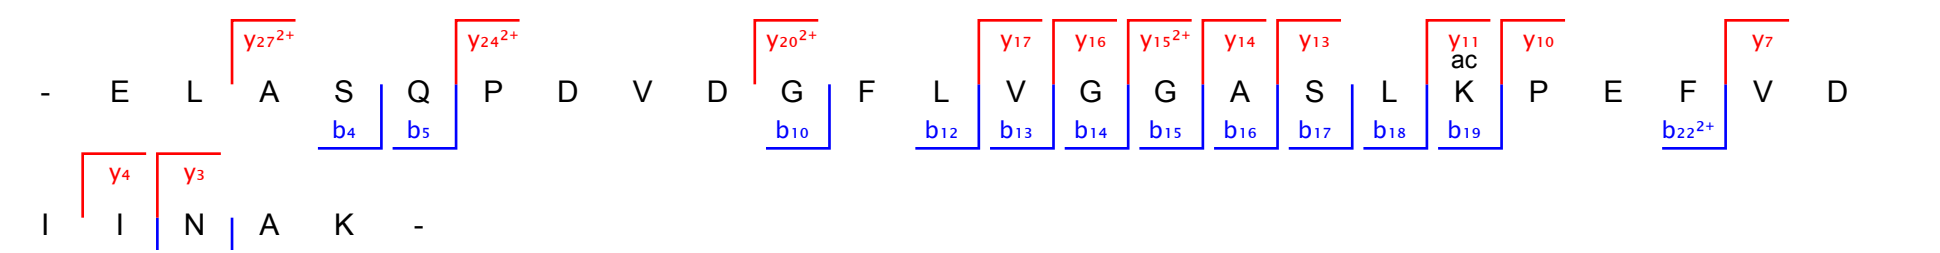



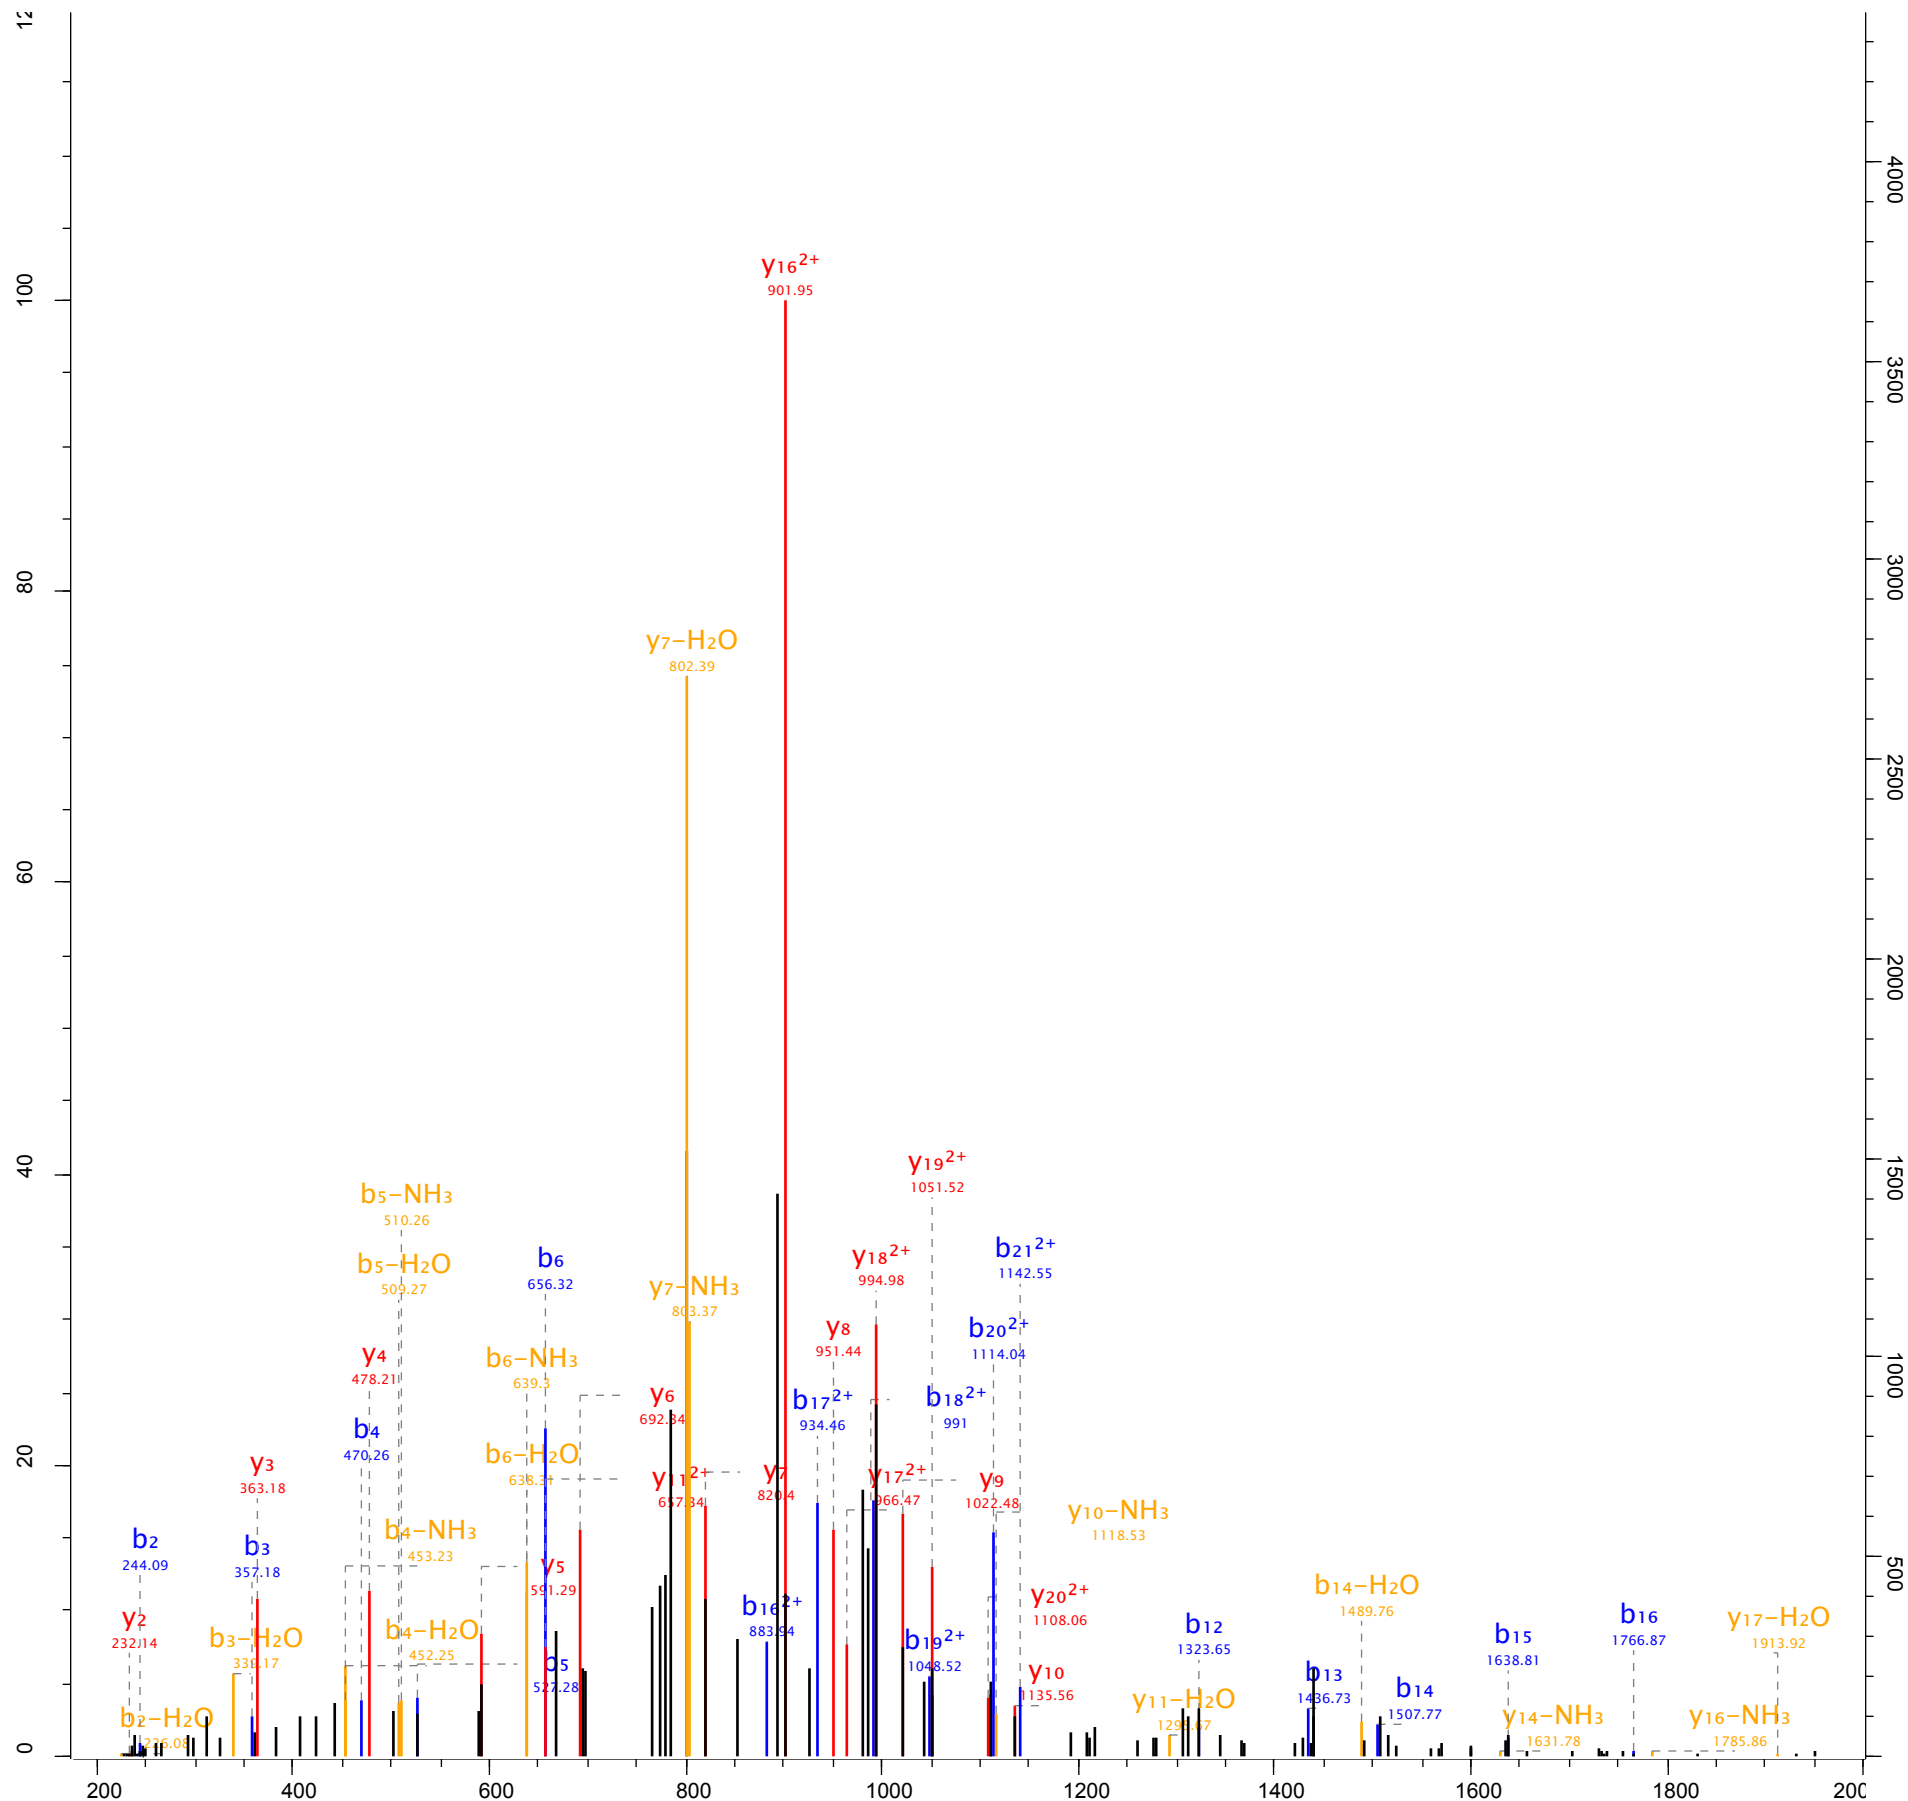

- E N L L G E P G M G F K I A M Q T L D M G R -

$y_{20}^{2+}$ 
 $y_{19}^{2+}$ 
 $y_{18}^{2+}$ 
 $y_{17}^{2+}$ 
 $y_{16}^{2+}$ 
 $y_{11}^{2+}$ 
ac
 $y_{10}$ 
 $y_9$ 
 $y_8$ 
 $y_7$ 
 $y_6$ 
 $y_5$ 
 $y_4$ 
 $y_3$ 
 $y_2$

$b_2$ 
 $b_3$ 
 $b_4$ 
 $b_5$ 
 $b_6$ 
 $b_{12}$ 
 $b_{13}$ 
 $b_{14}$ 
 $b_{15}$ 
 $b_{16}$ 
 $b_{17}^{2+}$ 
 $b_{18}^{2+}$ 
 $b_{19}^{2+}$ 
 $b_{20}^{2+}$ 
 $b_{21}^{2+}$

050813\_SCW\_II\_29\_16\_3

27435

ITMS; CID

160.03

659.01

Ldha

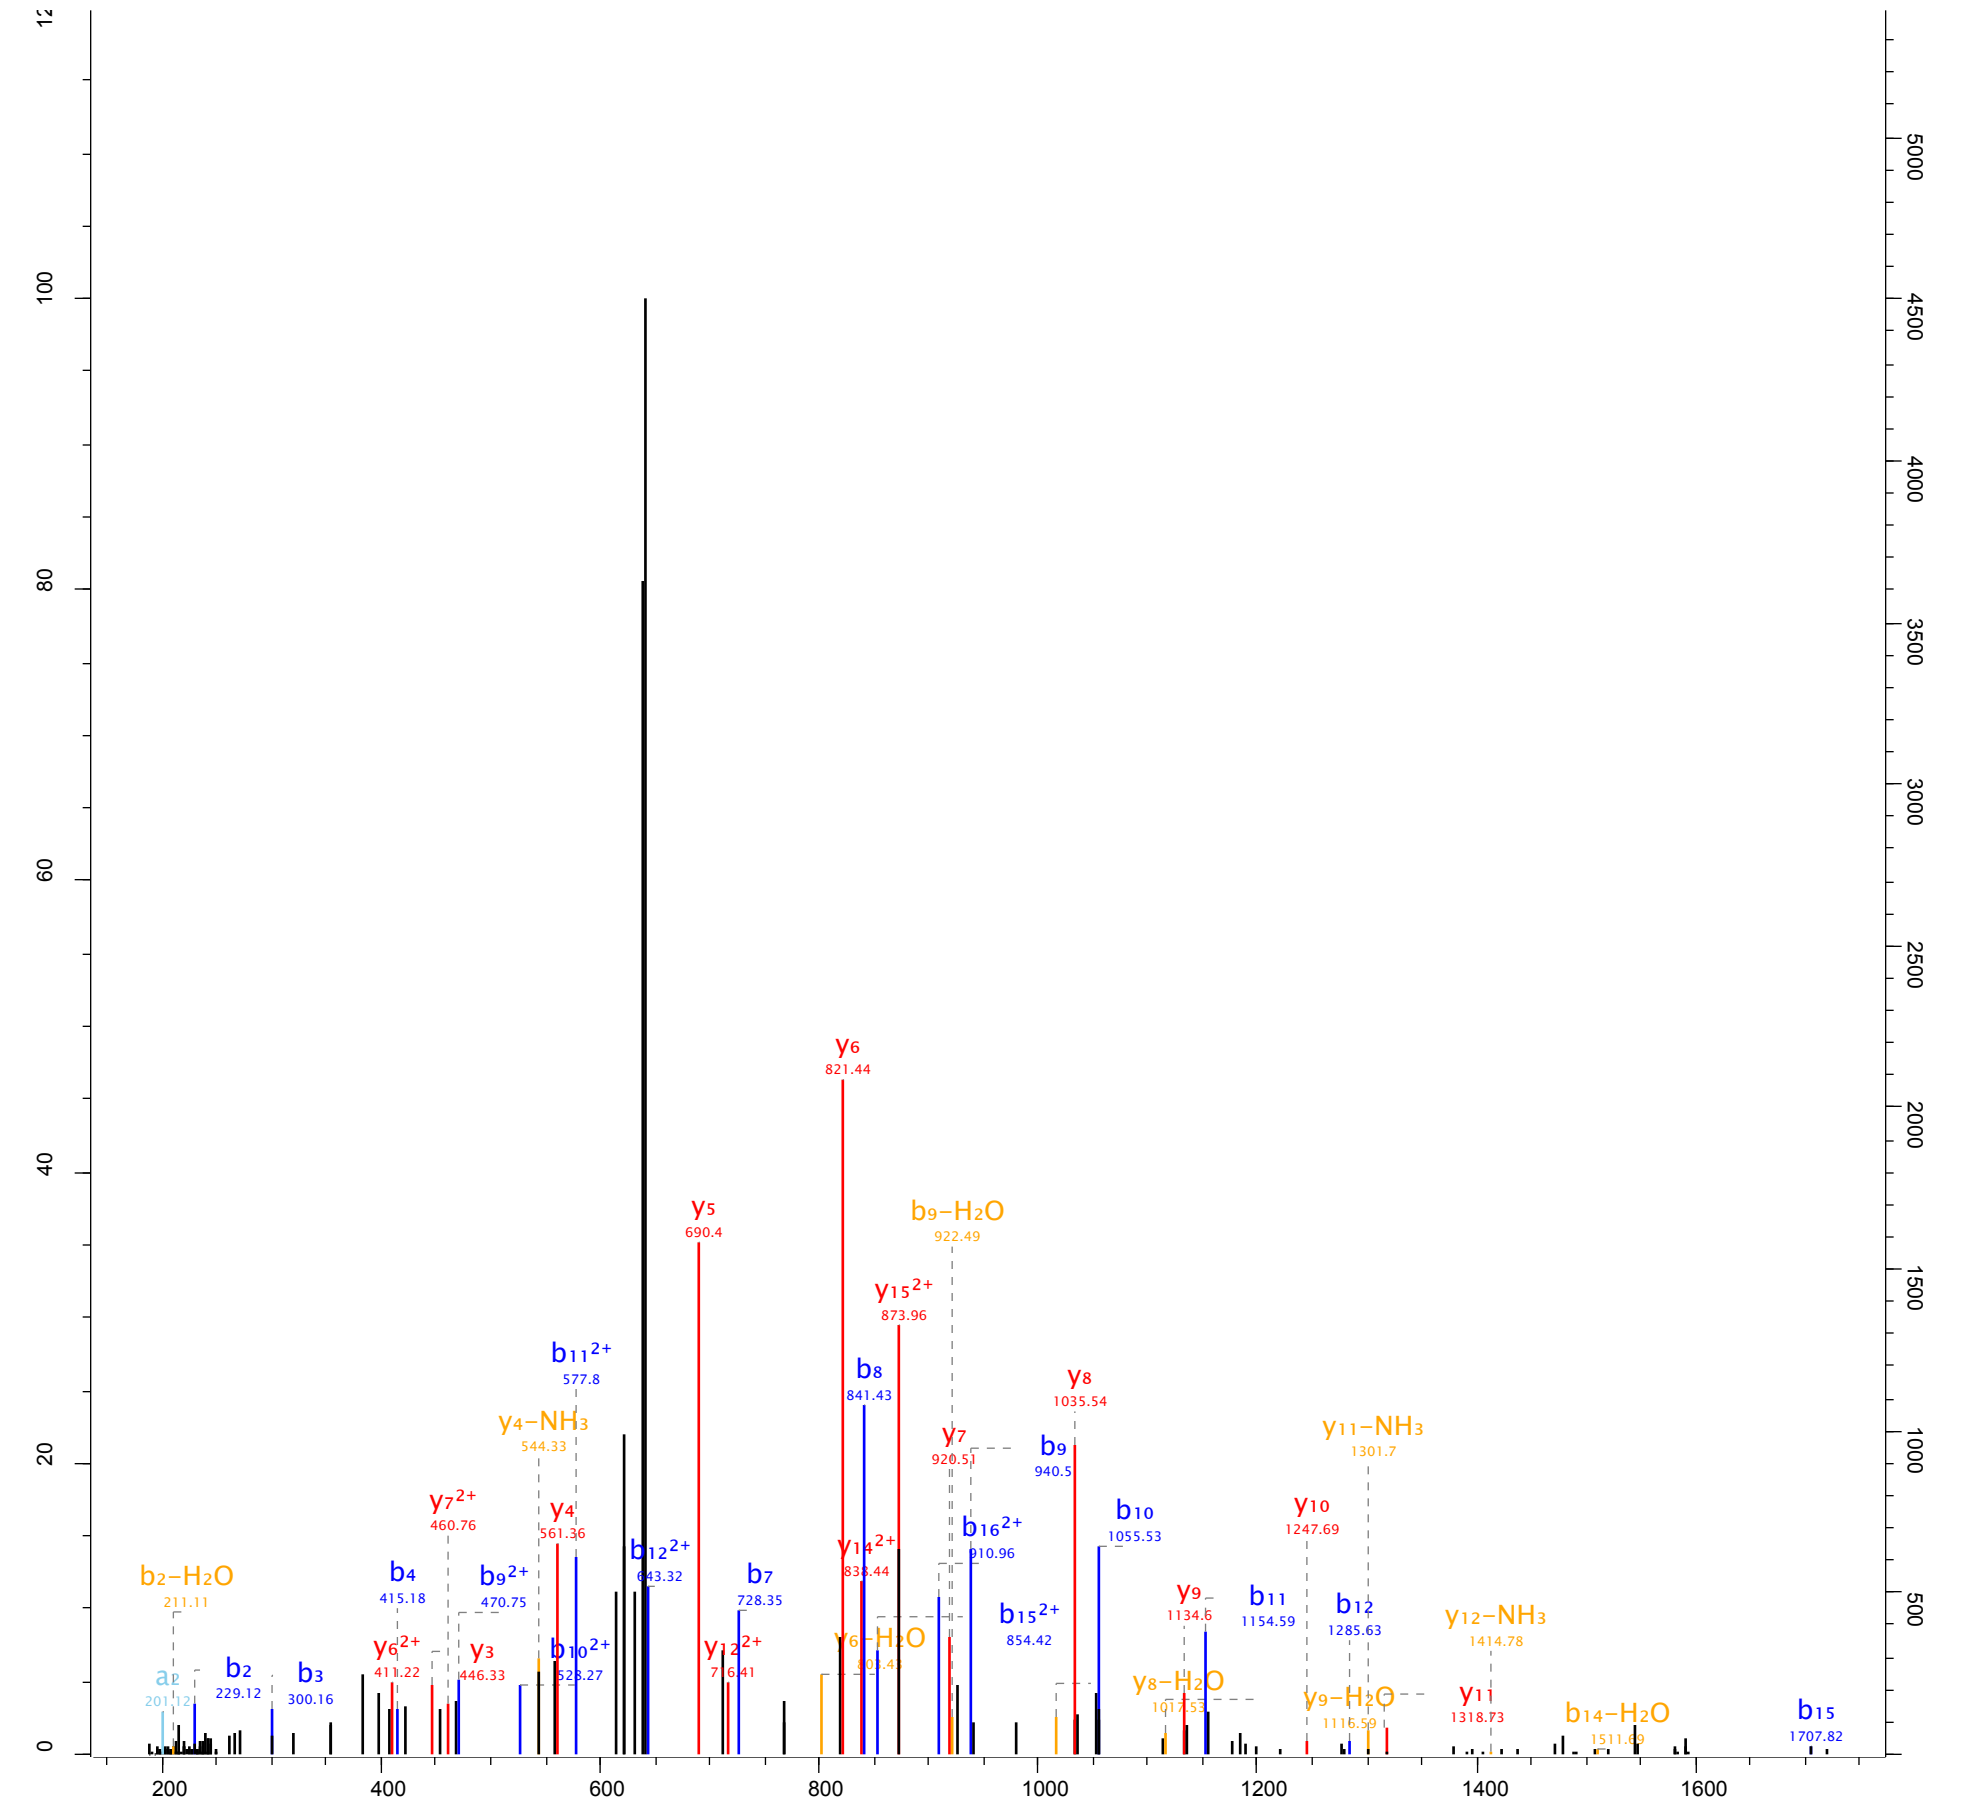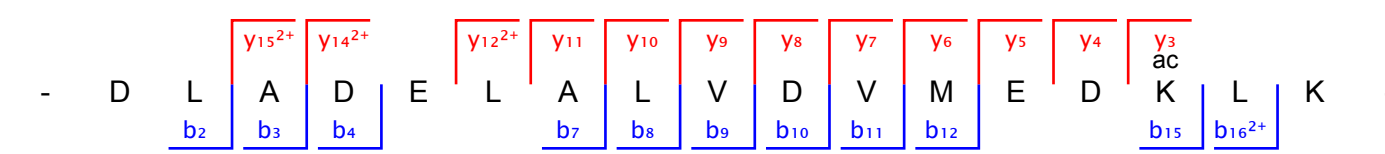

050813\_SCW\_II\_29\_16\_3

28156 ITMS; CID 172.81 883.47 Acadvl

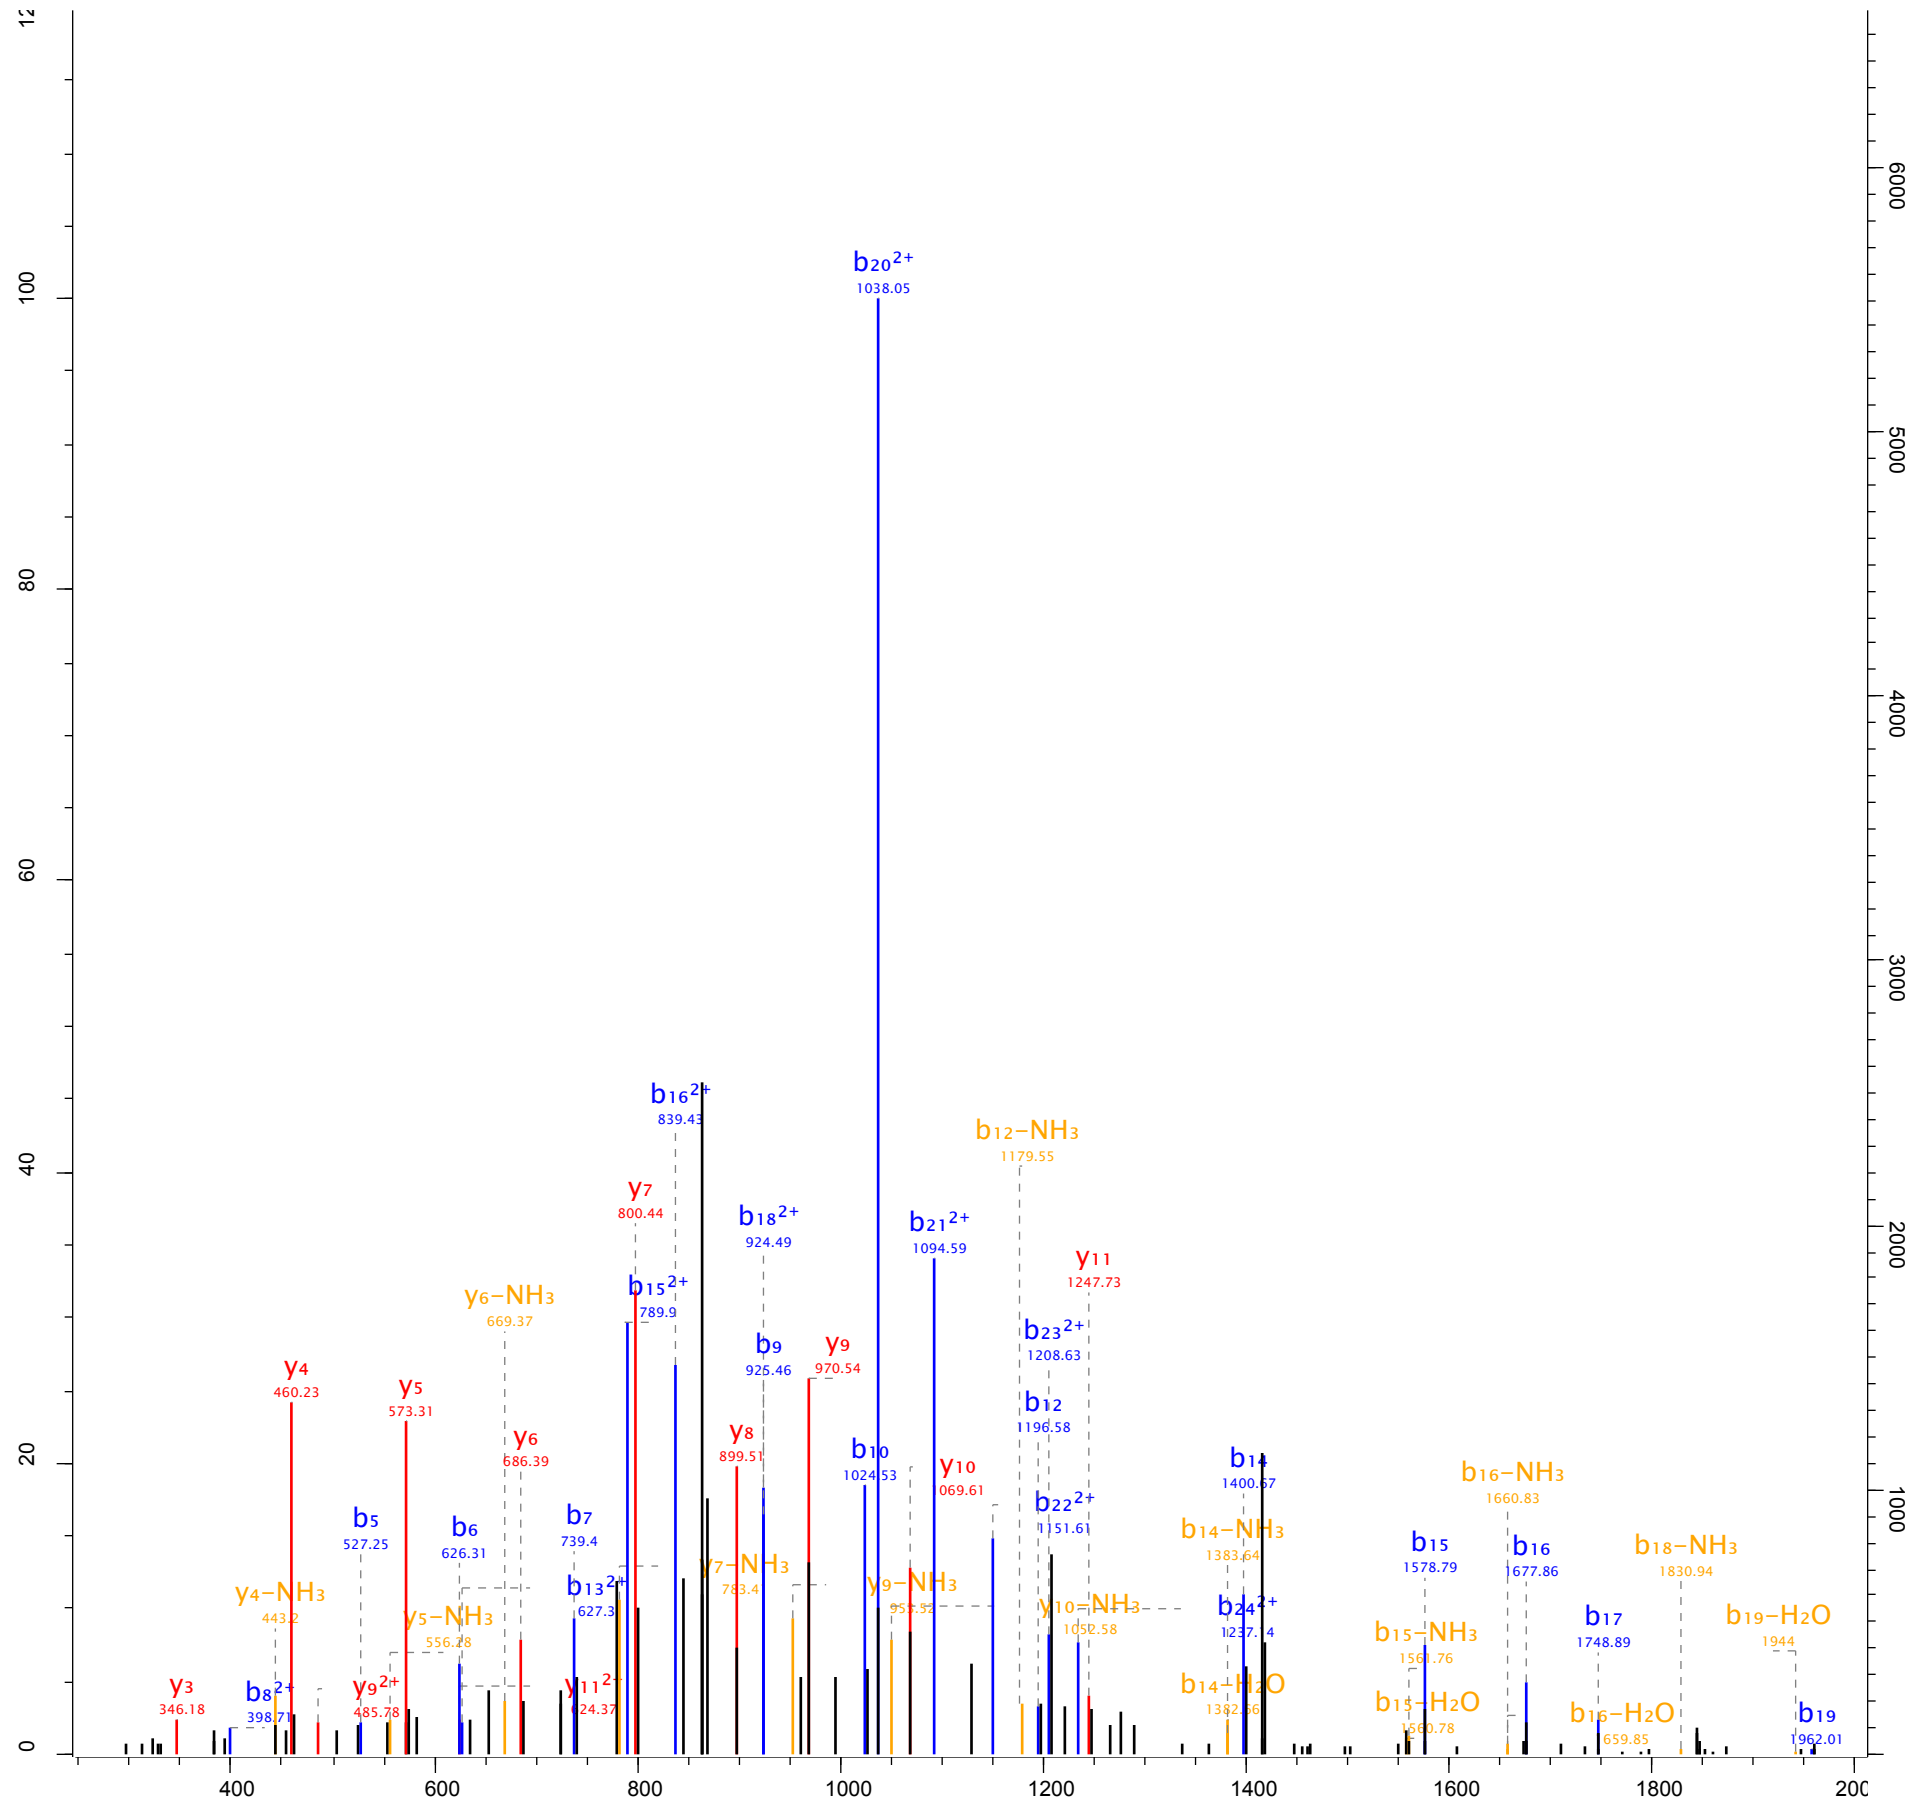

- V P S E N V L G E V G D G F K V A V N I L N N G

$b_5$   $b_6$   $b_7$   $b_8^{2+}$   $b_9$   $b_{10}$   $b_{12}$   $b_{13}^{2+}$   $b_{14}$   $b_{15}$   $b_{16}$   $b_{17}$   $b_{18}^{2+}$   $b_{19}$   $b_{20}^{2+}$   $b_{21}^{2+}$   $b_{22}^{2+}$   $b_{23}^{2+}$   $b_{24}^{2+}$

$y_{11}$  ac  $y_{10}$   $y_9$   $y_8$   $y_7$   $y_6$   $y_5$   $y_4$   $y_3$

R -

050813\_SCW\_II\_29\_16\_3

28195 ITMS; CID 144.82 836.43 TagIn

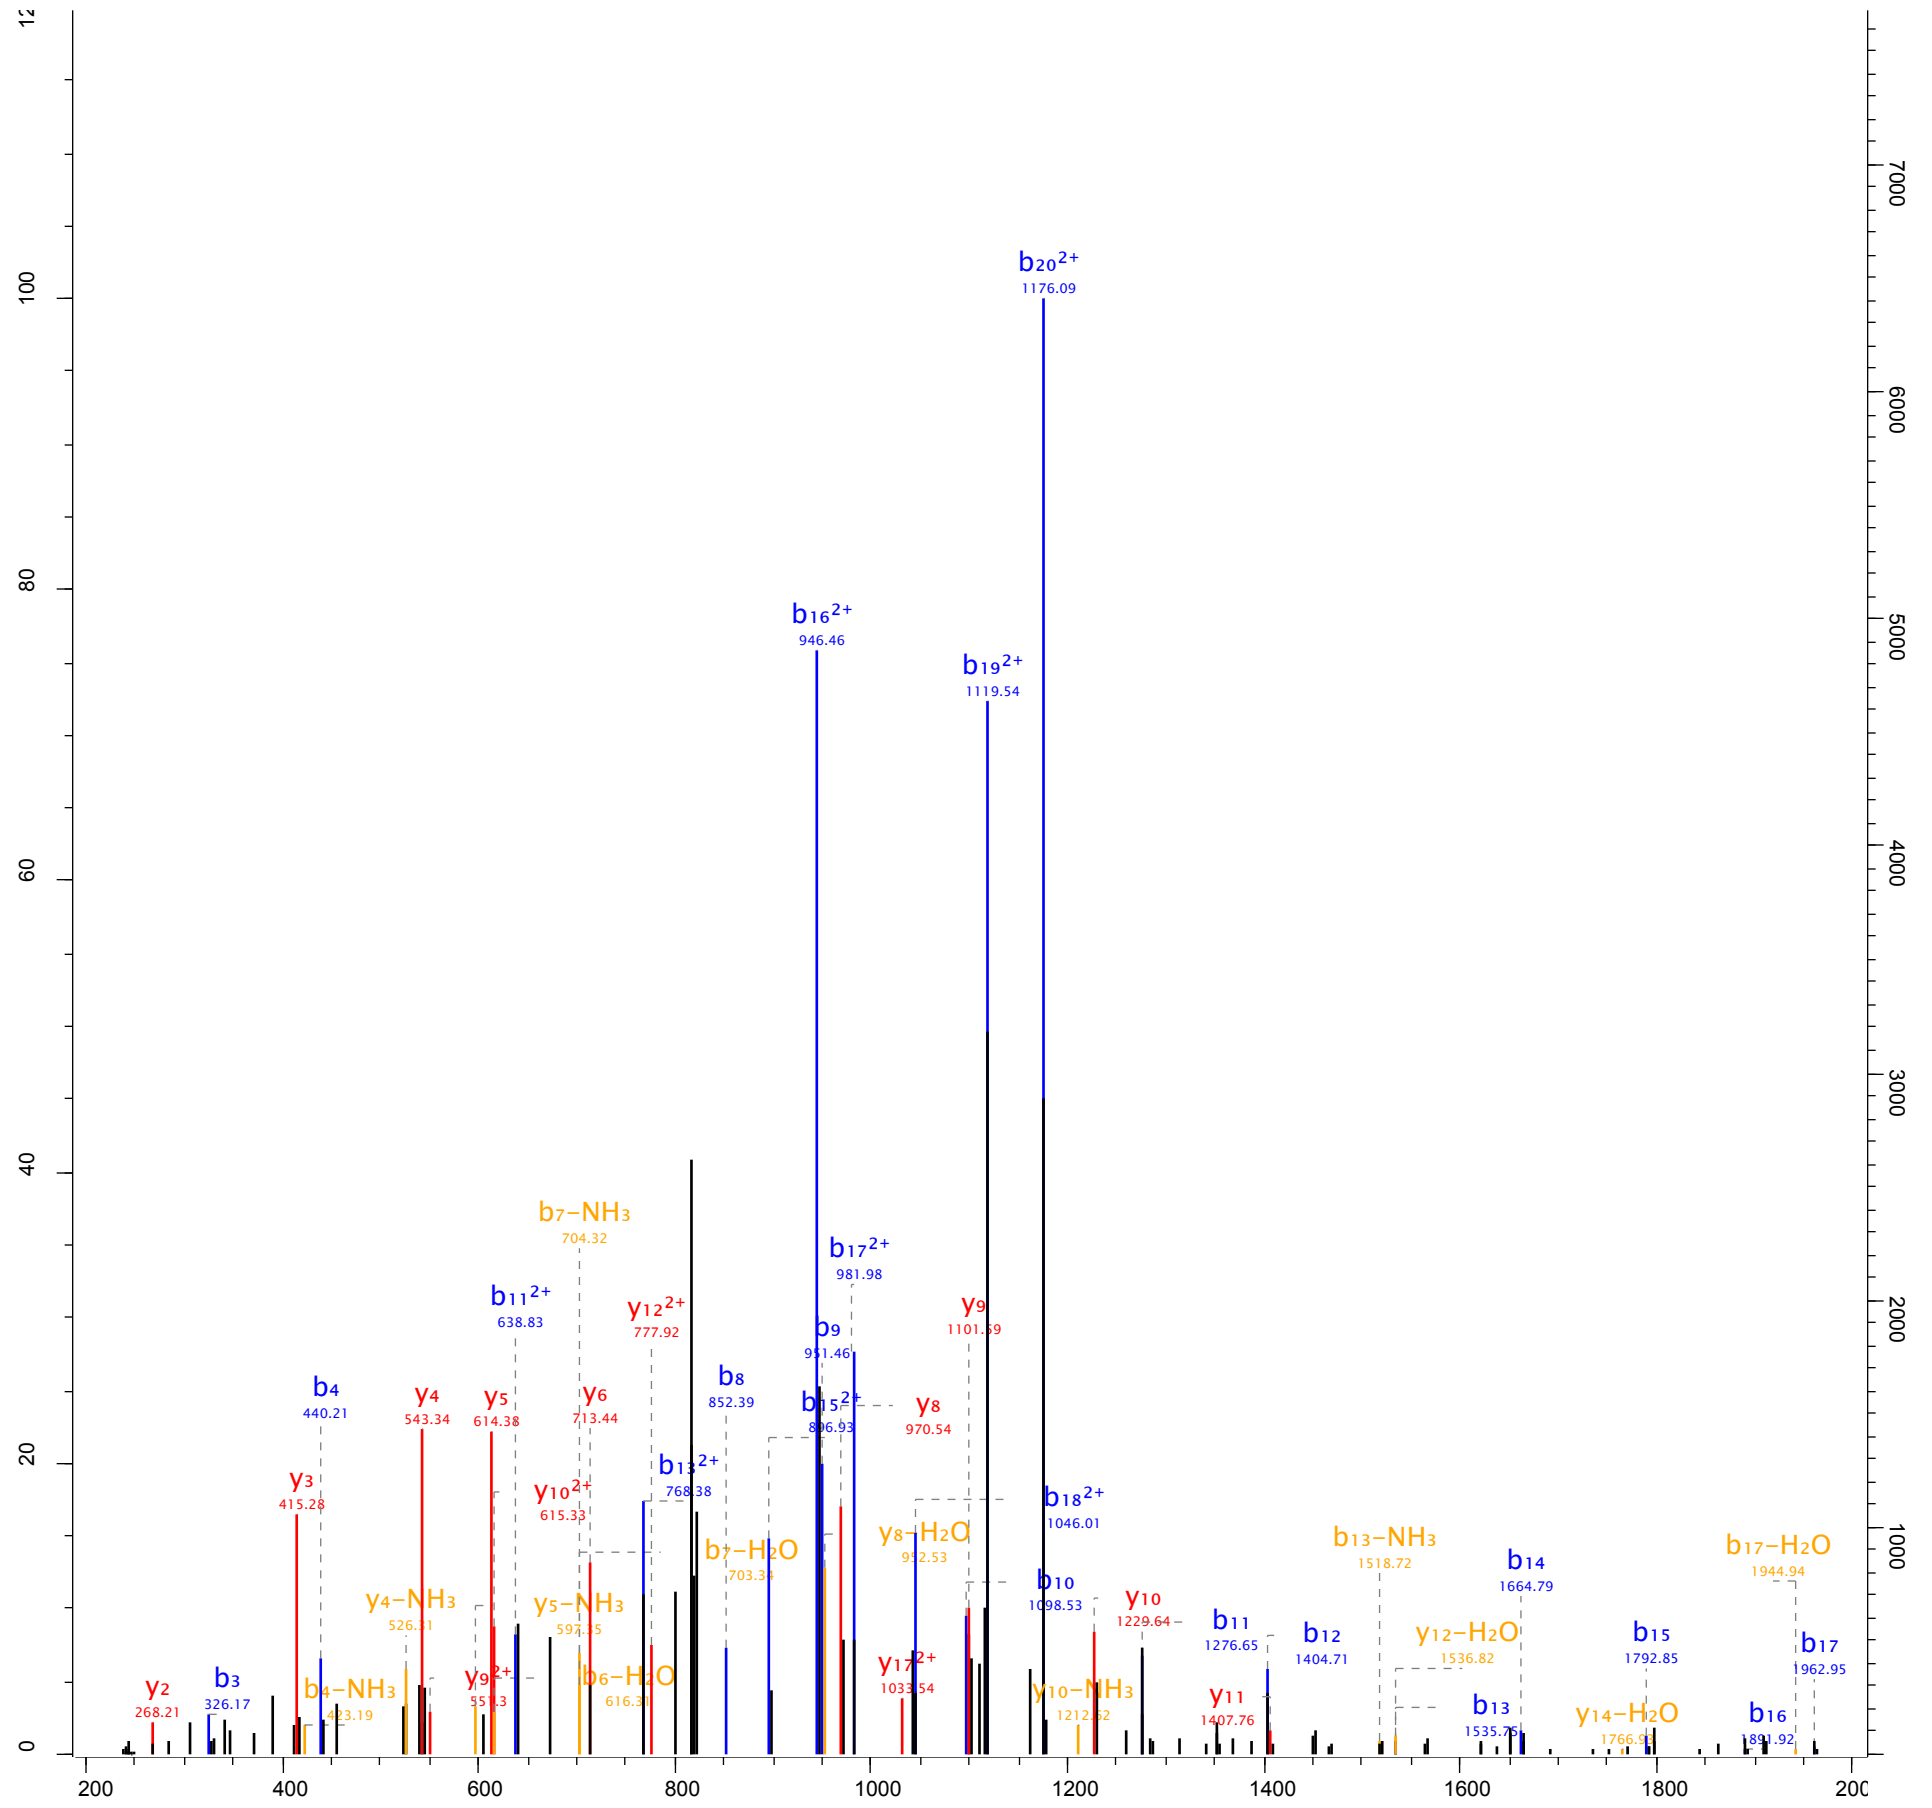

- V P E N P P S M V F K Q M E Q V A Q F L K -

b<sub>3</sub> b<sub>4</sub> y<sub>17</sub><sup>2+</sup> b<sub>8</sub> b<sub>9</sub> b<sub>10</sub> y<sub>12</sub><sup>2+</sup> y<sub>11</sub> ac b<sub>11</sub> b<sub>12</sub> y<sub>10</sub> y<sub>9</sub> y<sub>8</sub> b<sub>14</sub> b<sub>15</sub> y<sub>6</sub> b<sub>16</sub> b<sub>17</sub> b<sub>18</sub><sup>2+</sup> b<sub>19</sub><sup>2+</sup> b<sub>20</sub><sup>2+</sup>

050813\_SCW\_II\_29\_16\_3

28723 ITMS; CID 195.25 766.06 Ezr

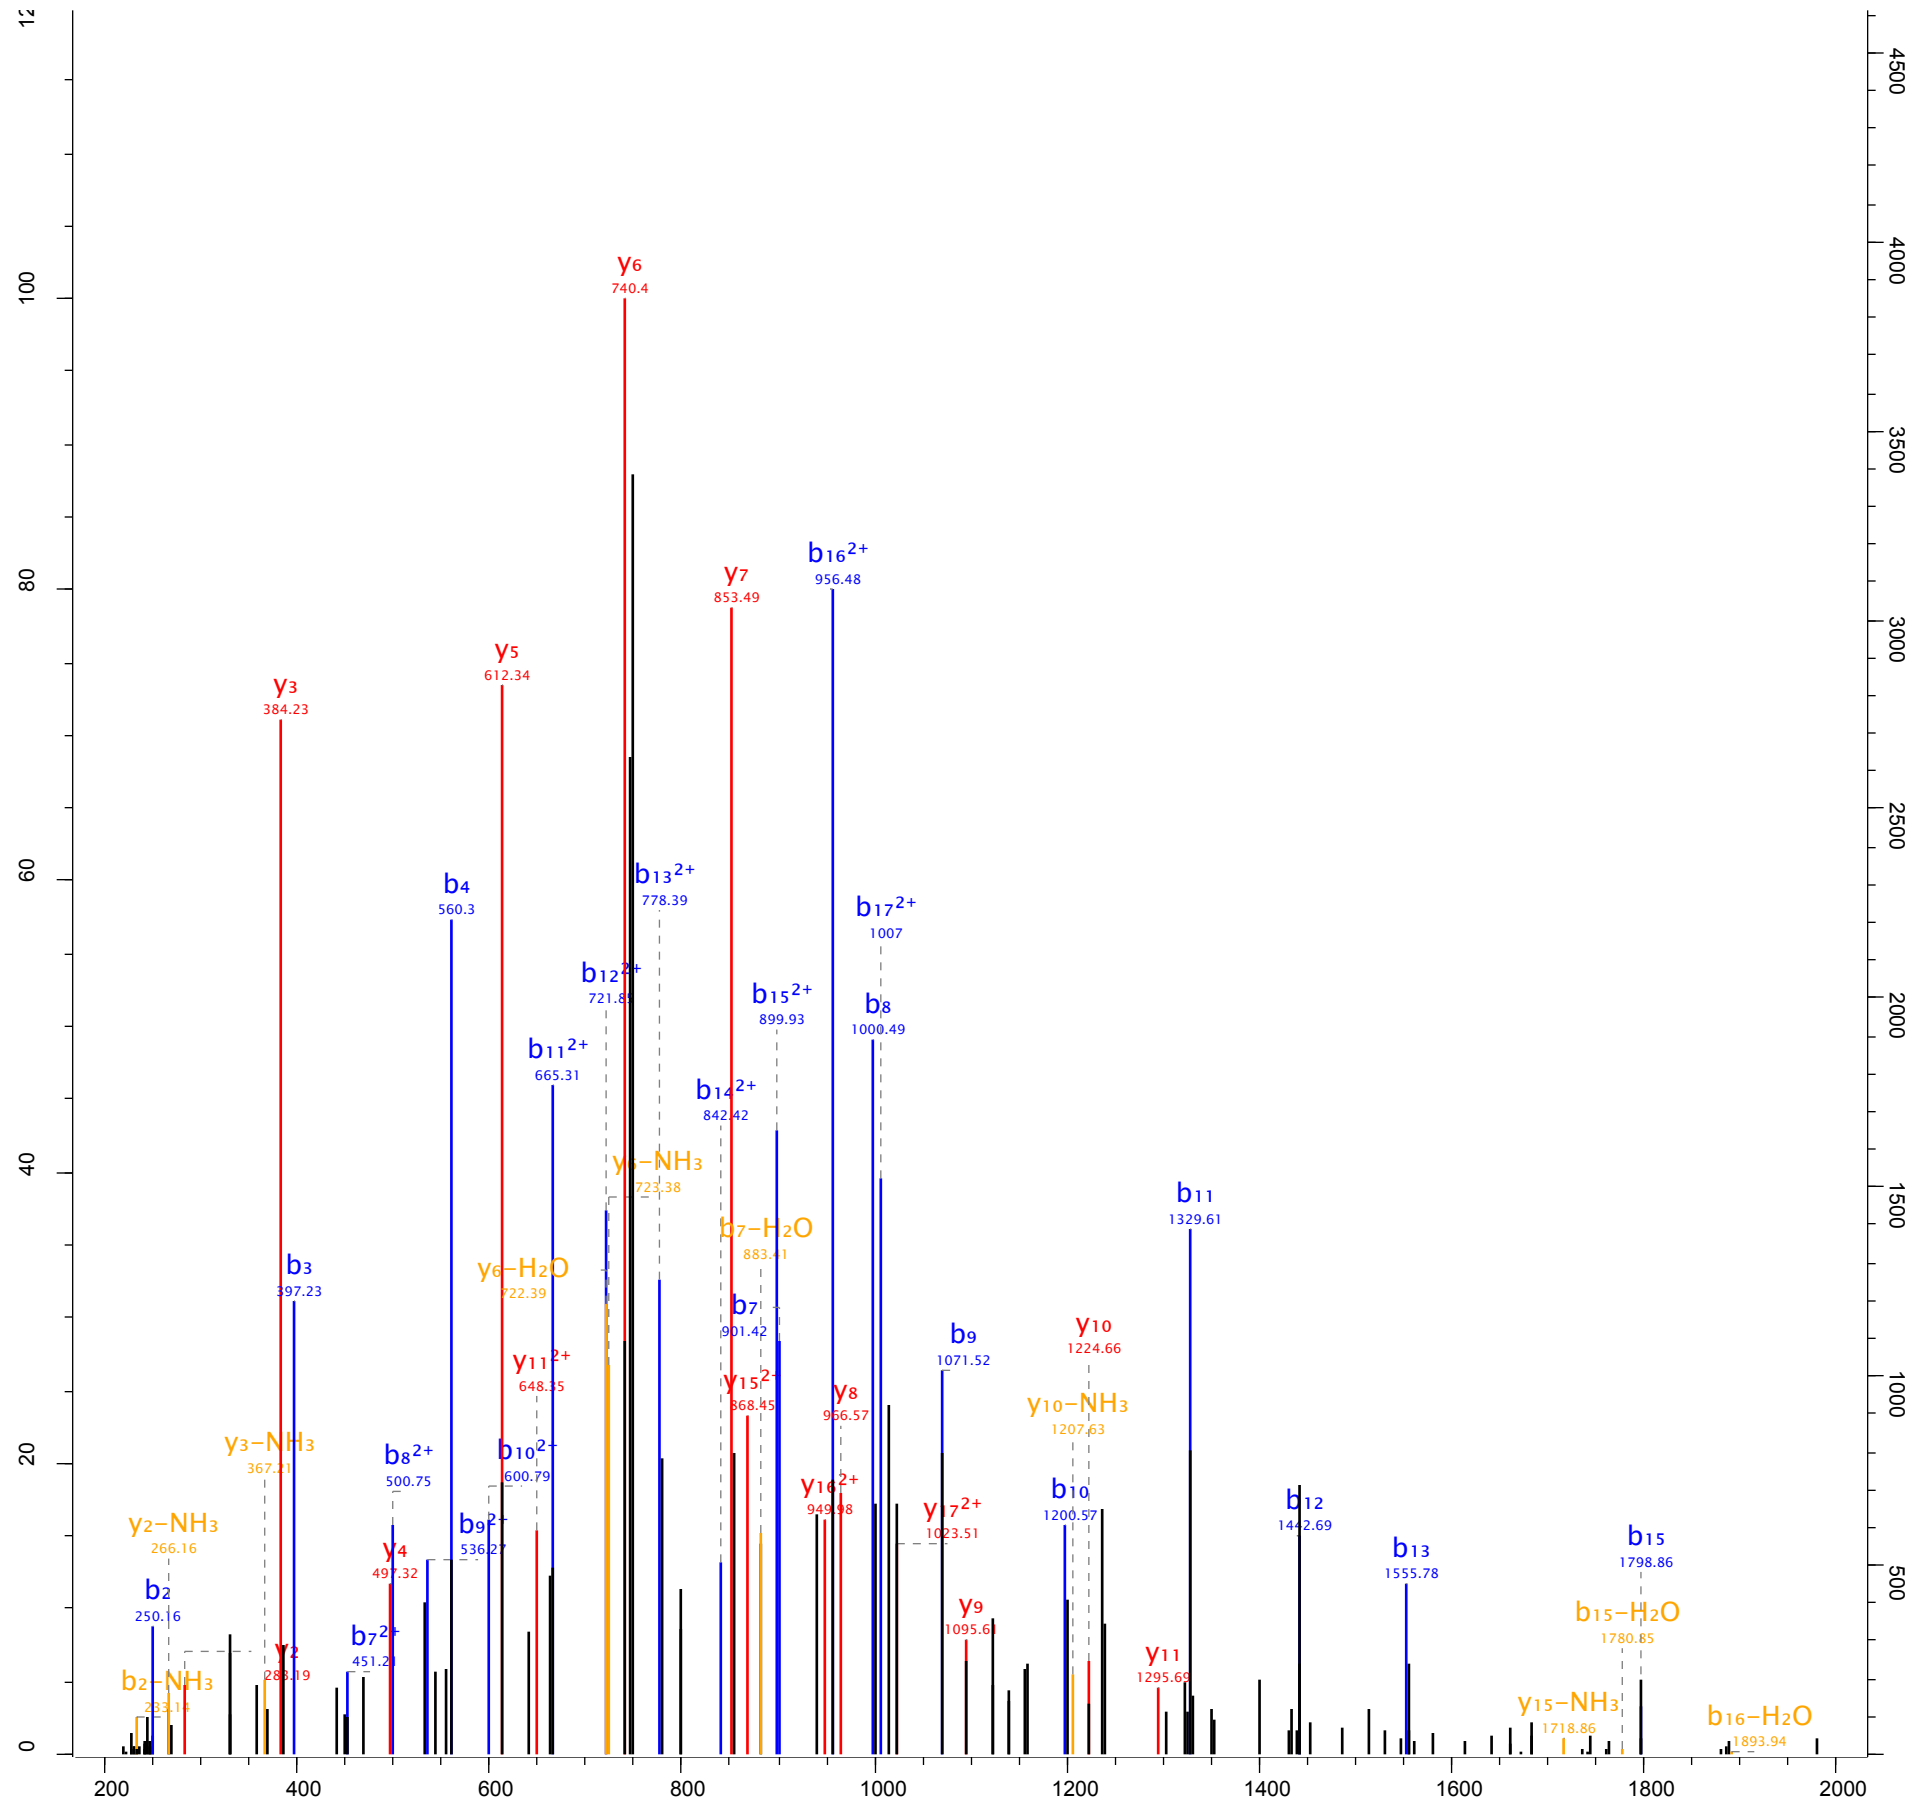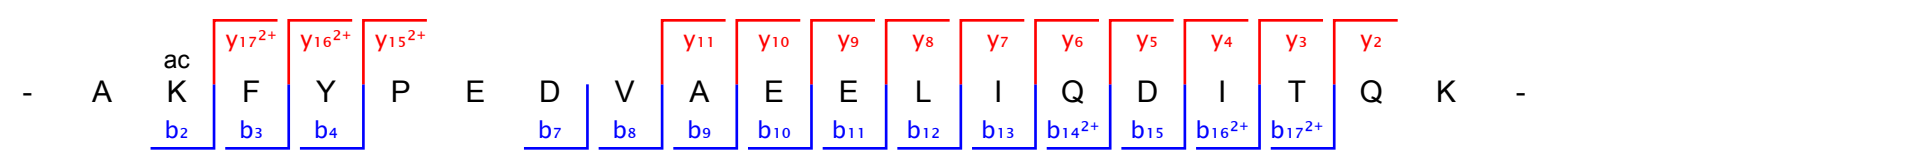

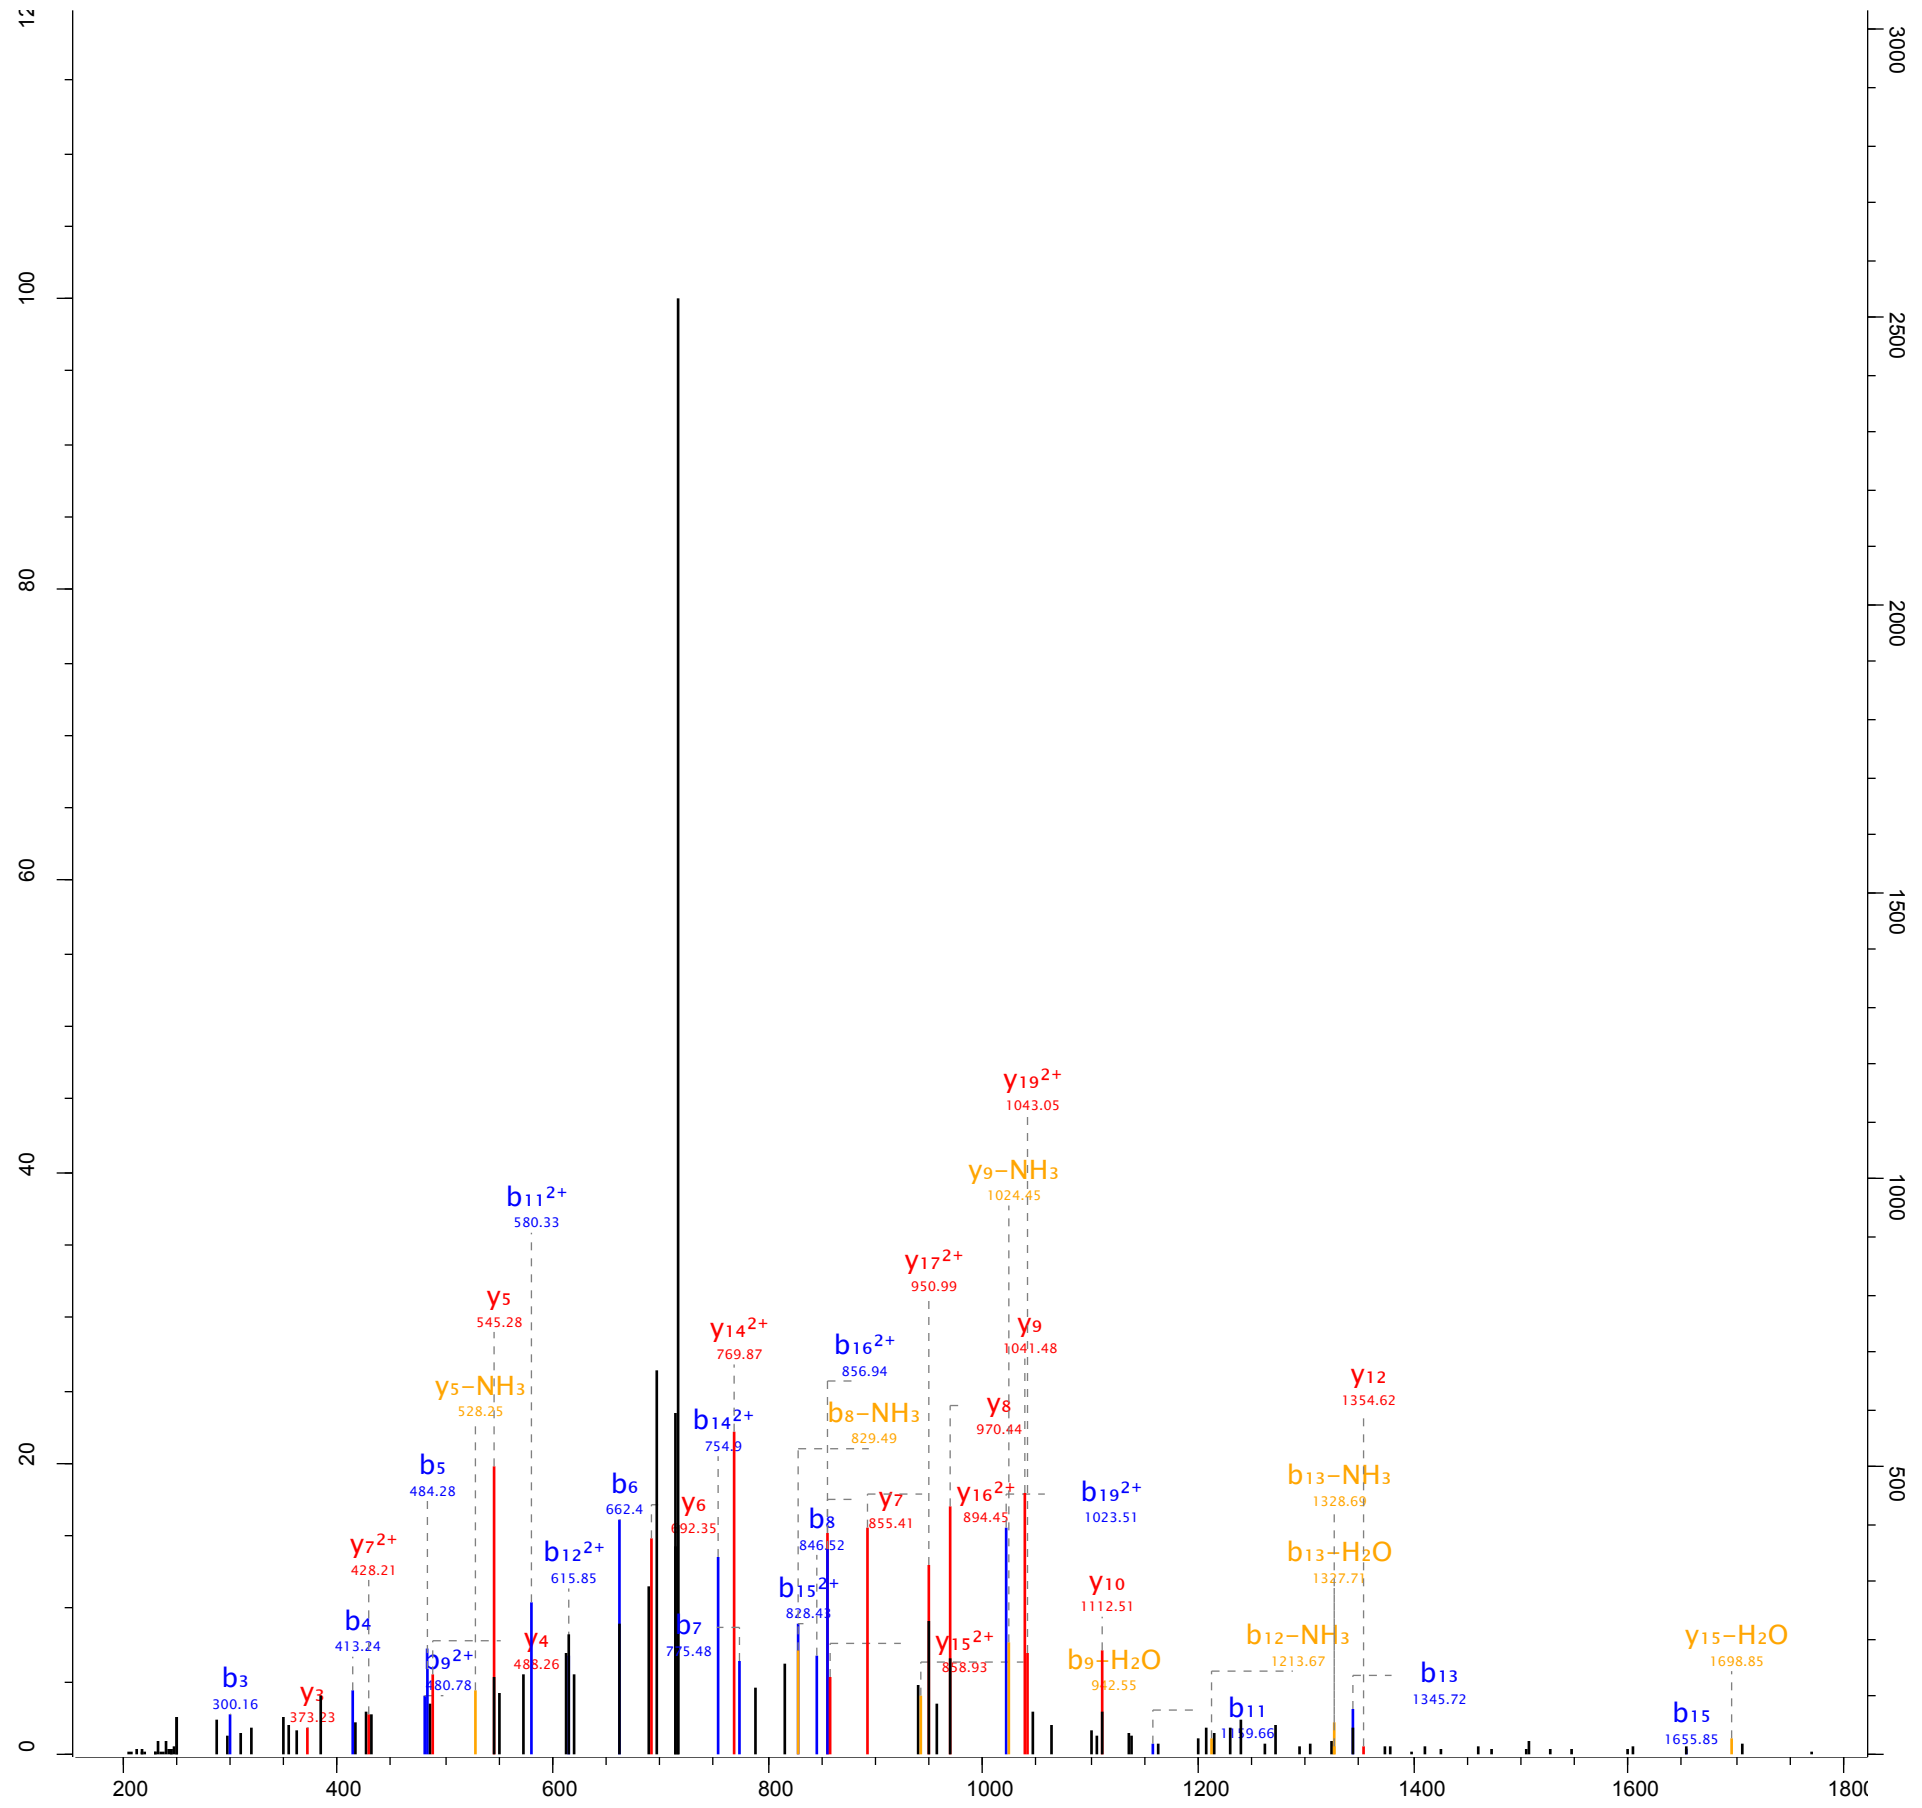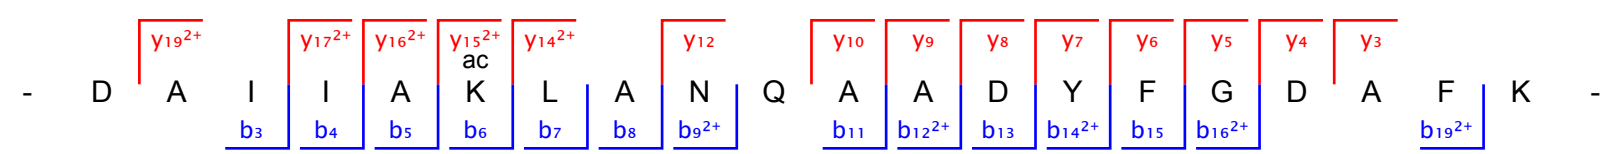

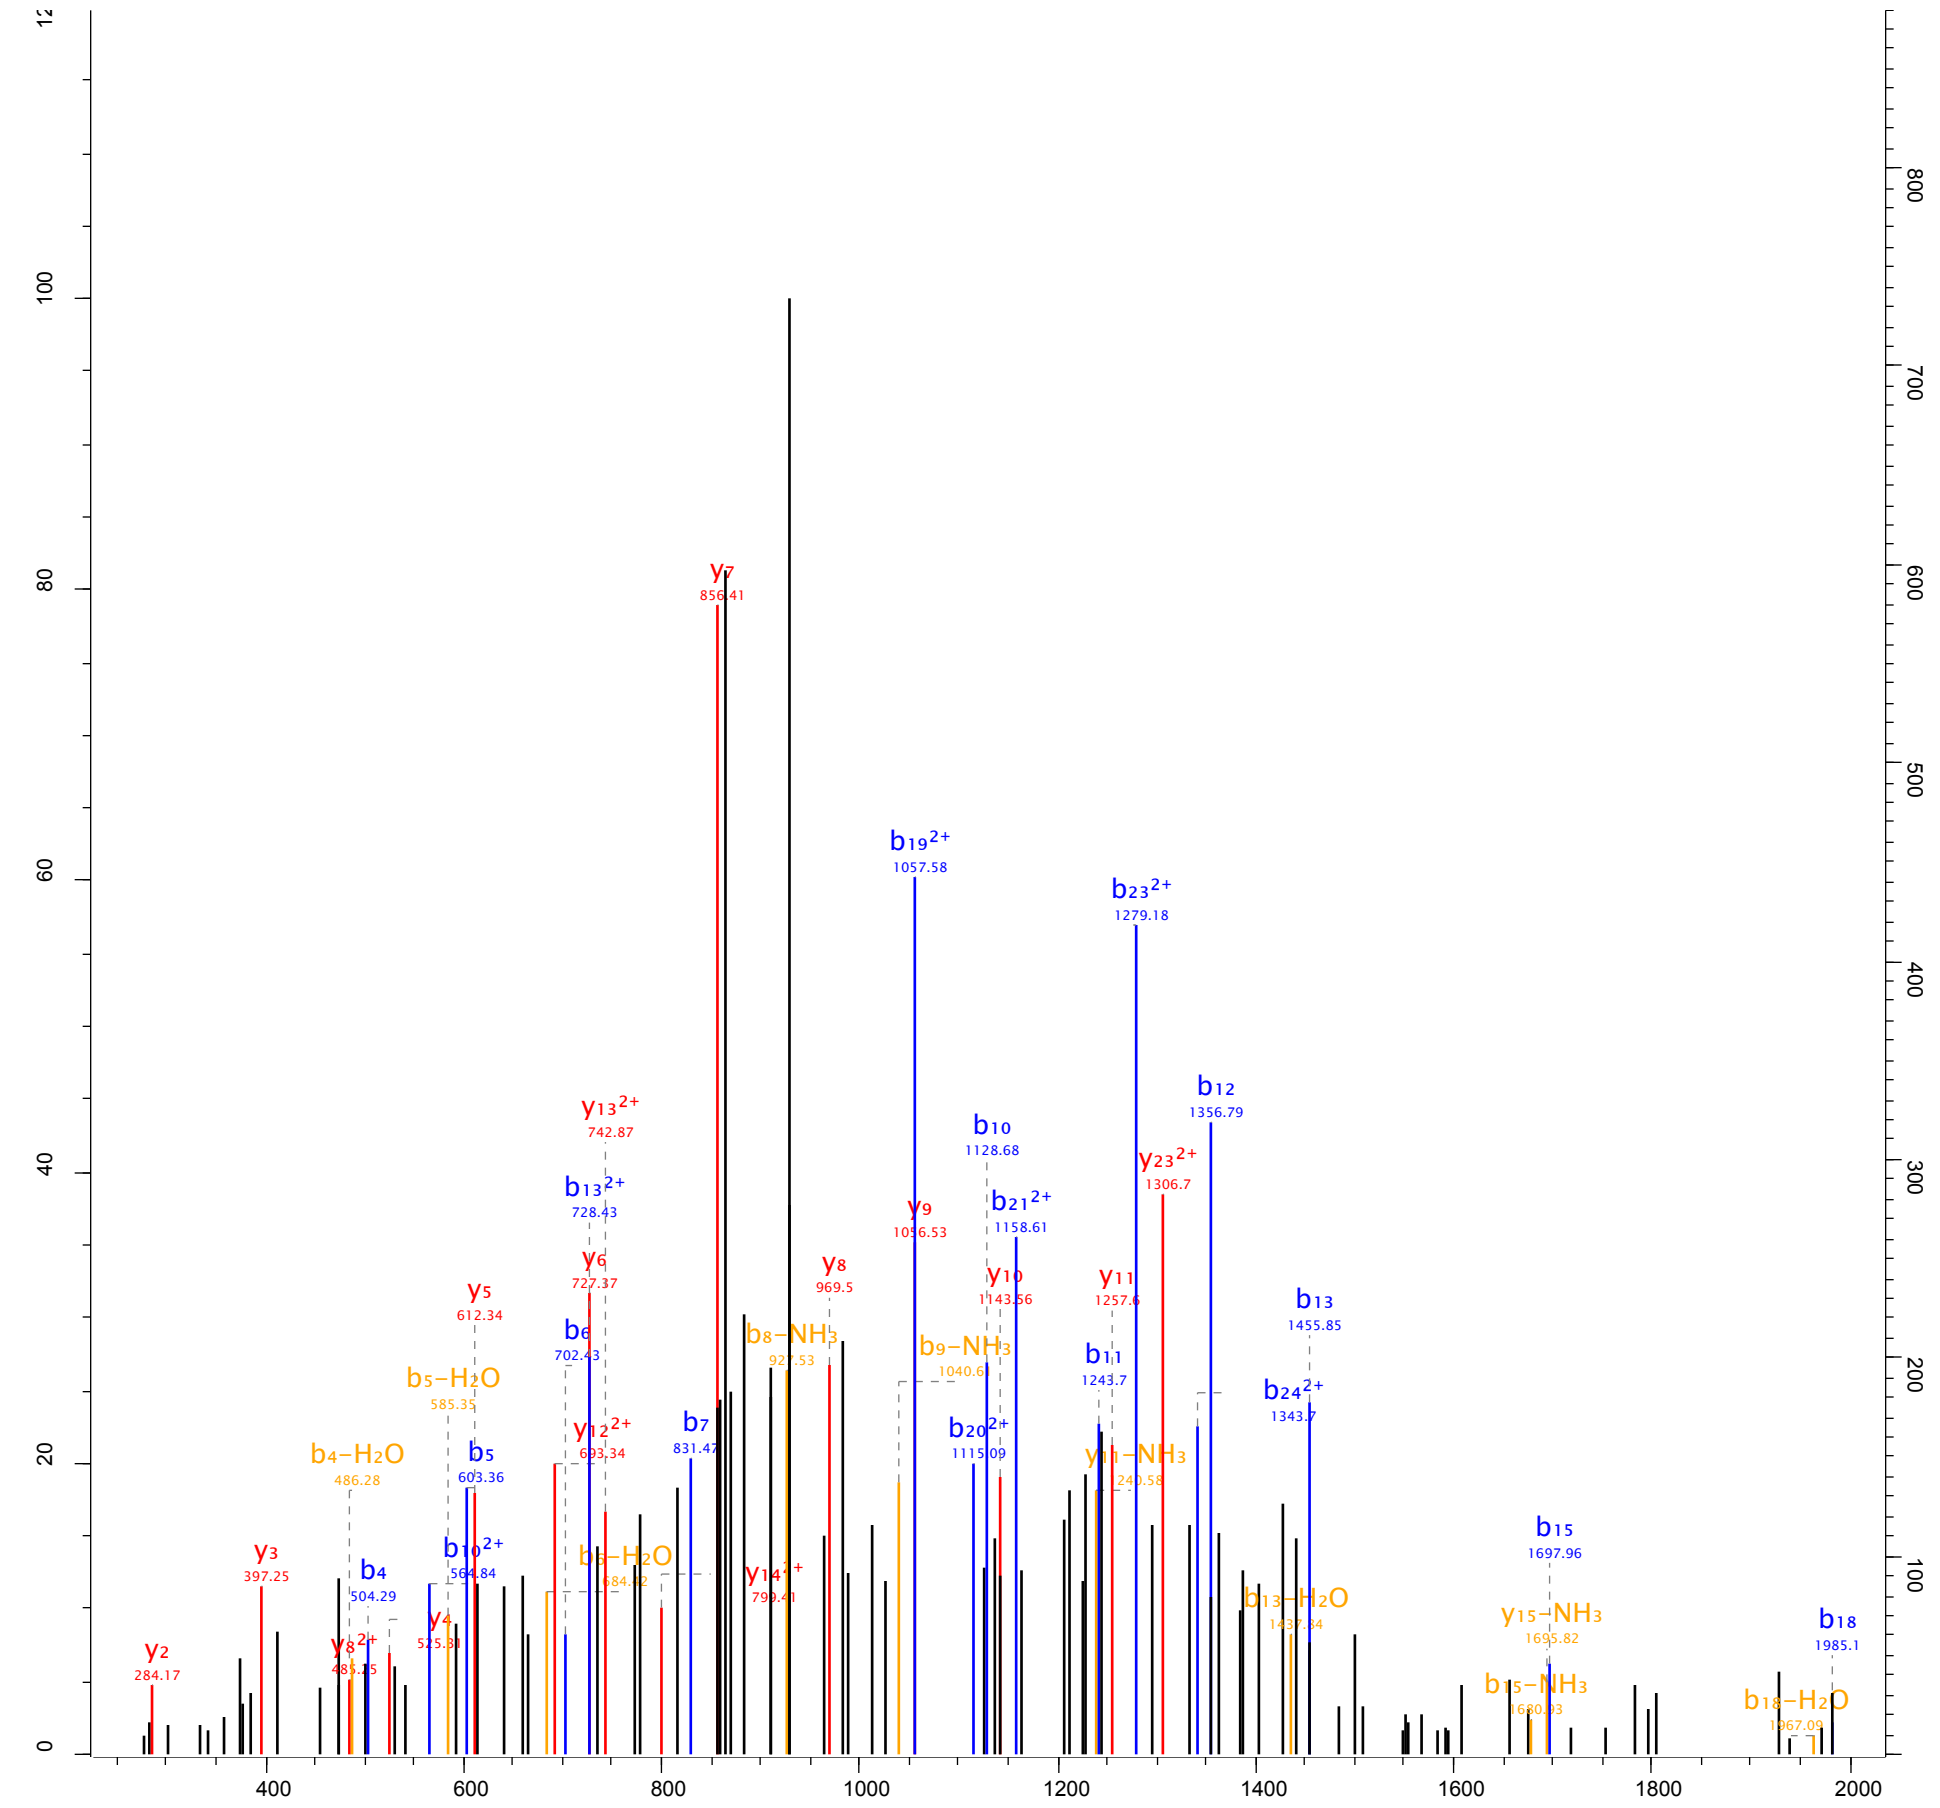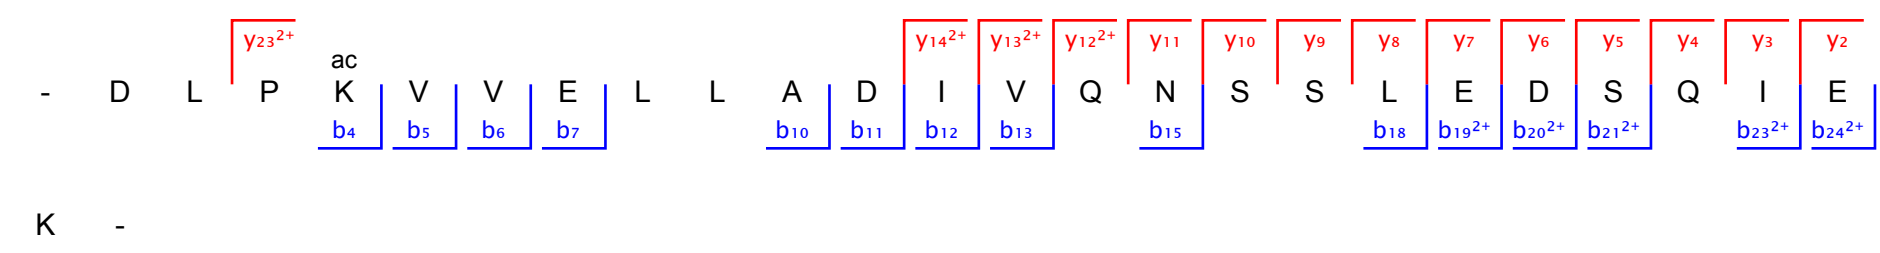

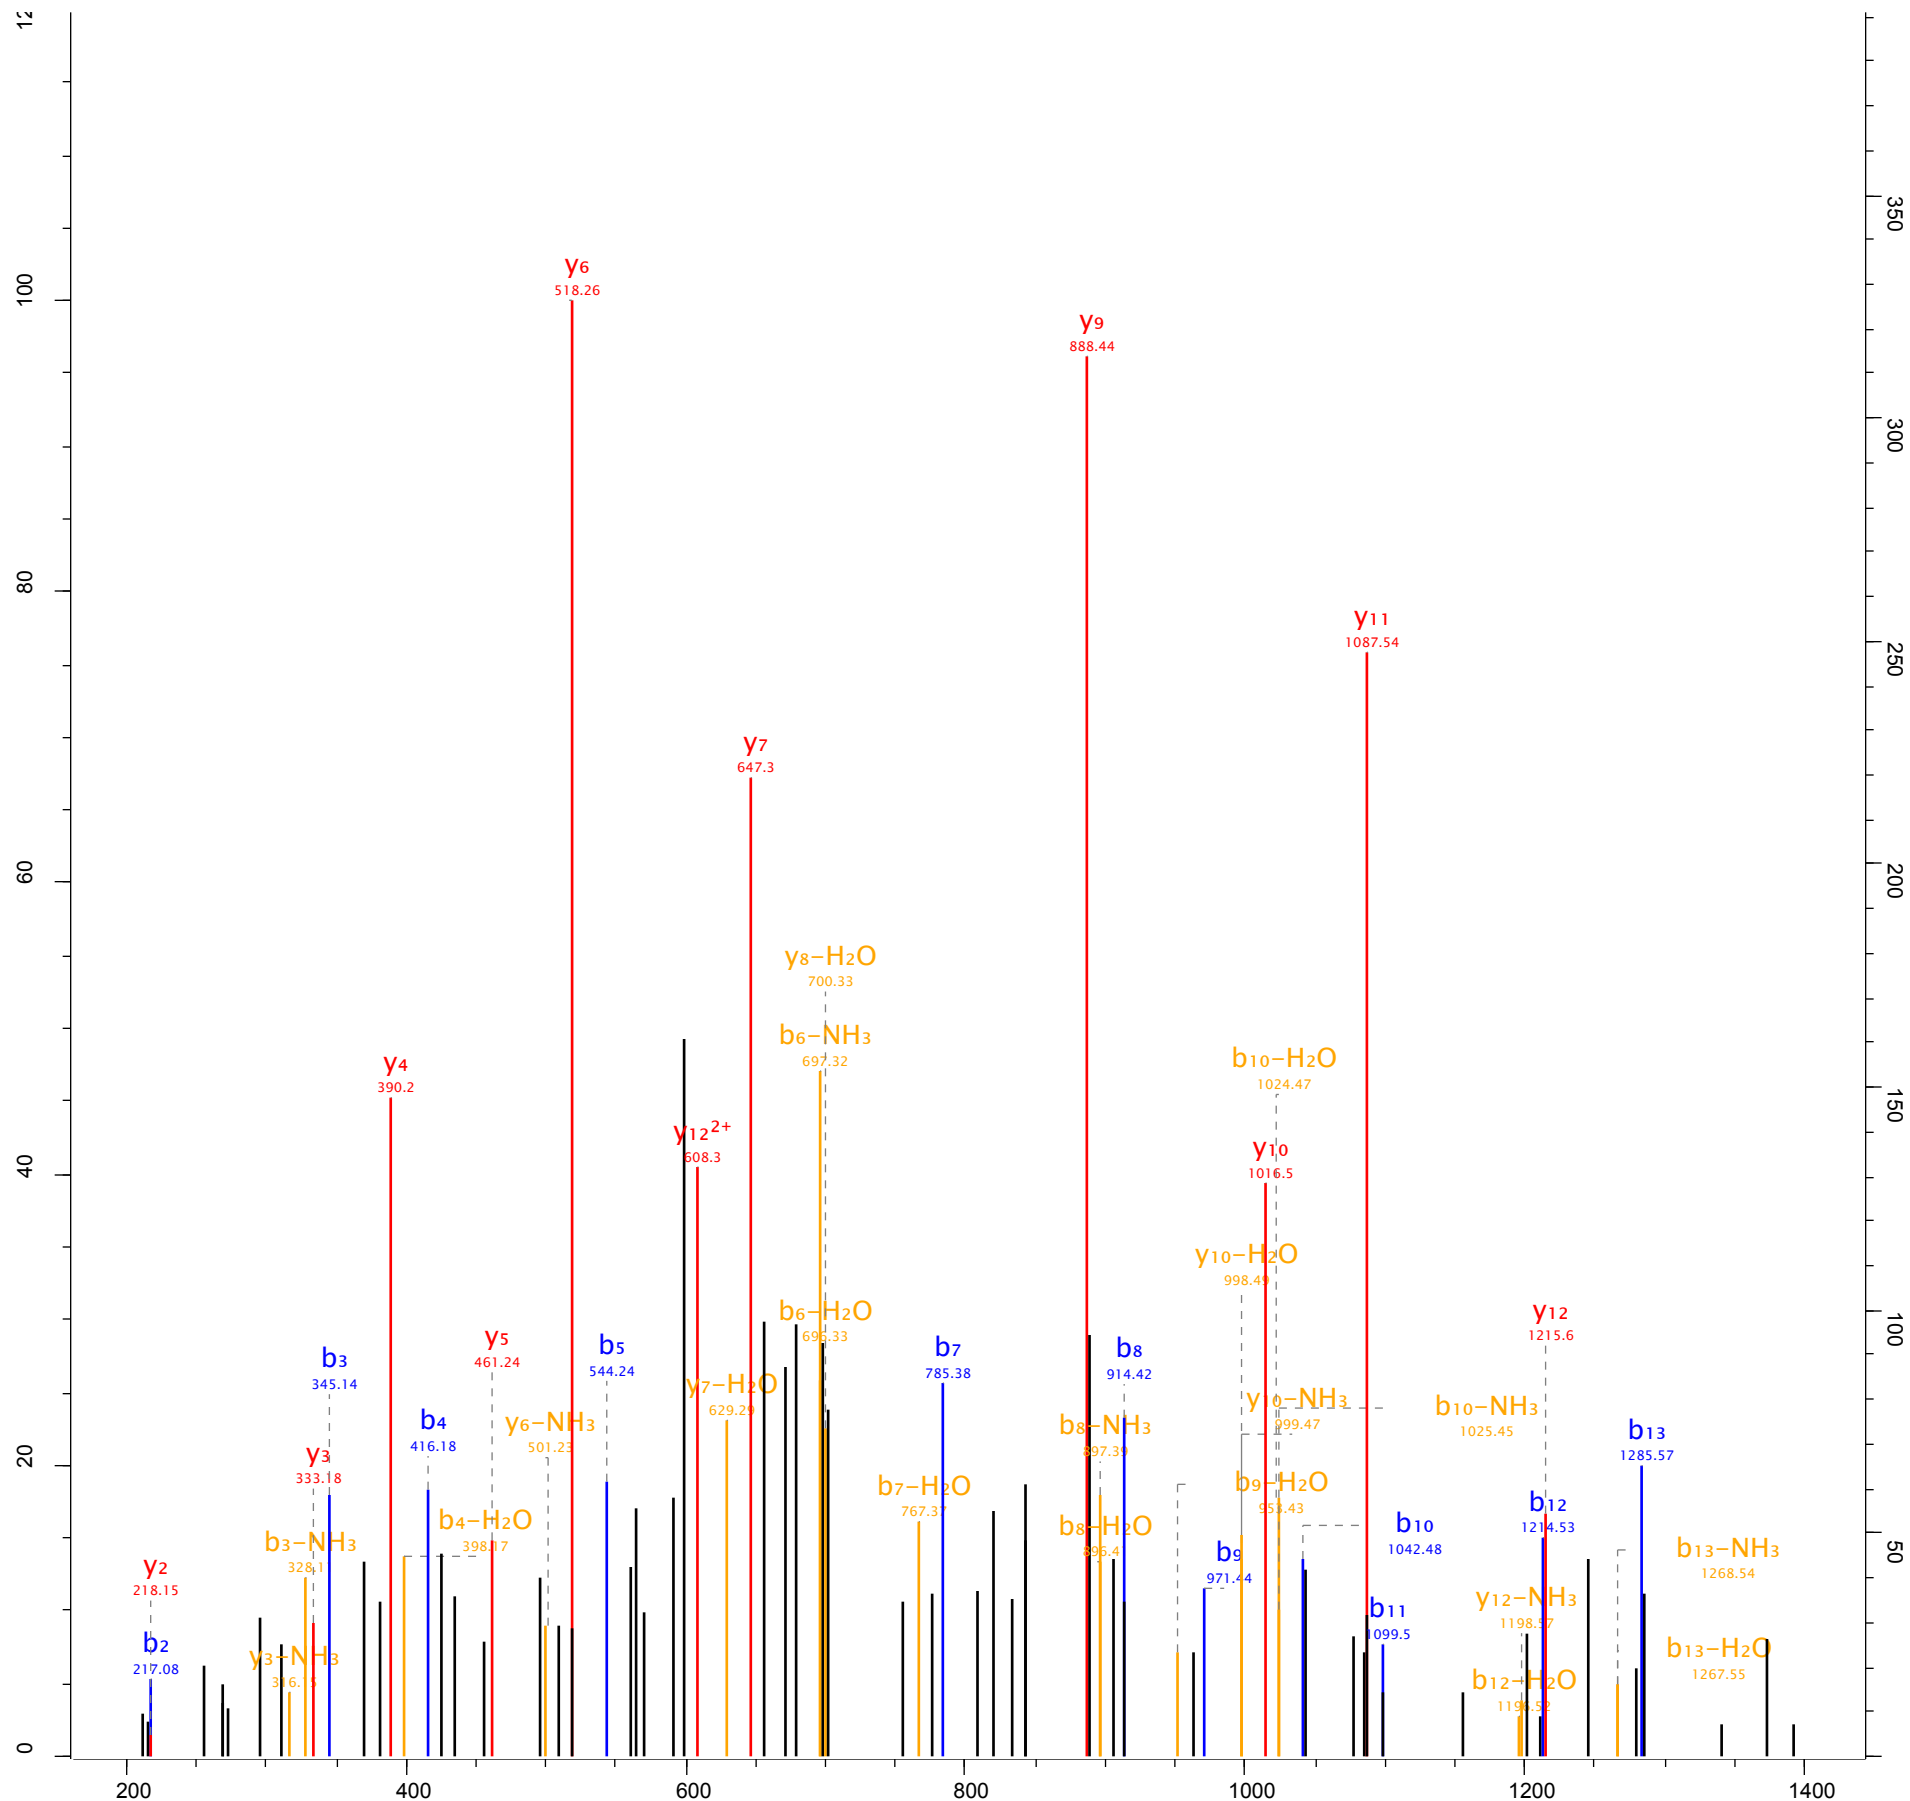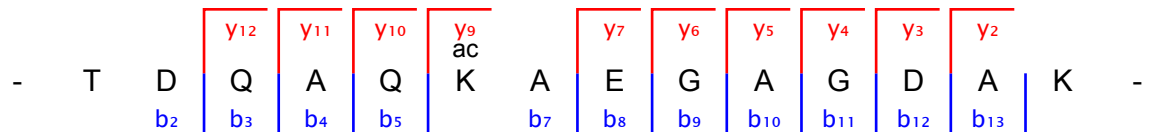



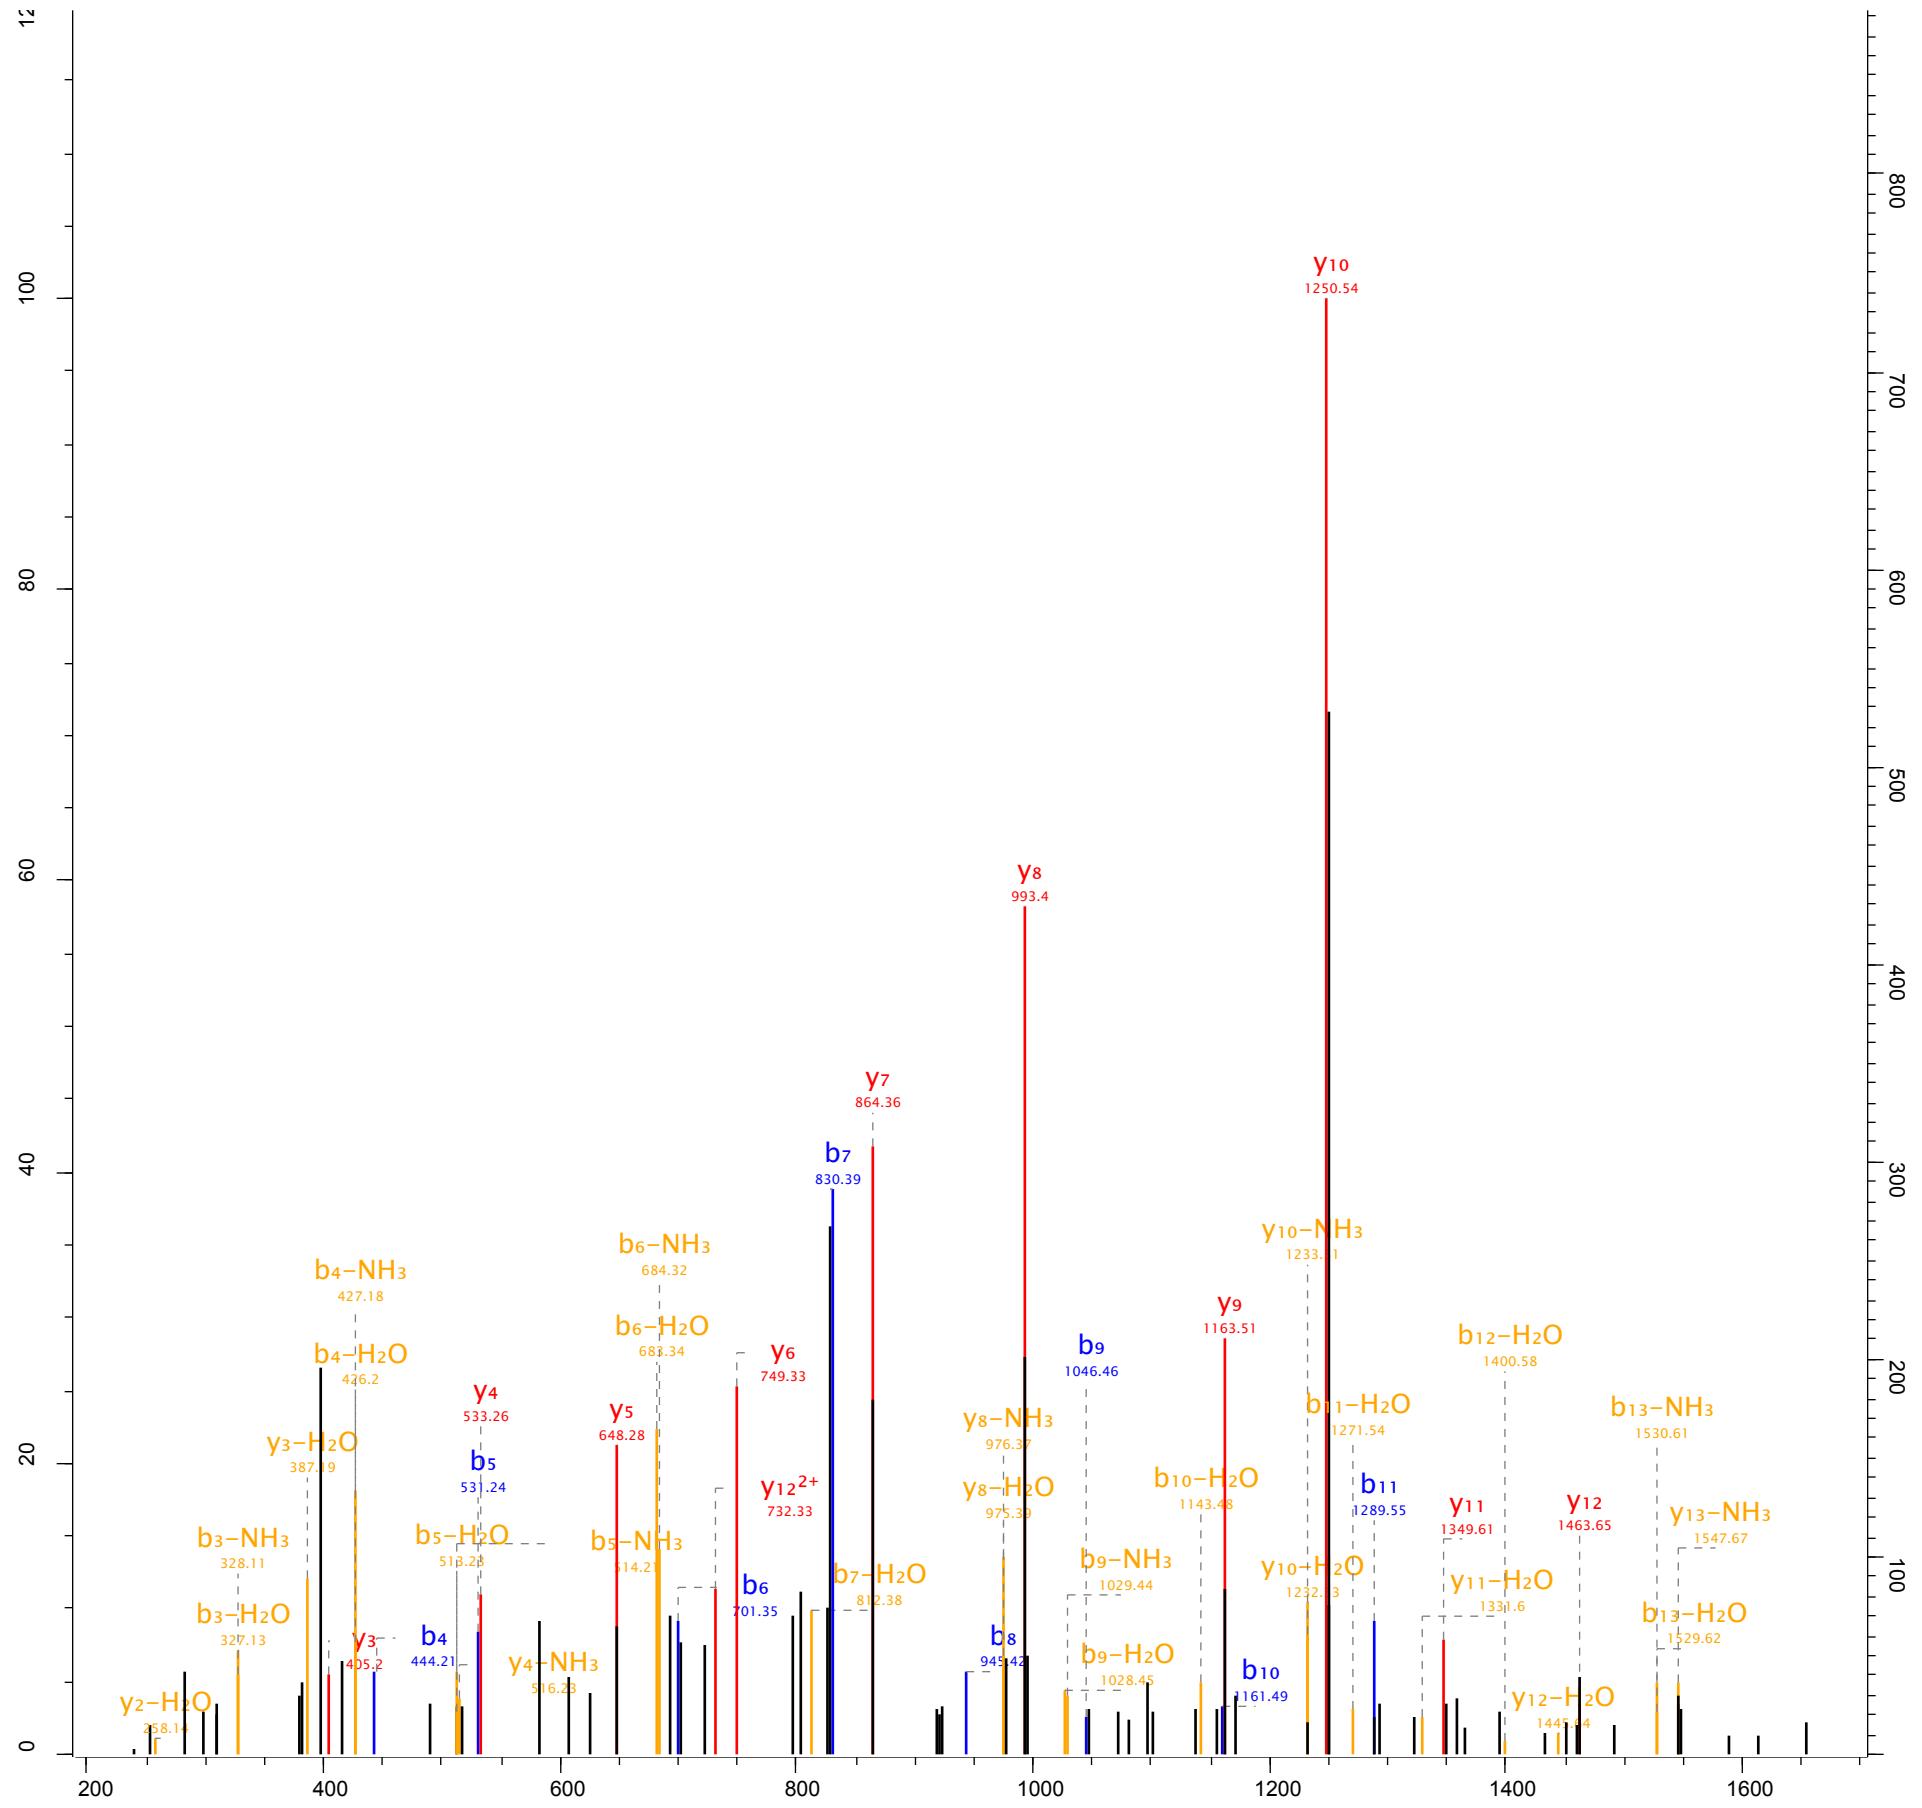

- E T N V S K E D T D Q E E K -

y12
y11
y10
y<sub>ac</sub>
y8
y7
y6
y5
y4
y3

b4
b5
b6
b7
b8
b9
b10
b11

Raw file: 050813\_SCW\_II\_29\_19\_4  
 Scan: 9813 Method: ITMS; CID Score: 164.15 m/z: 827.38 Gene names: Cast

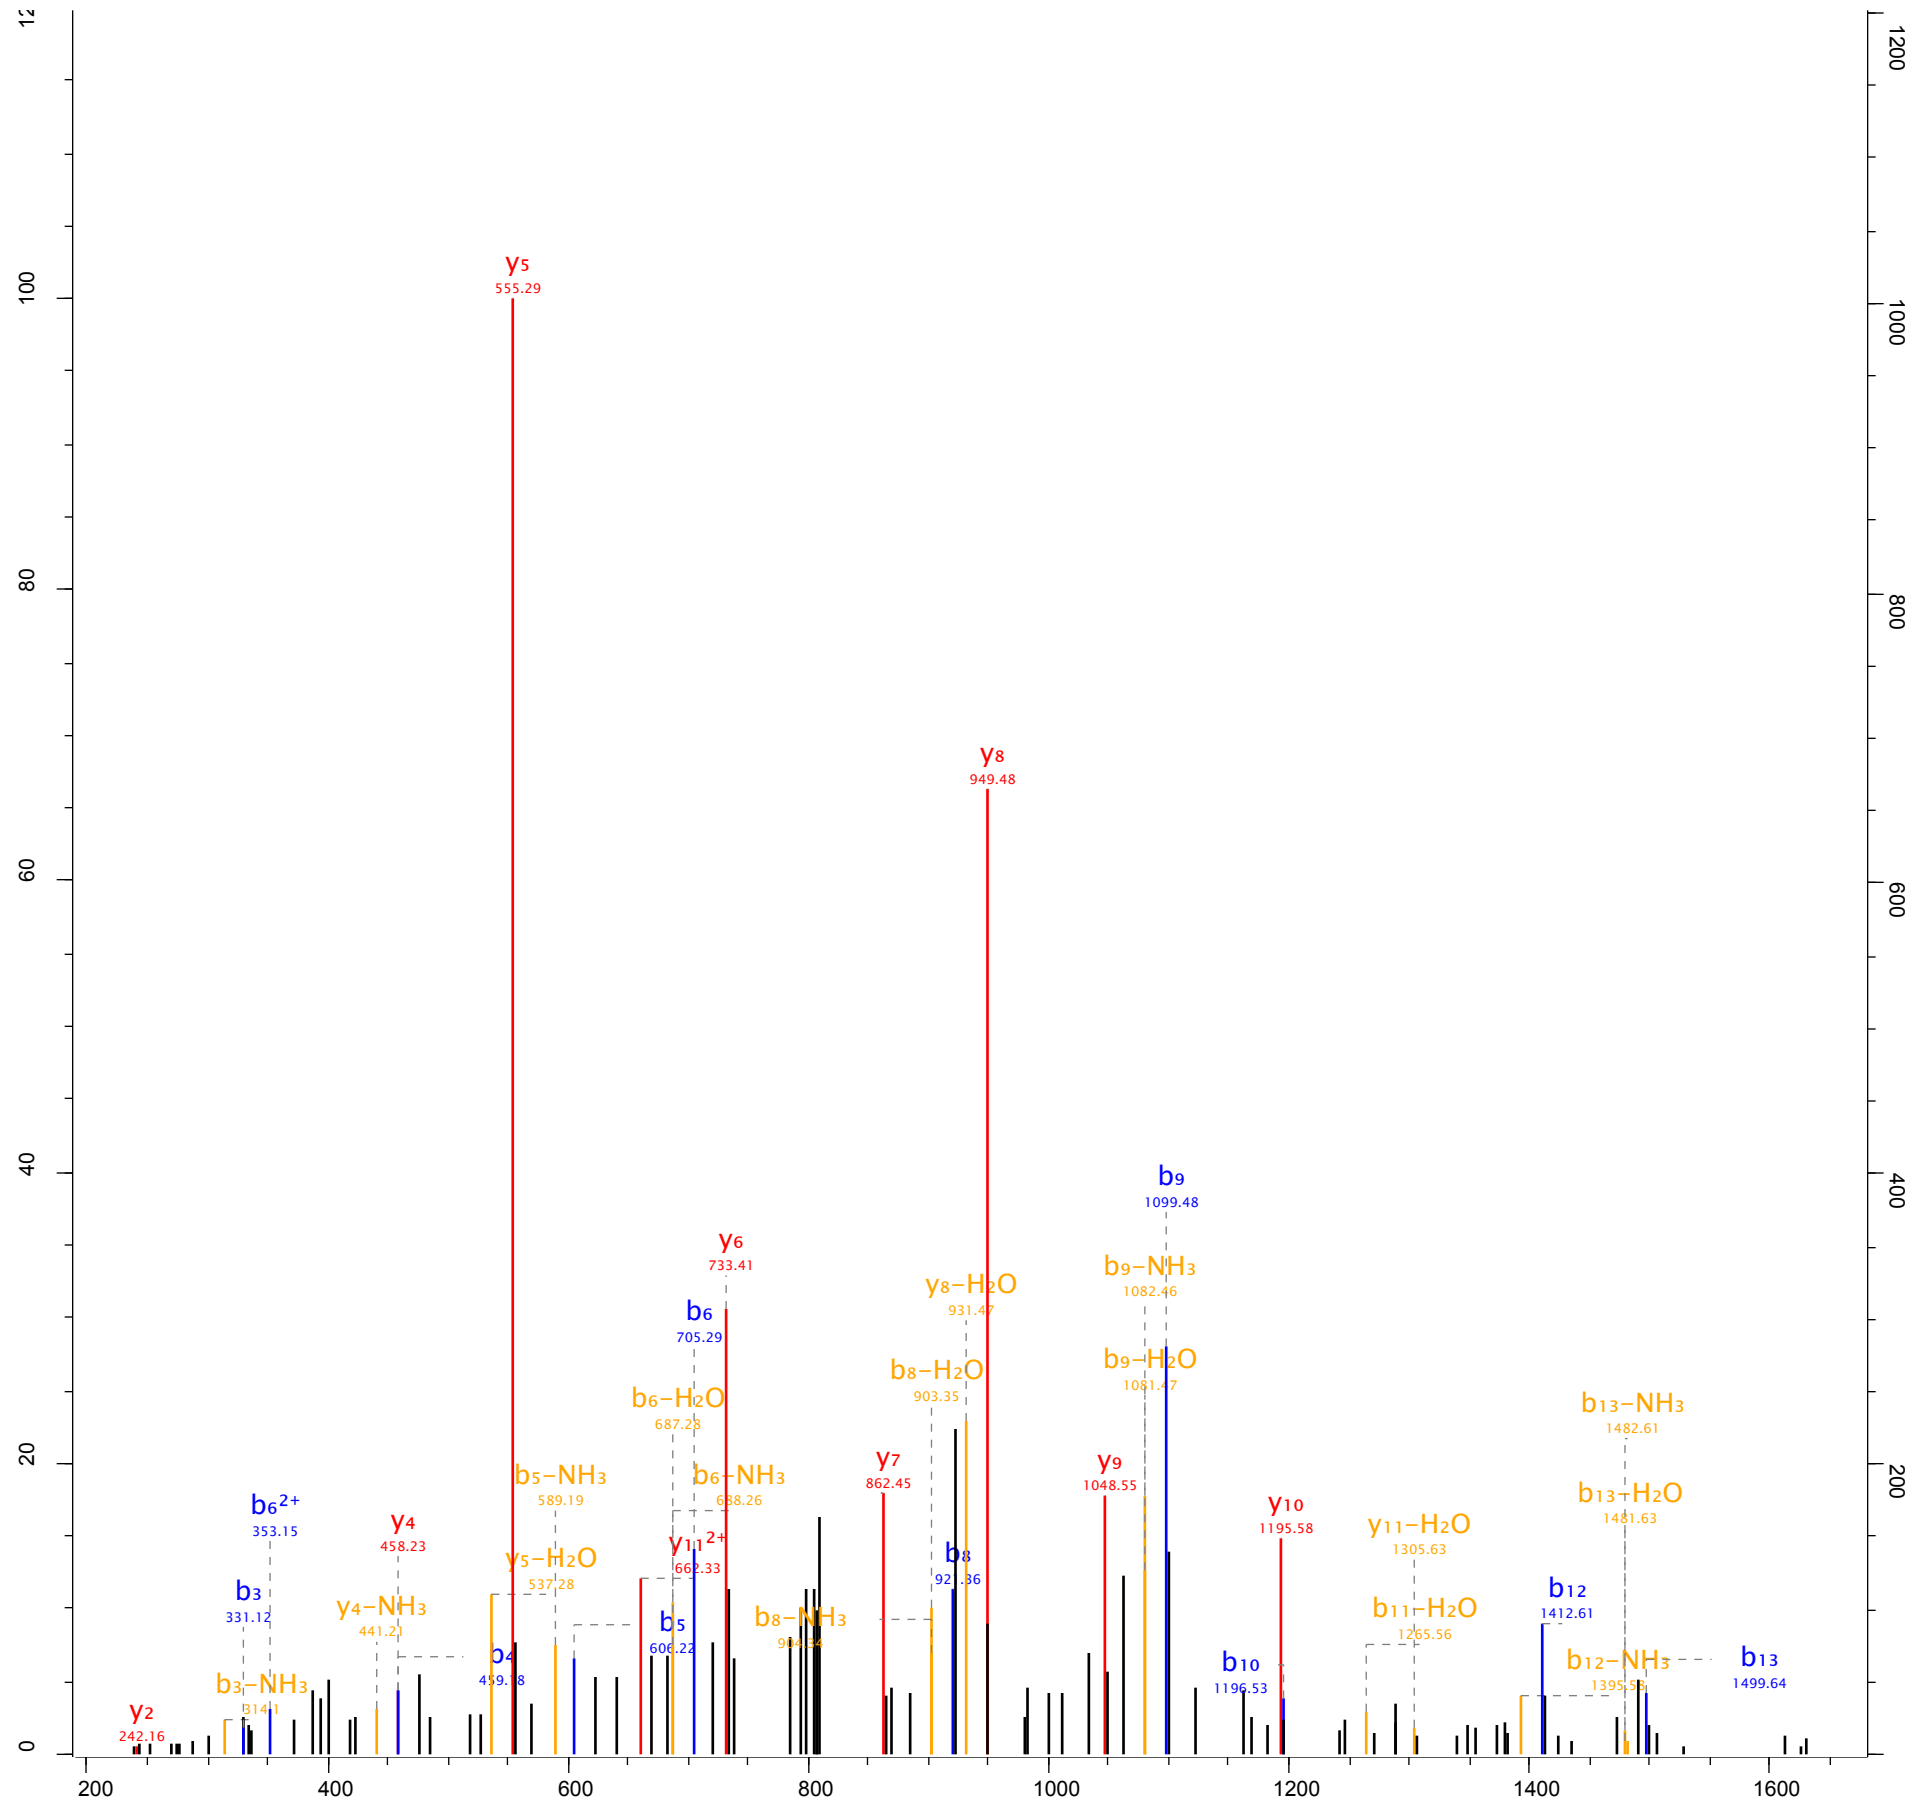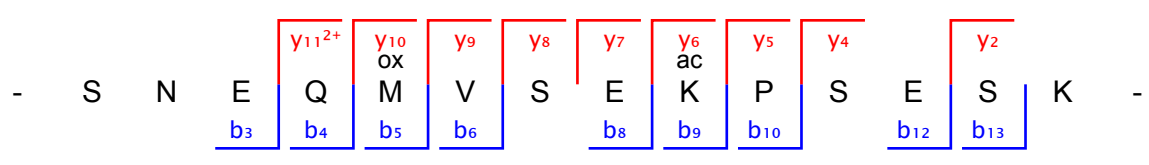

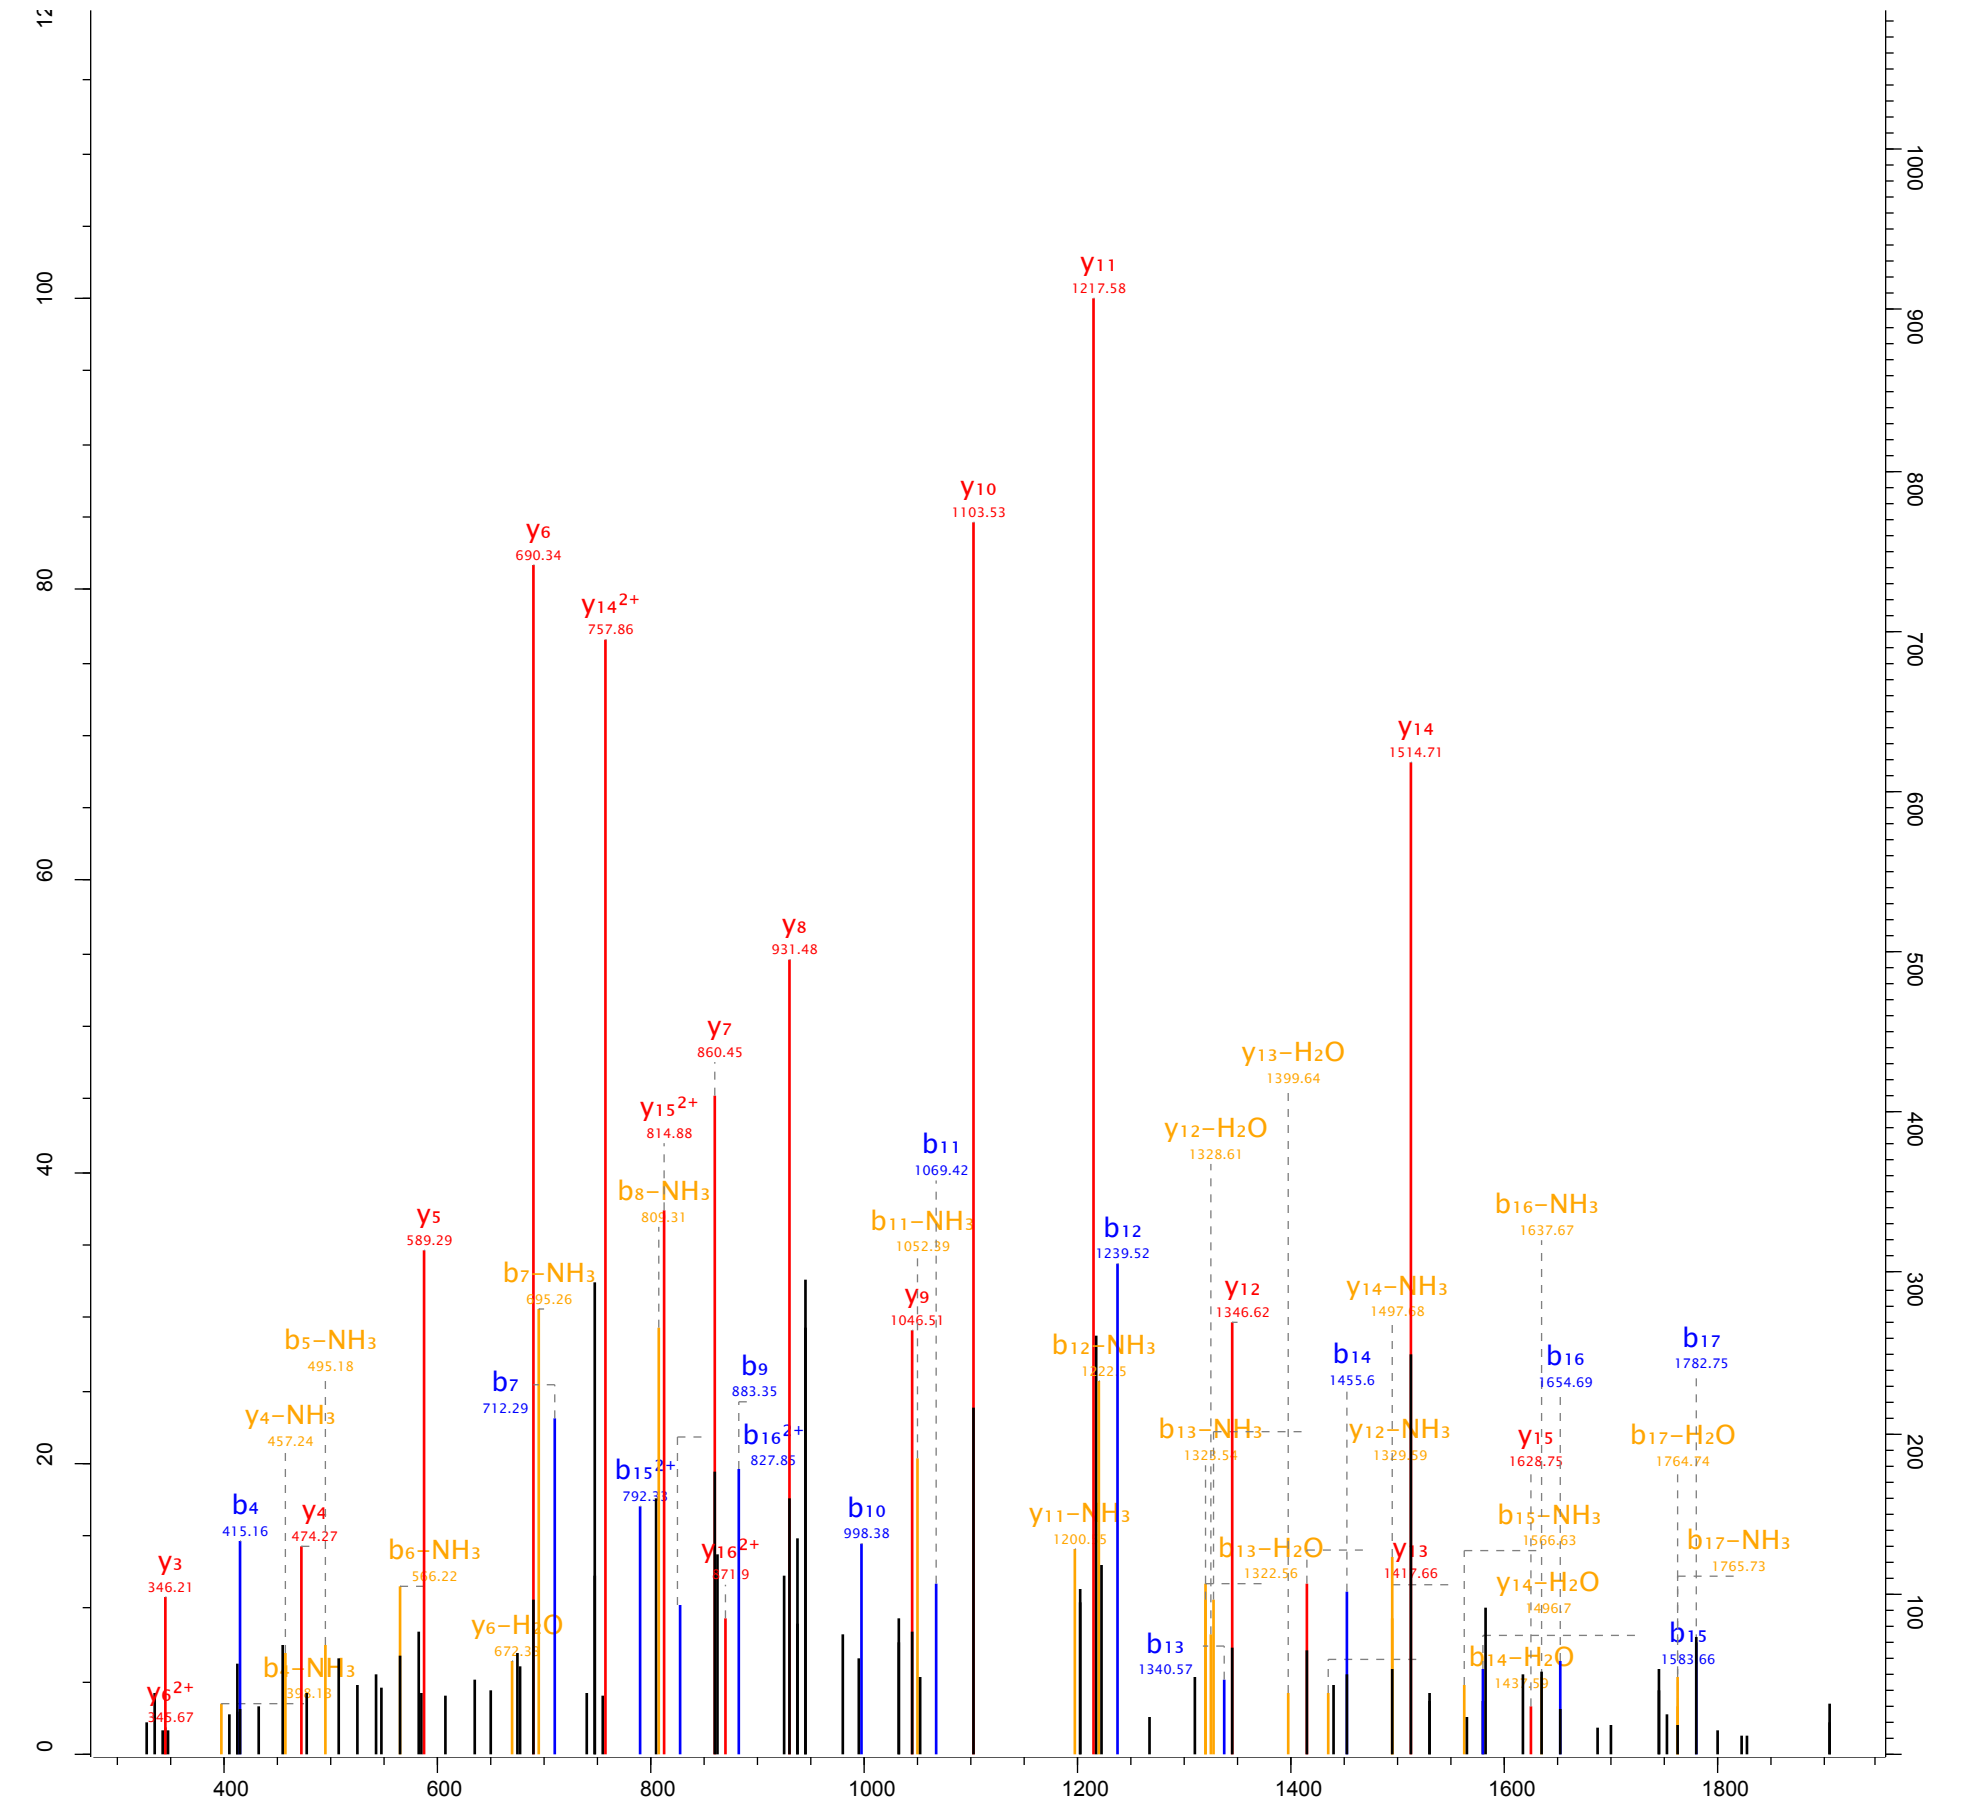

- D A N N P A E N G D A K T D Q A Q K -

y16<sup>2+</sup>
y15
y14
y13
y12
y11
y10
y9
y8
y7
y6
y5
y4
y3

b4
b7
b9
b10
b11
b12
b13
b14
b15
b16
b17

ac

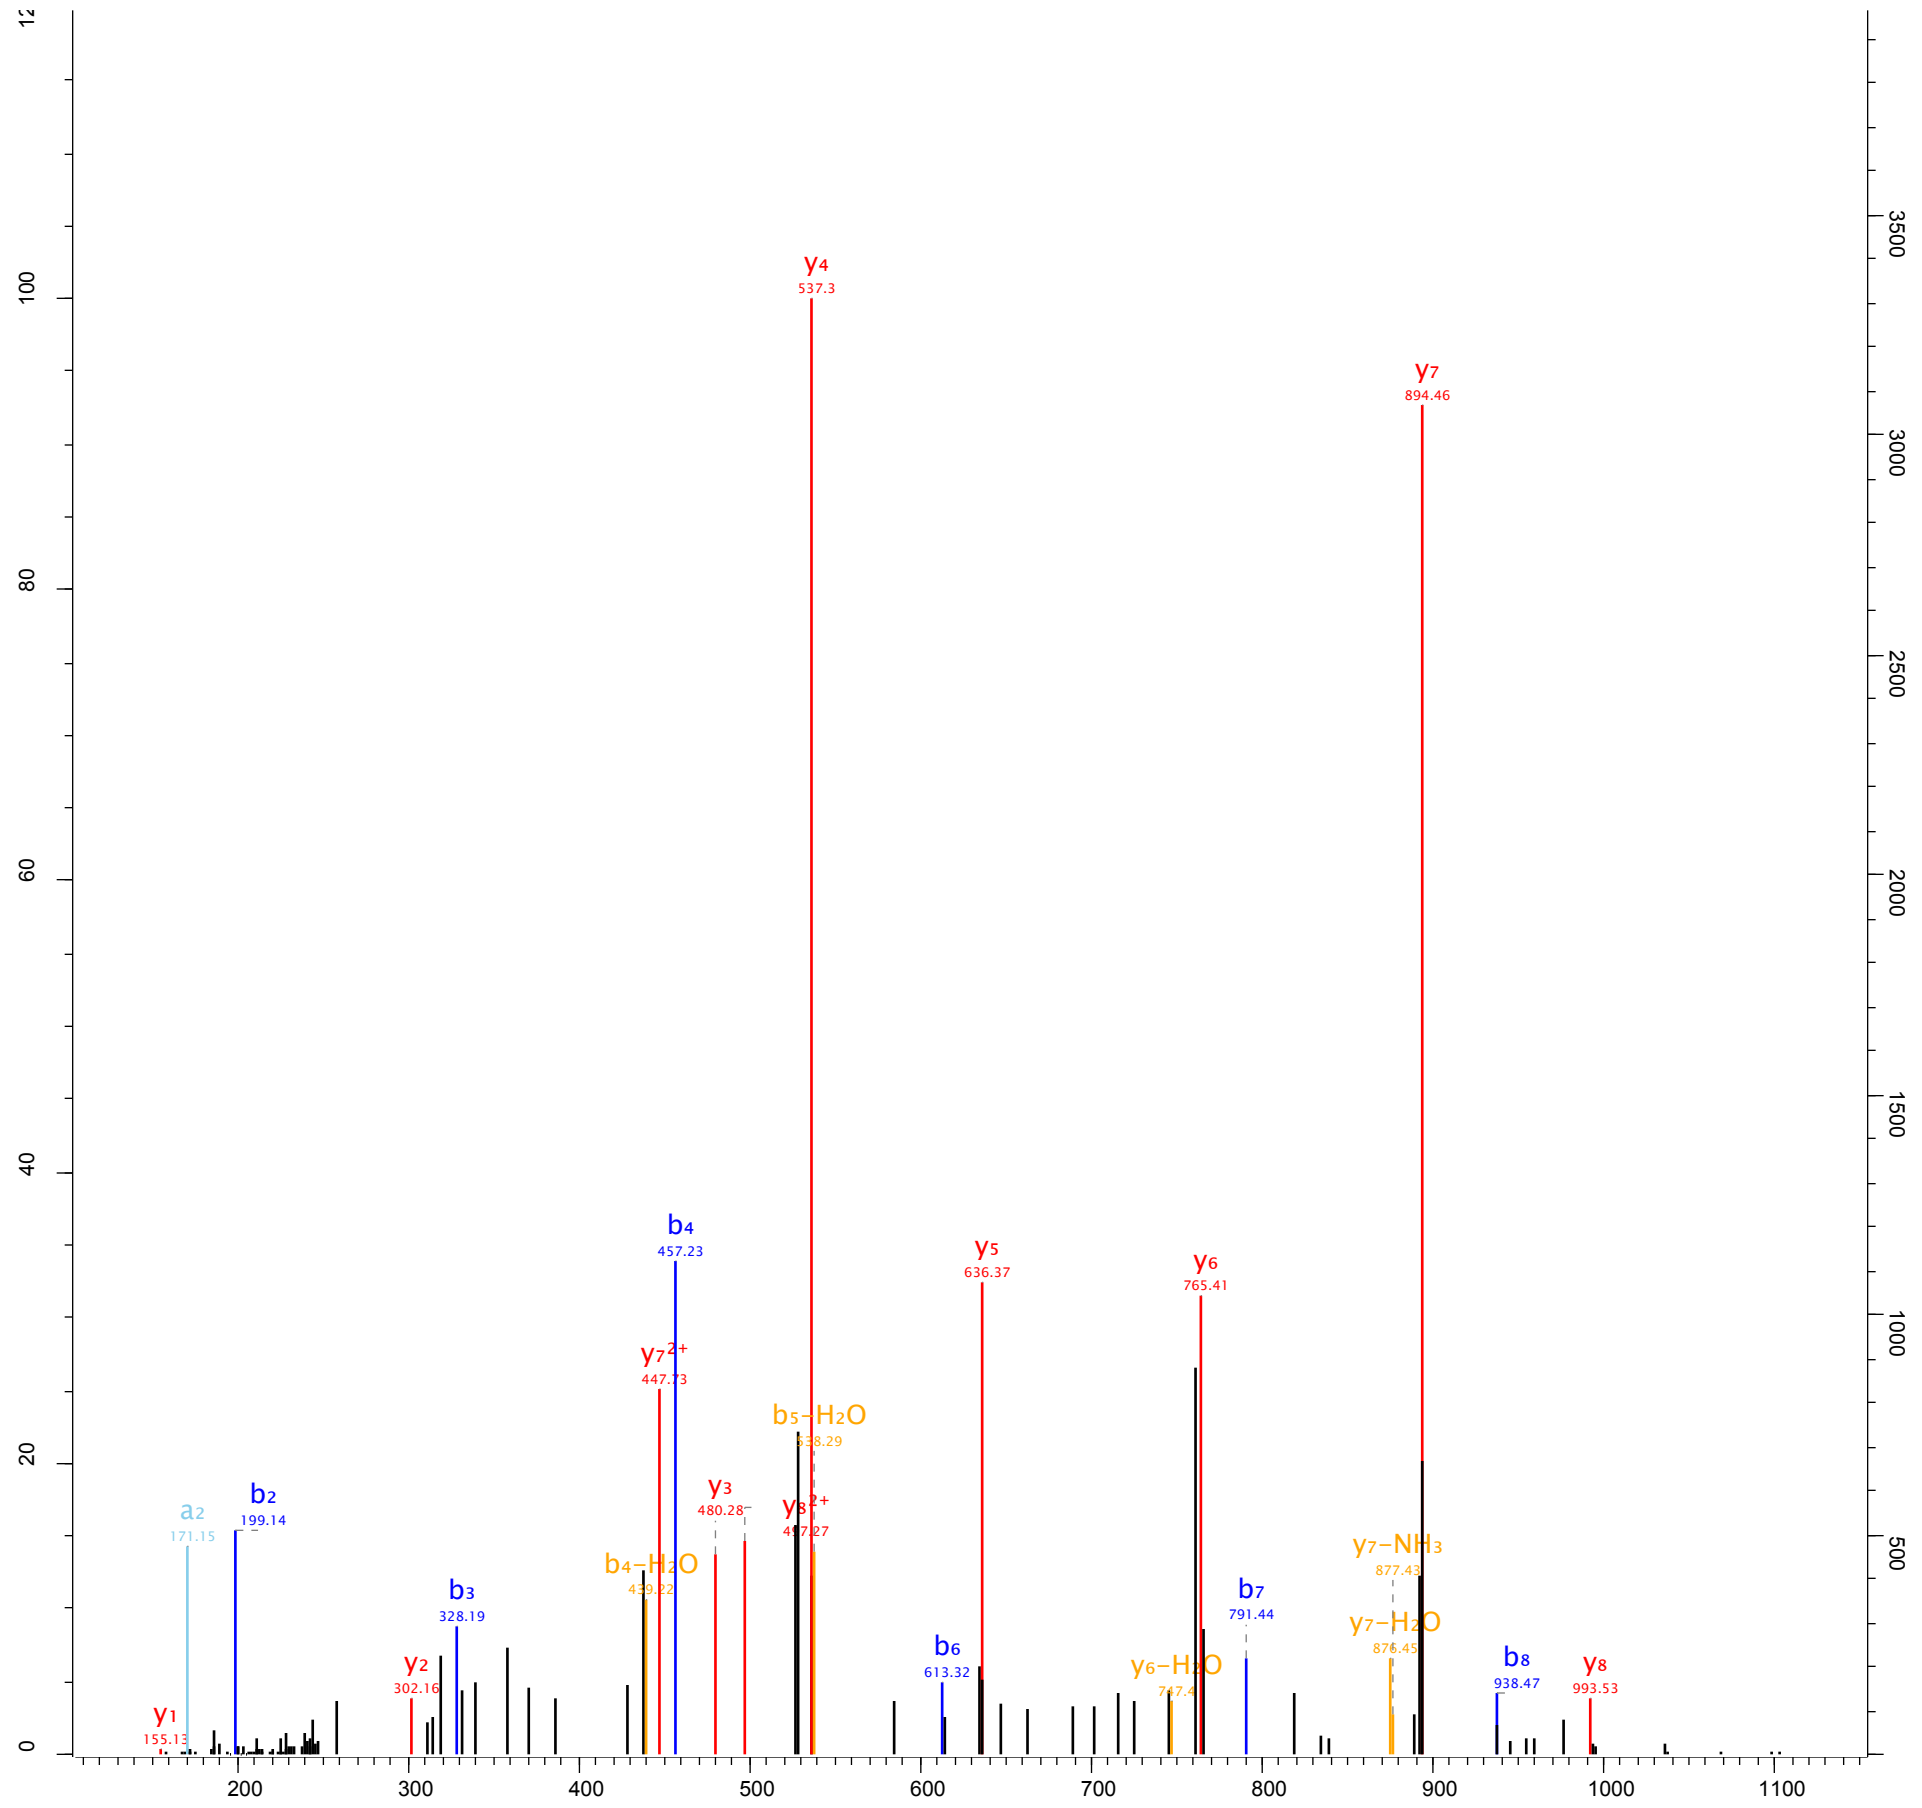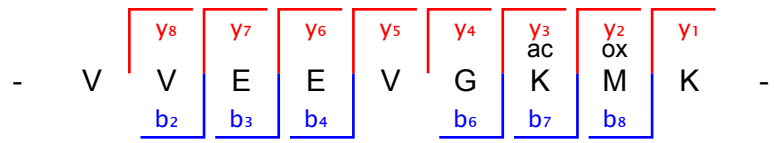

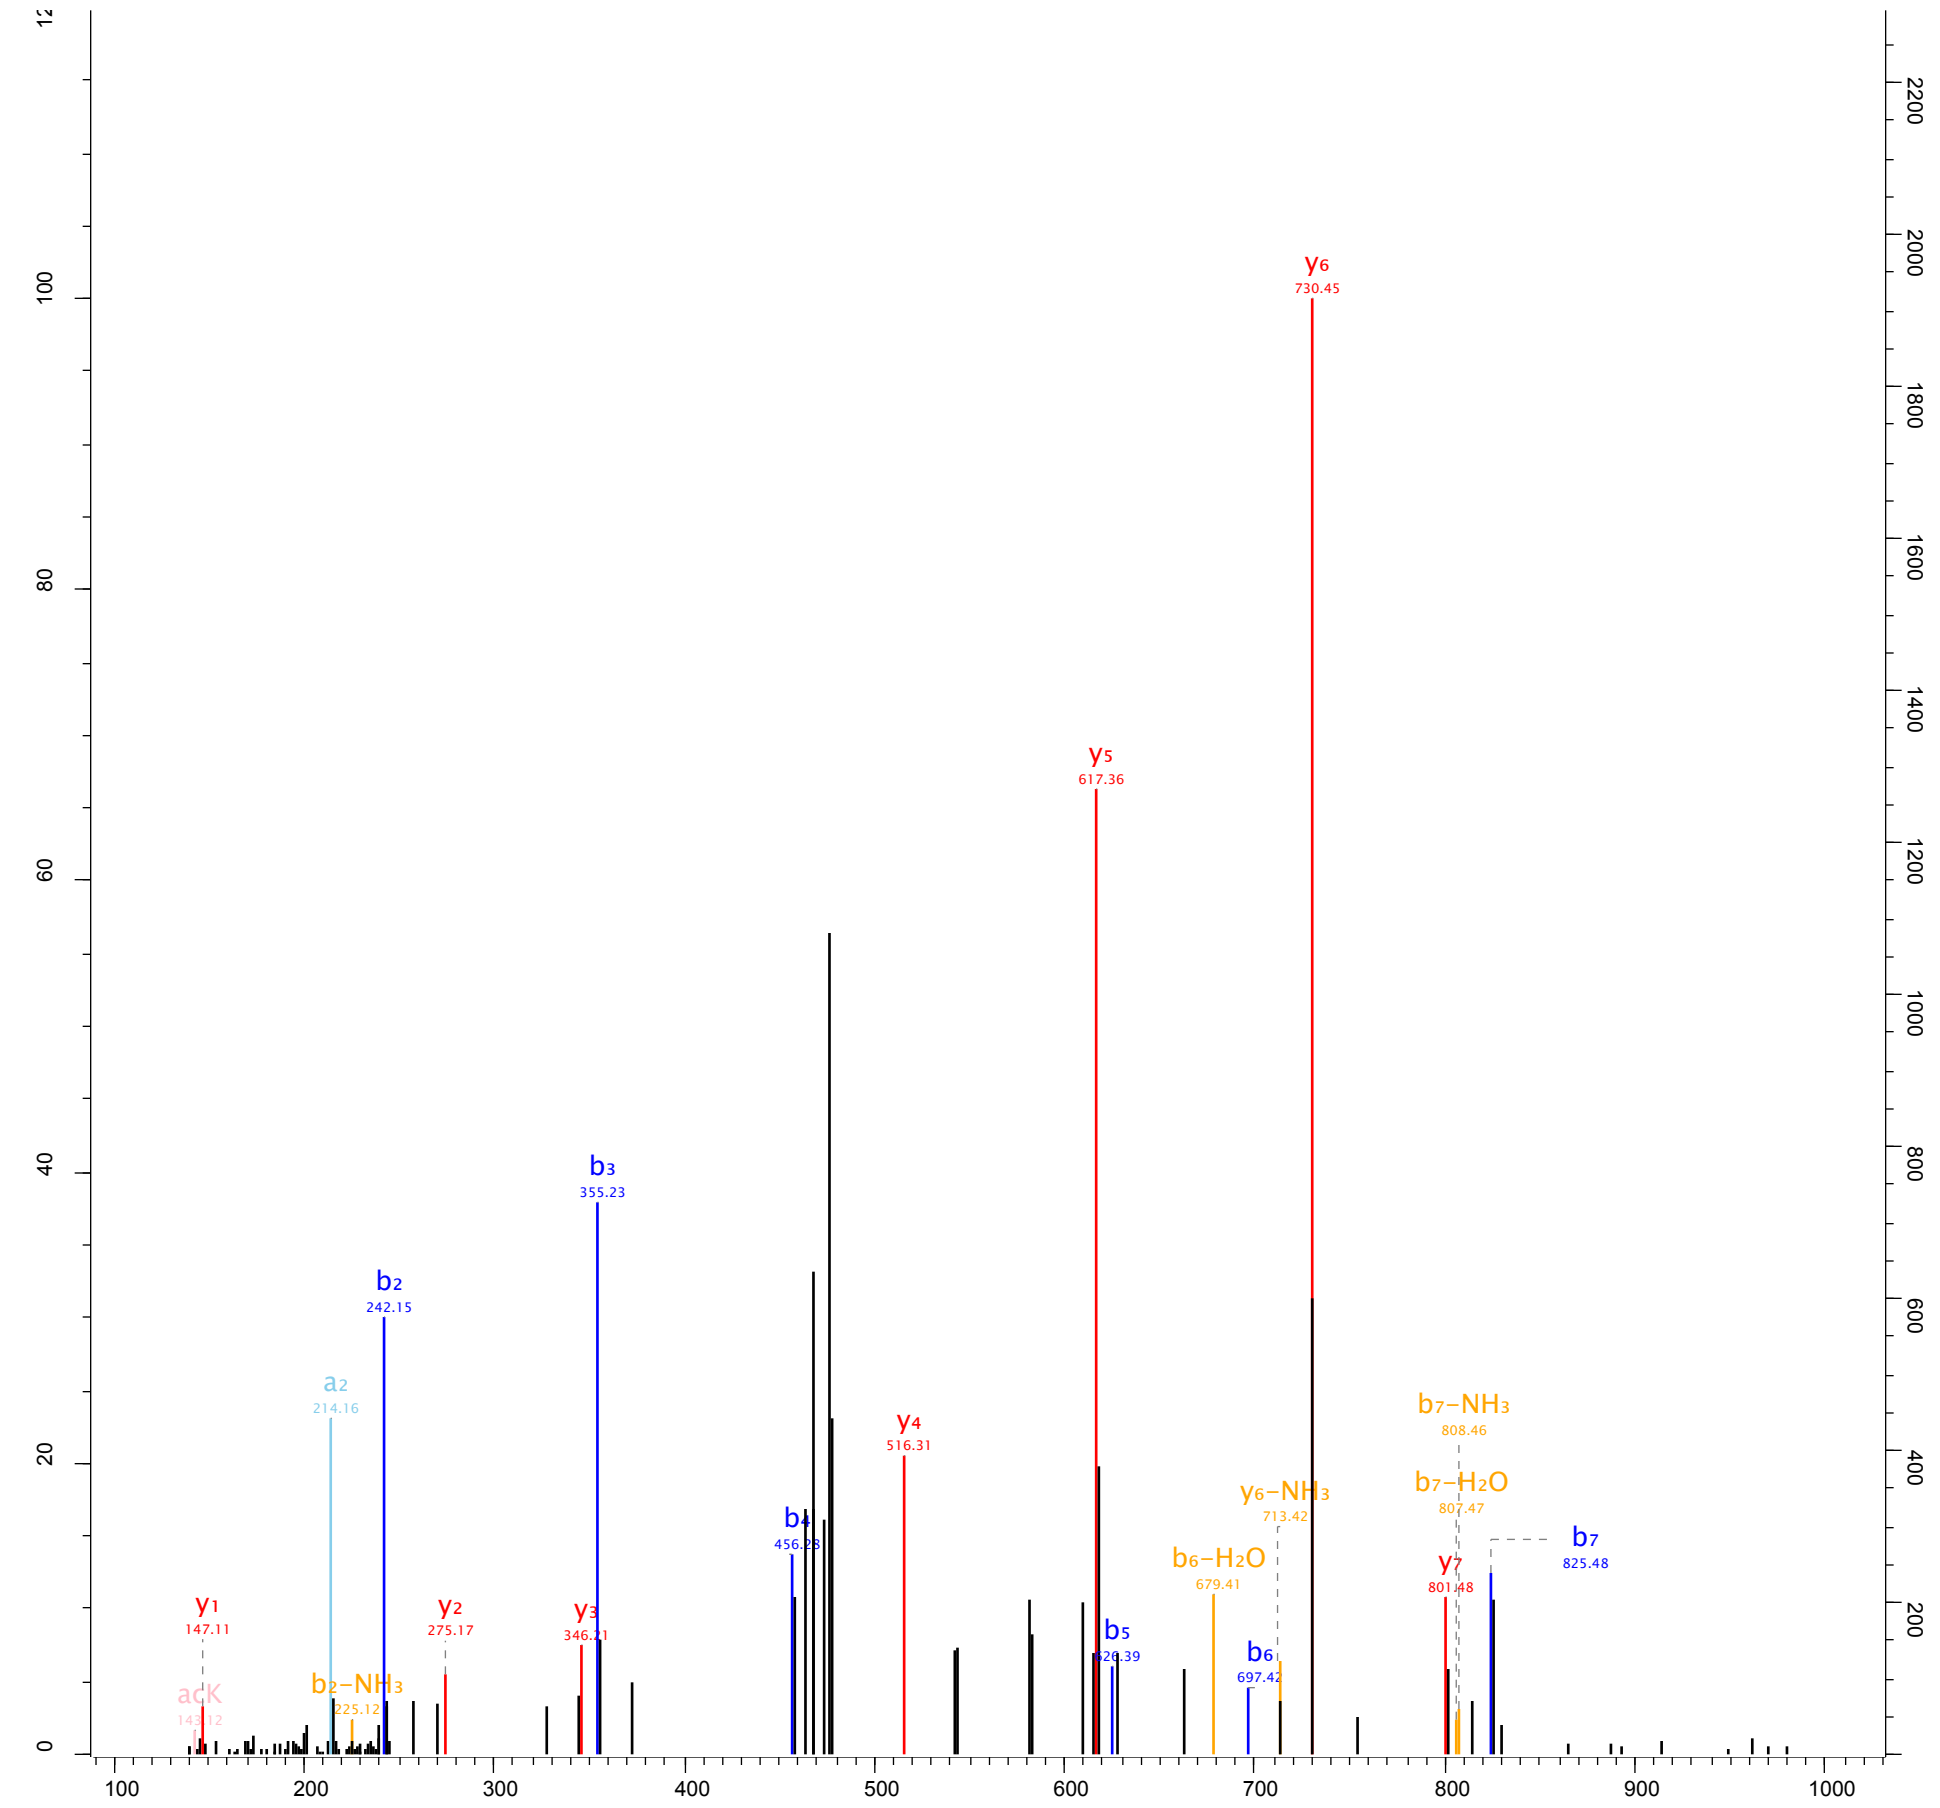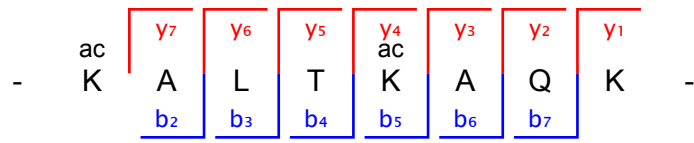

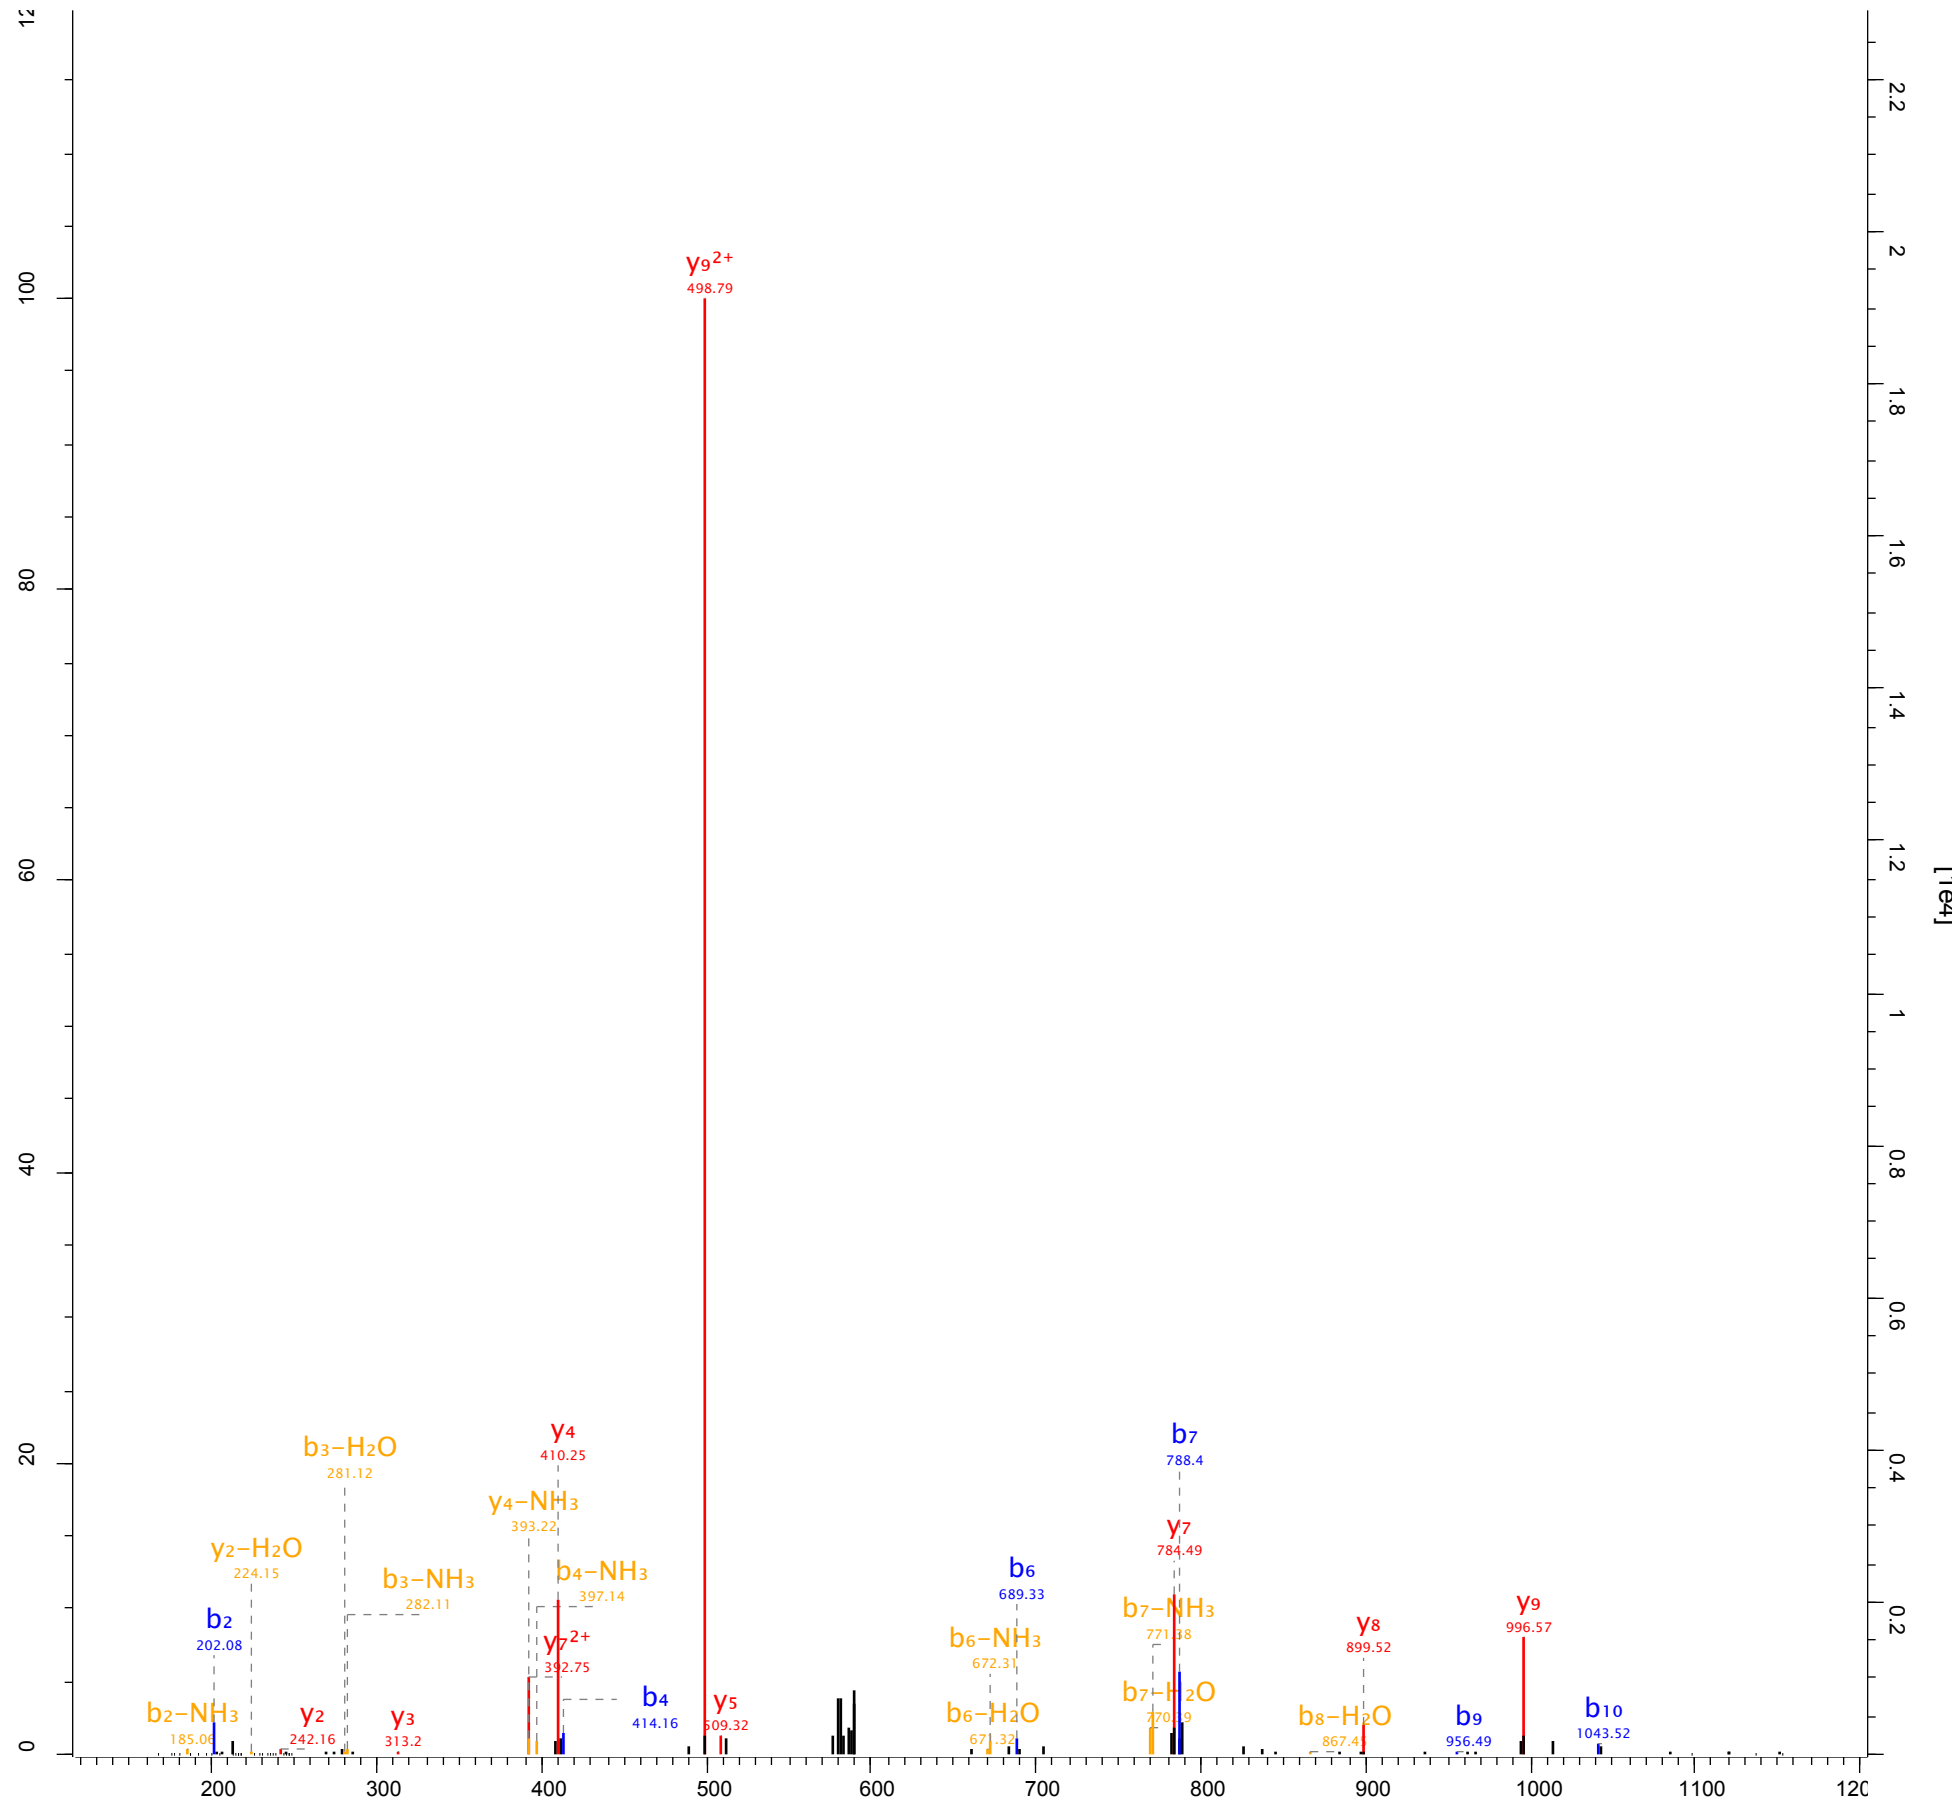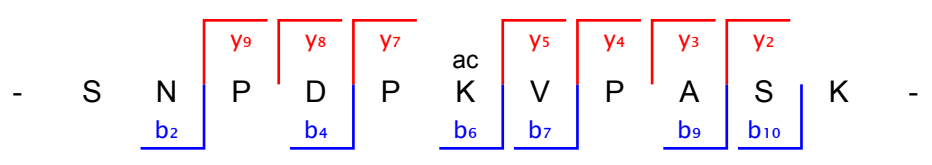

Raw file 050813\_SCW\_II\_29\_19\_4 Scan 10587 Method ITMS; CID Score 130.1 m/z 678.84 Gene names Rbm10;Rbm5

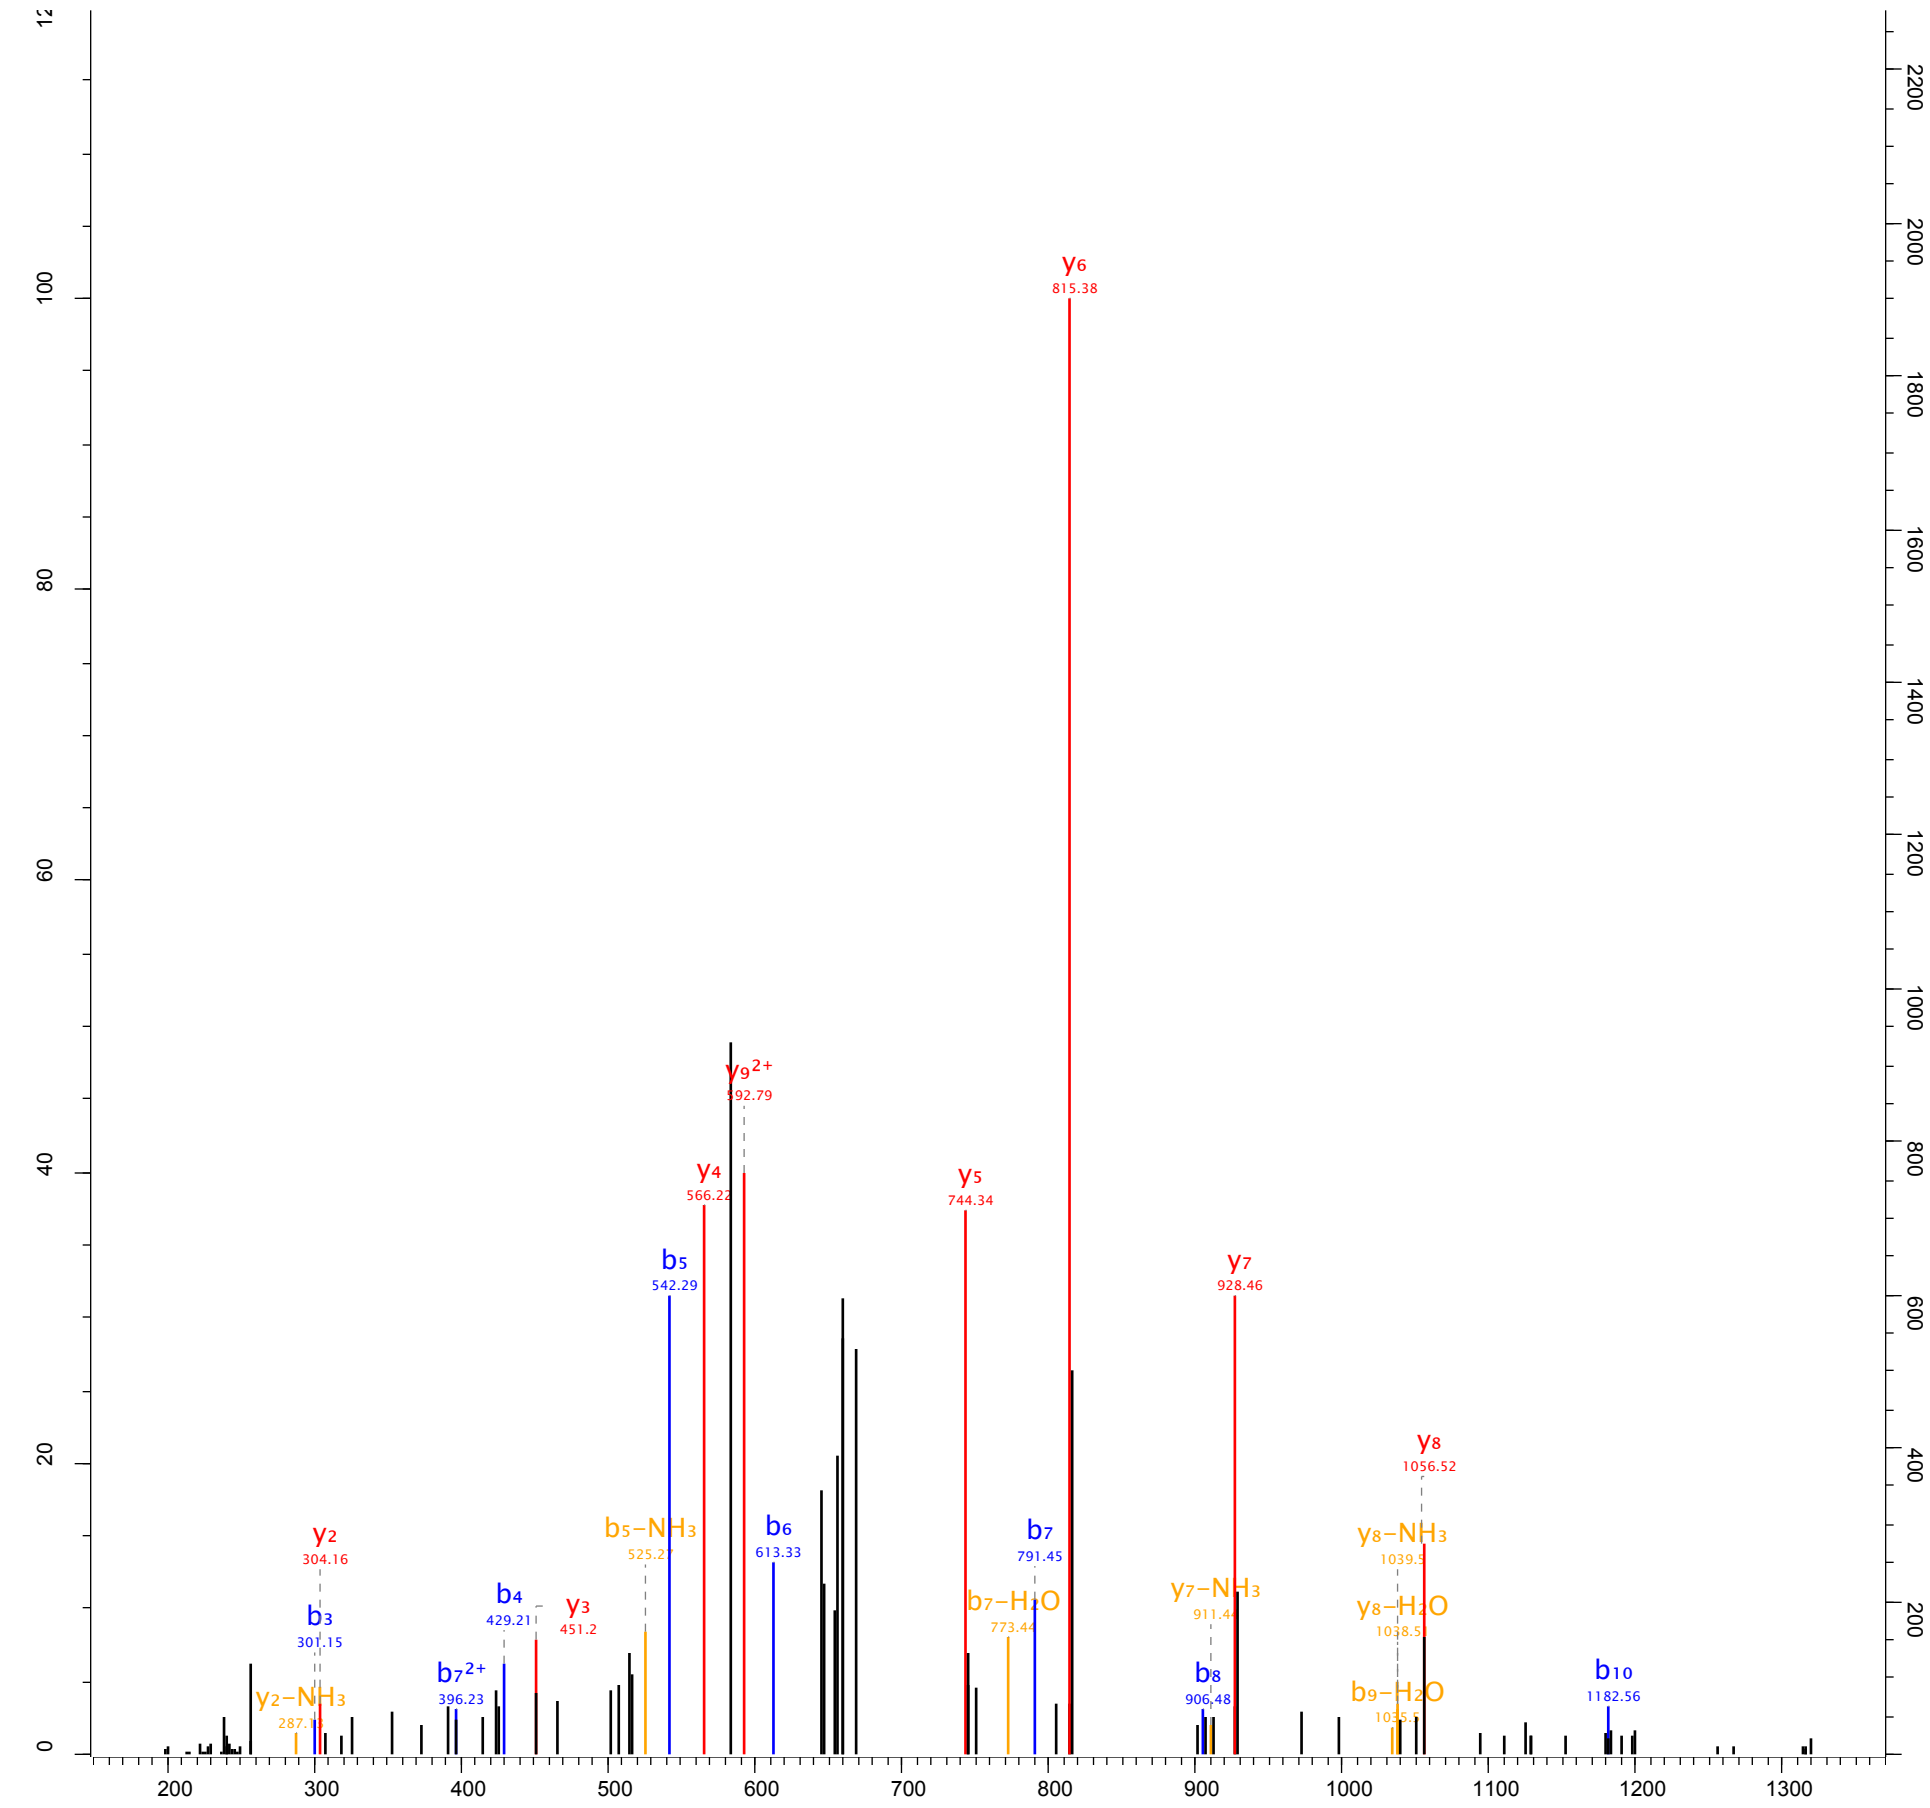

- T A Q Q I A K D M E R -

b<sub>3</sub>
b<sub>4</sub>
b<sub>5</sub>
b<sub>6</sub>
b<sub>7</sub>
b<sub>8</sub>
b<sub>10</sub>

Raw file: 050813\_SCW\_II\_29\_19\_4  
 Scan: 10709 Method: ITMS; CID Score: 103.11 m/z: 672.88 Gene names: Hist1h2bb

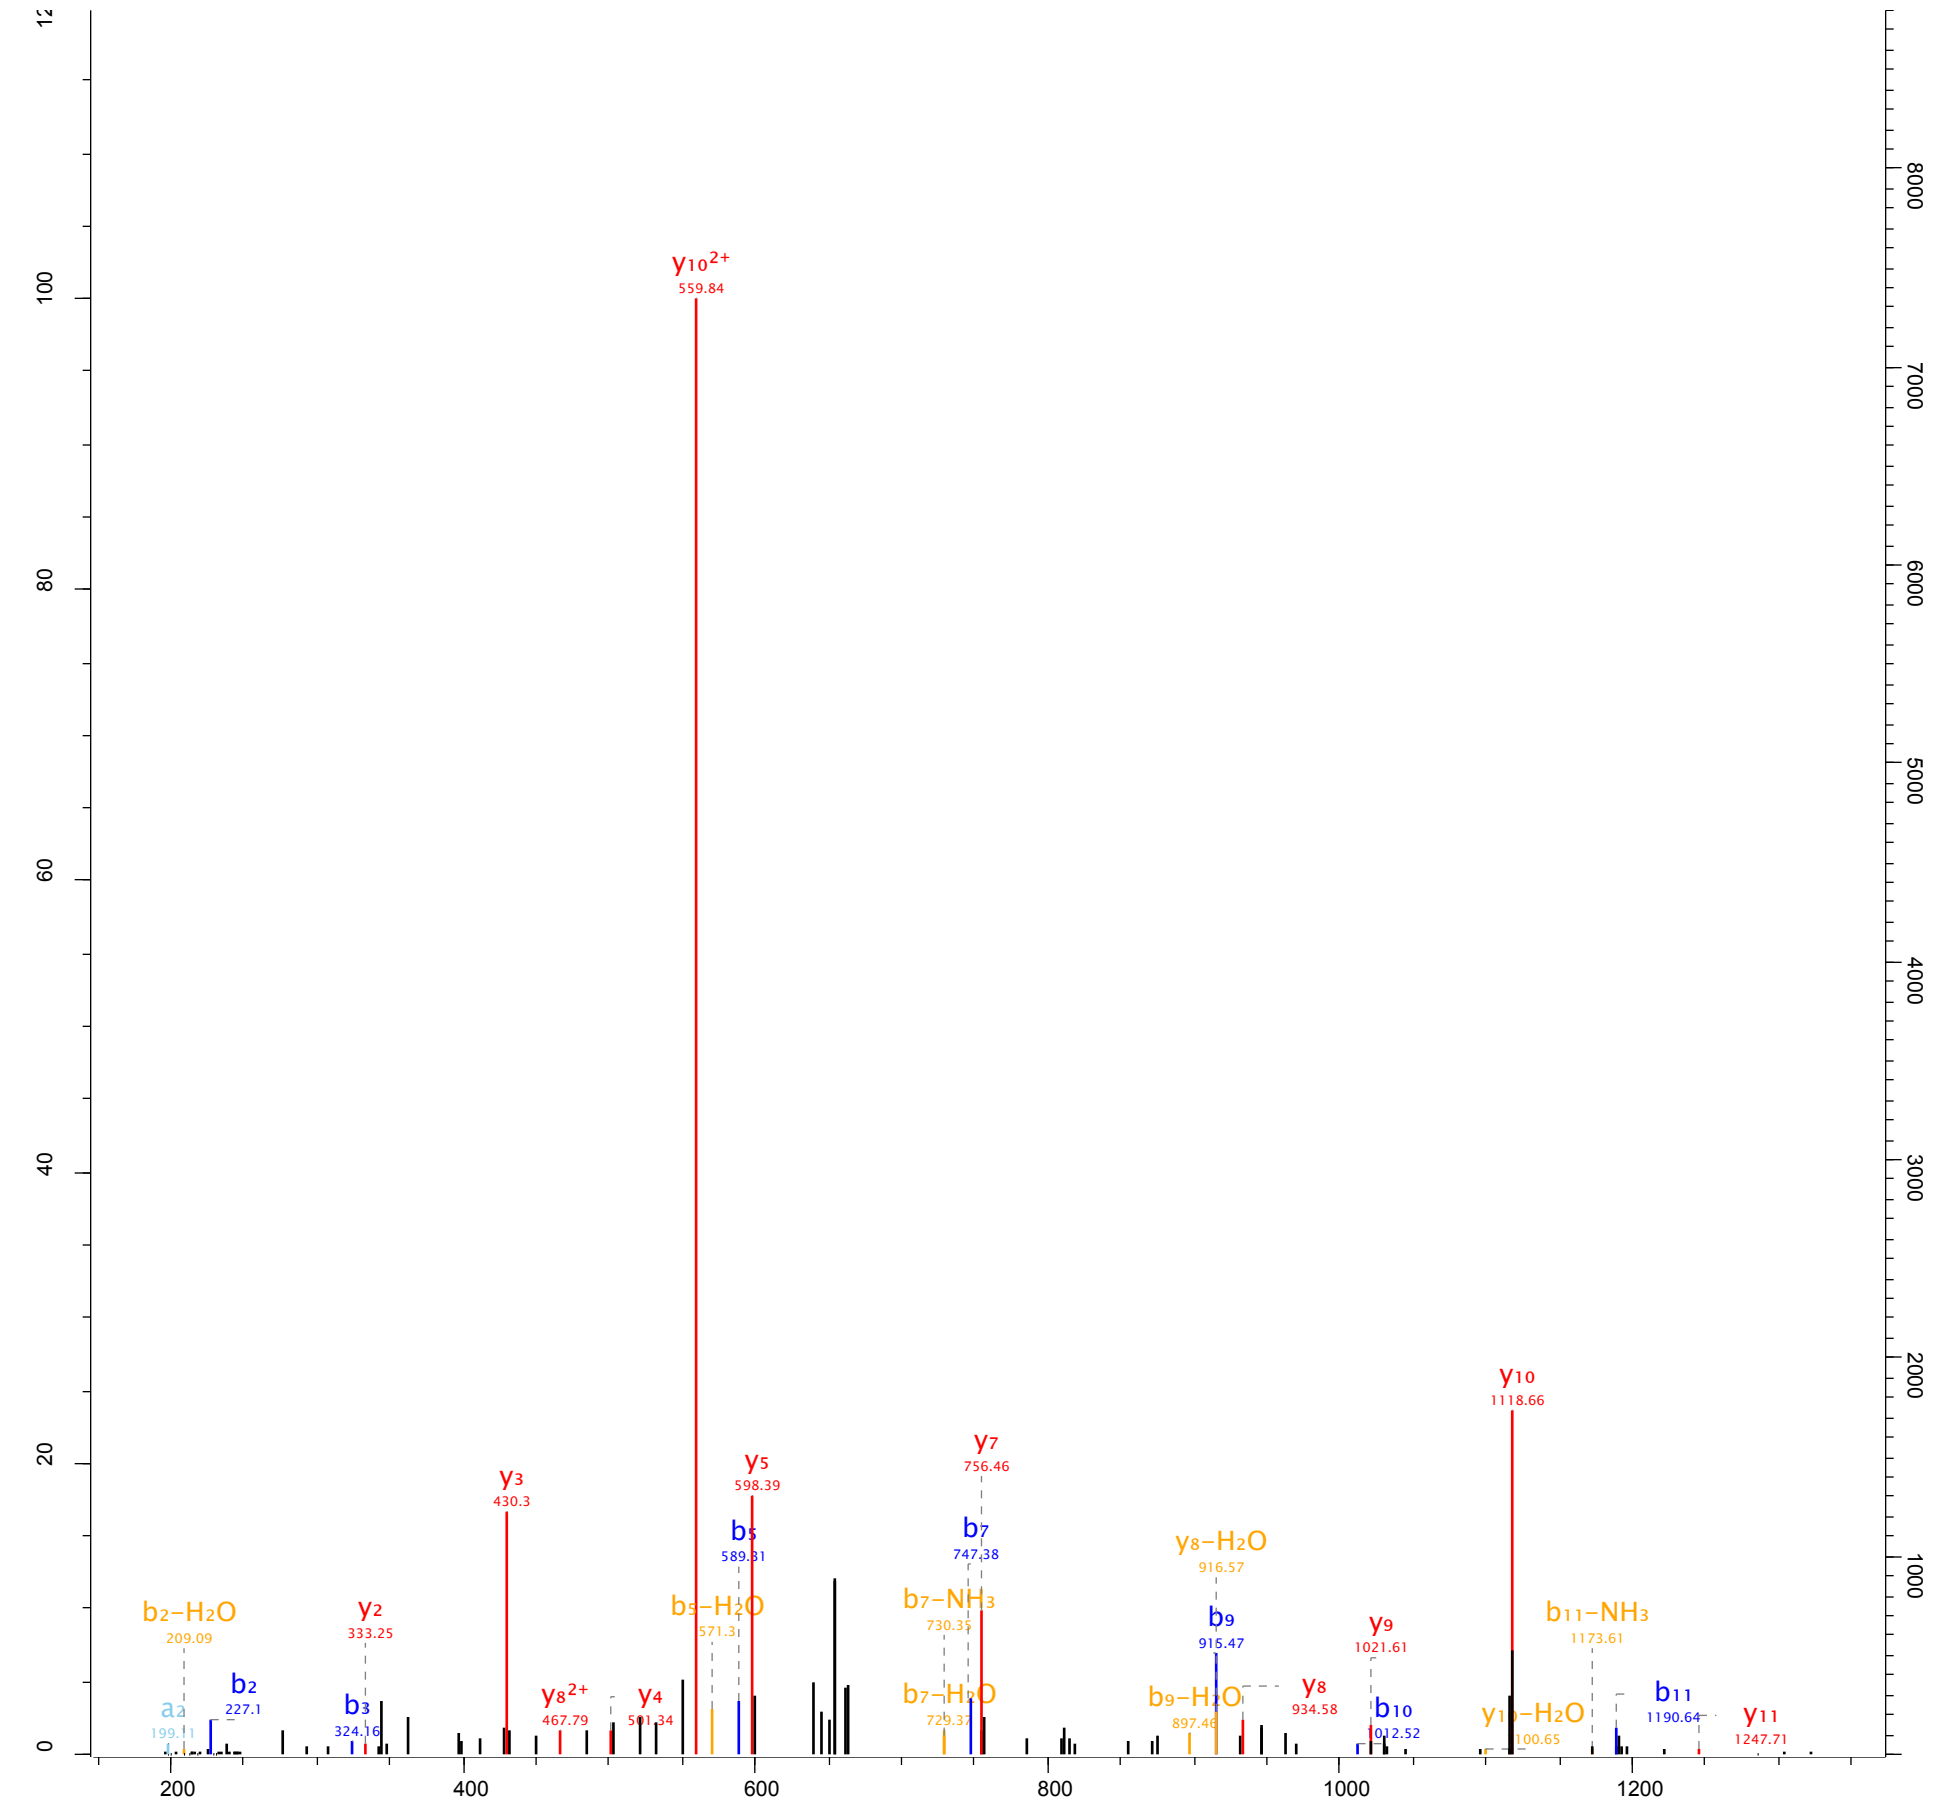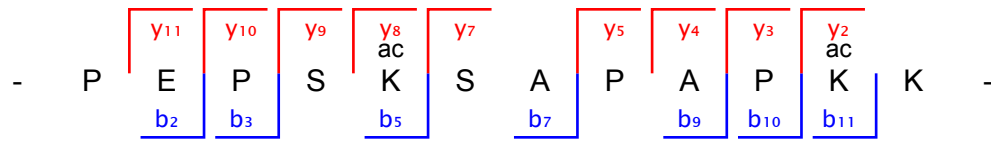



050813\_SCW\_II\_29\_19\_4

10775 ITMS; CID 128.35 521.79 Mrpl12

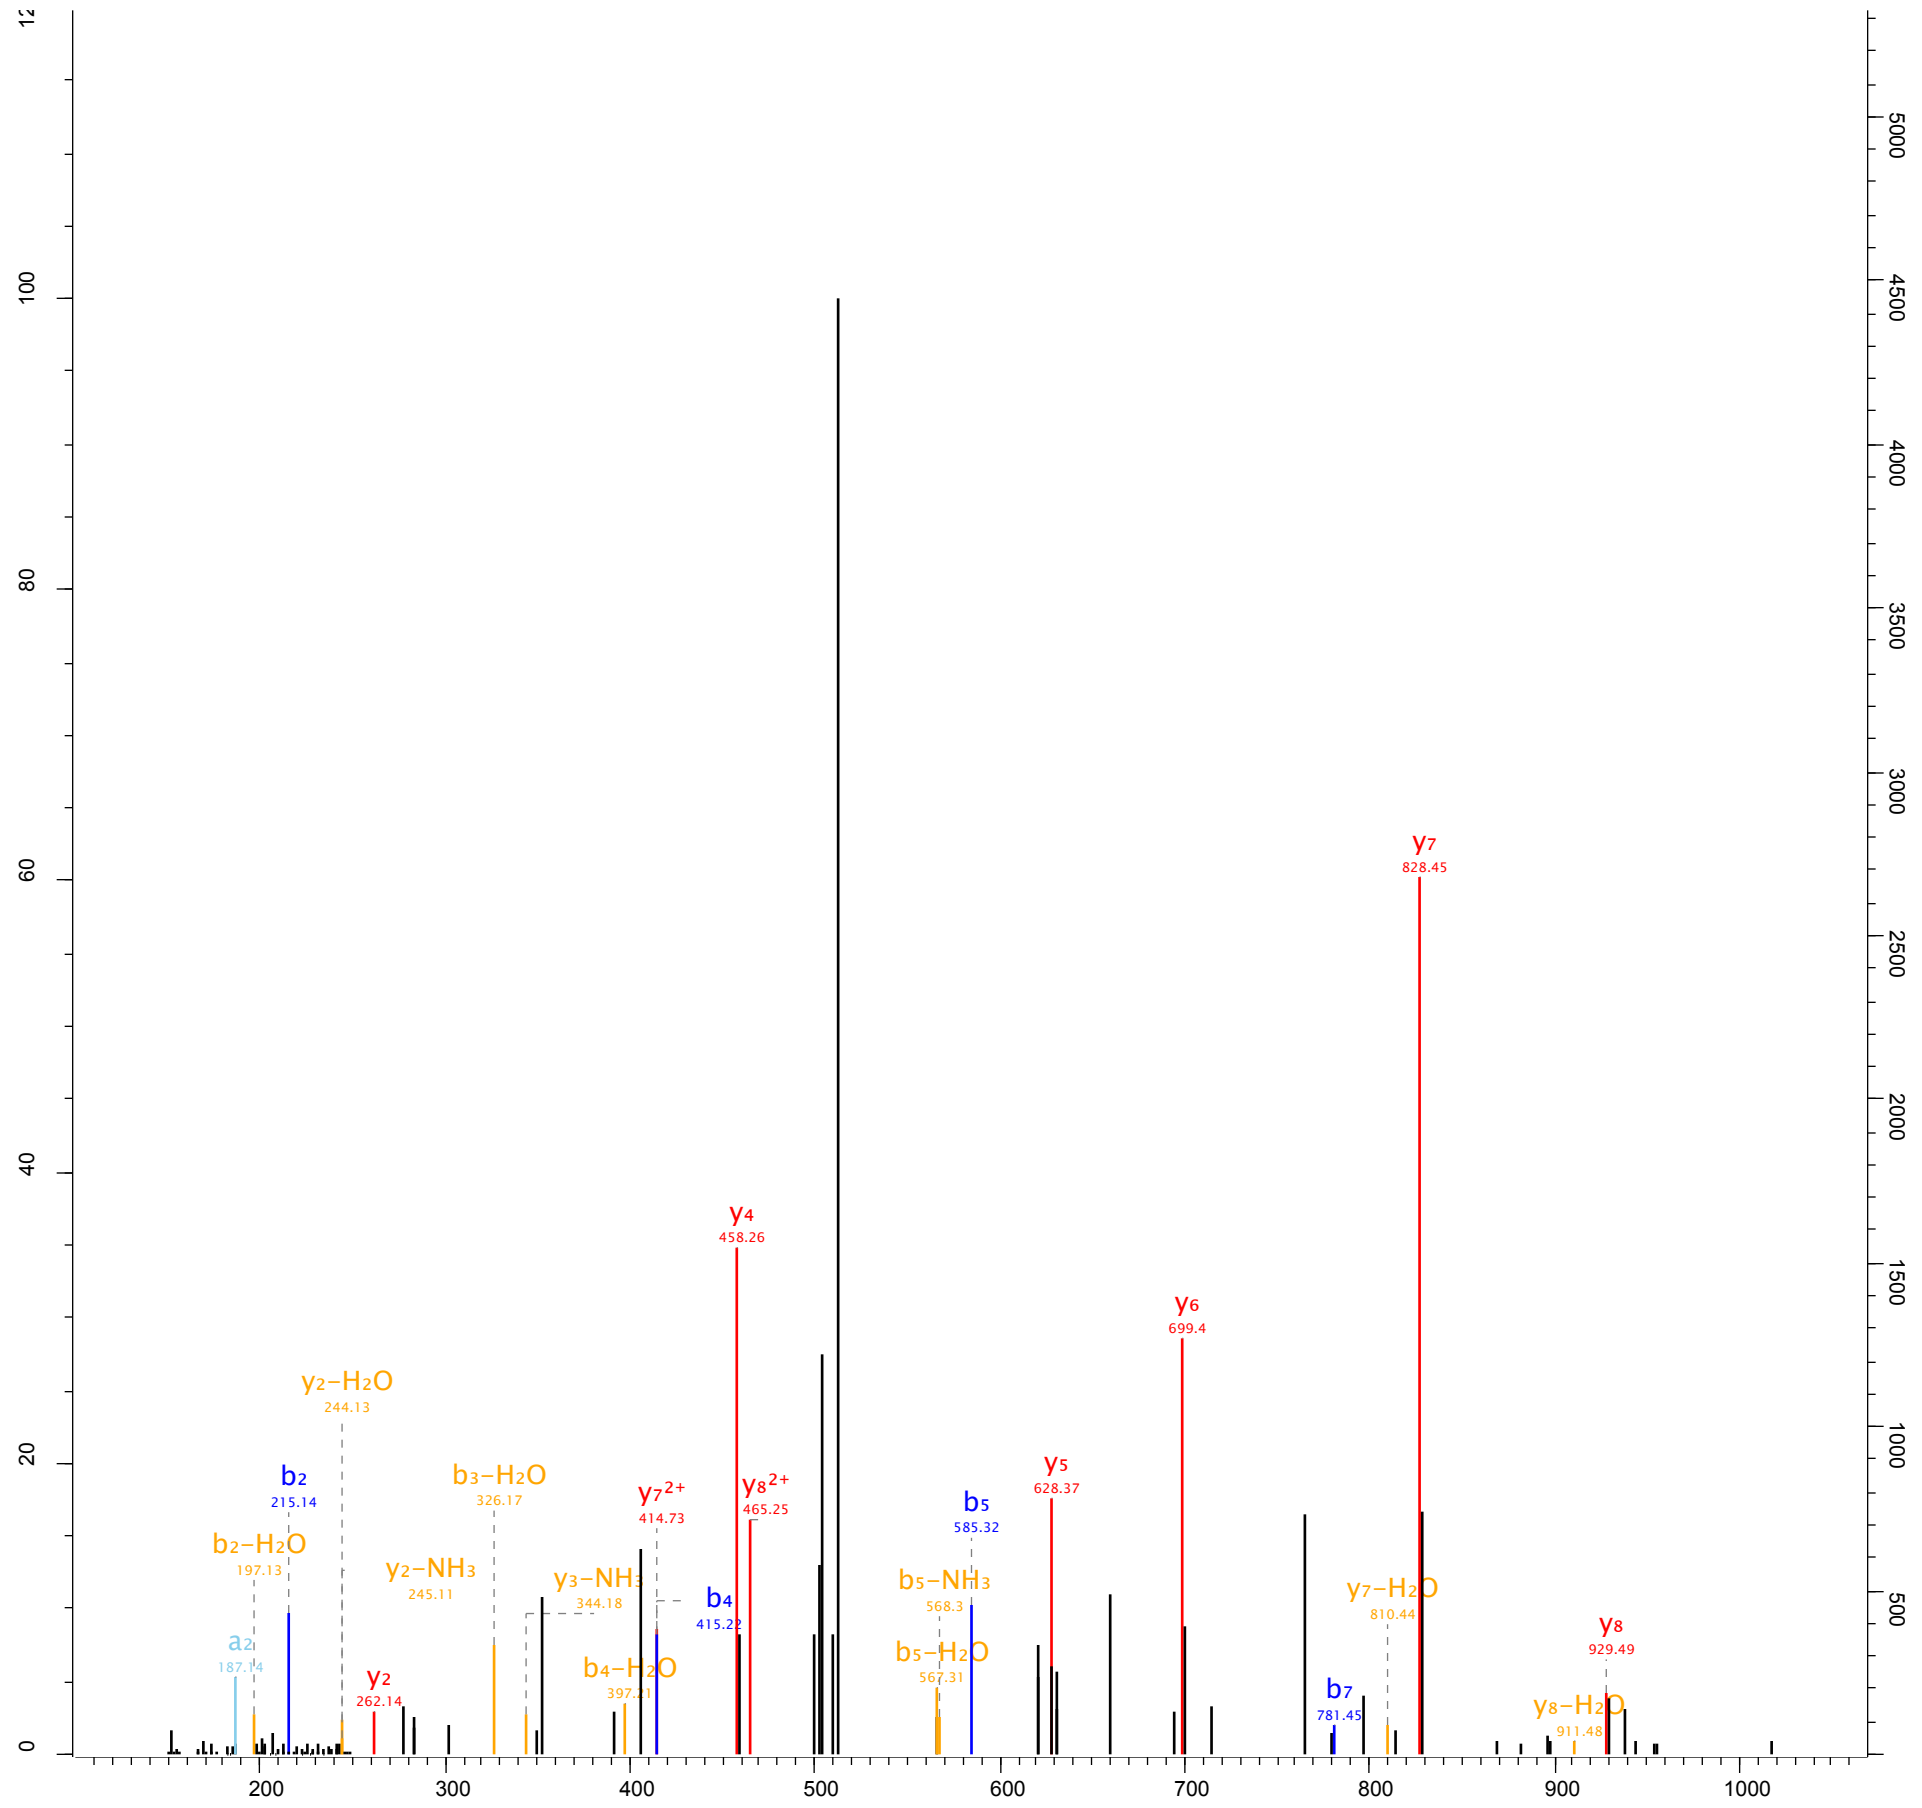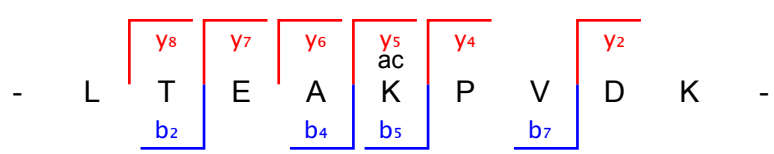

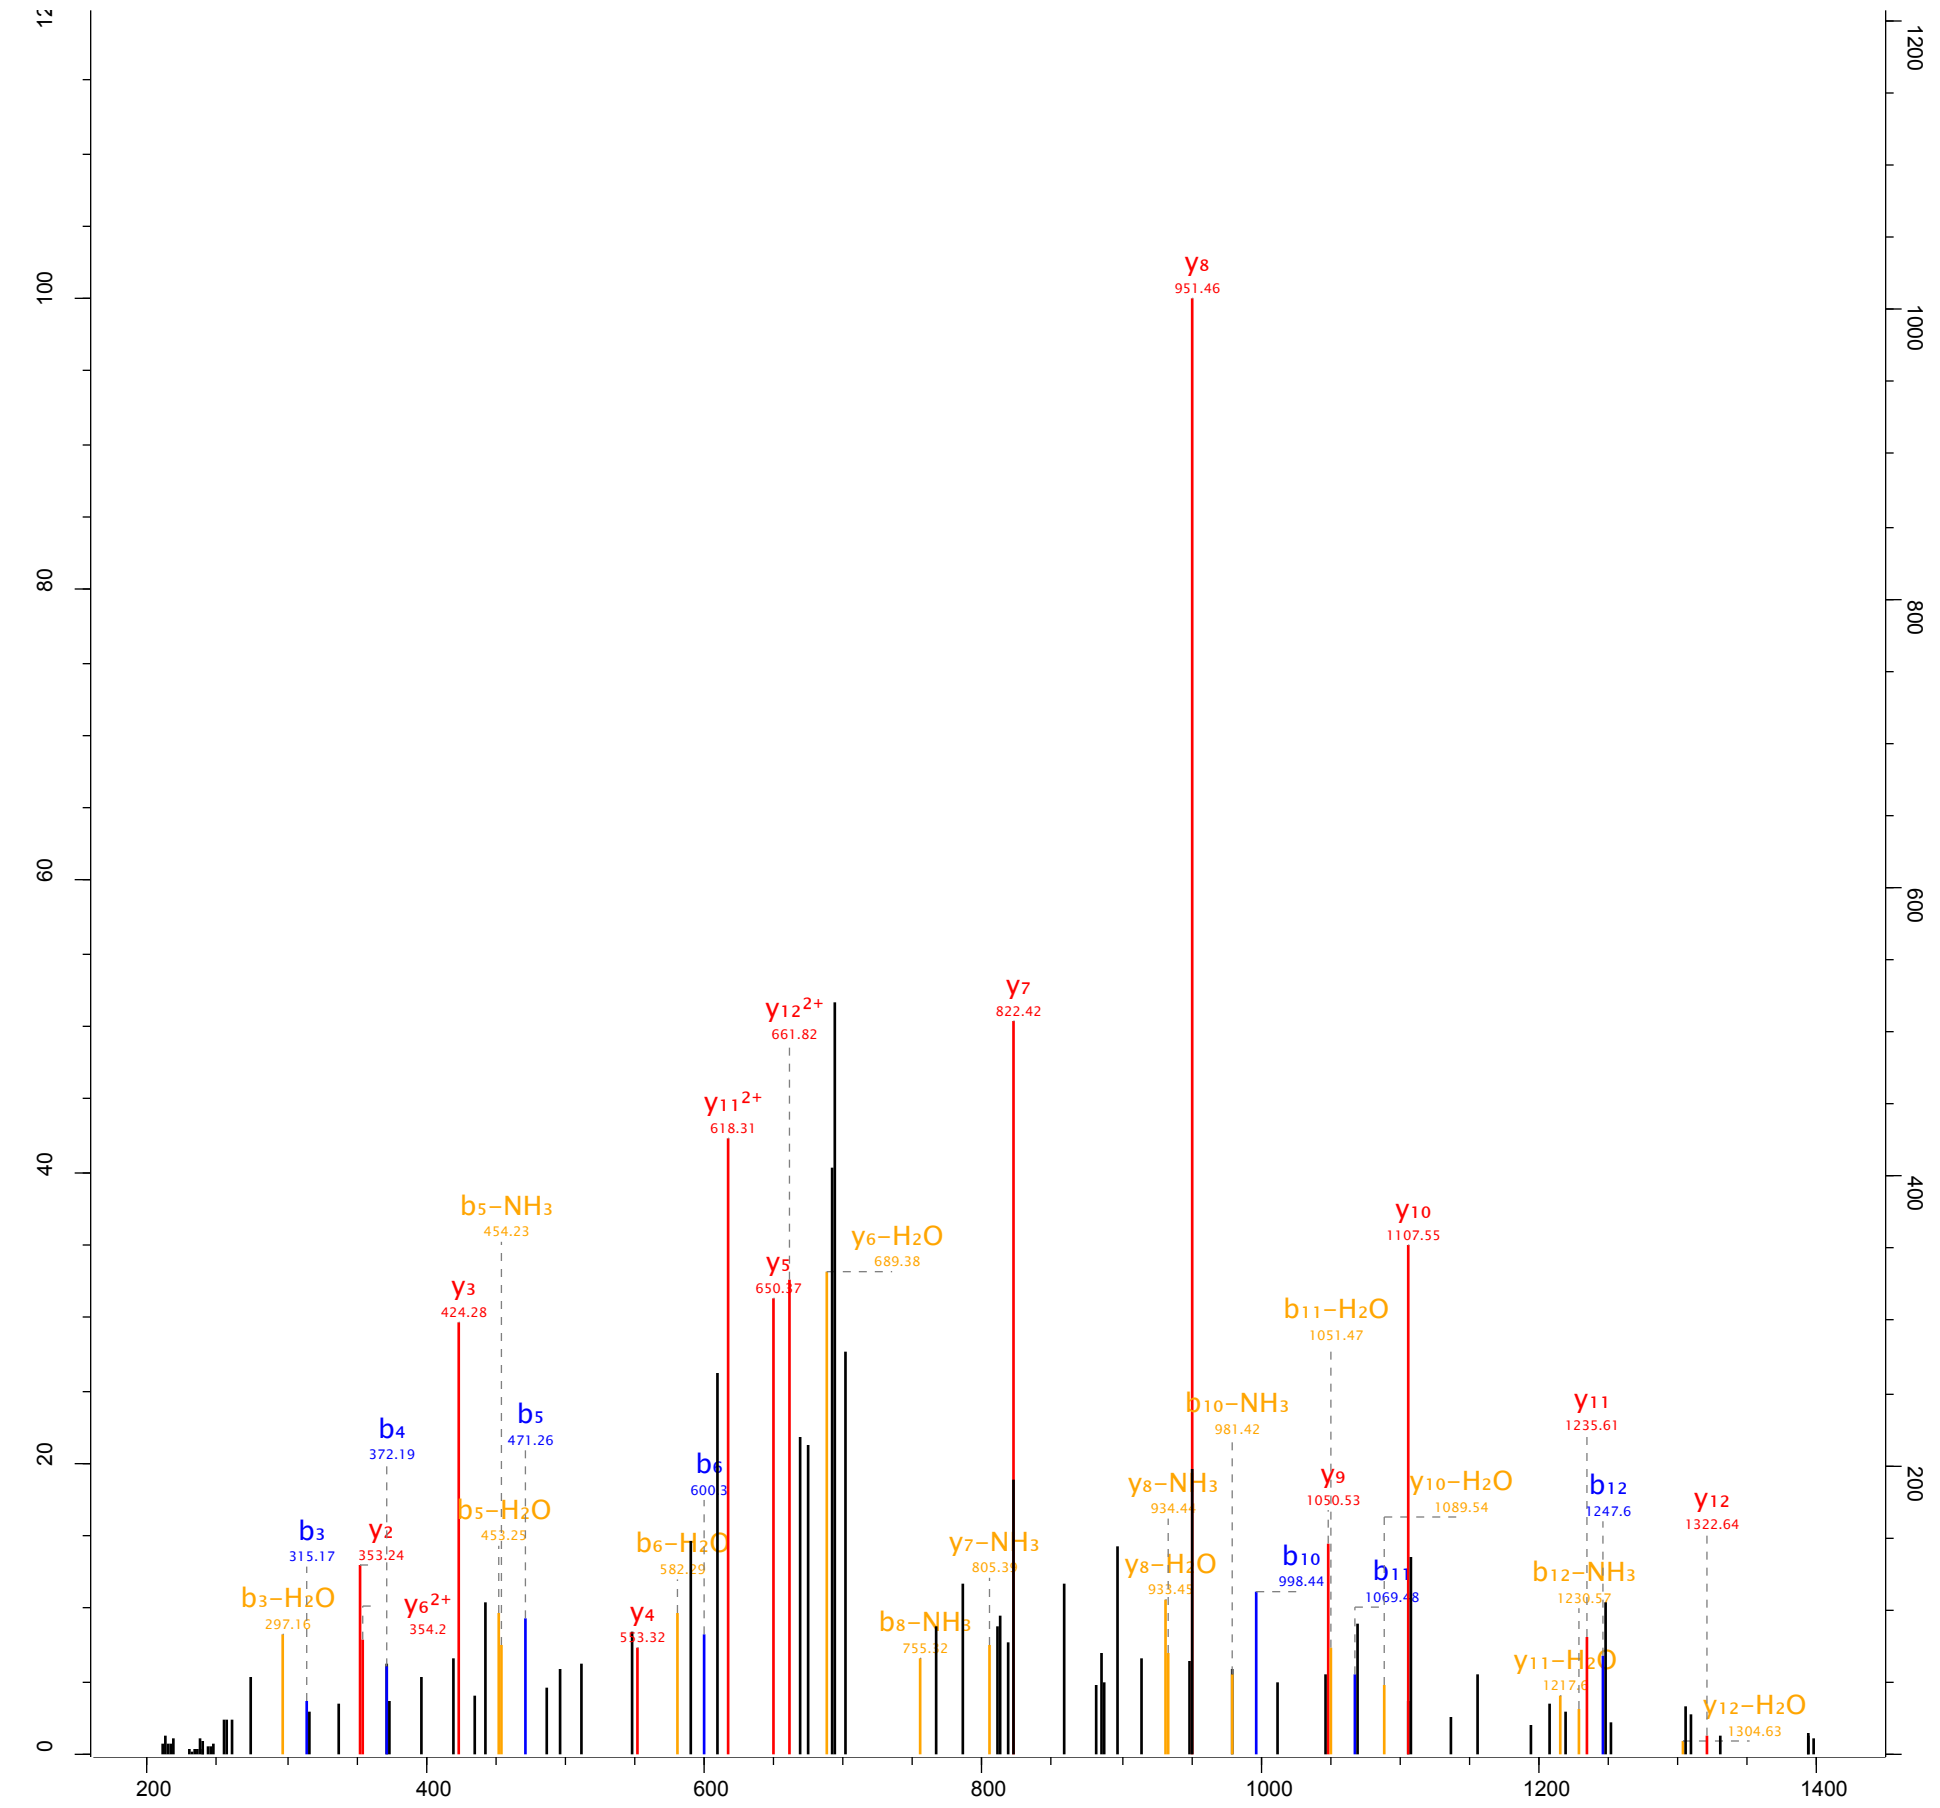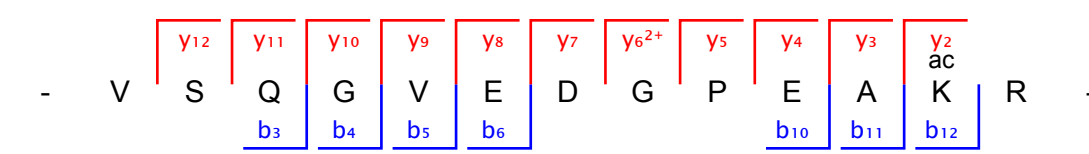

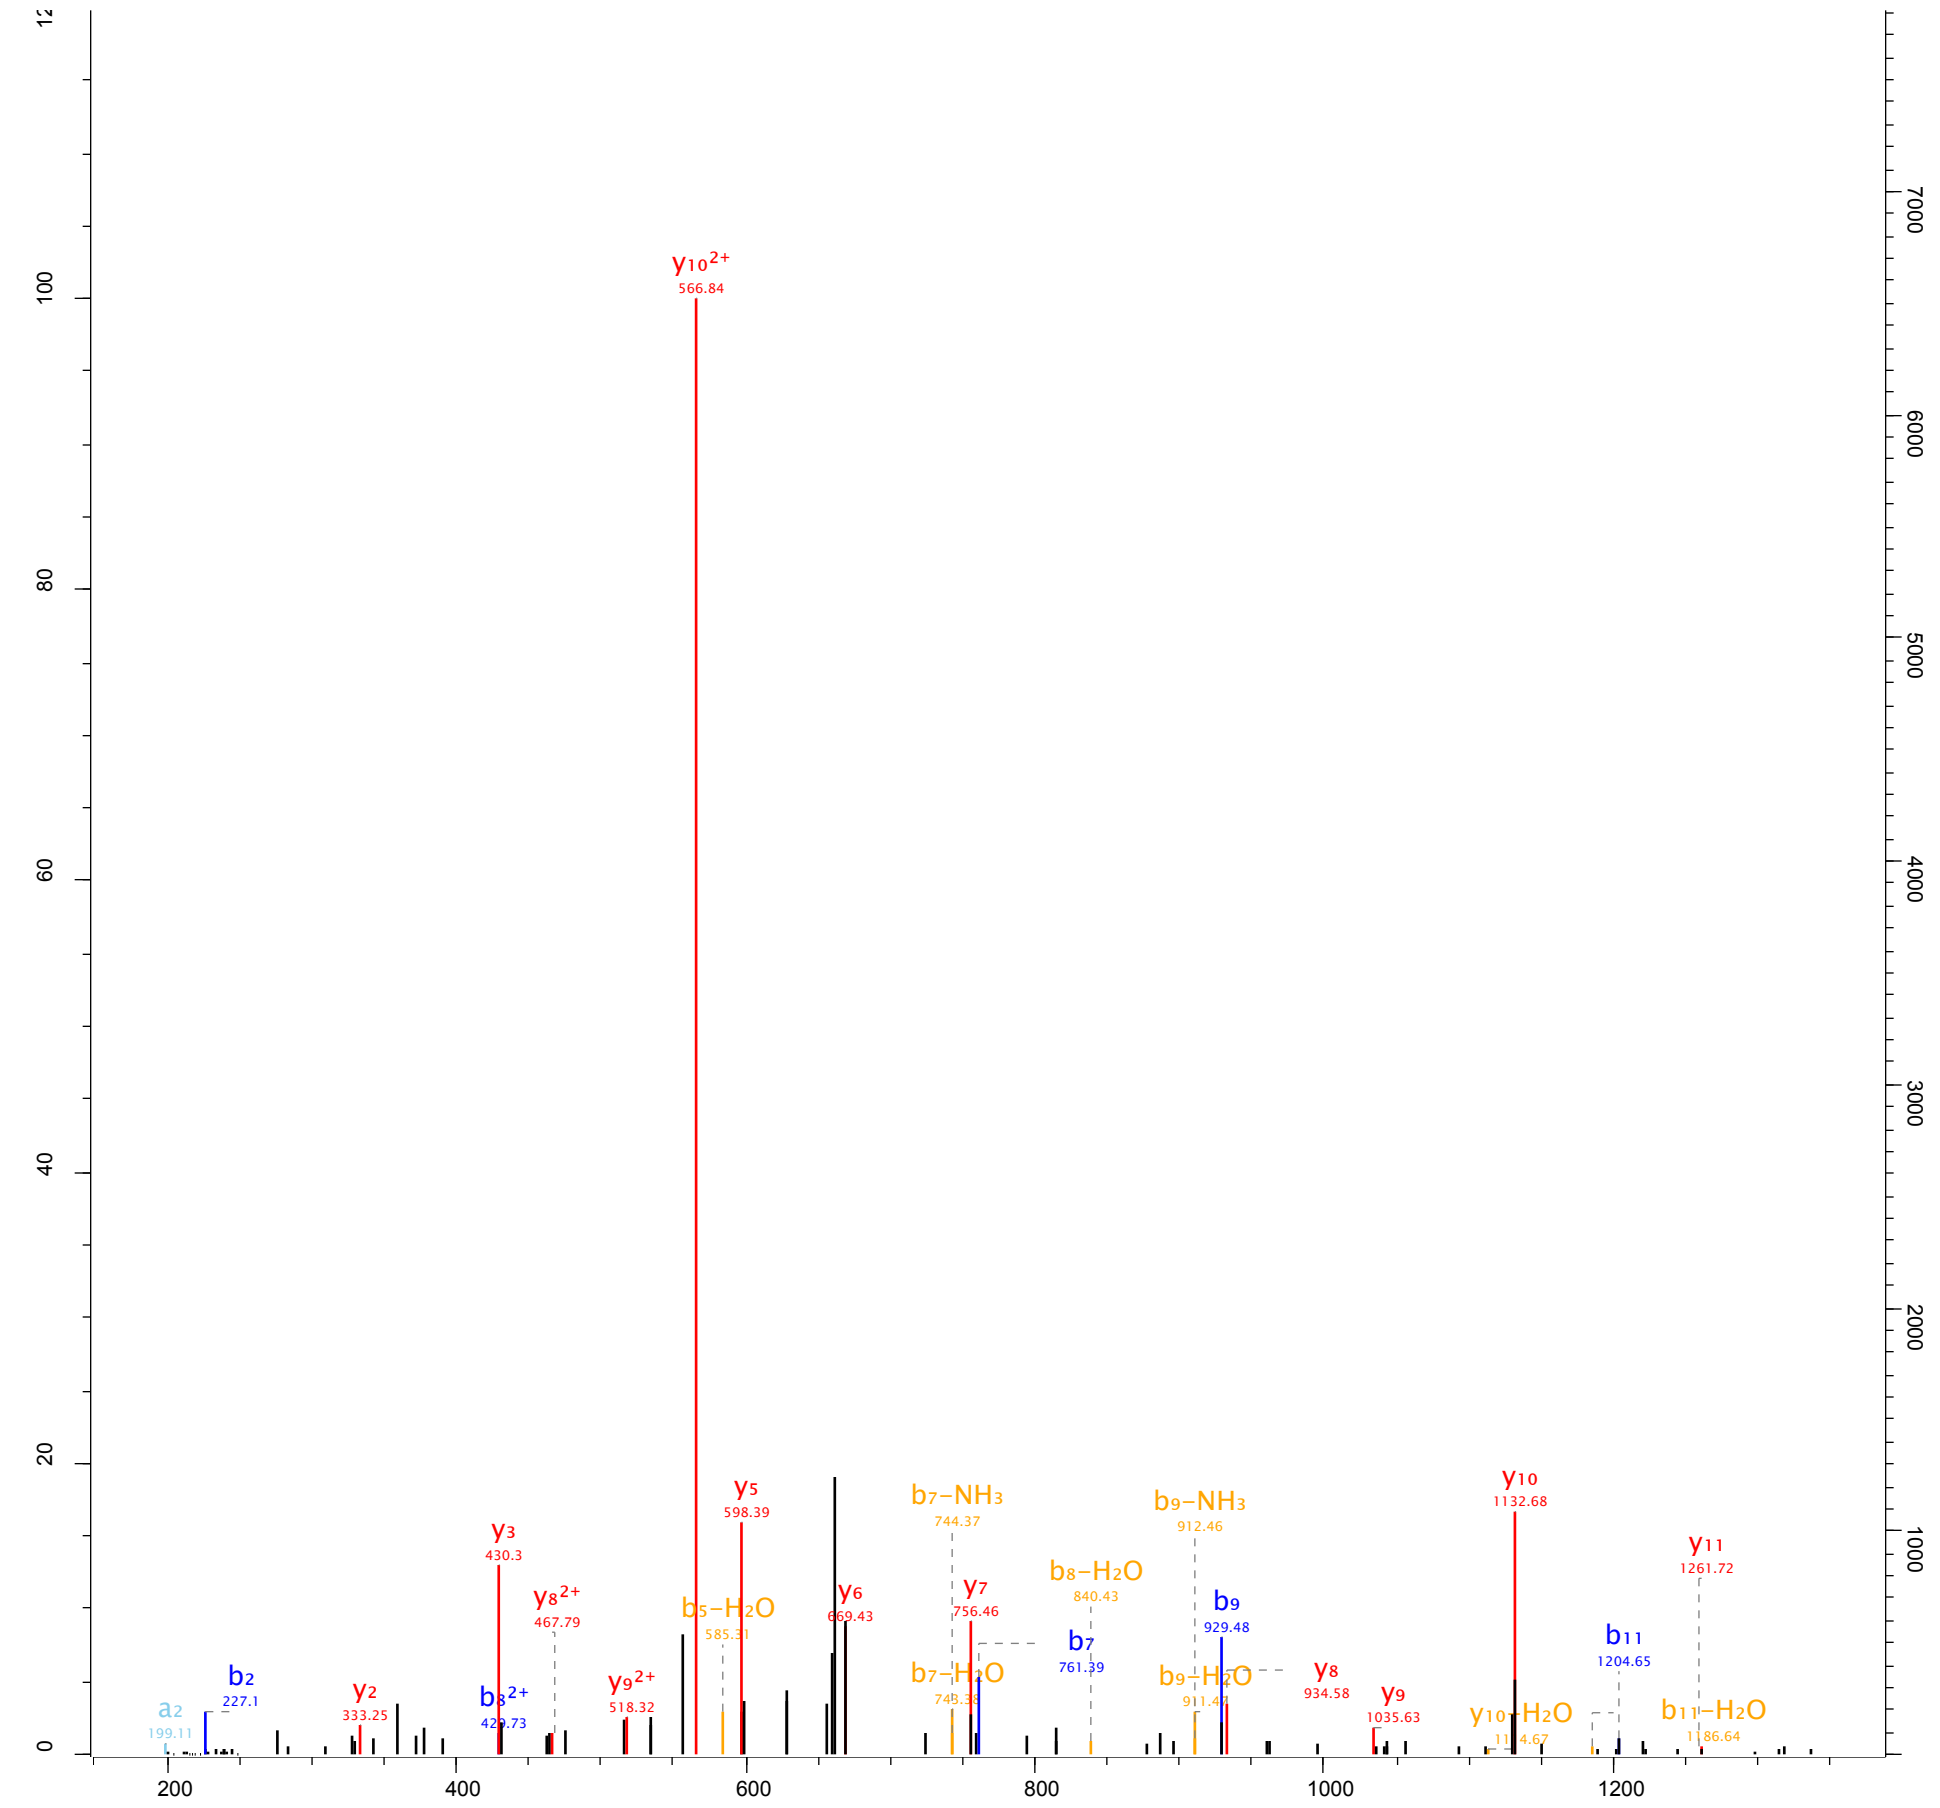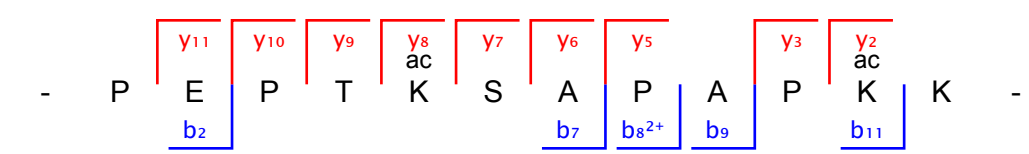

050813\_SCW\_II\_29\_19\_4

10970

ITMS; CID

160.03

844.87

Ing4

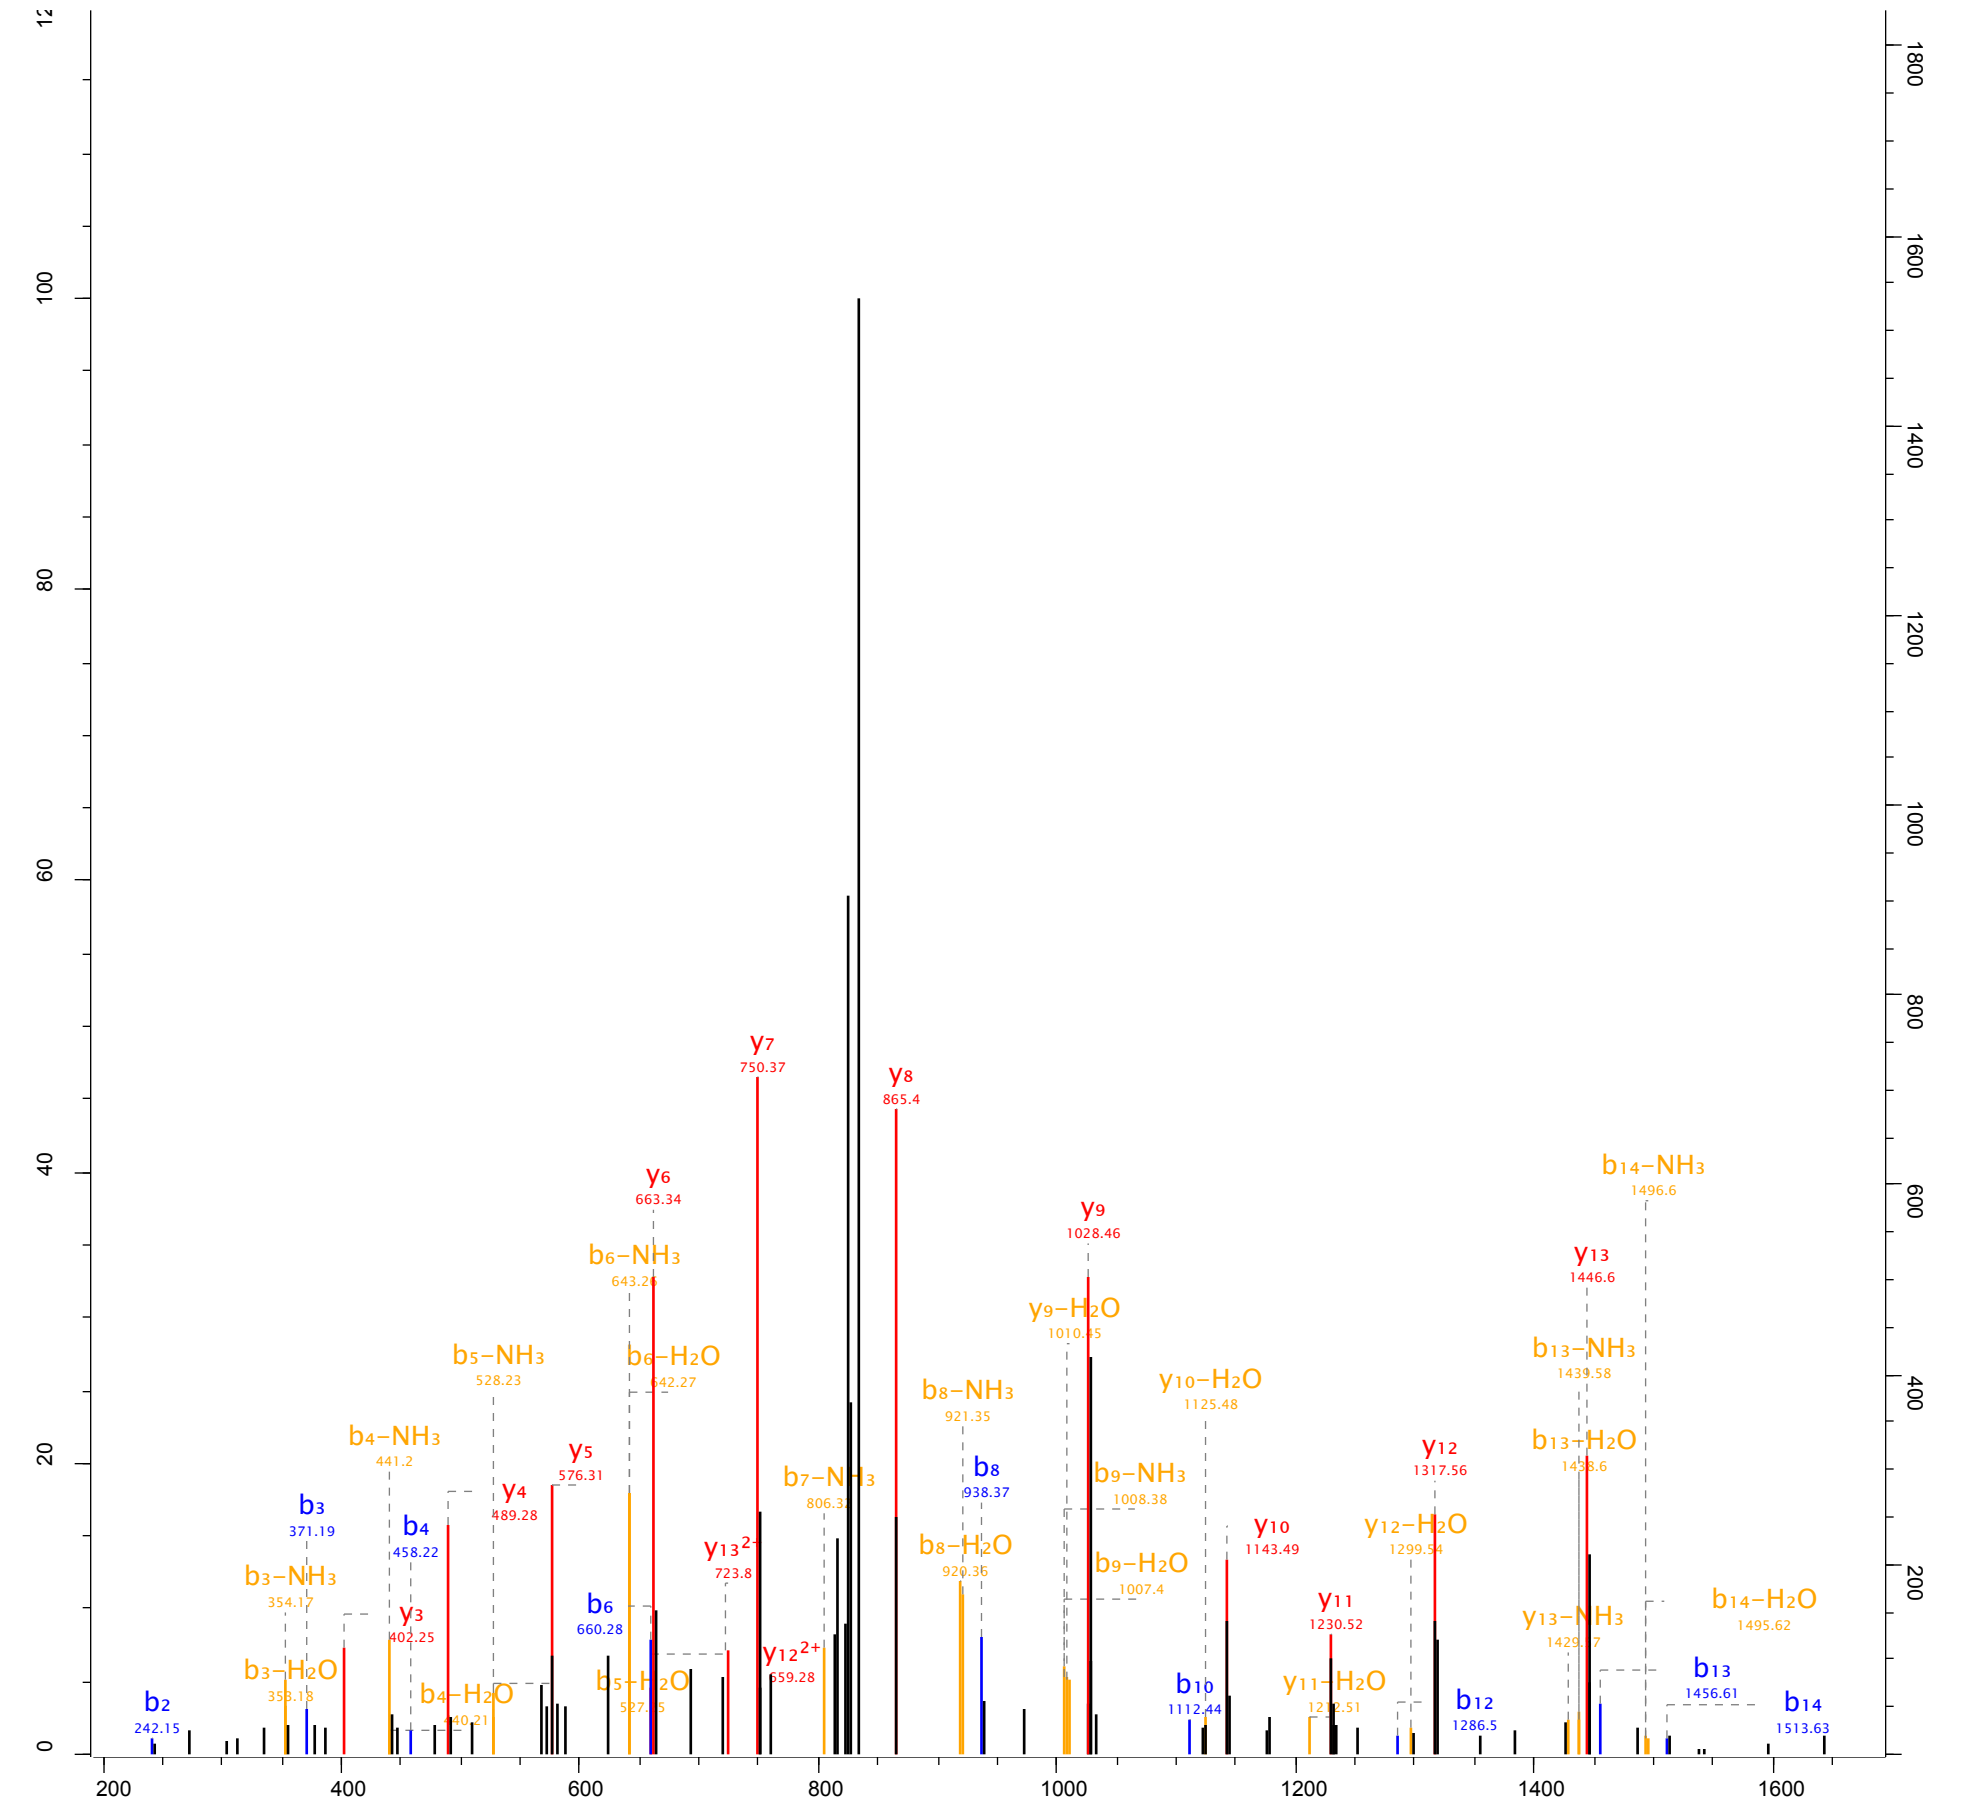

- Q I E S S D Y D S S S S K G R -

b<sub>2</sub> b<sub>3</sub> b<sub>4</sub> b<sub>6</sub> b<sub>8</sub> b<sub>10</sub> b<sub>12</sub> b<sub>13</sub> b<sub>14</sub>

y<sub>13</sub> y<sub>12</sub> y<sub>11</sub> y<sub>10</sub> y<sub>9</sub> y<sub>8</sub> y<sub>7</sub> y<sub>6</sub> y<sub>5</sub> y<sub>4</sub> y<sub>3</sub> ac

050813\_SCW\_II\_29\_19\_4

11405 ITMS; CID 328.34 915.42 Ing4

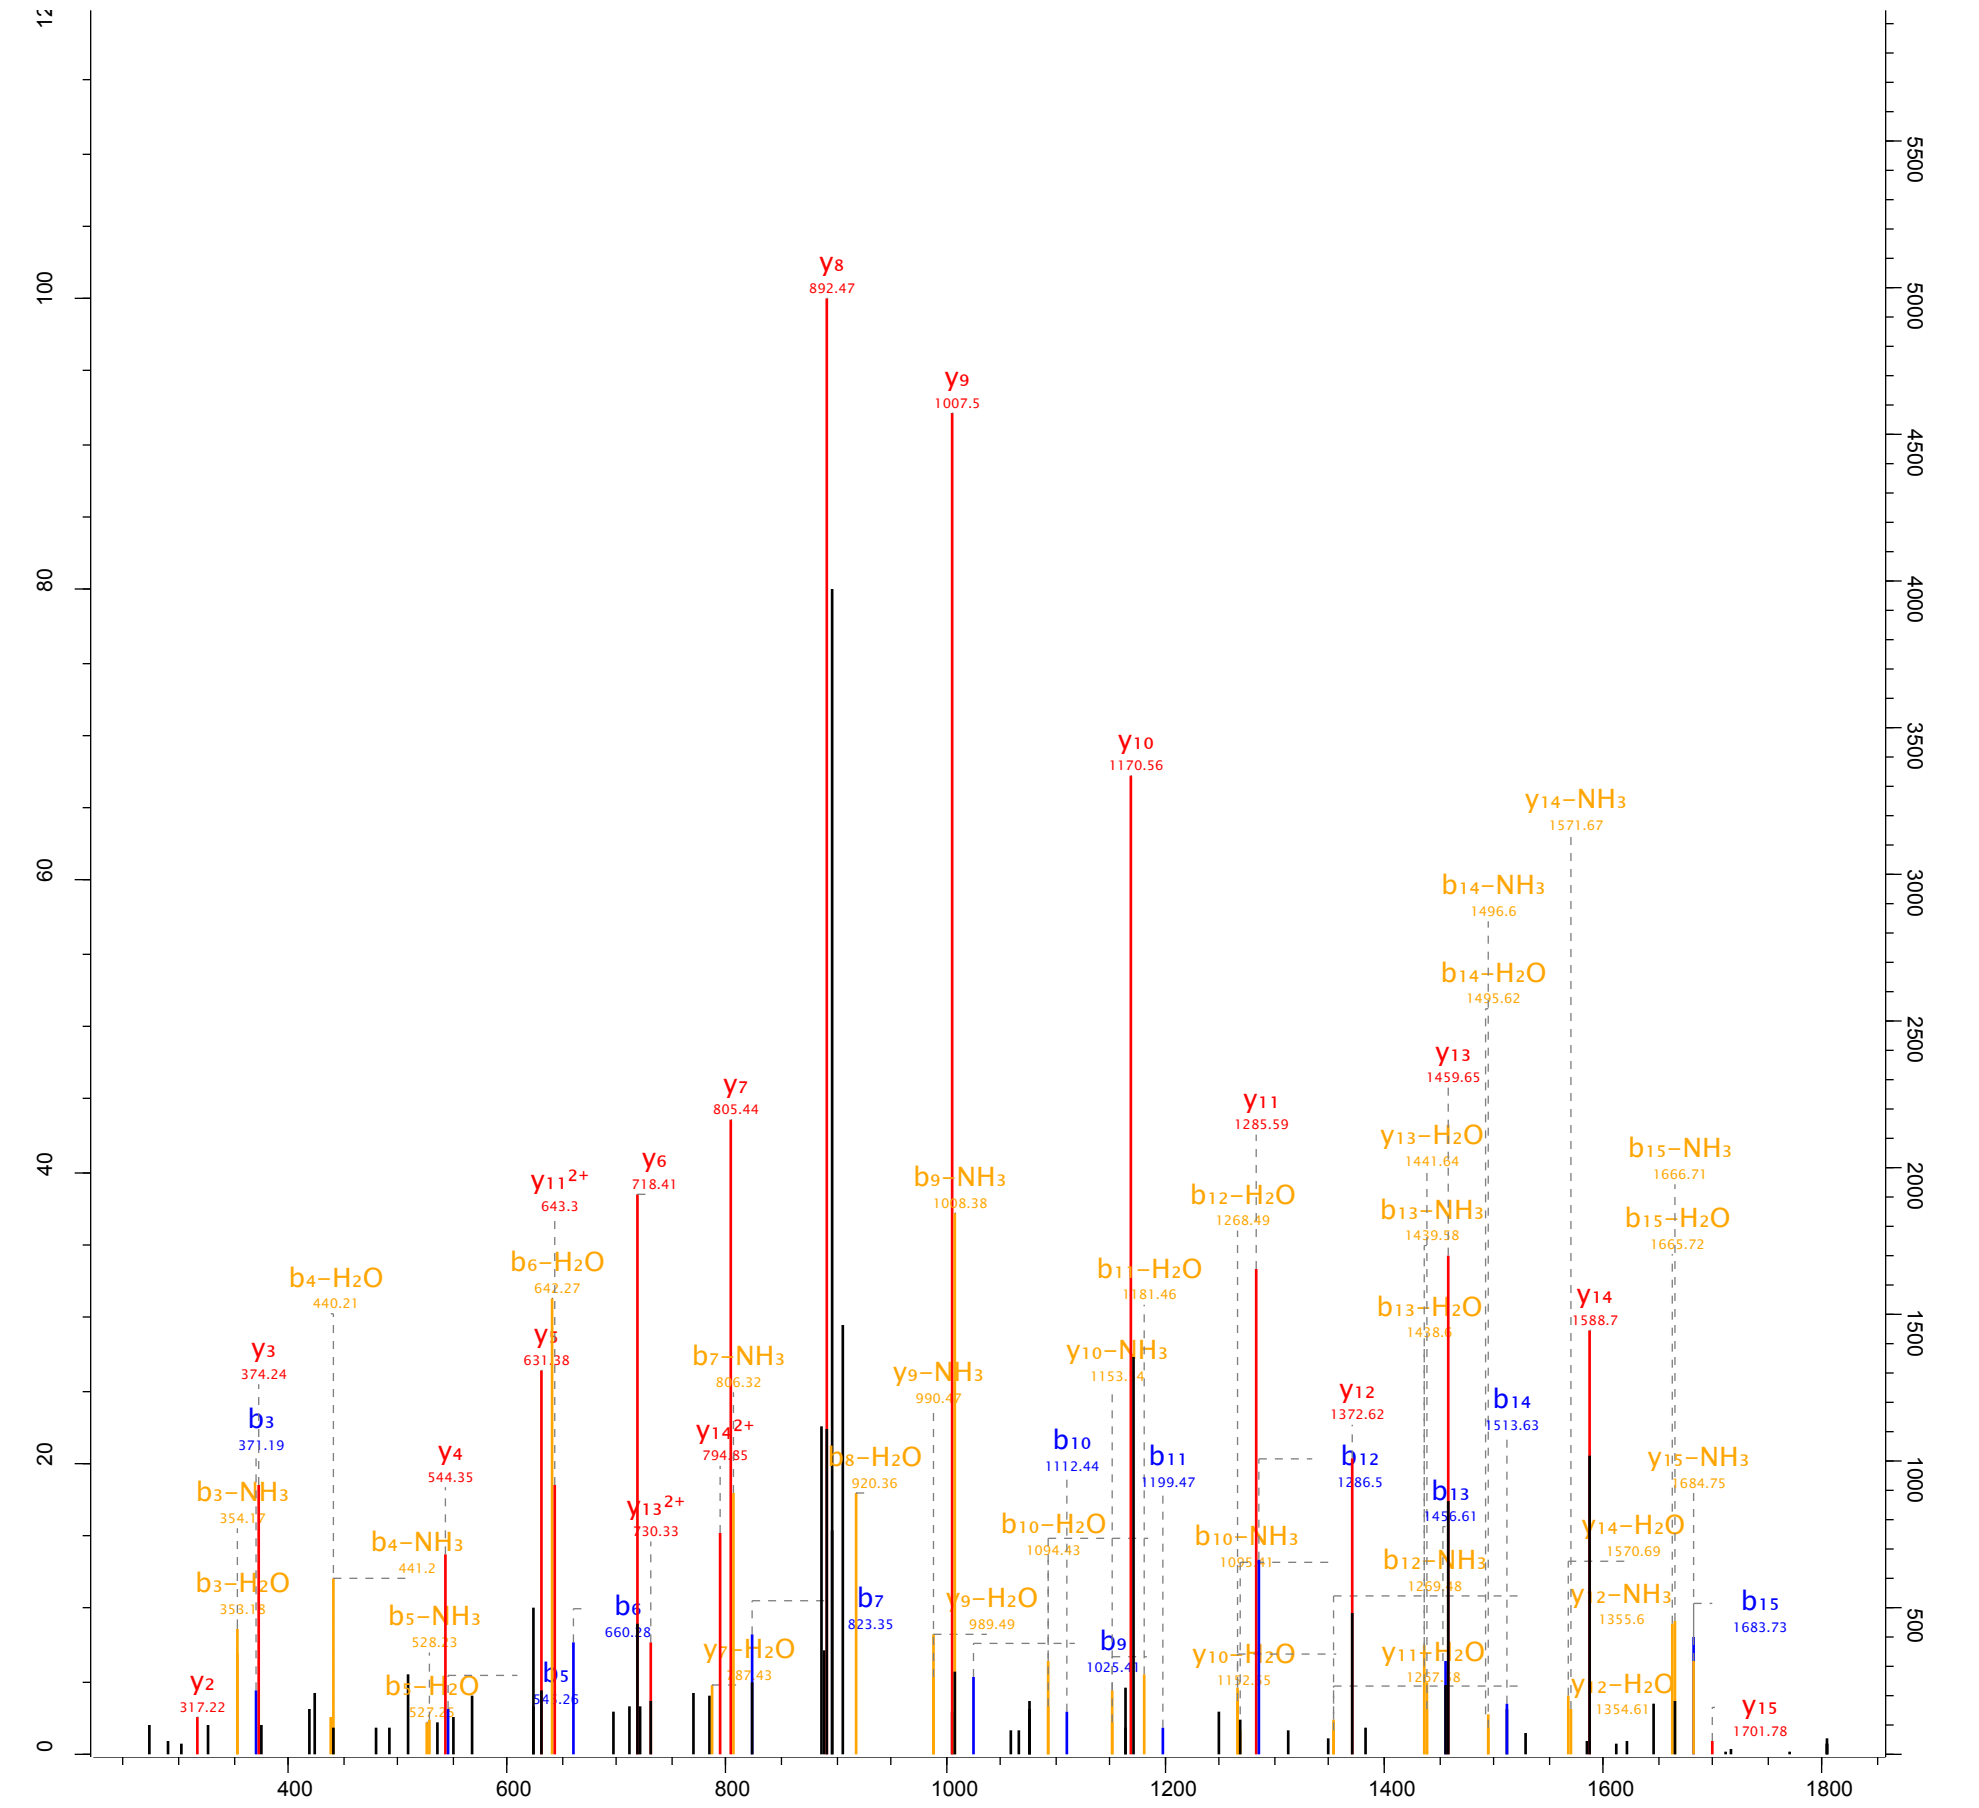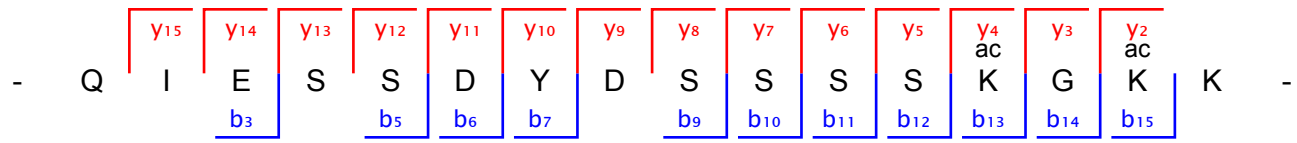

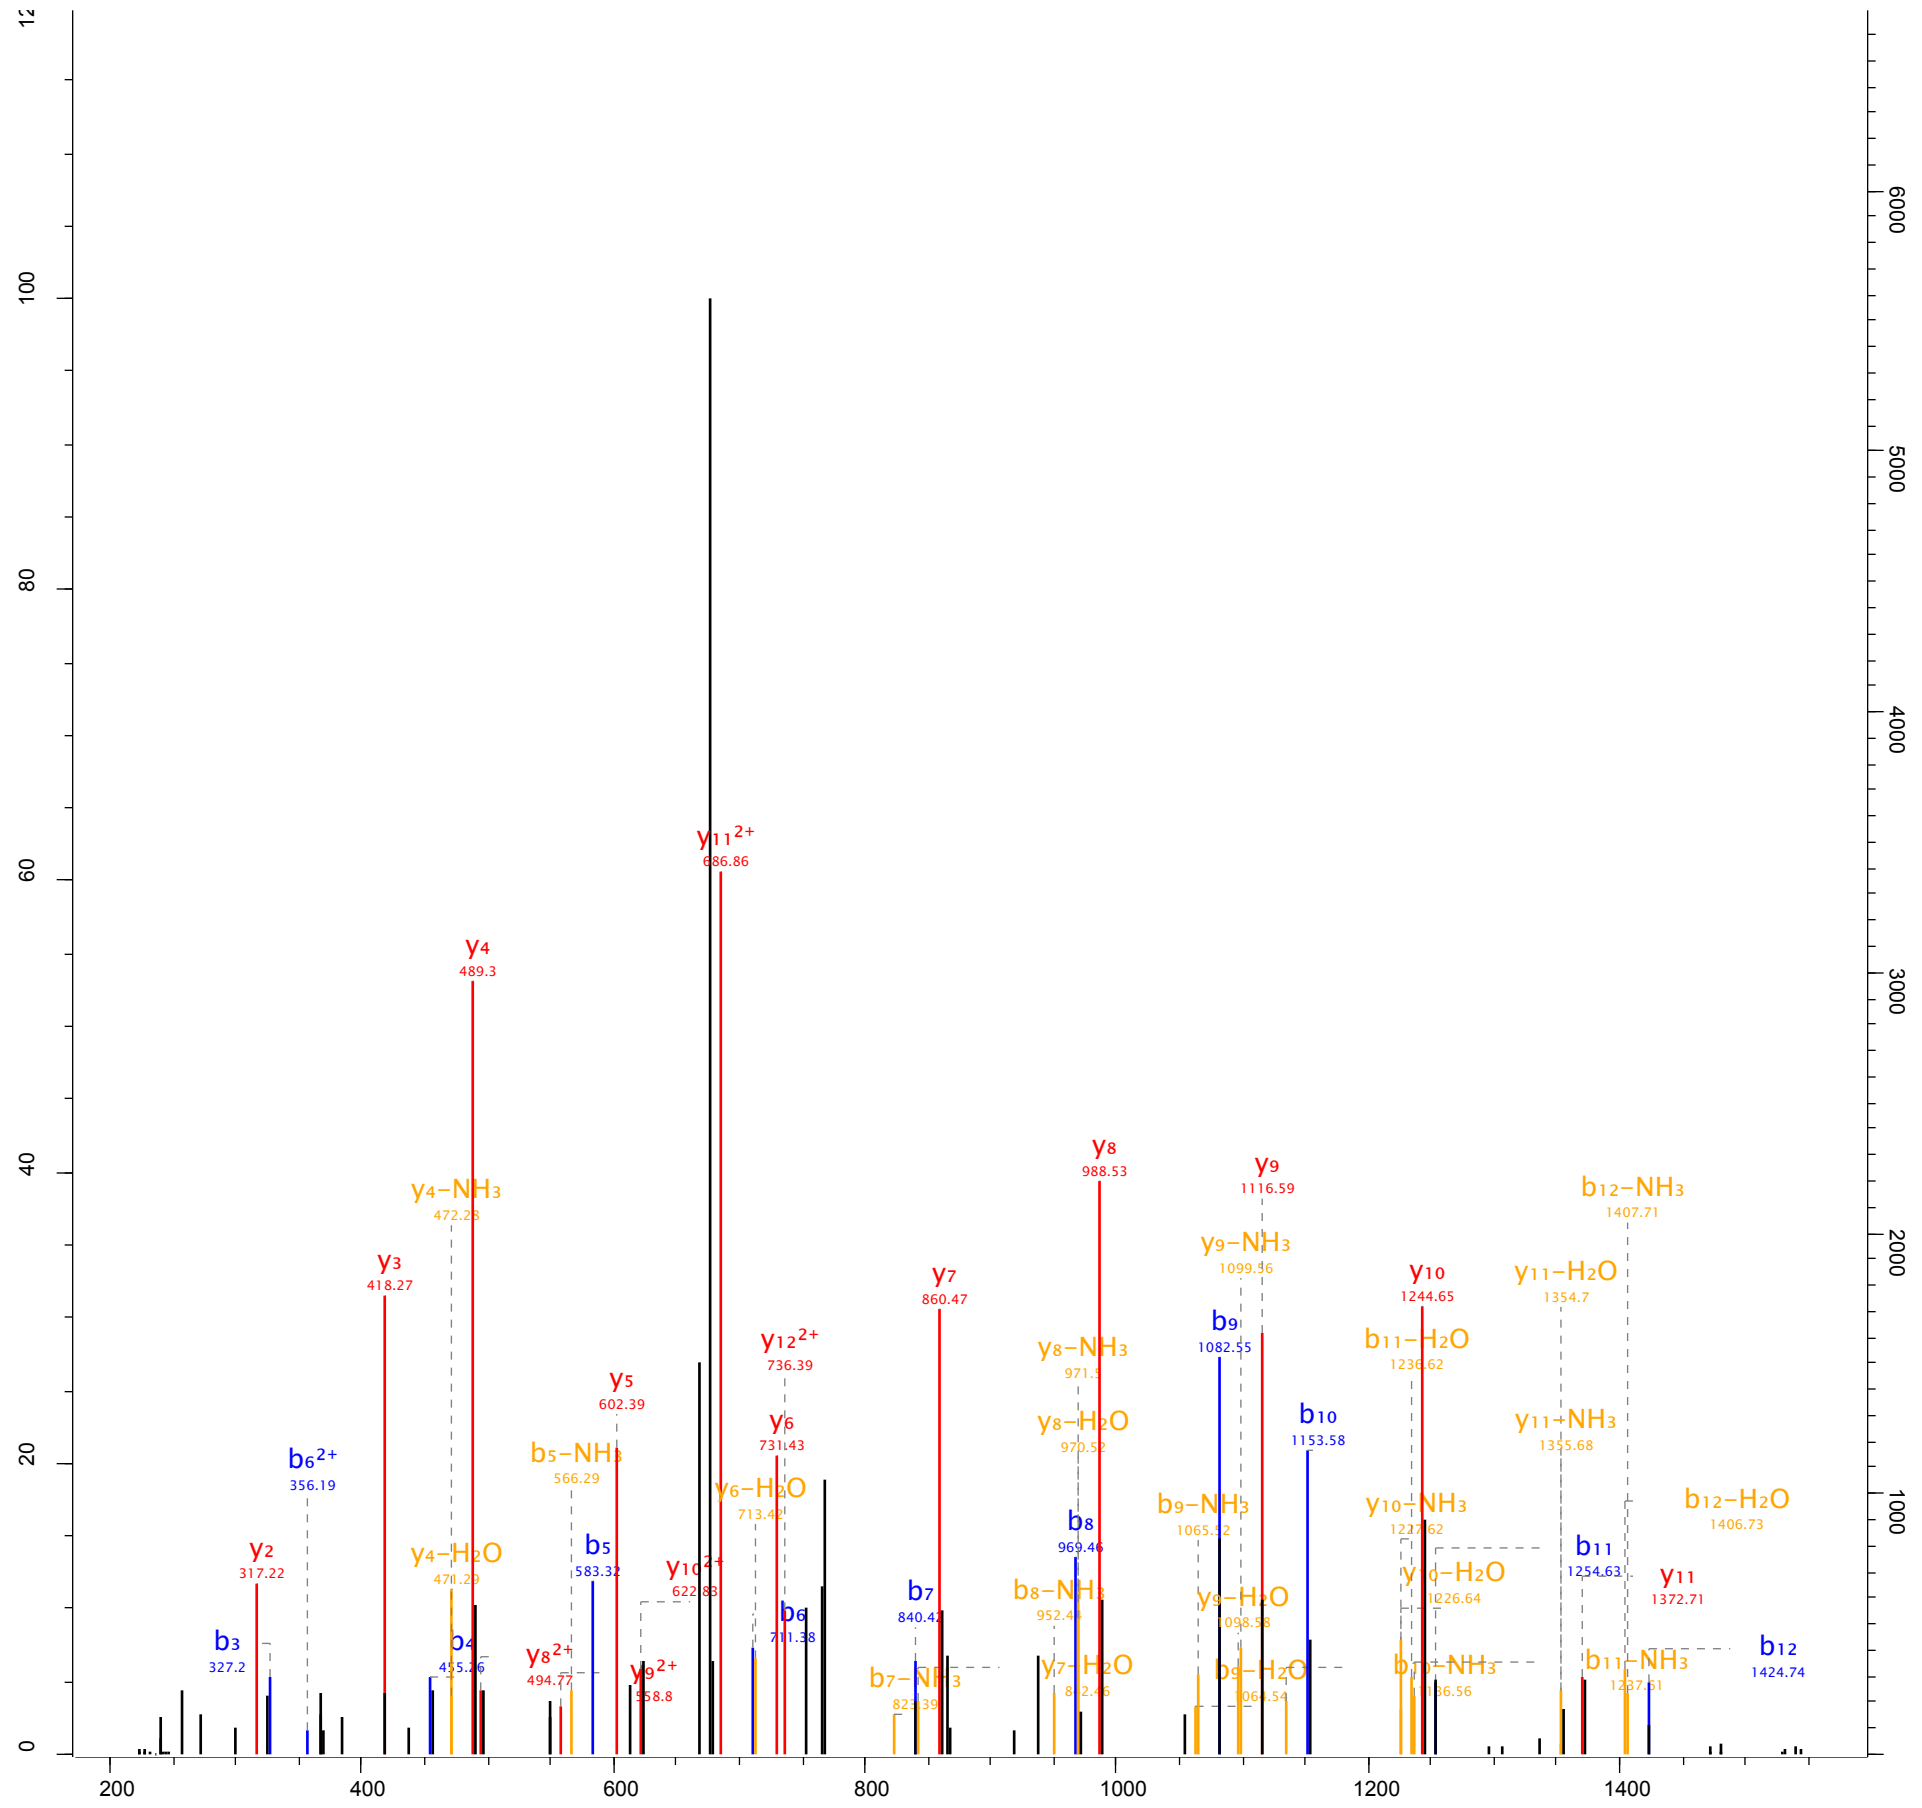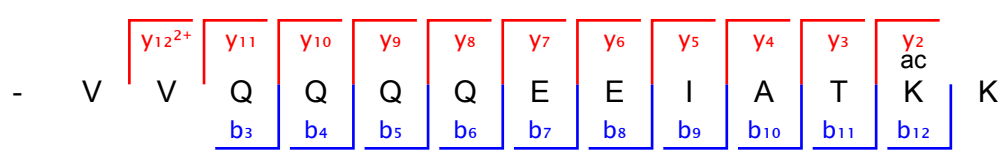

Raw file 050813\_SCW\_II\_29\_19\_4 Scan 11736 Method ITMS; CID Score 205.3 m/z 746.4 Gene names Enah

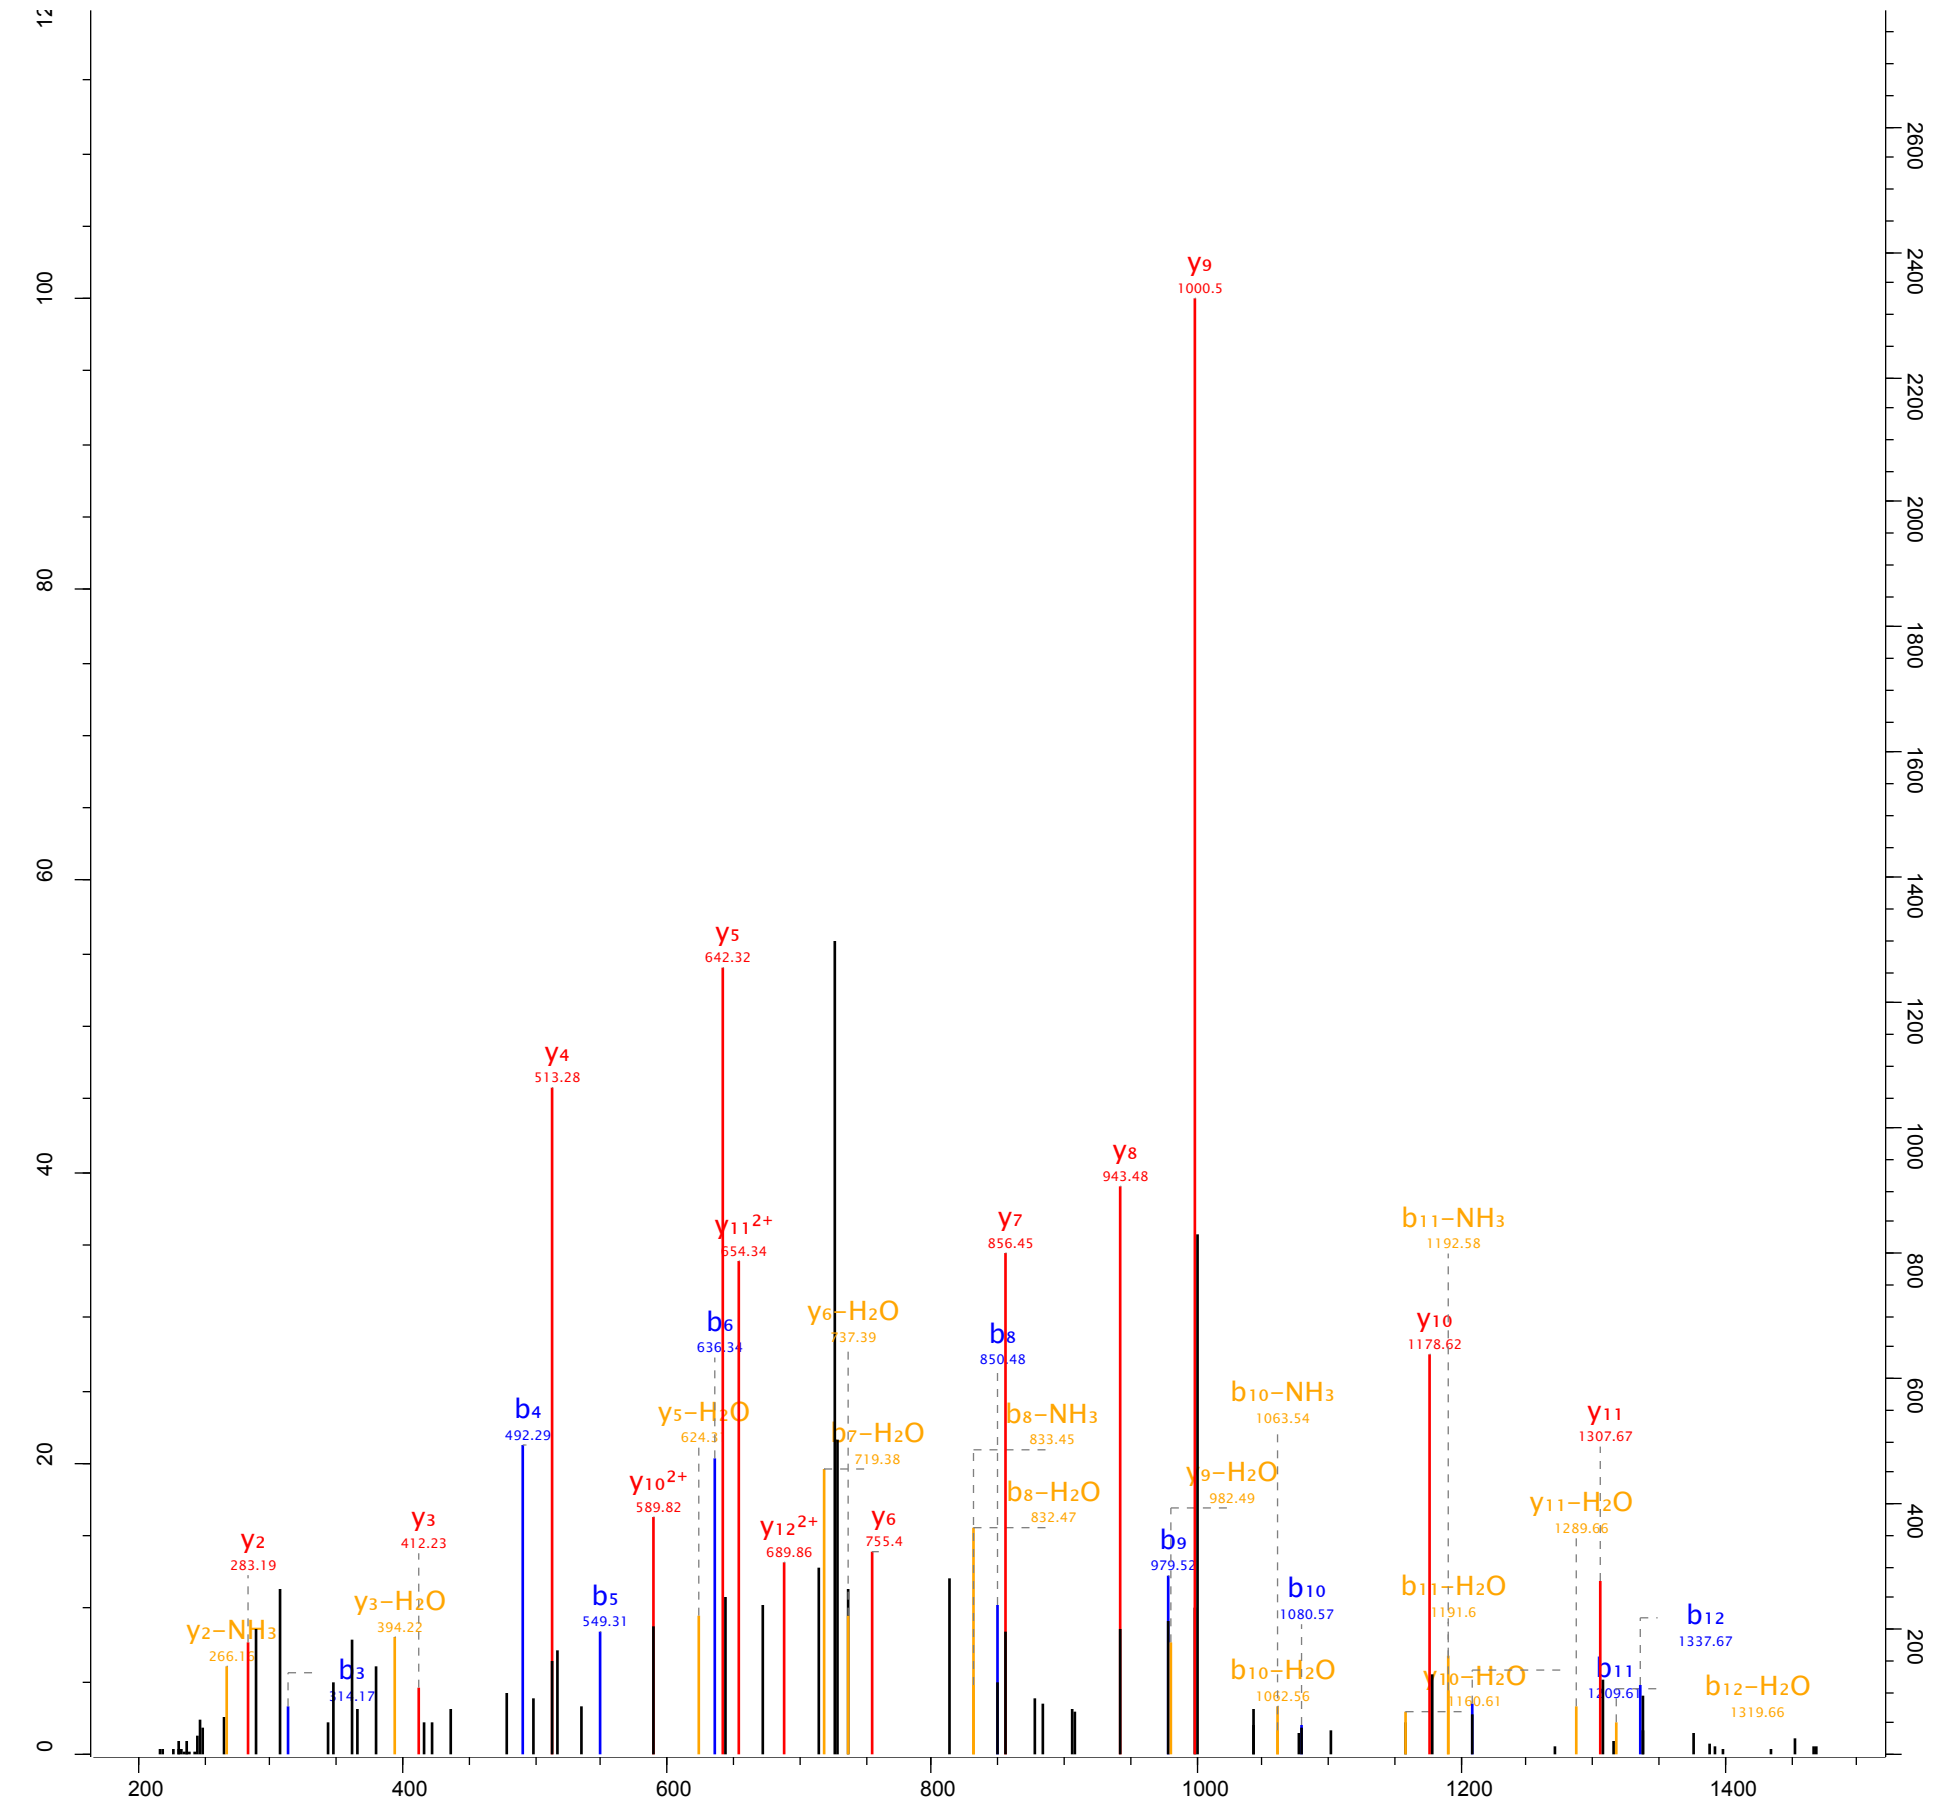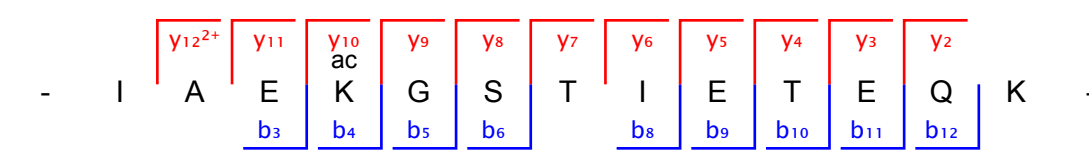

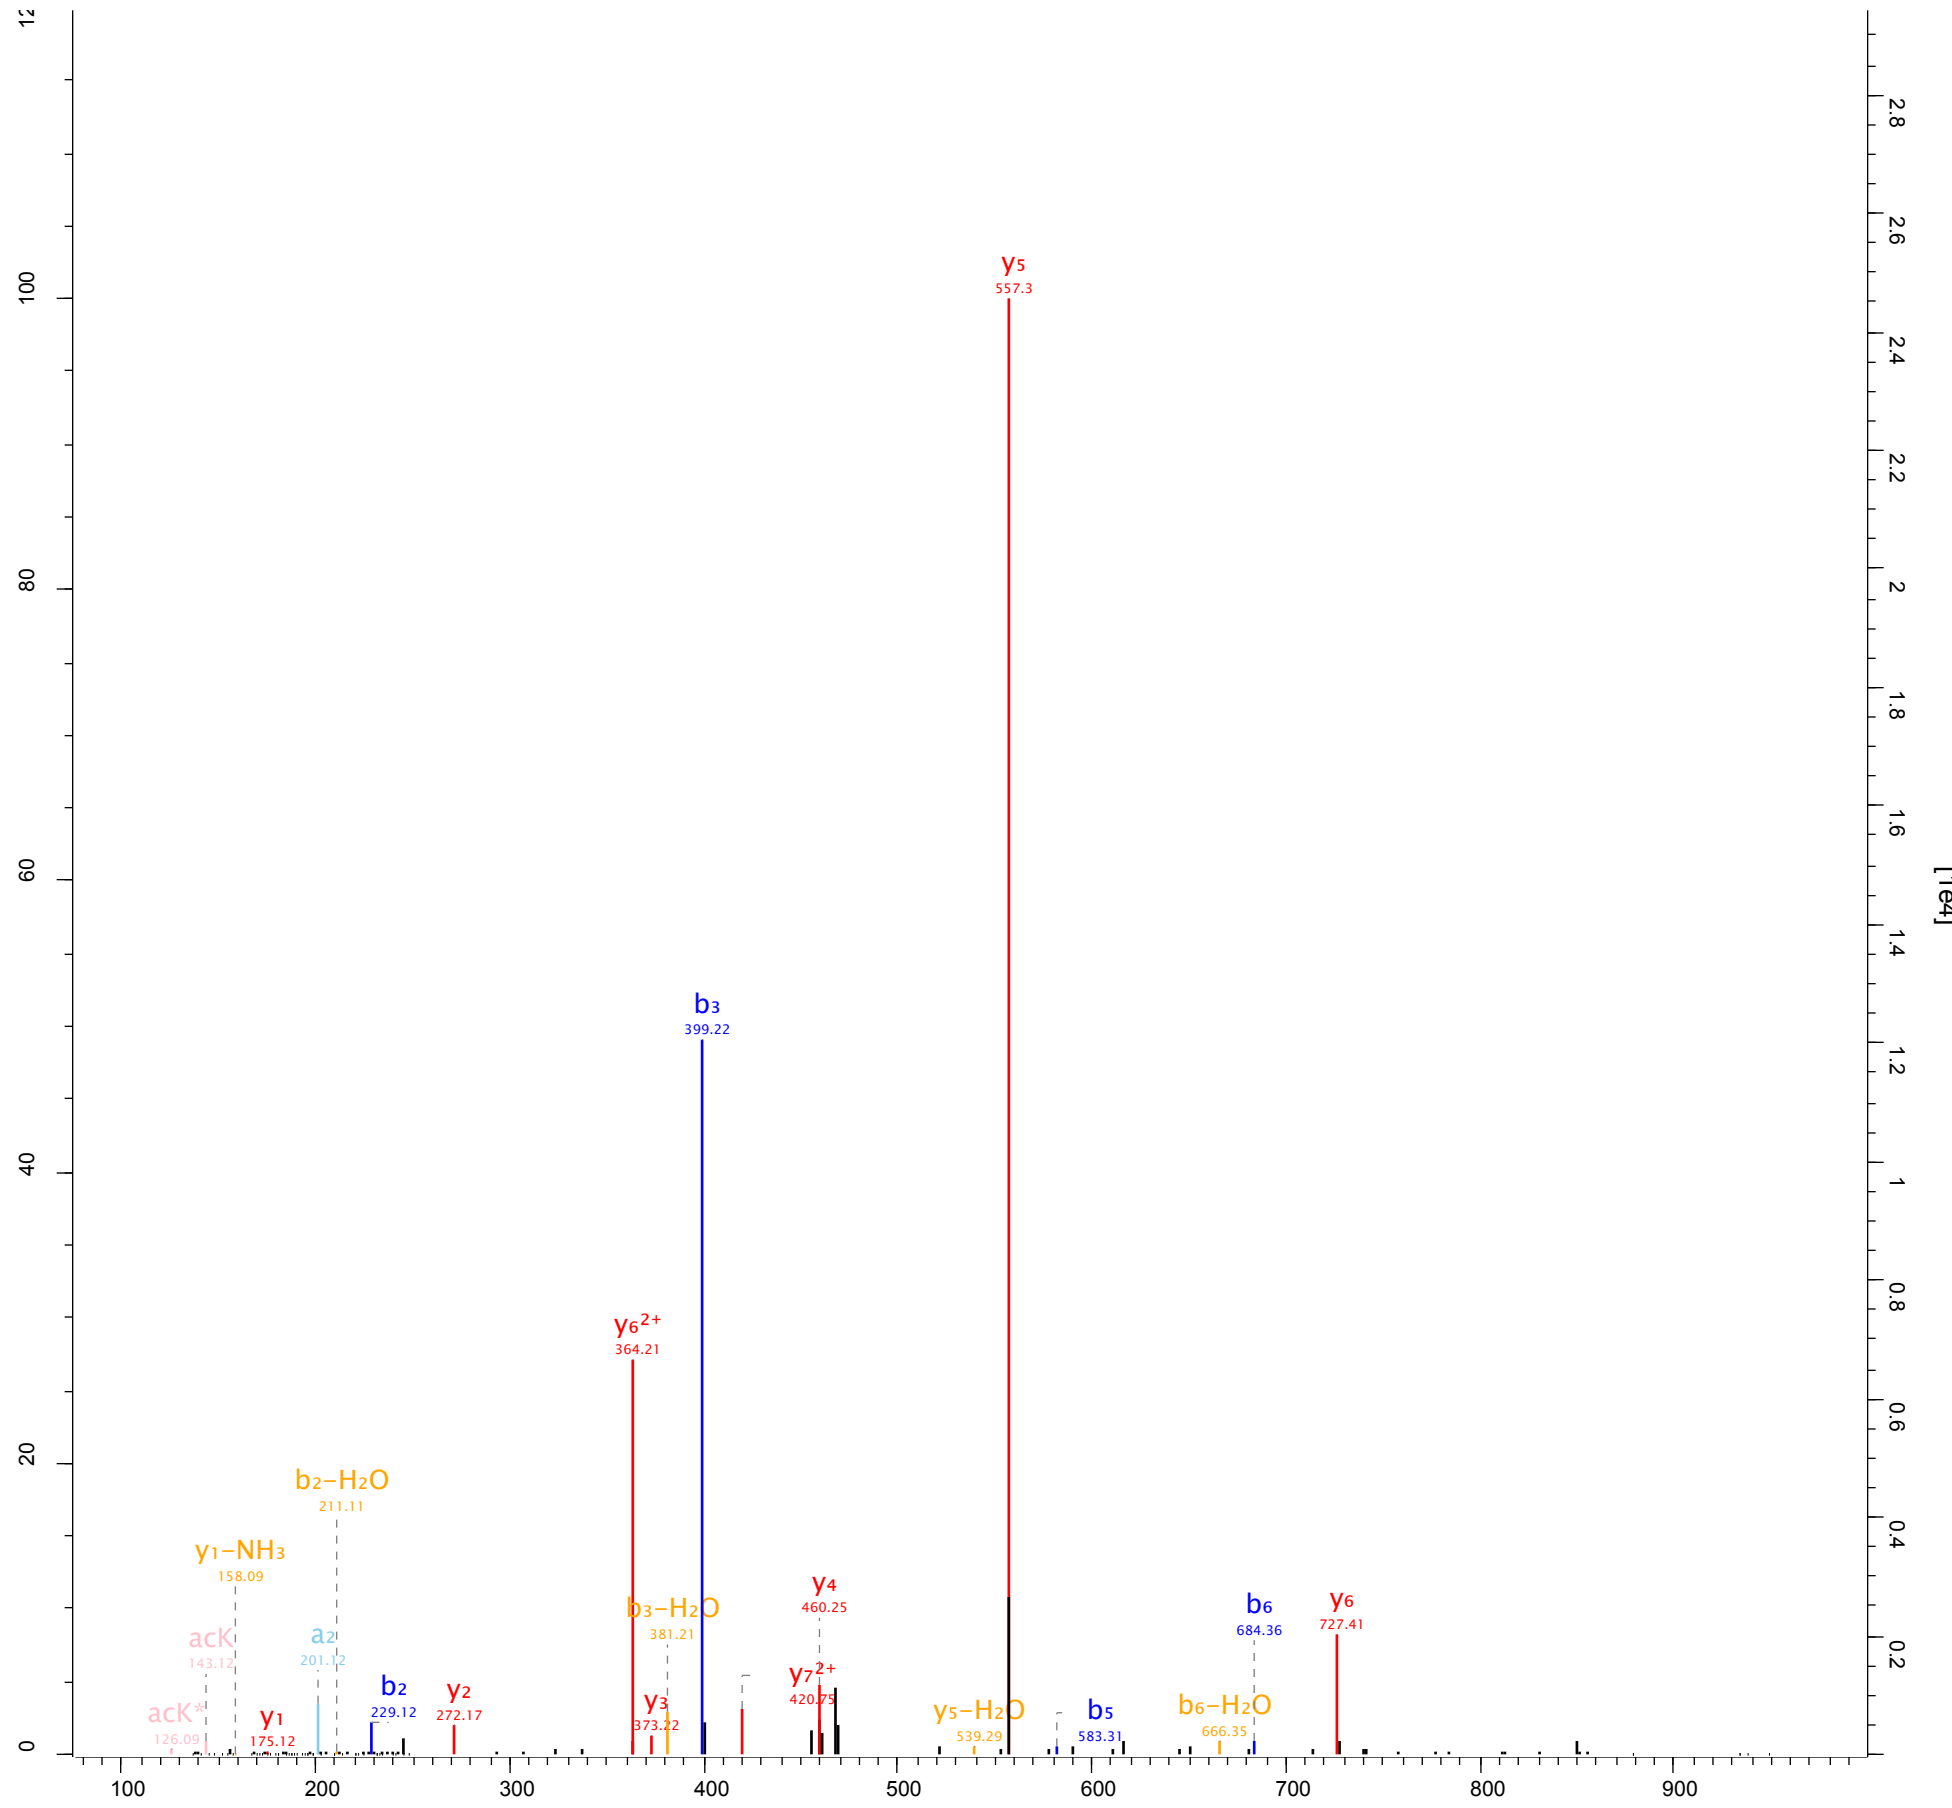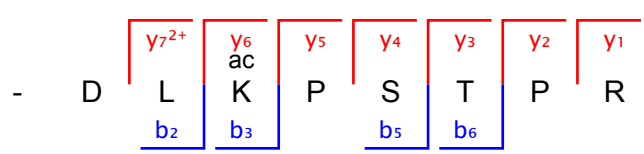



Raw file 050813\_SCW\_II\_29\_19\_4 Scan 11782 Method ITMS; CID Score 160.03 m/z 751.89 Gene names Ik

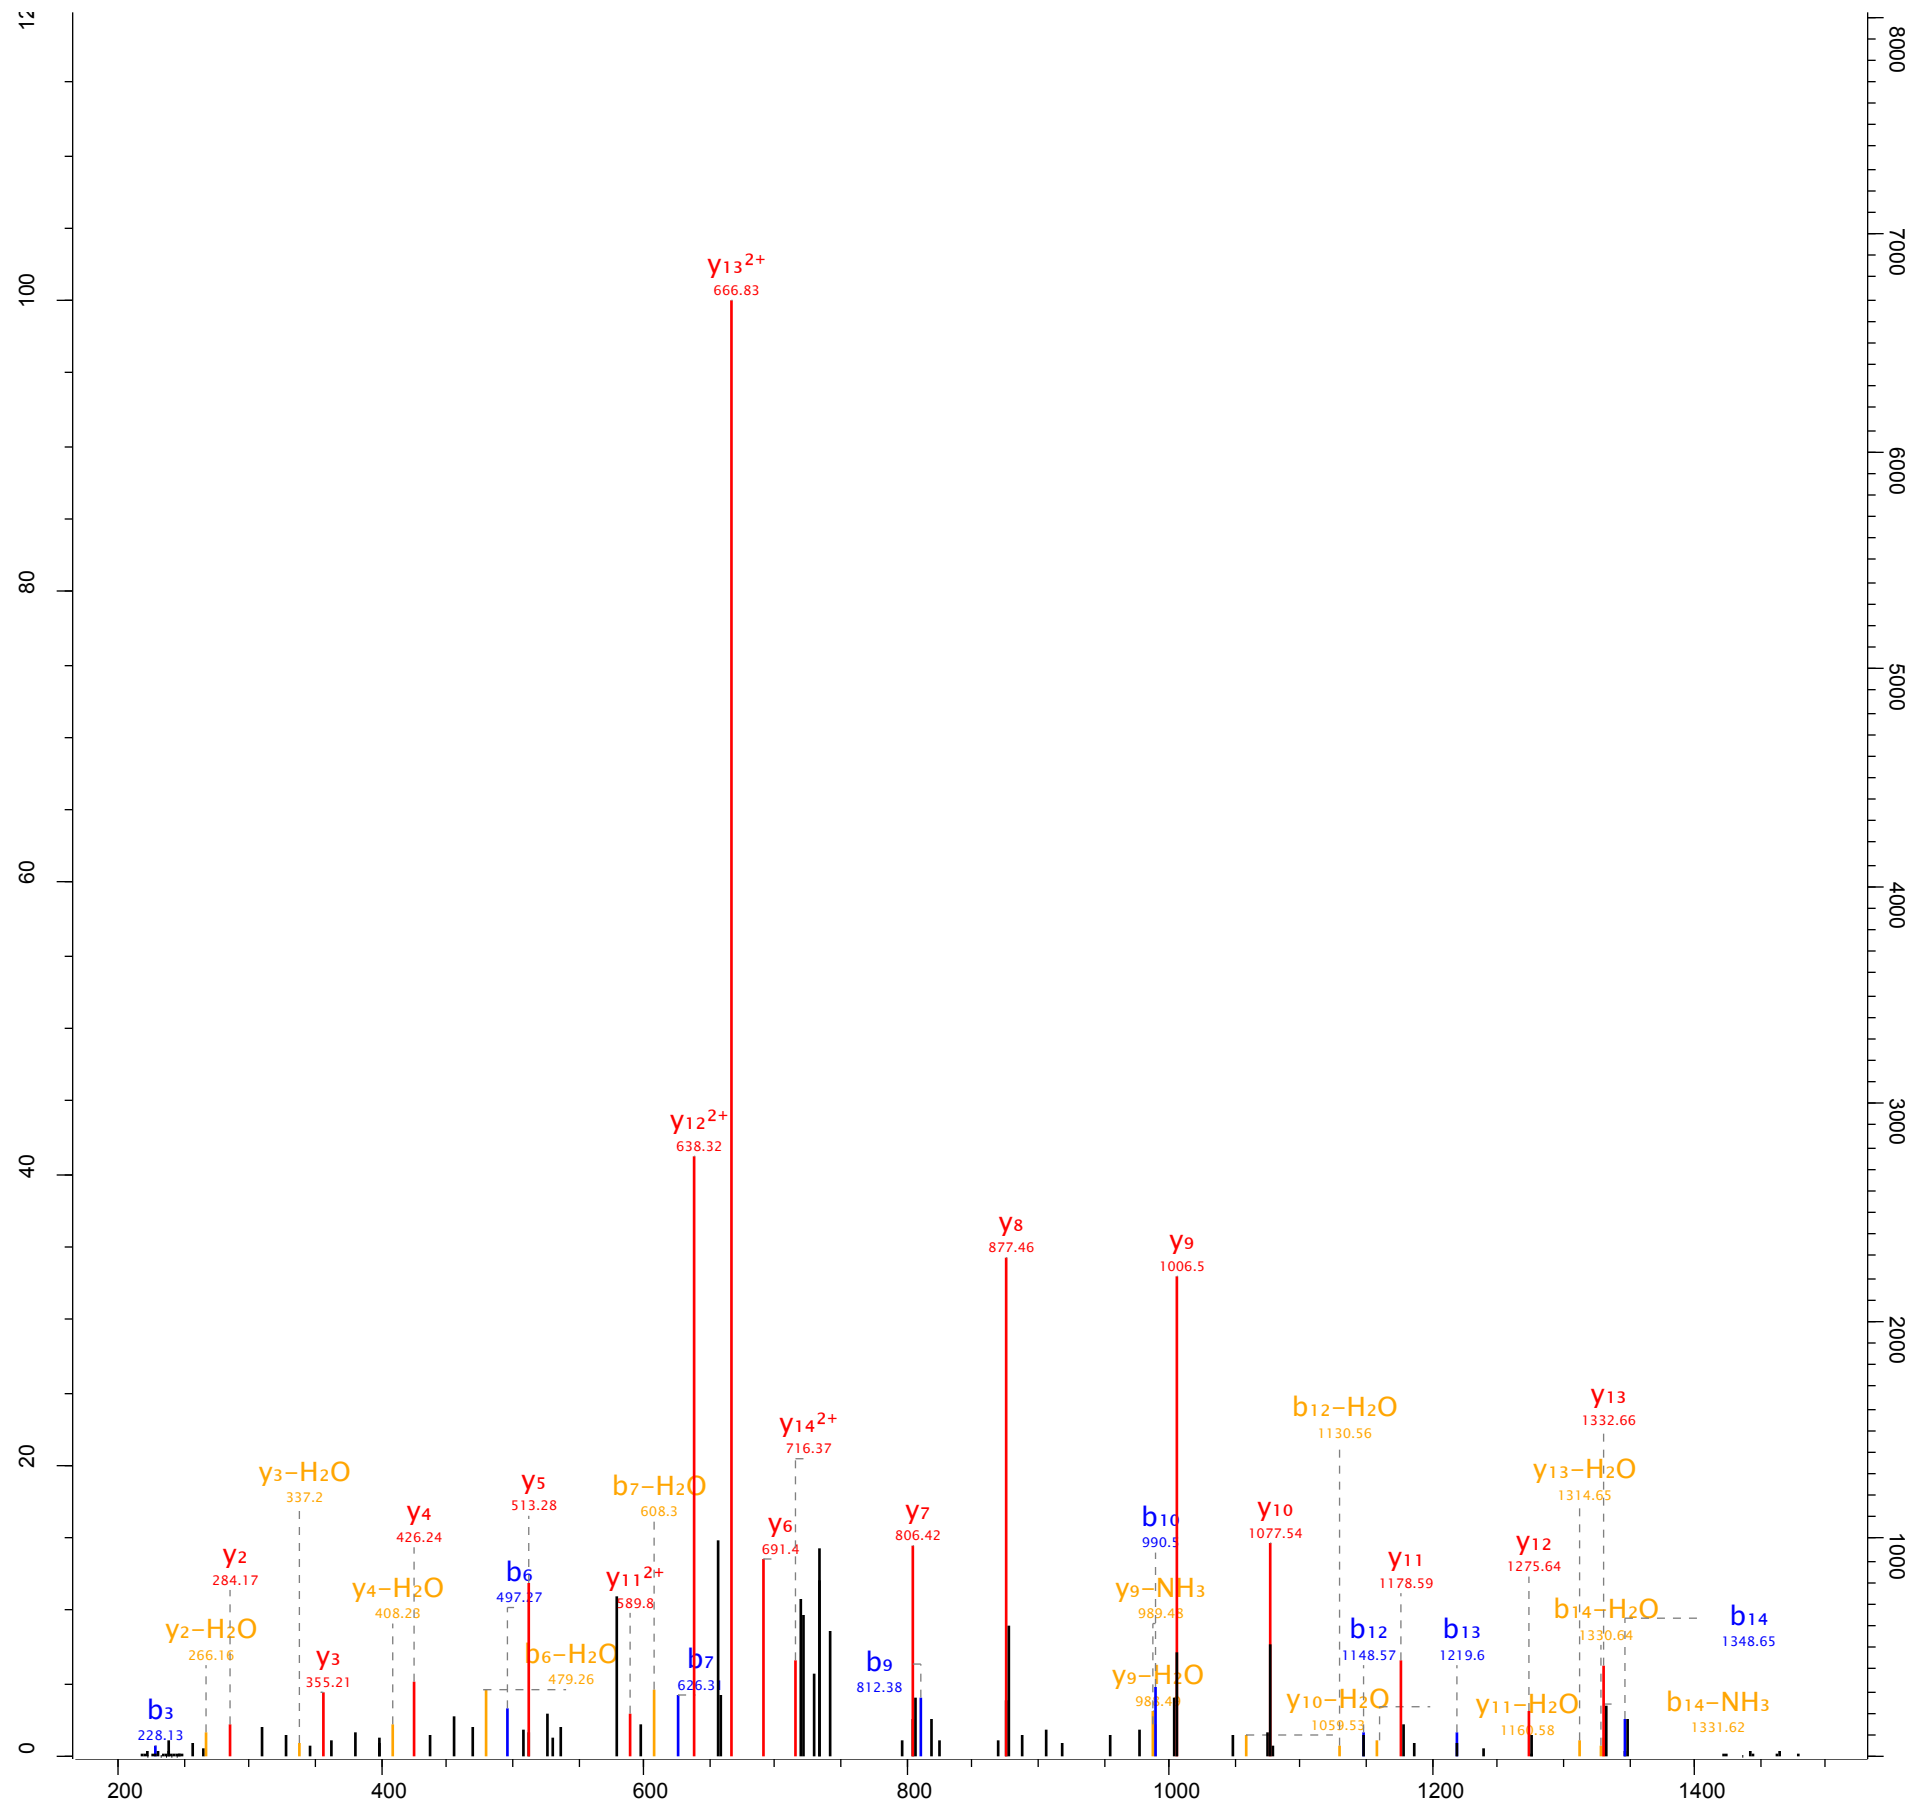

- A V G P T A E A D K S A A E K -

b<sub>3</sub> b<sub>6</sub> b<sub>7</sub> b<sub>9</sub> b<sub>10</sub> b<sub>12</sub> b<sub>13</sub> b<sub>14</sub>

y<sub>14</sub><sup>2+</sup> y<sub>13</sub> y<sub>12</sub> y<sub>11</sub> y<sub>10</sub> y<sub>9</sub> y<sub>8</sub> y<sub>7</sub> y<sub>6</sub> ac y<sub>5</sub> y<sub>4</sub> y<sub>3</sub> y<sub>2</sub>

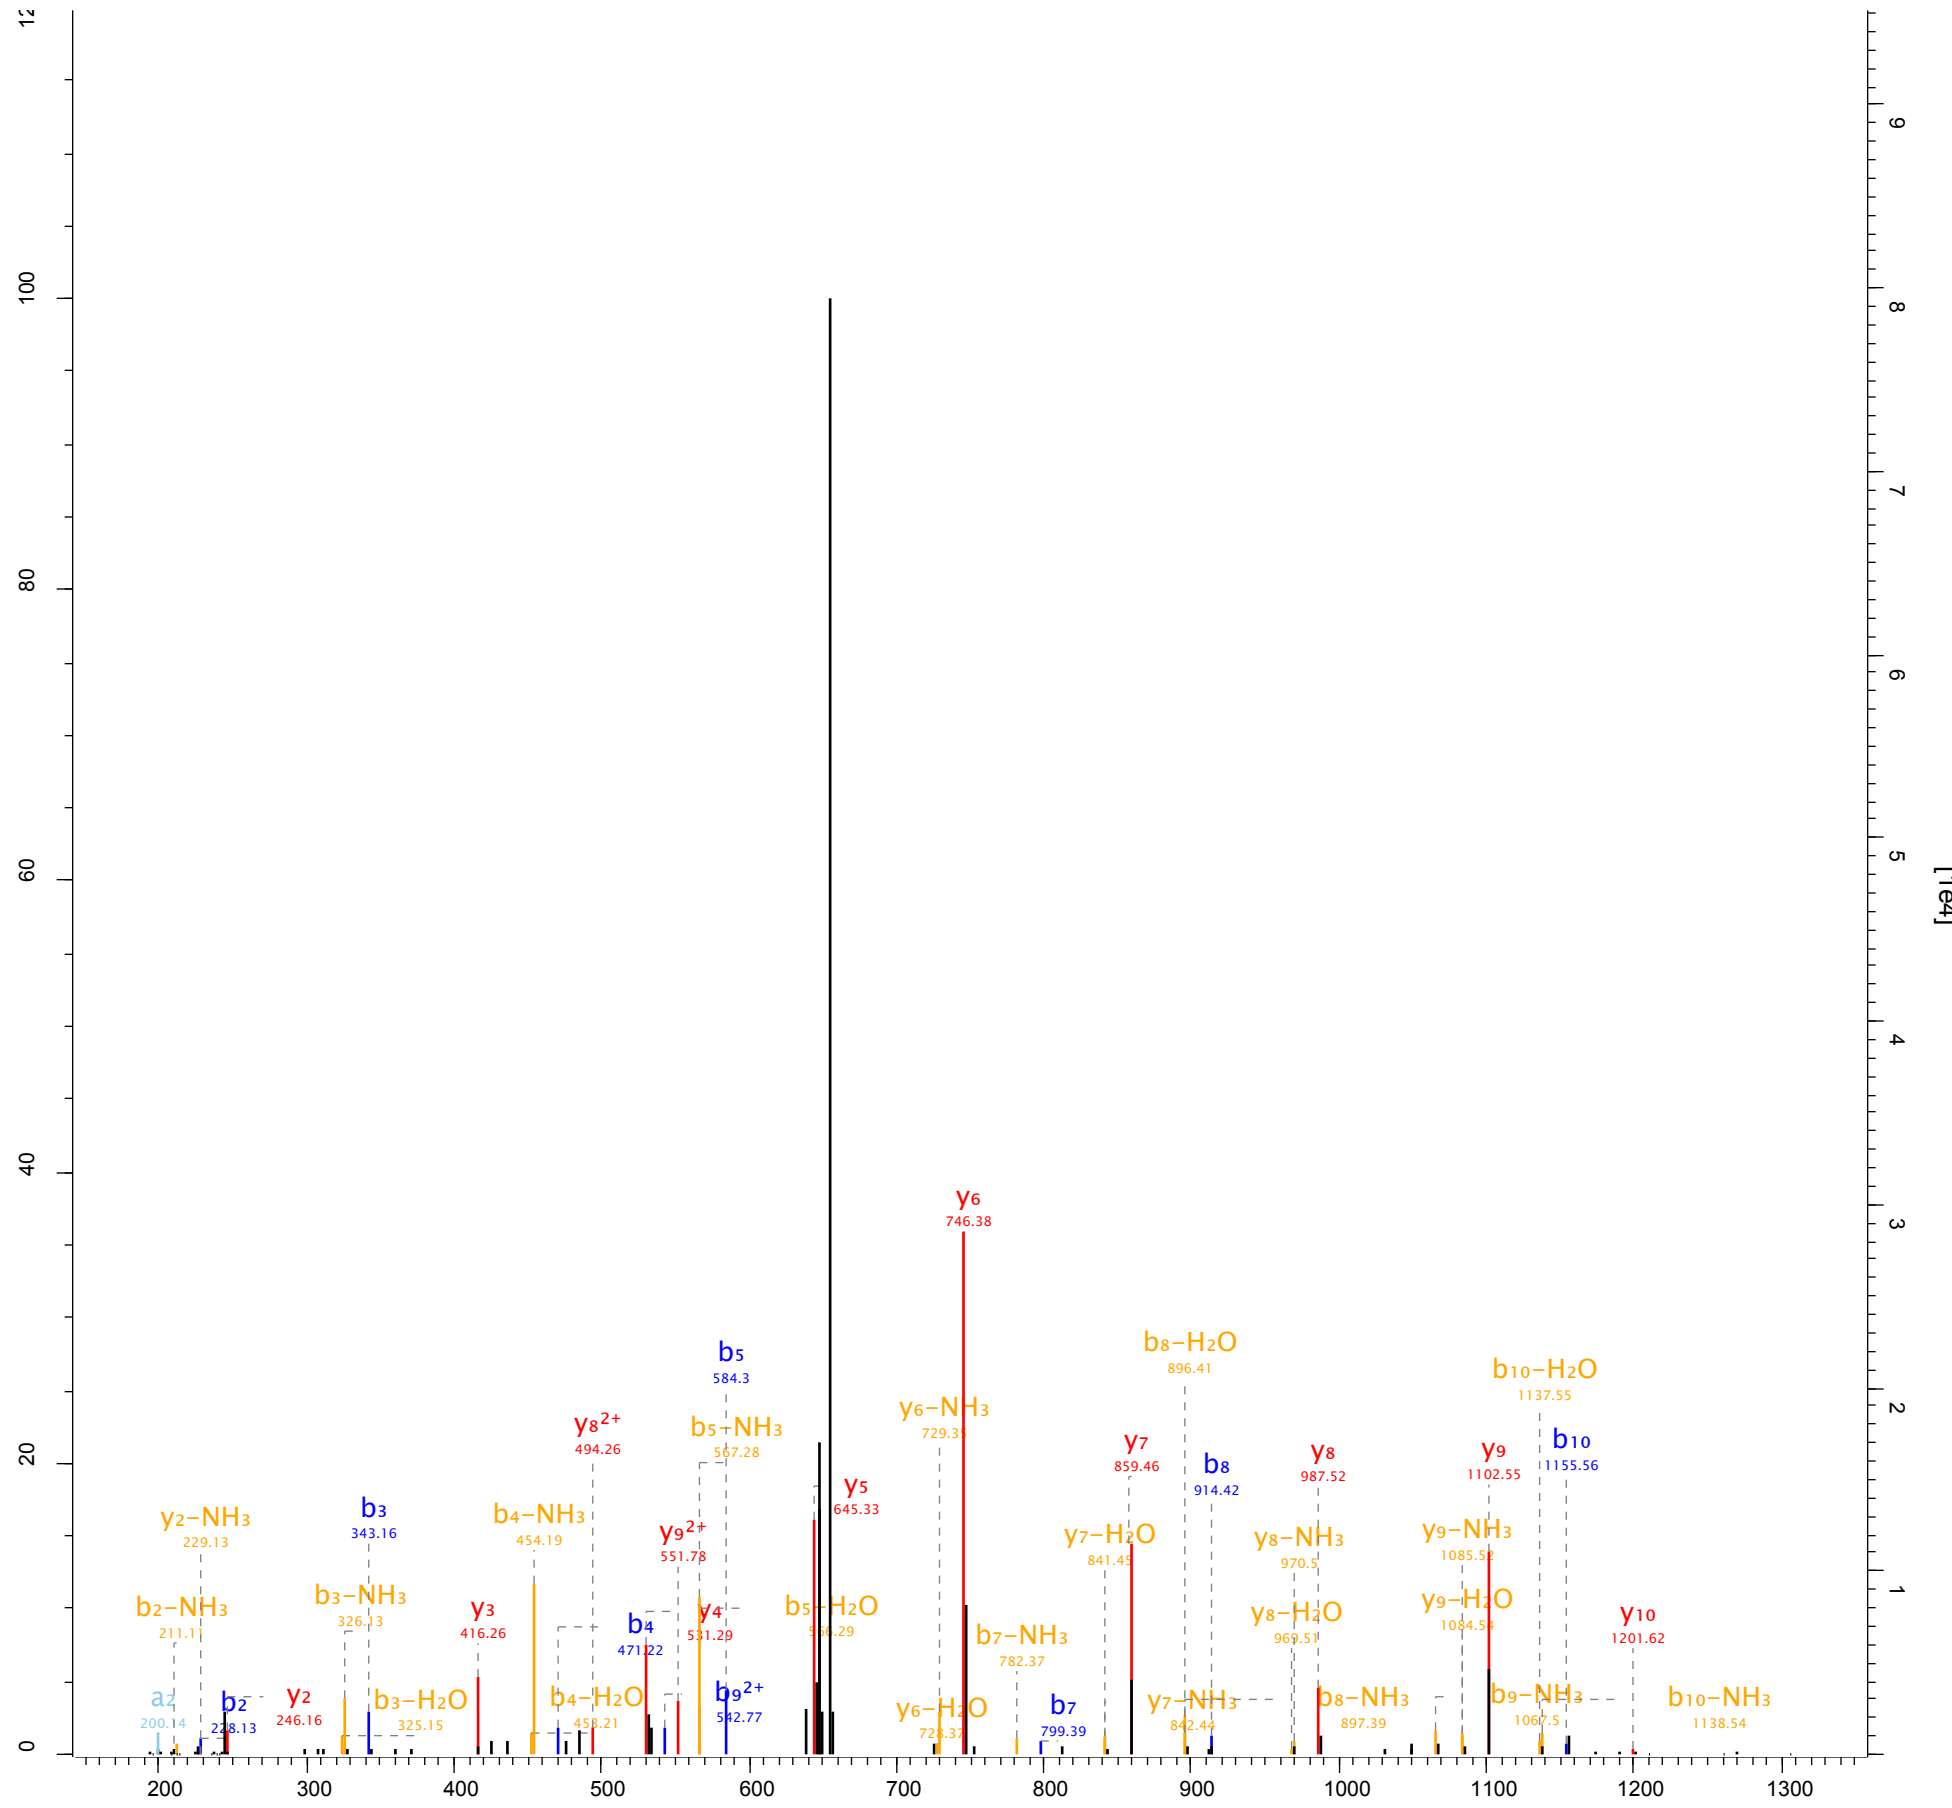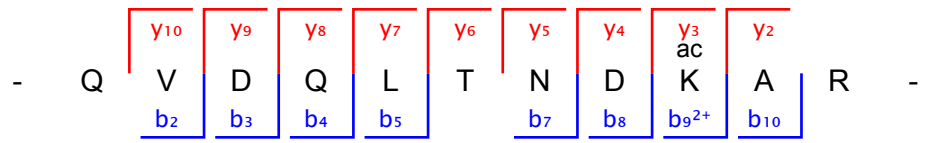

Raw file: 050813\_SCW\_II\_29\_19\_4  
 Scan: 11885  
 Method: ITMS; CID  
 Score: 103.26  
 m/z: 527.32  
 Gene names: Sub1

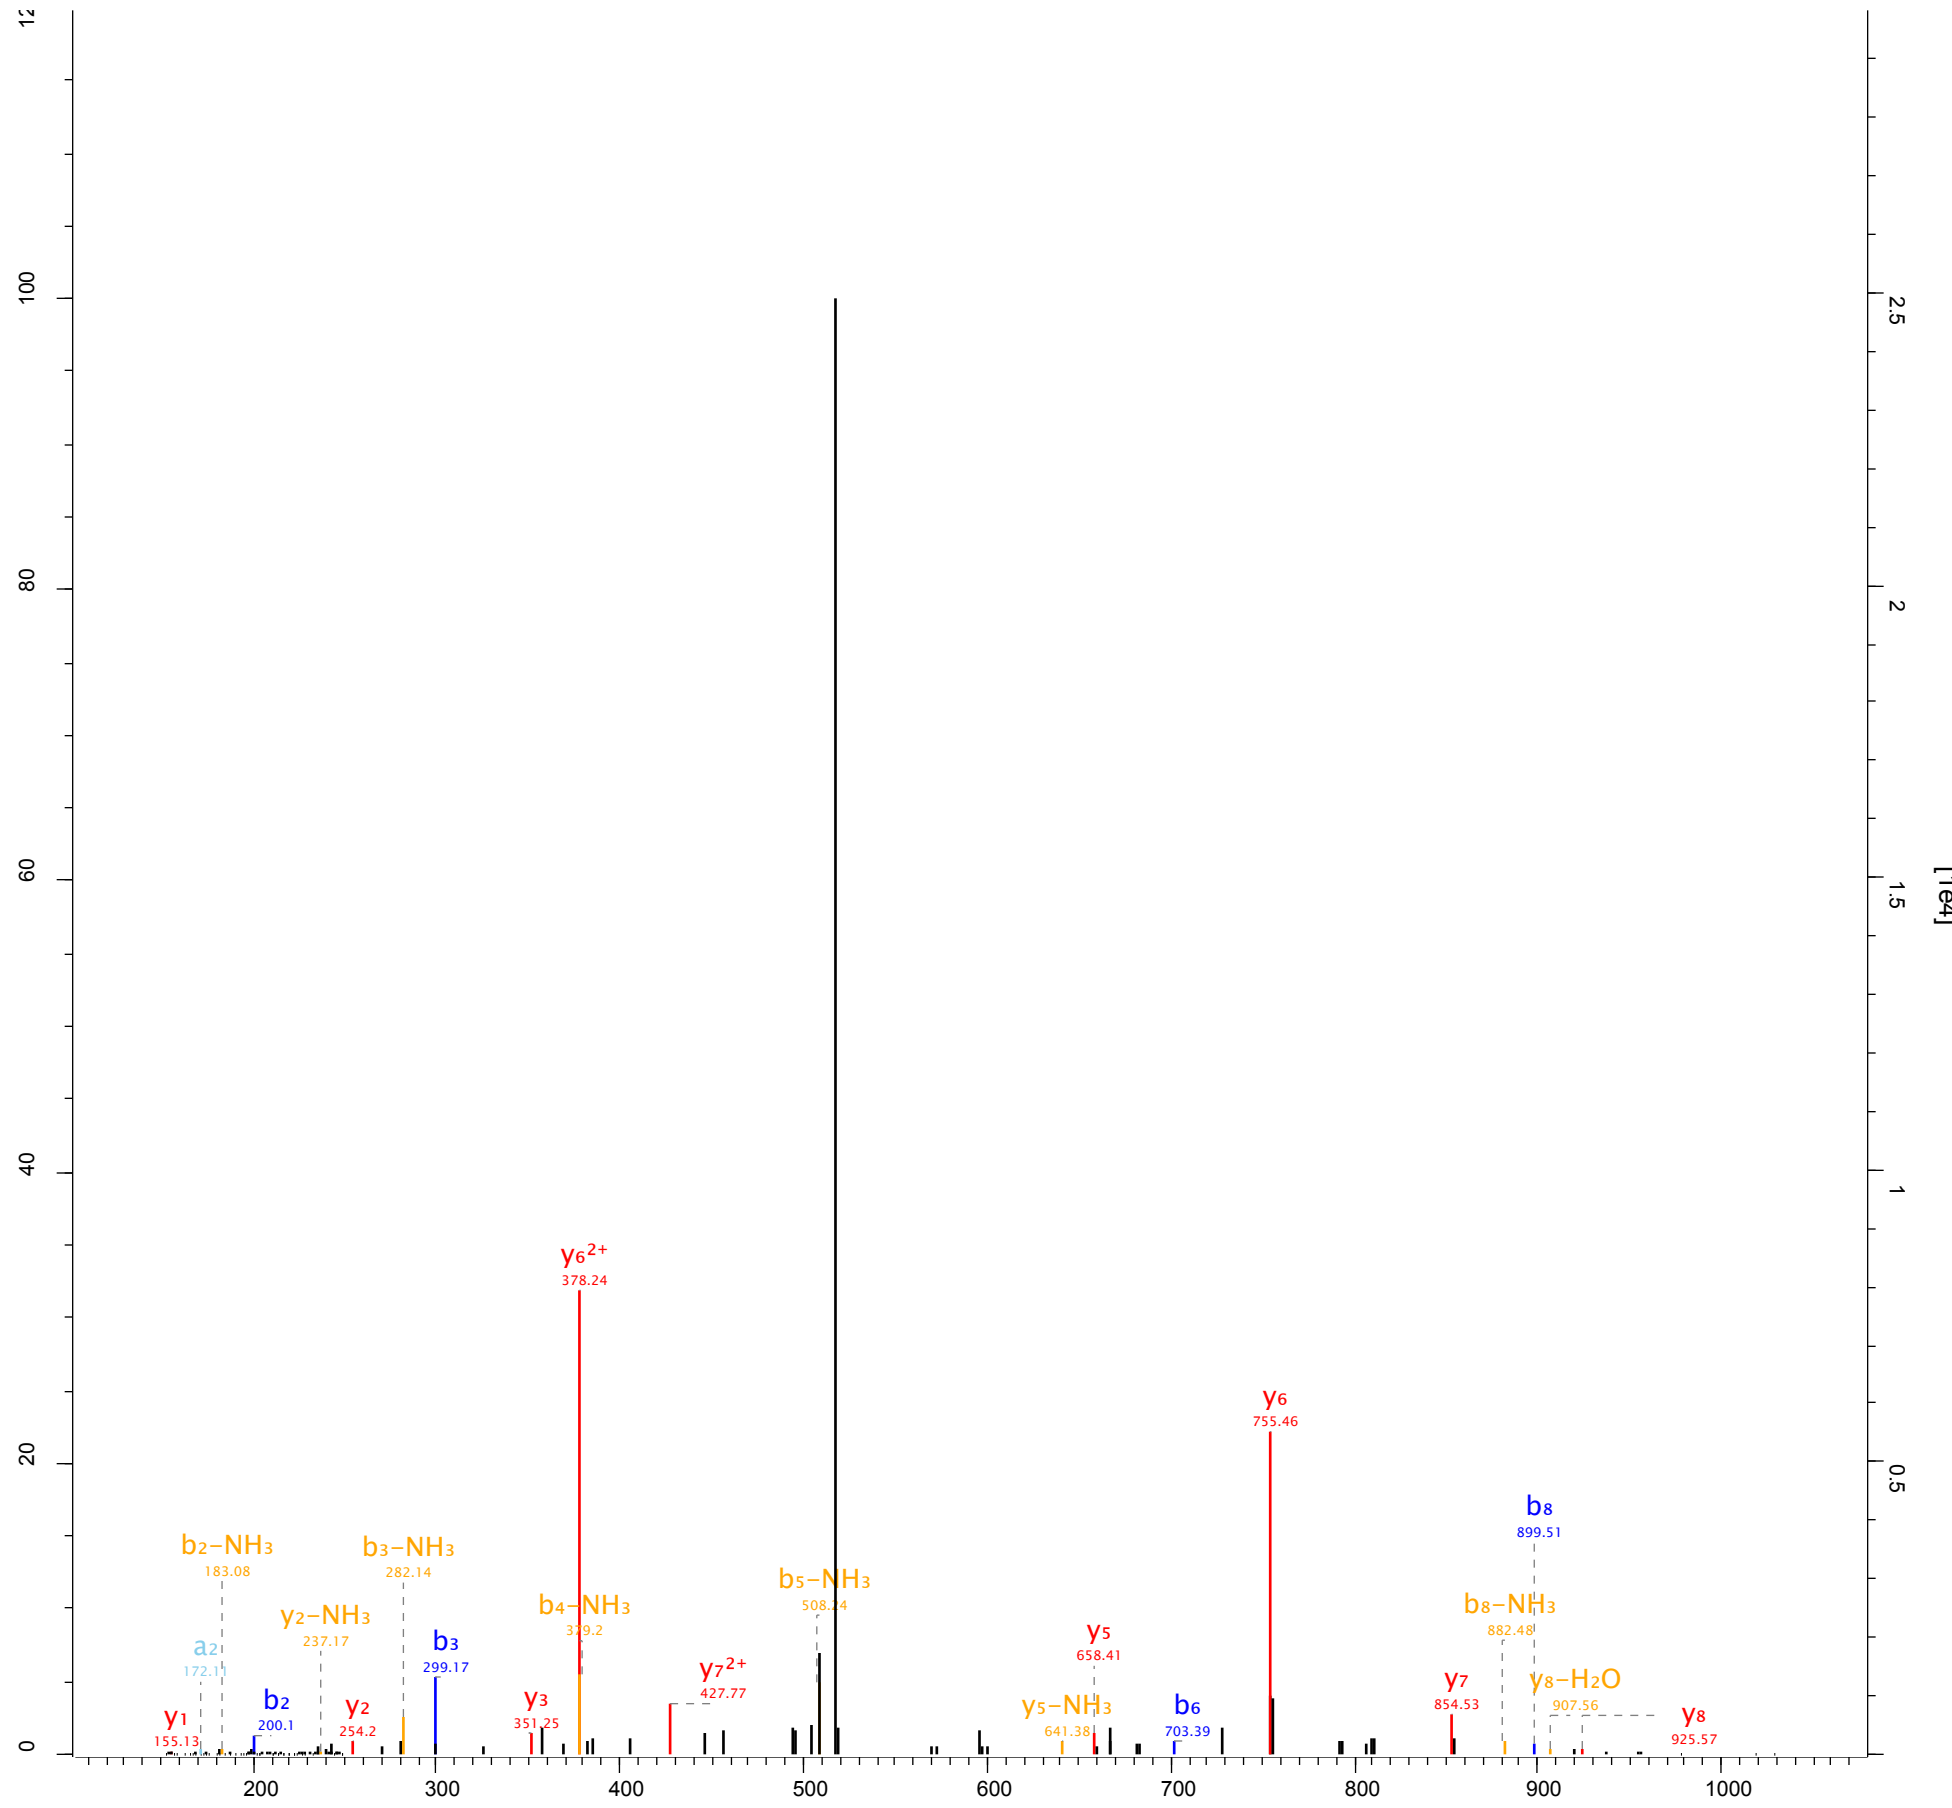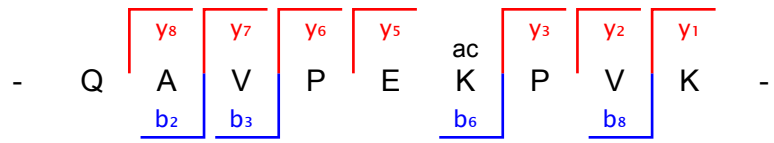

Raw file 050813\_SCW\_II\_29\_19\_4 Scan 12097 Method ITMS; CID Score 132.86 m/z 611.82 Gene names Ptms;Eif5a2;Eif5a

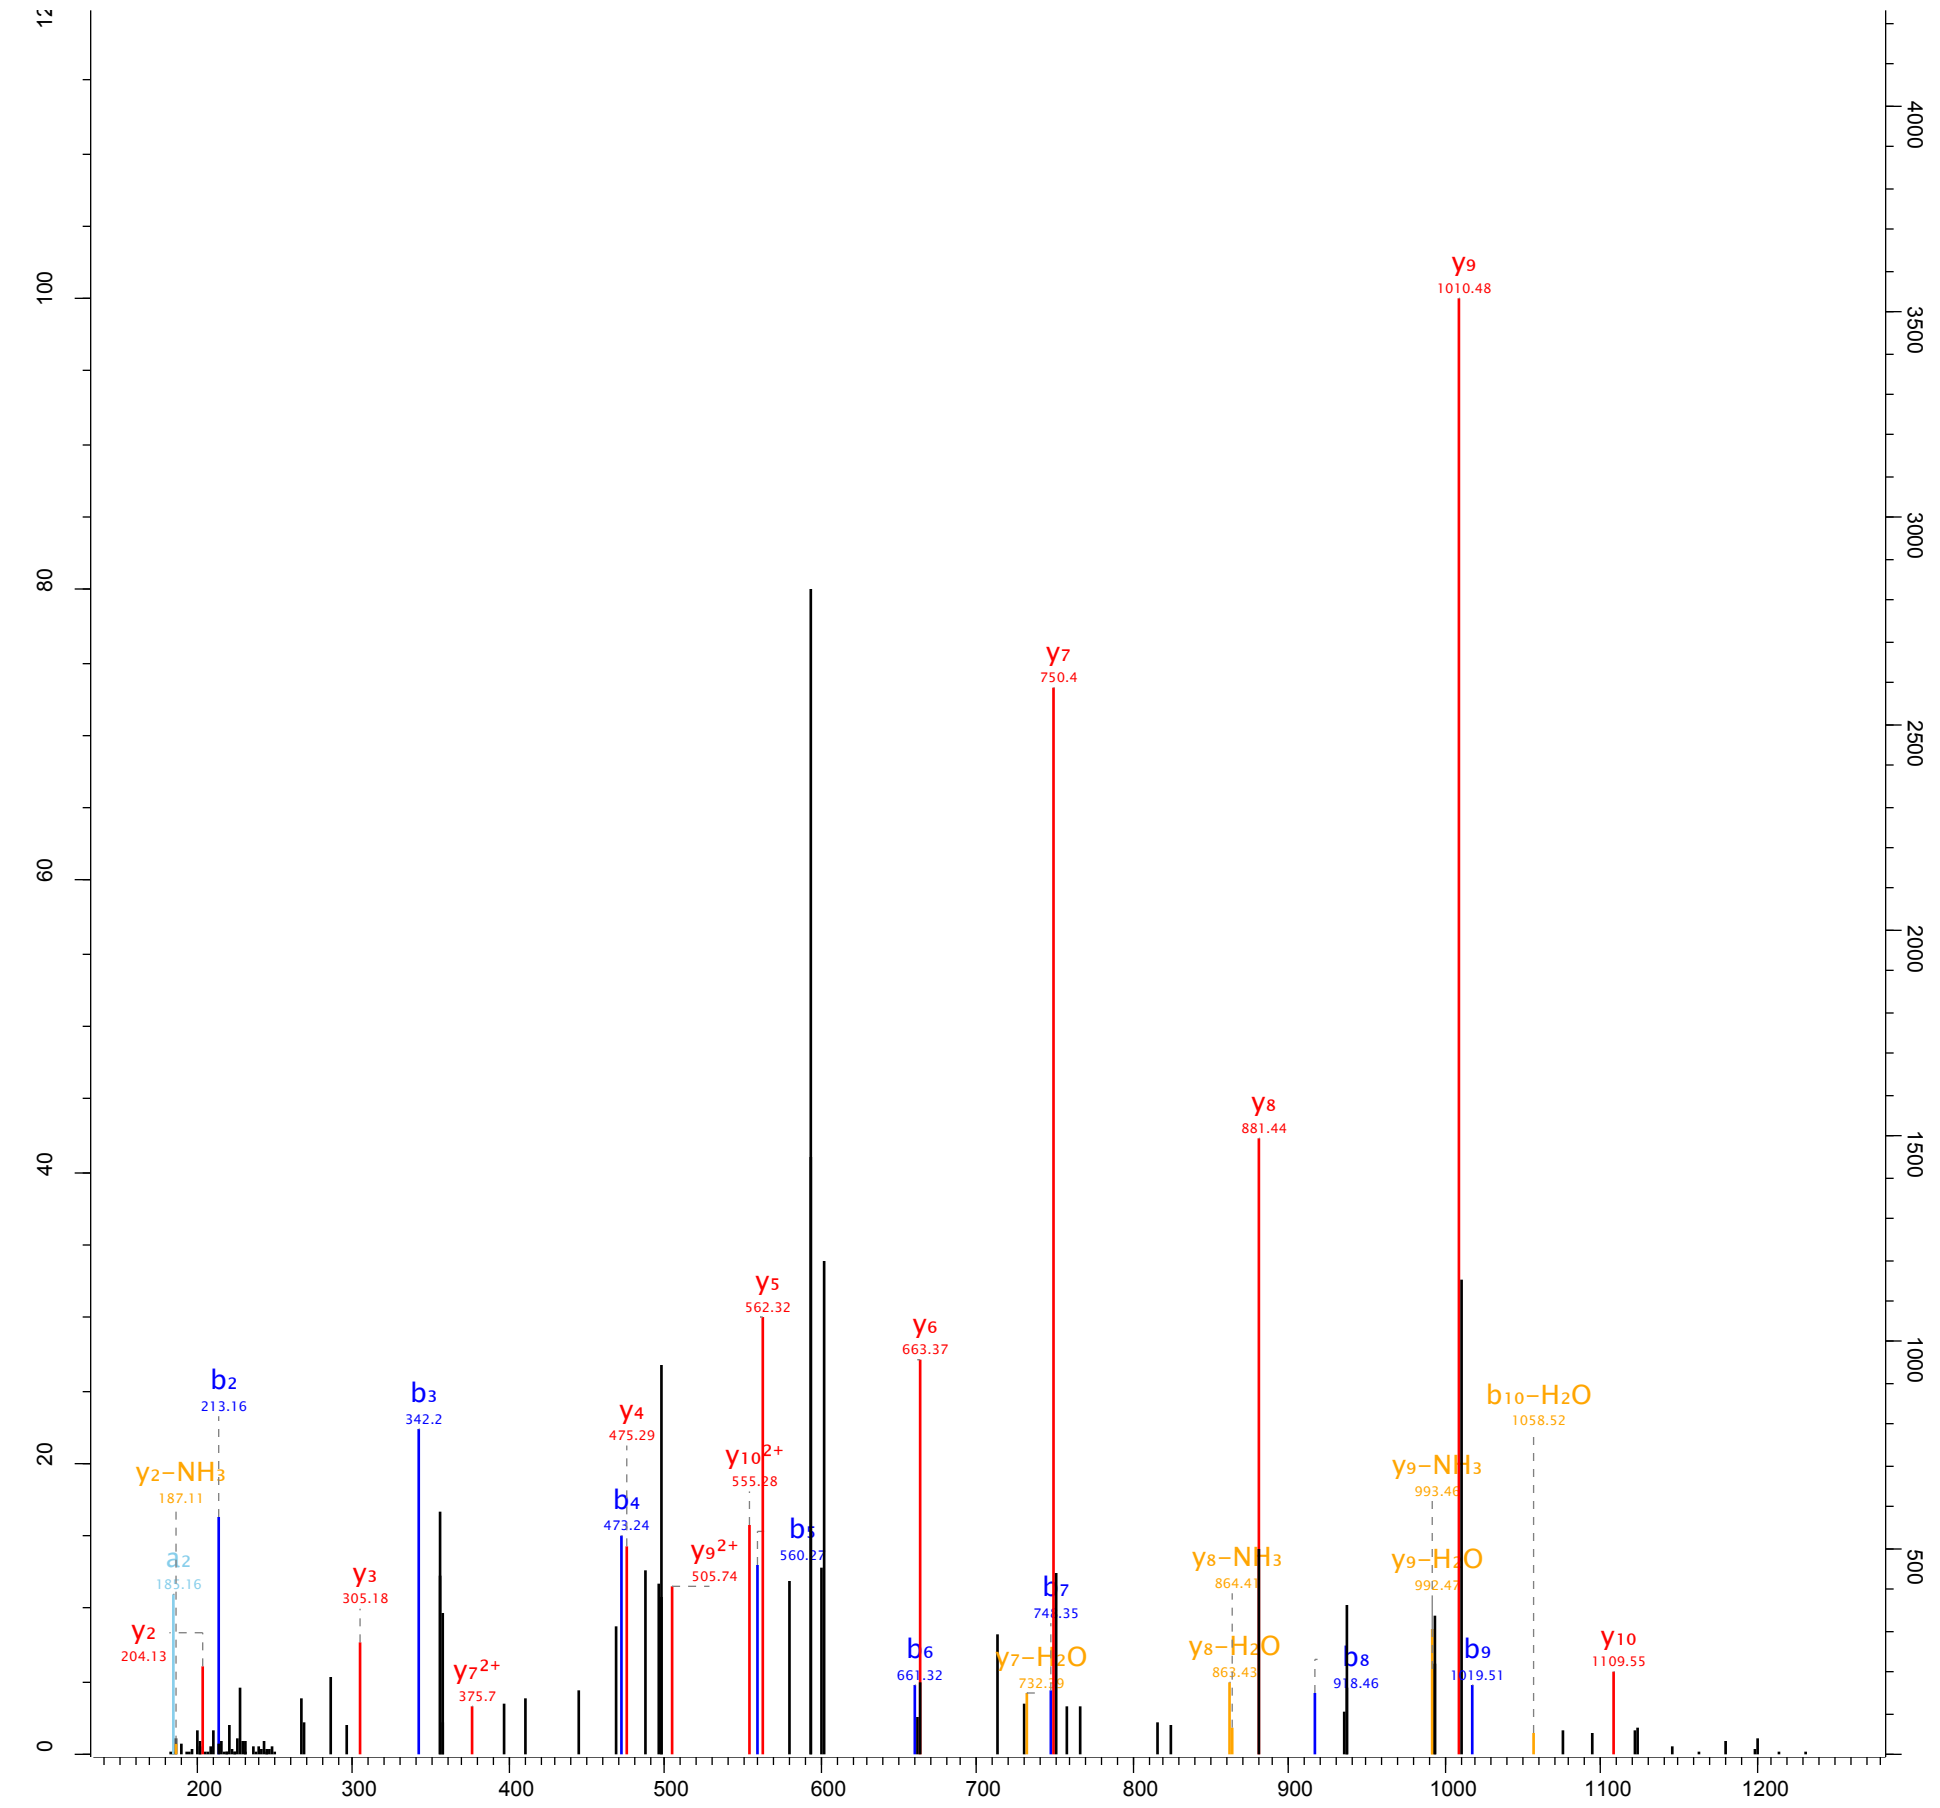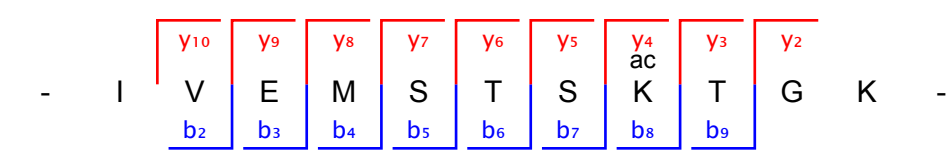

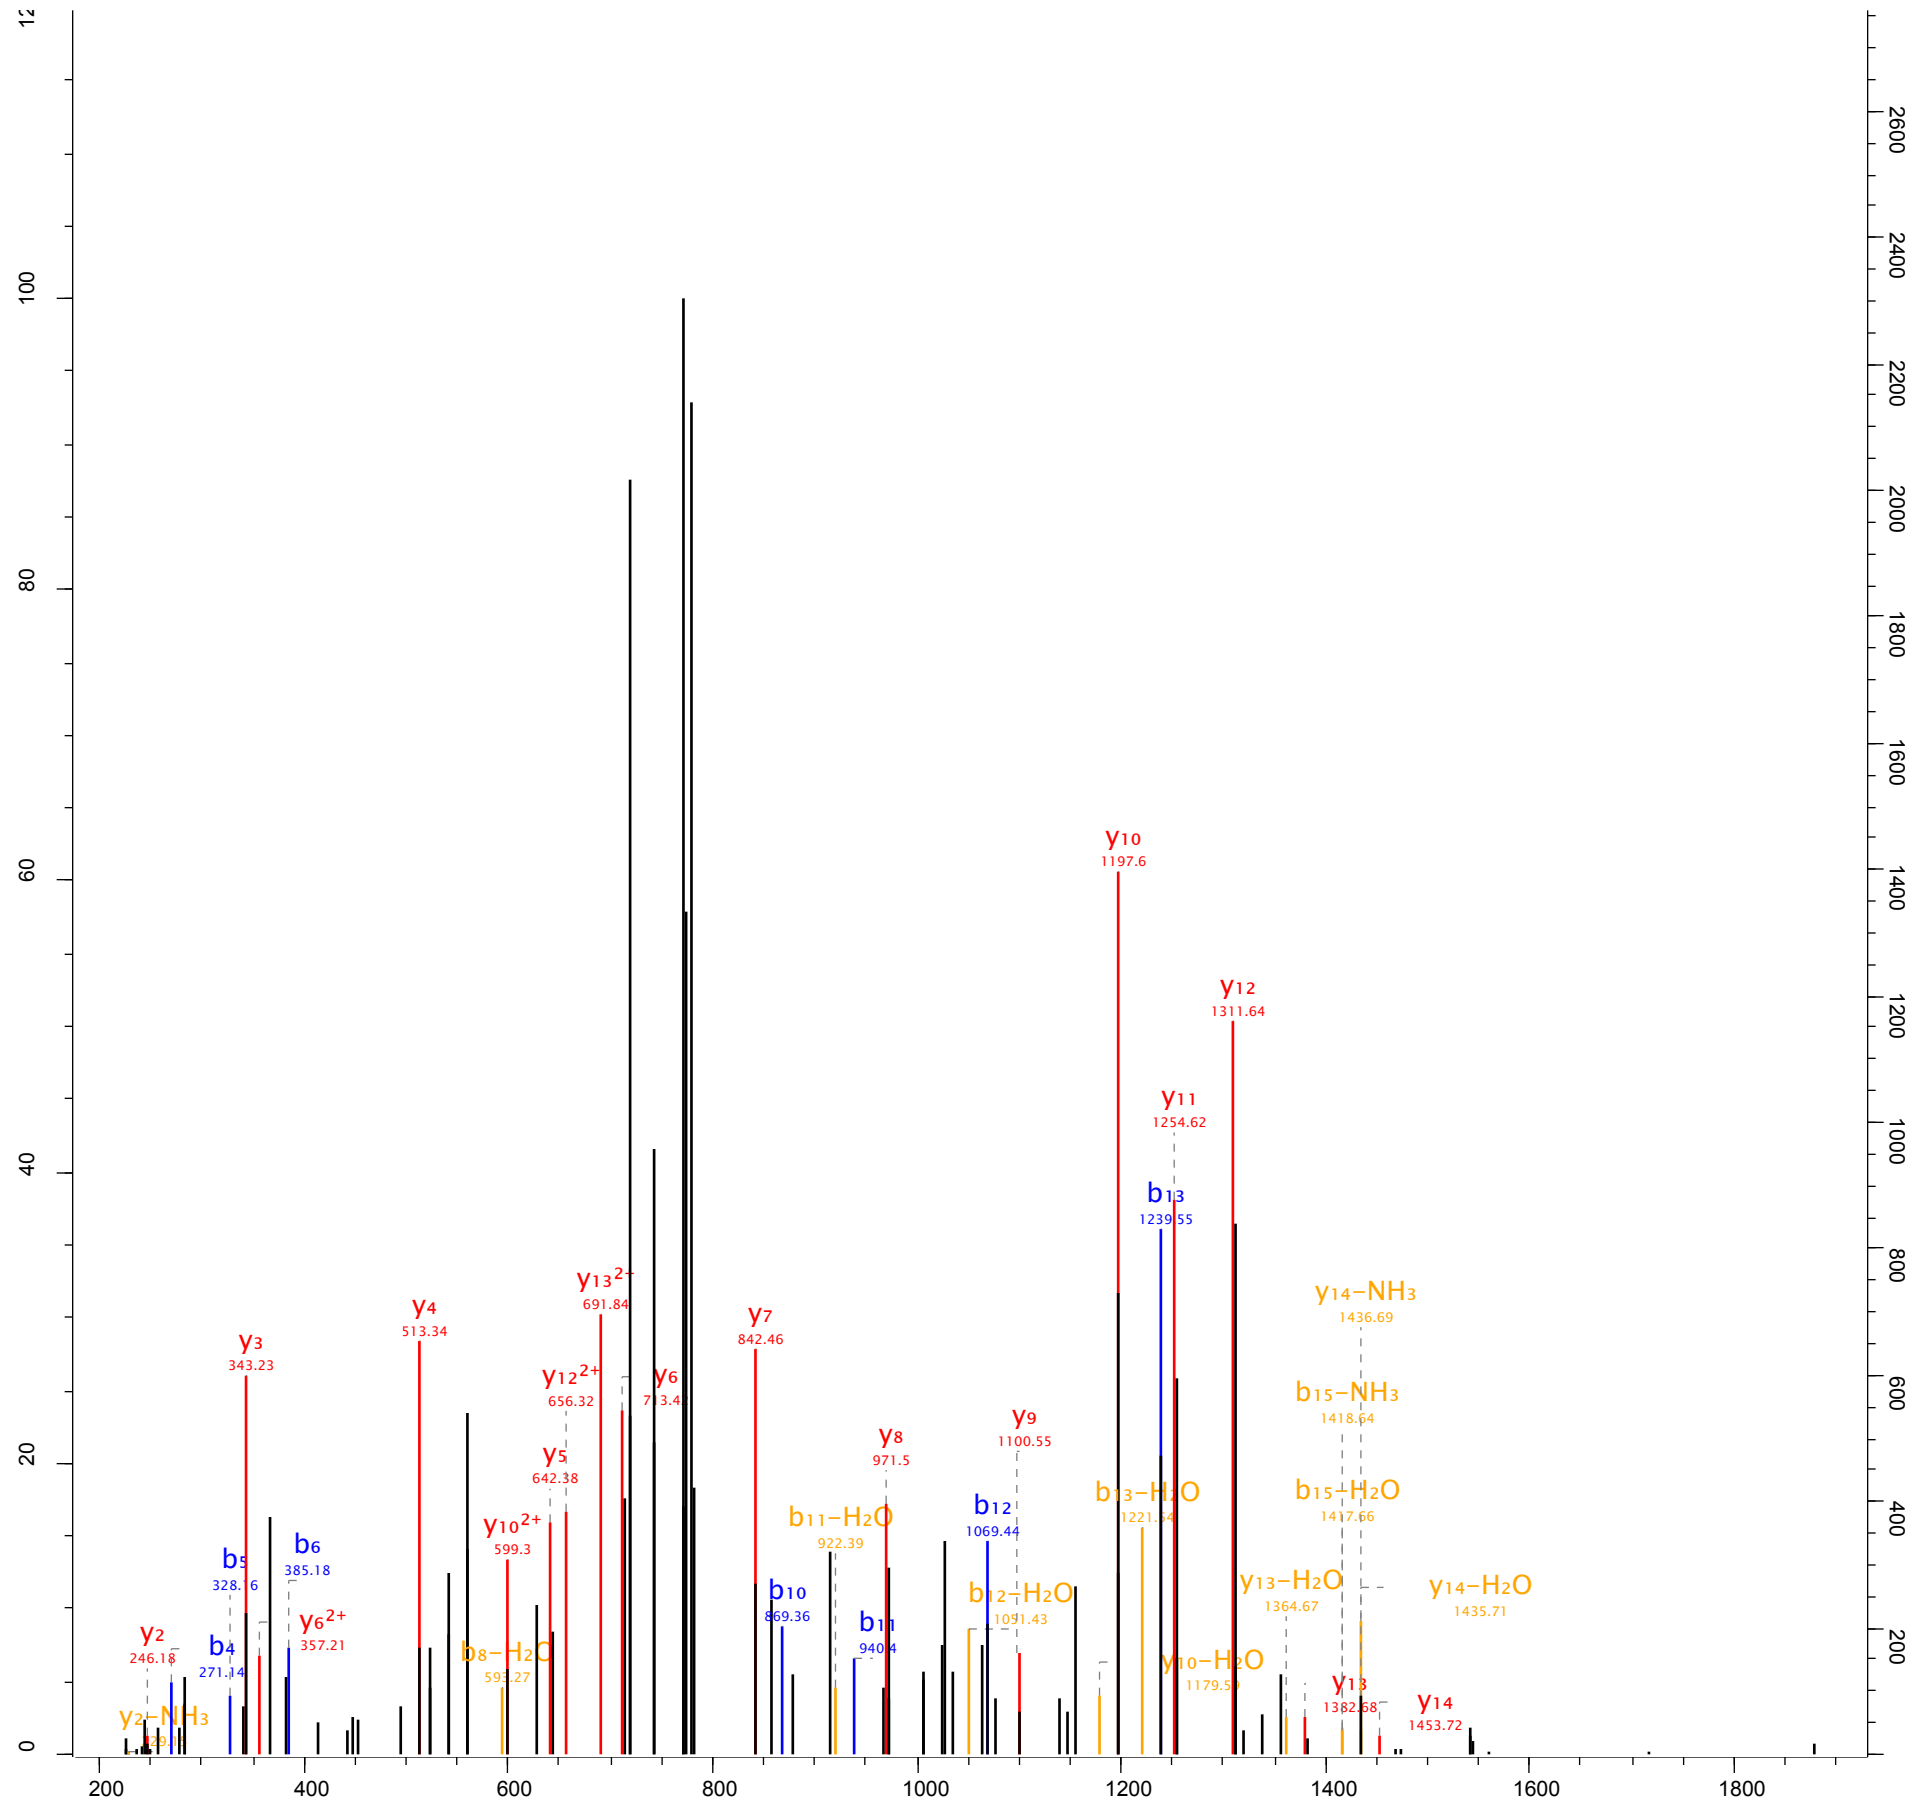

- A G A A G G P E E E A E K P V K -

y14
y13
y12
y11
y10
y9
y8
y7
y6
y5
y4
y3
y2

b4
b5
b6
b10
b11
b12
b13

ac

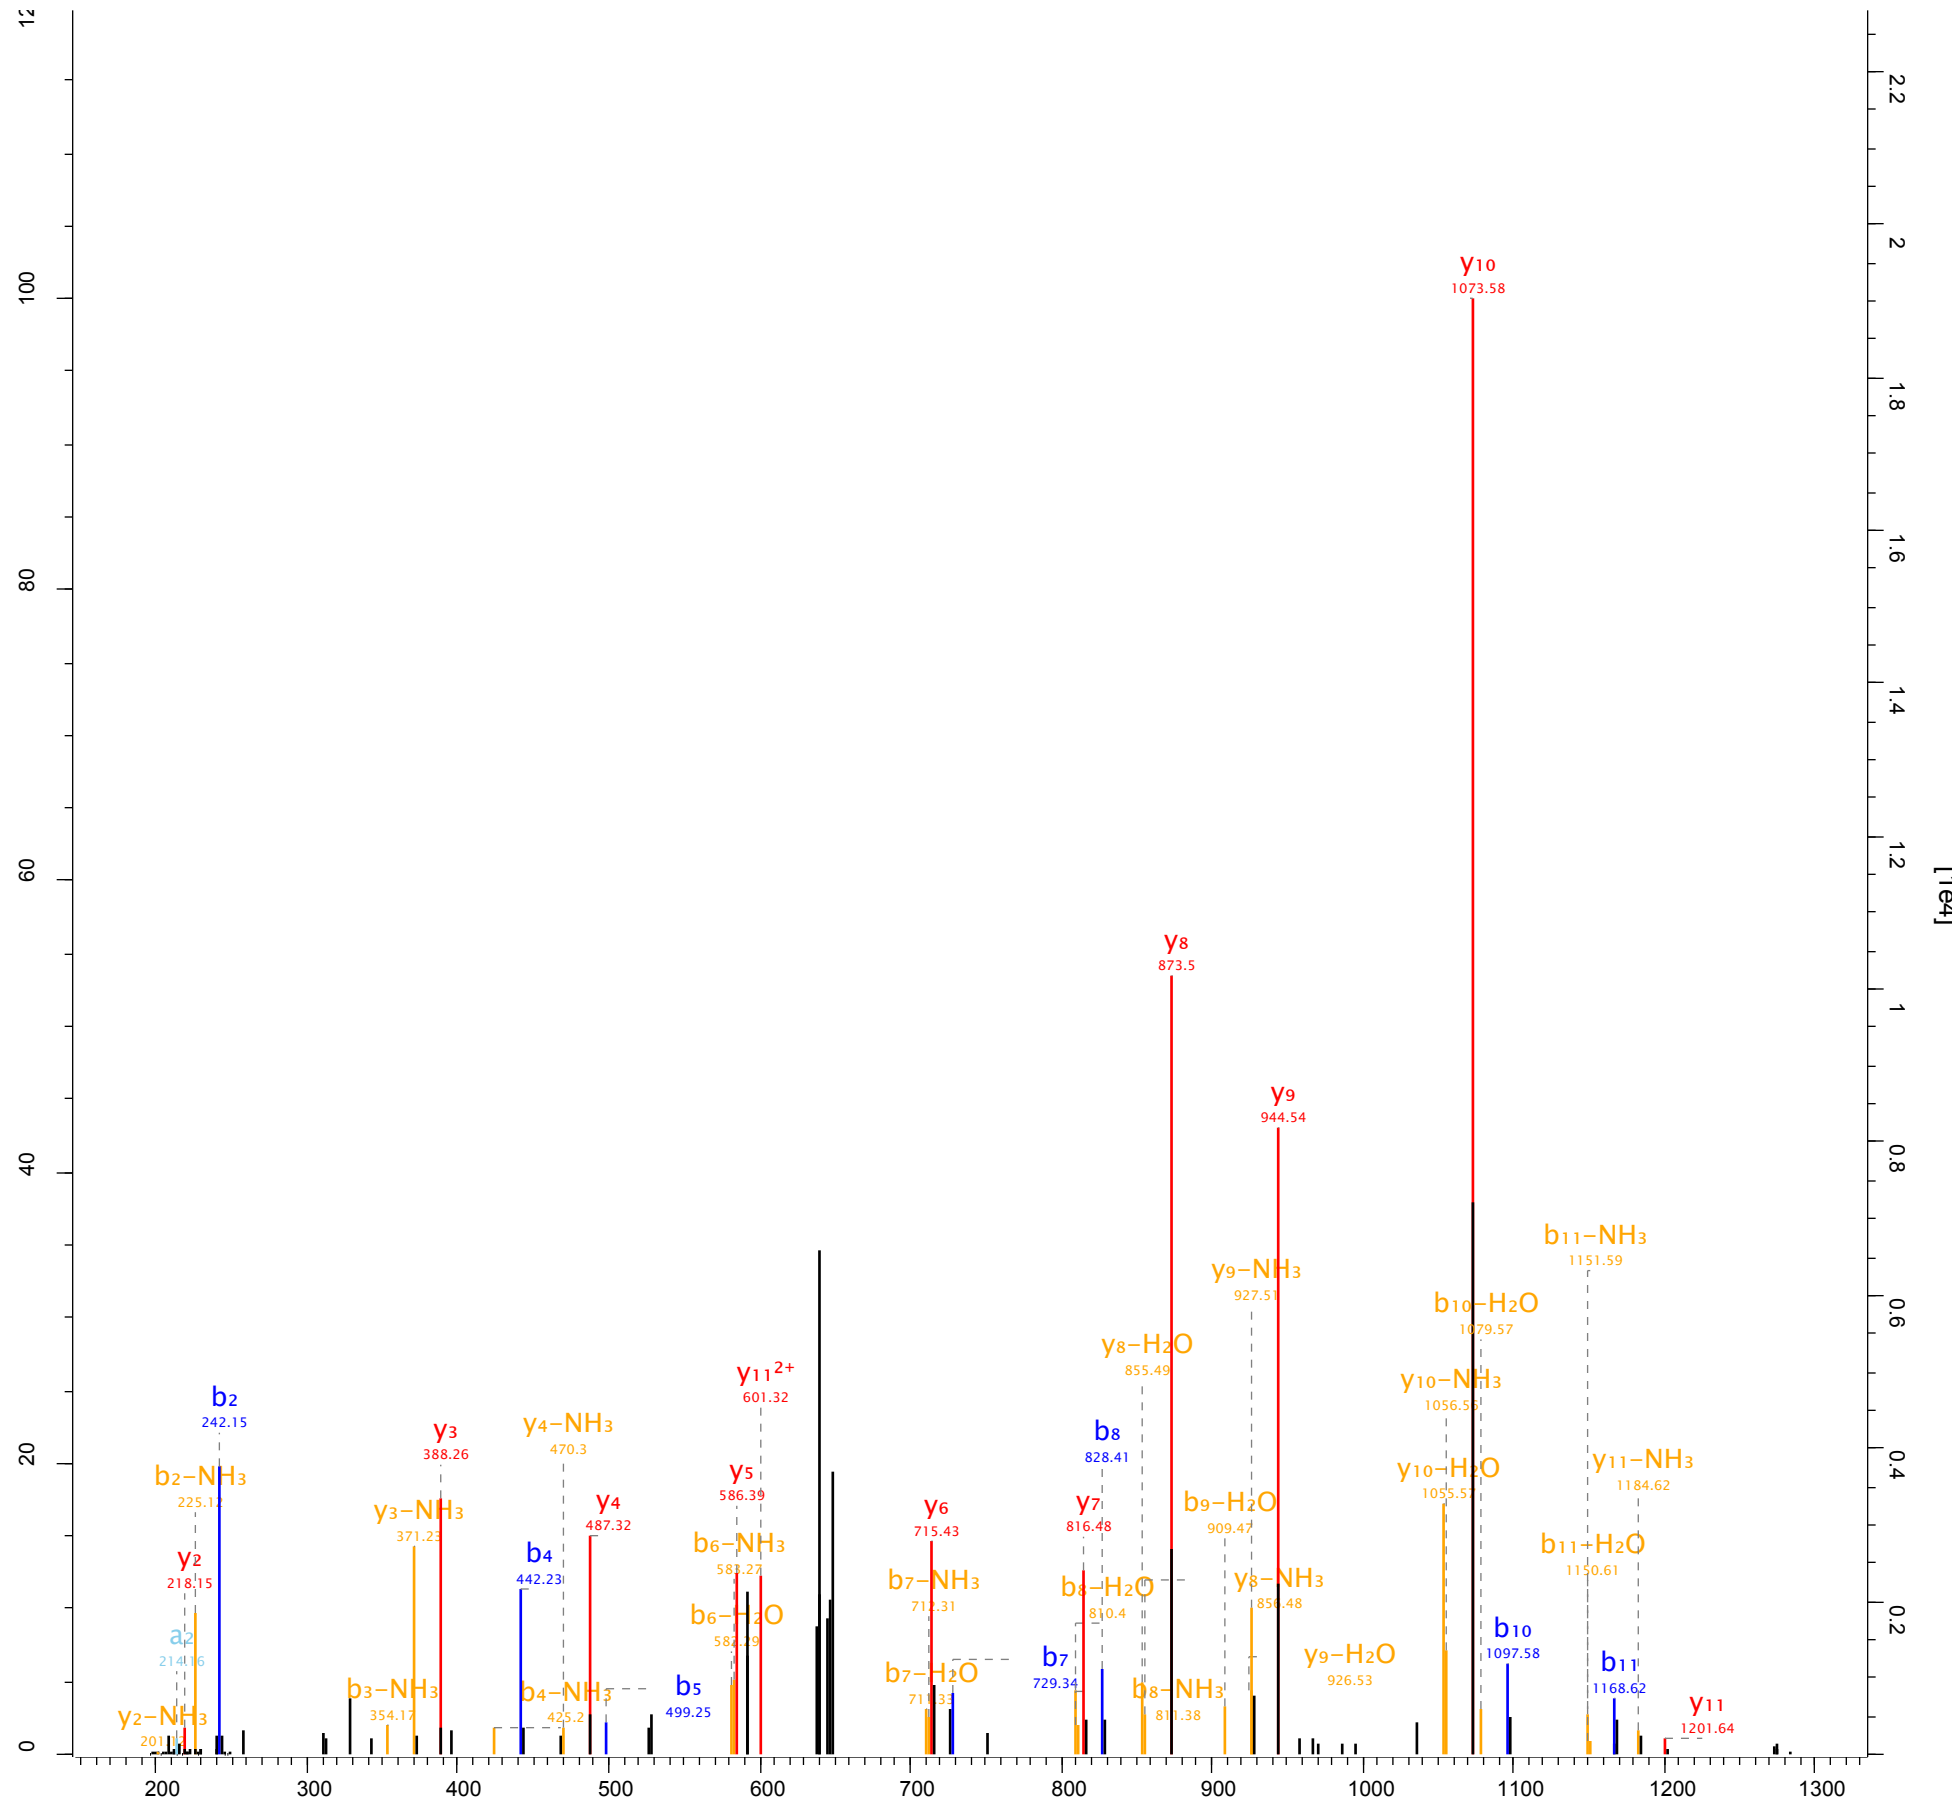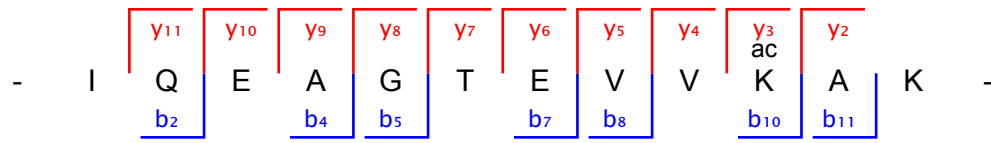

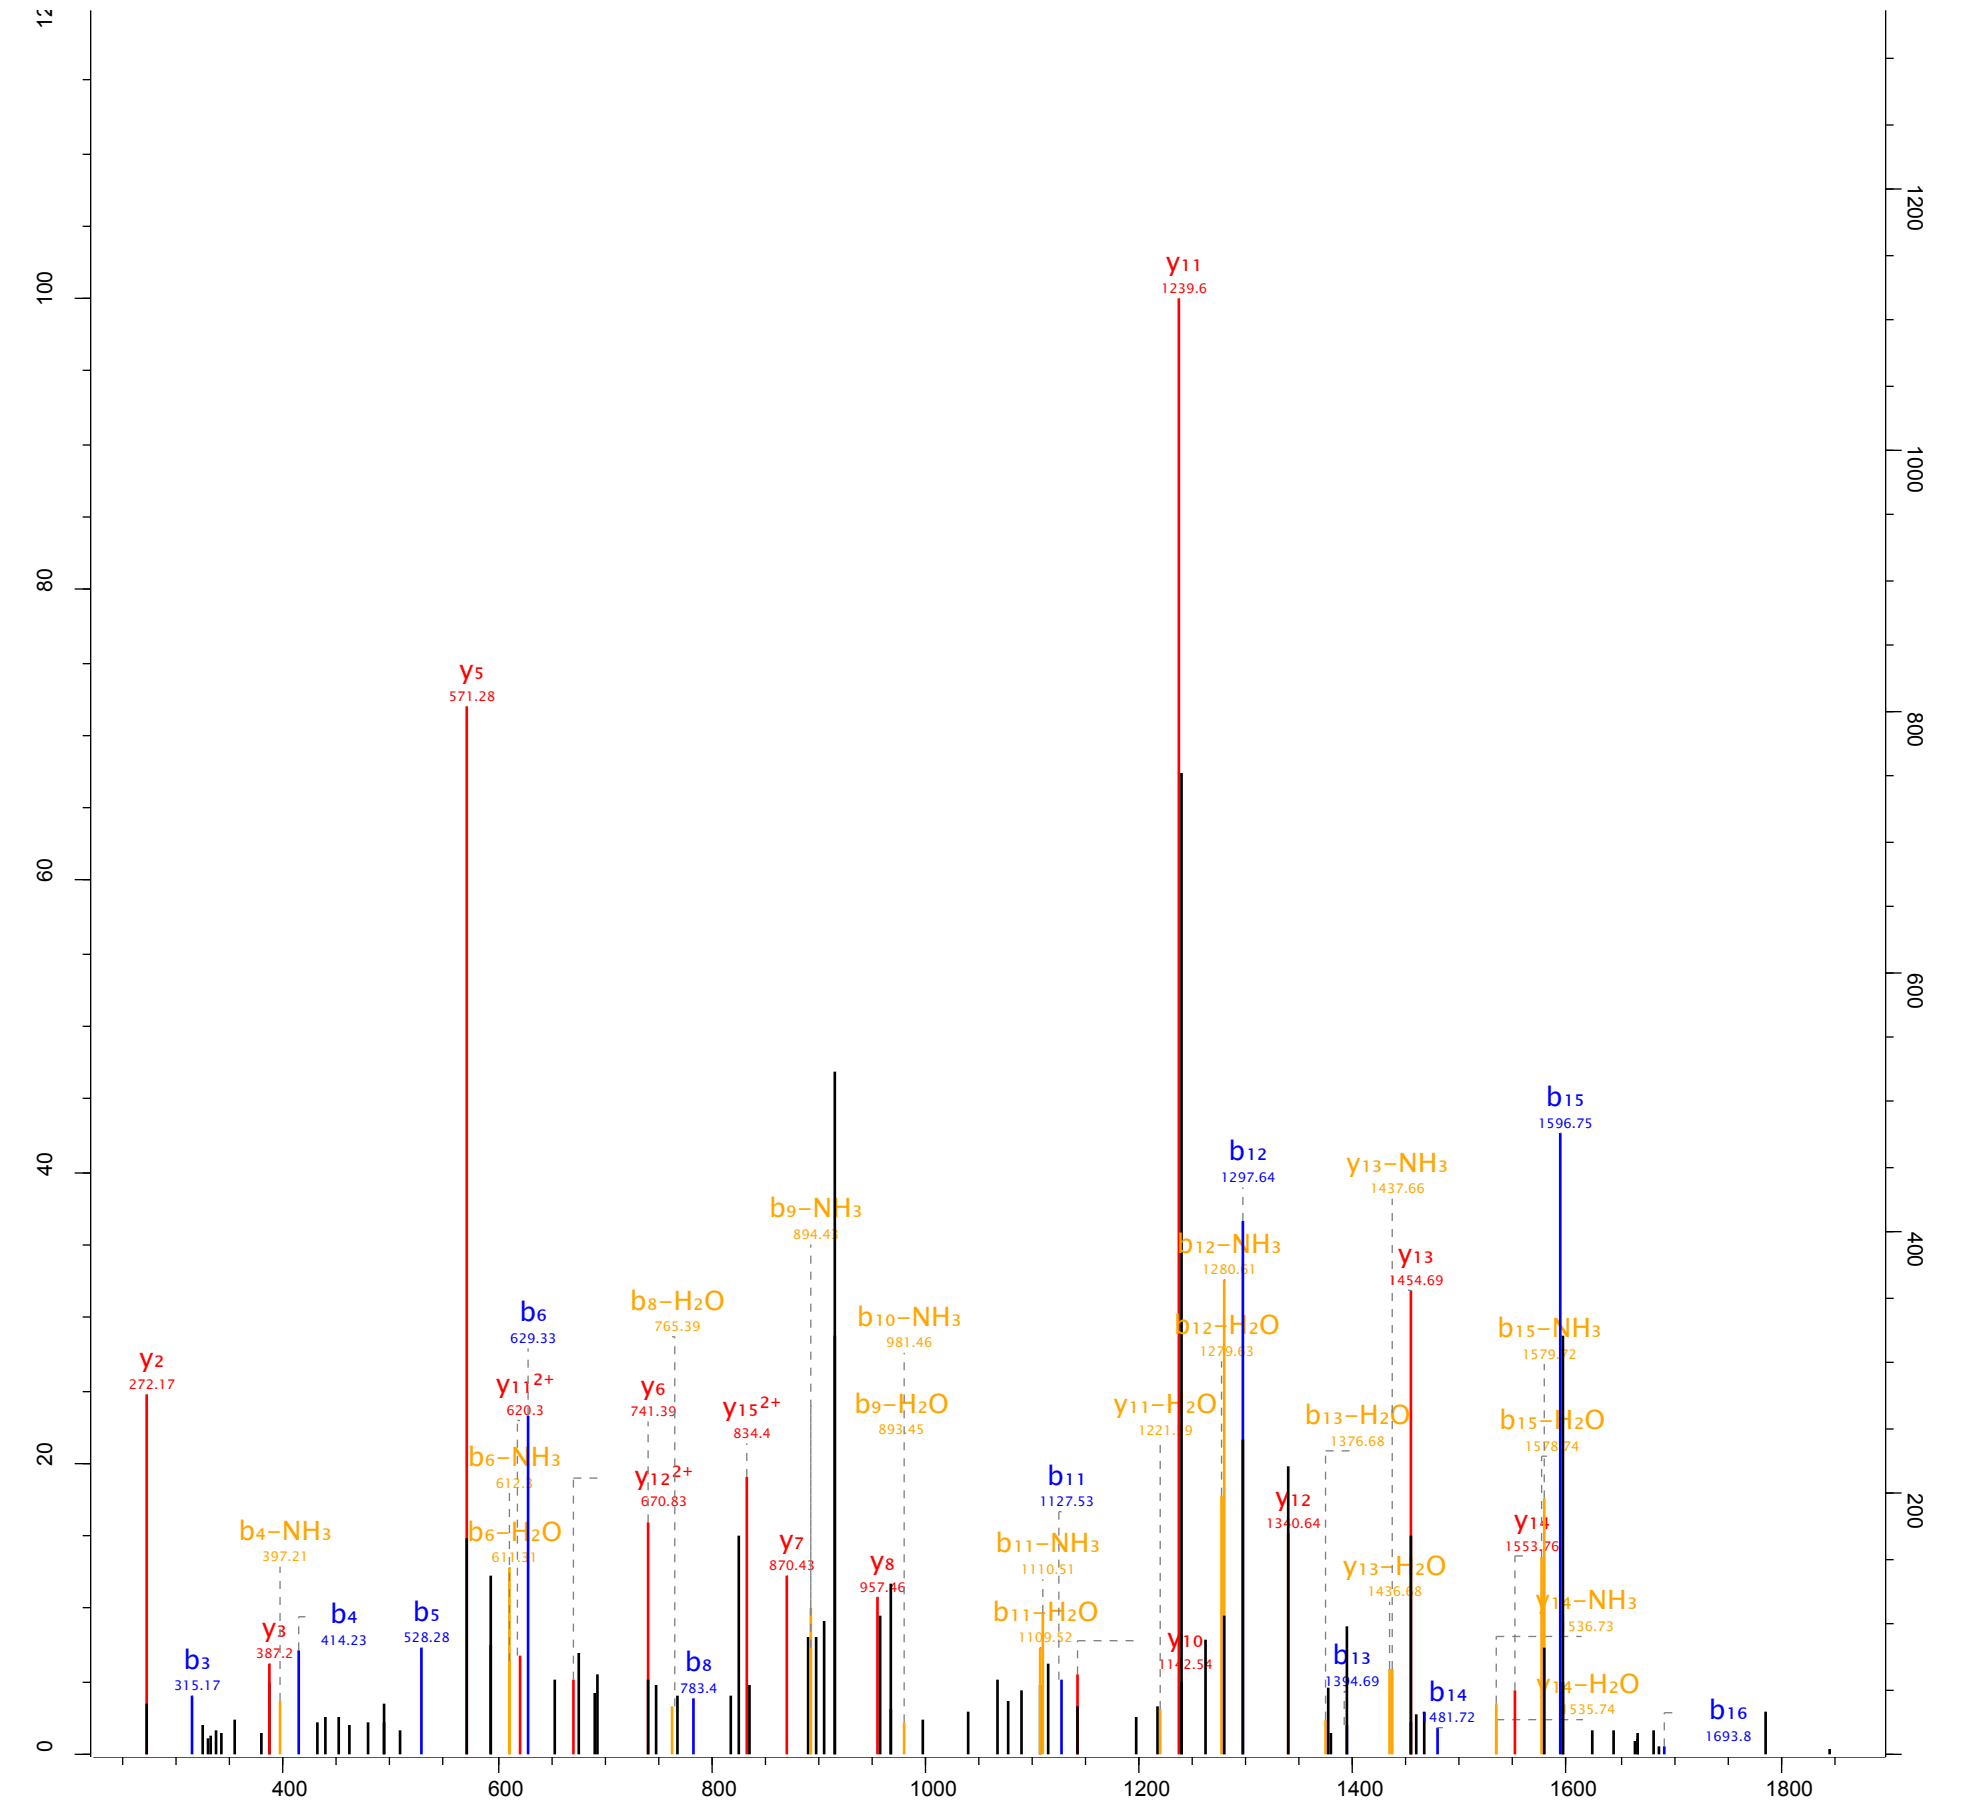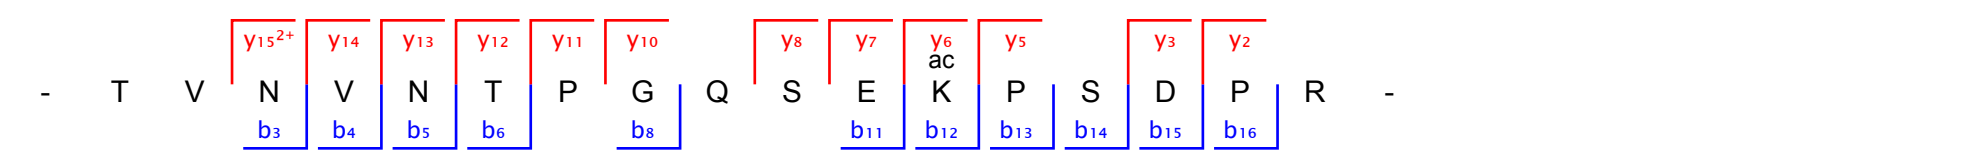

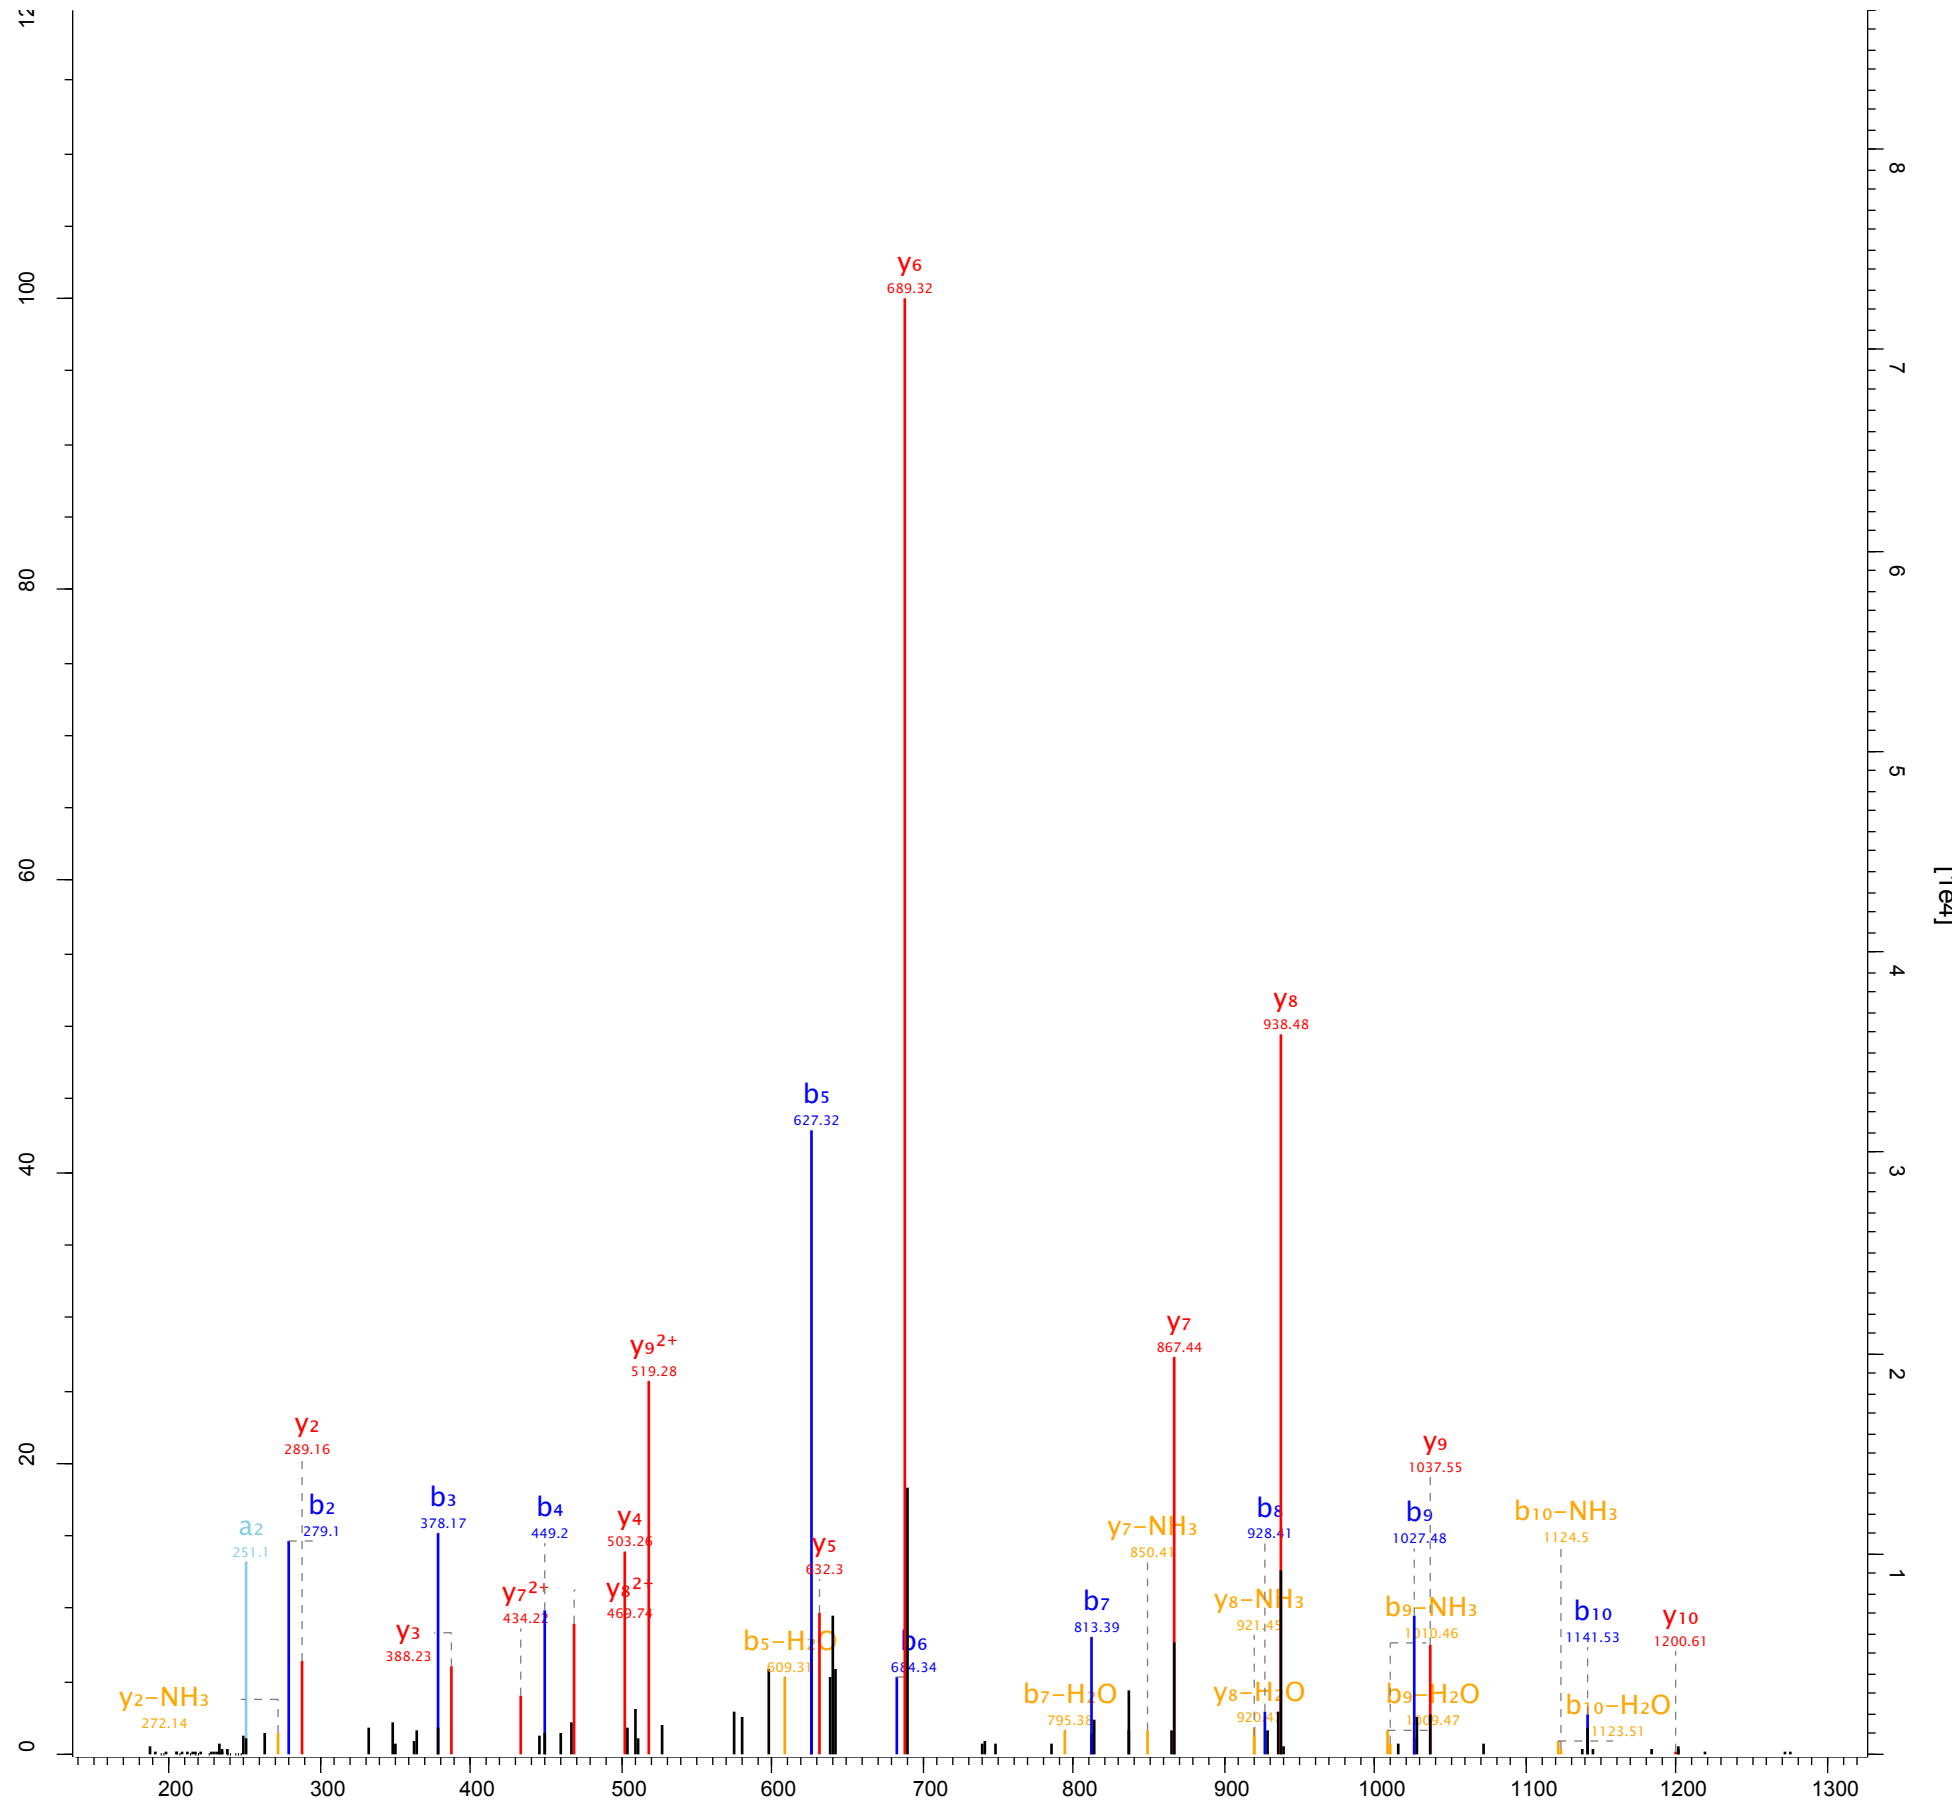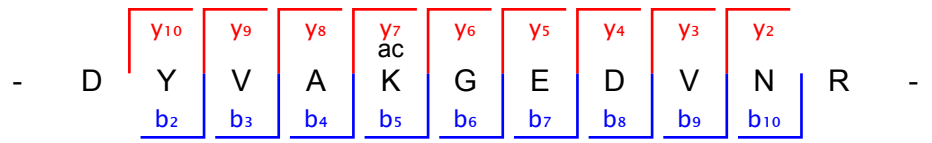



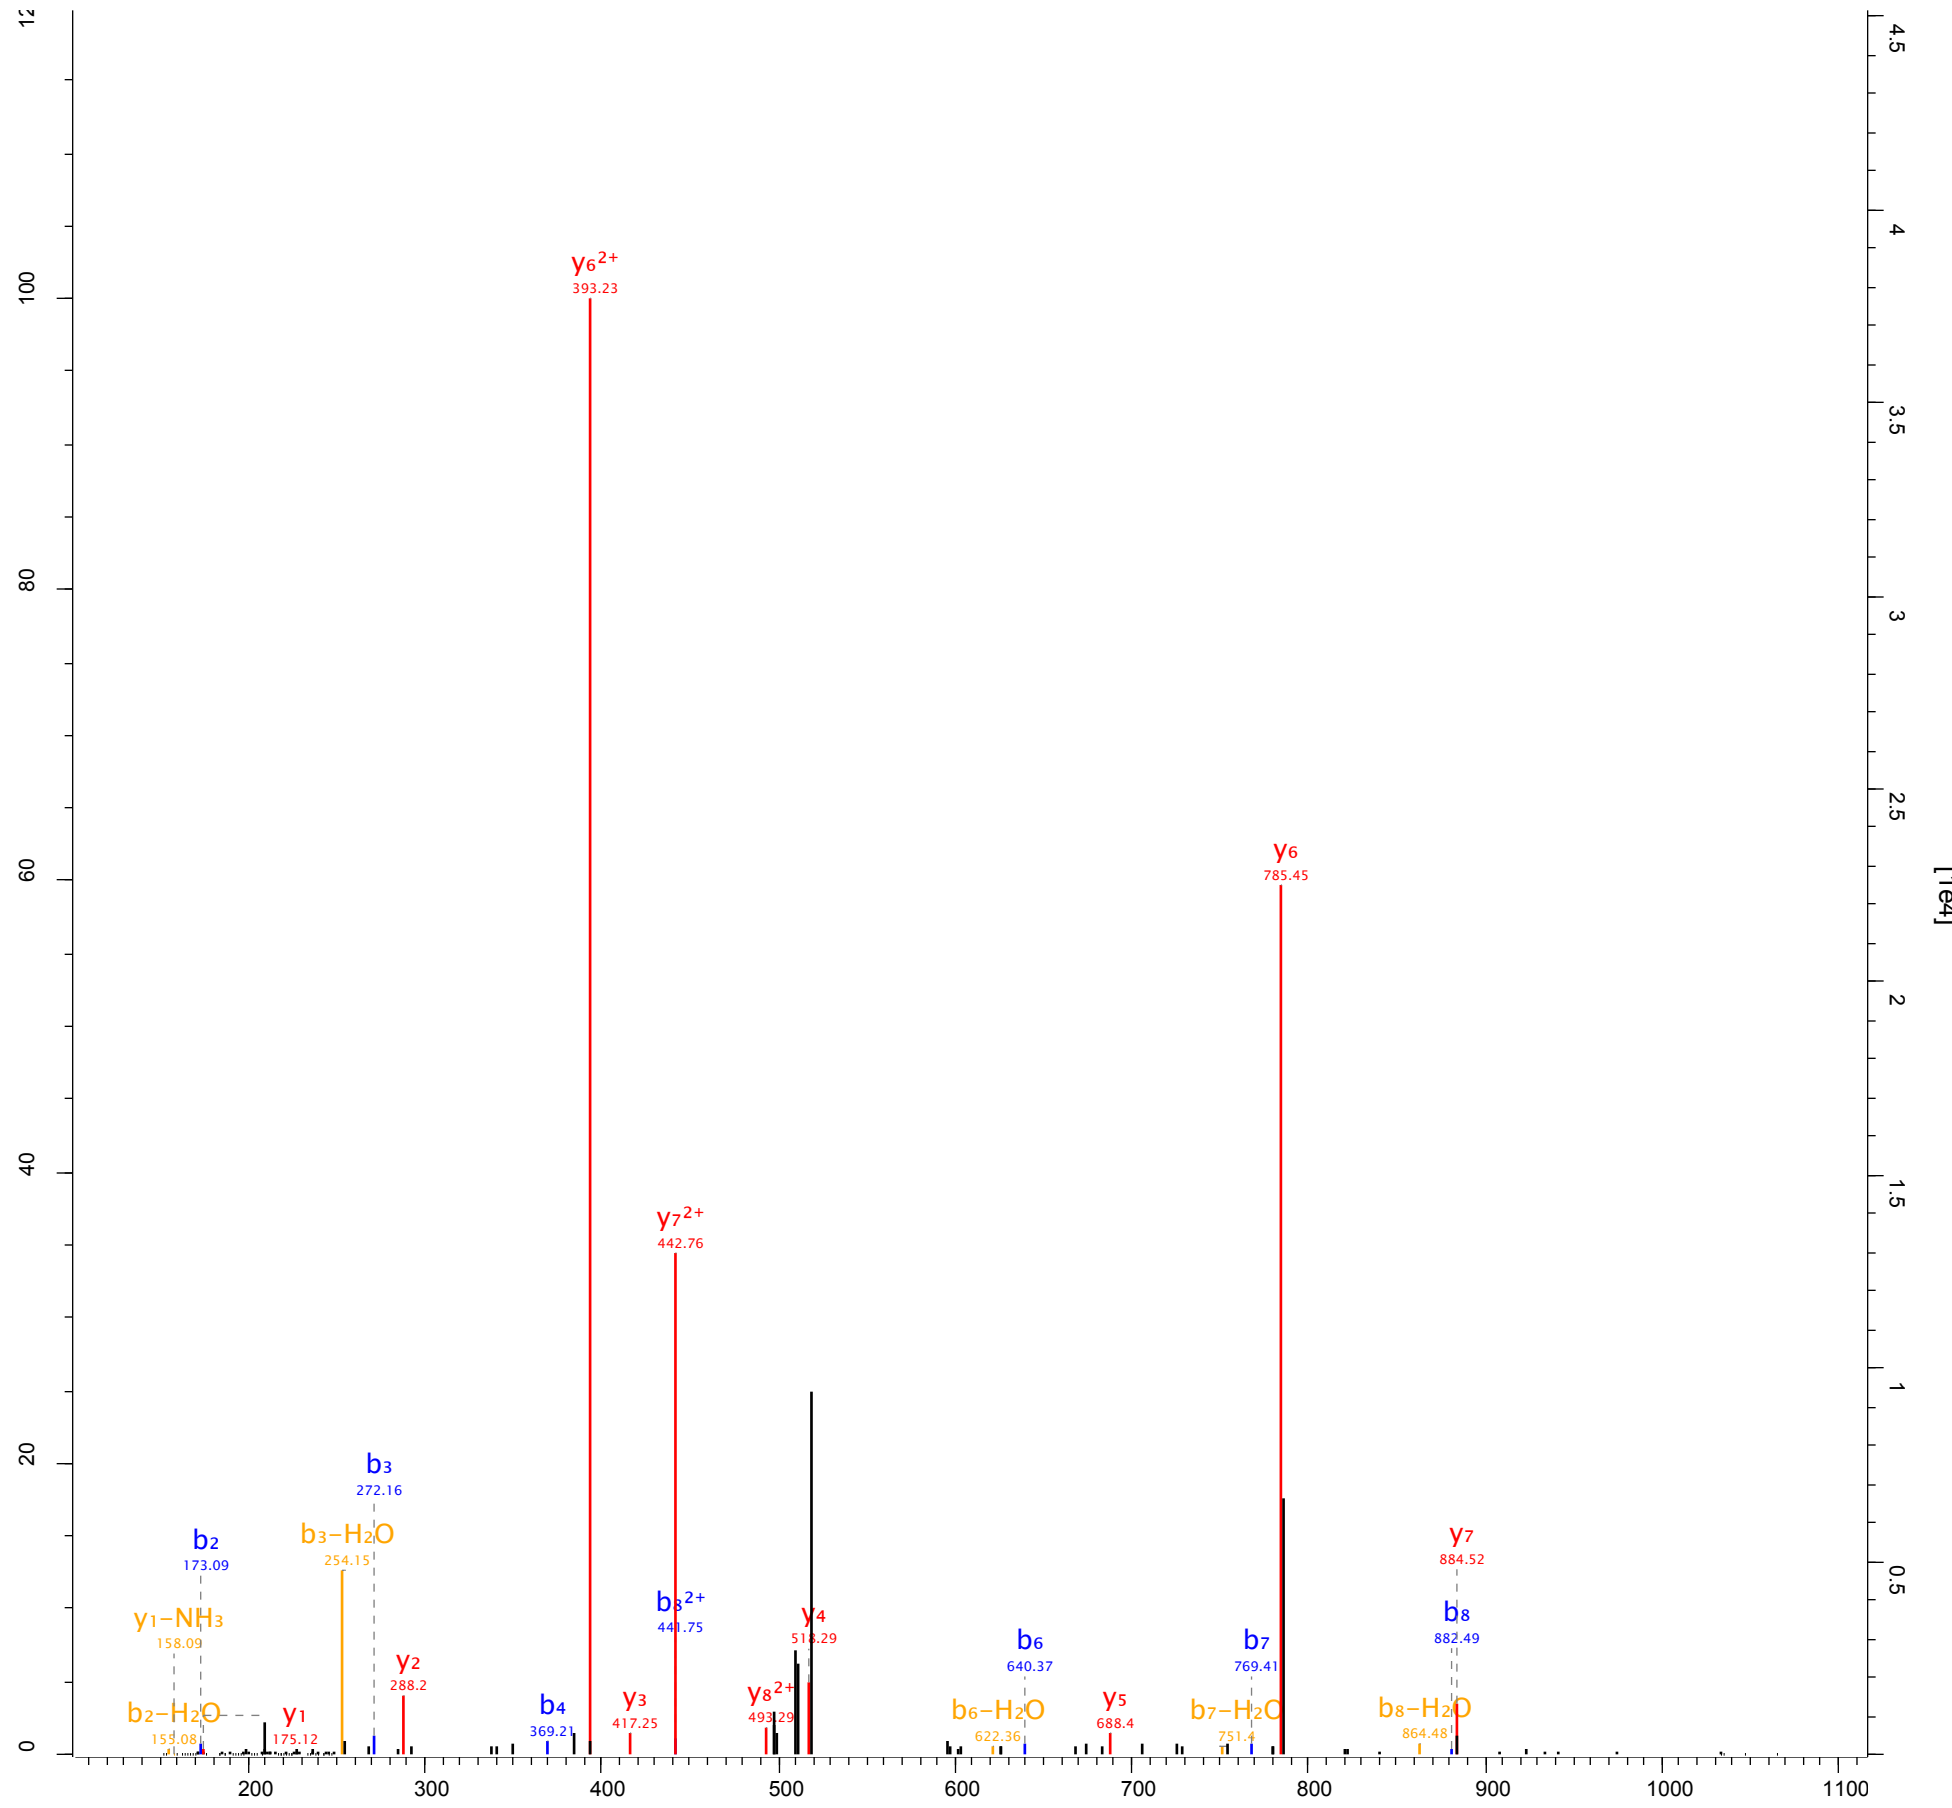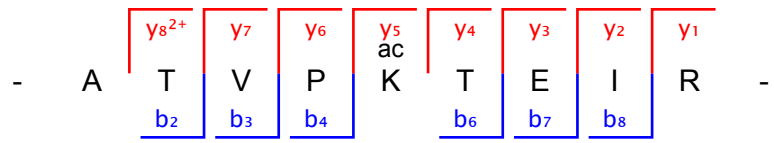

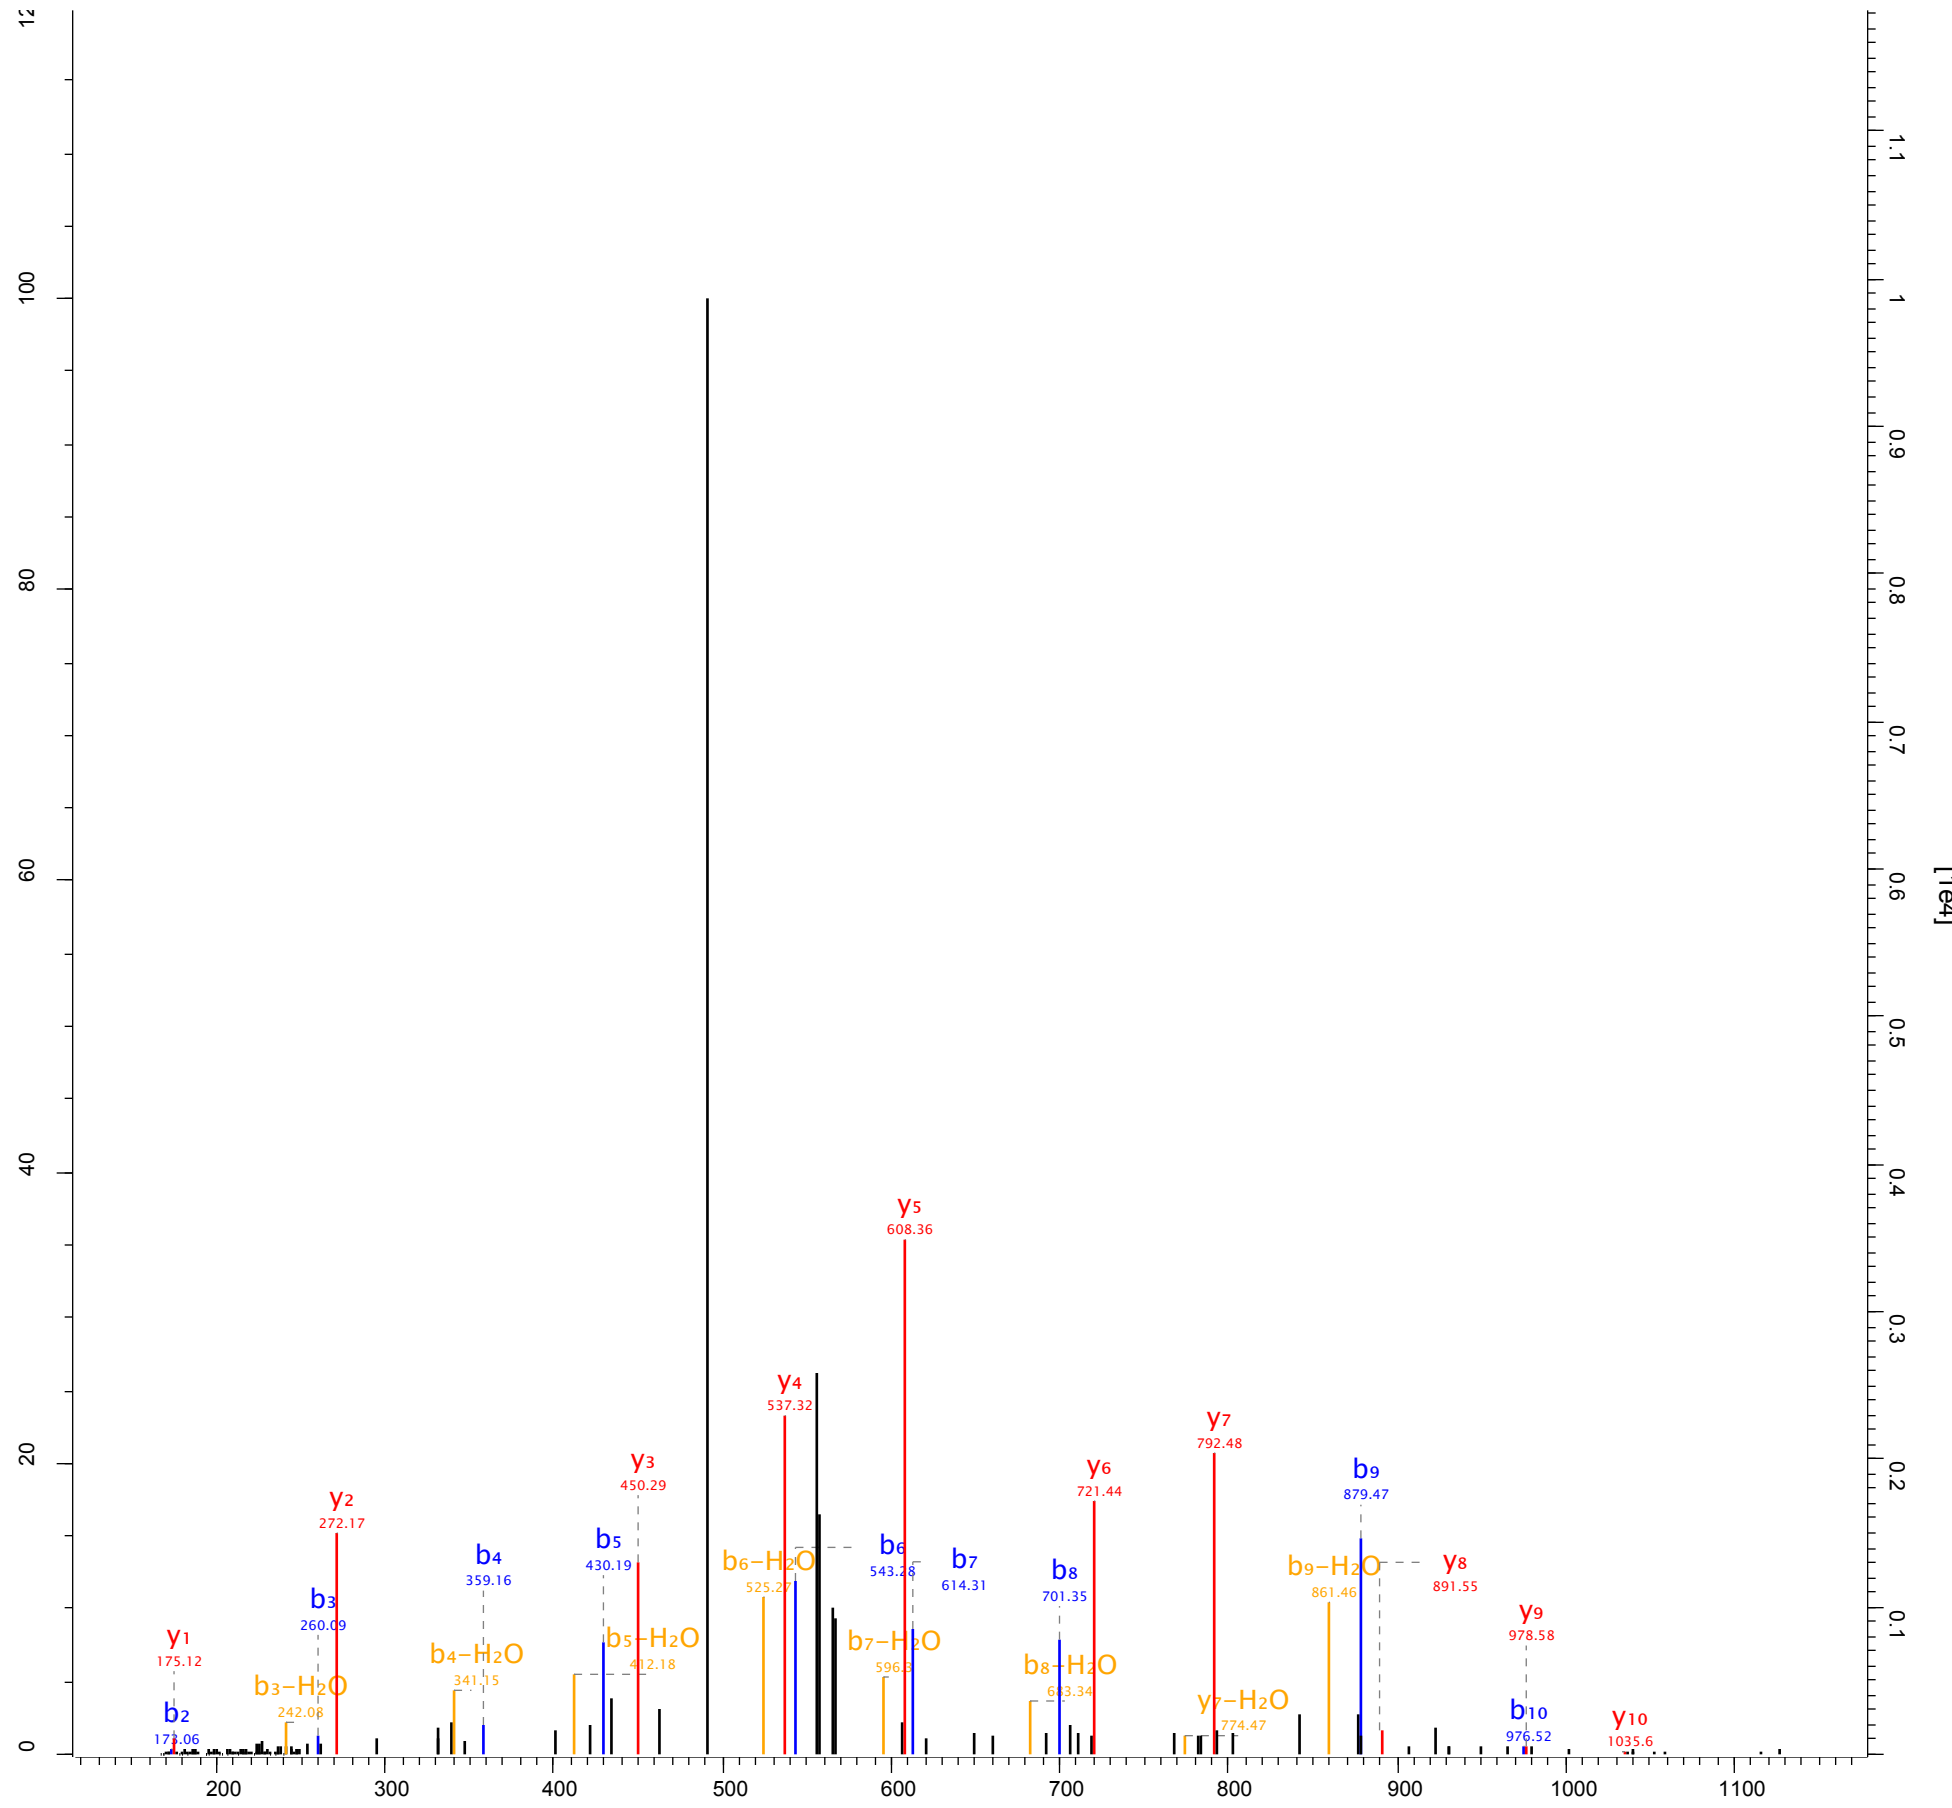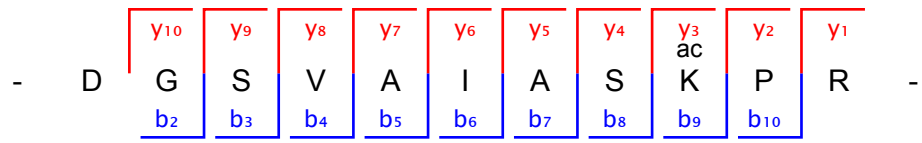

Raw file 050813\_SCW\_II\_29\_19\_4 Scan 13107 Method ITMS; CID Score 99.79 m/z 521.32 Gene names Hnrnpd

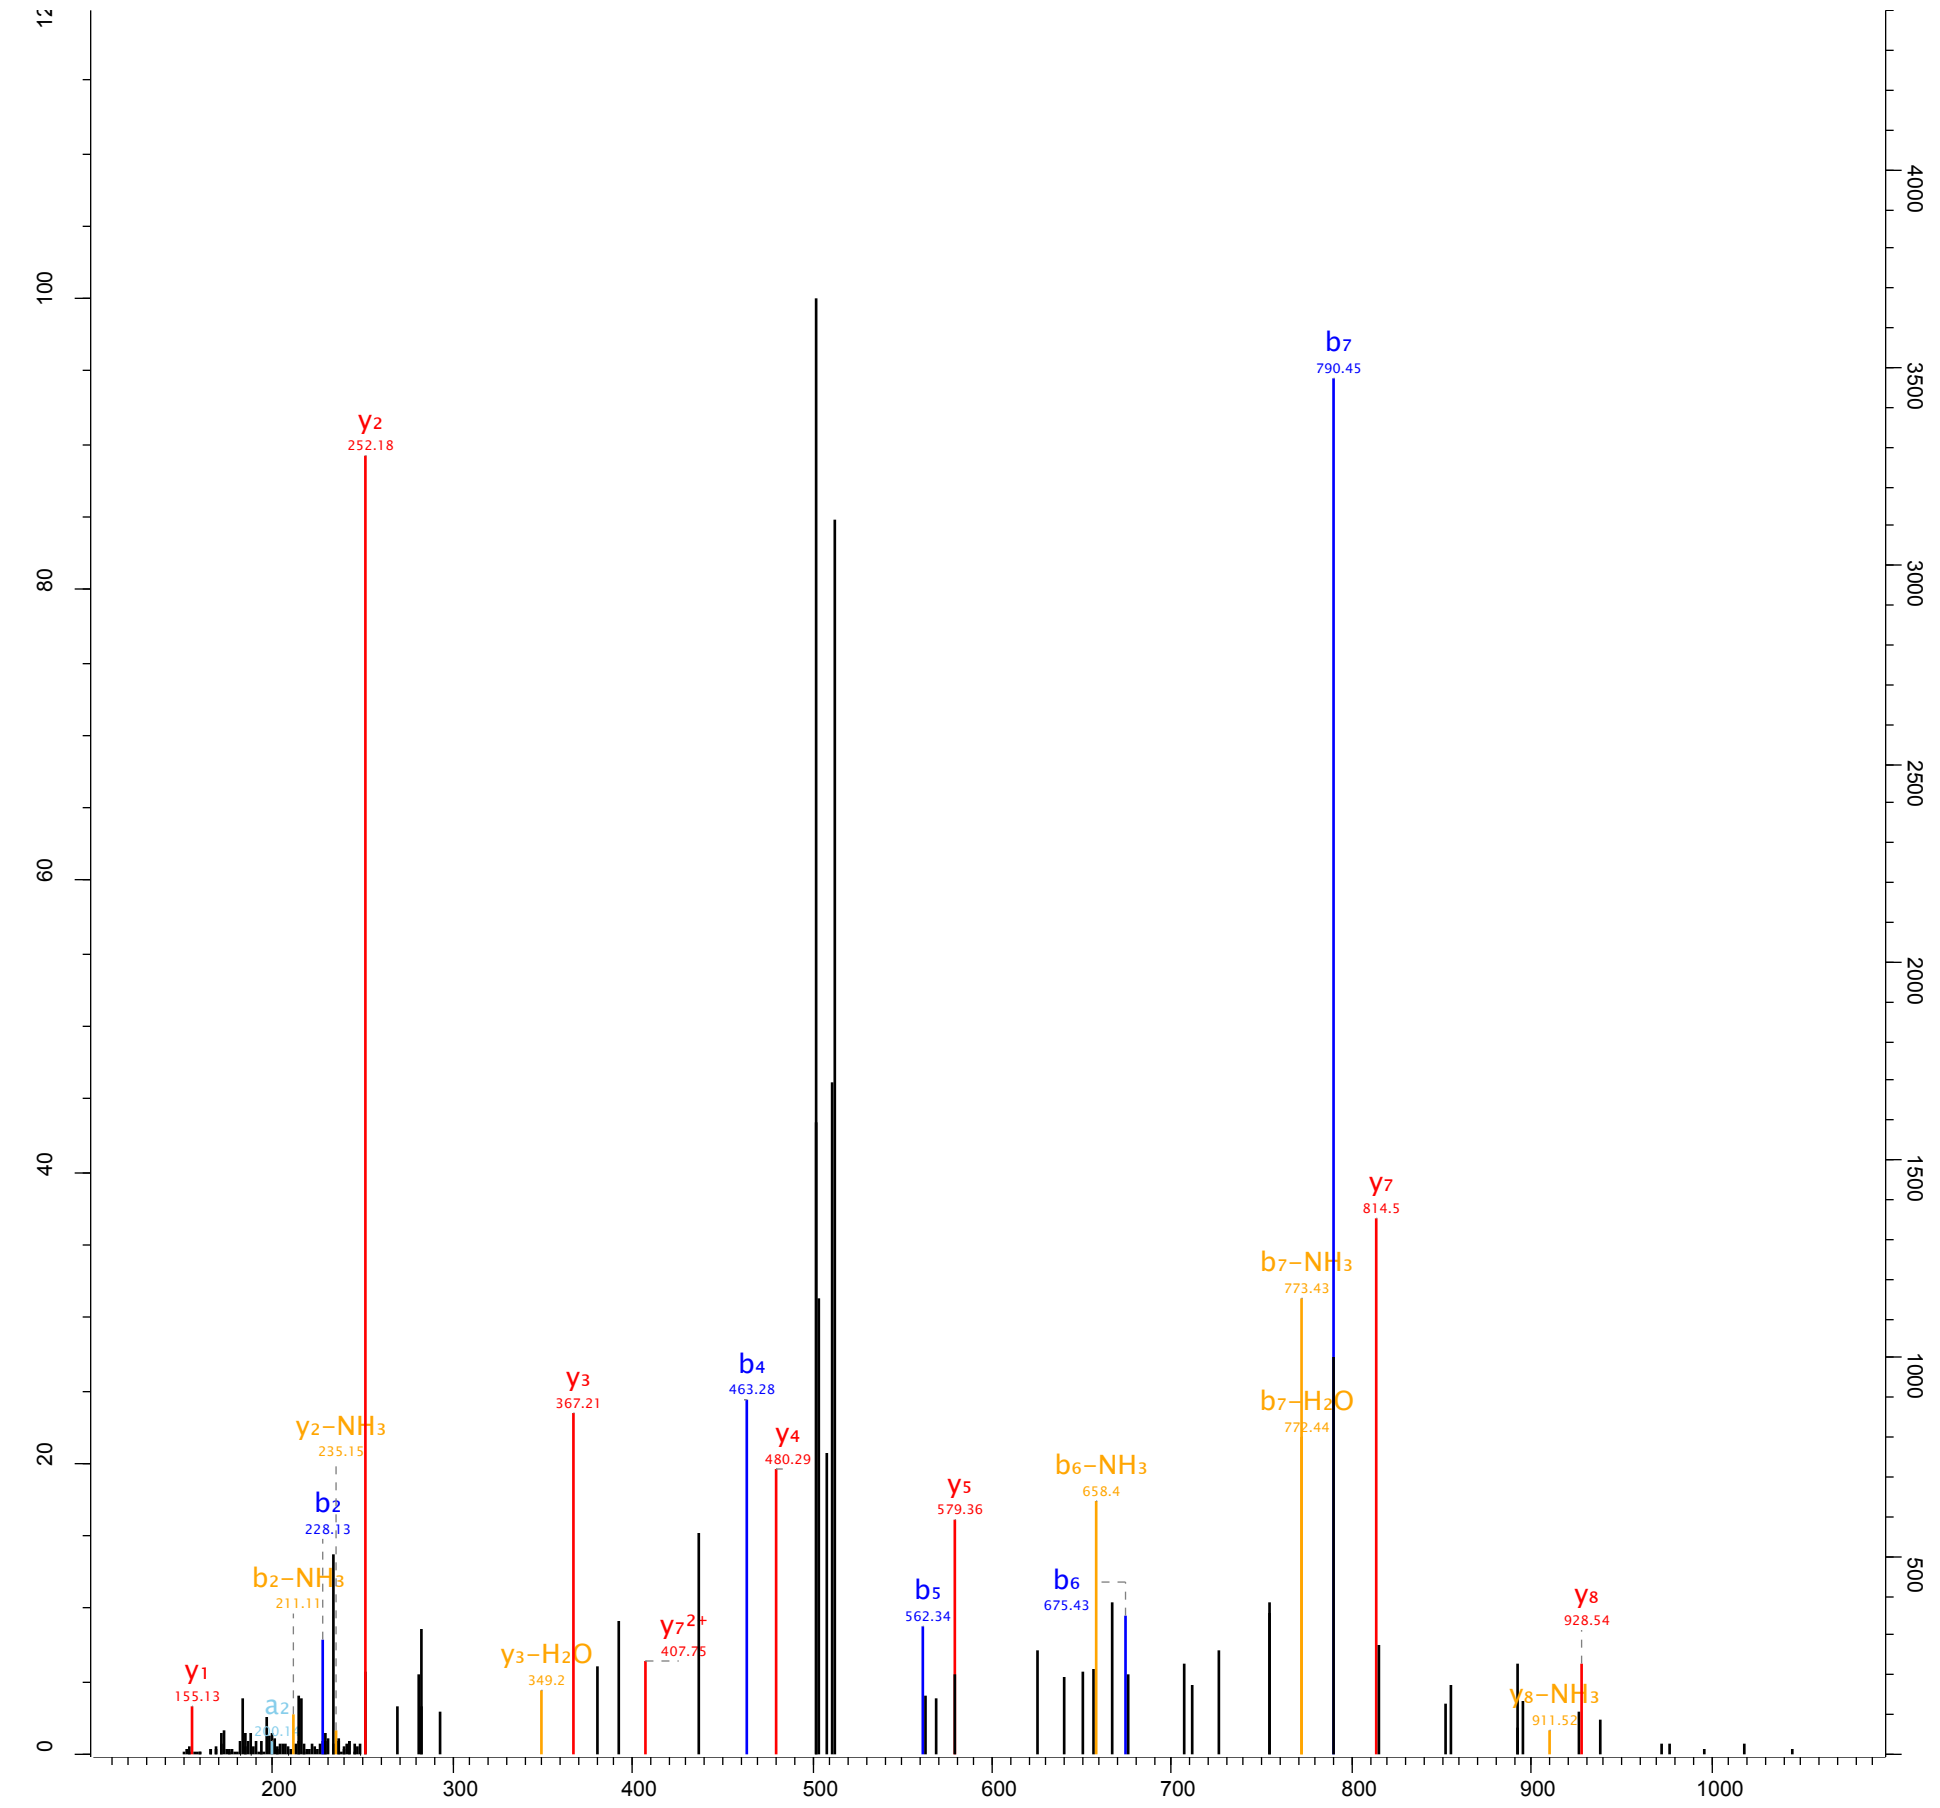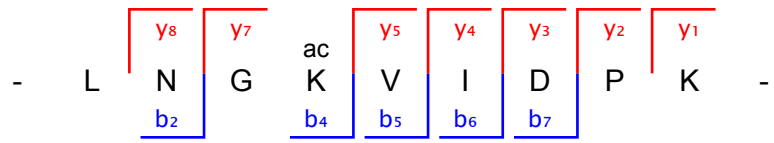

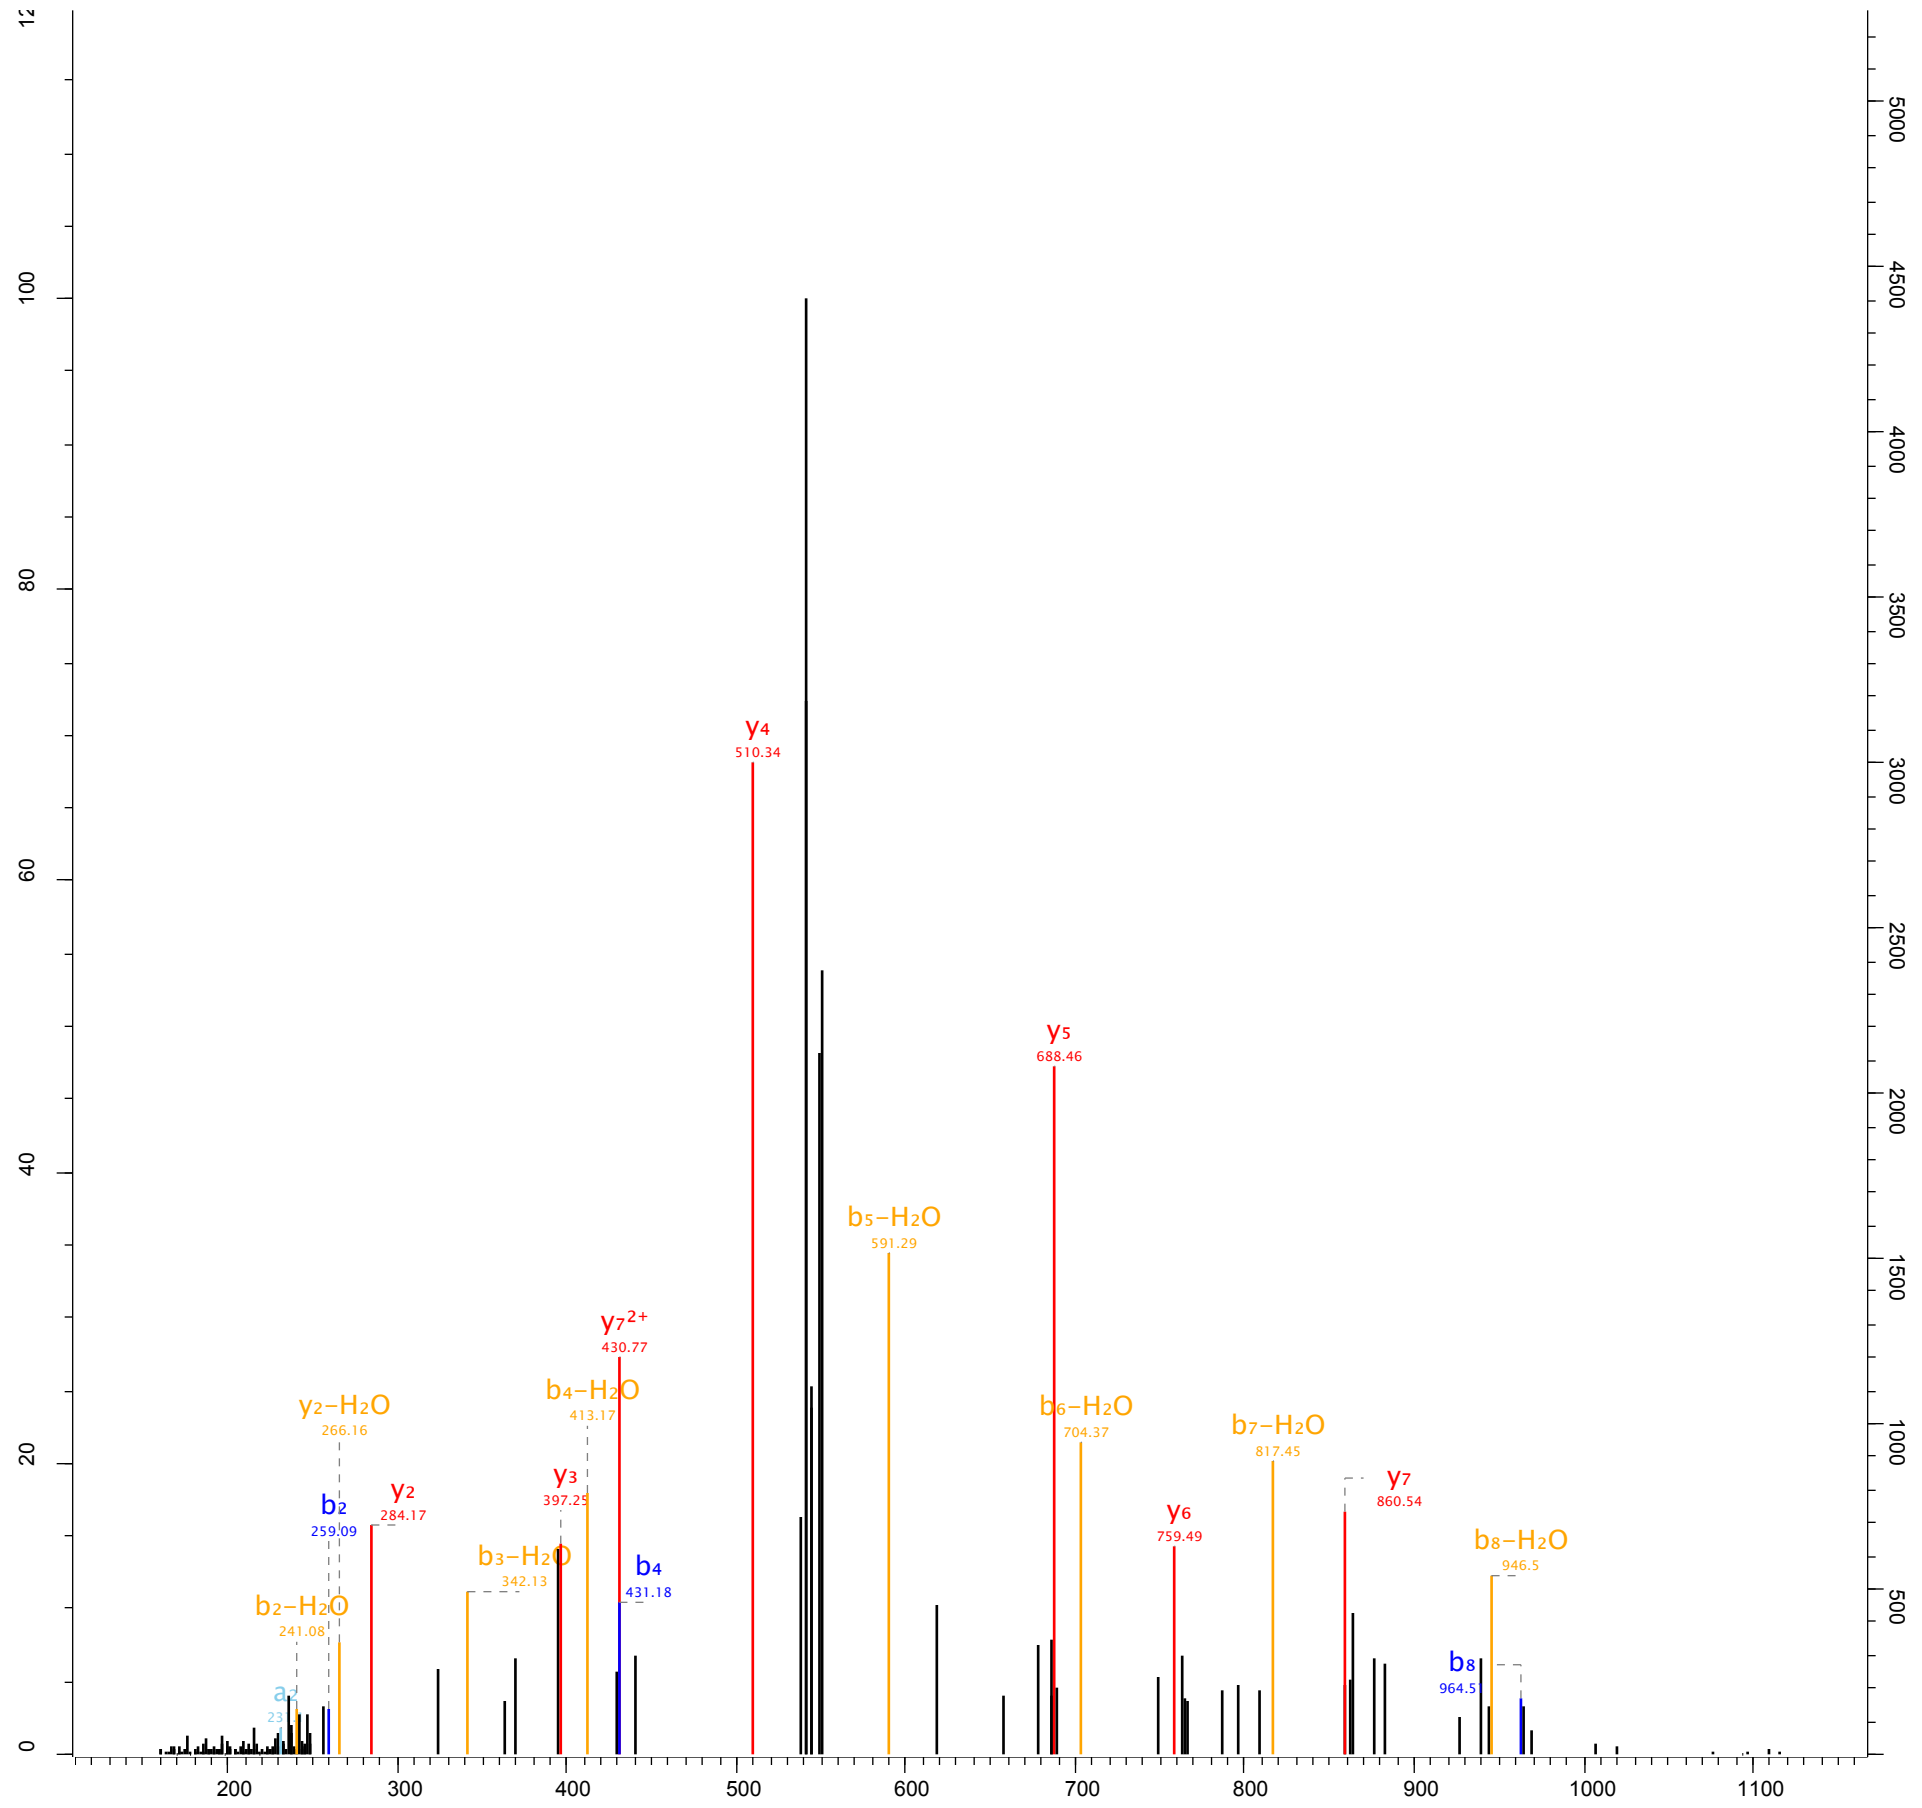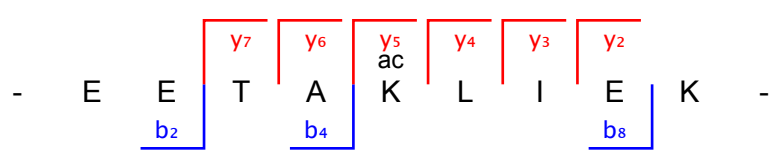

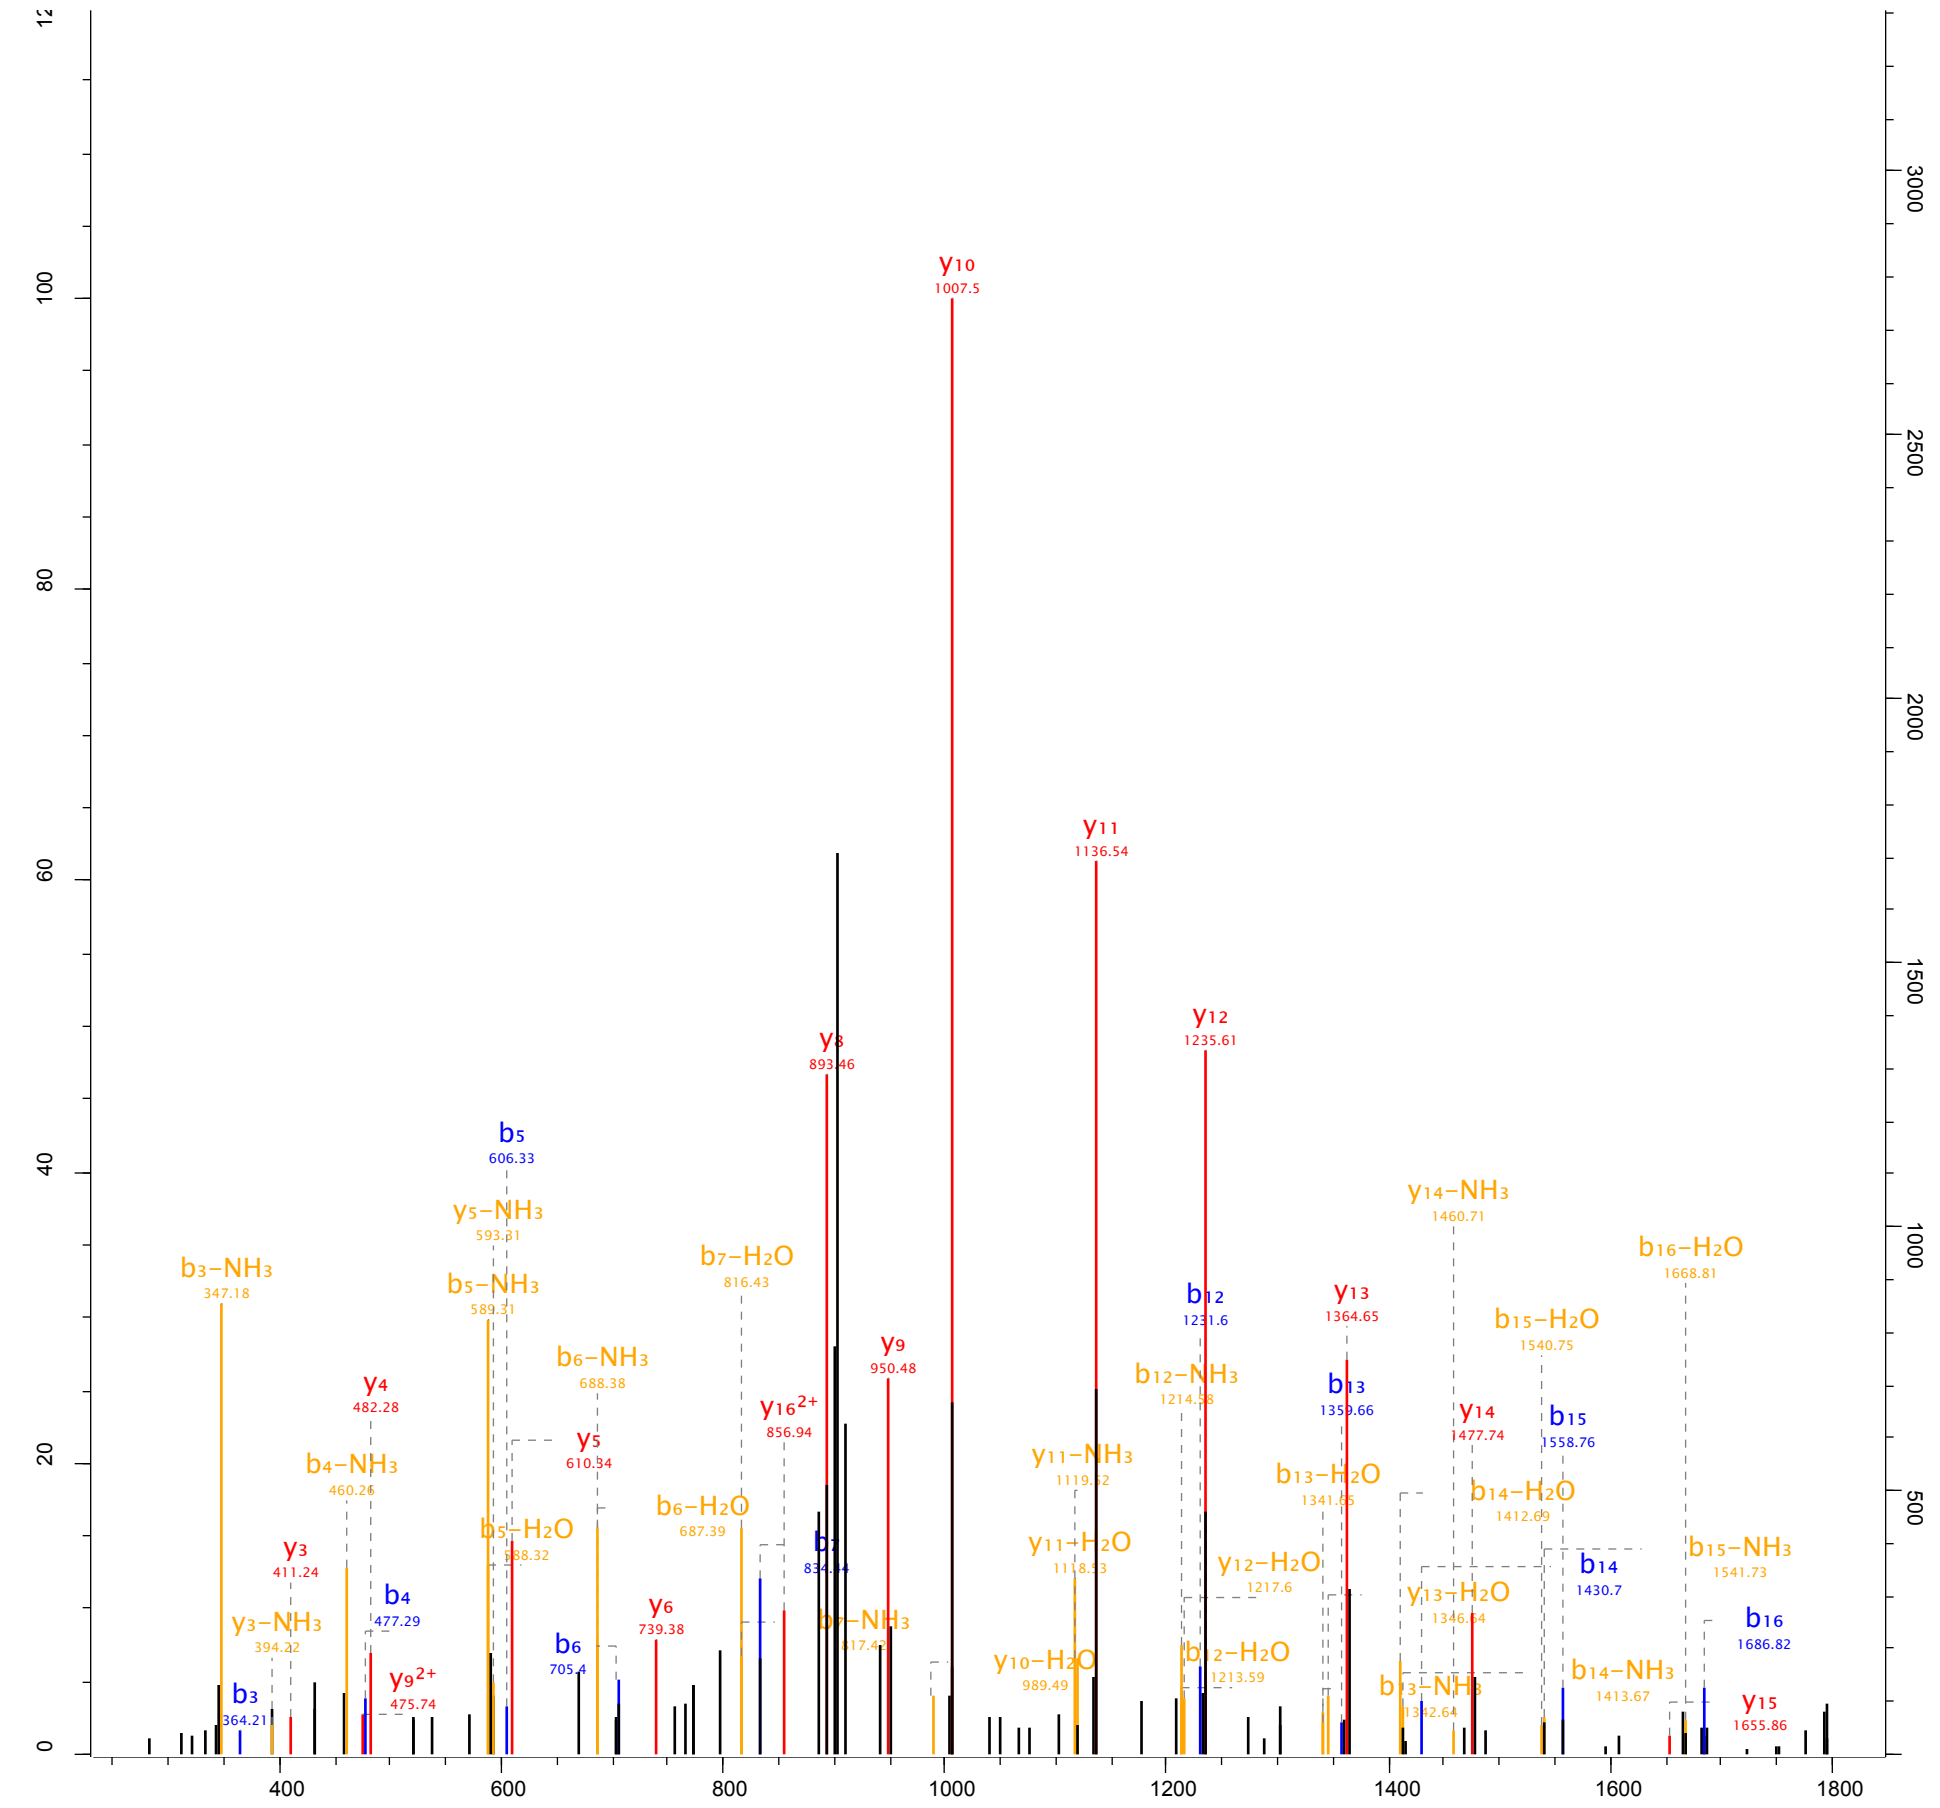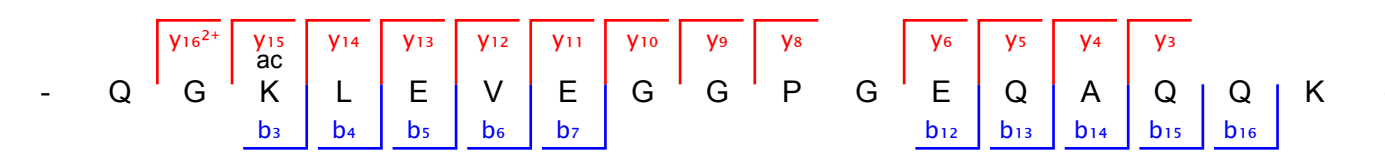

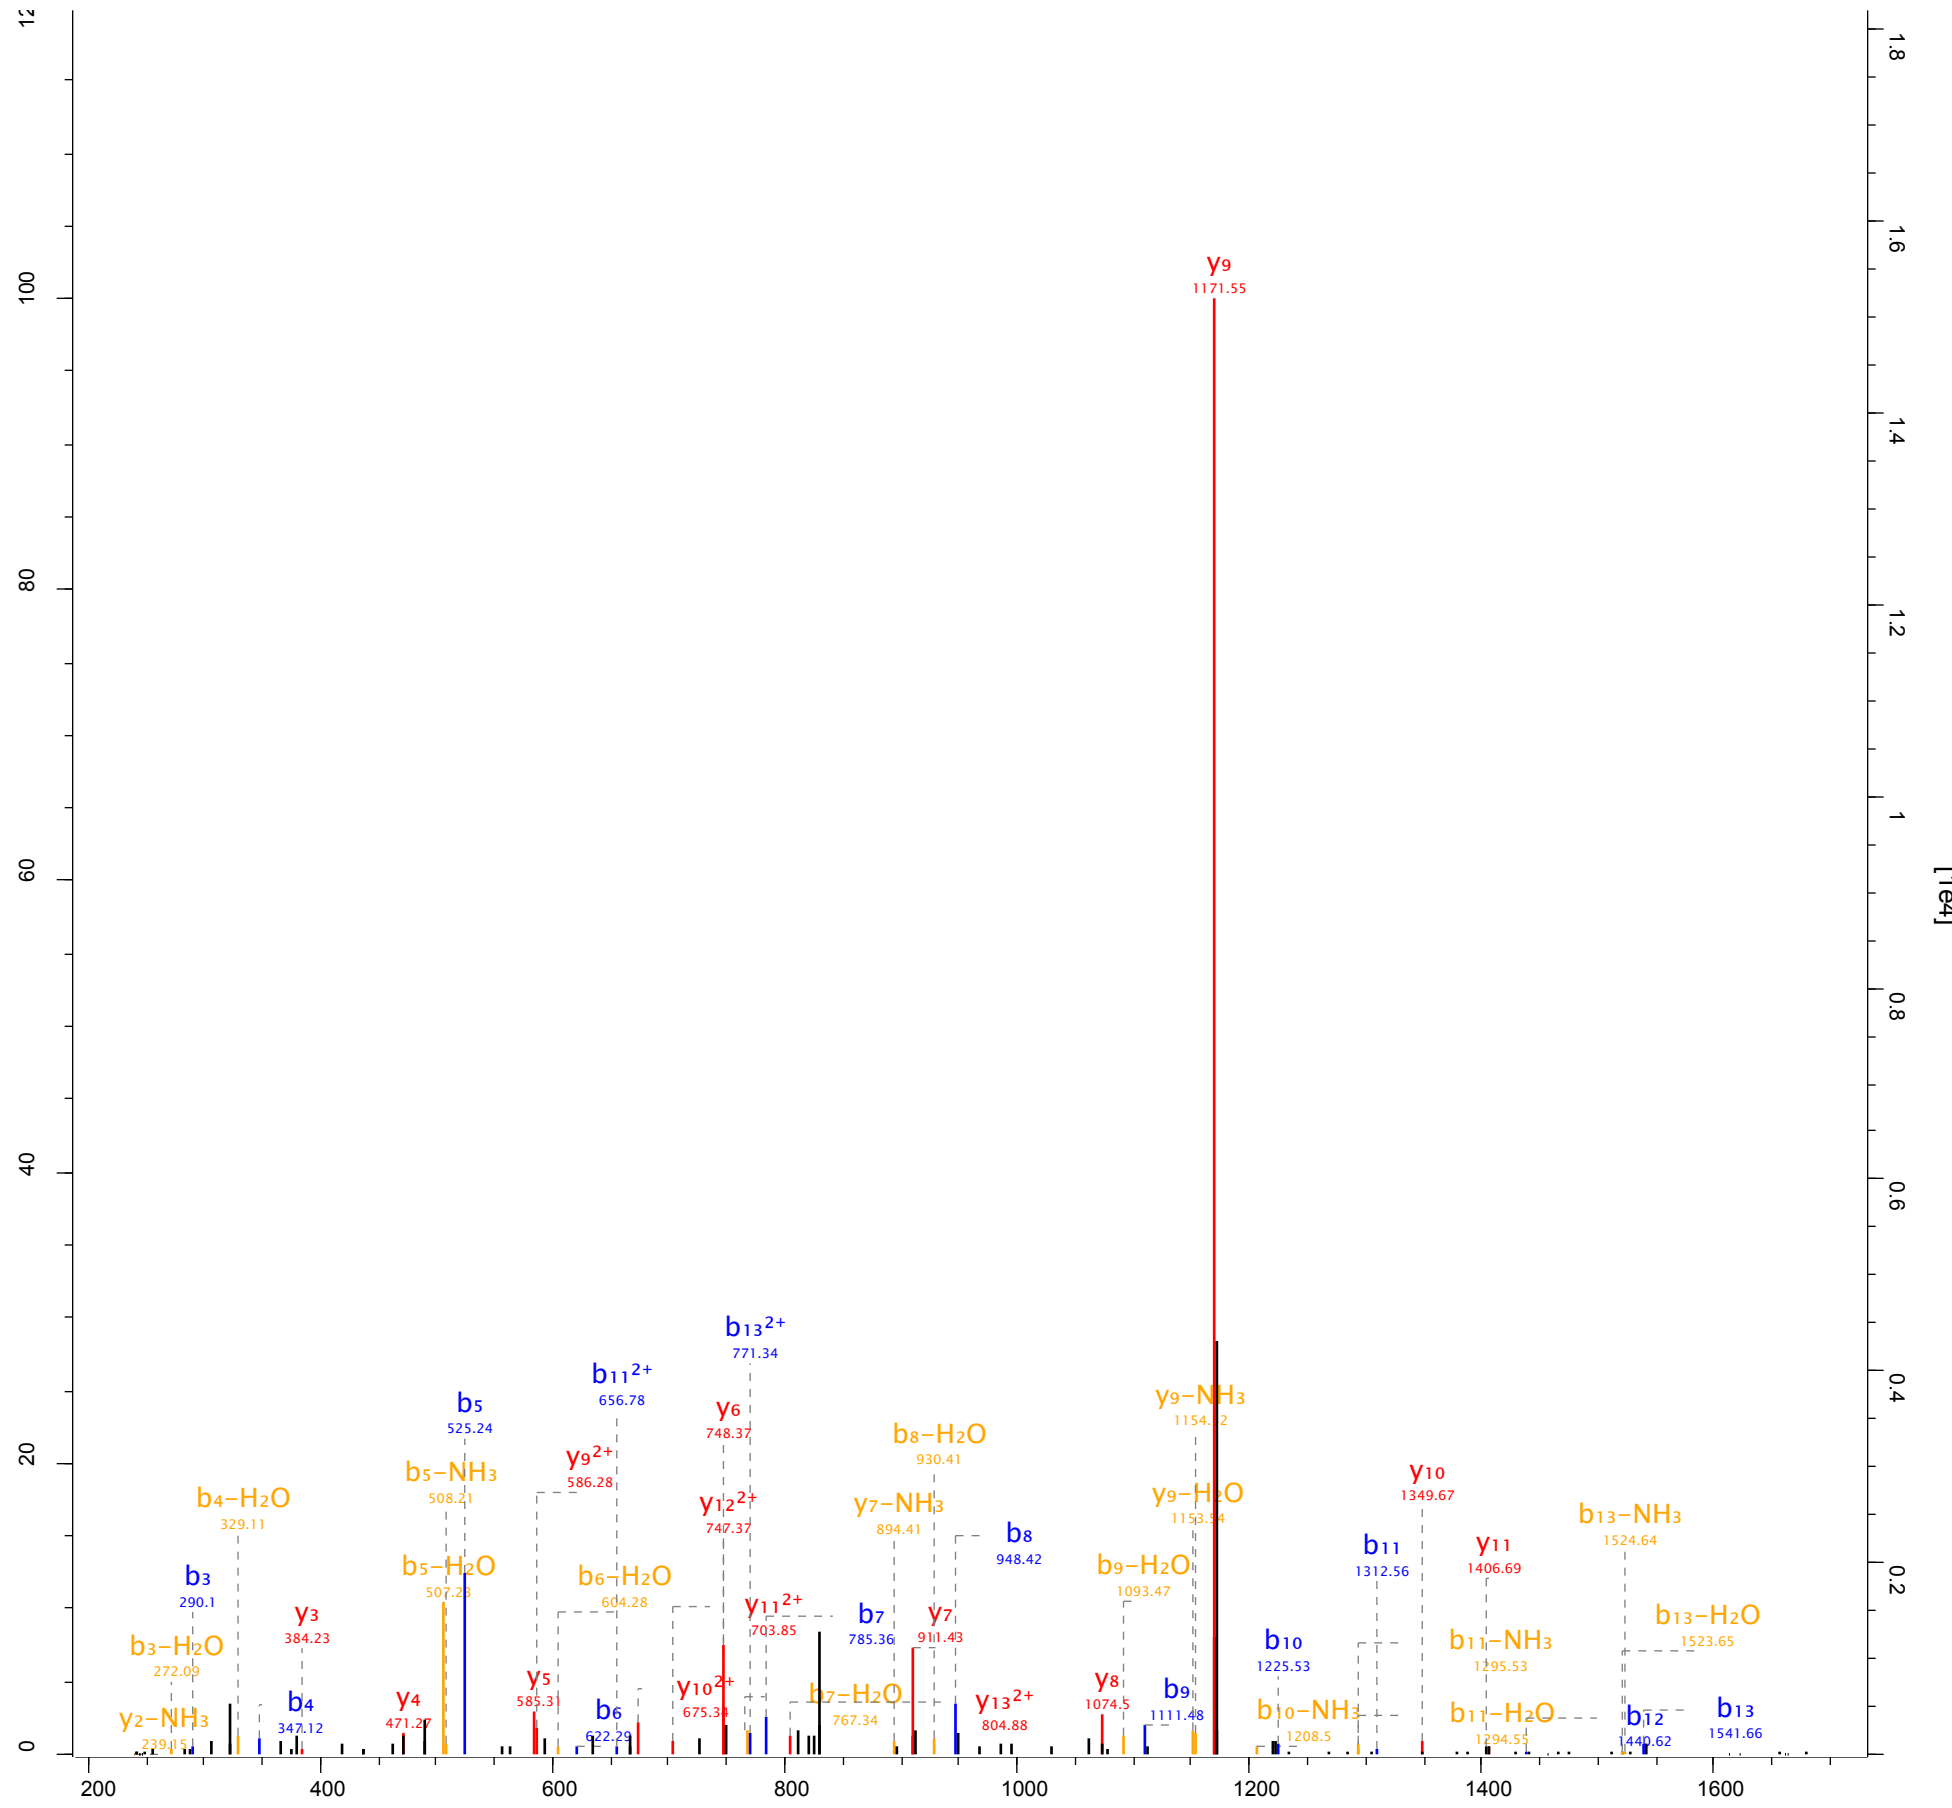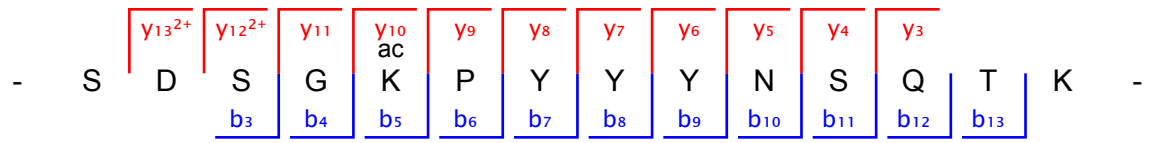

050813\_SCW\_II\_29\_19\_4

13439

ITMS; CID

245.39

815.41

Ldha

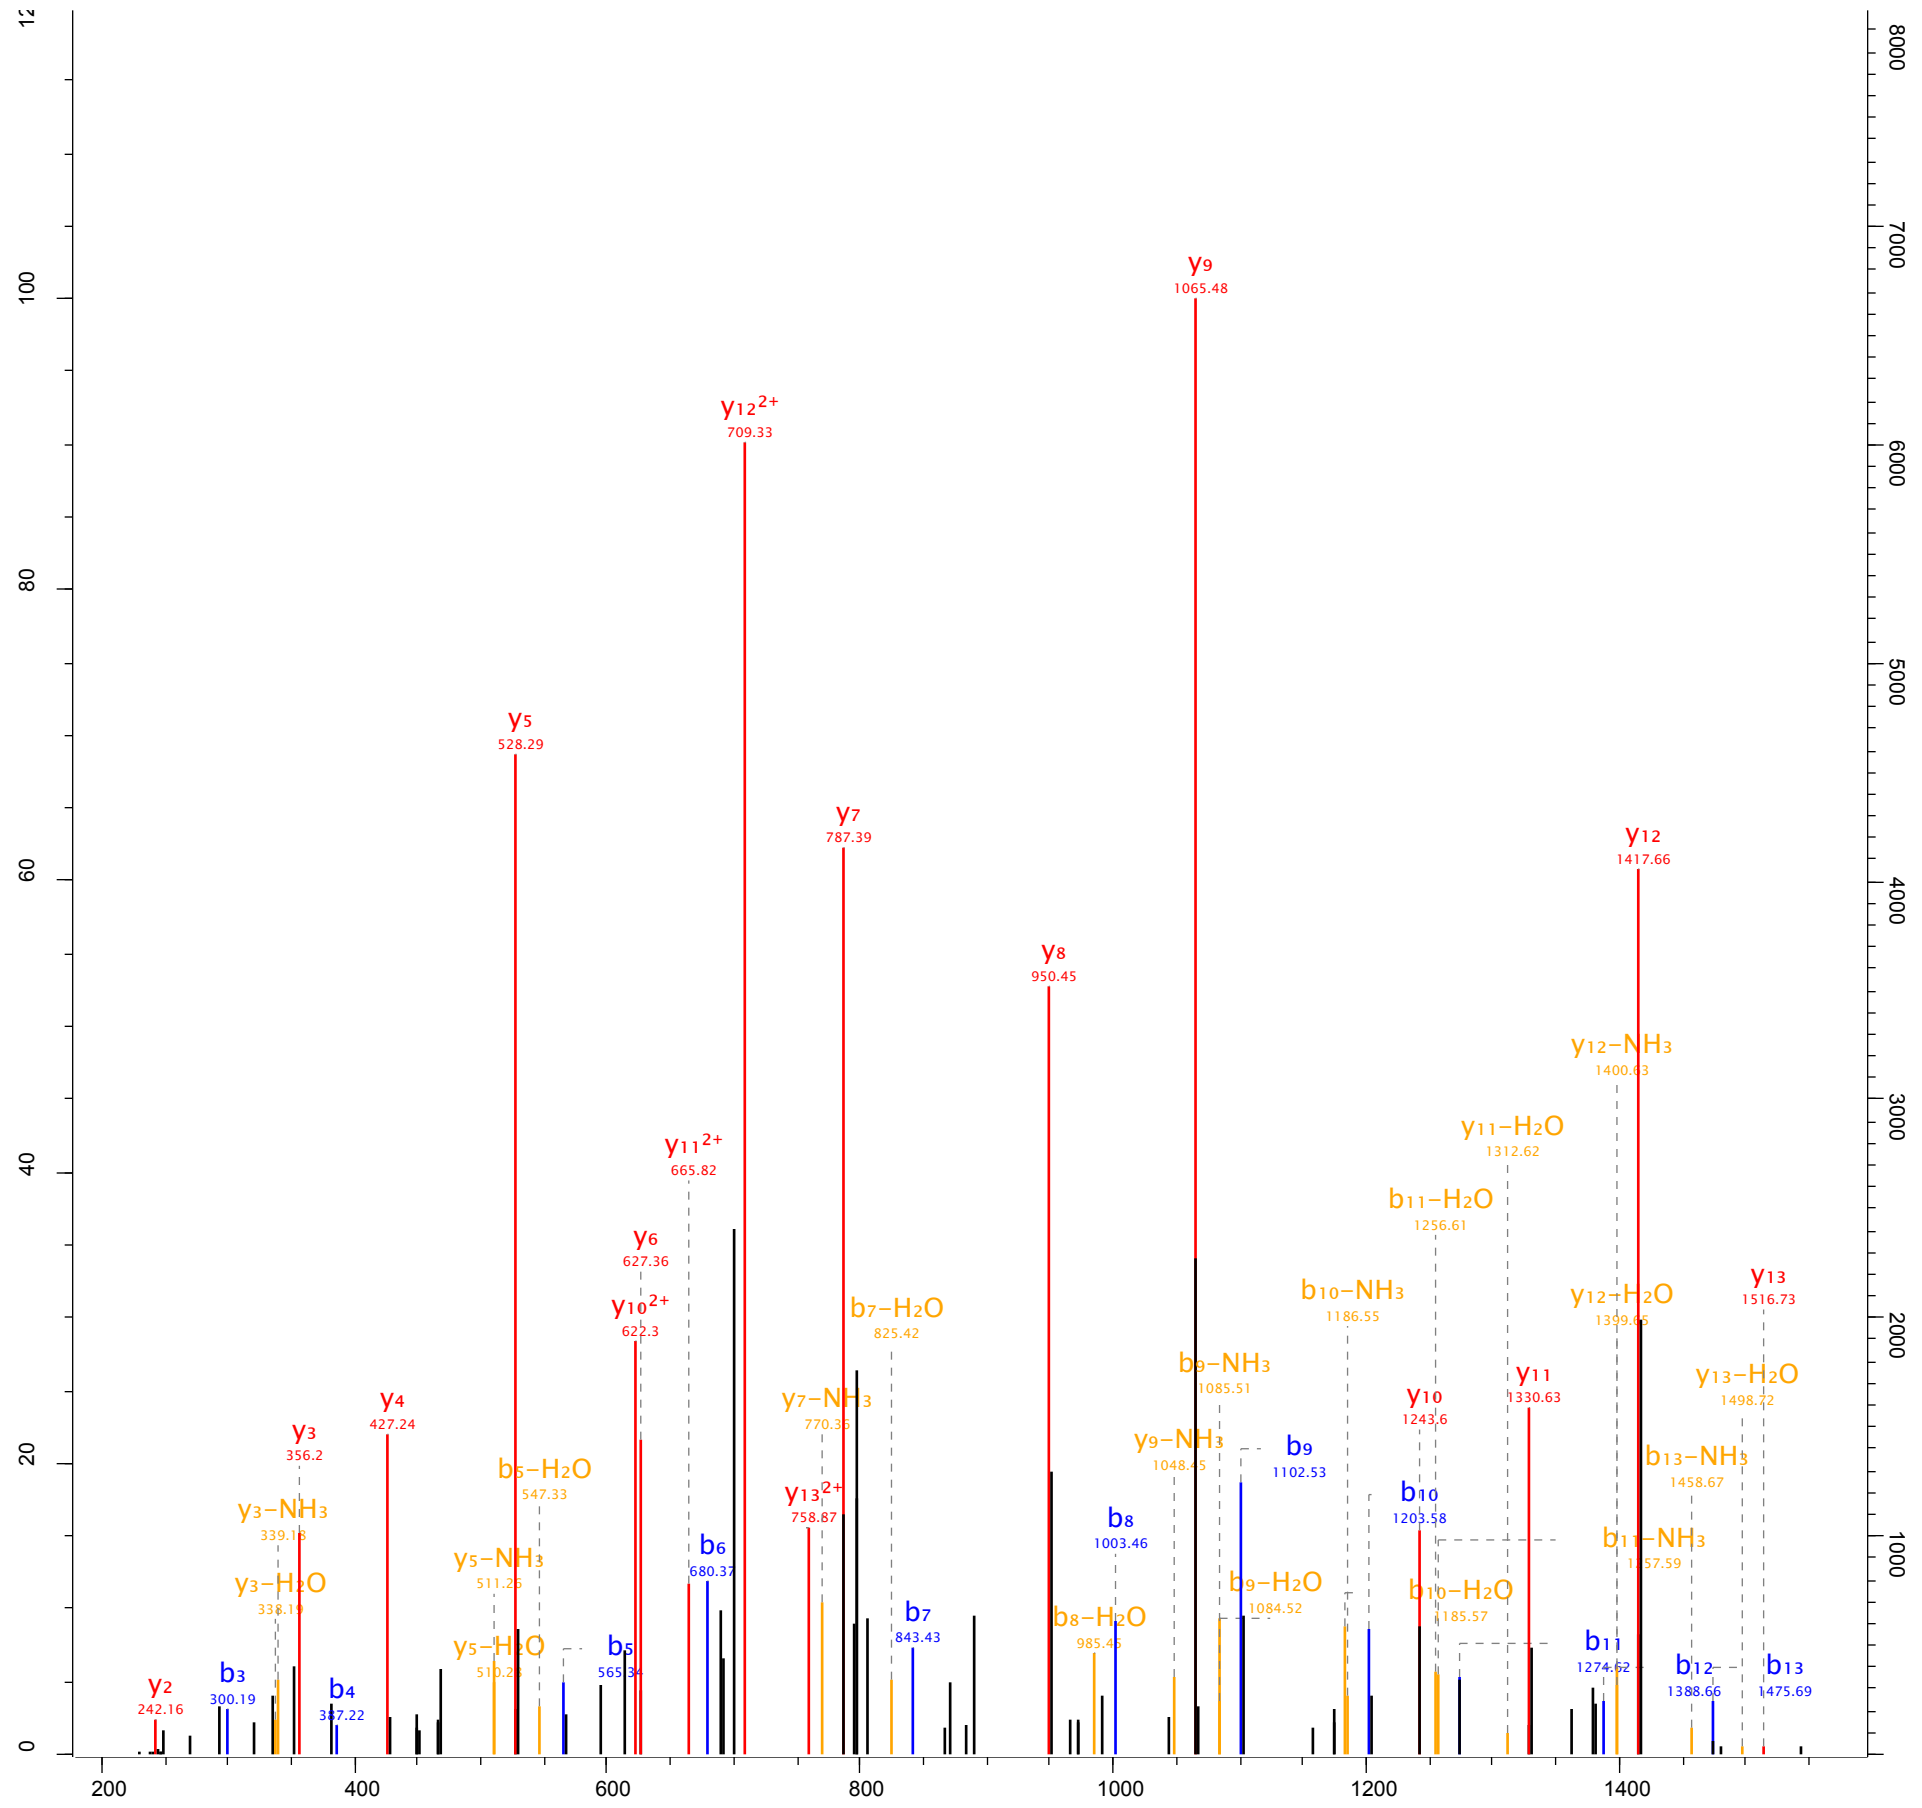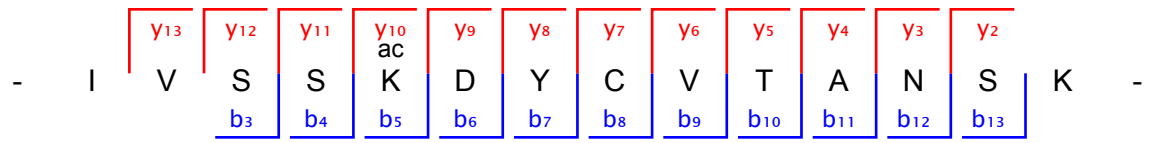

050813\_SCW\_II\_29\_19\_4

13650

ITMS; CID

186.74

624.33

Phb;1700071K01Rik

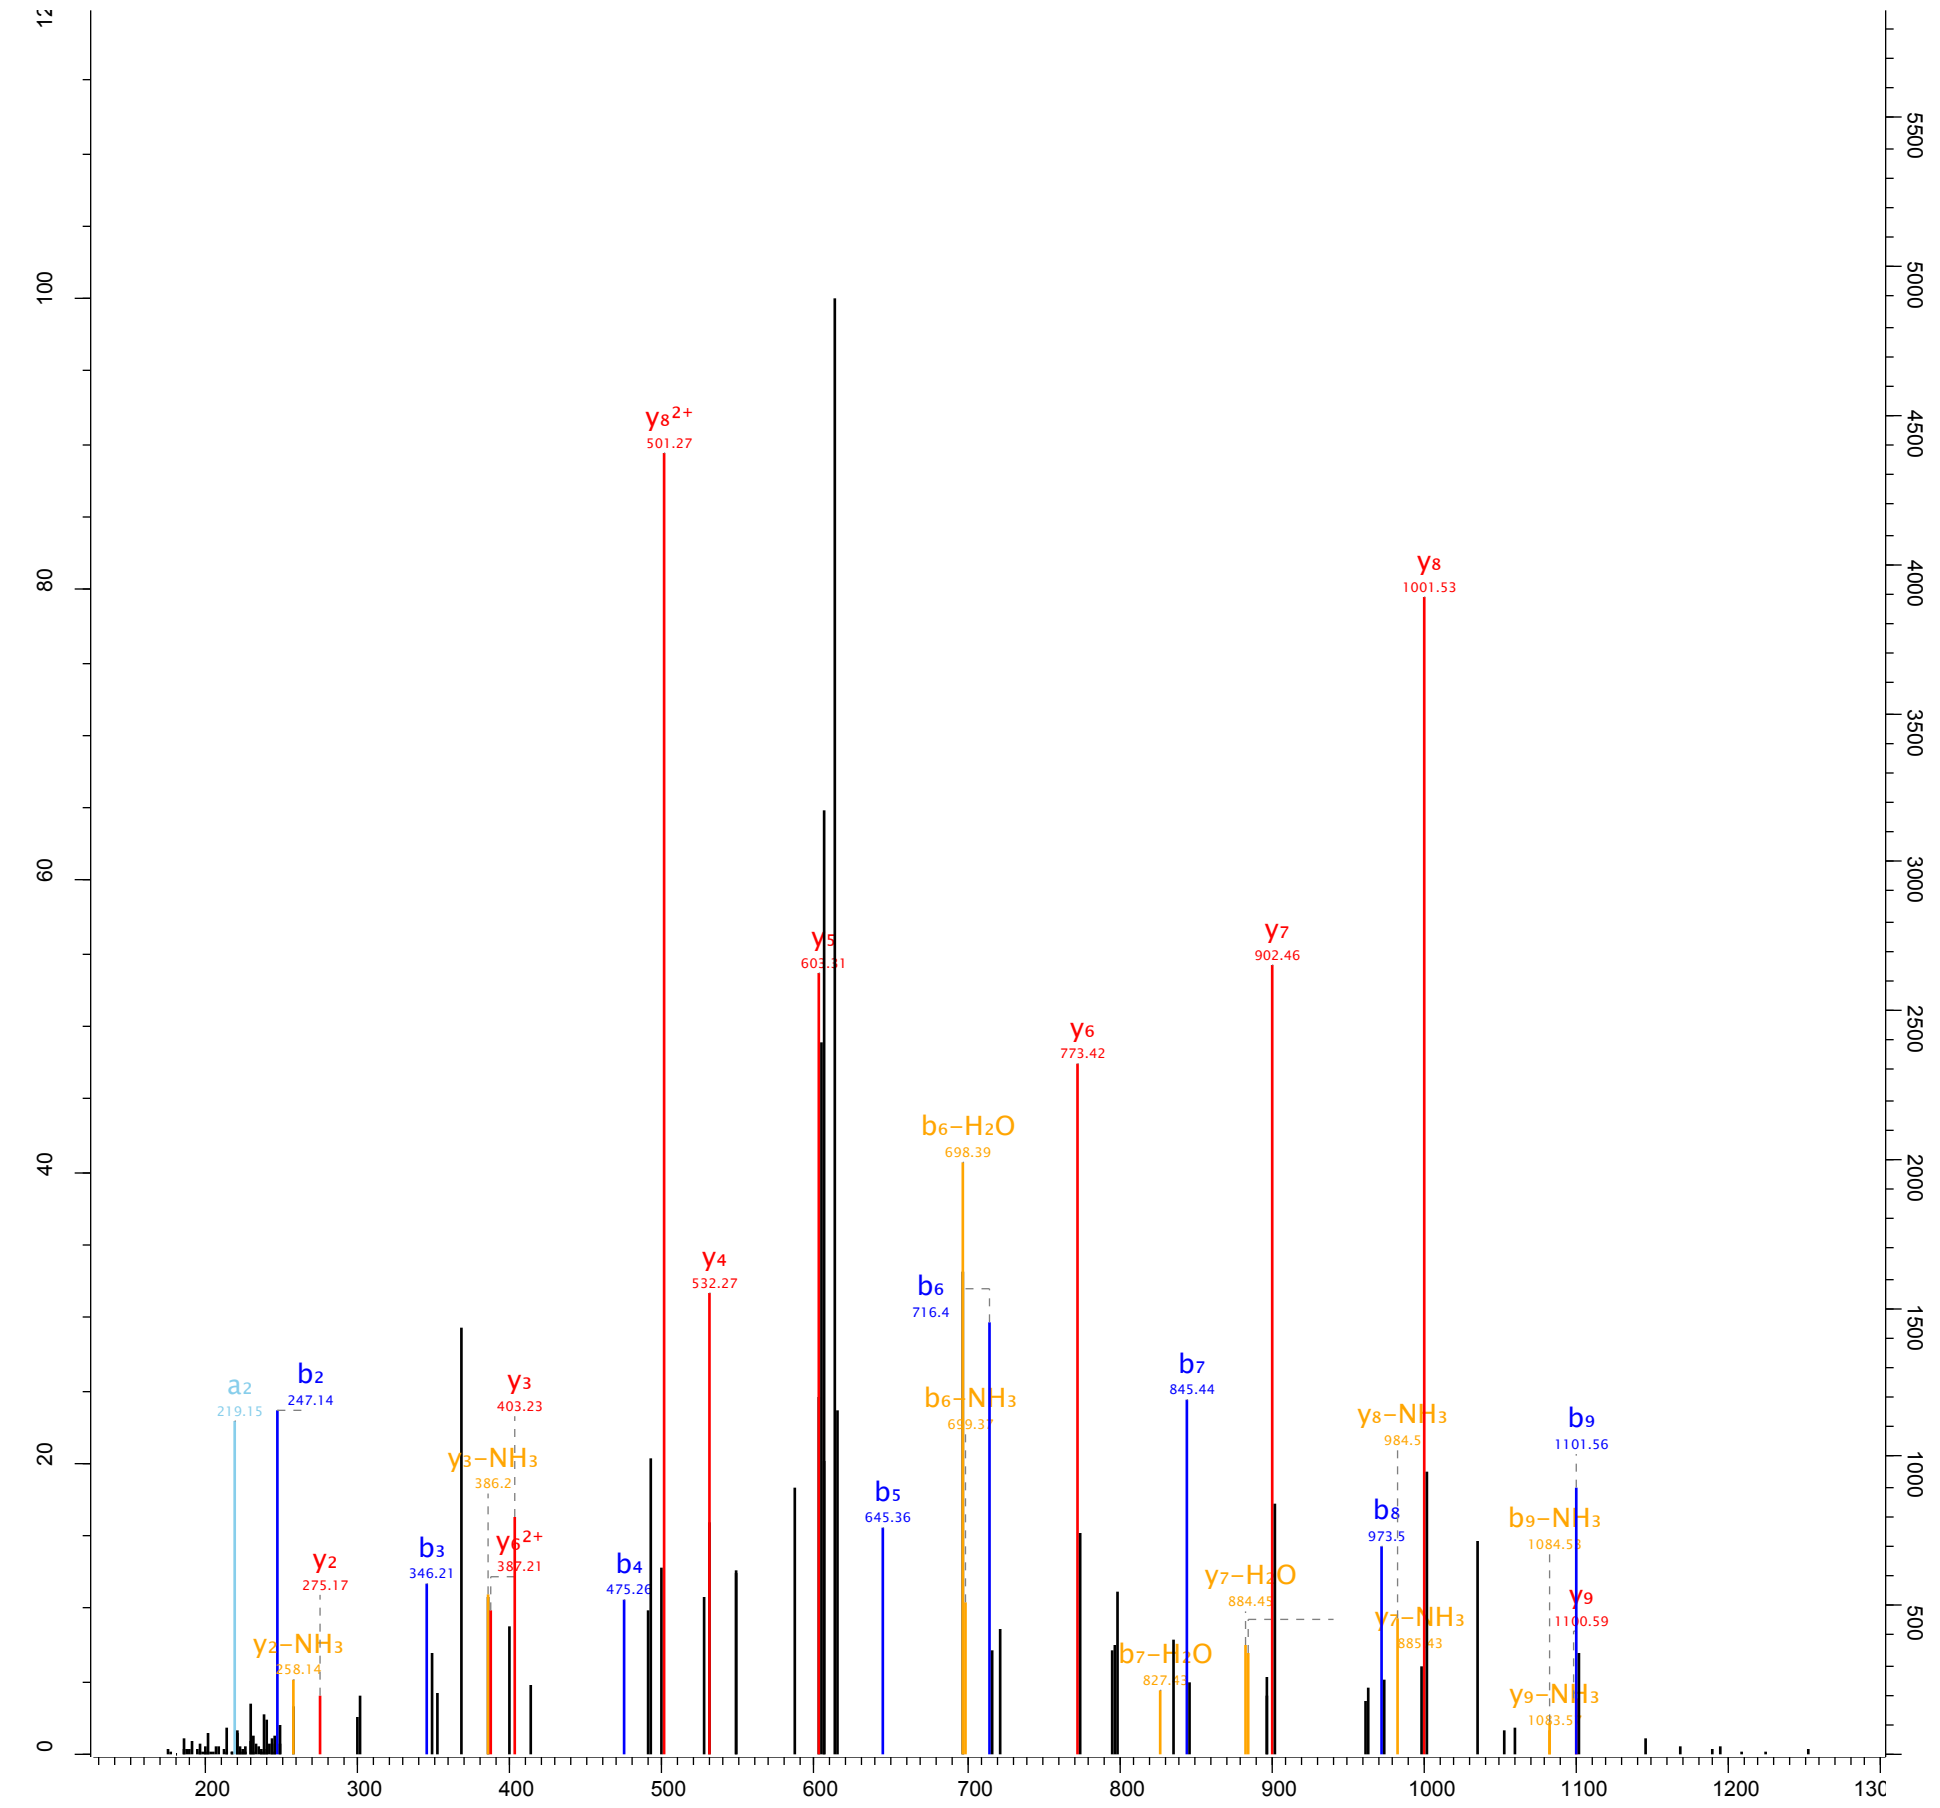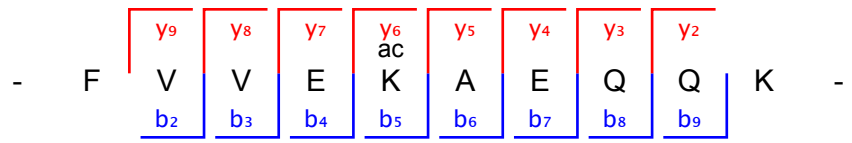



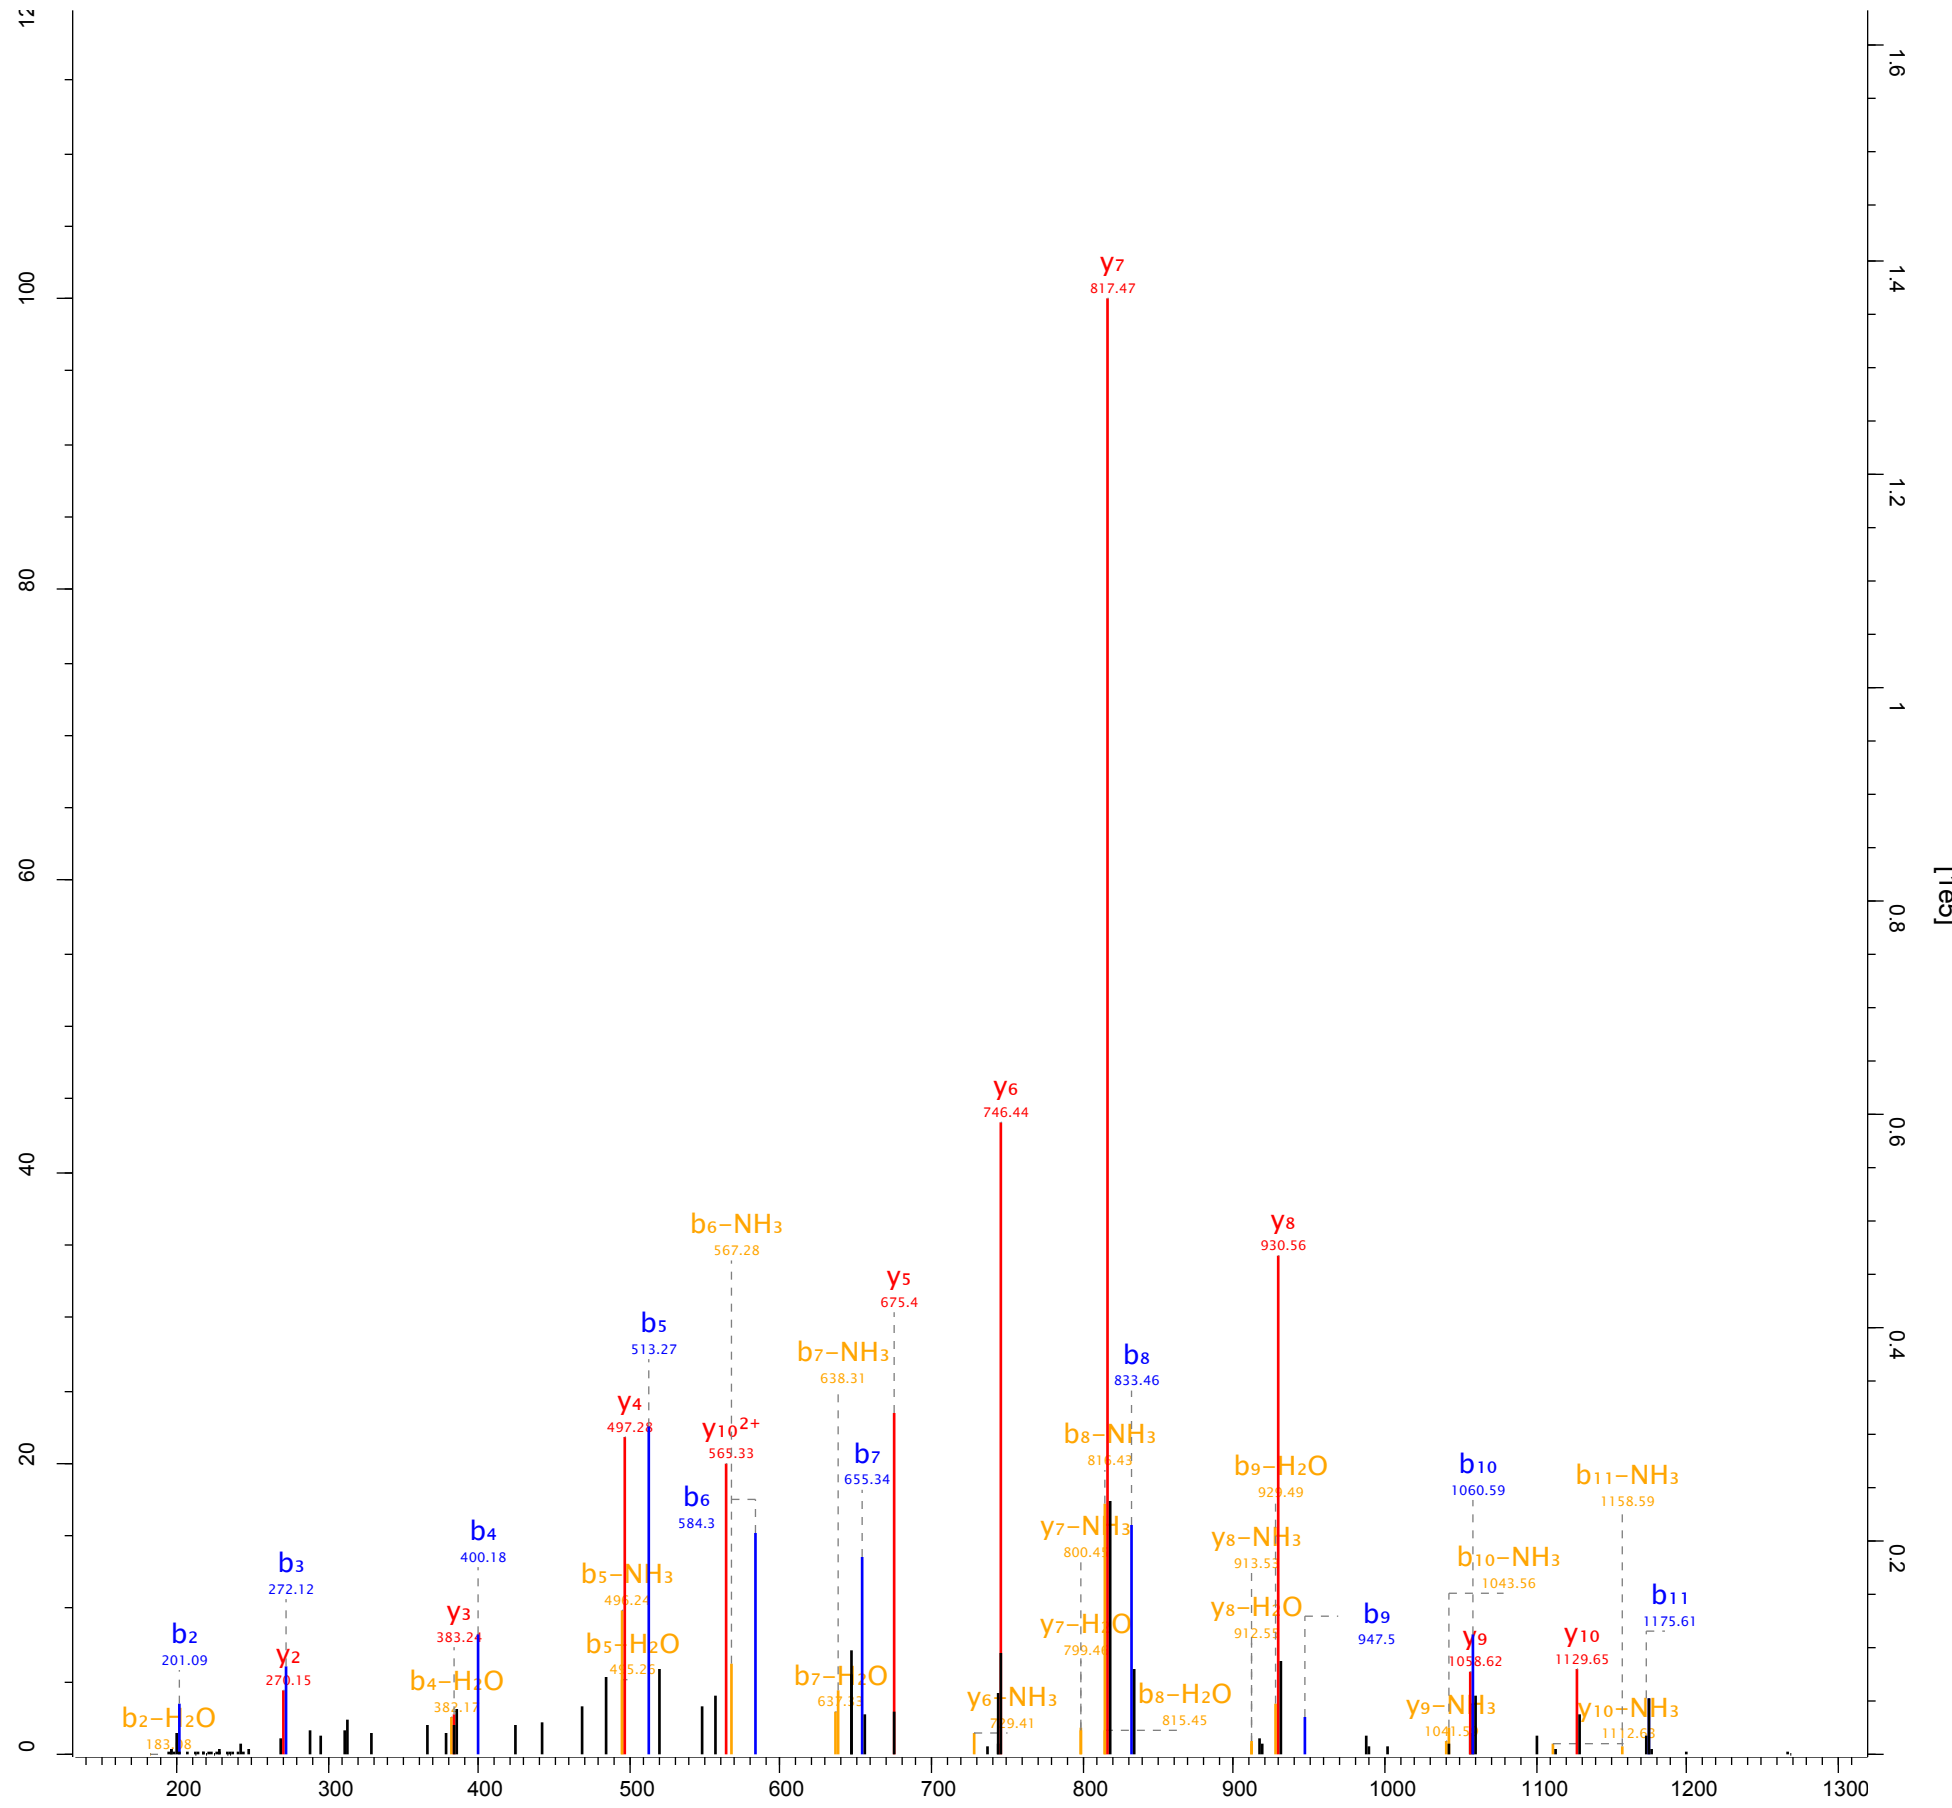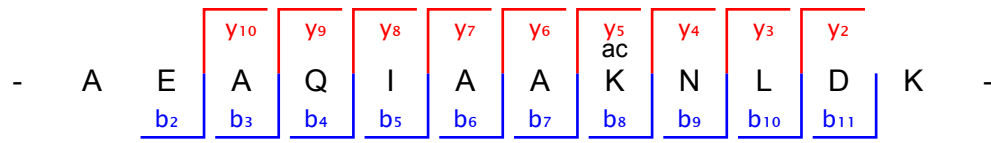

Raw file 050813\_SCW\_II\_29\_19\_4 Scan 13839 Method ITMS; CID Score 287.42 m/z 776.9 Gene names Ldhd

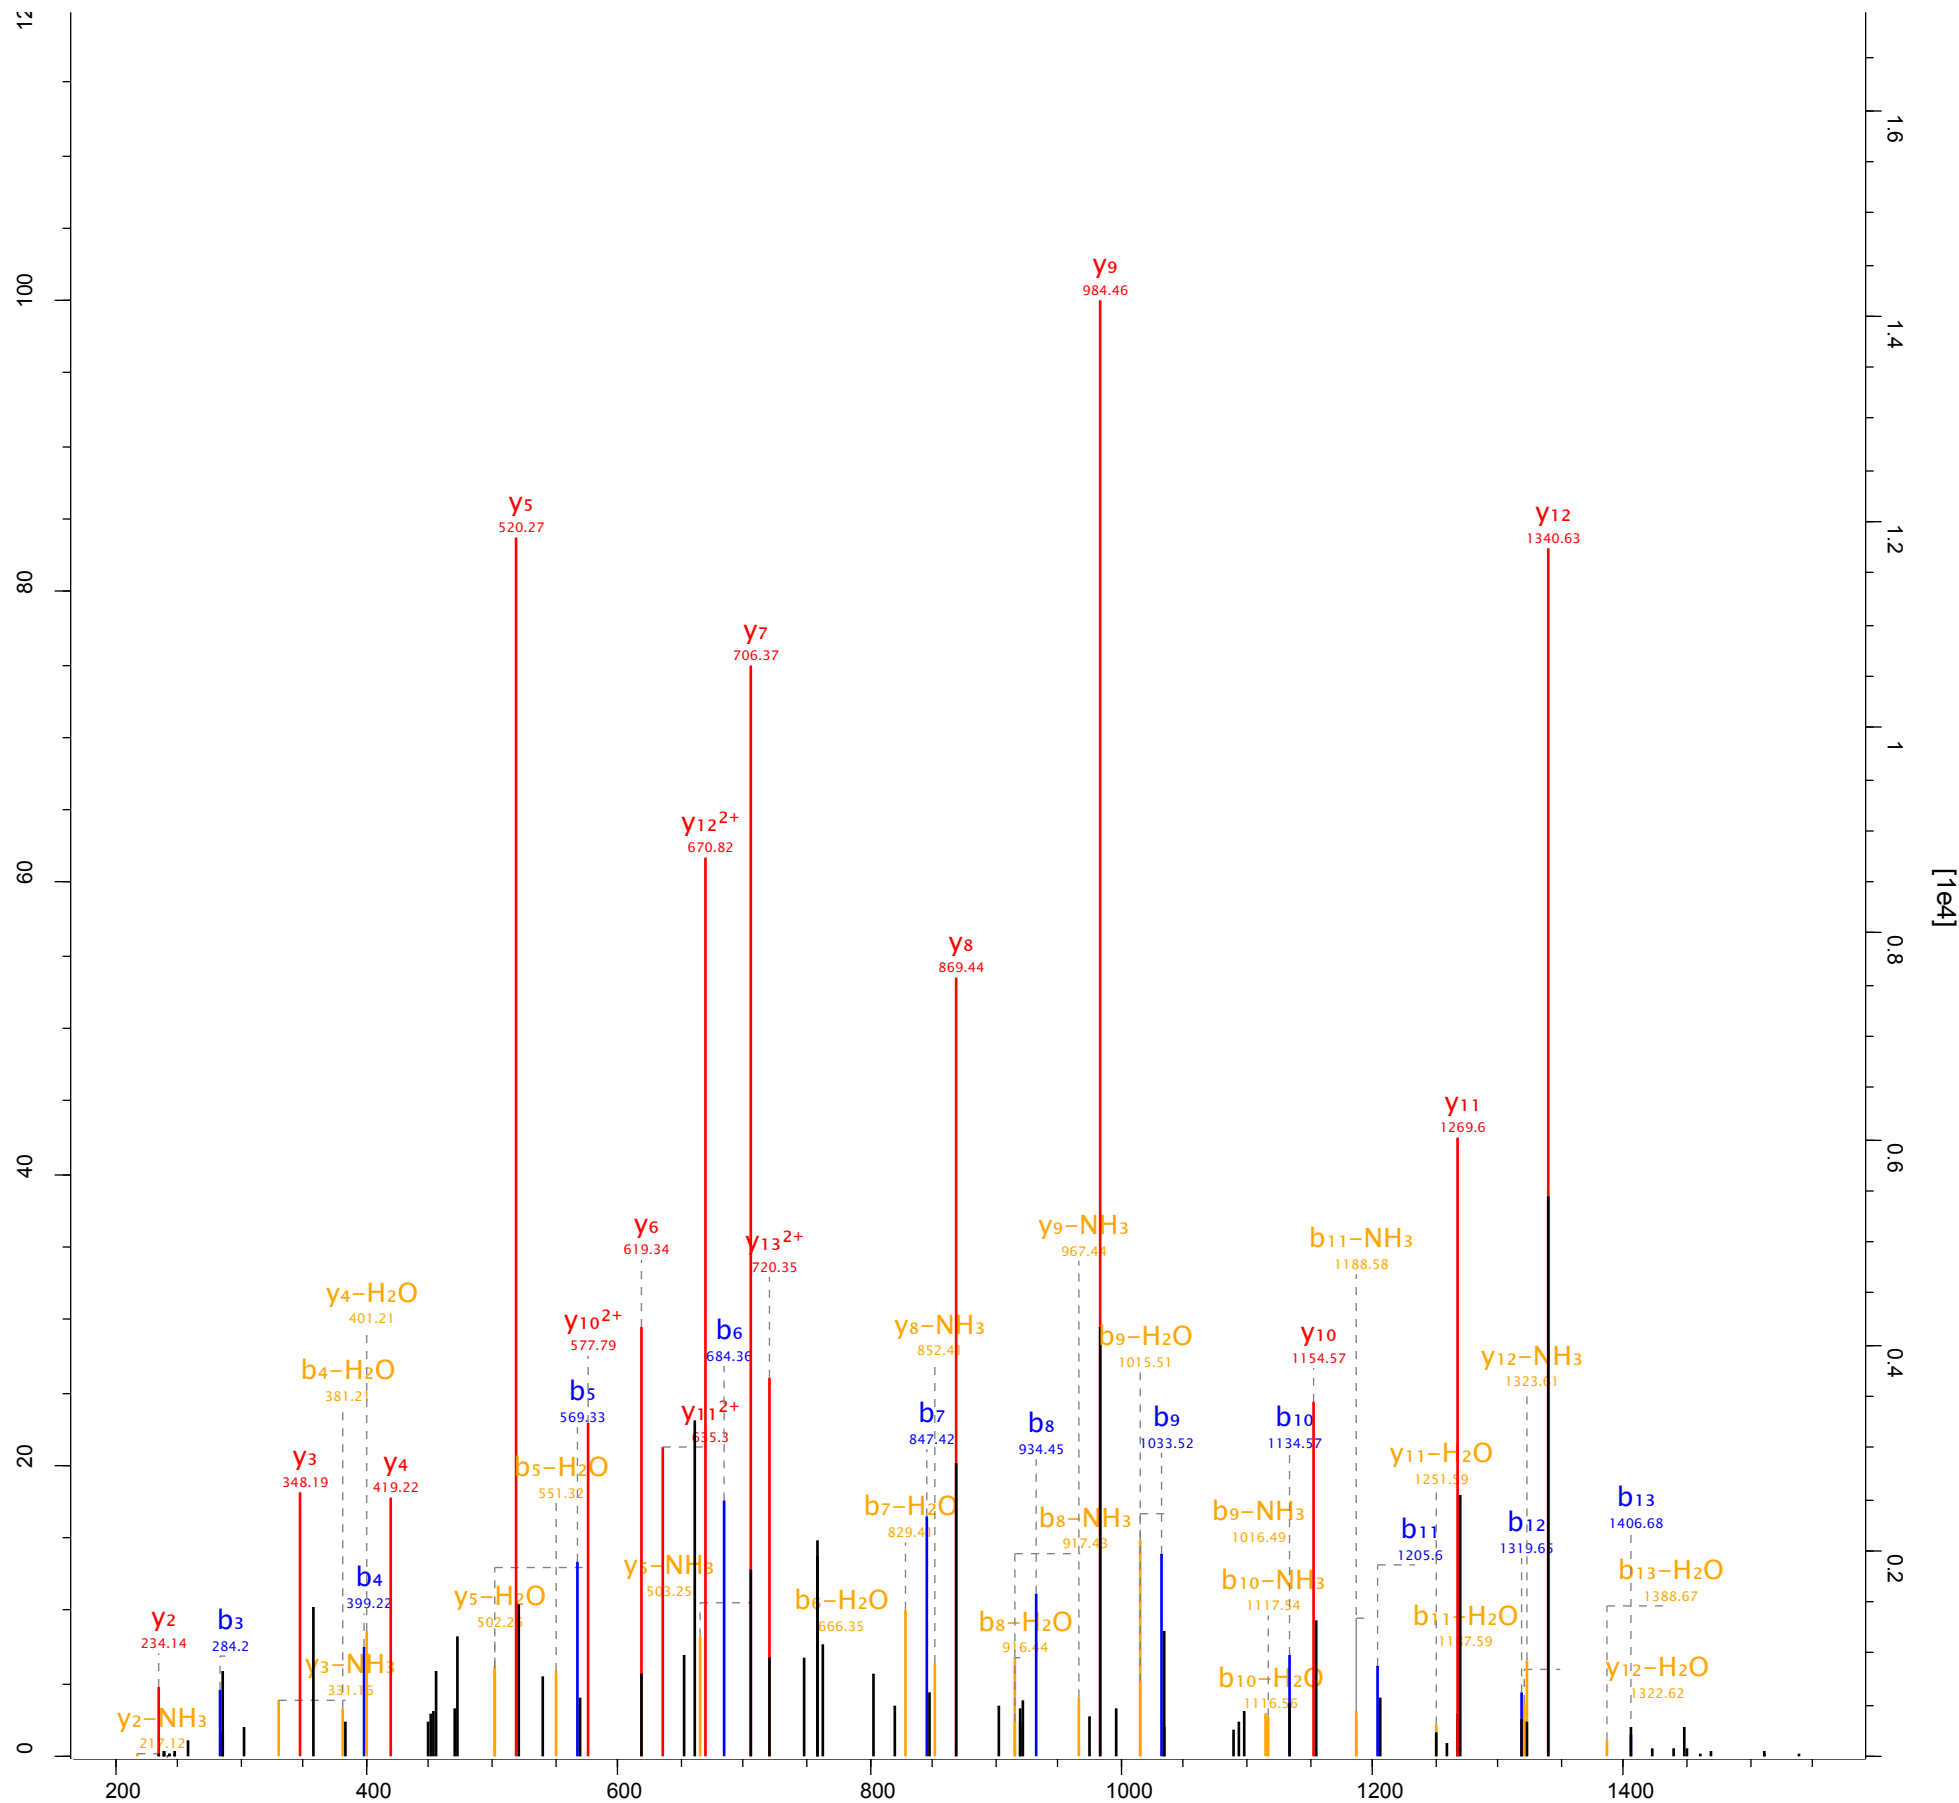

- I V A D K D Y S V T A N S K -

y<sub>13</sub><sup>2+</sup>
y<sub>12</sub>
y<sub>11</sub>
y<sub>10</sub>  
ac
y<sub>9</sub>
y<sub>8</sub>
y<sub>7</sub>
y<sub>6</sub>
y<sub>5</sub>
y<sub>4</sub>
y<sub>3</sub>
y<sub>2</sub>

b<sub>3</sub>
b<sub>4</sub>
b<sub>5</sub>
b<sub>6</sub>
b<sub>7</sub>
b<sub>8</sub>
b<sub>9</sub>
b<sub>10</sub>
b<sub>11</sub>
b<sub>12</sub>
b<sub>13</sub>

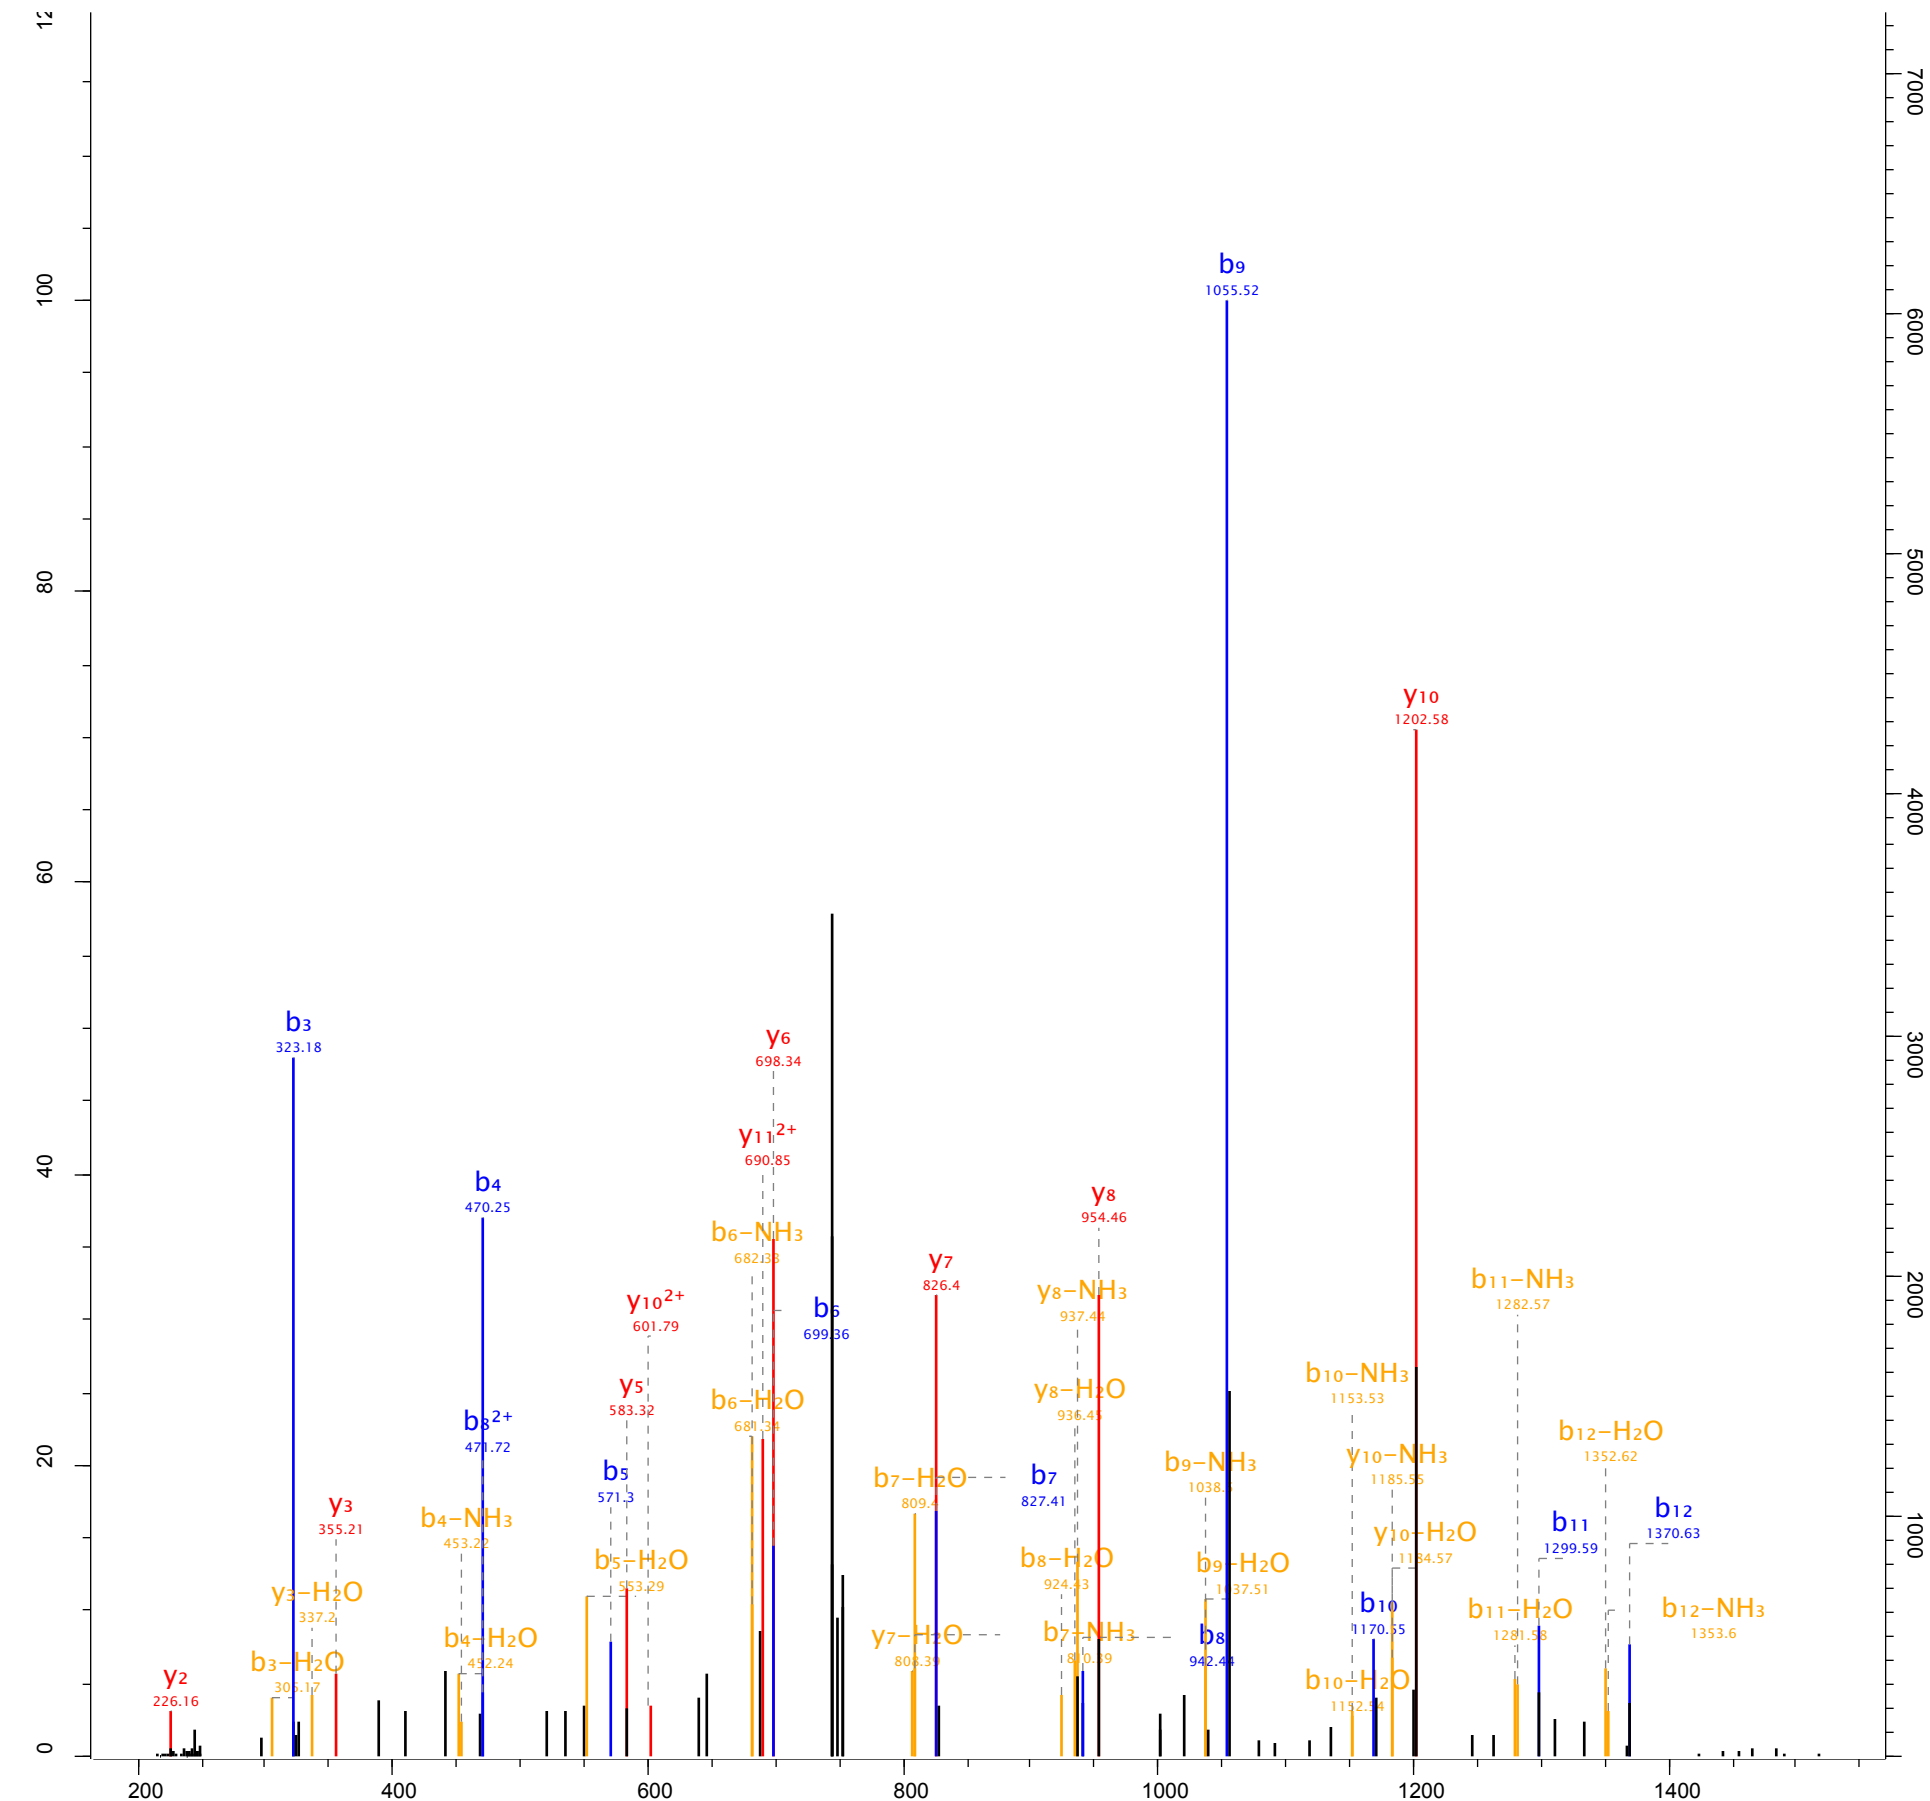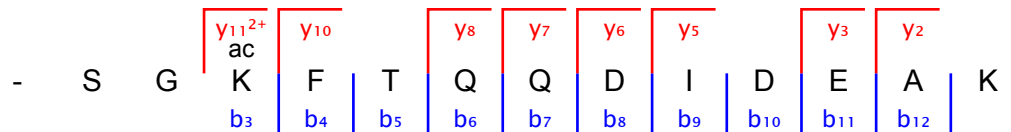

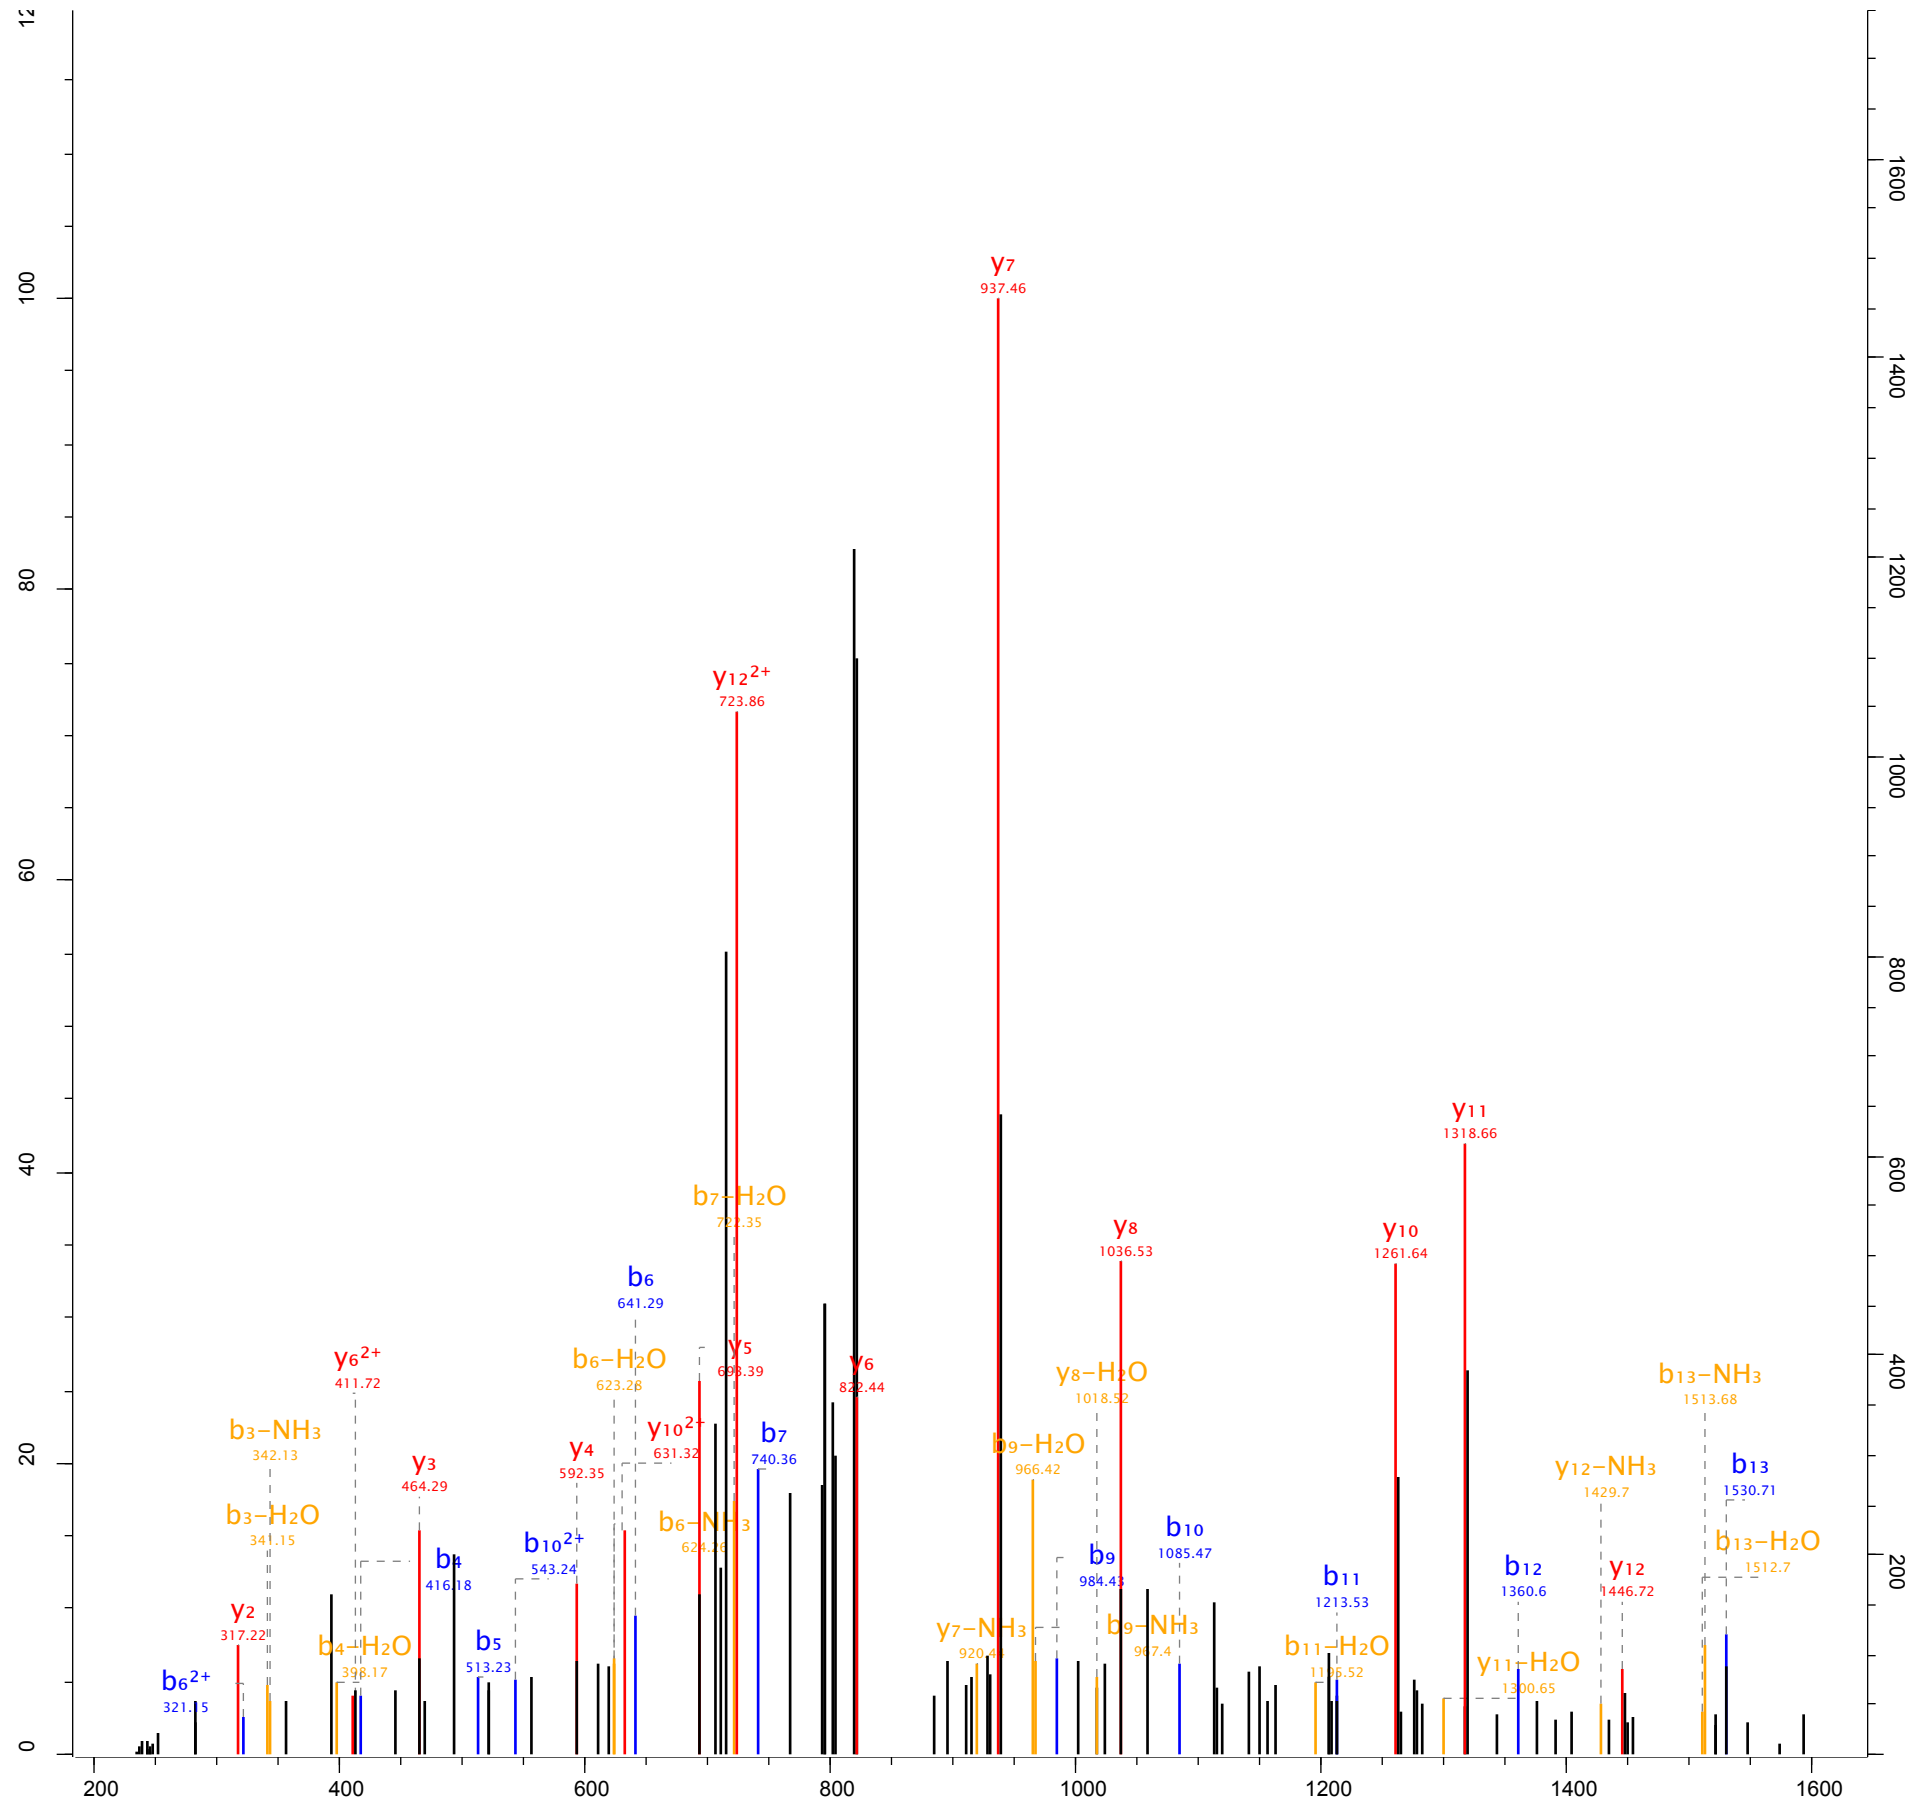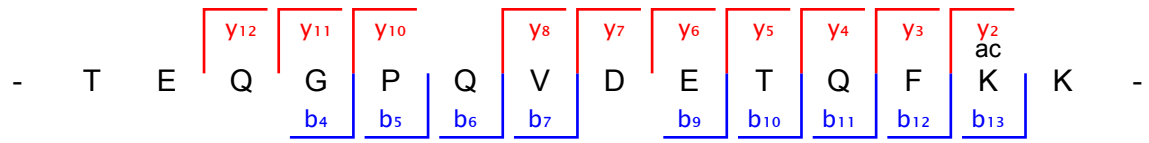

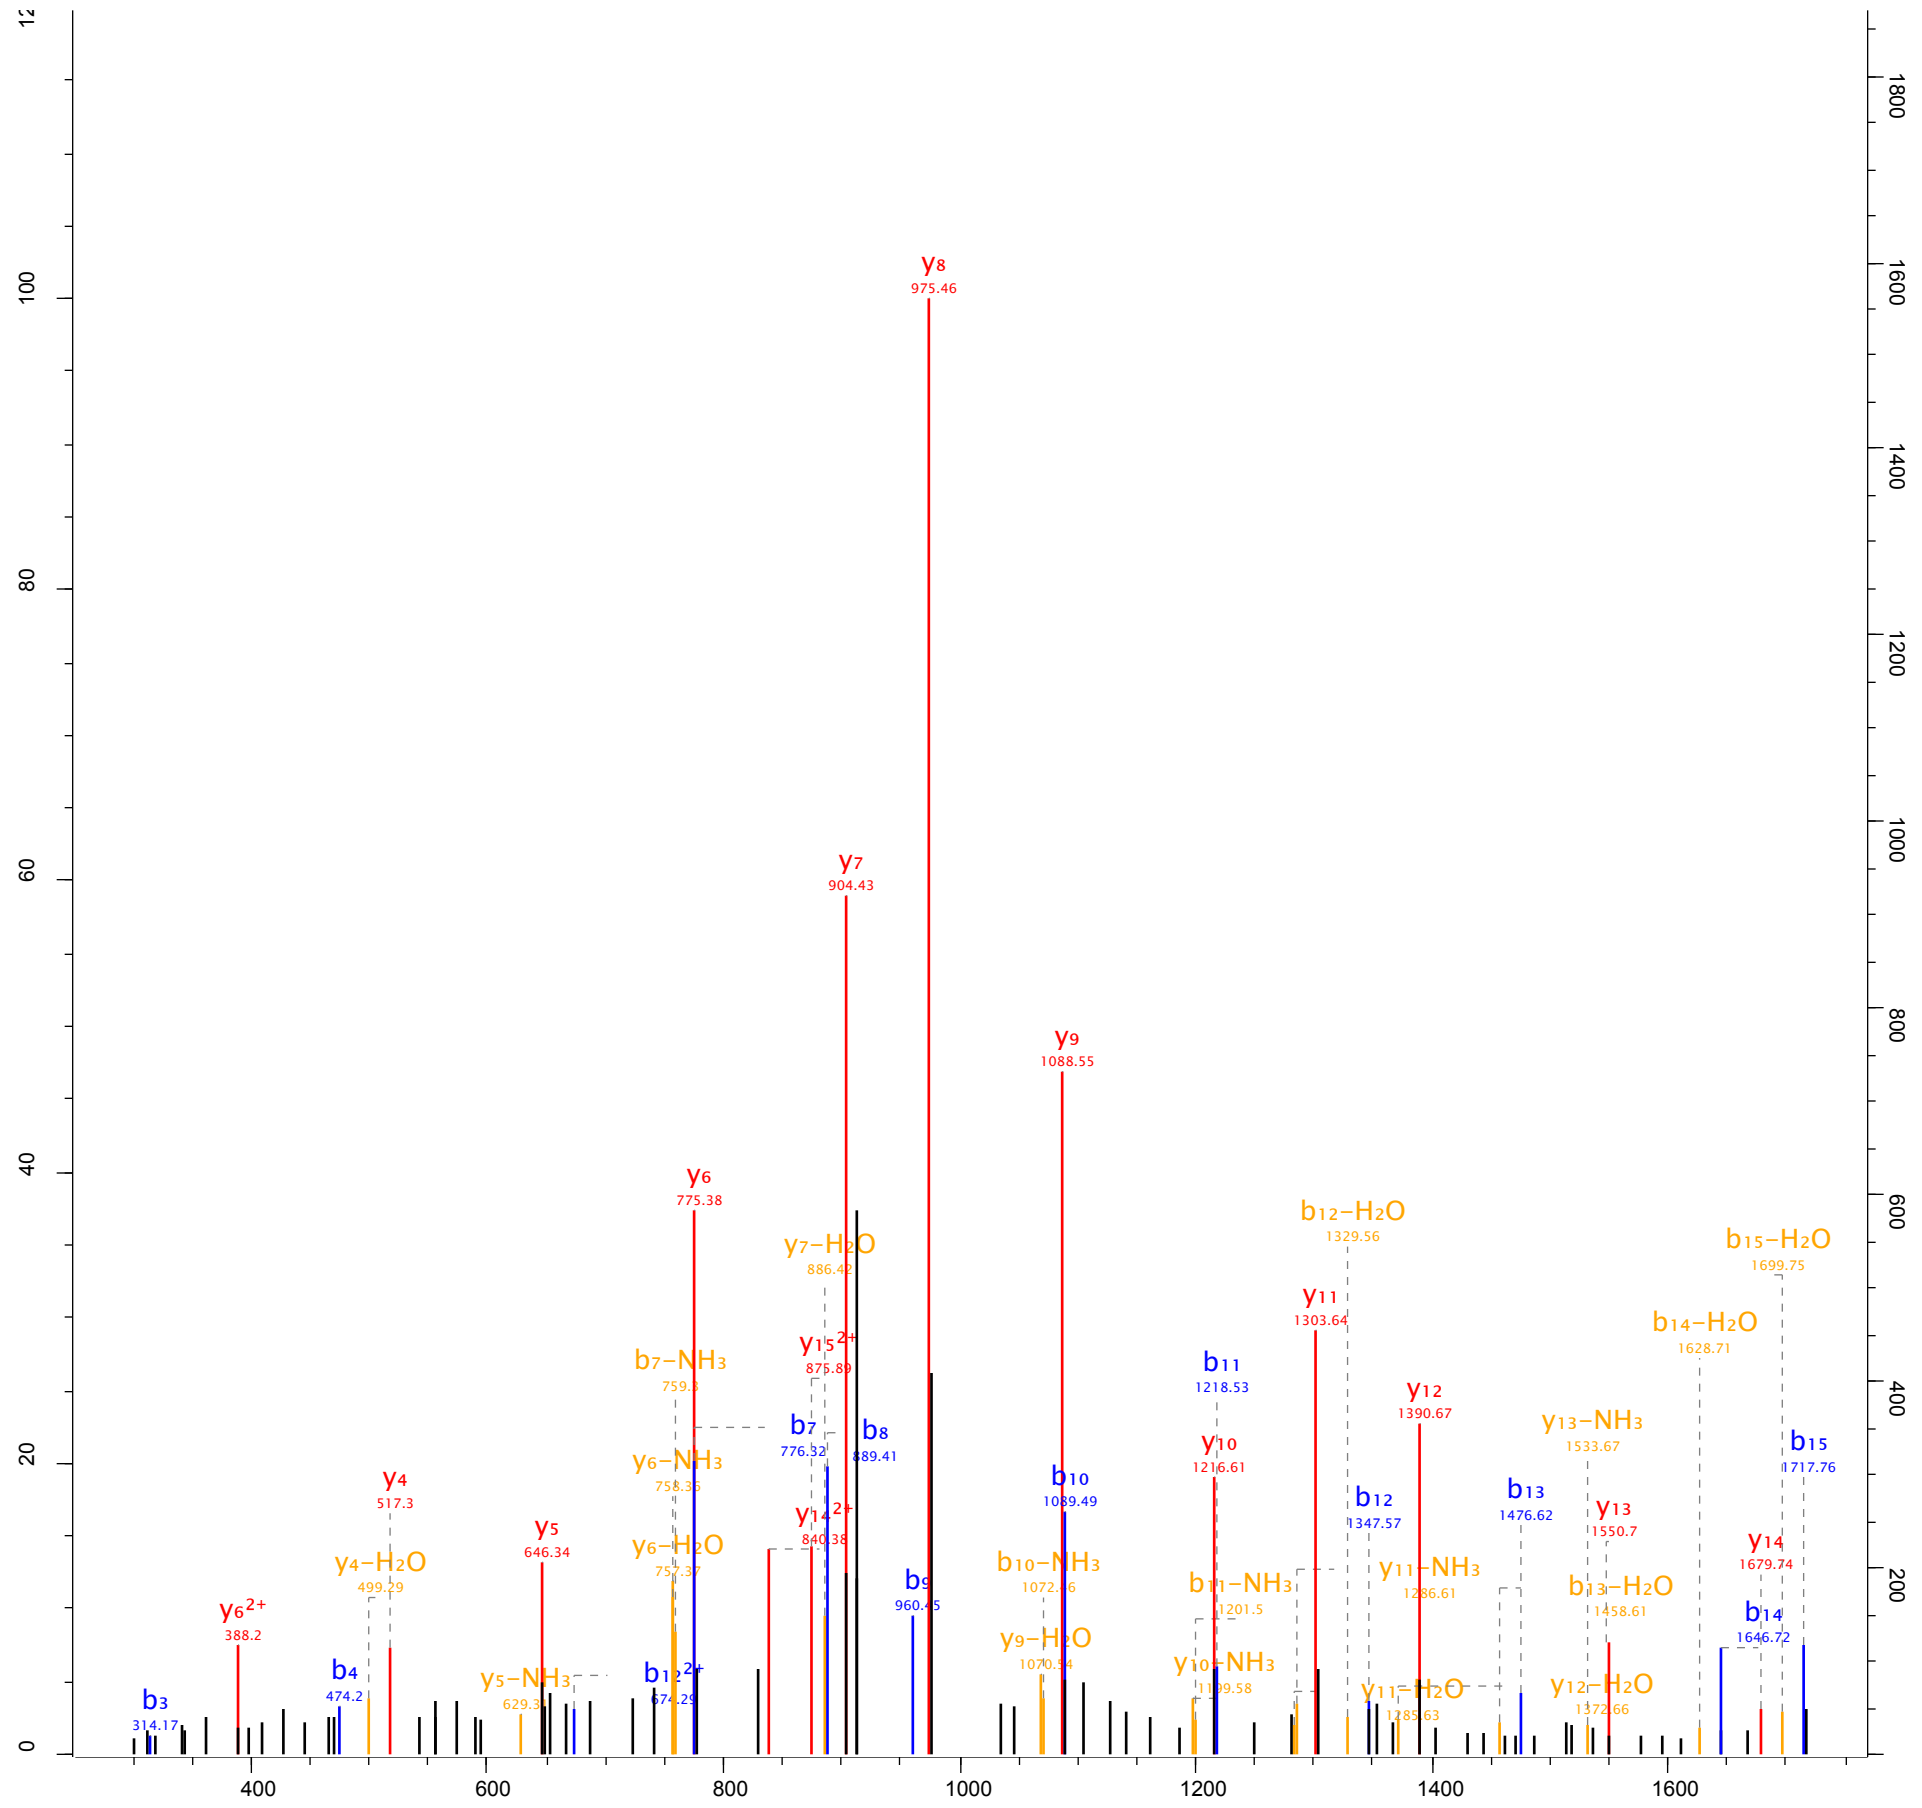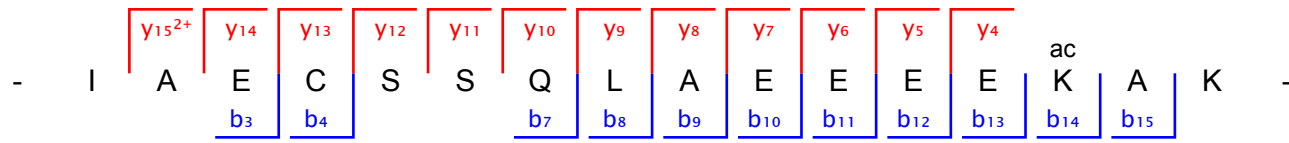

050813\_SCW\_II\_29\_19\_4

14502 ITMS; CID 133.93 912.45 Ywhah

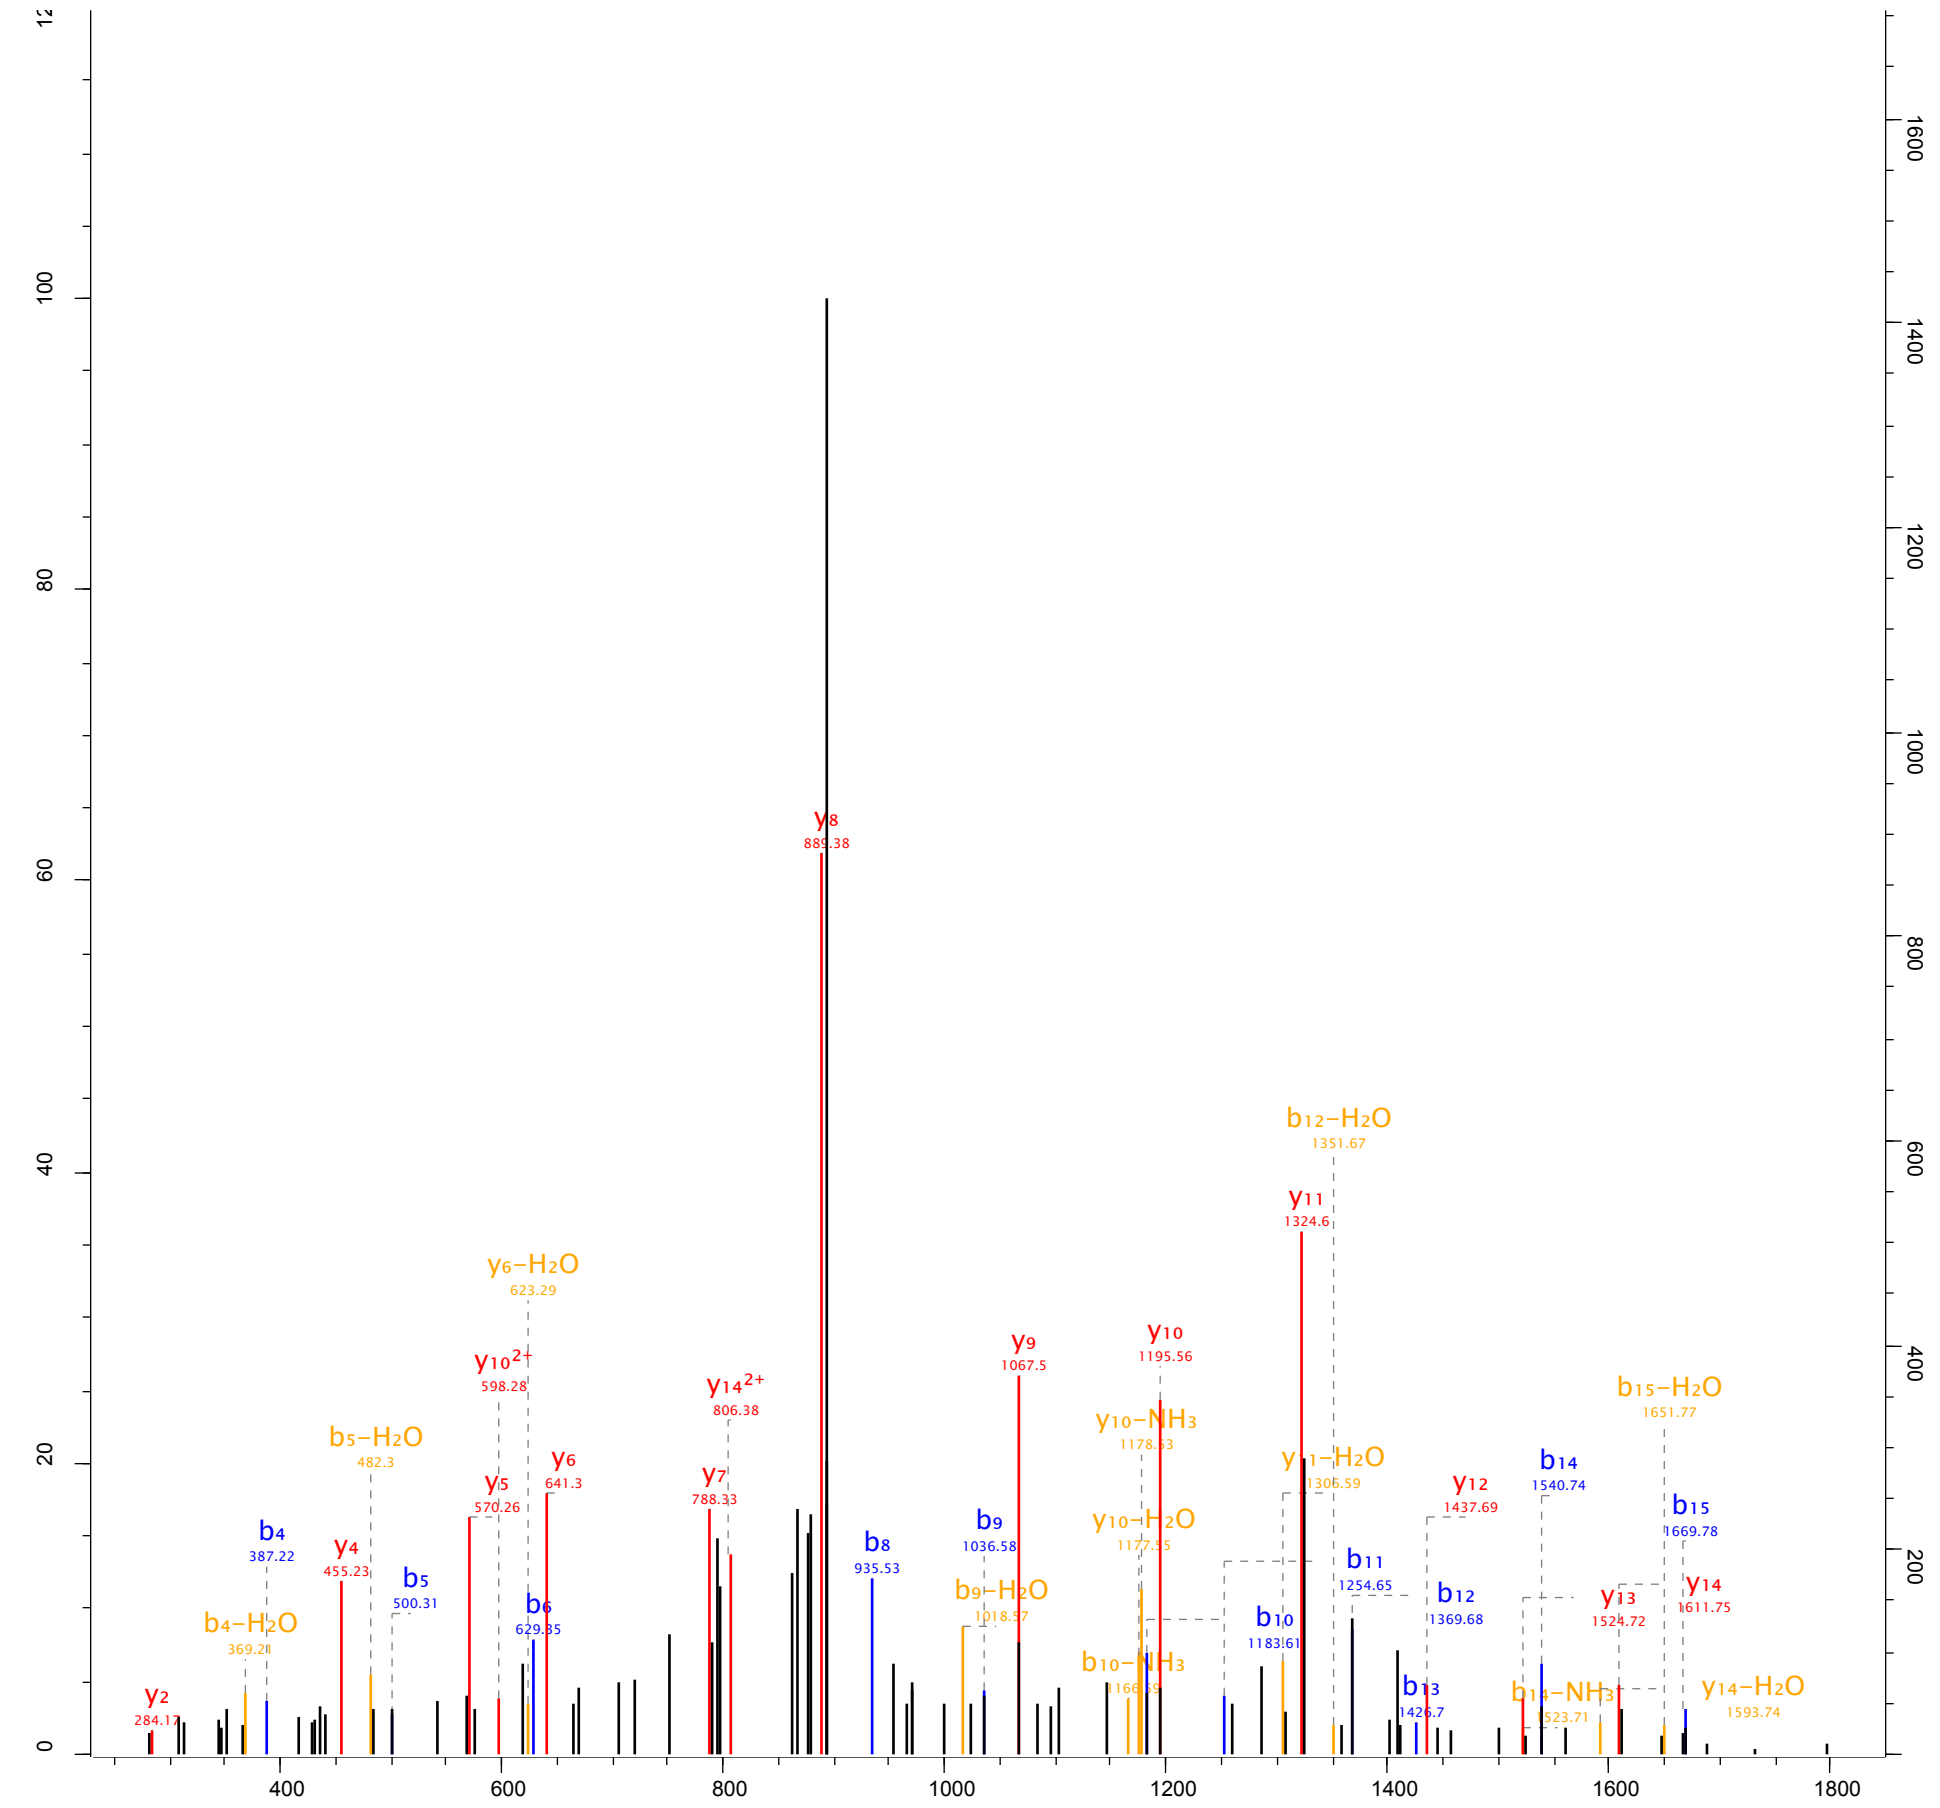

- V I S S I E Q K T M A D G N E K -

y14
y13
y12
y11
y10
y9 ac
y8
y7 ox
y6
y5
y4
y2

b4
b5
b6
b8
b9
b10
b11
b12
b13
b14
b15

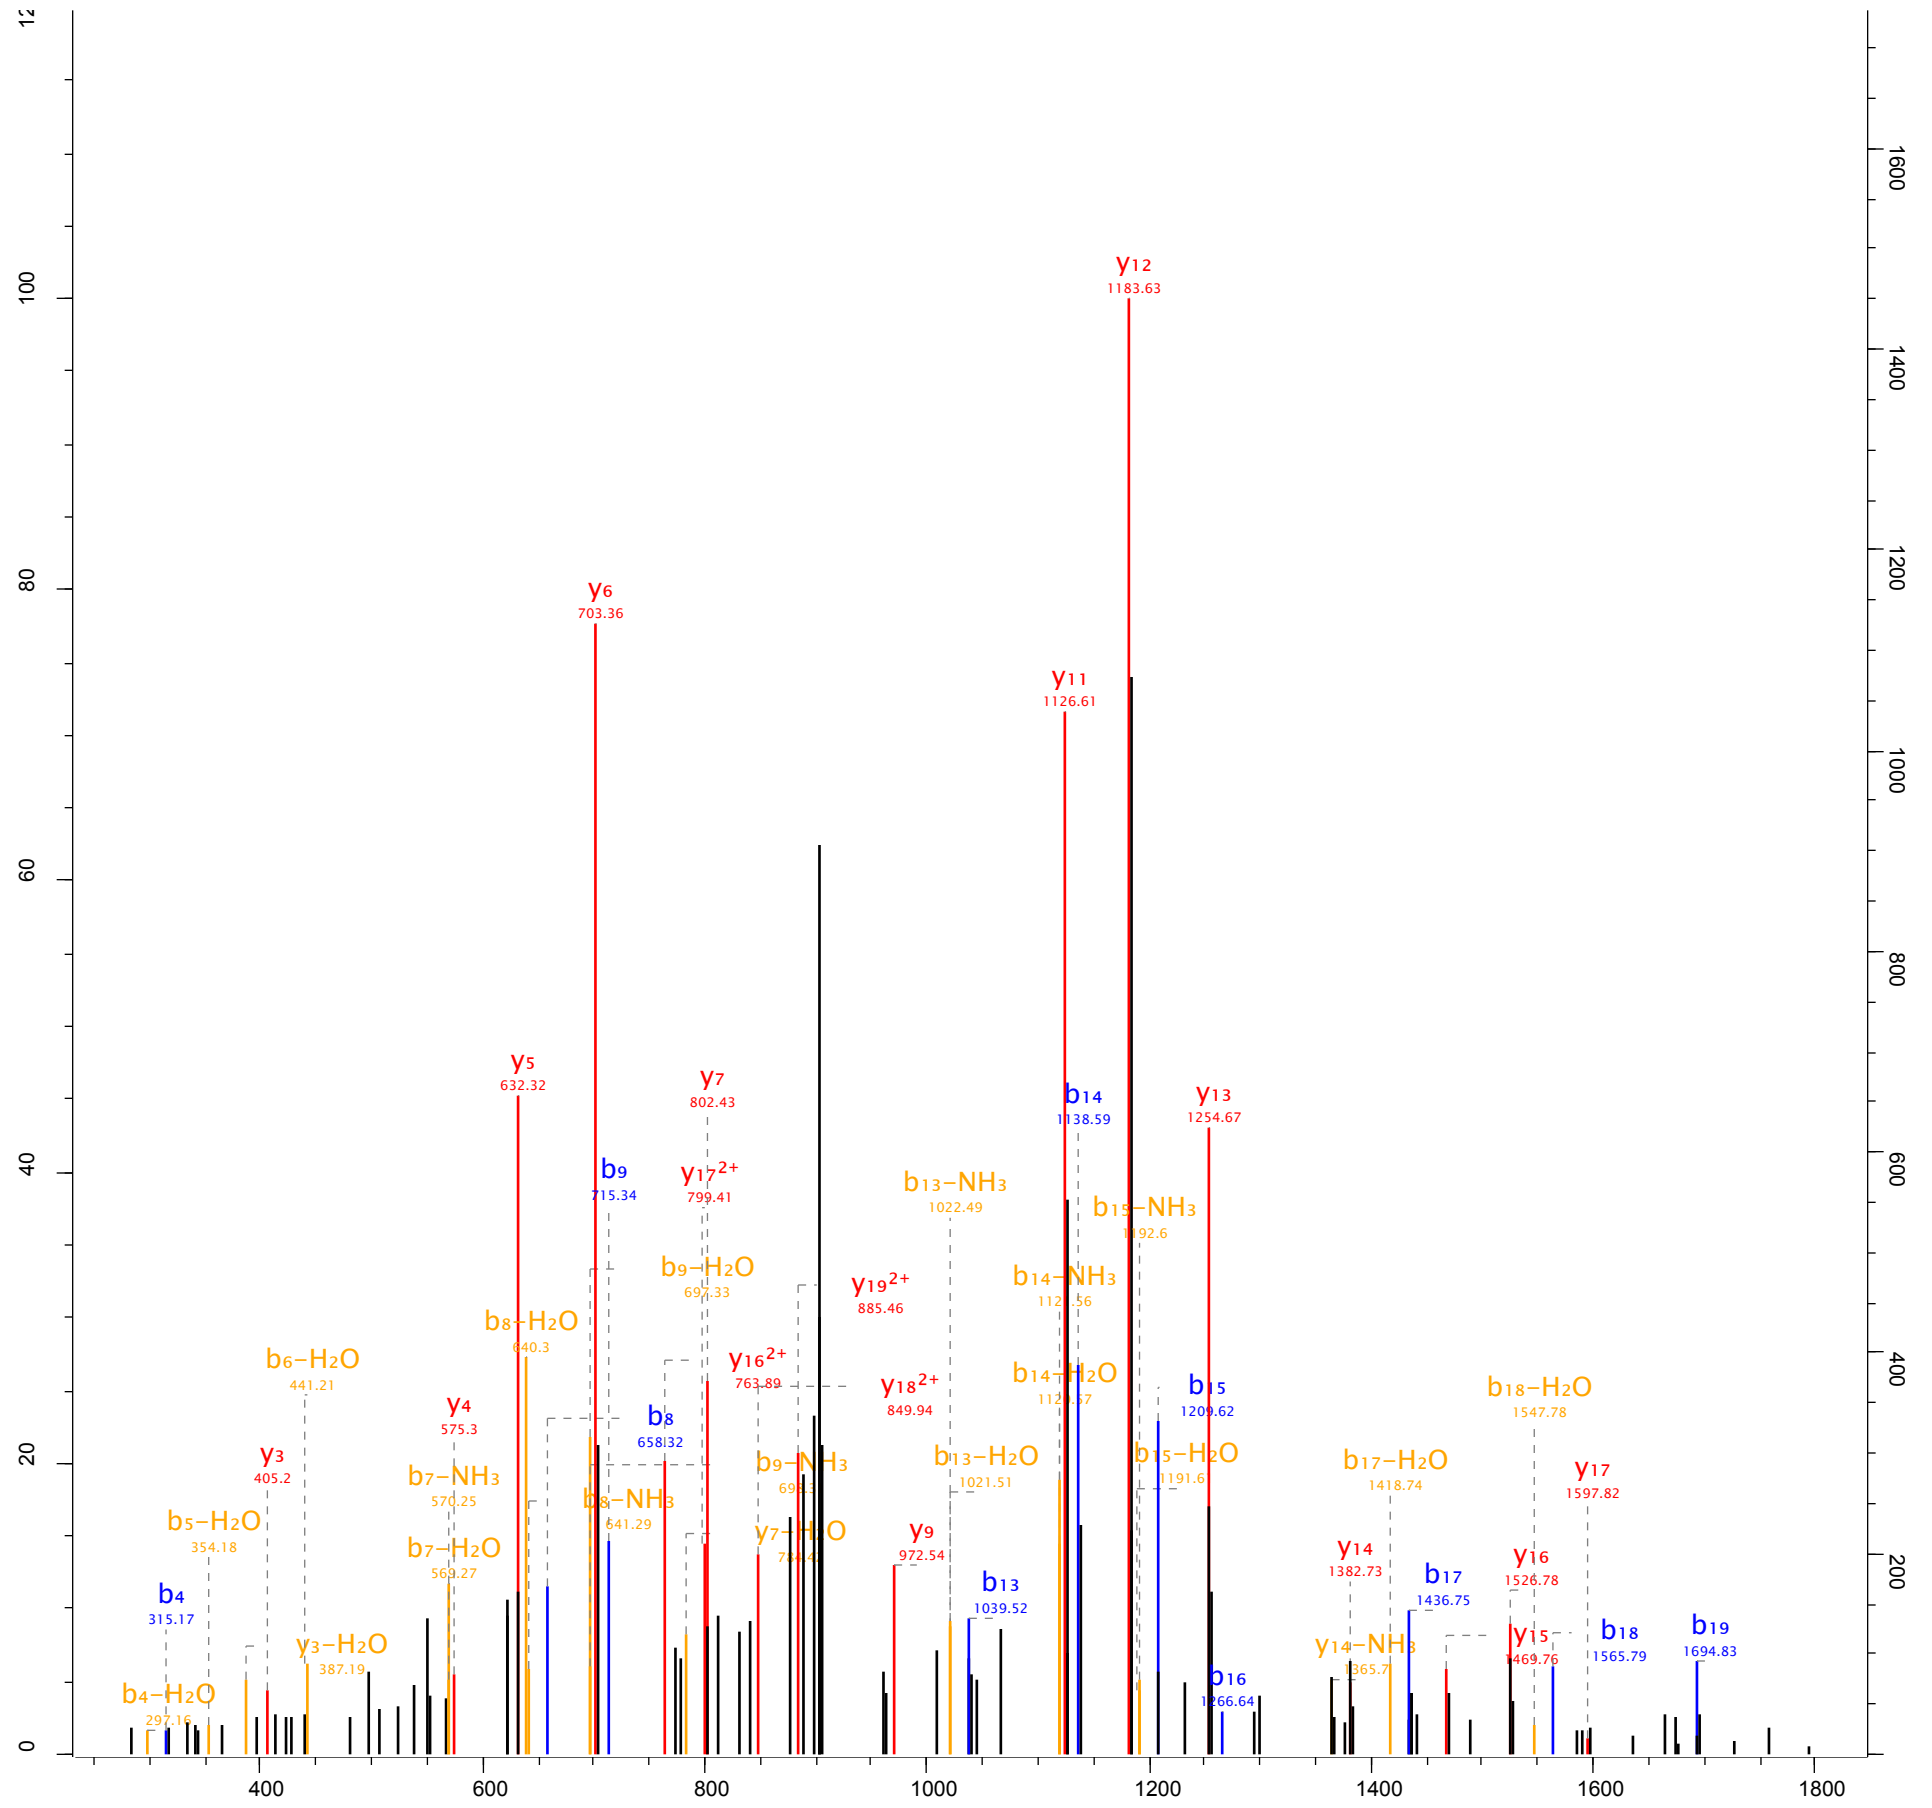

- A A T A G S Q A G P G G L V A G K E E K -  
          b4                  b8  b9                  b13  b14  b15  b16  b17  b18  b19

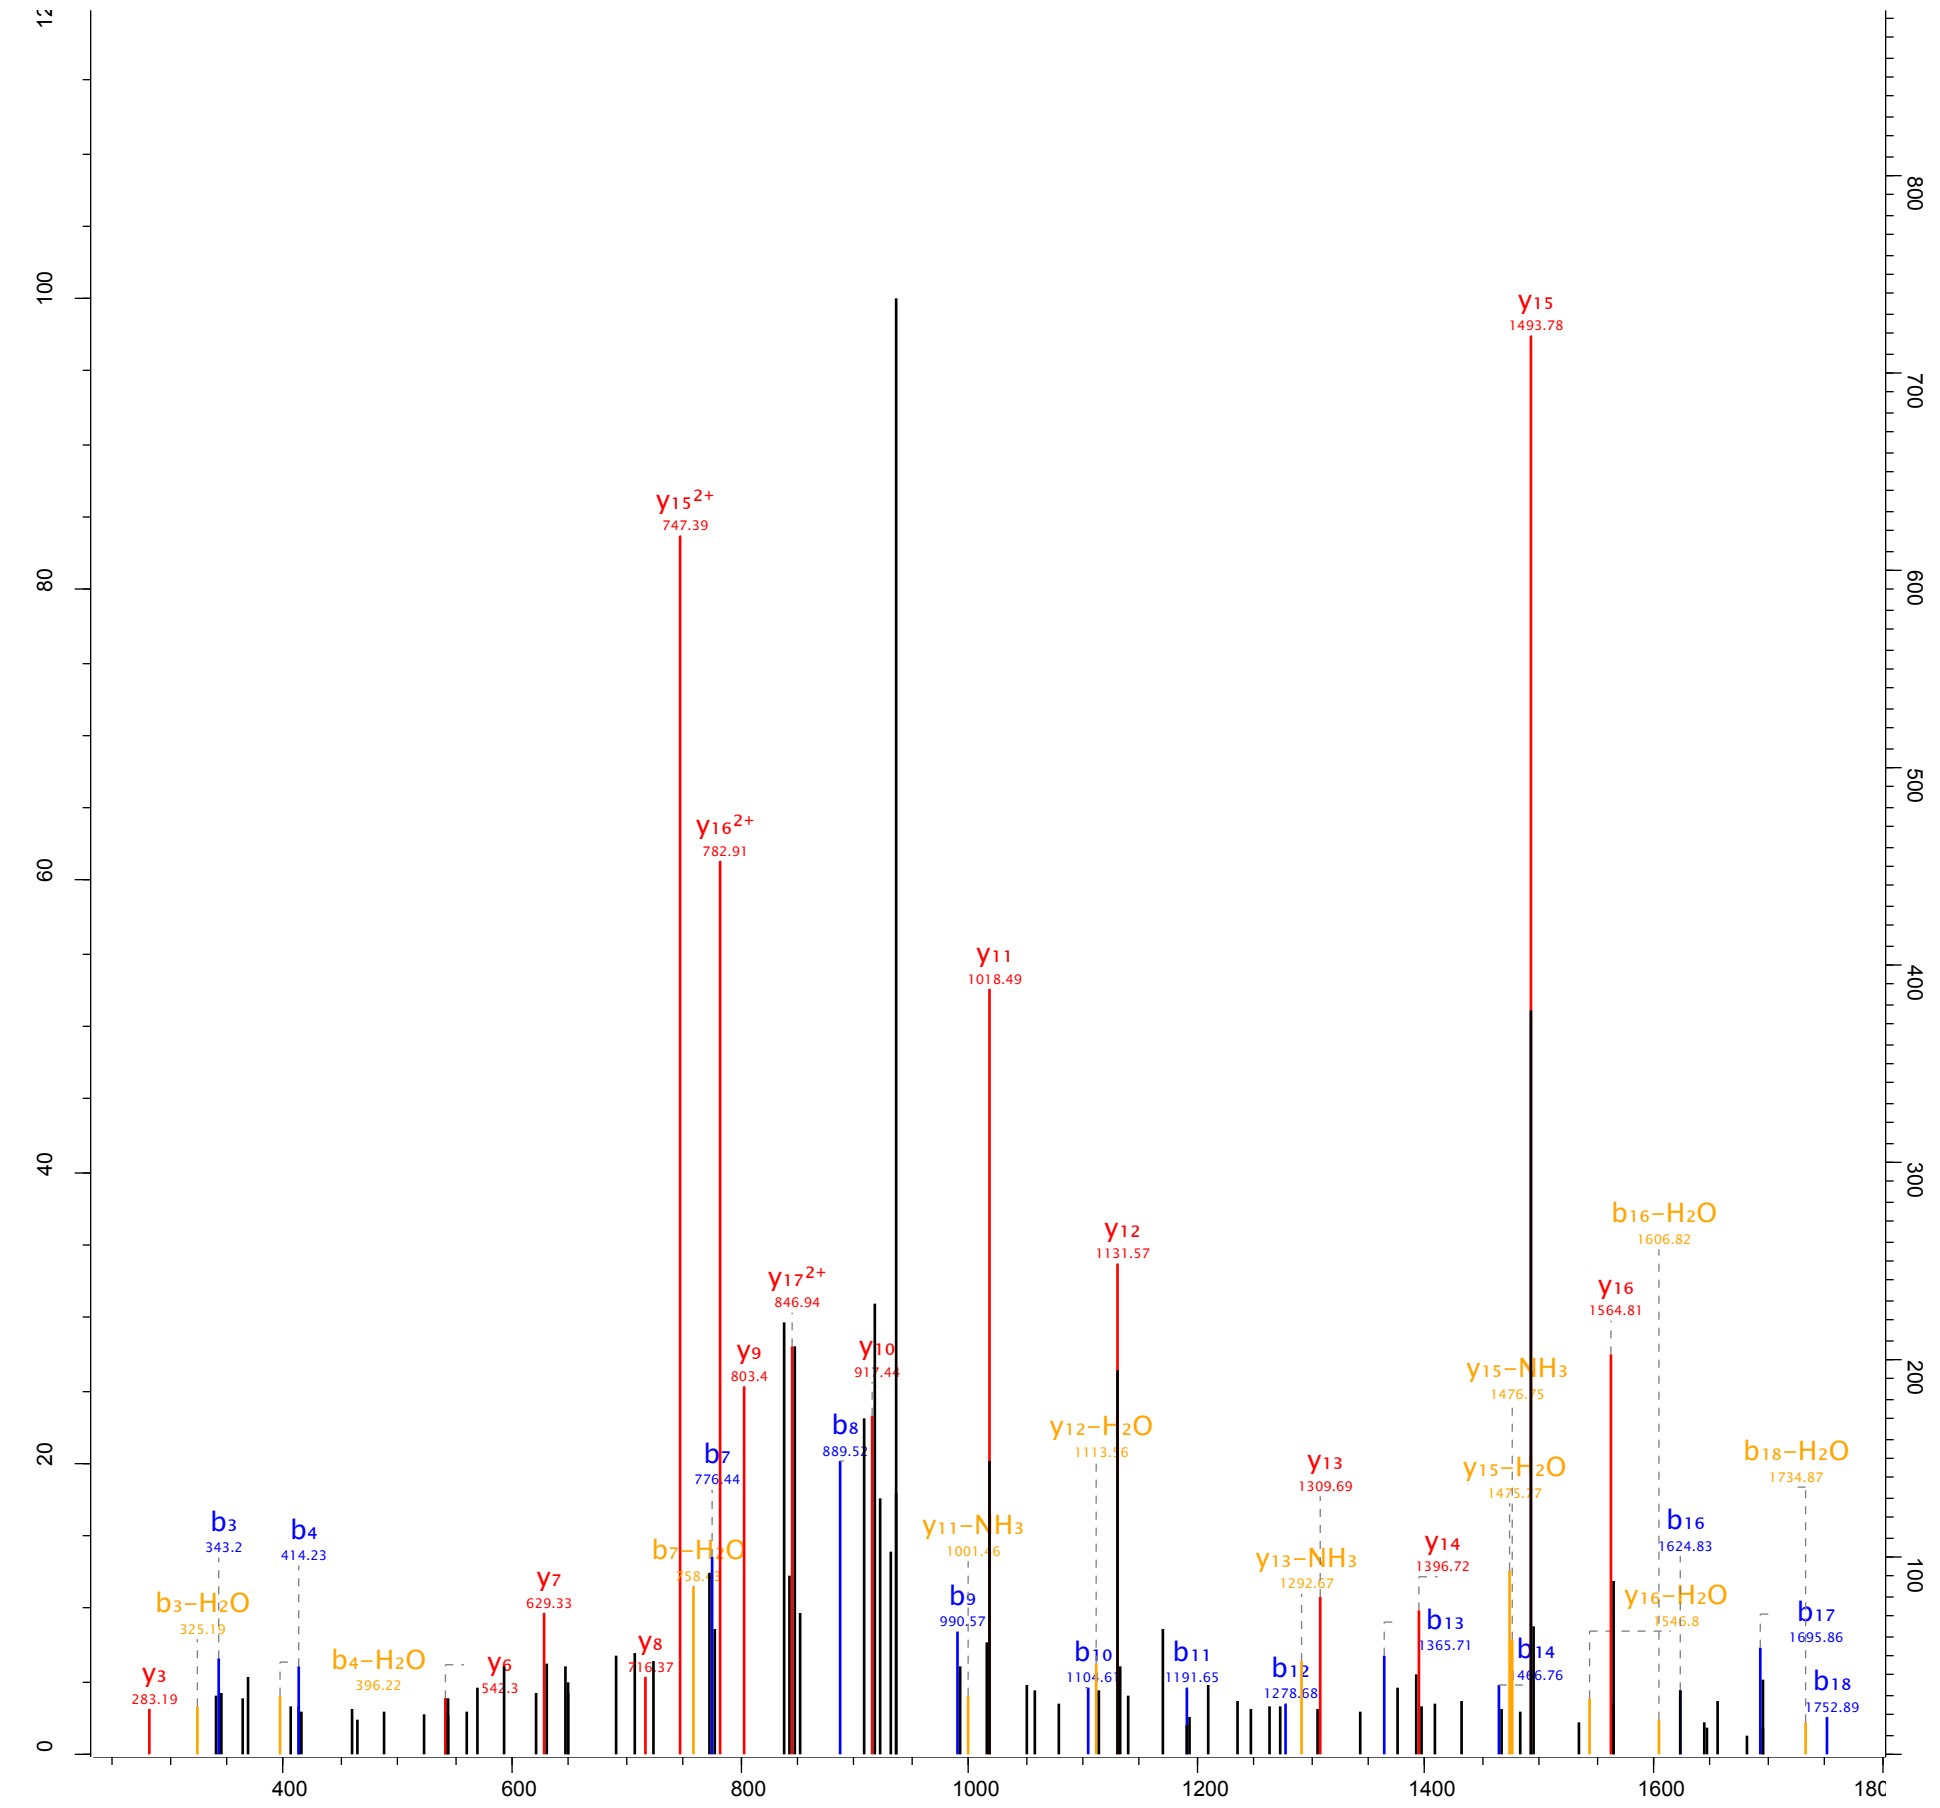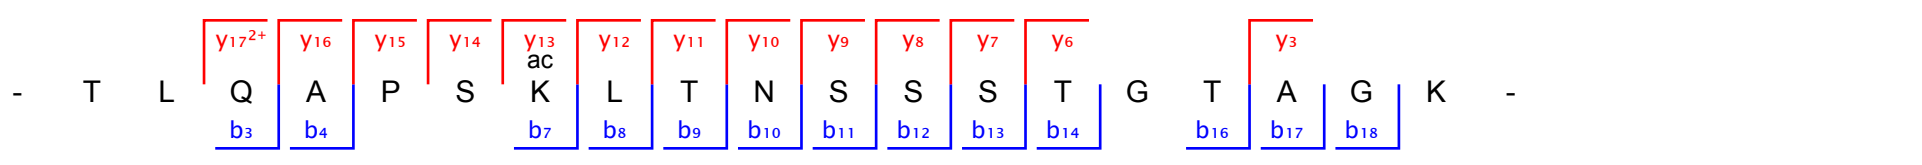



Raw file: 050813\_SCW\_II\_29\_19\_4  
 Scan: 14618 Method: ITMS; CID Score: 103.08 m/z: 507.3 Gene names: Aldoa;Aldoart1;Aldoart2

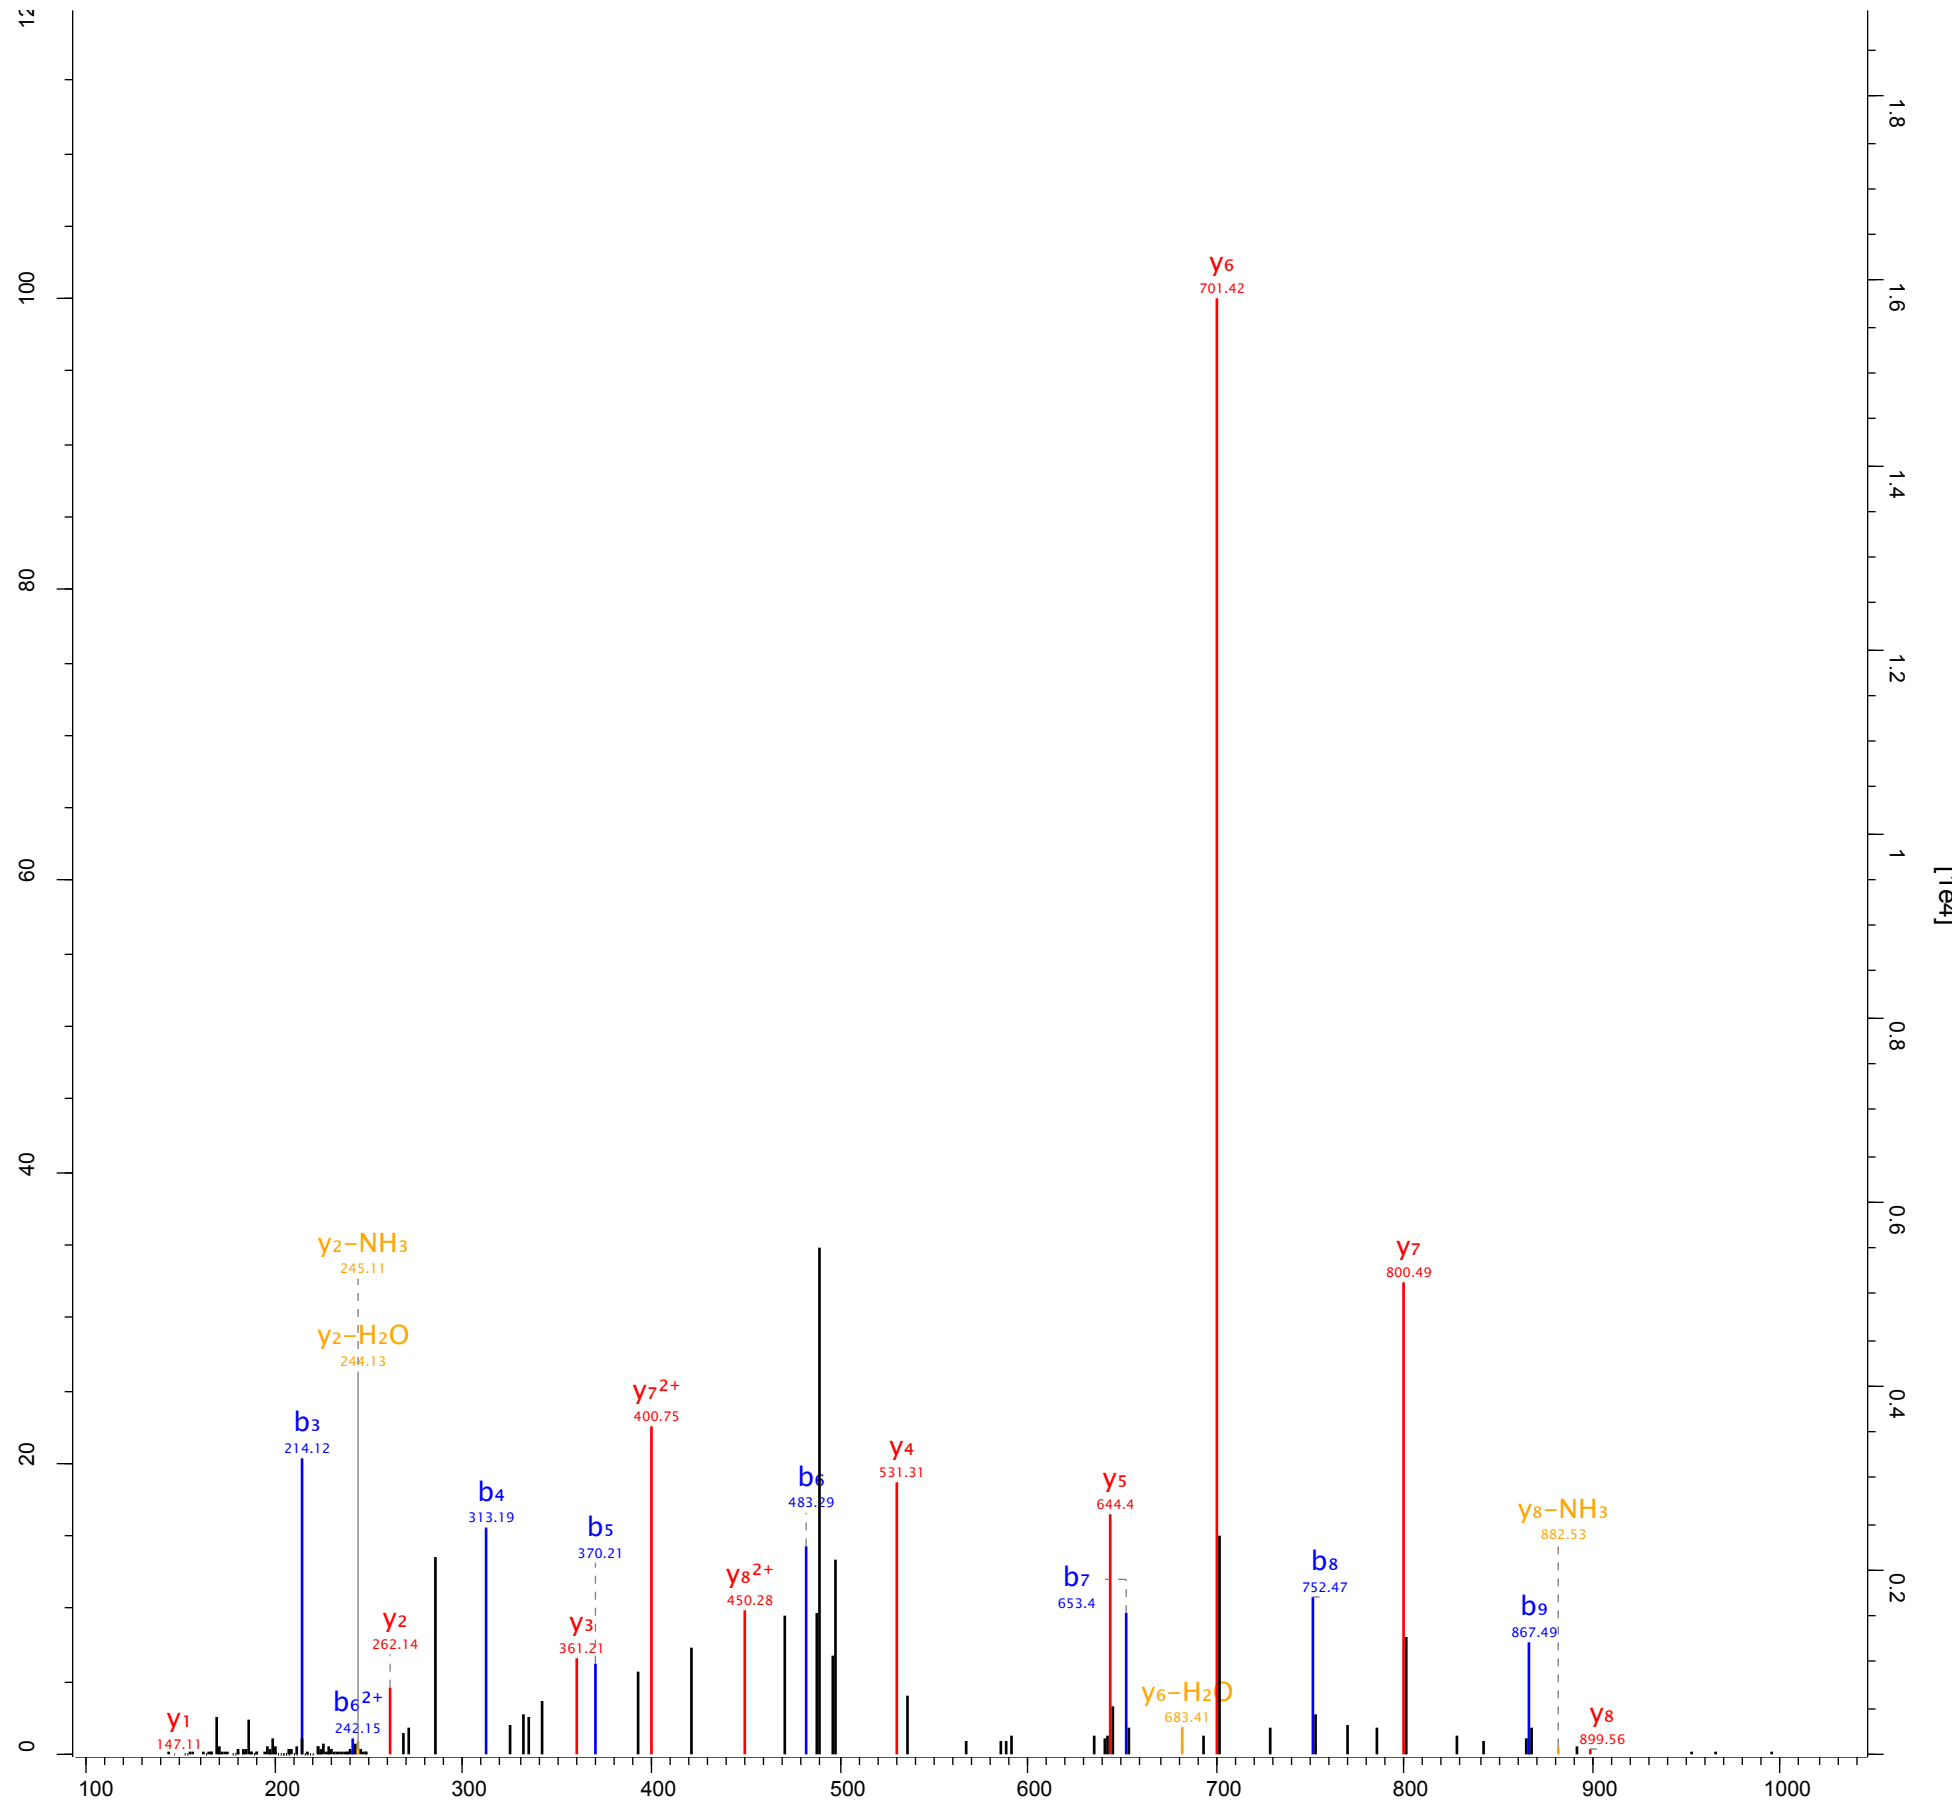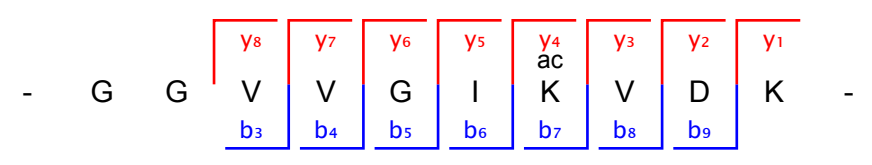

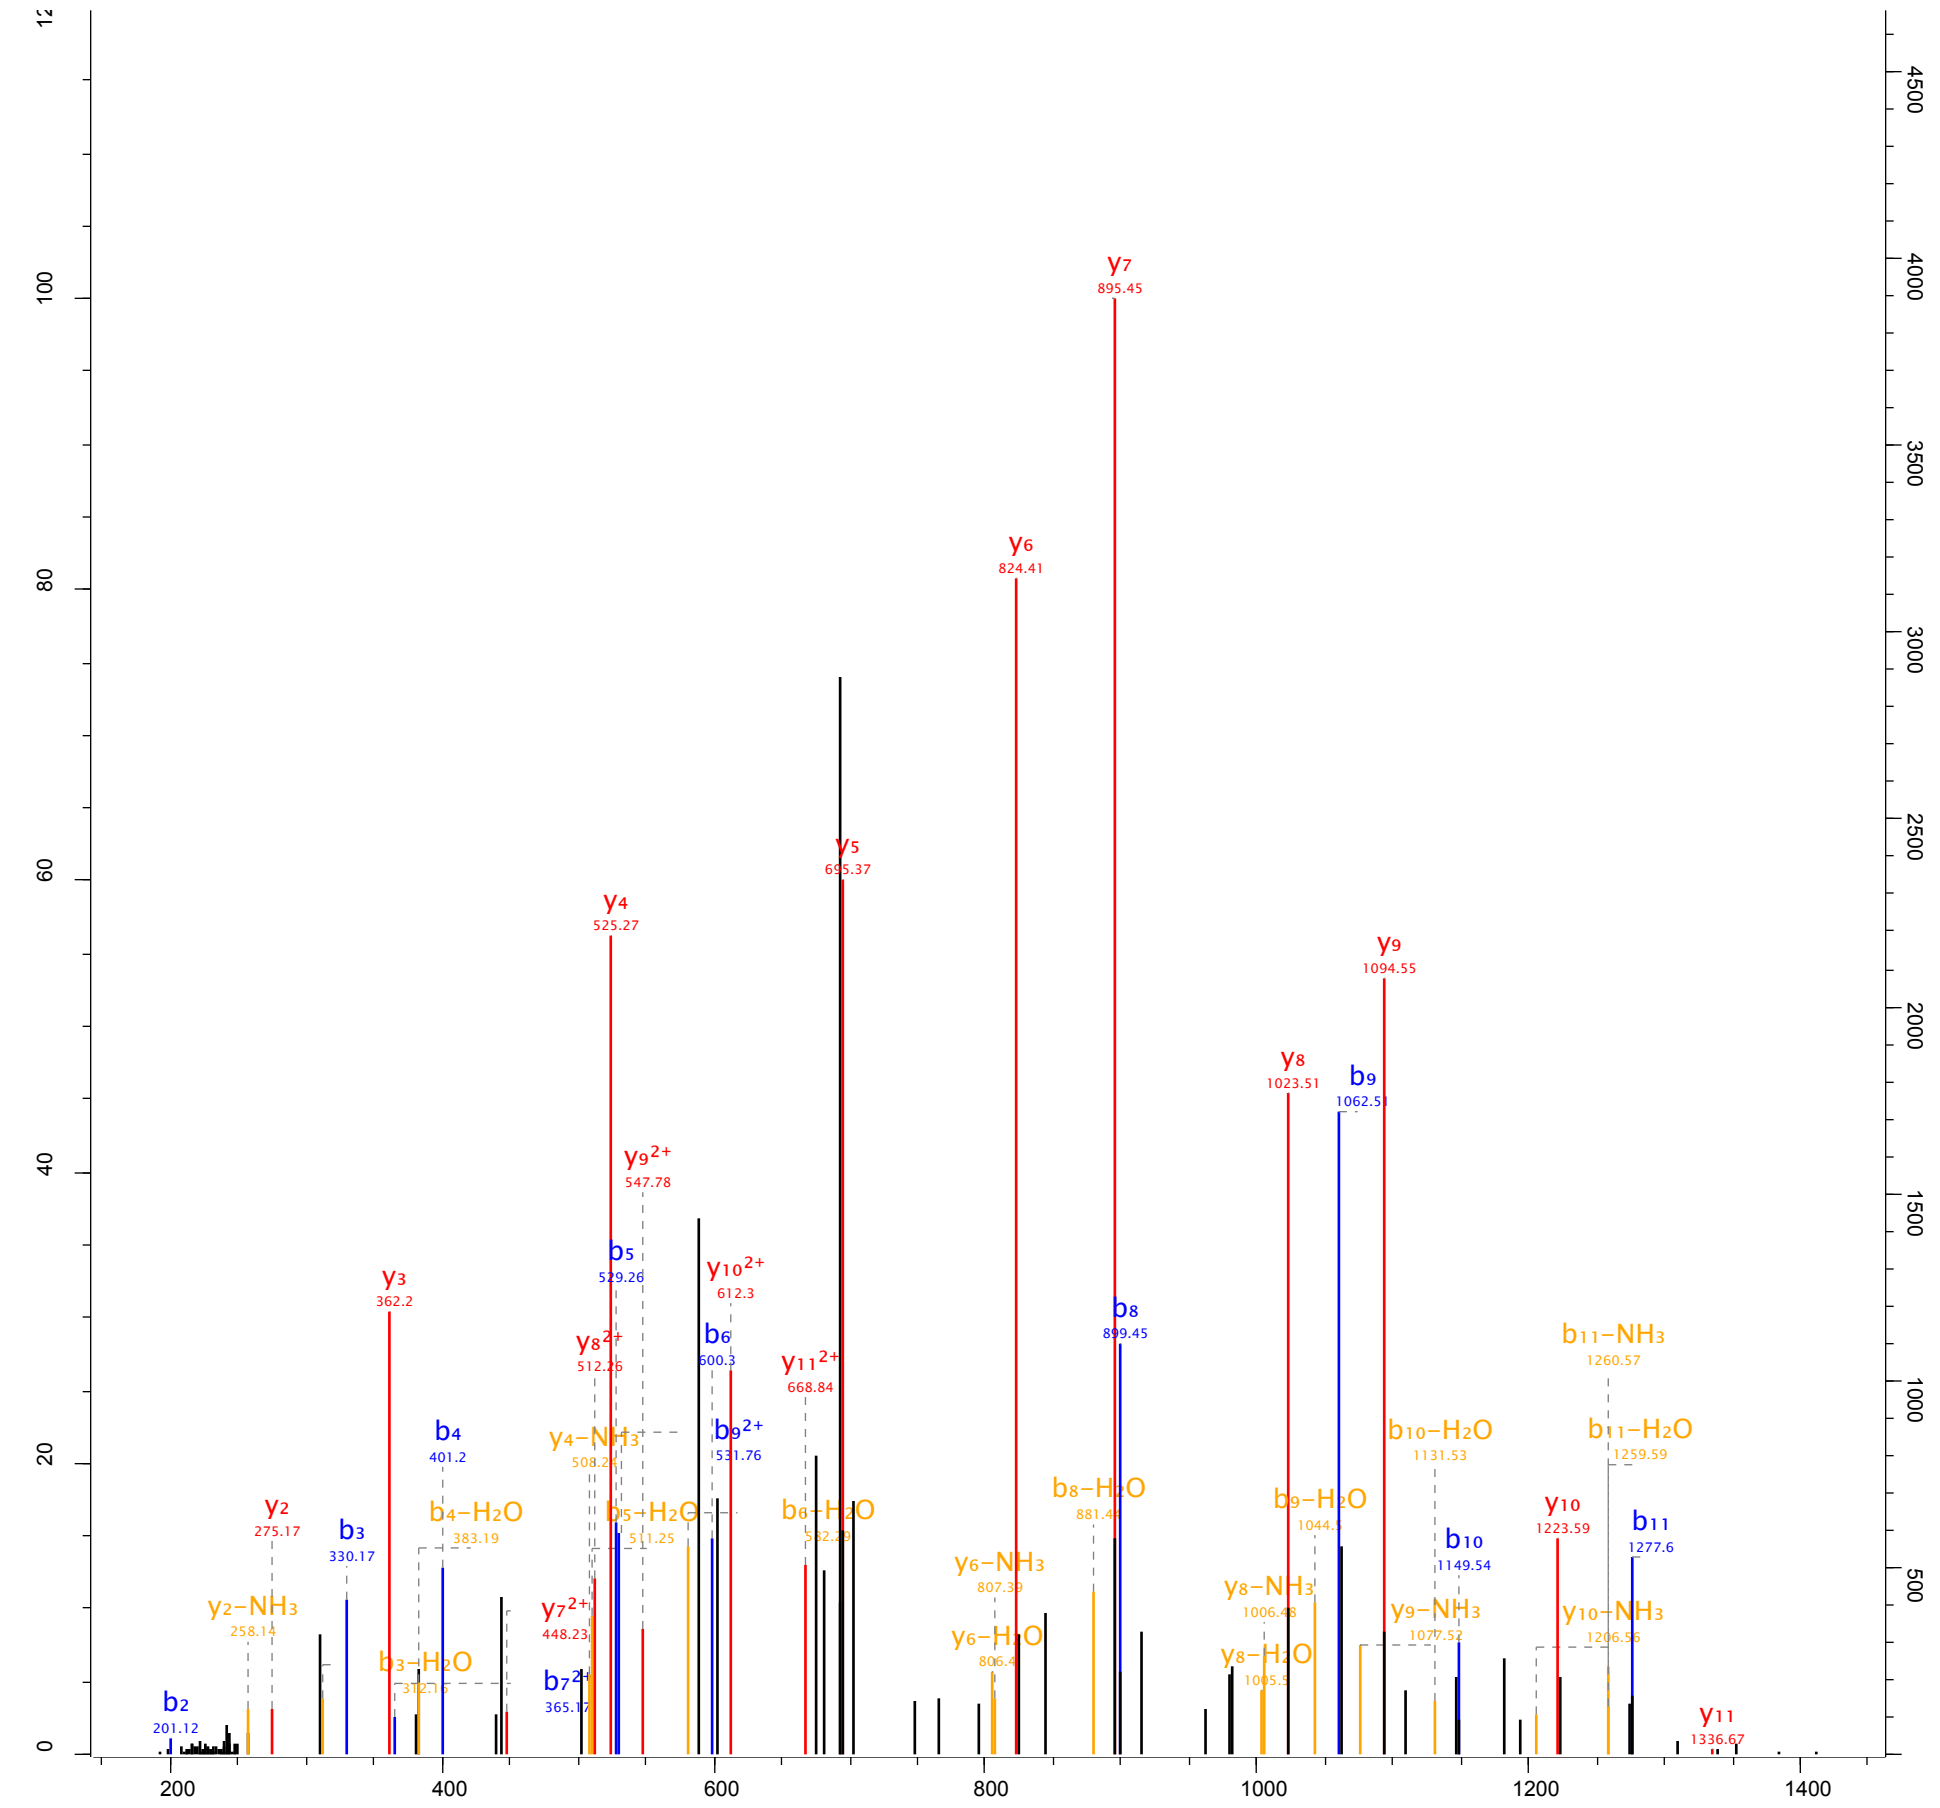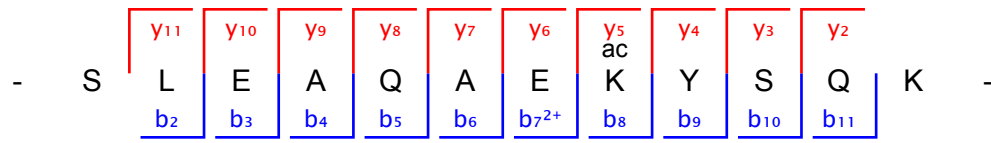

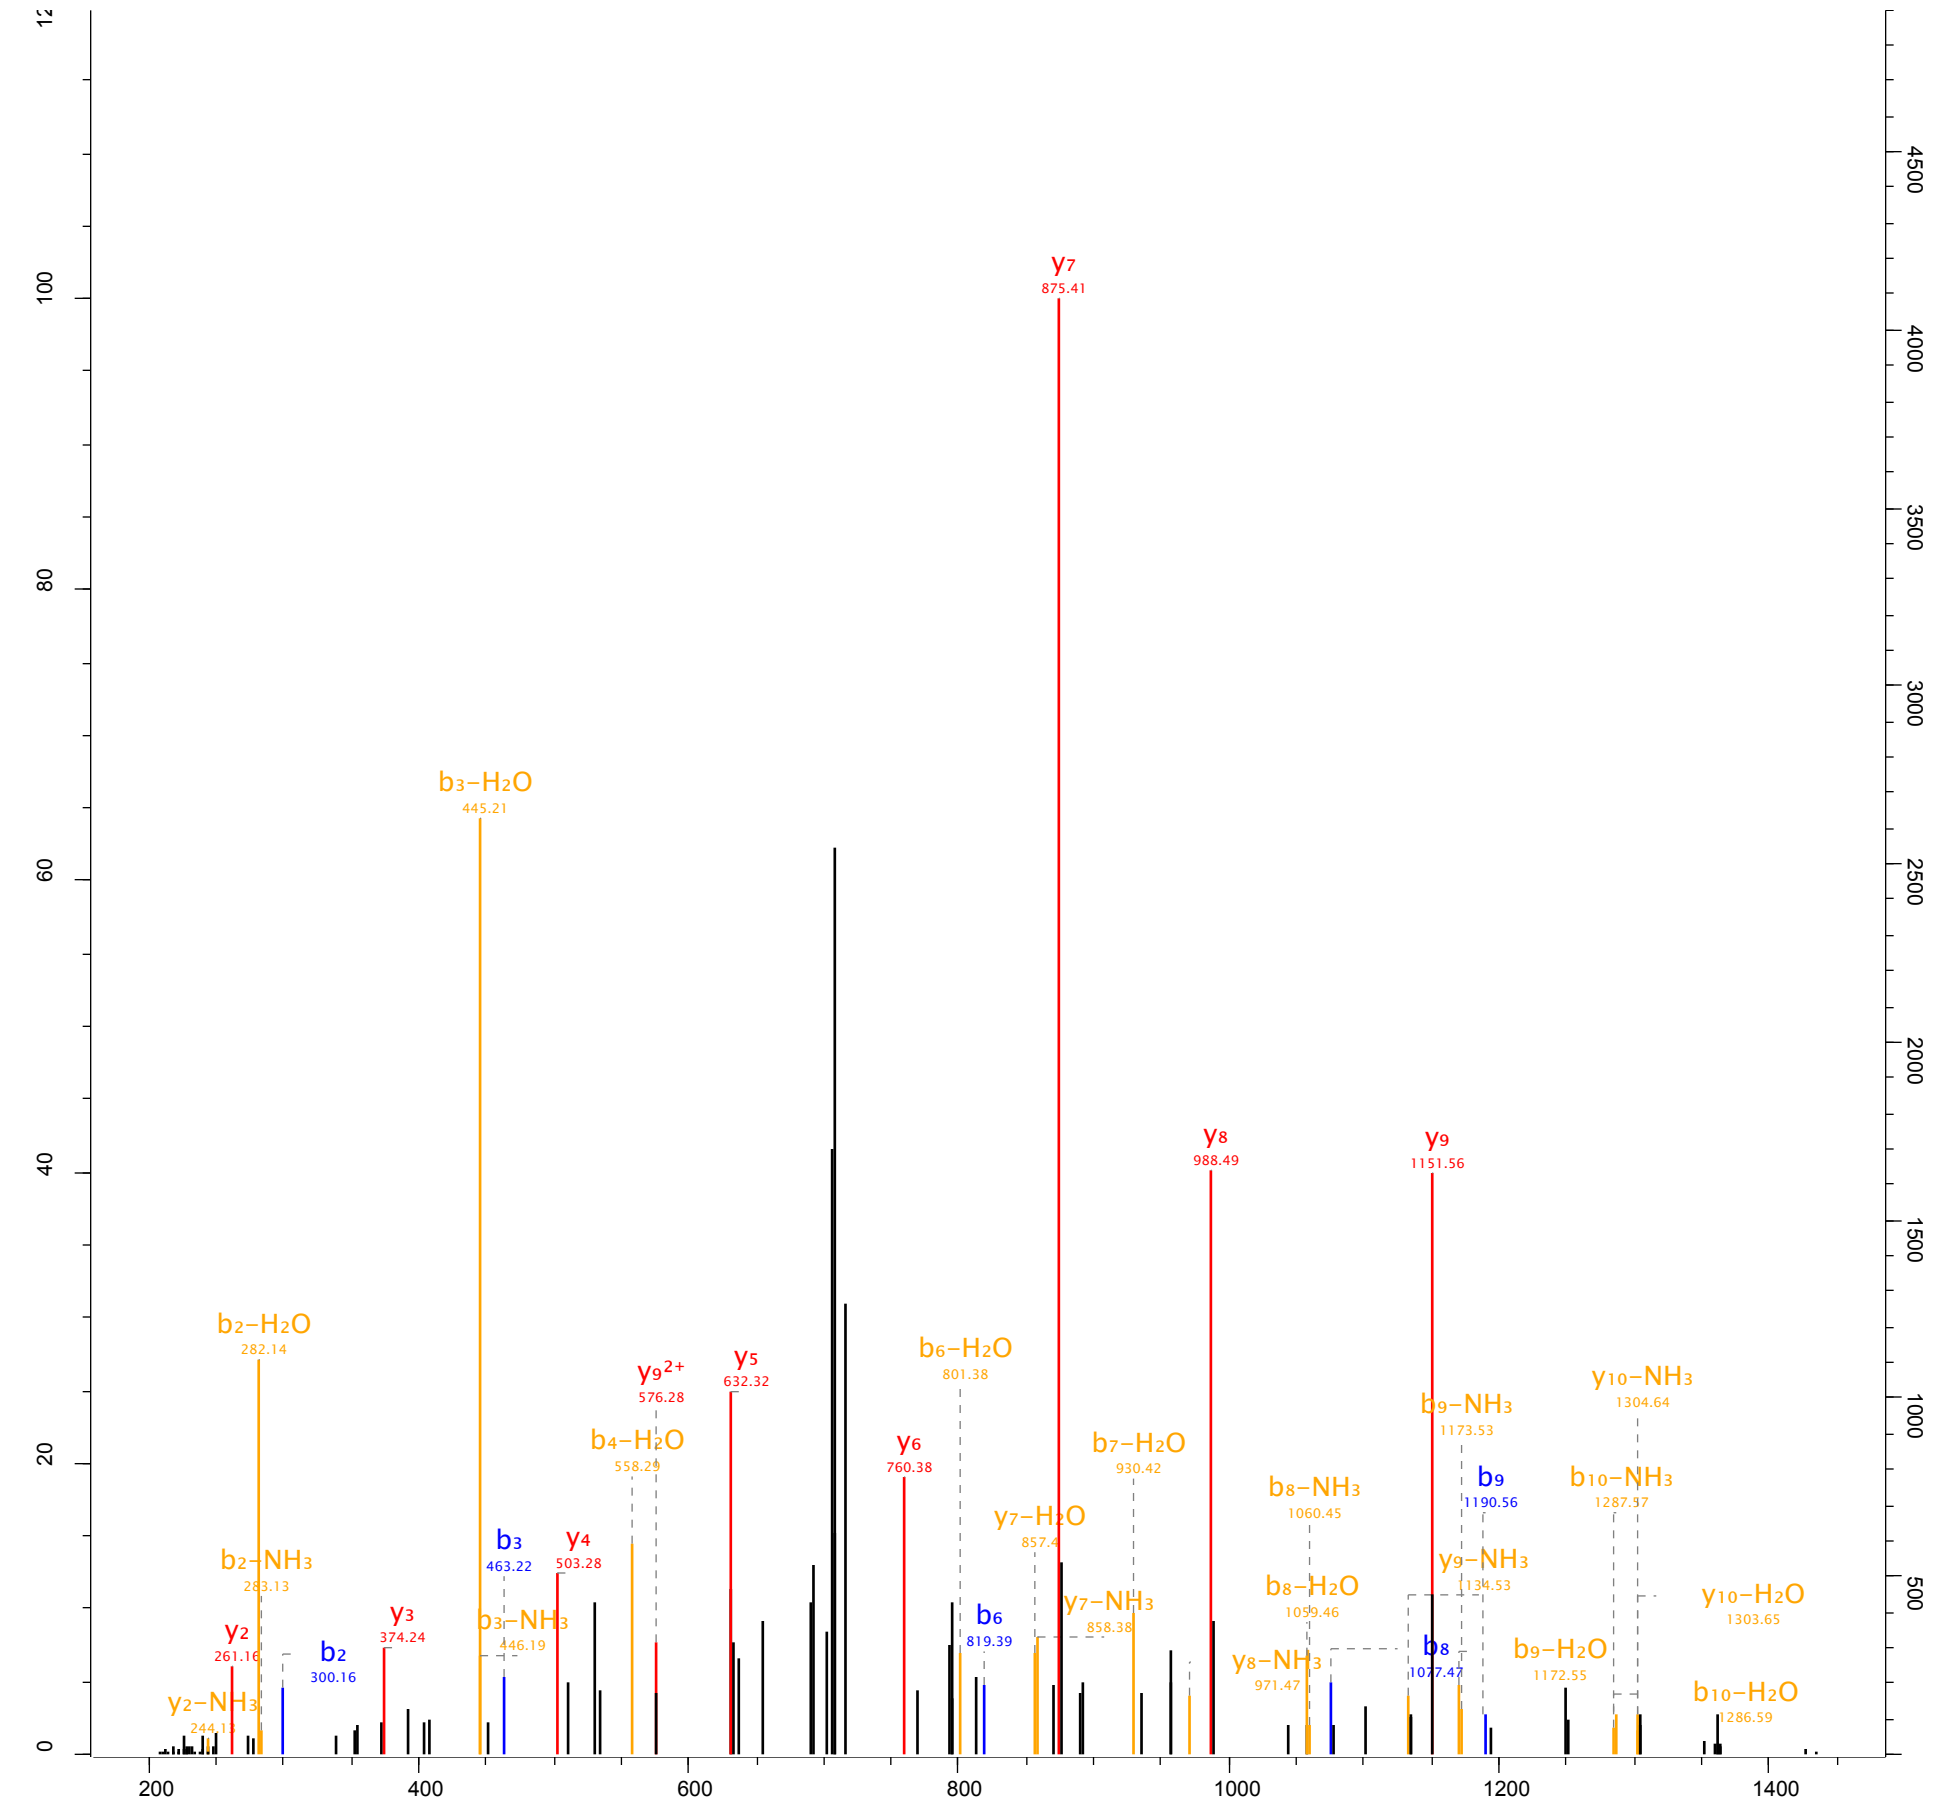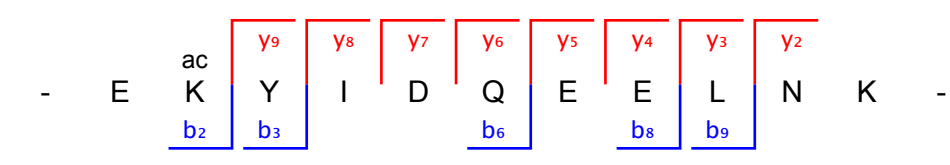

050813\_SCW\_II\_29\_19\_4

14744 ITMS; CID 143.64 739.36 Fh

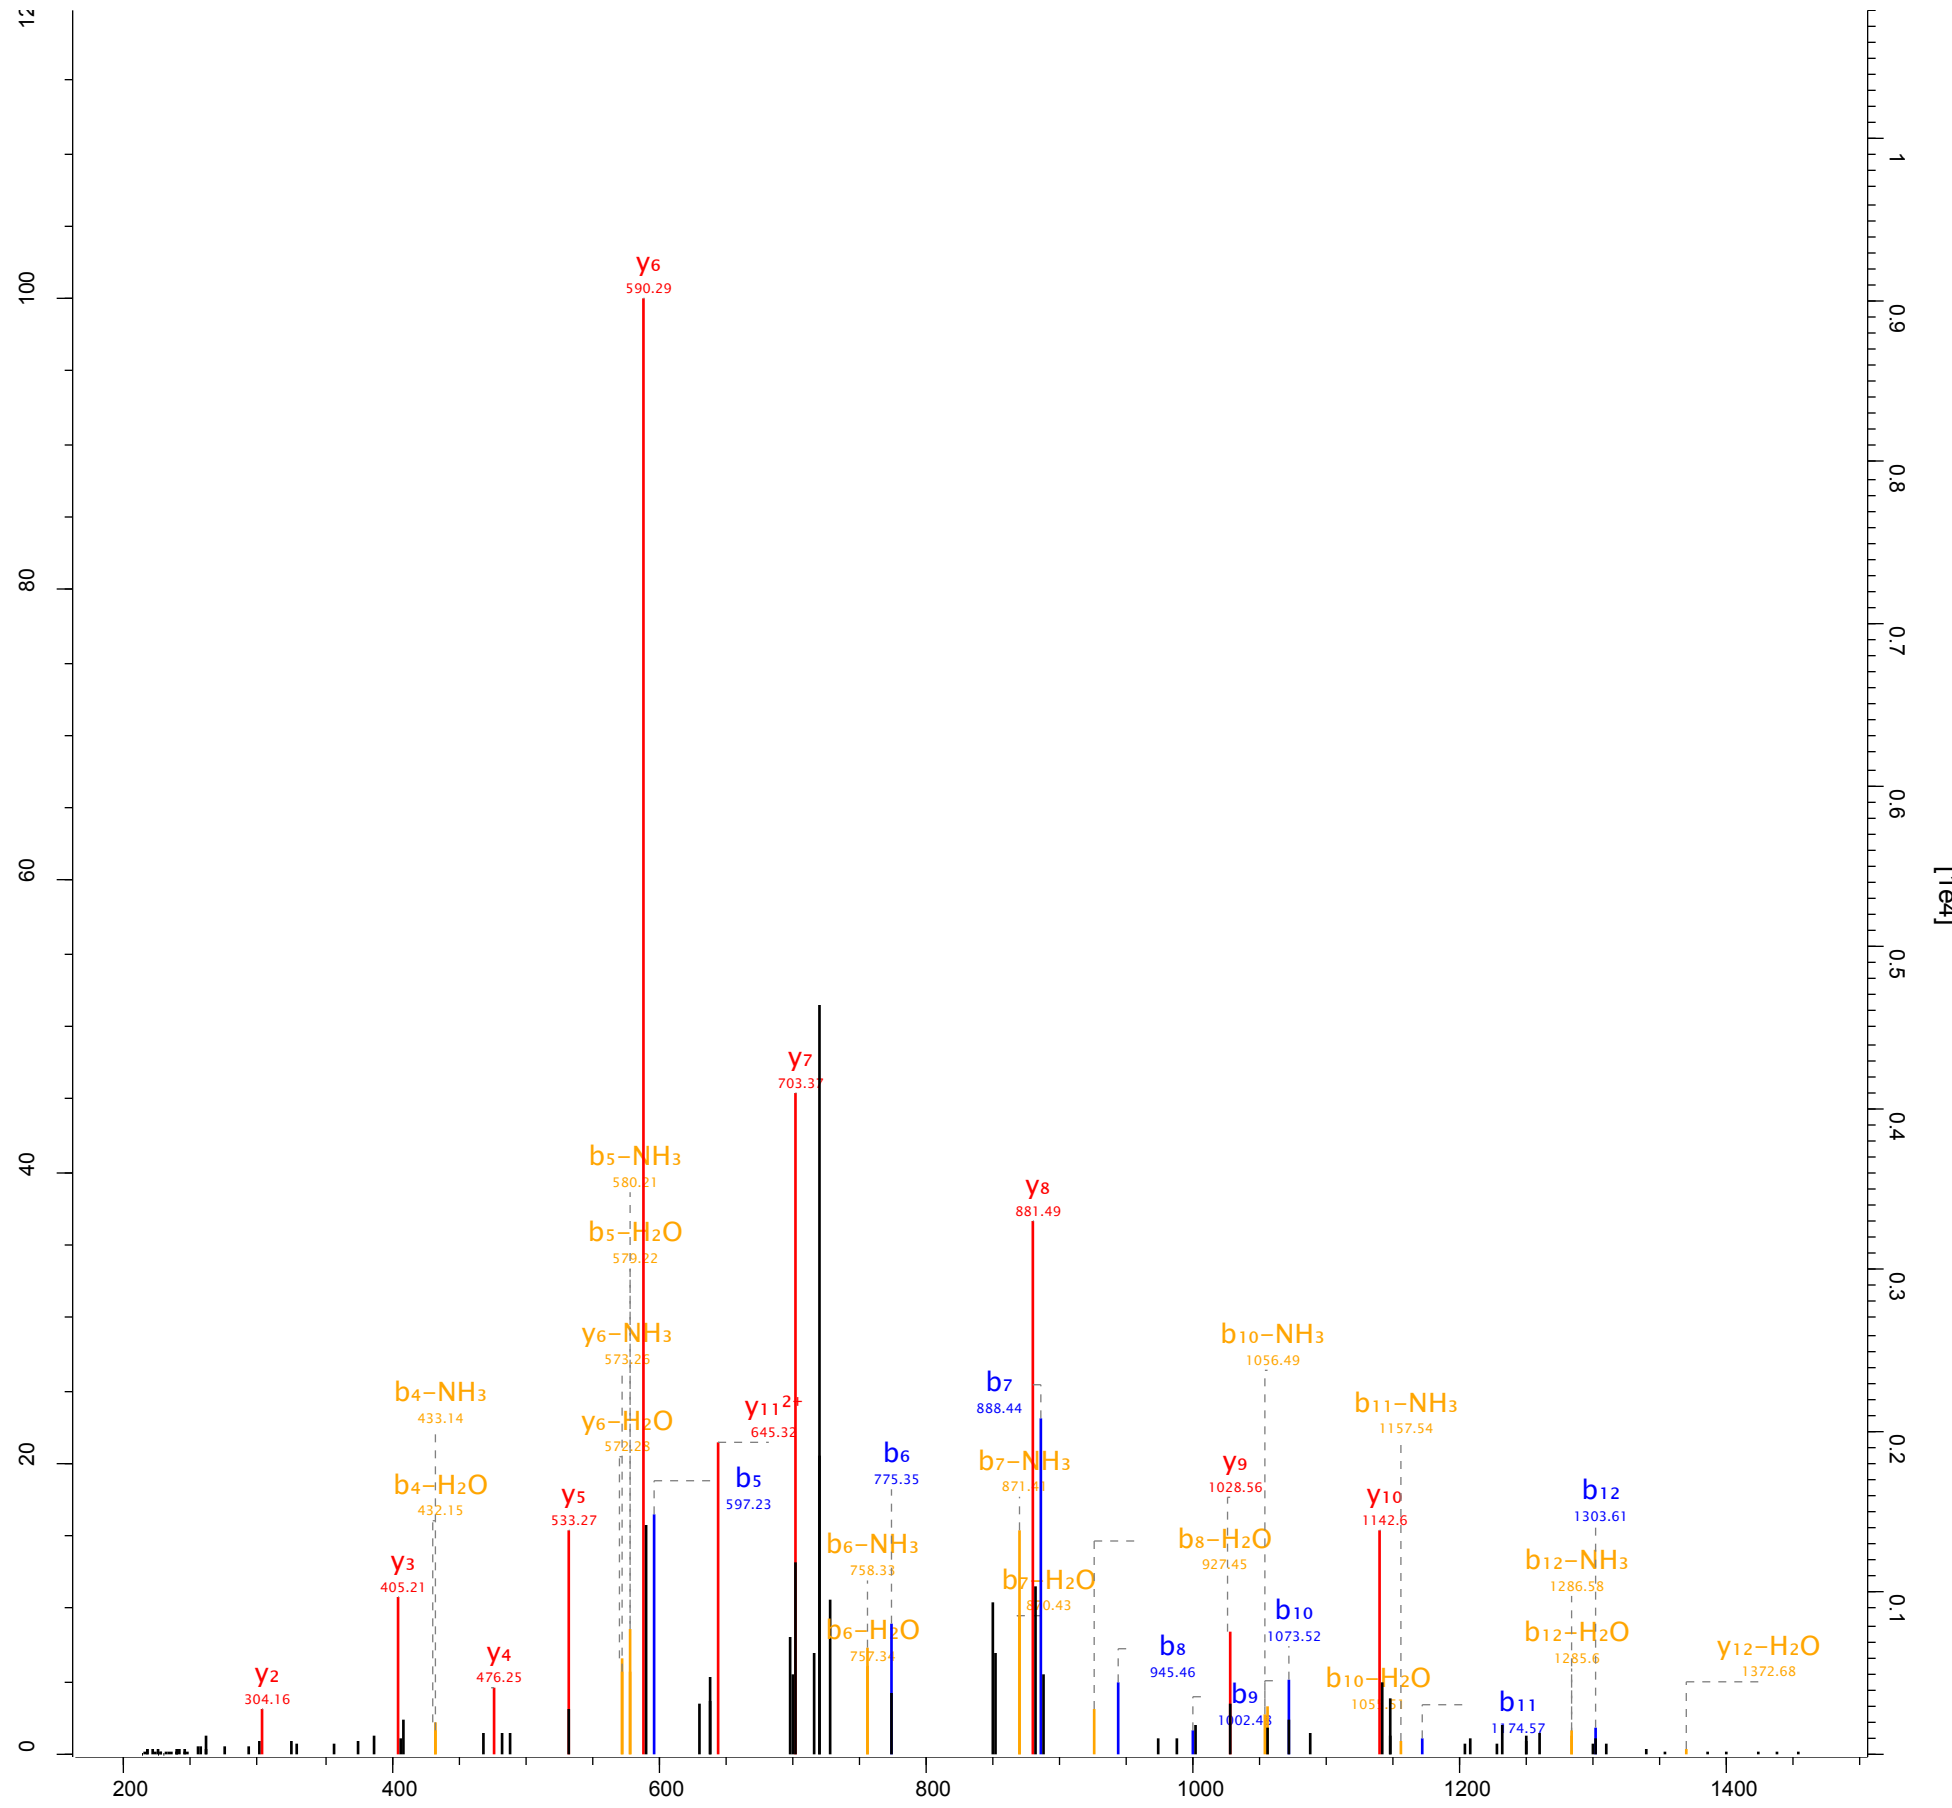

- S T M<sup>y<sub>11</sub><sup>2+</sup>ox</sup> N<sup>y<sub>10</sub></sup> F<sup>y<sub>9</sub></sup> K<sup>y<sub>8</sub>ac</sup> I<sup>y<sub>7</sub></sup> G<sup>y<sub>6</sub></sup> G<sup>y<sub>5</sub></sup> A<sup>y<sub>4</sub></sup> T<sup>y<sub>3</sub></sup> E<sup>y<sub>2</sub></sup> R -

b<sub>5</sub> b<sub>6</sub> b<sub>7</sub> b<sub>8</sub> b<sub>9</sub> b<sub>10</sub> b<sub>11</sub> b<sub>12</sub>

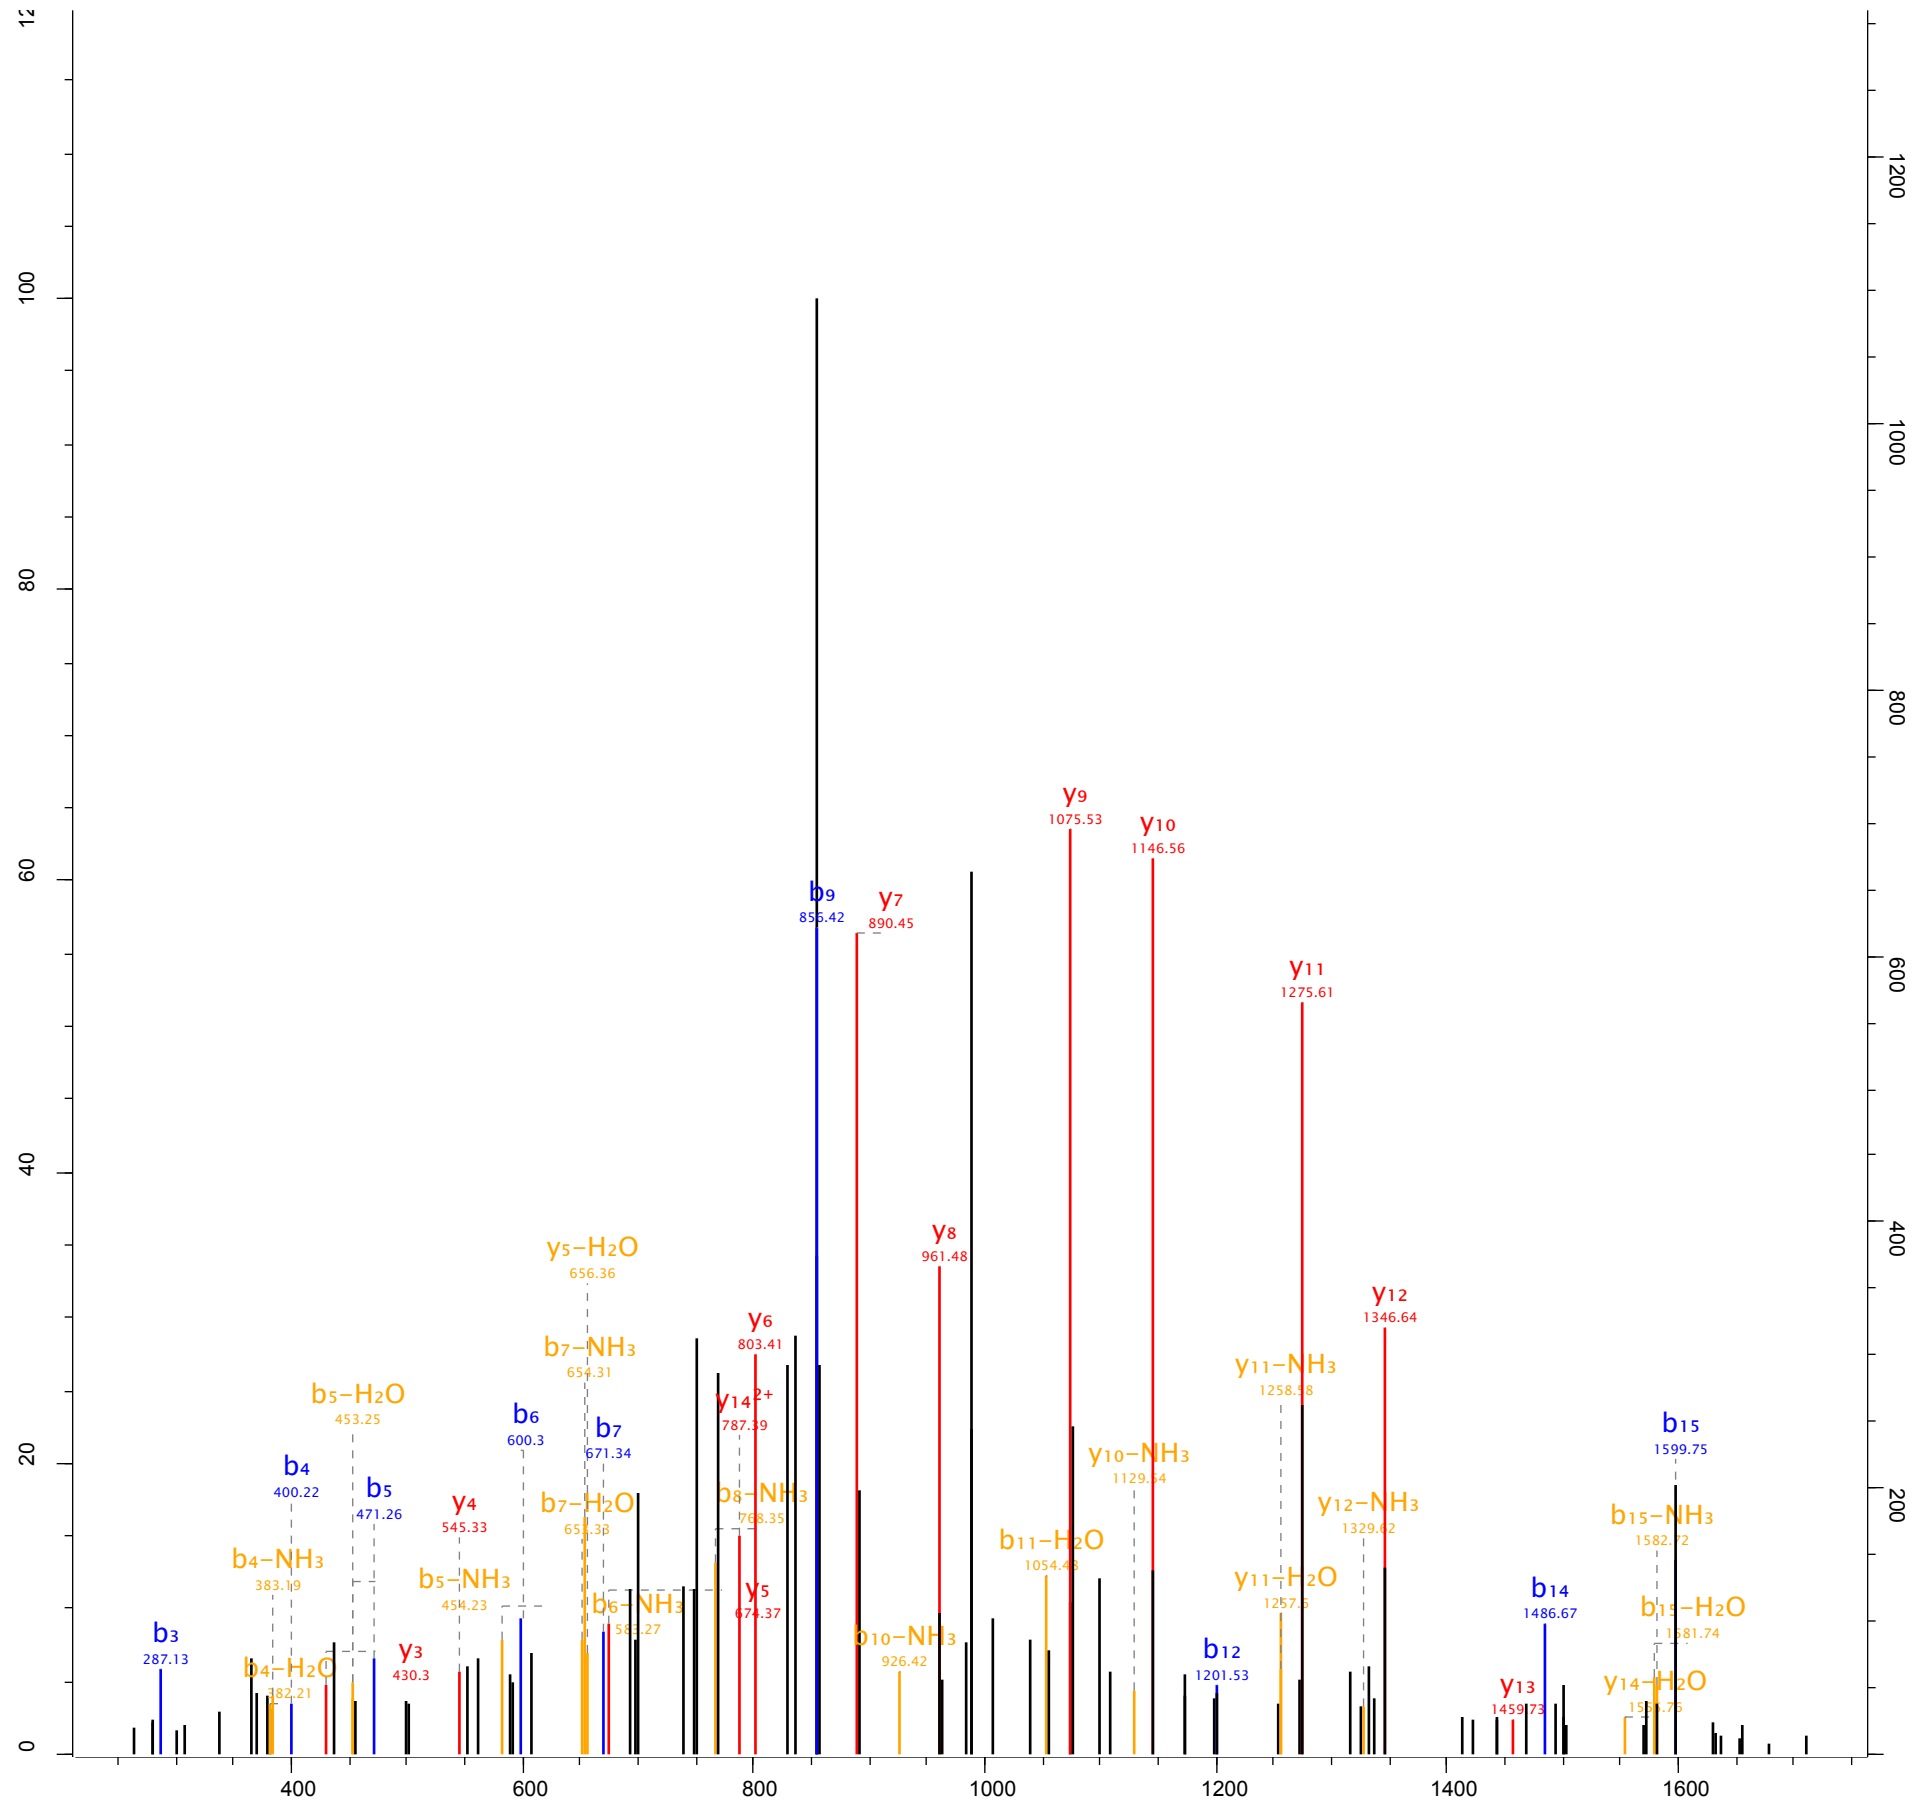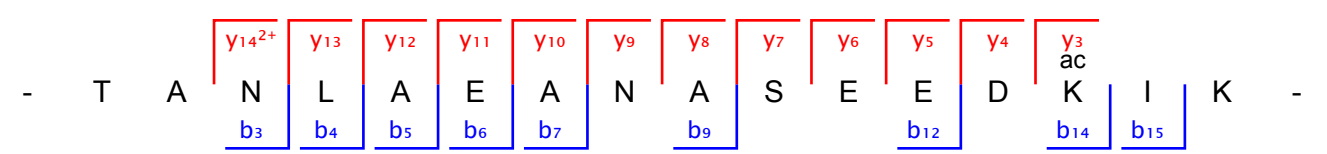

050813\_SCW\_II\_29\_19\_4

14831 ITMS; CID 214.54 813.93 Etfdh

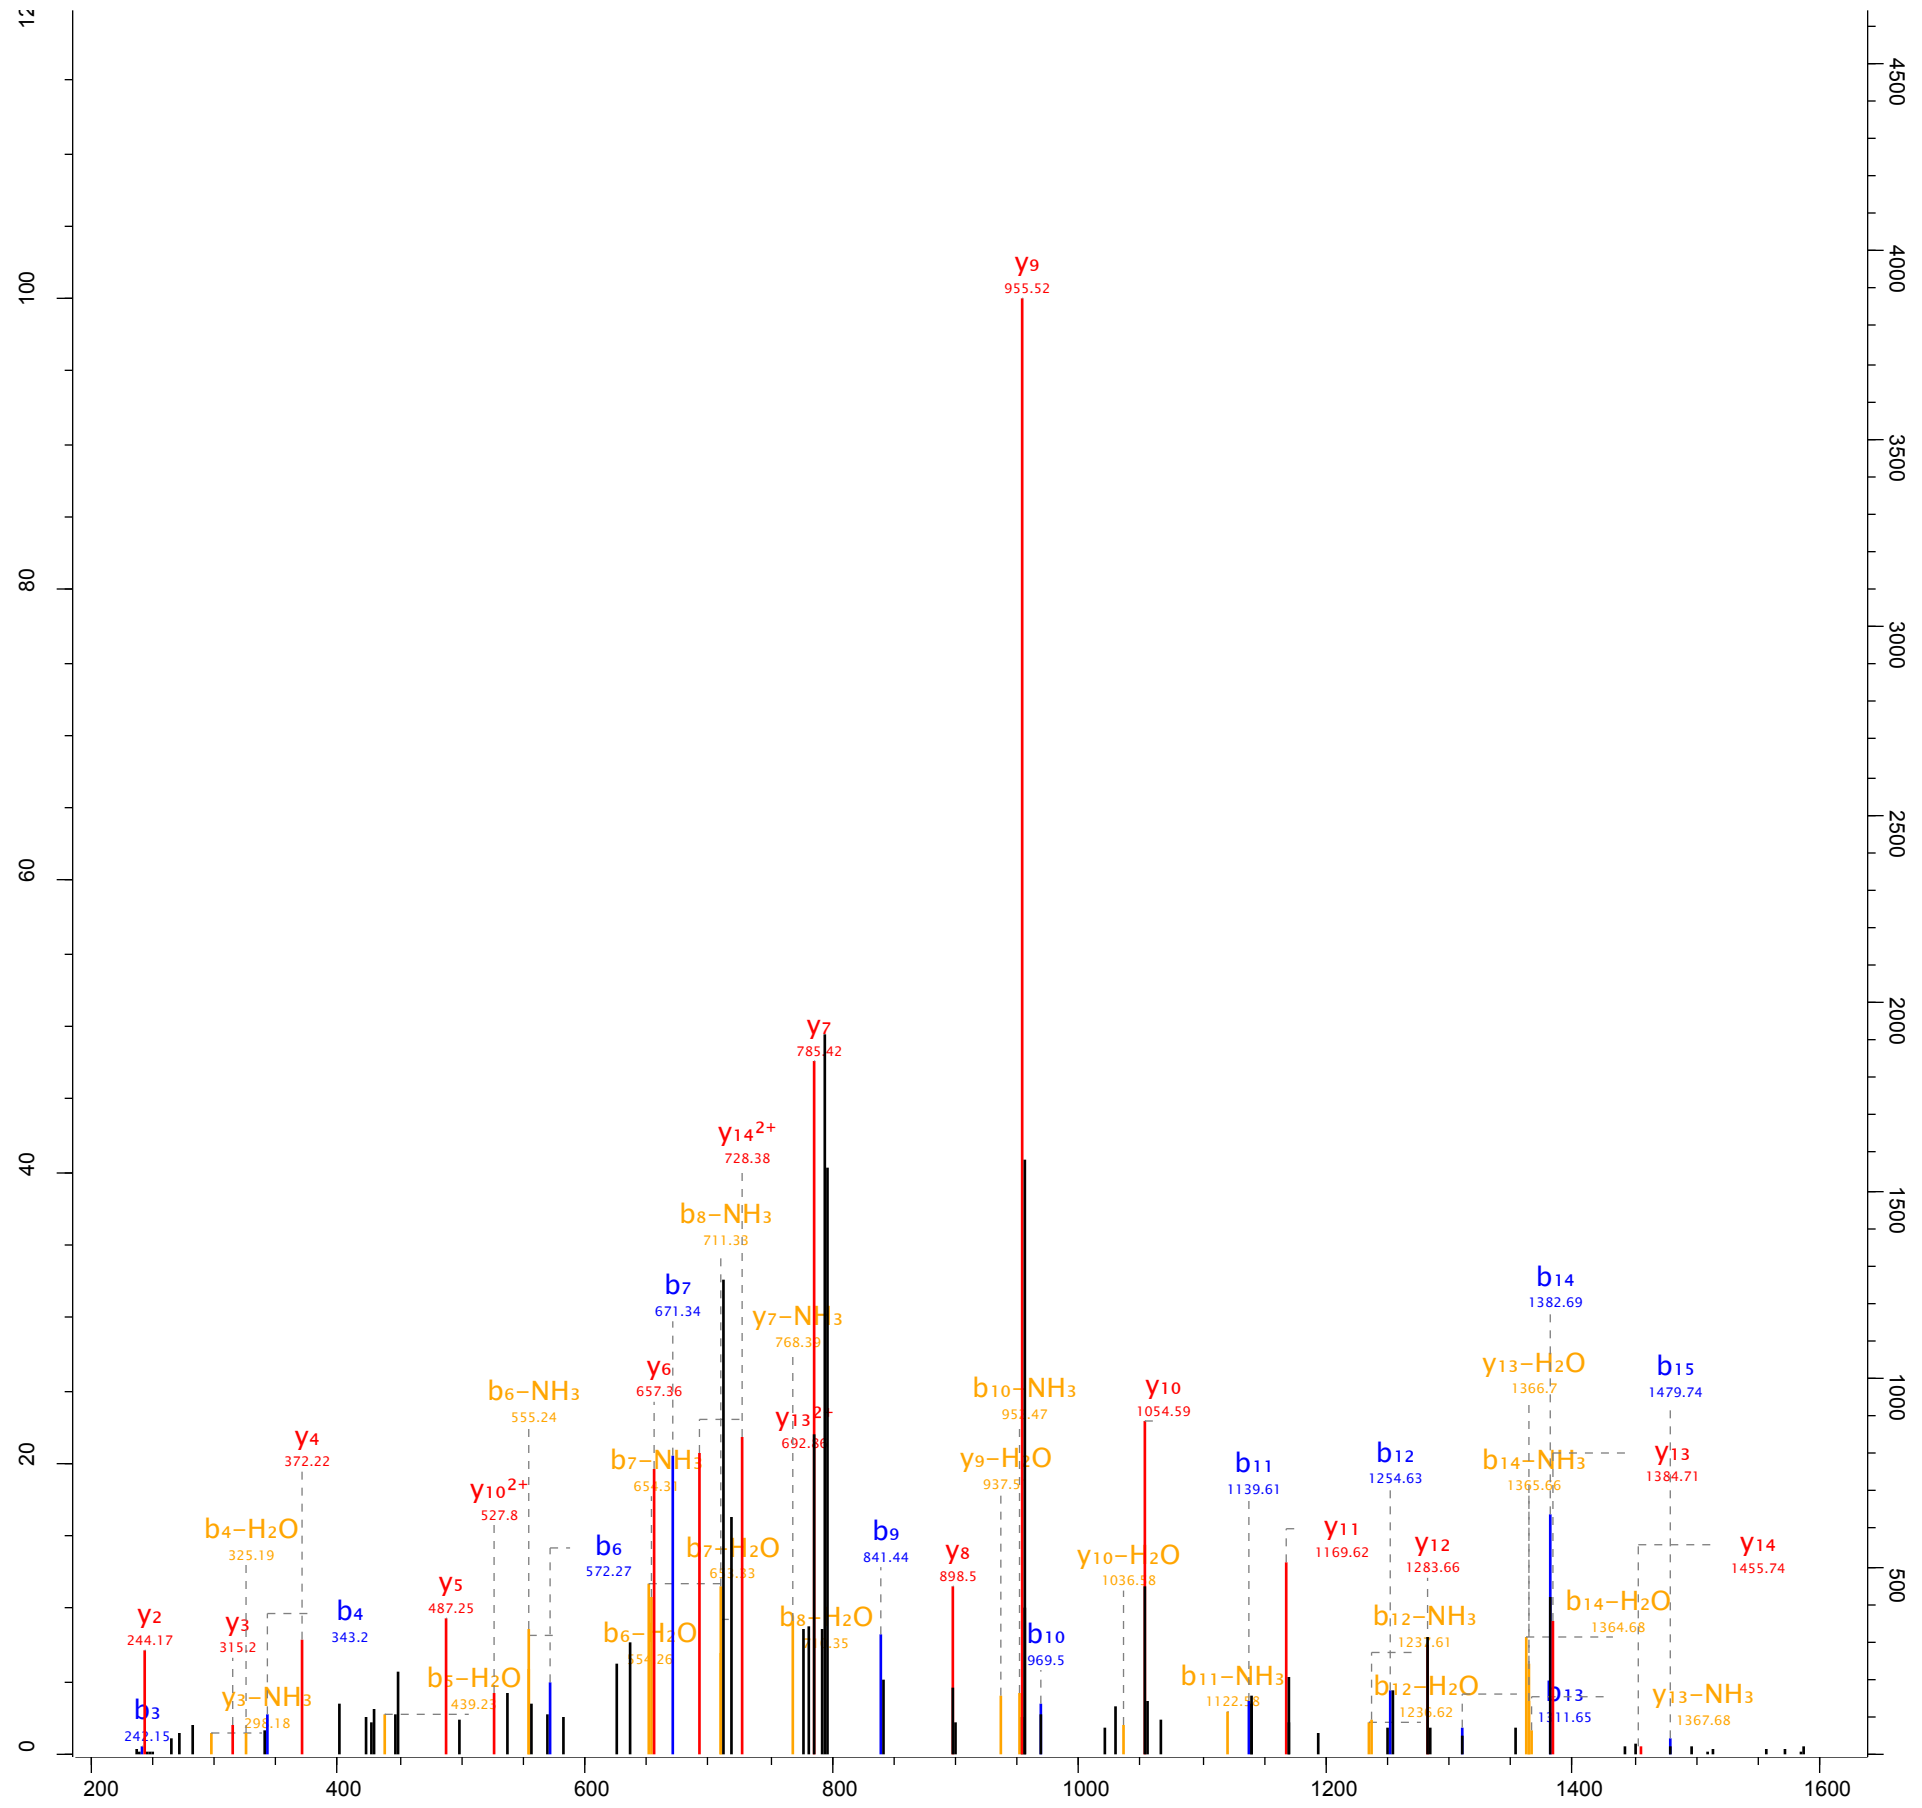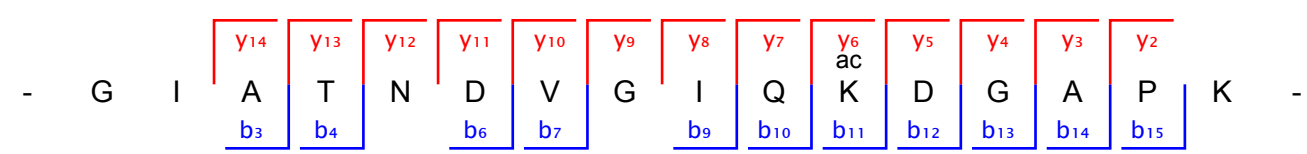

Raw file: 050813\_SCW\_II\_29\_19\_4  
 Scan: 14849  
 Method: ITMS; CID  
 Score: 183.28  
 m/z: 759.87  
 Gene names: Lmnb1

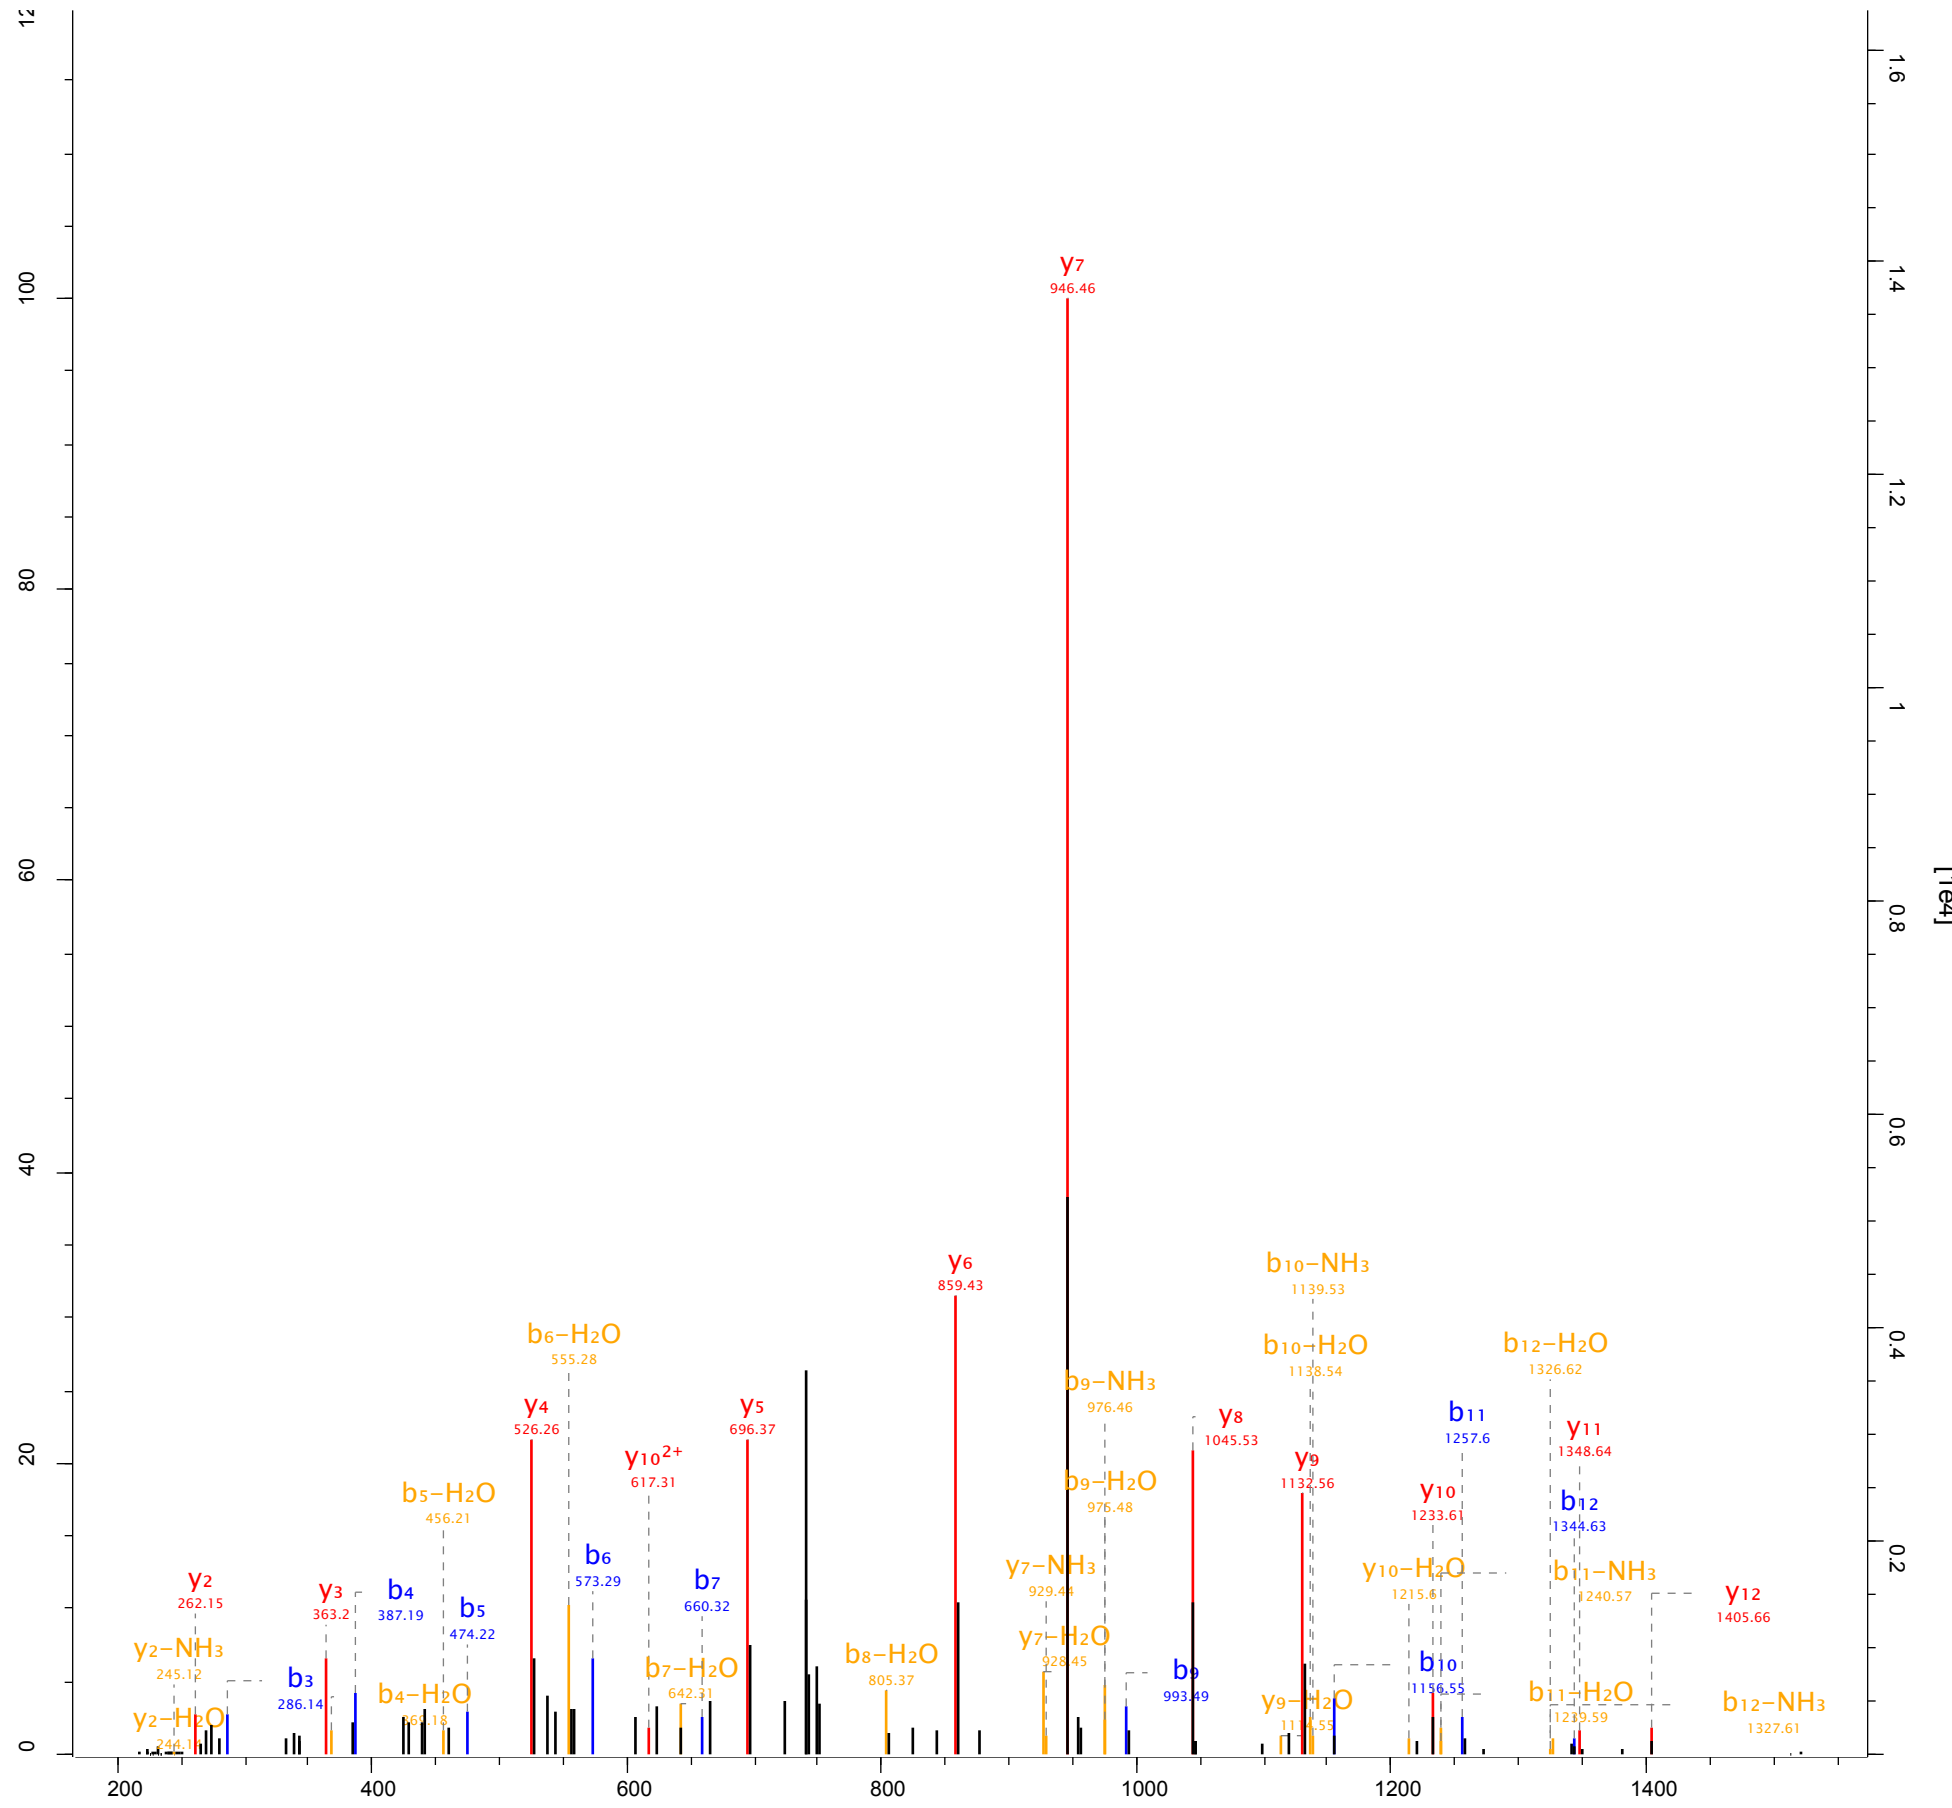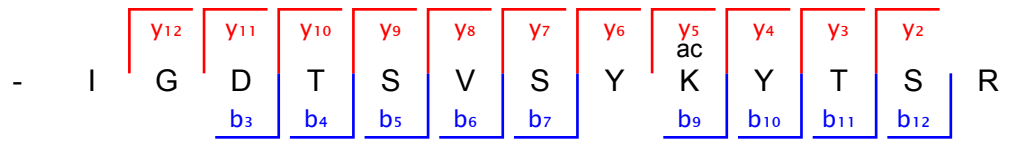

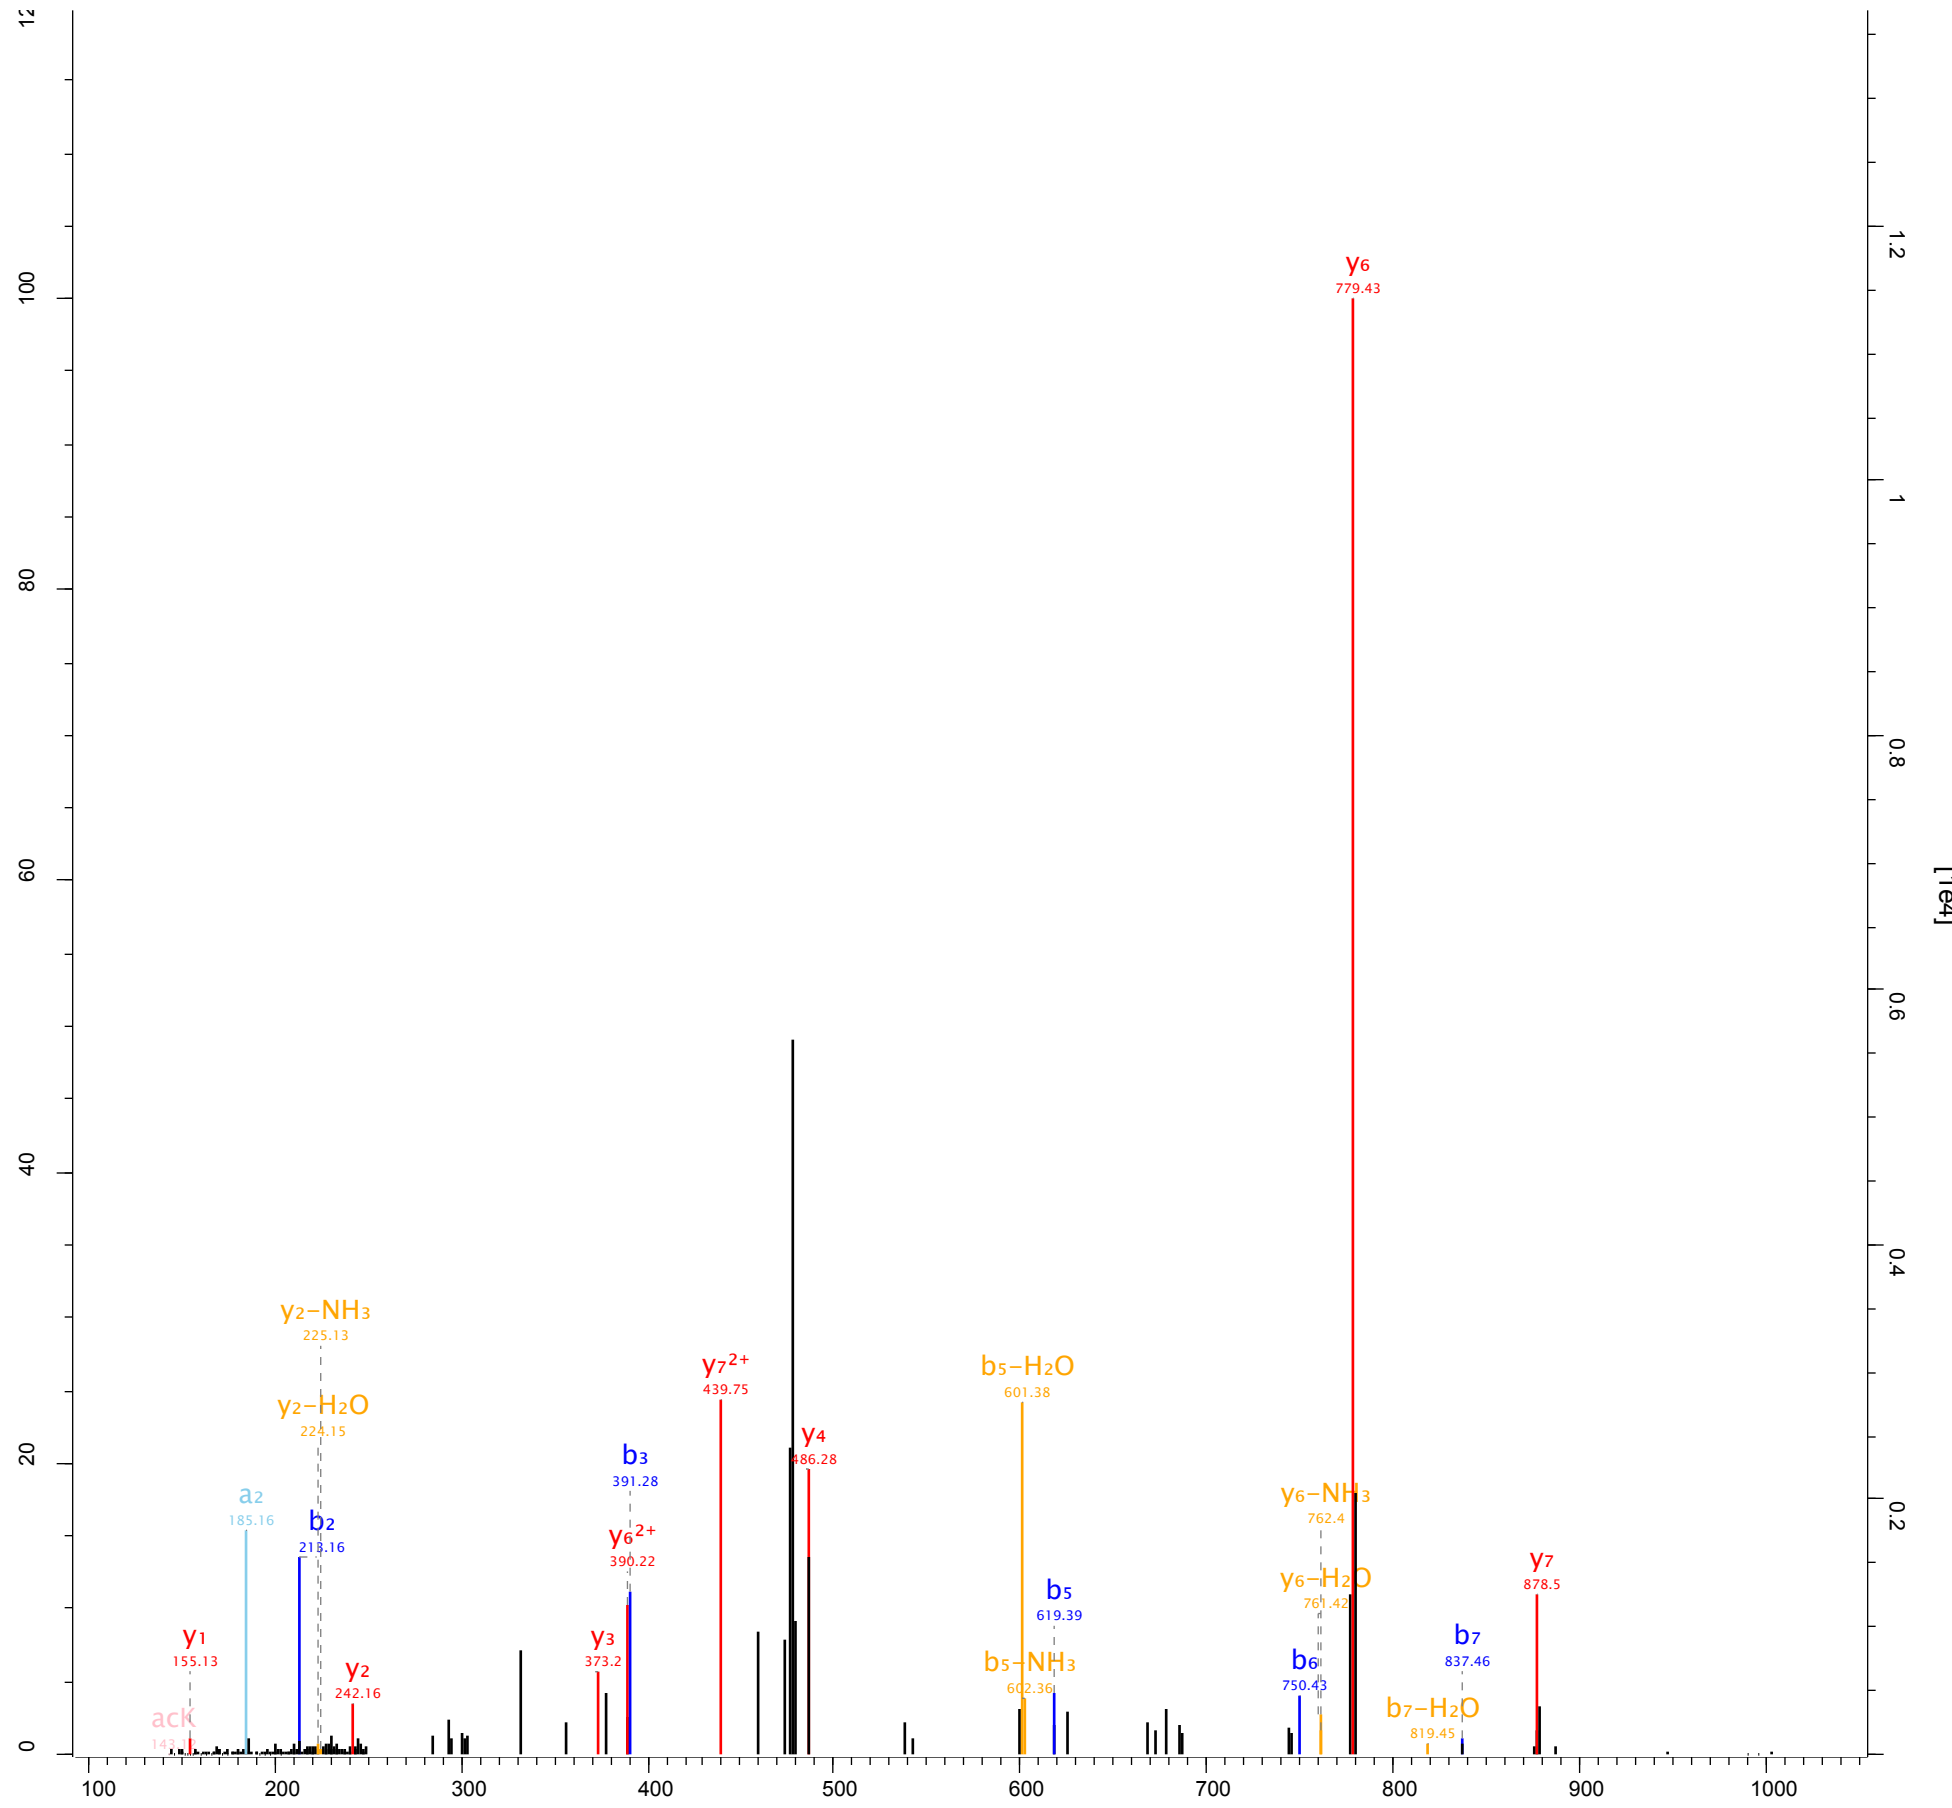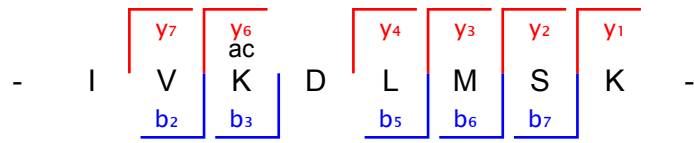



Raw file Scan Method Score m/z Gene names  
 050813\_SCW\_II\_29\_19\_4 14956 ITMS; CID 214.89 761.4 Anxa3

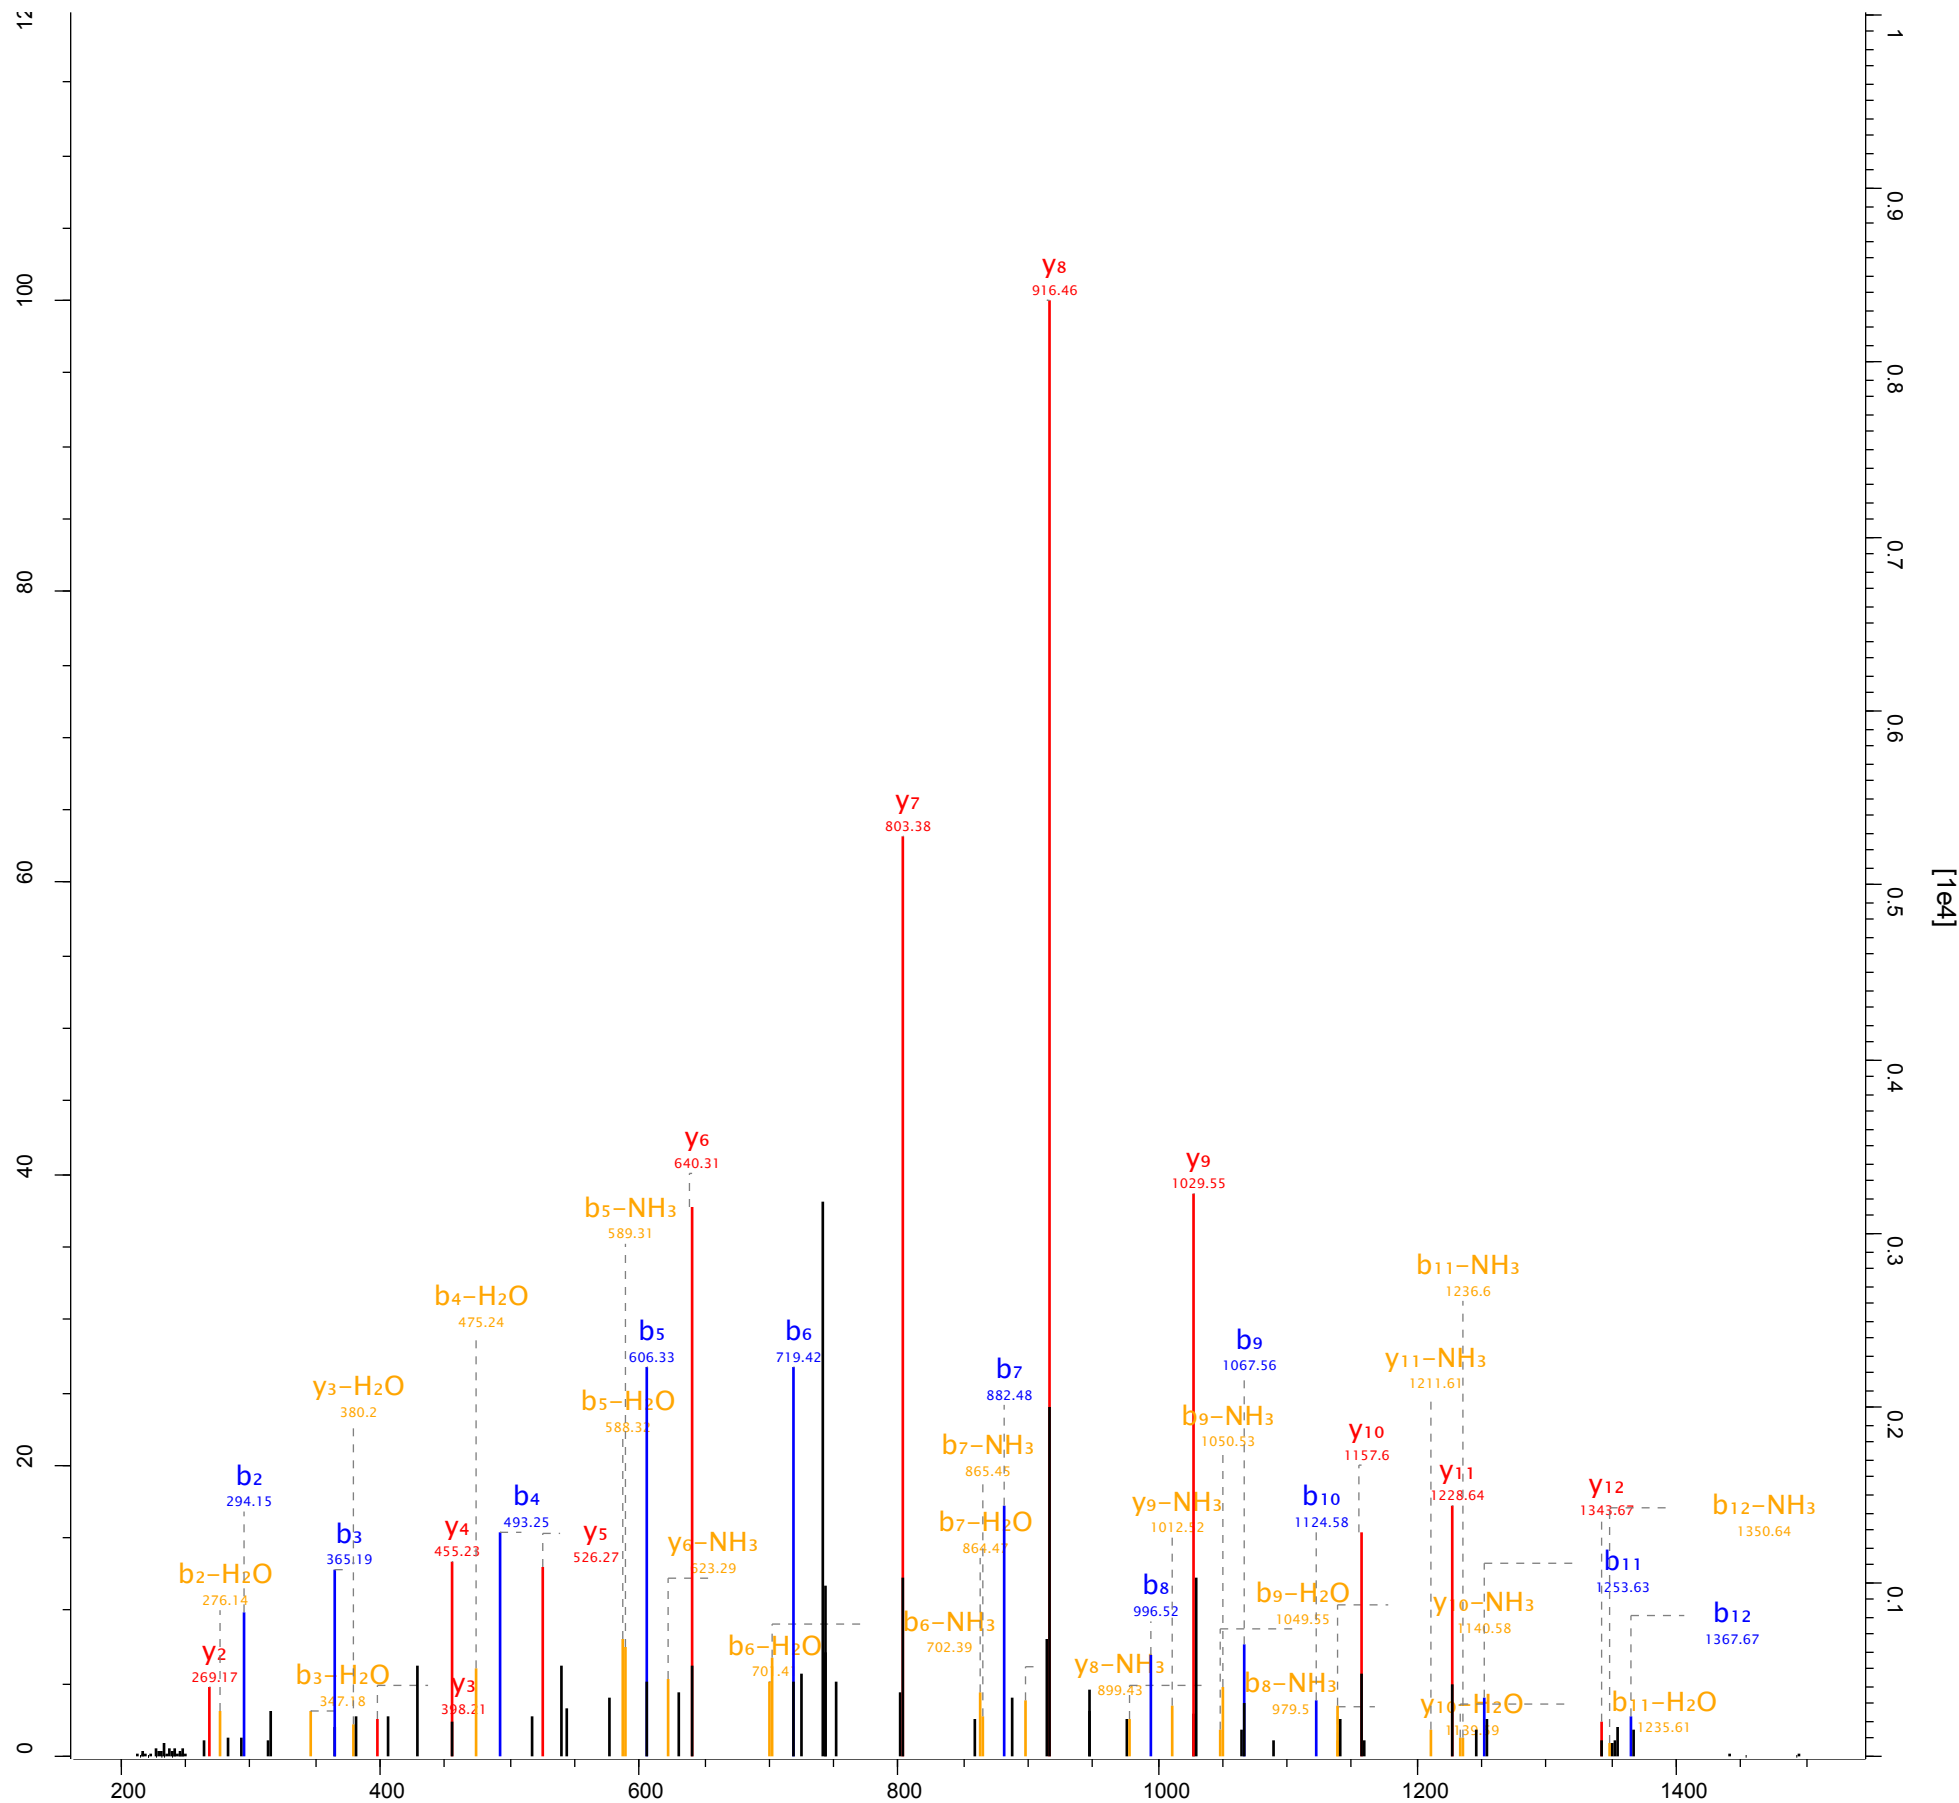

ac K y12 y11 y10 y9 y8 y7 y6 y5 y4 y3 y2  
 - D A Q I L Y N A G E N K -  
b2 b3 b4 b5 b6 b7 b8 b9 b10 b11 b12

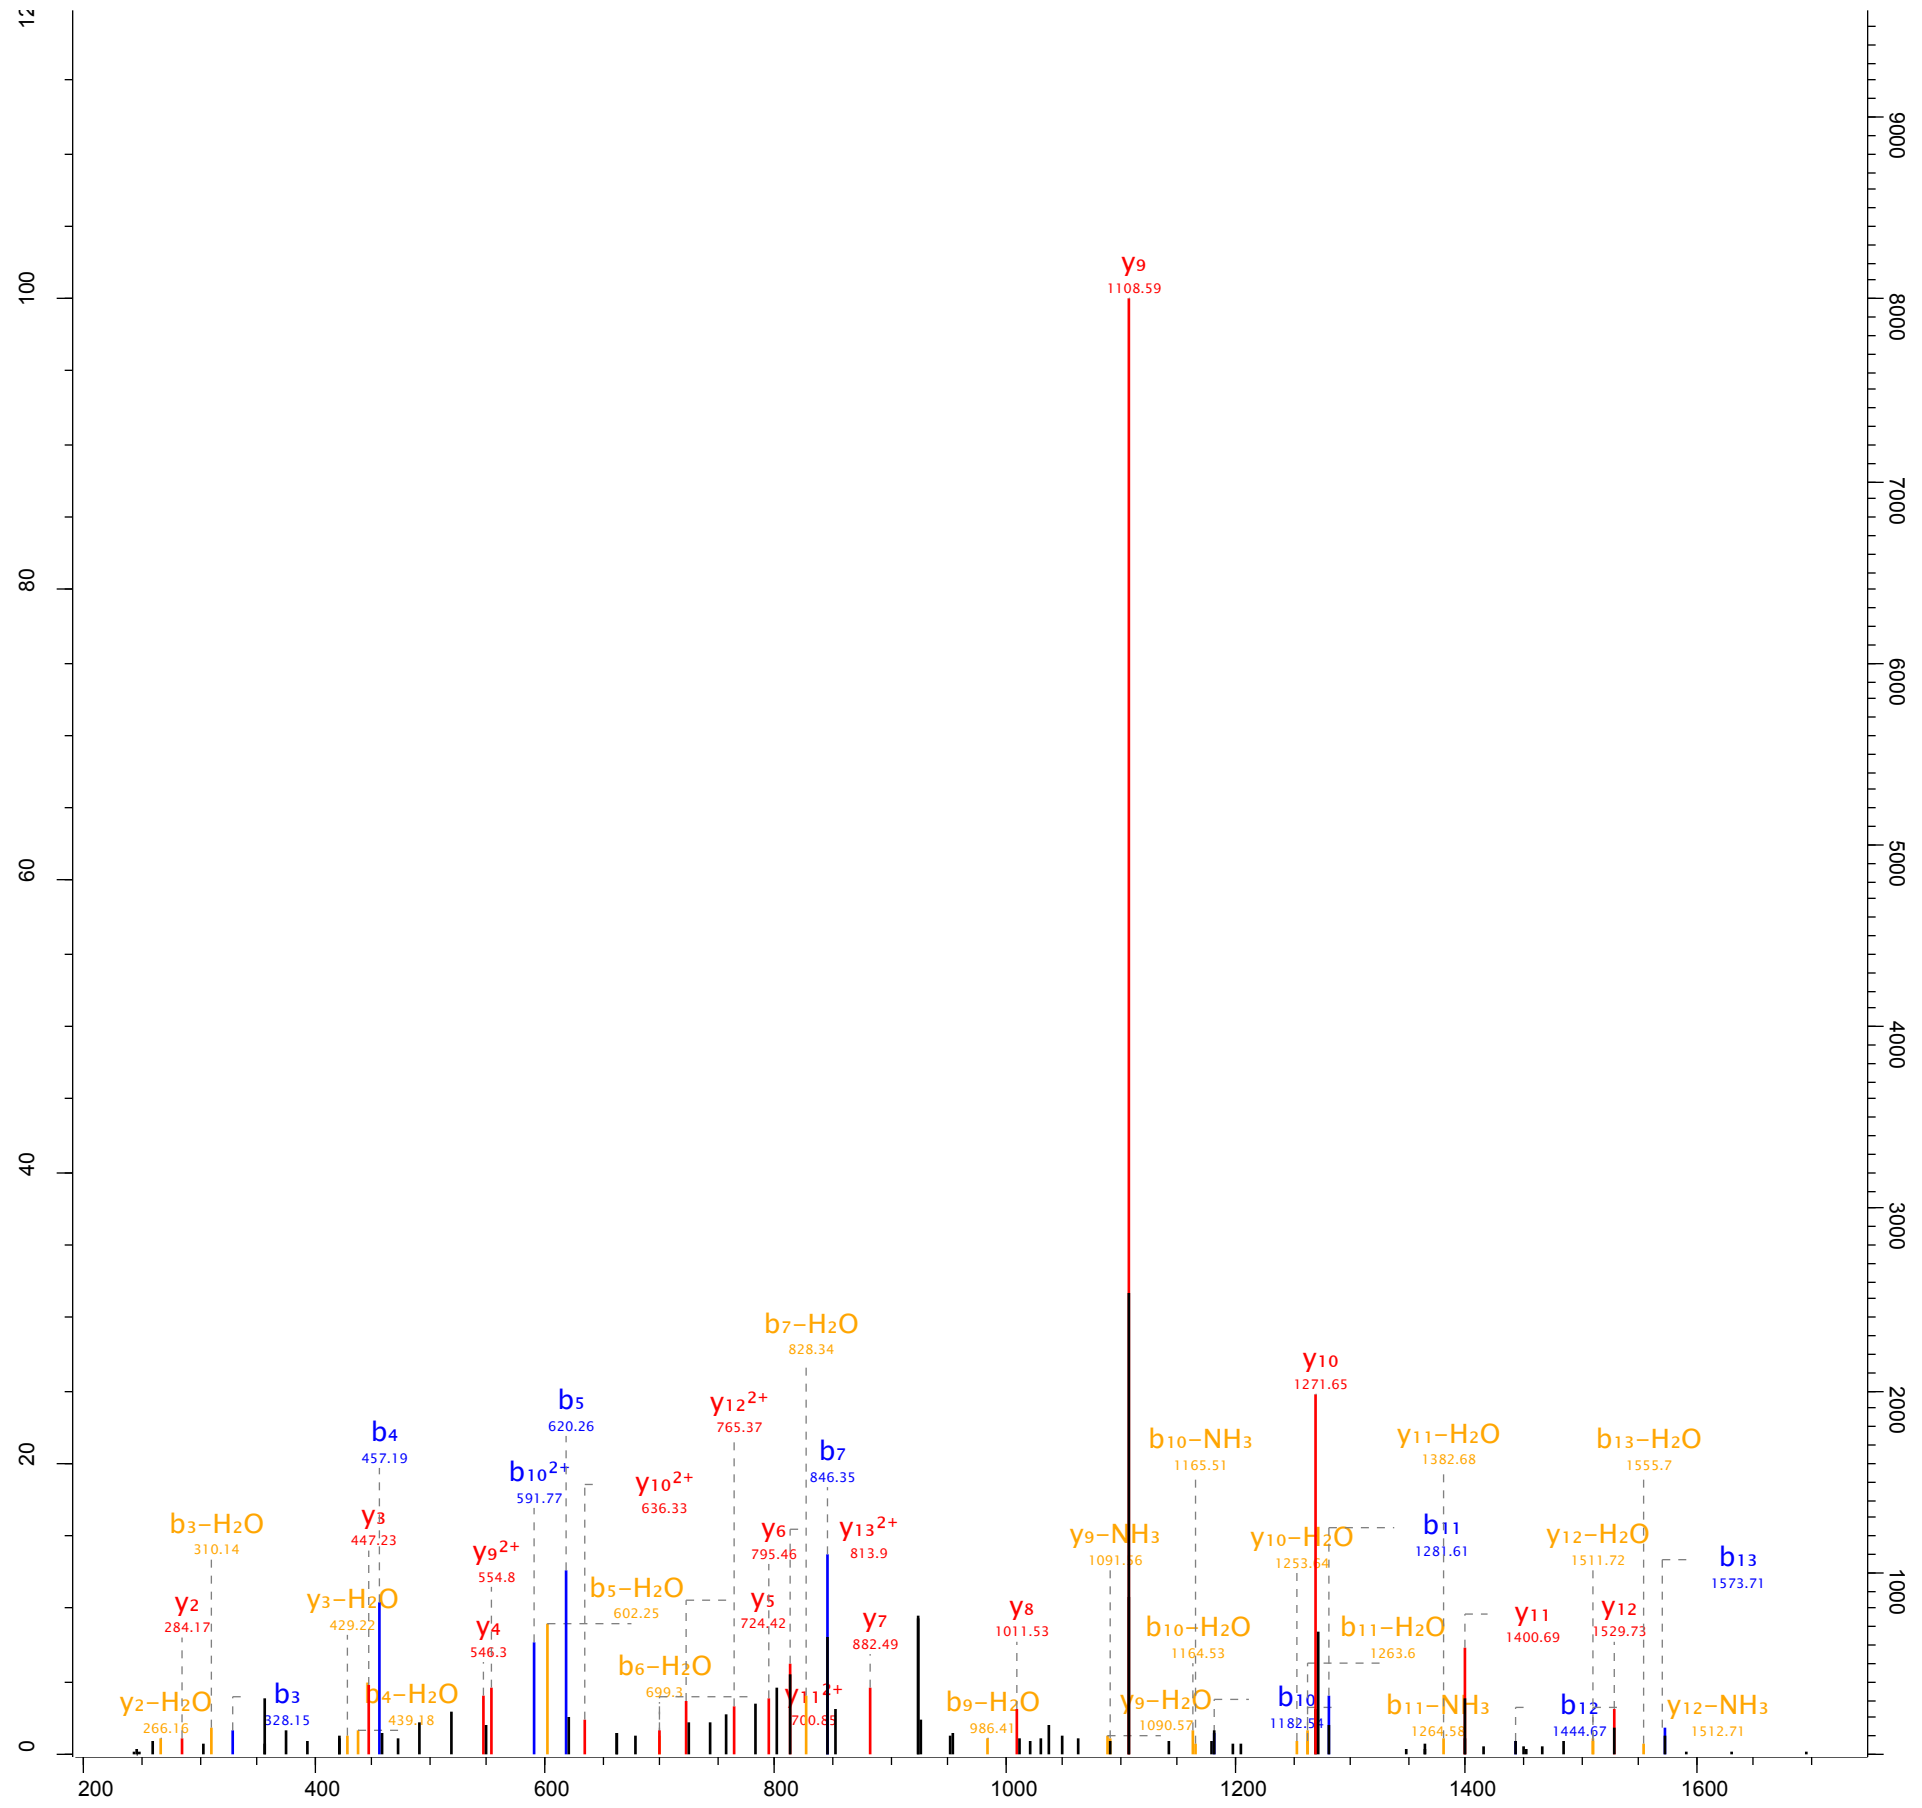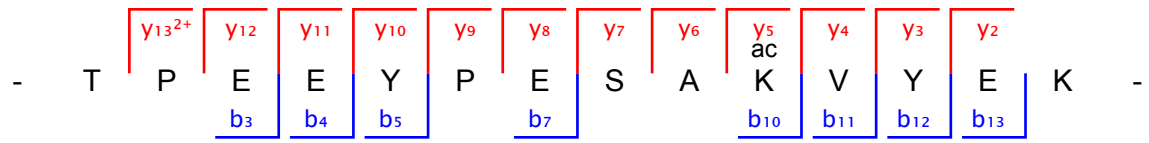

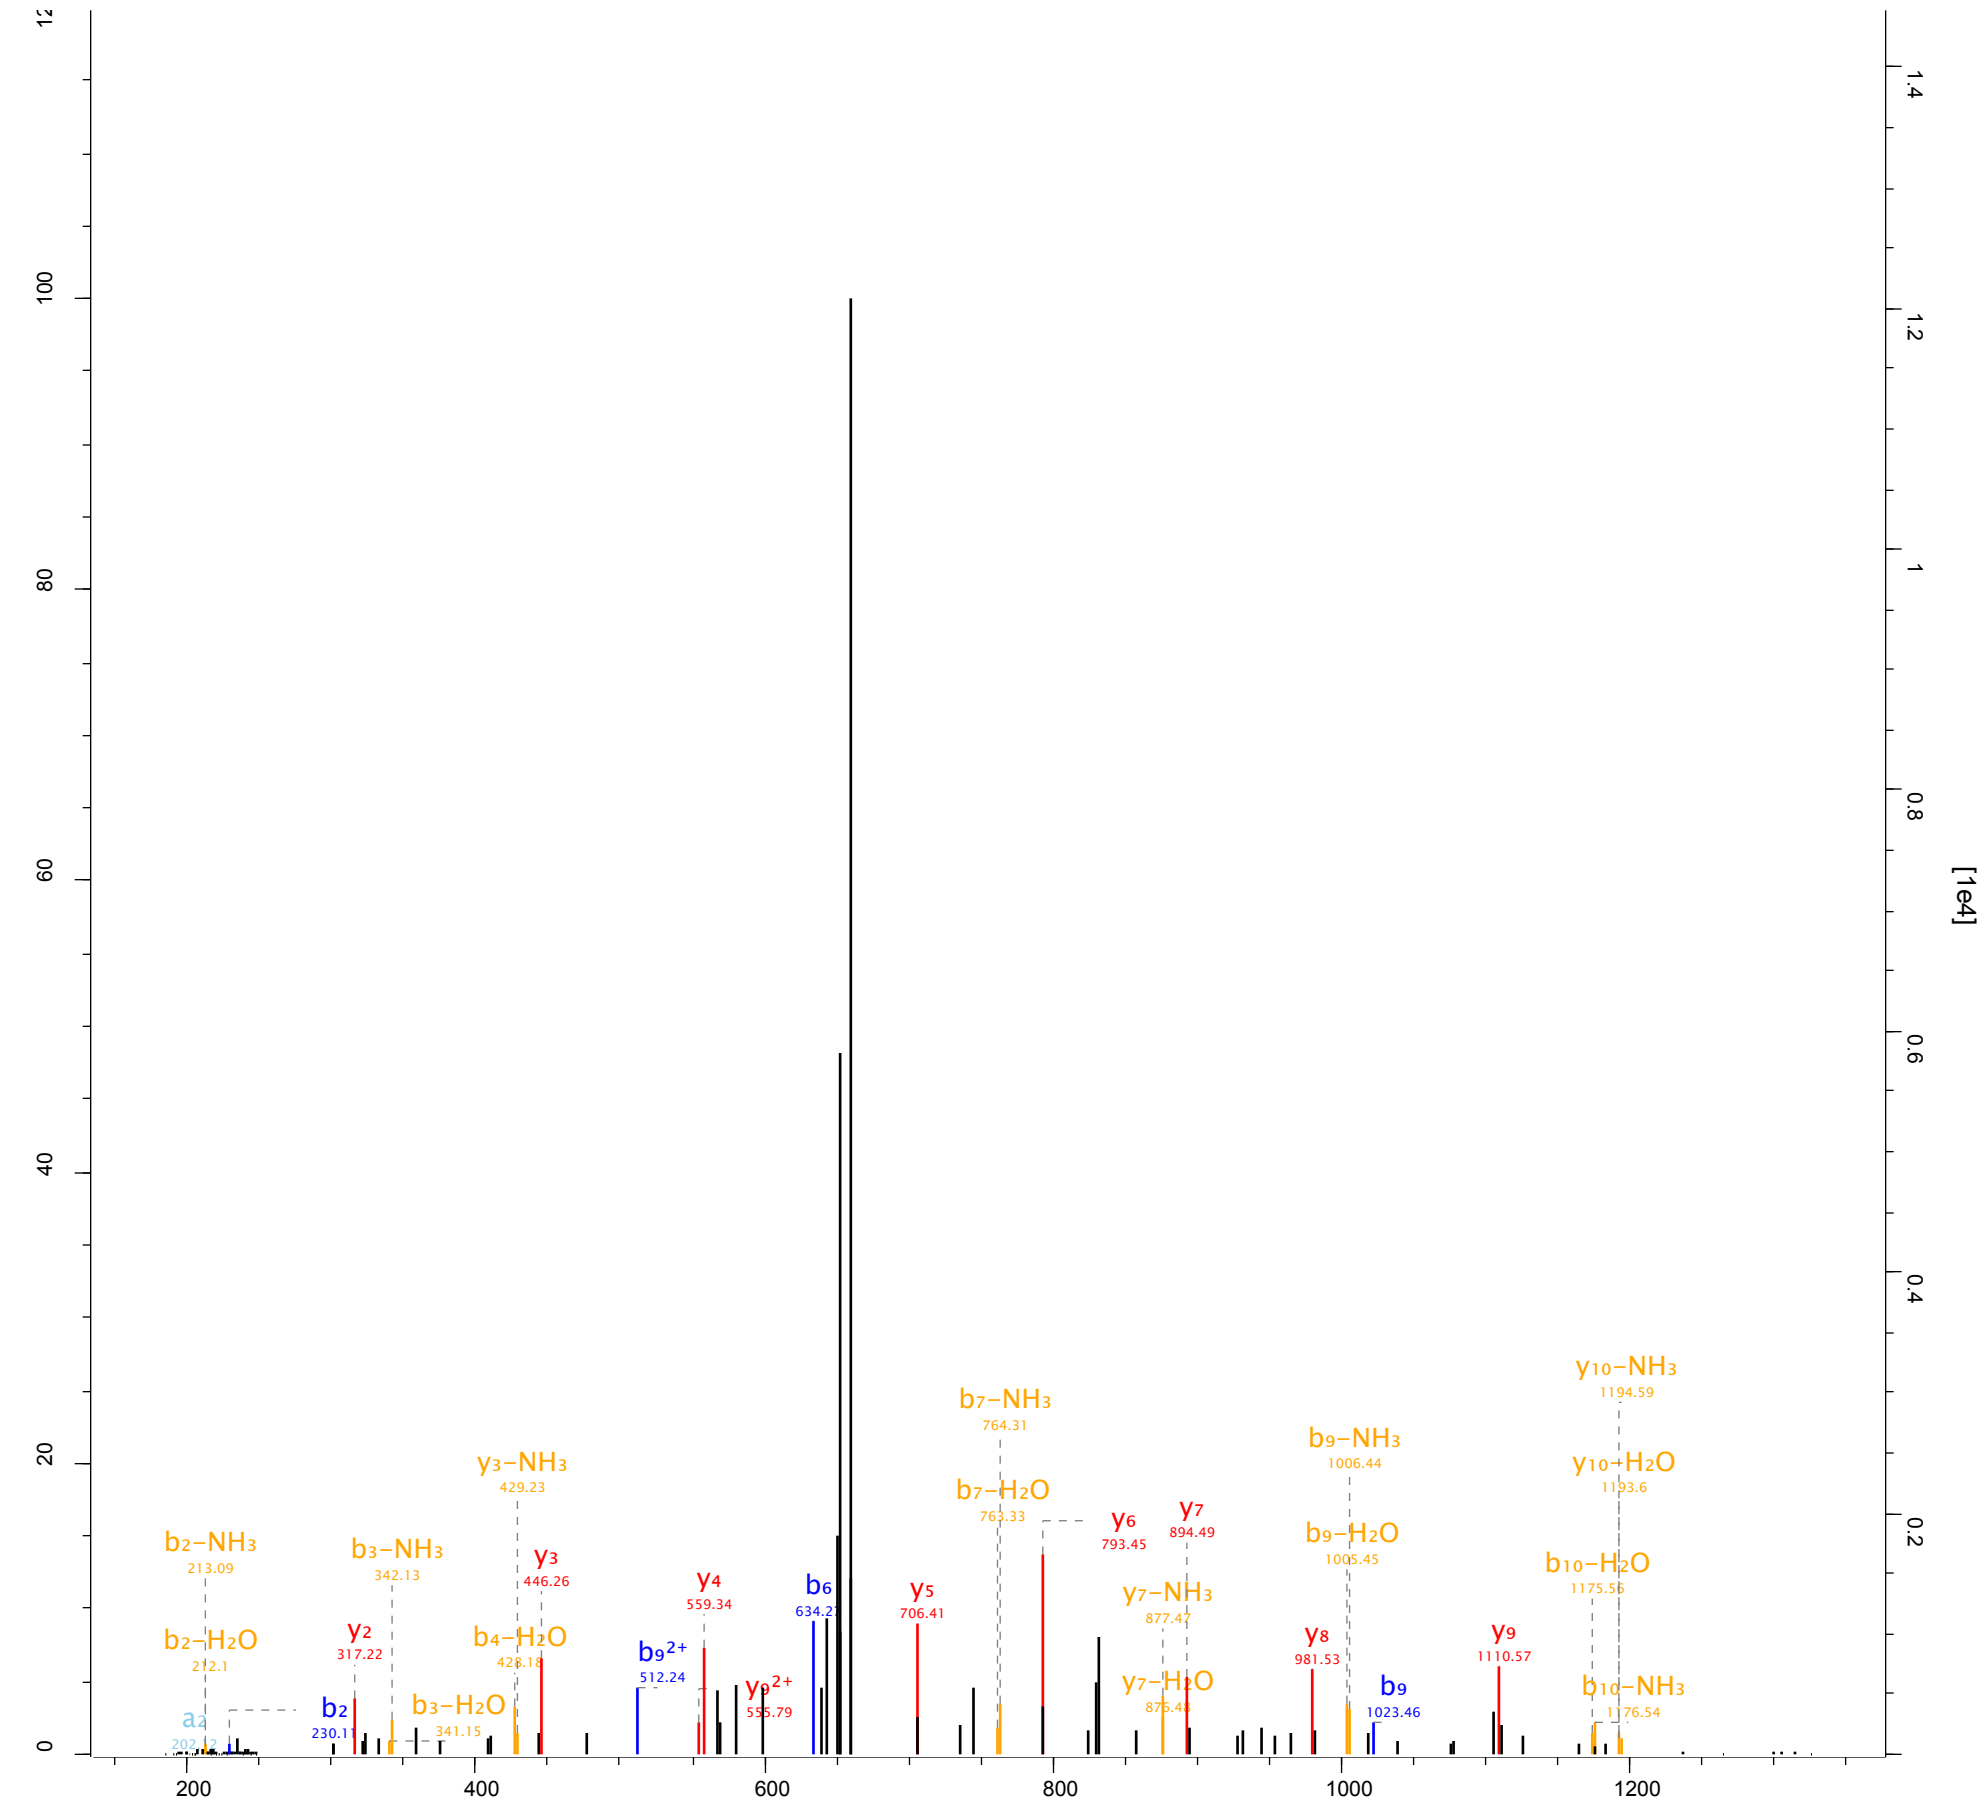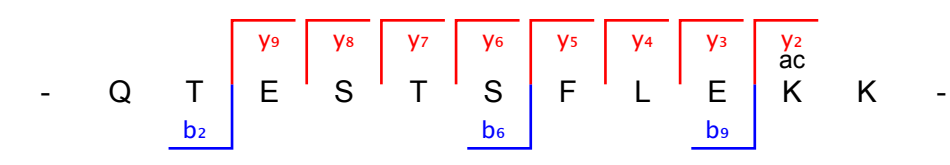

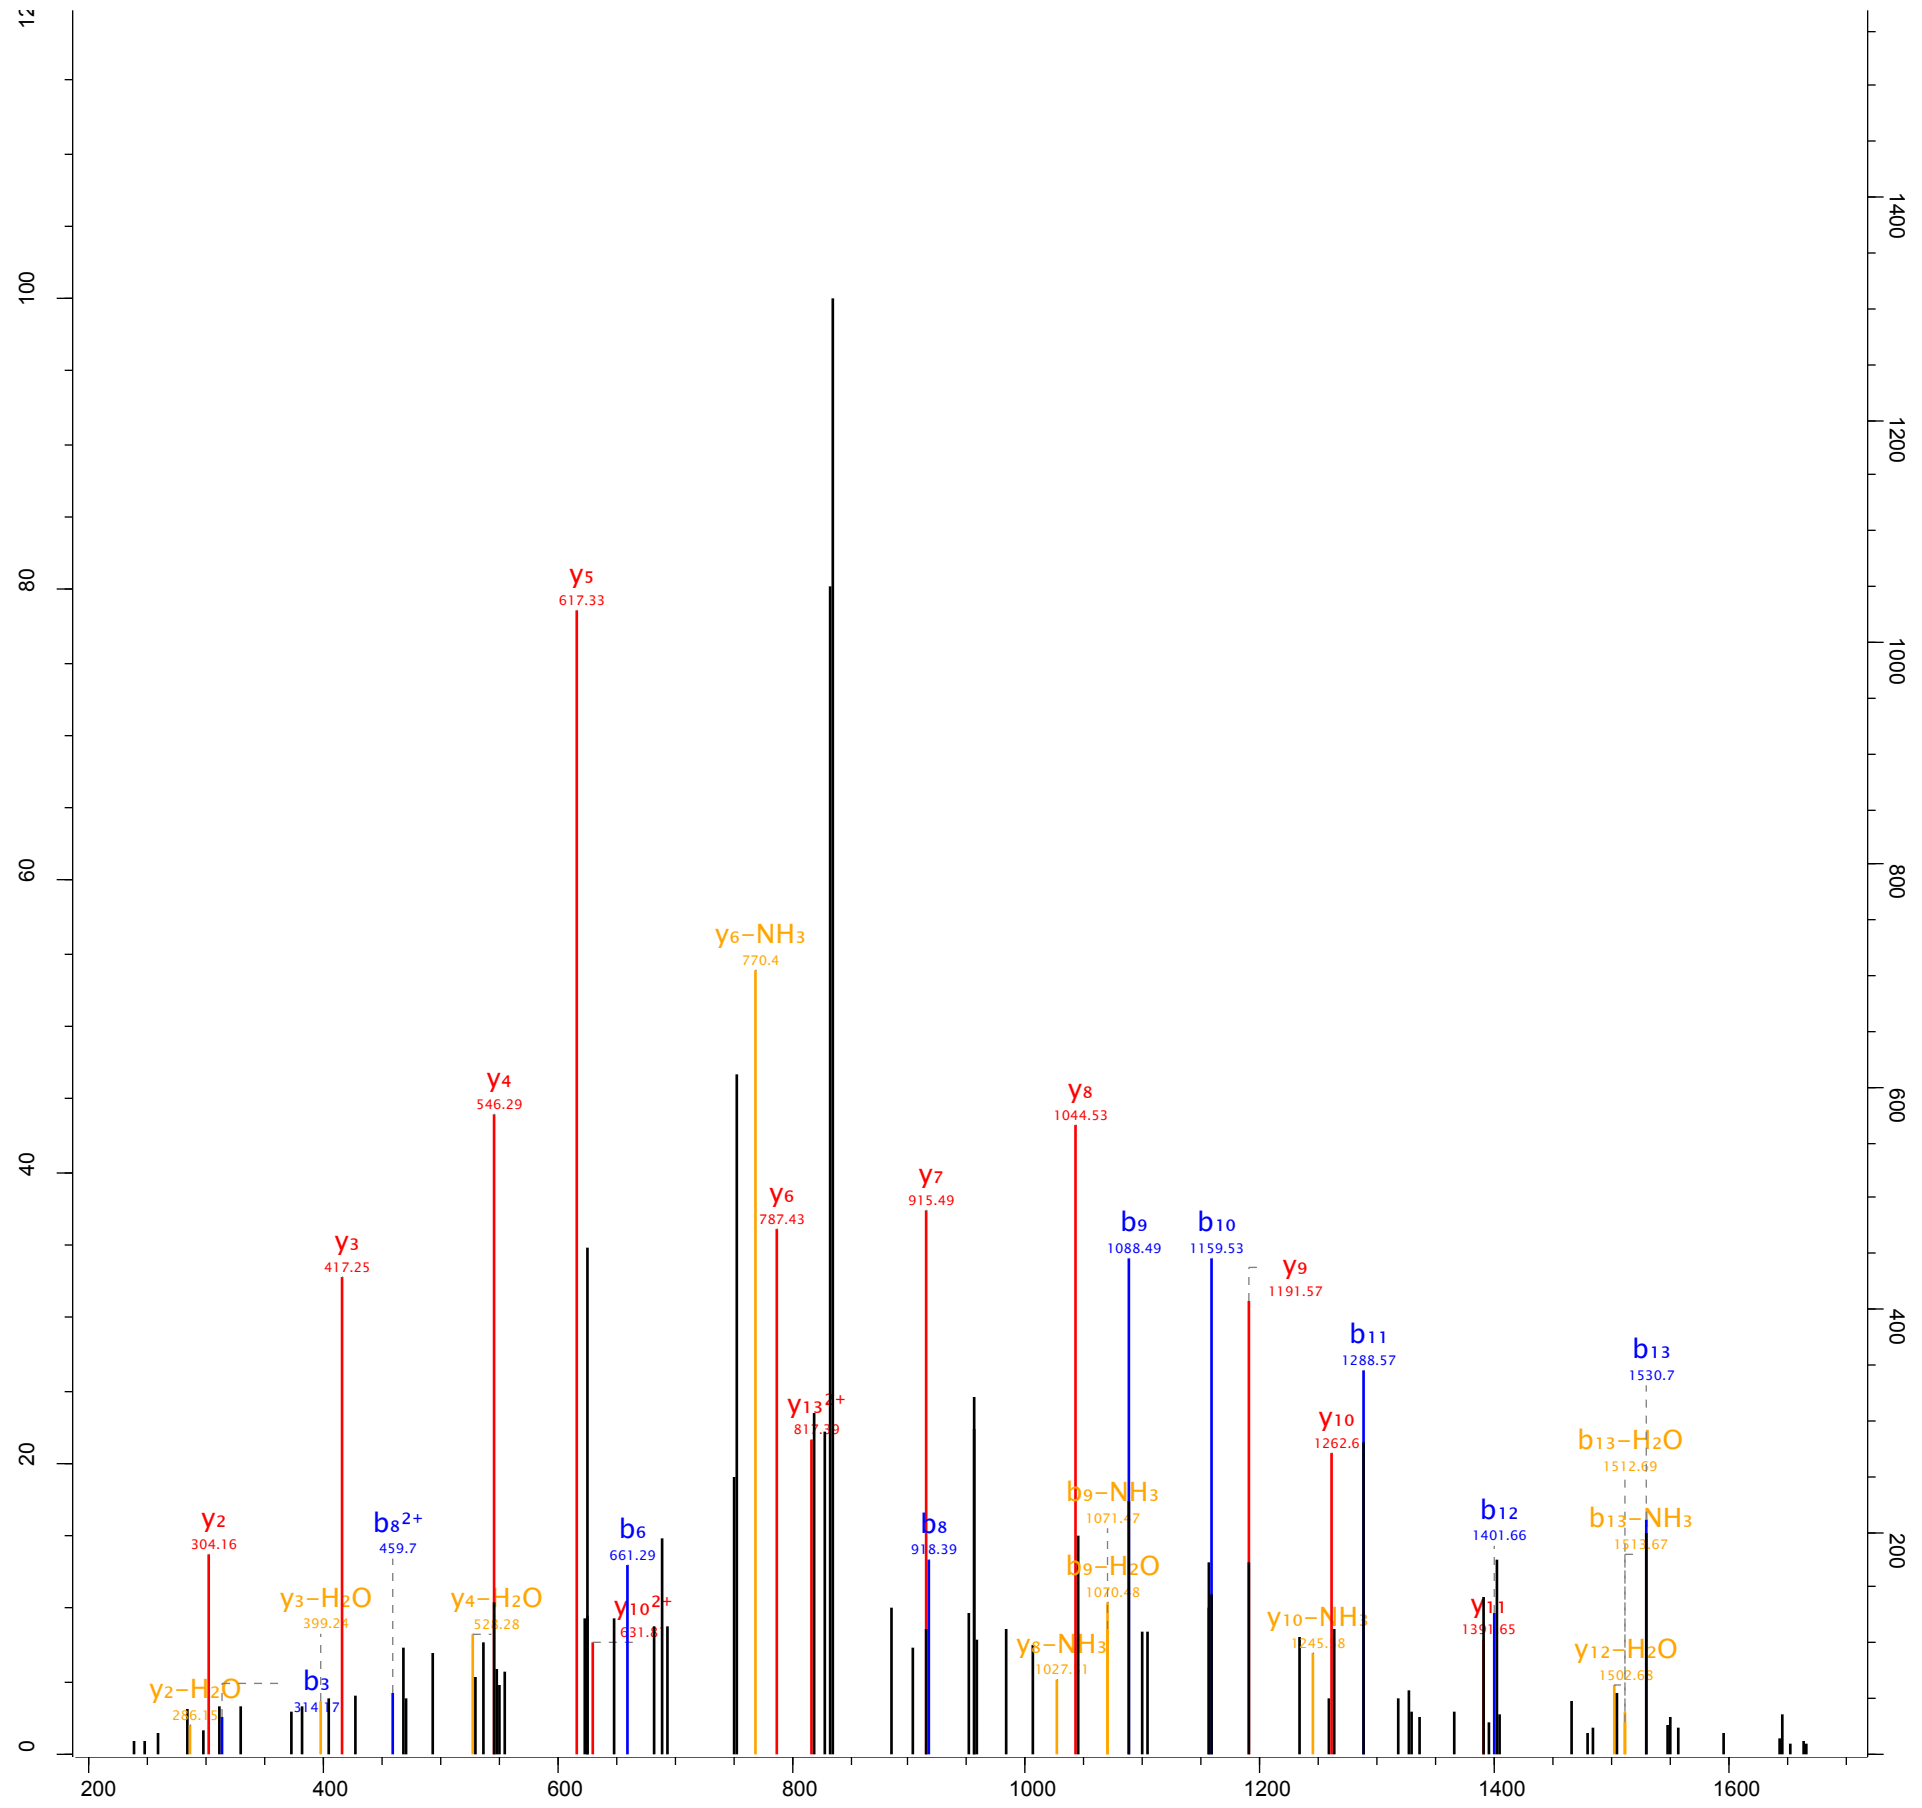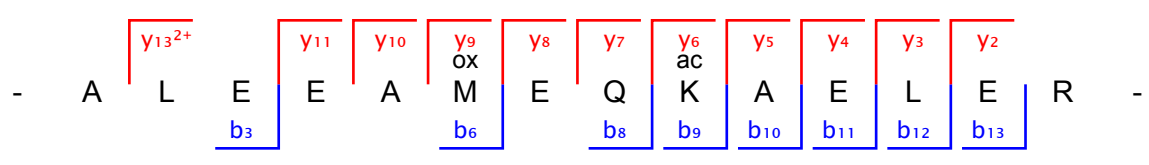

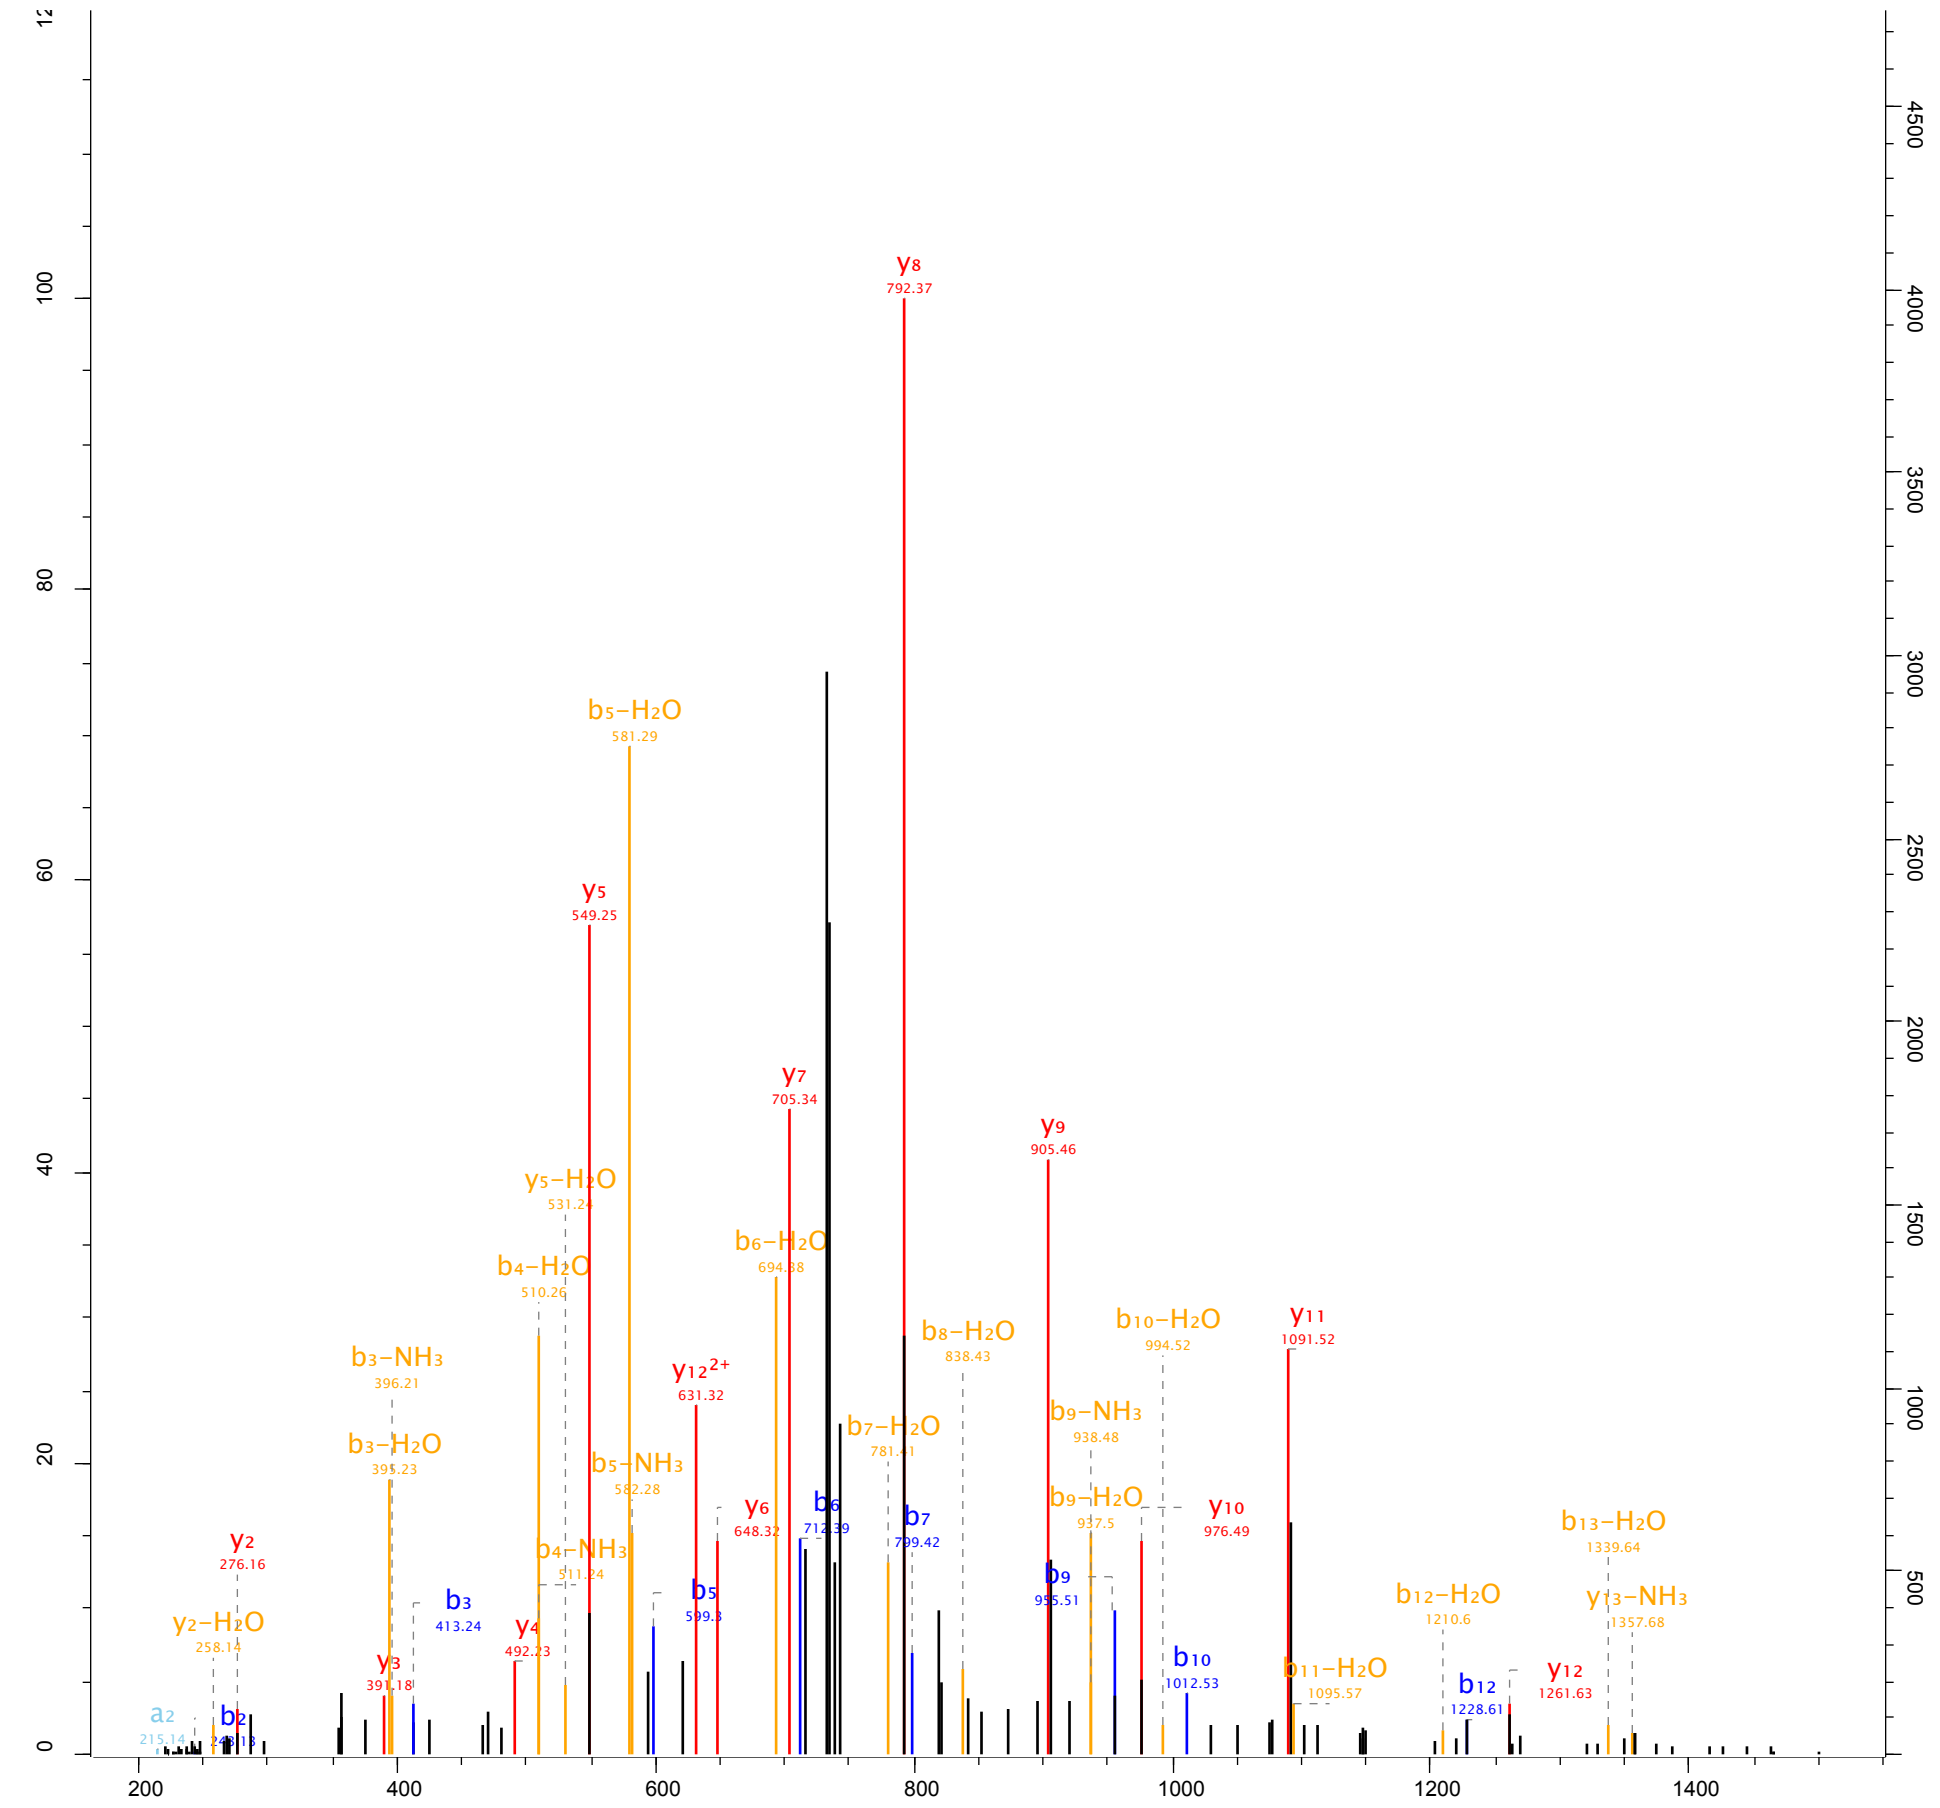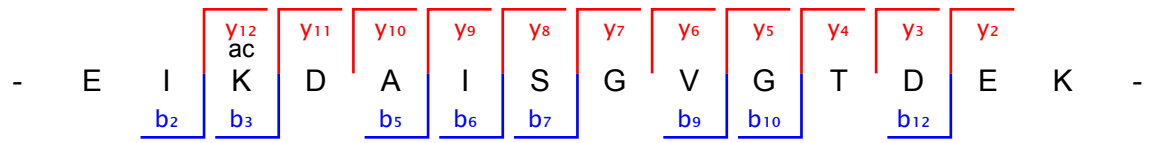

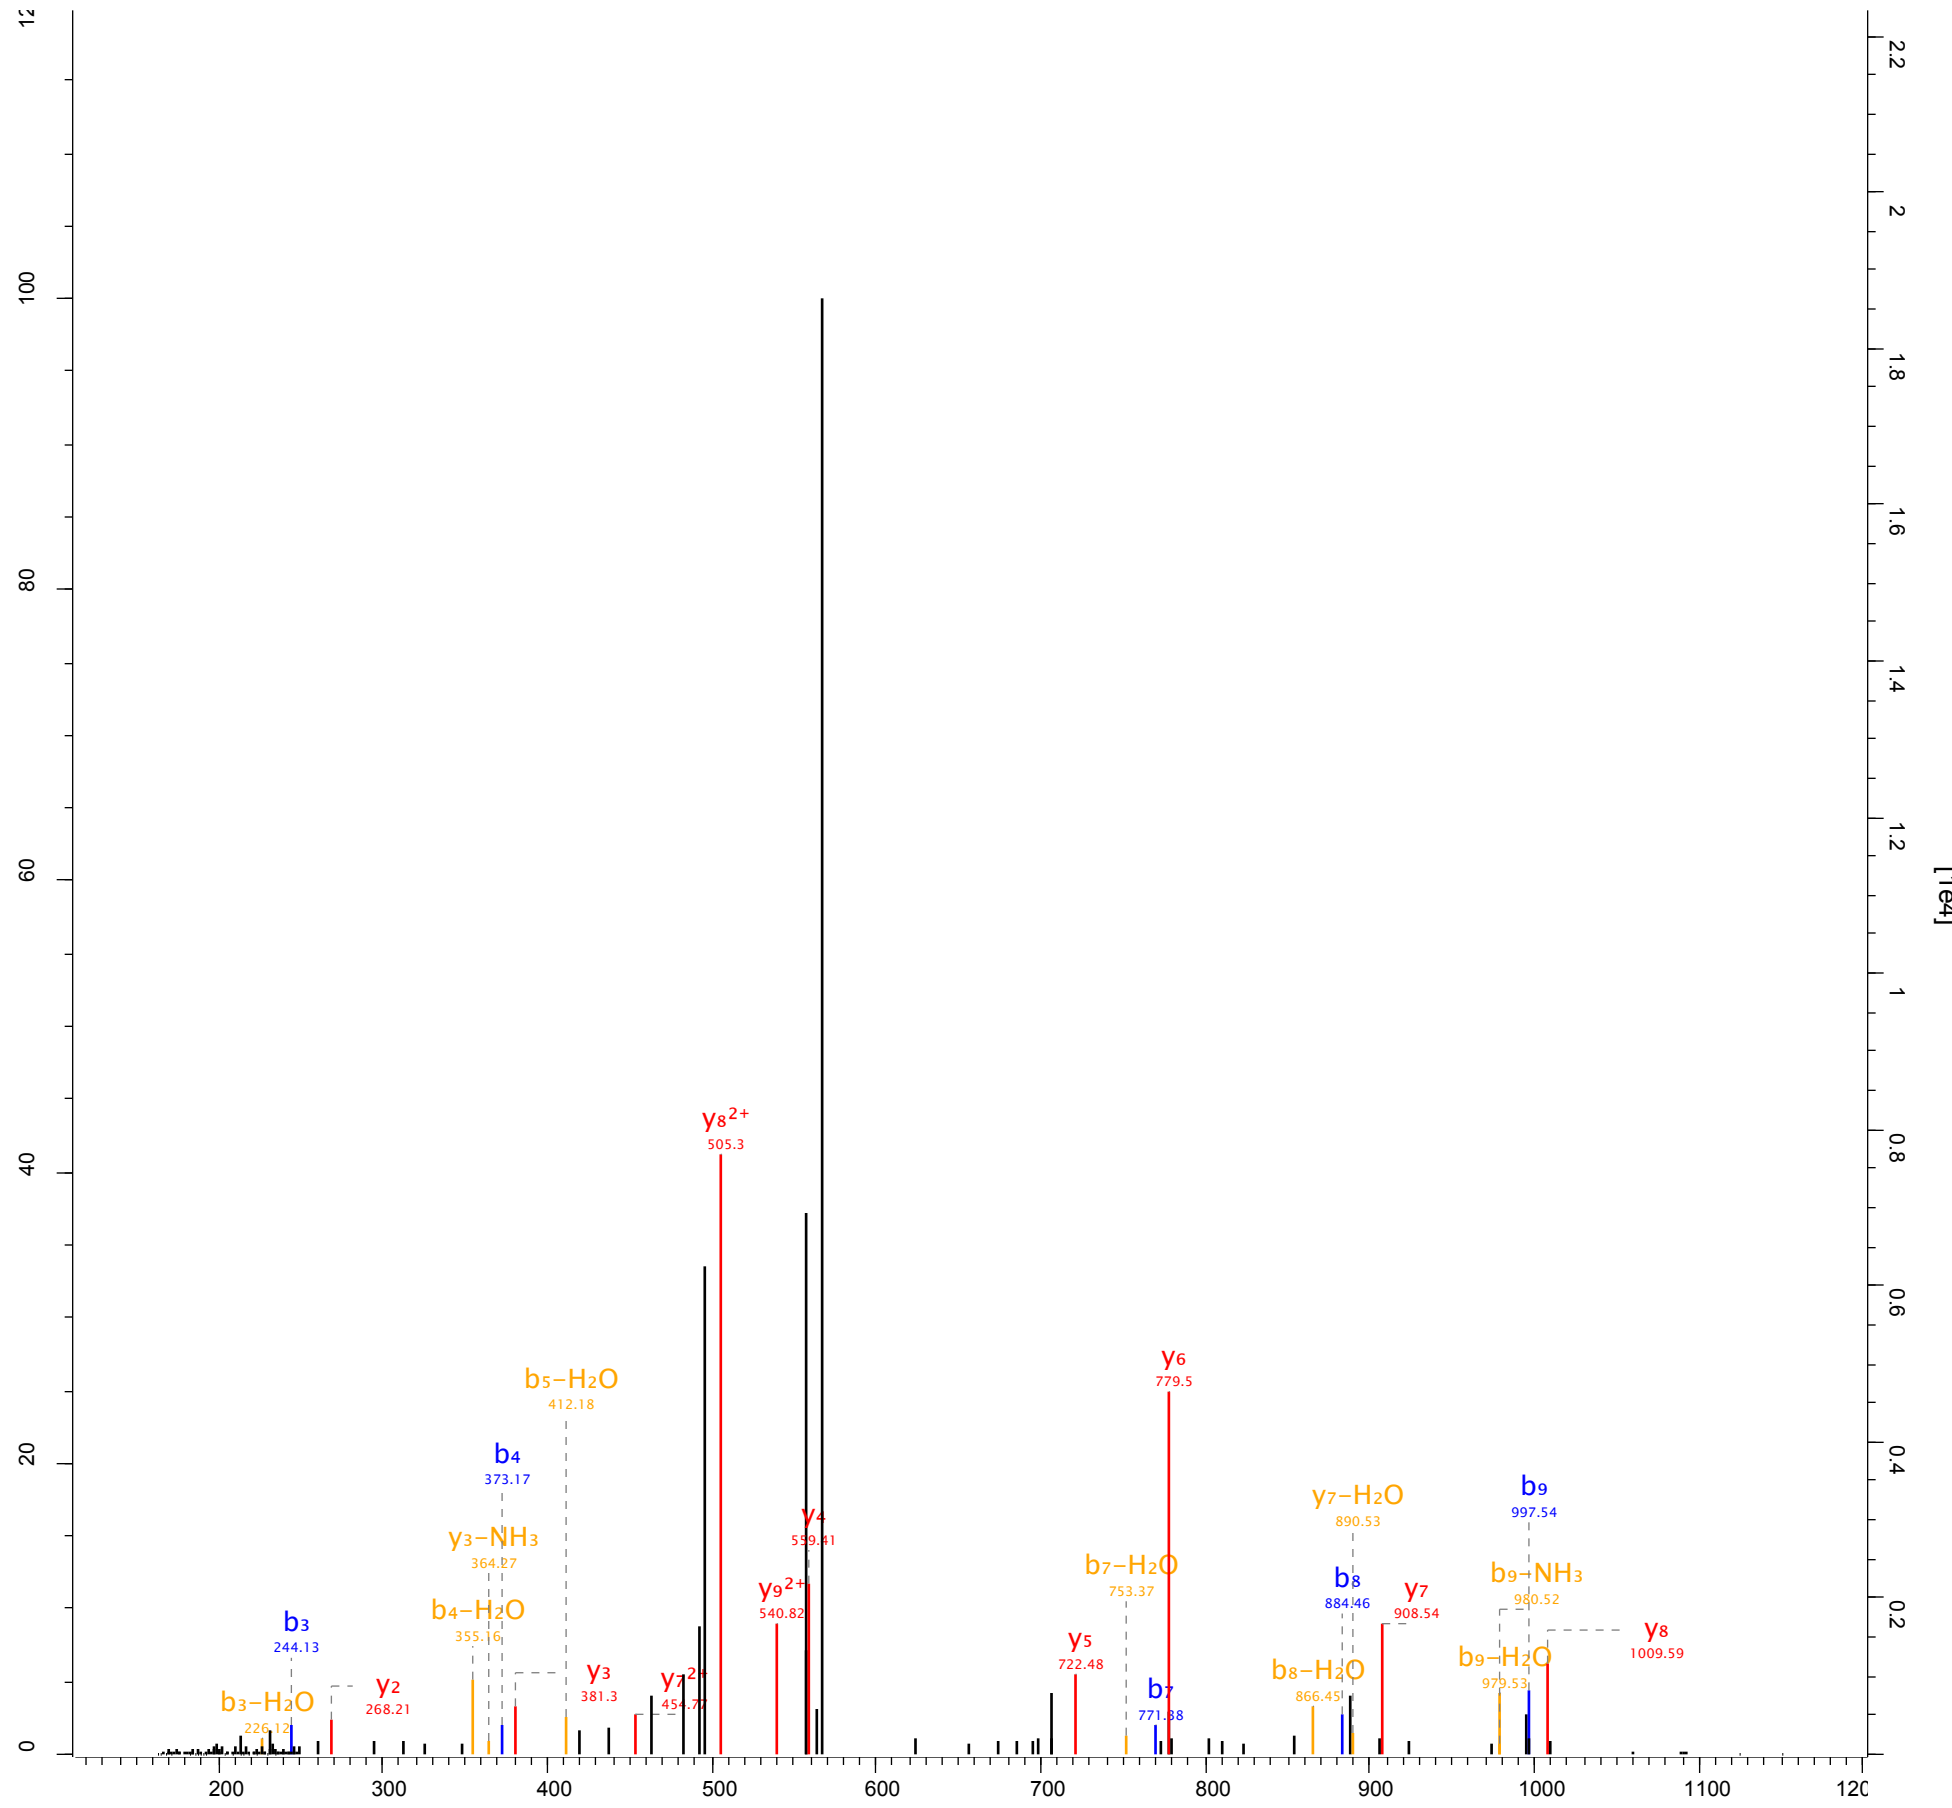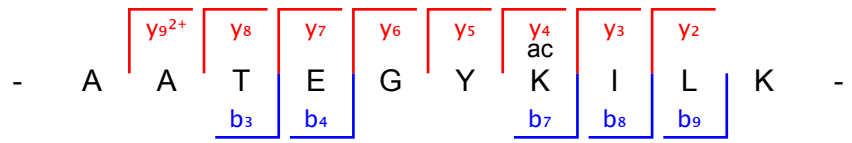

Raw file 050813\_SCW\_II\_29\_19\_4 Scan 15898 Method ITMS; CID Score 244.18 m/z 672.89 Gene names Kmt2c

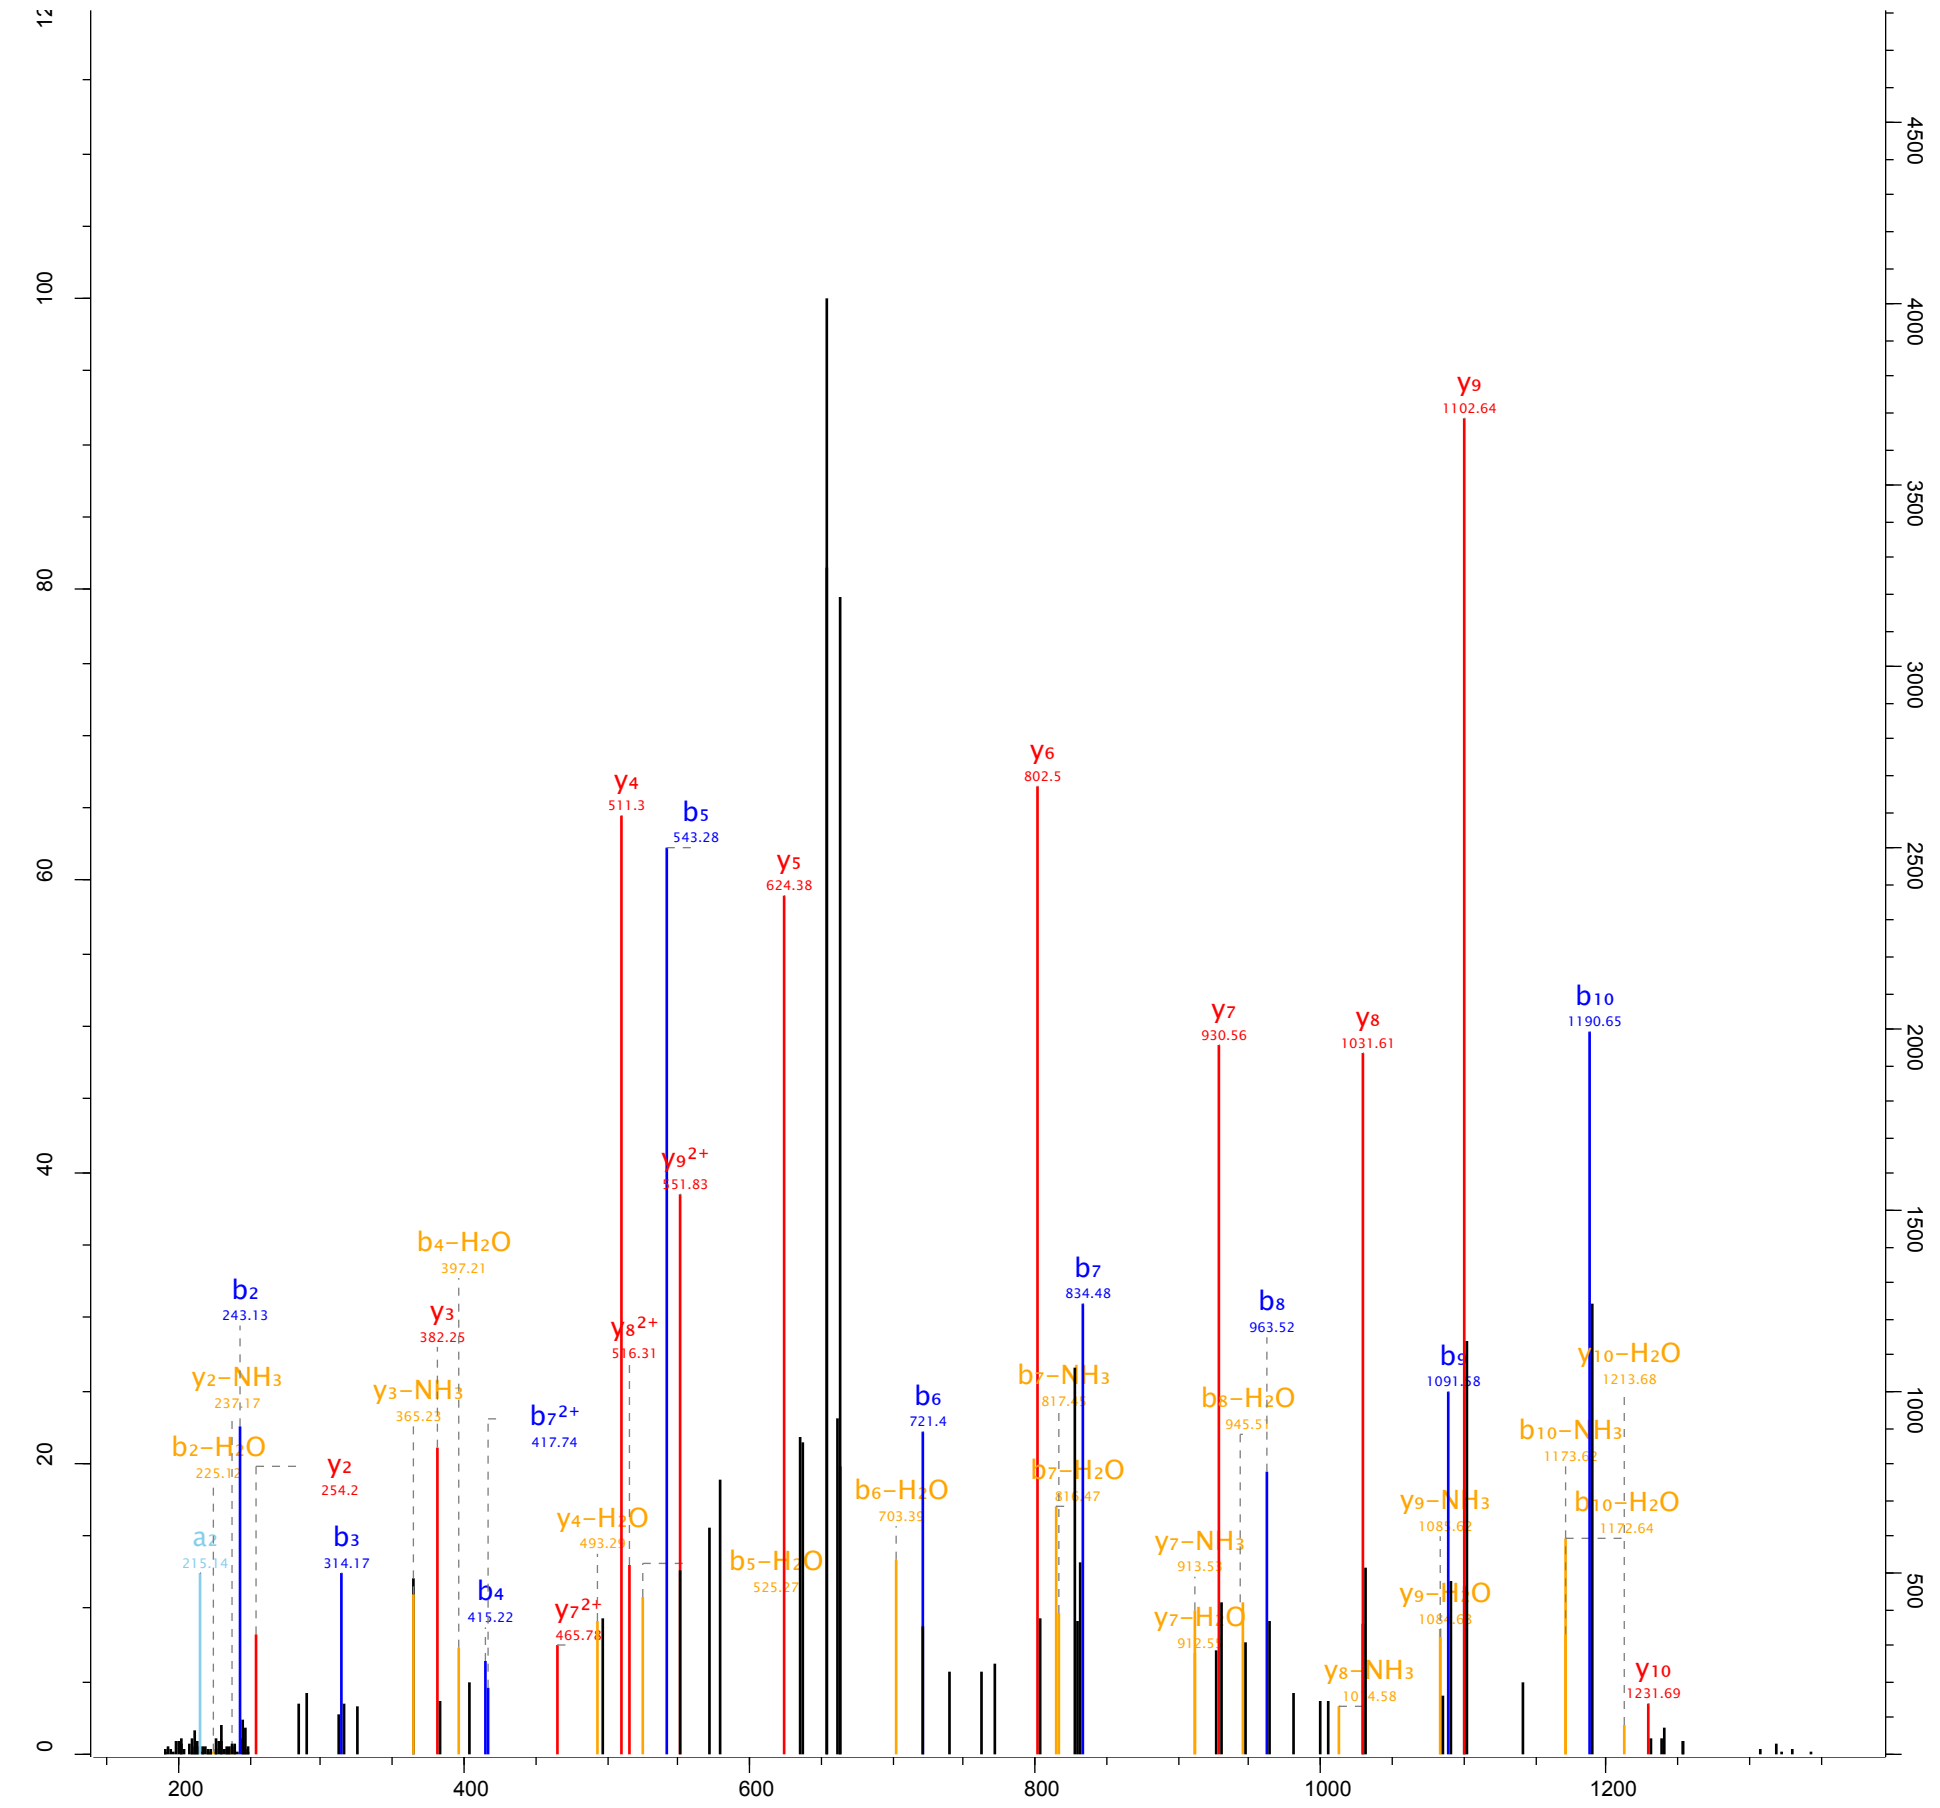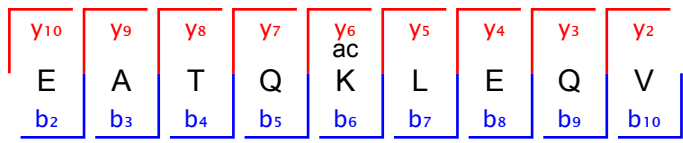

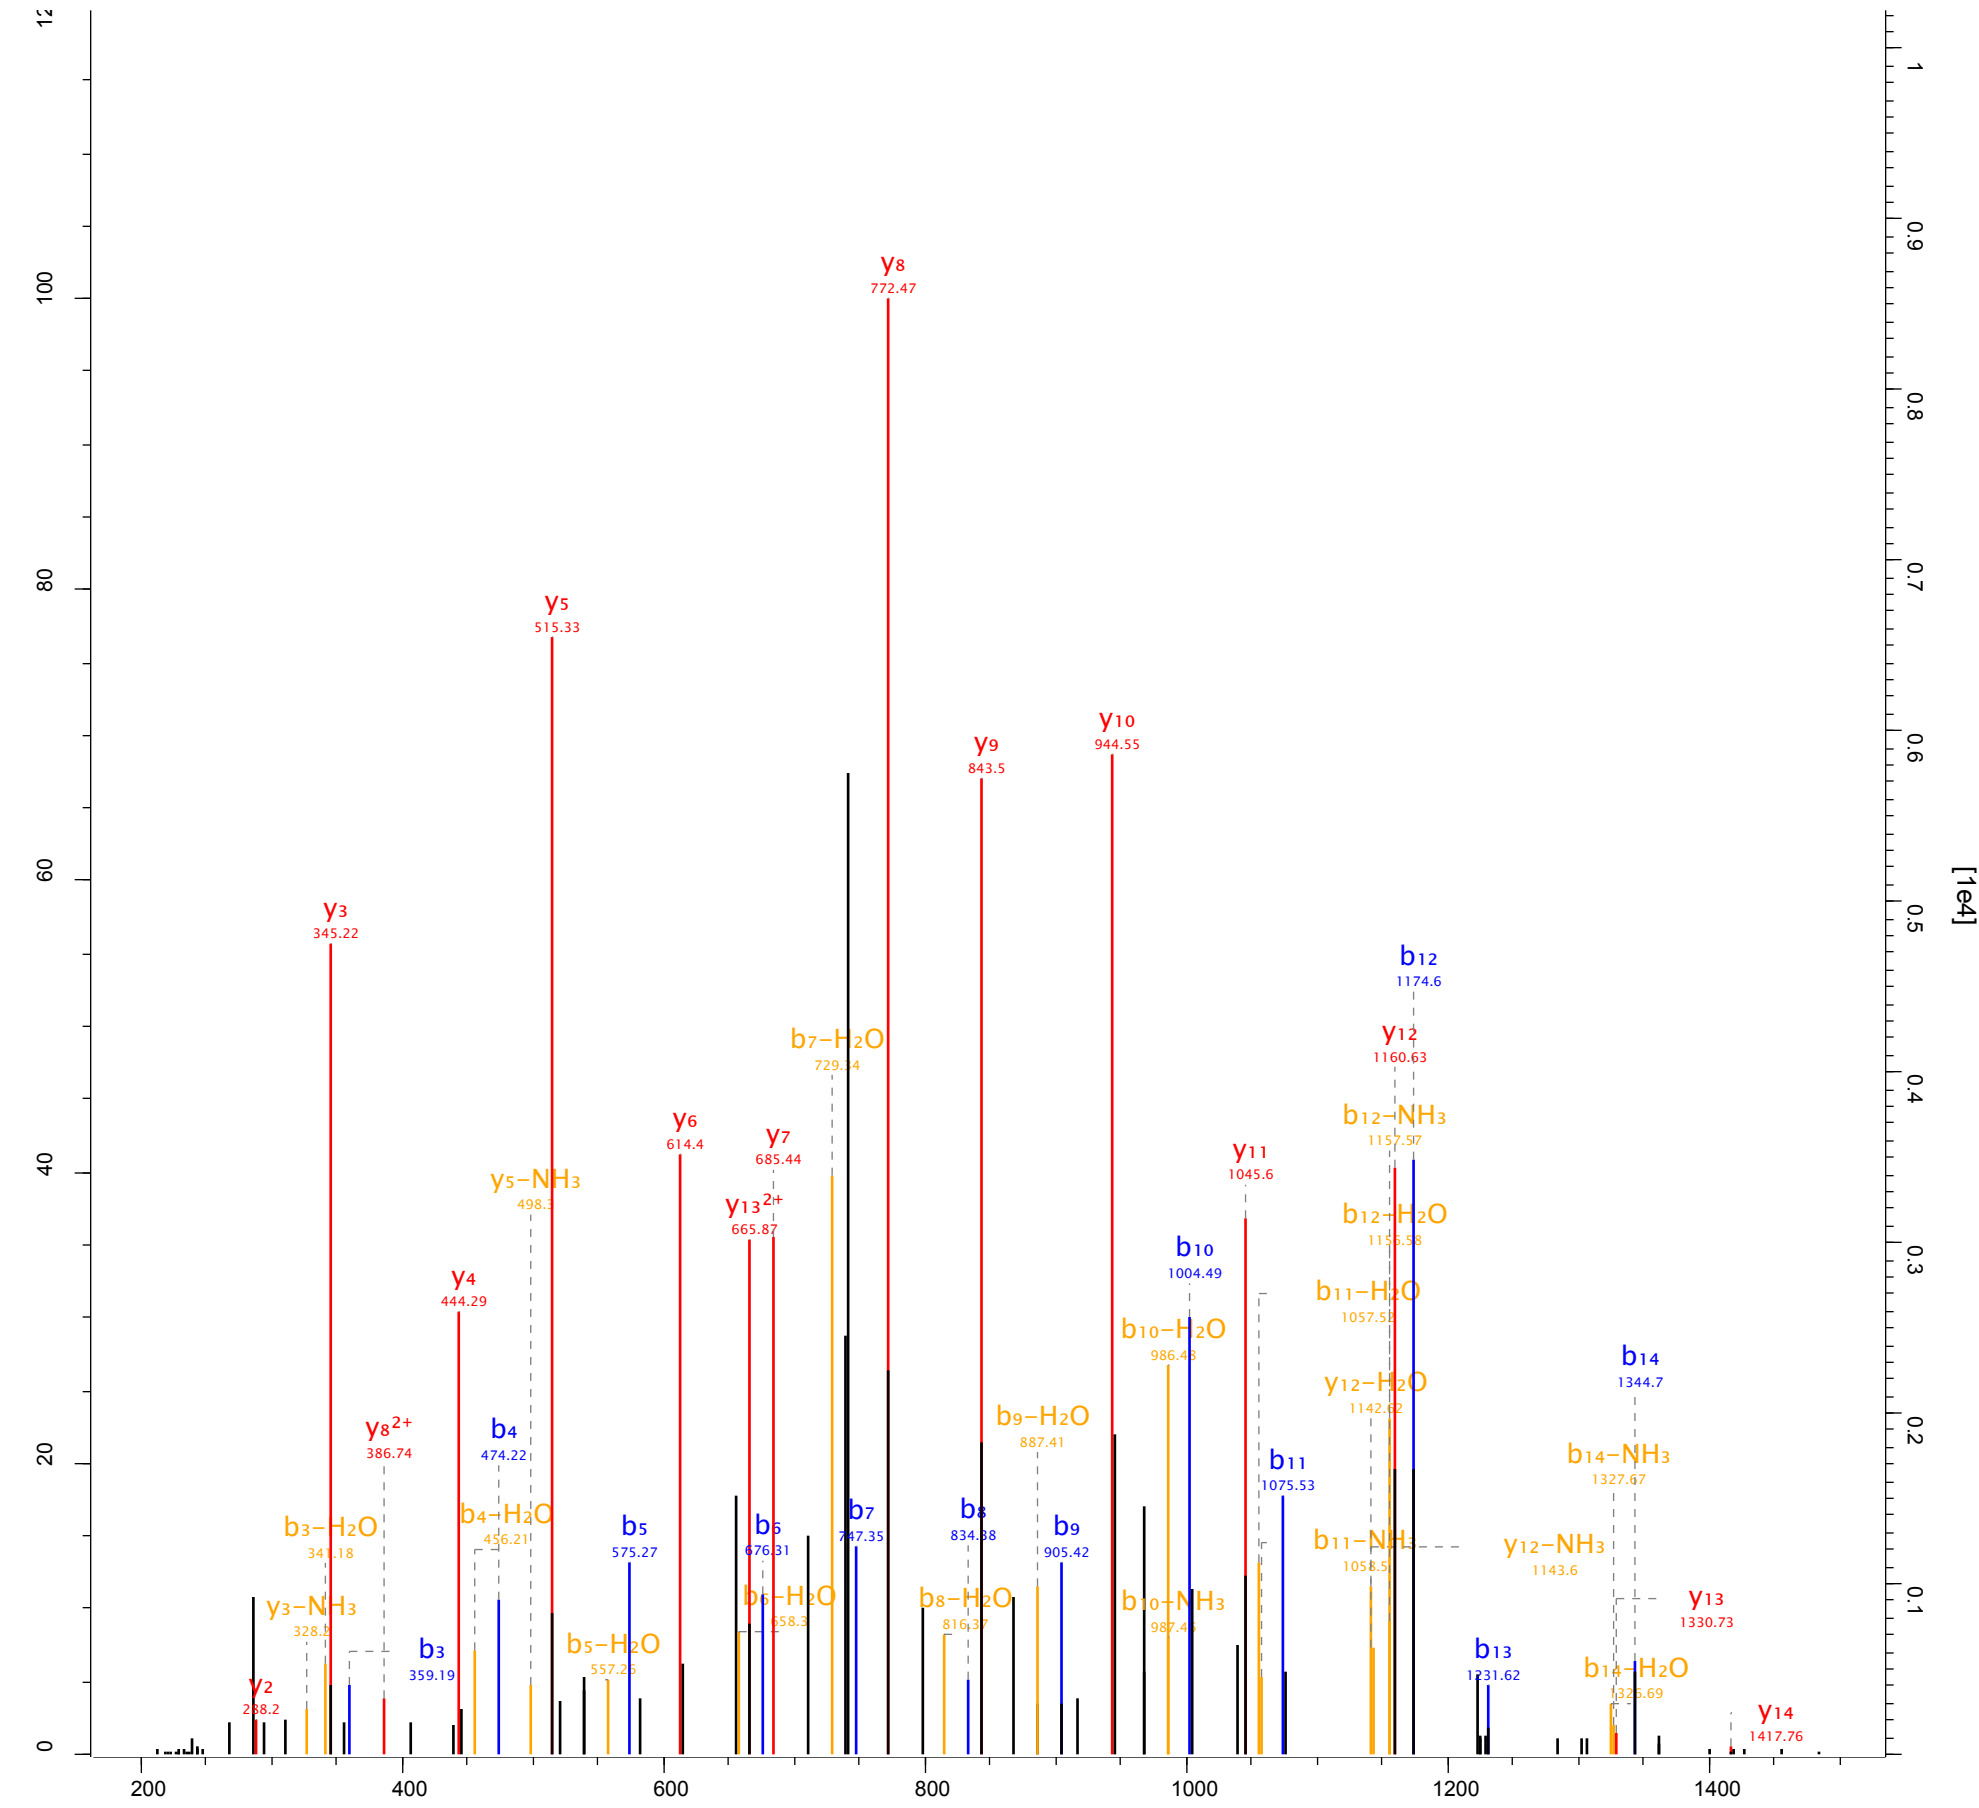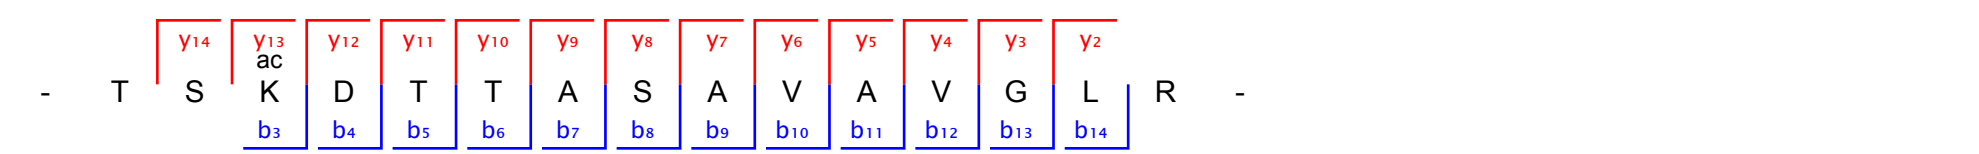



Raw file 050813\_SCW\_II\_29\_19\_4 Scan 16120 Method ITMS; CID Score 114.96 m/z 848.9 Gene names Ech1

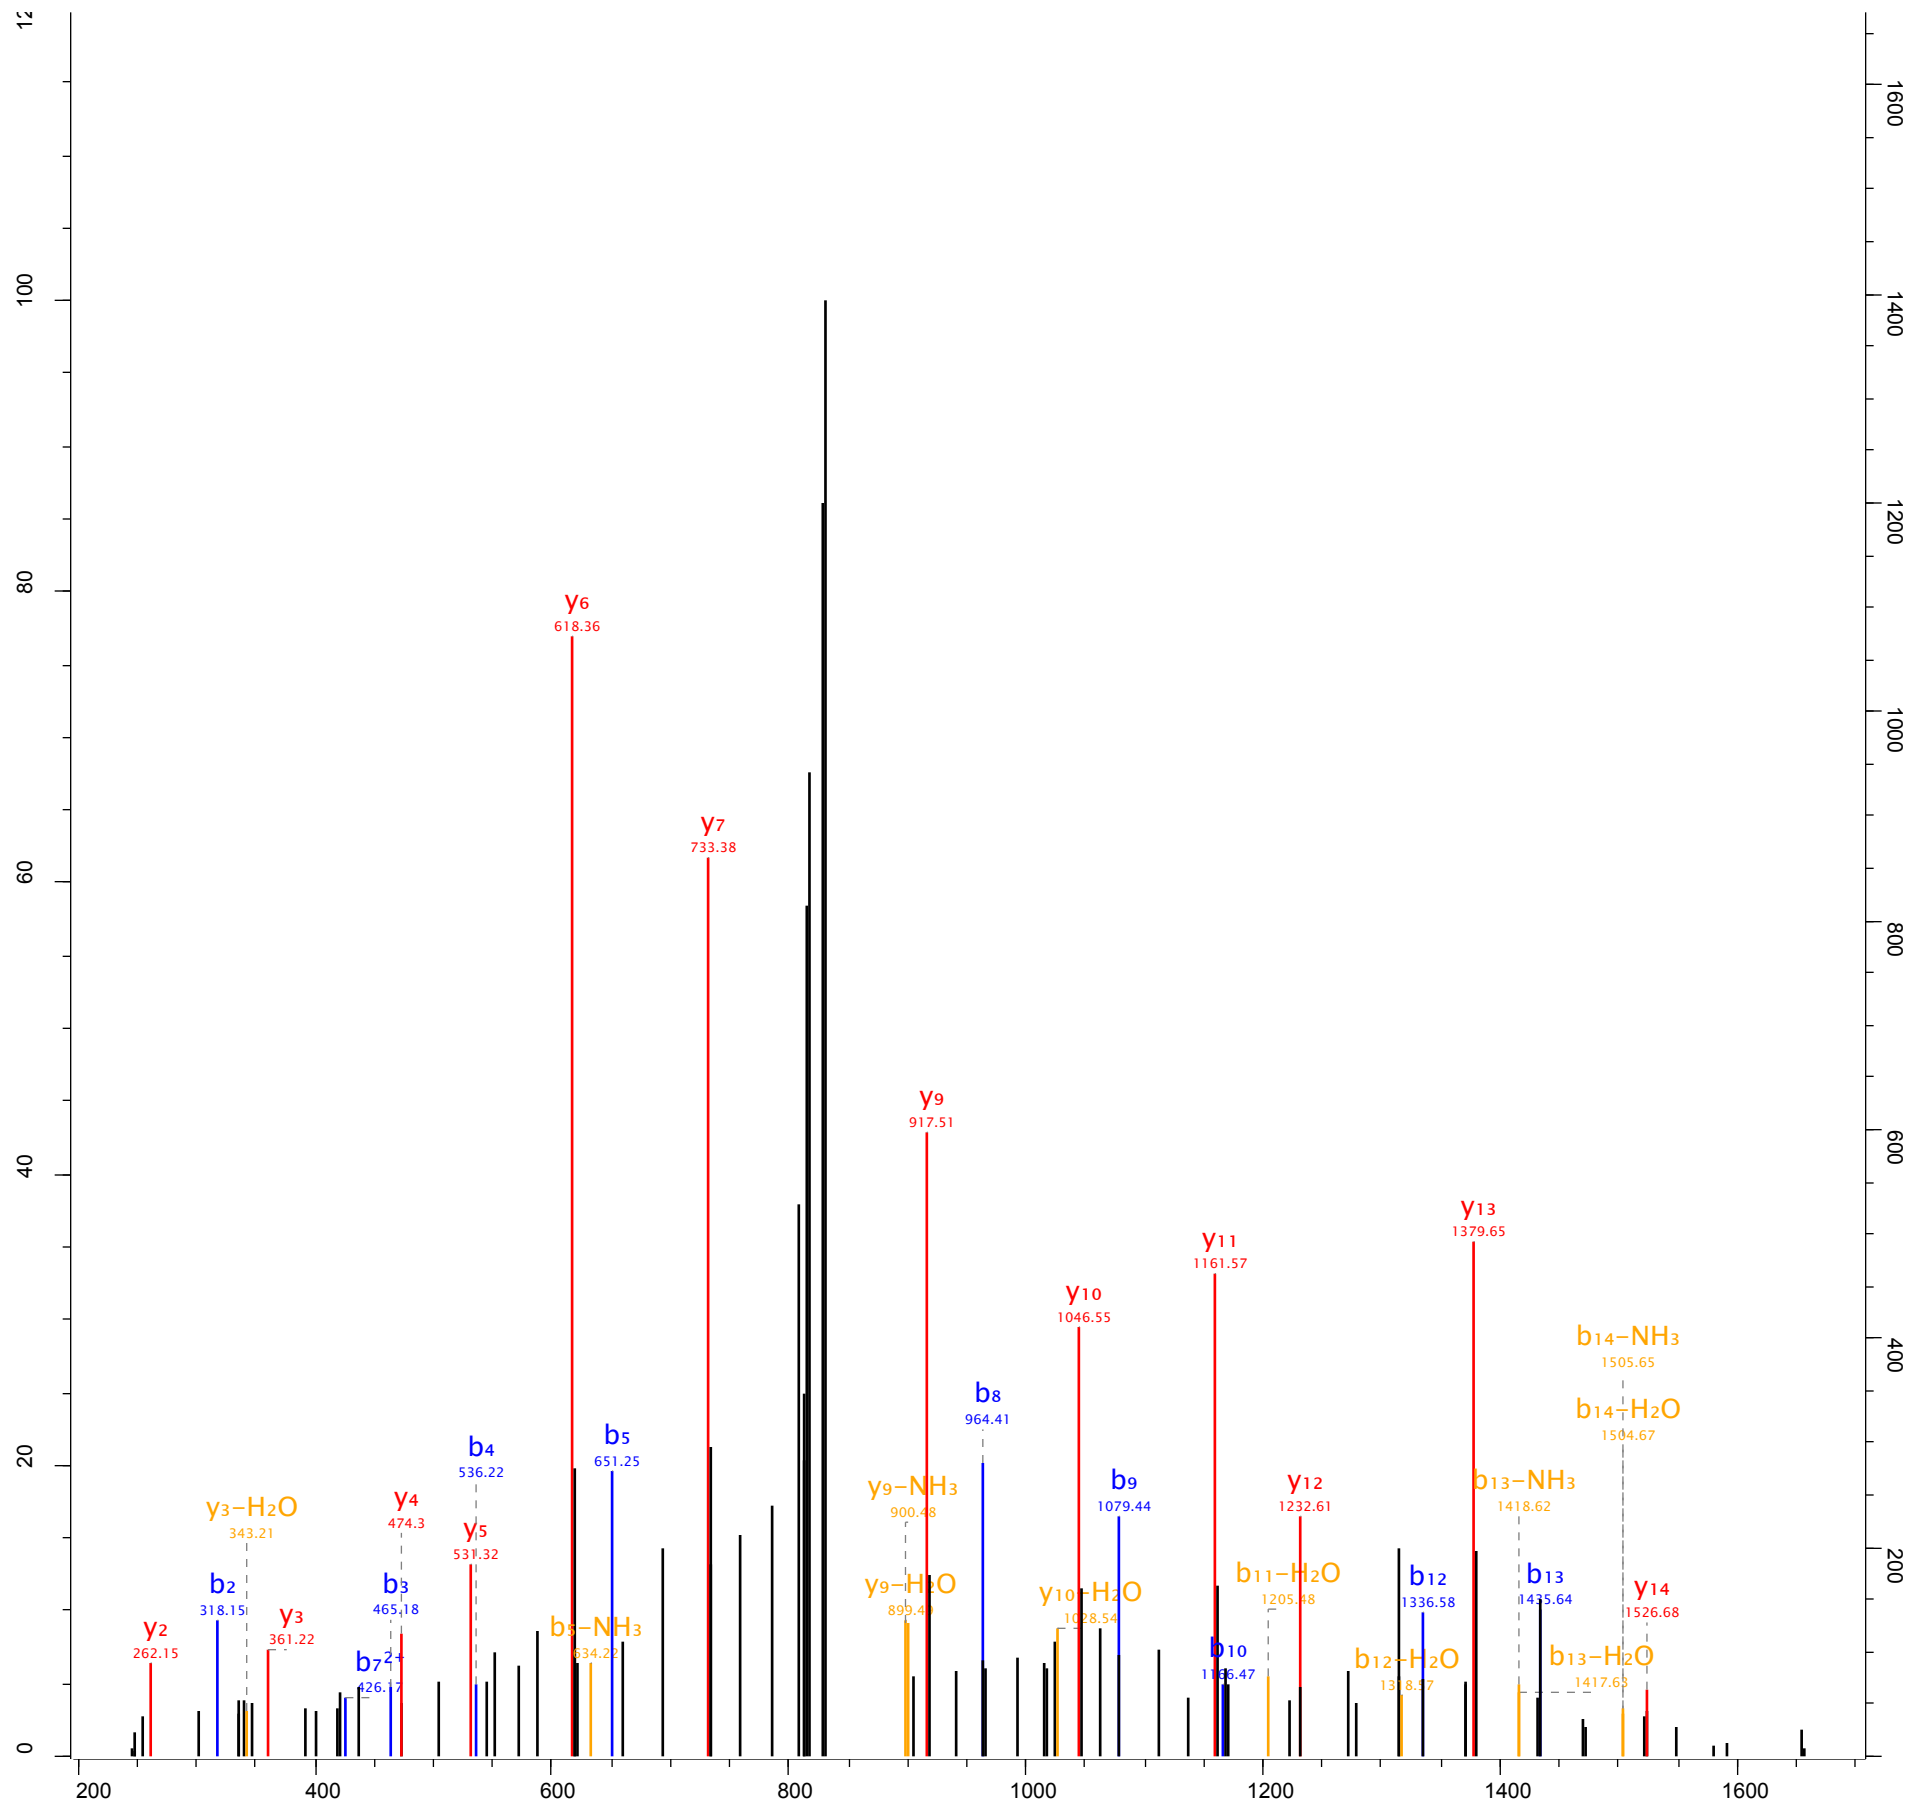

ac K [y14 OX M b2] [y13 OX M b3] [y12 A b4] [y11 D b5] E [y10 A b7<sup>2+</sup>] L [y7 D b9] [y6 S b10] G [y4 L b12] [y3 V b13] S R -

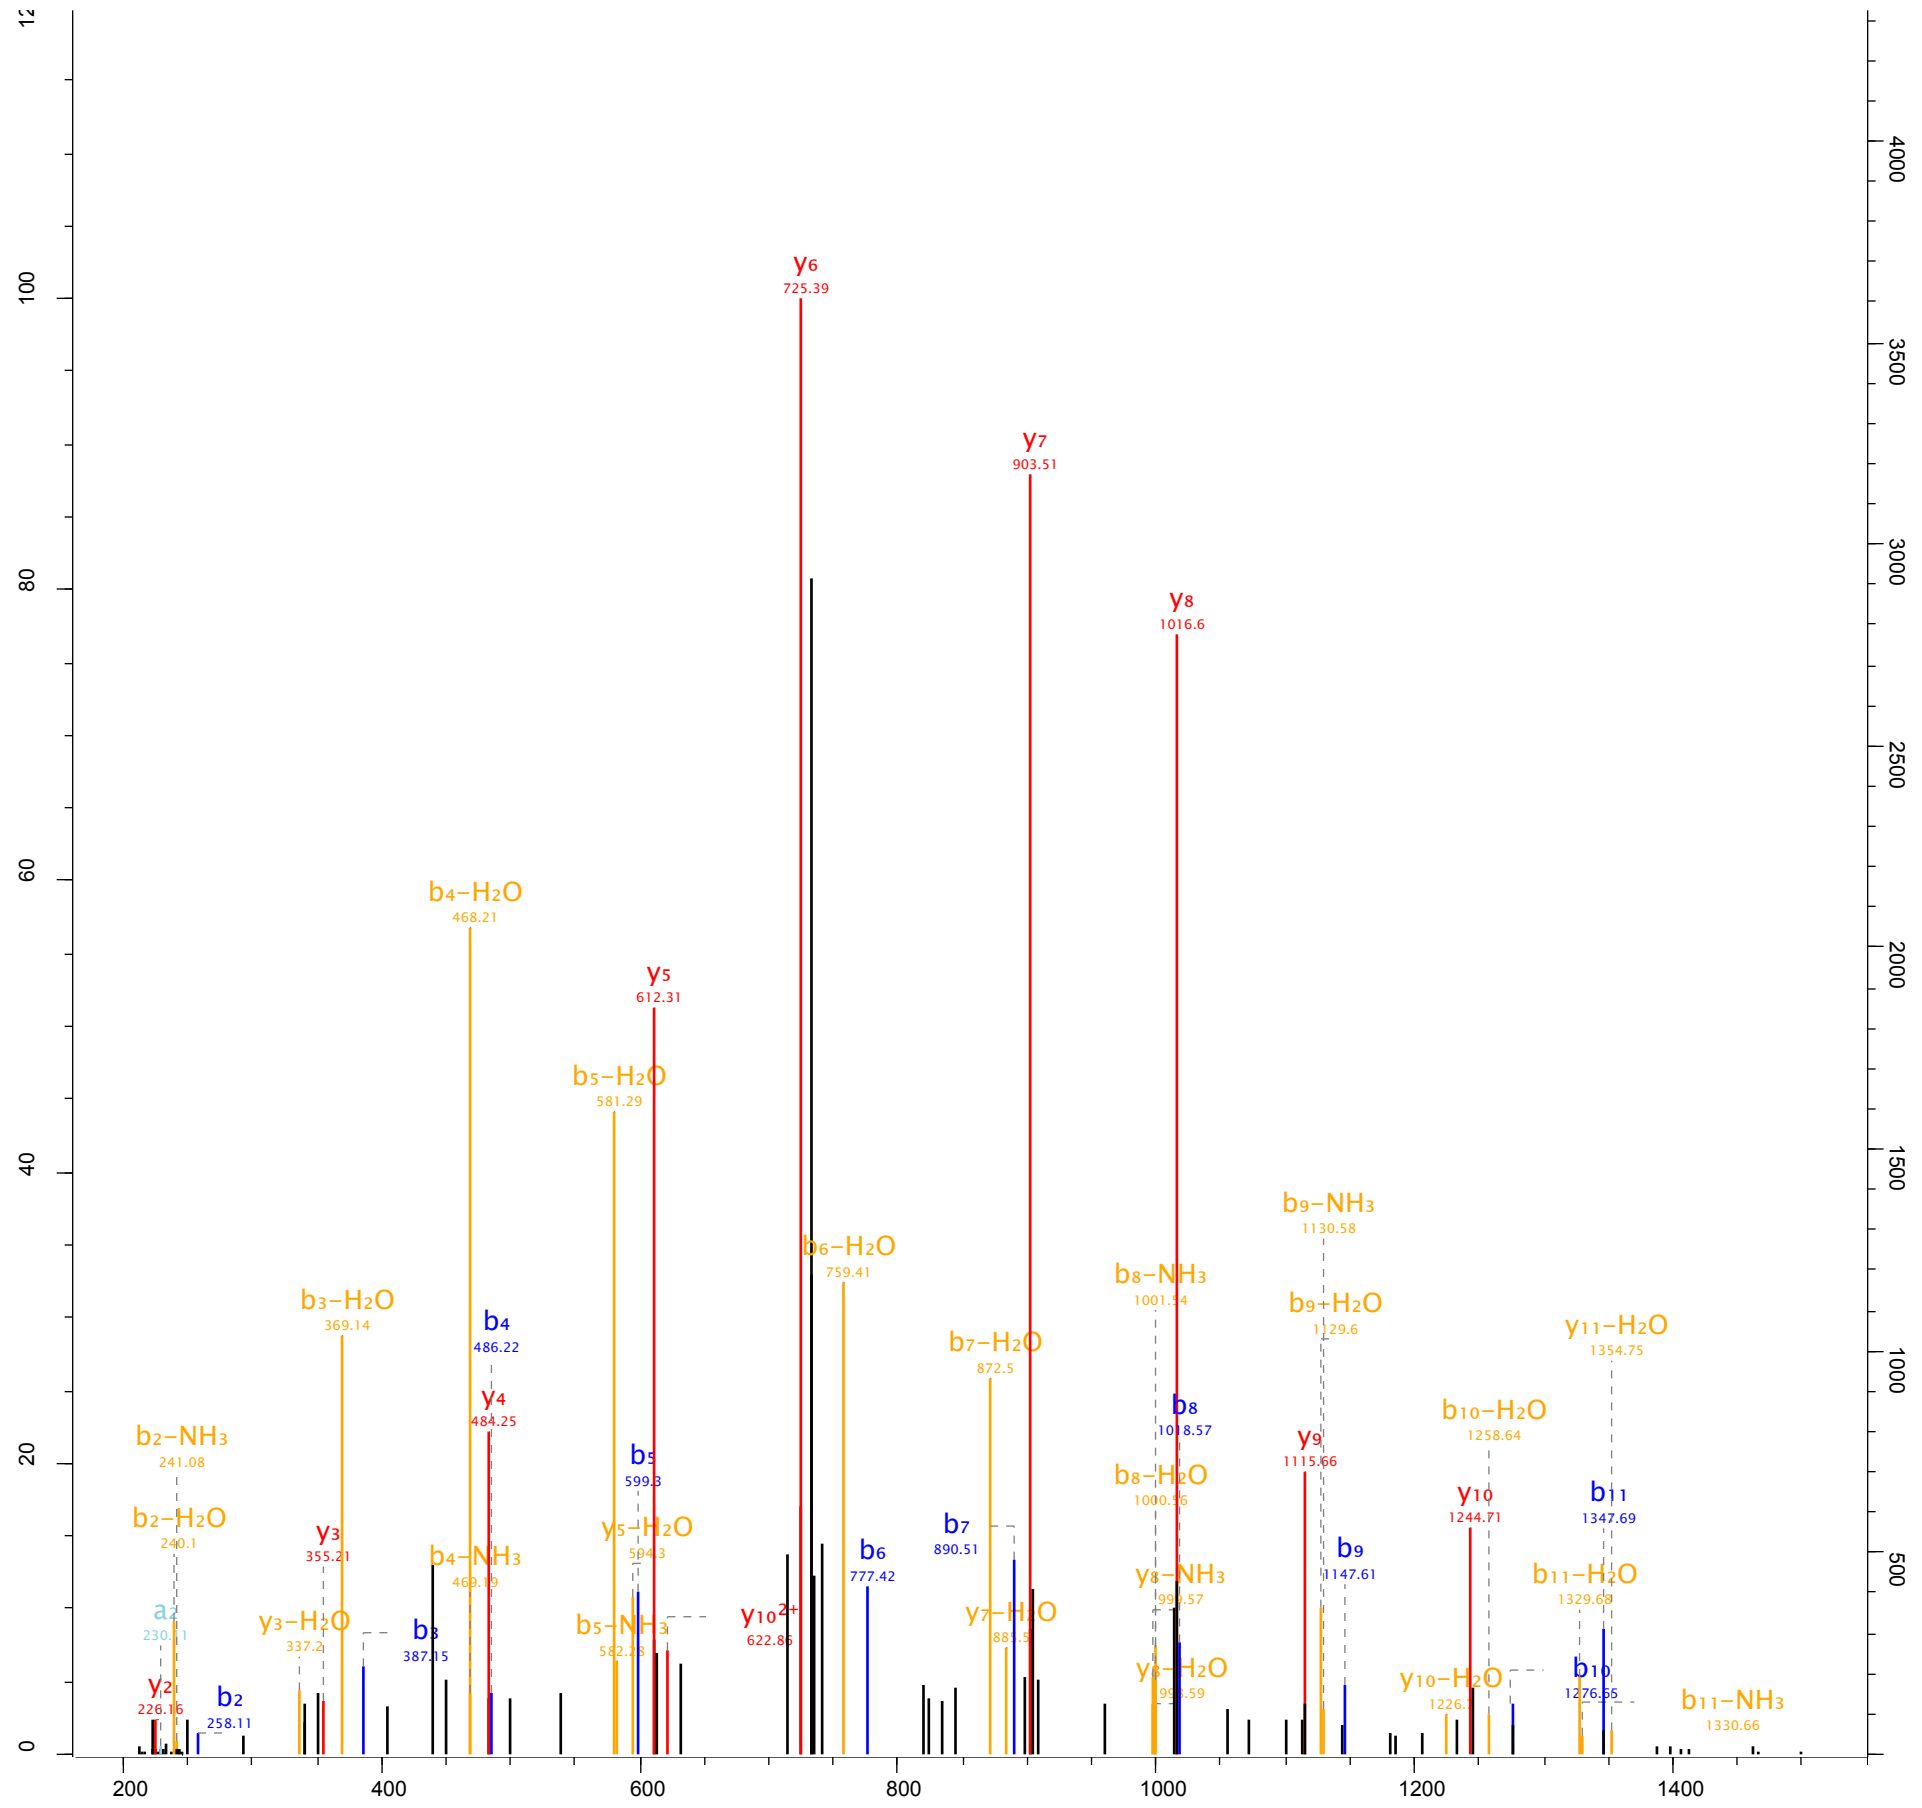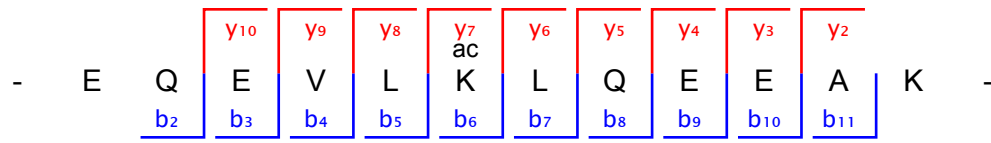

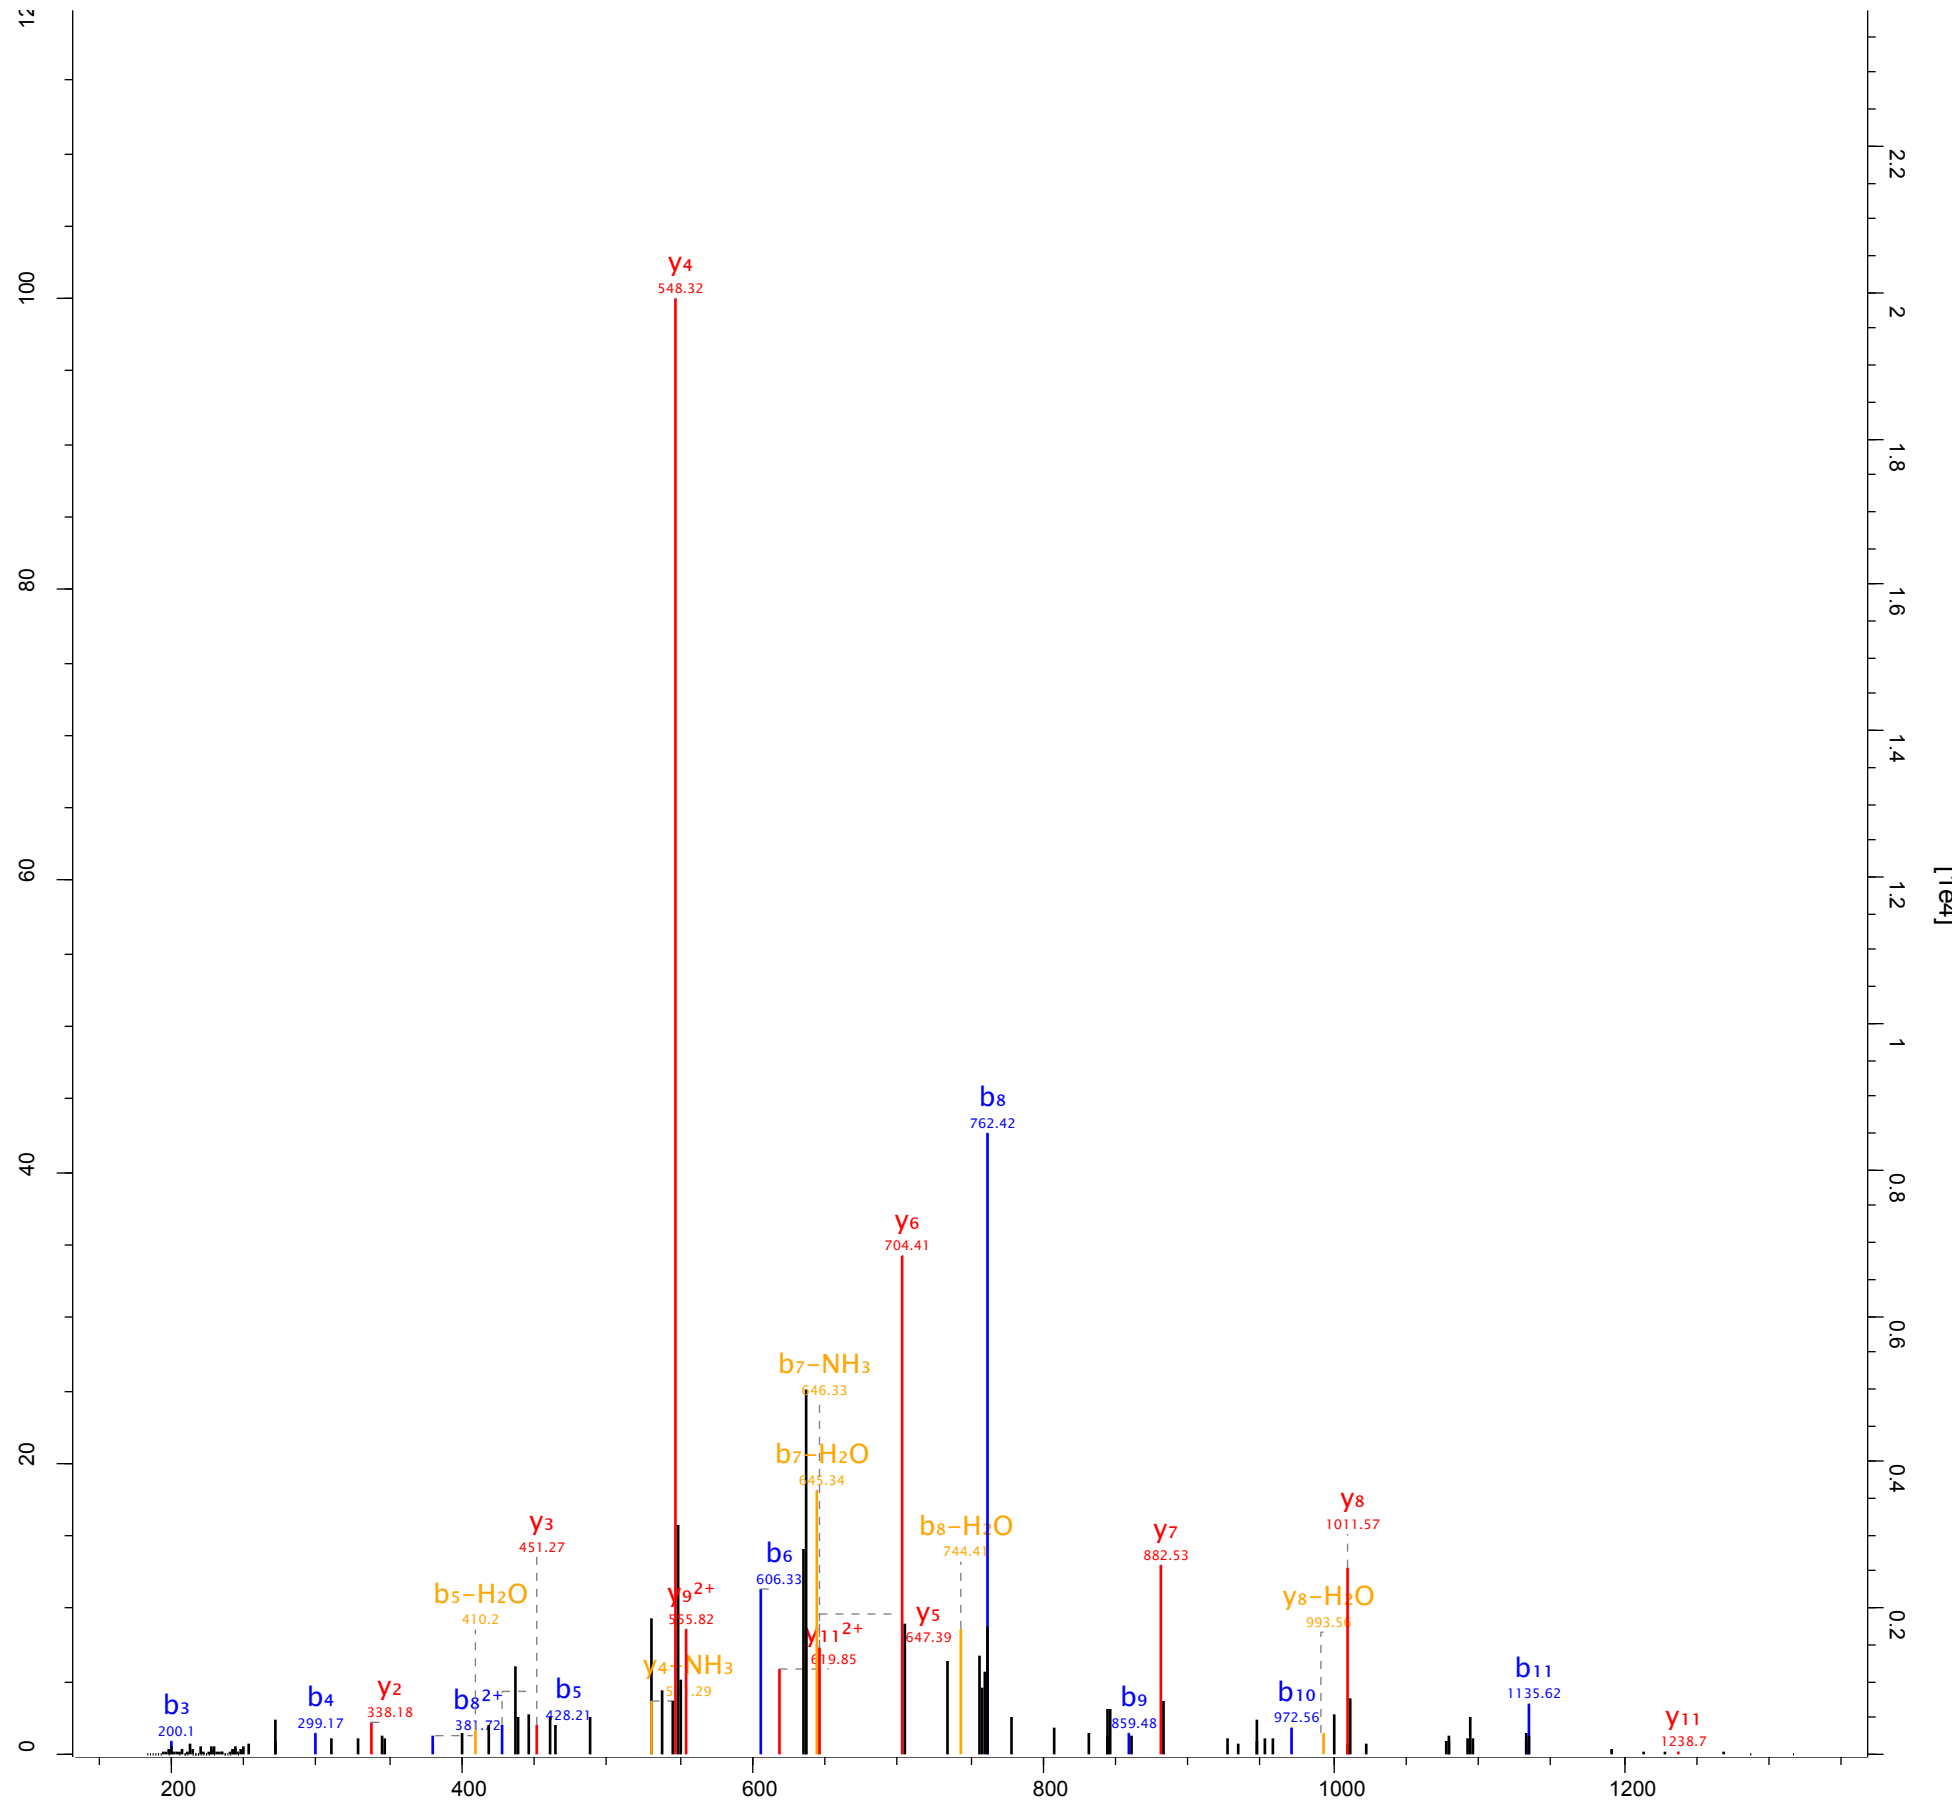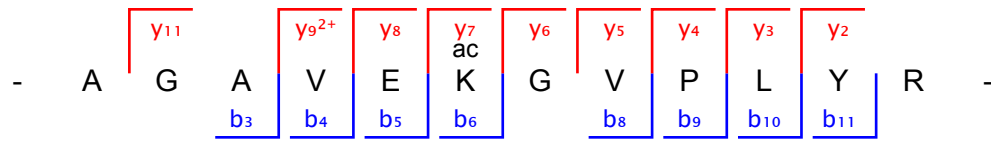

050813\_SCW\_II\_29\_19\_4

16521

ITMS; CID

154.46

935.98

Cox5b

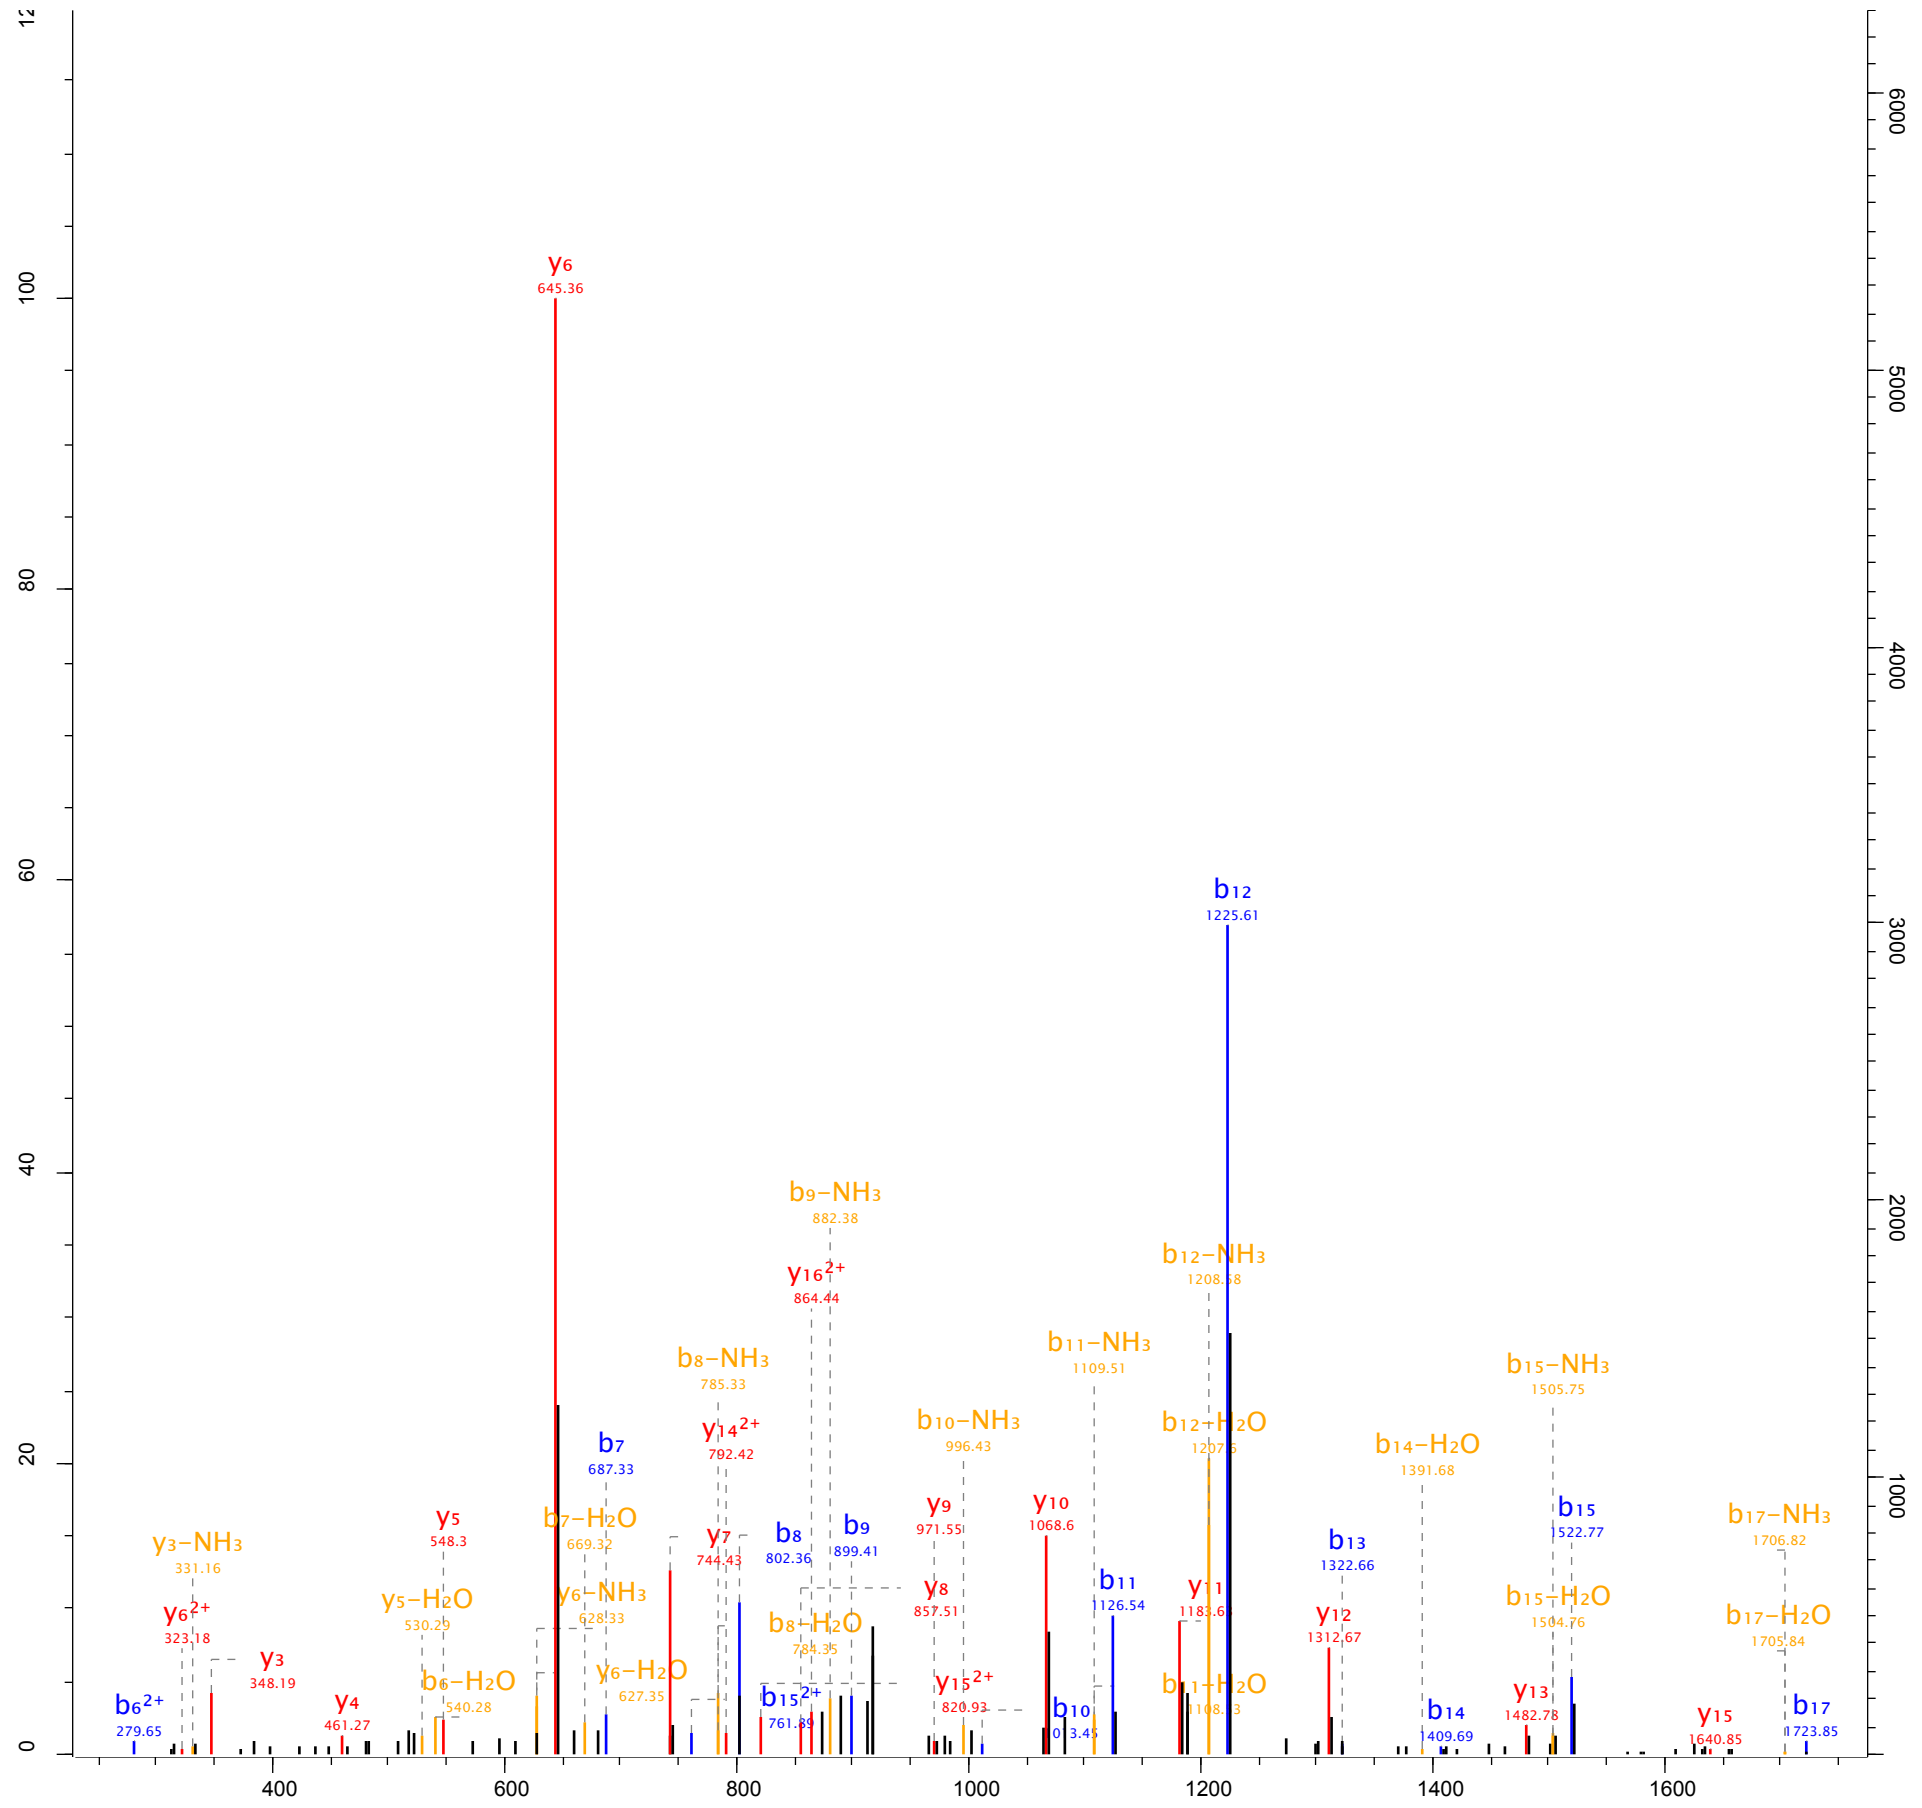

- A A S G T K E D P N L V P S I S N K -

y16<sup>2+</sup>
y15
y14<sup>2+</sup>
y13  
ac
y12
y11
y10
y9
y8
y7
y6
y5
y4
y3

b6<sup>2+</sup>
b7
b8
b9
b10
b11
b12
b13
b14
b15
b17

Raw file 050813\_SCW\_II\_29\_19\_4 Scan 16524 Method ITMS; CID Score 285.38 m/z 751.9 Gene names Atp5f1

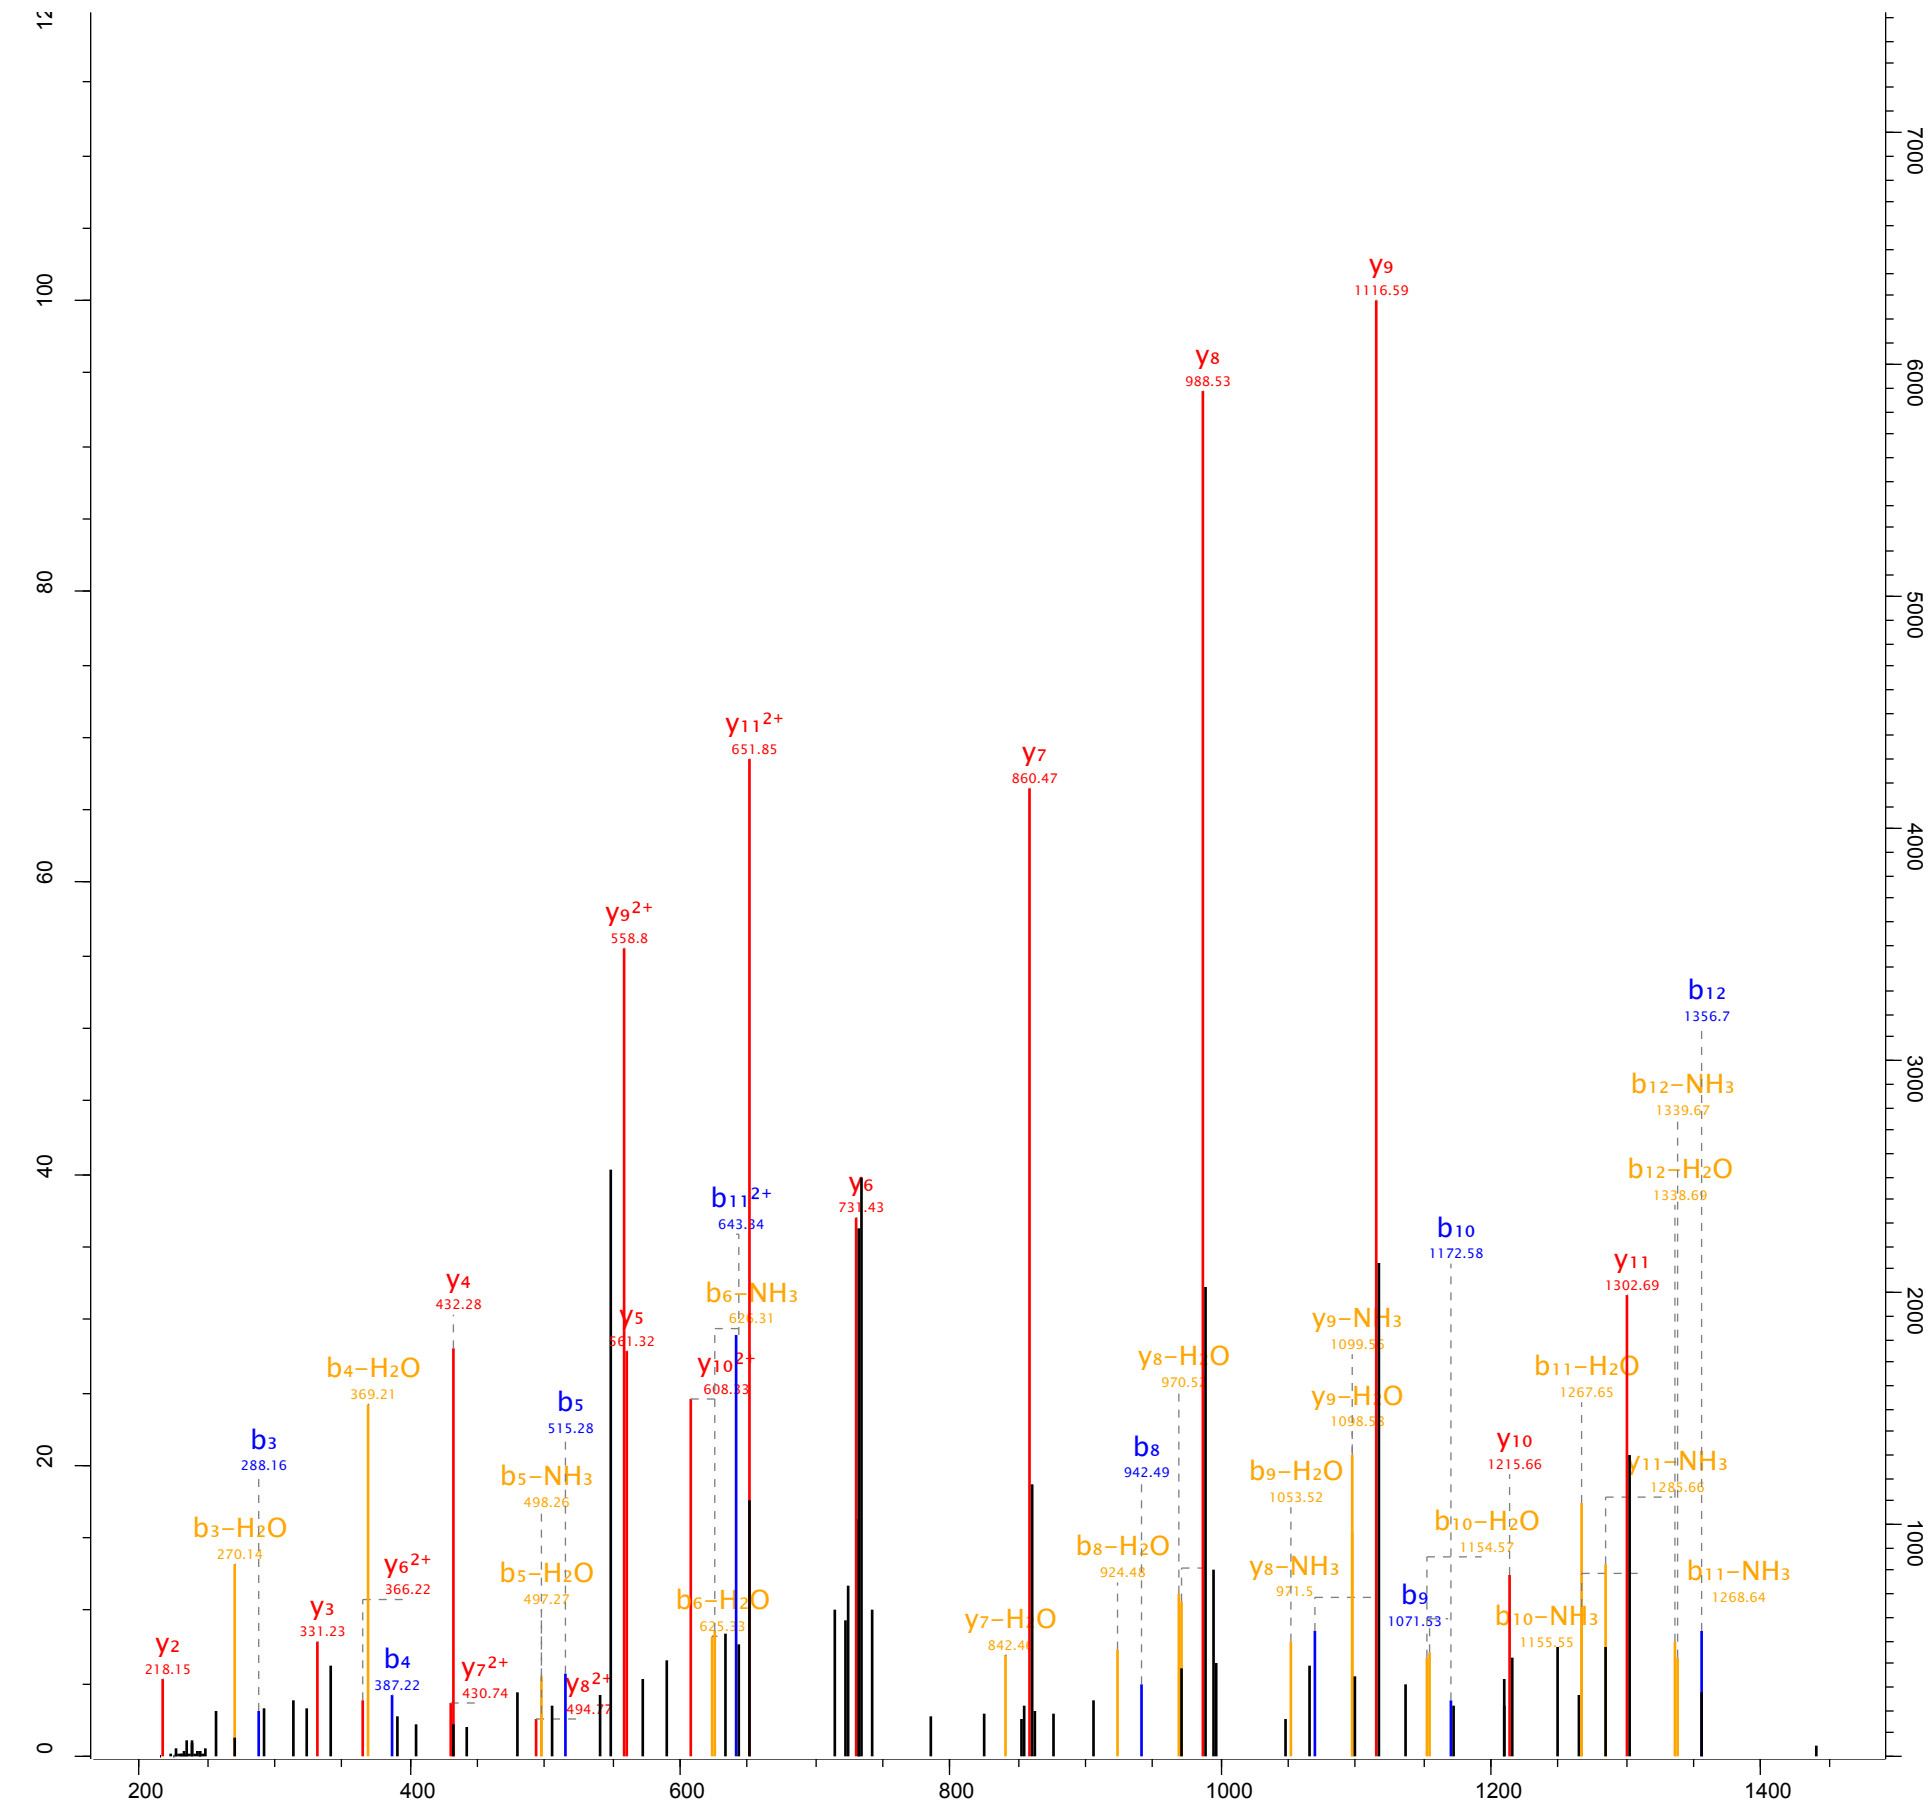

- S I S V Q Q E K E T I A K -

b3 b4 b5 b8 b9 b10 b11<sup>2+</sup> b12

Raw file 050813\_SCW\_II\_29\_19\_4 Scan 16625 Method ITMS; CID Score 120.77 m/z 667.89 Gene names Aldh6a1

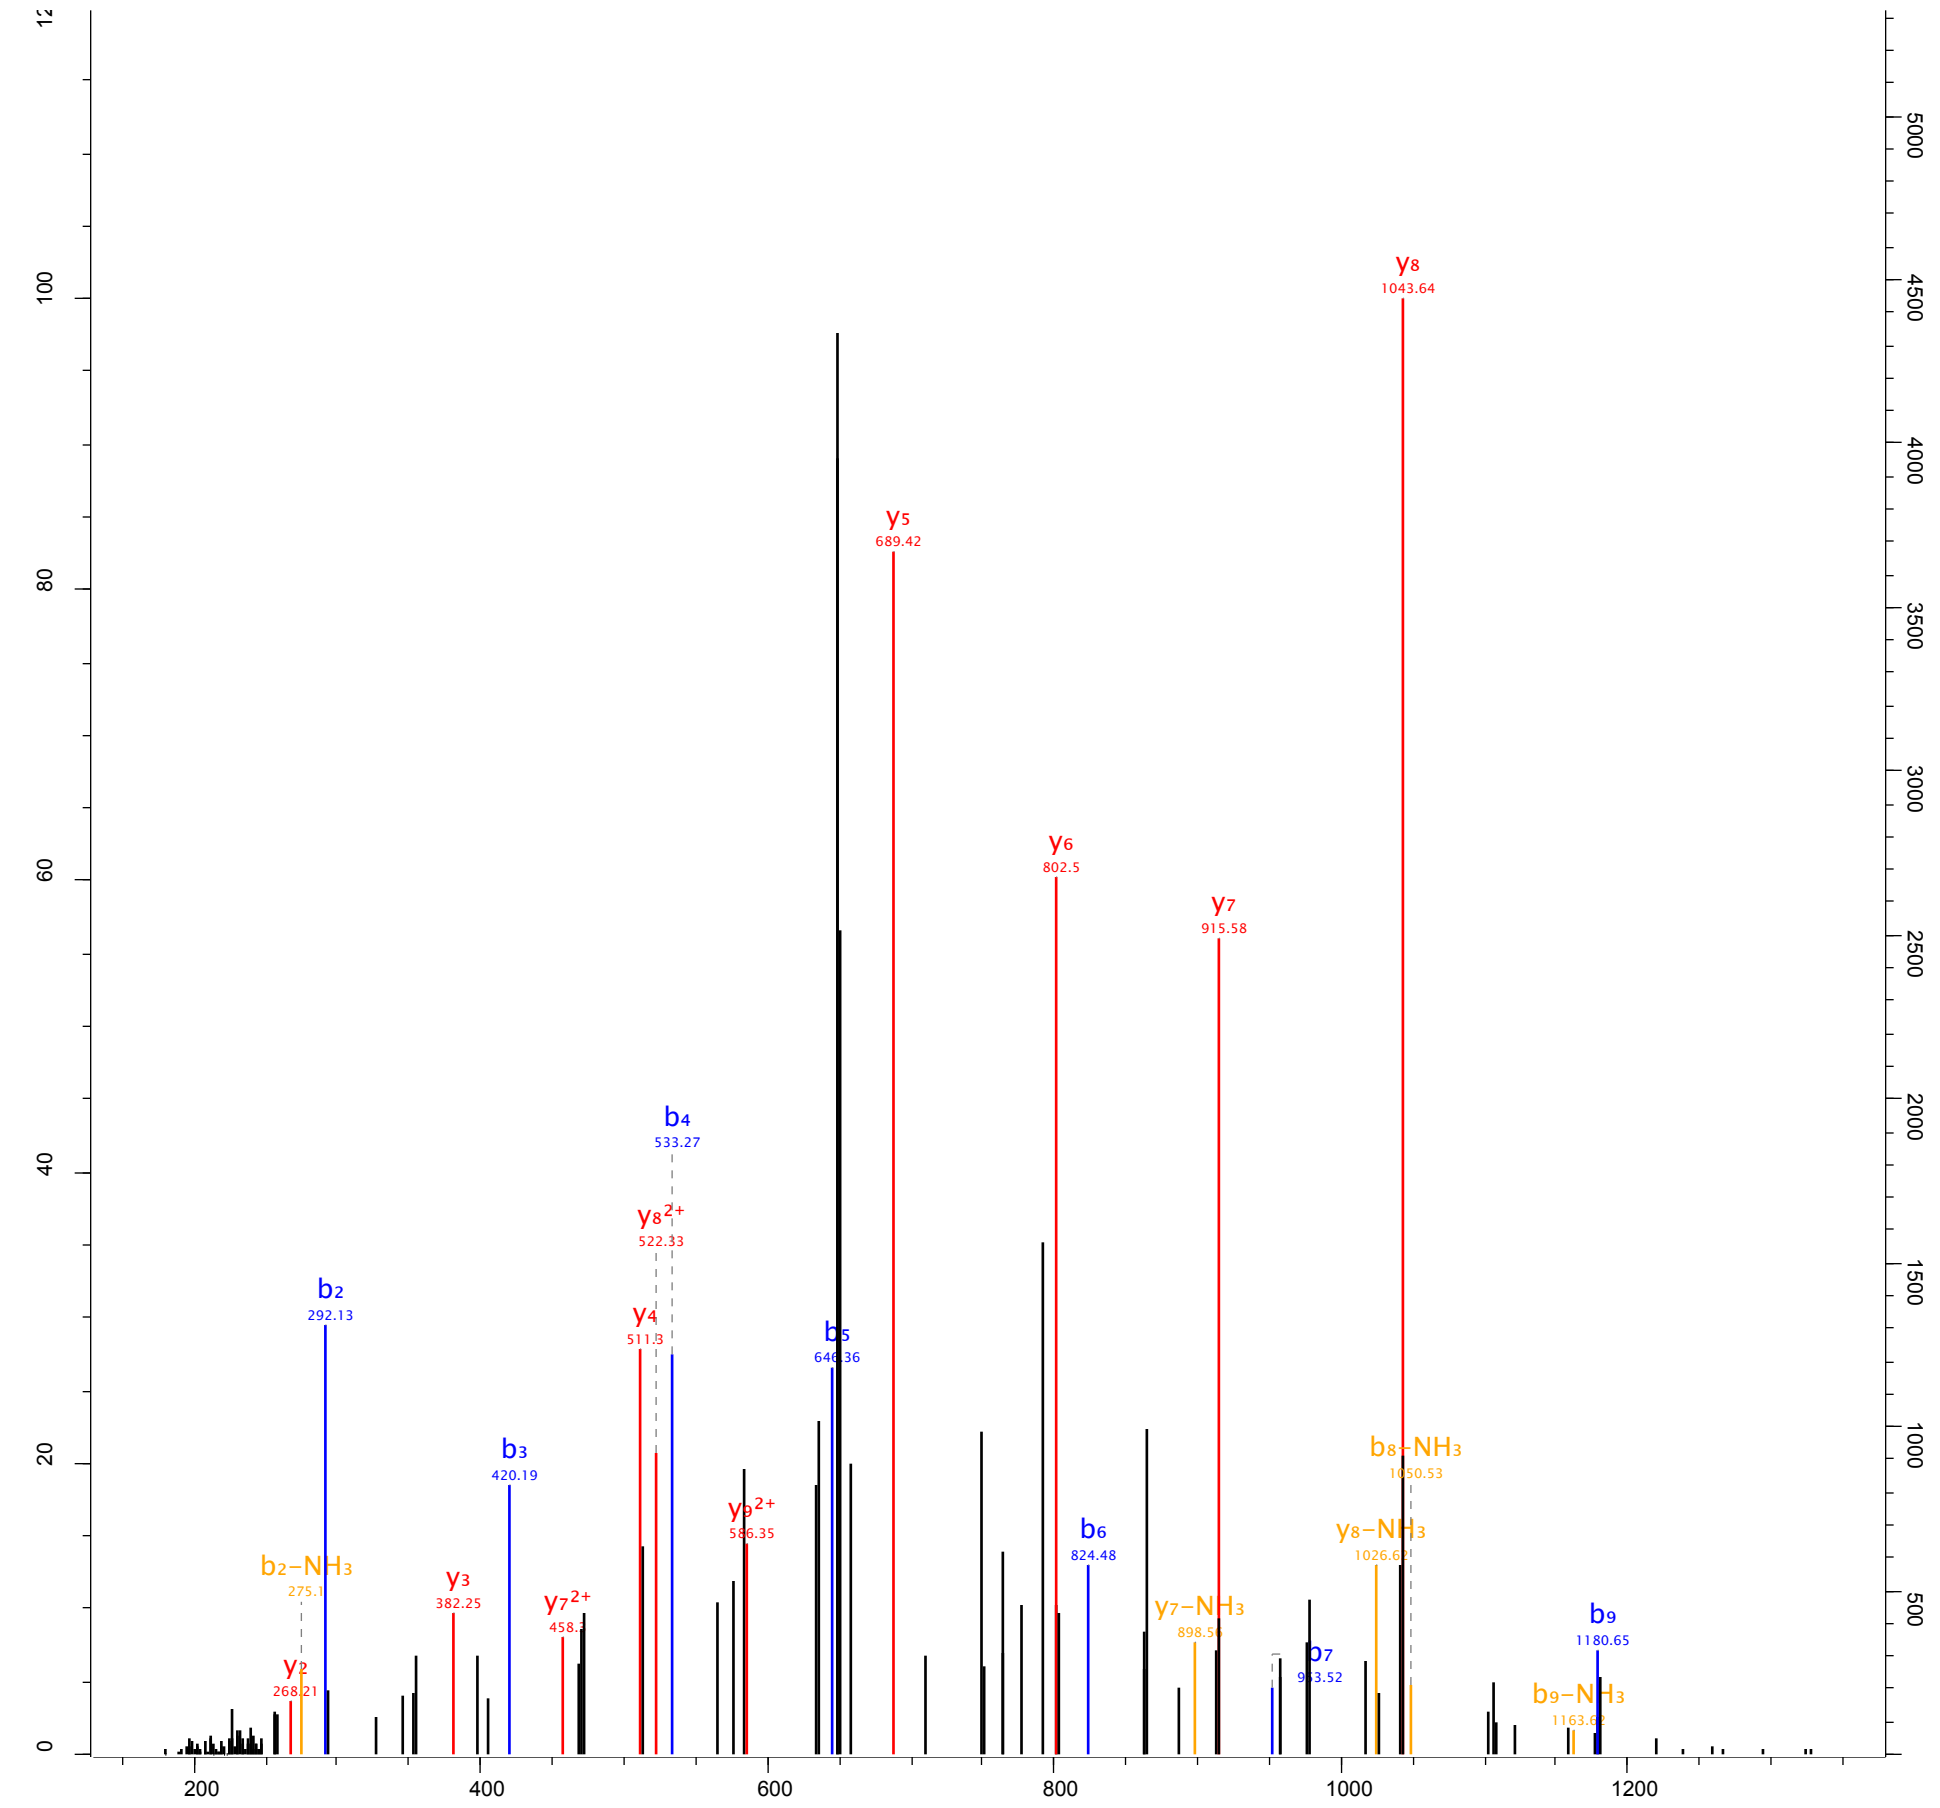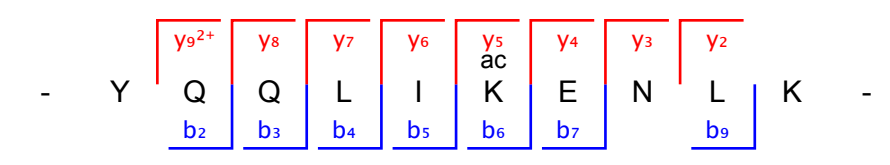

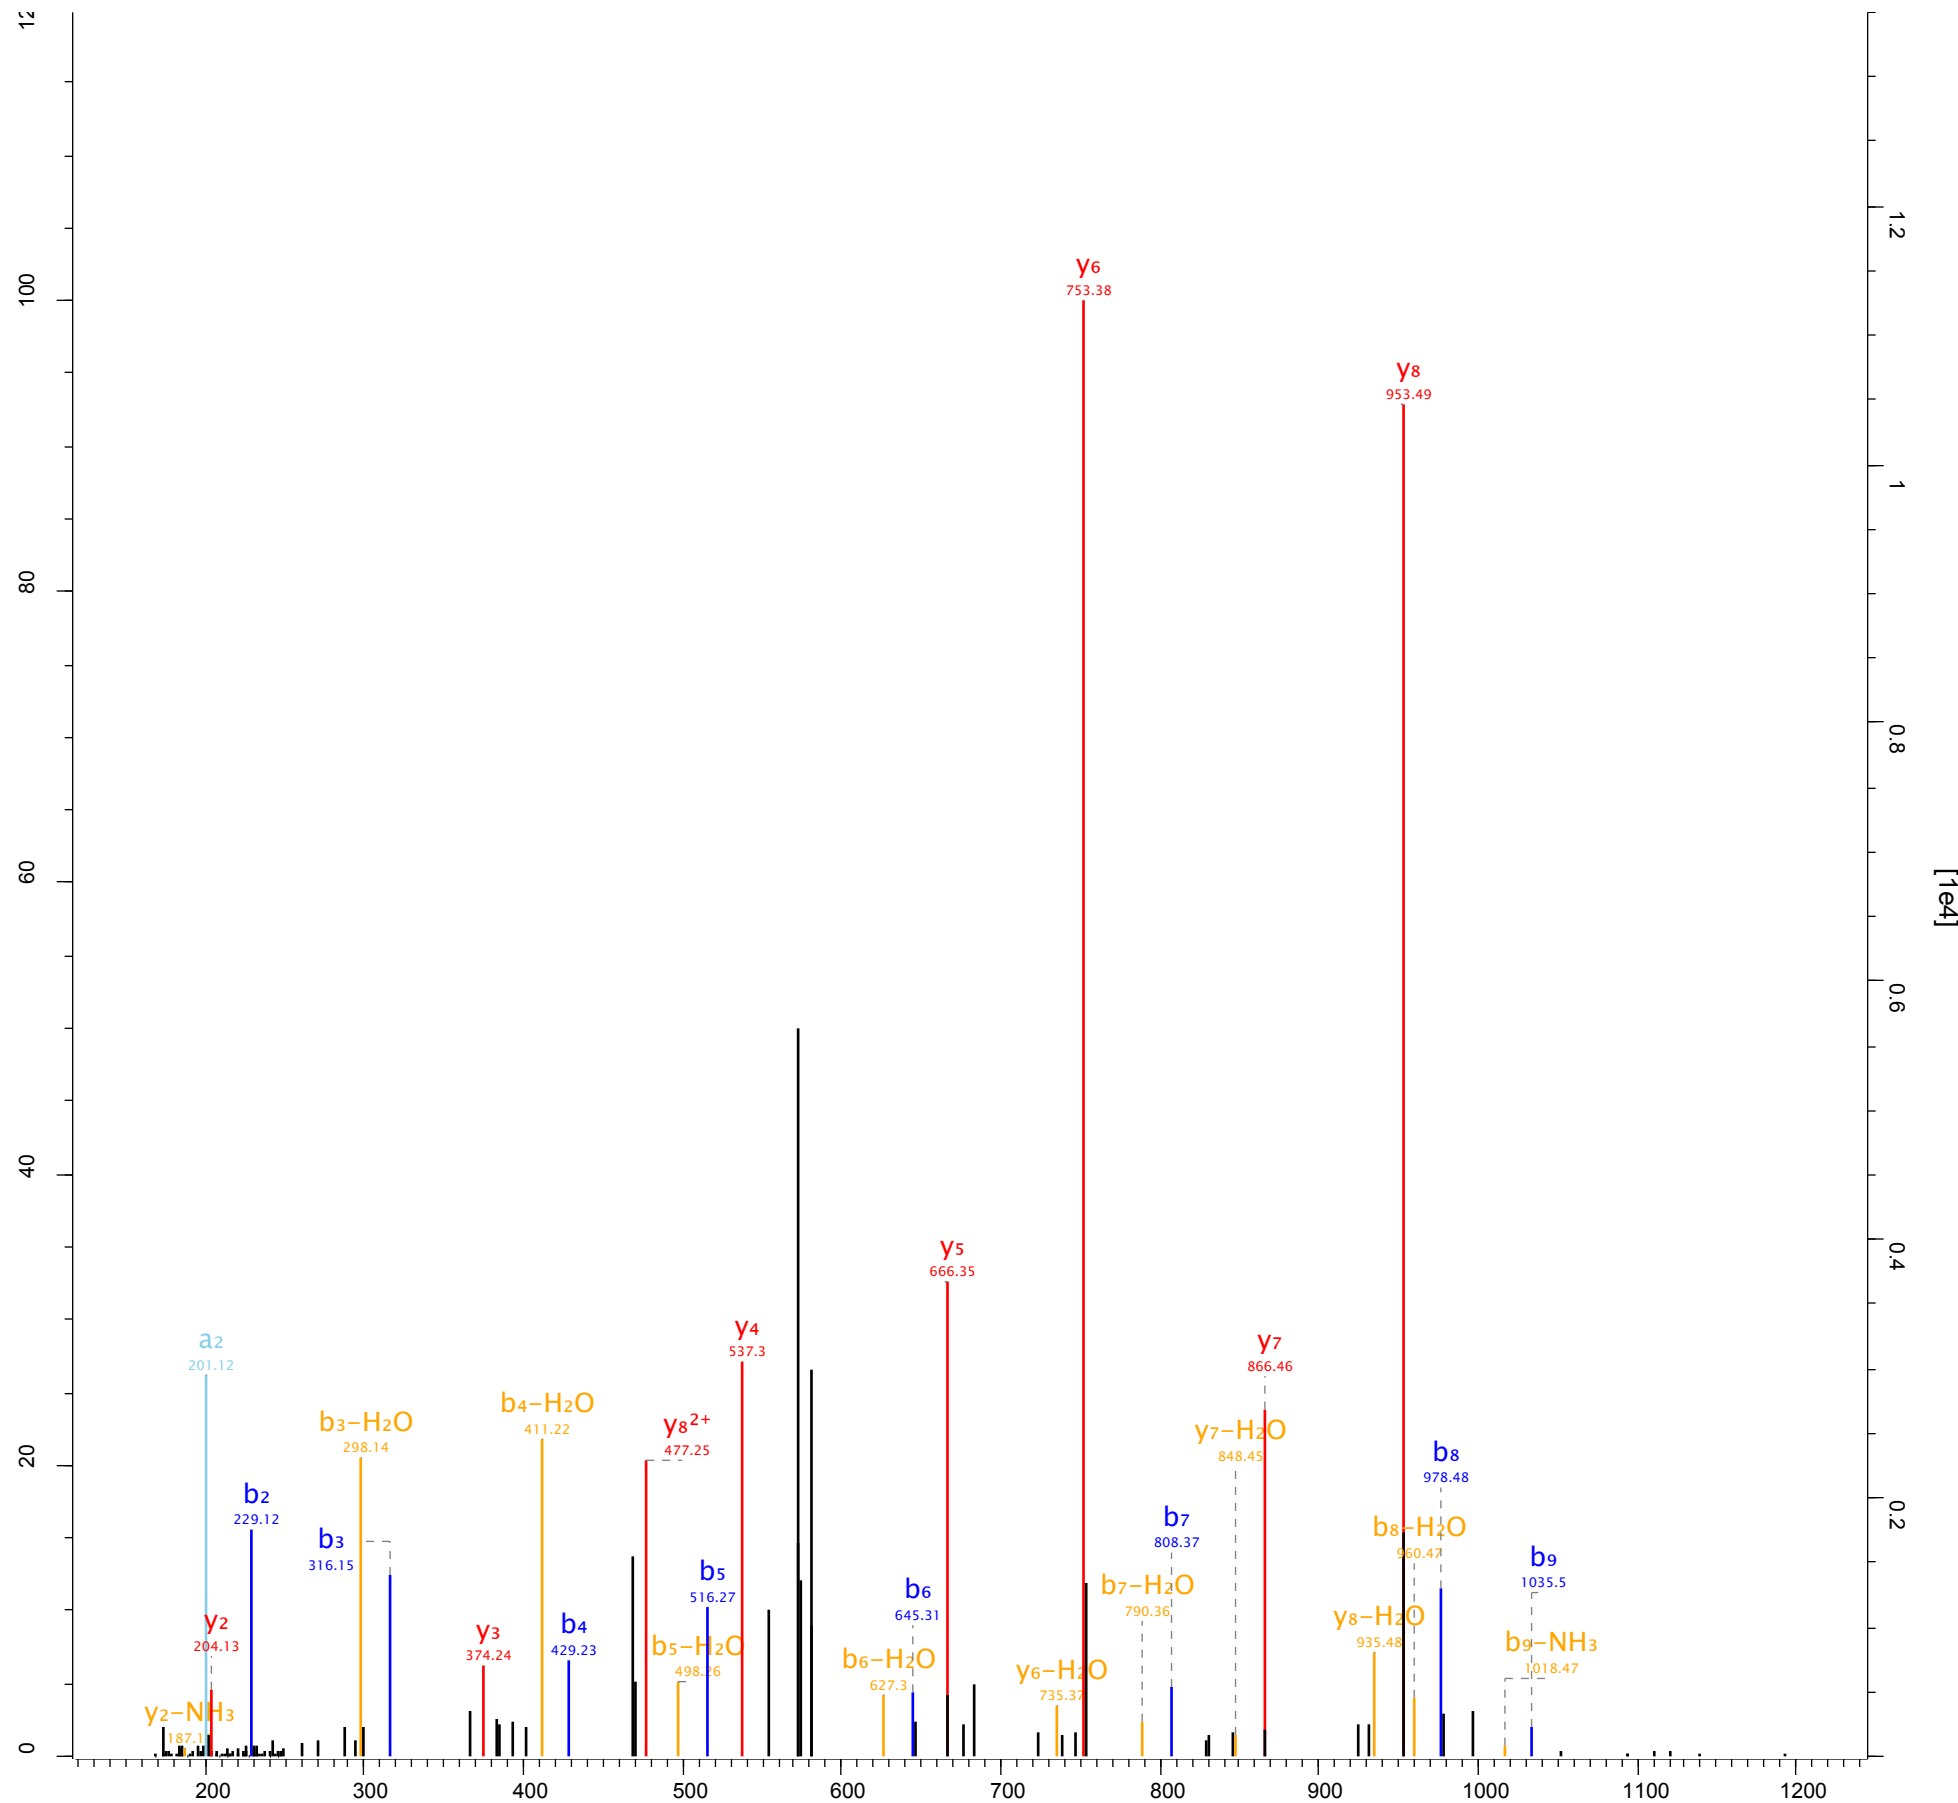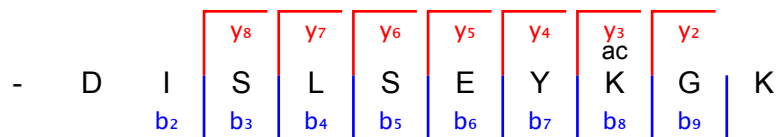

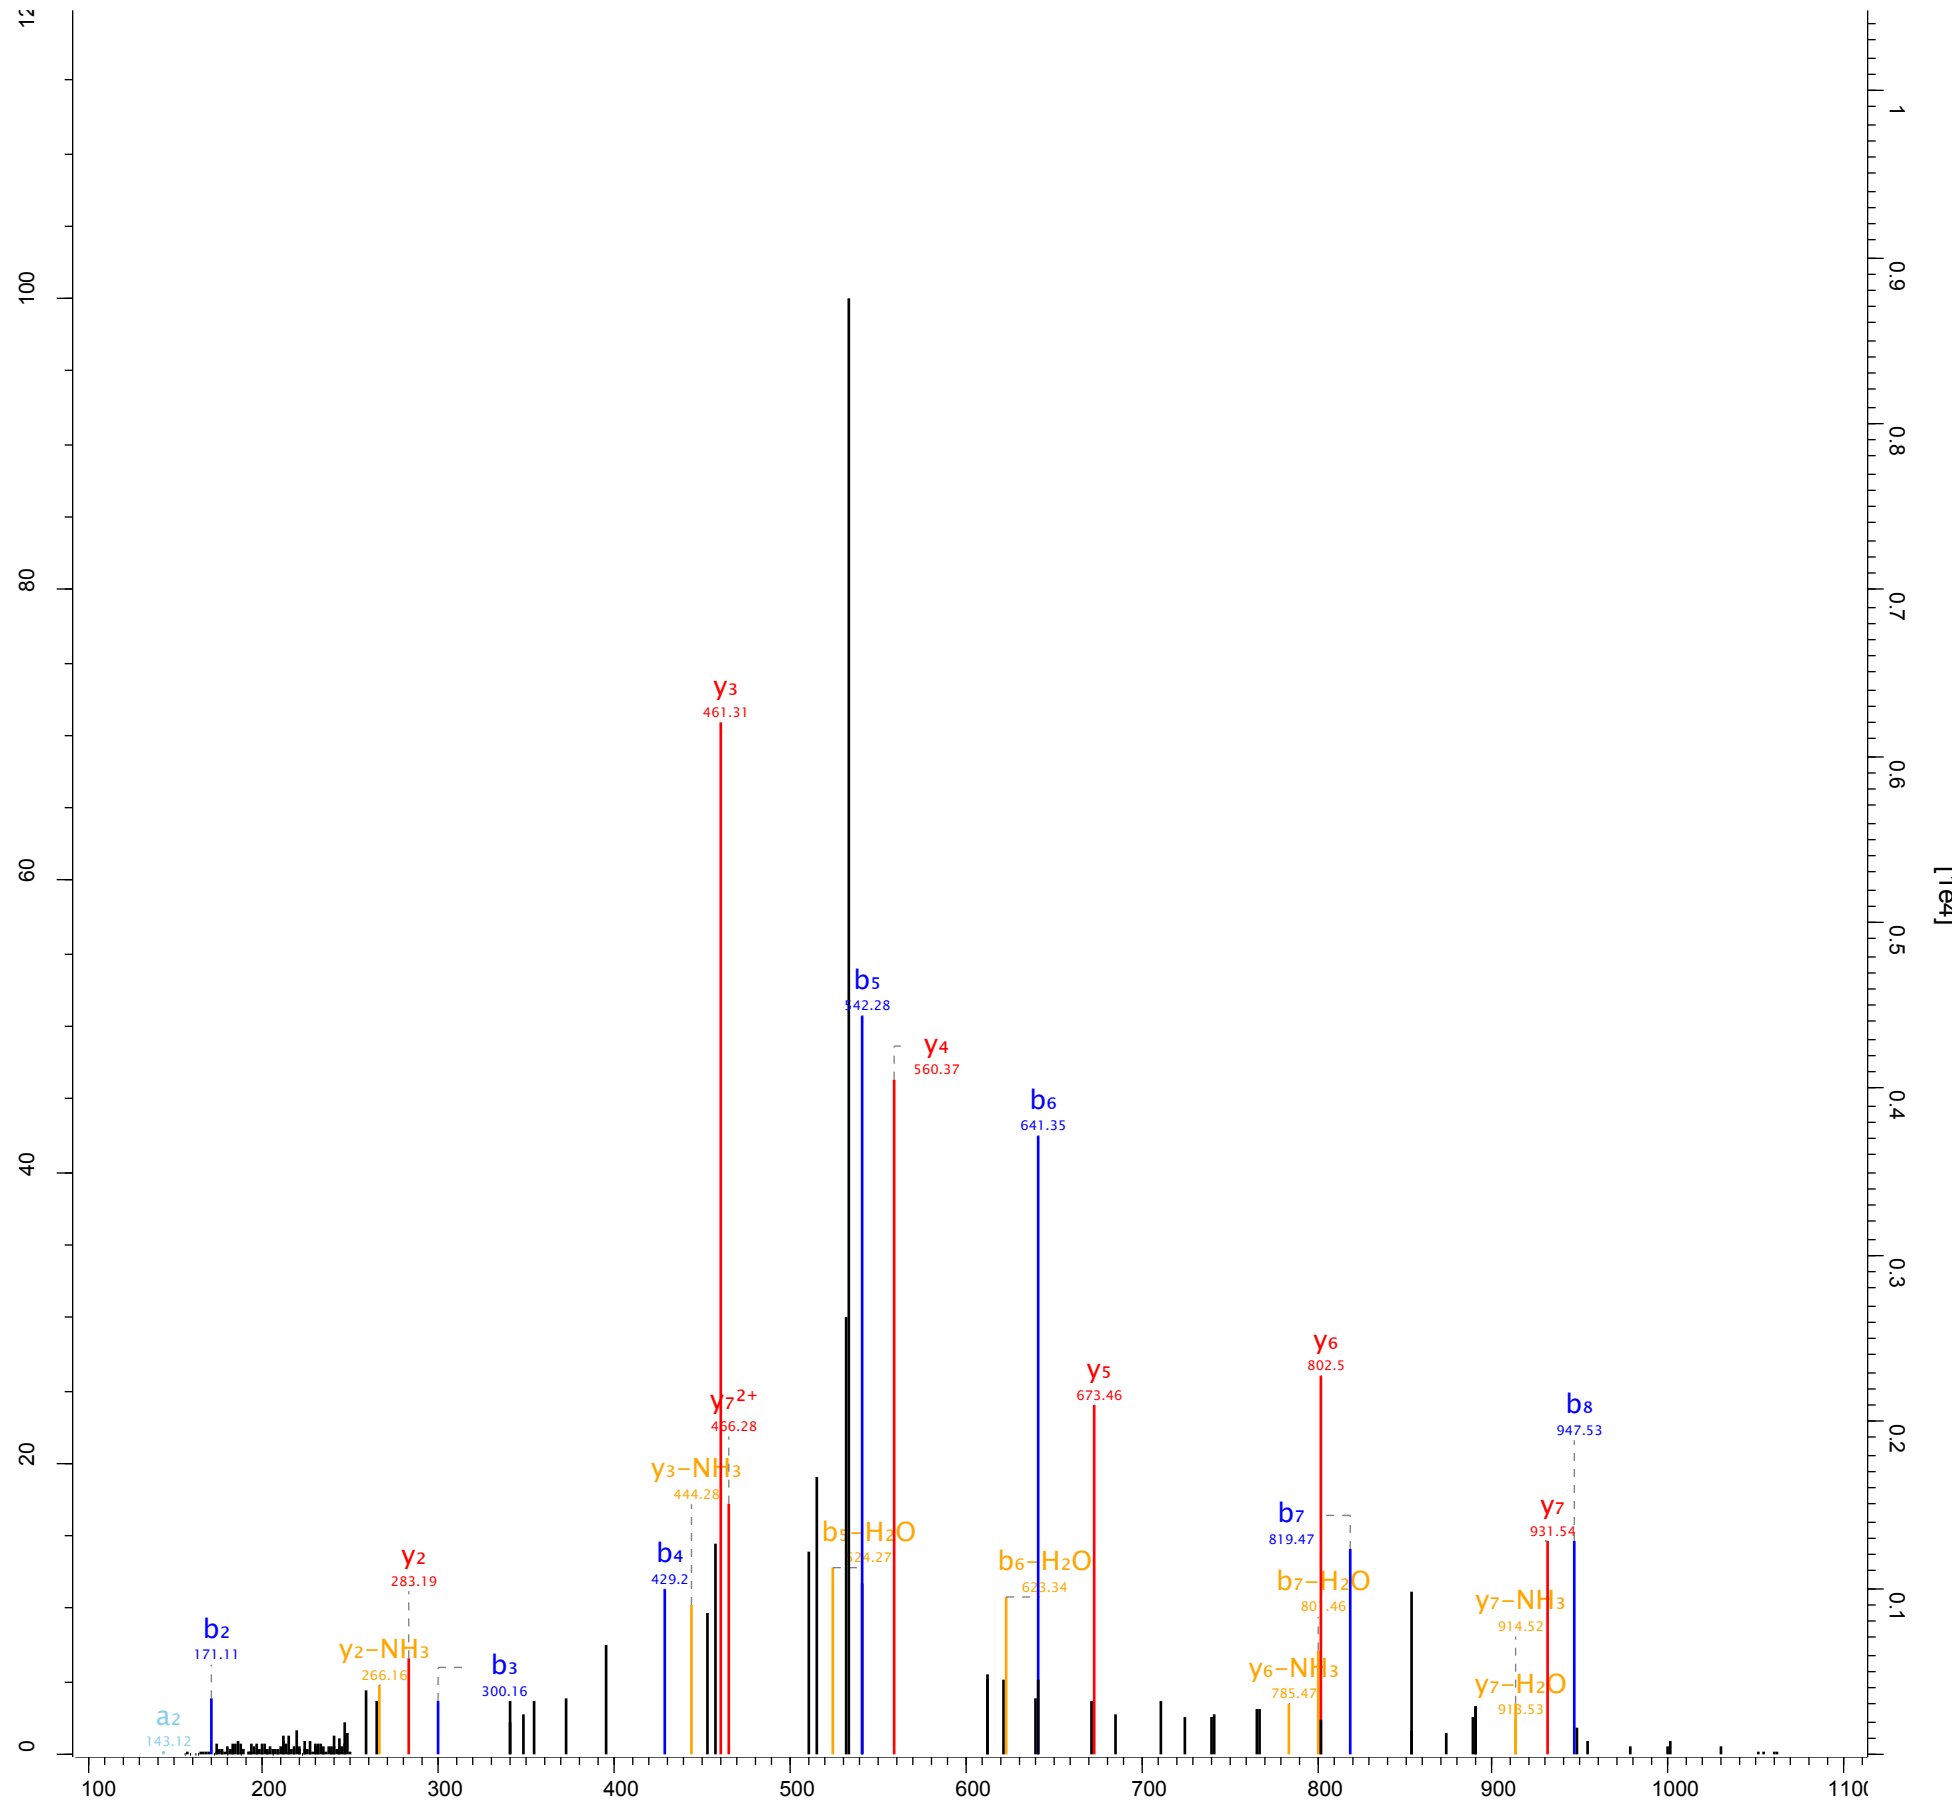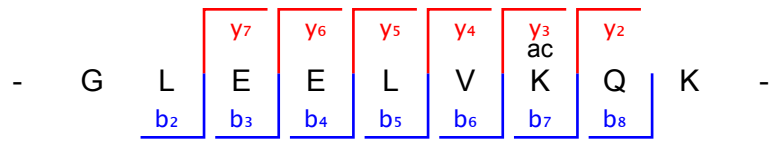



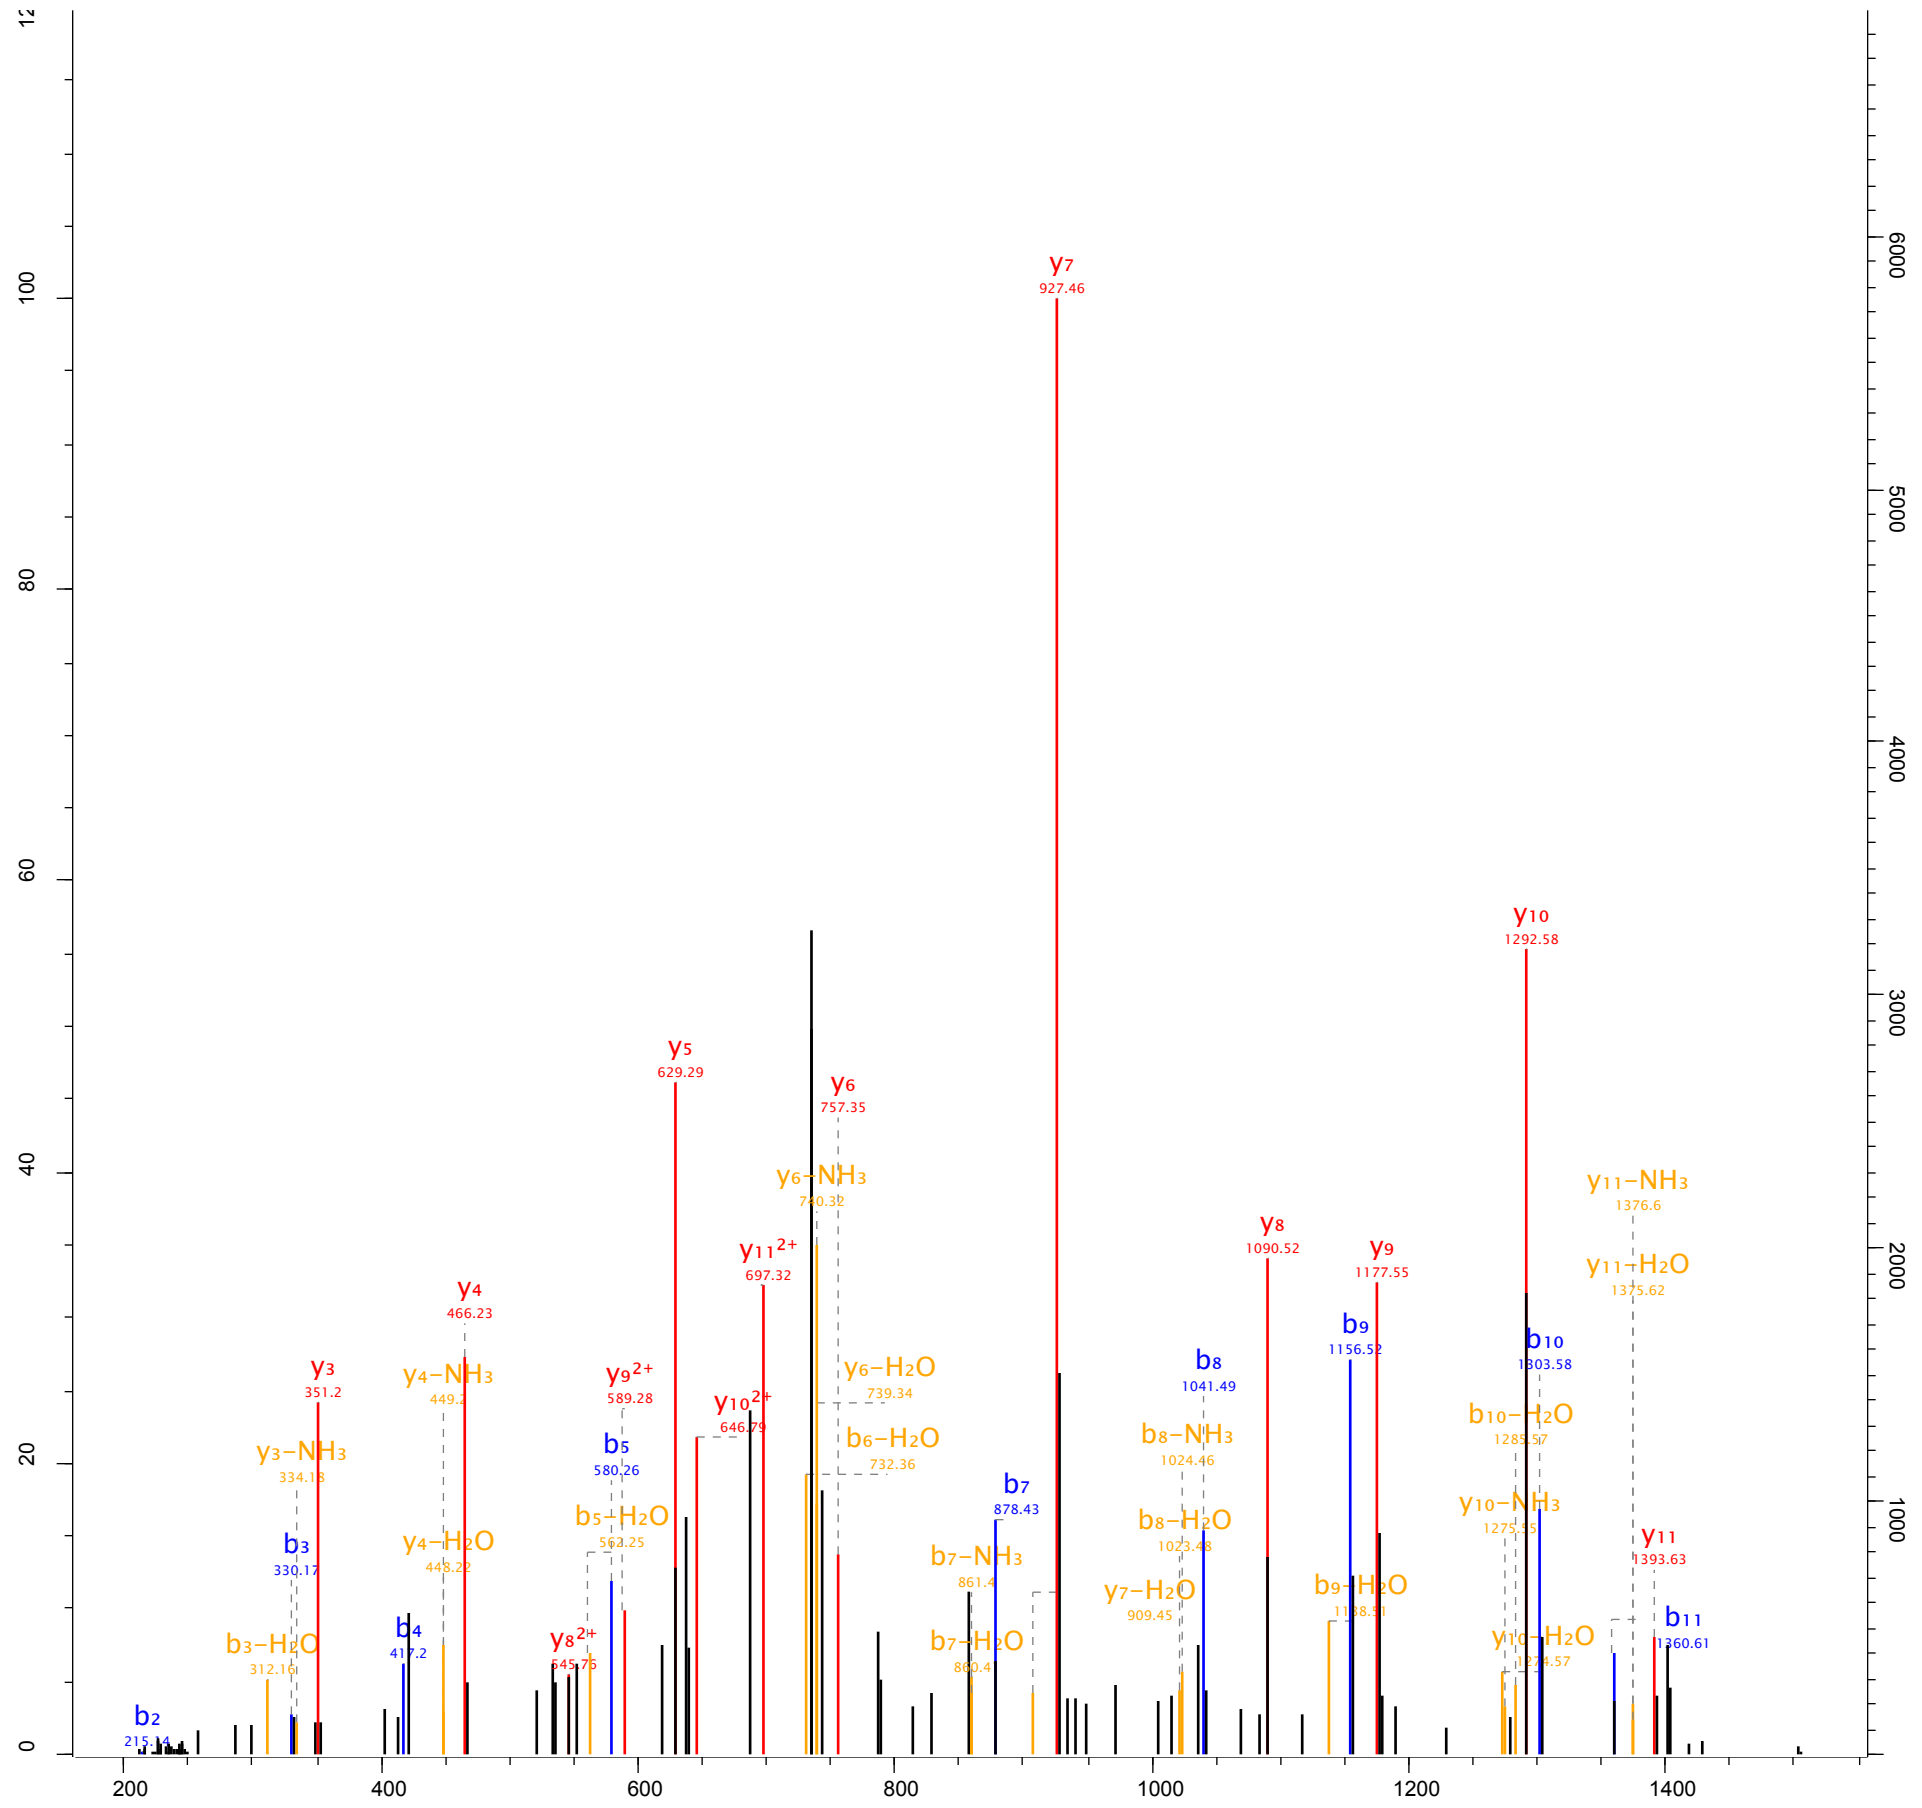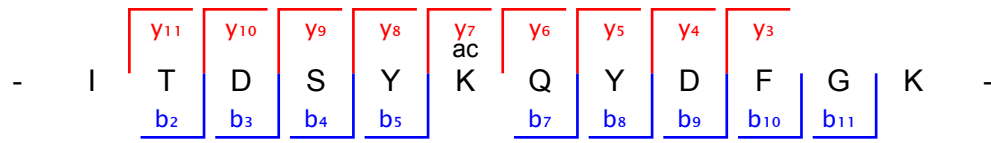

Raw file 050813\_SCW\_II\_29\_19\_4 Scan 17078 Method ITMS; CID Score 214.65 m/z 809.93 Gene names Zfr

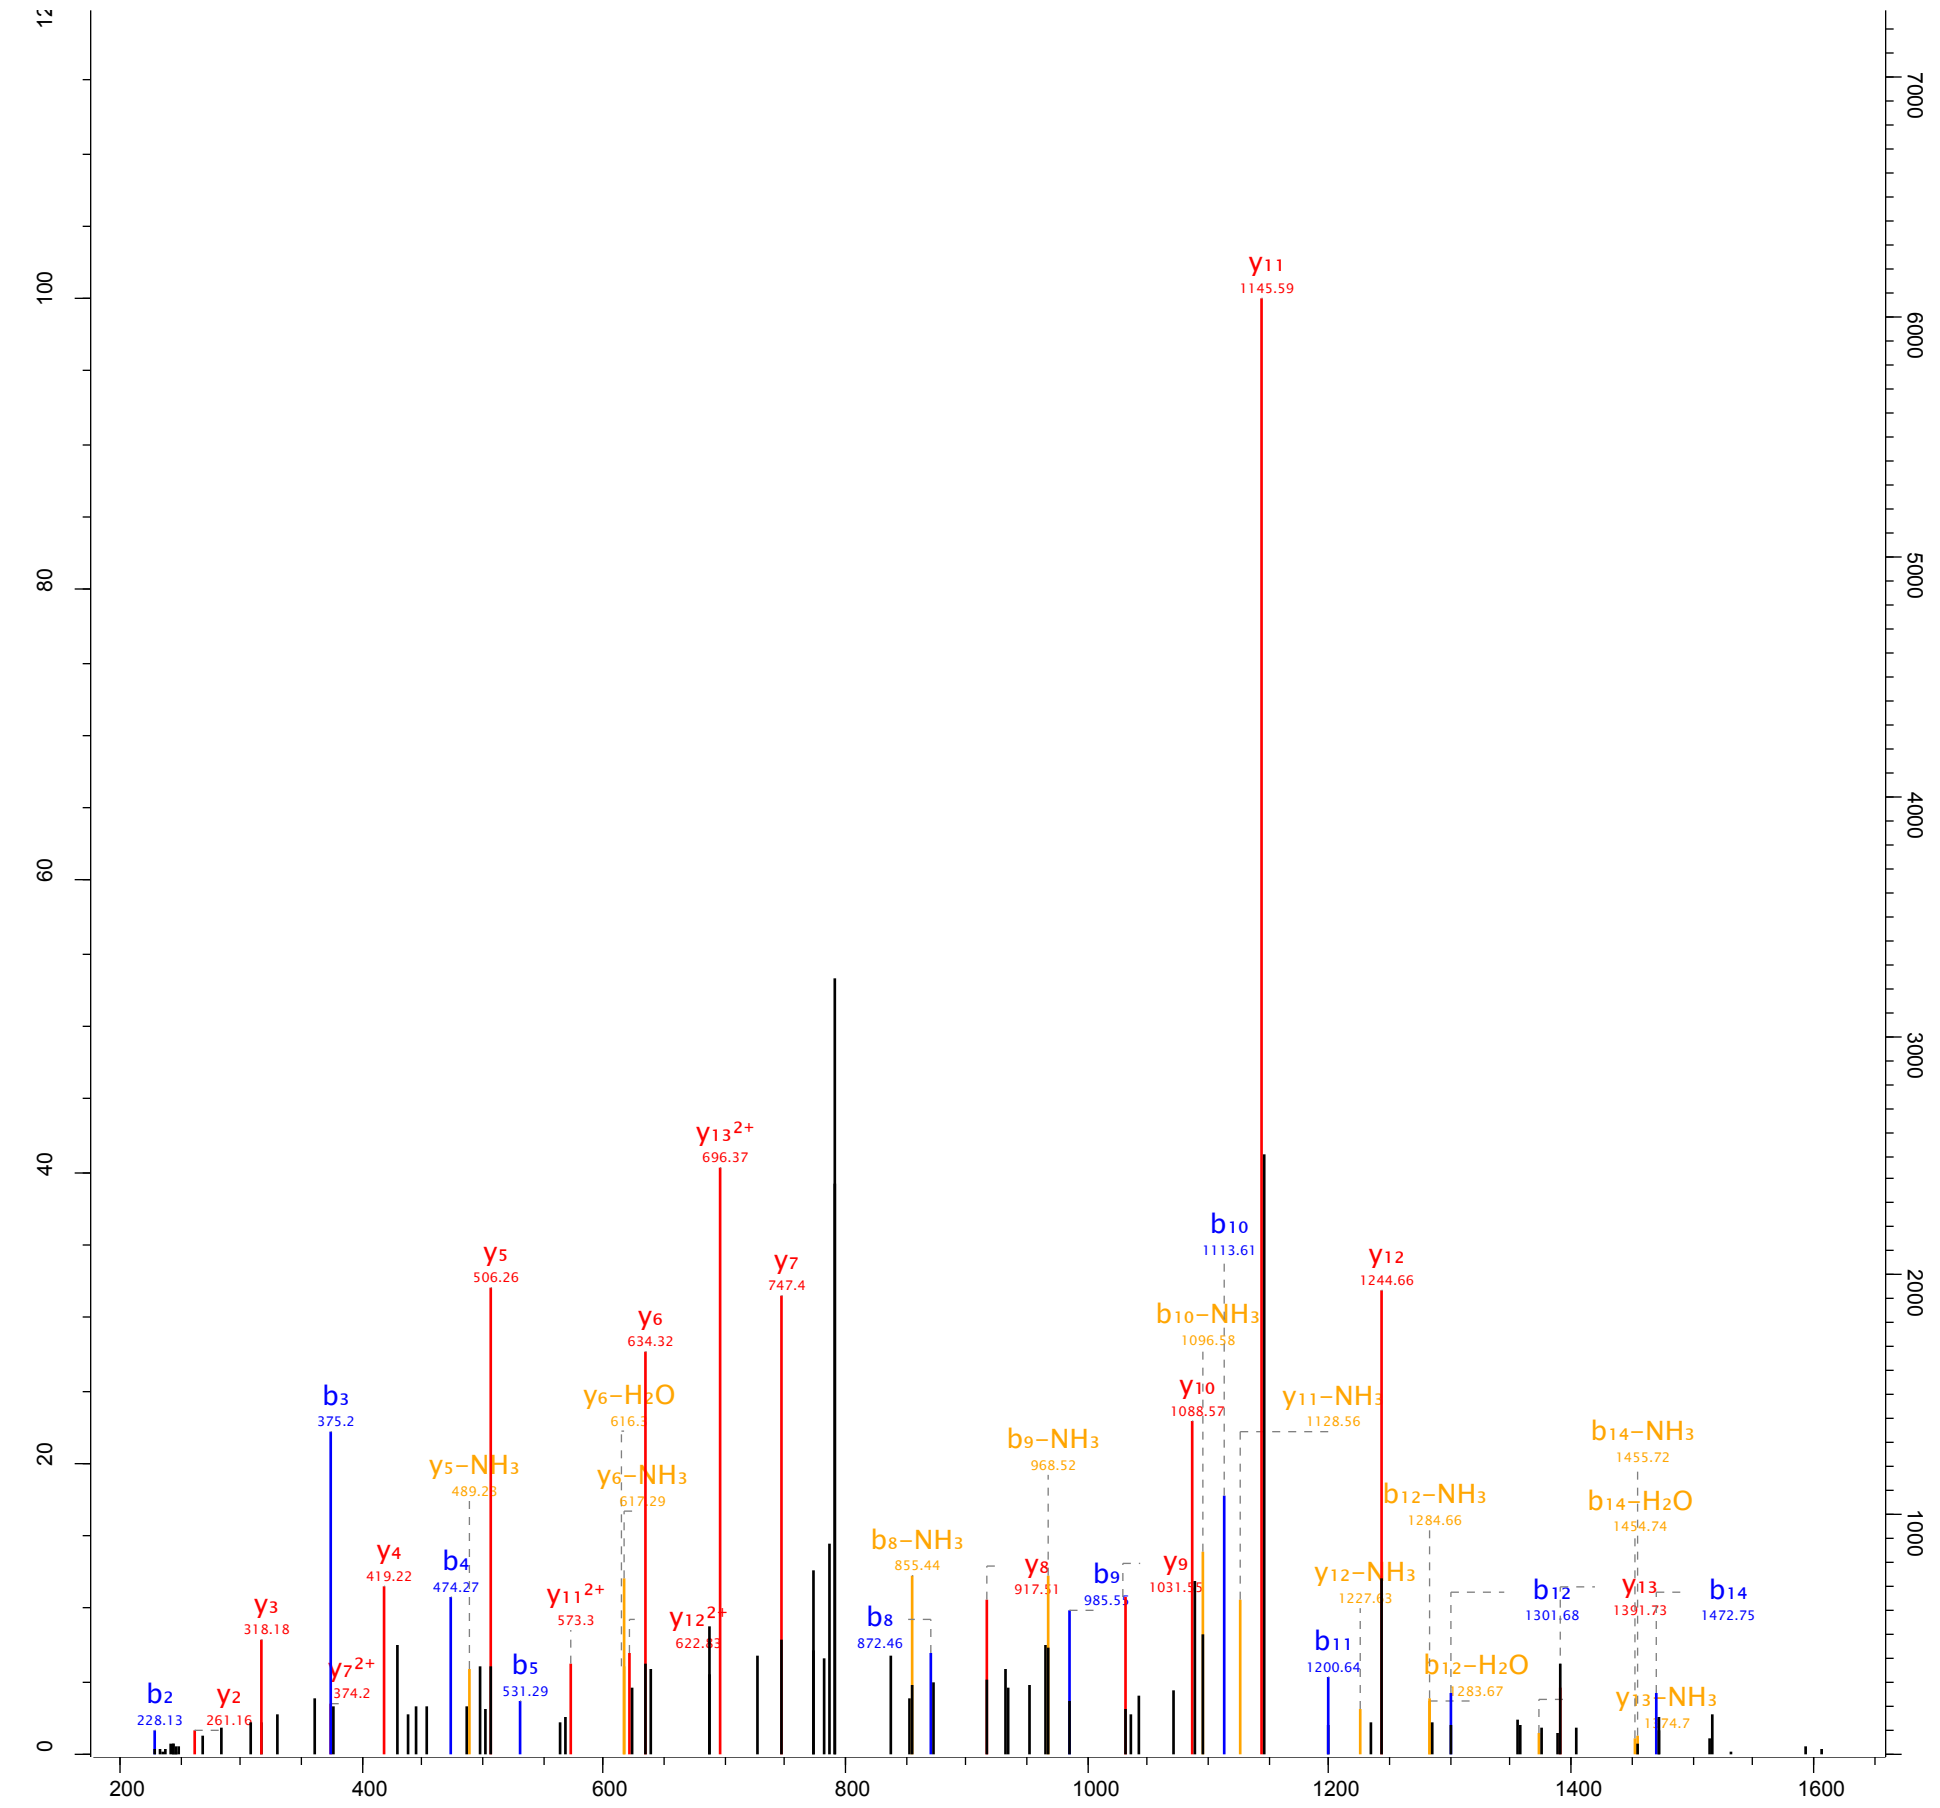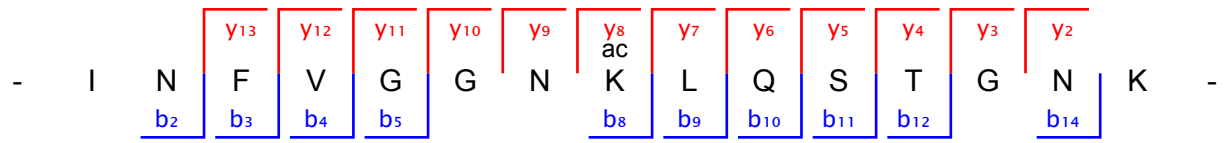

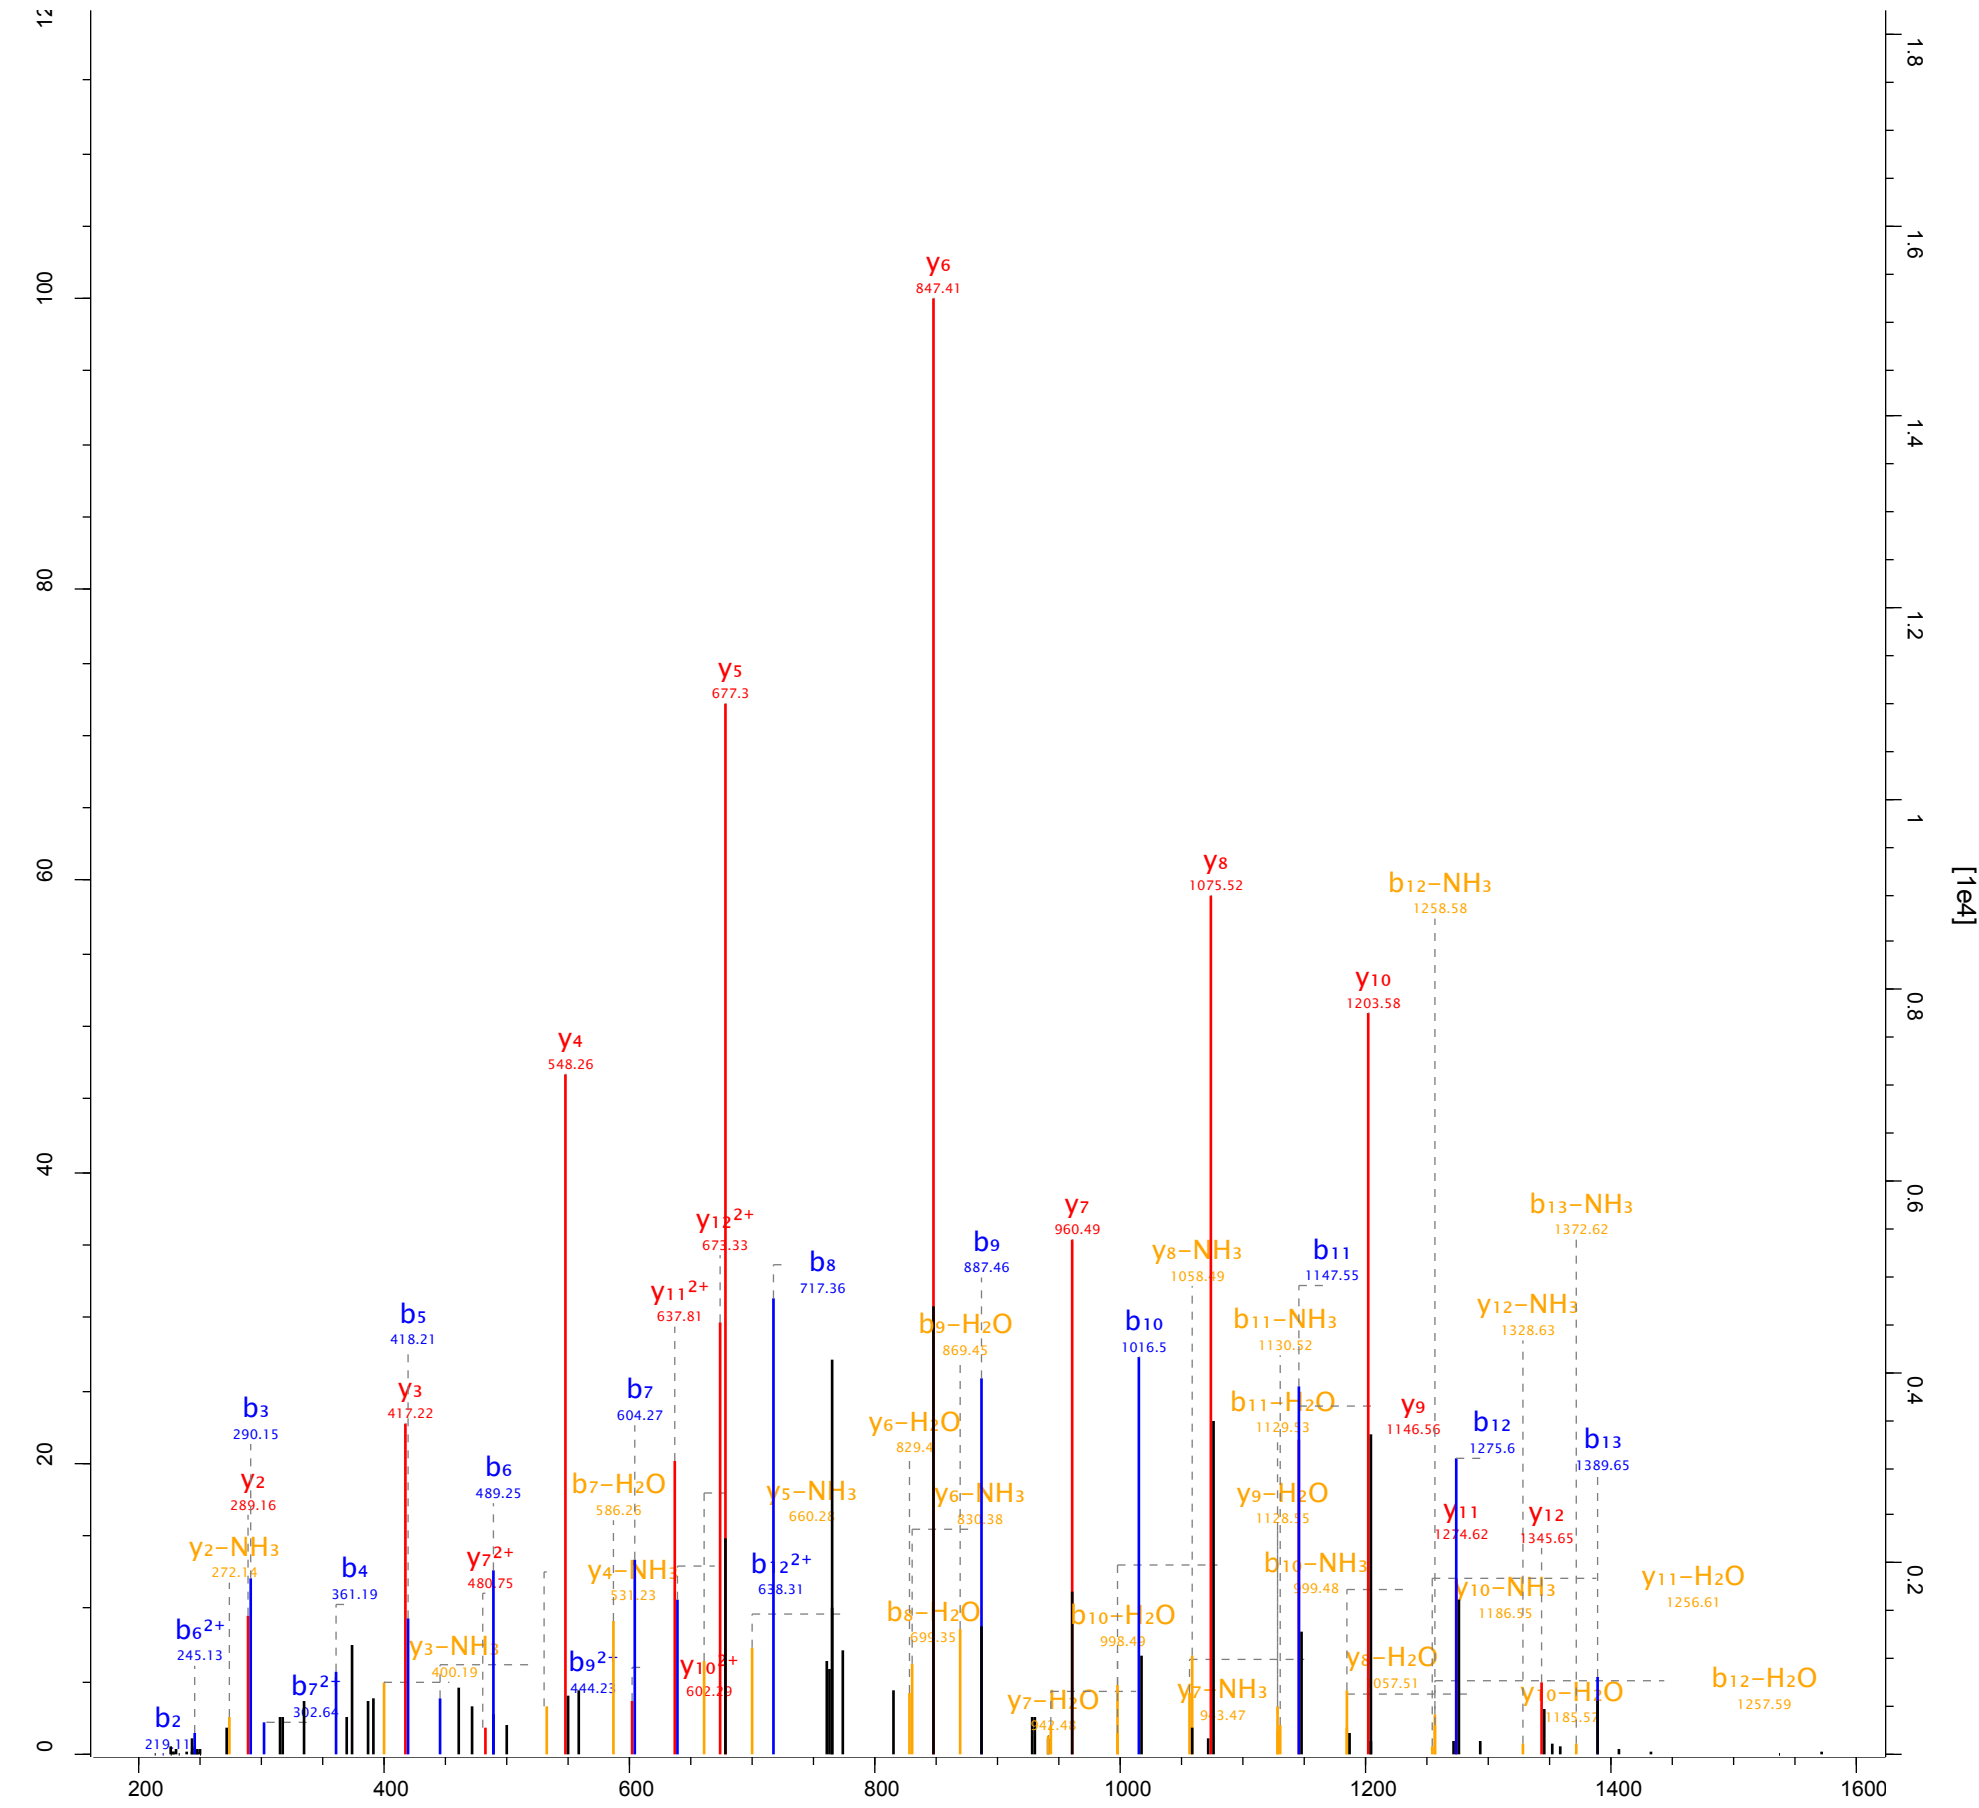

- A F A A G A D I K E M Q N R -

y12
y11
y10
y9
y8
y7
y6
y5
y4
y3
y2

b2
b3
b4
b5
b6
b7
b8
b9
b10
b11
b12
b13

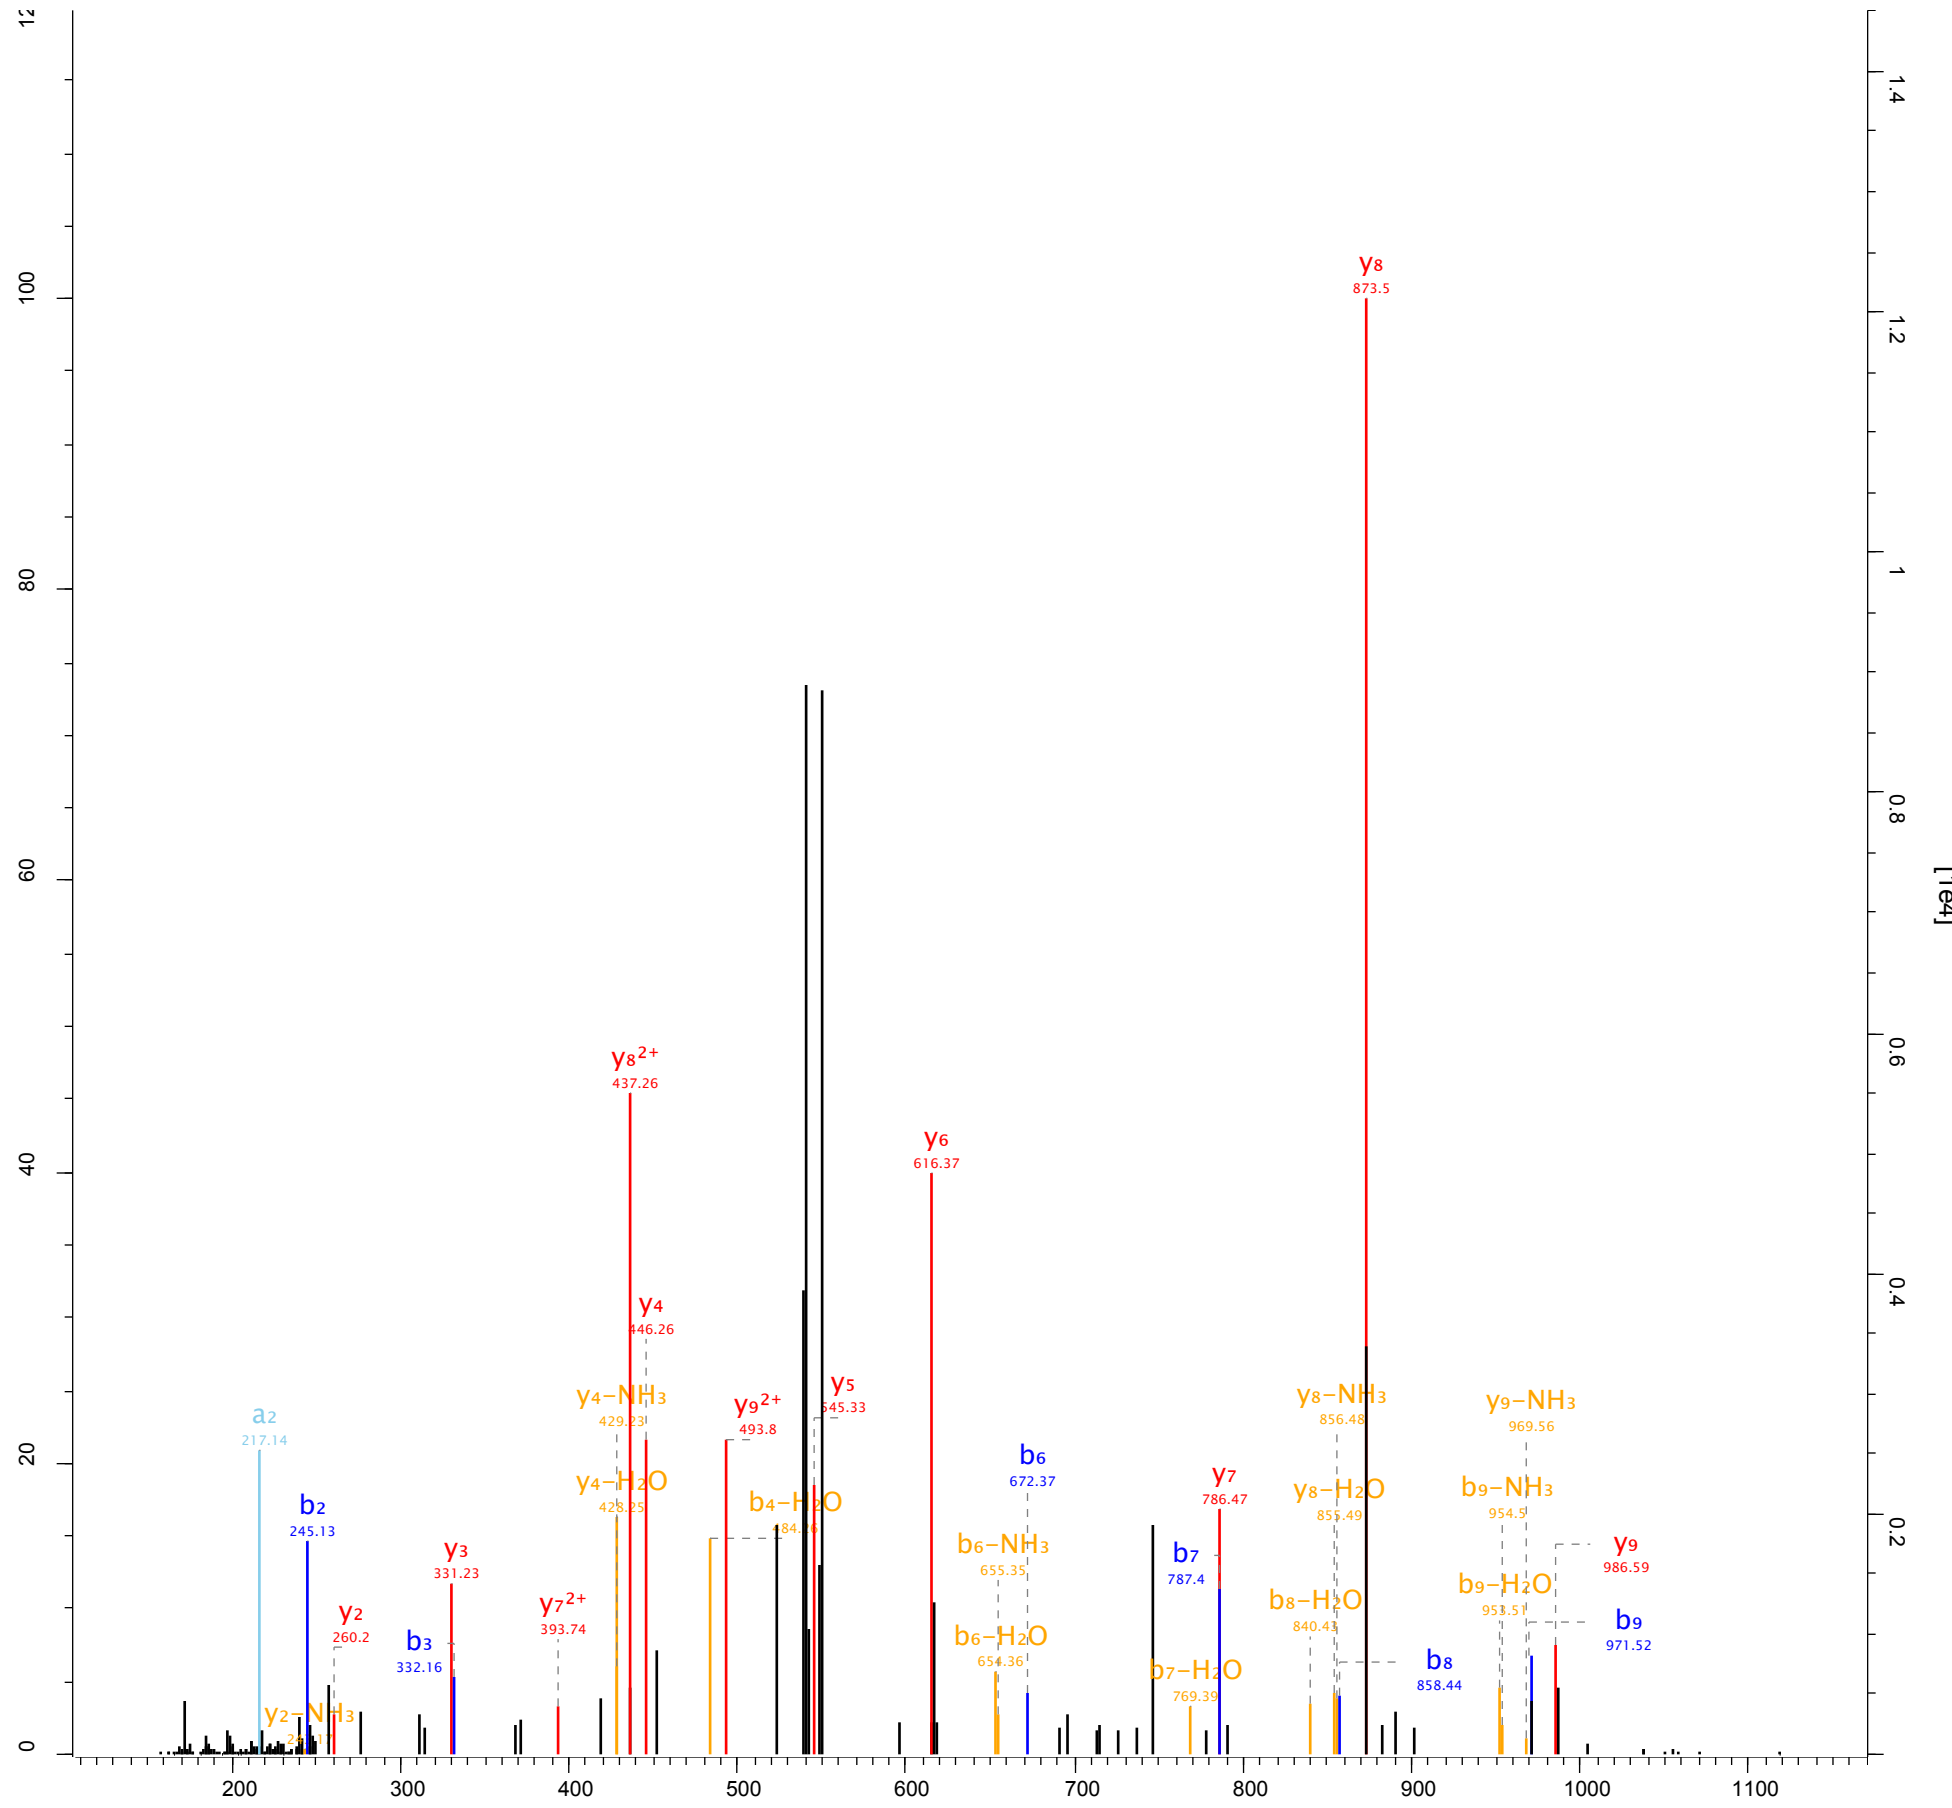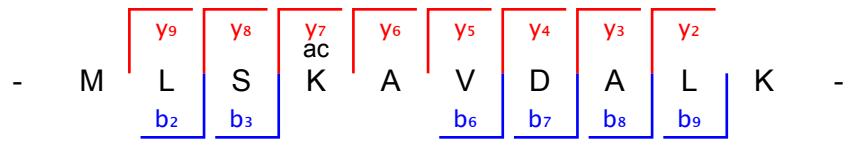

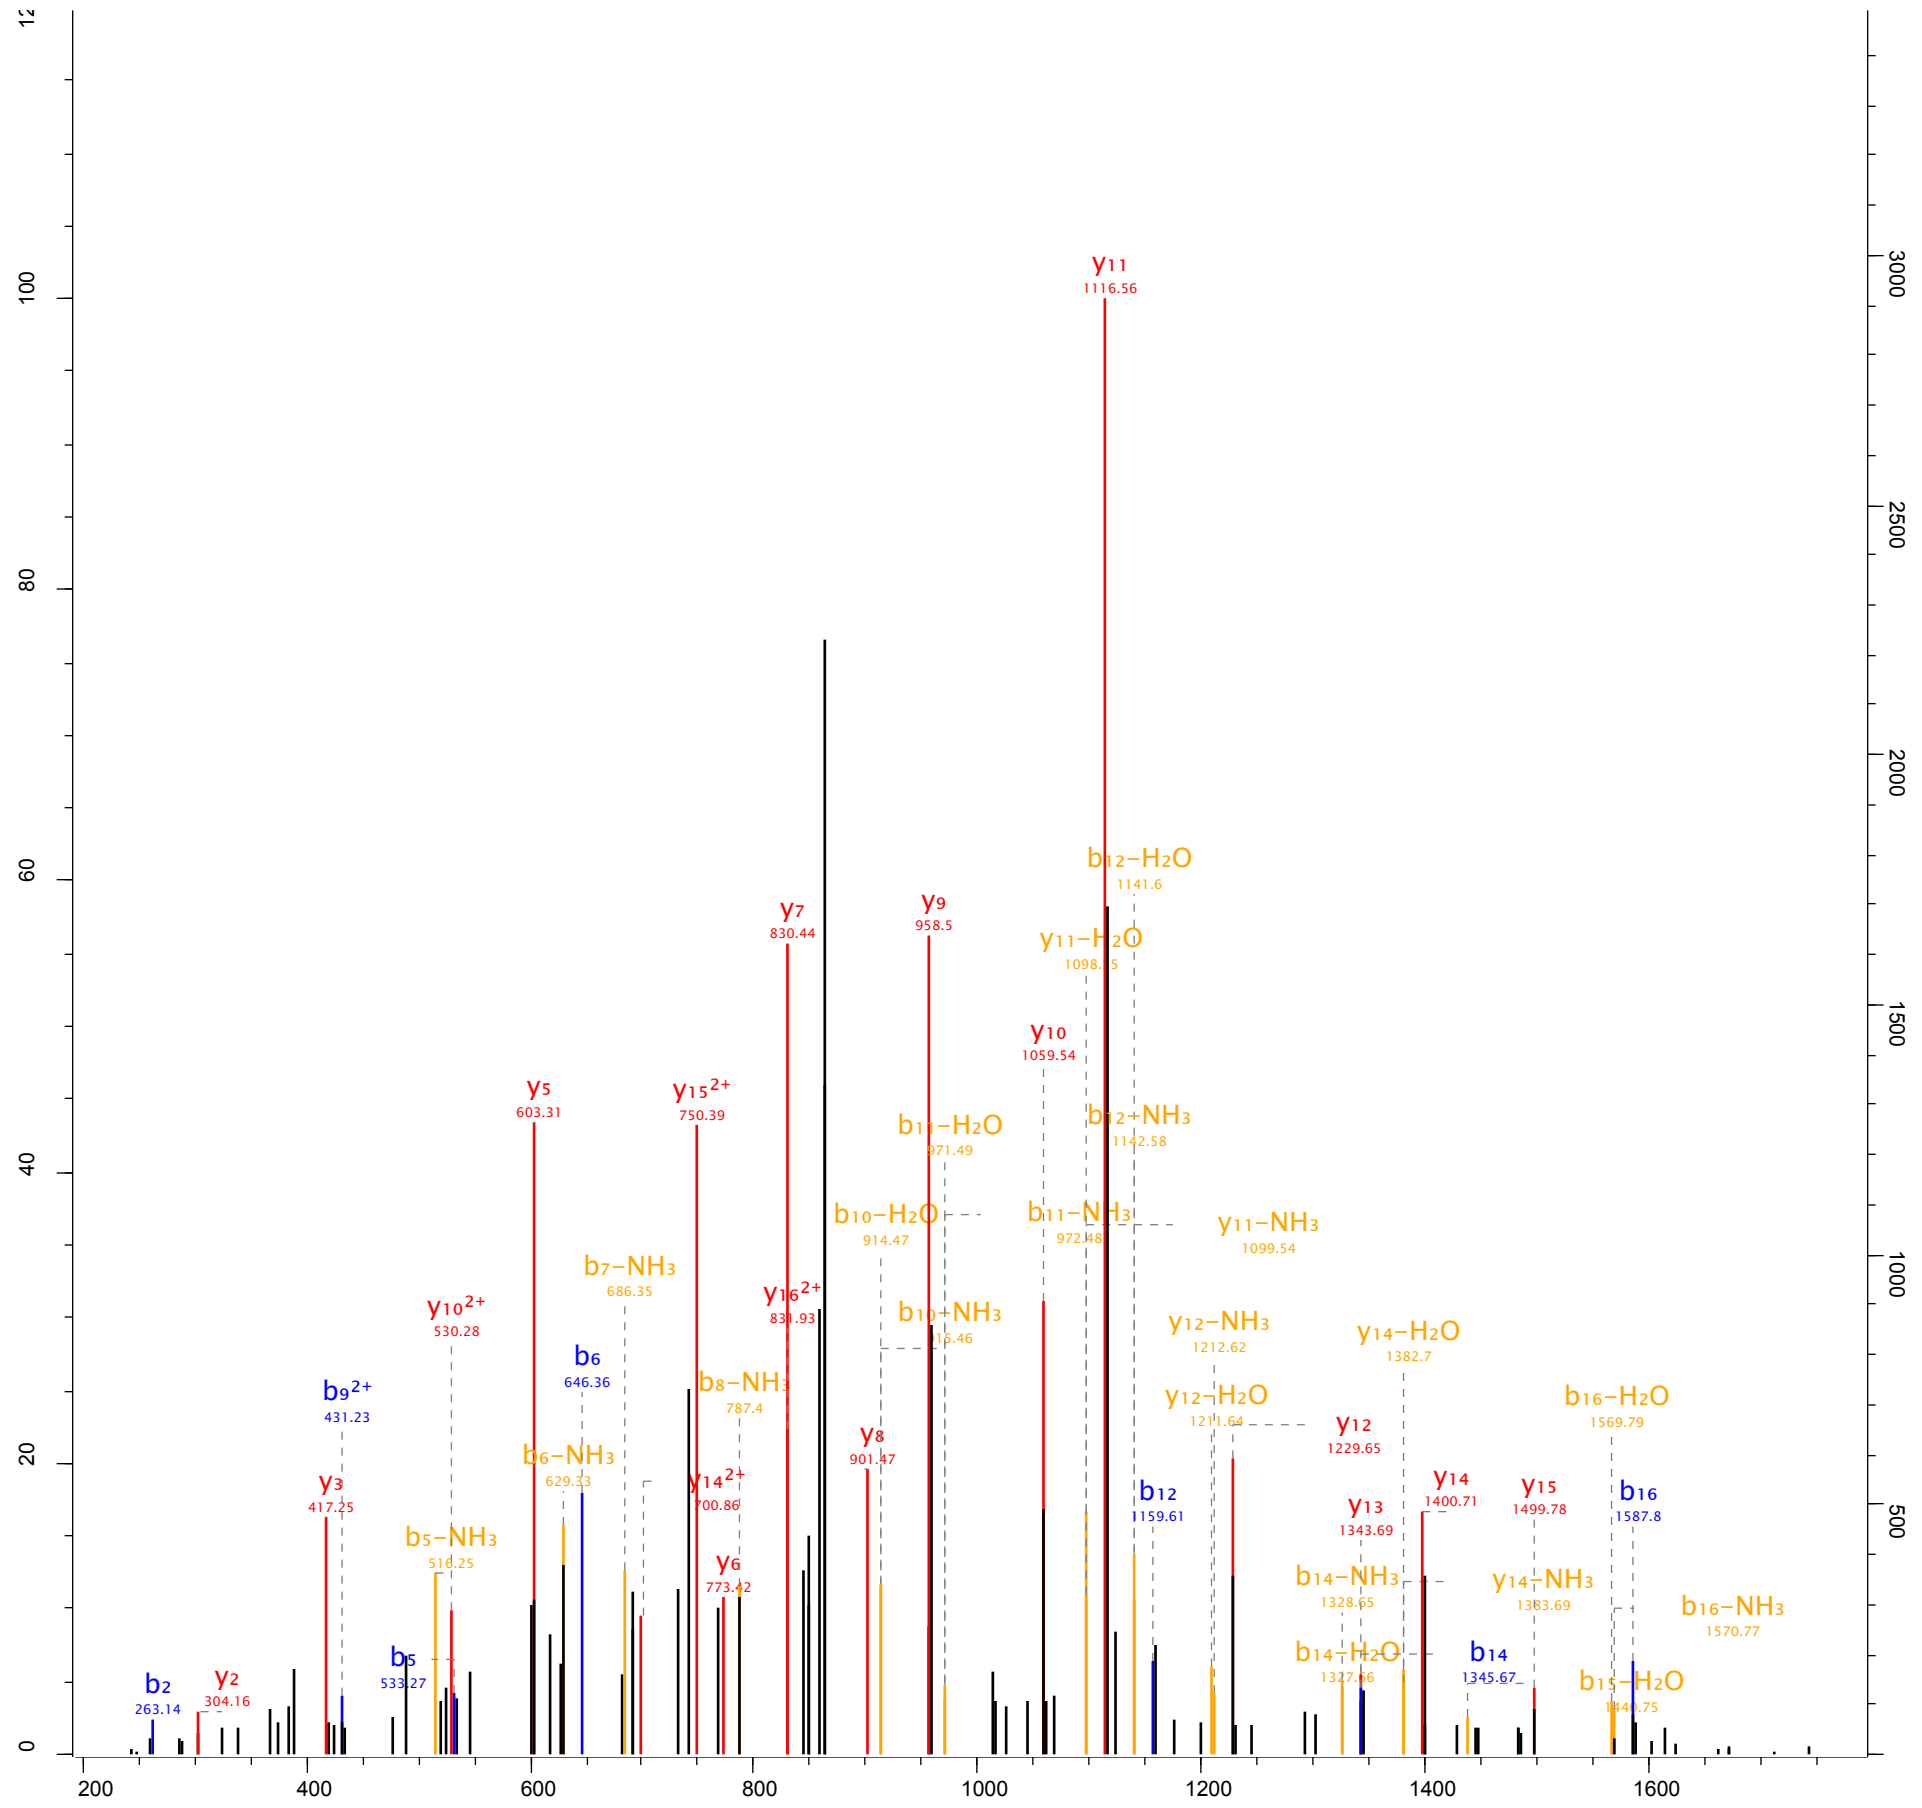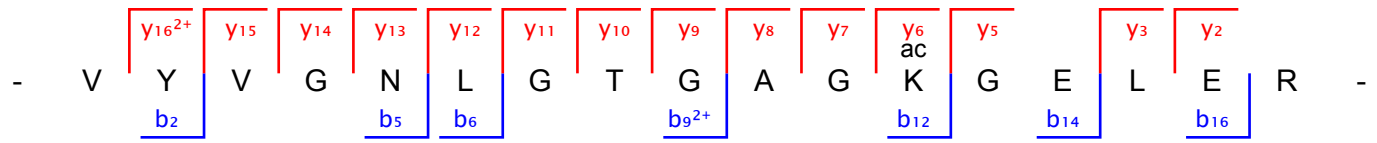

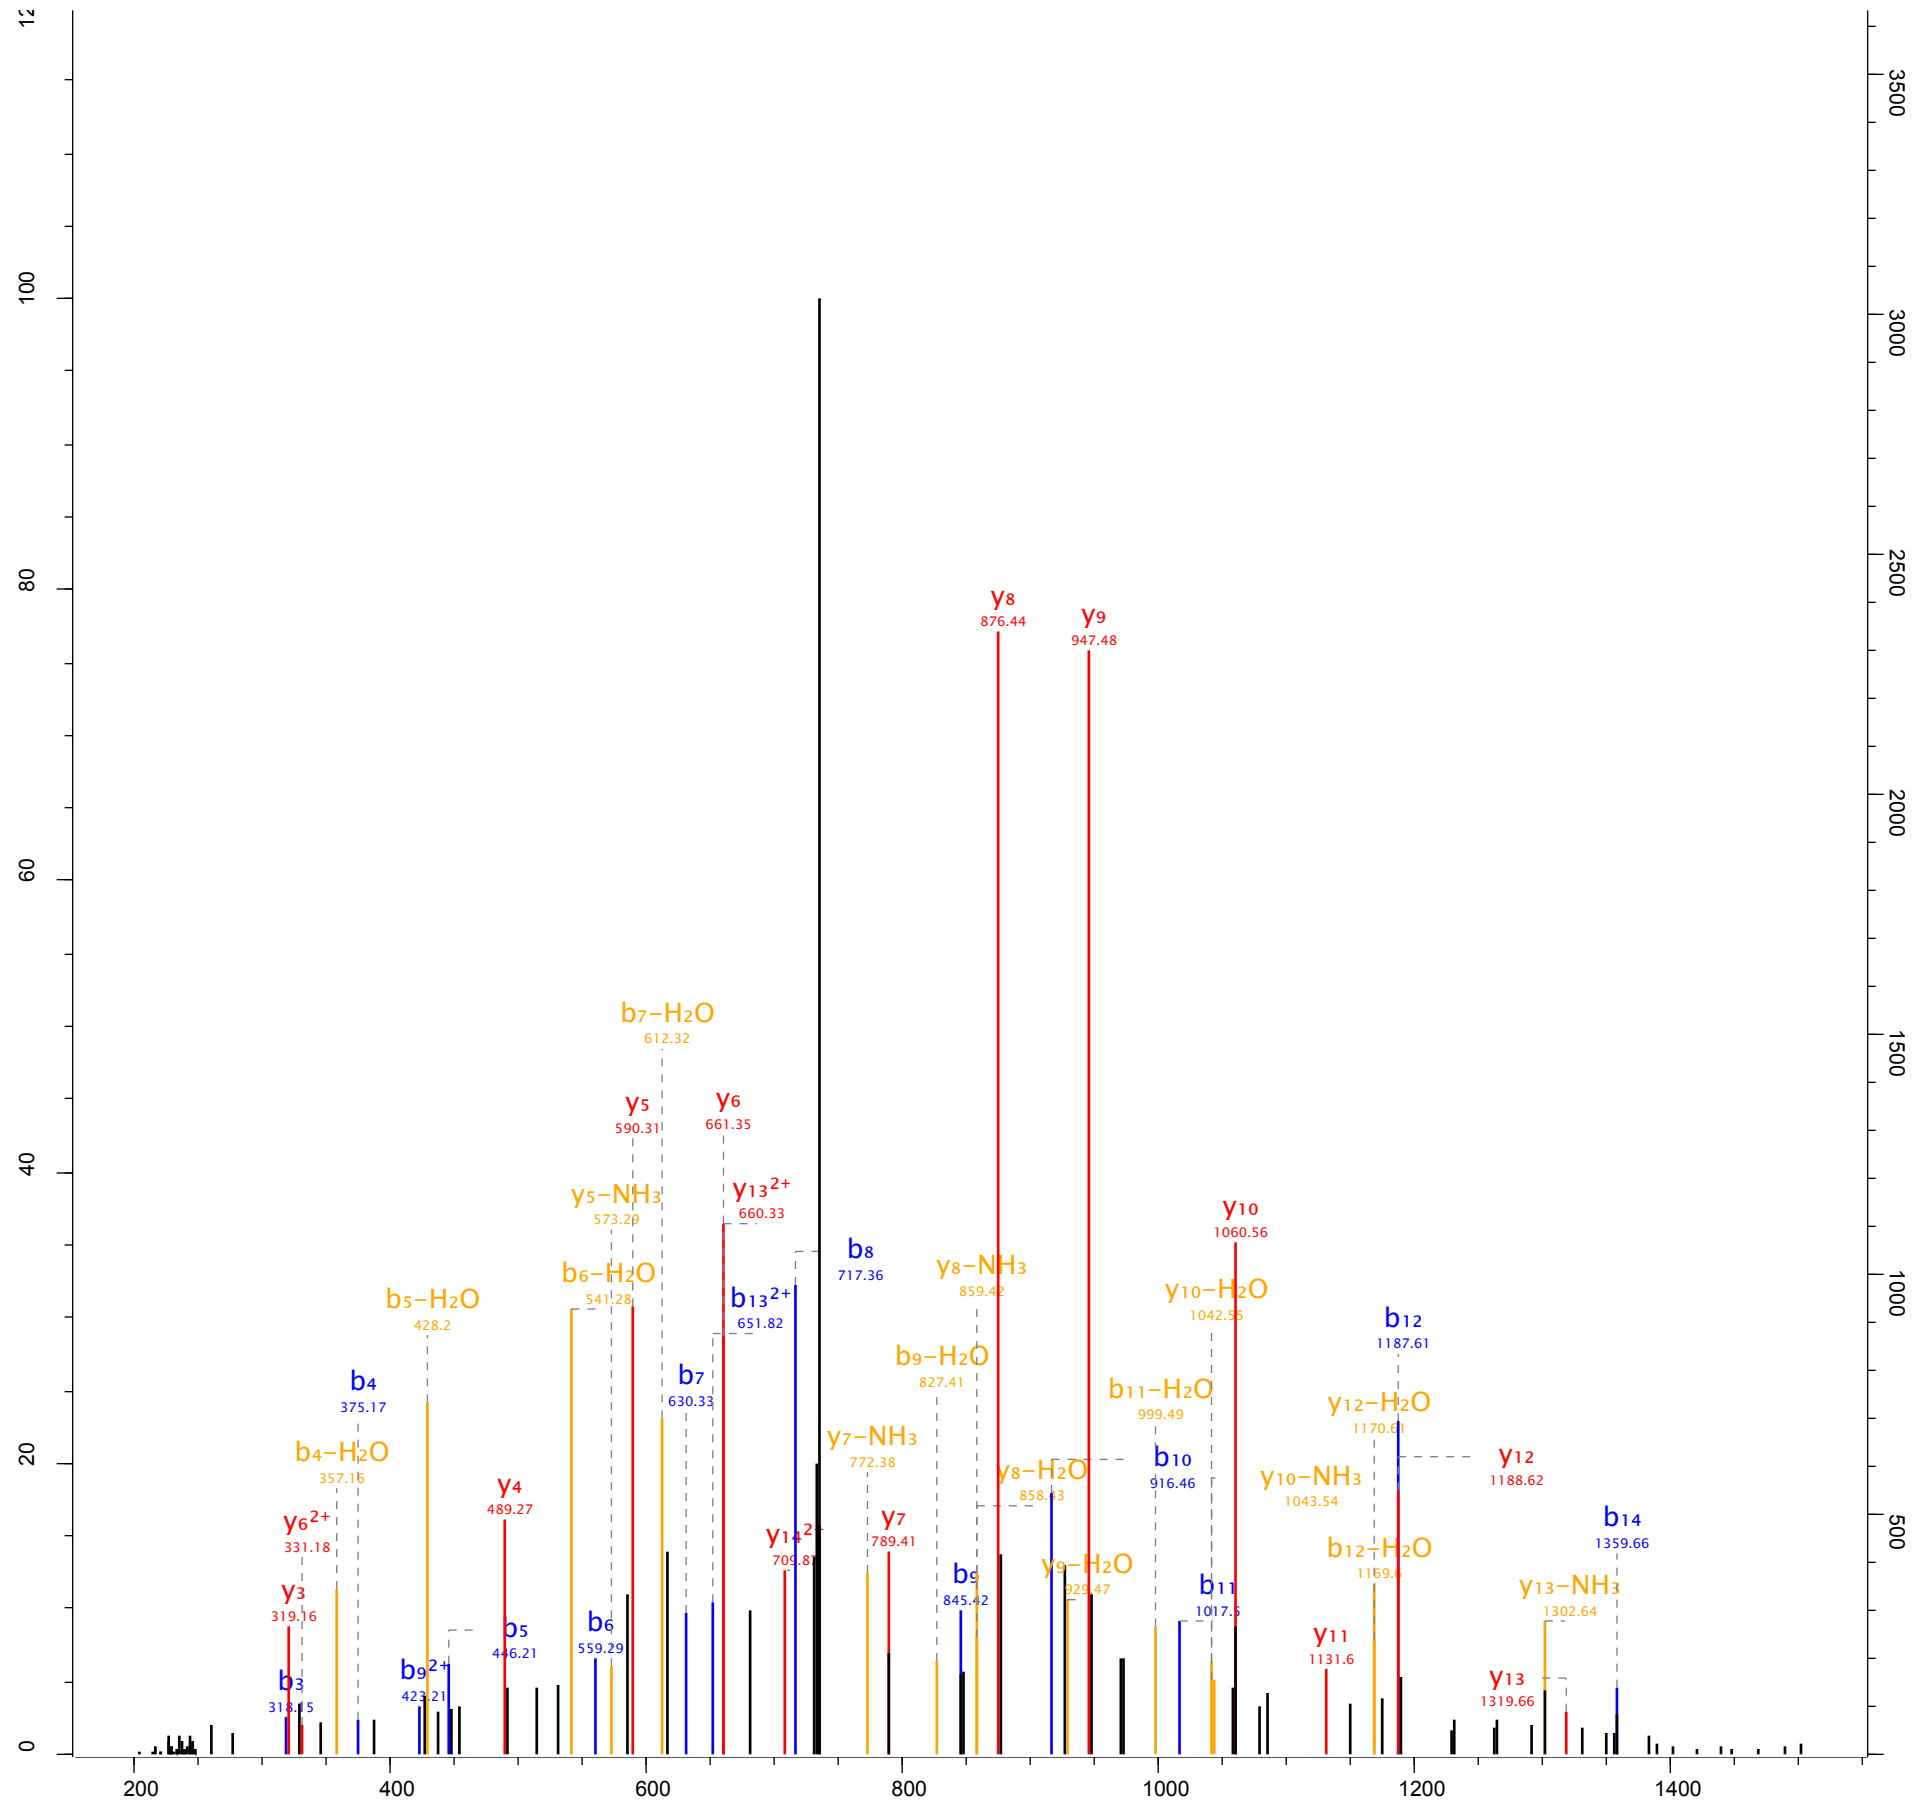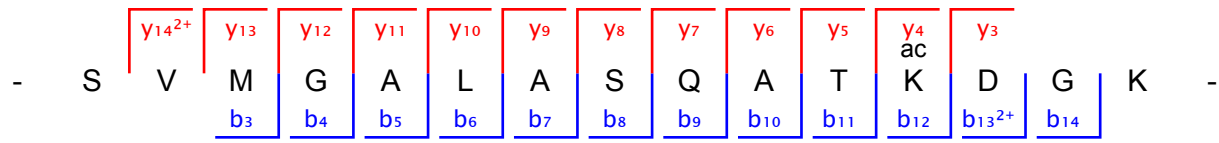

050813\_SCW\_II\_29\_19\_4

17671

ITMS; CID

134.13

592.33

Taldo1

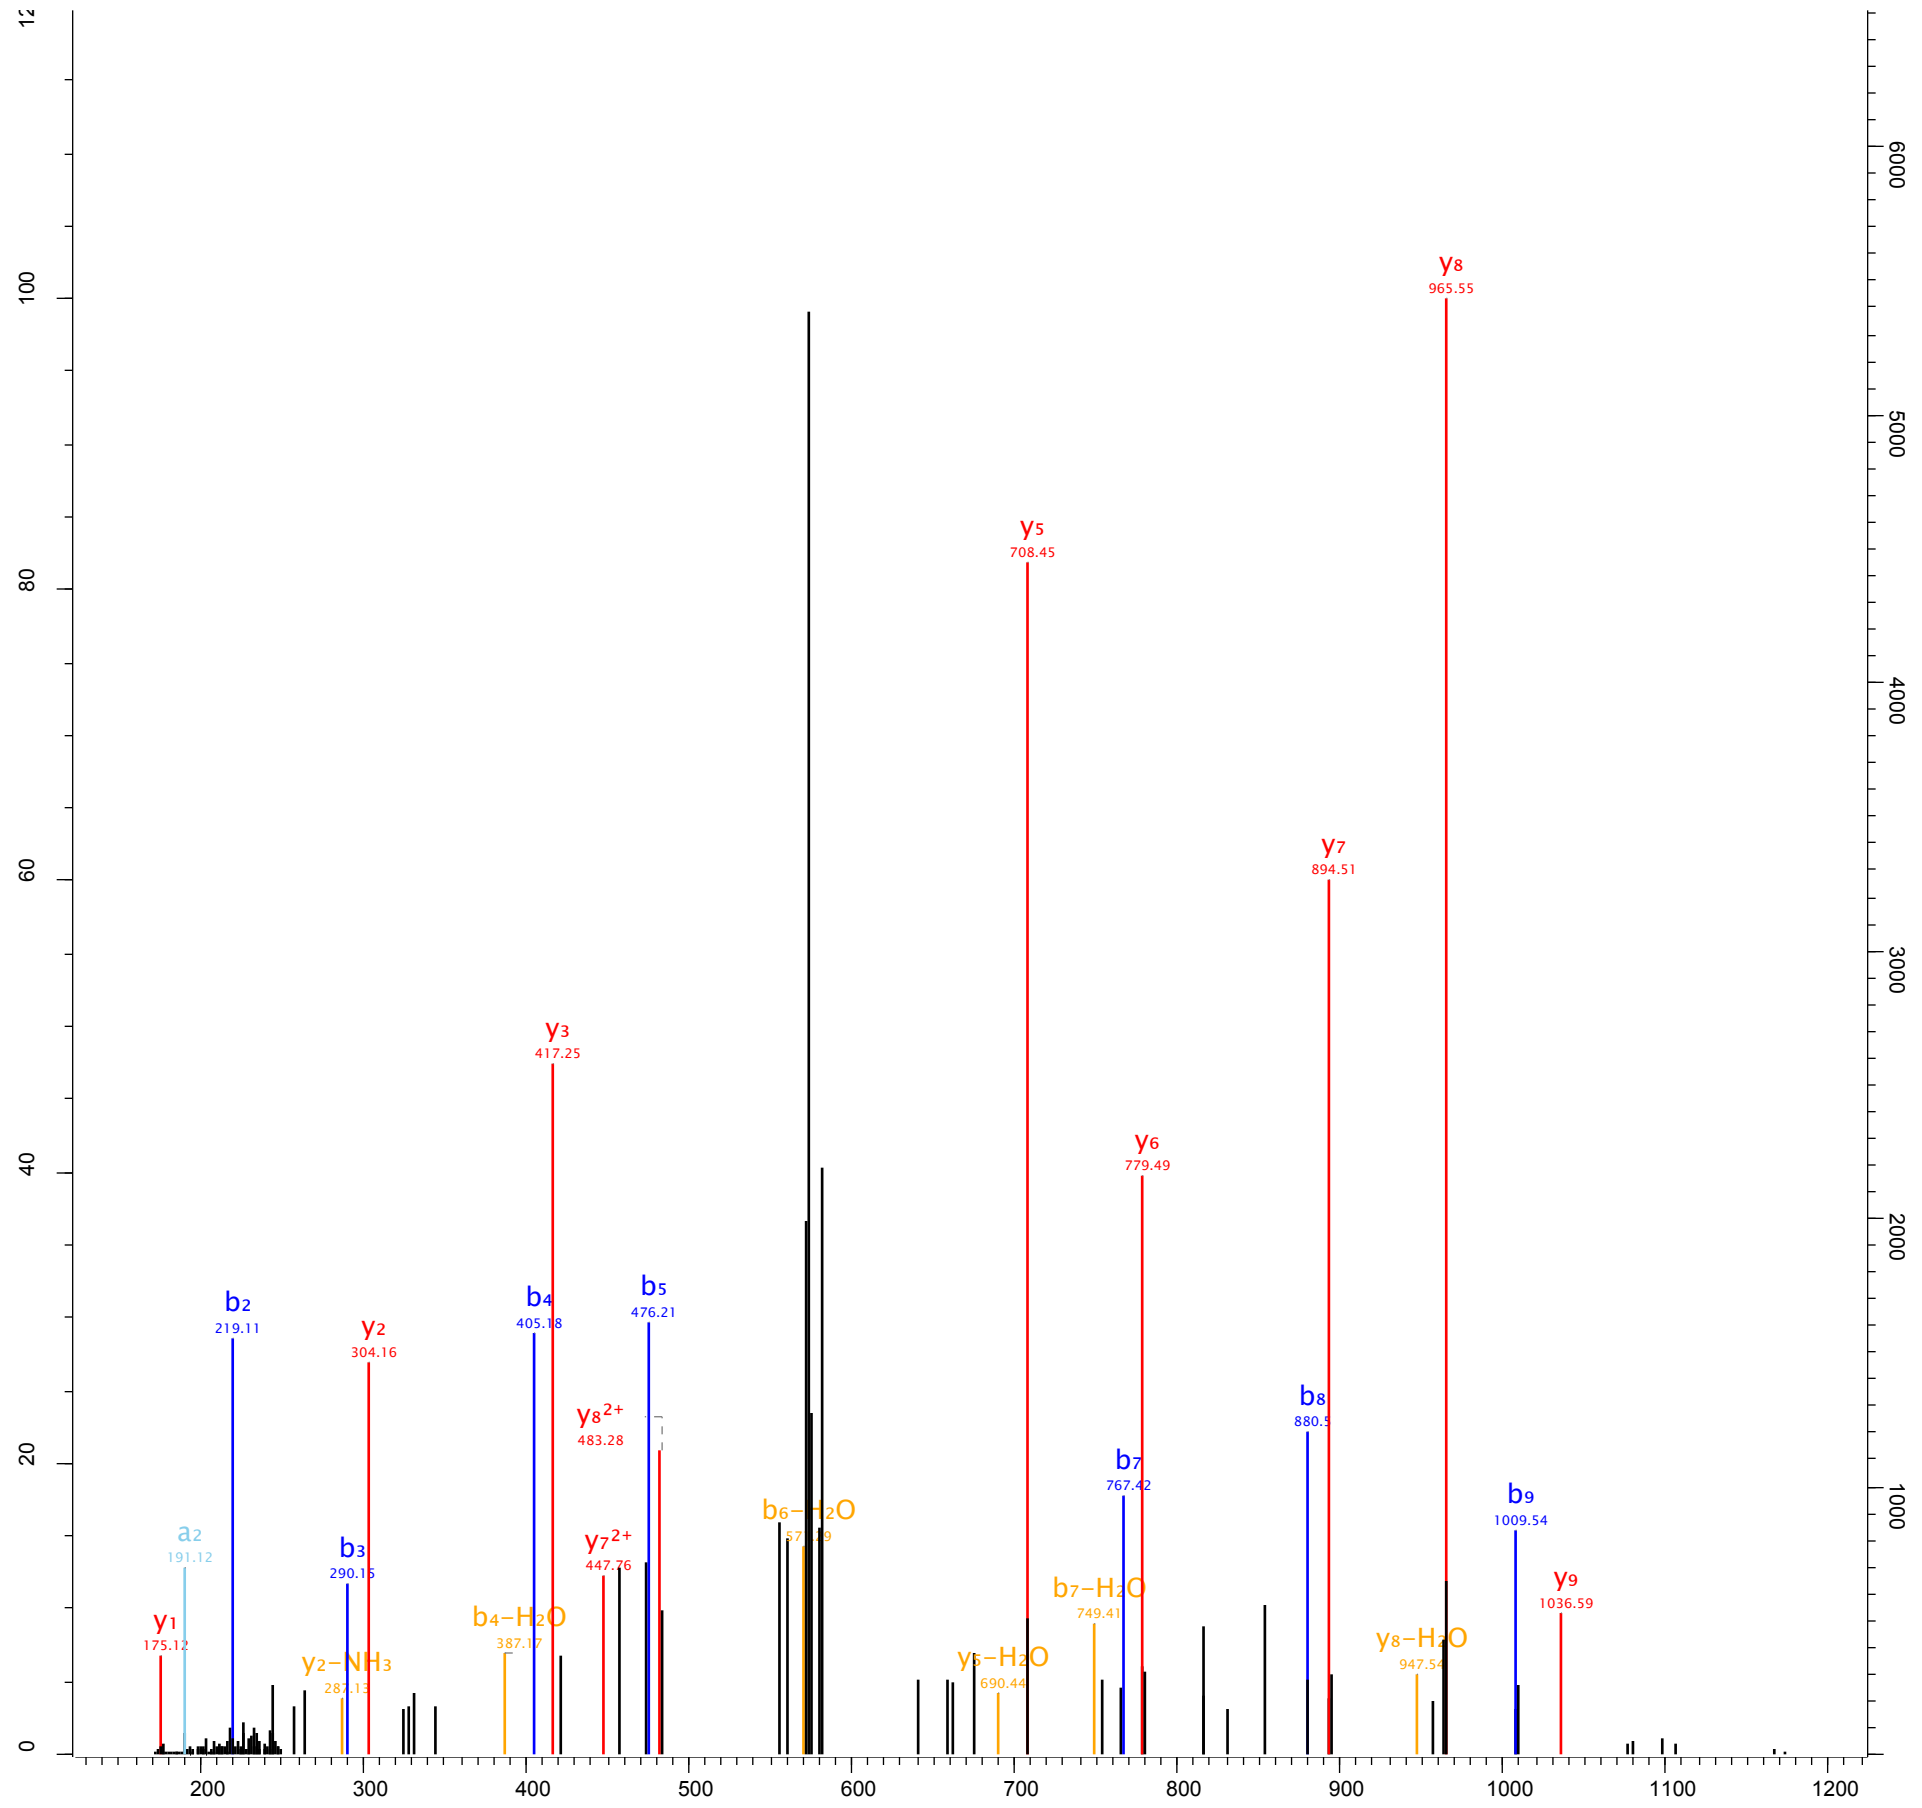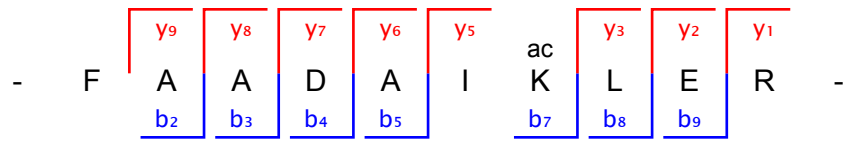

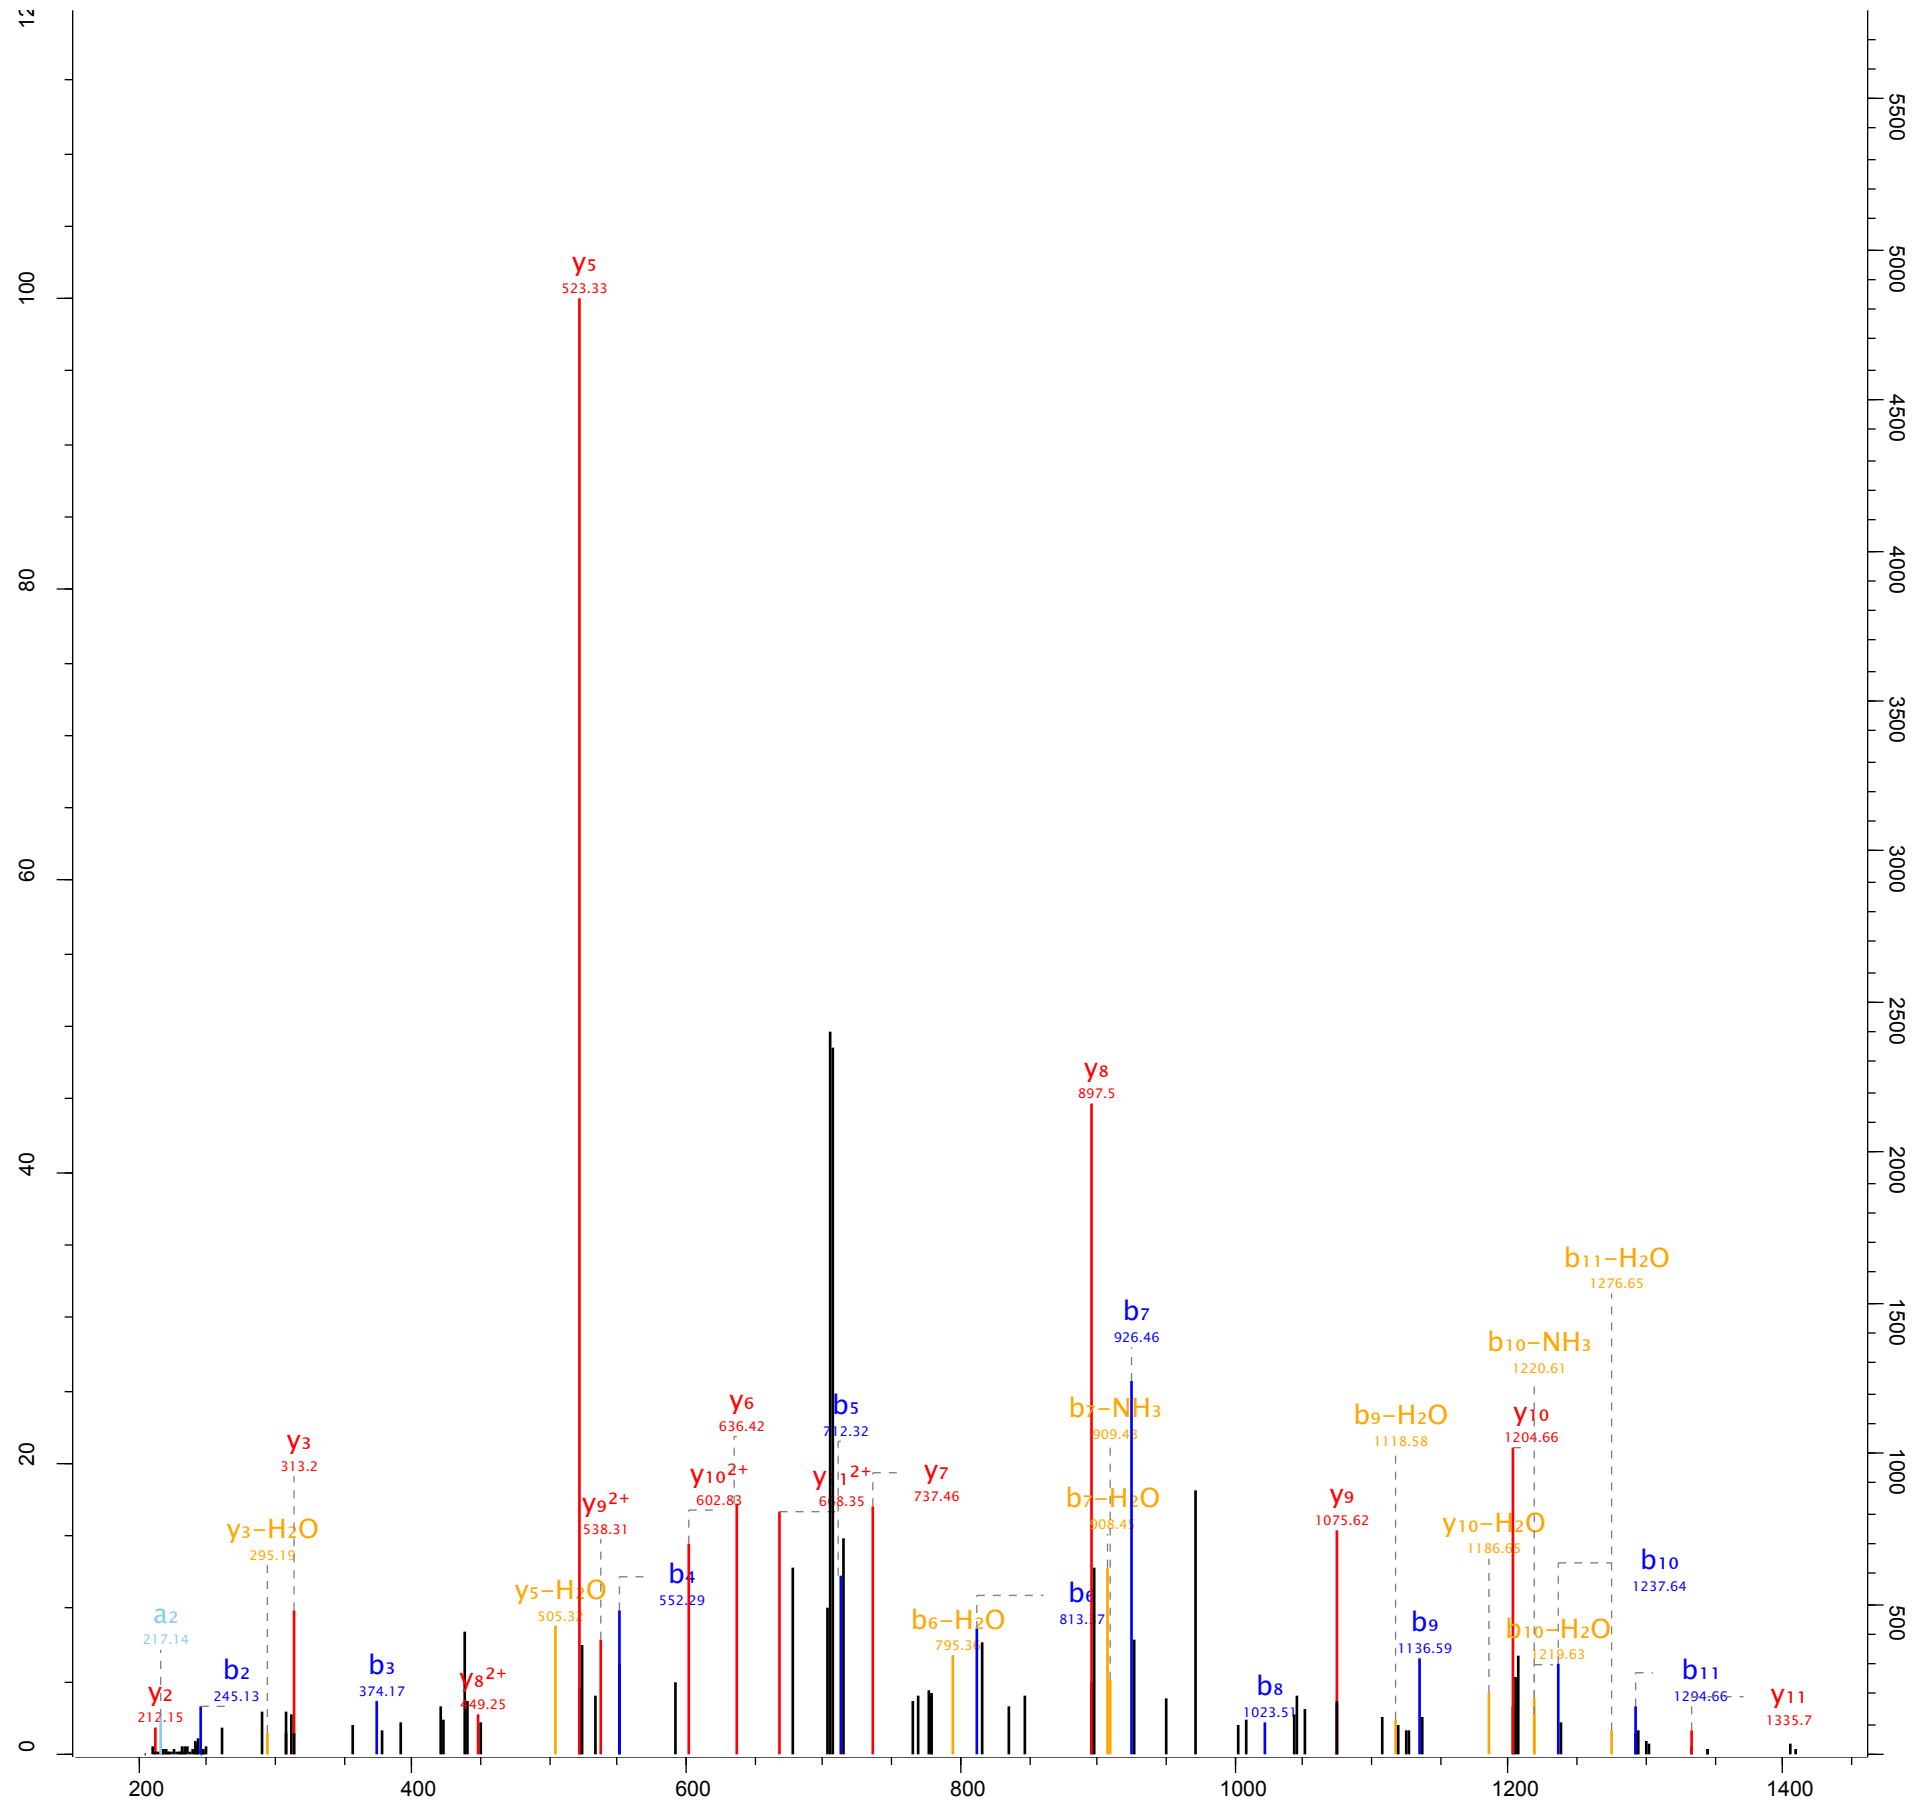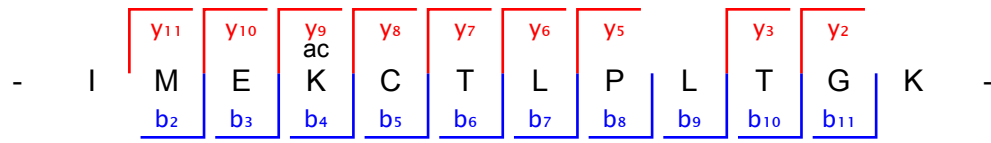



050813\_SCW\_II\_29\_19\_4

17802 ITMS; CID 166.52 957.03 Fabp7

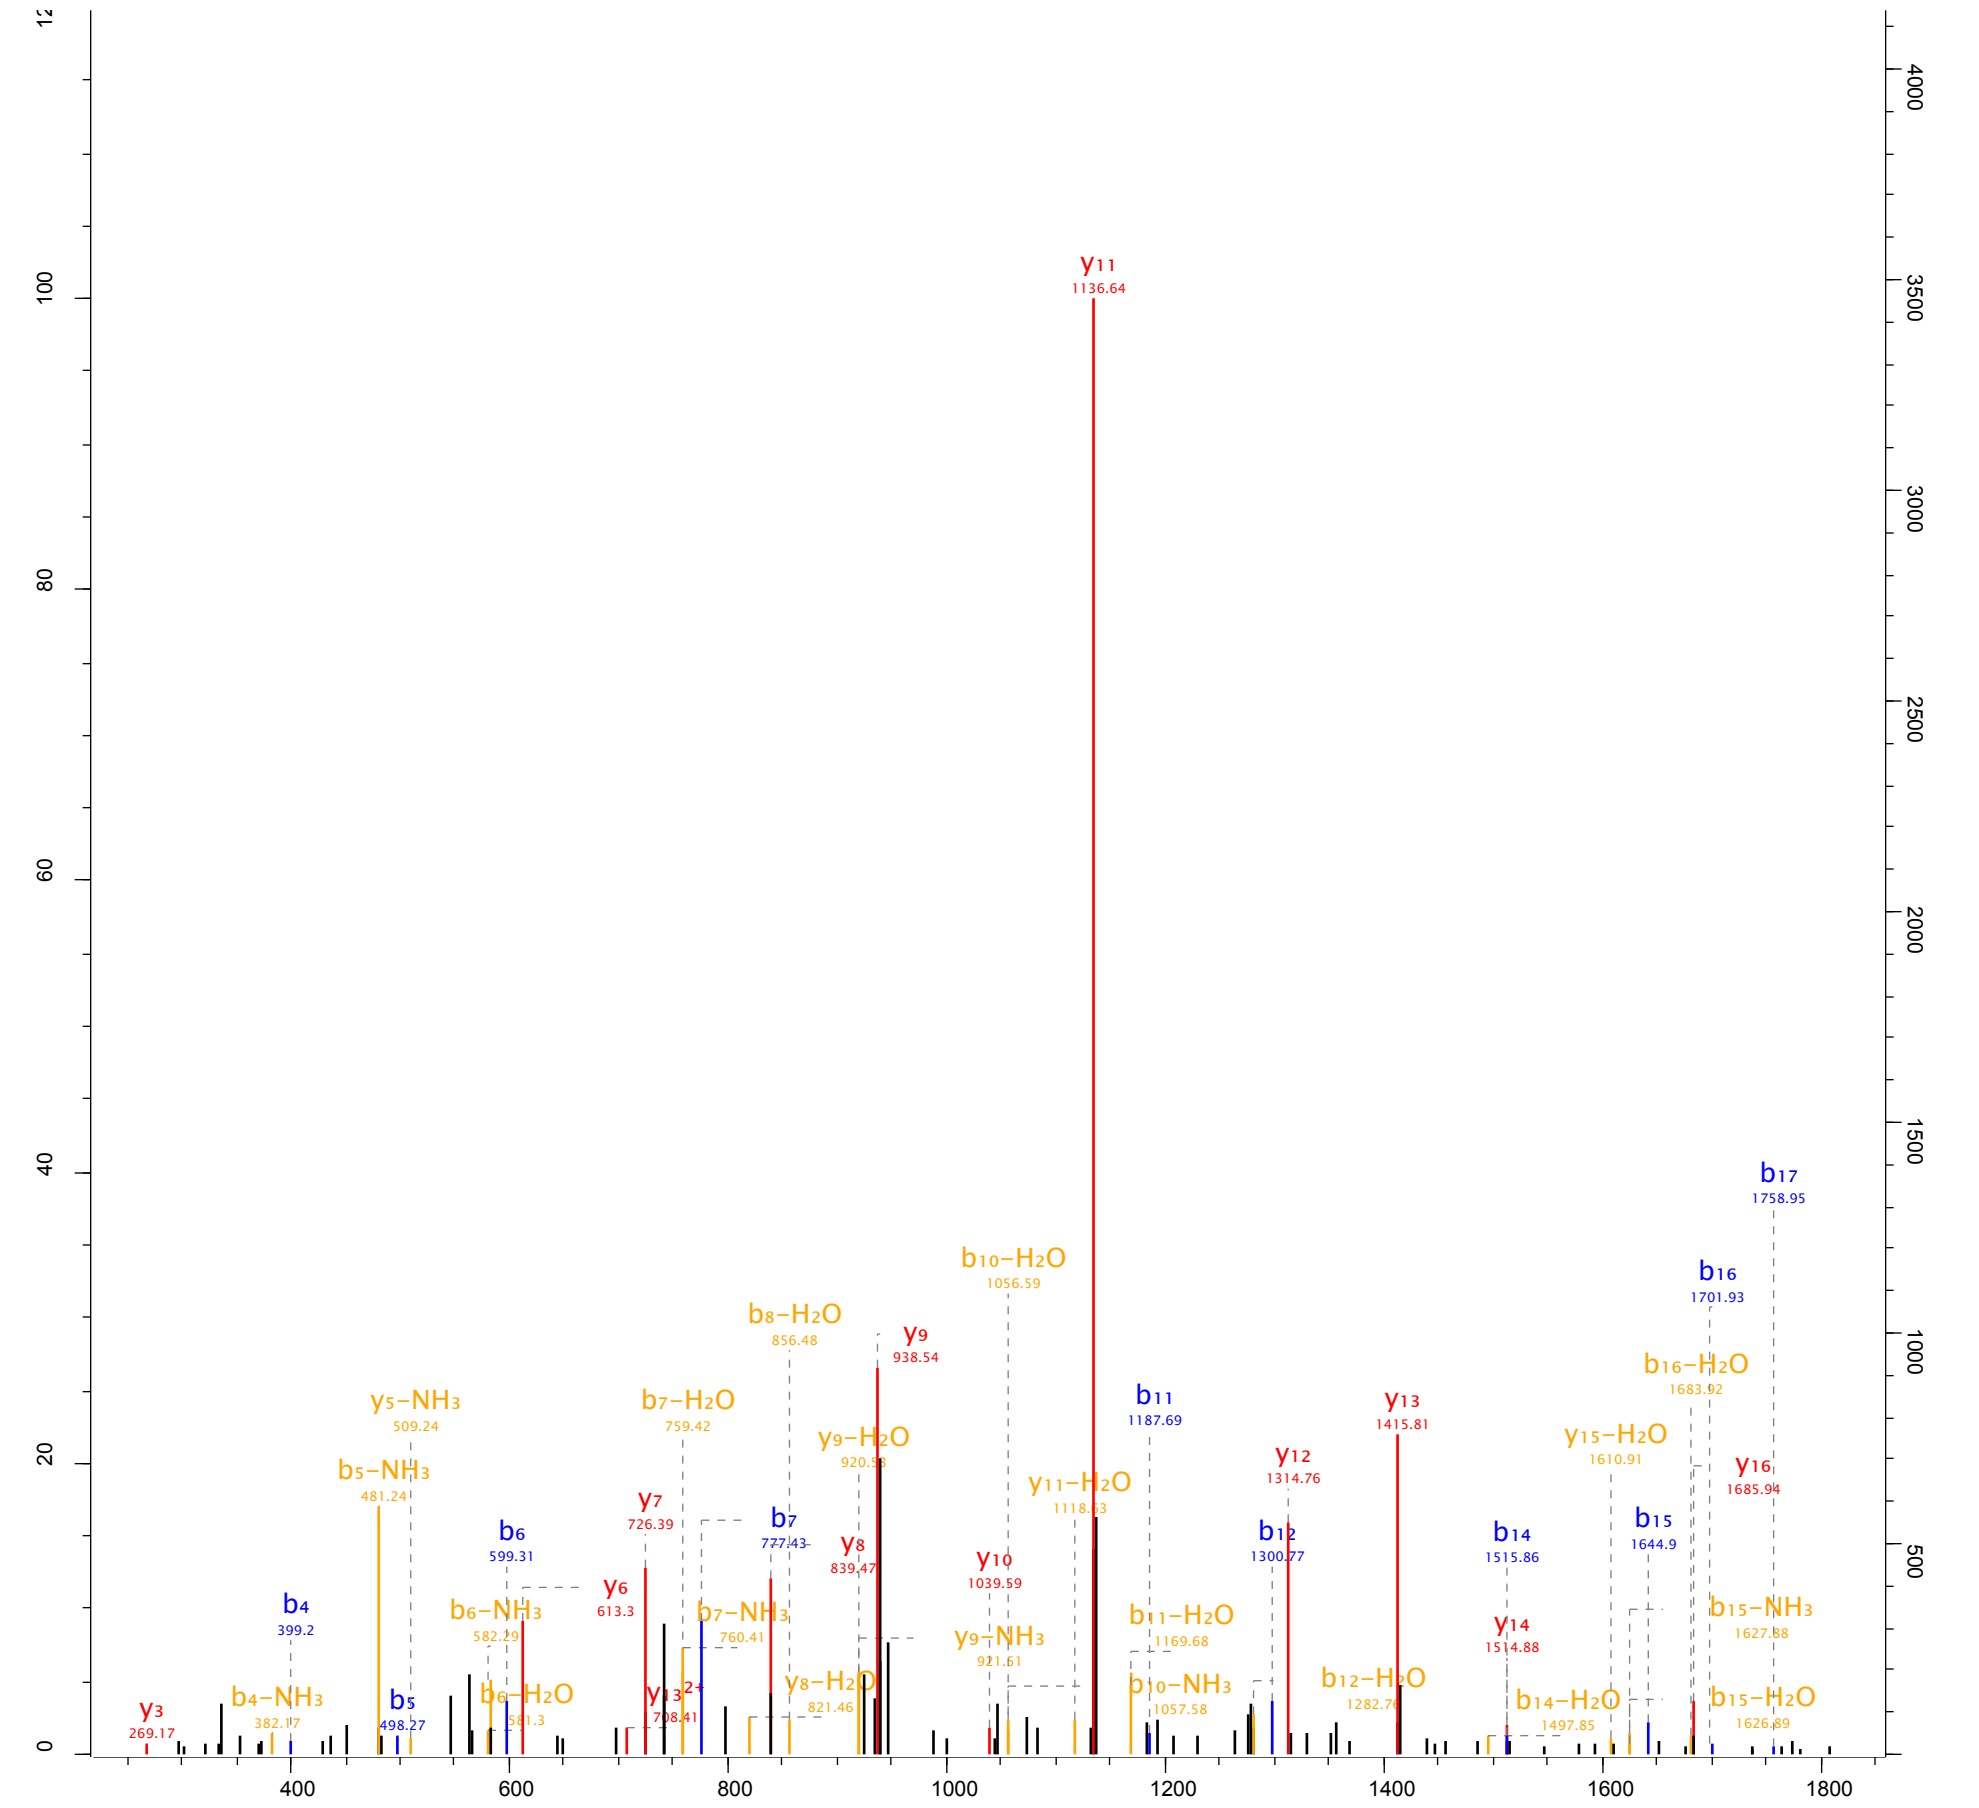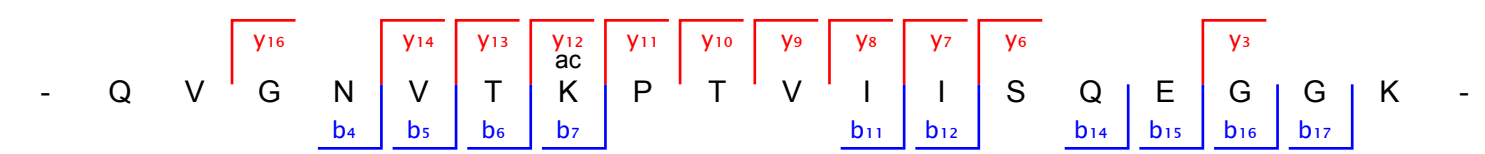

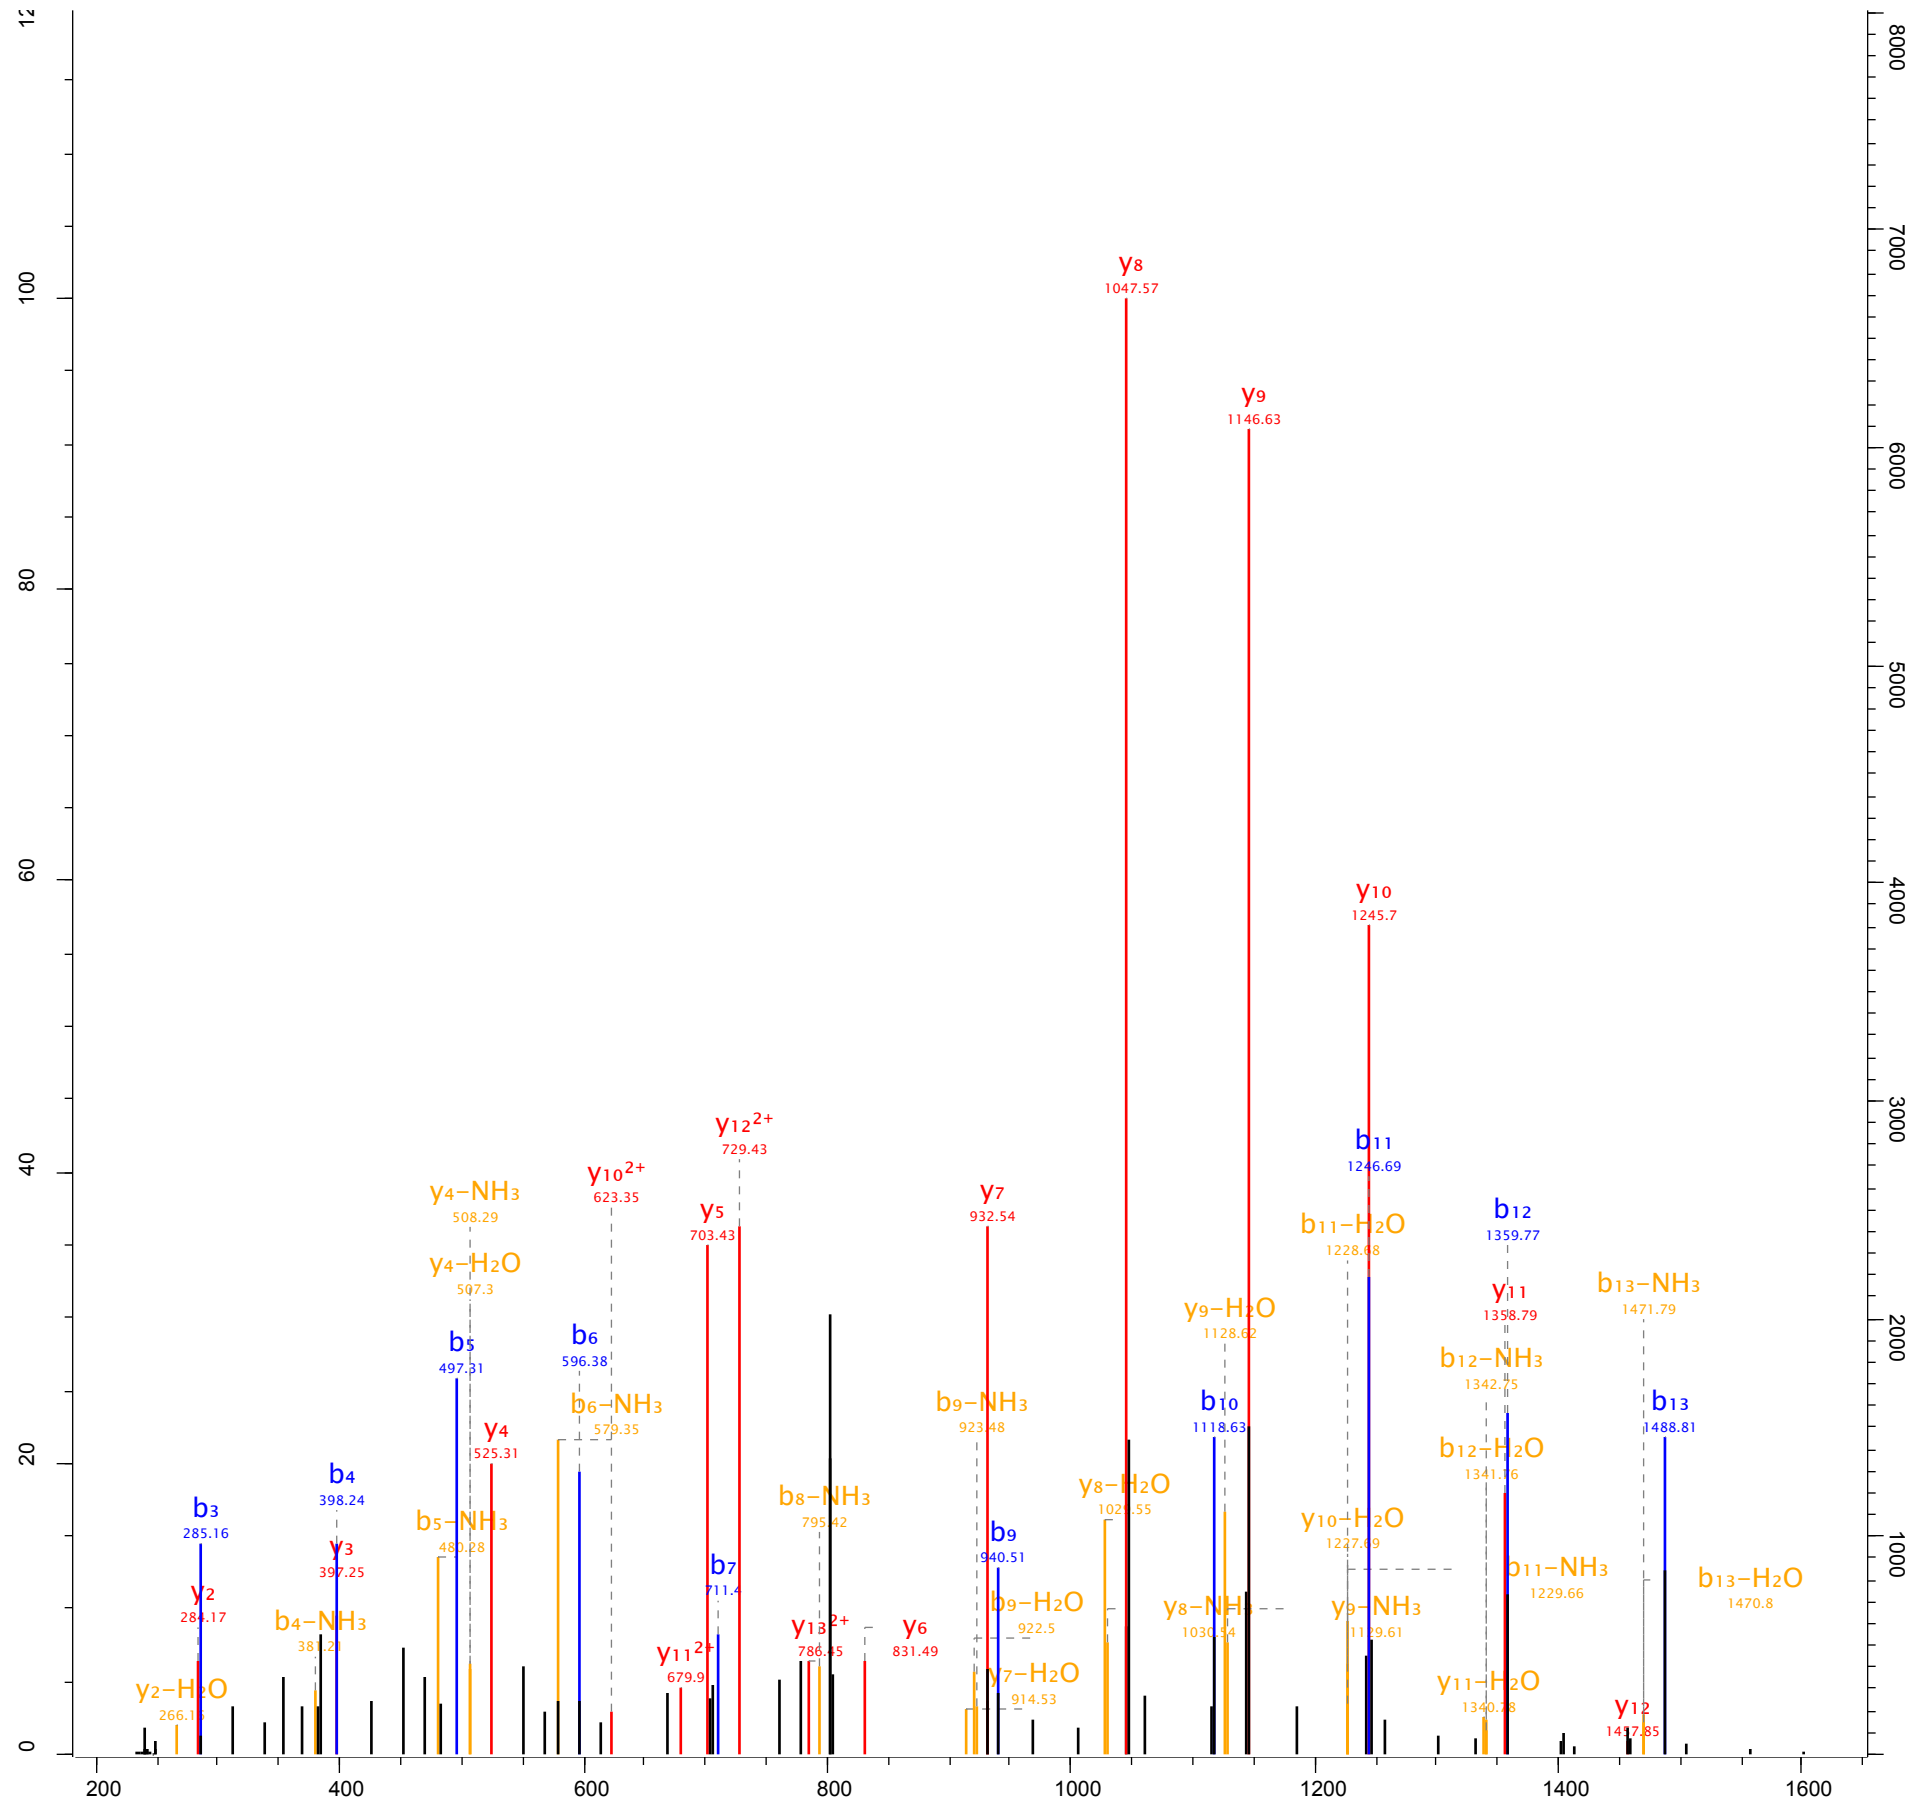

- A N V I V V D T Q K Q L E K -

y13<sup>2+</sup>
y12
y11
y10
y9
y8
y7
y6
y5  
ac
y4
y3
y2

b3
b4
b5
b6
b7
b9
b10
b11
b12
b13

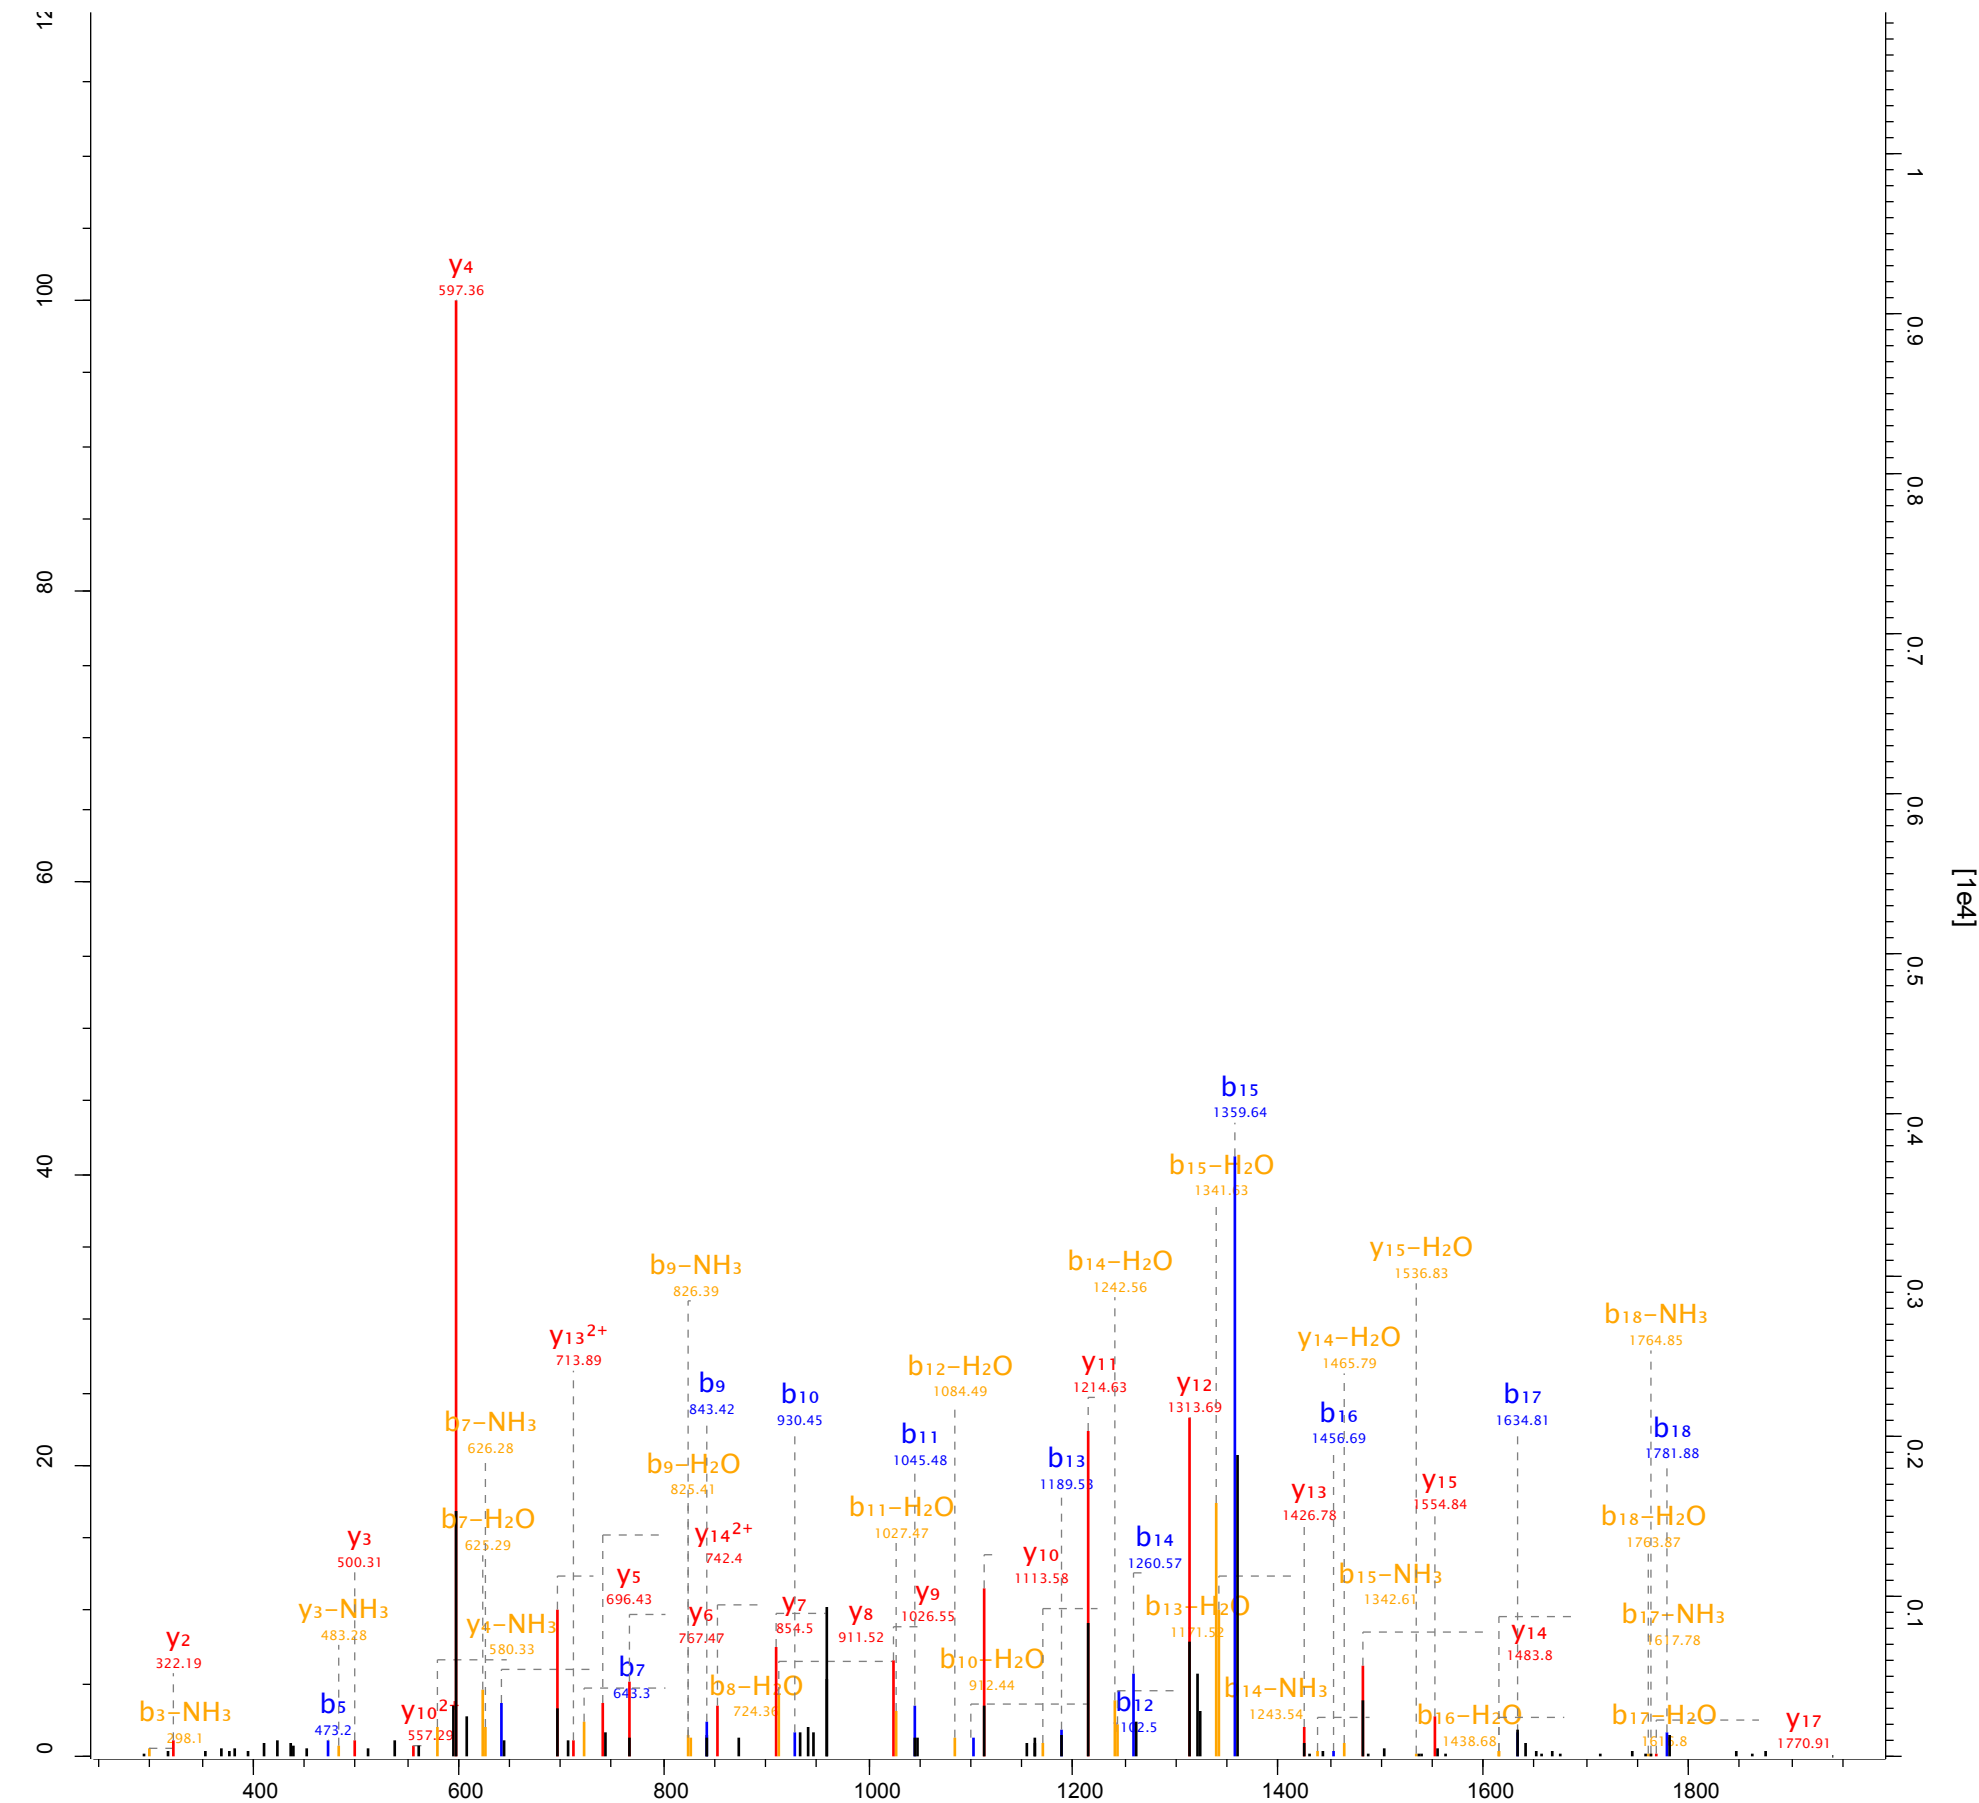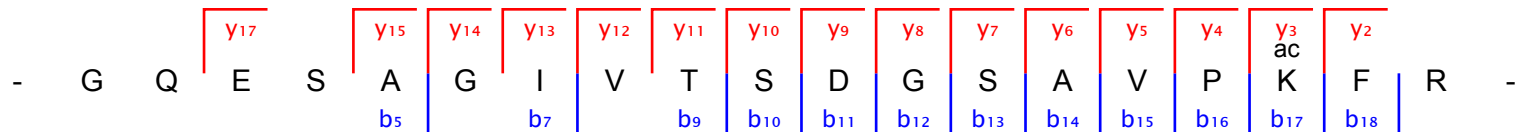

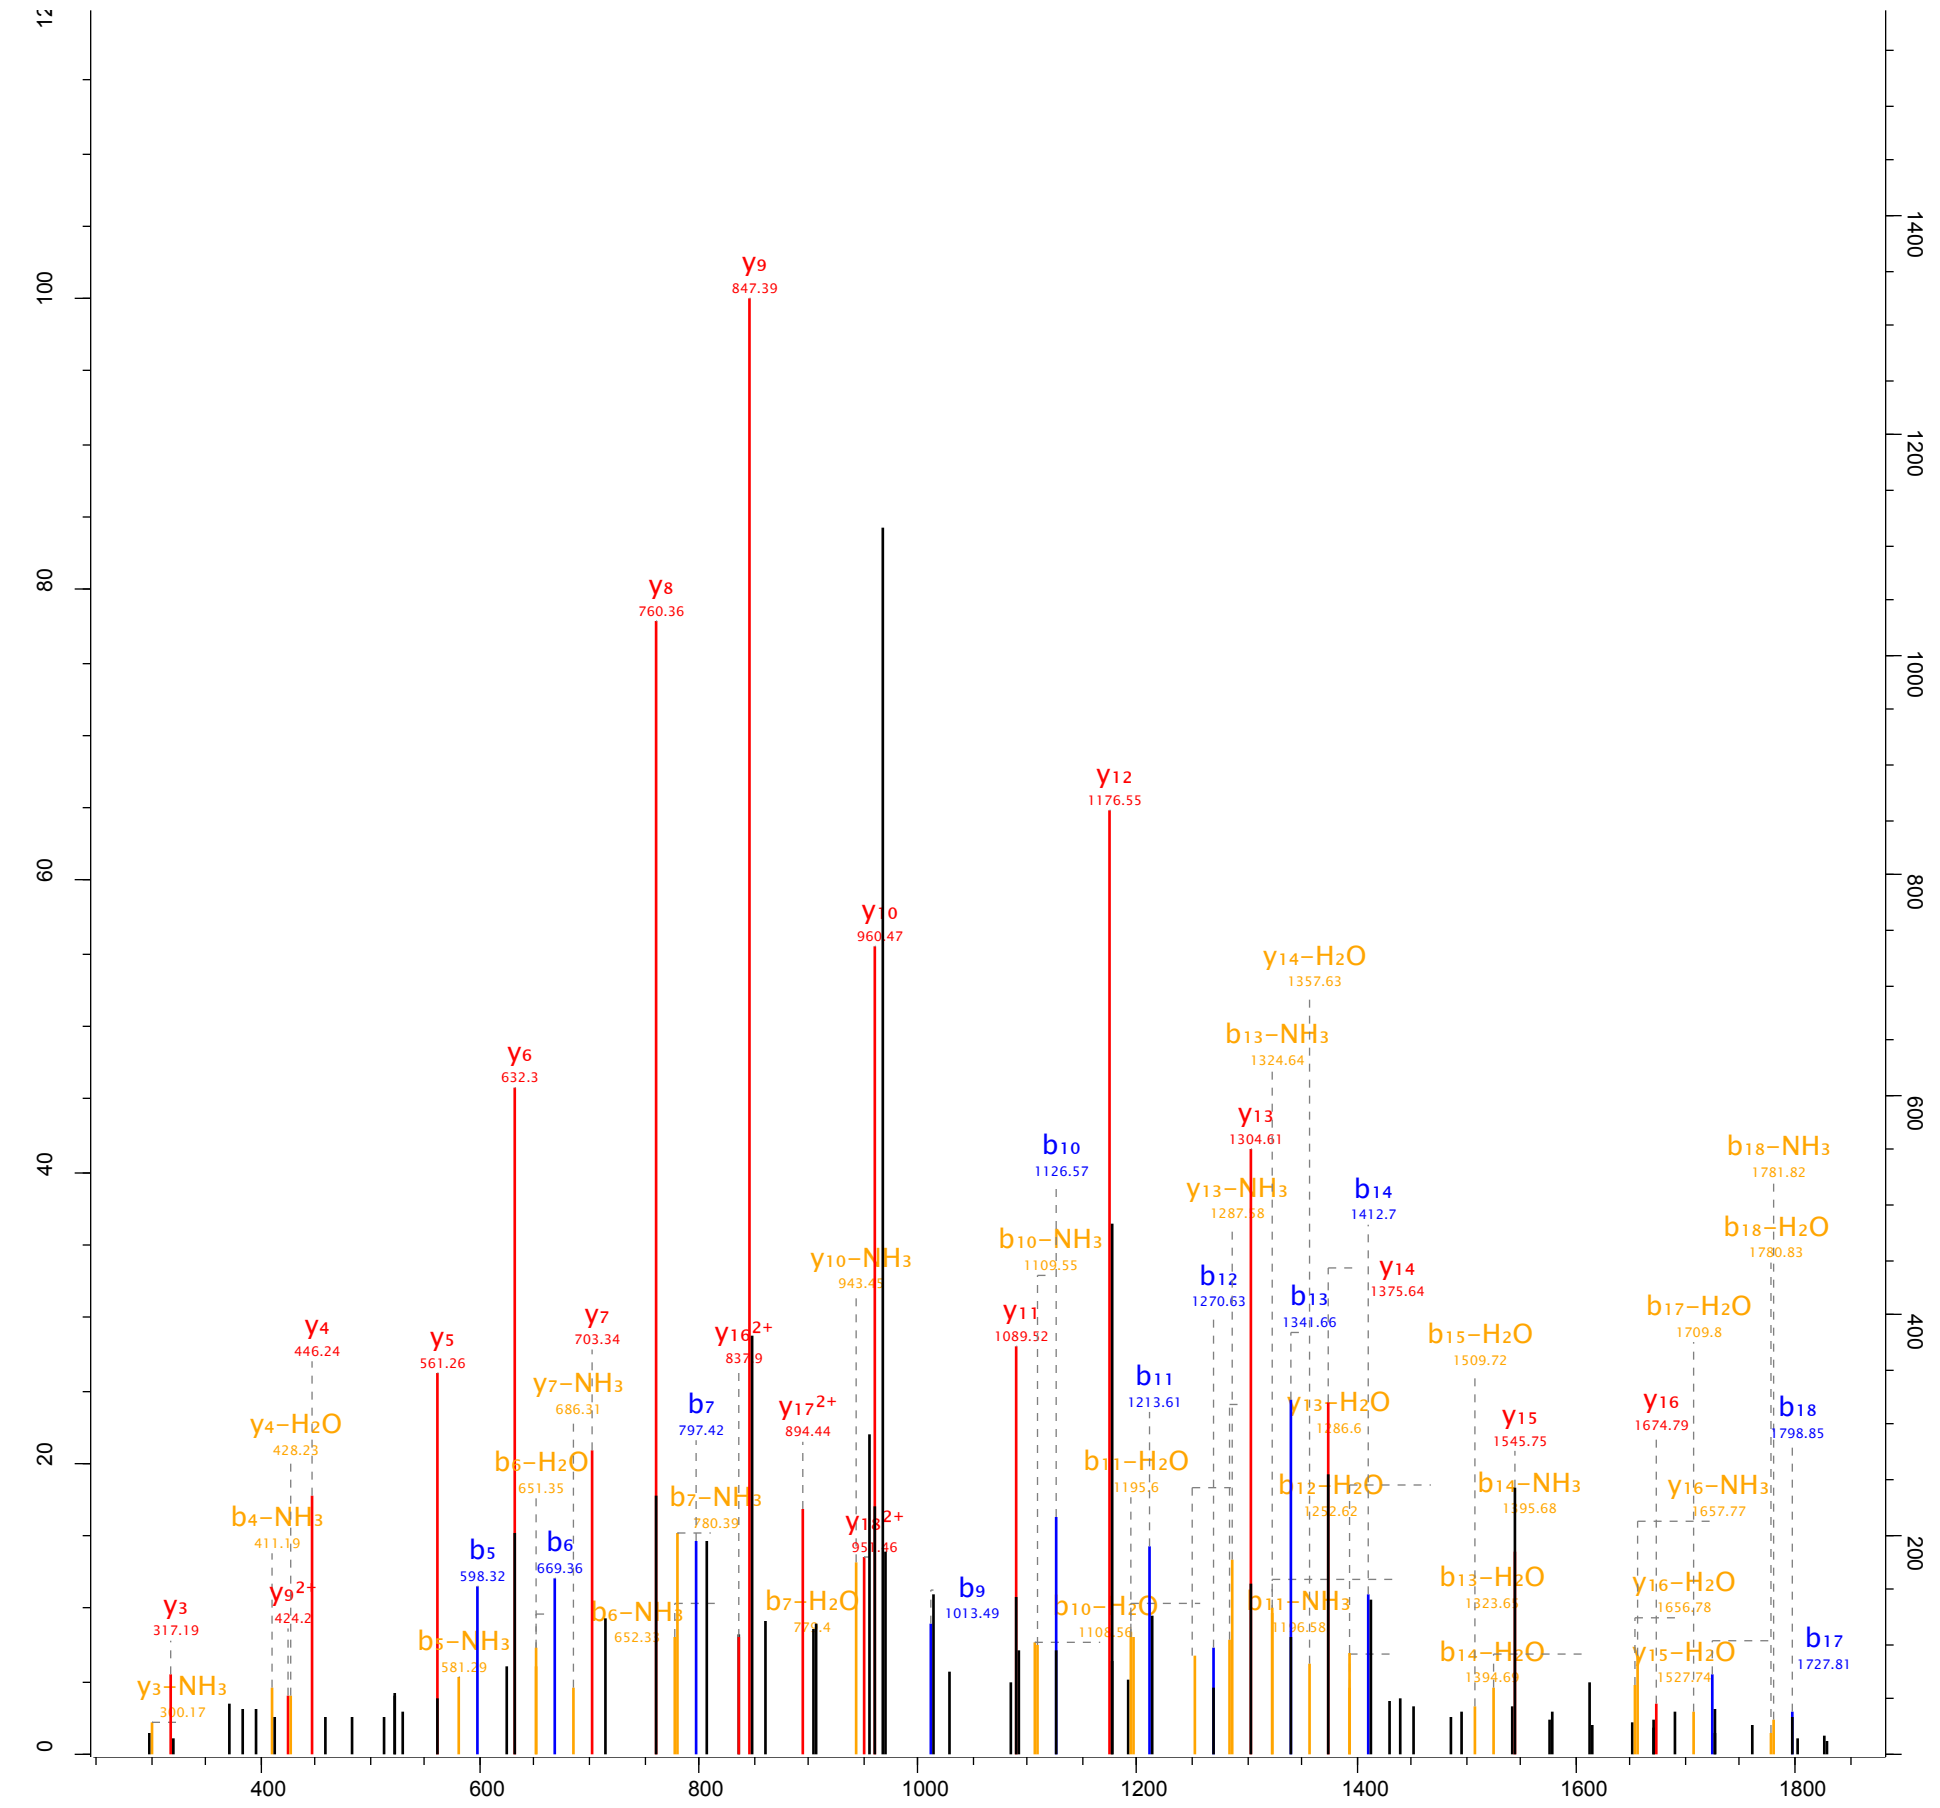

- A N L E K A Q S E L S G A A D E A A R -

y18<sup>2+</sup>
y17<sup>2+</sup>
y16
y15  
ac
y14
y13
y12
y11
y10
y9
y8
y7
y6
y5
y4
y3

b5
b6
b7
b9
b10
b11
b12
b13
b14
b17
b18

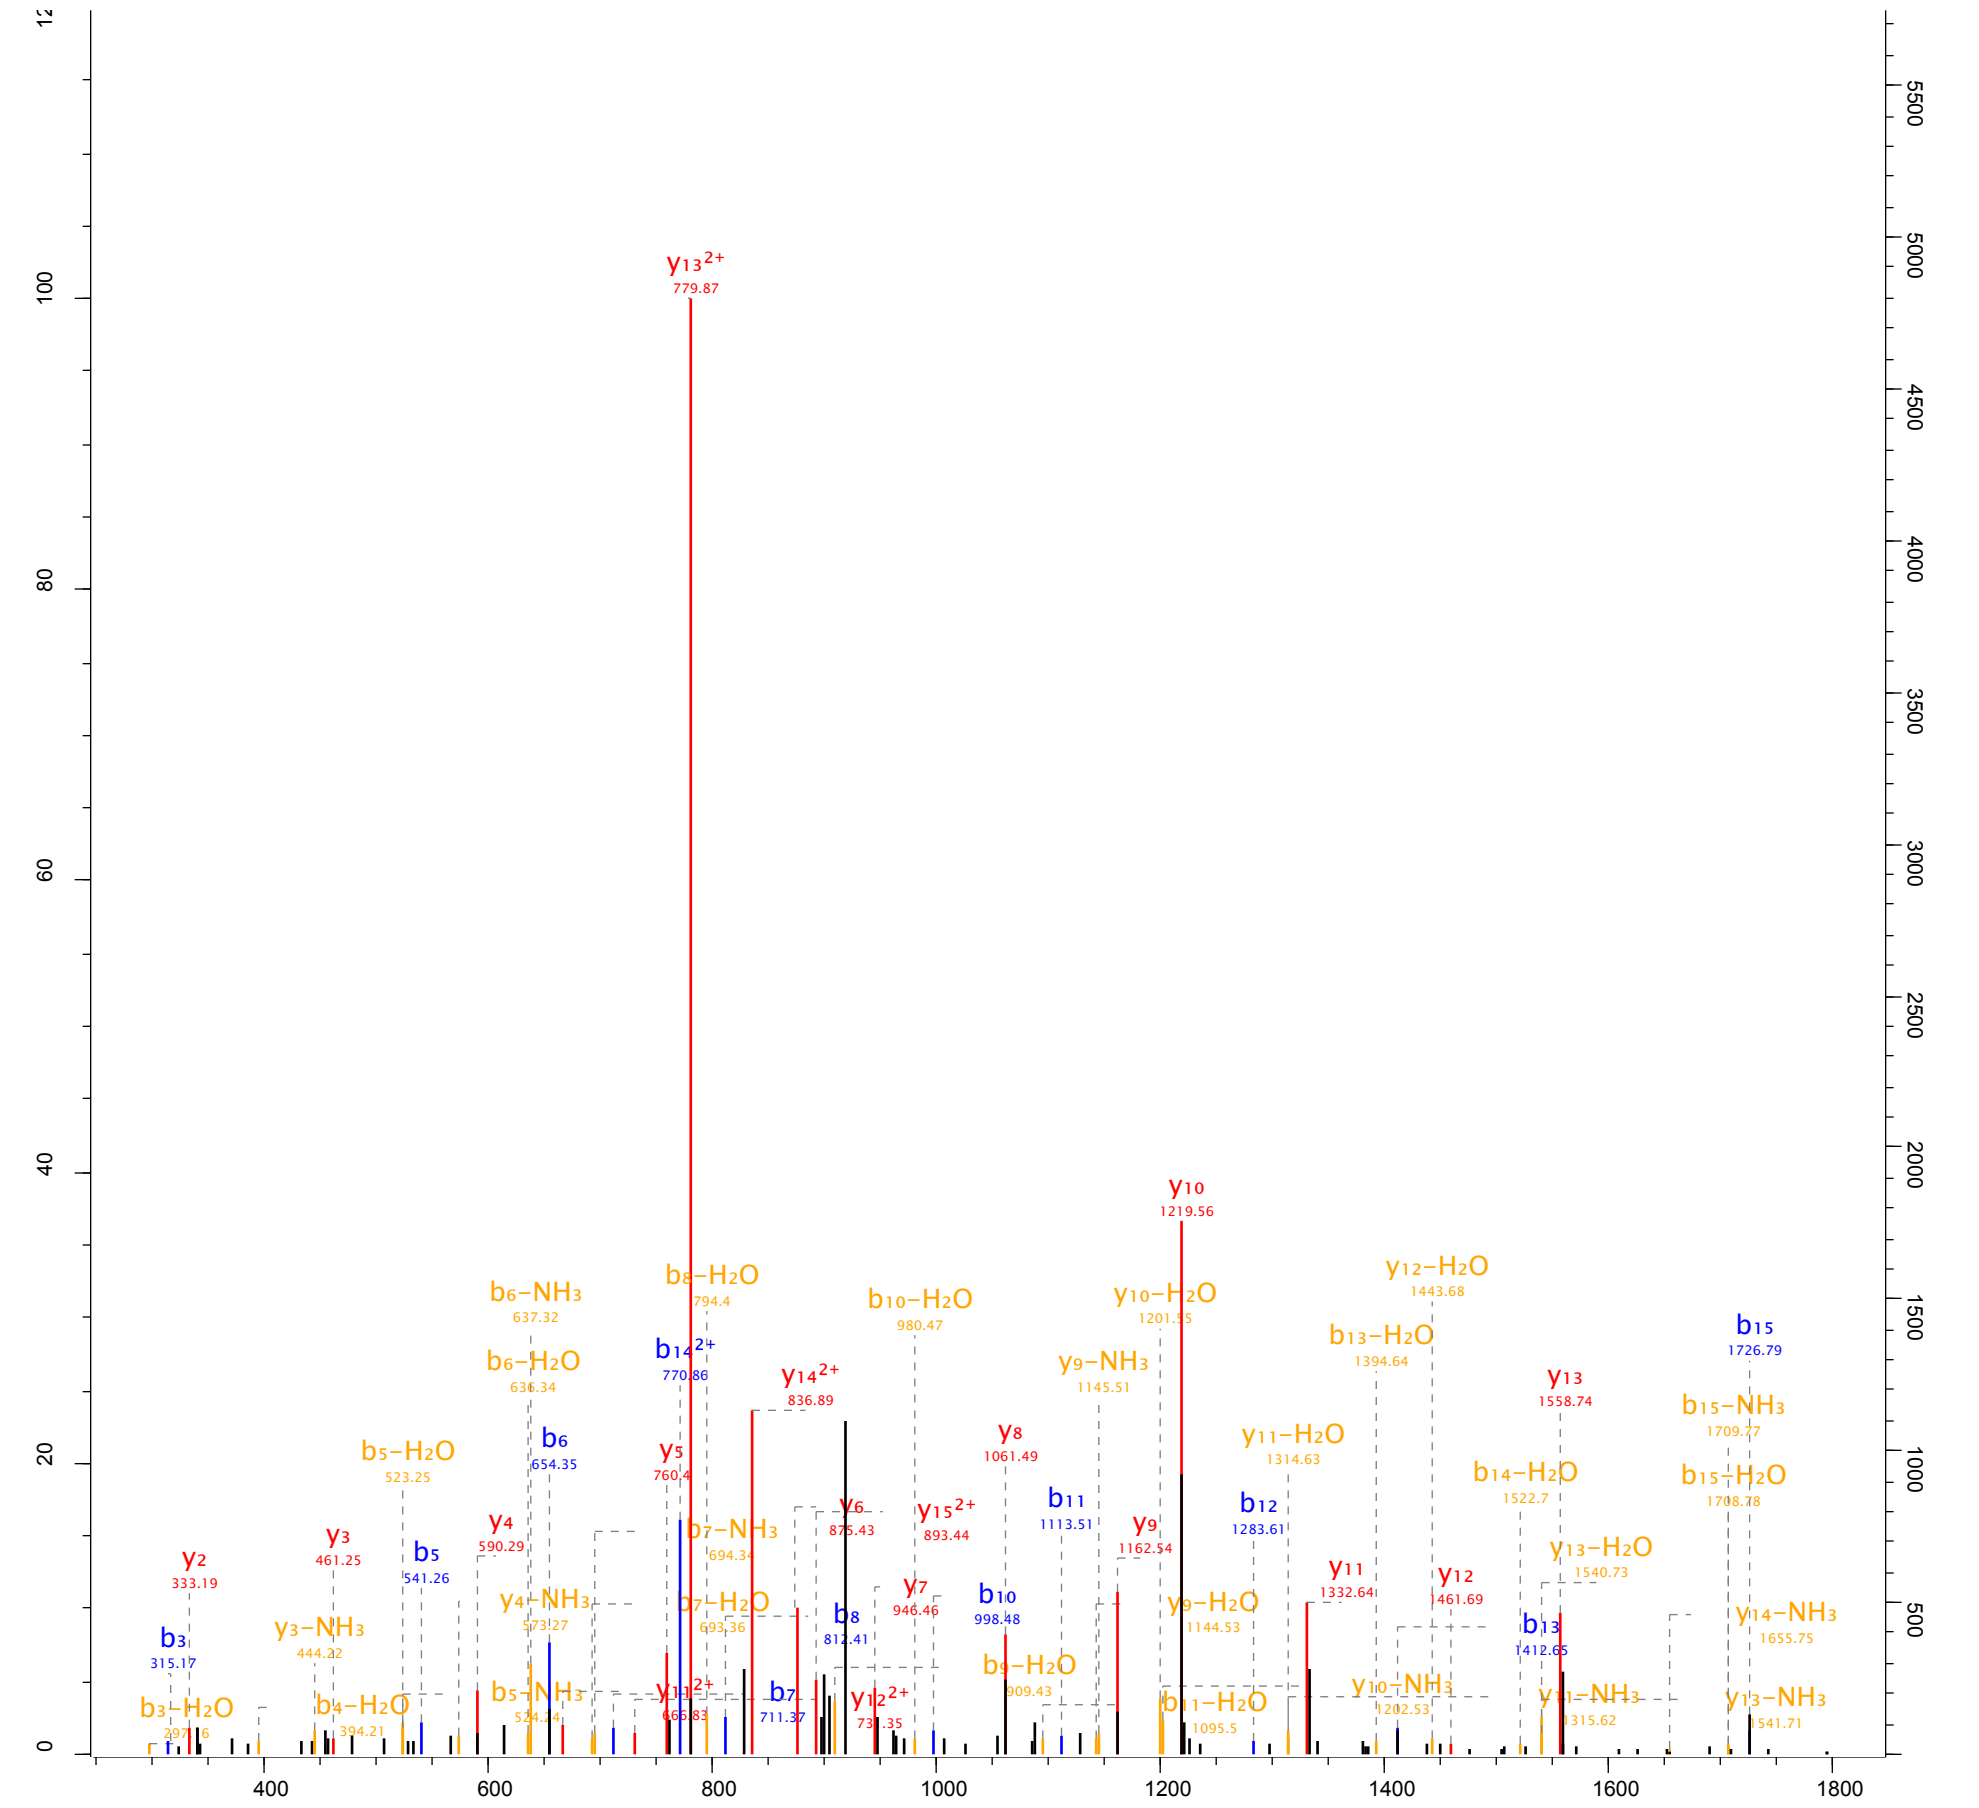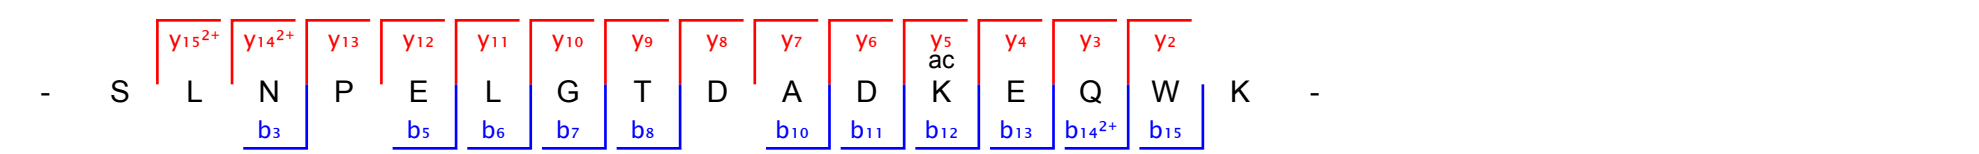

050813\_SCW\_II\_29\_19\_4

18022

ITMS; CID

297.55

950.49

Got2

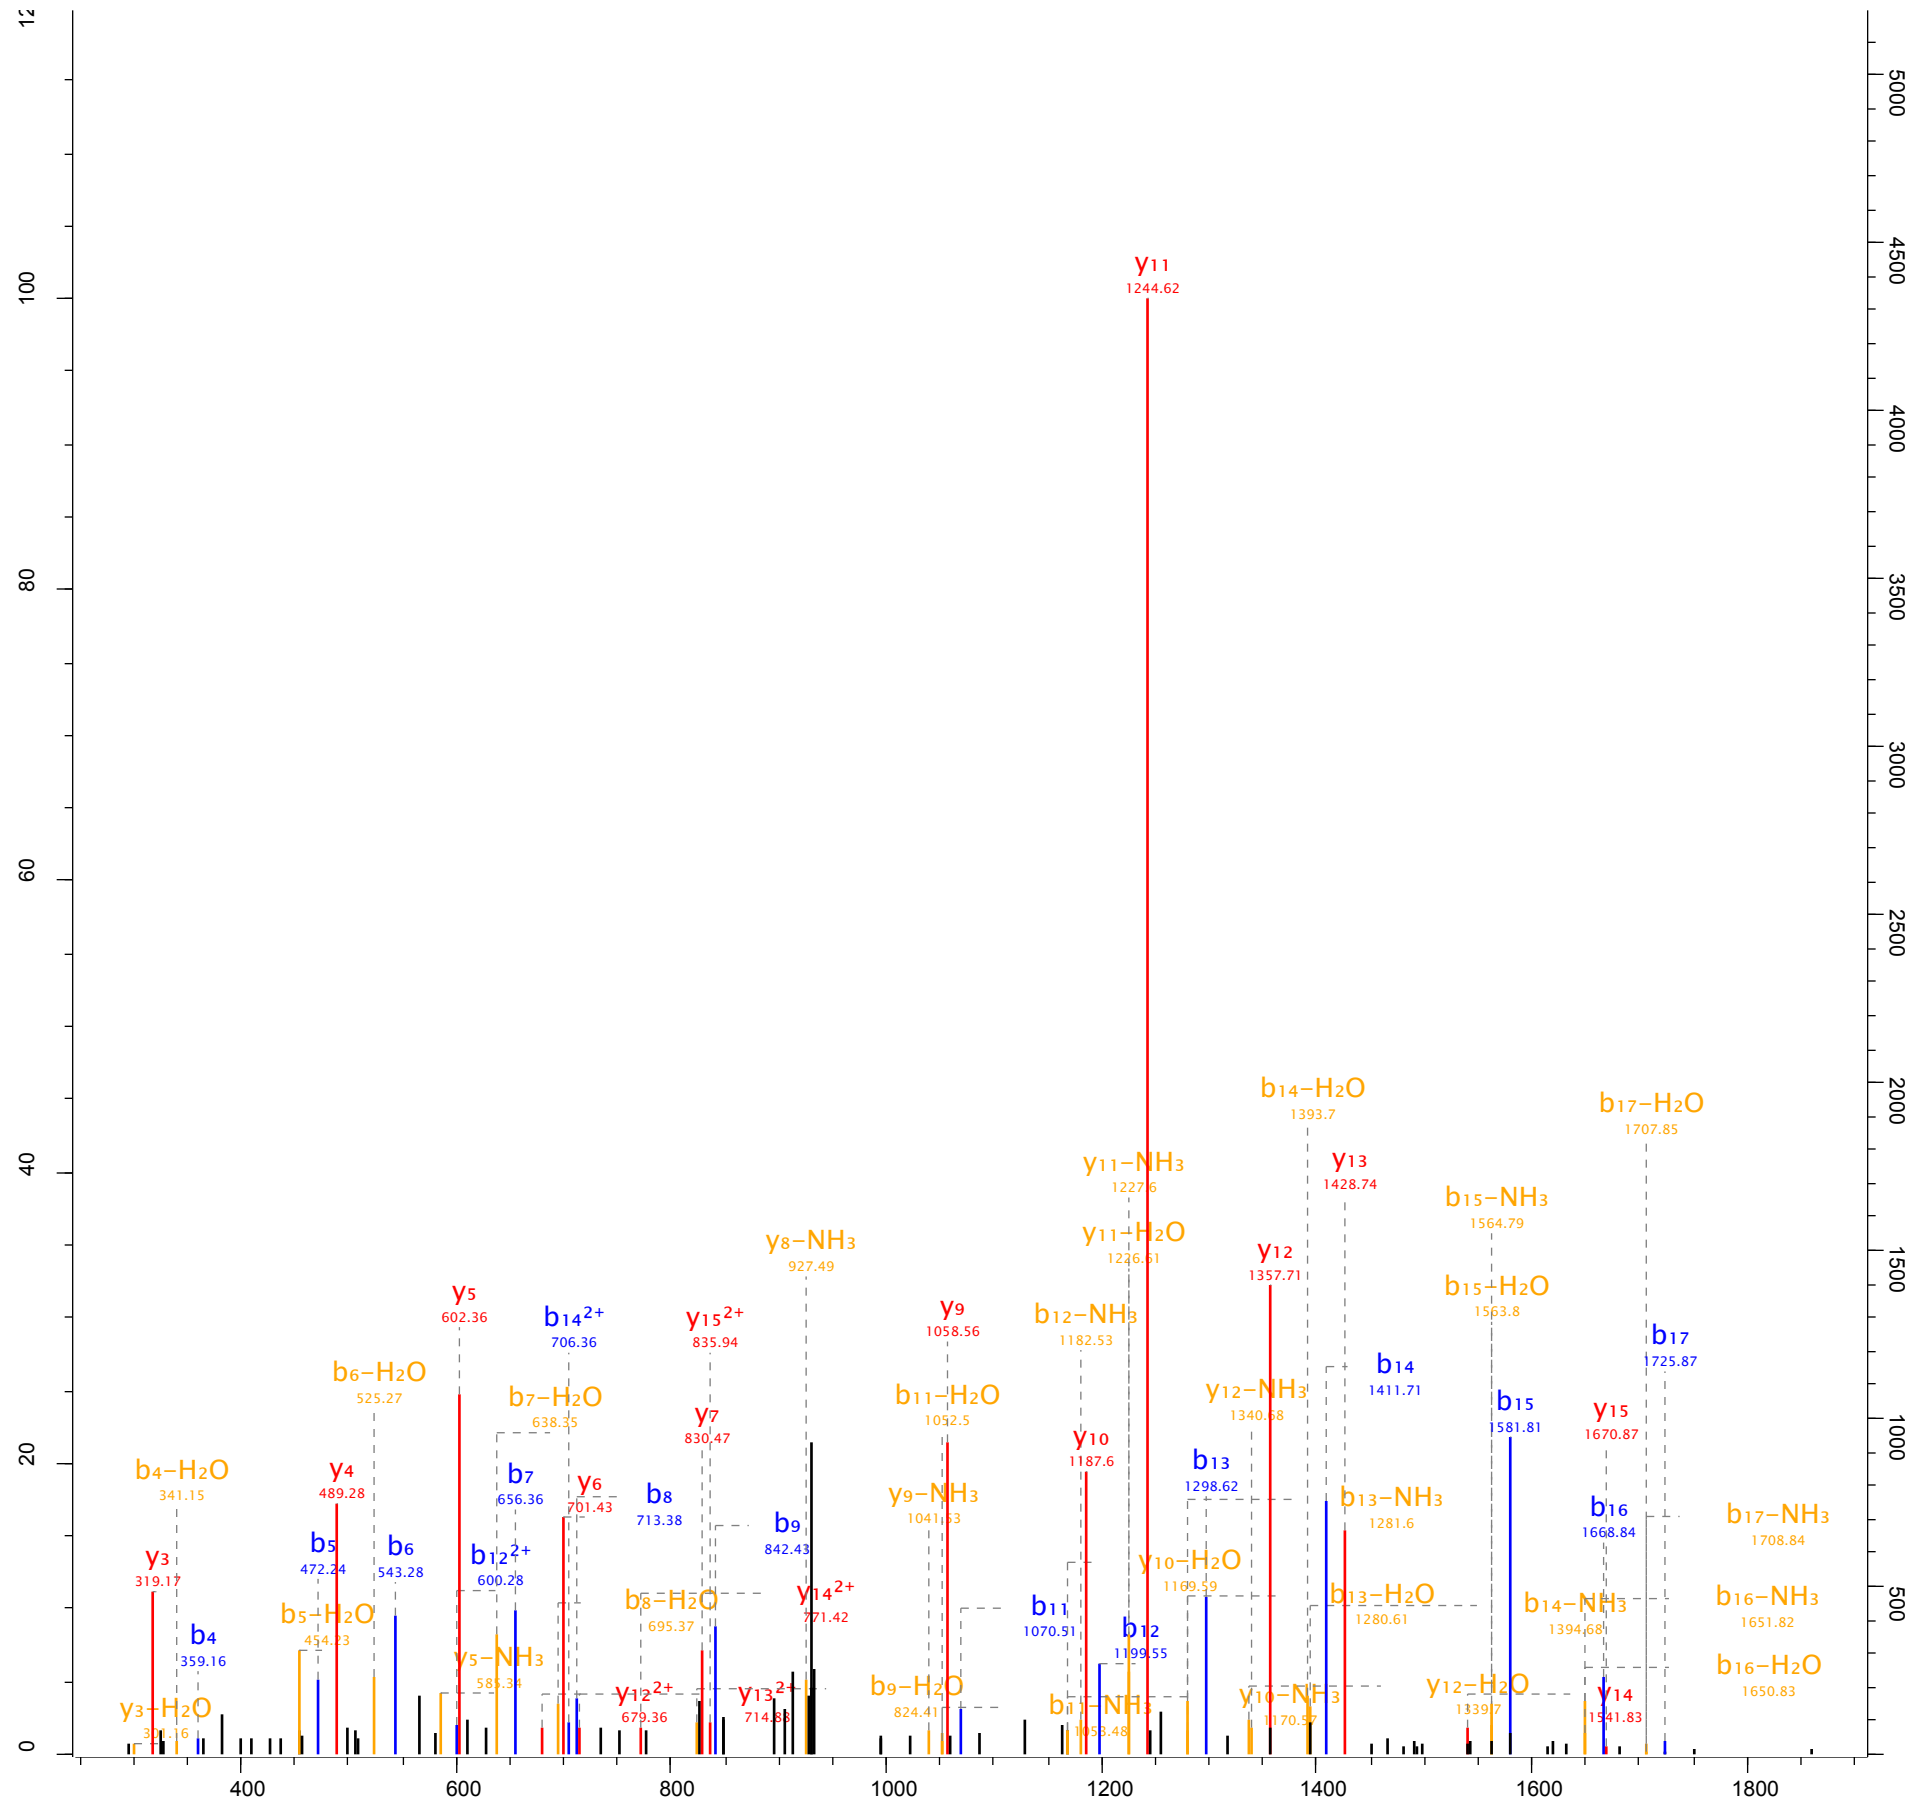

- A S A E L A L G E N N E V L K S G R -

y15
y14
y13
y12
y11
y10
y9
b4
b5
b6
b7
b8
b9
b11
b12
b13
b14
b15
b16
b17

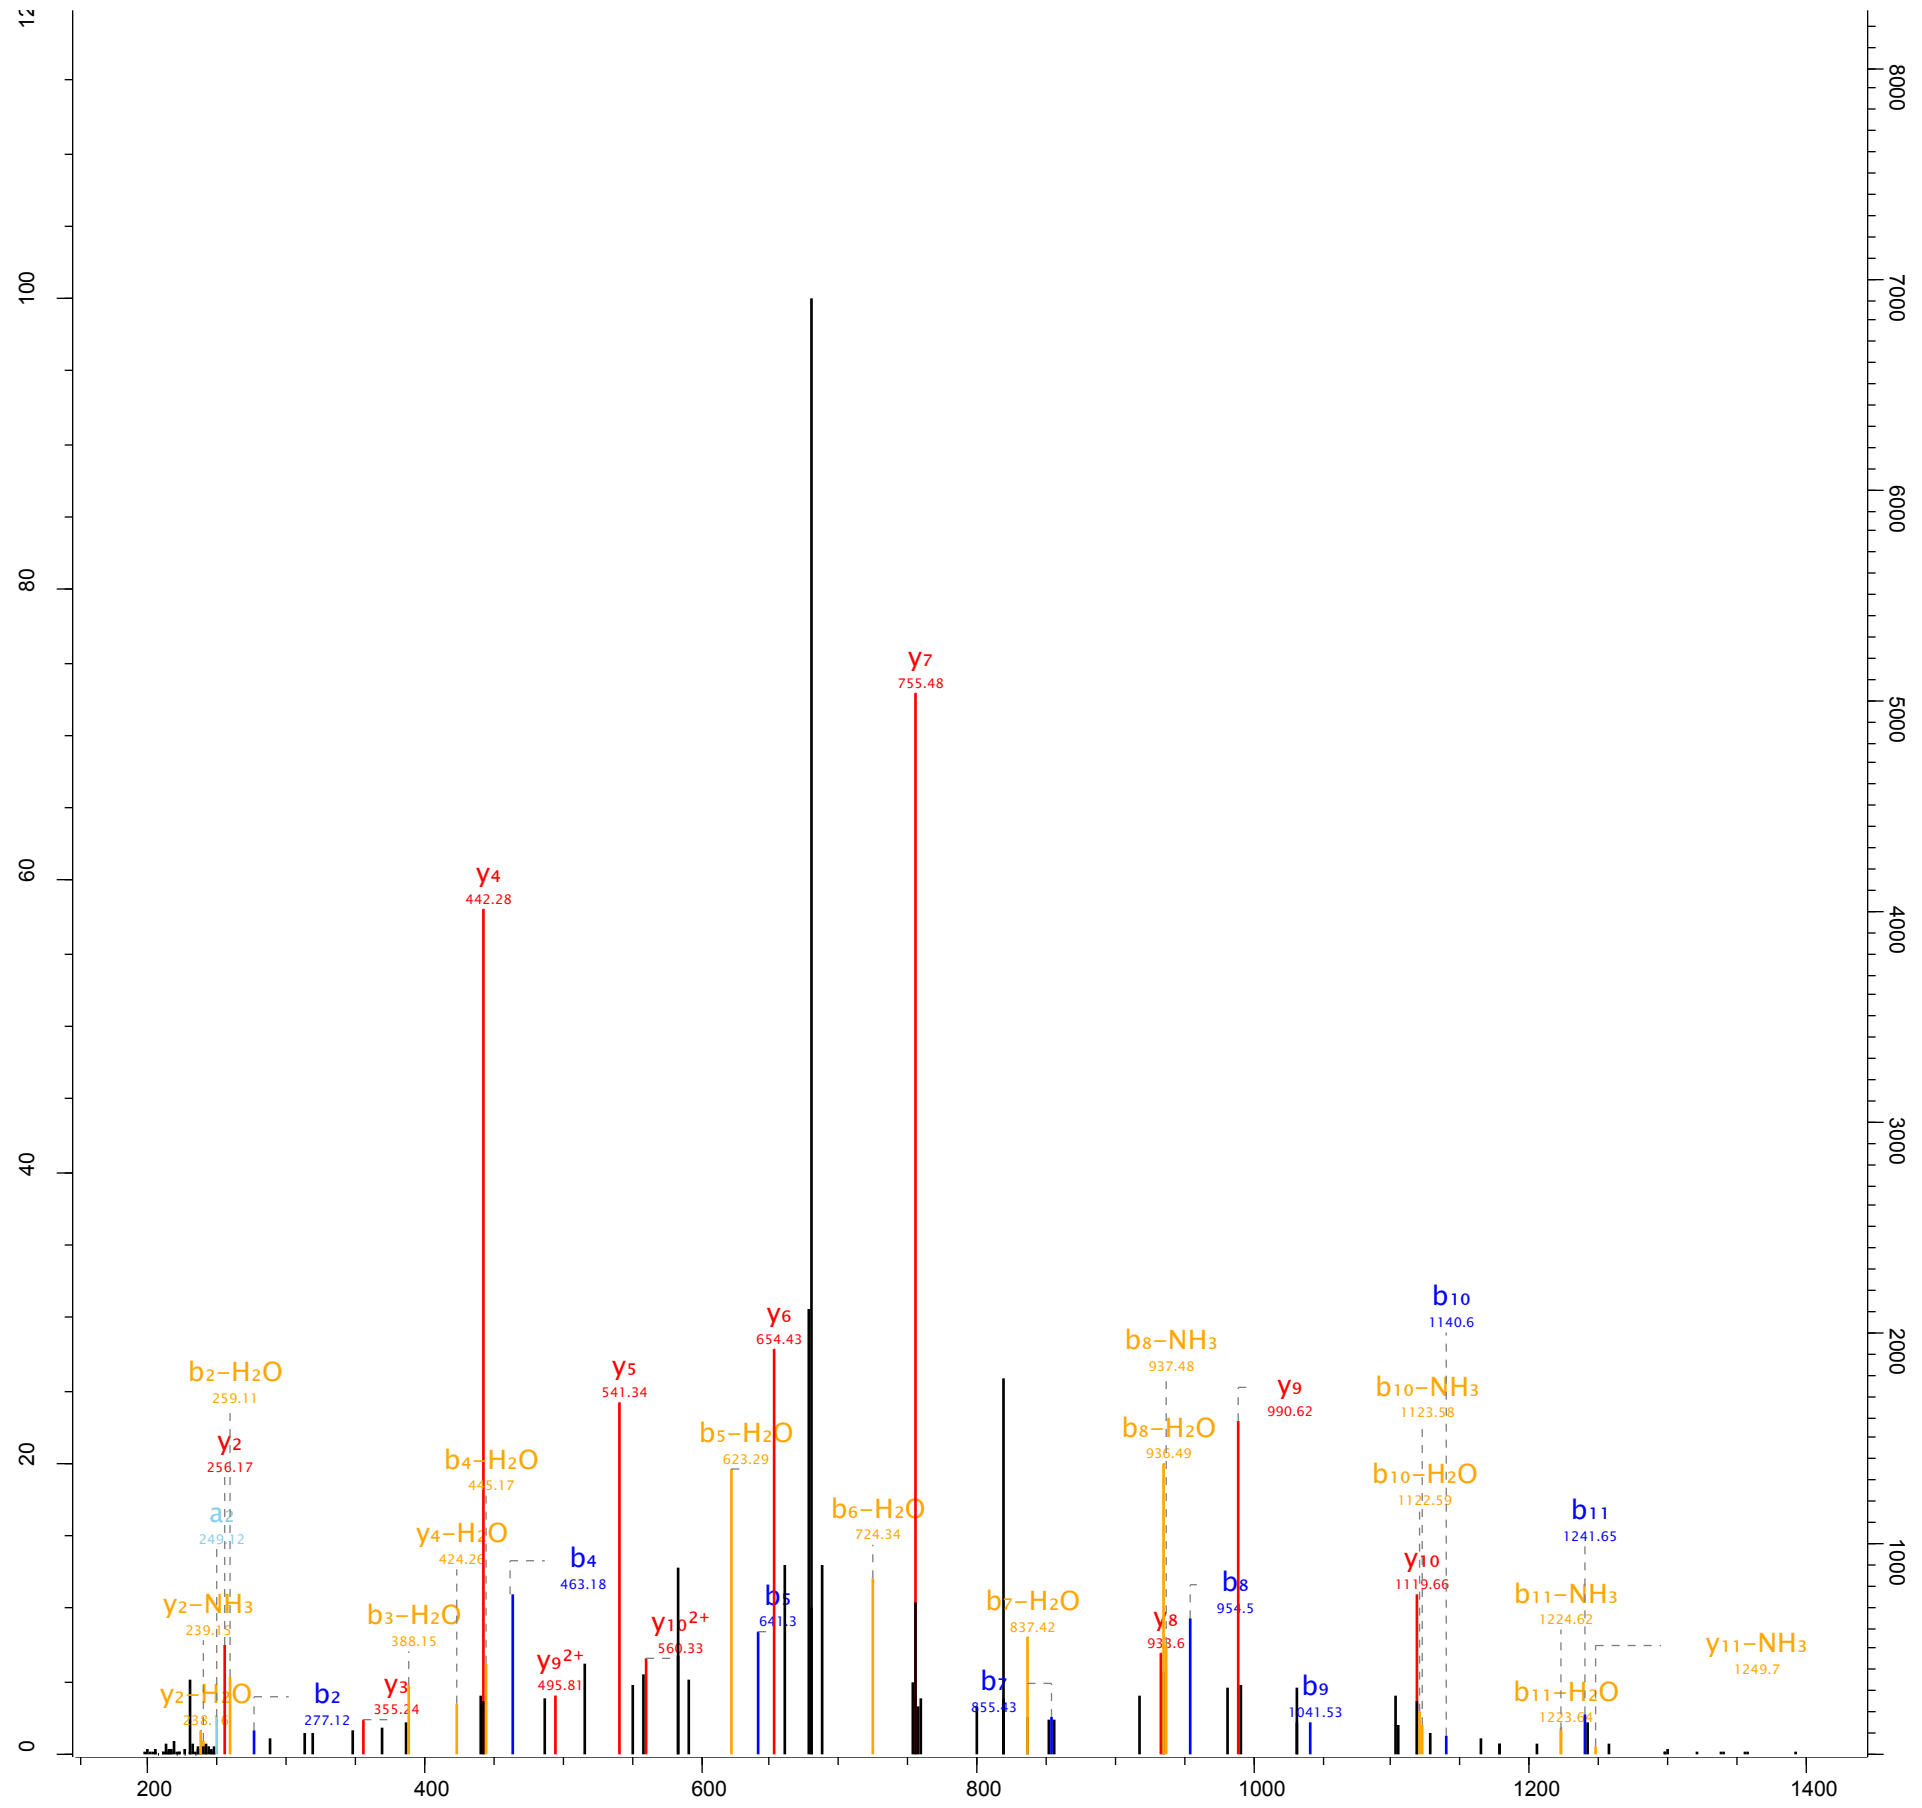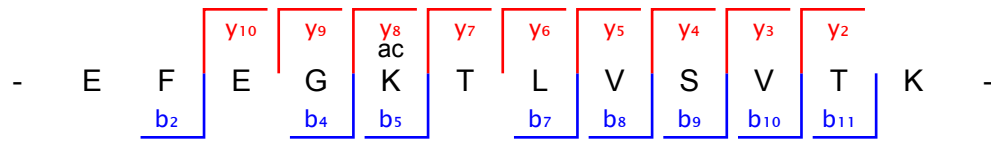

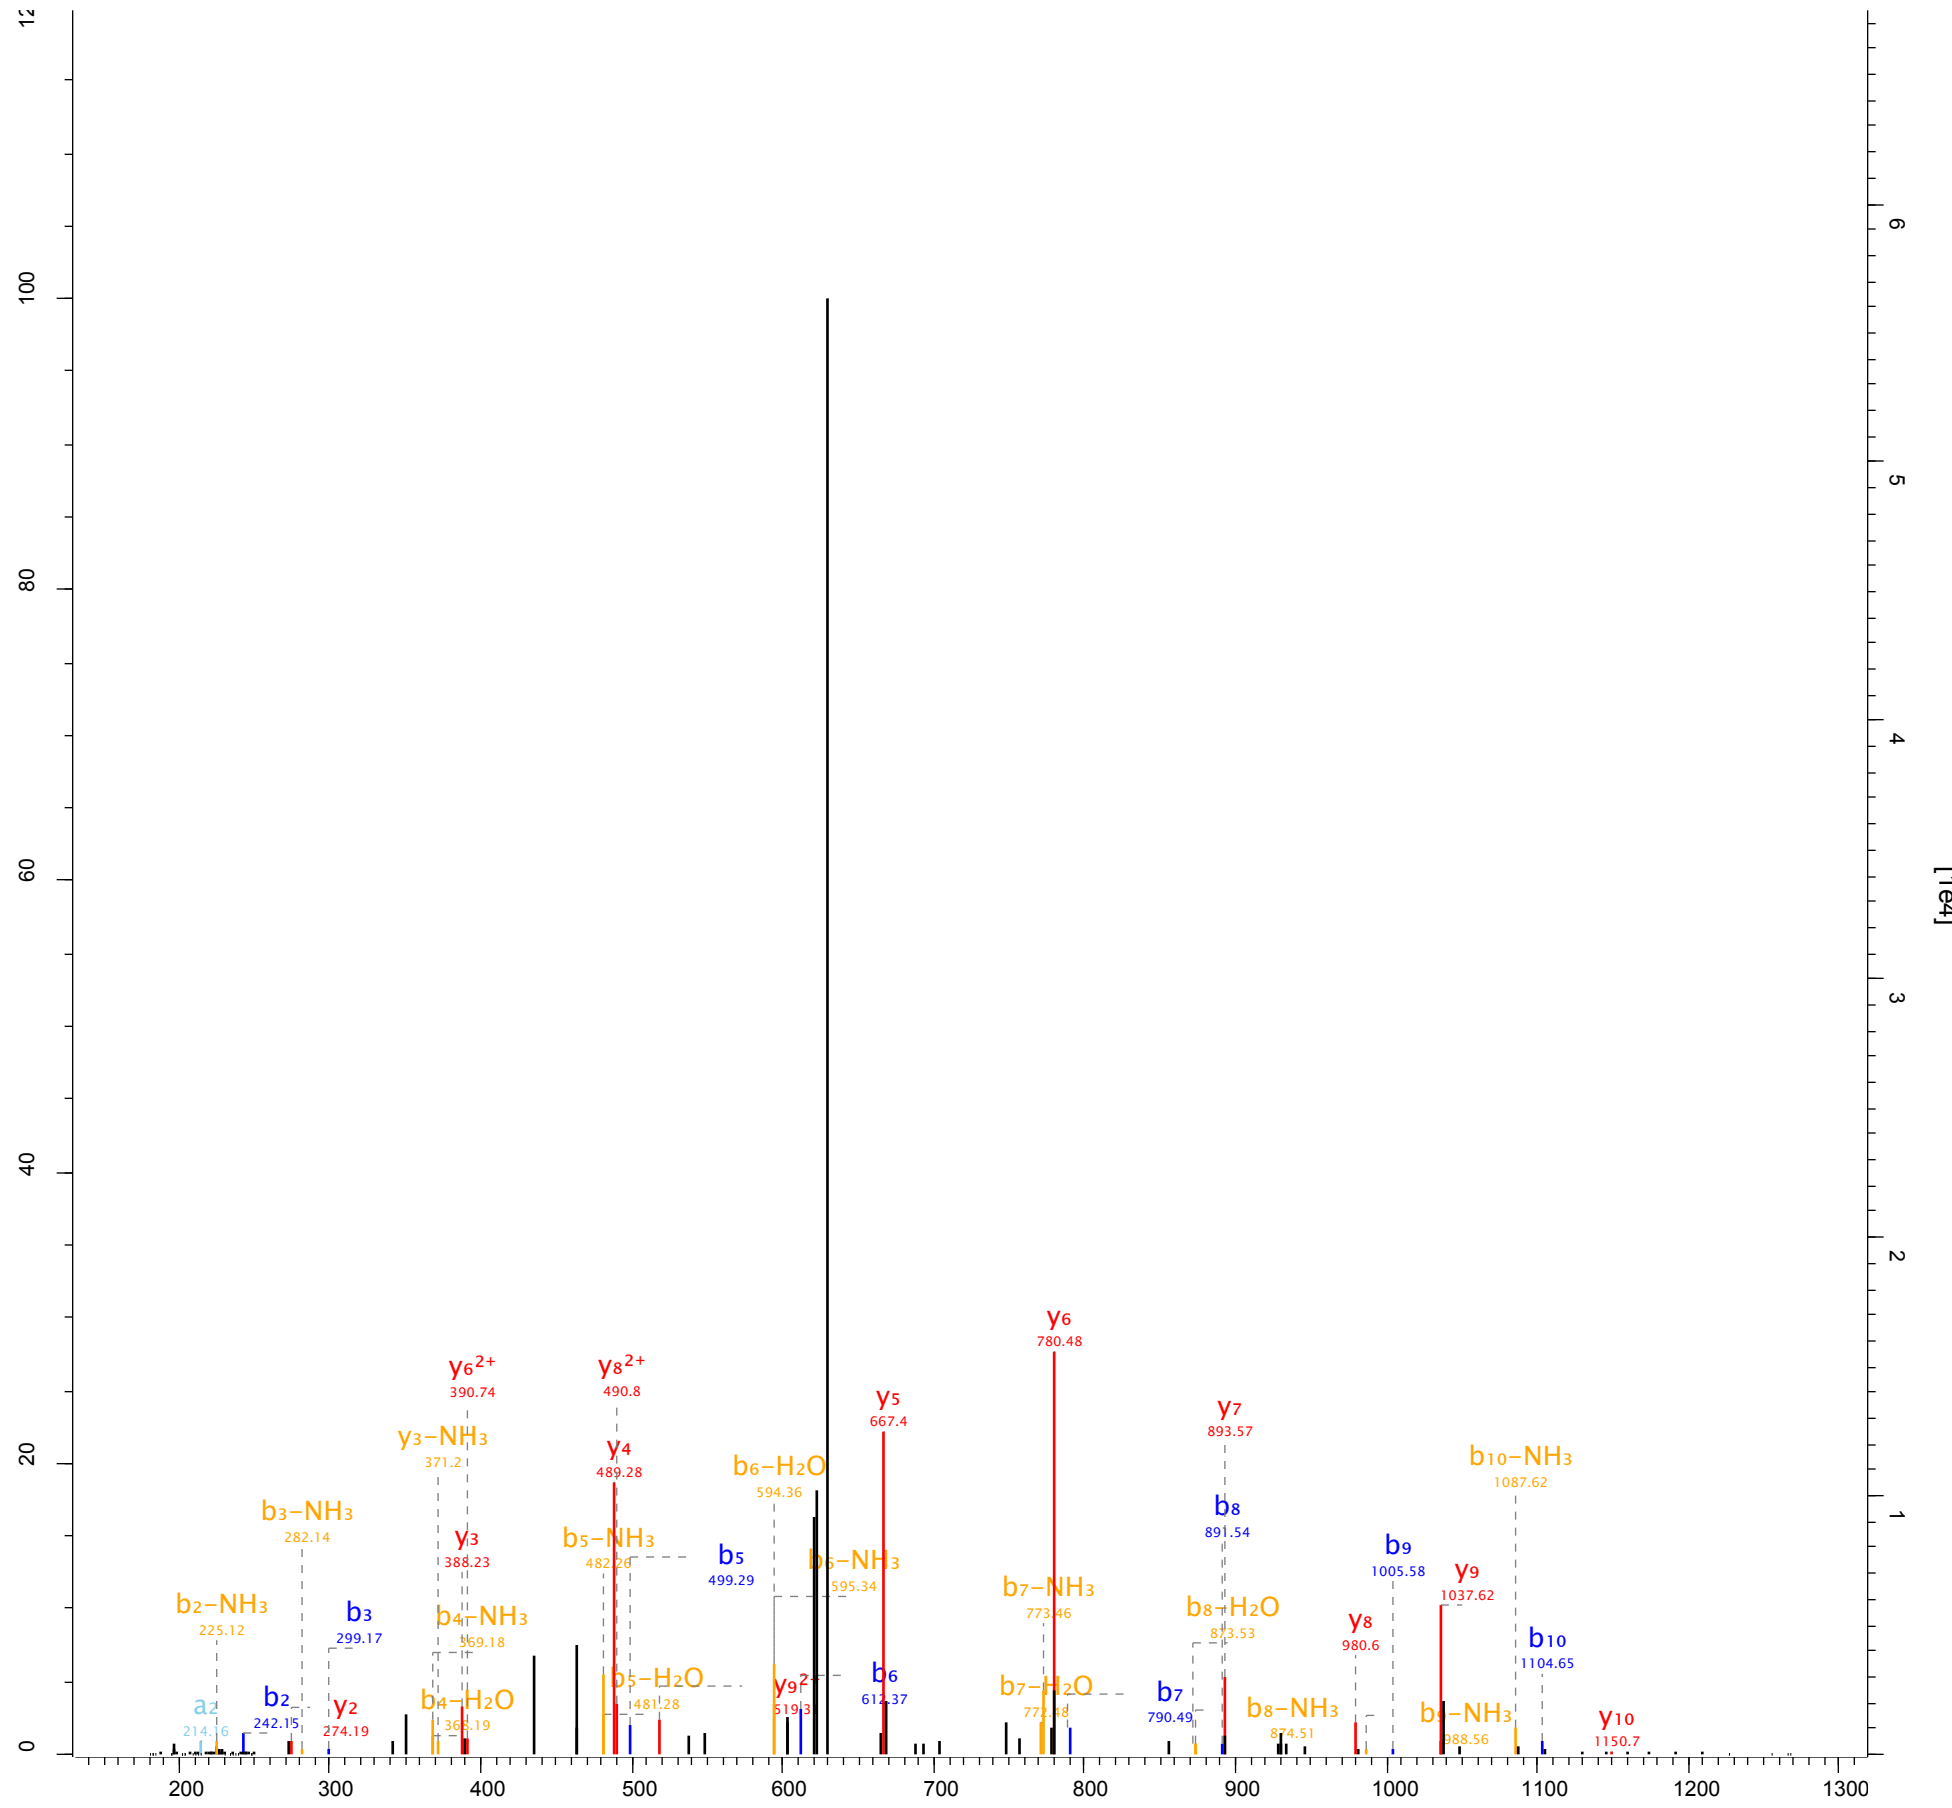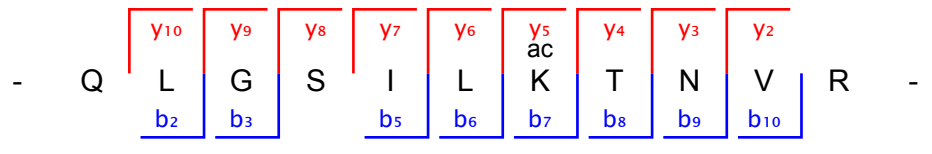



Raw file 050813\_SCW\_II\_29\_19\_4 Scan 18056 Method ITMS; CID Score 273.07 m/z 812.41 Gene names DId

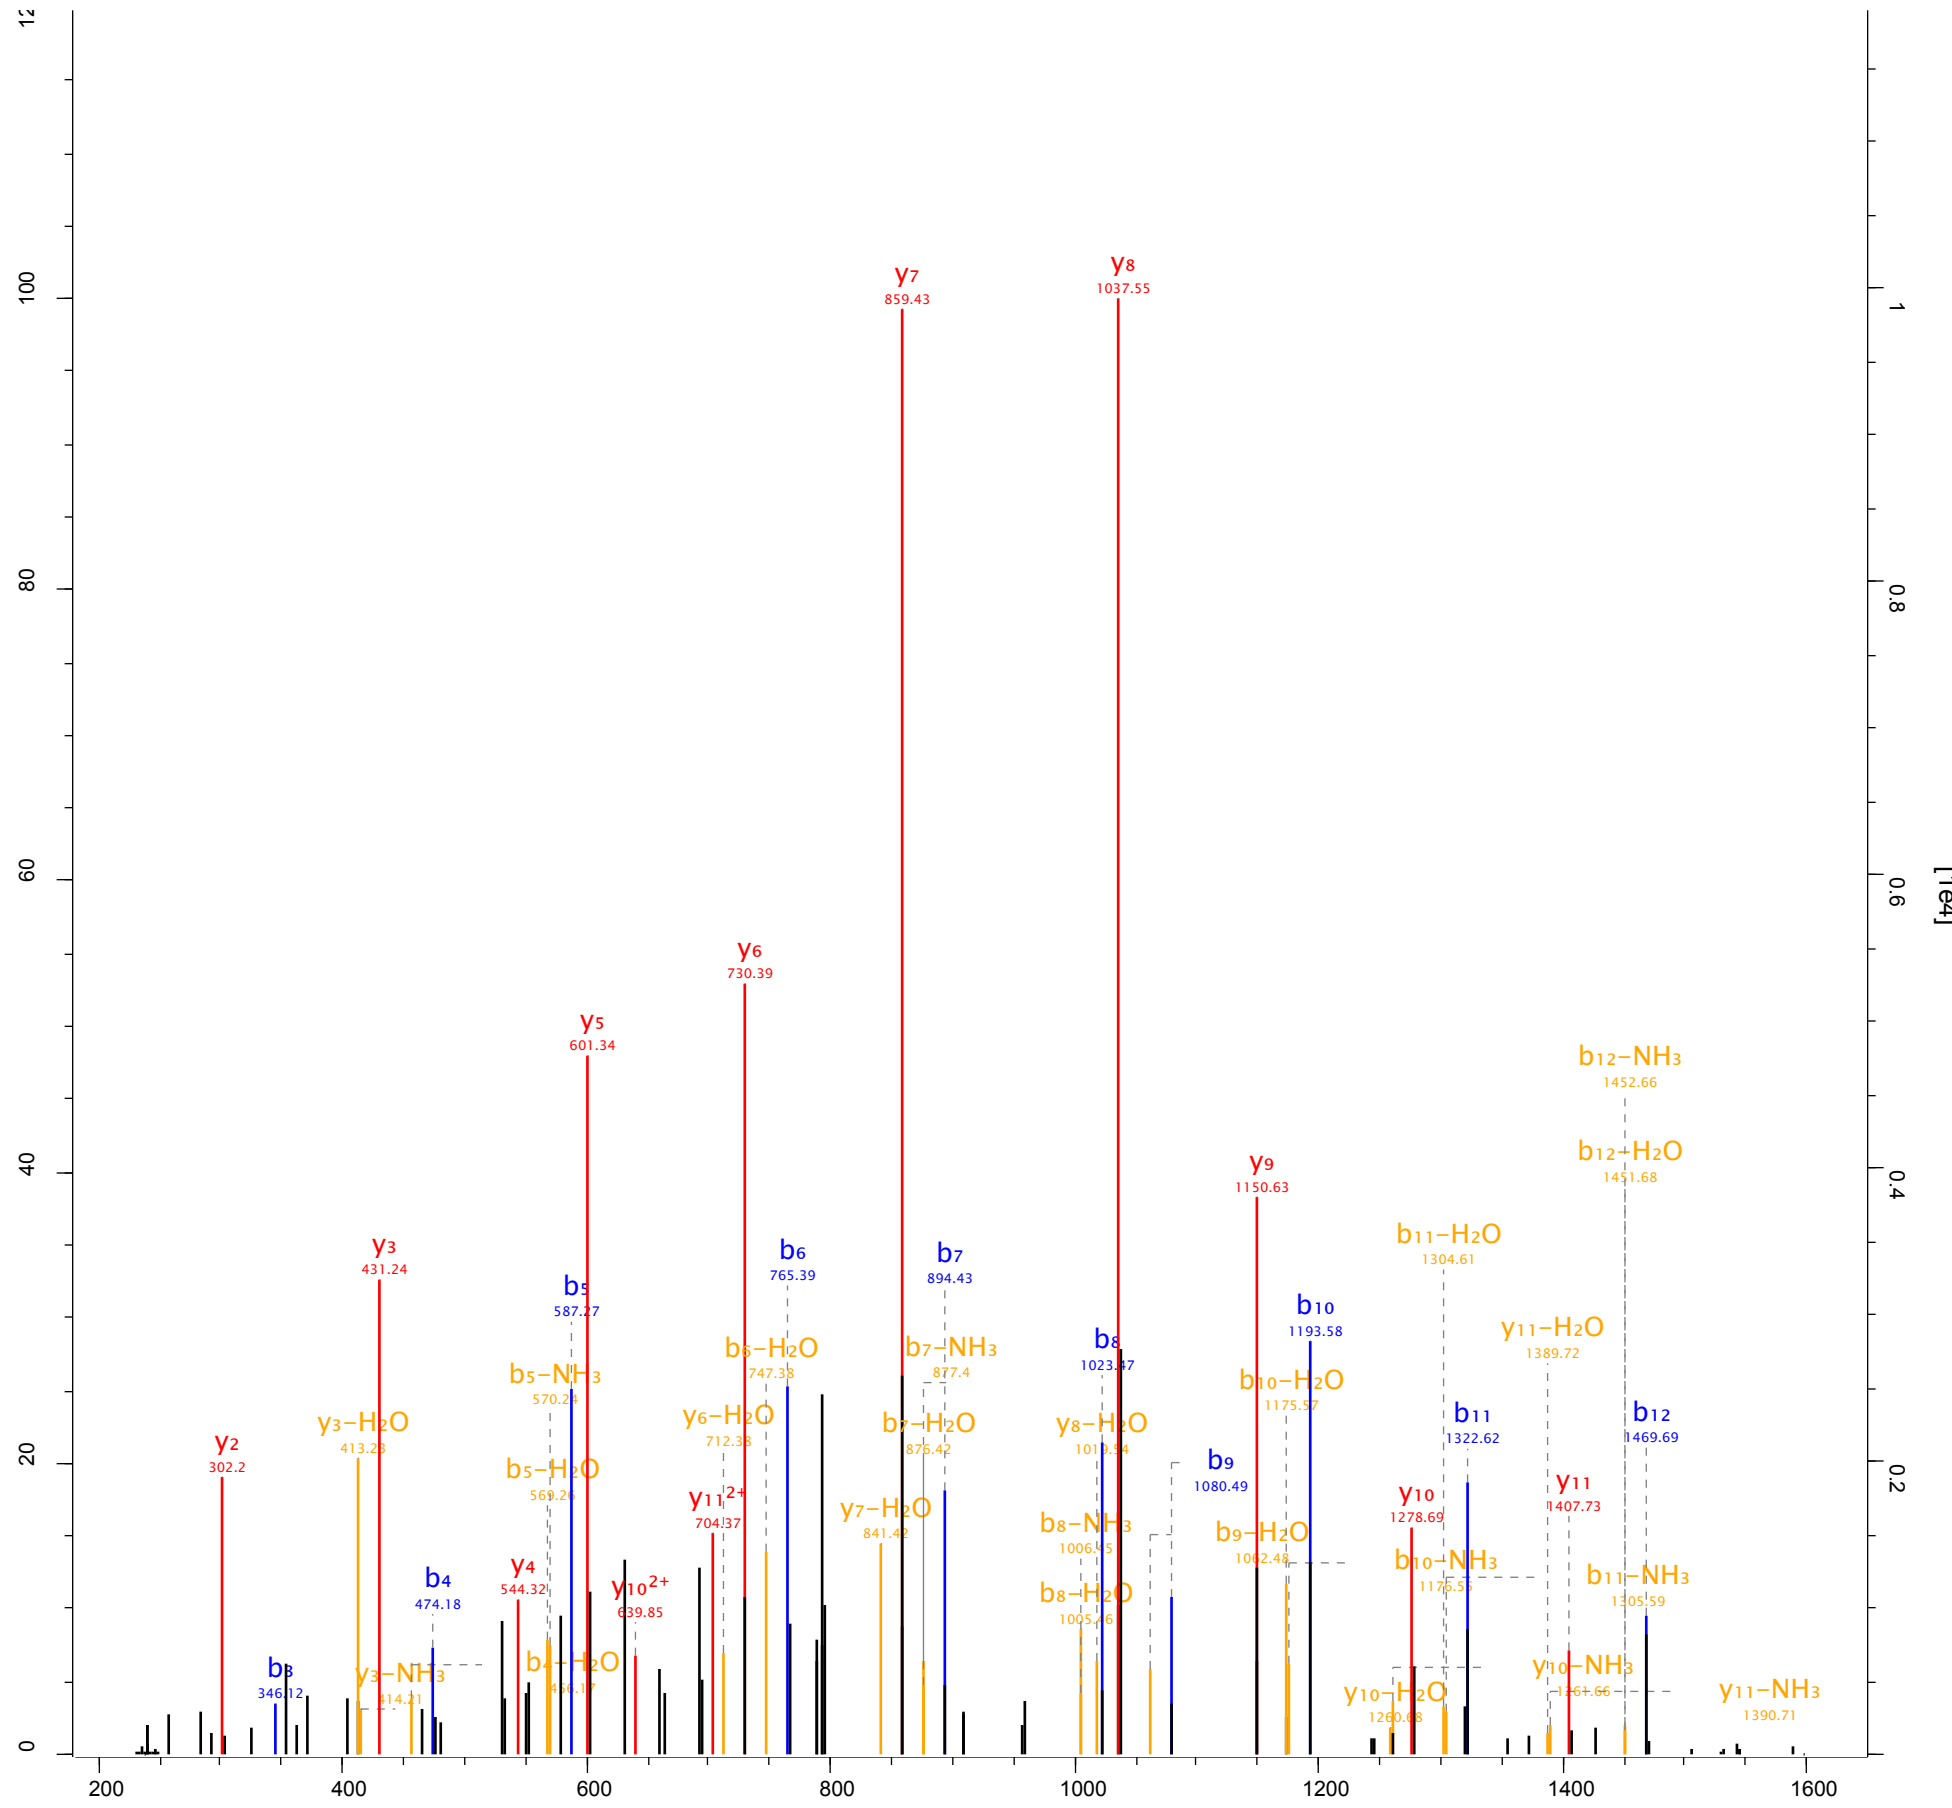

- S E EELK EEEGIEF K -

y11 y10 y9 y8 ac y7 y6 y5 y4 y3 y2  
b3 b4 b5 b6 b7 b8 b9 b10 b11 b12

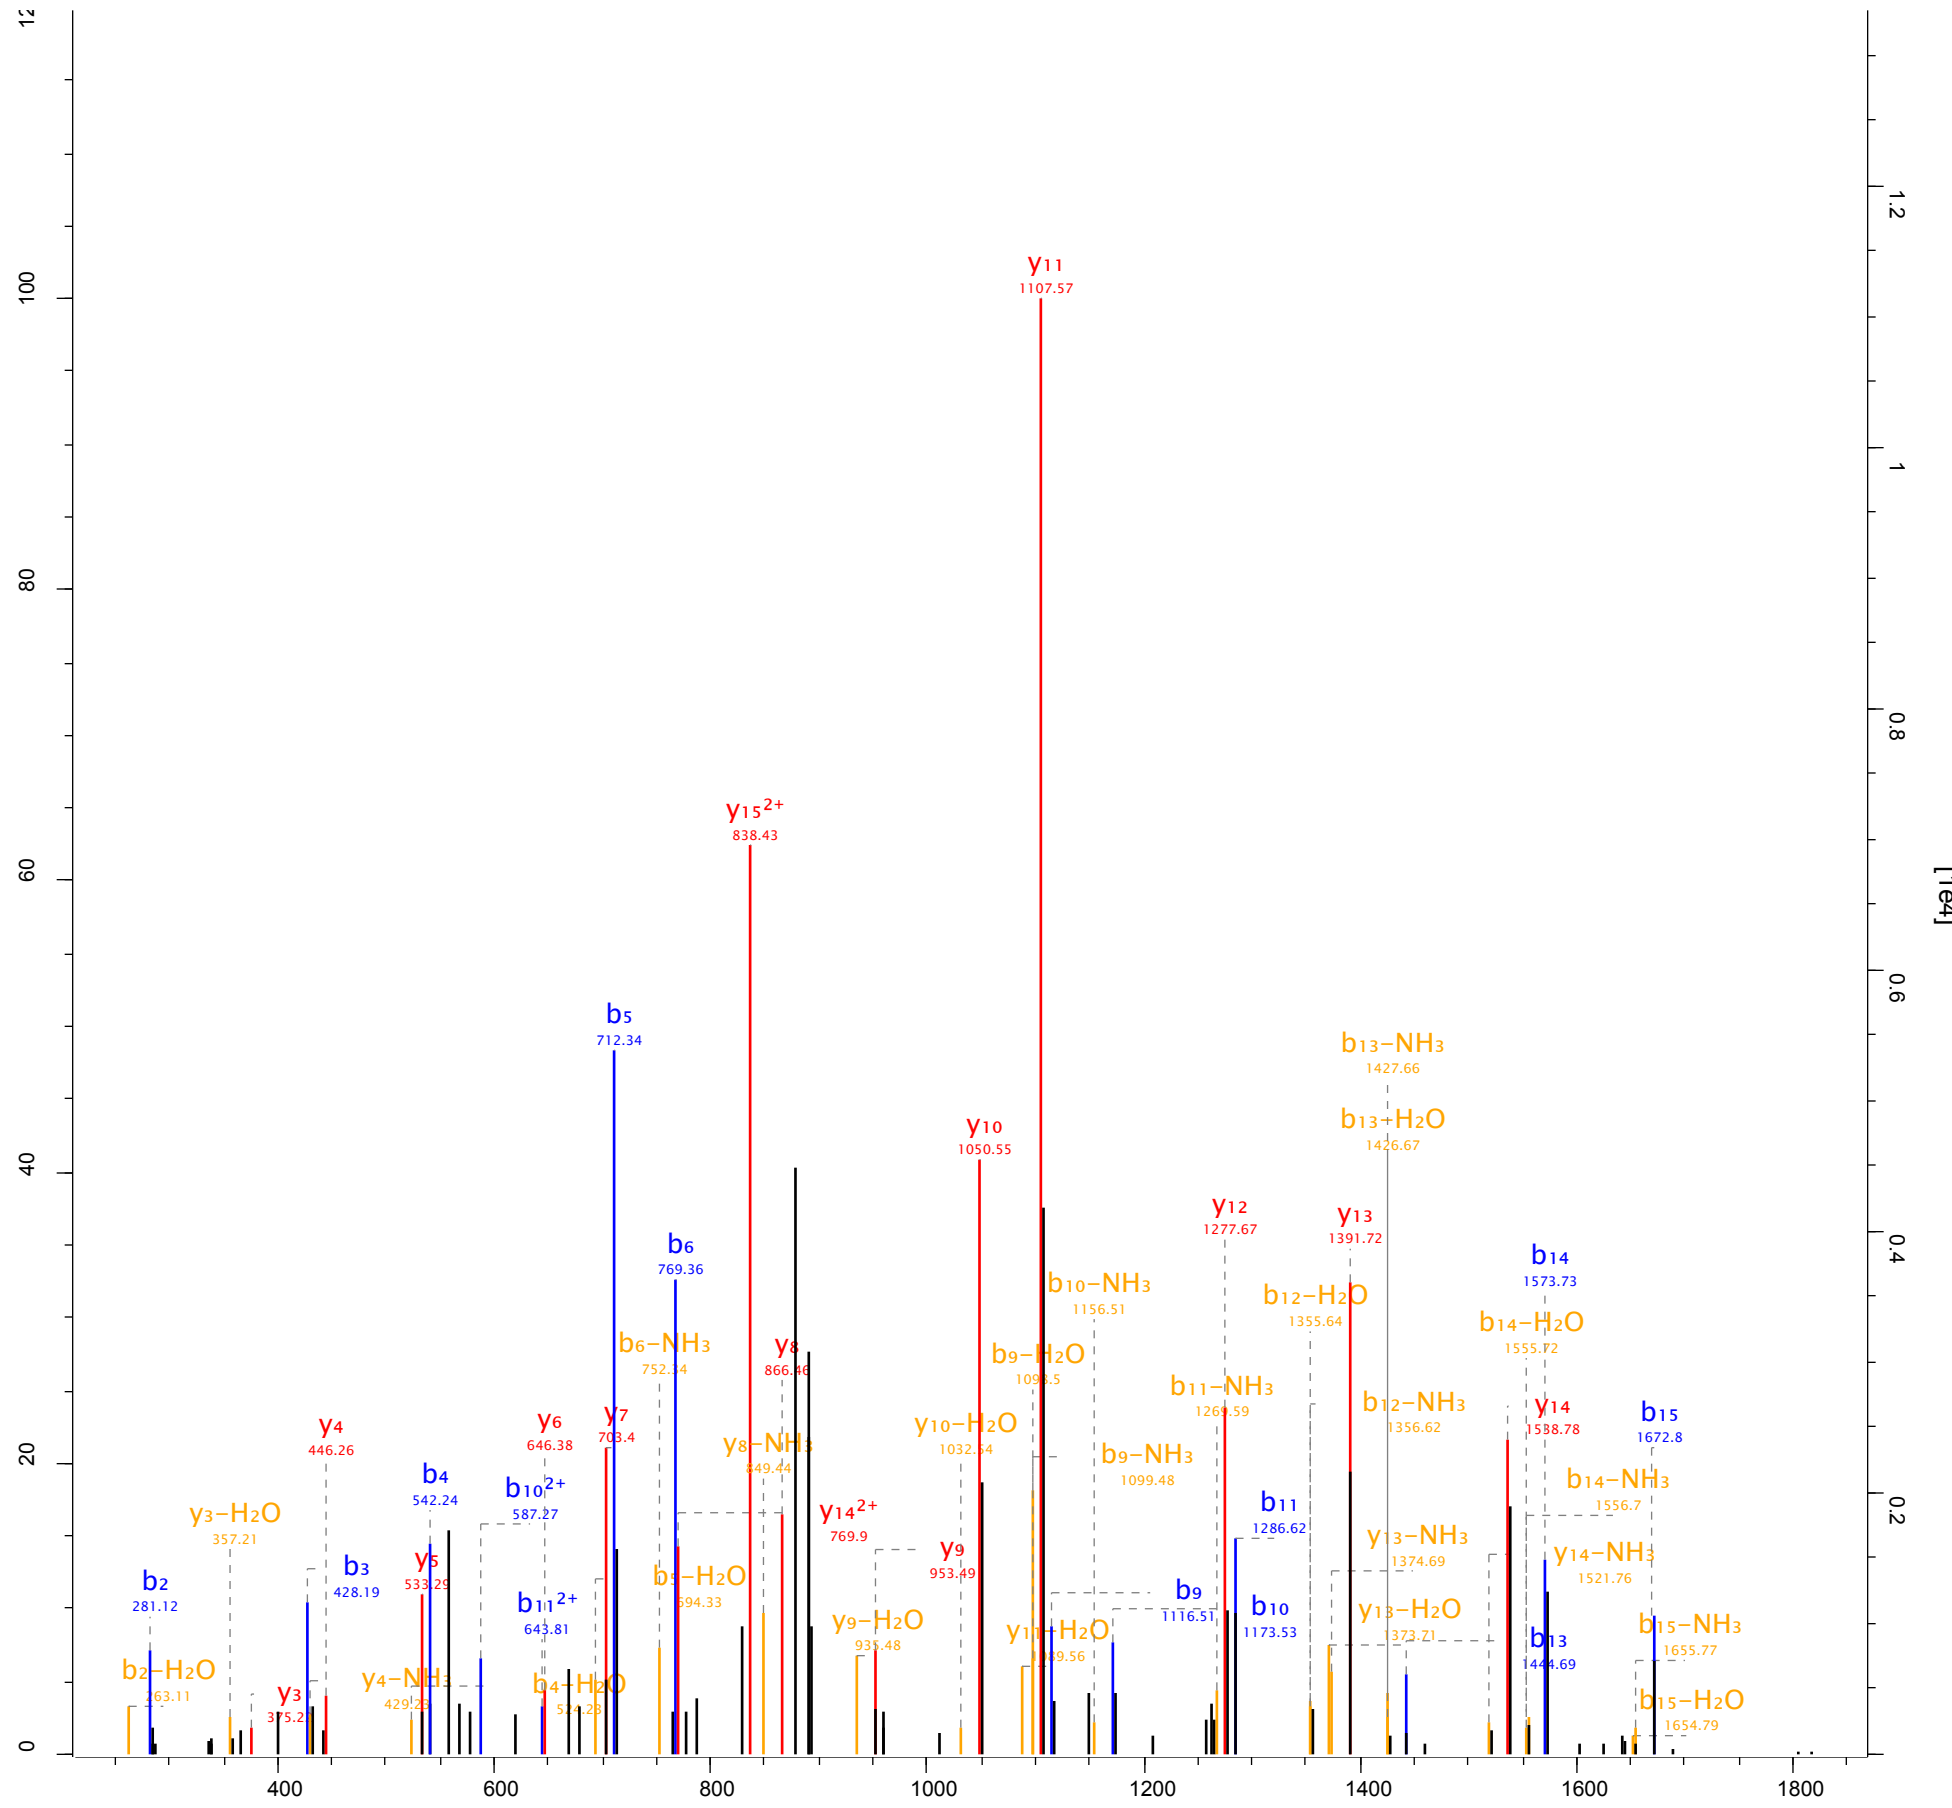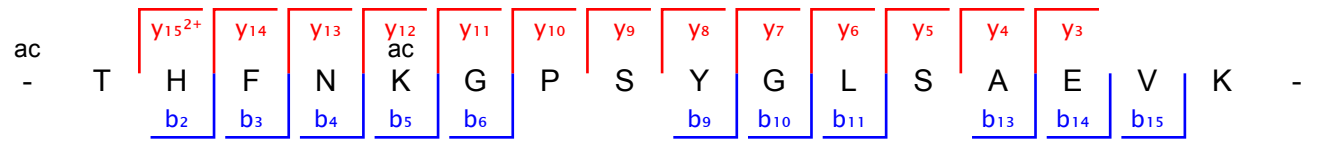

Raw file 050813\_SCW\_II\_29\_19\_4 Scan 18083 Method ITMS; CID Score 142.95 m/z 732.9 Gene names Cand1

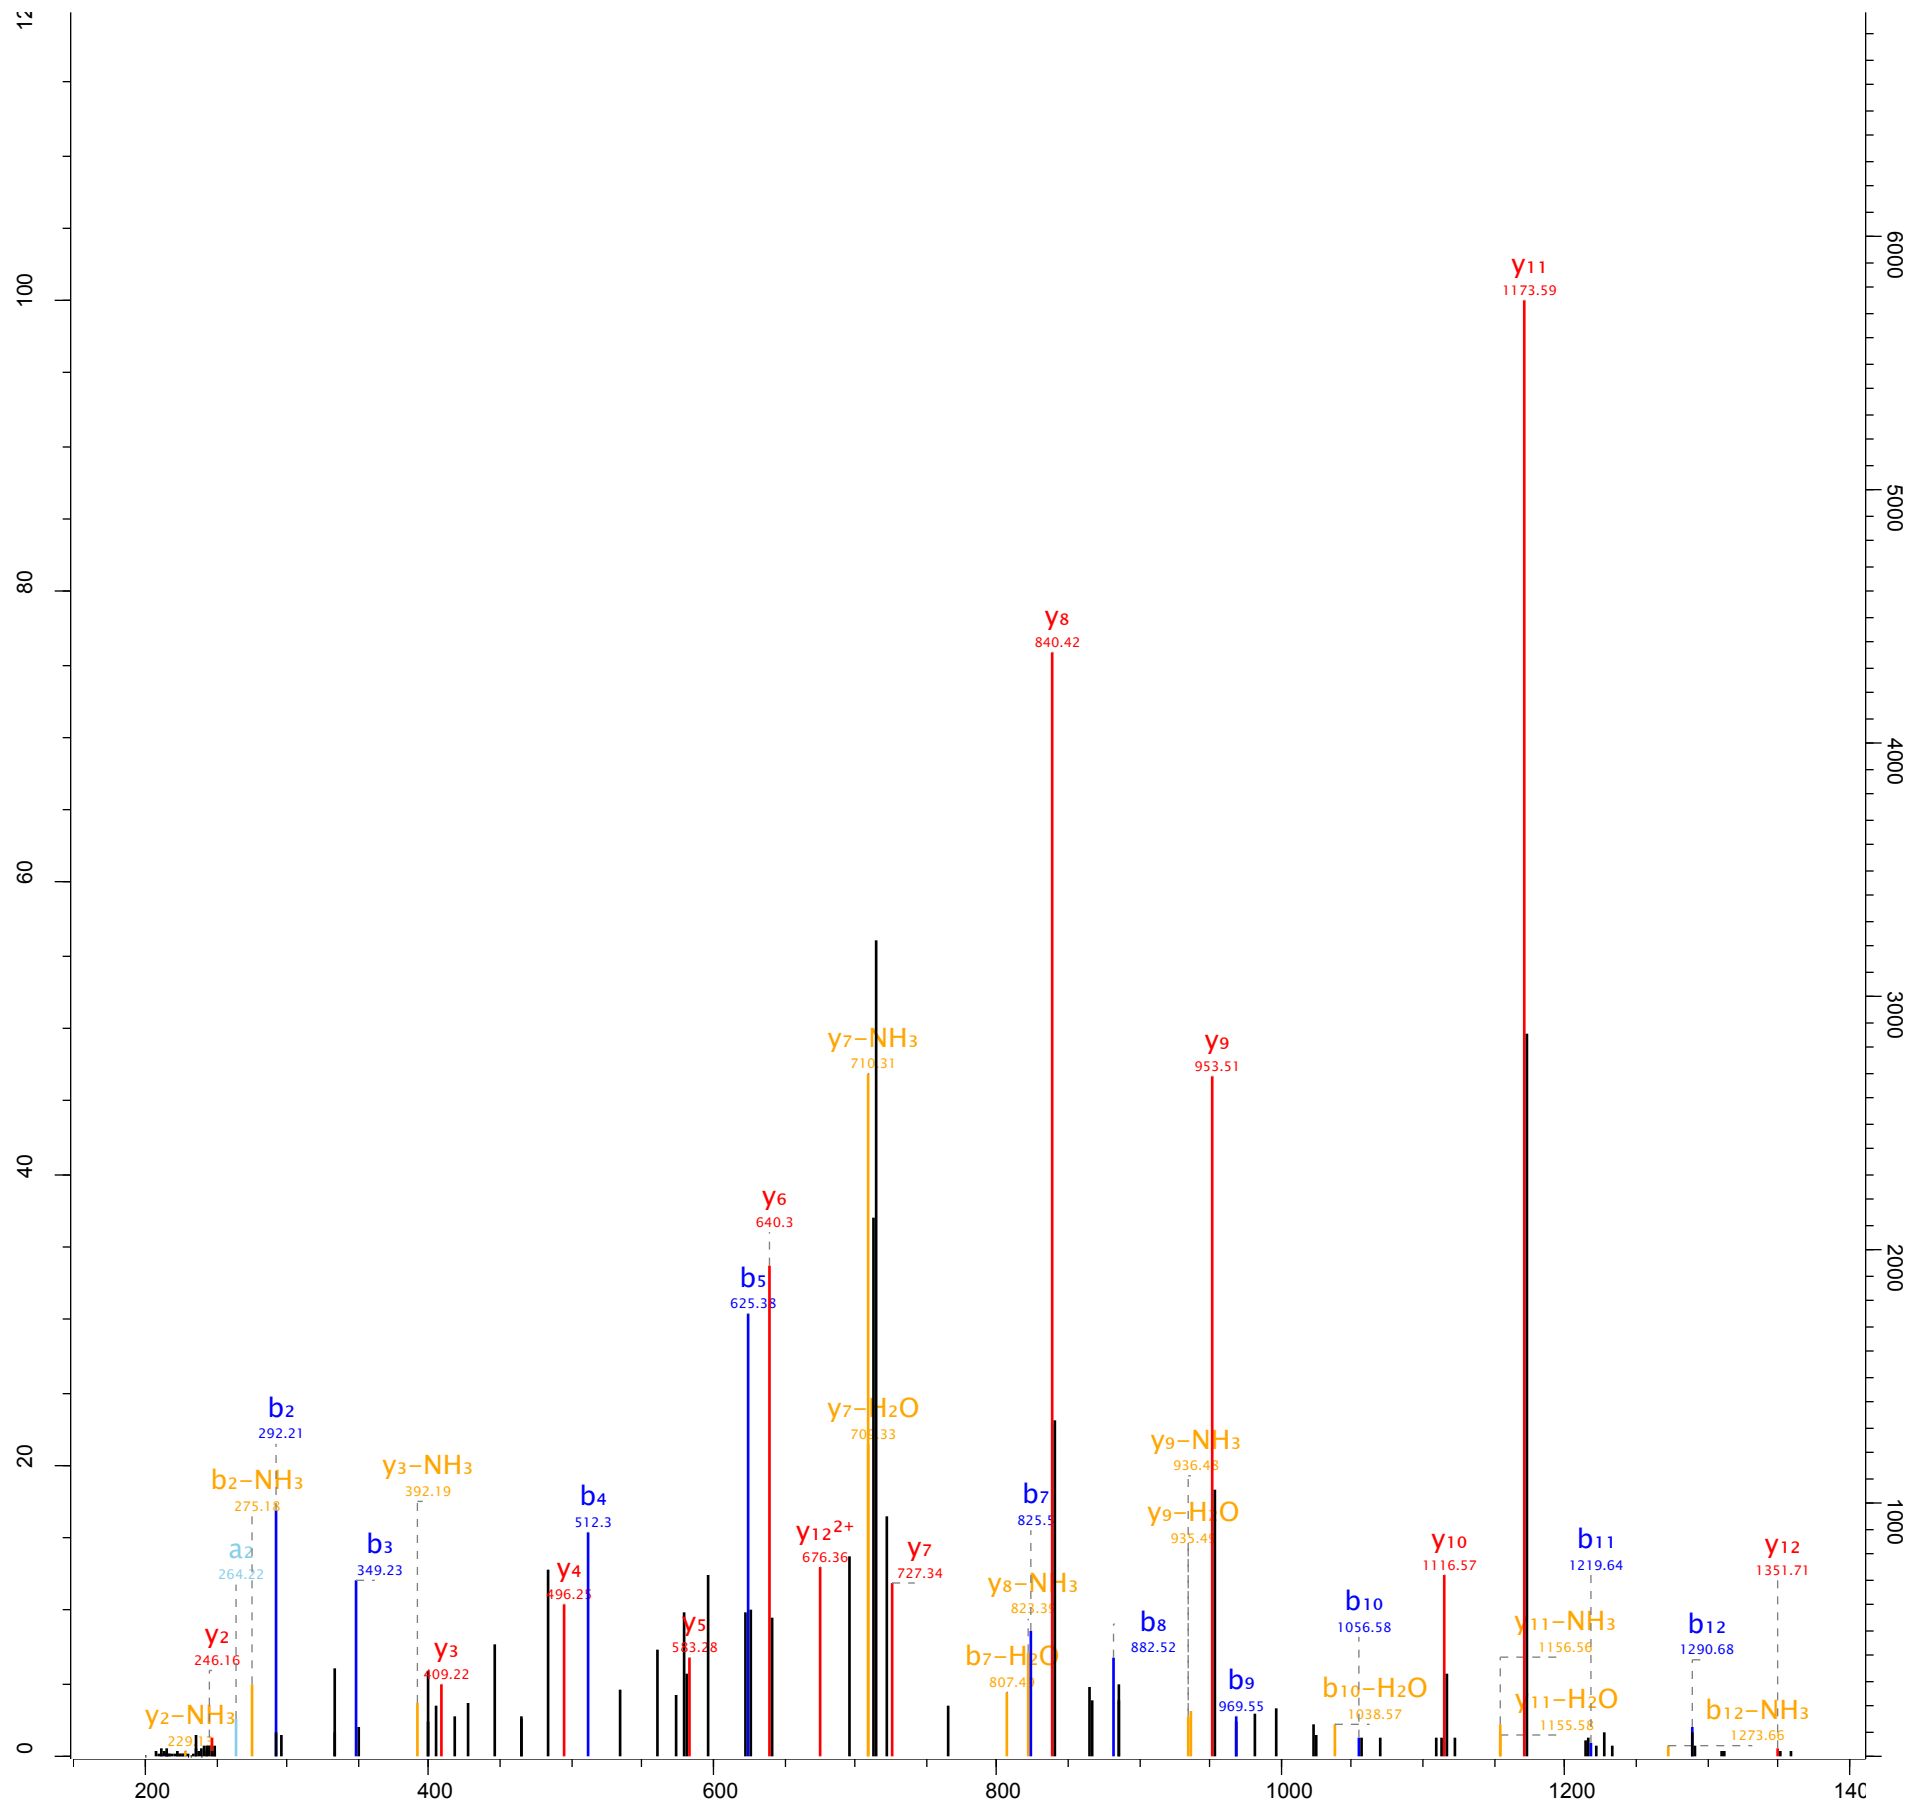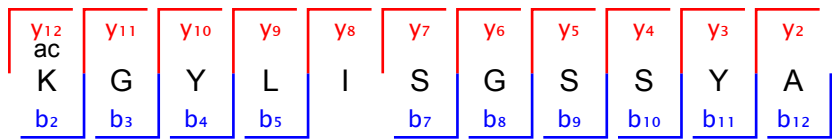

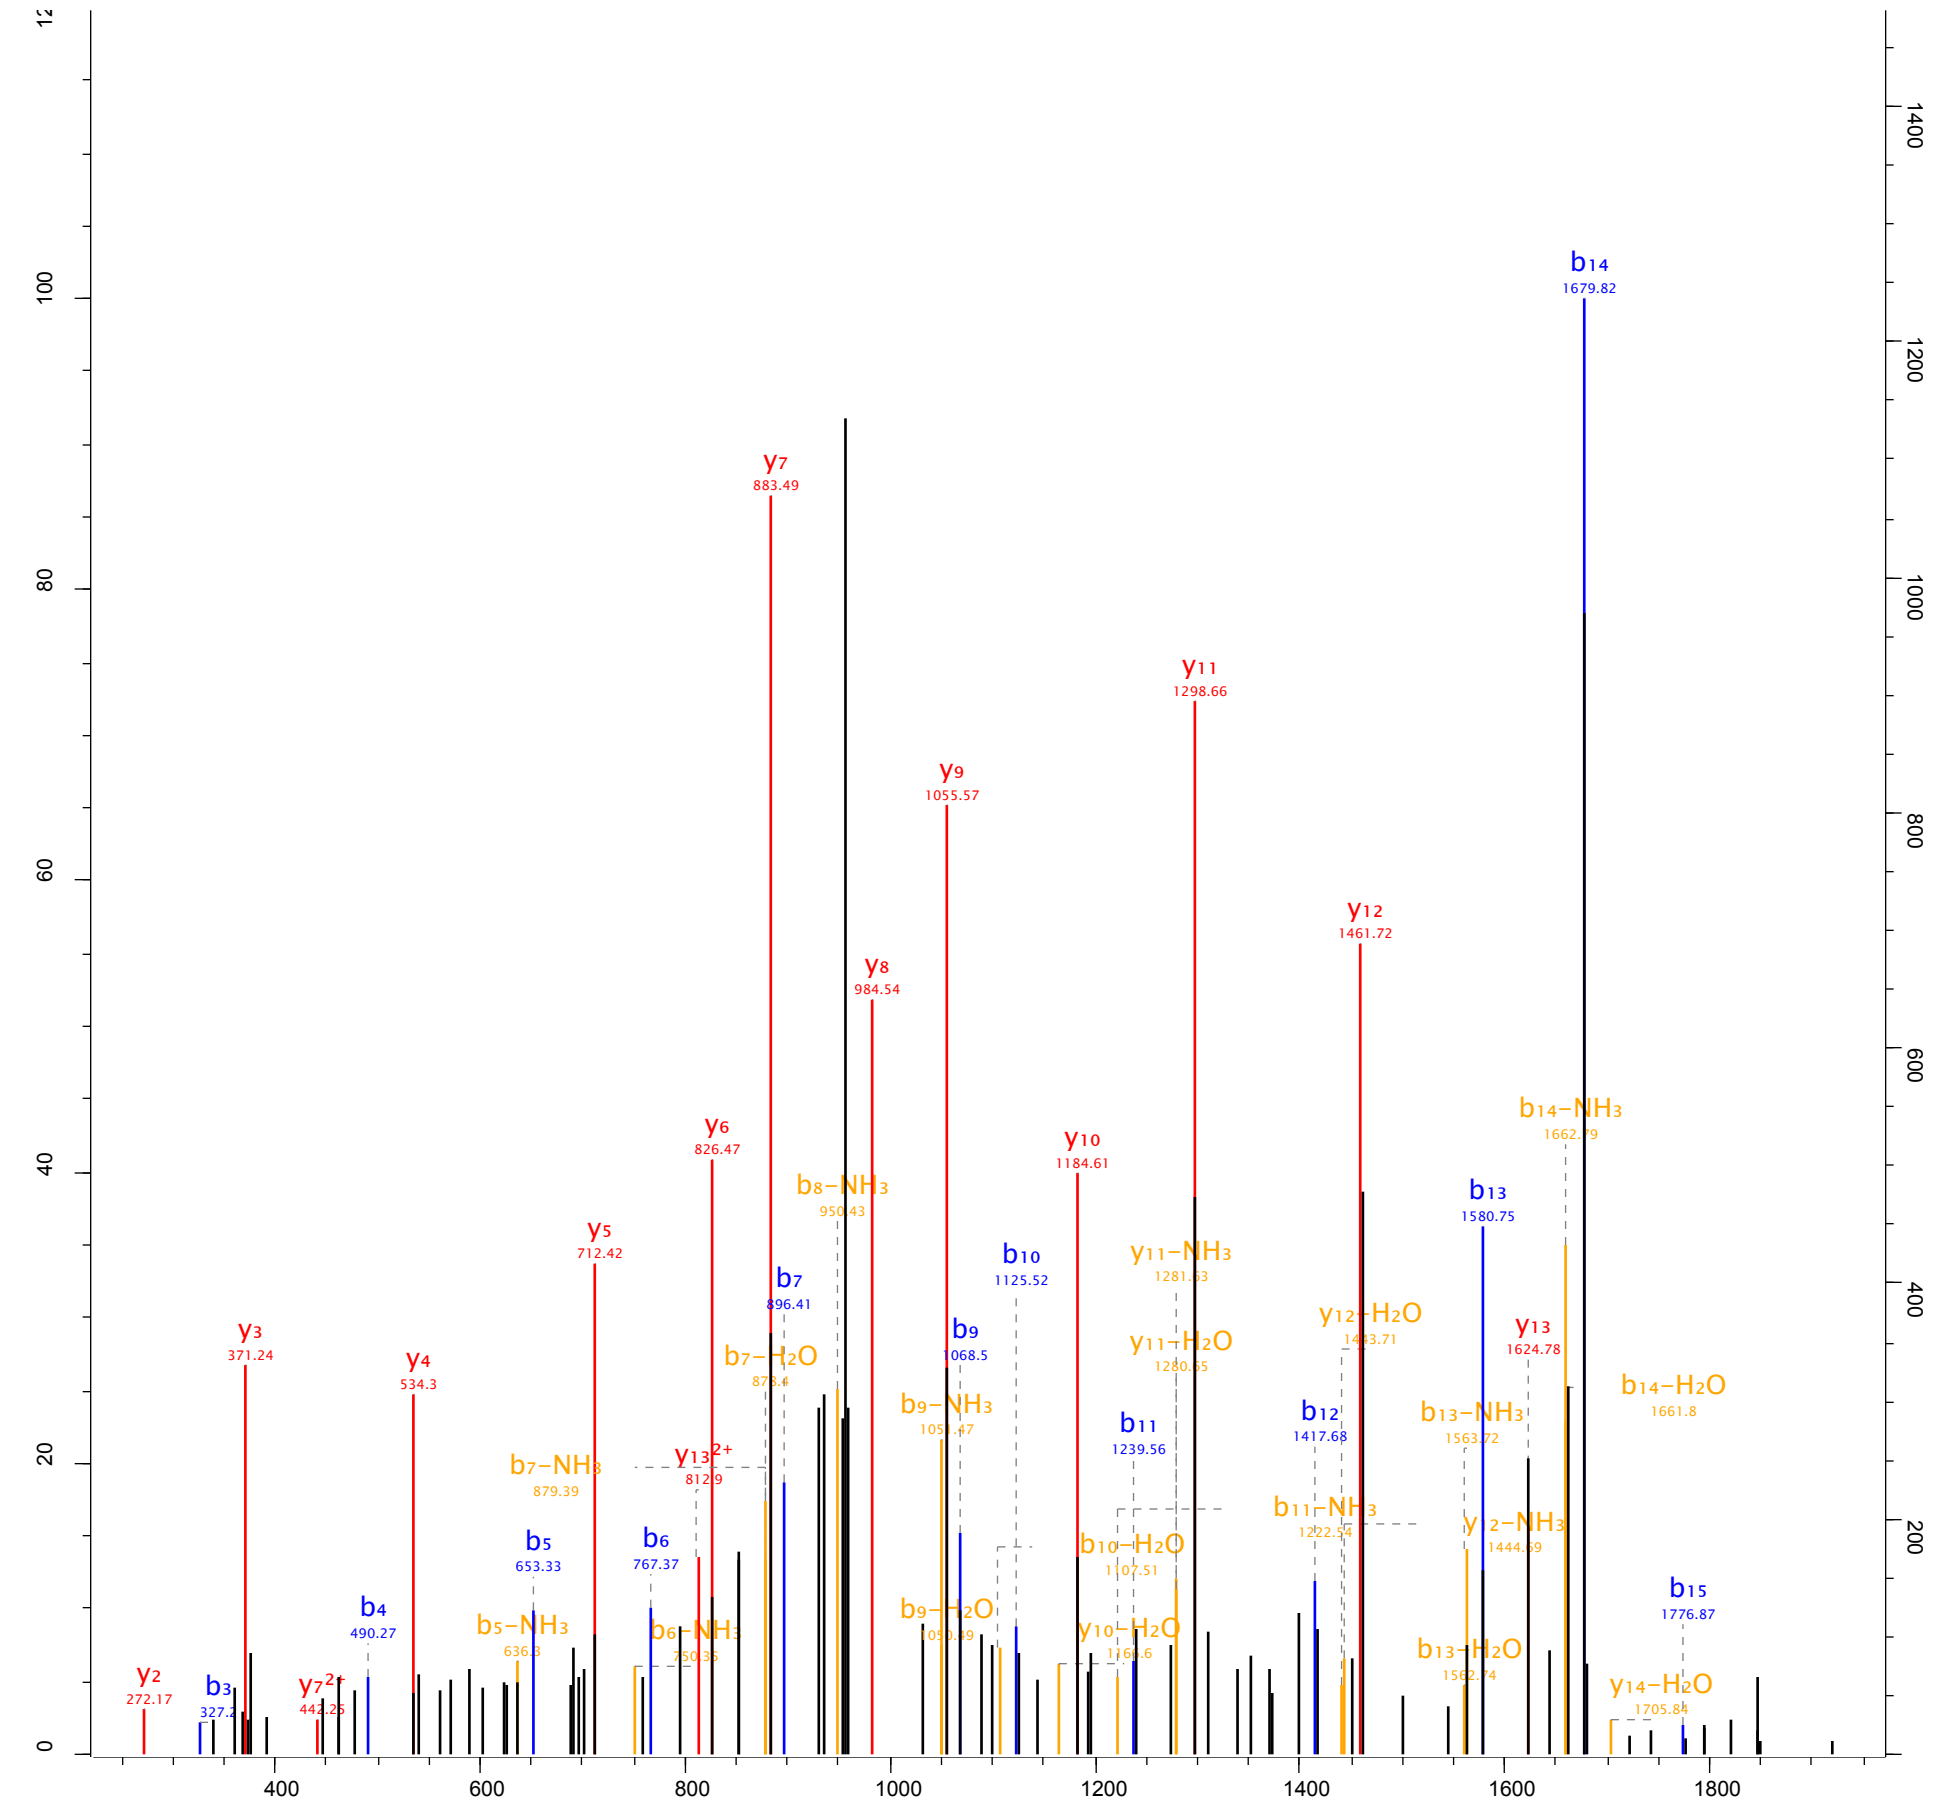

- I N V Y13 Y12 Y11 Y10 Y9 Y8 Y7 Y6 Y5 Y4 Y3 Y2 R -

b3 b4 b5 b6 b7 b9 b10 b11 b12 b13 b14 b15

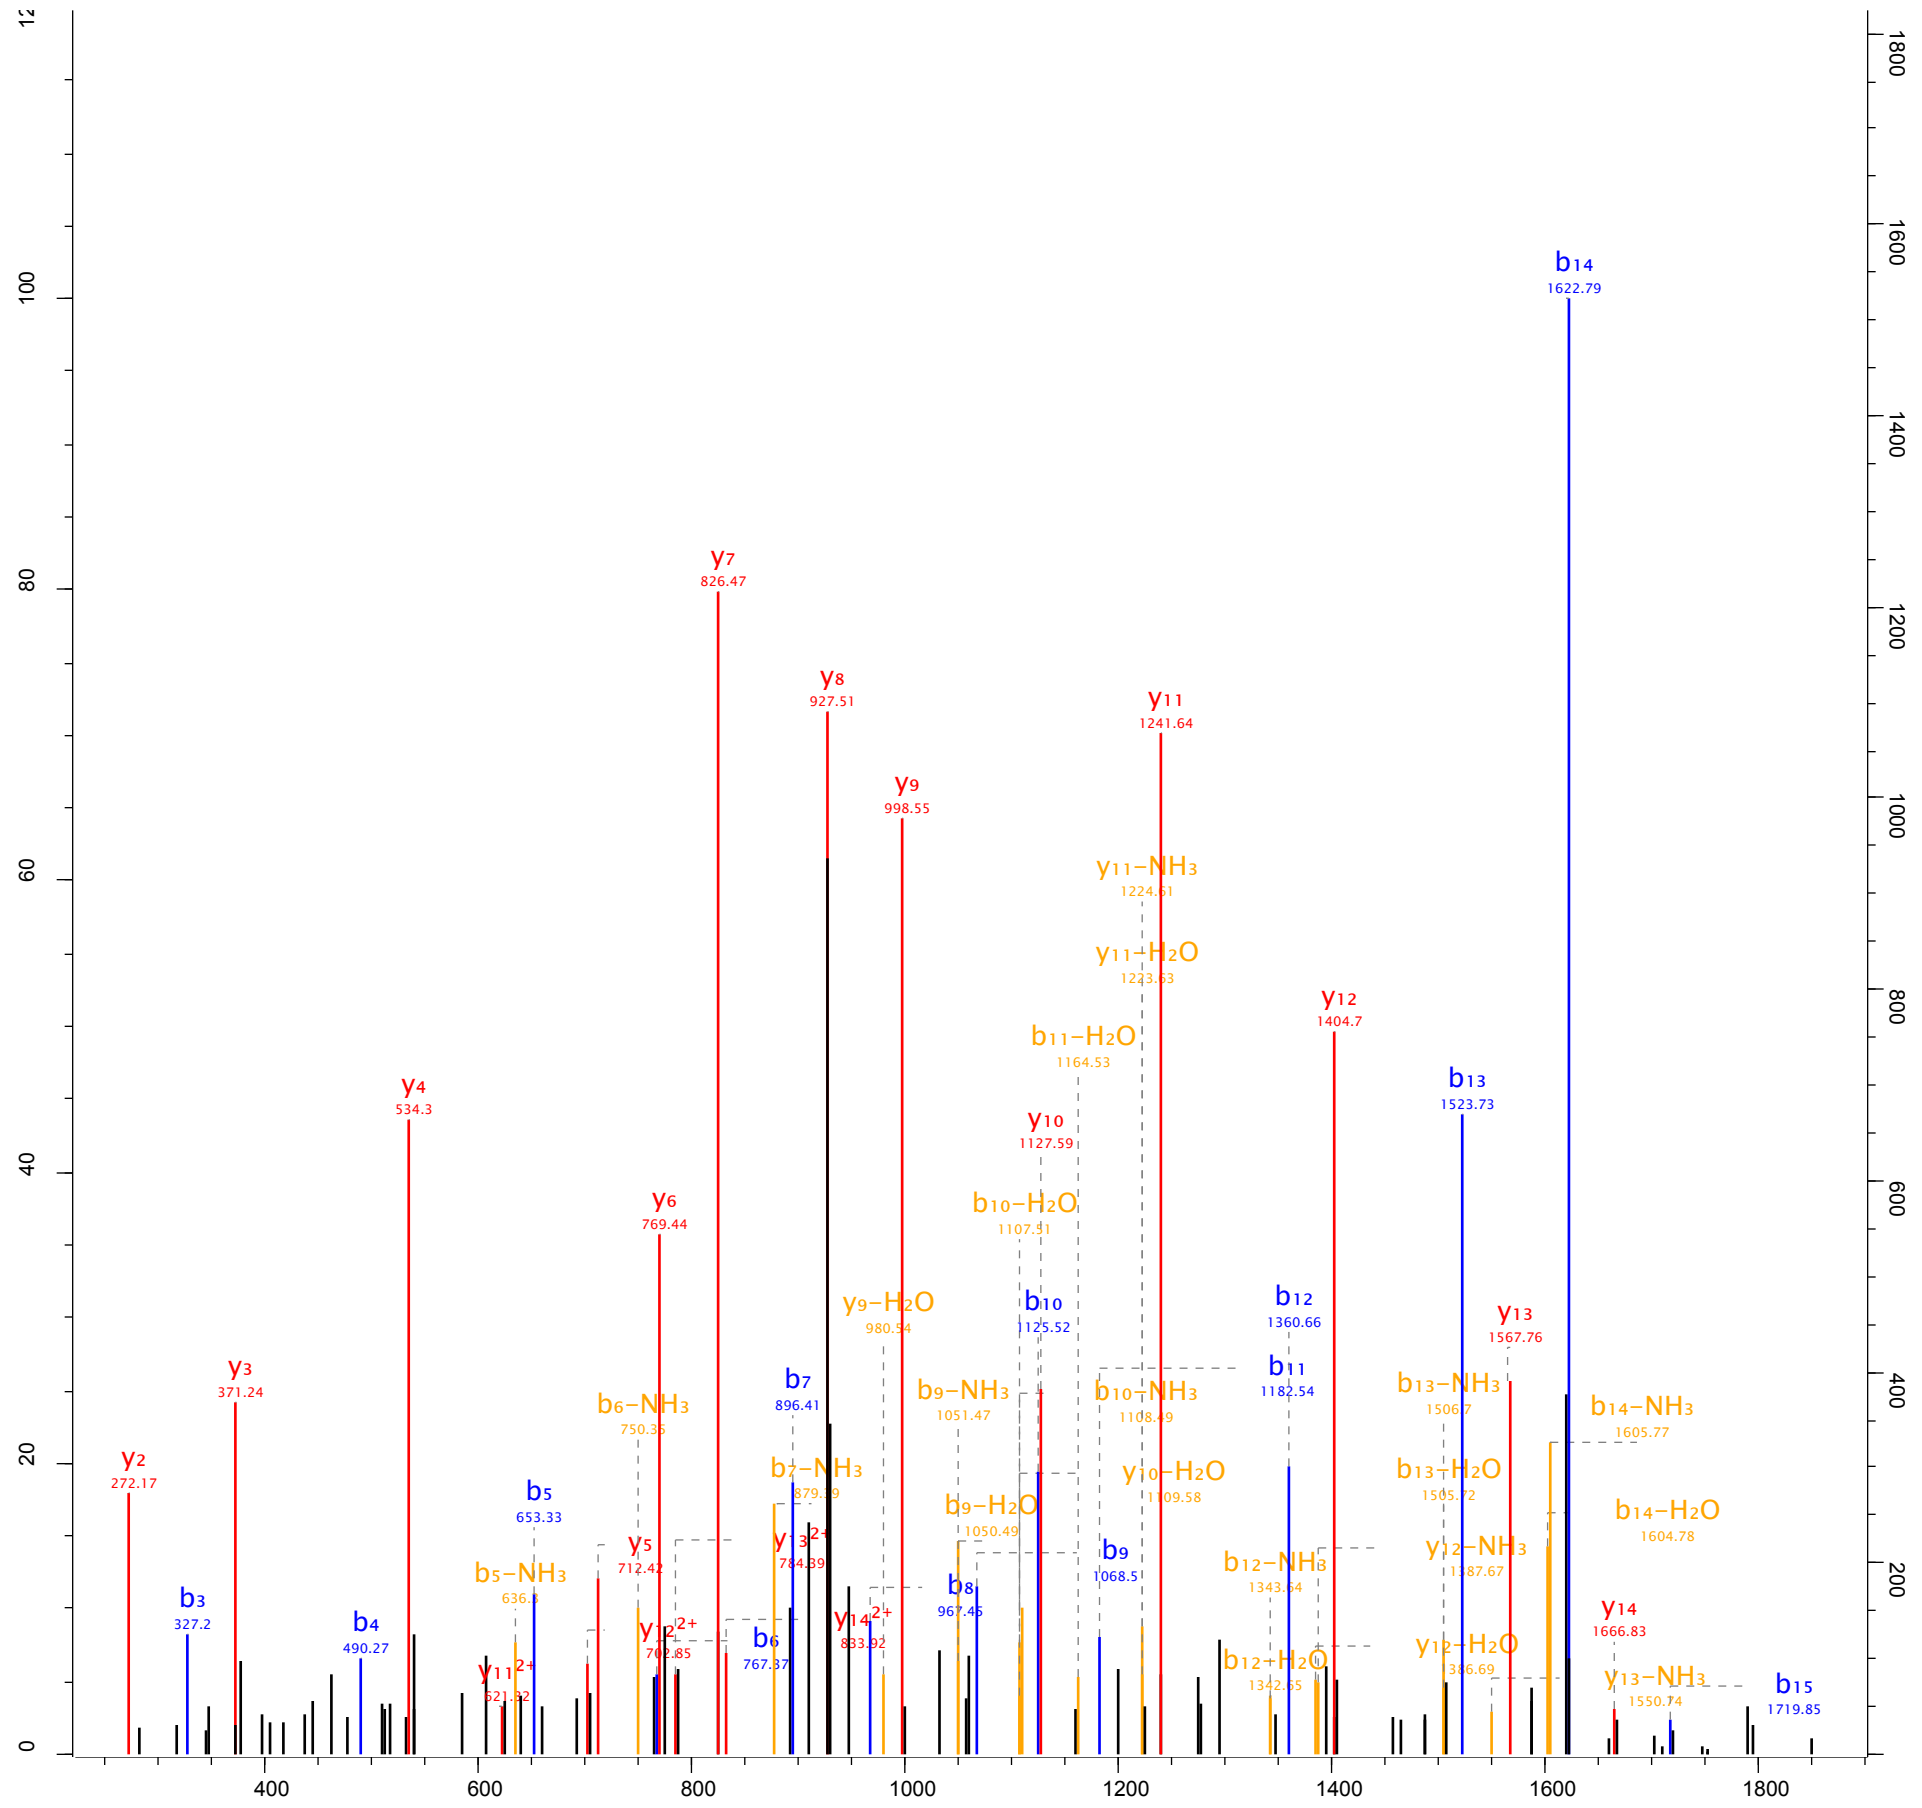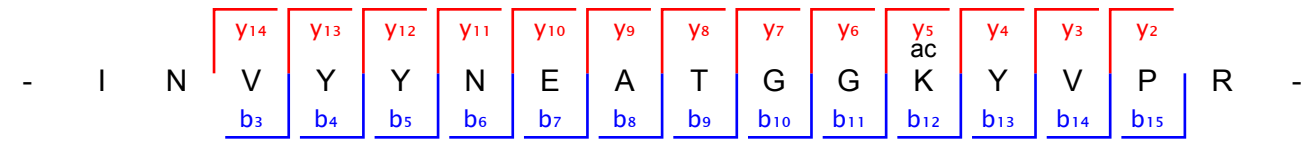

Raw file: 050813\_SCW\_II\_29\_19\_4  
 Scan: 18302  
 Method: ITMS; CID  
 Score: 135.55  
 m/z: 550.82  
 Gene names: G6pdx;G6pd2

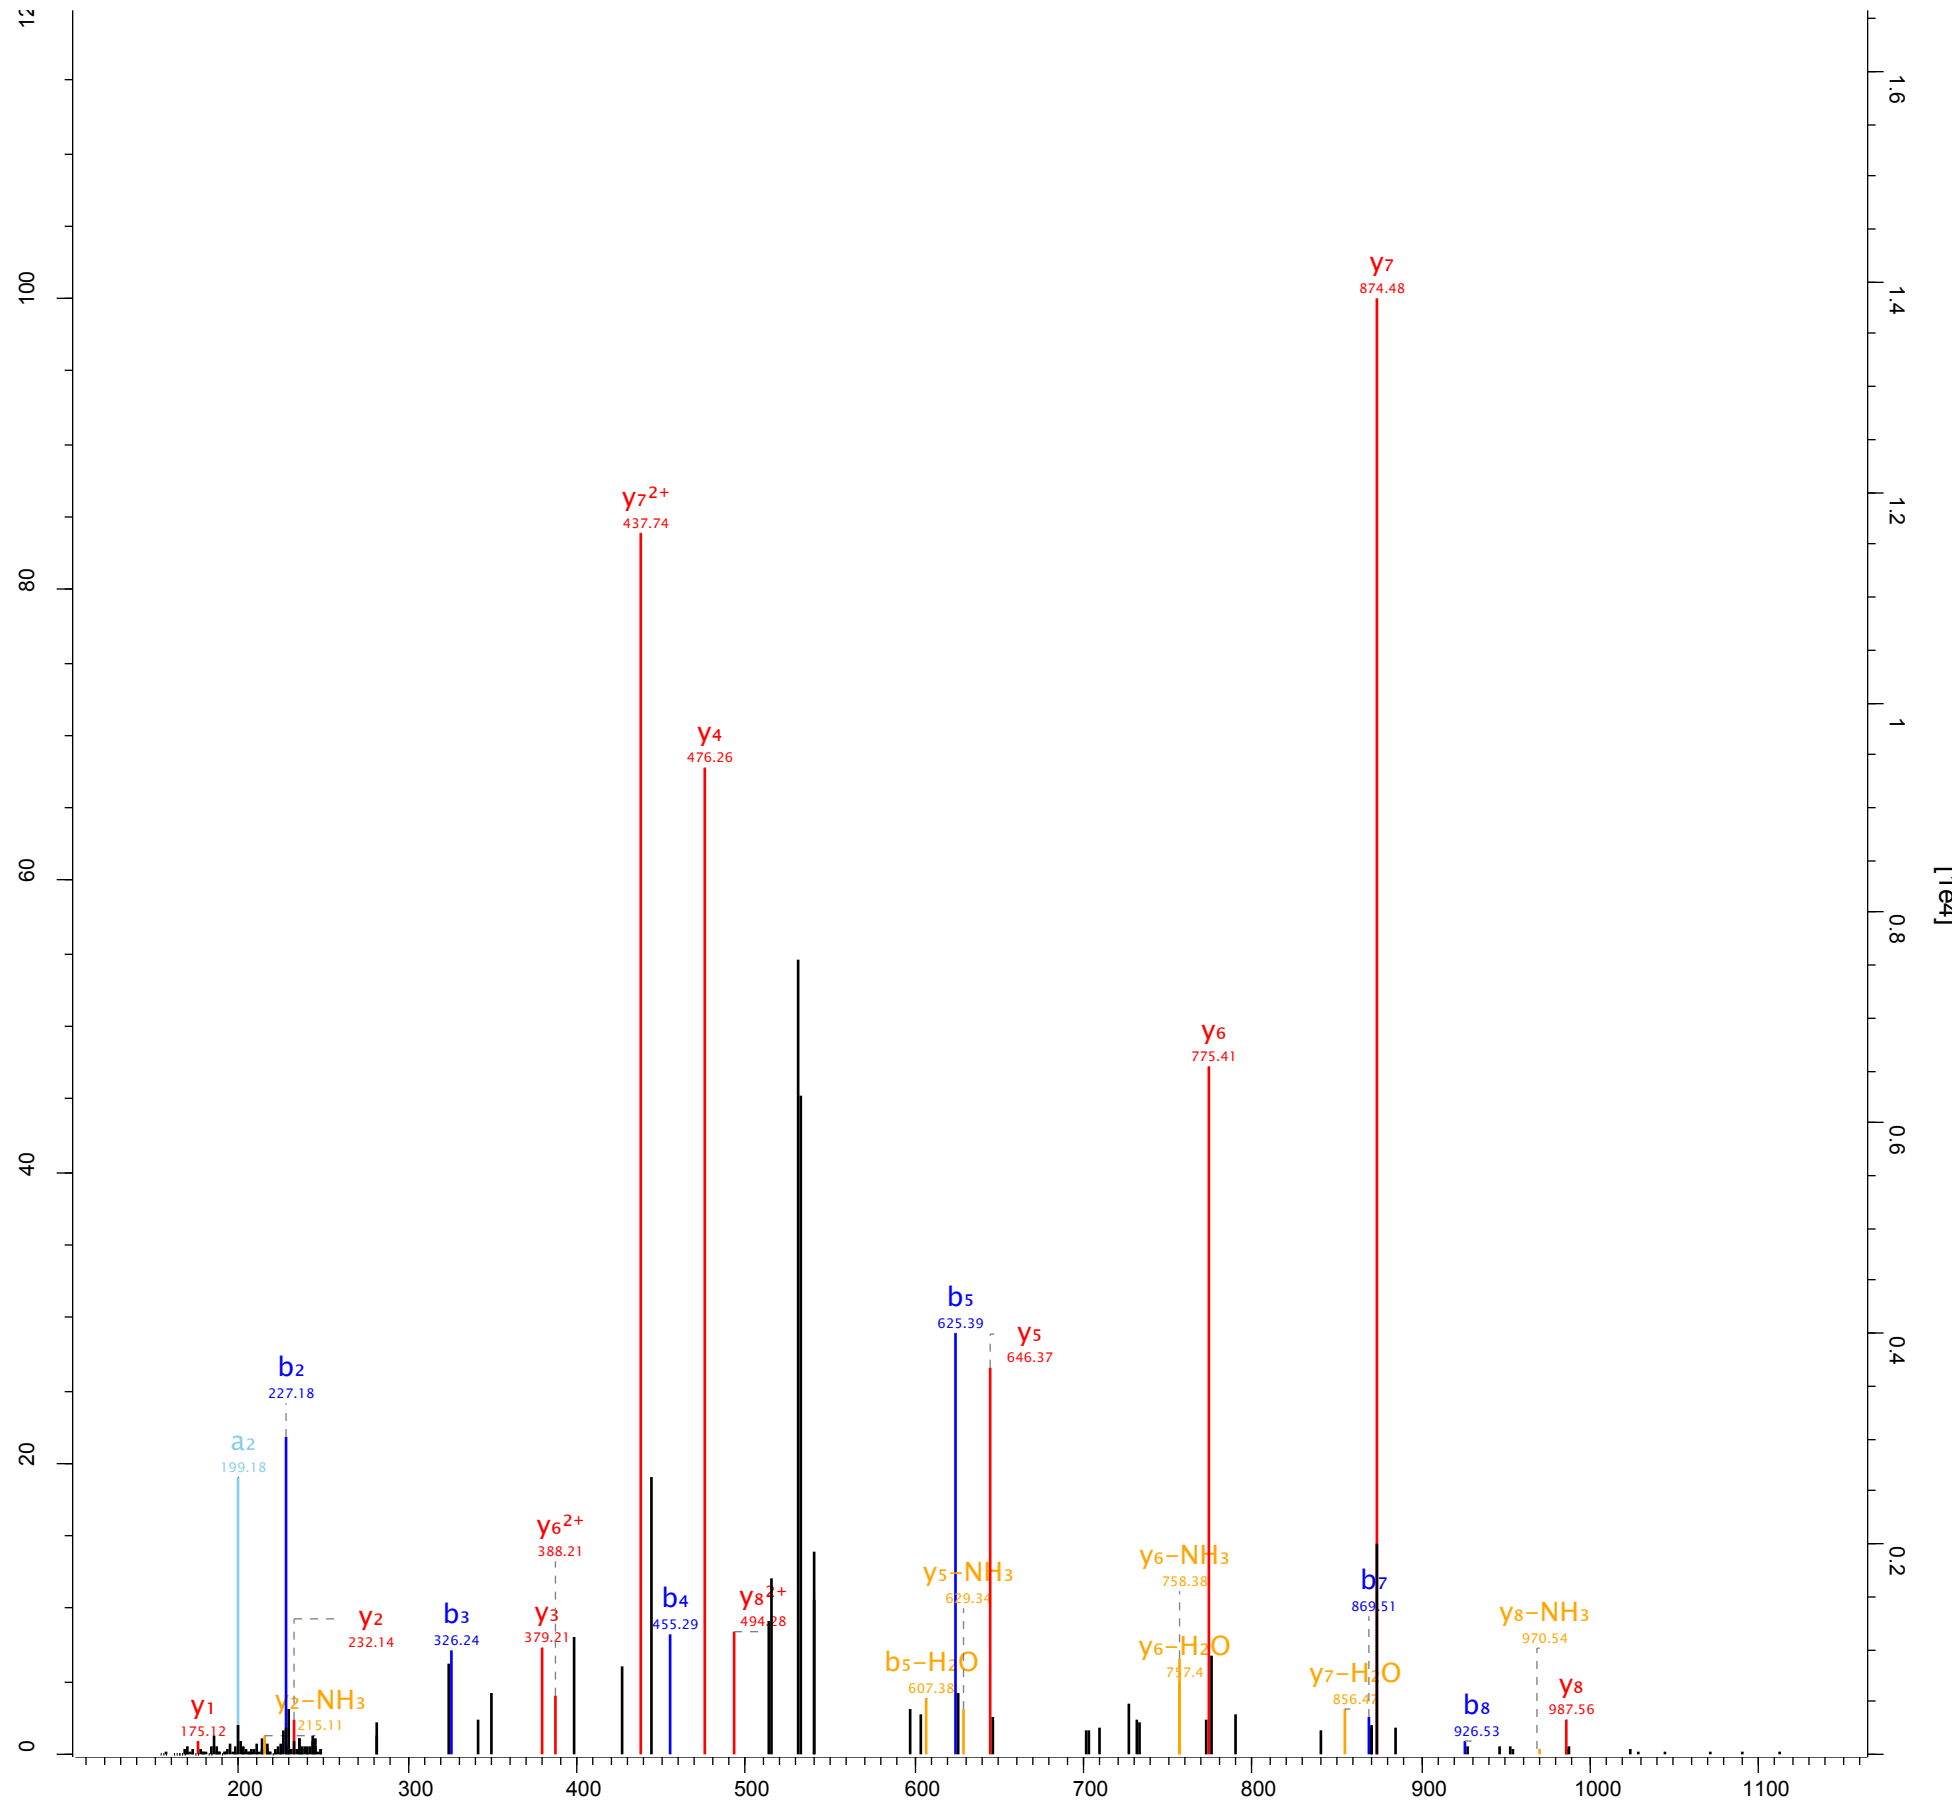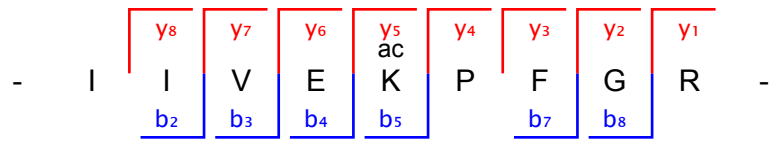

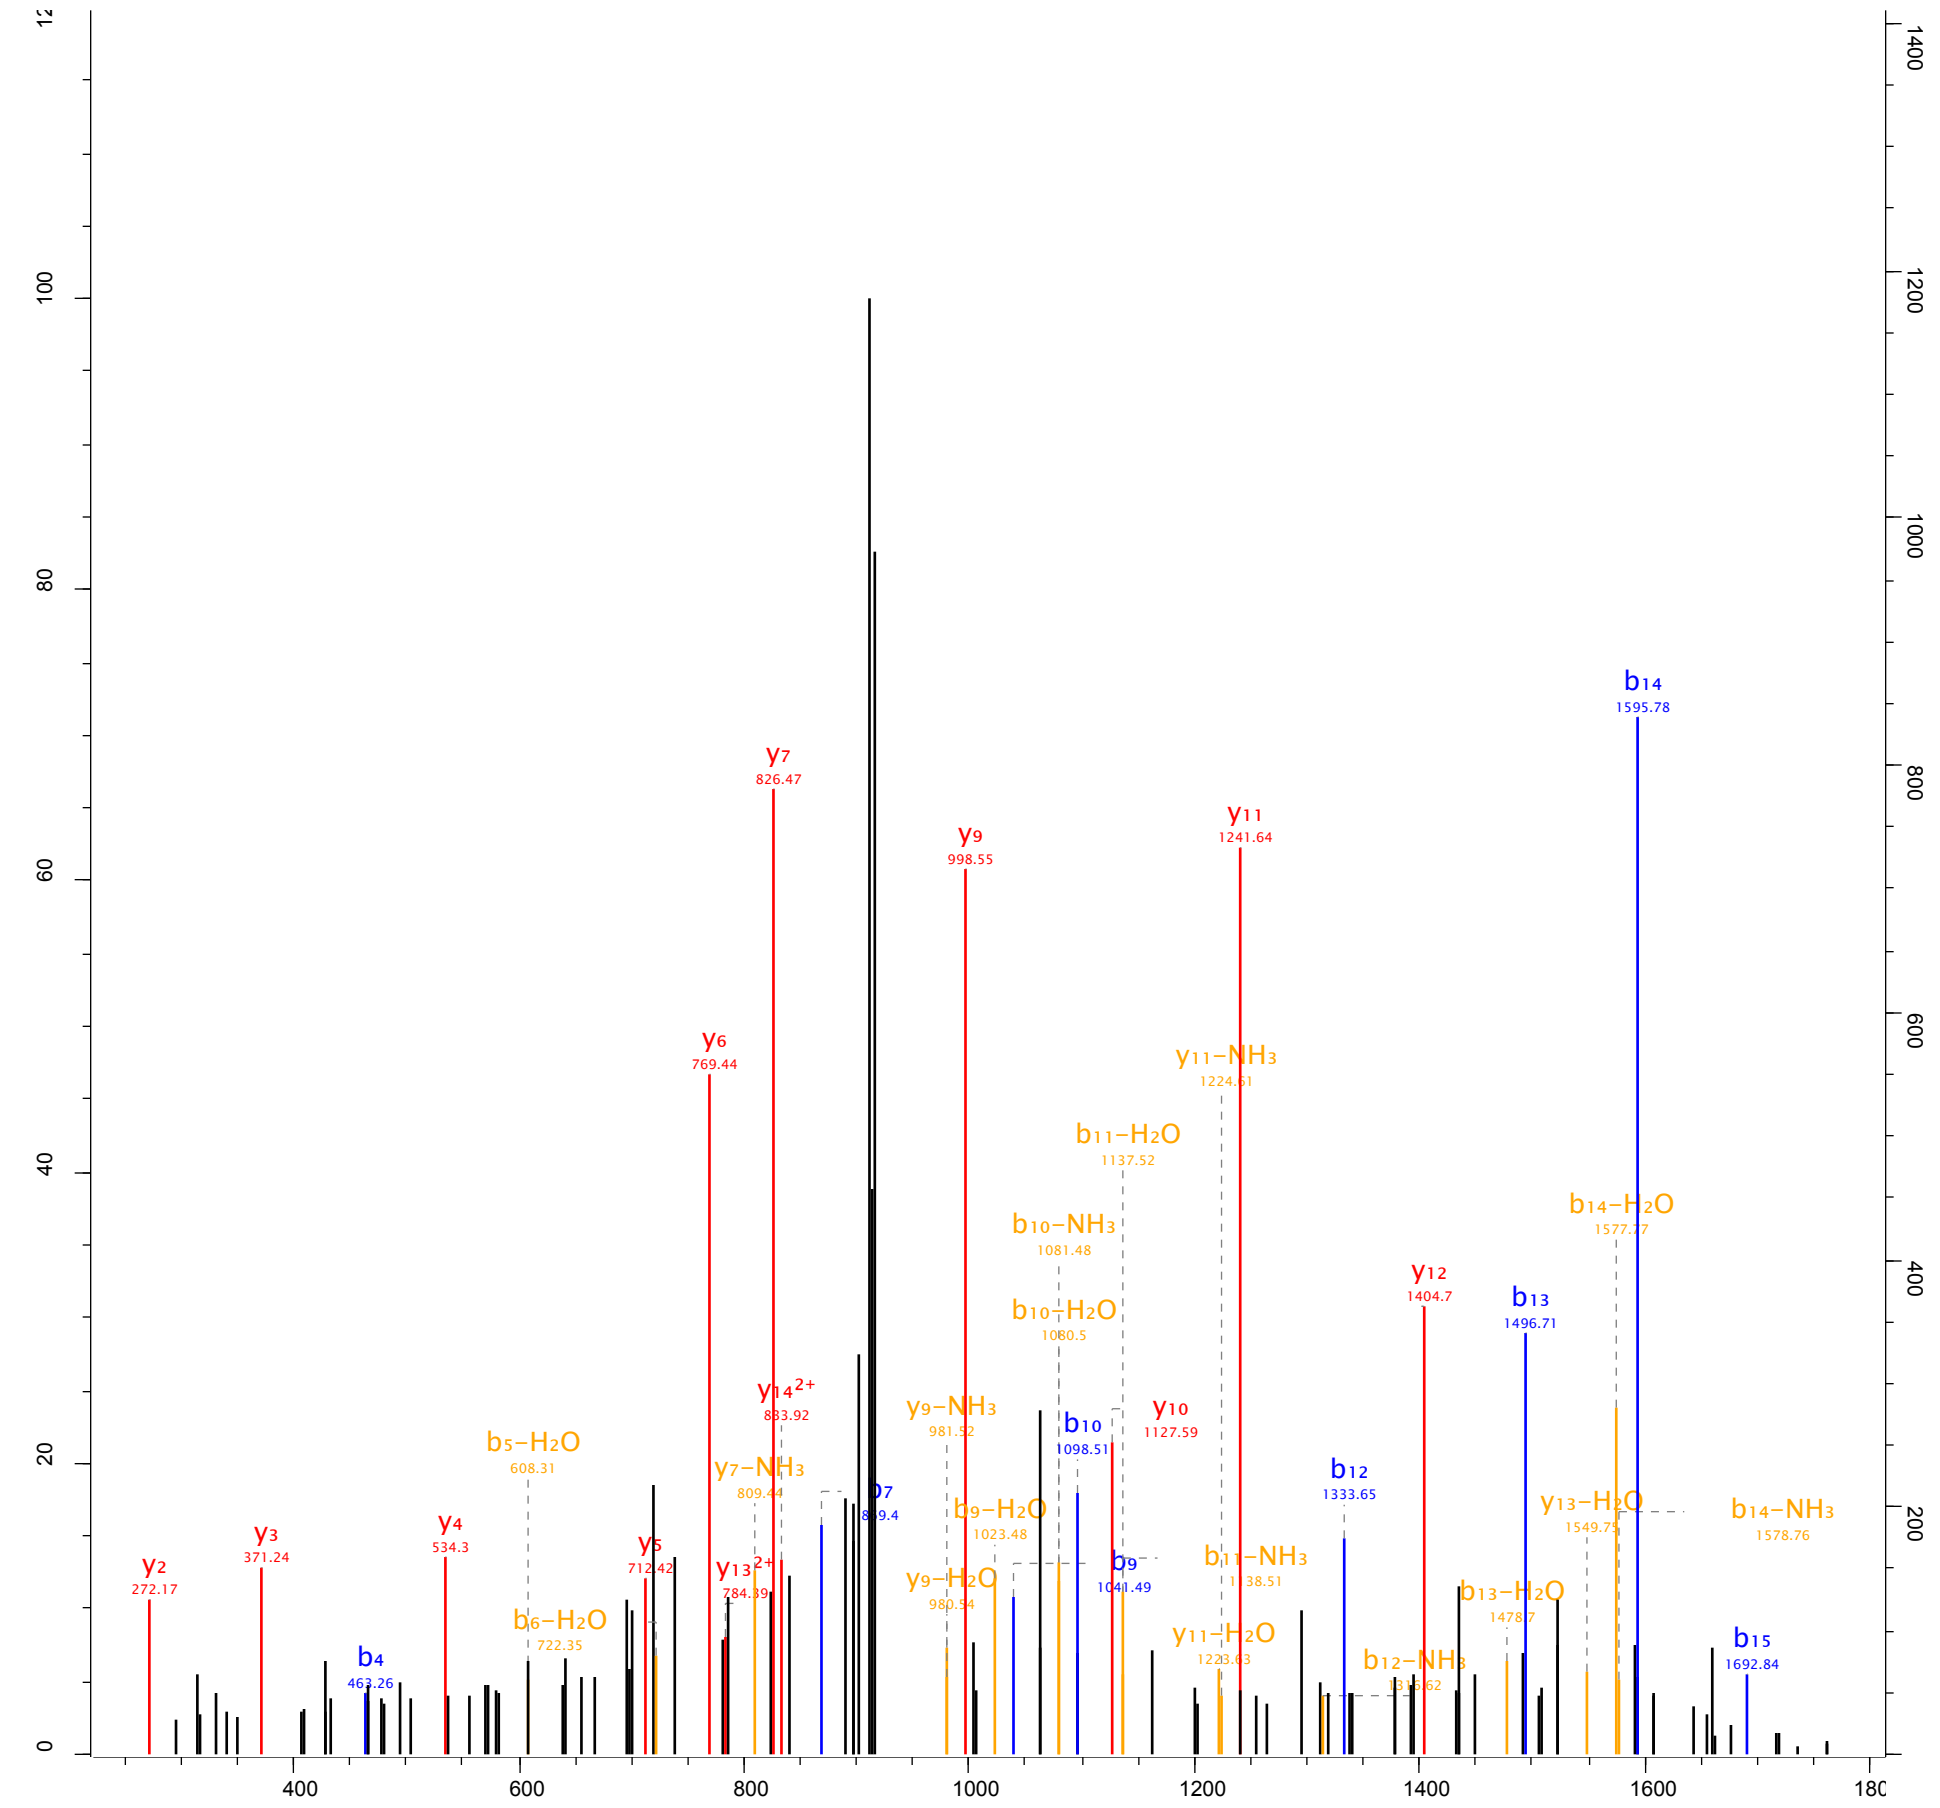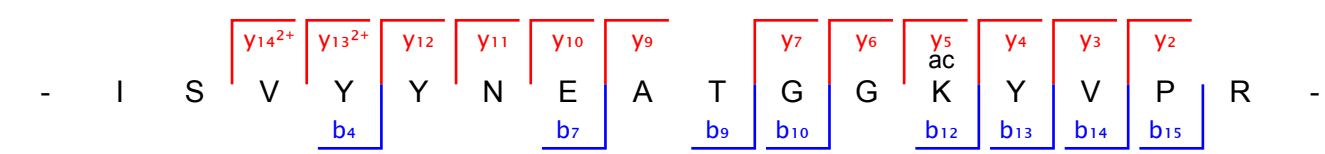

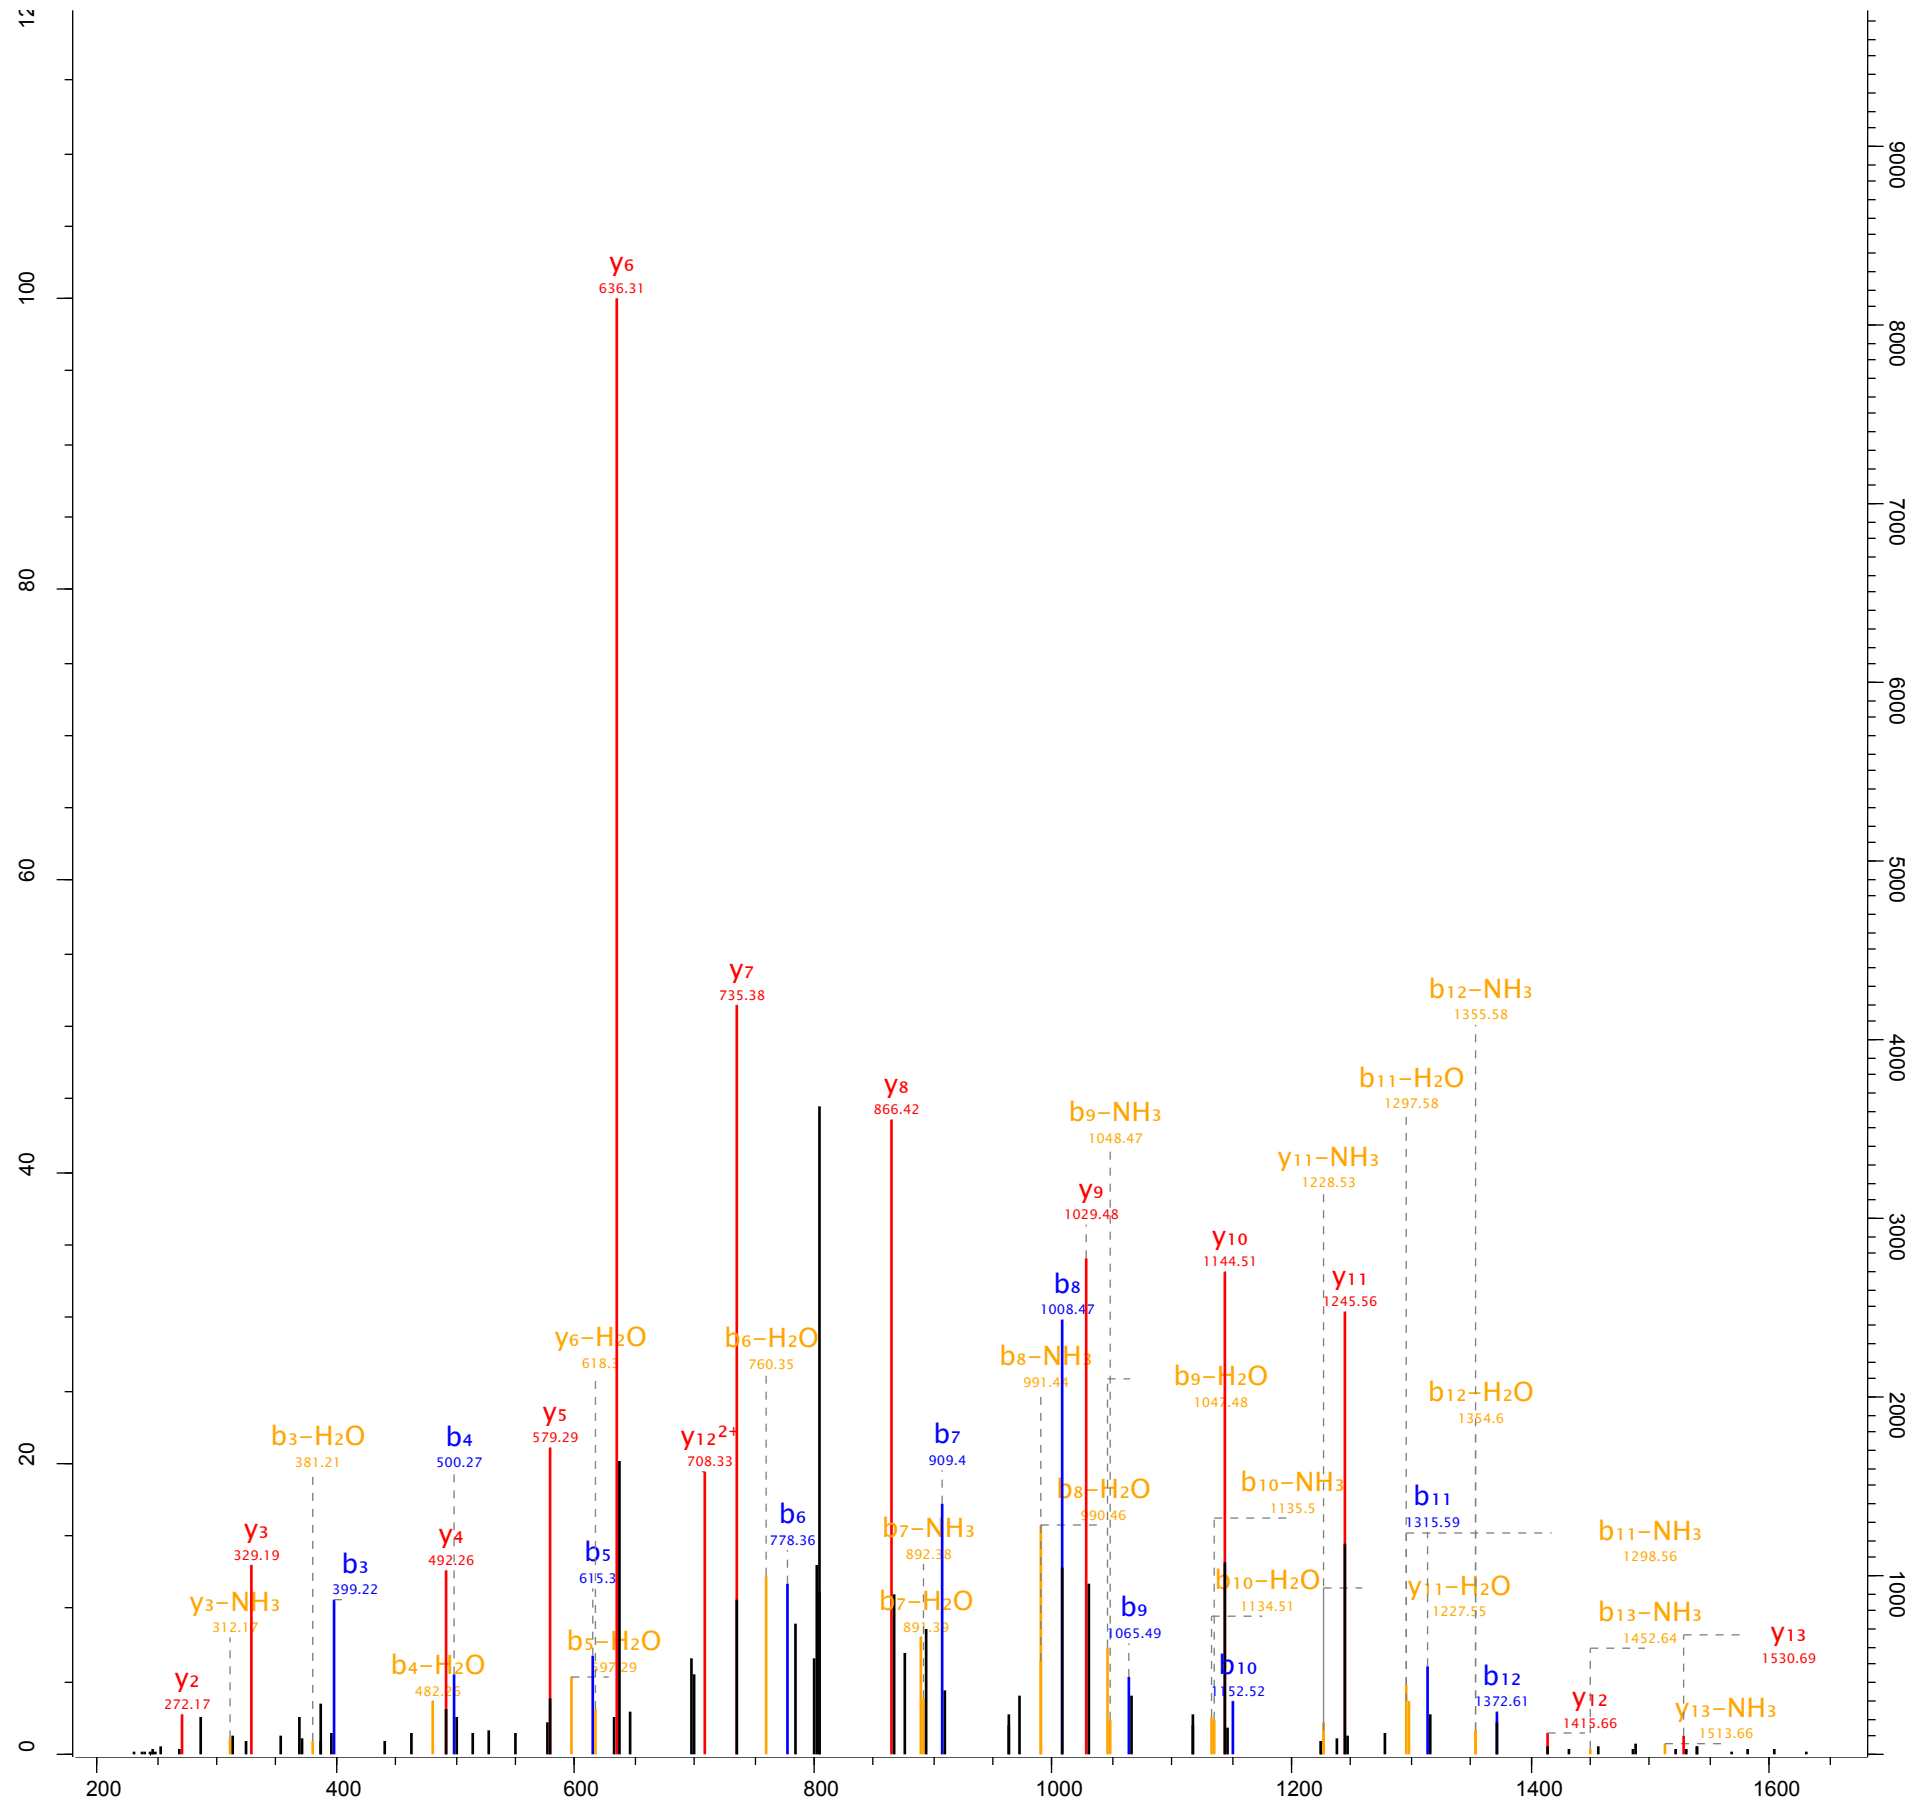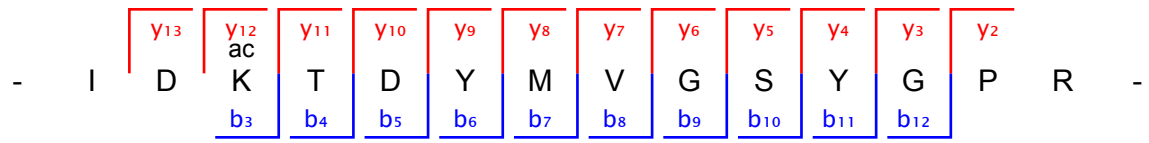



Raw file 050813\_SCW\_II\_29\_19\_4 Scan 18592 Method ITMS; CID Score 117.89 m/z 471.82 Gene names Npepps

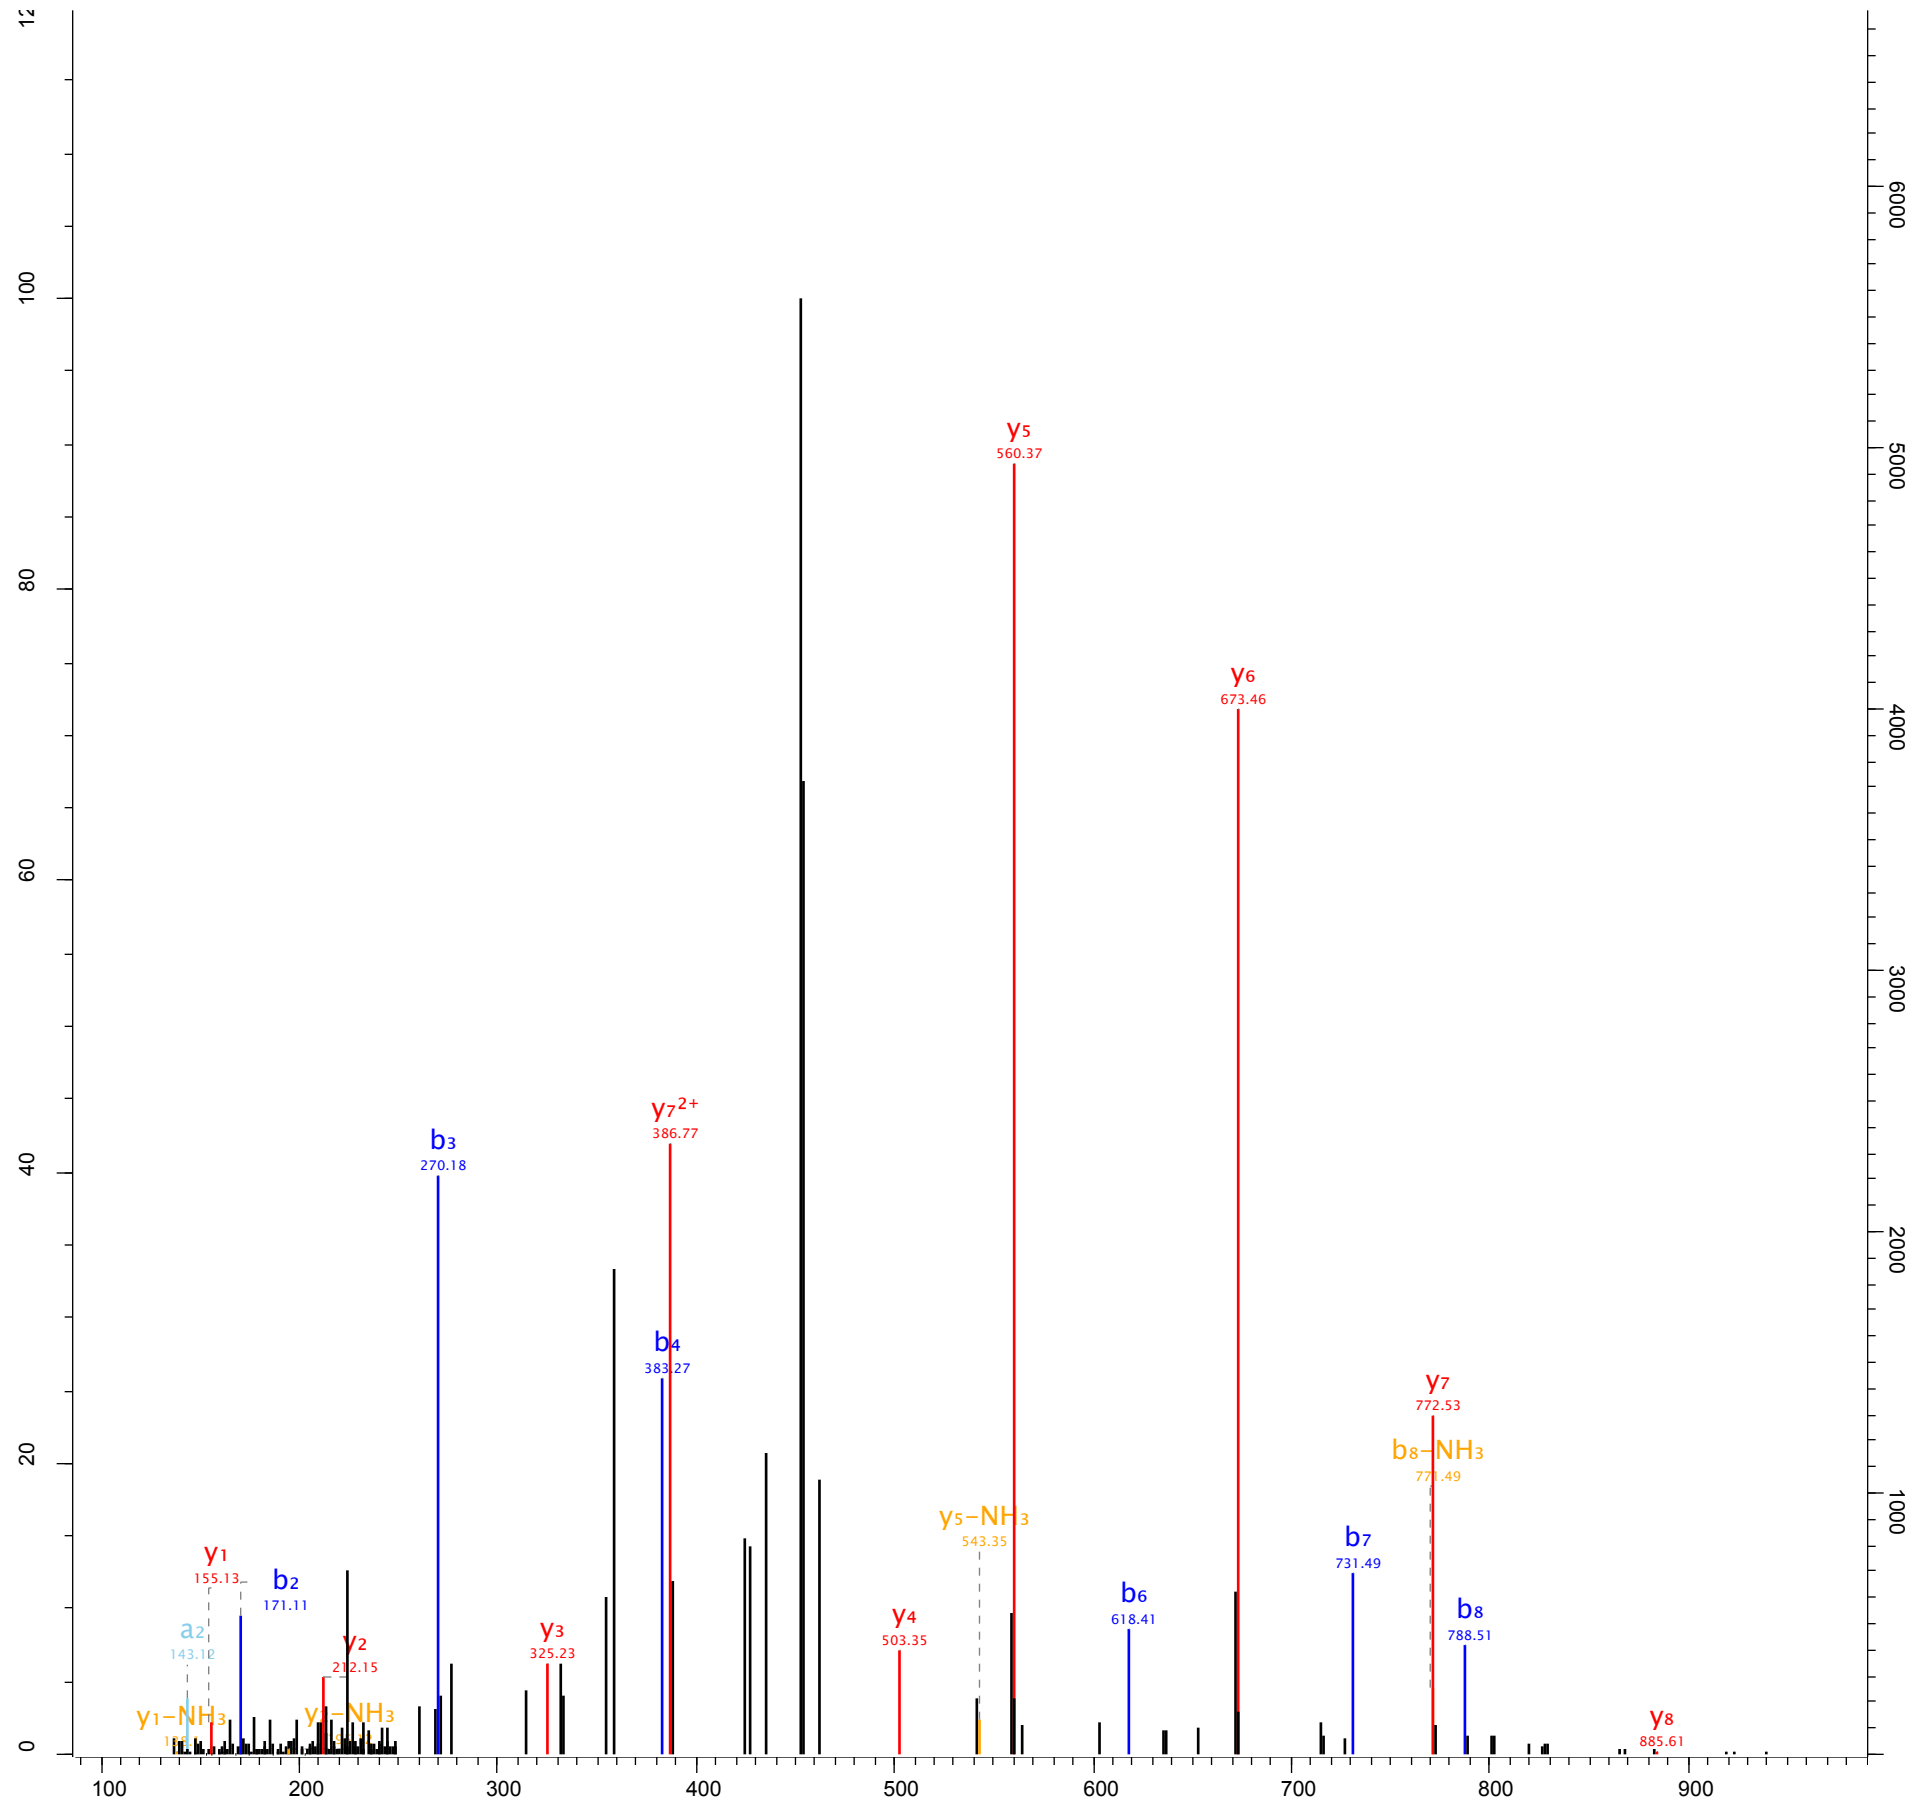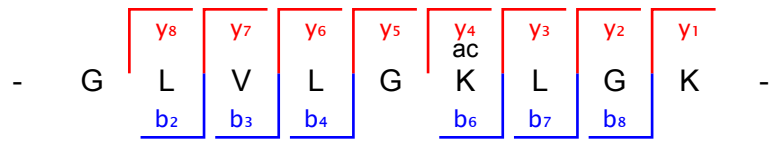

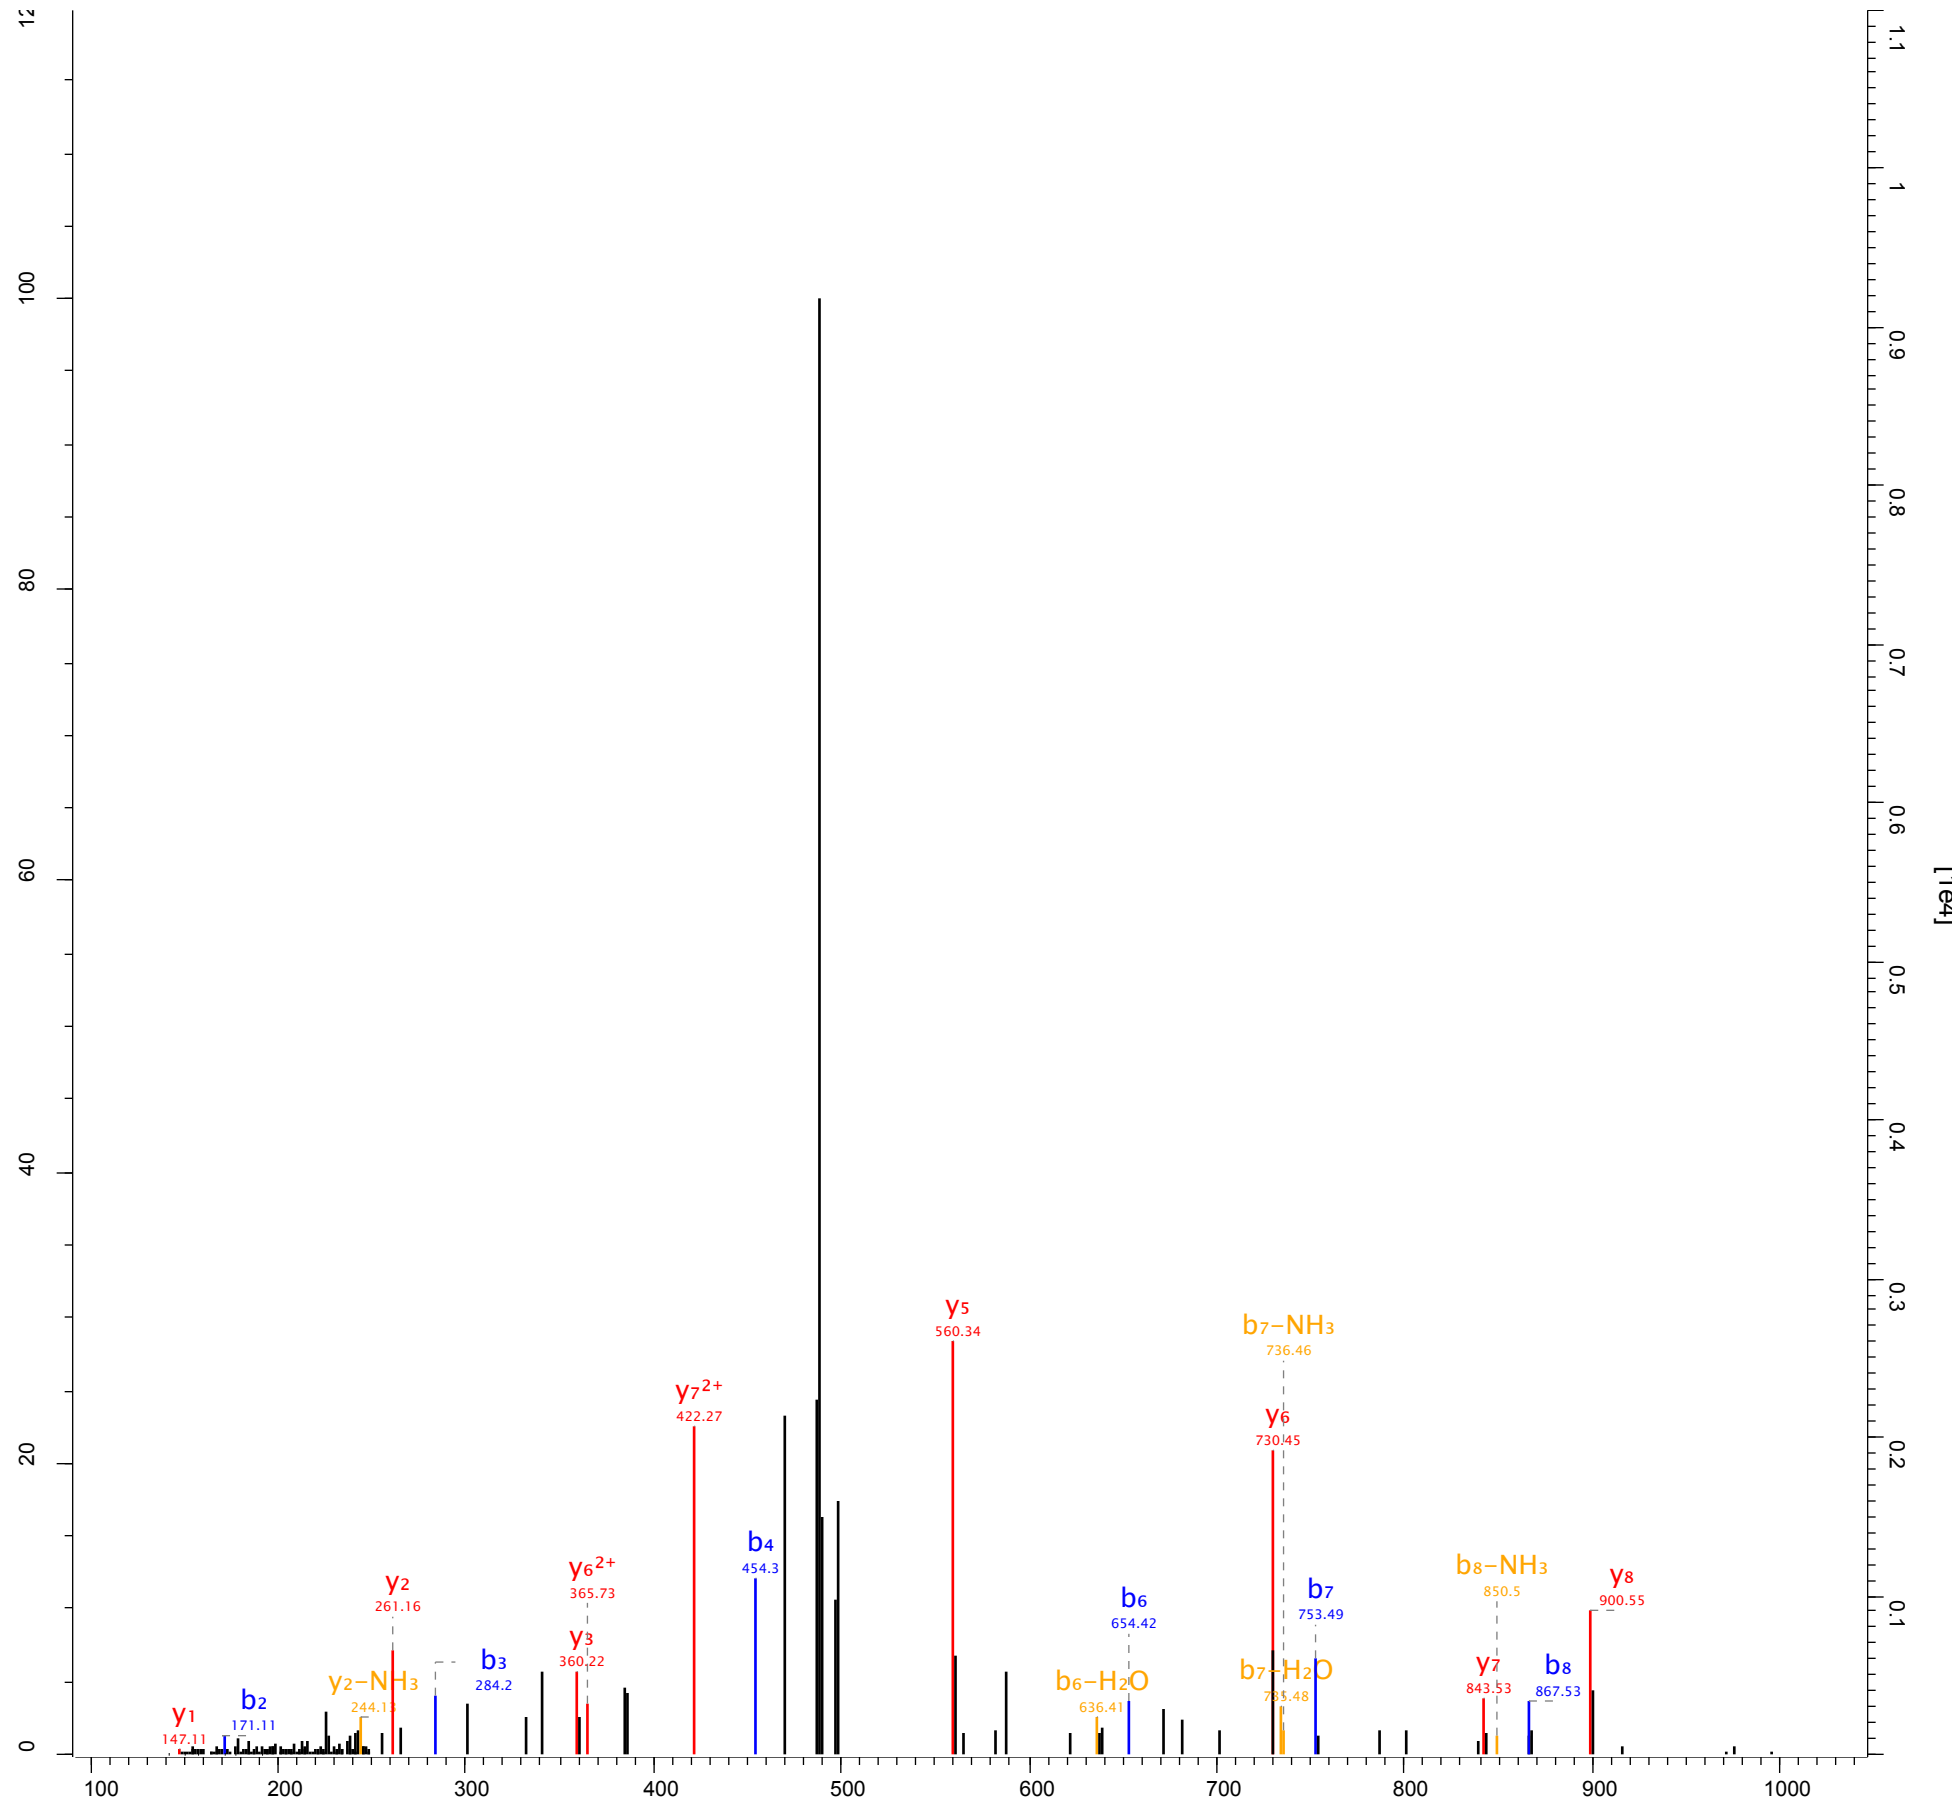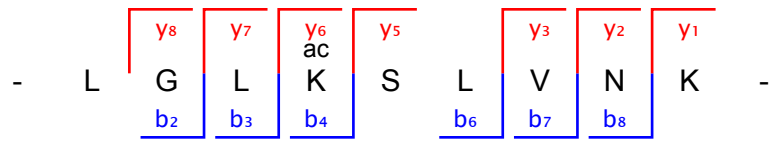

050813\_SCW\_II\_29\_19\_4

18726

ITMS; CID

108.68

729.4

Psmc3

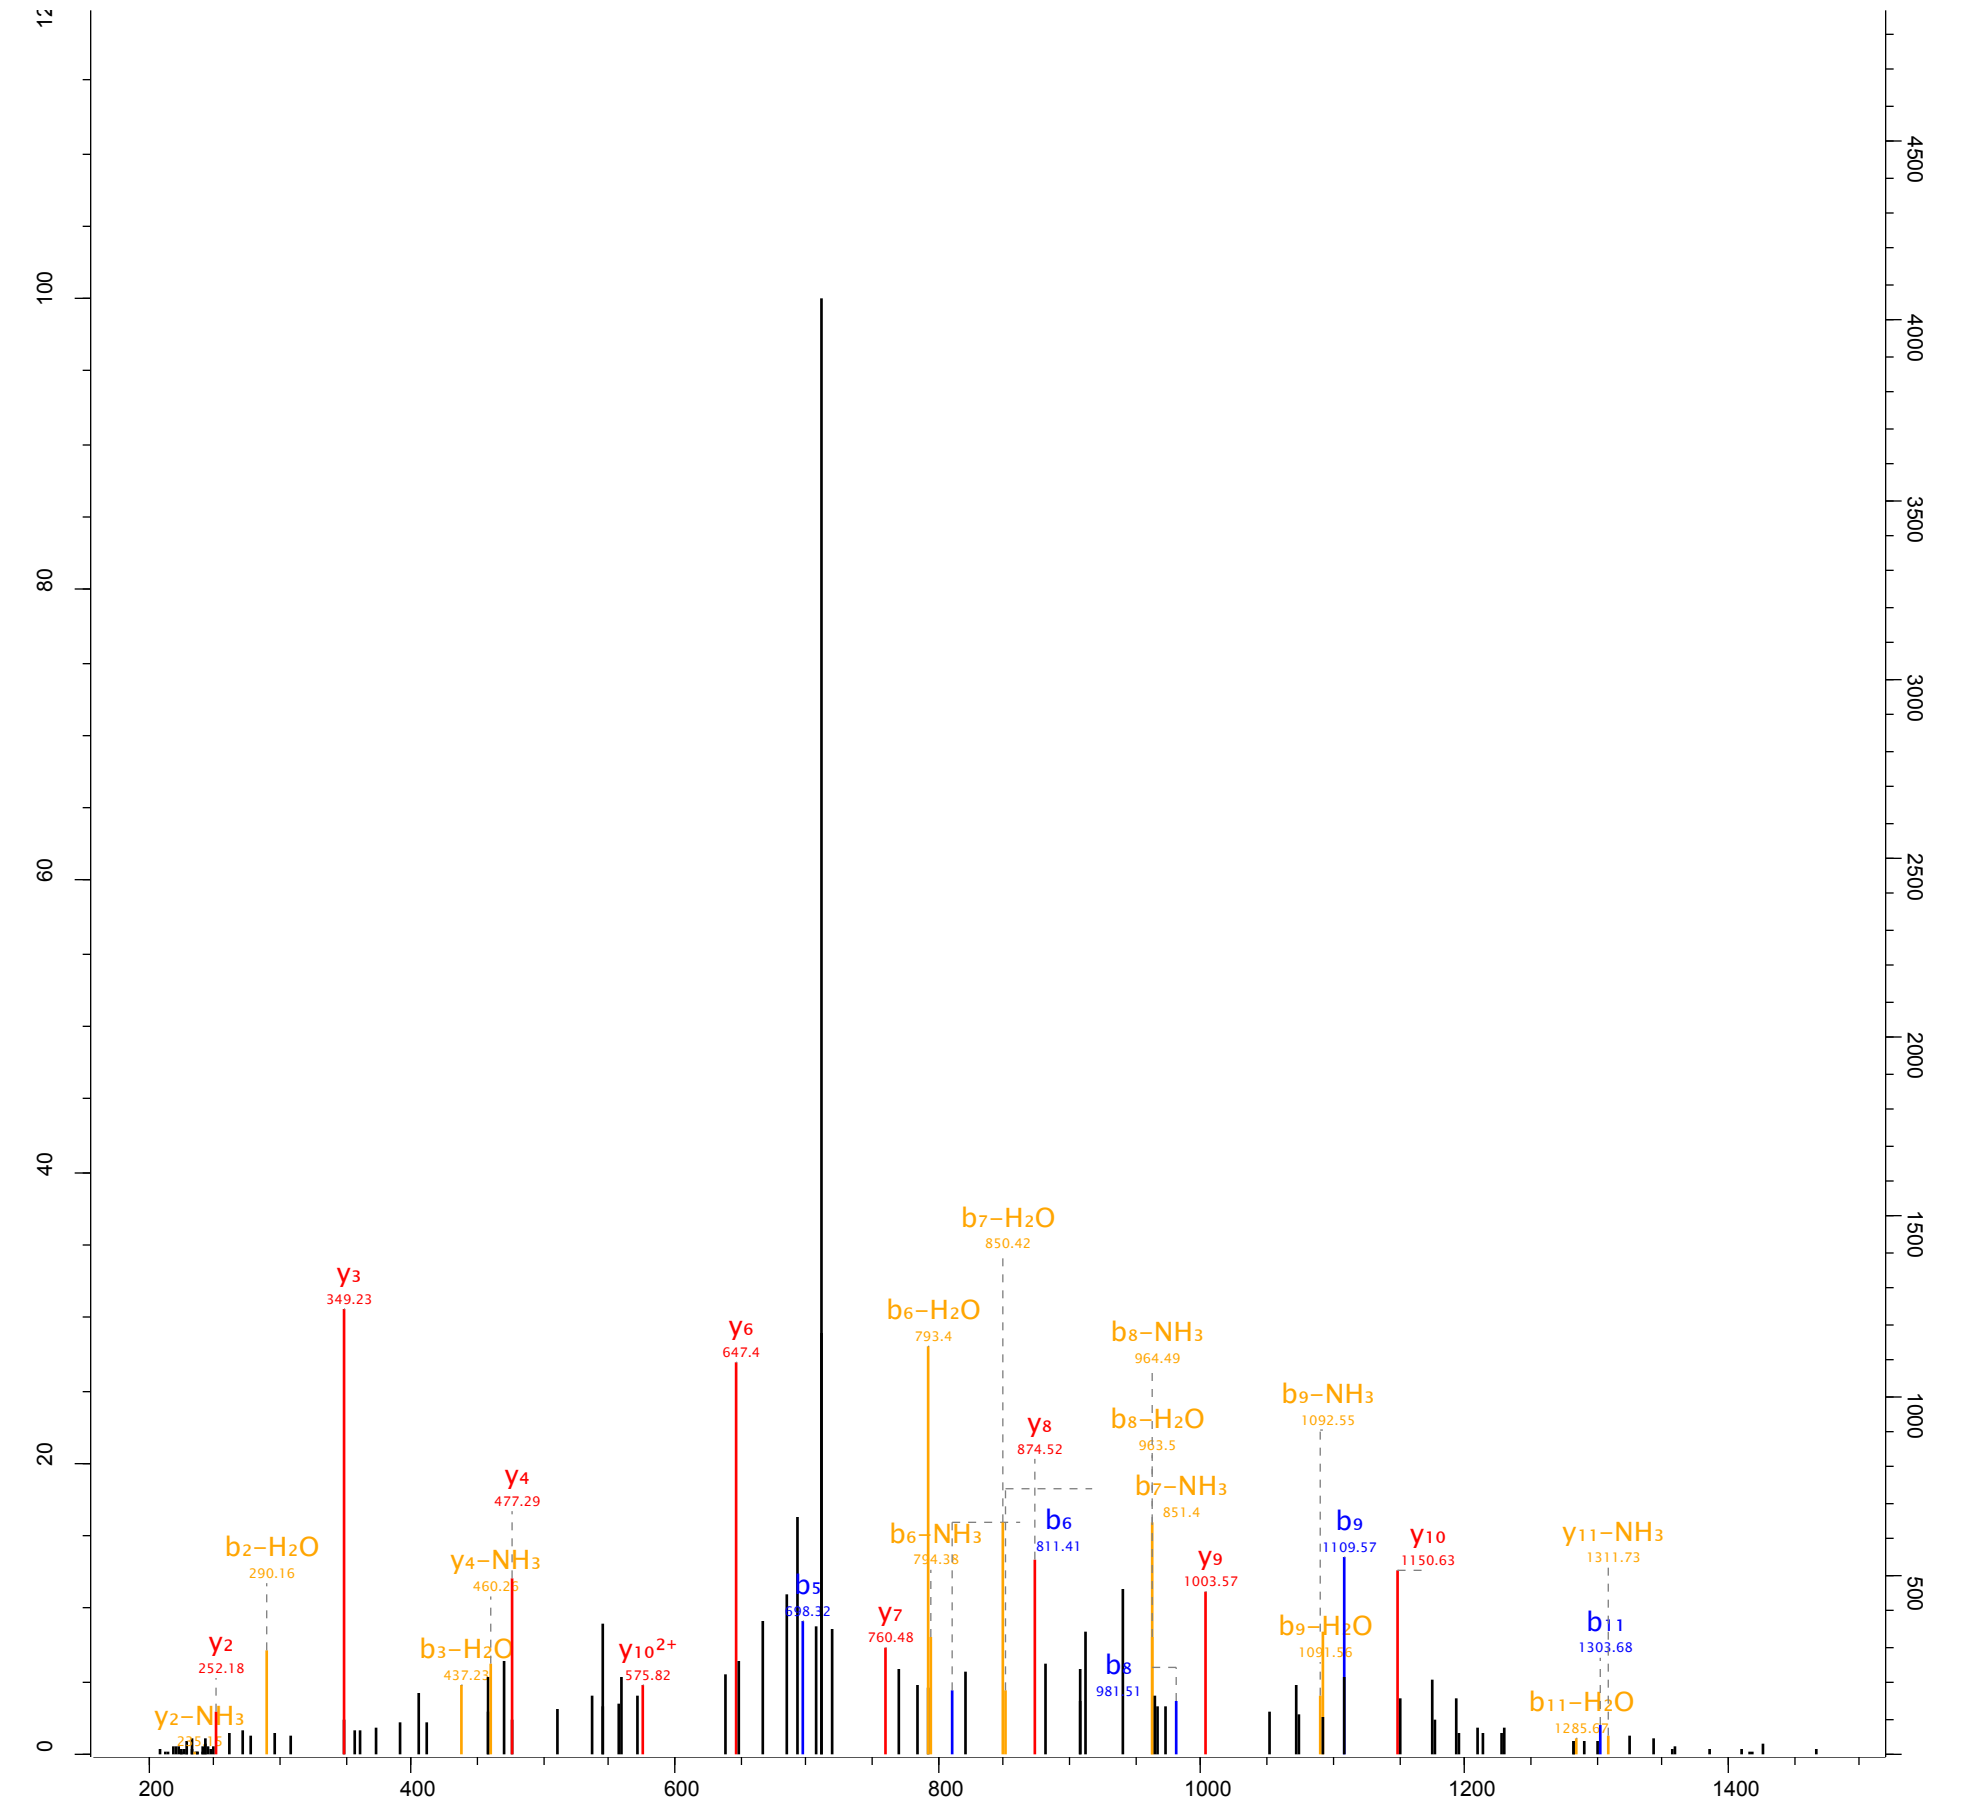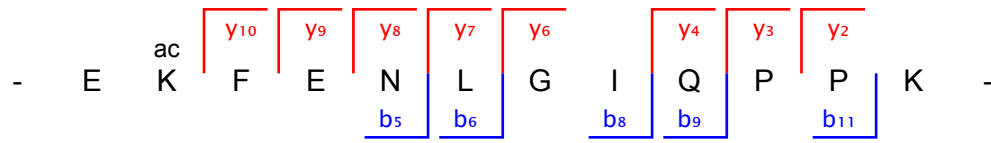

050813\_SCW\_II\_29\_19\_4

18898

ITMS; CID

261.64

914.92

Myl6

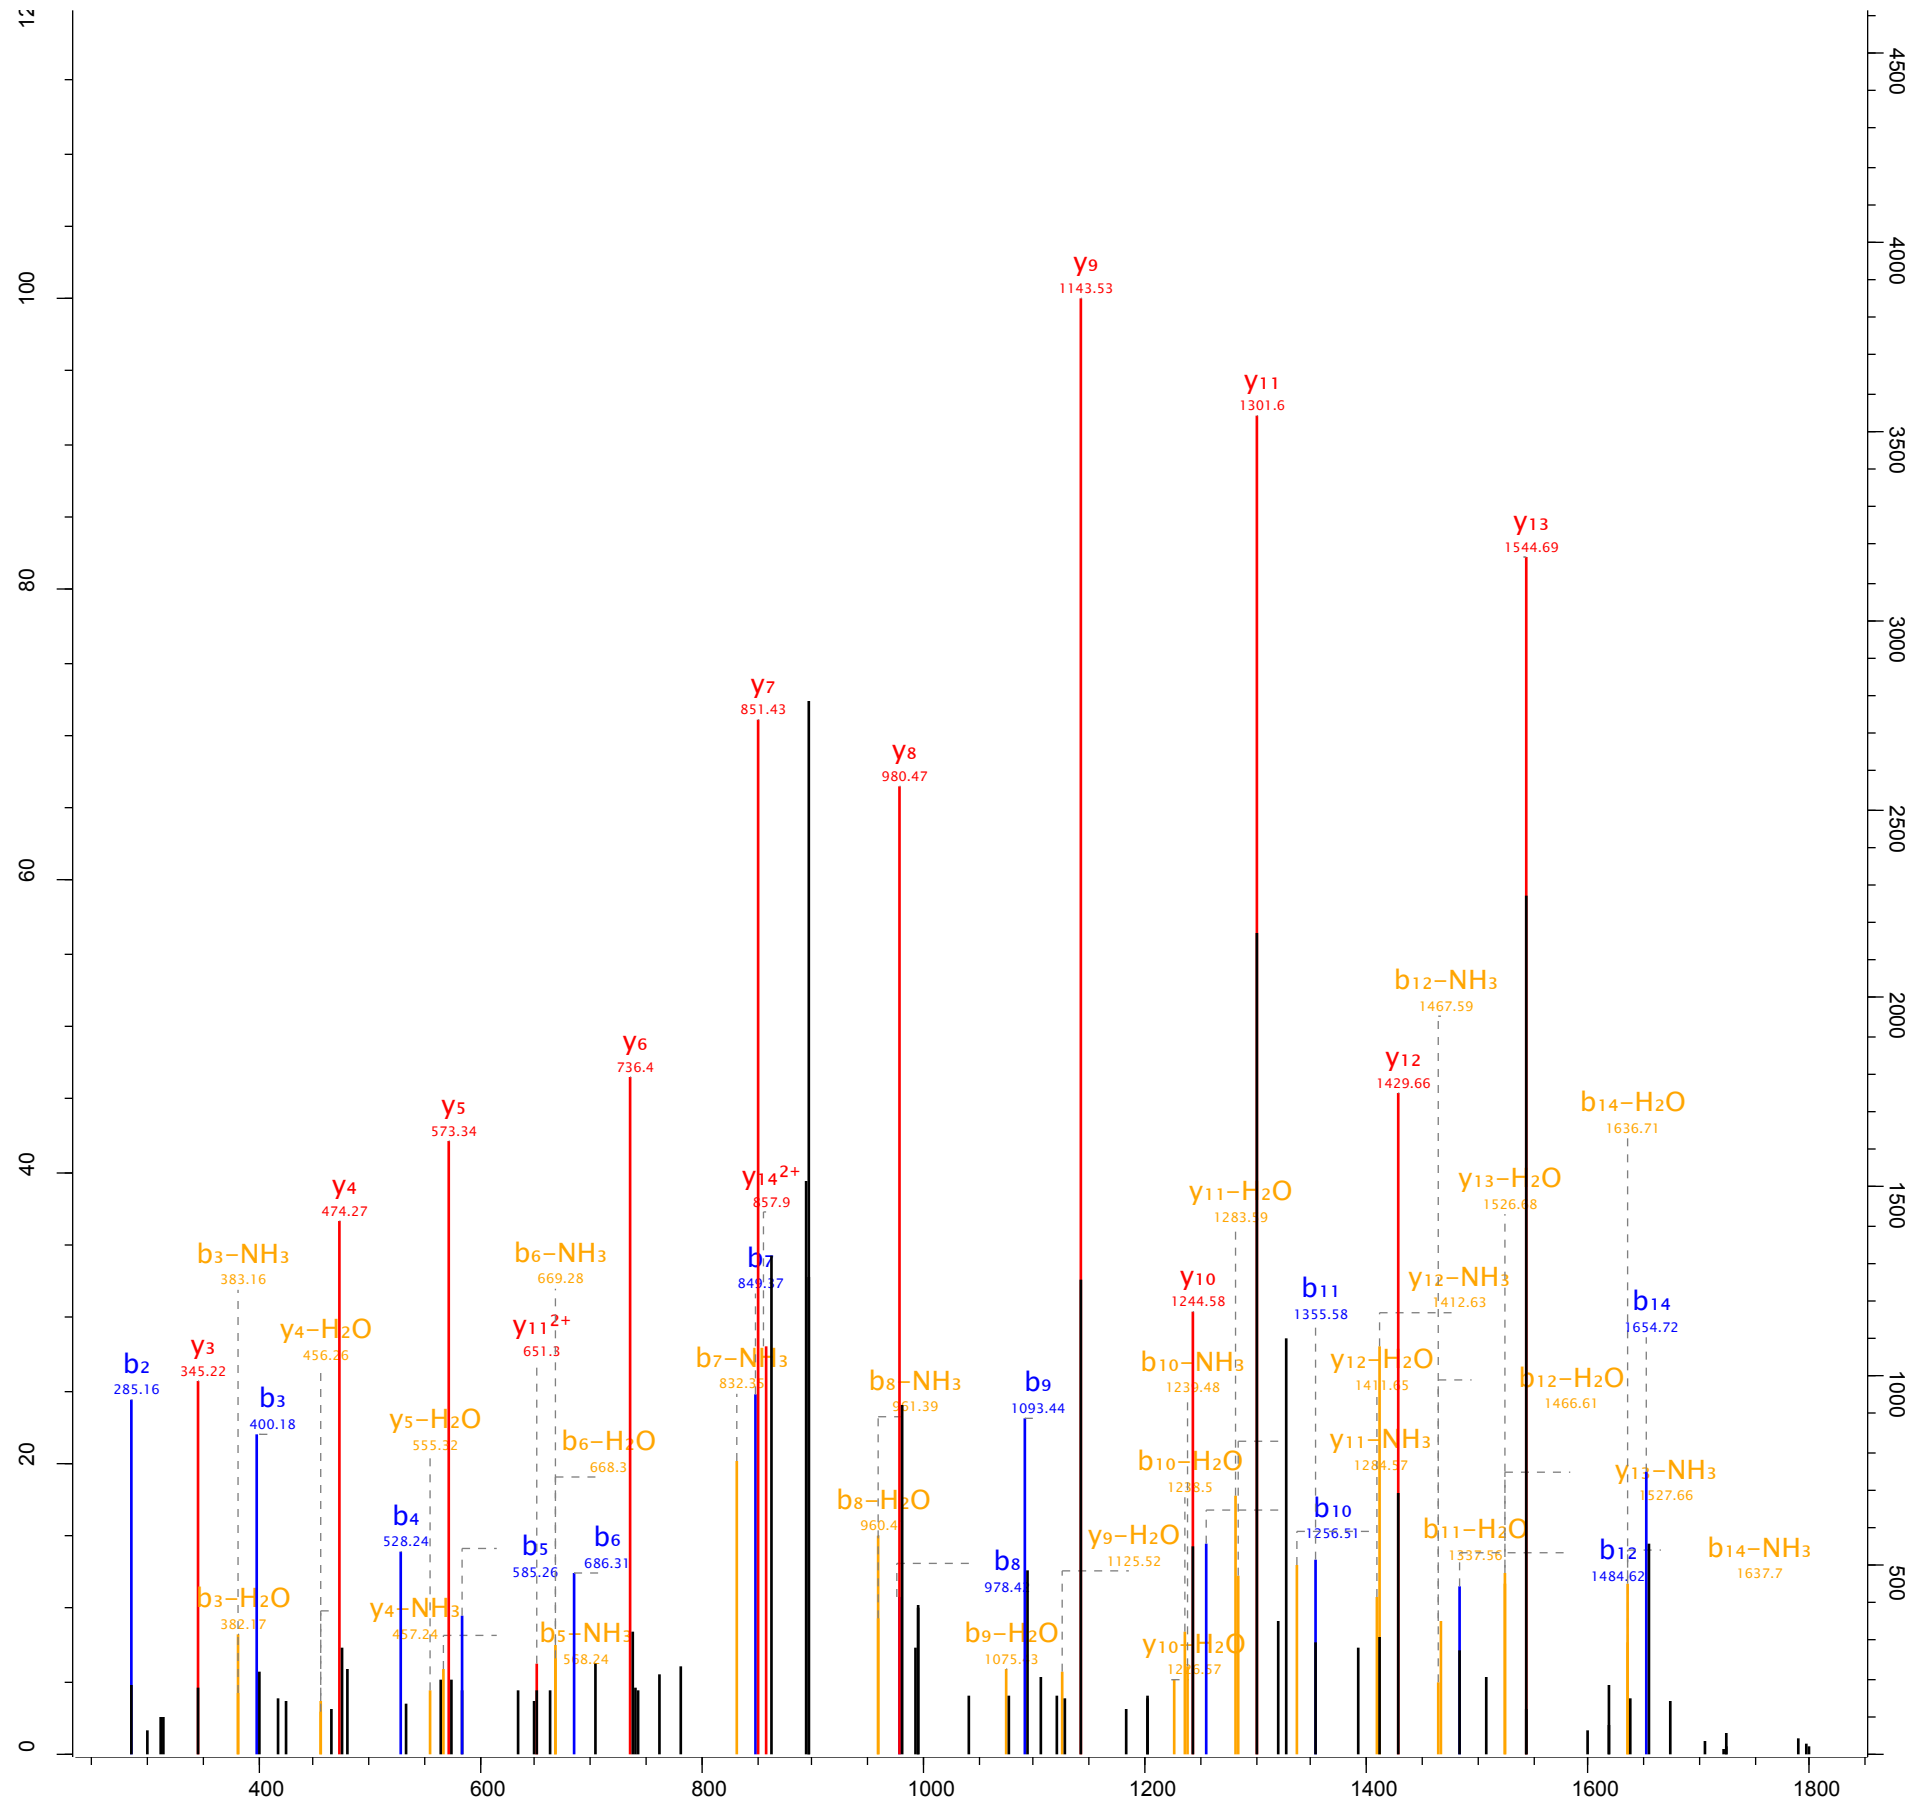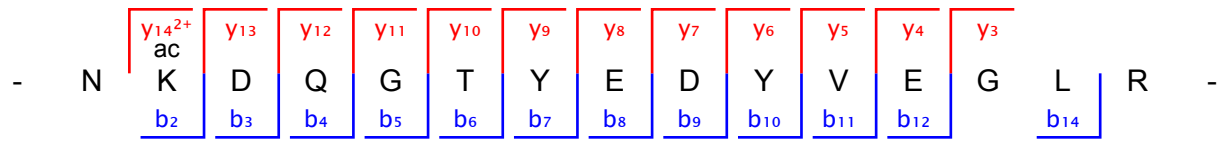

050813\_SCW\_II\_29\_19\_4

18959

ITMS; CID

222.81

708.92

S100a6

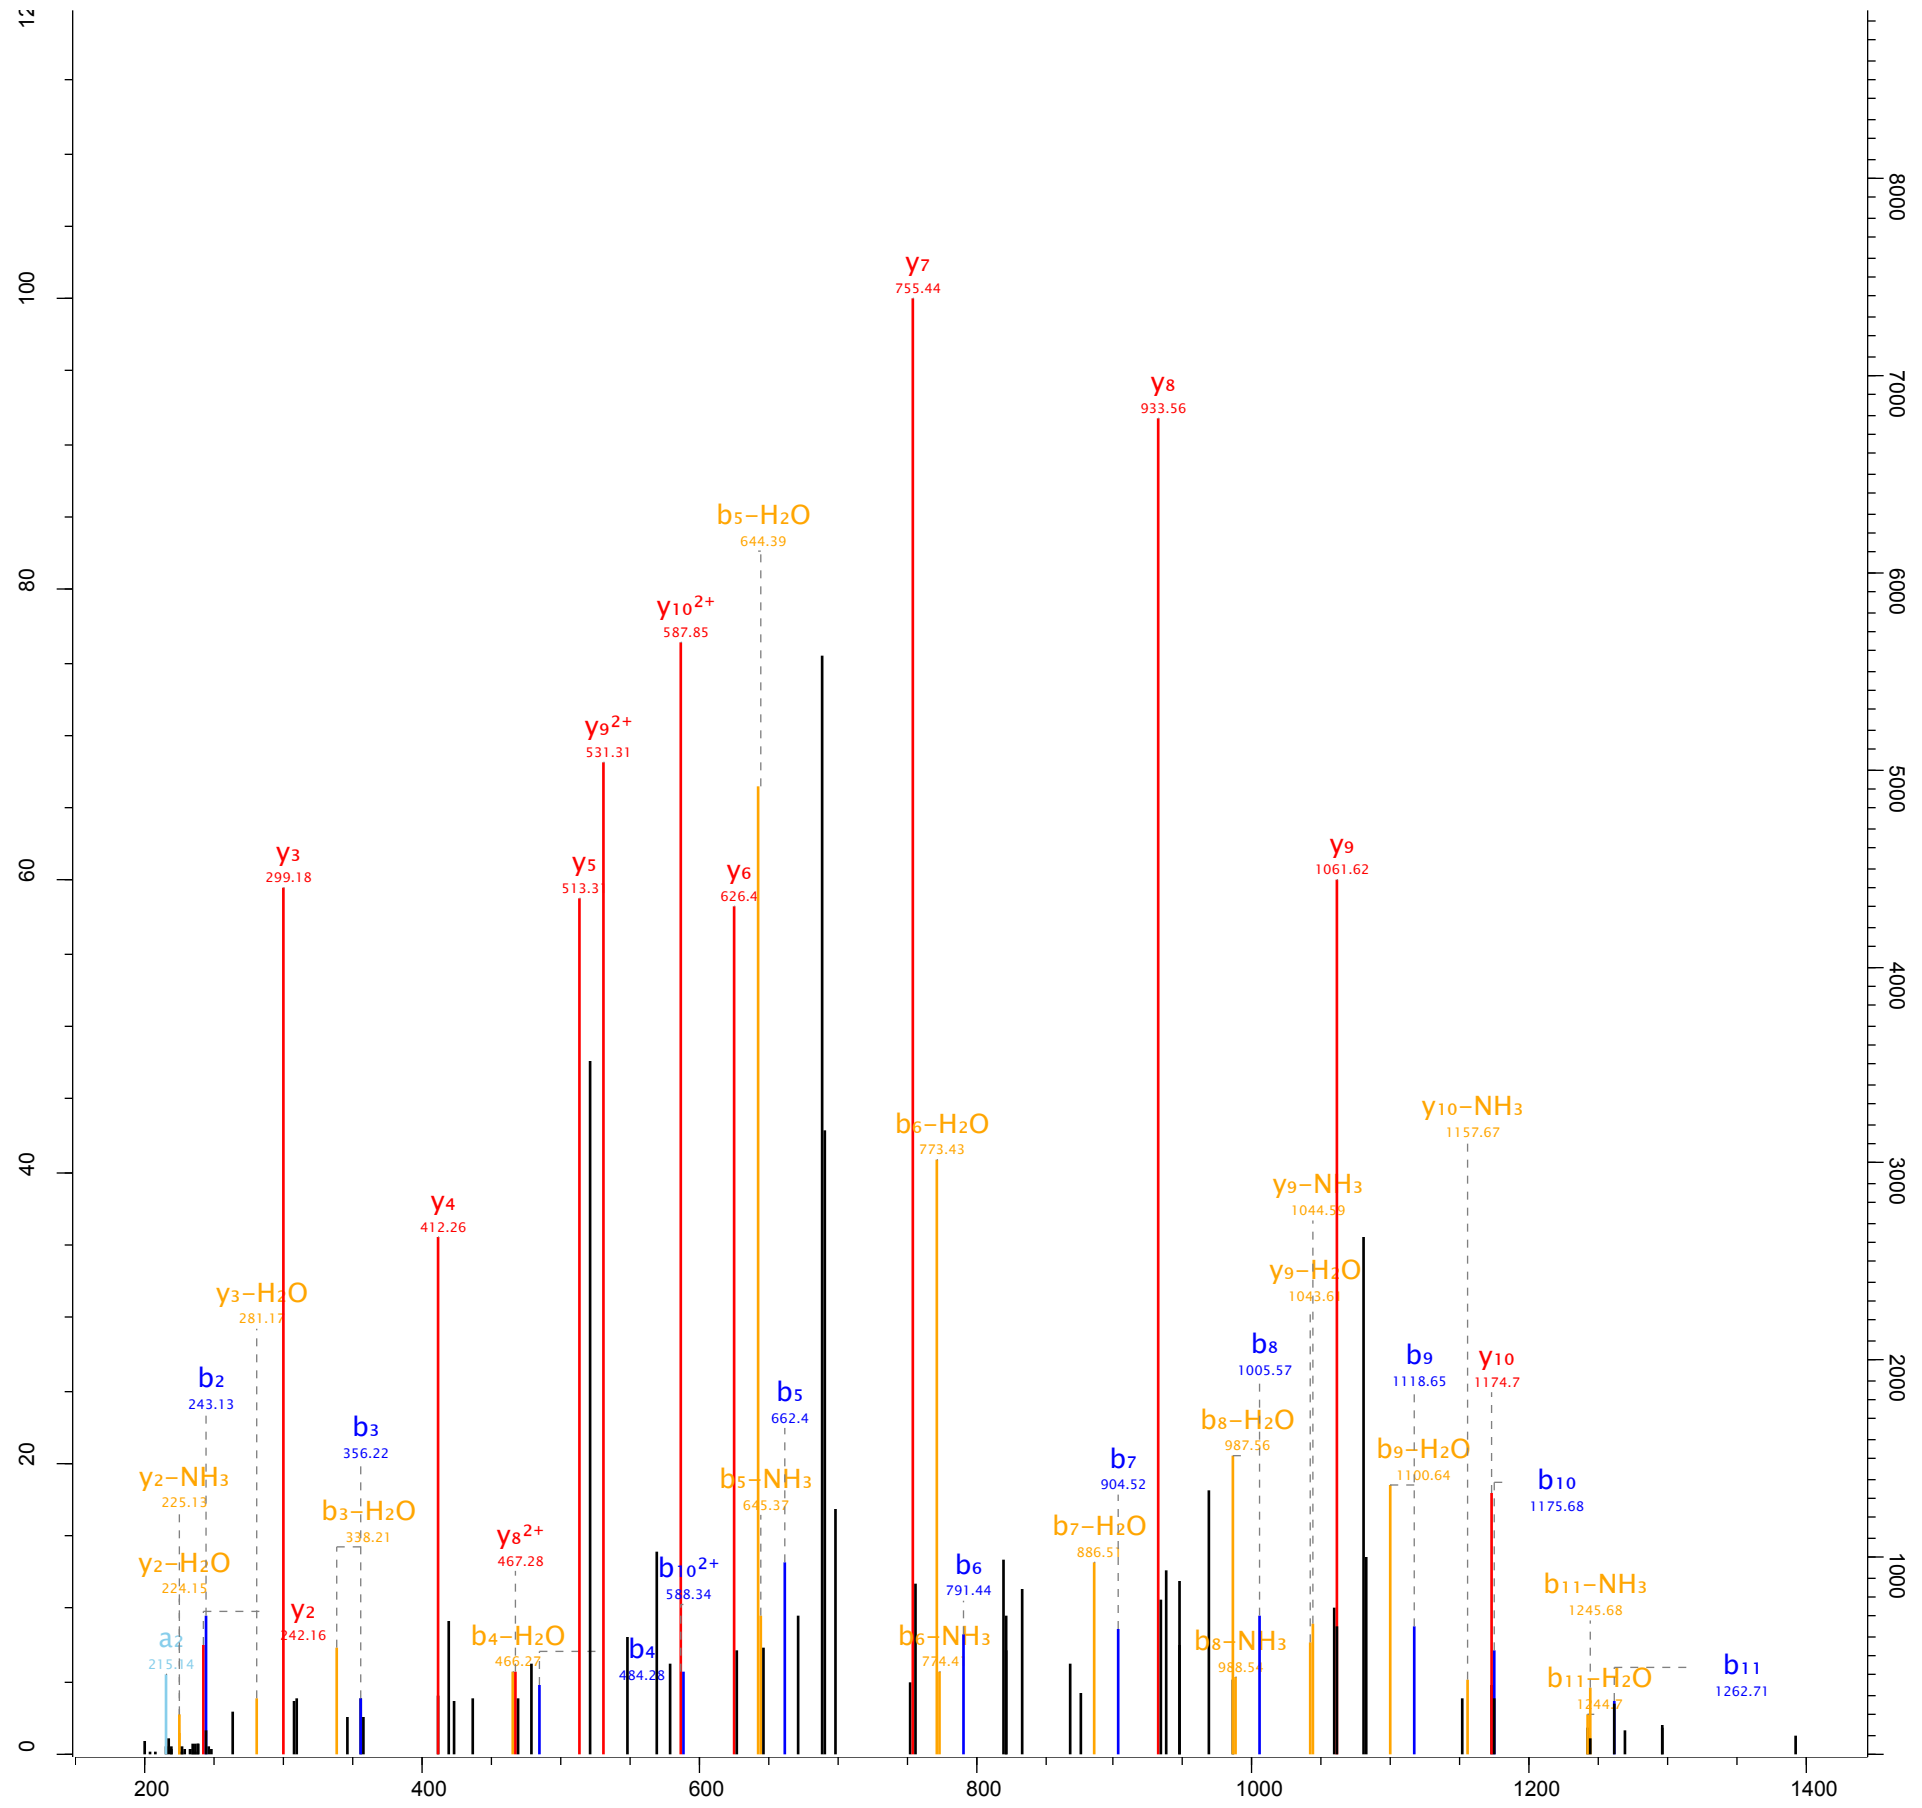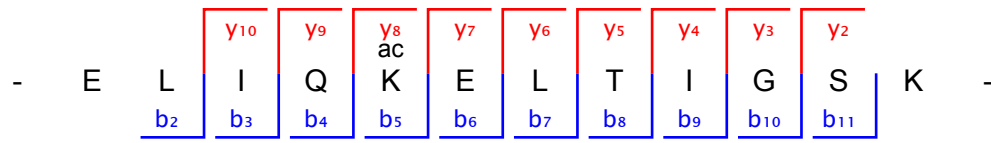

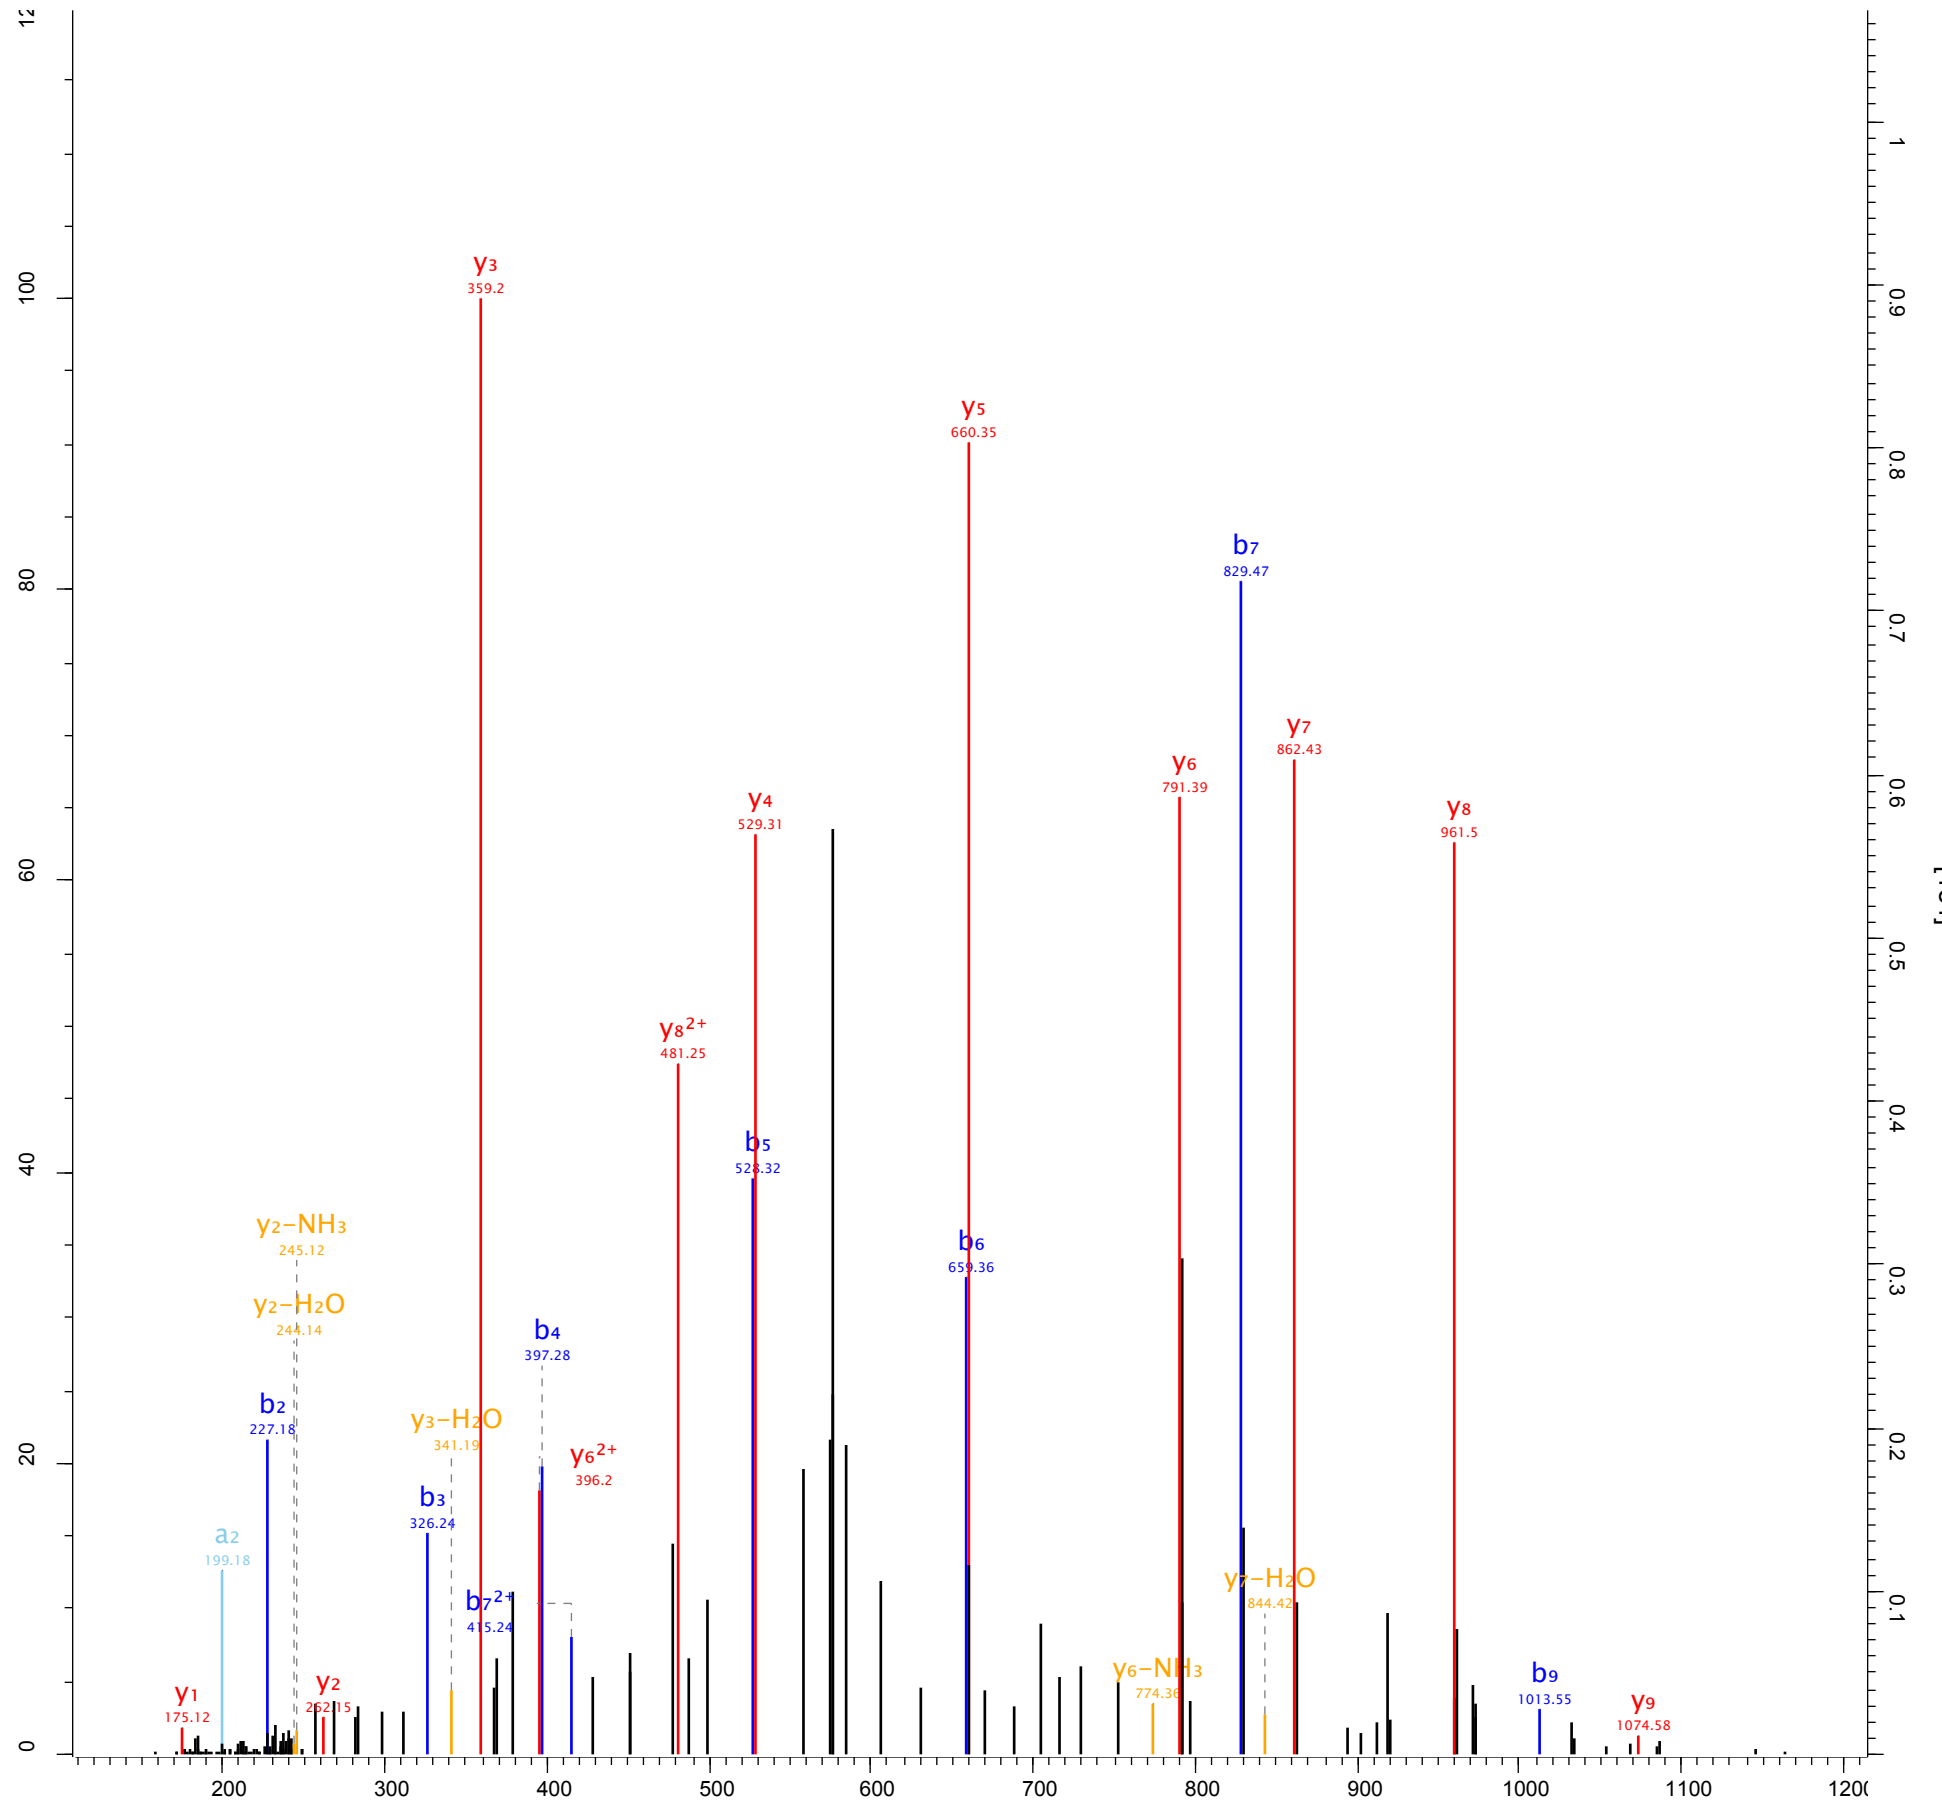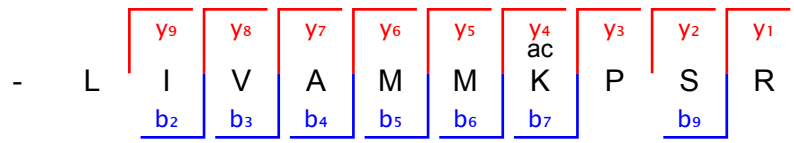

Raw file: 050813\_SCW\_II\_29\_19\_4  
 Scan: 19071  
 Method: ITMS; CID  
 Score: 111.72  
 m/z: 730.92  
 Gene names: Actb;Actg1;Actc1;Acta1;Acta2;Actg2

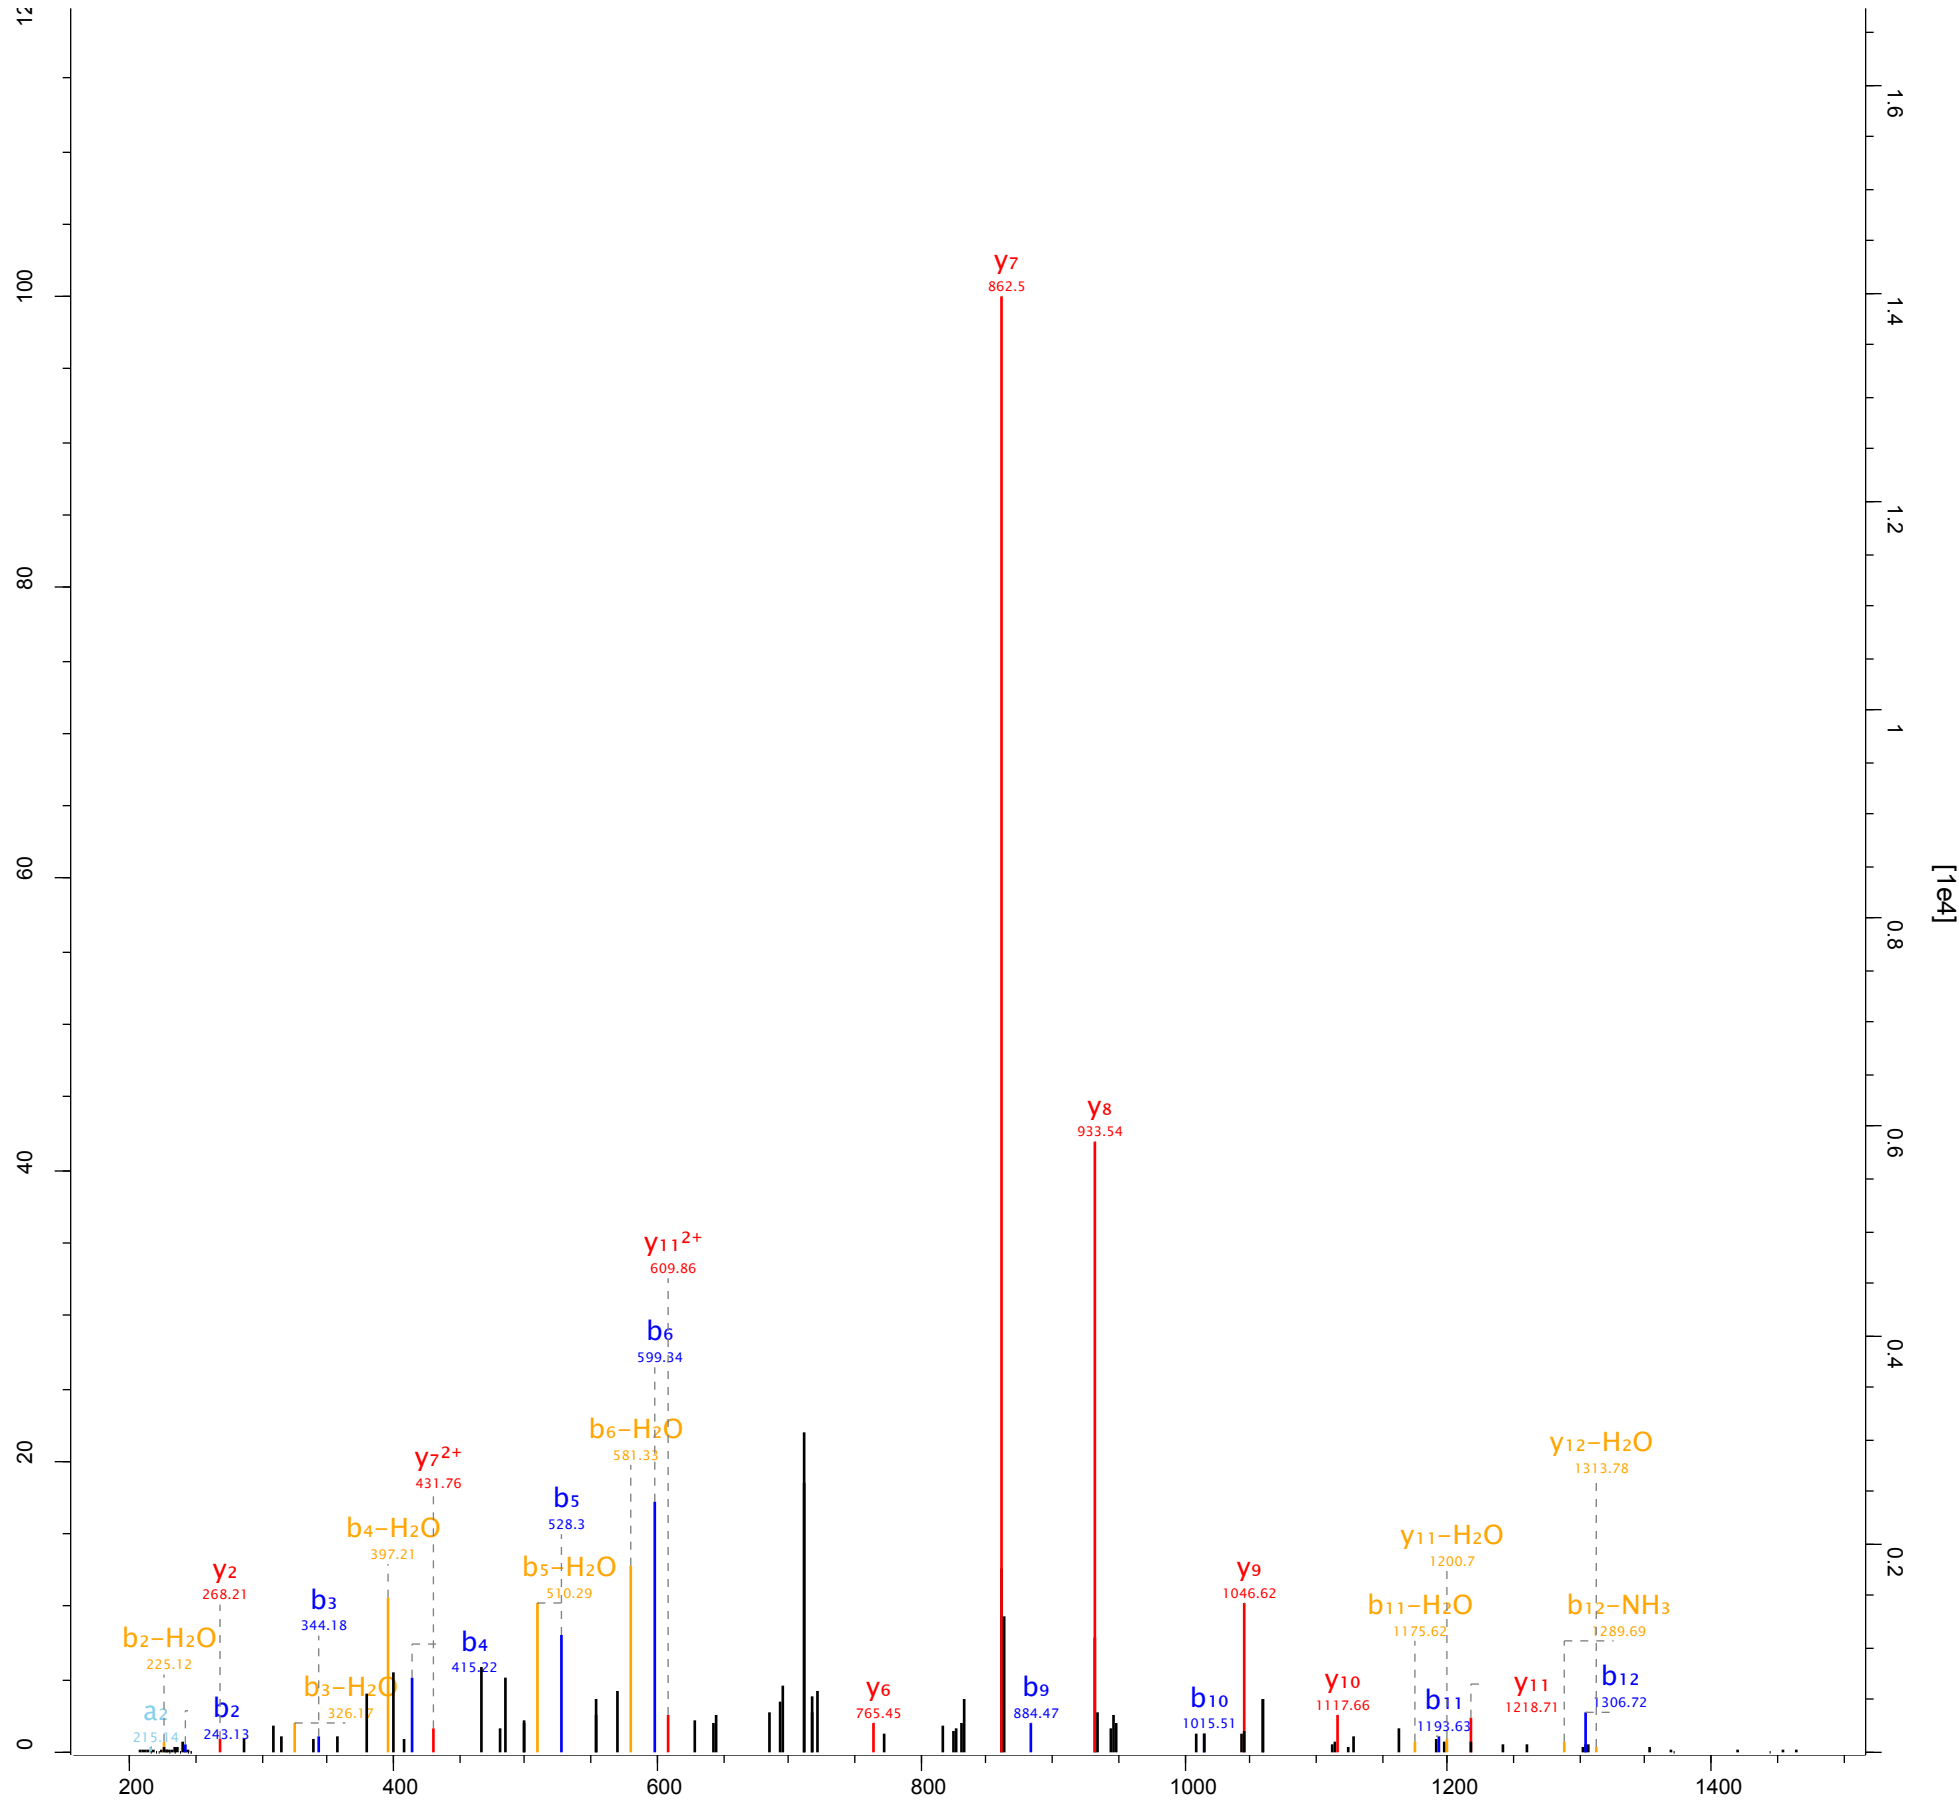

- E I T A L A P S T M K I K -

Fragmentation sites are indicated by boxes and labels:

- Red boxes: y11, y10, y9, y8, y7, y6, y2
- Blue boxes: b2, b3, b4, b5, b6, b9, b10, b11, b12

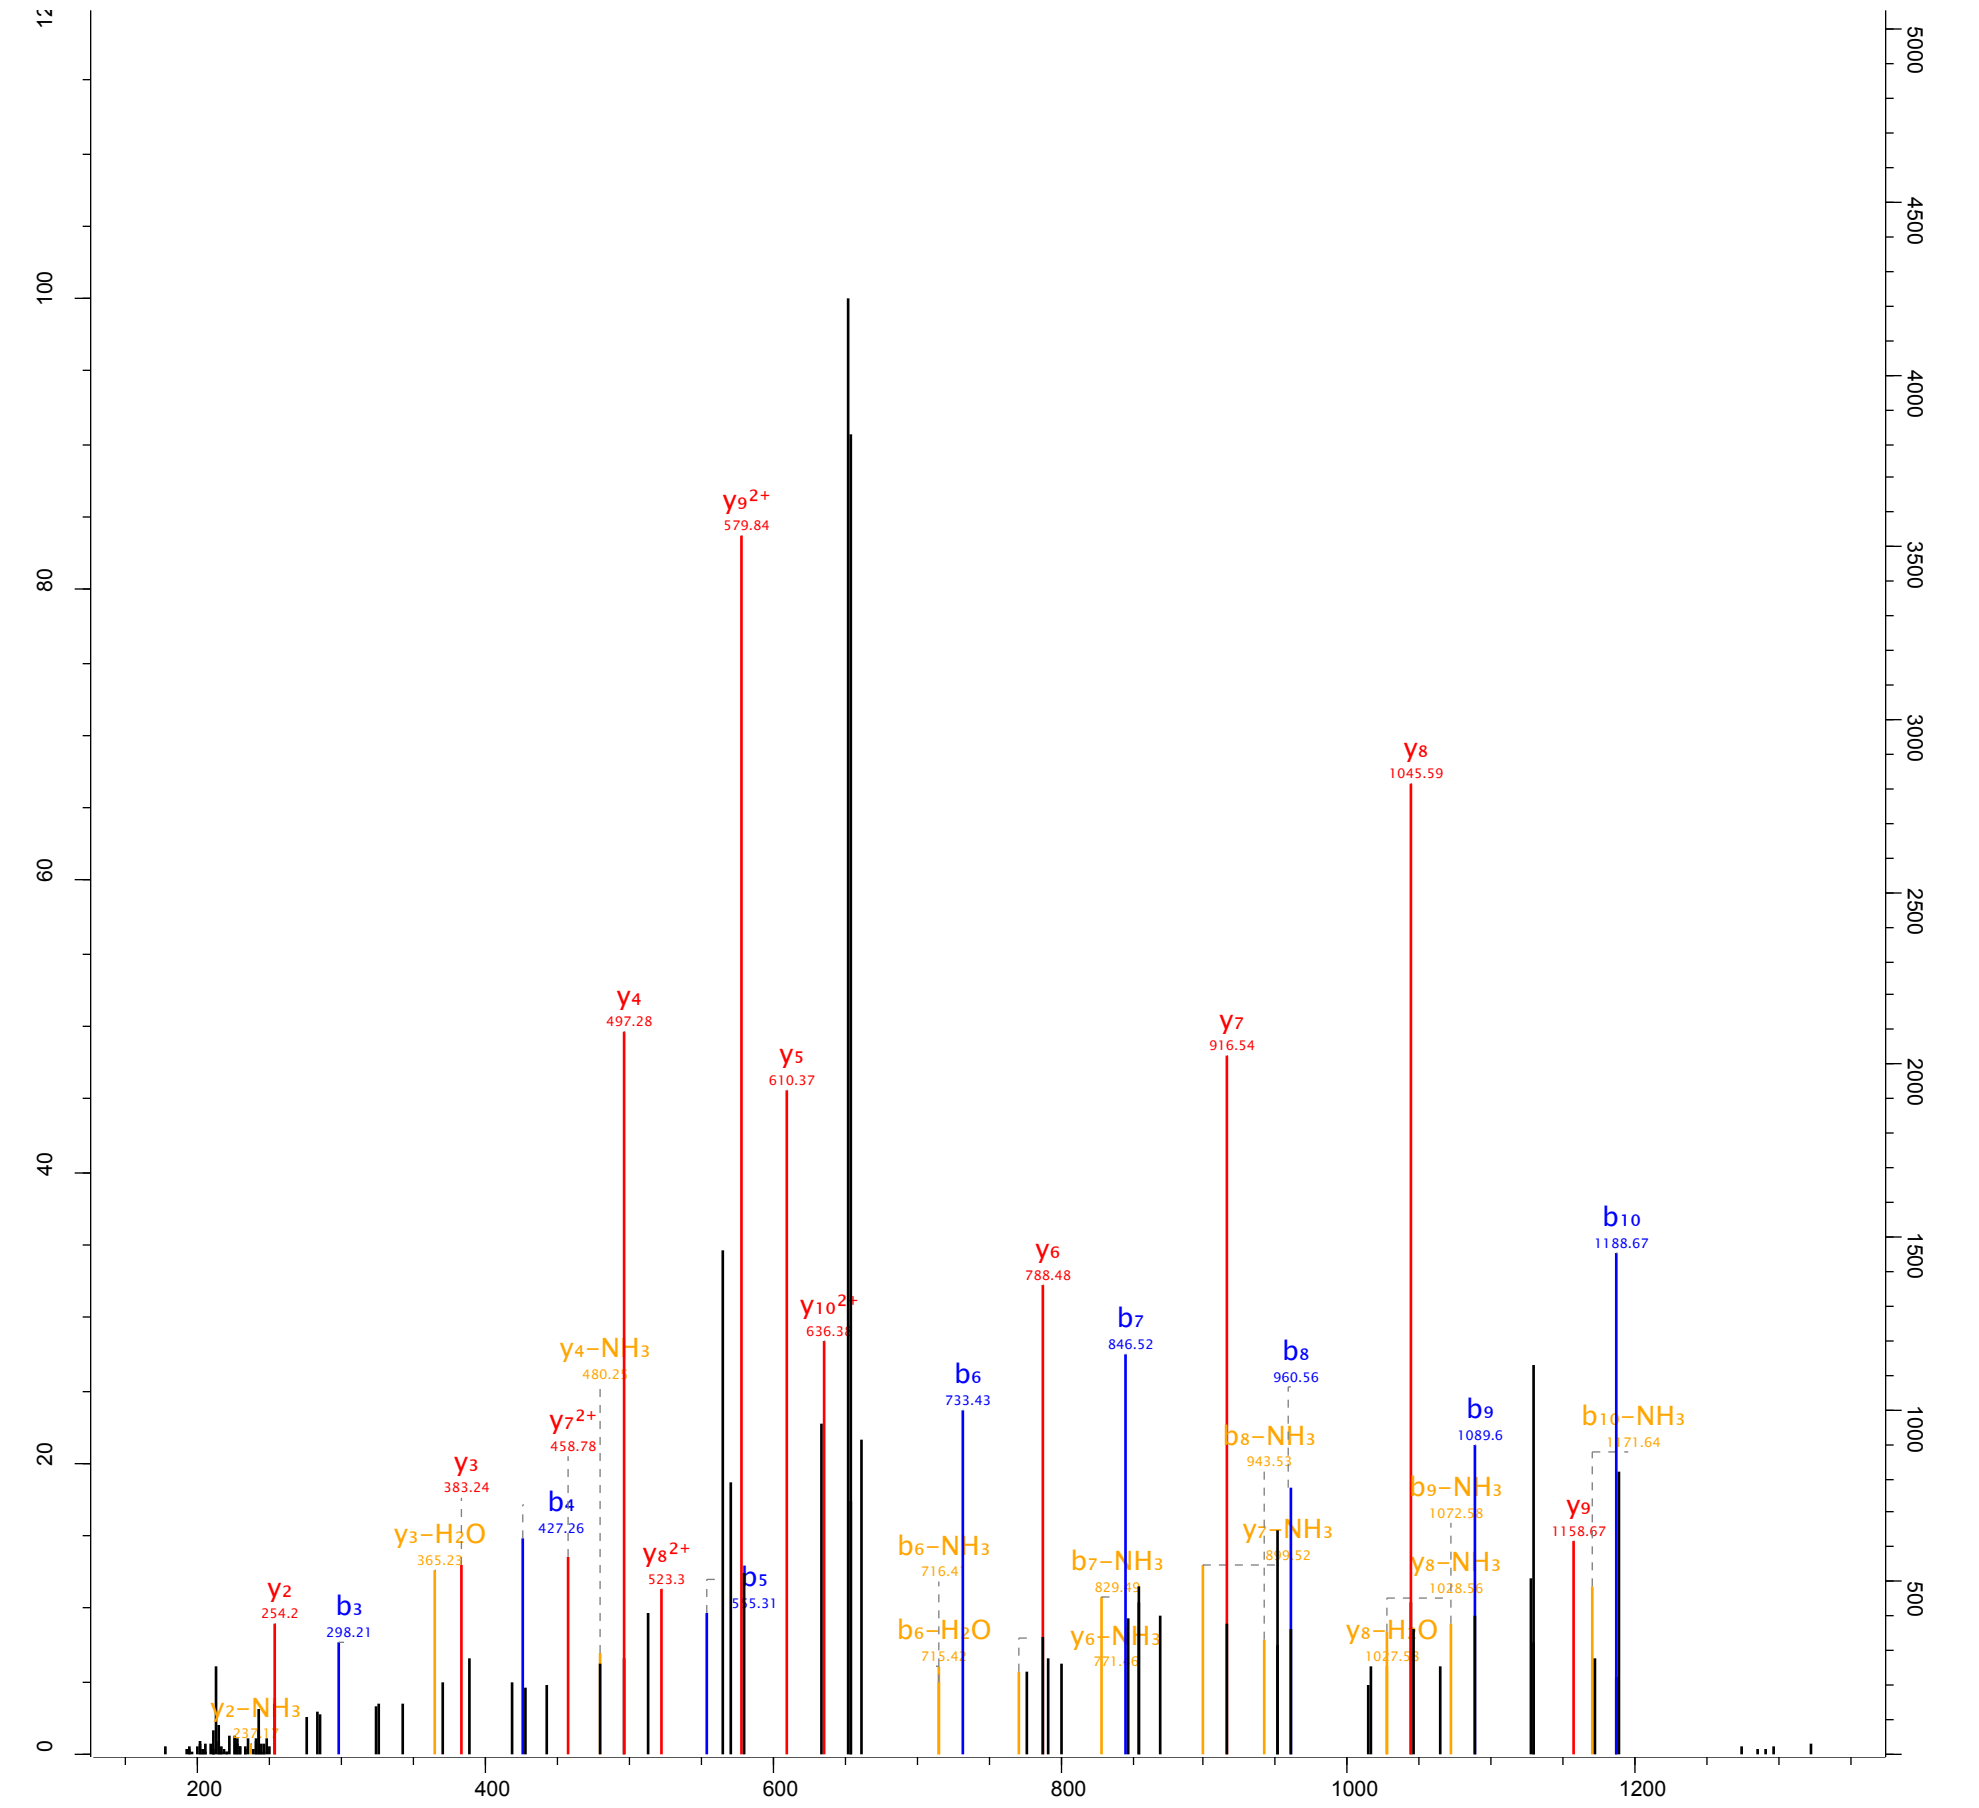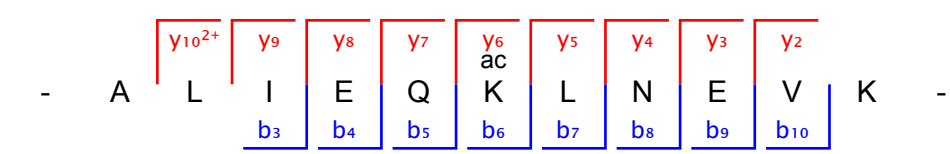



Raw file 050813\_SCW\_II\_29\_19\_4 Scan 19170 Method ITMS; CID Score 148.13 m/z 706.86 Gene names Esd

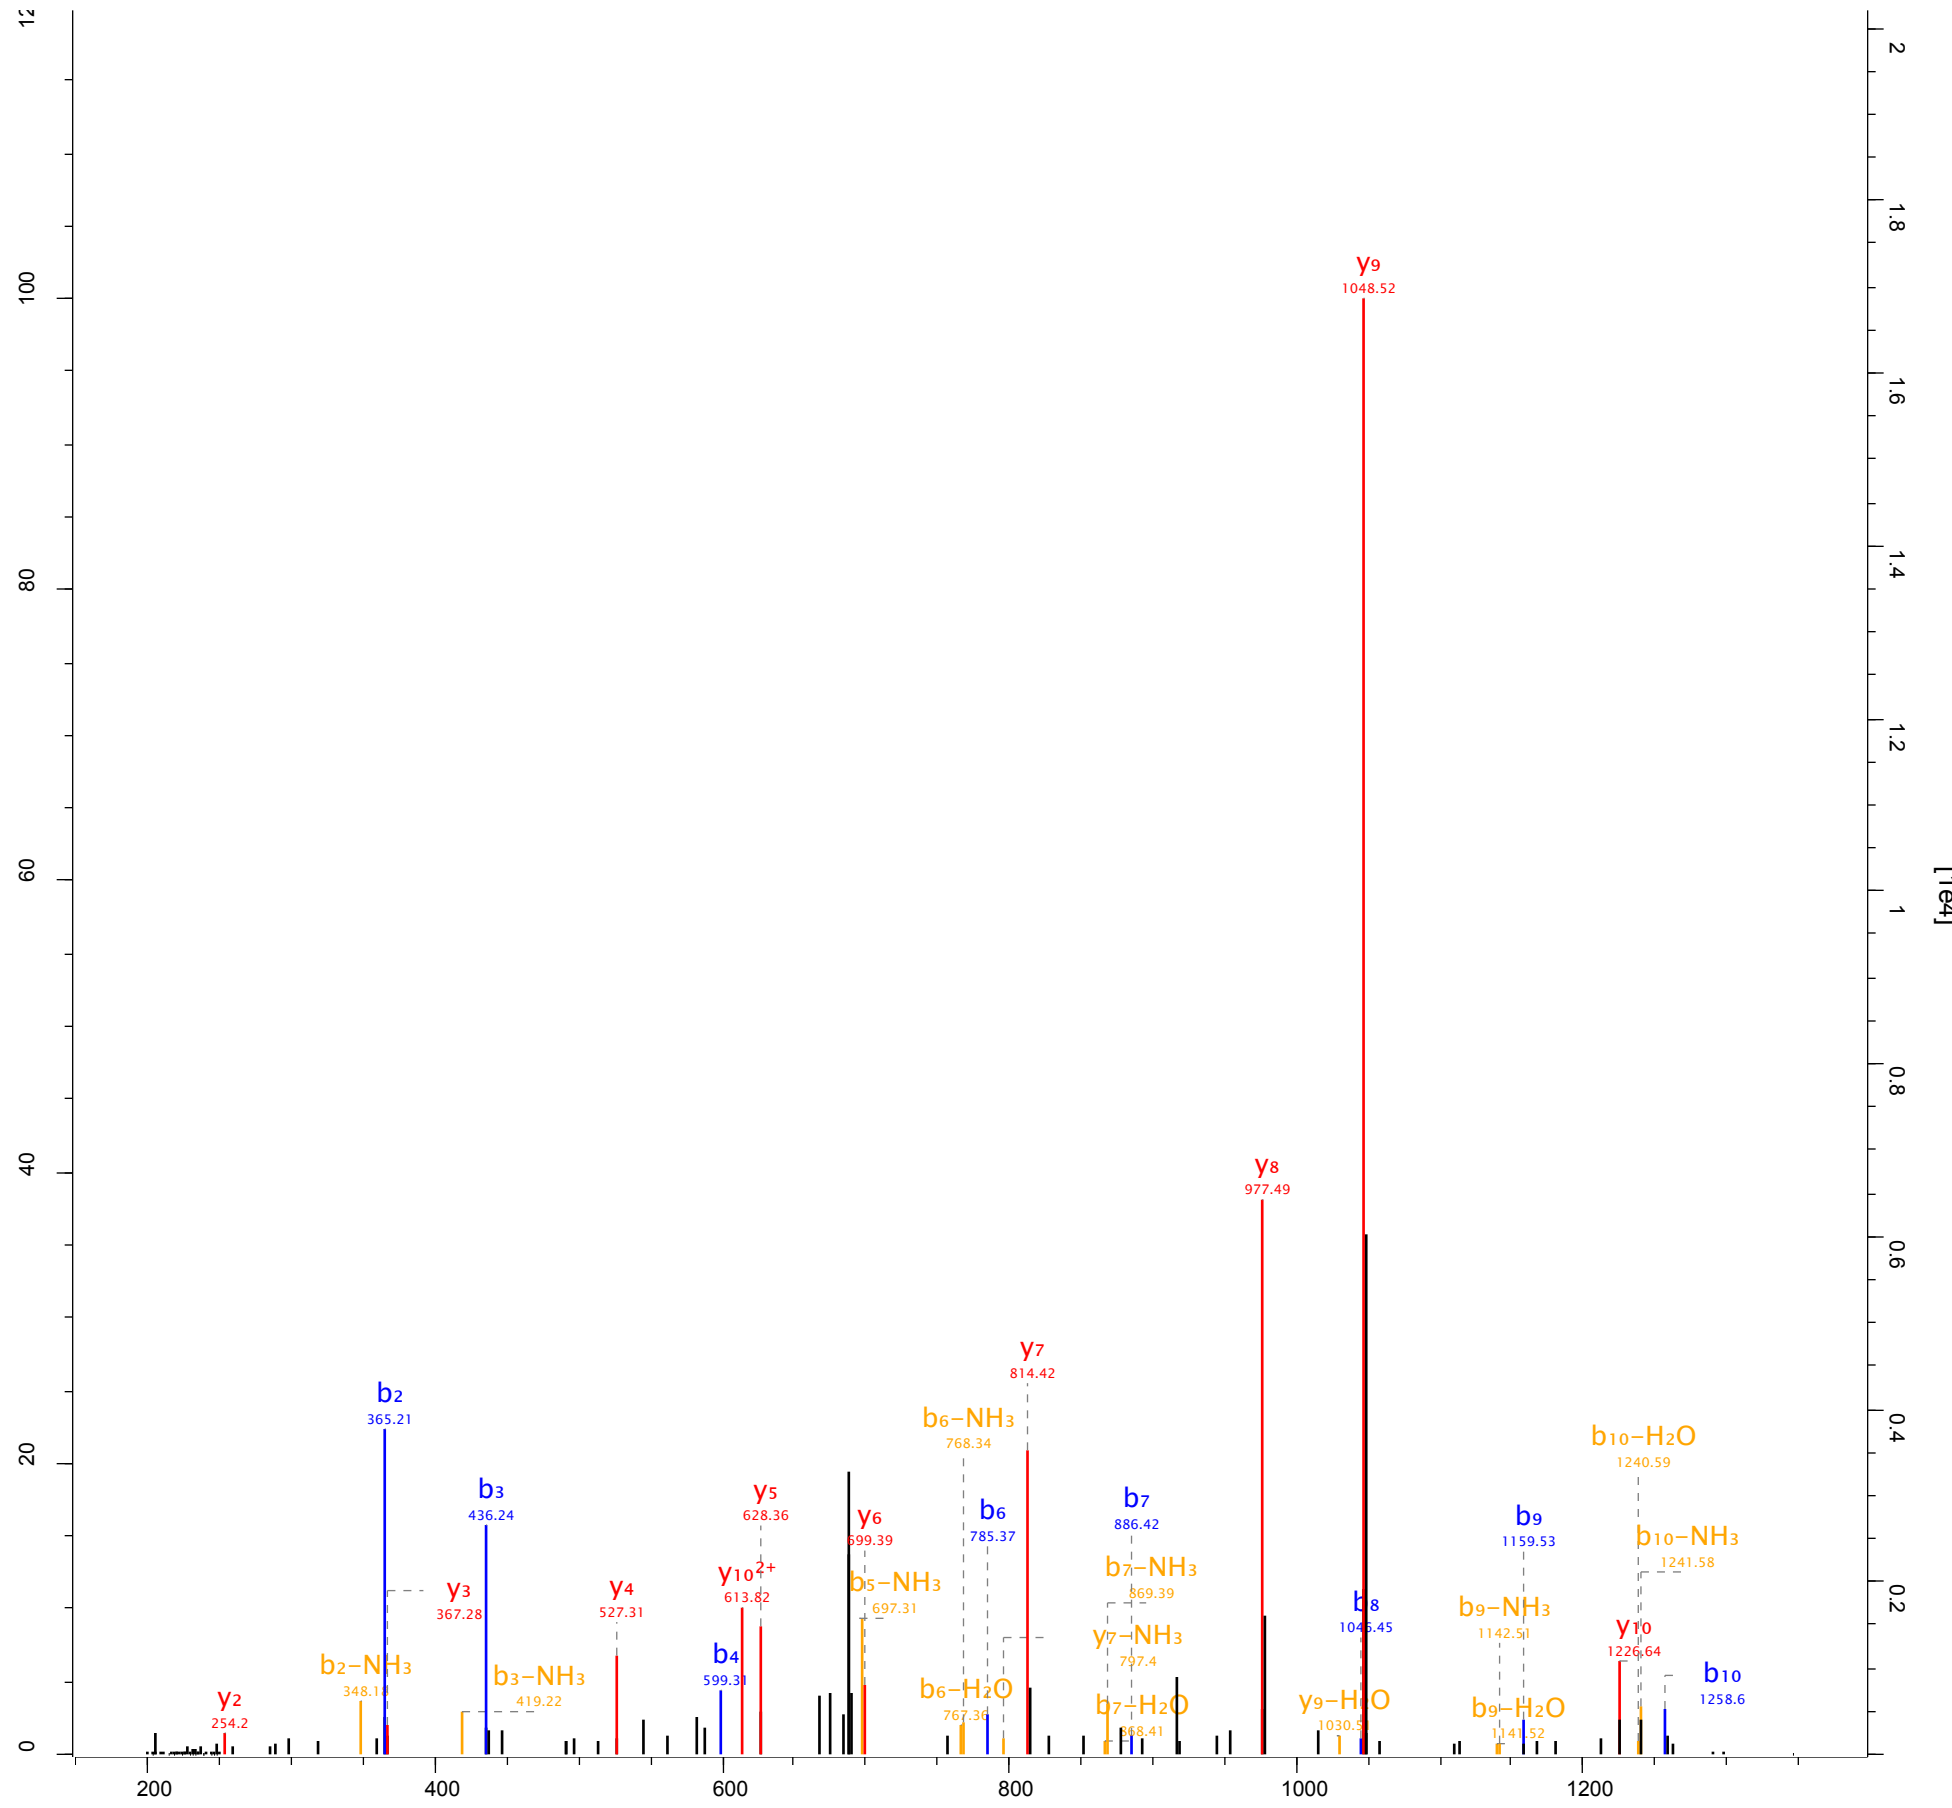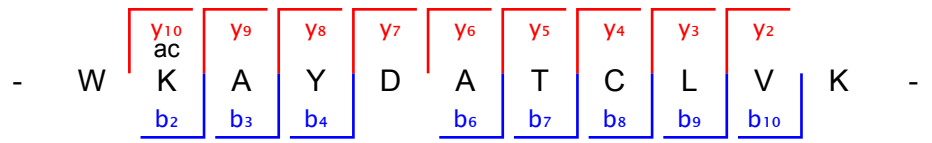

Raw file 050813\_SCW\_II\_29\_19\_4 Scan 19188 Method ITMS; CID Score 155.56 m/z 828.4 Gene names Tpm3;Tpm1

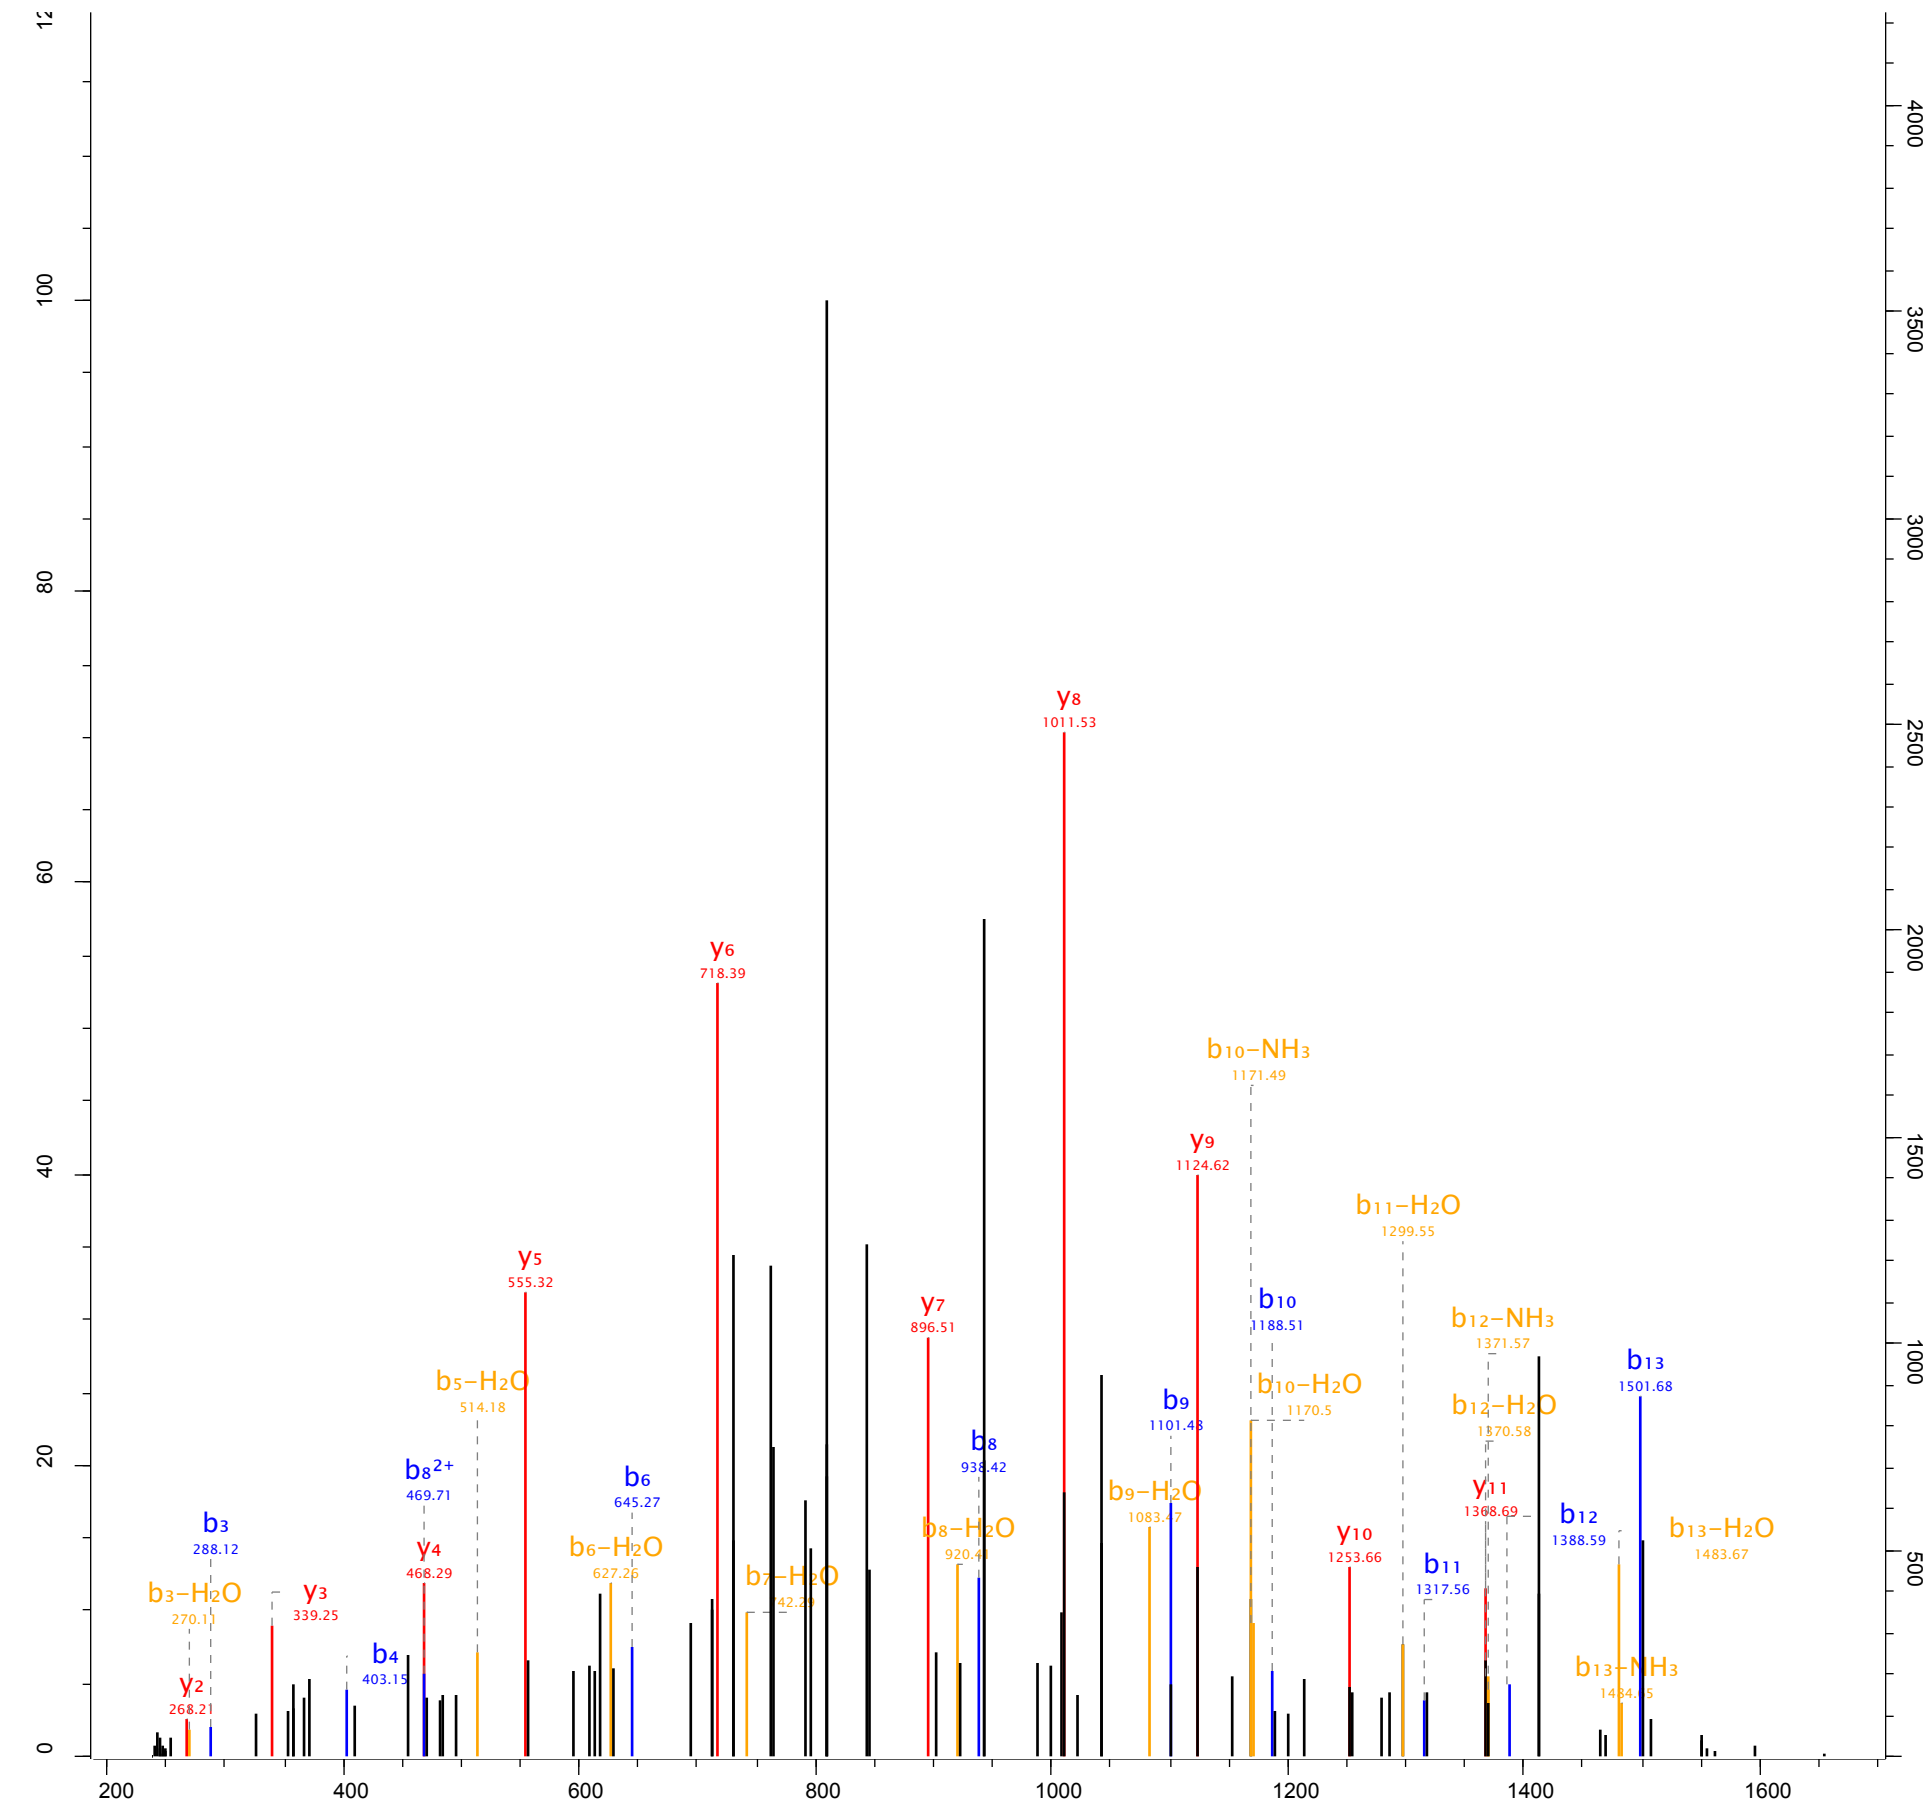

- G T E D E L D K Y S E A L K -

Fragmentation mapping: b<sub>3</sub> (E), b<sub>4</sub> (D), b<sub>6</sub> (L), b<sub>8</sub> (K), b<sub>9</sub> (Y), b<sub>10</sub> (S), b<sub>11</sub> (E), b<sub>12</sub> (A), b<sub>13</sub> (L)

Fragmentation mapping: y<sub>2</sub> (L), y<sub>3</sub> (A), y<sub>4</sub> (E), y<sub>5</sub> (S), y<sub>6</sub> (Y), y<sub>7</sub> (K), y<sub>8</sub> (D), y<sub>9</sub> (L), y<sub>10</sub> (E), y<sub>11</sub> (D)

050813\_SCW\_II\_29\_19\_4

19398 ITMS; CID 187.78 925.47 Myh10

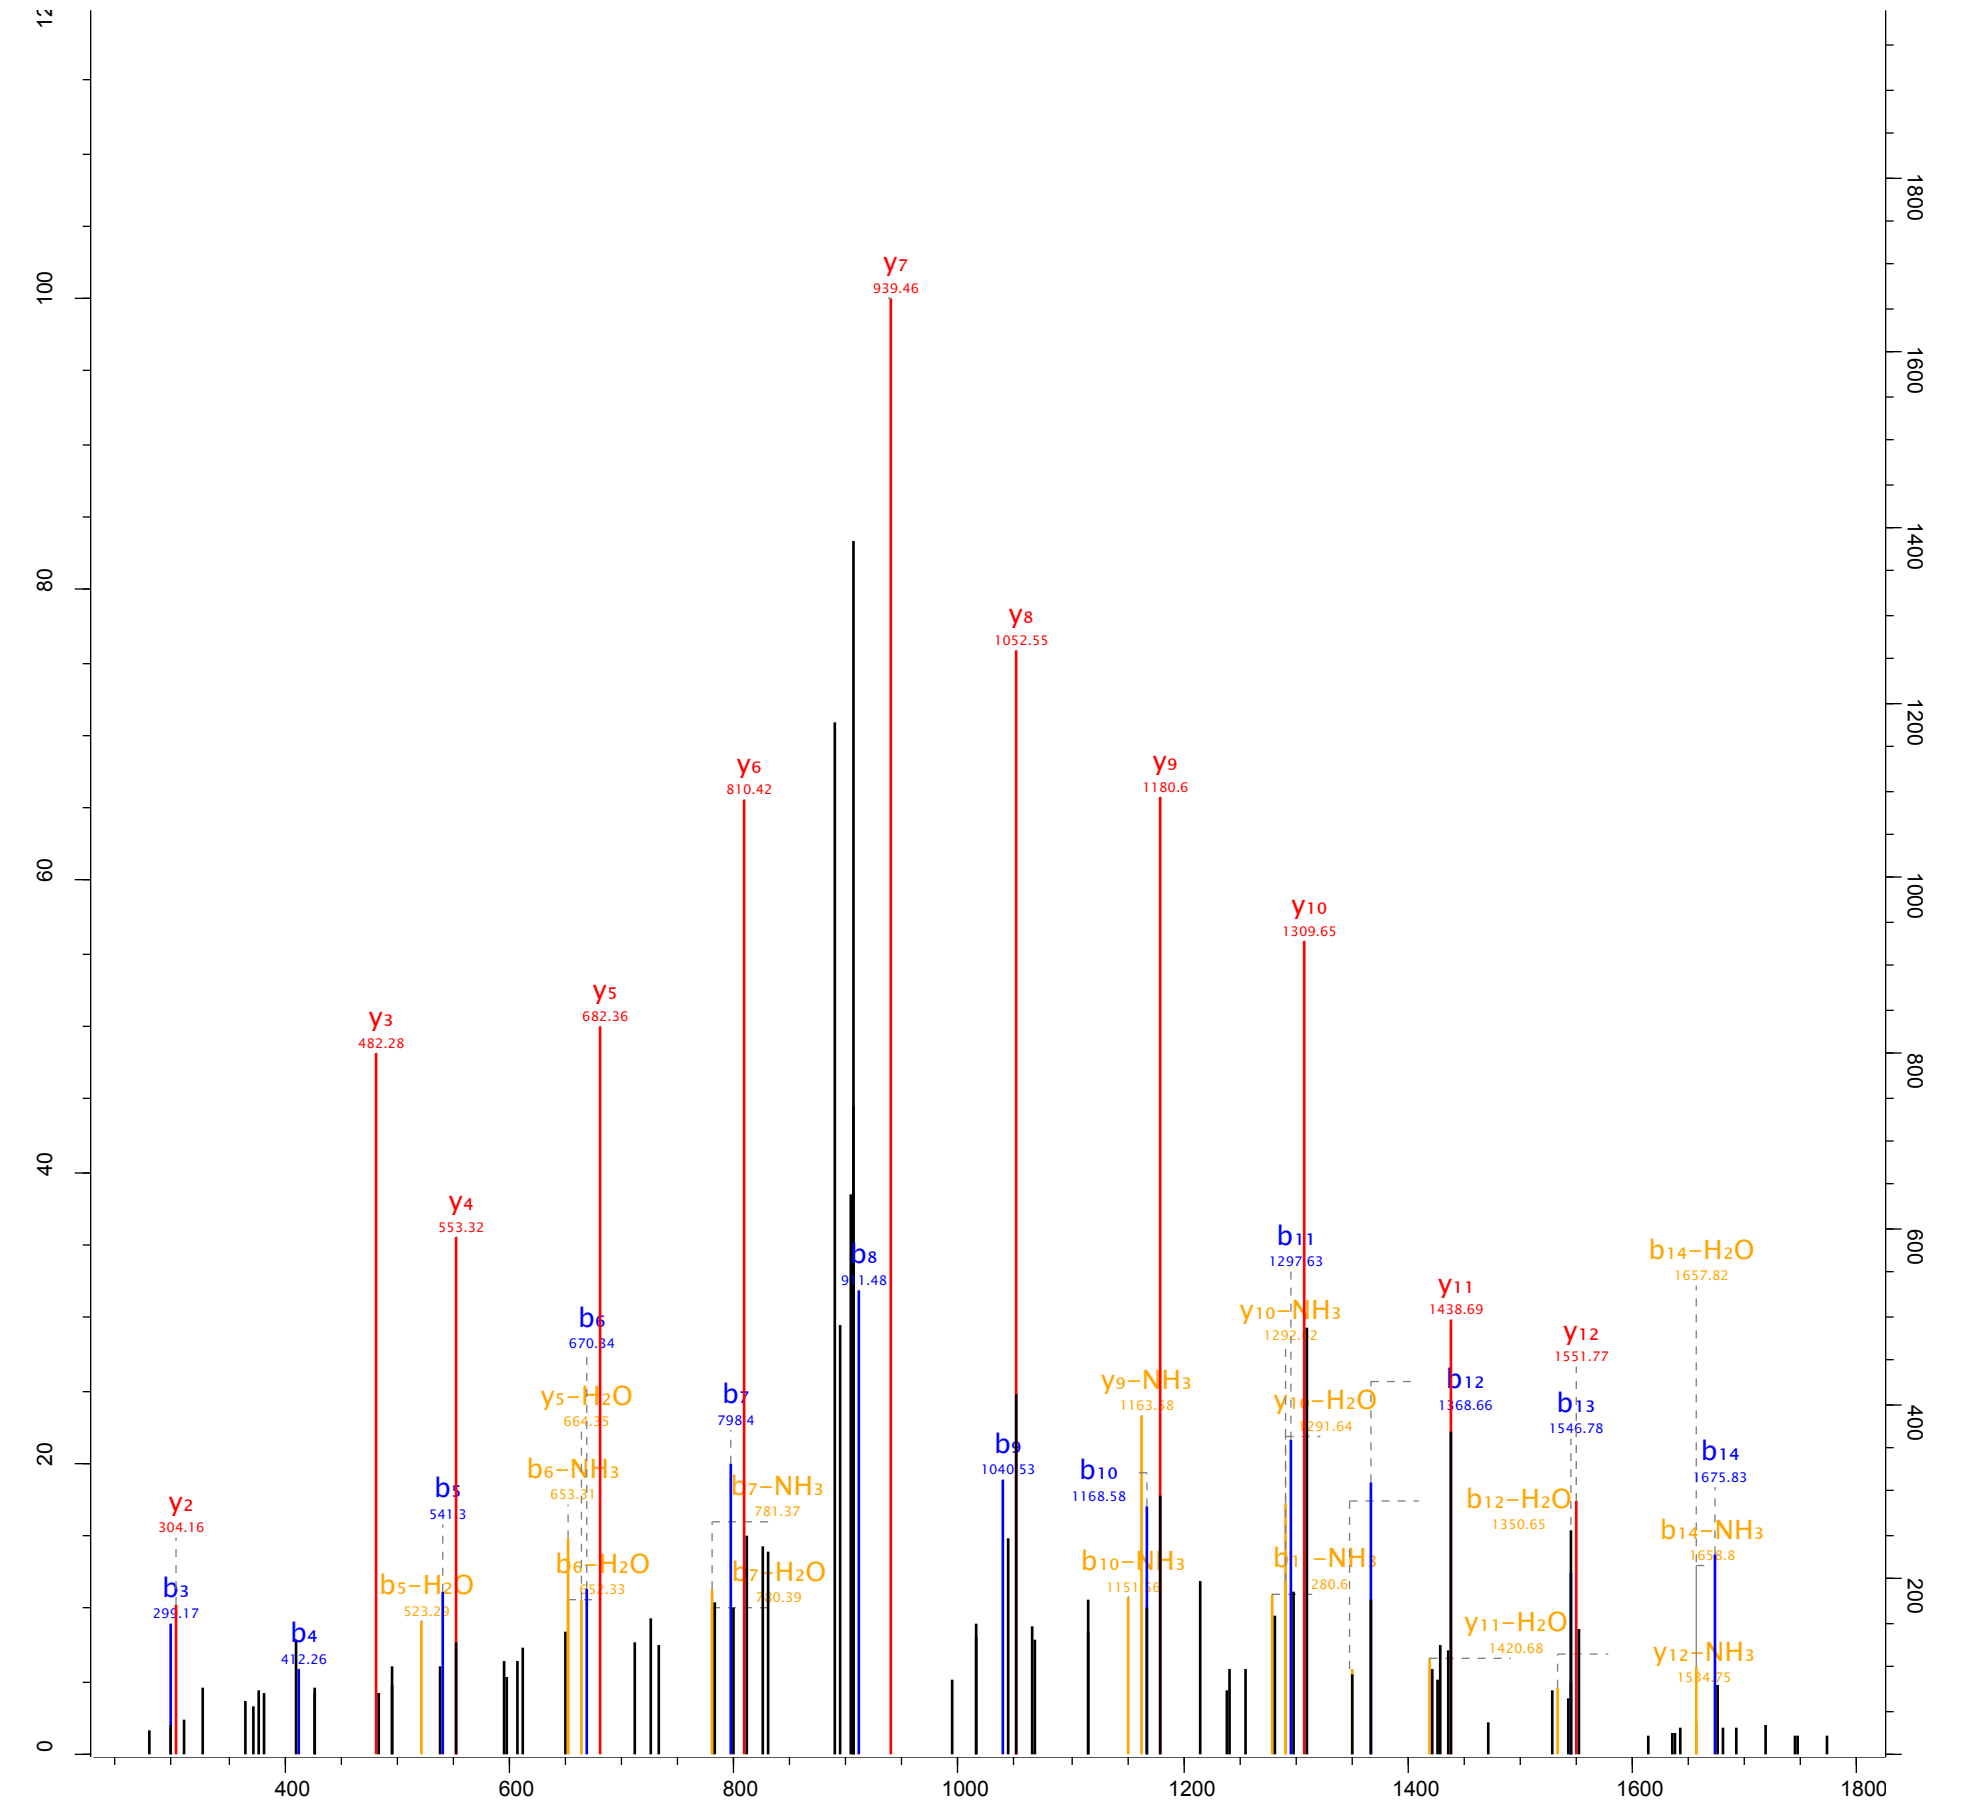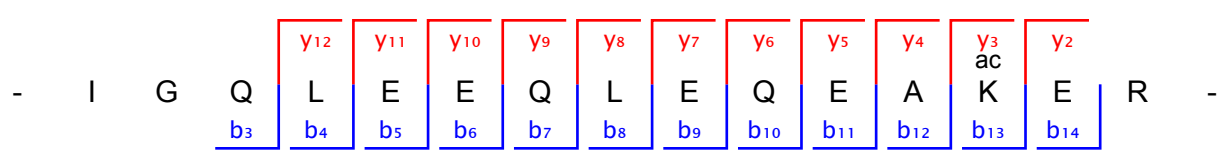

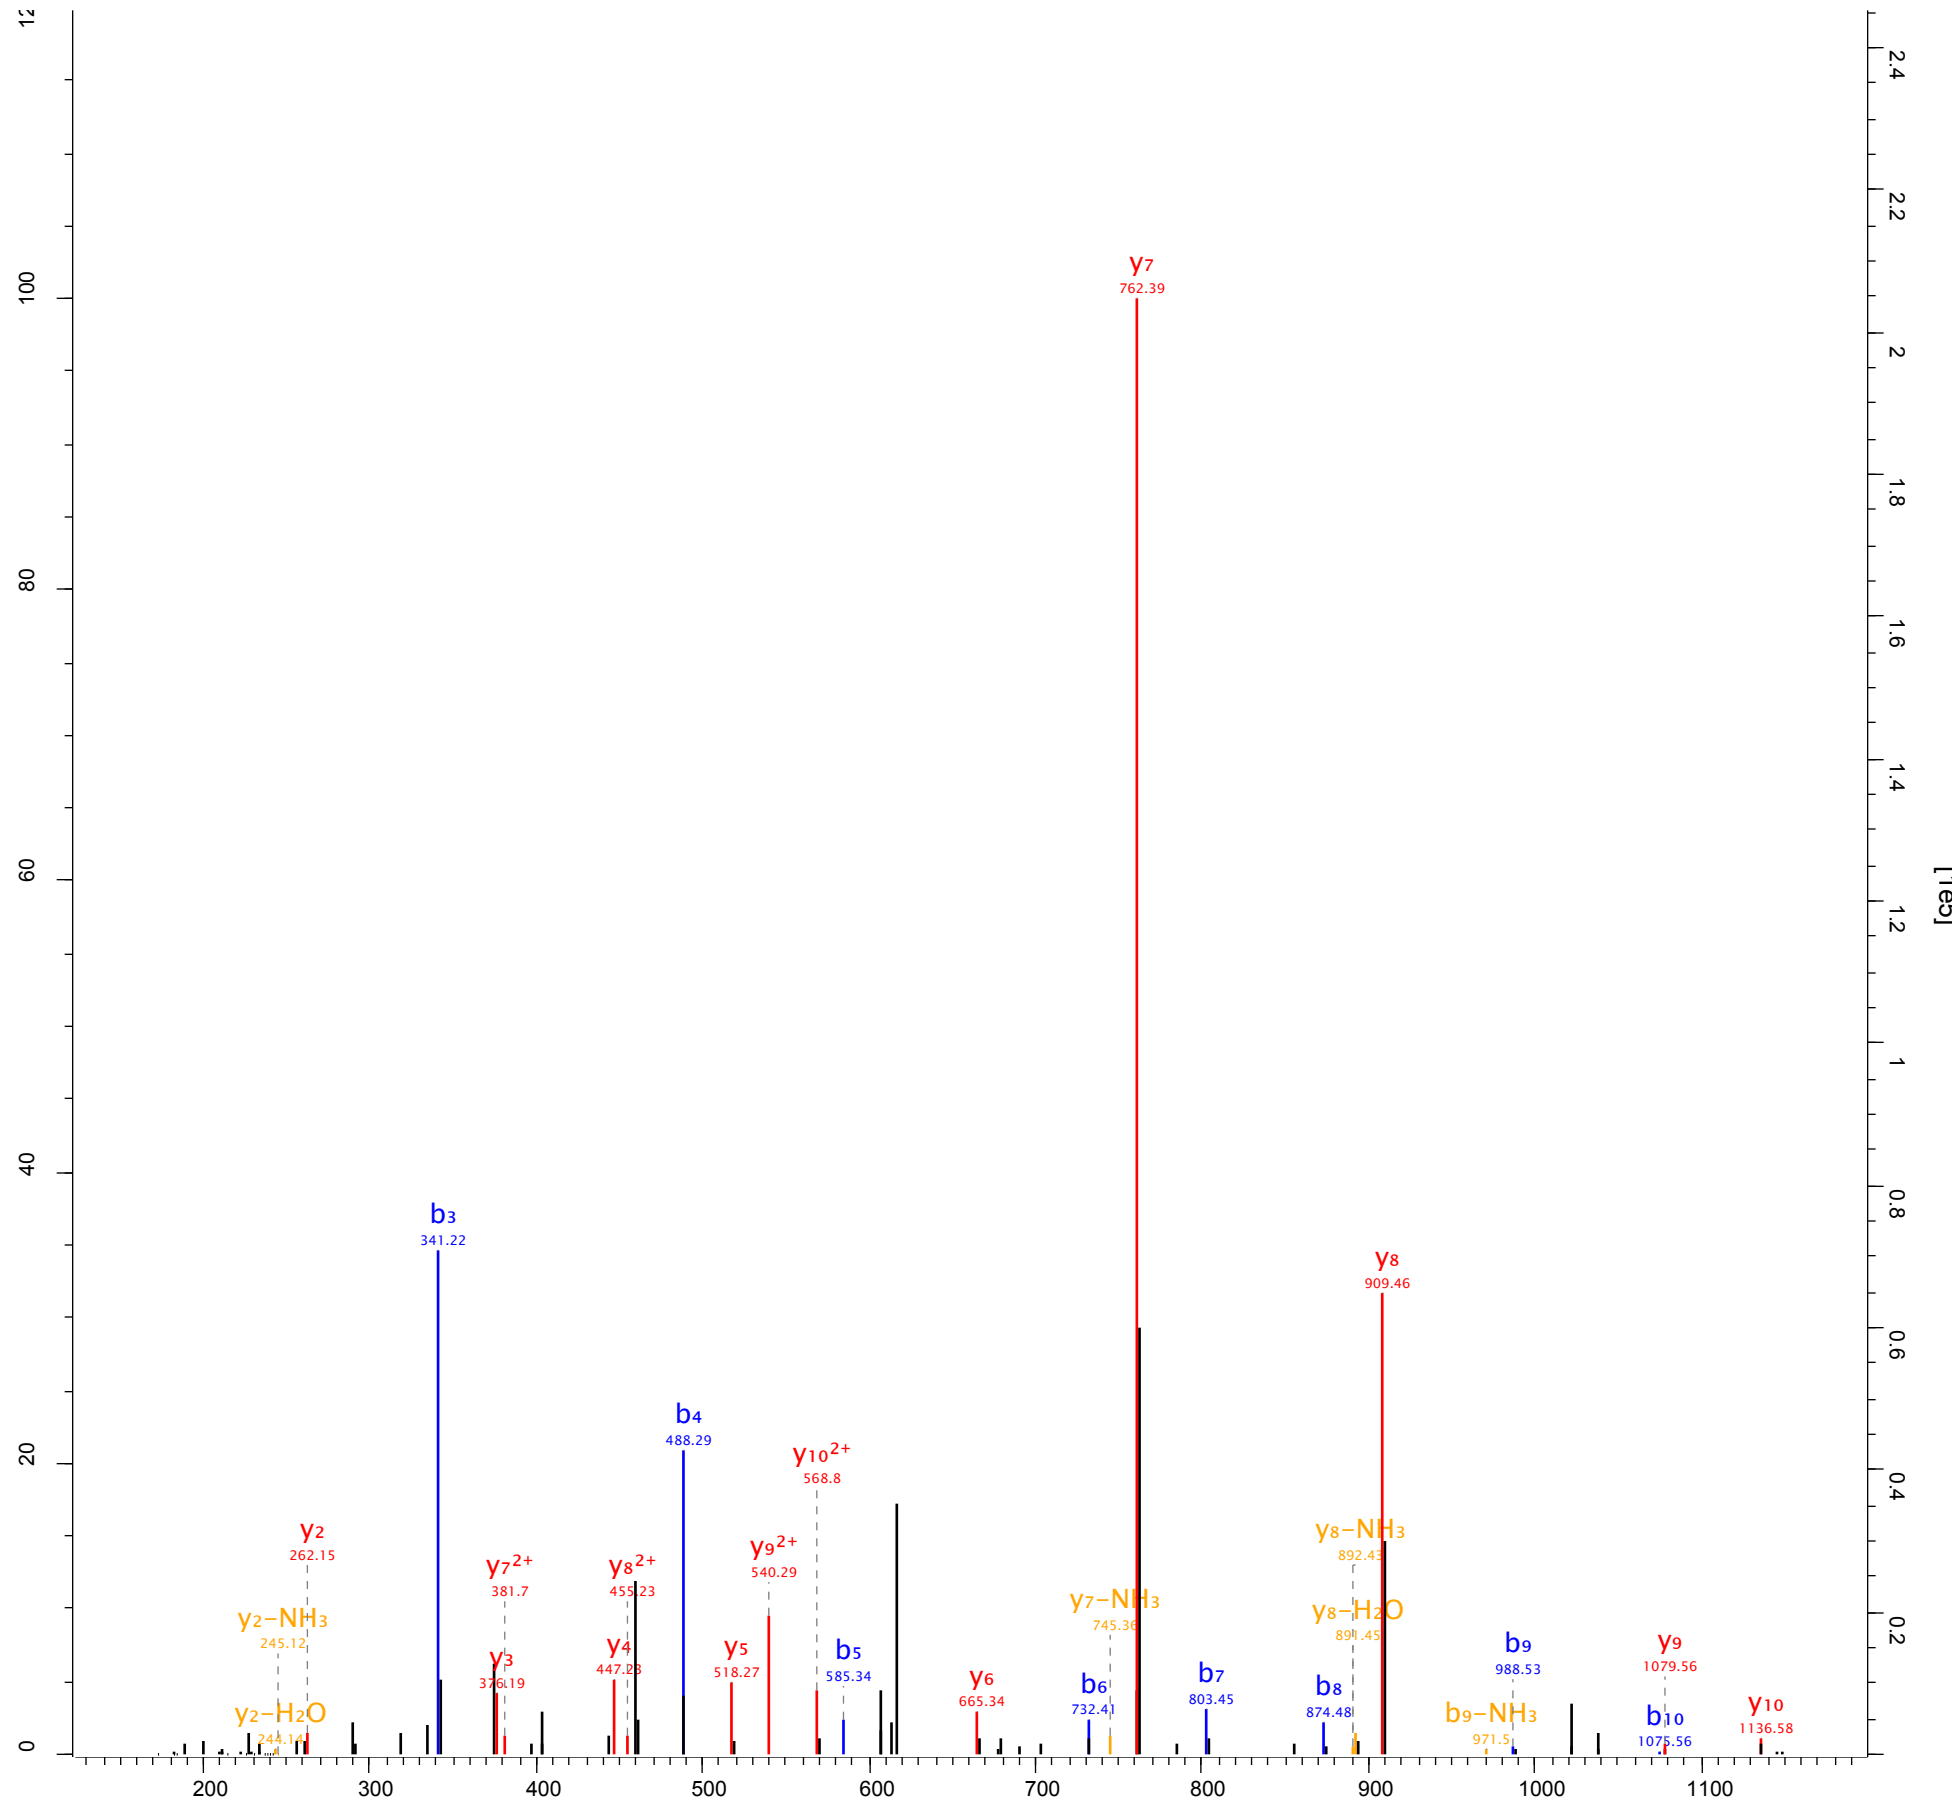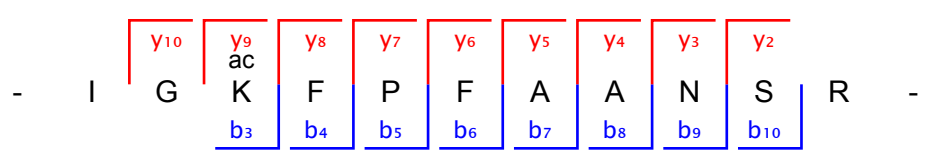

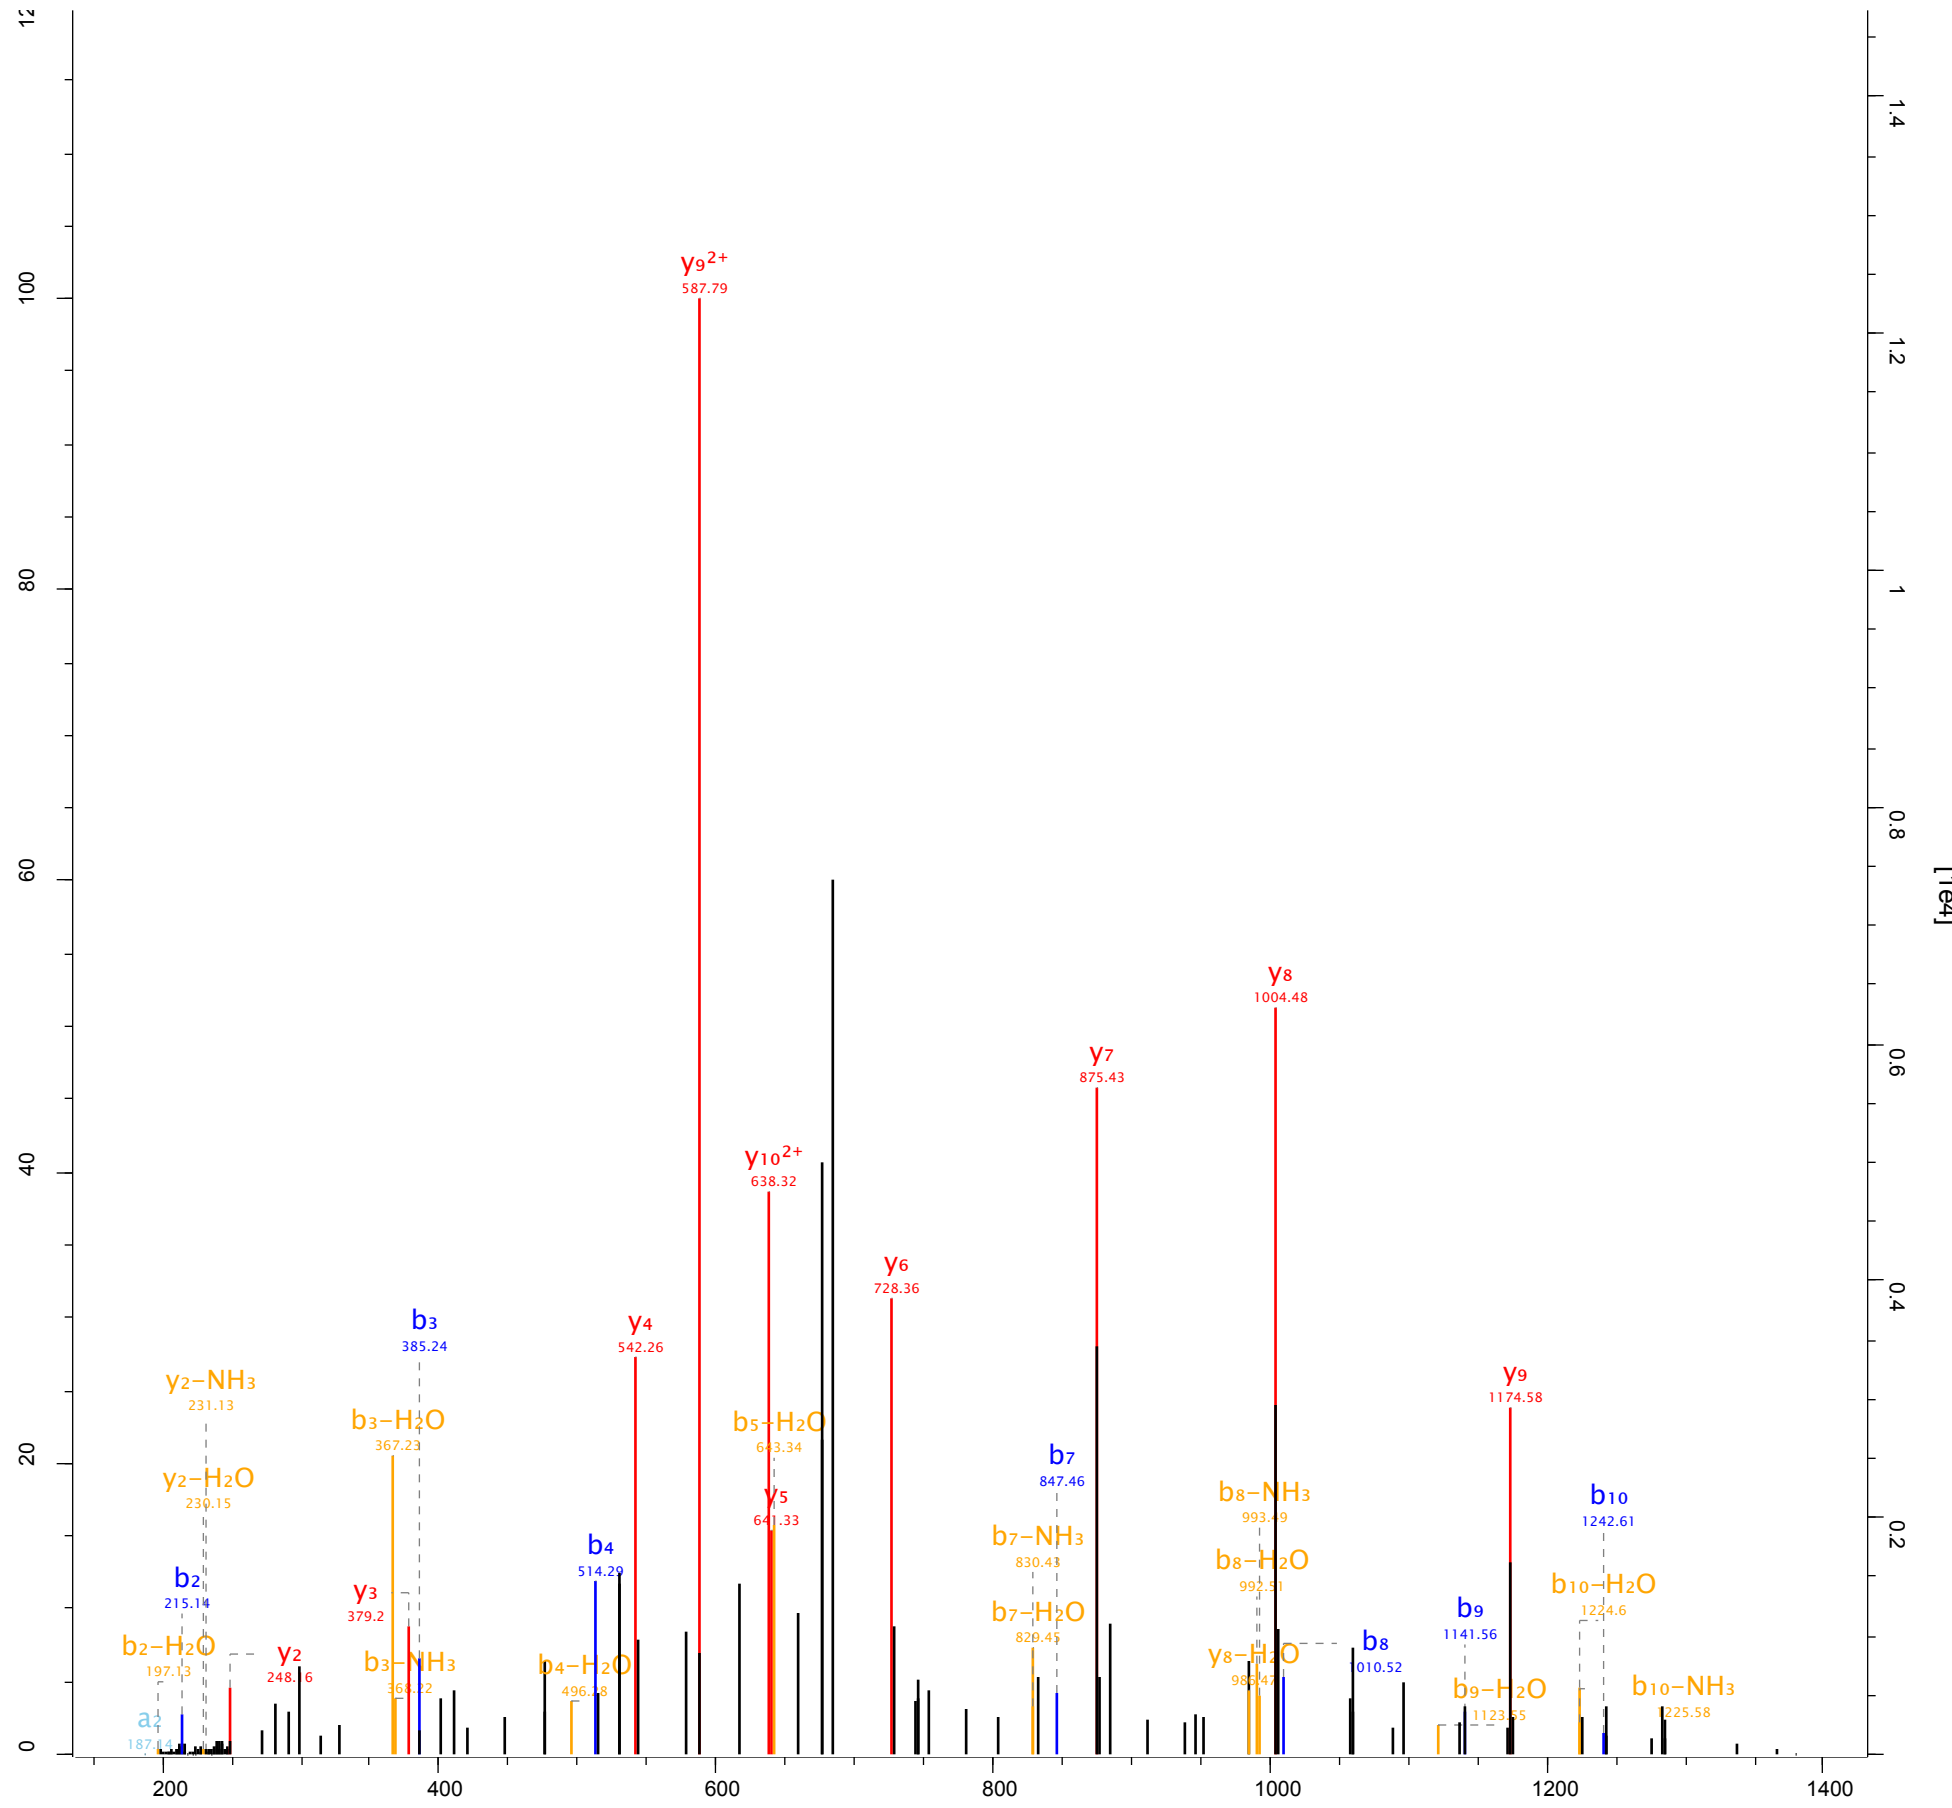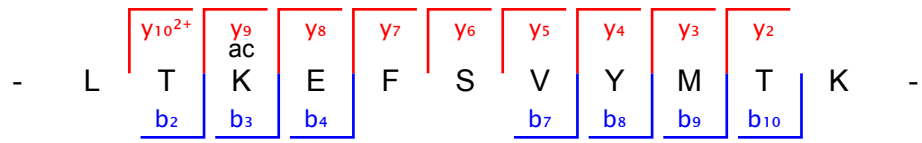

050813\_SCW\_II\_29\_19\_4

19501

ITMS; CID

211.75

792.93

Atp5f1

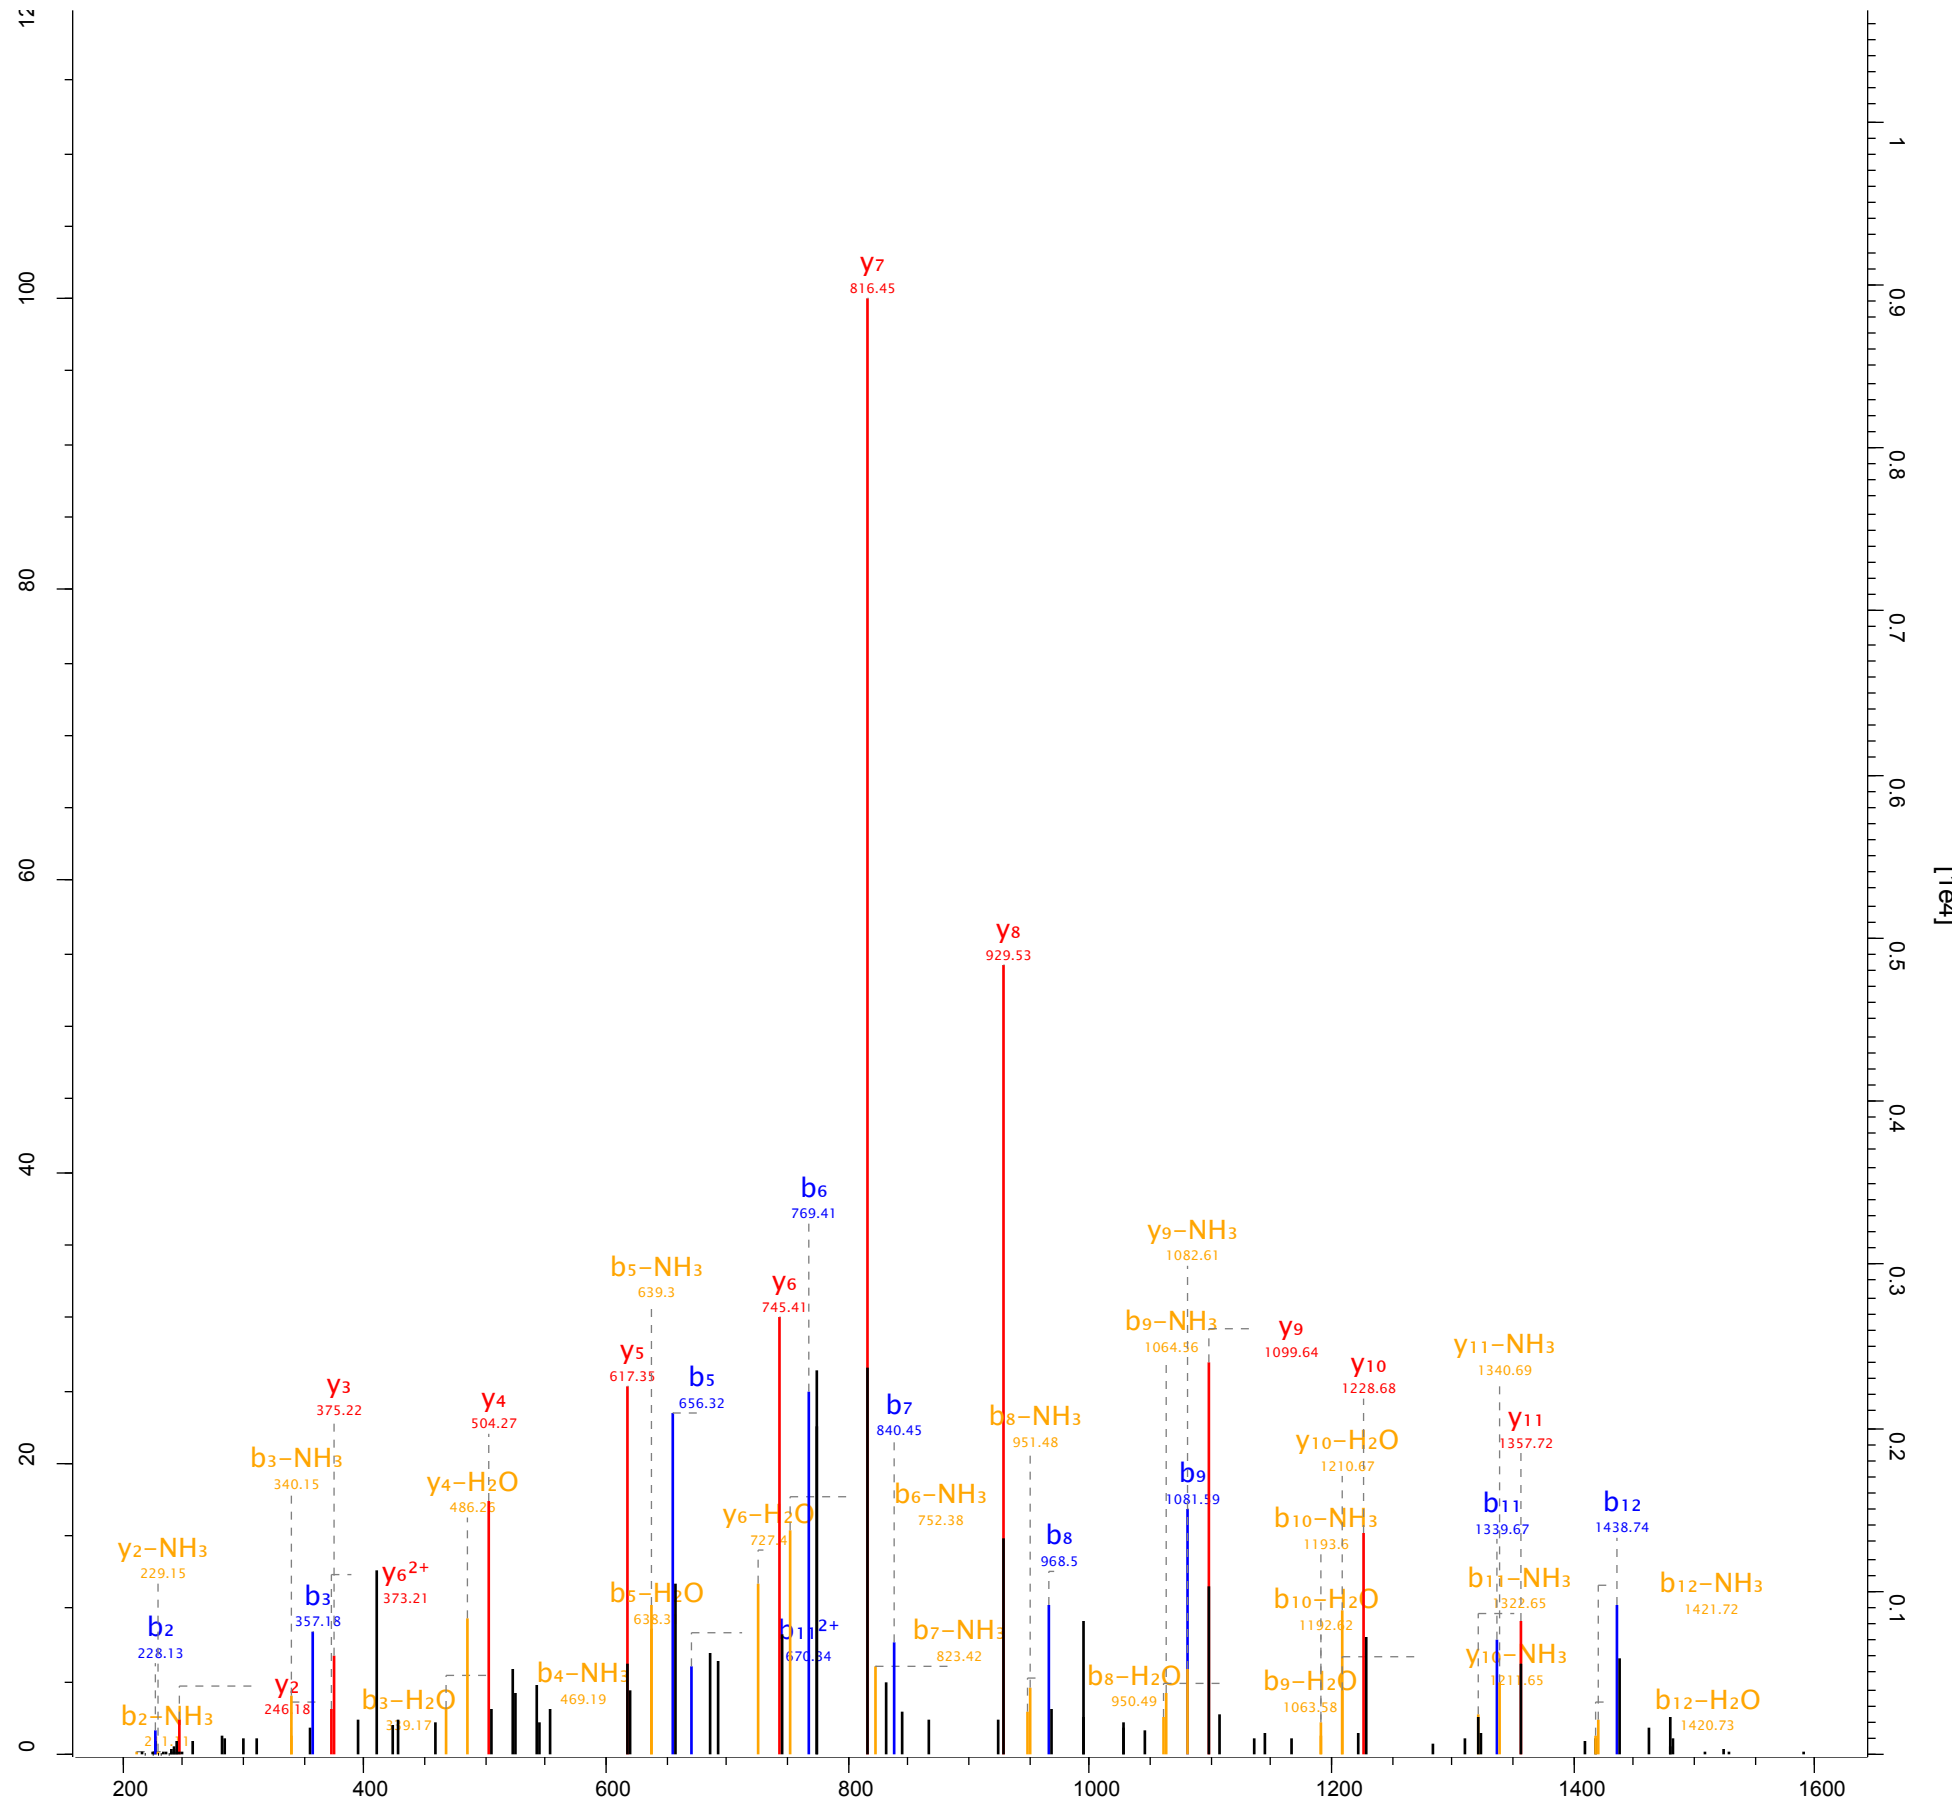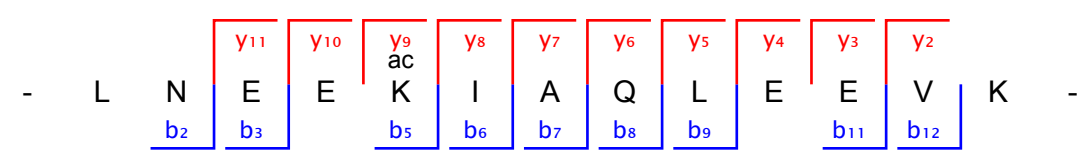

050813\_SCW\_II\_29\_19\_4

19583

ITMS; CID

186.72

808.42

Scp2

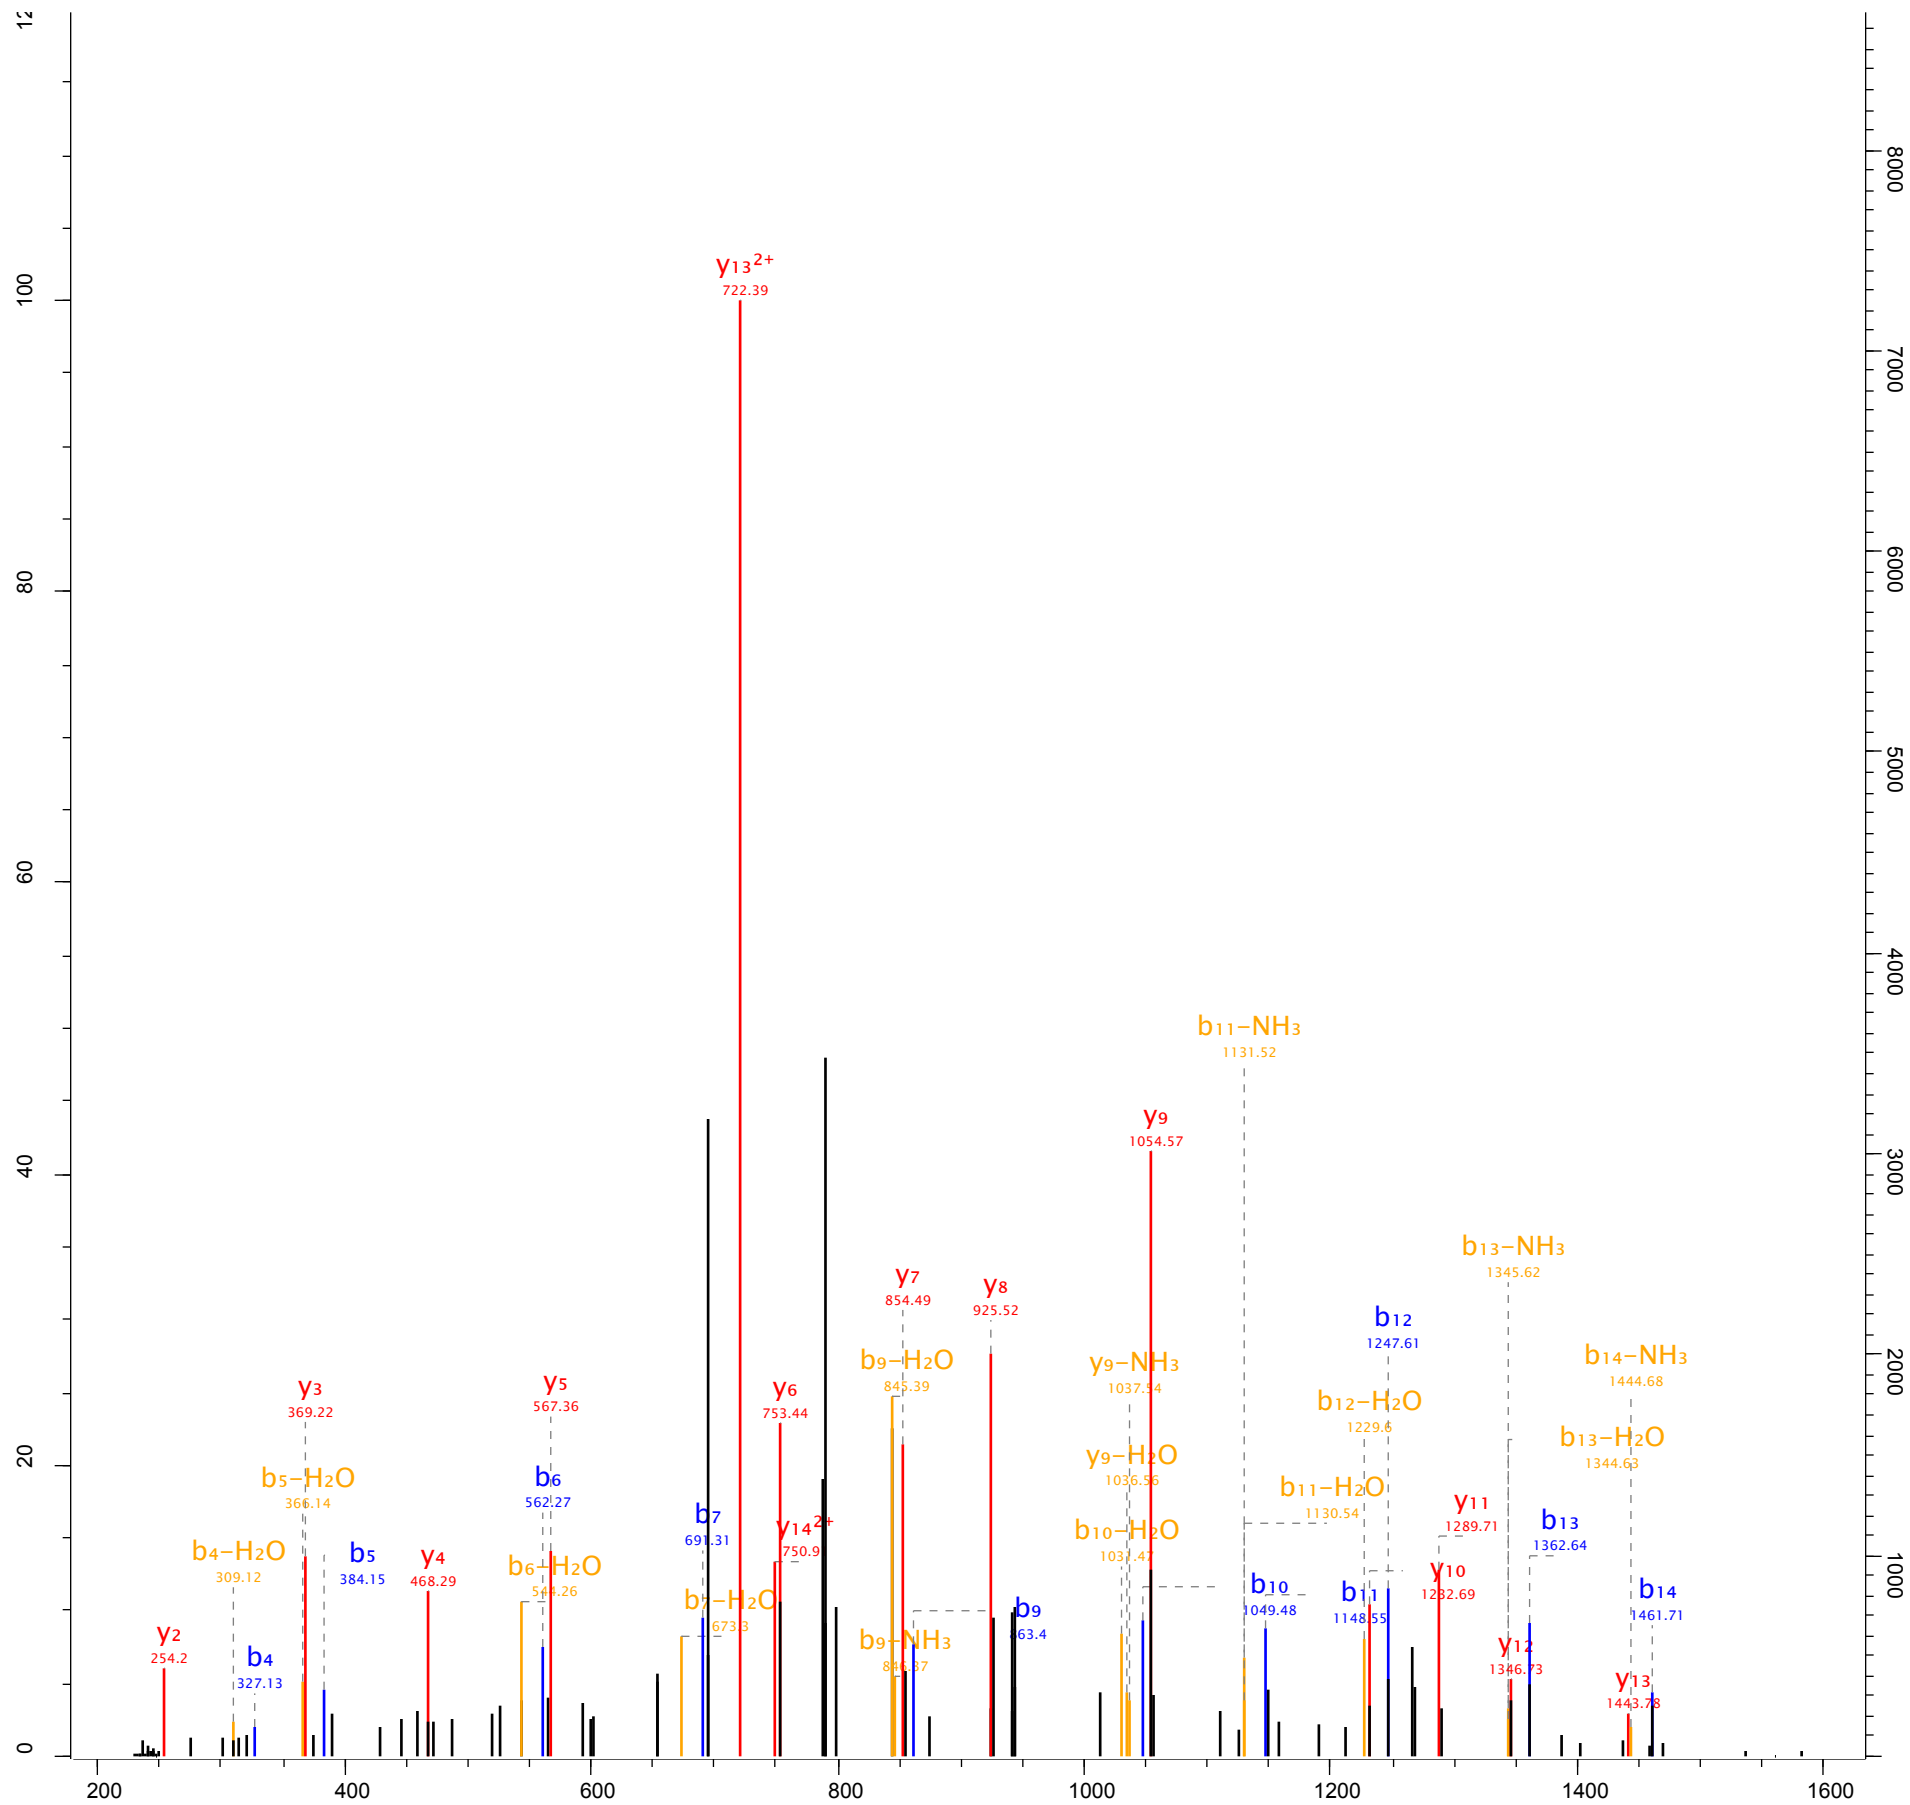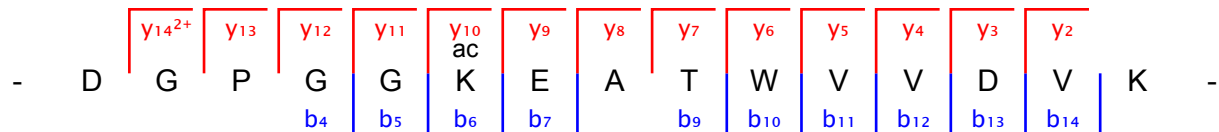

050813\_SCW\_II\_29\_19\_4

19625 ITMS; CID 248.33 1000 Cbr4

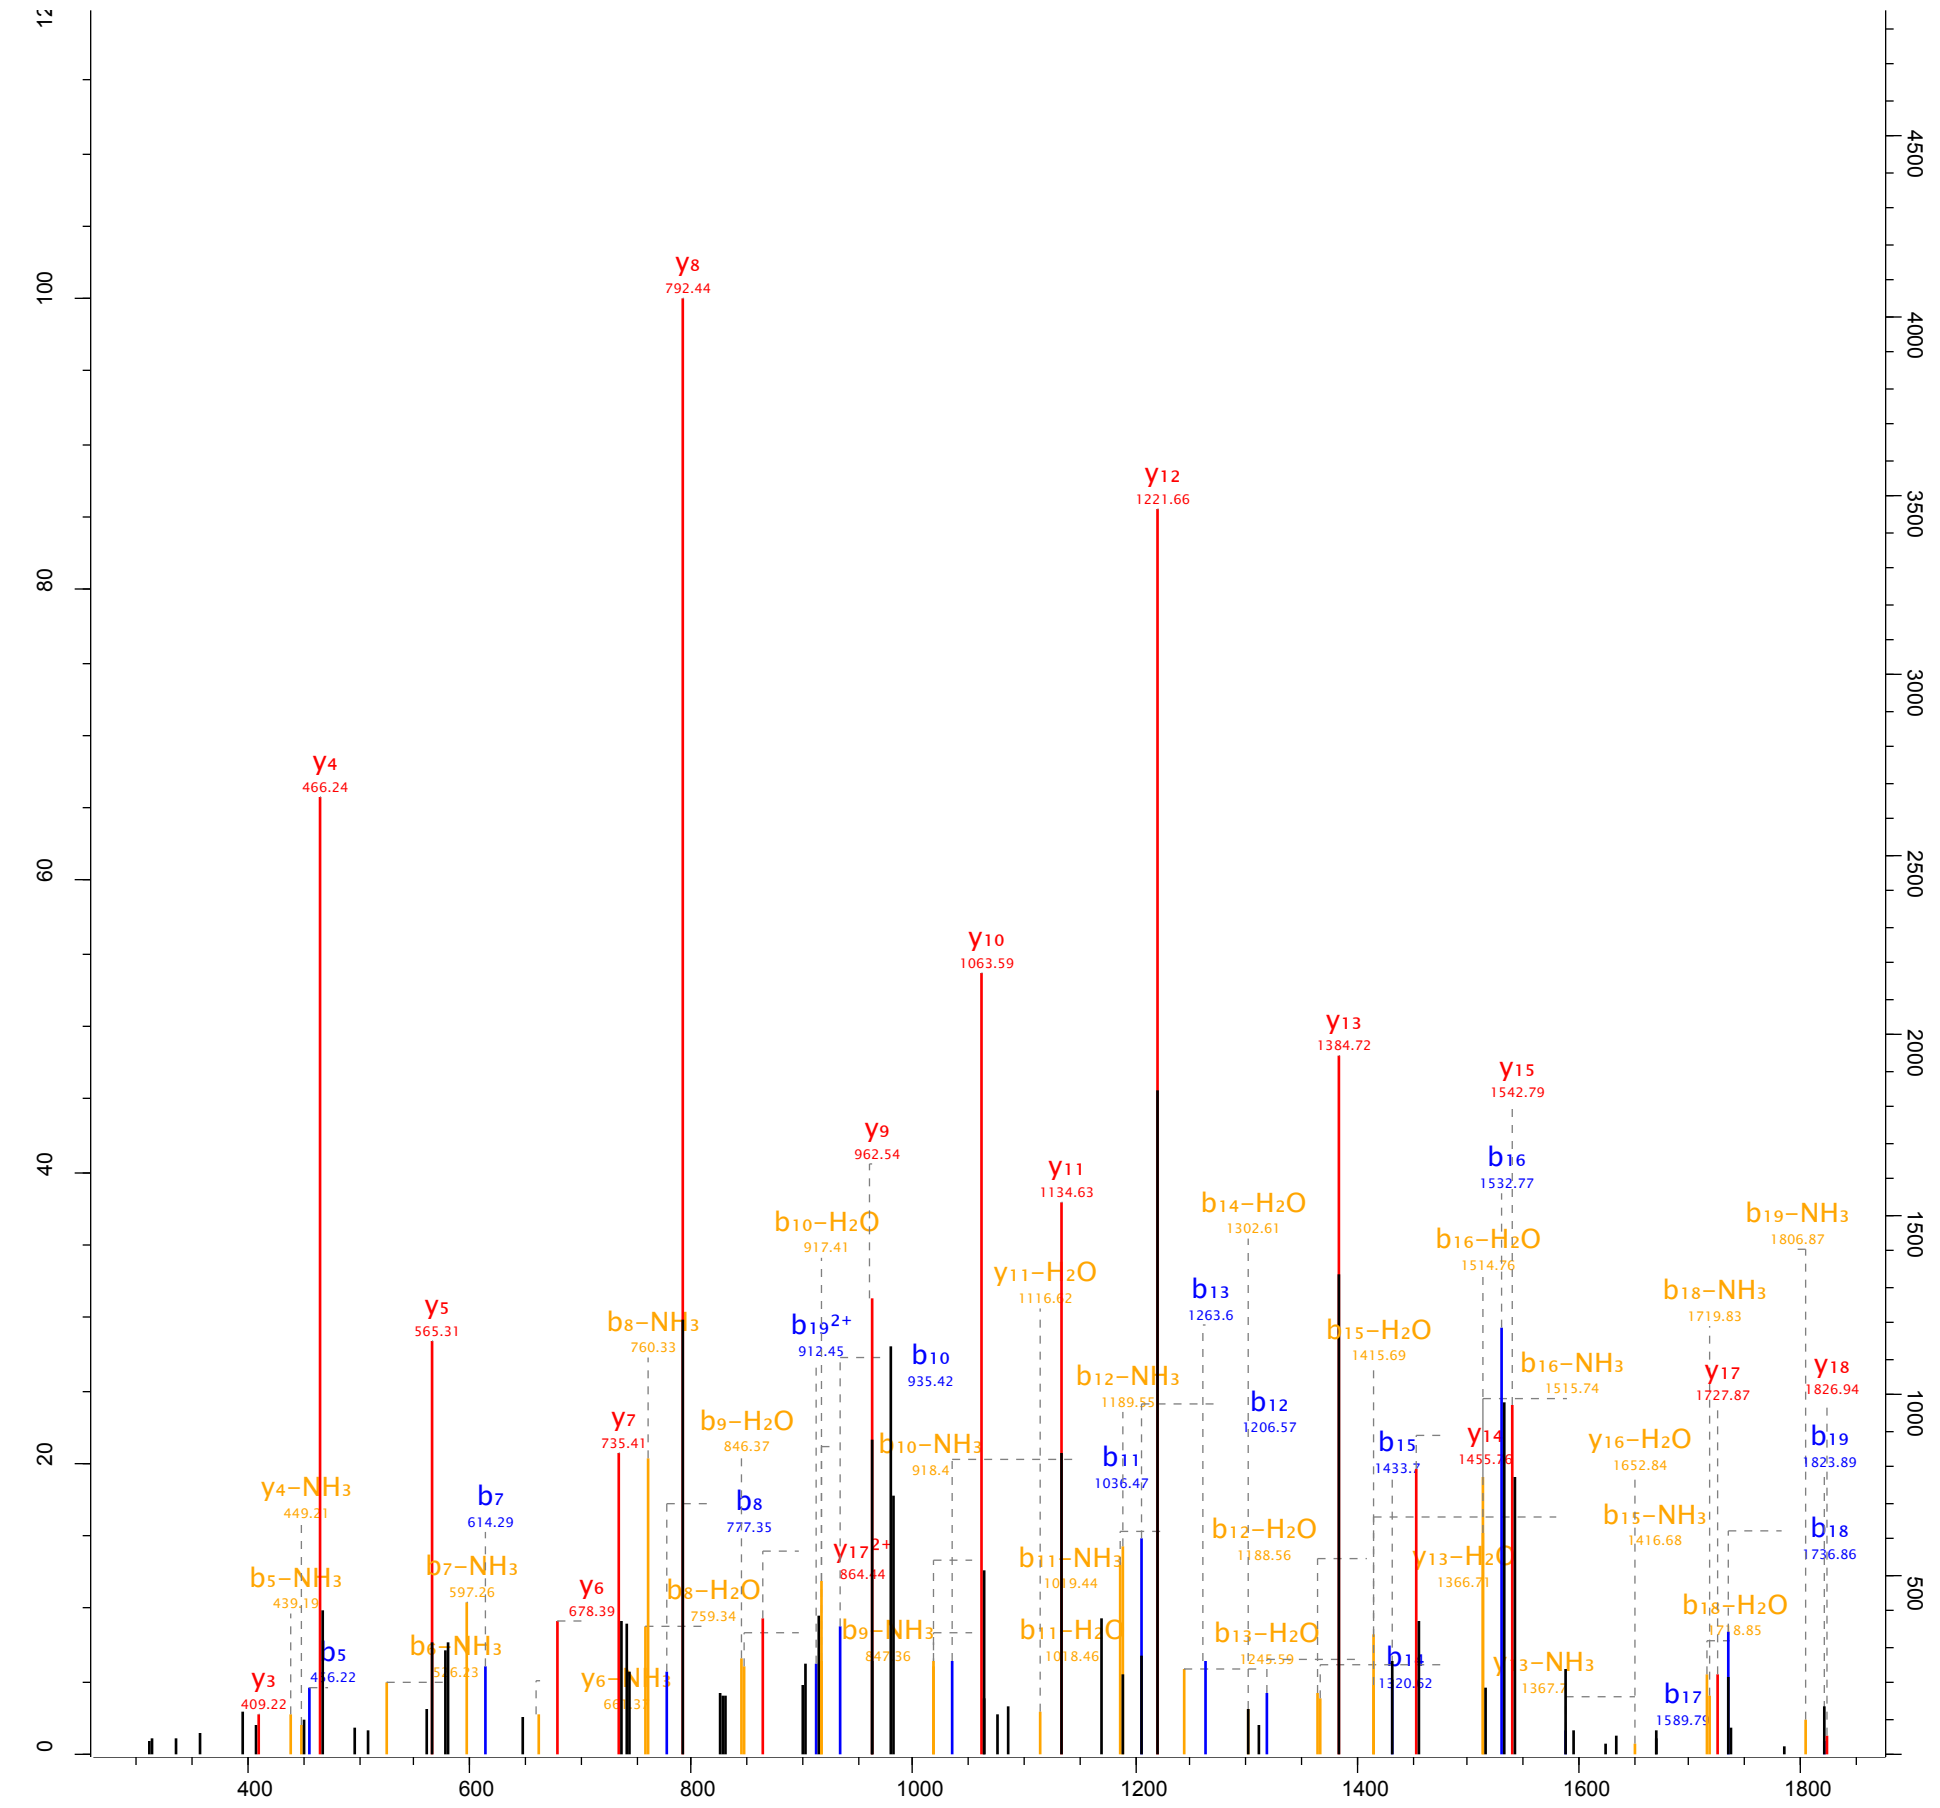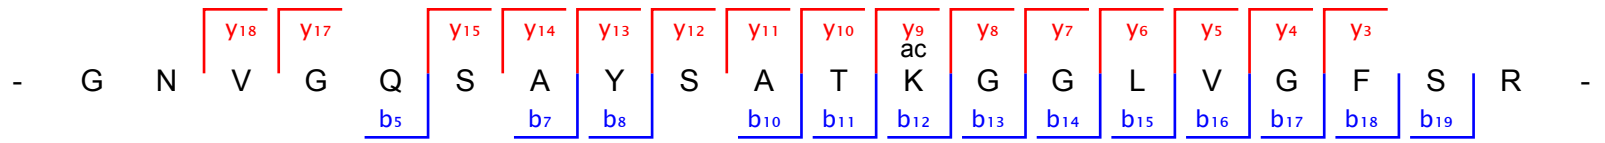



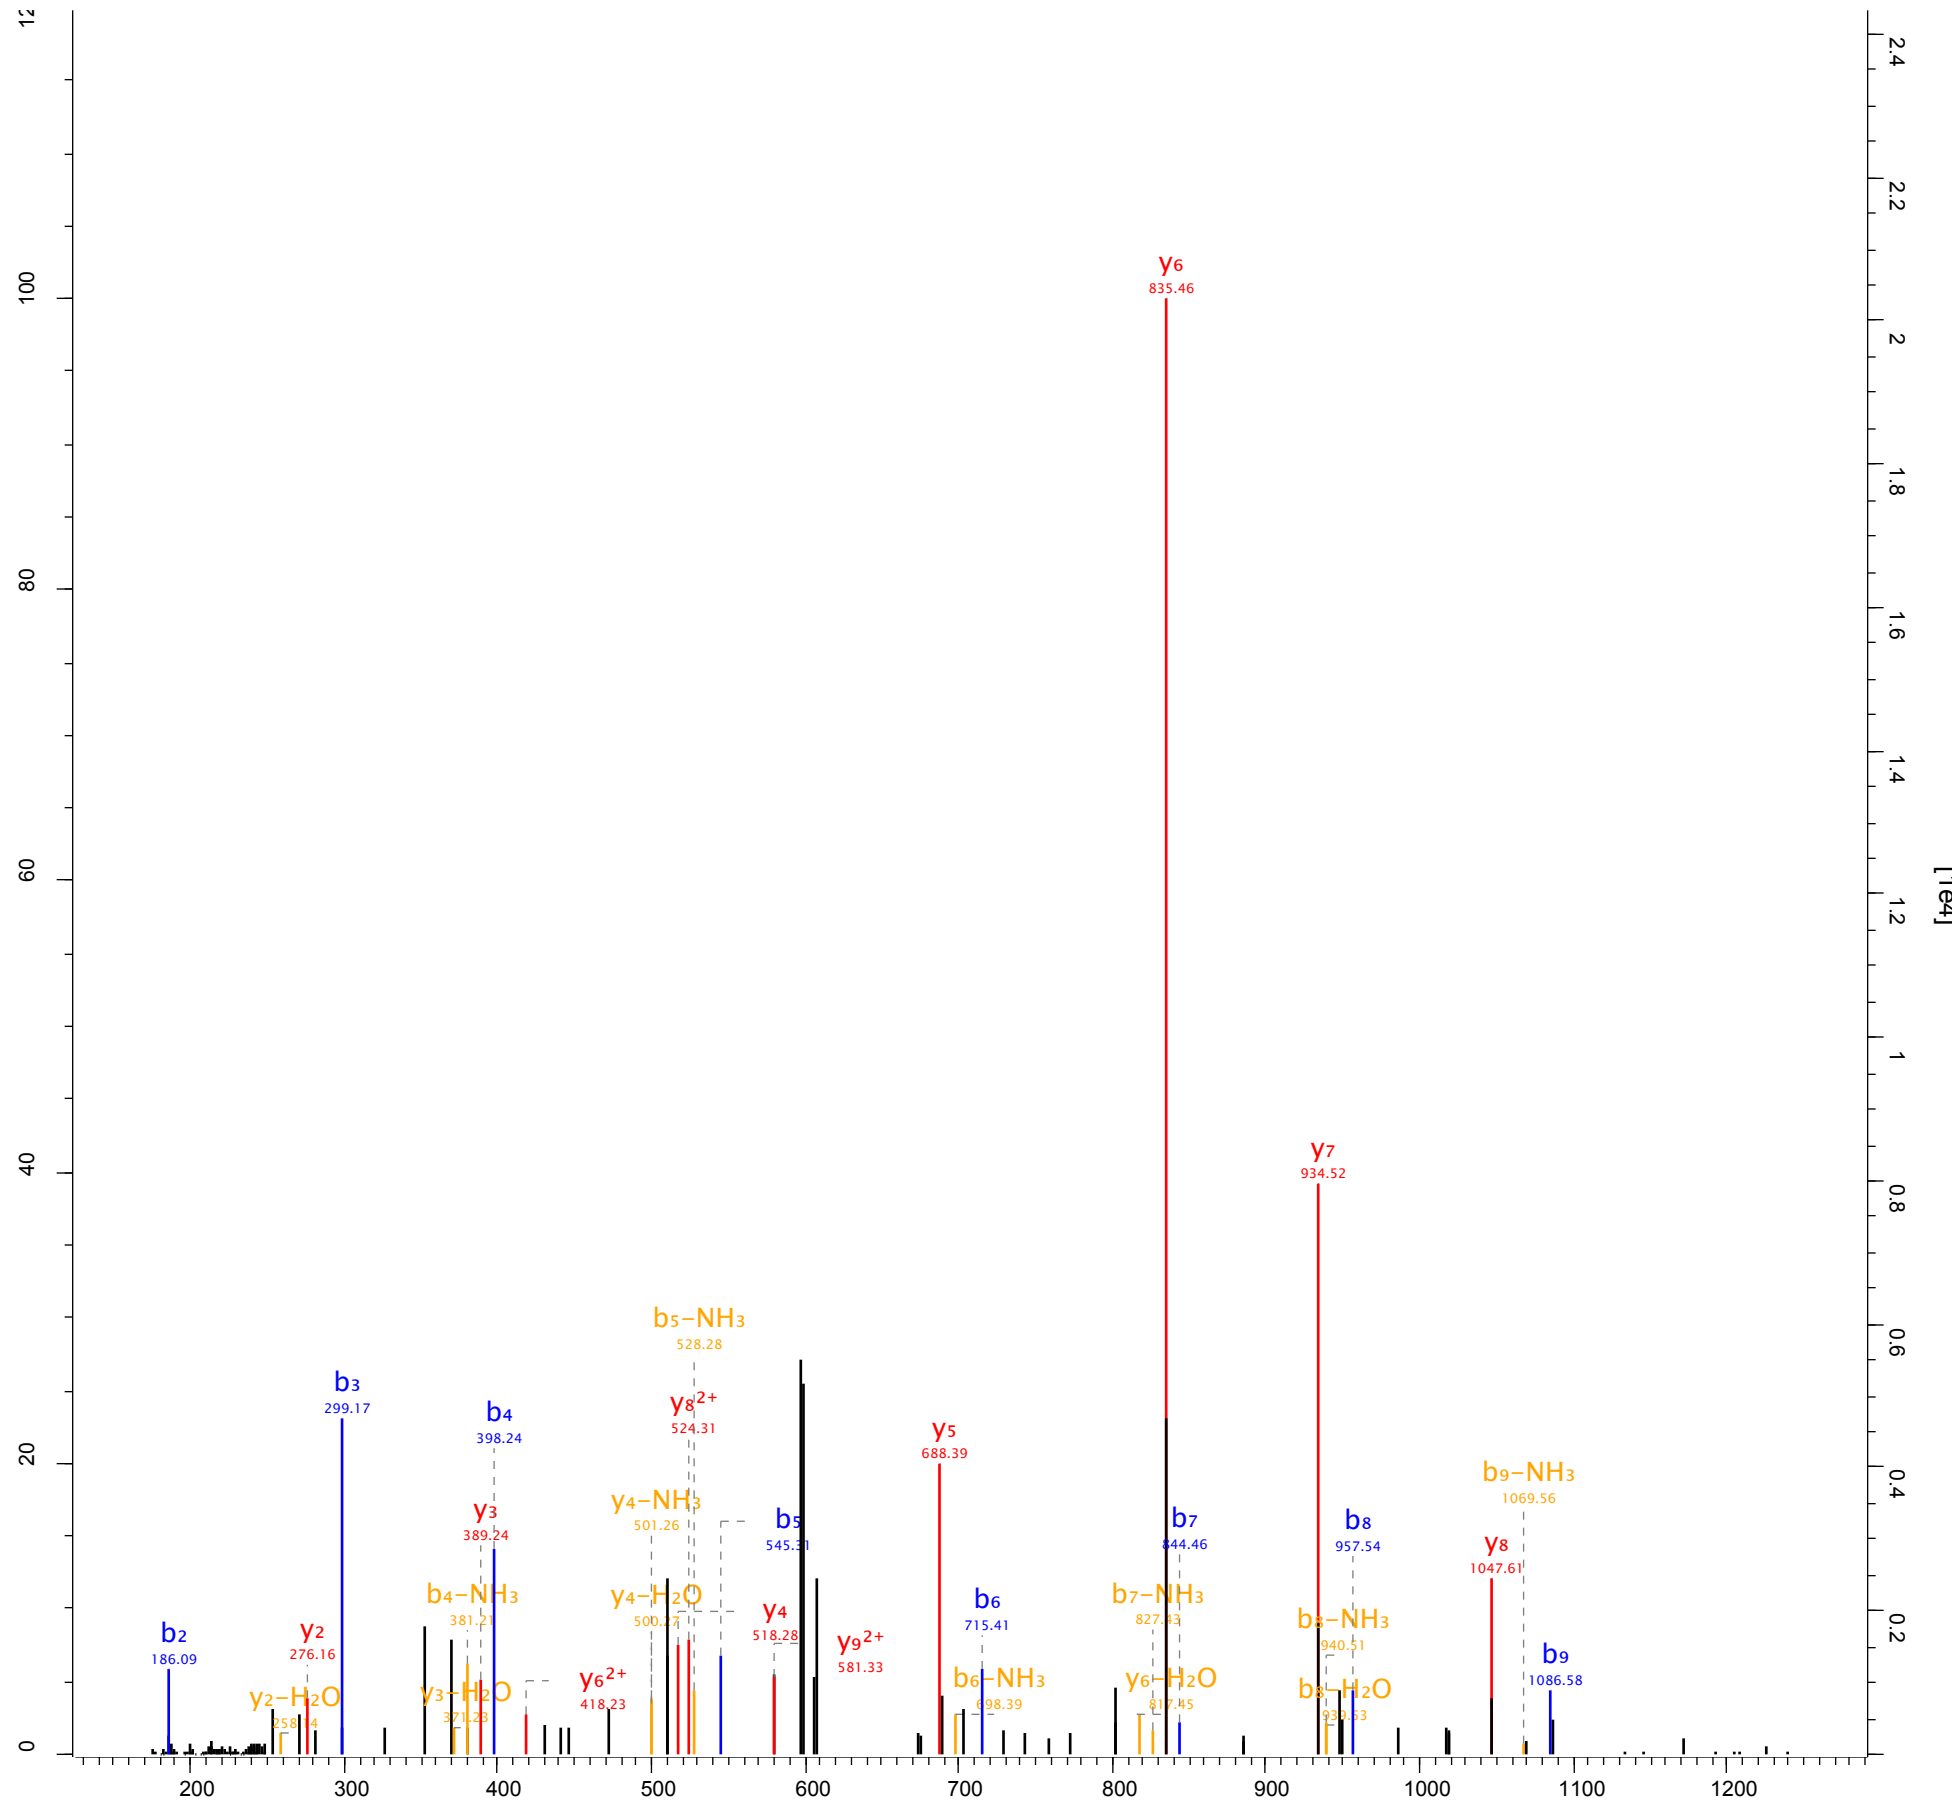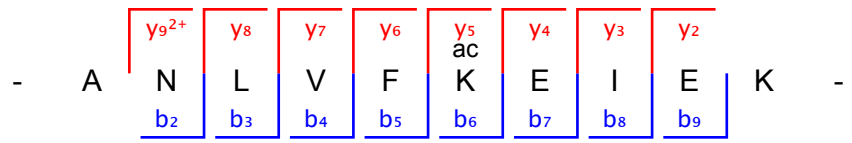

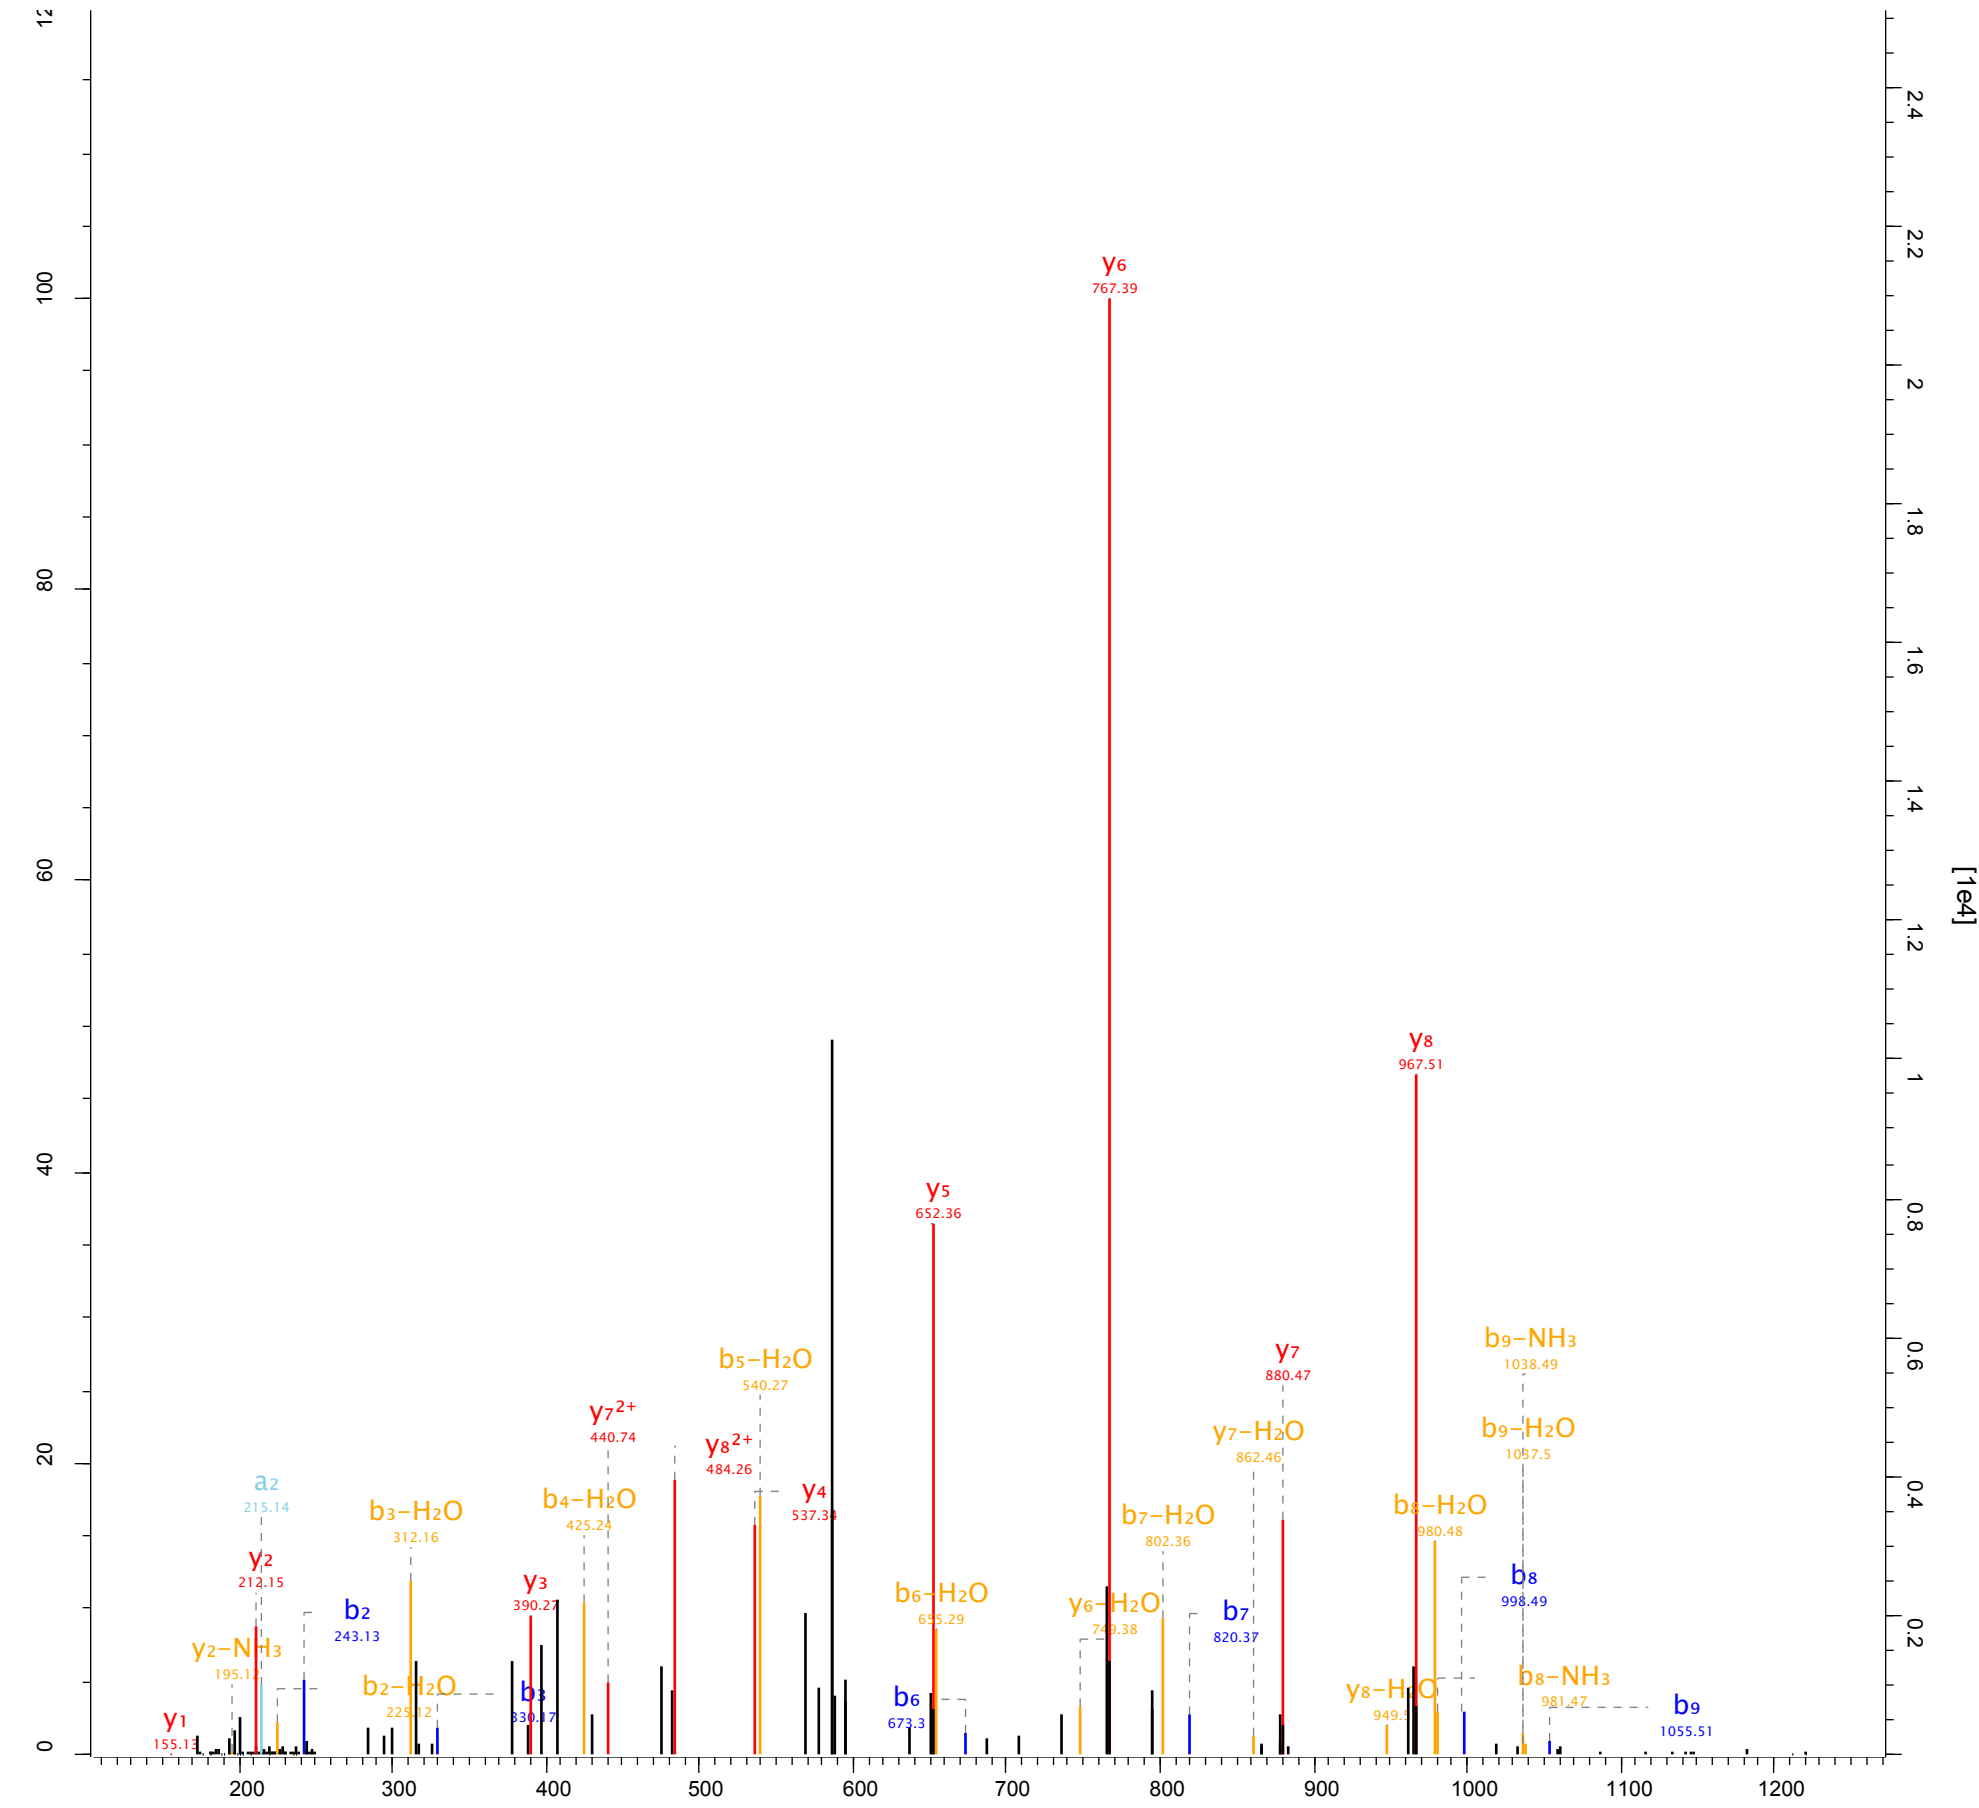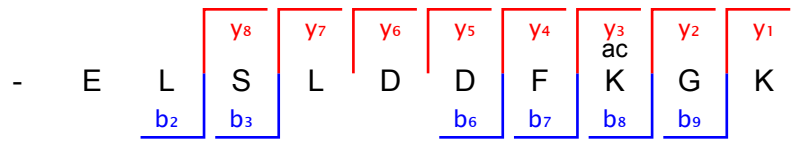

Raw file  
072613\_SCW\_II\_68\_Enriched\_10

Scan  
18307

Method  
ITMS; CID

Score  
170.4

m/z  
722.87

Gene names  
Anxa2

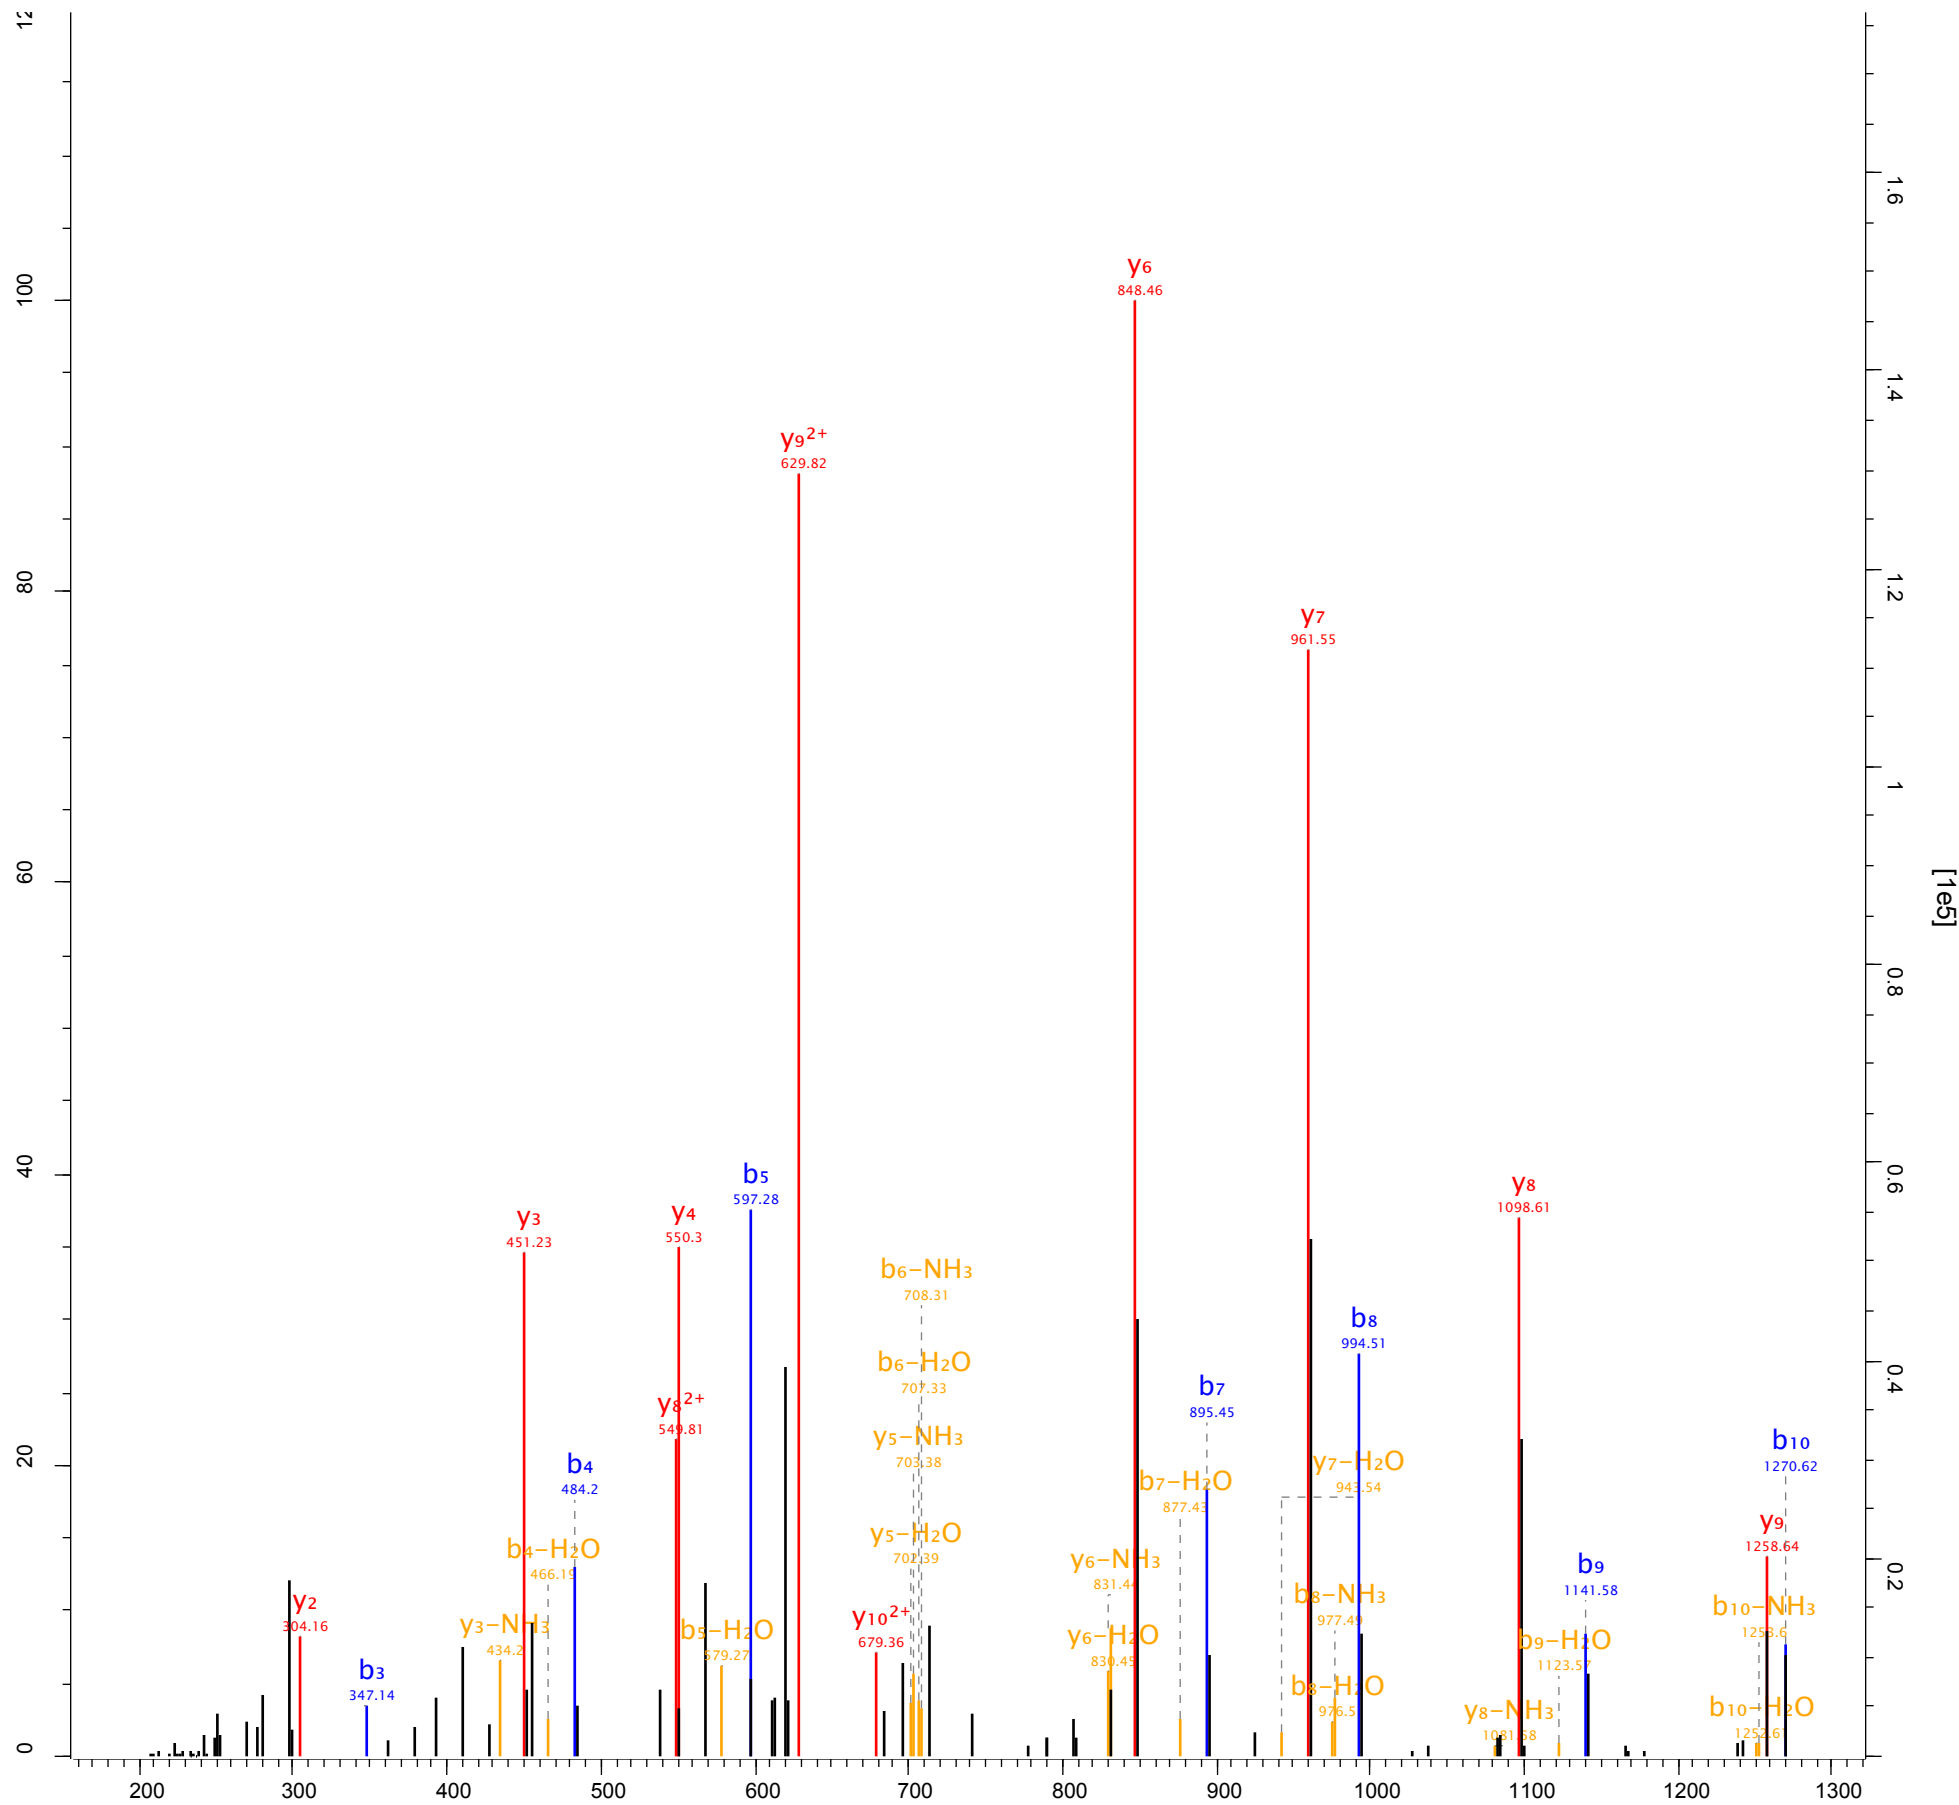

- S V C H L Q ac K V F E R -

Annotations below the sequence:

- Red boxes above: y10<sup>2+</sup>, y9, y8, y7, y6
- Blue boxes below: b3, b4, b5, b7, b8, b9, b10

072613\_SCW\_II\_68\_Enriched\_10

18657

ITMS; CID

128.01

916.11

Flnb

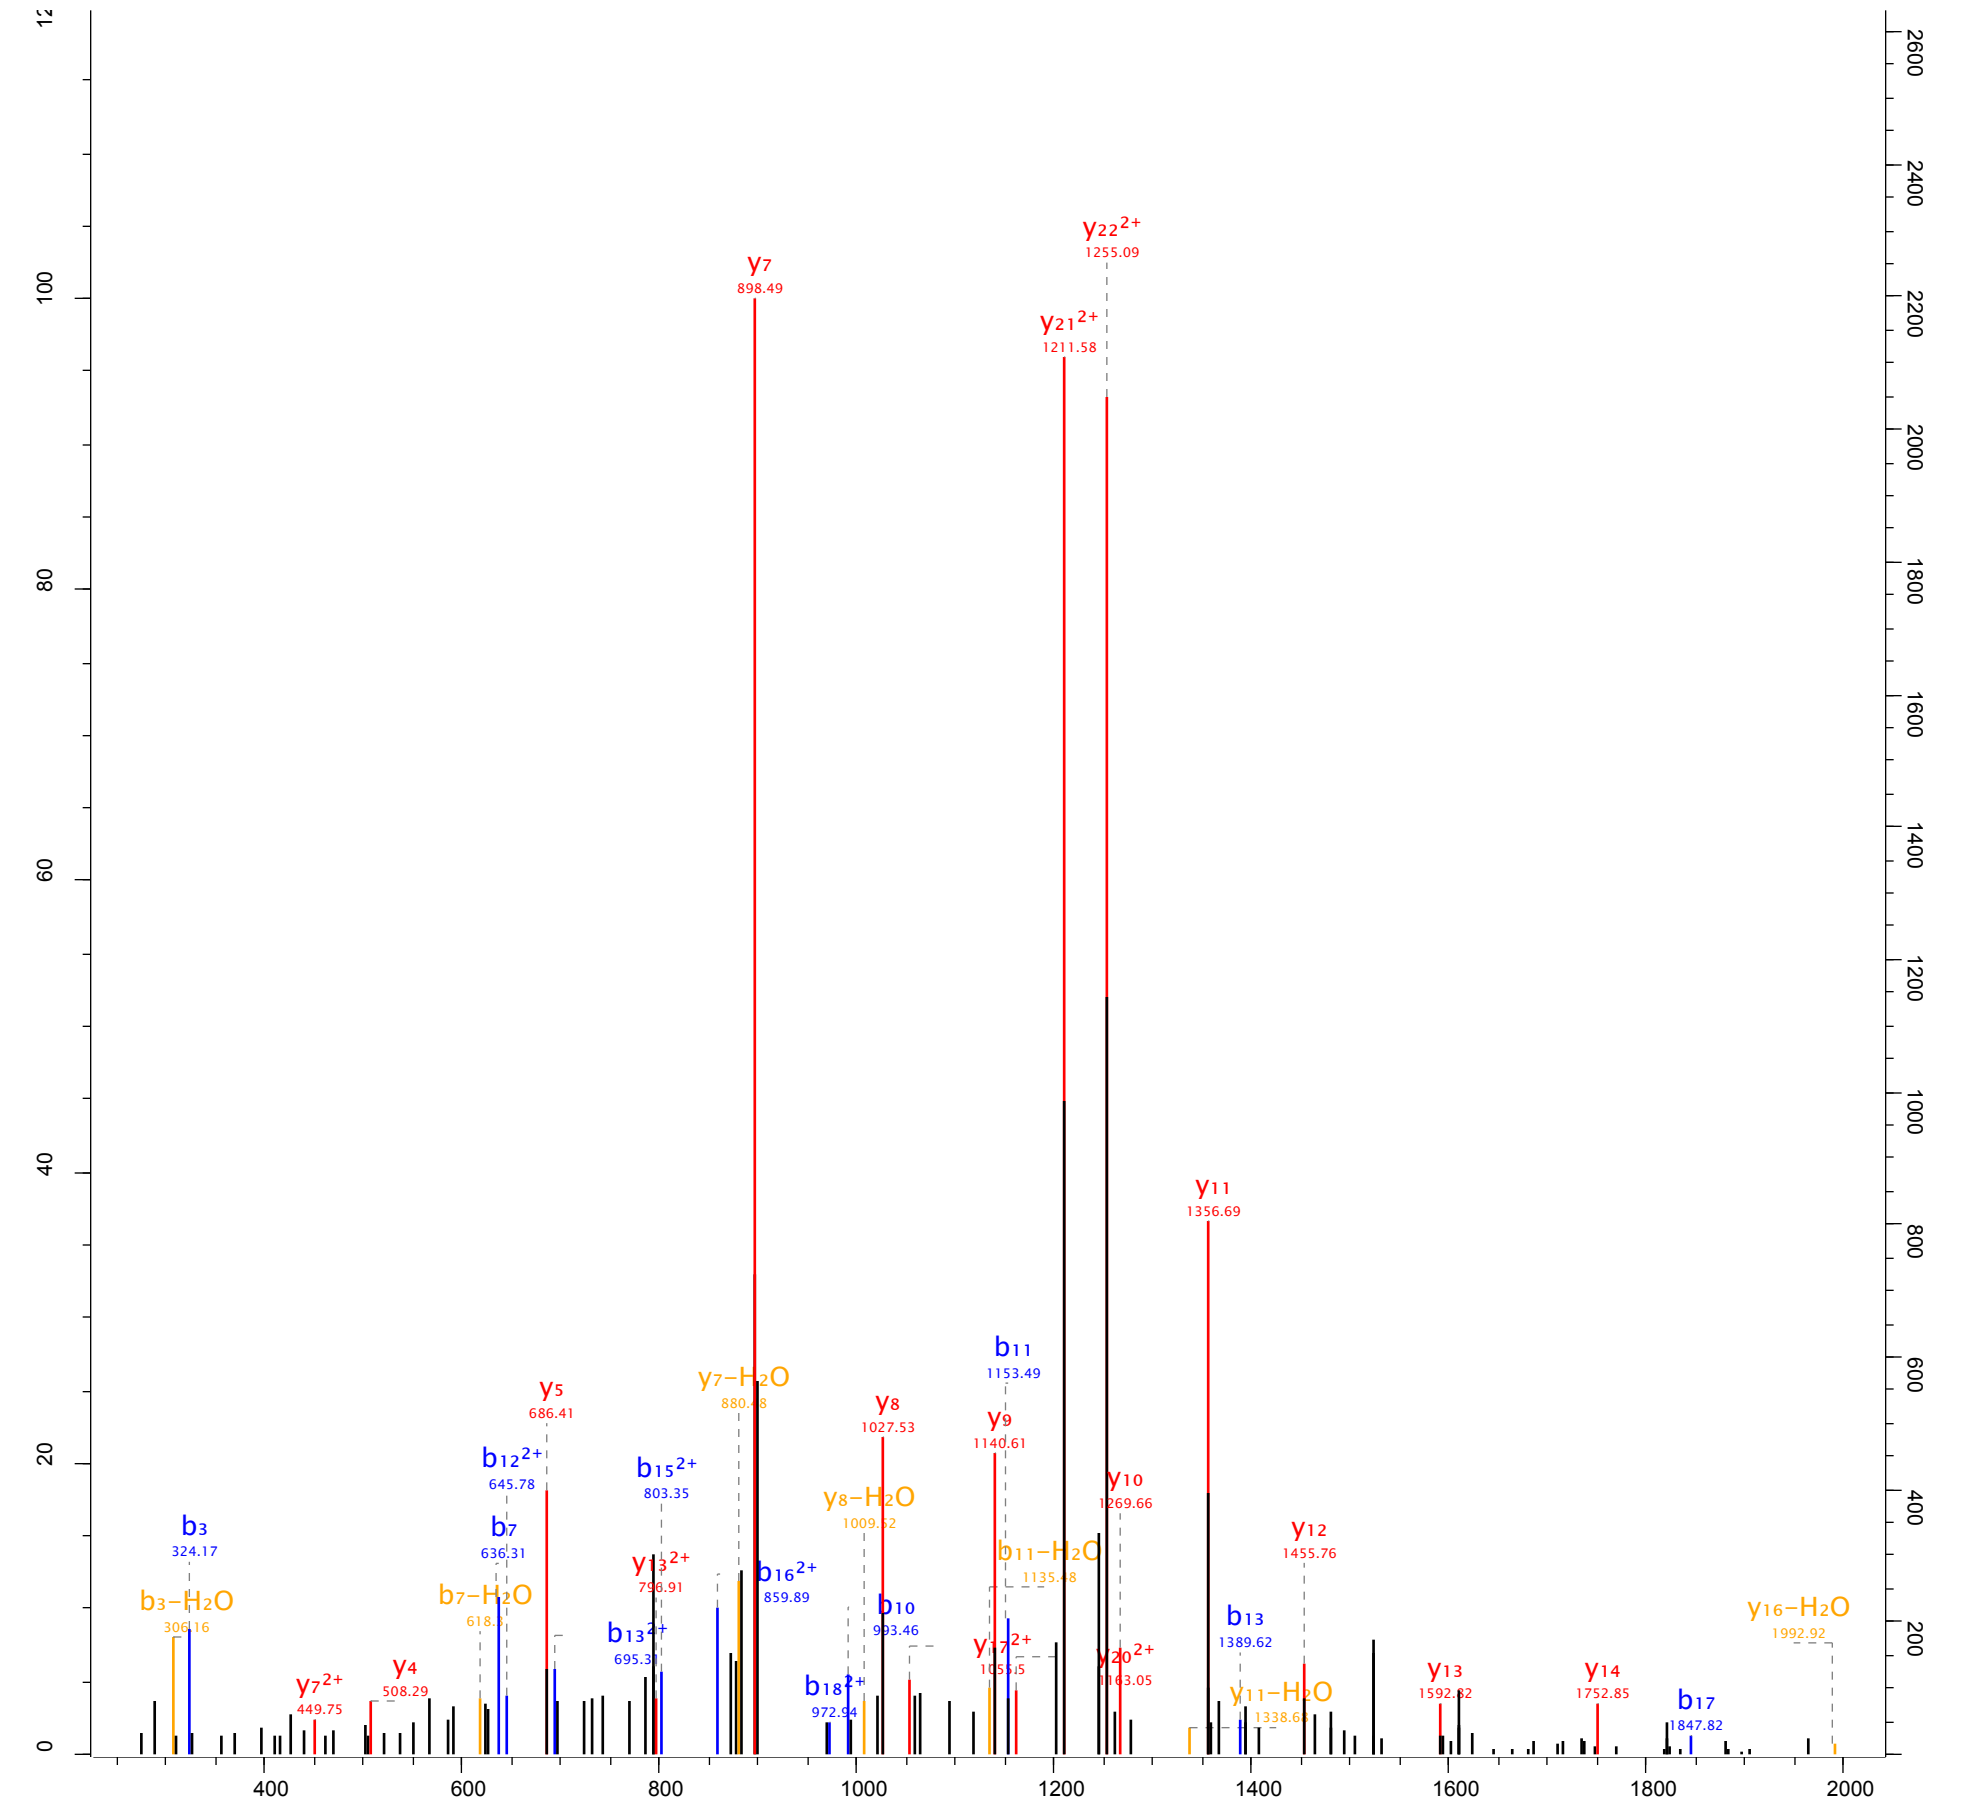

- V H S P S G A V E E C H V S E L E P D K Y A V R

b<sub>3</sub> b<sub>7</sub> b<sub>10</sub> b<sub>11</sub> b<sub>12</sub><sup>2+</sup> b<sub>13</sub> b<sub>15</sub><sup>2+</sup> b<sub>16</sub><sup>2+</sup> b<sub>17</sub> b<sub>18</sub><sup>2+</sup> y<sub>22</sub><sup>2+</sup> y<sub>21</sub><sup>2+</sup> y<sub>20</sub><sup>2+</sup> y<sub>17</sub><sup>2+</sup> y<sub>14</sub> y<sub>13</sub> y<sub>12</sub> y<sub>11</sub> y<sub>10</sub> y<sub>9</sub> y<sub>8</sub> y<sub>7</sub> y<sub>5</sub> ac y<sub>4</sub>

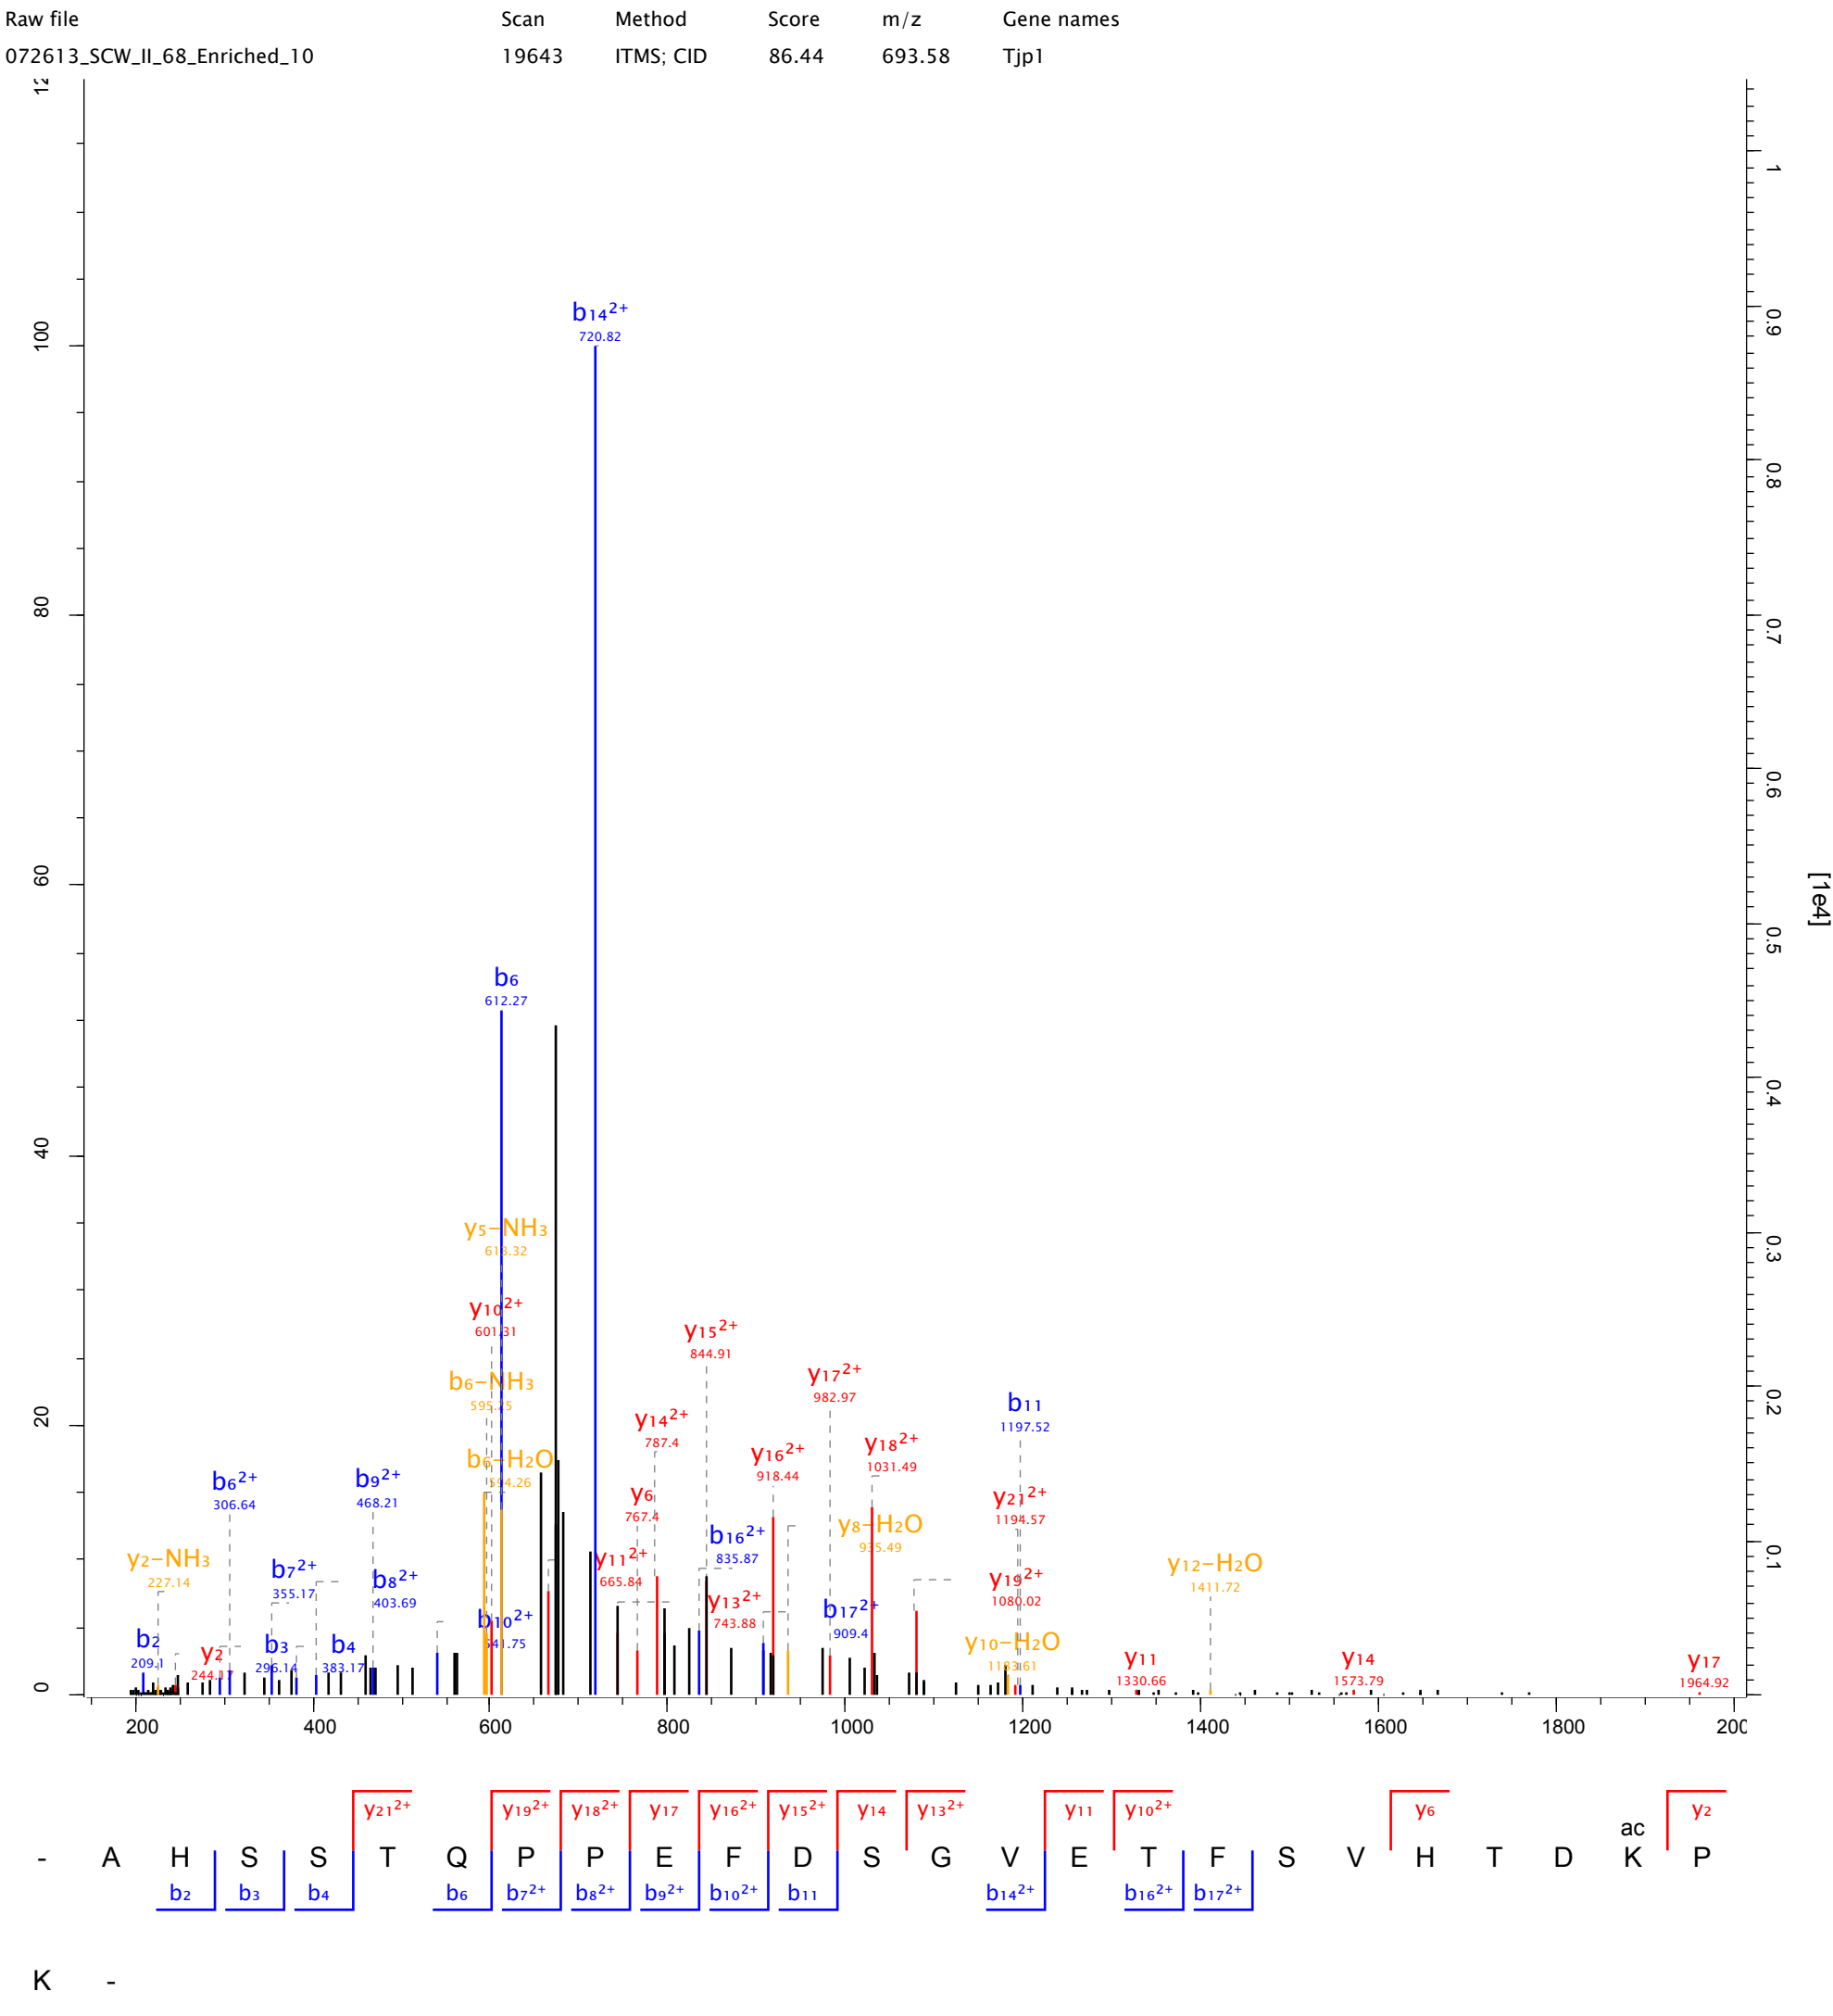

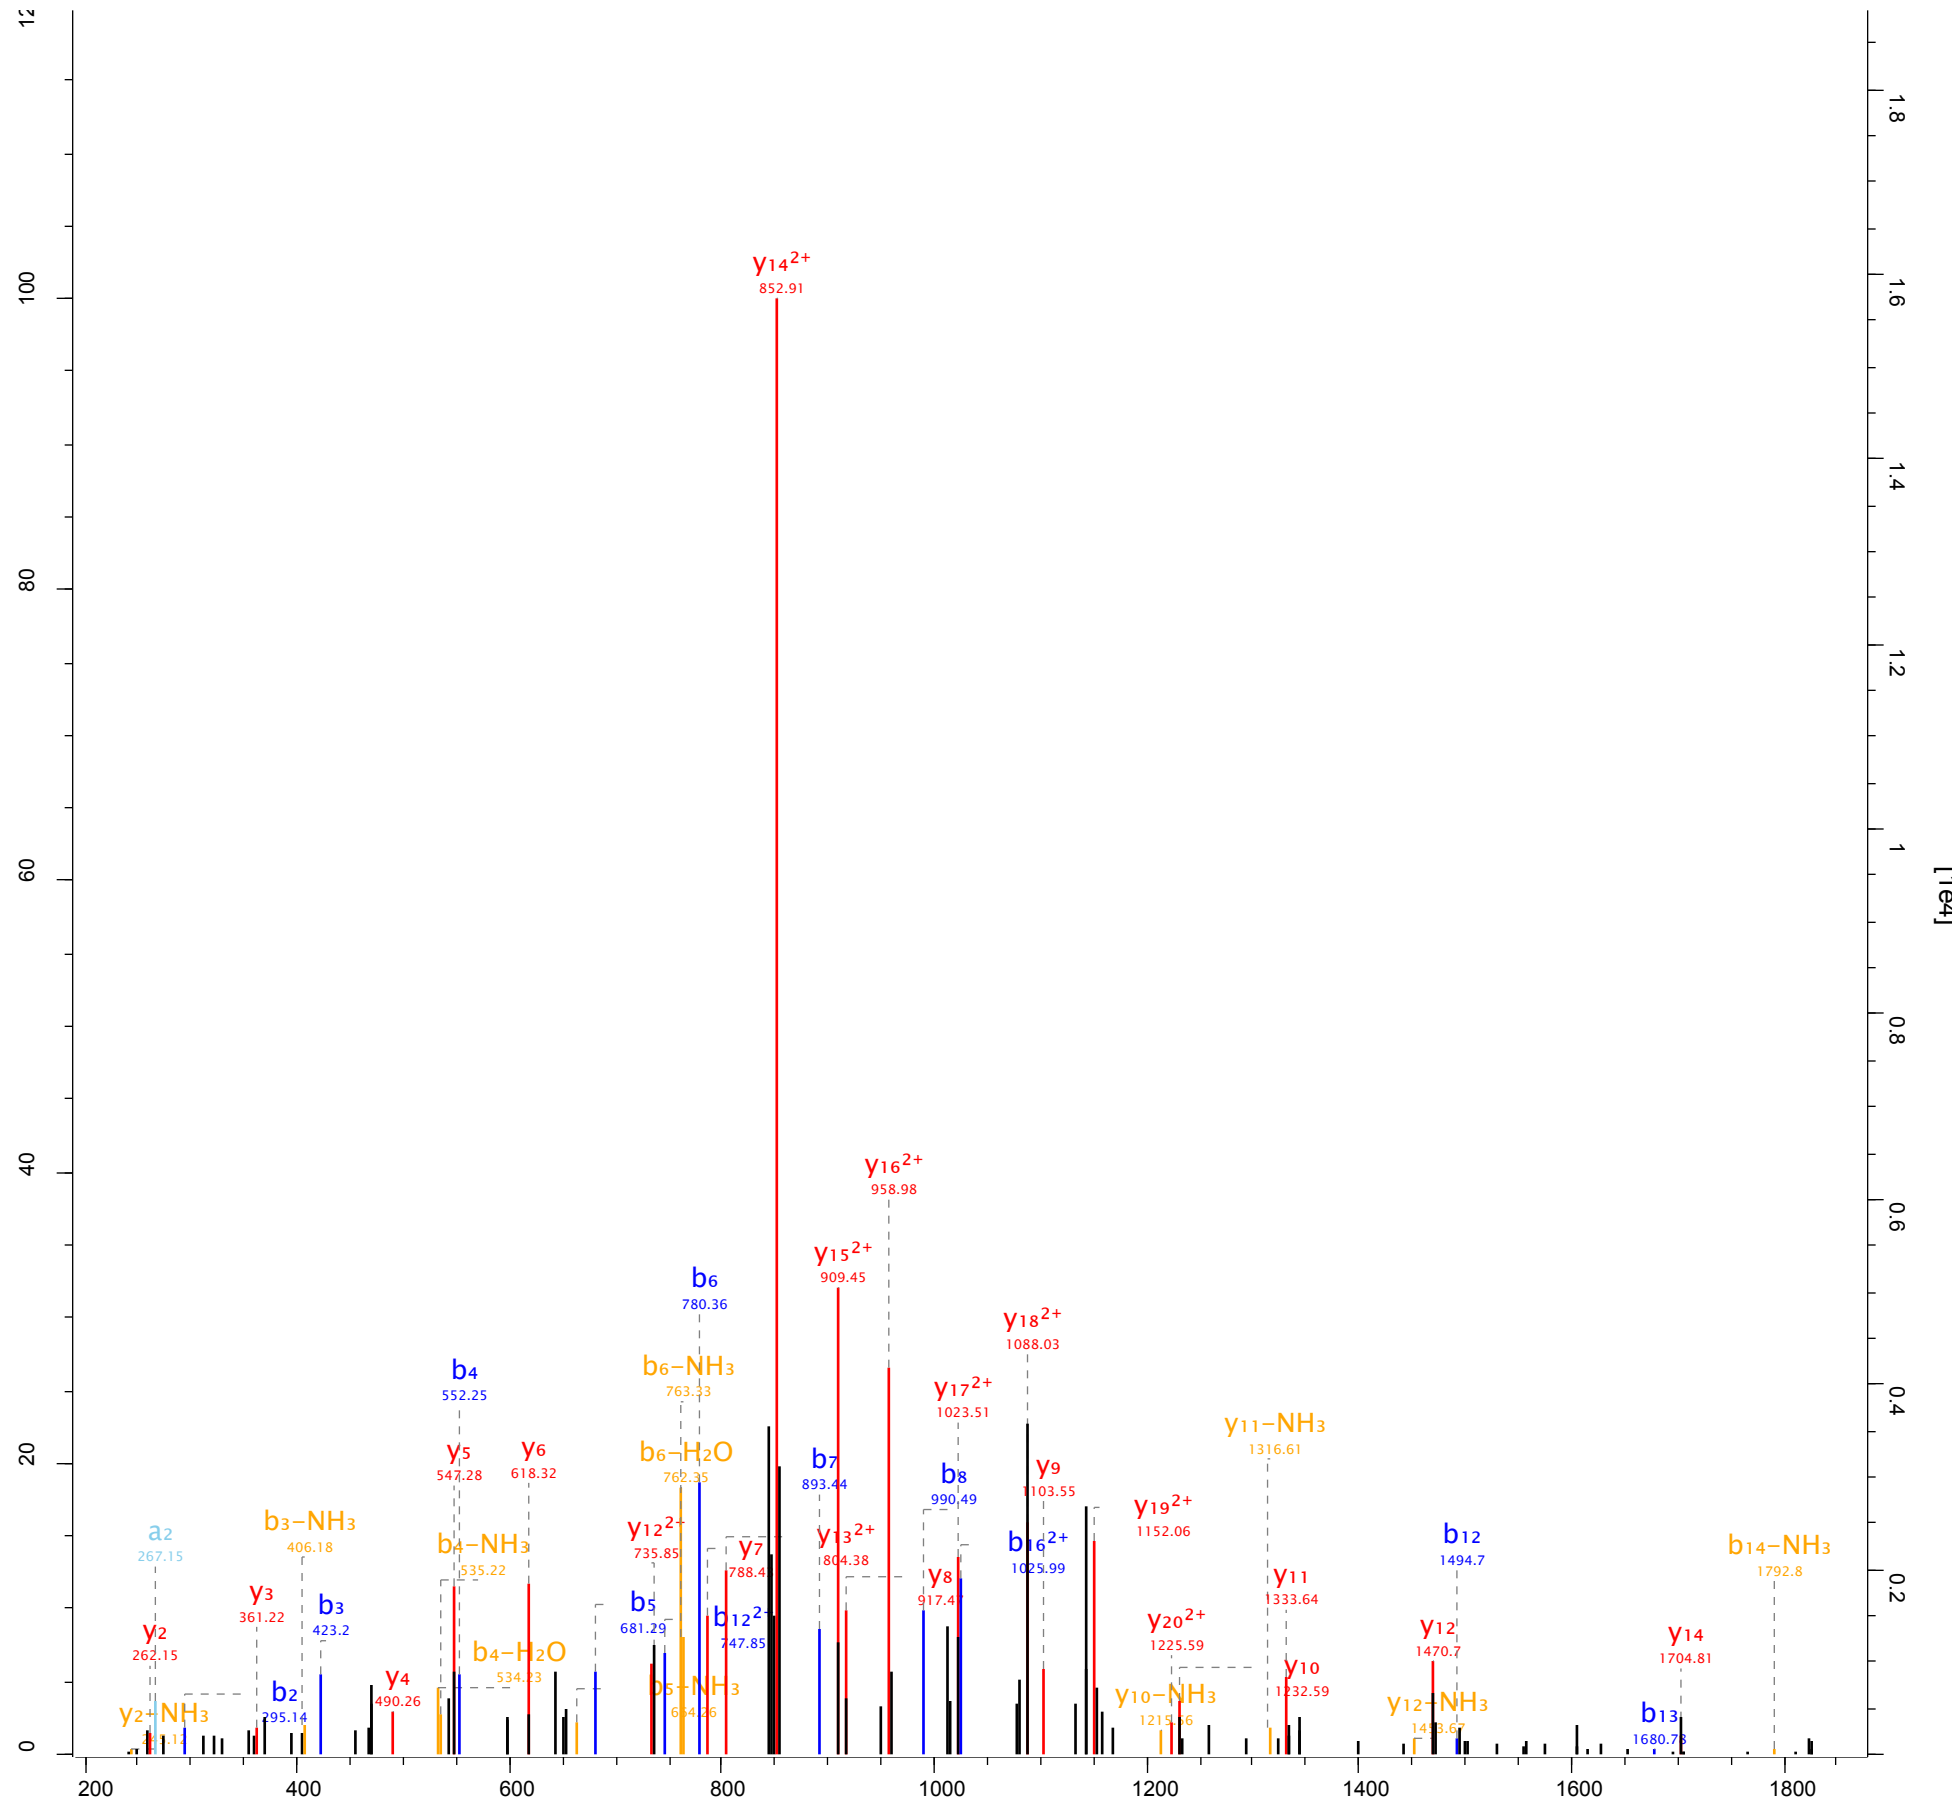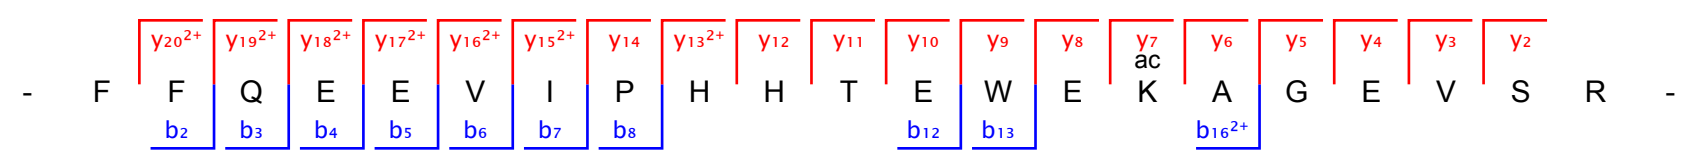

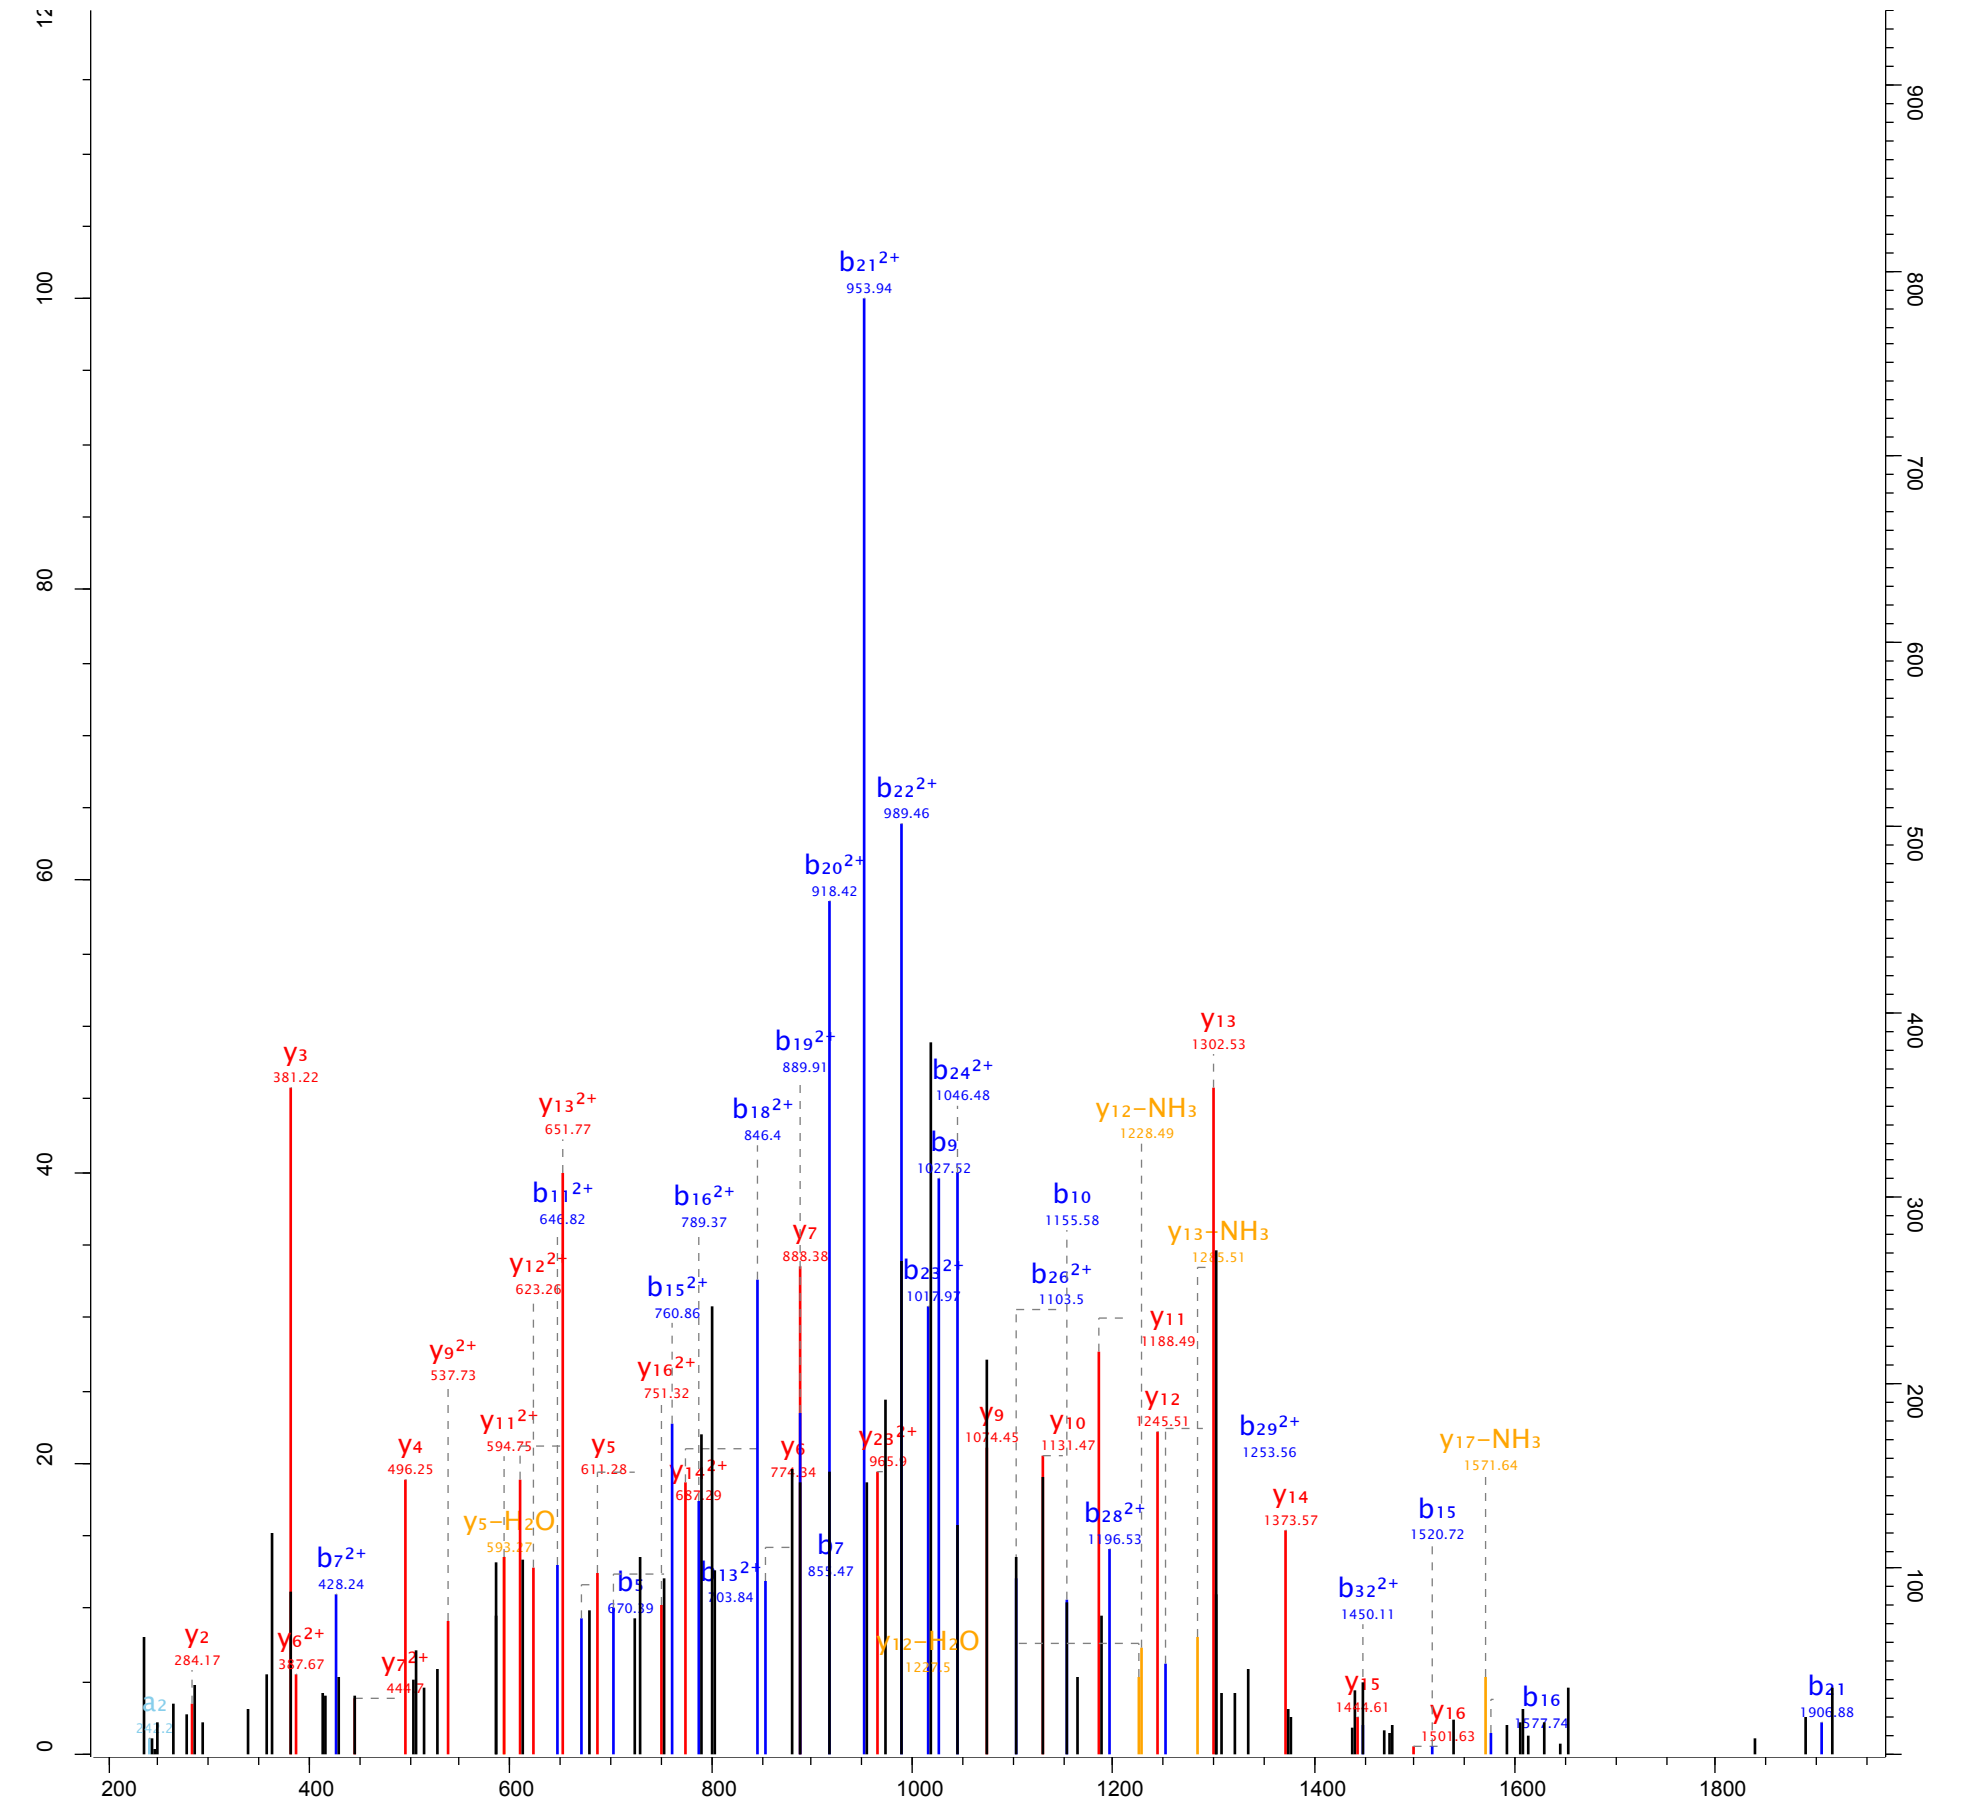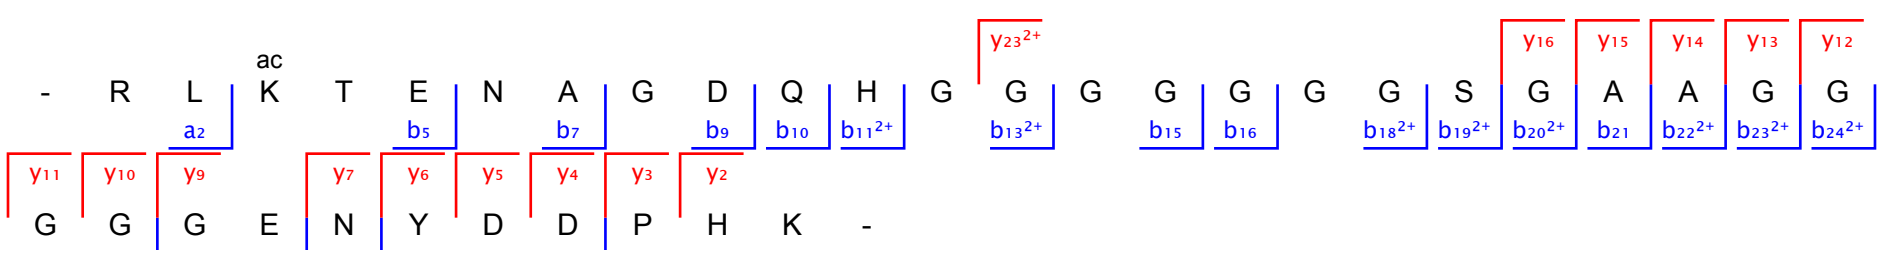

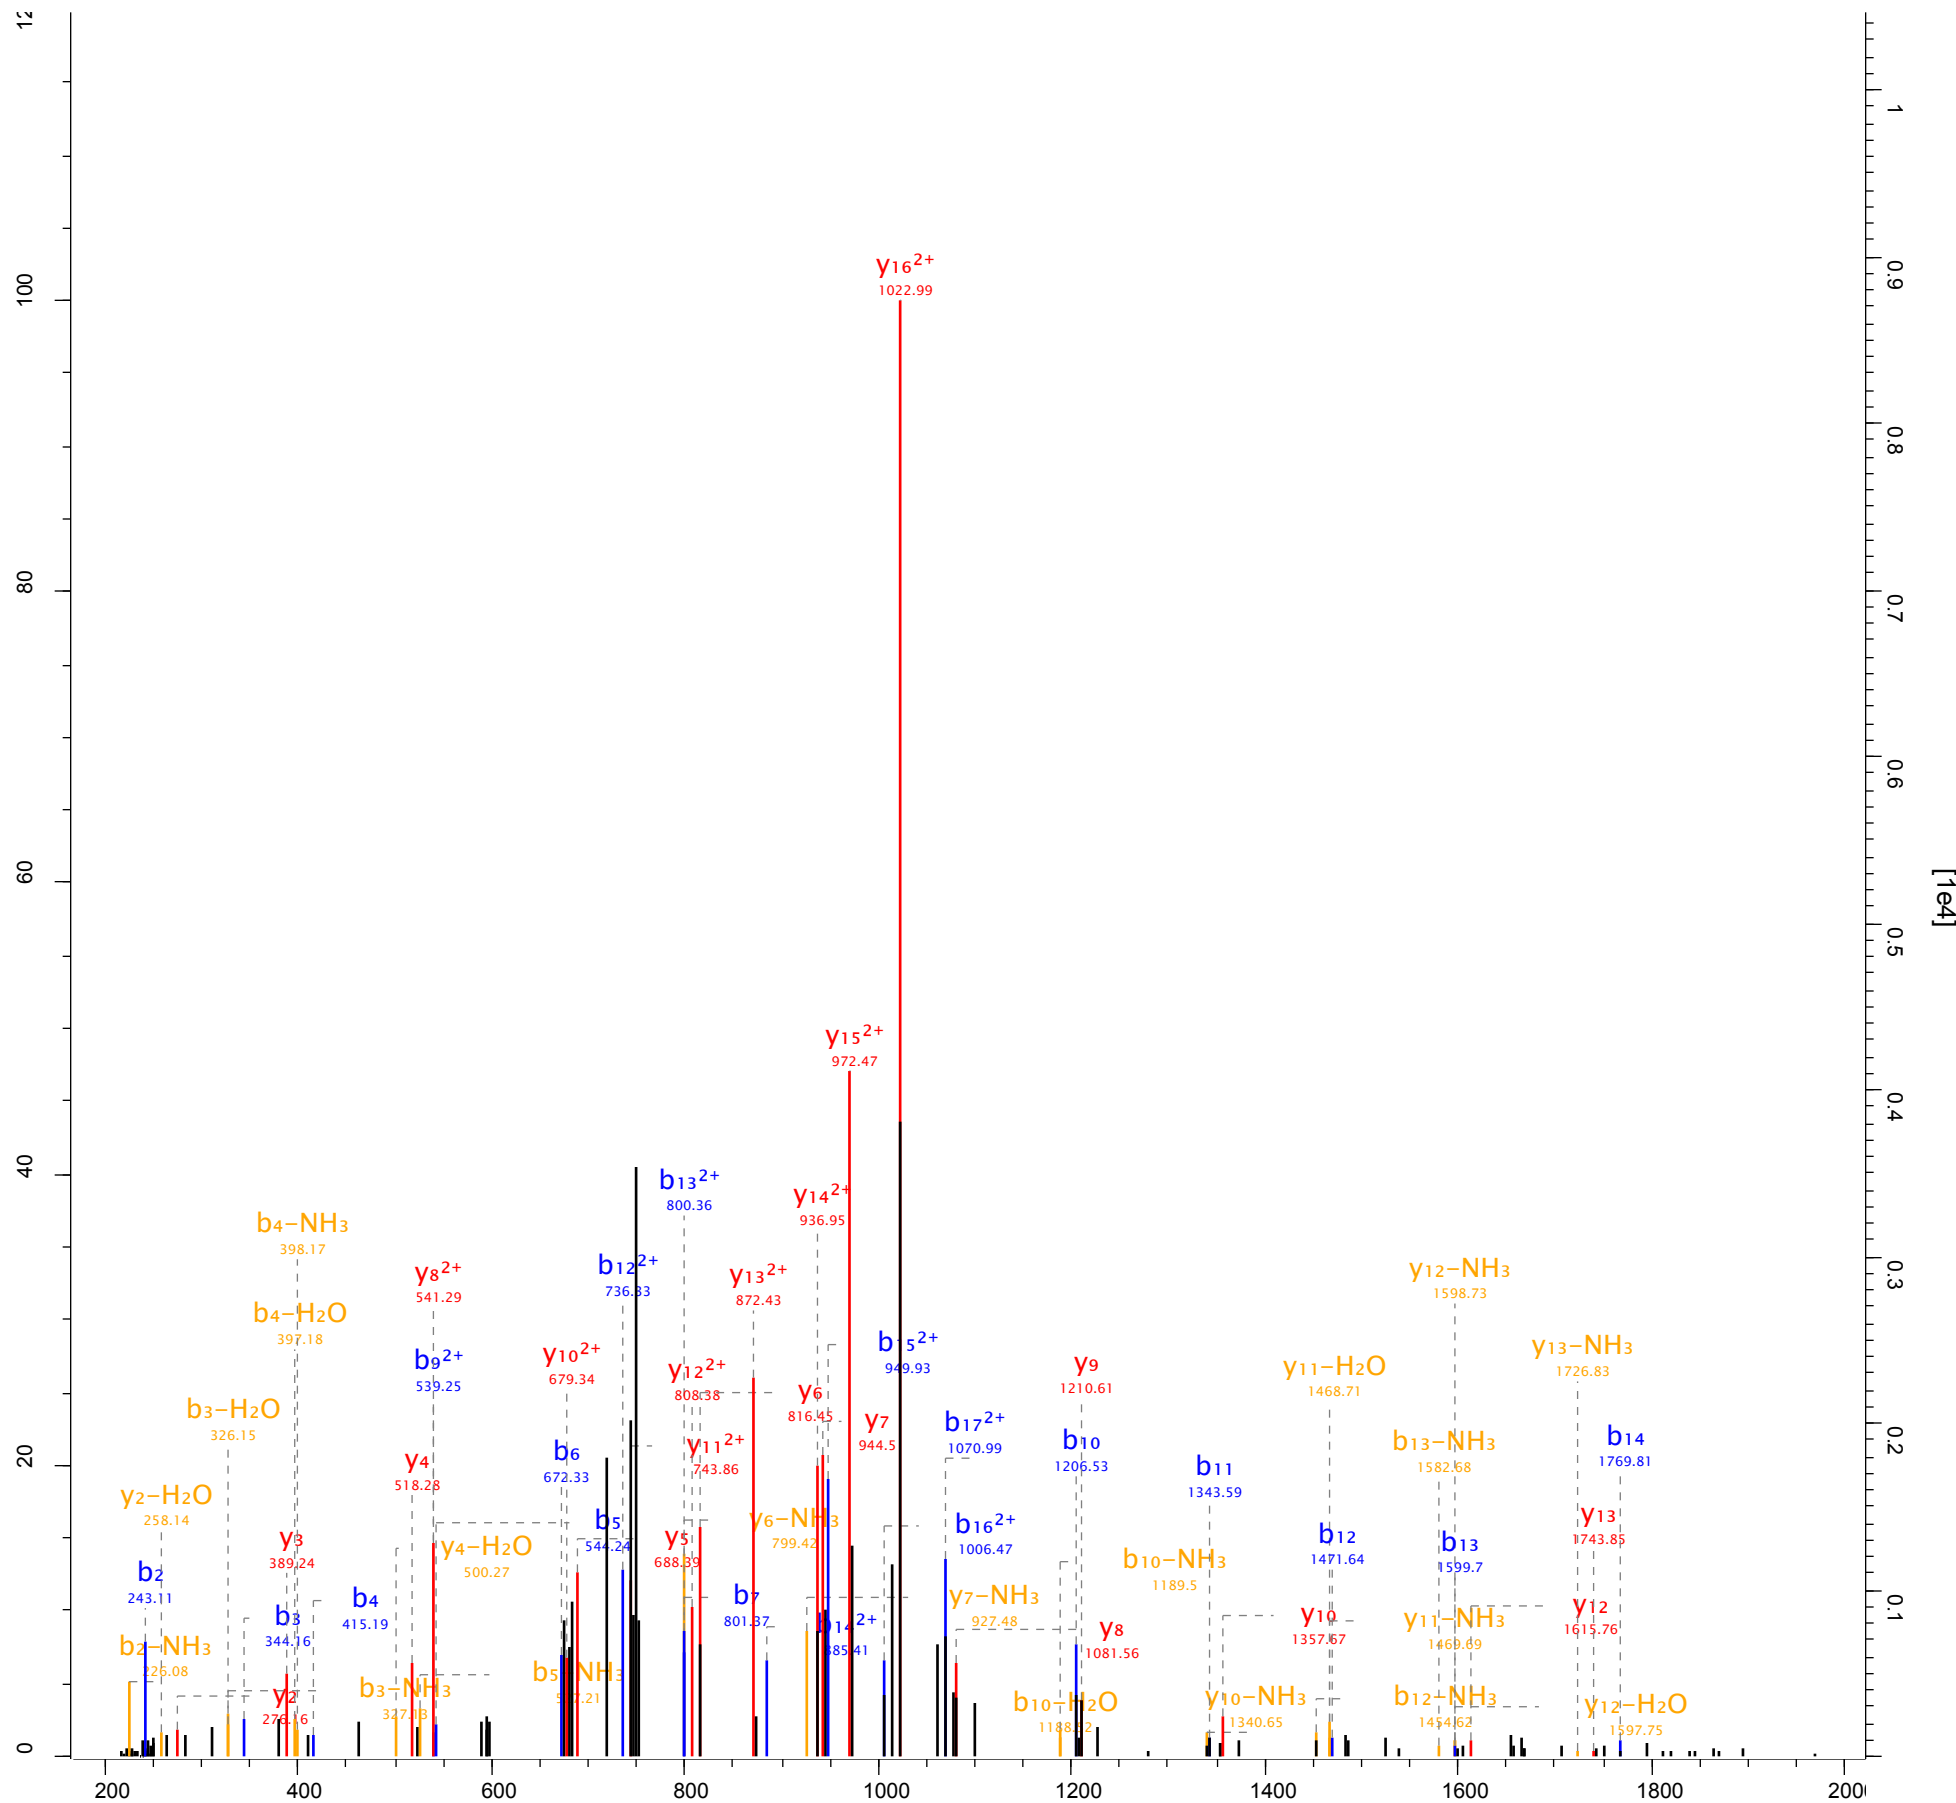

- N Q T A E K E E F E H Q Q K E L E K -

b<sub>2</sub> b<sub>3</sub> b<sub>4</sub> b<sub>5</sub> b<sub>6</sub> b<sub>7</sub> b<sub>9</sub><sup>2+</sup> b<sub>10</sub> b<sub>11</sub> b<sub>12</sub> b<sub>13</sub> b<sub>14</sub> b<sub>15</sub><sup>2+</sup> b<sub>16</sub><sup>2+</sup> b<sub>17</sub><sup>2+</sup>

y<sub>16</sub><sup>2+</sup> y<sub>15</sub><sup>2+</sup> y<sub>14</sub><sup>2+</sup> y<sub>13</sub> y<sub>12</sub> y<sub>11</sub><sup>2+</sup> y<sub>10</sub> y<sub>9</sub> y<sub>8</sub> y<sub>7</sub> y<sub>6</sub> y<sub>5</sub> ac y<sub>4</sub> y<sub>3</sub> y<sub>2</sub>



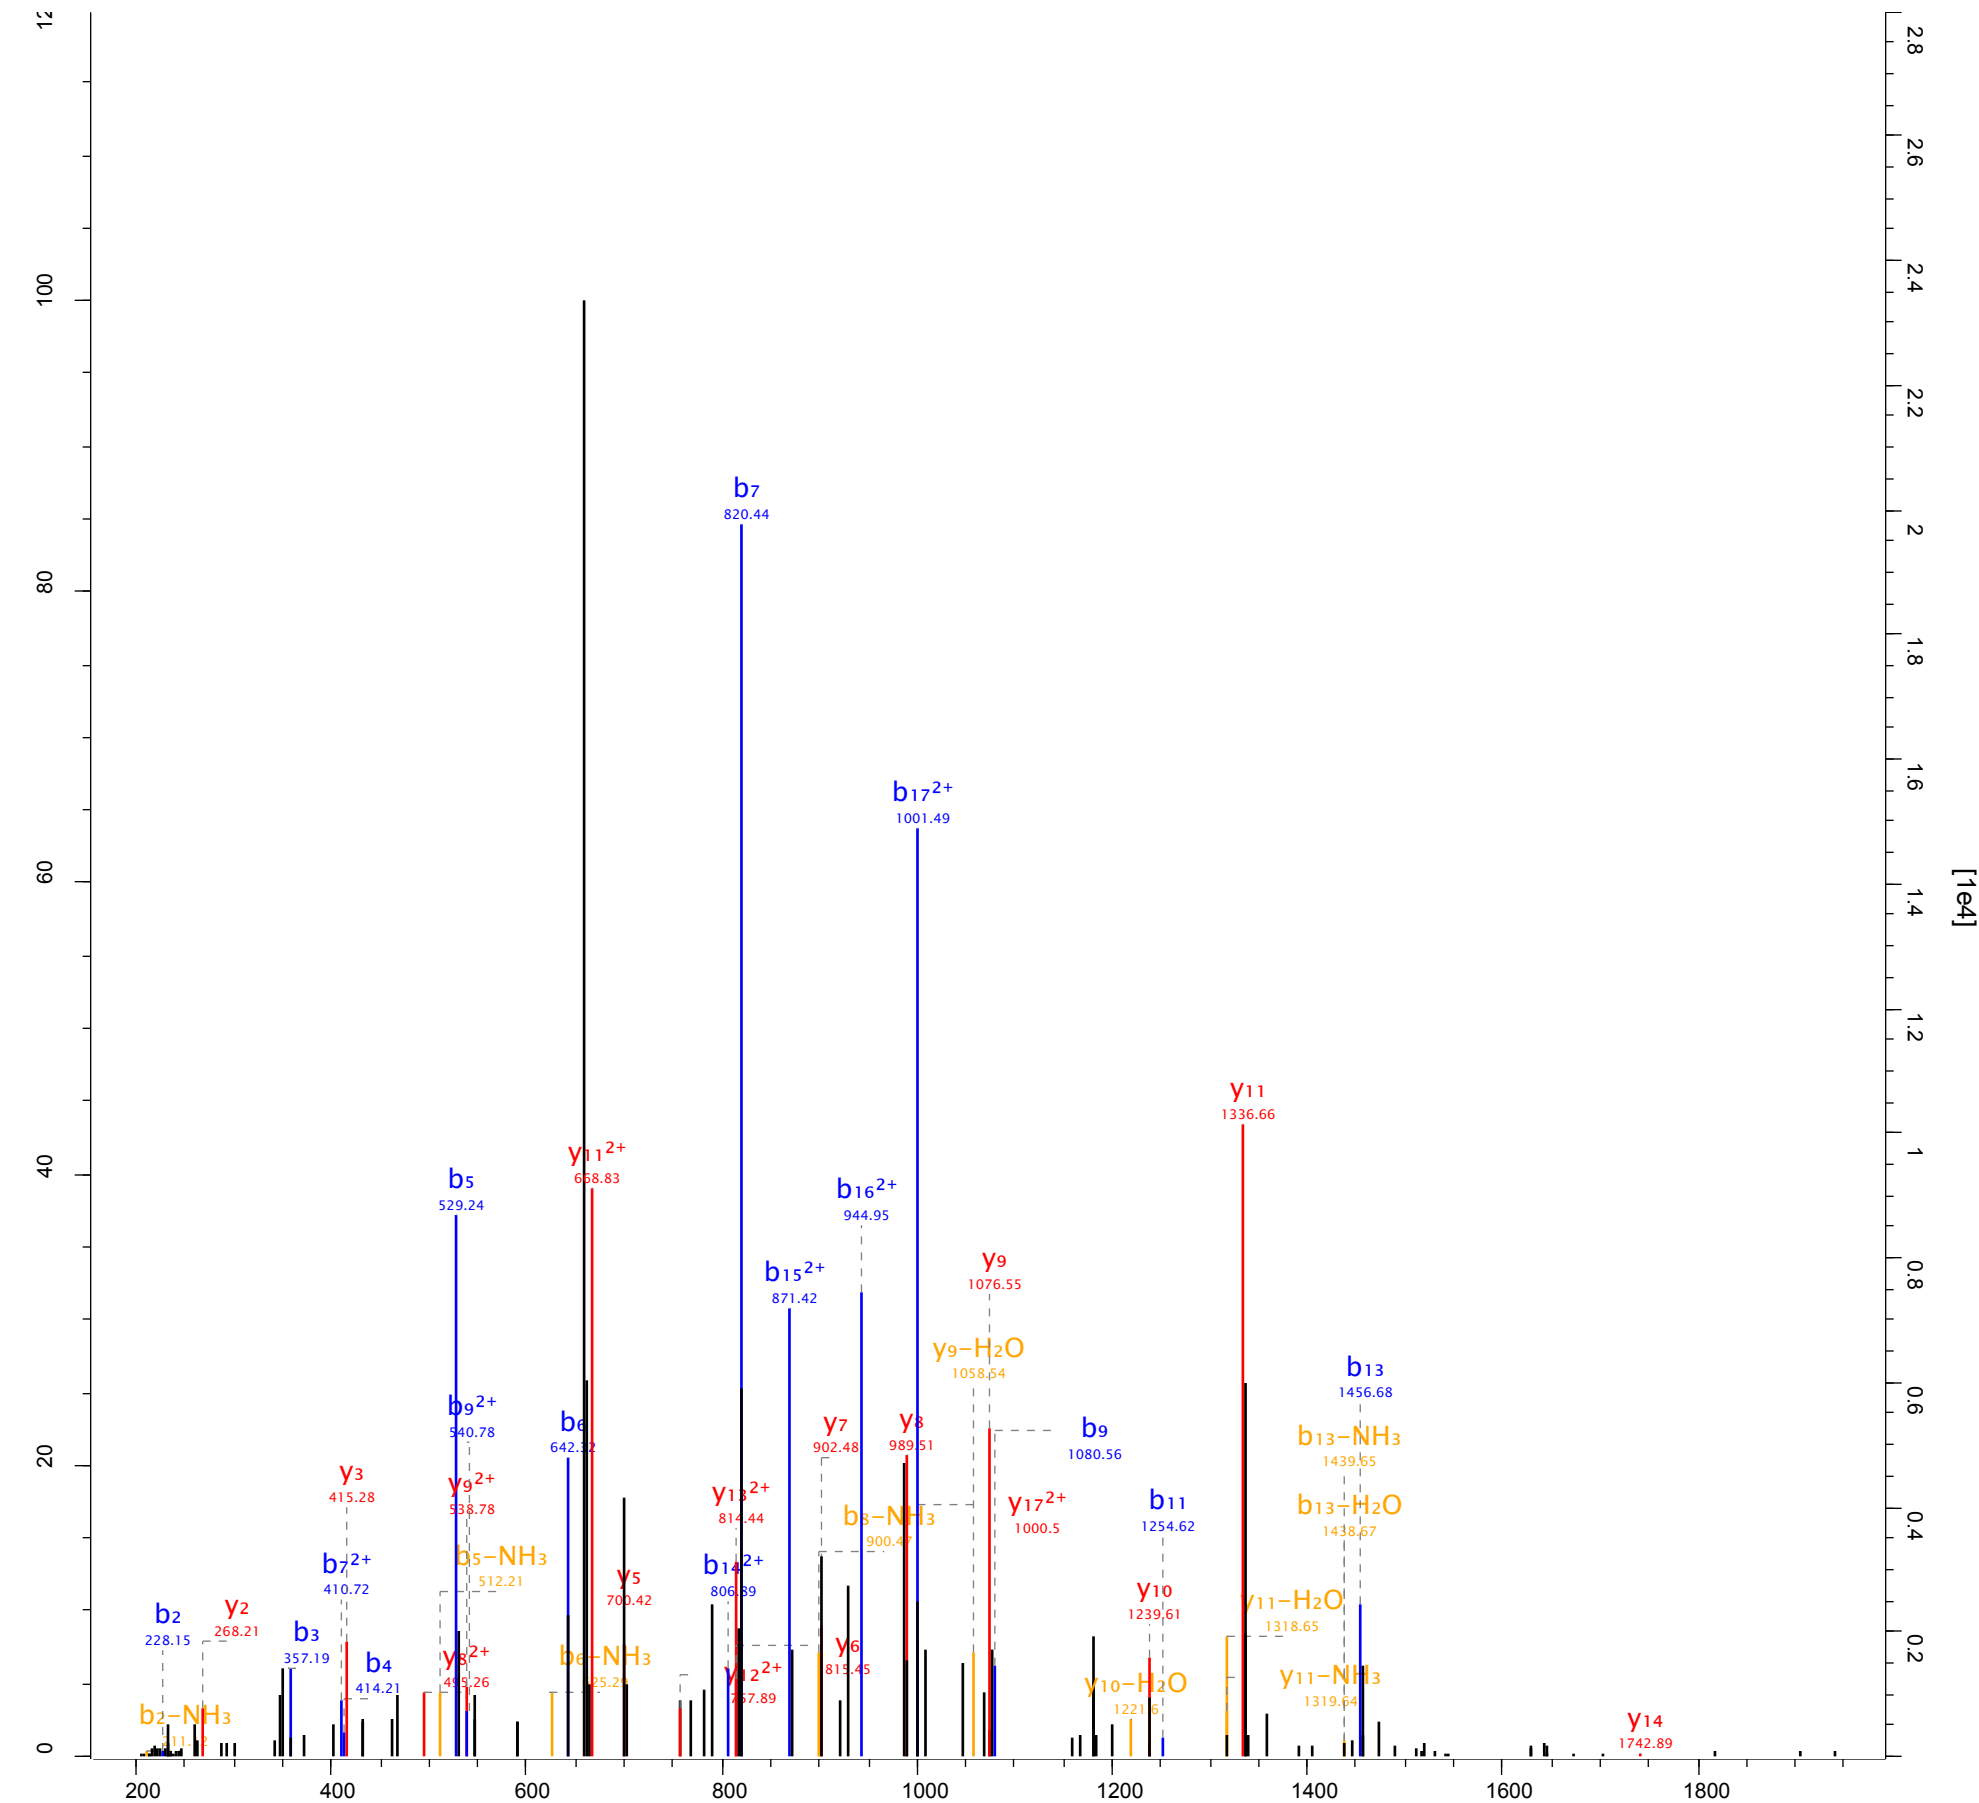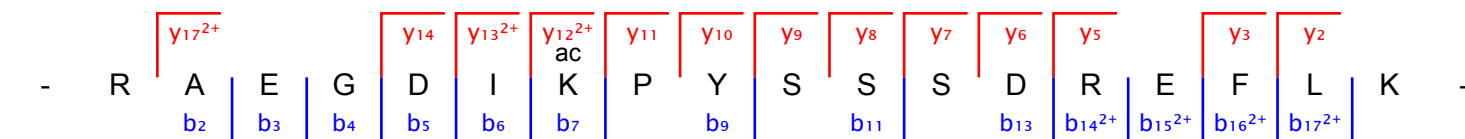

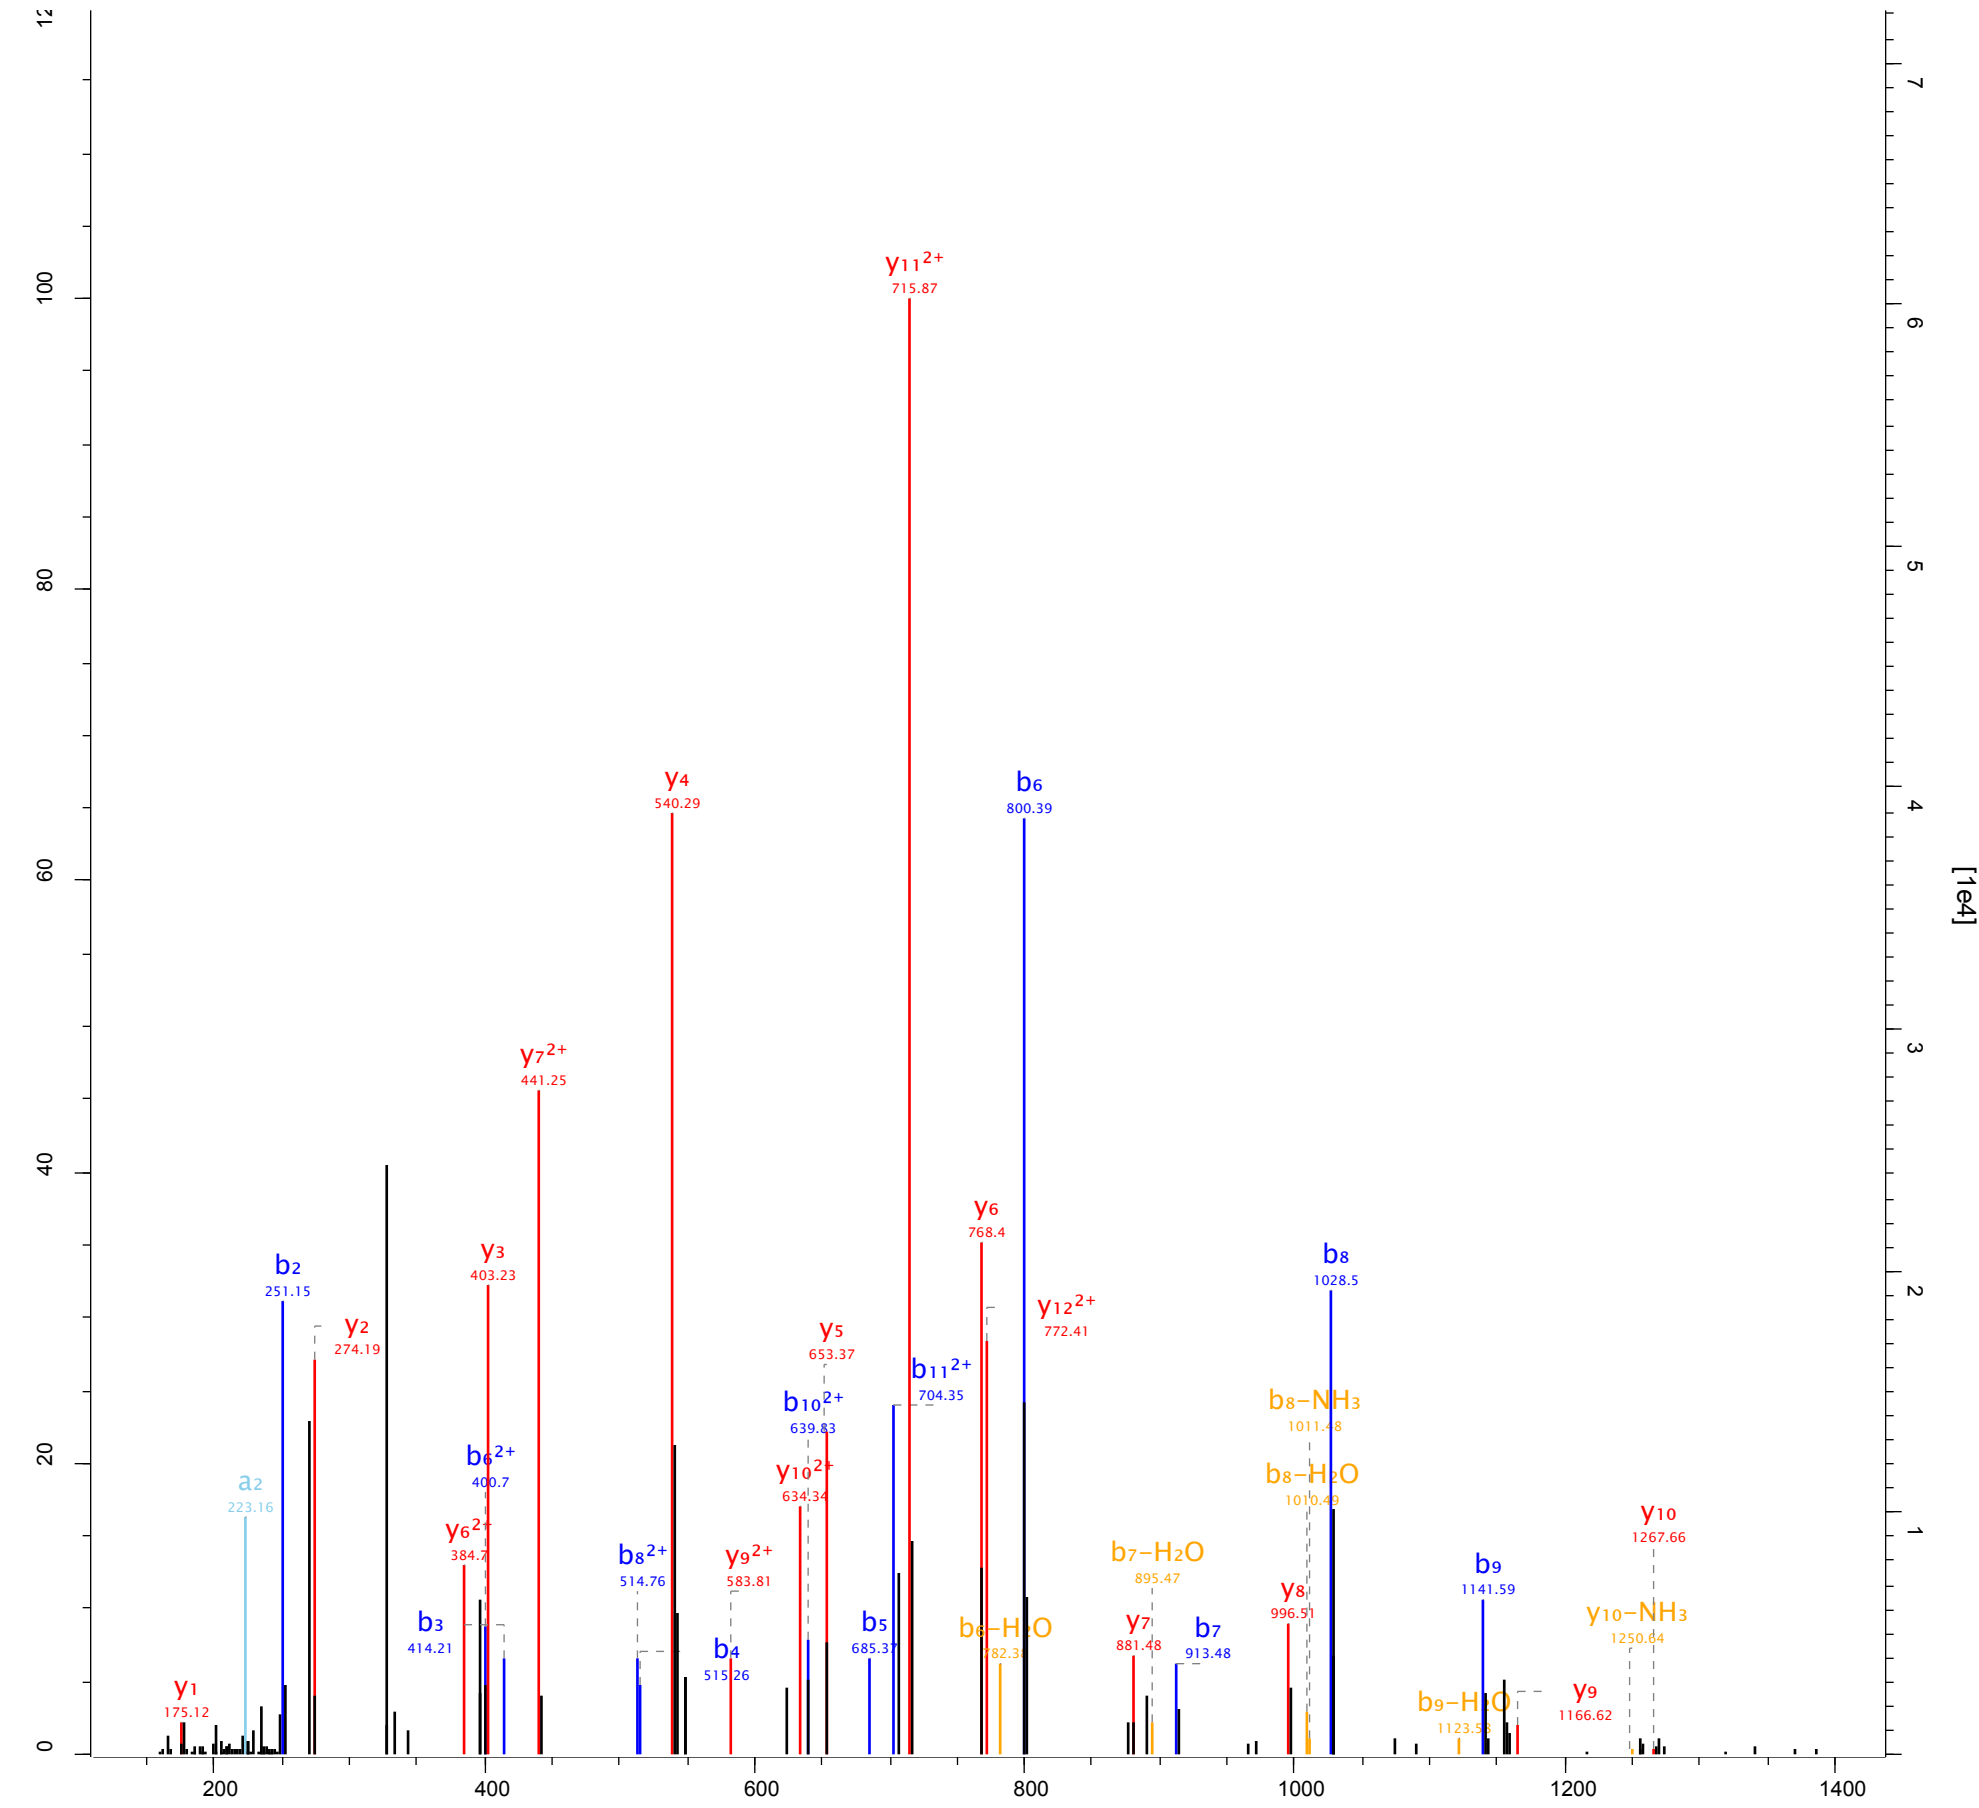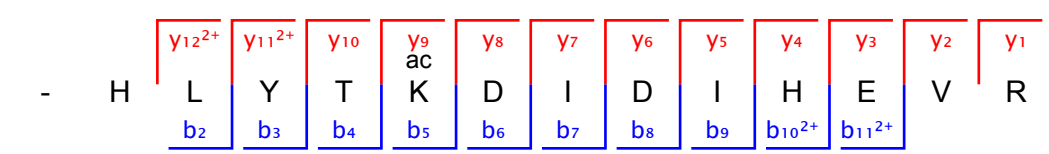

Raw file 072613\_SCW\_II\_68\_Enriched\_11 Scan 19840 Method ITMS; CID Score 255.93 m/z 861.44 Gene names Sod2

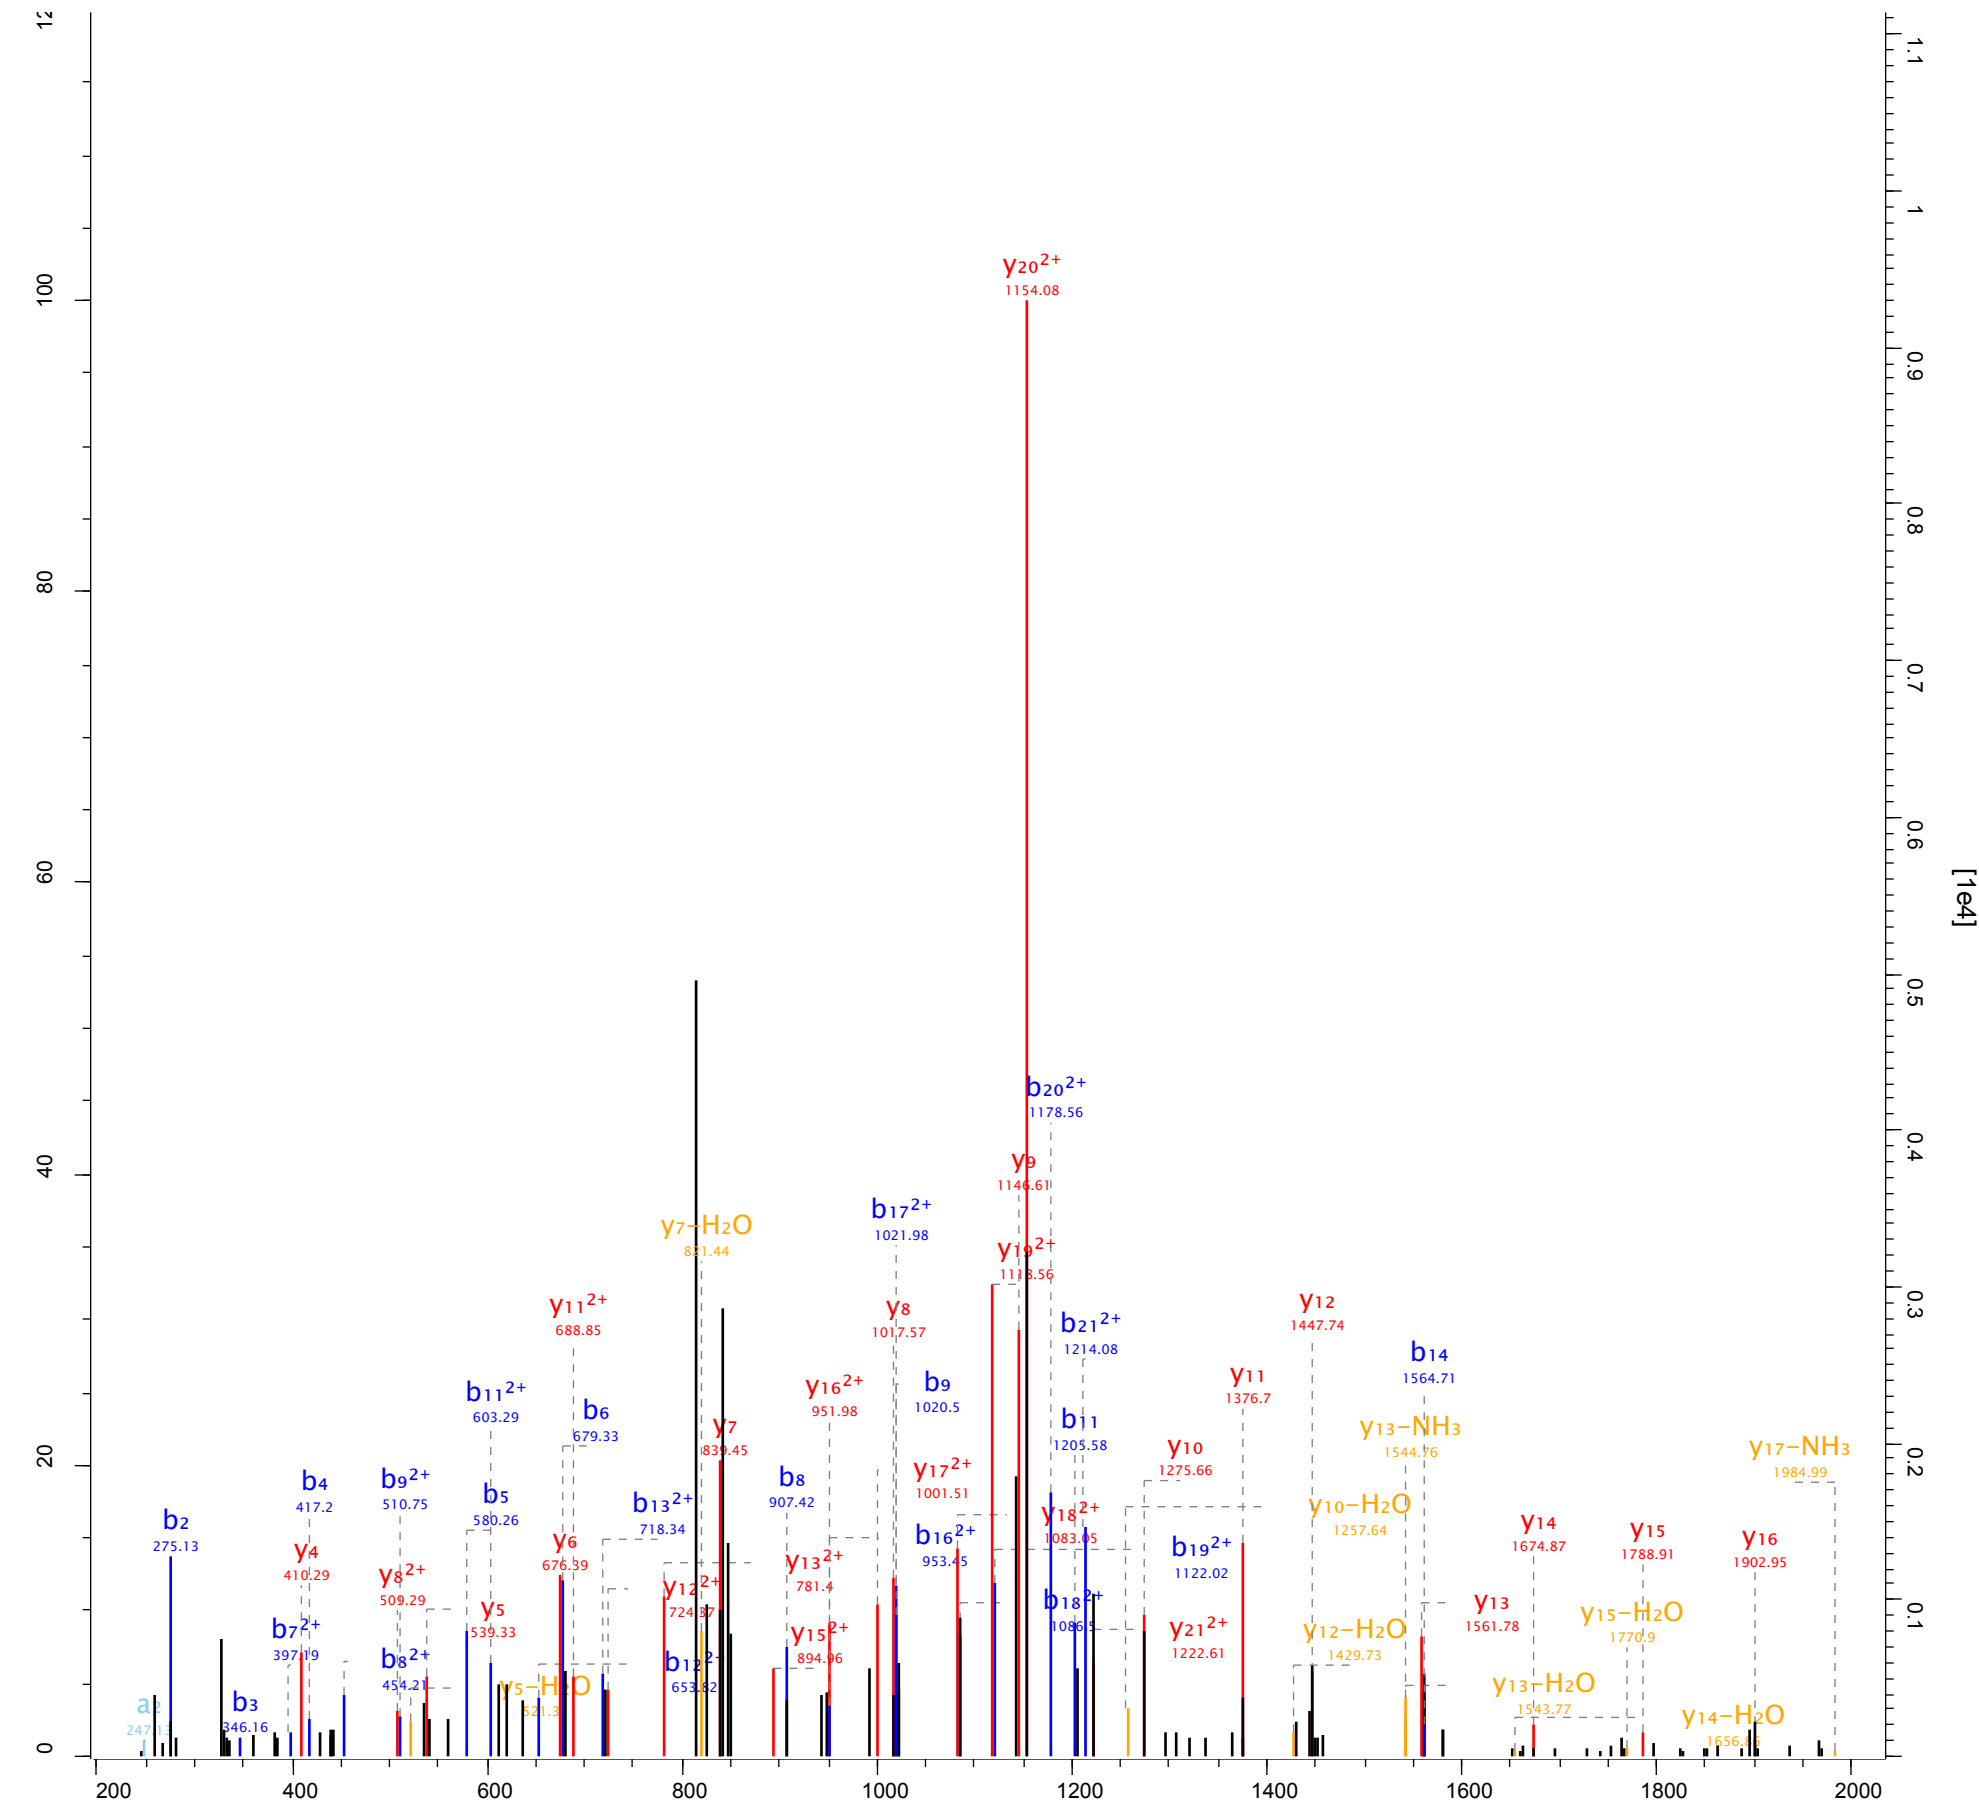

- H y<sub>21</sub><sup>2+</sup> y<sub>20</sub><sup>2+</sup> y<sub>19</sub><sup>2+</sup> y<sub>18</sub><sup>2+</sup> y<sub>17</sub><sup>2+</sup> y<sub>16</sub> y<sub>15</sub> y<sub>14</sub> y<sub>13</sub> y<sub>12</sub> y<sub>11</sub> y<sub>10</sub> y<sub>9</sub> y<sub>8</sub> y<sub>7</sub> y<sub>6</sub> y<sub>5</sub> y<sub>4</sub>   
 - H b<sub>2</sub> b<sub>3</sub> b<sub>4</sub> b<sub>5</sub> b<sub>6</sub> b<sub>7</sub><sup>2+</sup> b<sub>8</sub> b<sub>9</sub> b<sub>11</sub> b<sub>12</sub><sup>2+</sup> b<sub>13</sub><sup>2+</sup> b<sub>14</sub> b<sub>16</sub><sup>2+</sup> b<sub>17</sub><sup>2+</sup> b<sub>18</sub><sup>2+</sup> b<sub>19</sub><sup>2+</sup> b<sub>20</sub><sup>2+</sup> b<sub>21</sub><sup>2+</sup>   
 - H A A Y V N N L N A T E E K Y H E A L A K -

072613\_SCW\_II\_68\_Enriched\_11

20206

ITMS; CID

158.42

526.94

Tuba4a;Tuba1b;Tuba1a;Tuba3a;Tuba3b

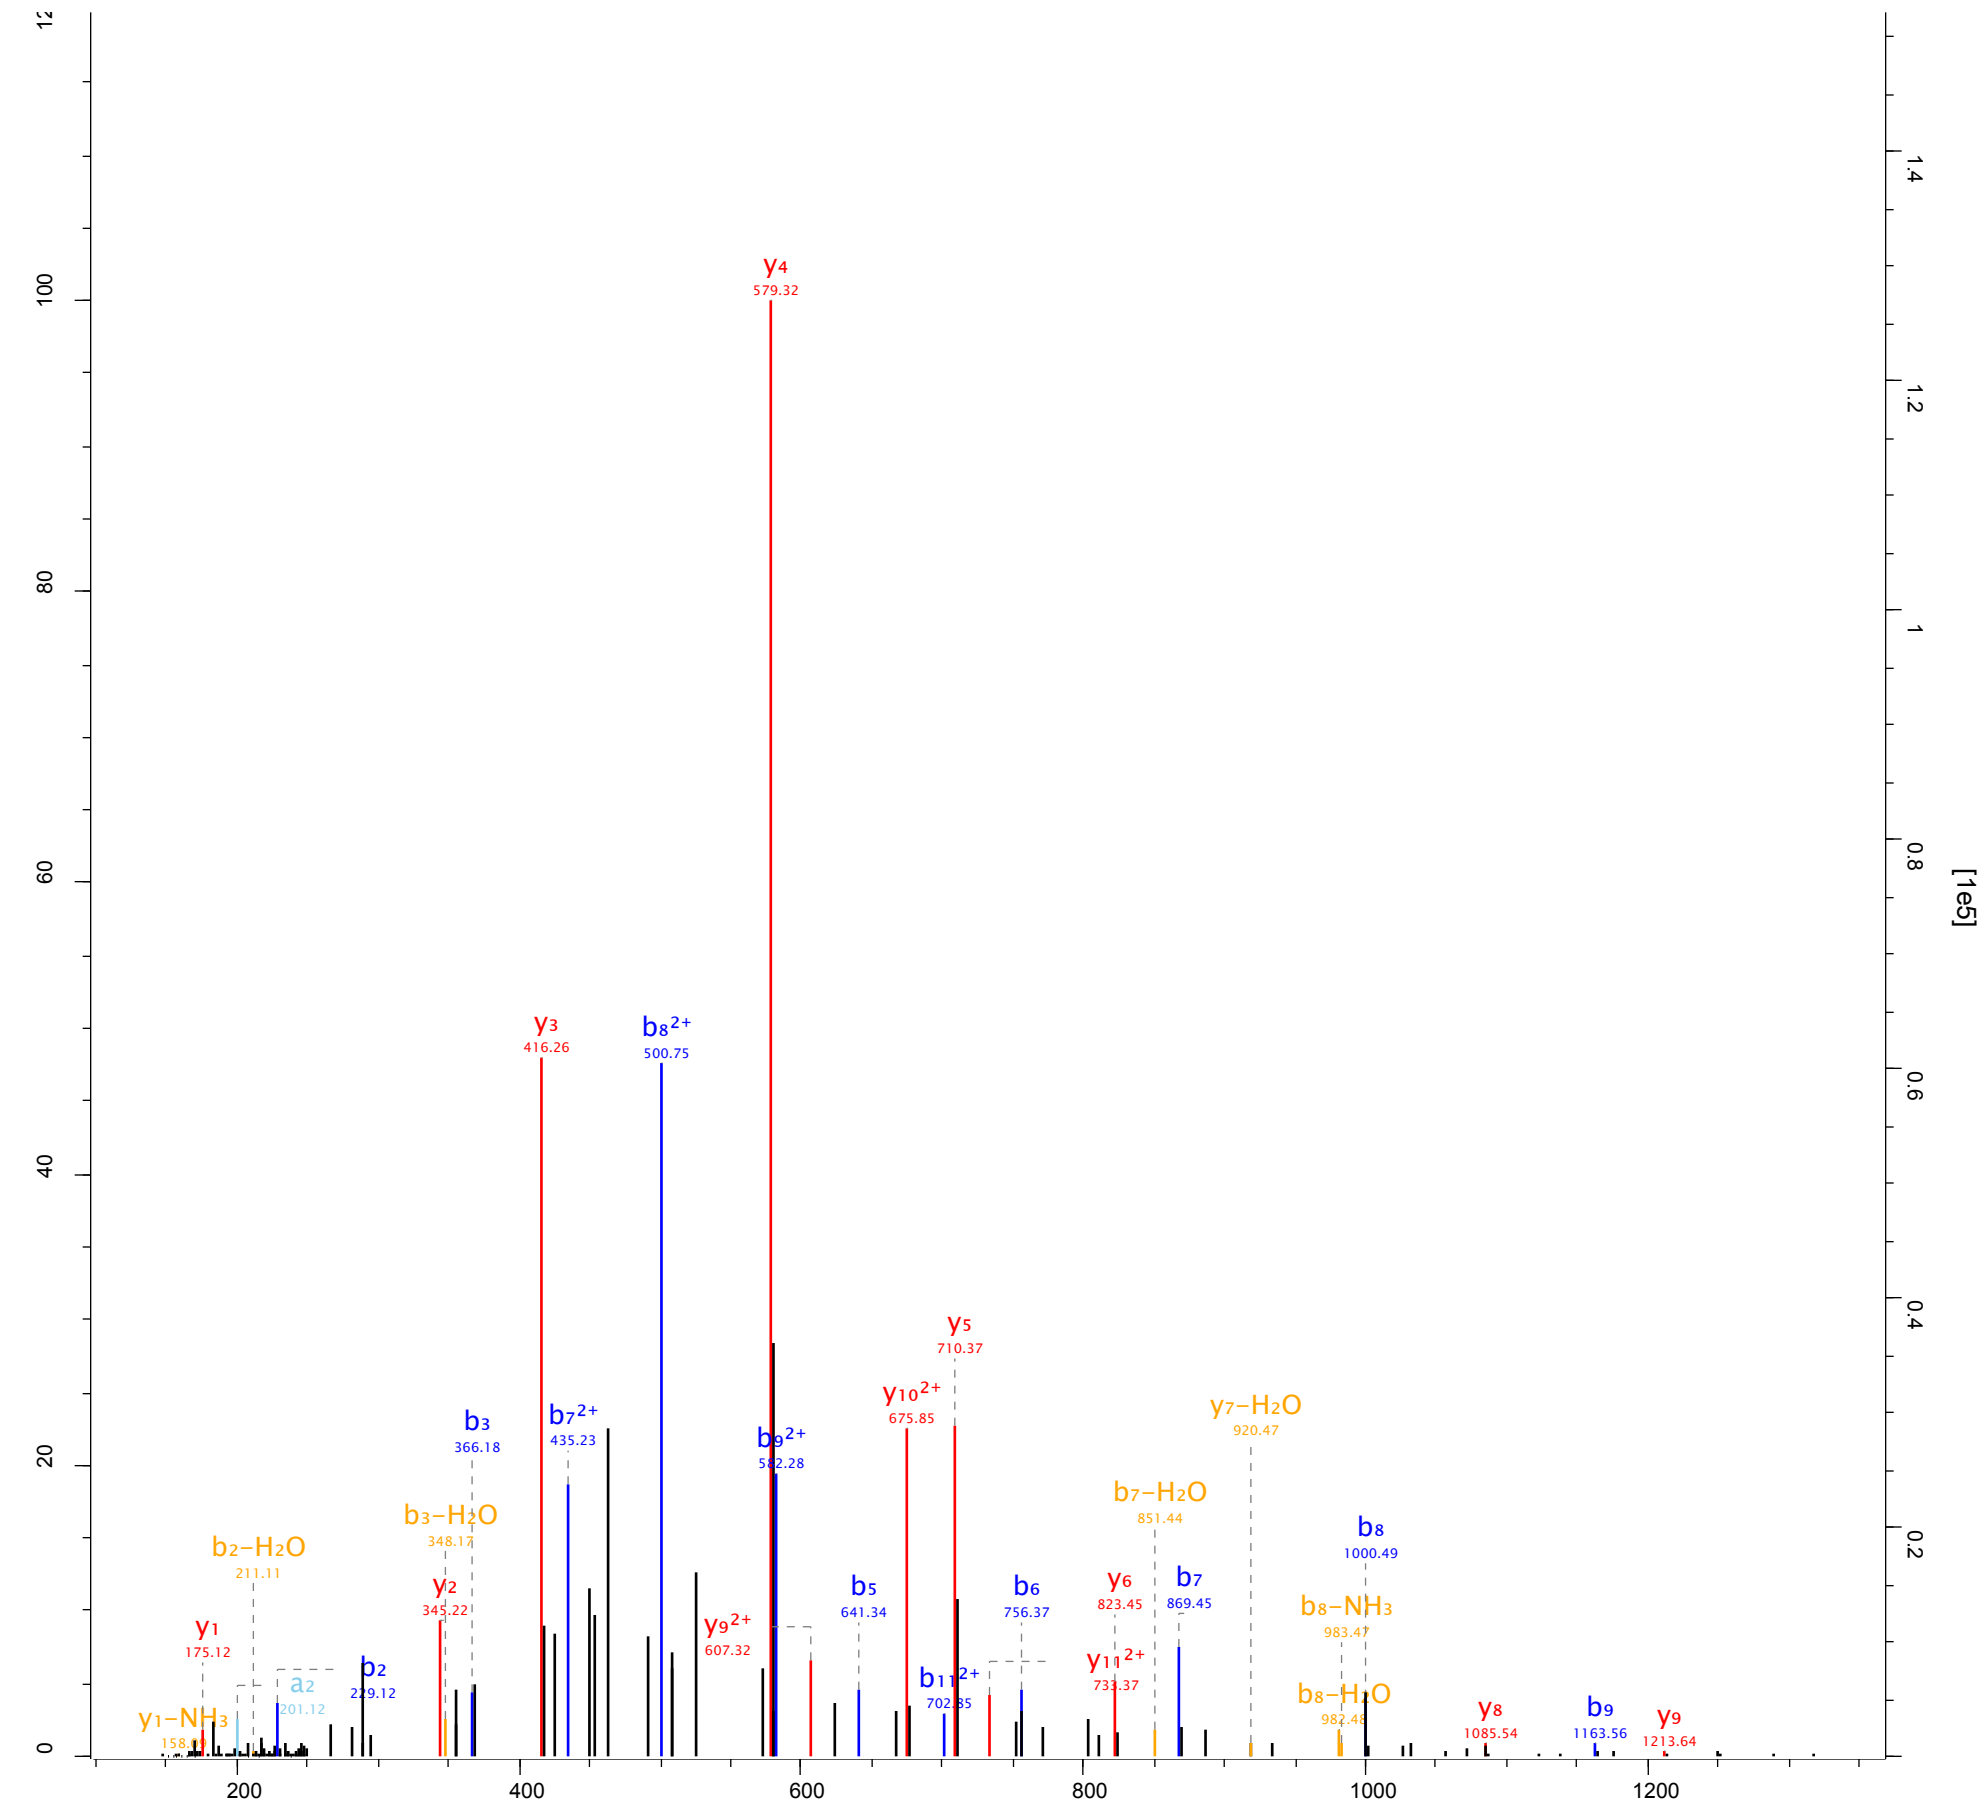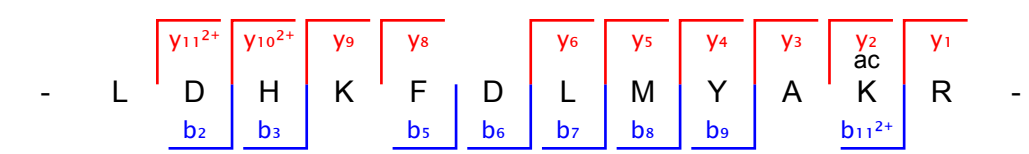

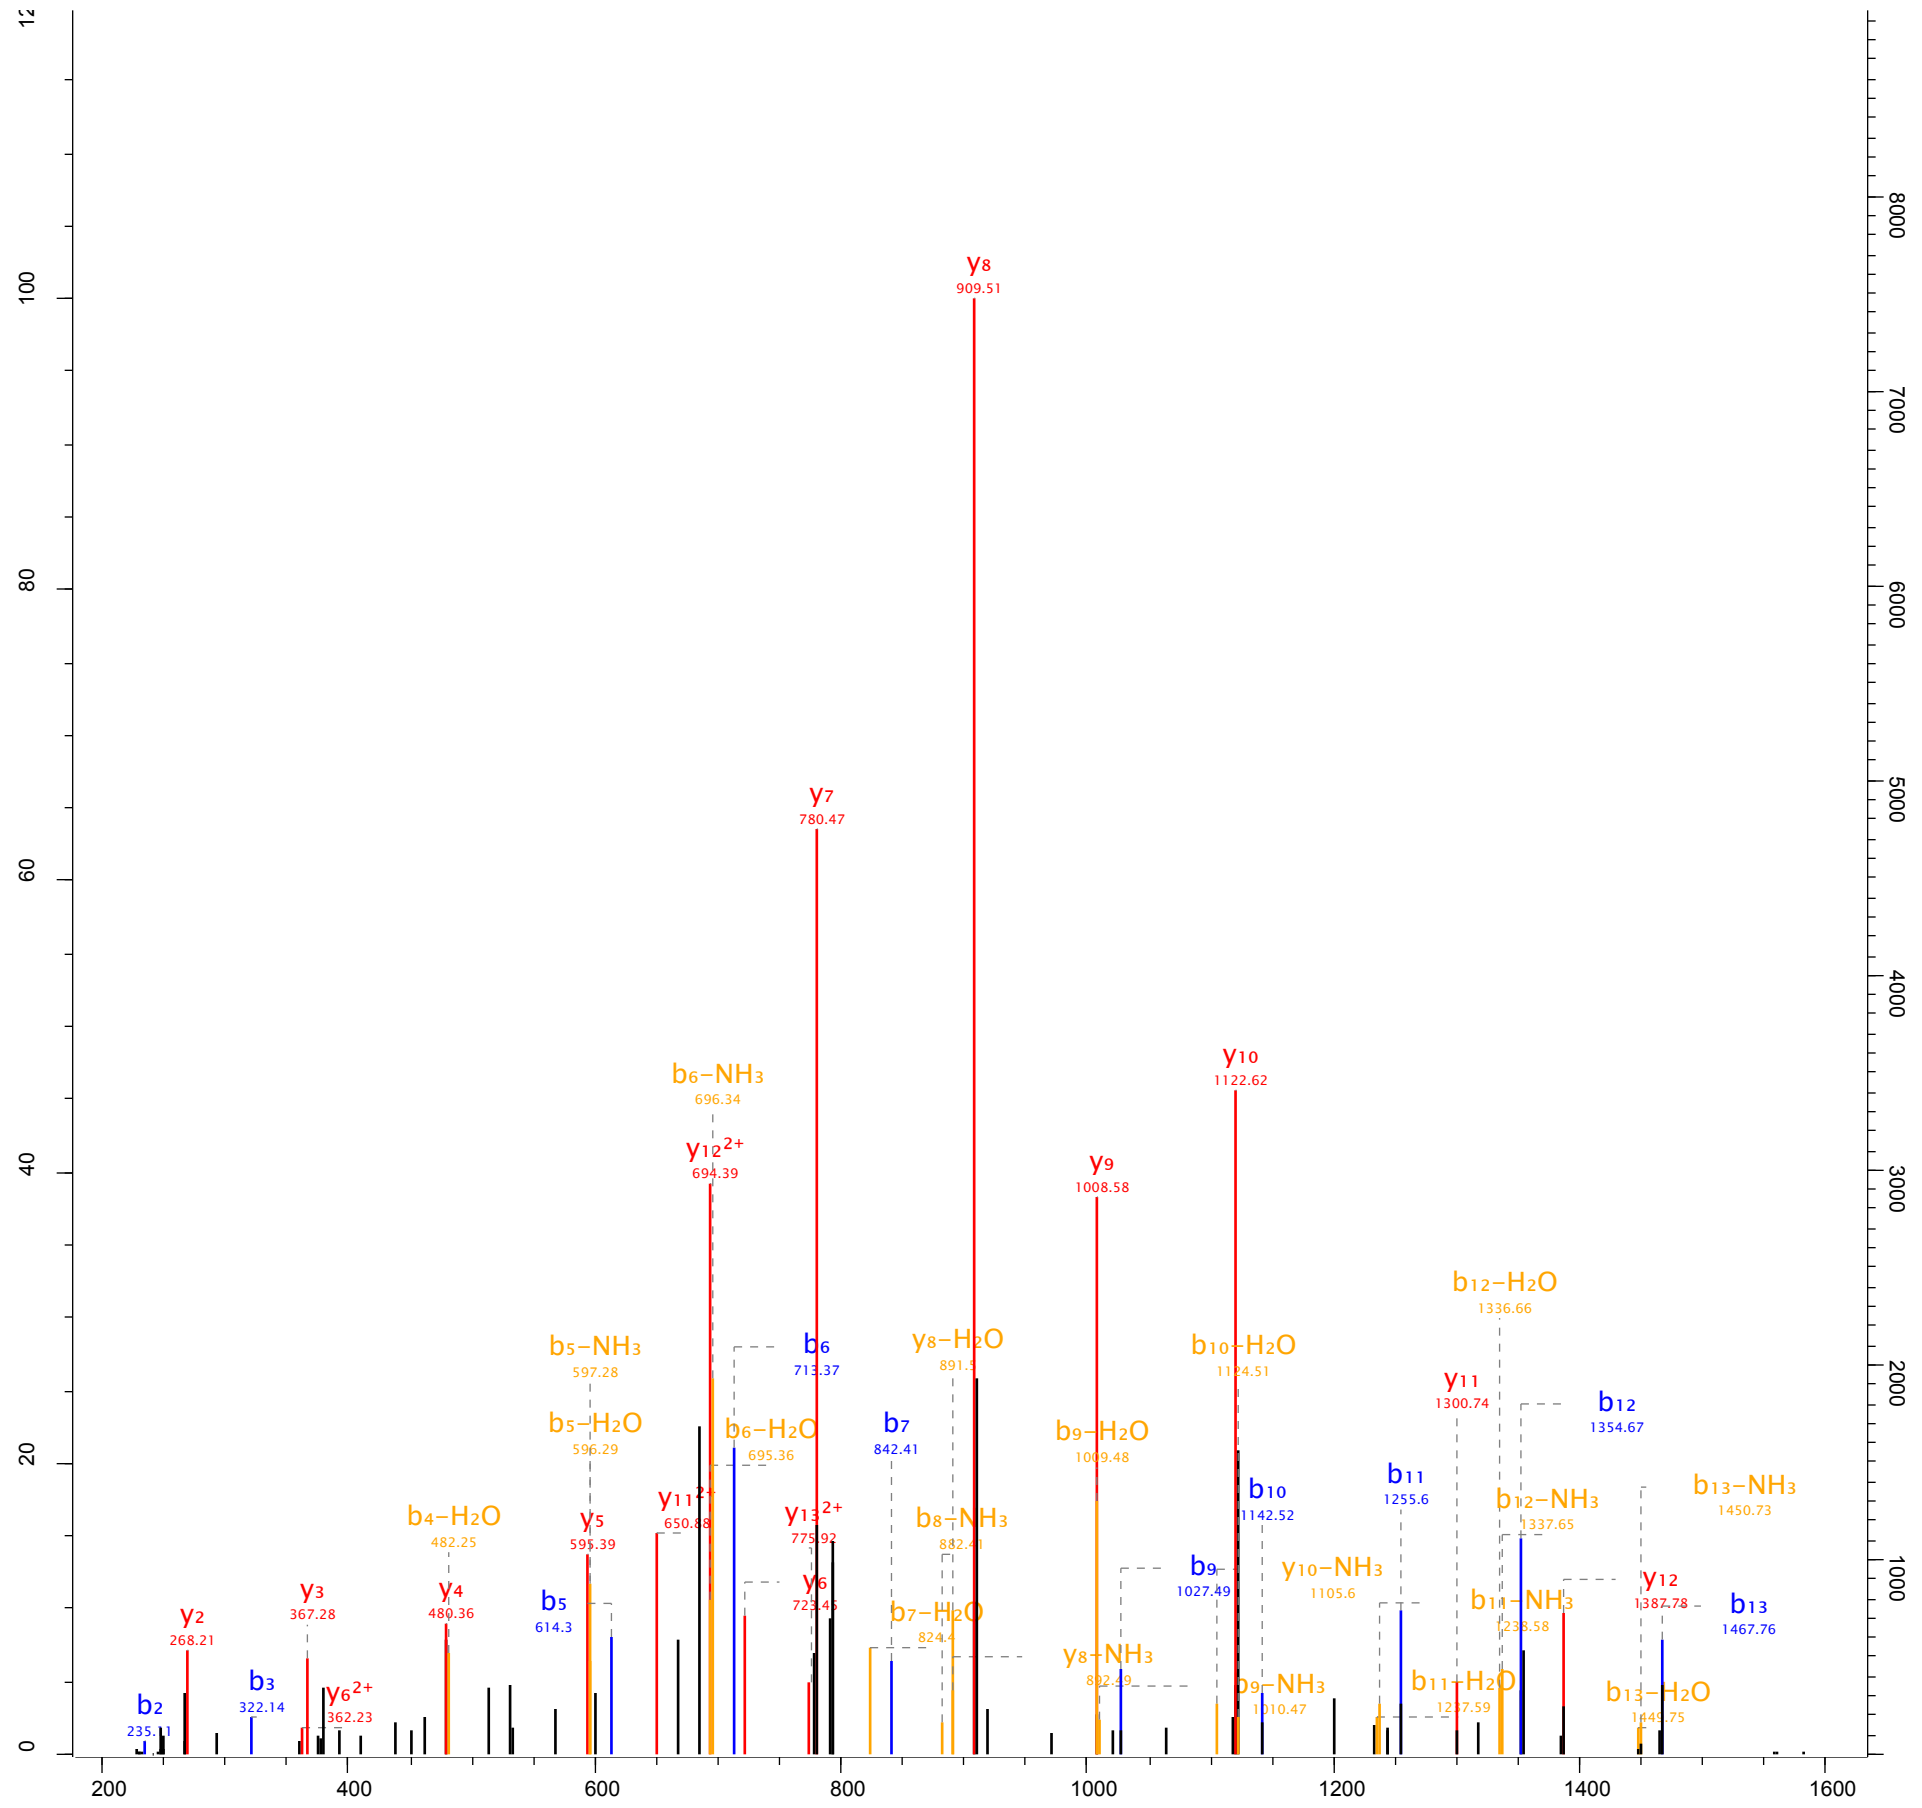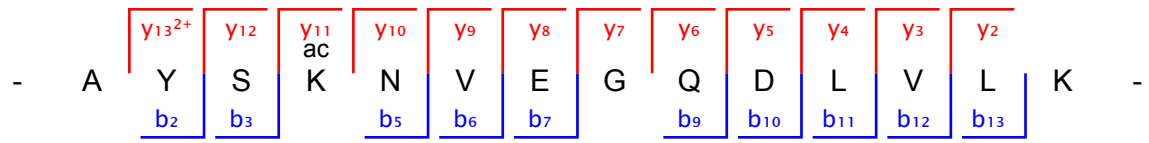

Supplement: 10.1074_M115.049288_mcp.M115.049288-6.pdf [file 10.1074_M115.049288_mcp.M115.049288-6.pdf]
