# Supplementary material
Source: PubMed Central journal article supplement (PMC4739669)

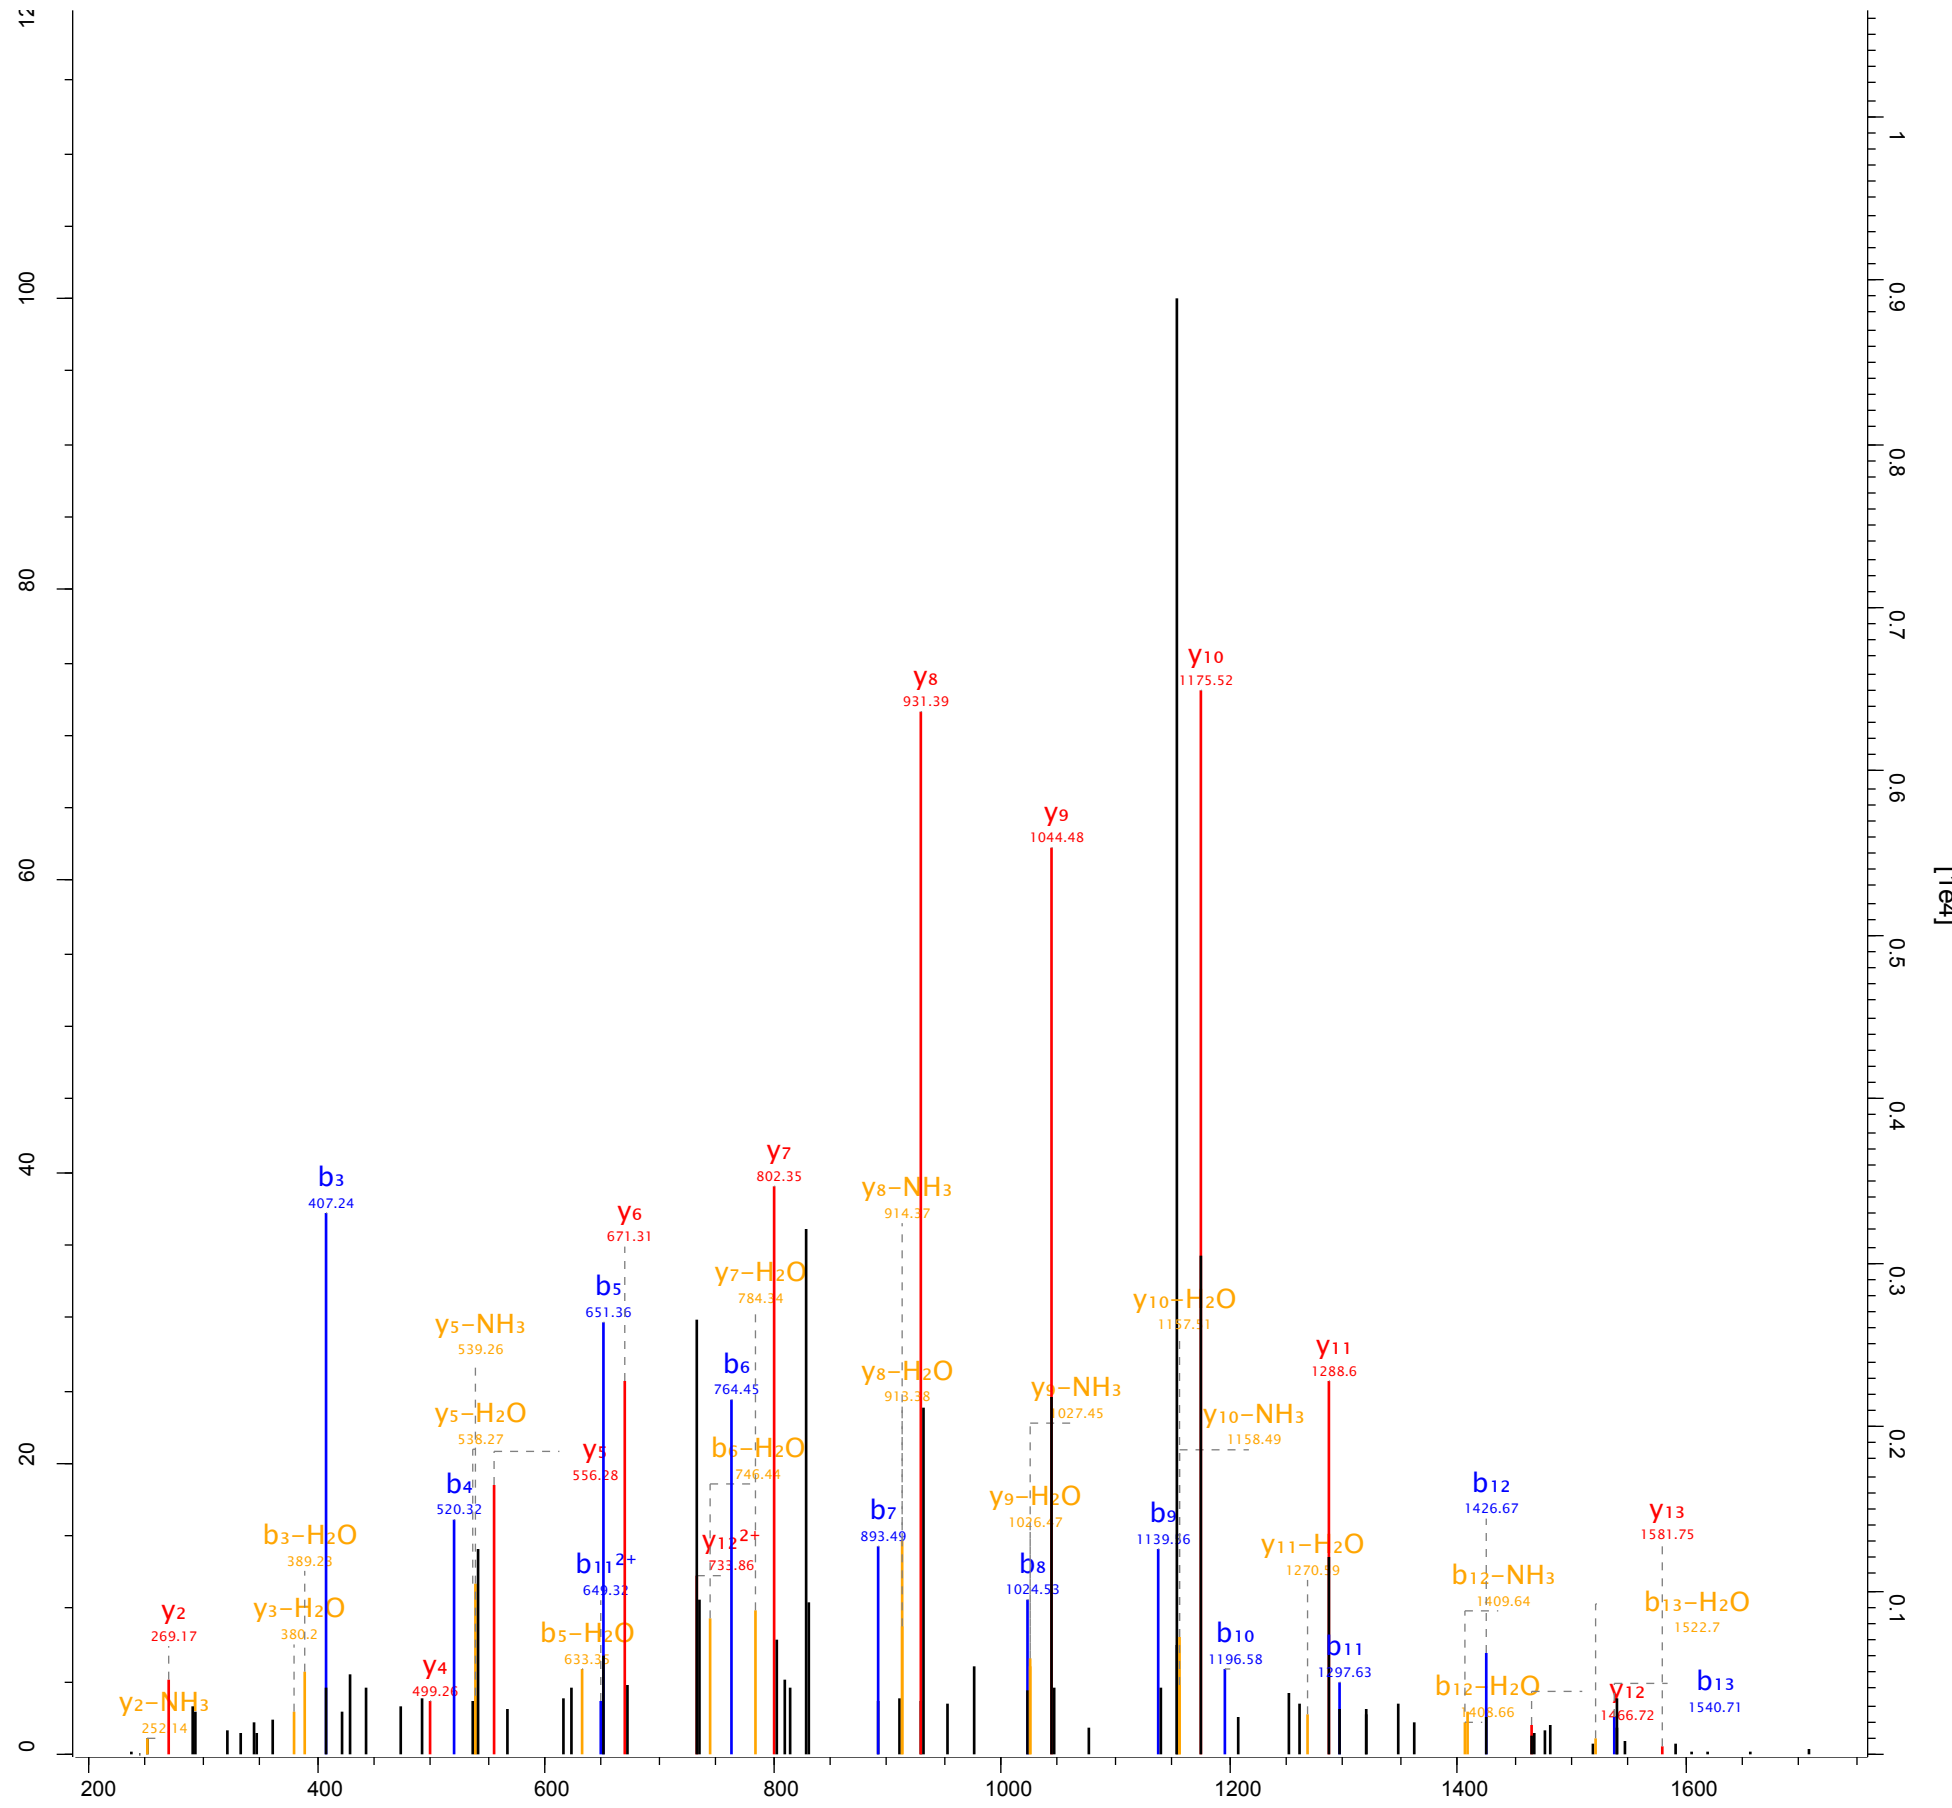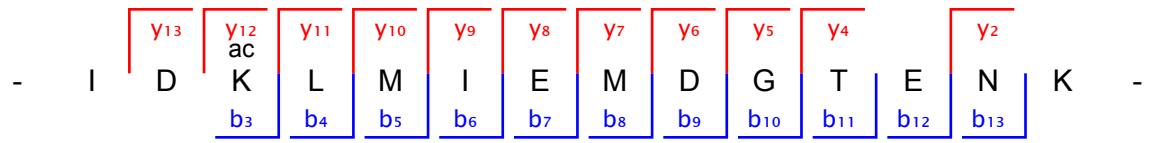

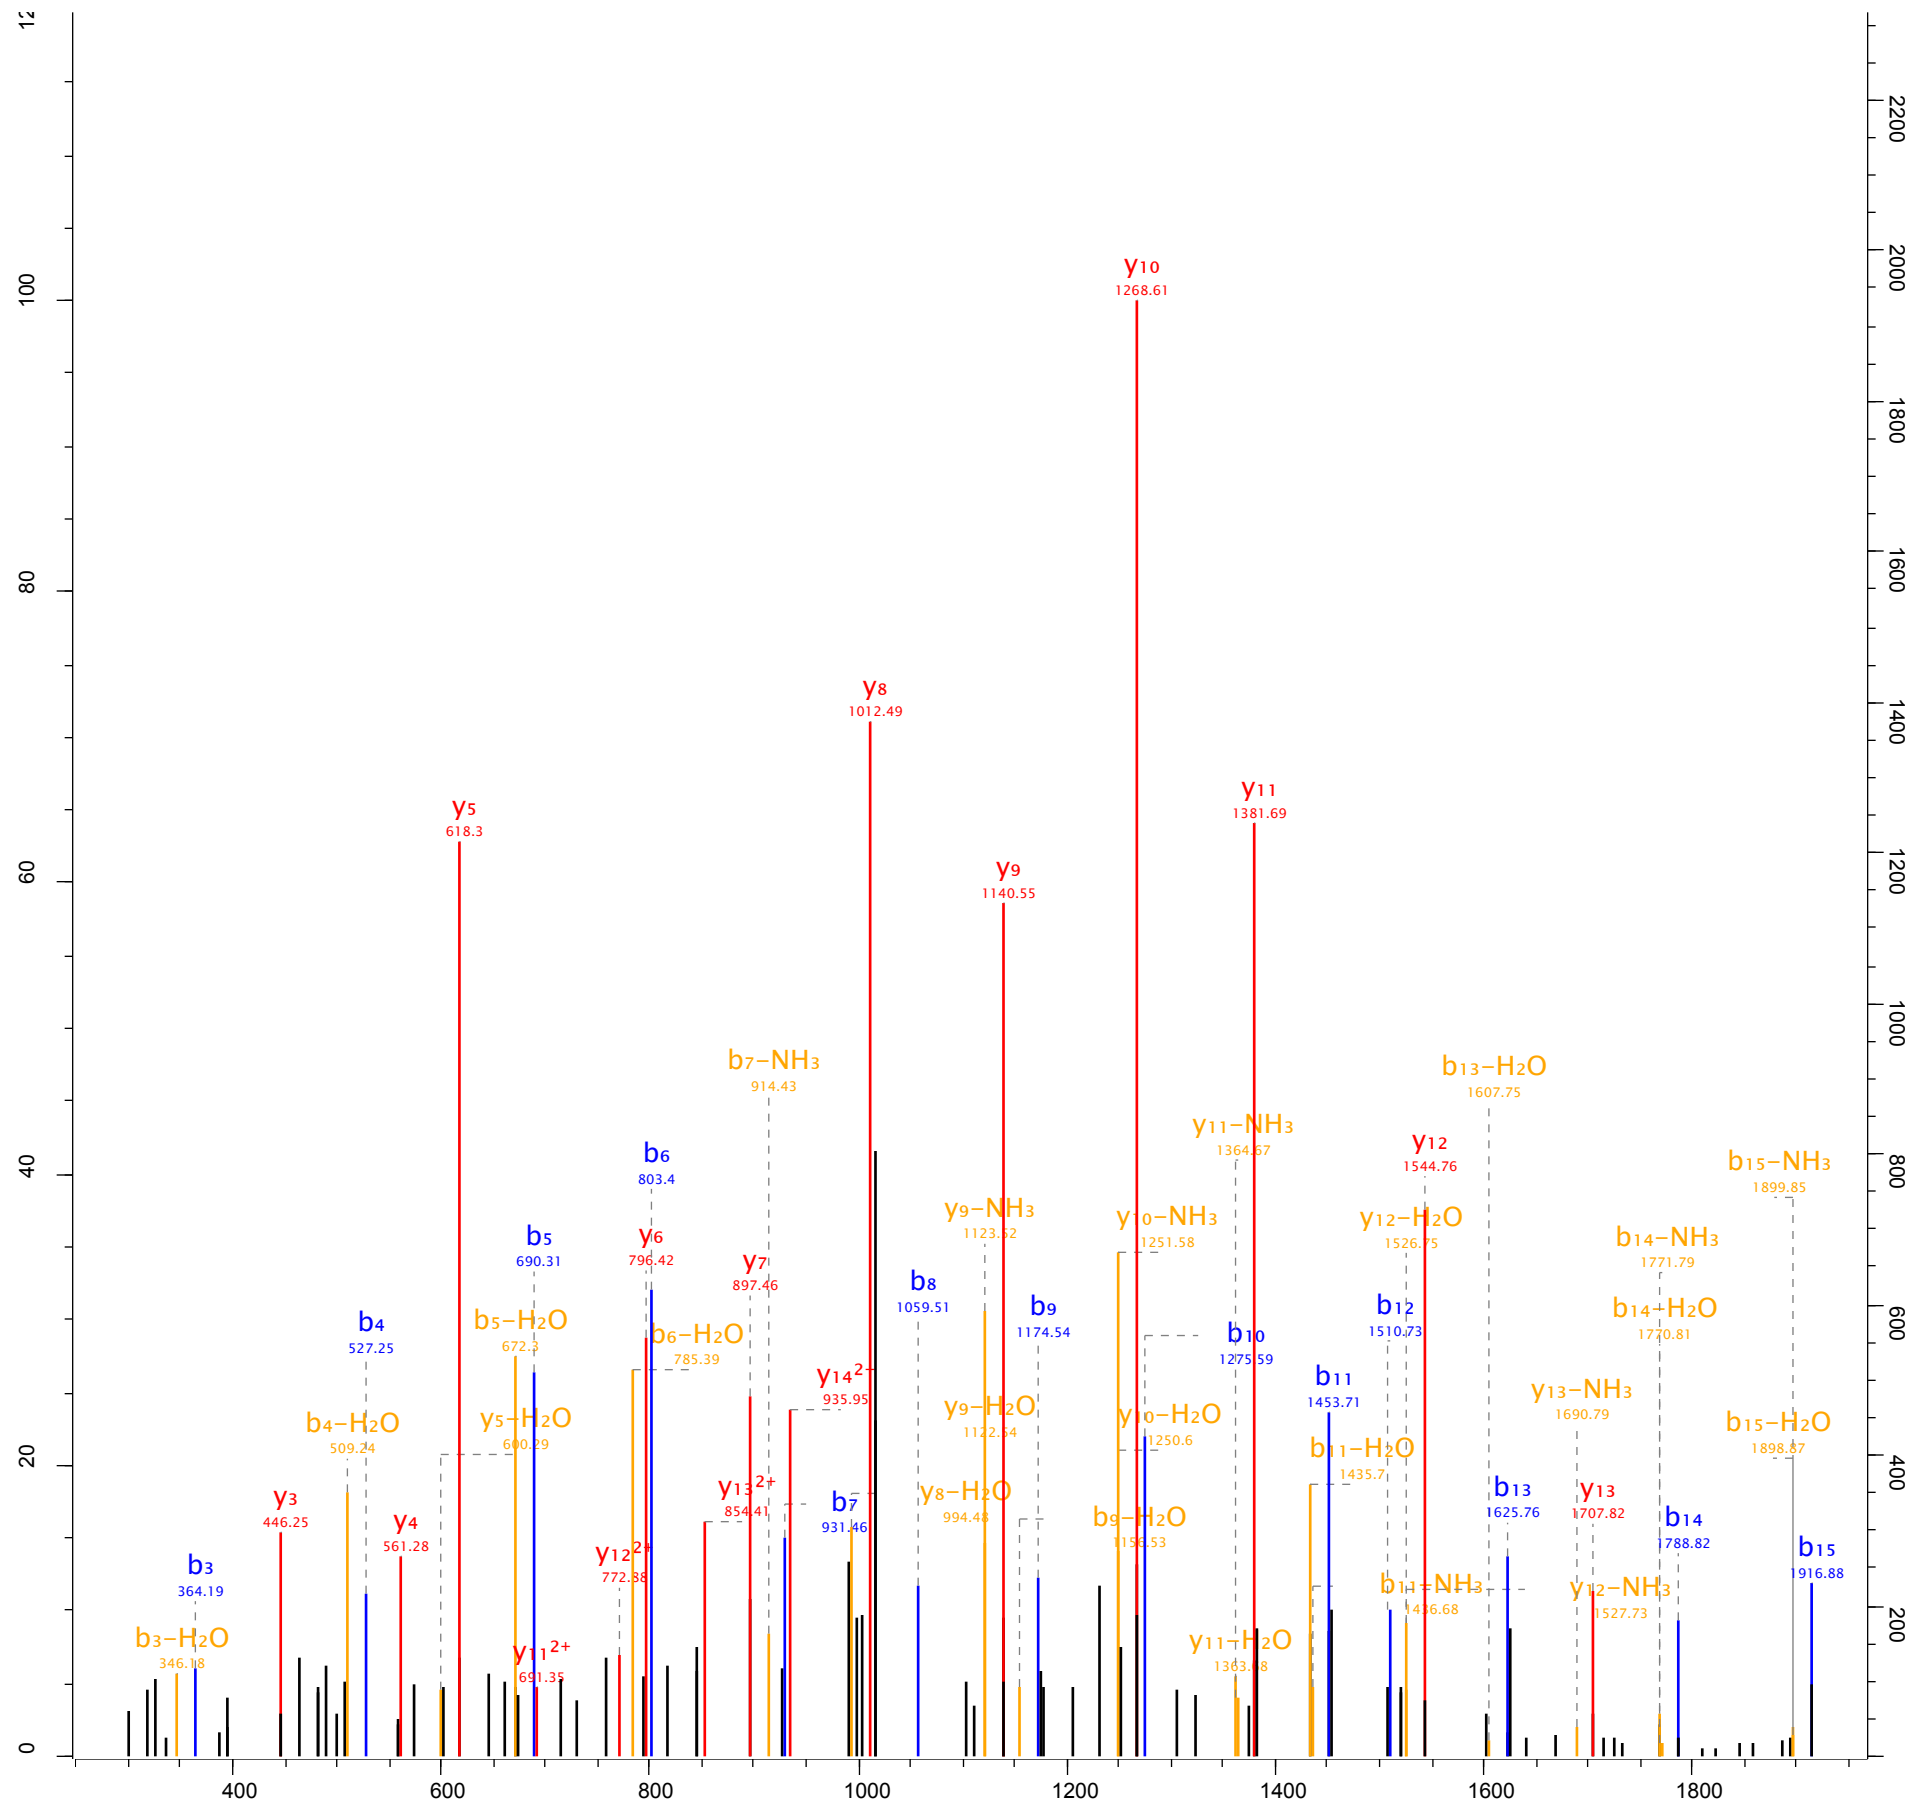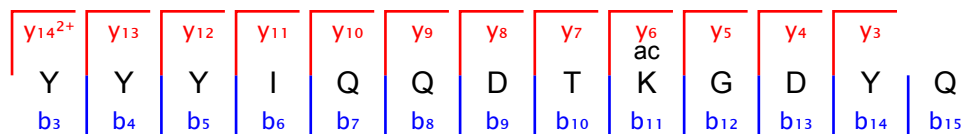

050813\_SCW\_II\_29\_19\_4

20049 ITMS; CID 155.37 789.9 Pgd

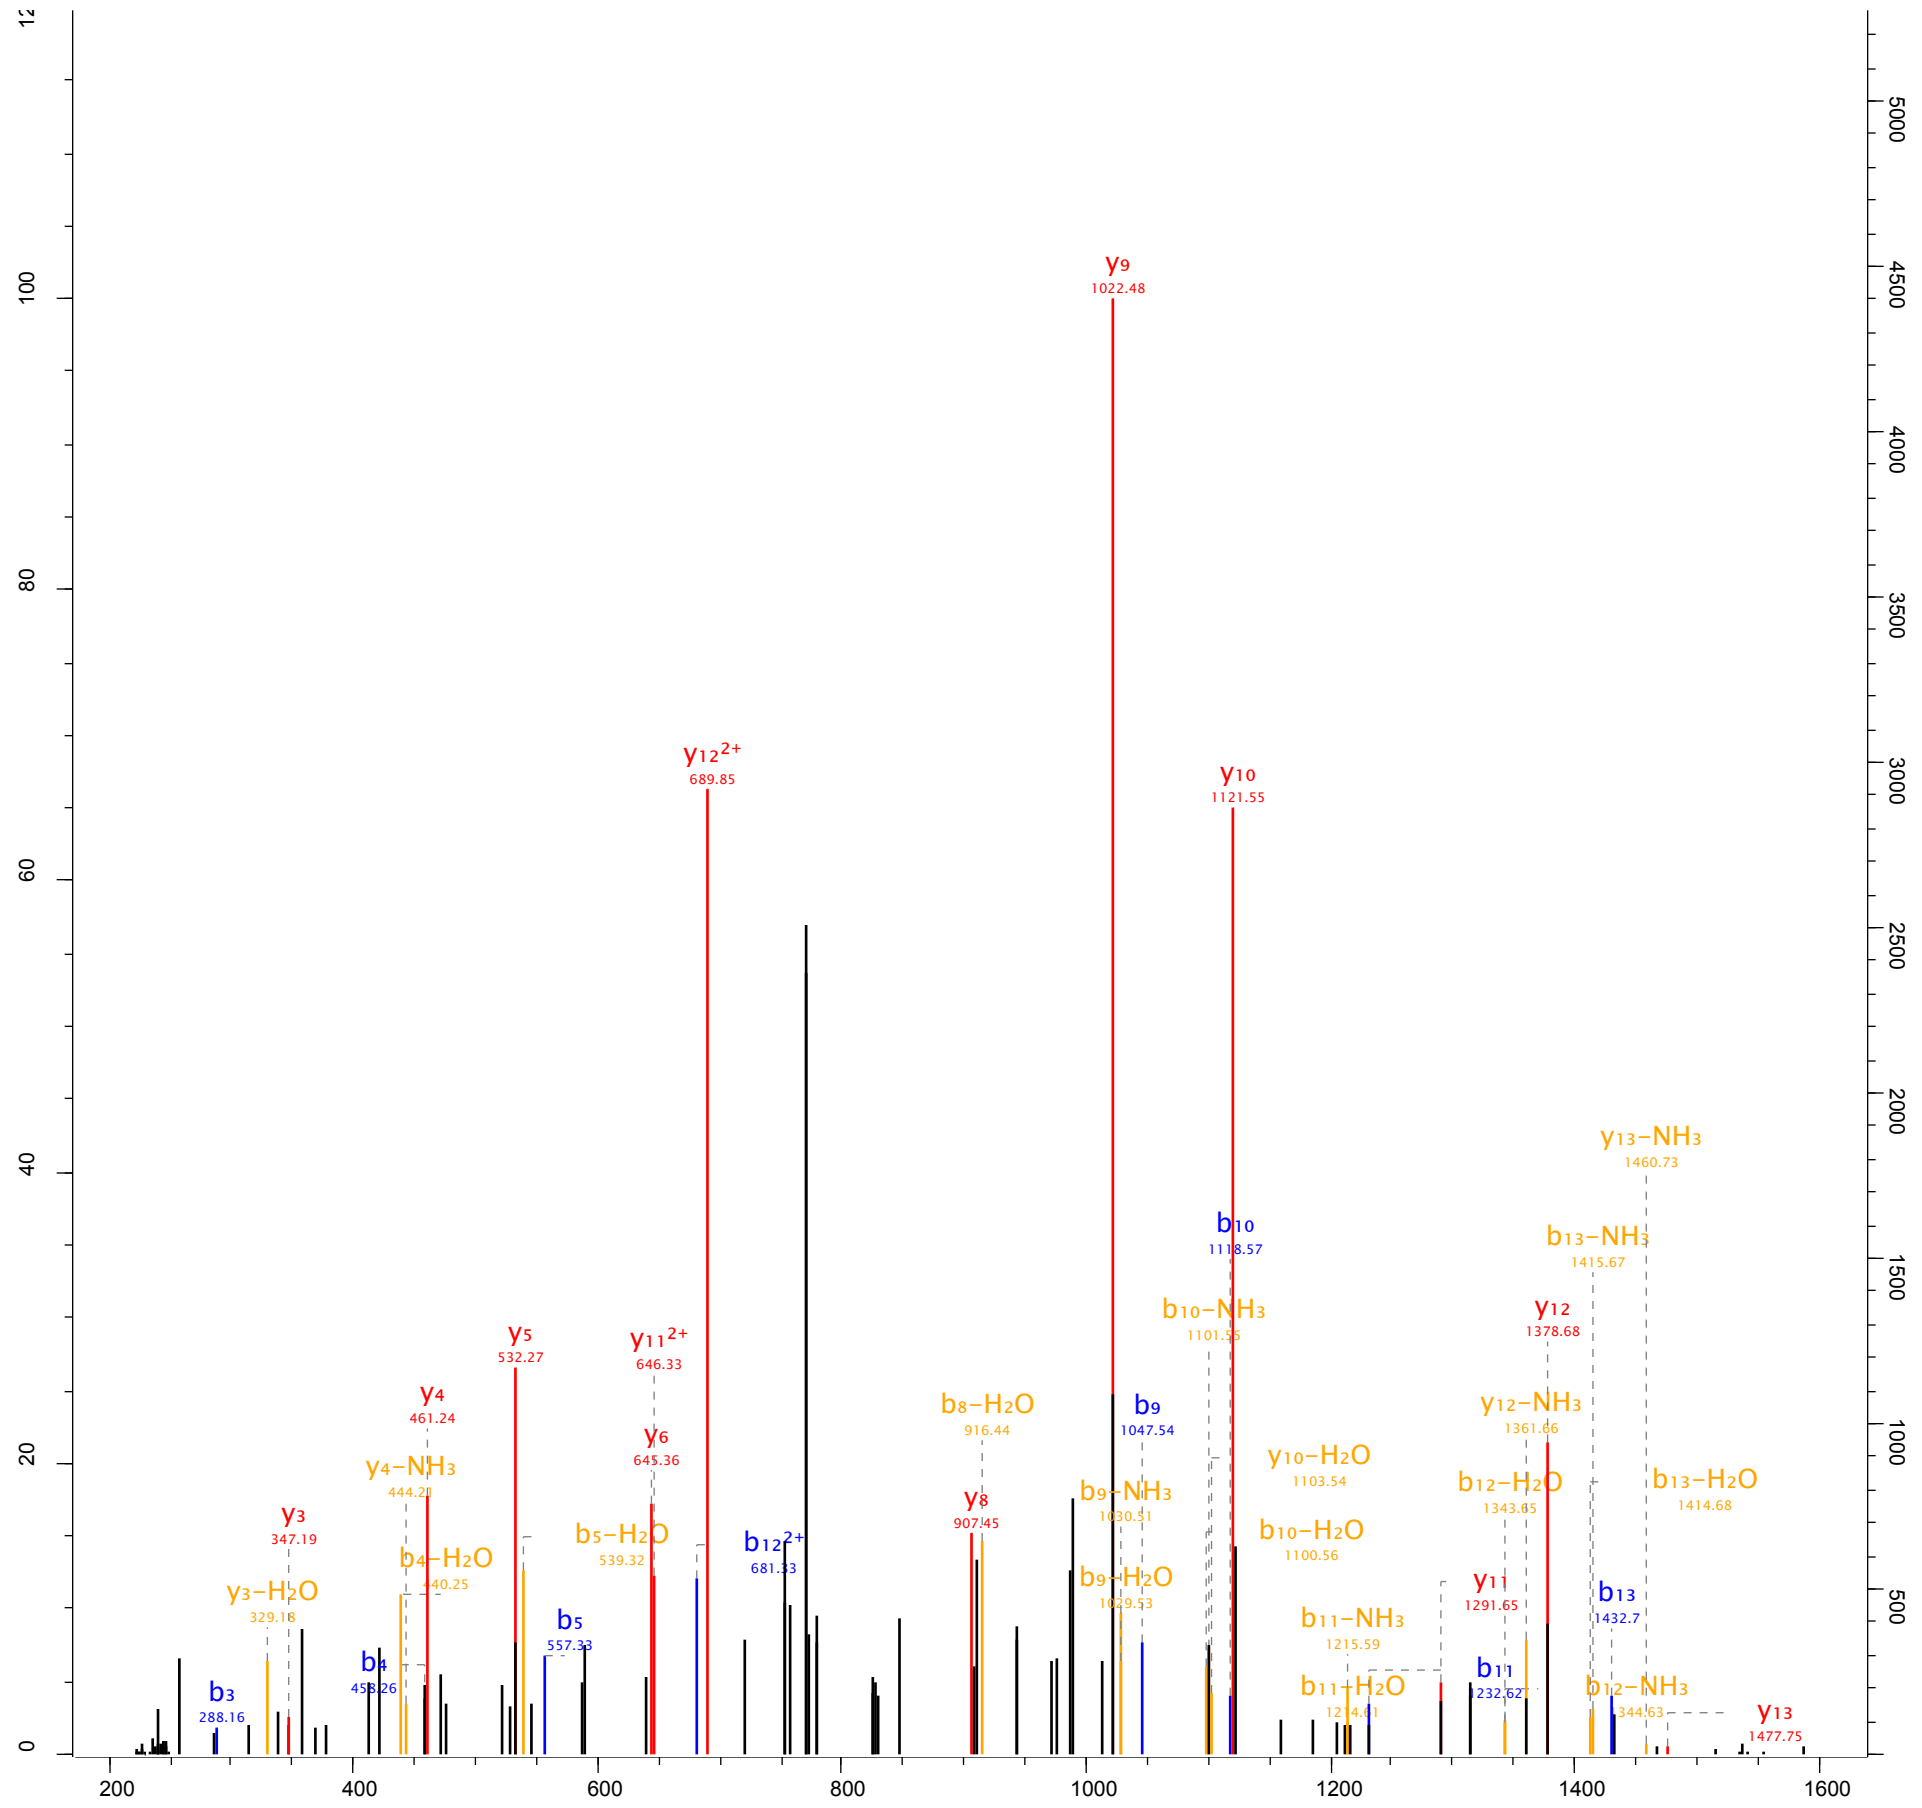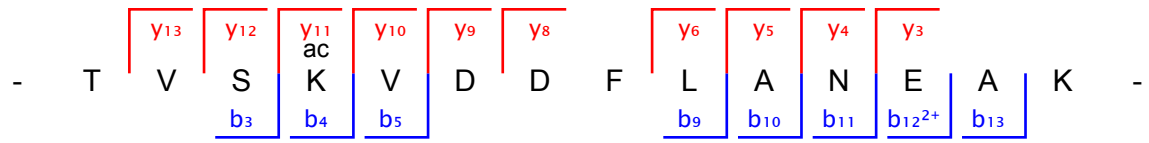

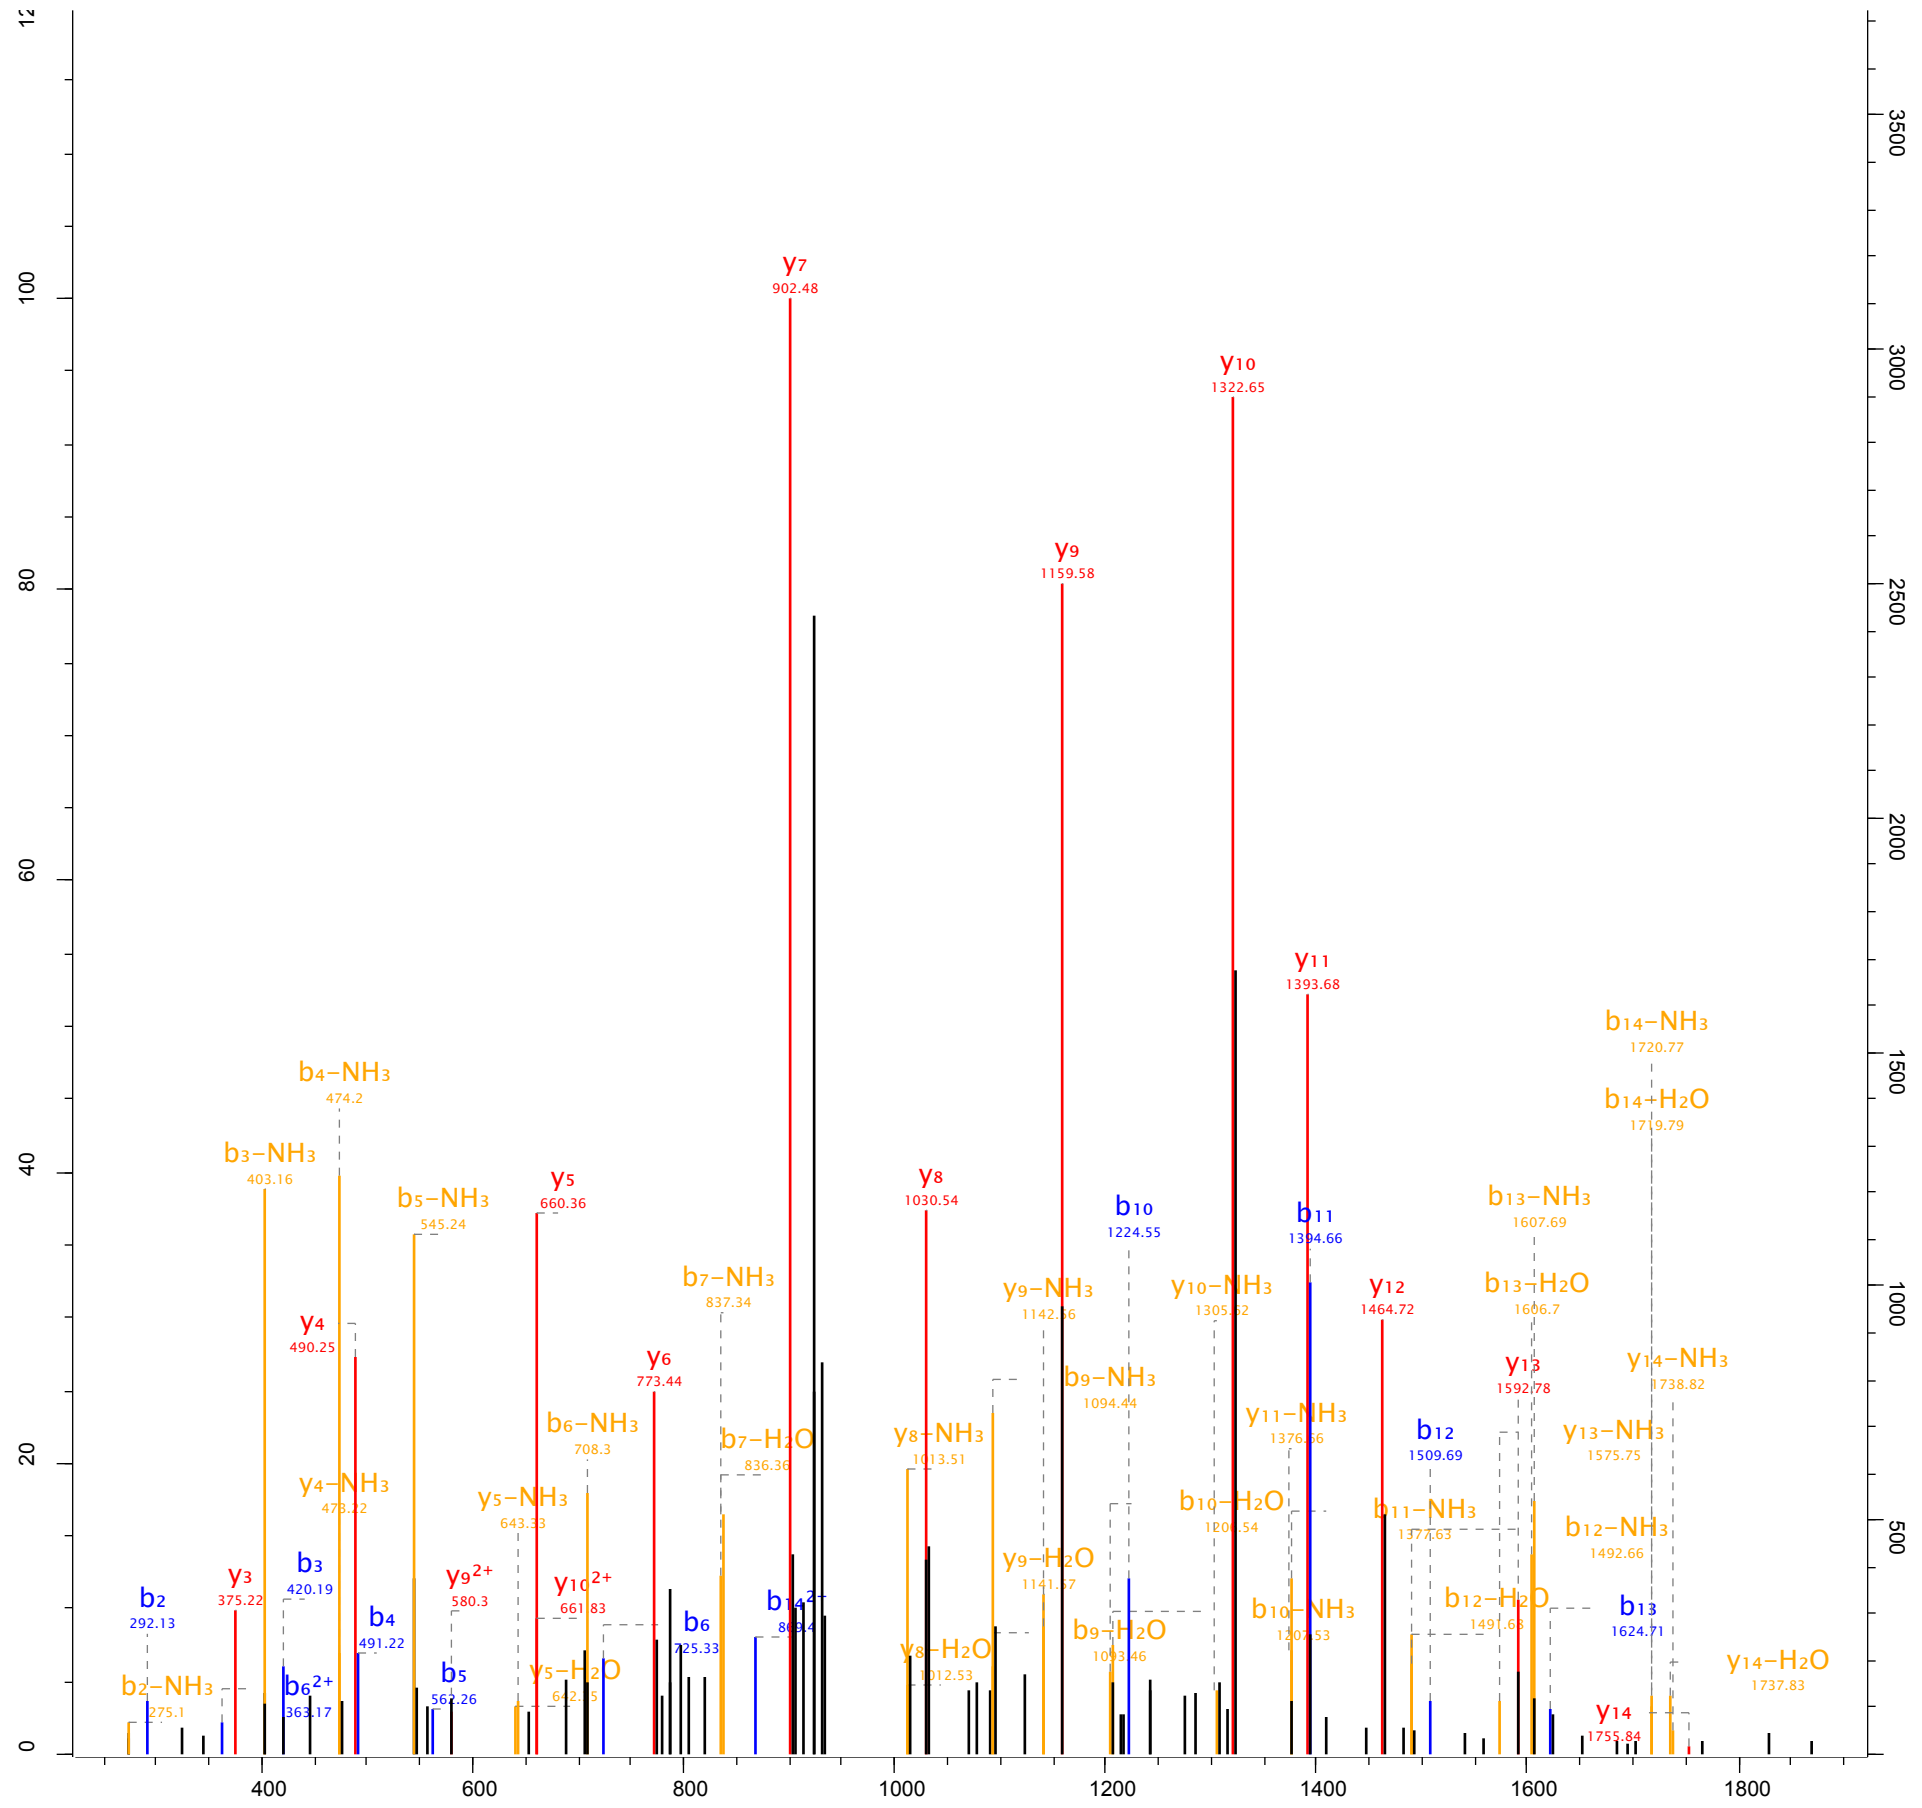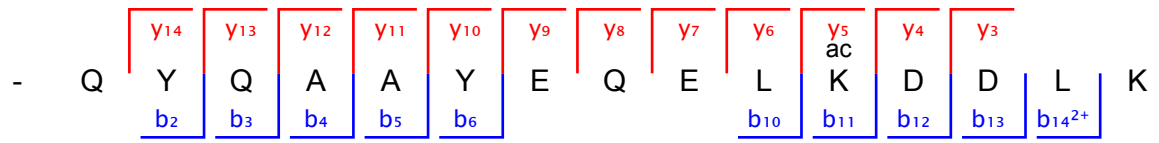

050813\_SCW\_II\_29\_19\_4

20502

ITMS; CID

224.25

757.93

Atp5a1

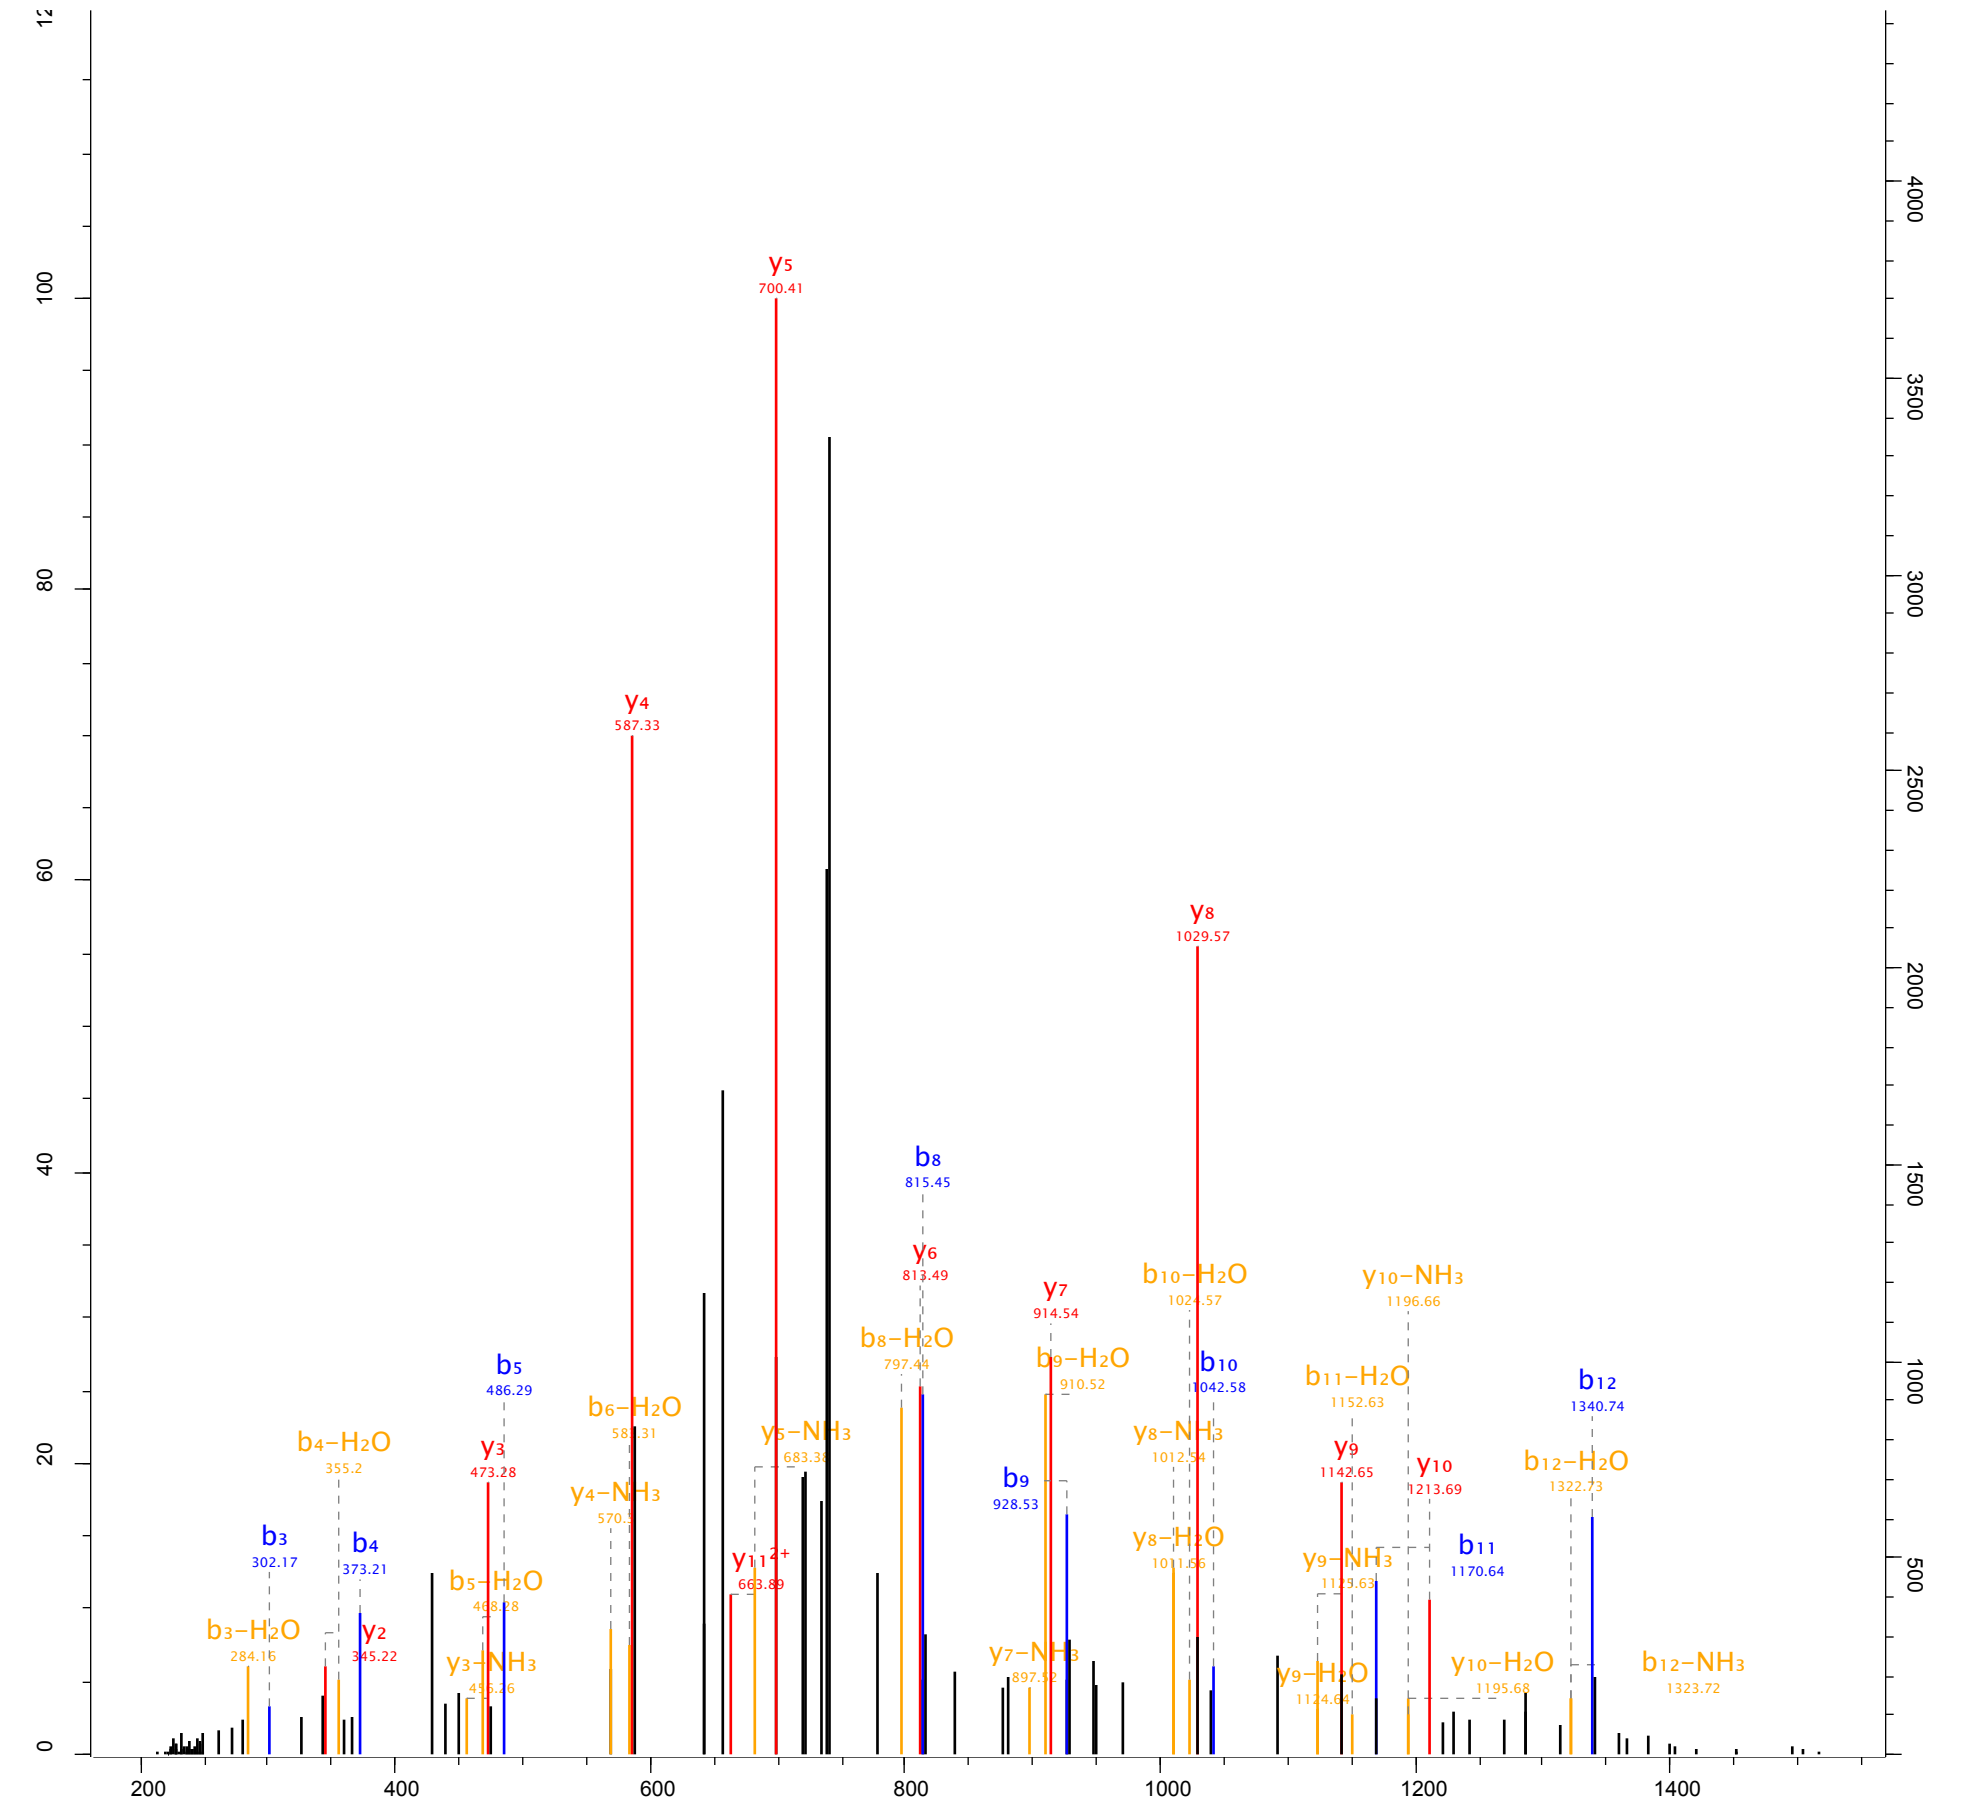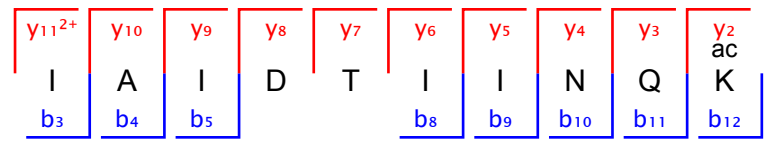

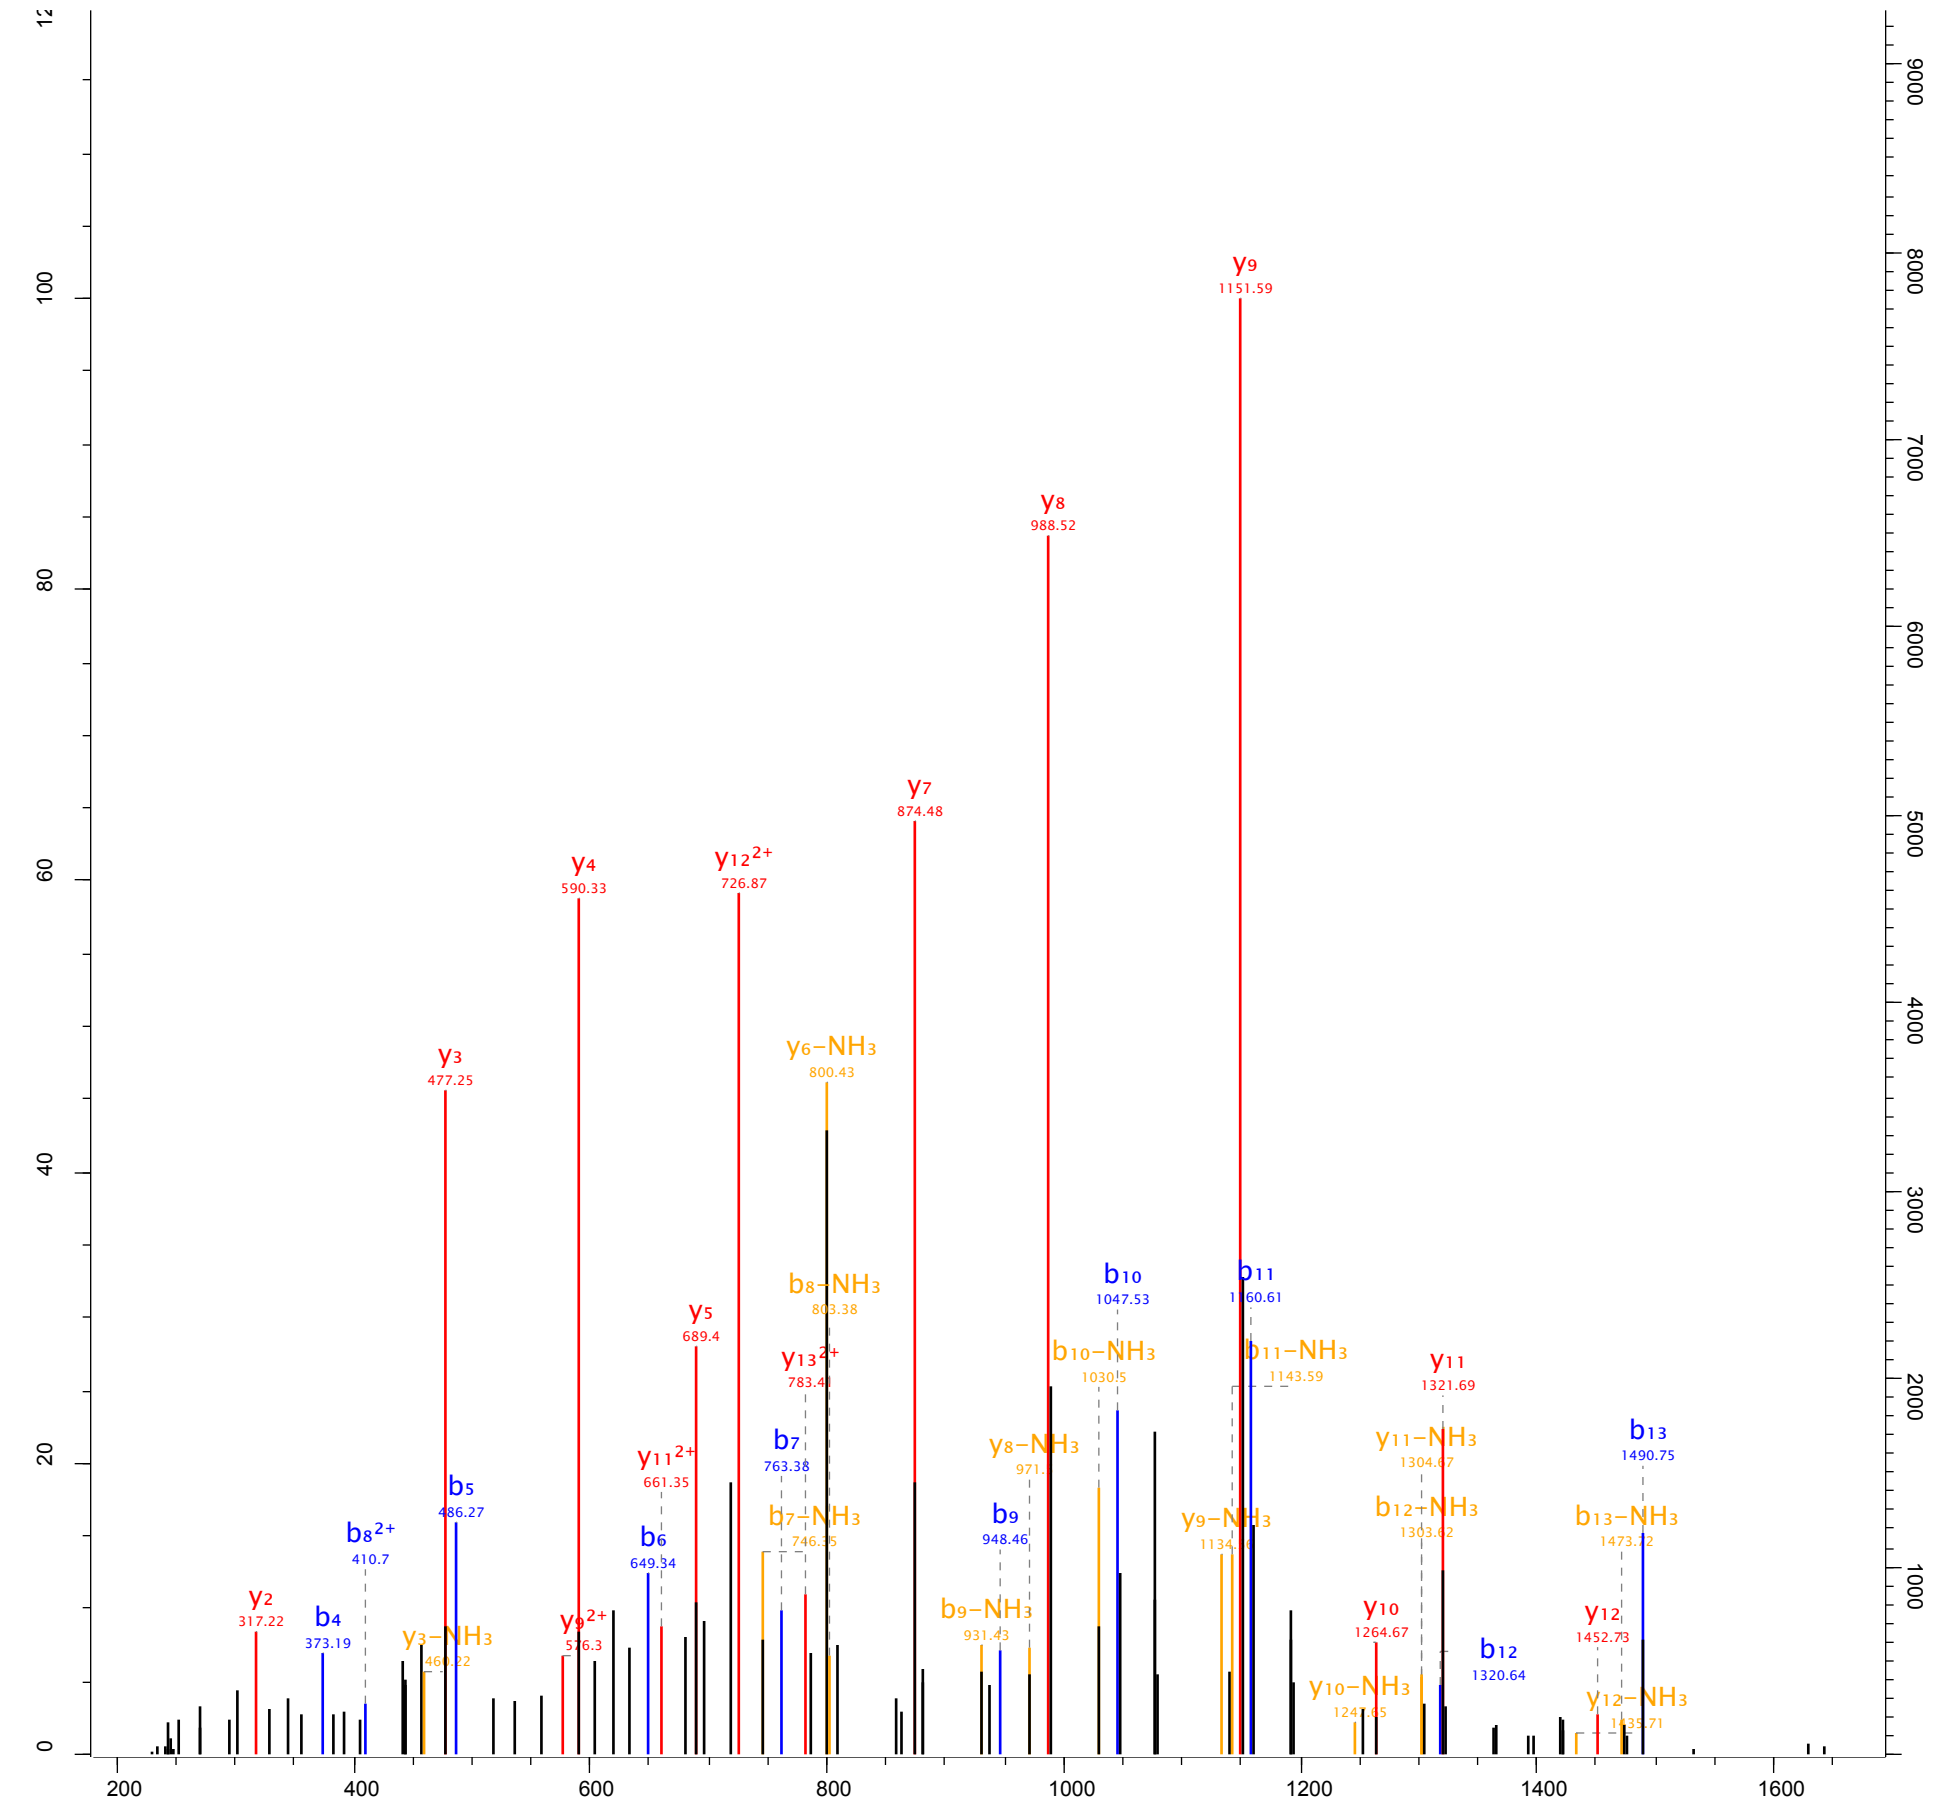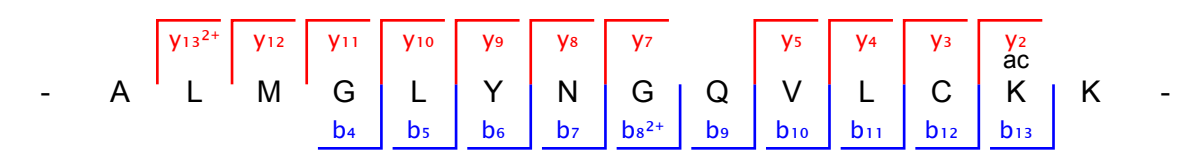

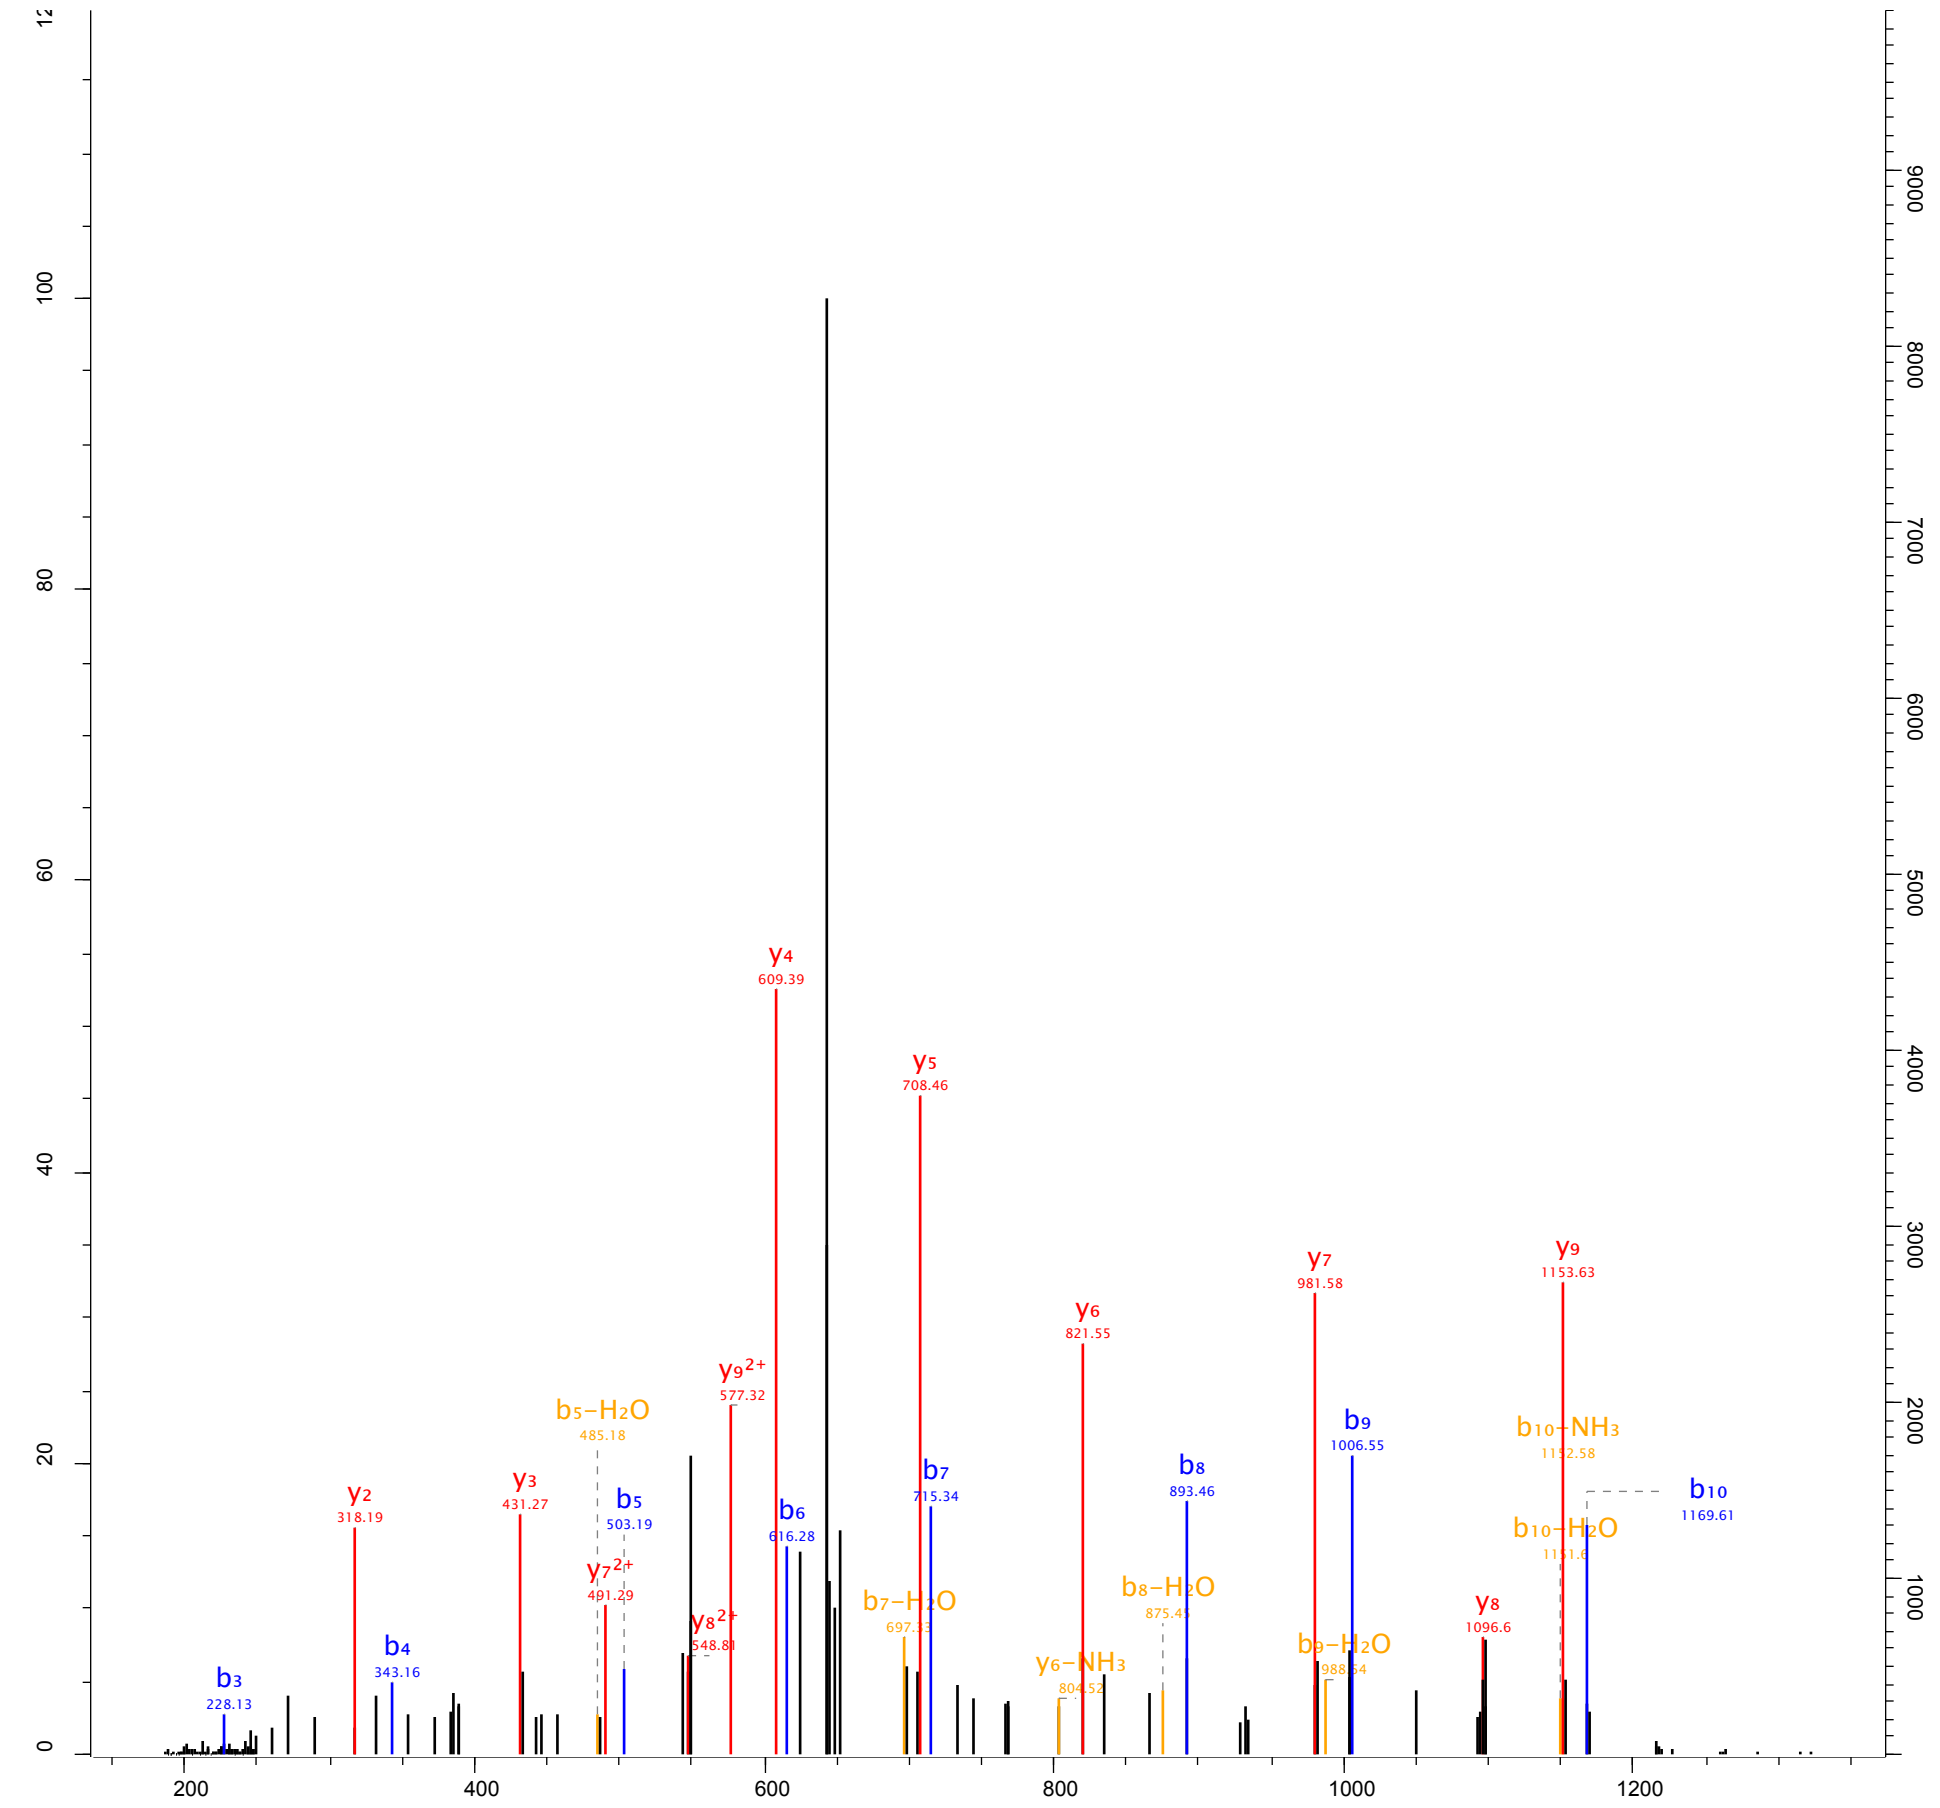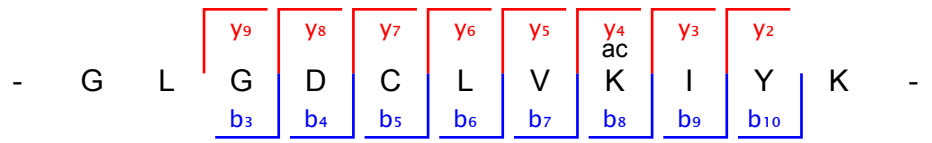

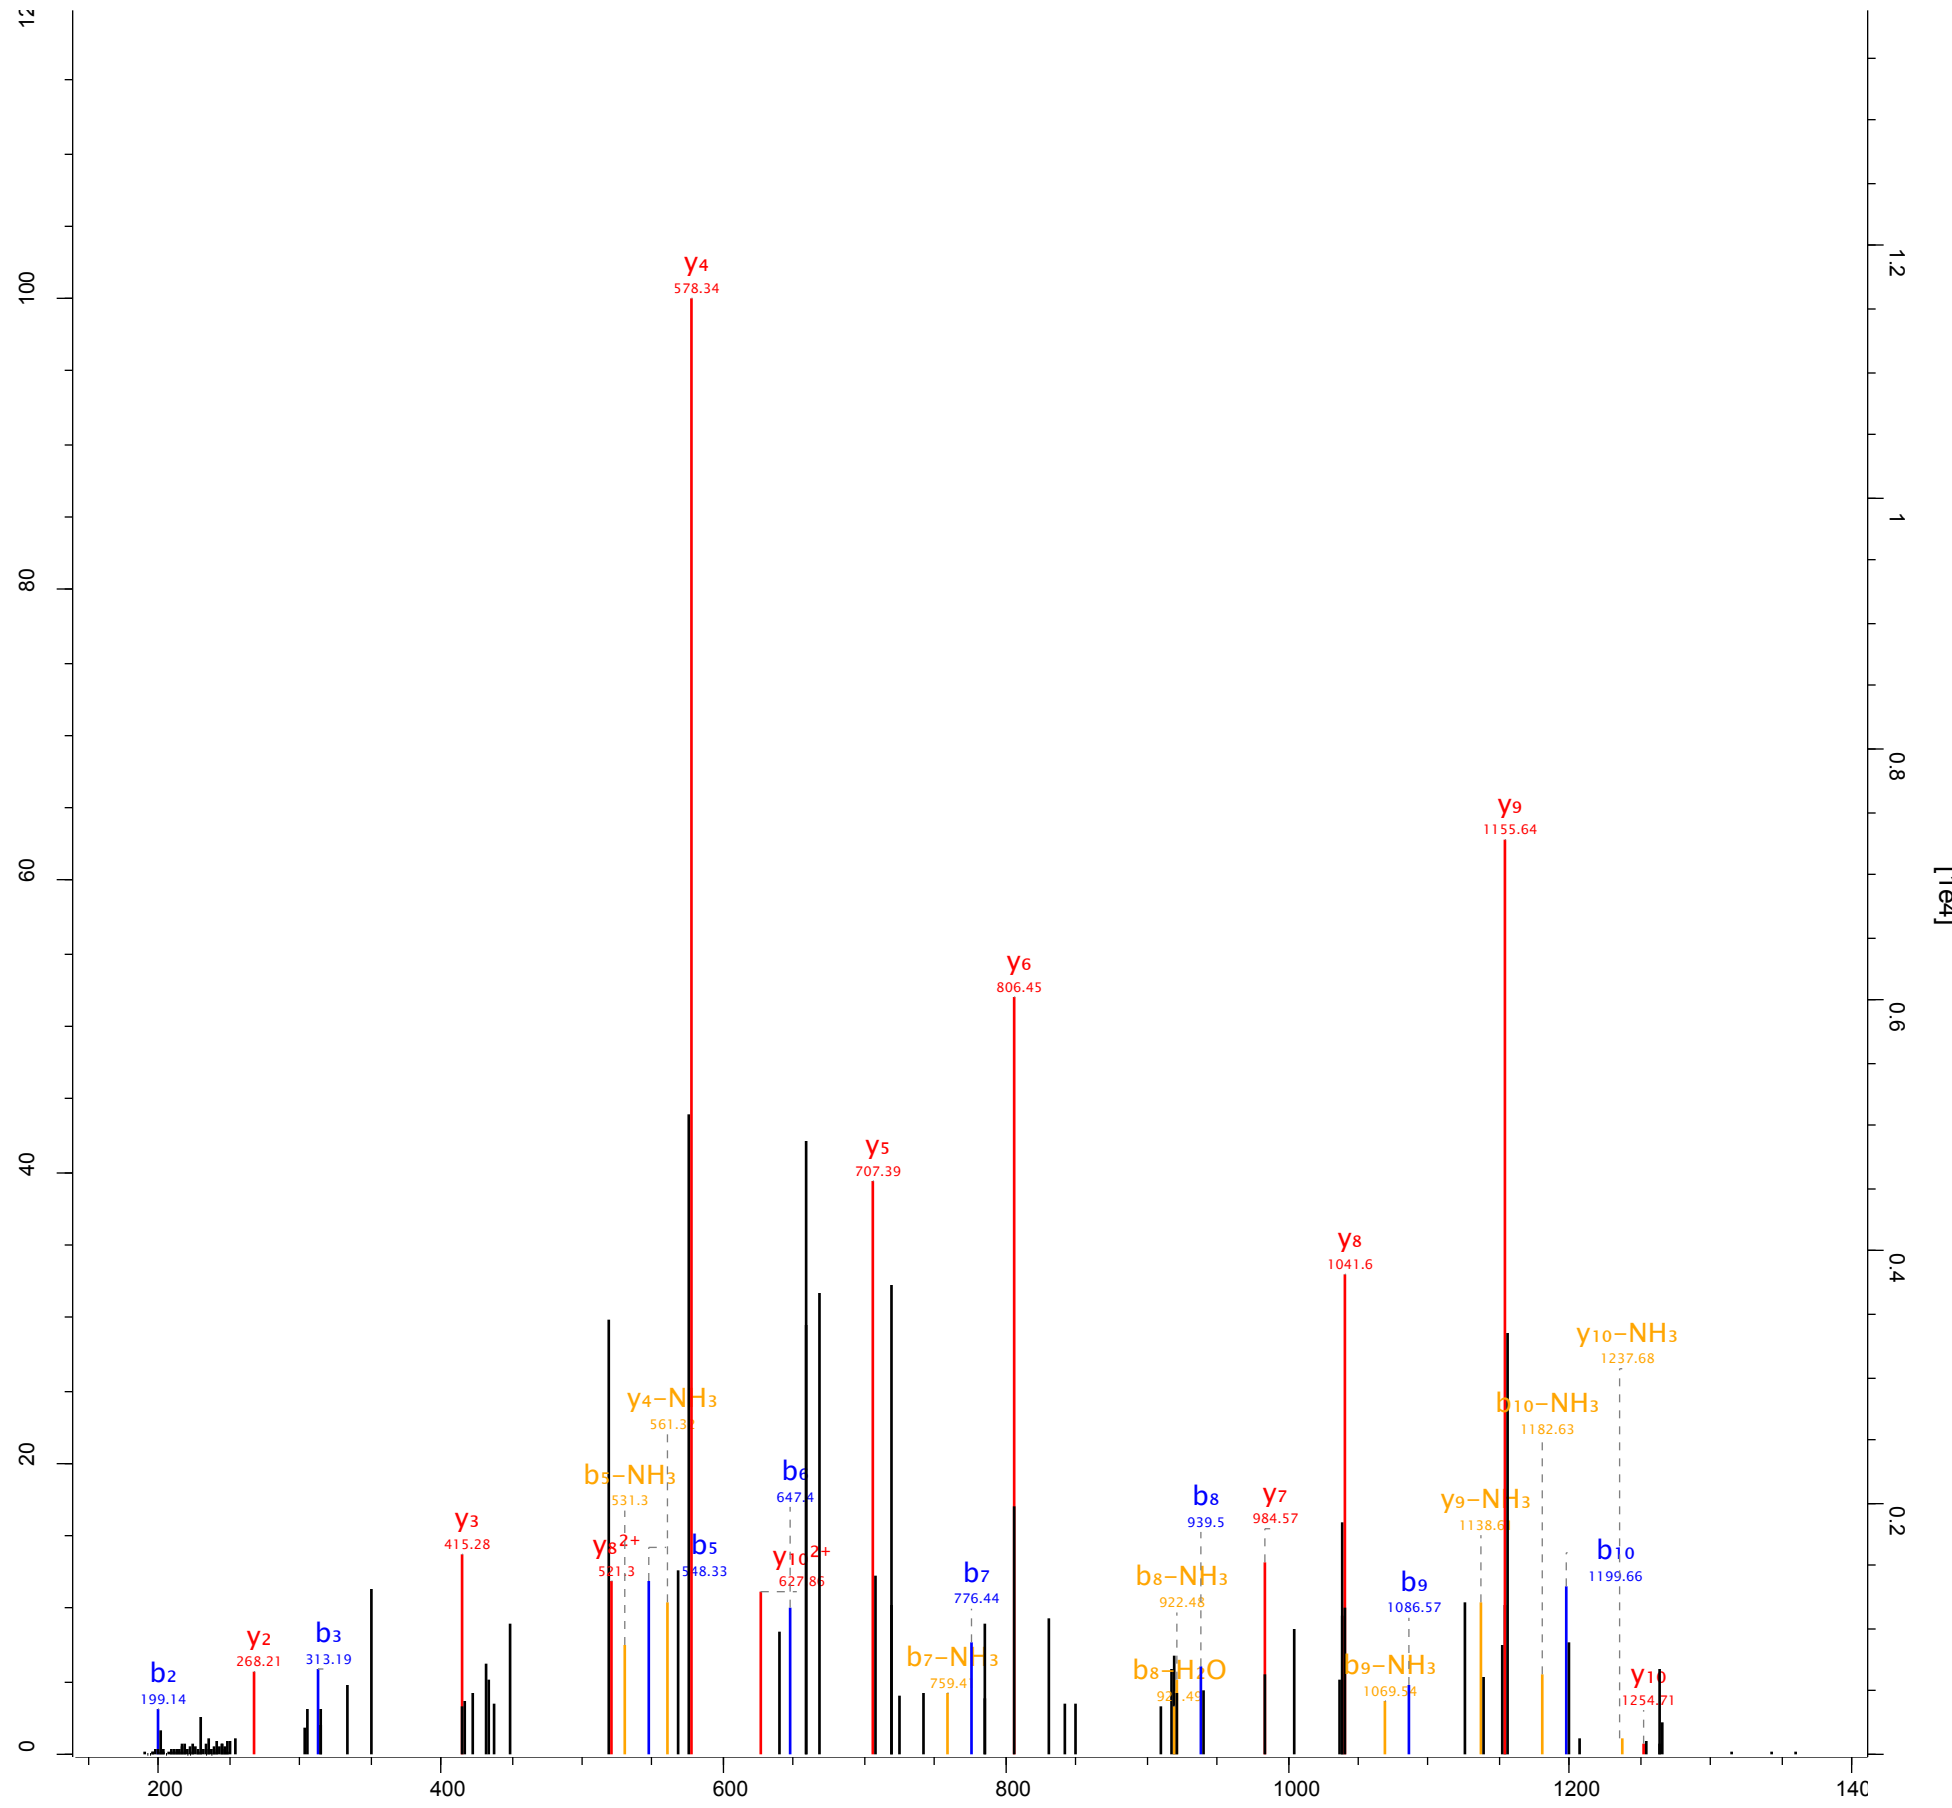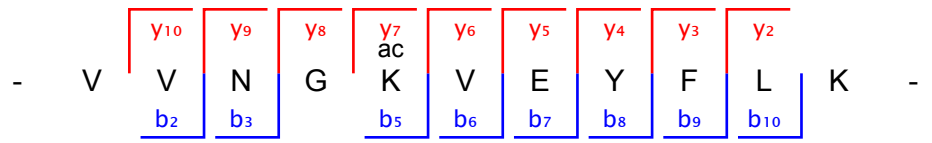



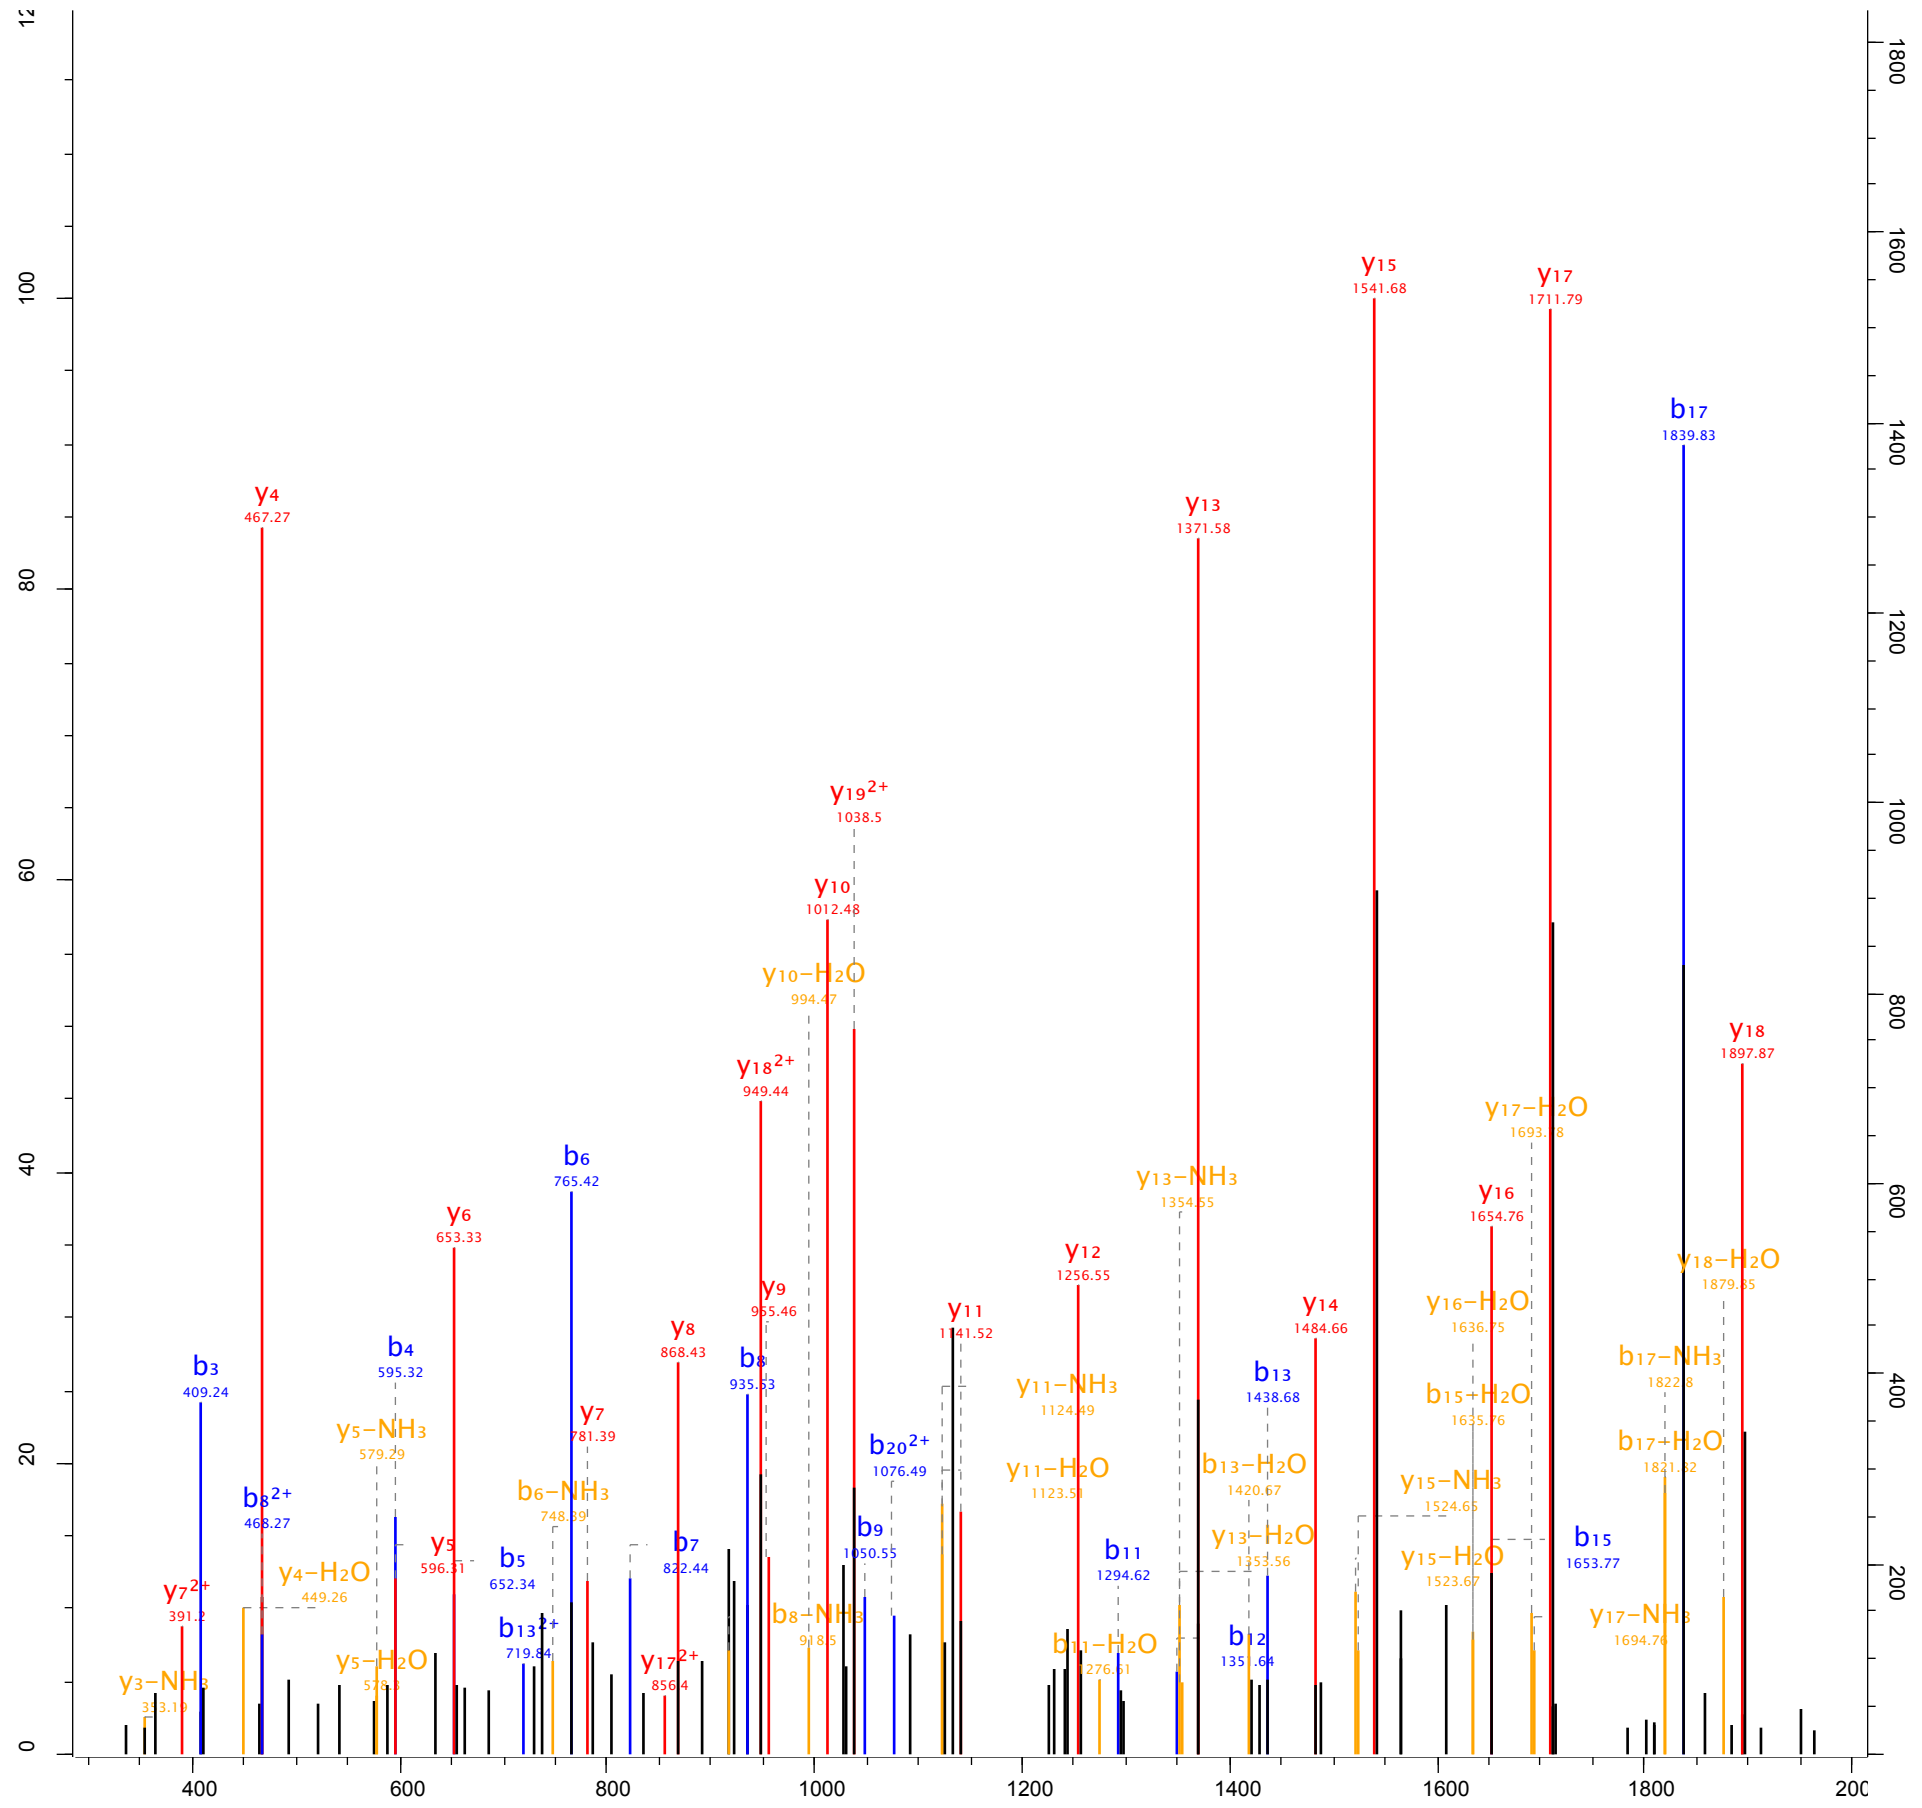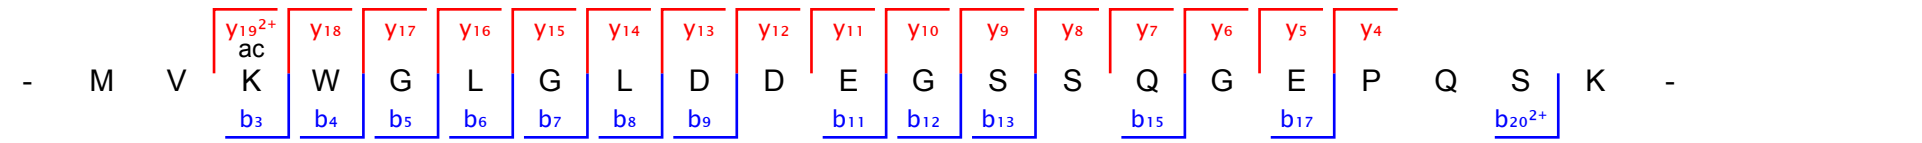

050813\_SCW\_II\_29\_19\_4

20798 ITMS; CID 129.89 642.34 Glrx3

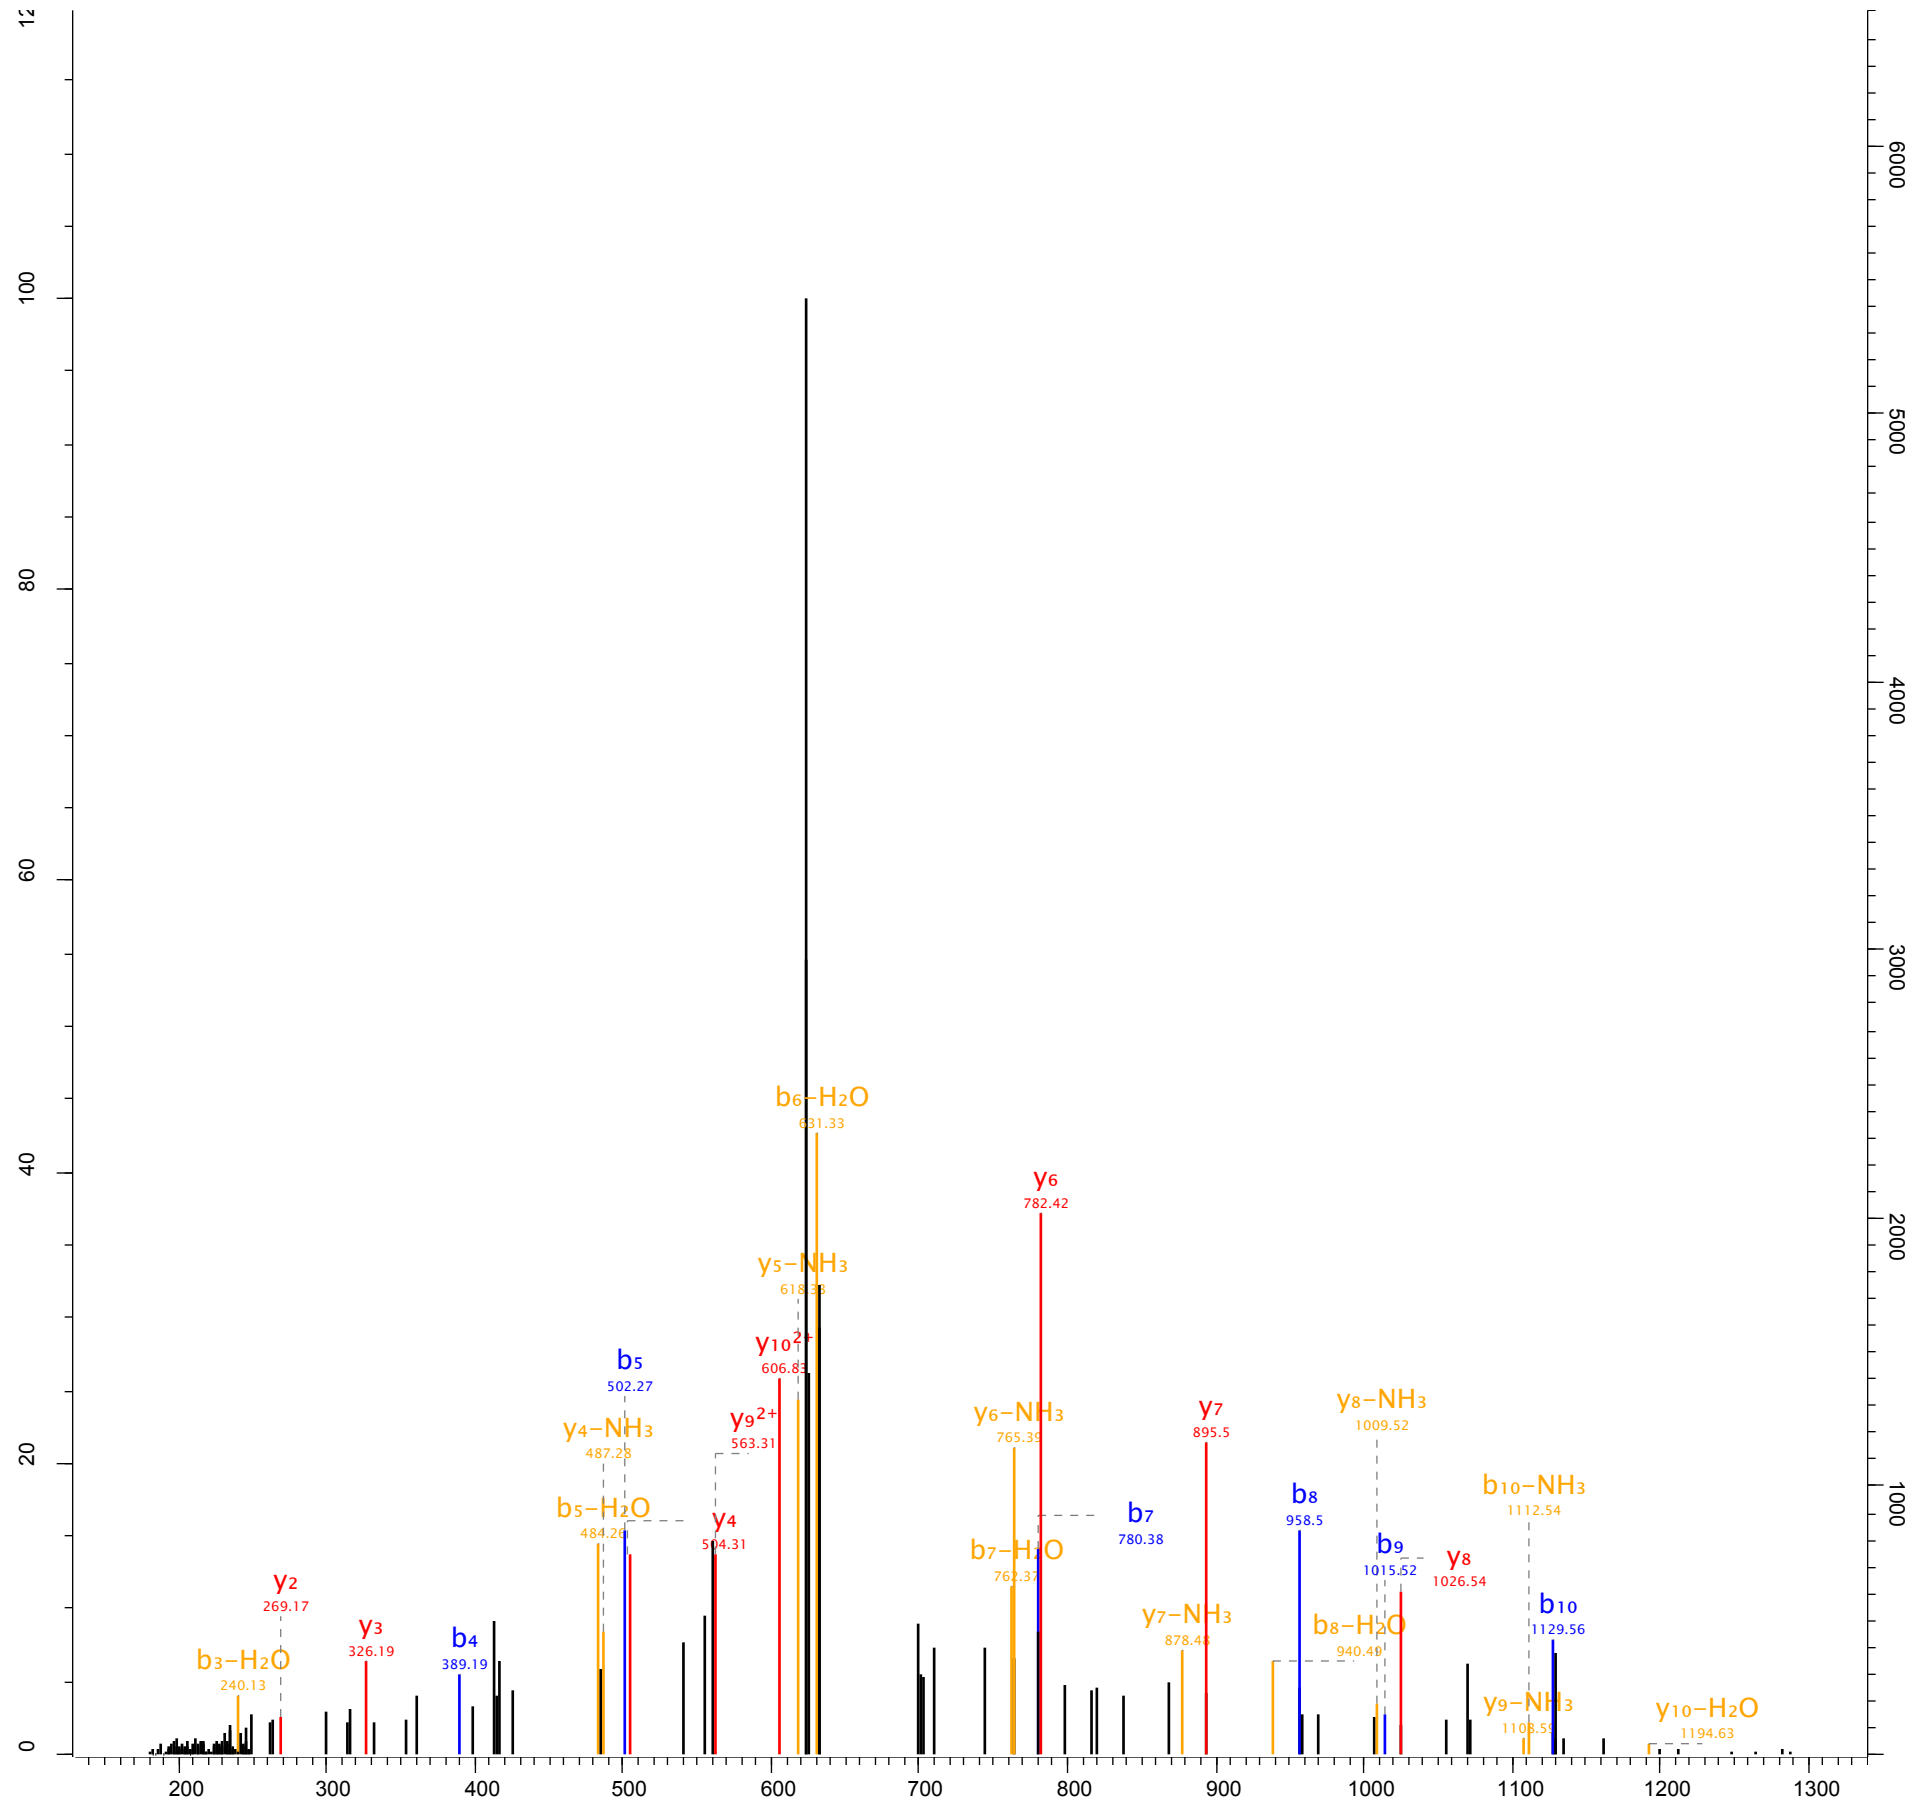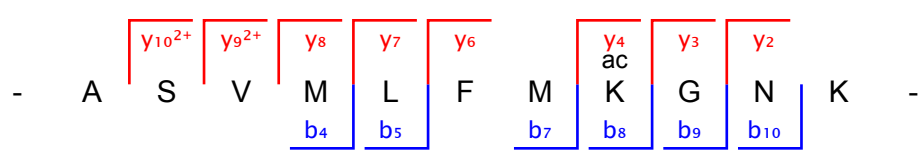

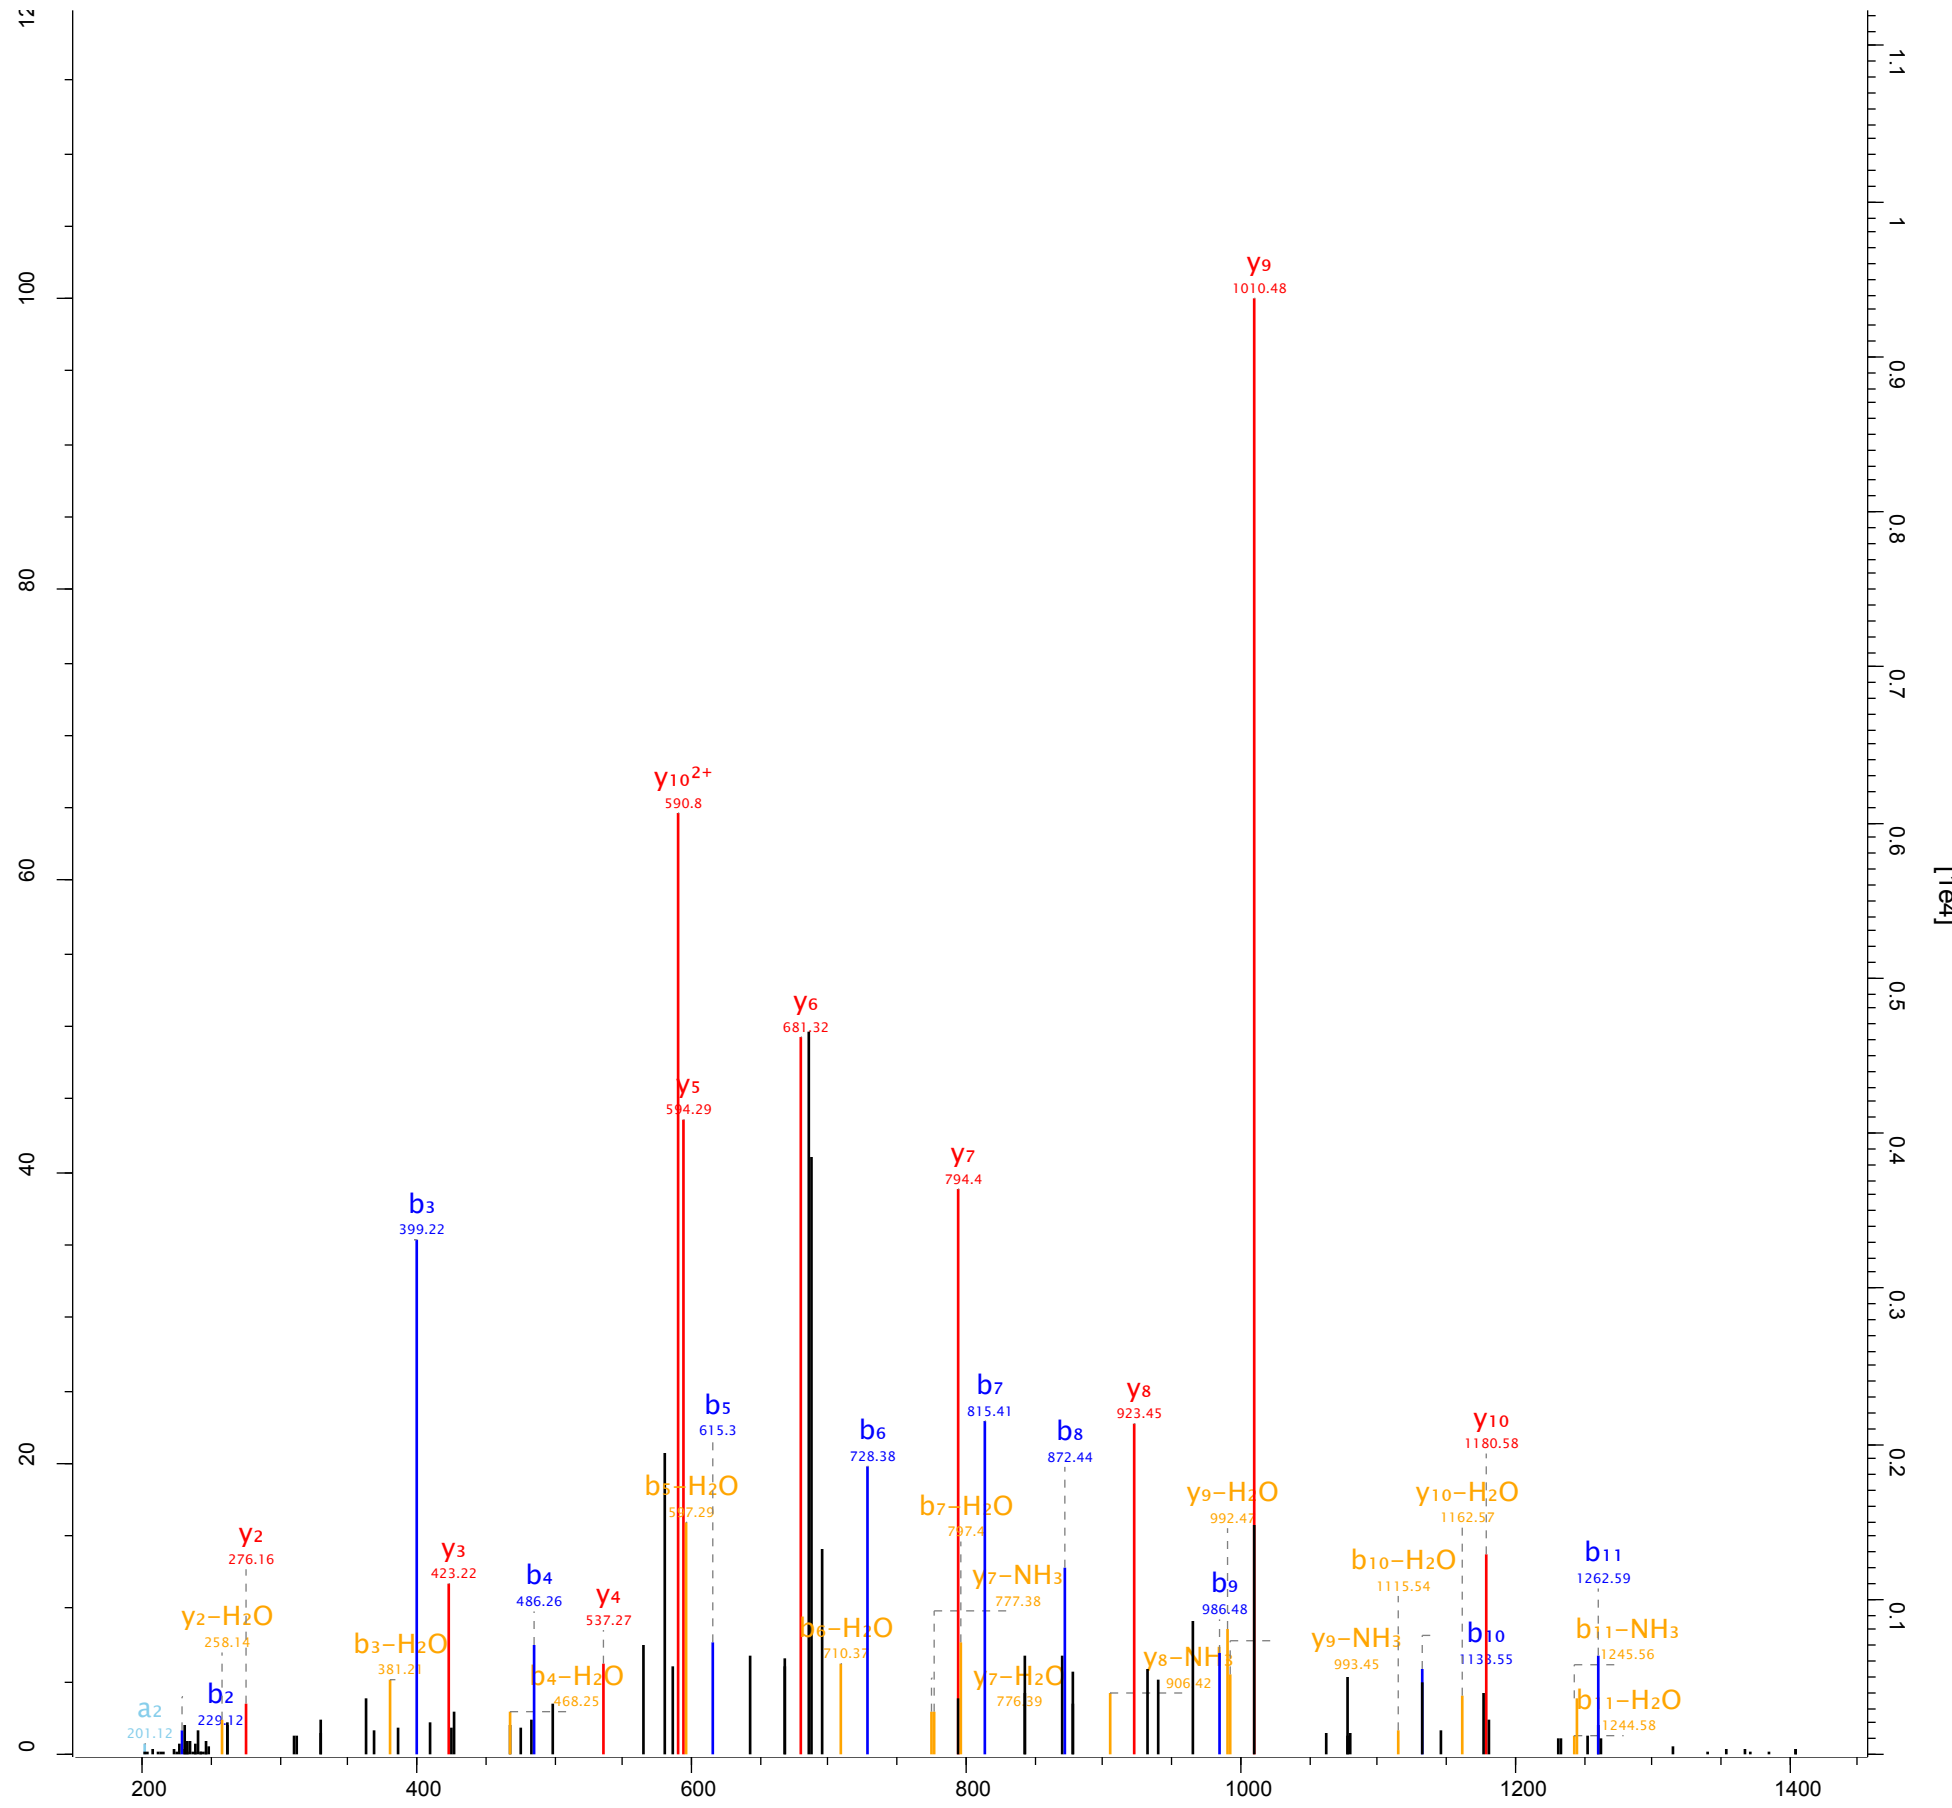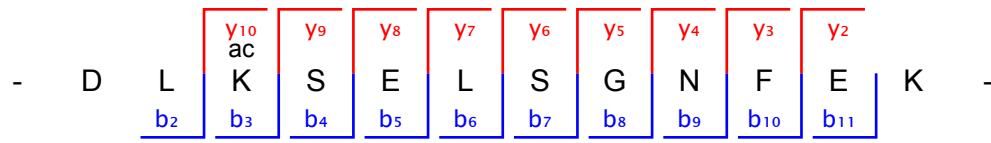

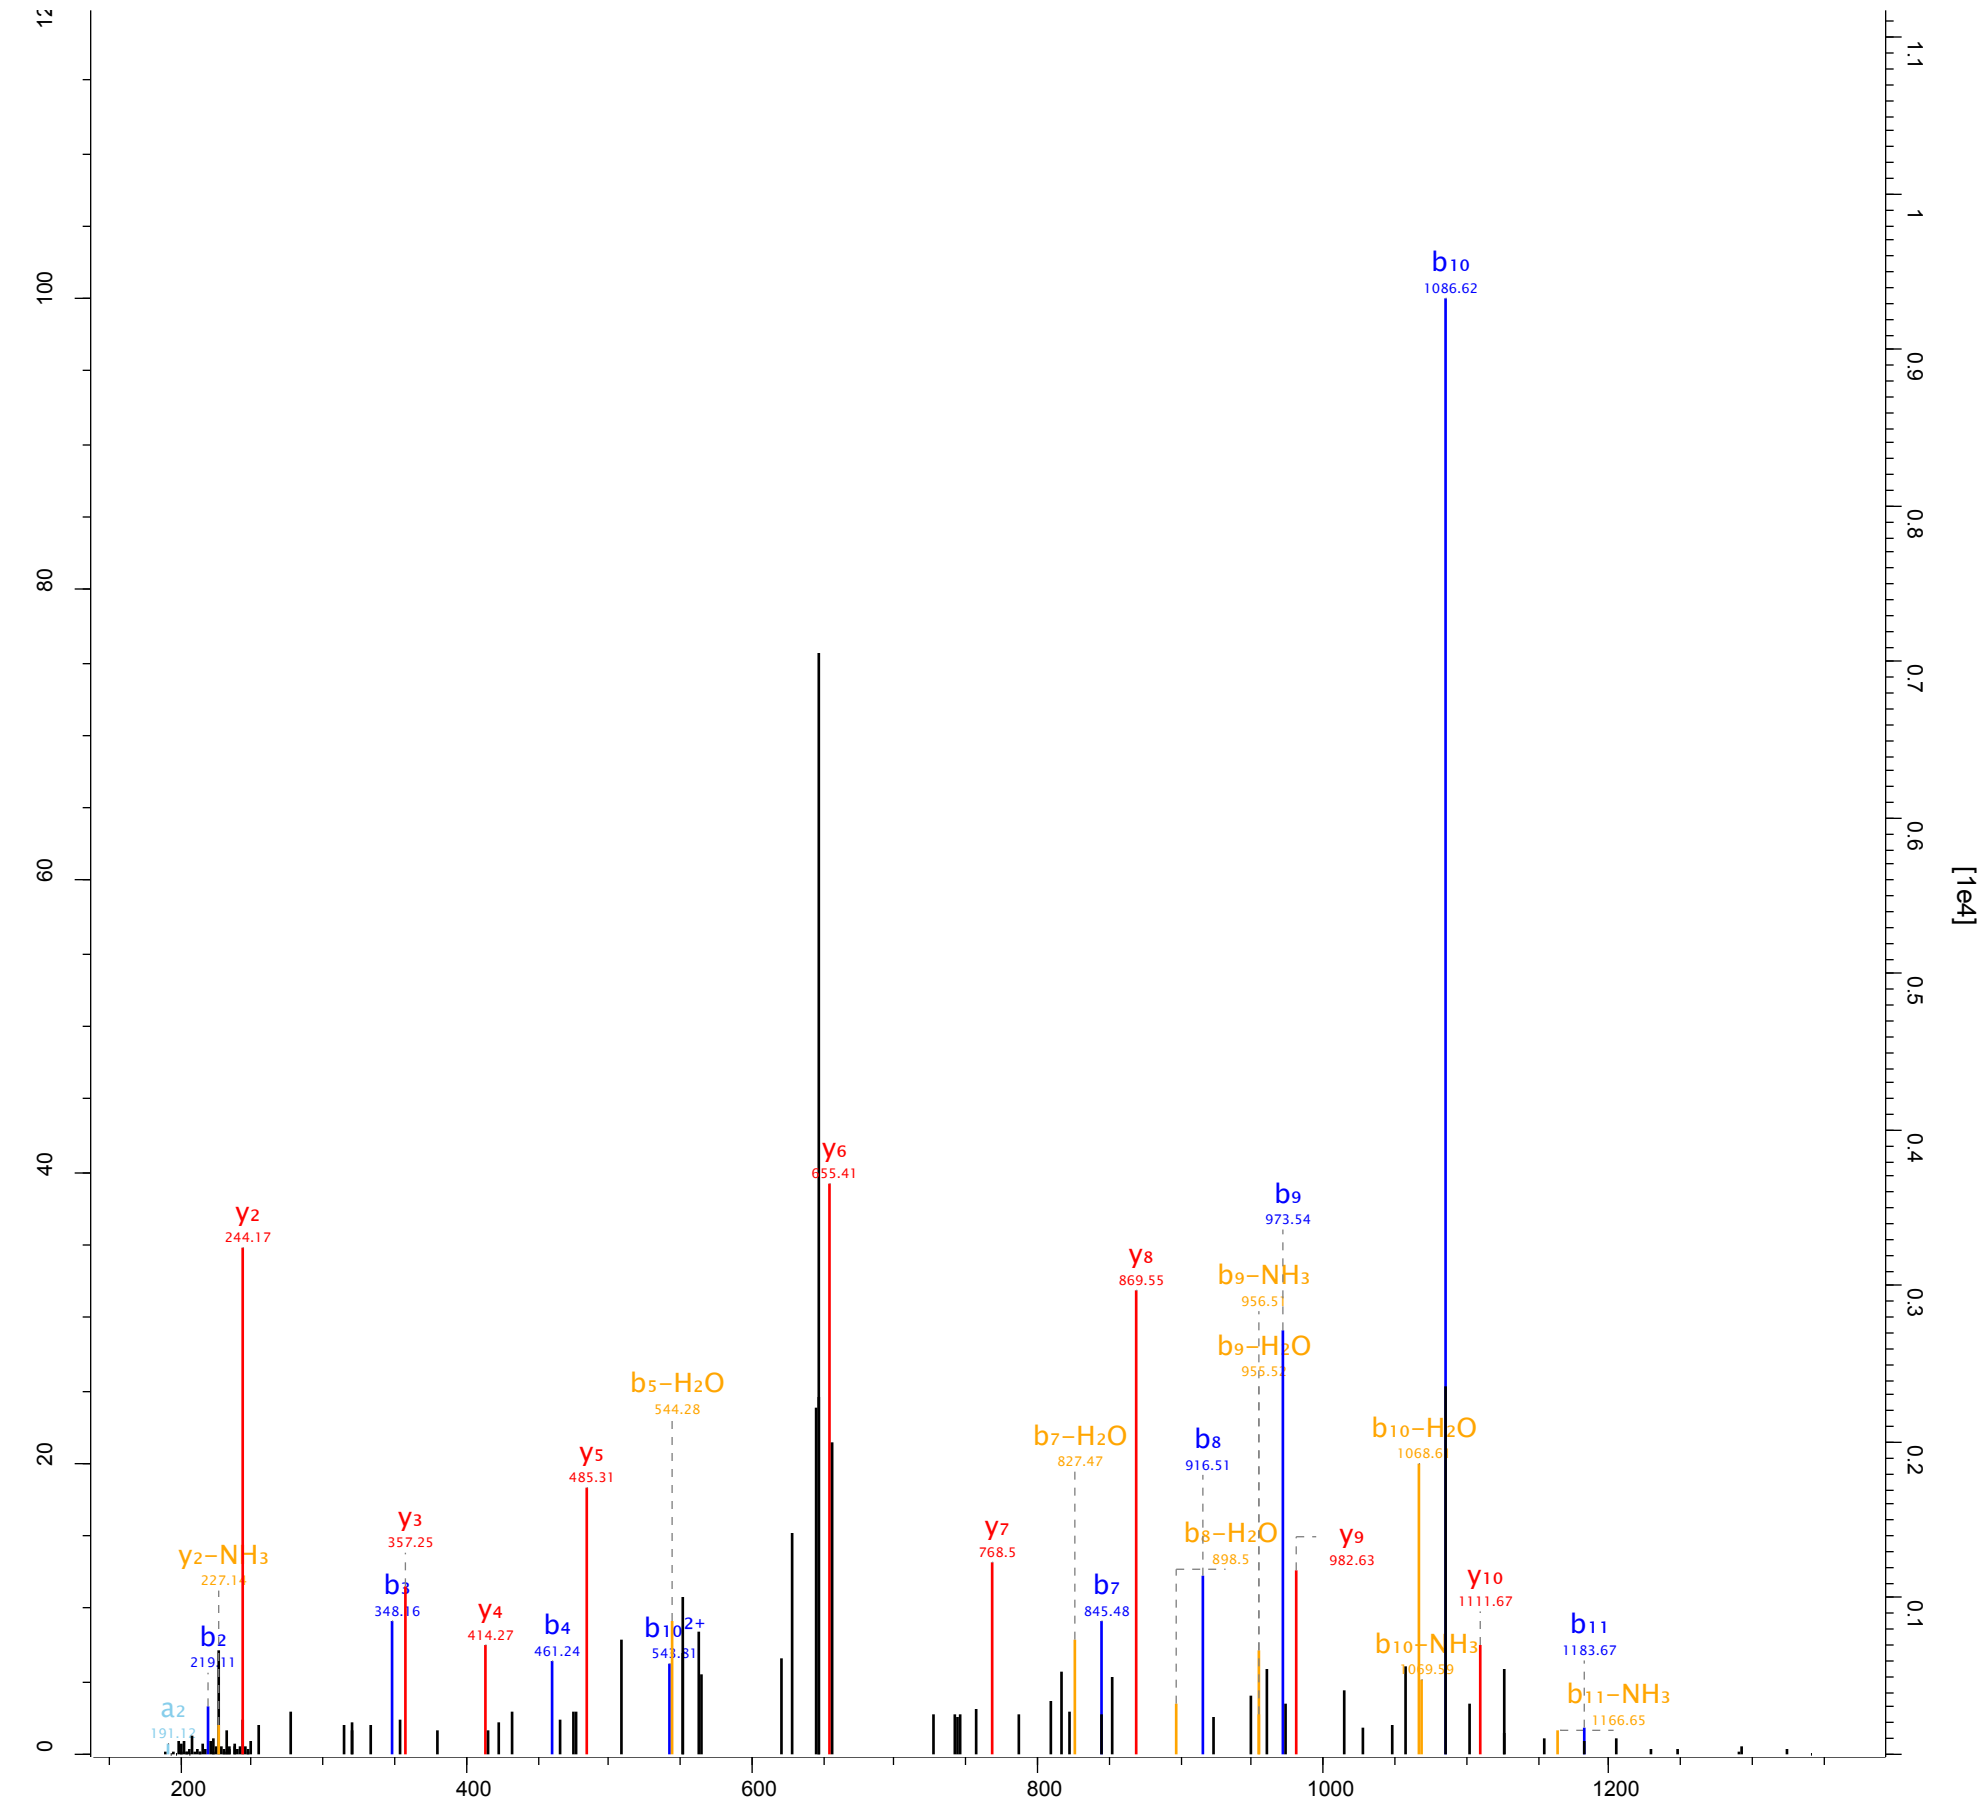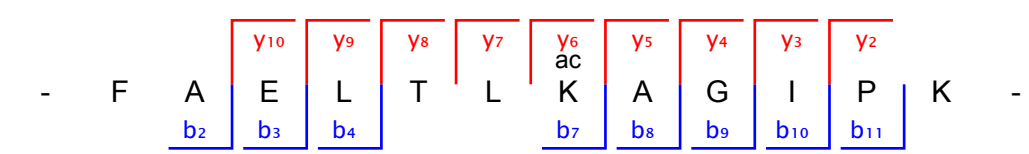

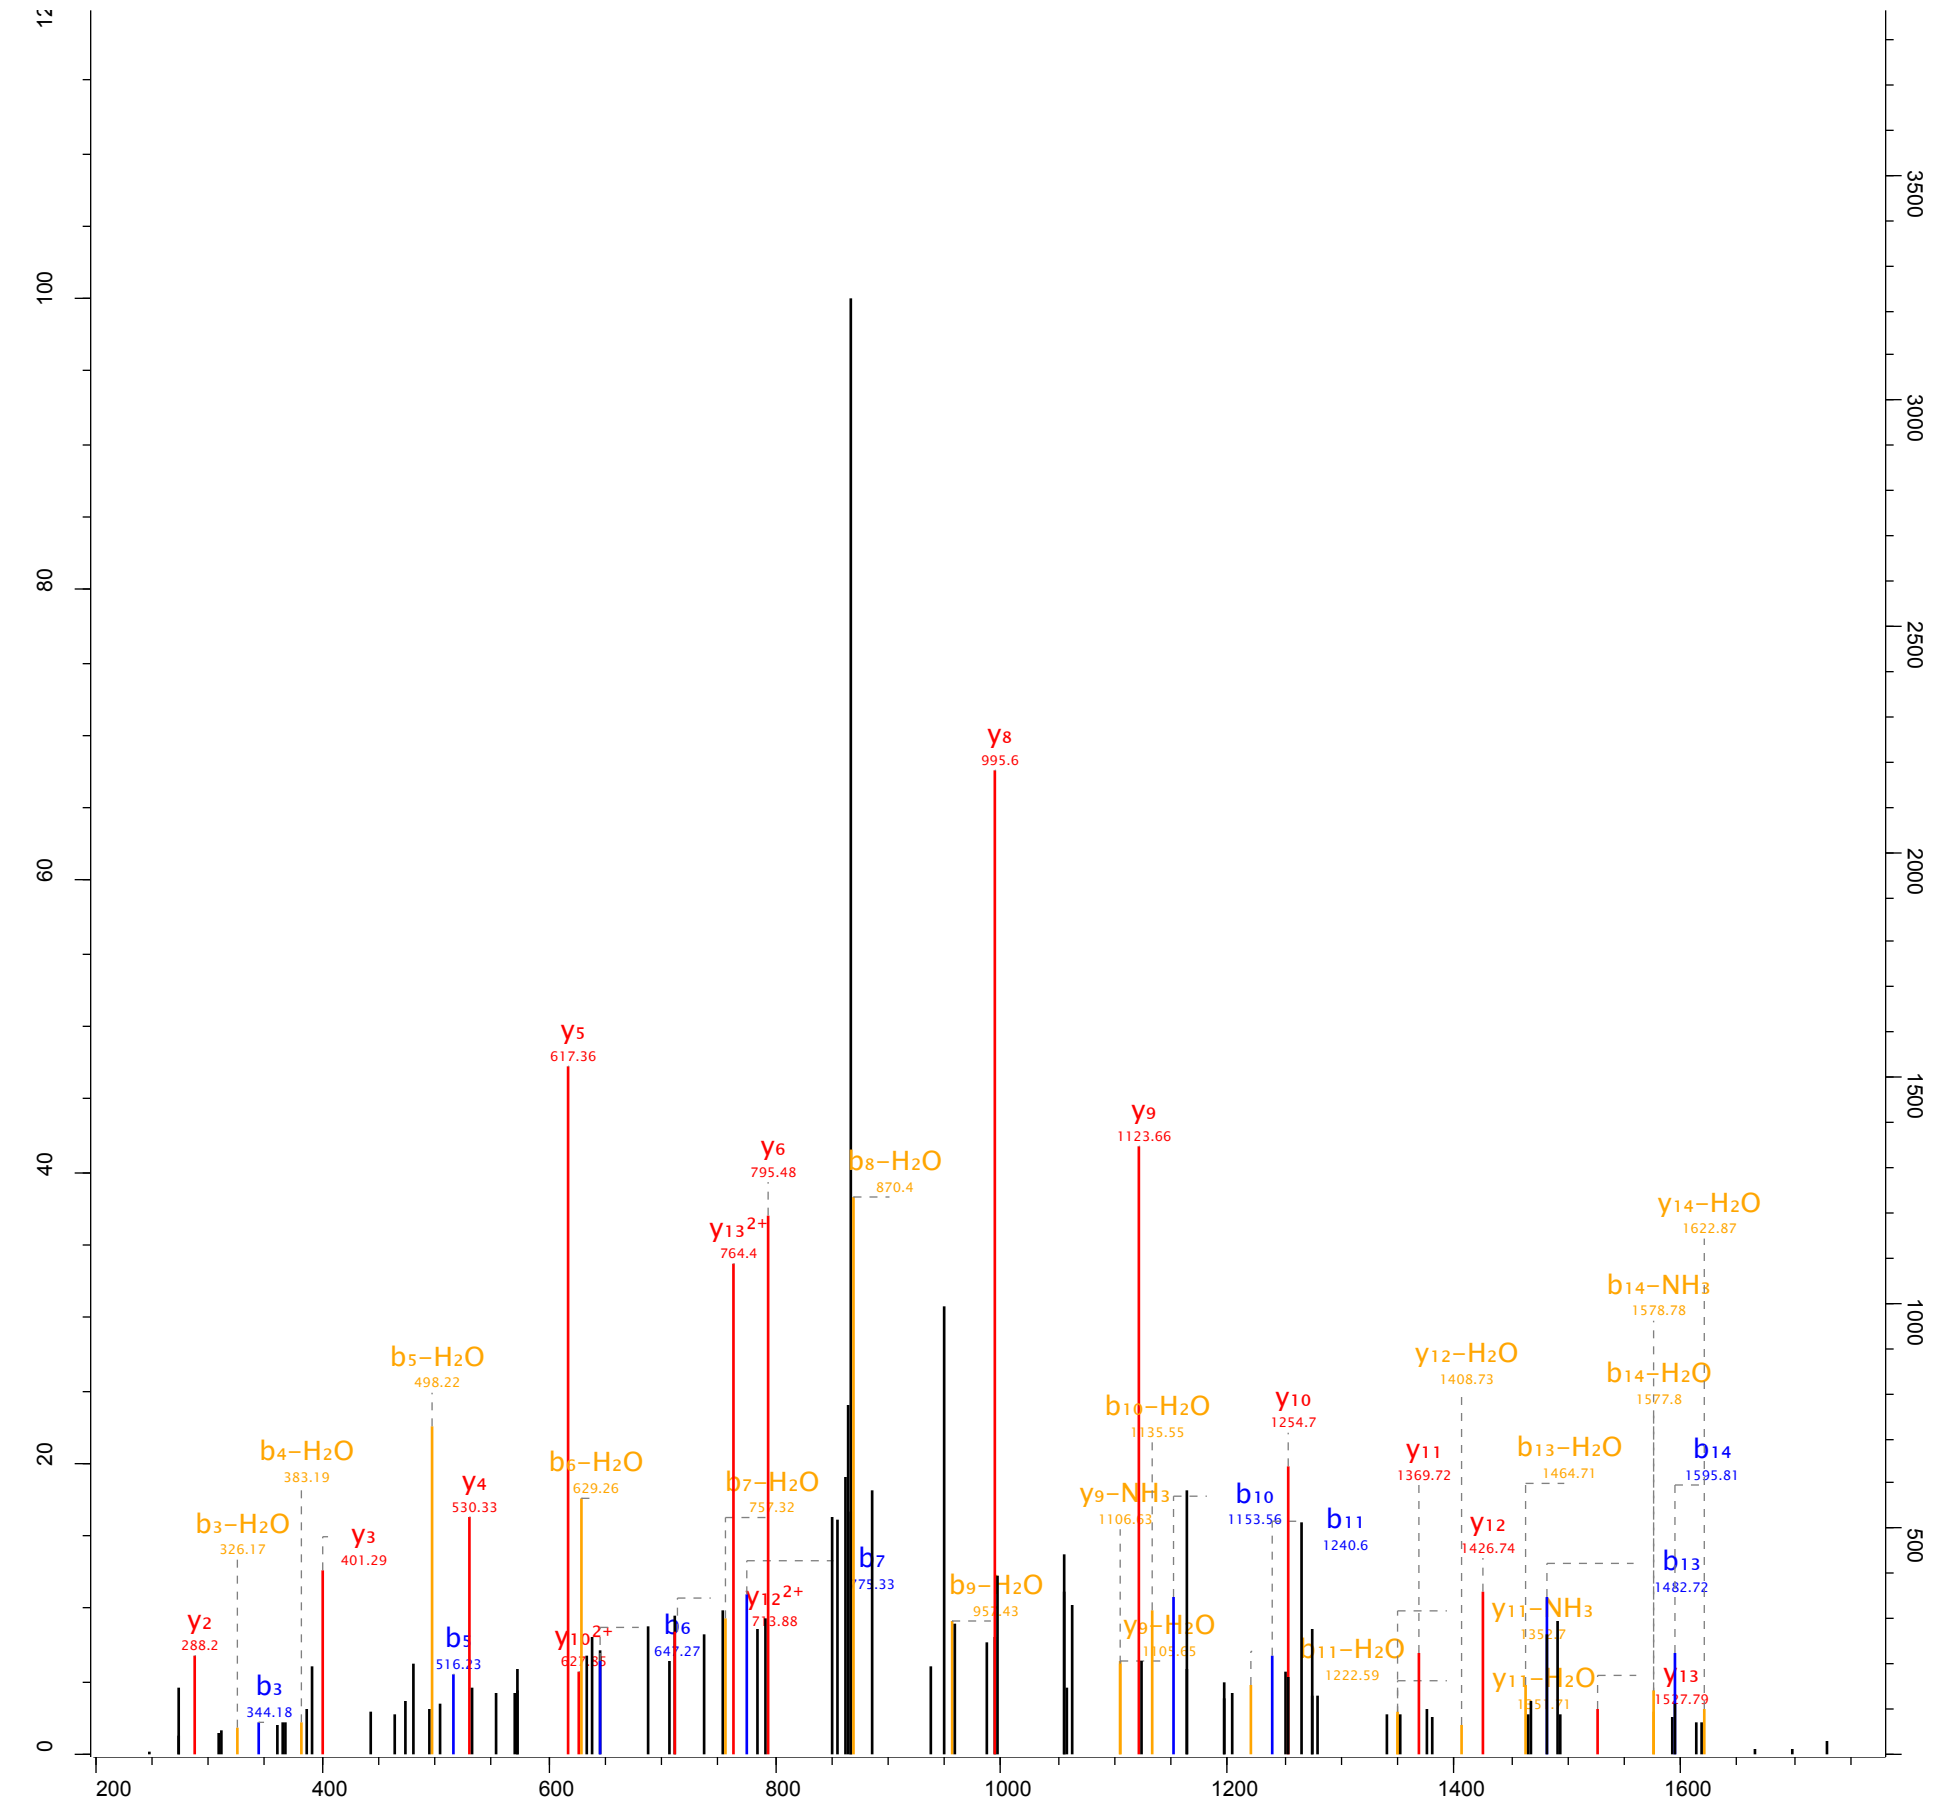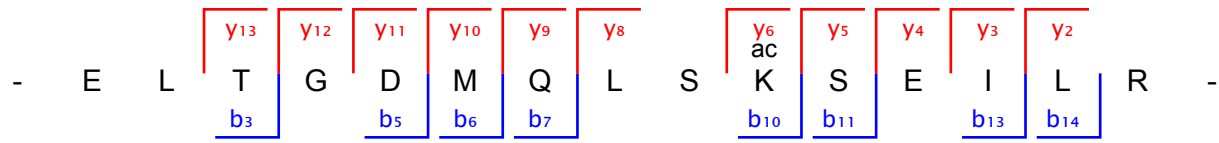

050813\_SCW\_II\_29\_19\_4

21216 ITMS; CID 140.31 771.93 Aldh11l1

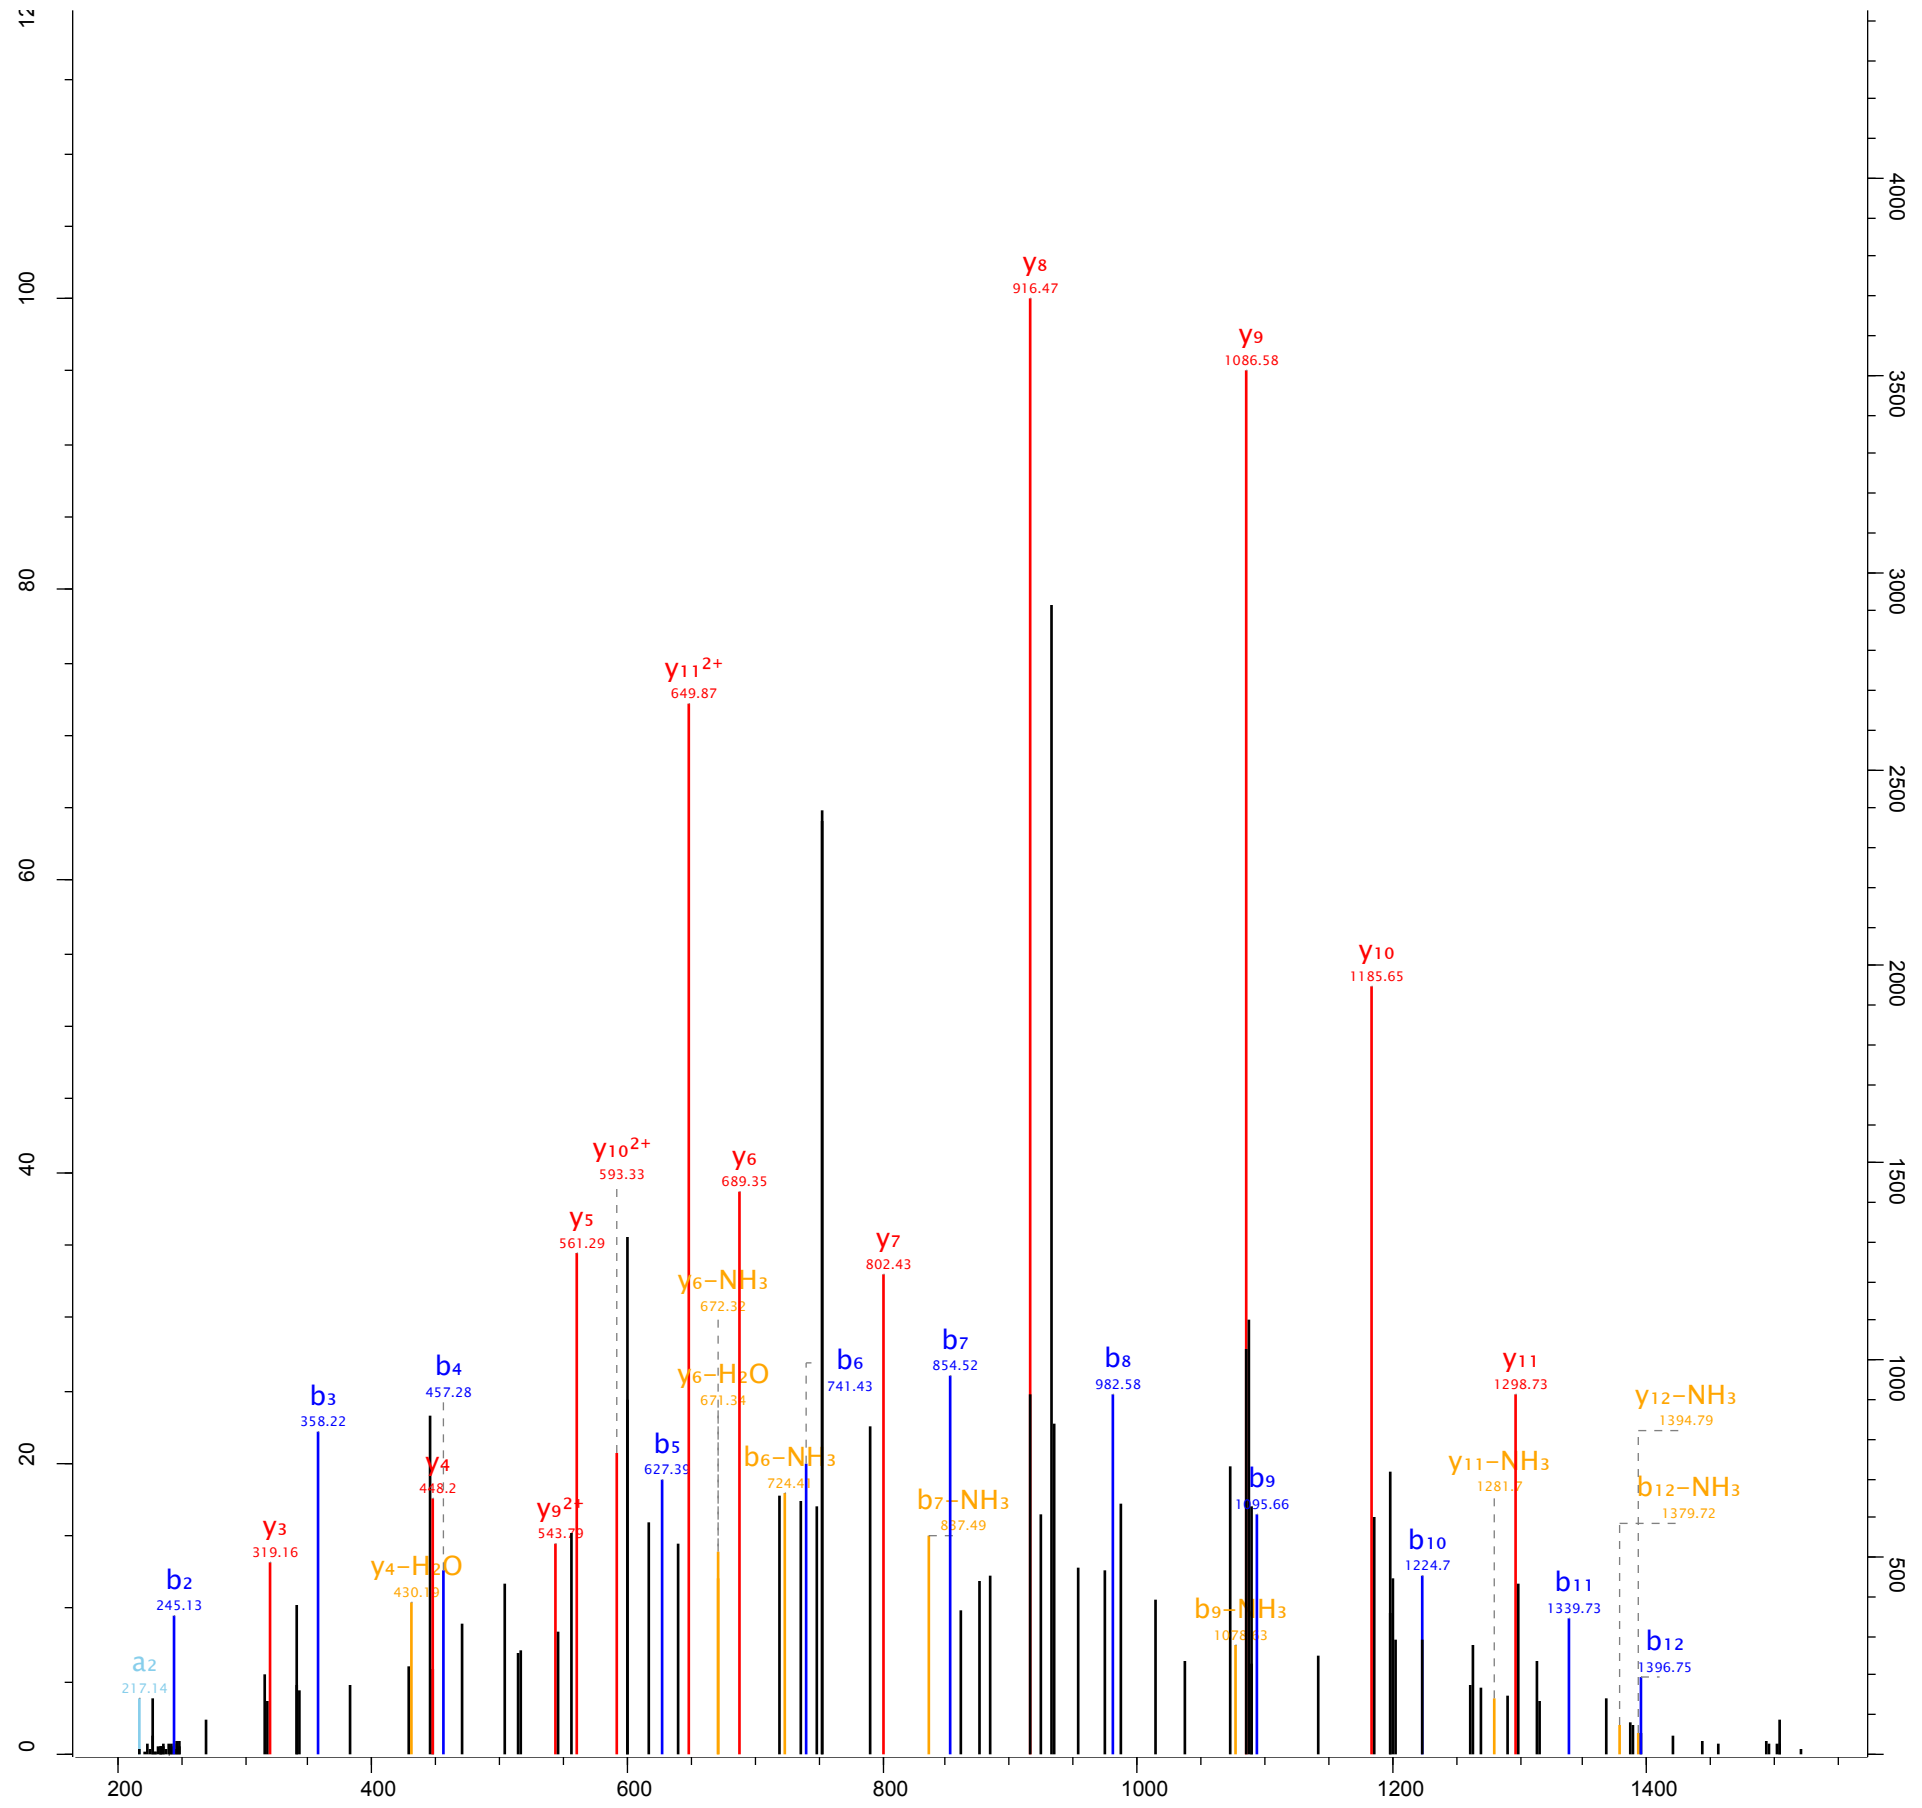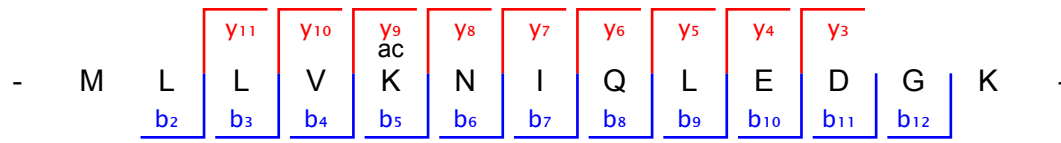

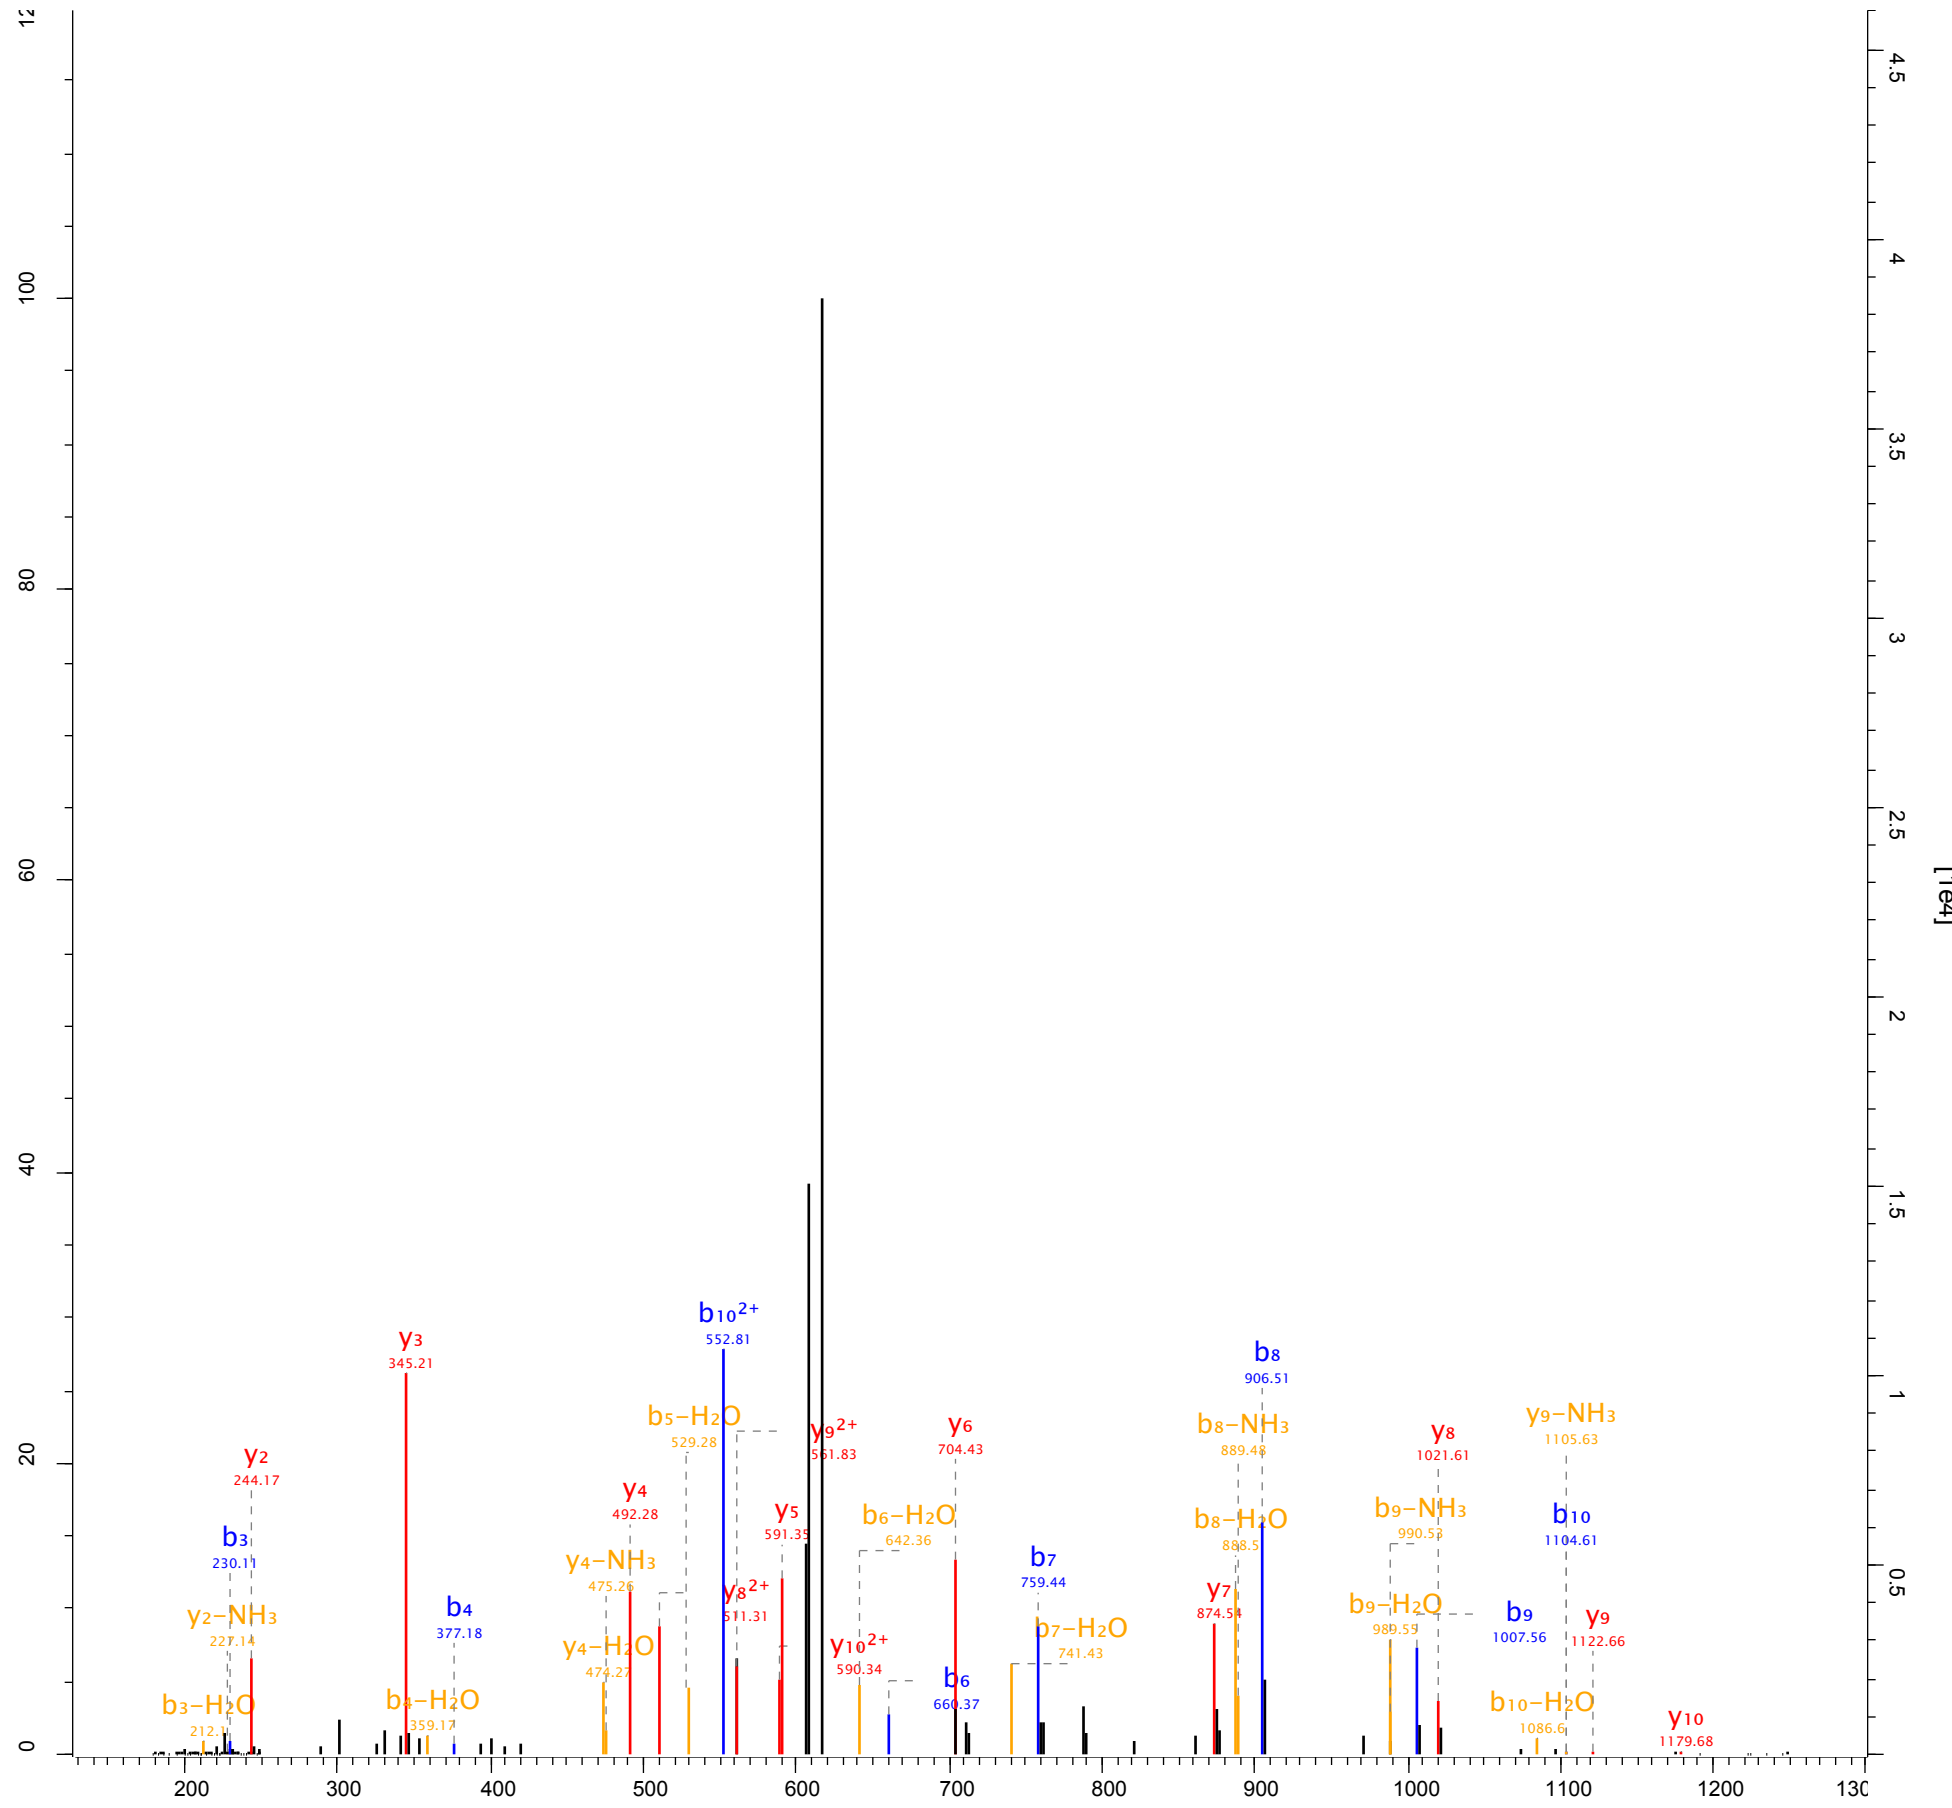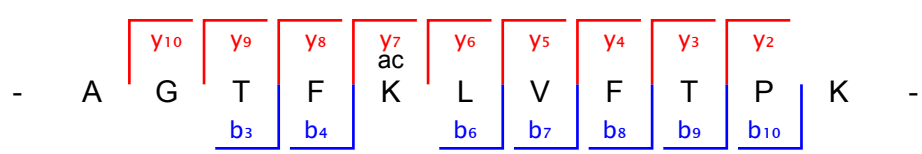

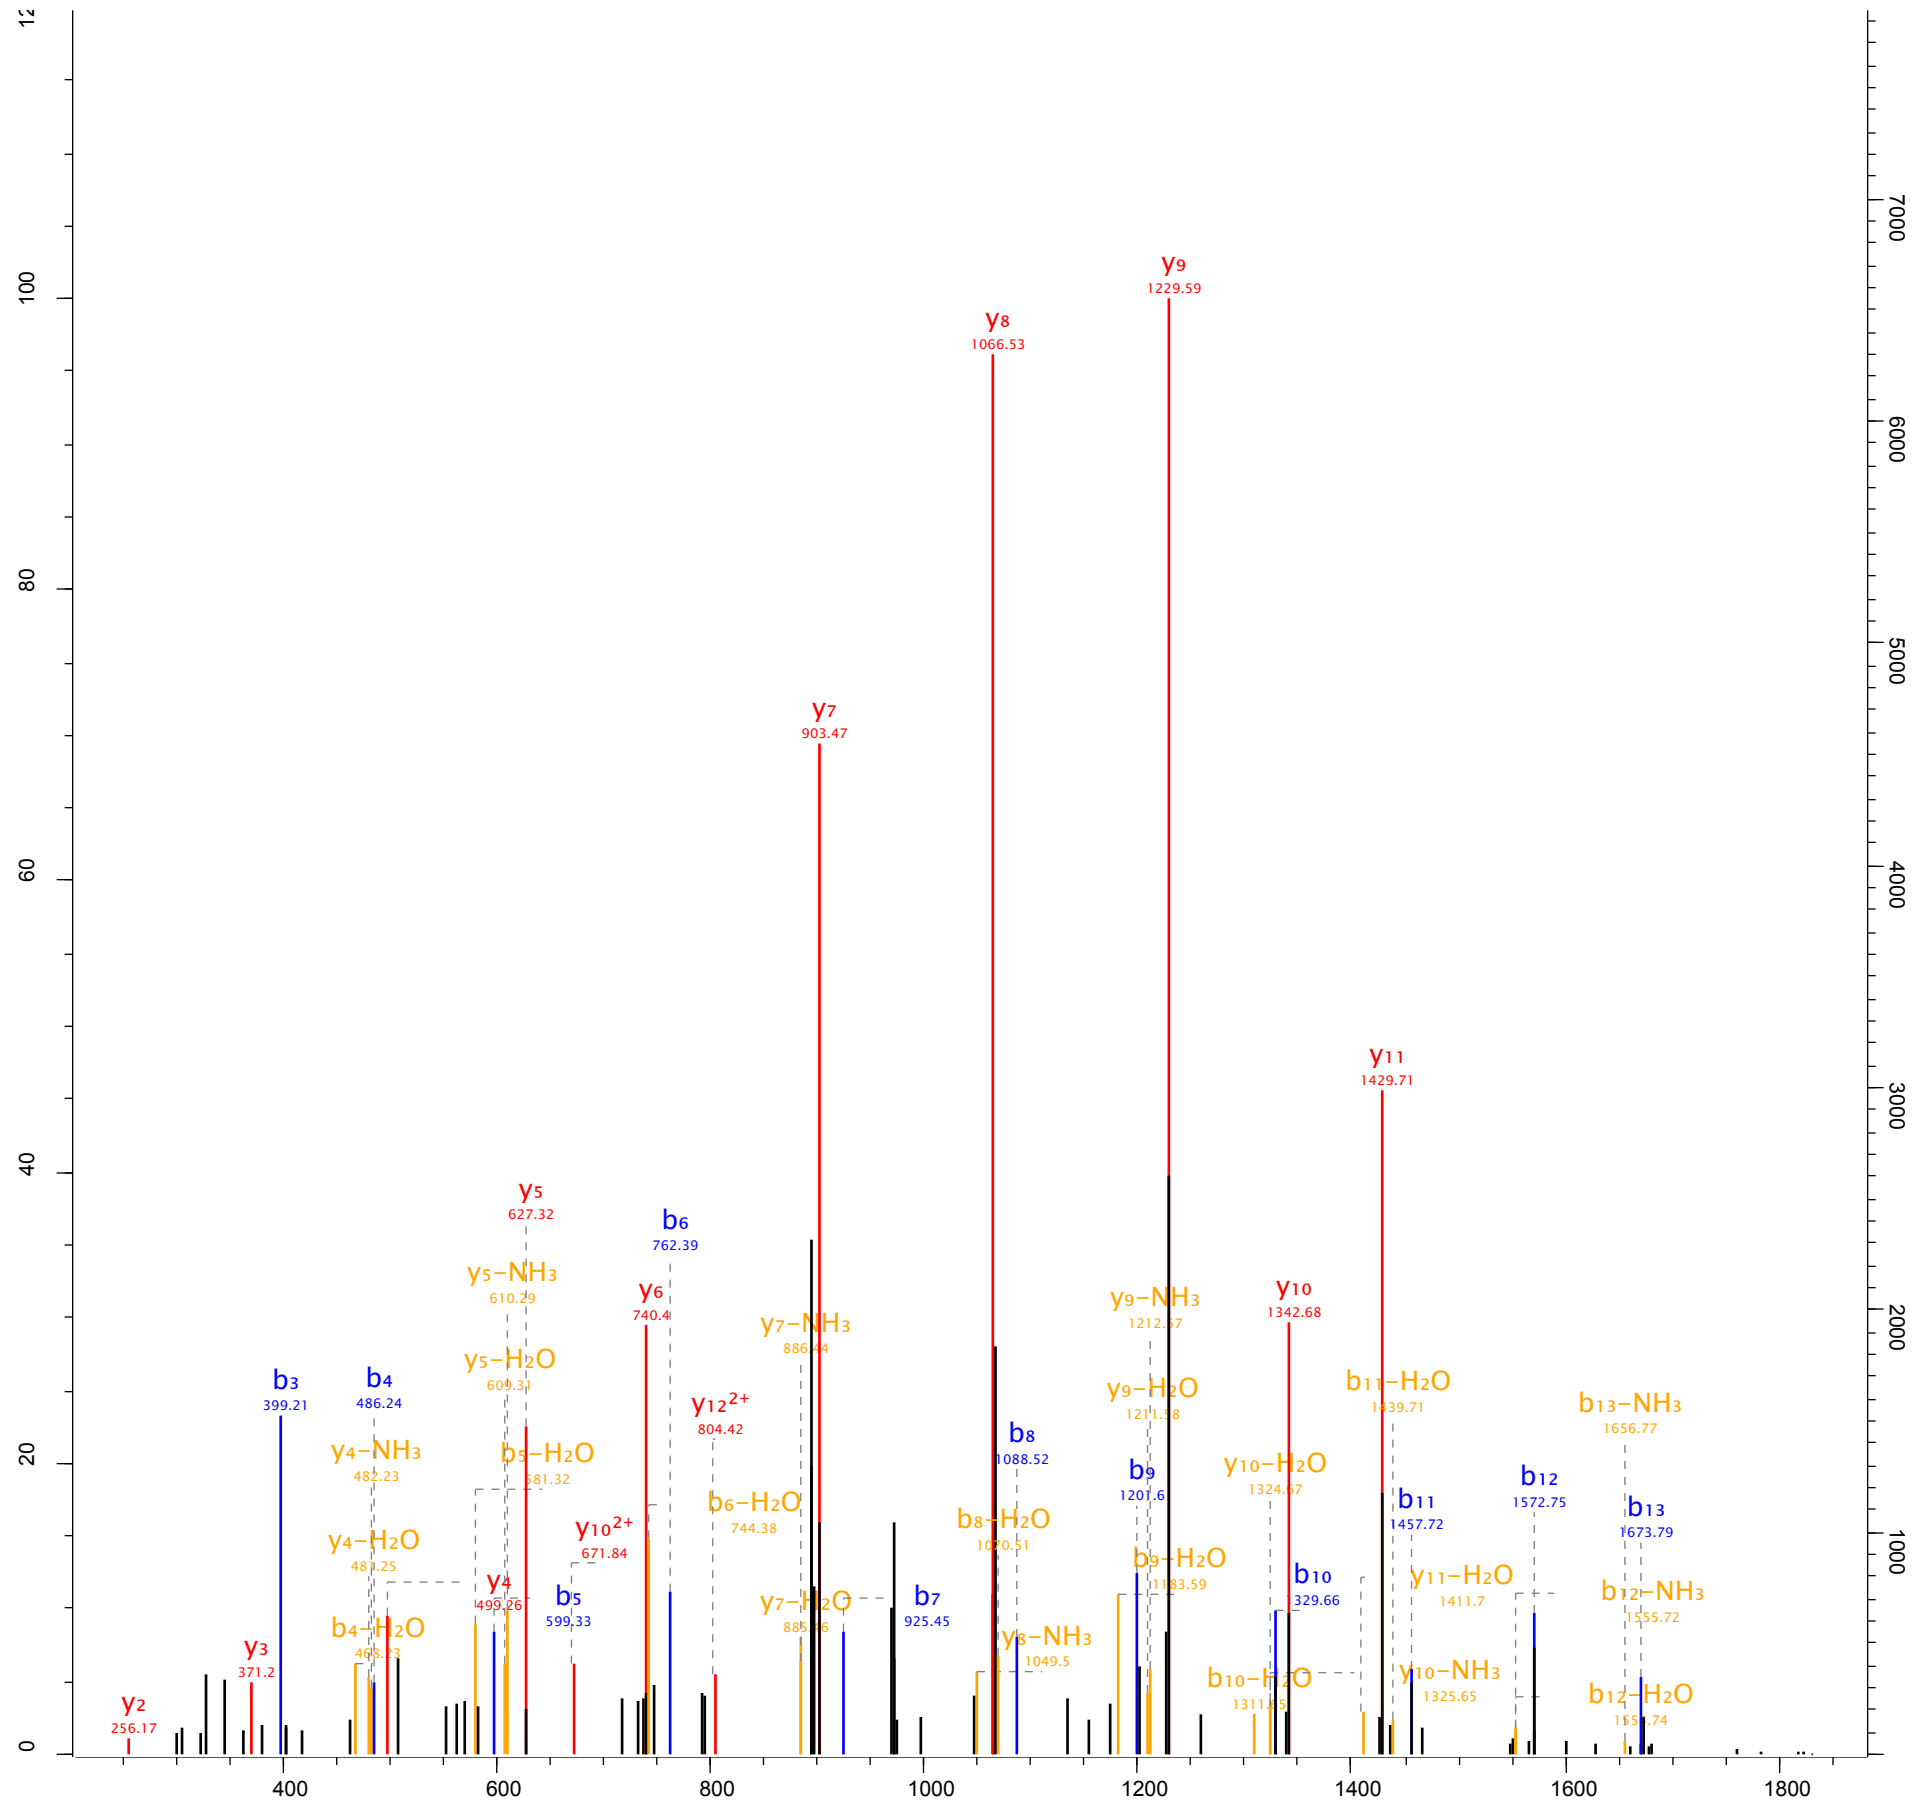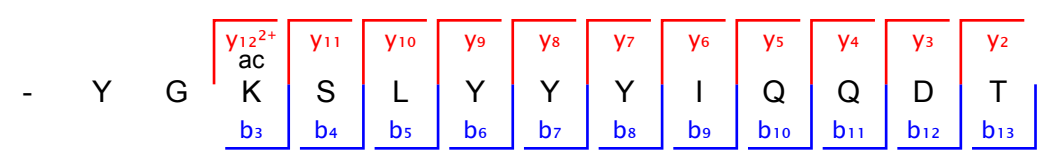



Raw file: 050813\_SCW\_II\_29\_19\_4  
 Scan: 22222 Method: ITMS; CID Score: 217.48 m/z: 853.93 Gene names: Ing3

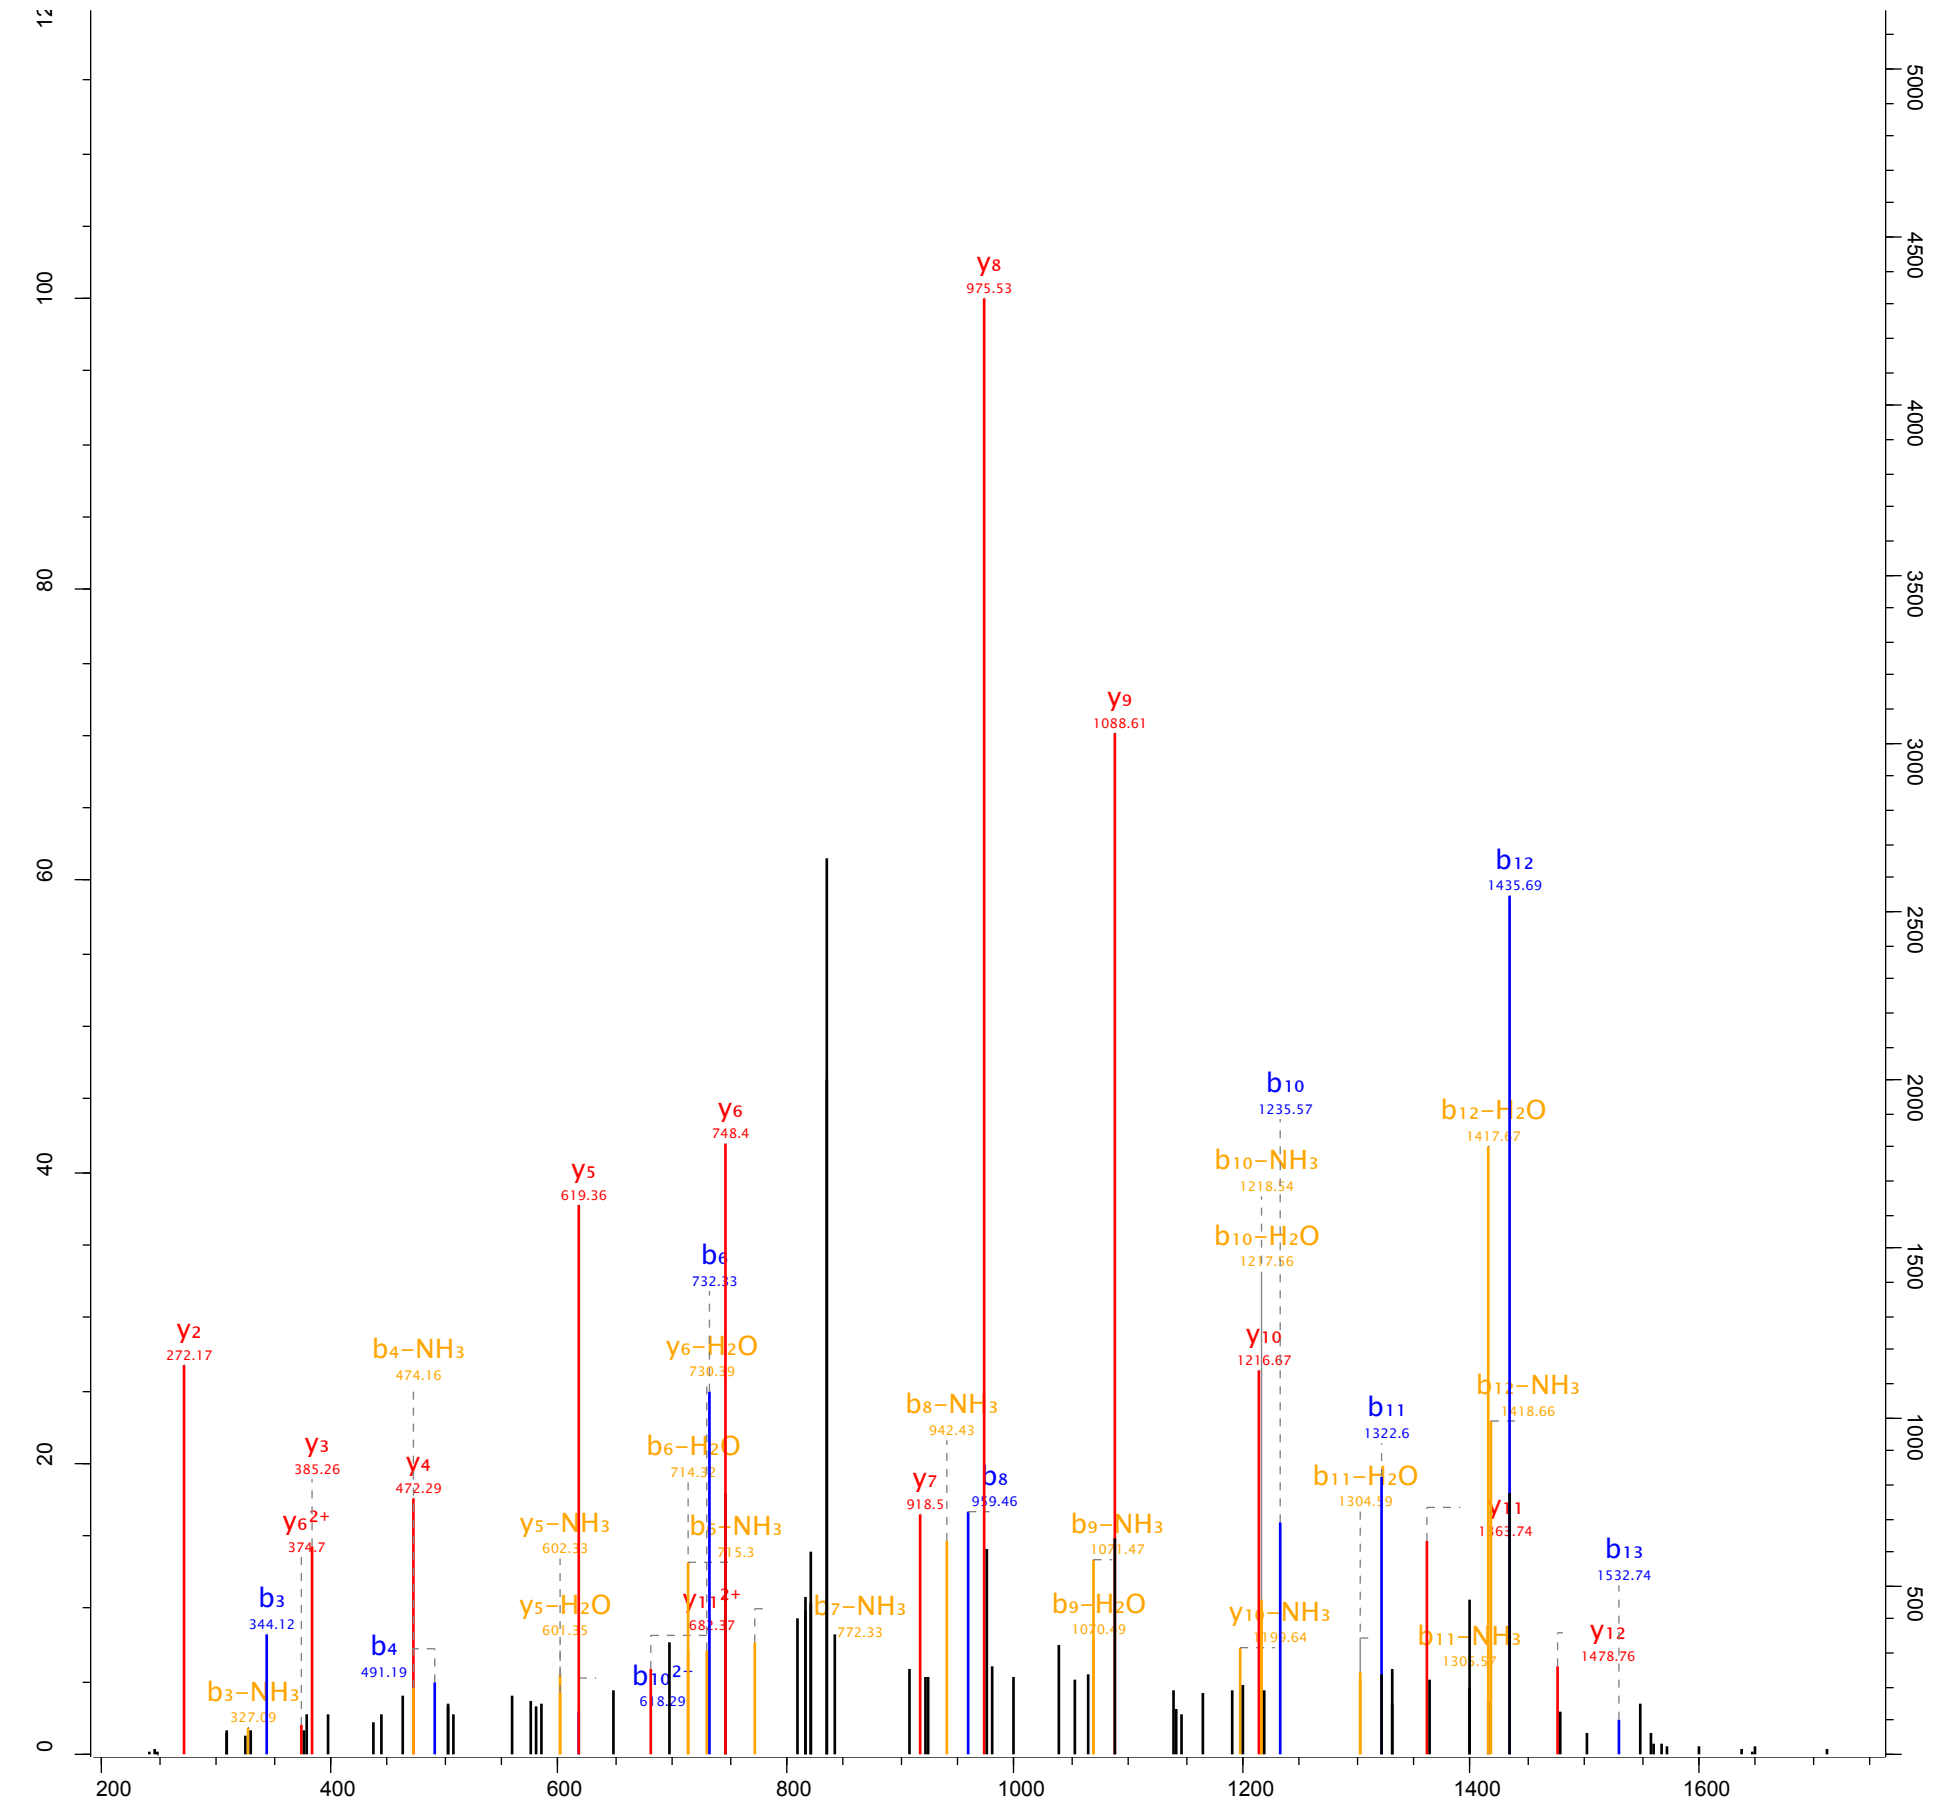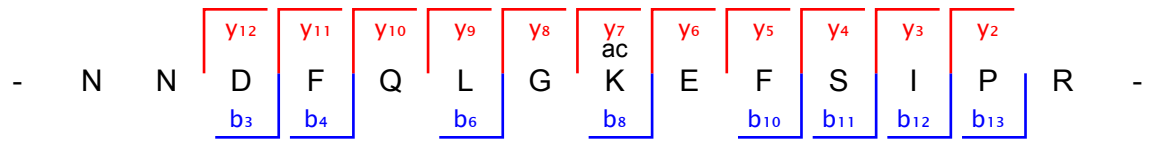

050813\_SCW\_II\_29\_19\_4

22484 ITMS; CID 124.81 709.42 Rps23

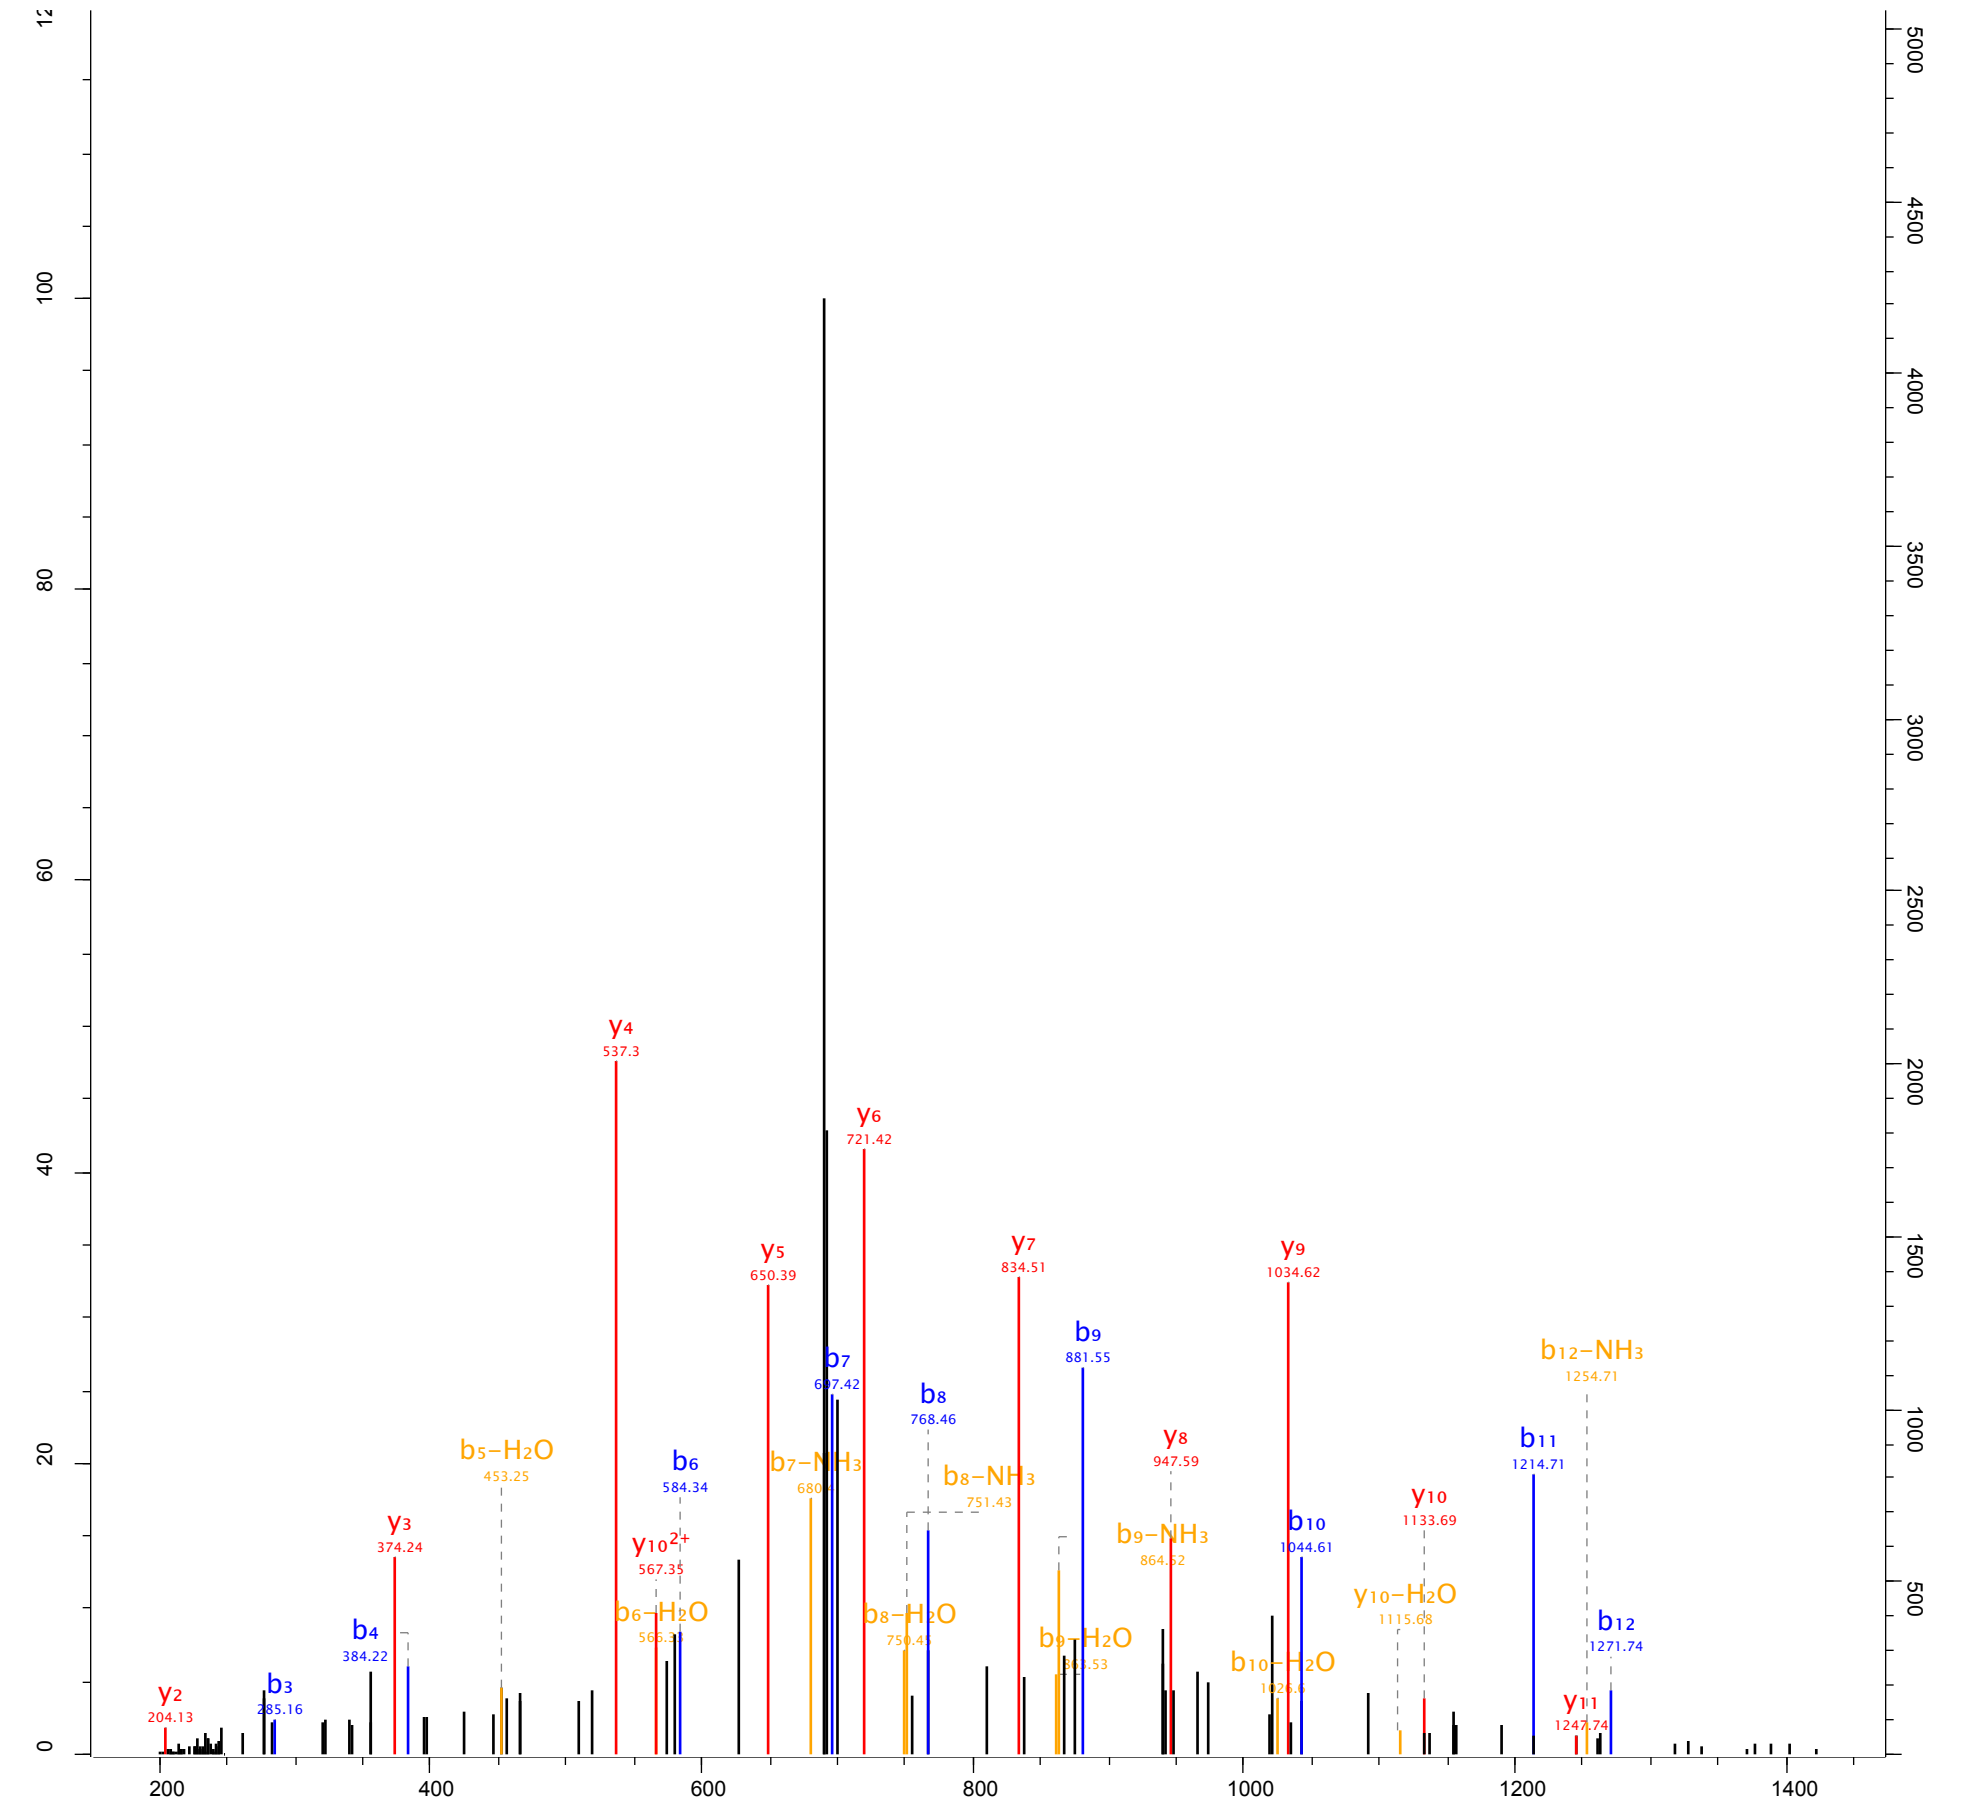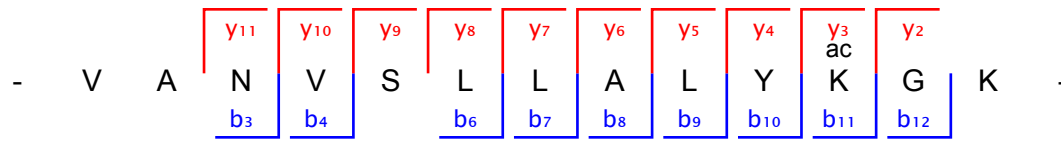

Raw file: 050813\_SCW\_II\_29\_19\_4  
 Scan: 22548  
 Method: ITMS; CID  
 Score: 139.9  
 m/z: 973  
 Gene names: Wdr1

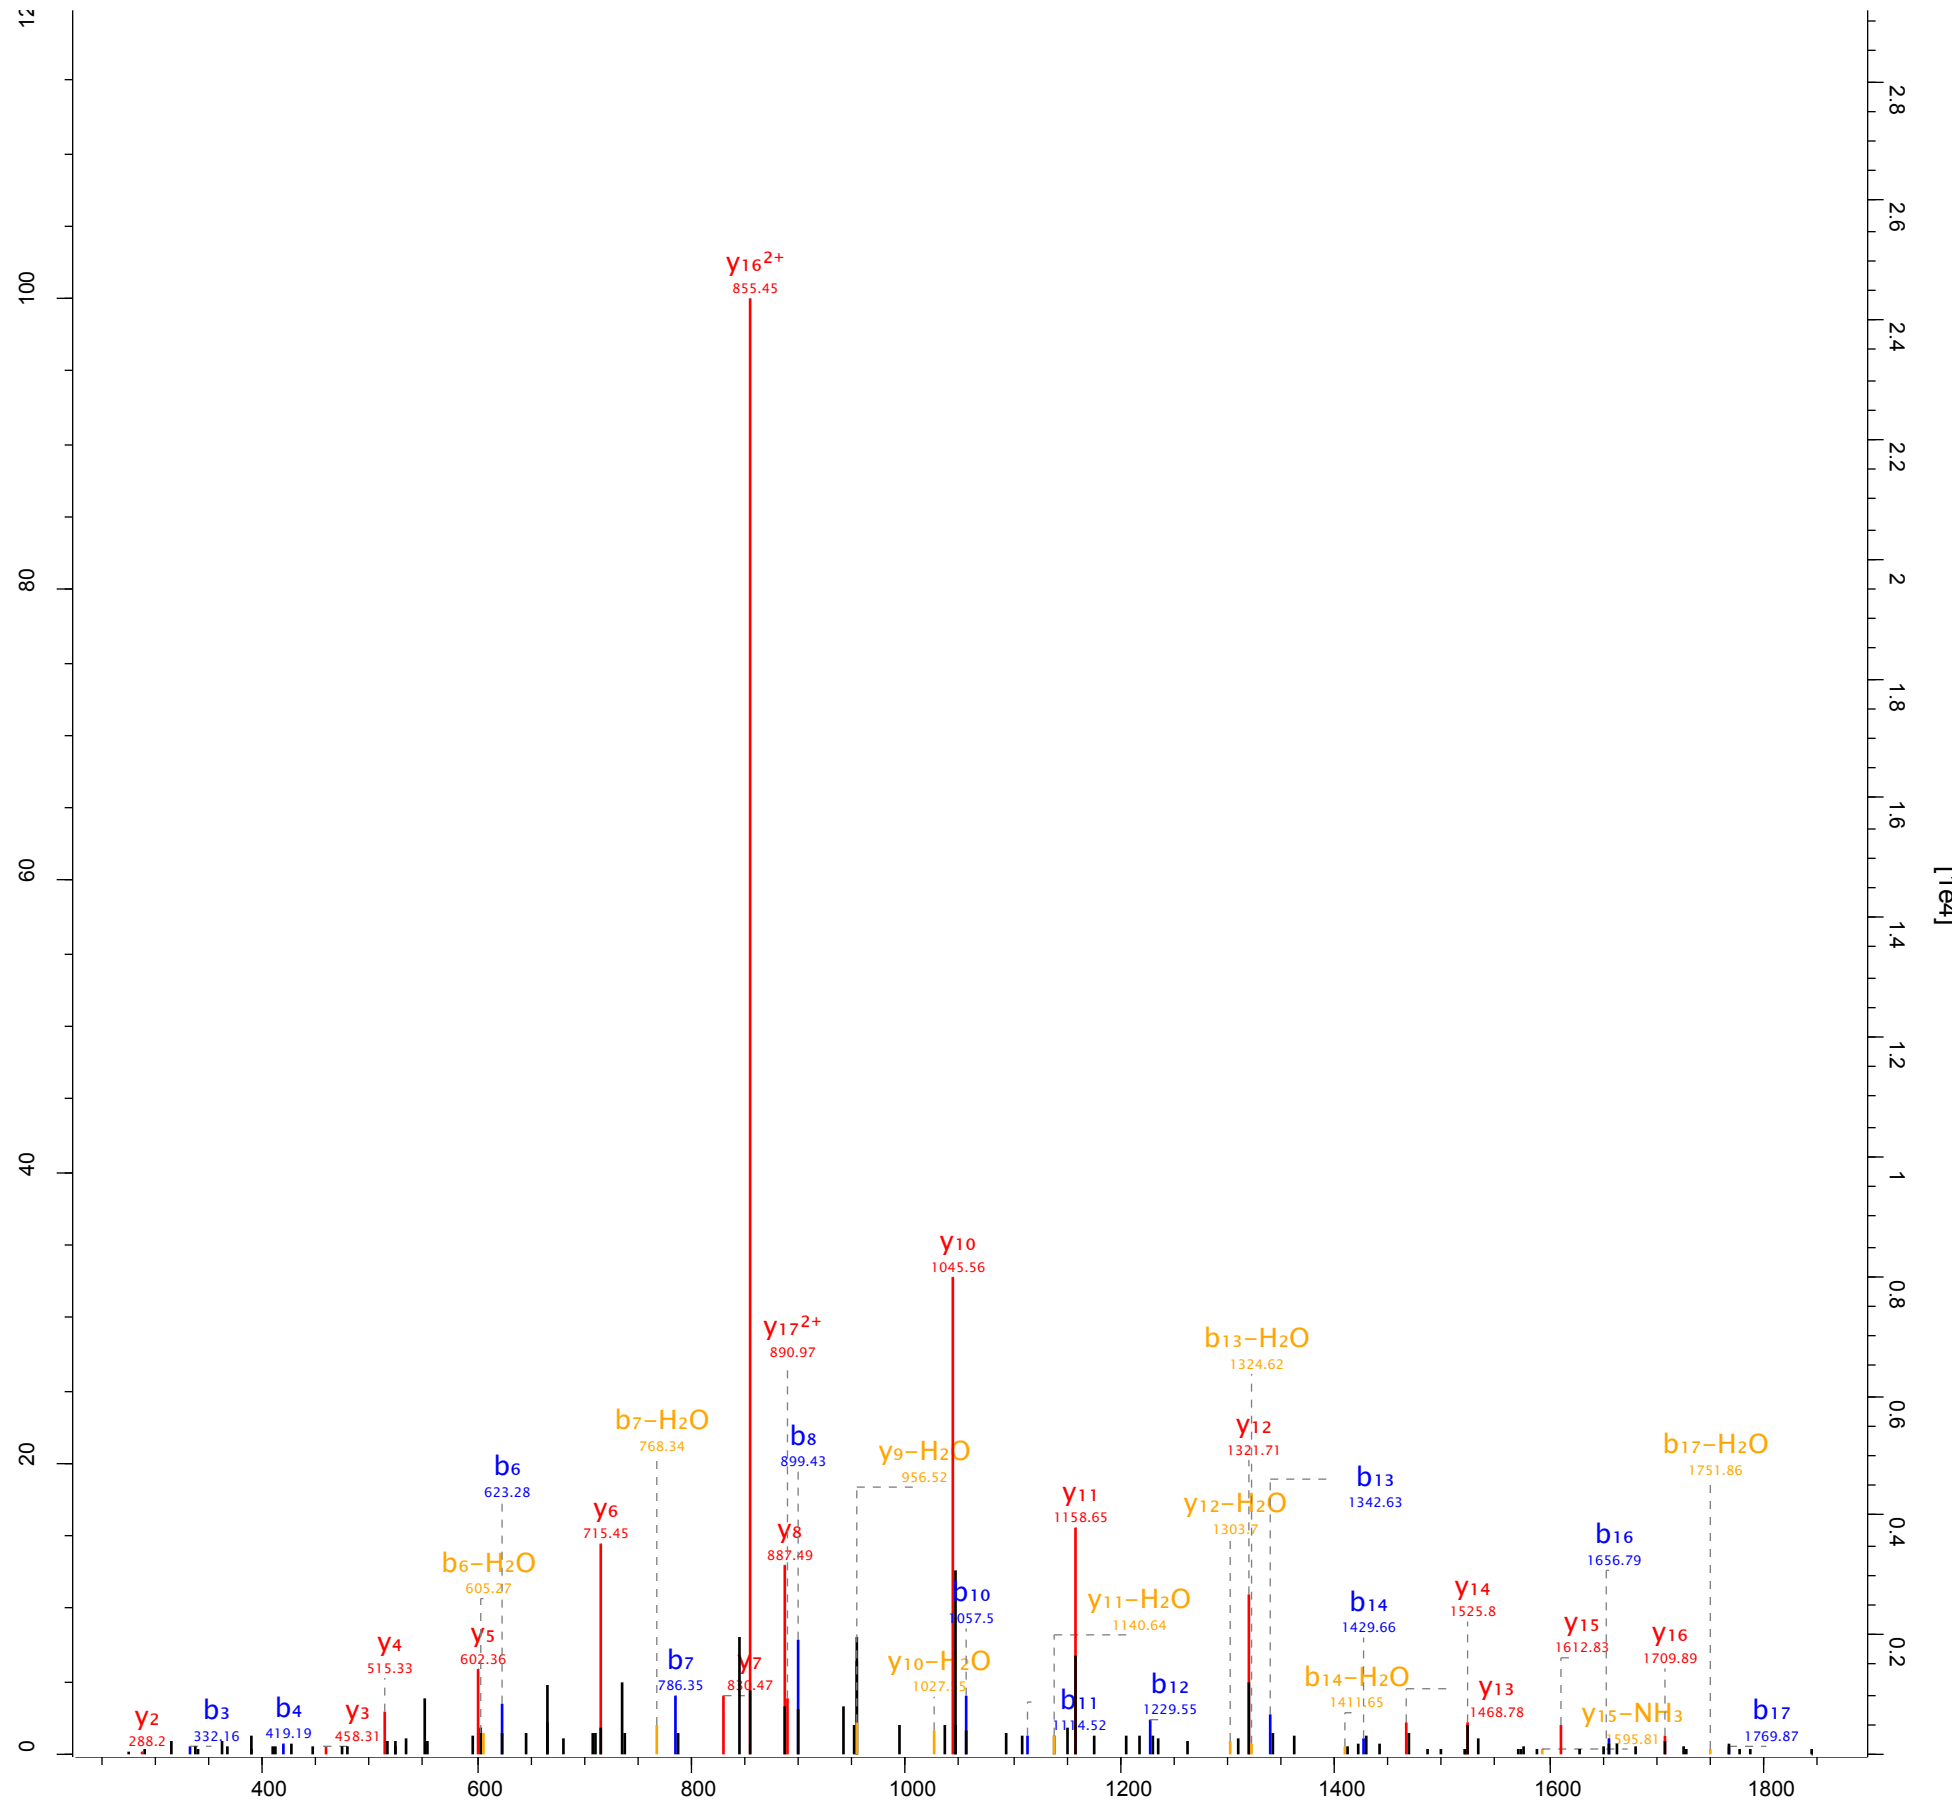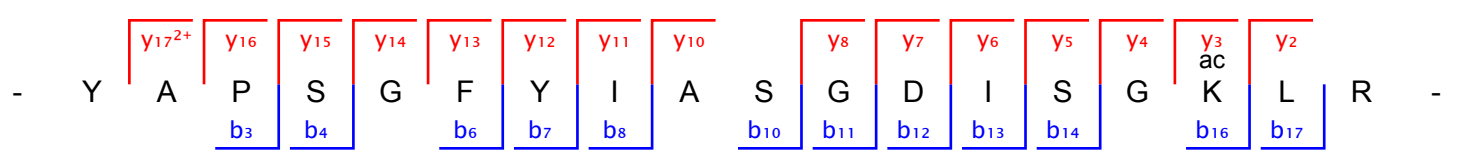

Raw file 050813\_SCW\_II\_29\_19\_4 Scan 22708 Method ITMS; CID Score 124.5 m/z 897.94 Gene names Aldh5a1

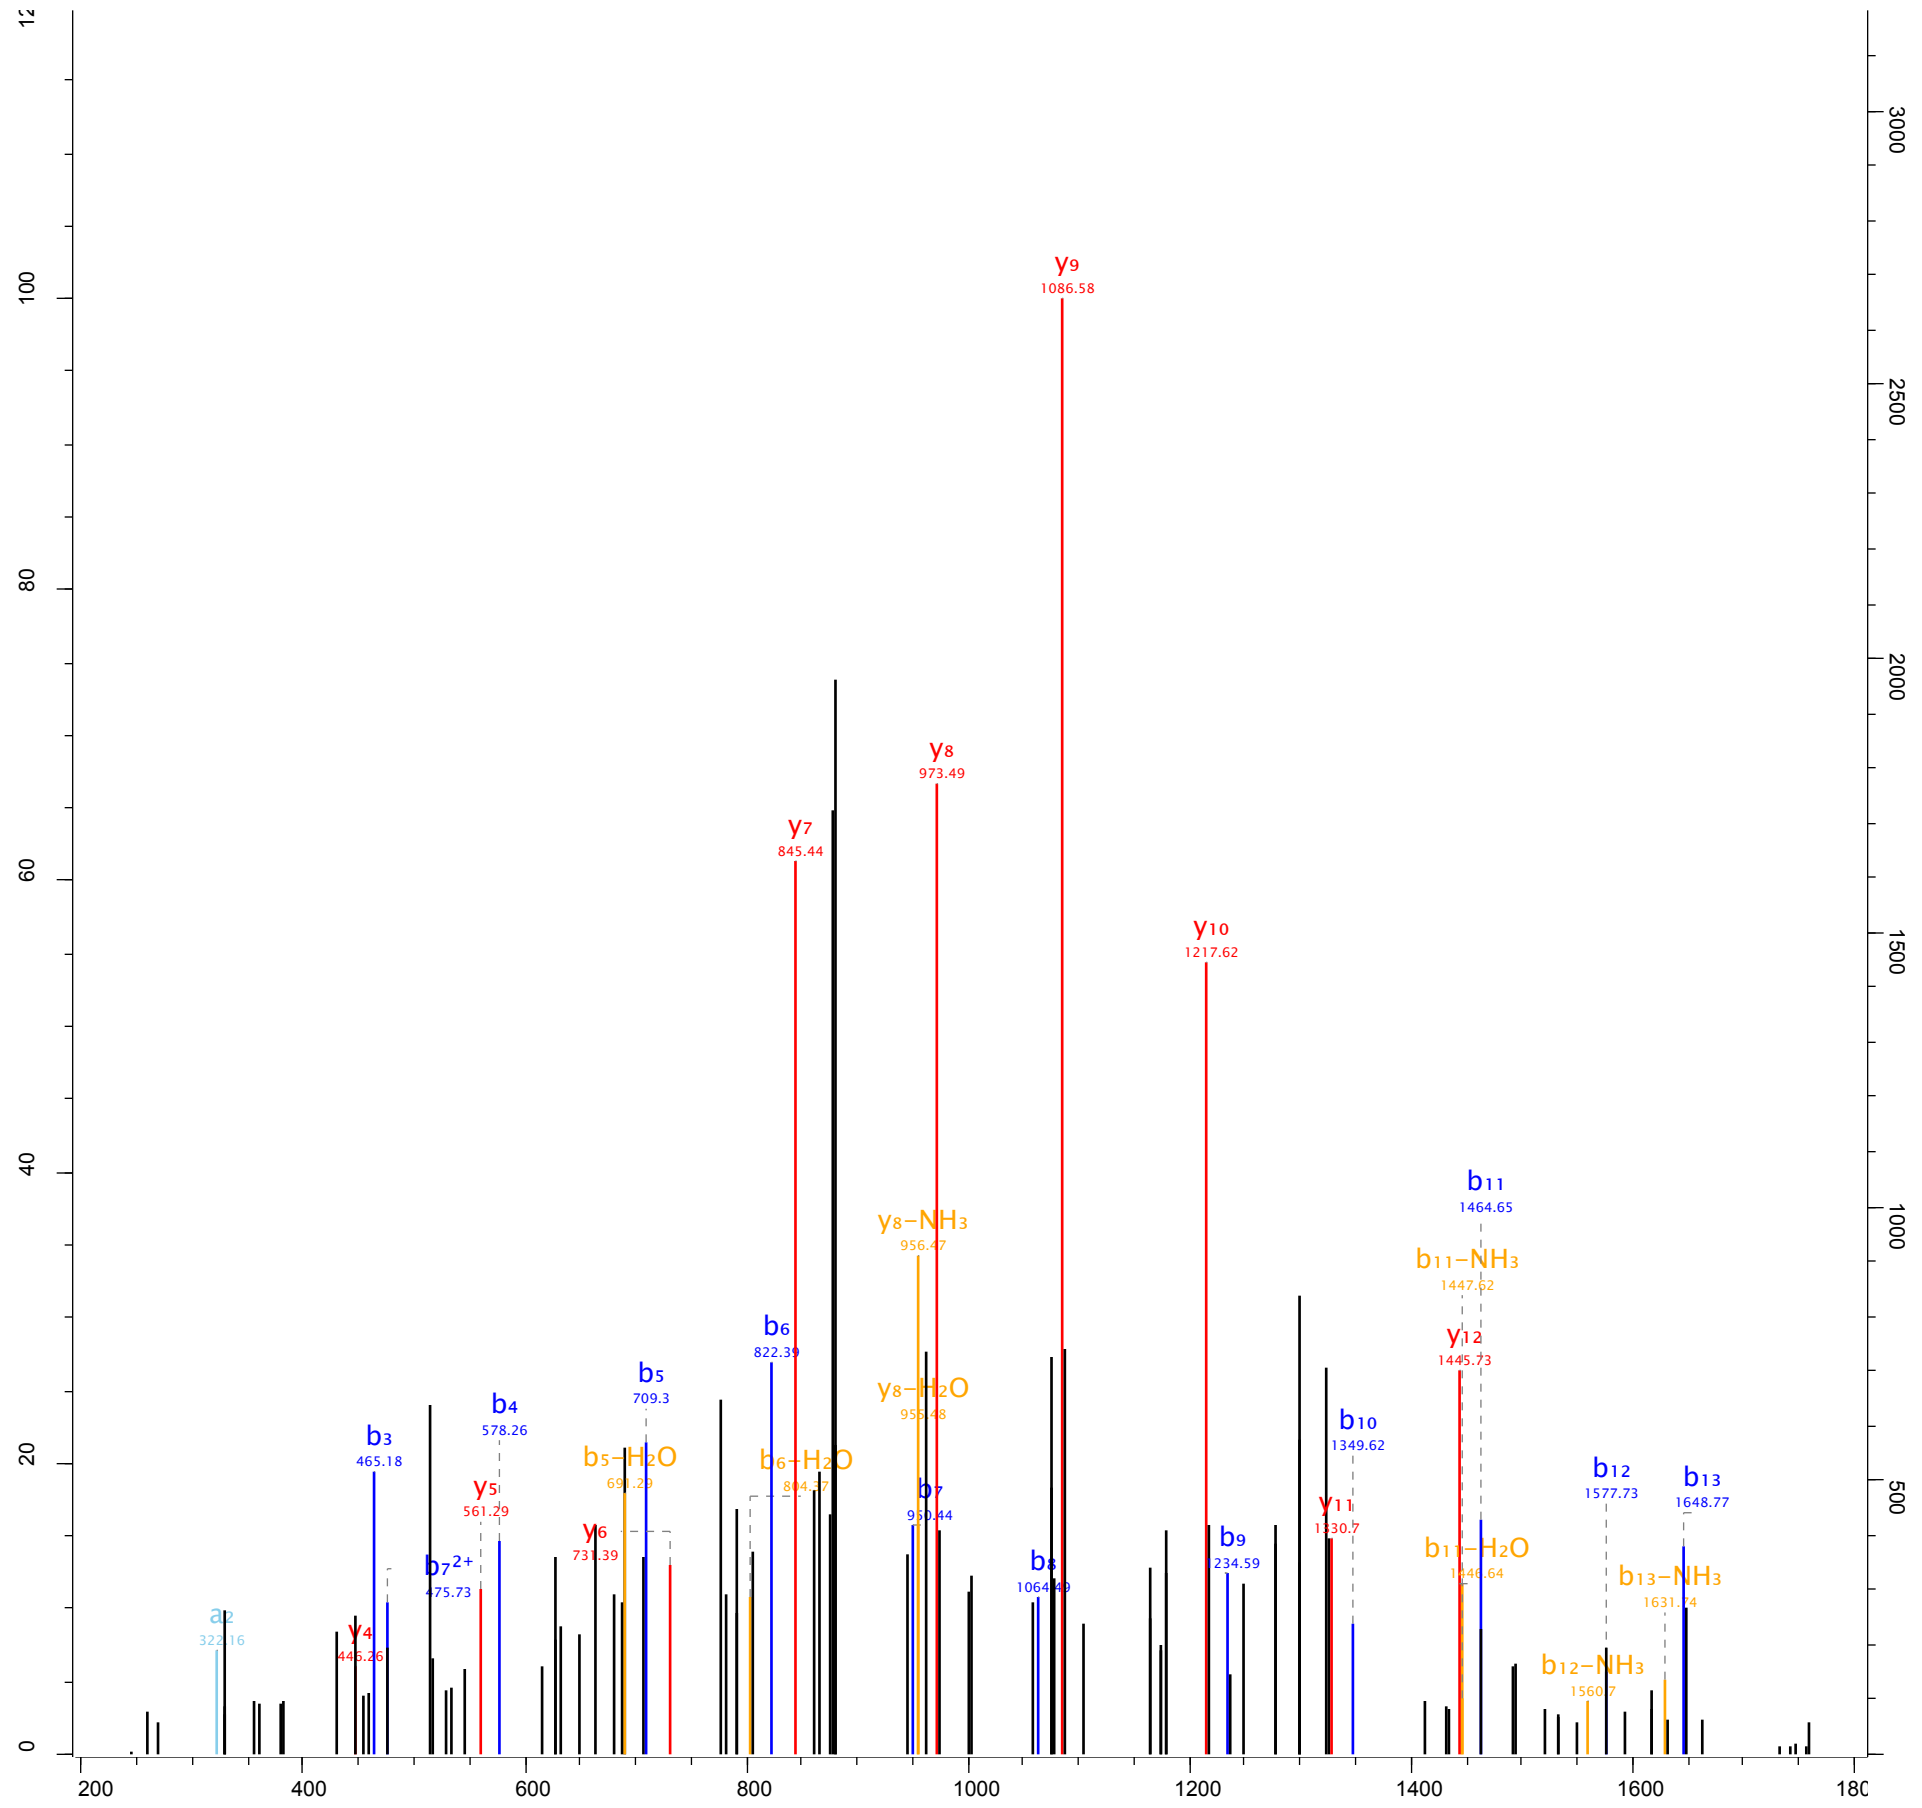

- W Y D L M I Q N K D D L A K -

a2 b3 b4 b5 b6 b7 b8 b9 b10 b11 b12 b13

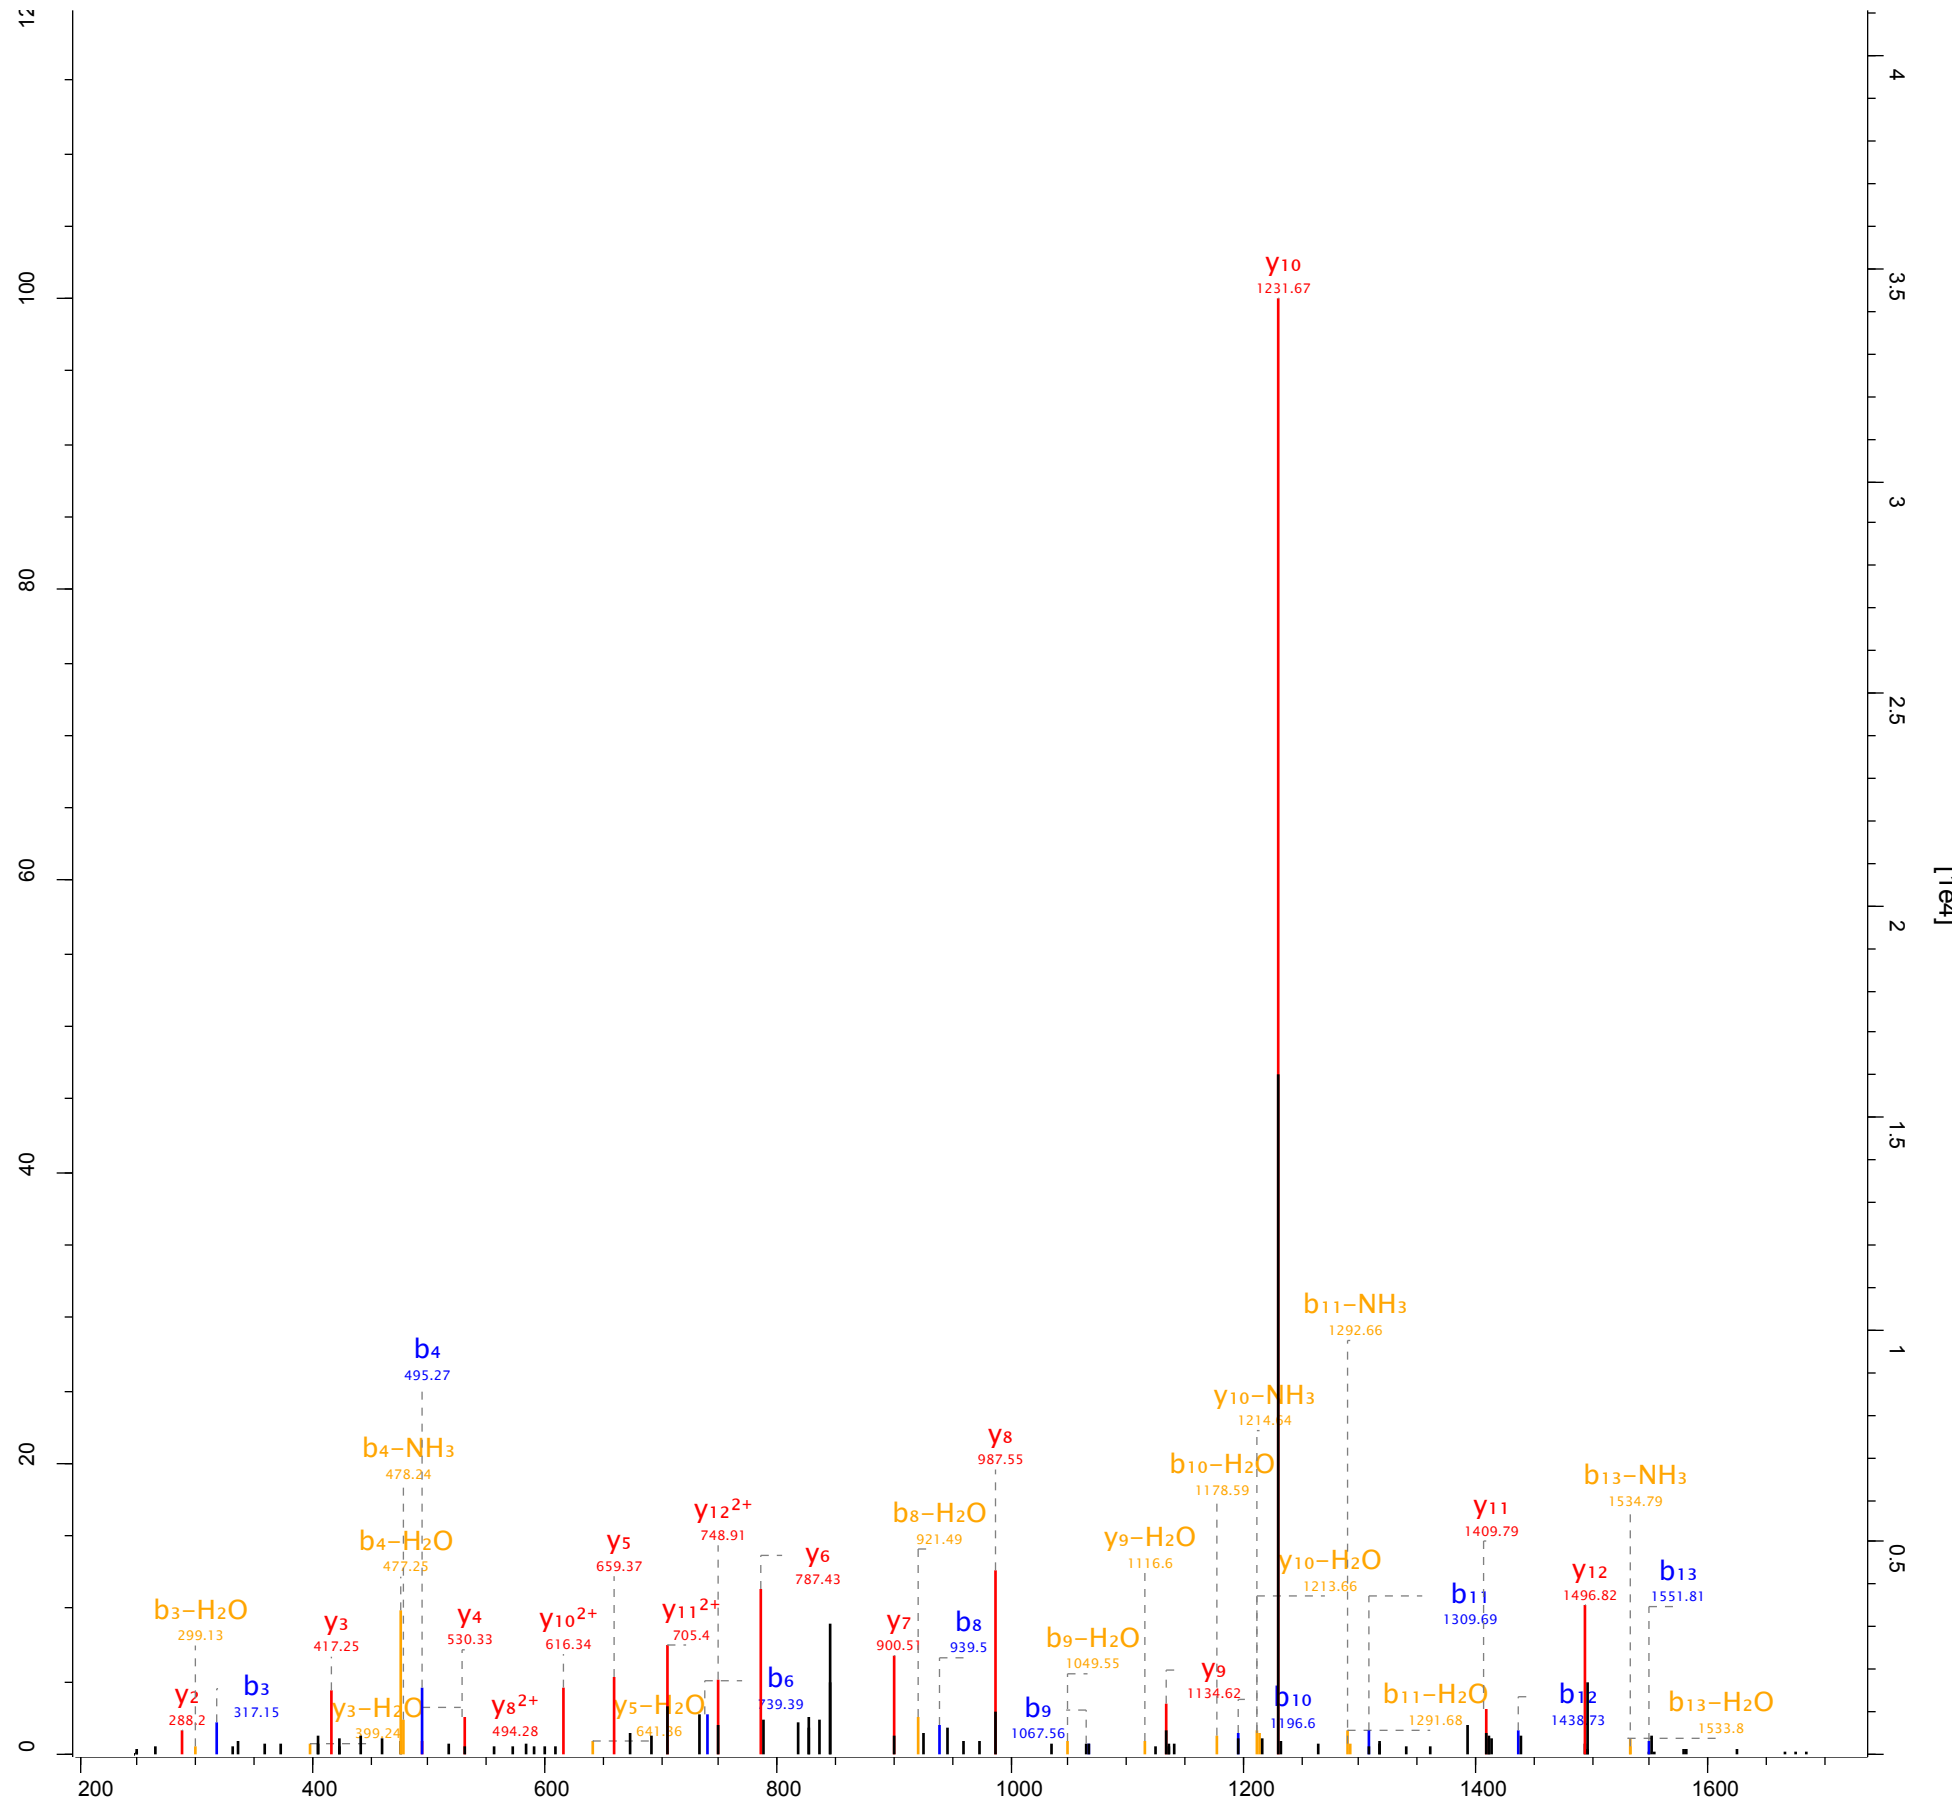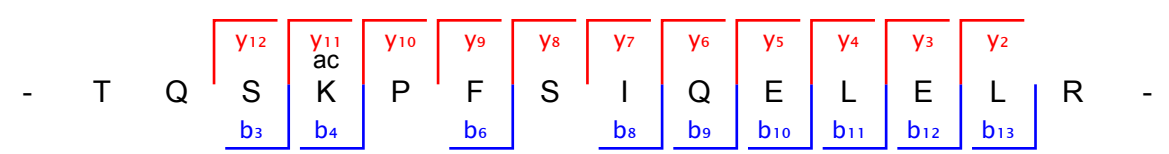

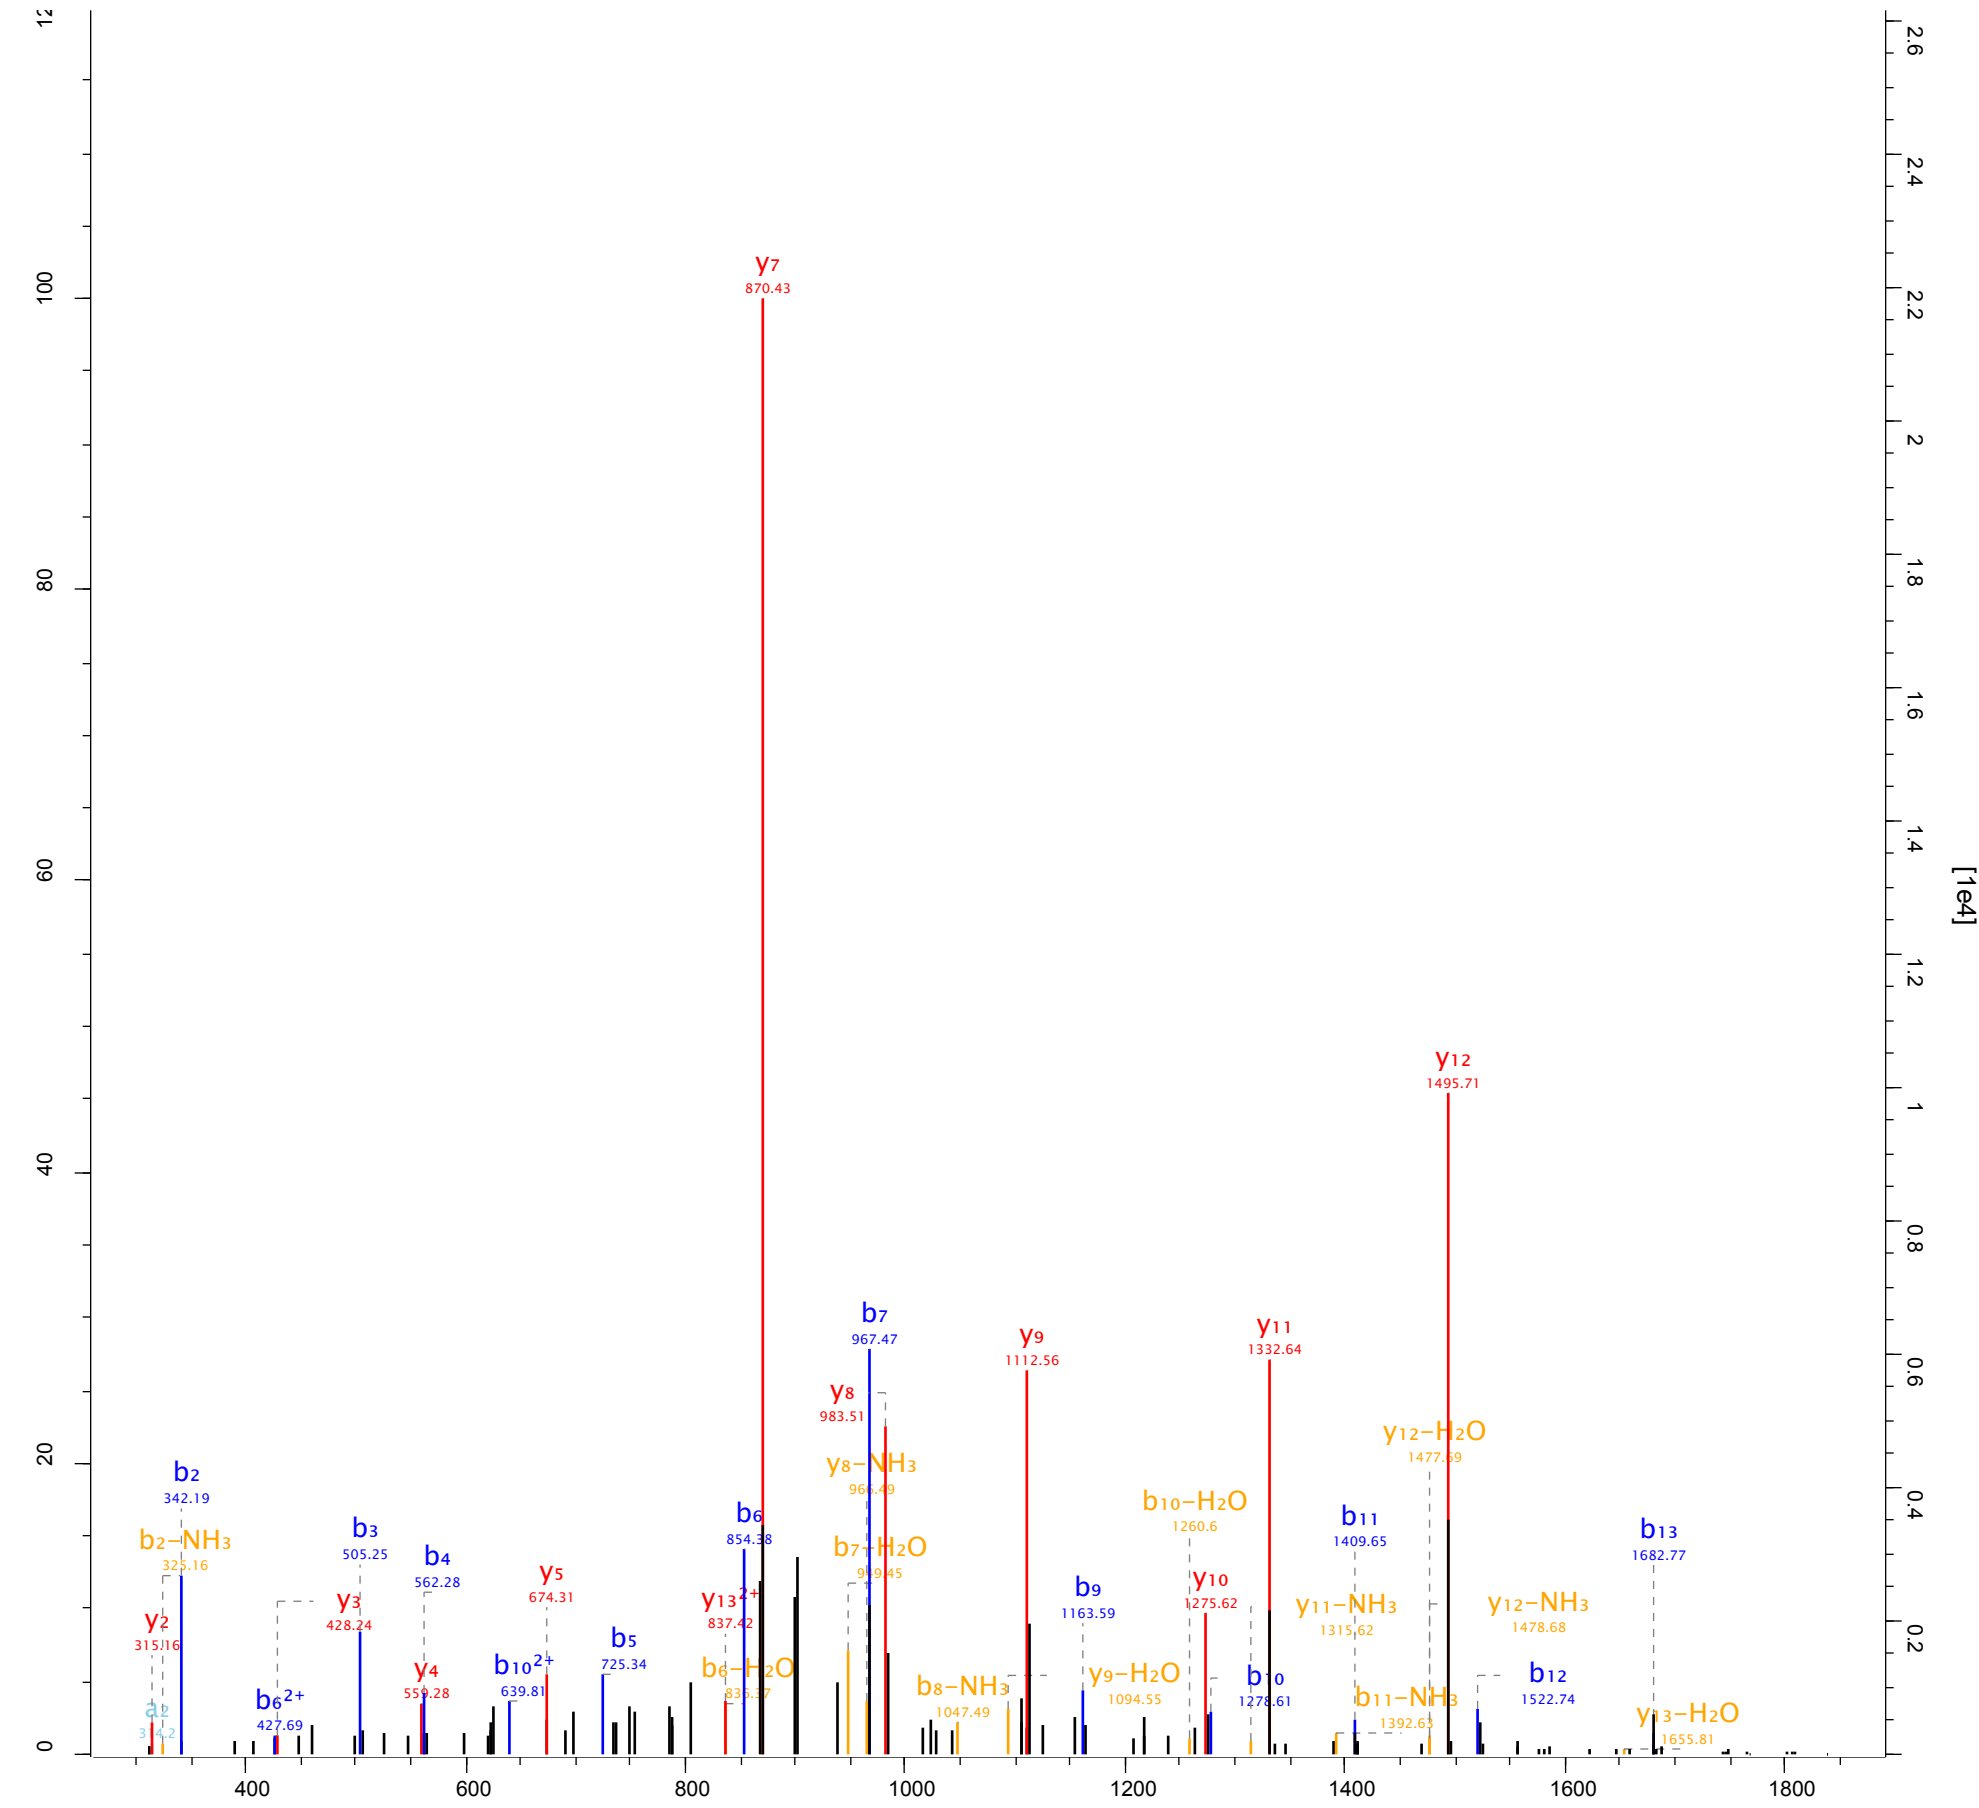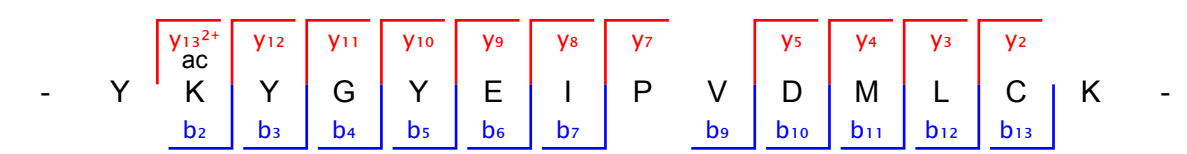

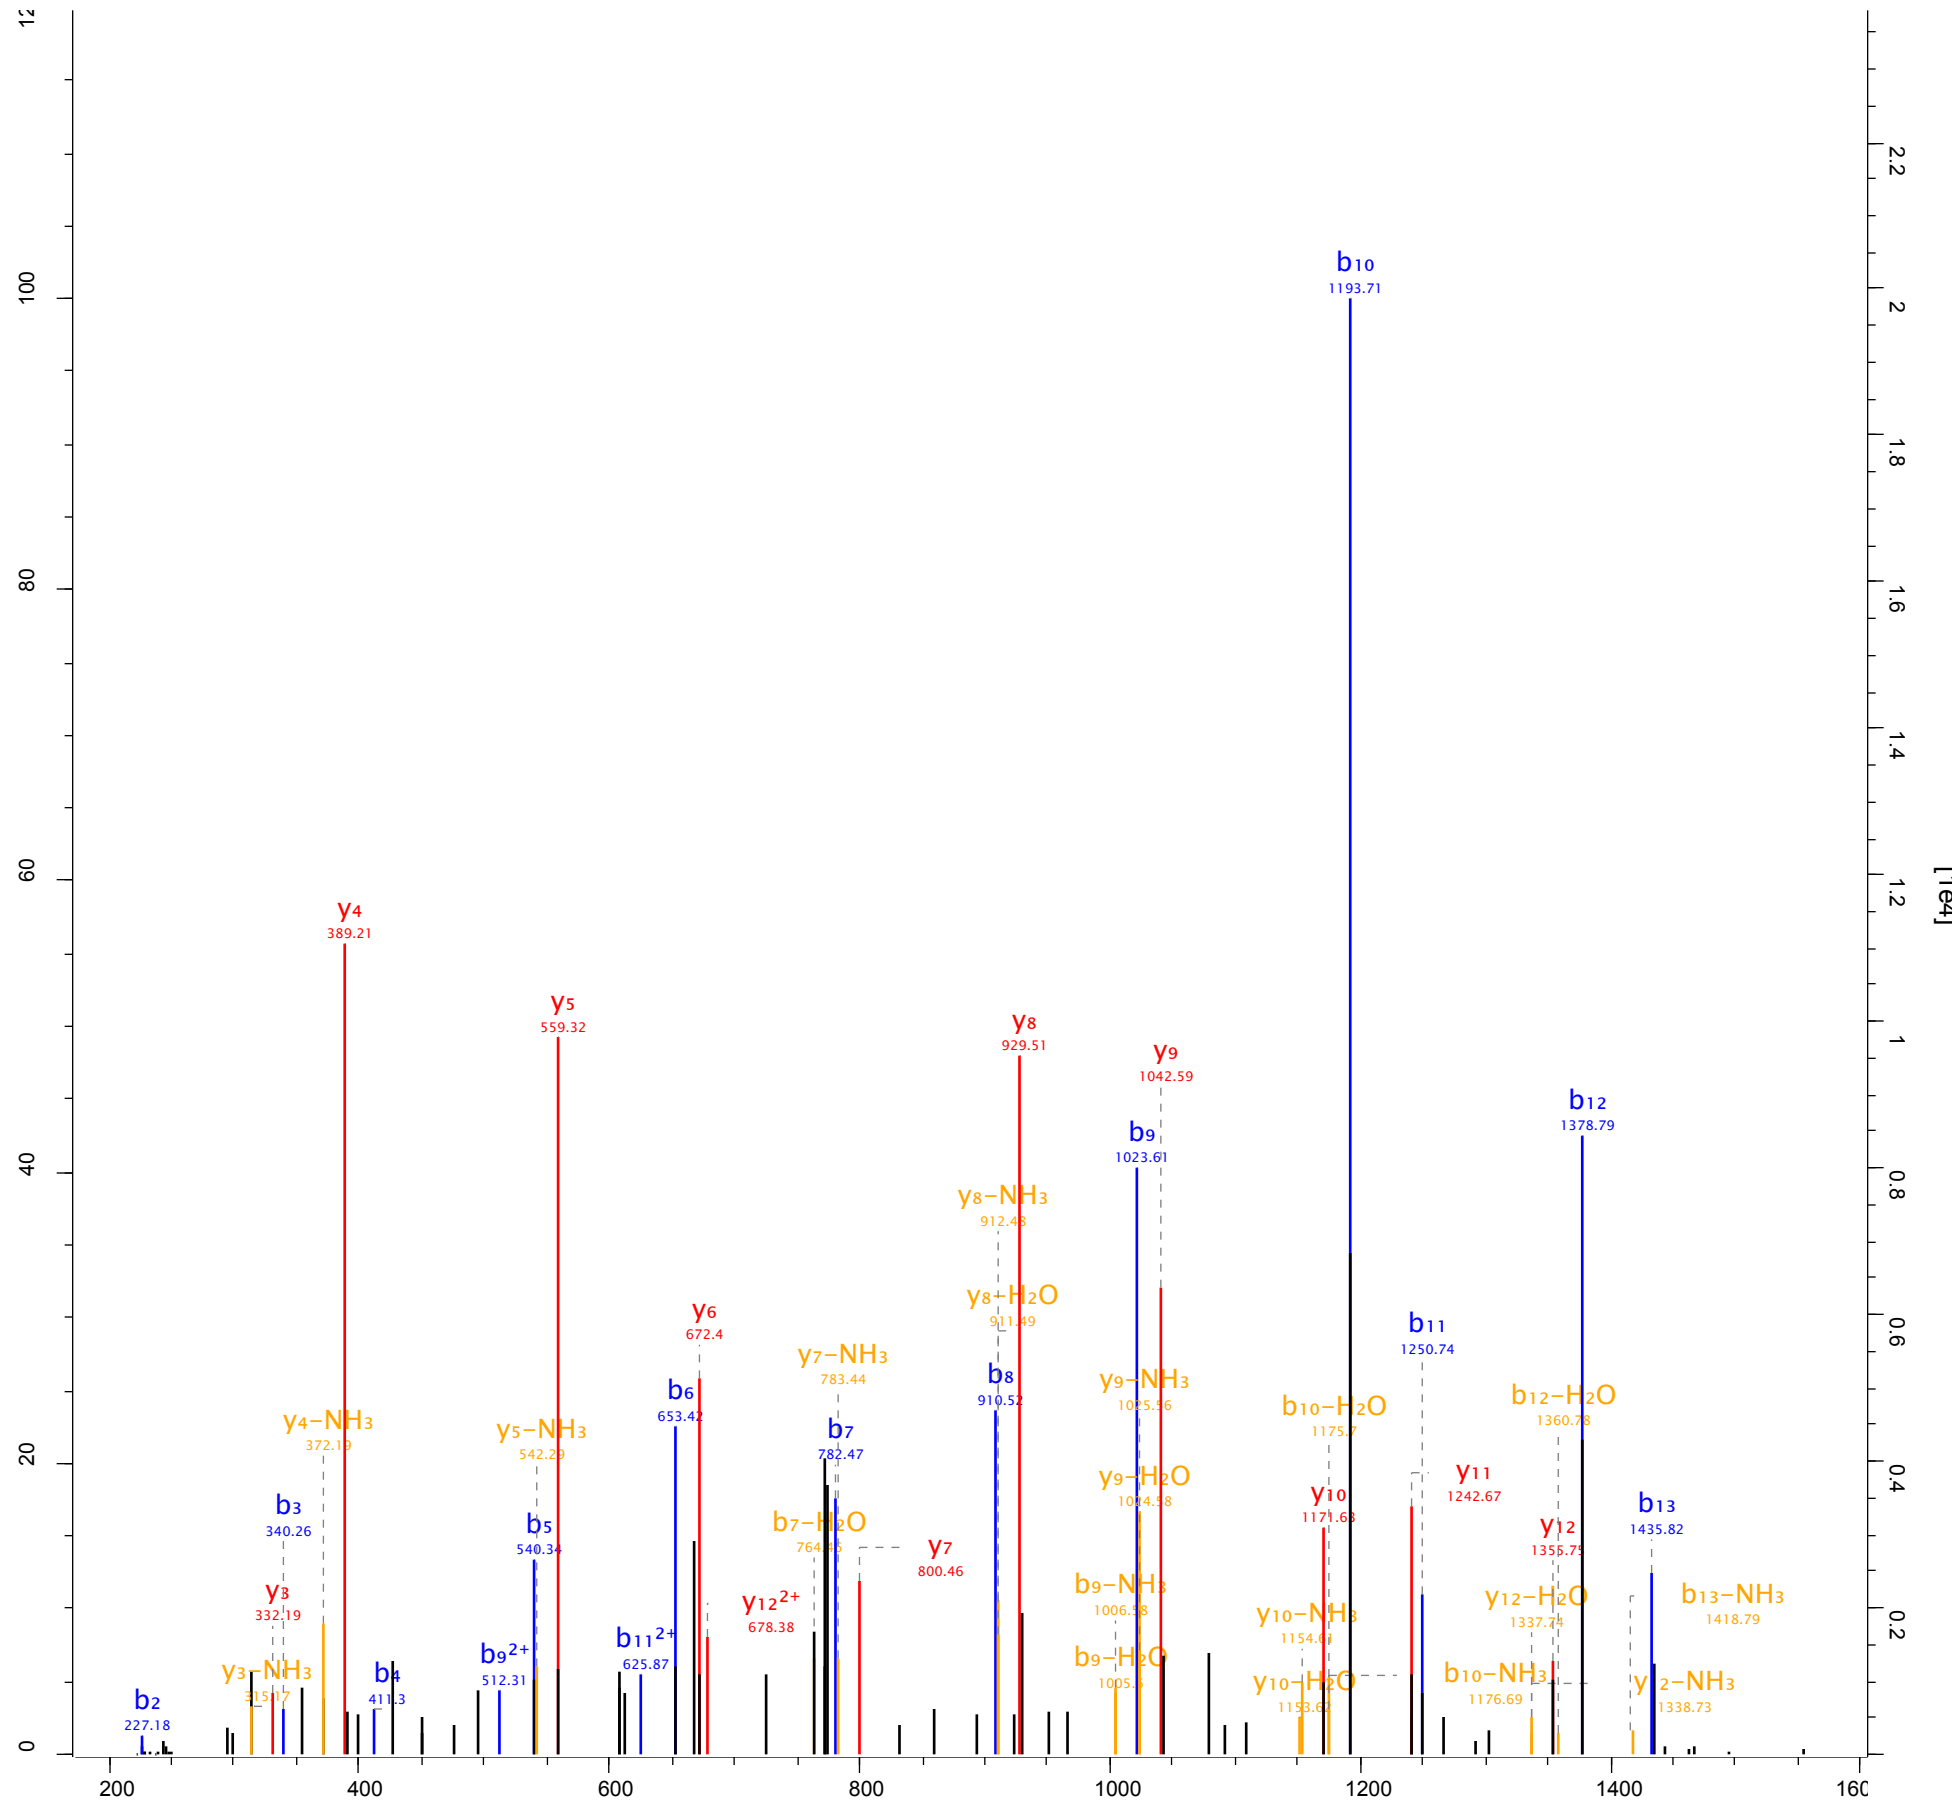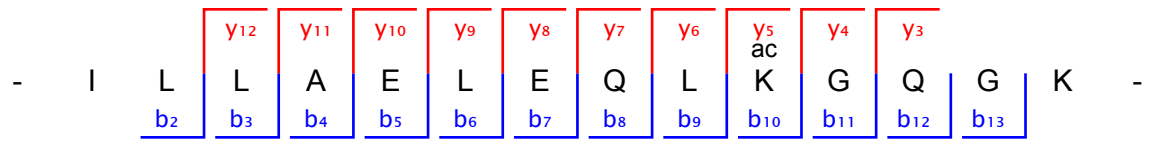

050813\_SCW\_II\_29\_19\_4

24186

ITMS; CID

317.01

1005.5

Aldh1l1

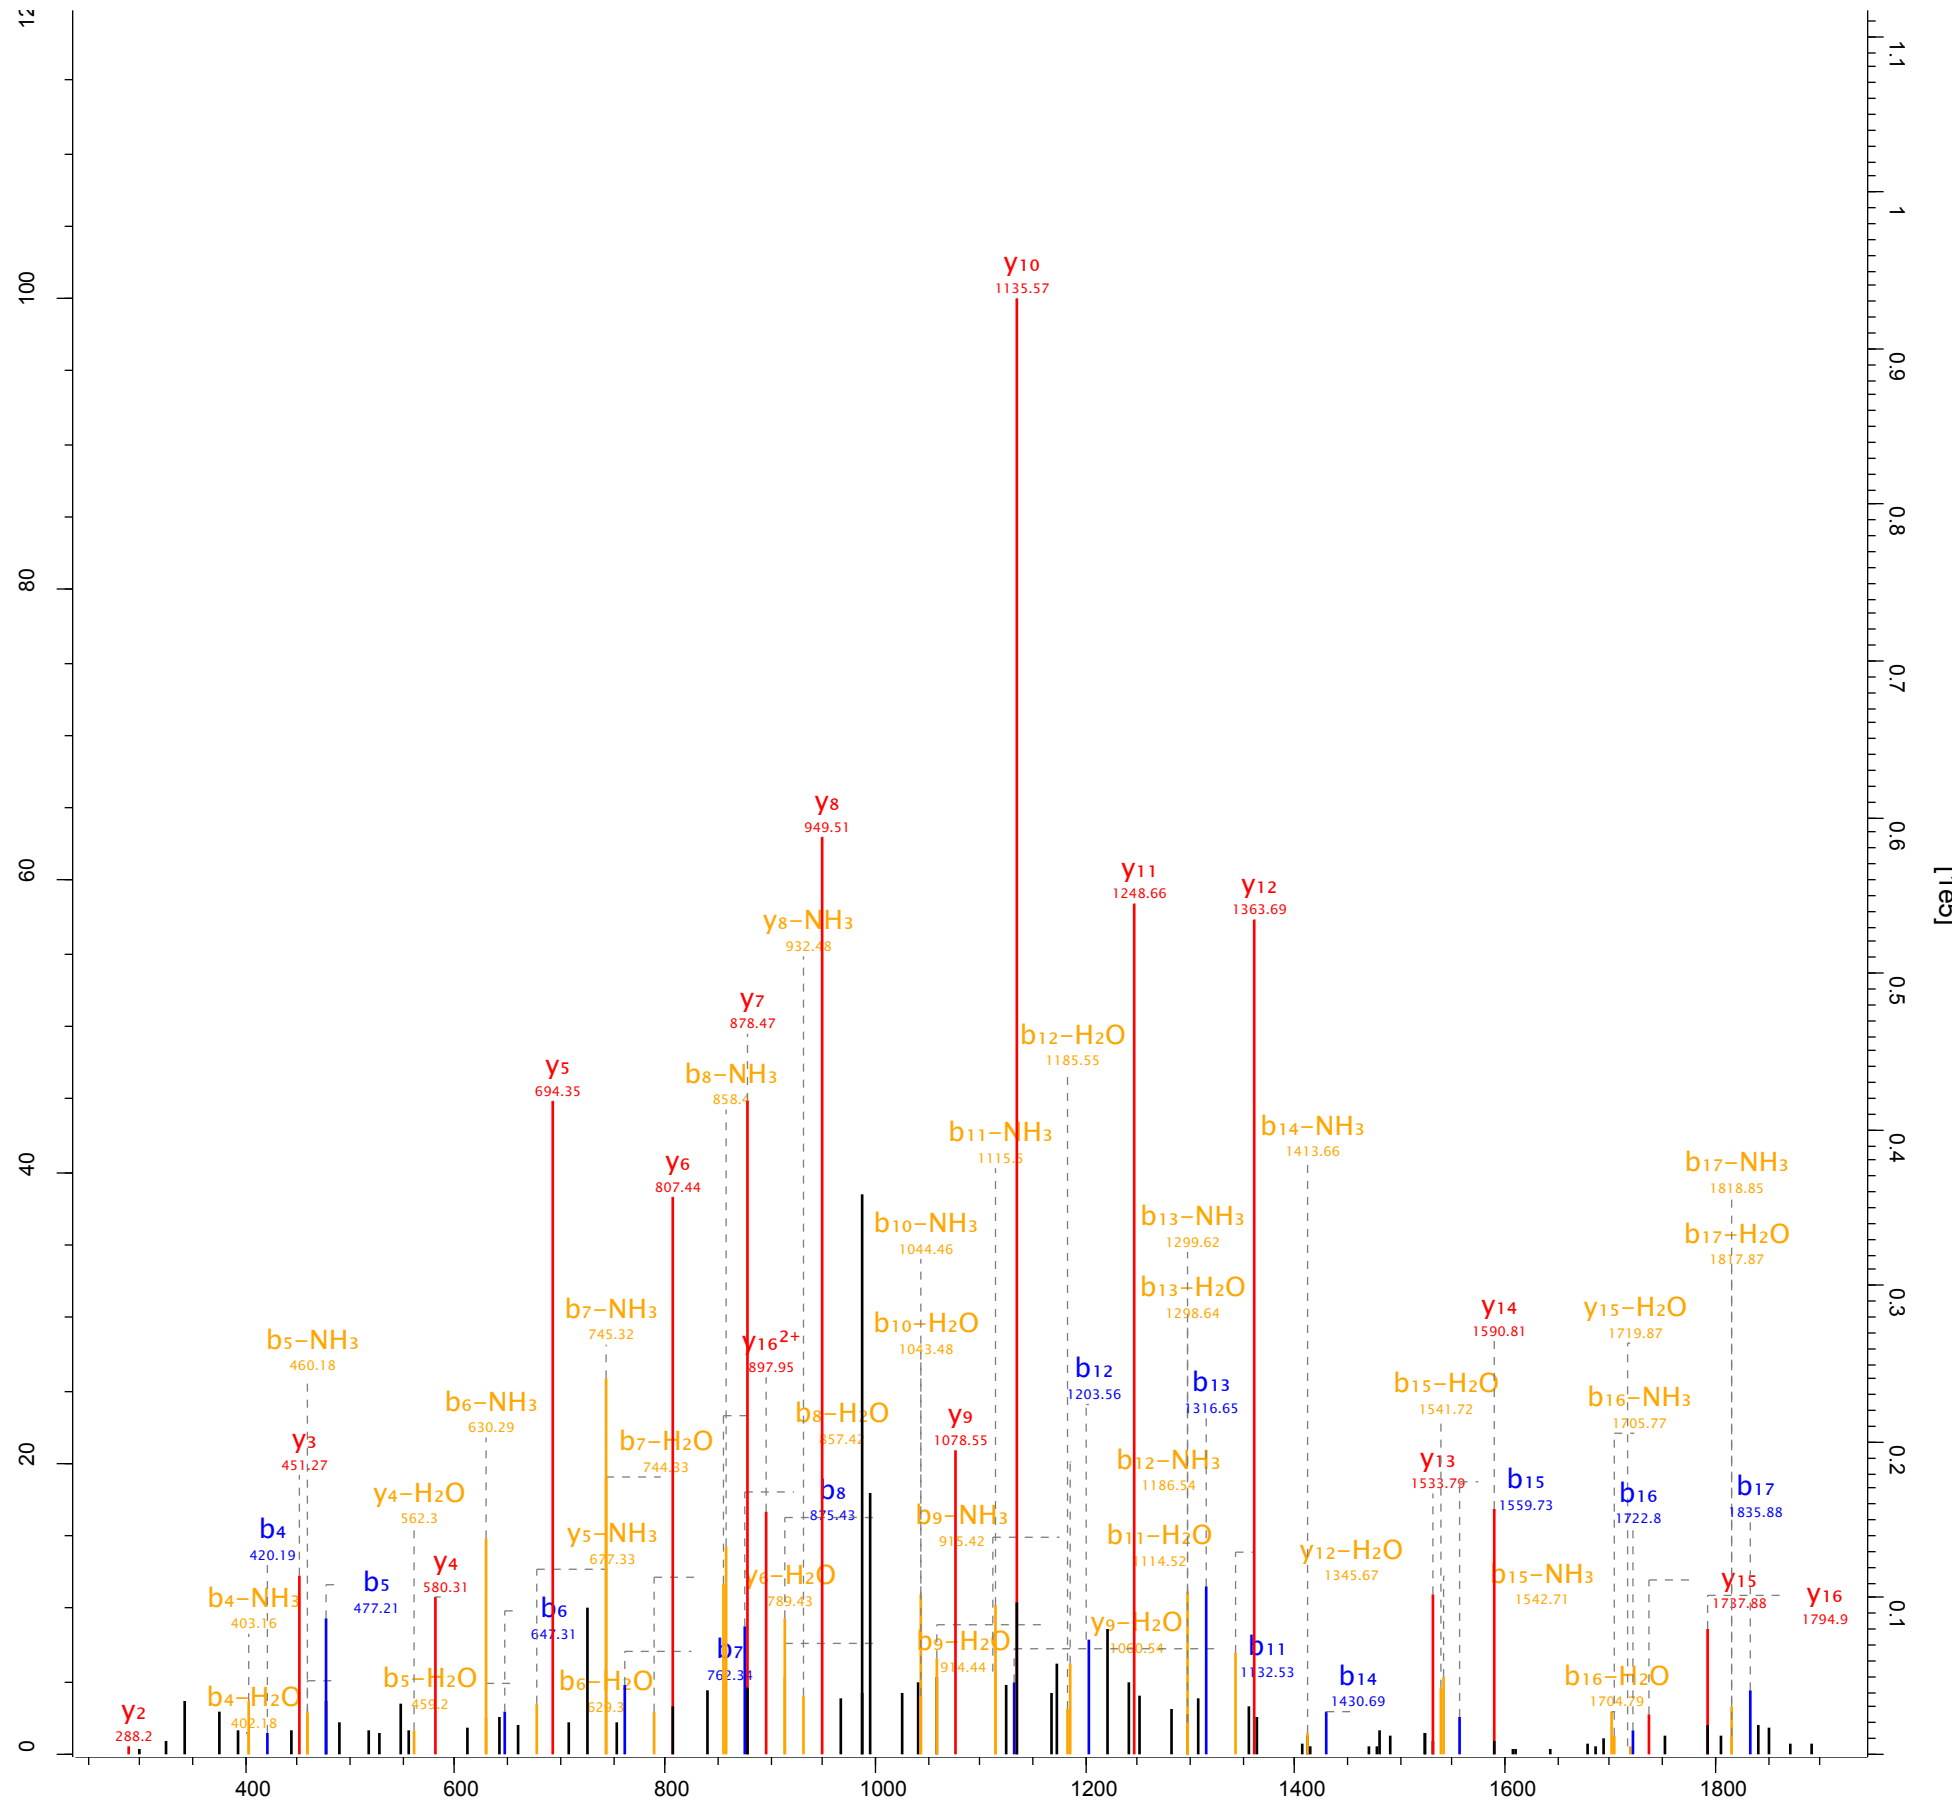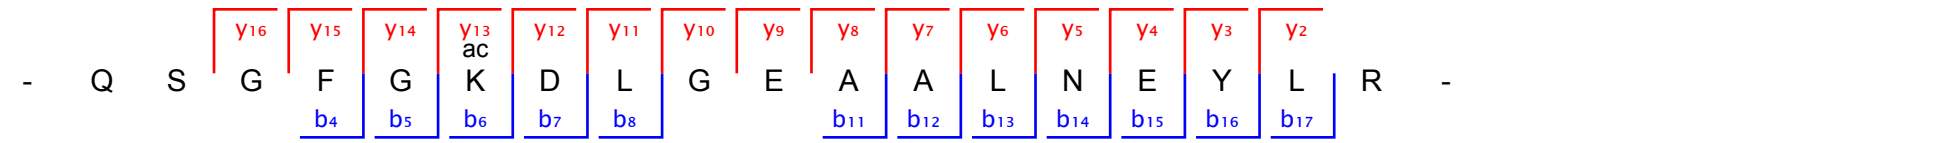



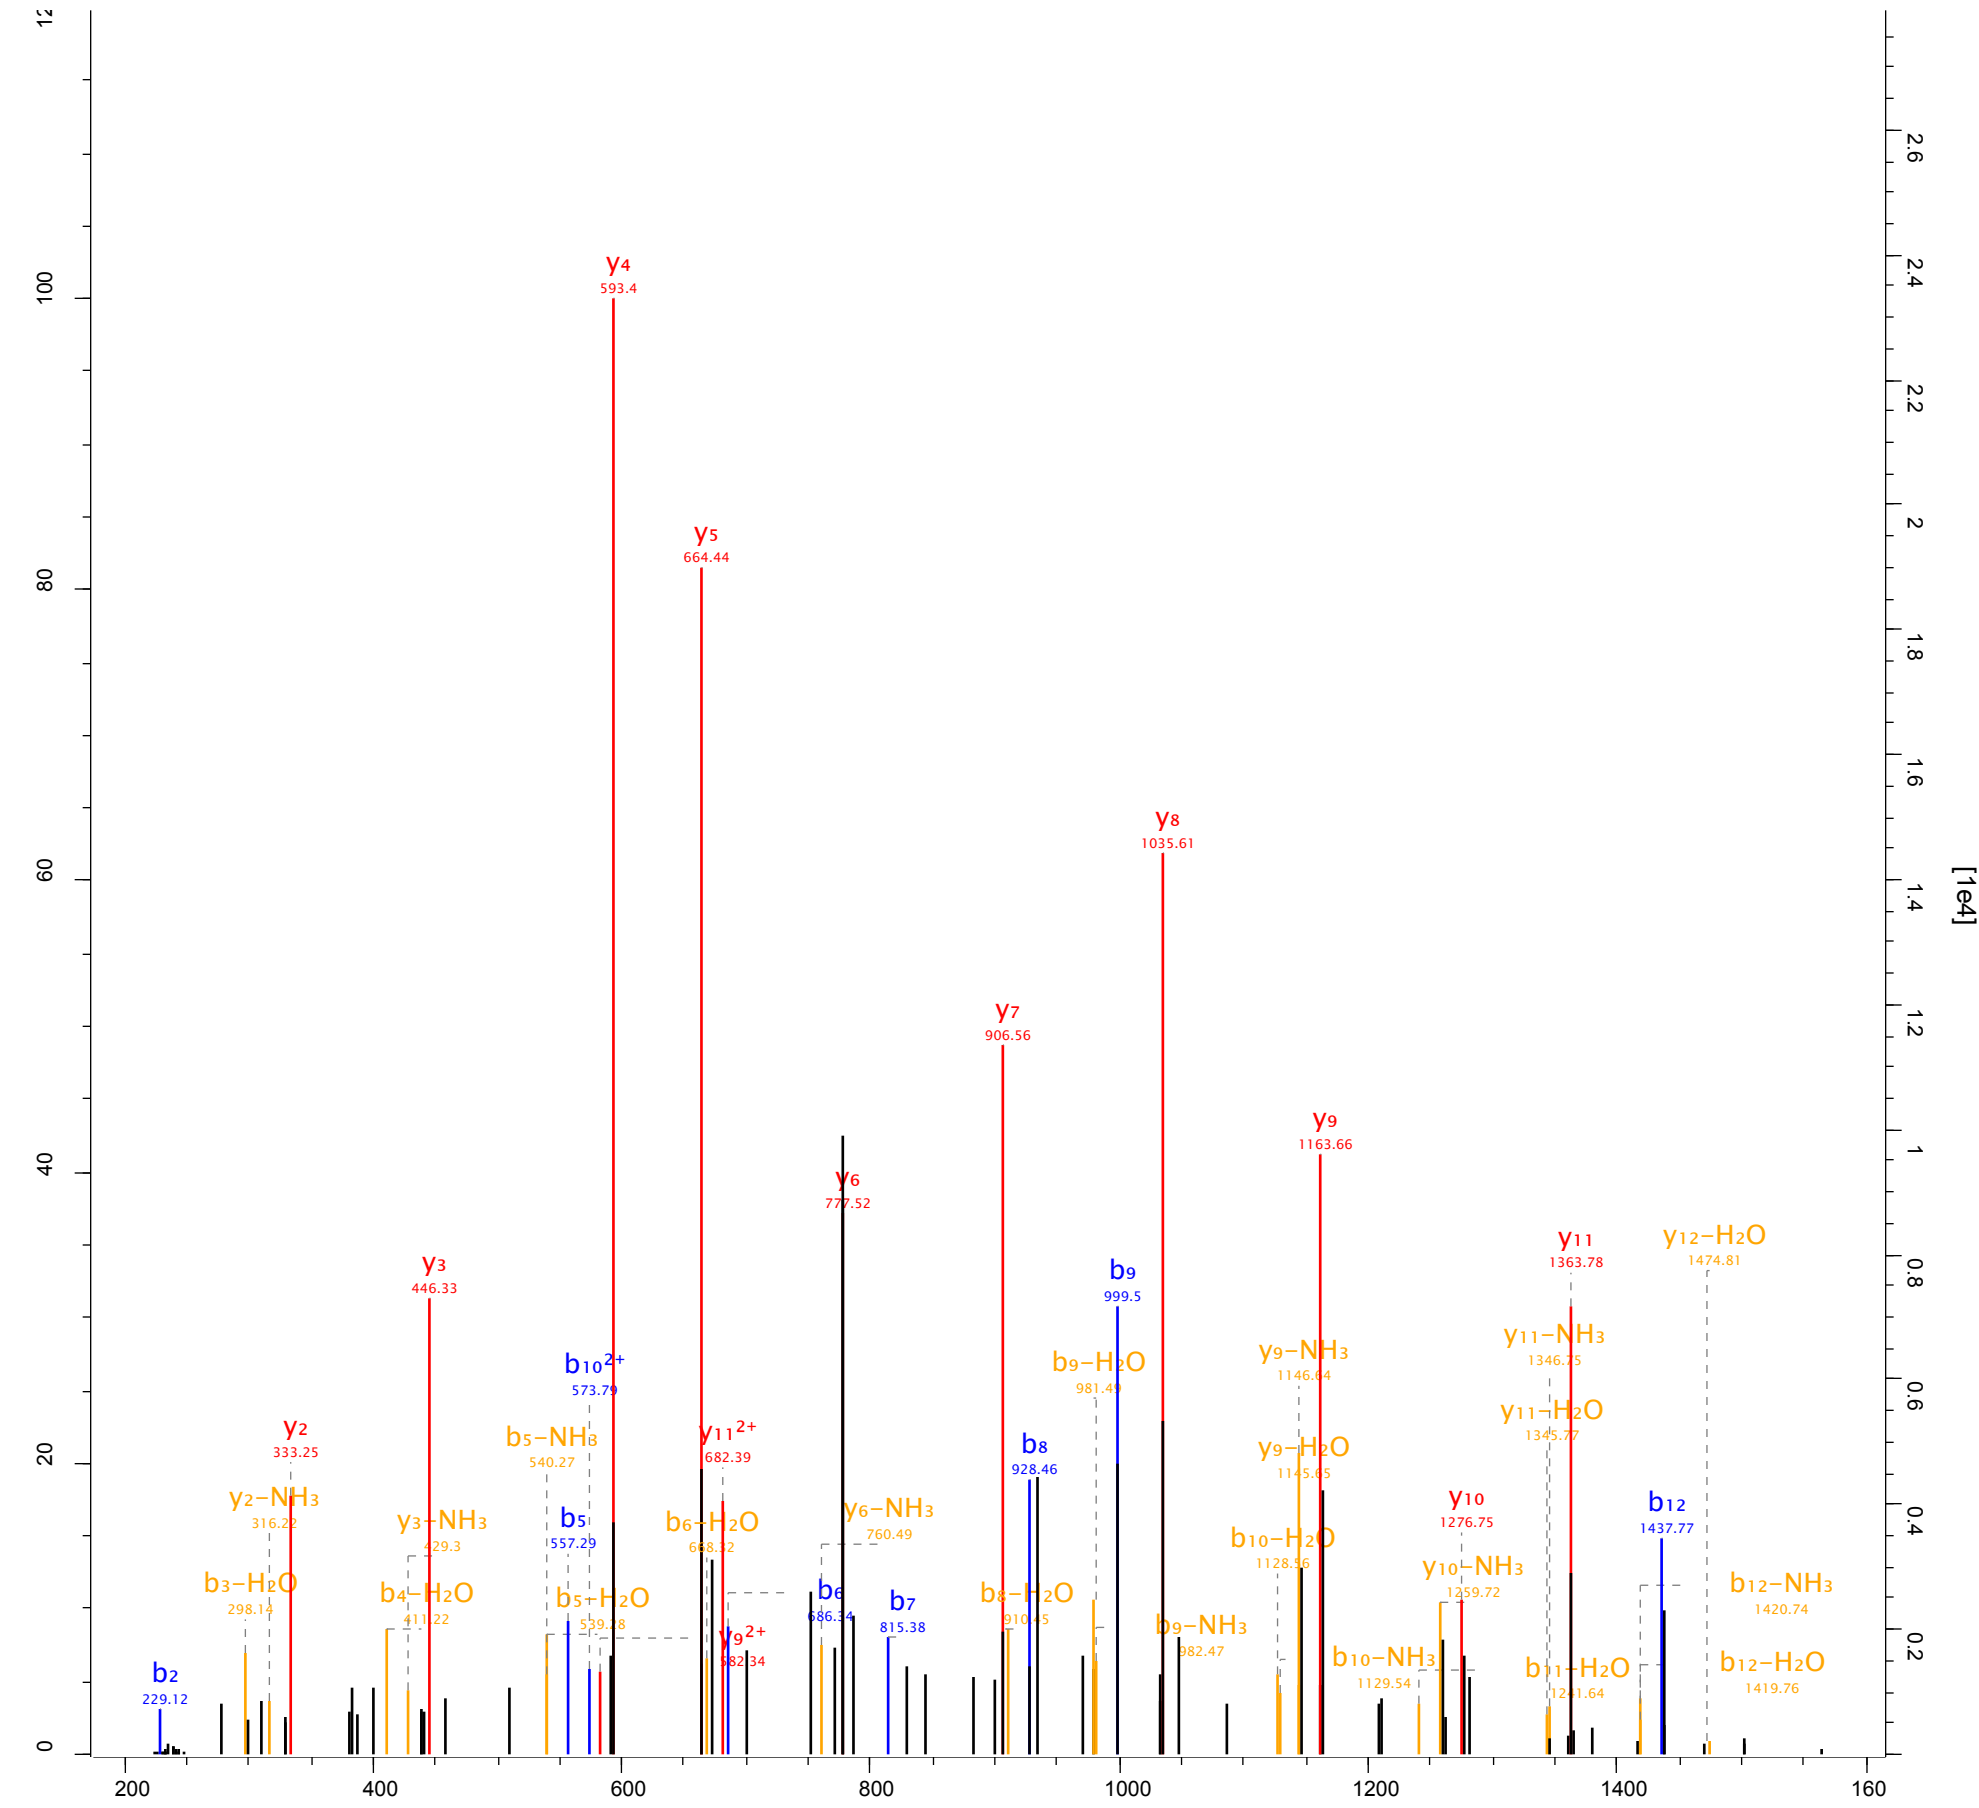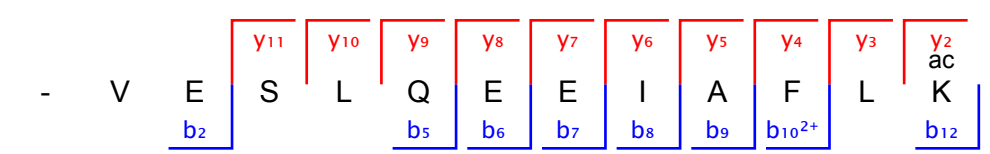

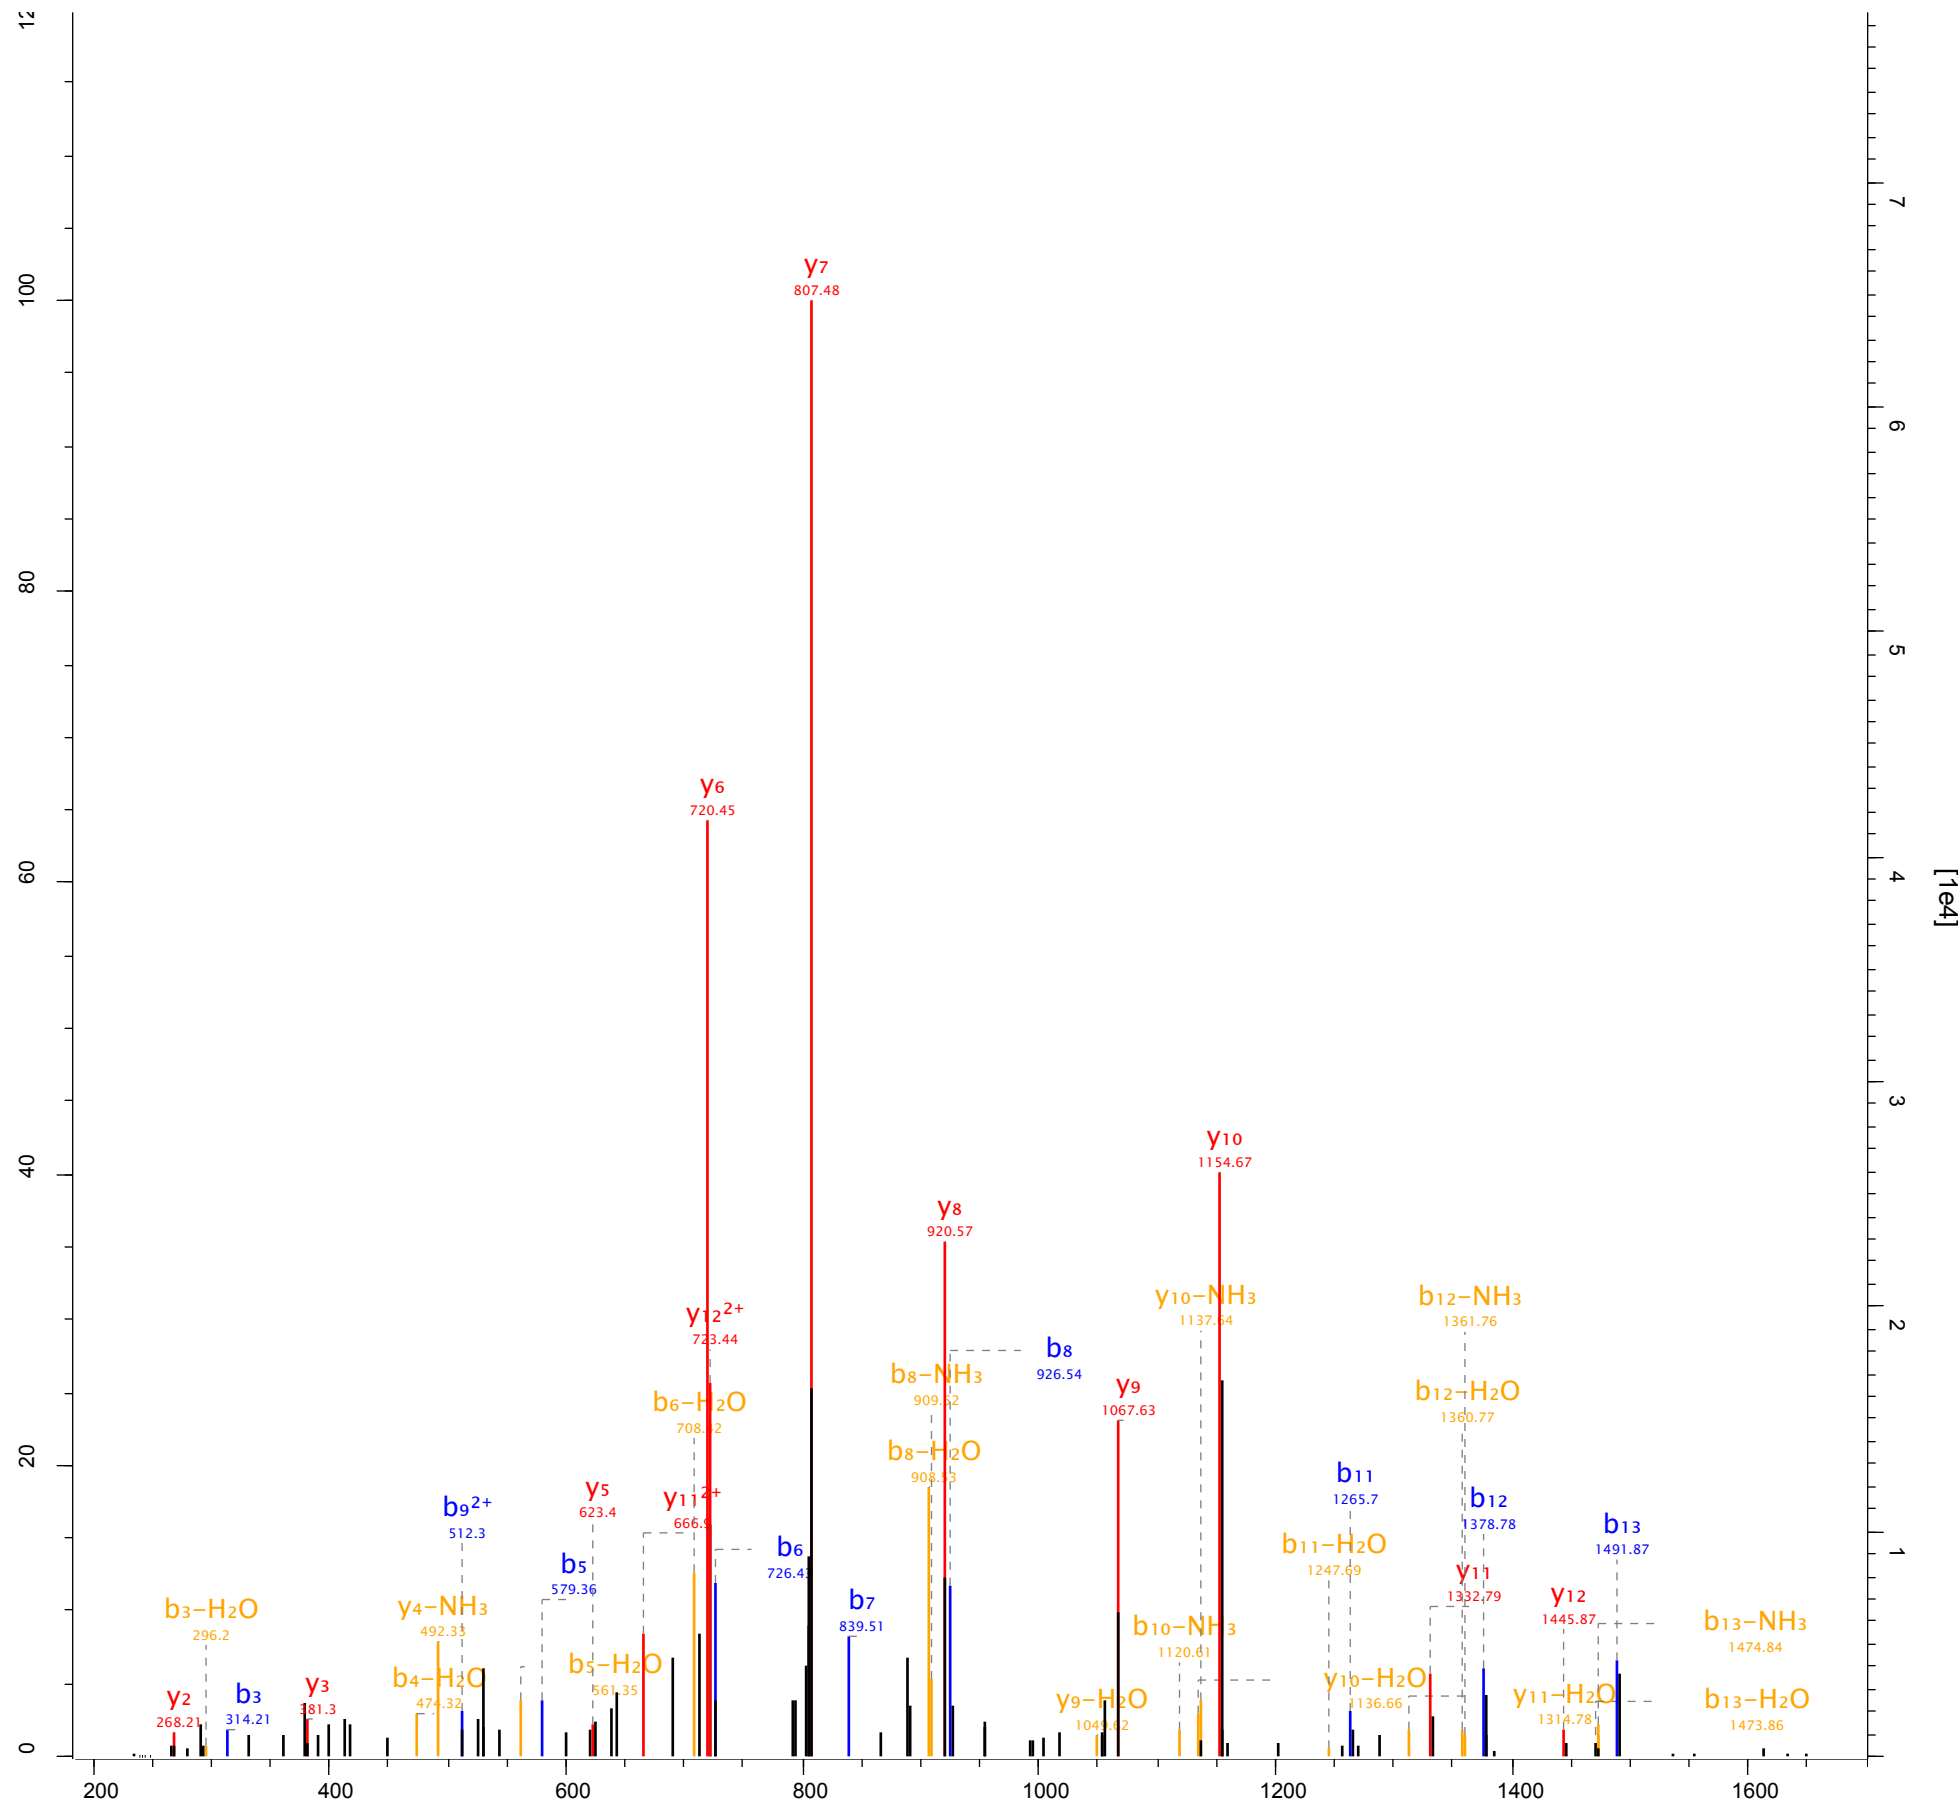

- T V L K S F L S P N Q I L K -

b3 b5 b6 b7 b8 b9<sup>2+</sup> b11 b12 b13

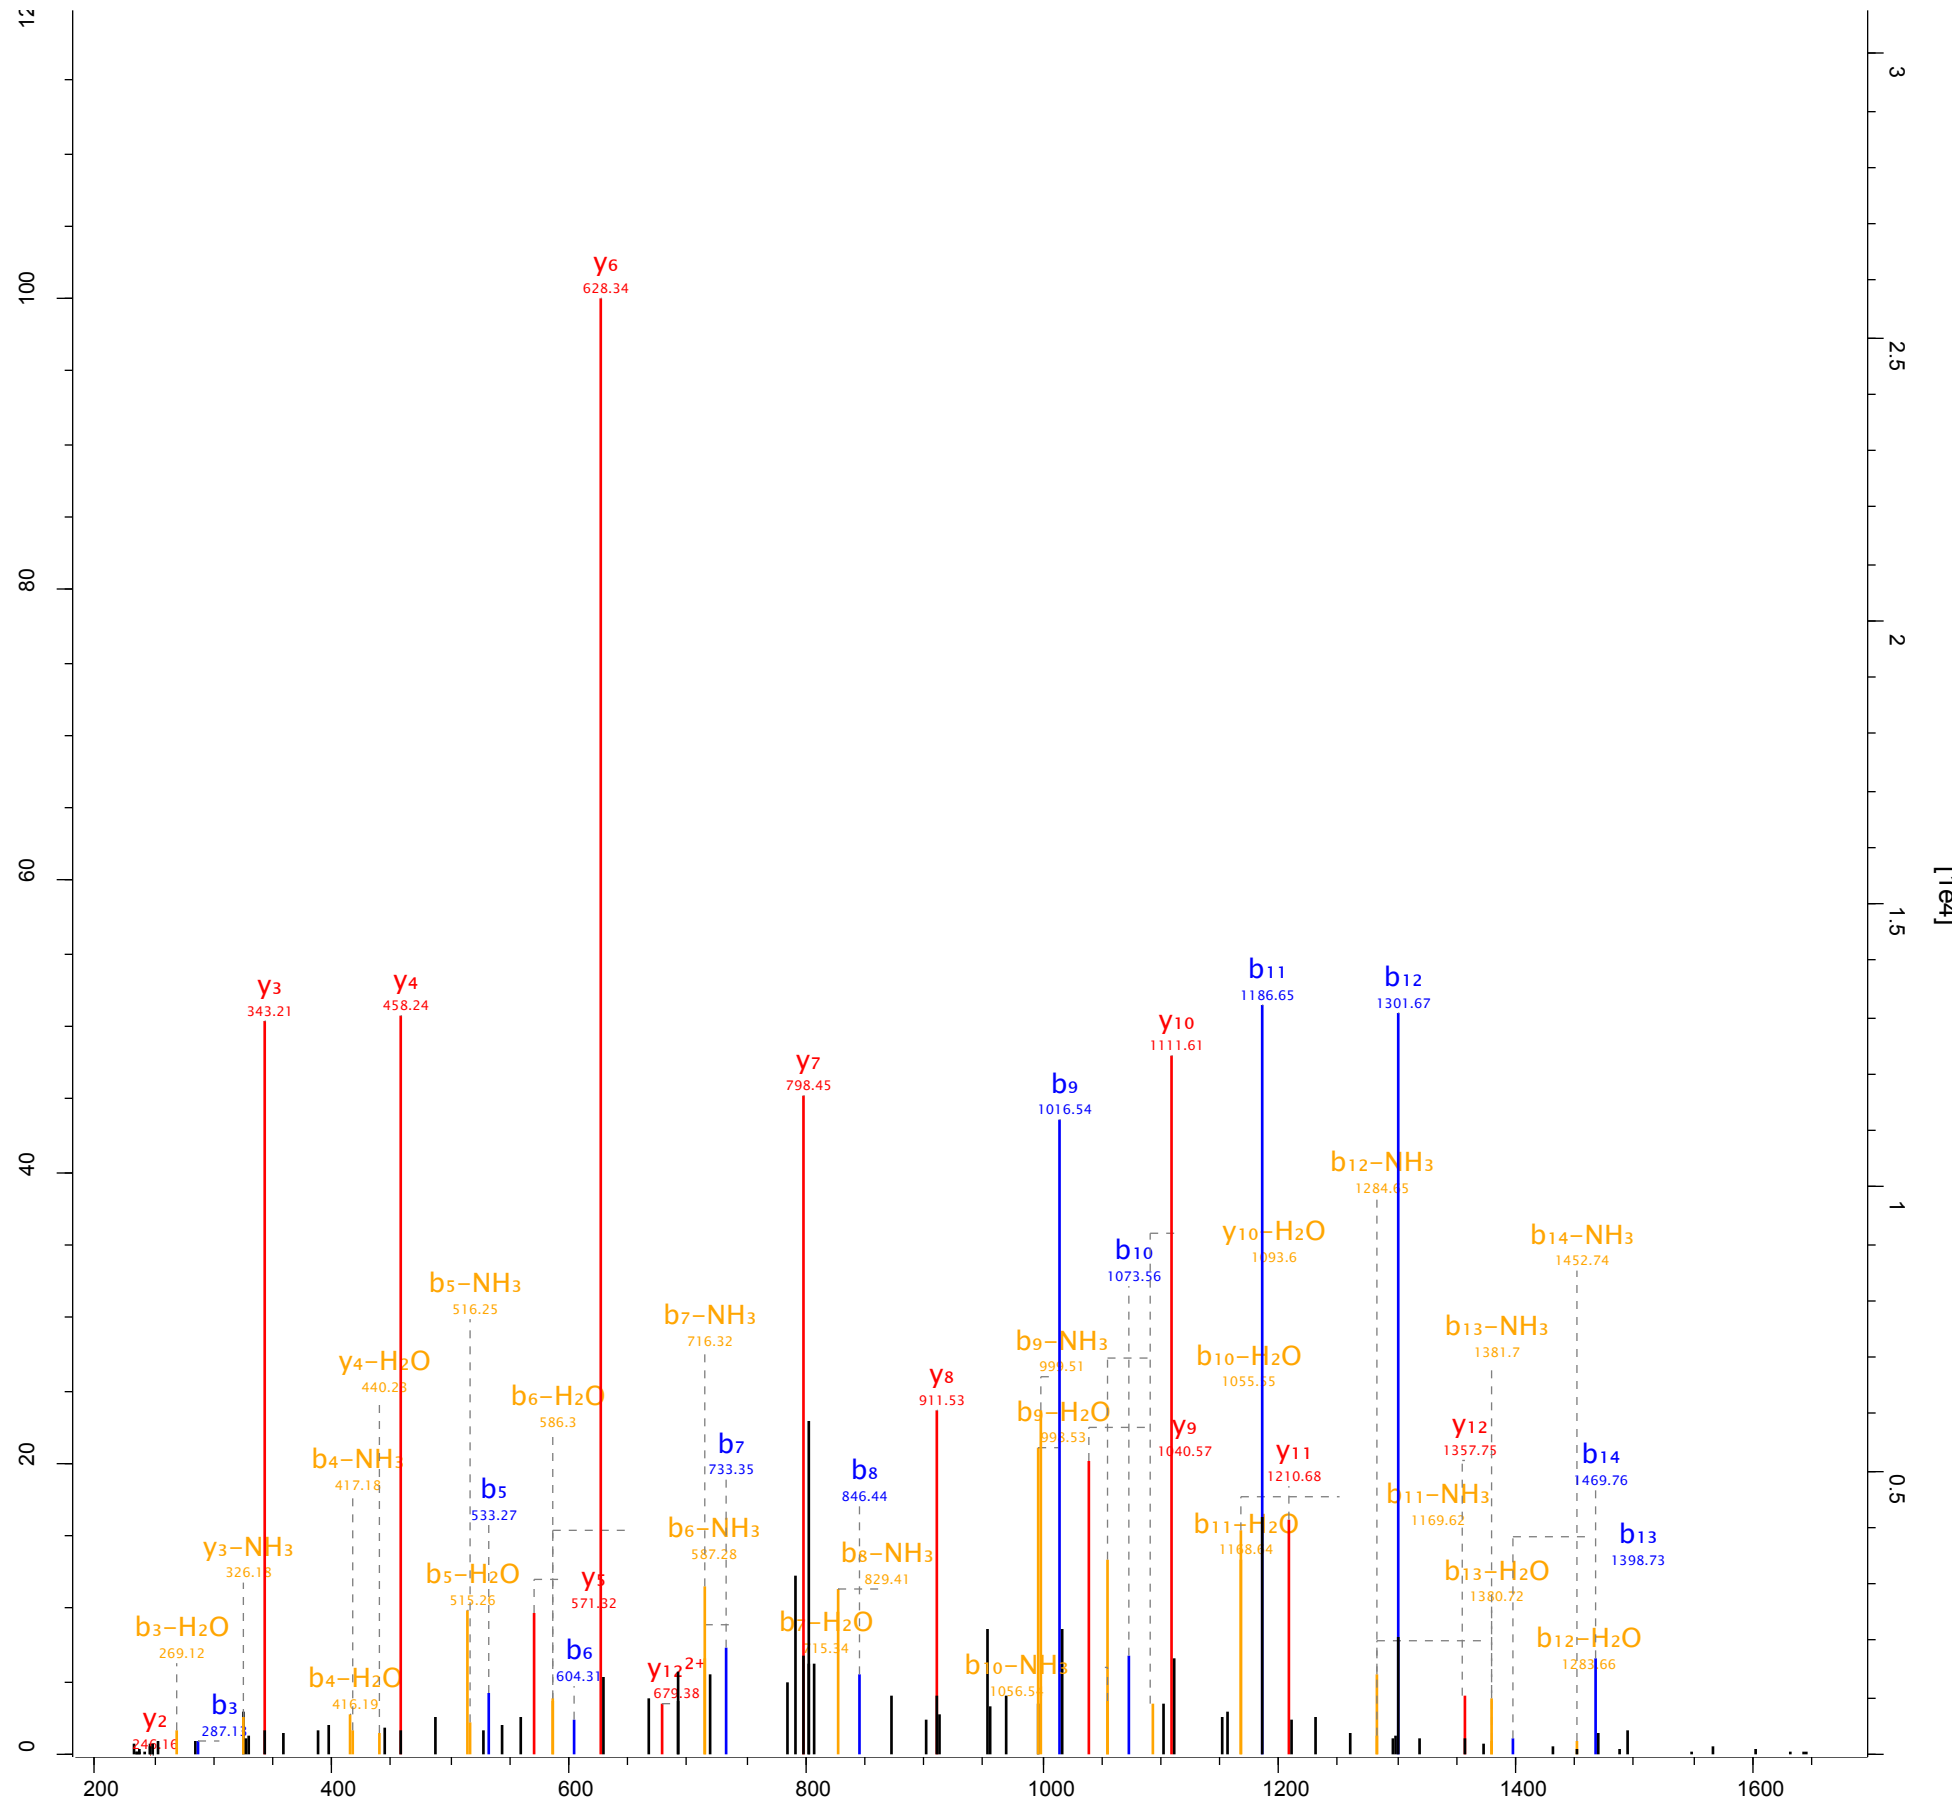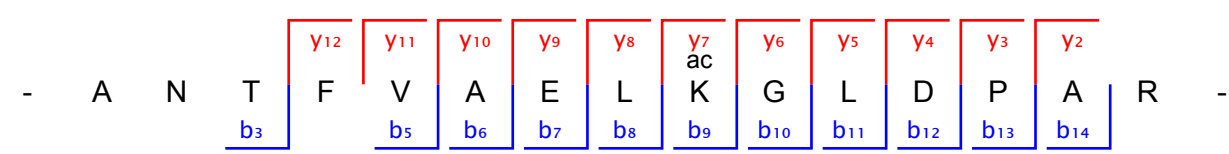

Raw file  
050813\_SCW\_II\_29\_19\_4

Scan 25012 Method ITMS; CID Score 173.44 m/z 748.41 Gene names Glud1

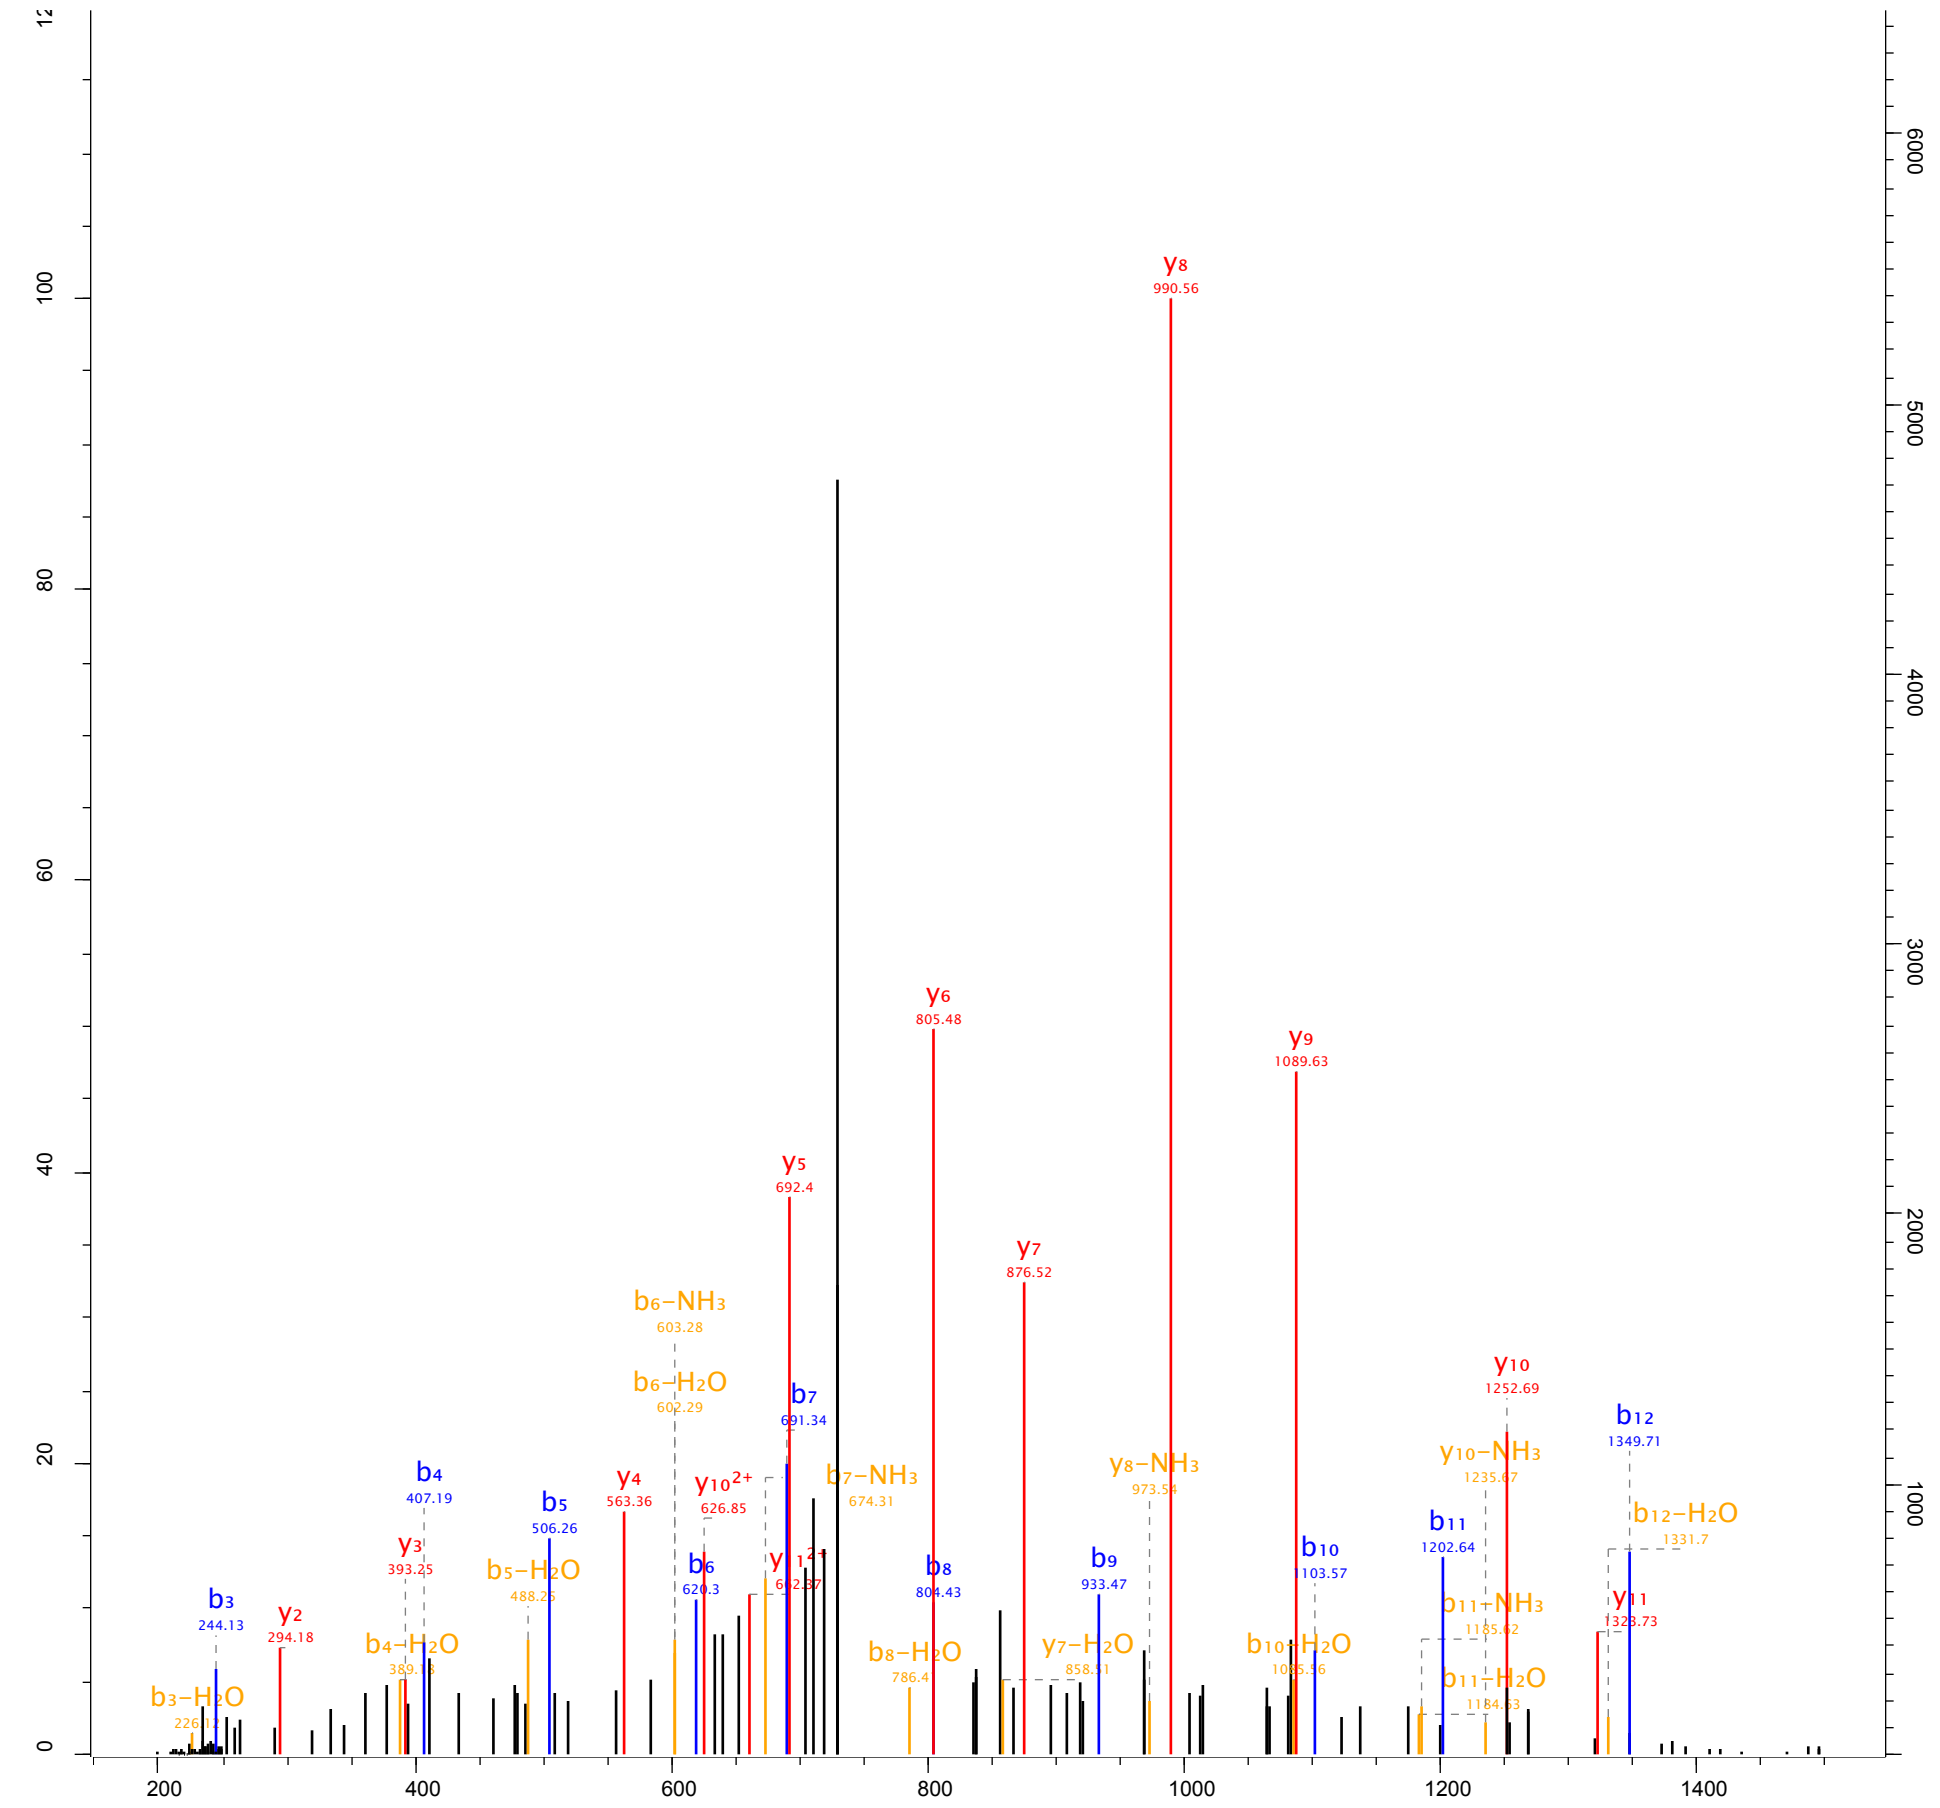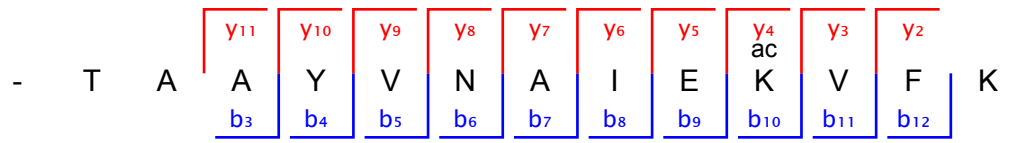

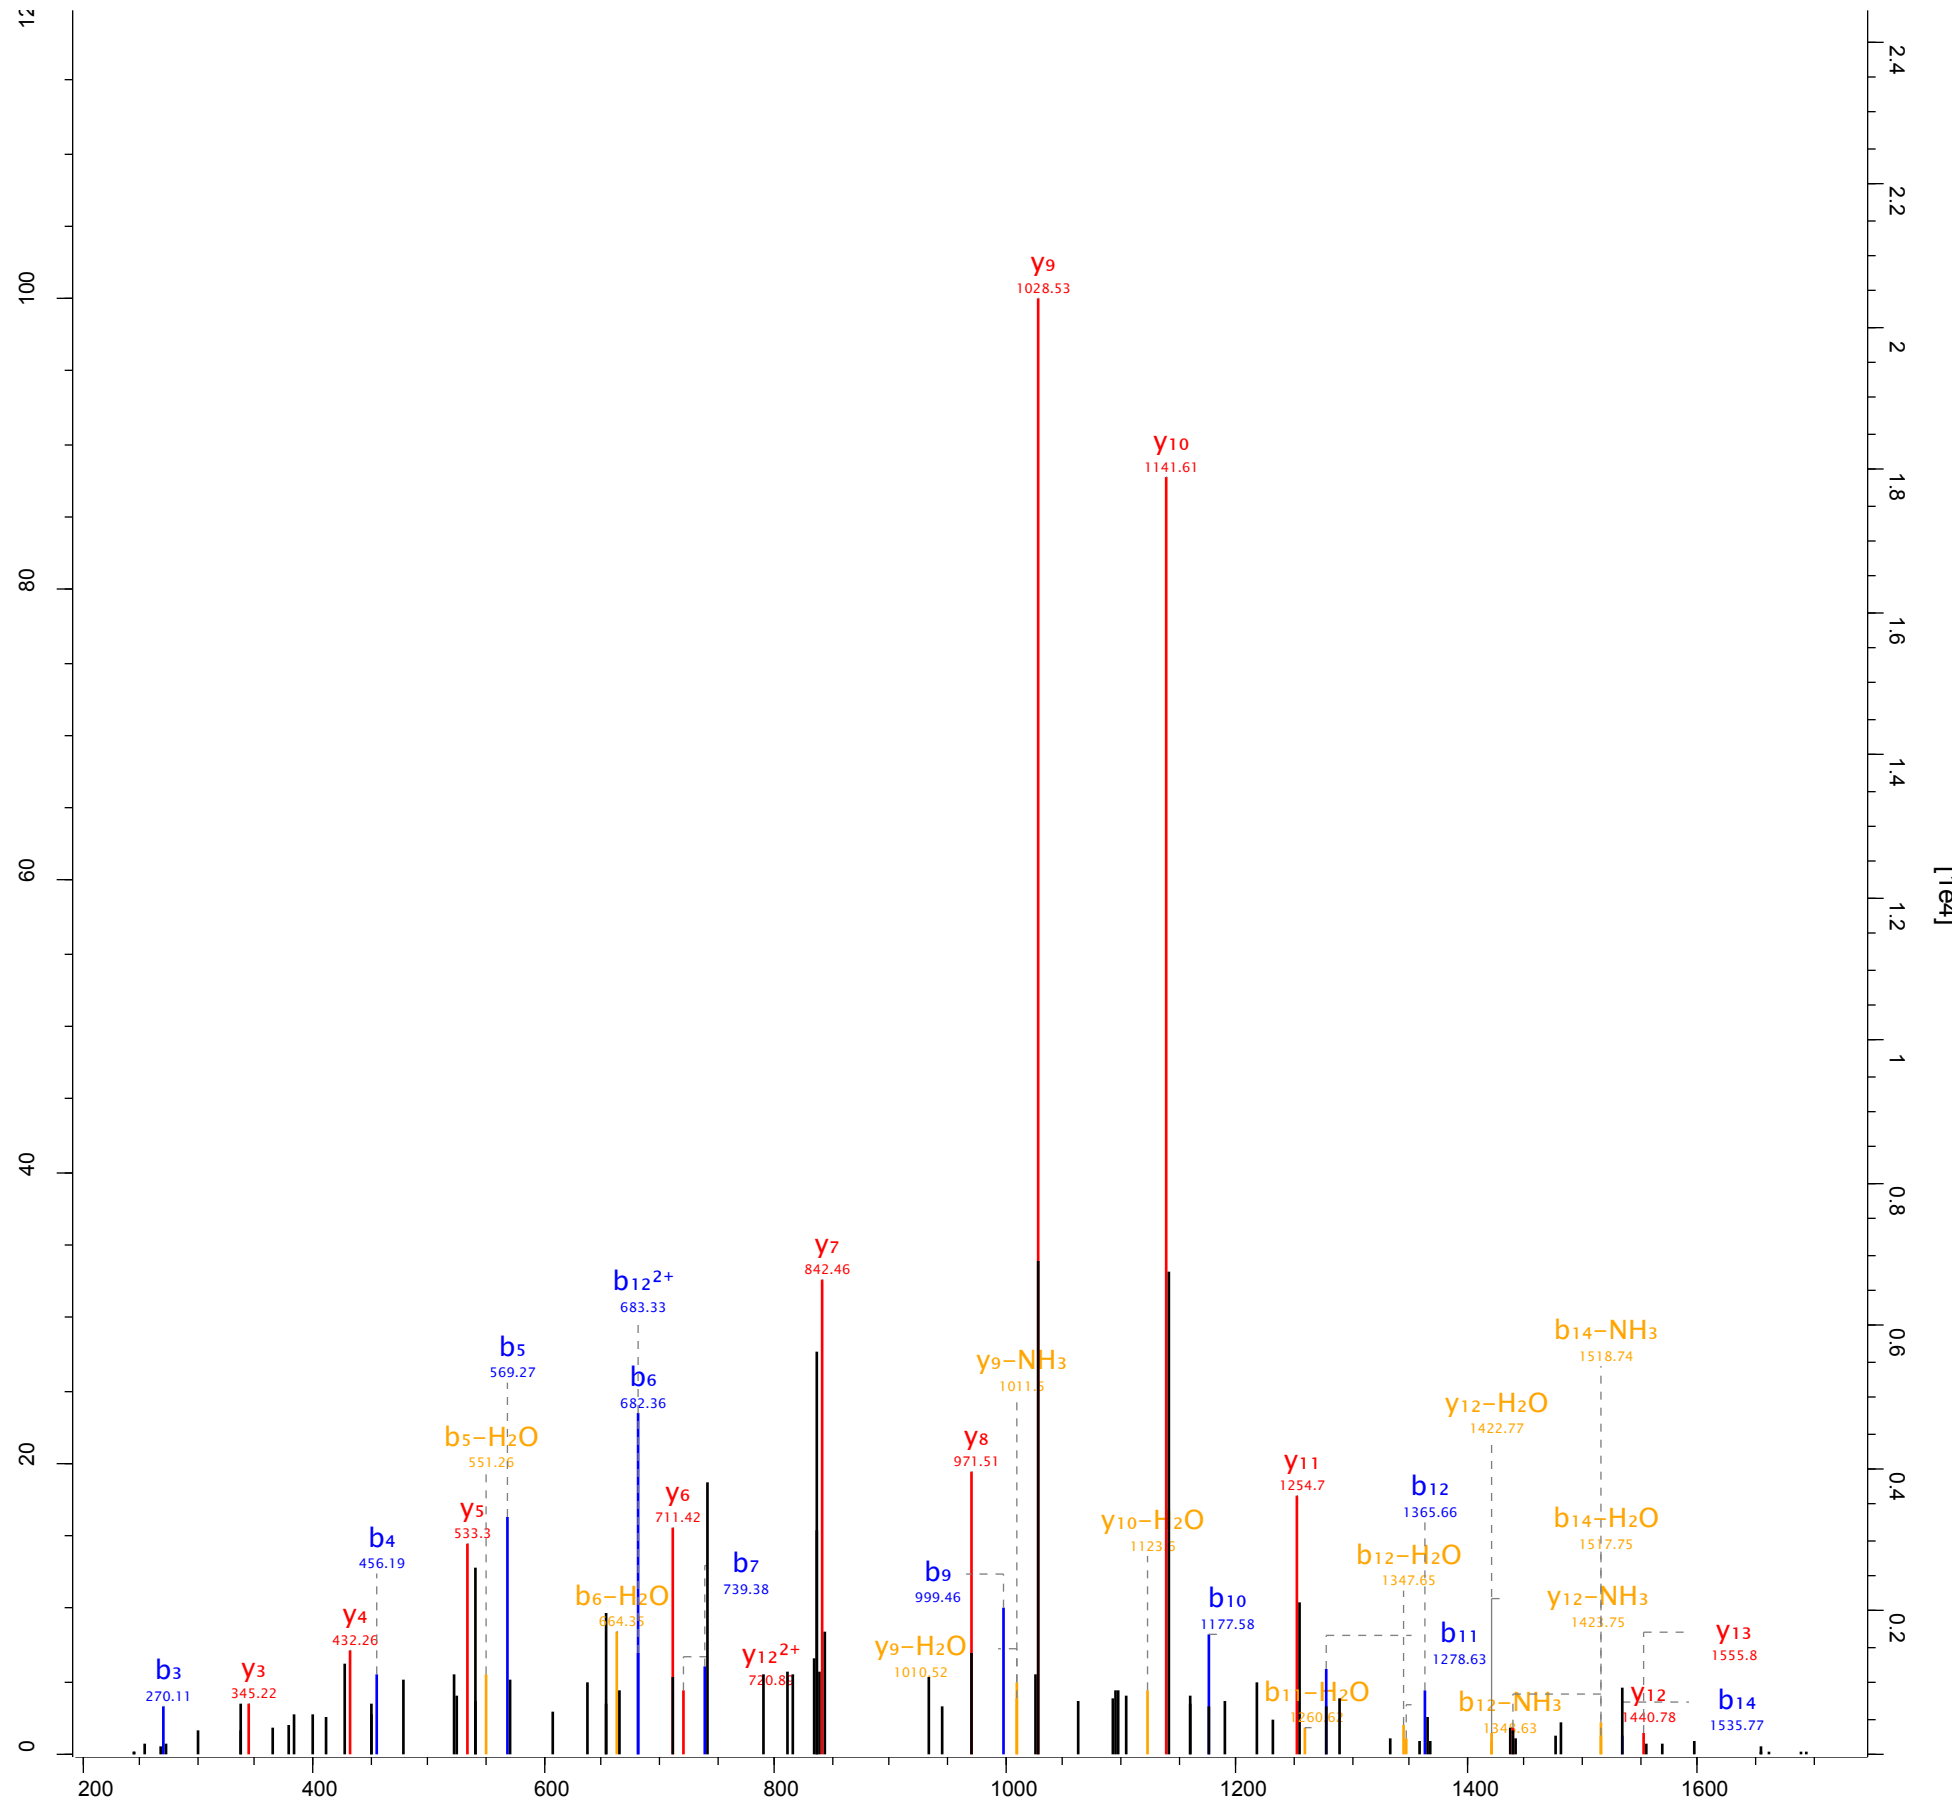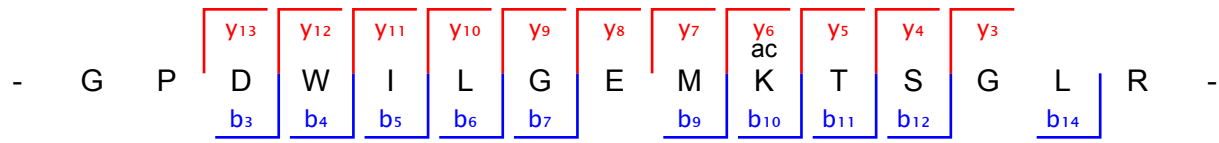

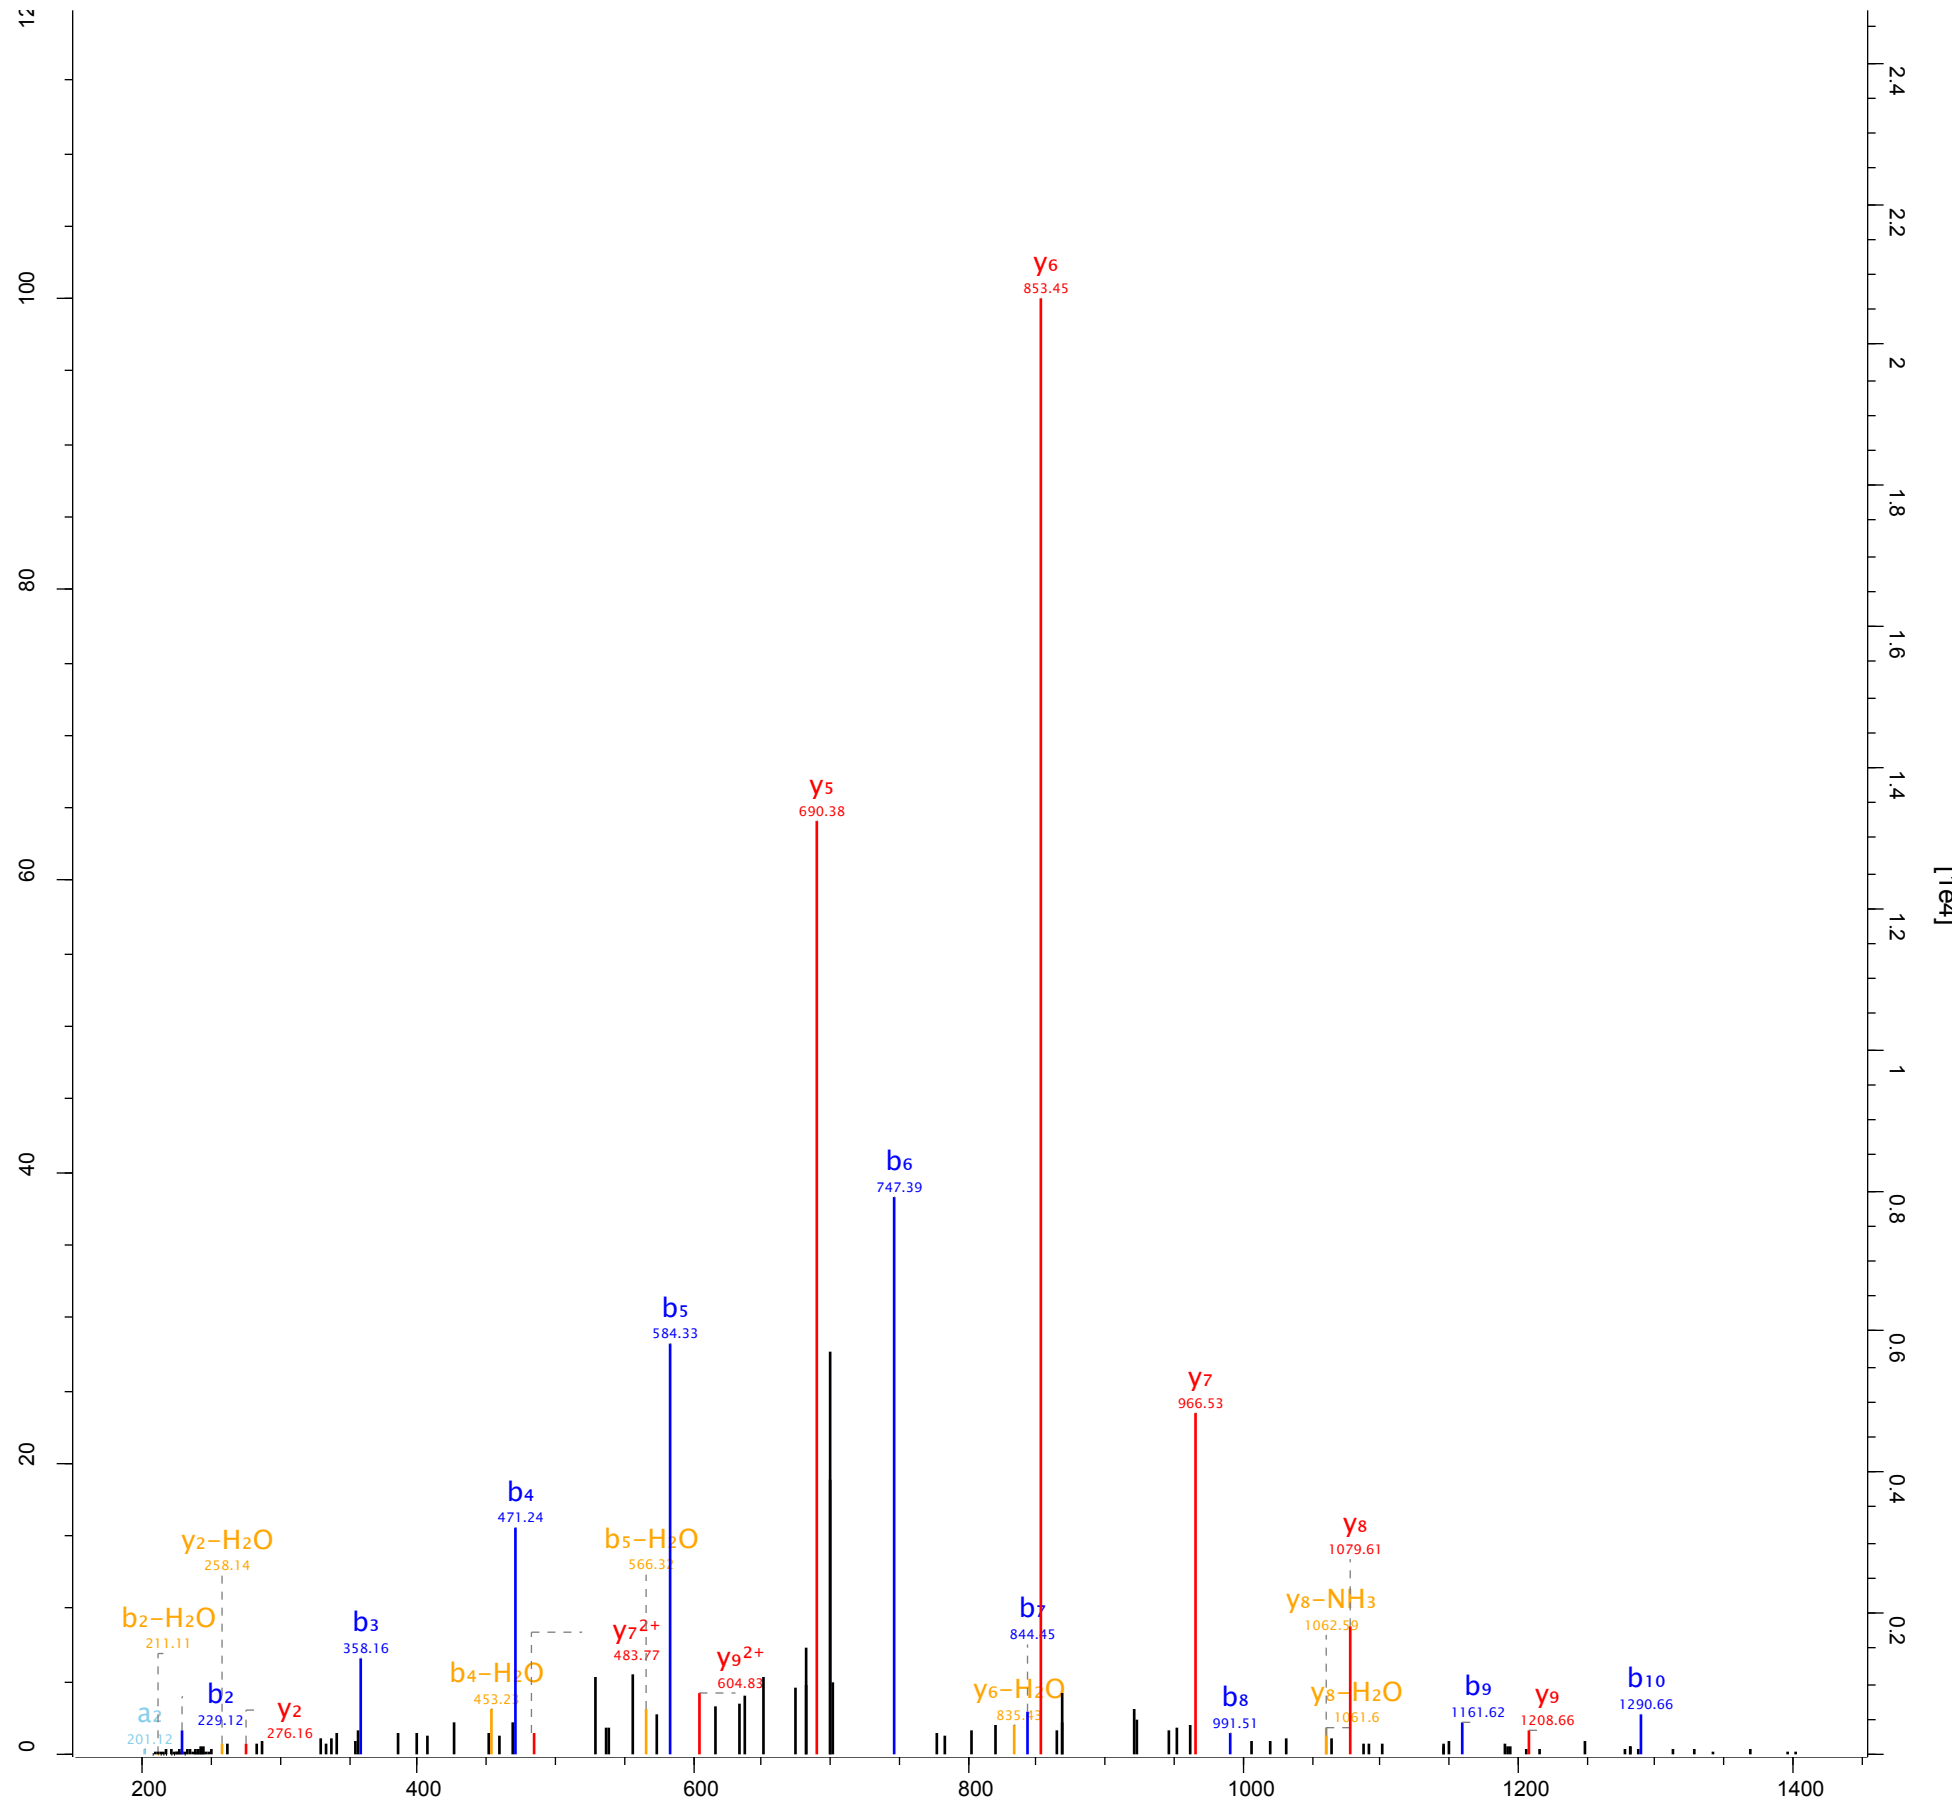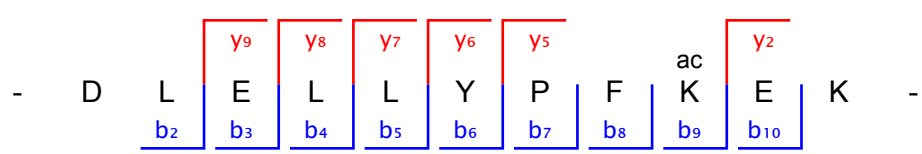

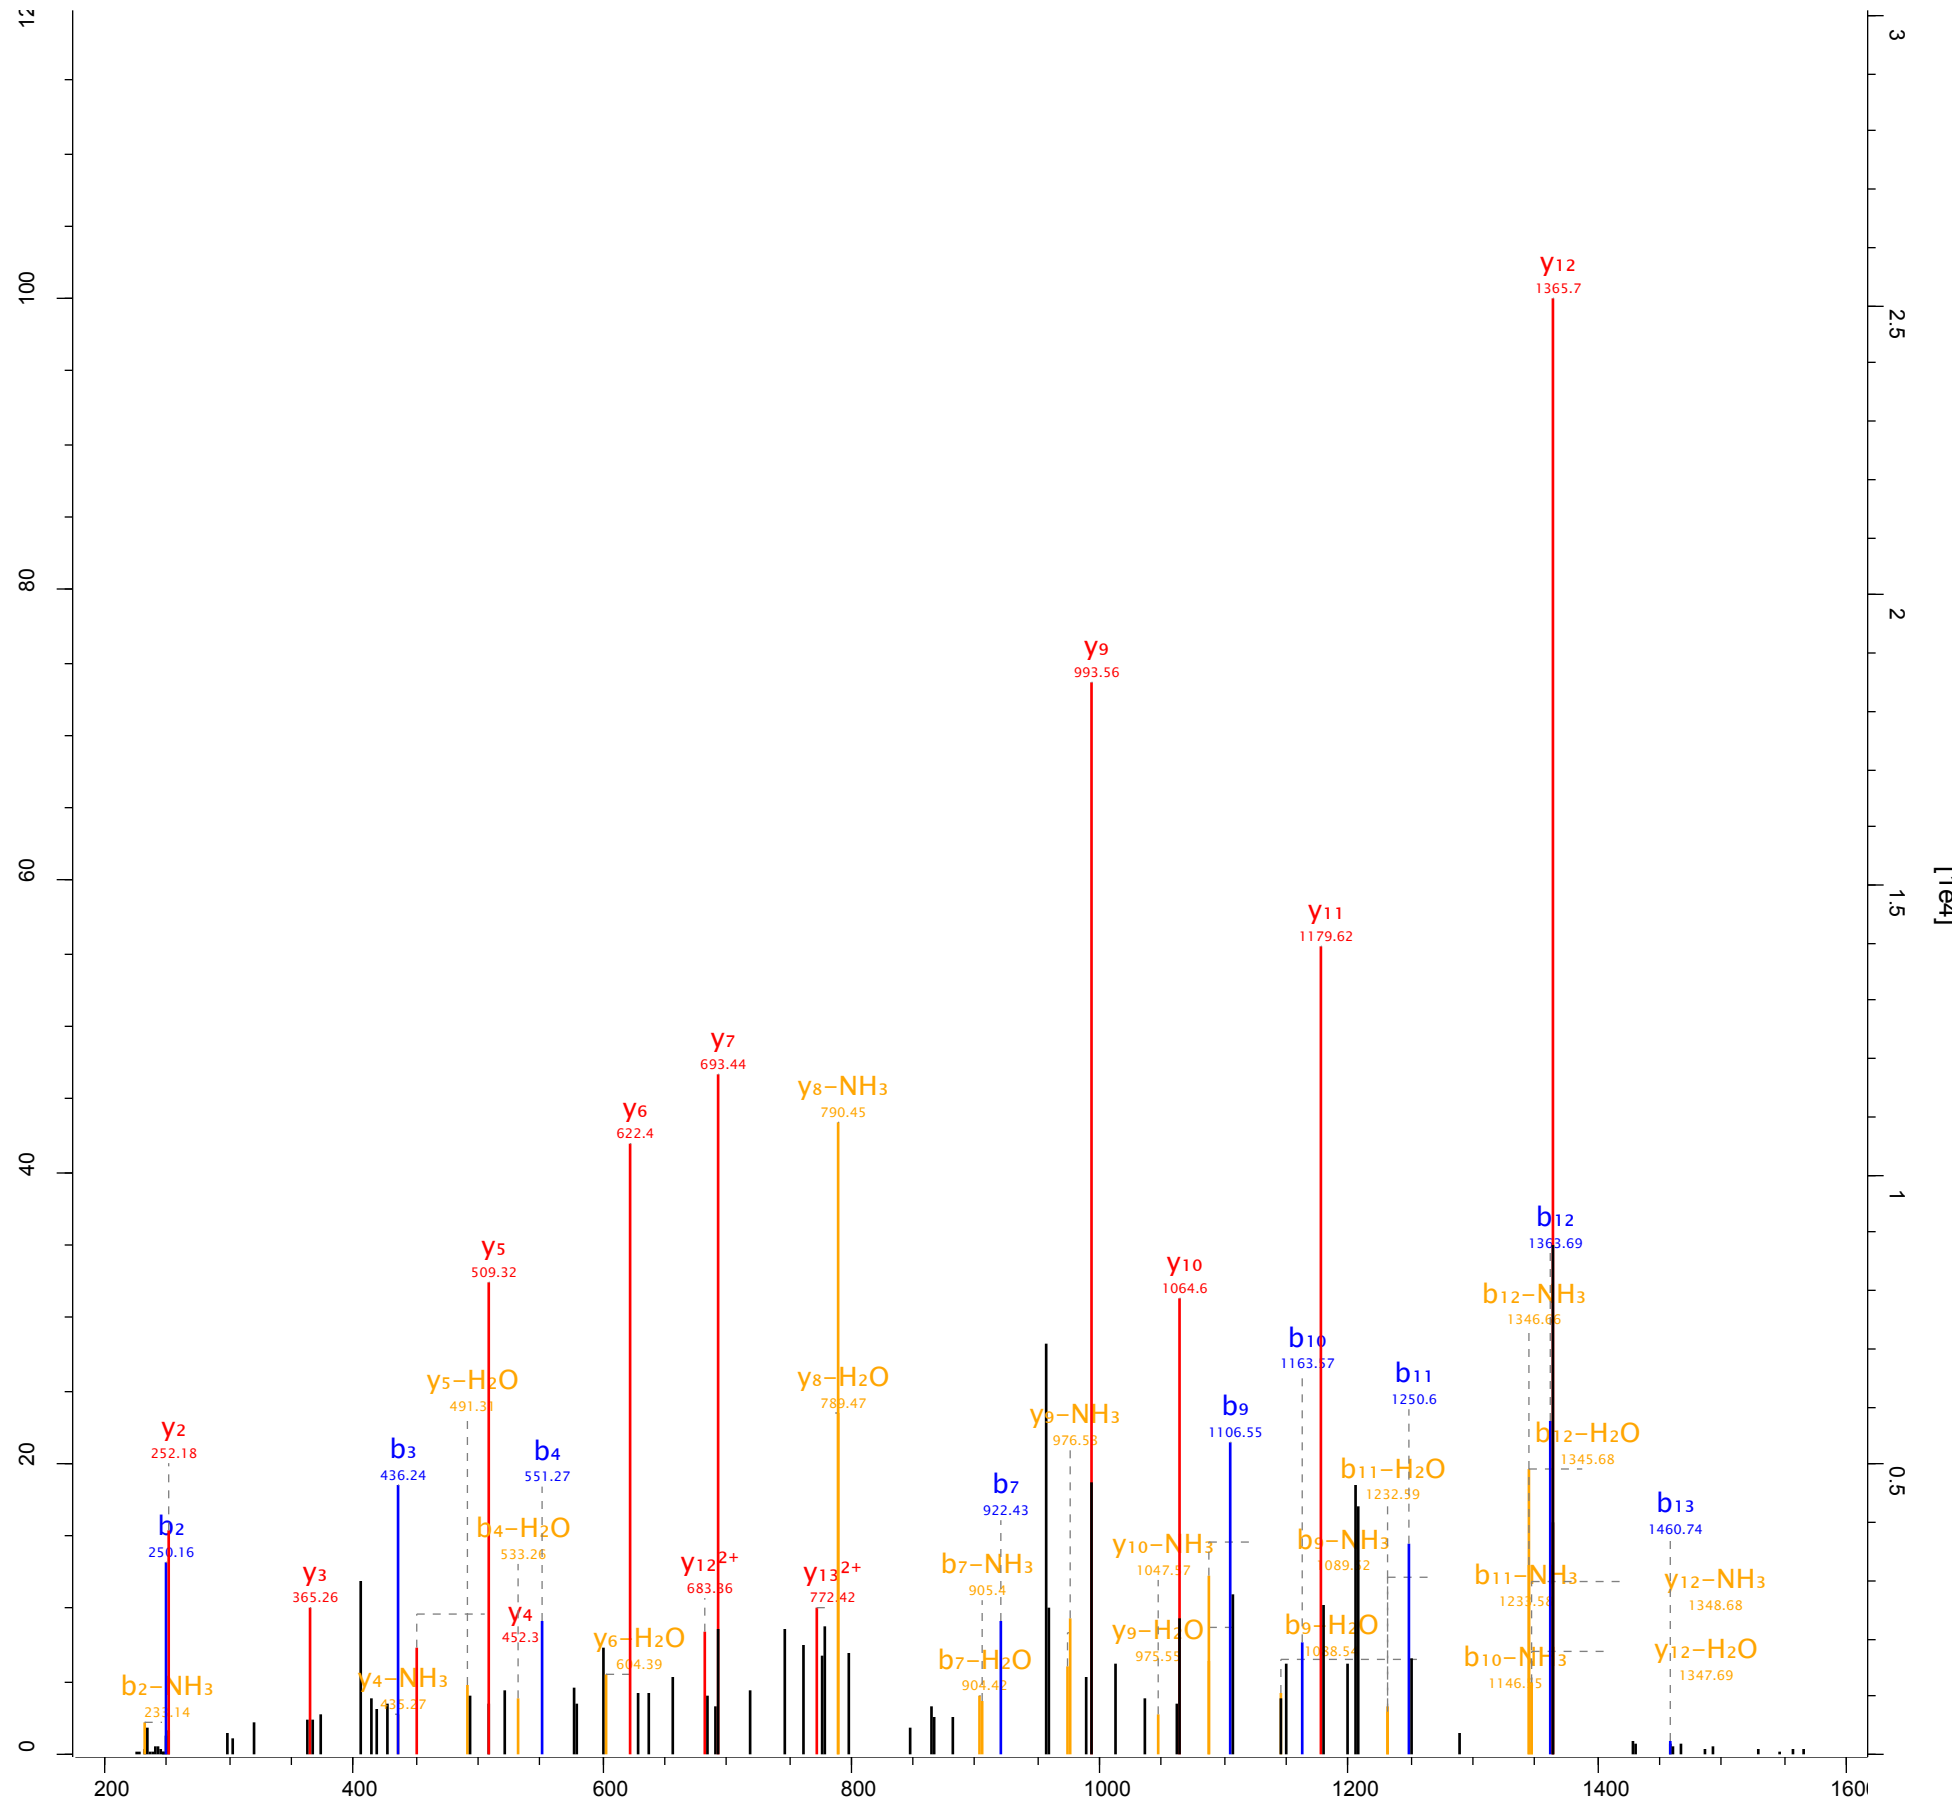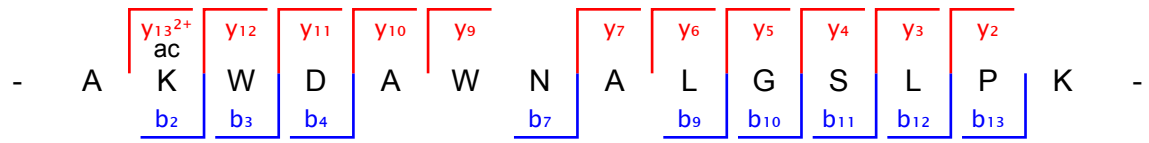

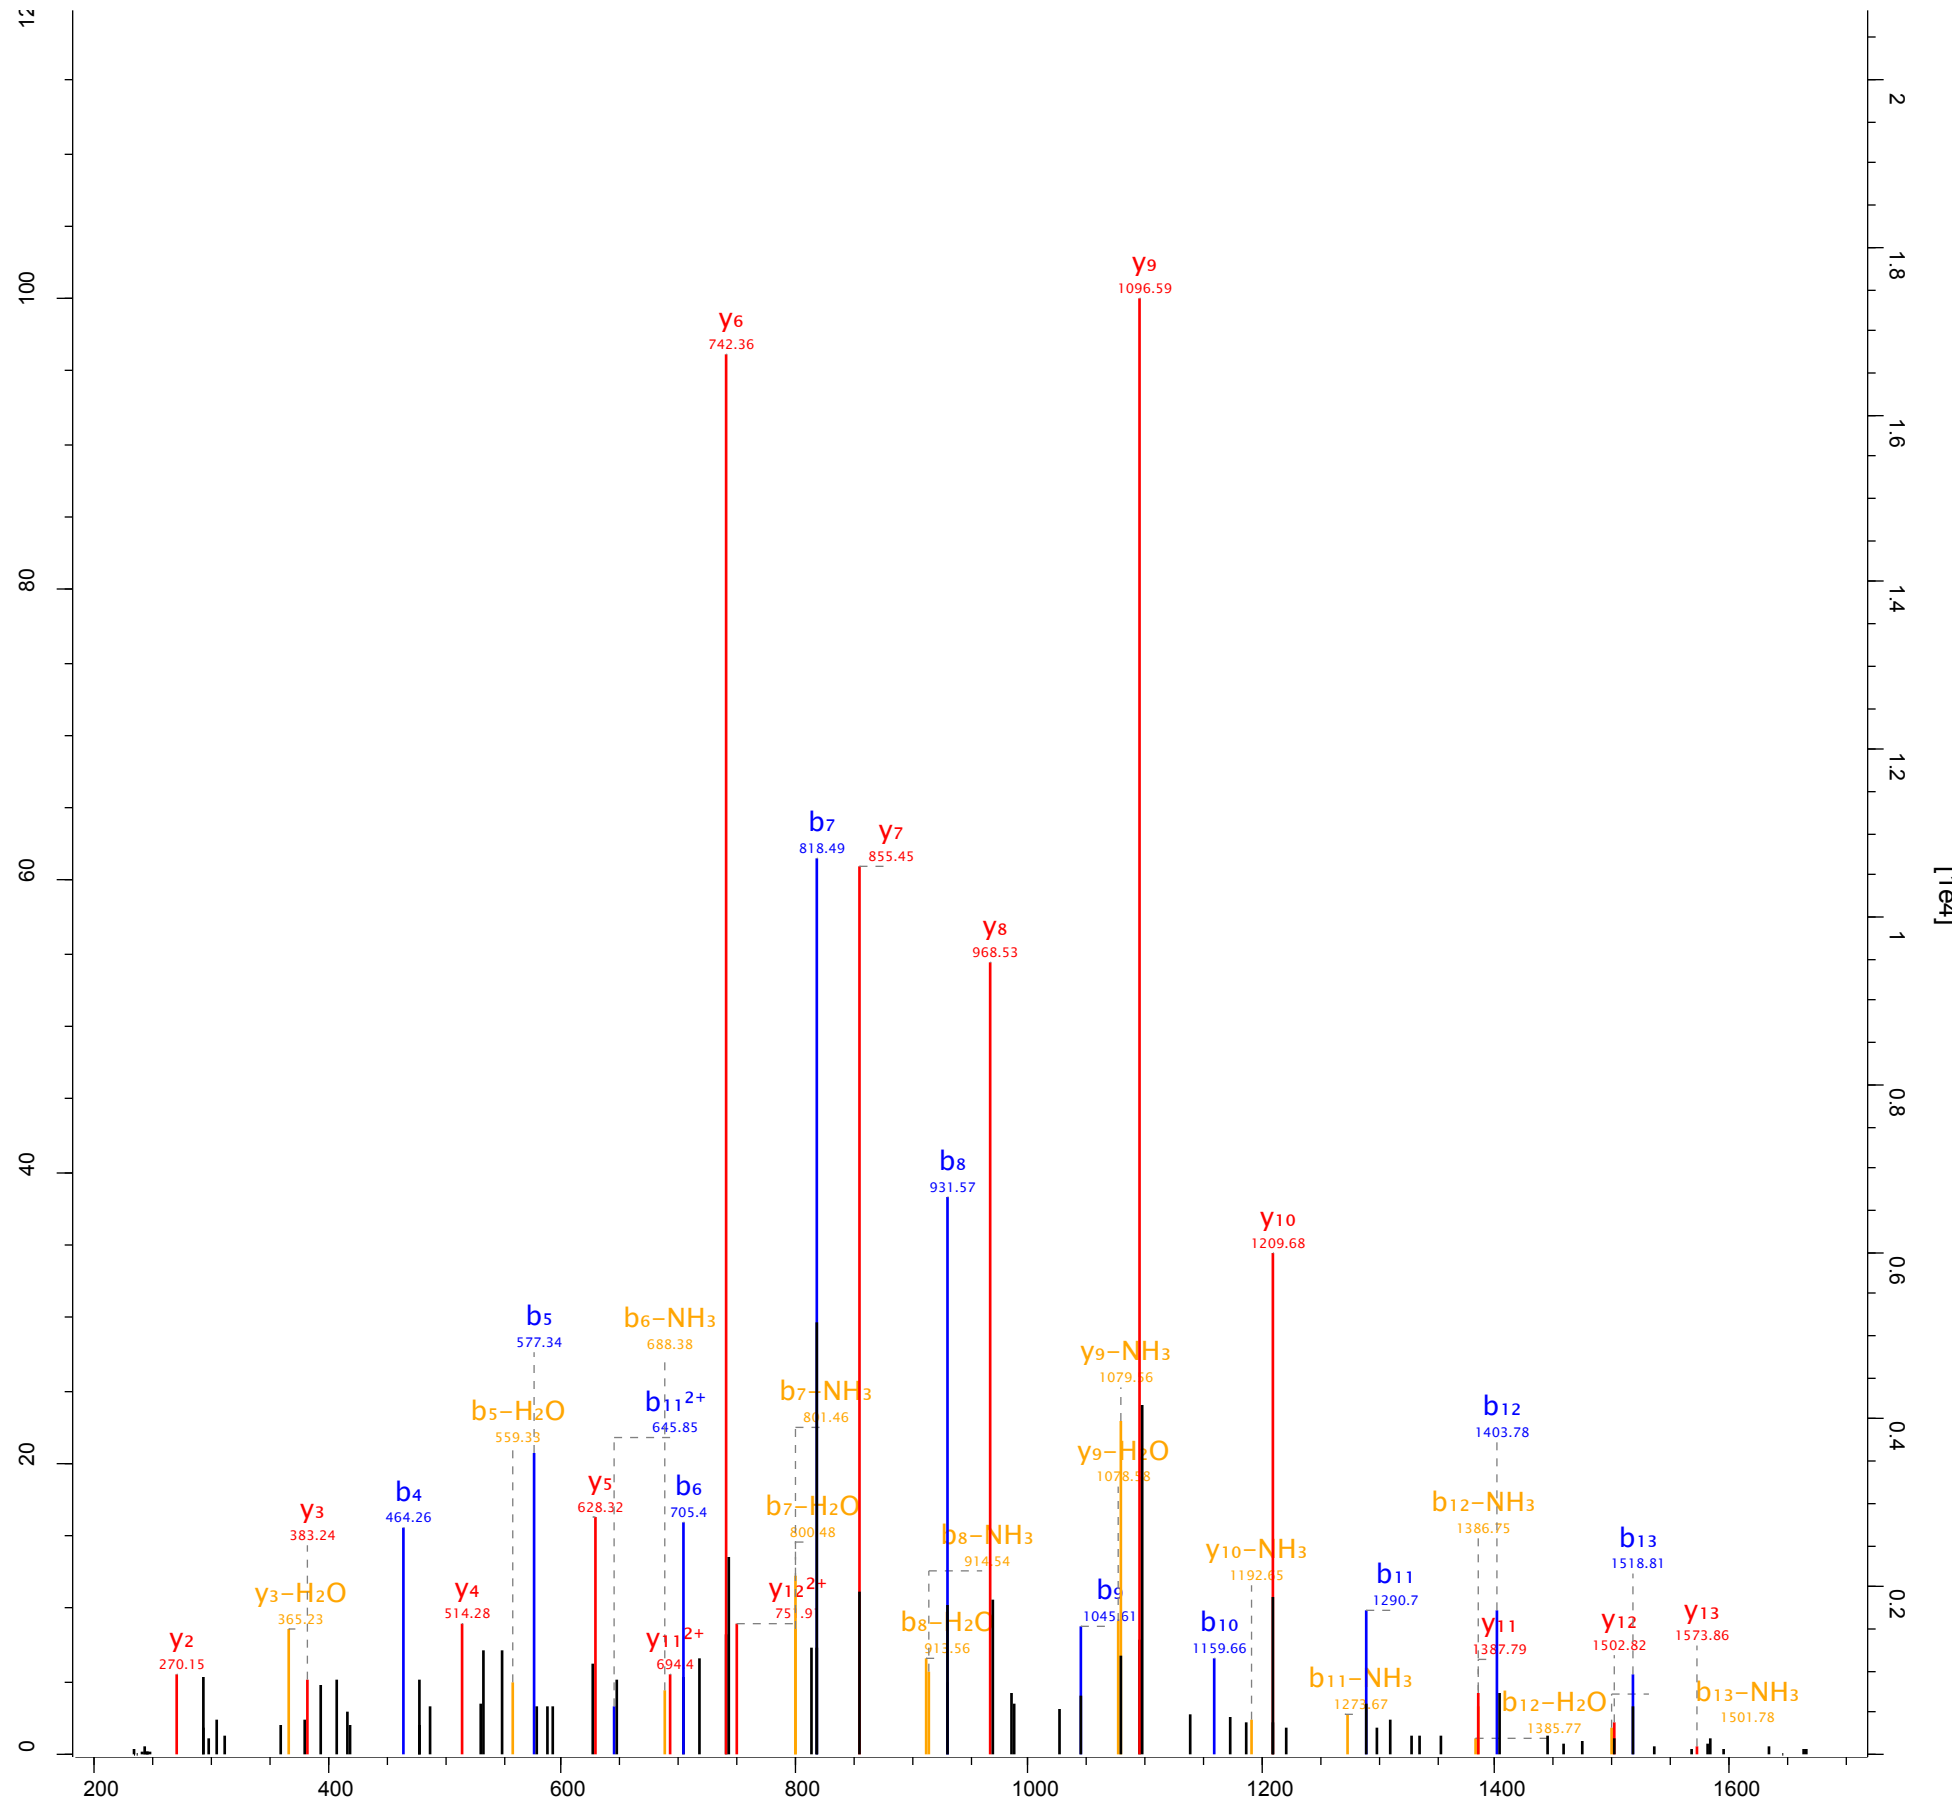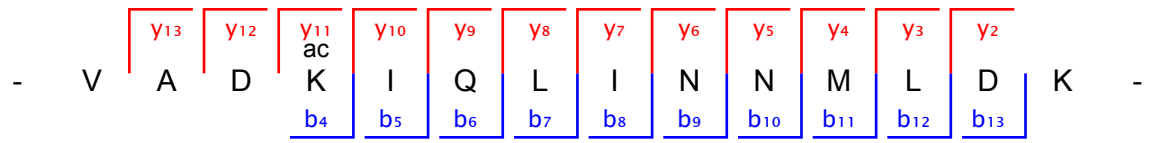



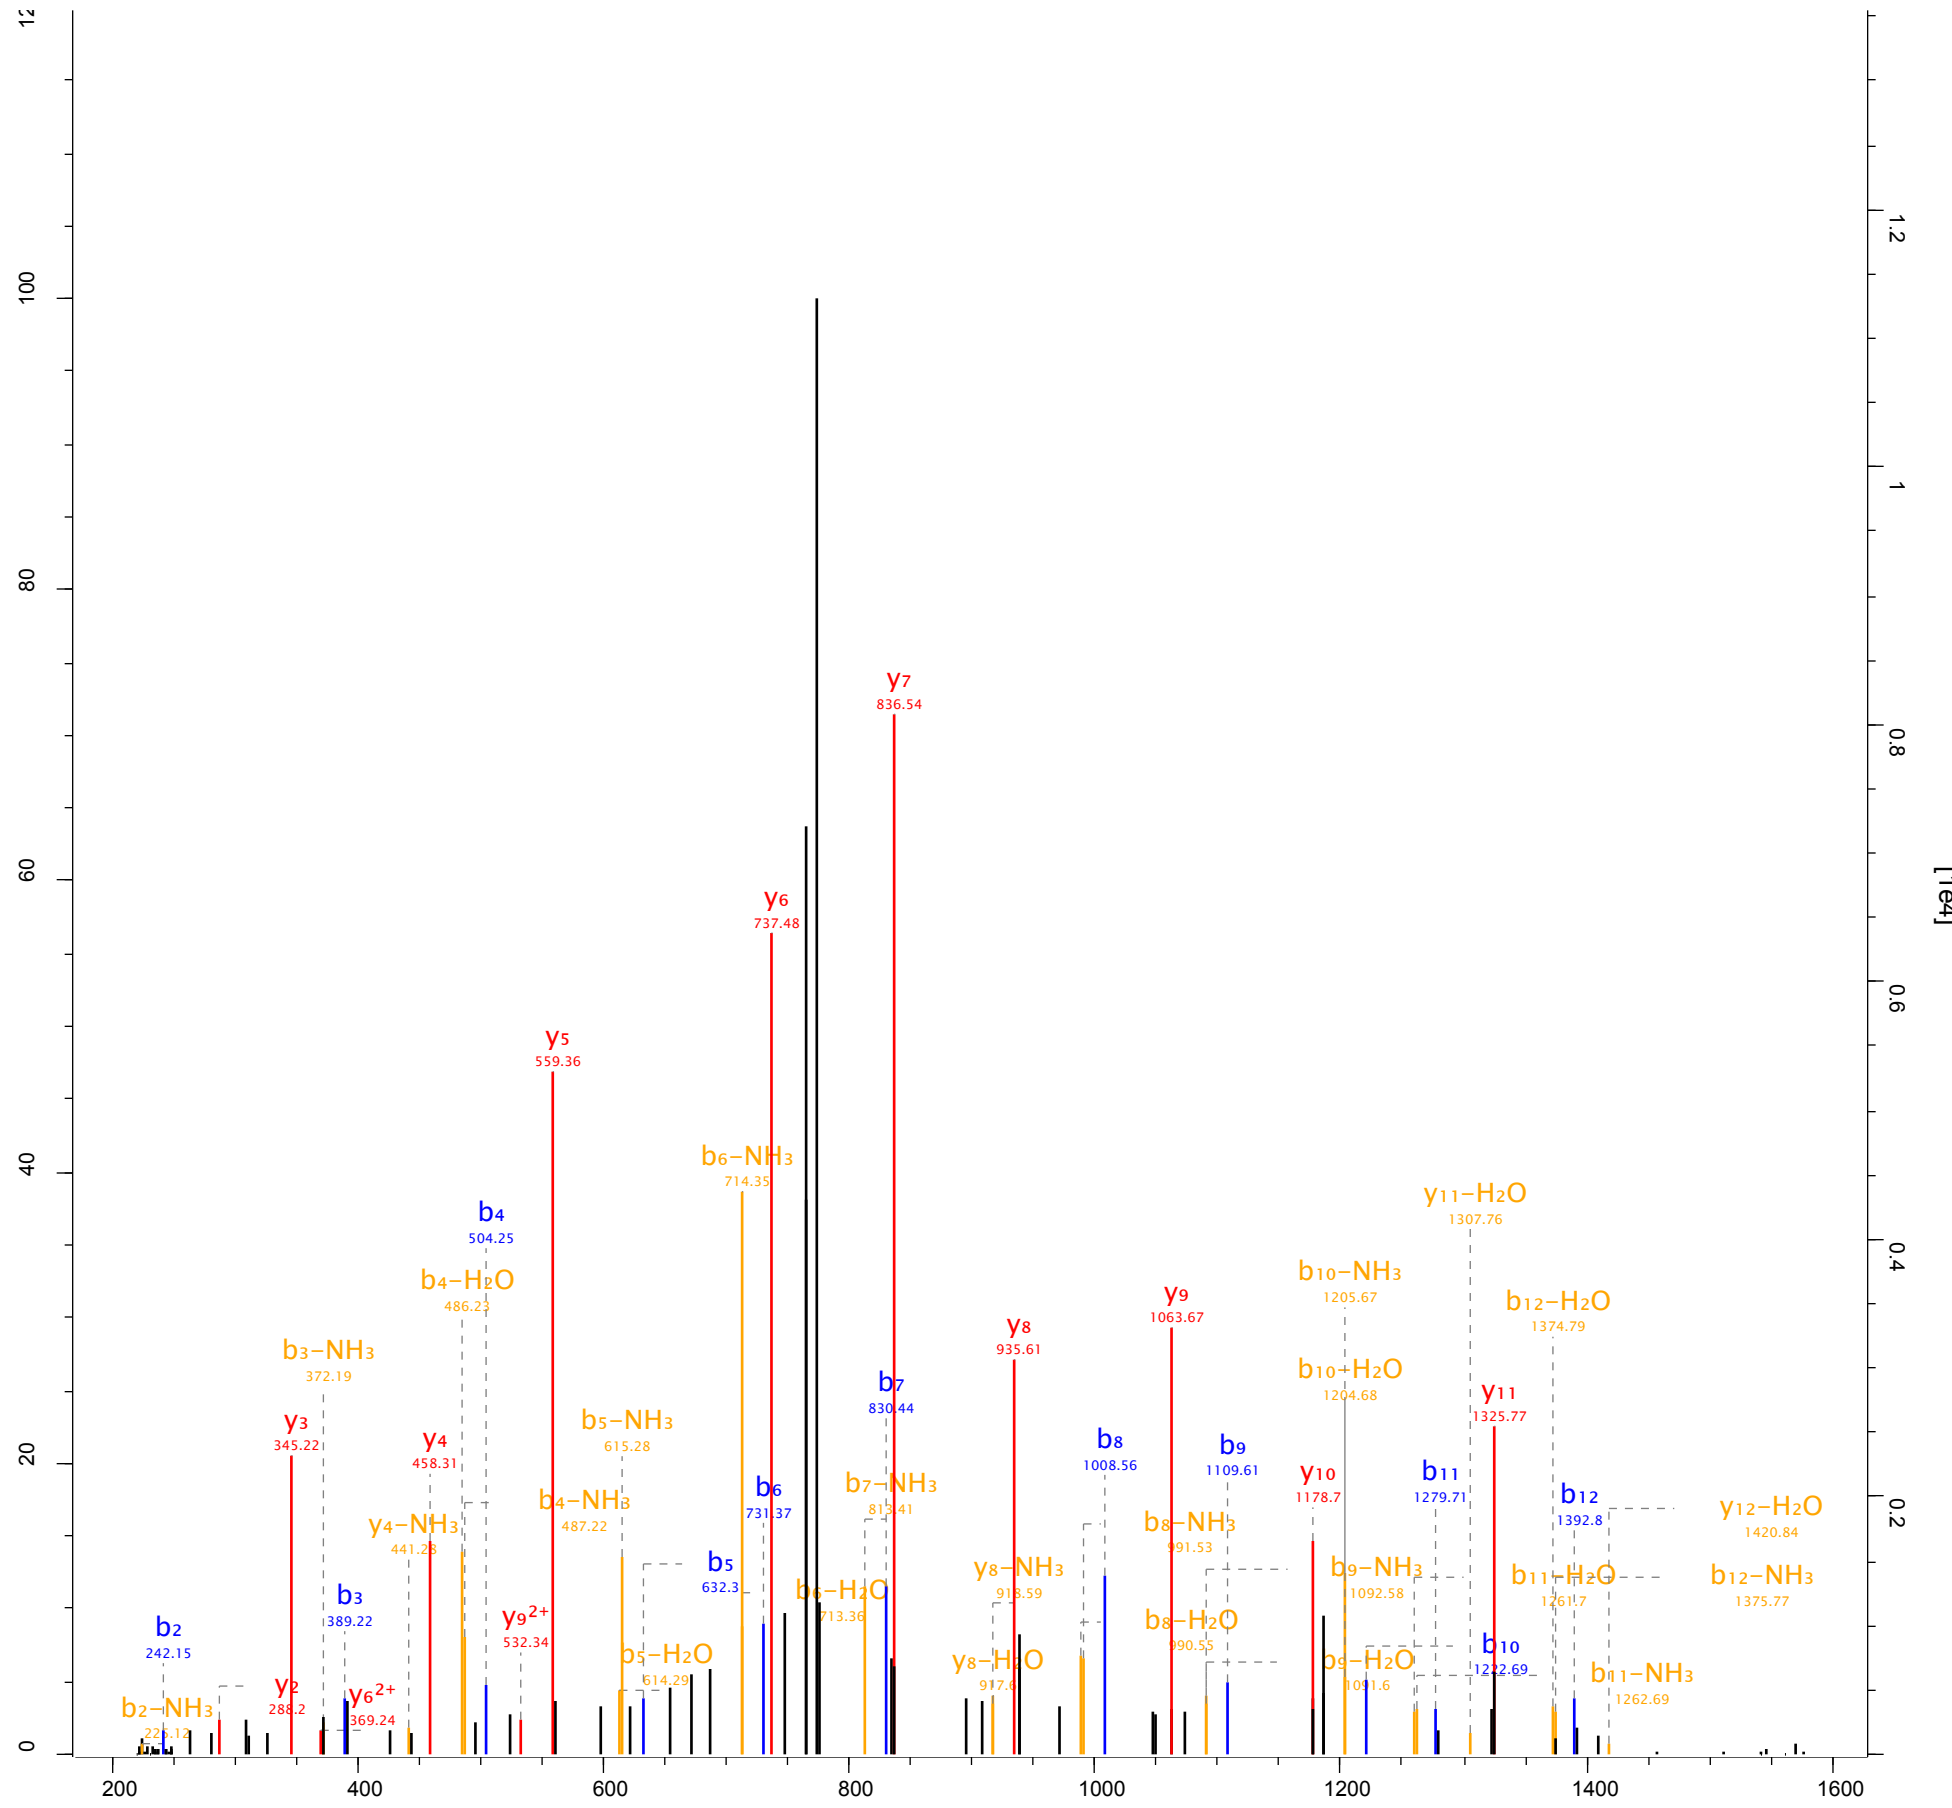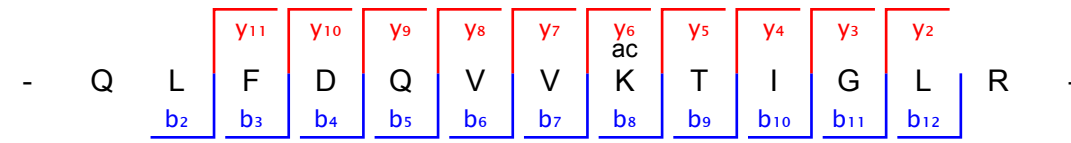

050813\_SCW\_II\_29\_19\_4

25592

ITMS; CID

148.89

754.91

Hist1h4a;Gm11275;Hist2h4

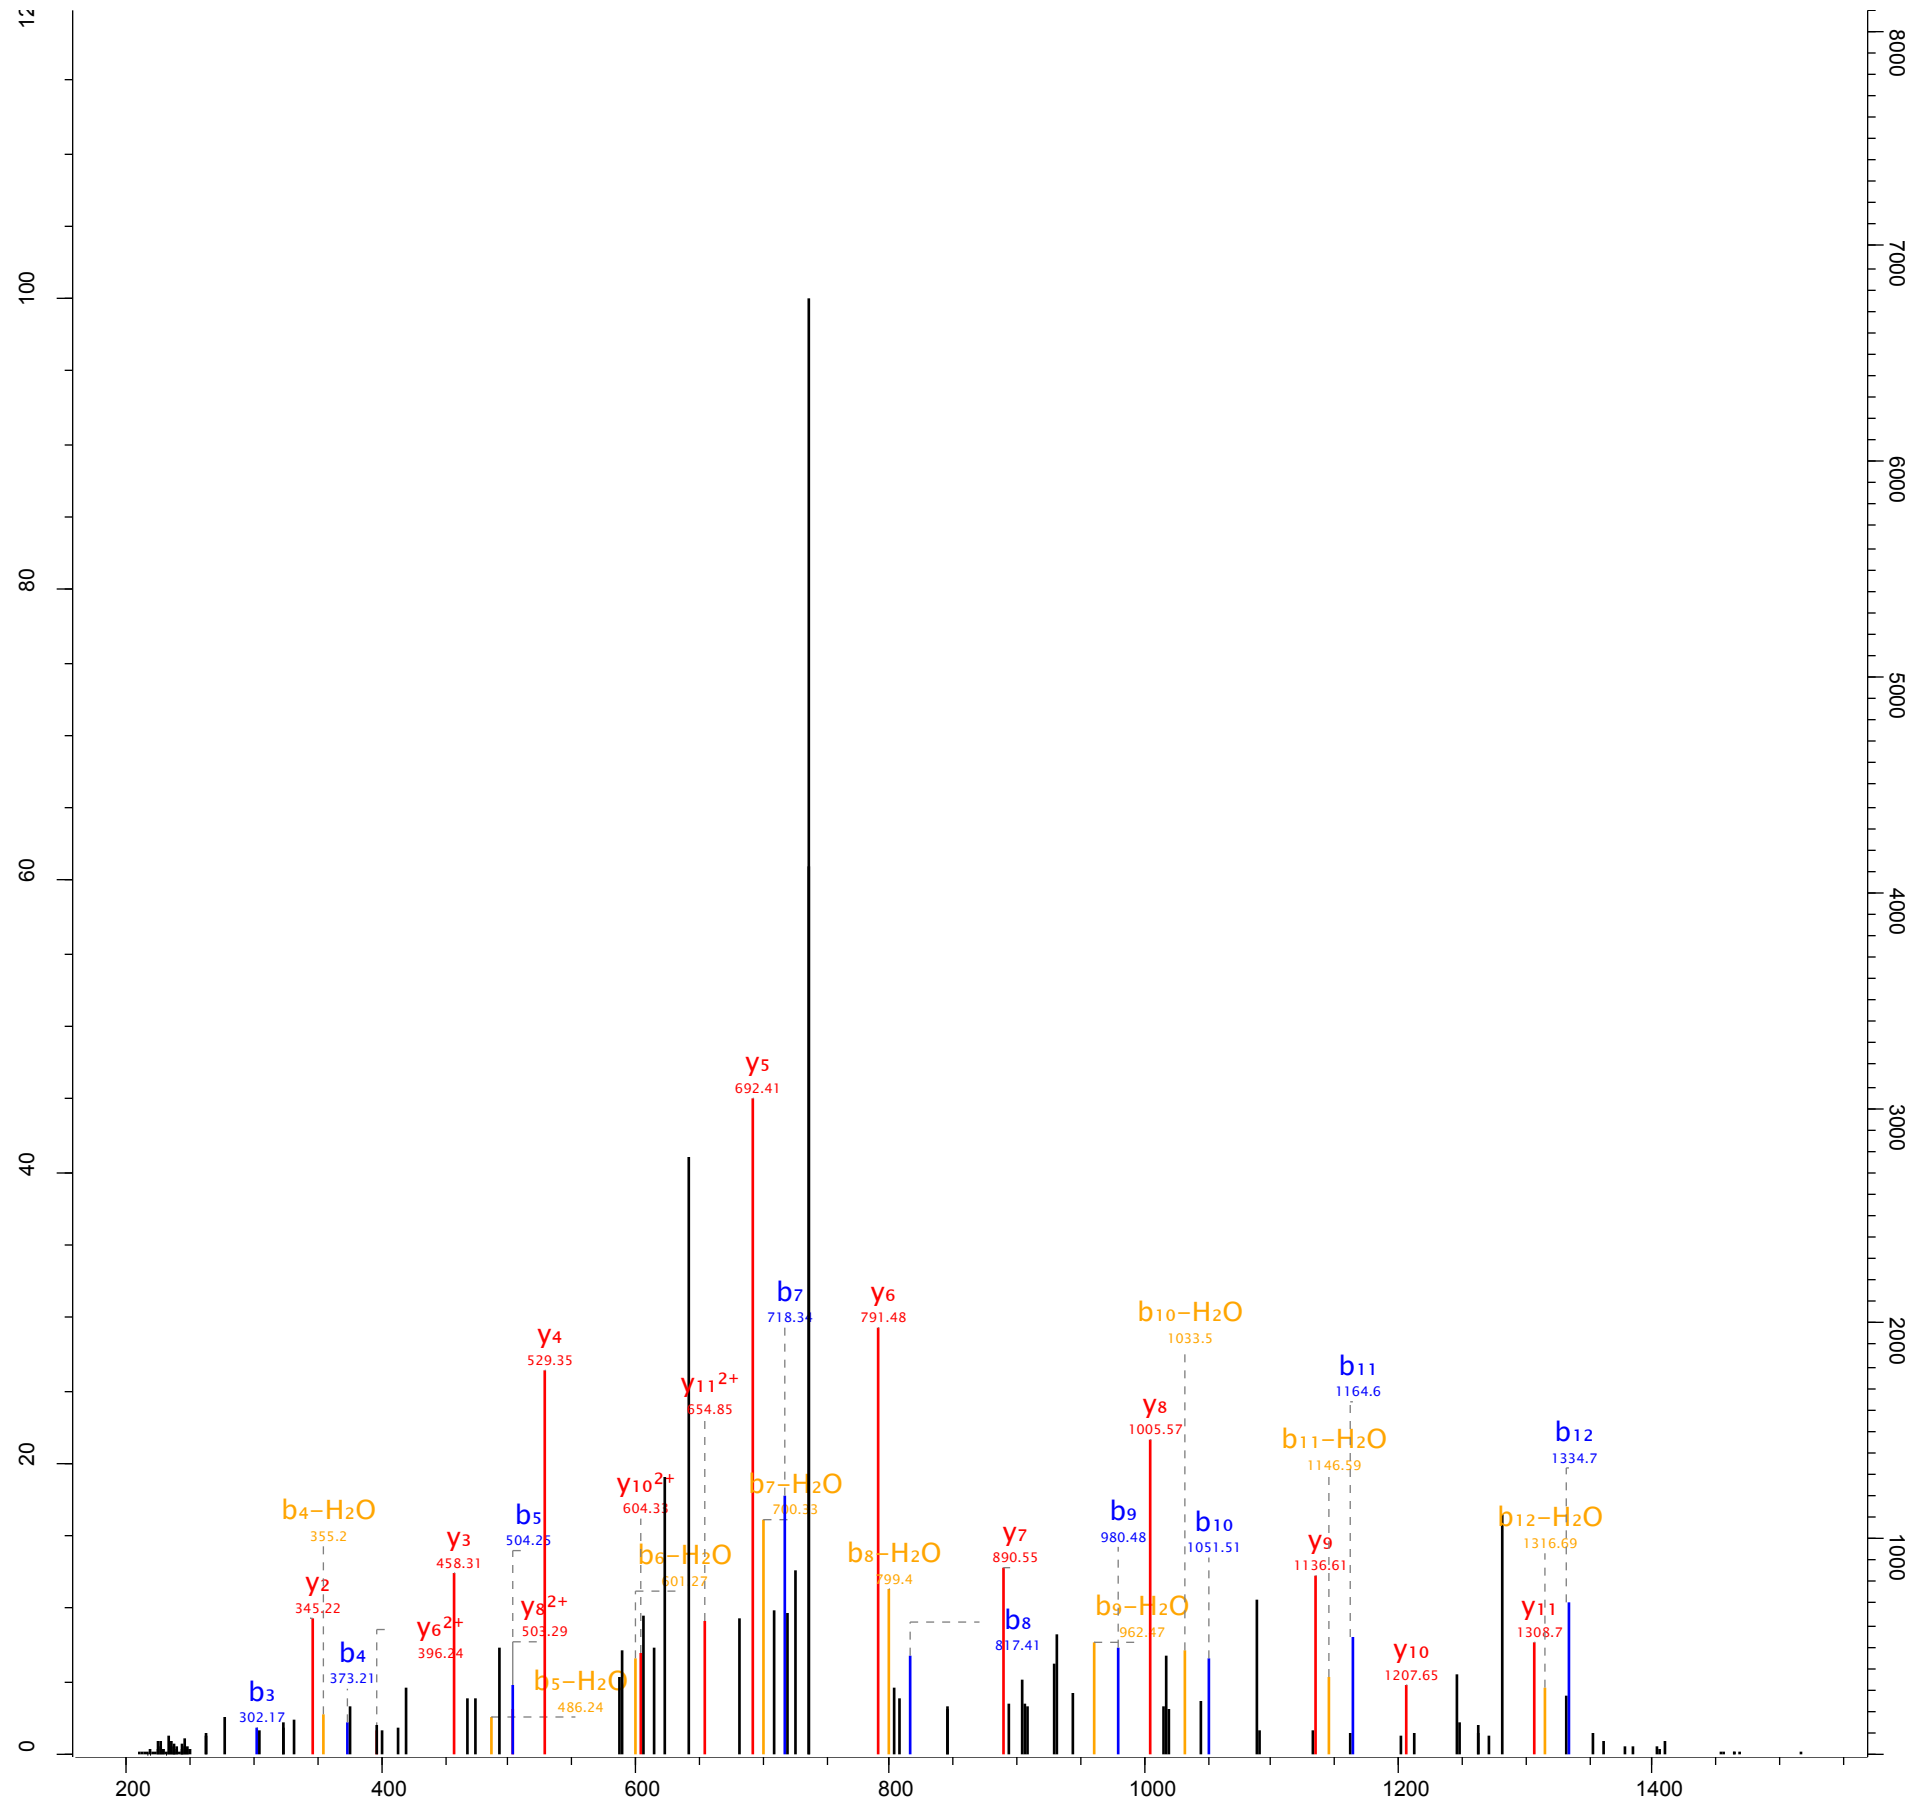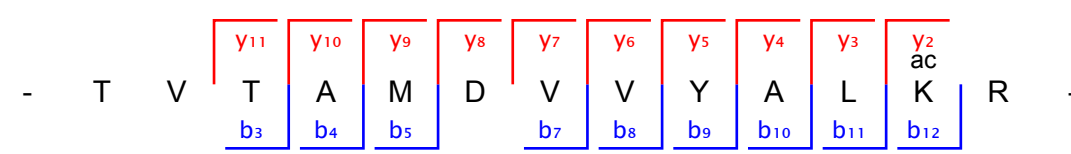

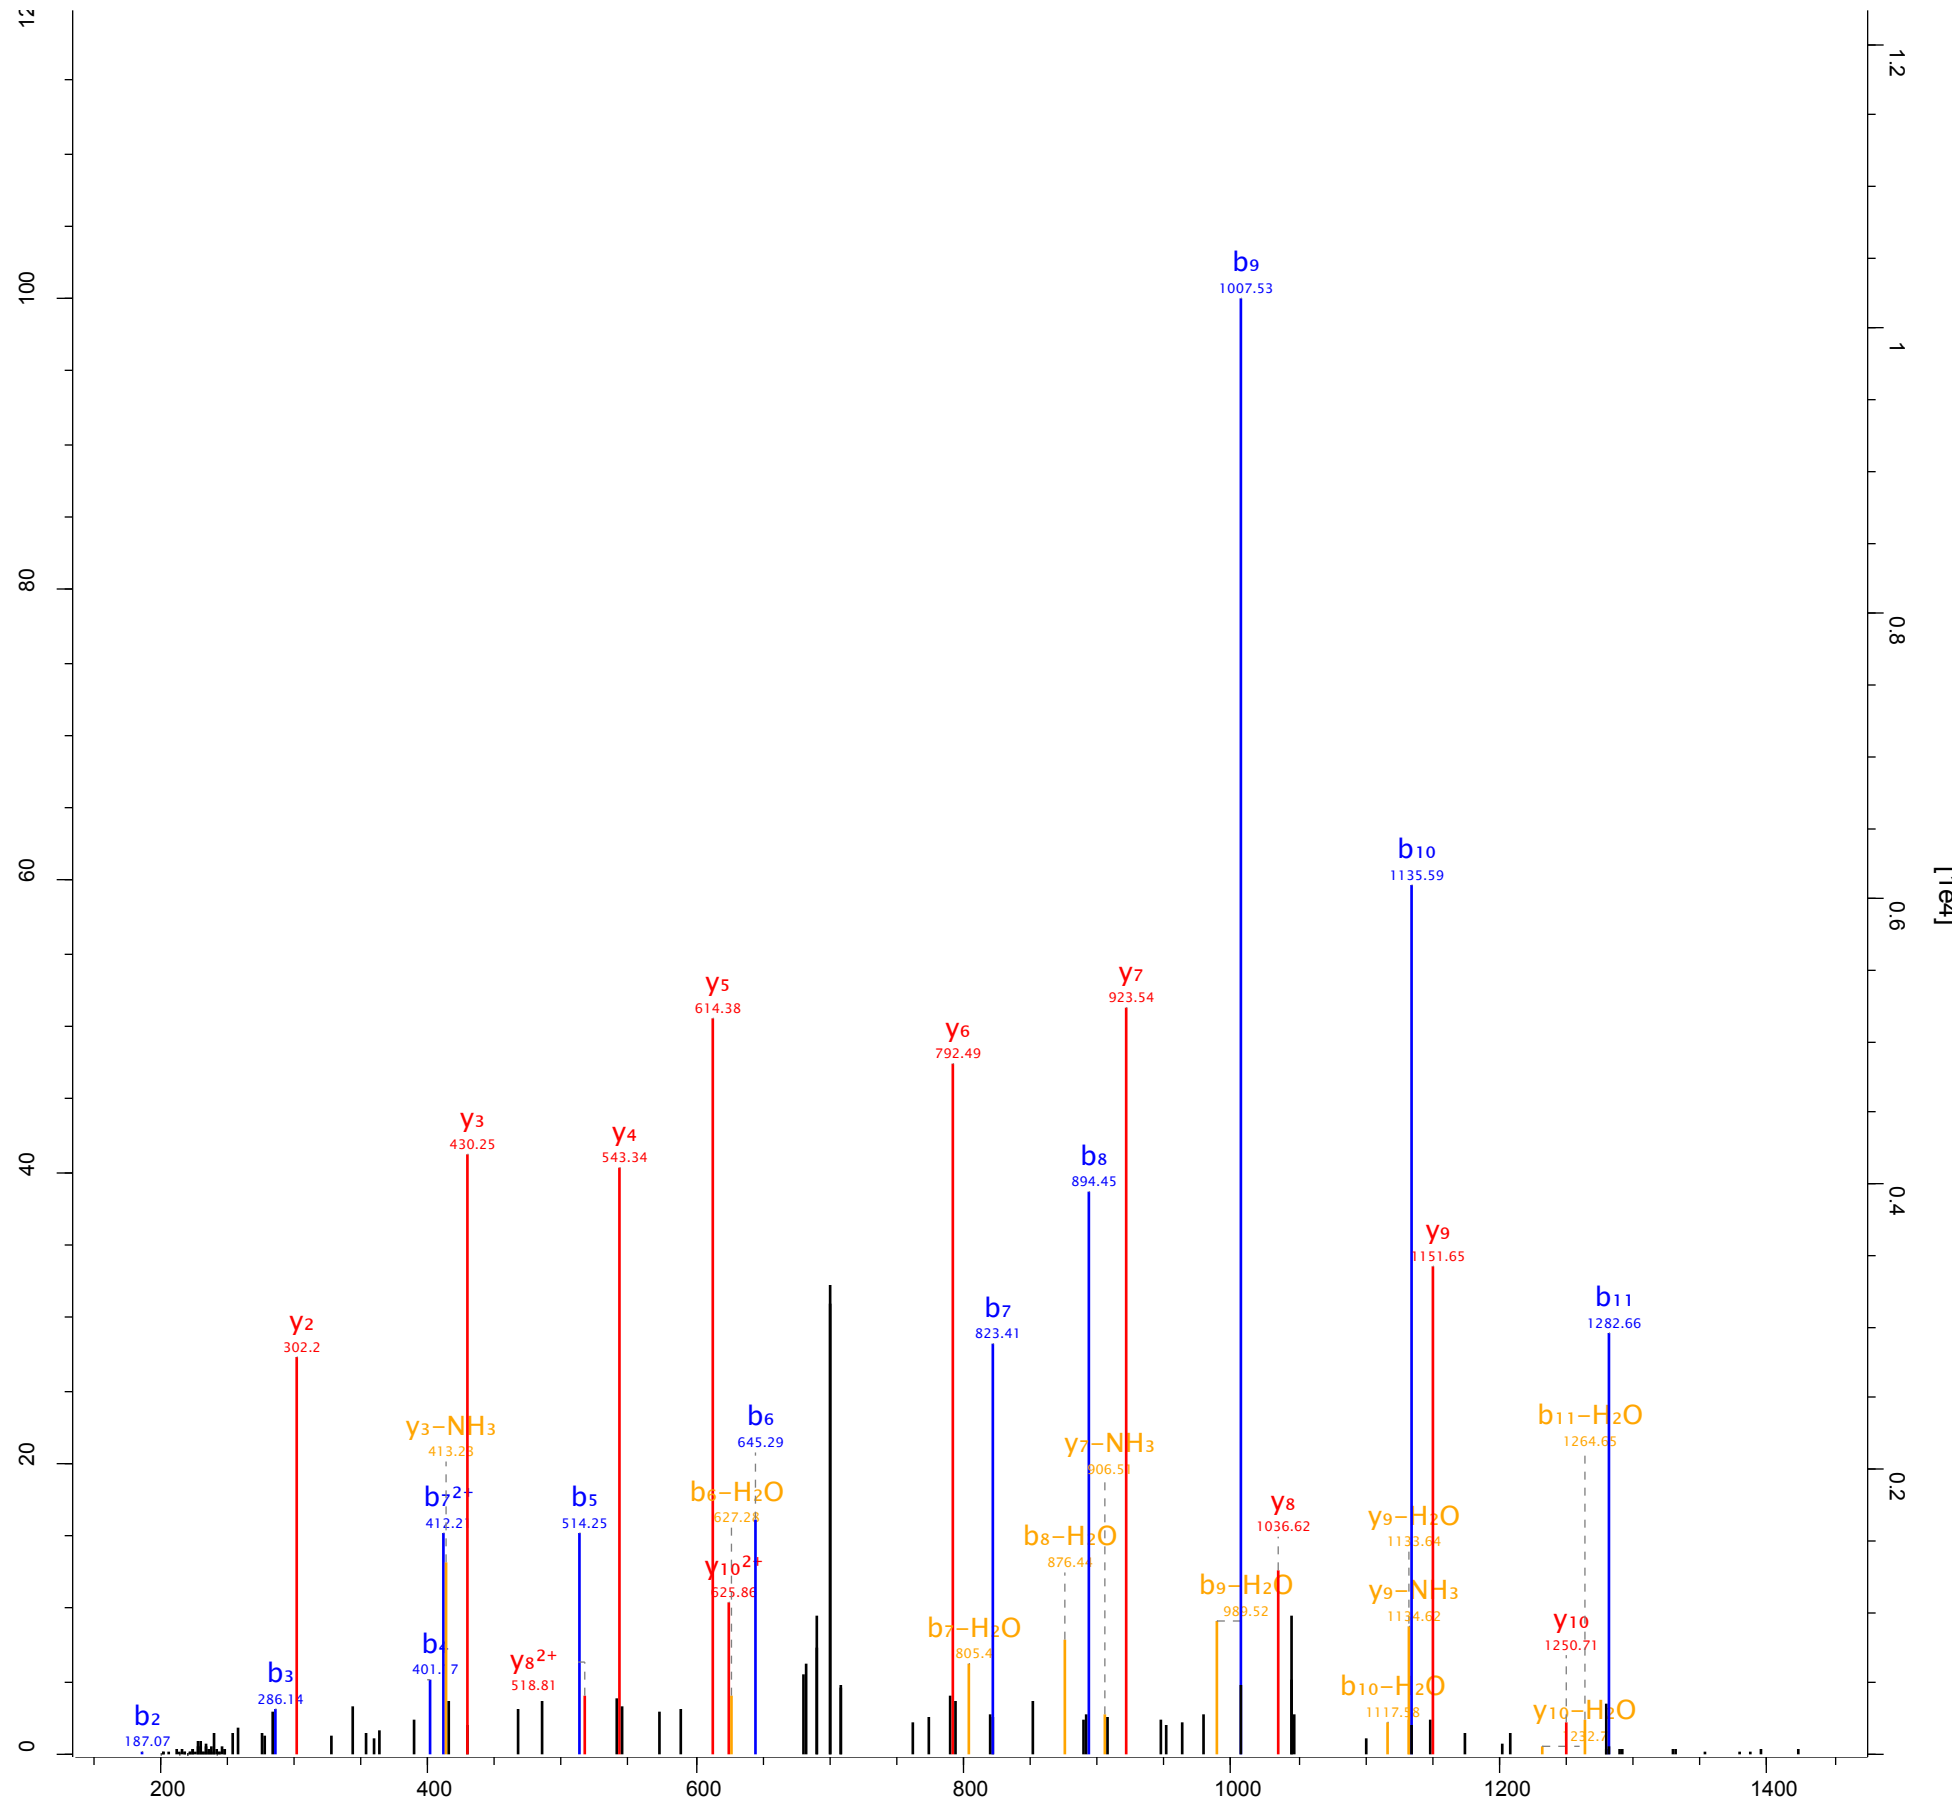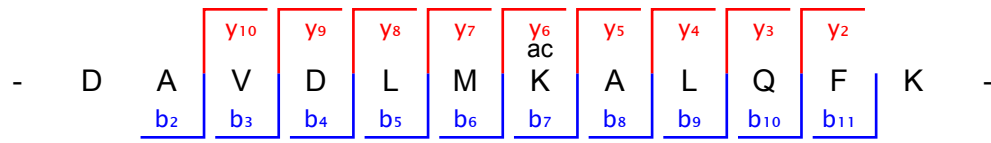

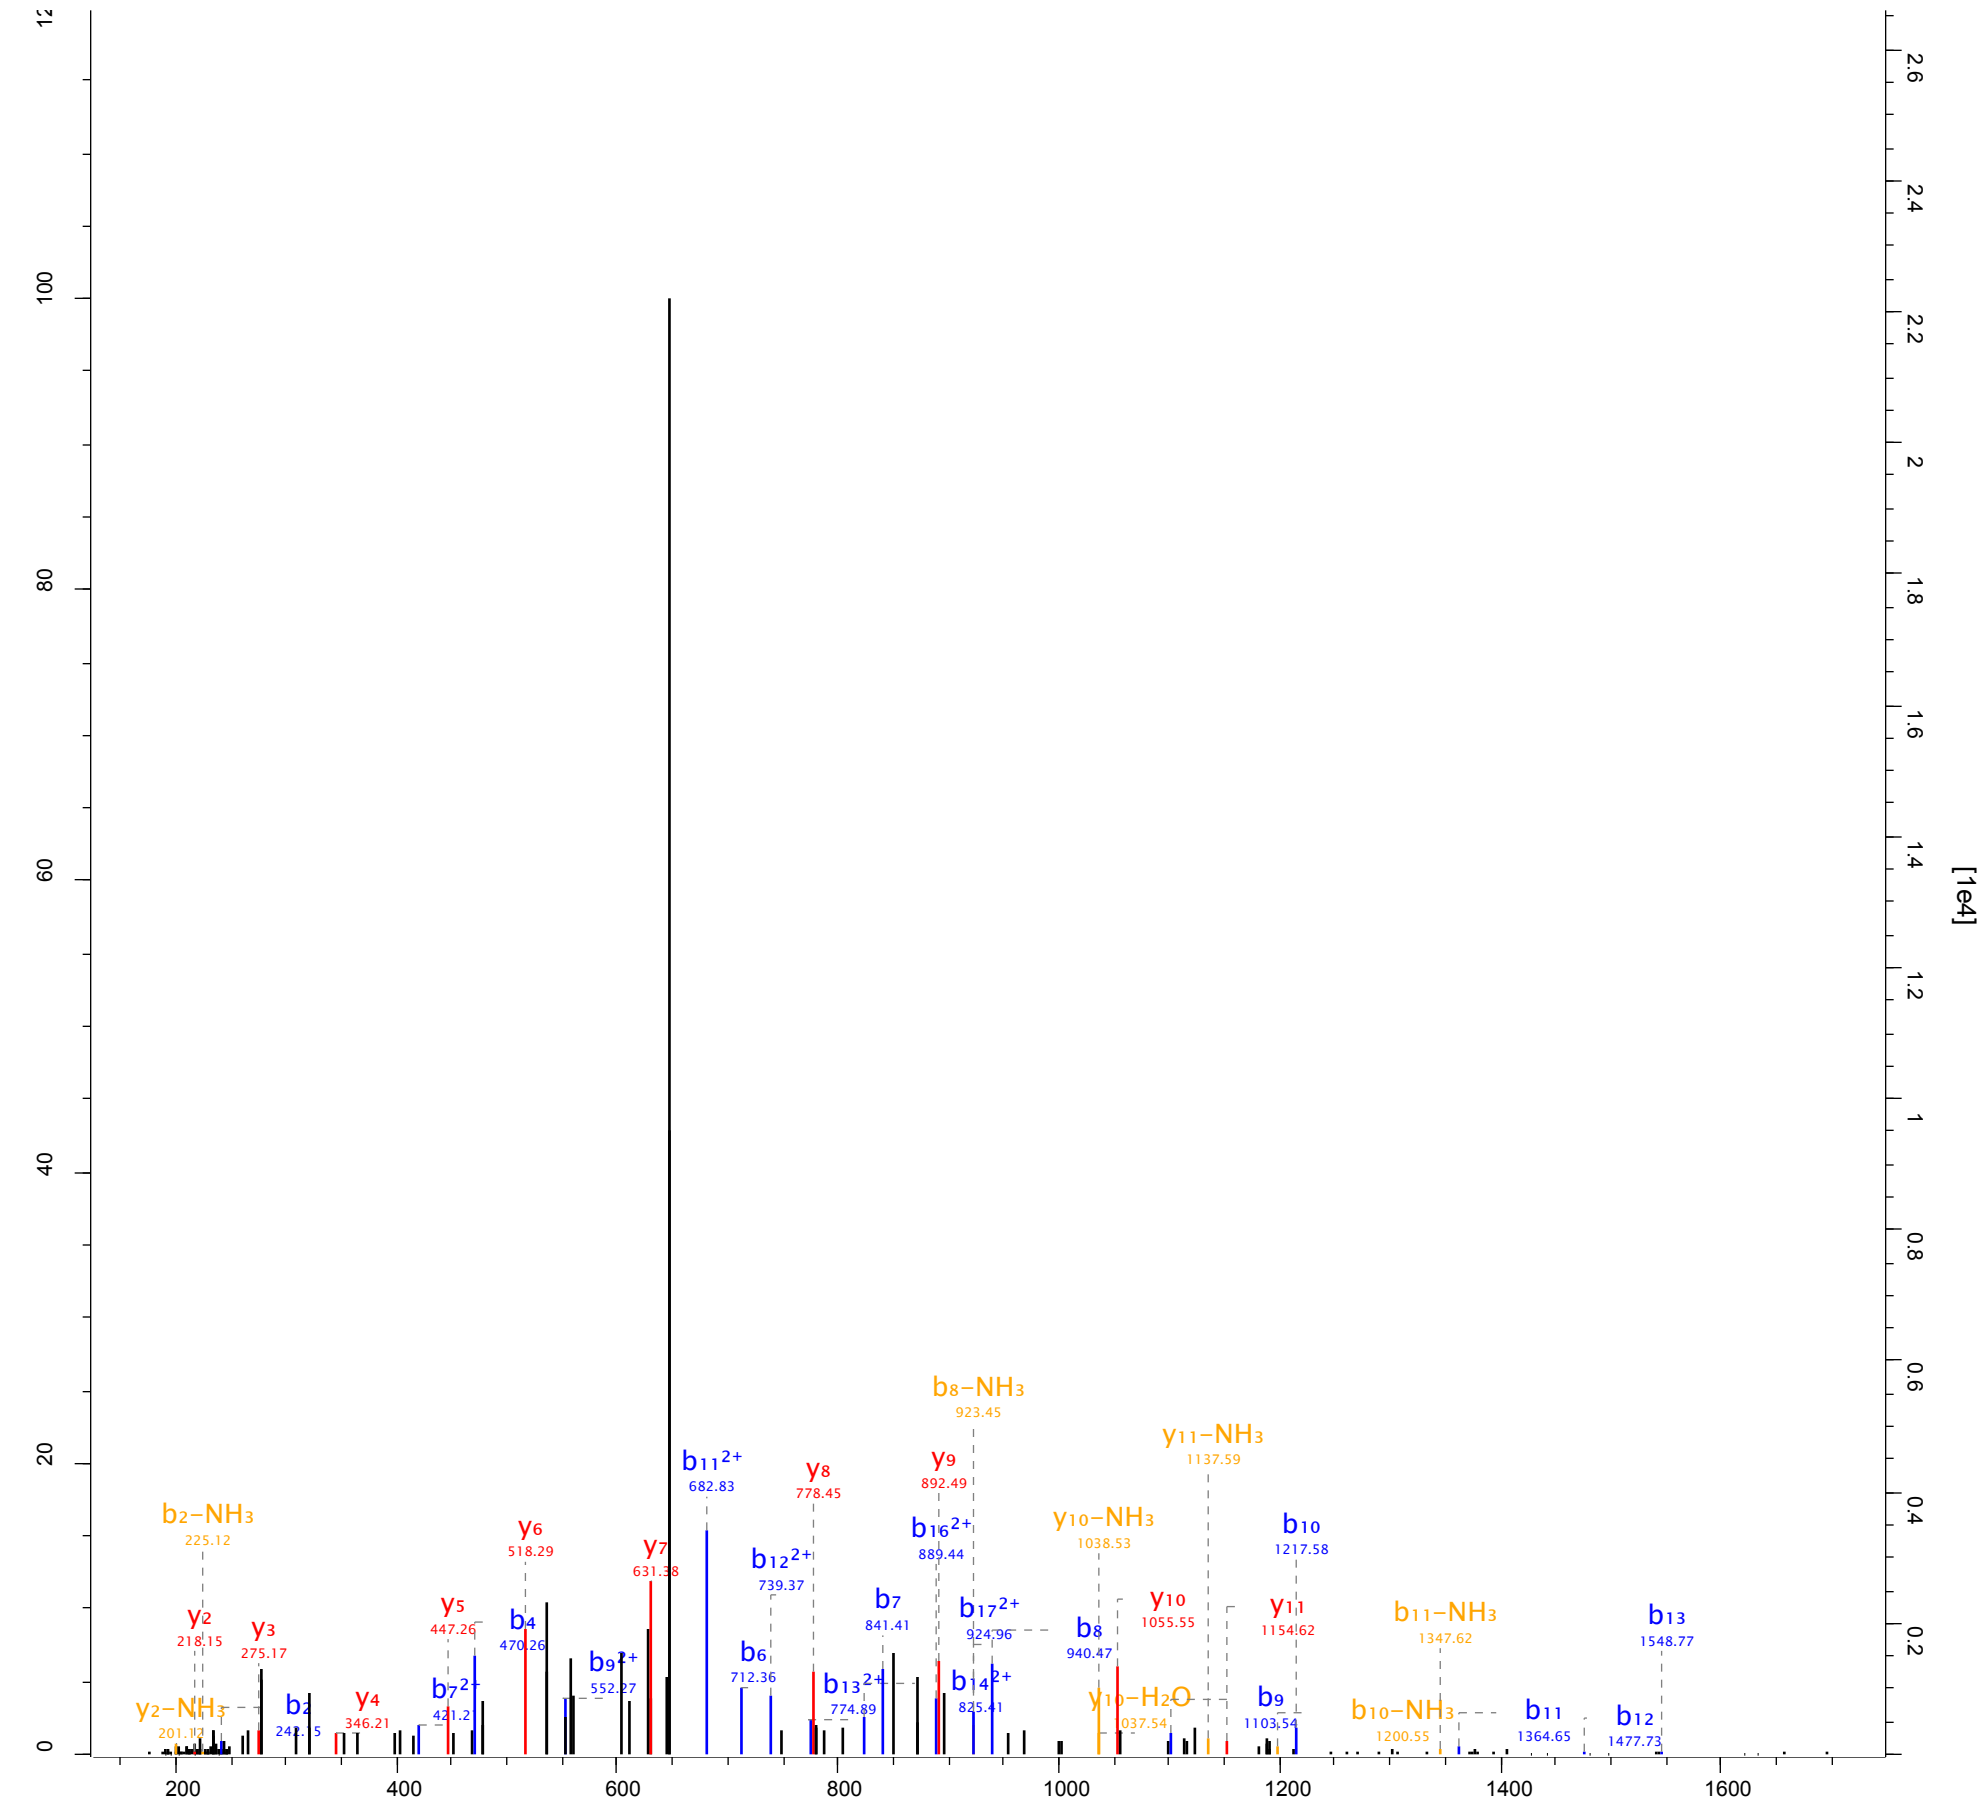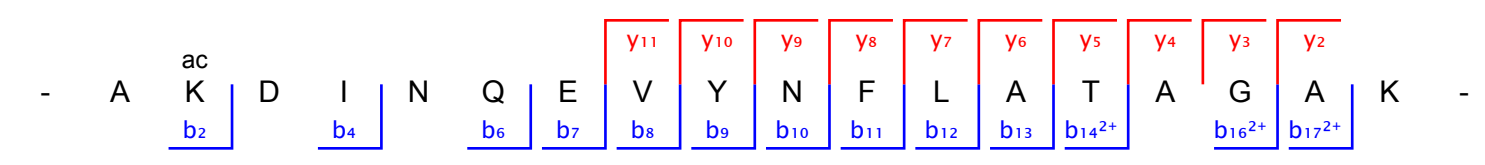

050813\_SCW\_II\_29\_19\_4

28180

ITMS; CID

215.02

744.39

ldh2

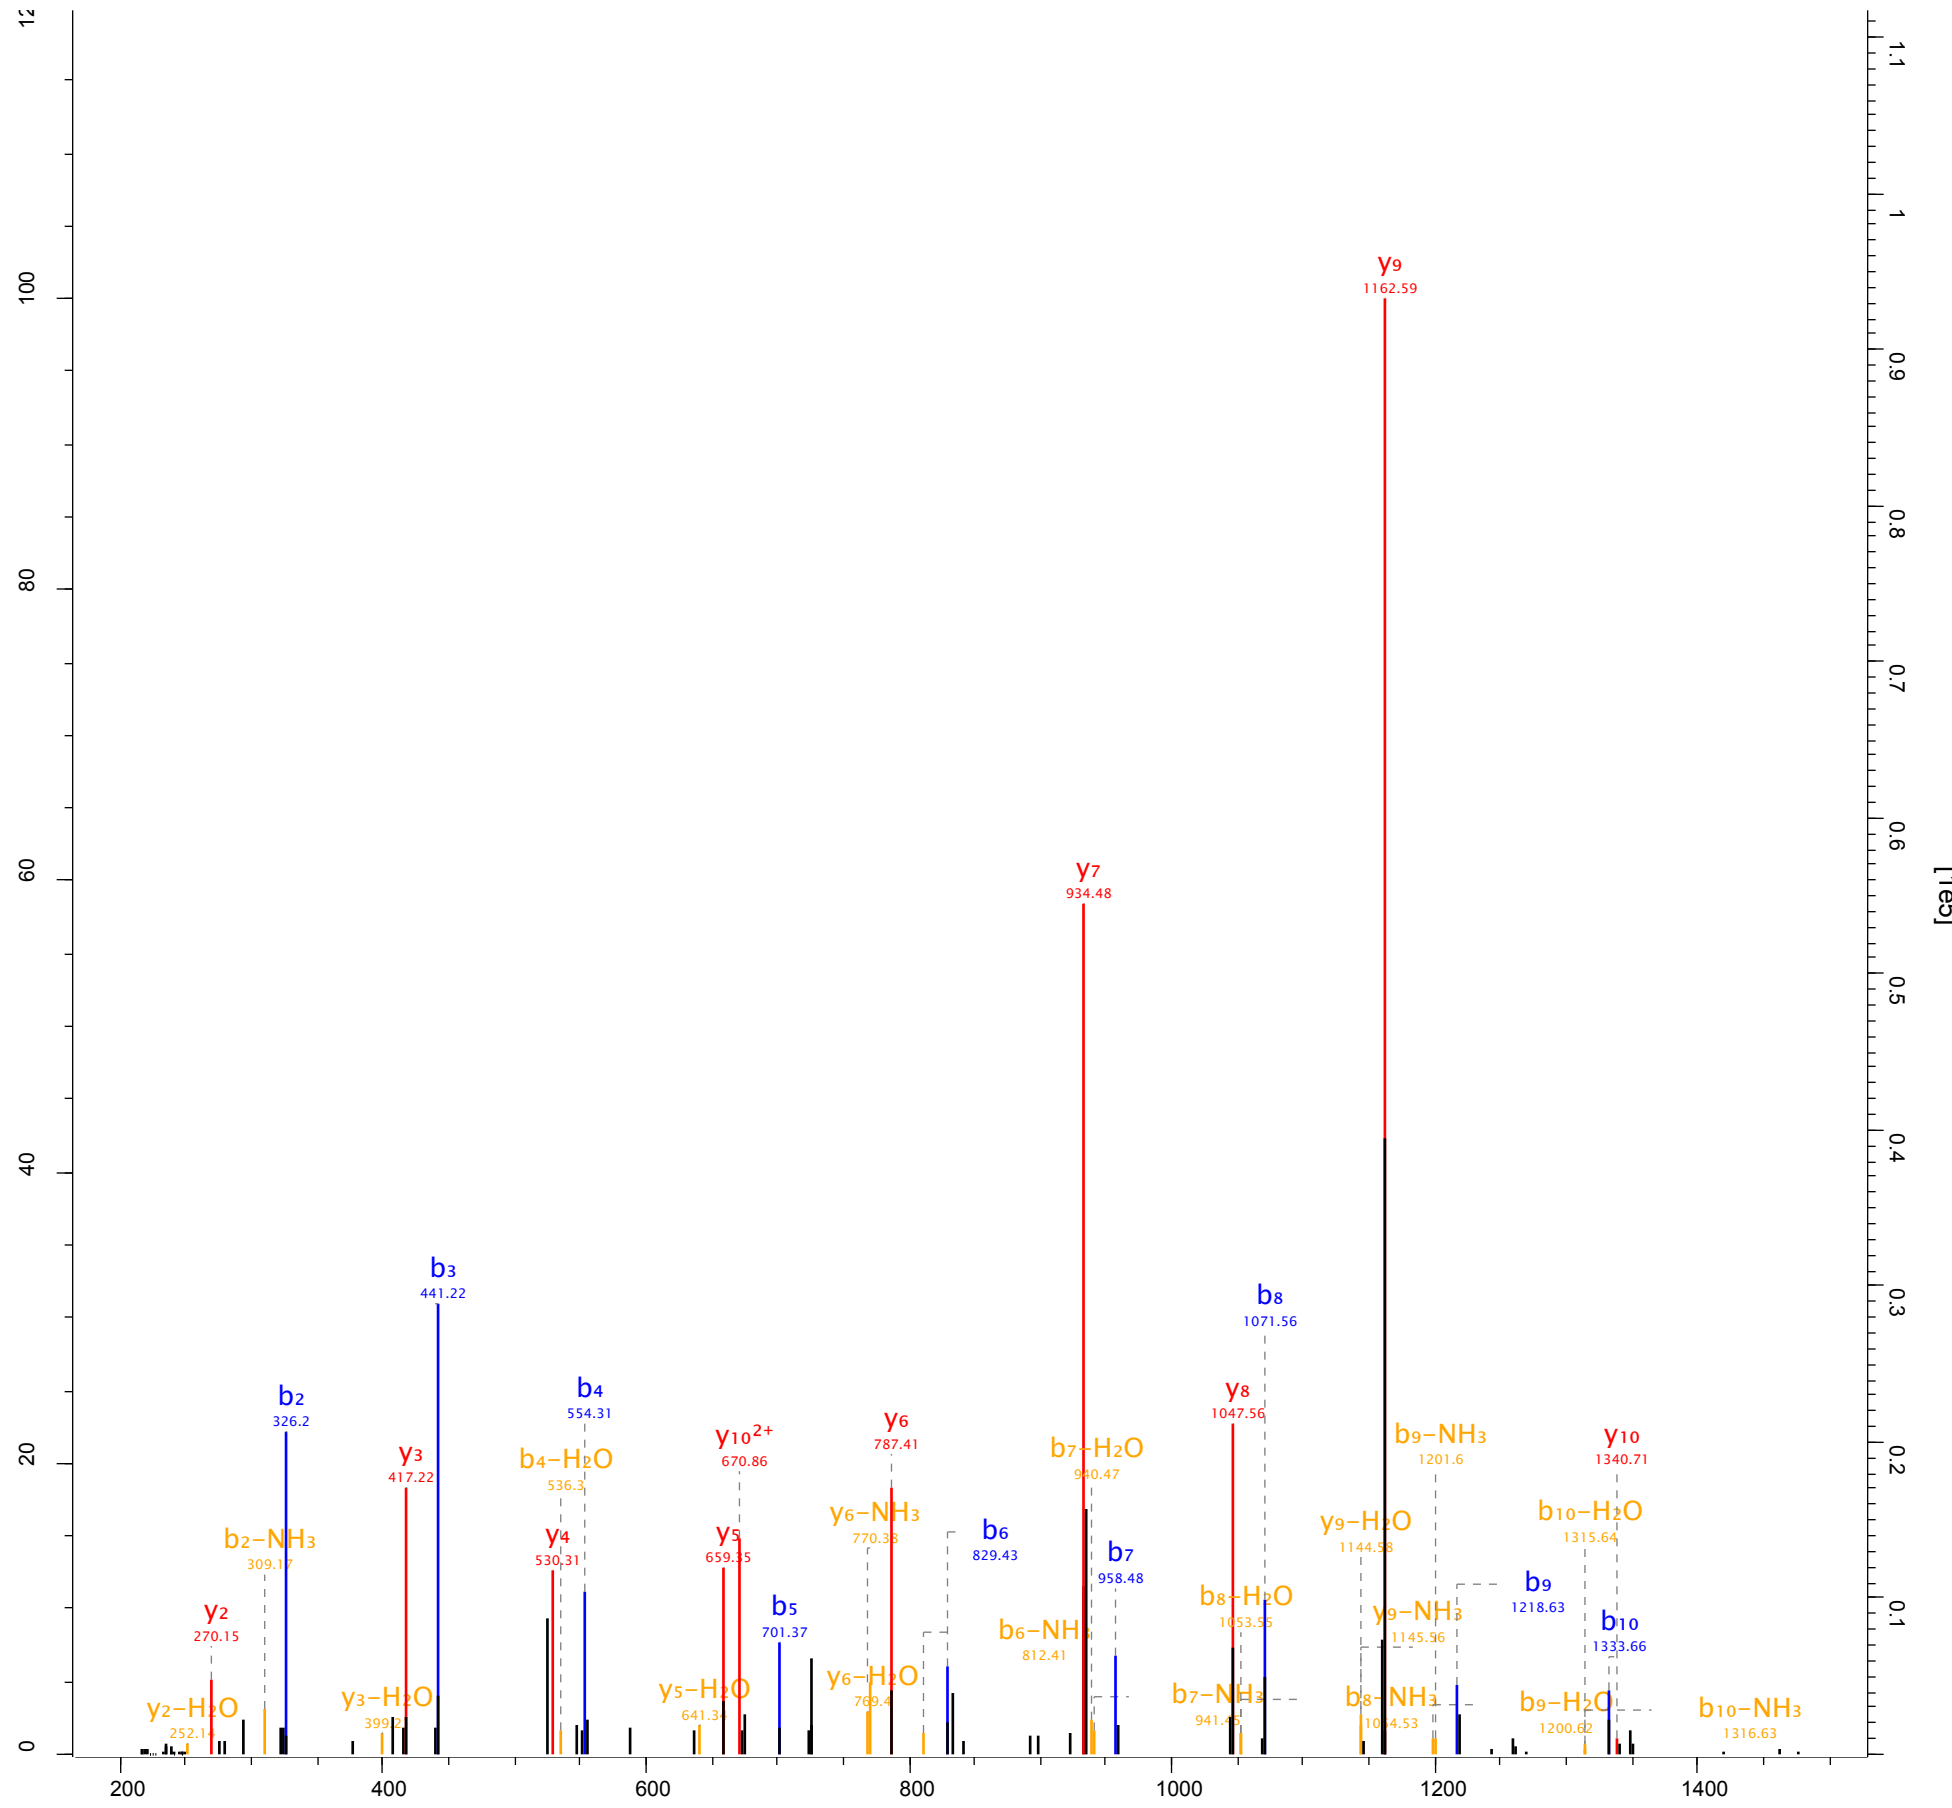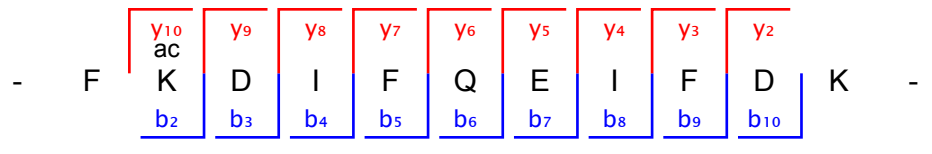

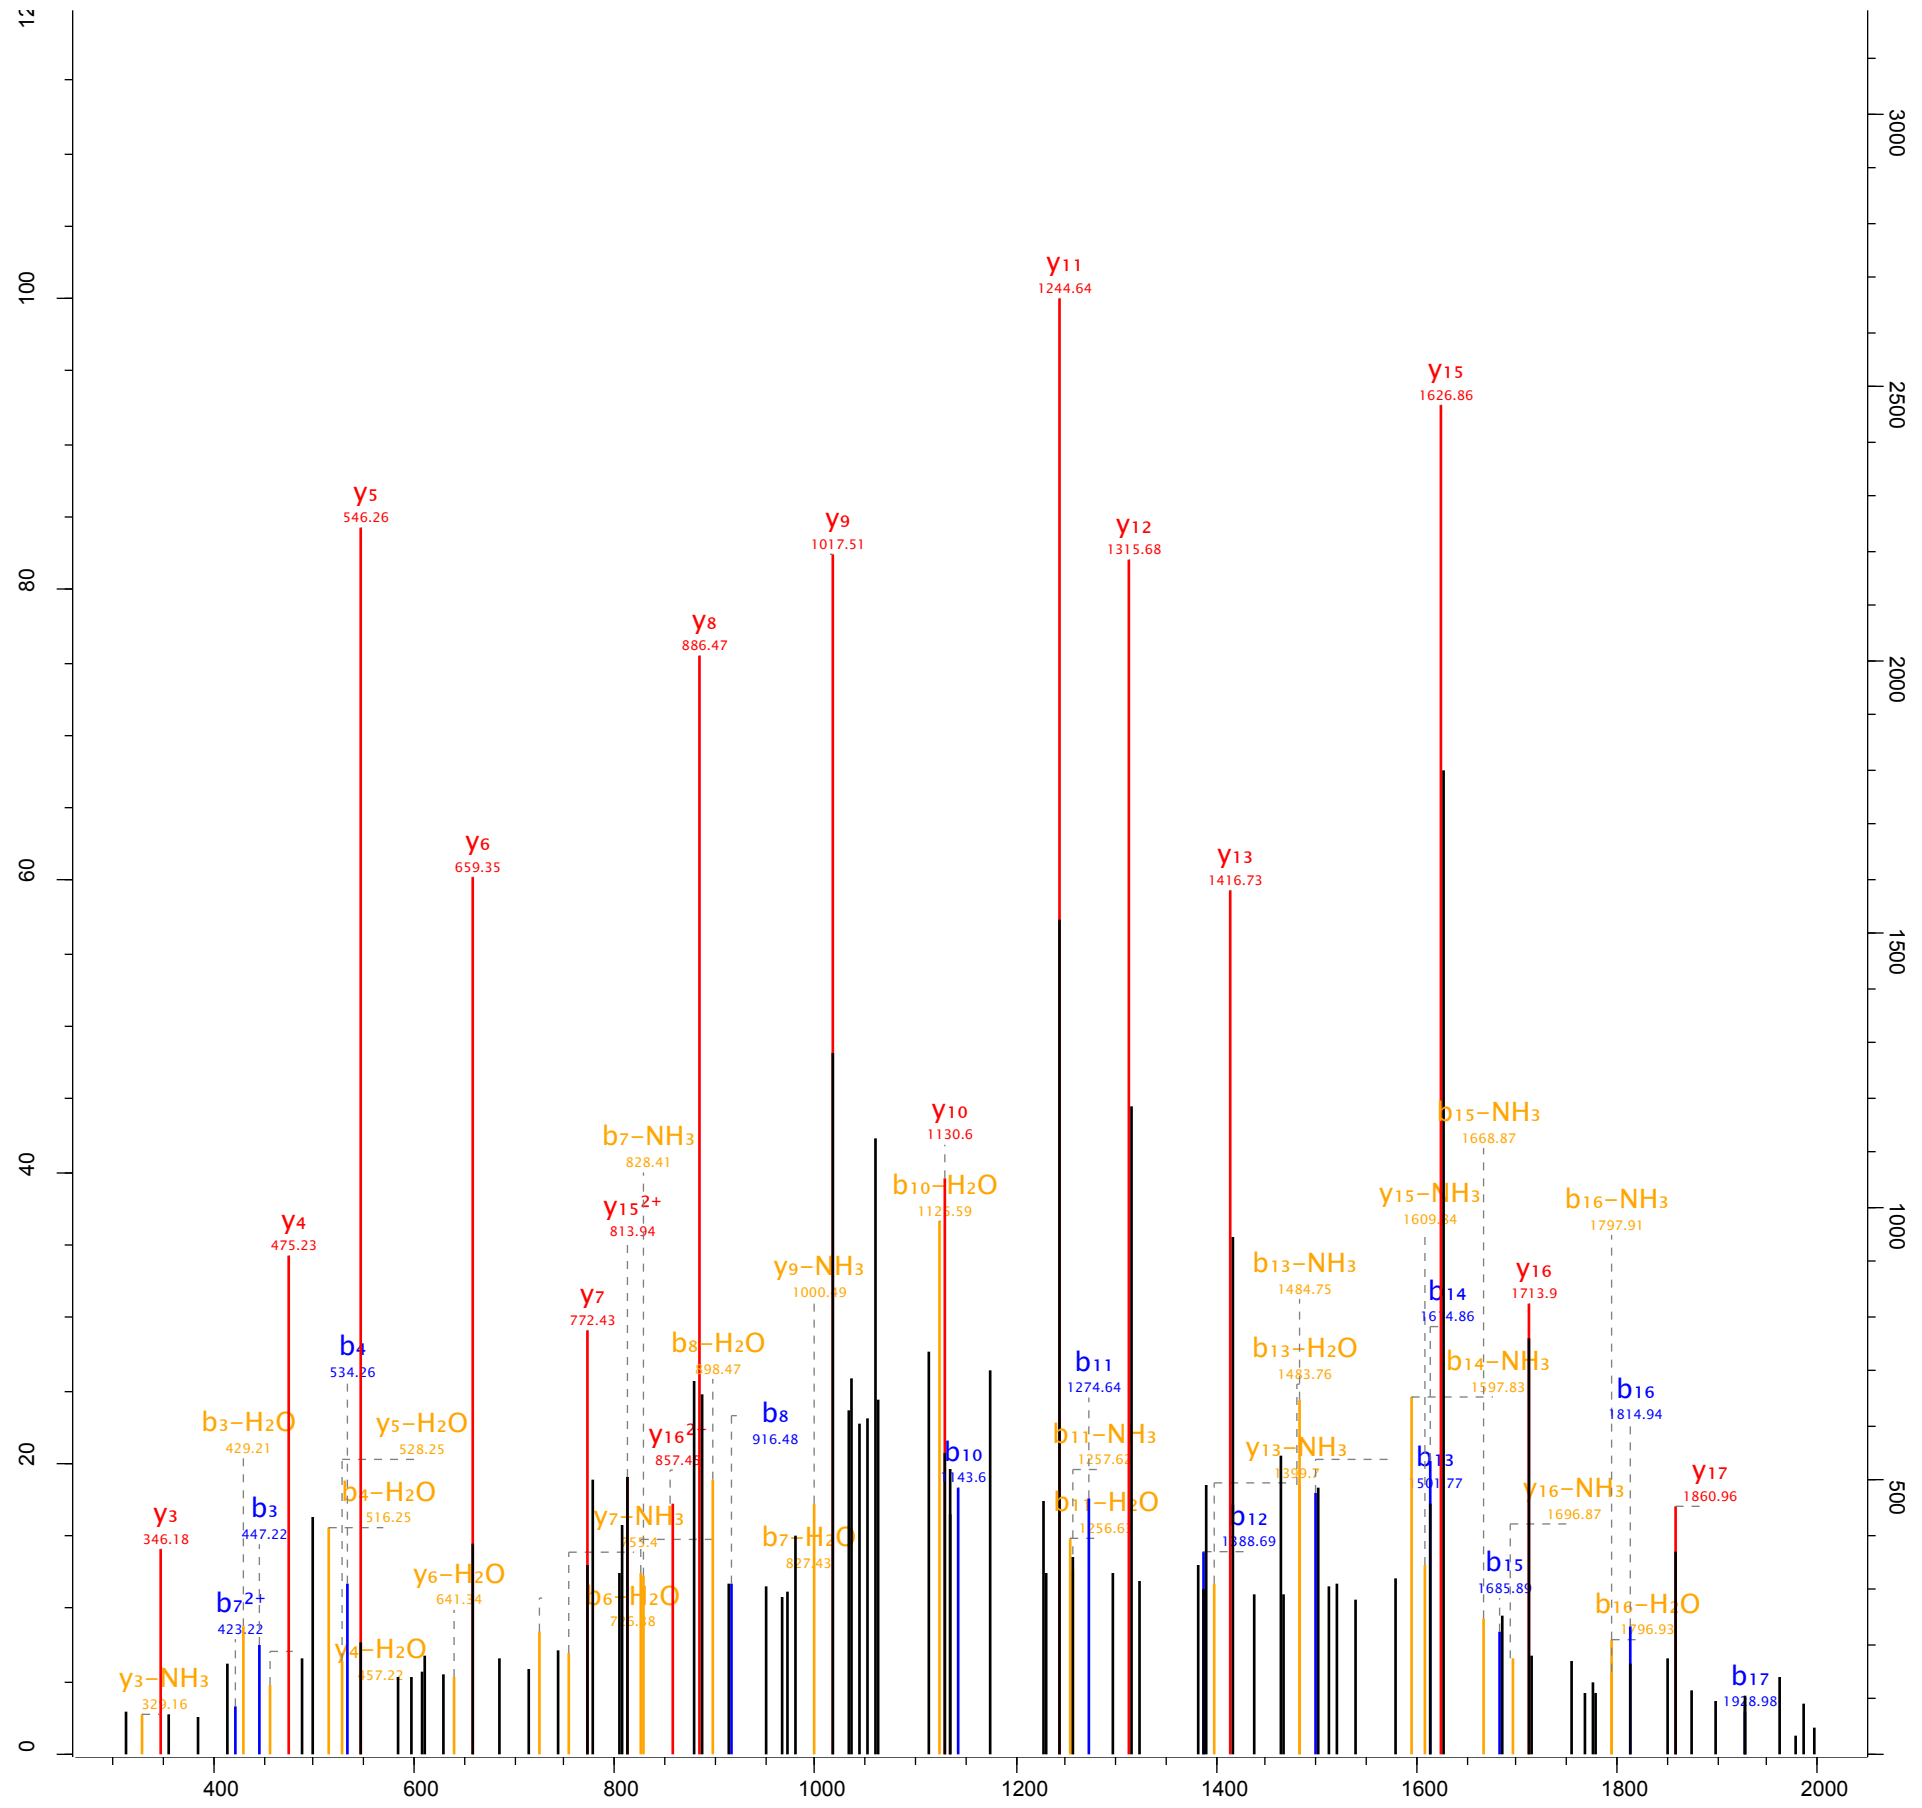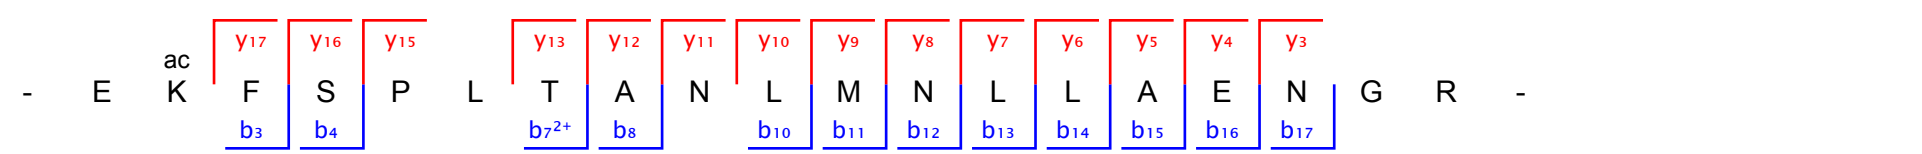

Raw file: 050813\_SCW\_II\_29\_19\_4  
 Scan: 29089  
 Method: ITMS; CID  
 Score: 156.14  
 m/z: 694.93  
 Gene names: Ap2b1

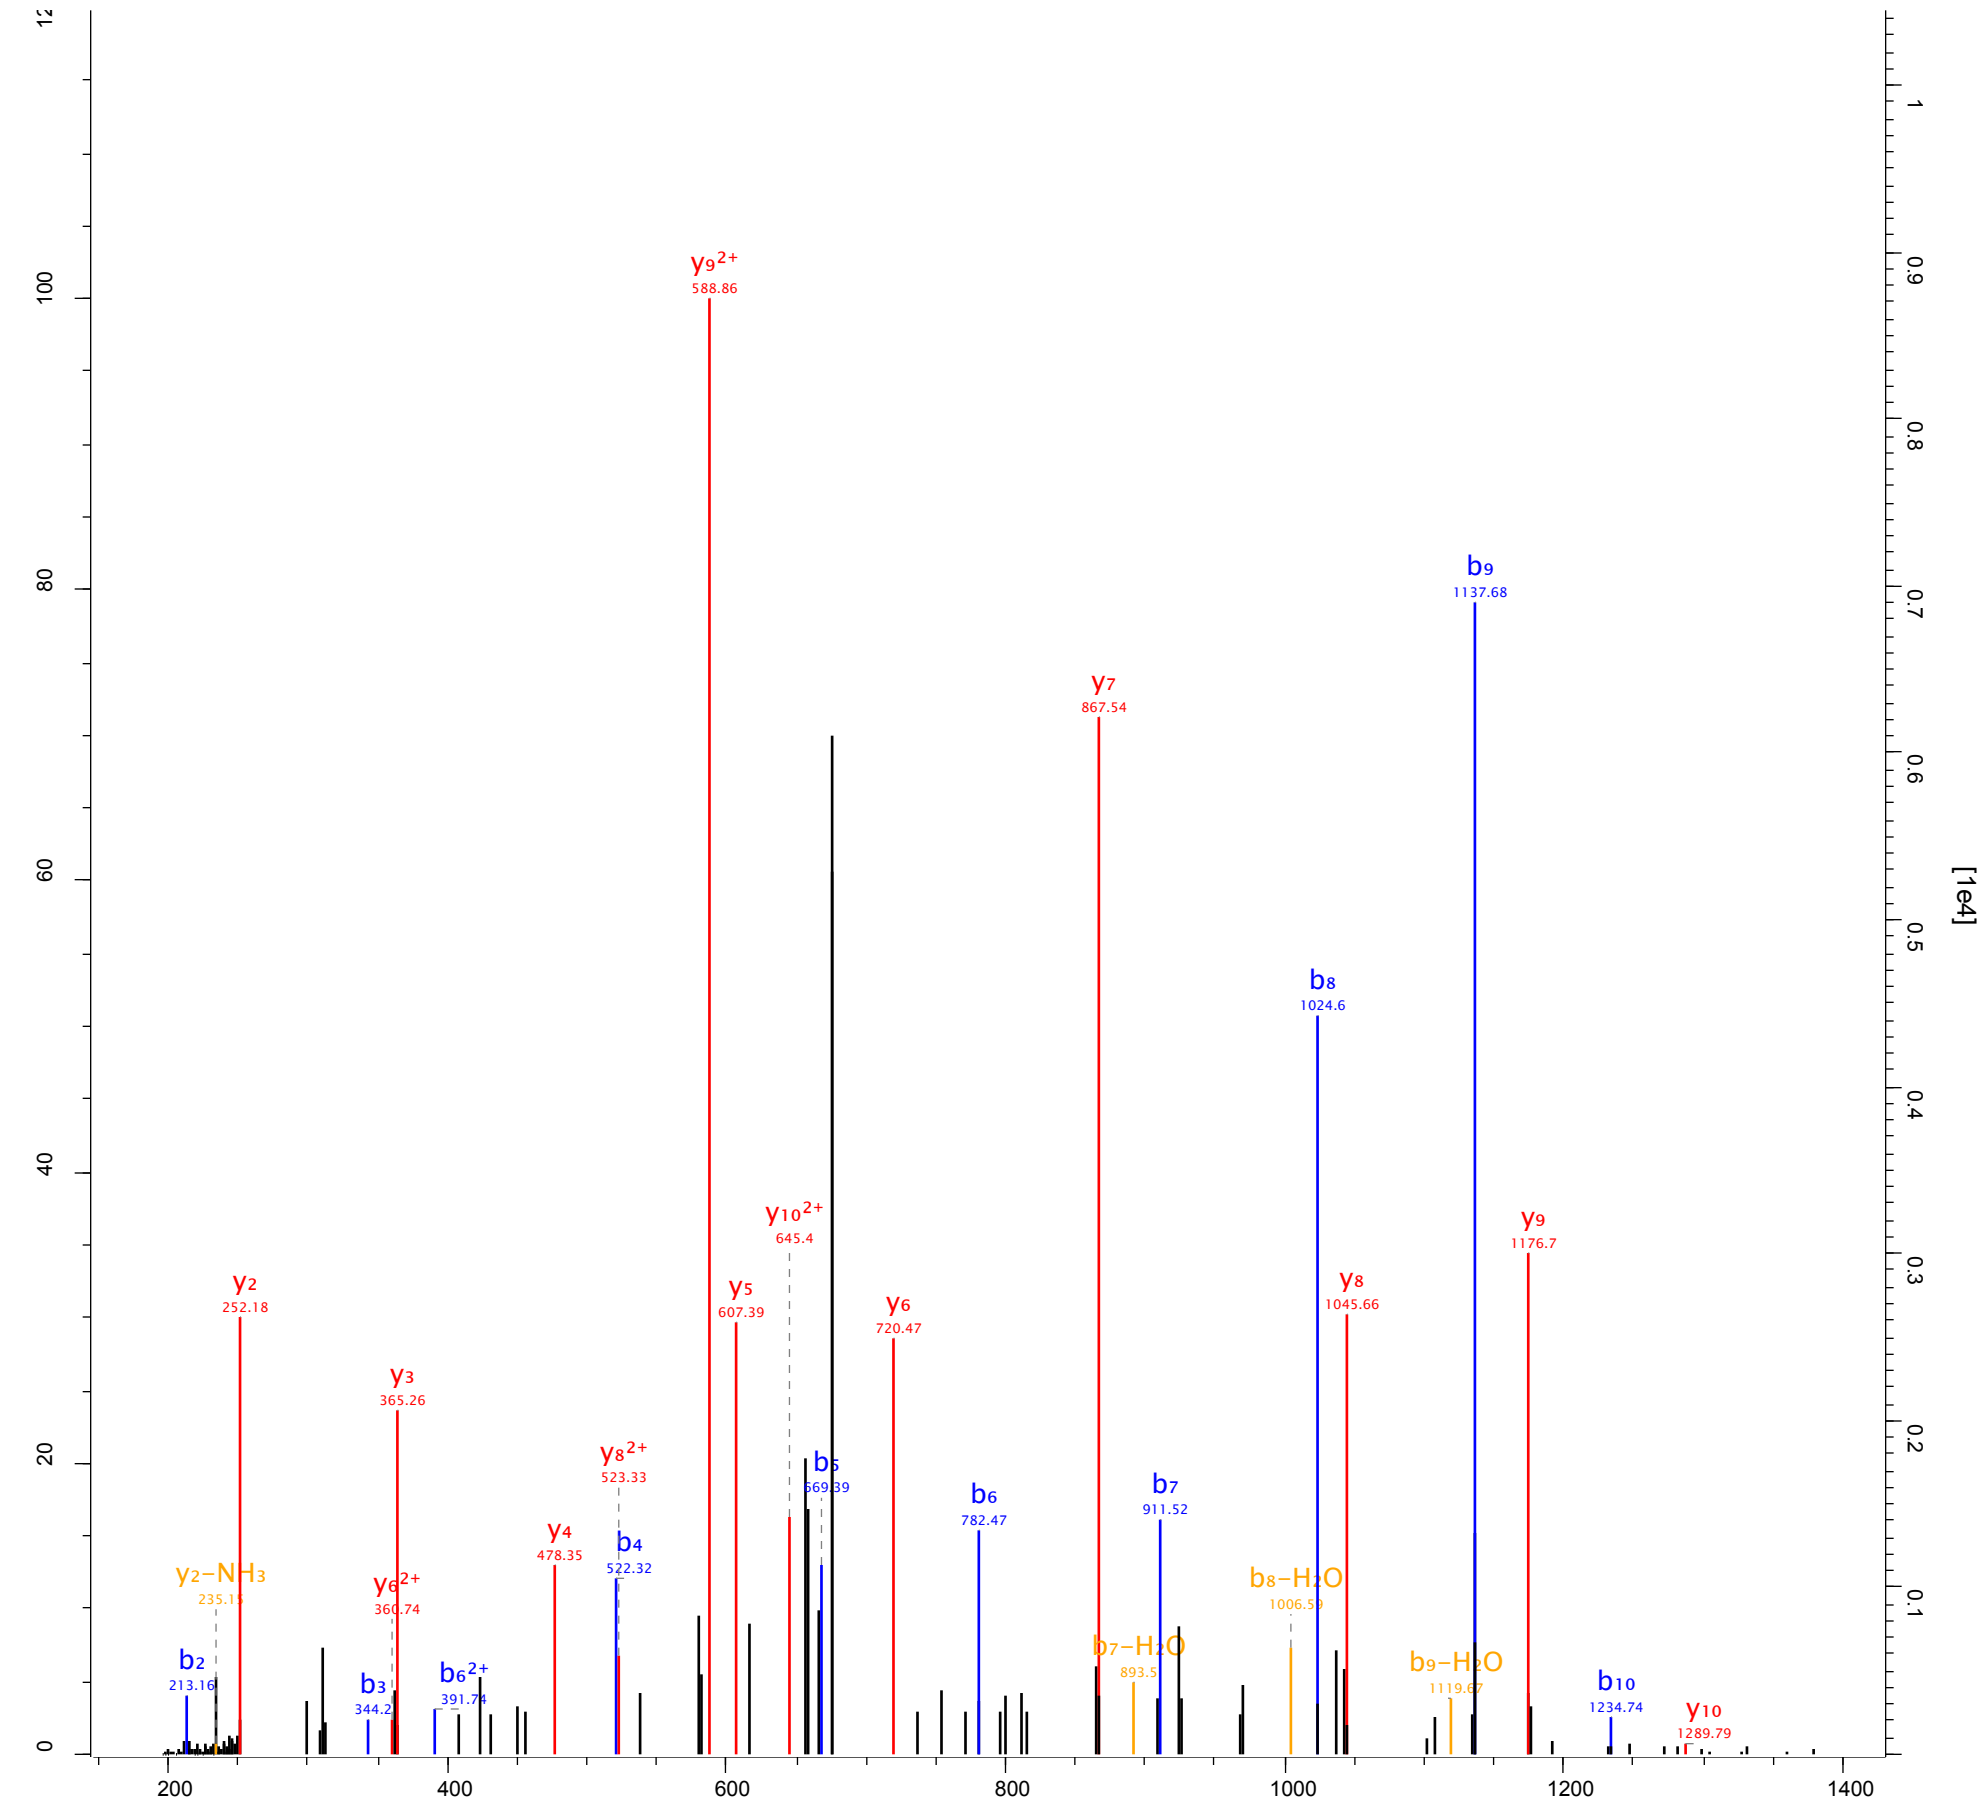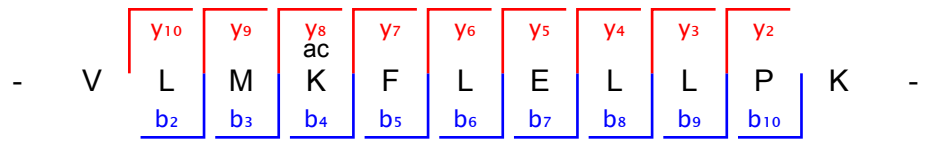

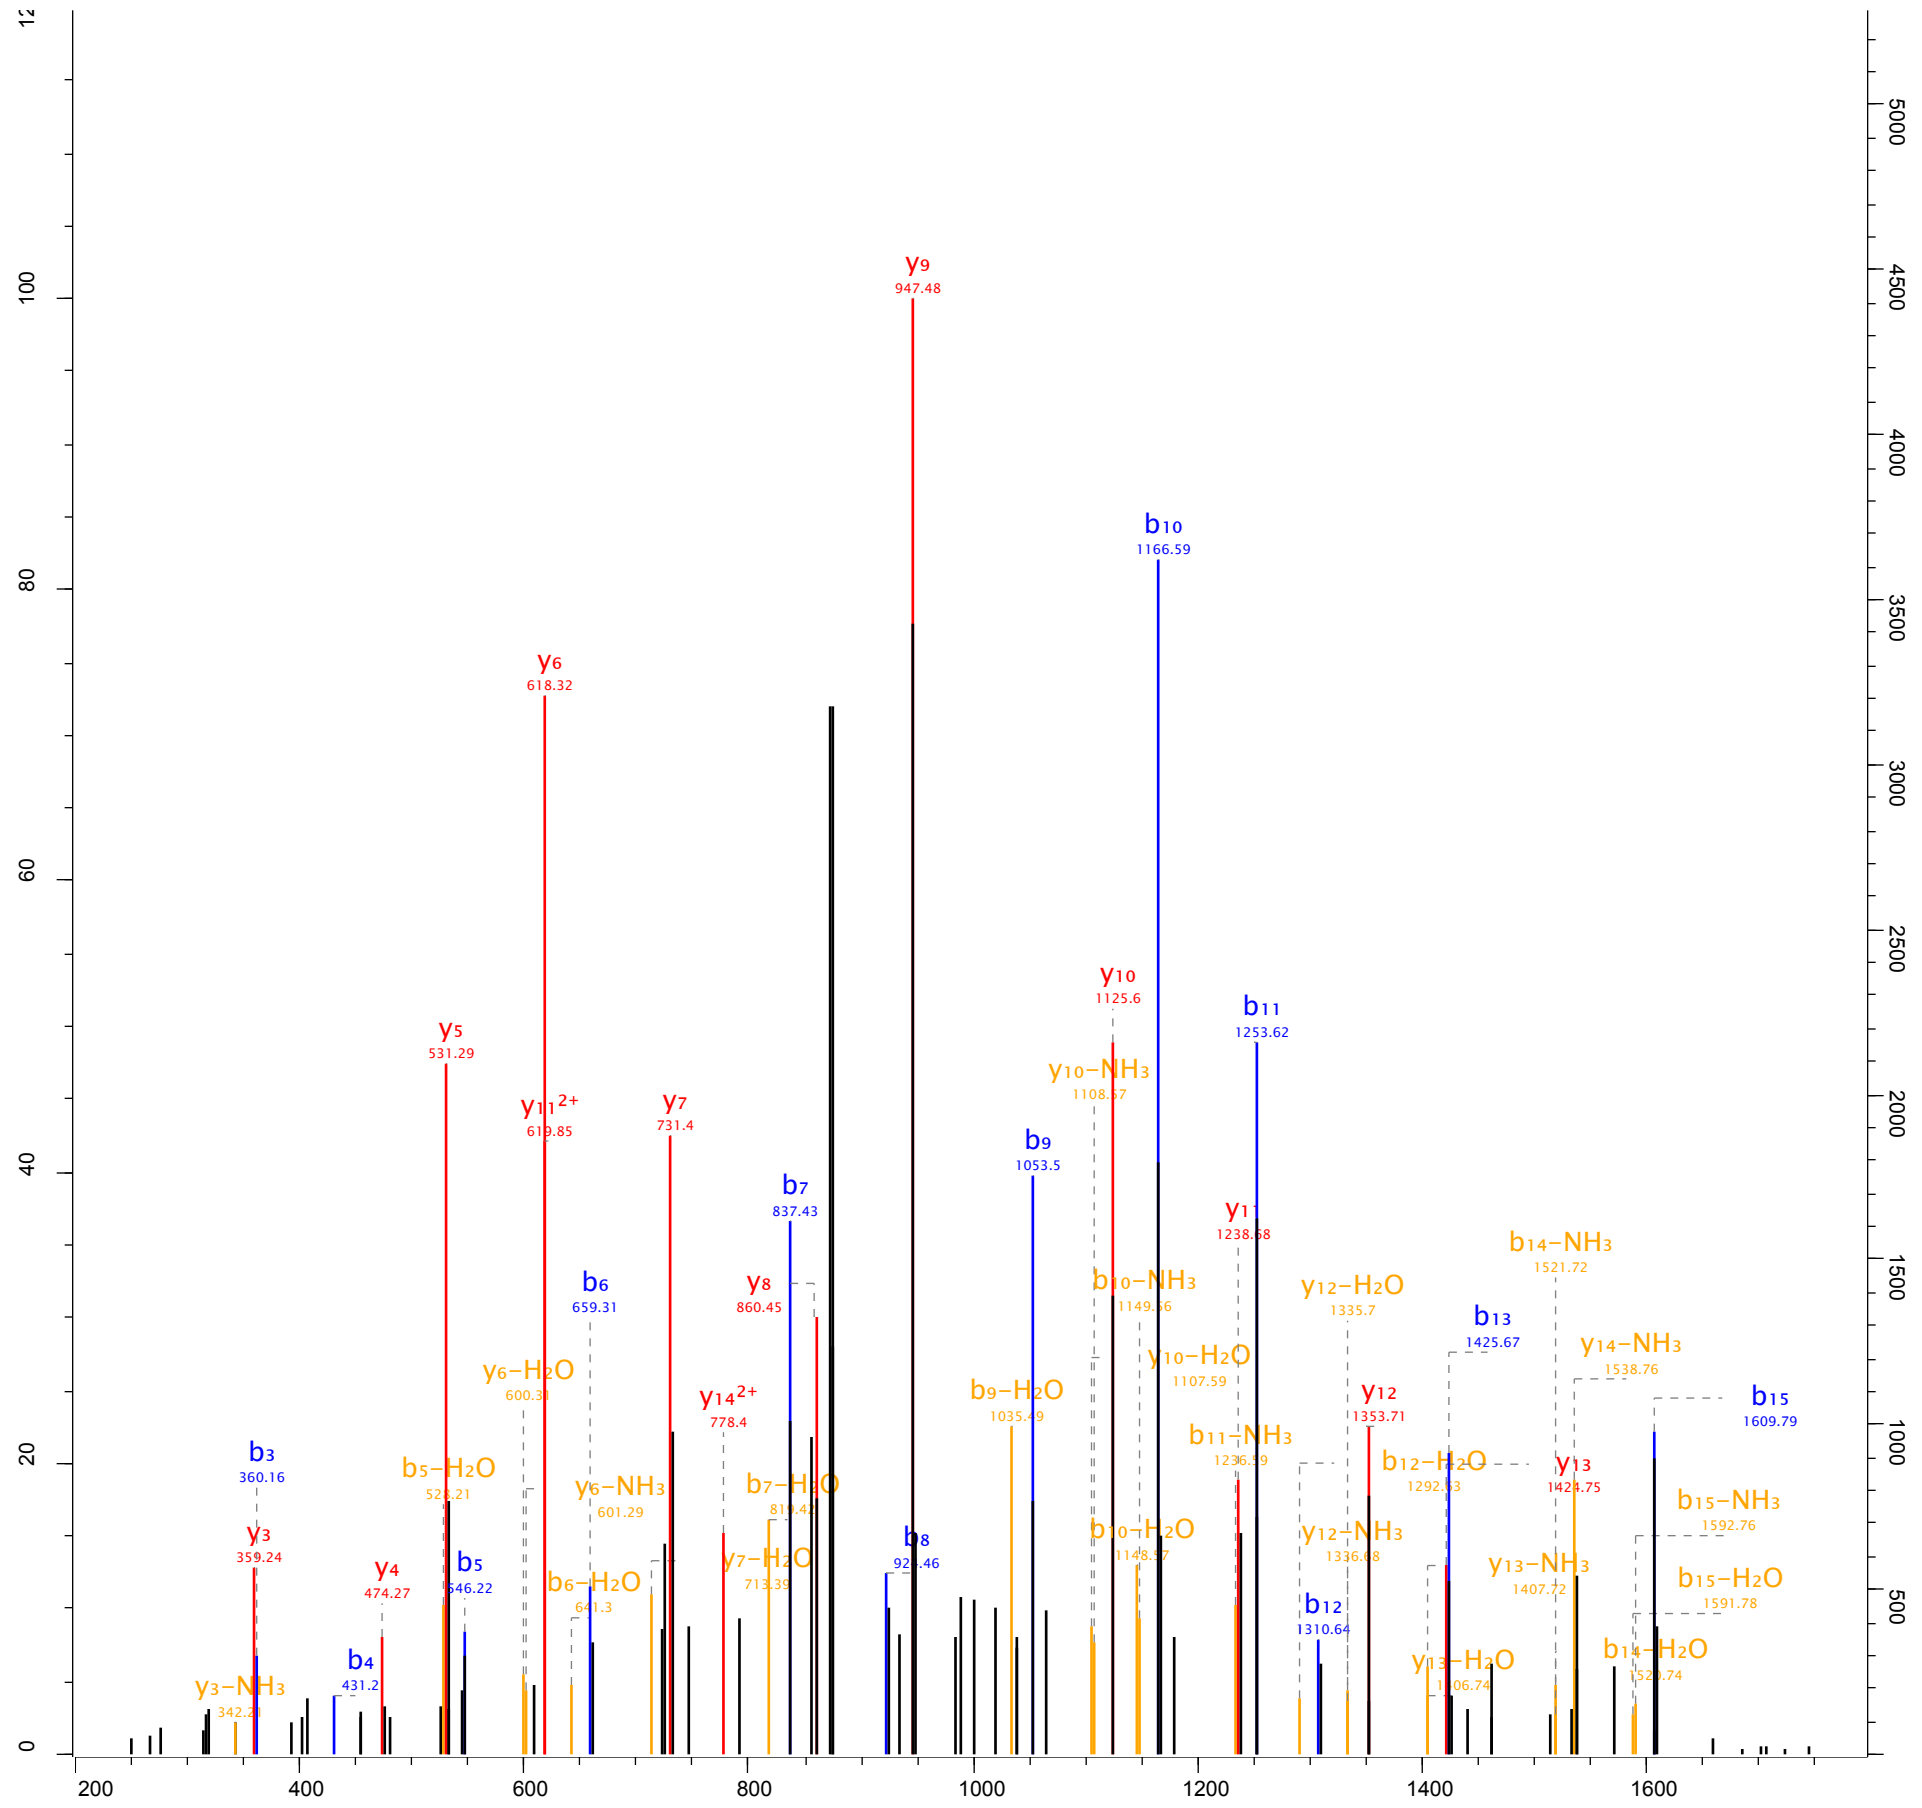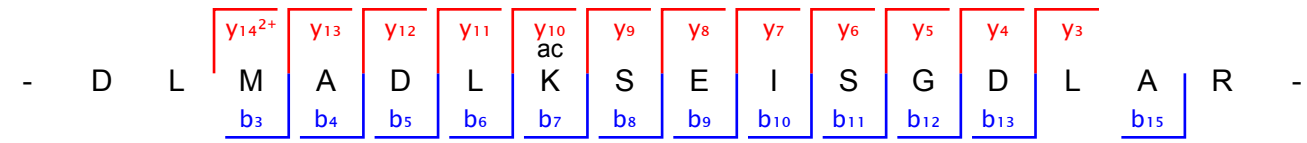



Raw file  
050813\_SCW\_II\_29\_19\_4

Scan 29521 Method ITMS; CID Score 157.11 m/z 992.53 Gene names Atp5j2

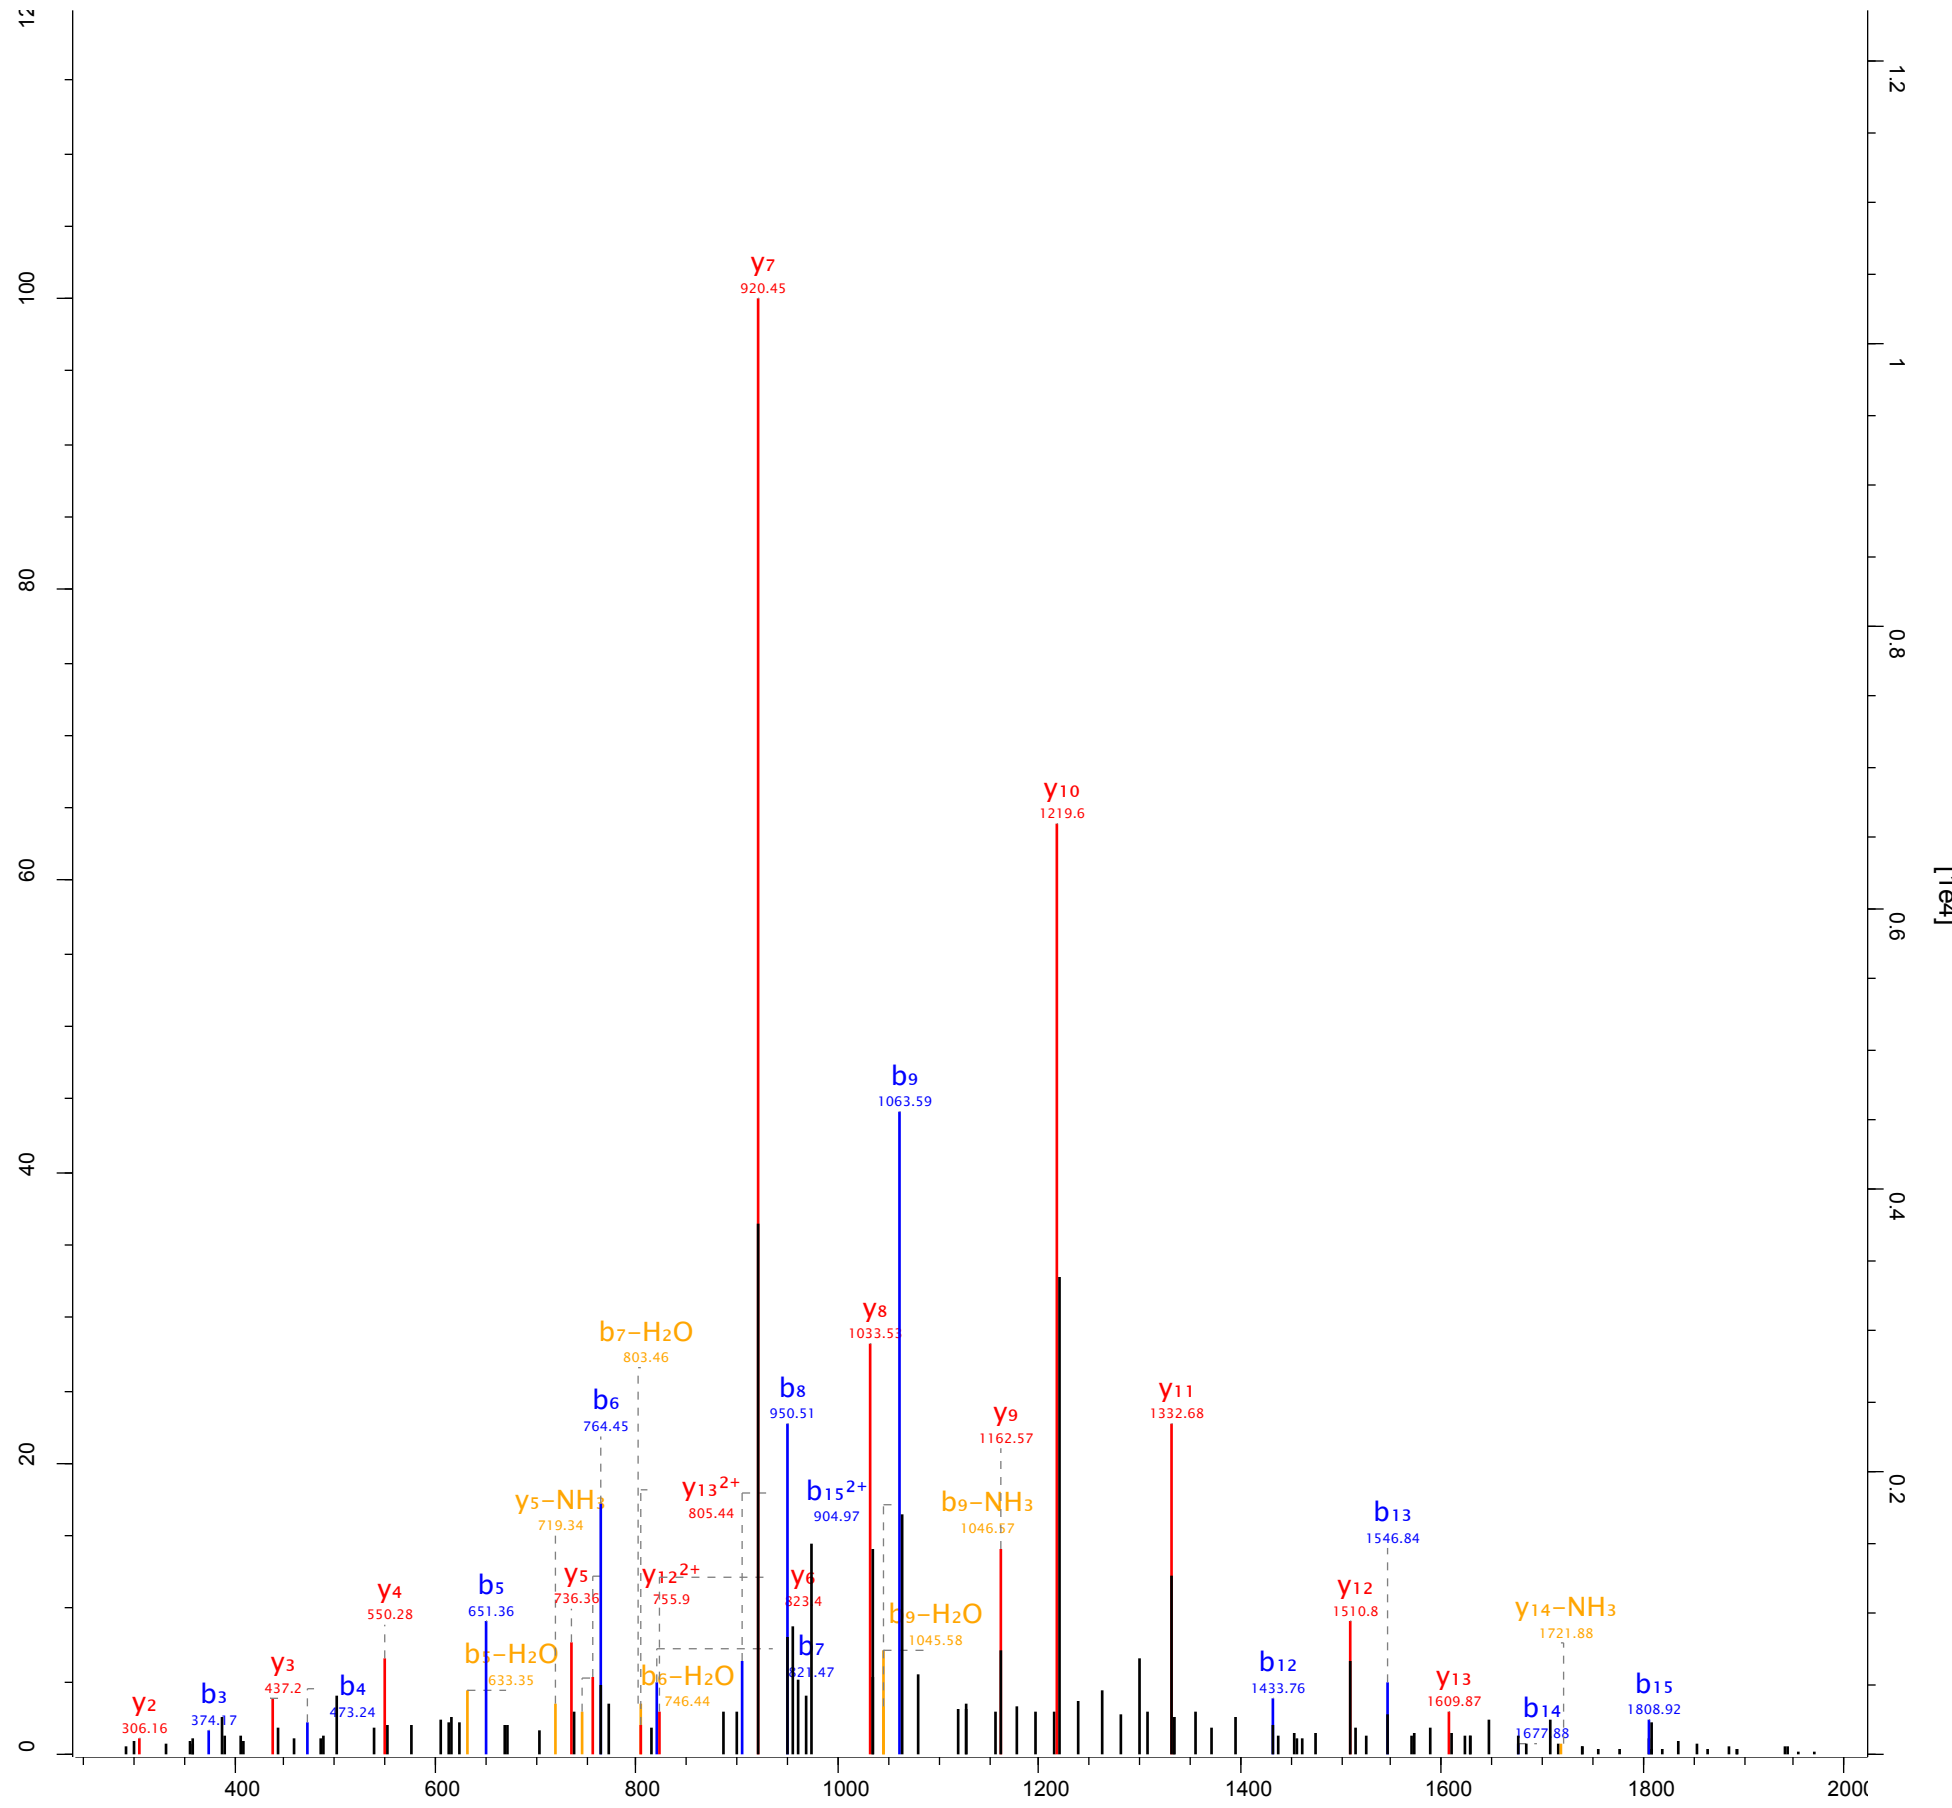

- L M E V K L G E L P S W I M M R -

b3 b4 b5 b6 b7 b8 b9 b12 b13 b14 b15

y13 y12 ac y11 y10 y9 y8 y7 y6 y5 y4 y3 y2

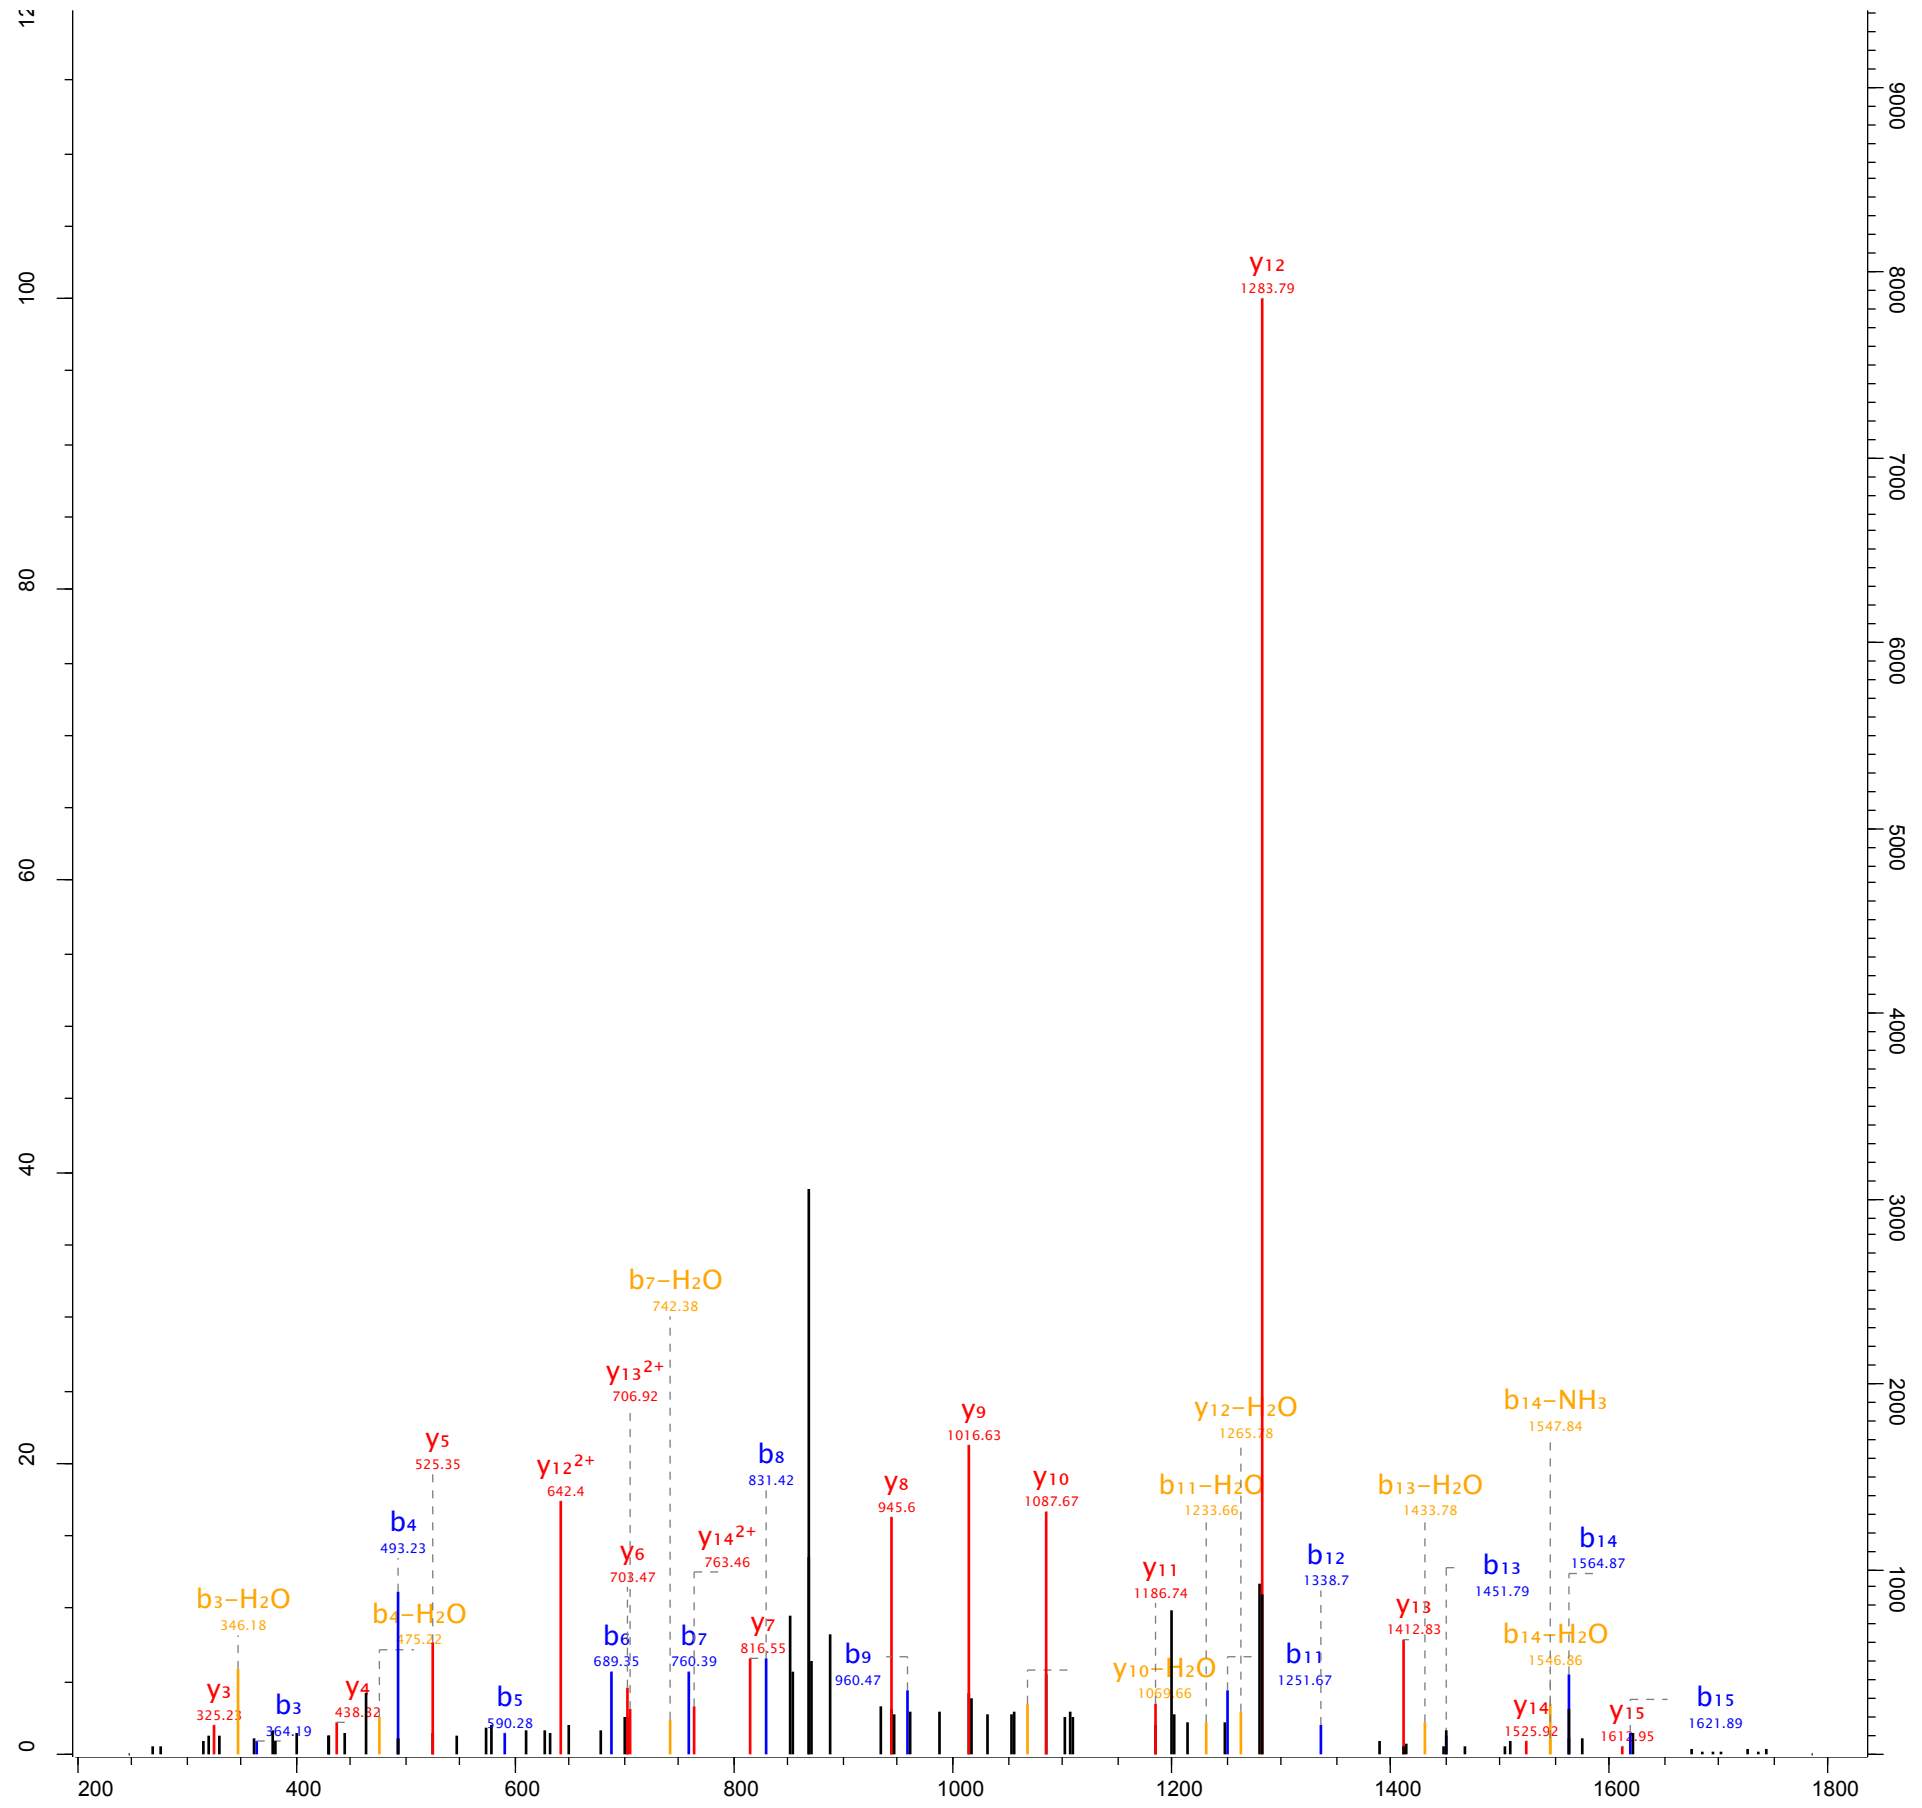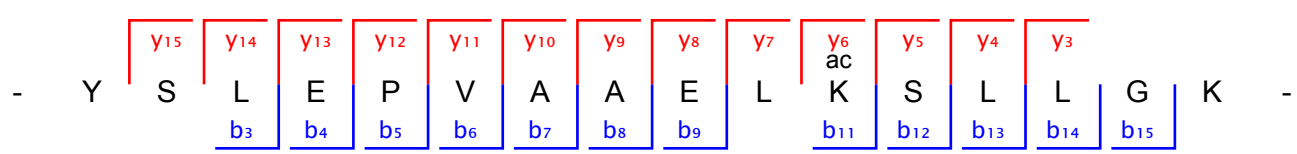

050813\_SCW\_II\_29\_19\_4

30756

ITMS; CID

191.06

797.93

Anxa6

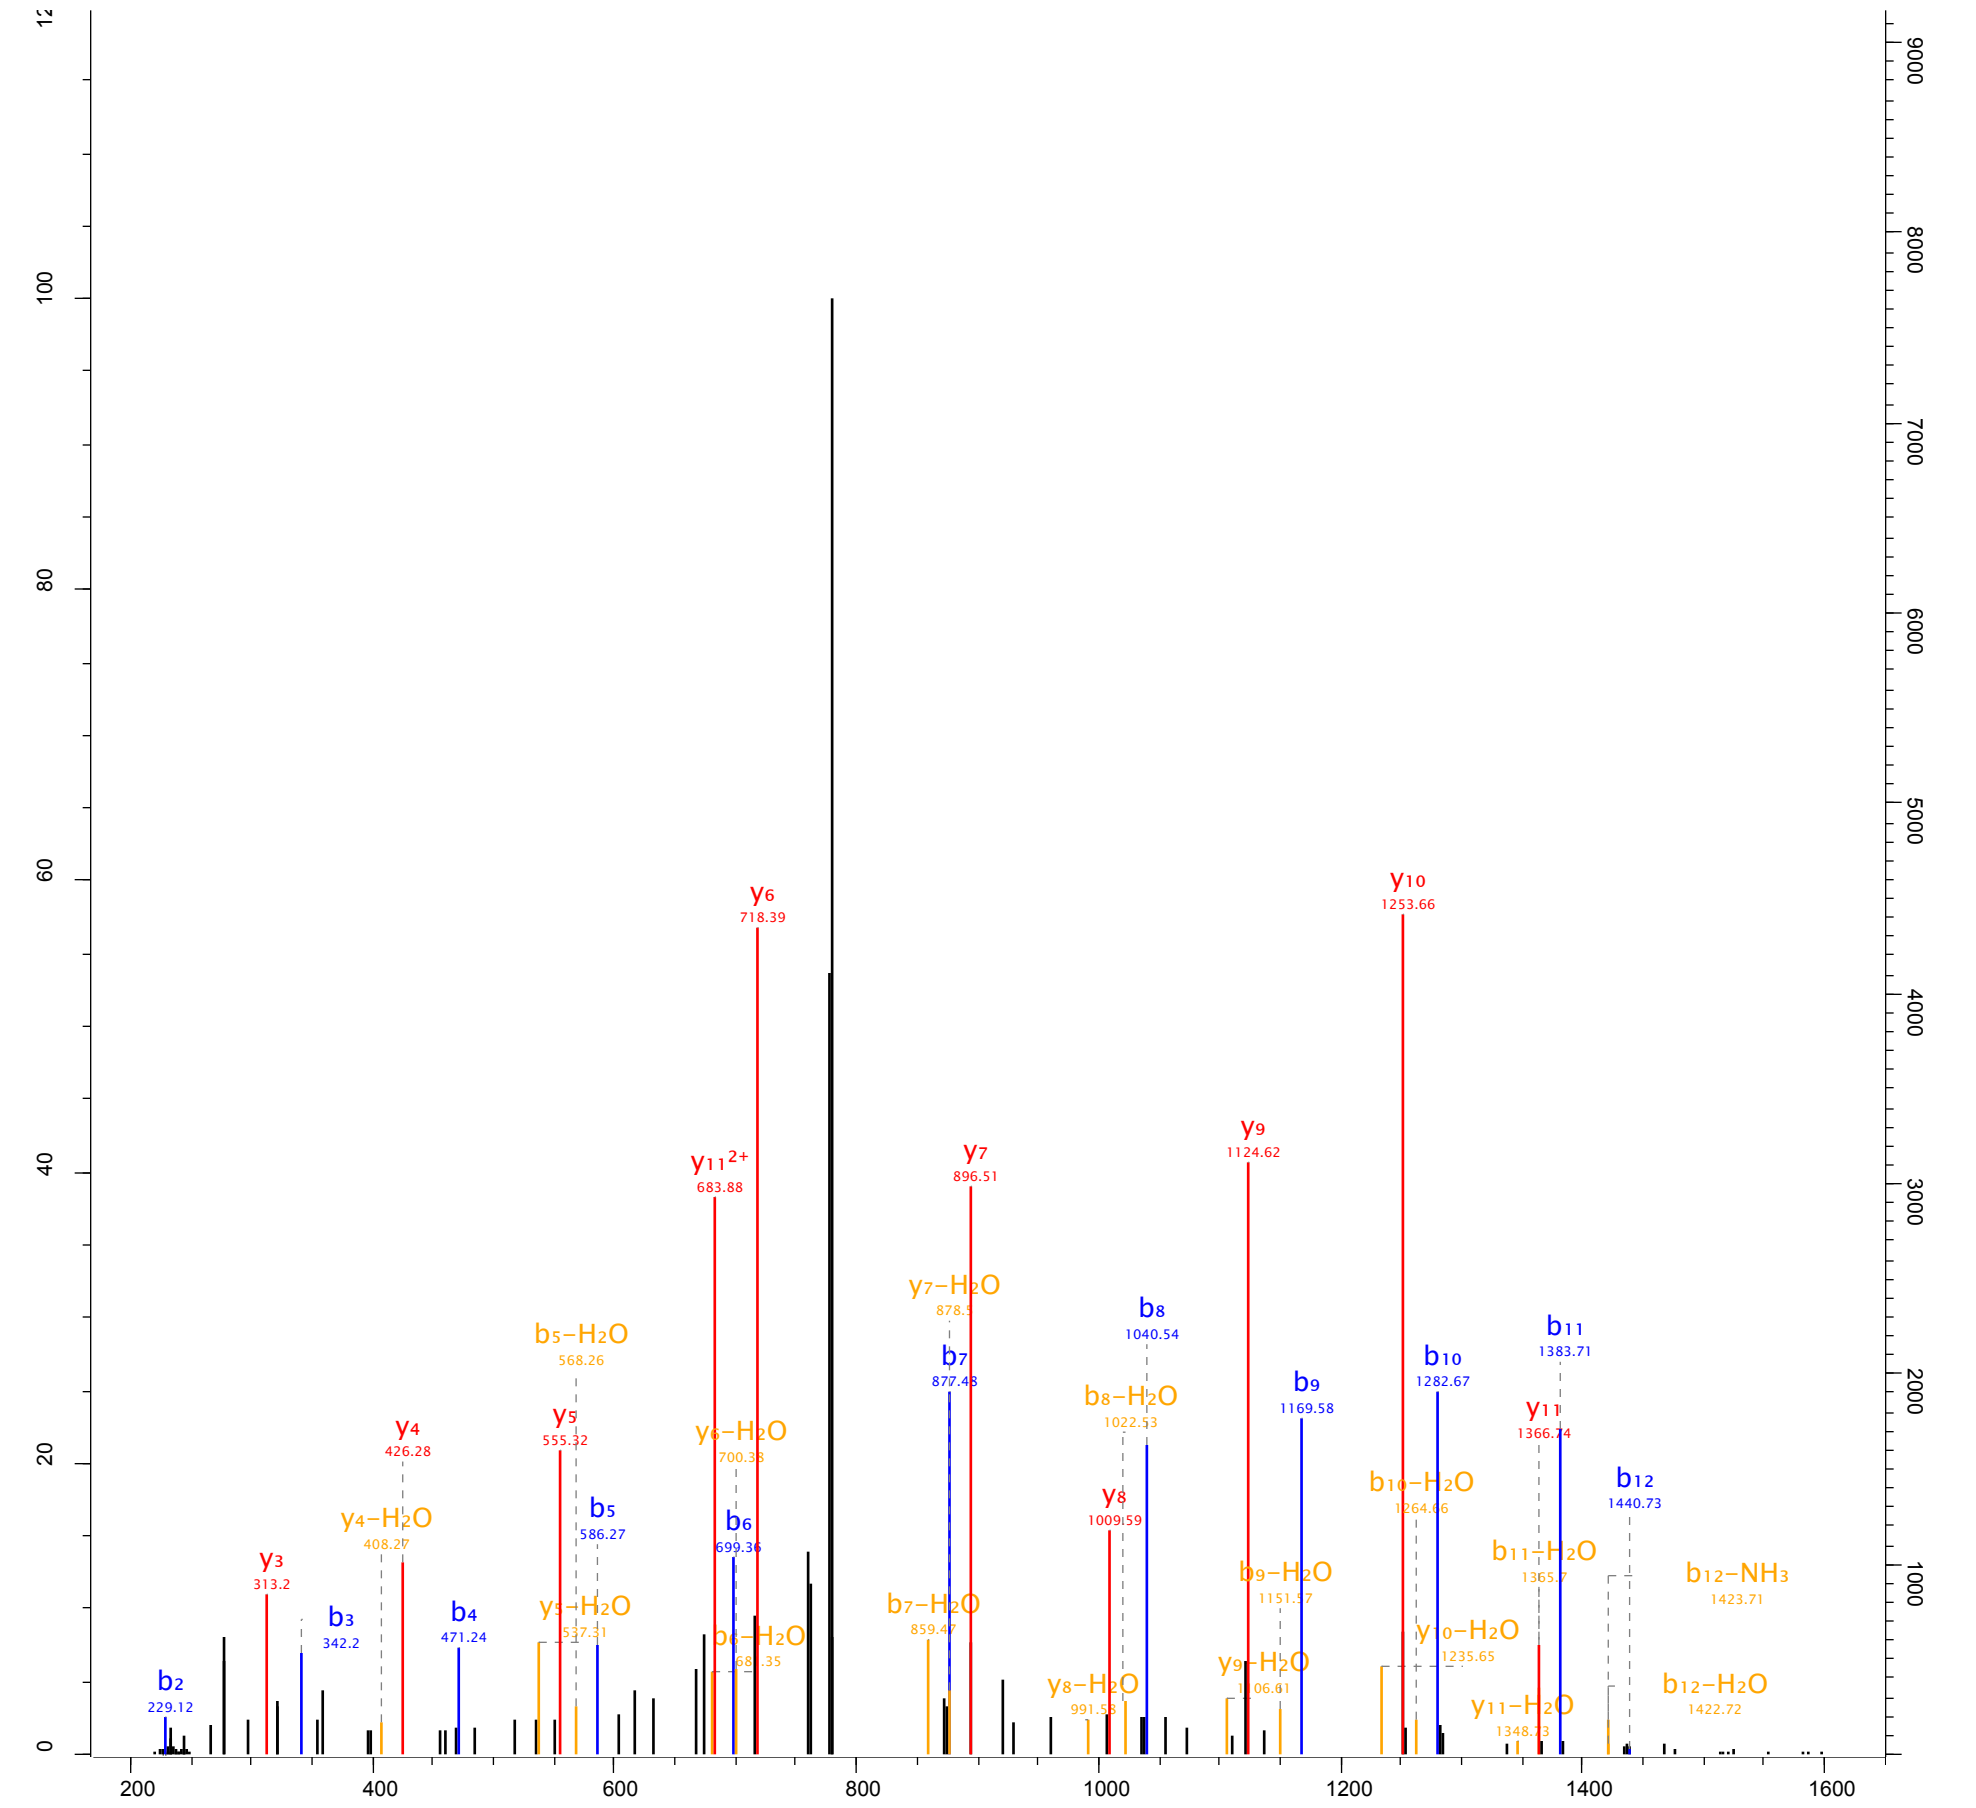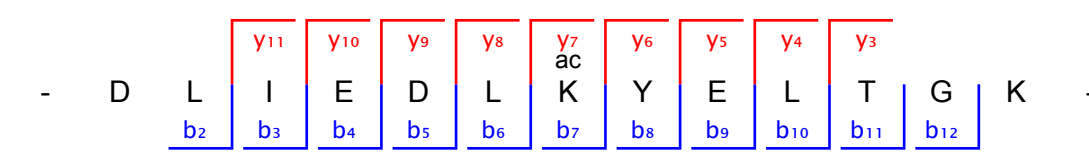

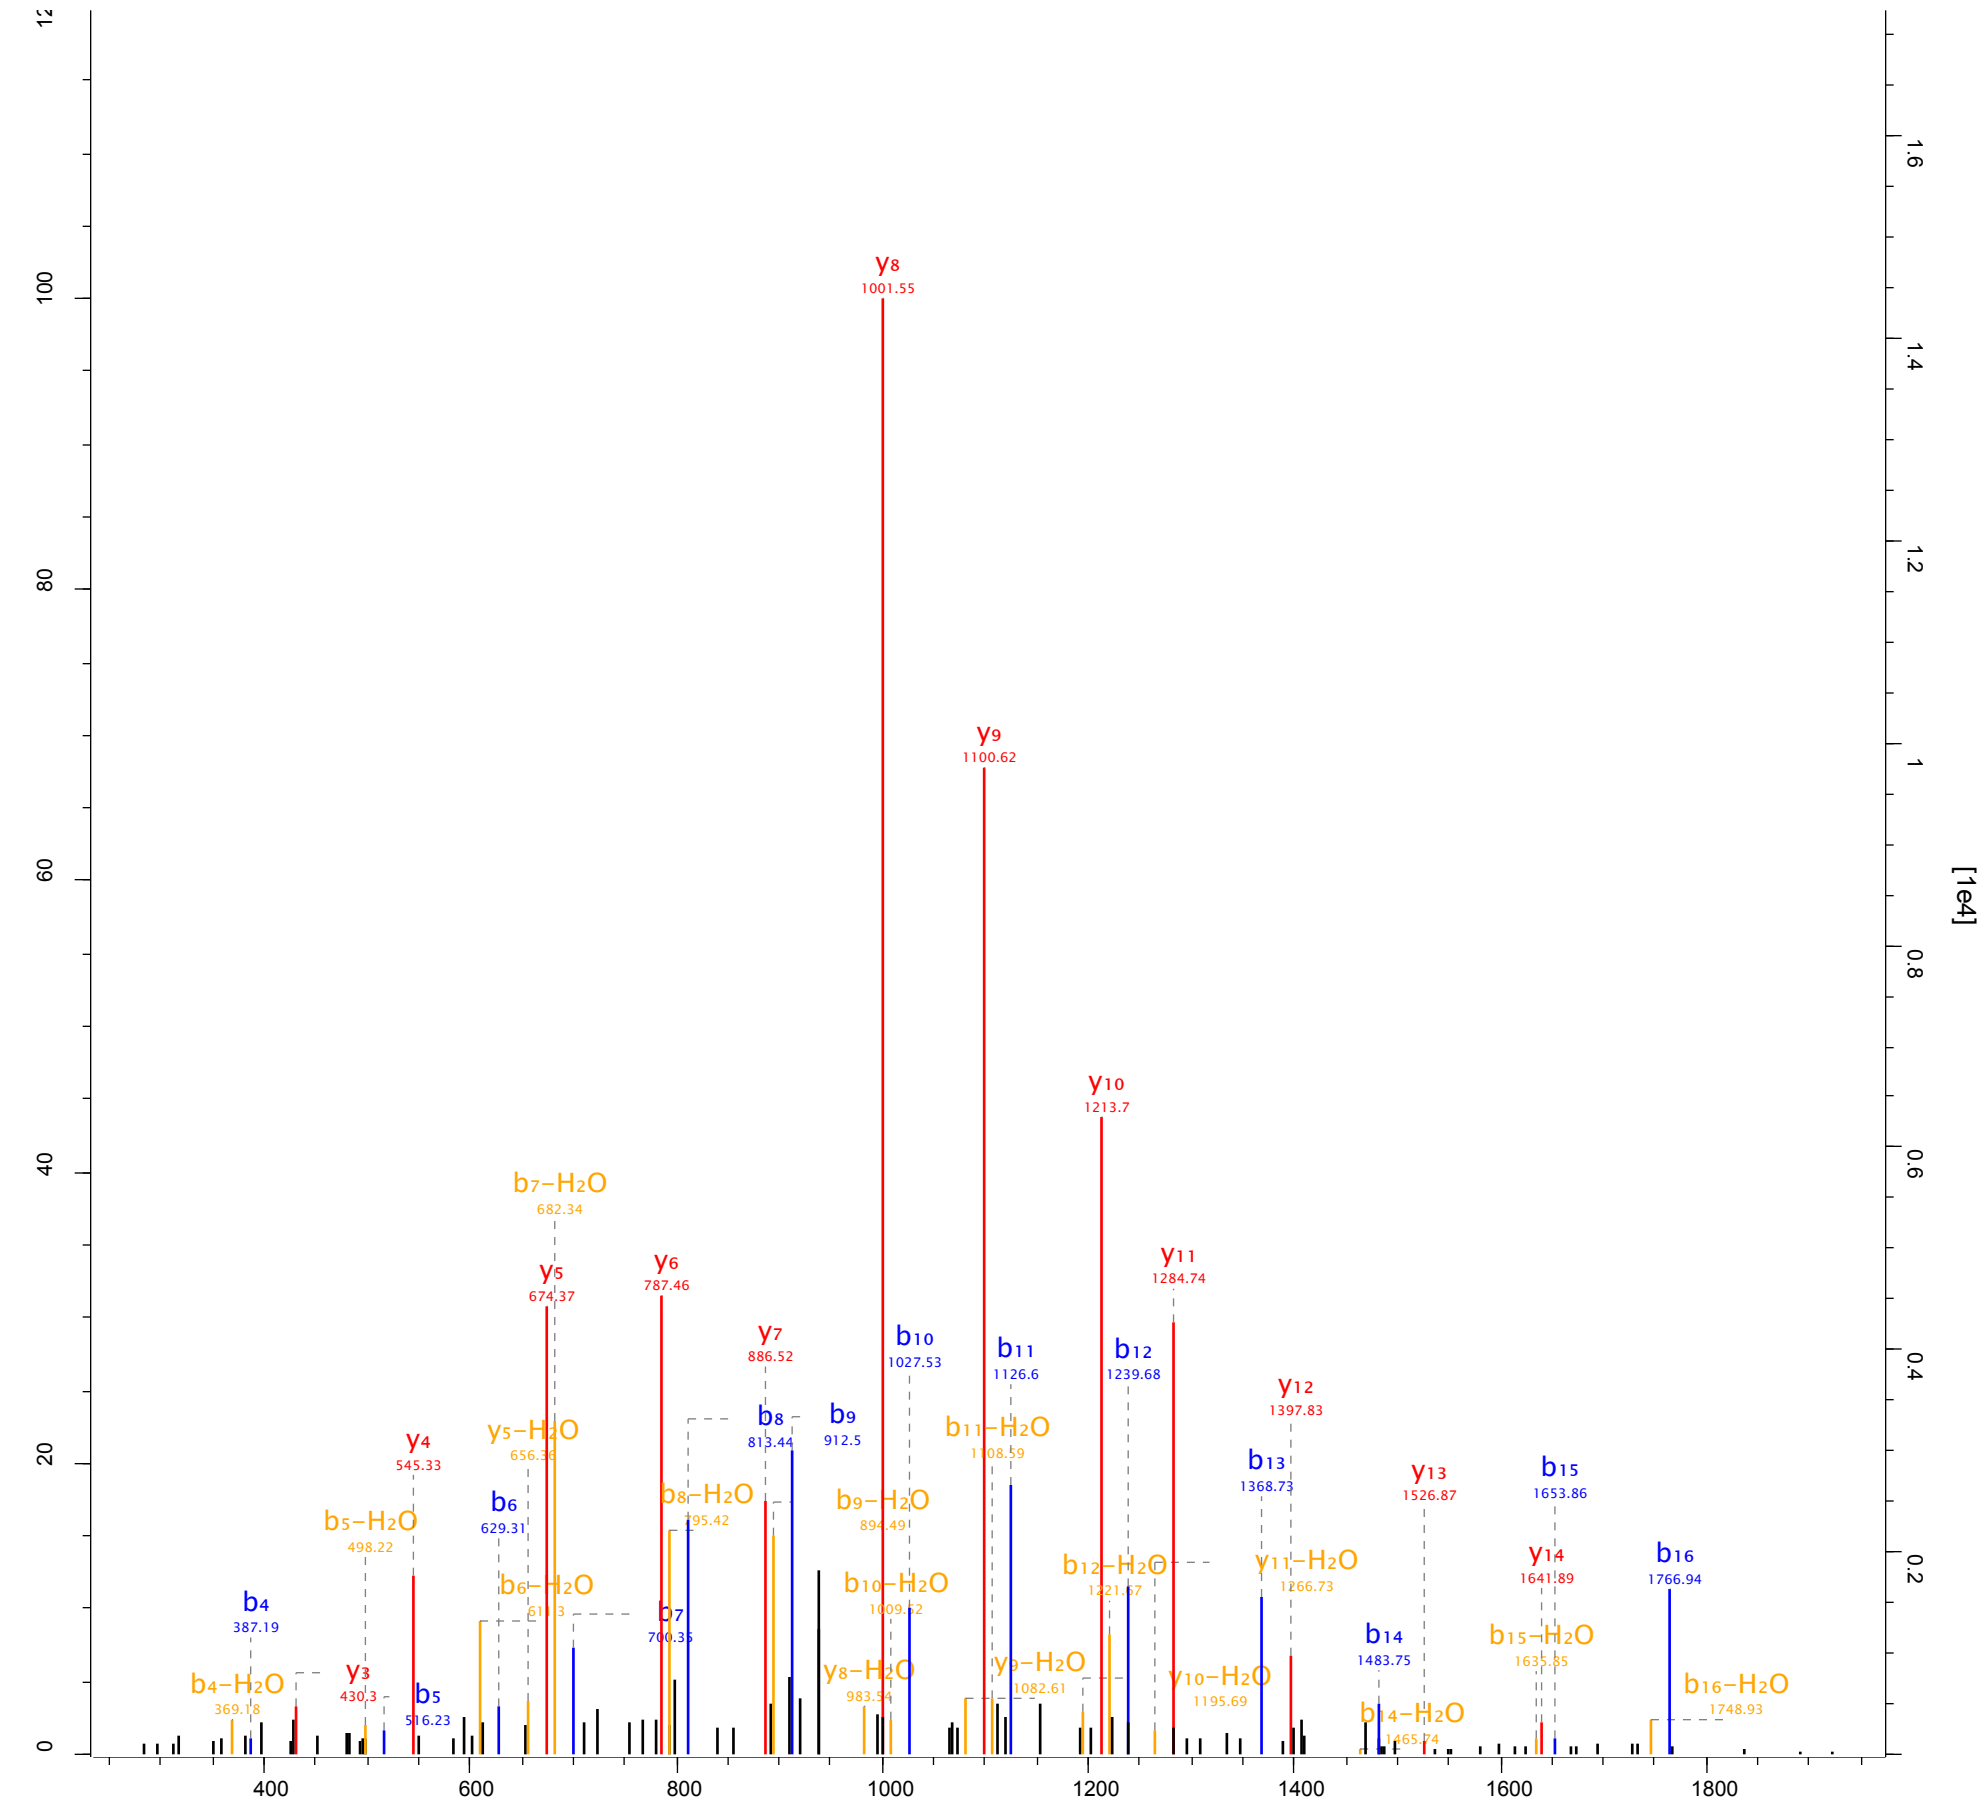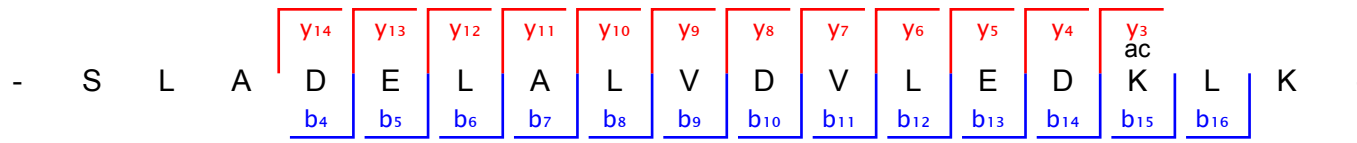

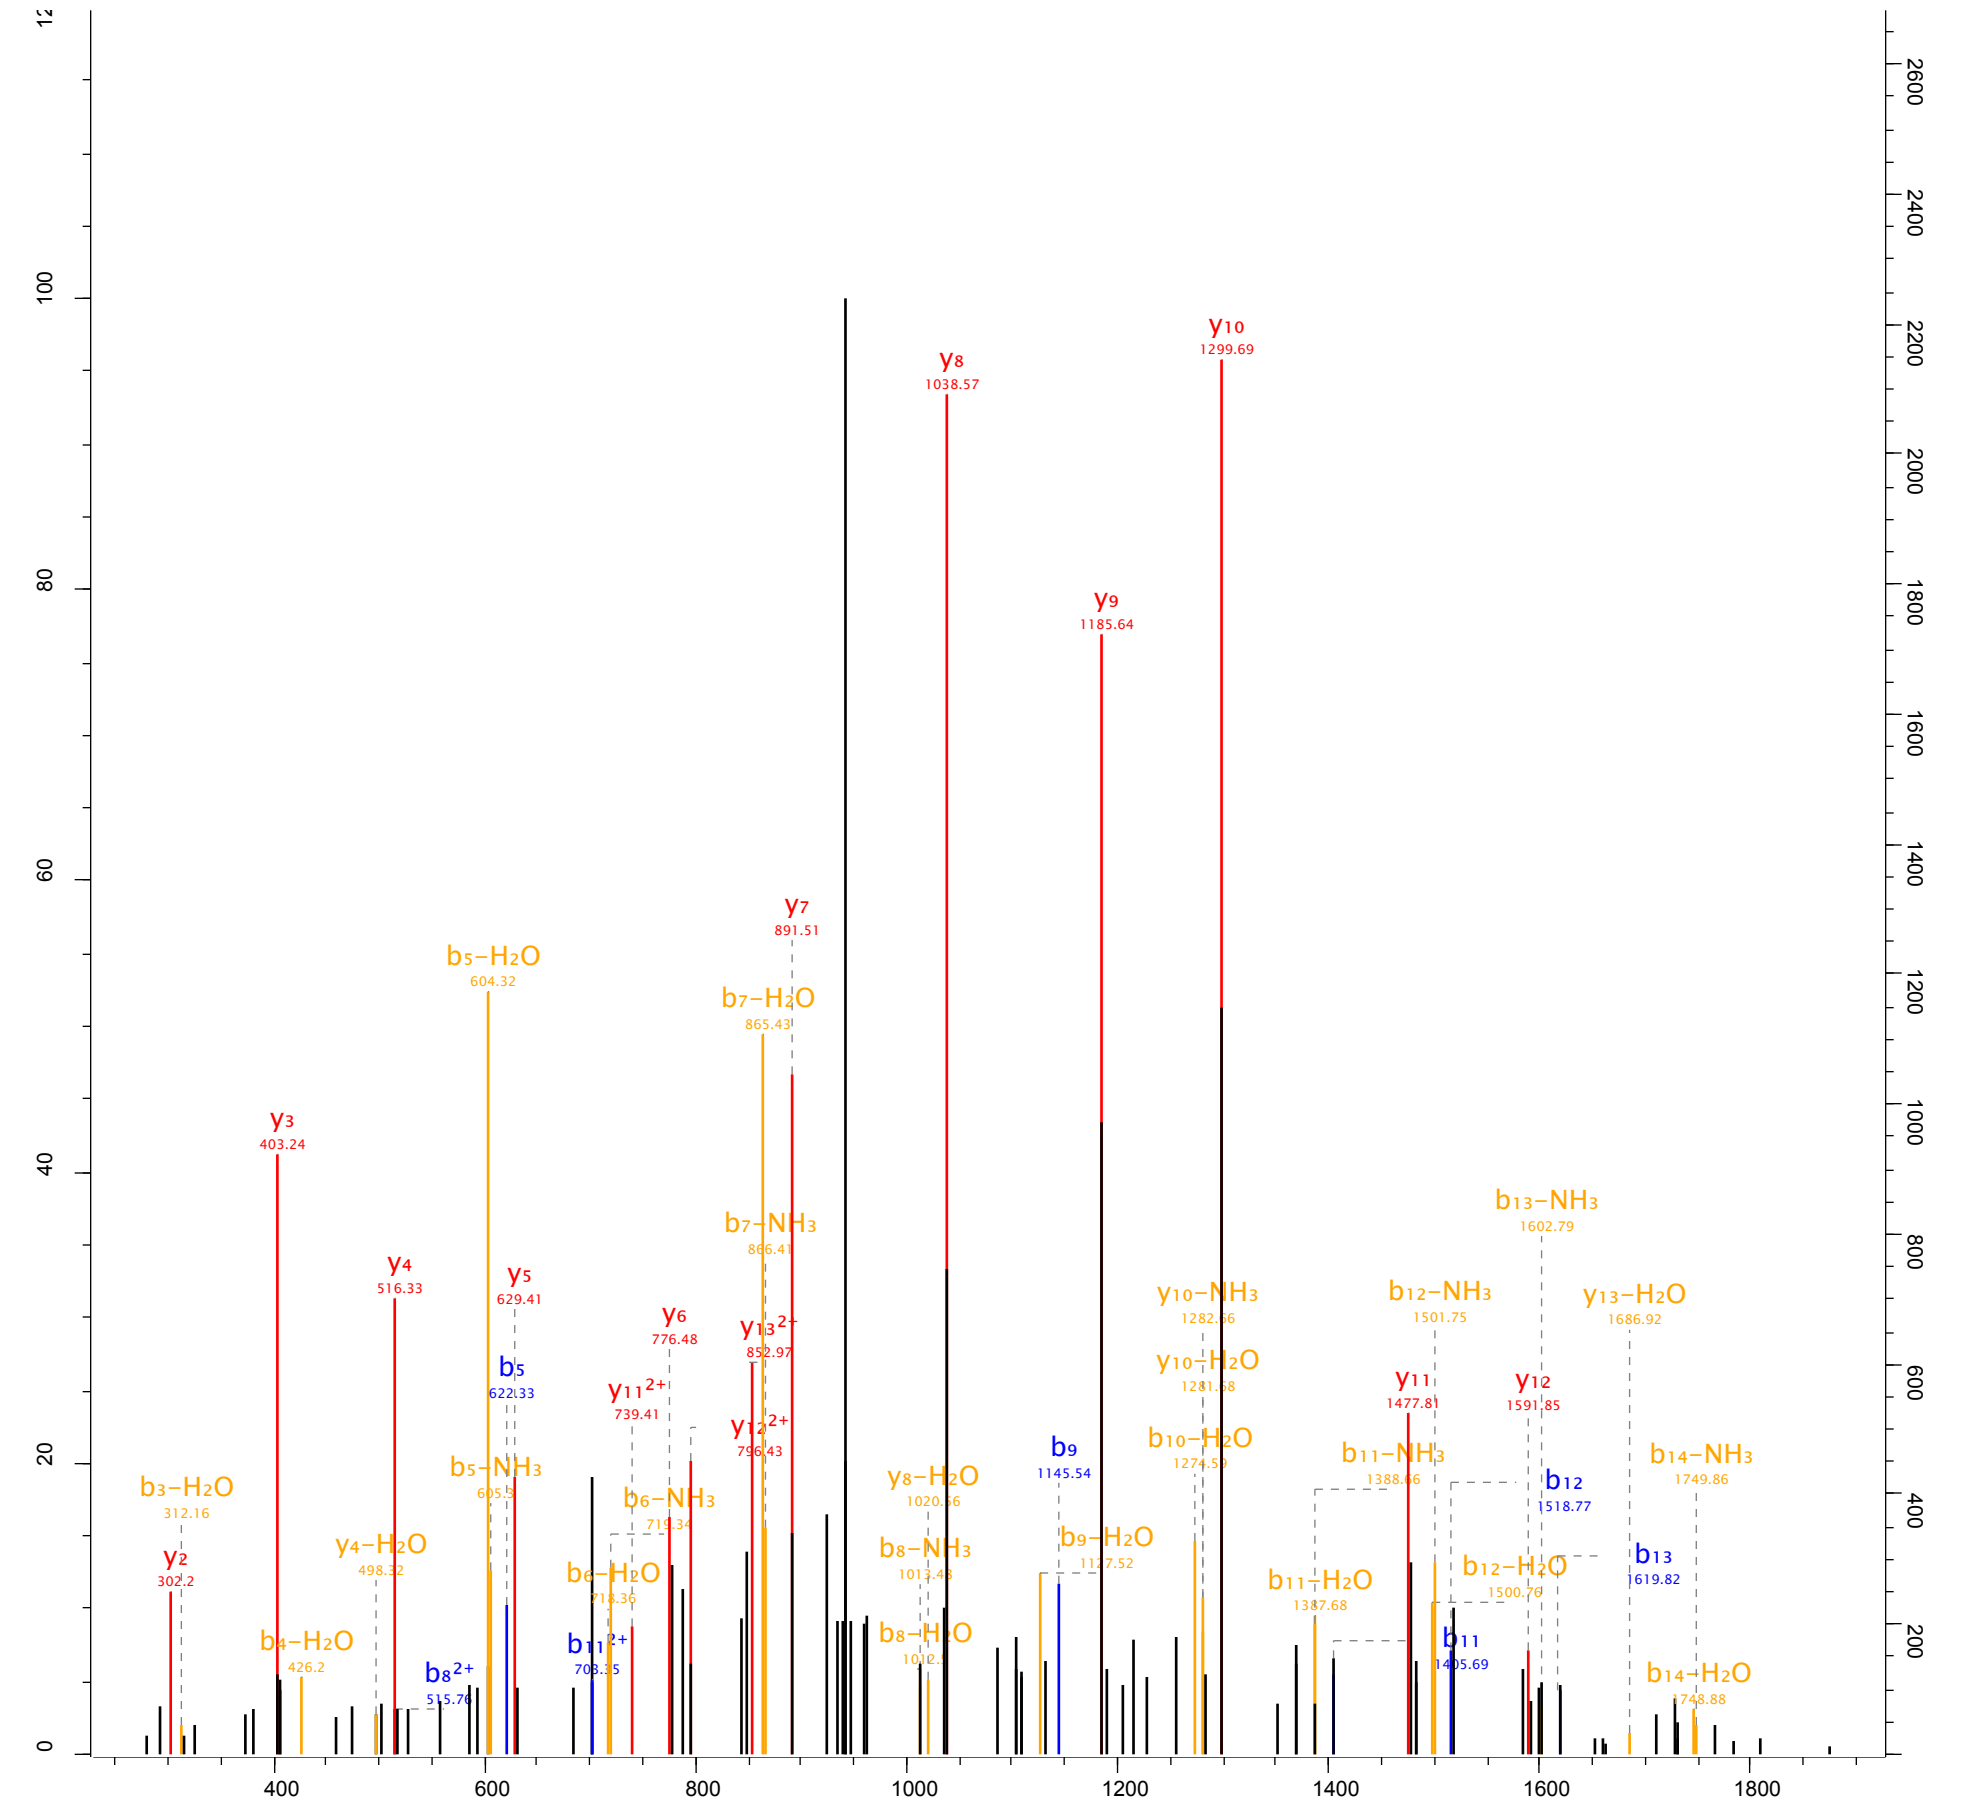

- E S L N K N F F D F L L T F K -

y13<sup>2+</sup>
y12
y11
y10
y9
y8
y7
y6
y5
y4
y3
y2

b5
b8<sup>2+</sup>
b9
b11
b12
b13

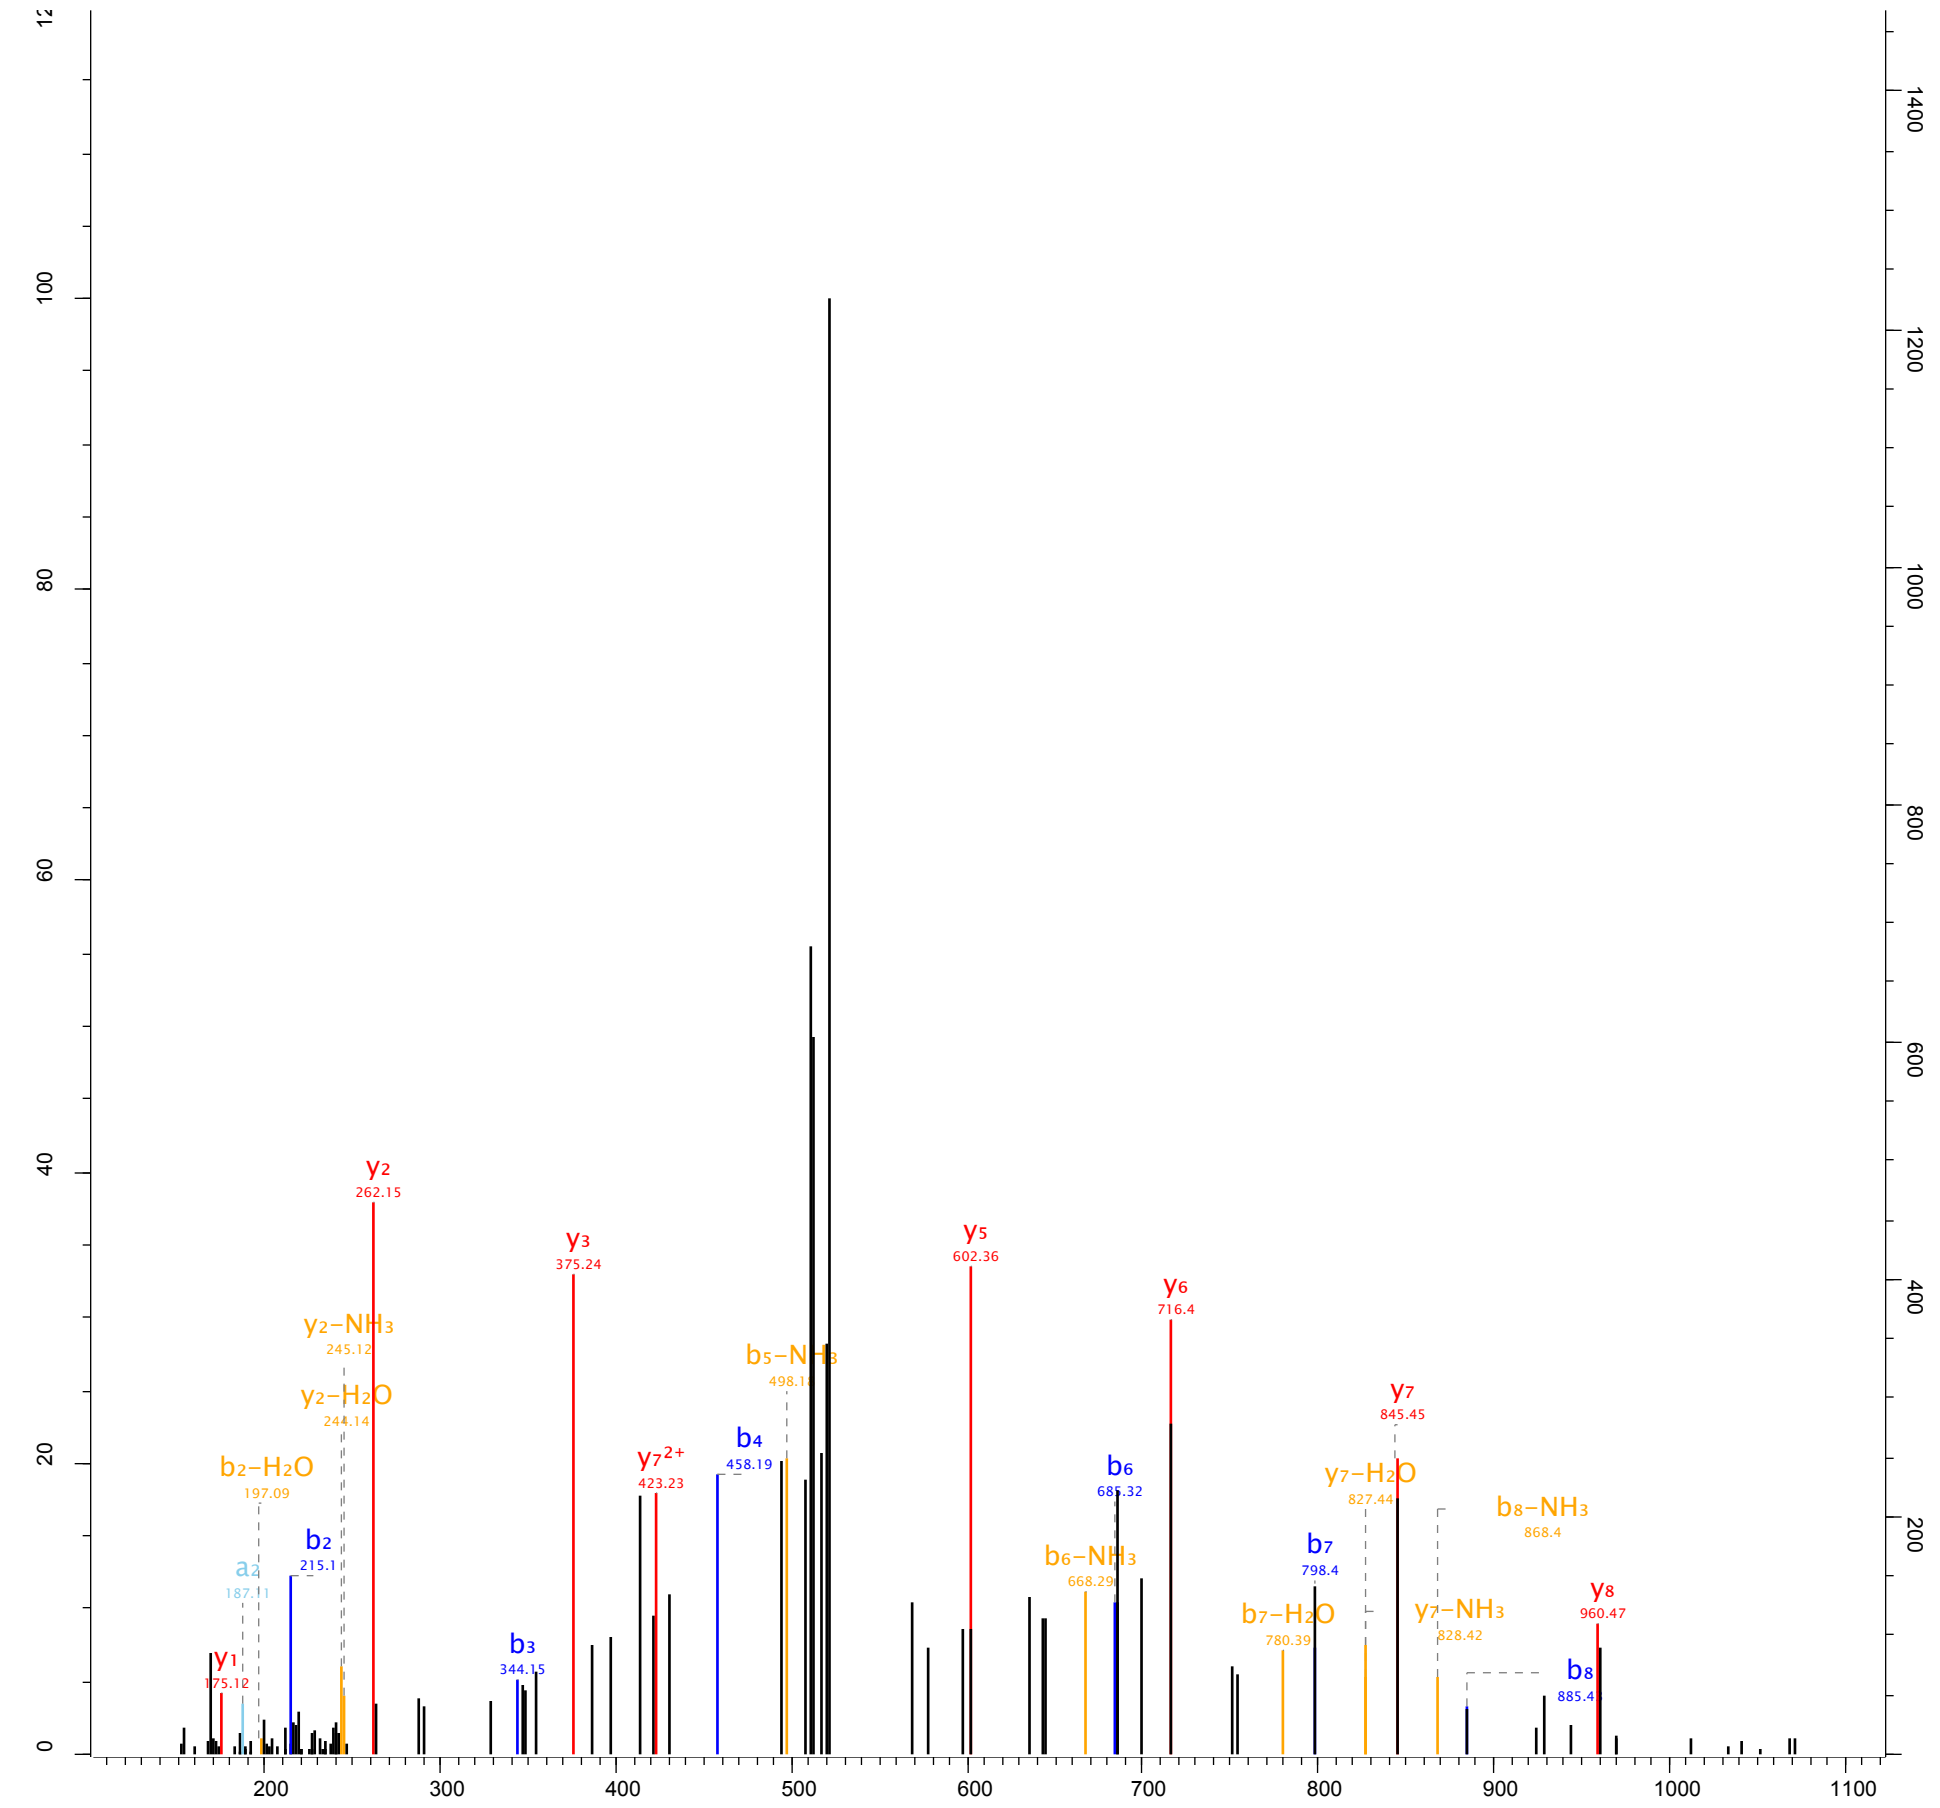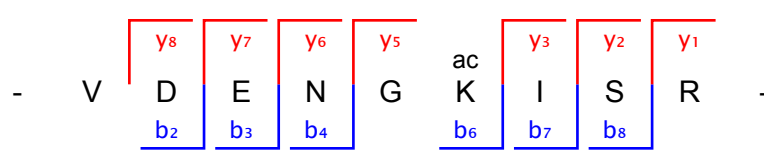

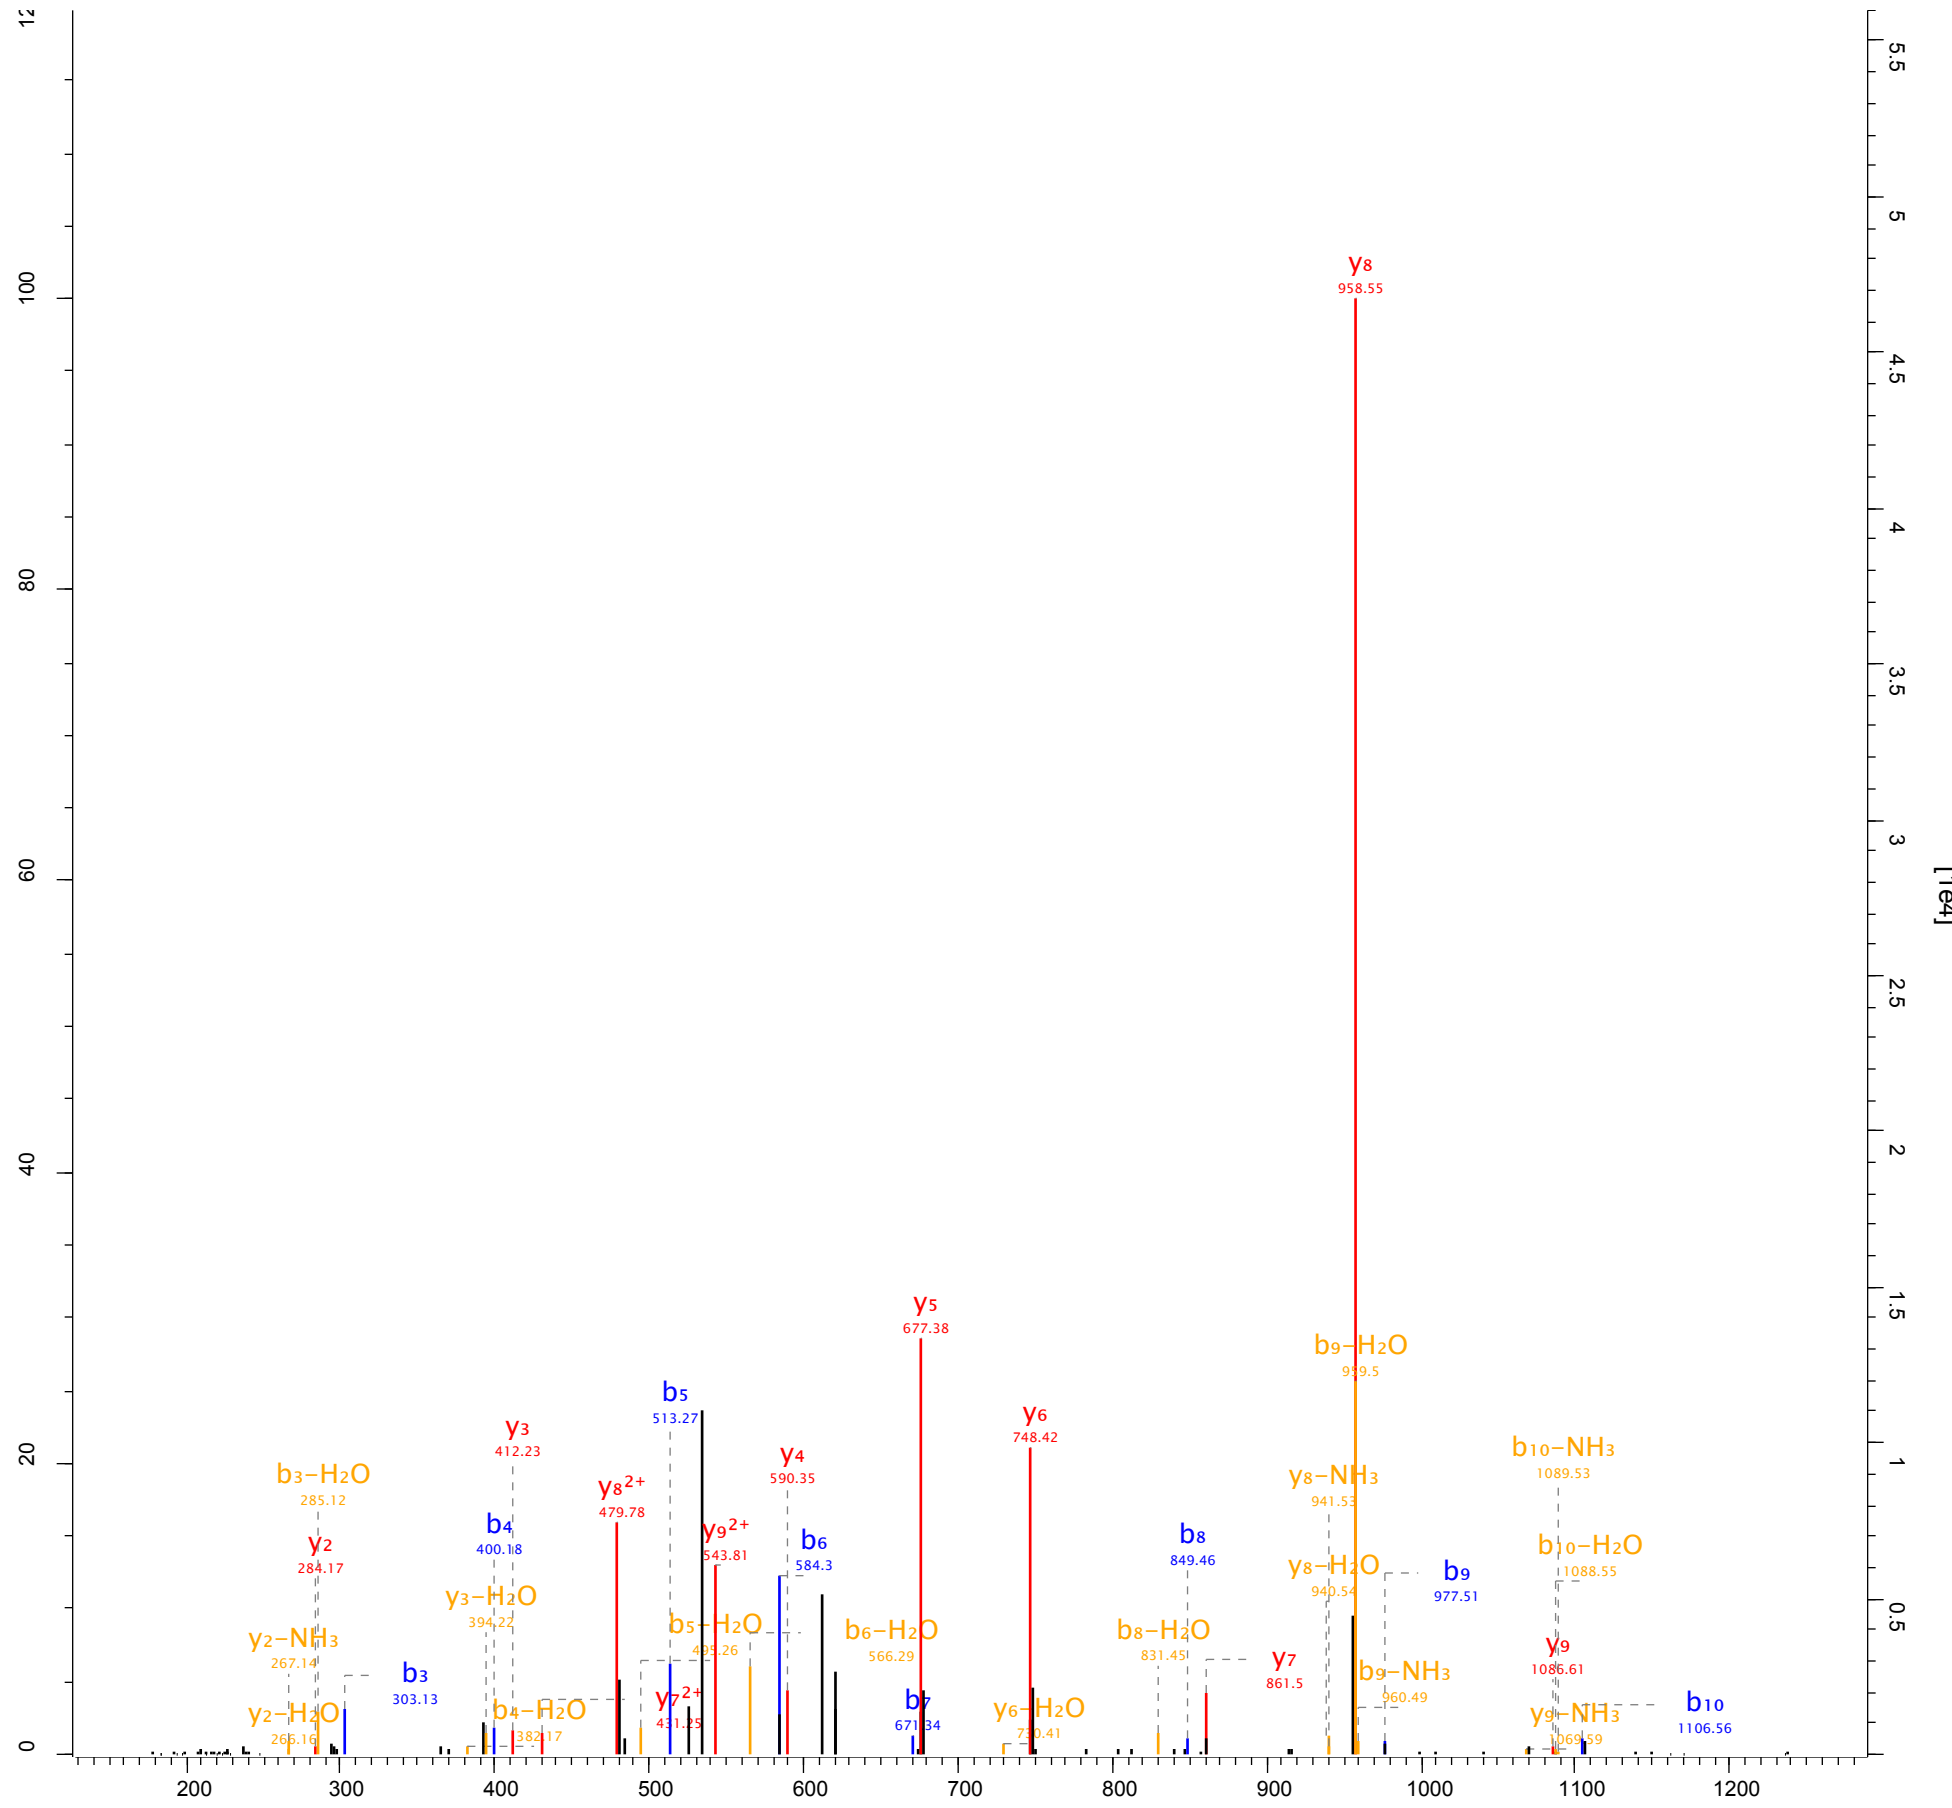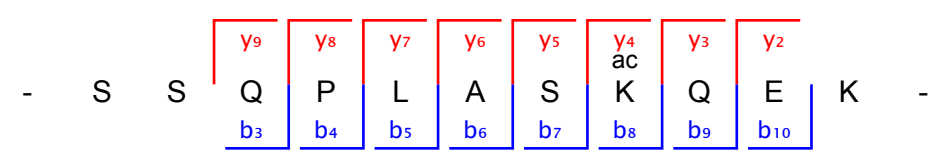

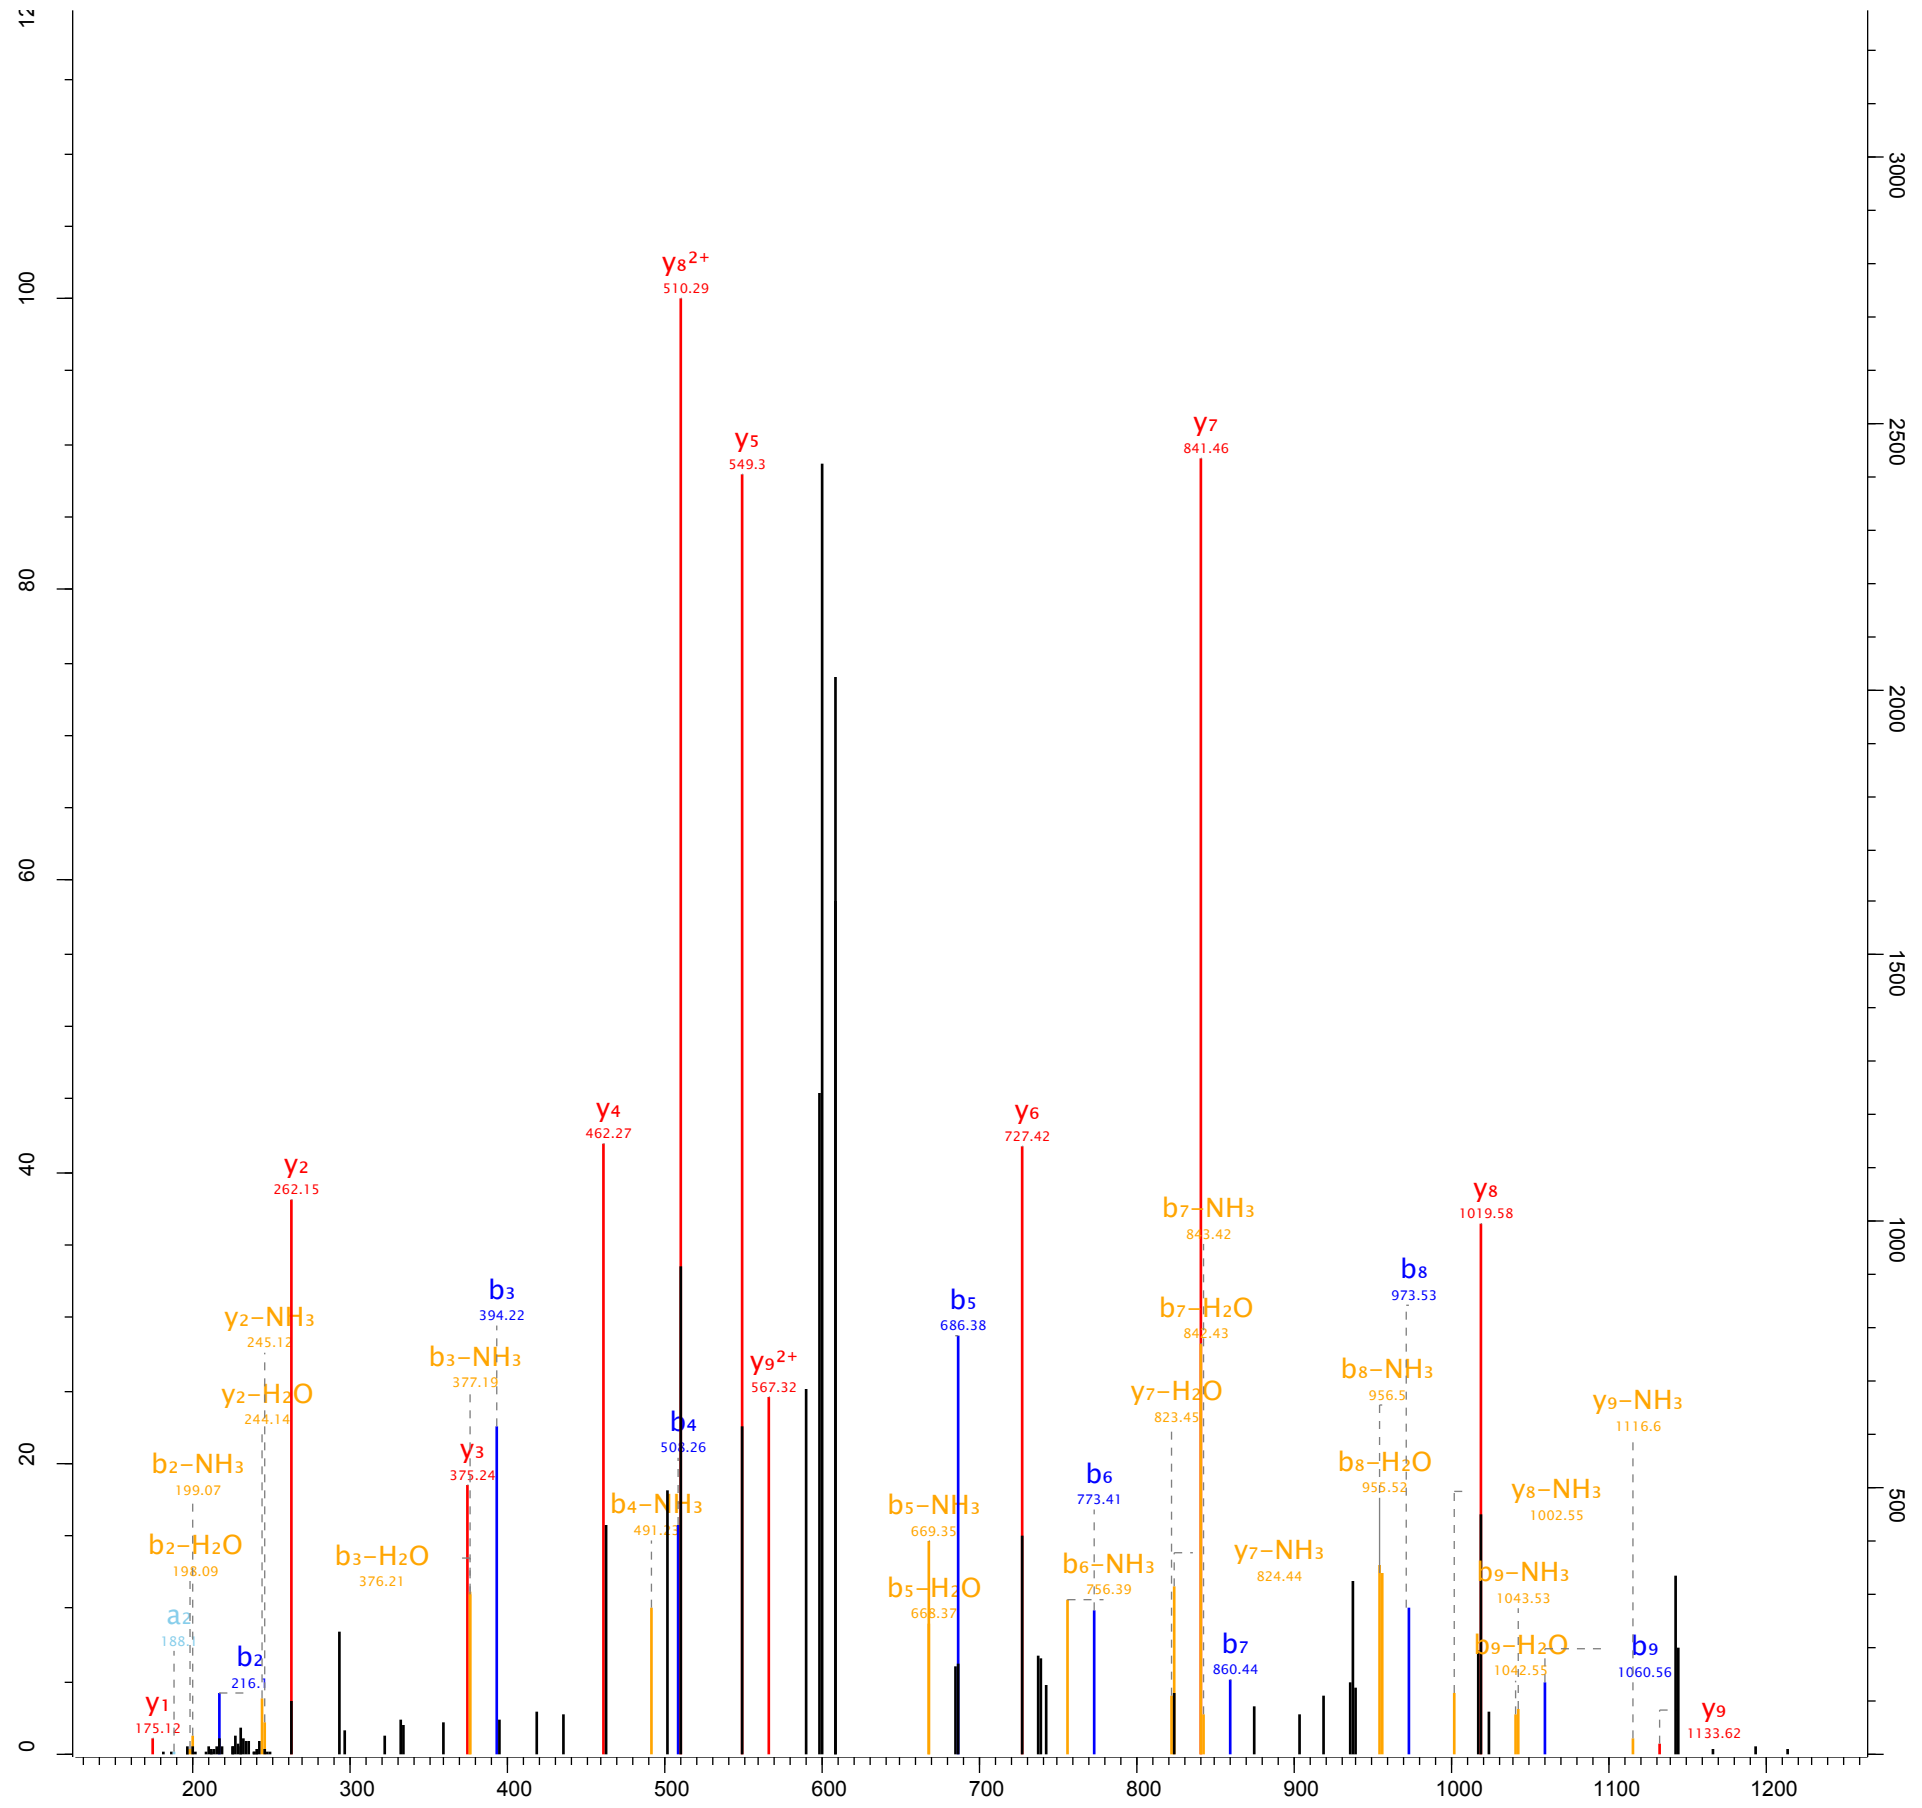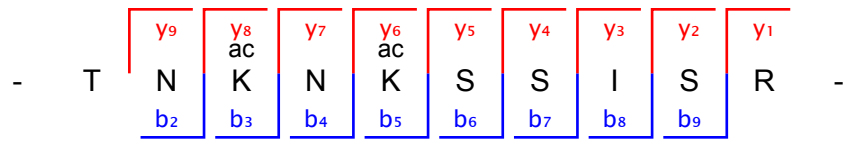



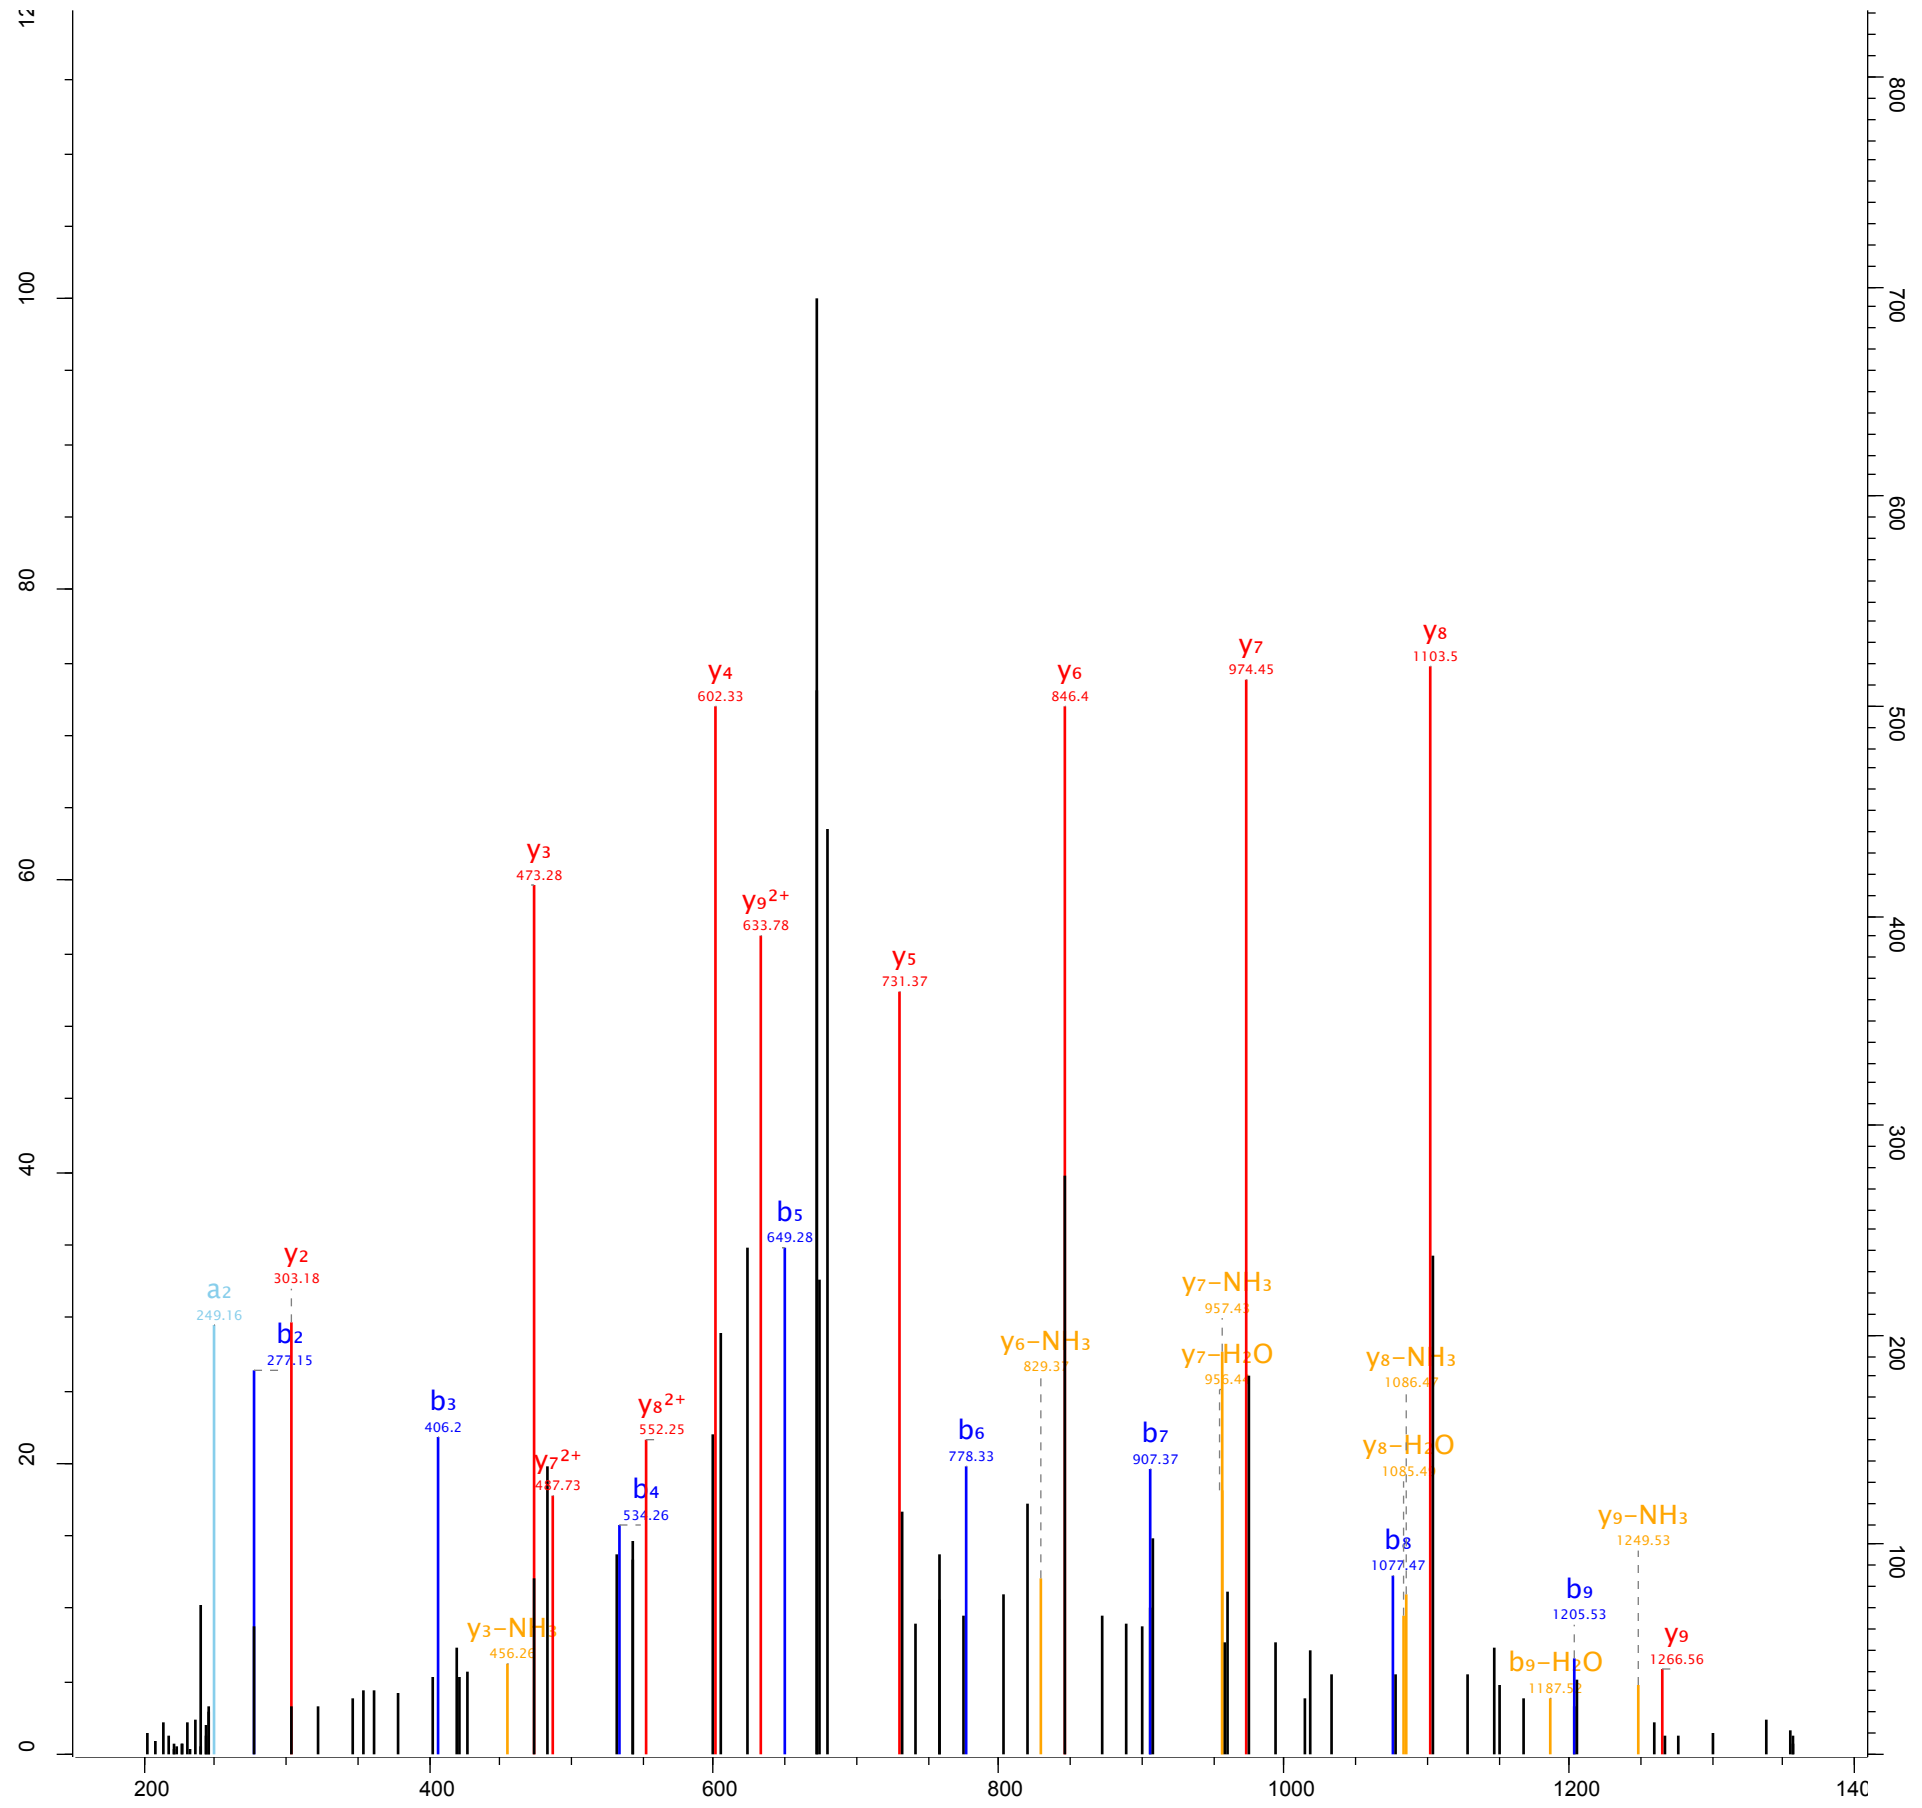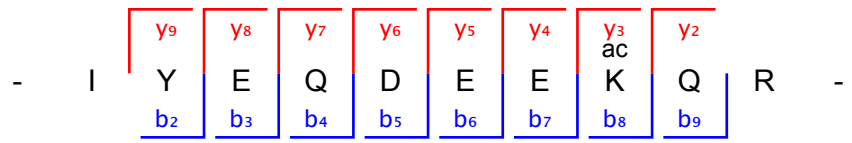

050813\_SCW\_II\_29\_22\_5

10300

ITMS; CID

155.58

464.27

Hist1h4a;Gm11275

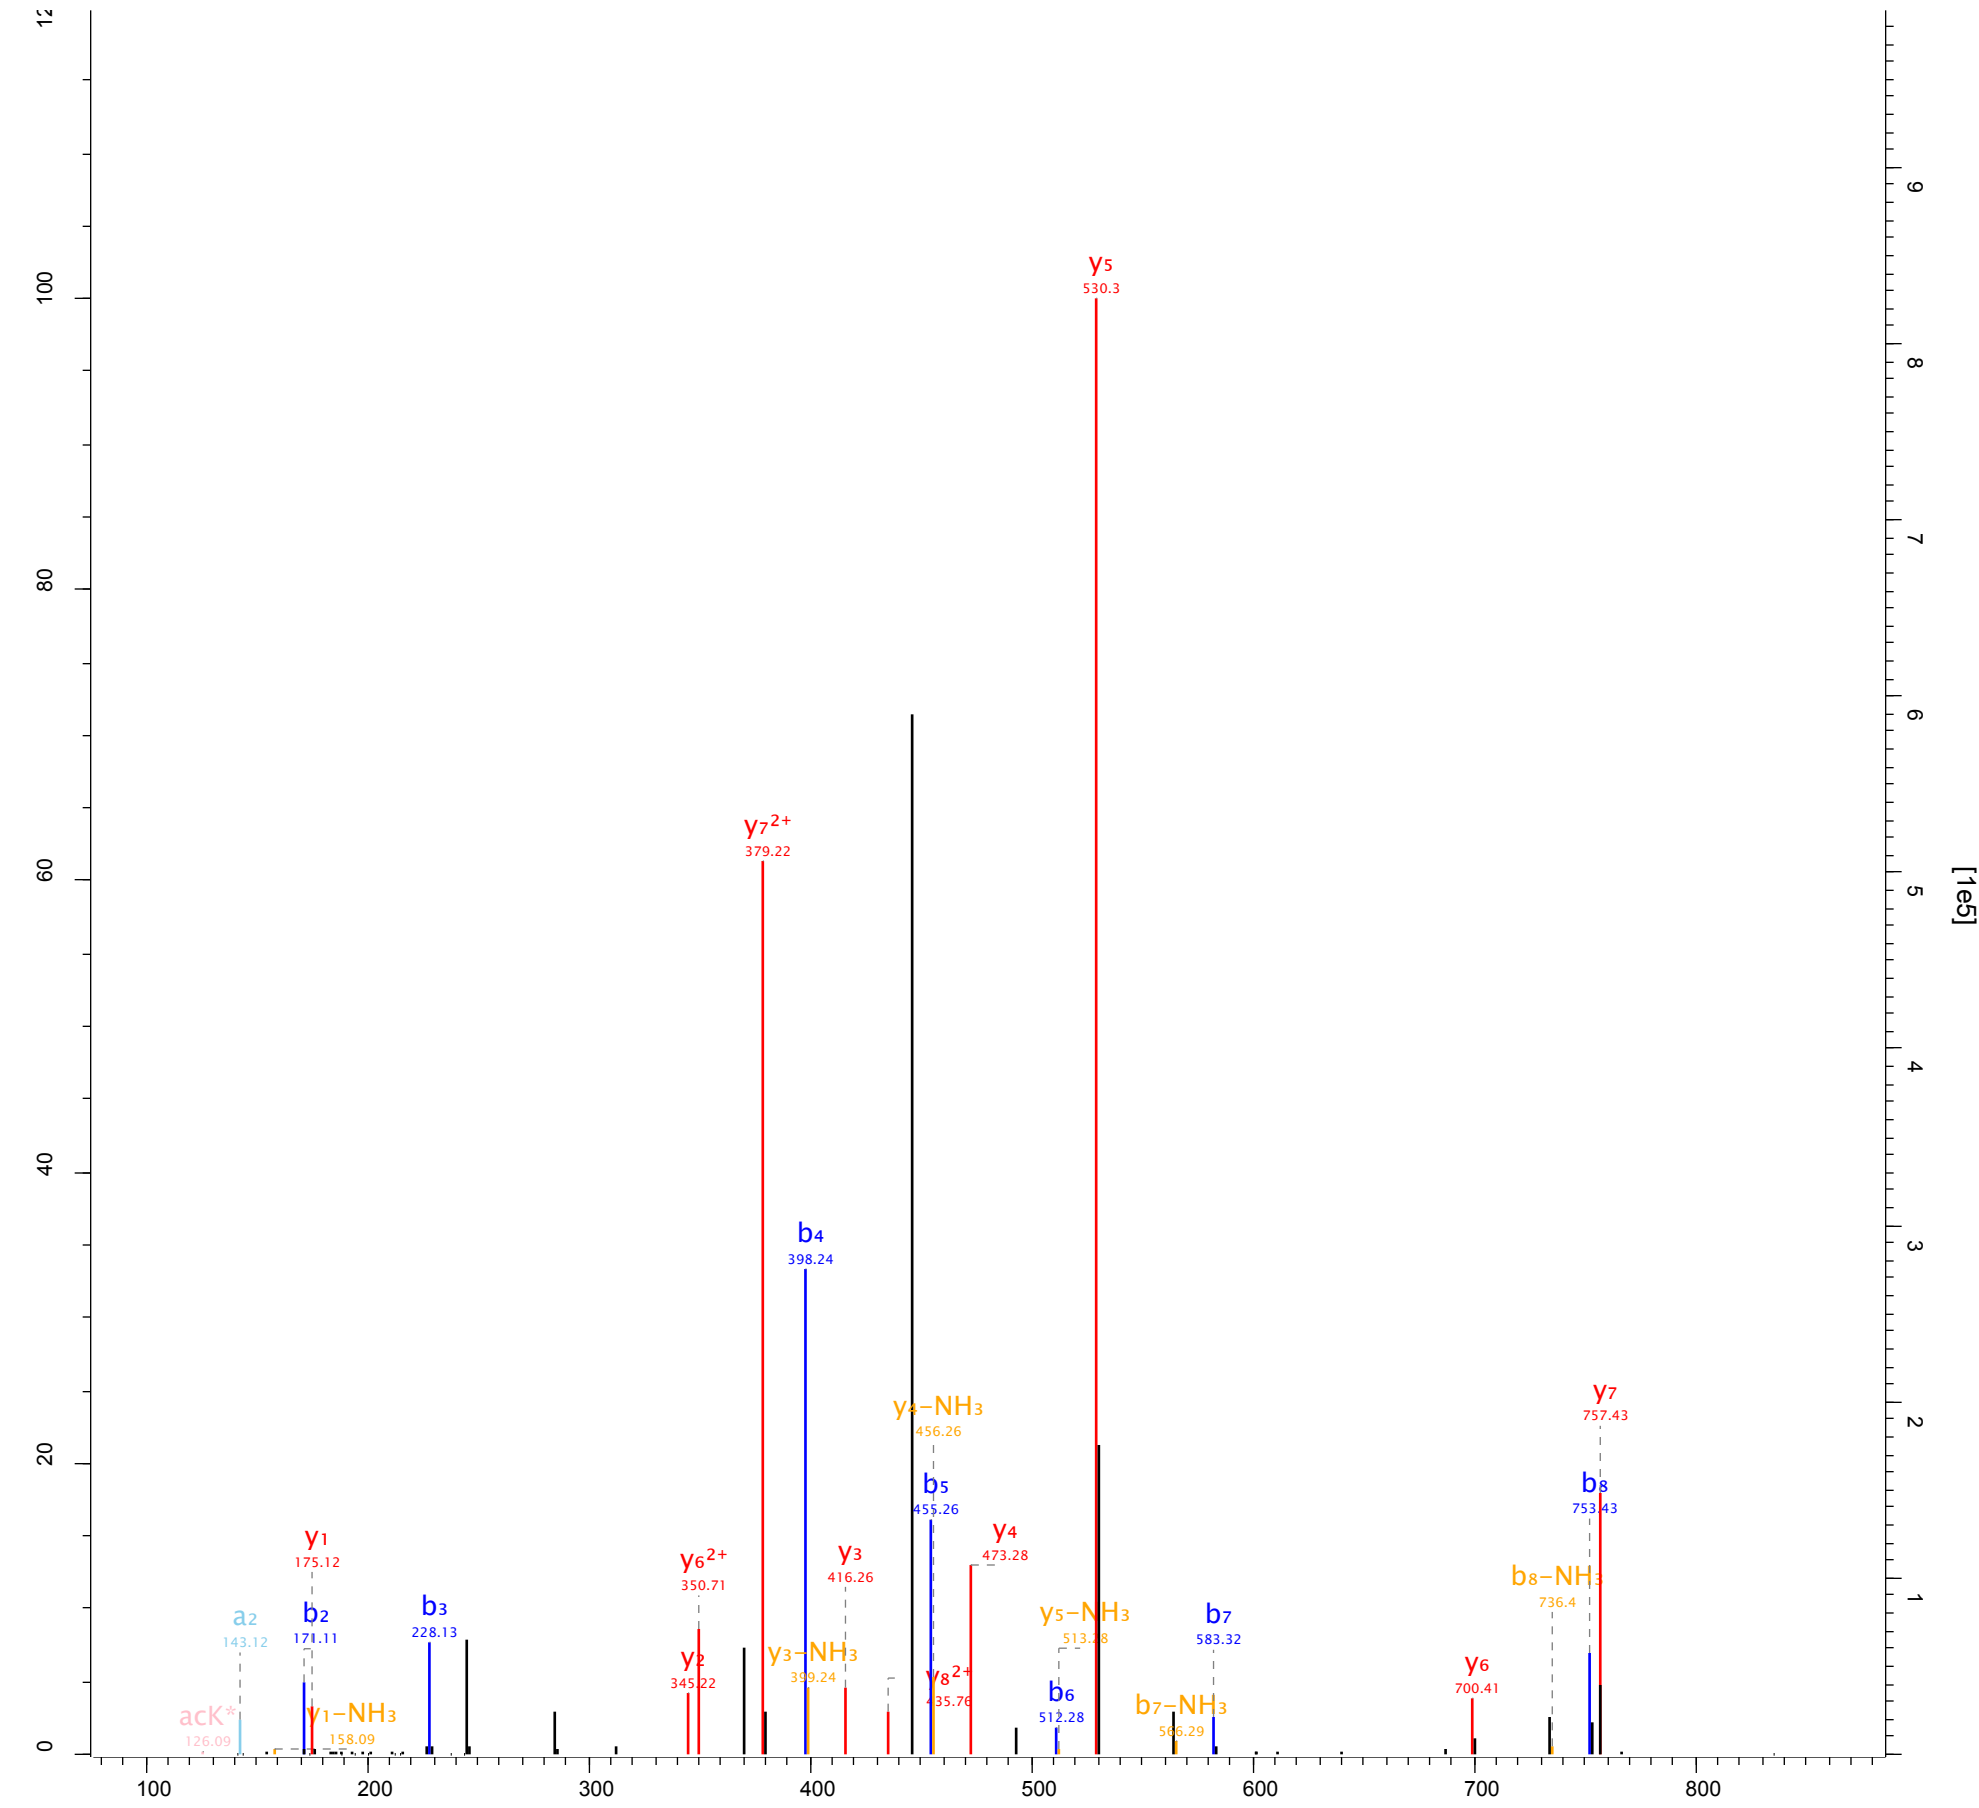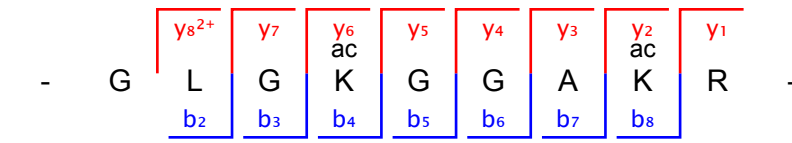

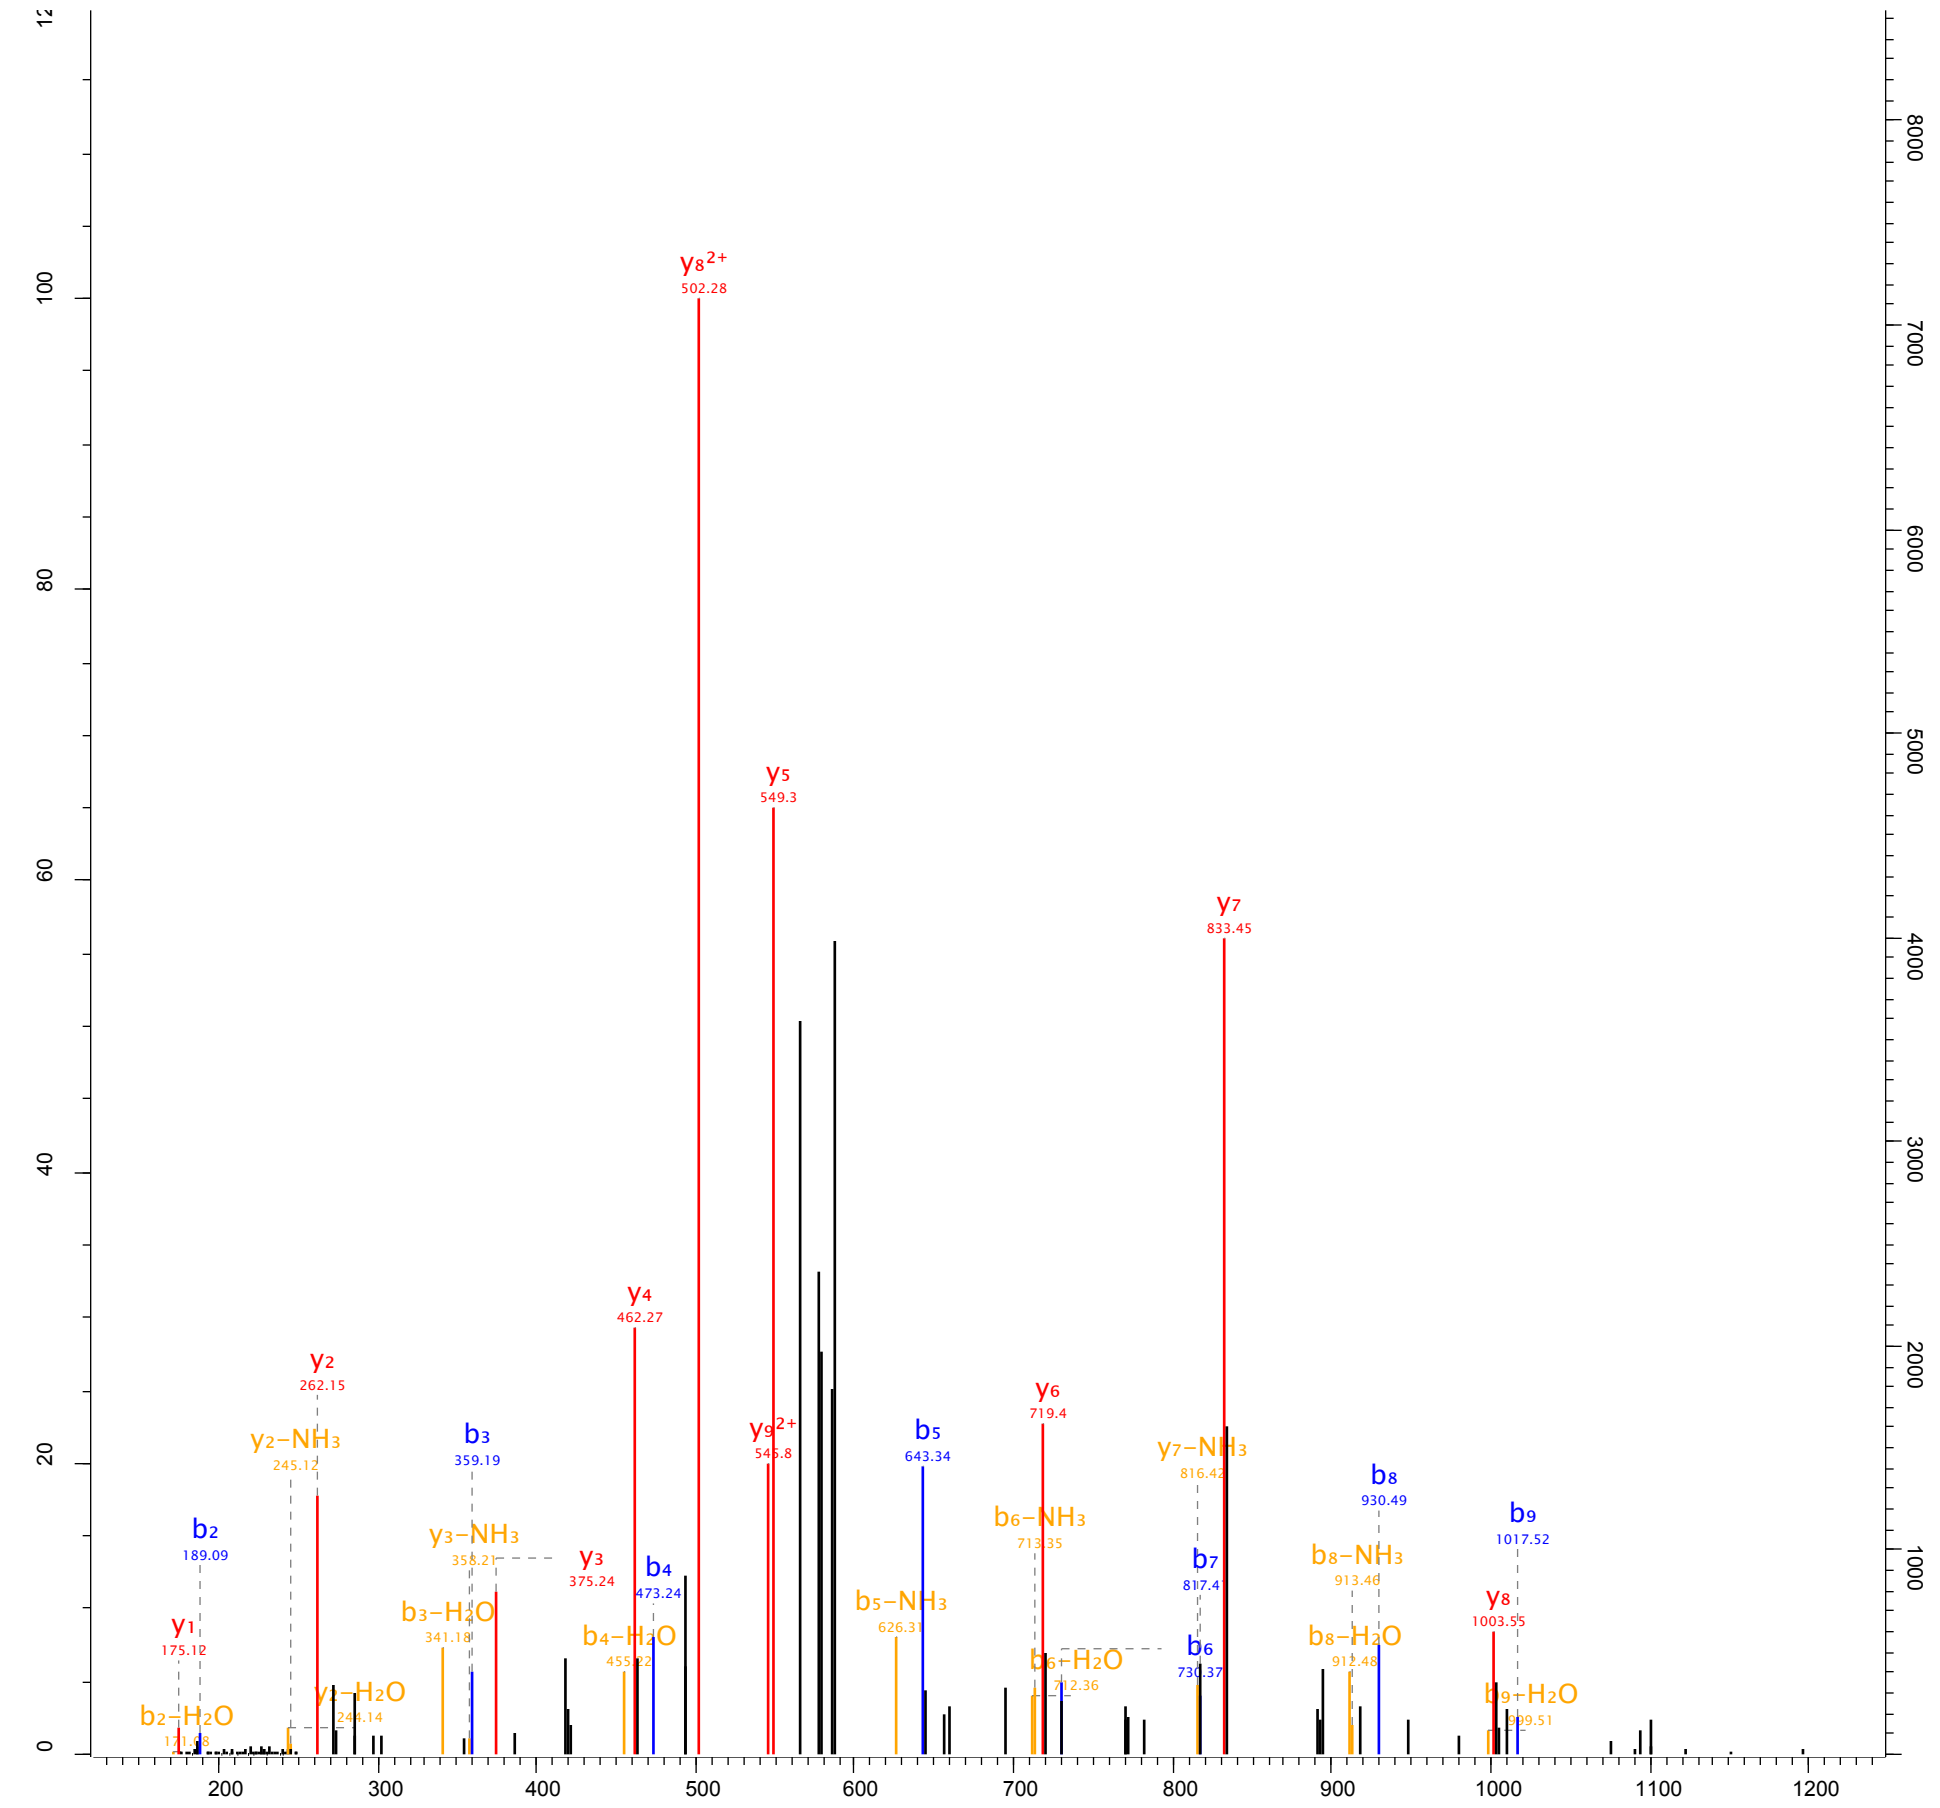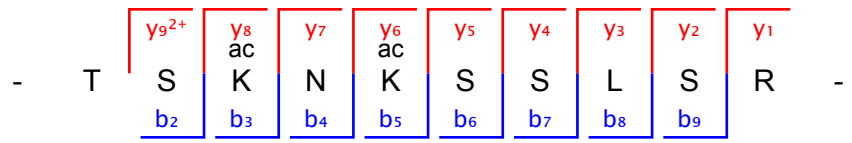

050813\_SCW\_II\_29\_22\_5

10642

ITMS; CID

137.14

452.77

Hspa9

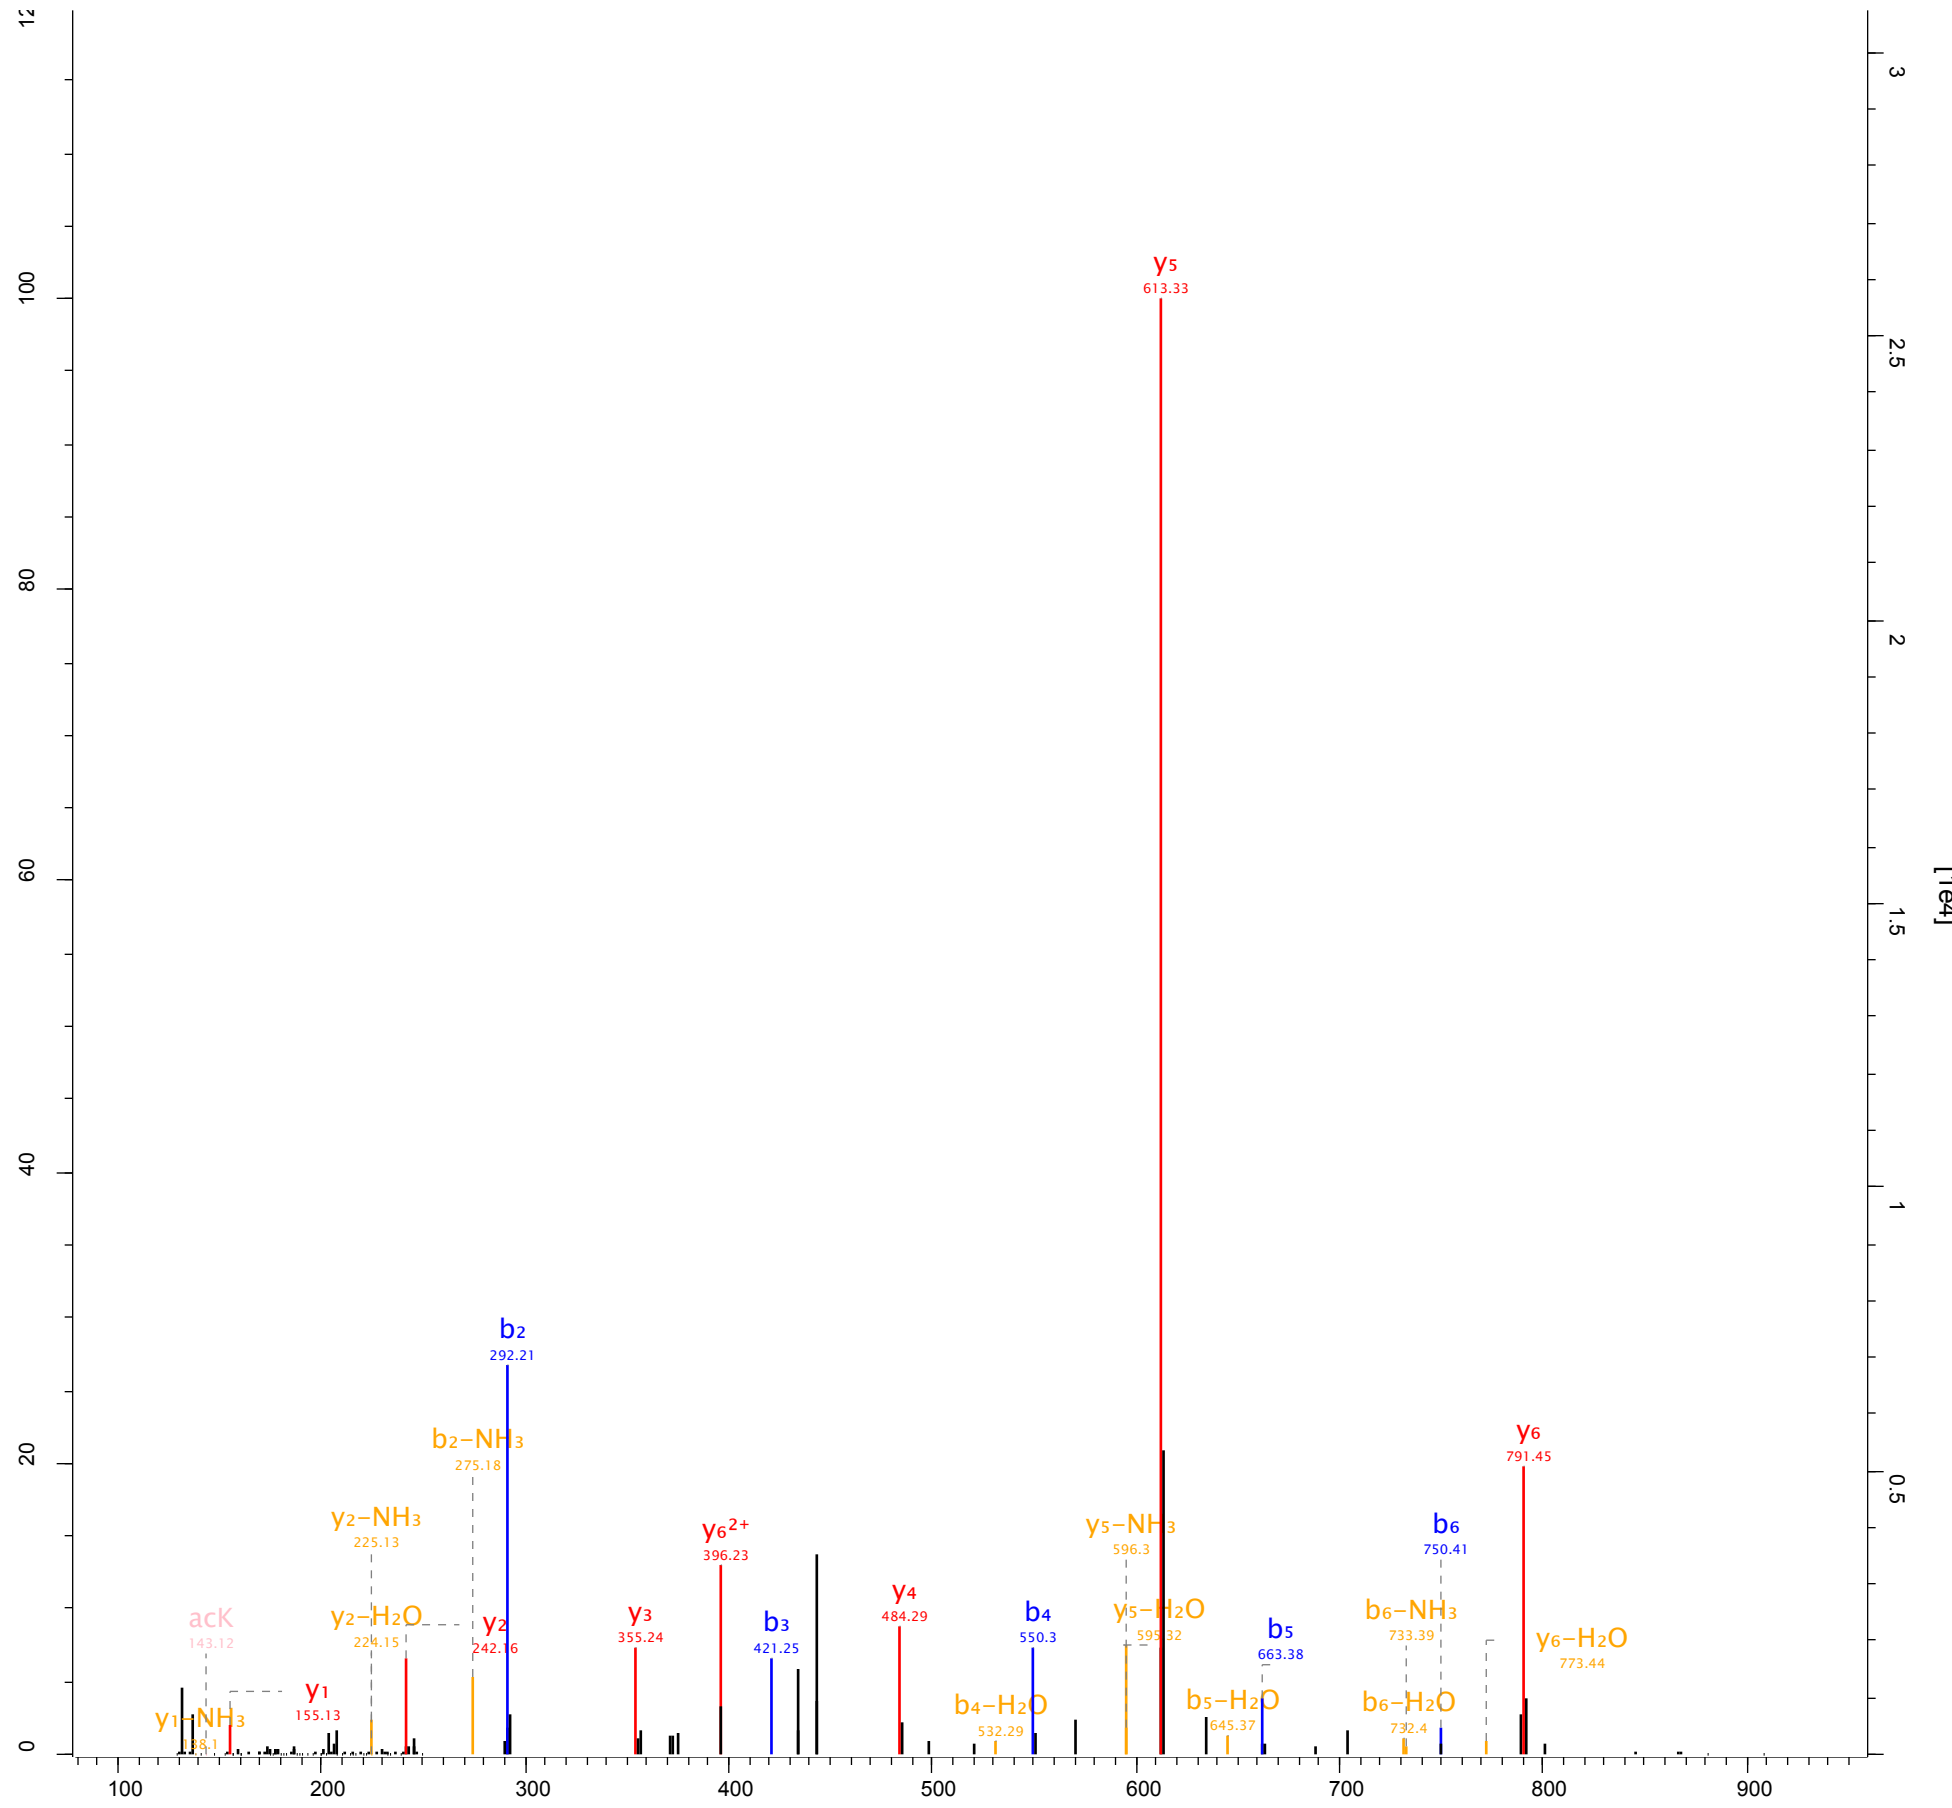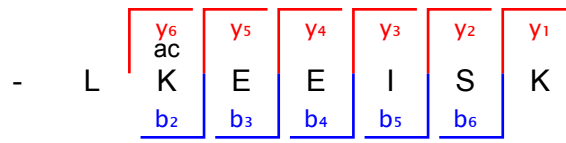

Raw file: 050813\_SCW\_II\_29\_22\_5  
 Scan: 10644 Method: ITMS; CID Score: 212.68 m/z: 603.81 Gene names: Gapdh;Gm7293;Gm5069

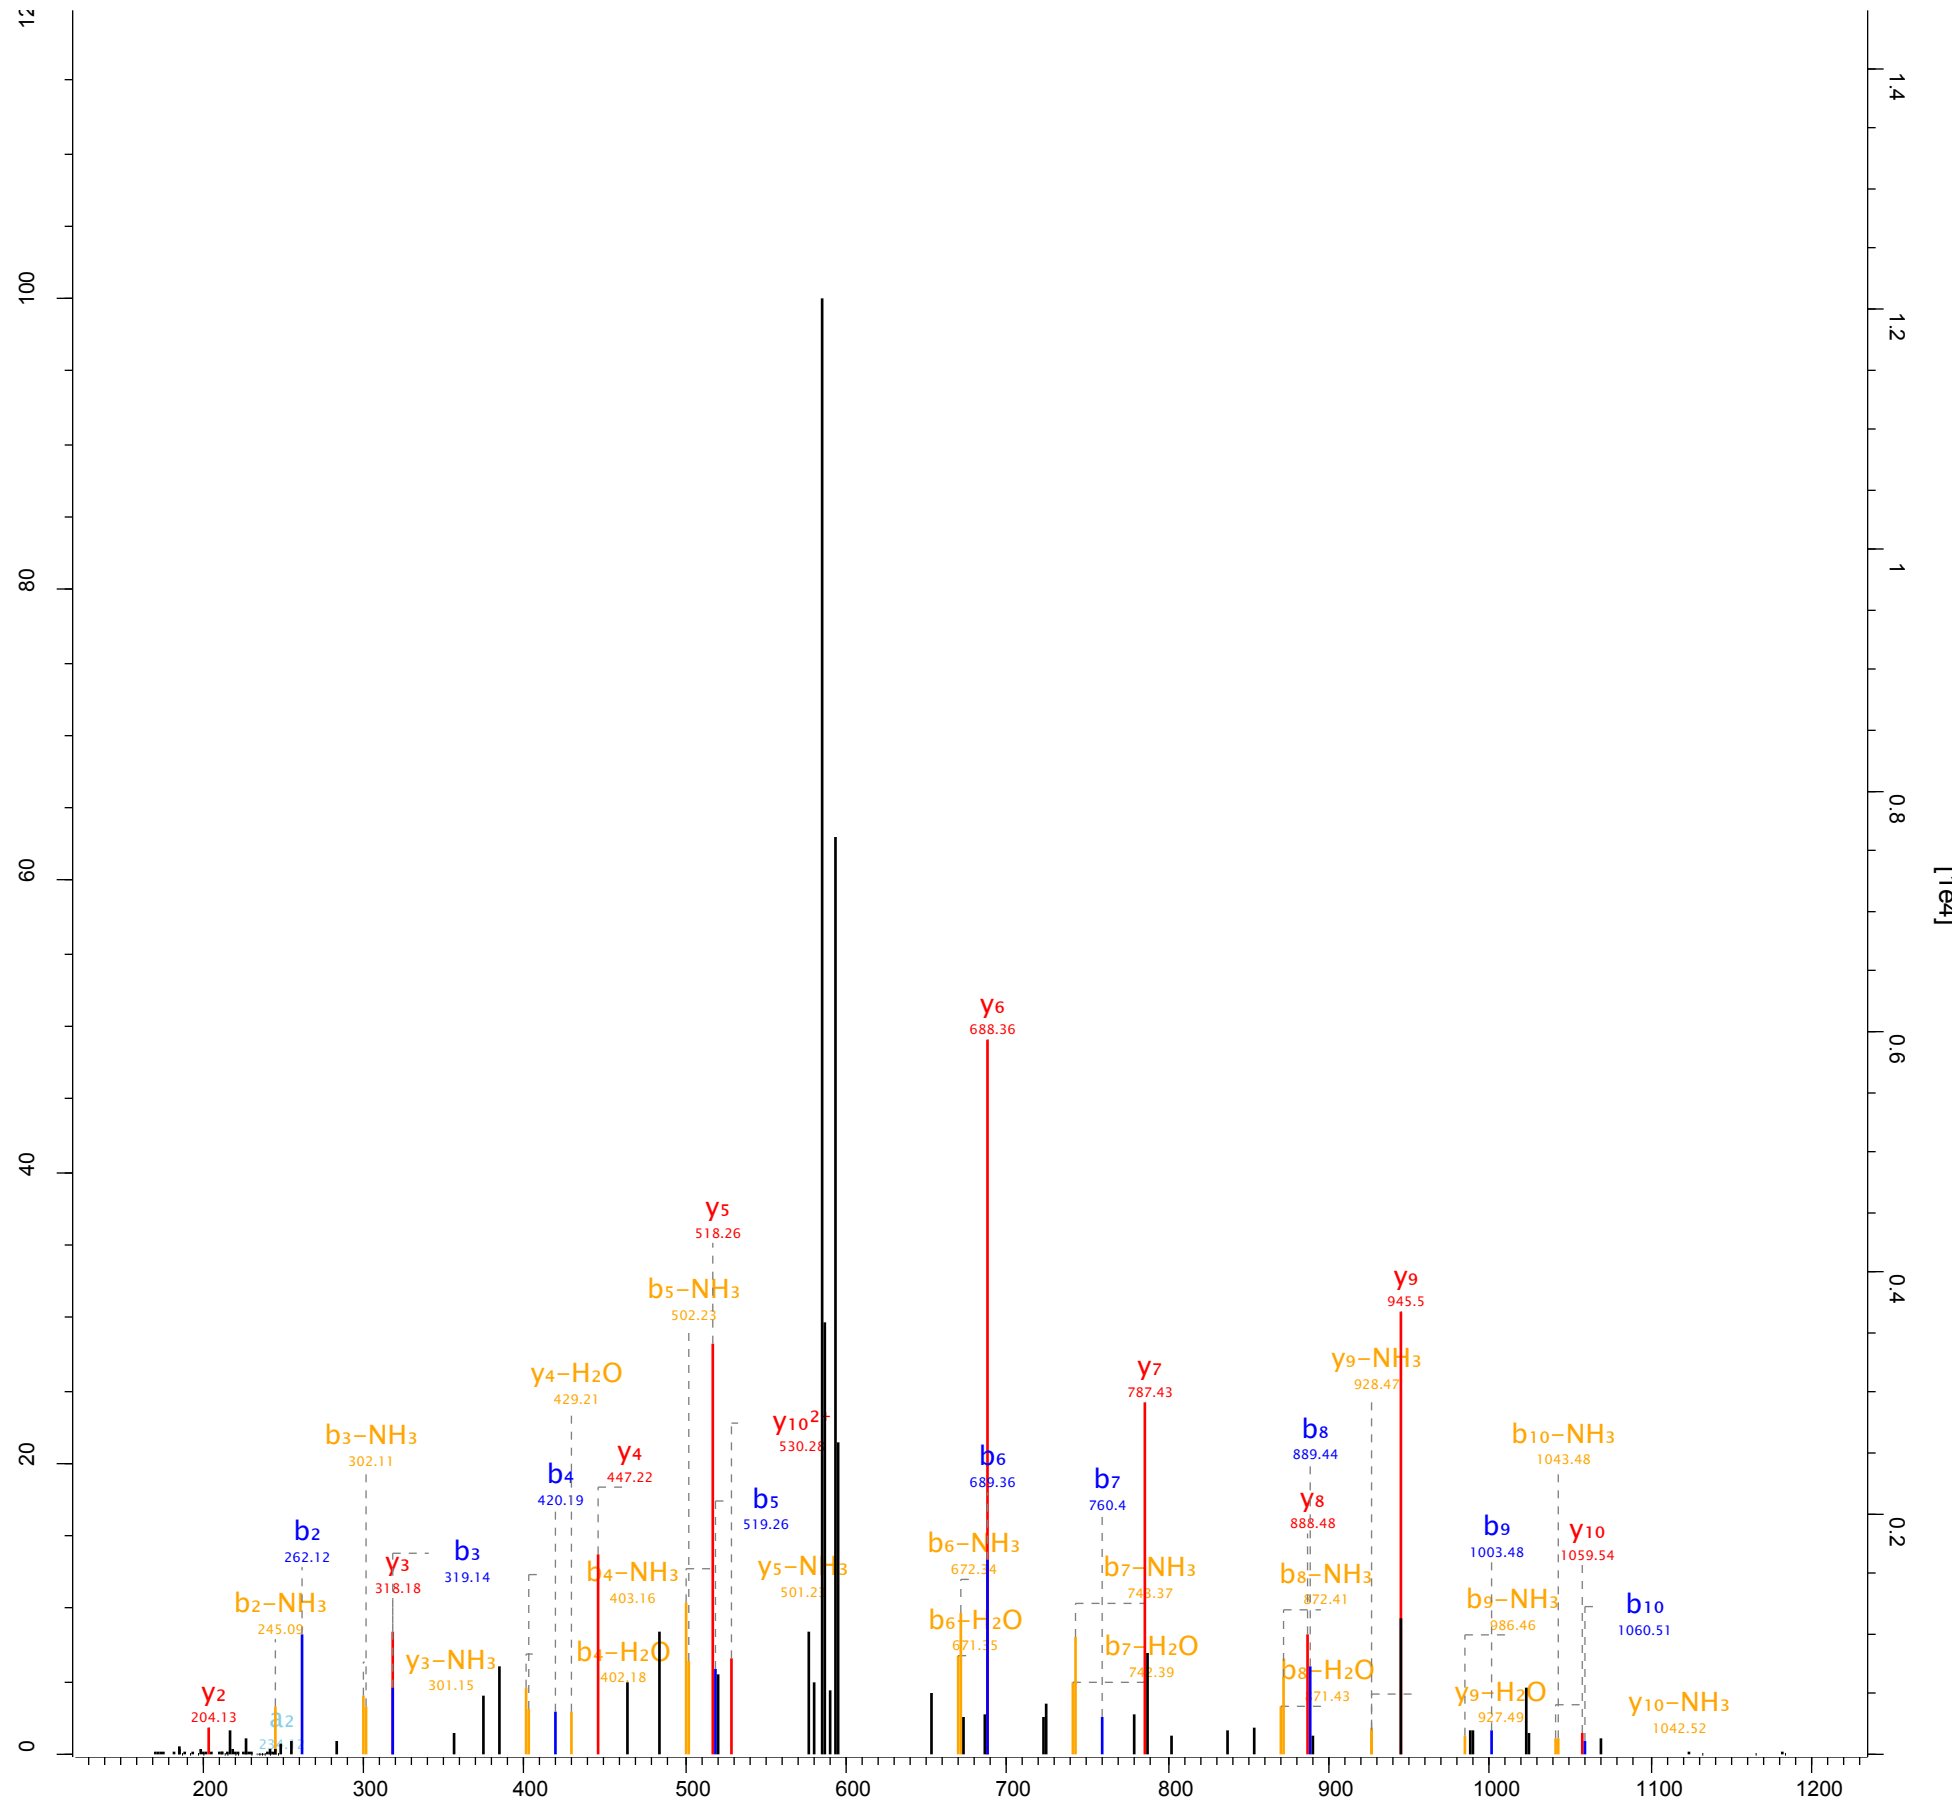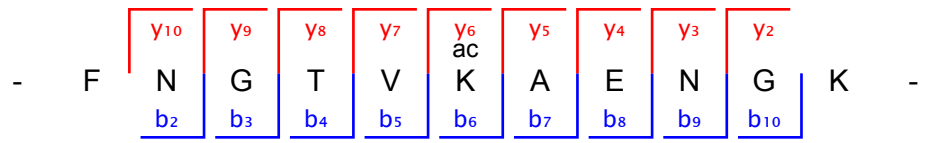

Raw file: 050813\_SCW\_II\_29\_22\_5  
 Scan: 10663  
 Method: ITMS; CID  
 Score: 202  
 m/z: 577.82  
 Gene names: Ass1;Gm5424

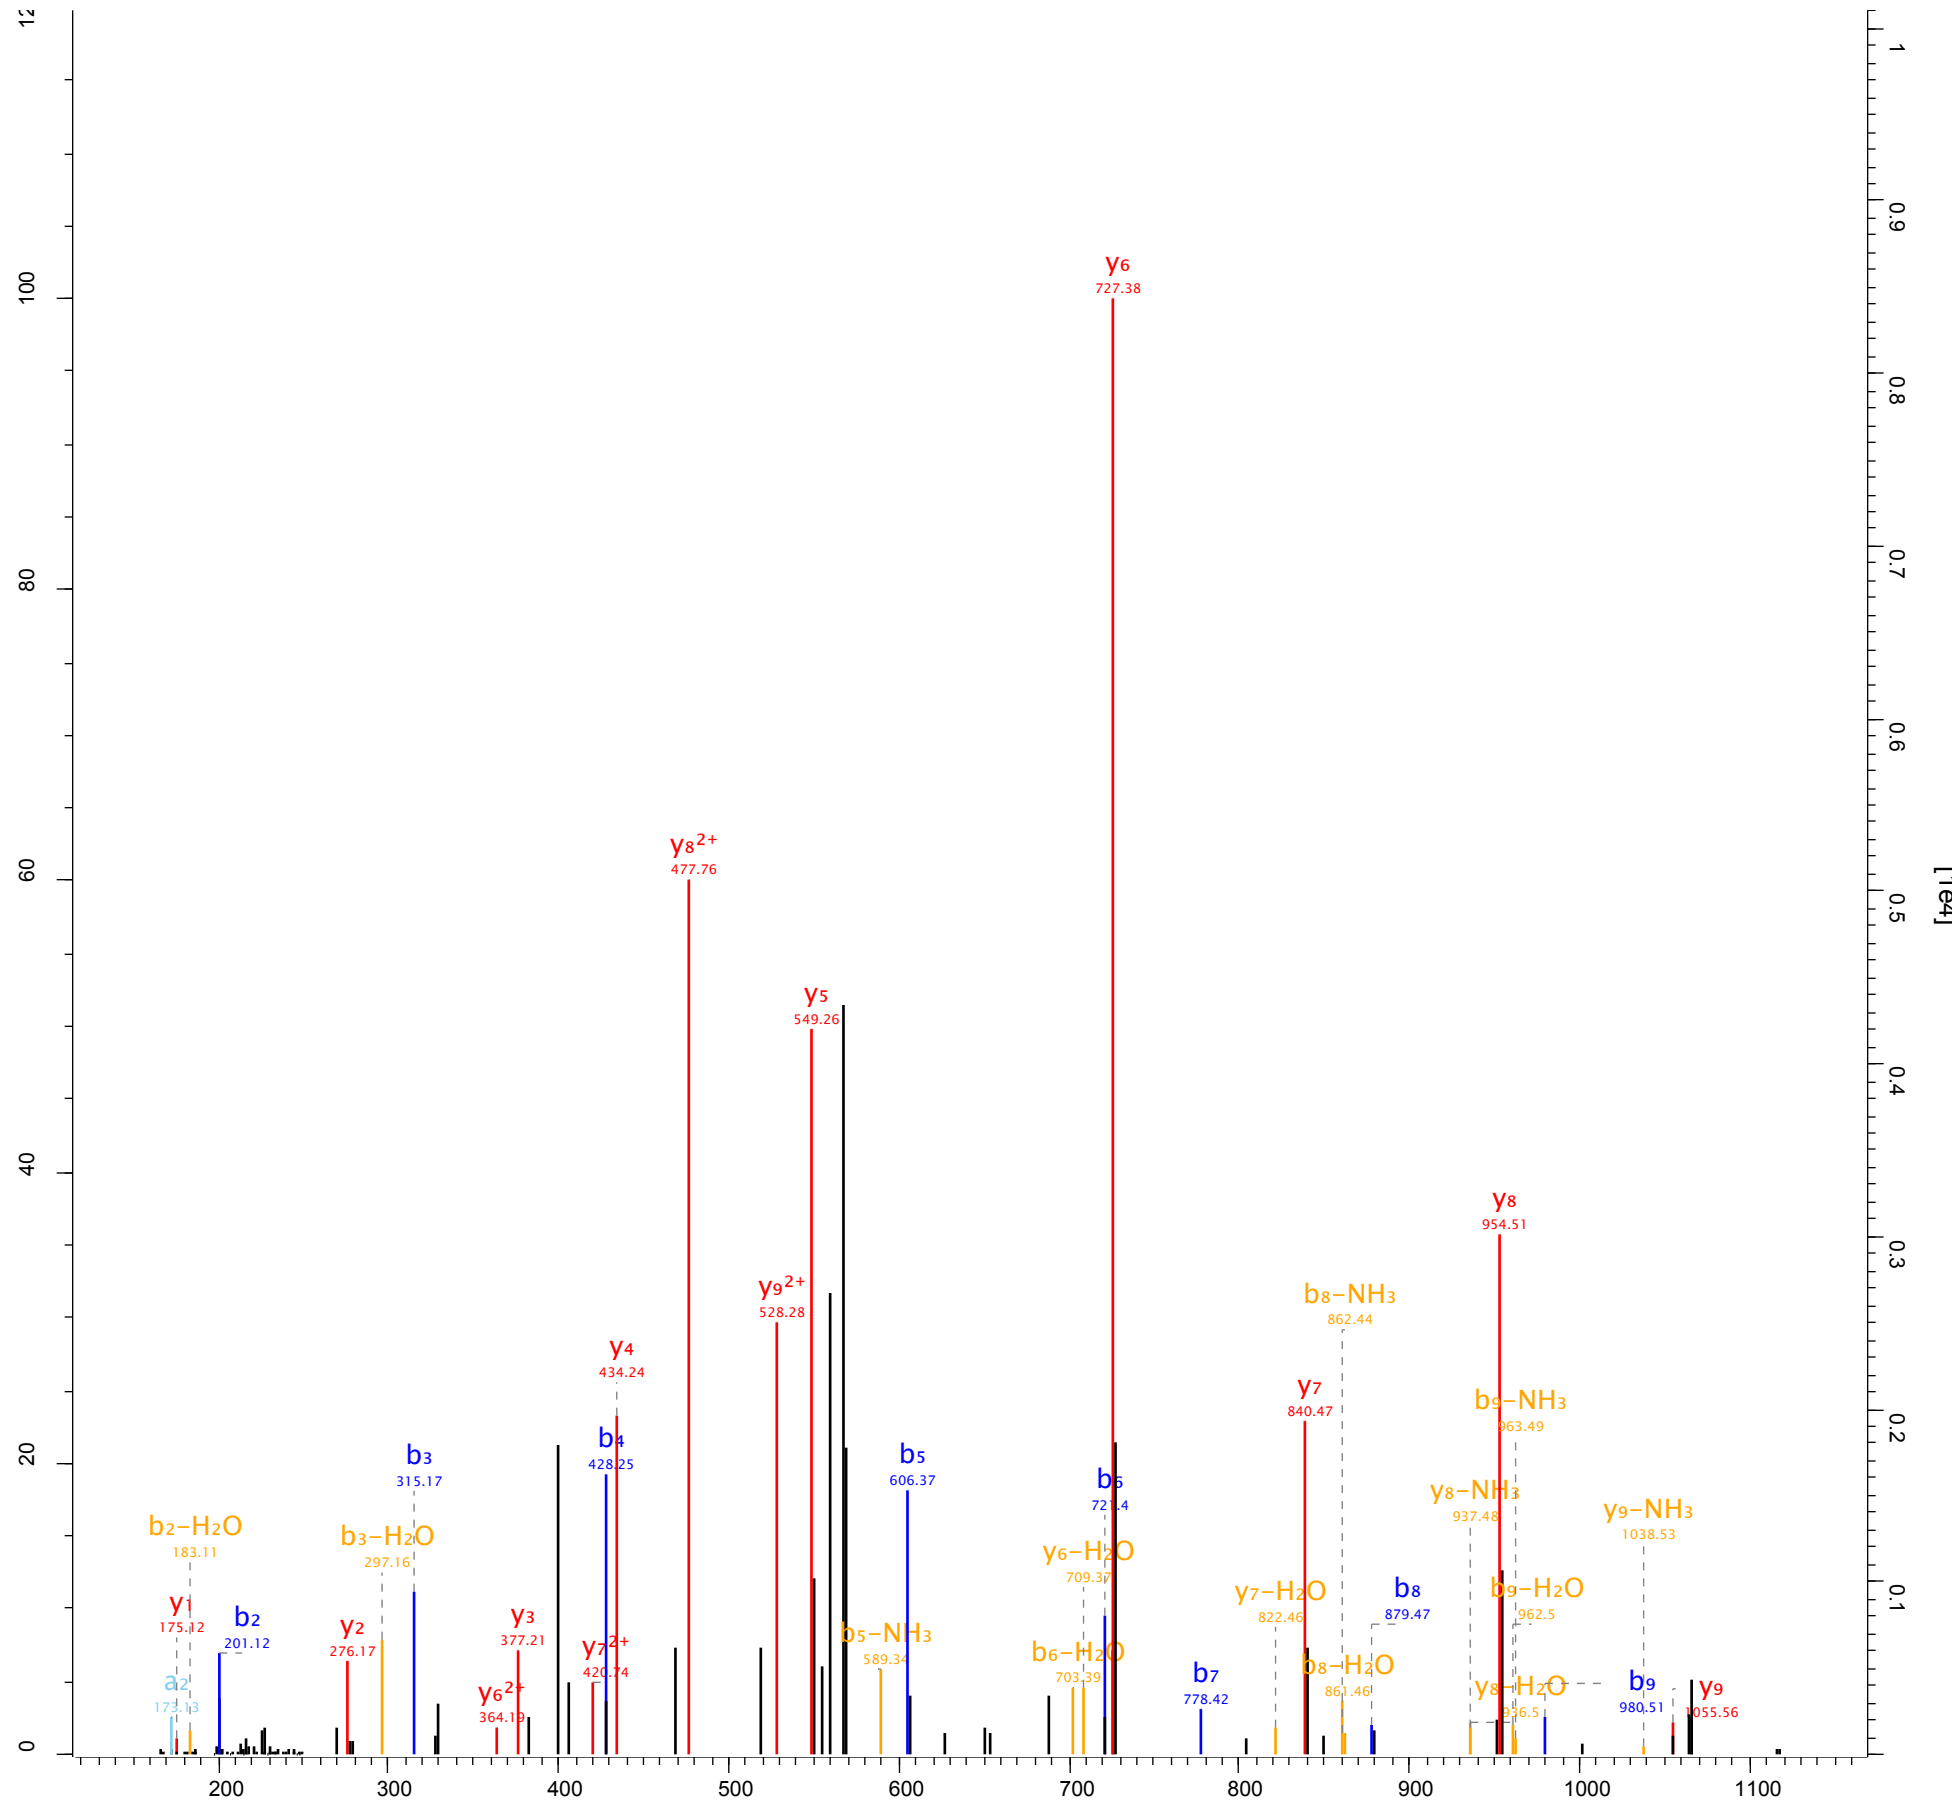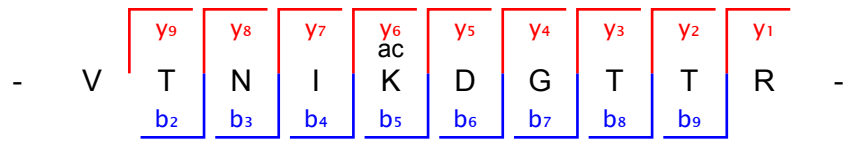

Raw file 050813\_SCW\_II\_29\_22\_5 Scan 10796 Method ITMS; CID Score 92.54 m/z 512.78 Gene names Eci1

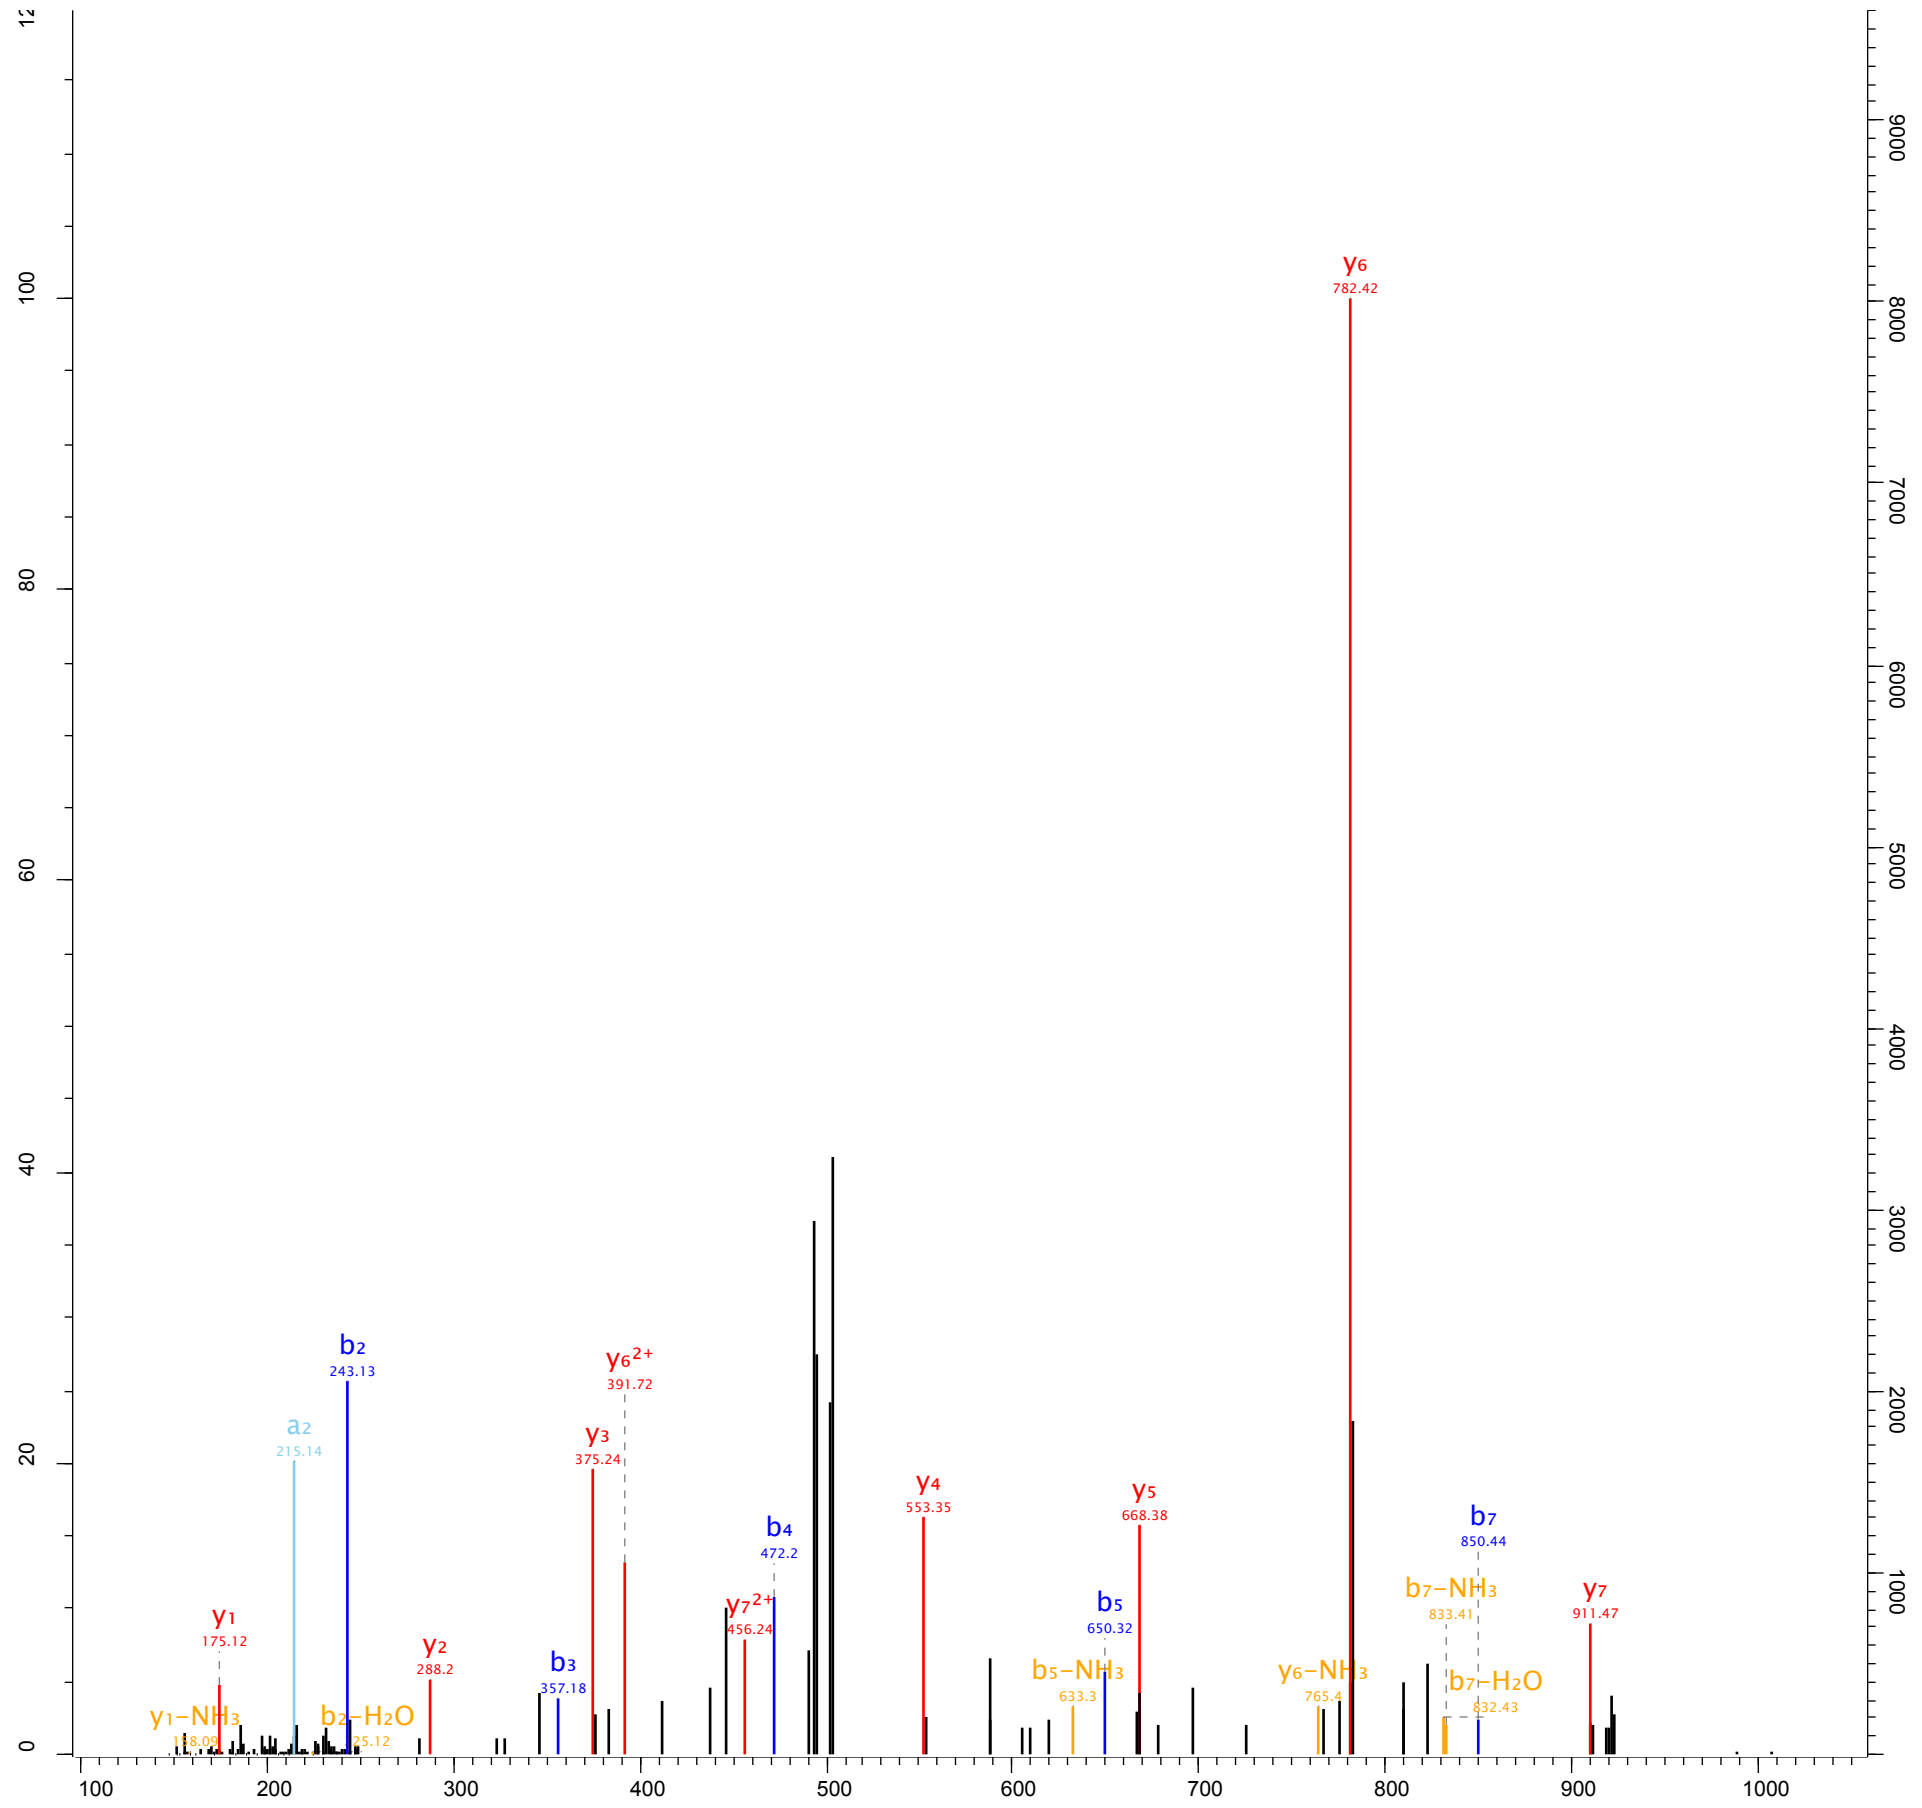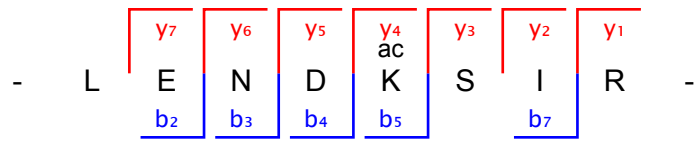

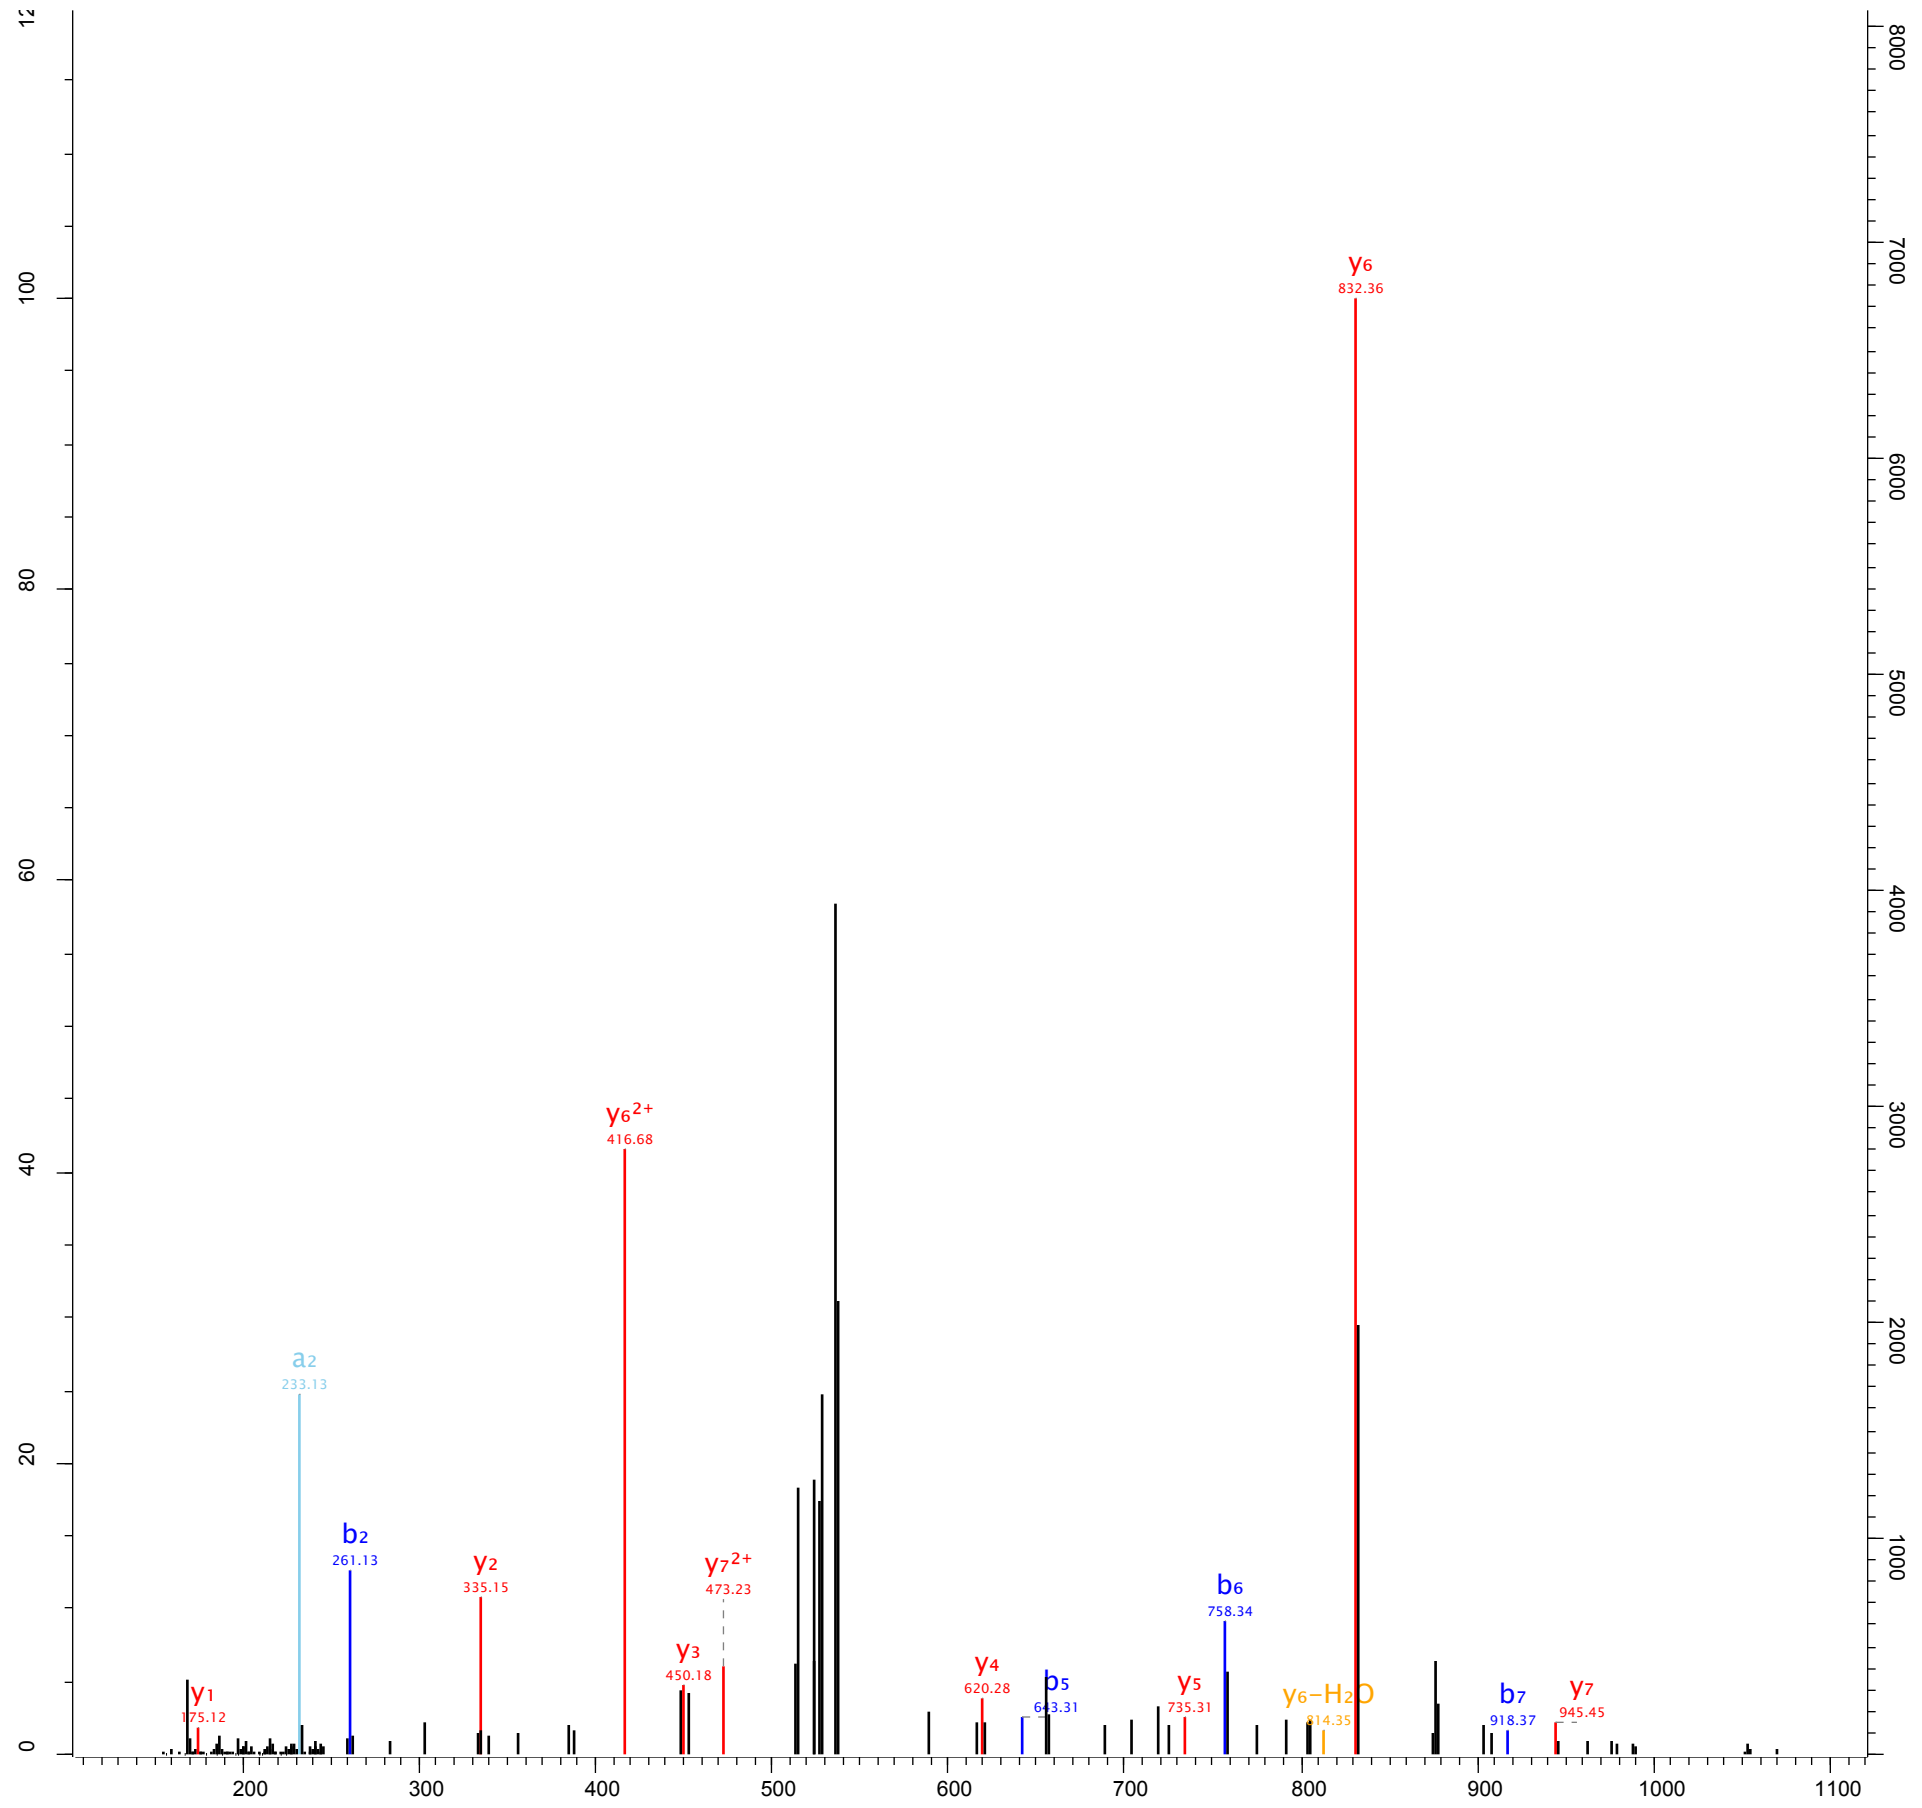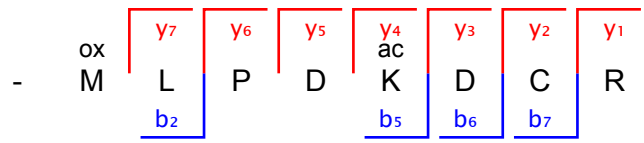



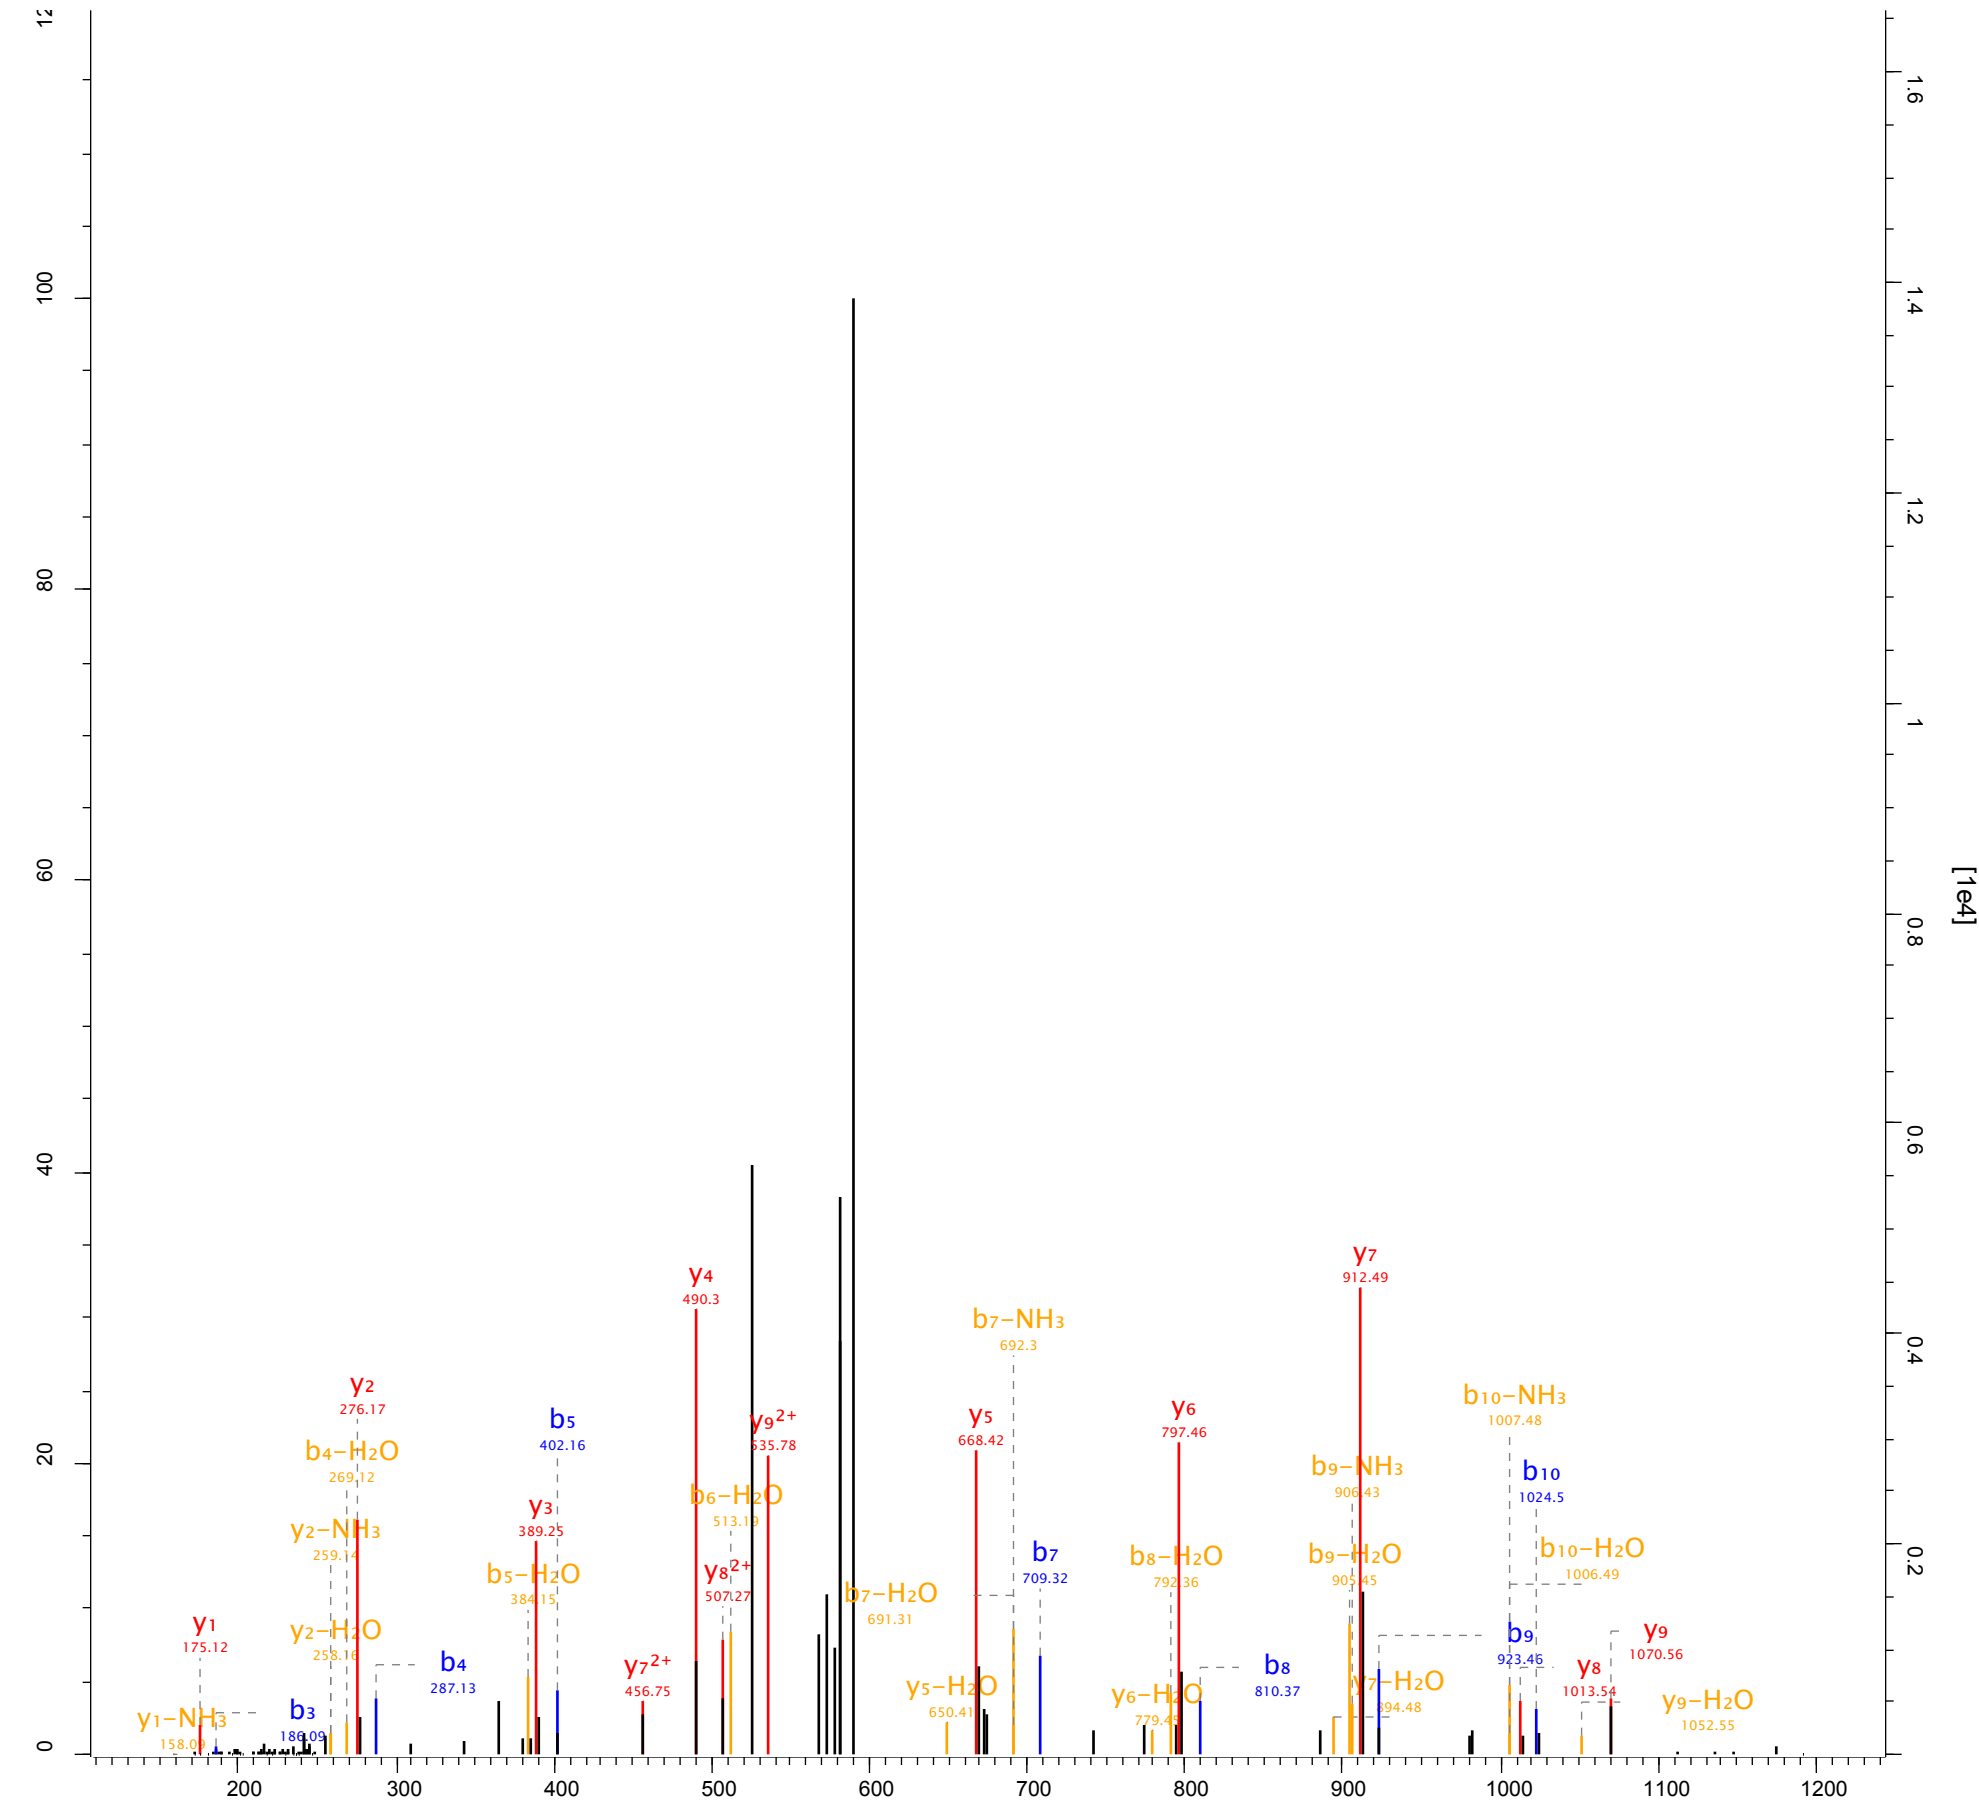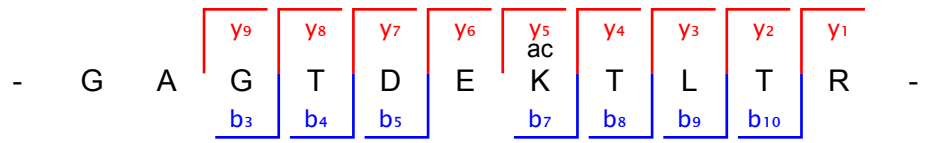

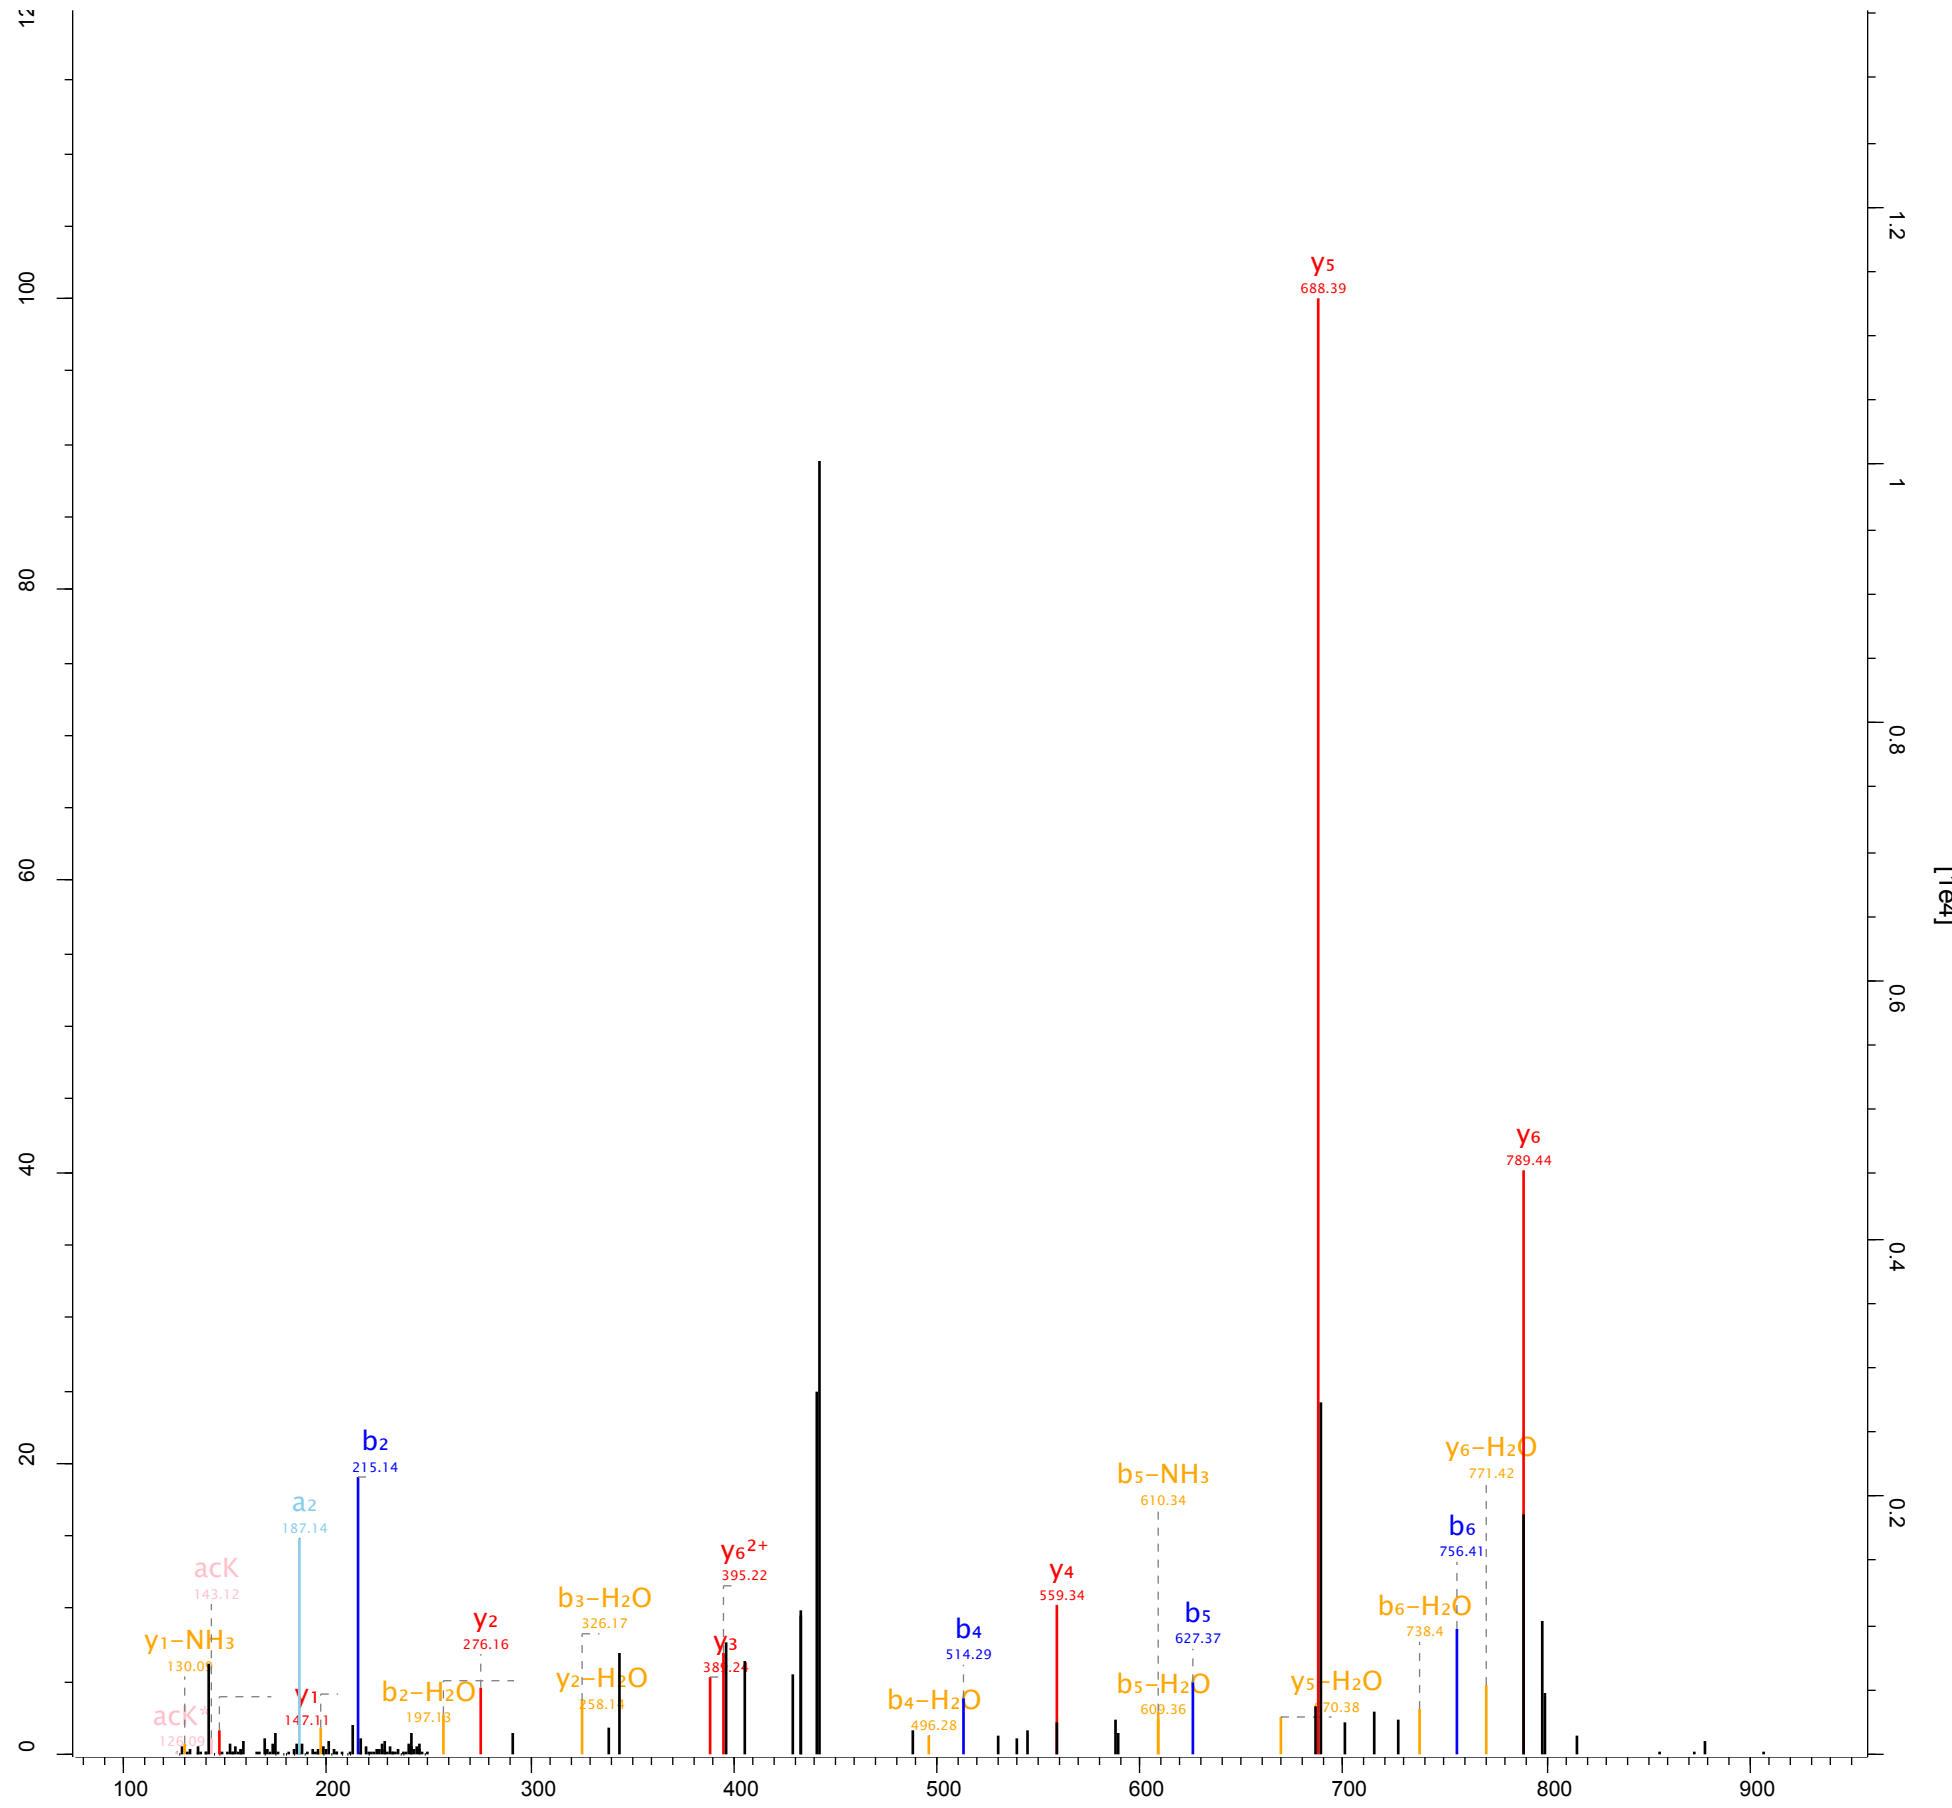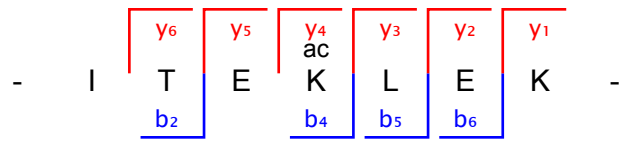

Raw file 050813\_SCW\_II\_29\_22\_5 Scan 11673 Method ITMS; CID Score 107.55 m/z 497.27 Gene names Auh

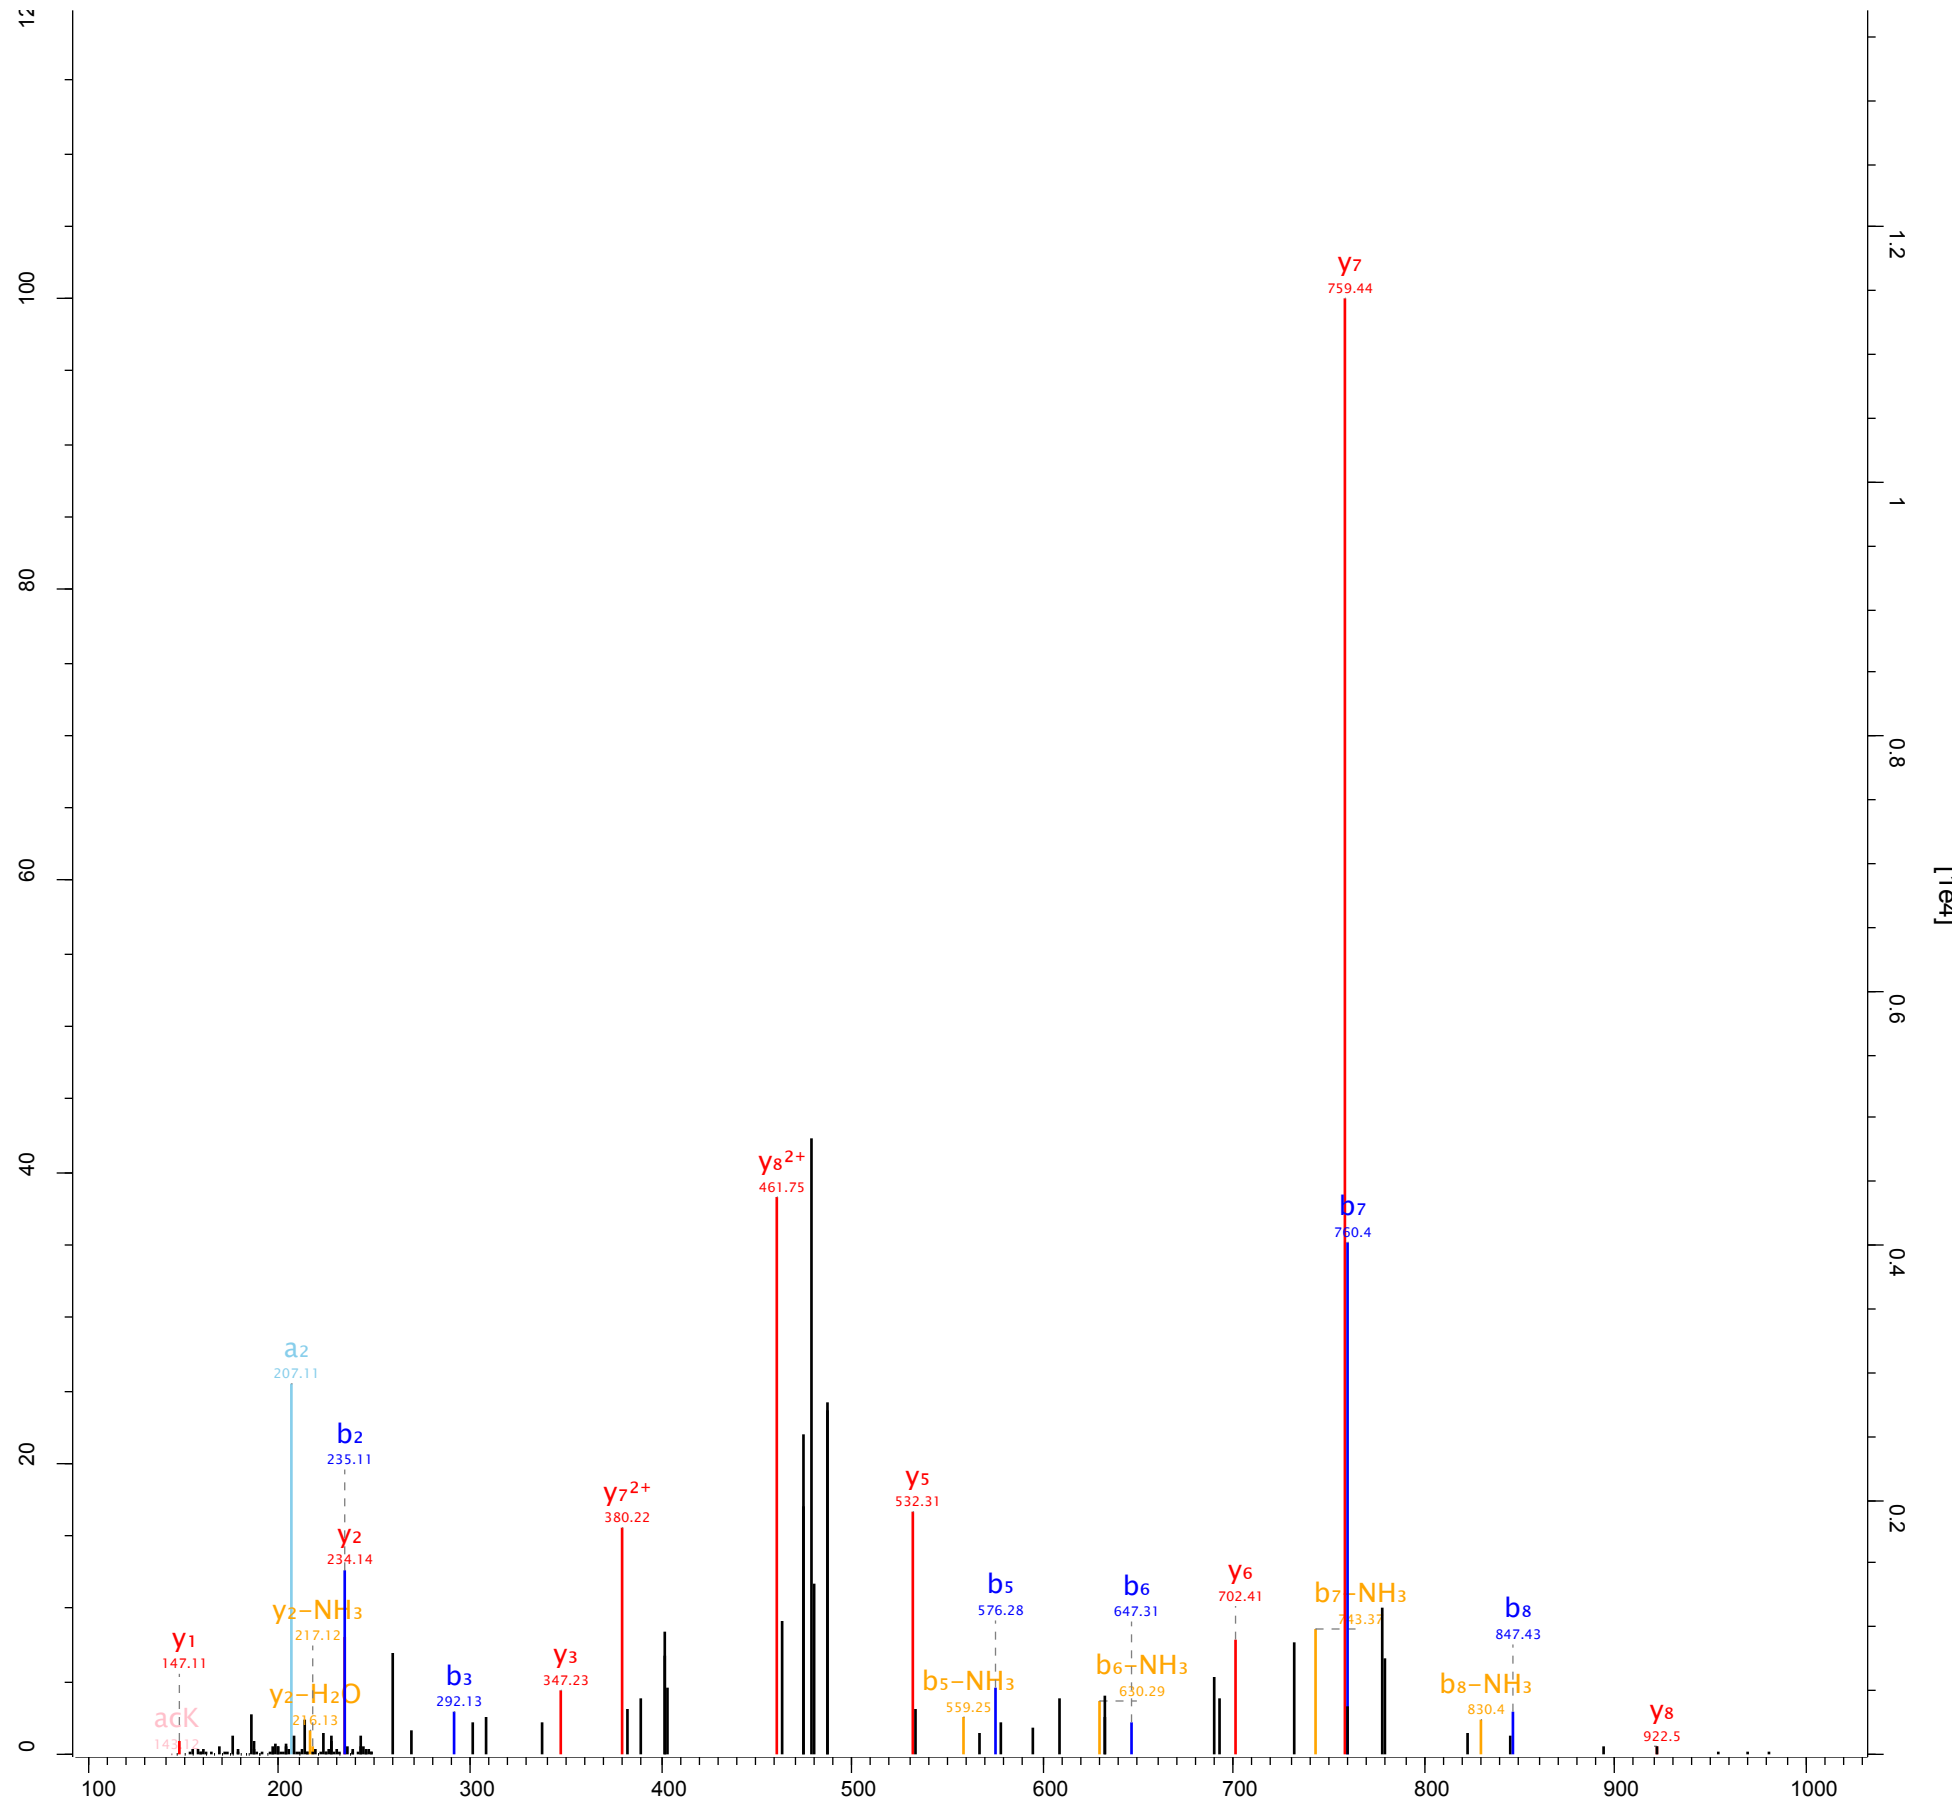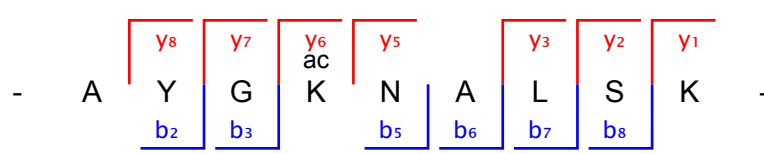

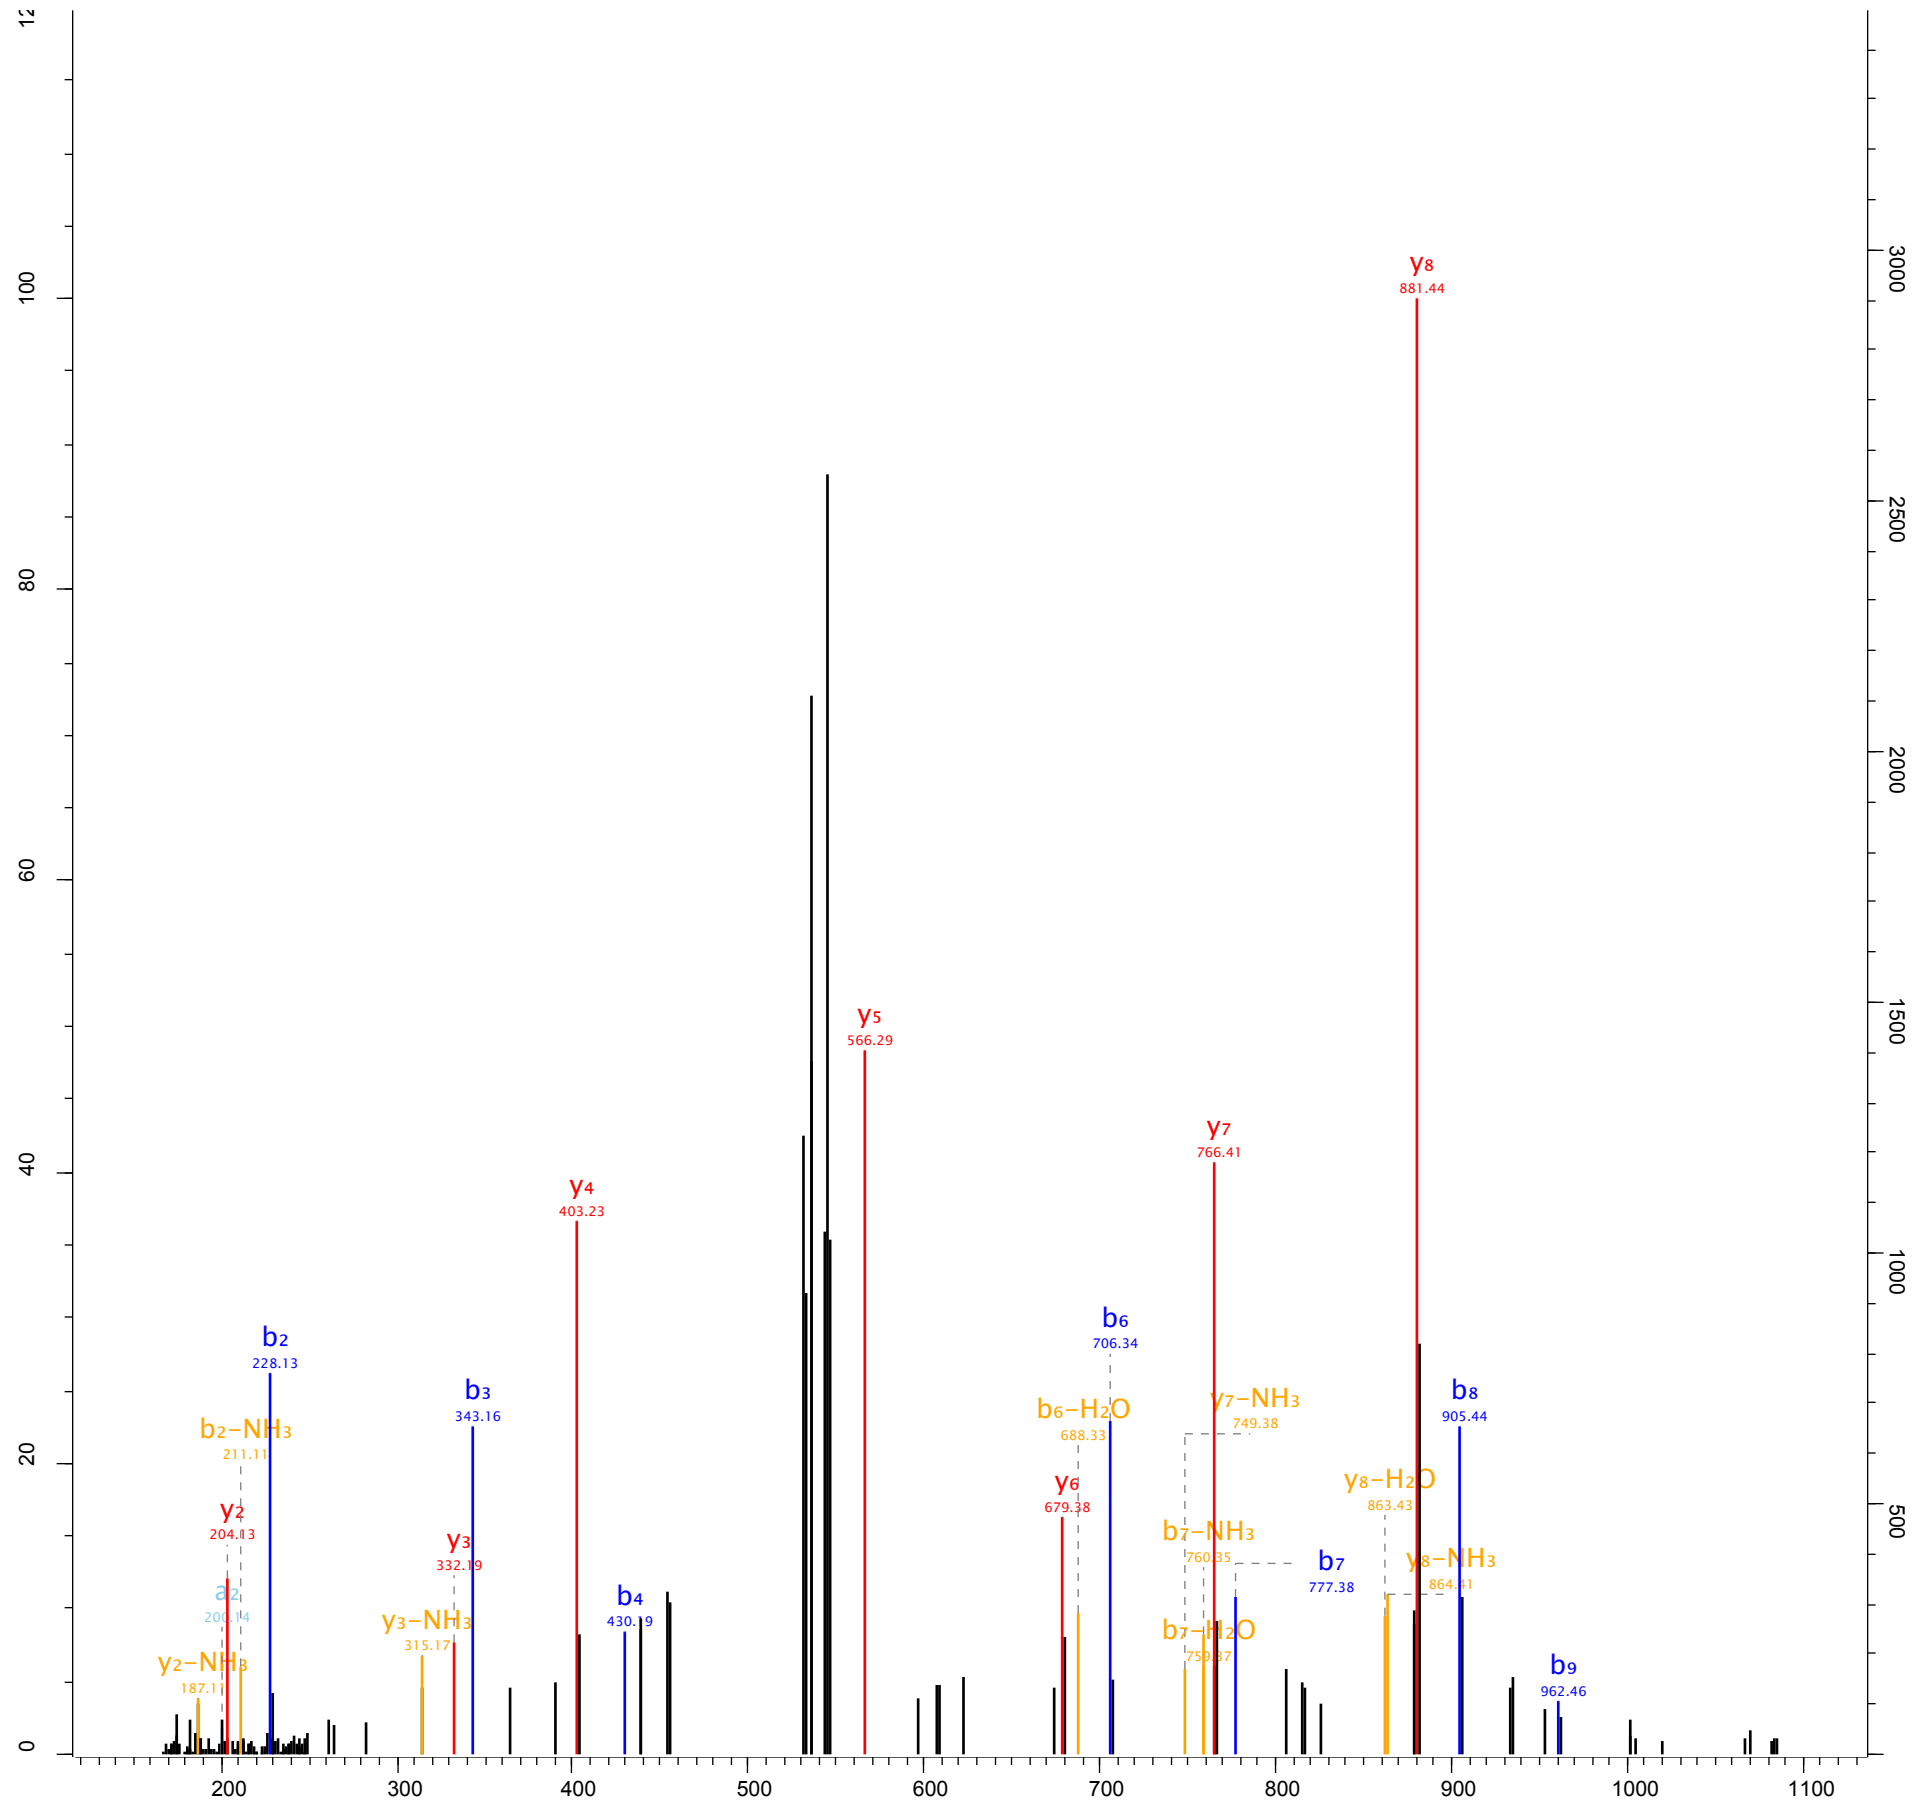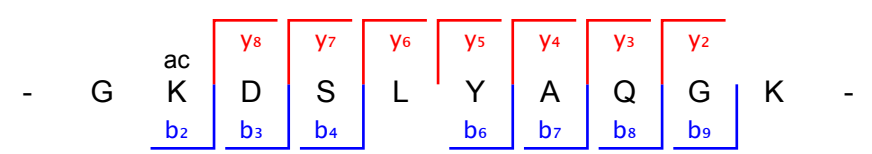

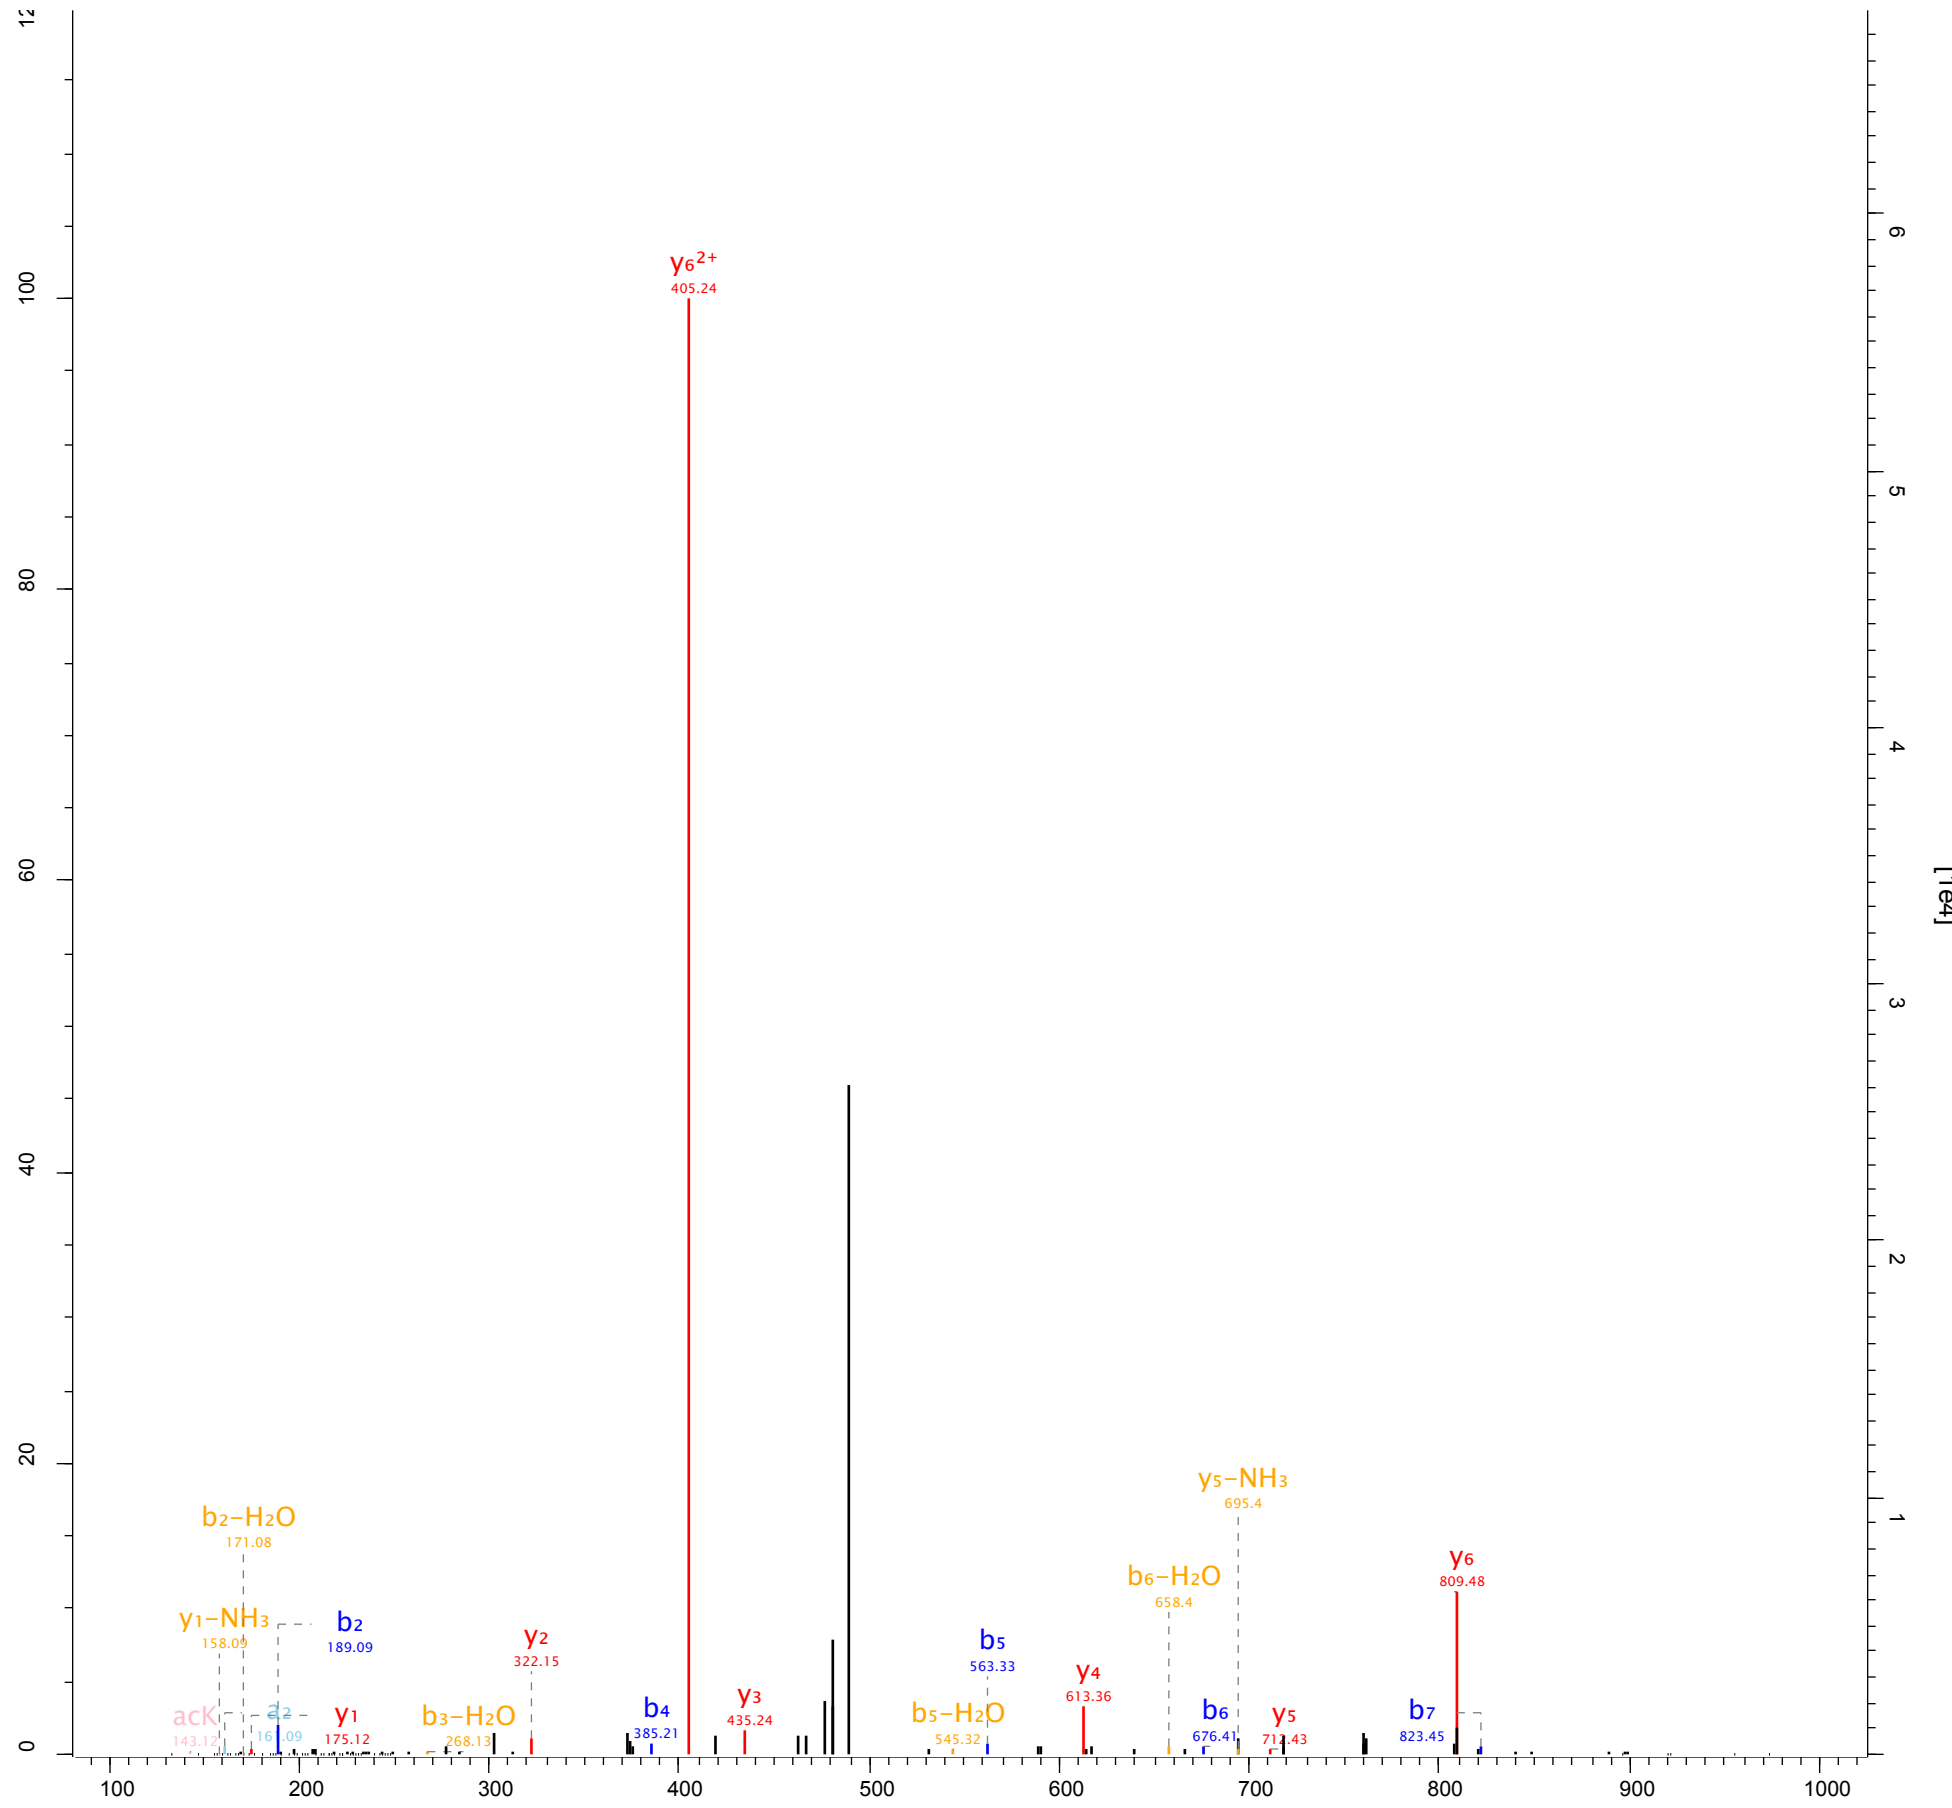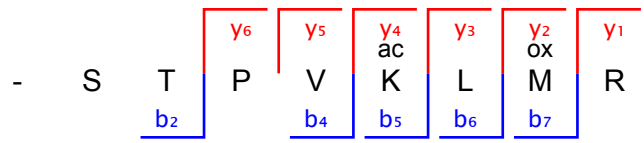

Raw file: 050813\_SCW\_II\_29\_22\_5  
 Scan: 11838 Method: ITMS; CID Score: 183.85 m/z: 552.8 Gene names: Pabpc1;Pabpc4;Gm10110;Pabpc4l

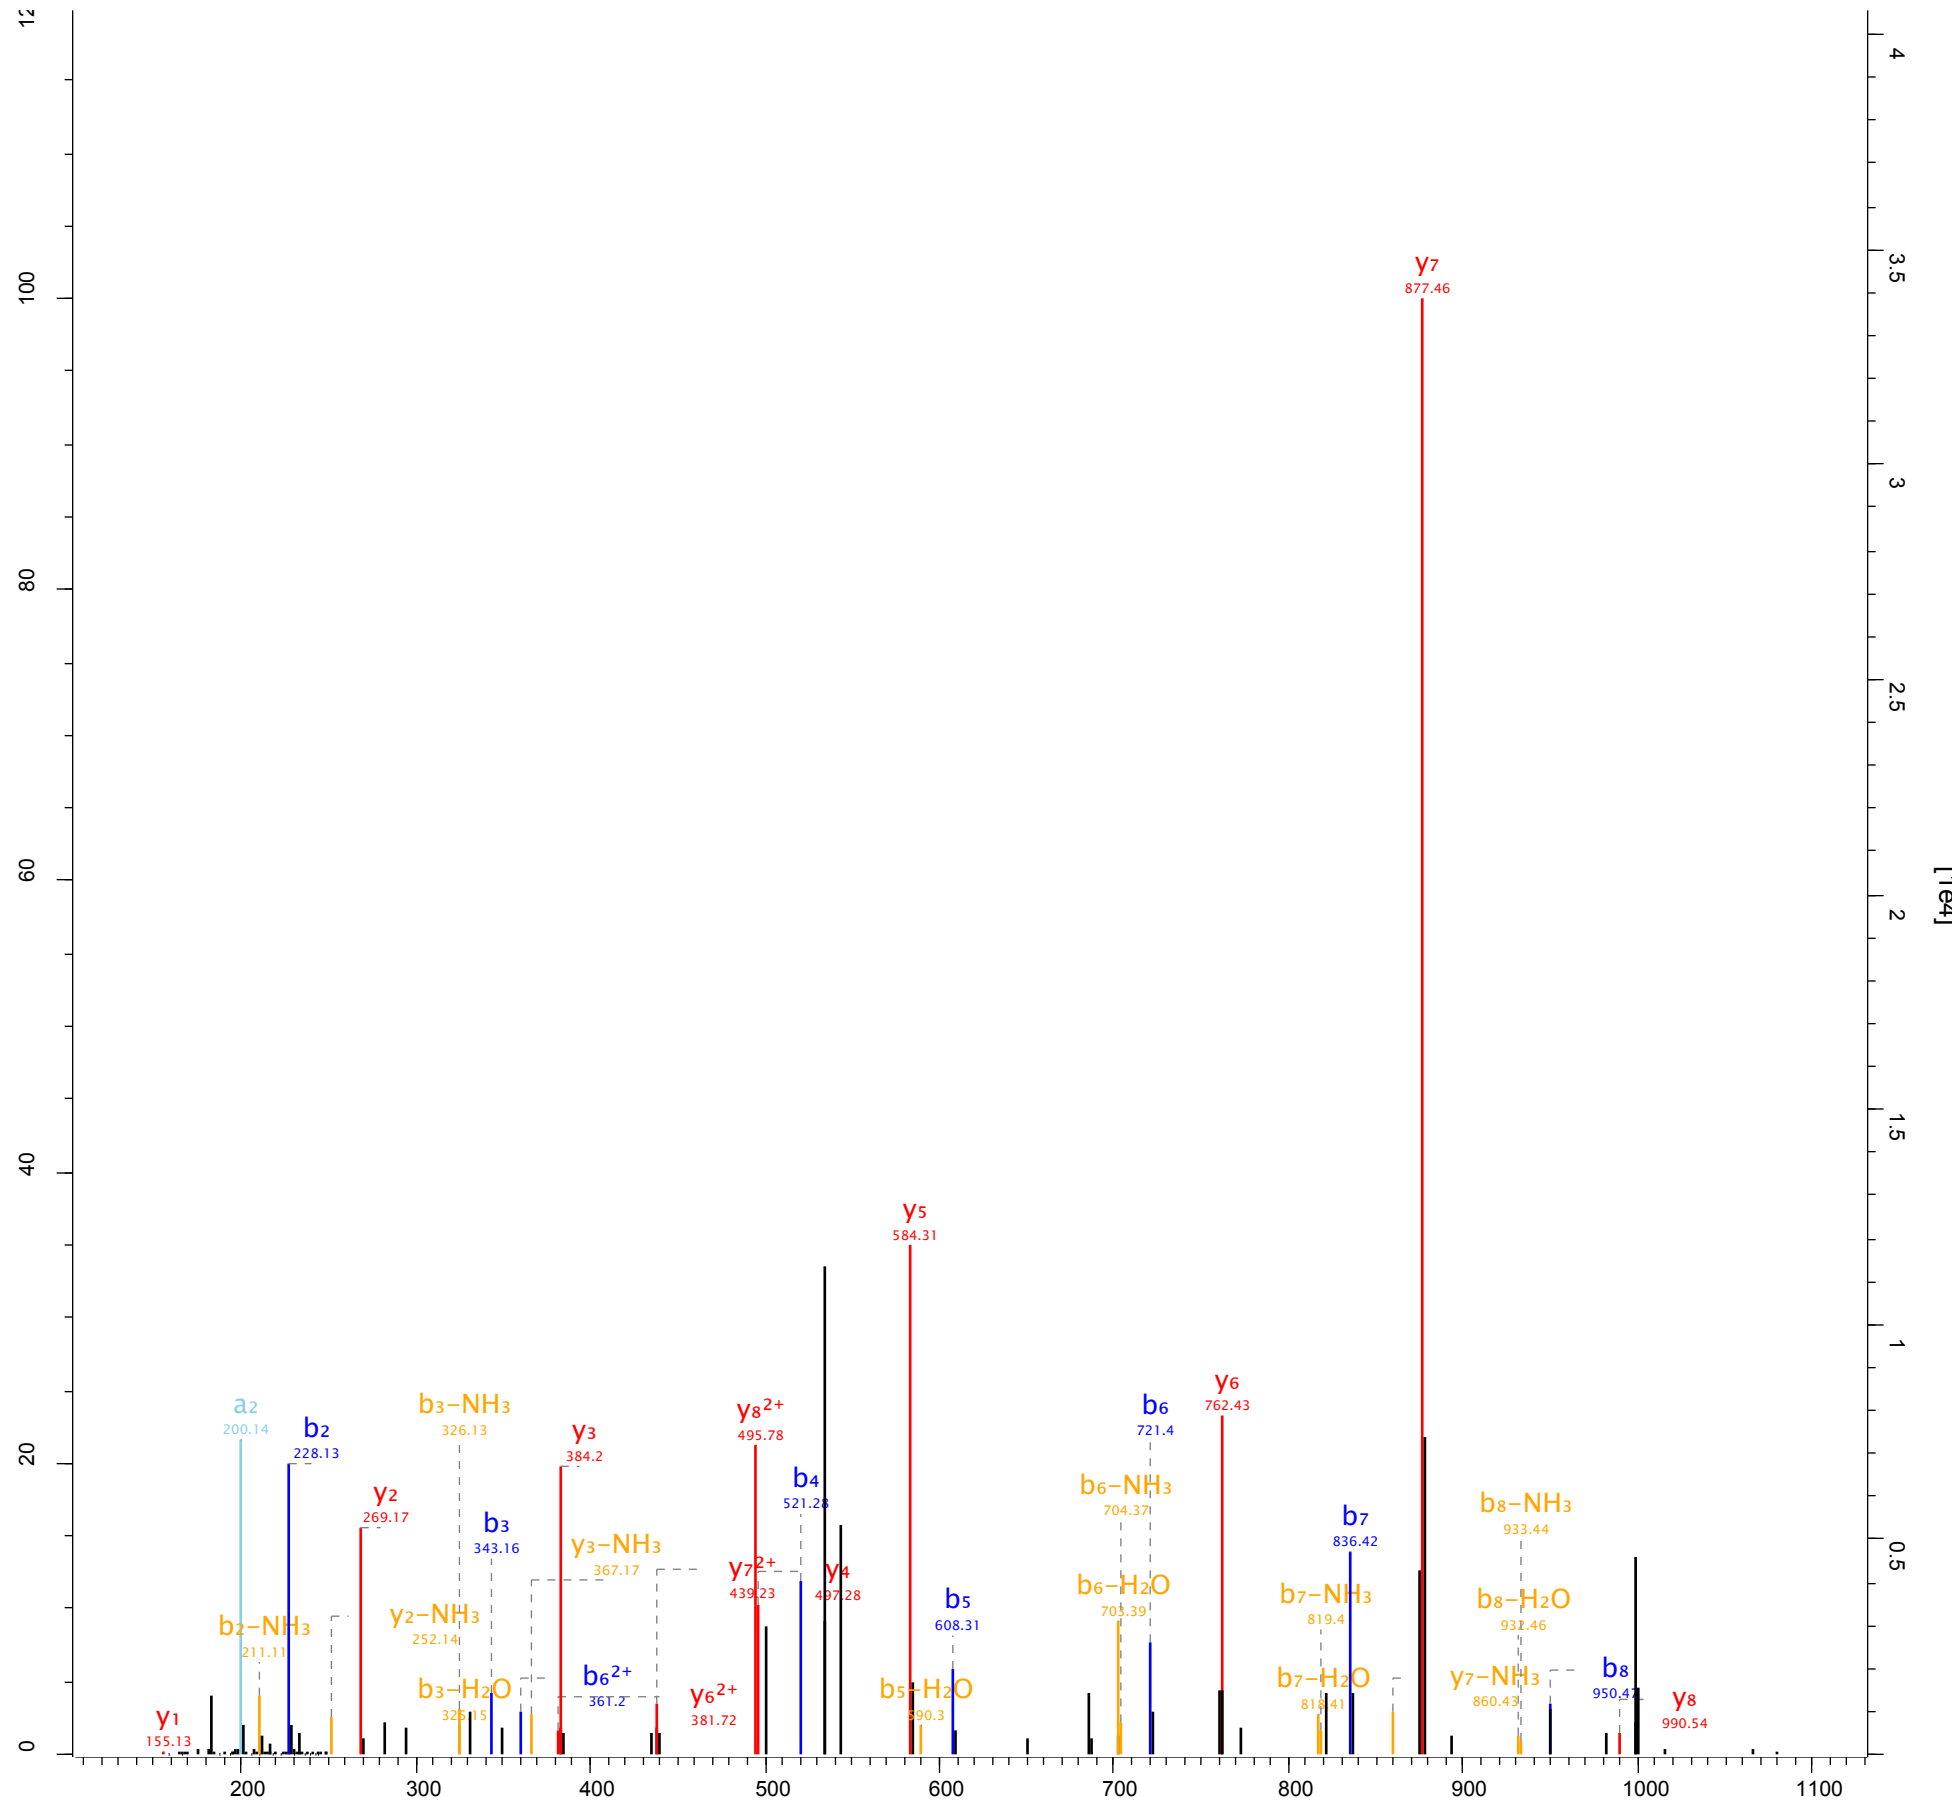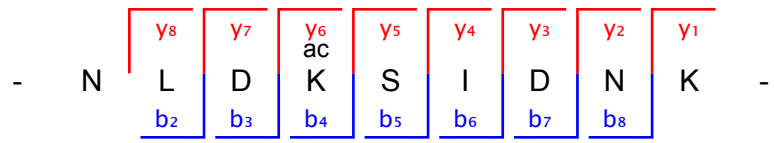

Raw file: 050813\_SCW\_II\_29\_22\_5  
 Scan: 11996 Method: ITMS; CID Score: 110.39 m/z: 579.3 Gene names: Aldoa;Aldoat1

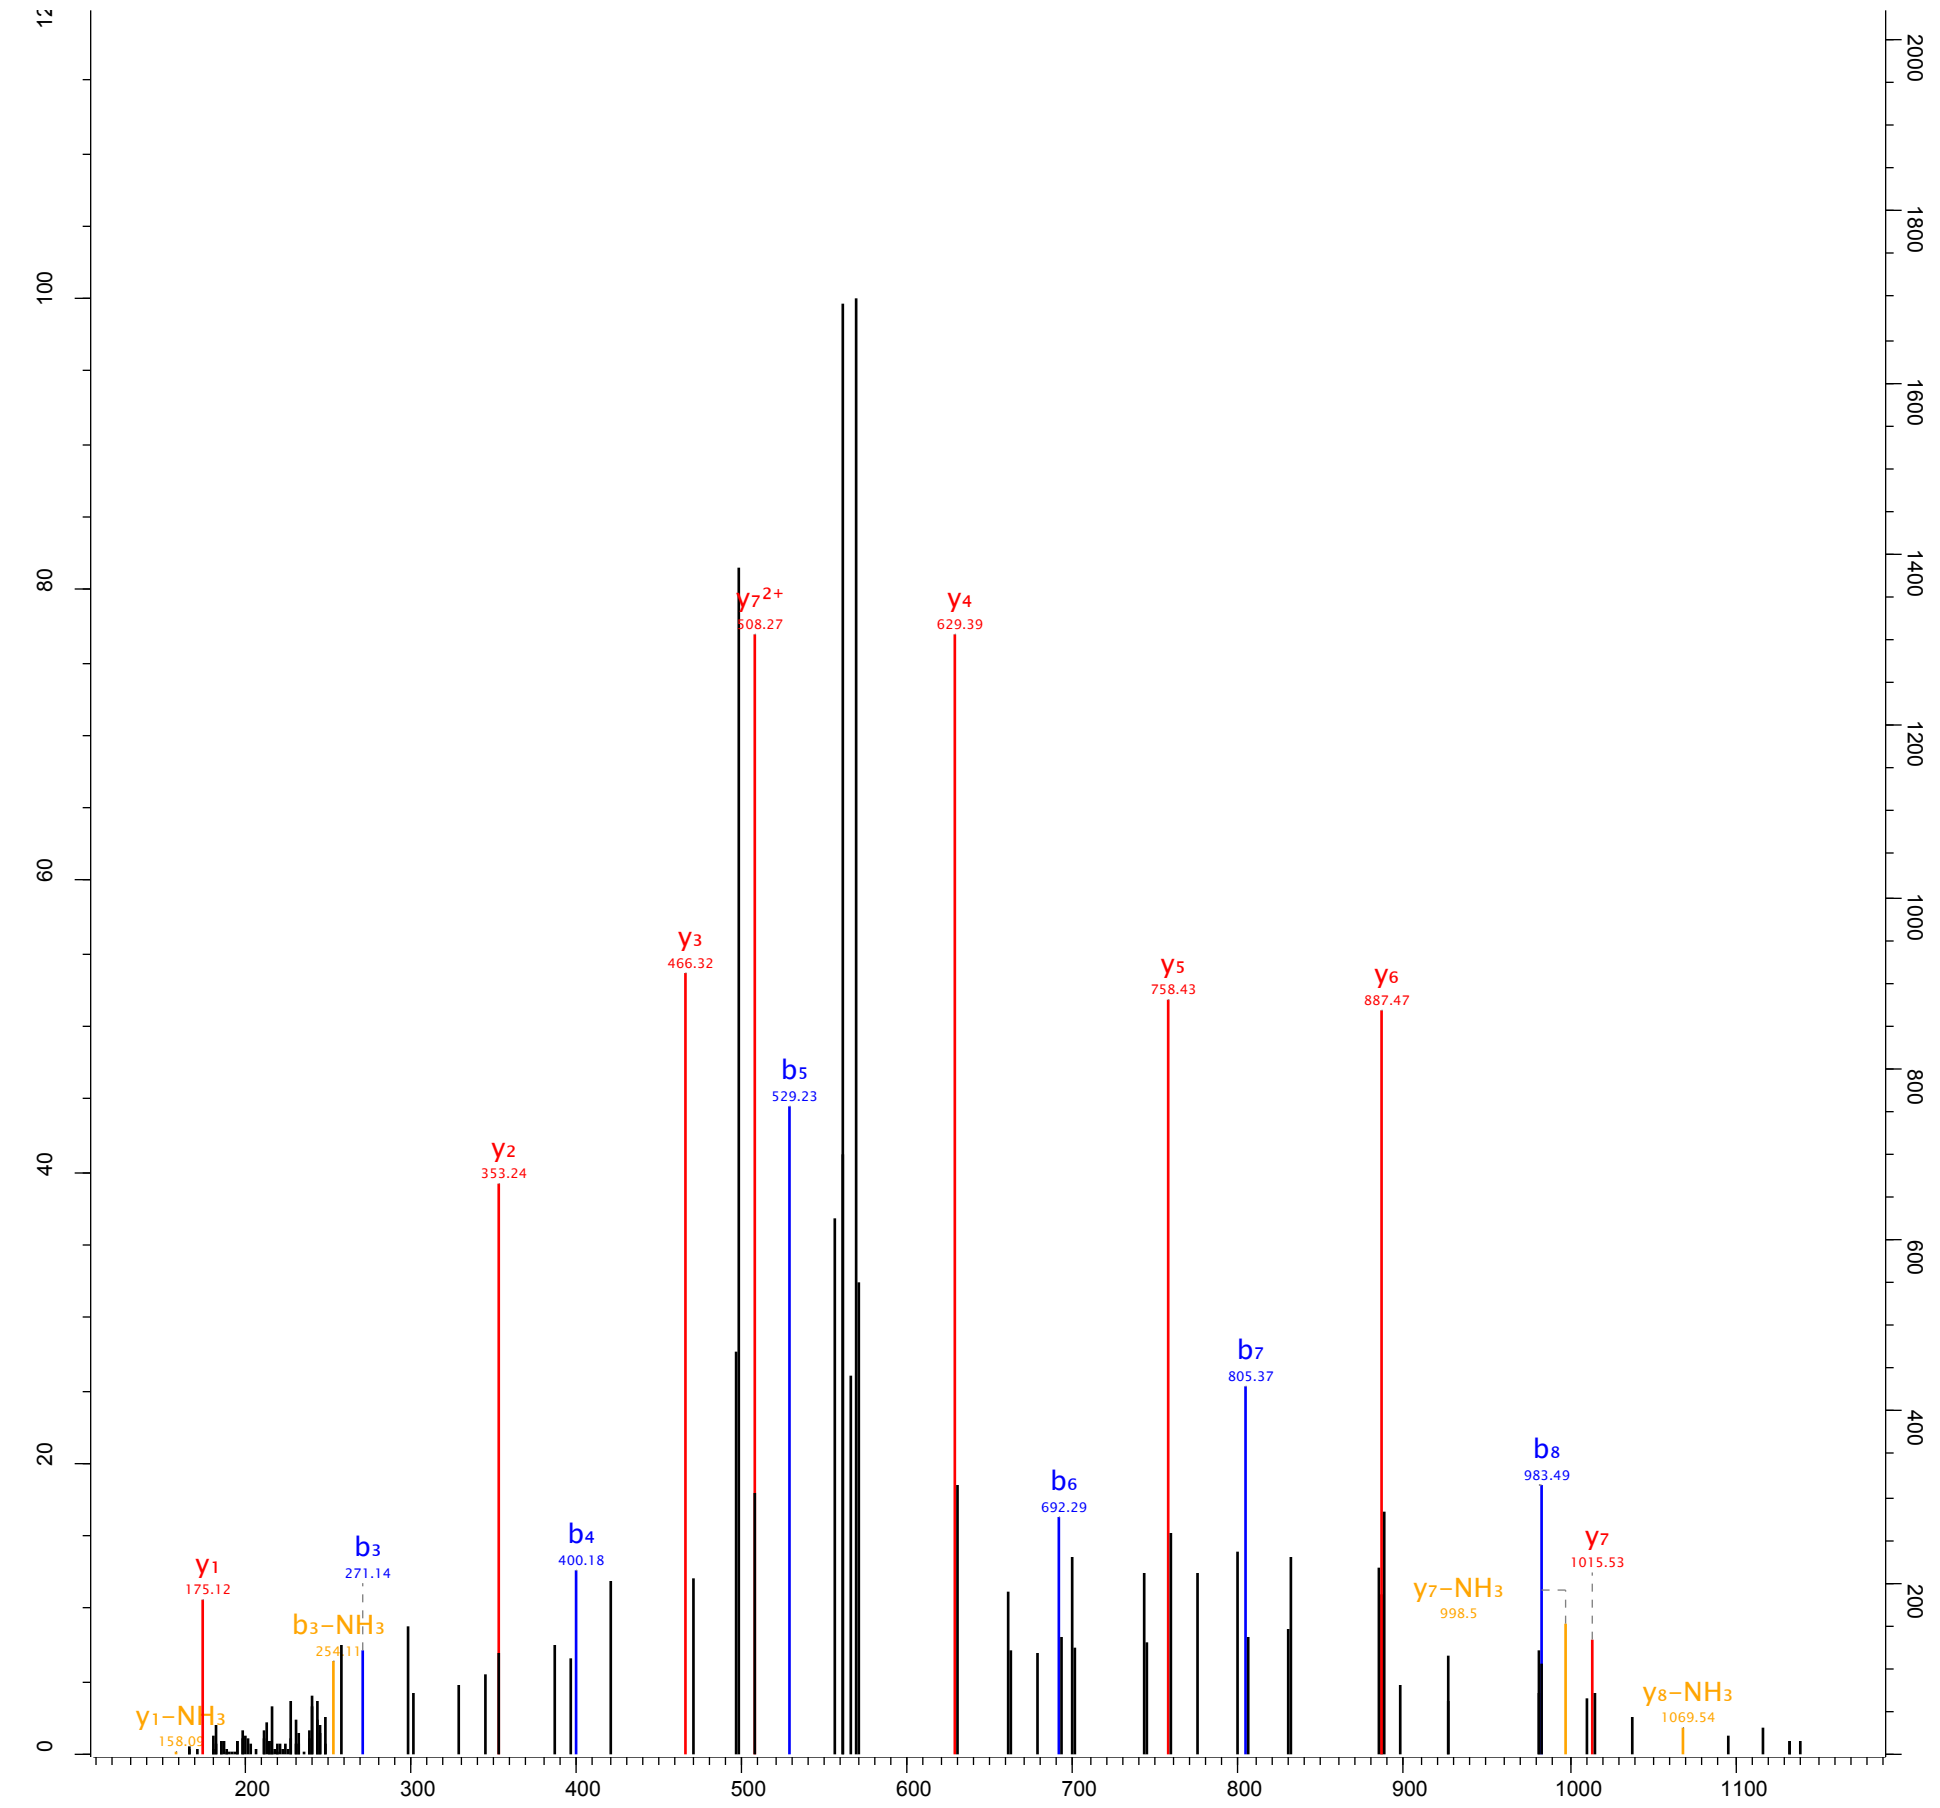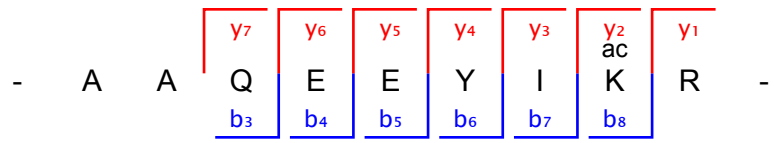

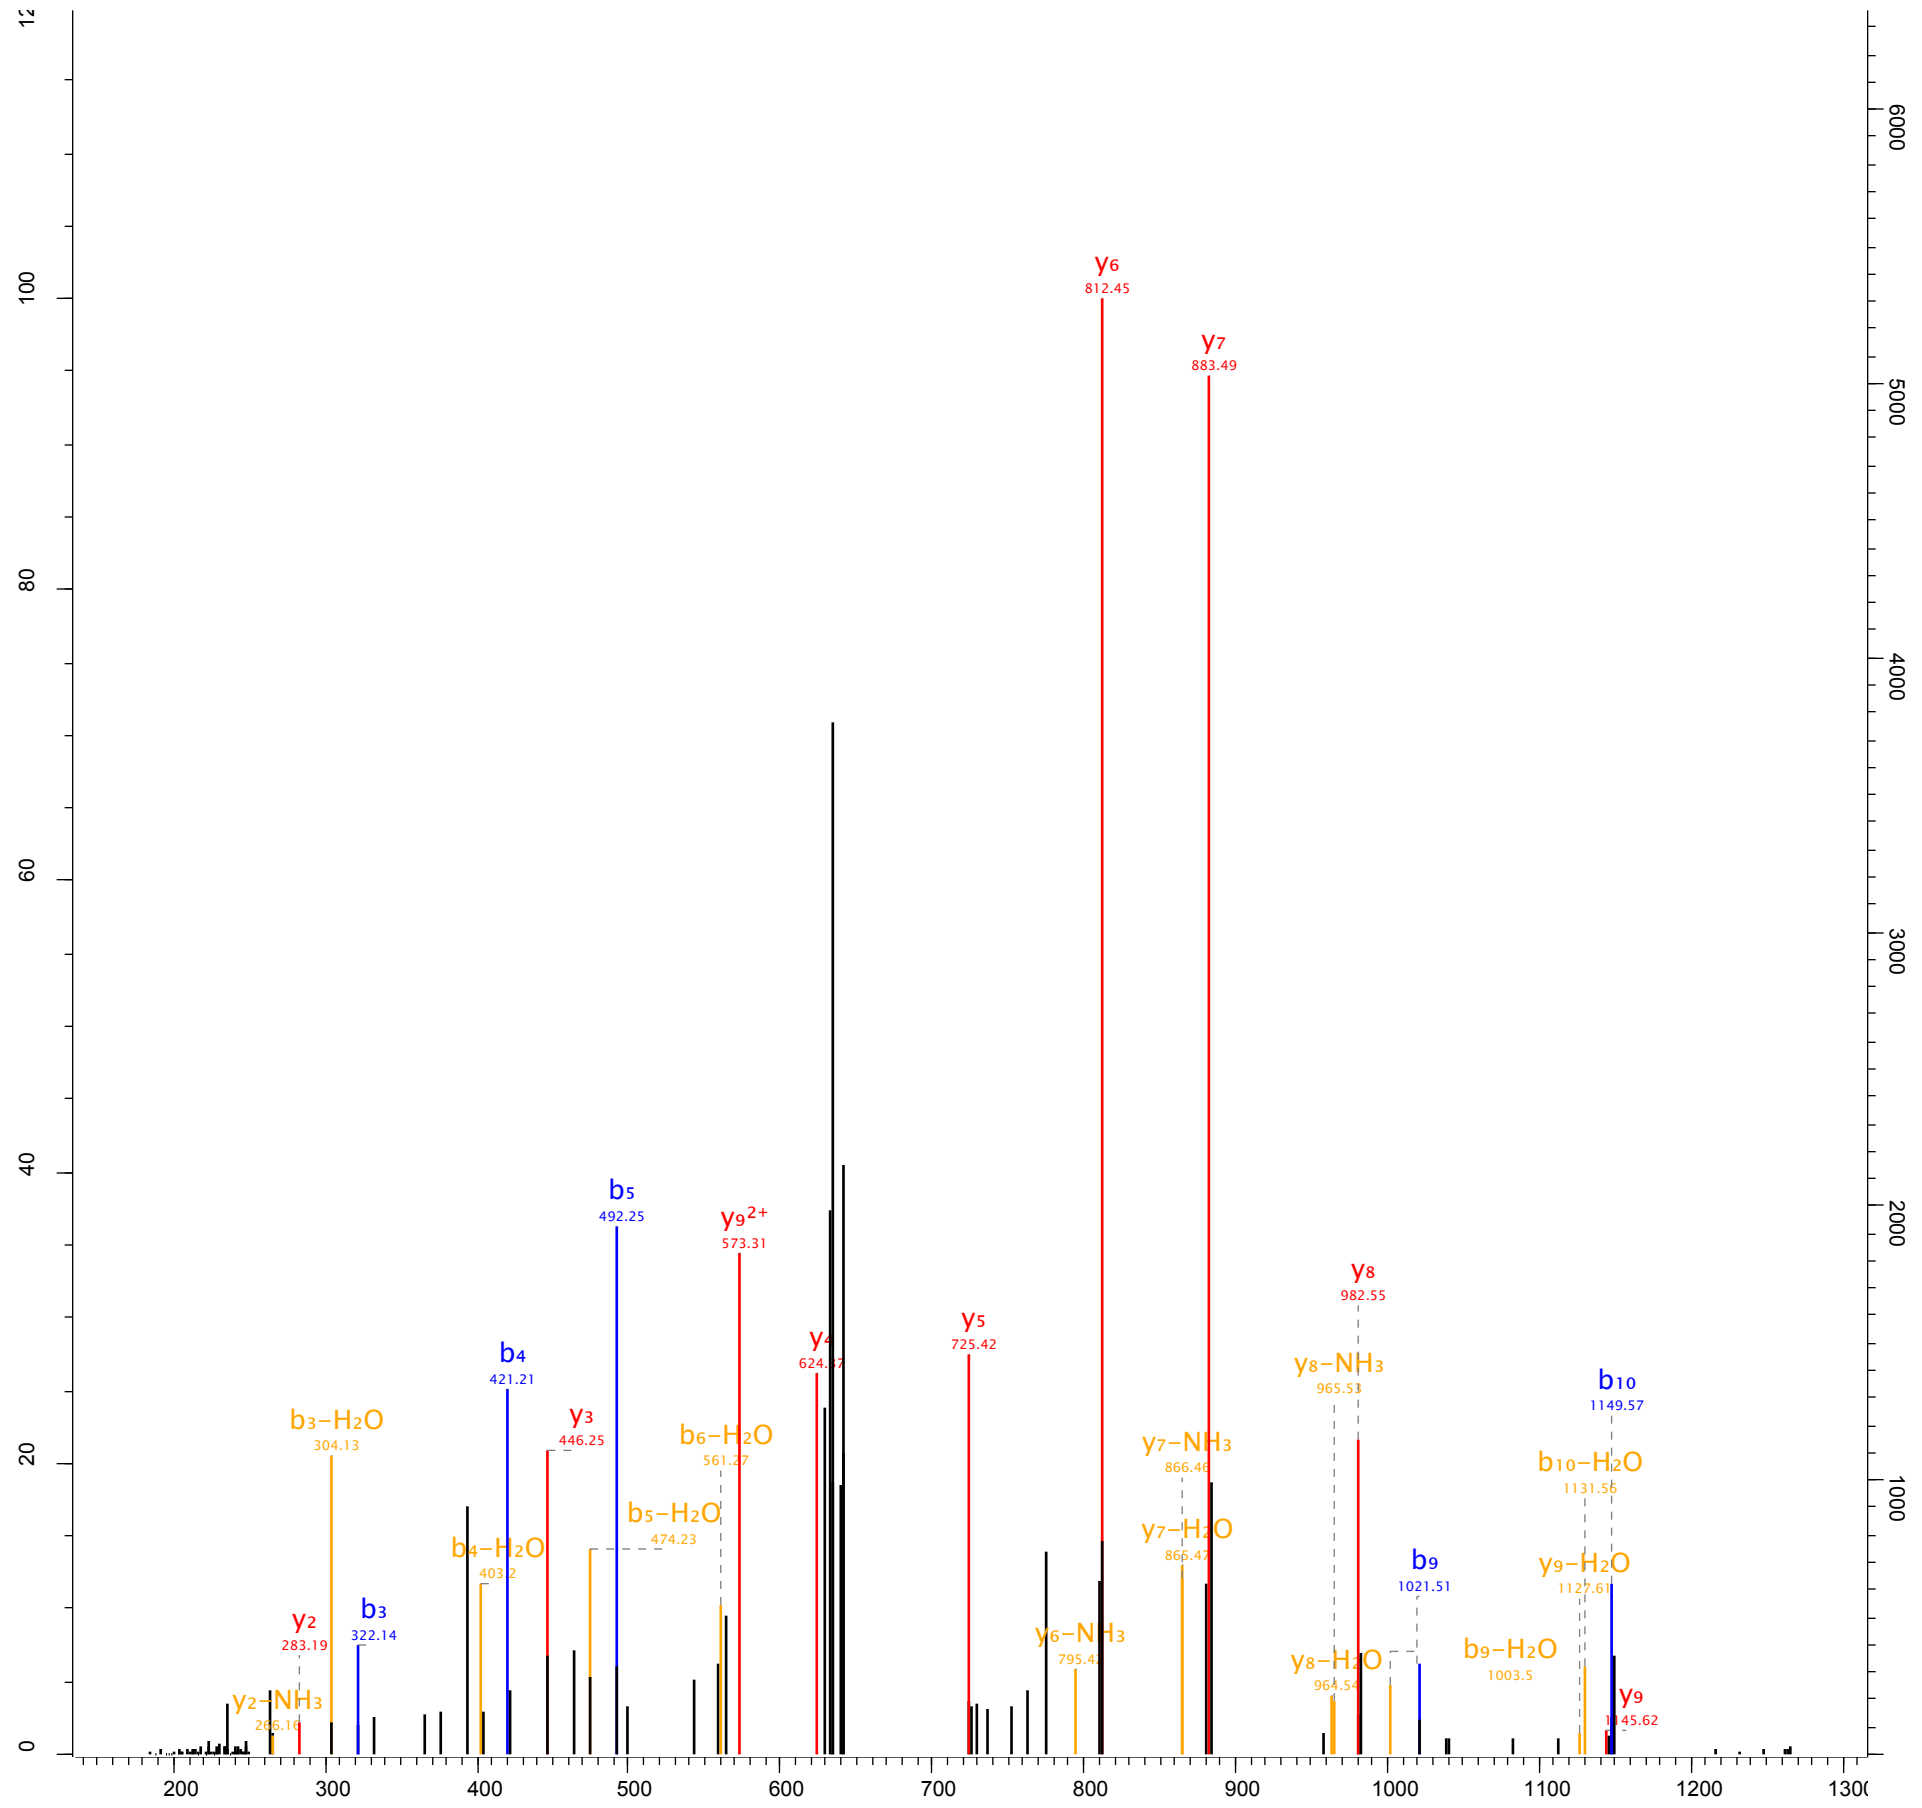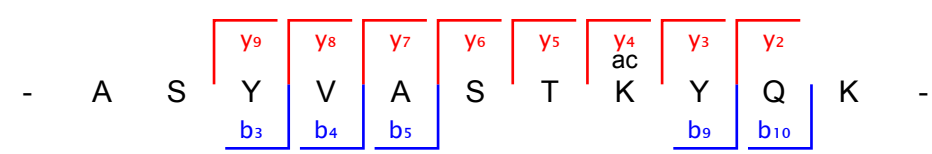



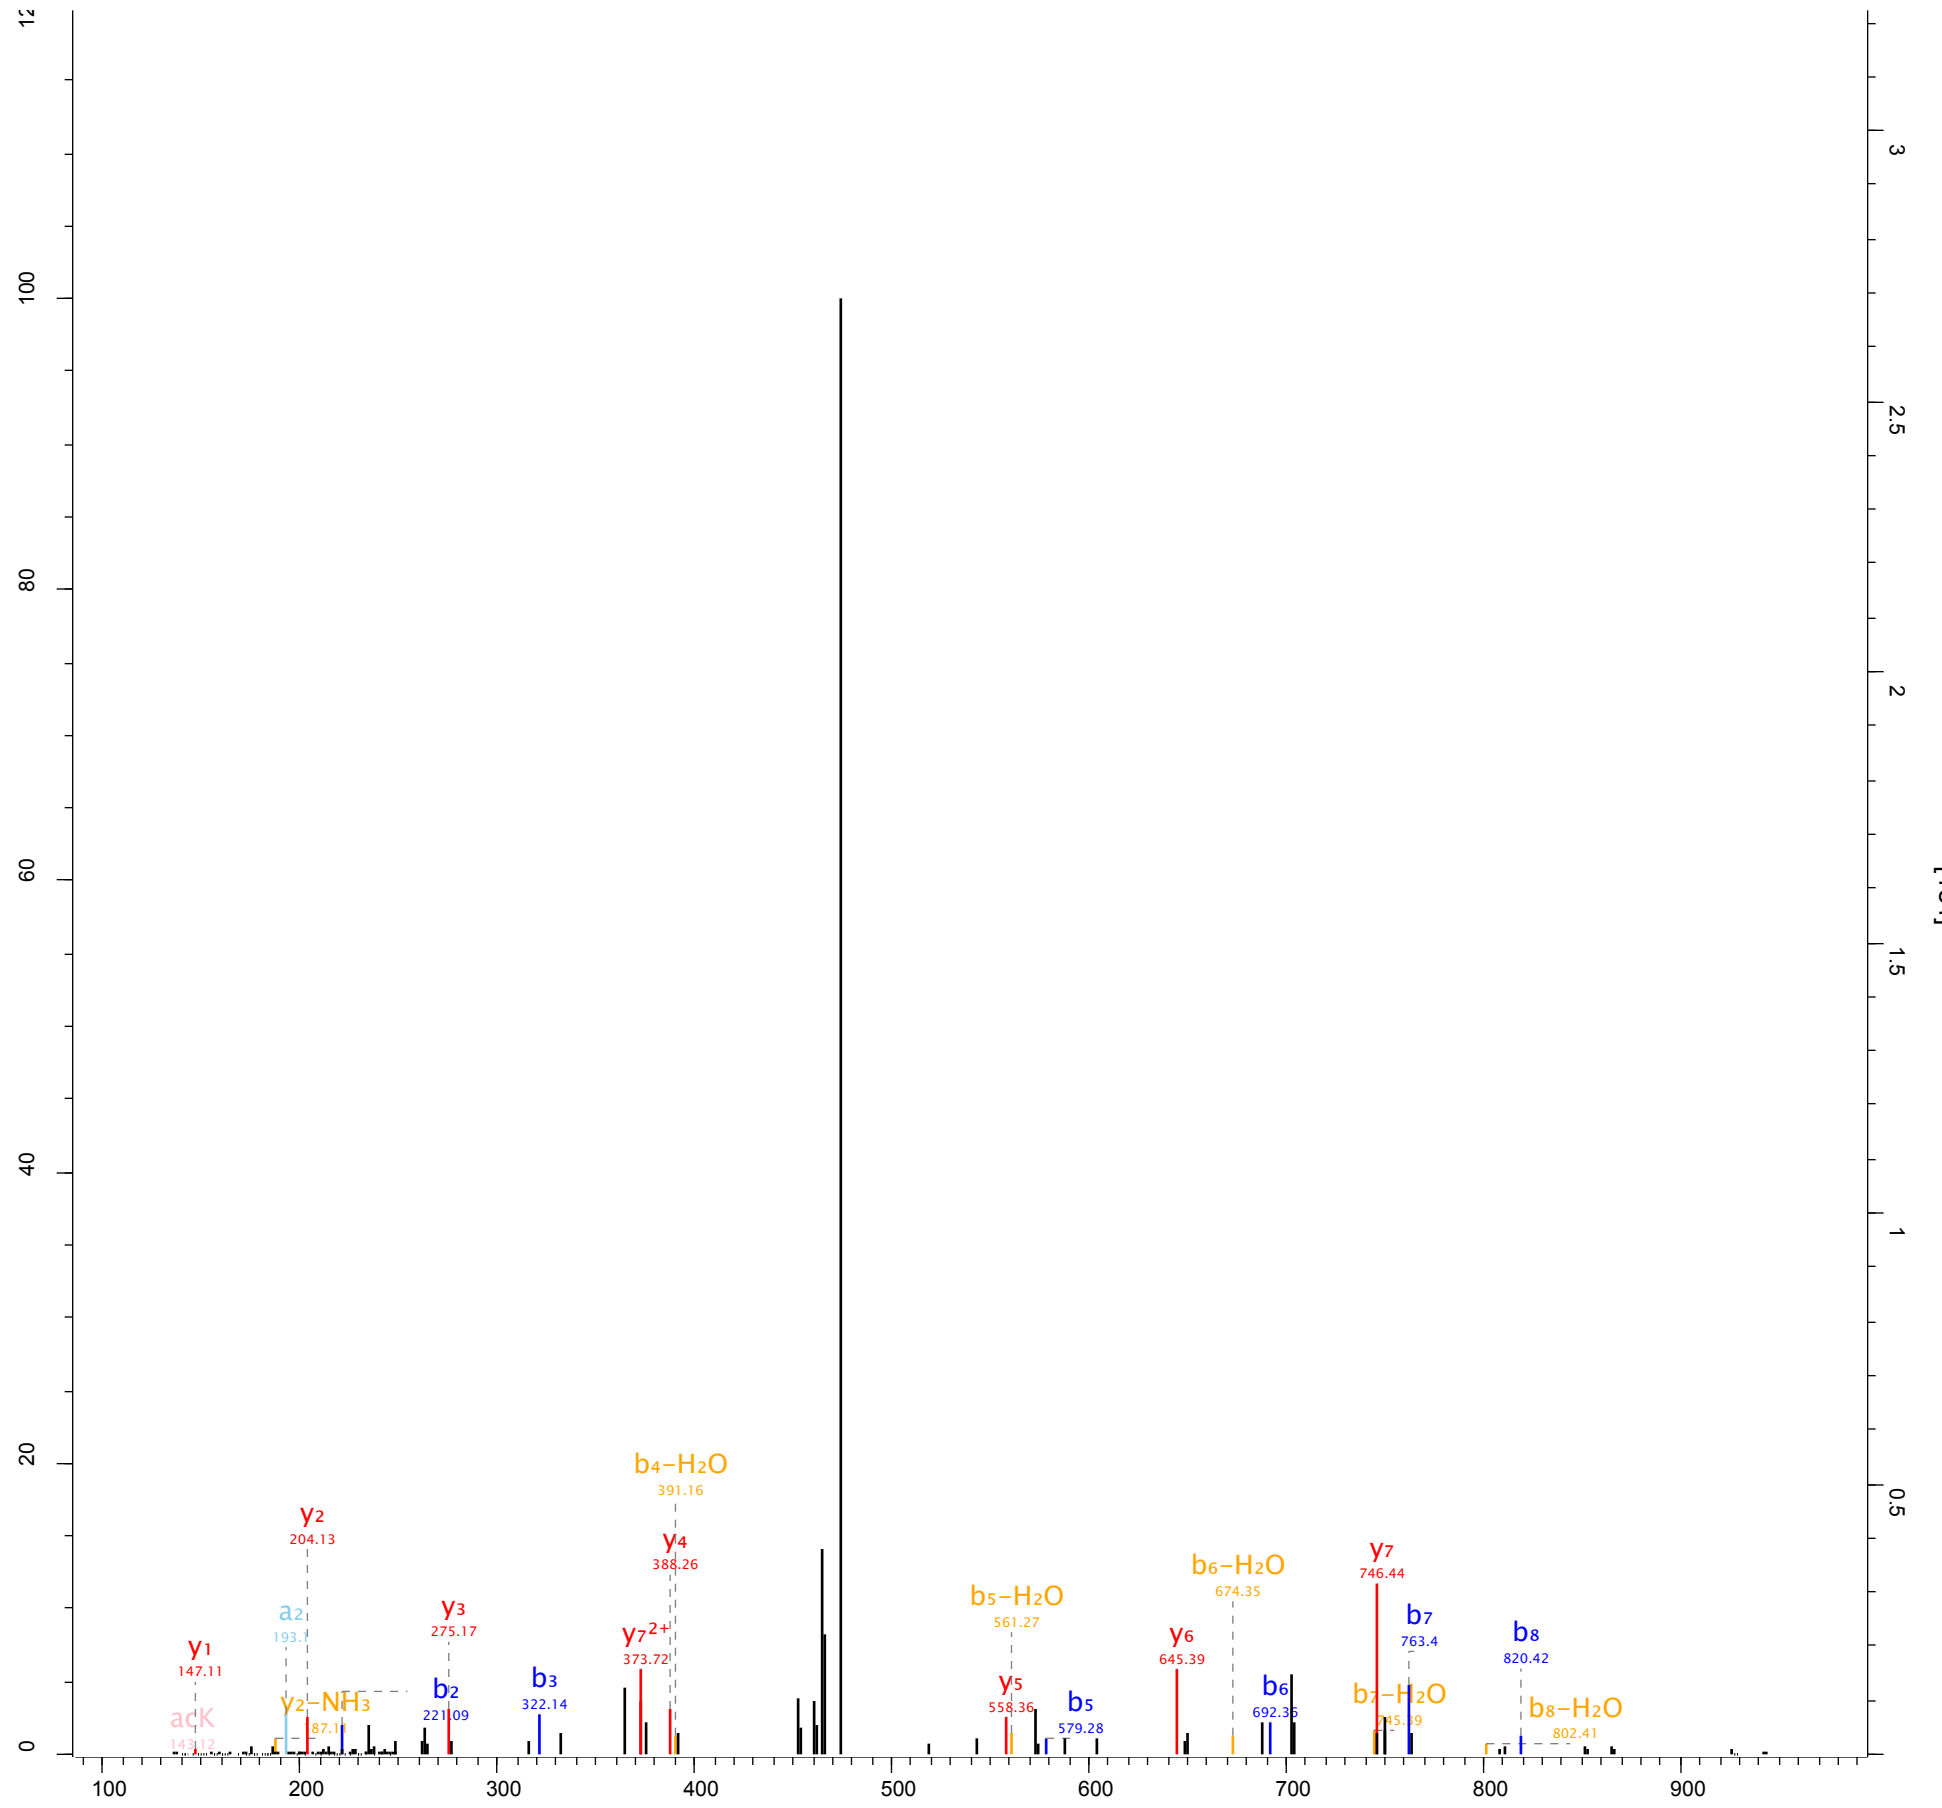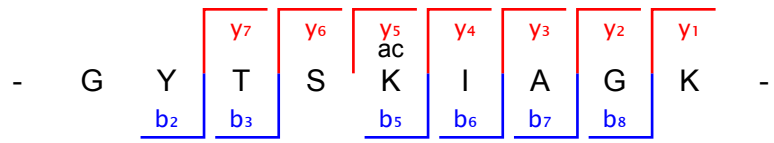

Raw file 050813\_SCW\_II\_29\_22\_5 Scan 12606 Method ITMS; CID Score 98.18 m/z 586.32 Gene names Tkt

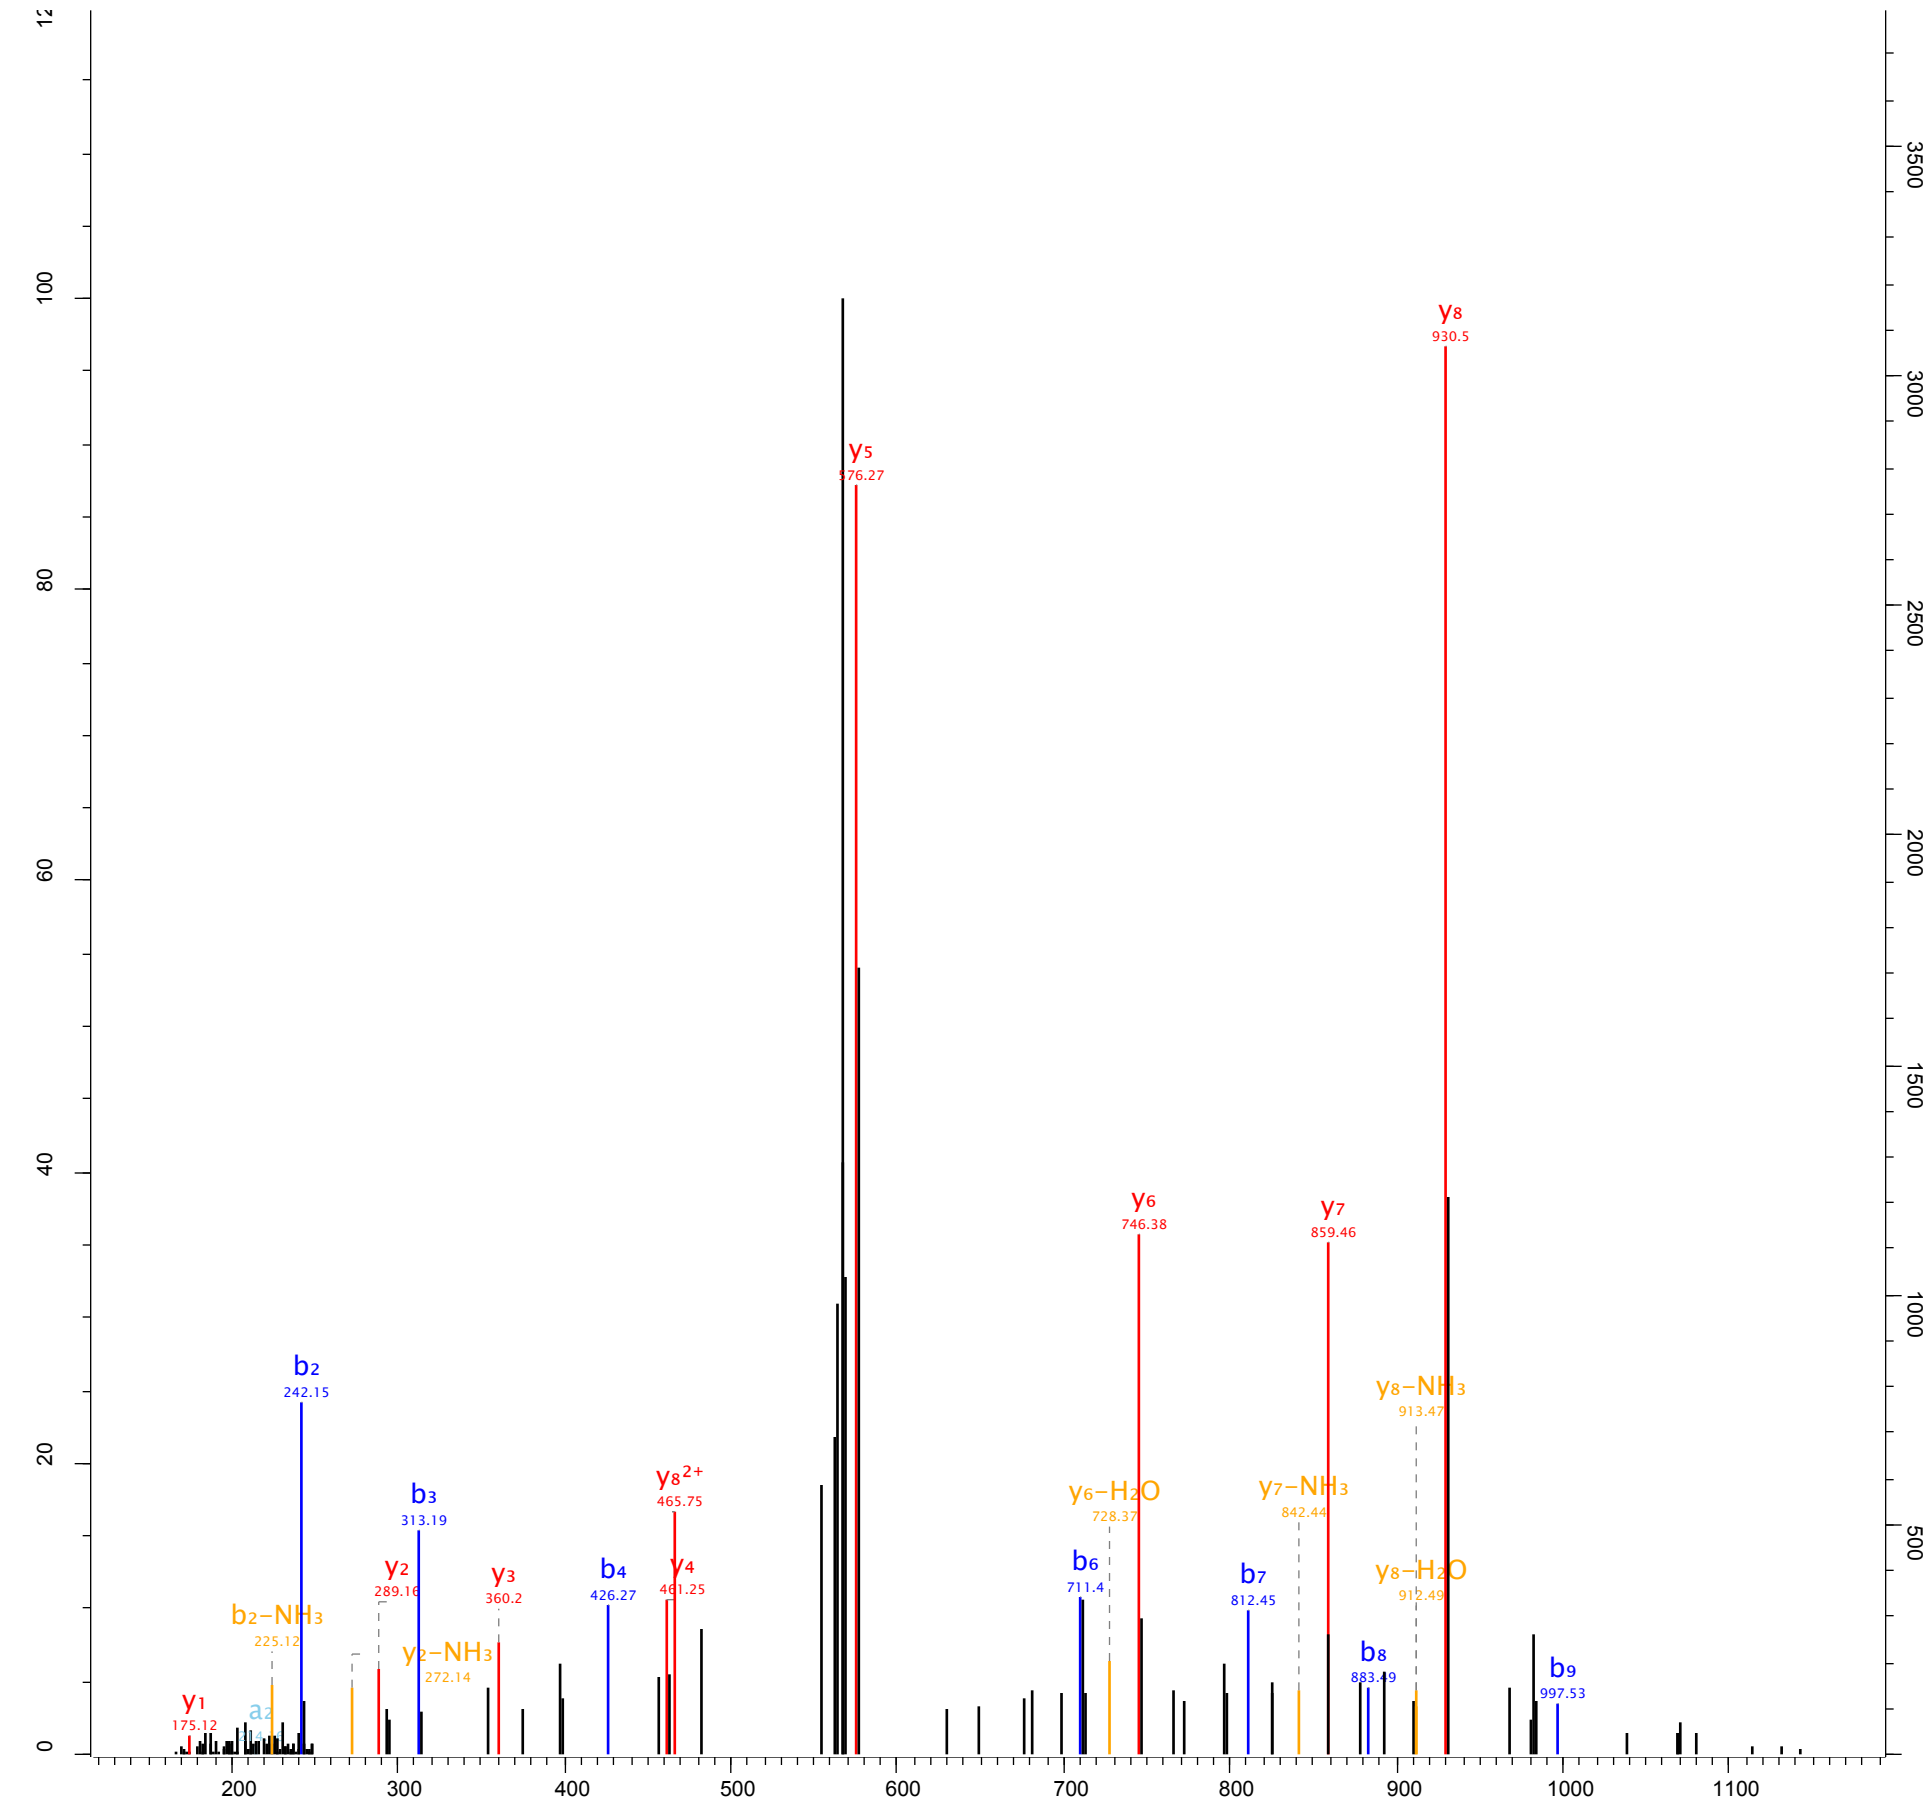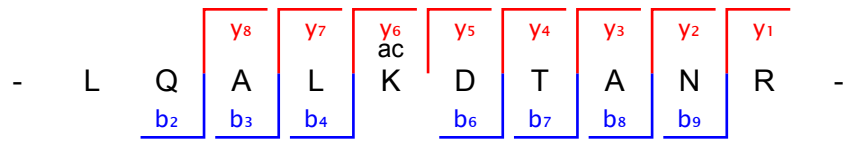

Raw file 050813\_SCW\_II\_29\_22\_5 Scan 12782 Method ITMS; CID Score 111.27 m/z 552.29 Gene names Ppia;Gm5160

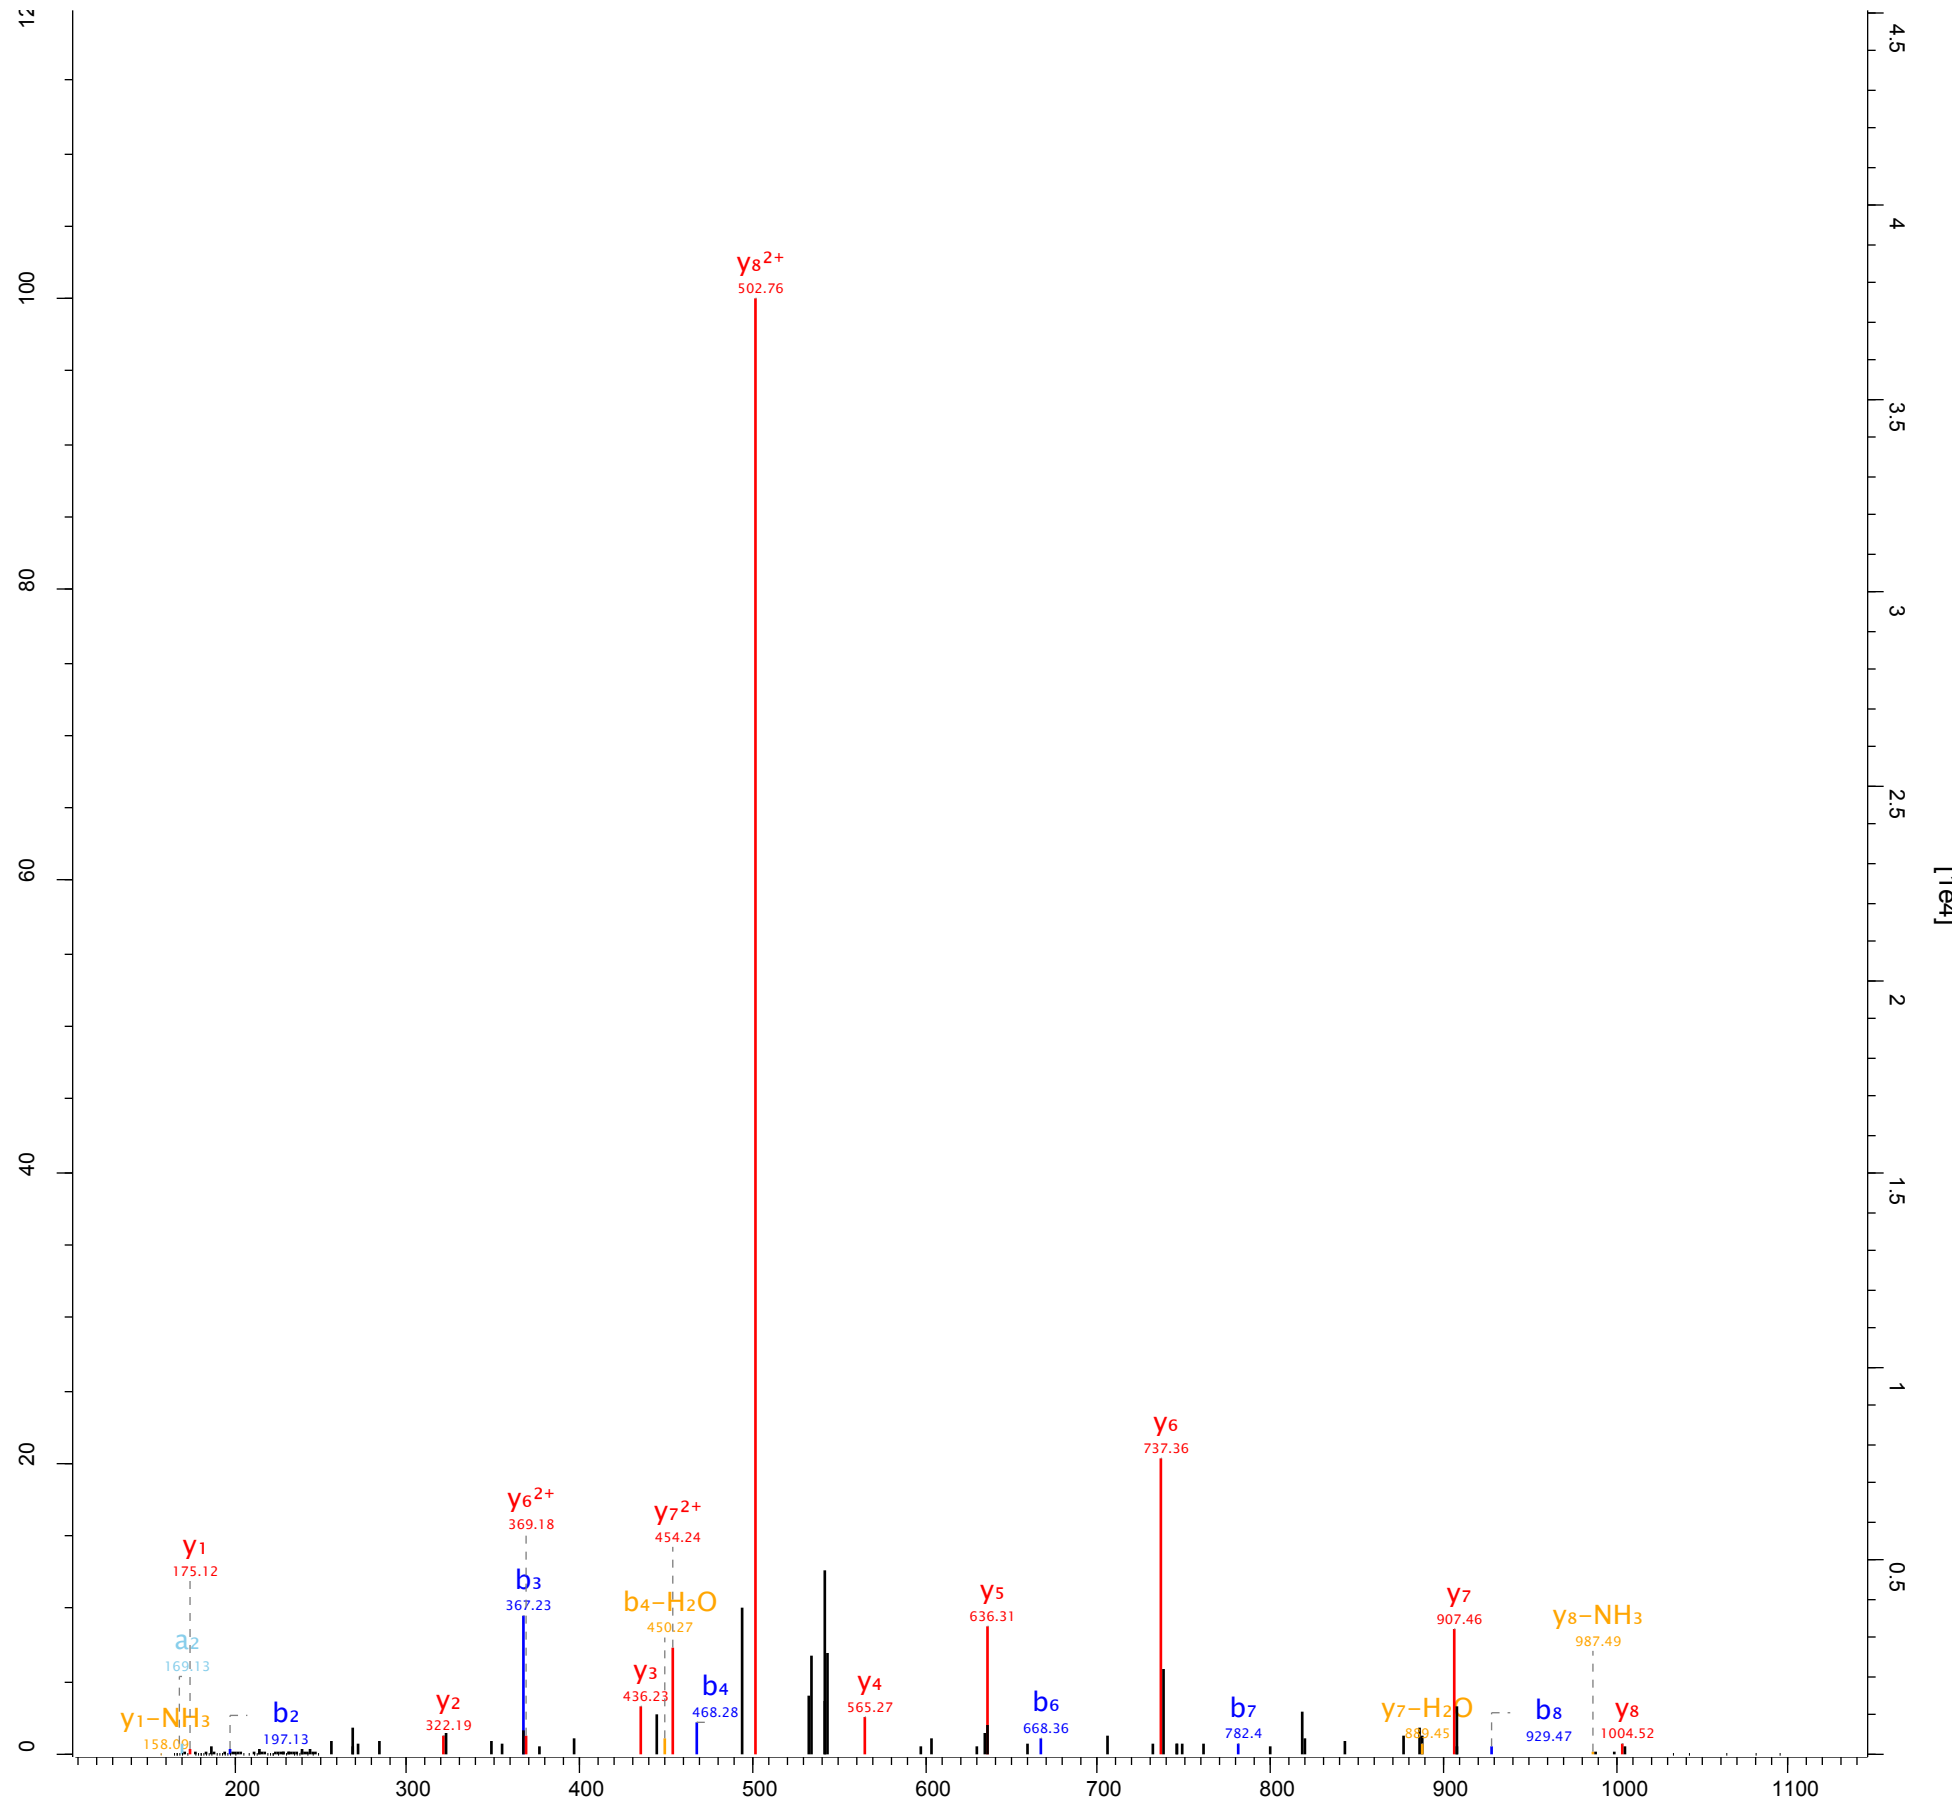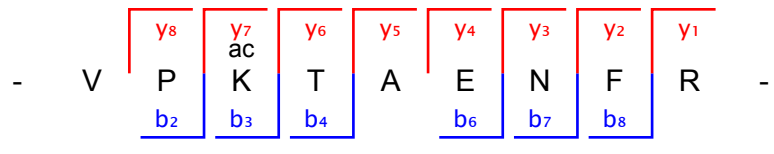

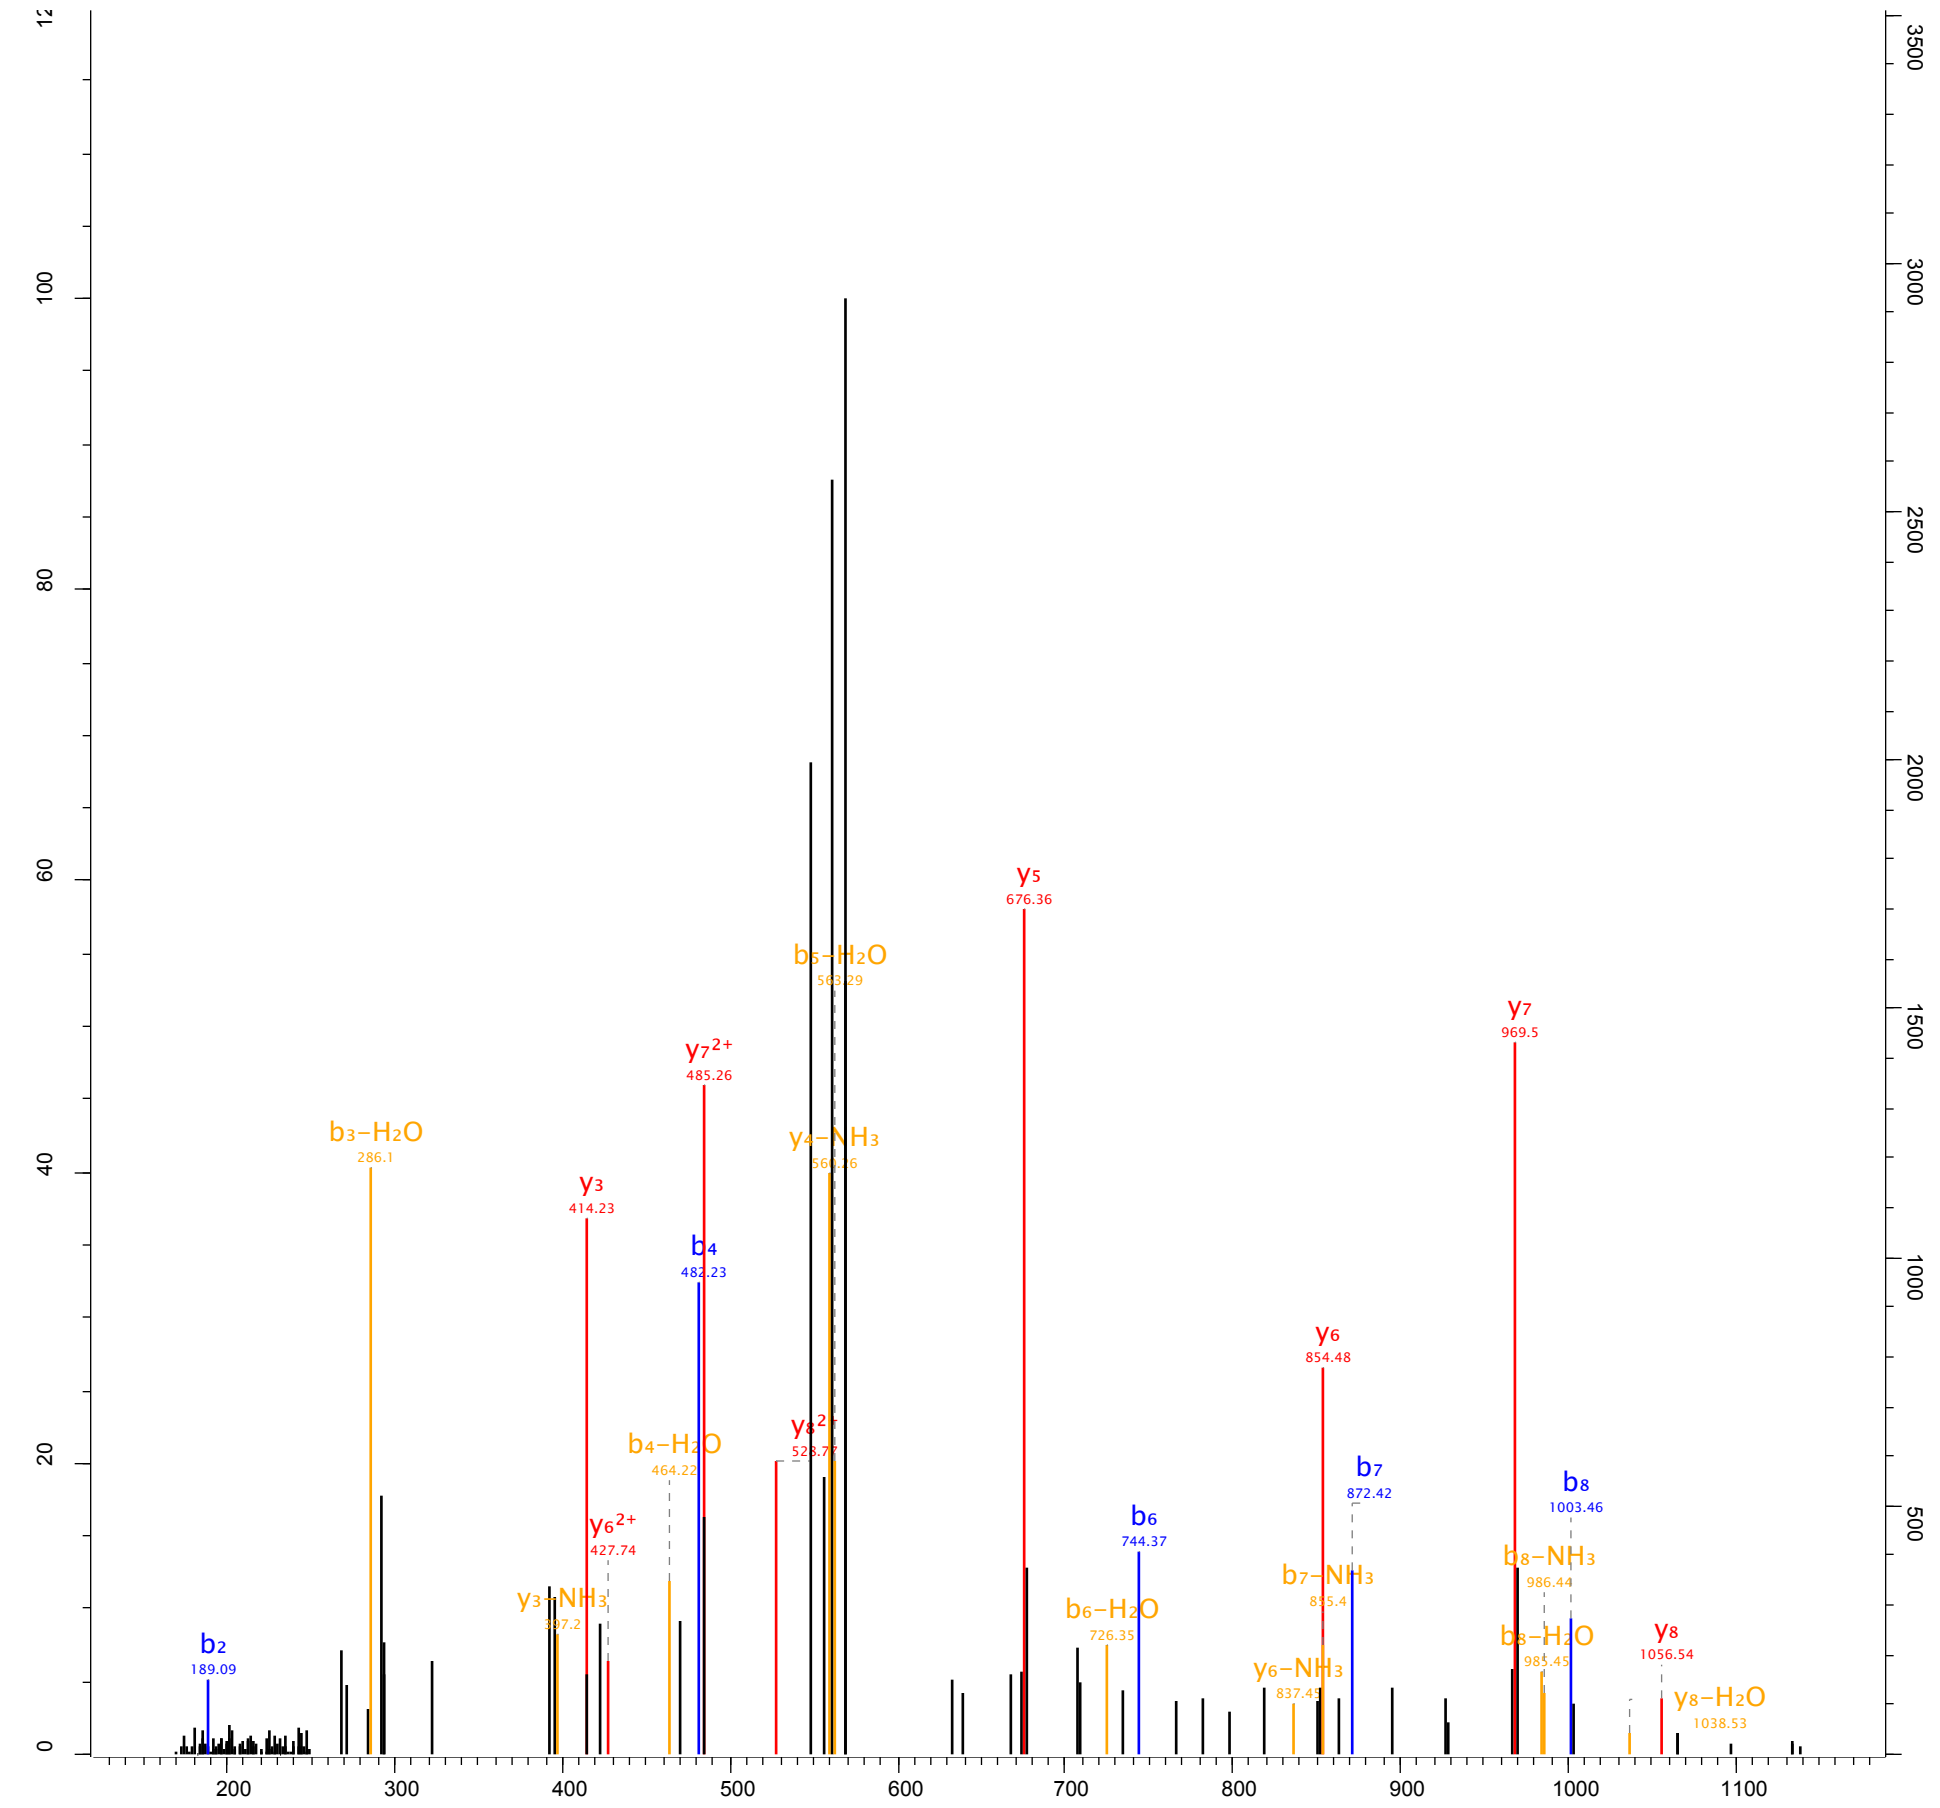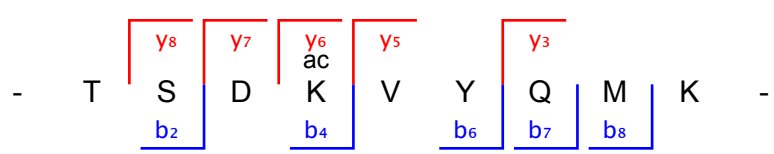

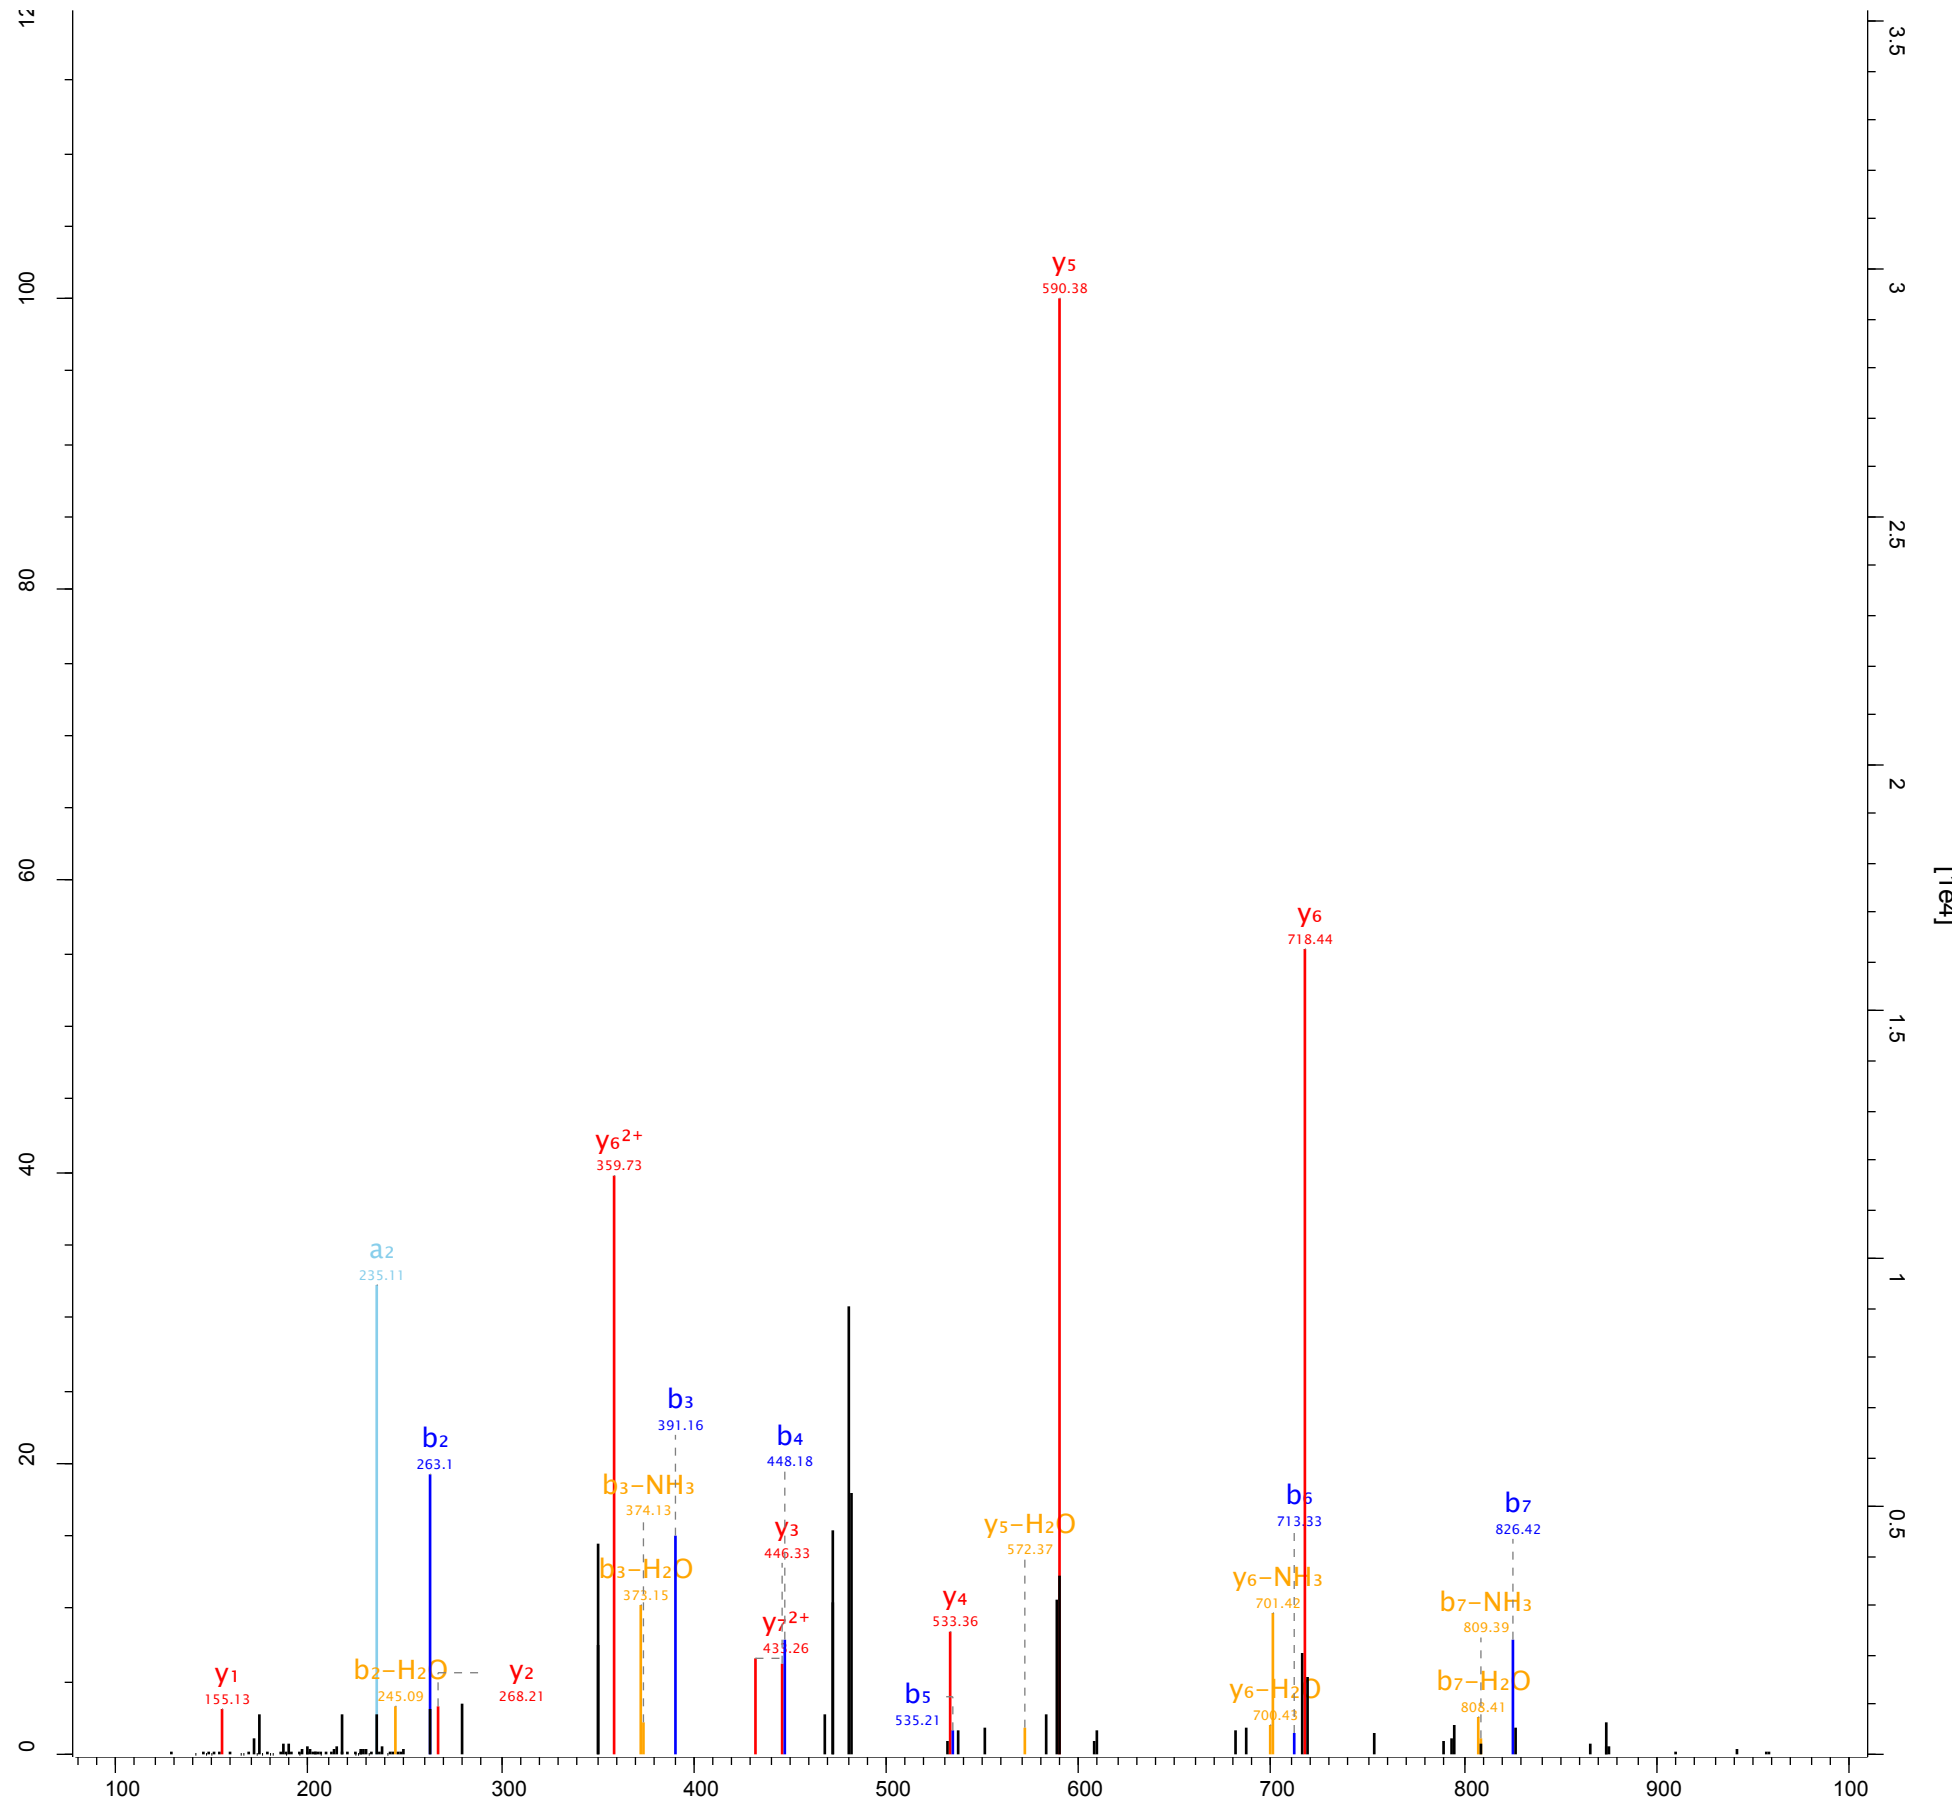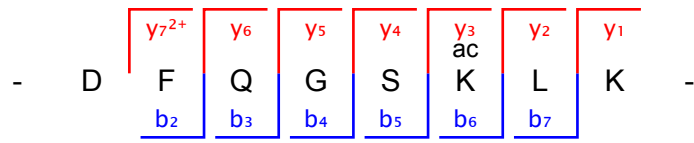

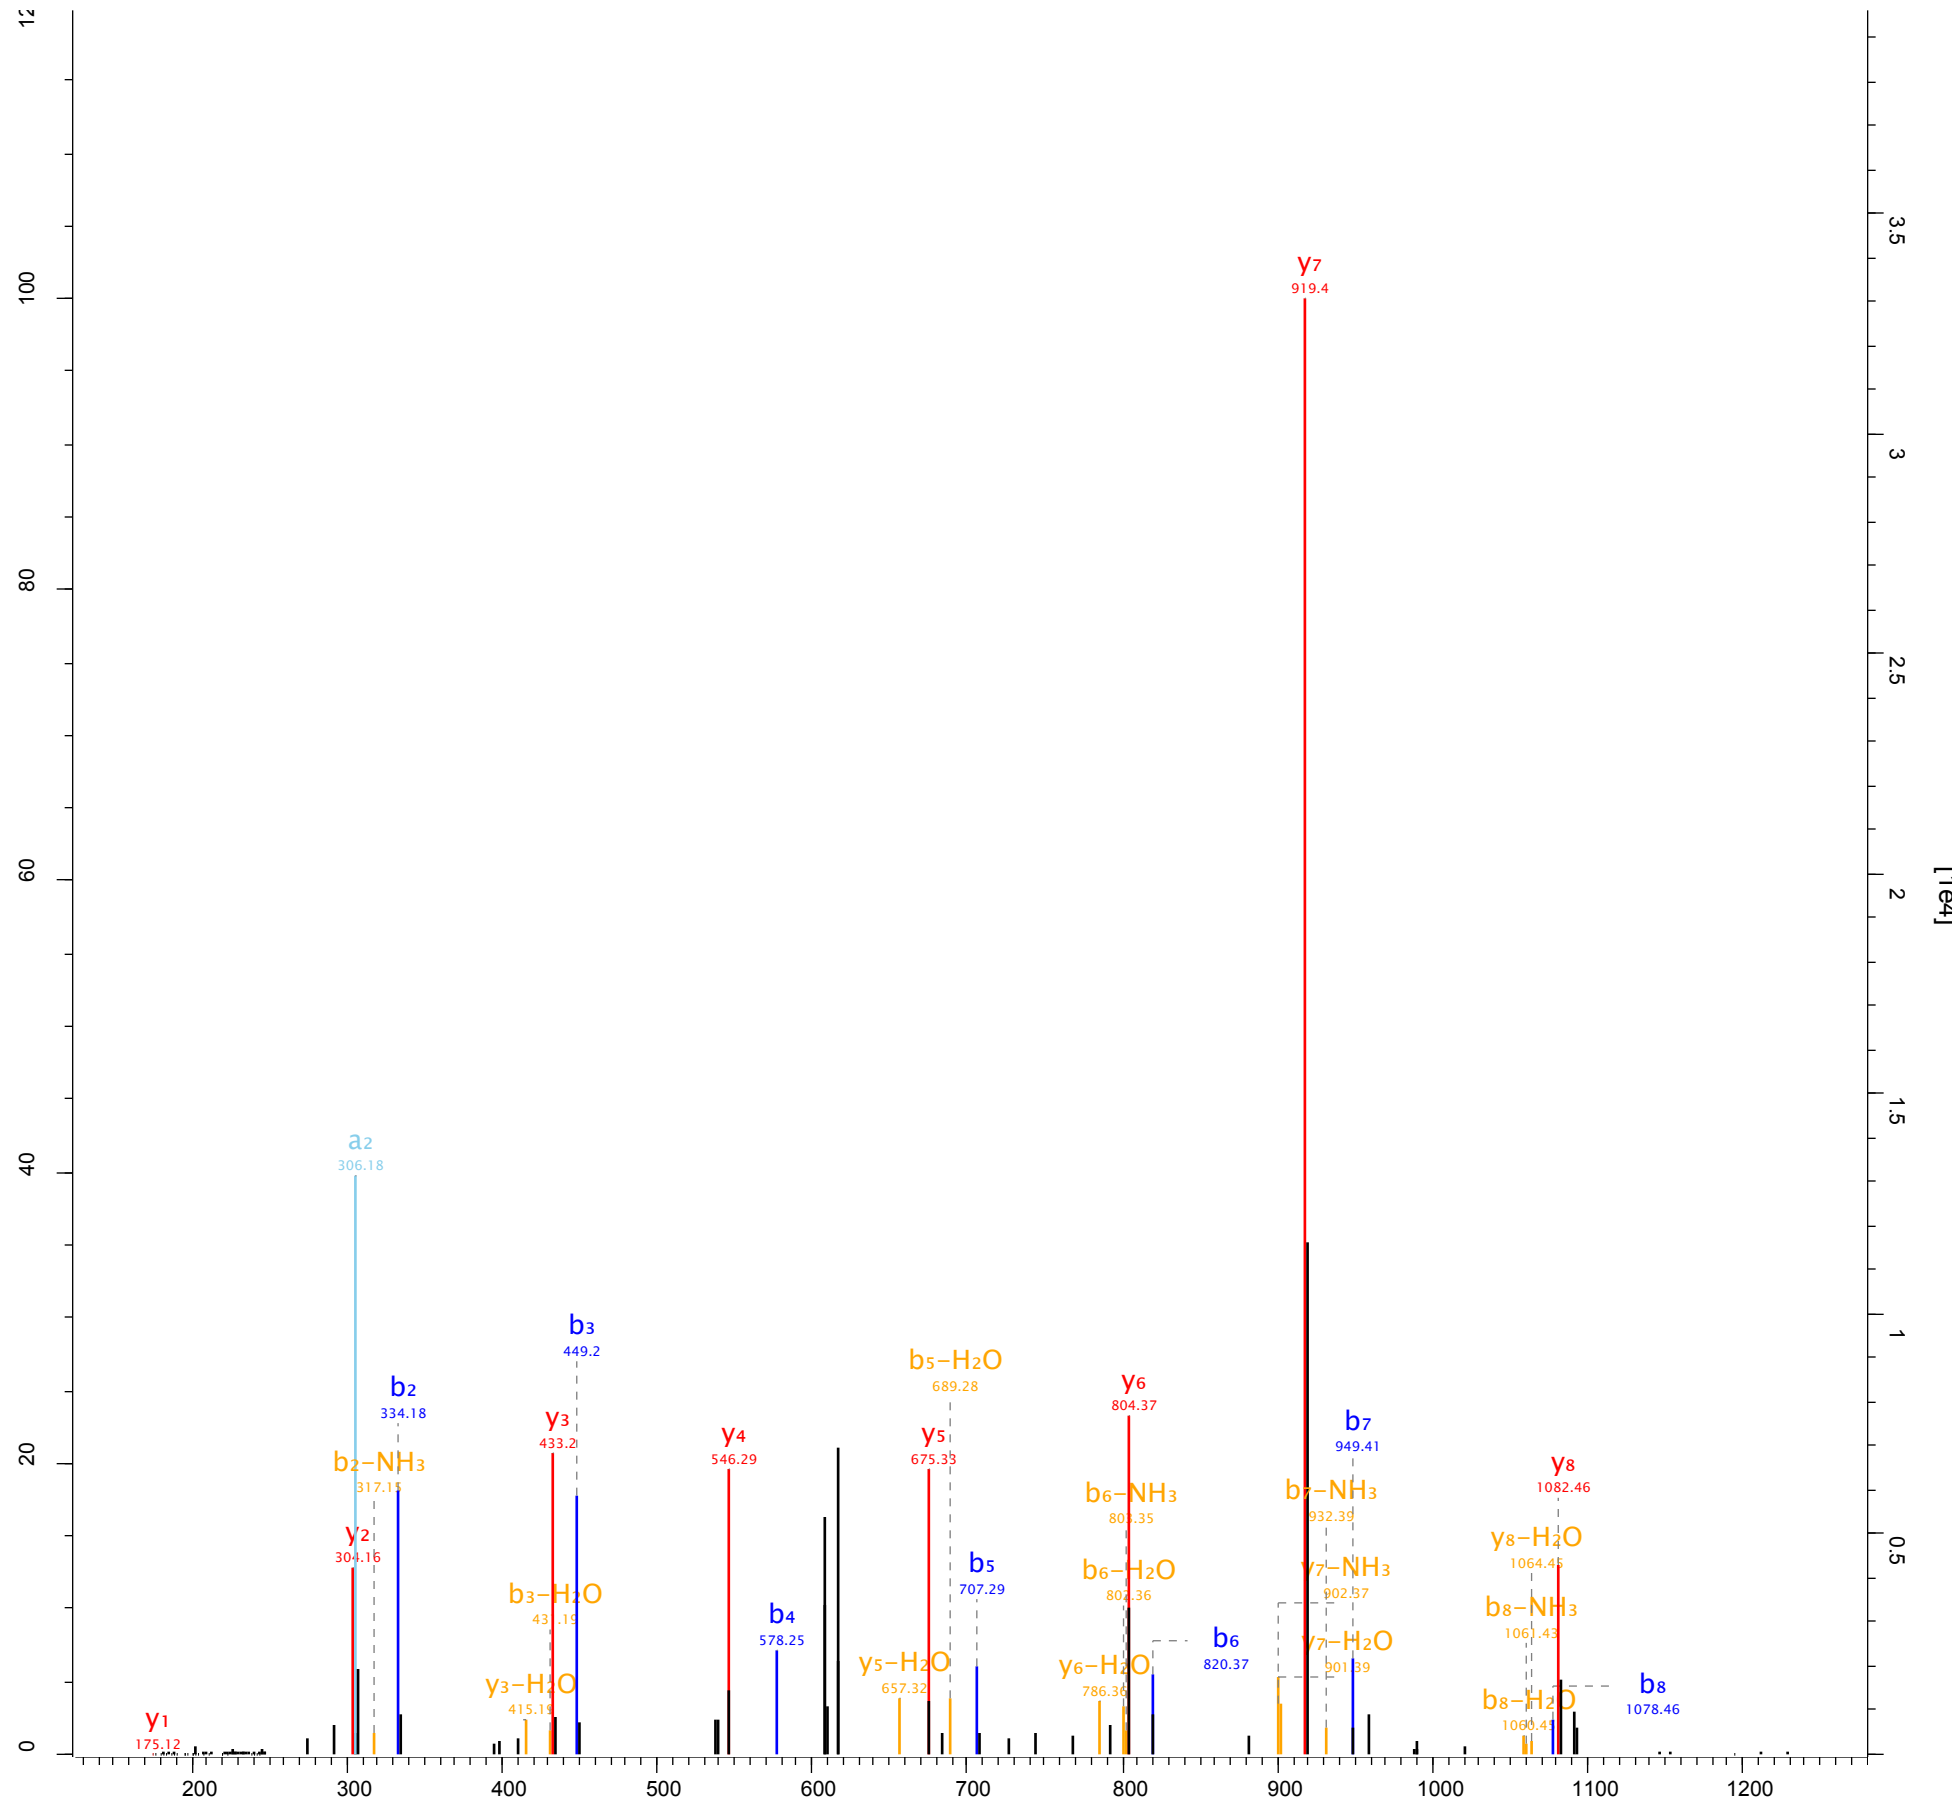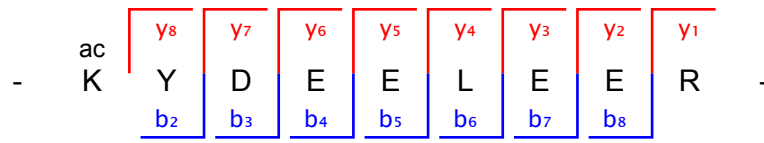

Raw file 050813\_SCW\_II\_29\_22\_5 Scan 13474 Method ITMS; CID Score 167.18 m/z 623.3 Gene names Smek1

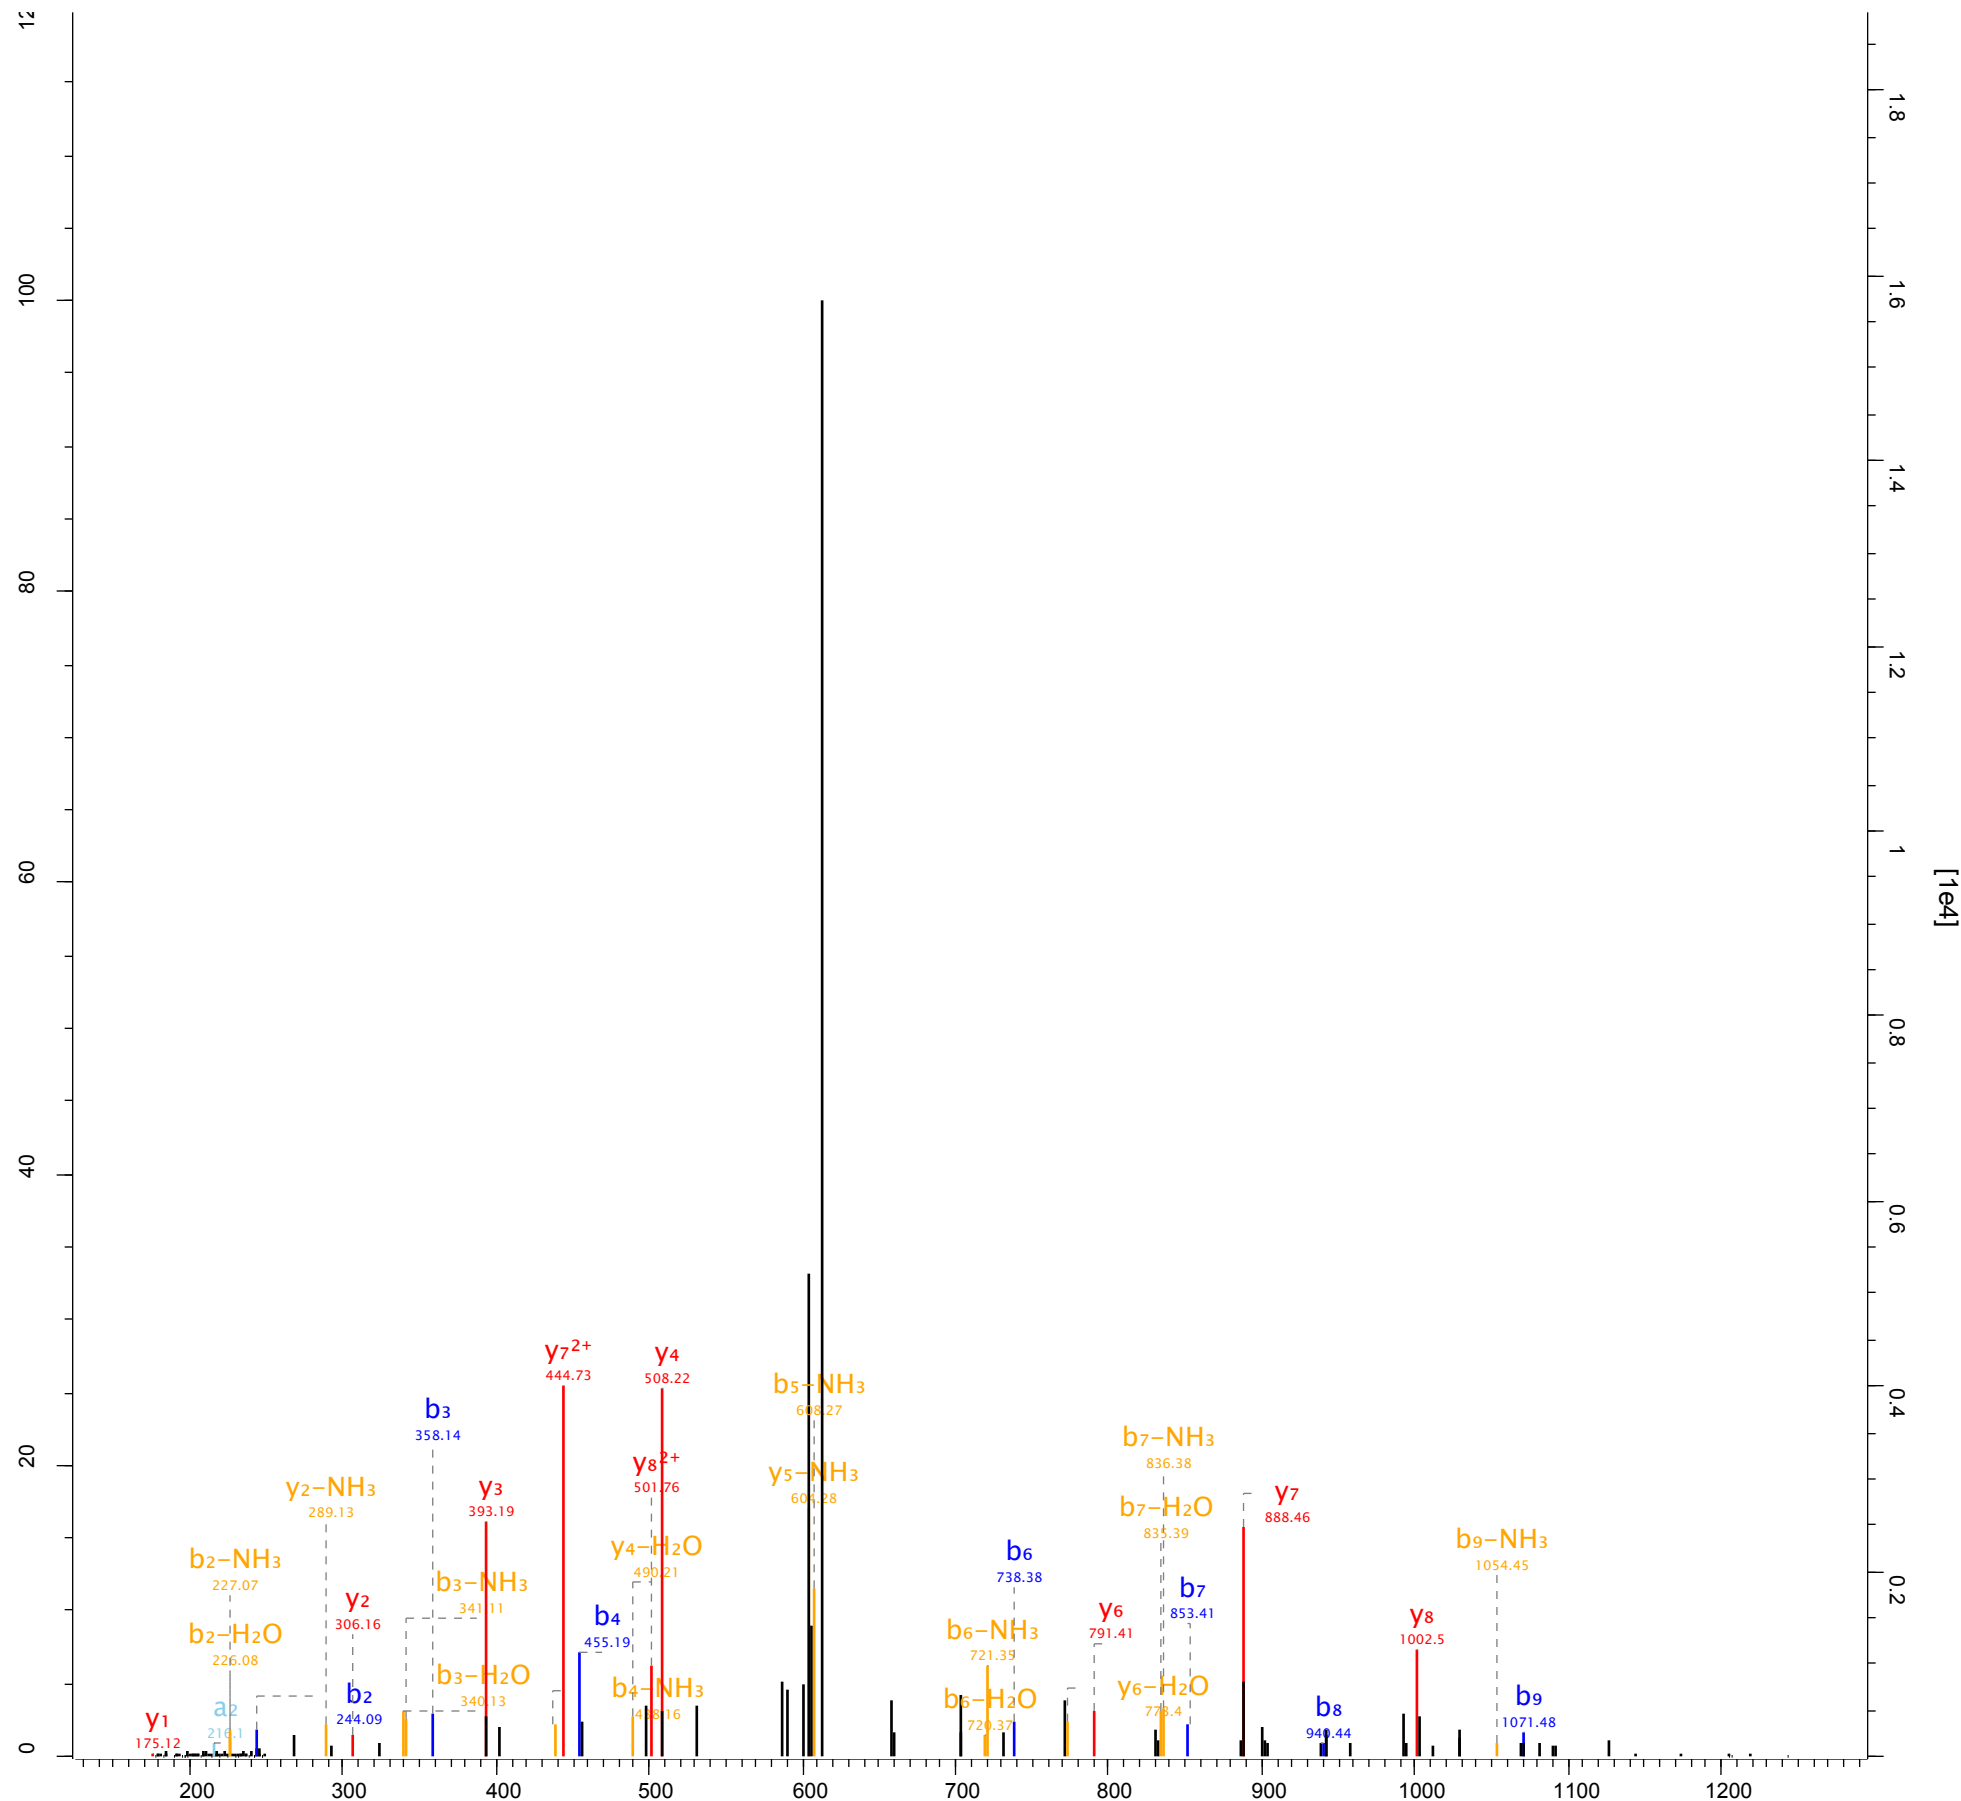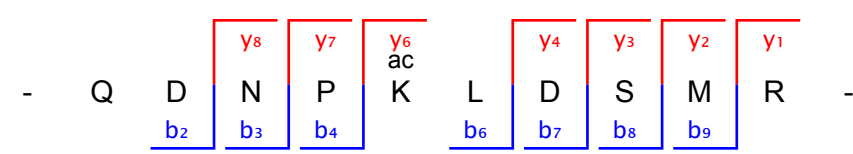

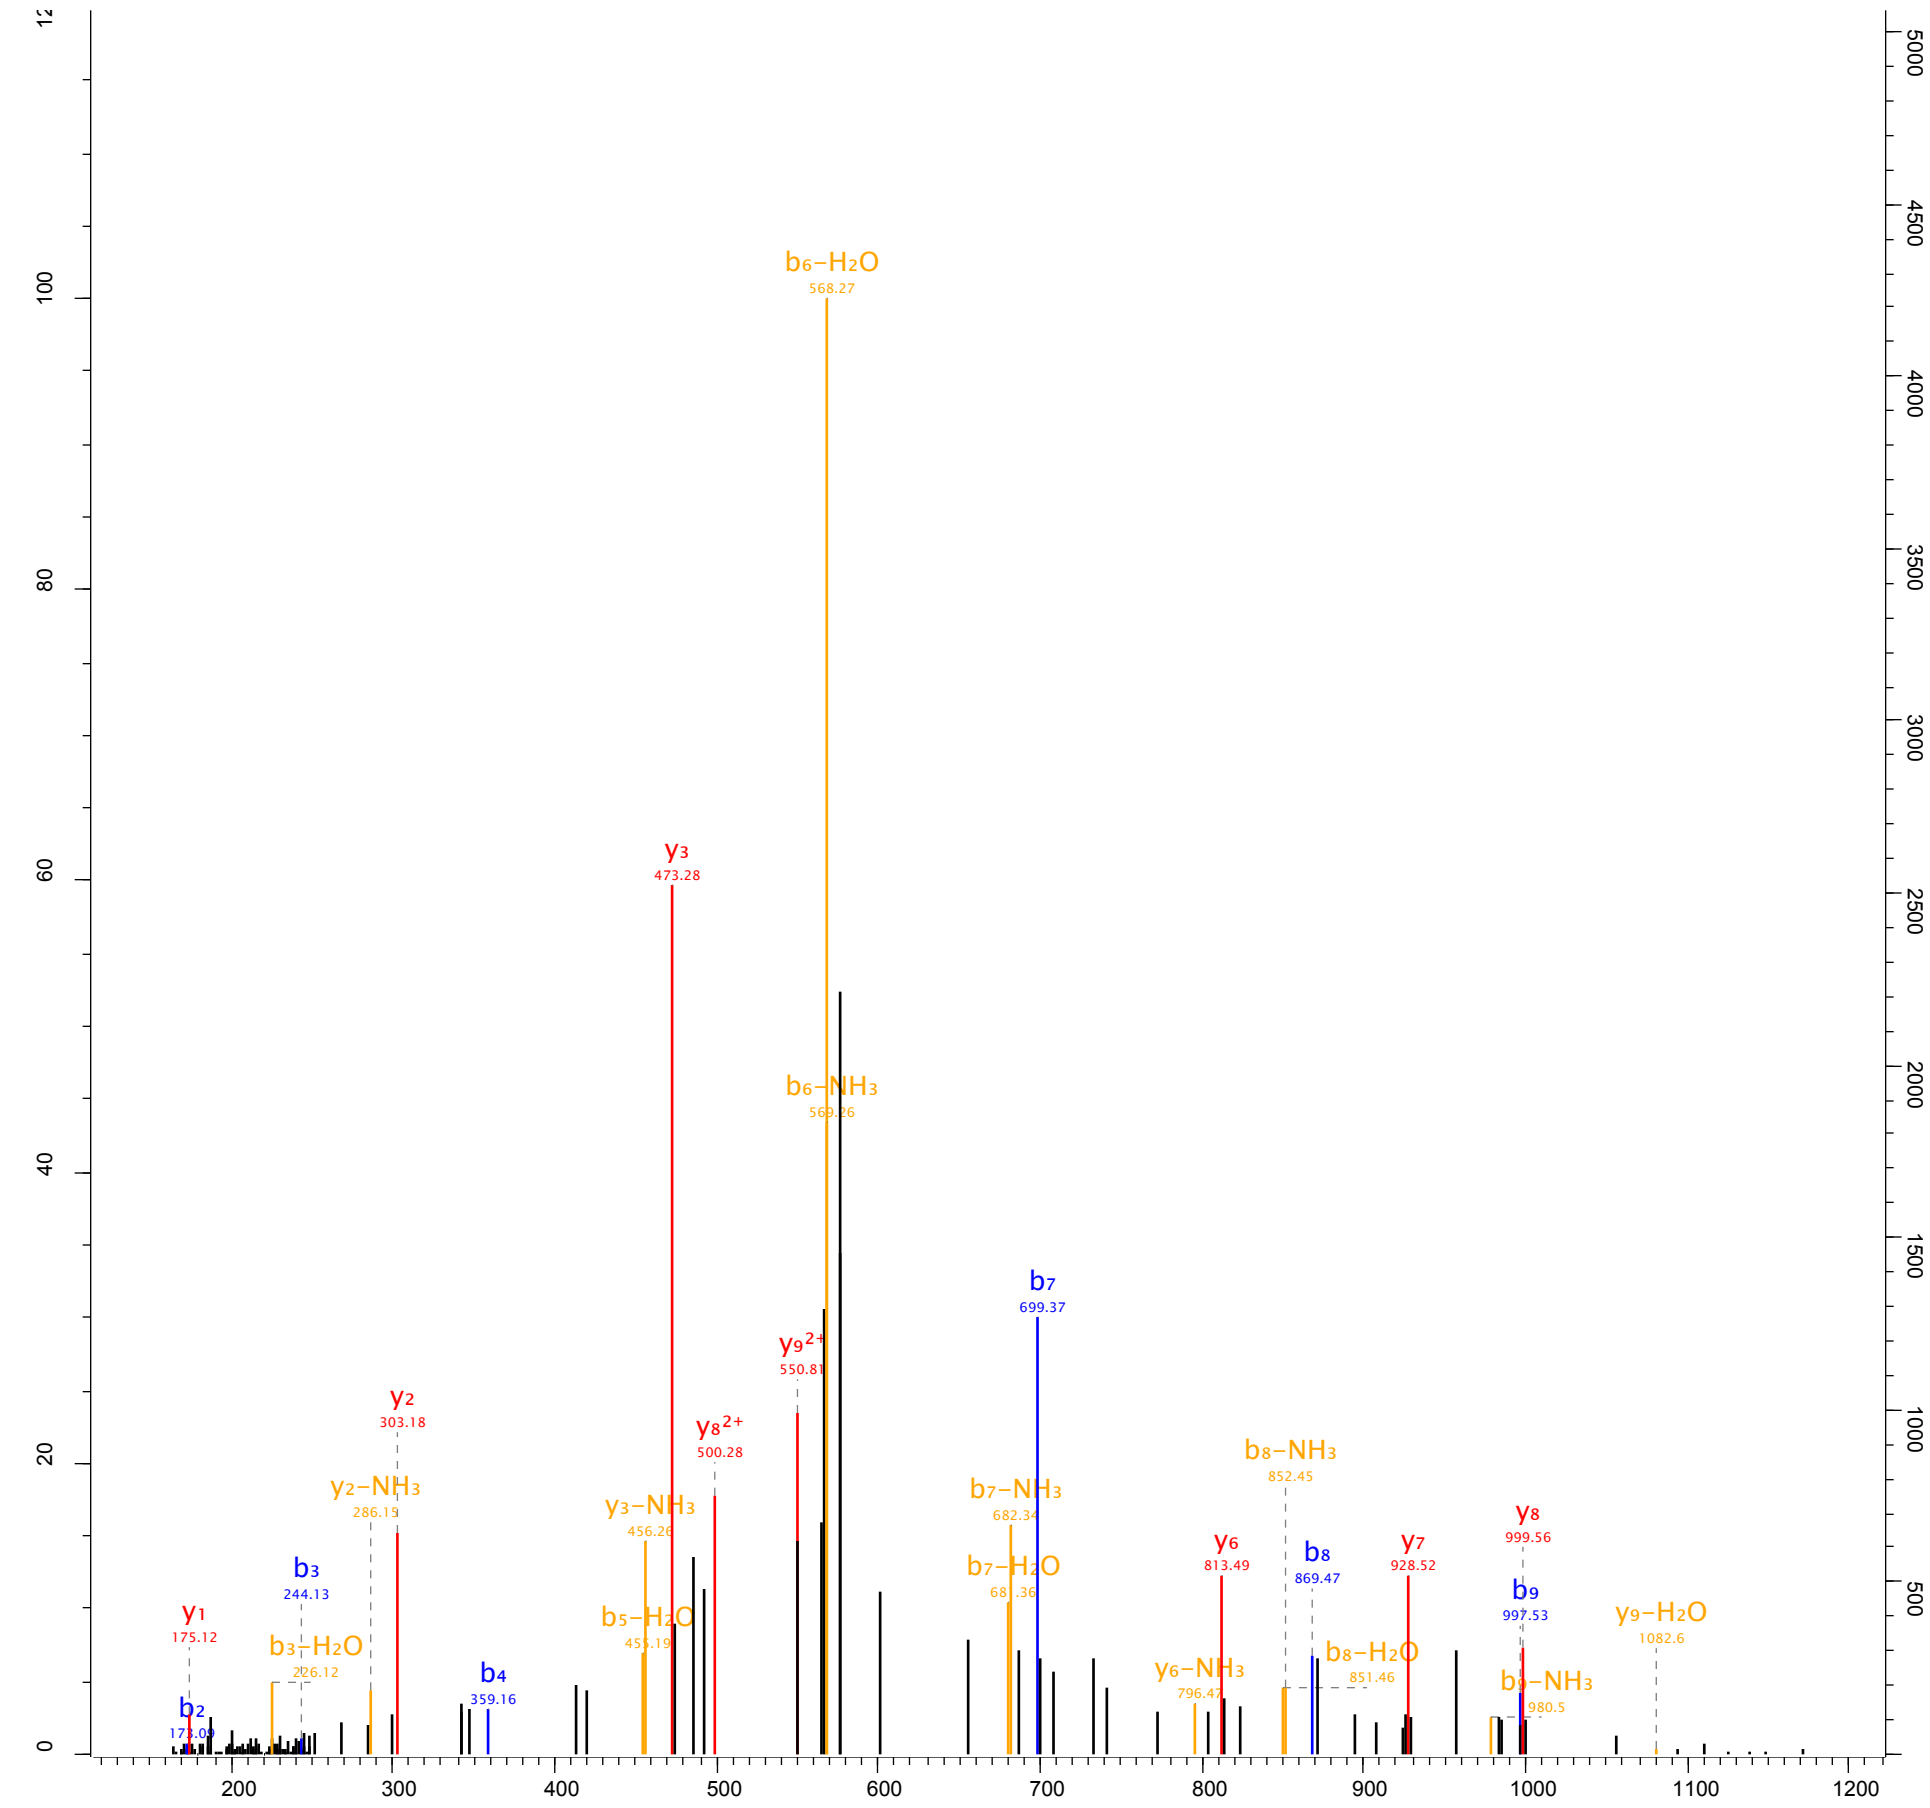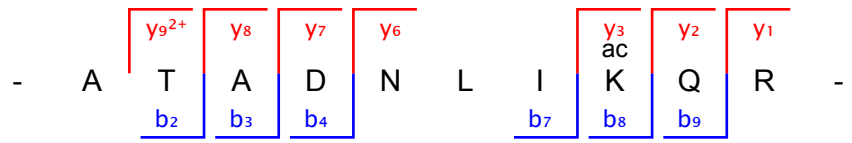



050813\_SCW\_II\_29\_22\_5

13591 ITMS; CID 122.96 539.79 Gdi2

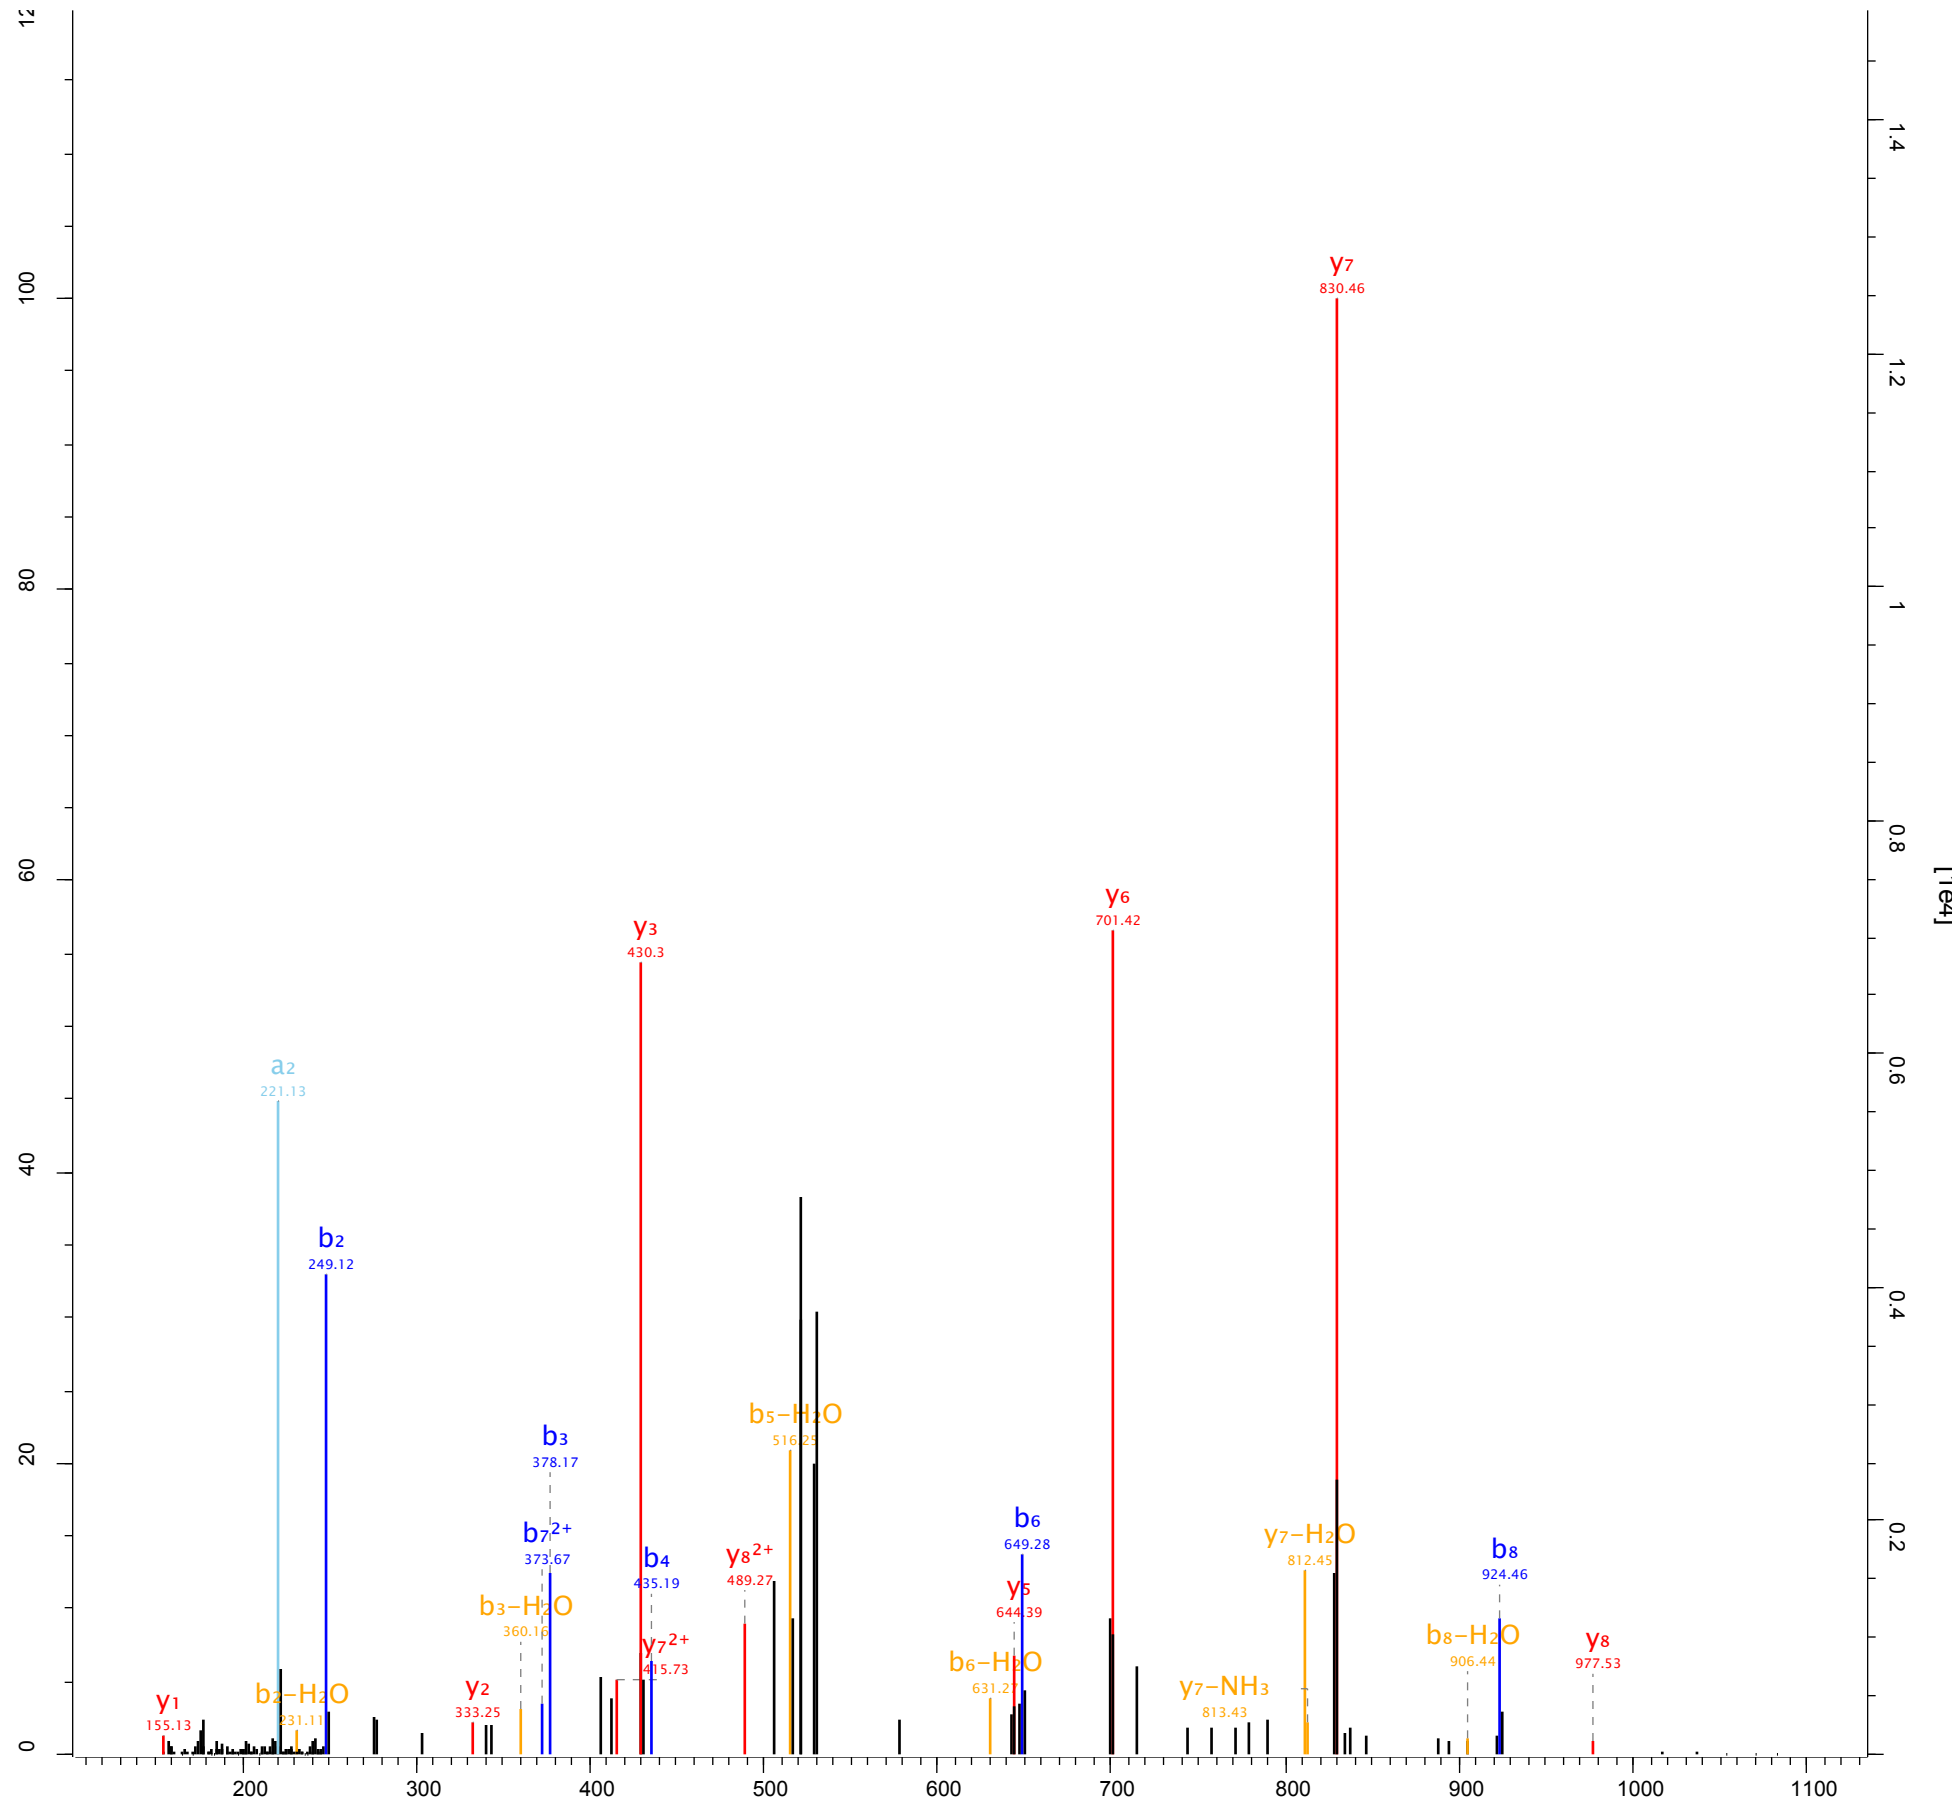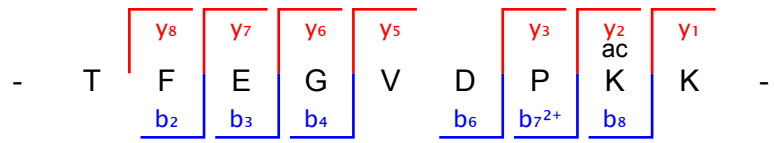

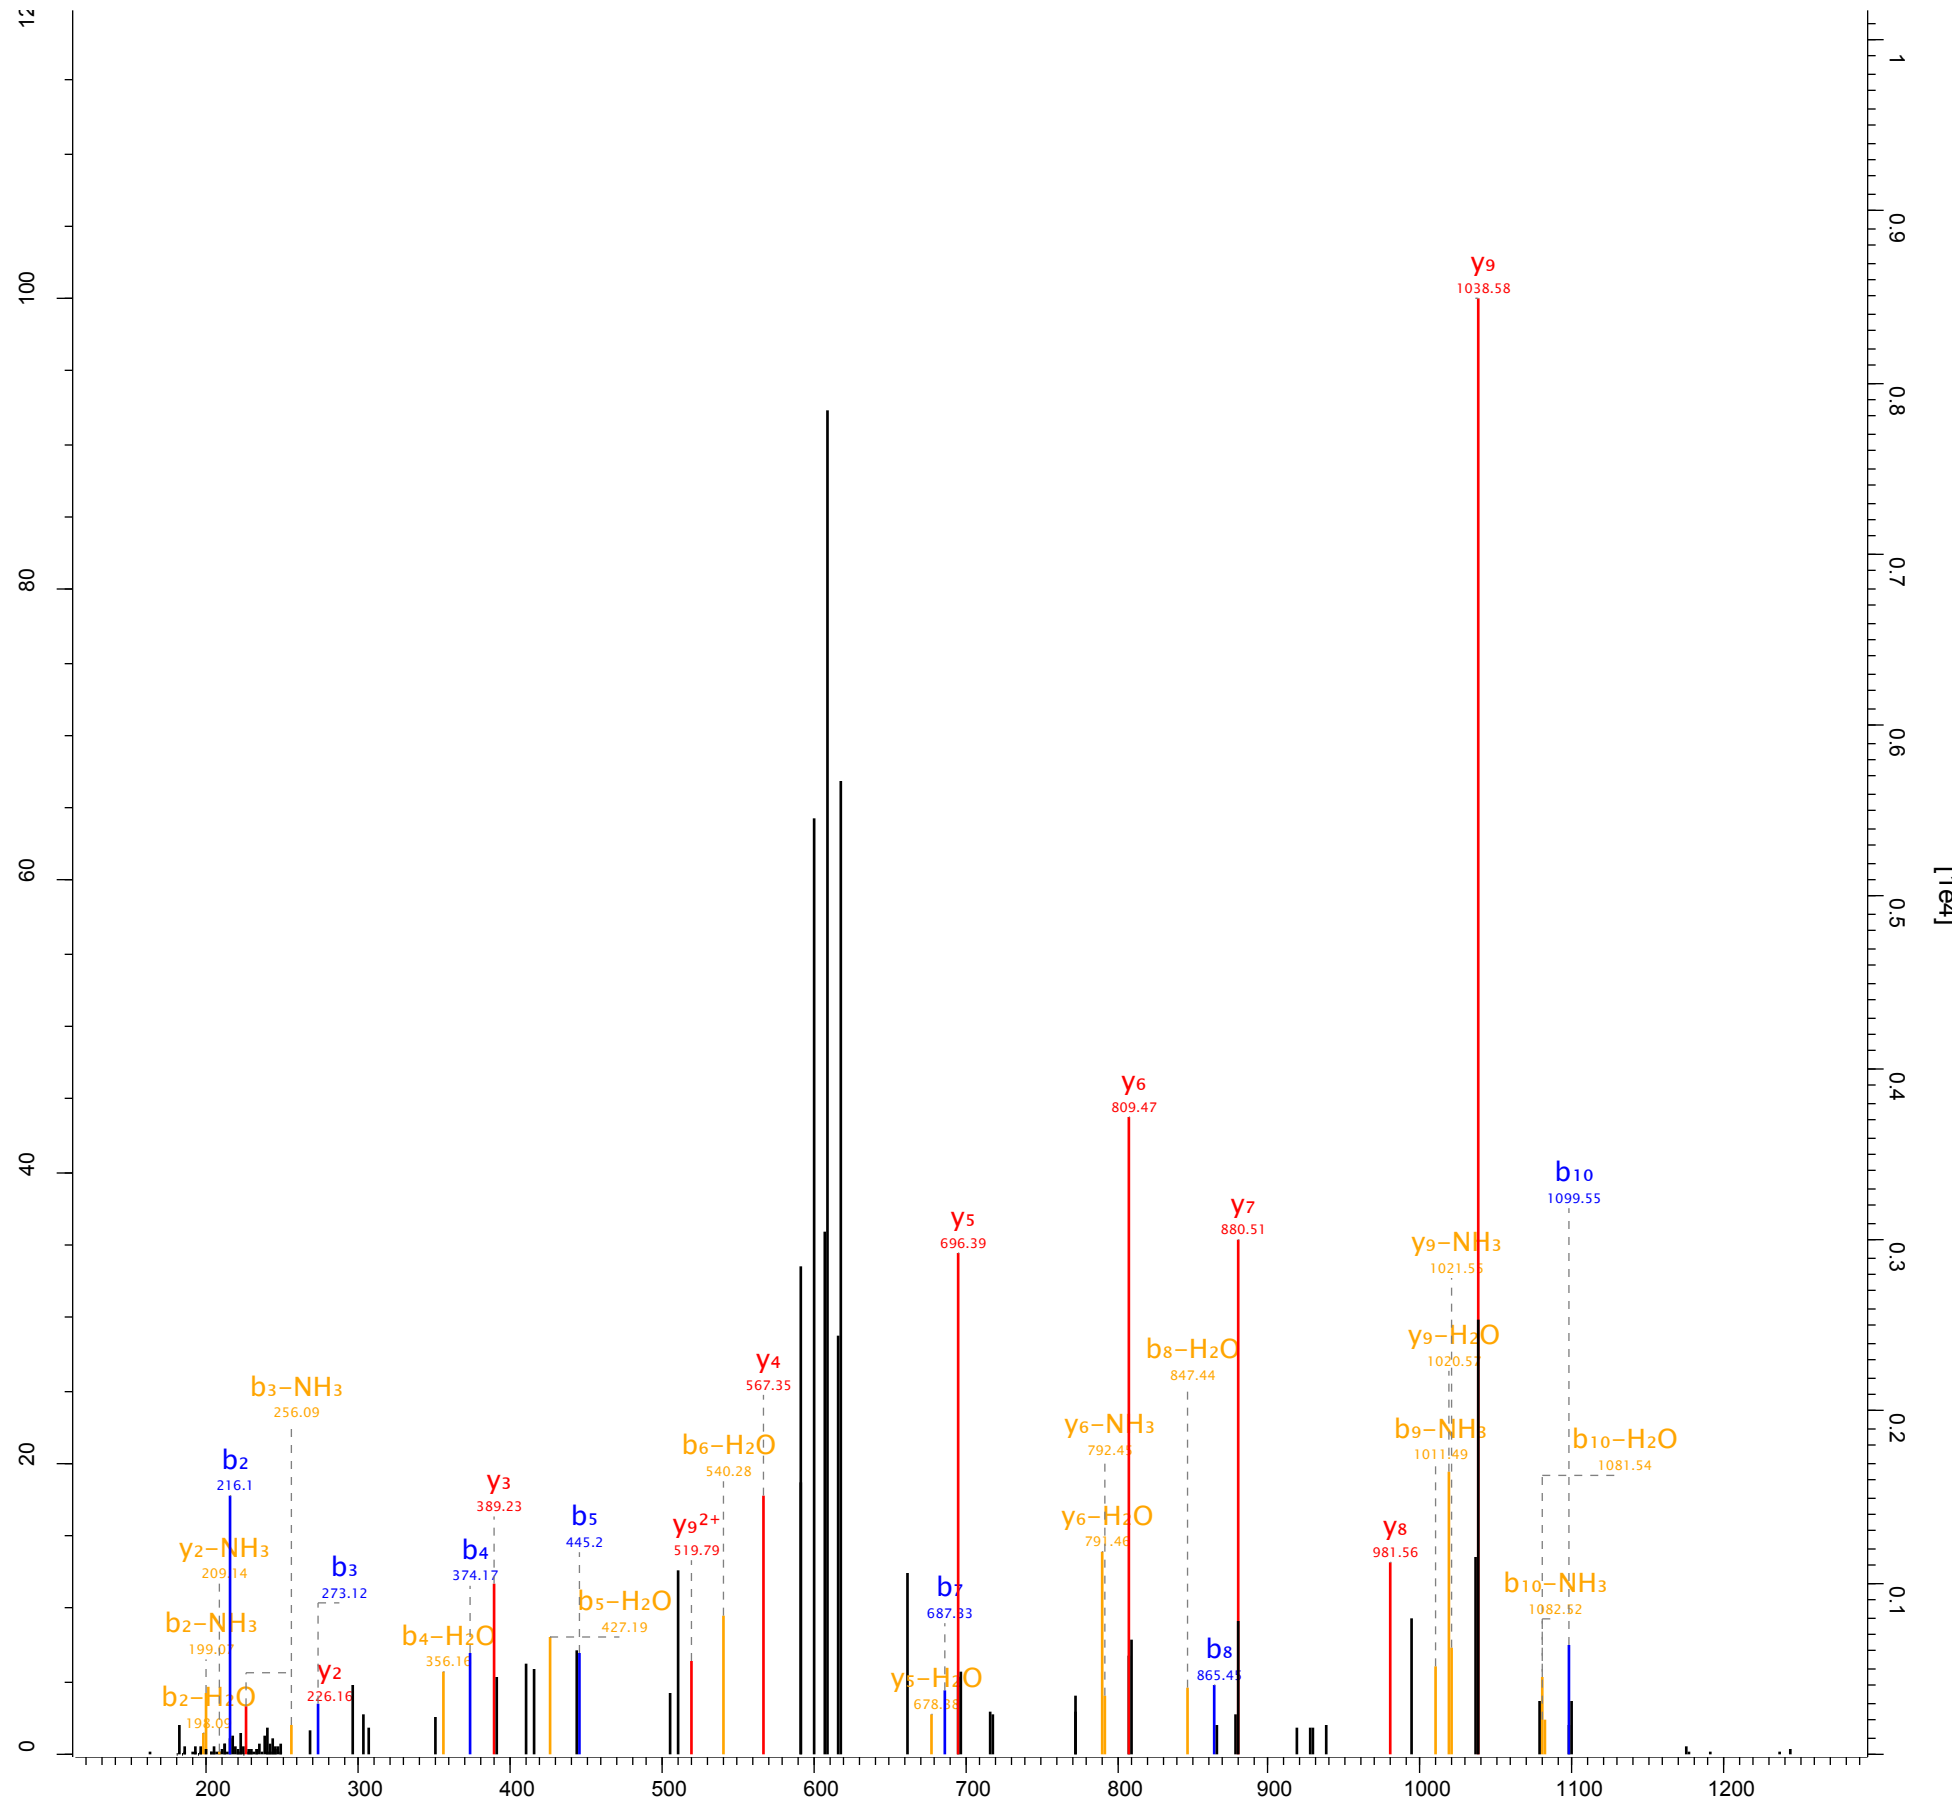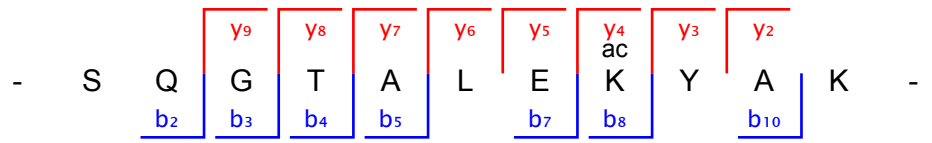

Raw file 050813\_SCW\_II\_29\_22\_5 Scan 14370 Method ITMS; CID Score 160.53 m/z 560.8 Gene names Crat

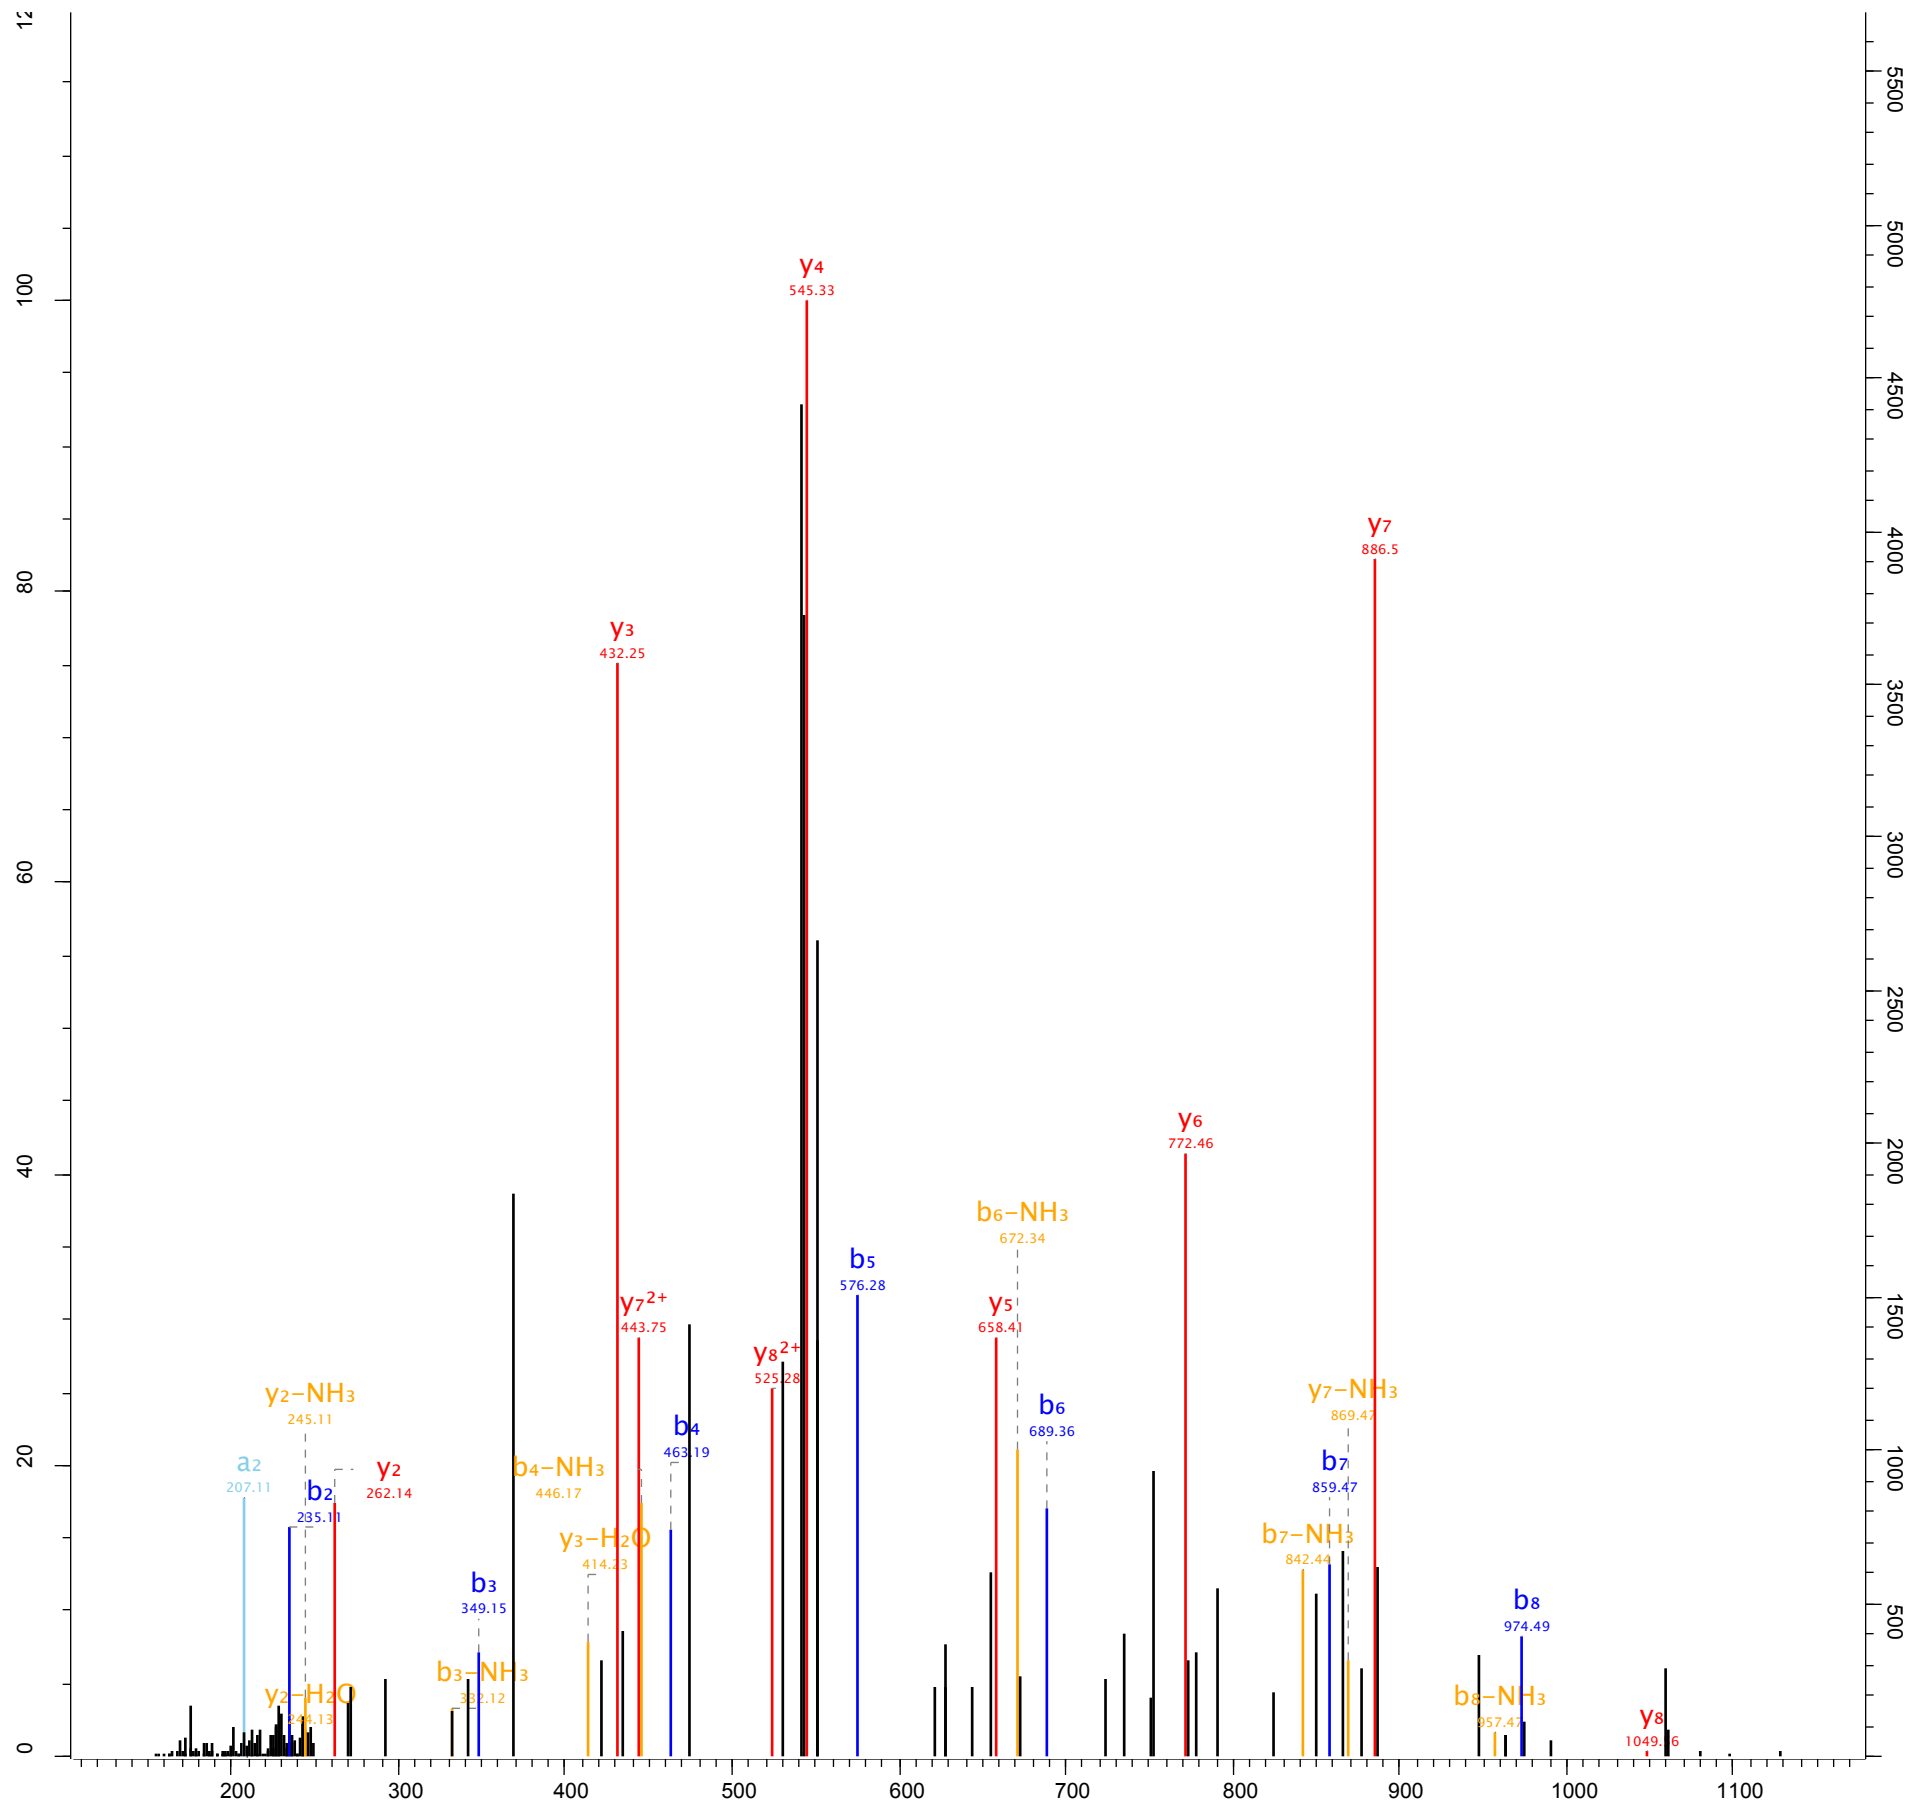

- A 

|    |    |    |    |    |          |    |
|----|----|----|----|----|----------|----|
| y8 | y7 | y6 | y5 | y4 | y3<br>ac | y2 |
| Y  | N  | N  | L  | I  | K        | D  |
| b2 | b3 | b4 | b5 | b6 | b7       | b8 |

 K -

Raw file: 050813\_SCW\_II\_29\_22\_5  
 Scan: 14414 Method: ITMS; CID Score: 95.77 m/z: 509.81 Gene names: Glyr1

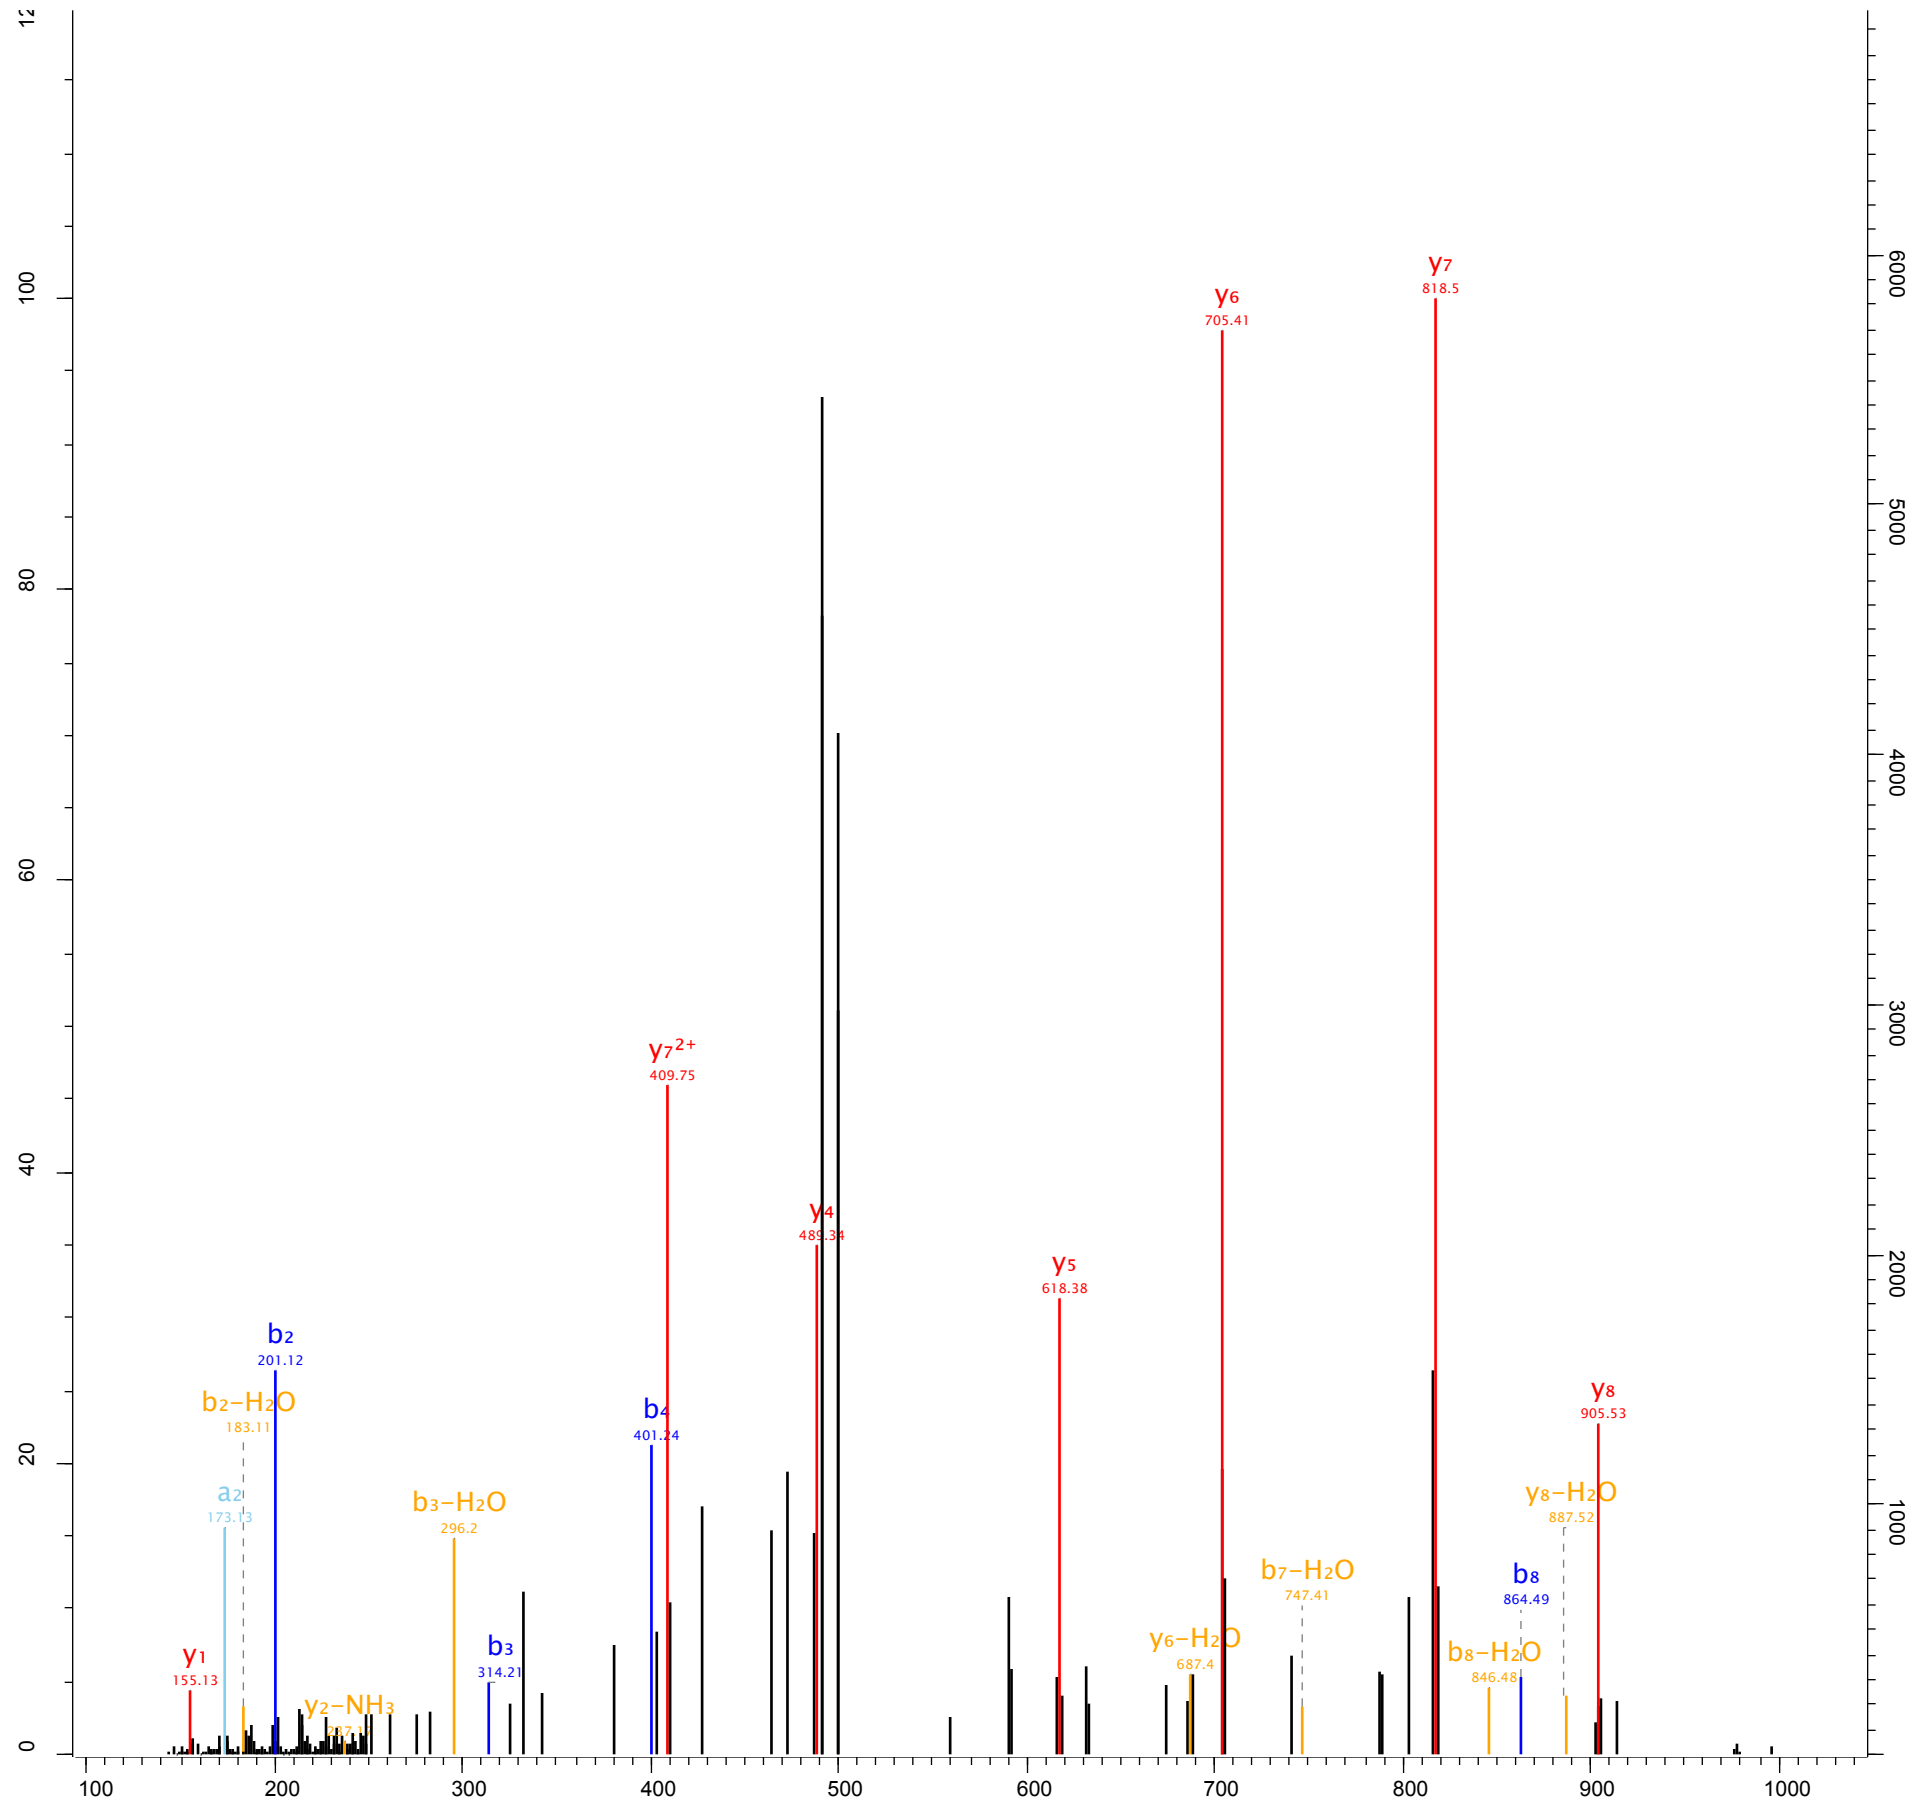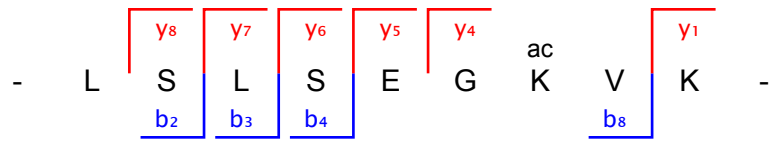

Raw file 050813\_SCW\_II\_29\_22\_5 Scan 14574 Method ITMS; CID Score 115.7 m/z 487.28 Gene names Prdx6;Prdx6b

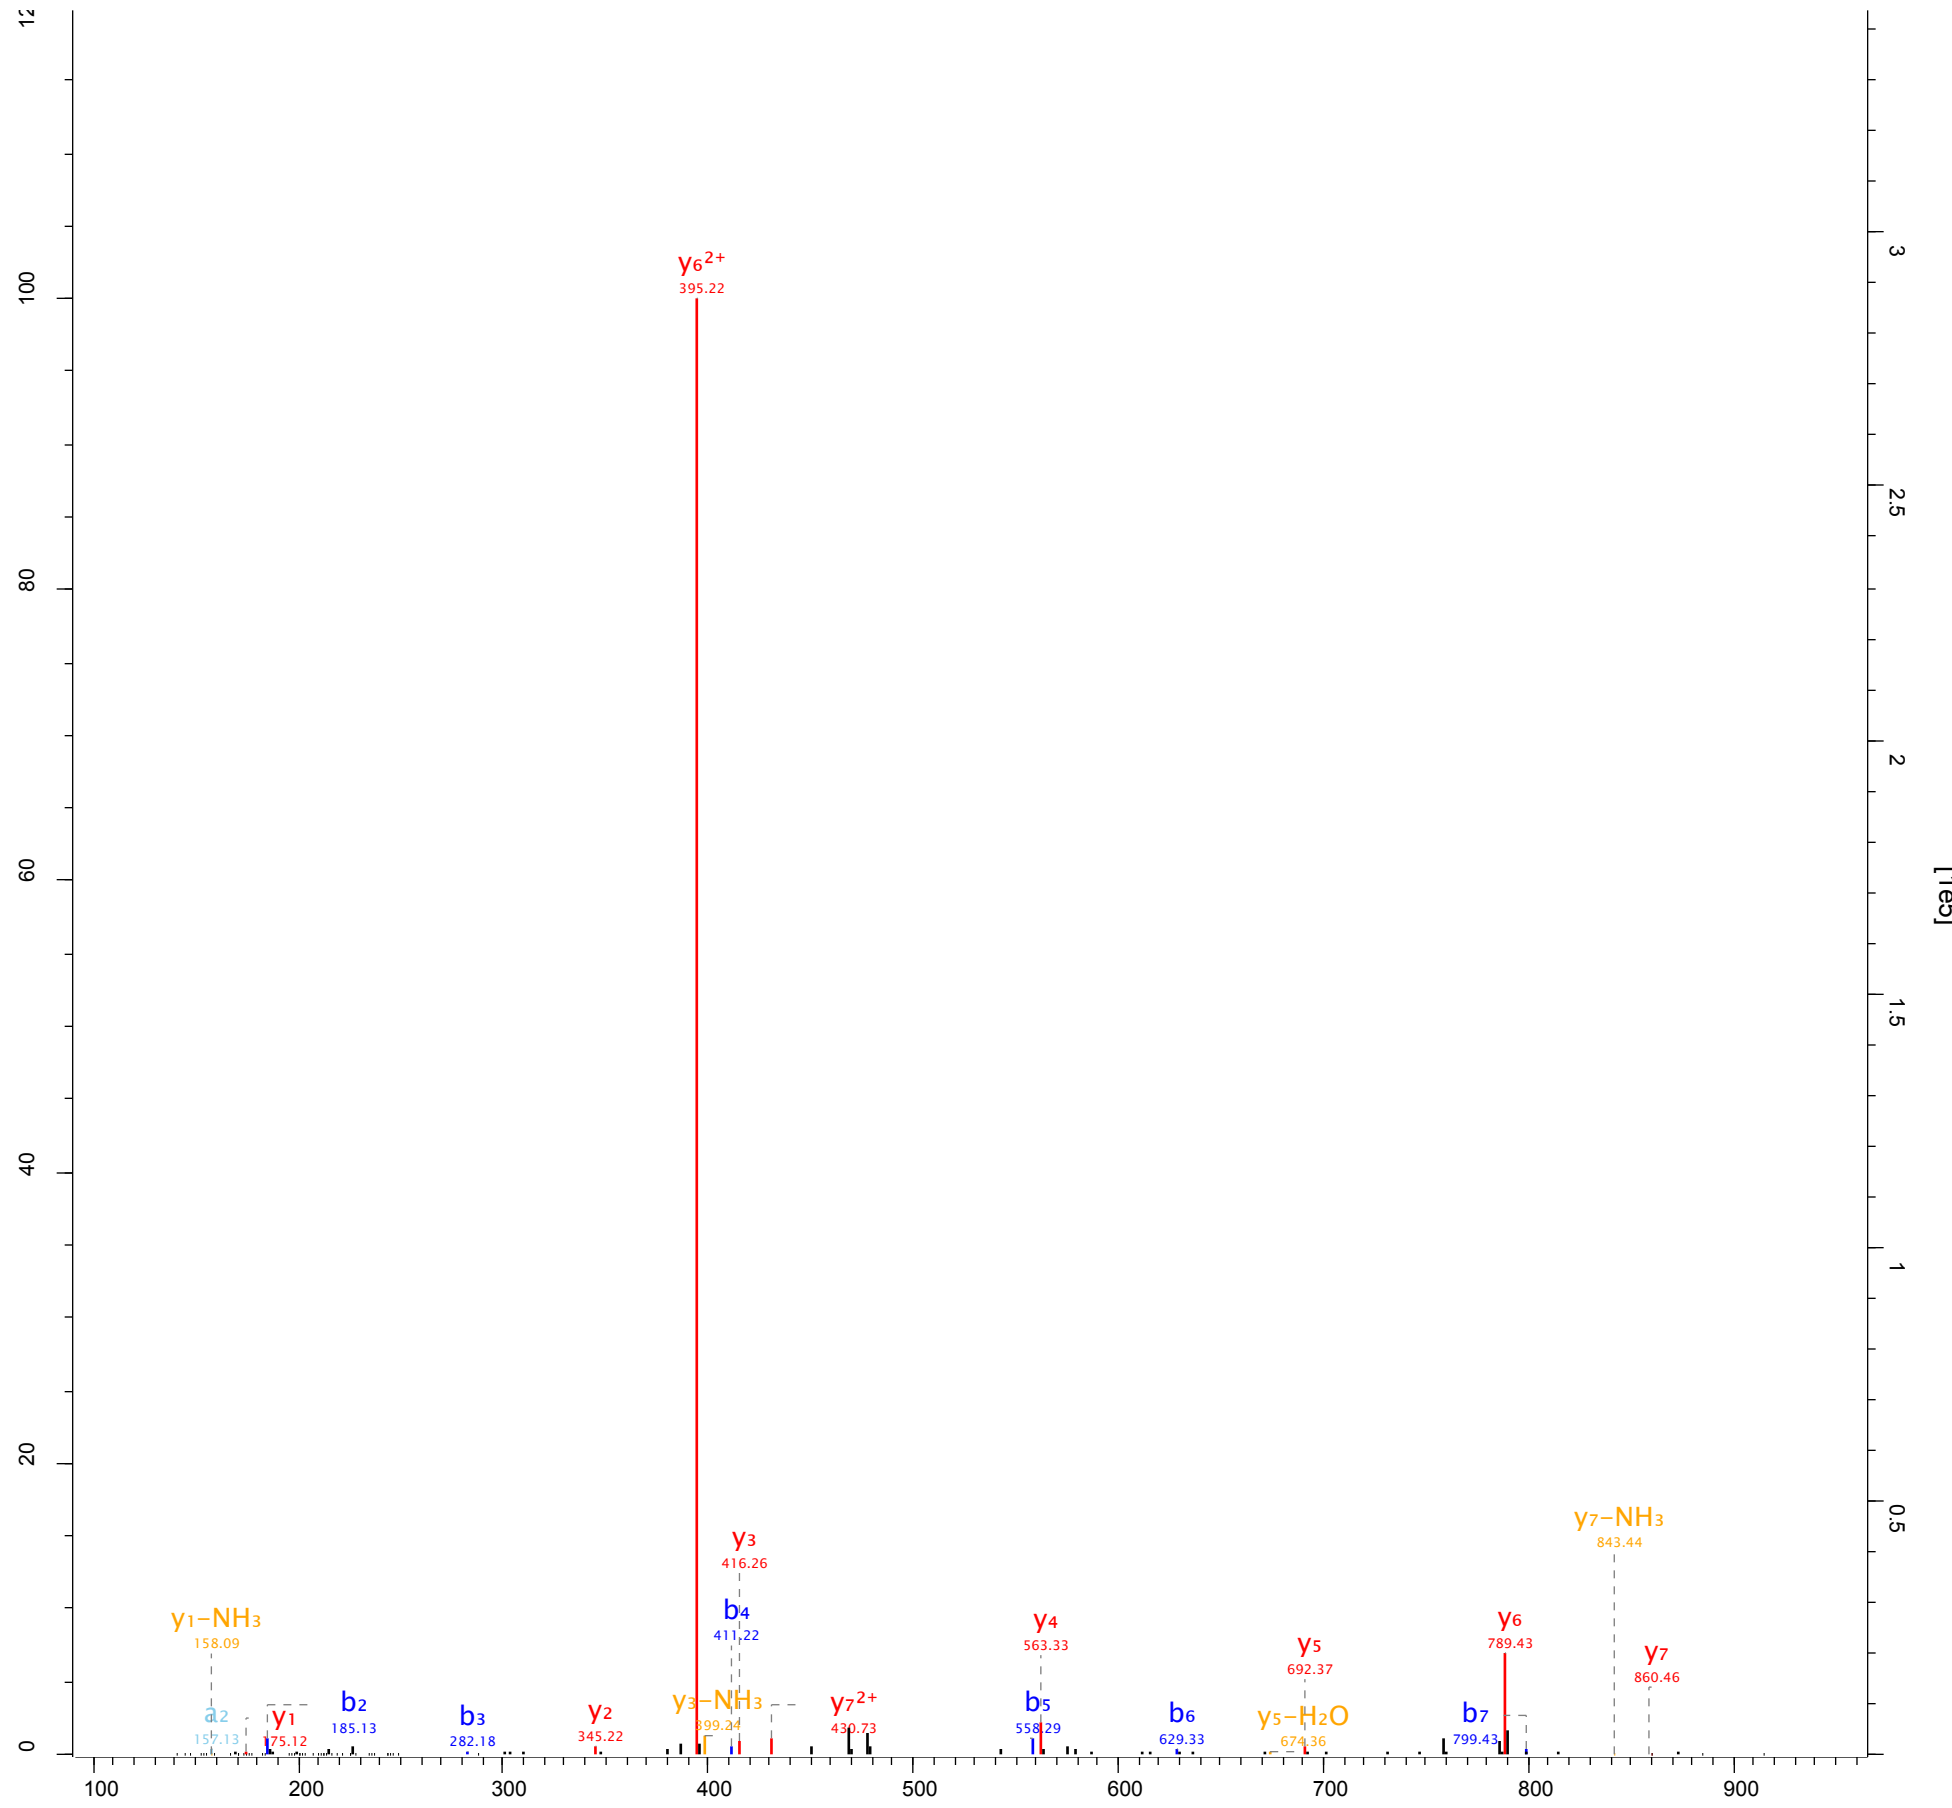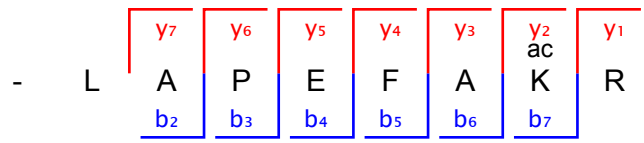

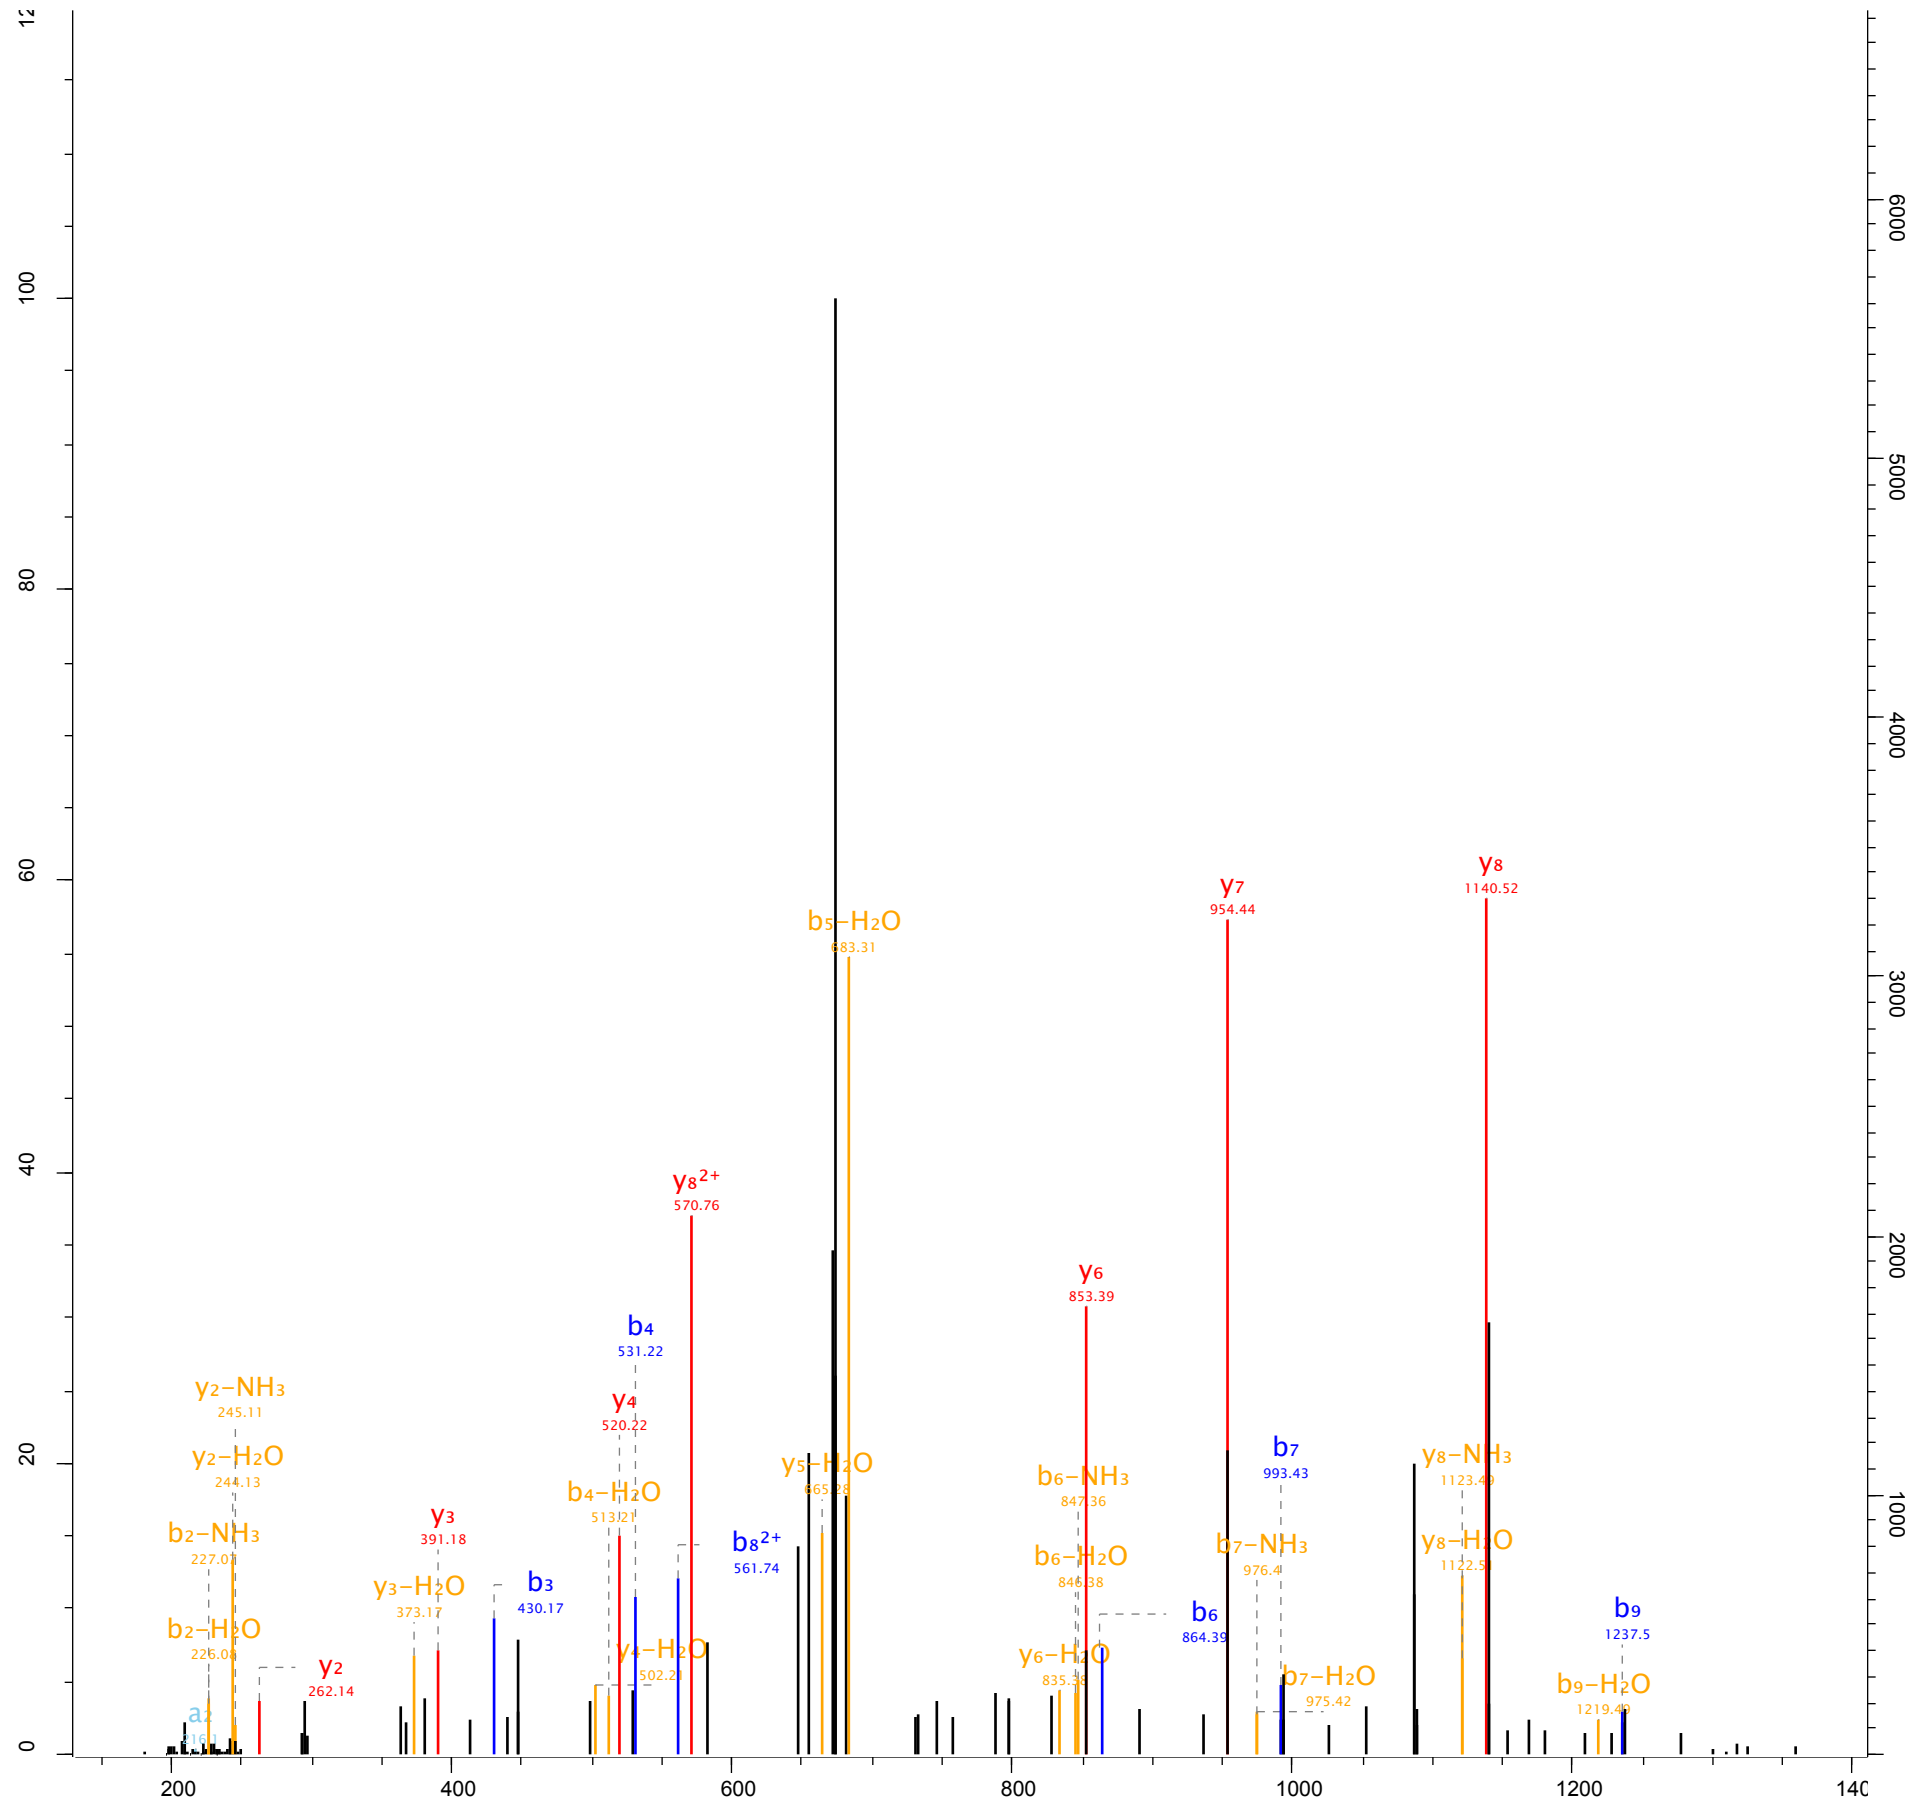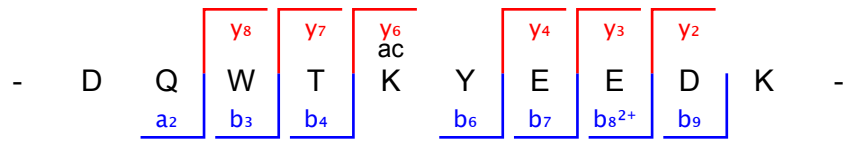

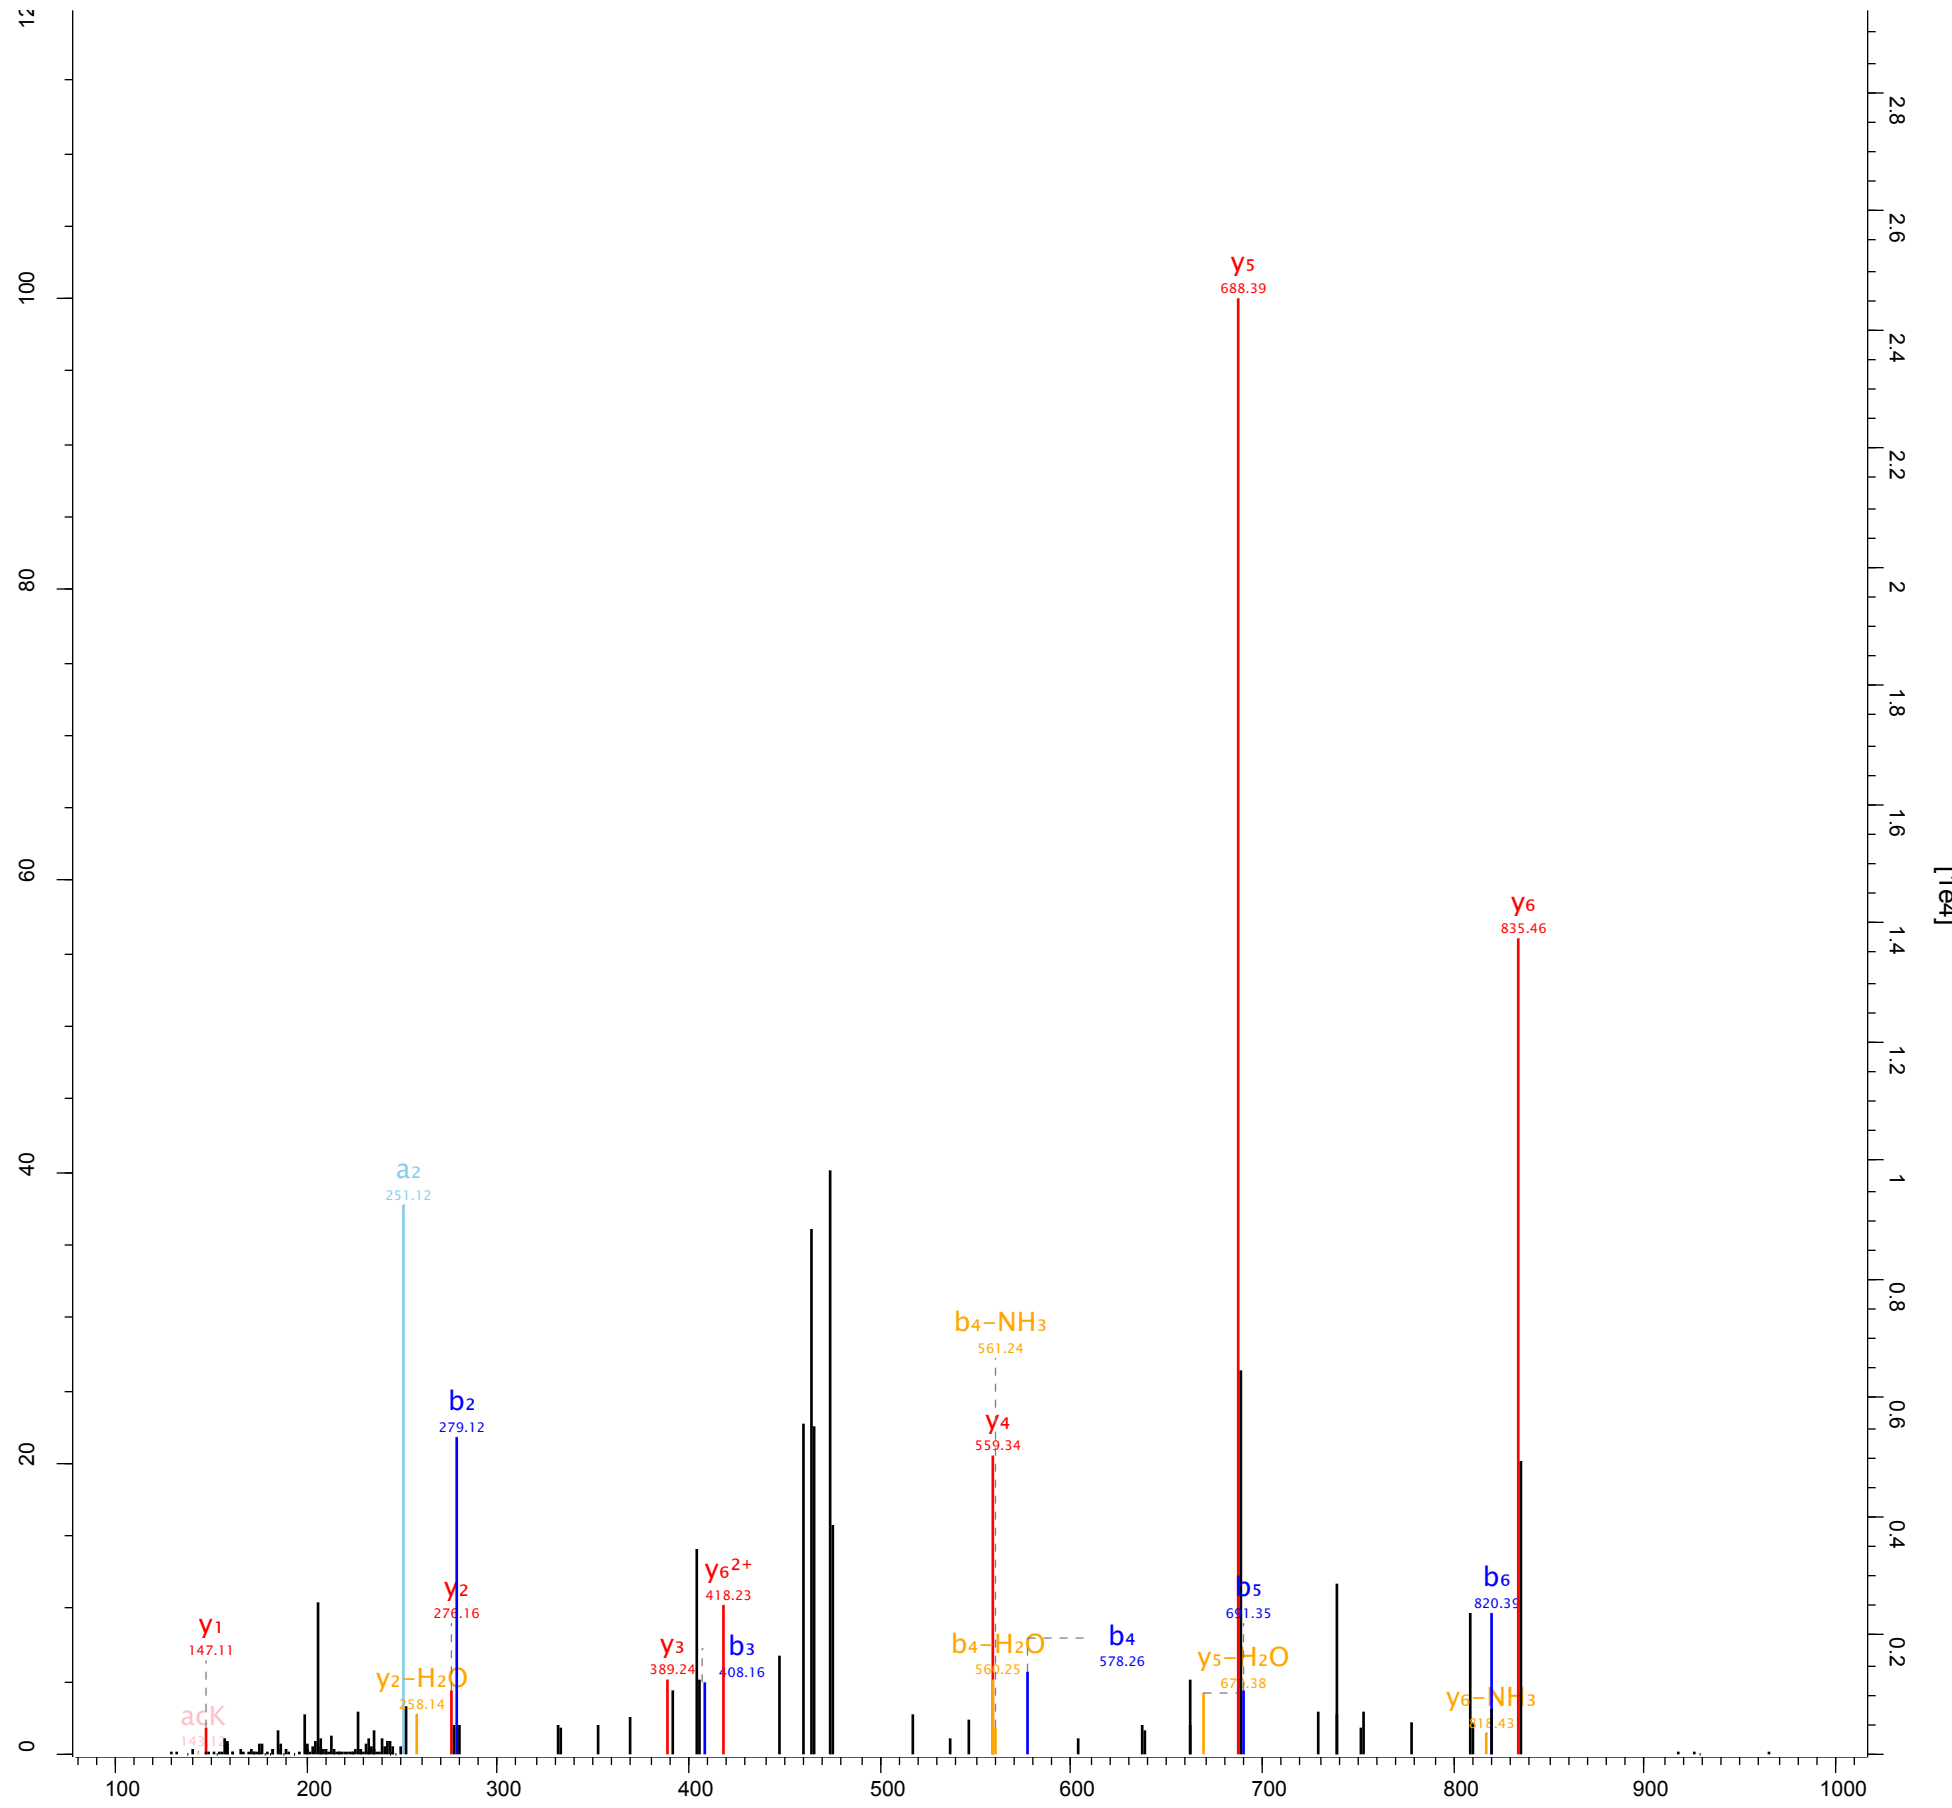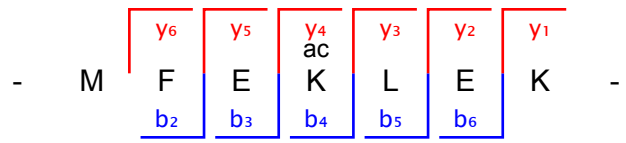

Raw file: 050813\_SCW\_II\_29\_22\_5  
 Scan: 15685 Method: ITMS; CID Score: 115.49 m/z: 467.29 Gene names: Acat1

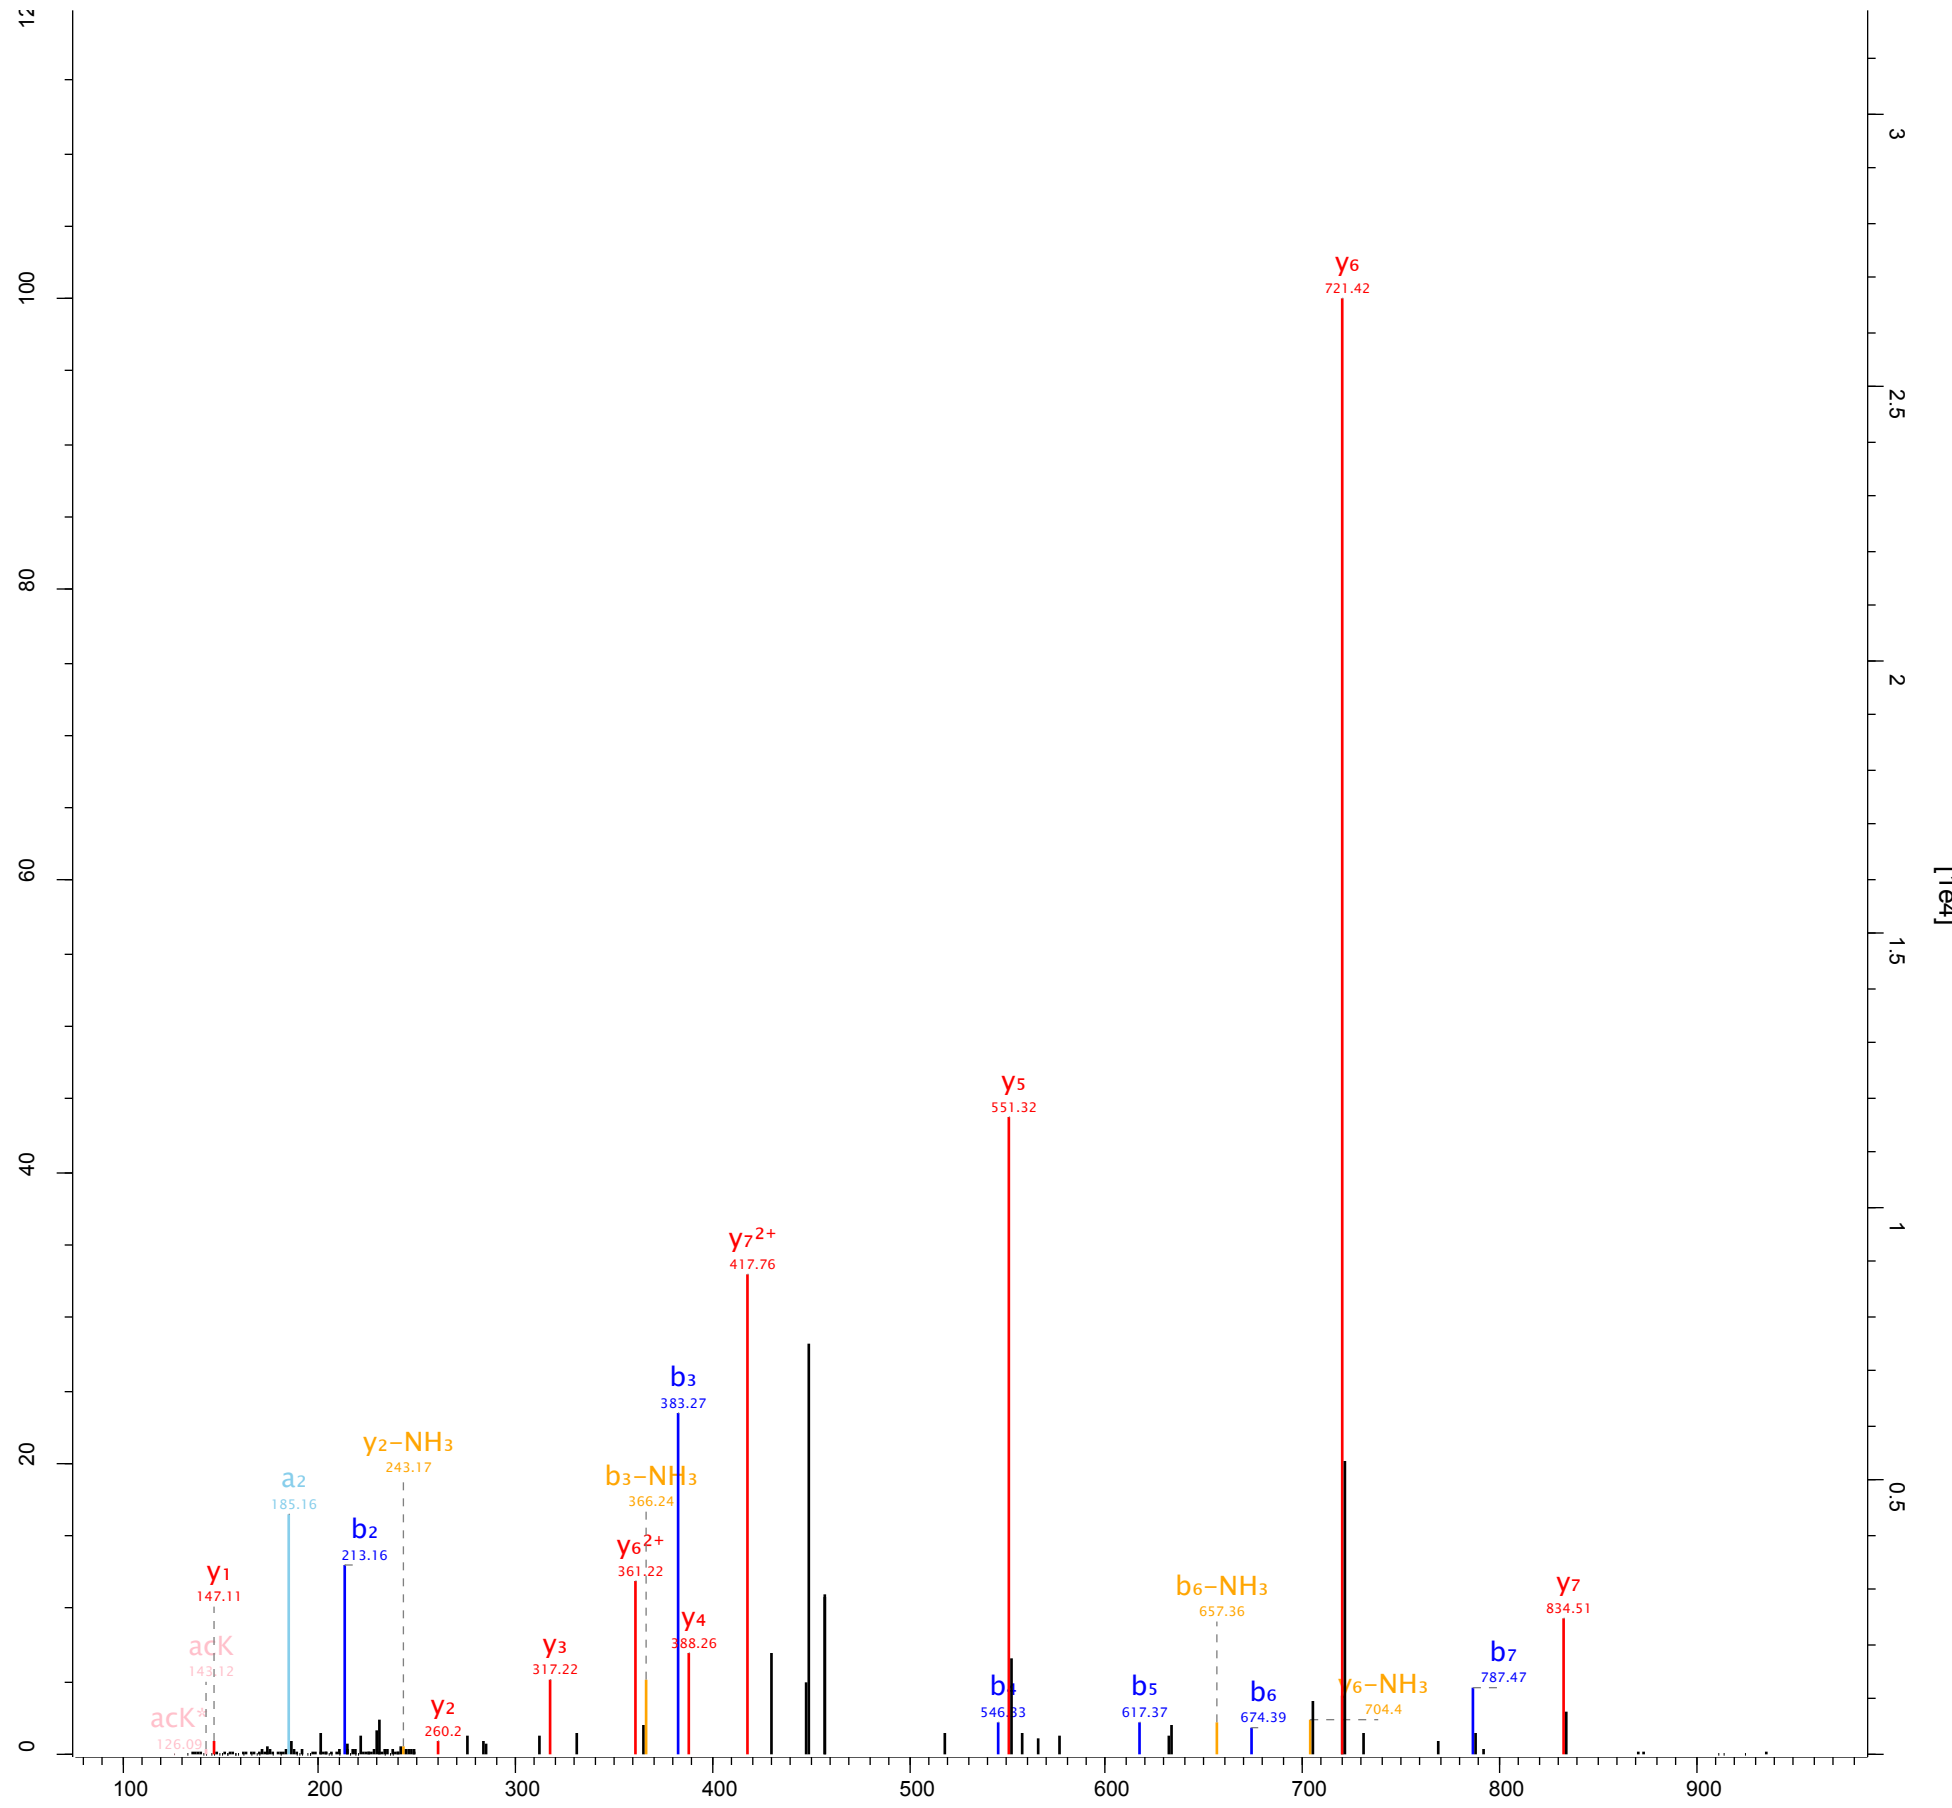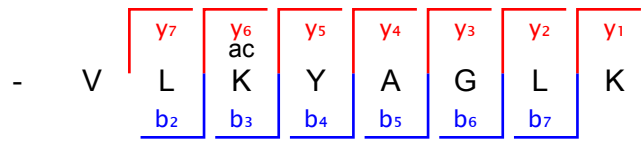



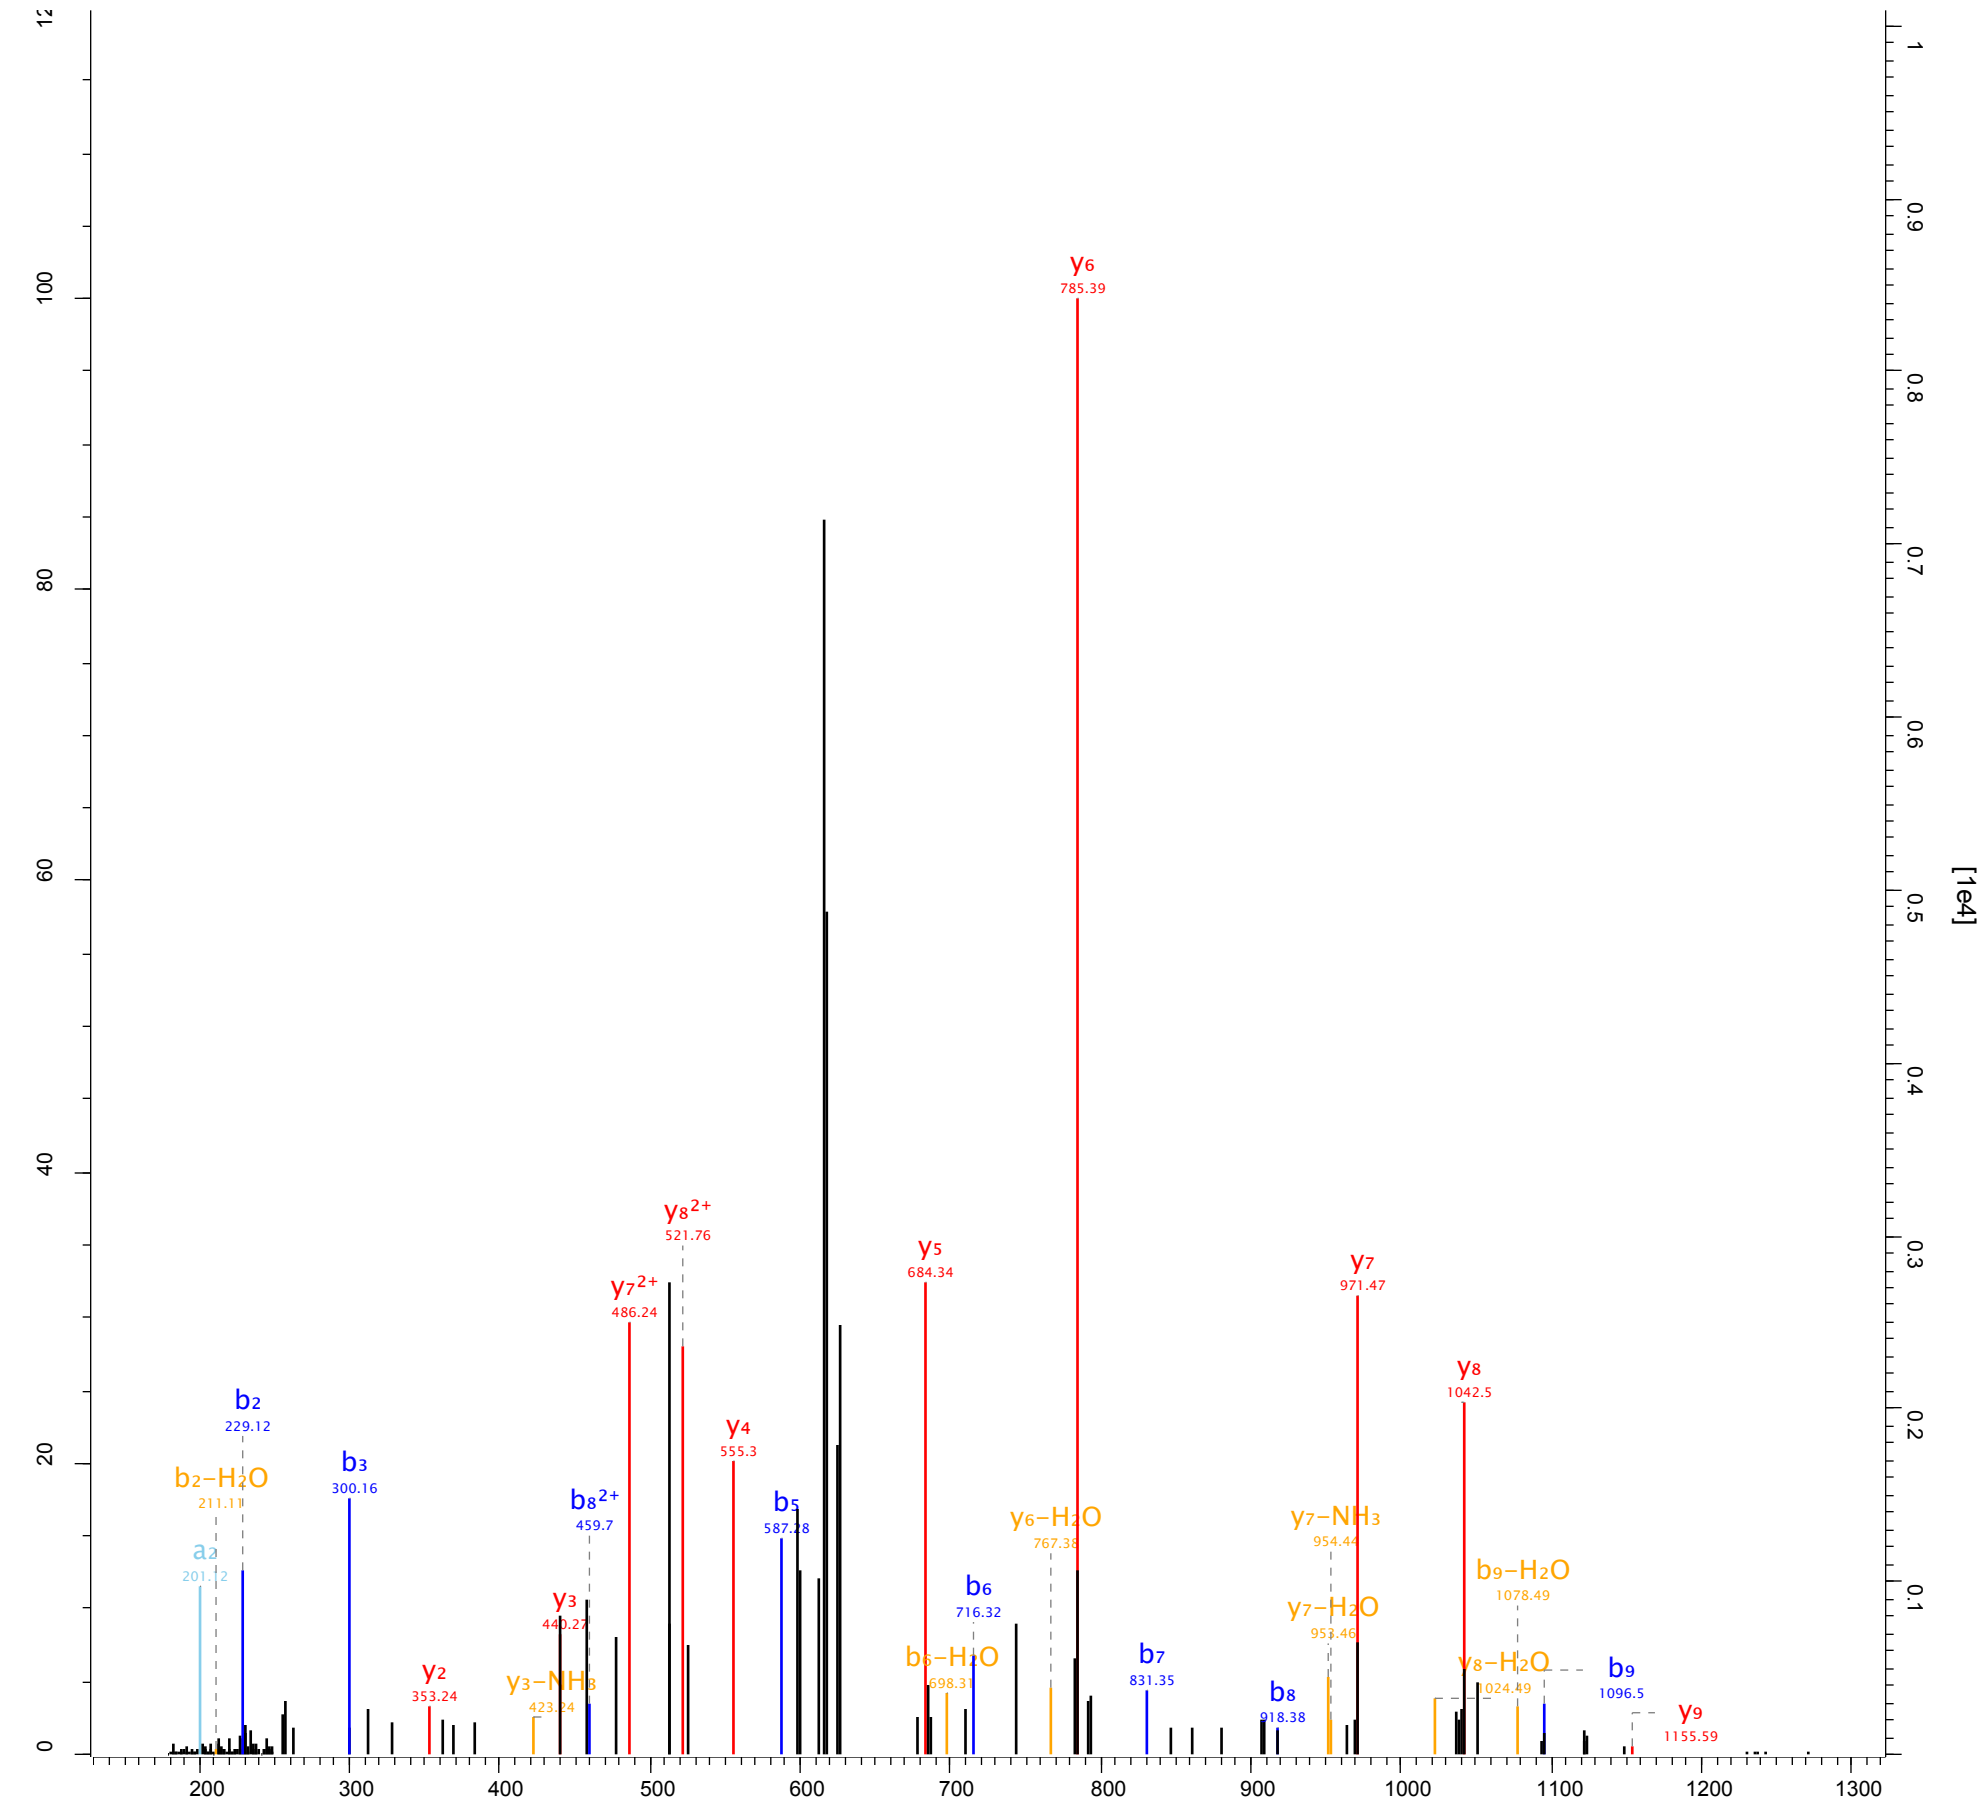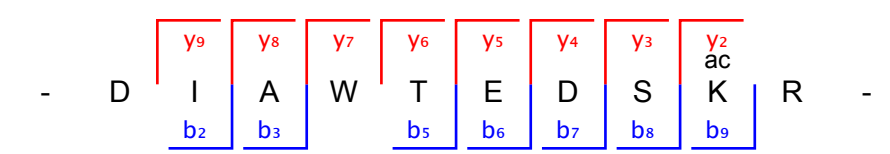

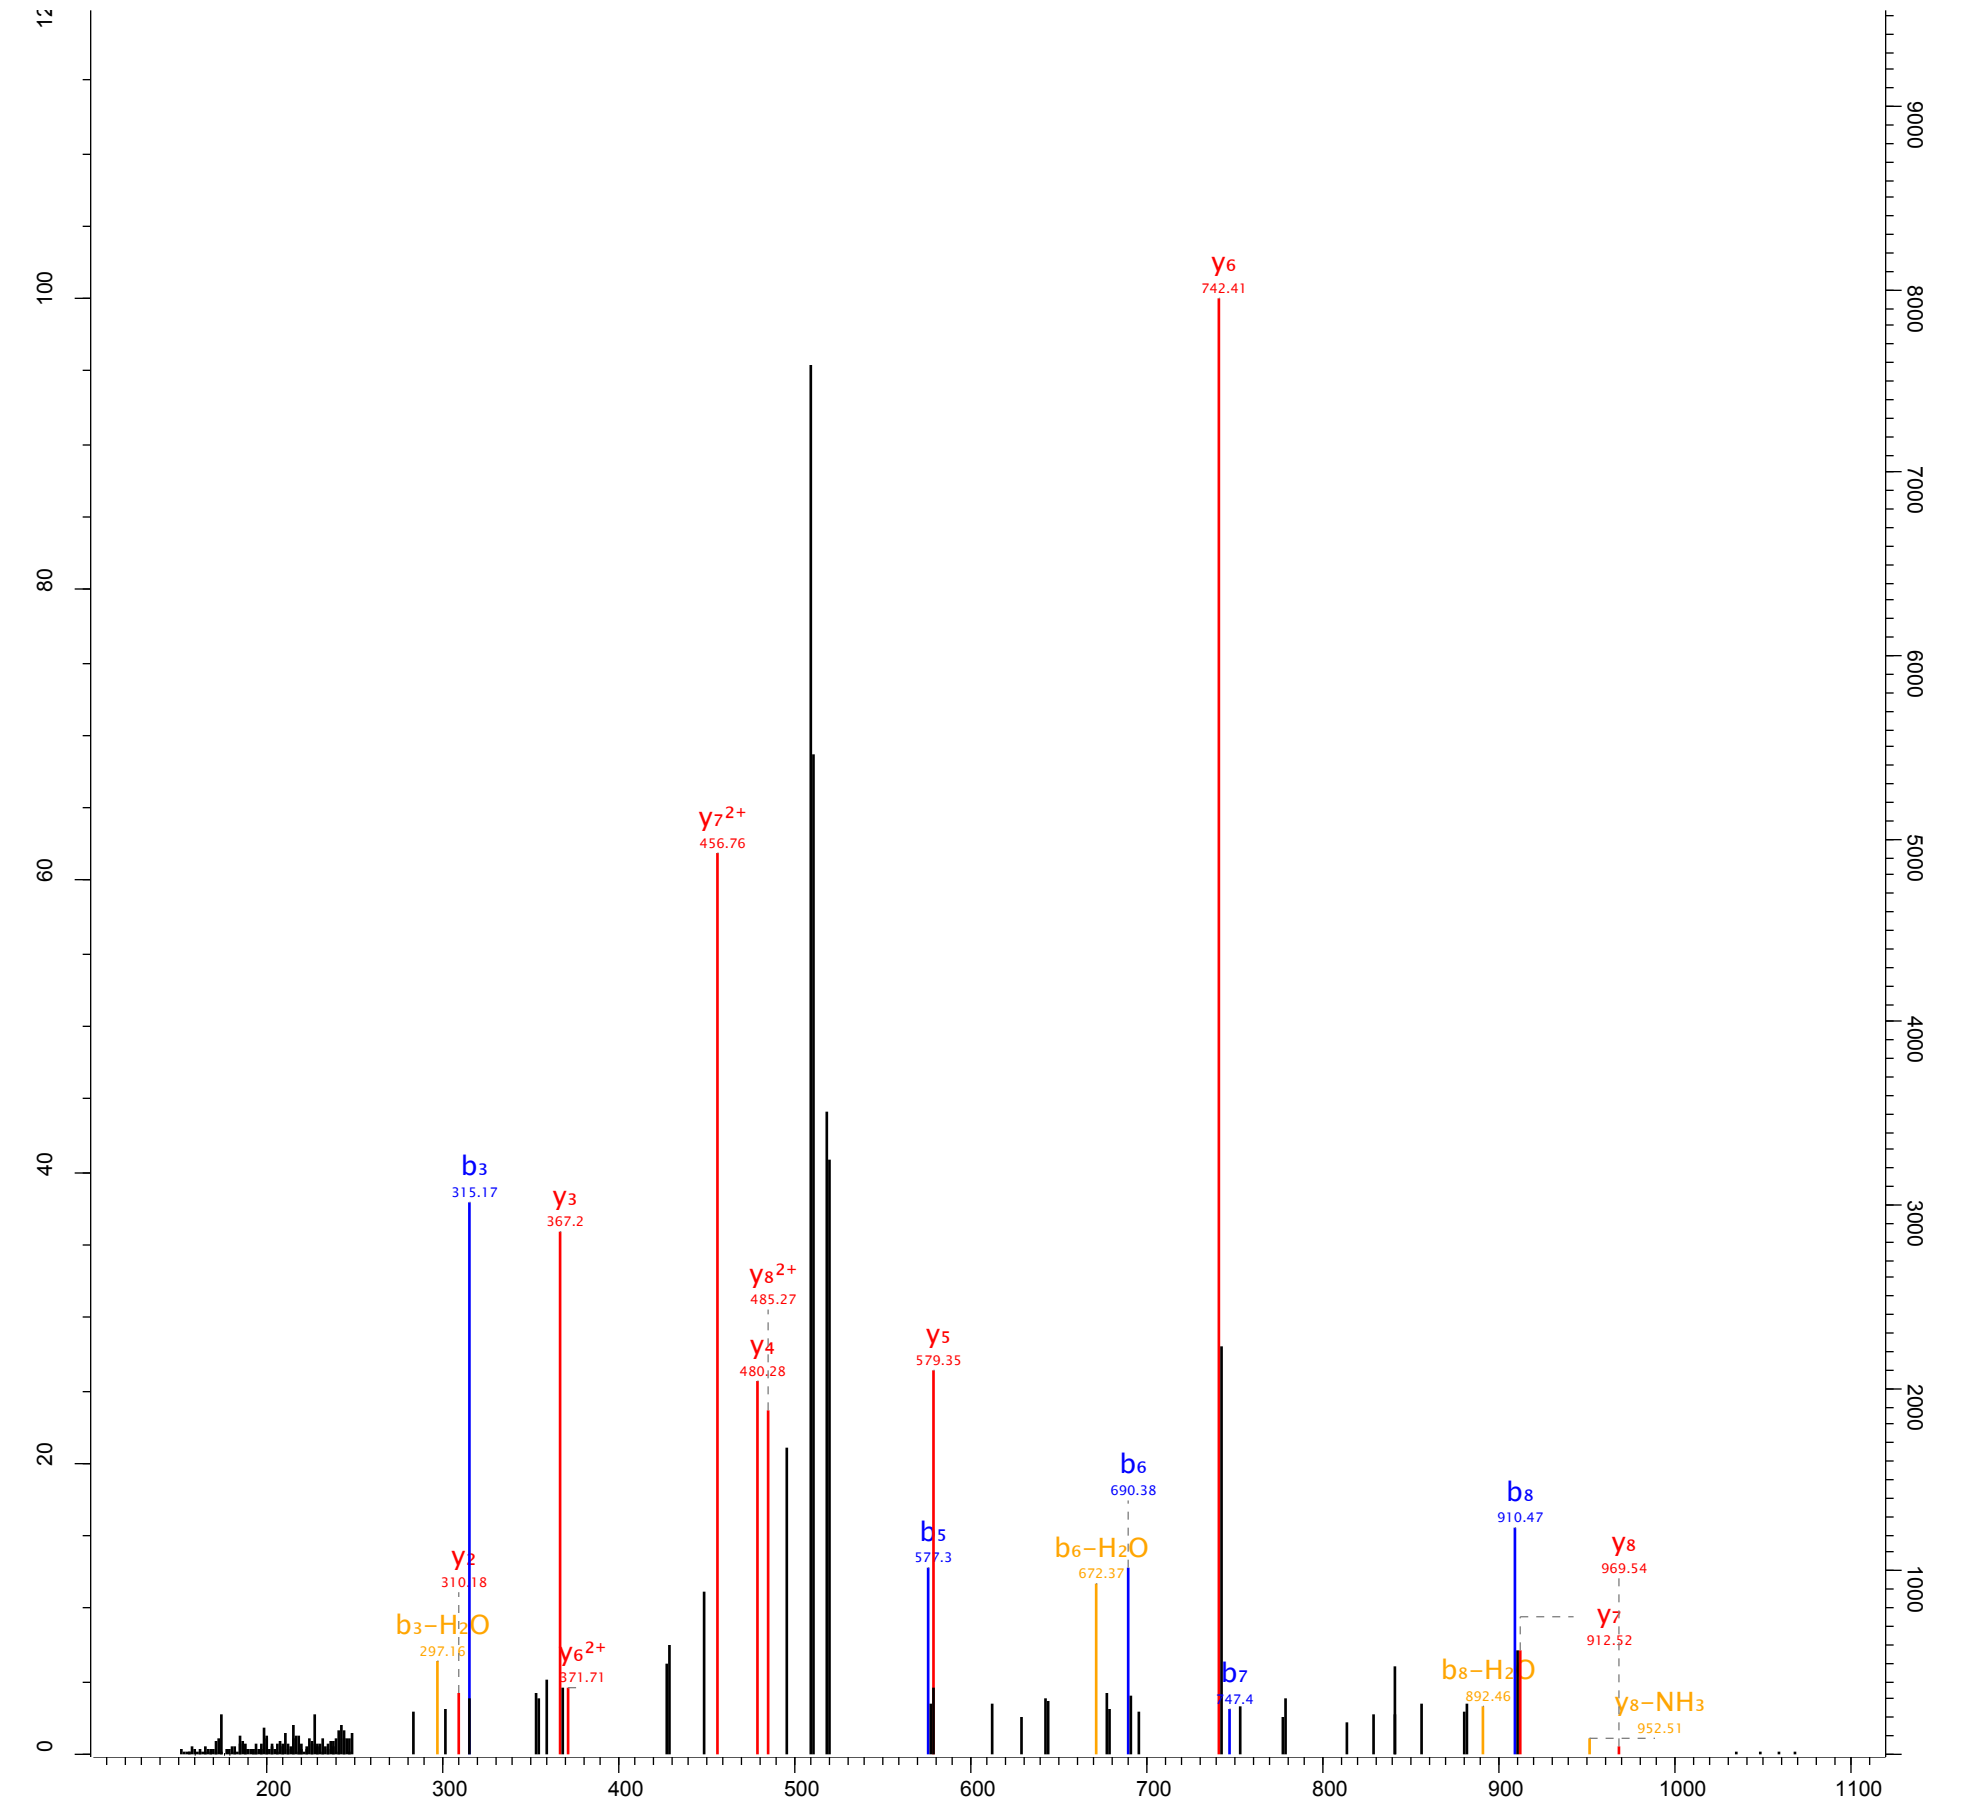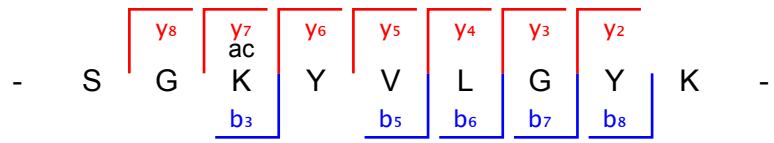

Raw file 050813\_SCW\_II\_29\_22\_5 Scan 15908 Method ITMS; CID Score 79.47 m/z 491.3 Gene names Uaca

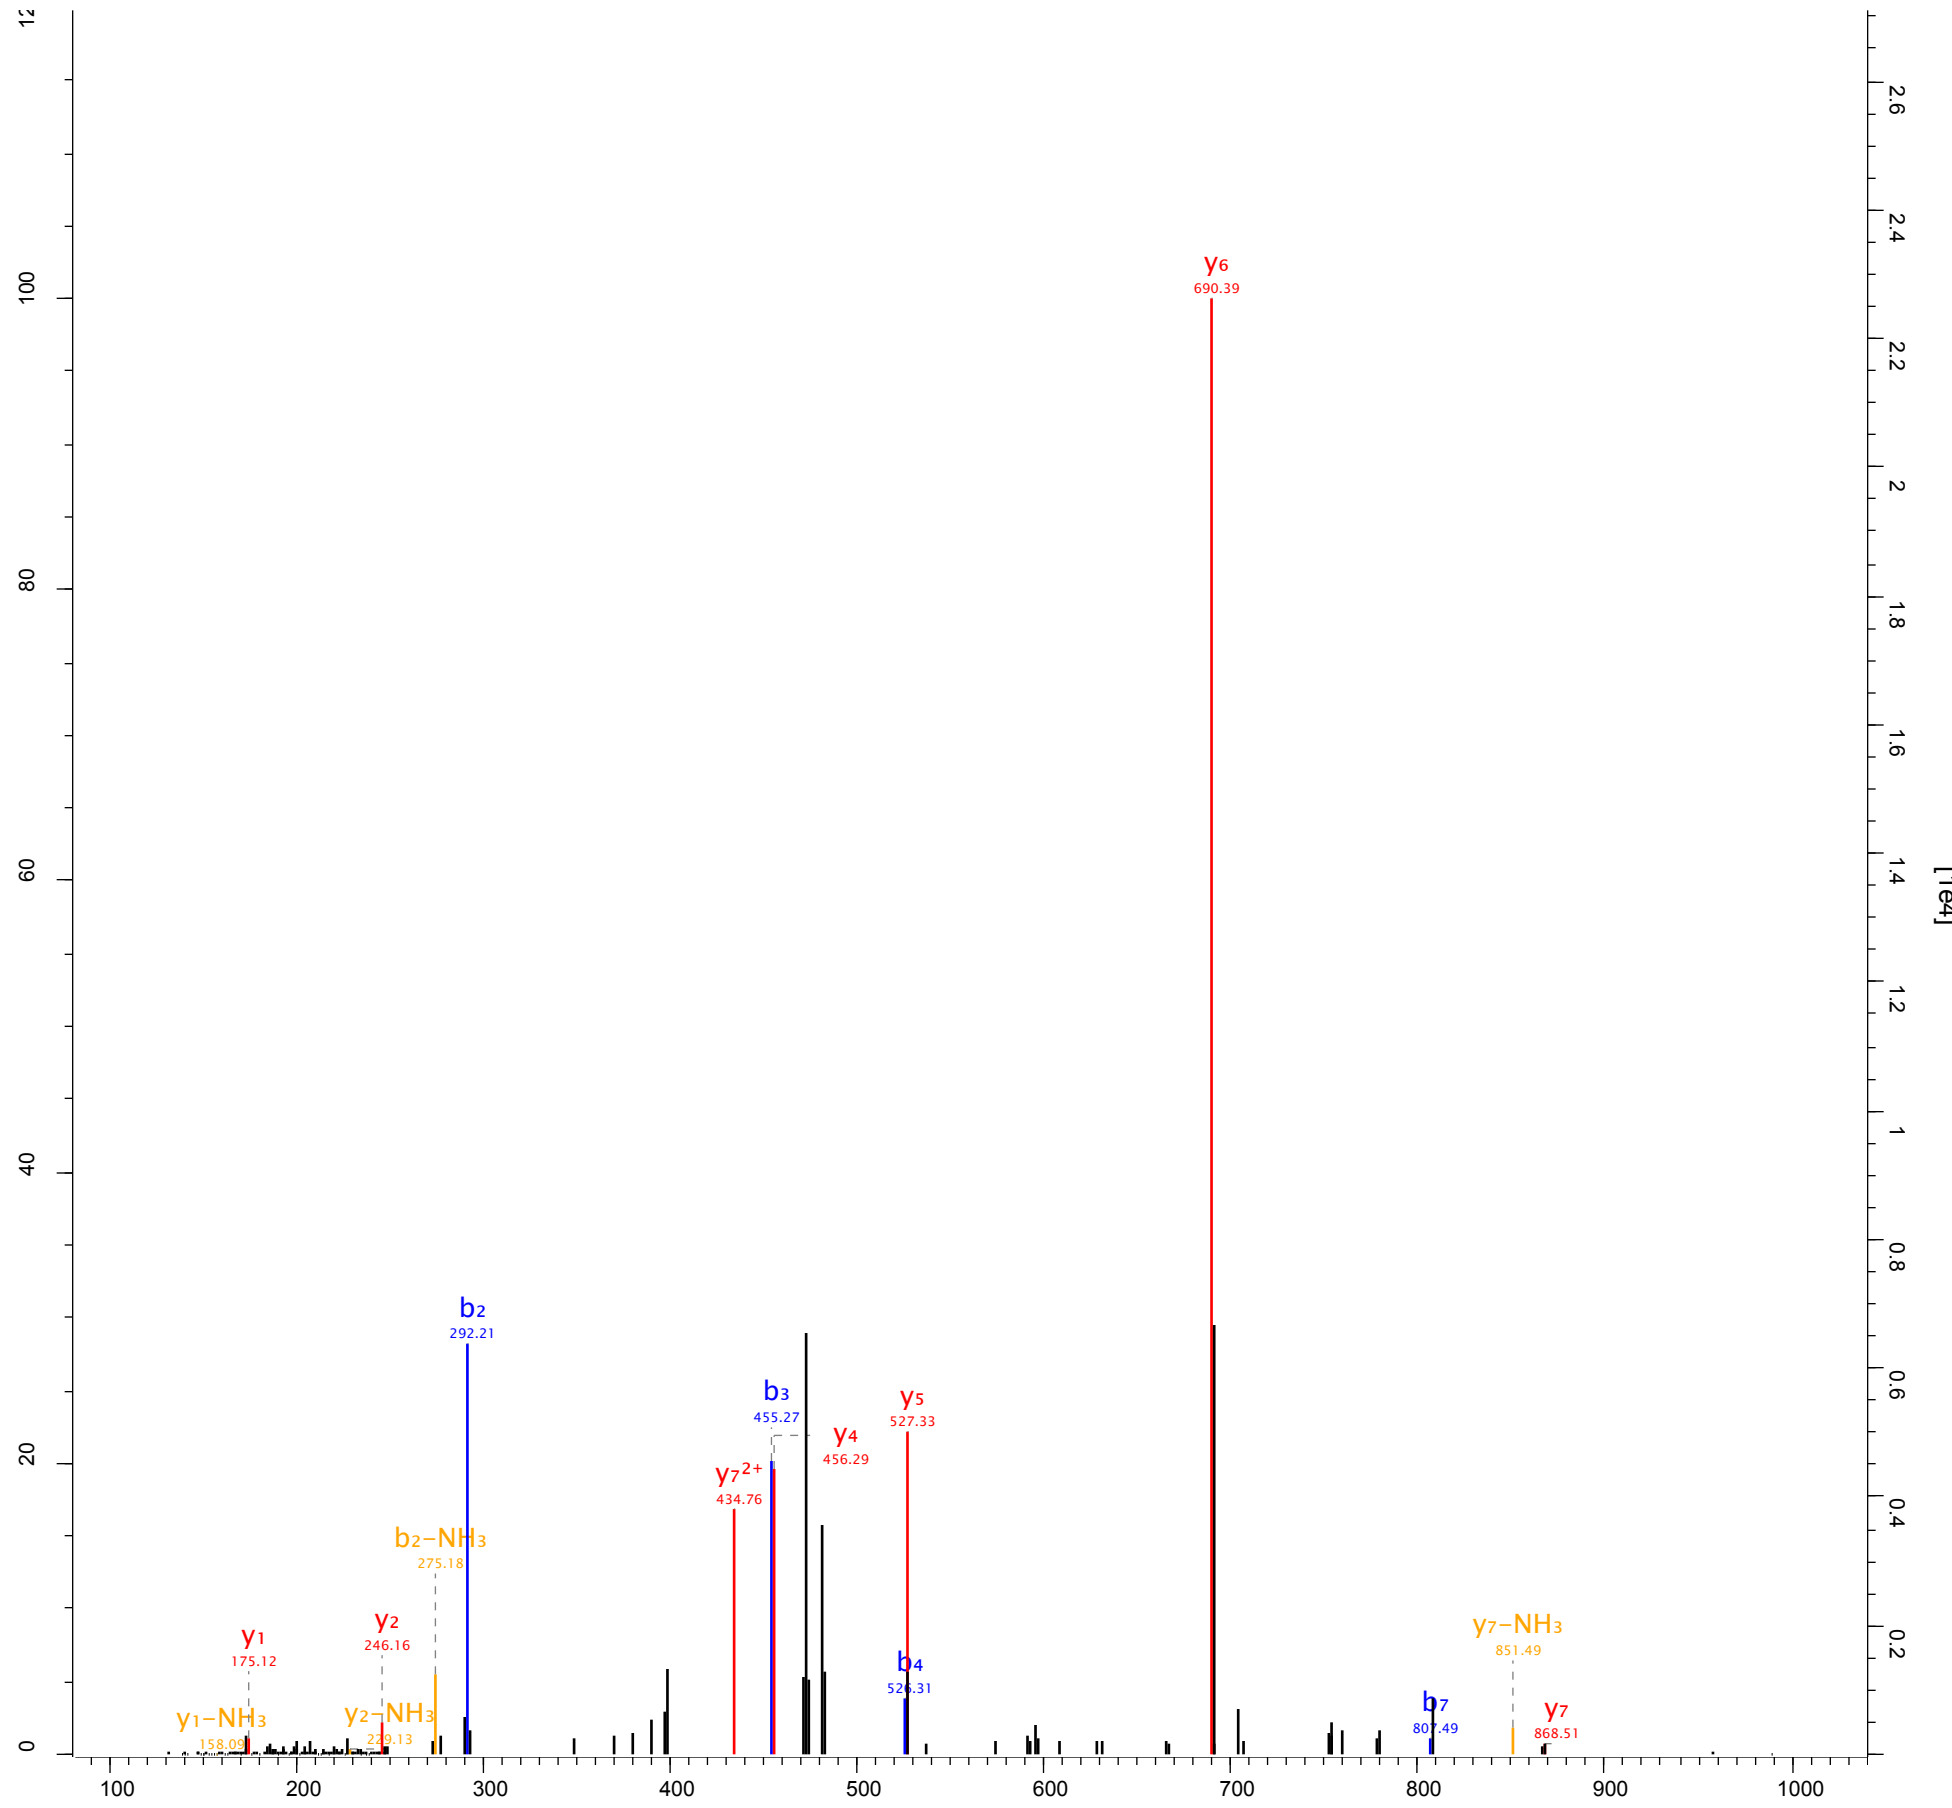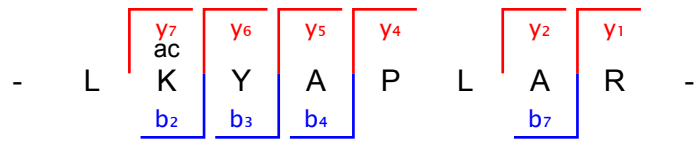

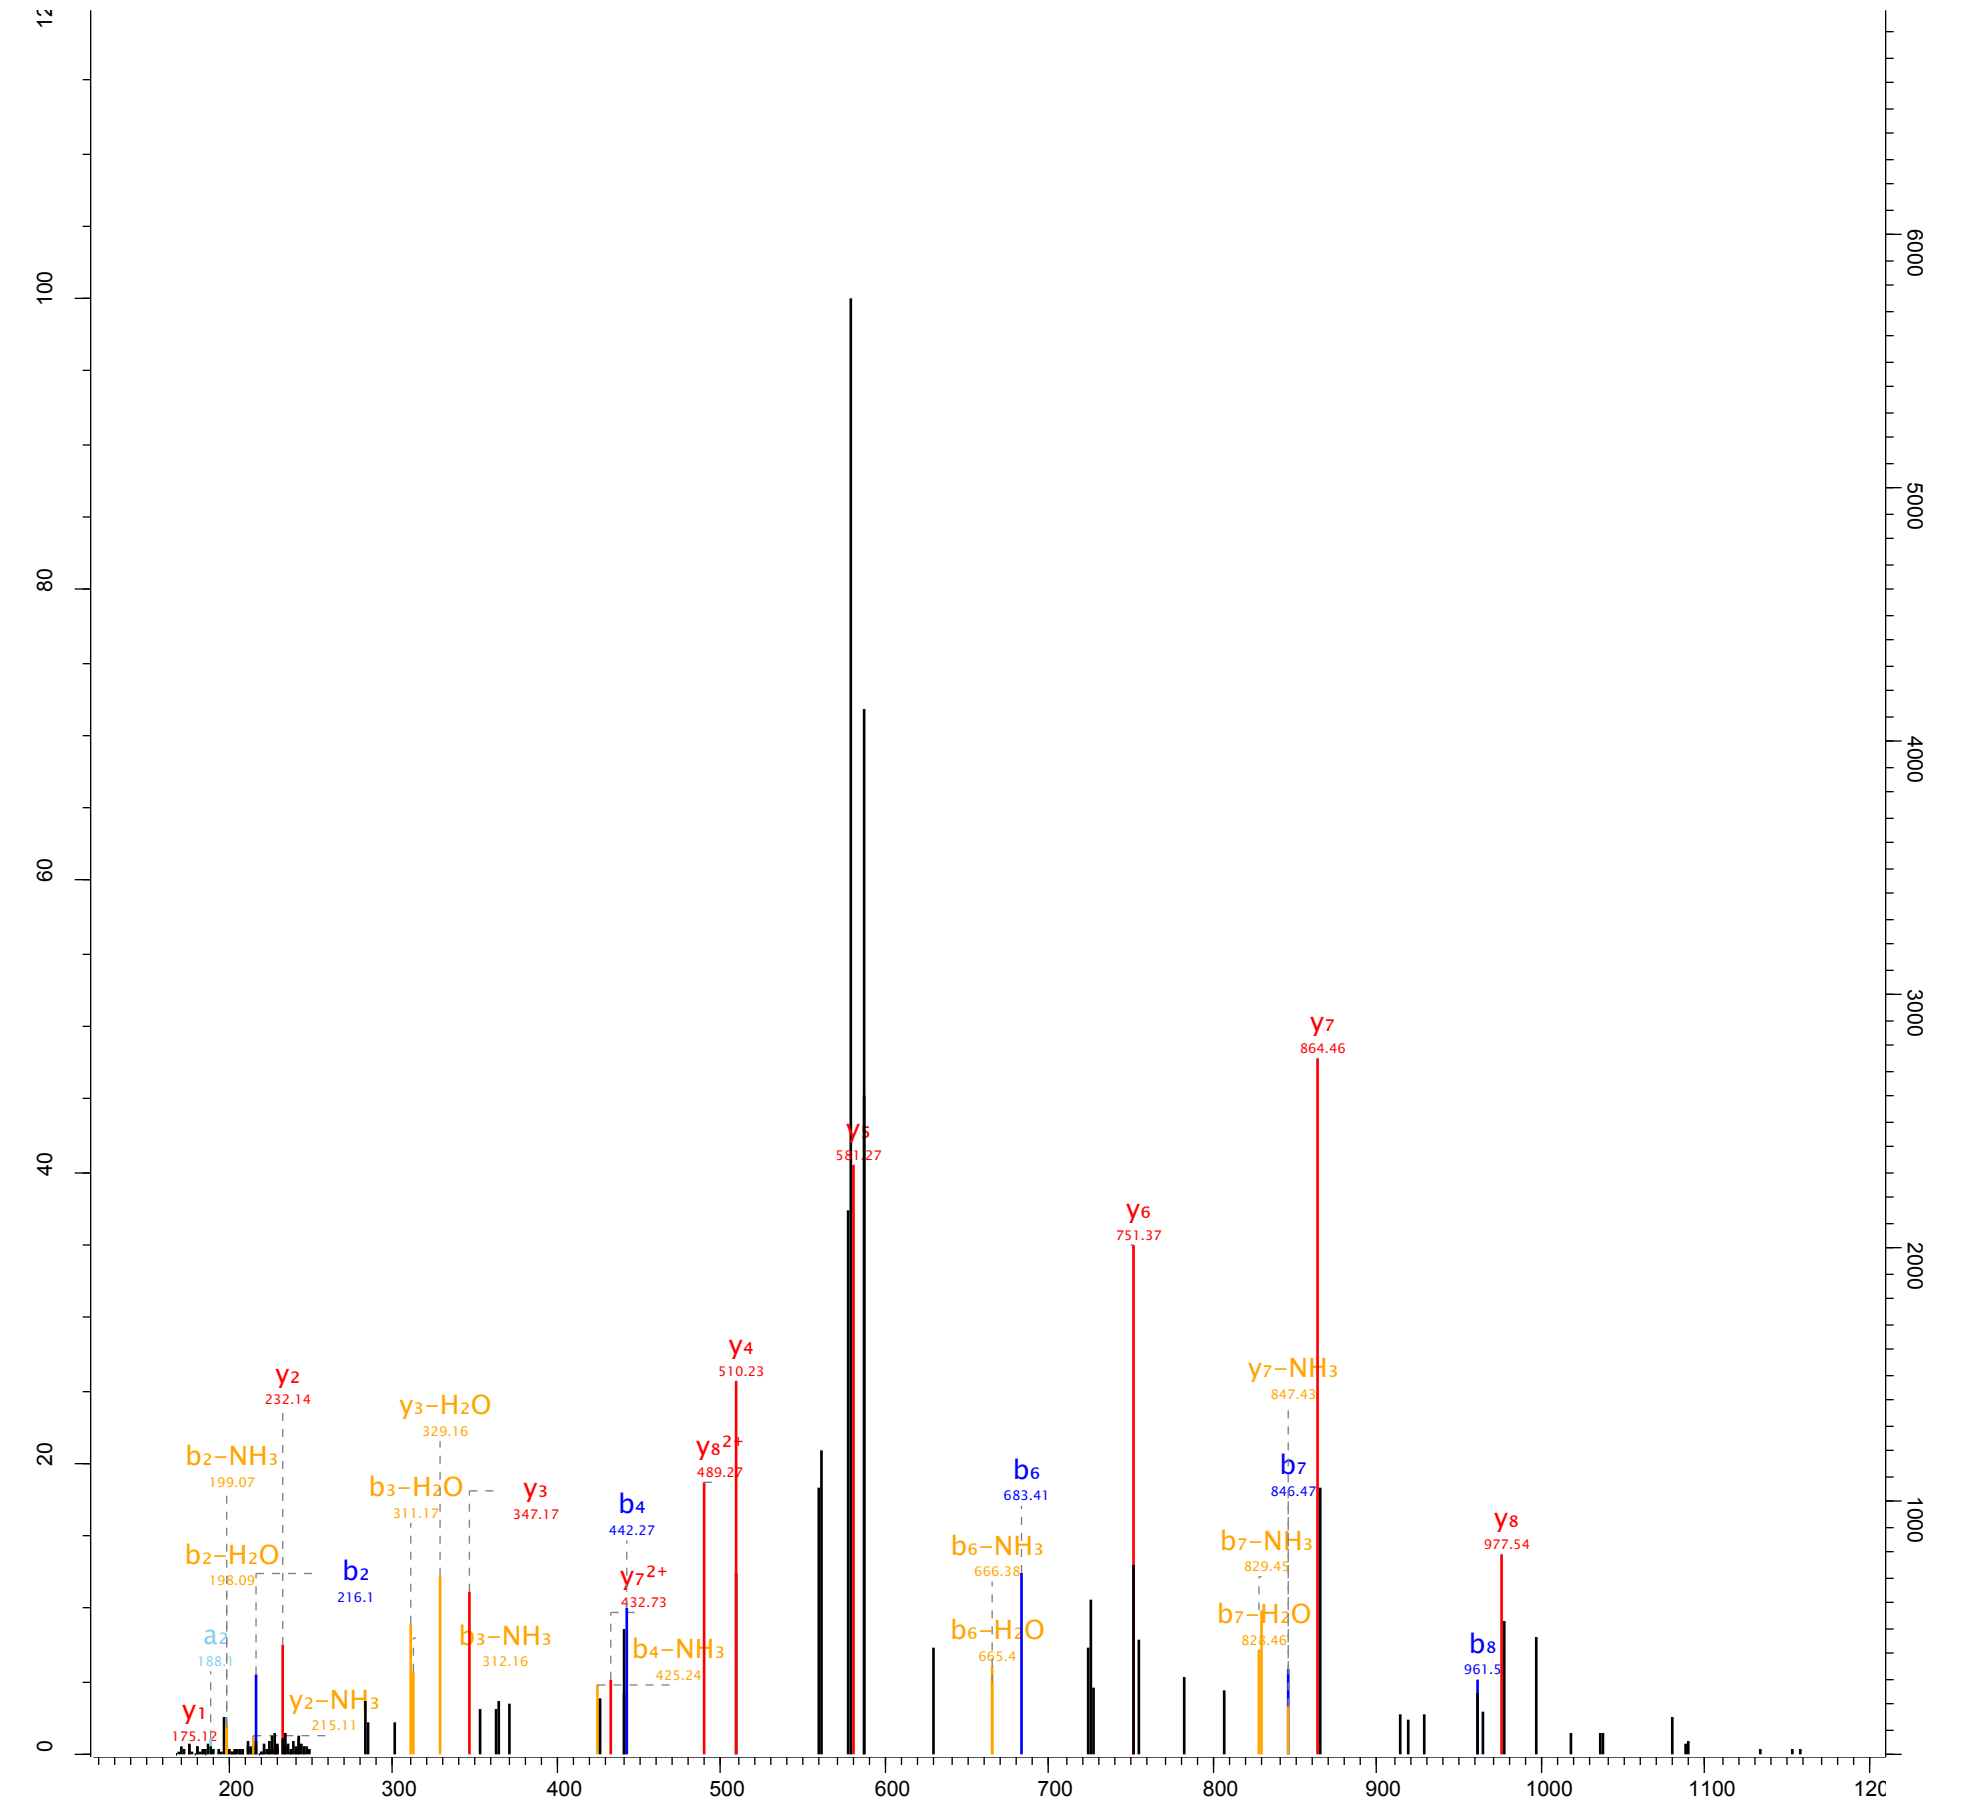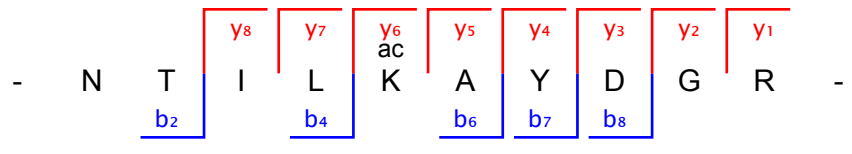

Raw file 050813\_SCW\_II\_29\_22\_5 Scan 16547 Method ITMS; CID Score 101.65 m/z 521.3 Gene names Nipsnap3b

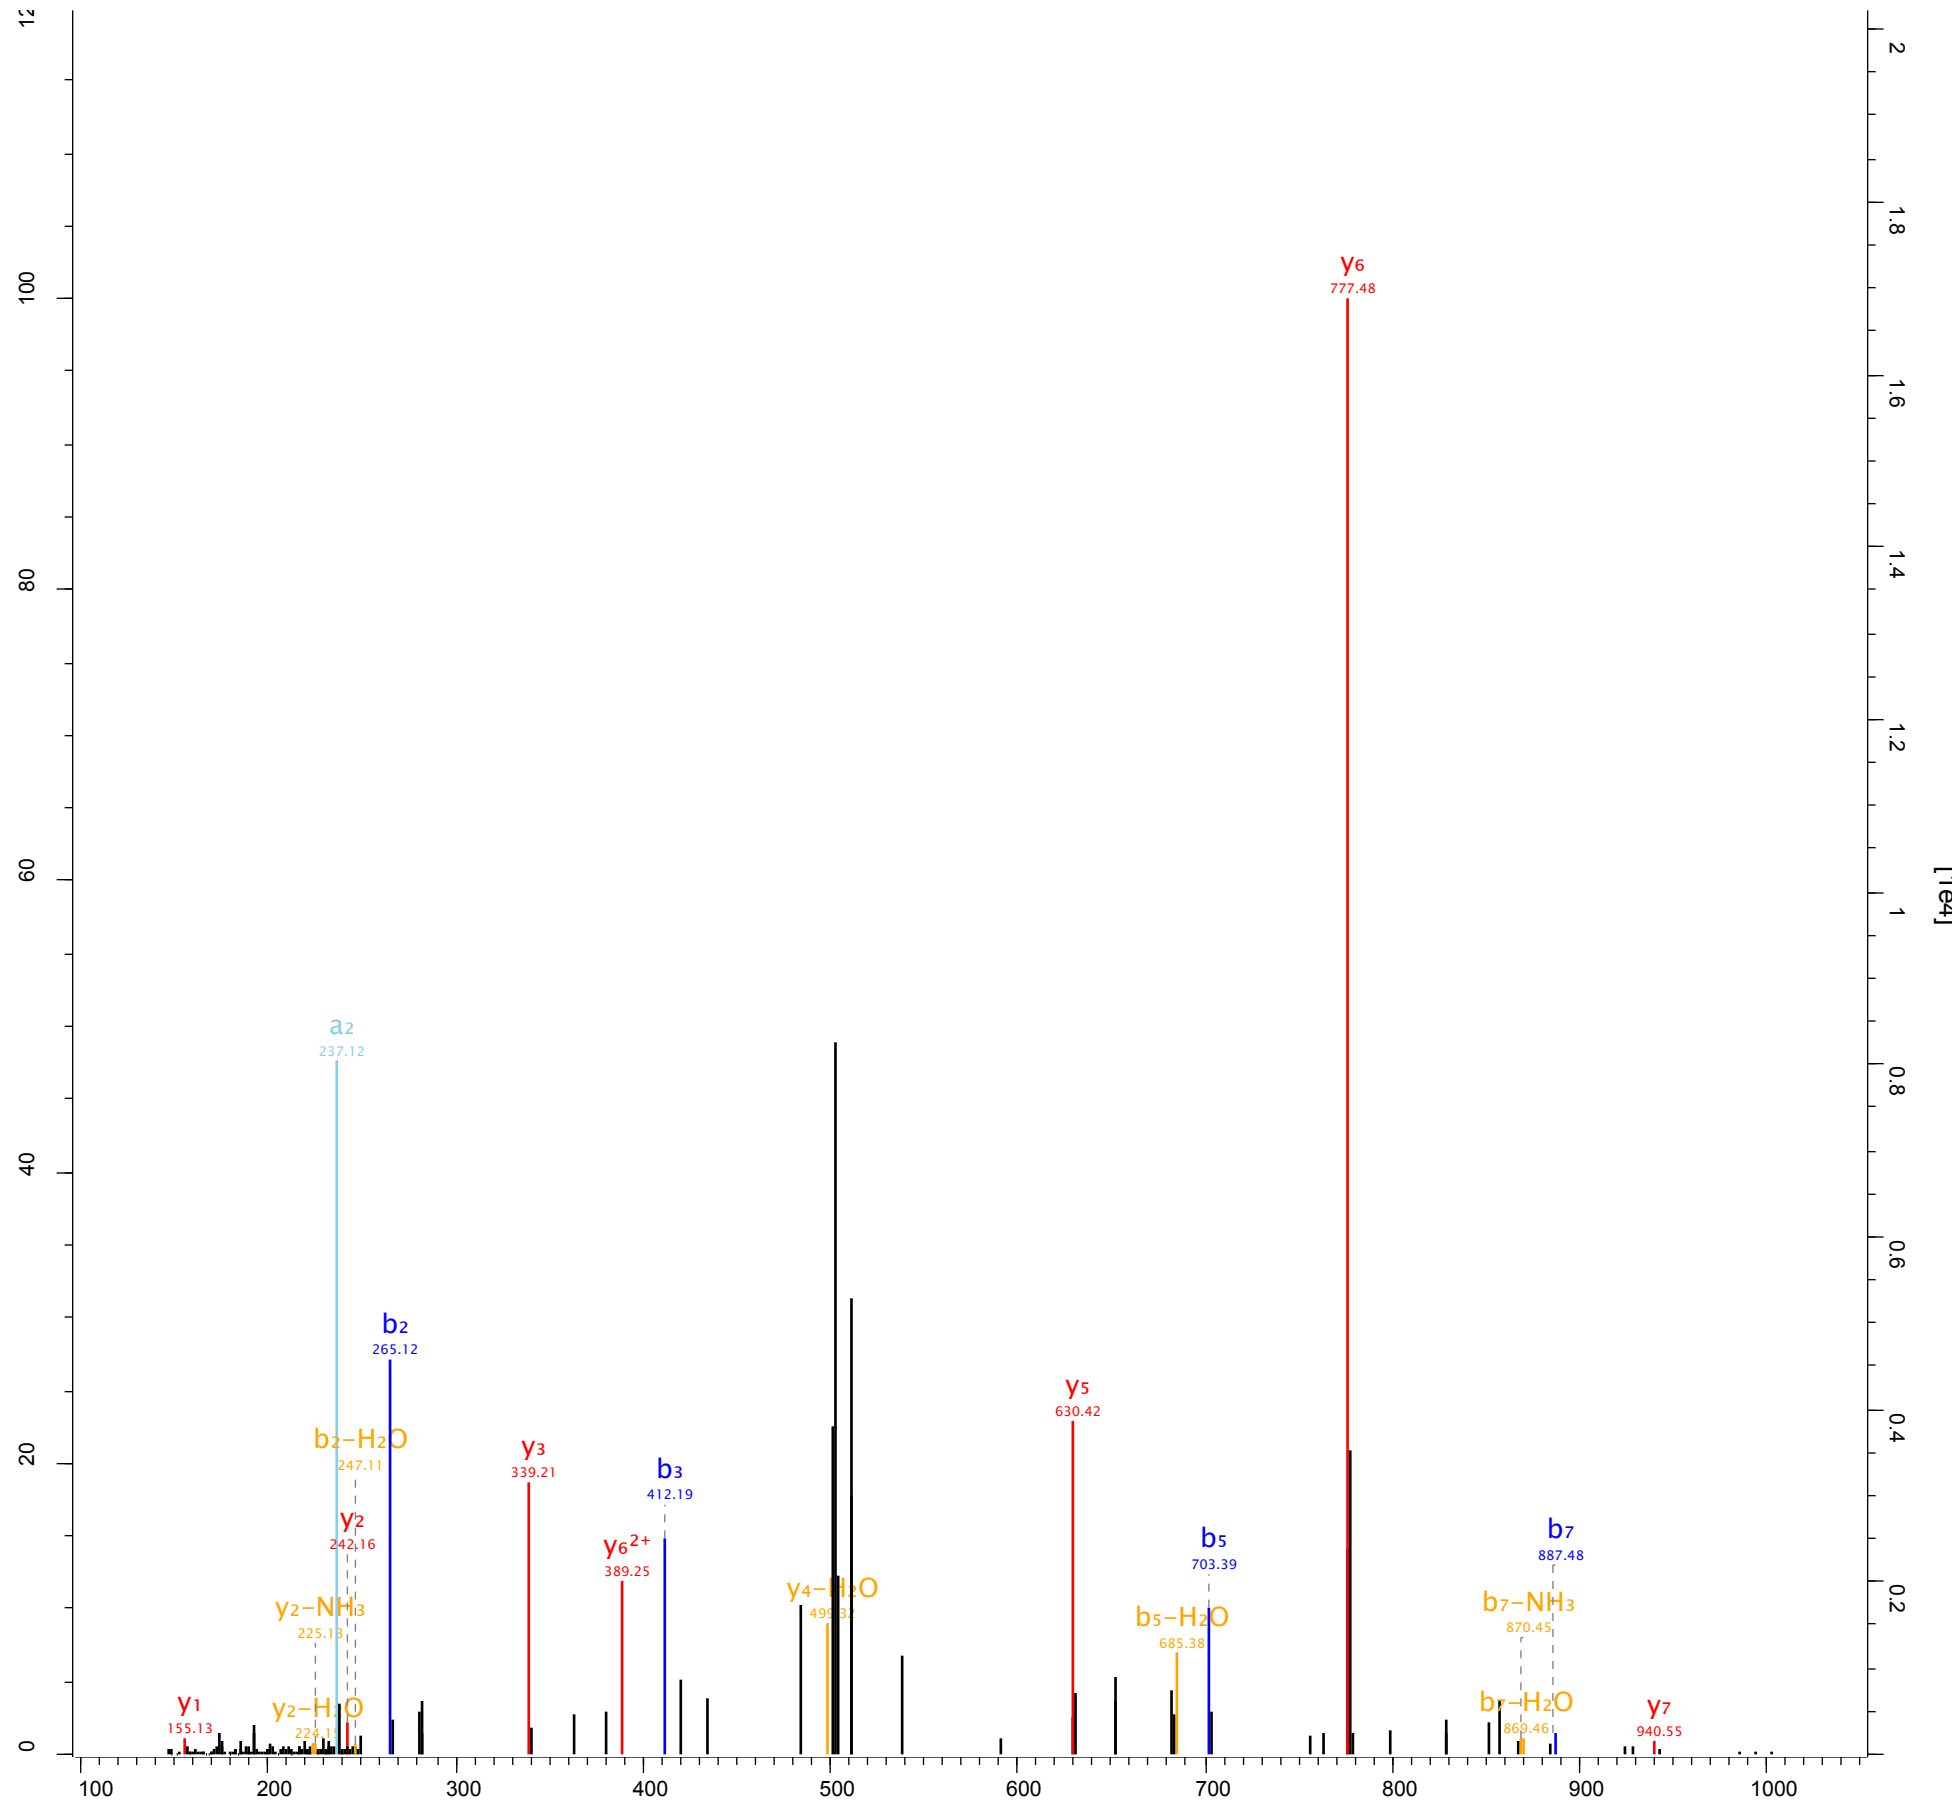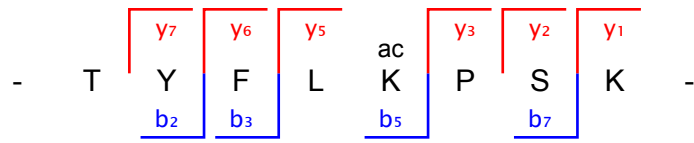

Raw file 050813\_SCW\_II\_29\_22\_5 Scan 16616 Method ITMS; CID Score 134.48 m/z 531.31 Gene names Hsp90ab1;Hsp90aa1

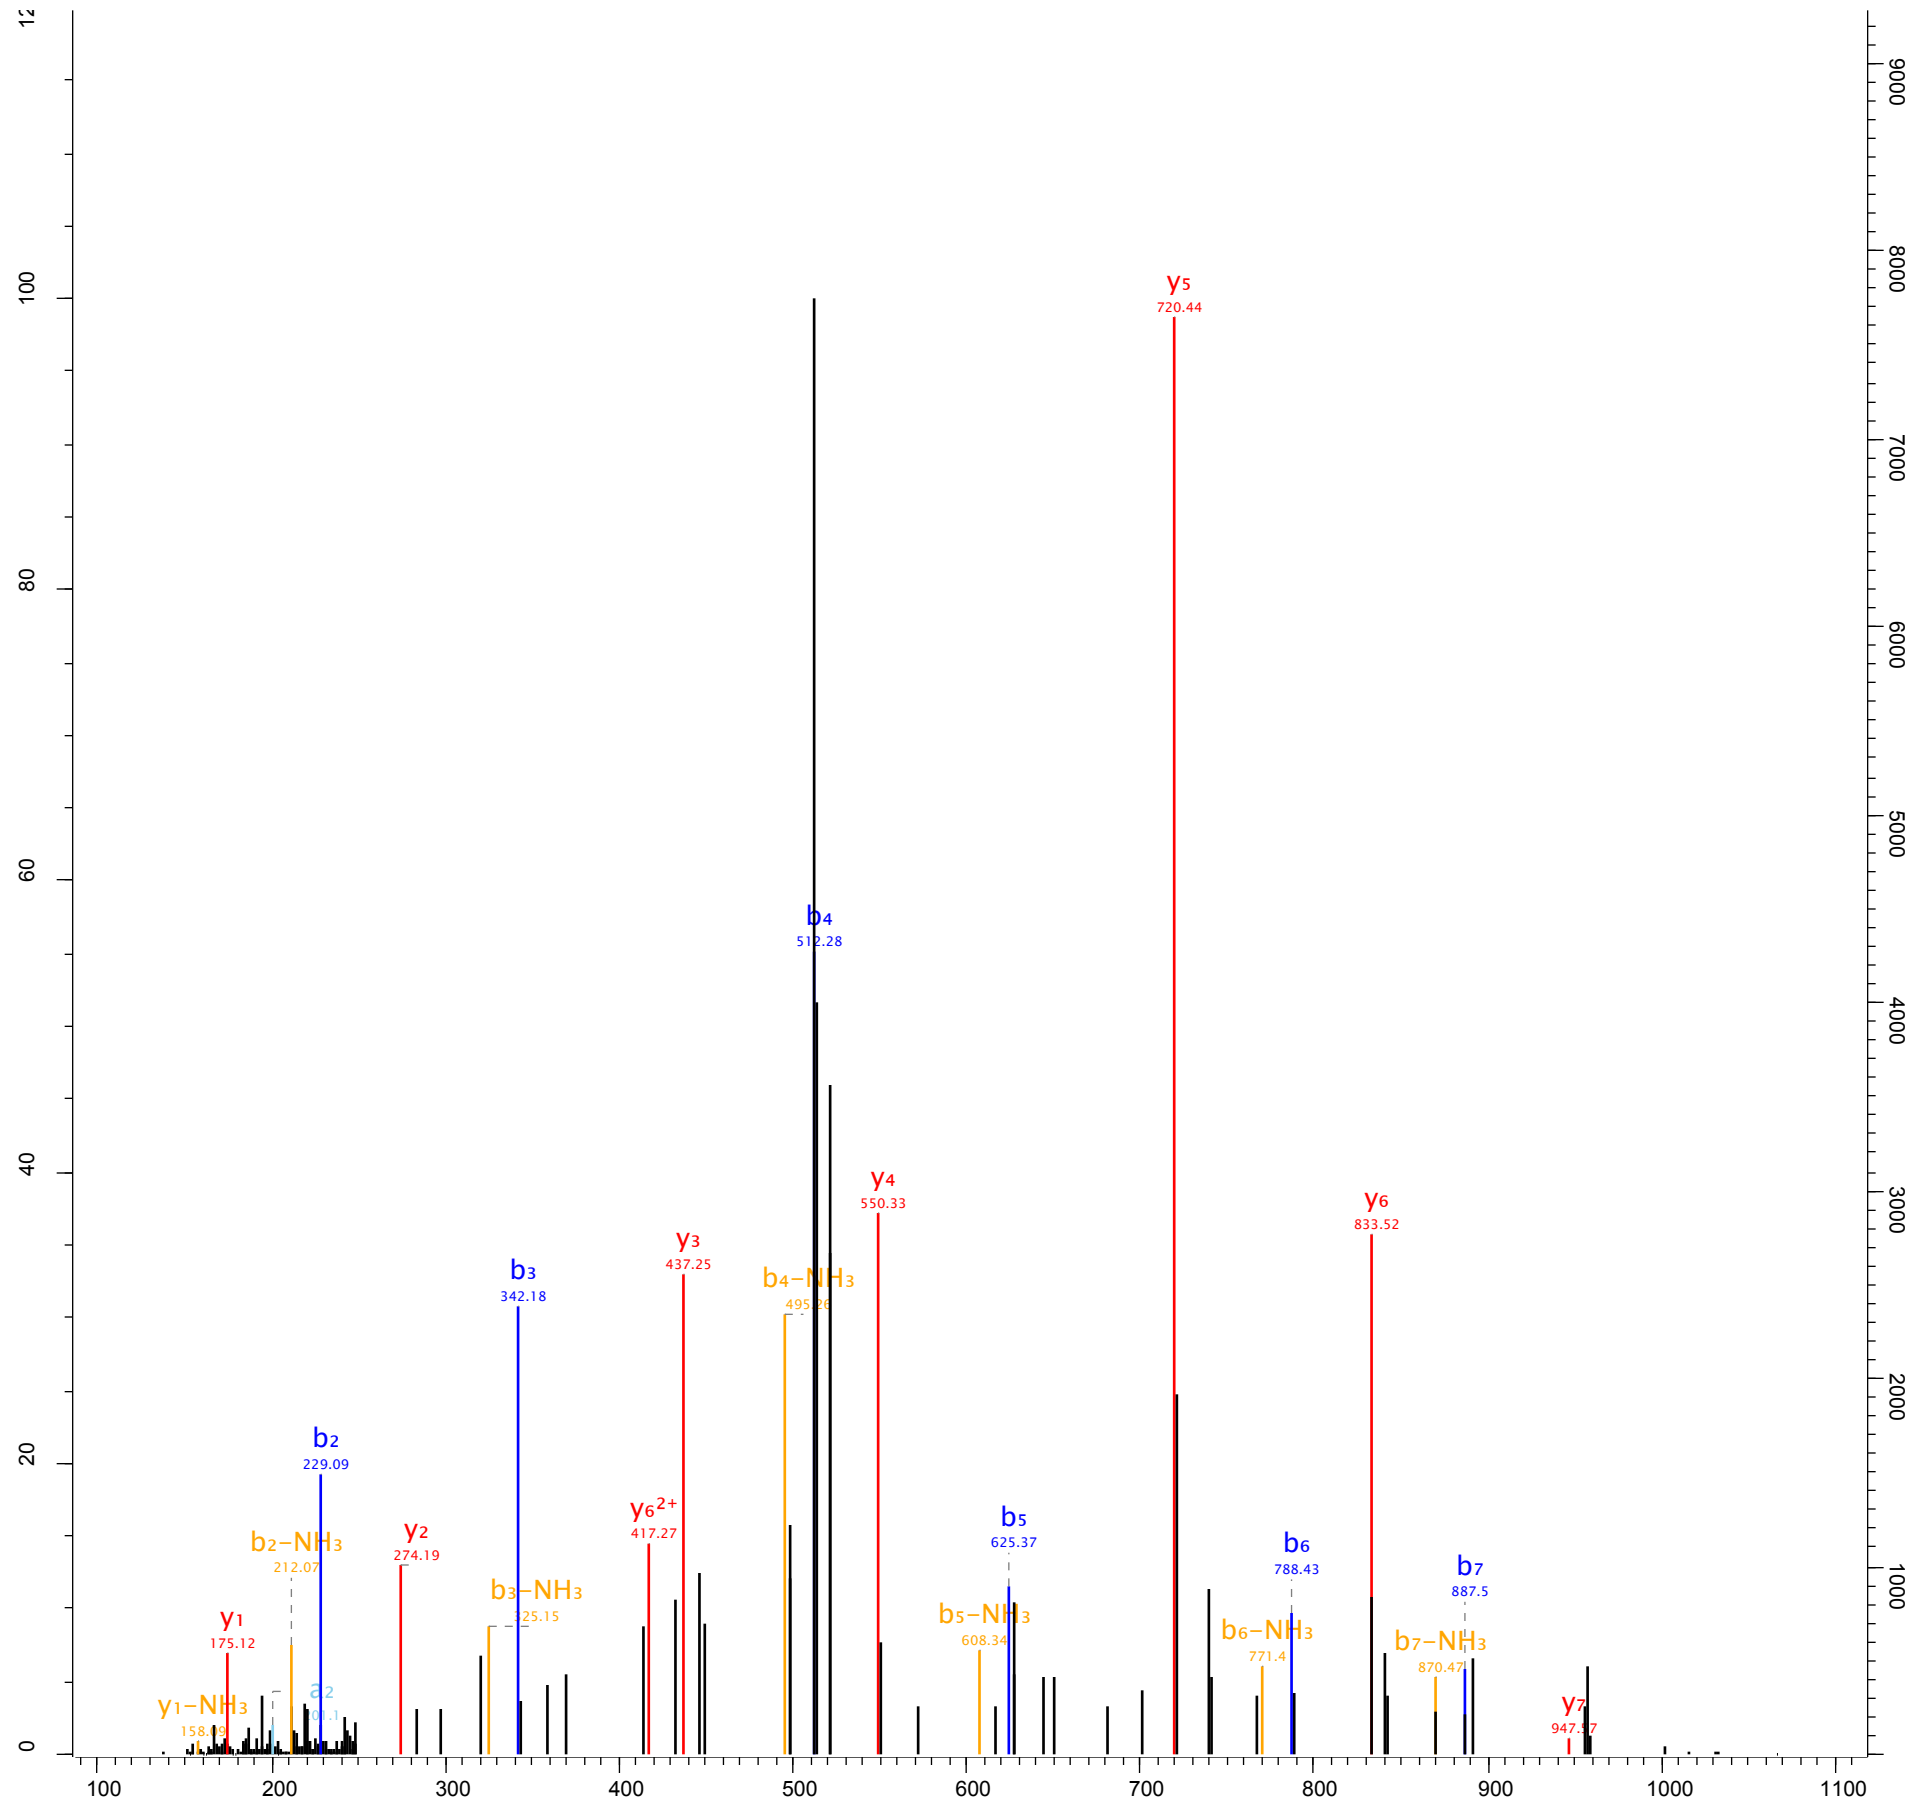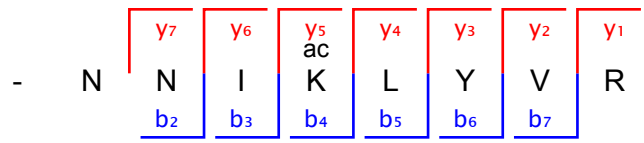

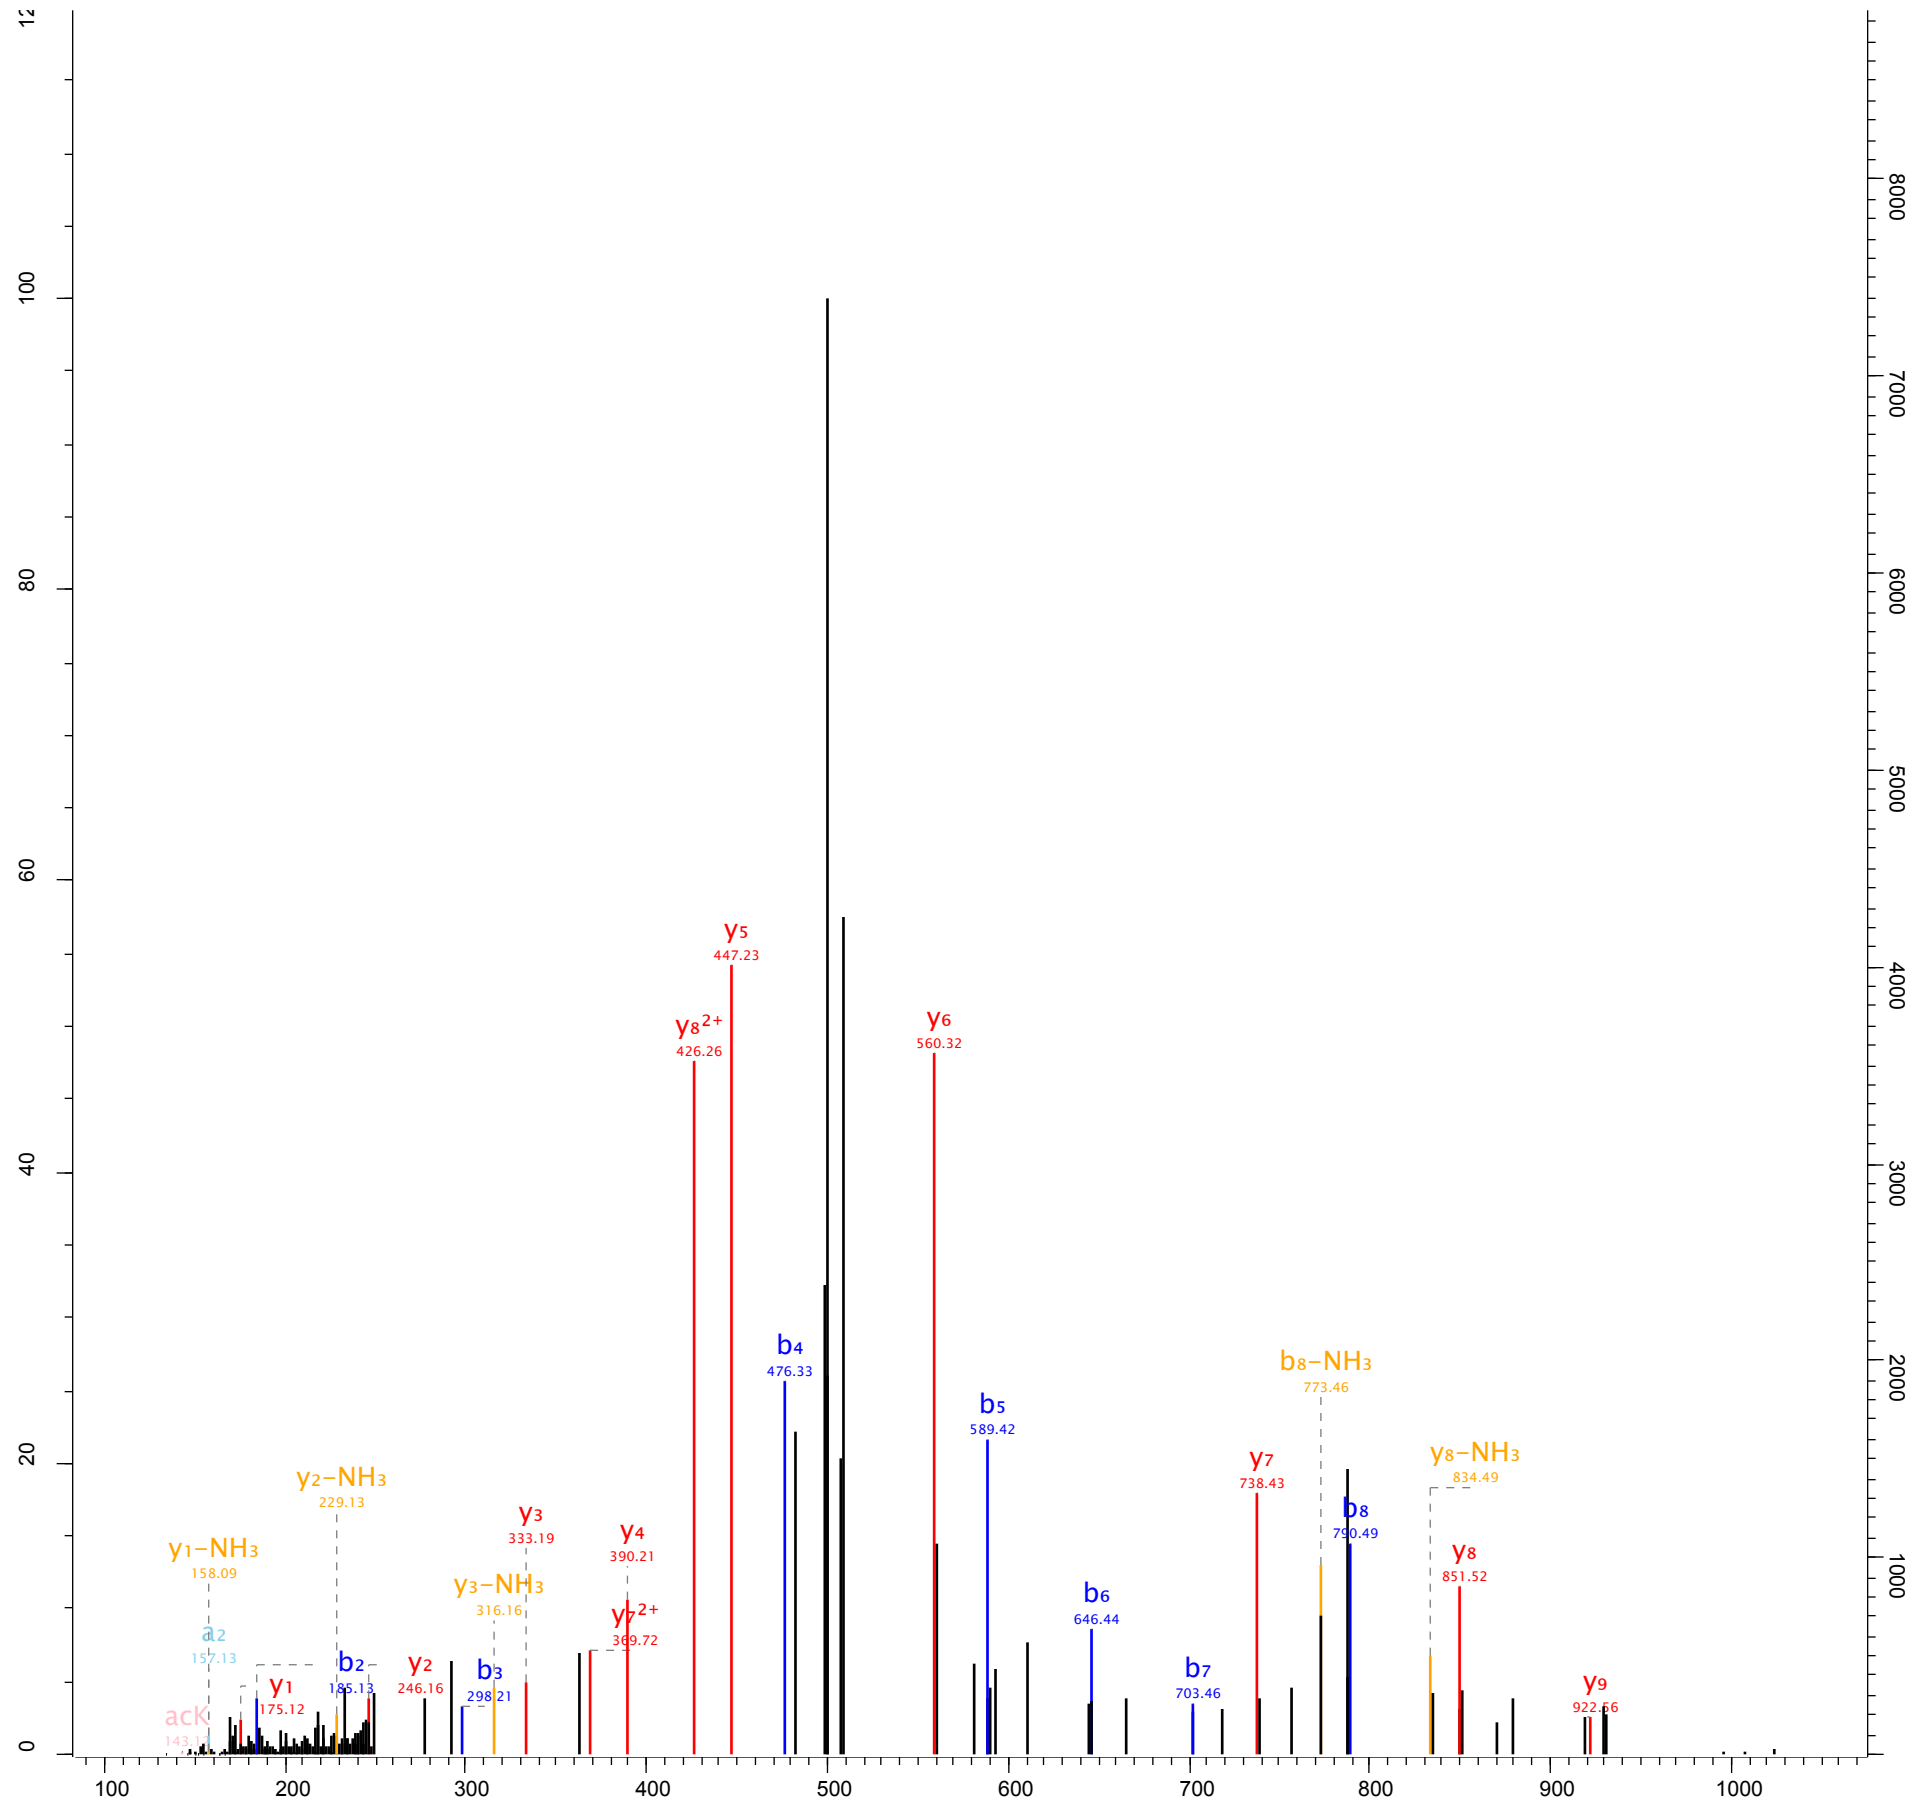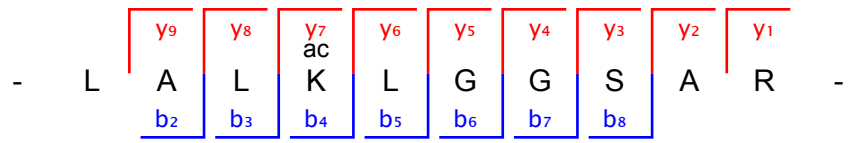

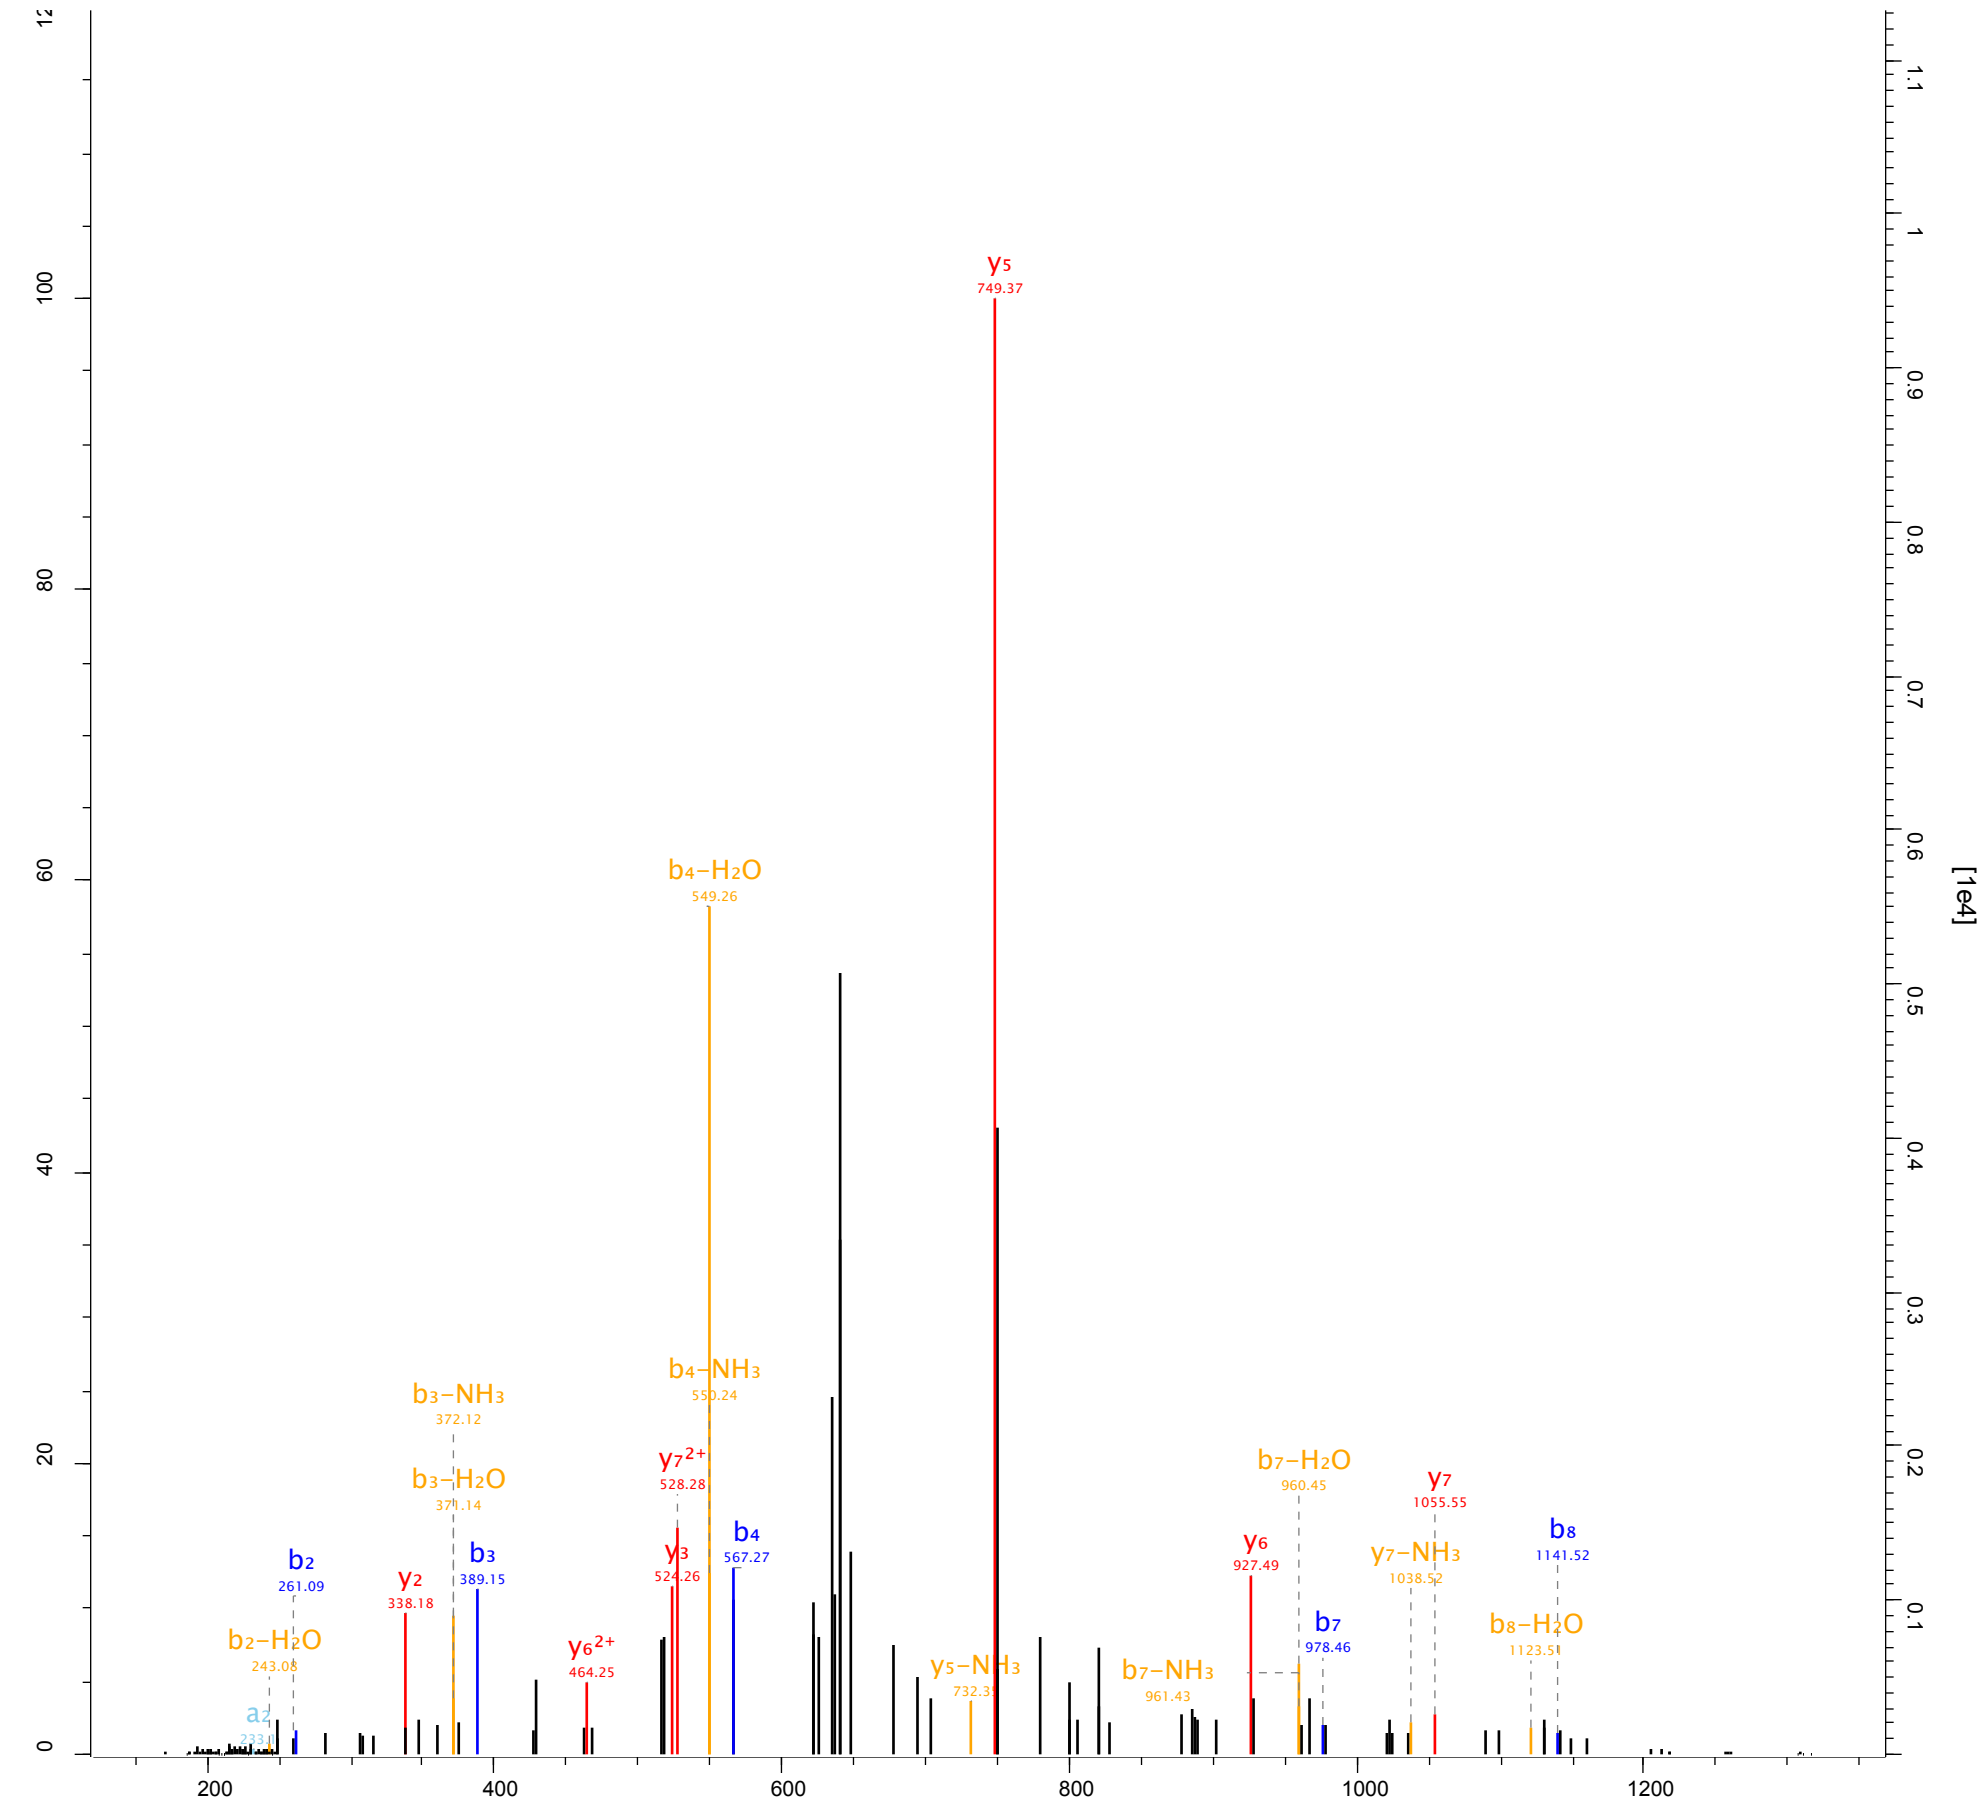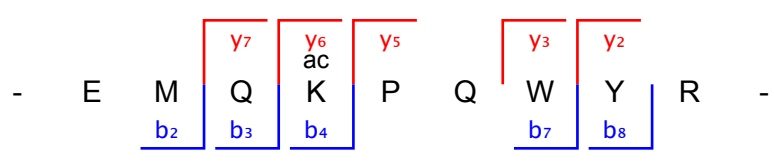



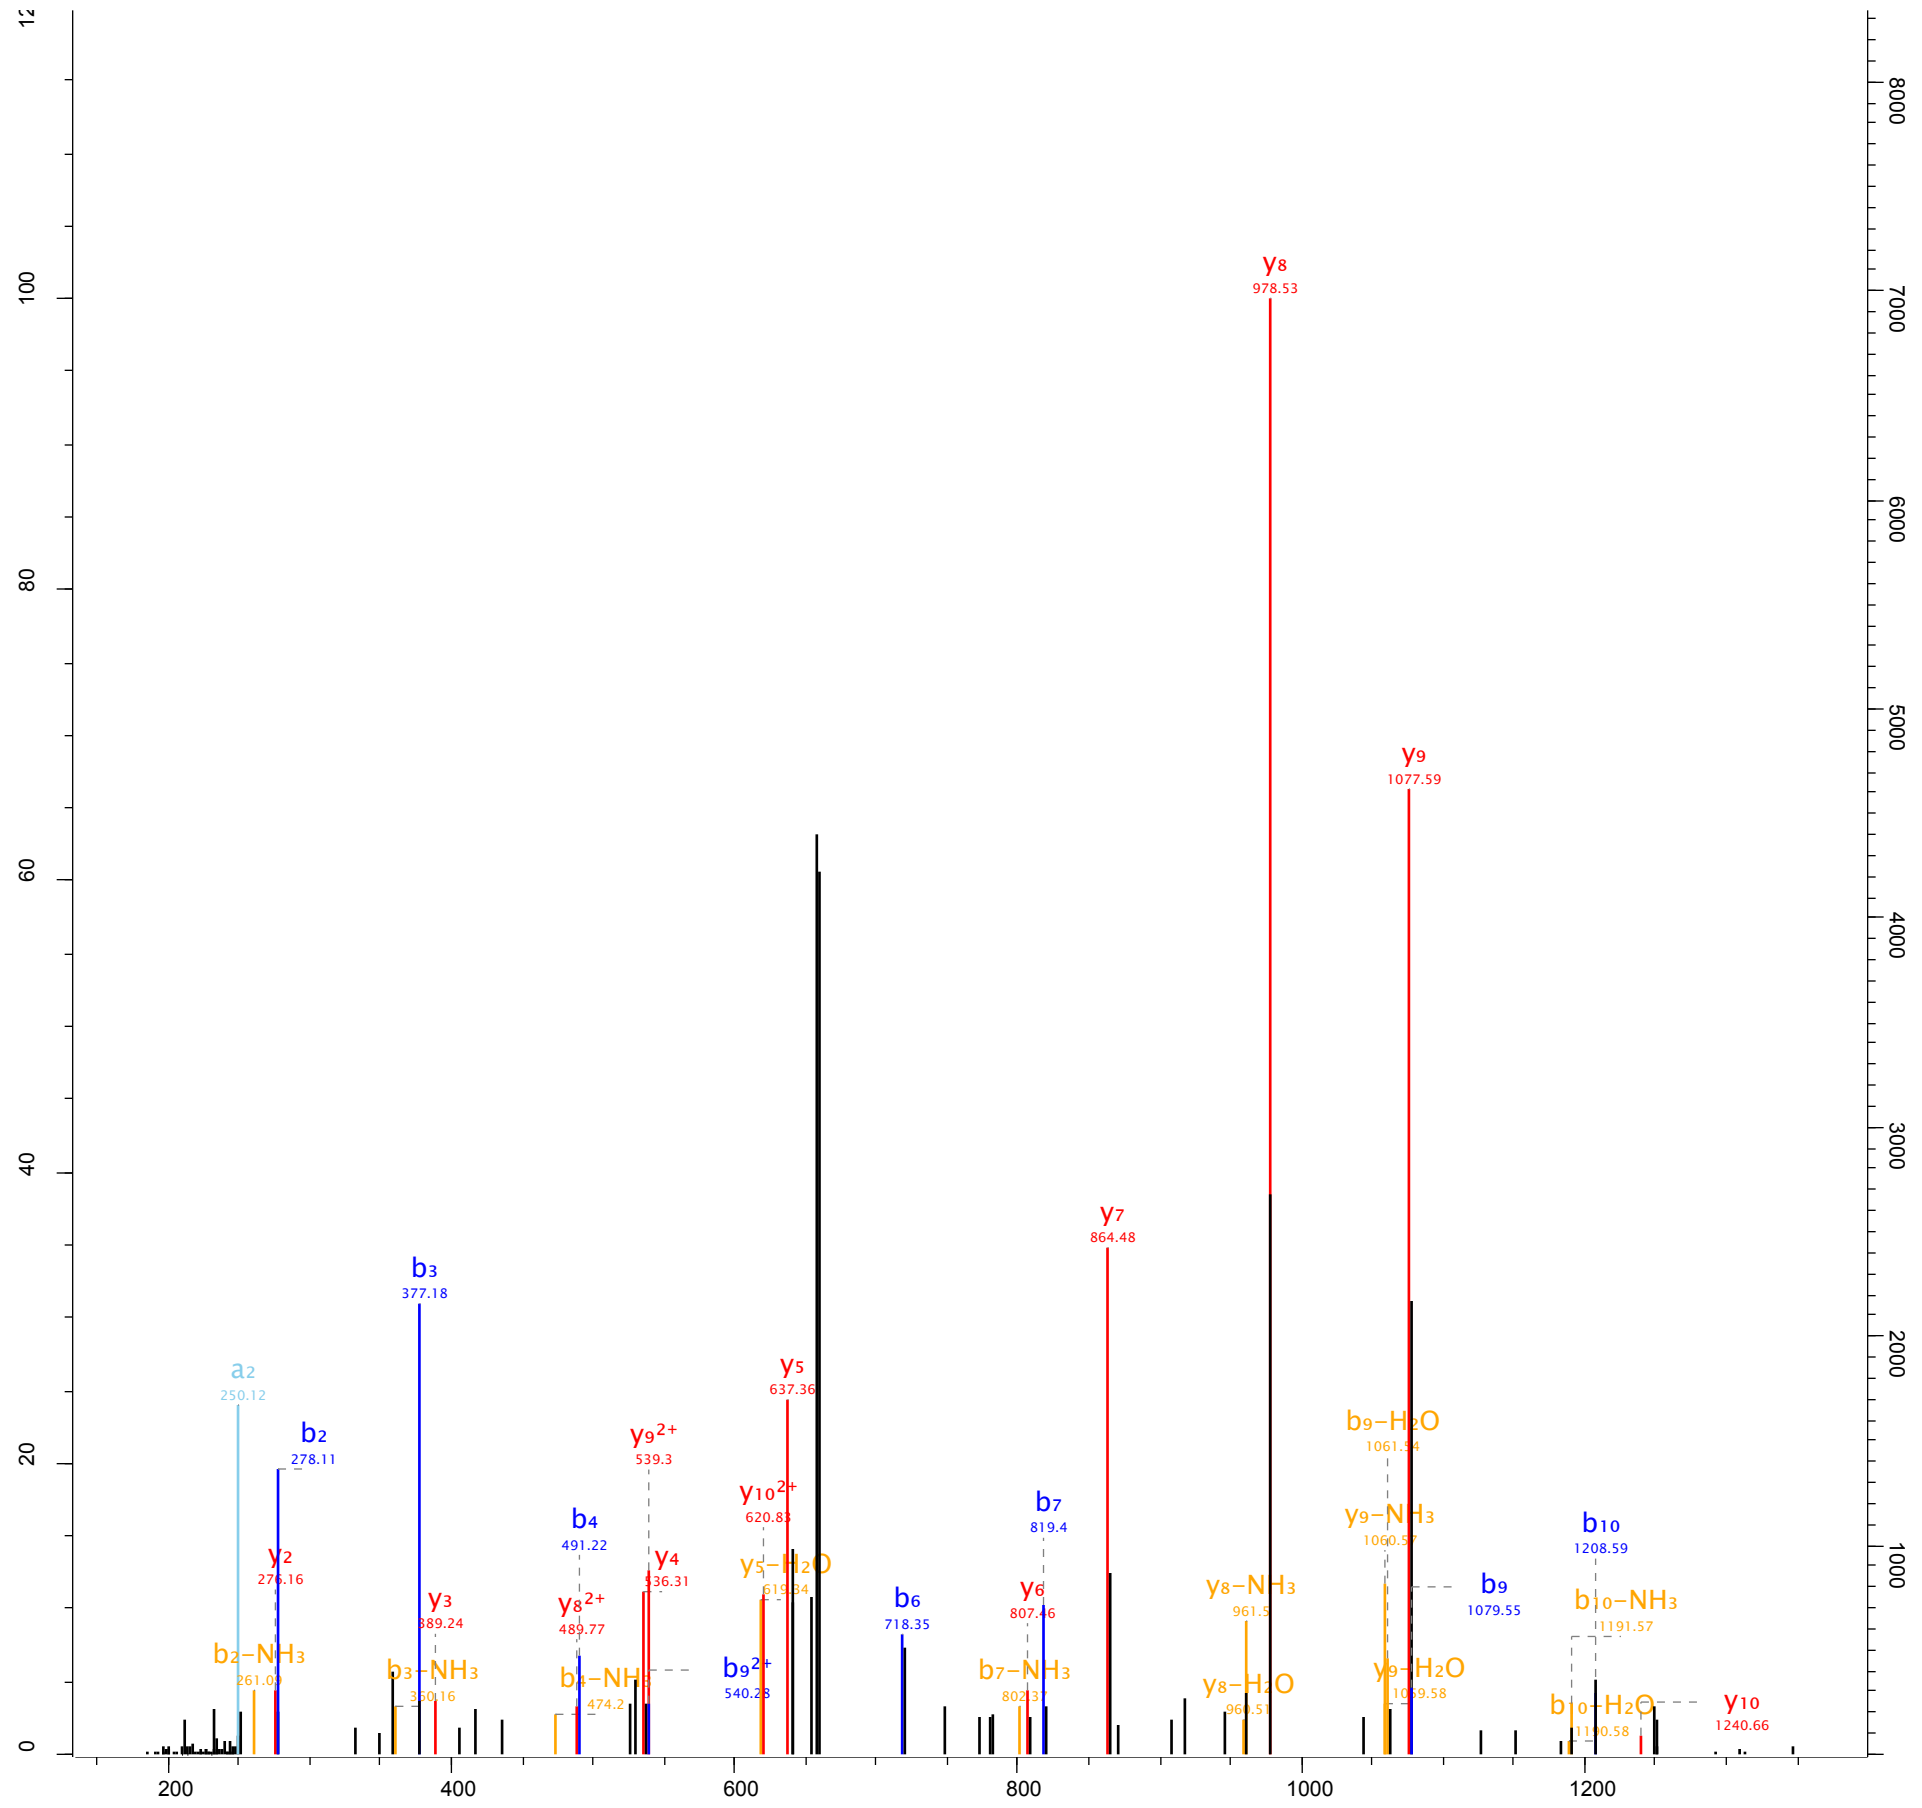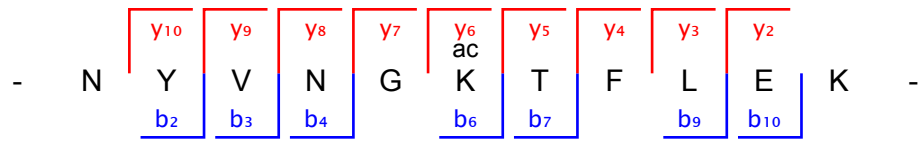

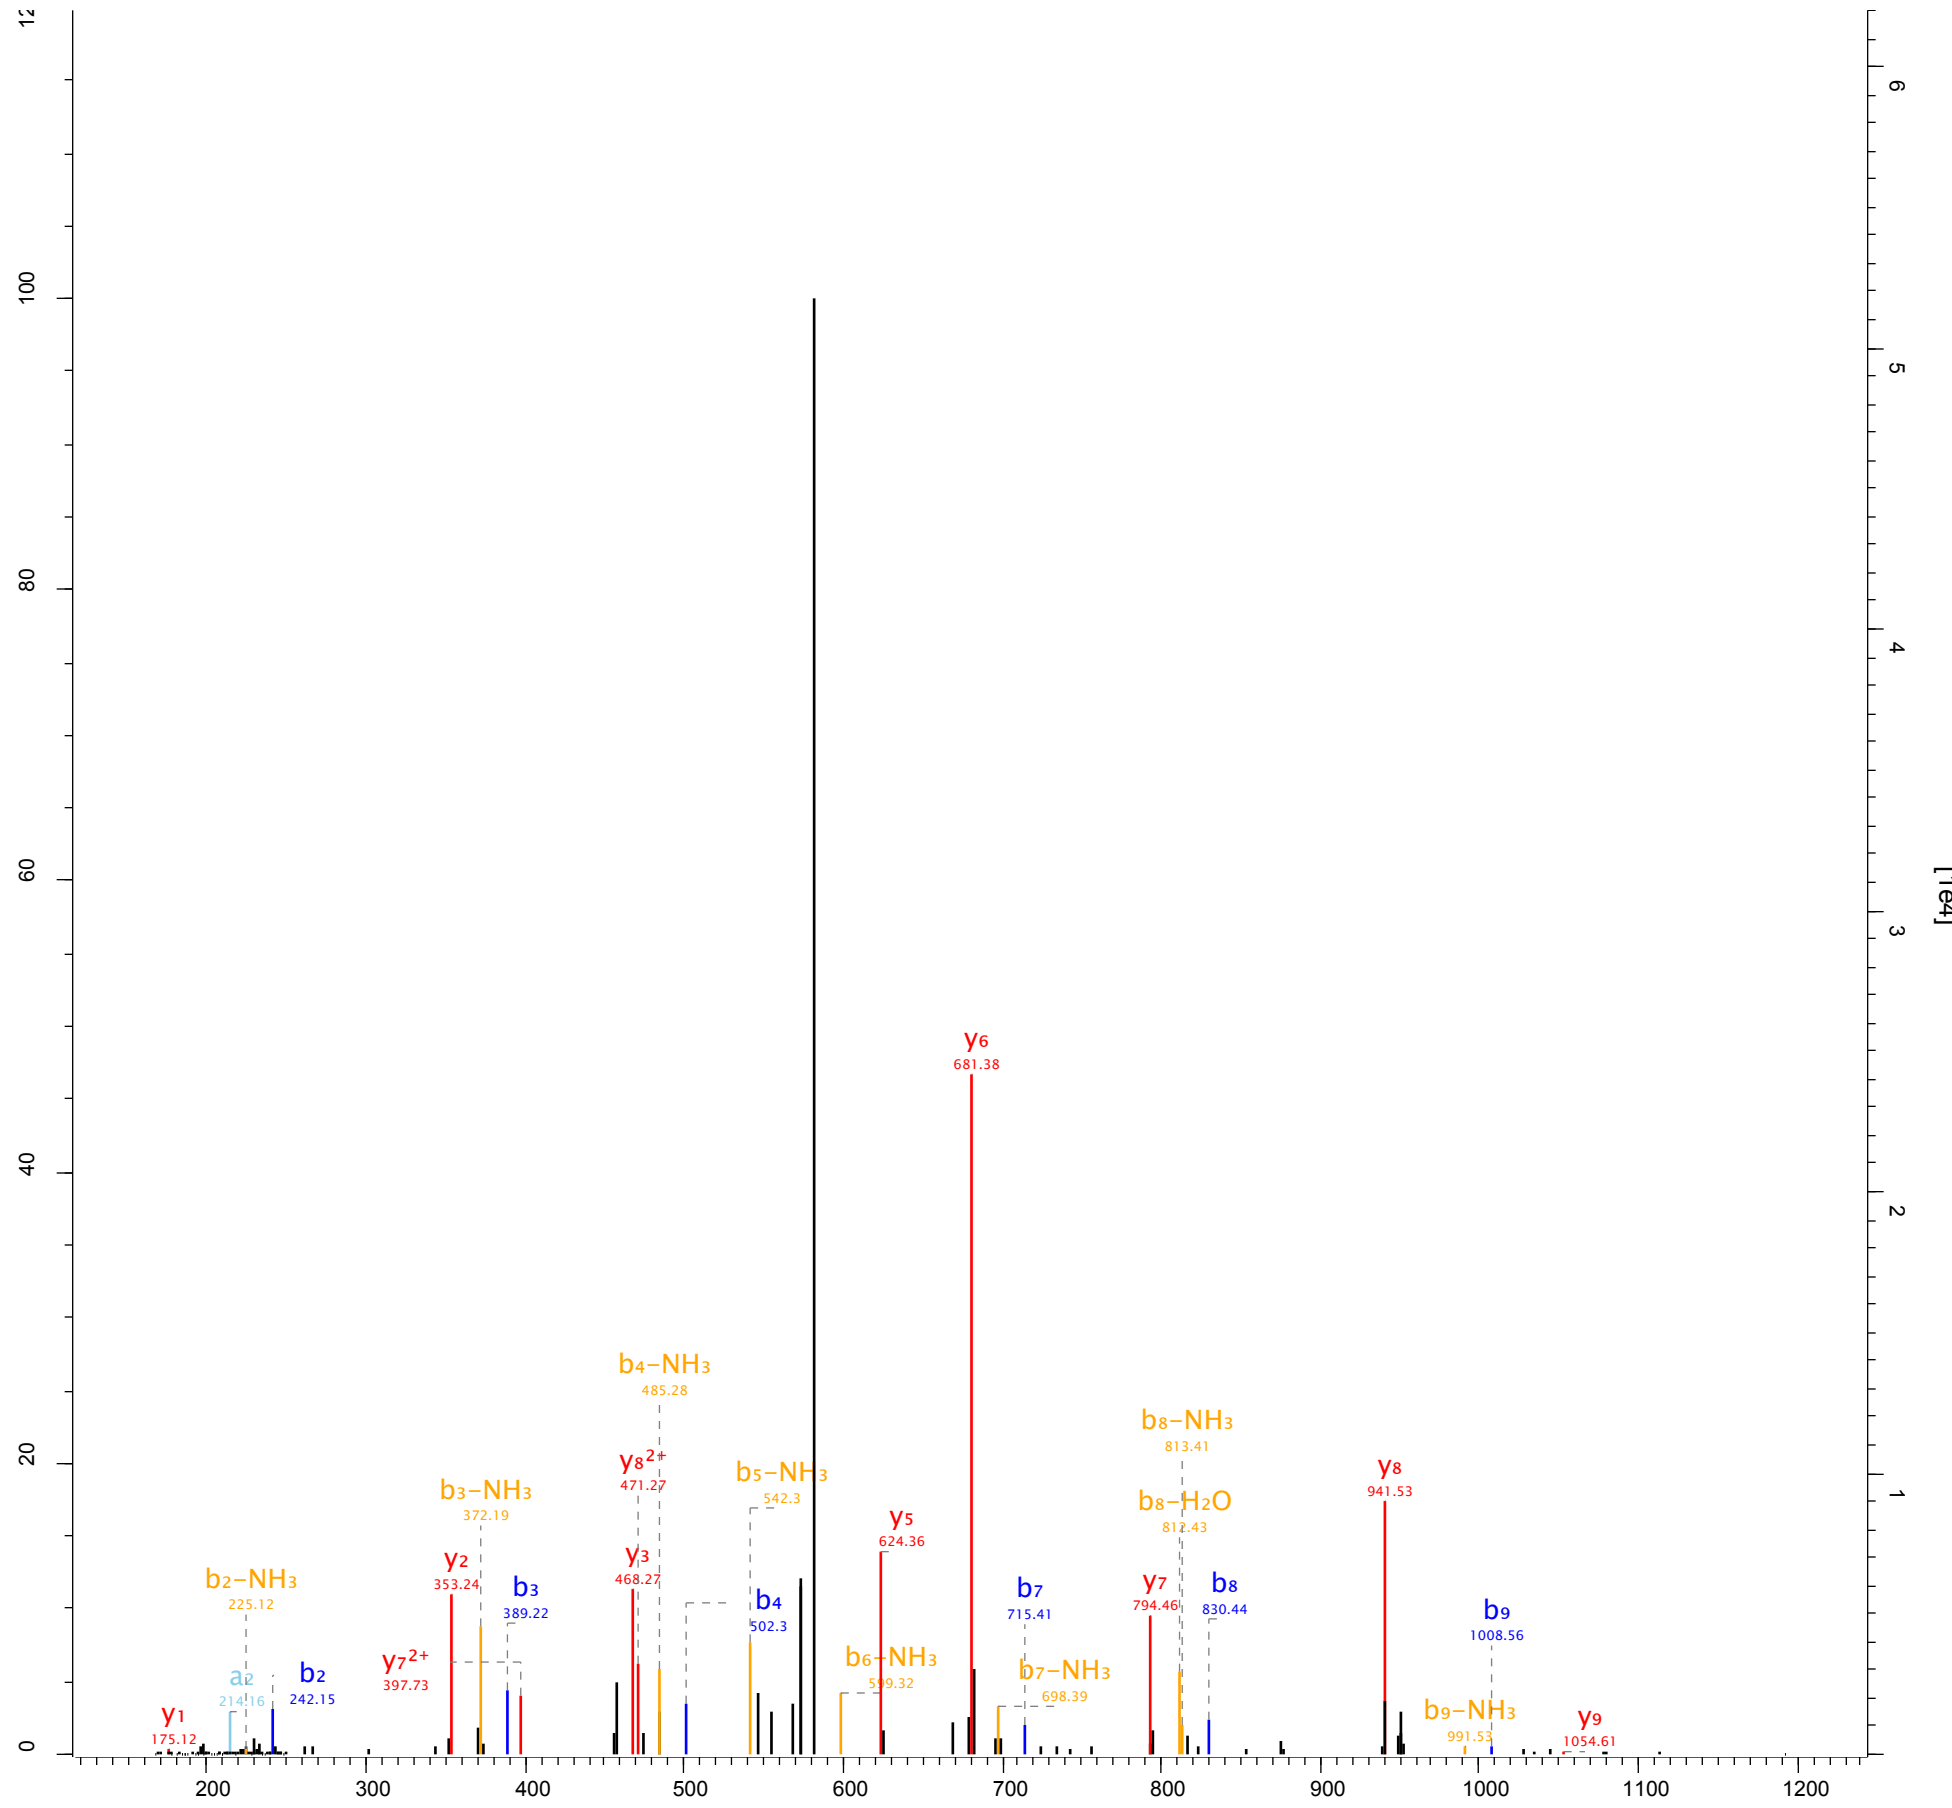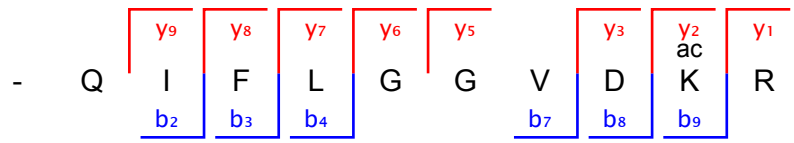

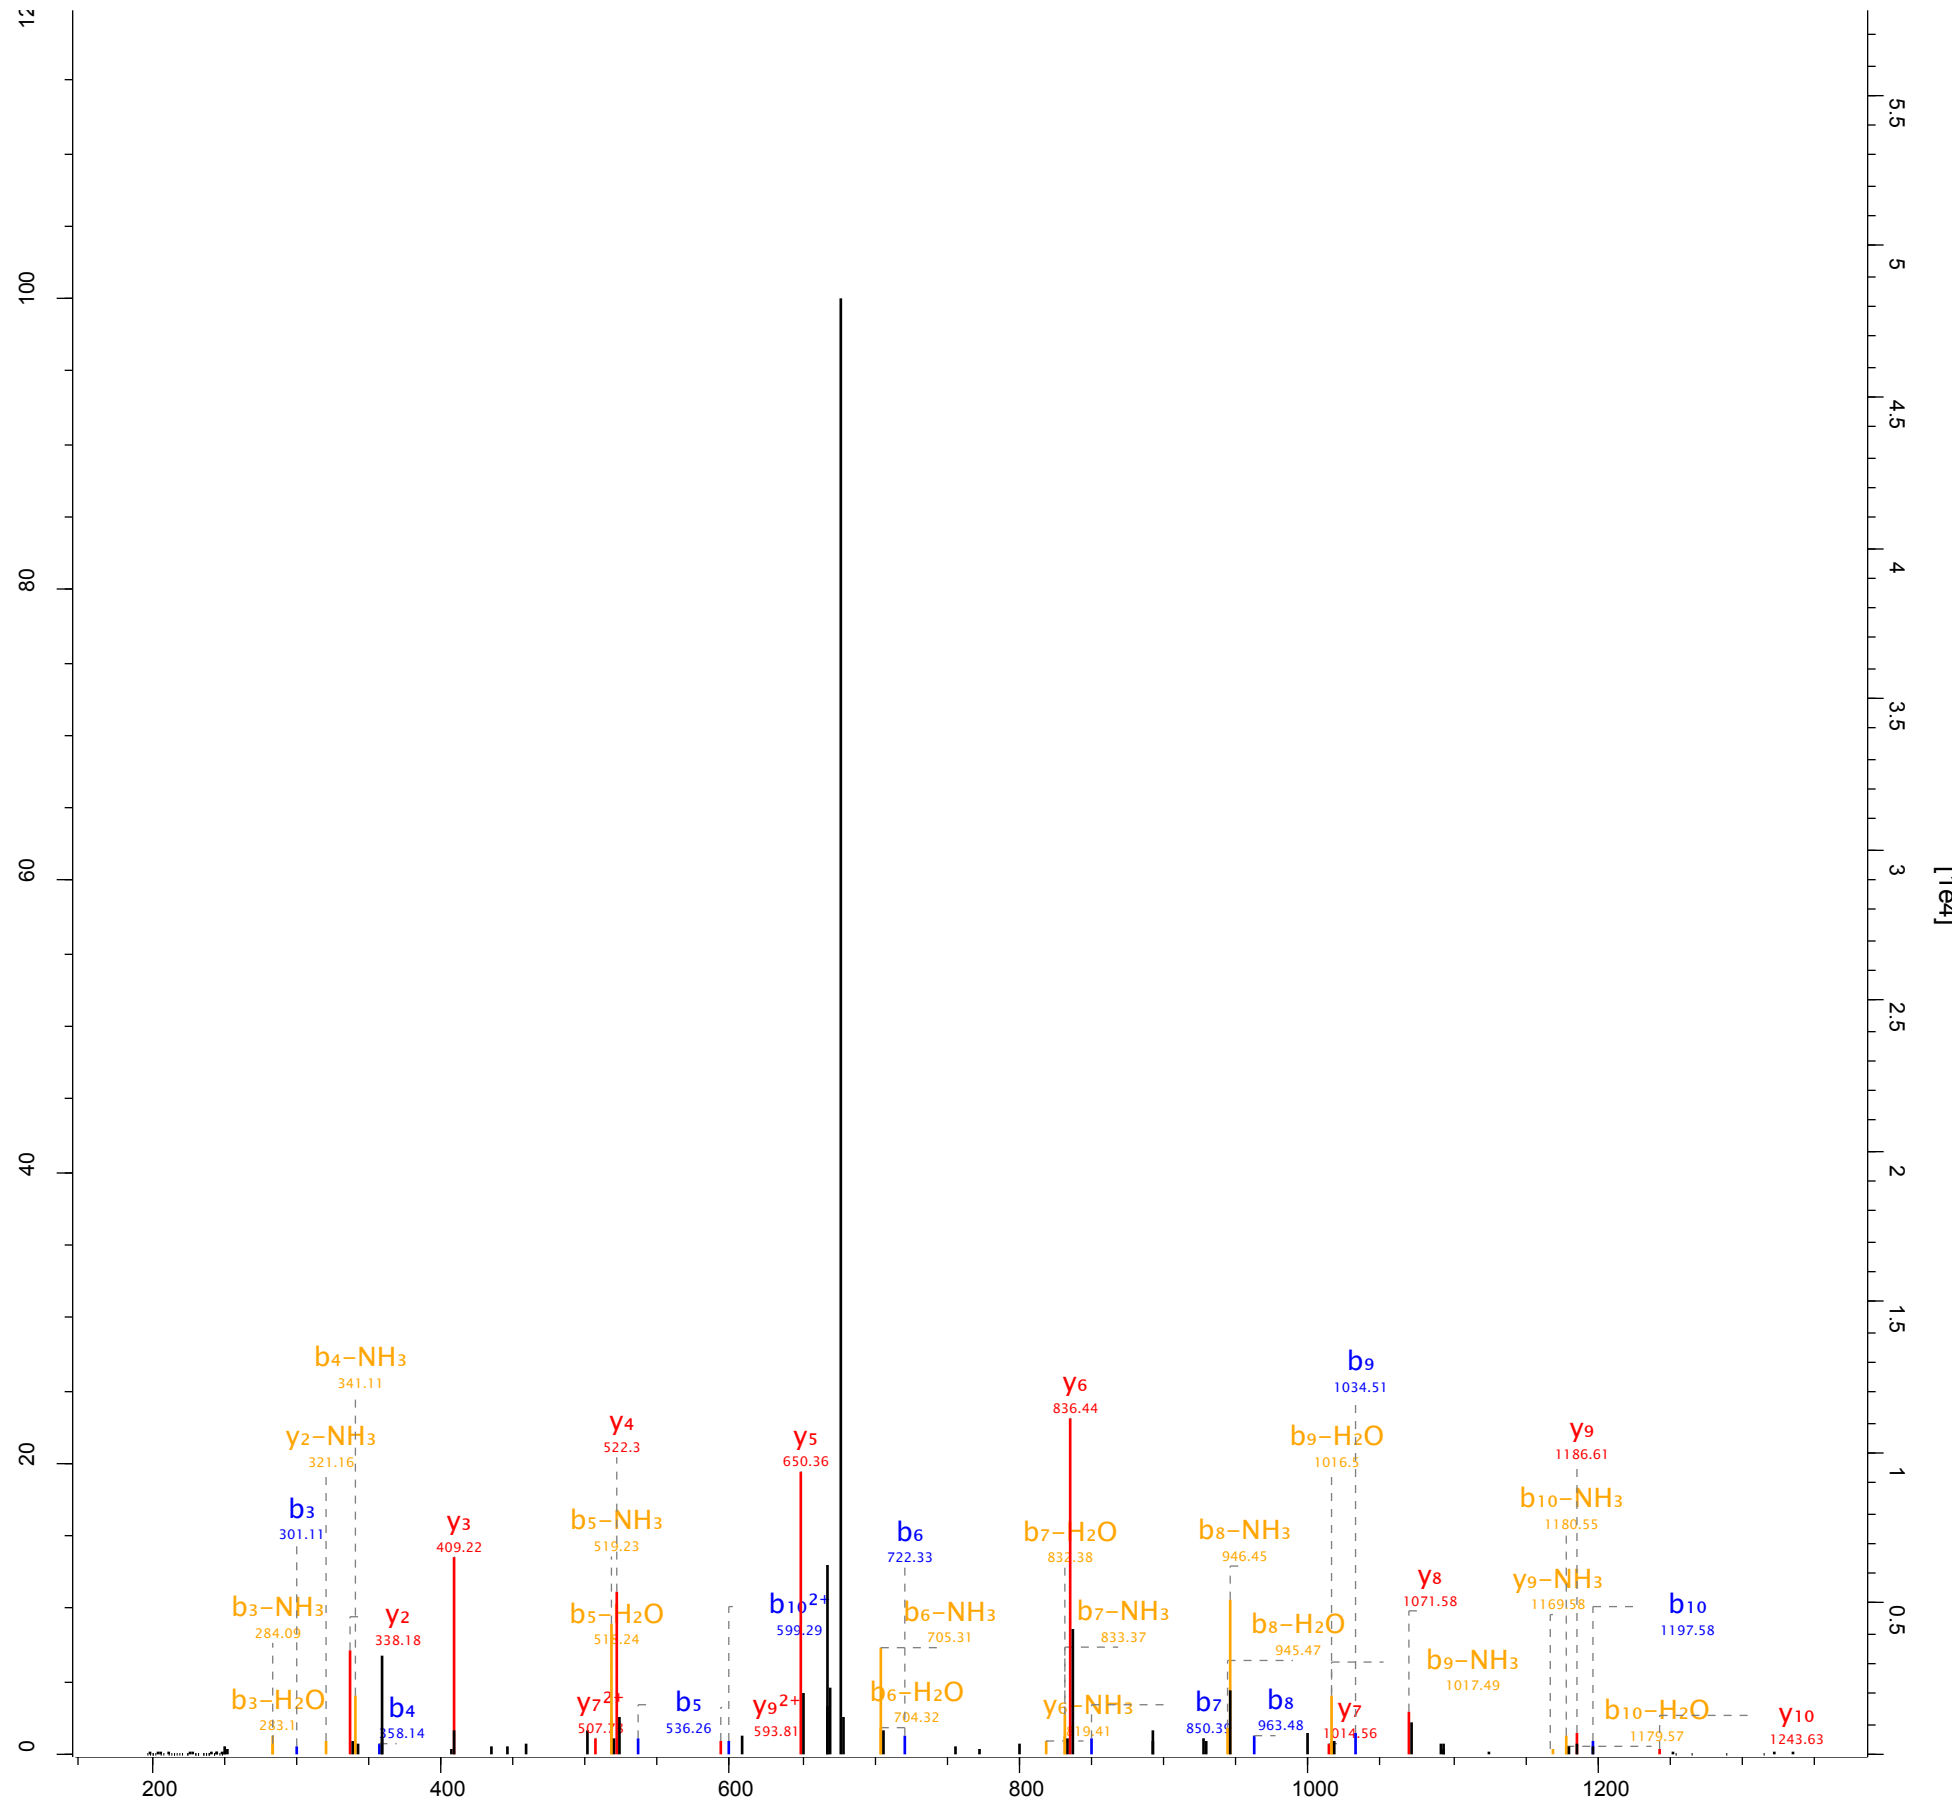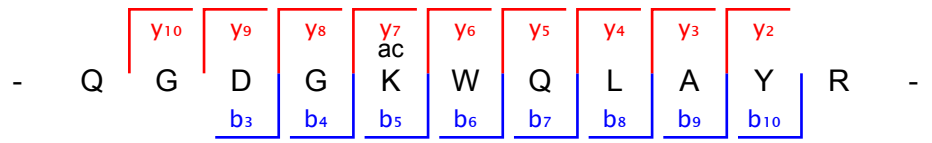

050813\_SCW\_II\_29\_22\_5

18463

ITMS; CID

176.87

652.86

Ldha

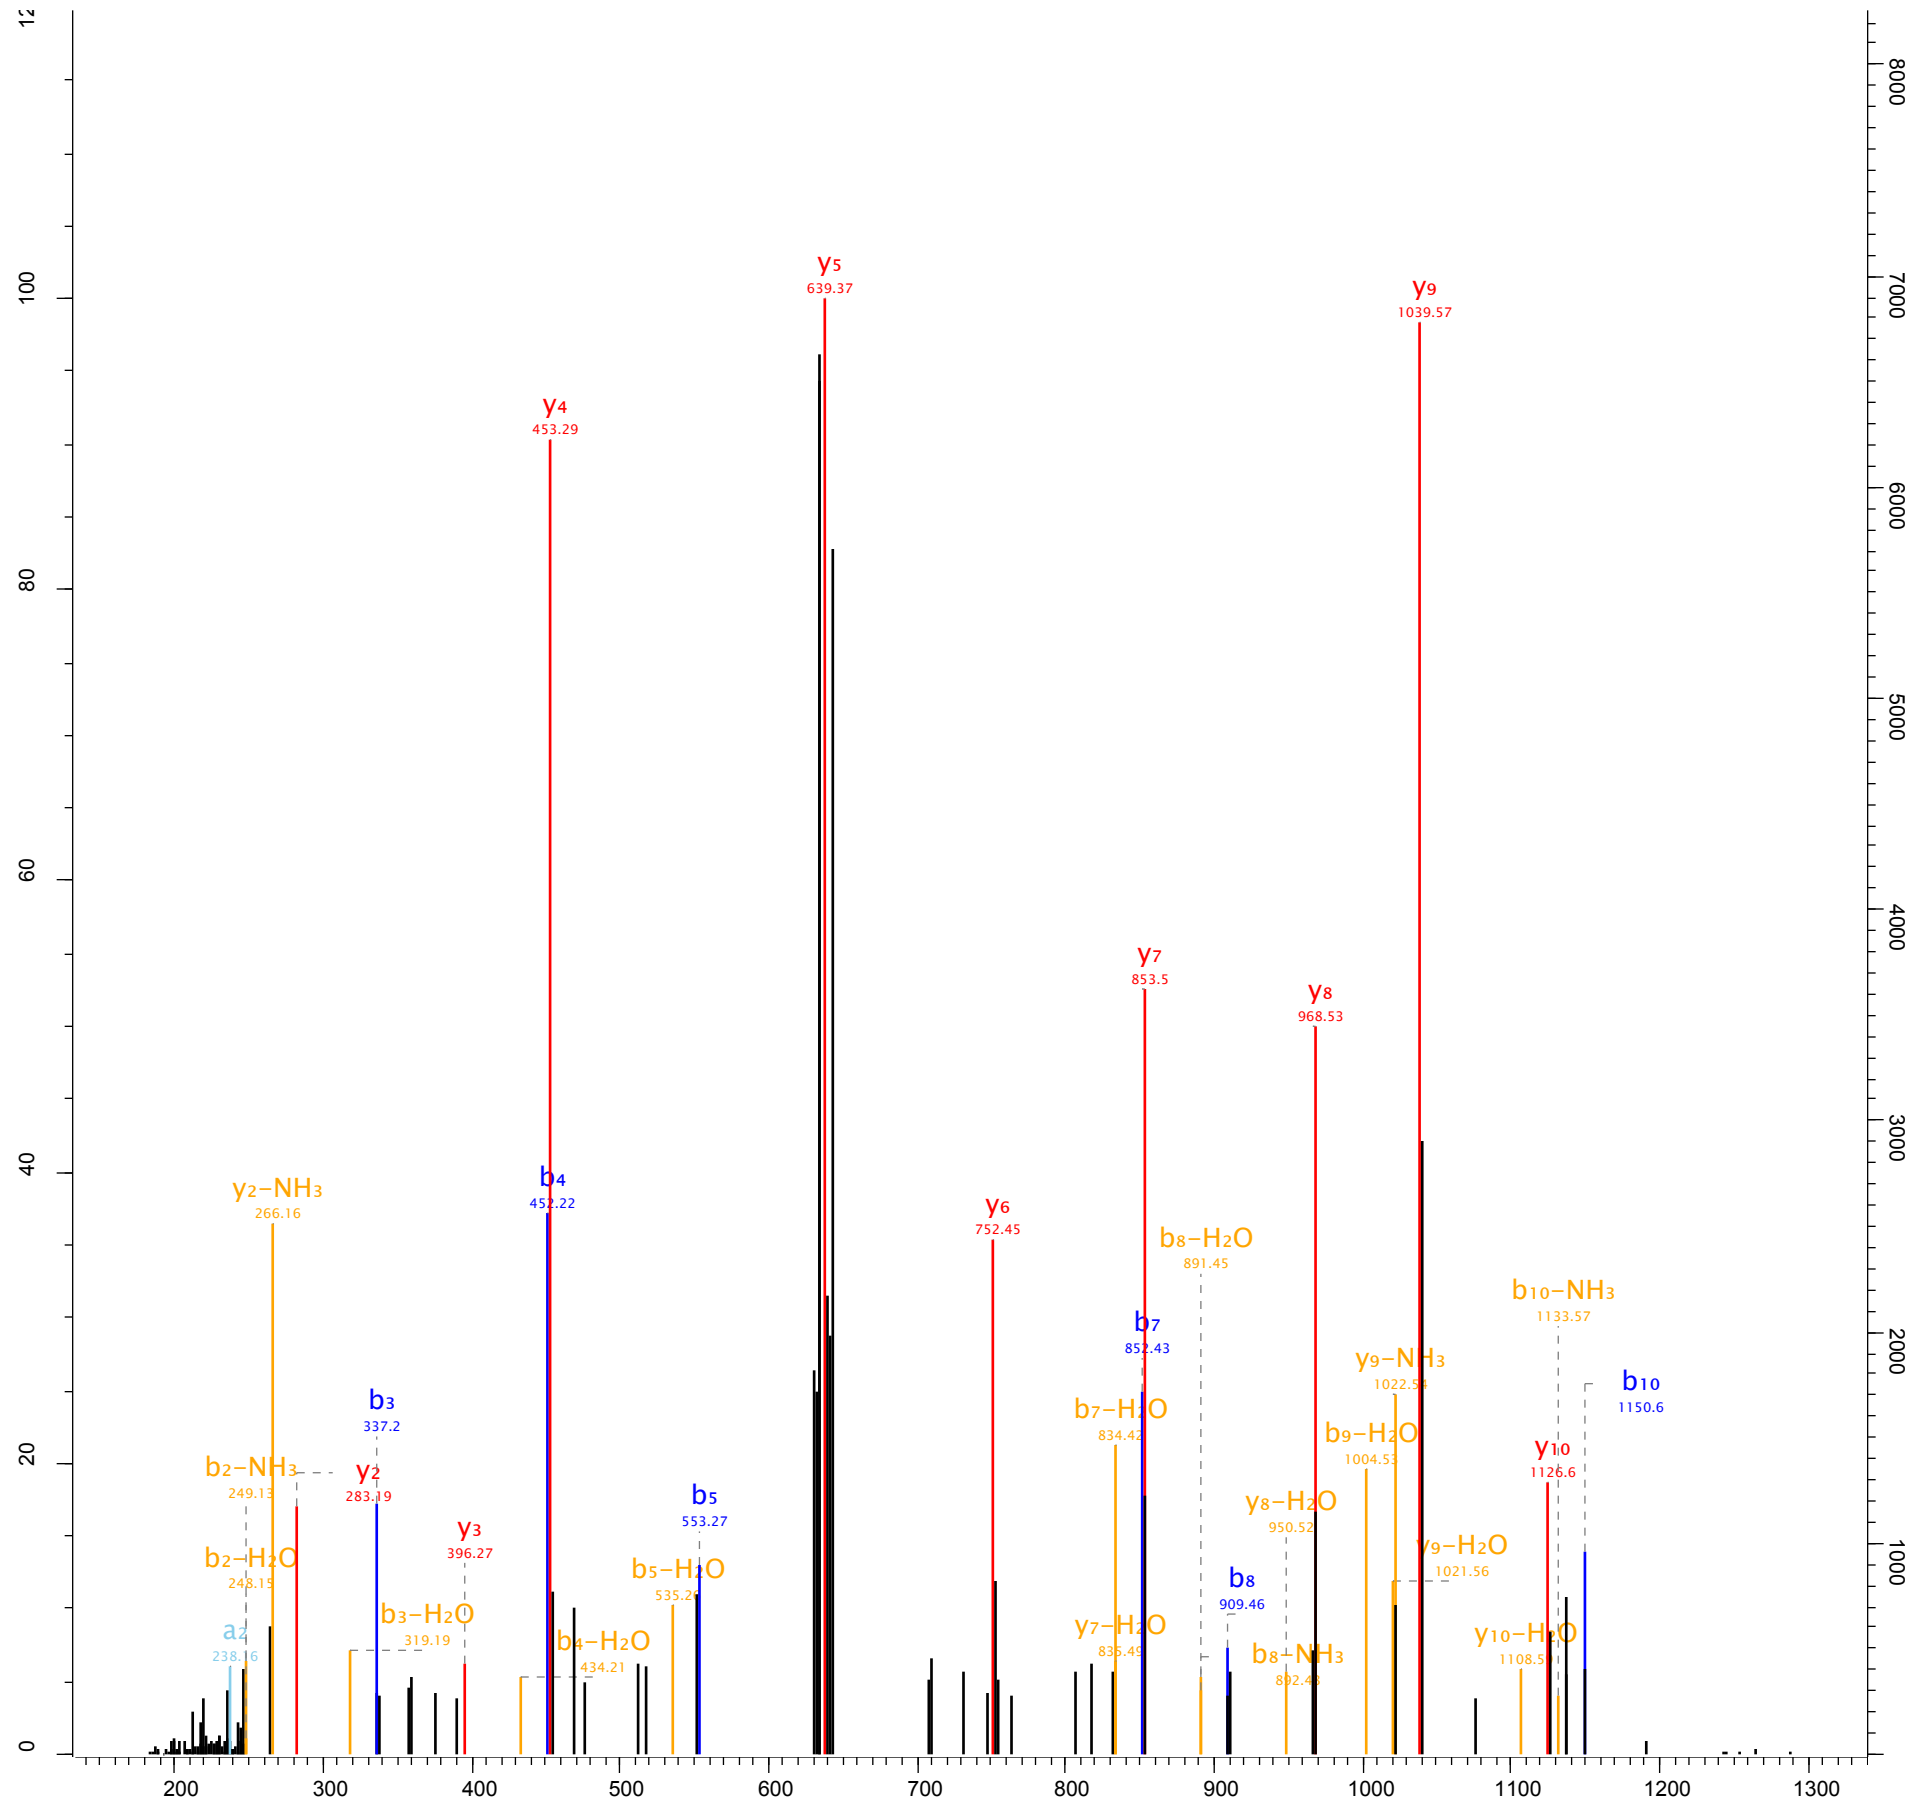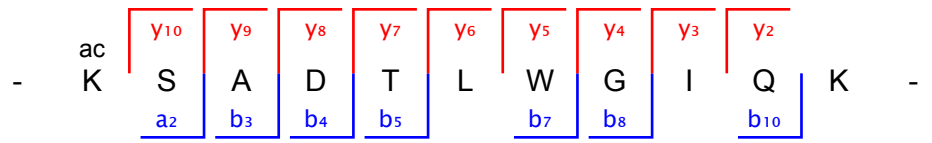

050813\_SCW\_II\_29\_22\_5

18744 ITMS; CID 125.71 550.31 Ncl

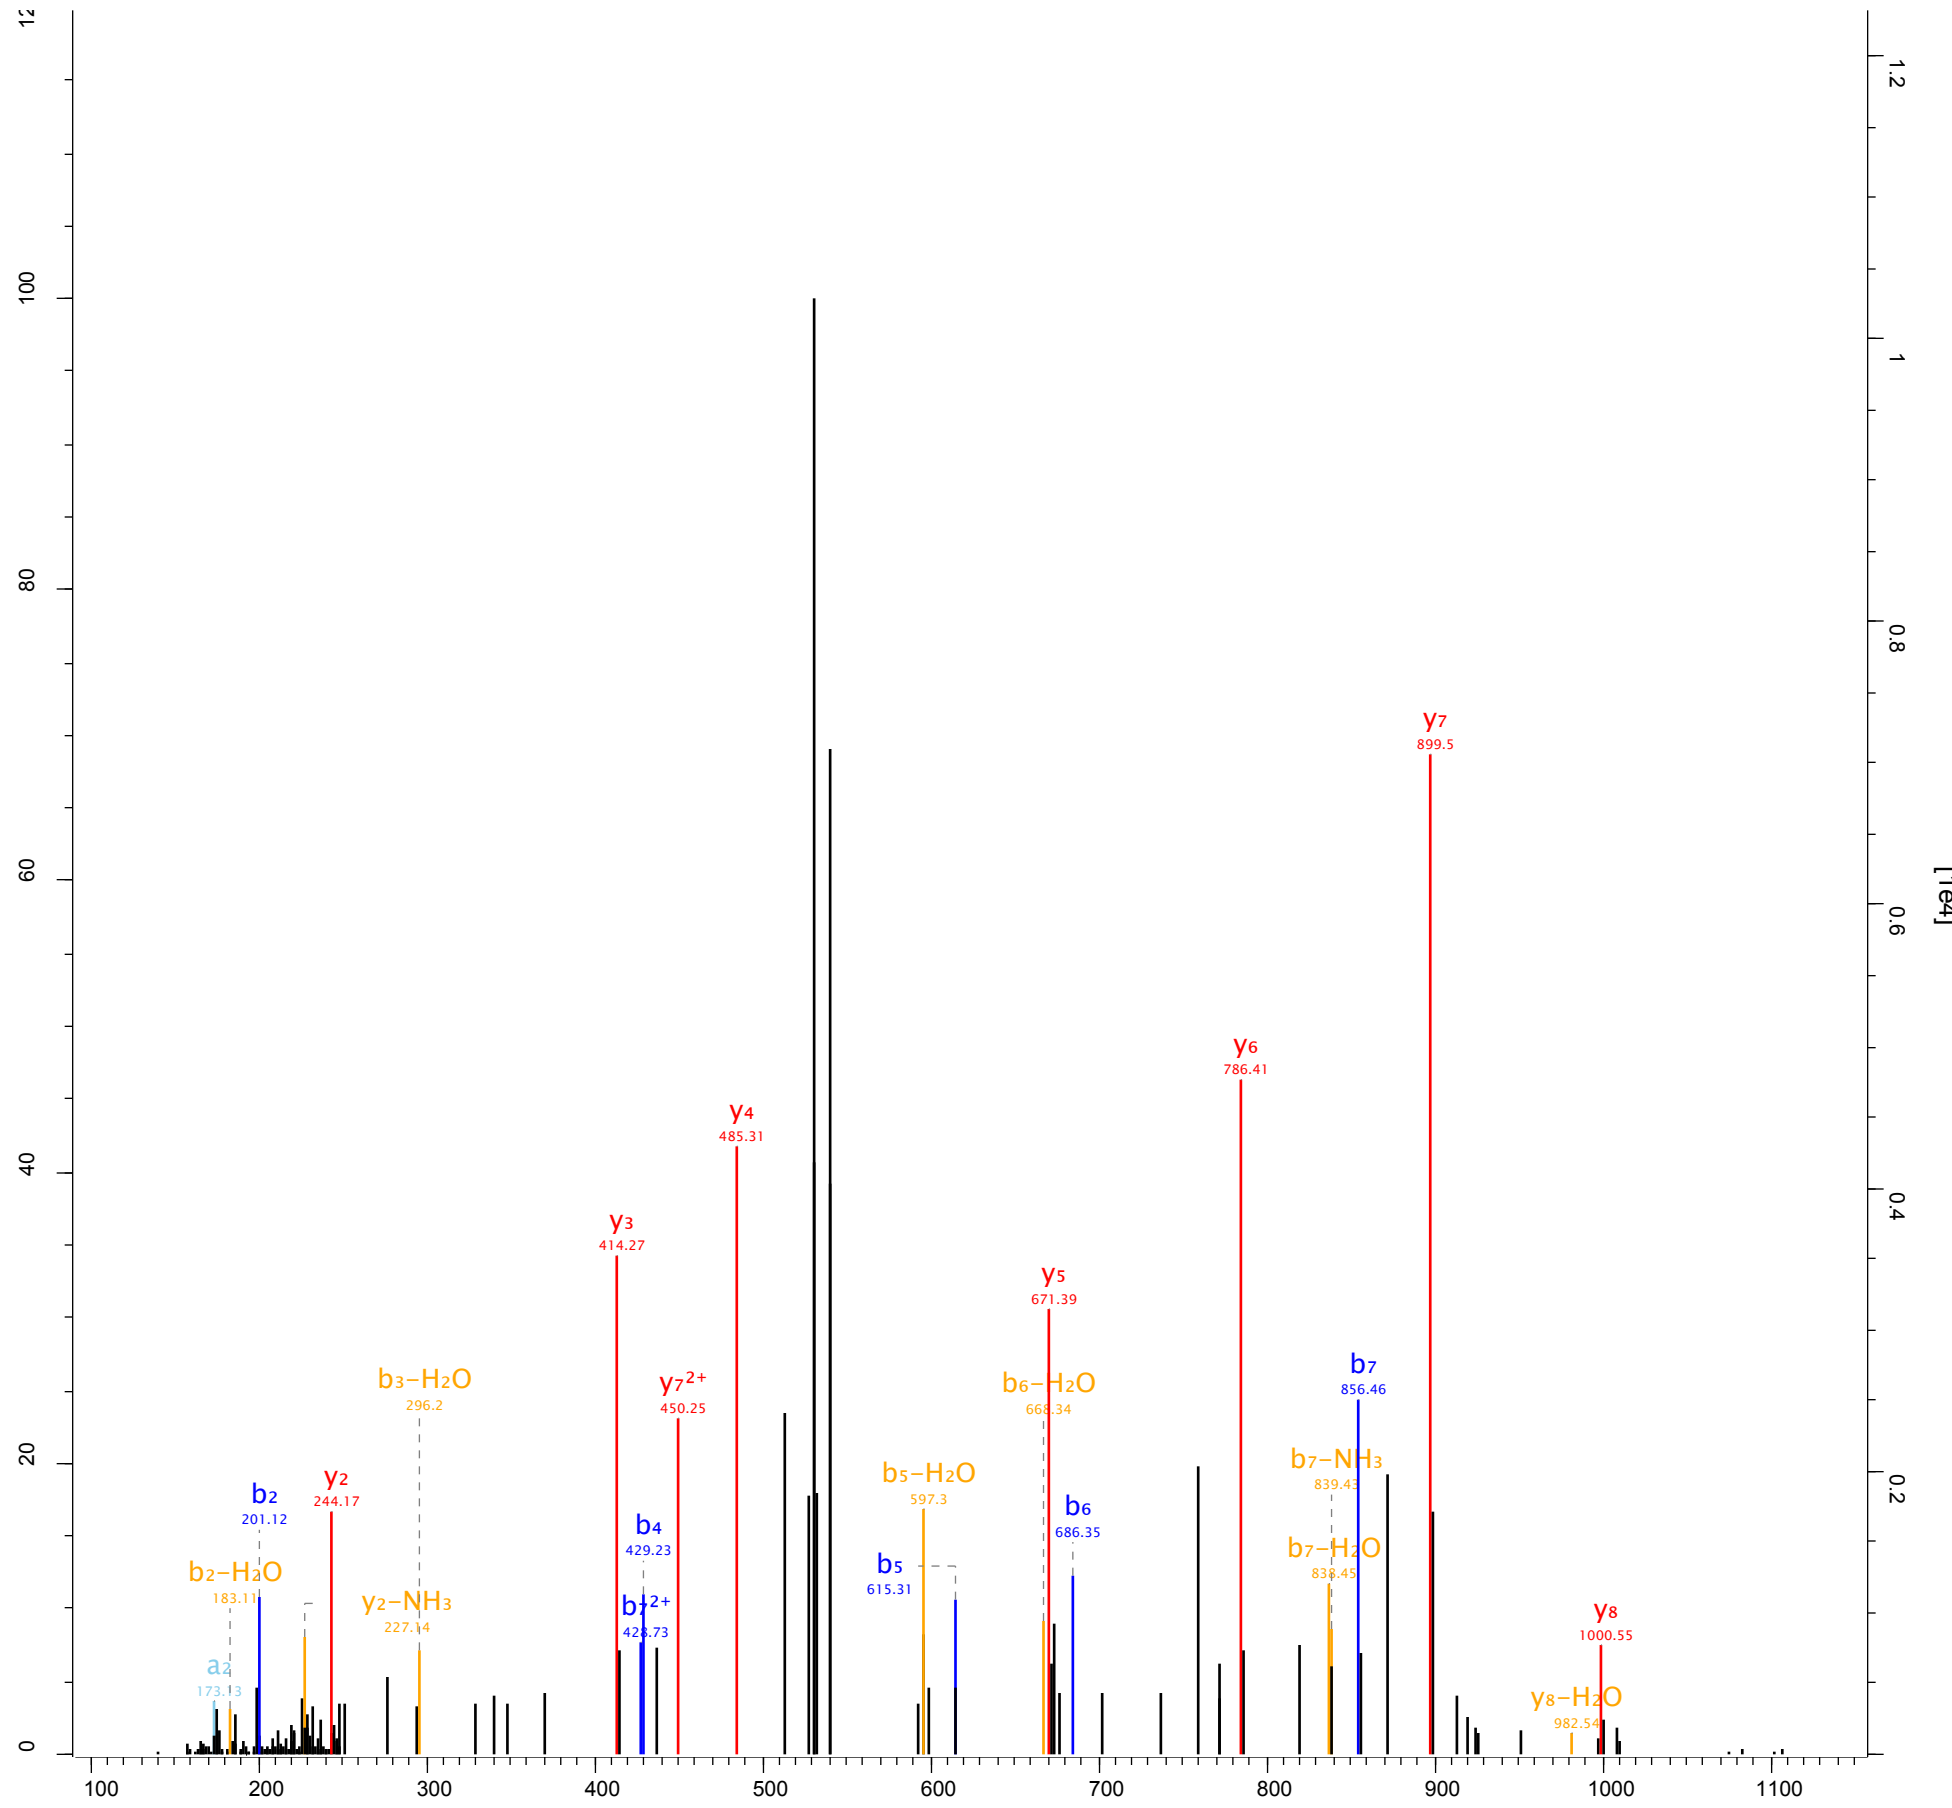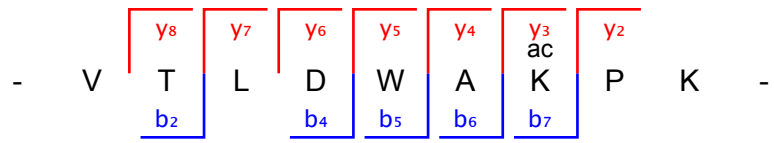

Raw file 050813\_SCW\_II\_29\_22\_5 Scan 18904 Method ITMS; CID Score 105.52 m/z 492.32 Gene names Hspd1

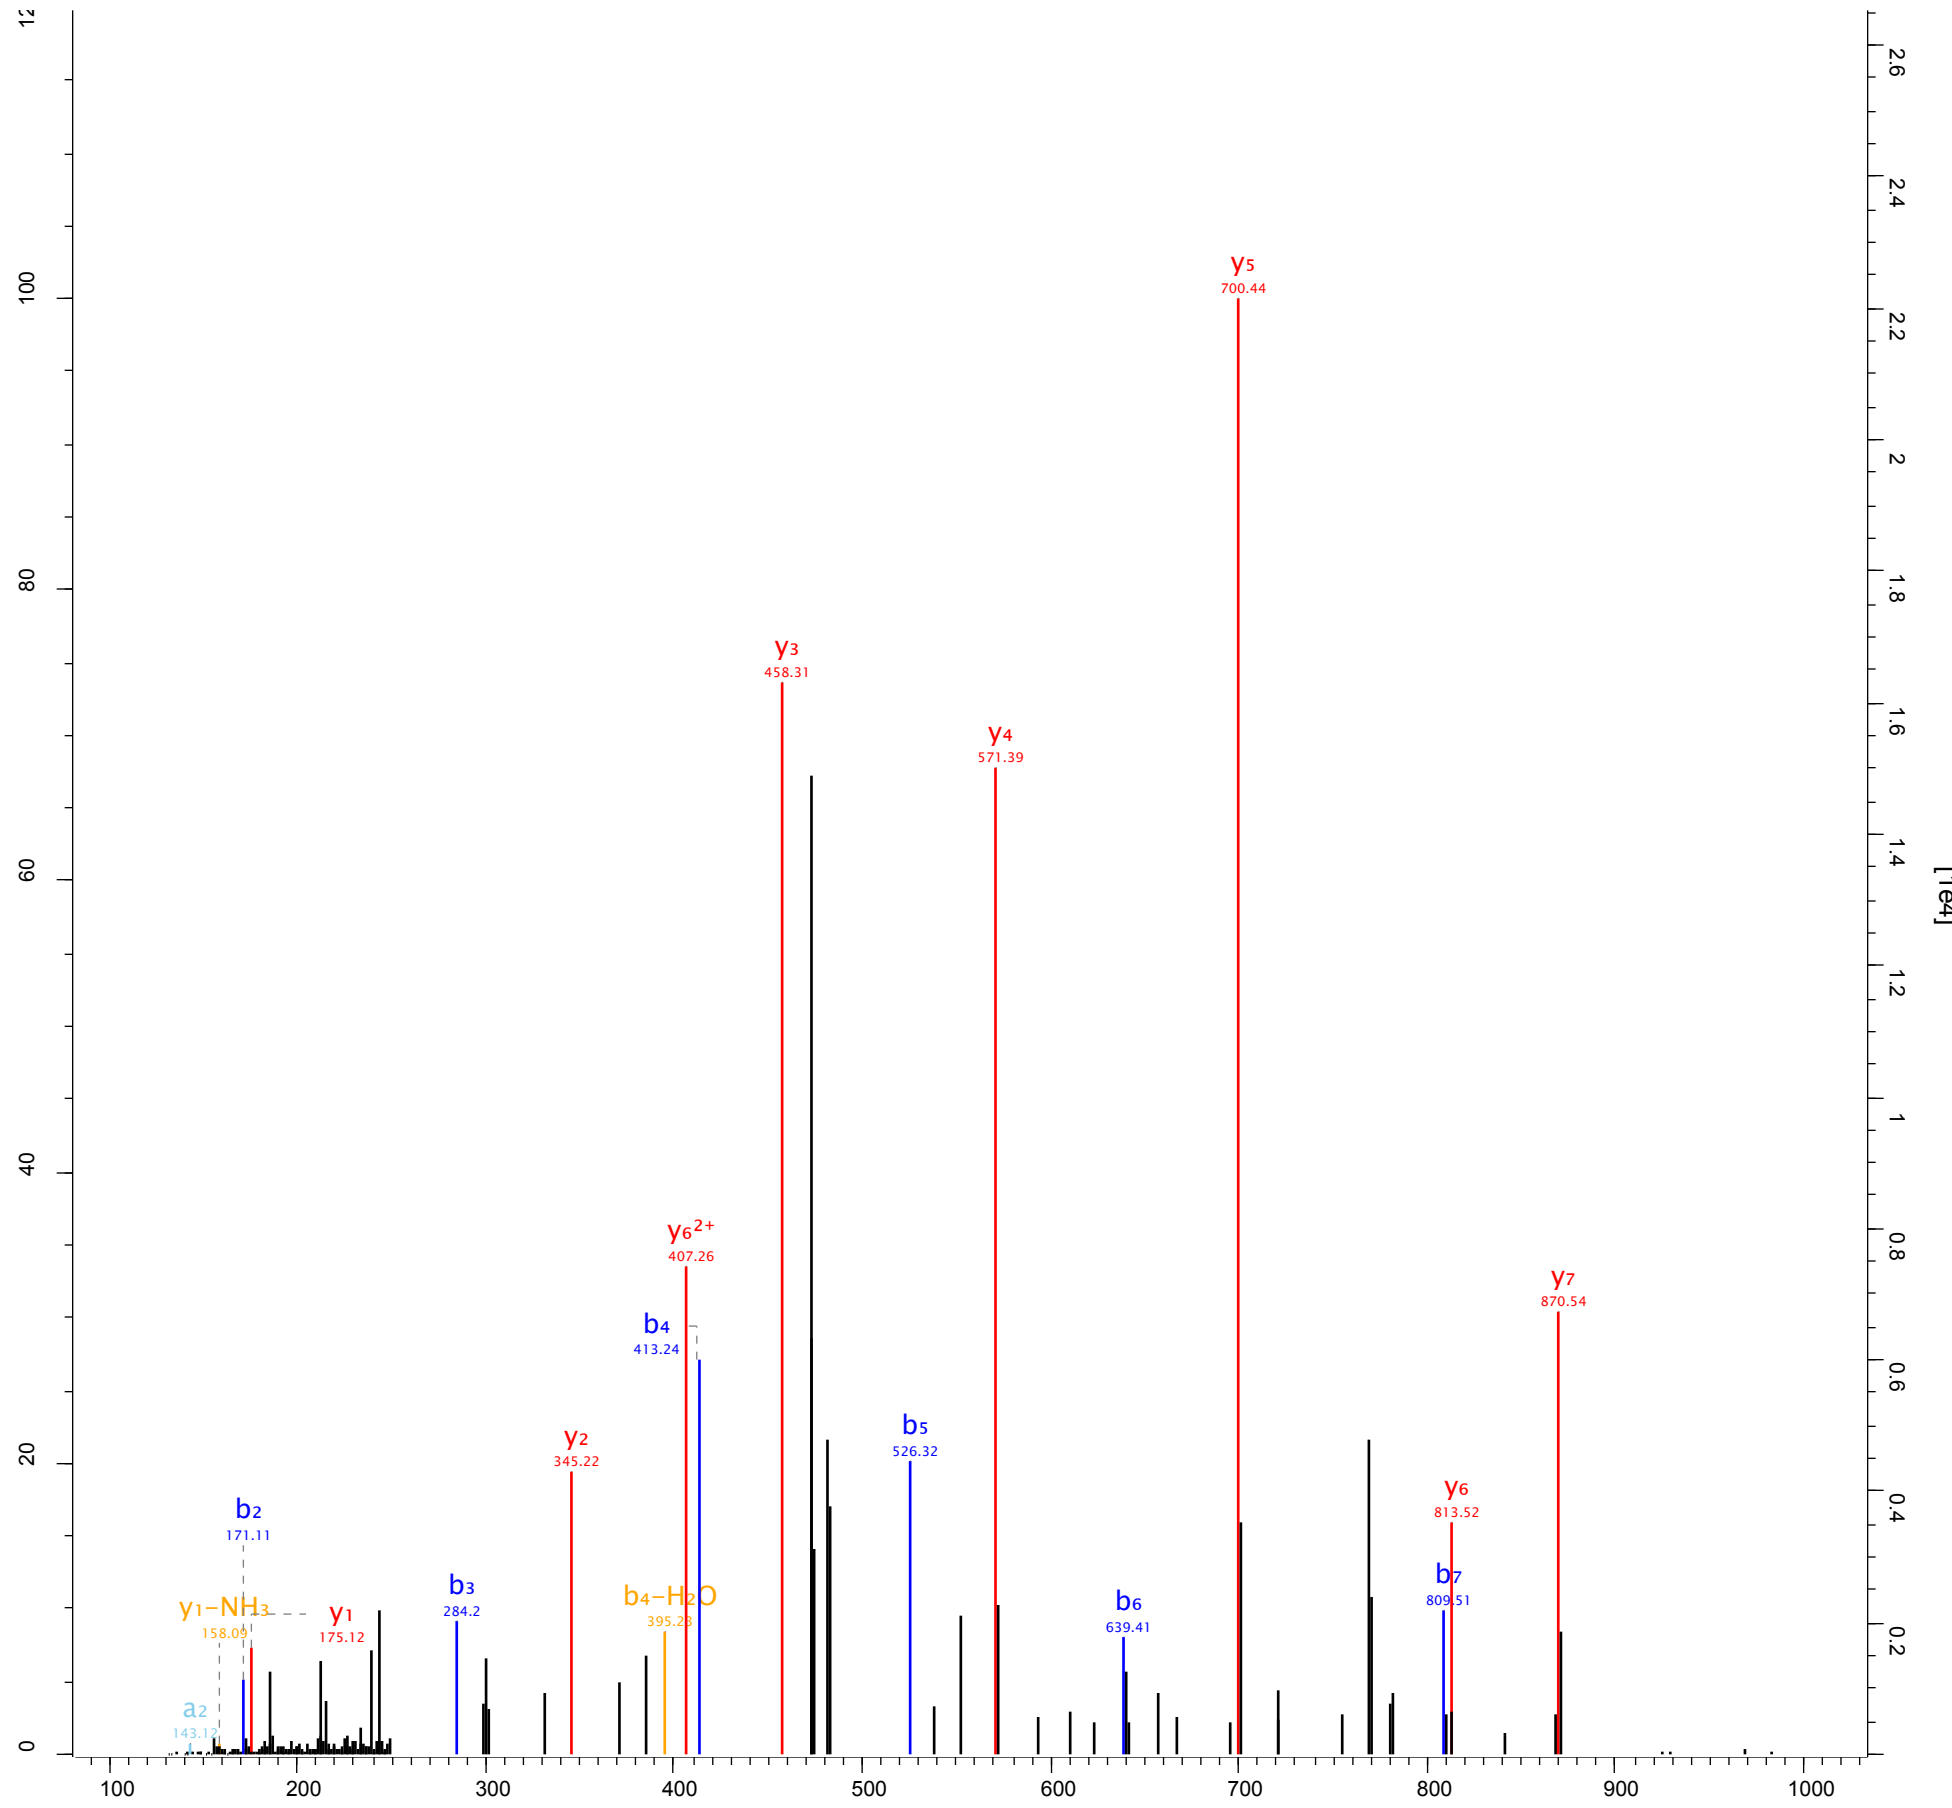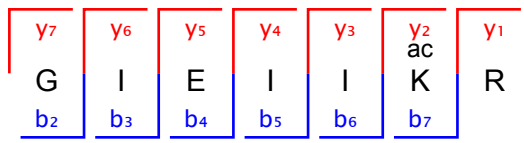

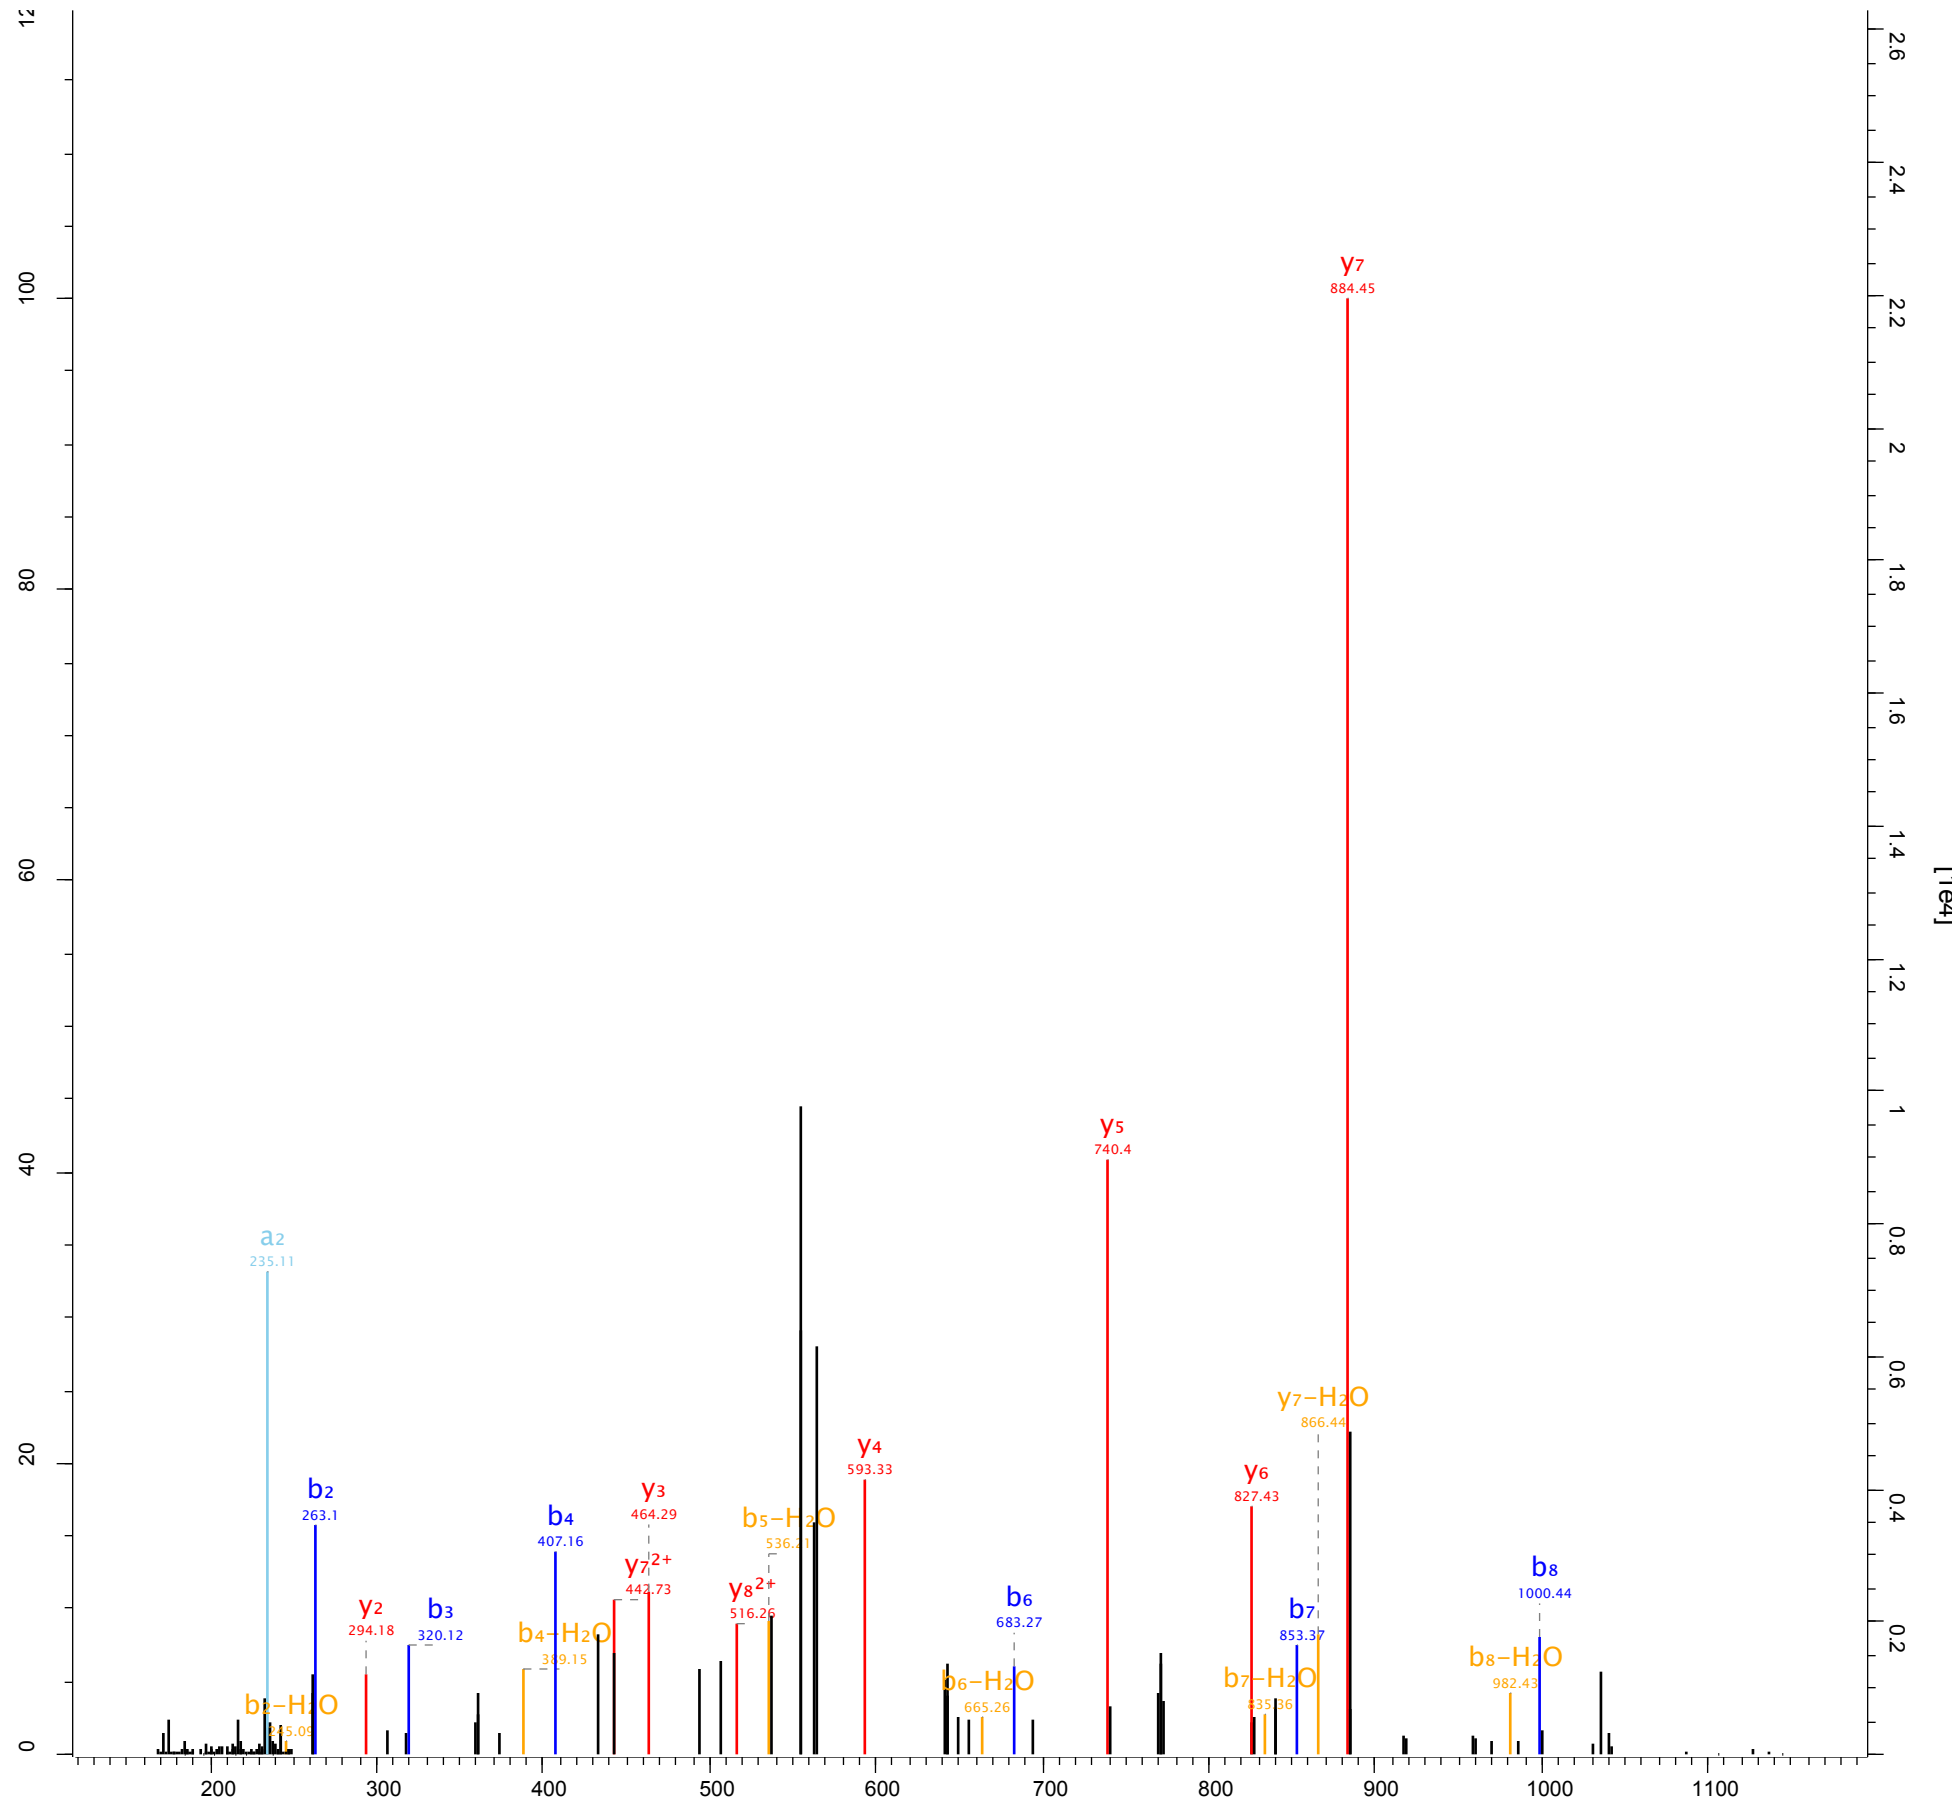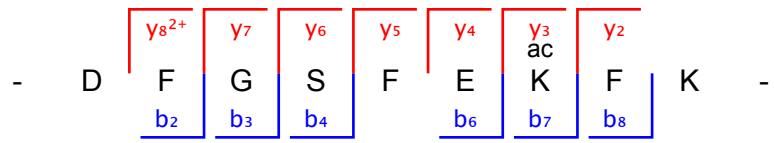

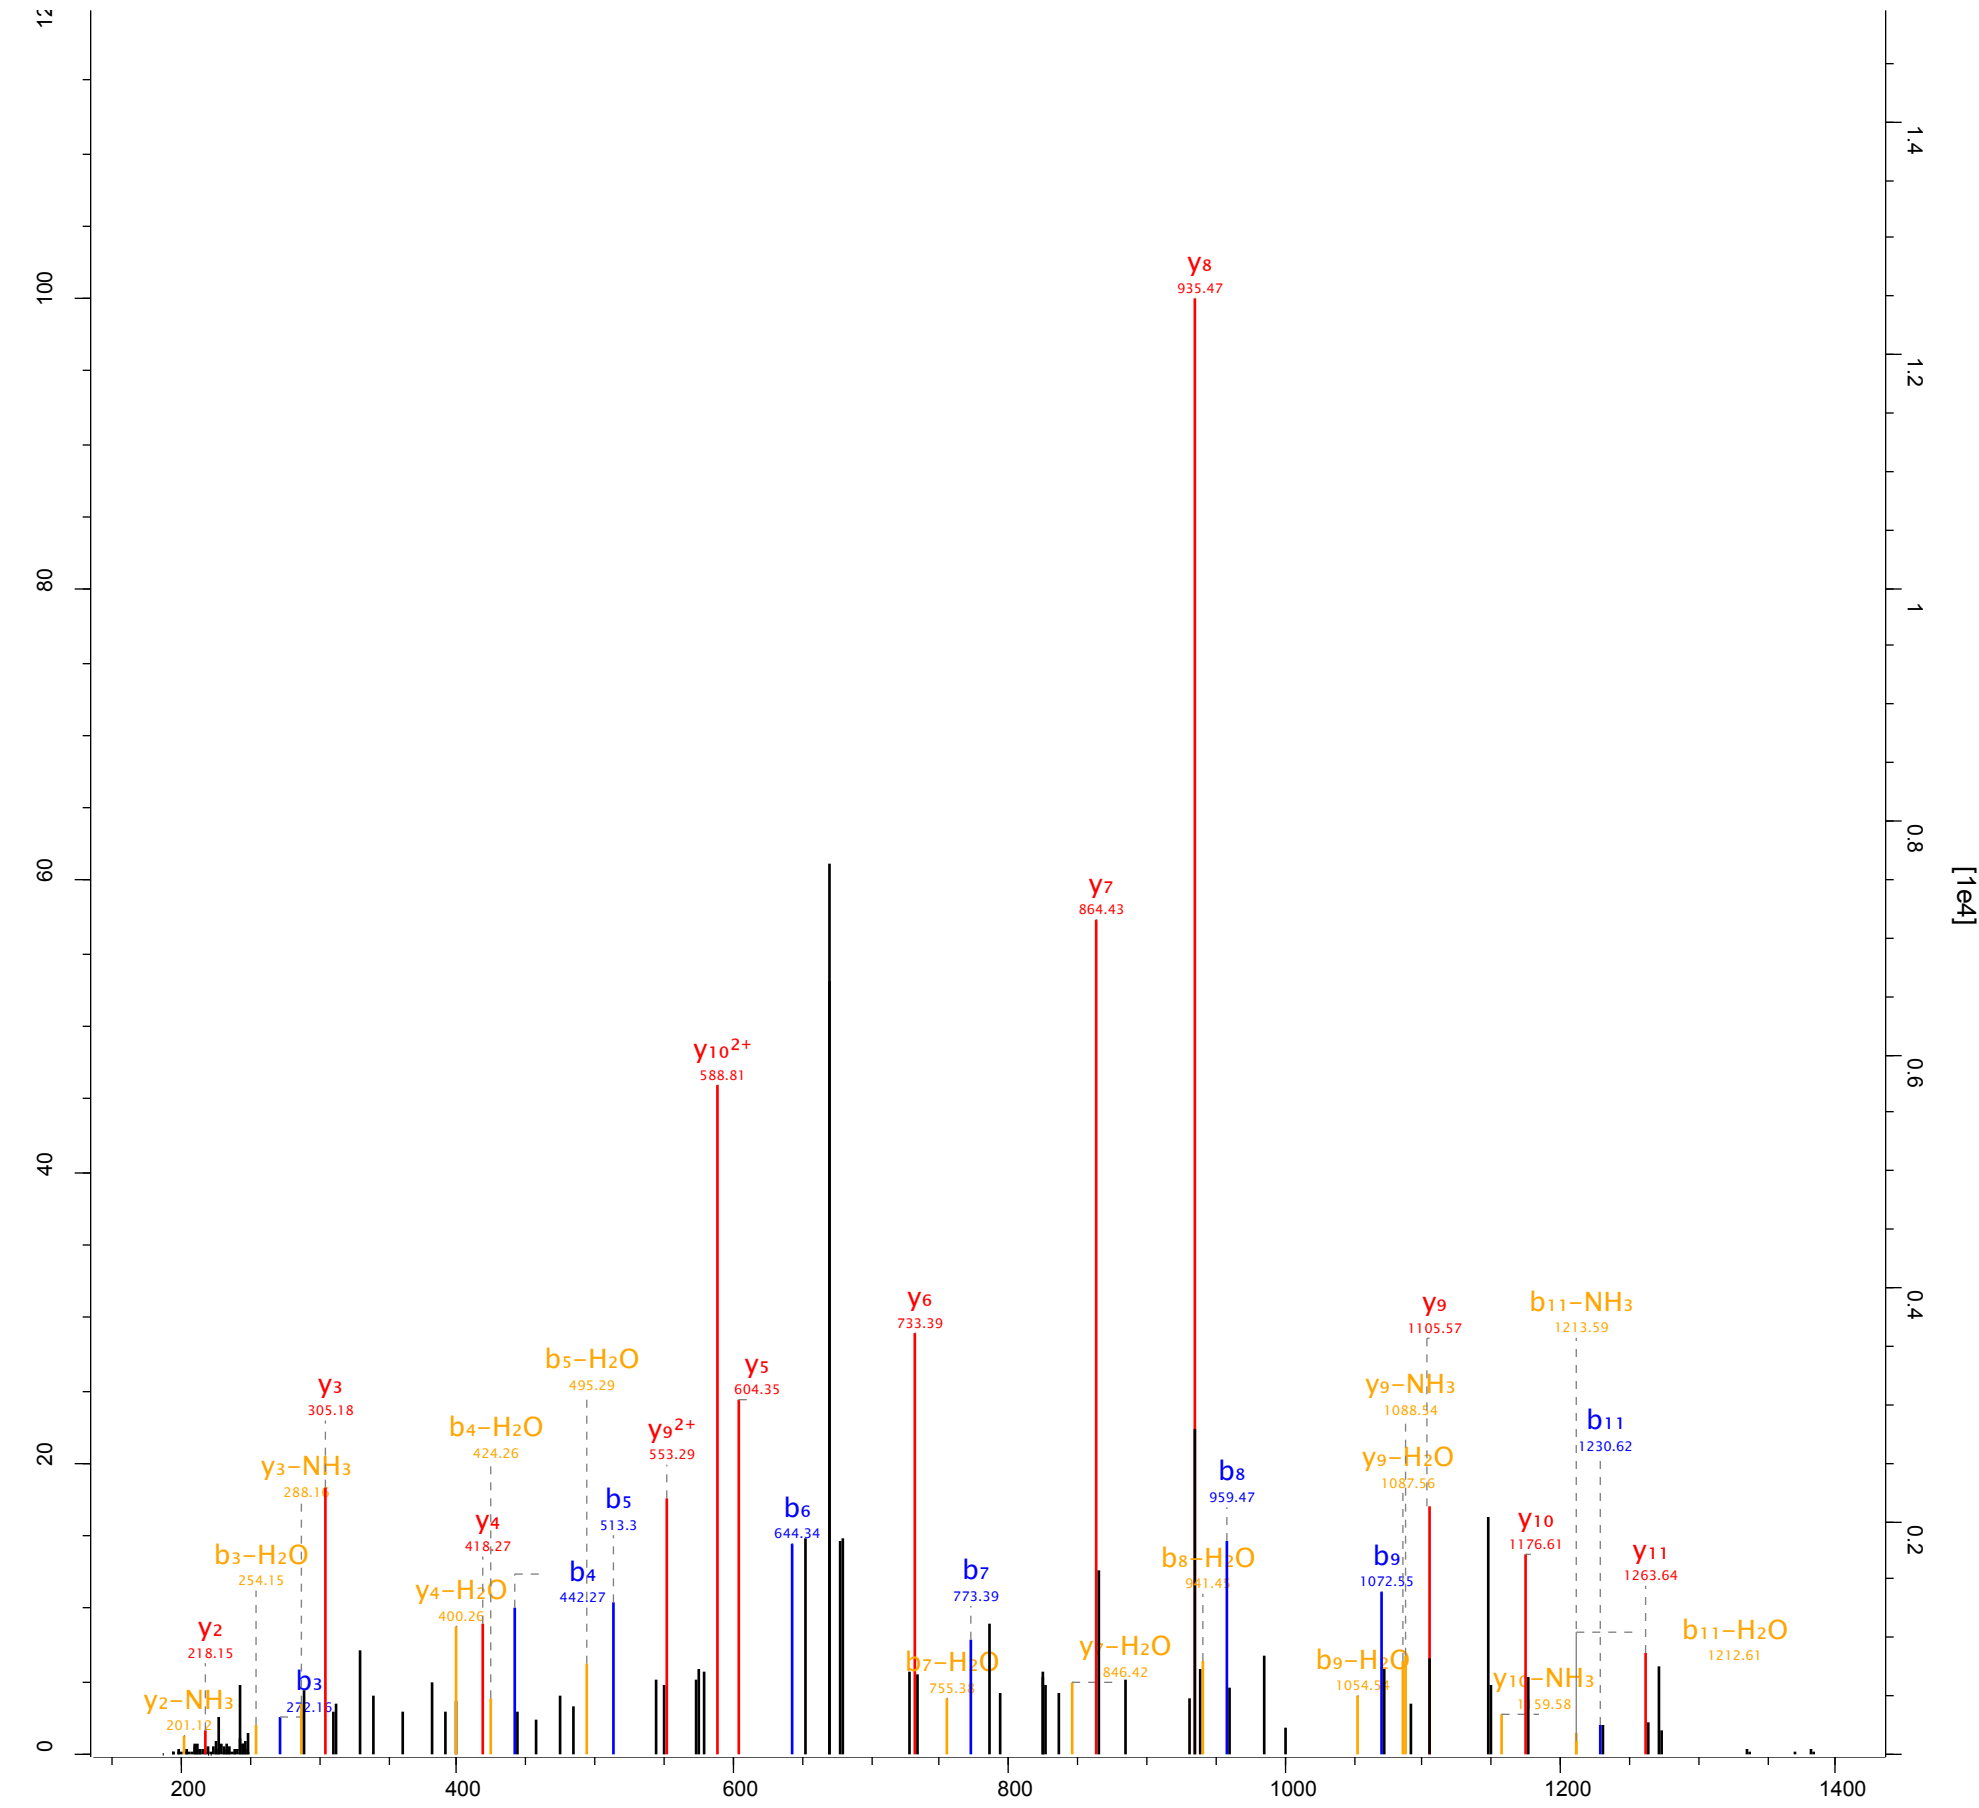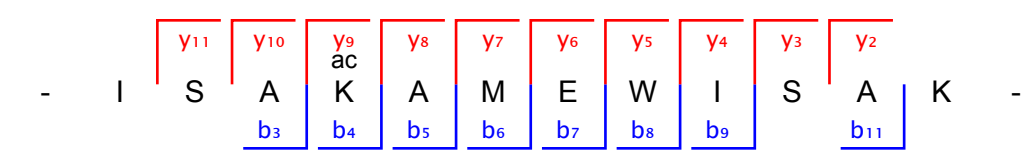



Raw file  
050813\_SCW\_II\_29\_22\_5

Scan Method Score m/z Gene names  
21042 ITMS; CID 199.33 731.86 Tpi1

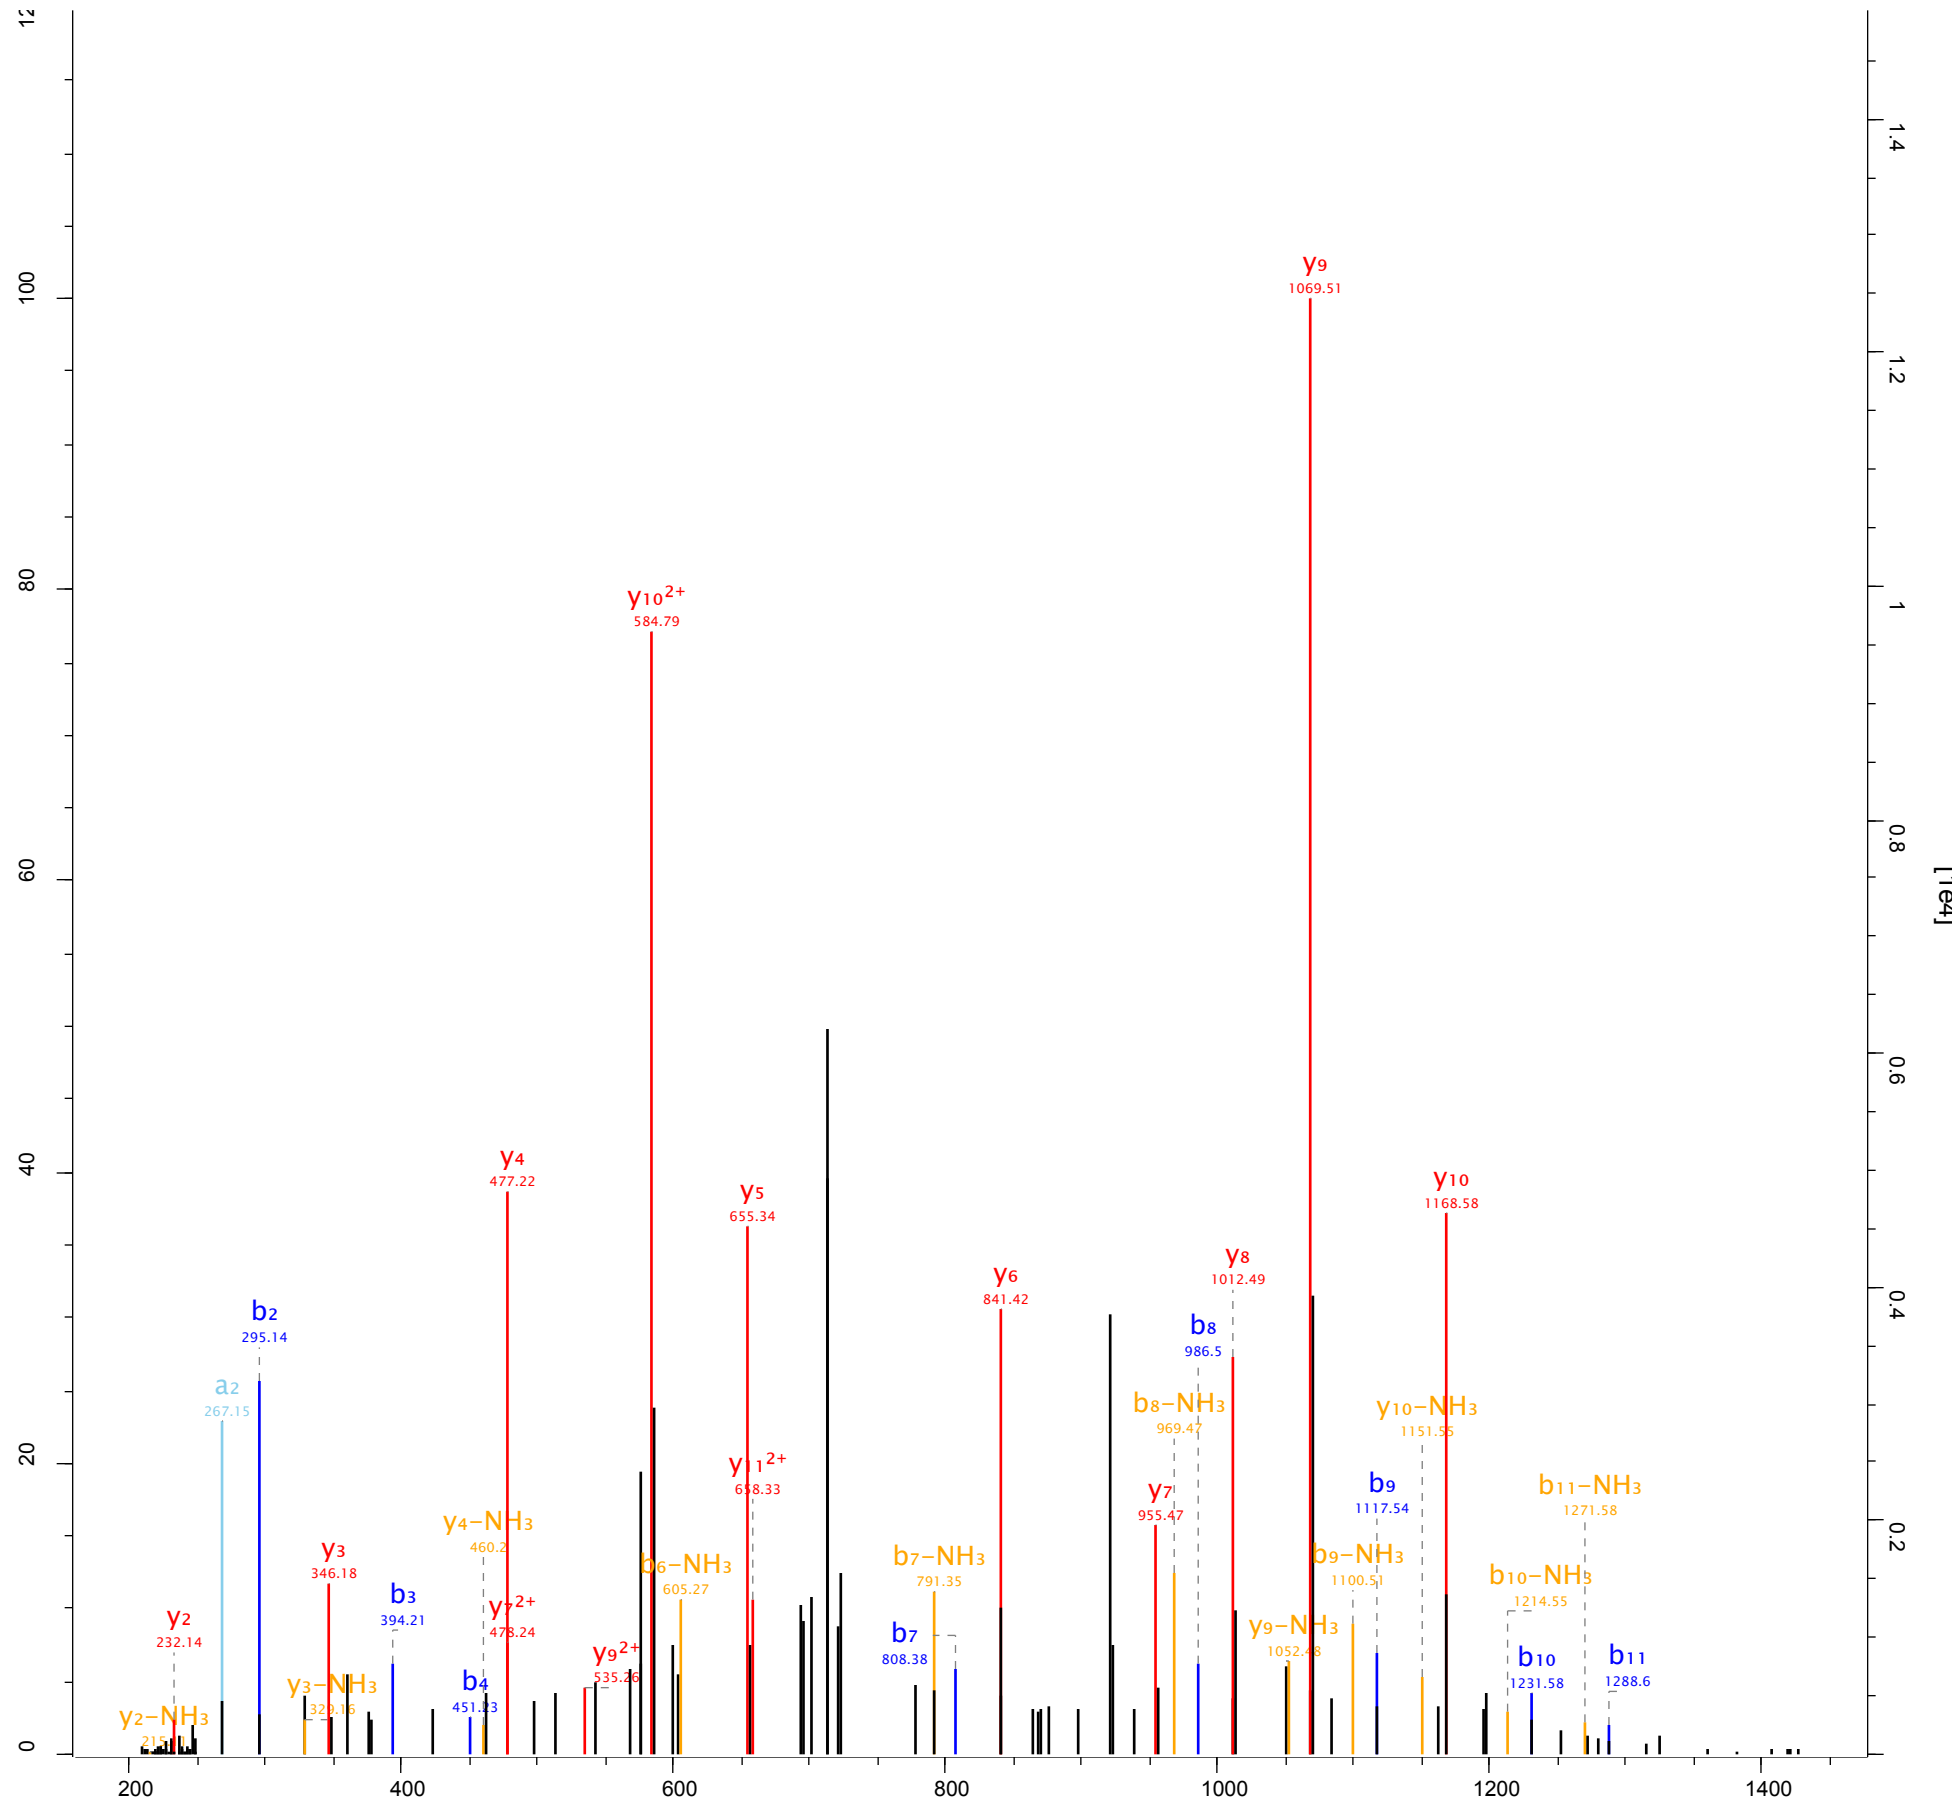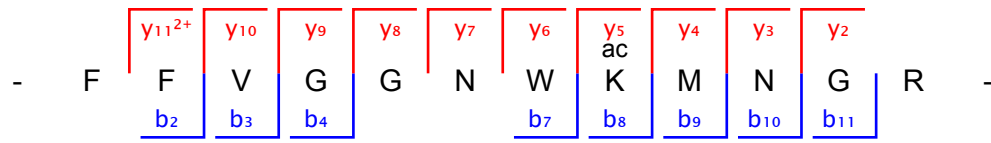

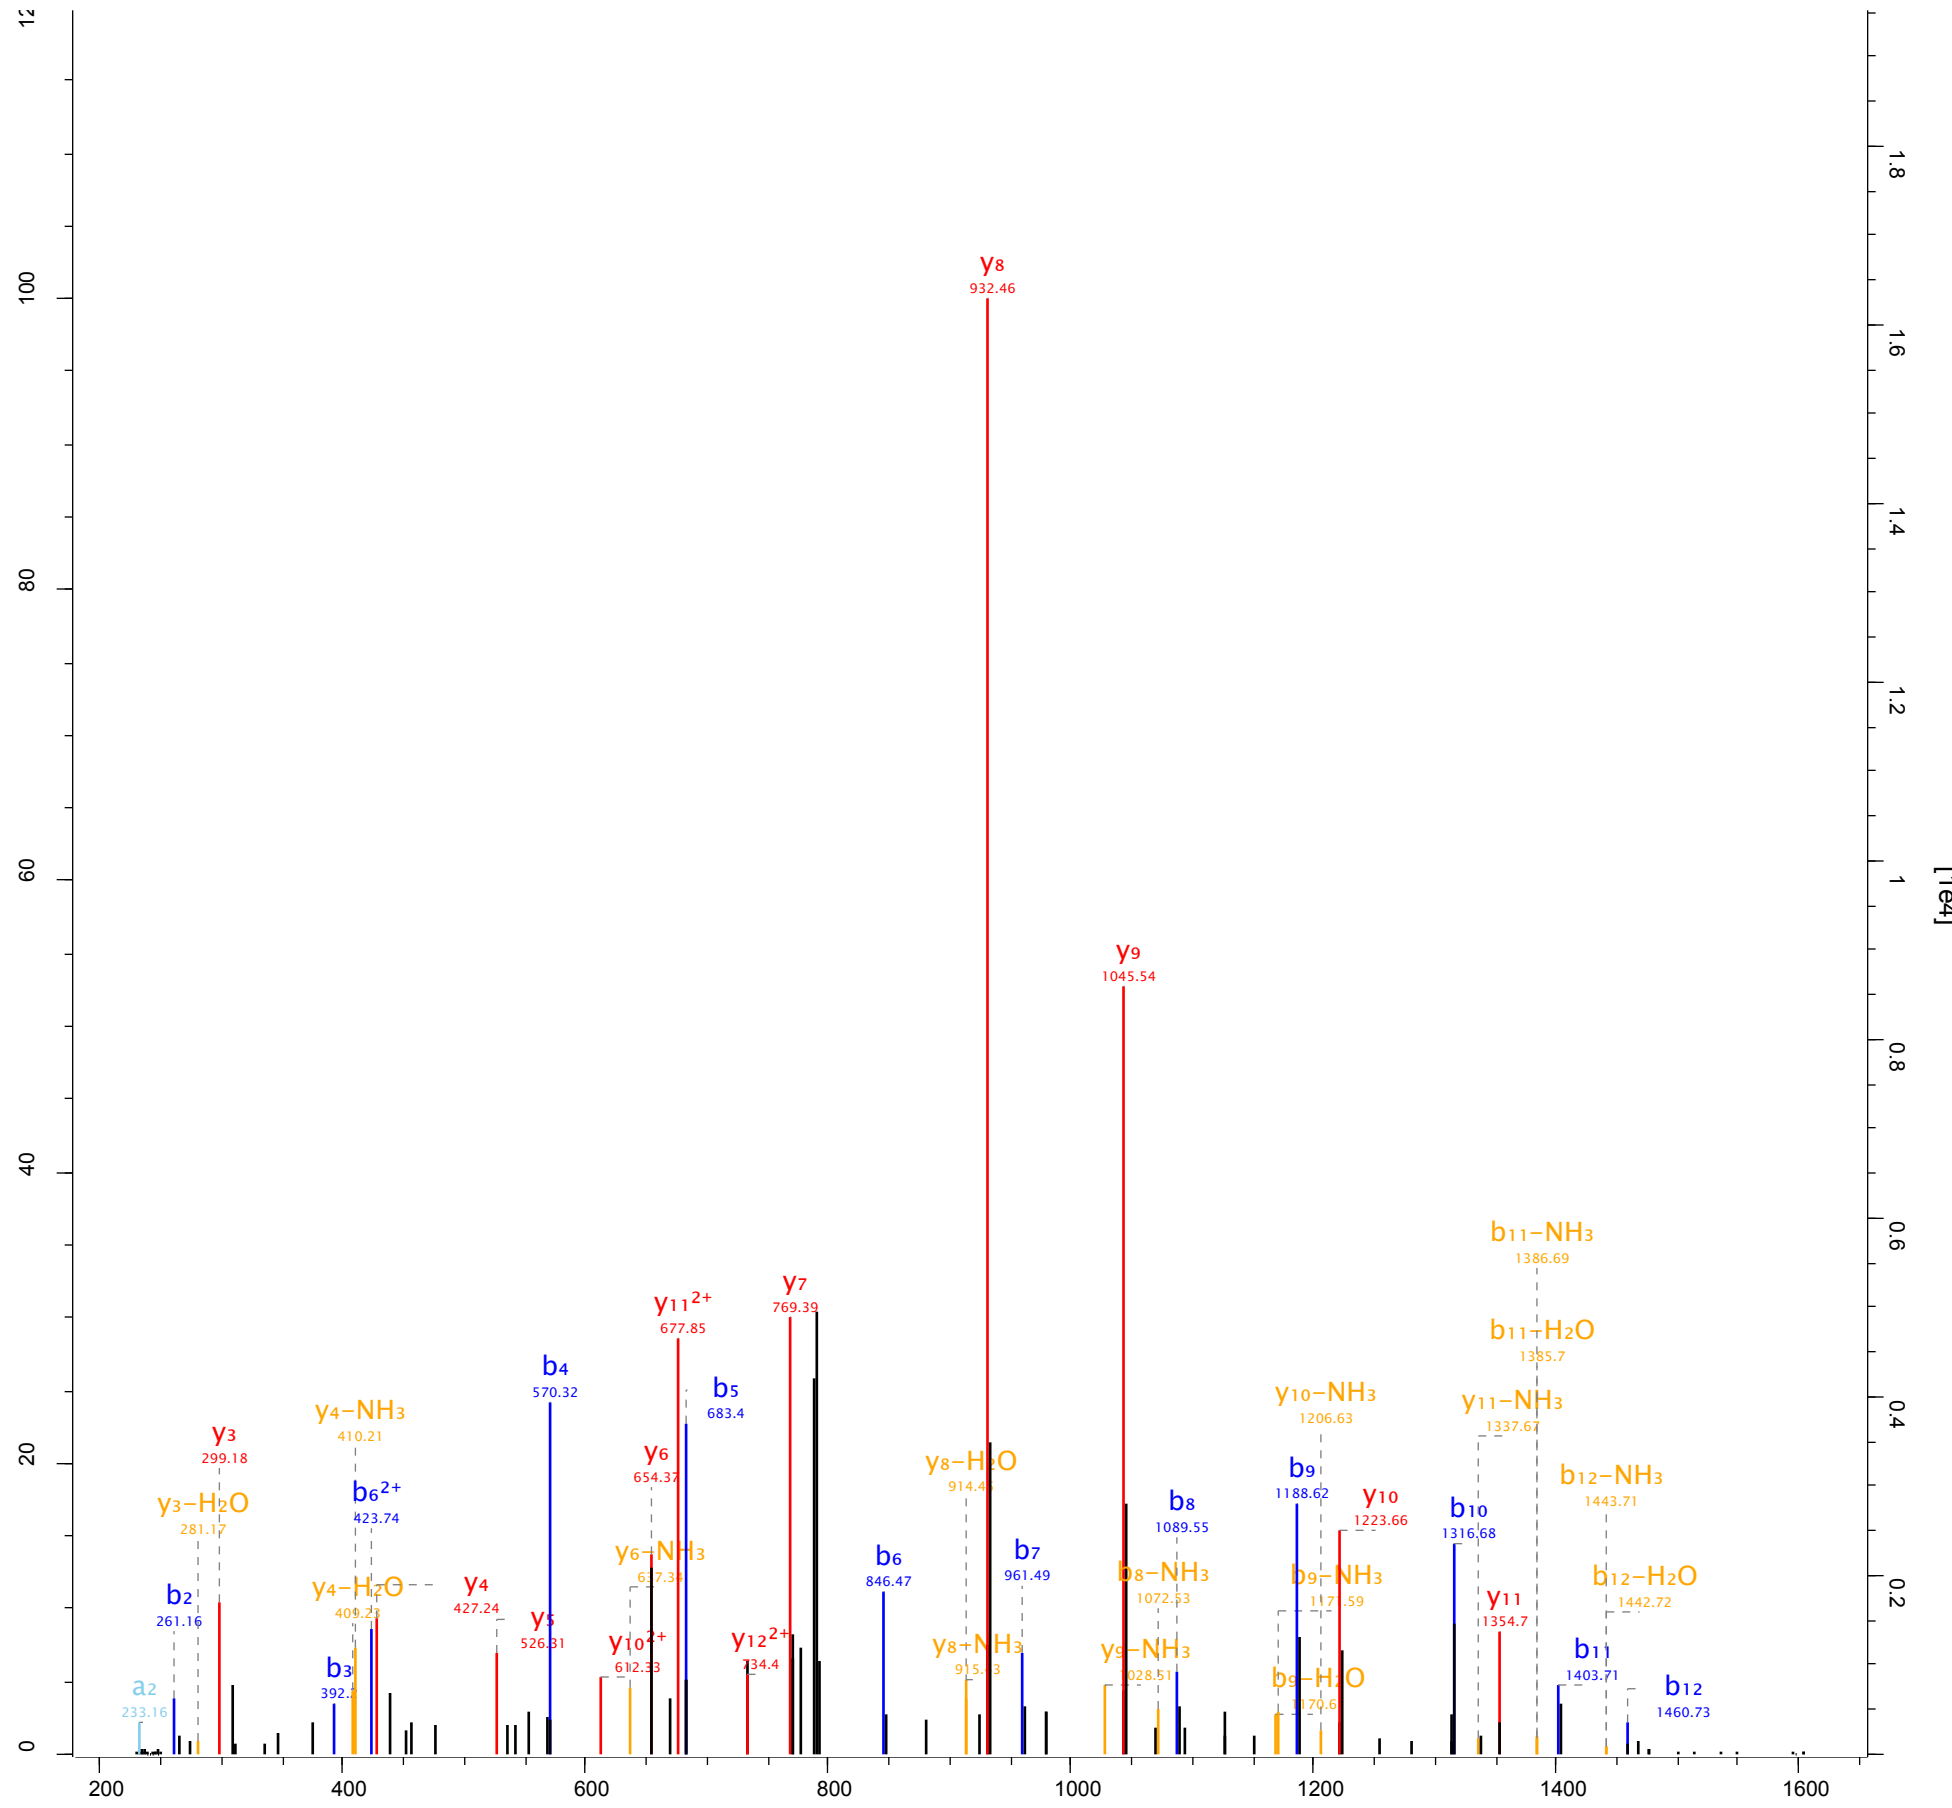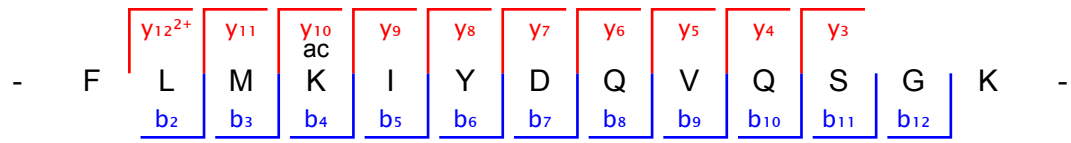

Raw file 050813\_SCW\_II\_29\_22\_5 Scan 21420 Method ITMS; CID Score 204.52 m/z 853.98 Gene names Hadha

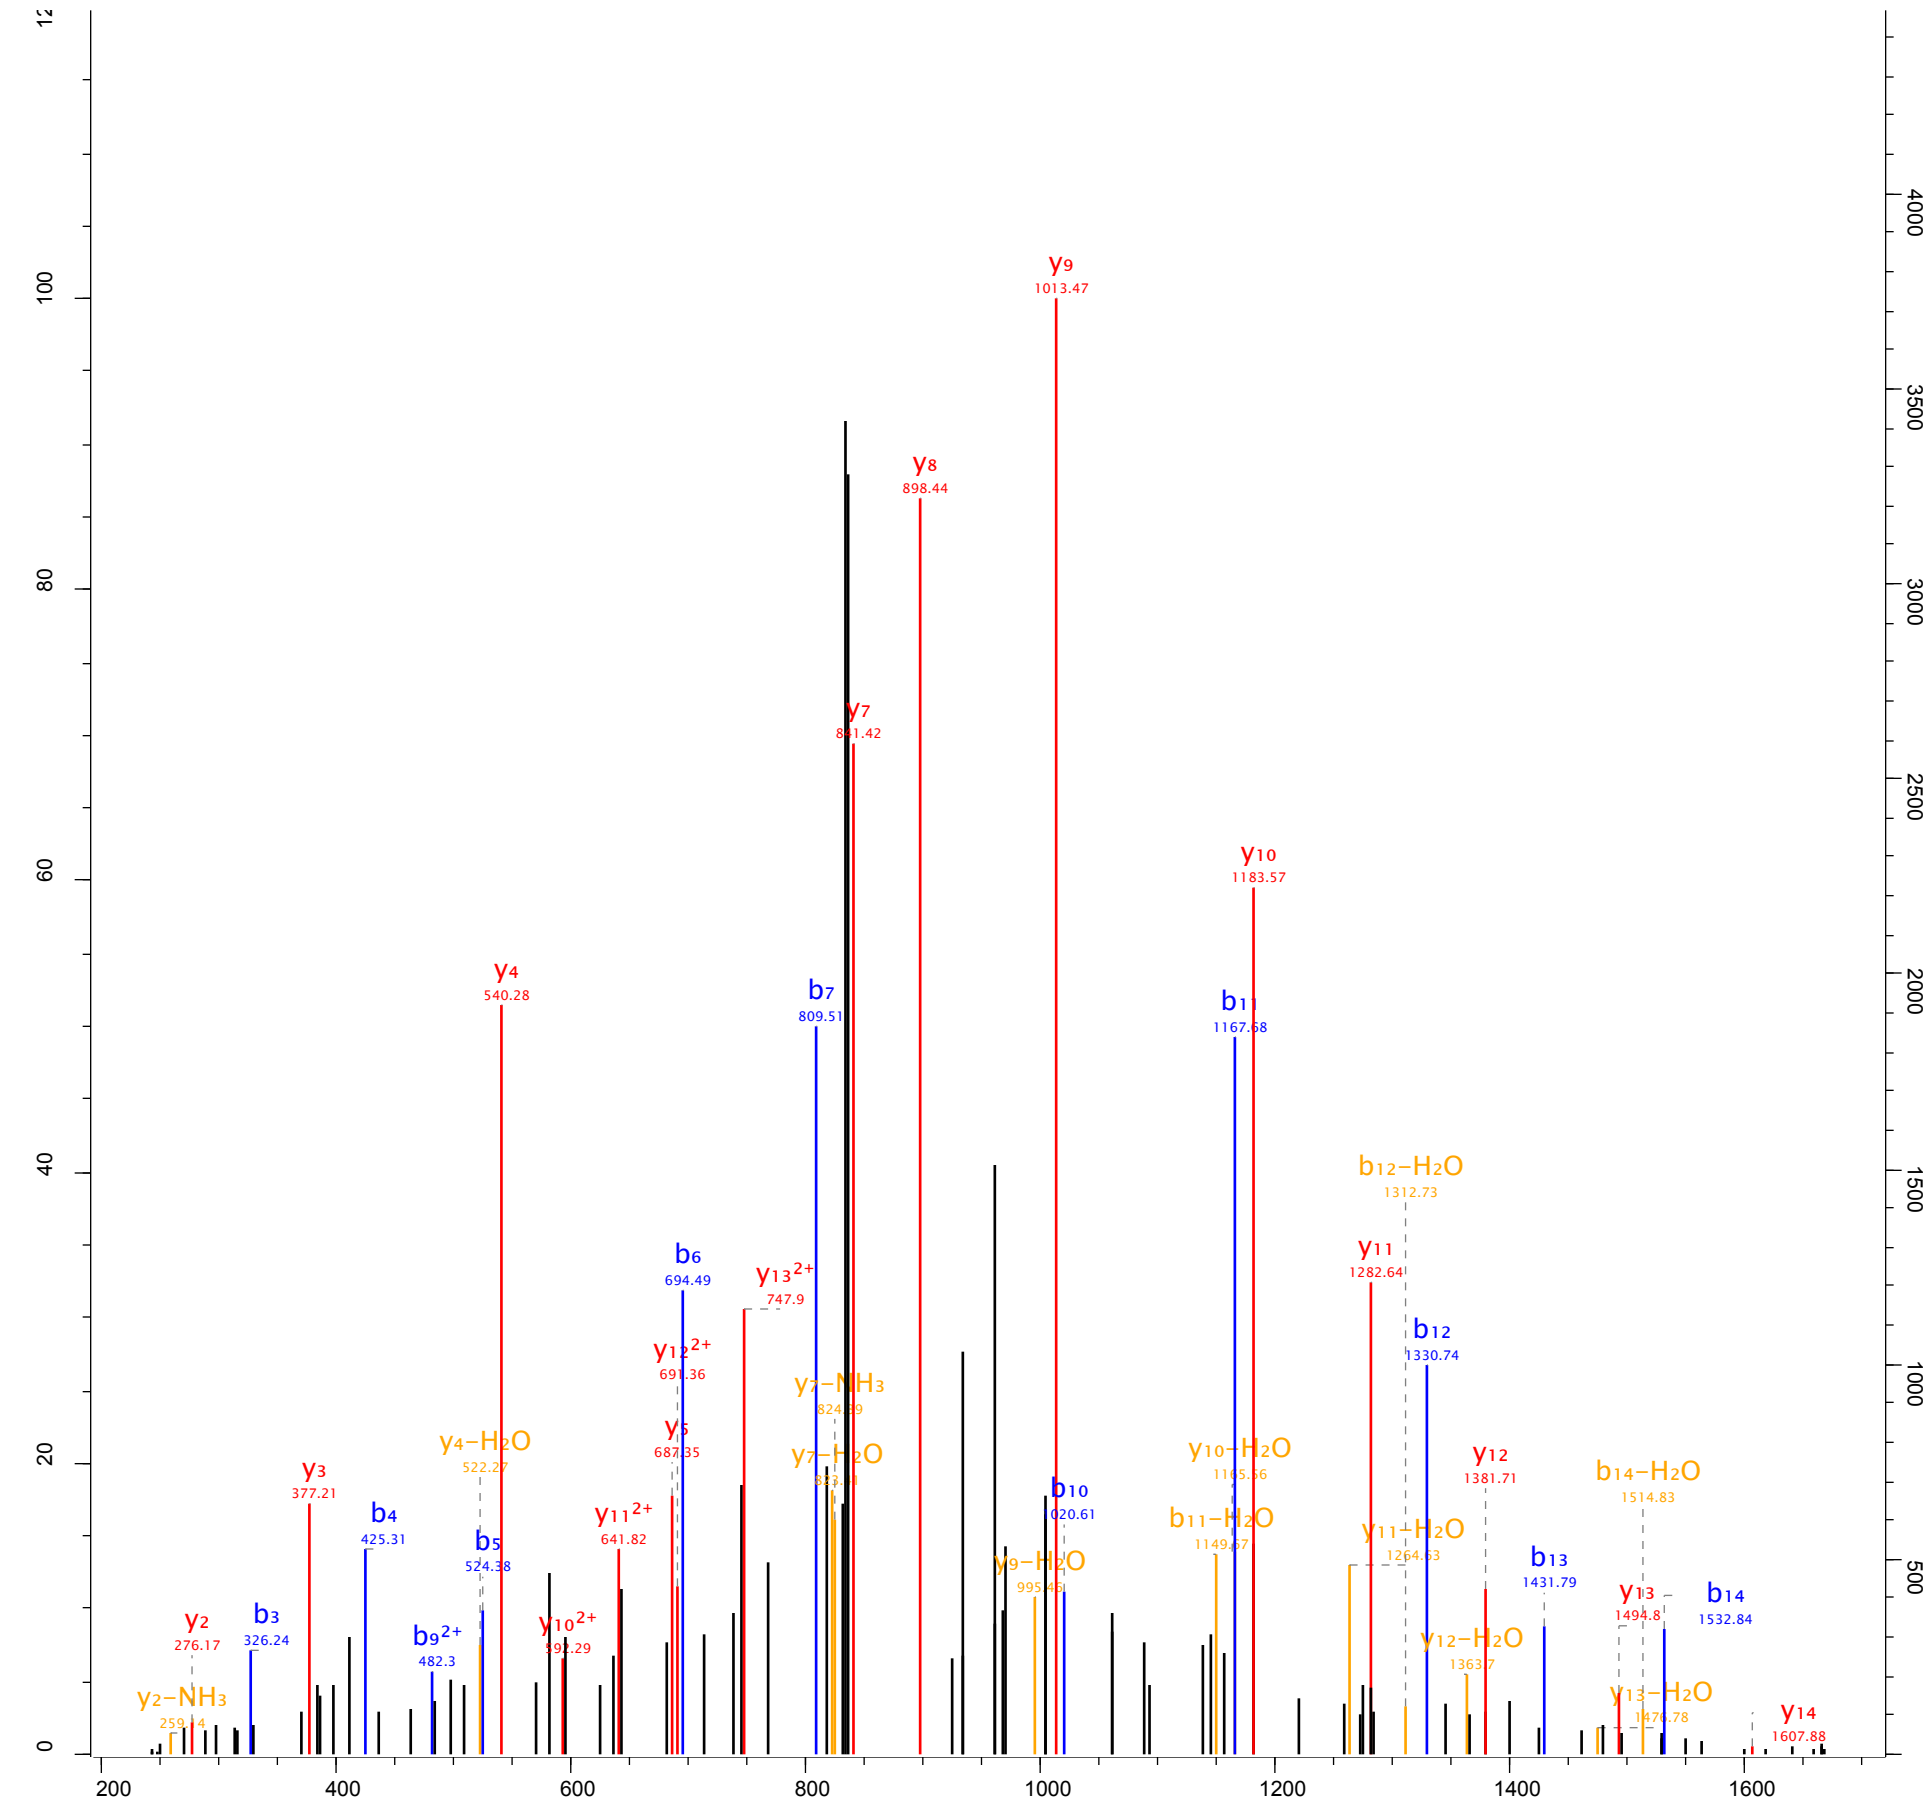

- V I I V V K D G P G F Y T T R -

y<sub>14</sub>
y<sub>13</sub>
y<sub>12</sub>
y<sub>11</sub>
y<sub>10</sub>
ac
y<sub>9</sub>
y<sub>8</sub>
y<sub>7</sub>
y<sub>5</sub>
y<sub>4</sub>
y<sub>3</sub>
y<sub>2</sub>

b<sub>3</sub>
b<sub>4</sub>
b<sub>5</sub>
b<sub>6</sub>
b<sub>7</sub>
b<sub>9</sub><sup>2+</sup>
b<sub>10</sub>
b<sub>11</sub>
b<sub>12</sub>
b<sub>13</sub>
b<sub>14</sub>

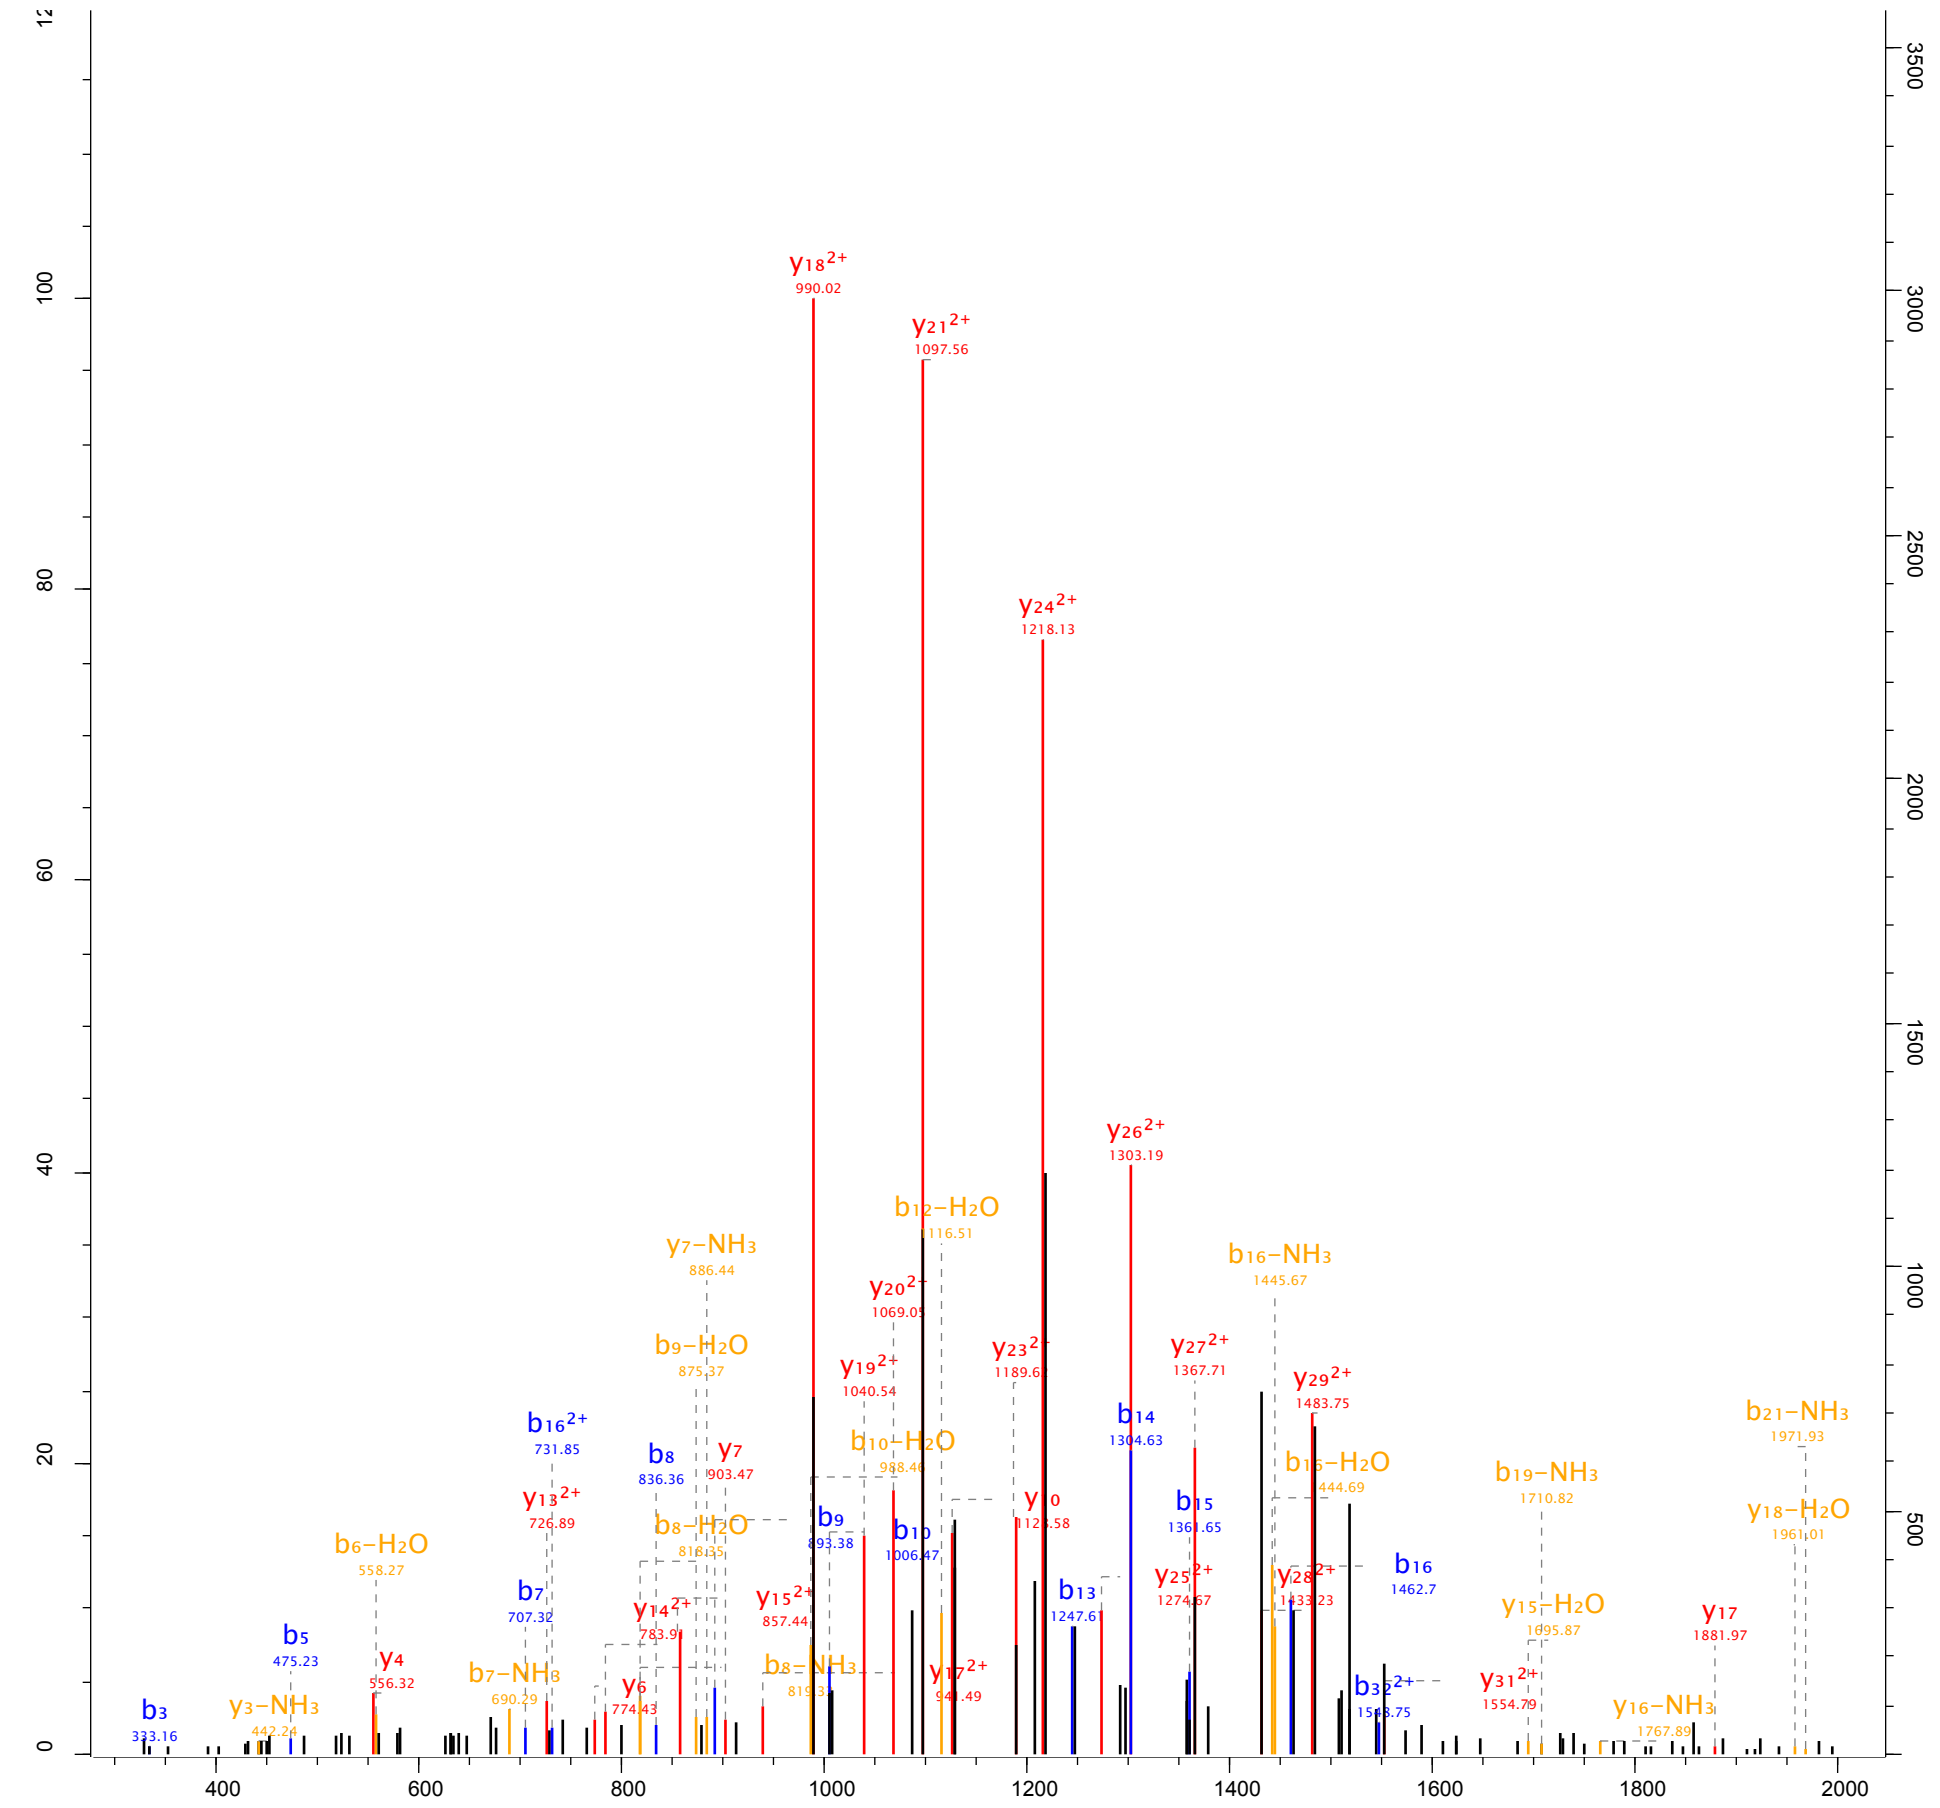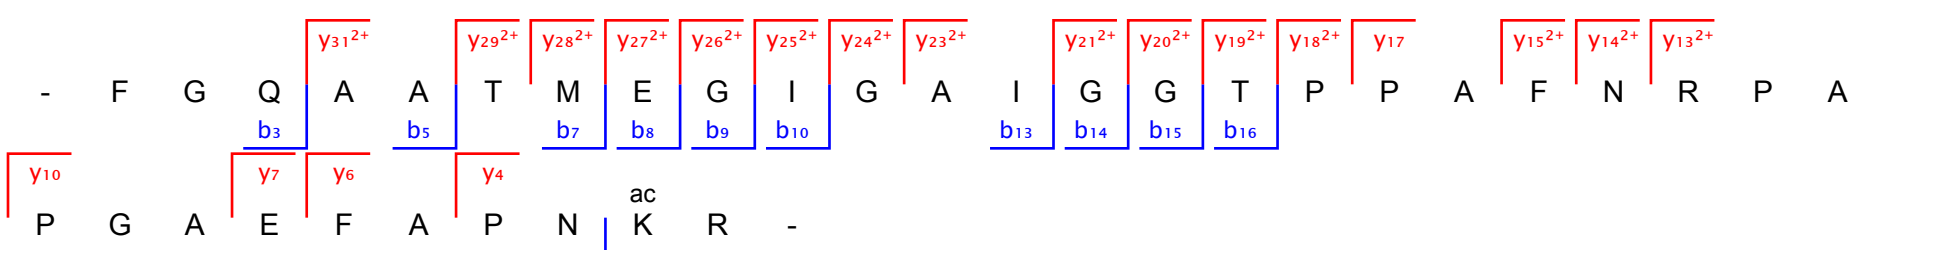

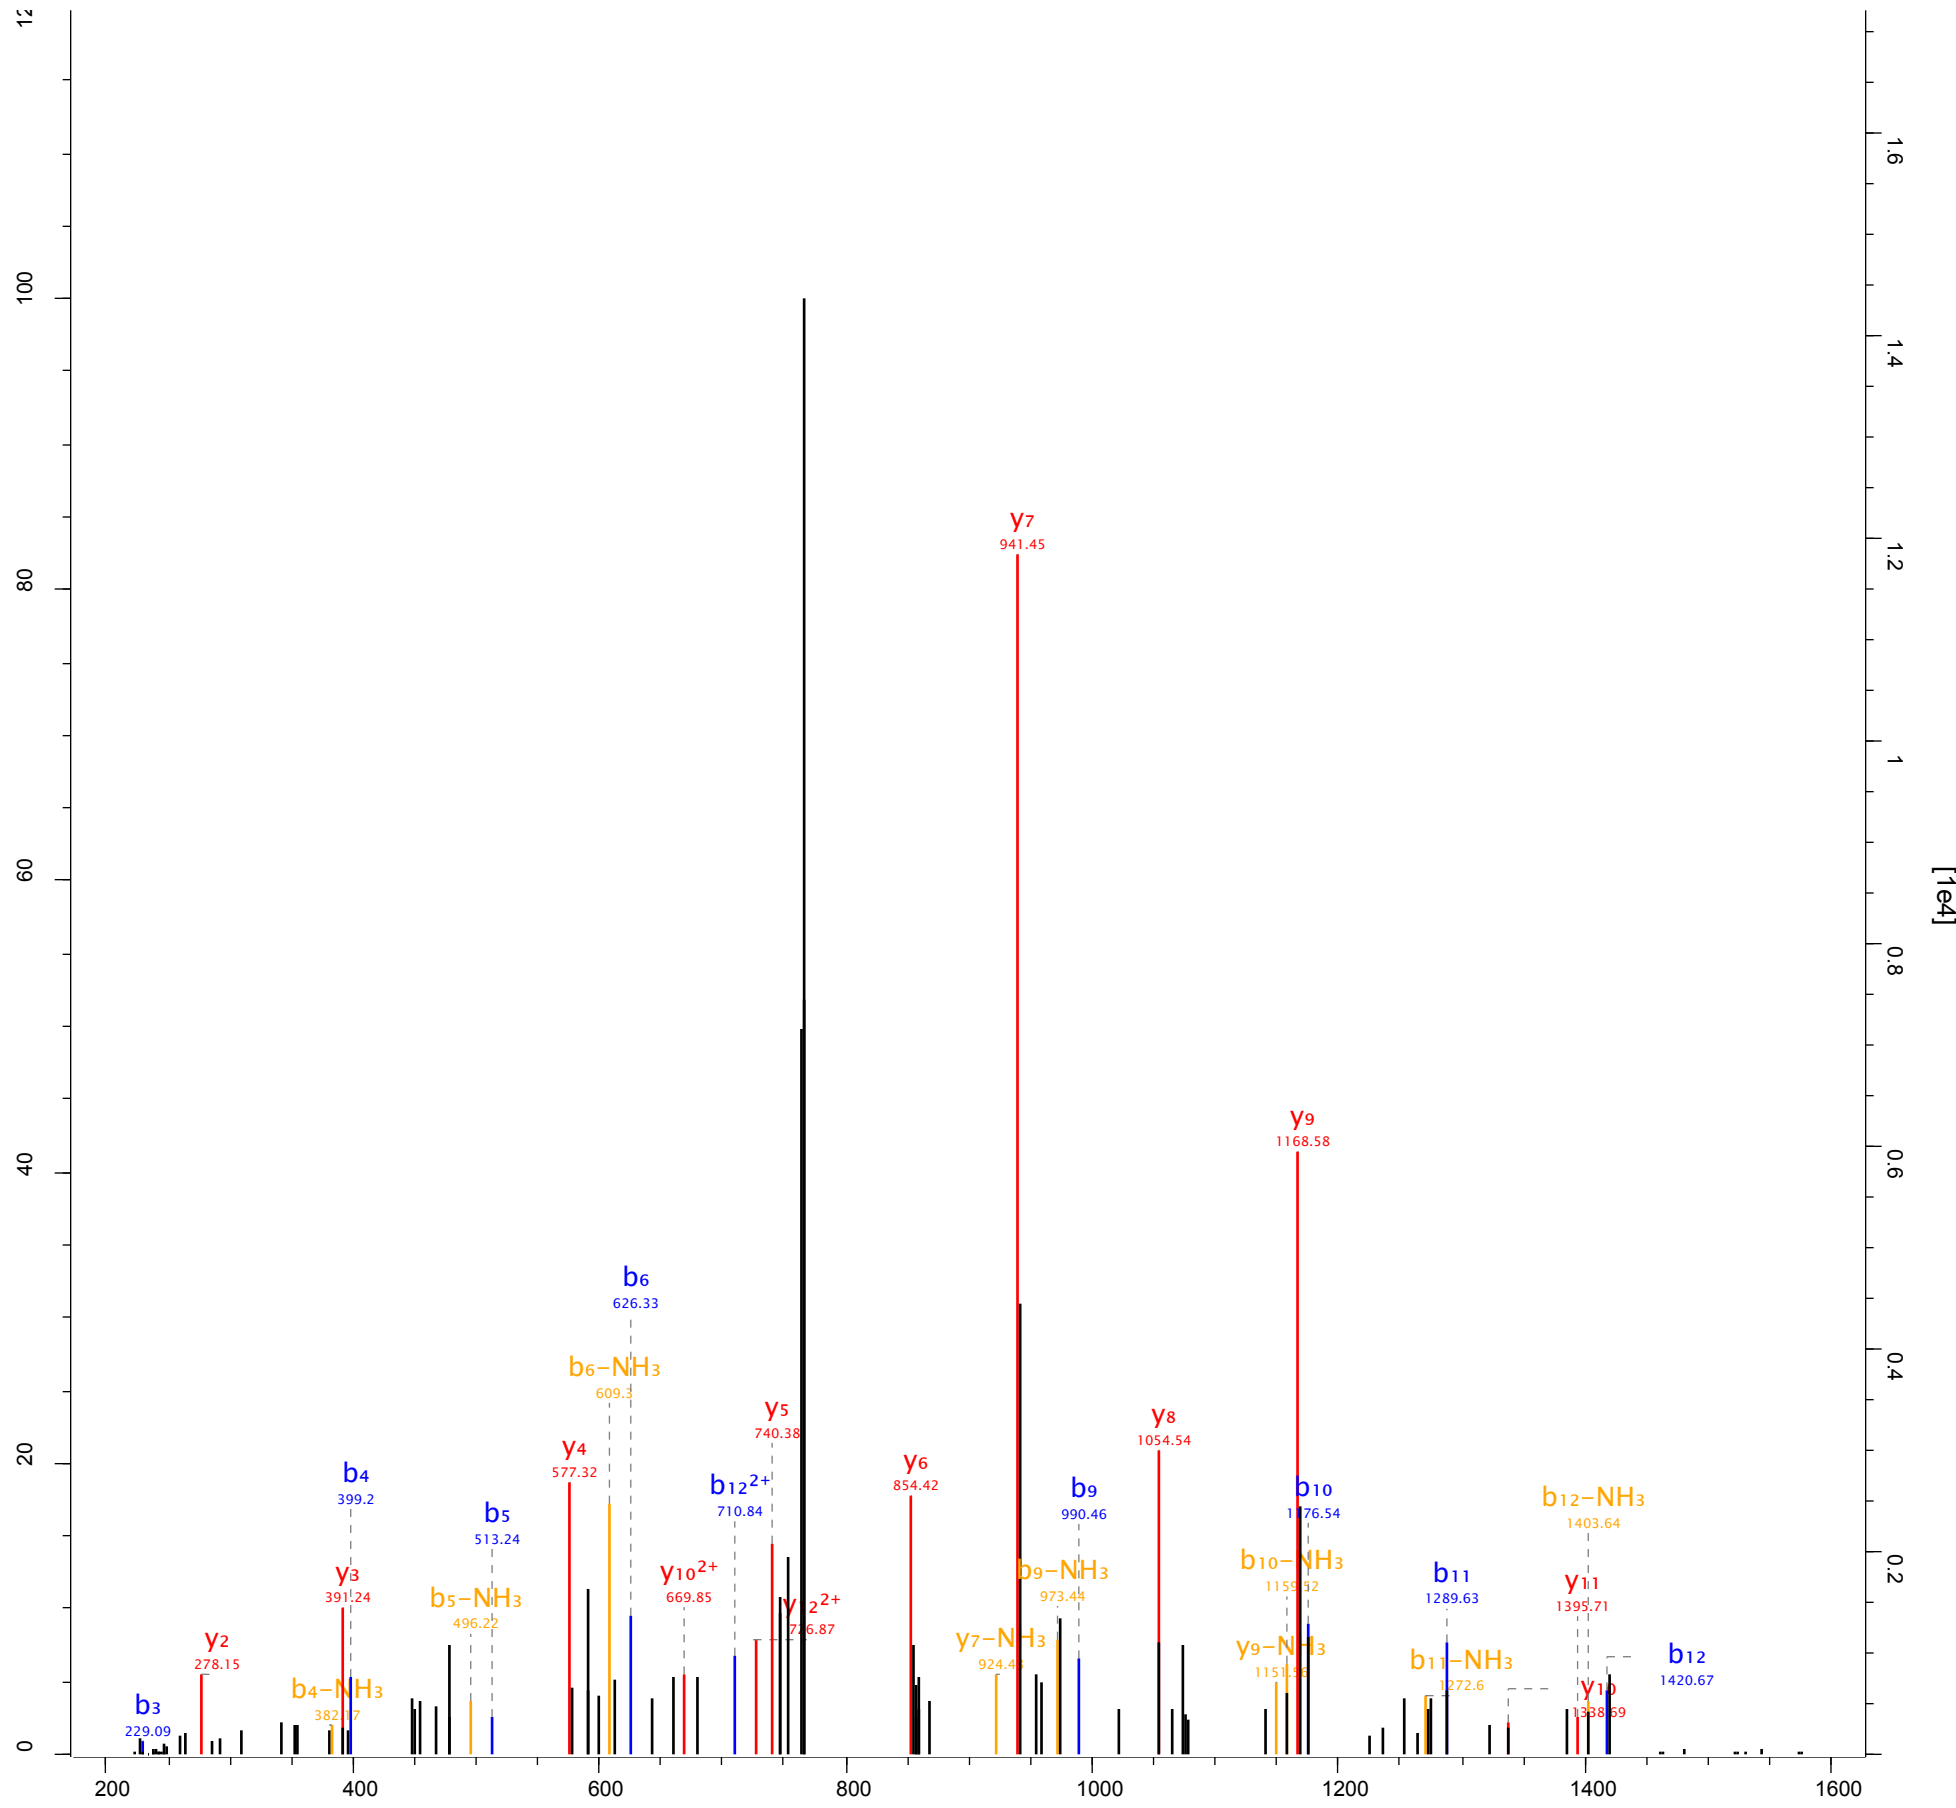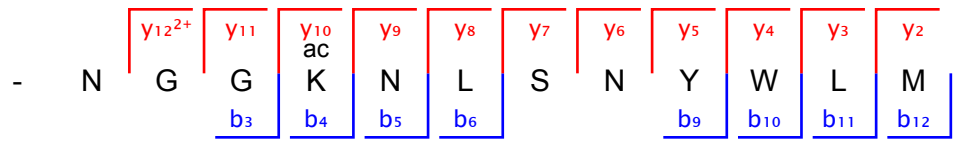

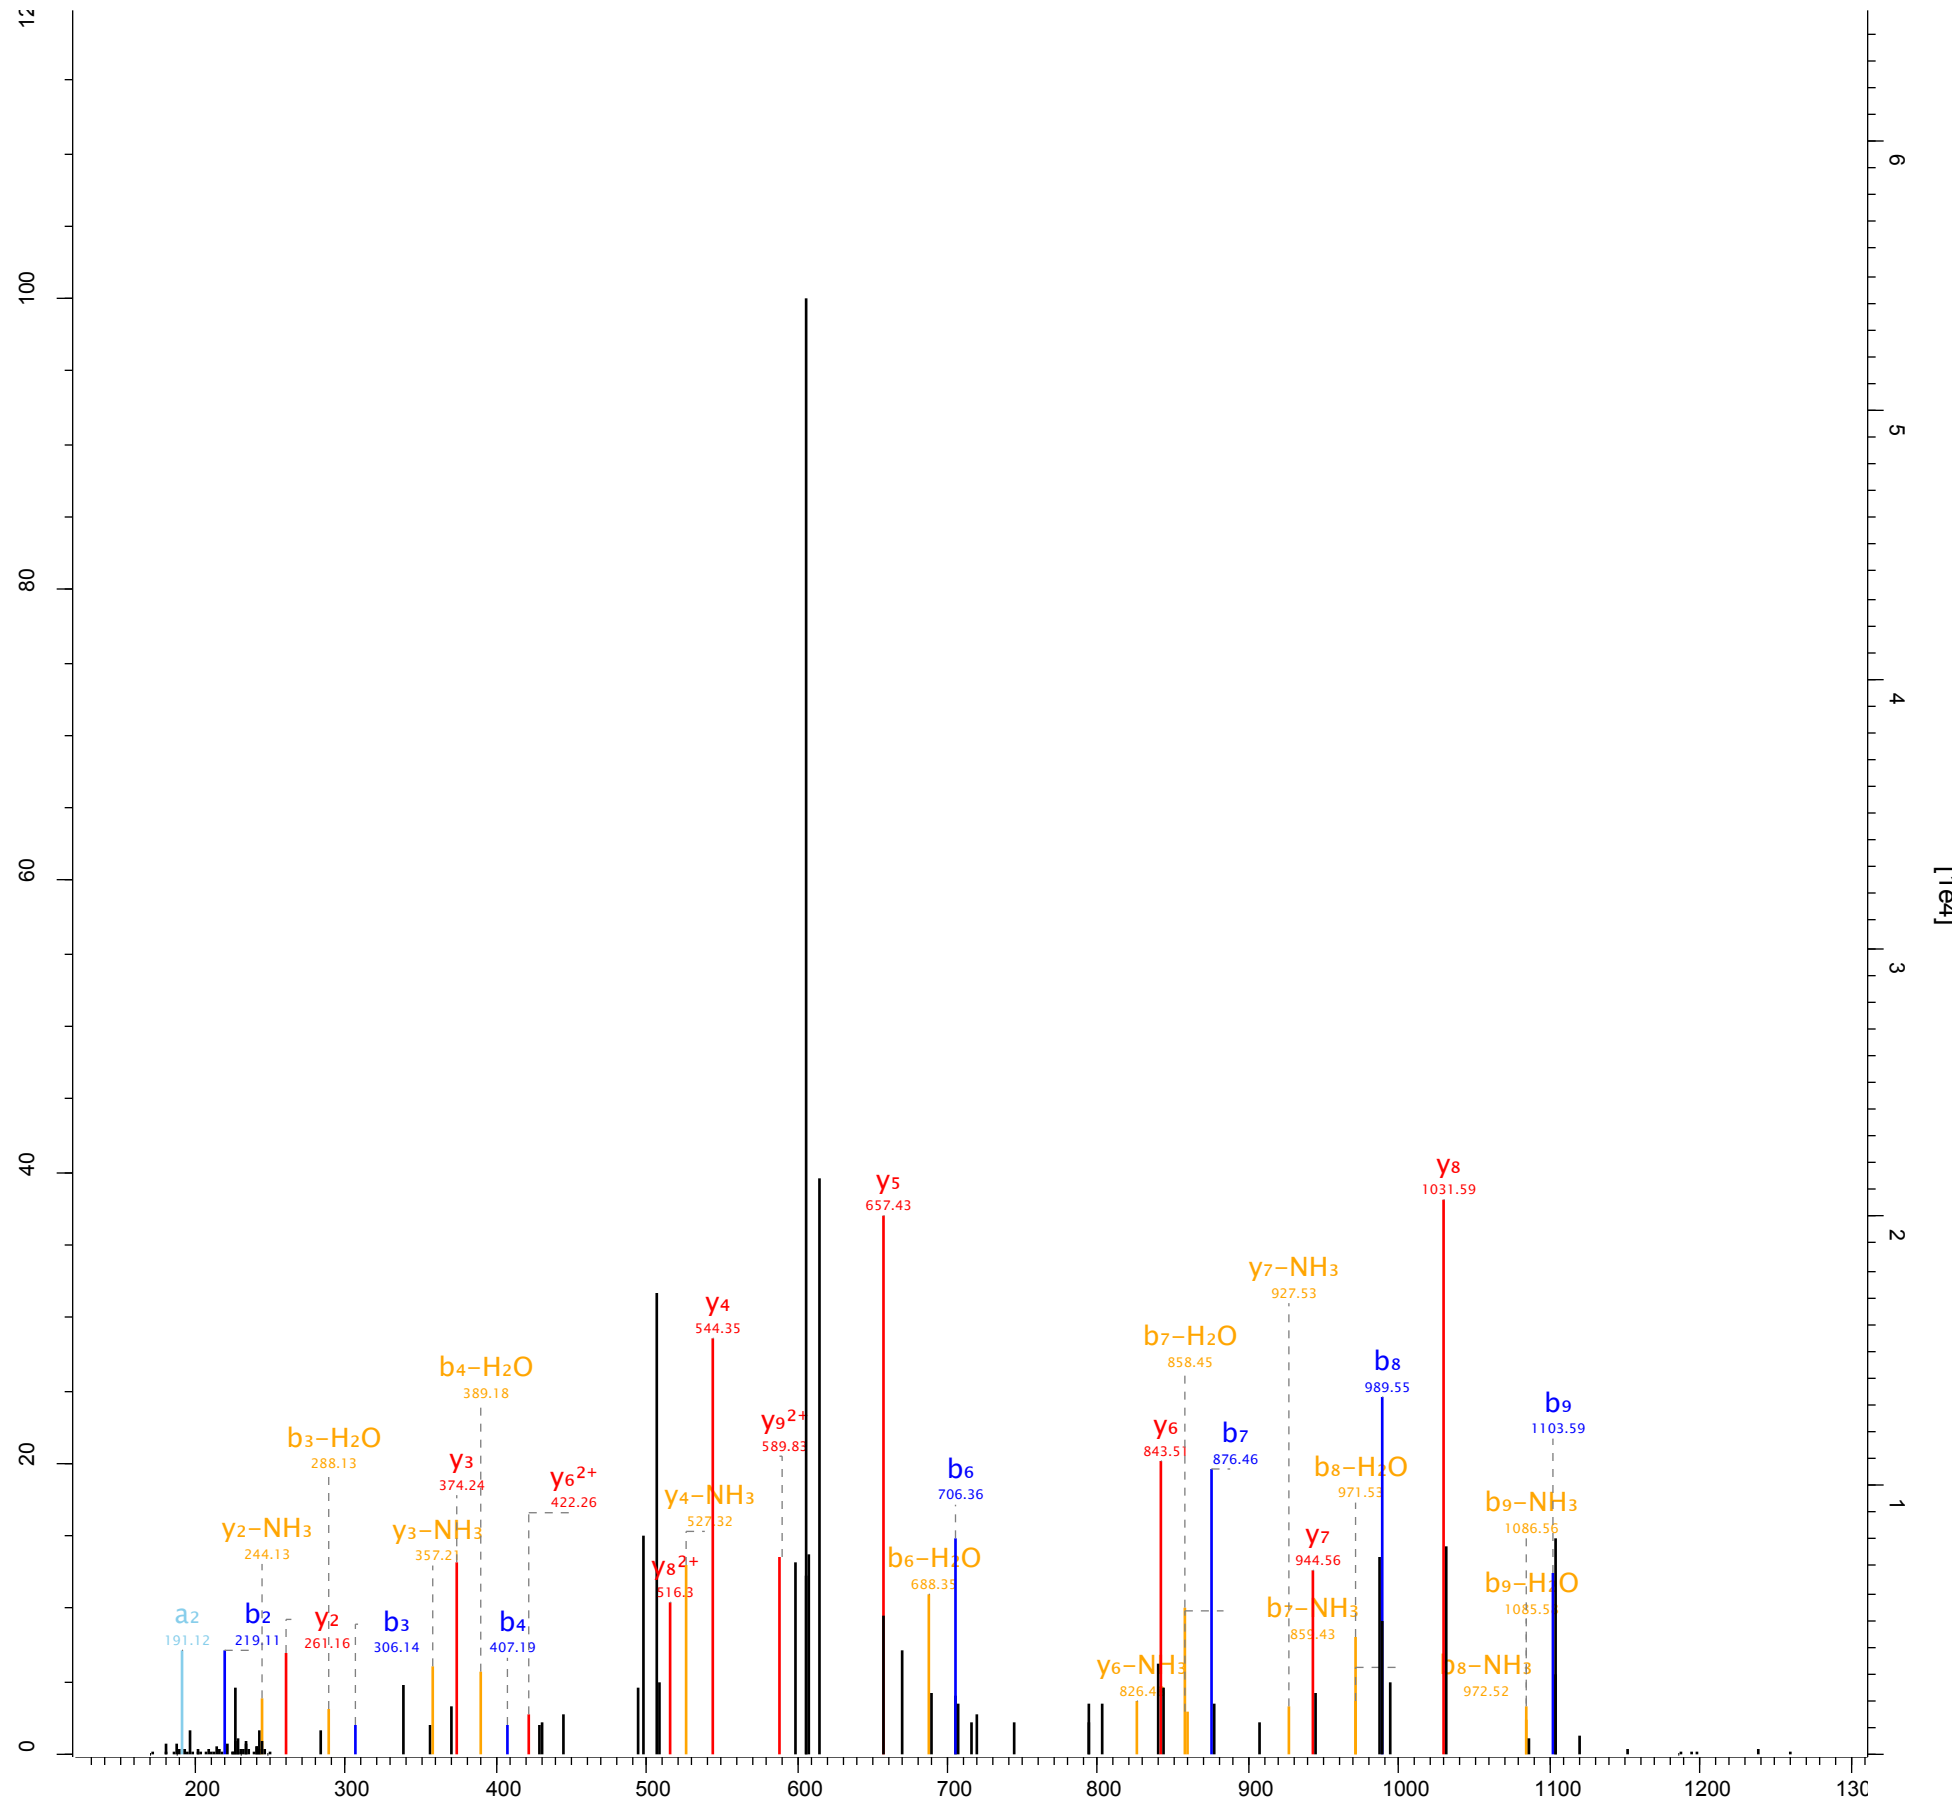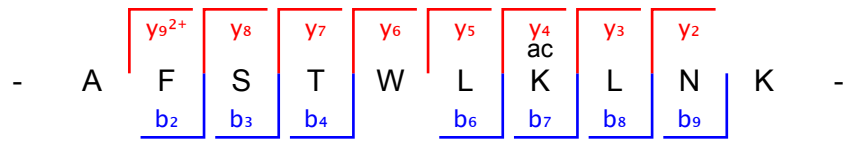

Raw file: 050813\_SCW\_II\_29\_22\_5  
 Scan: 22354 Method: ITMS; CID Score: 207.55 m/z: 886.44 Gene names: Cds2

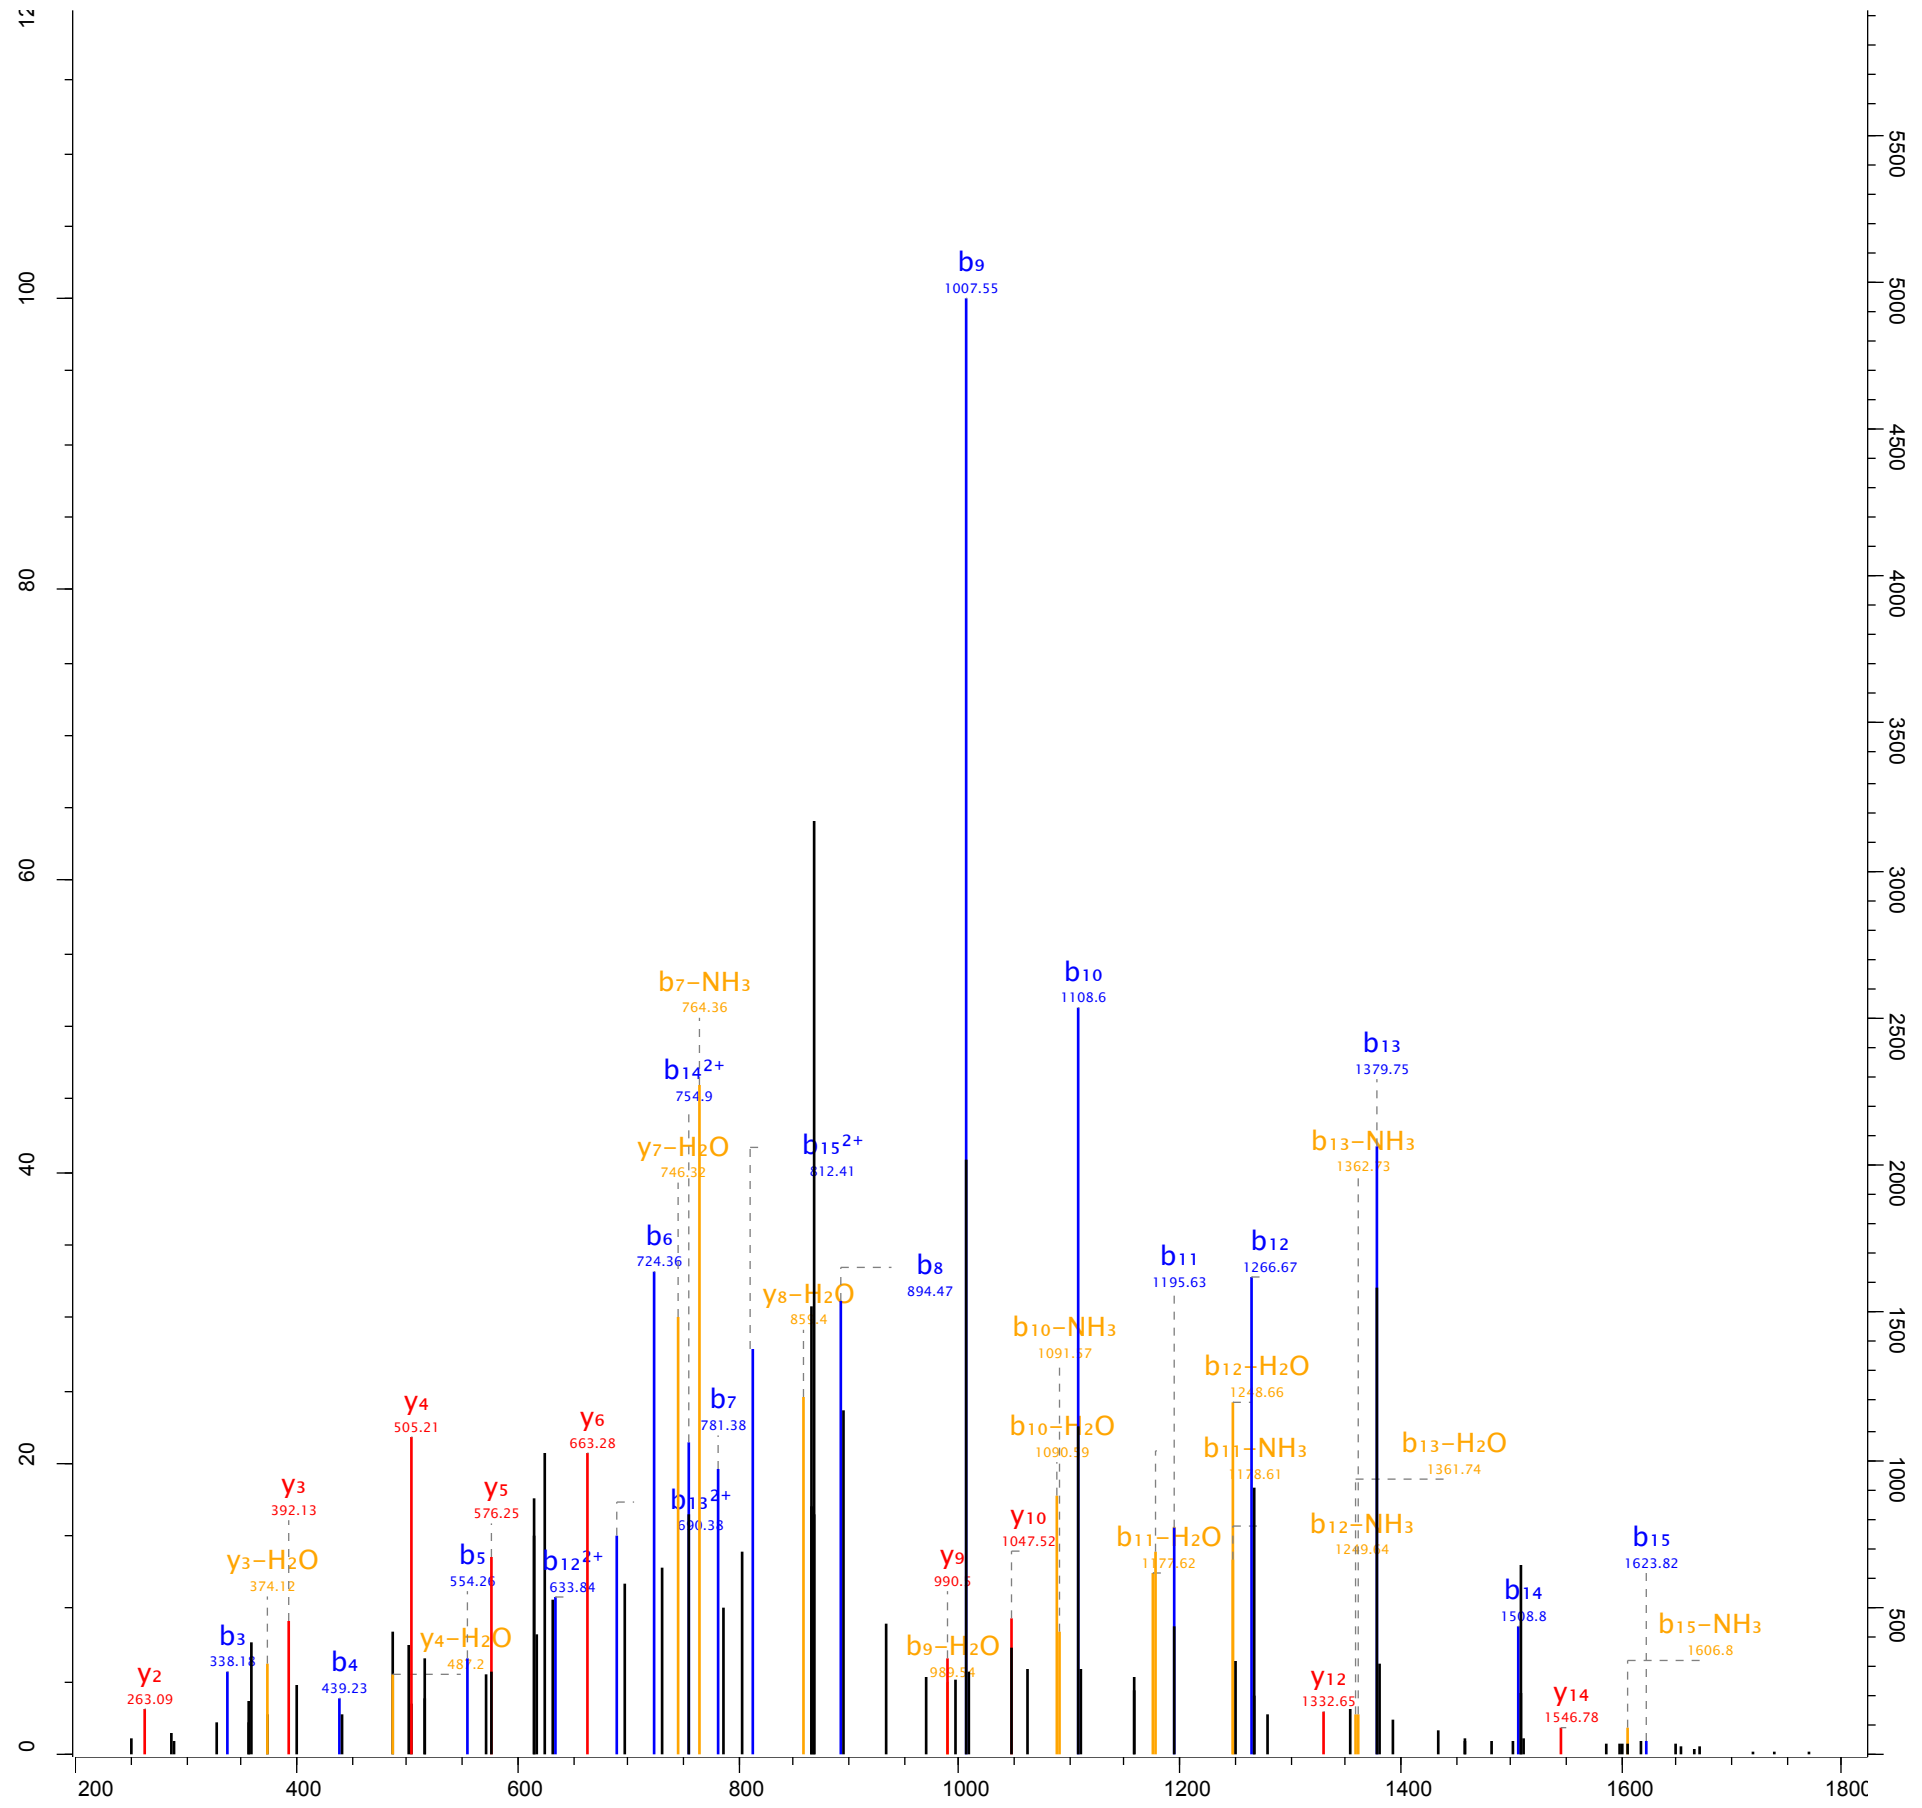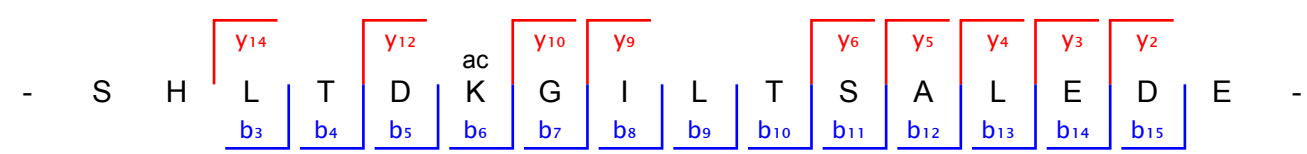

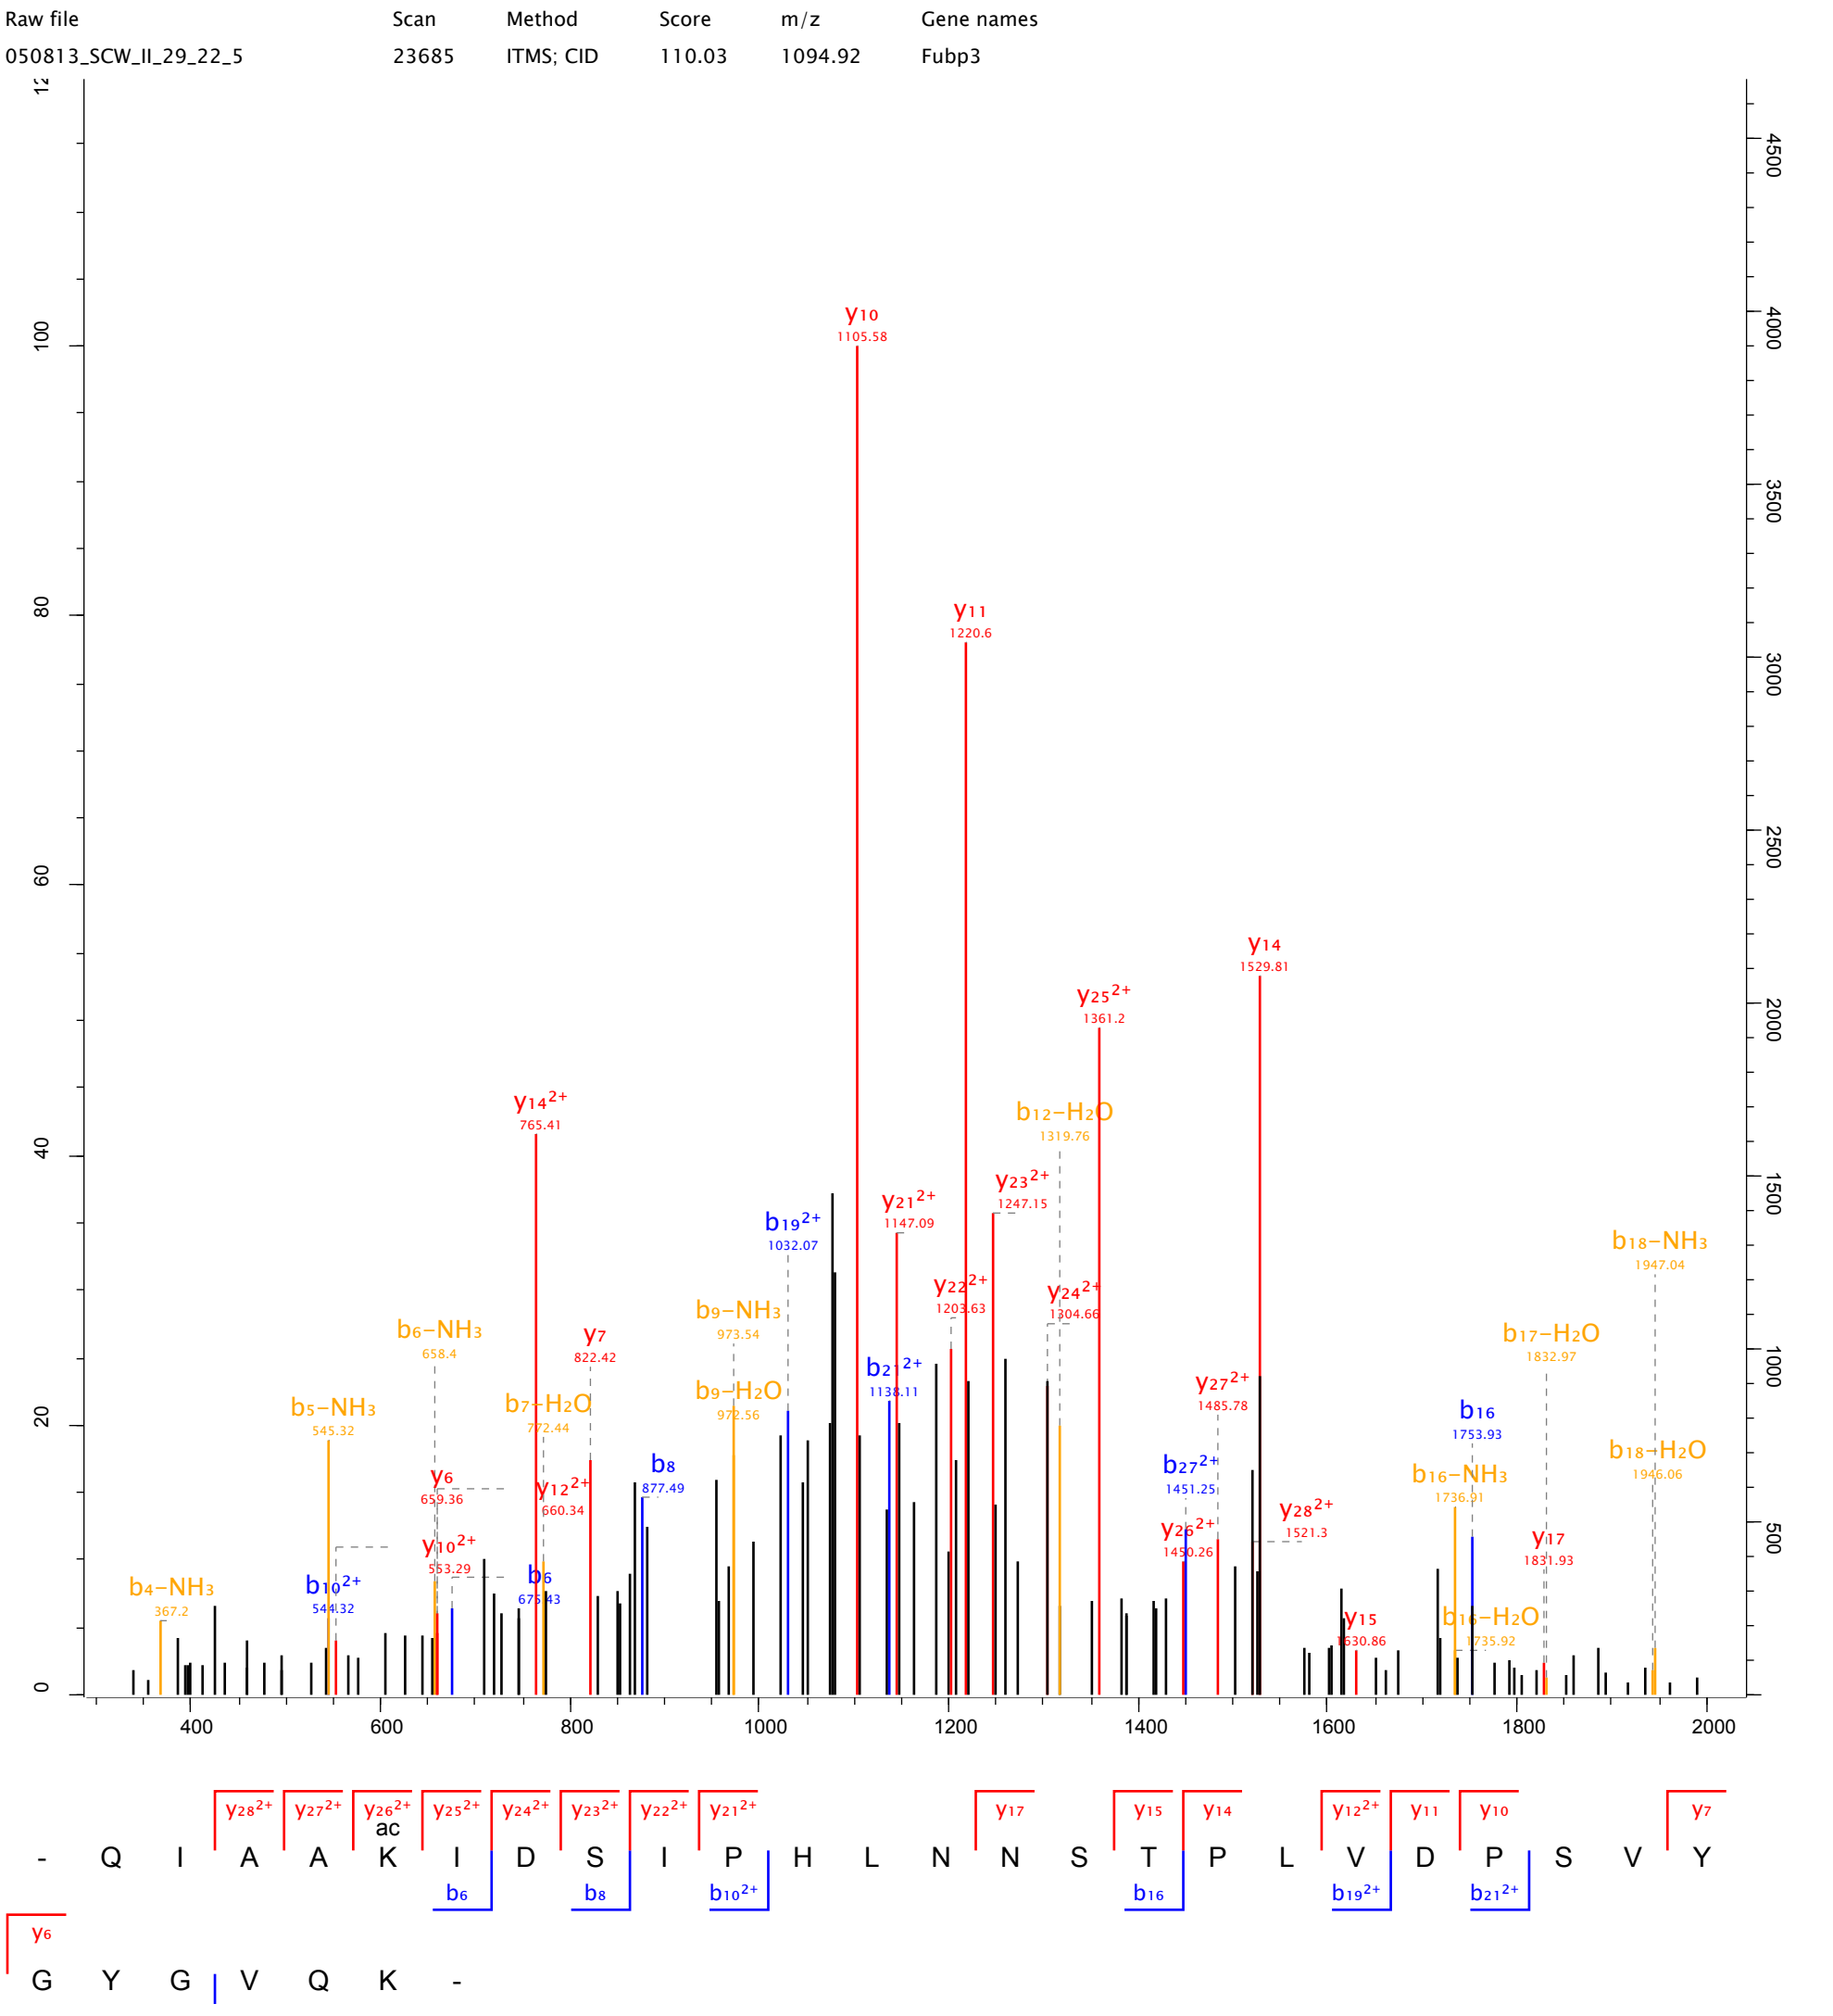



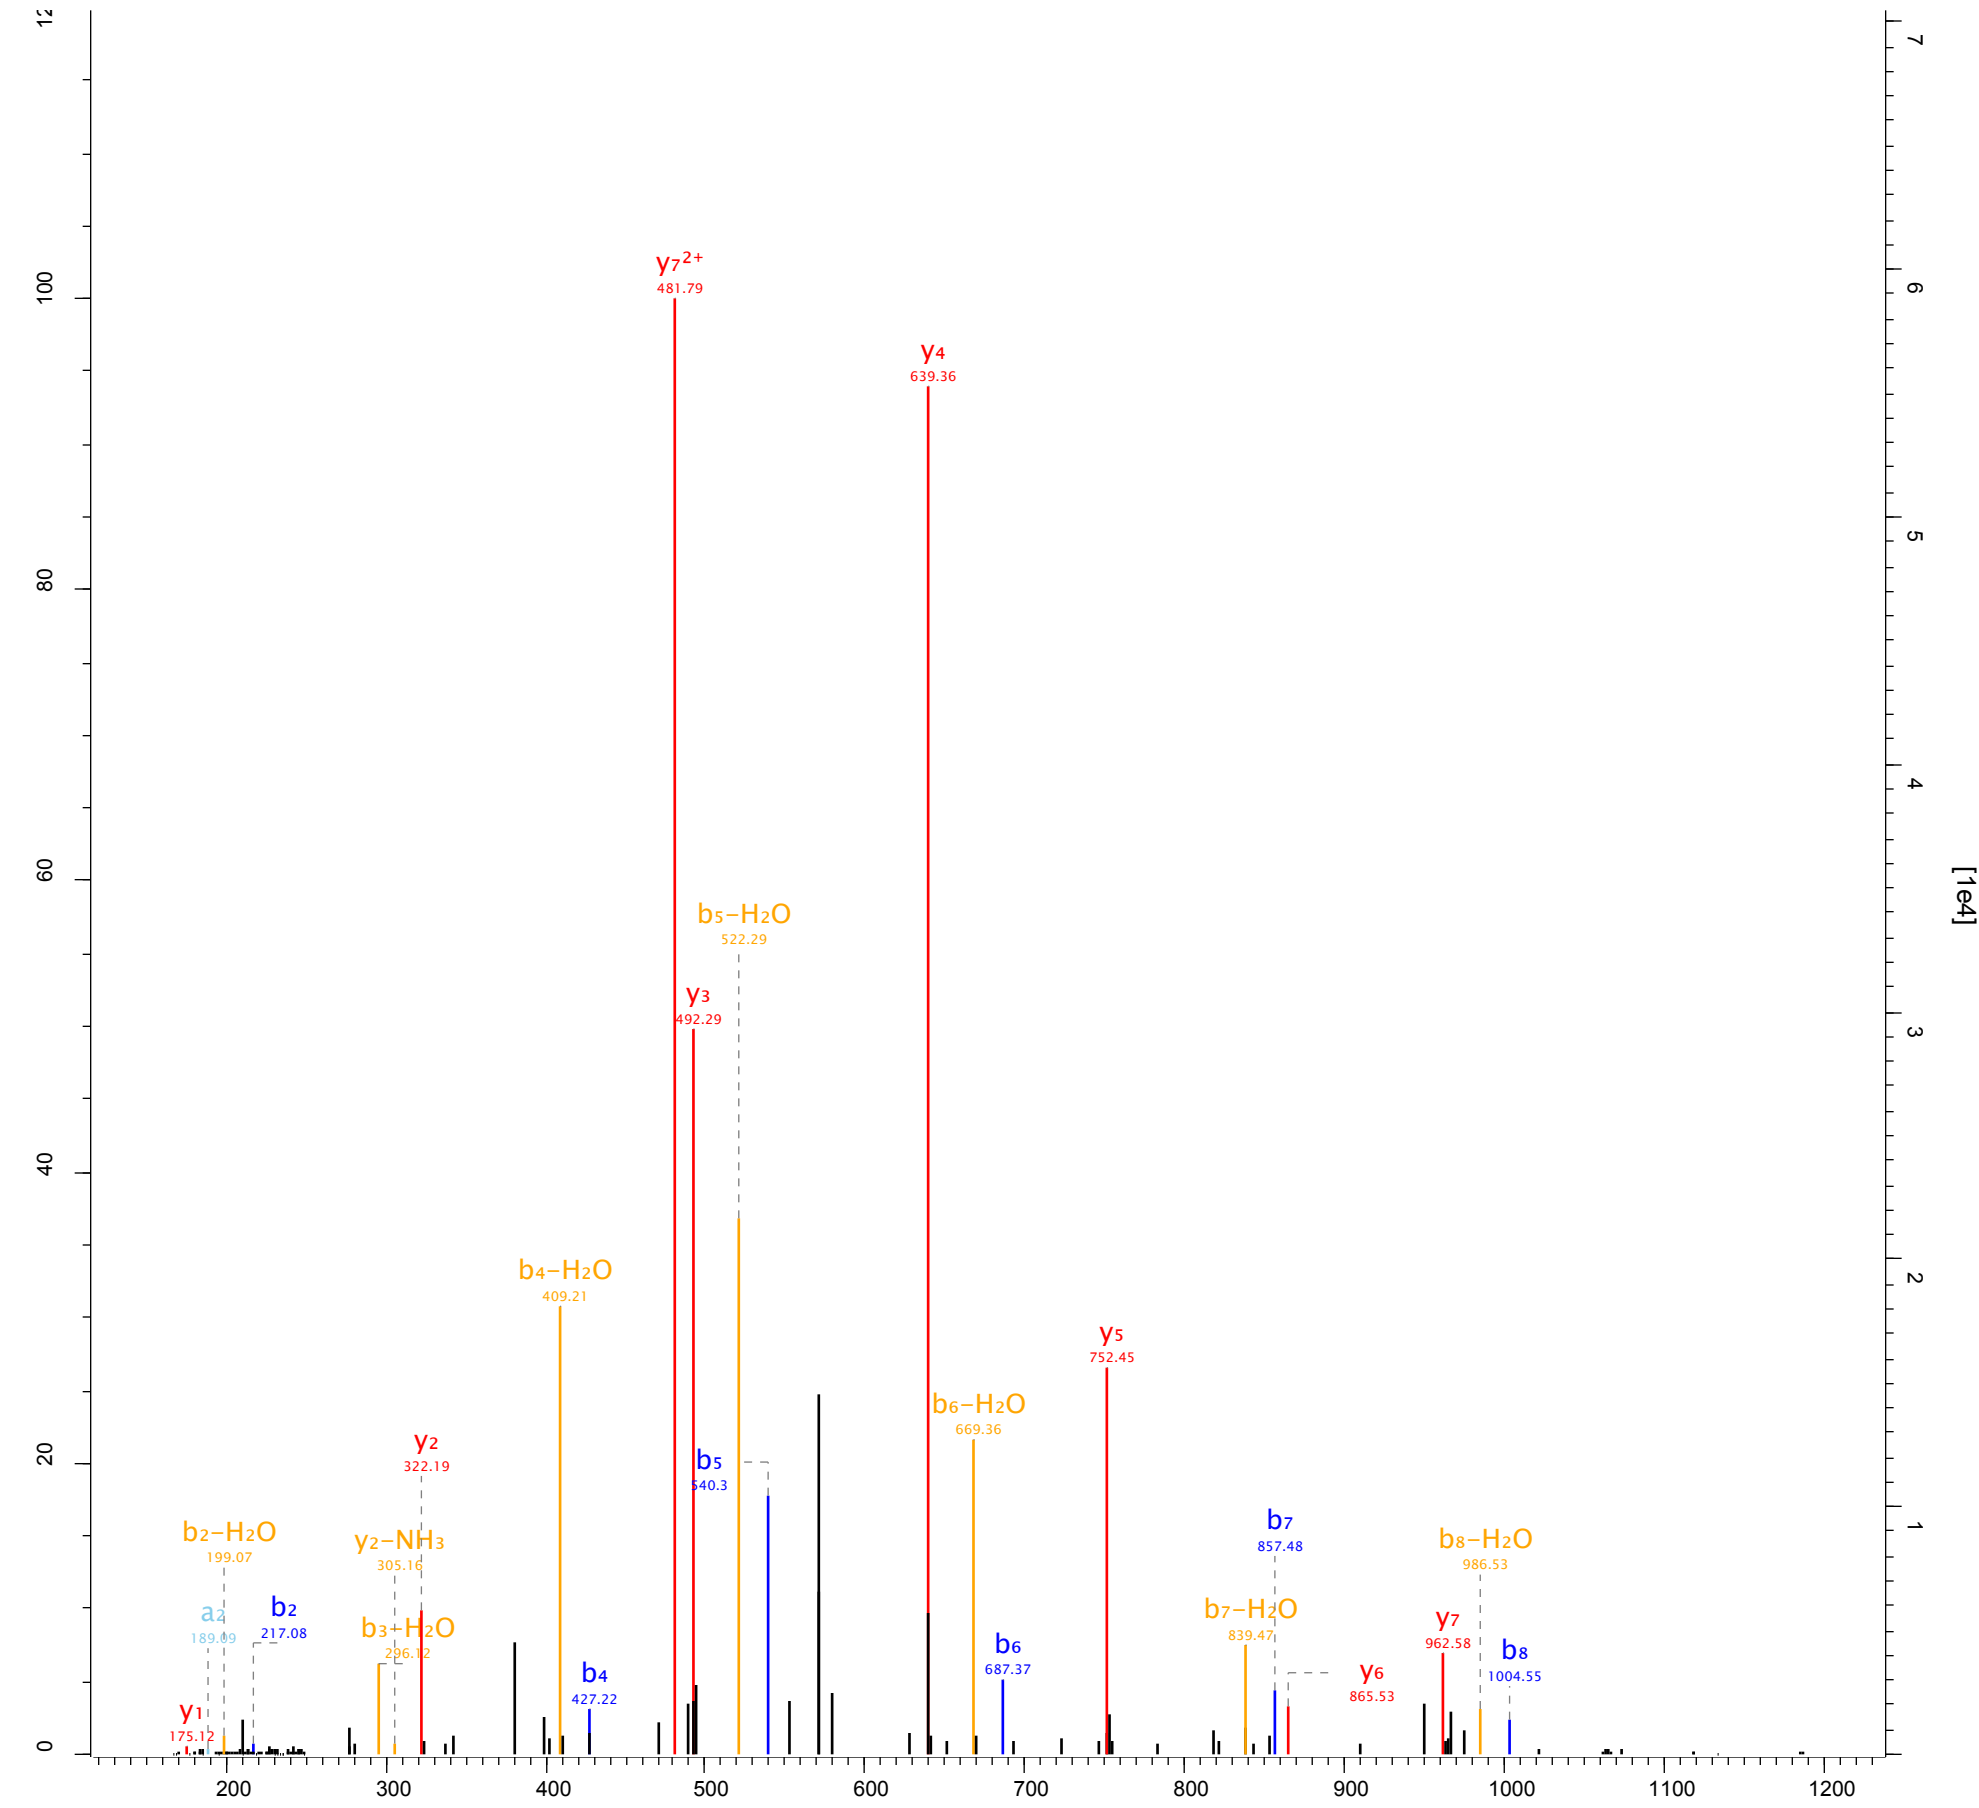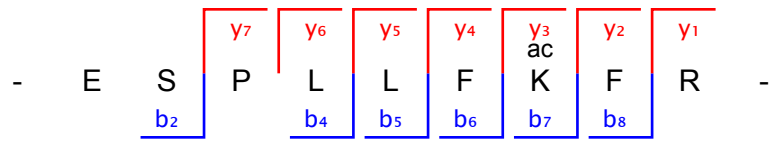

050813\_SCW\_II\_29\_22\_5

23962 ITMS; CID 154.28 693.38 Vdac3

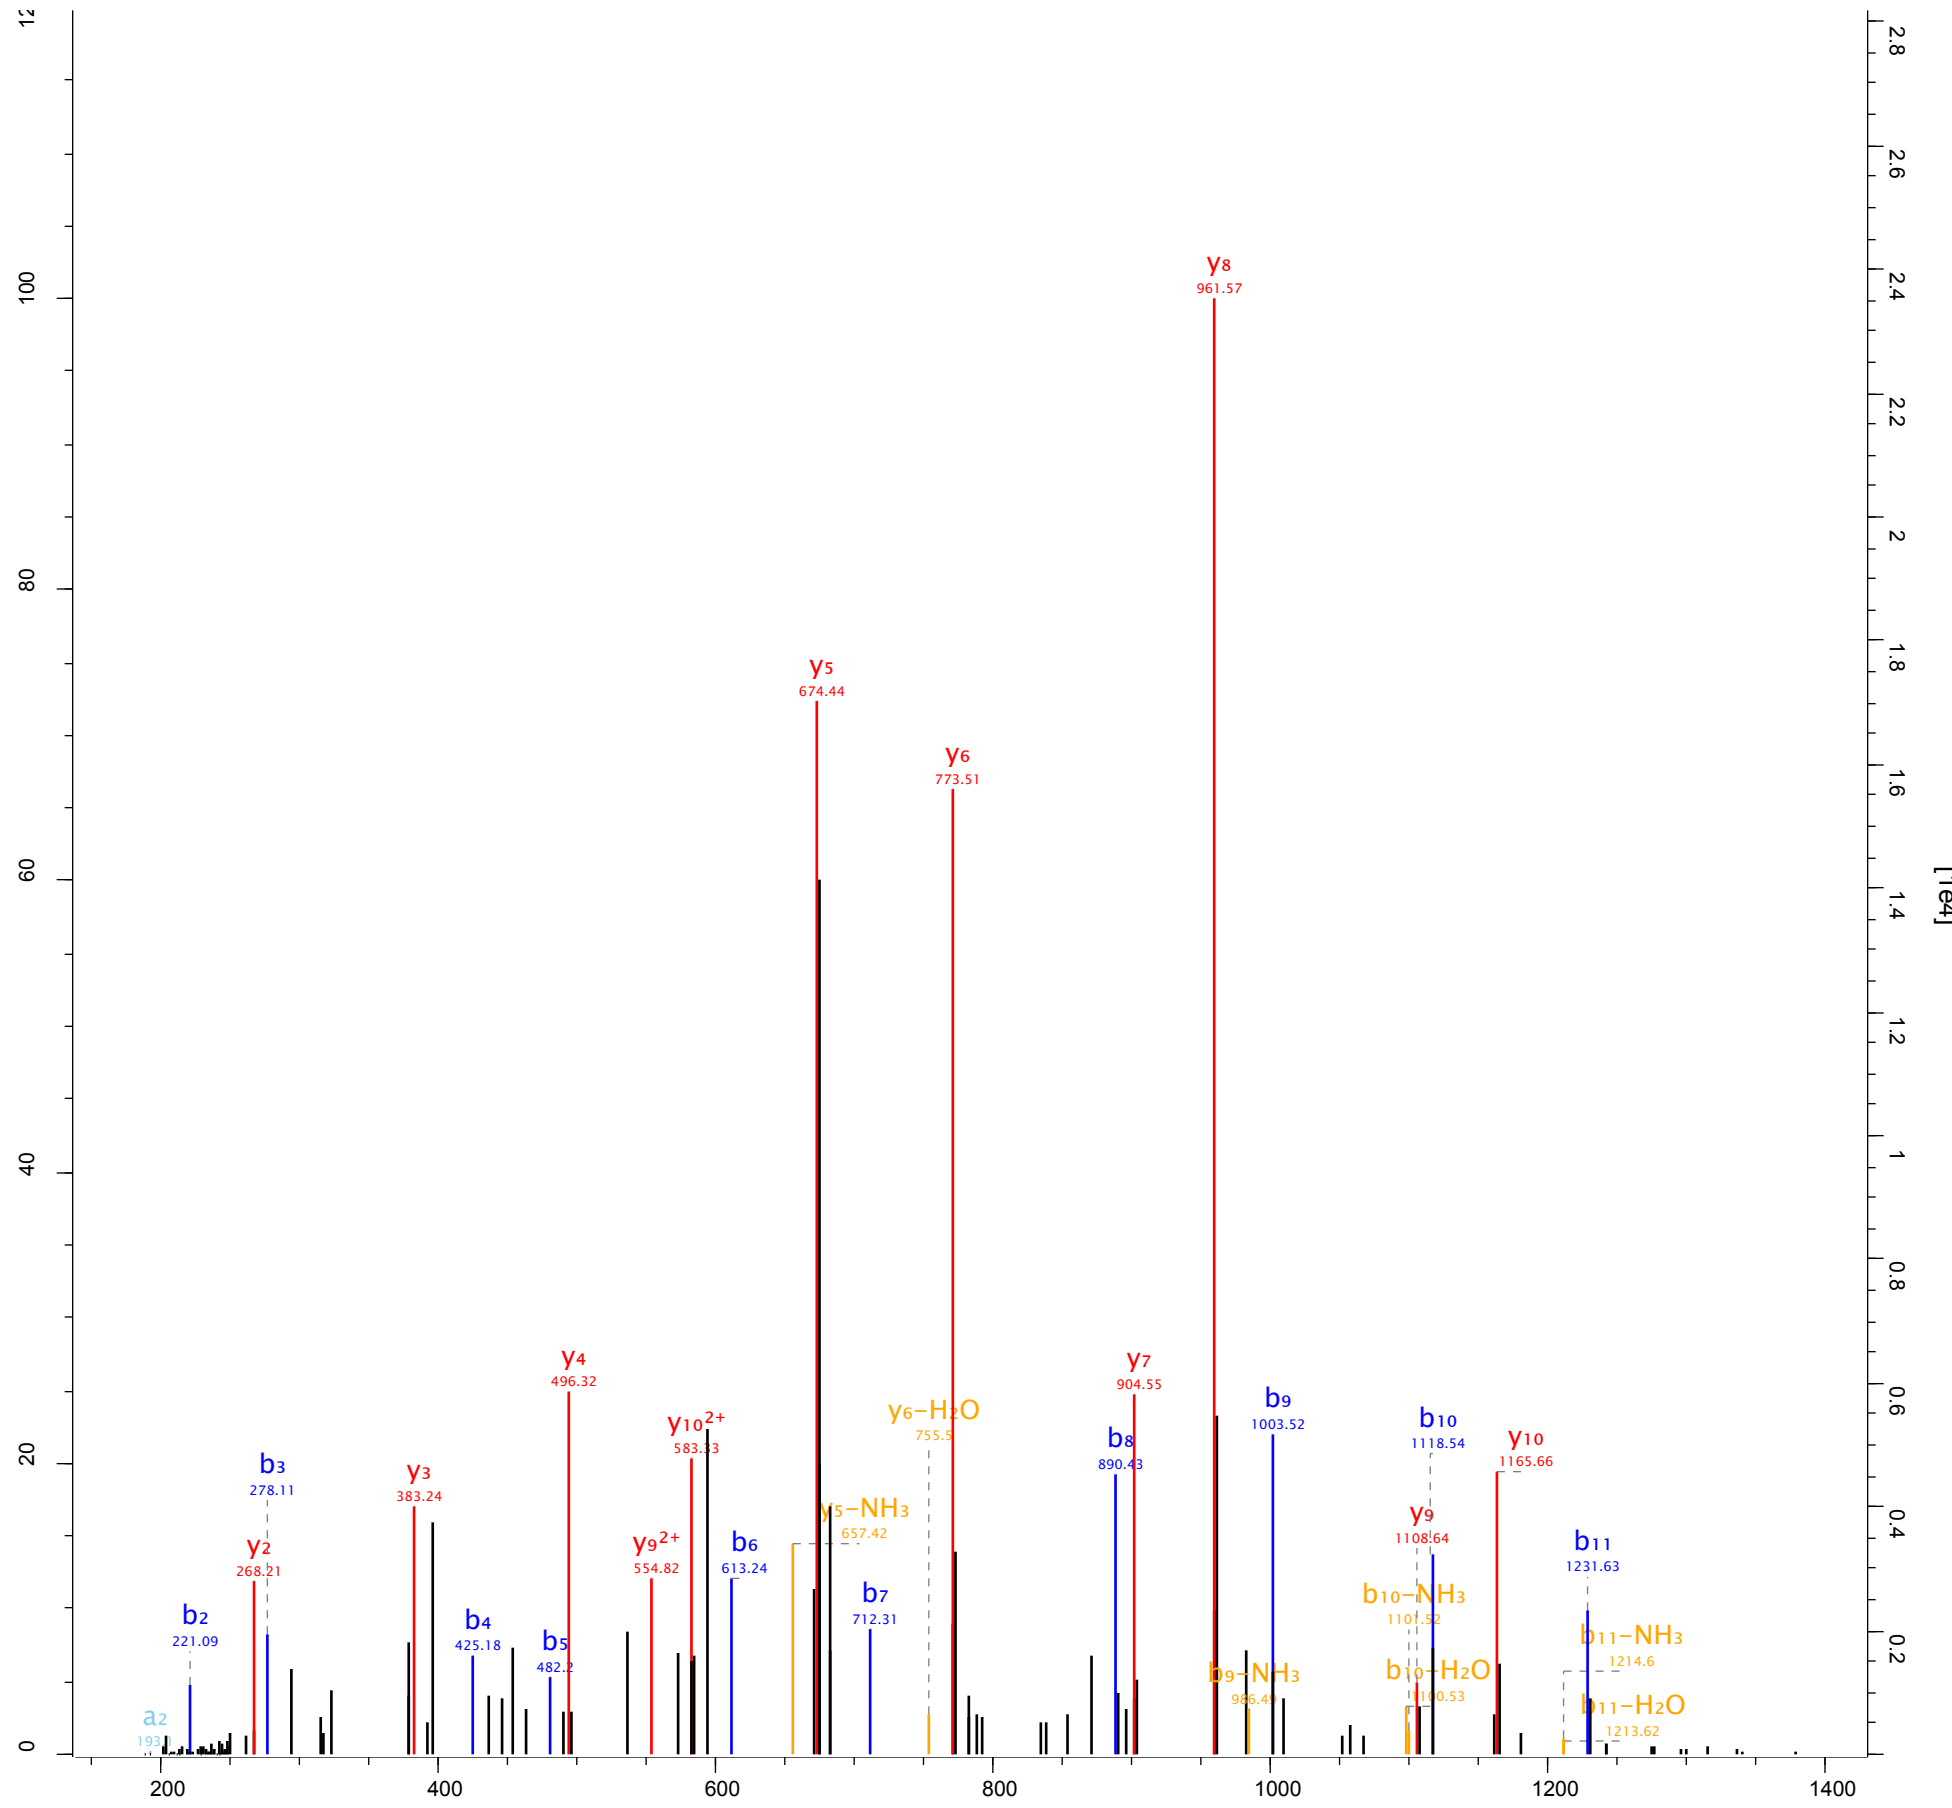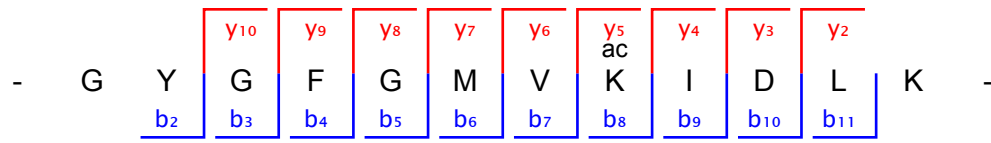

Raw file 050813\_SCW\_II\_29\_22\_5 Scan 29174 Method ITMS; CID Score 95.45 m/z 1211.27 Gene names Ckb

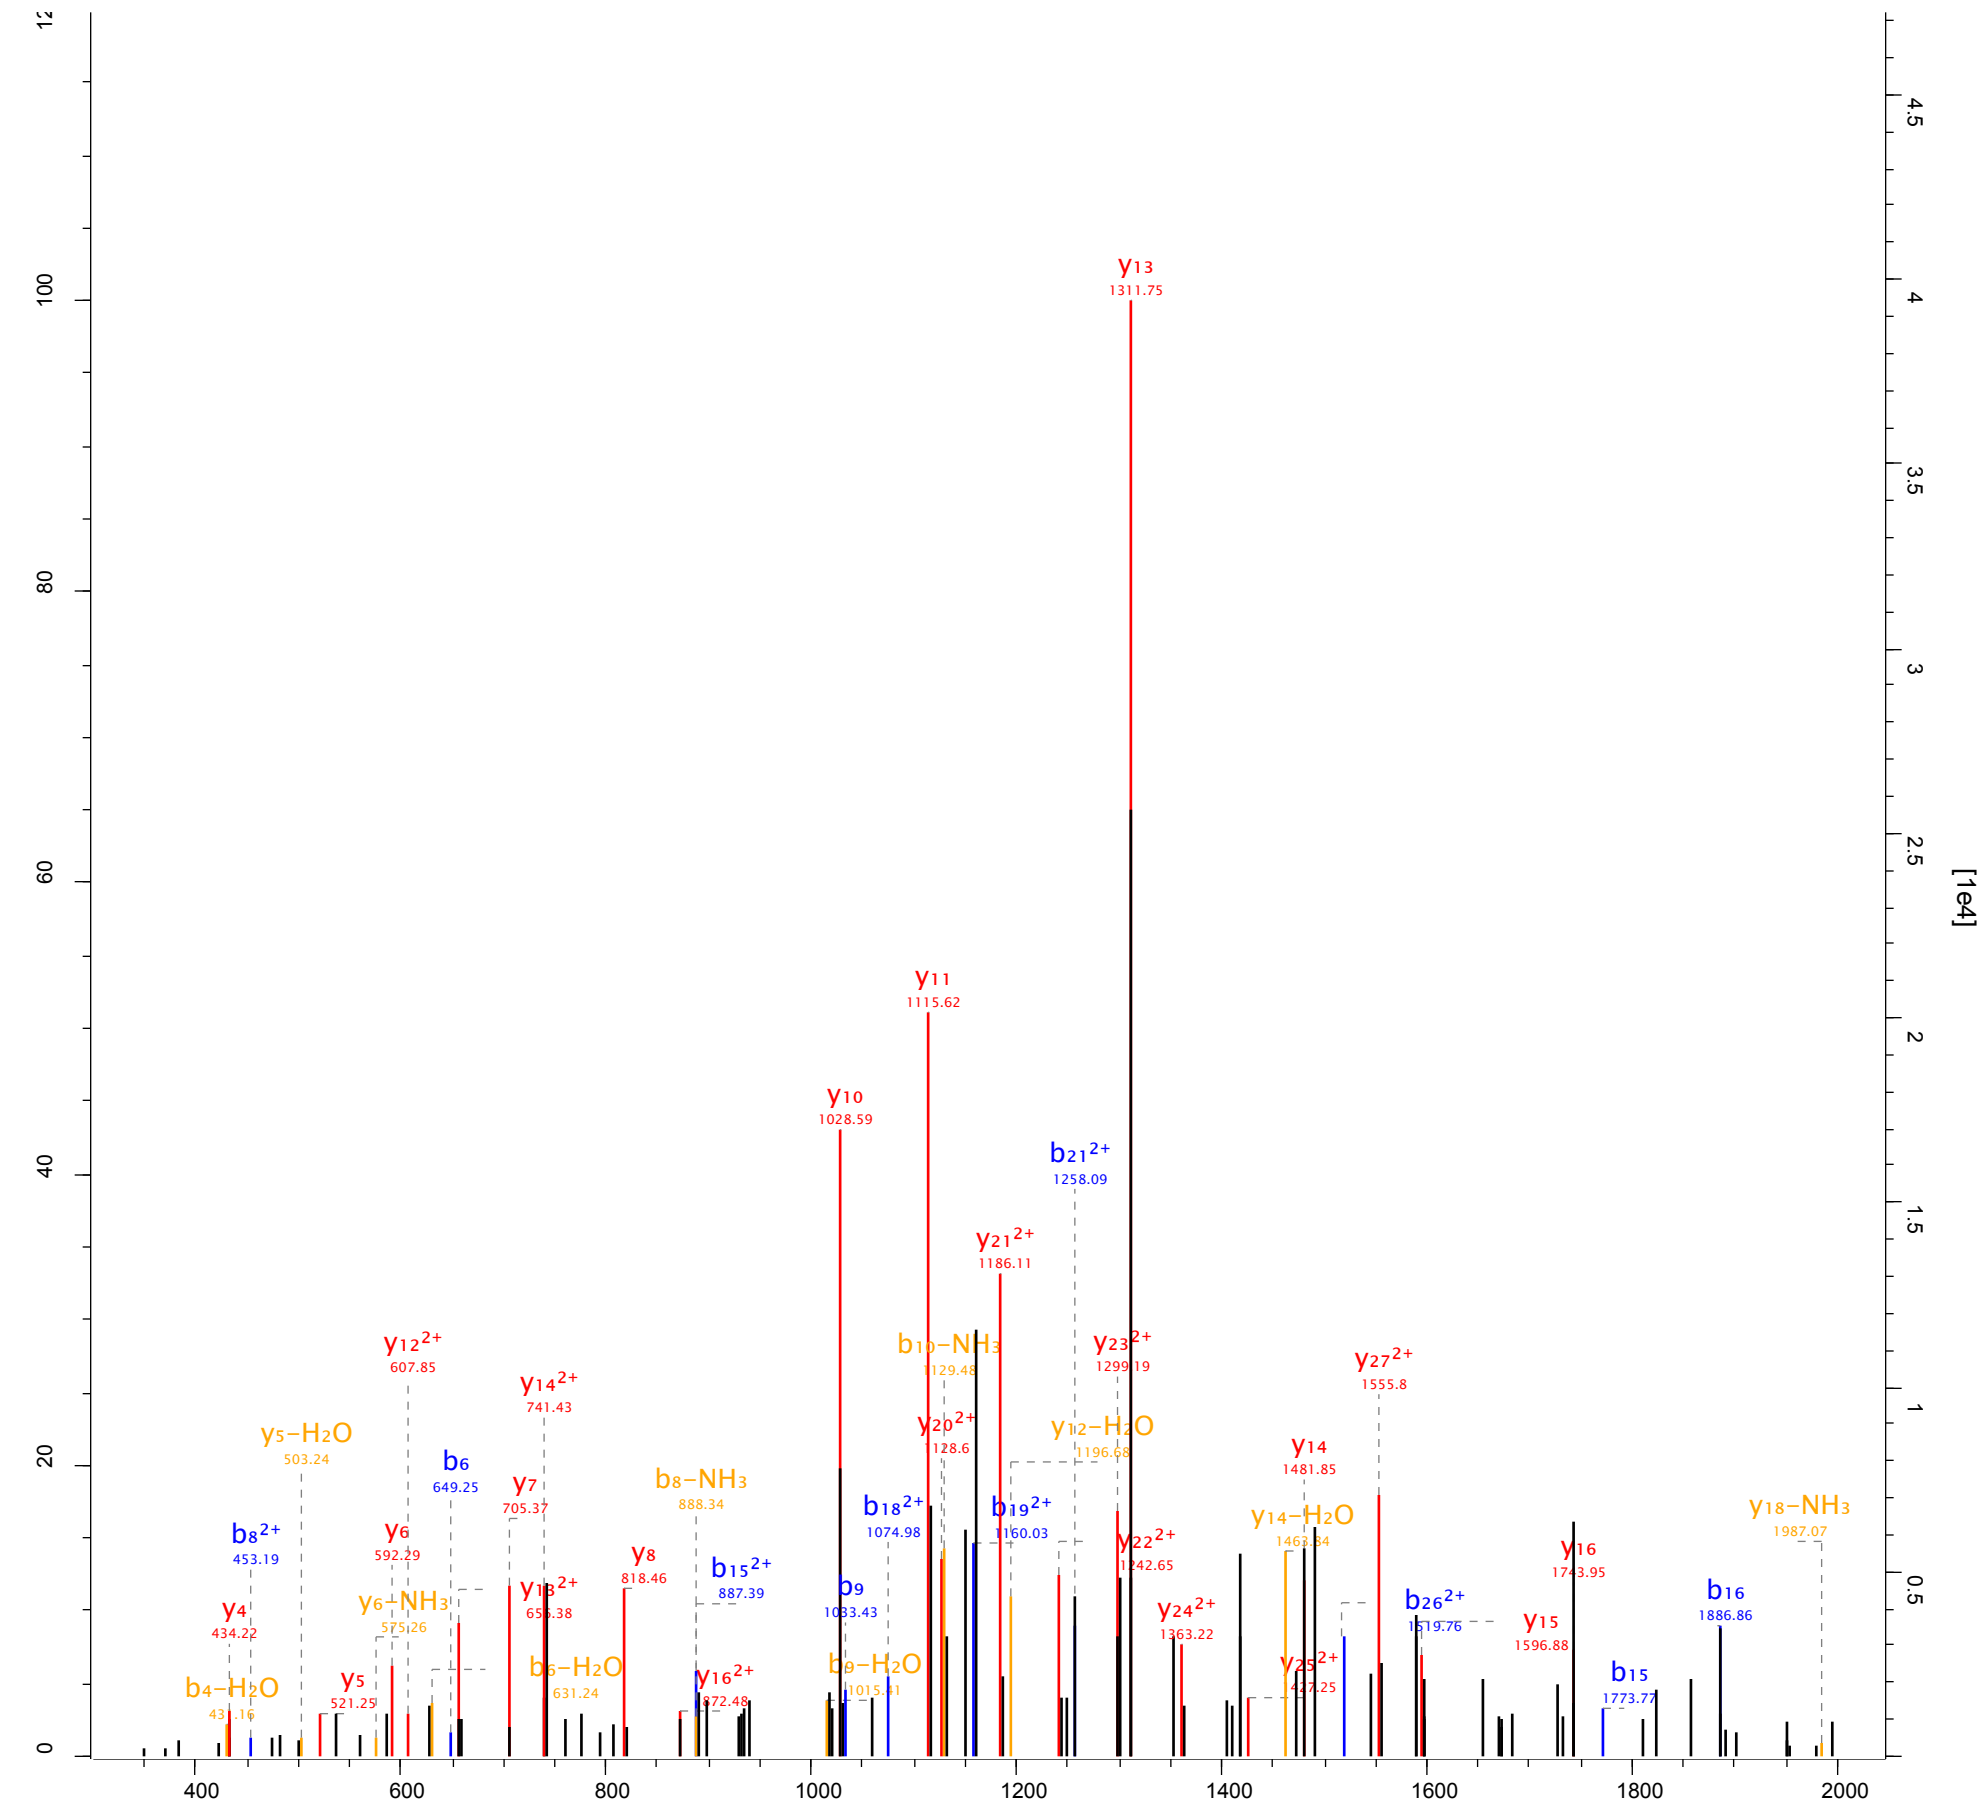

y<sub>27</sub><sup>2+</sup> y<sub>25</sub><sup>2+</sup> y<sub>24</sub><sup>2+</sup> y<sub>23</sub><sup>2+</sup> y<sub>22</sub><sup>2+</sup> y<sub>21</sub><sup>2+</sup> y<sub>20</sub><sup>2+</sup> y<sub>16</sub> y<sub>15</sub> y<sub>14</sub>  
ac y<sub>13</sub> y<sub>12</sub><sup>2+</sup> y<sub>11</sub> y<sub>10</sub>  
 - S M T E A b<sub>6</sub> Q b<sub>8</sub><sup>2+</sup> b<sub>9</sub> L I D D H b<sub>15</sub> b<sub>16</sub> F b<sub>18</sub><sup>2+</sup> b<sub>19</sub><sup>2+</sup> b<sub>21</sub><sup>2+</sup>  
y<sub>8</sub> y<sub>7</sub> y<sub>6</sub> y<sub>5</sub> y<sub>4</sub>  
 L L A S G M A R -

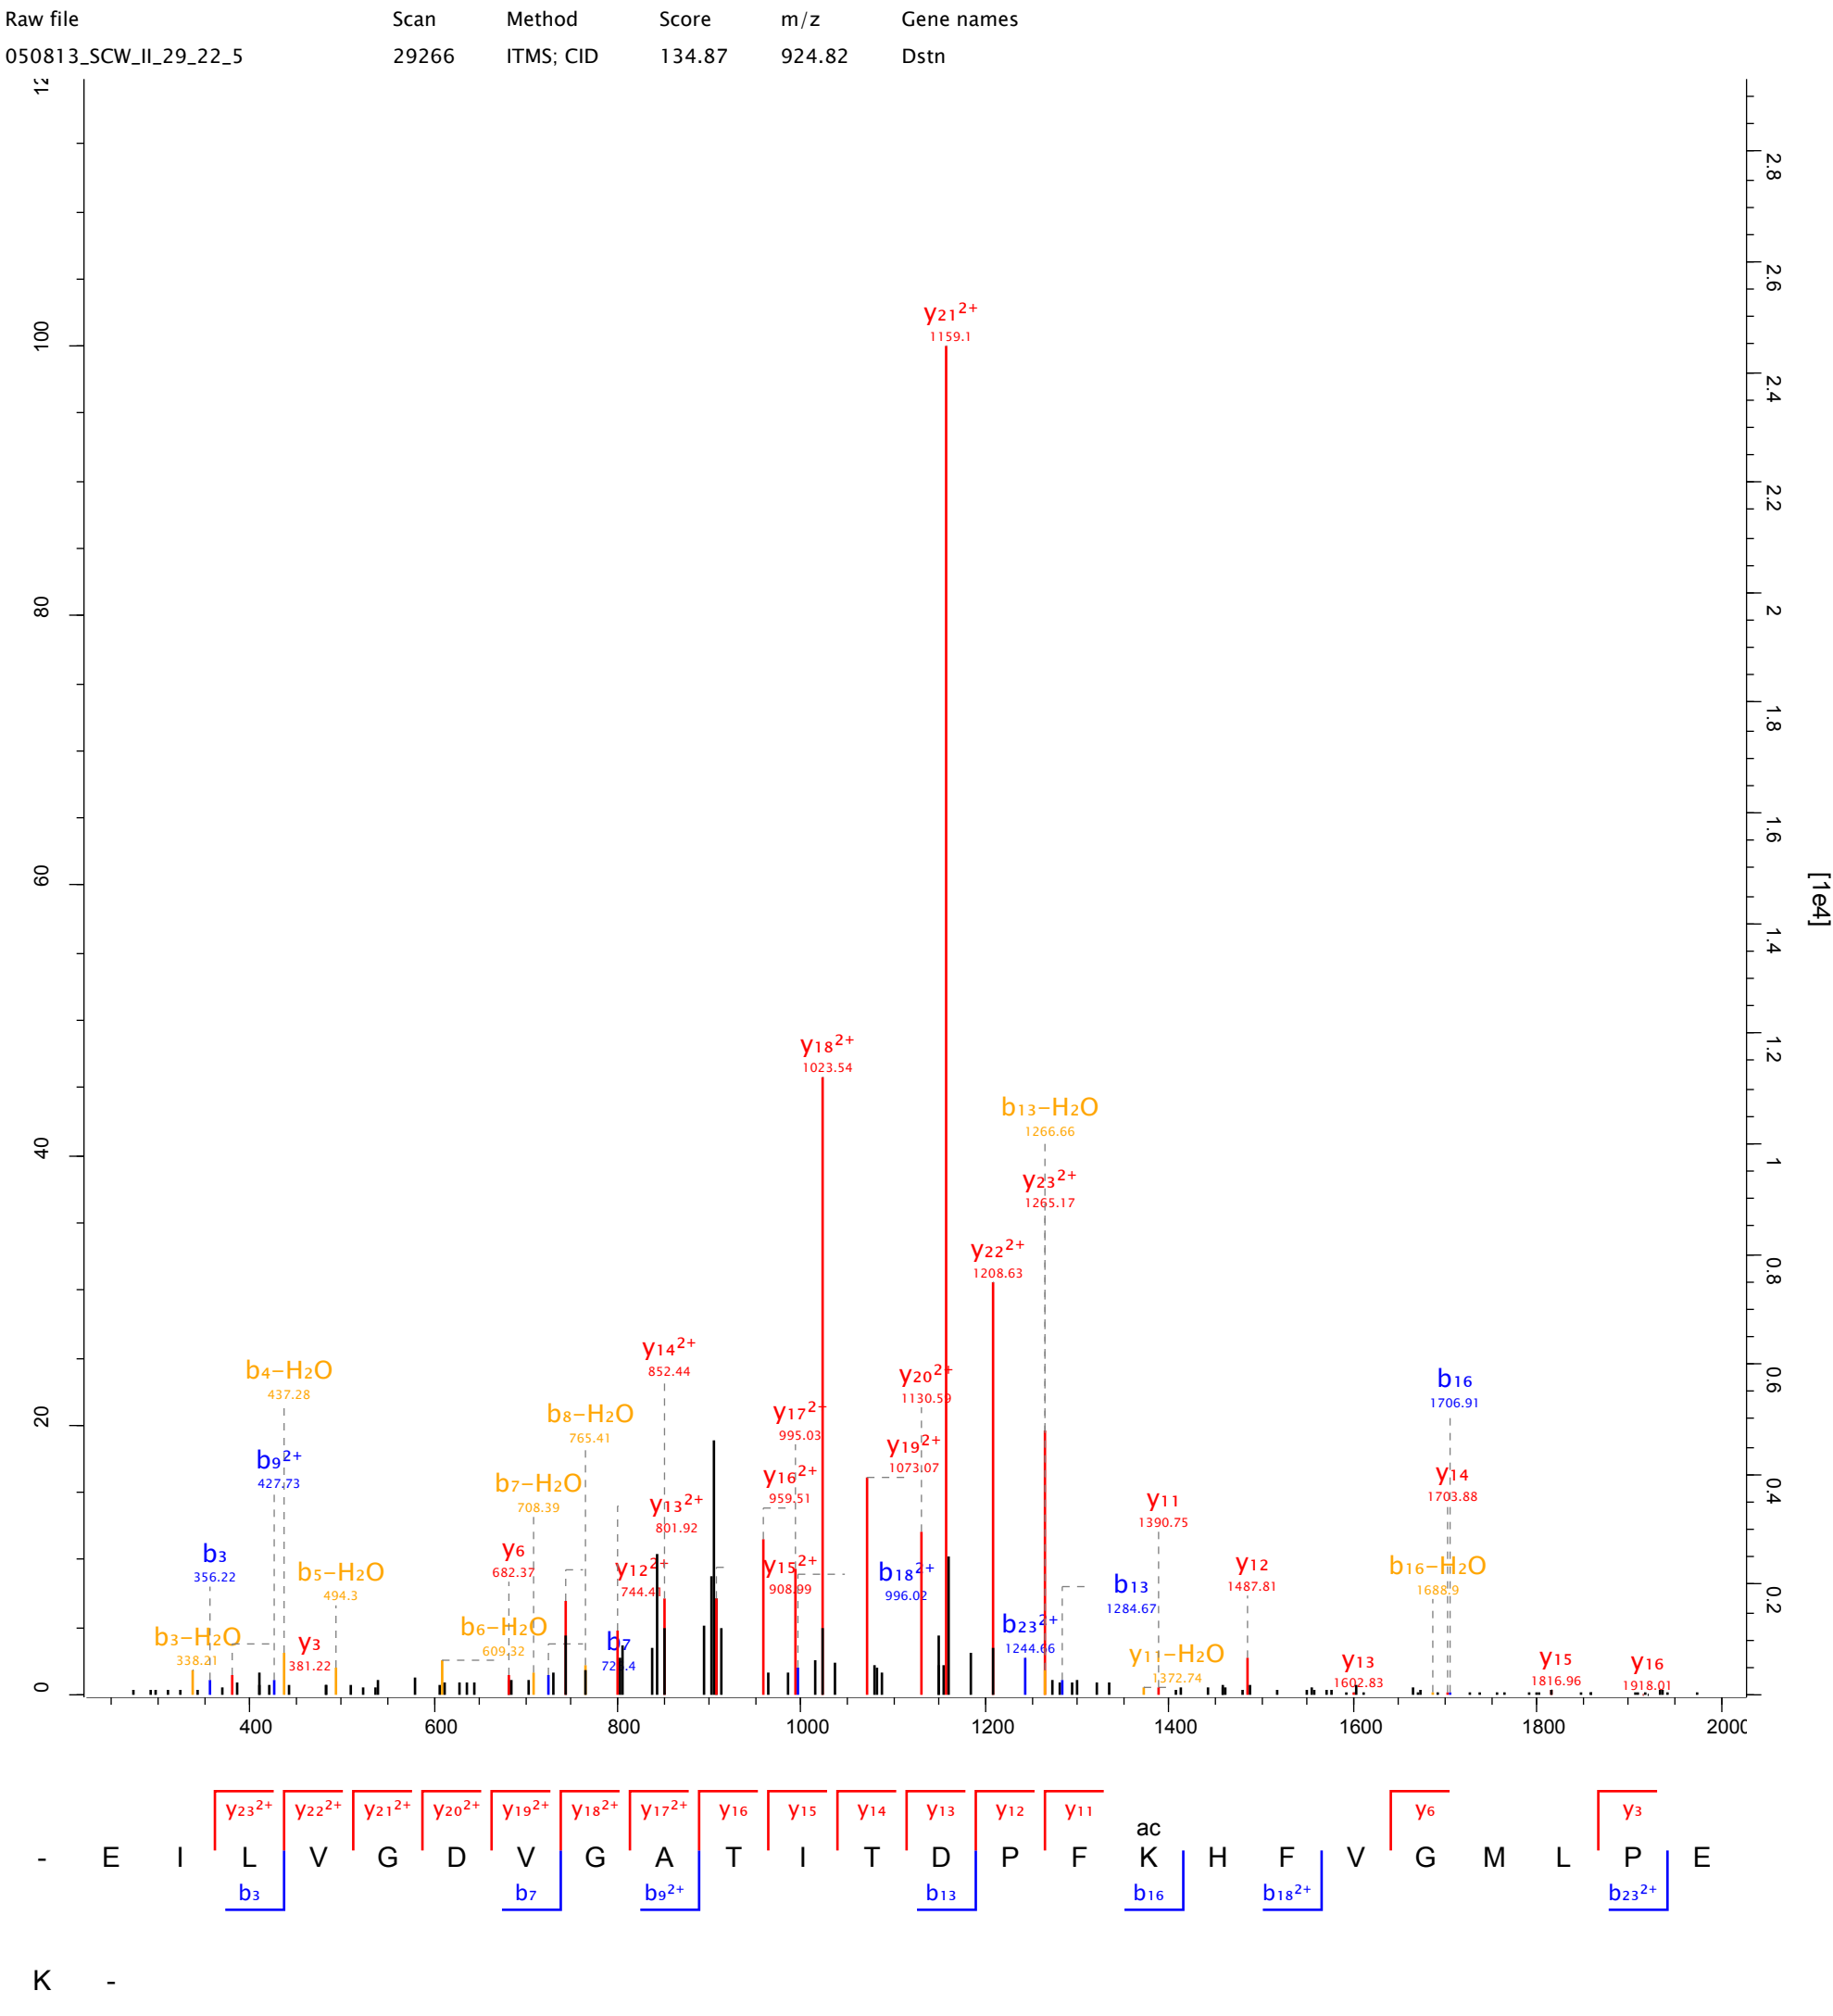

Raw file 052413\_SCW\_II\_29\_Second\_ZT\_4\_1 Scan 5987 Method ITMS; CID Score 155.53 m/z 545.8 Gene names Cbx3

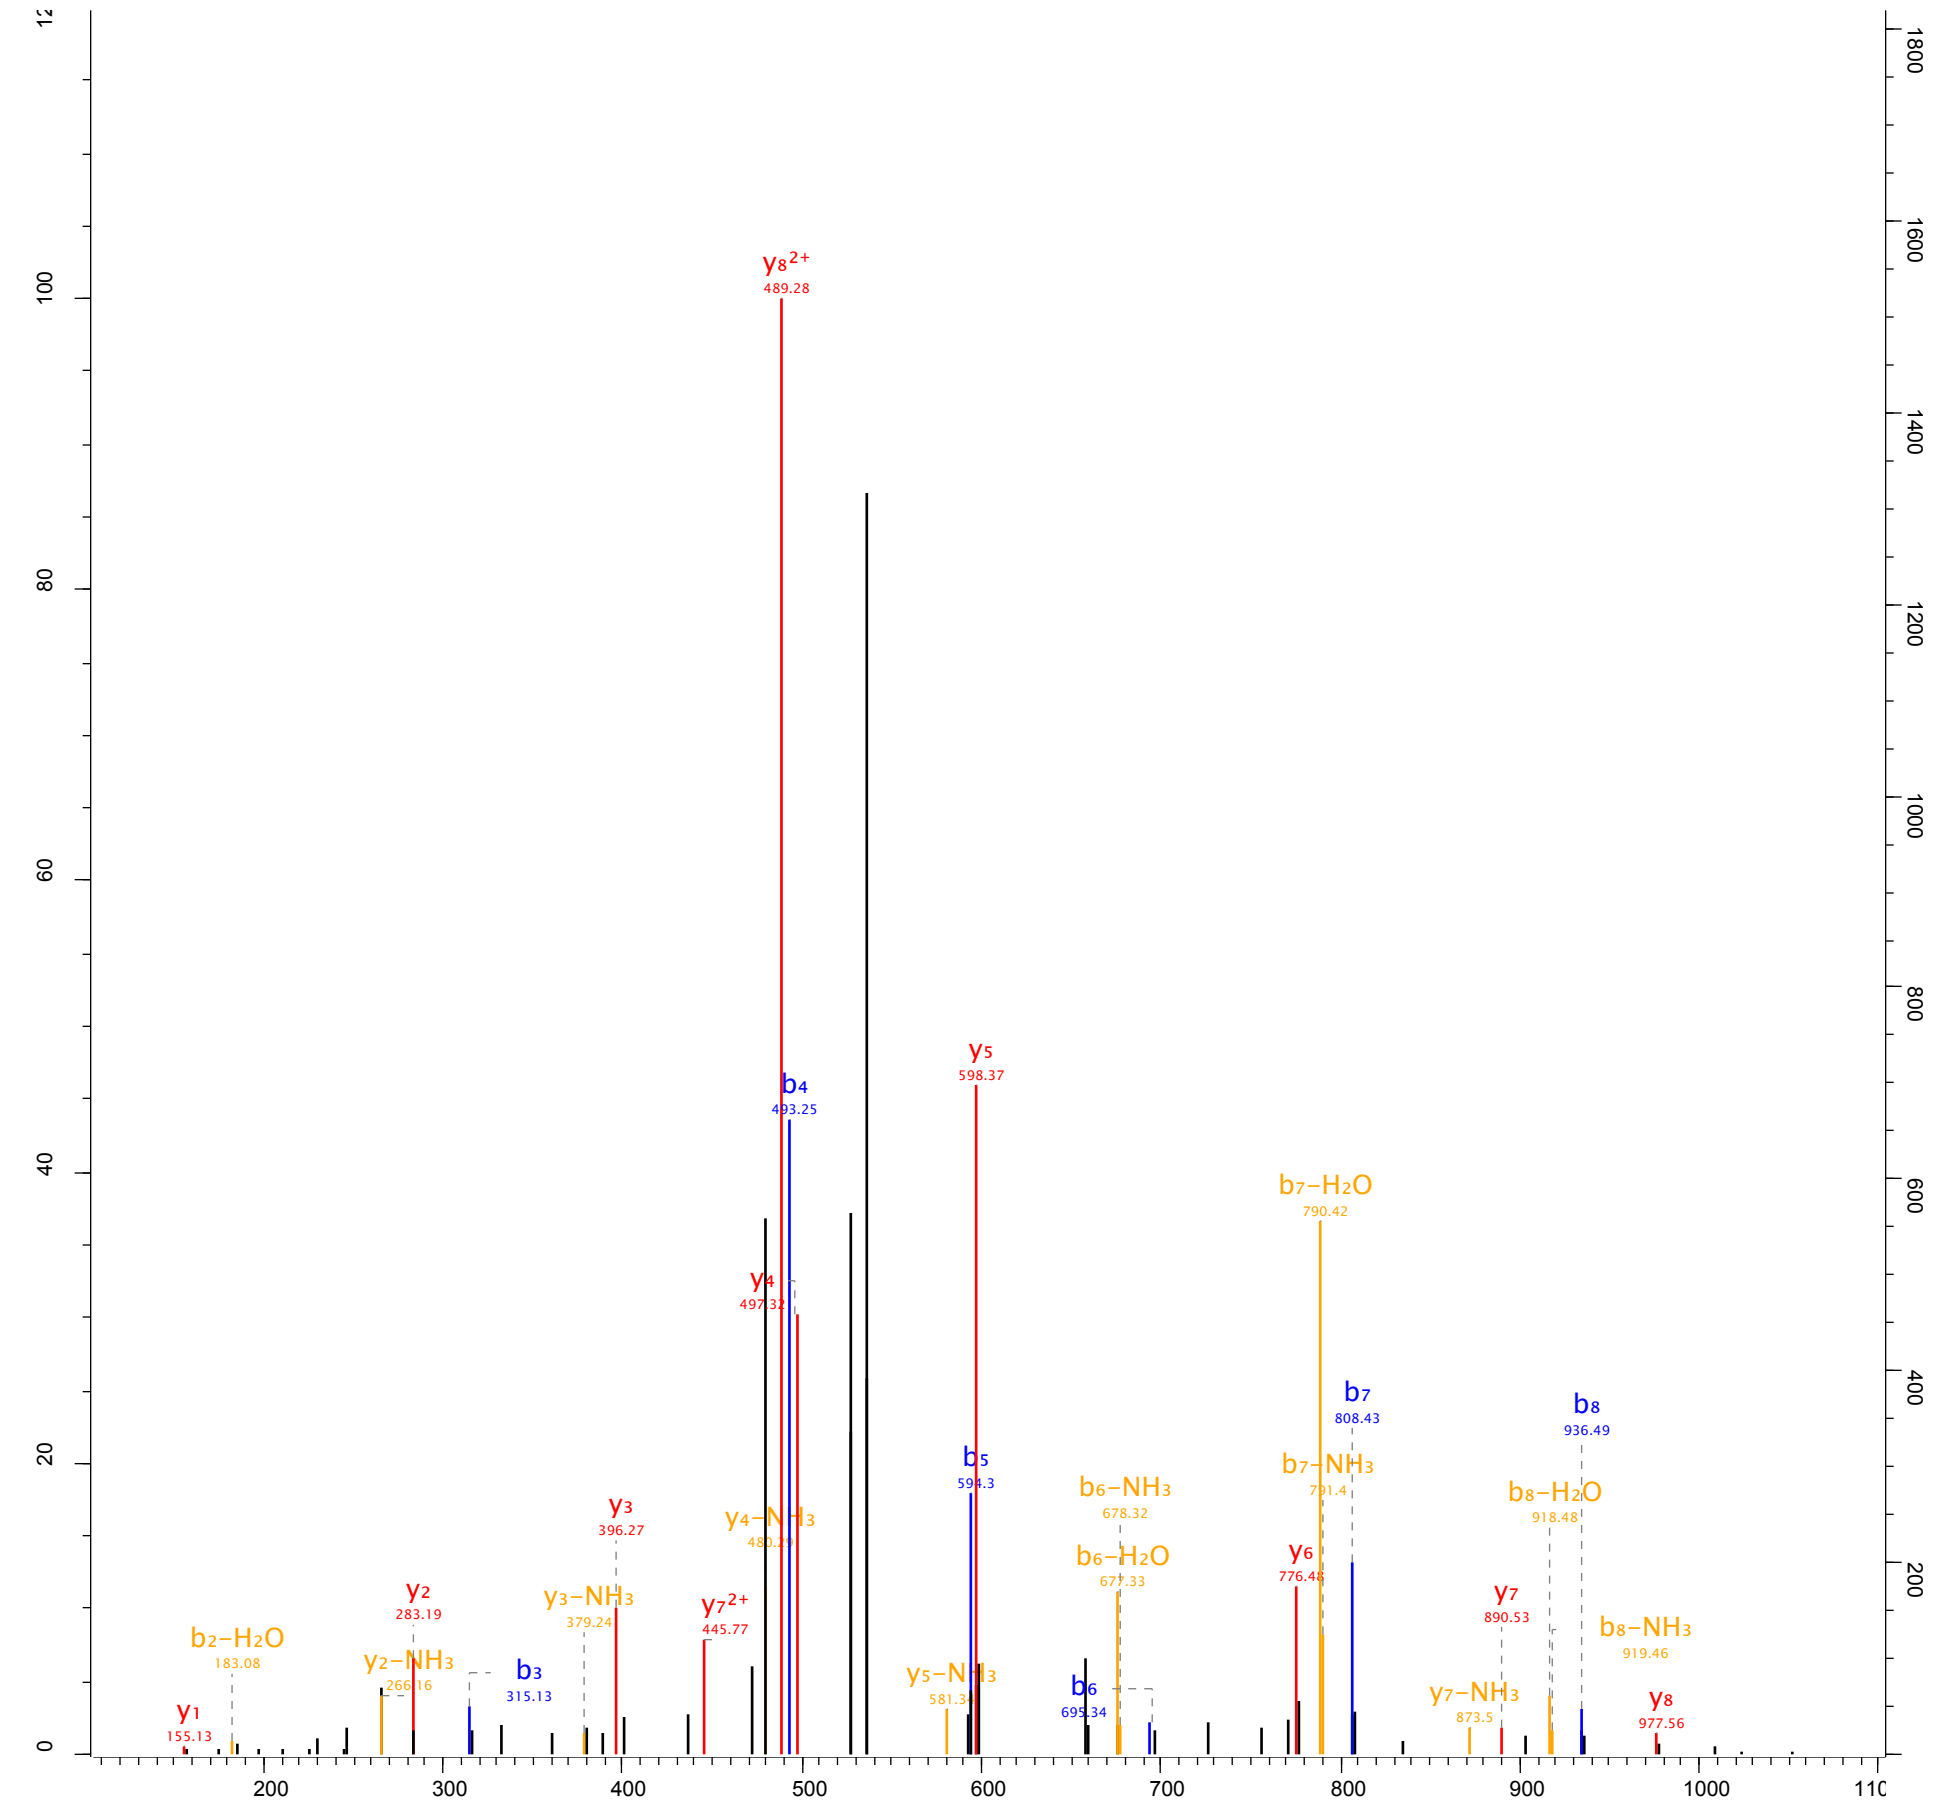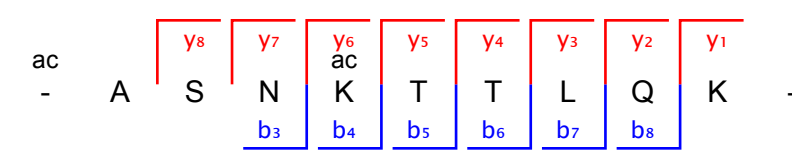

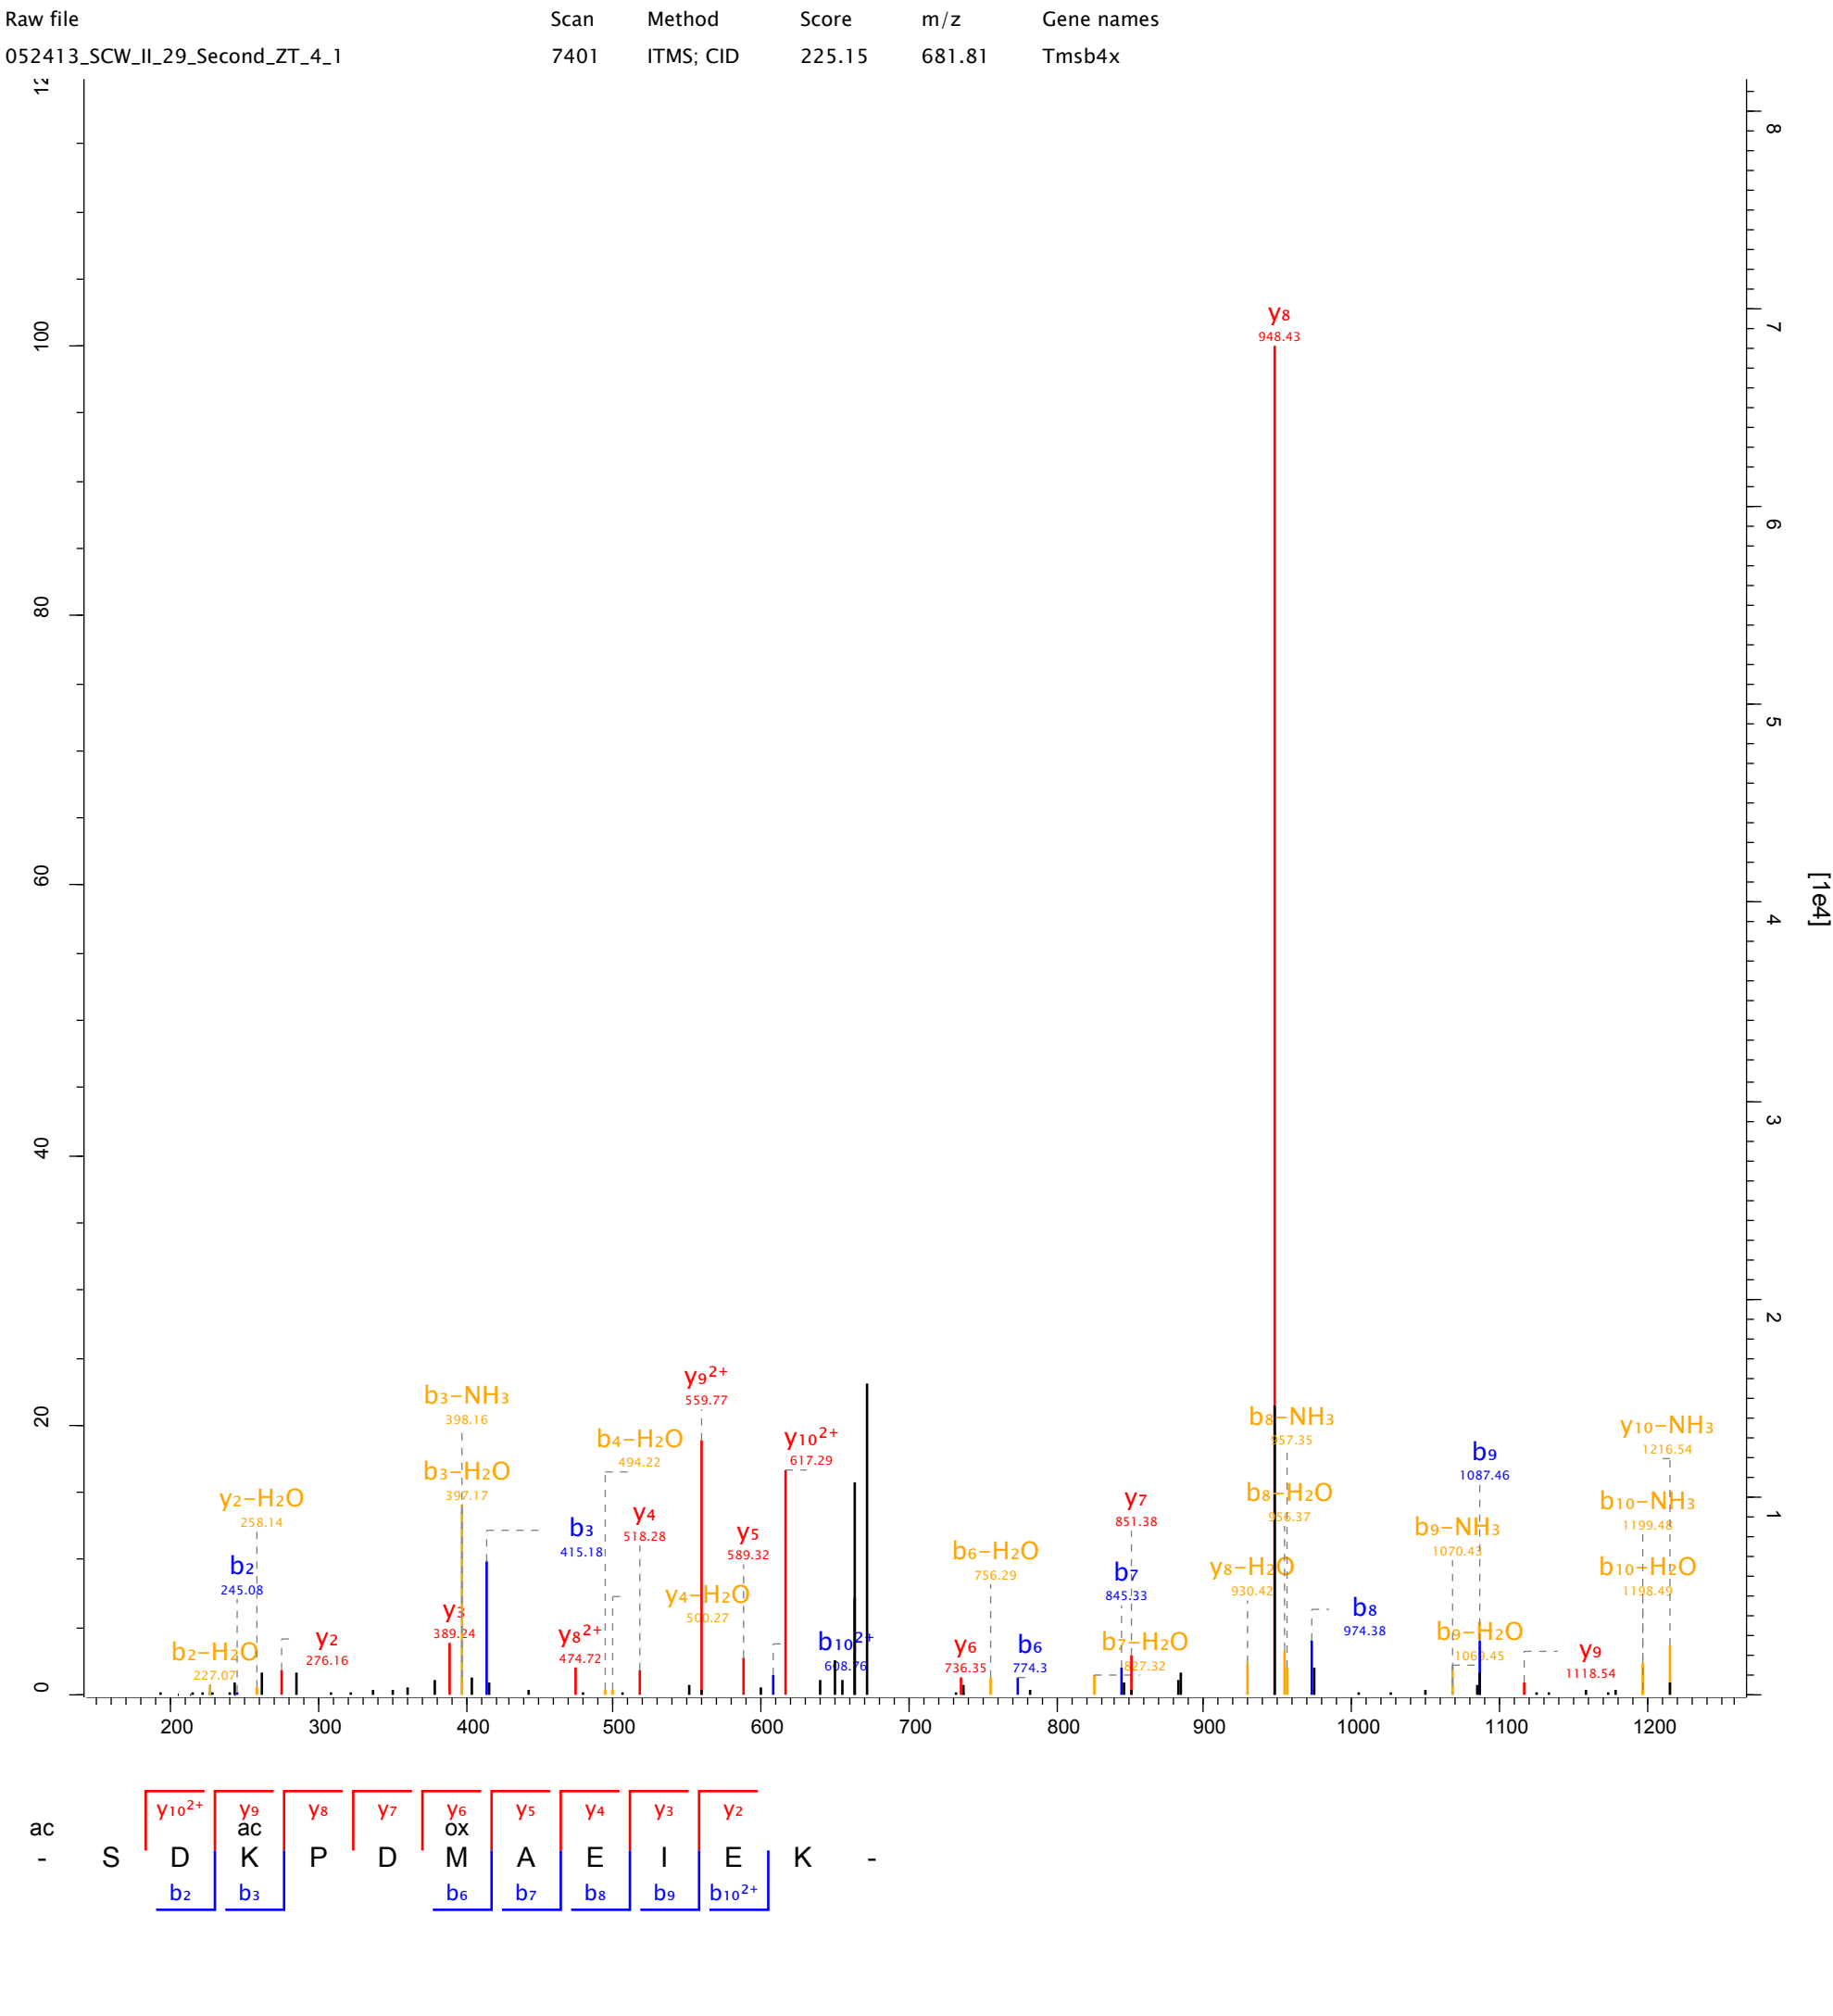

052413\_SCW\_II\_29\_Second\_ZT\_4\_1

14656

ITMS; CID

133.05

722.33

Mtpn

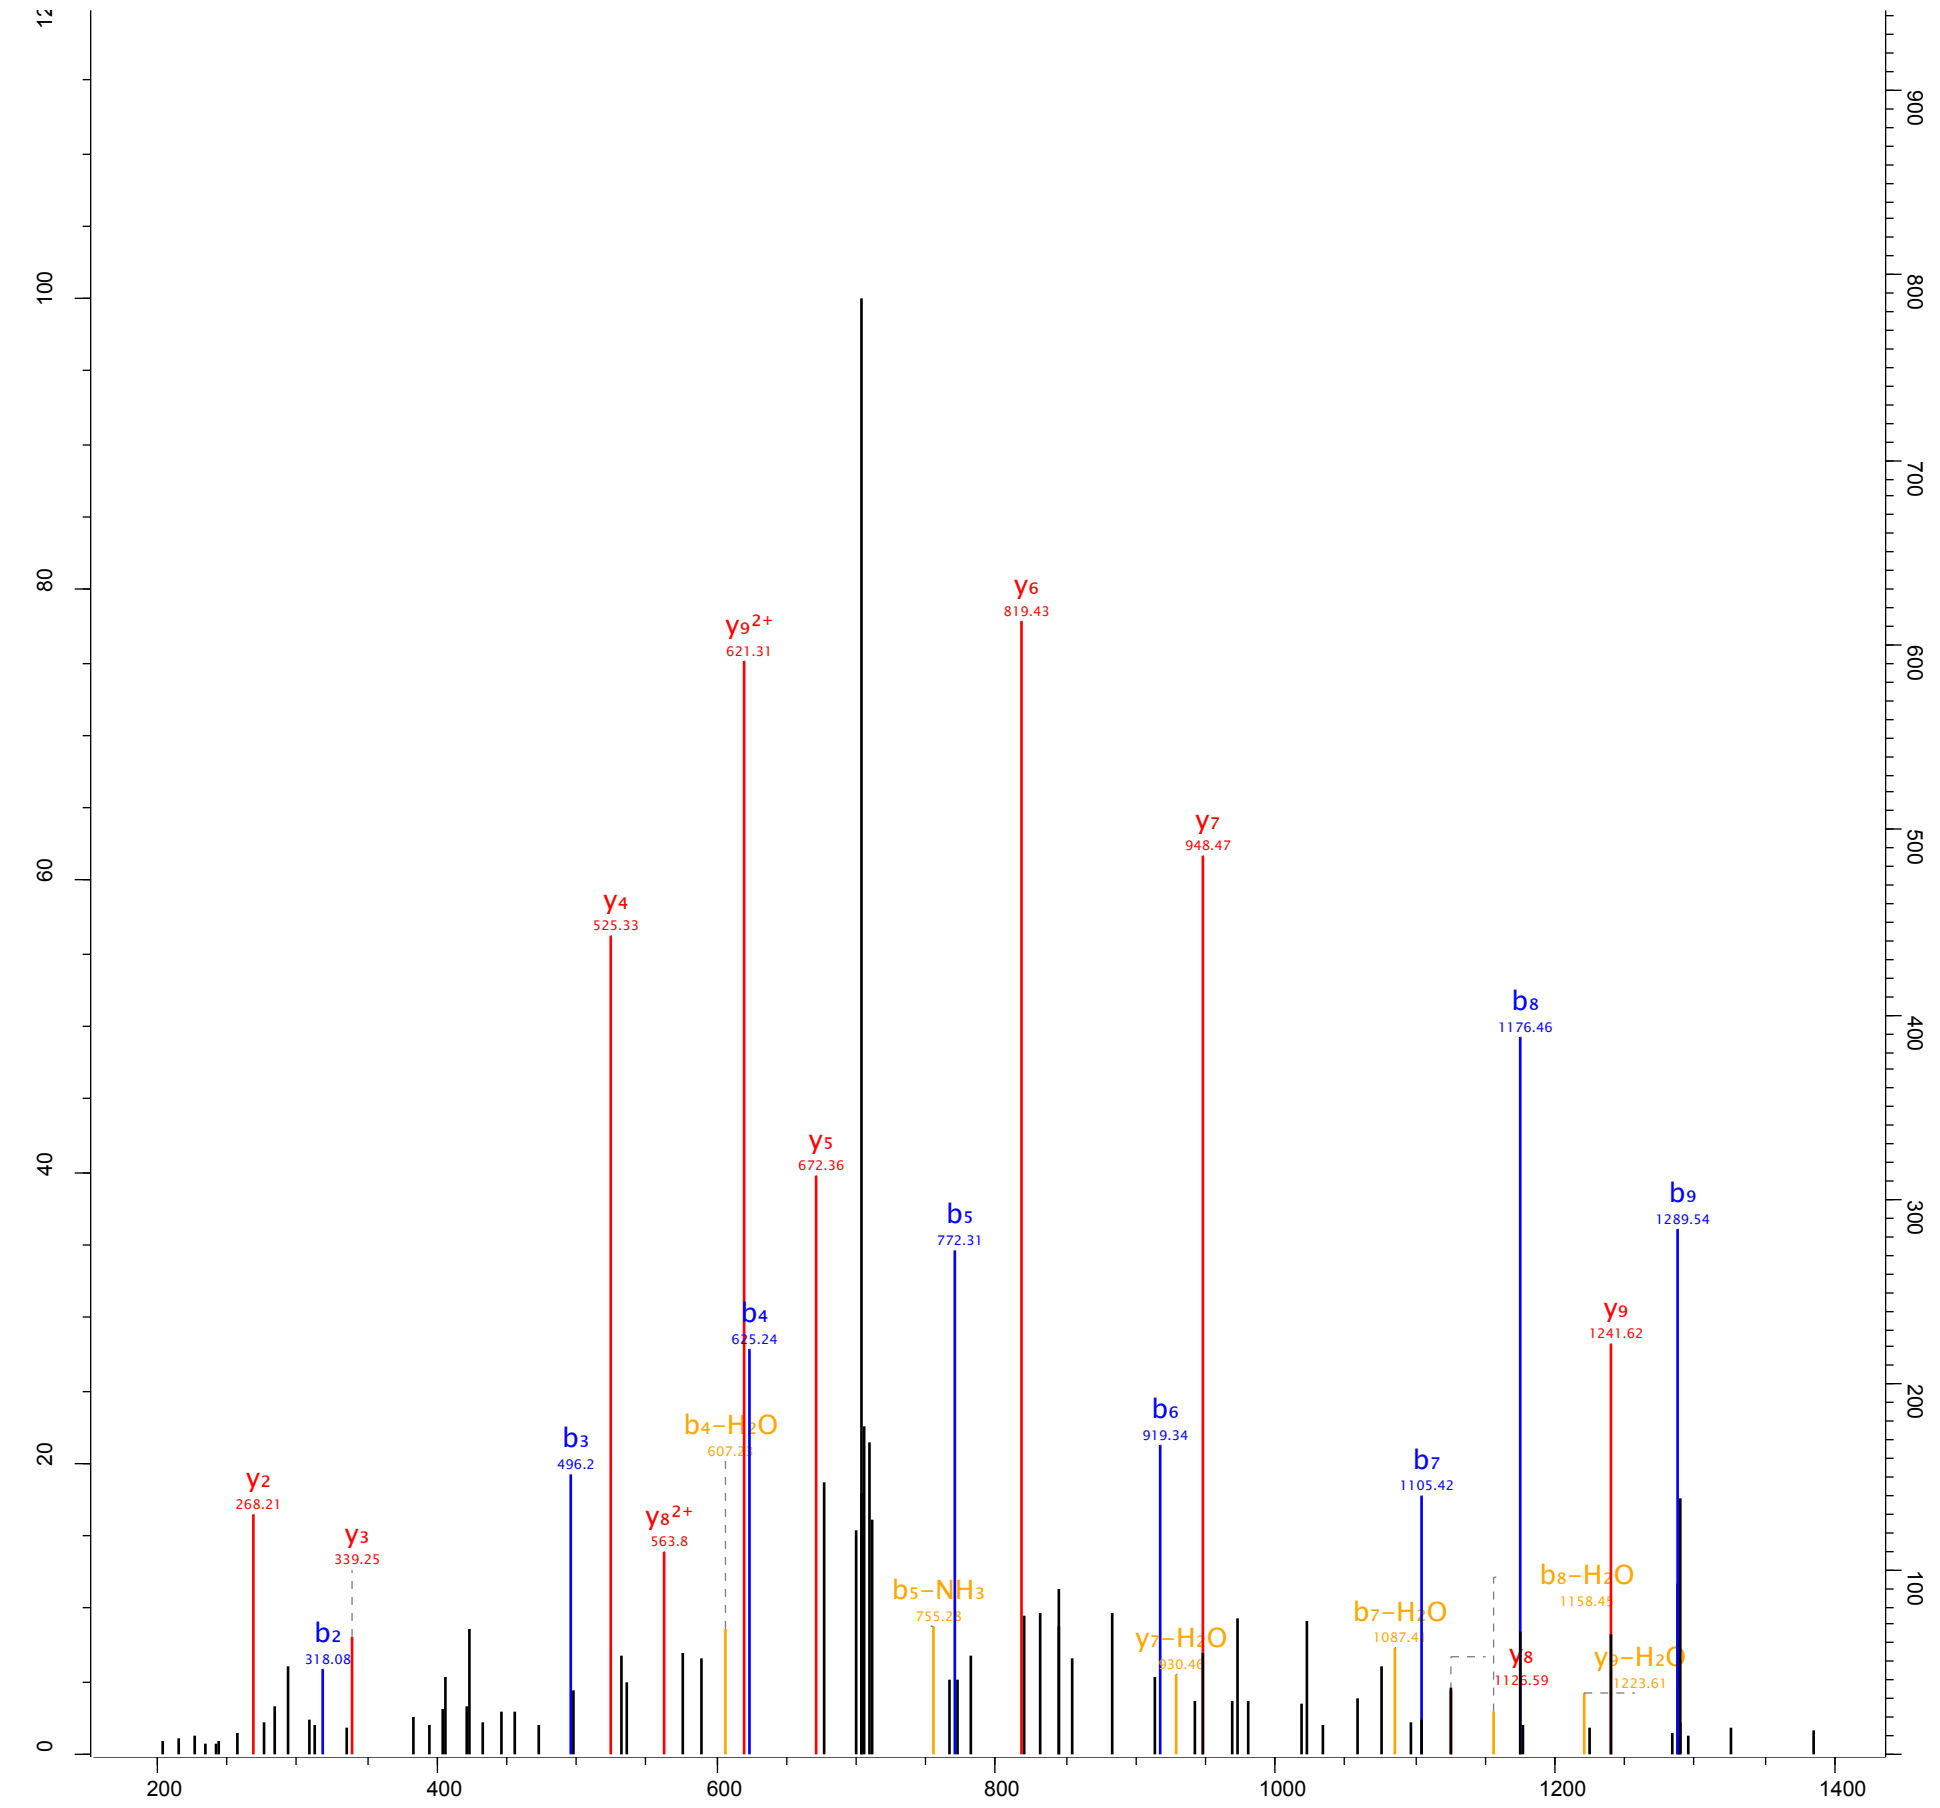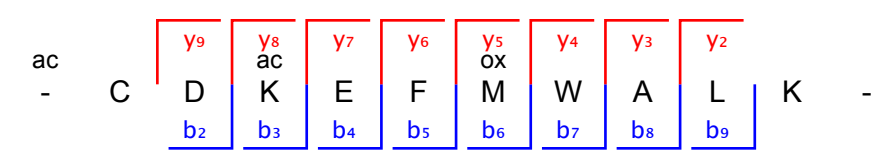

052413\_SCW\_II\_29\_Second\_ZT\_4\_1

16150

ITMS; CID

126.3

969.44

Glud1

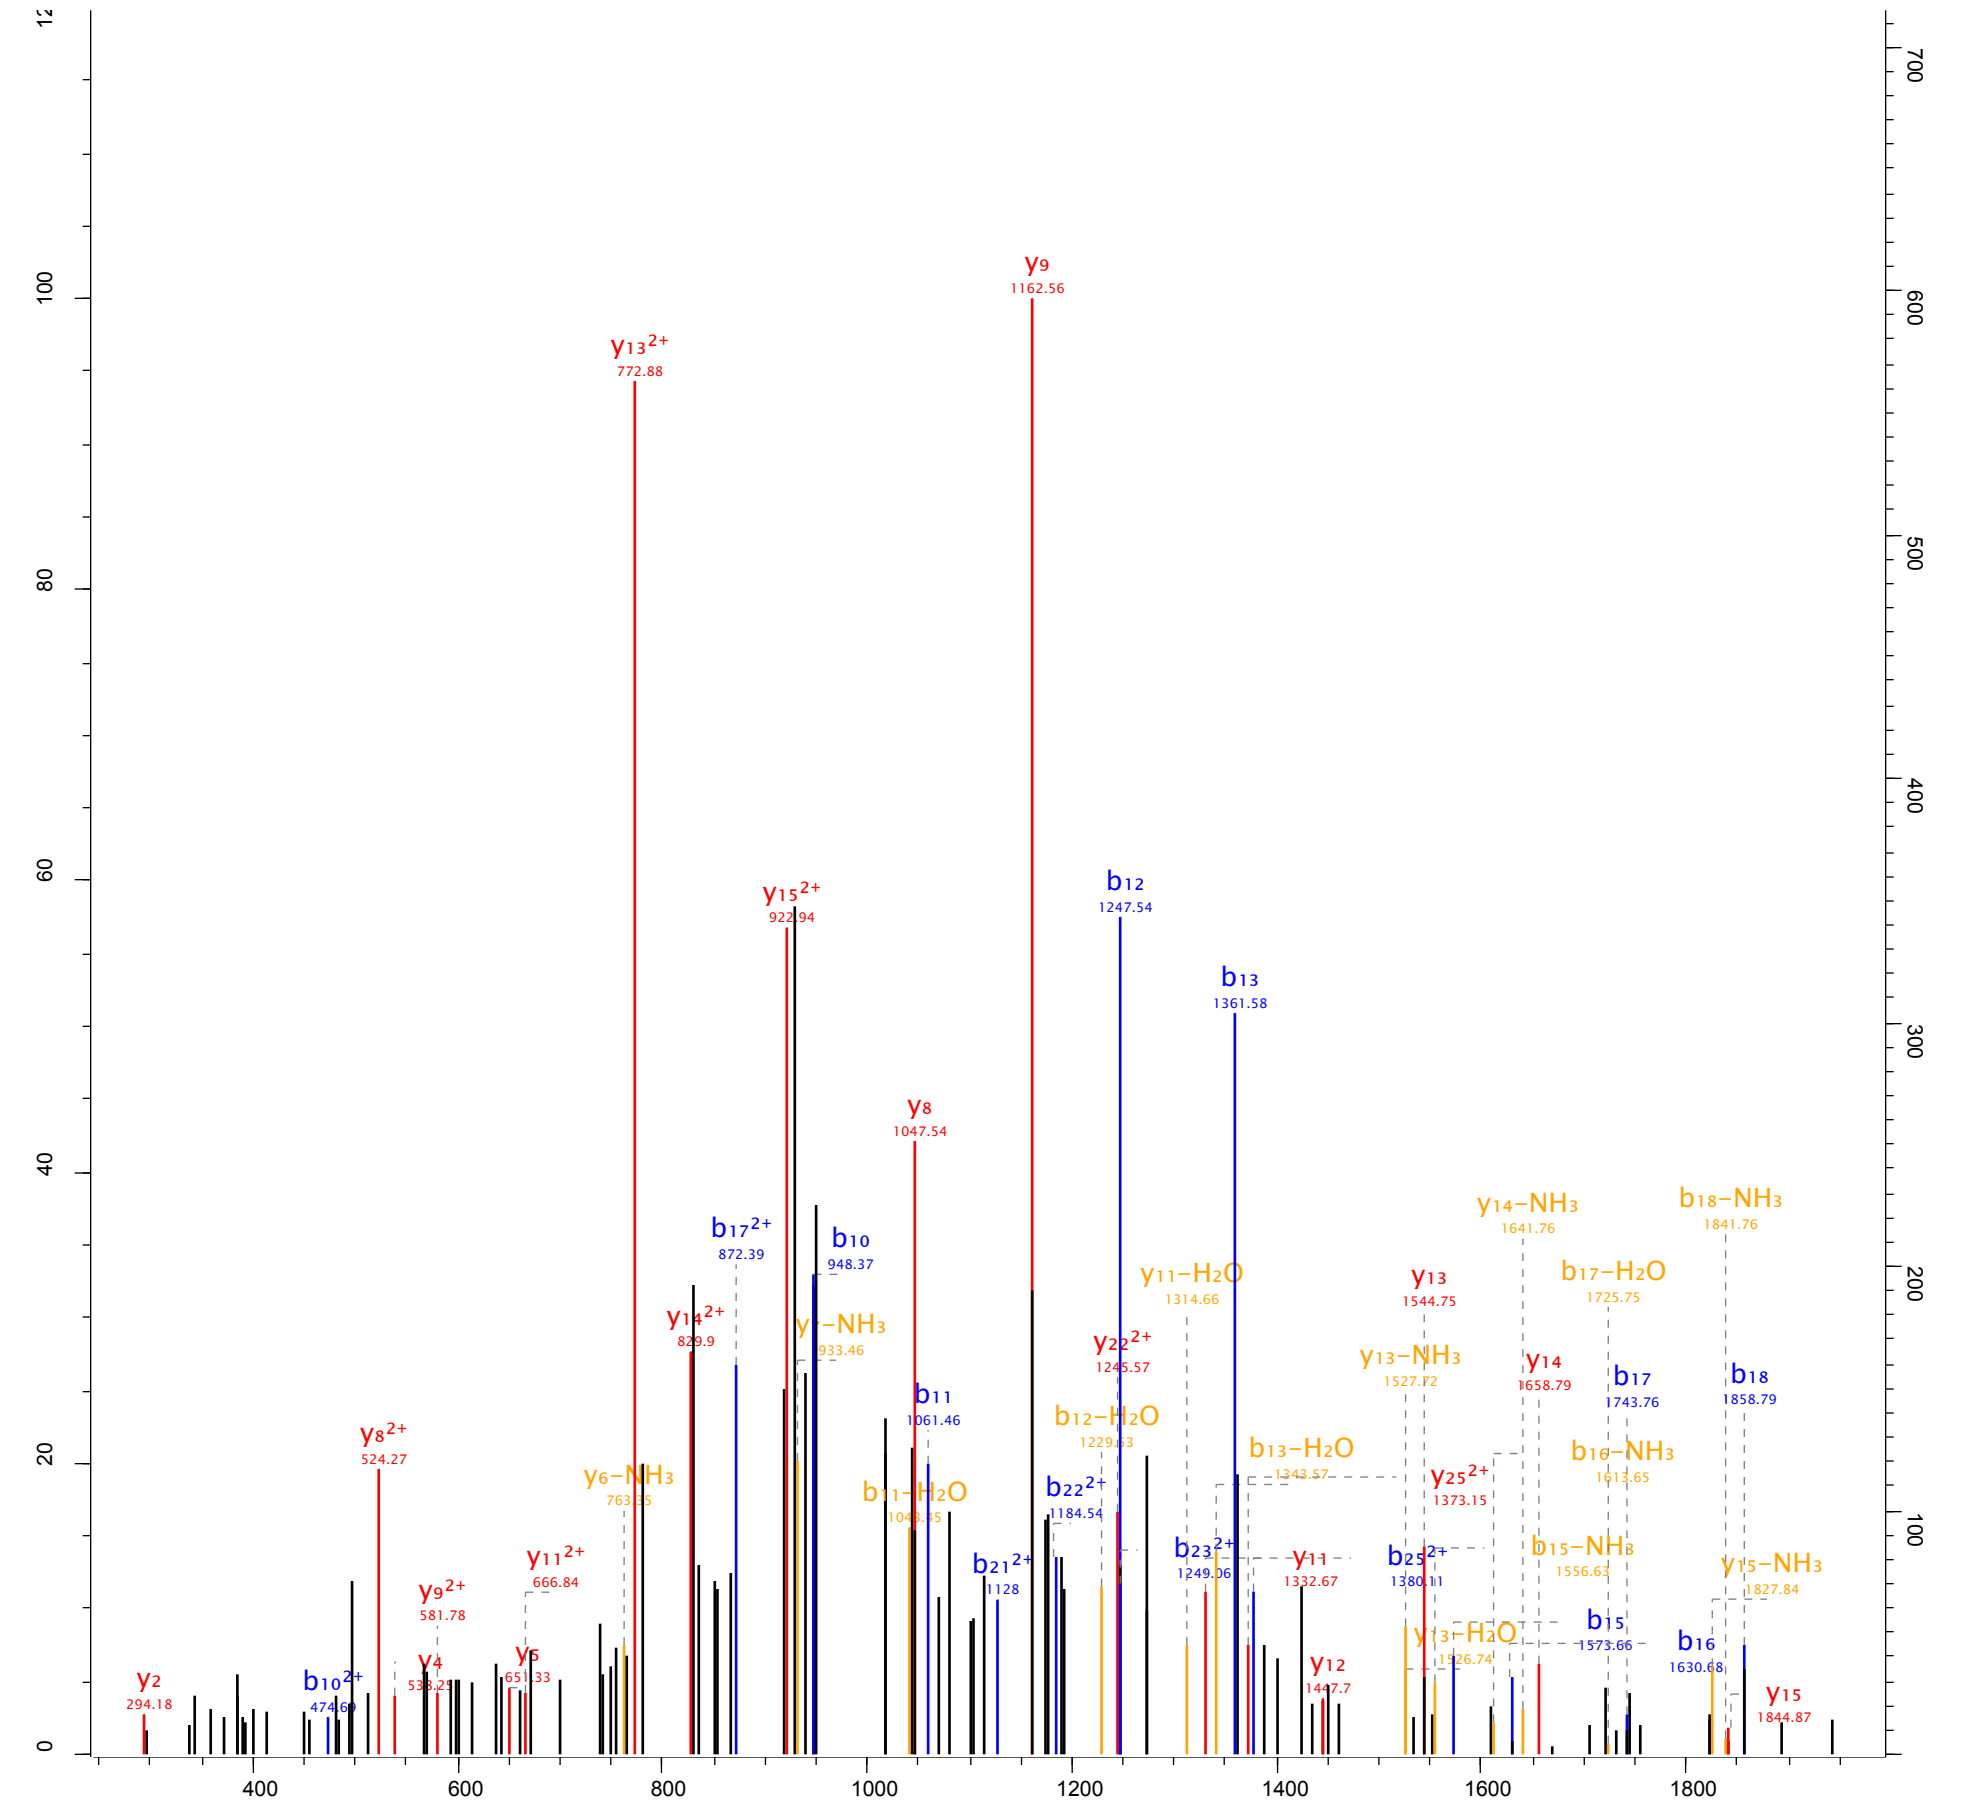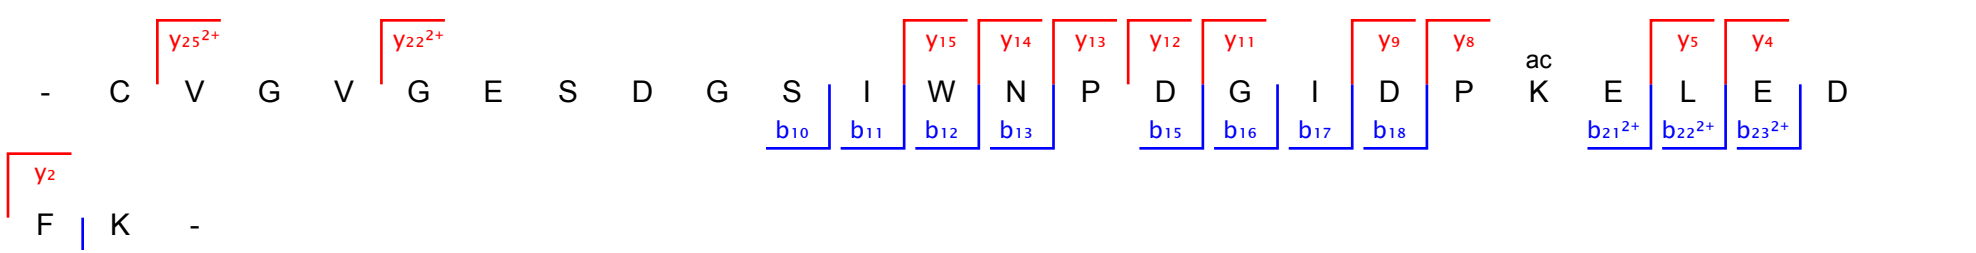



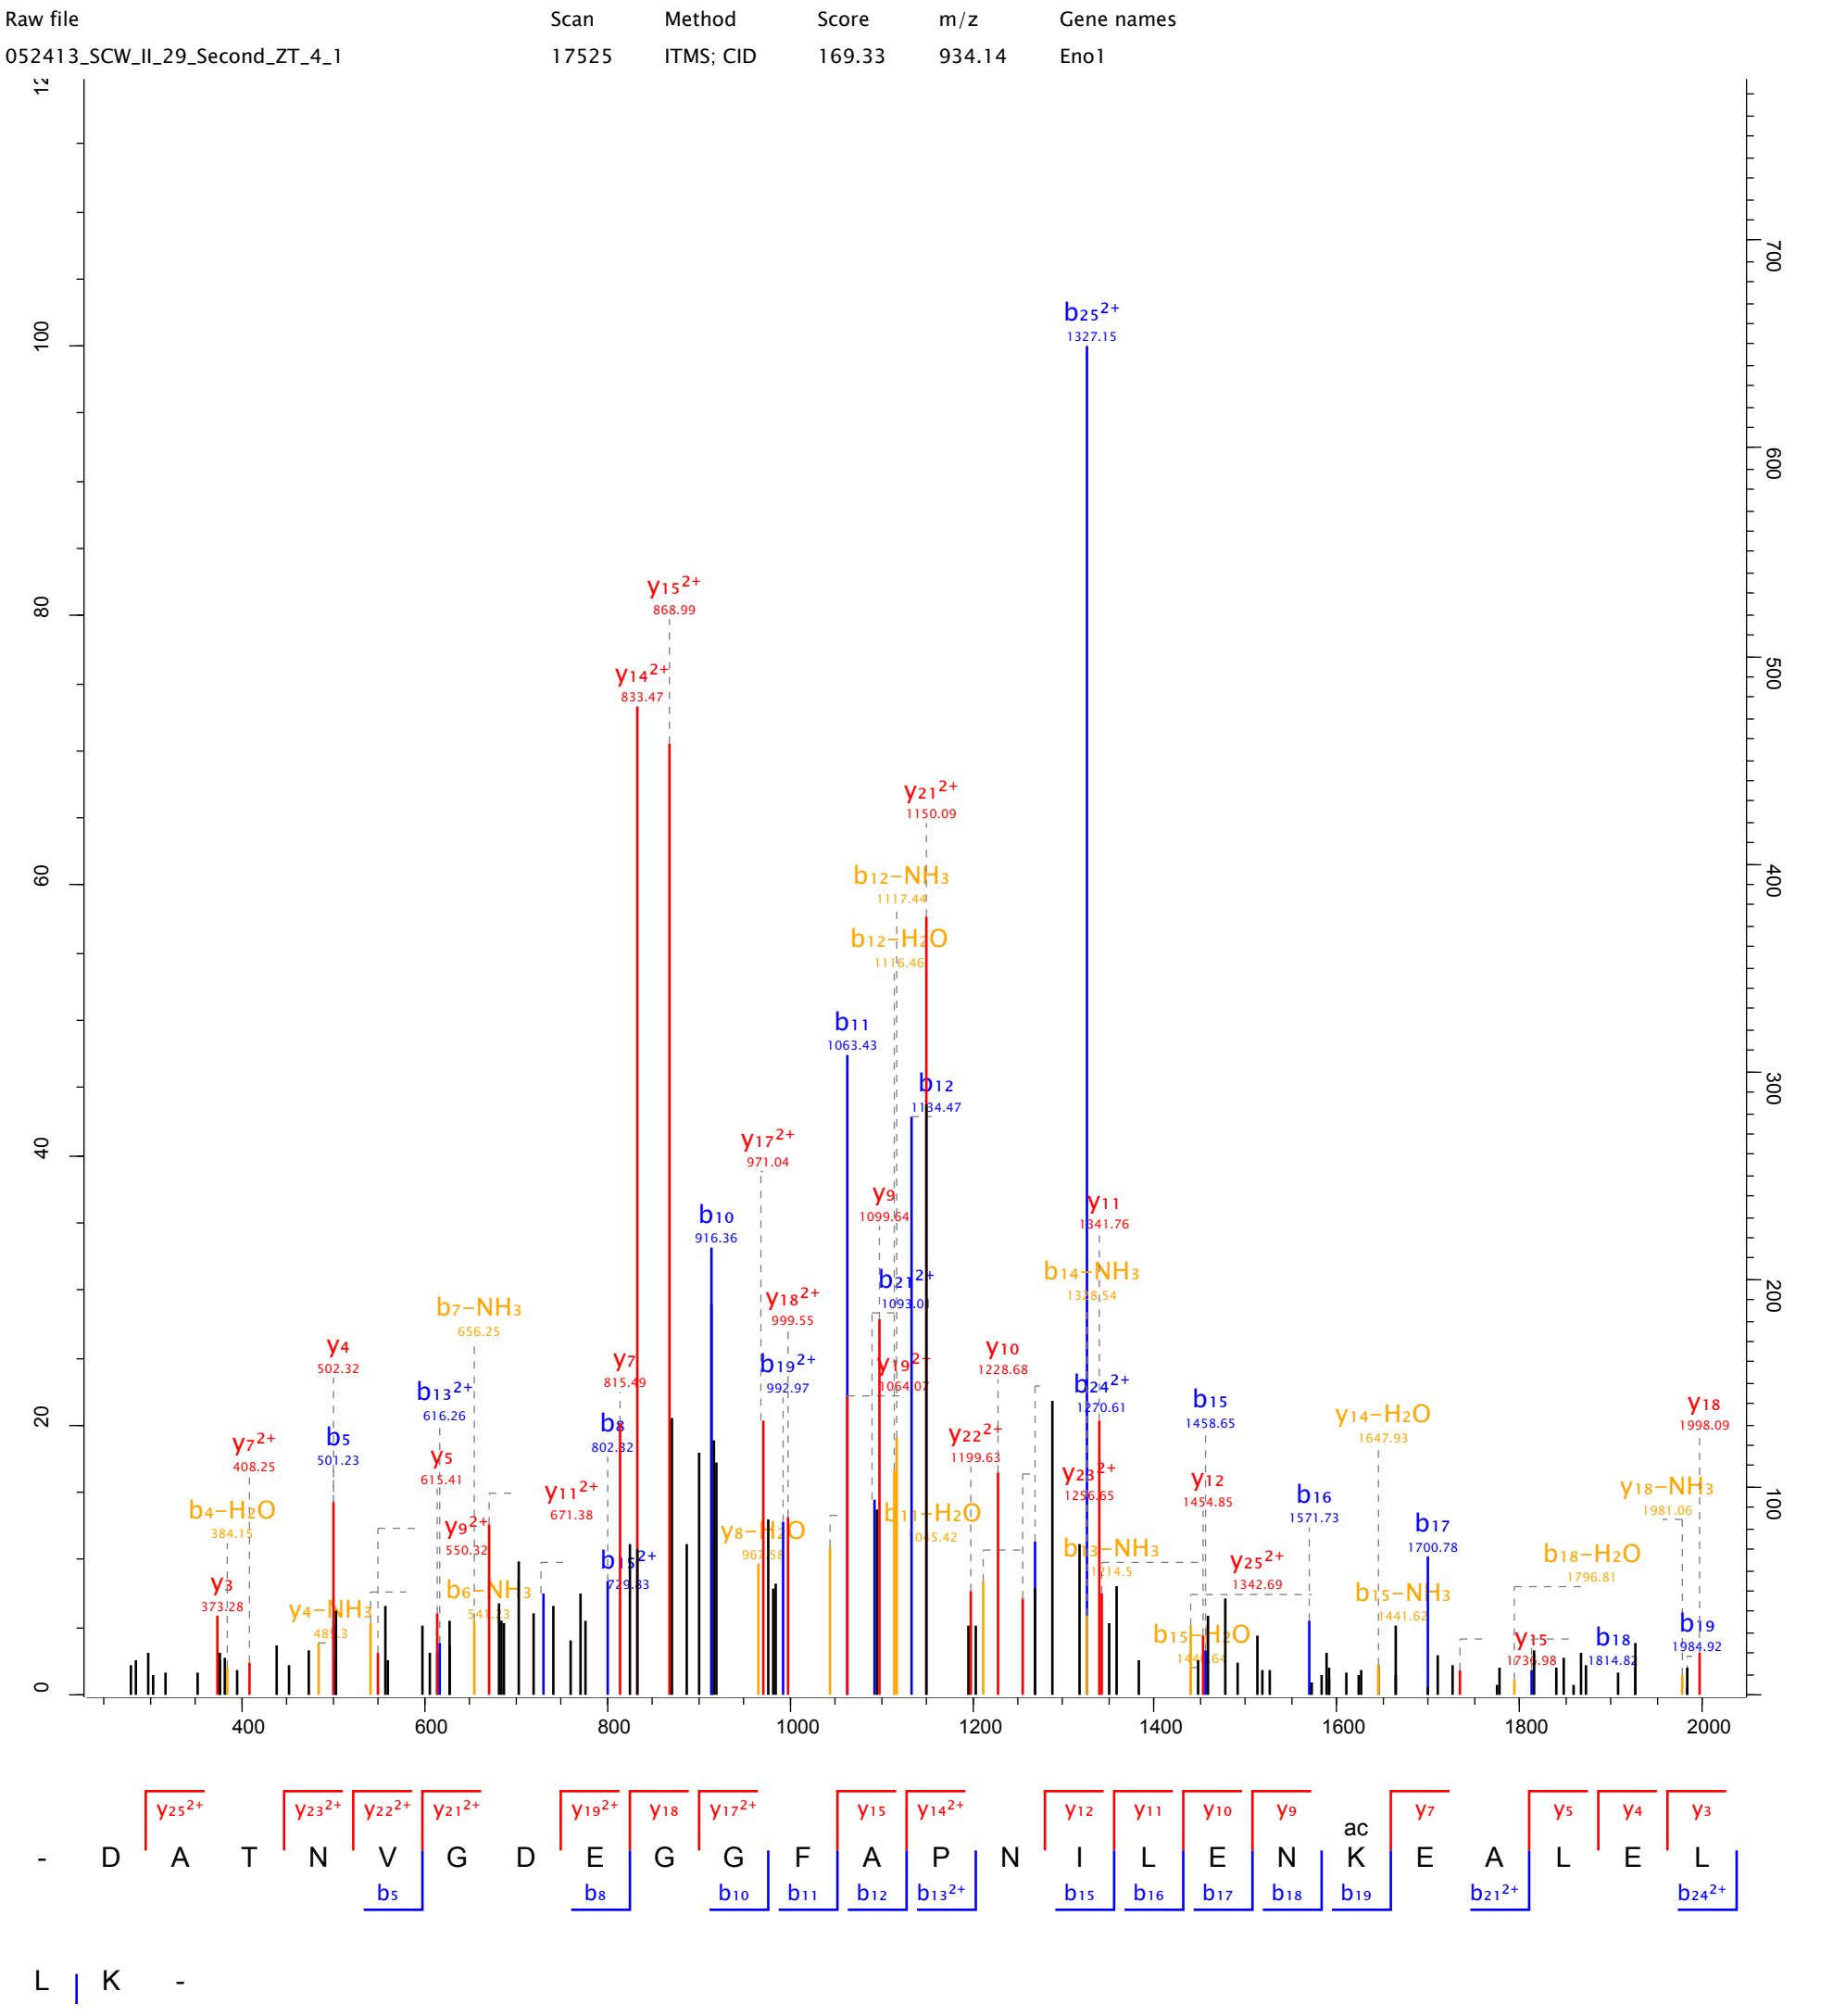

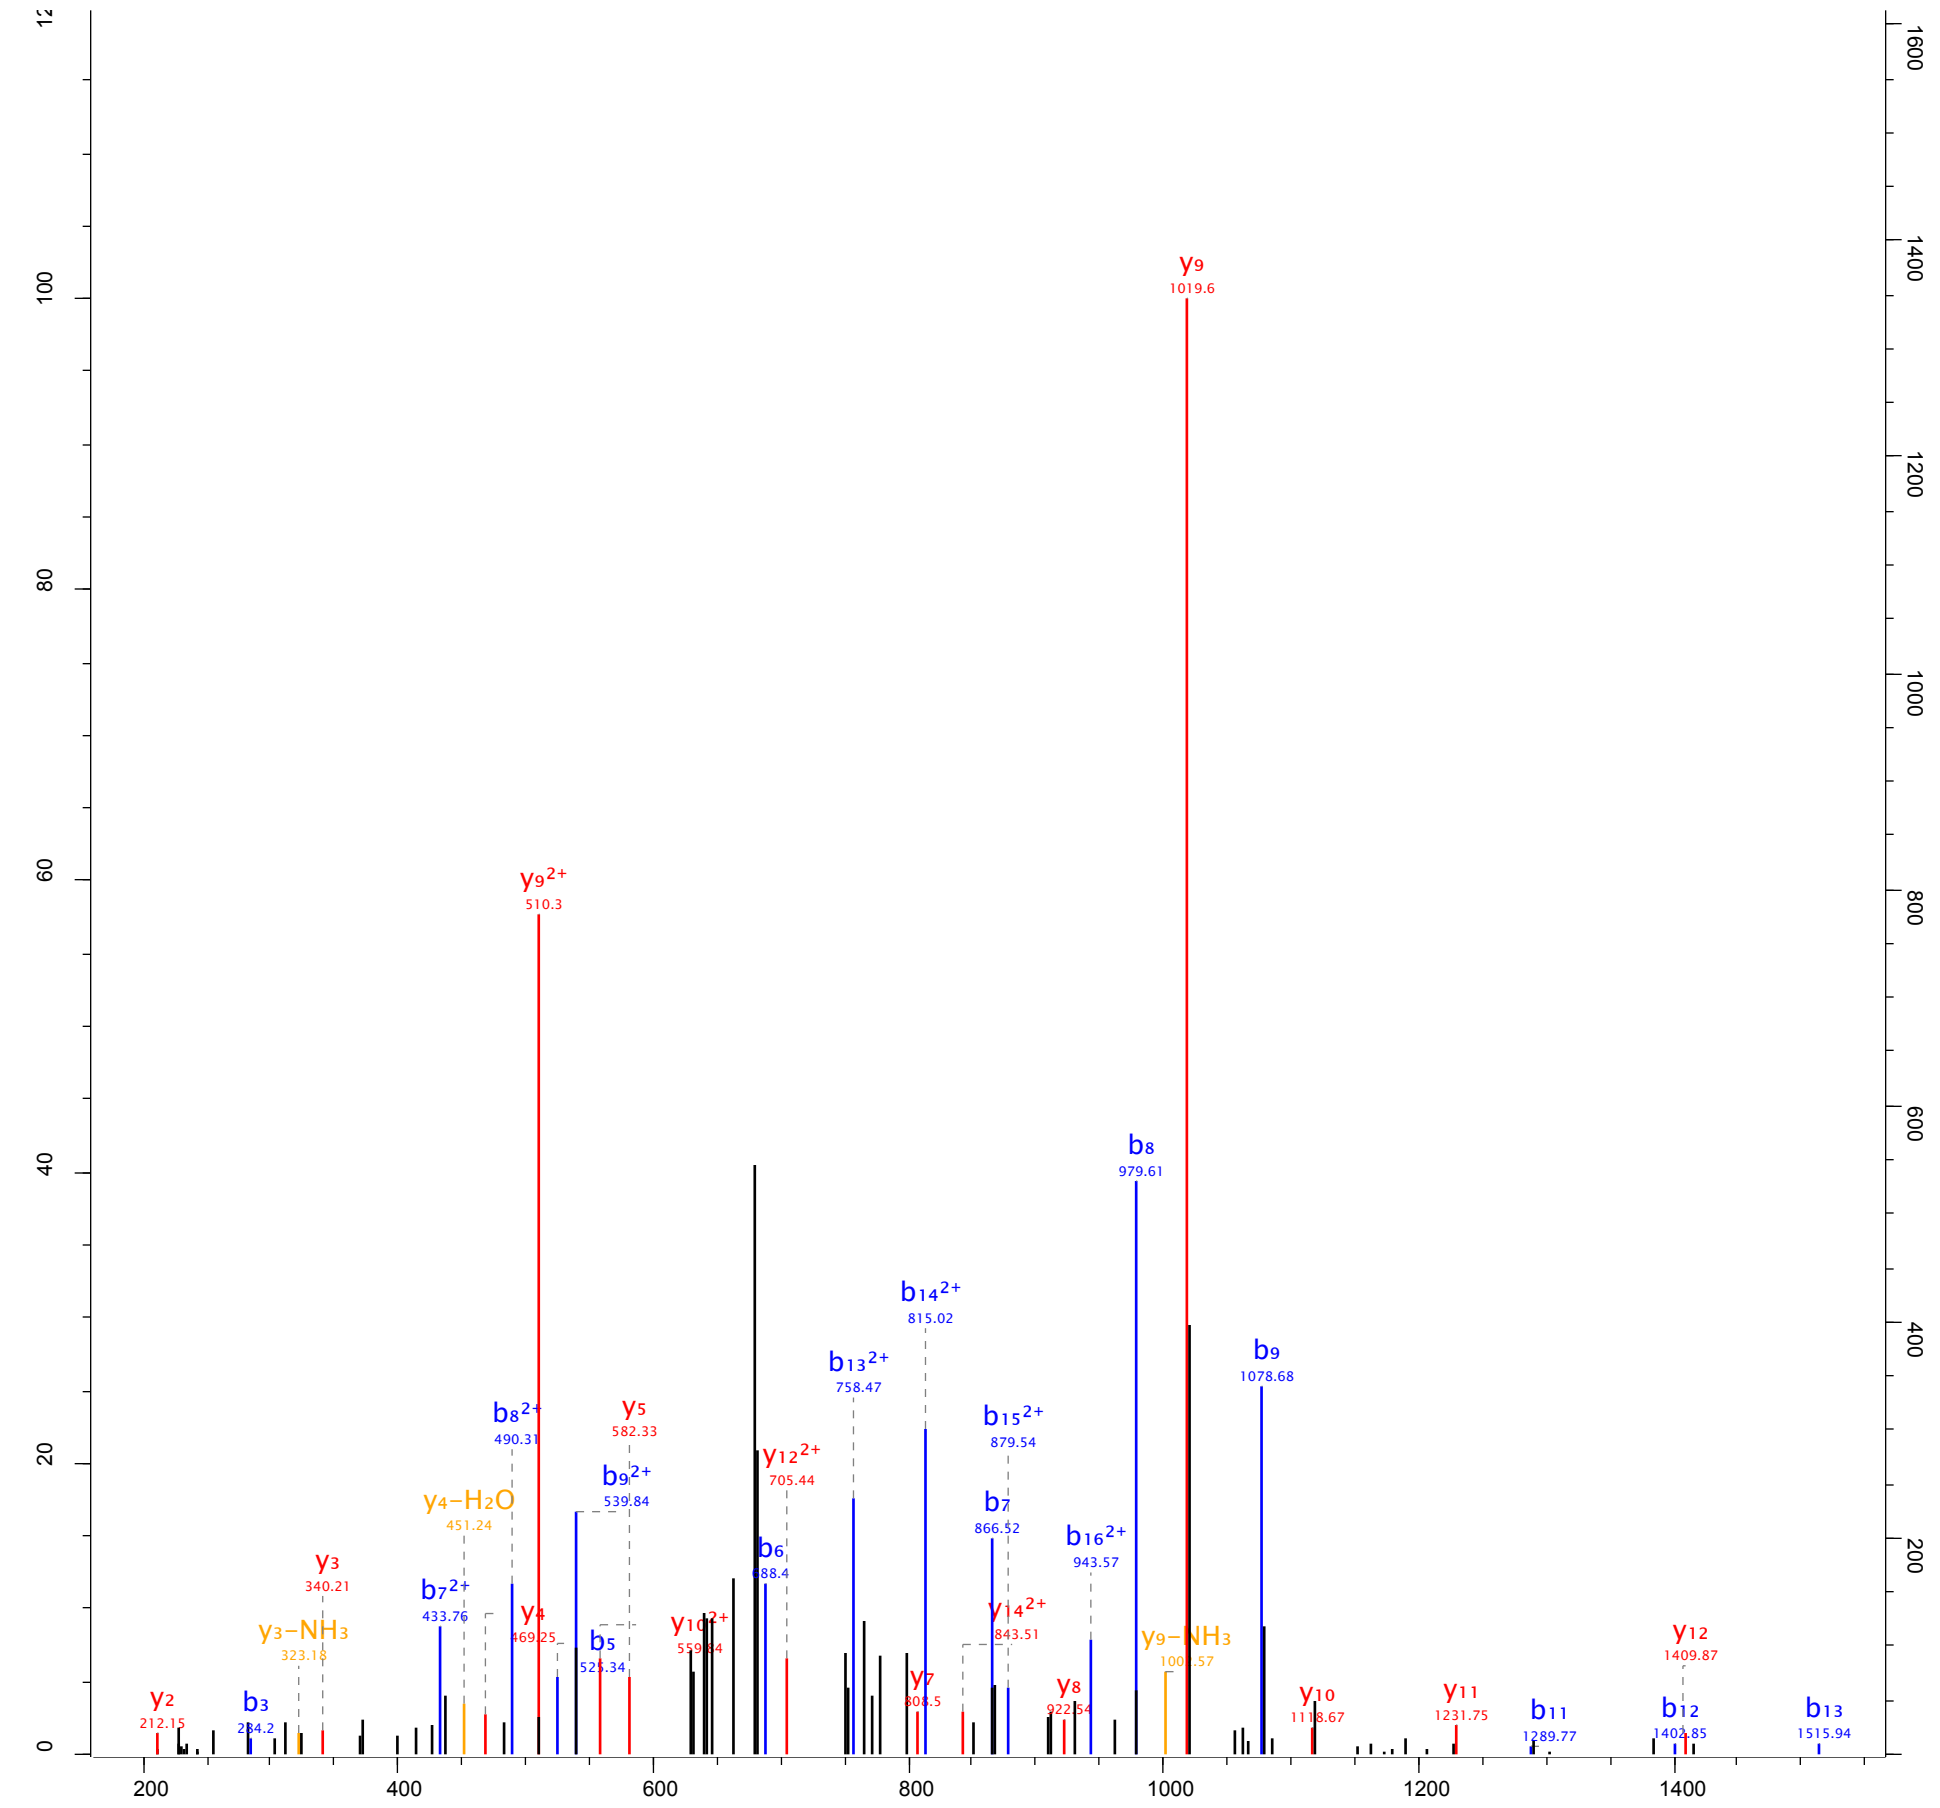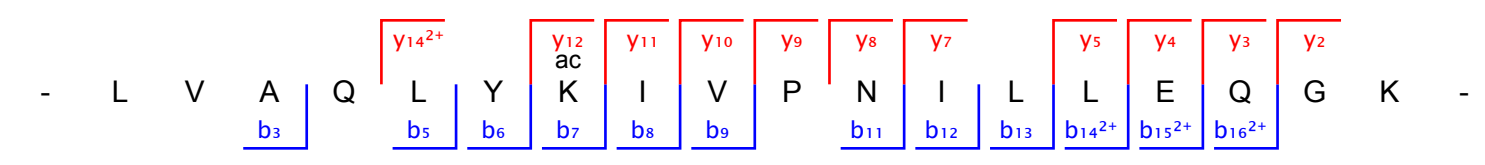

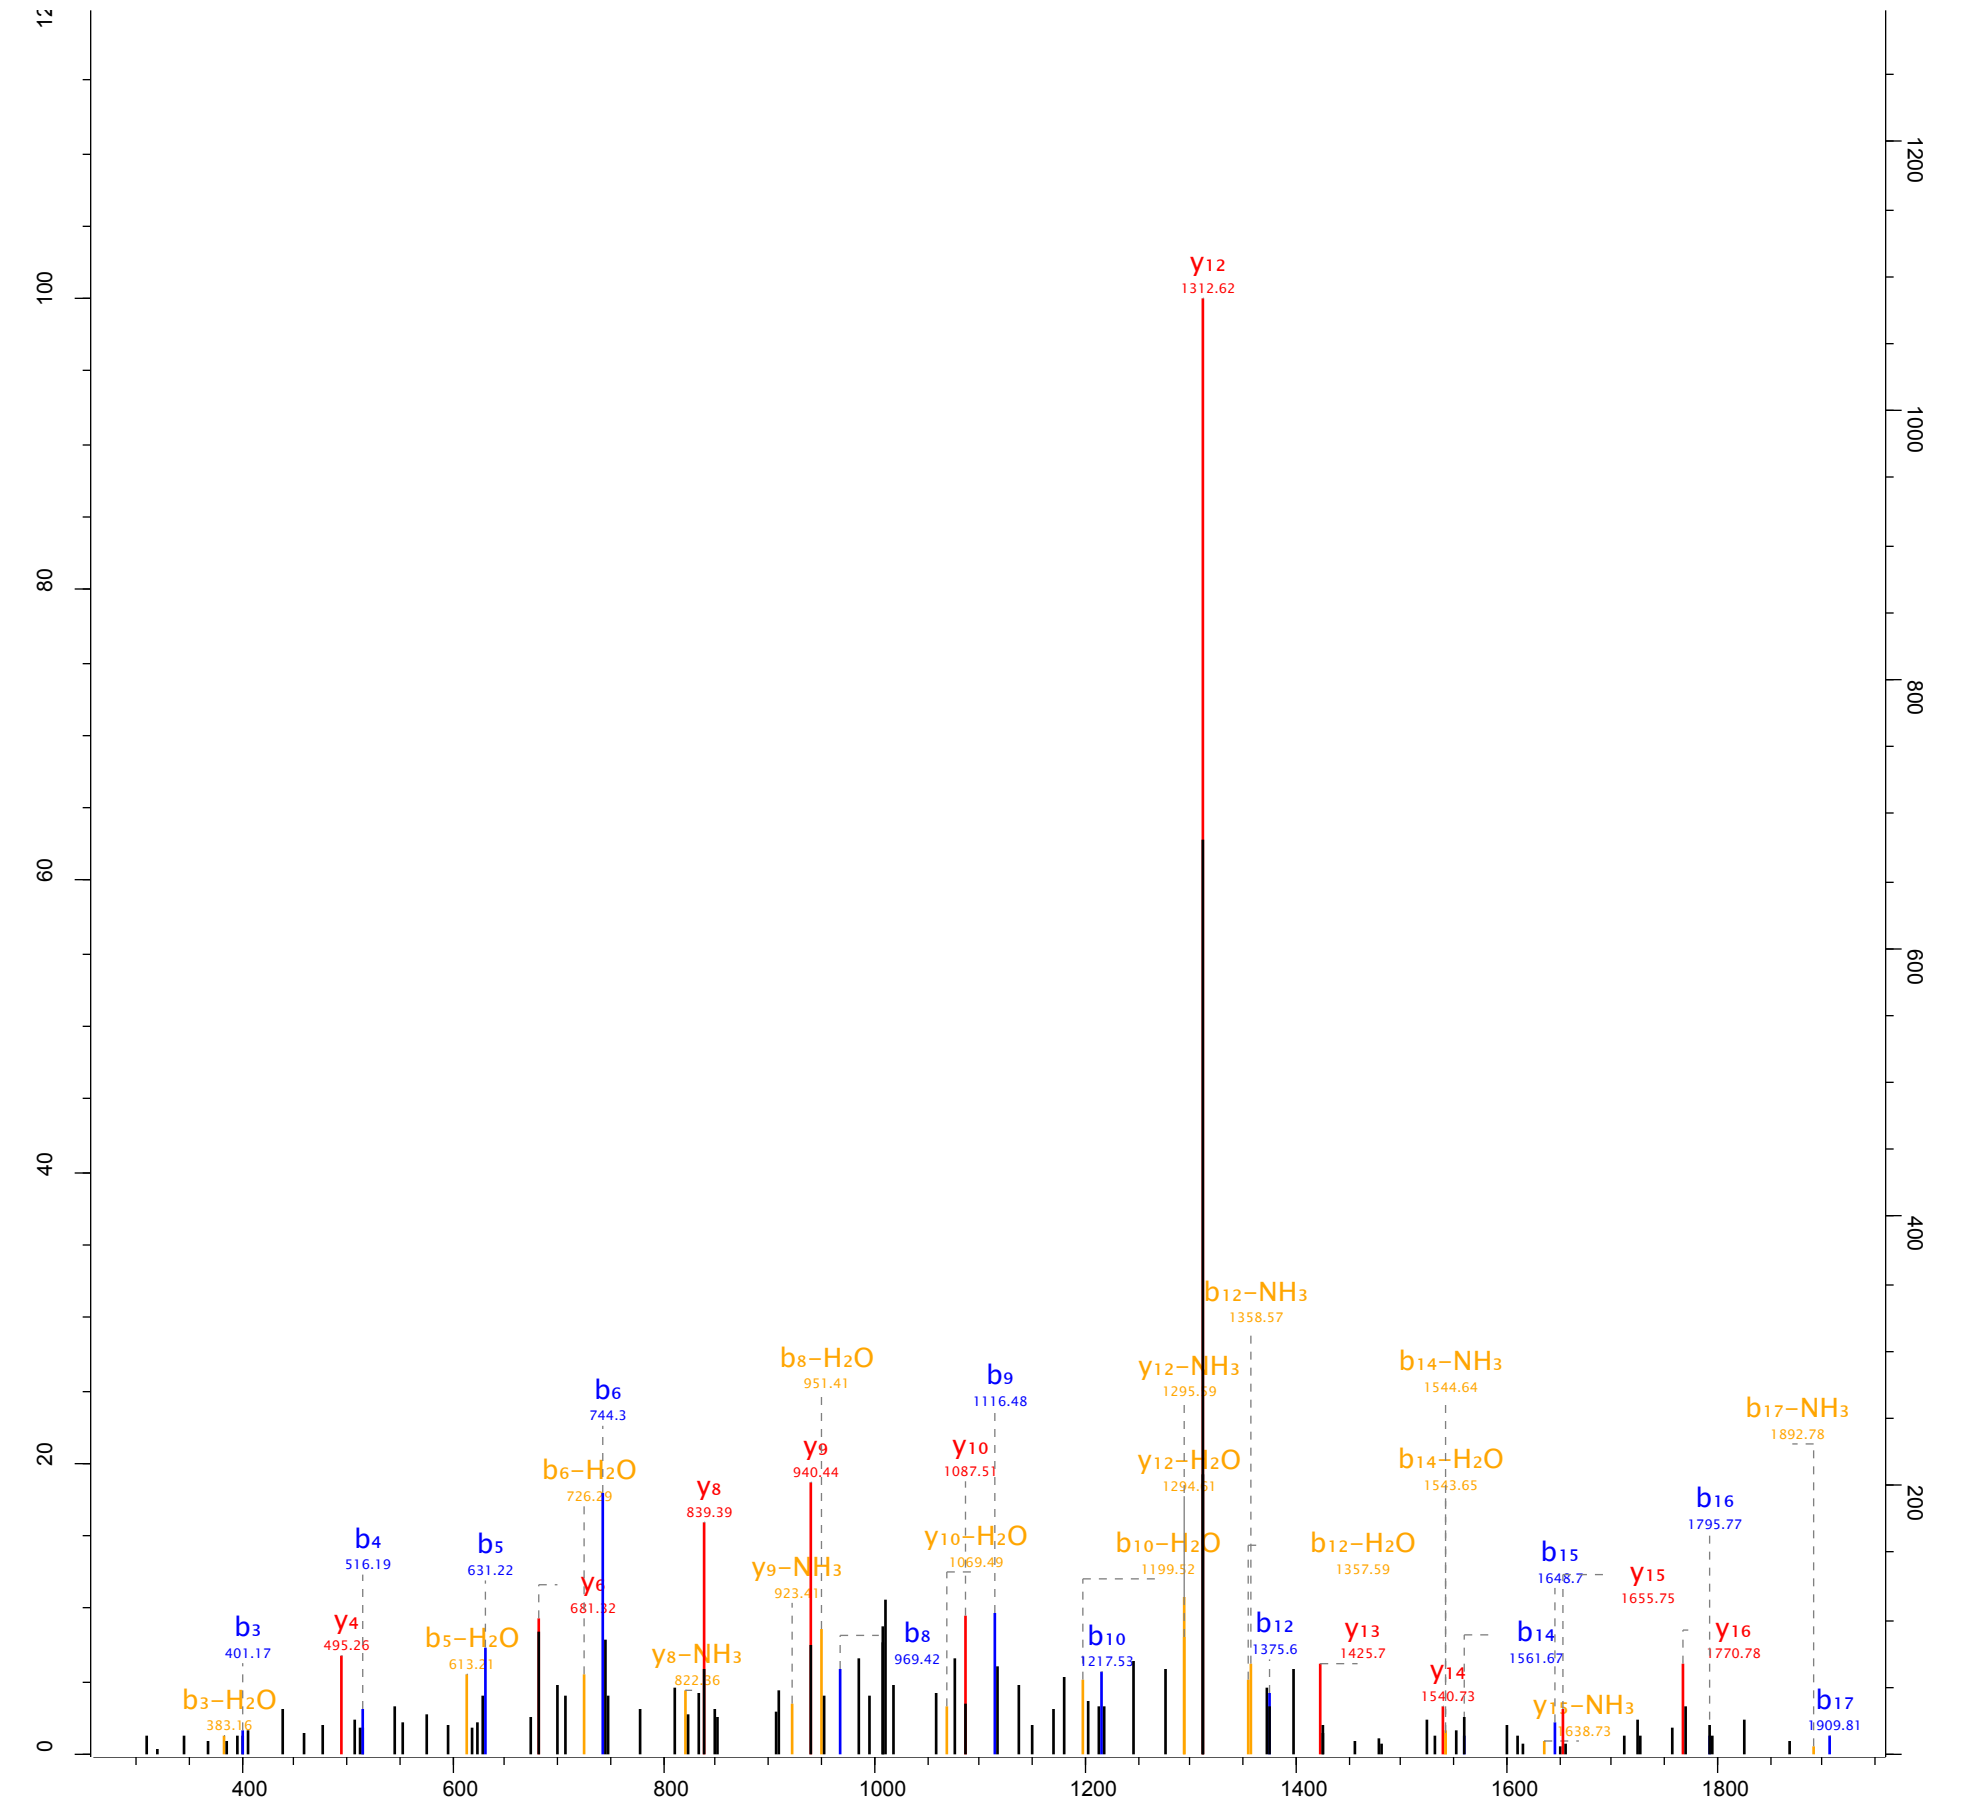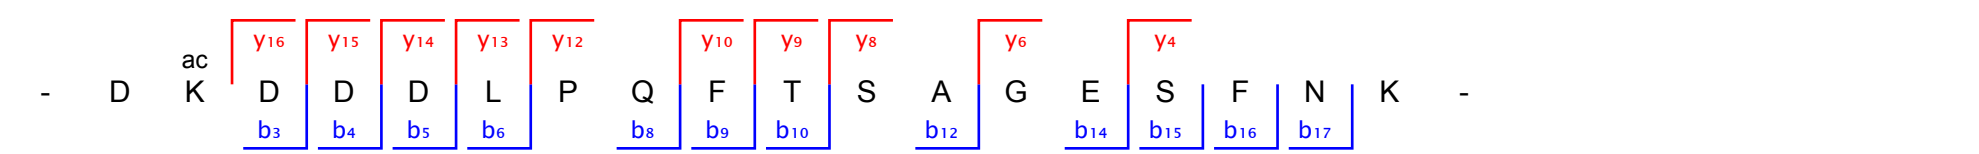

052413\_SCW\_II\_29\_Second\_ZT\_16\_3

12861

ITMS; CID

209.45

912.45

Khsrp

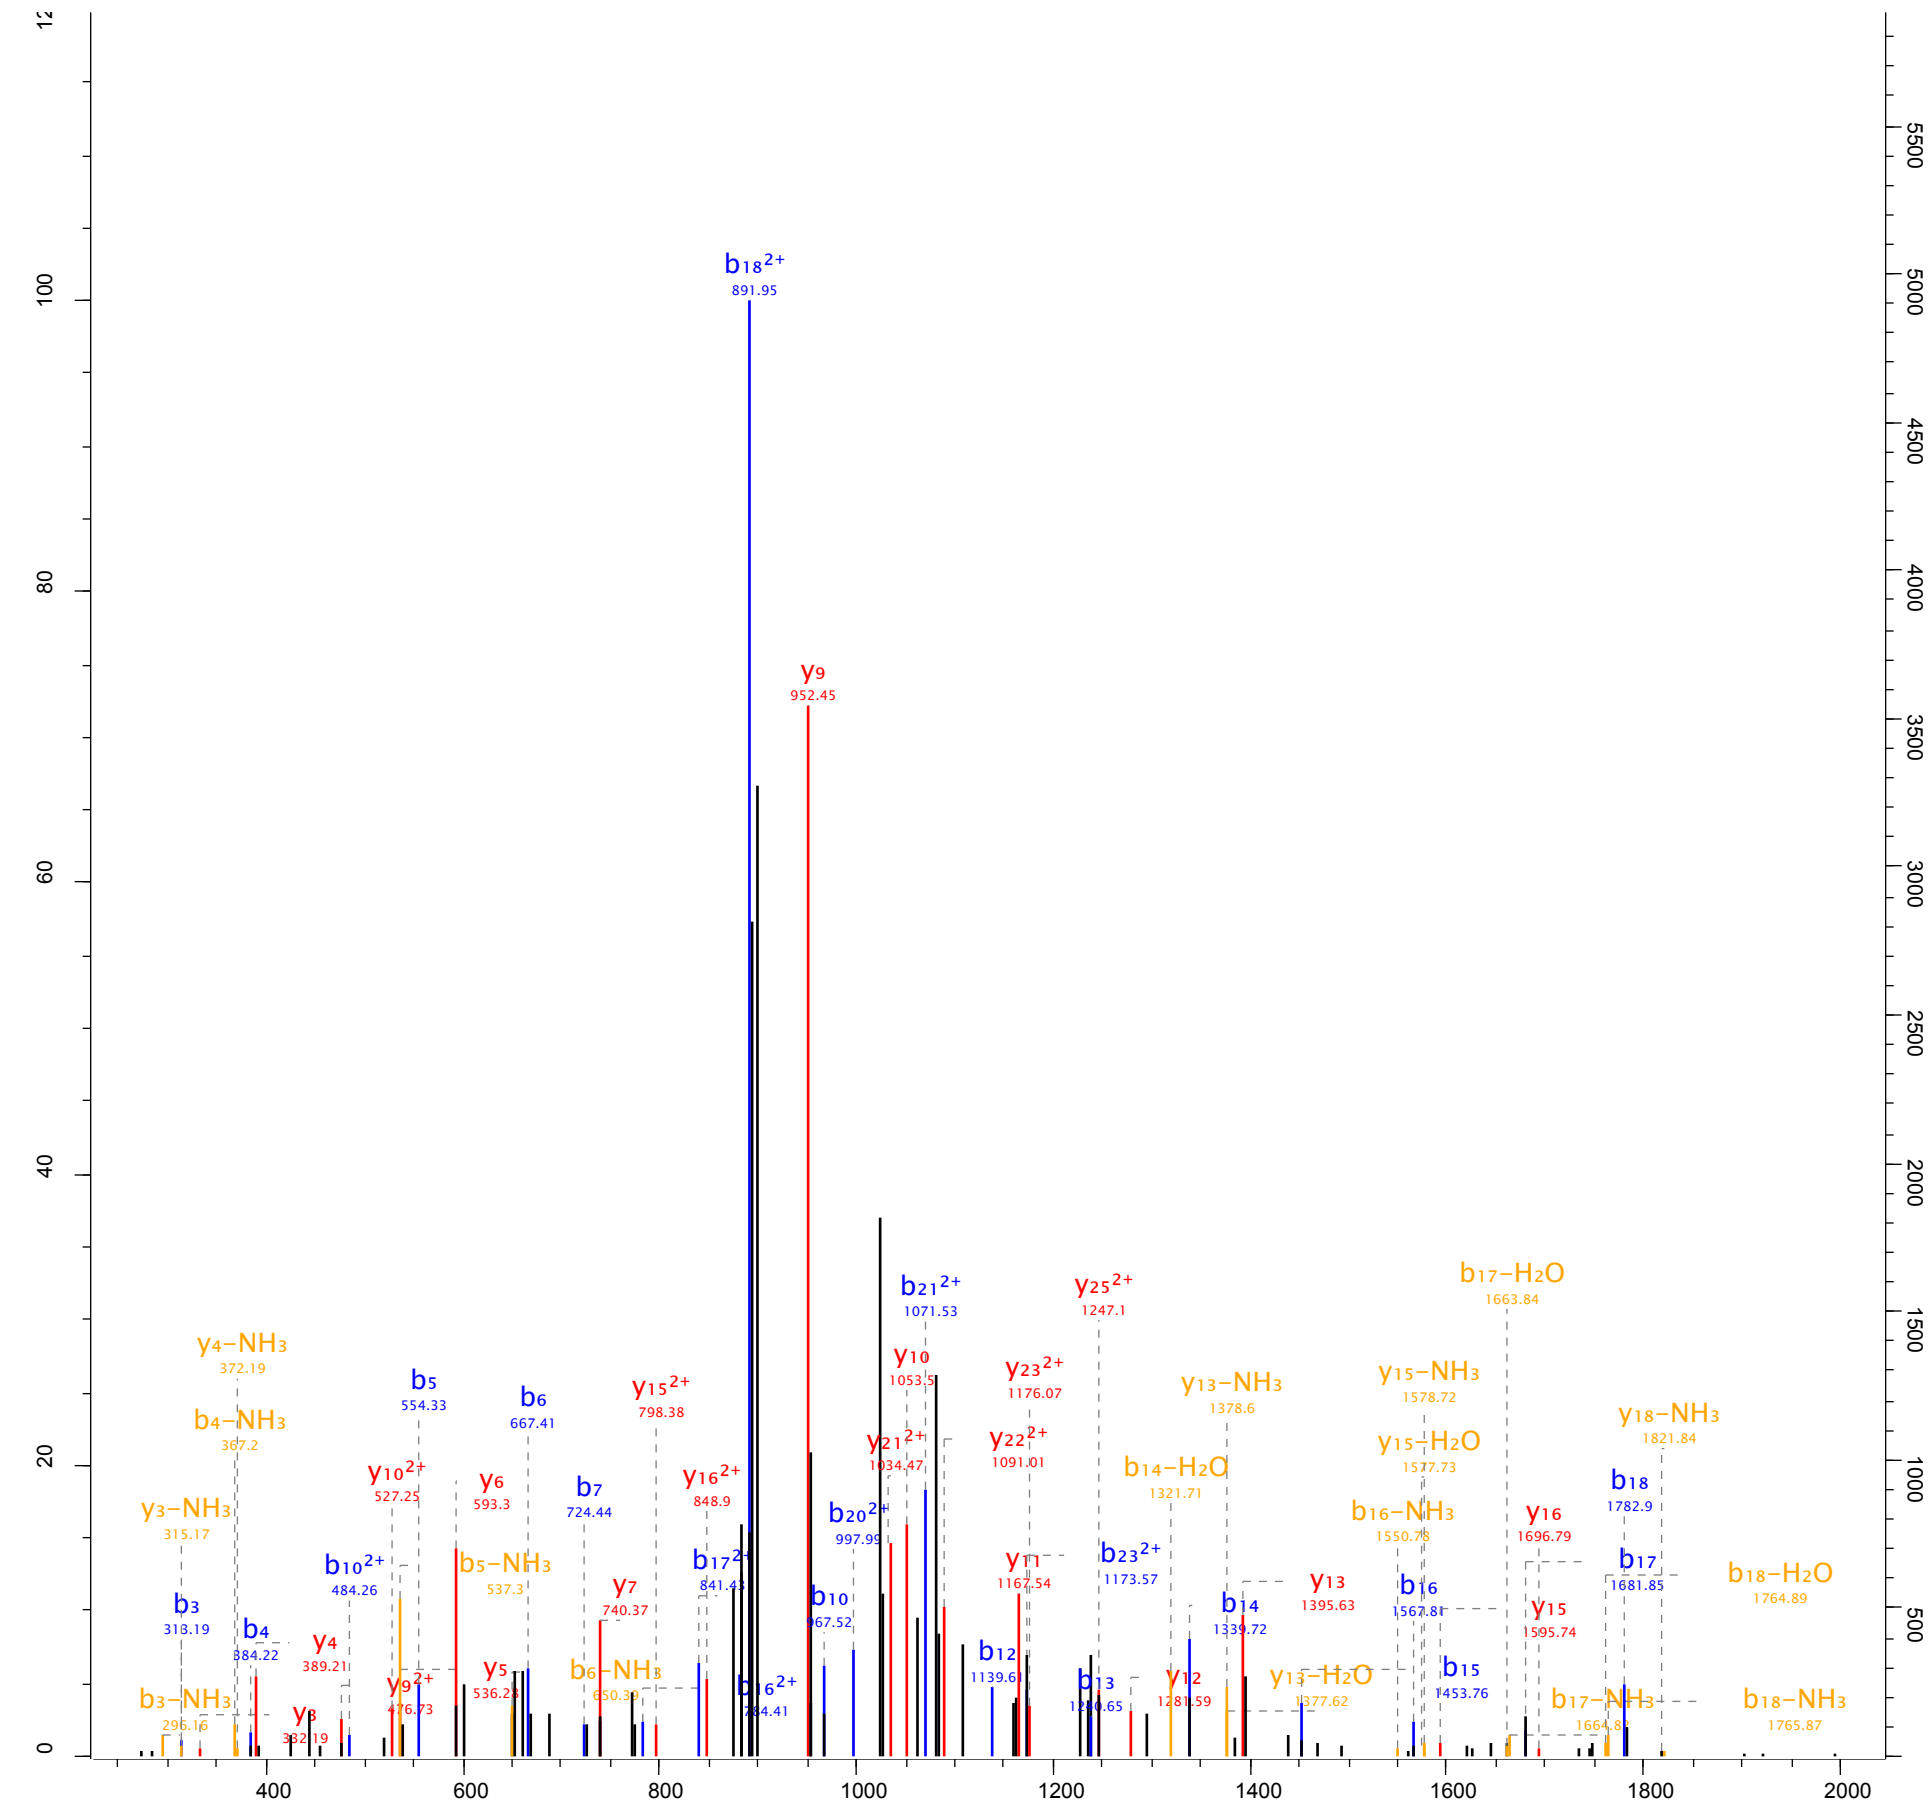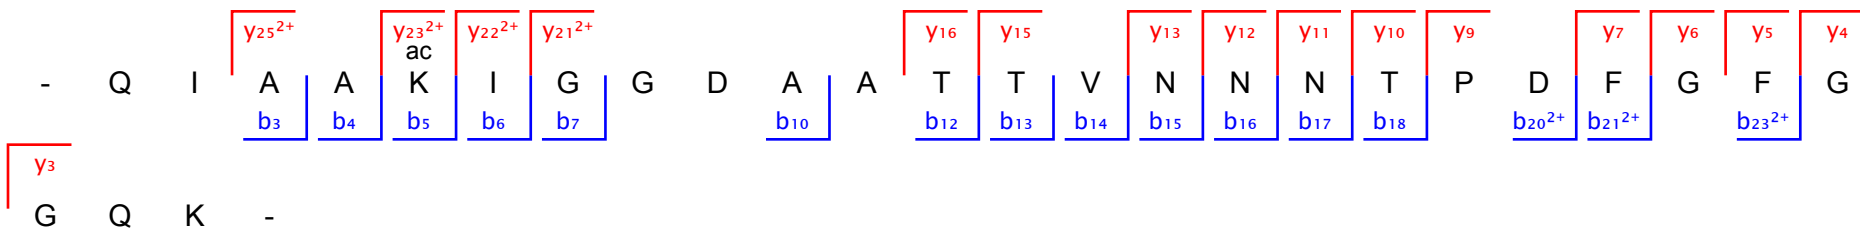

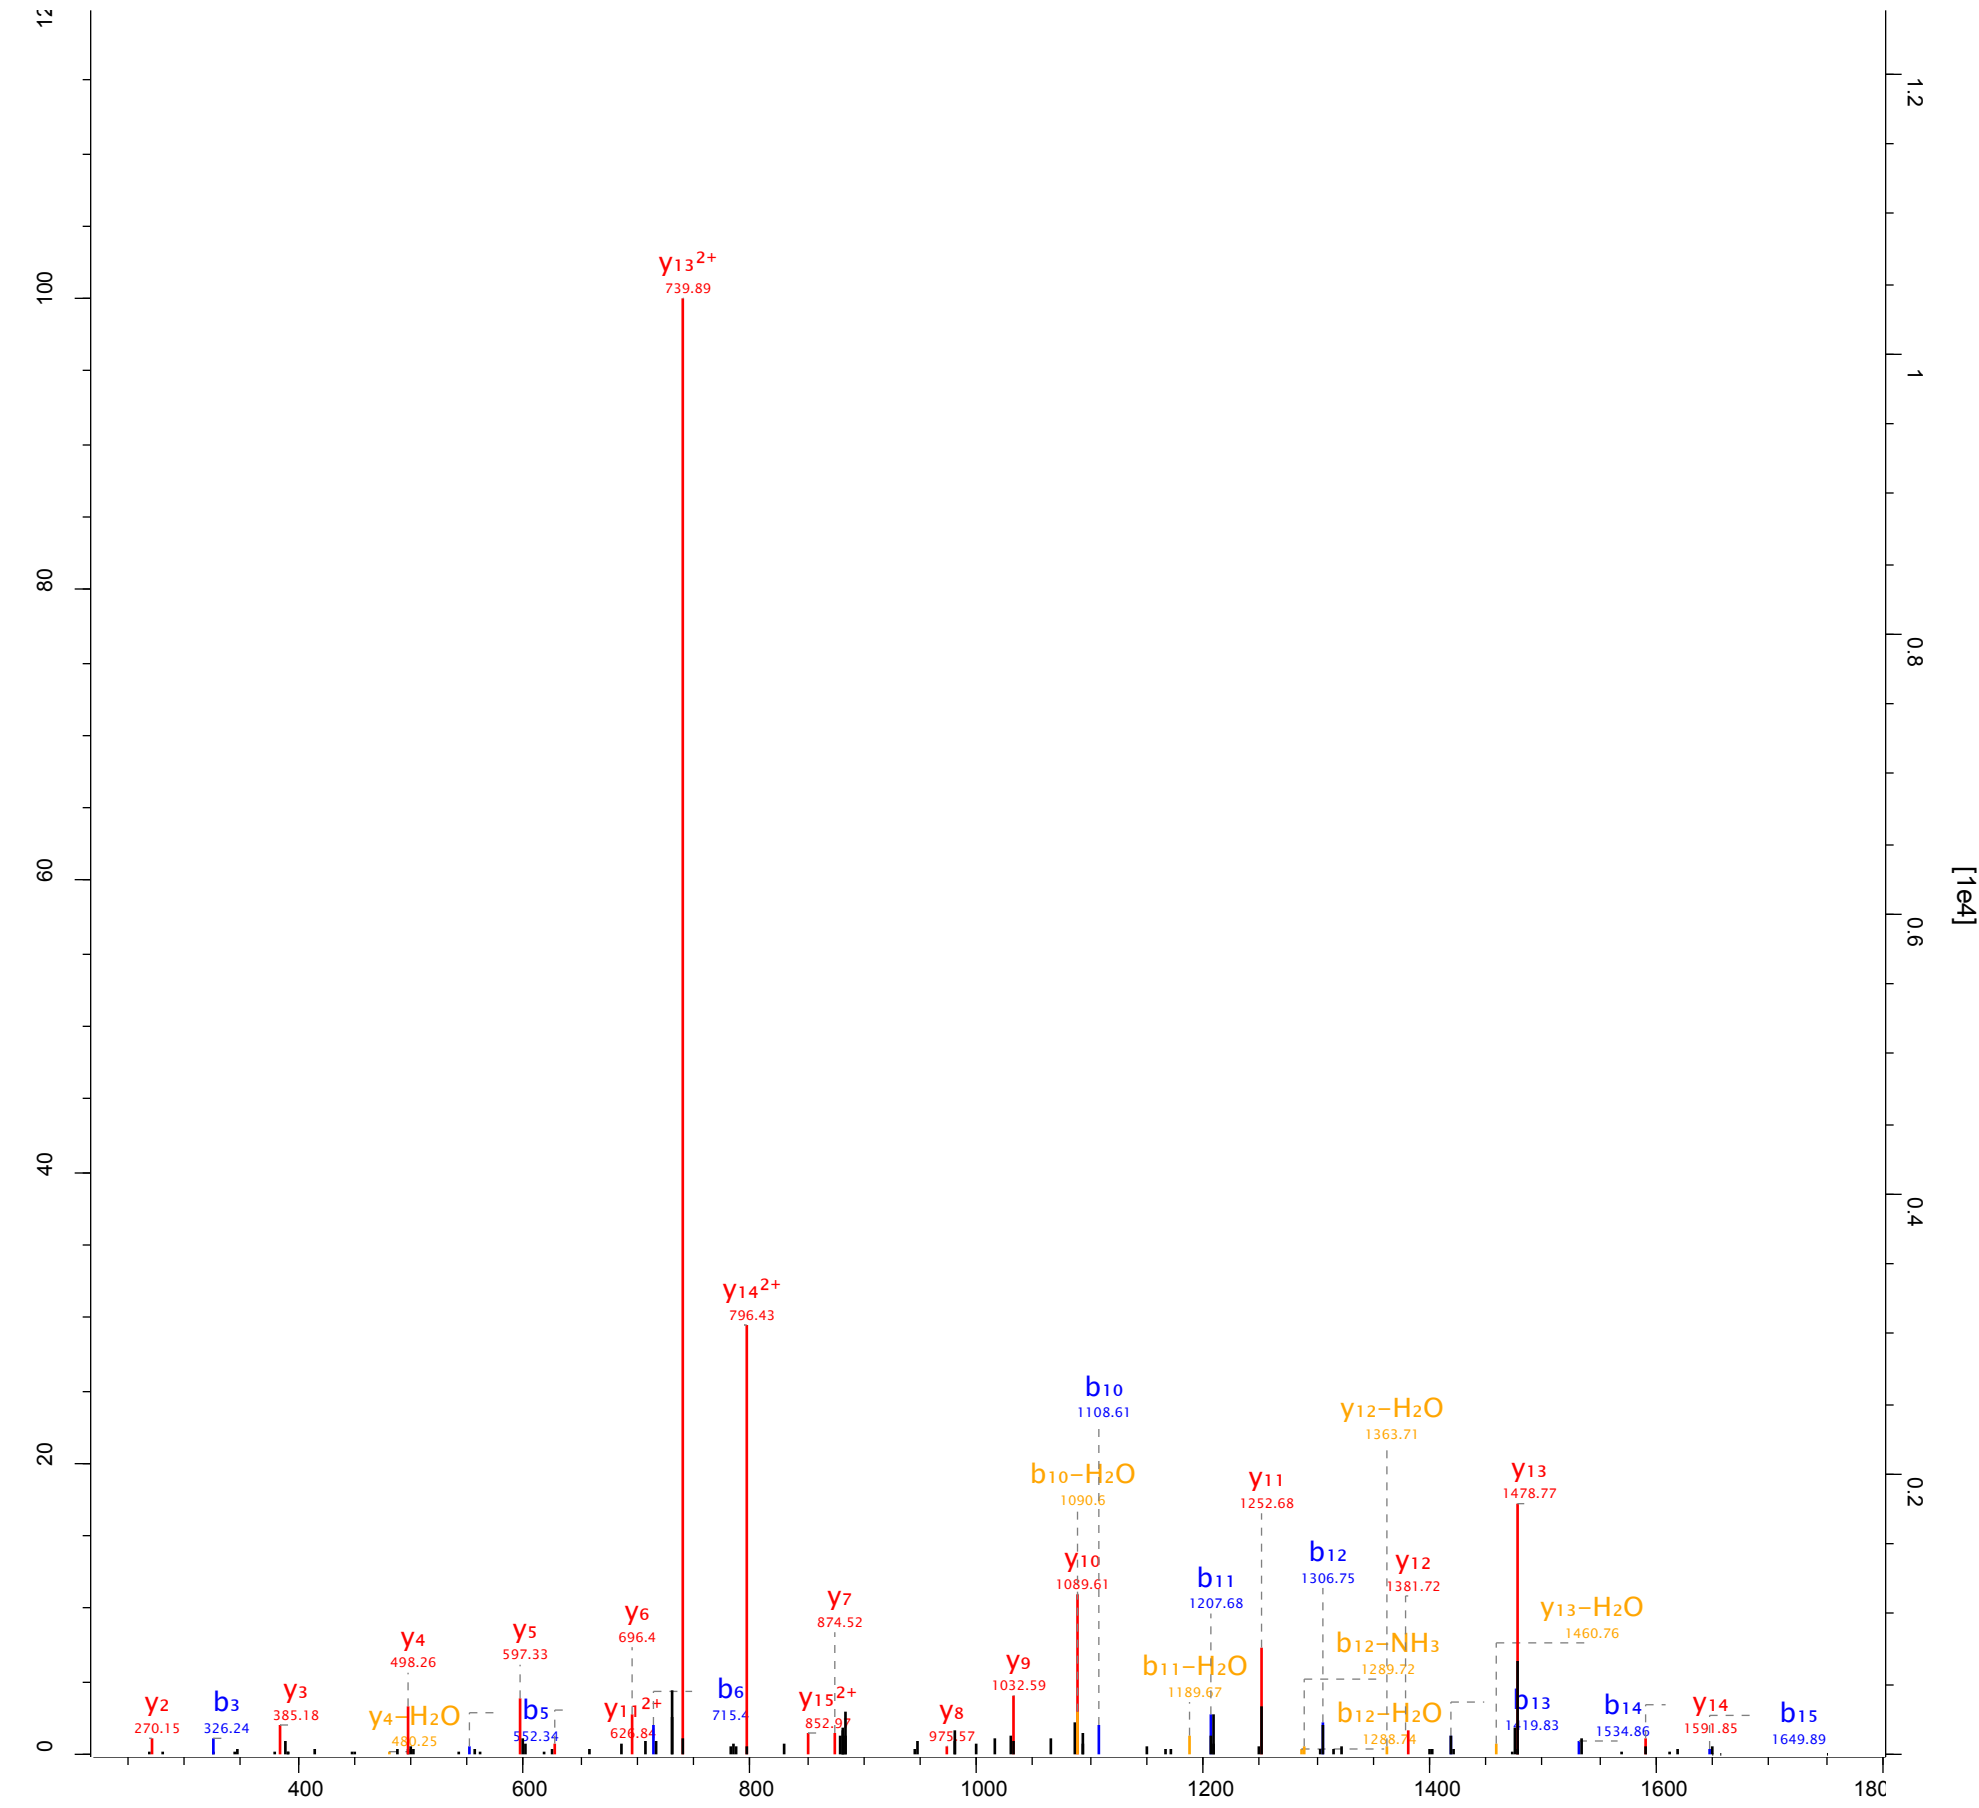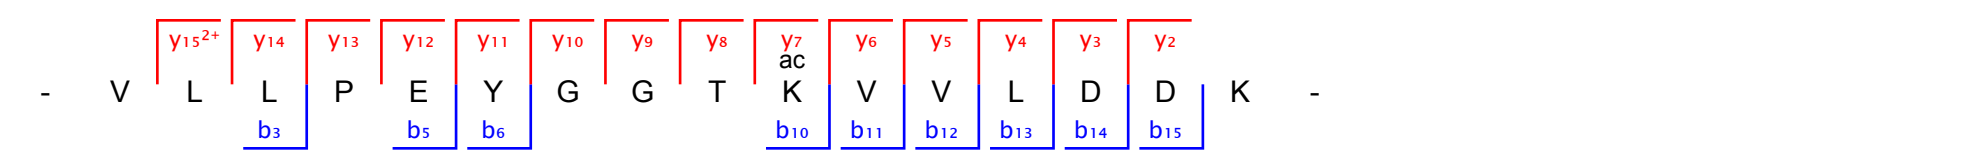

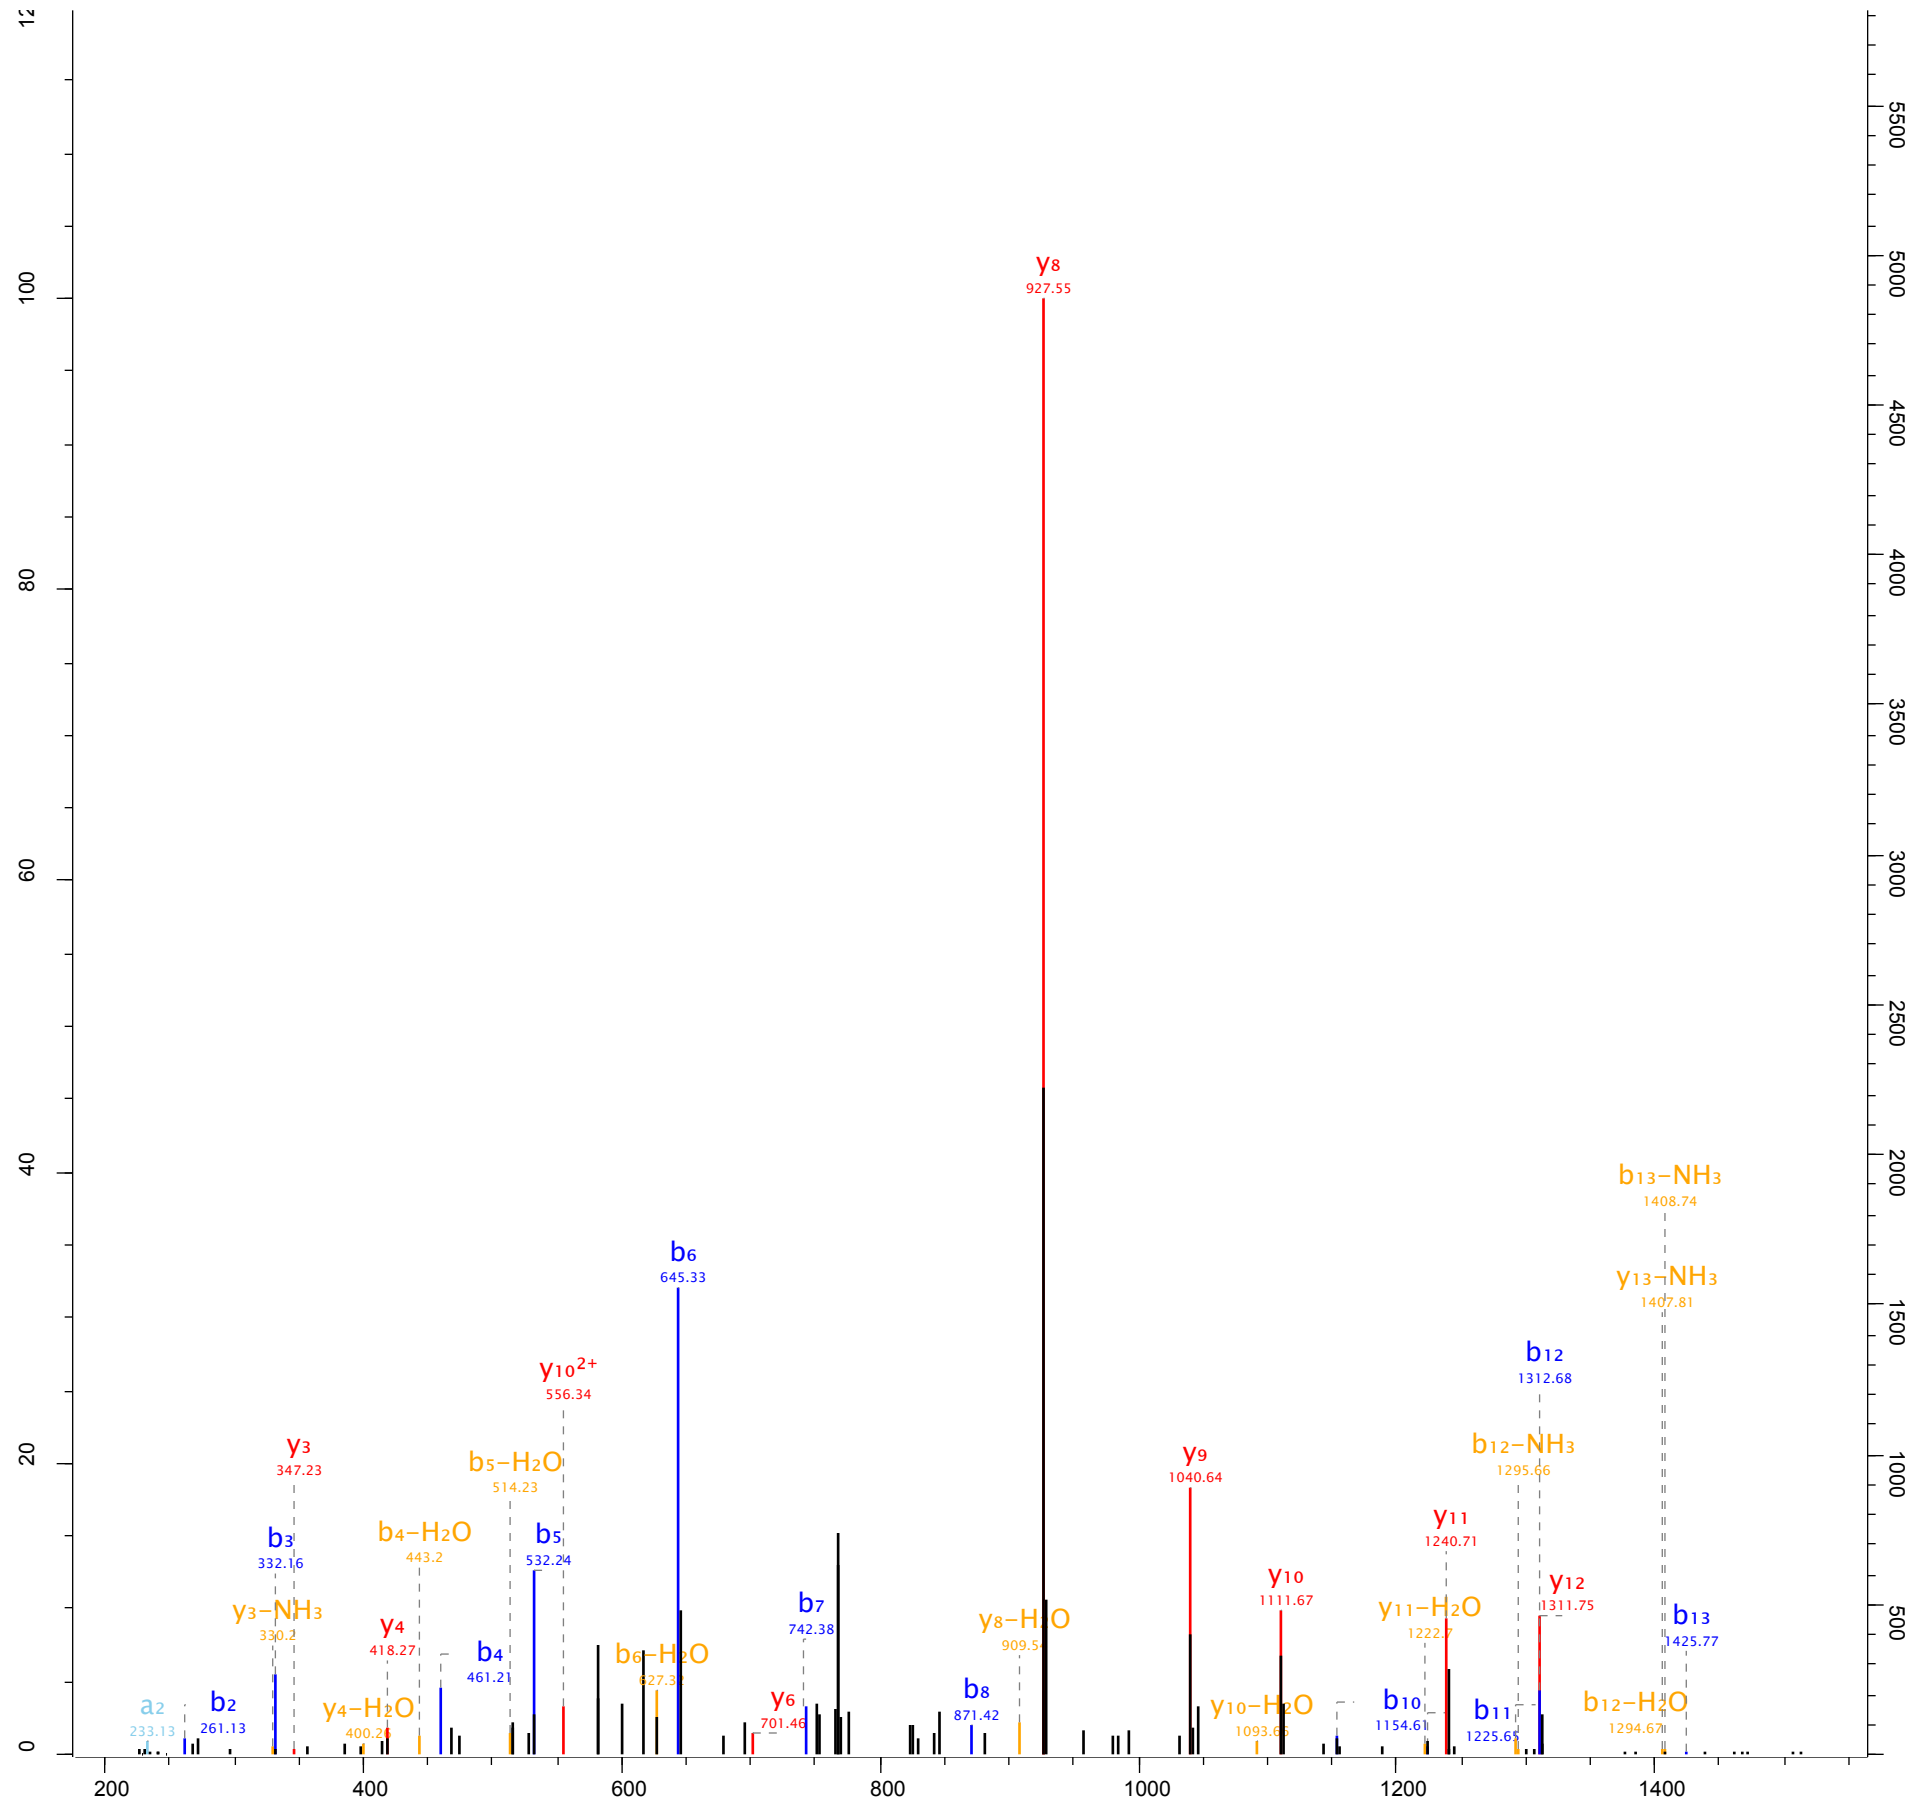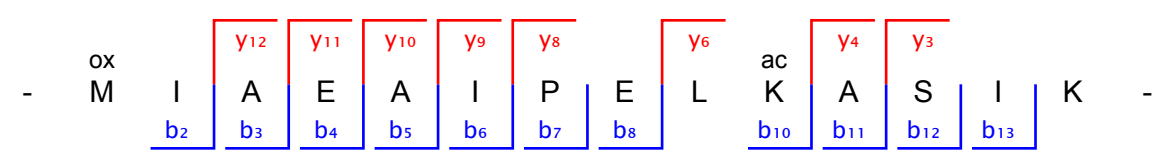

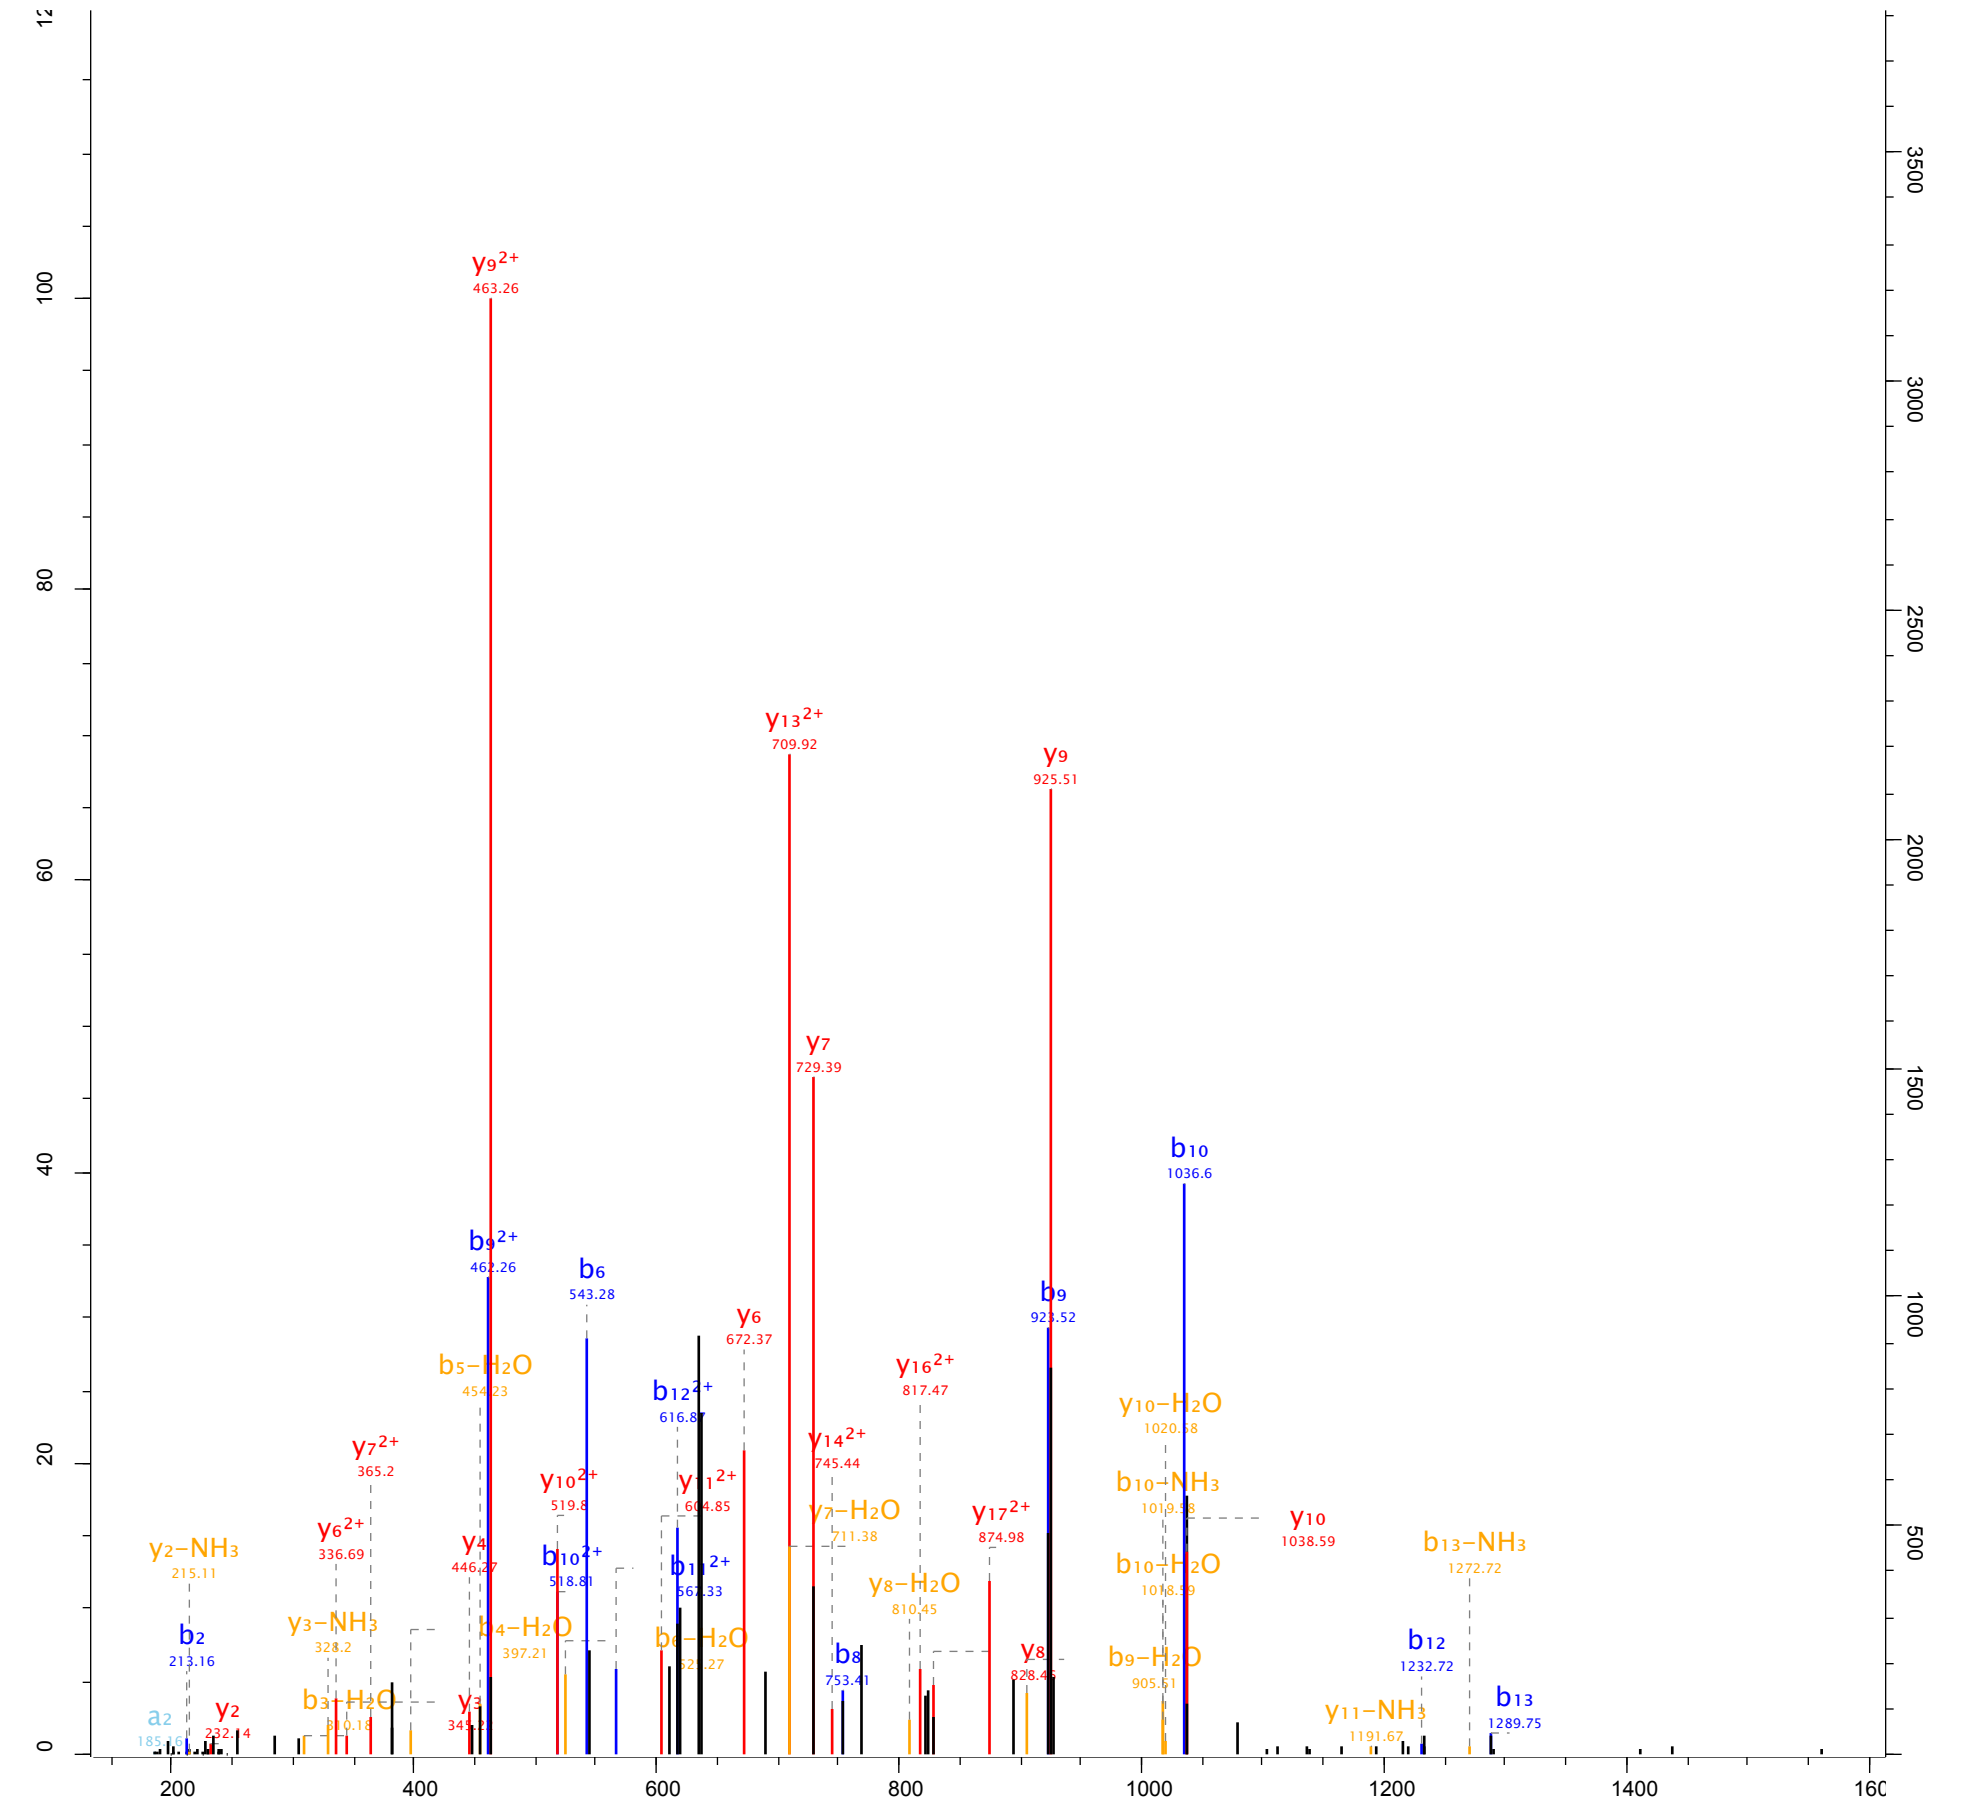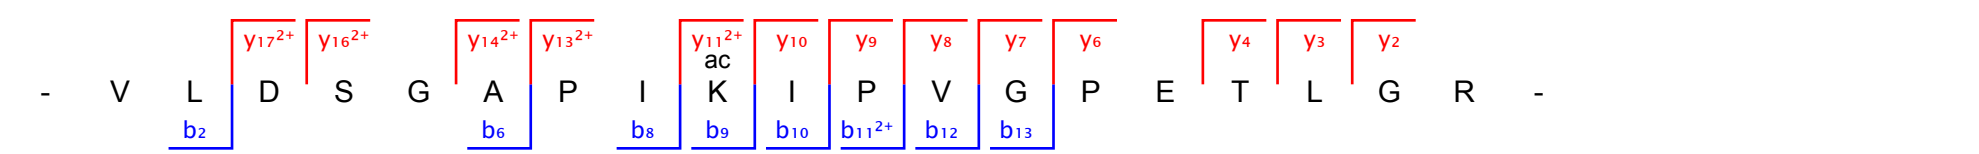

Raw file 052413\_SCW\_II\_29\_Second\_ZT\_16\_3 Scan 13965 Method ITMS; CID Score 148.7 m/z 905.48 Gene names Acly

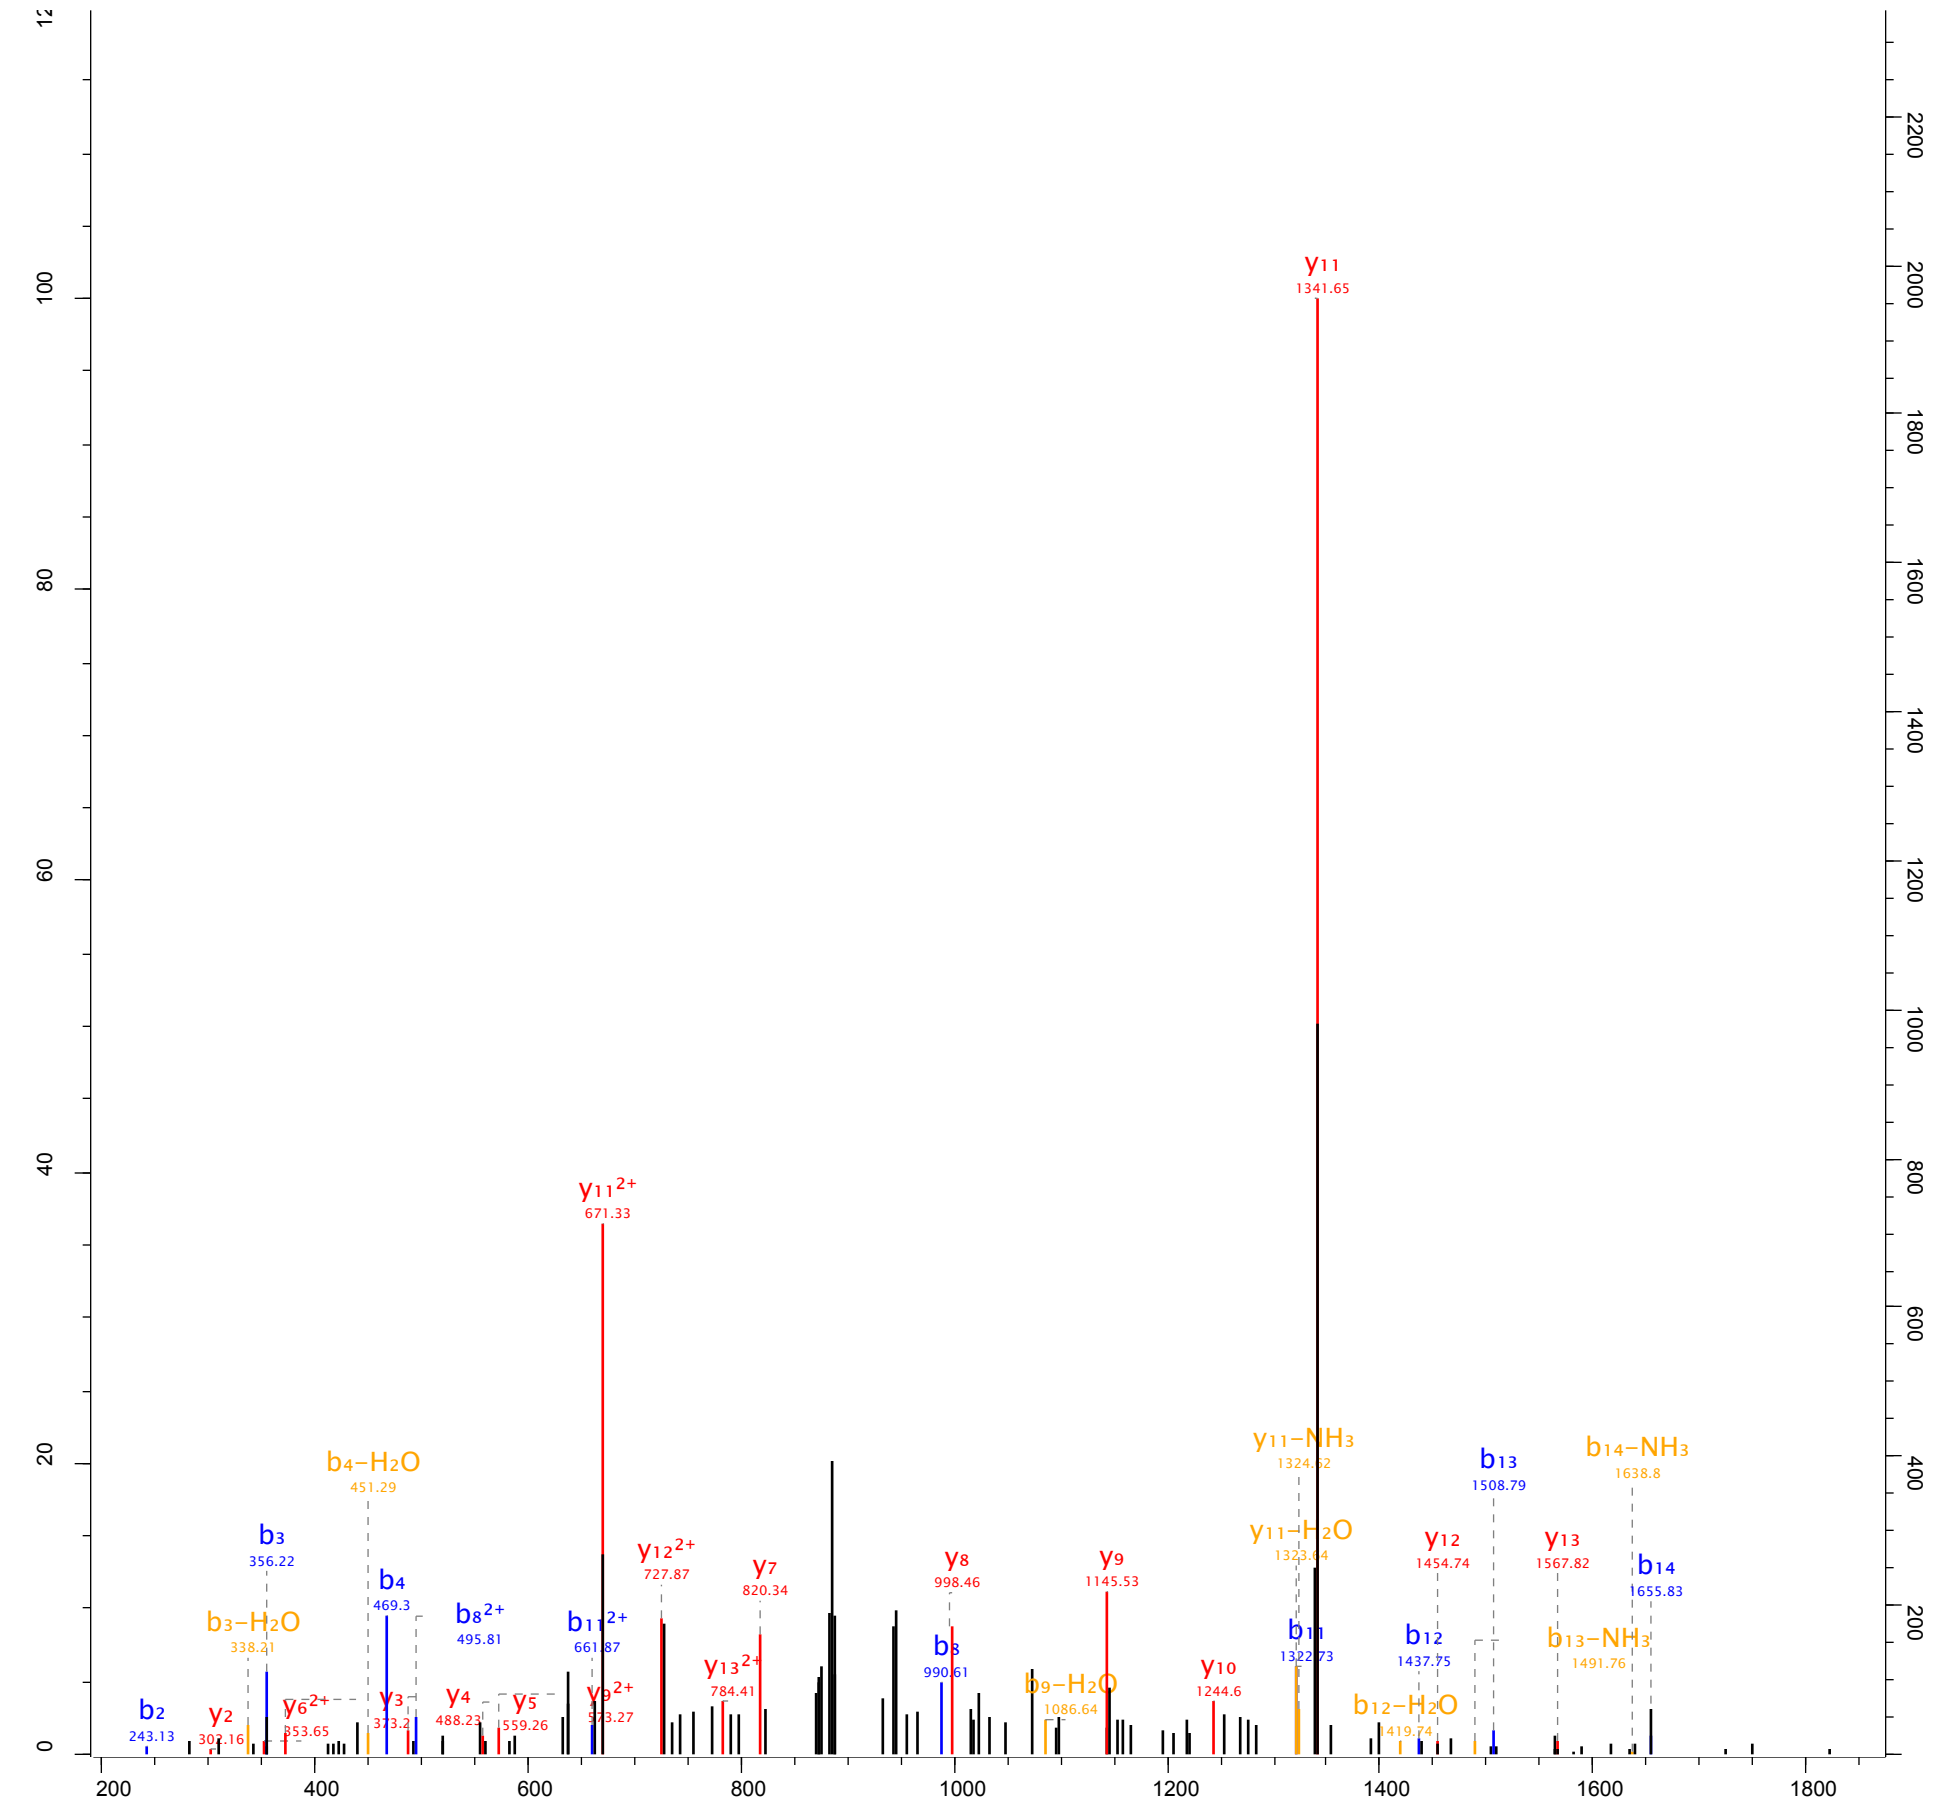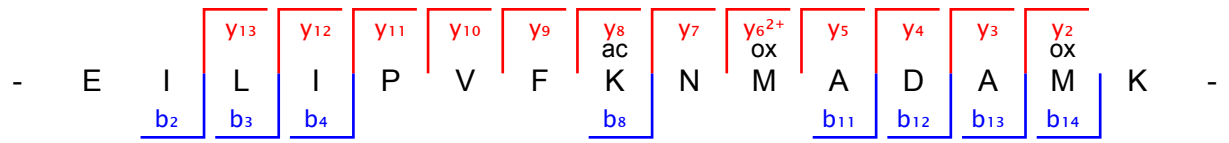



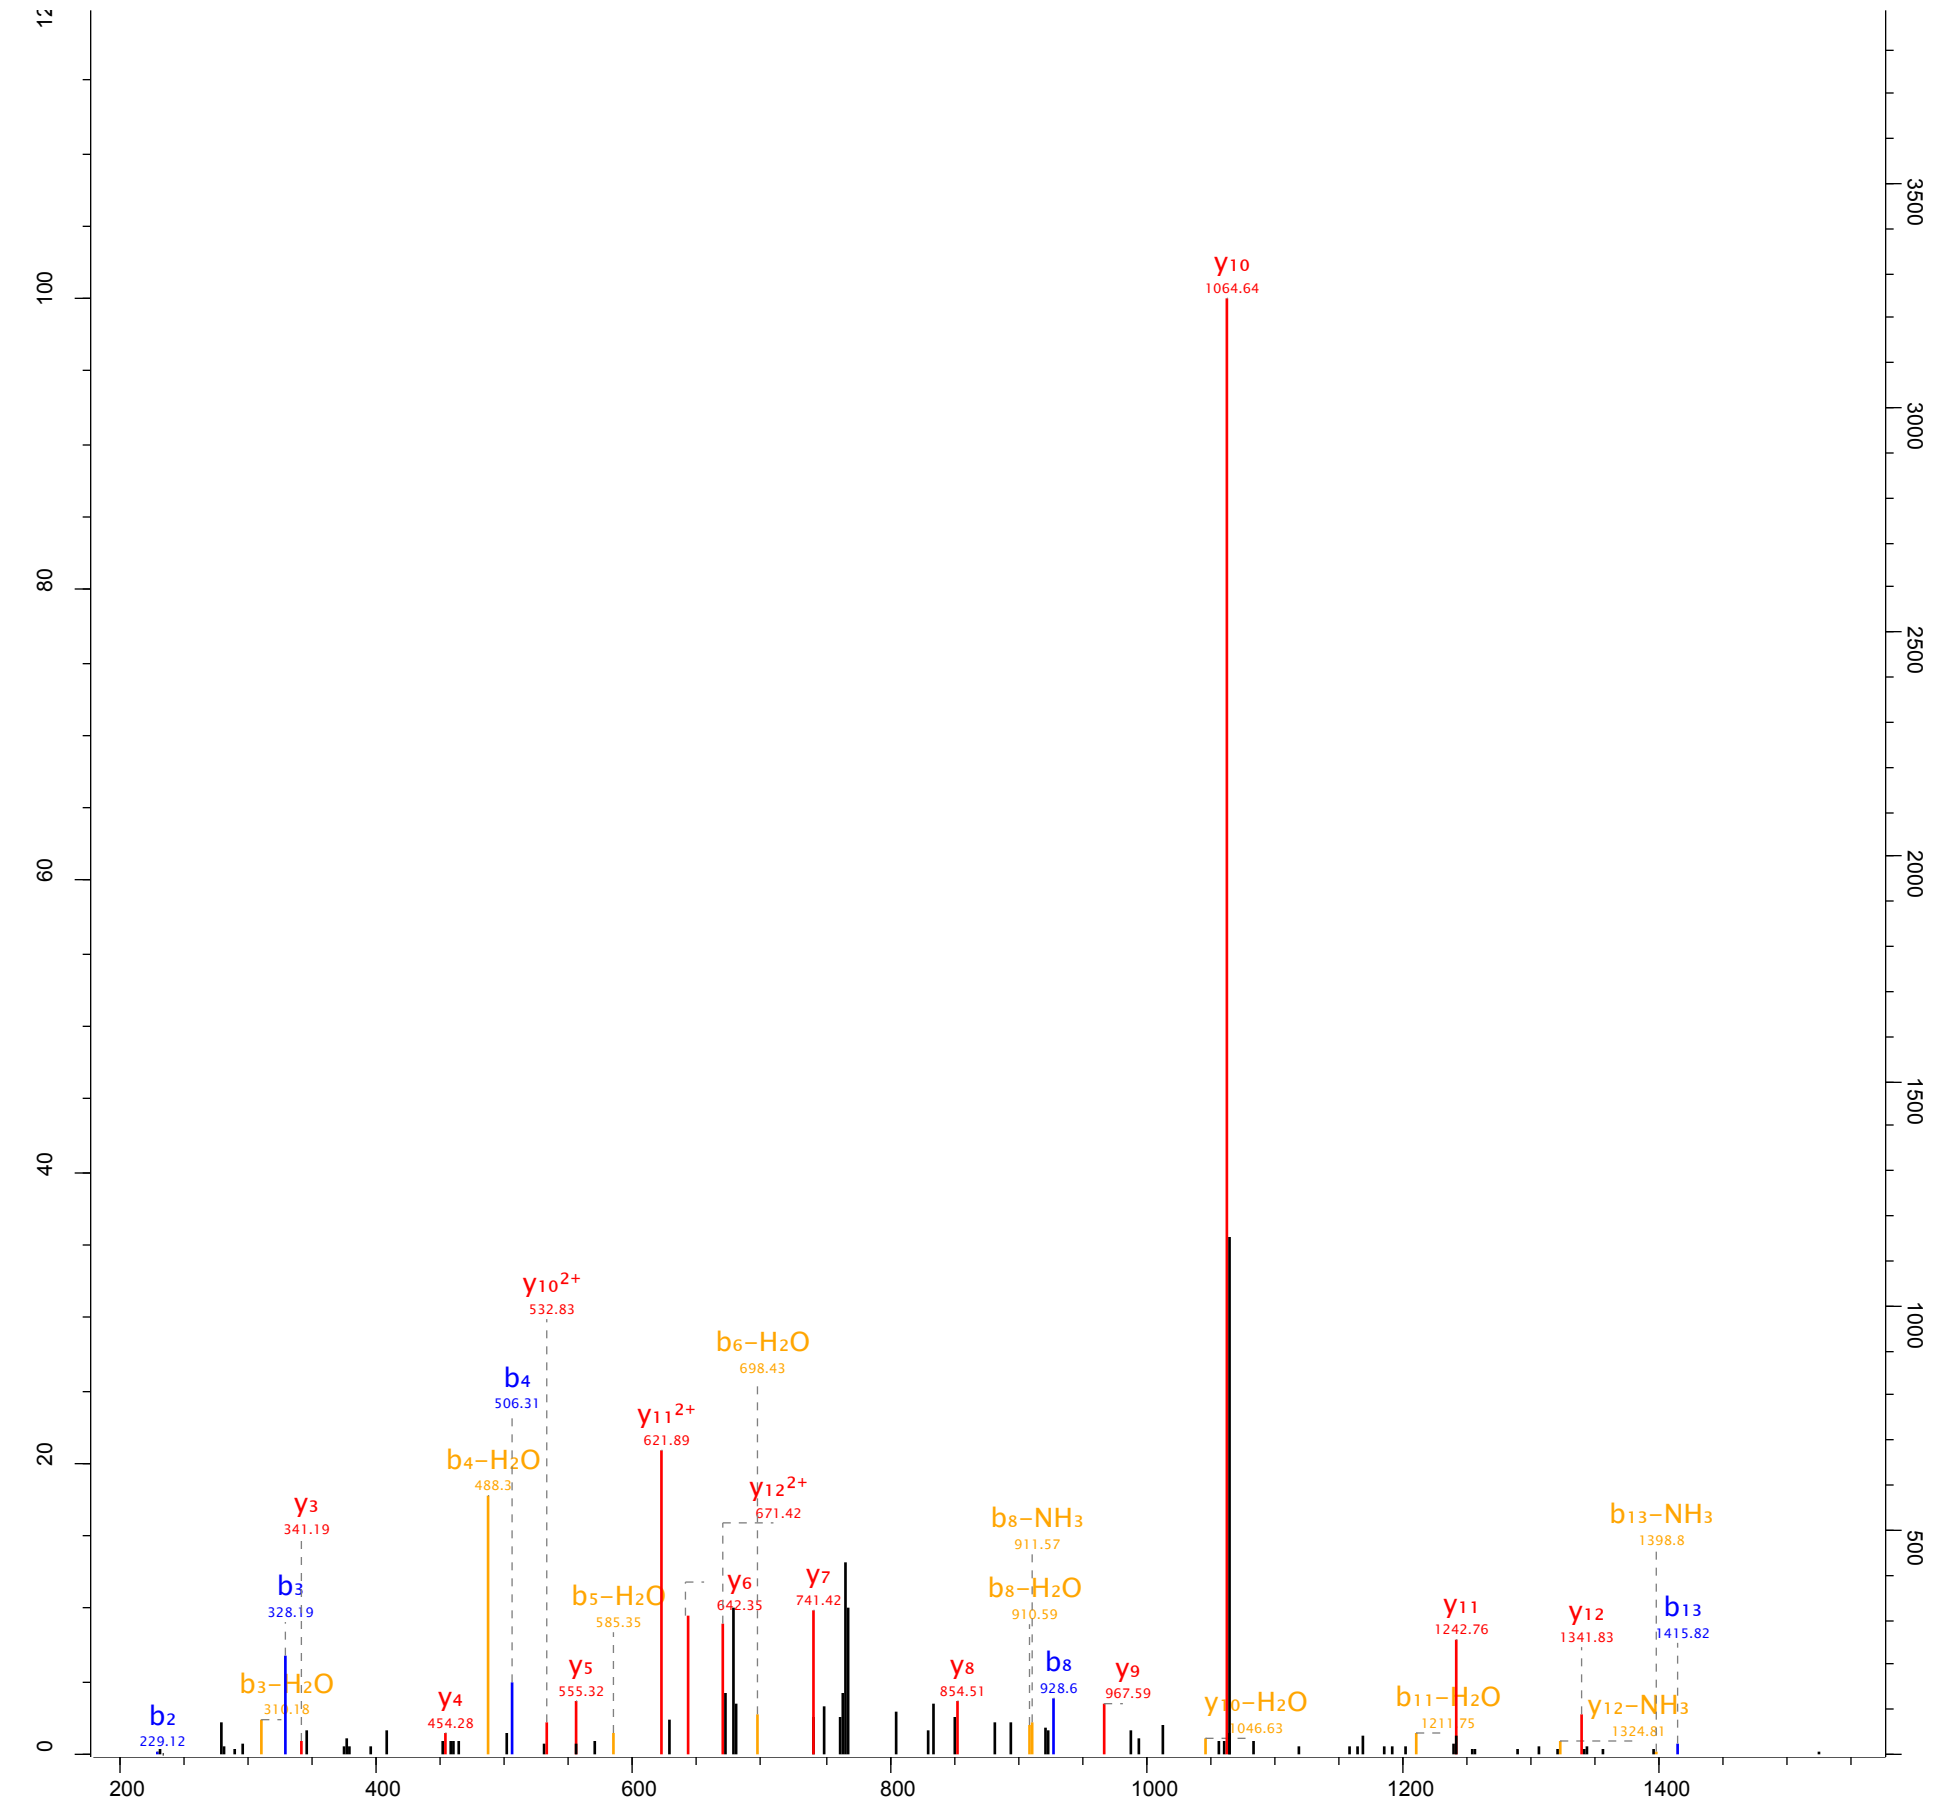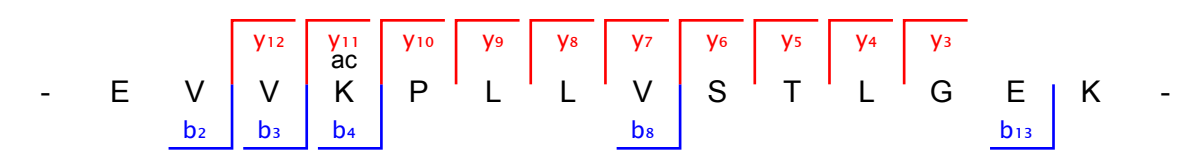

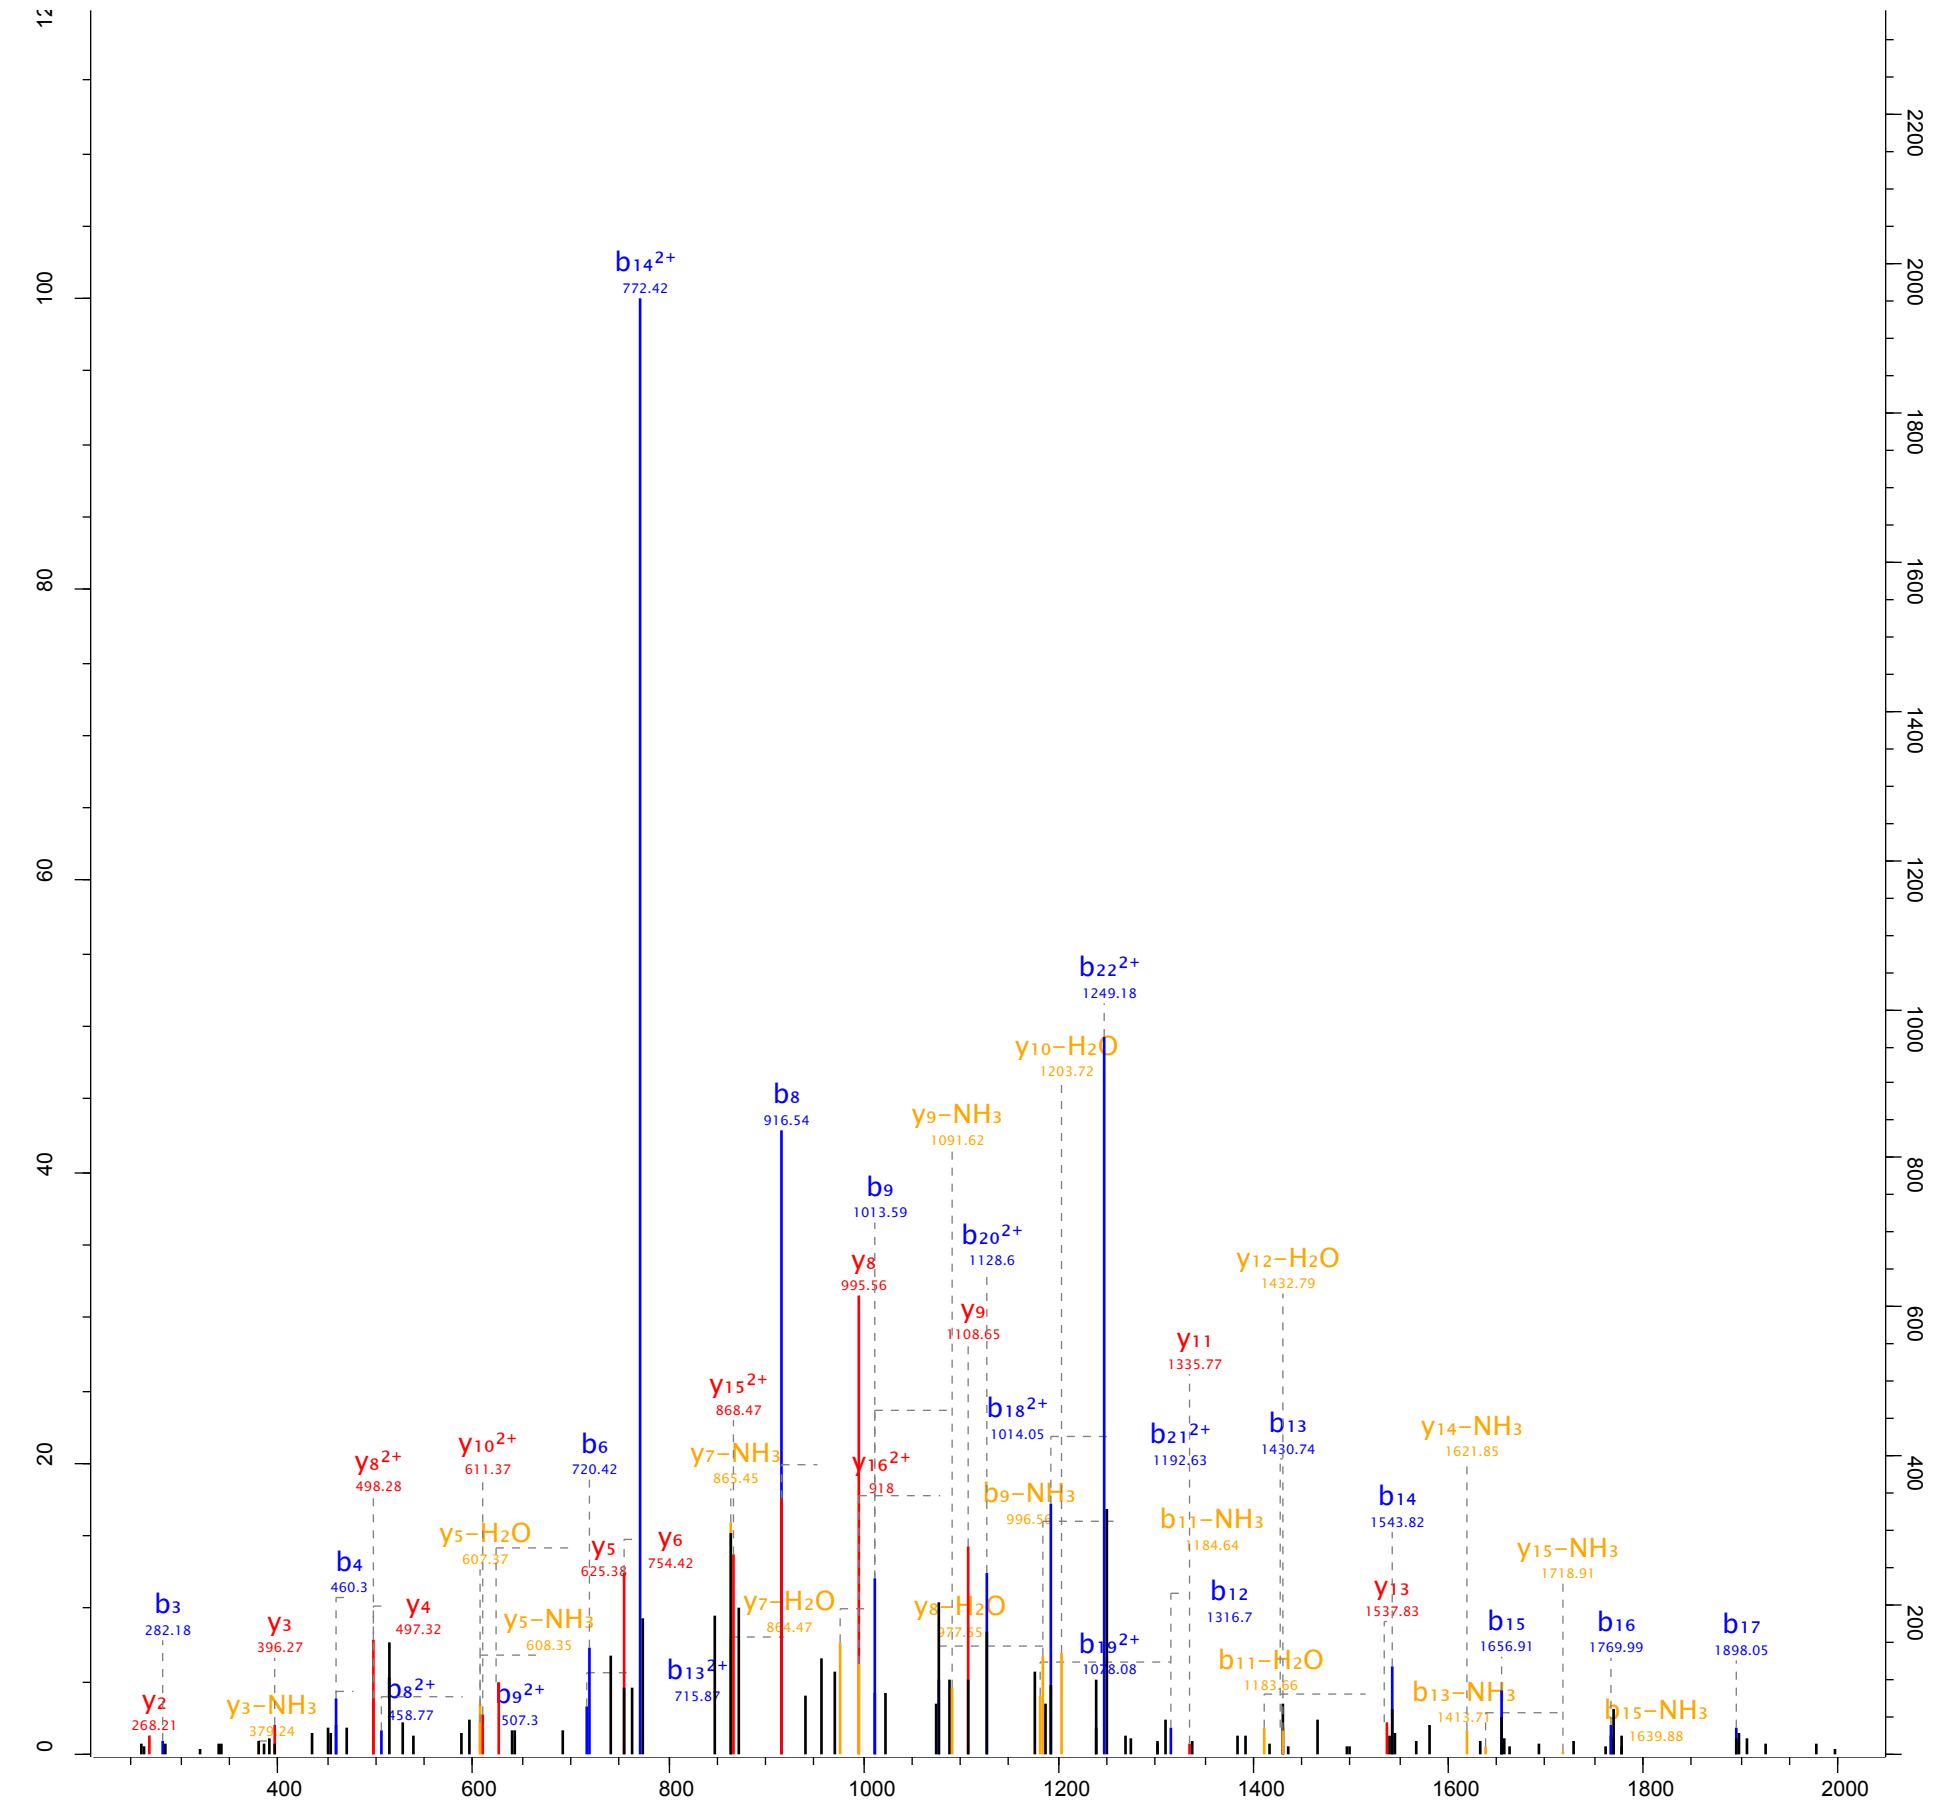

- A P L K P Y P V P T S D N I L I Q E Q T Q L K -

b<sub>3</sub>
b<sub>4</sub>
b<sub>6</sub>
b<sub>8</sub>
b<sub>9</sub>
b<sub>12</sub>
b<sub>13</sub>
b<sub>14</sub>
b<sub>15</sub>
b<sub>16</sub>
b<sub>17</sub>
b<sub>18</sub><sup>2+</sup>
b<sub>19</sub><sup>2+</sup>
b<sub>20</sub><sup>2+</sup>
b<sub>21</sub><sup>2+</sup>
b<sub>22</sub><sup>2+</sup>

y<sub>16</sub><sup>2+</sup>
y<sub>15</sub><sup>2+</sup>
y<sub>13</sub>
y<sub>11</sub>
y<sub>10</sub><sup>2+</sup>
y<sub>9</sub>
y<sub>8</sub>
y<sub>6</sub>
y<sub>5</sub>
y<sub>4</sub>
y<sub>3</sub>
y<sub>2</sub>

Raw file  
052413\_SCW\_II\_29\_Second\_ZT\_16\_3

Scan 14631 Method ITMS; CID Score 217.21 m/z 1079.59 Gene names Nfrkb

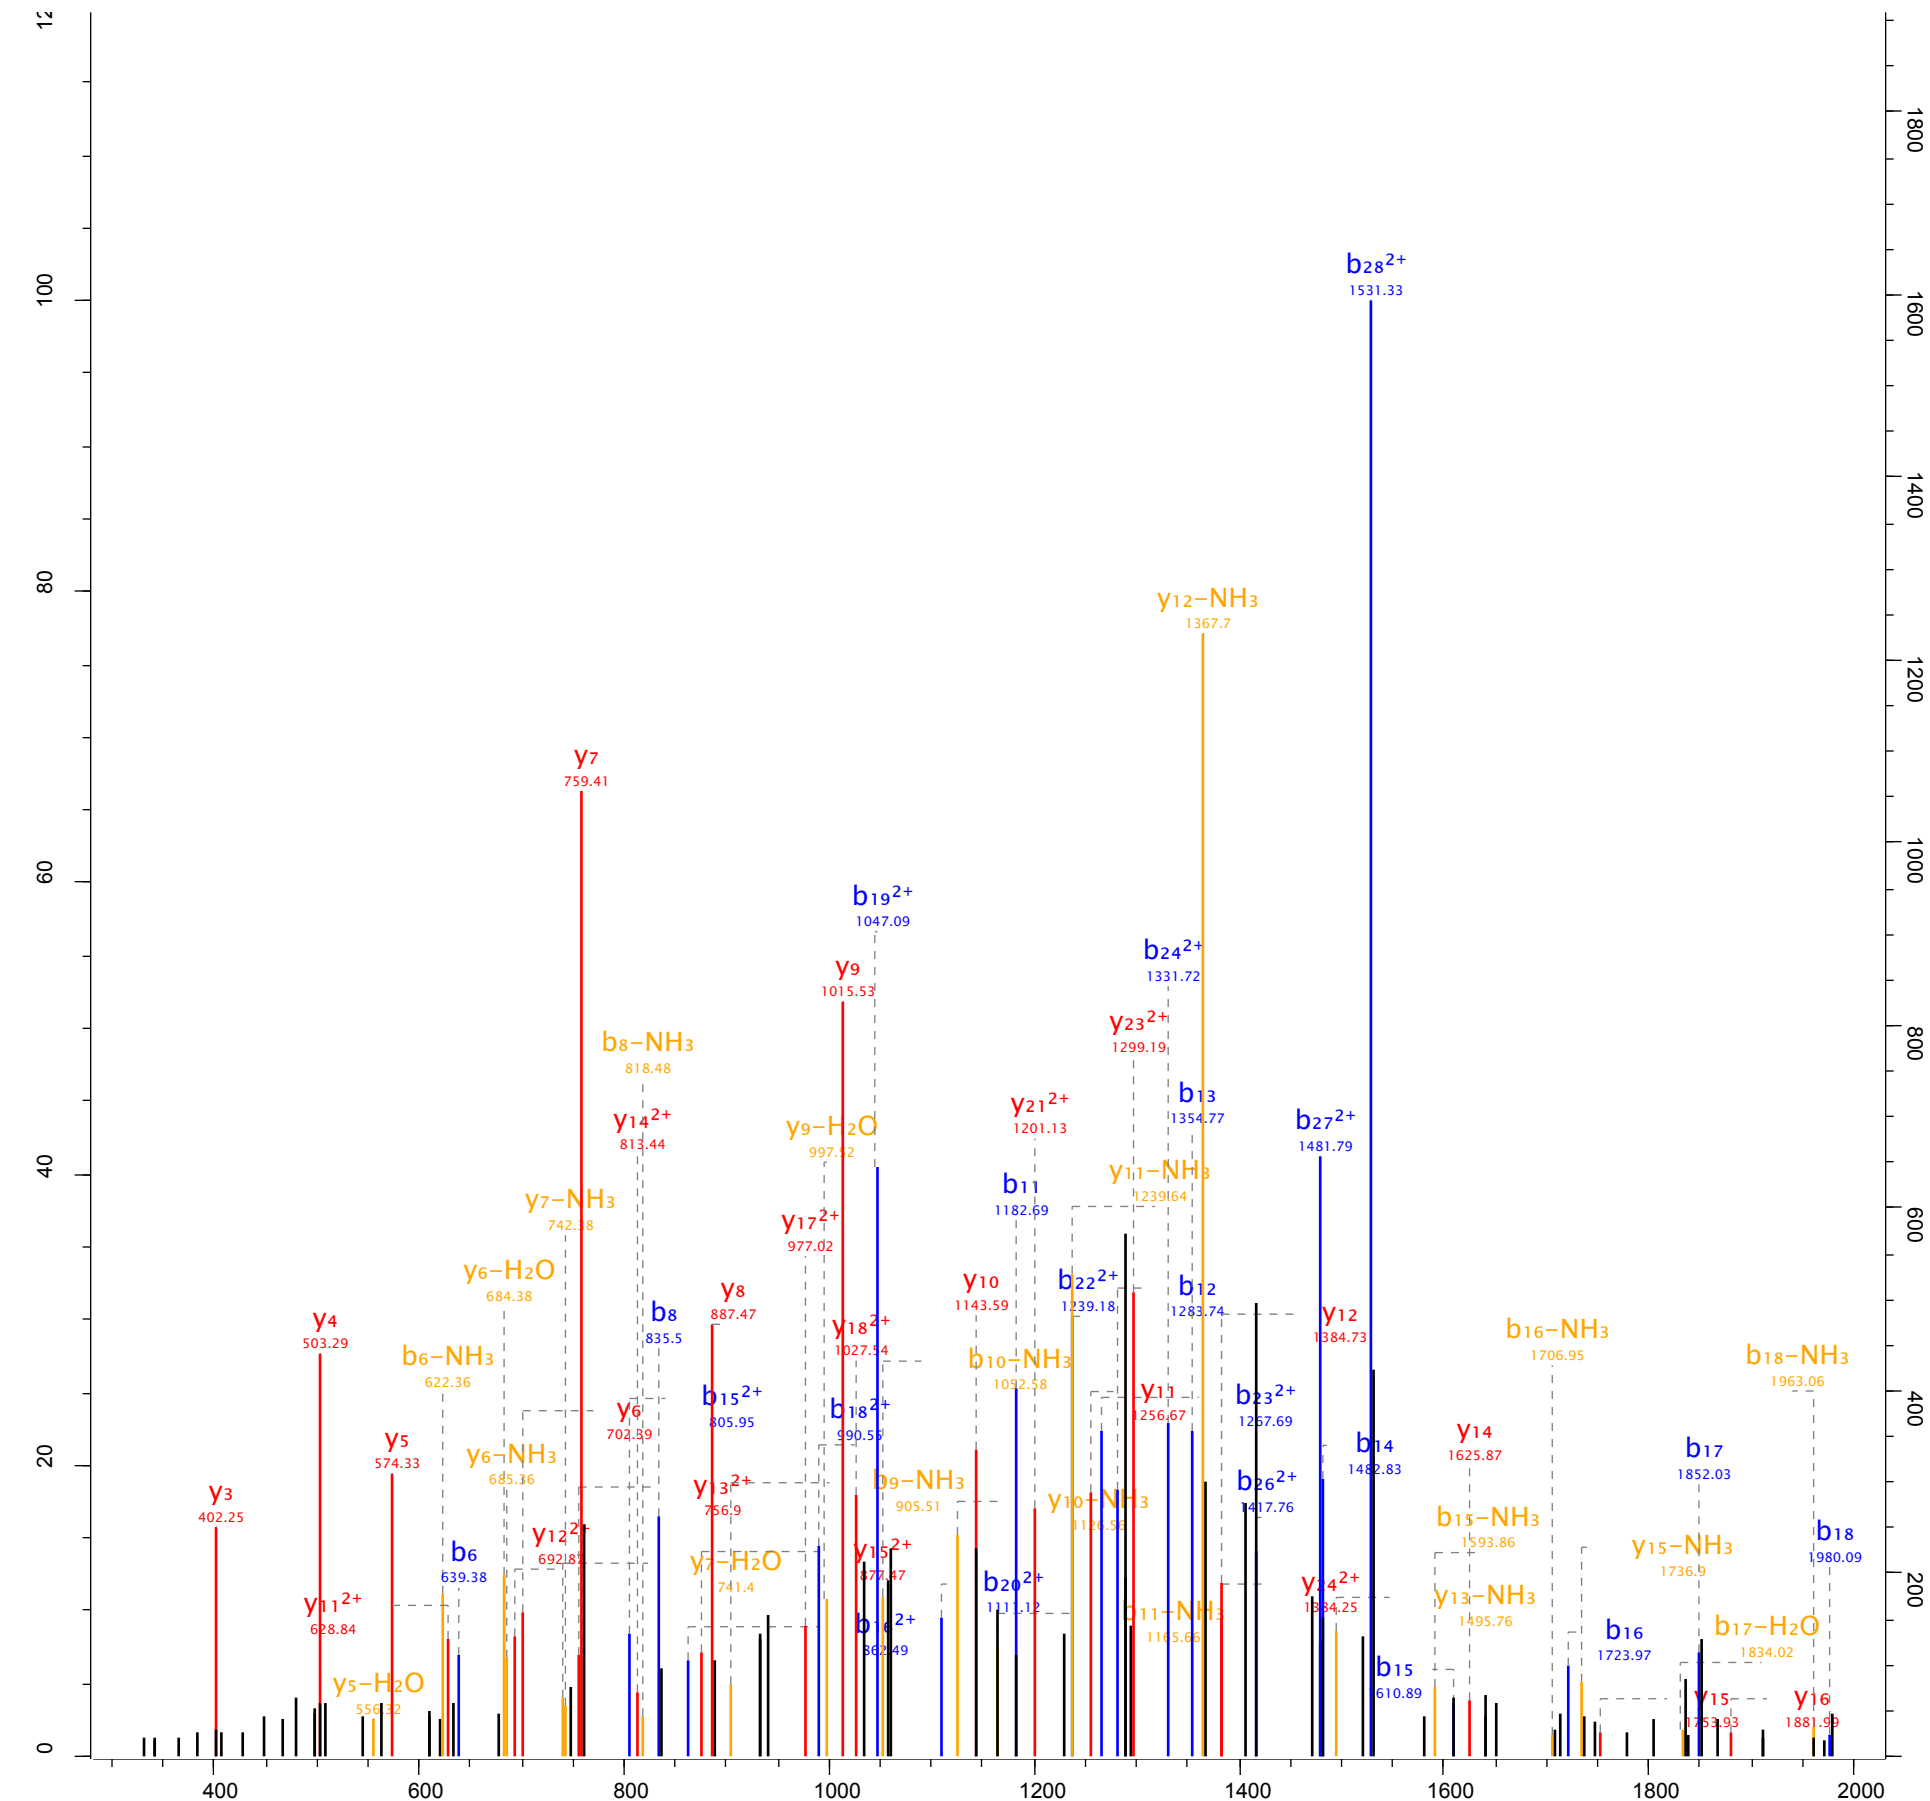

- L I A G N y<sub>24</sub><sup>2+</sup>  
ac y<sub>23</sub><sup>2+</sup> y<sub>21</sub><sup>2+</sup>  
b<sub>6</sub> K P V S F L T A Q Q L Q Q L Q Q y<sub>18</sub><sup>2+</sup> y<sub>17</sub><sup>2+</sup> y<sub>16</sub> y<sub>15</sub> y<sub>14</sub> y<sub>13</sub><sup>2+</sup> y<sub>12</sub> y<sub>11</sub> y<sub>10</sub> y<sub>9</sub> y<sub>8</sub> y<sub>7</sub> y<sub>6</sub>  
b<sub>11</sub> b<sub>12</sub> b<sub>13</sub> b<sub>14</sub> b<sub>15</sub> b<sub>16</sub> b<sub>17</sub> b<sub>18</sub> b<sub>19</sub><sup>2+</sup> b<sub>20</sub><sup>2+</sup> b<sub>22</sub><sup>2+</sup> b<sub>23</sub><sup>2+</sup> b<sub>24</sub><sup>2+</sup>  
A T Q V R -

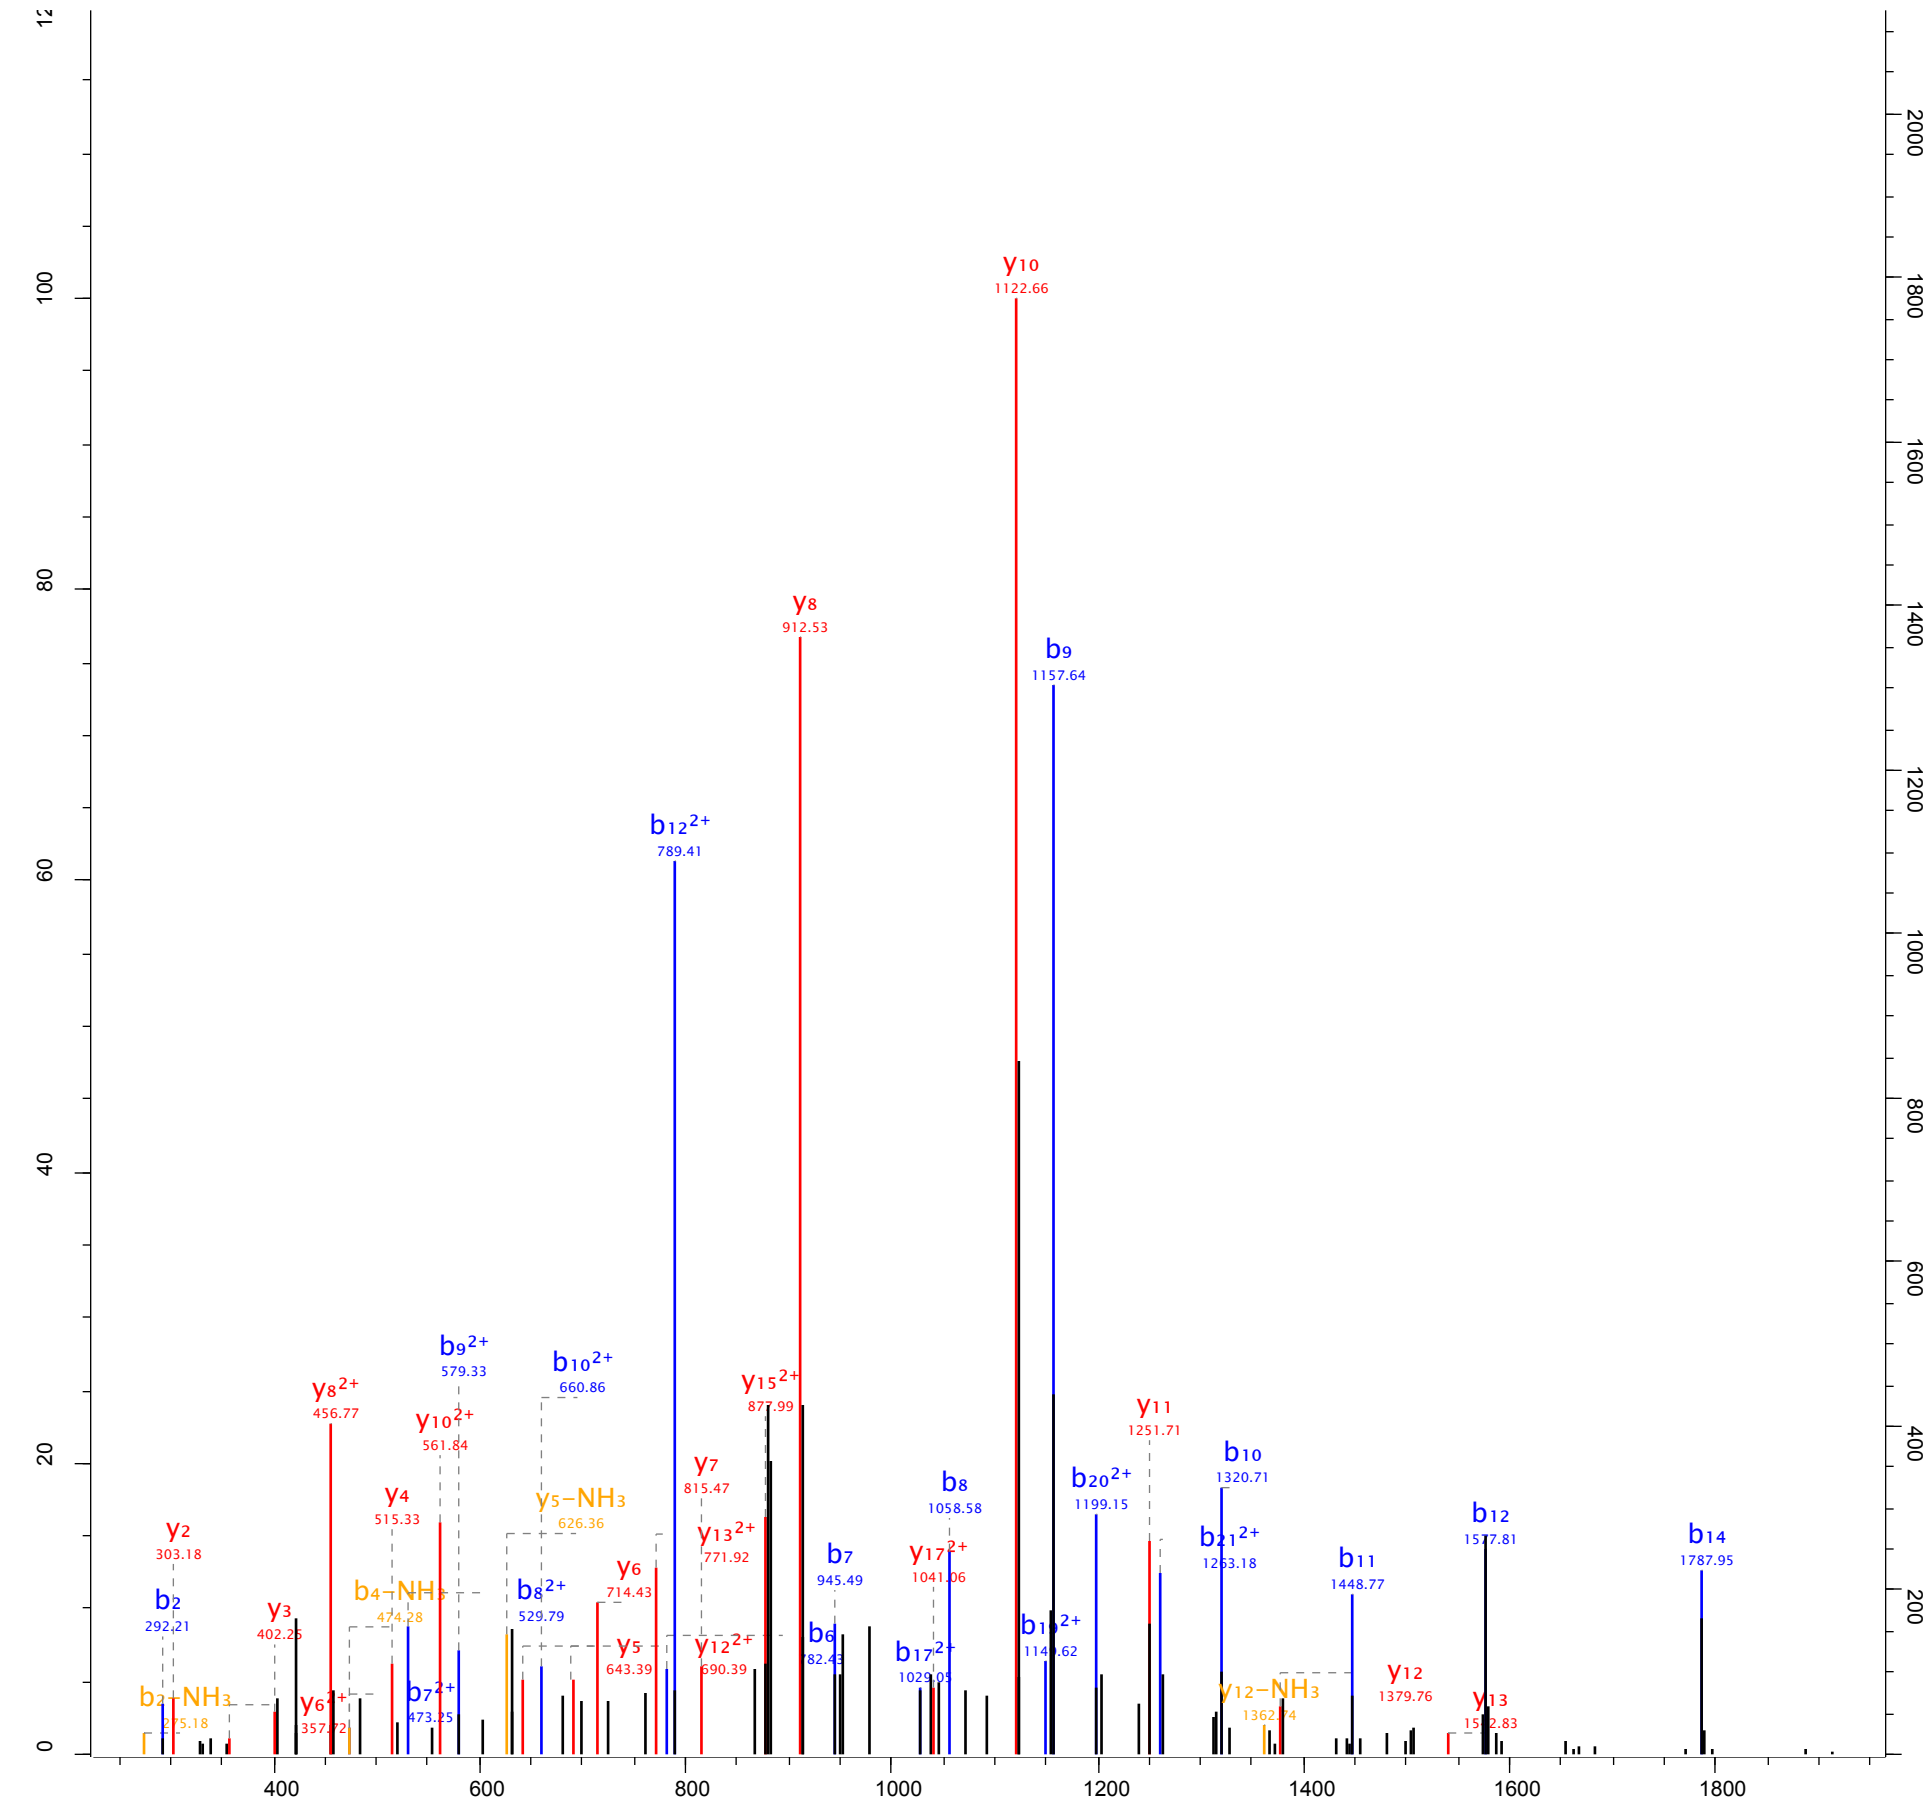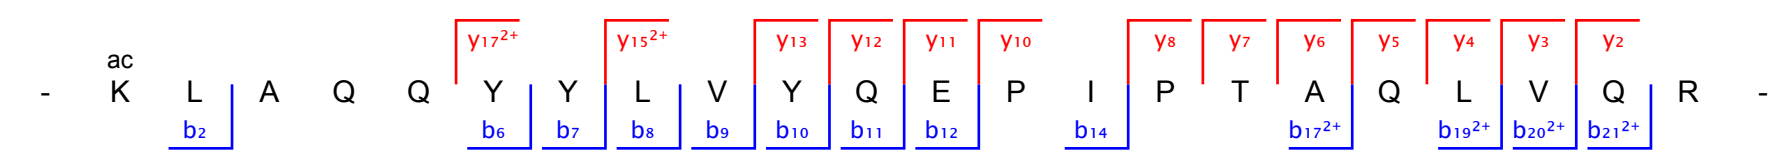

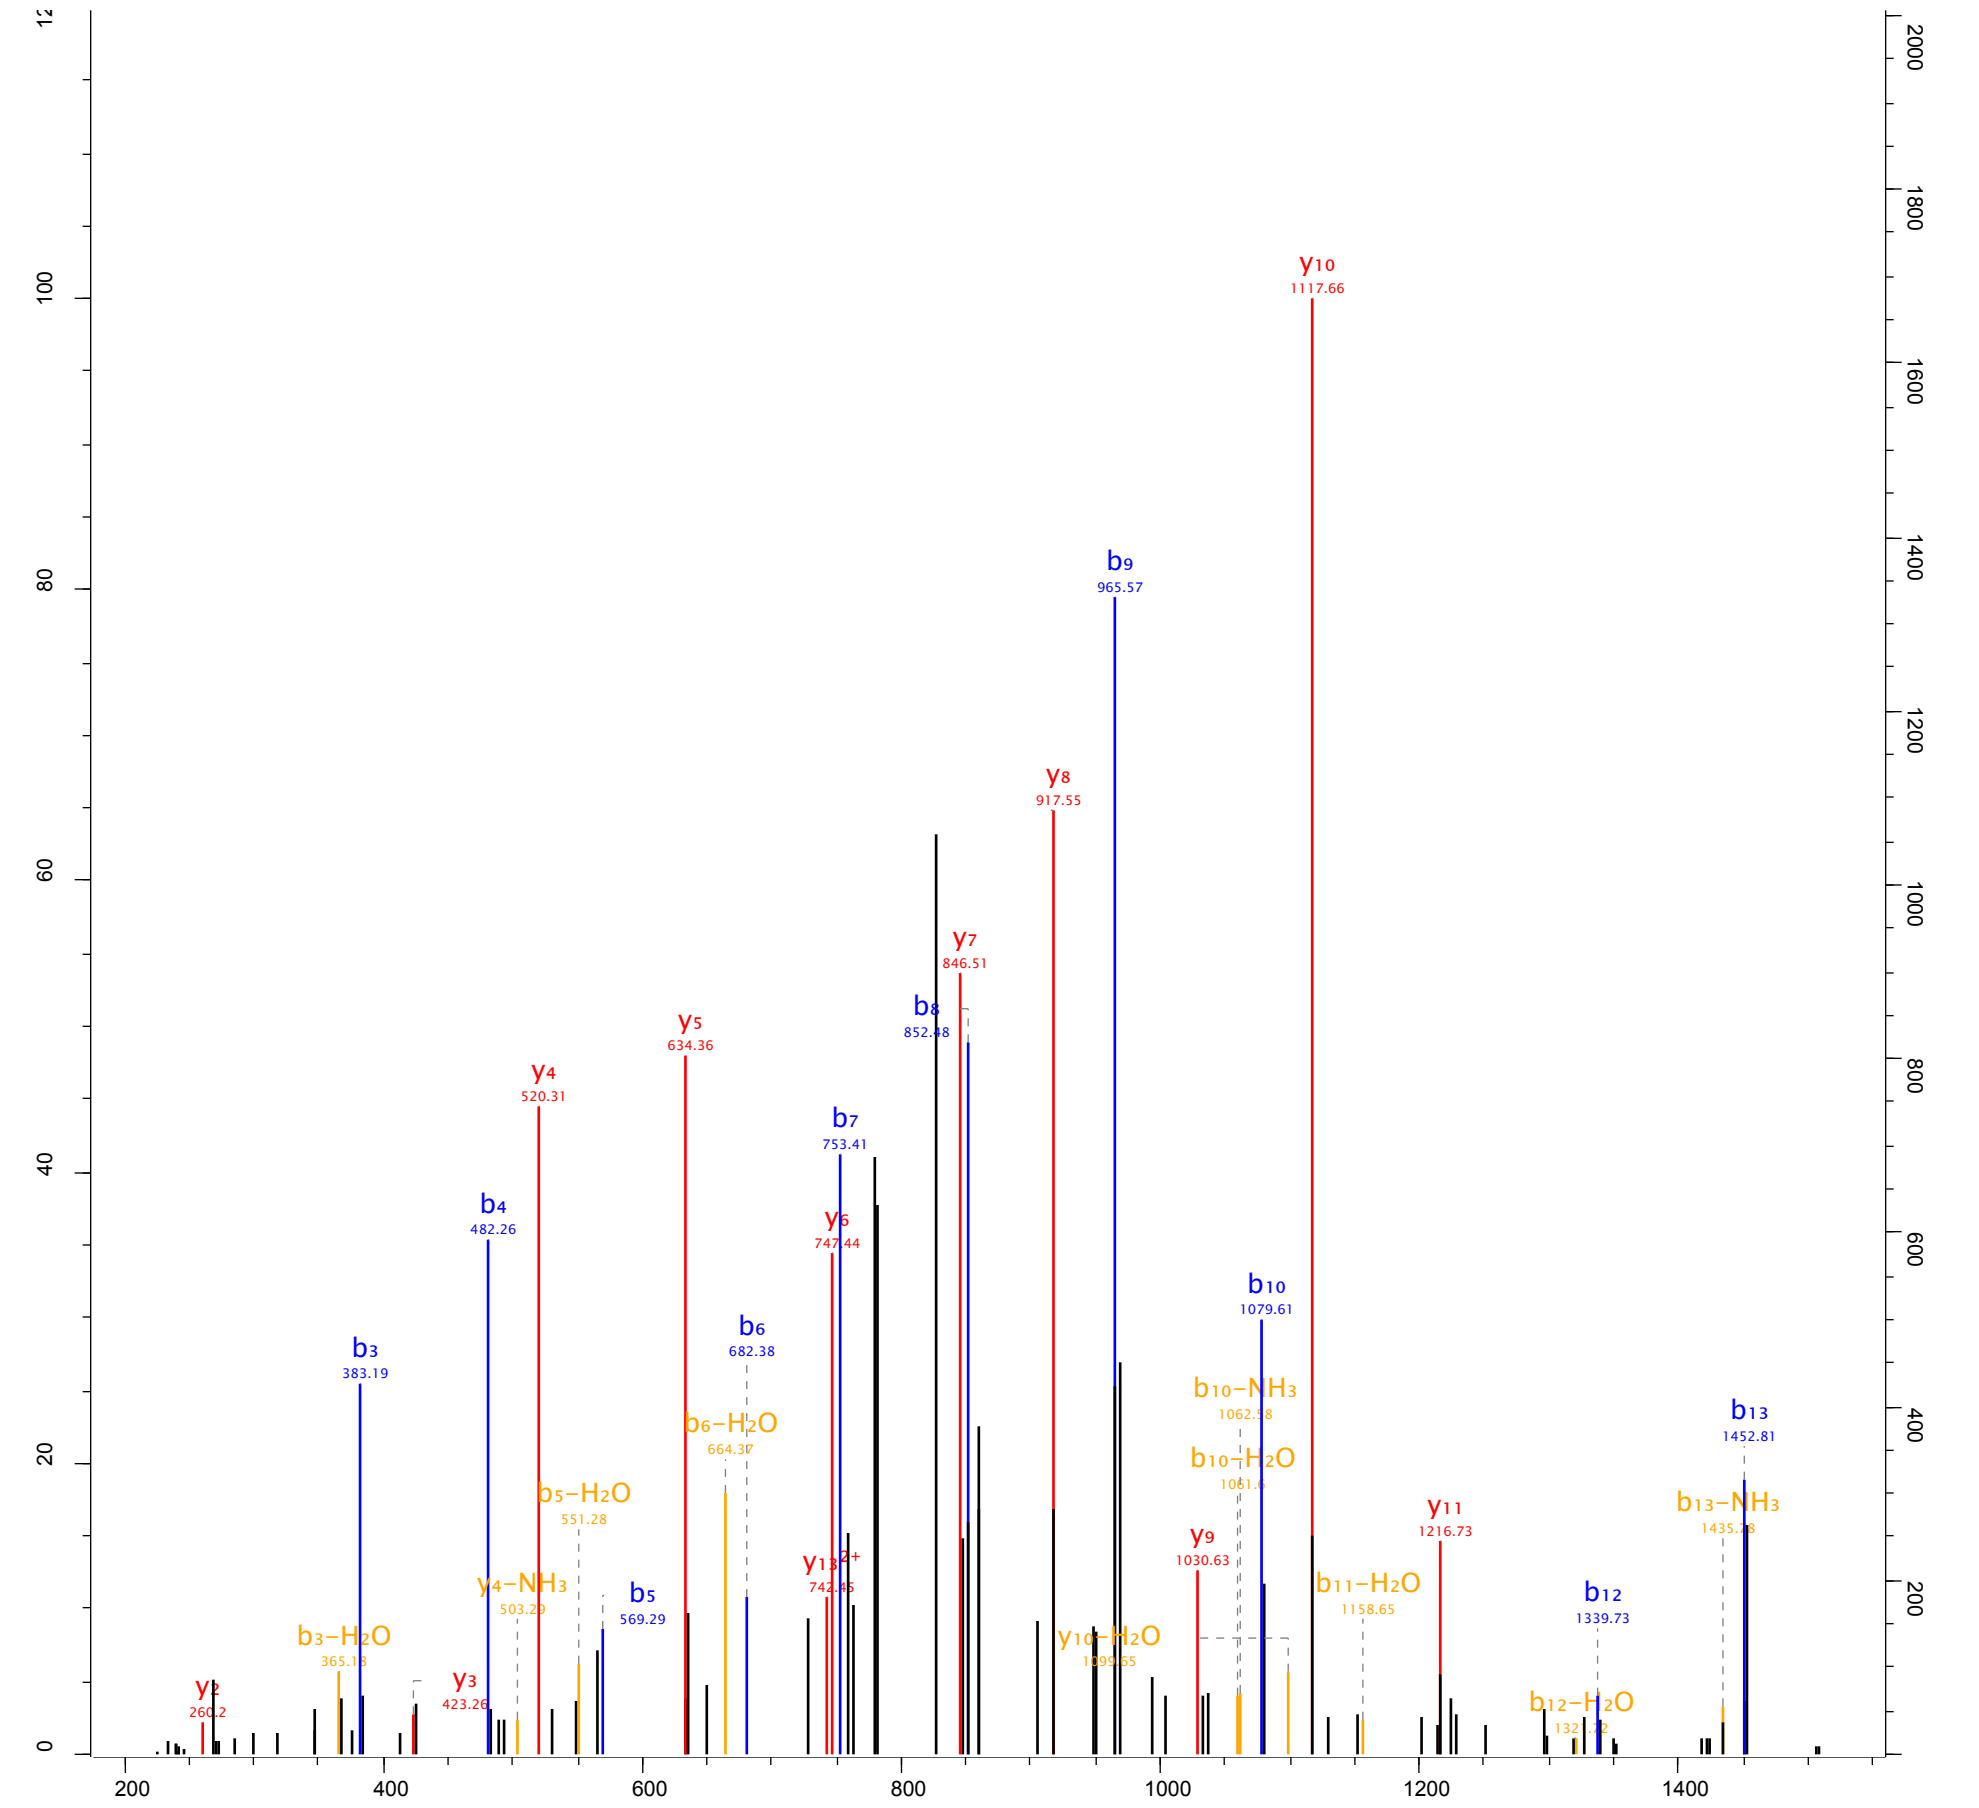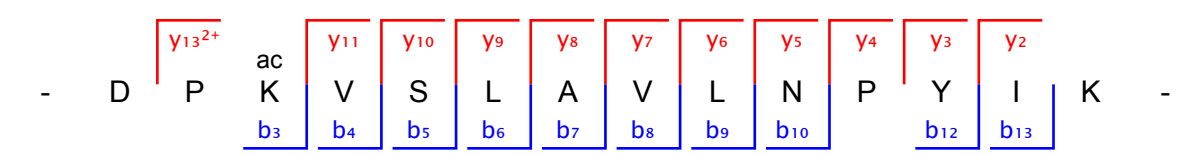

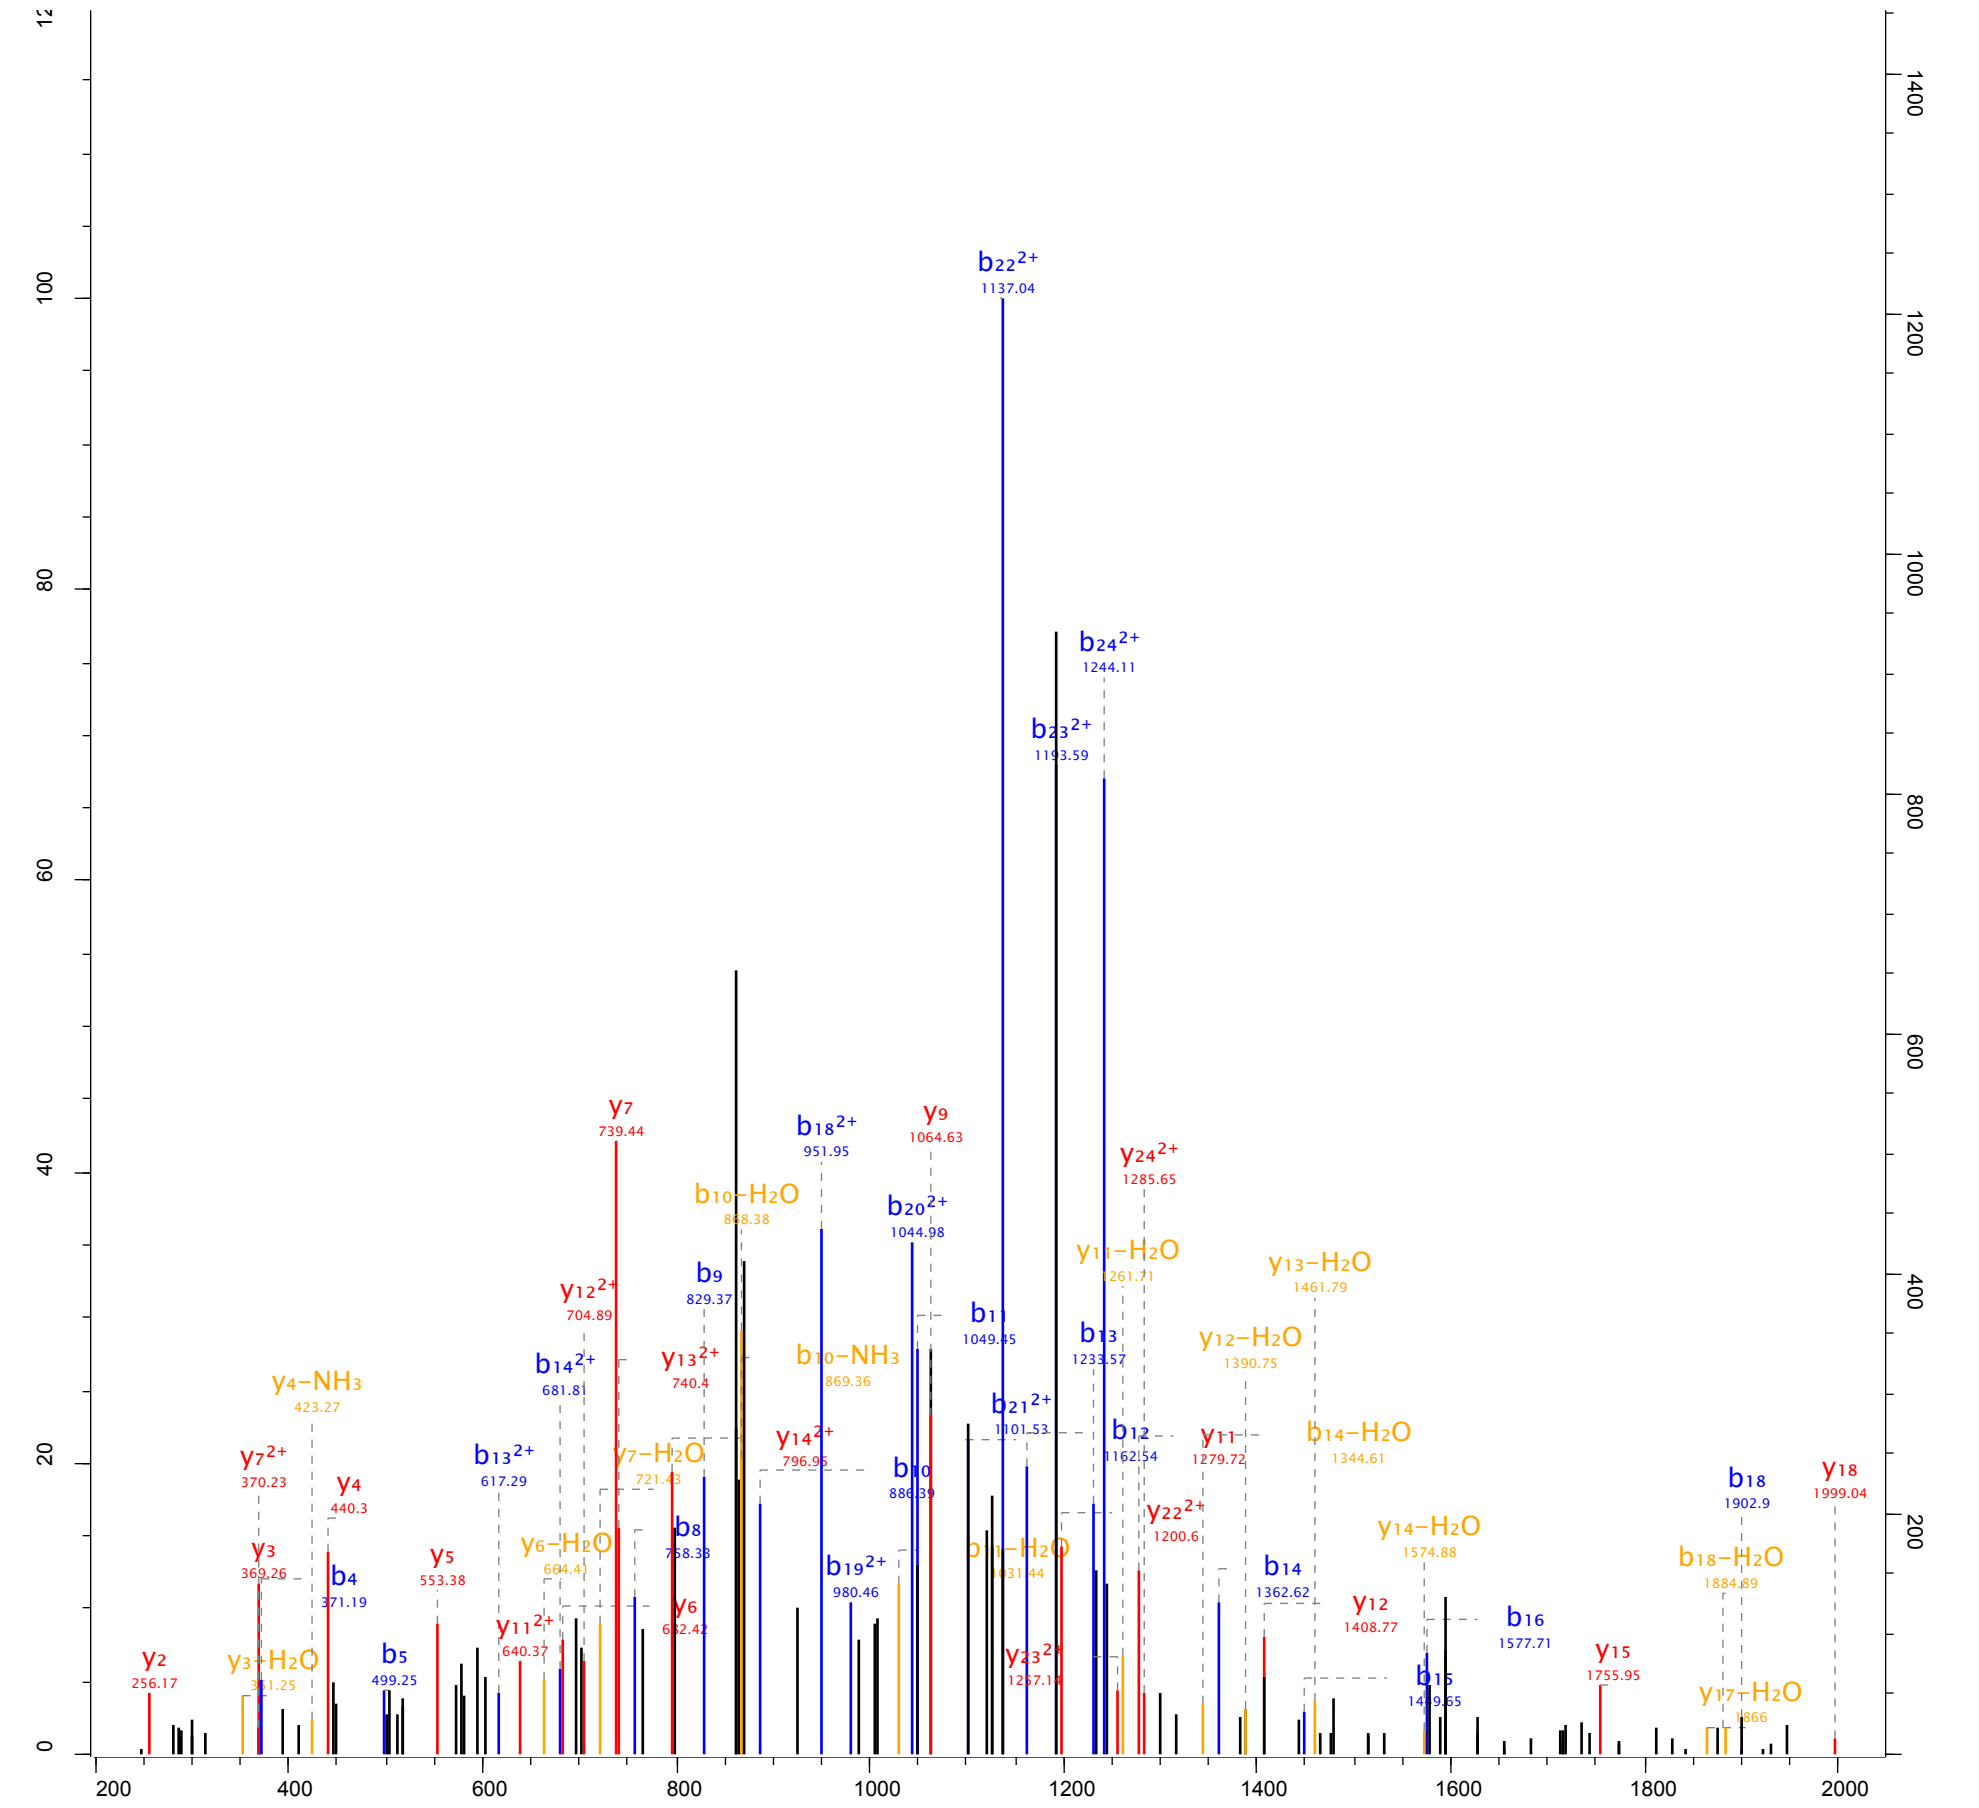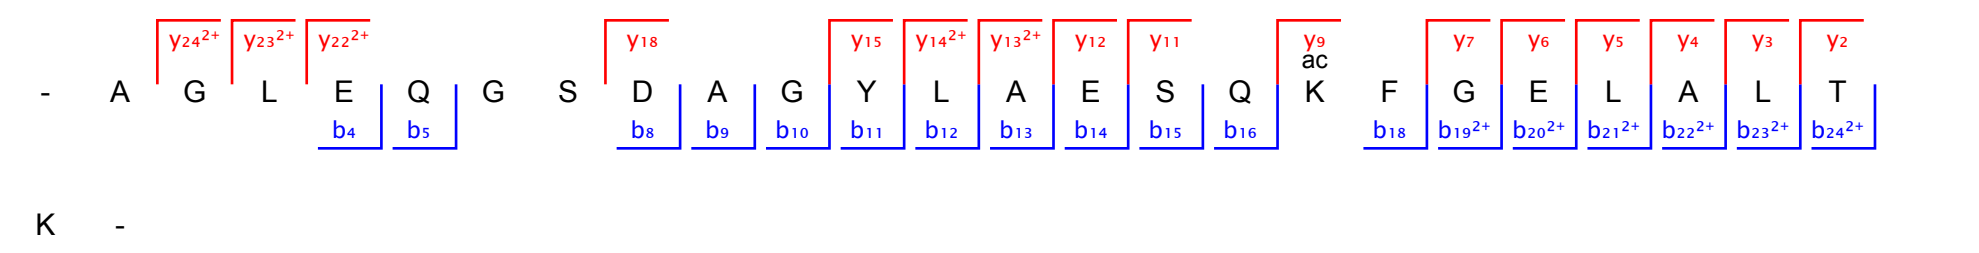

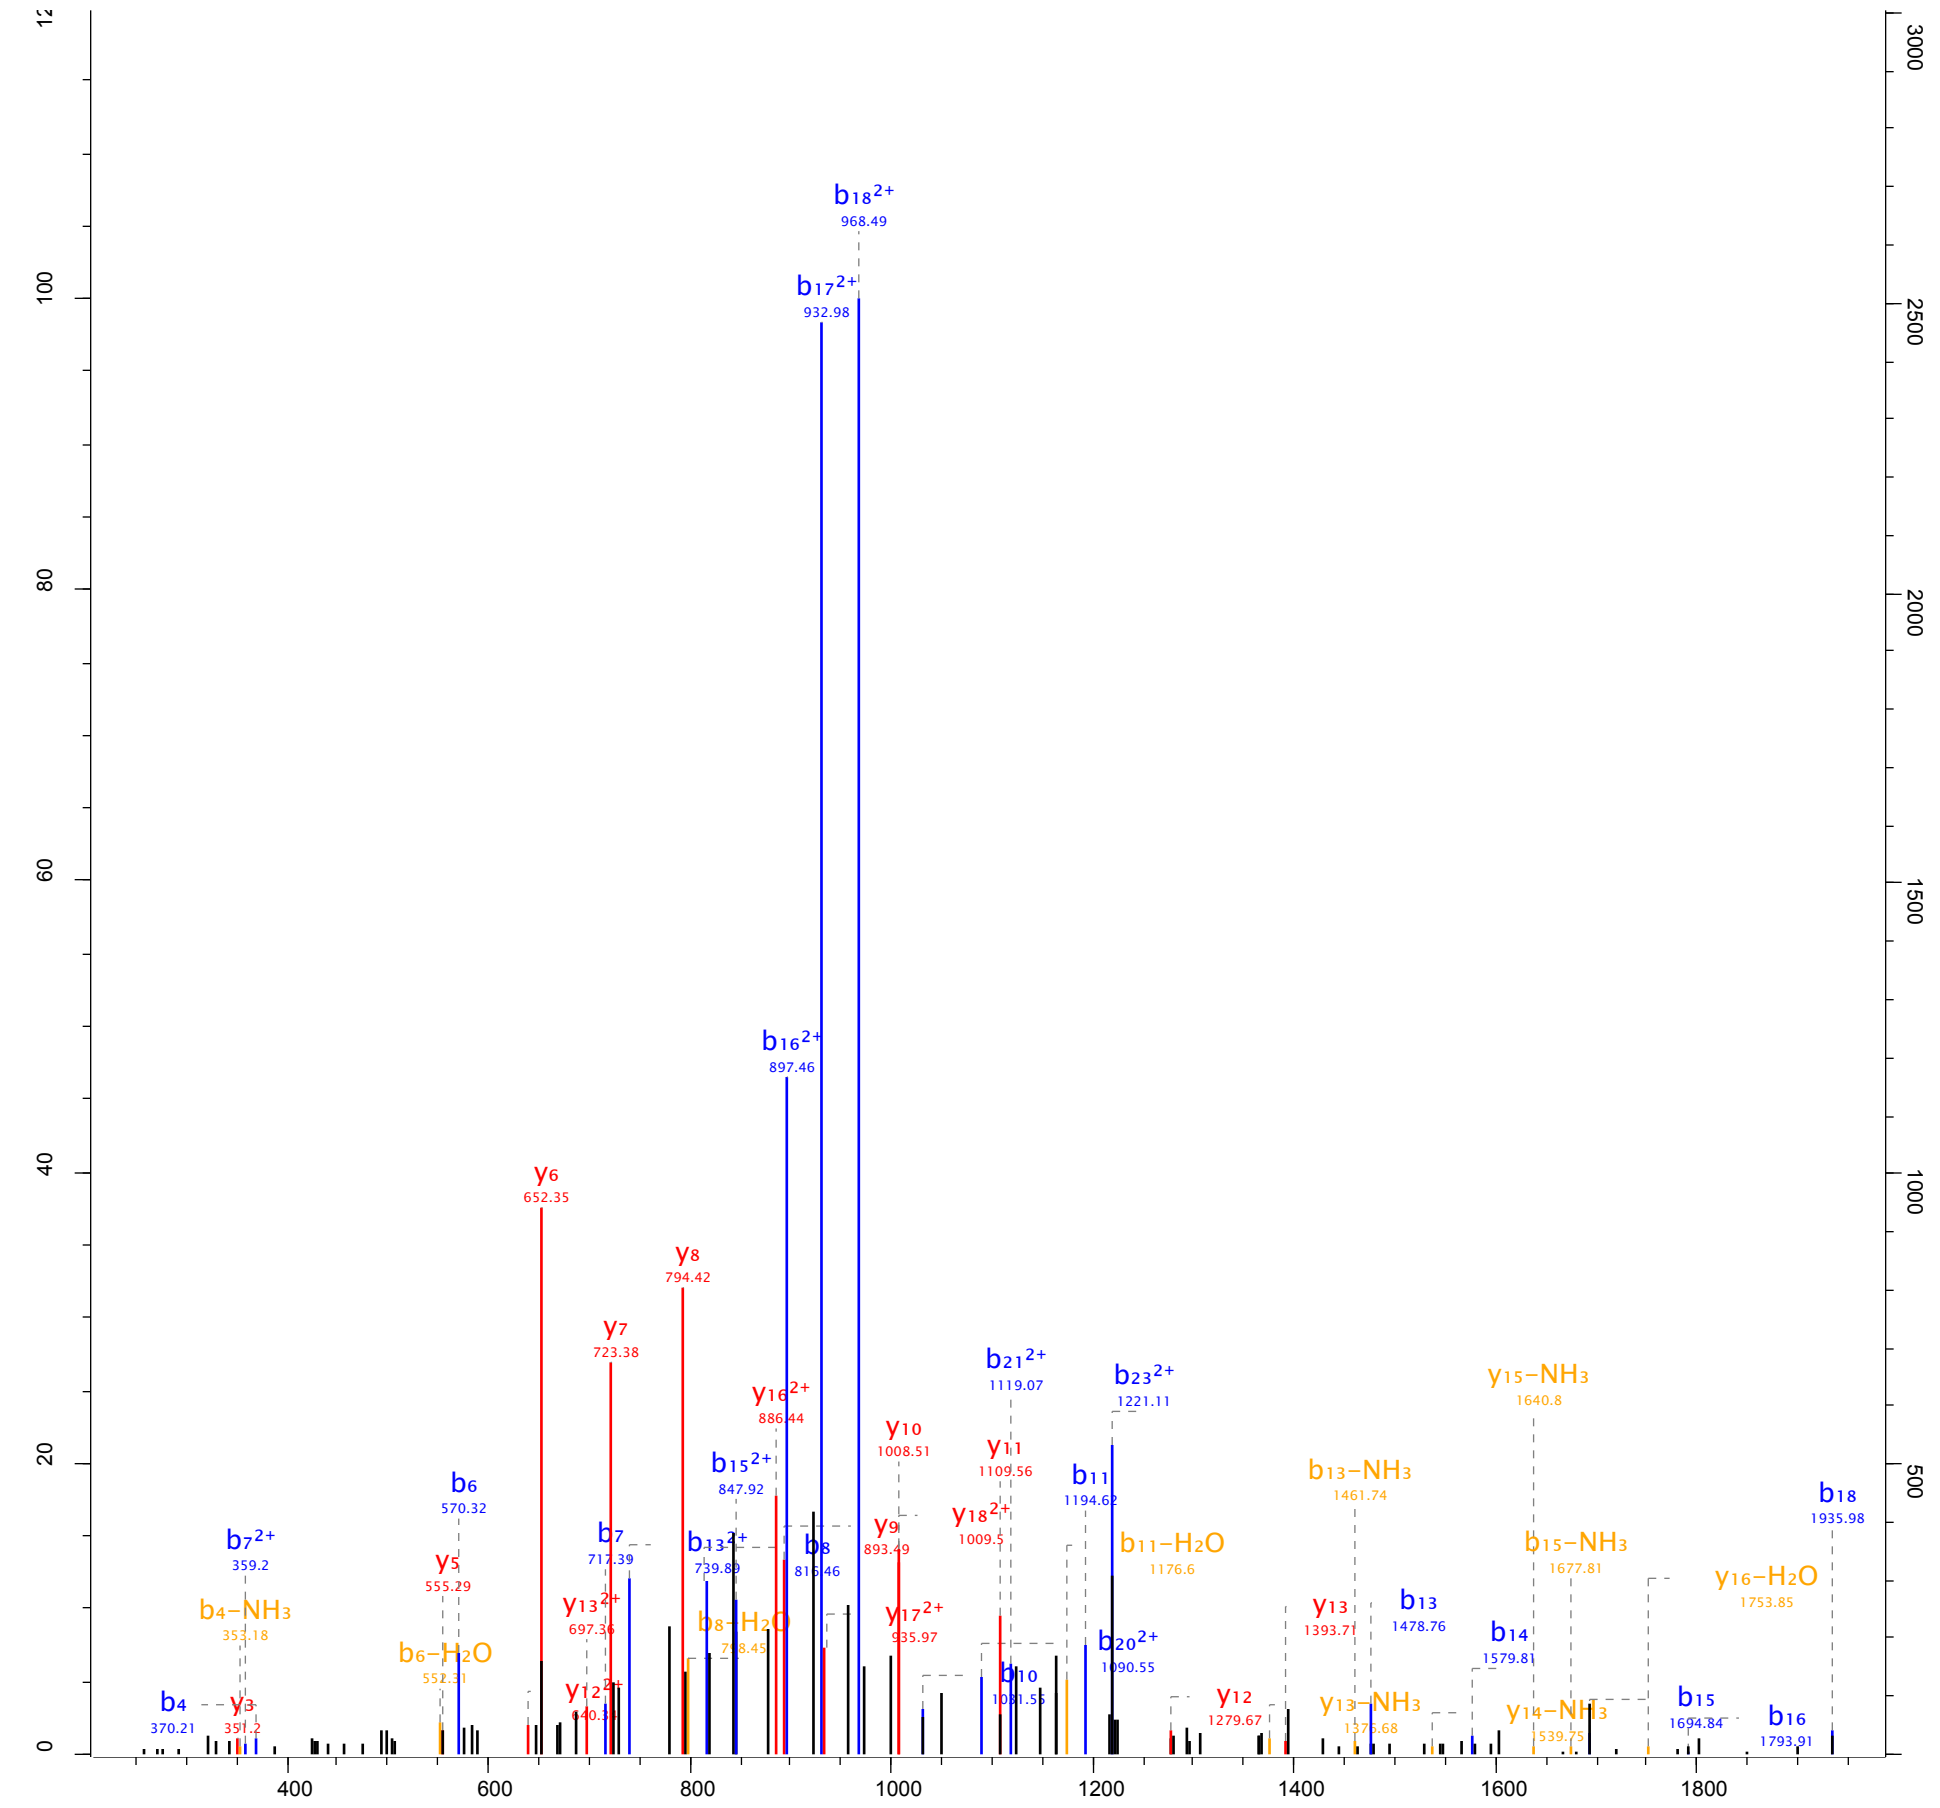

- L Q A G T V F V N T Y N K T D V A A P F G G F K

b4
b6
b7
b8
b10
b11
b13
b14
b15
b16
b17^2+
b18
b20^2+
b21^2+
b23^2+

y18^2+
y17^2+
y16^2+
y13
y12 ac
y11
y10
y9
y8
y7
y6
y5
y3

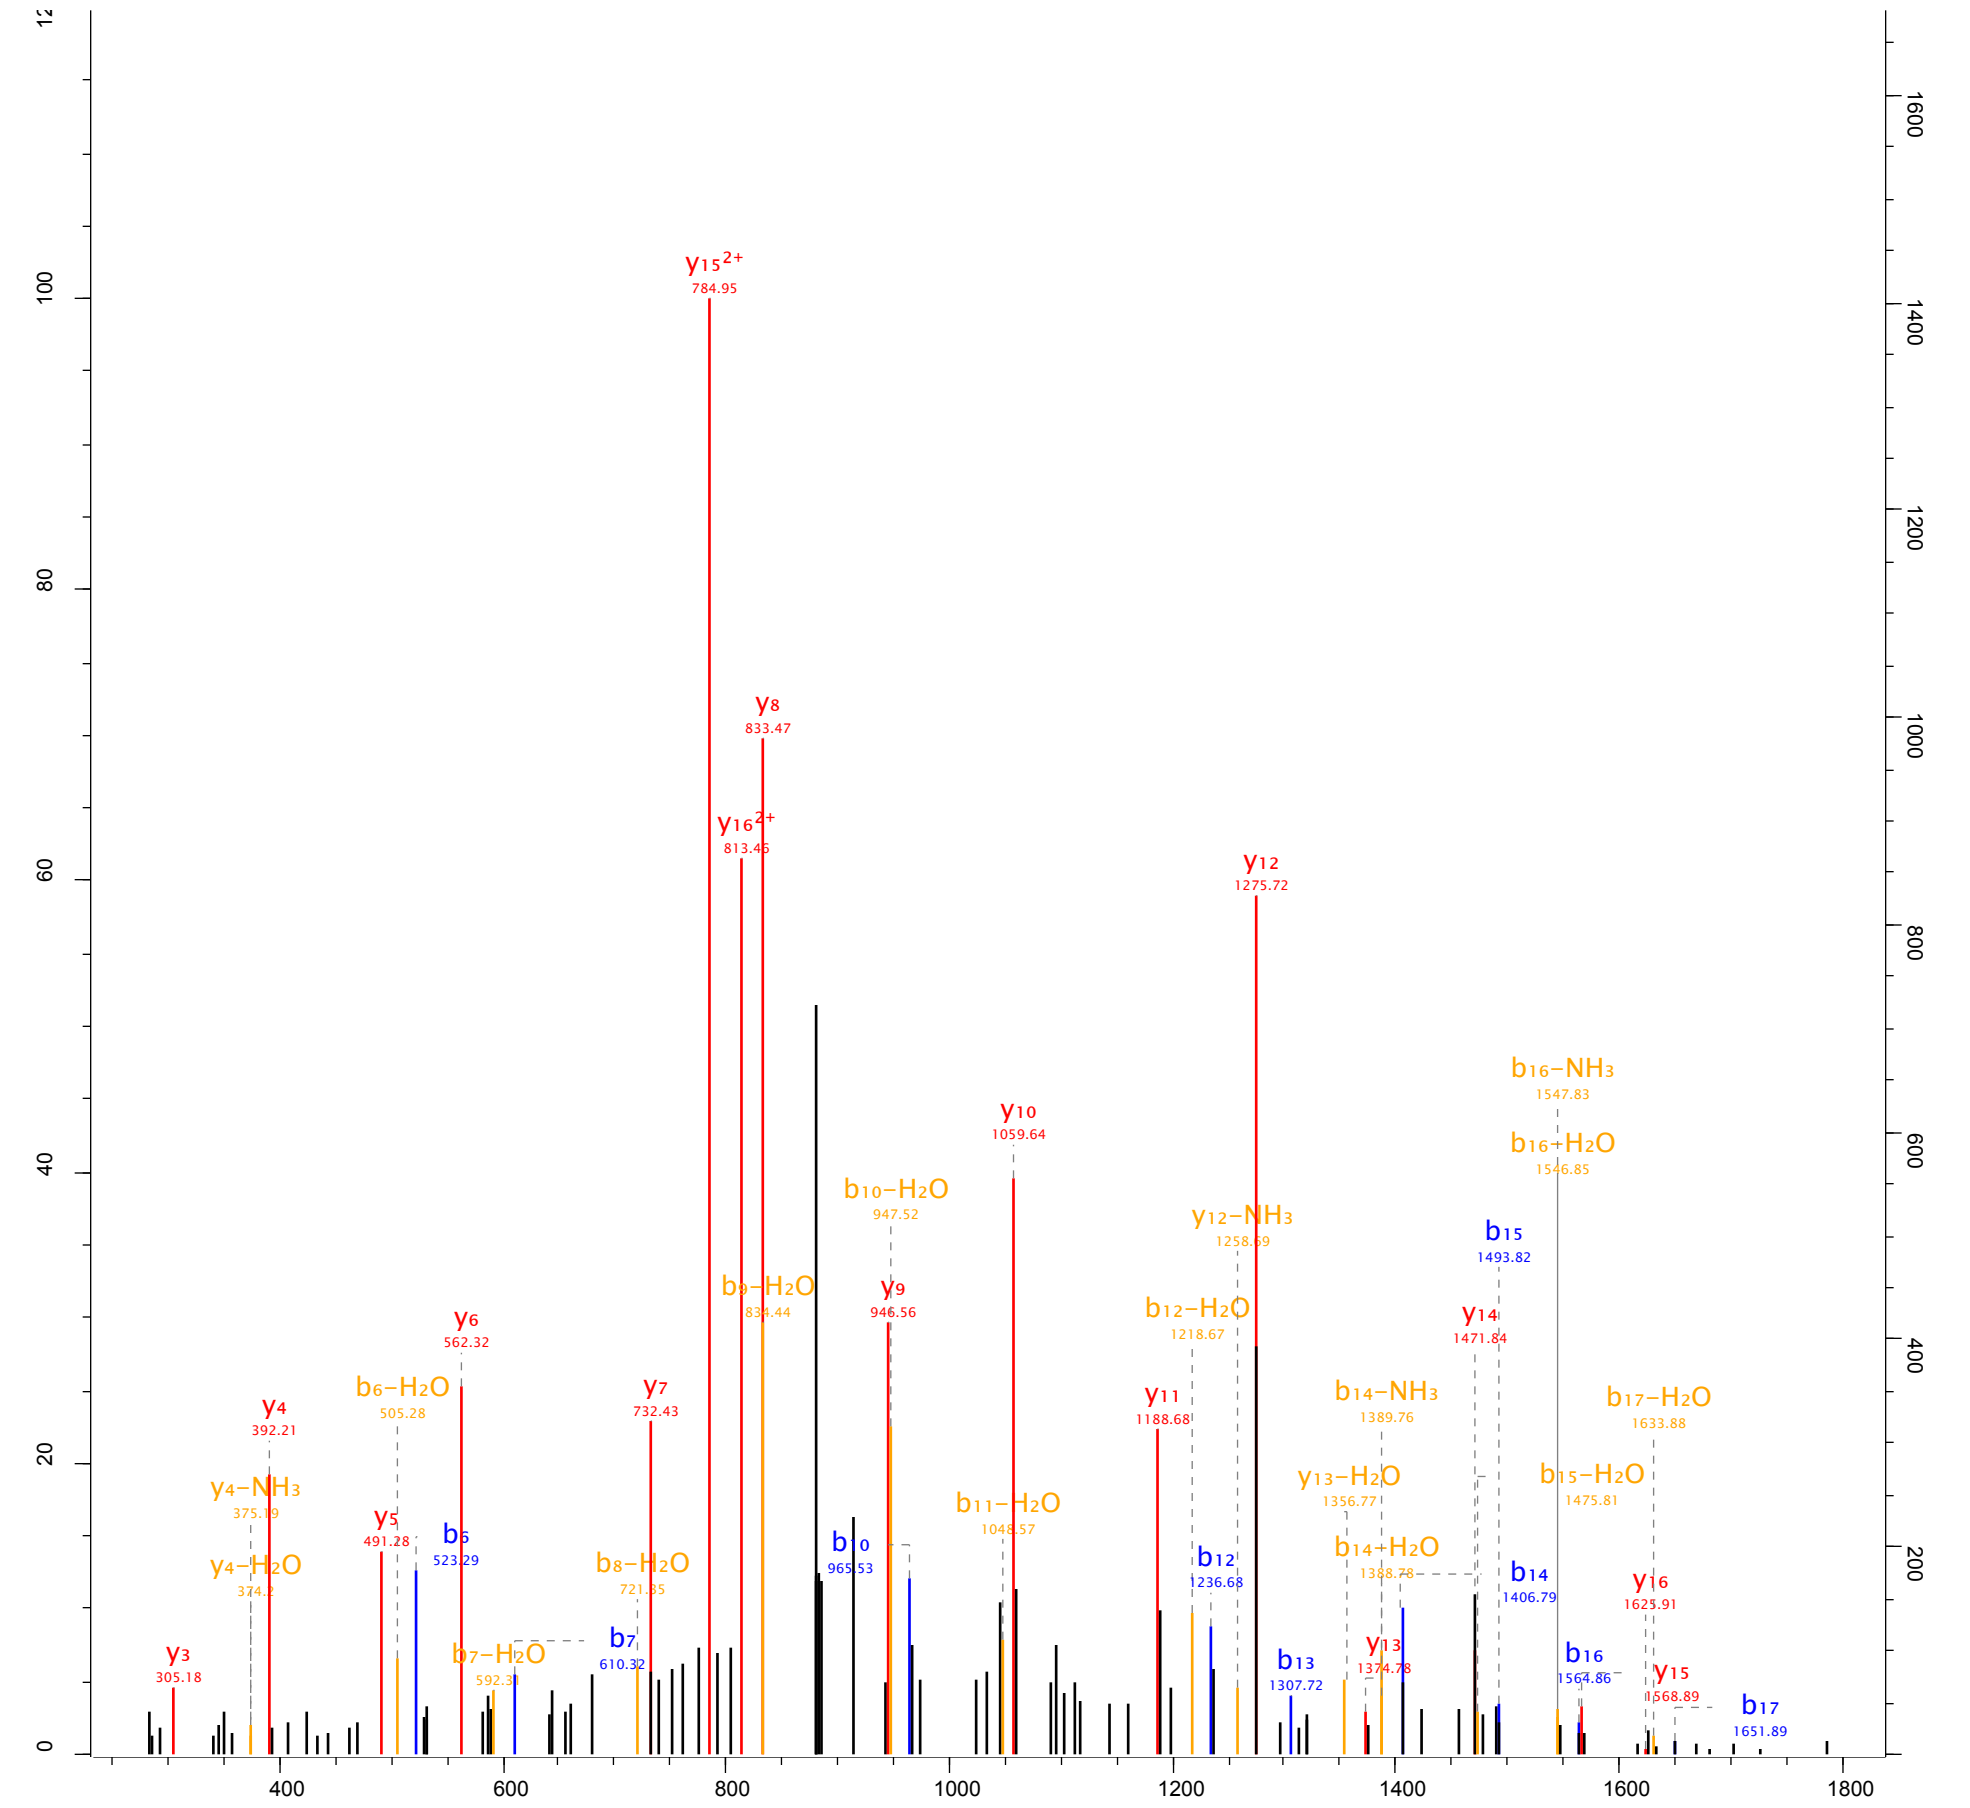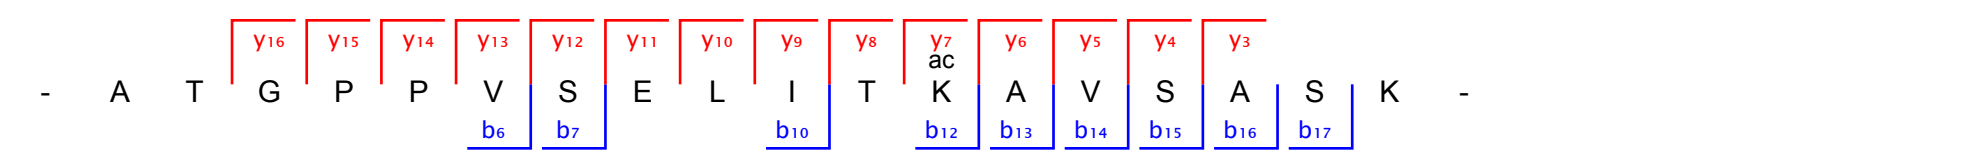



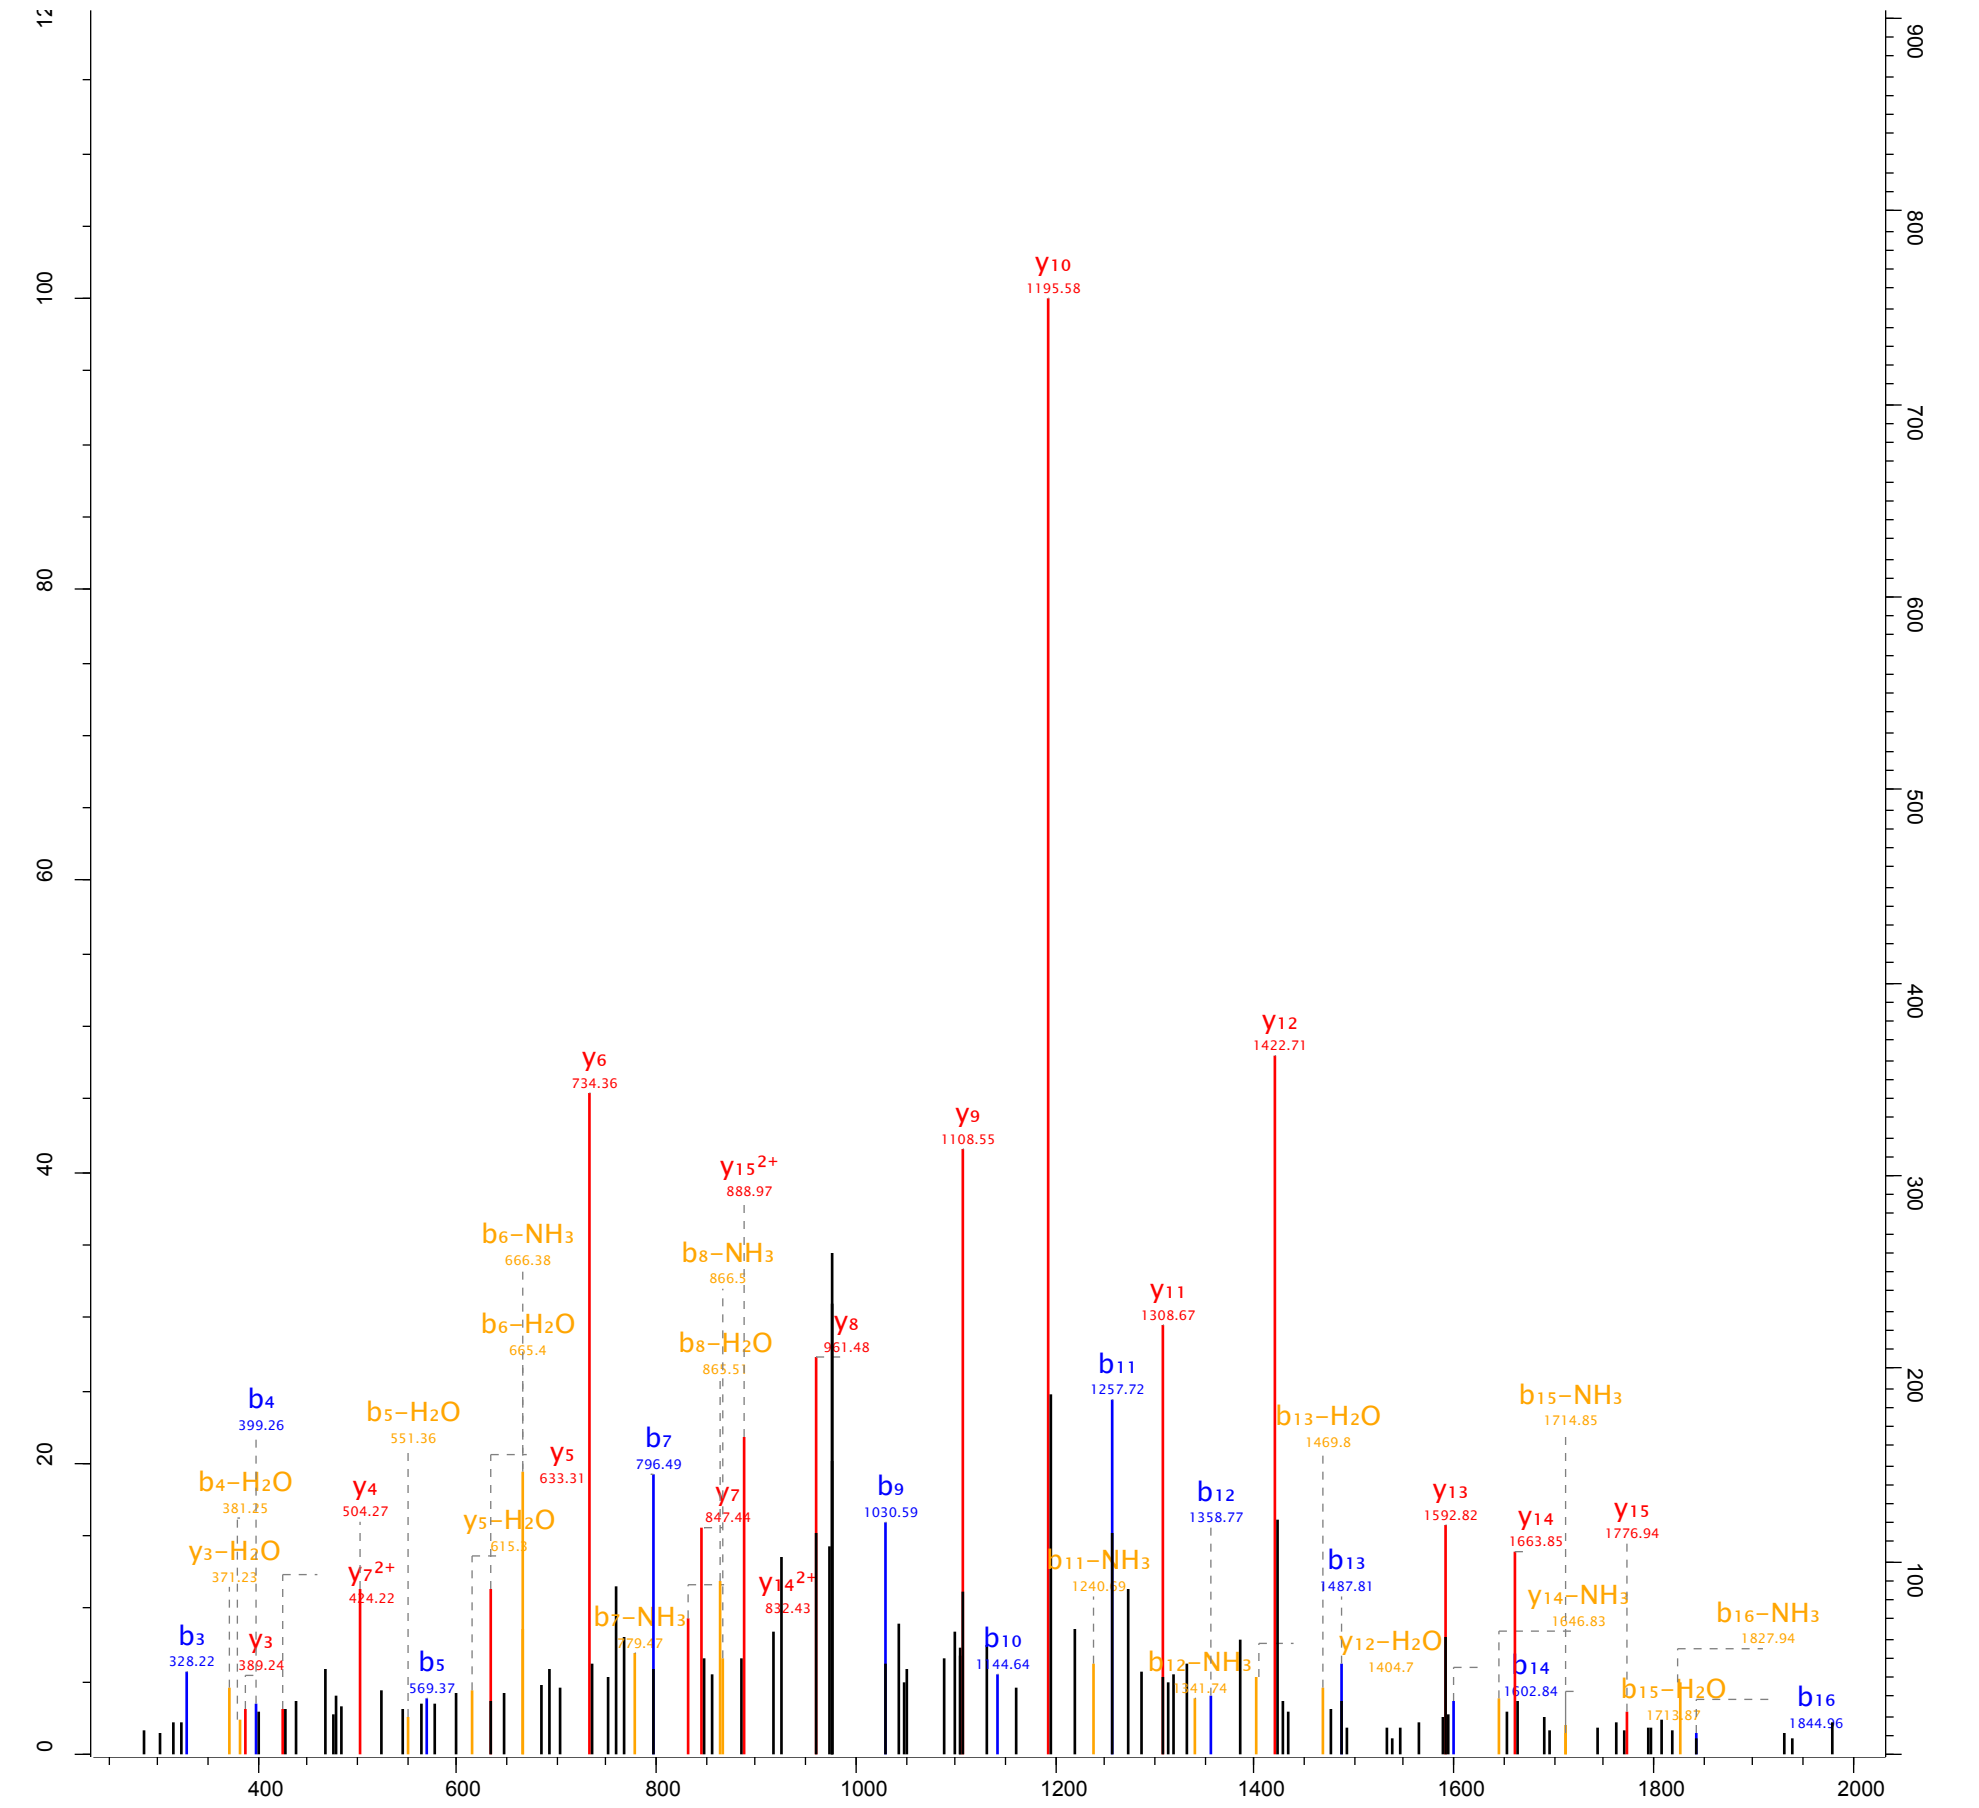

- T L L A K N L S F N I T E D E L K -

y15
y14
y13  
ac
y12
y11
y10
y9
y8
y7
y6
y5
y4
y3

b3
b4
b5
b7
b9
b10
b11
b12
b13
b14
b16

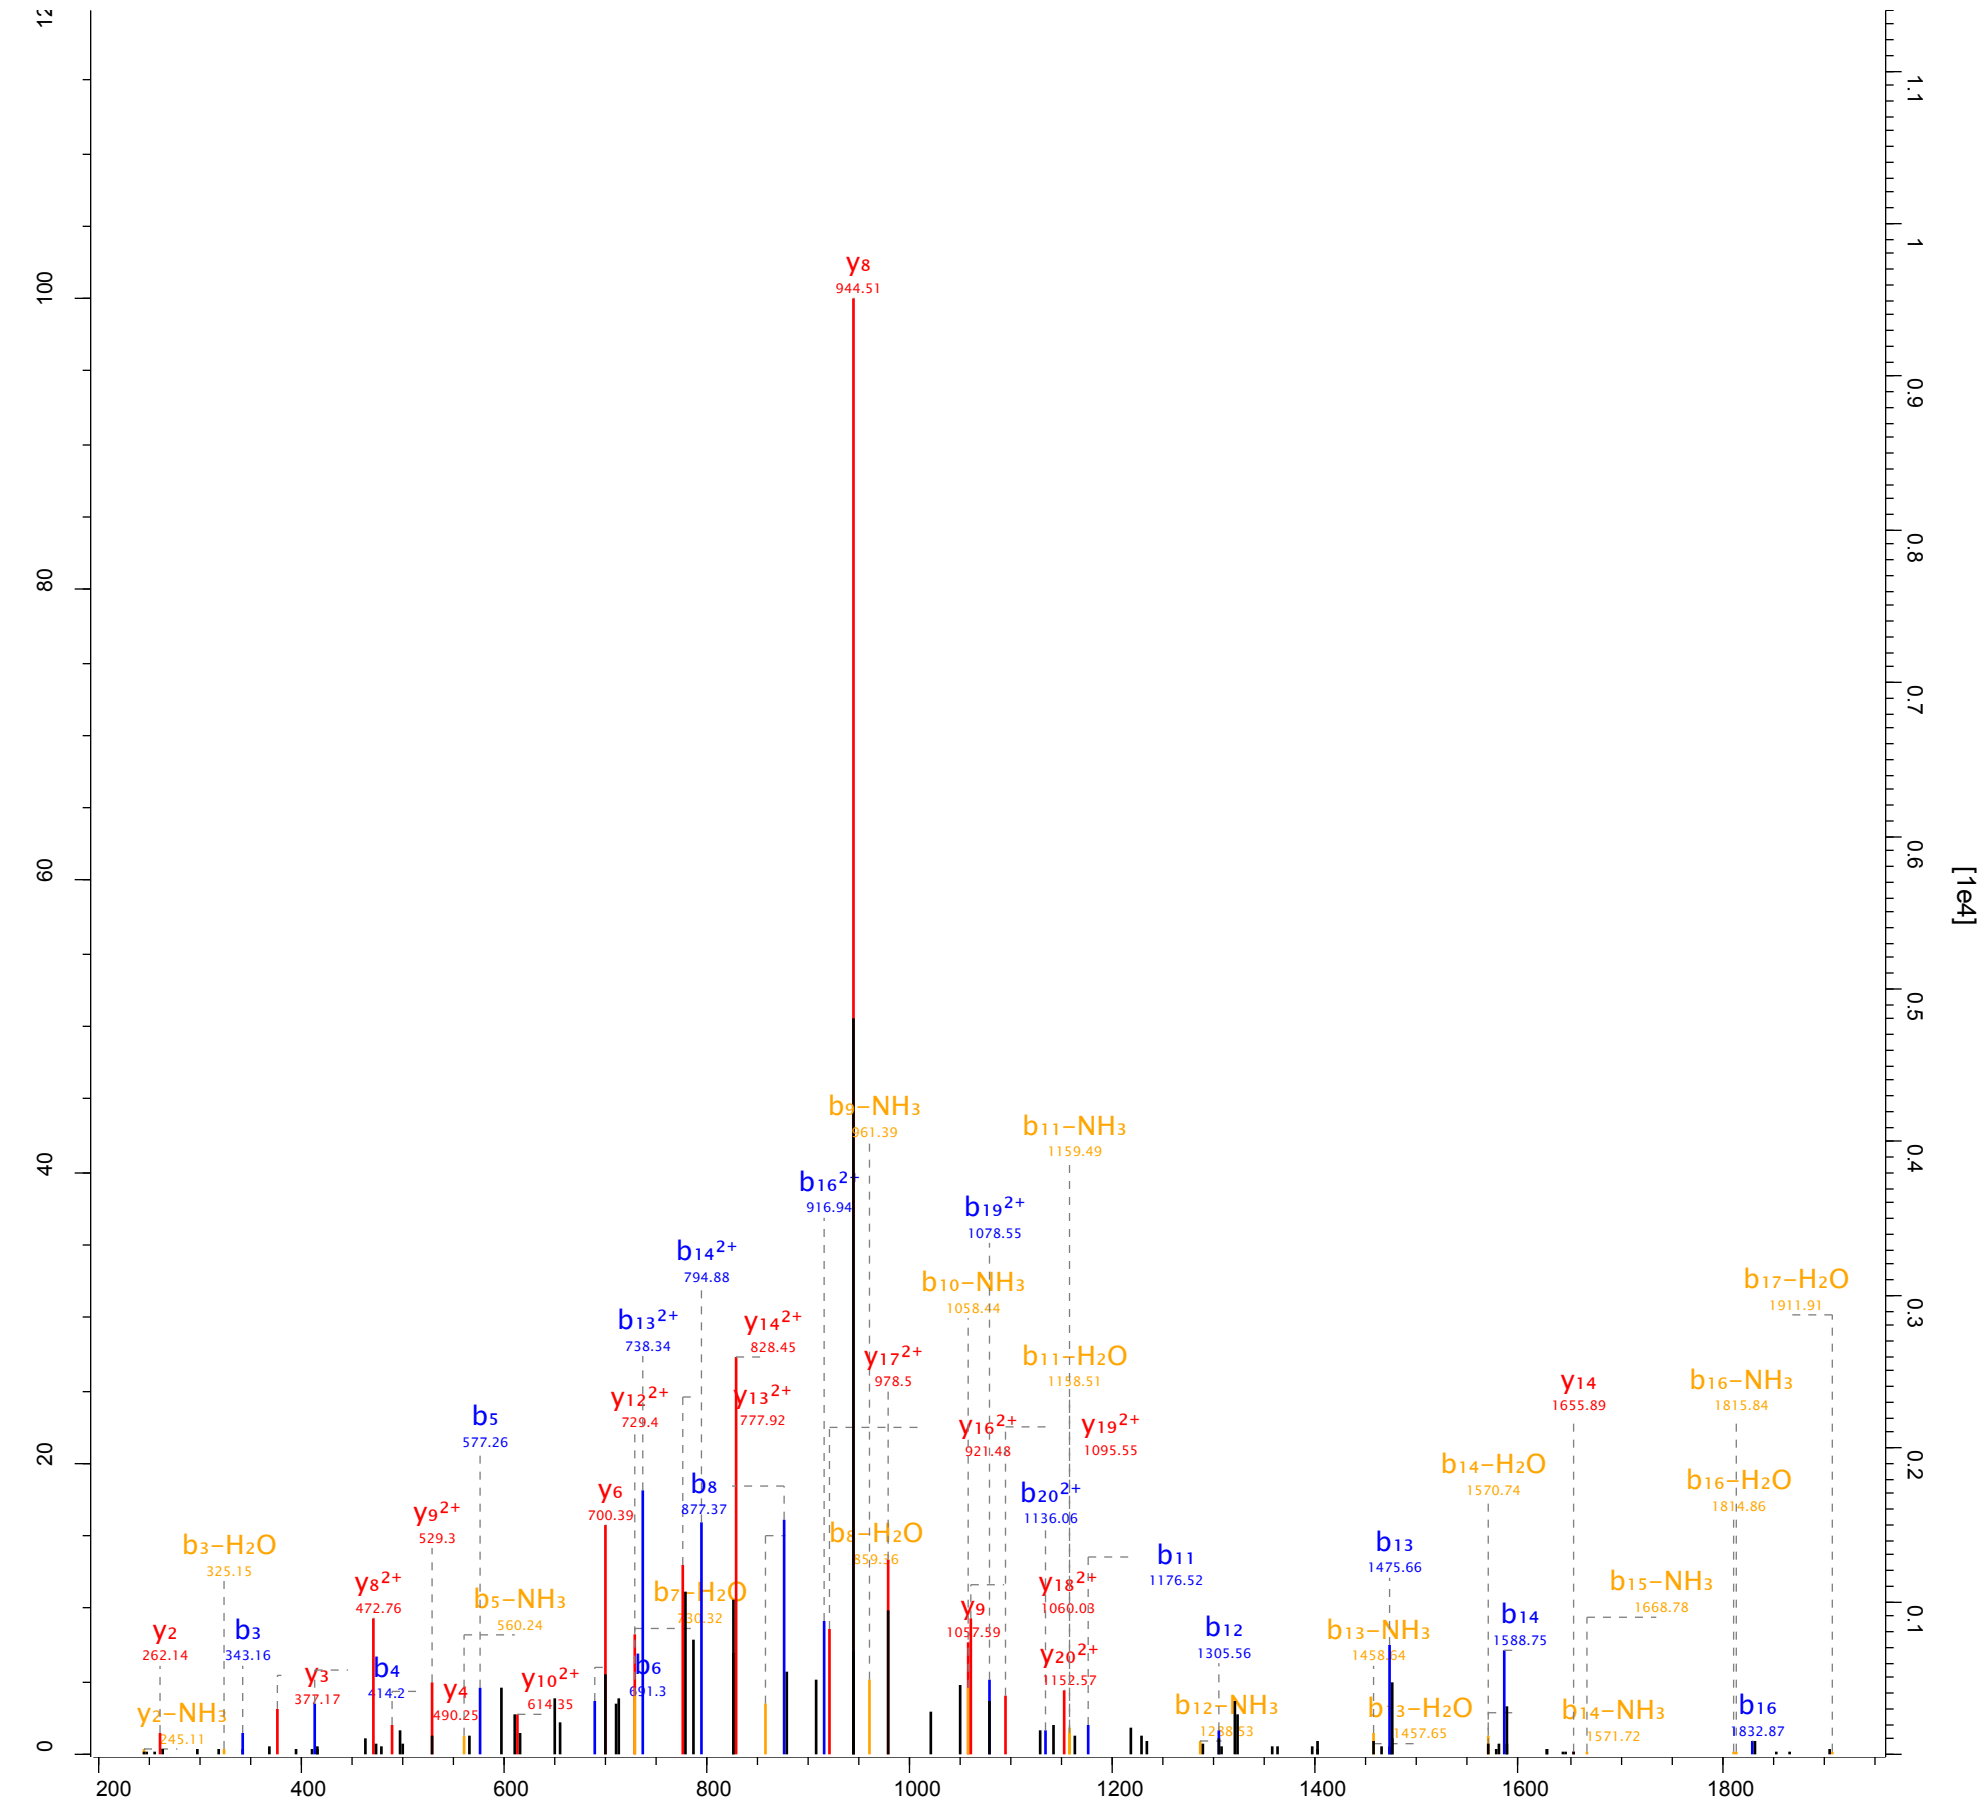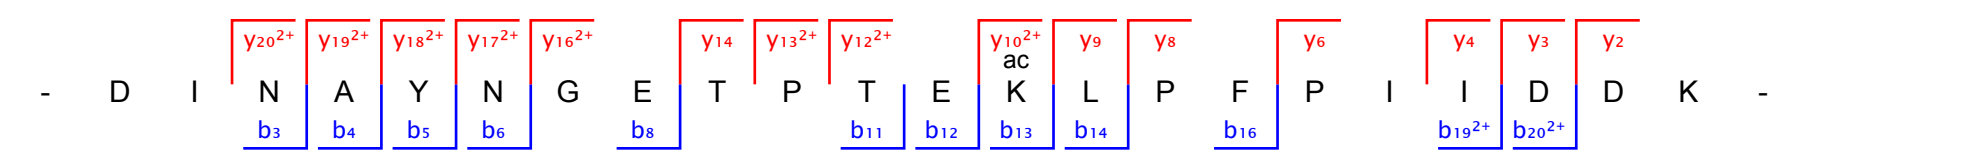

052413\_SCW\_II\_29\_Second\_ZT\_16\_3

16287

ITMS; CID

123.4

936.02

Pkm;Pklr

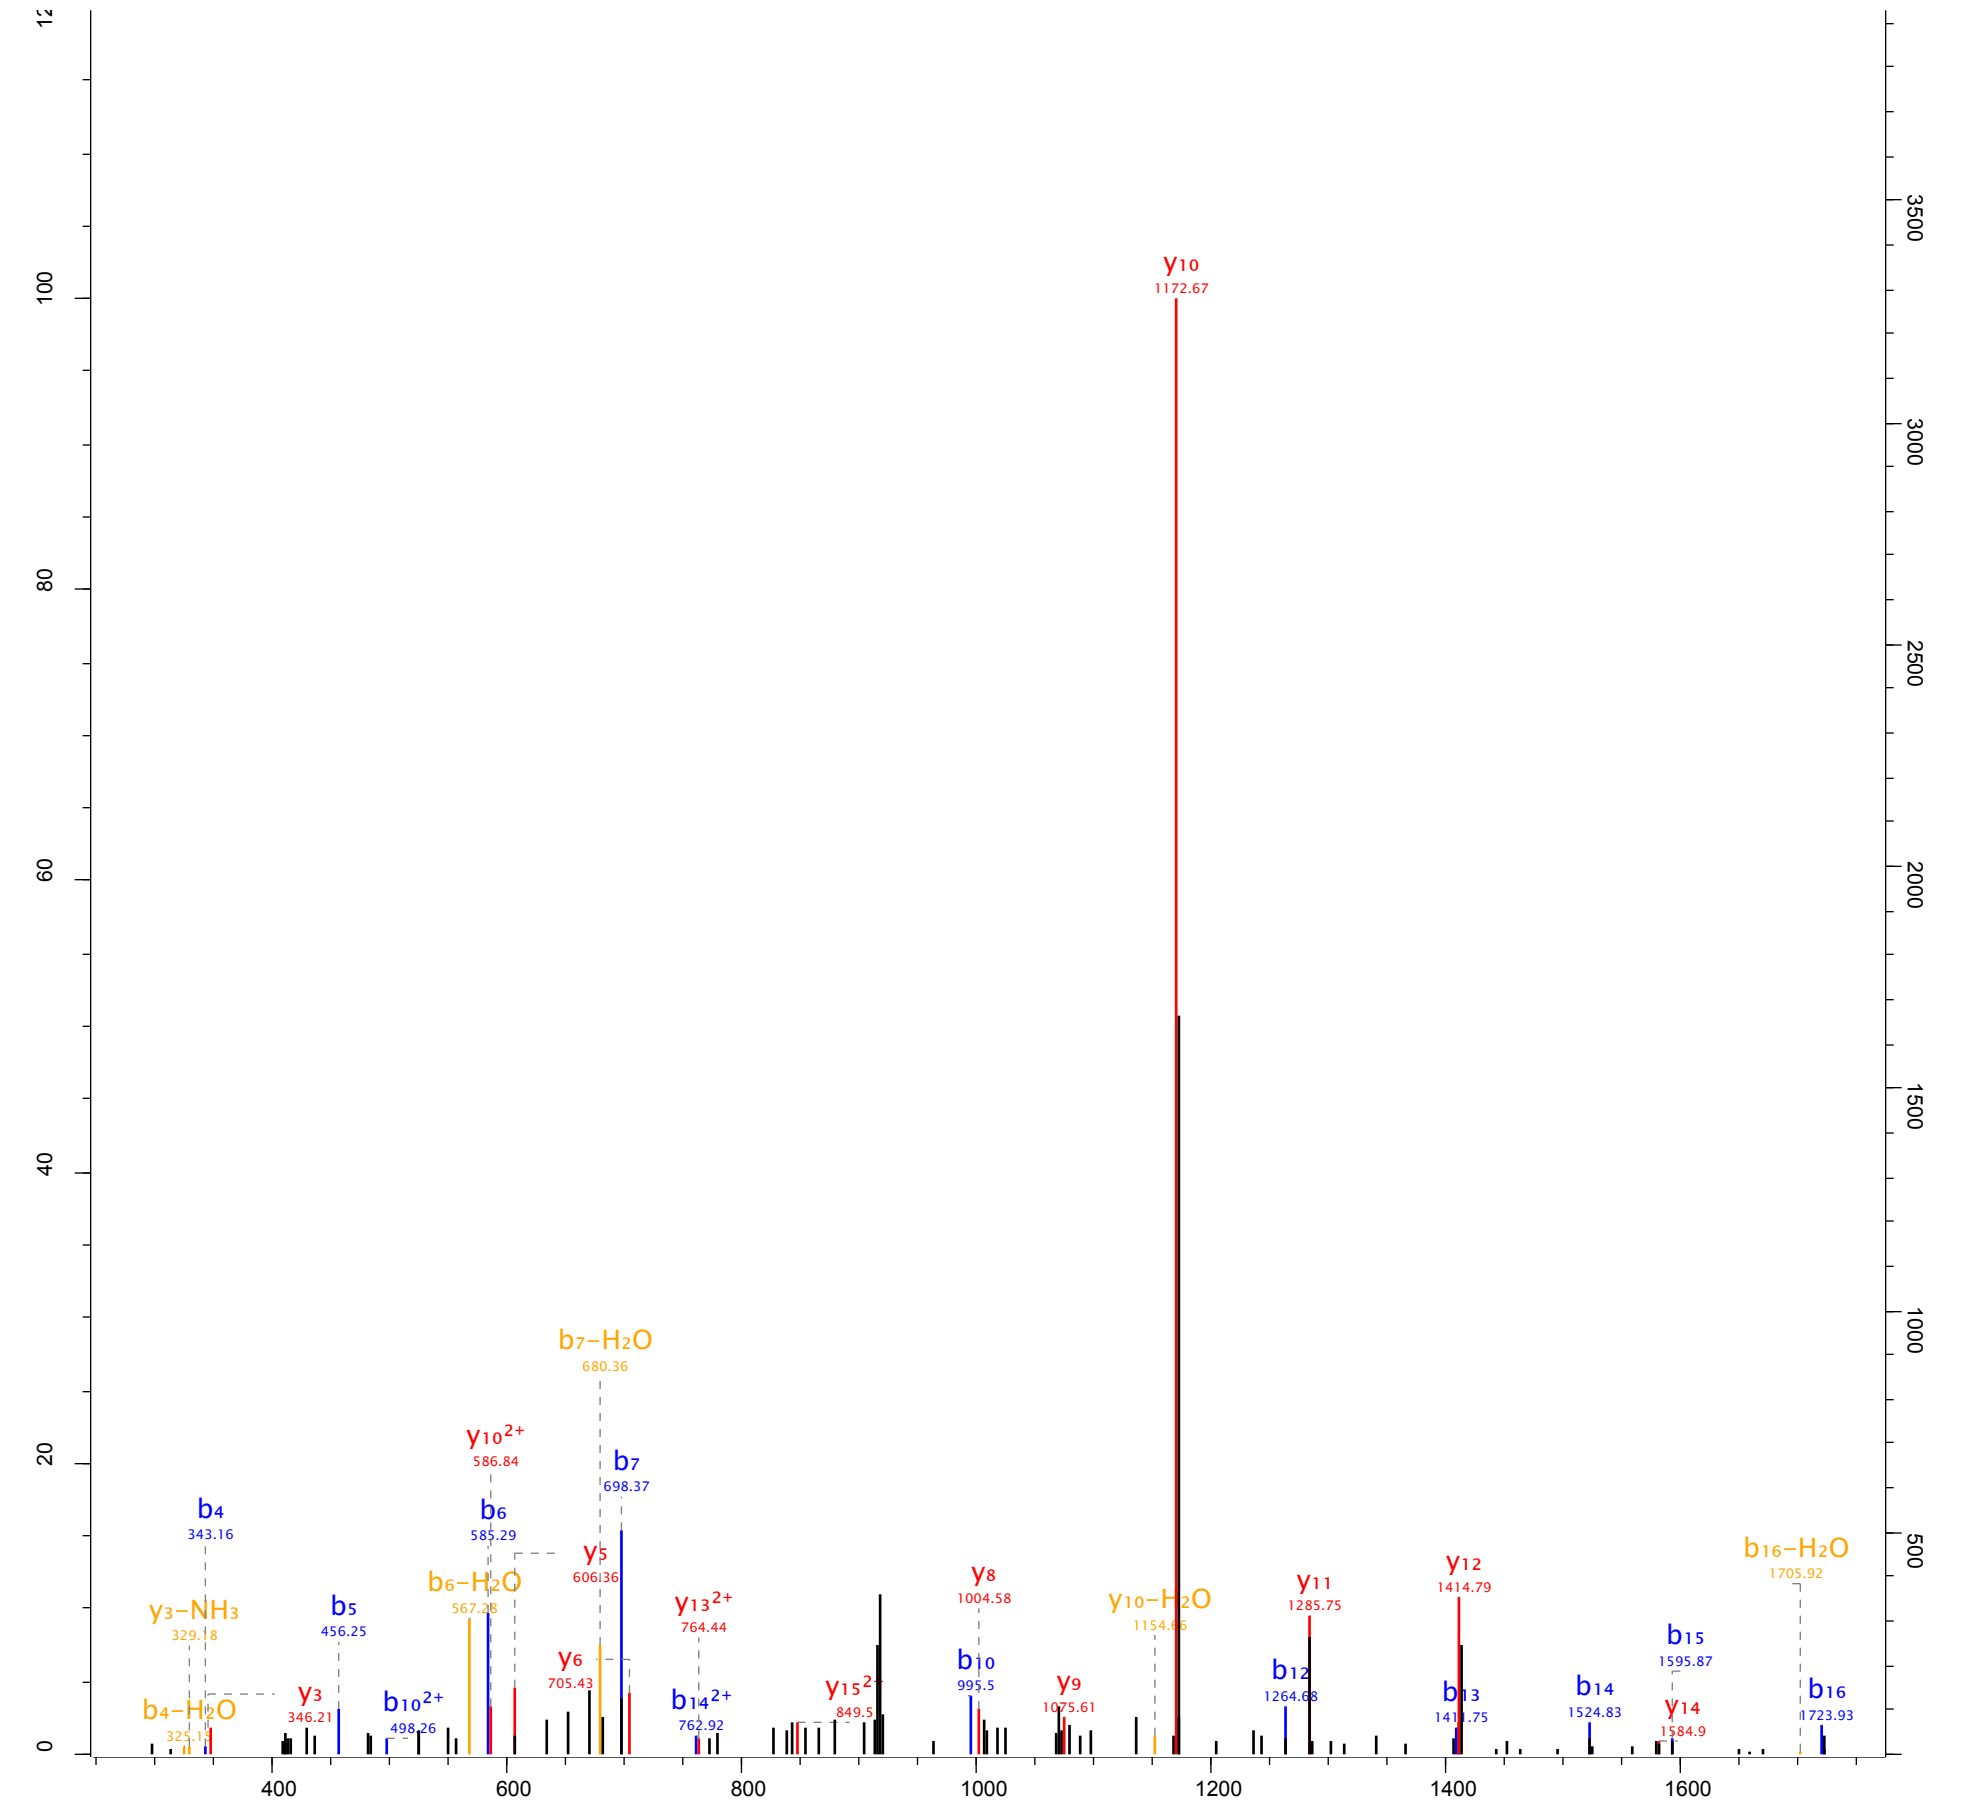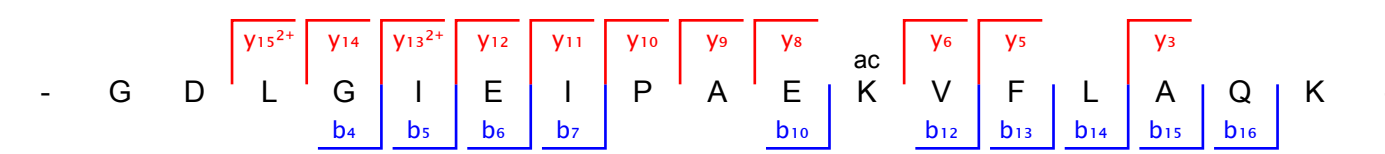

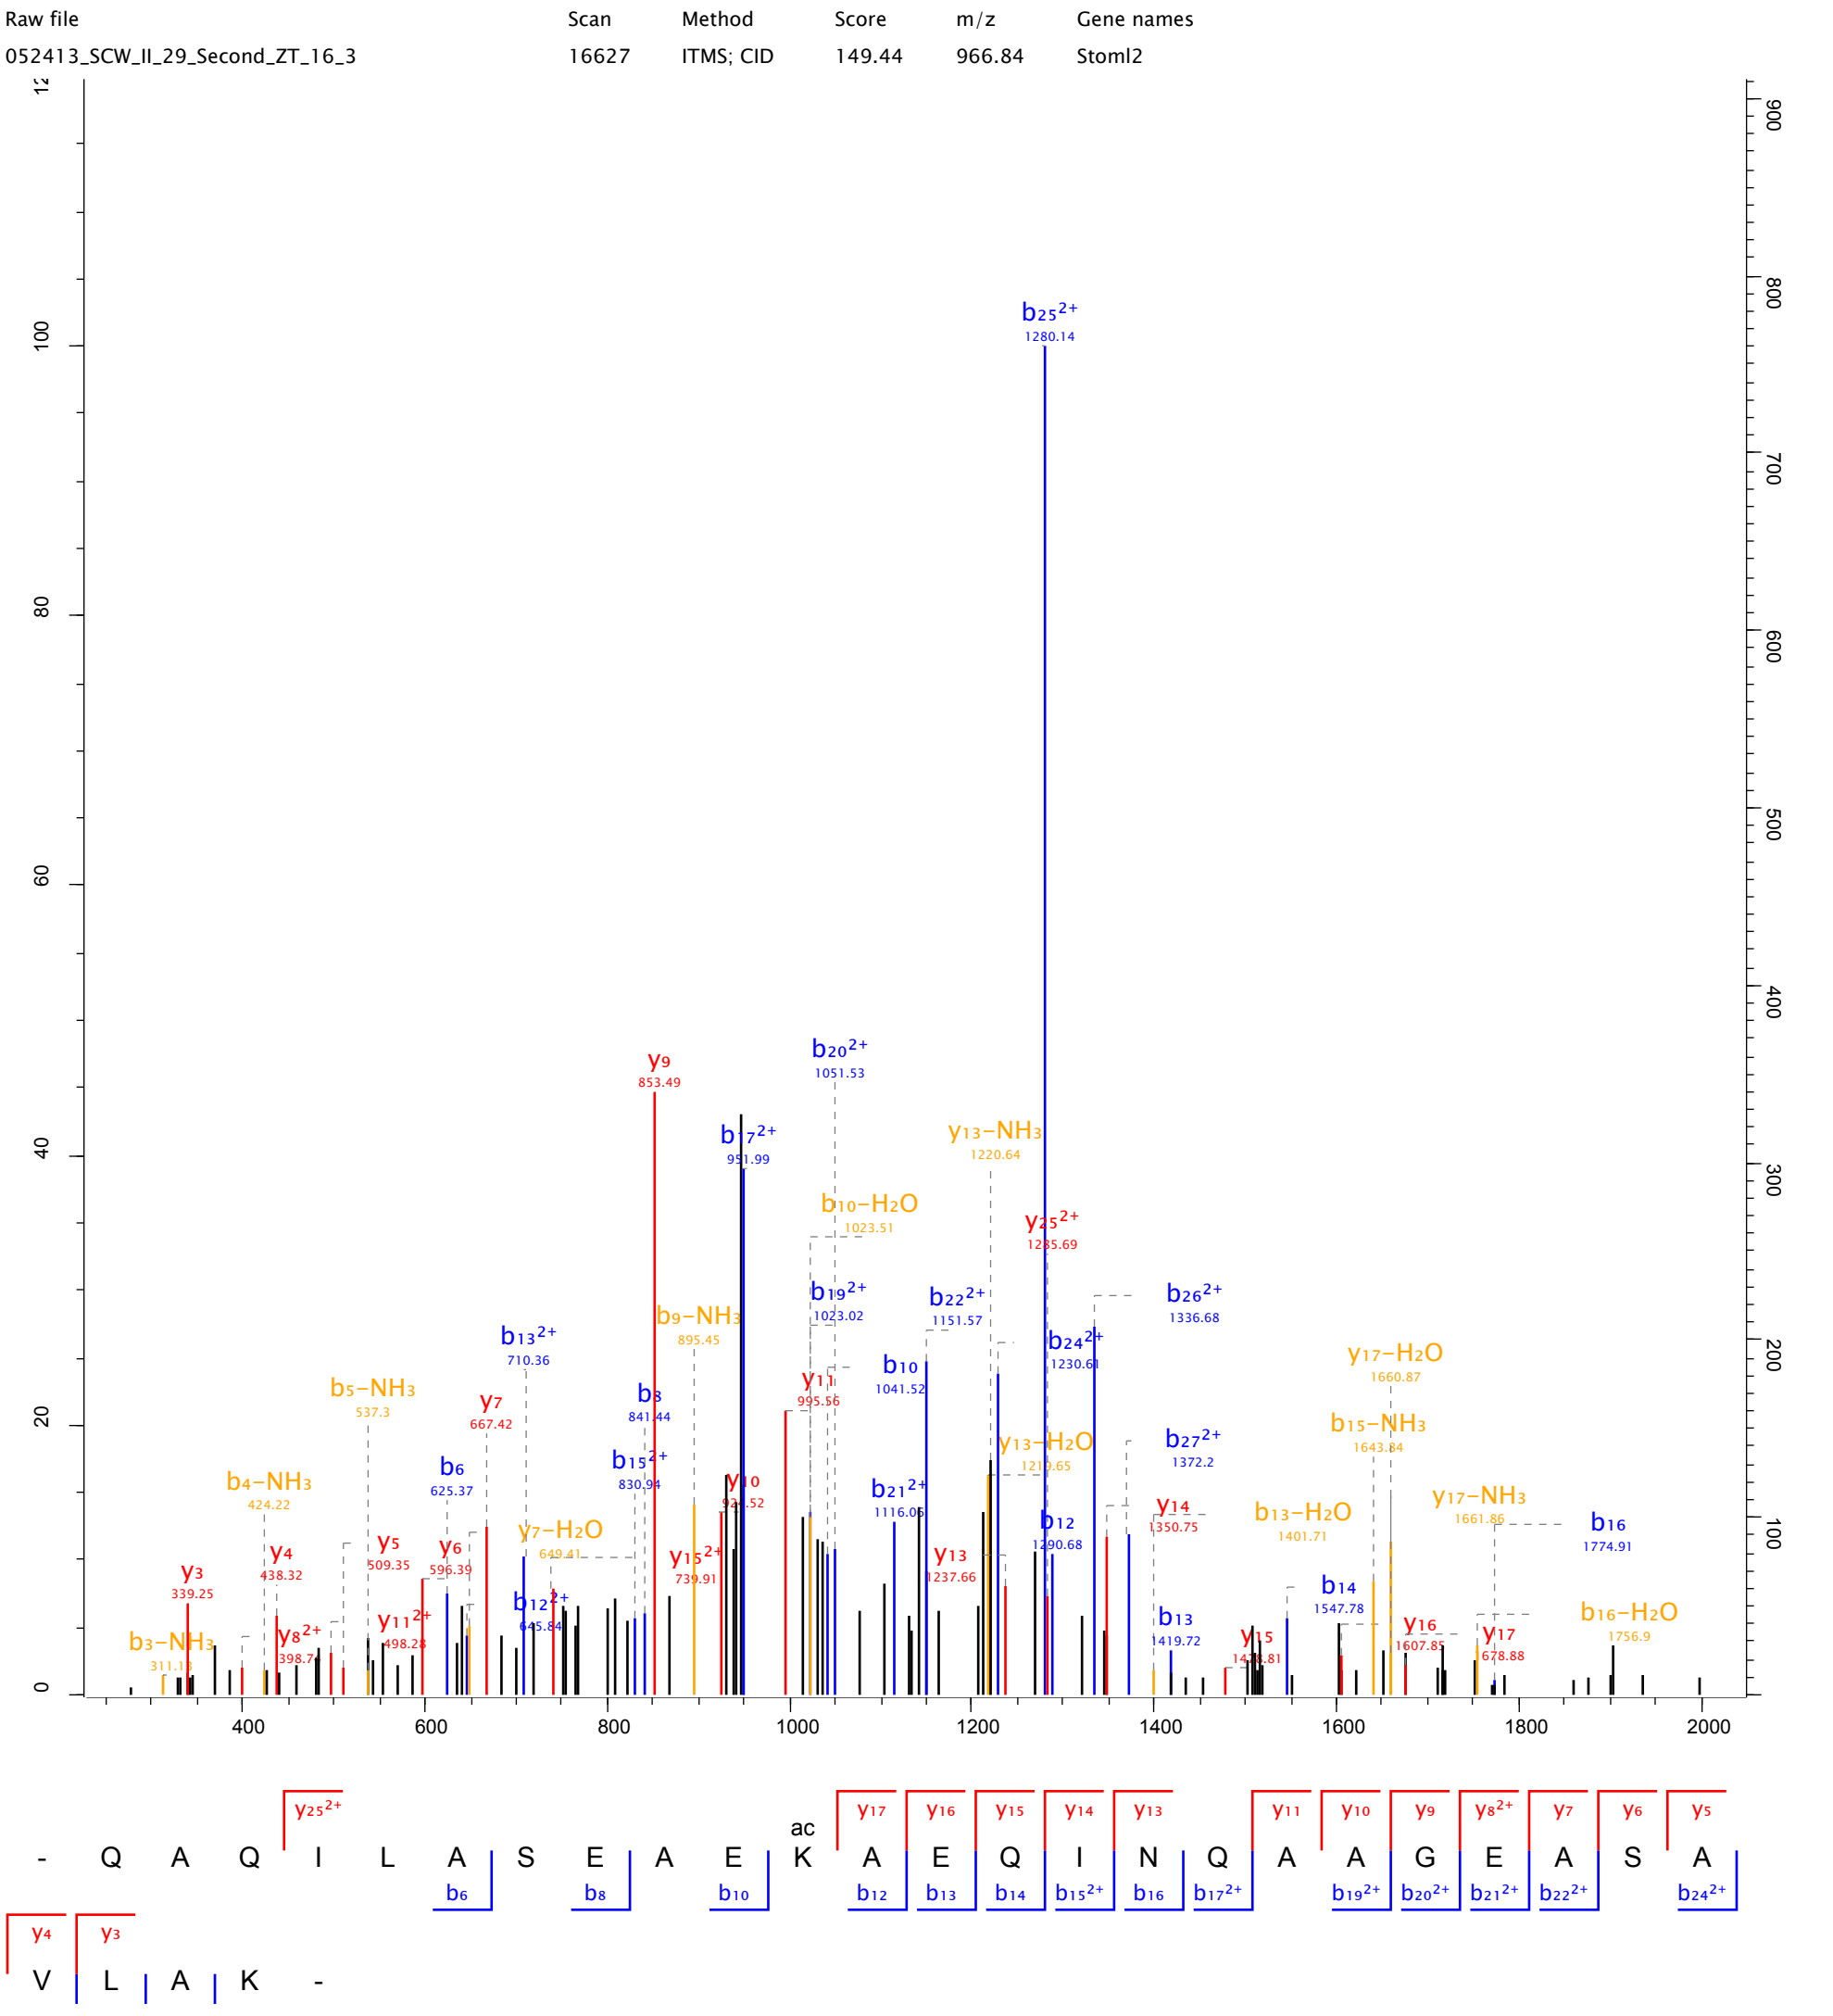

052413\_SCW\_II\_29\_Second\_ZT\_16\_3

16723 ITMS; CID 92.93 1025.57 Acad12;Acad10

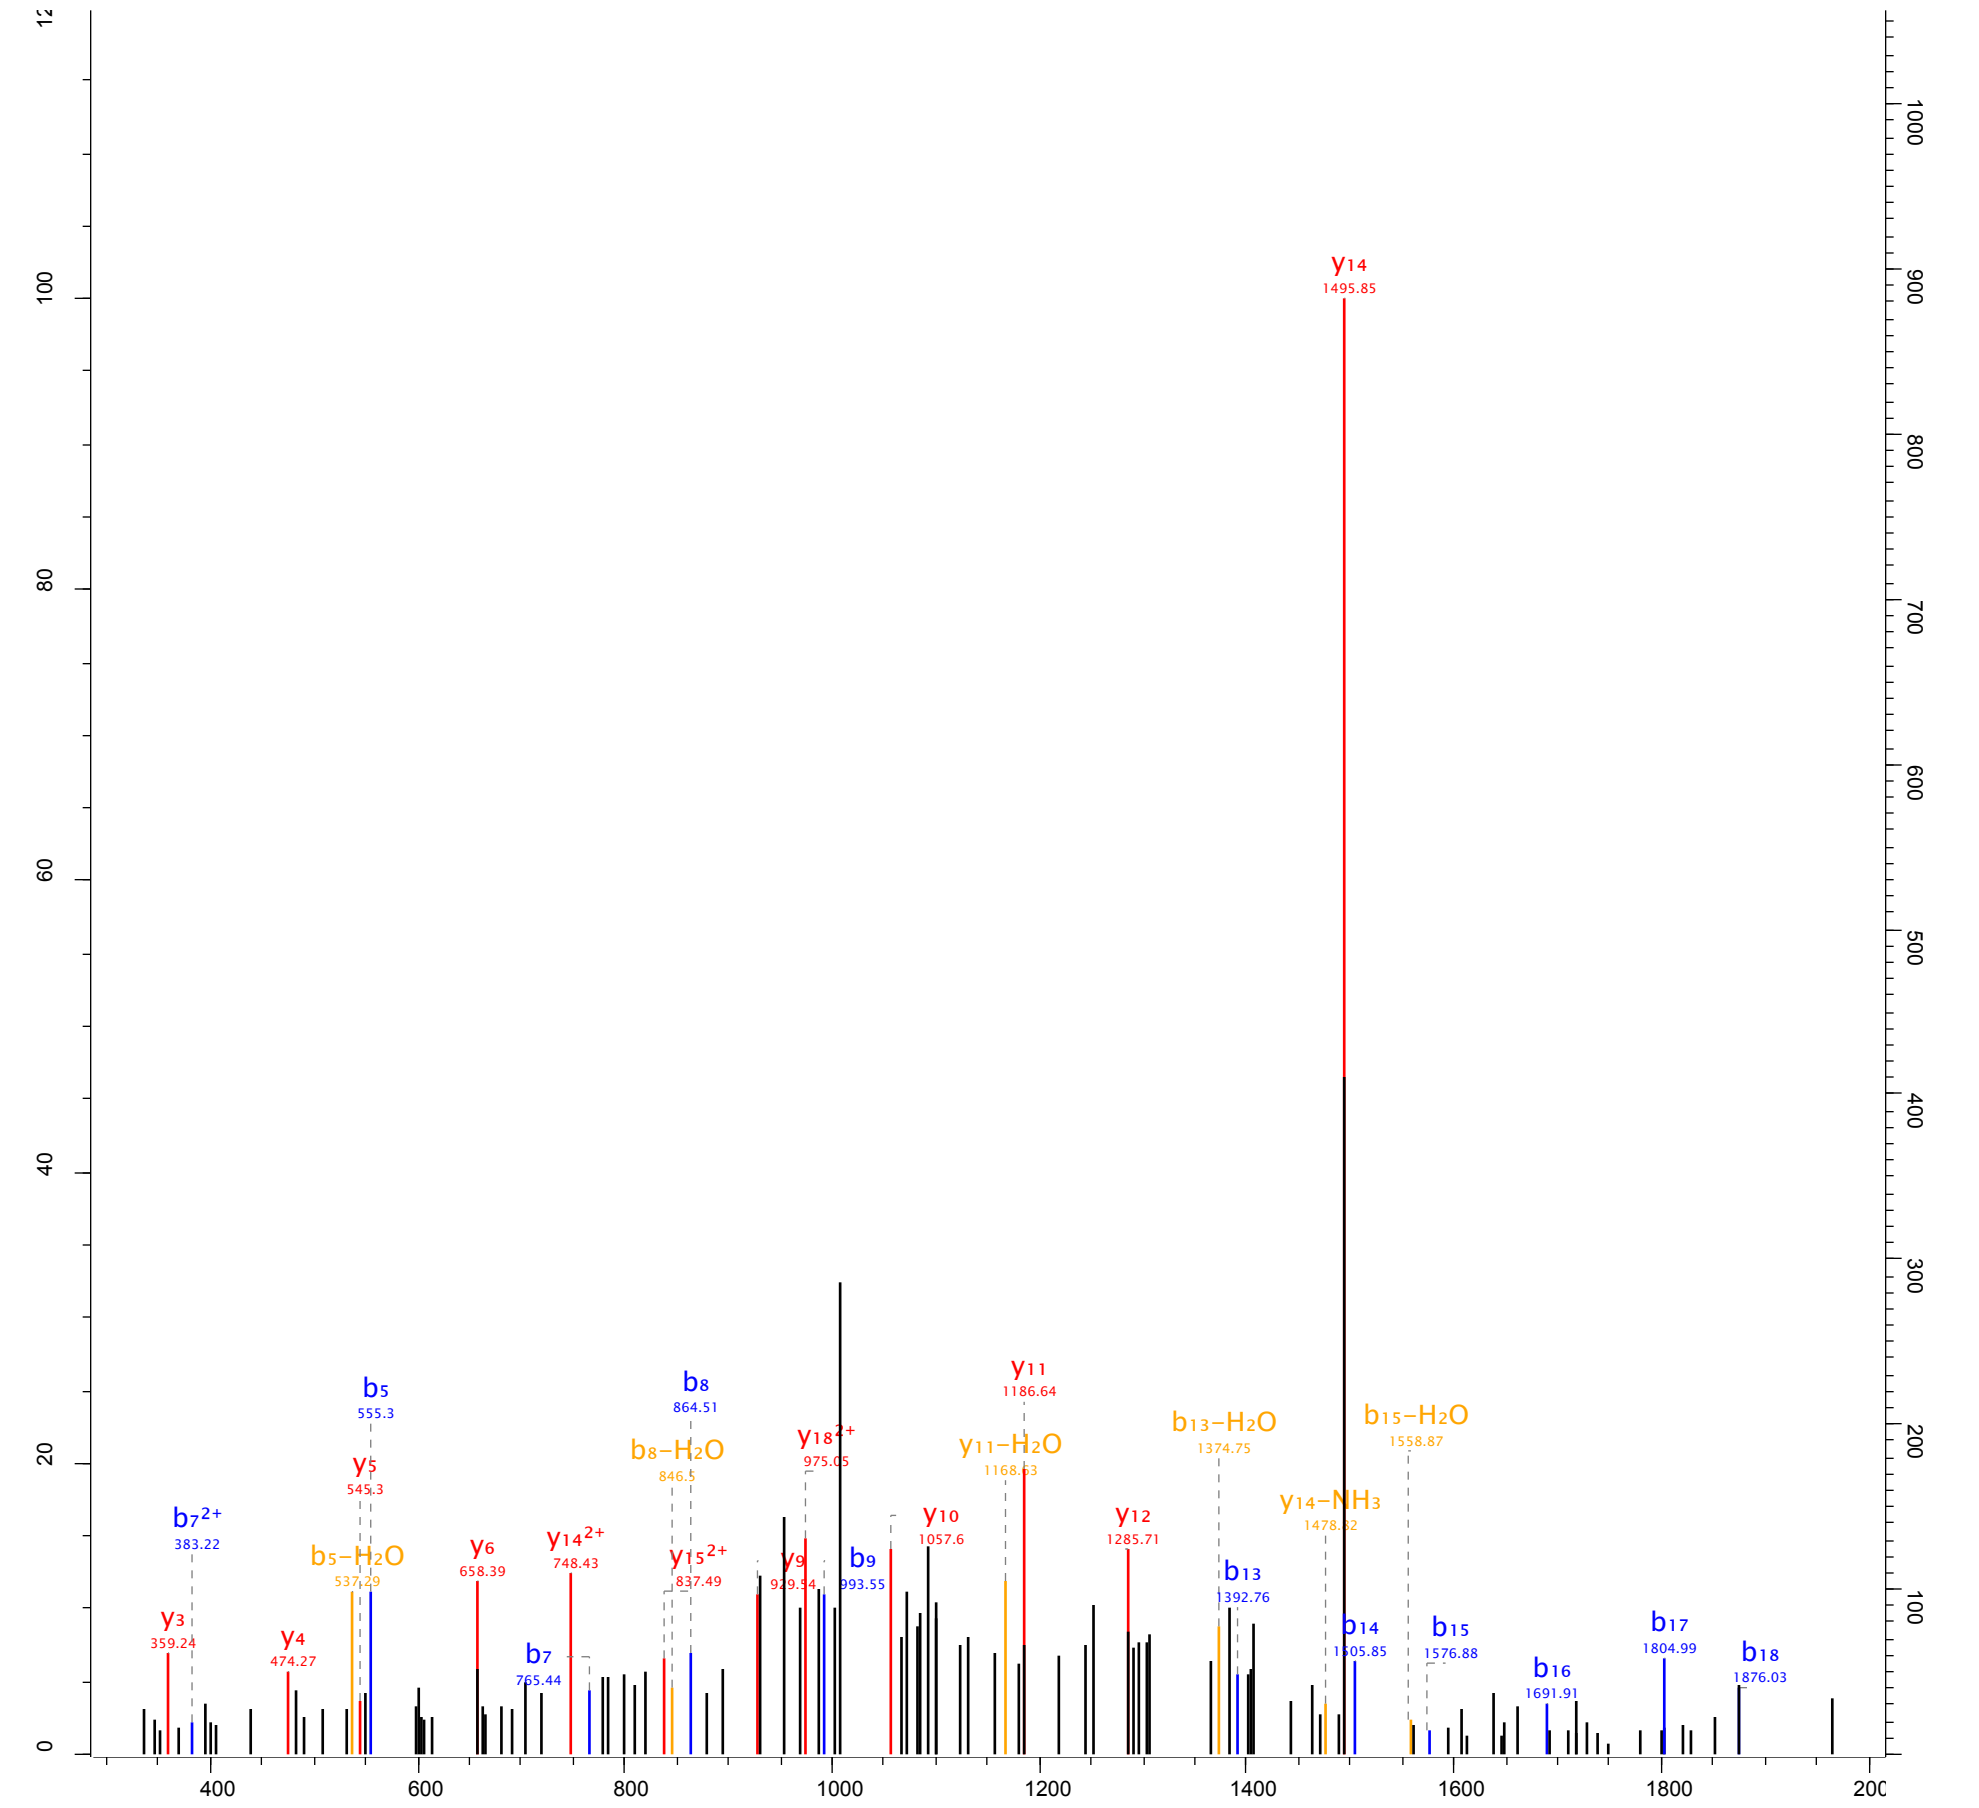

- T A F G K P L V E Q G T I L A D I A R -

Fragmentation mapping: y18<sup>2+</sup> (A), y15<sup>2+</sup> (K), y14 (P), y12 (V), y11 (E), y10 (Q), y9 (G), y6 (L), y5 (A), y4 (D), y3 (I), b5 (K), b7 (L), b8 (V), b9 (E), b13 (I), b14 (L), b15 (A), b16 (D), b17 (I), b18 (A).

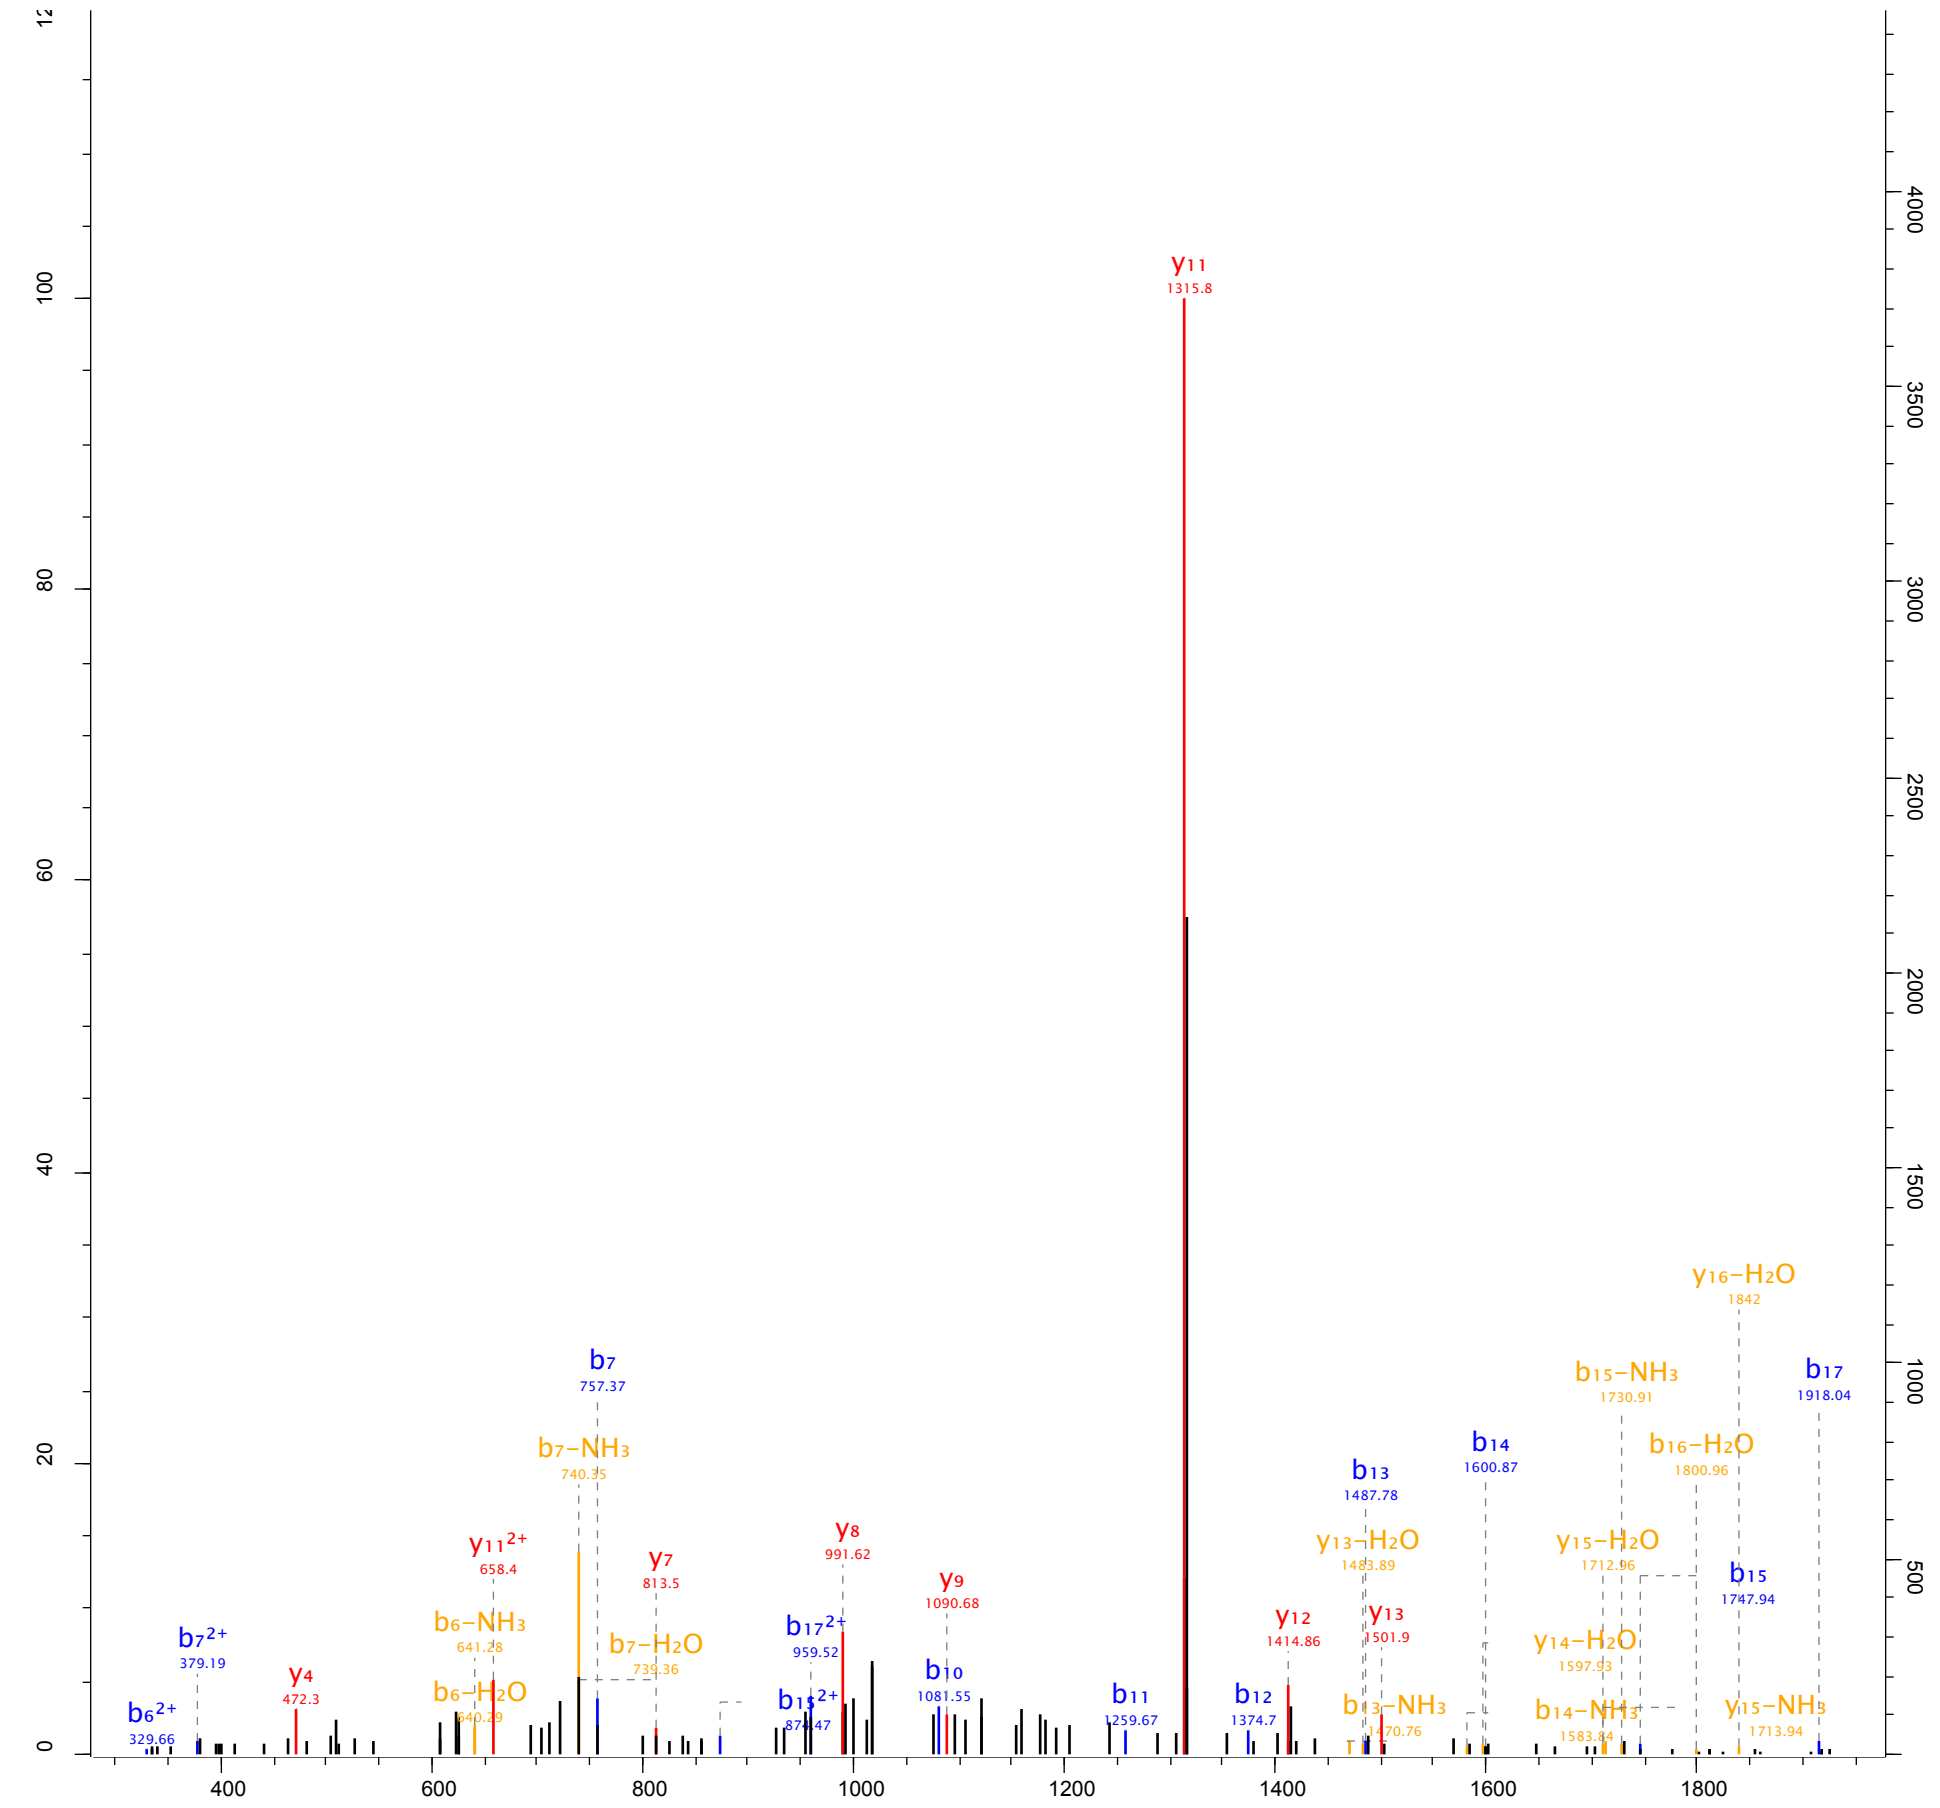

- V L E D N S V P Q V K D I I F A V K -

b<sub>6</sub><sup>2+</sup> b<sub>7</sub> b<sub>10</sub> b<sub>11</sub> b<sub>12</sub> b<sub>13</sub> b<sub>14</sub> b<sub>15</sub> b<sub>17</sub>

052413\_SCW\_II\_29\_Second\_ZT\_16\_3

17403 ITMS; CID 188.56 1116.11 Ppp2r1a

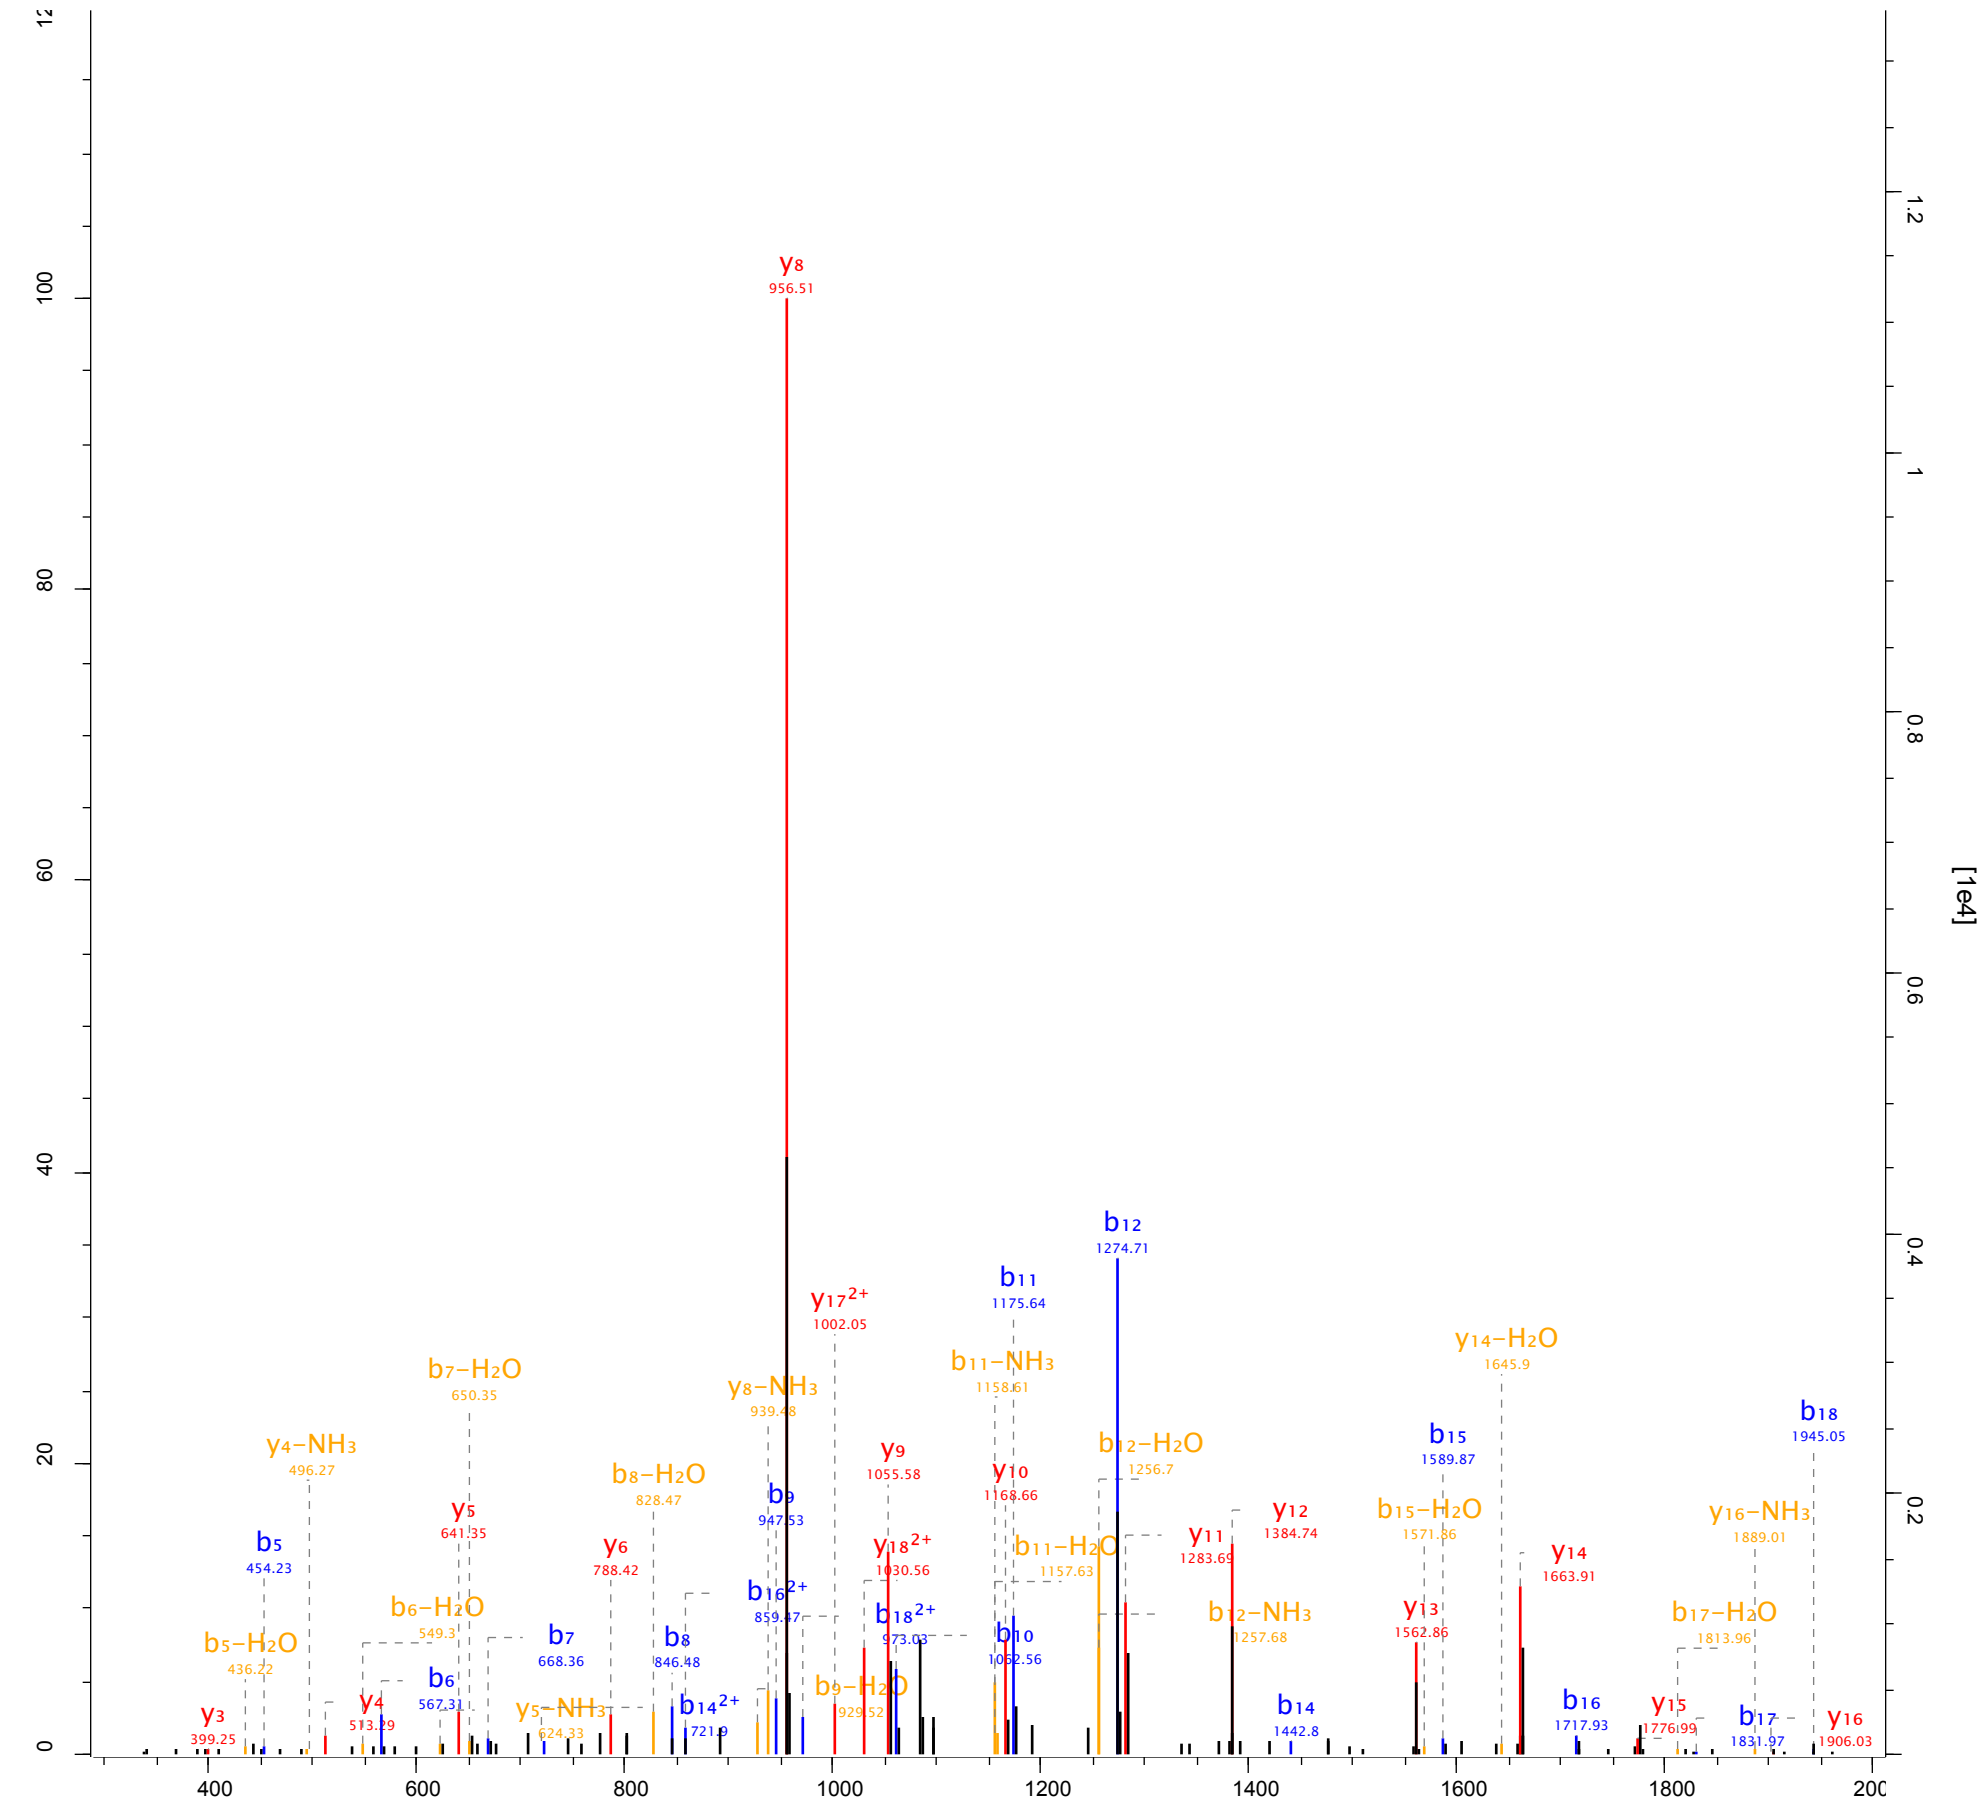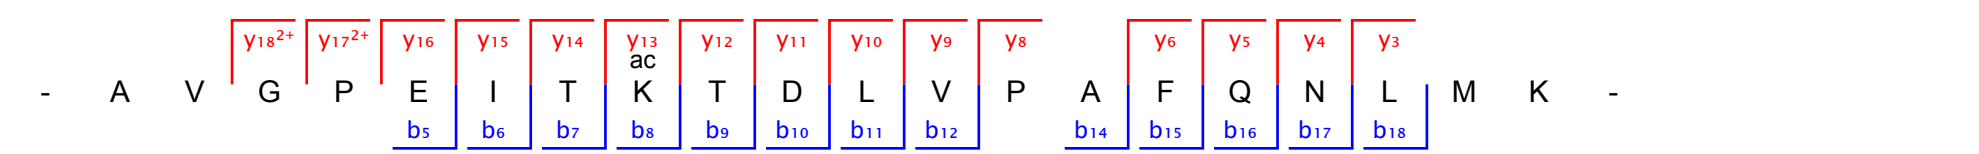

052413\_SCW\_II\_29\_Second\_ZT\_19\_4

5735

ITMS; CID

106.58

690.85

Nfia

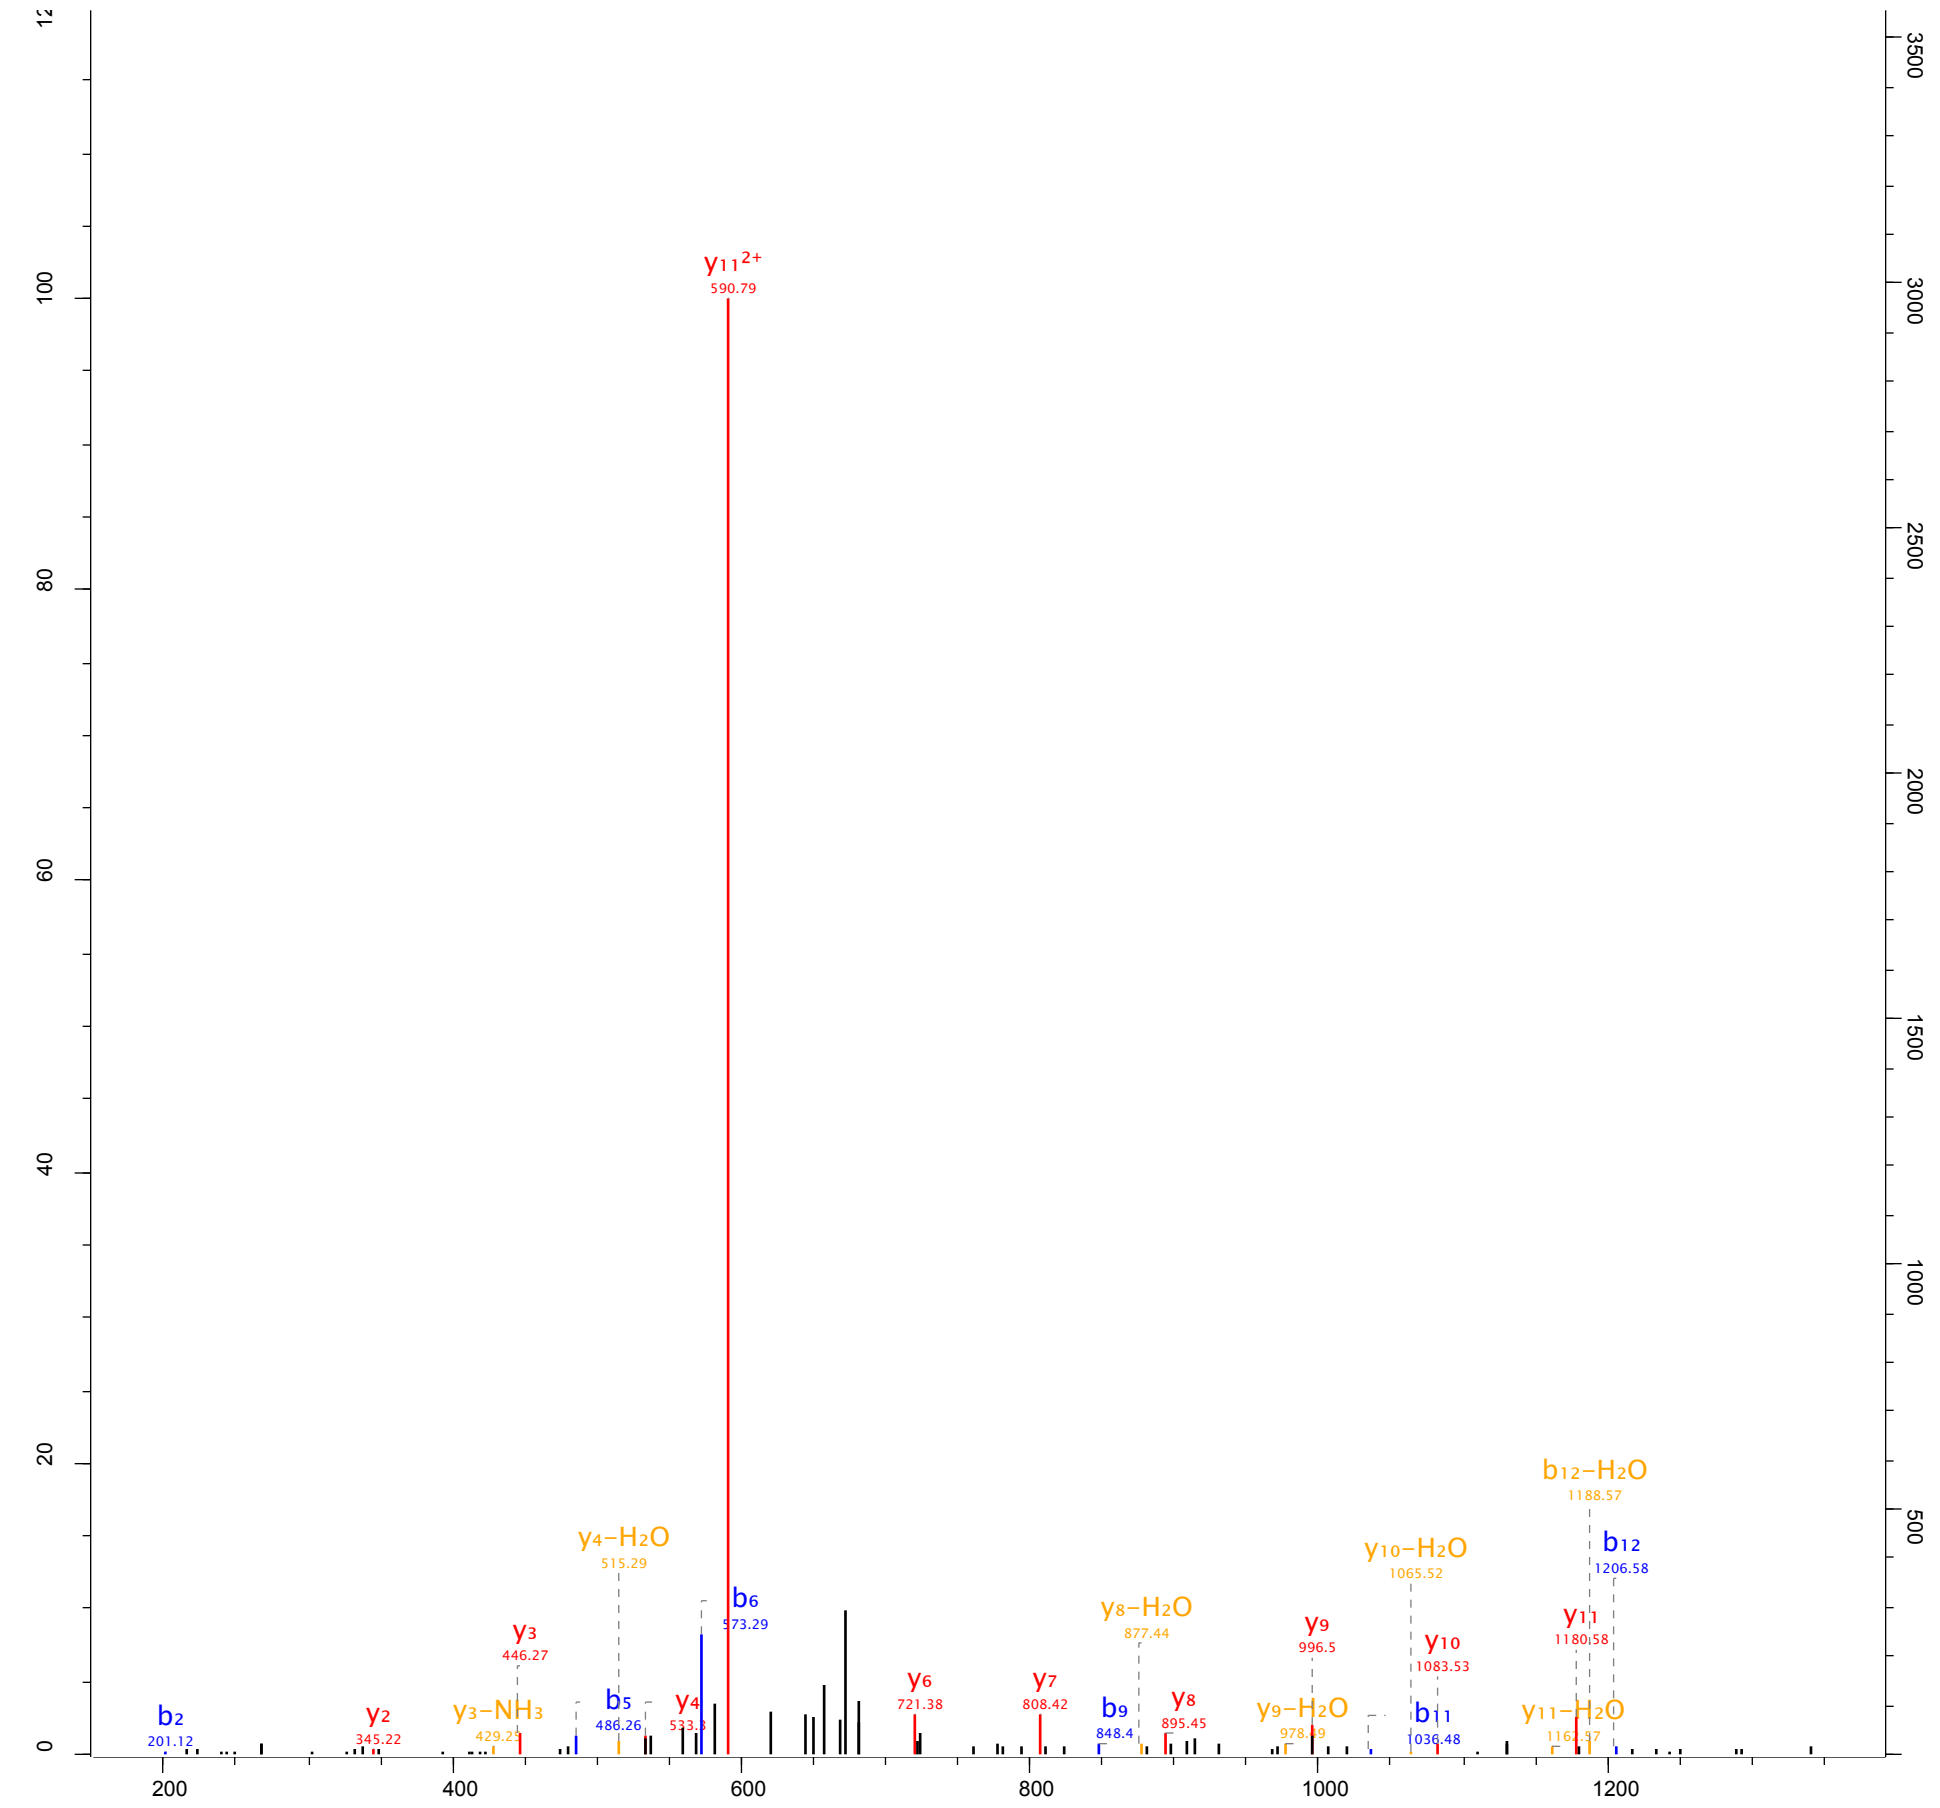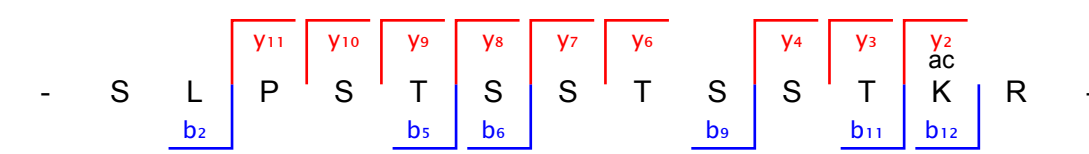



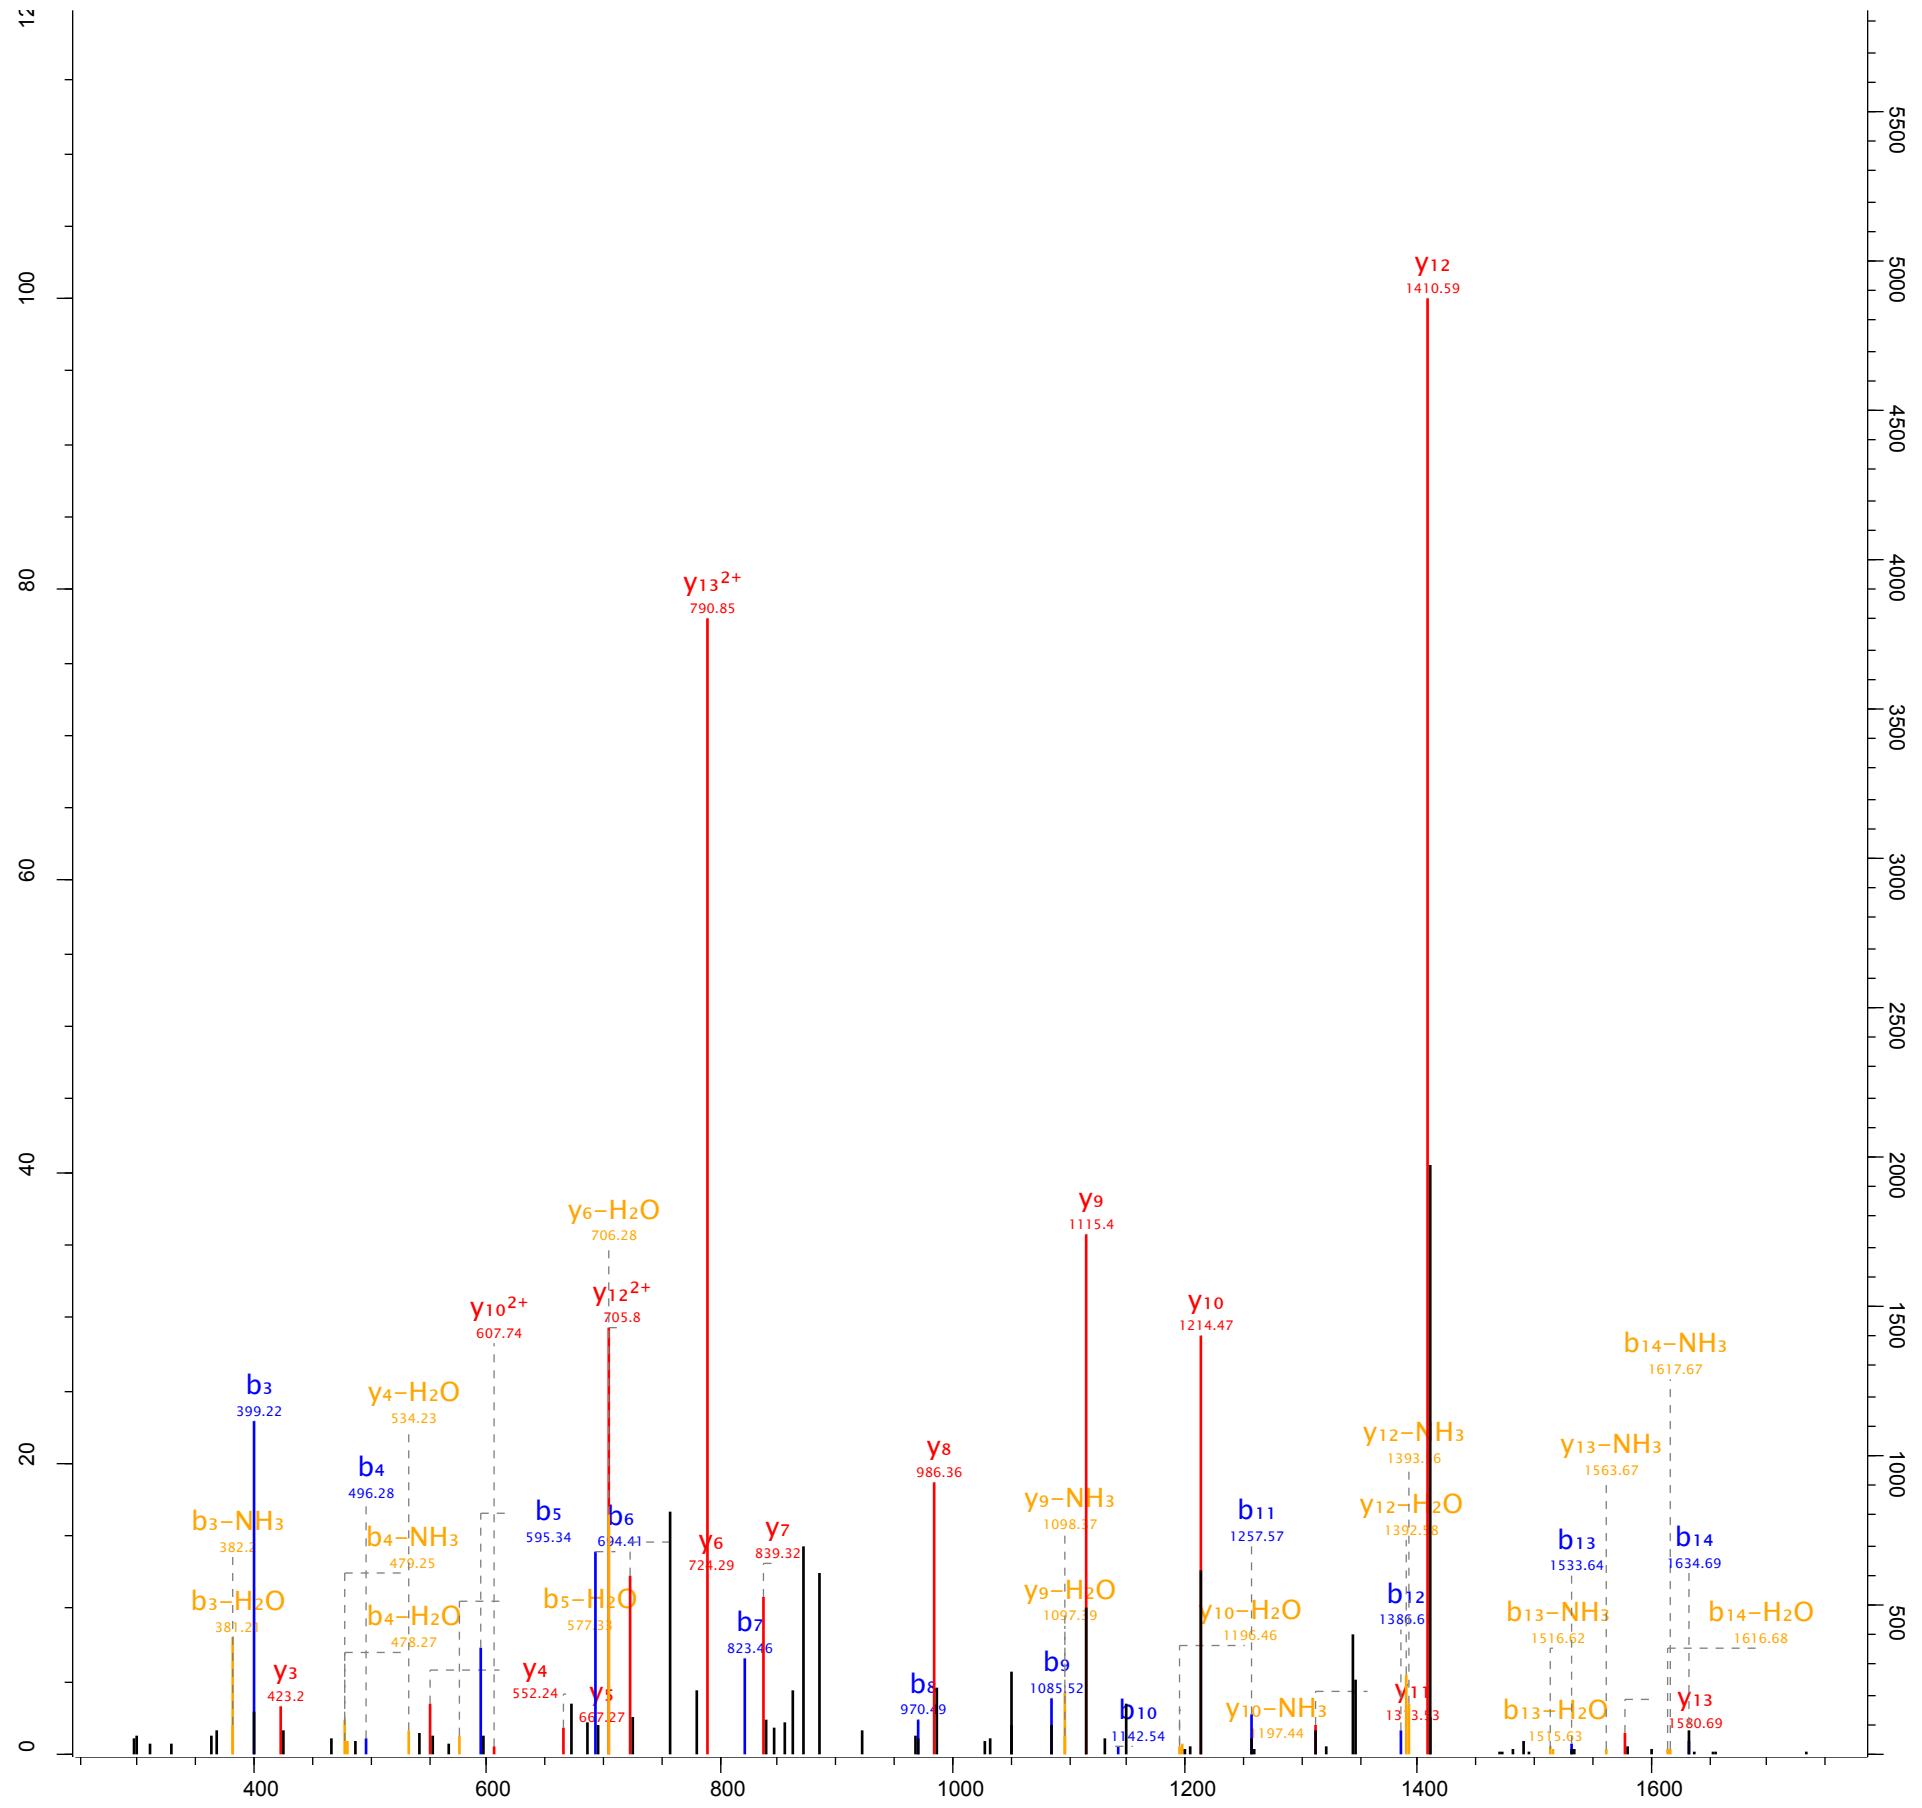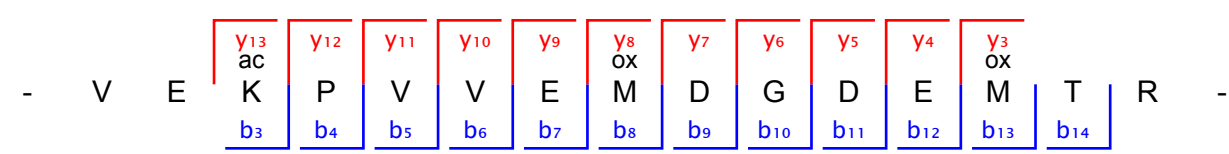

052413\_SCW\_II\_29\_Second\_ZT\_19\_4

8736 ITMS; CID 183.85 558.32 Rps11

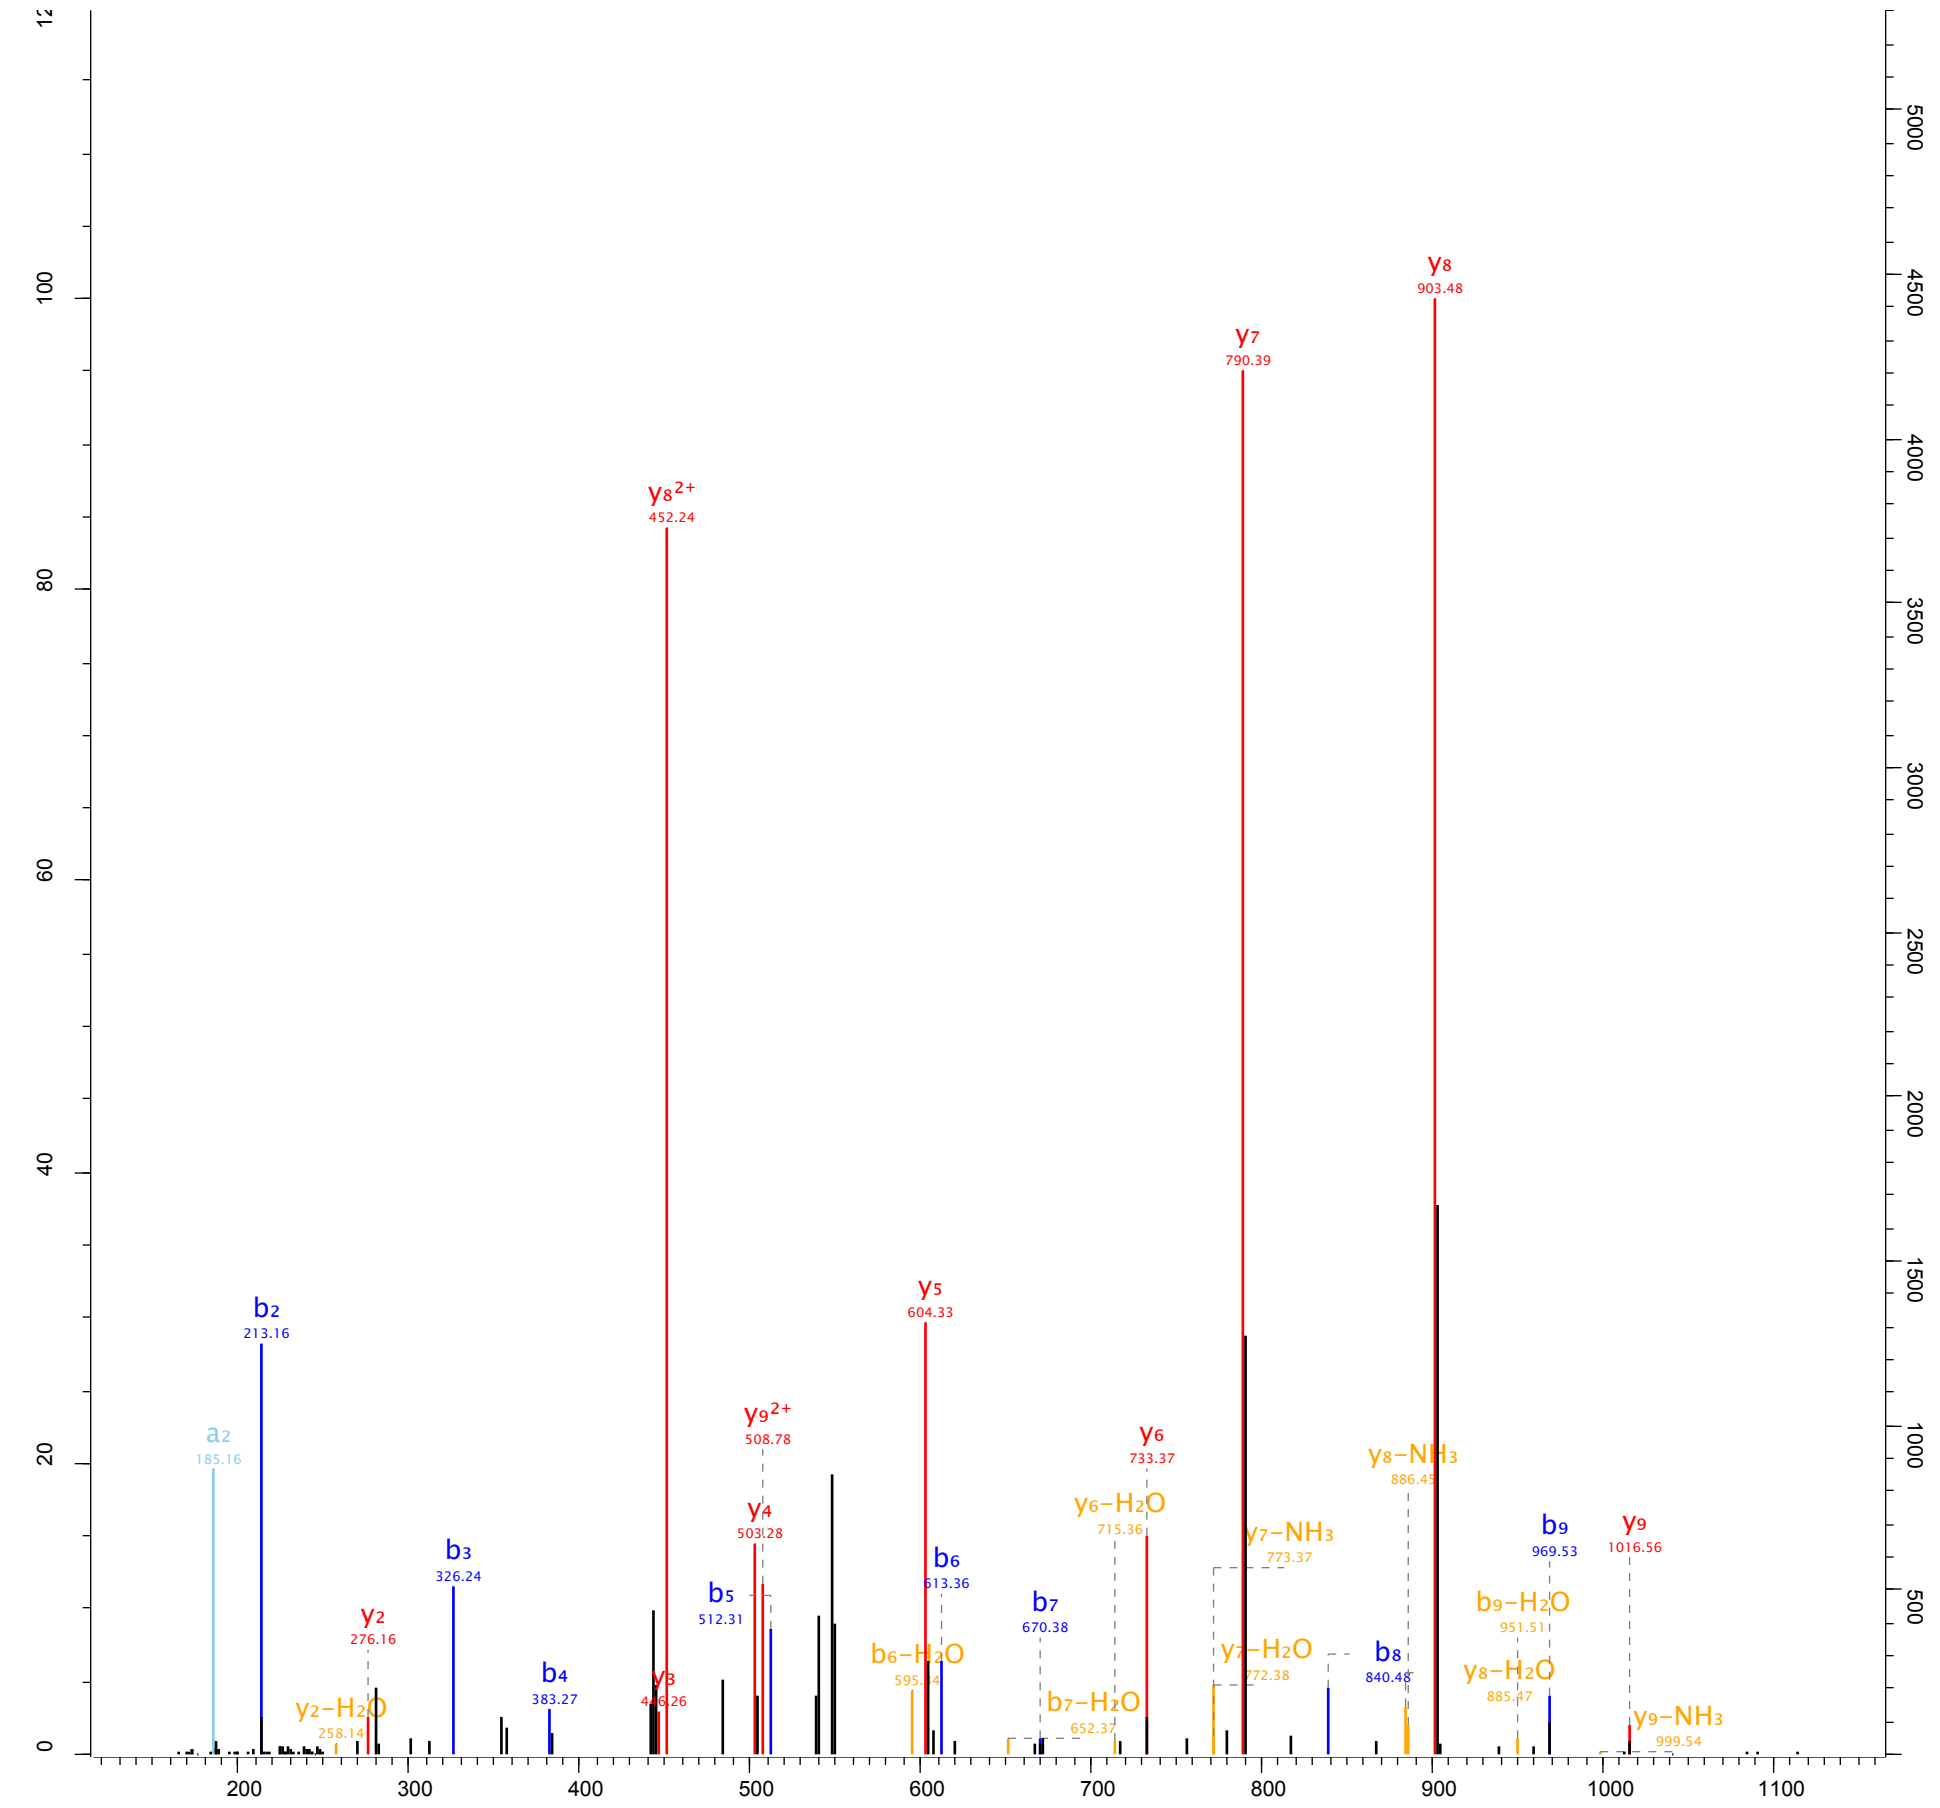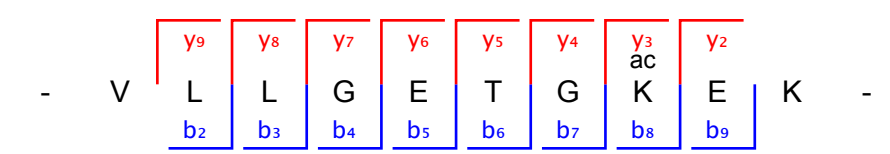

052413\_SCW\_II\_29\_Second\_ZT\_19\_4

9236

ITMS; CID

154.84

520.31

Atp5o

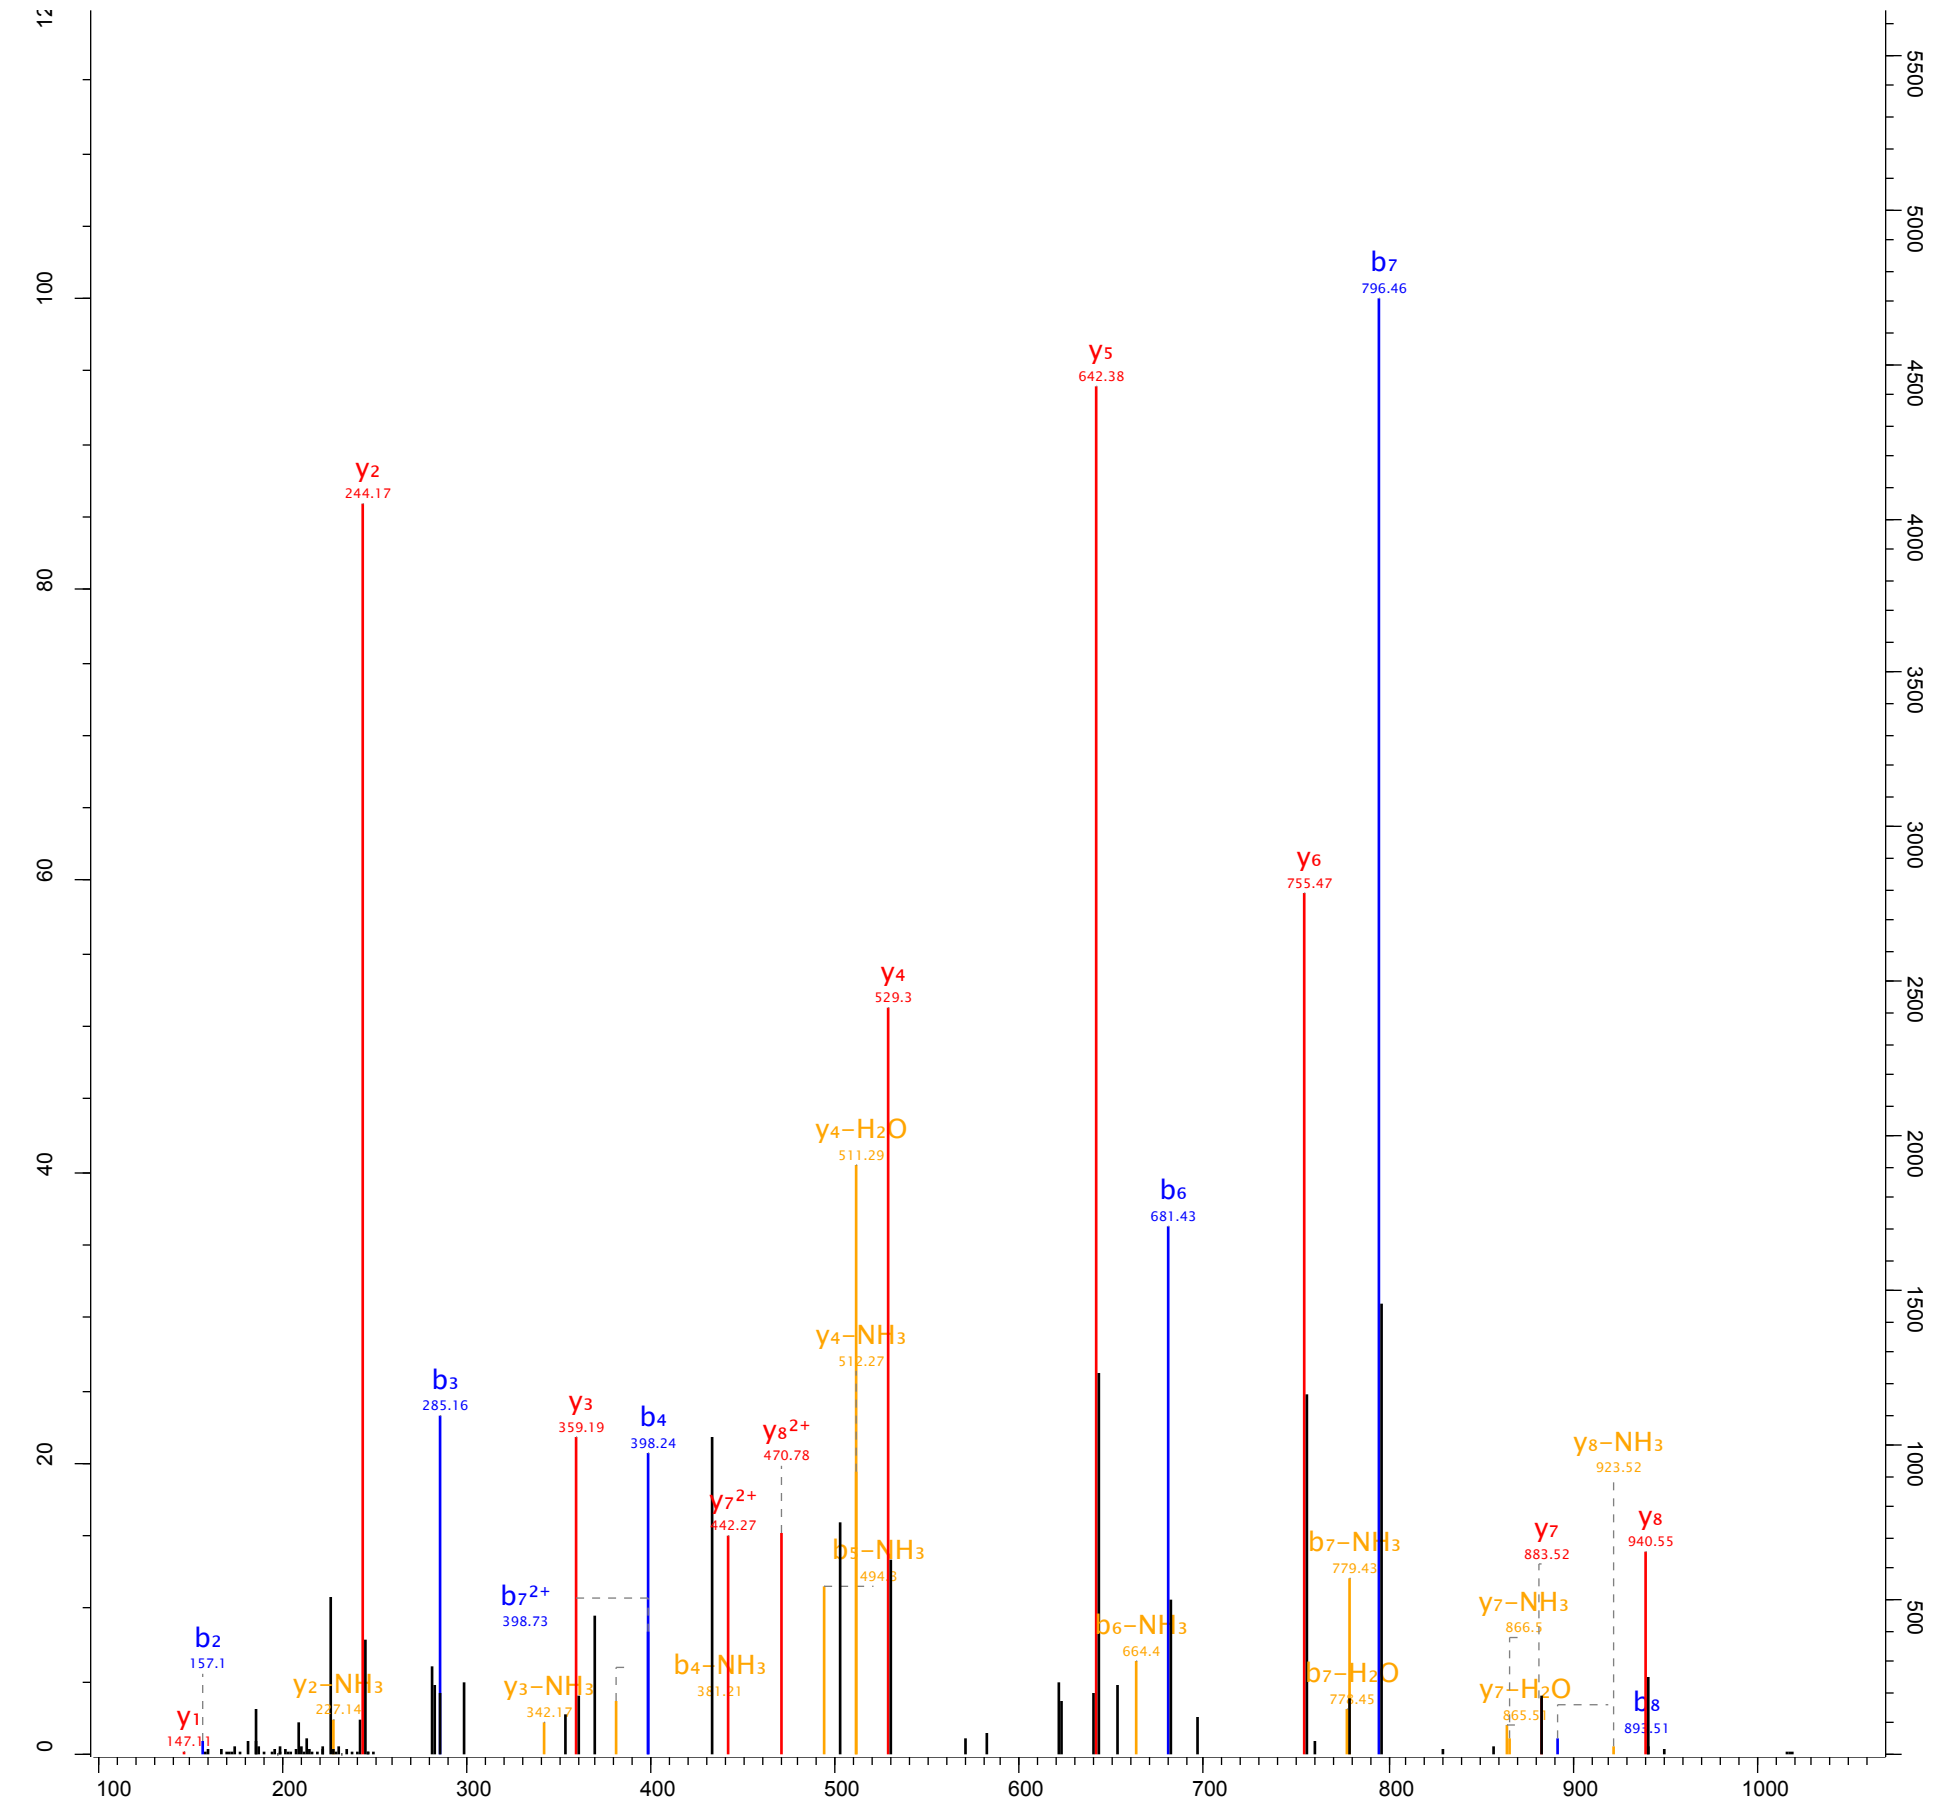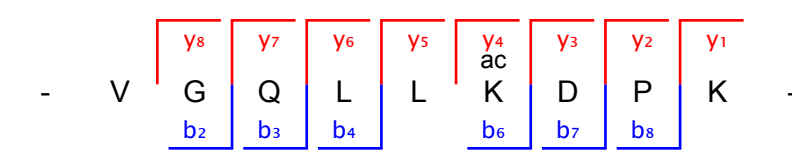

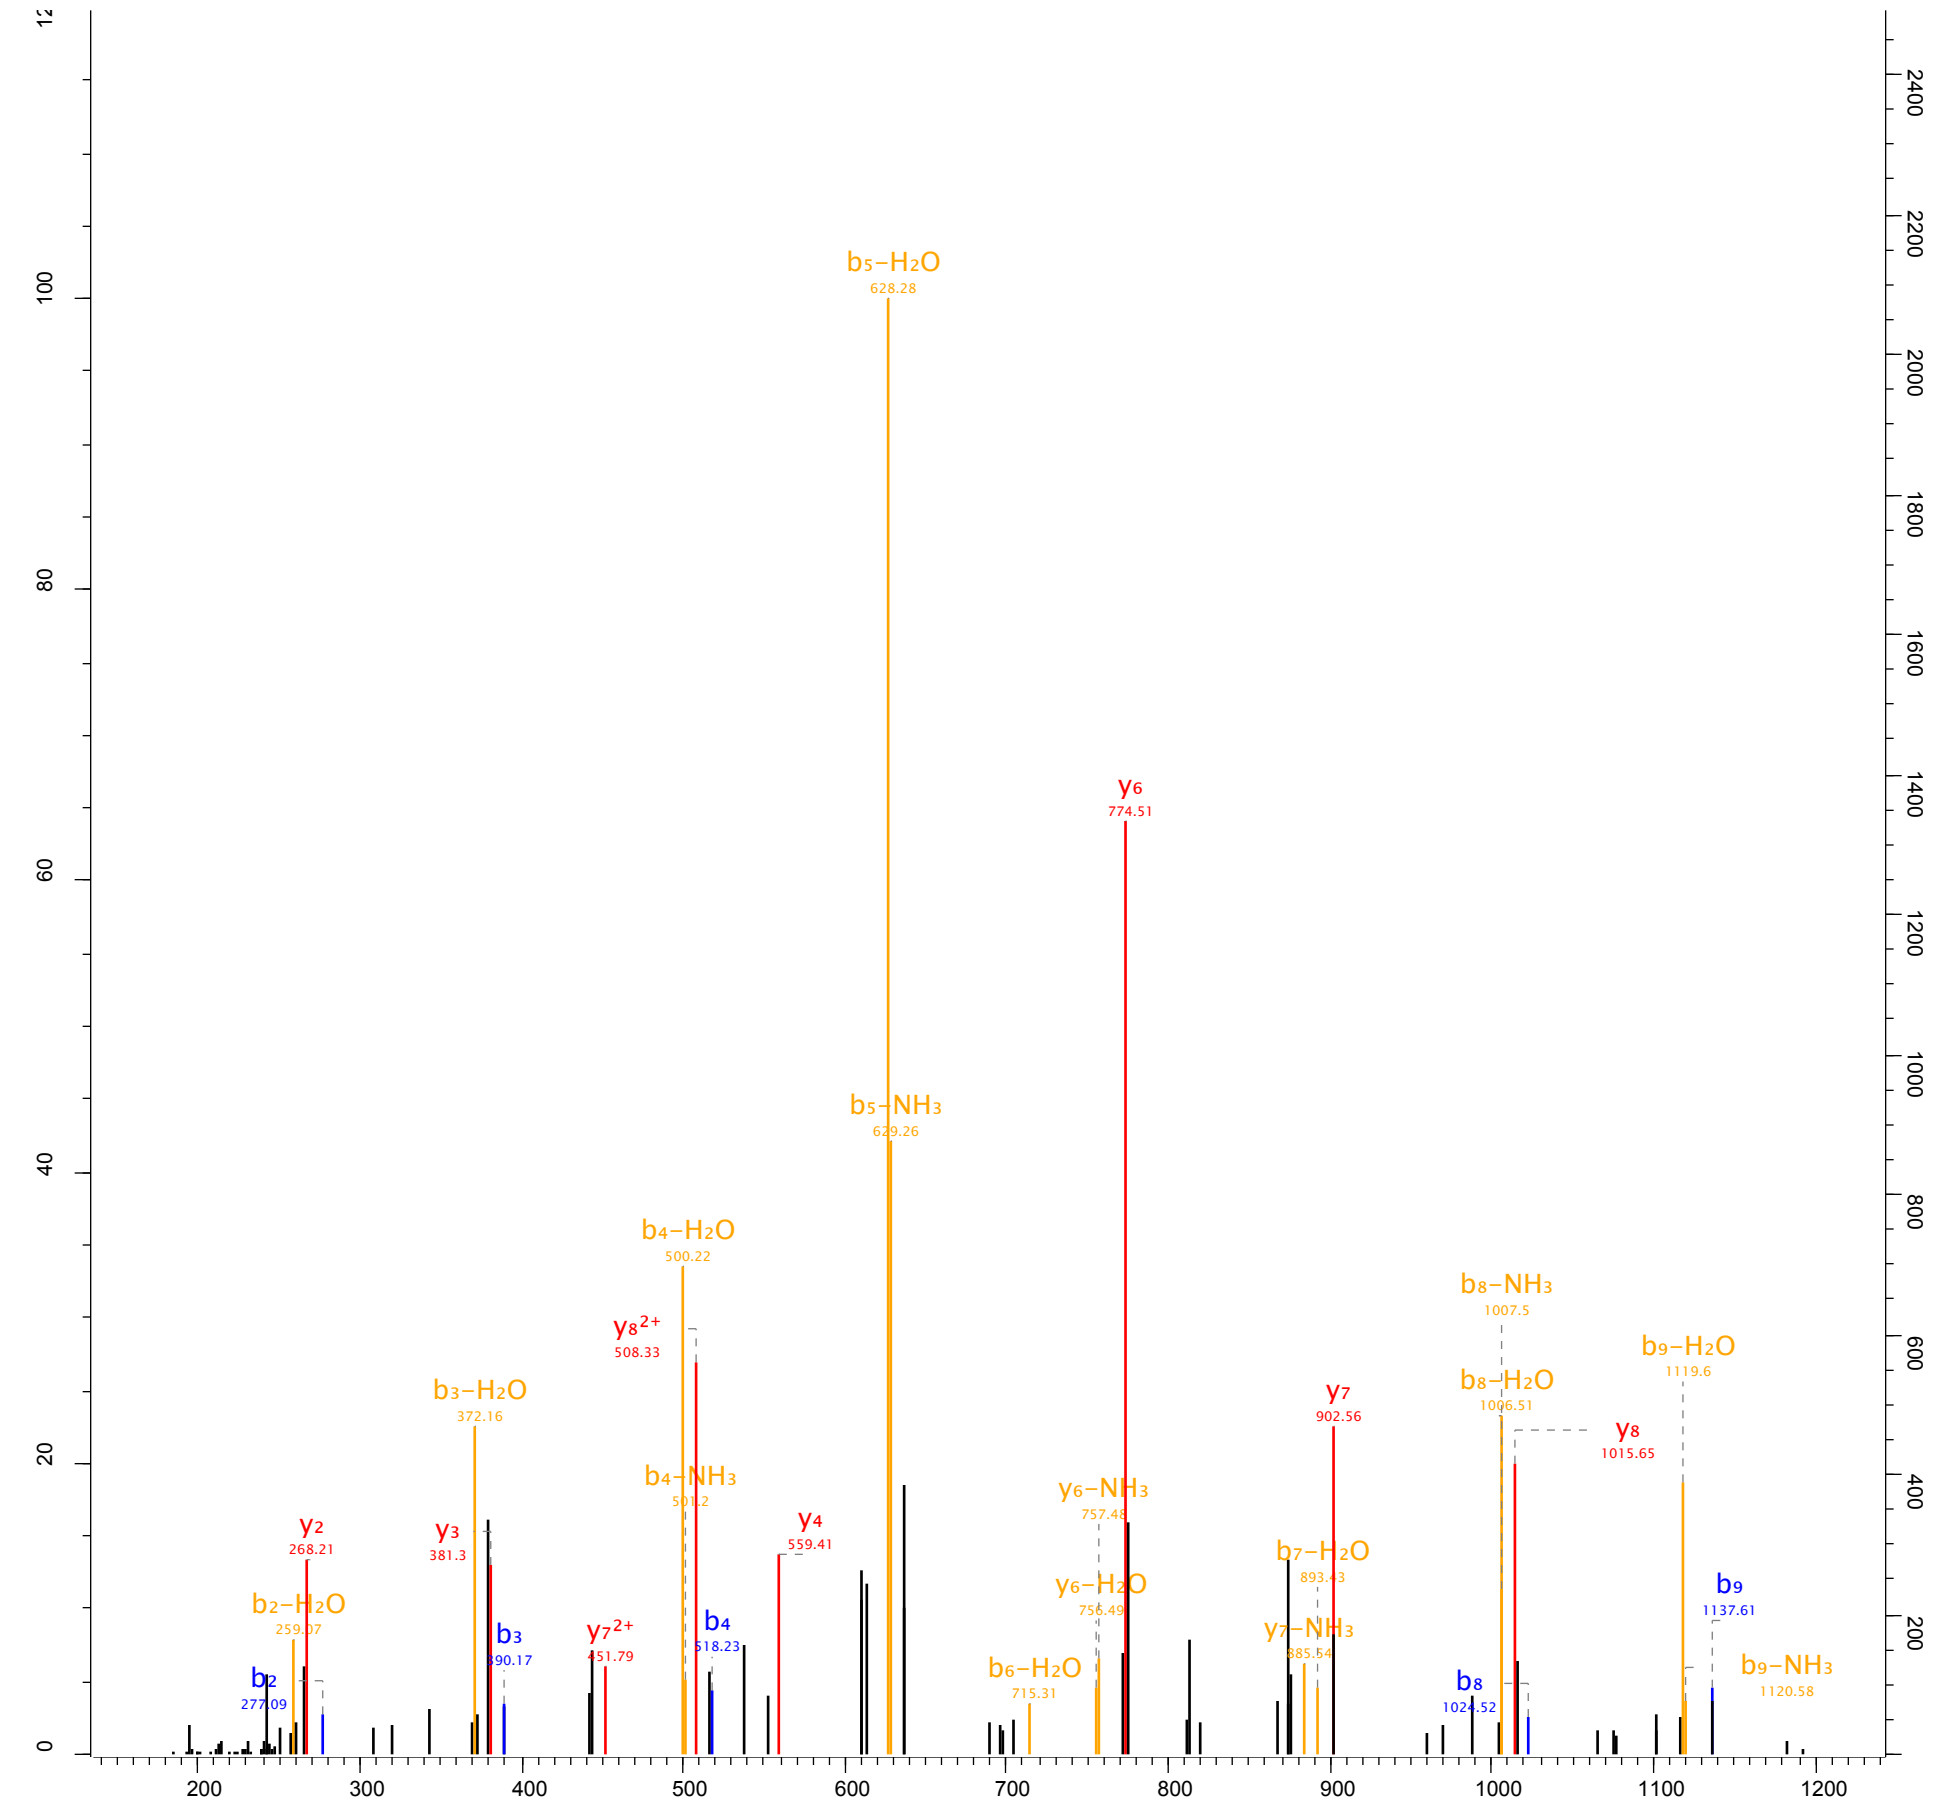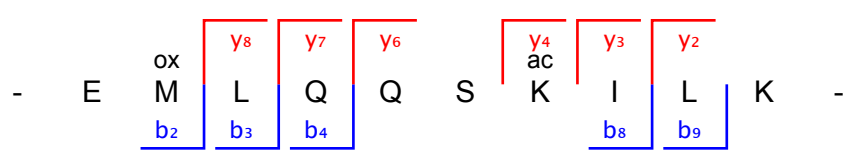

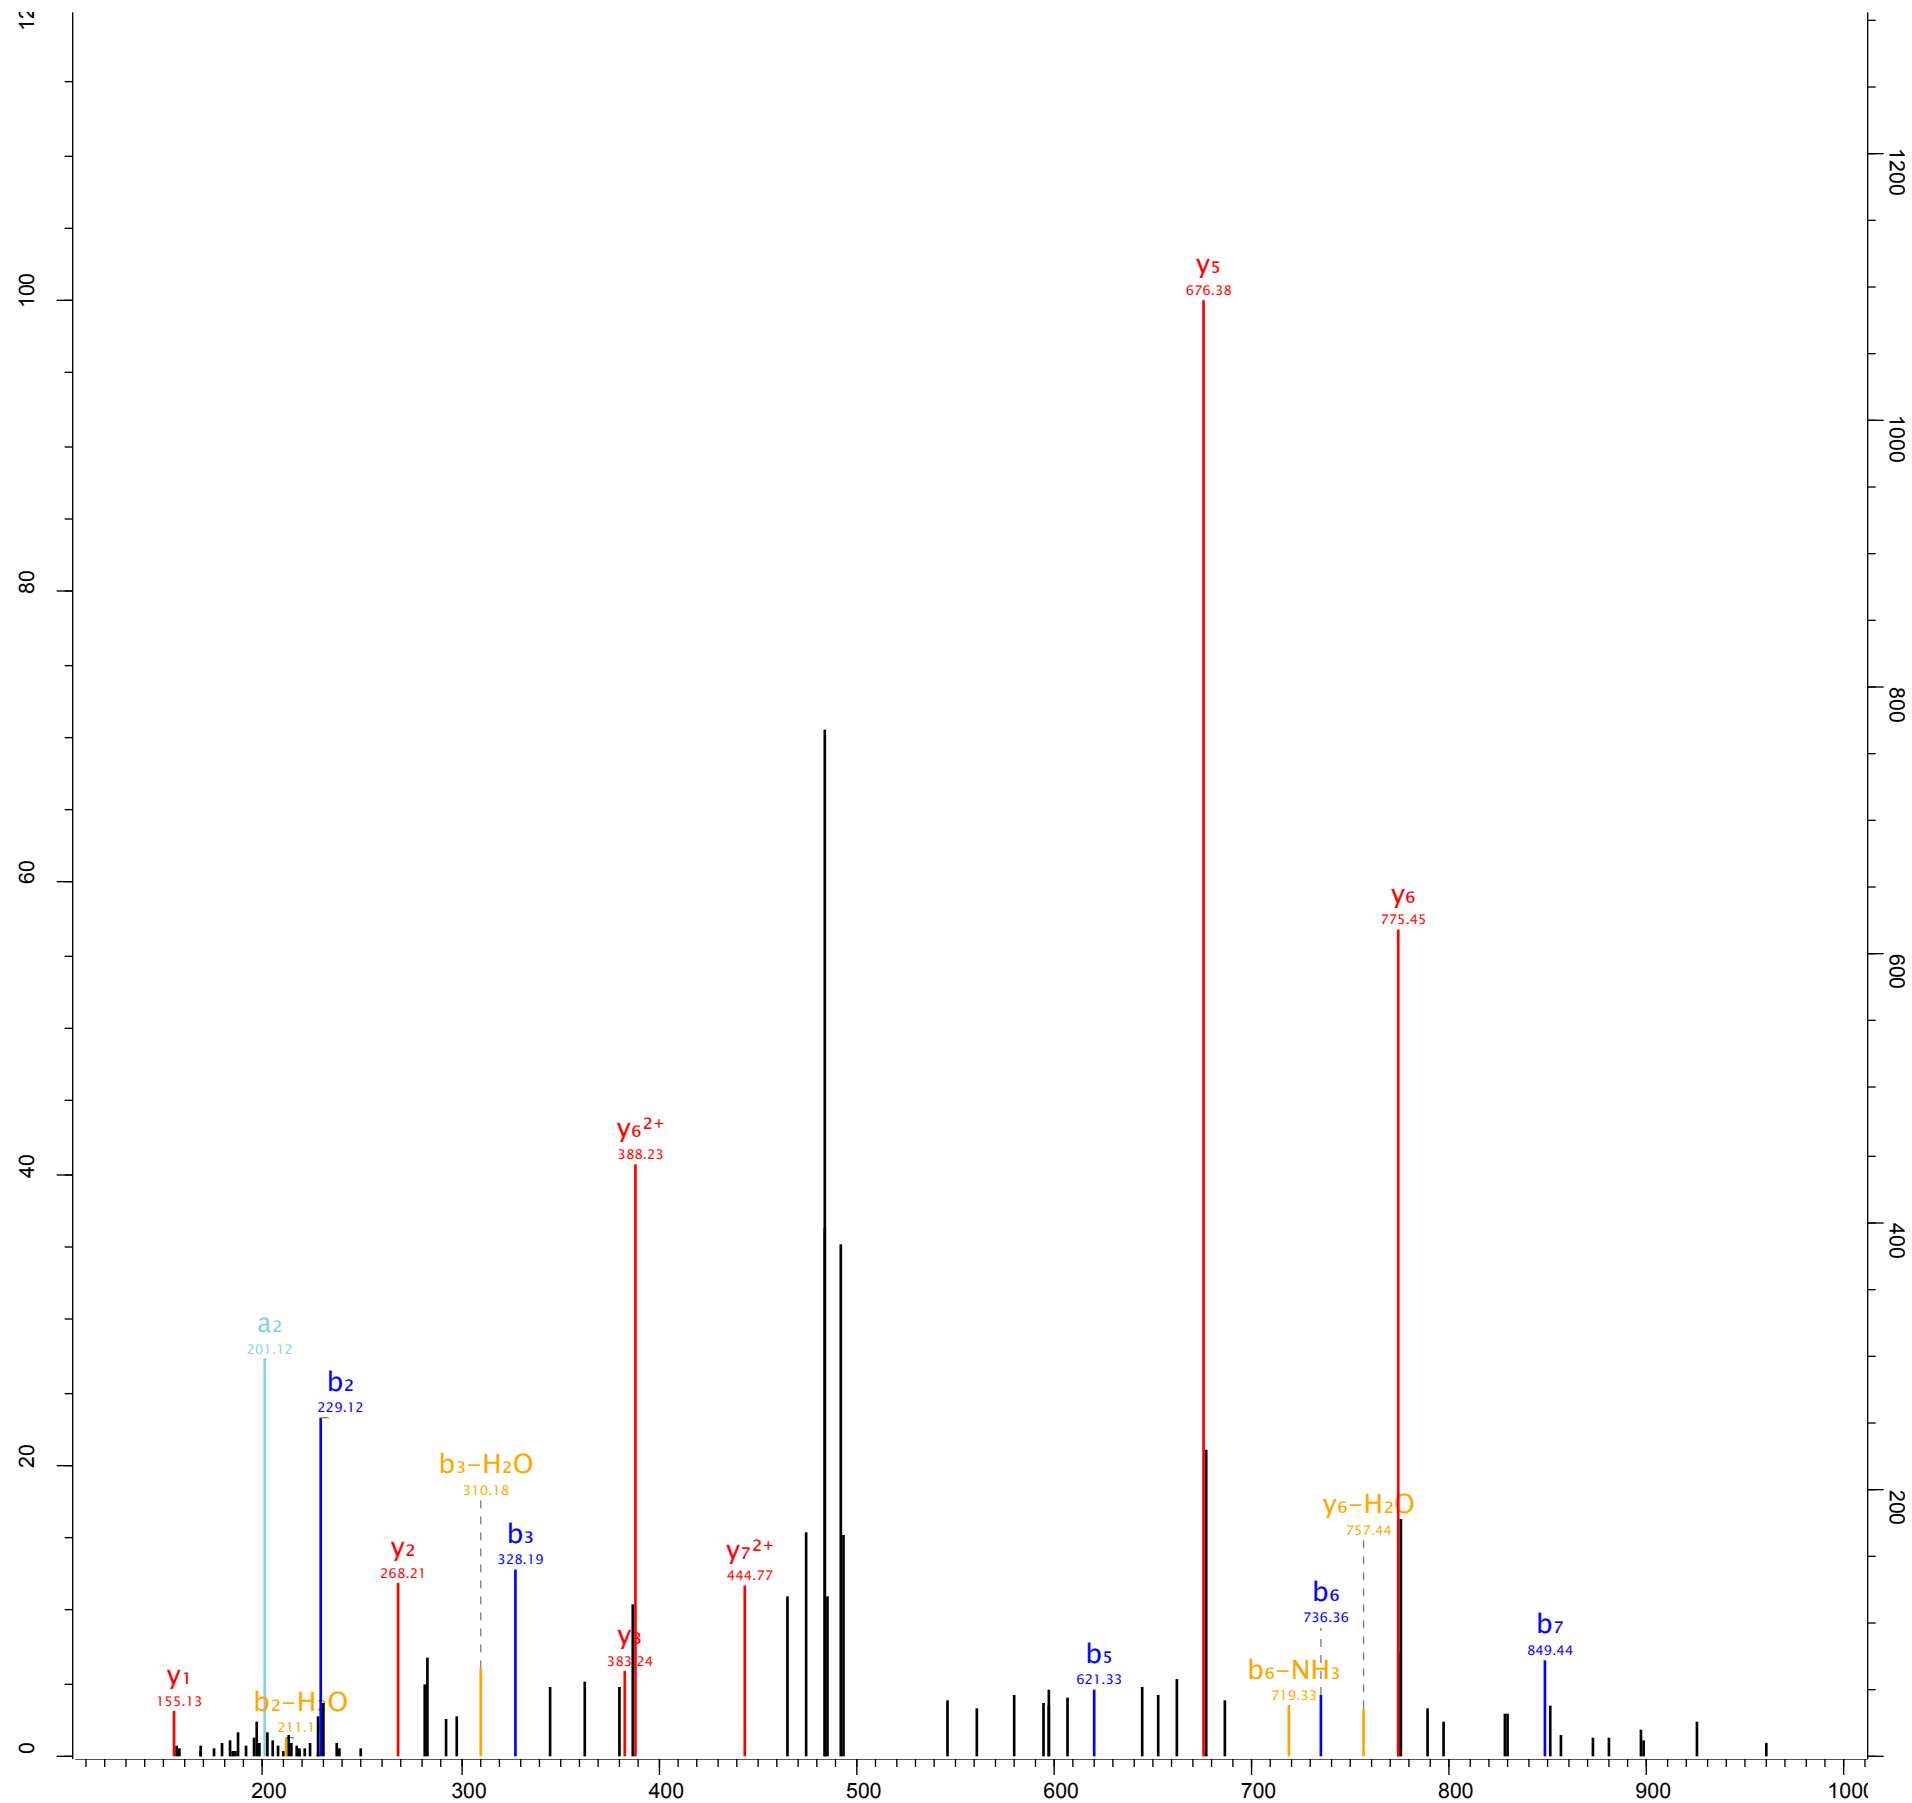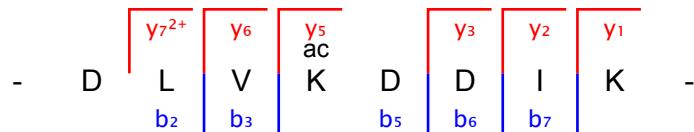

052413\_SCW\_II\_29\_Second\_ZT\_19\_4

9530

ITMS; CID

209.11

658.85

Zranb2

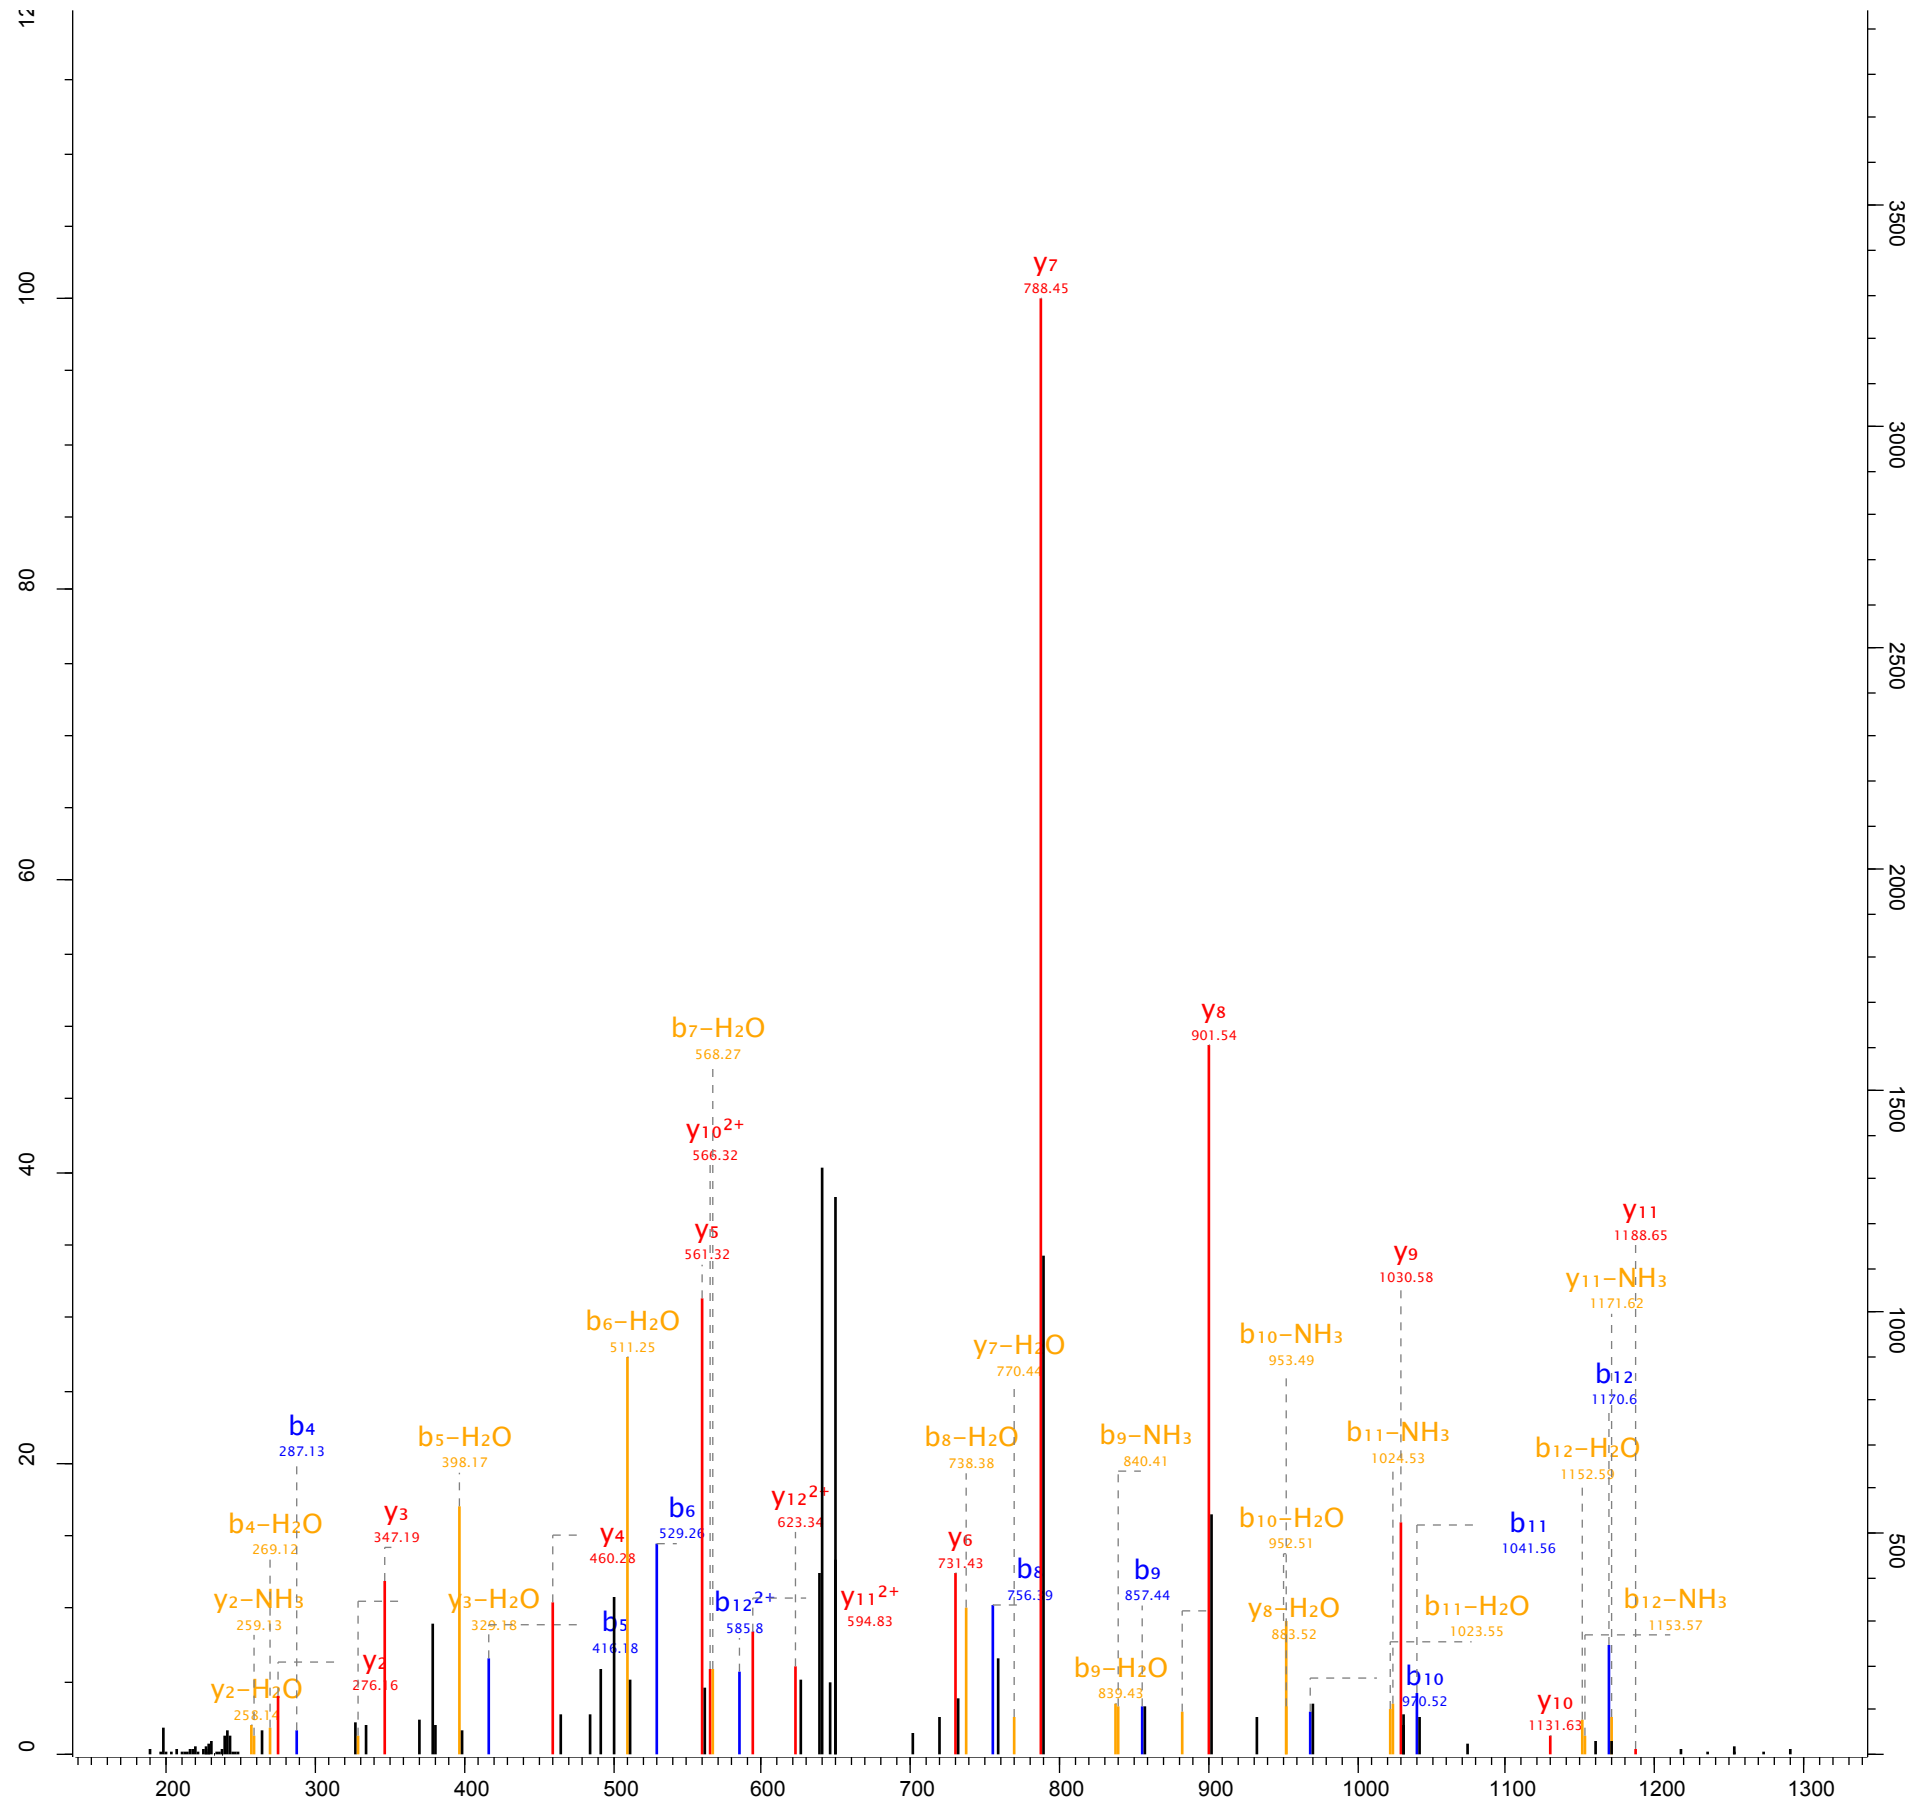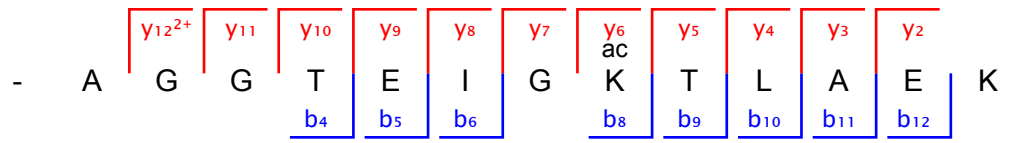

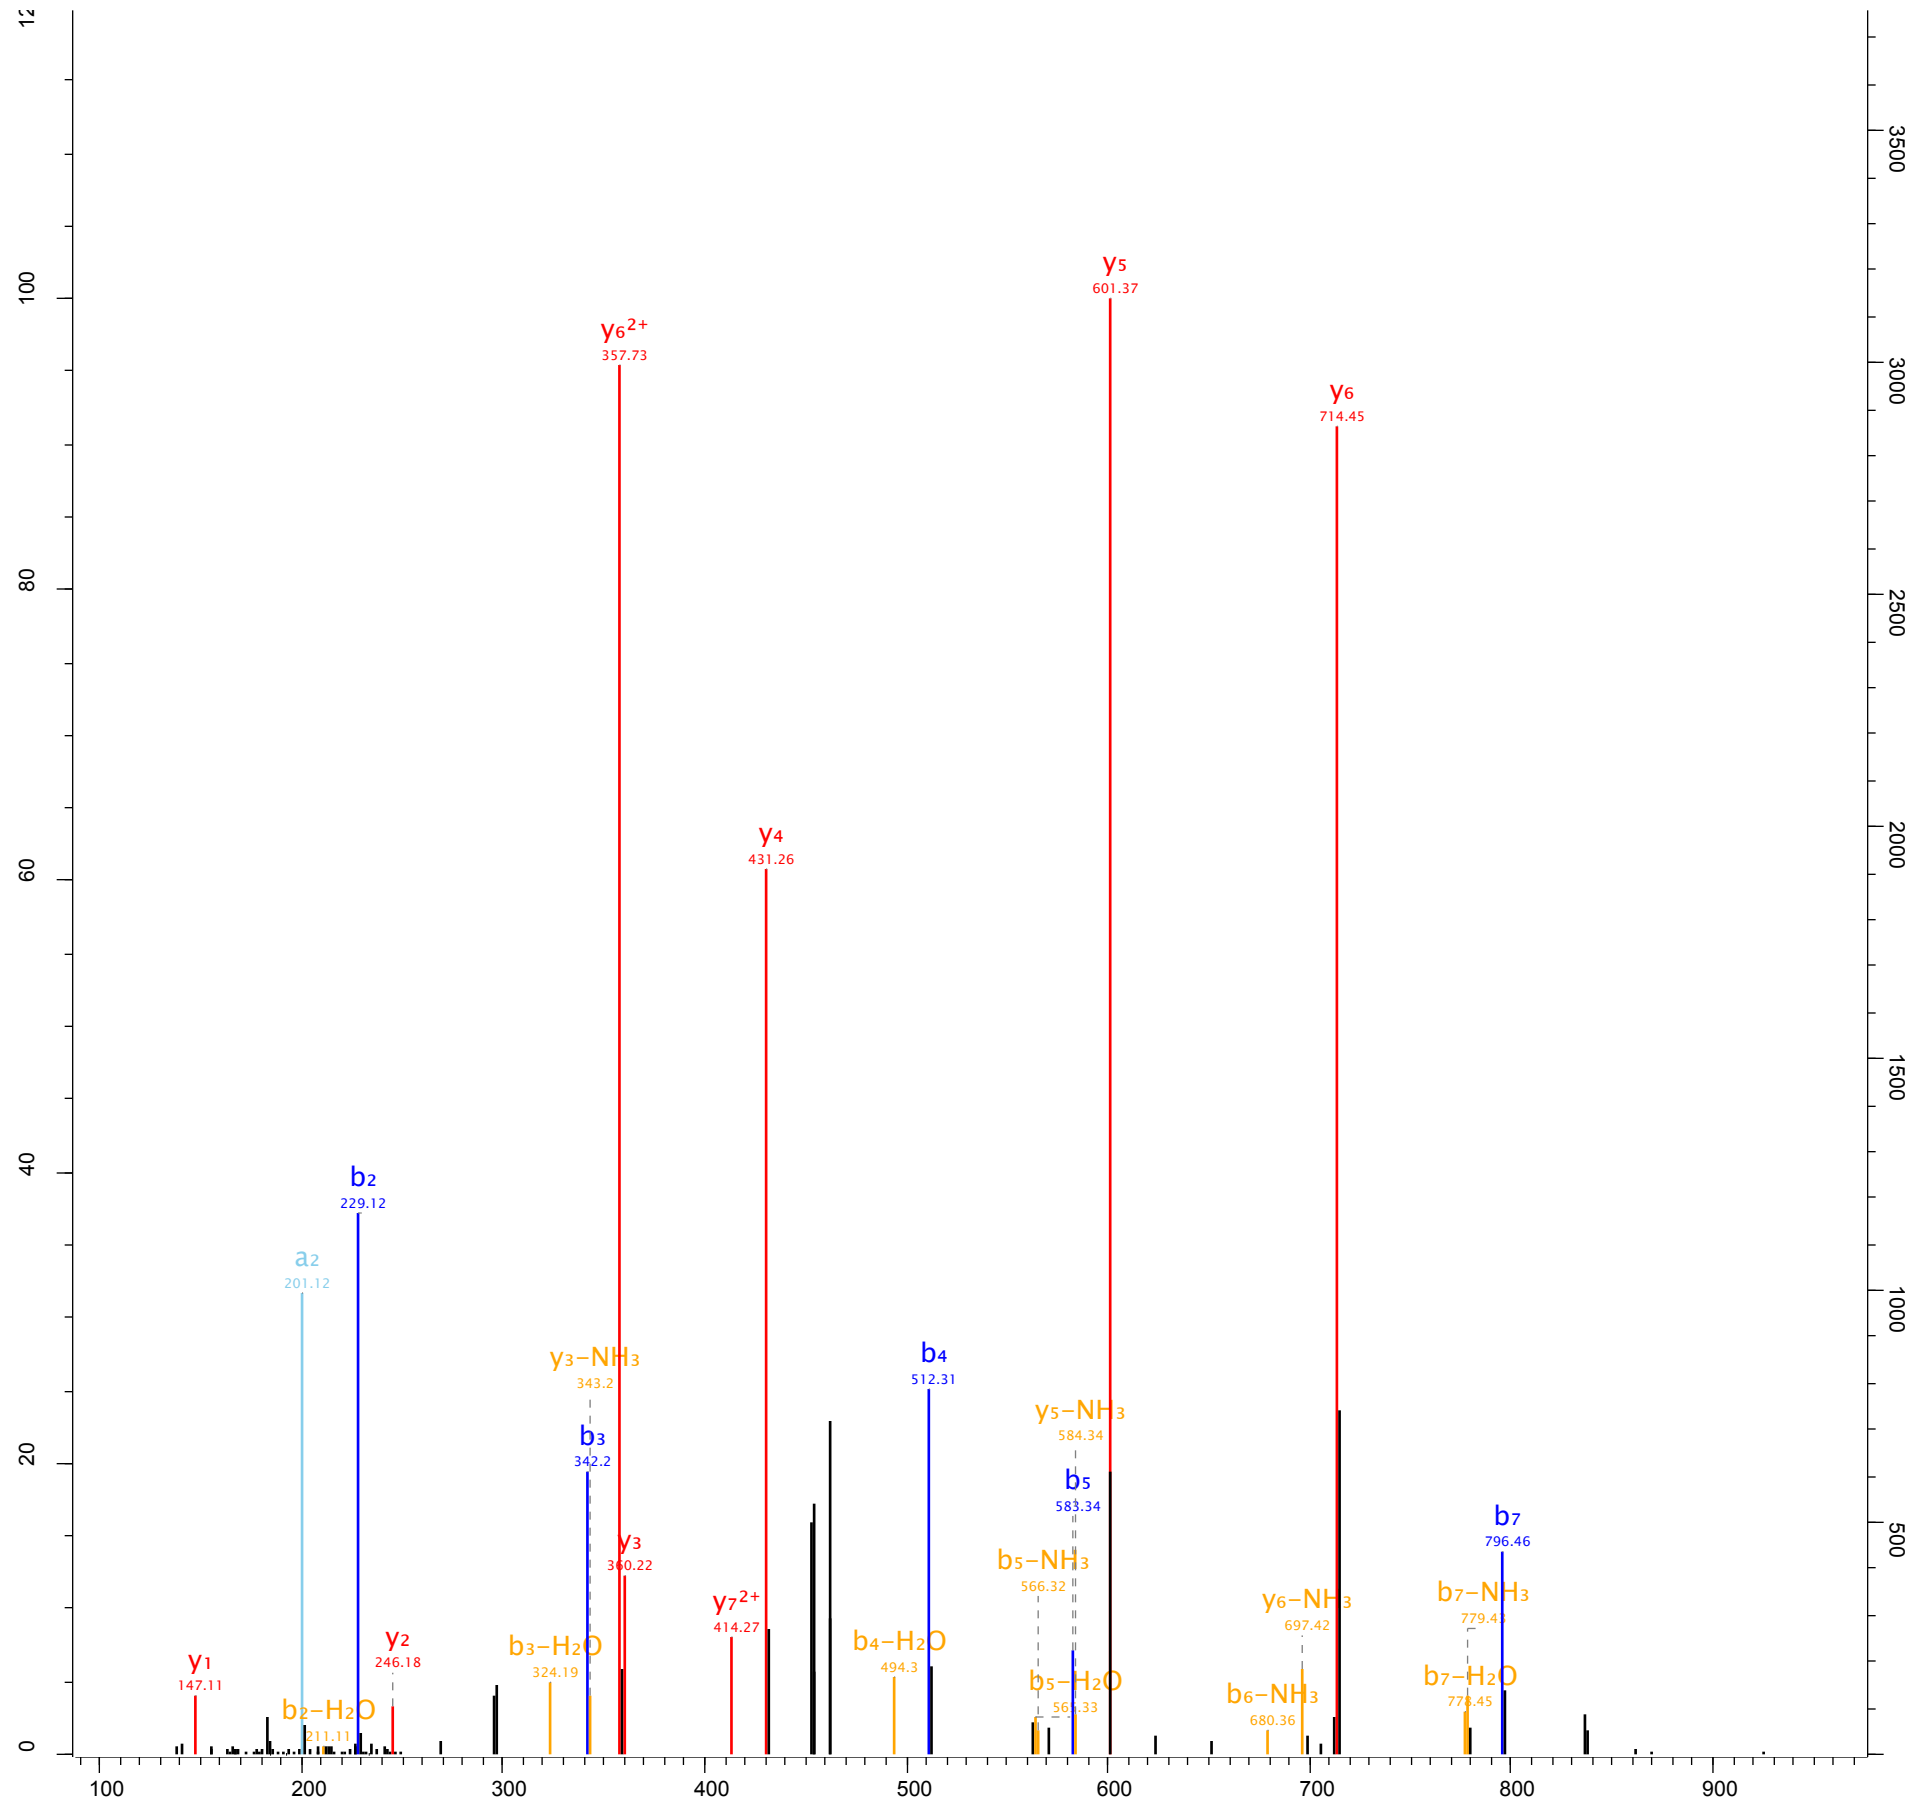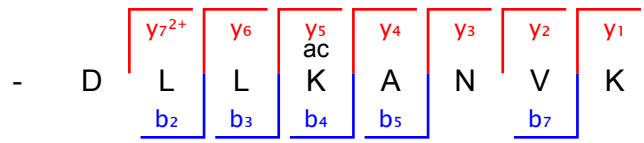

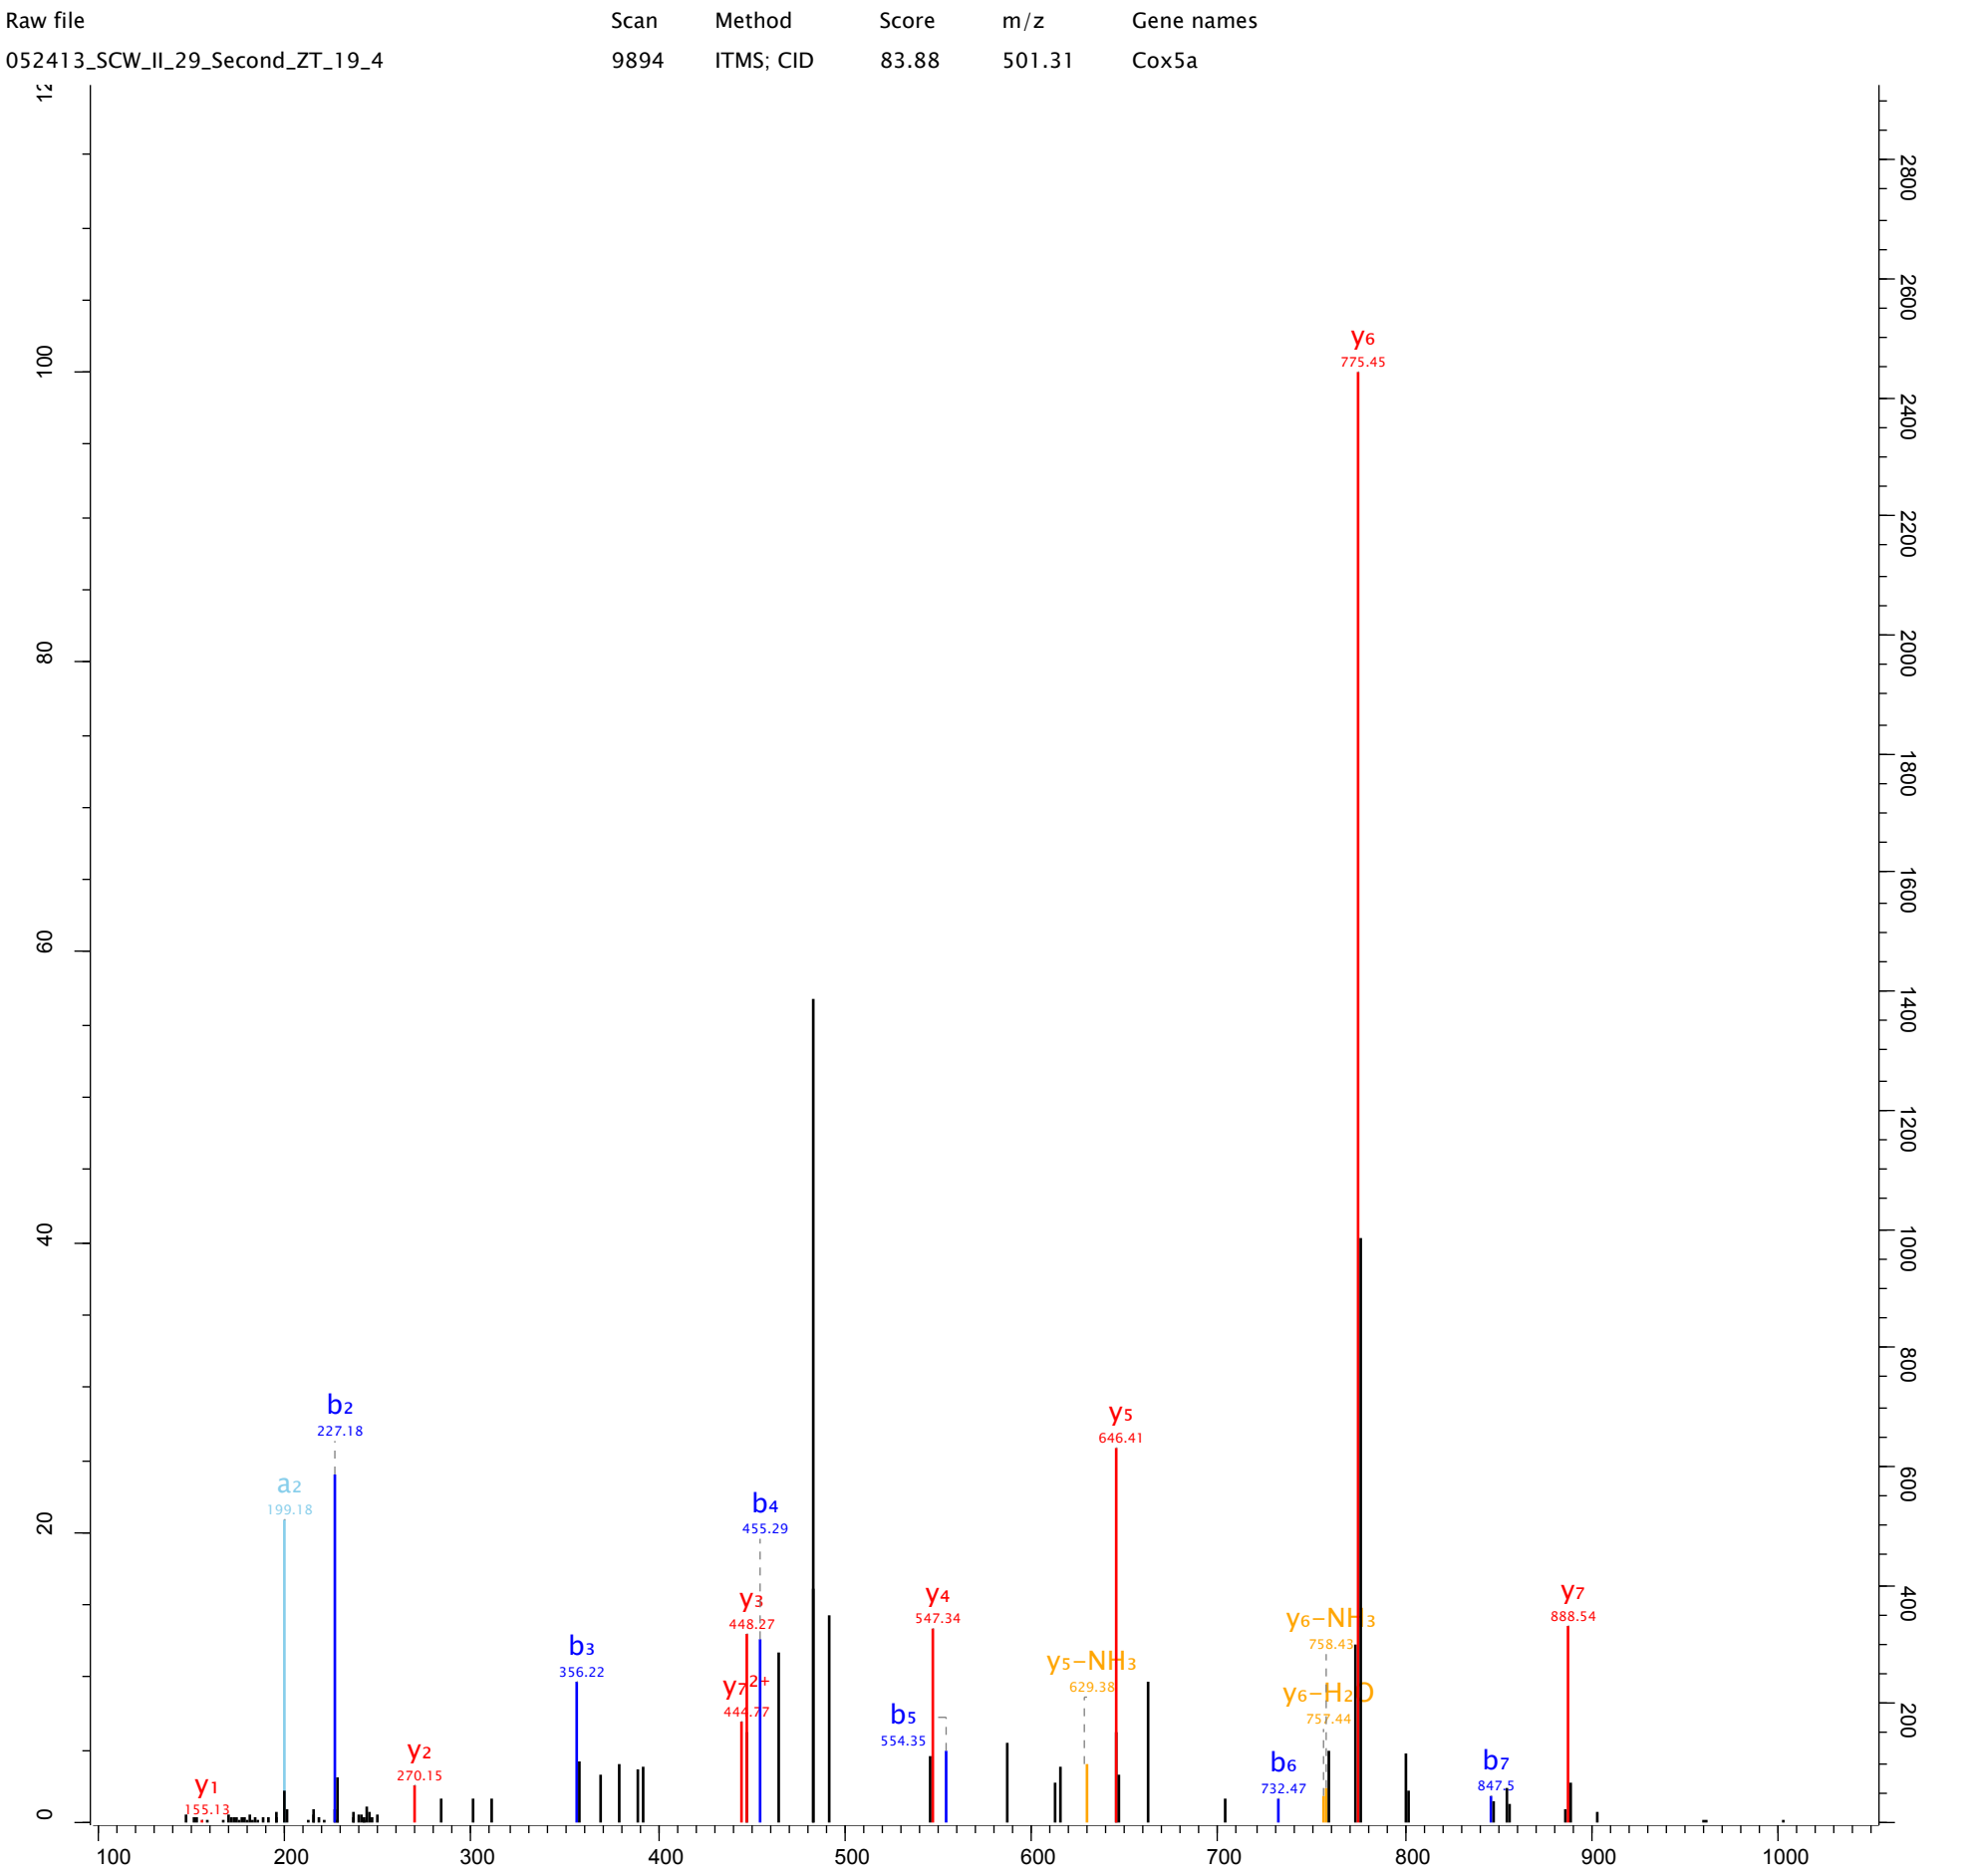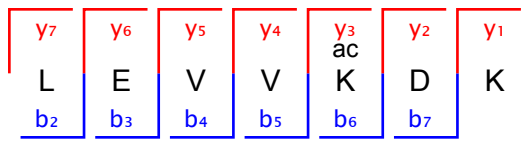



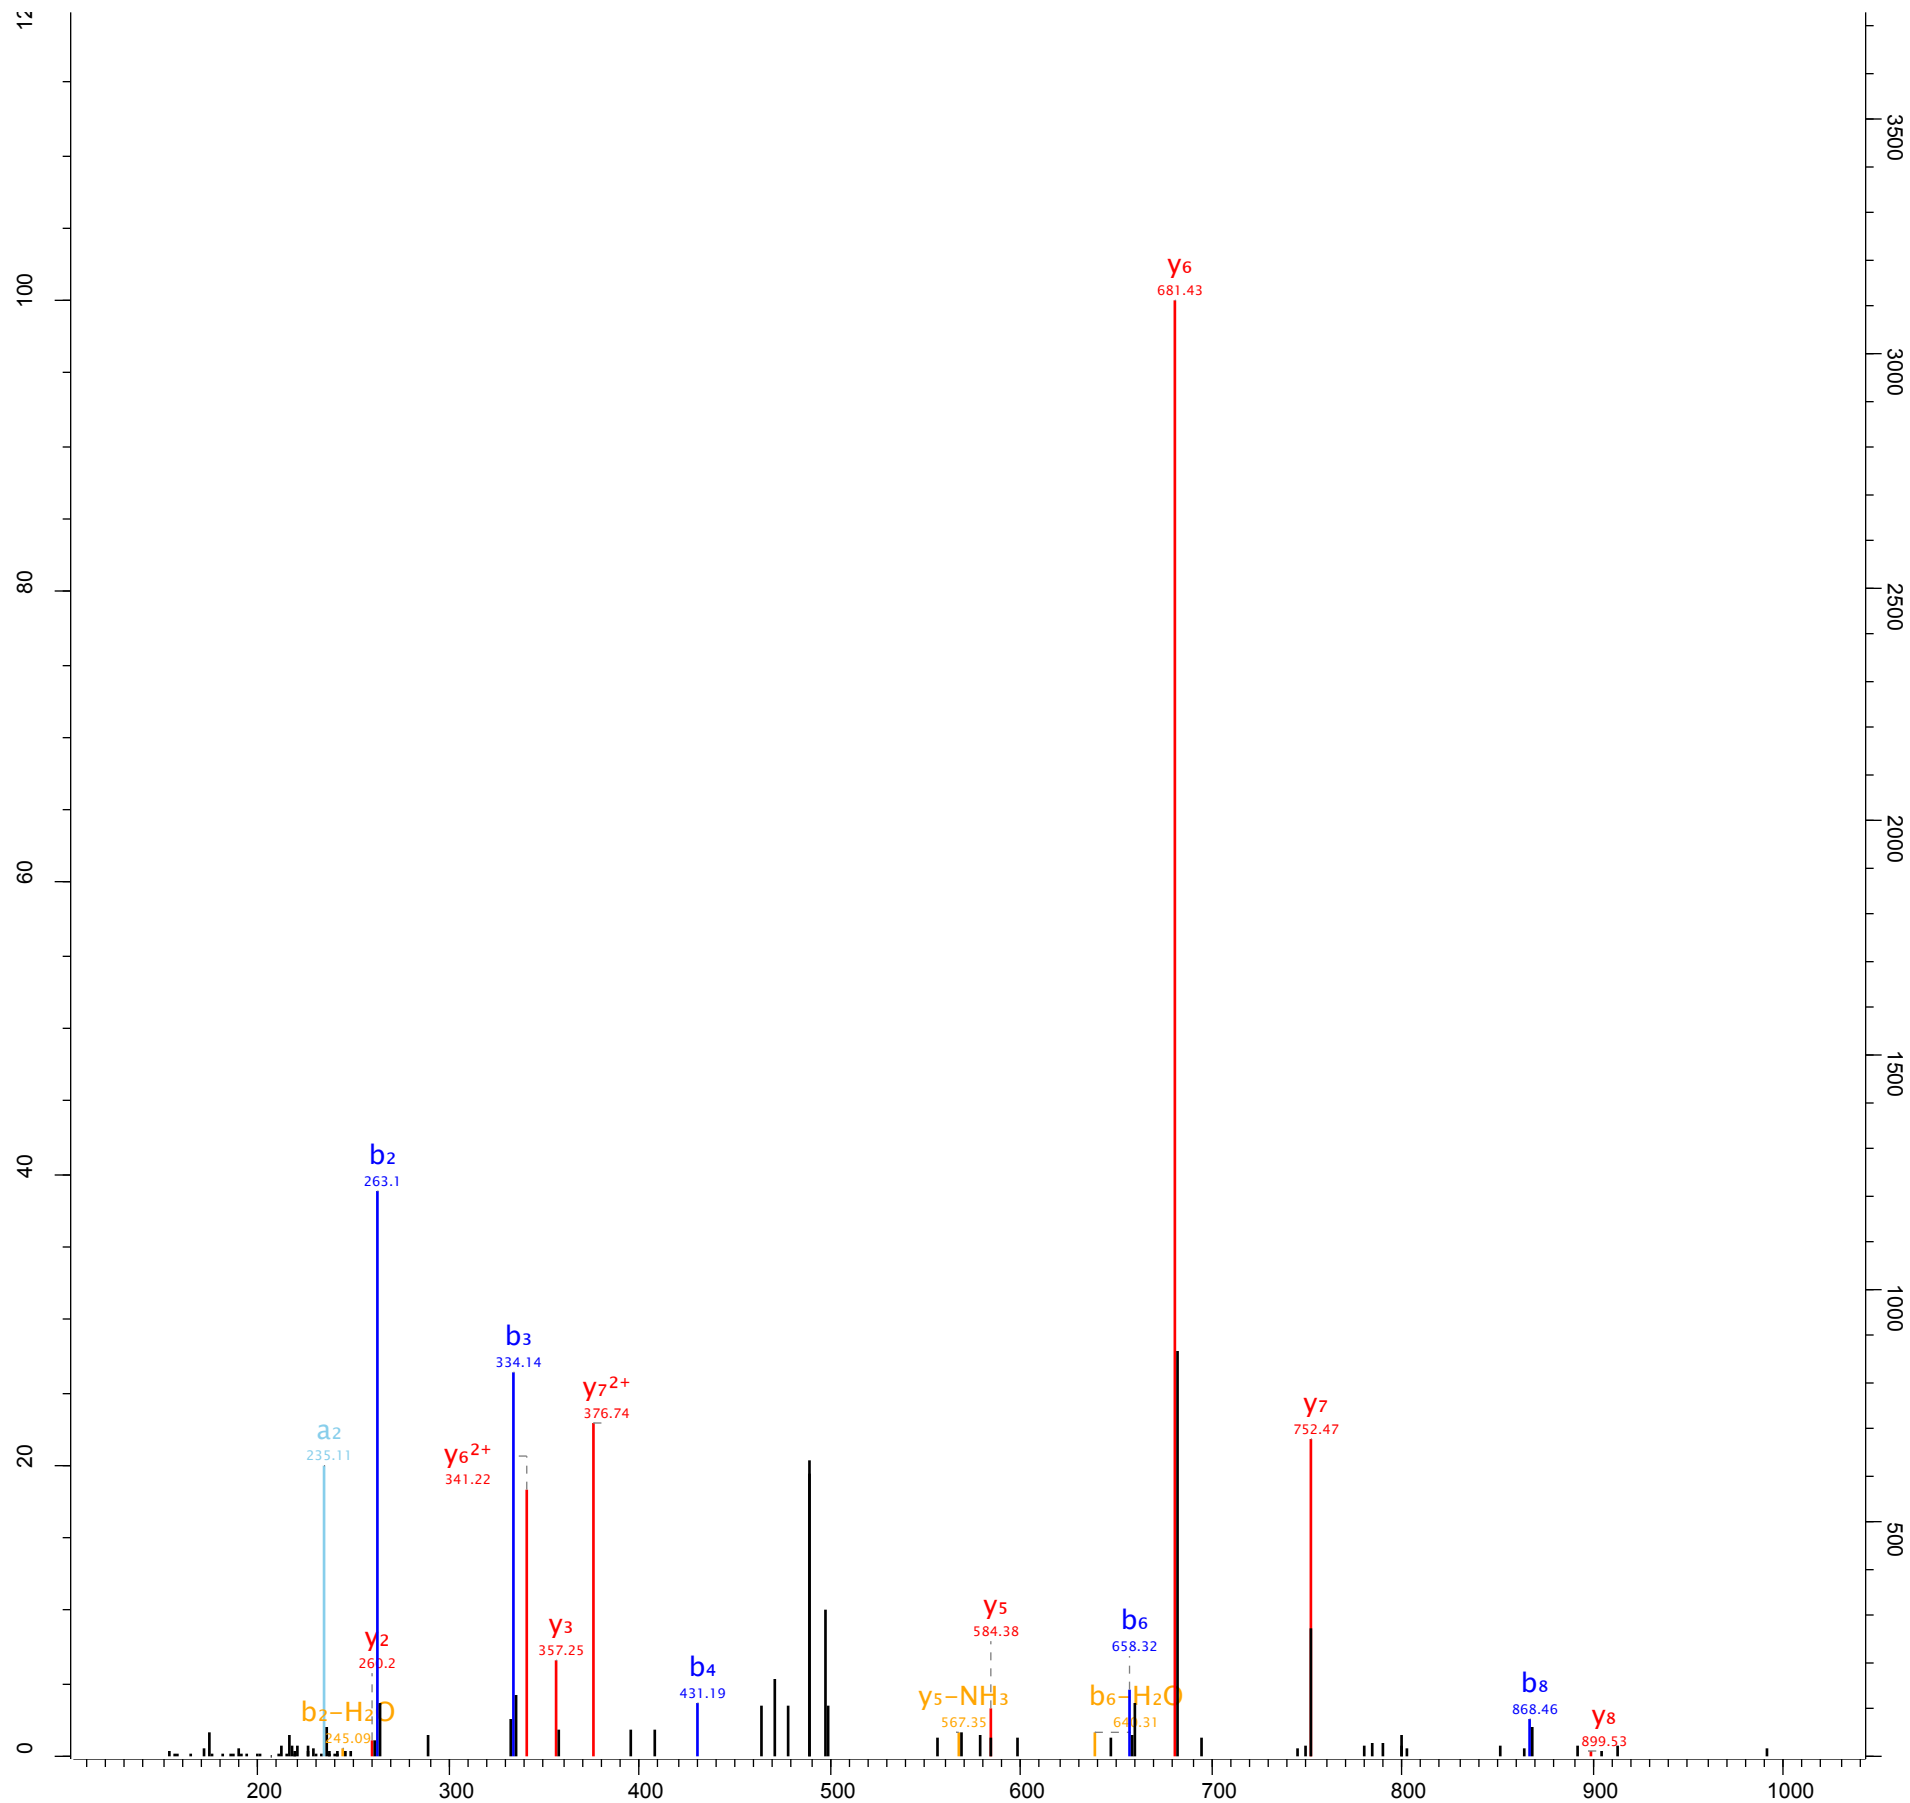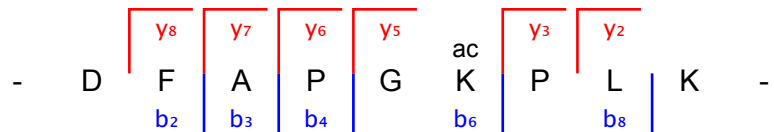

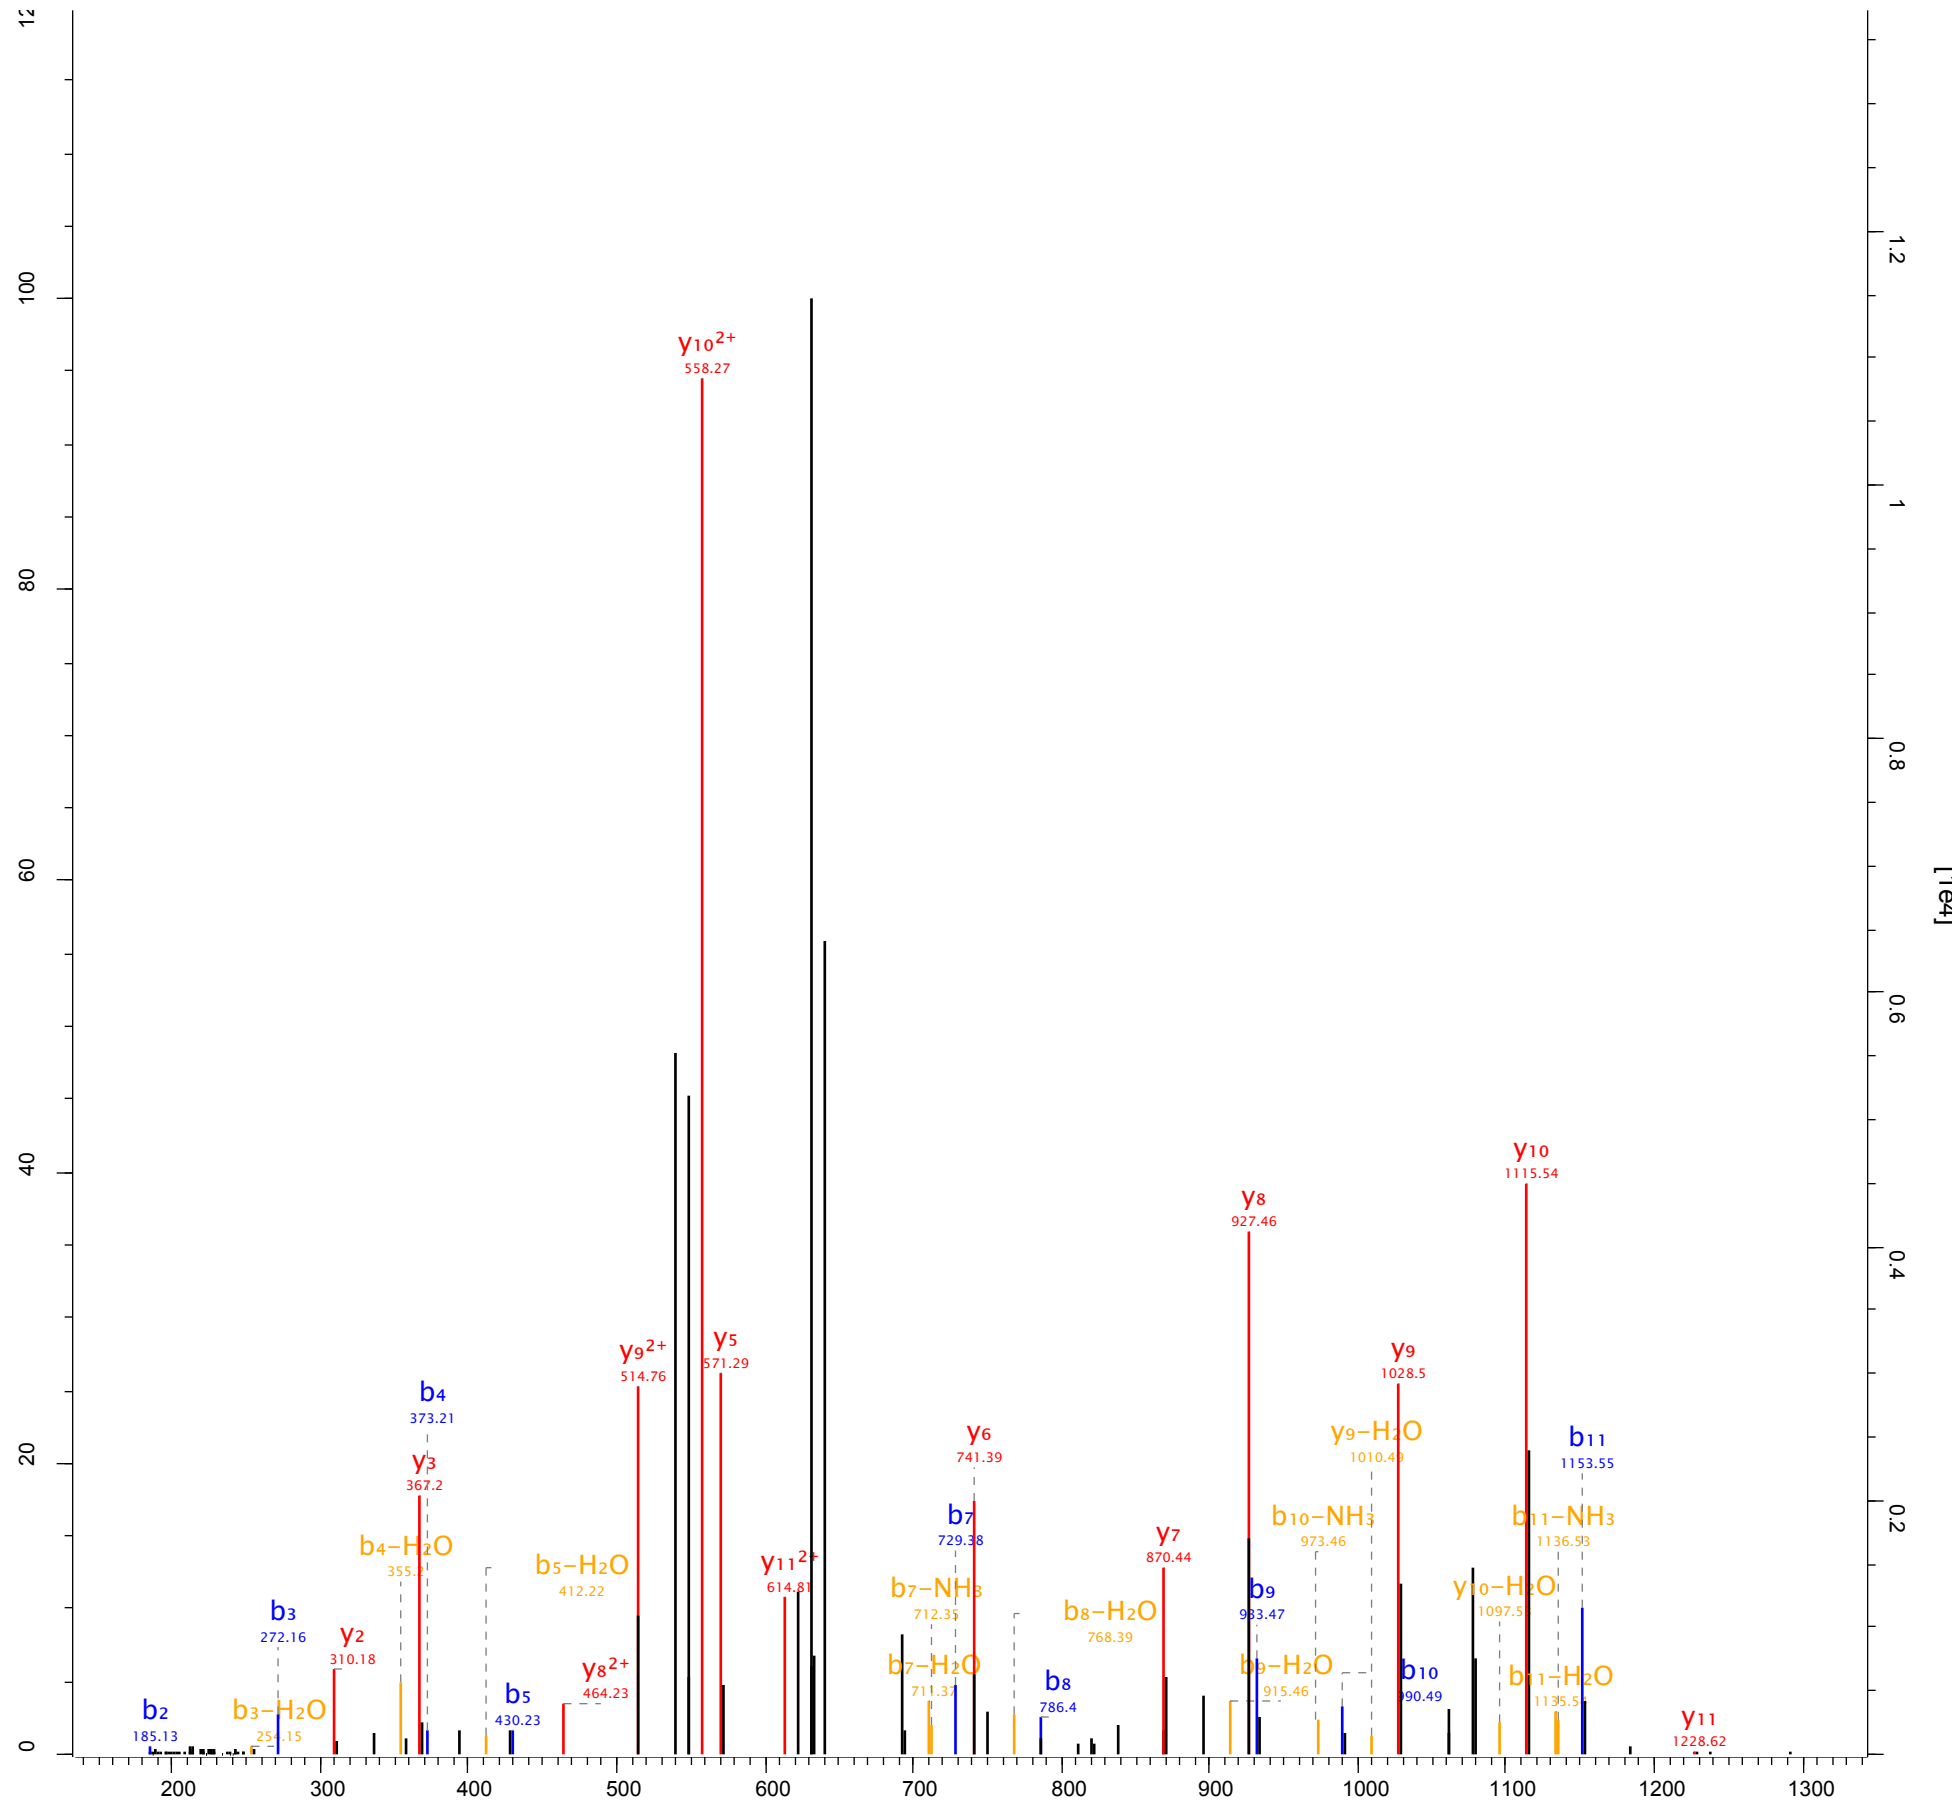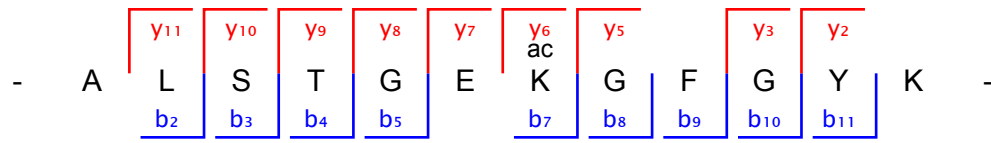

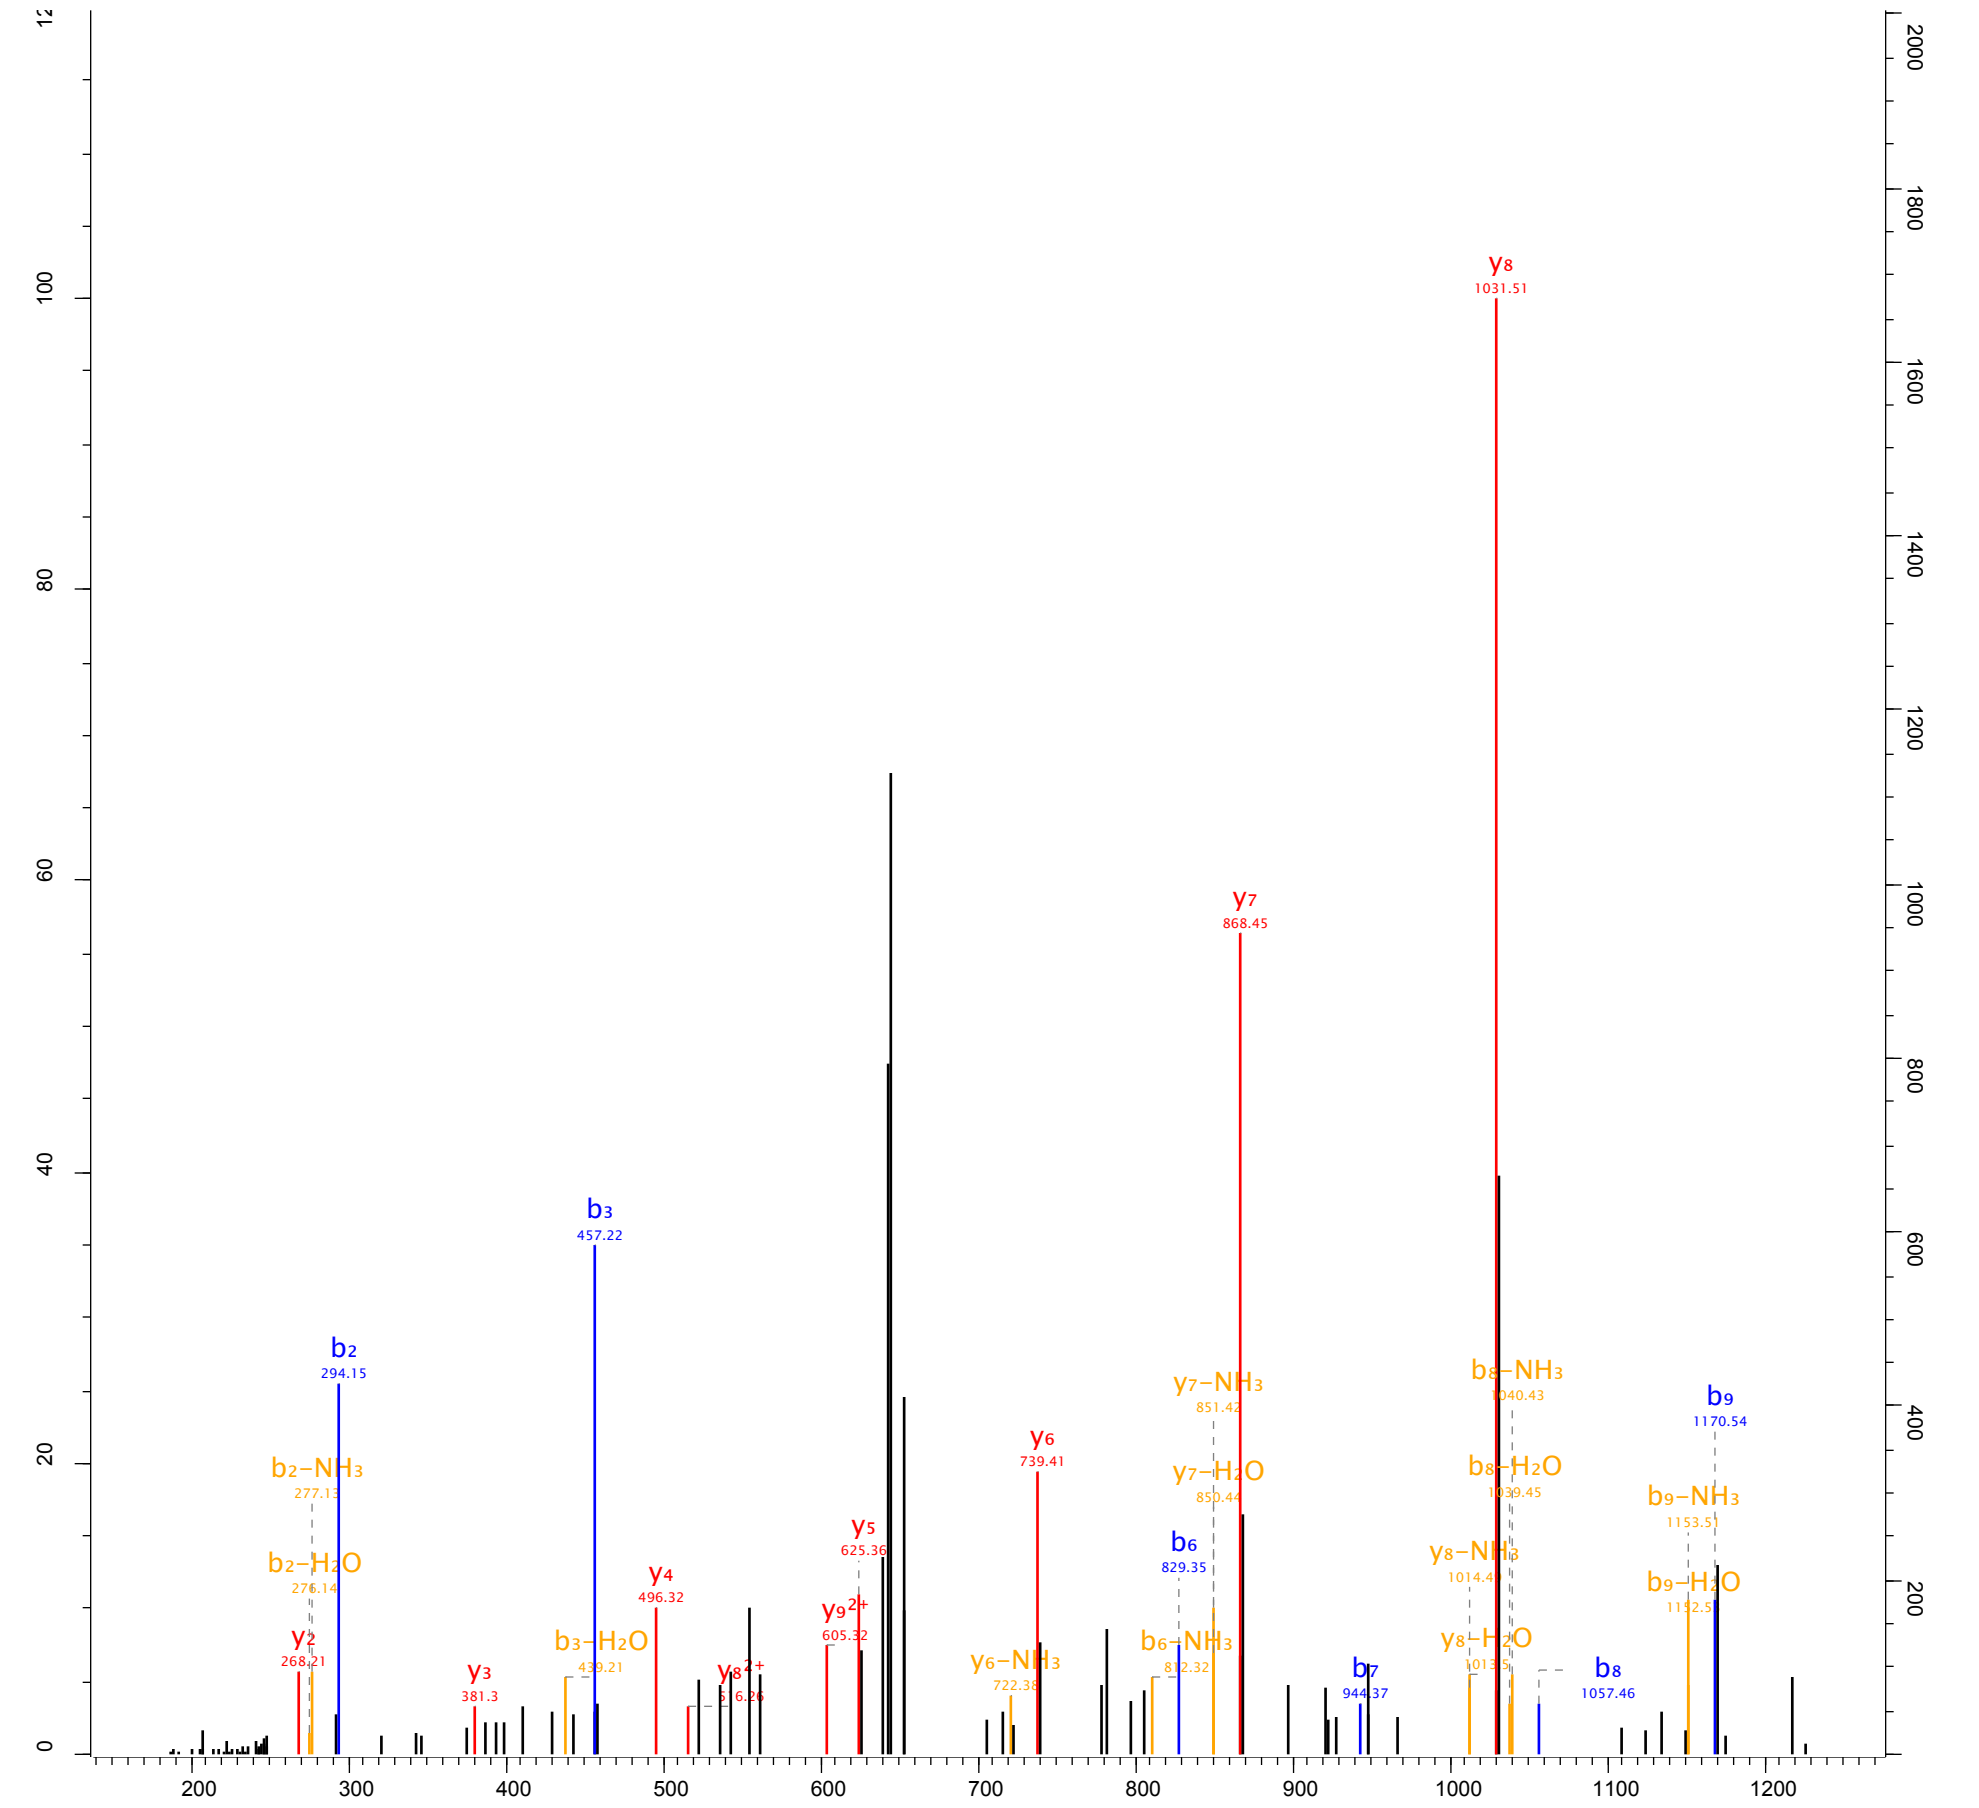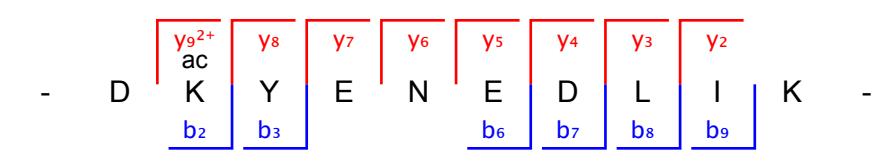

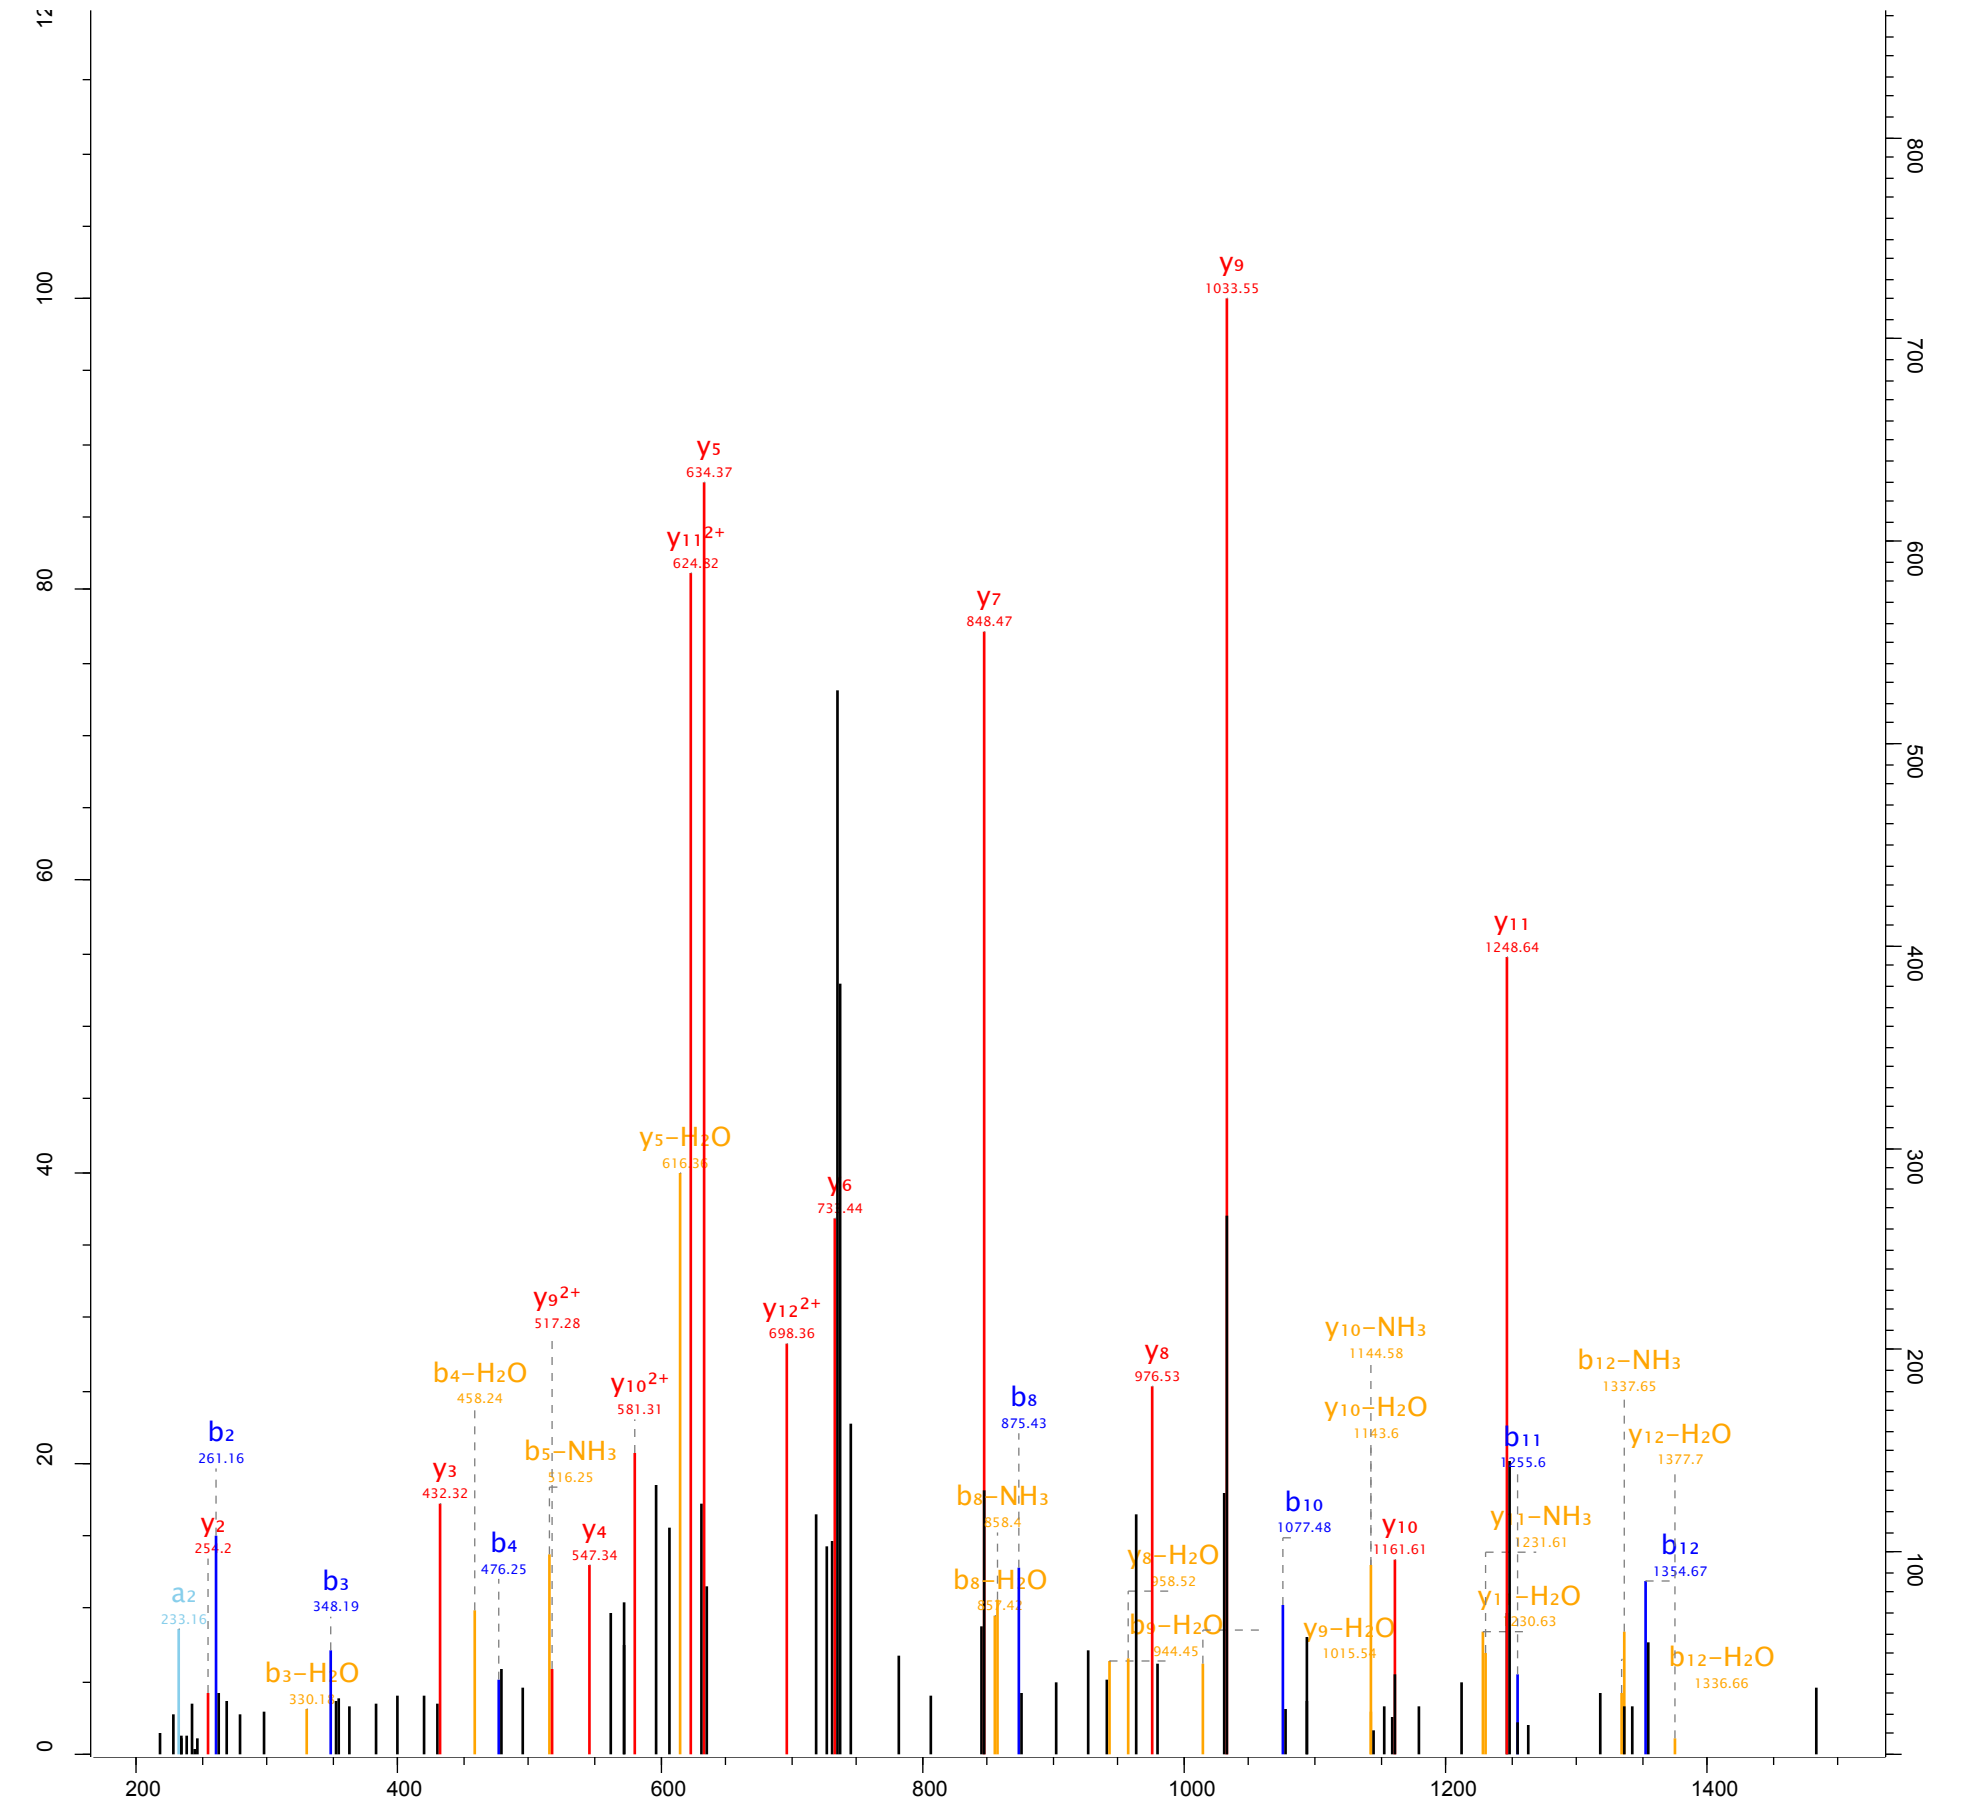

- L y12<sup>2+</sup> y11 y10 y9 y8 y7 y6 y5 y4 y3 y2 ac K -

b2 b3 b4 b8 b10 b11 b12

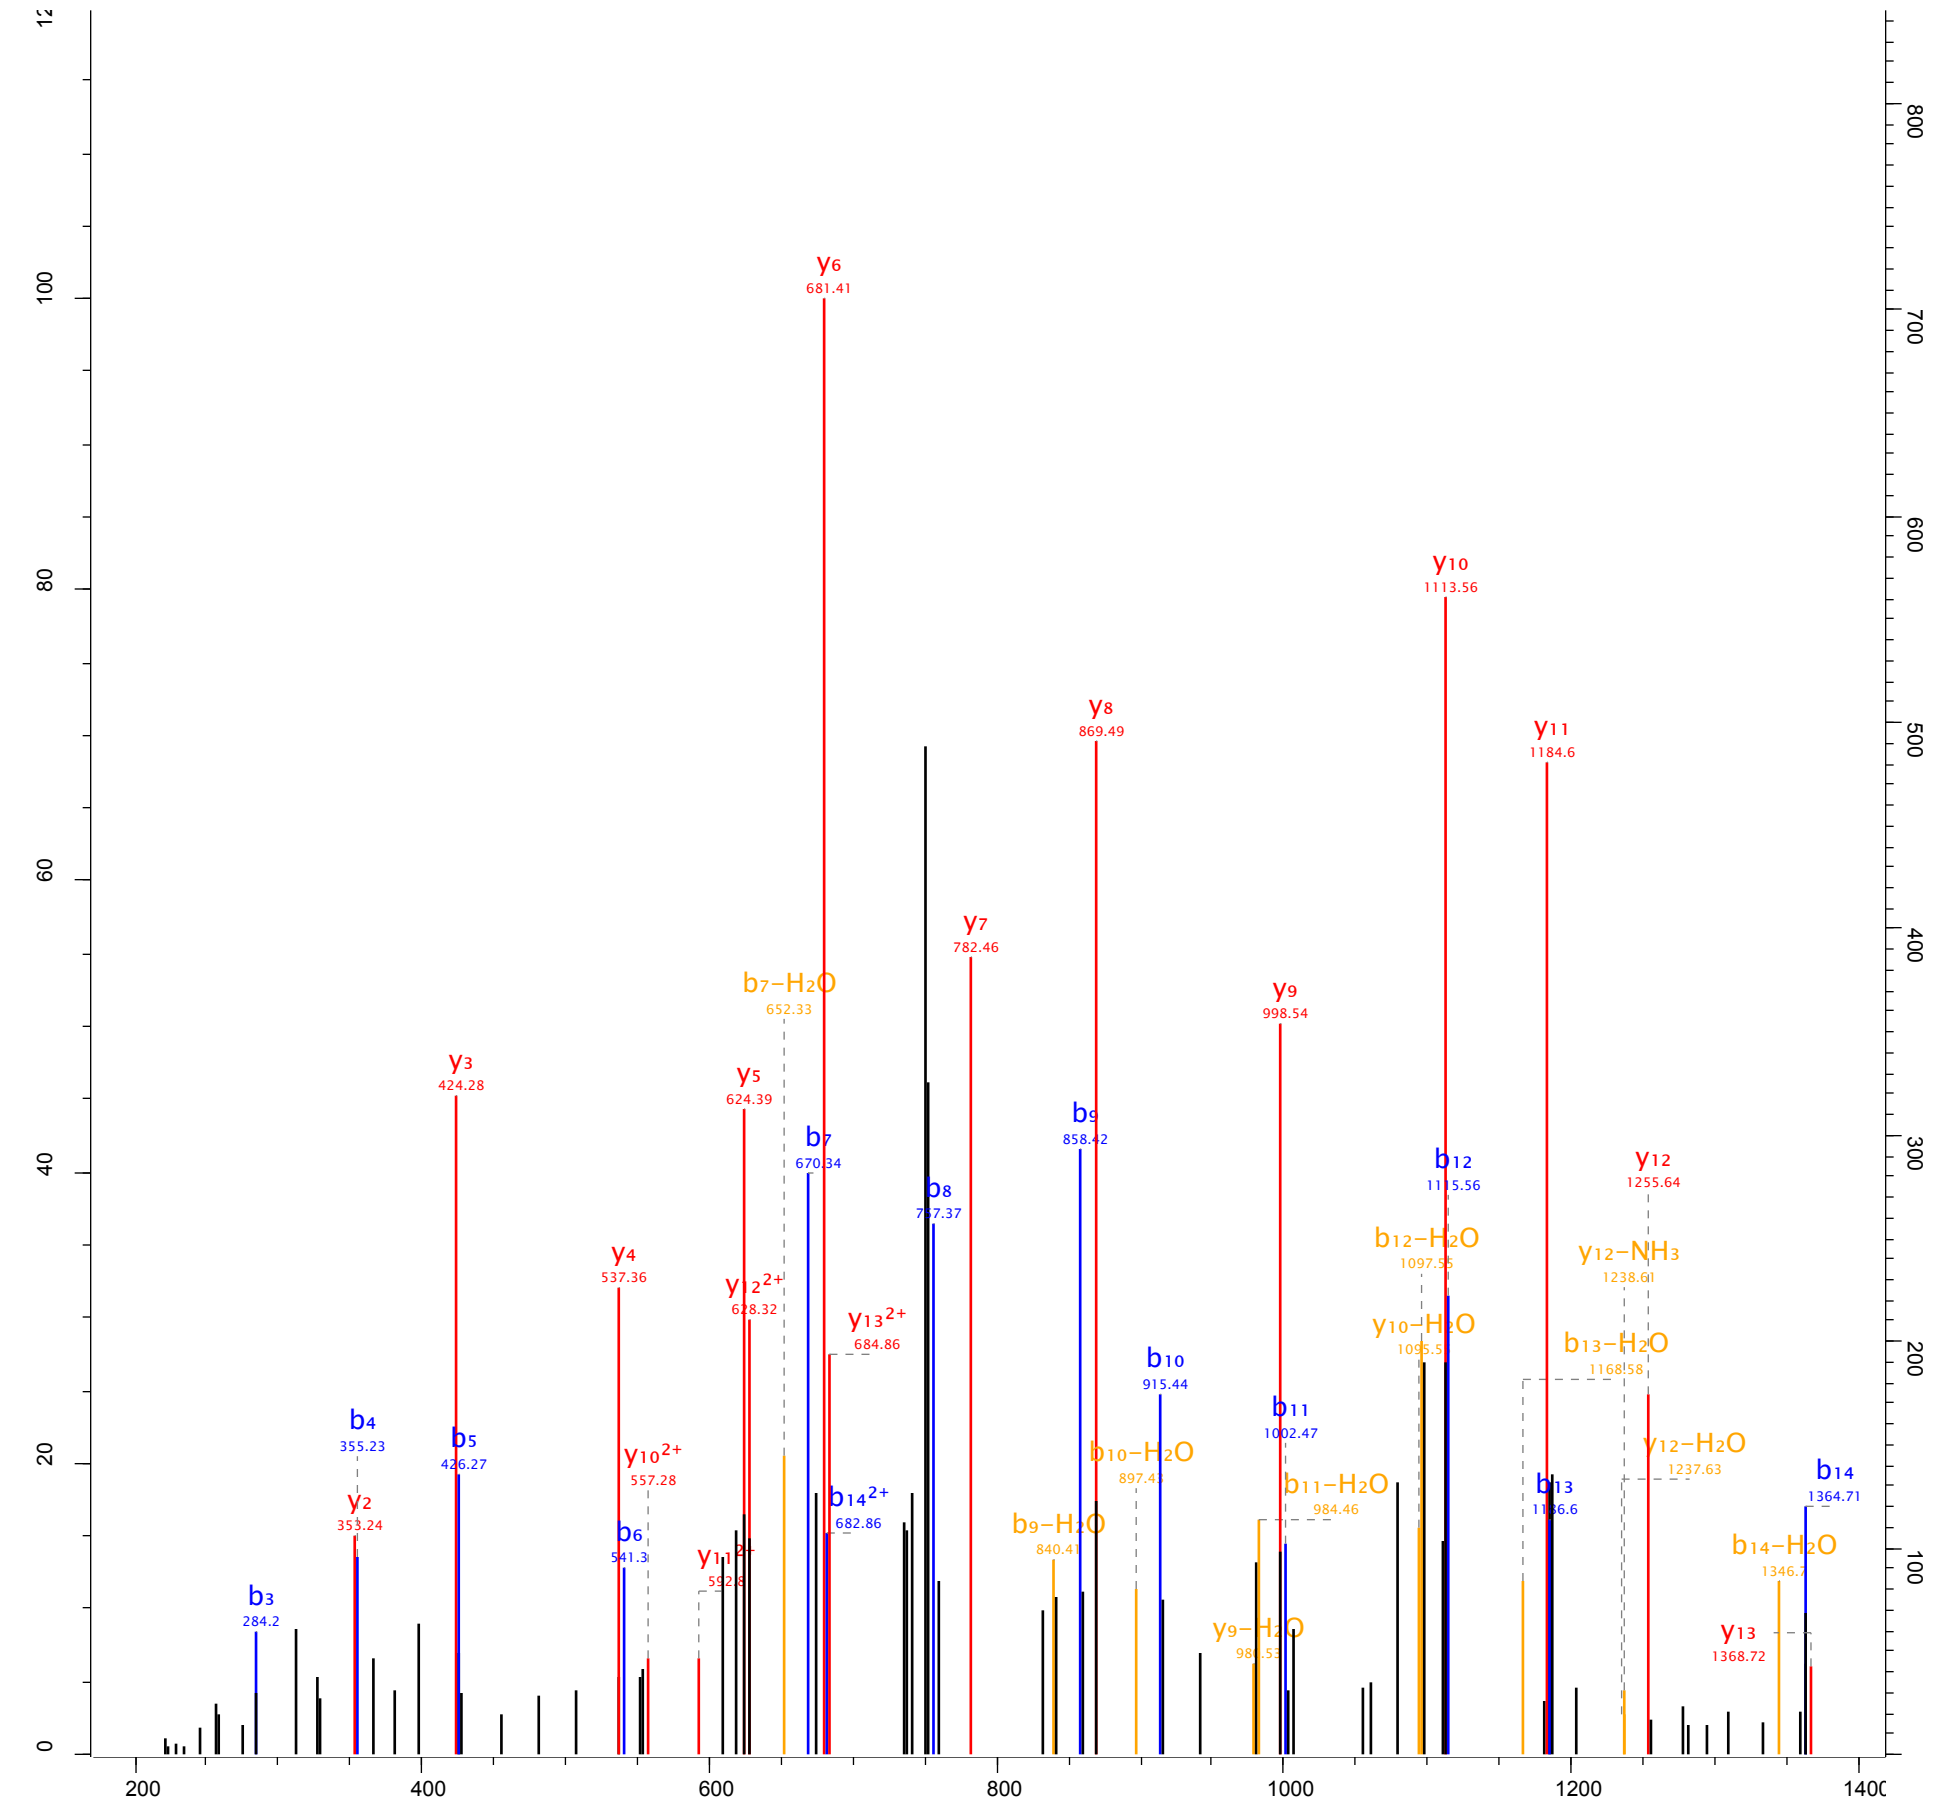

- G I L A A D E S T G S I A K R -

y13
y12
y11
y10
y9
y8
y7
y6
y5
y4
y3
y2

b3
b4
b5
b6
b7
b8
b9
b10
b11
b12
b13
b14

ac

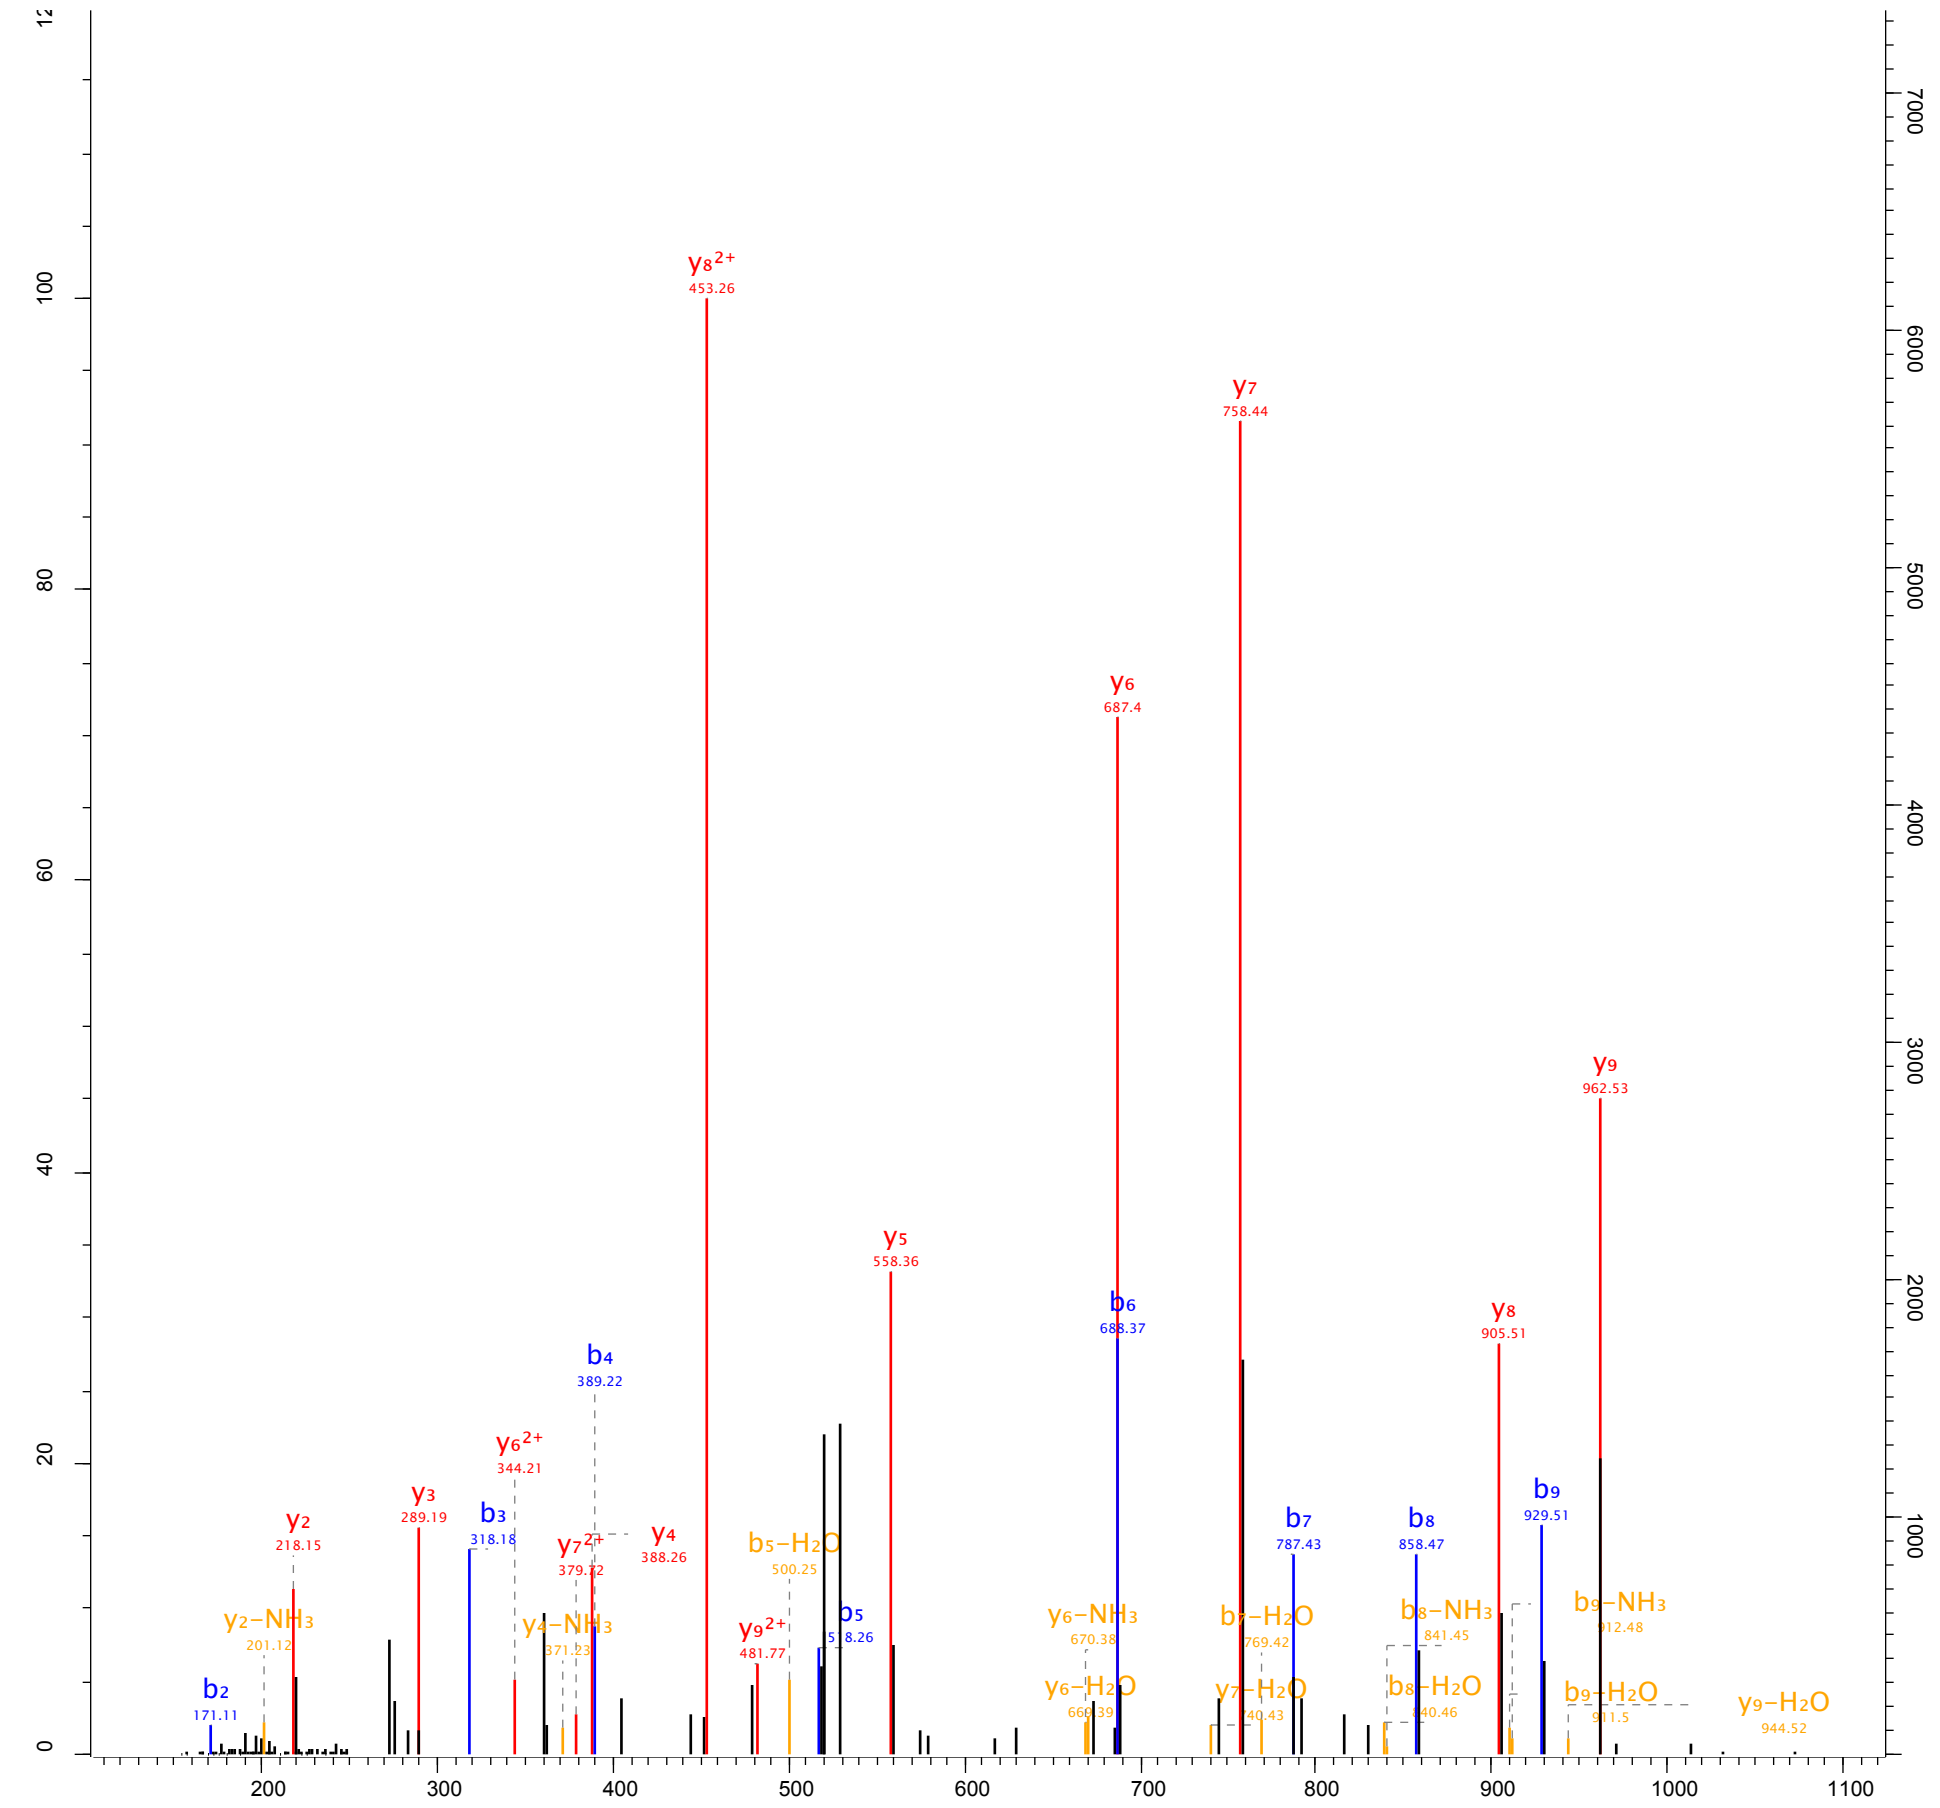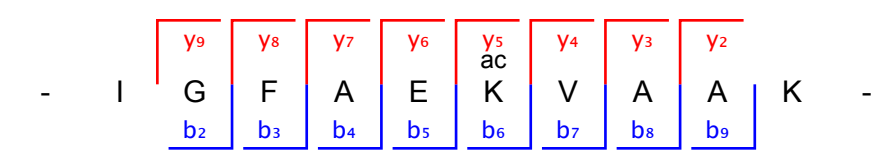

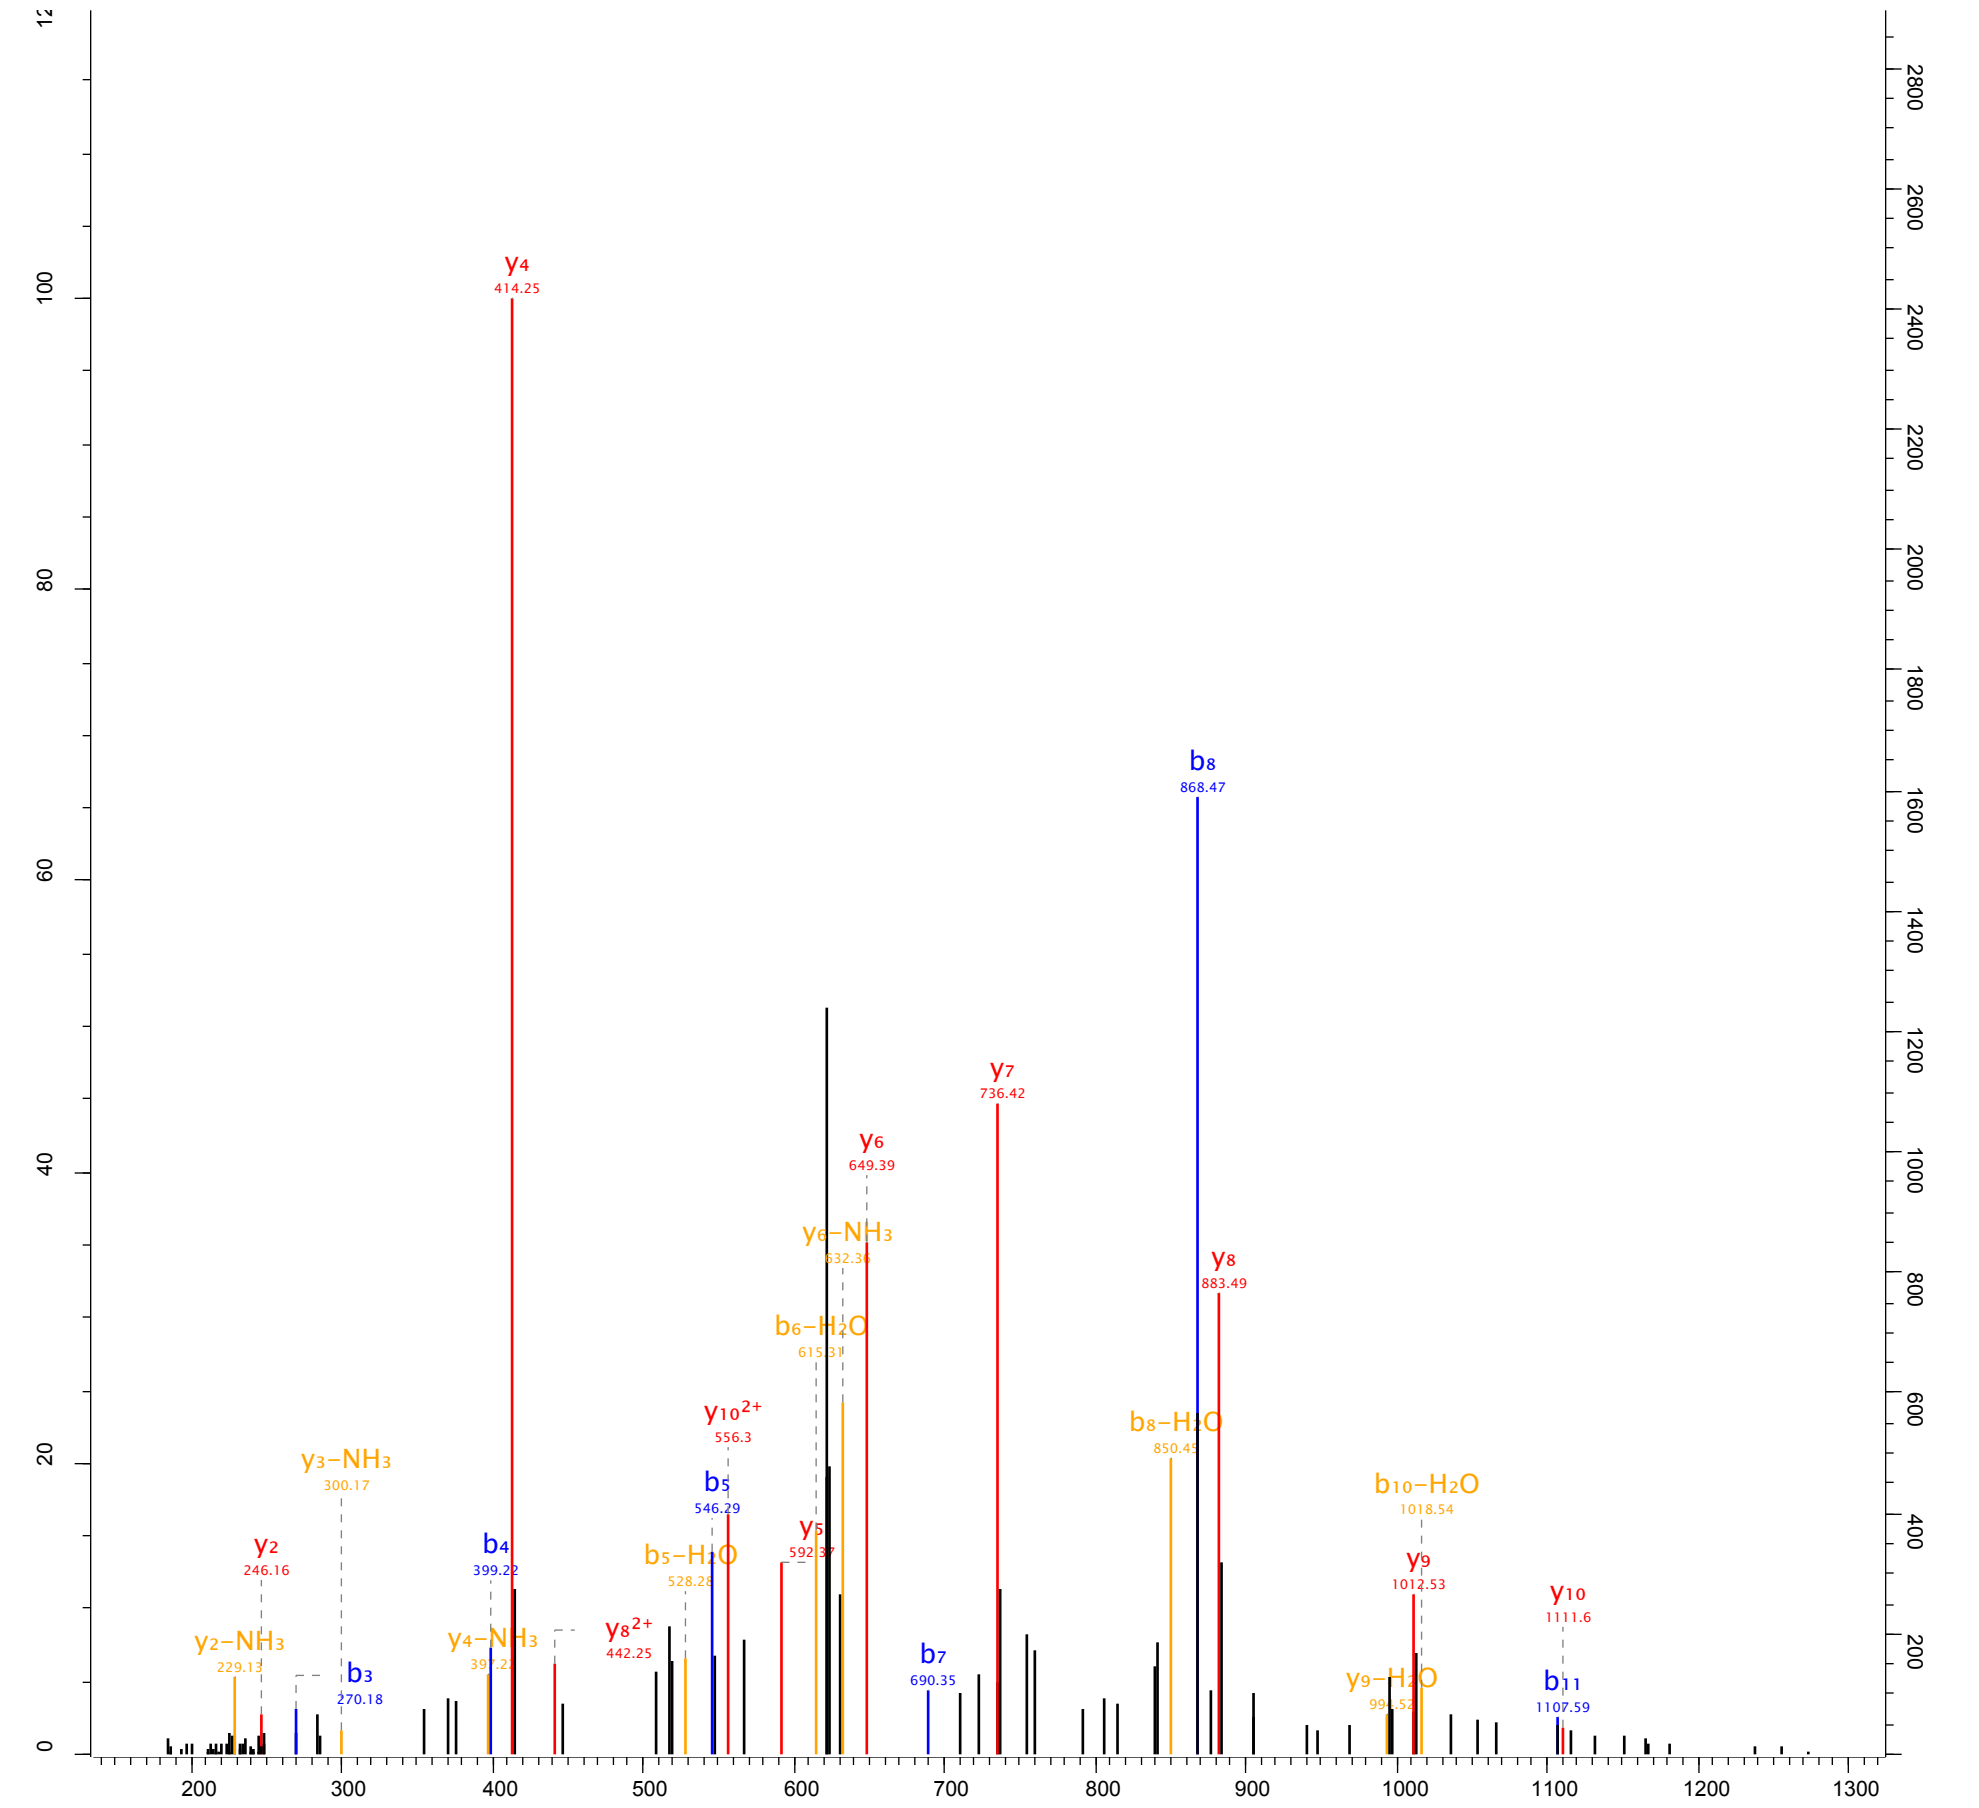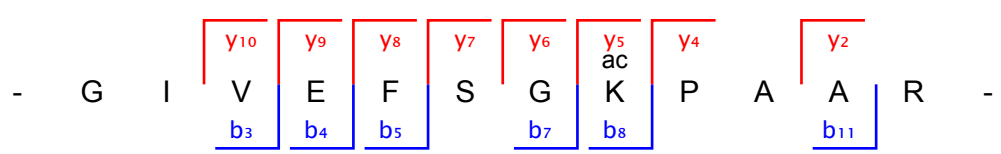

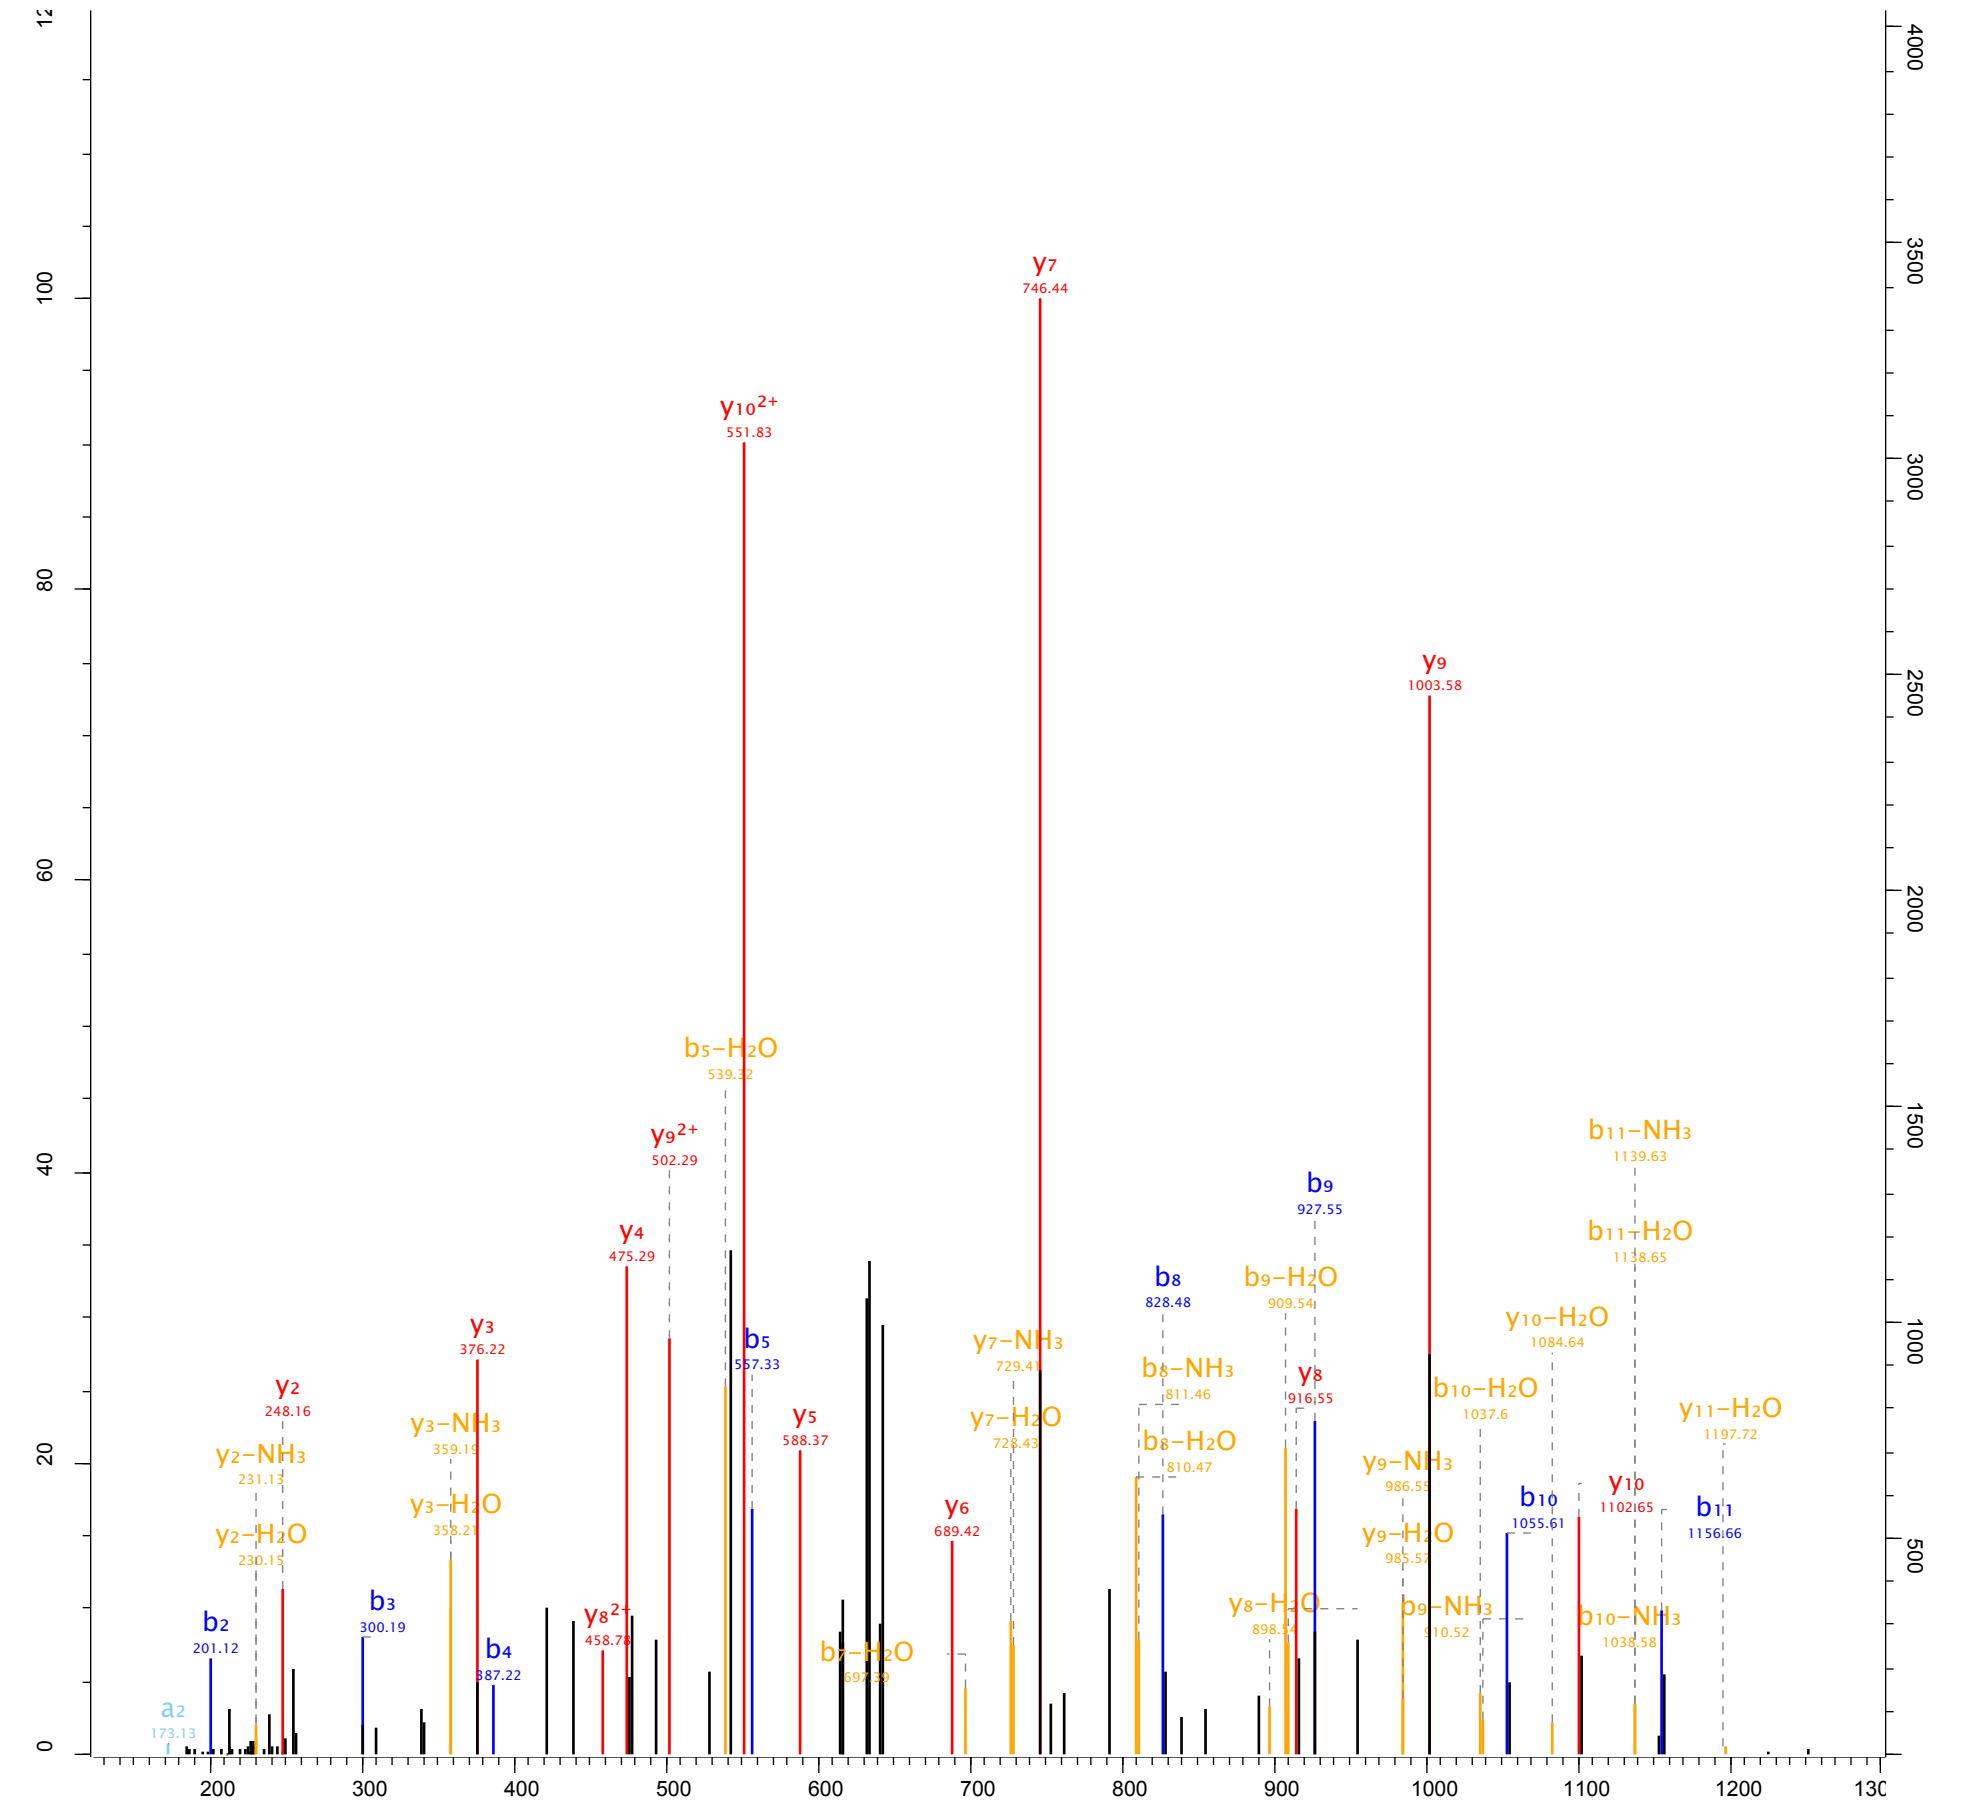

- S L V S K G T L V Q T K -

b<sub>2</sub>
b<sub>3</sub>
b<sub>4</sub>
b<sub>5</sub>
y<sub>10</sub>
y<sub>9</sub>
y<sub>8</sub> ac
y<sub>7</sub>
y<sub>6</sub>
y<sub>5</sub>
y<sub>4</sub>
y<sub>3</sub>
y<sub>2</sub>
b<sub>8</sub>
b<sub>9</sub>
b<sub>10</sub>
b<sub>11</sub>



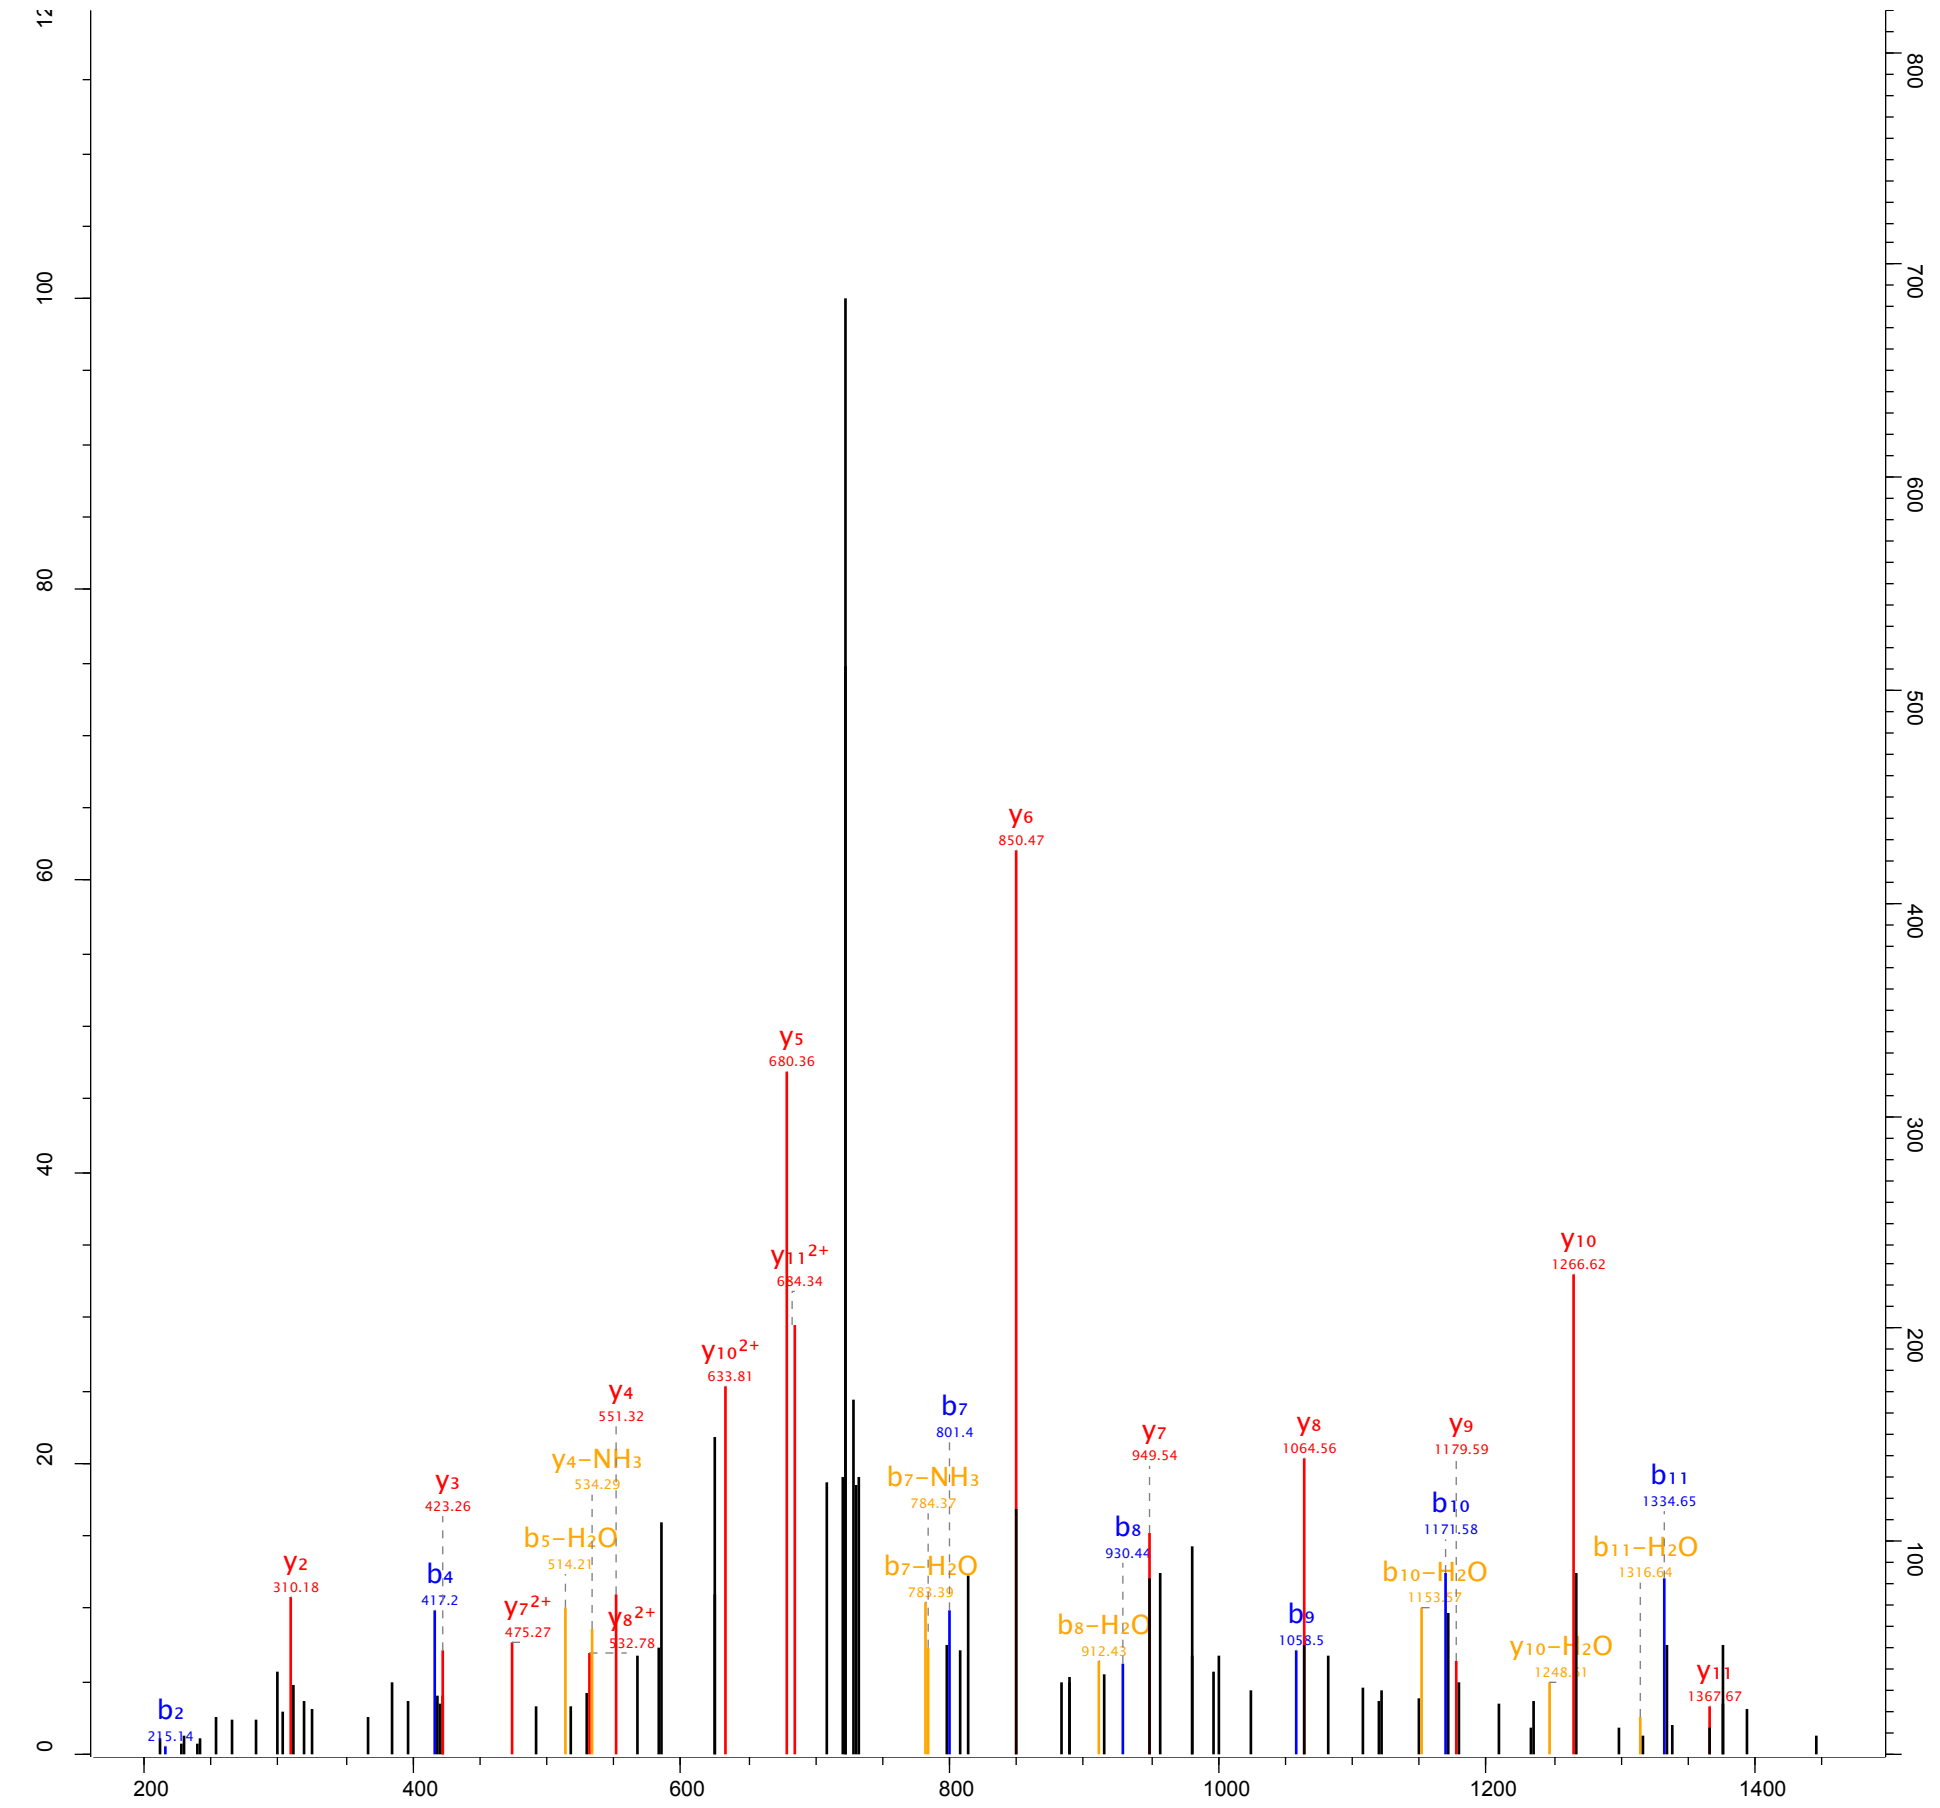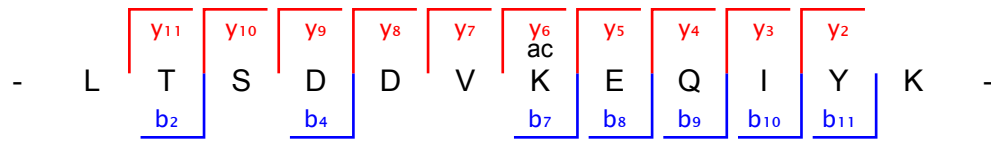

052413\_SCW\_II\_29\_Second\_ZT\_19\_4

11404

ITMS; CID

115.12

722.91

Etfa

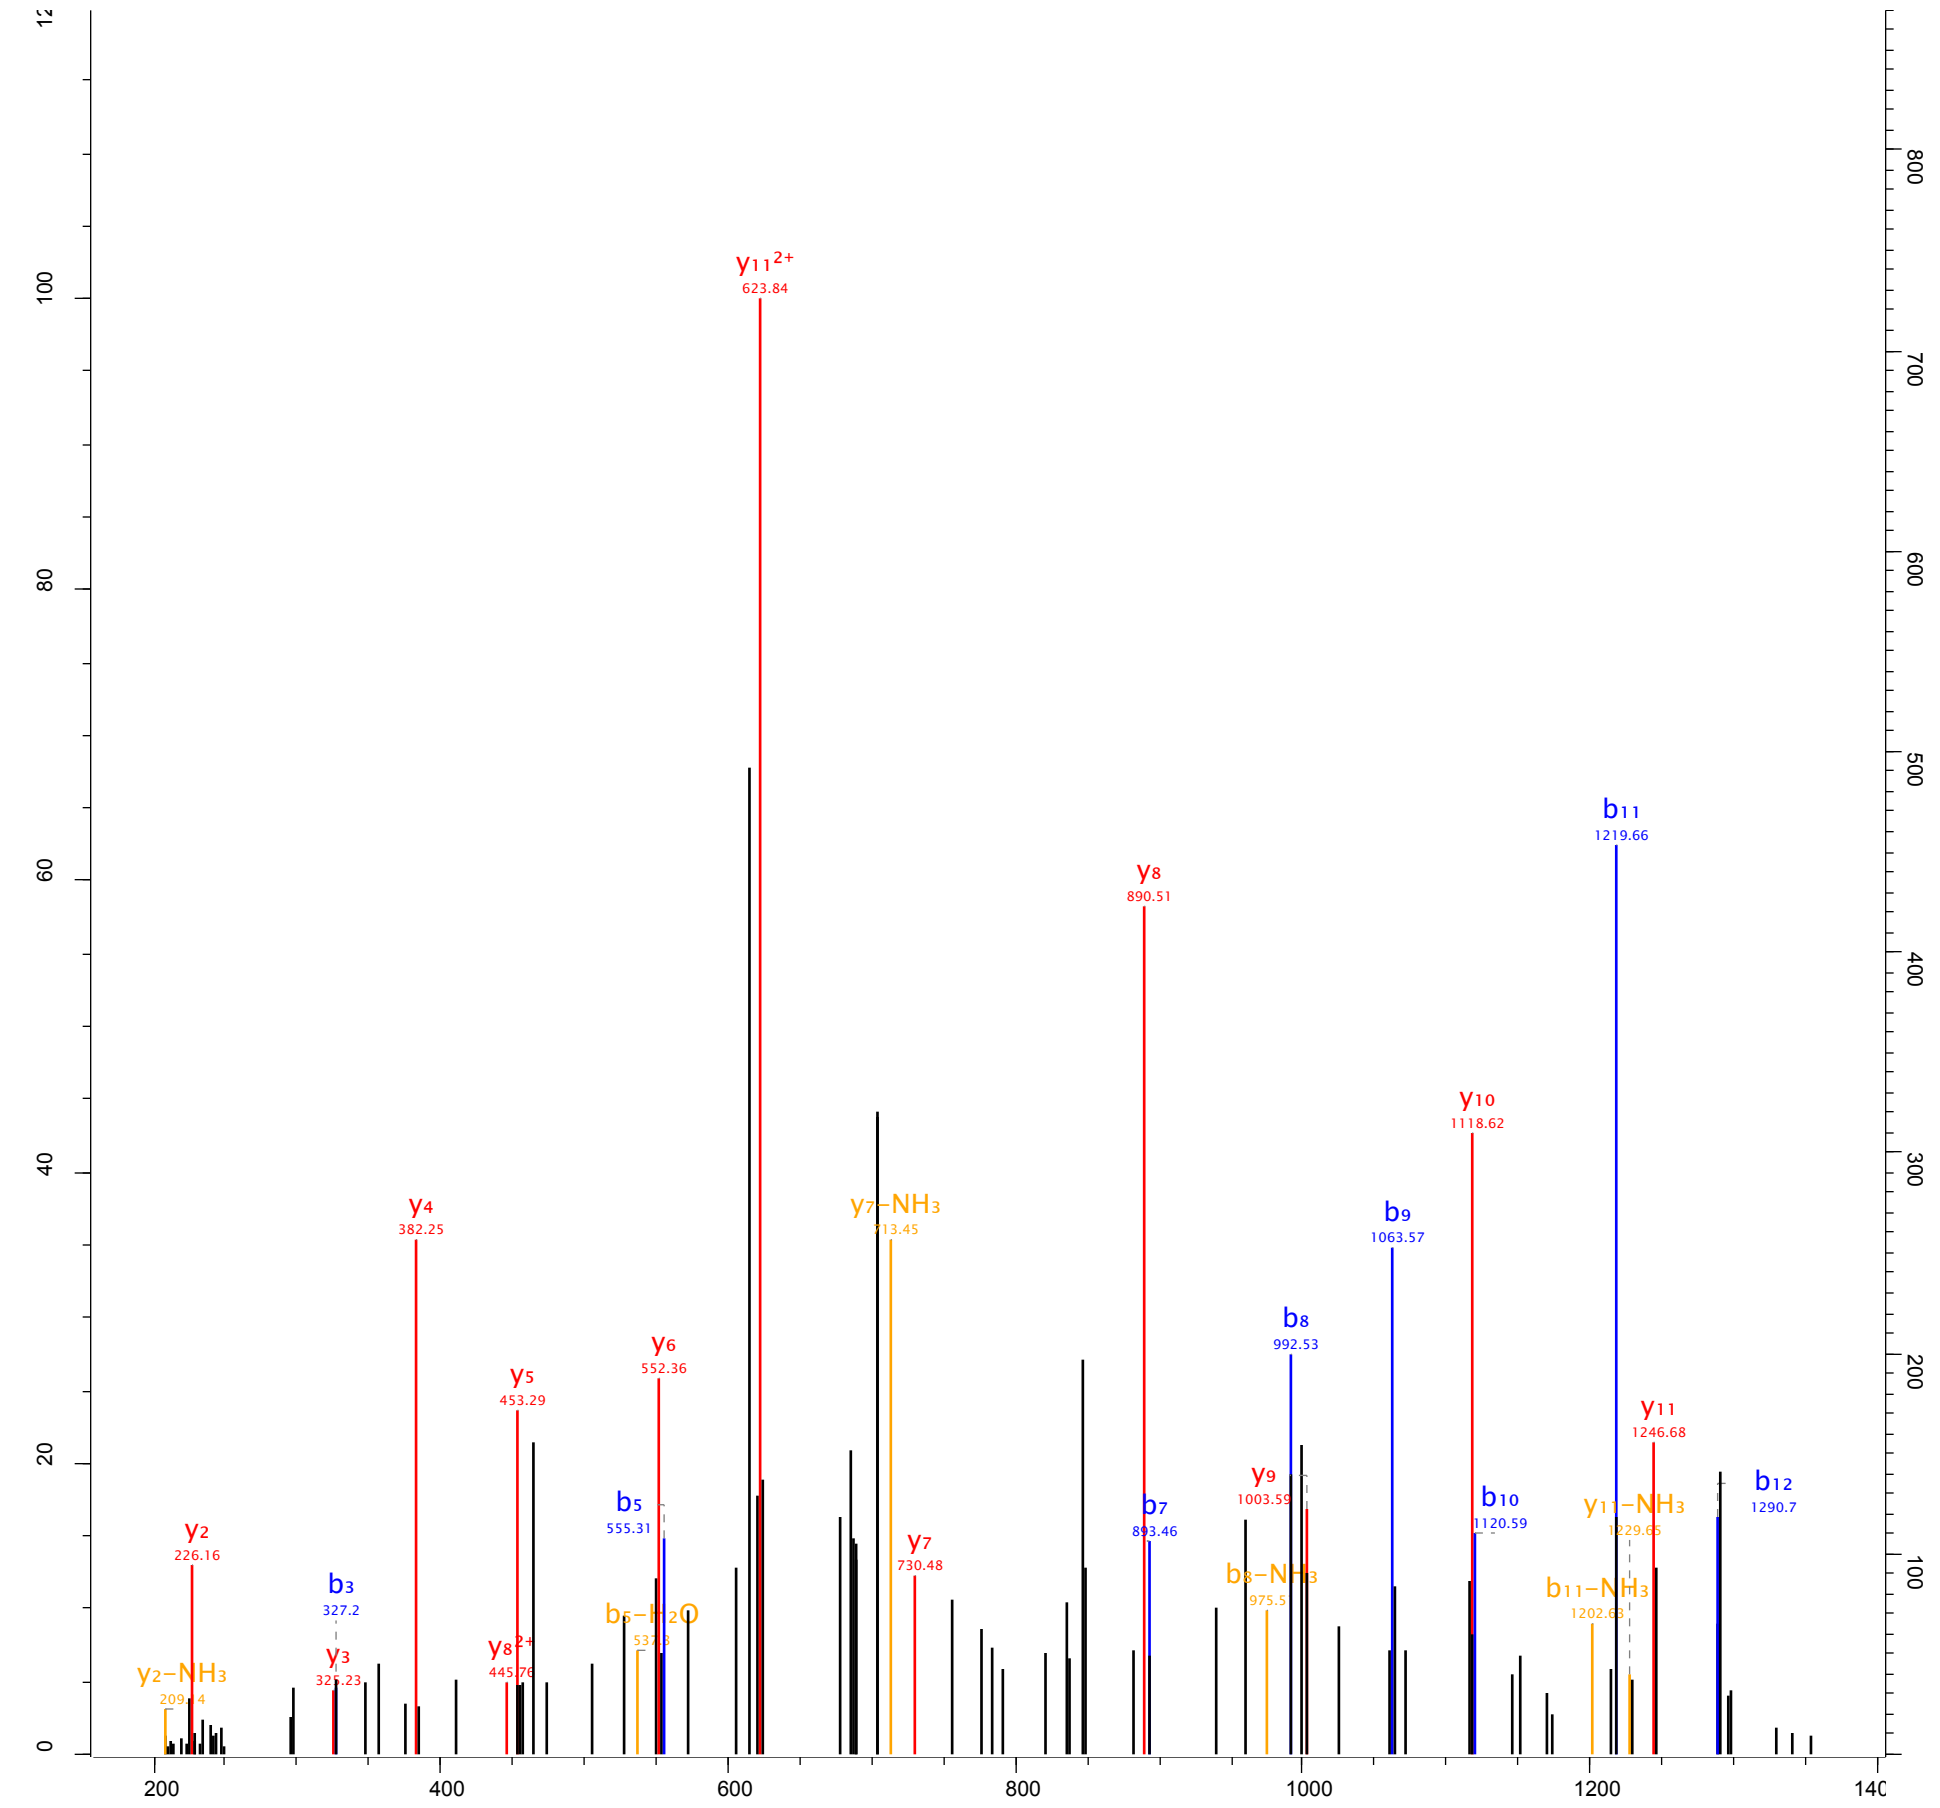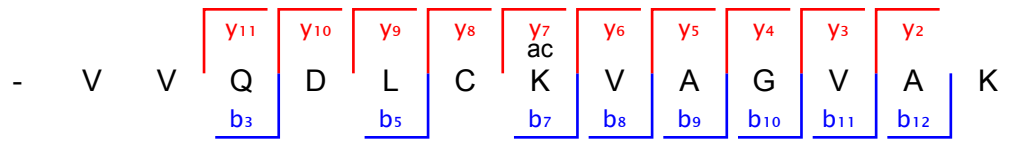

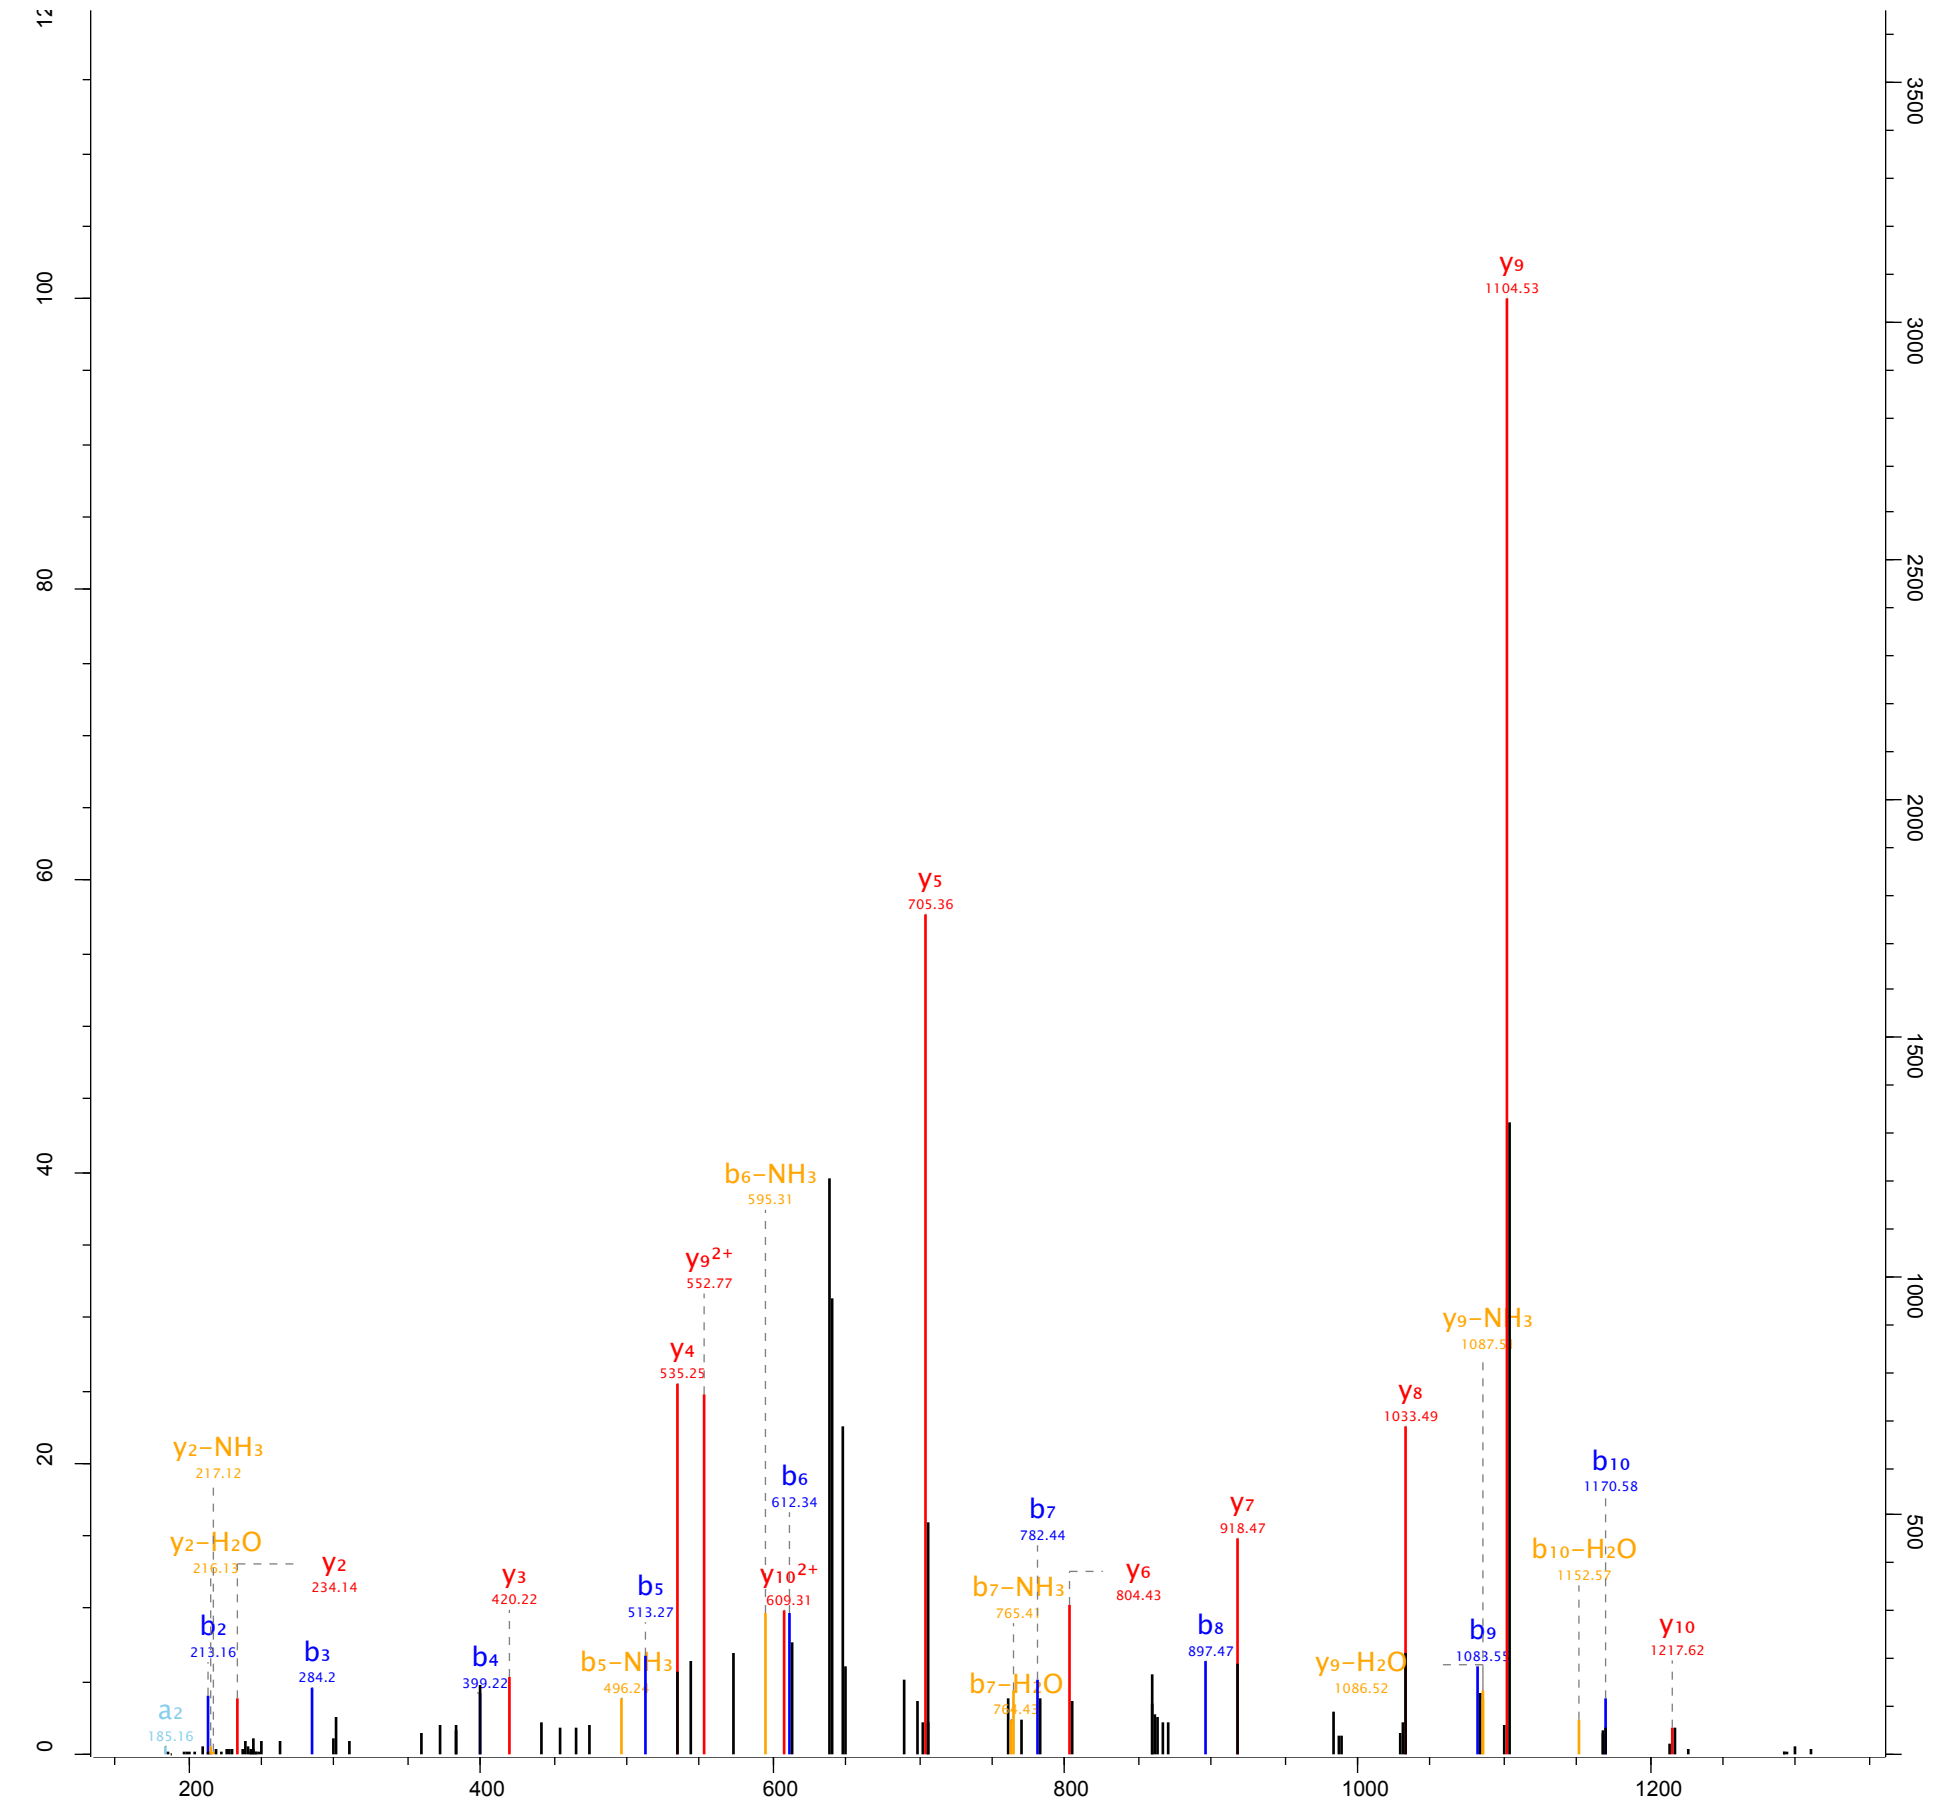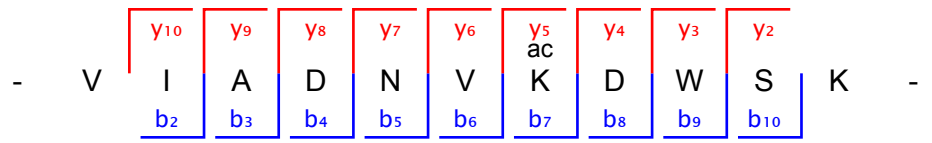

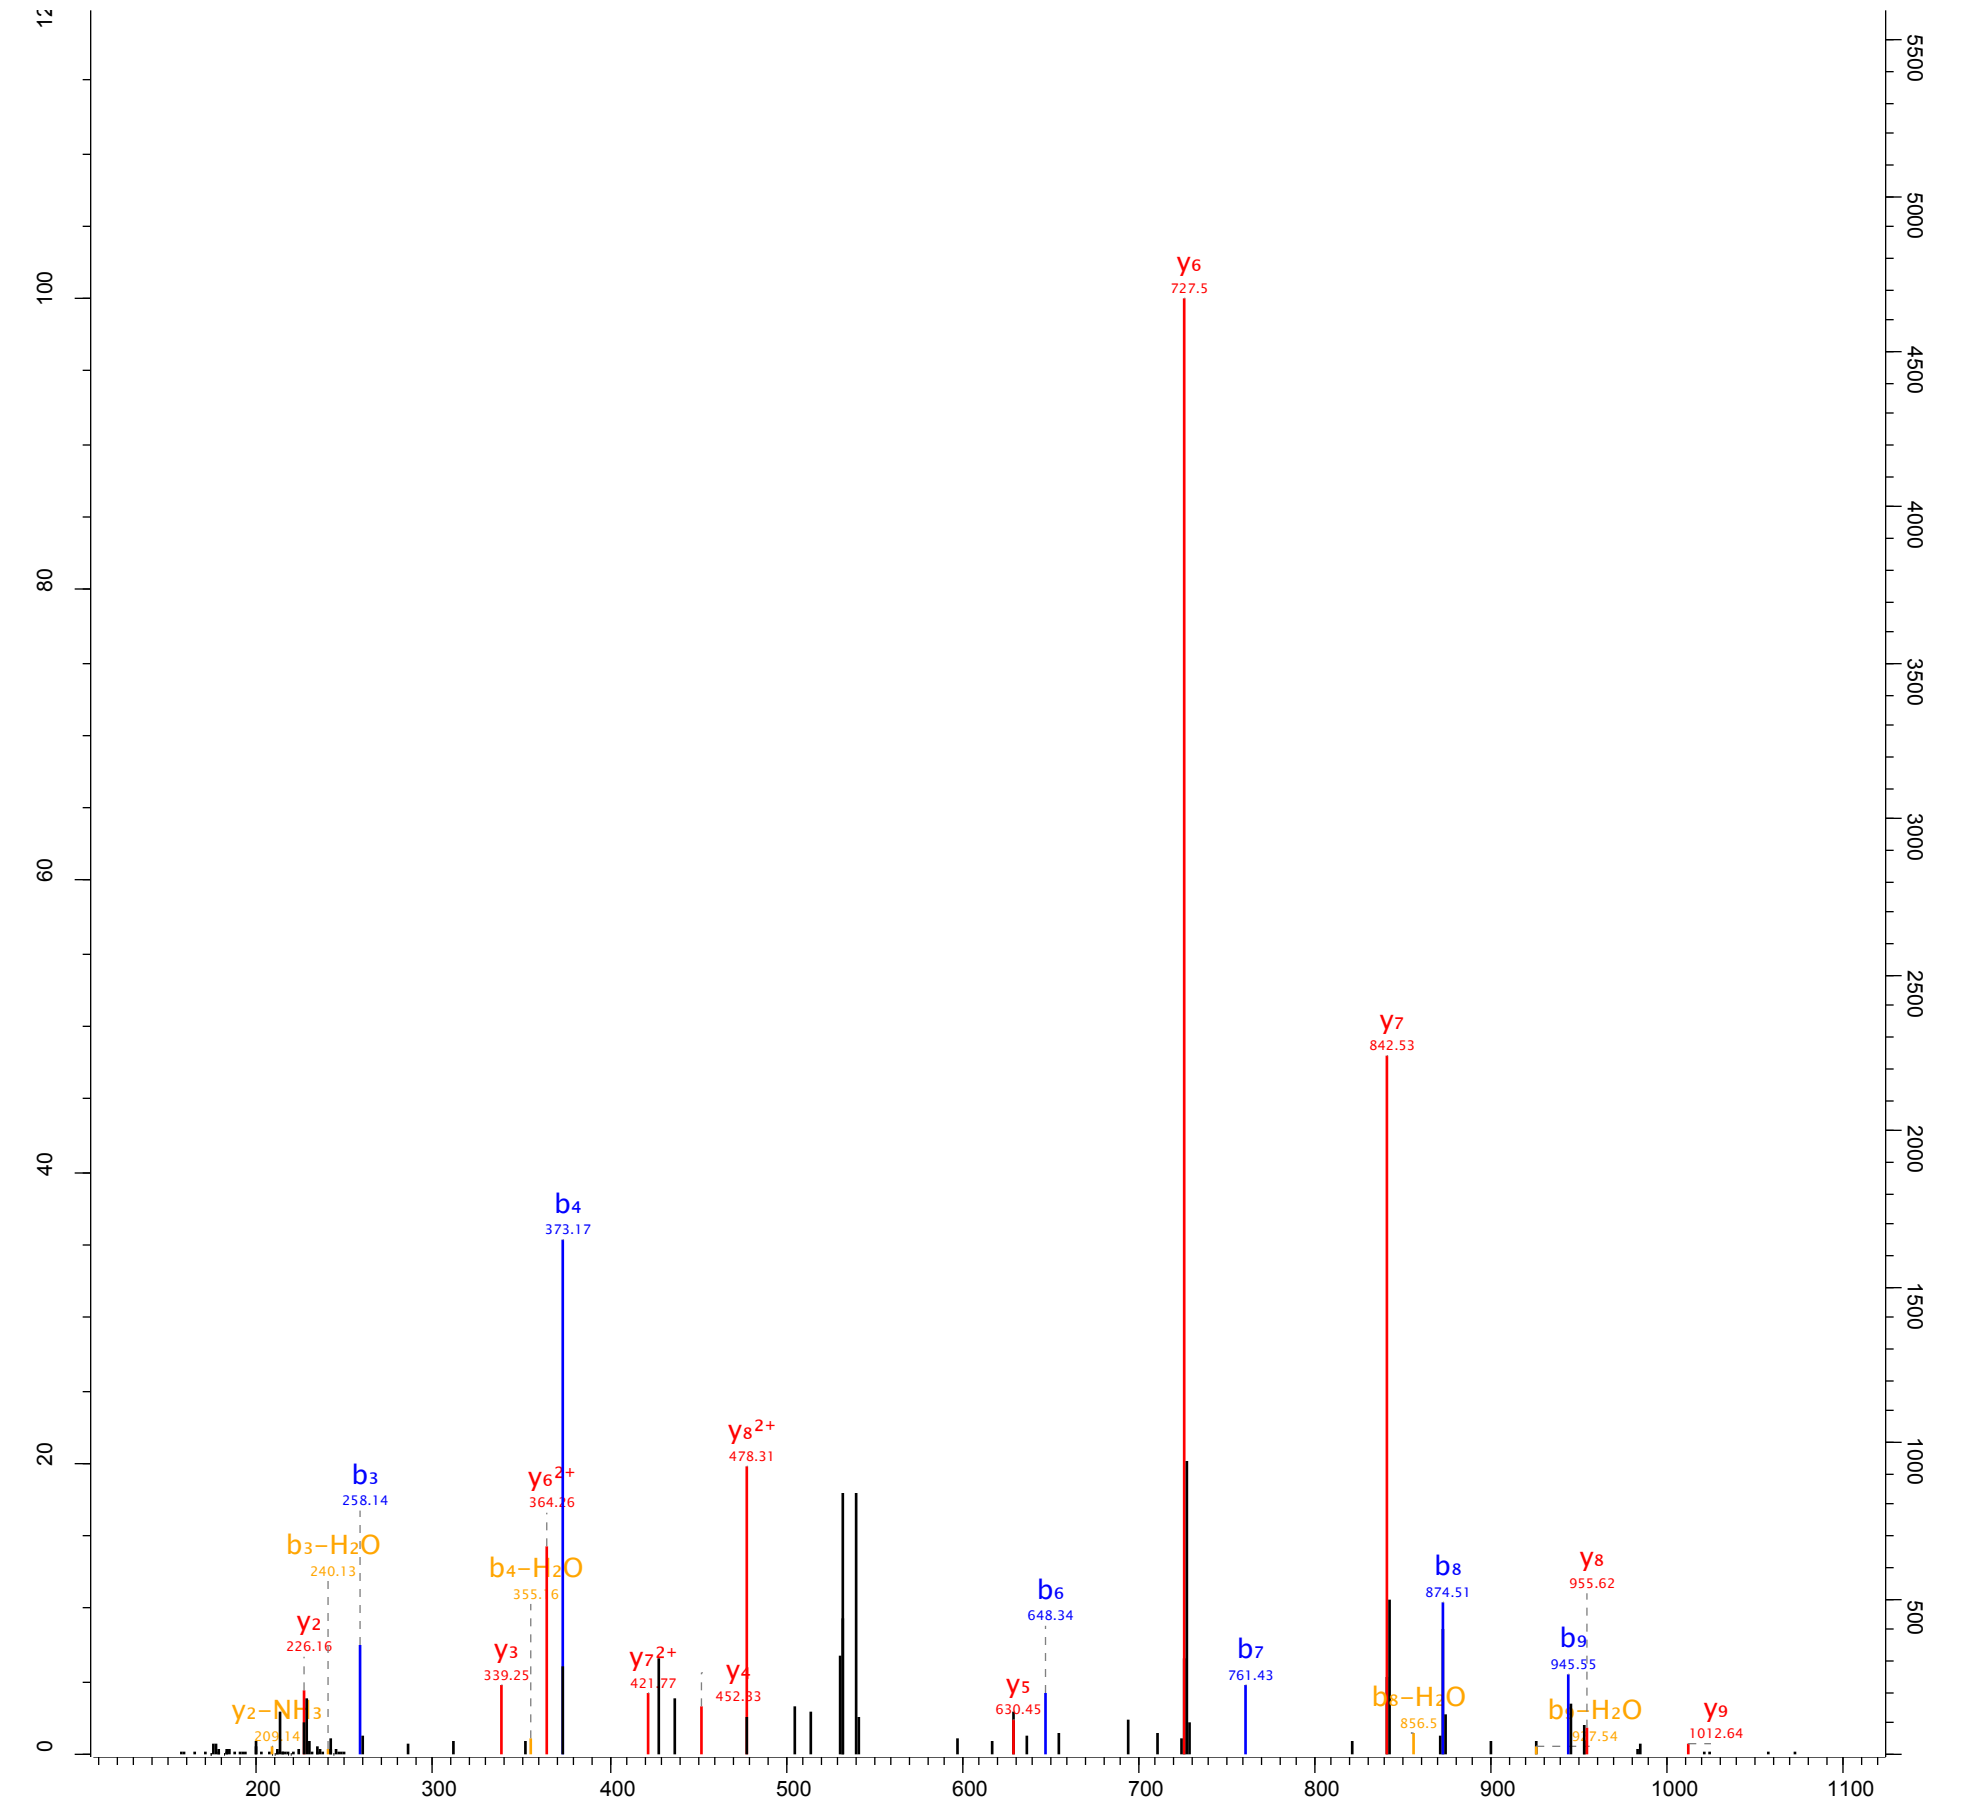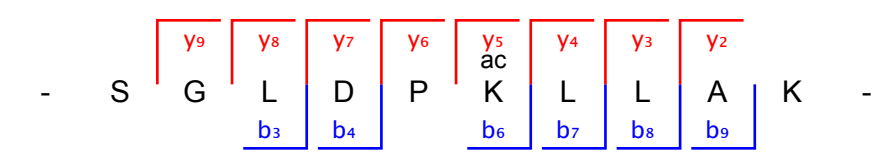

052413\_SCW\_II\_29\_Second\_ZT\_19\_4

12291

ITMS; CID

143.93

676.86

Hsd17b4

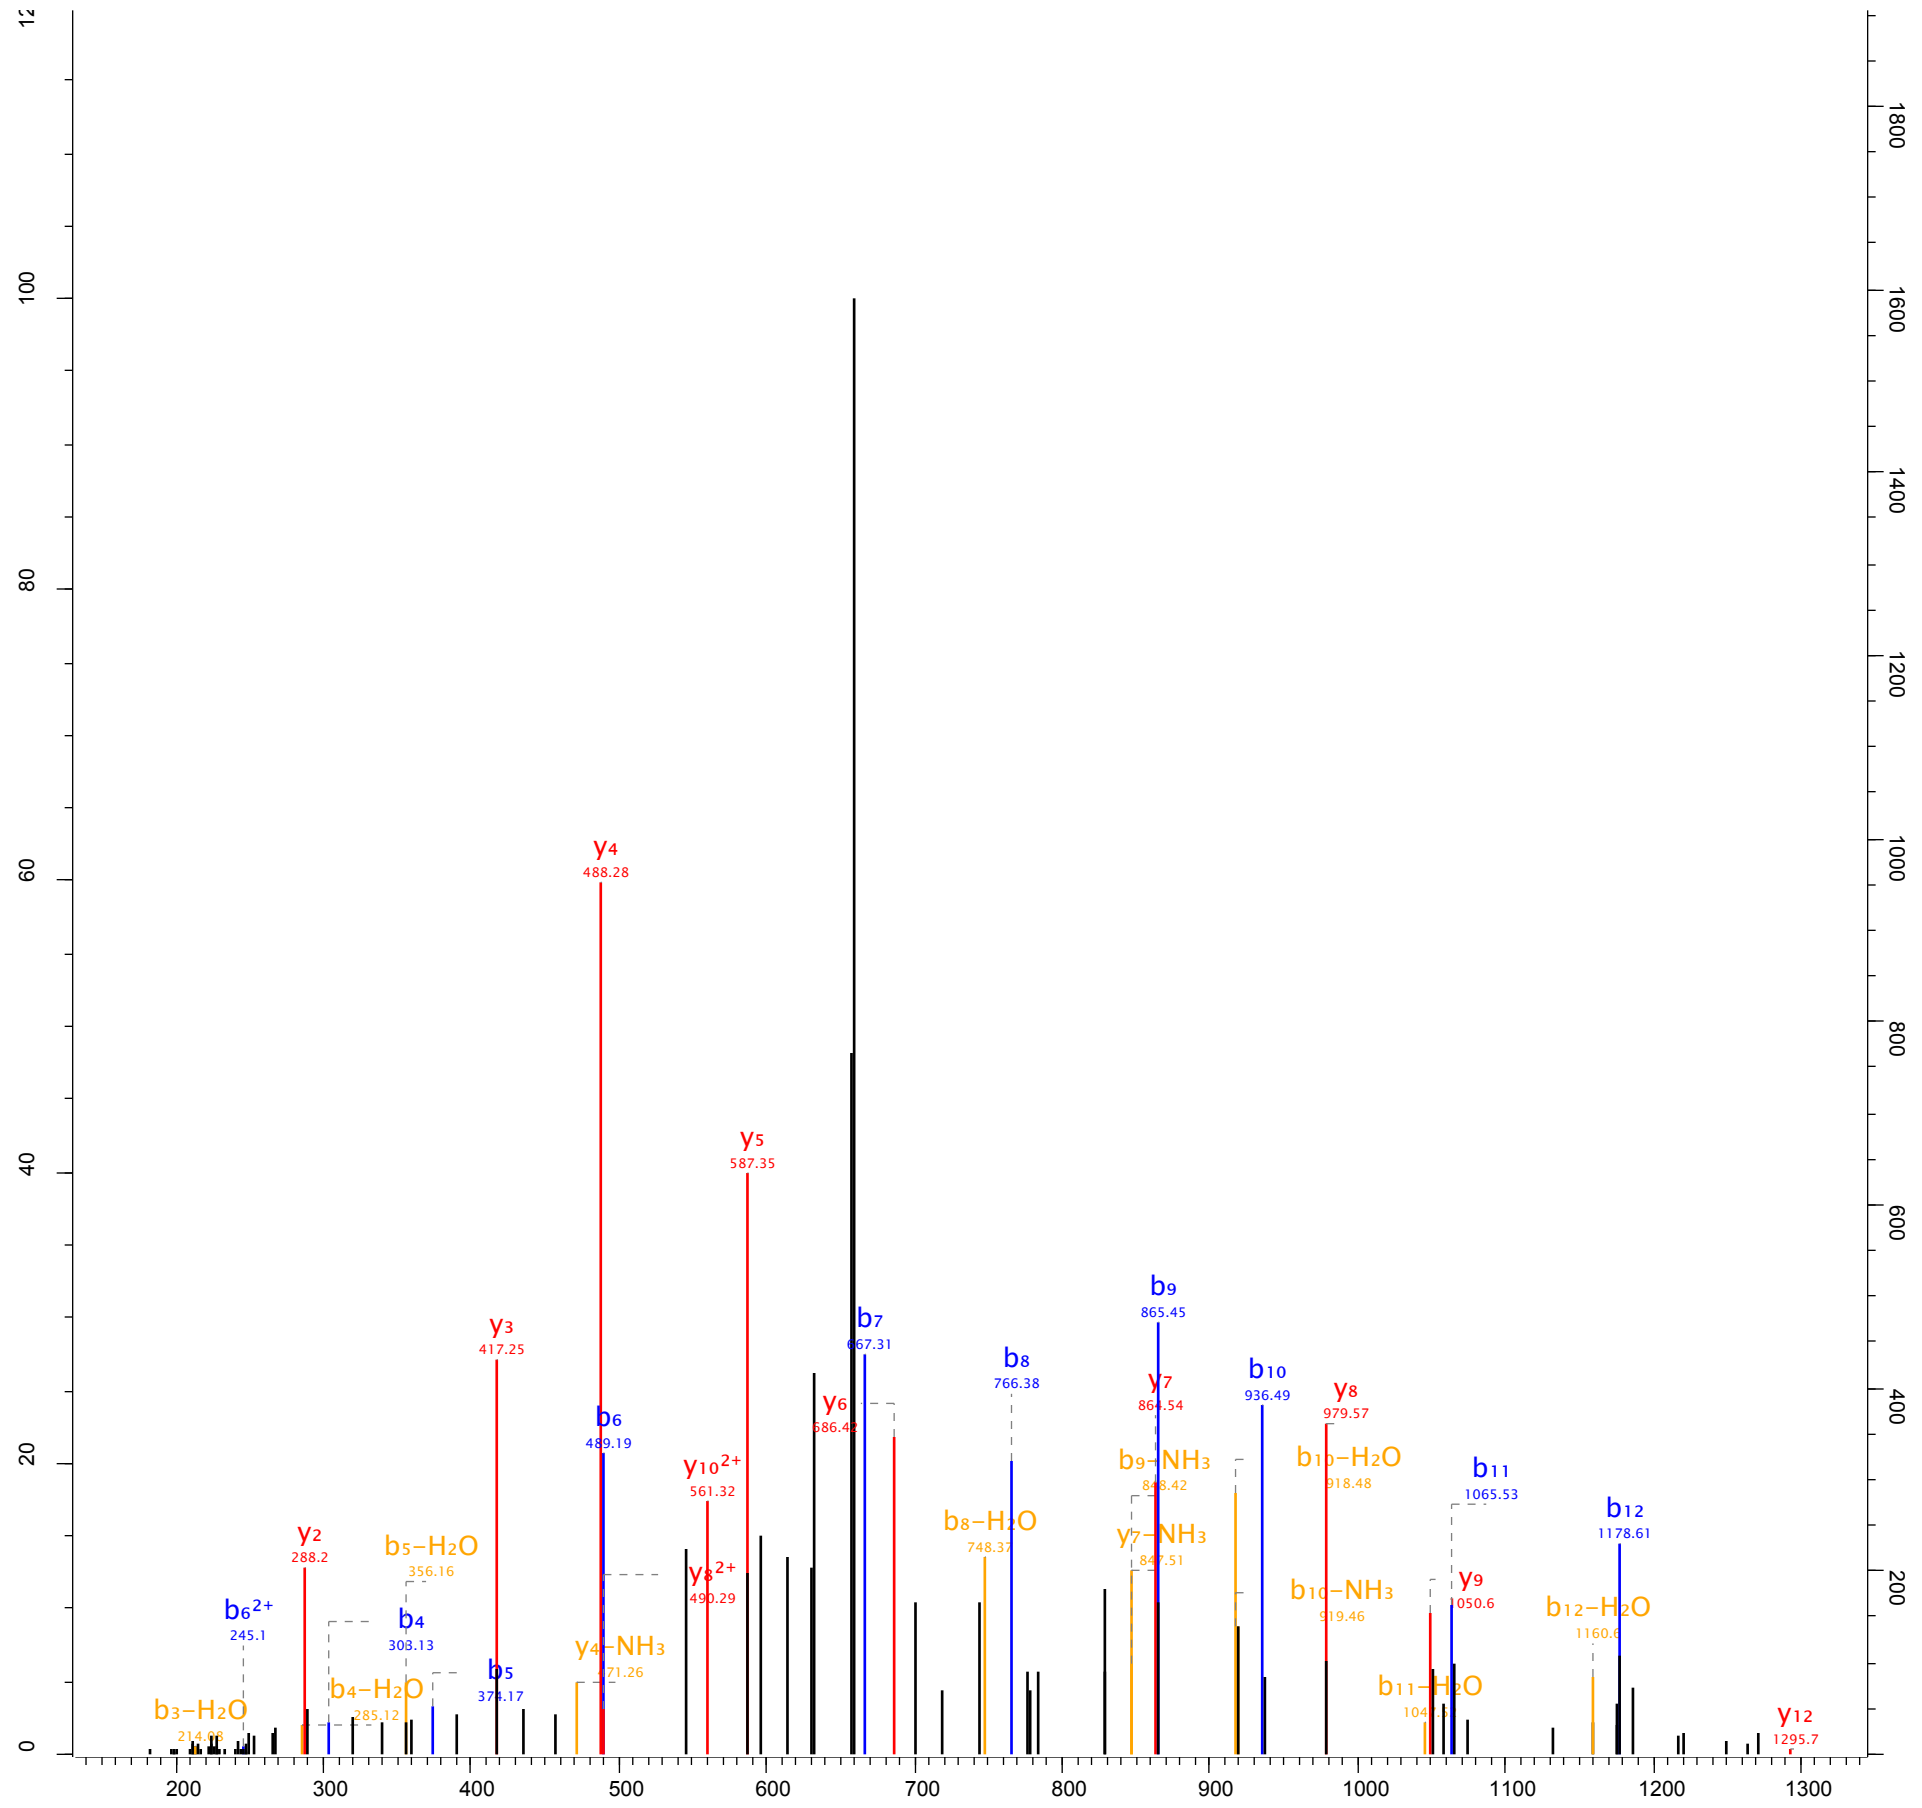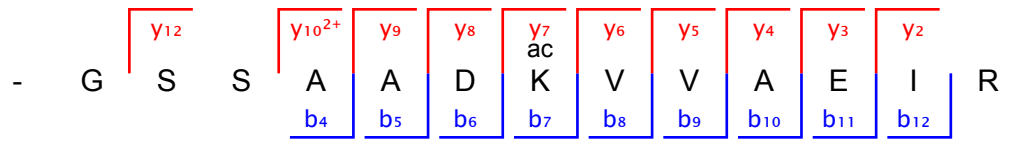

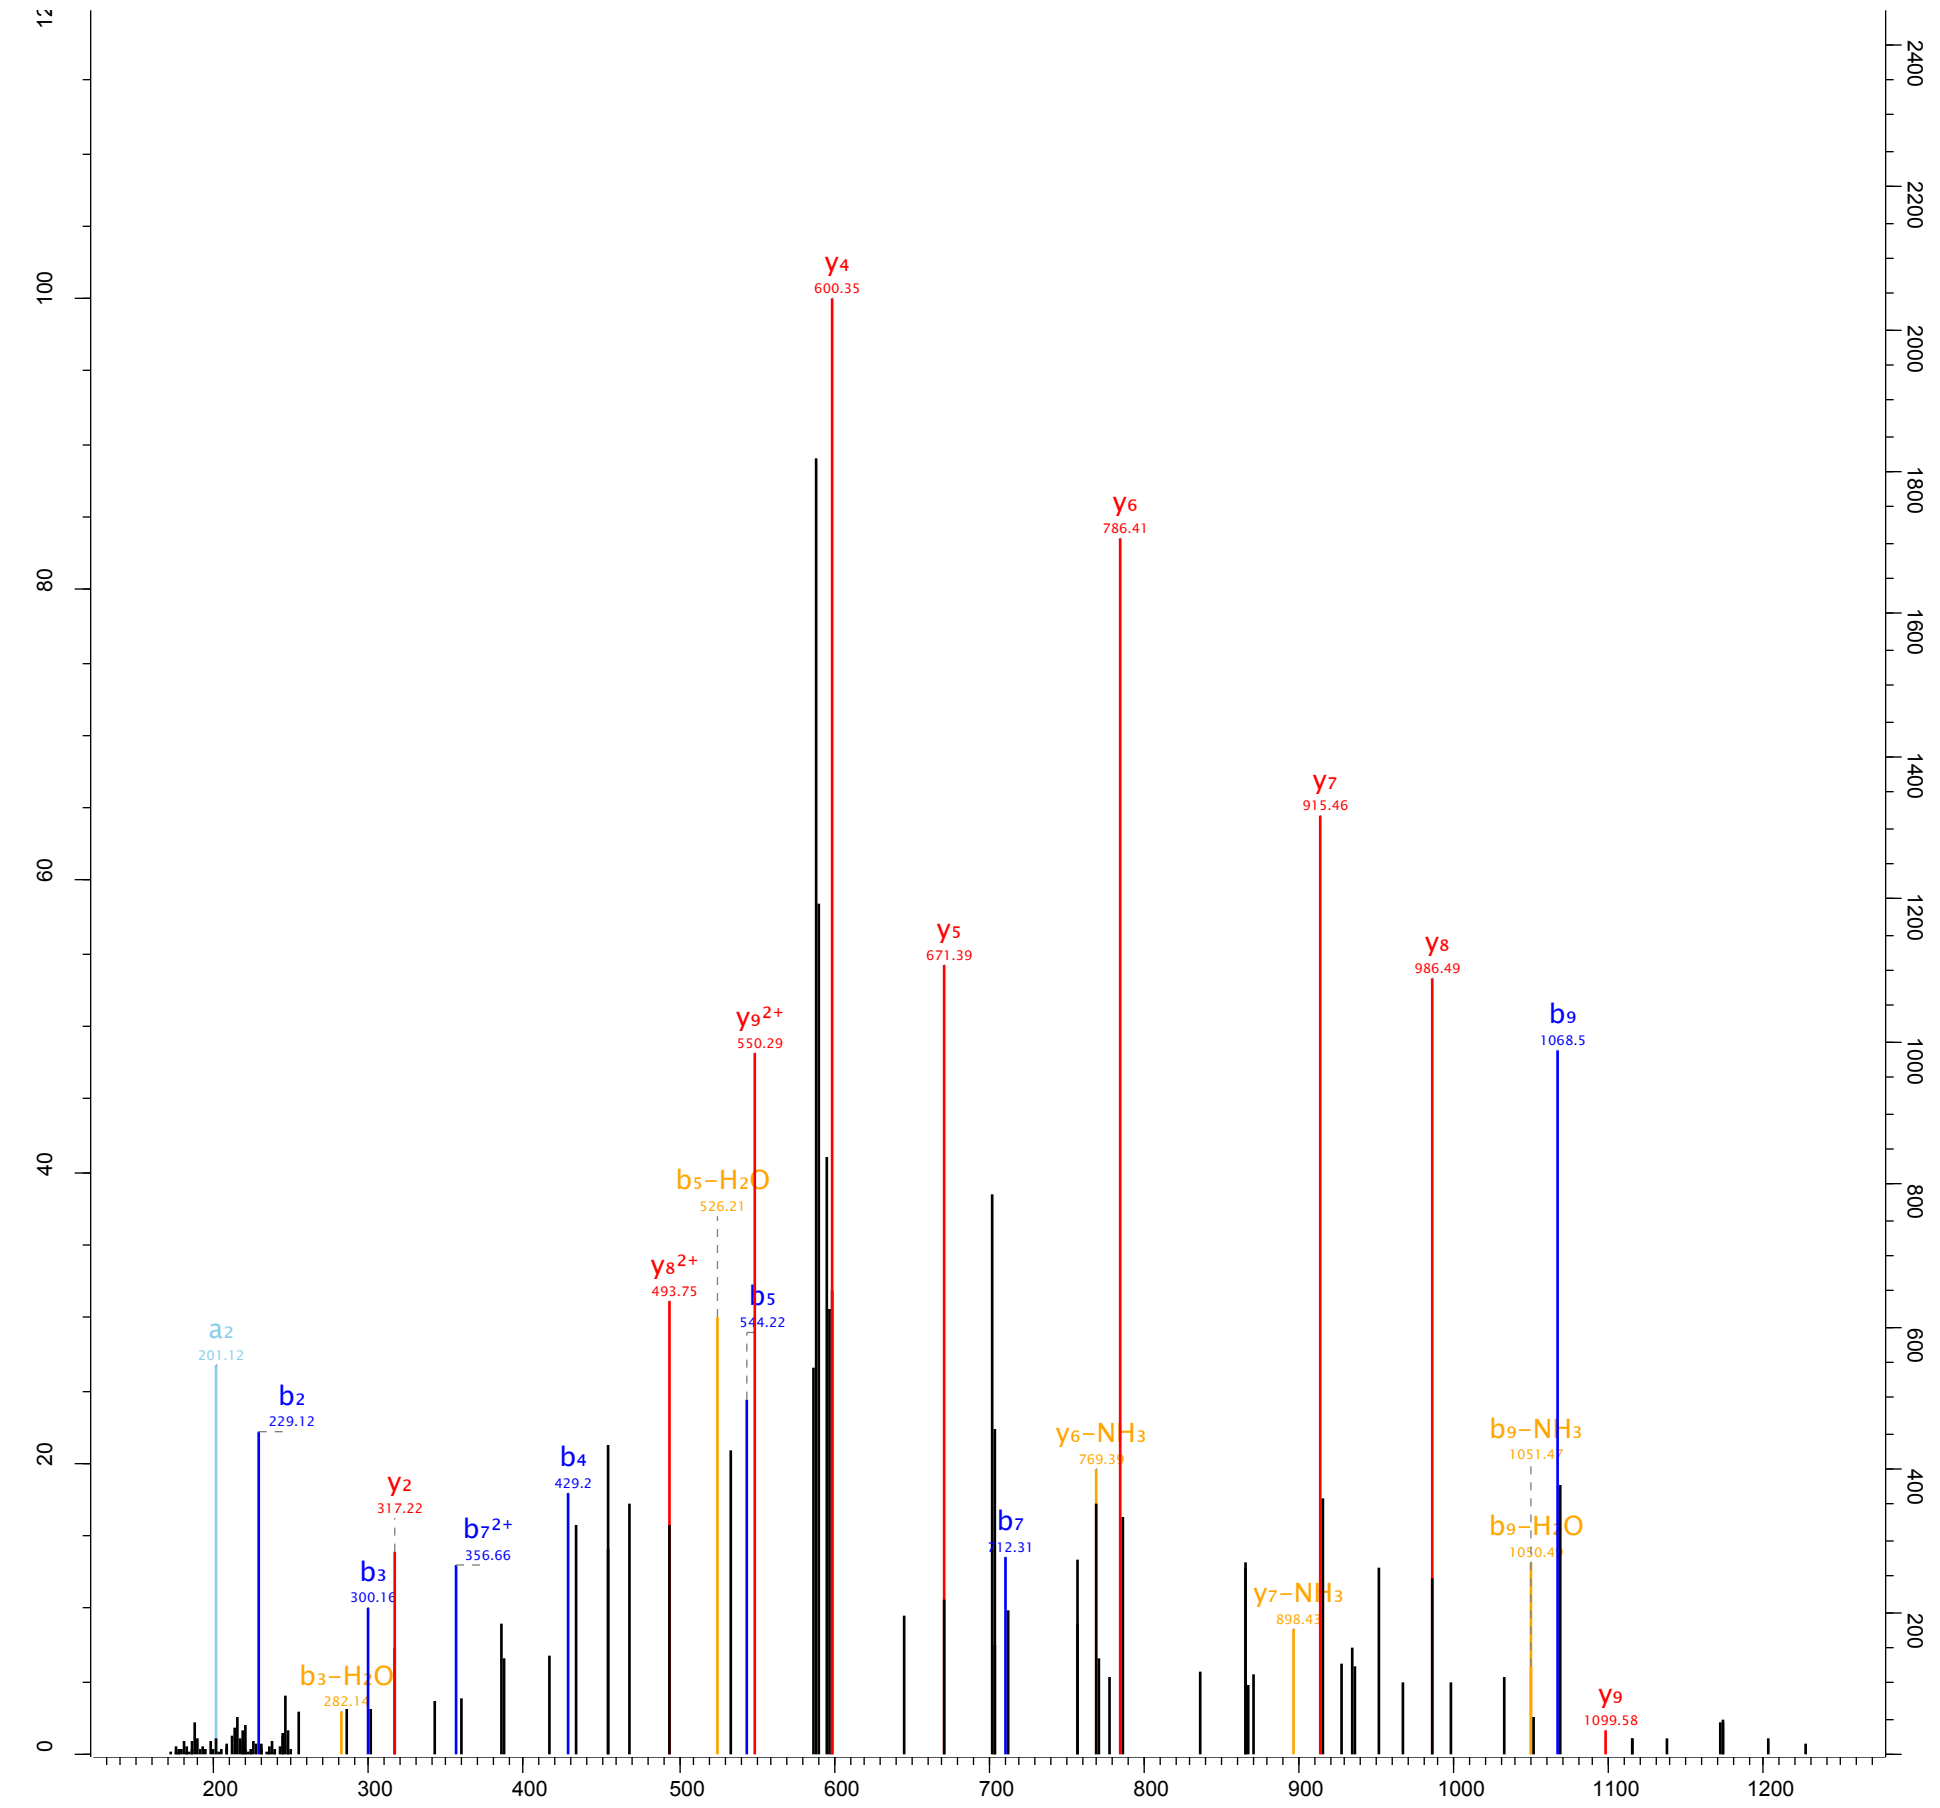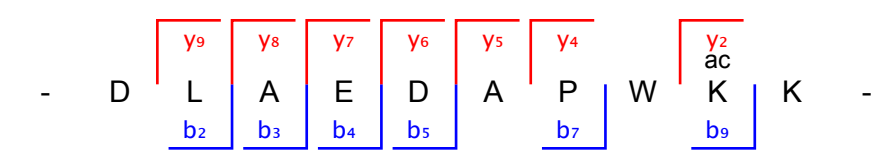

052413\_SCW\_II\_29\_Second\_ZT\_19\_4

12582

ITMS; CID

217.2

838.43

Fdps

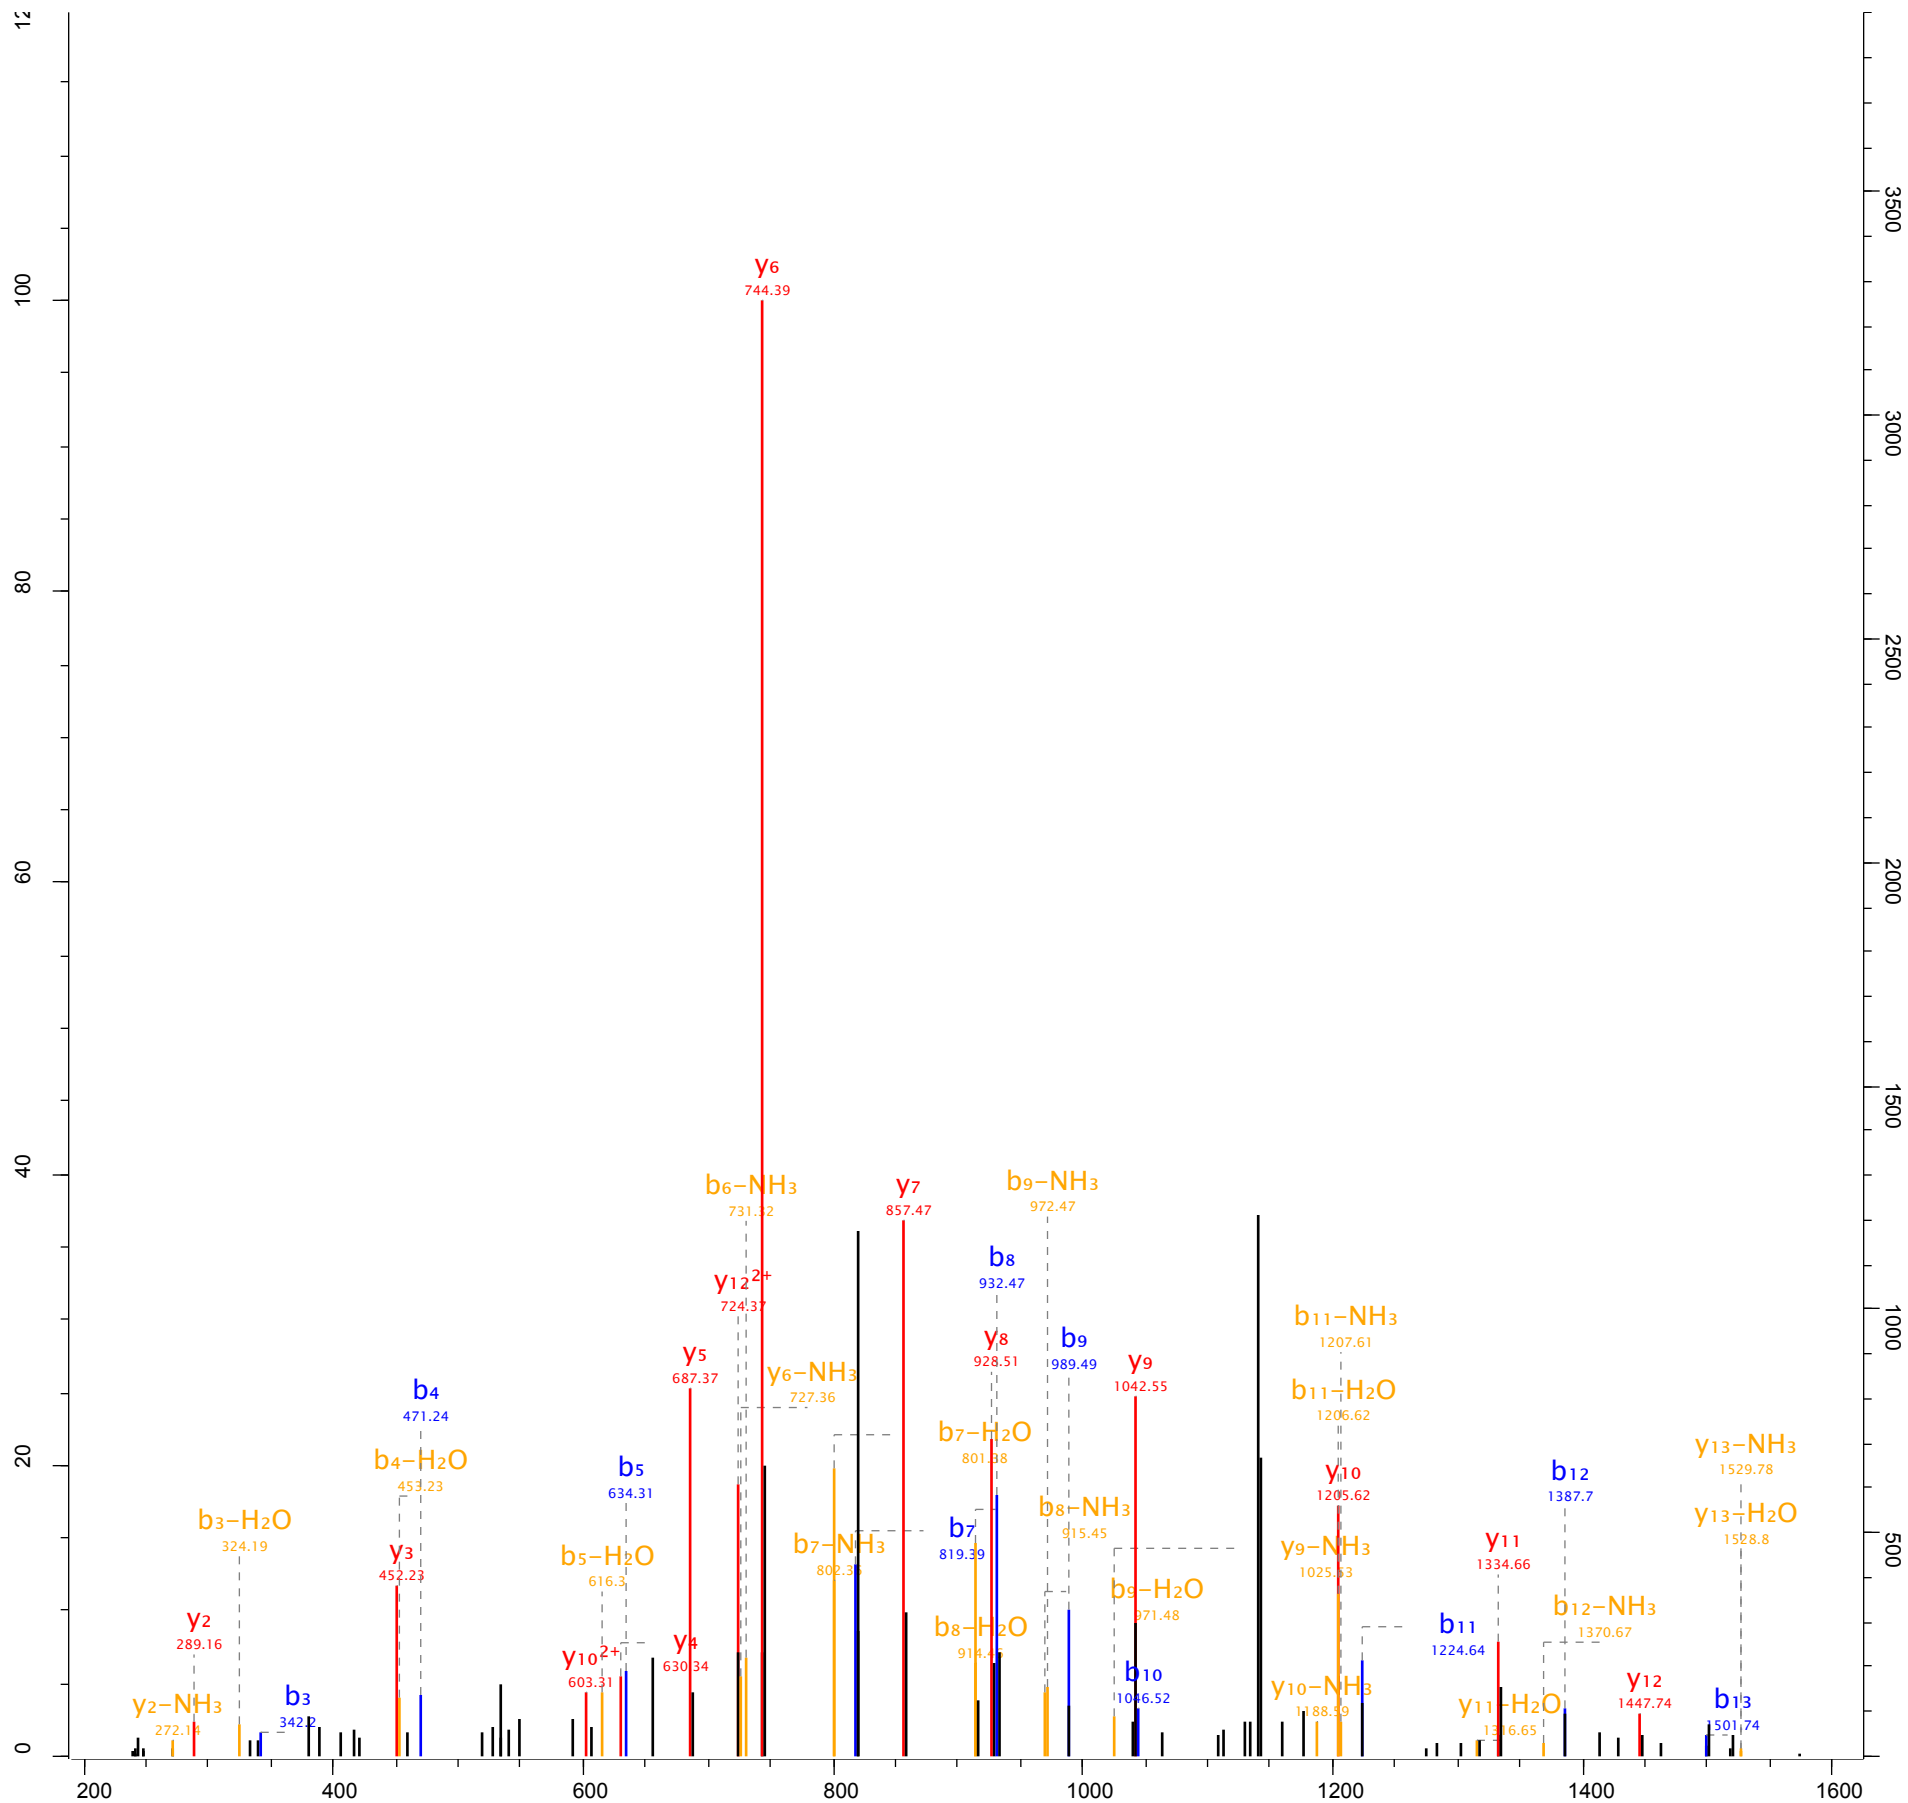

- E V L E Y N A L G G K Y N R -

b3 b4 b5 b7 b8 b9 b10 b11 b12 b13

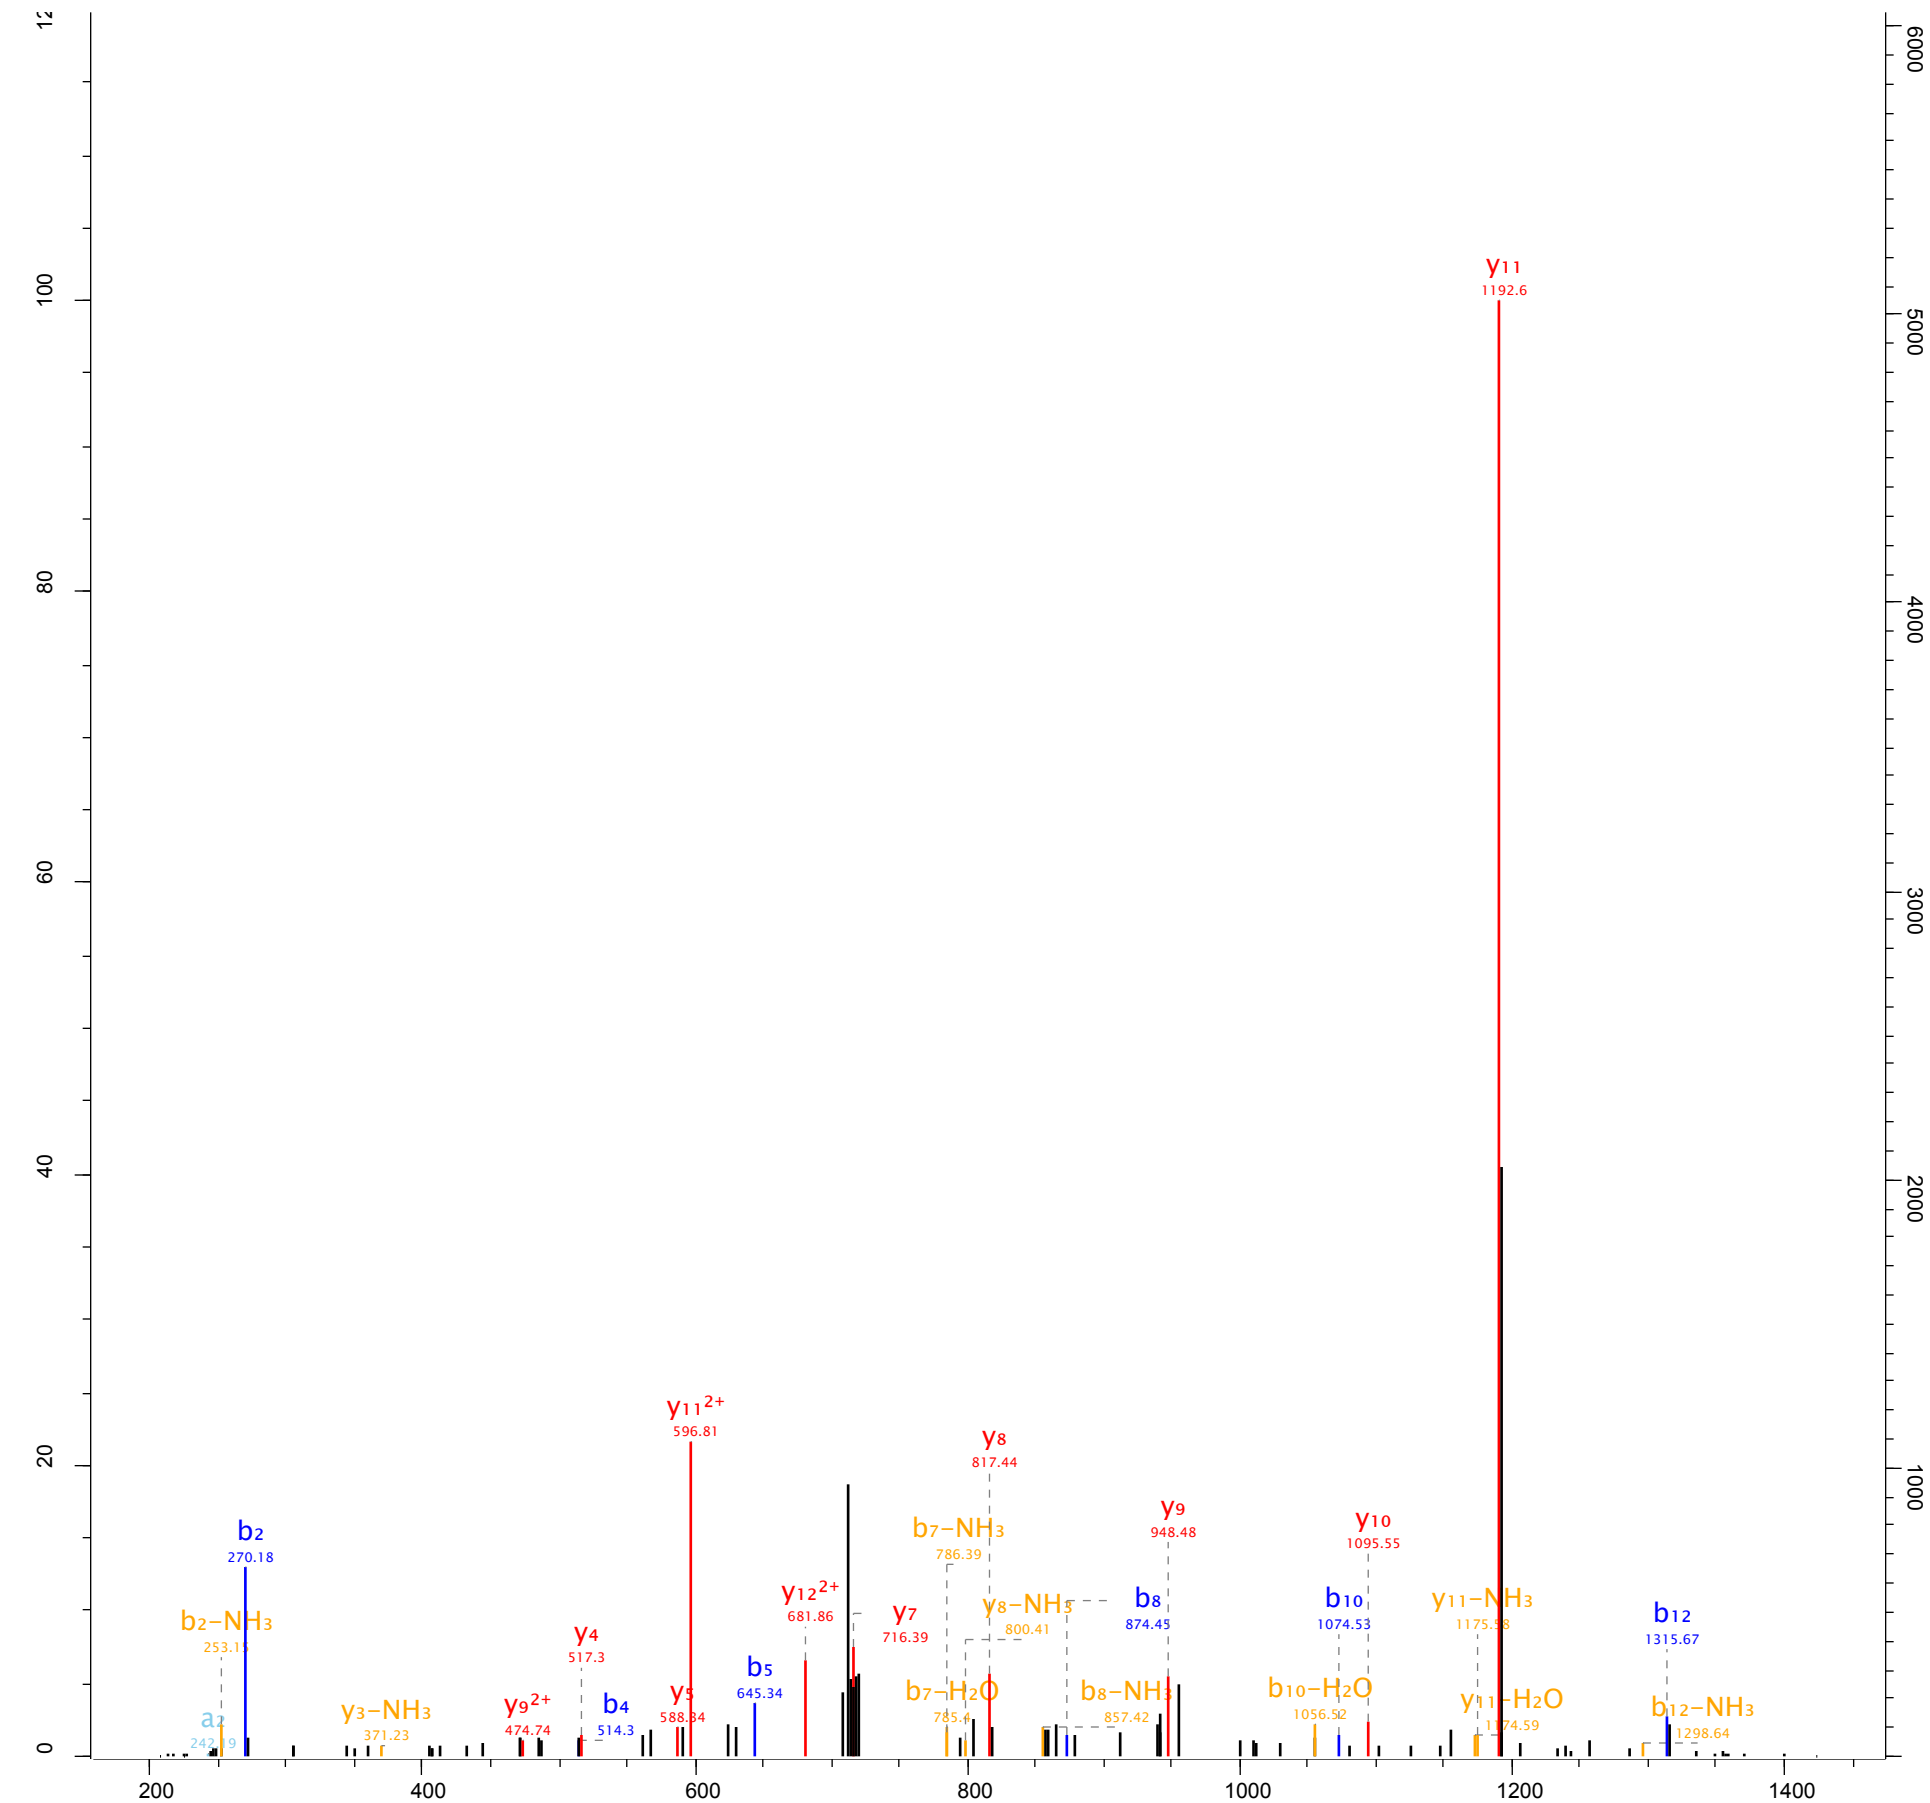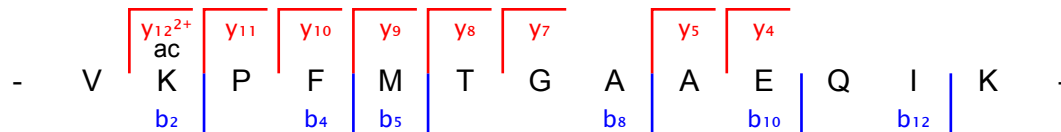



Raw file 052413\_SCW\_II\_29\_Second\_ZT\_19\_4 Scan 13061 Method ITMS; CID Score 146.27 m/z 780.91 Gene names Gm10250;Atp5h

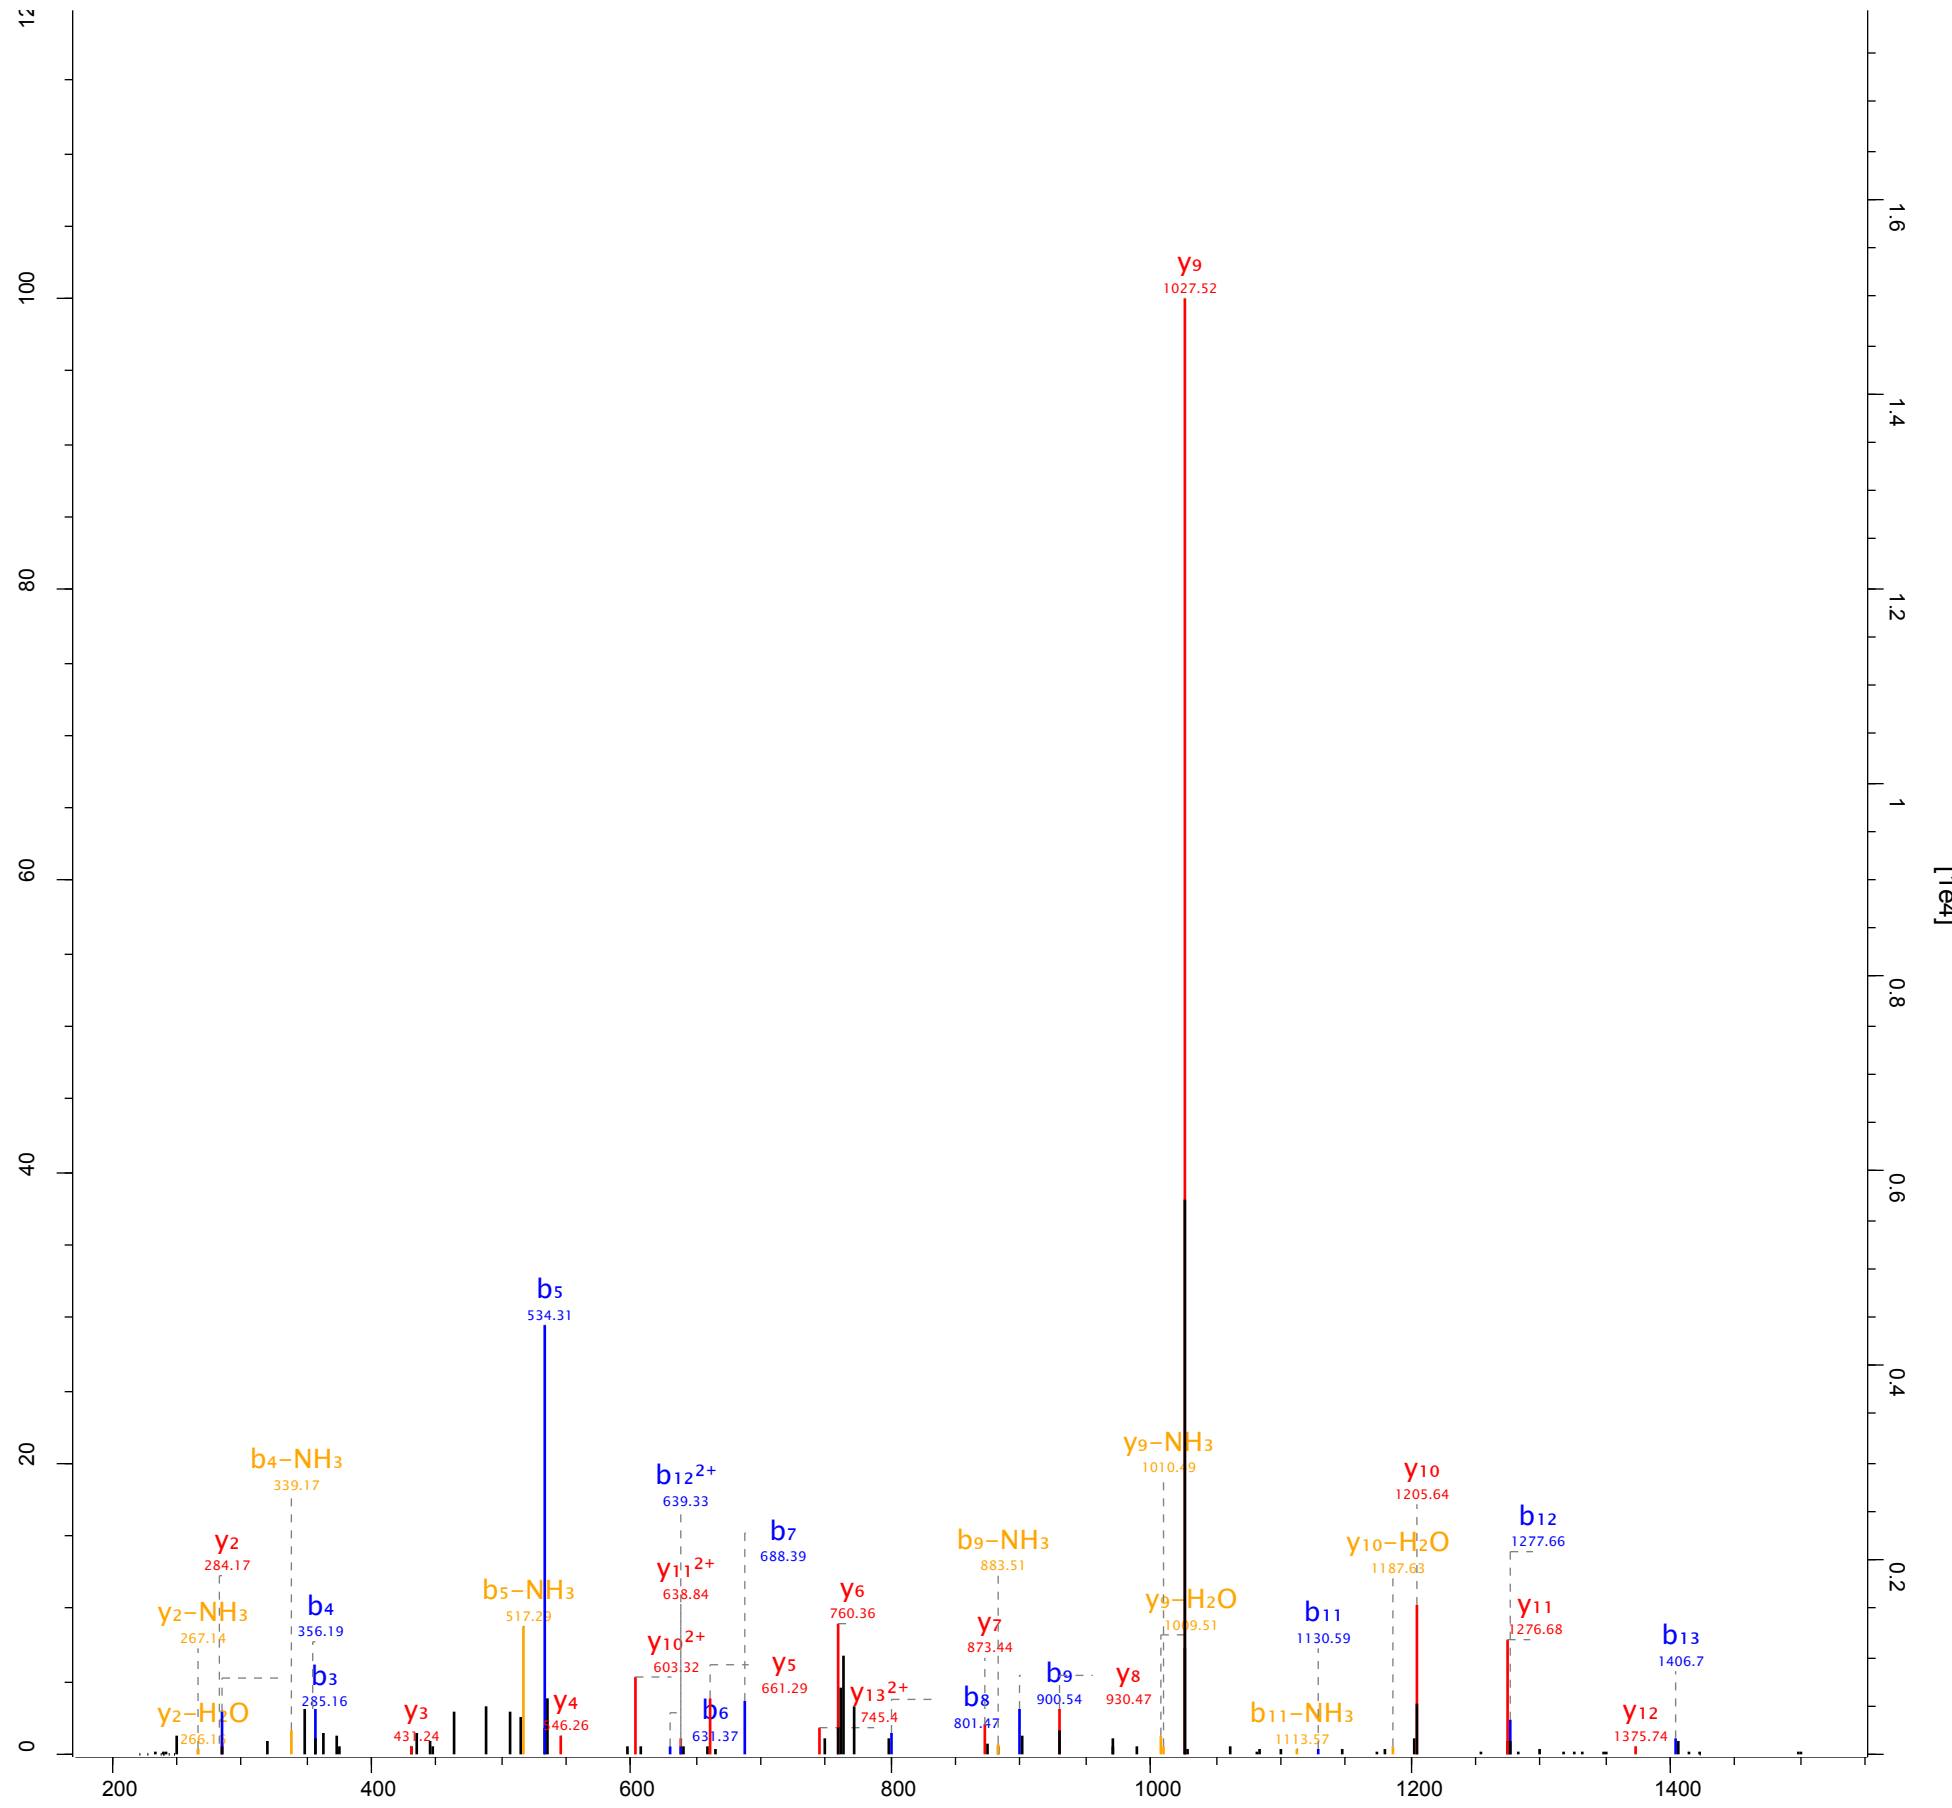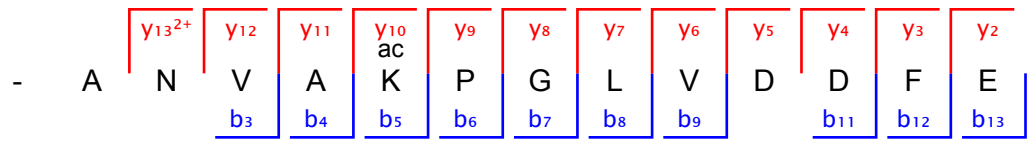

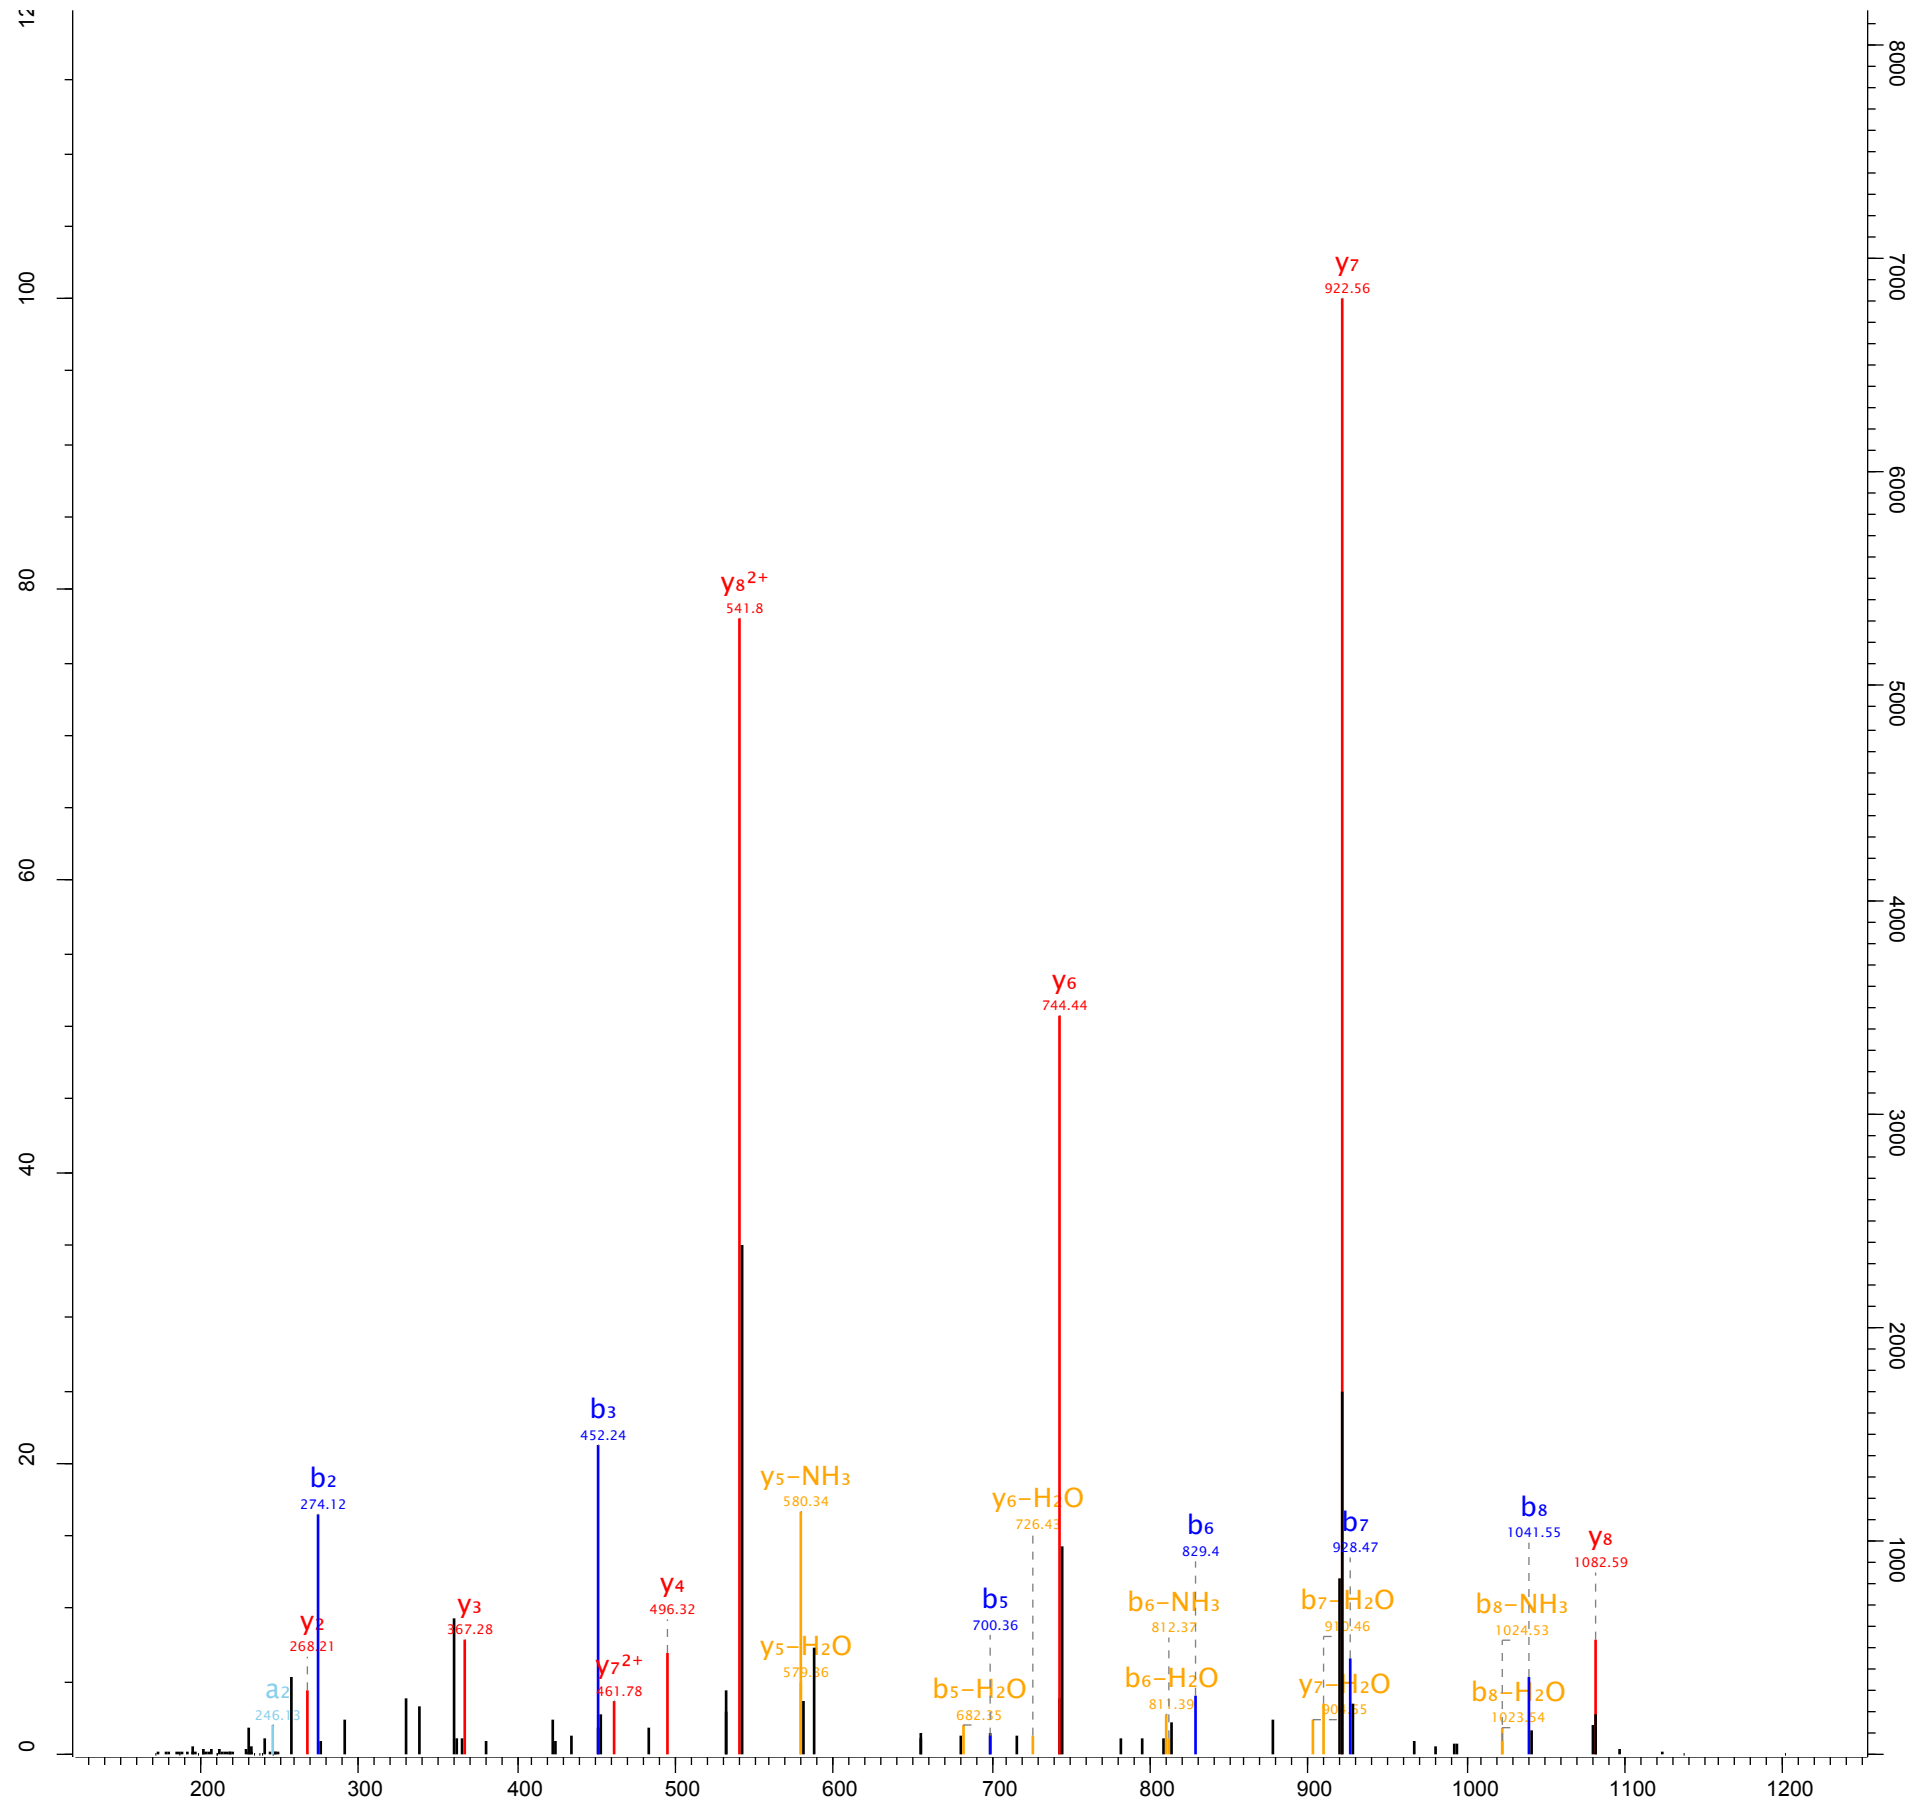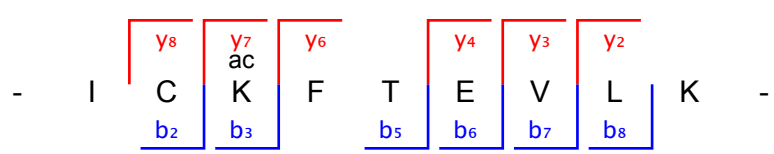

052413\_SCW\_II\_29\_Second\_ZT\_19\_4

13446

ITMS; CID

112.96

854.42

Atp5j

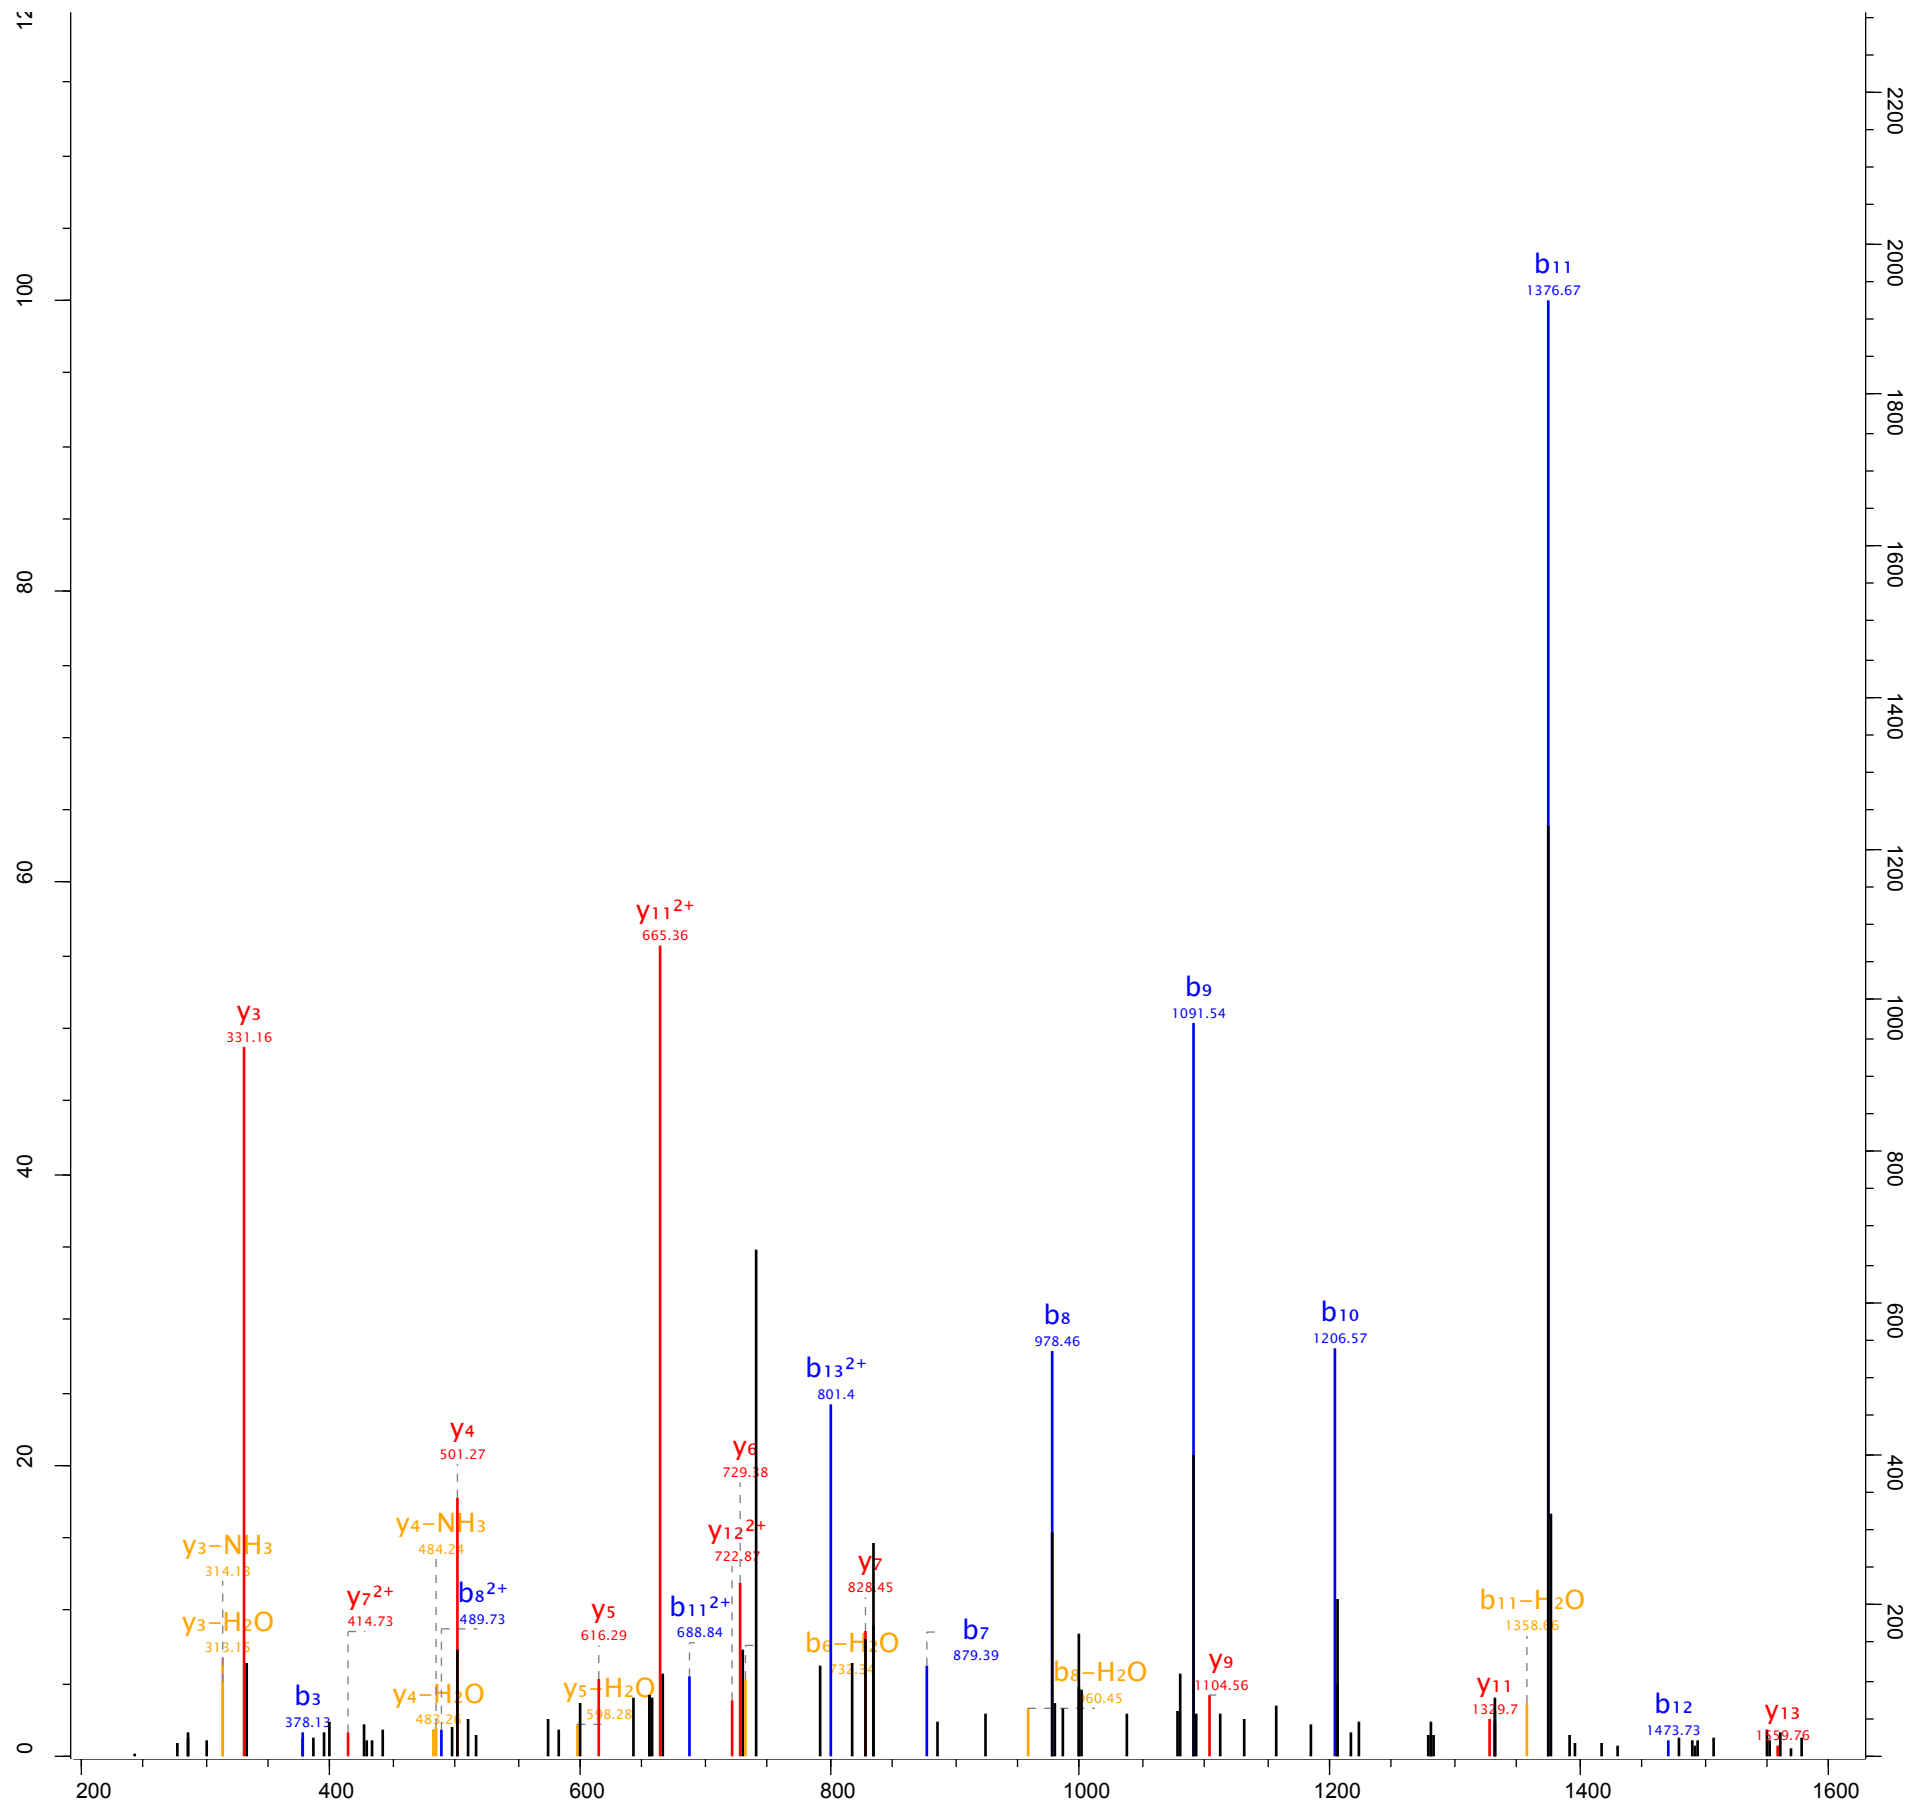

- F D D P K F E V I D K P Q S -

y<sub>13</sub>
y<sub>12</sub><sup>2+</sup>
y<sub>11</sub>
y<sub>9</sub>
b<sub>3</sub>
b<sub>7</sub>
b<sub>8</sub>
b<sub>9</sub>
b<sub>10</sub>
b<sub>11</sub>
b<sub>12</sub>
b<sub>13</sub><sup>2+</sup>

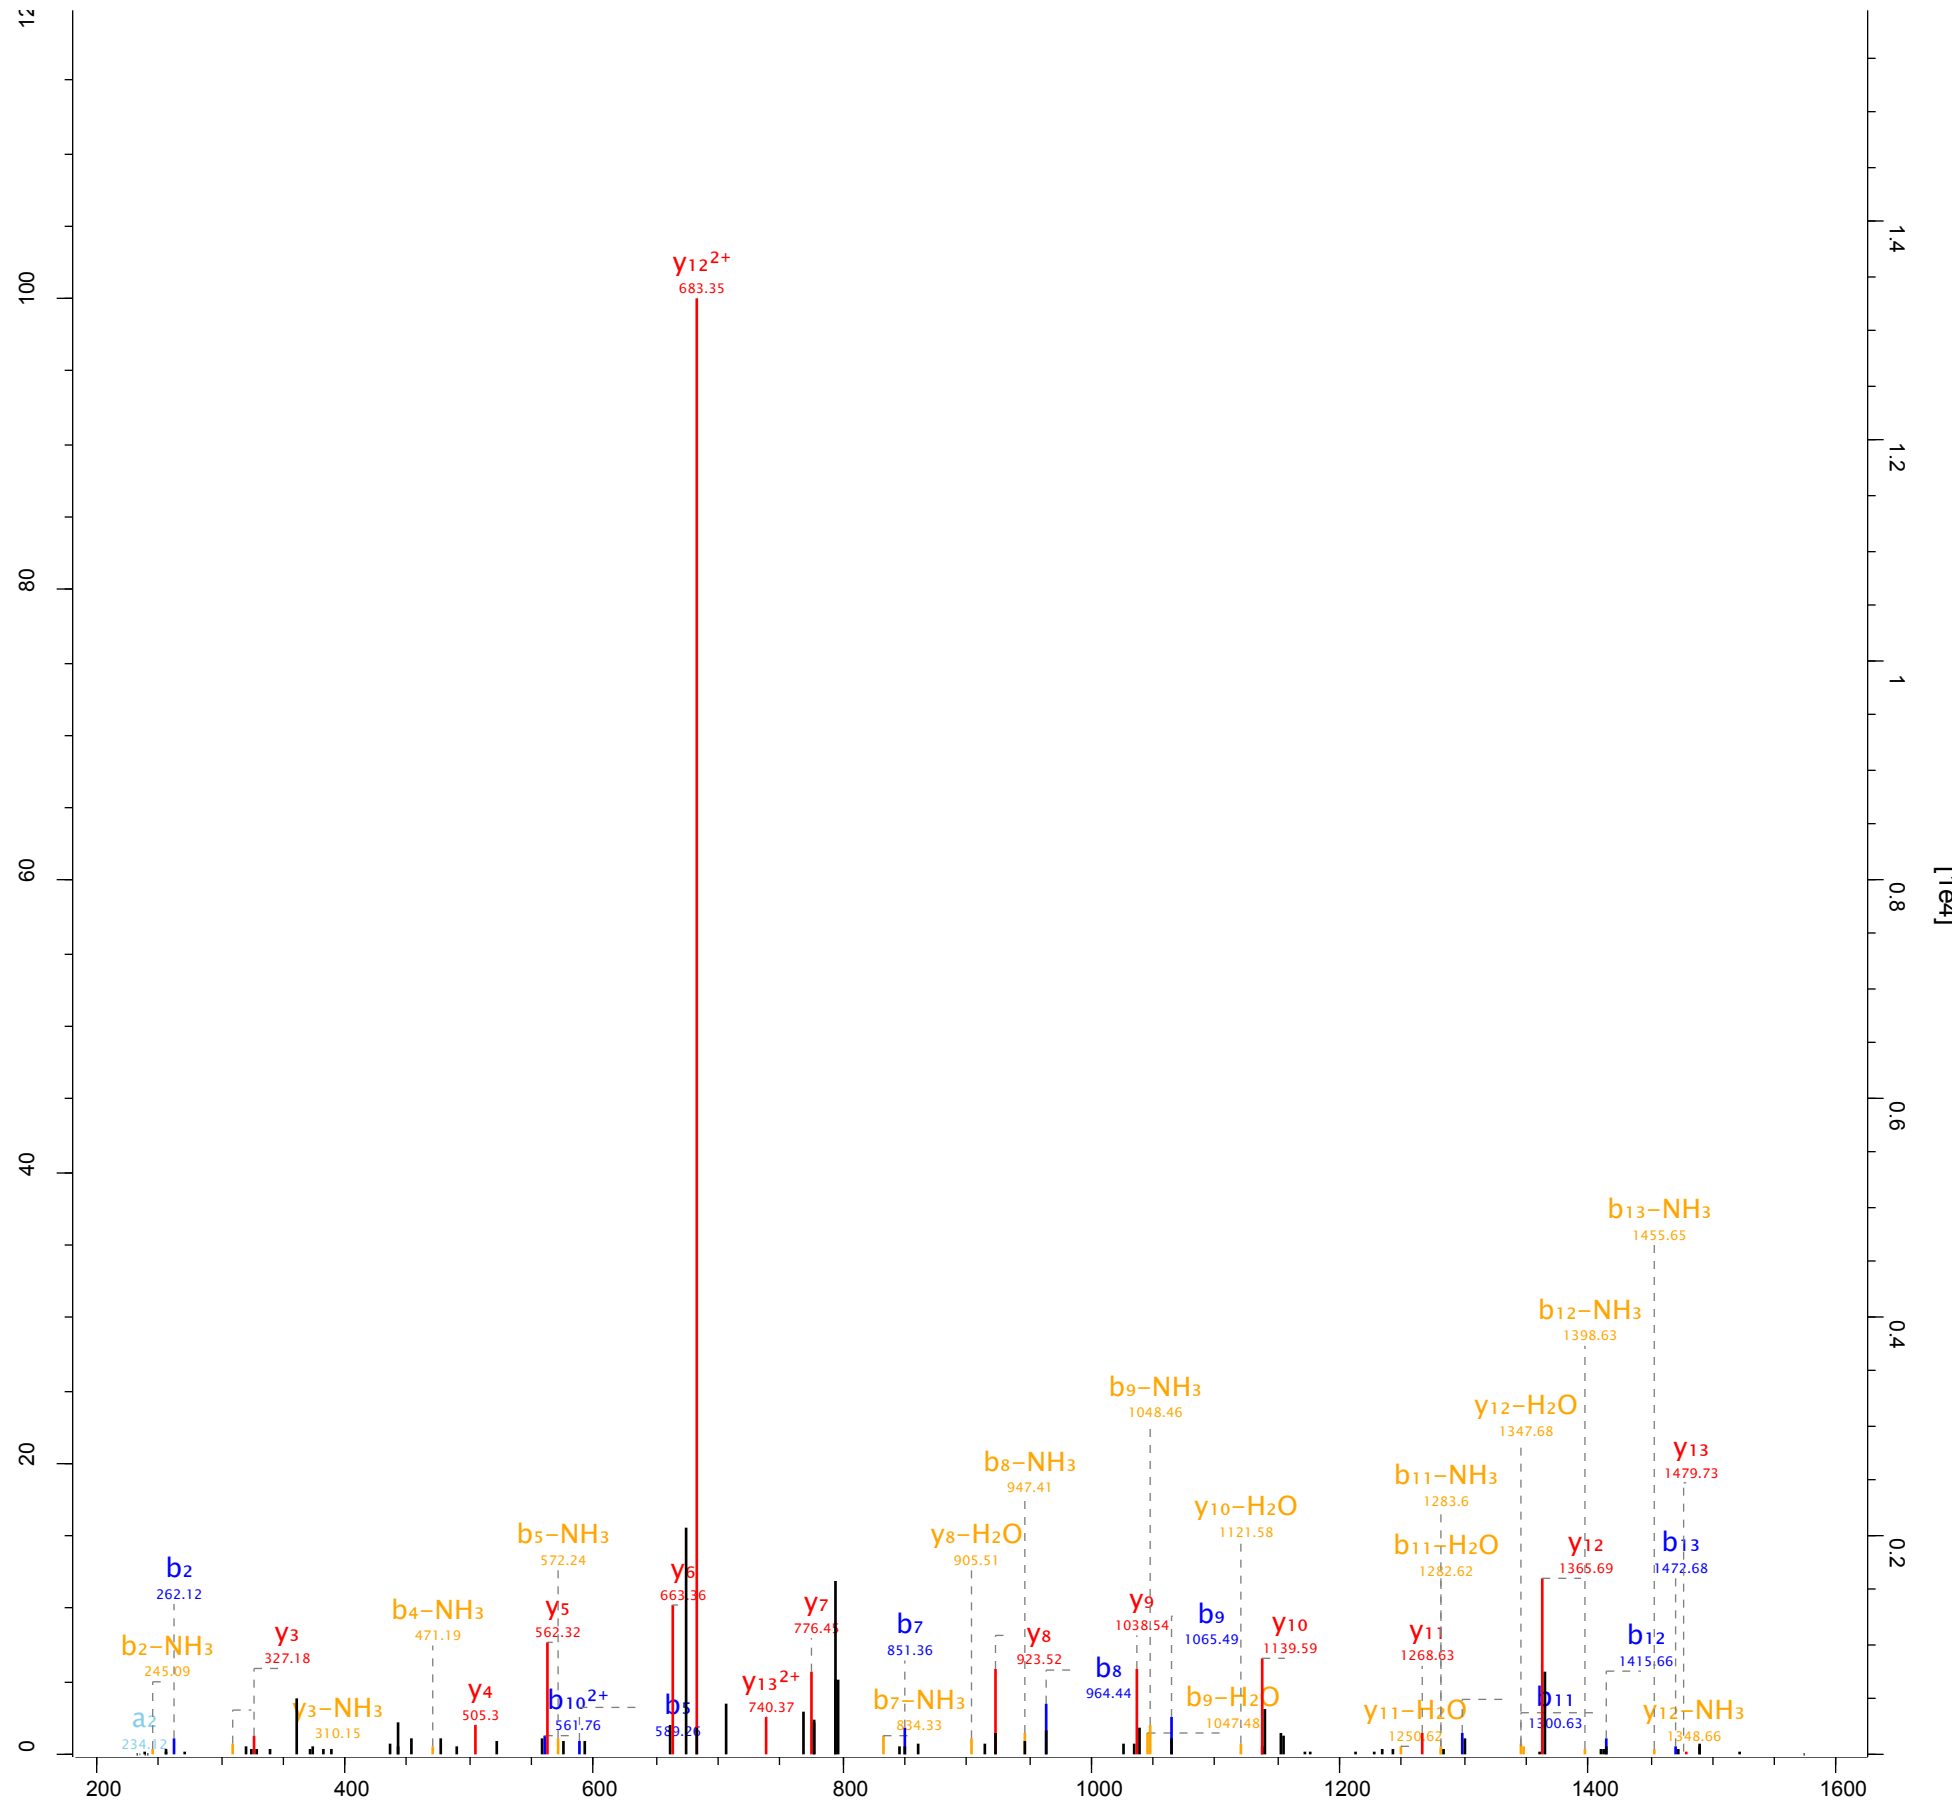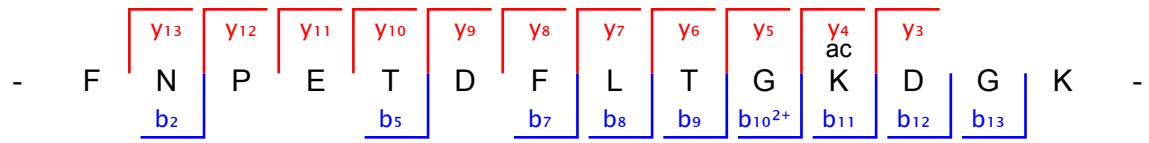

052413\_SCW\_II\_29\_Second\_ZT\_19\_4

13821

ITMS; CID

130.15

670.88

Aldh6a1

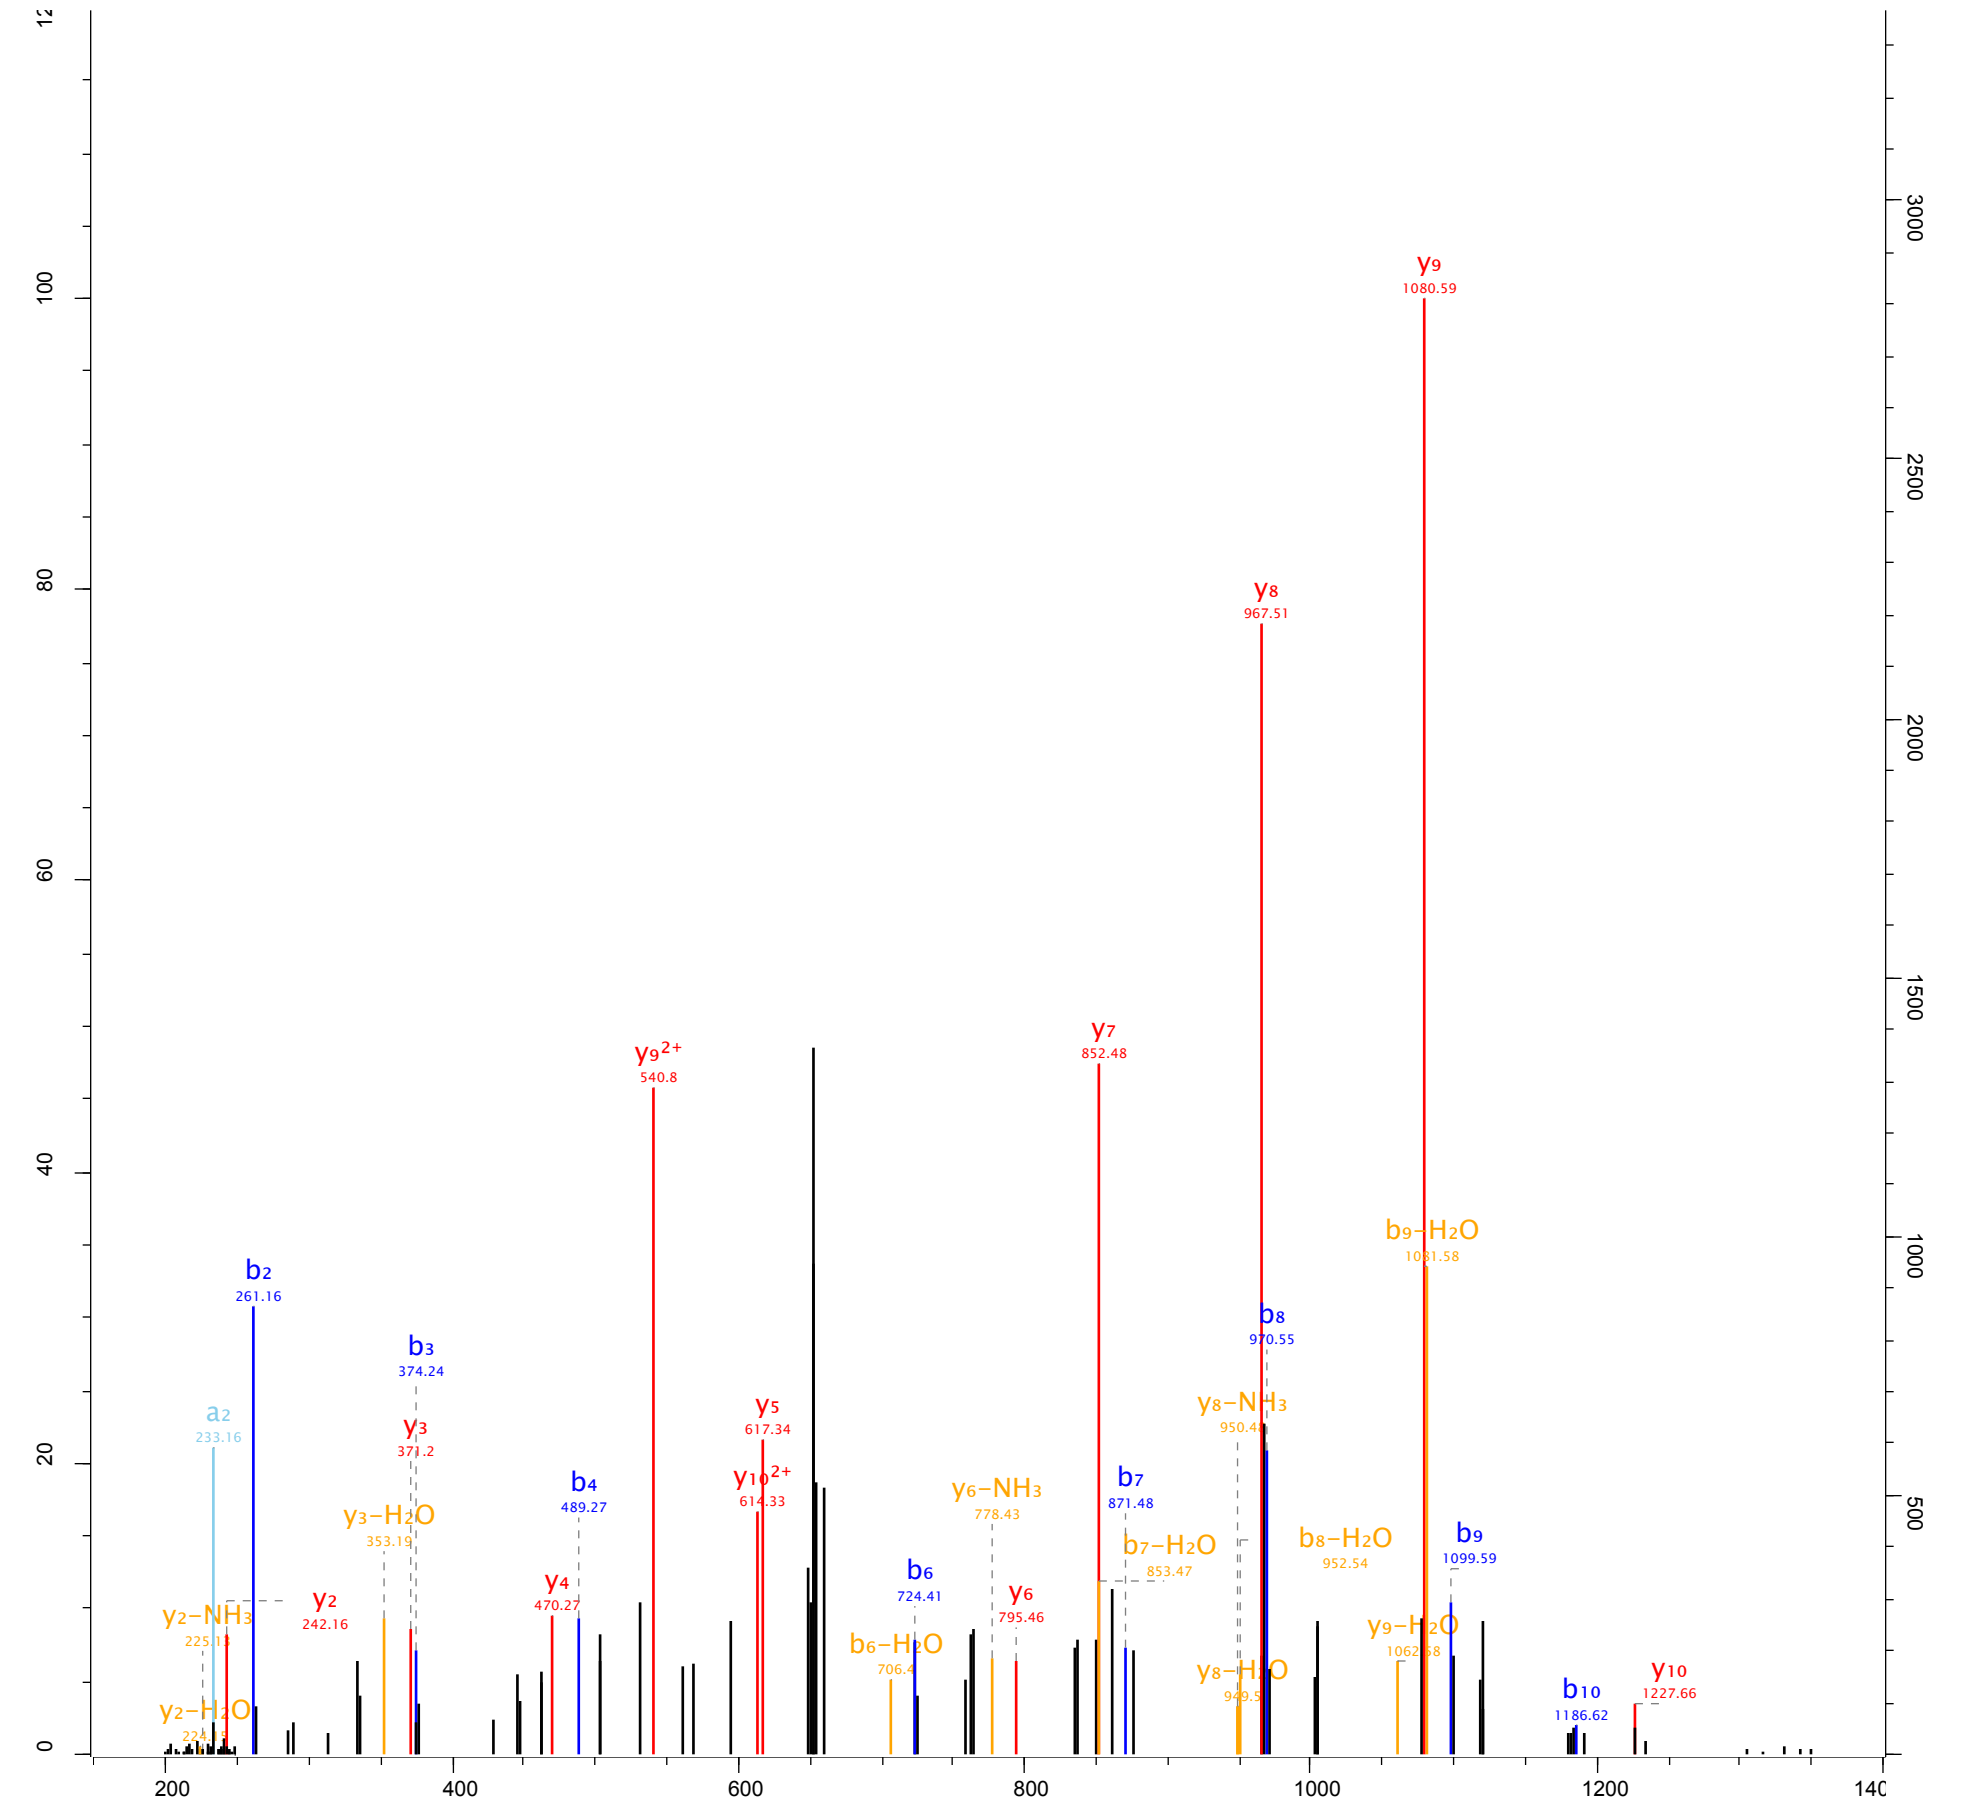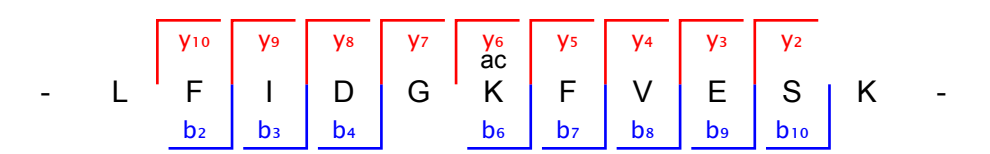

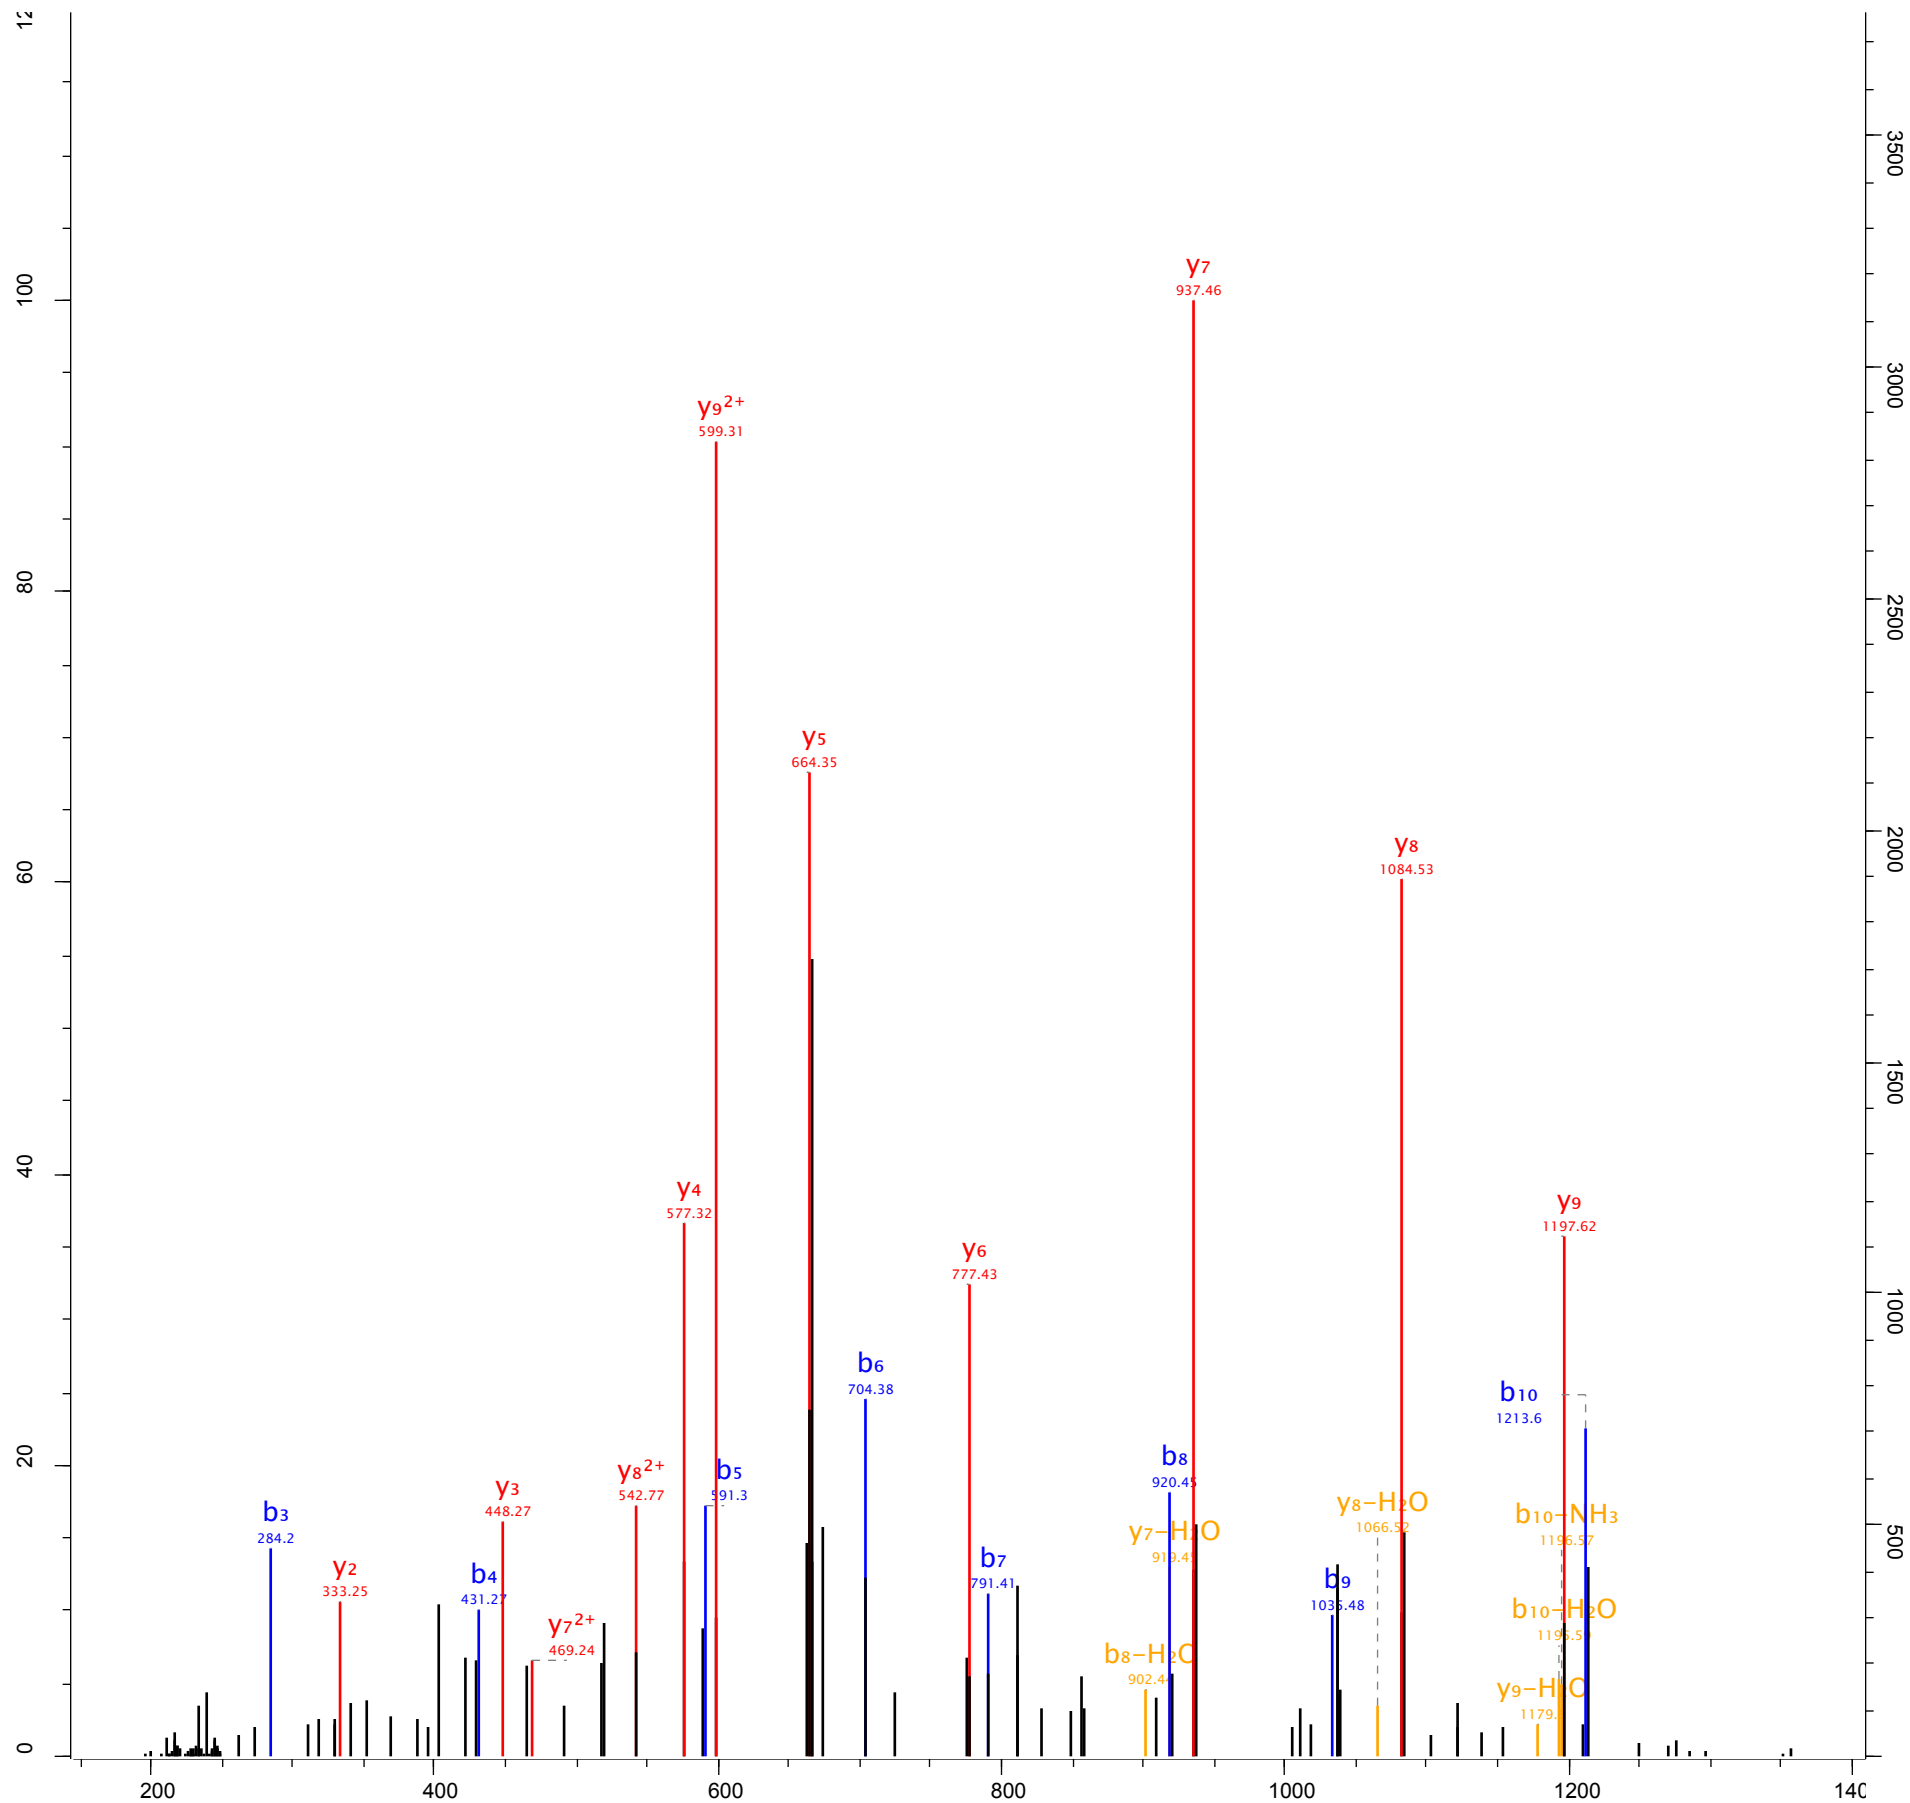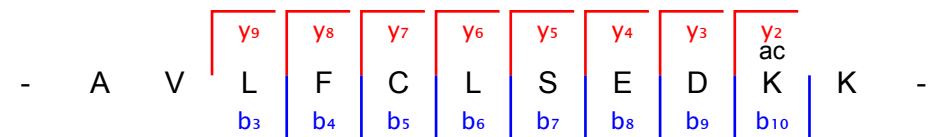

052413\_SCW\_II\_29\_Second\_ZT\_19\_4

13996

ITMS; CID

156.96

776.41

Hadha

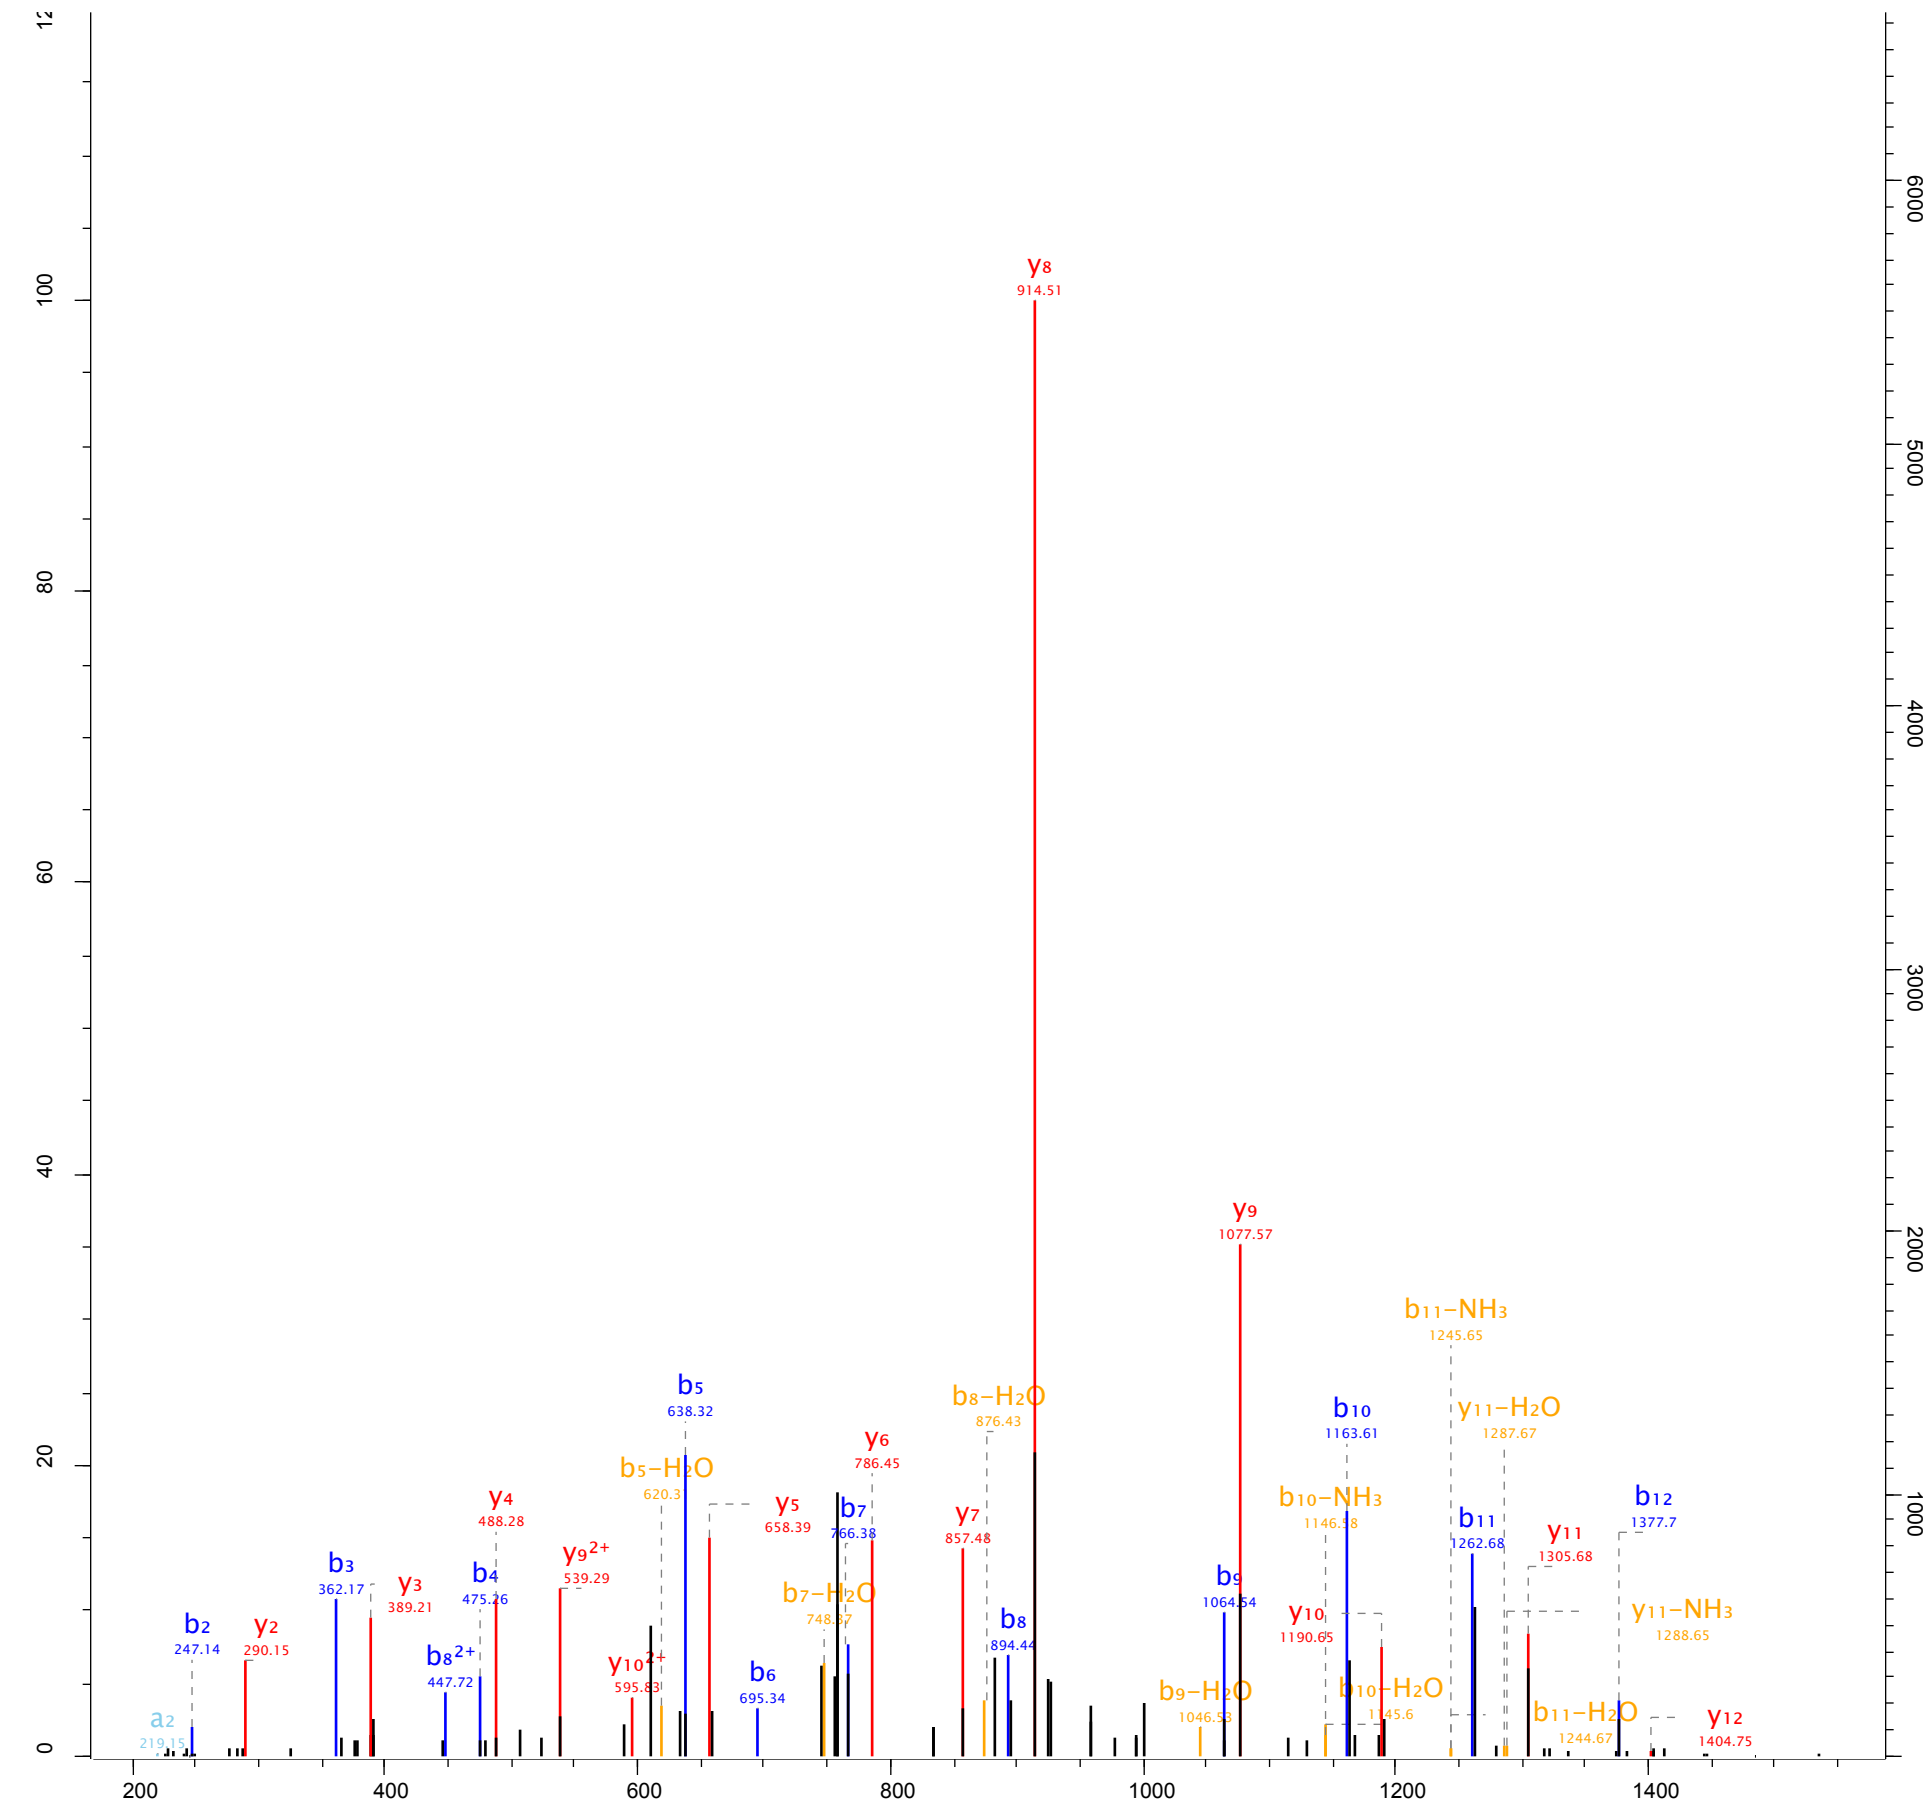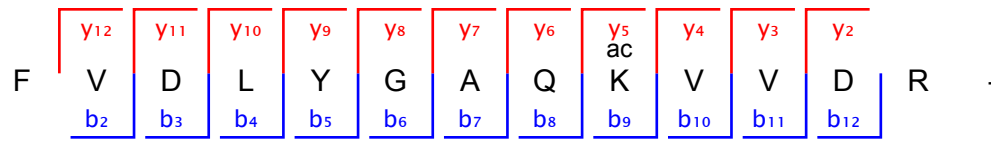

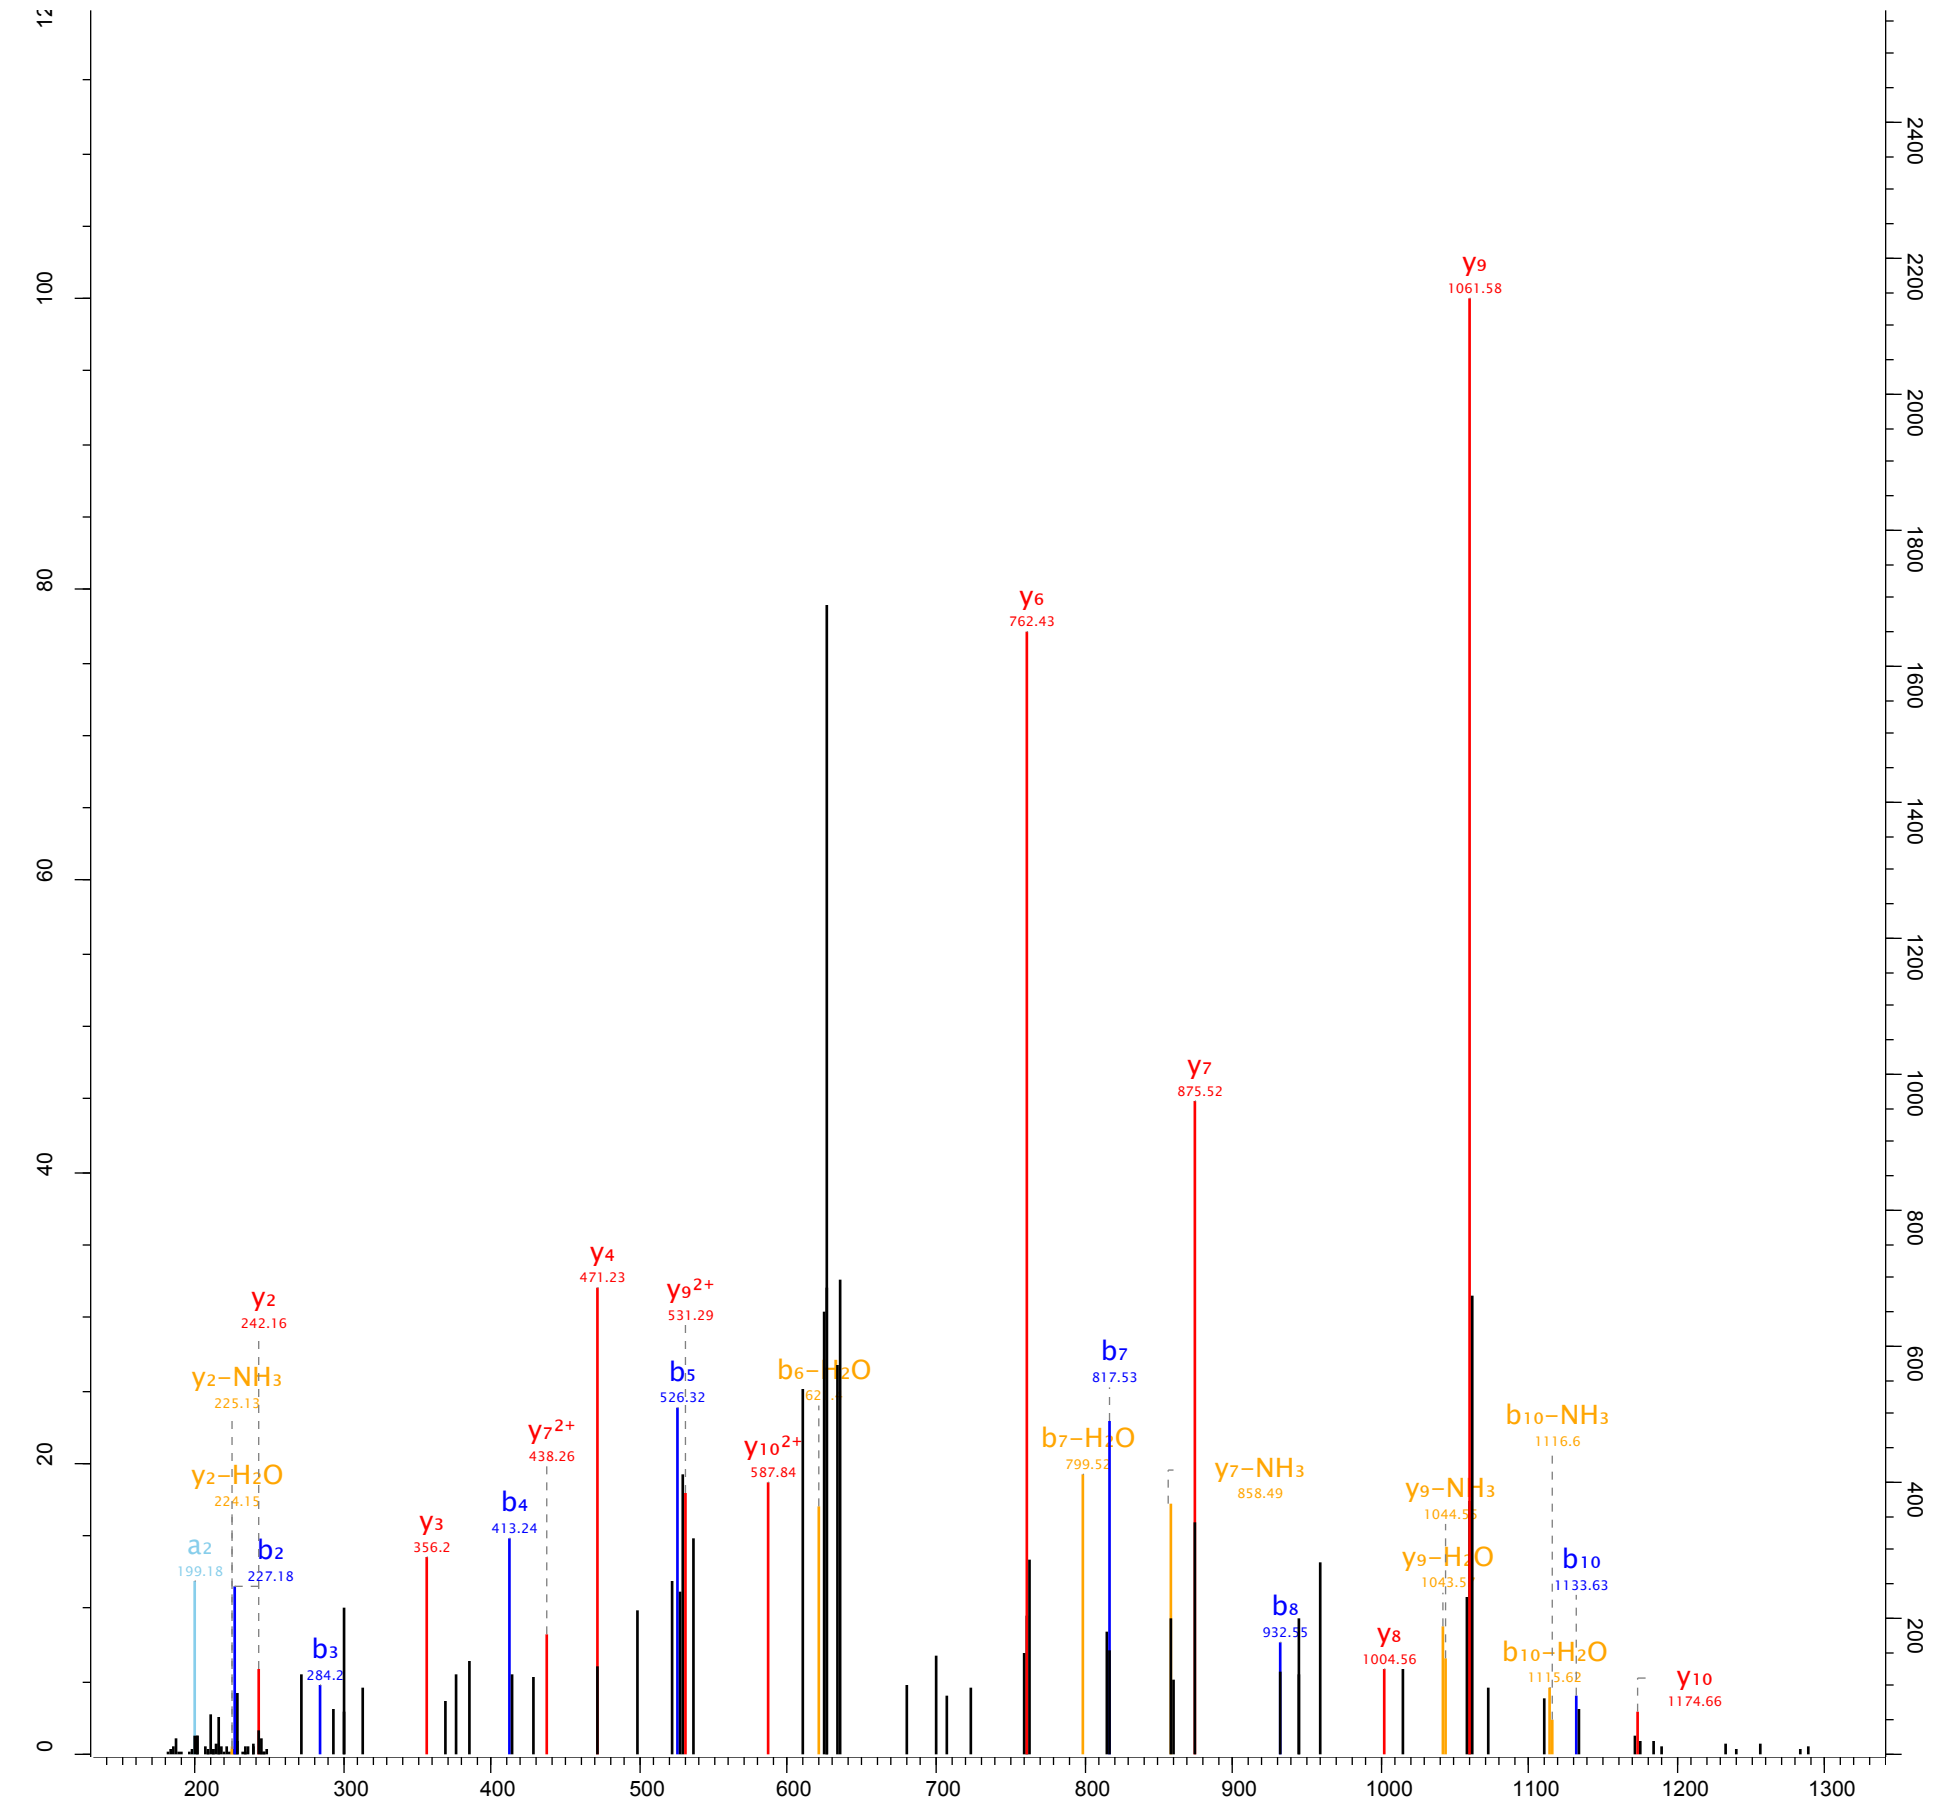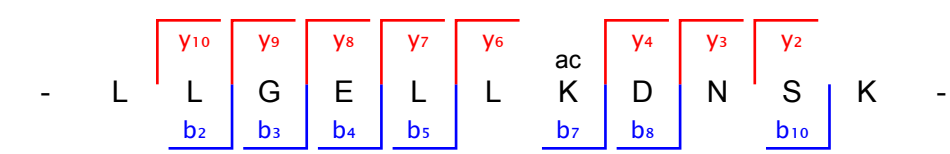



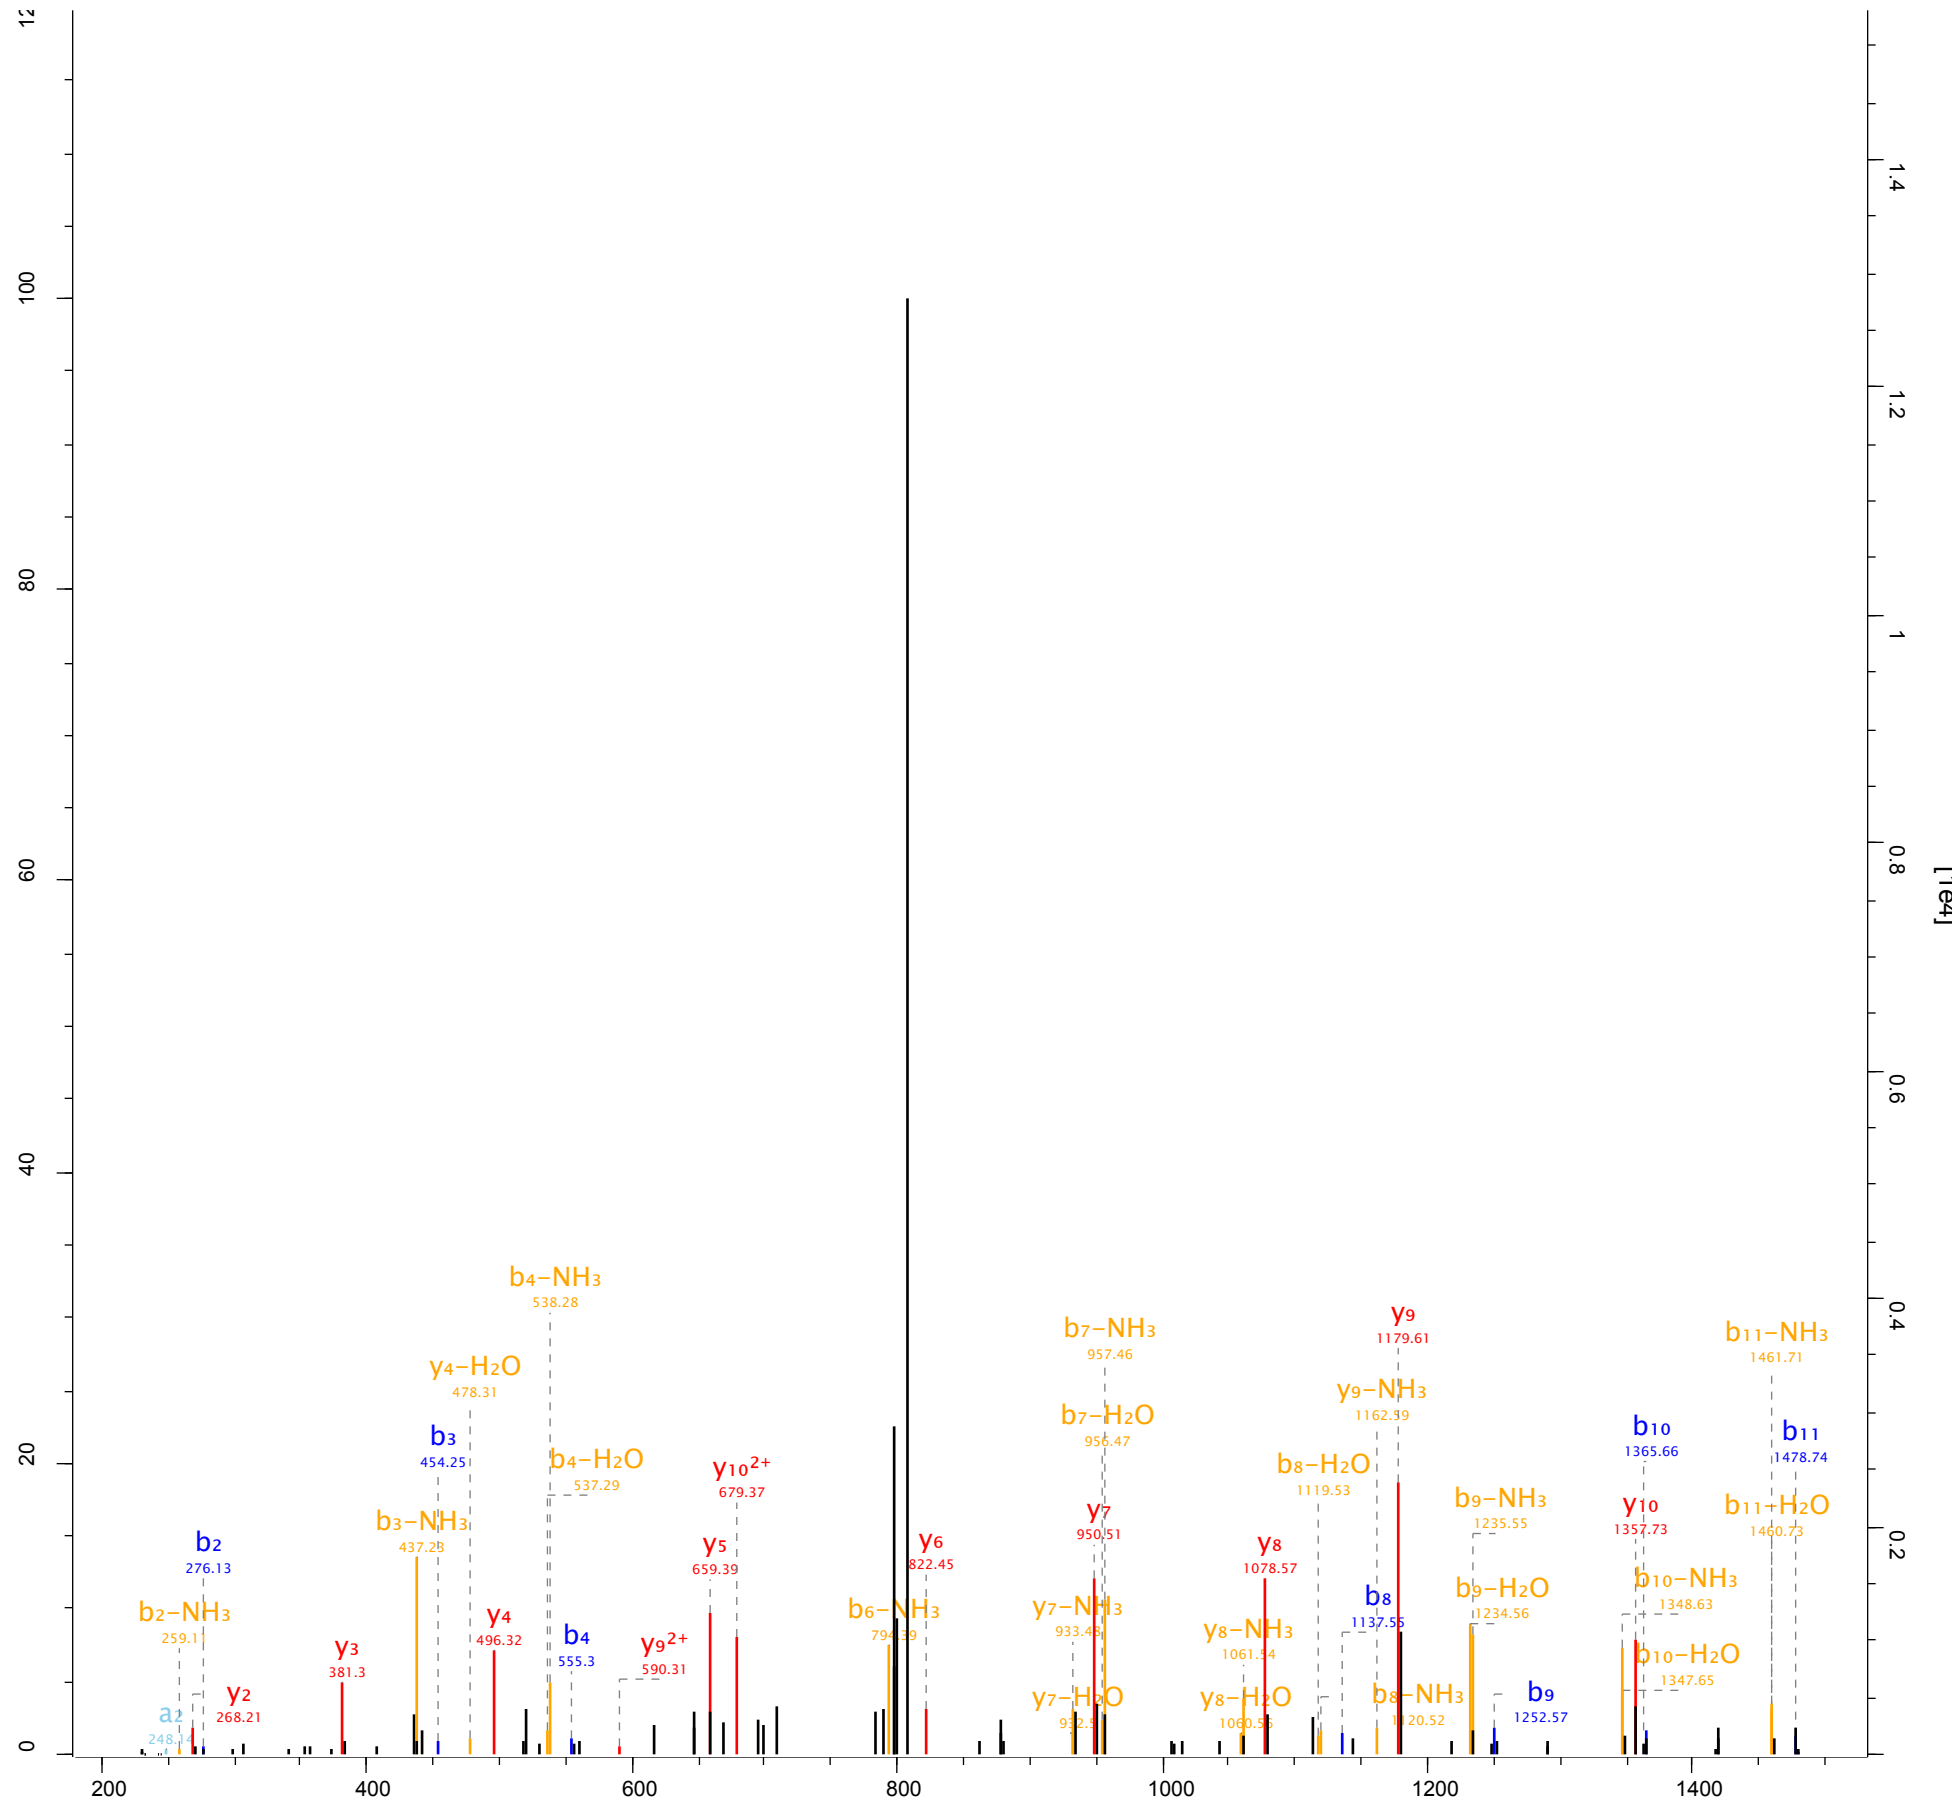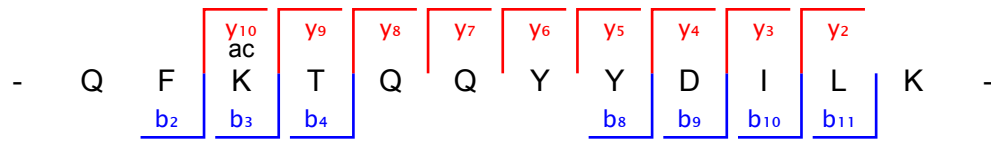

052413\_SCW\_II\_29\_Second\_ZT\_19\_4

14710

ITMS; CID

228.62

720.9

Pfkp

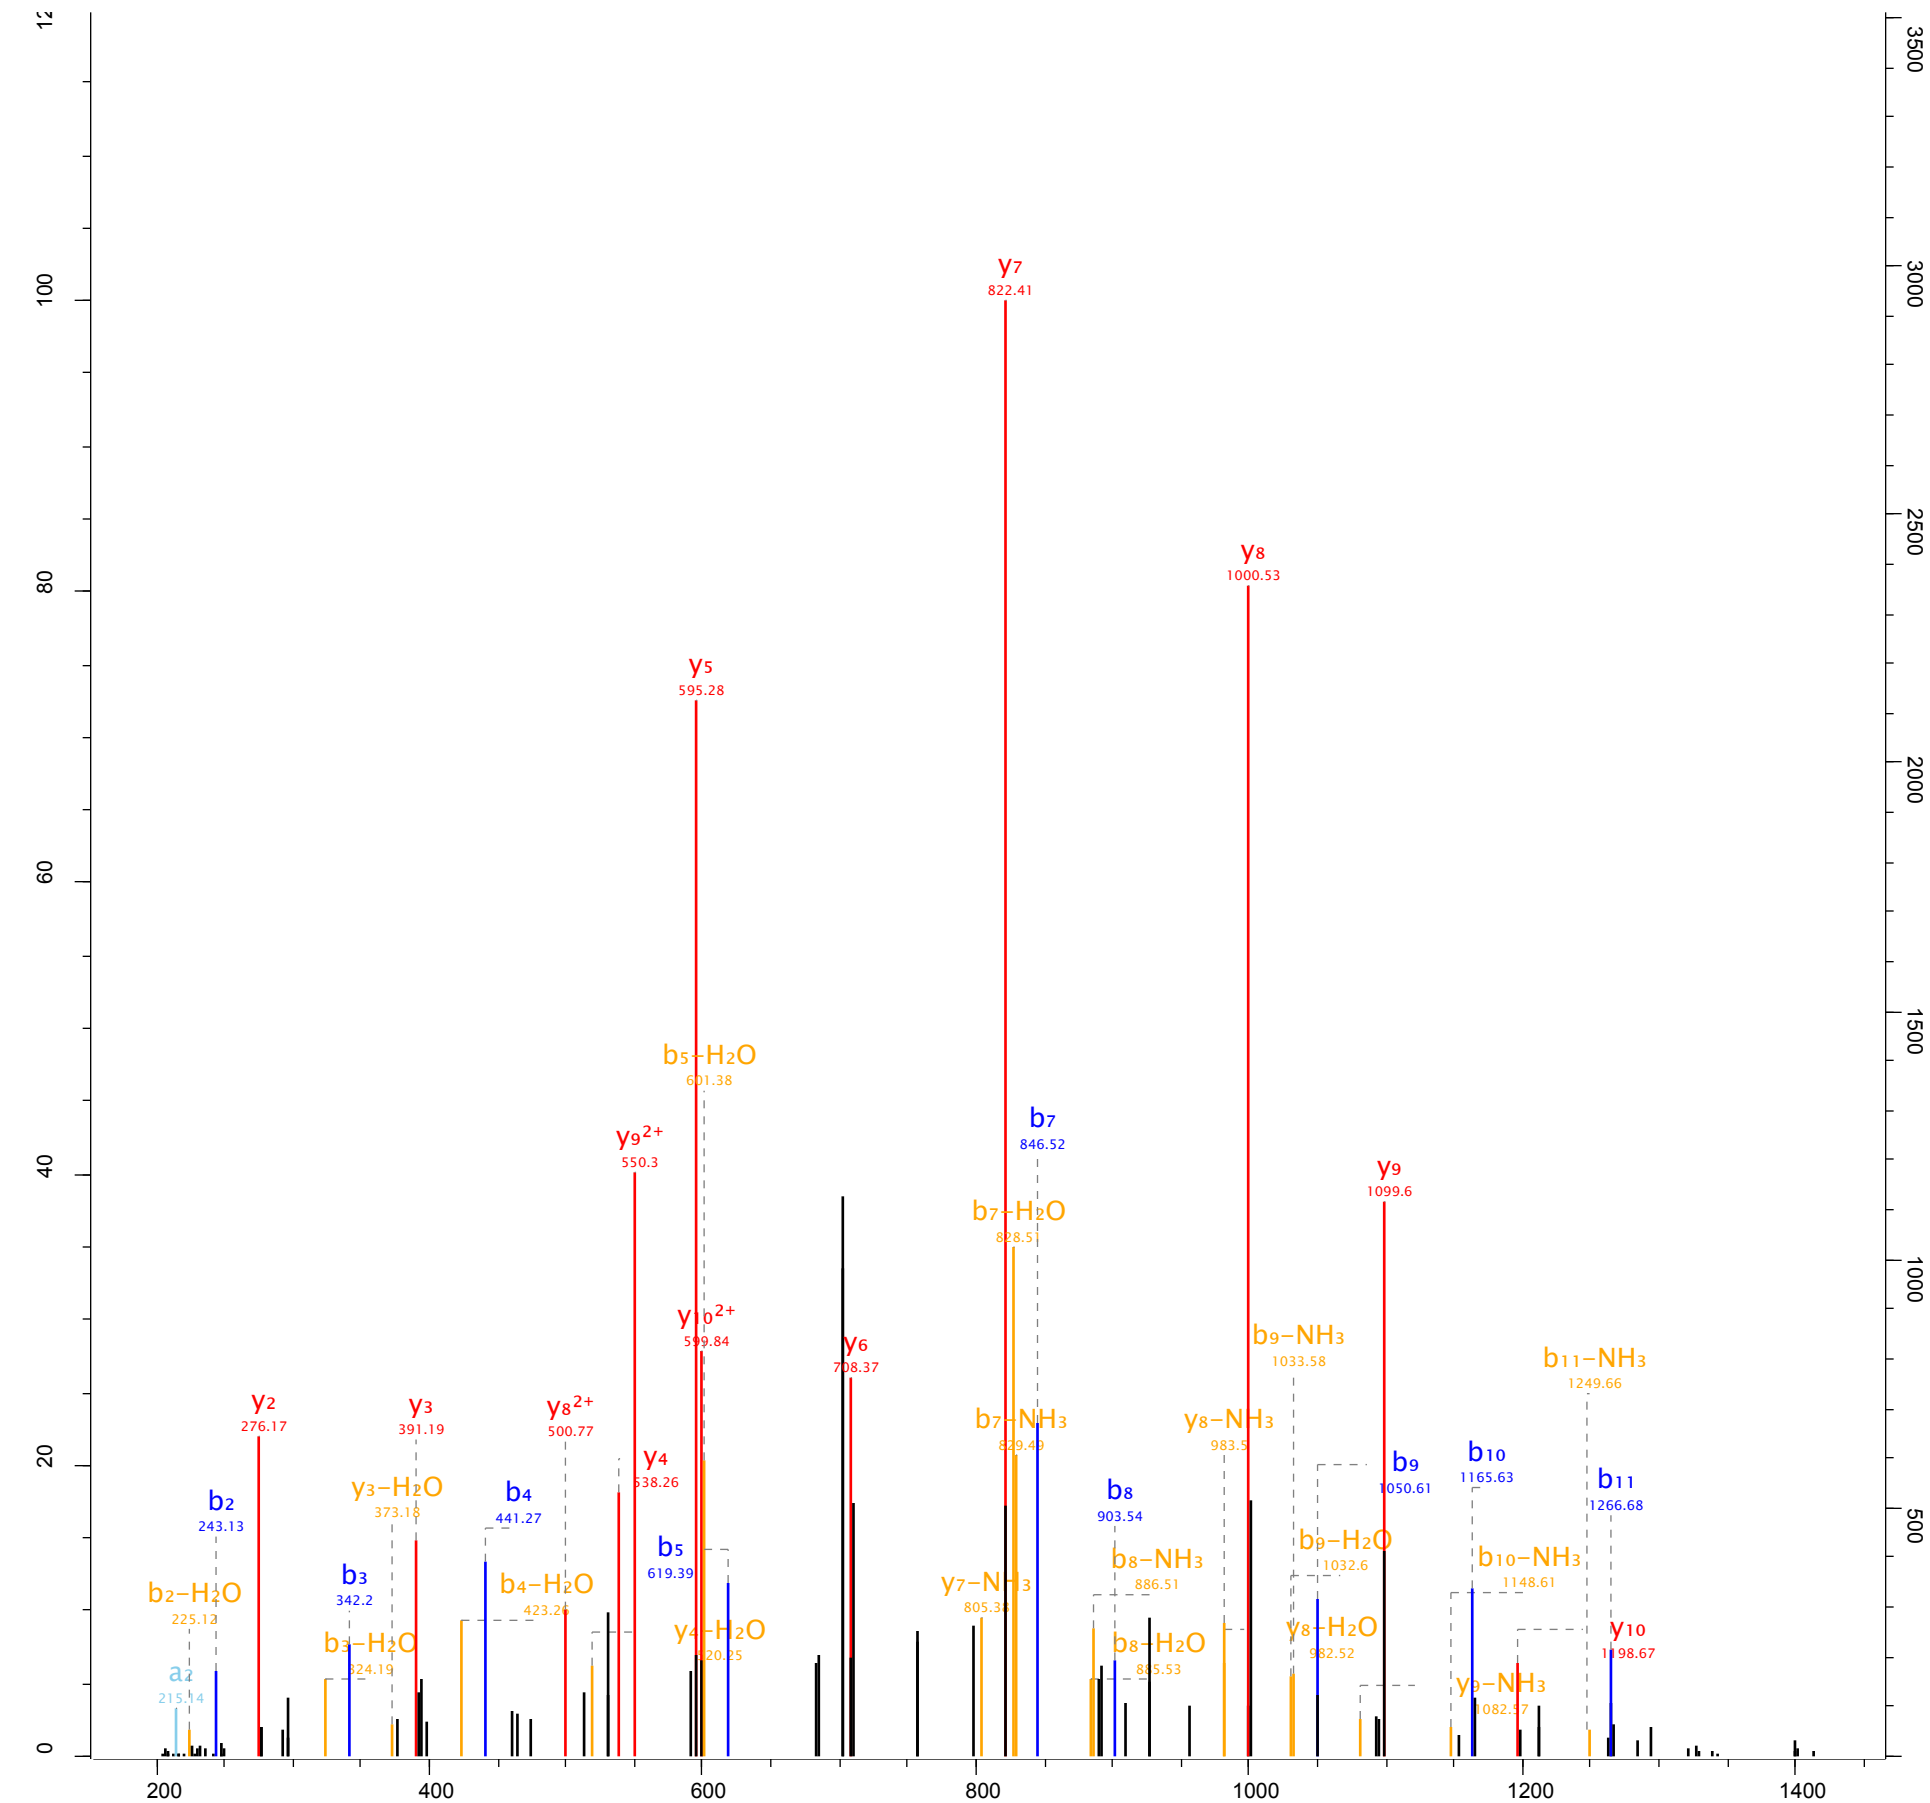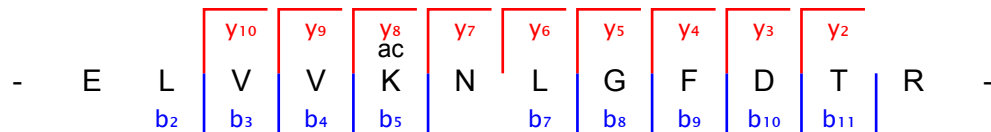

052413\_SCW\_II\_29\_Second\_ZT\_19\_4

14744

ITMS; CID

110.39

580.32

Ube2n

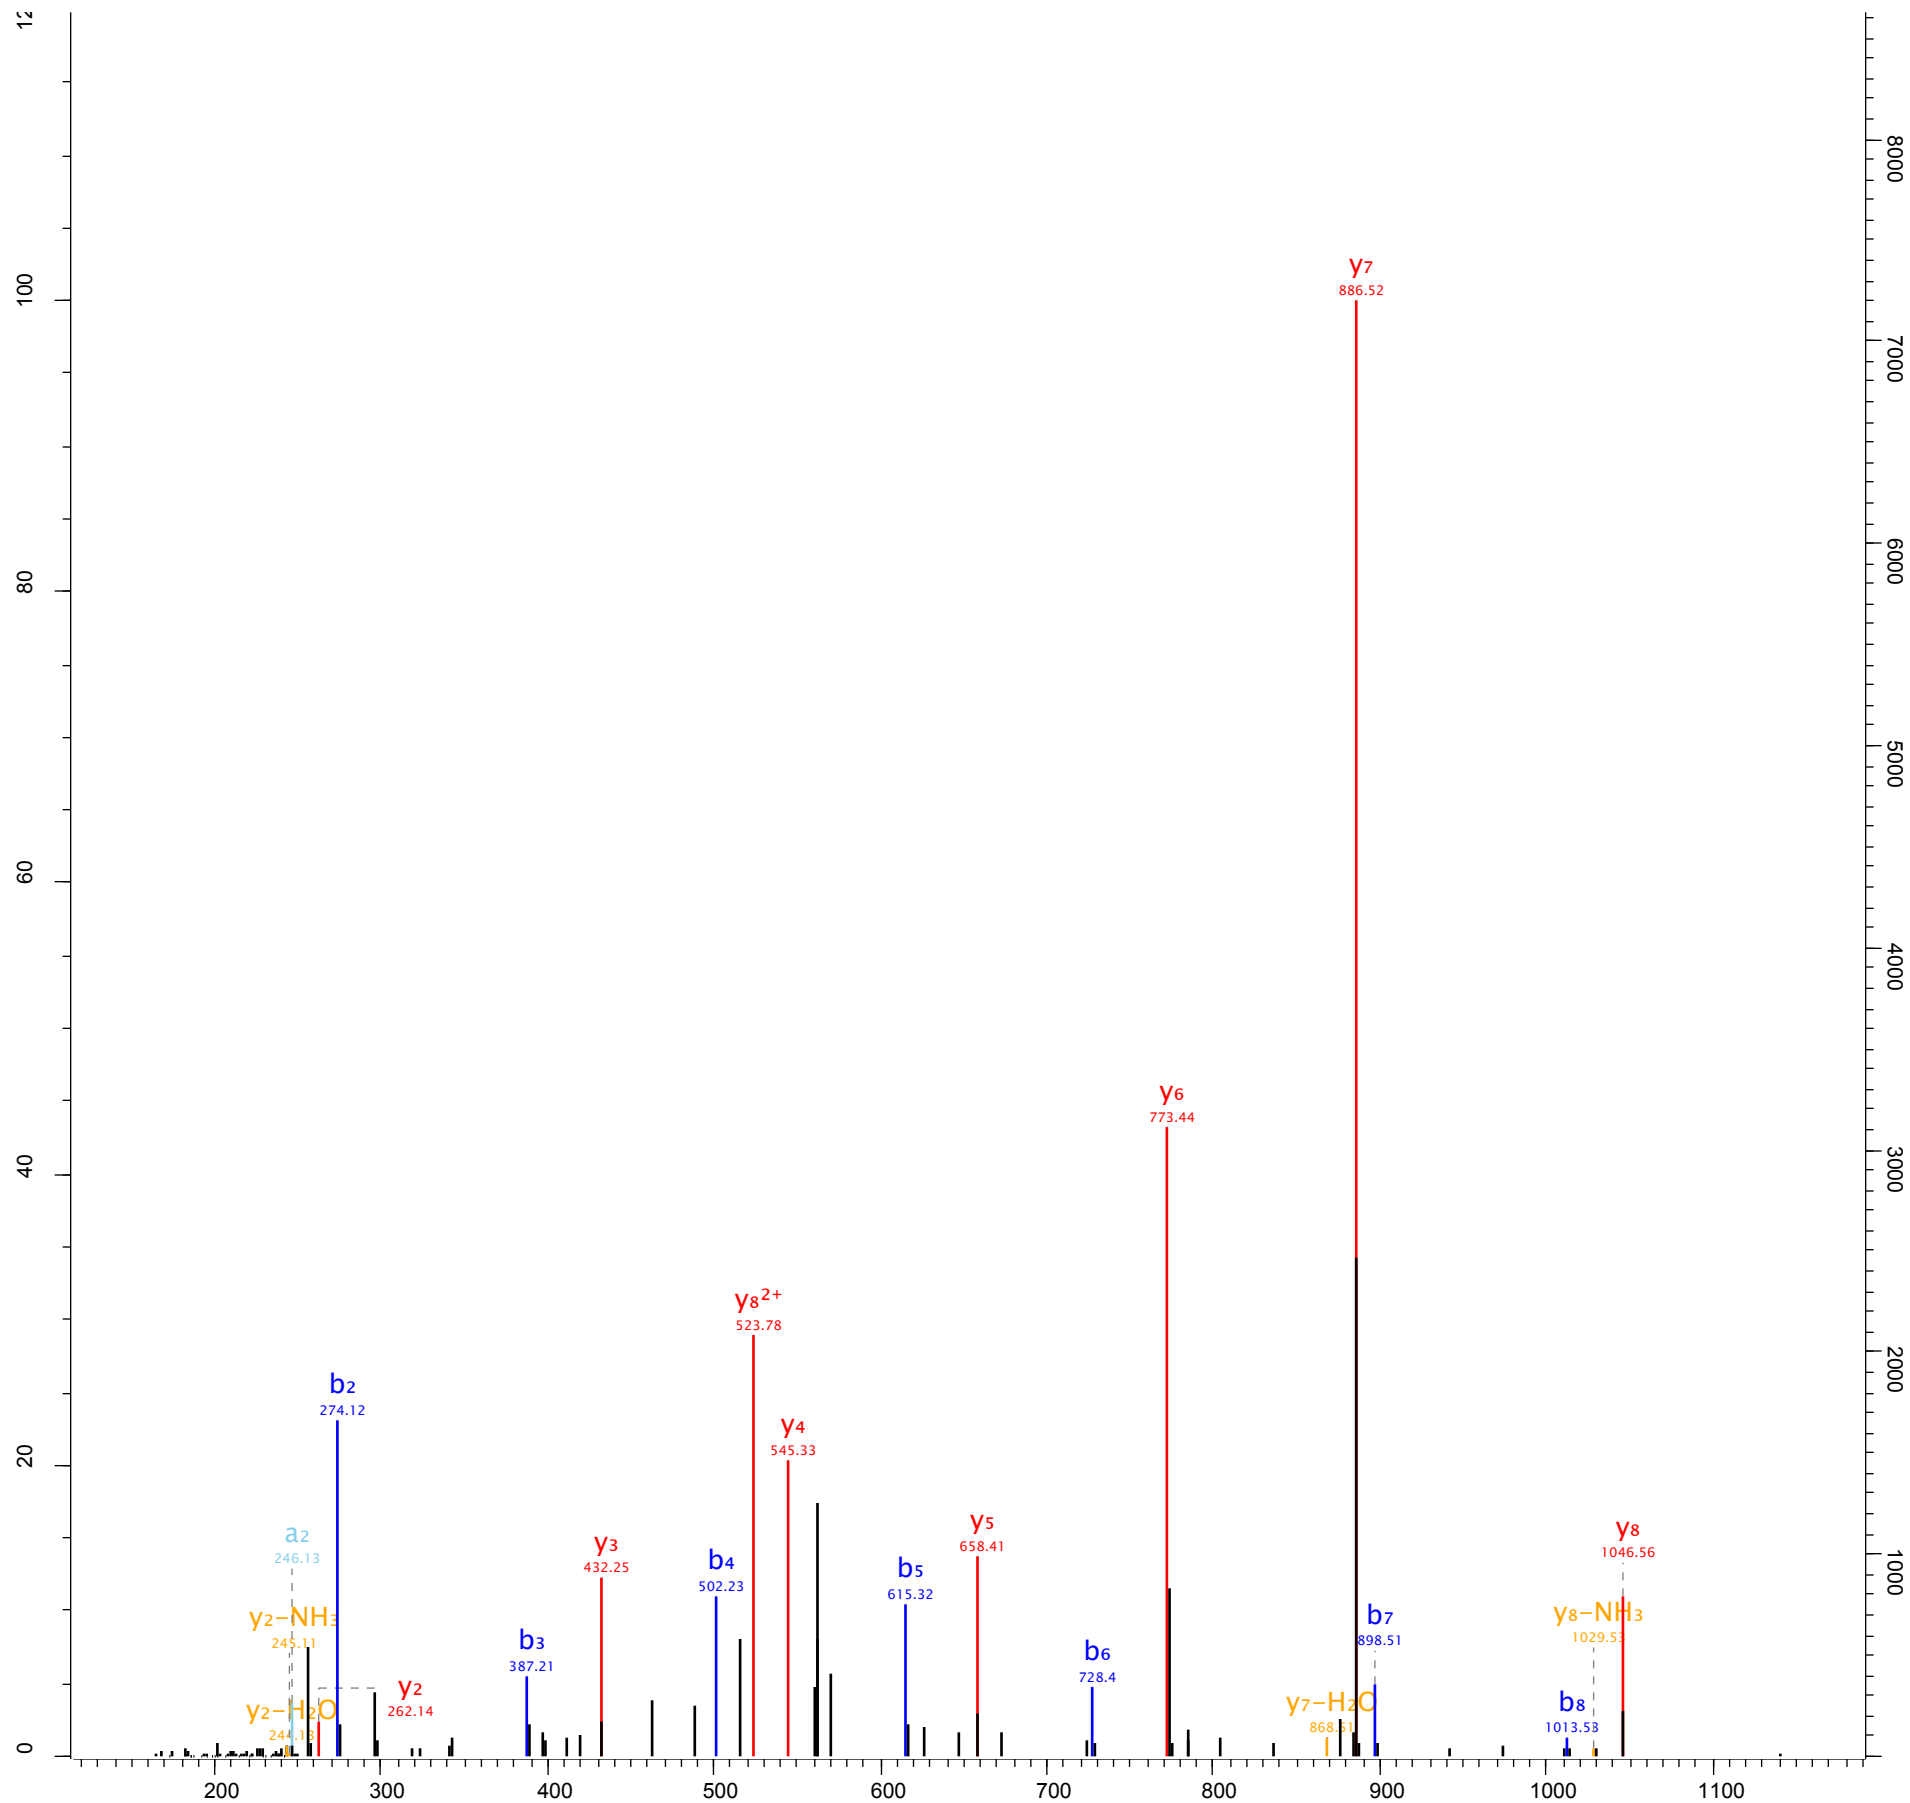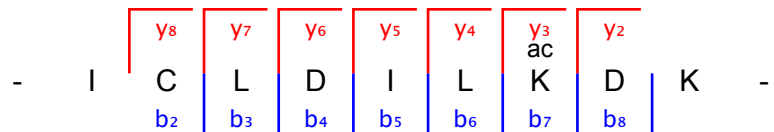

052413\_SCW\_II\_29\_Second\_ZT\_19\_4

14812

ITMS; CID

174.57

576.35

Cpt2

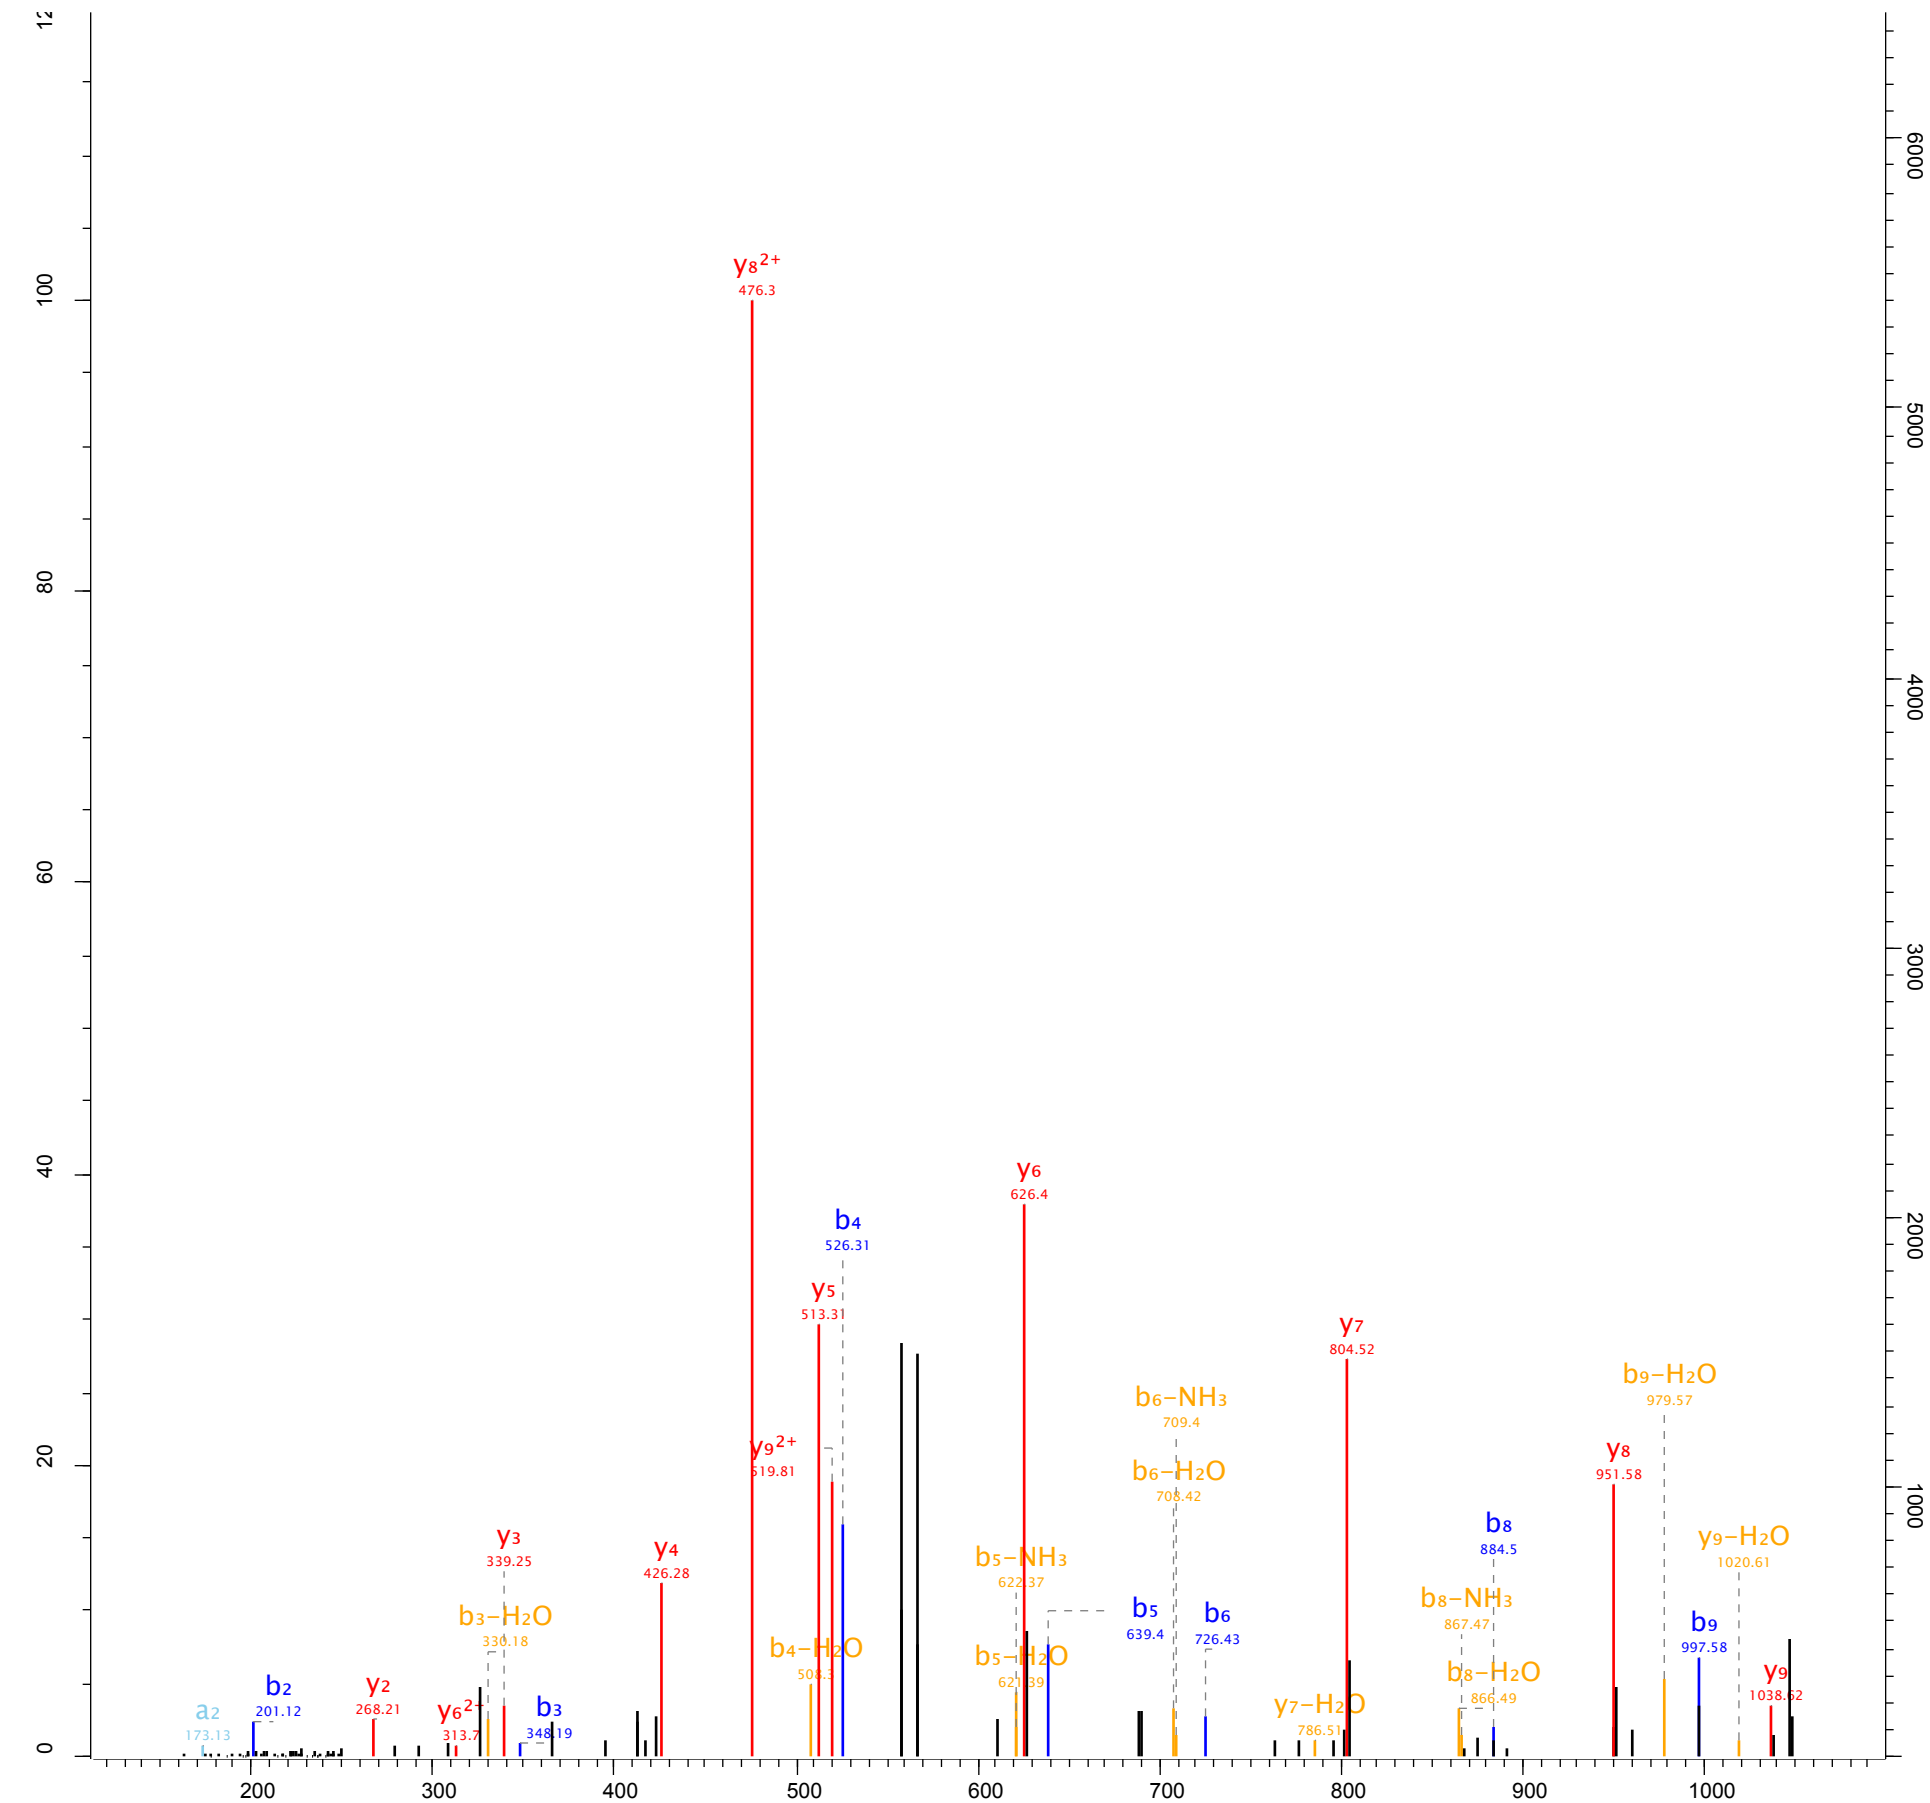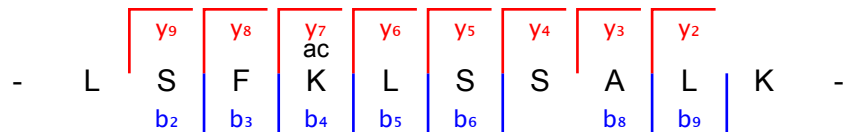

052413\_SCW\_II\_29\_Second\_ZT\_19\_4

14834

ITMS; CID

199.37

814.93

Ass1

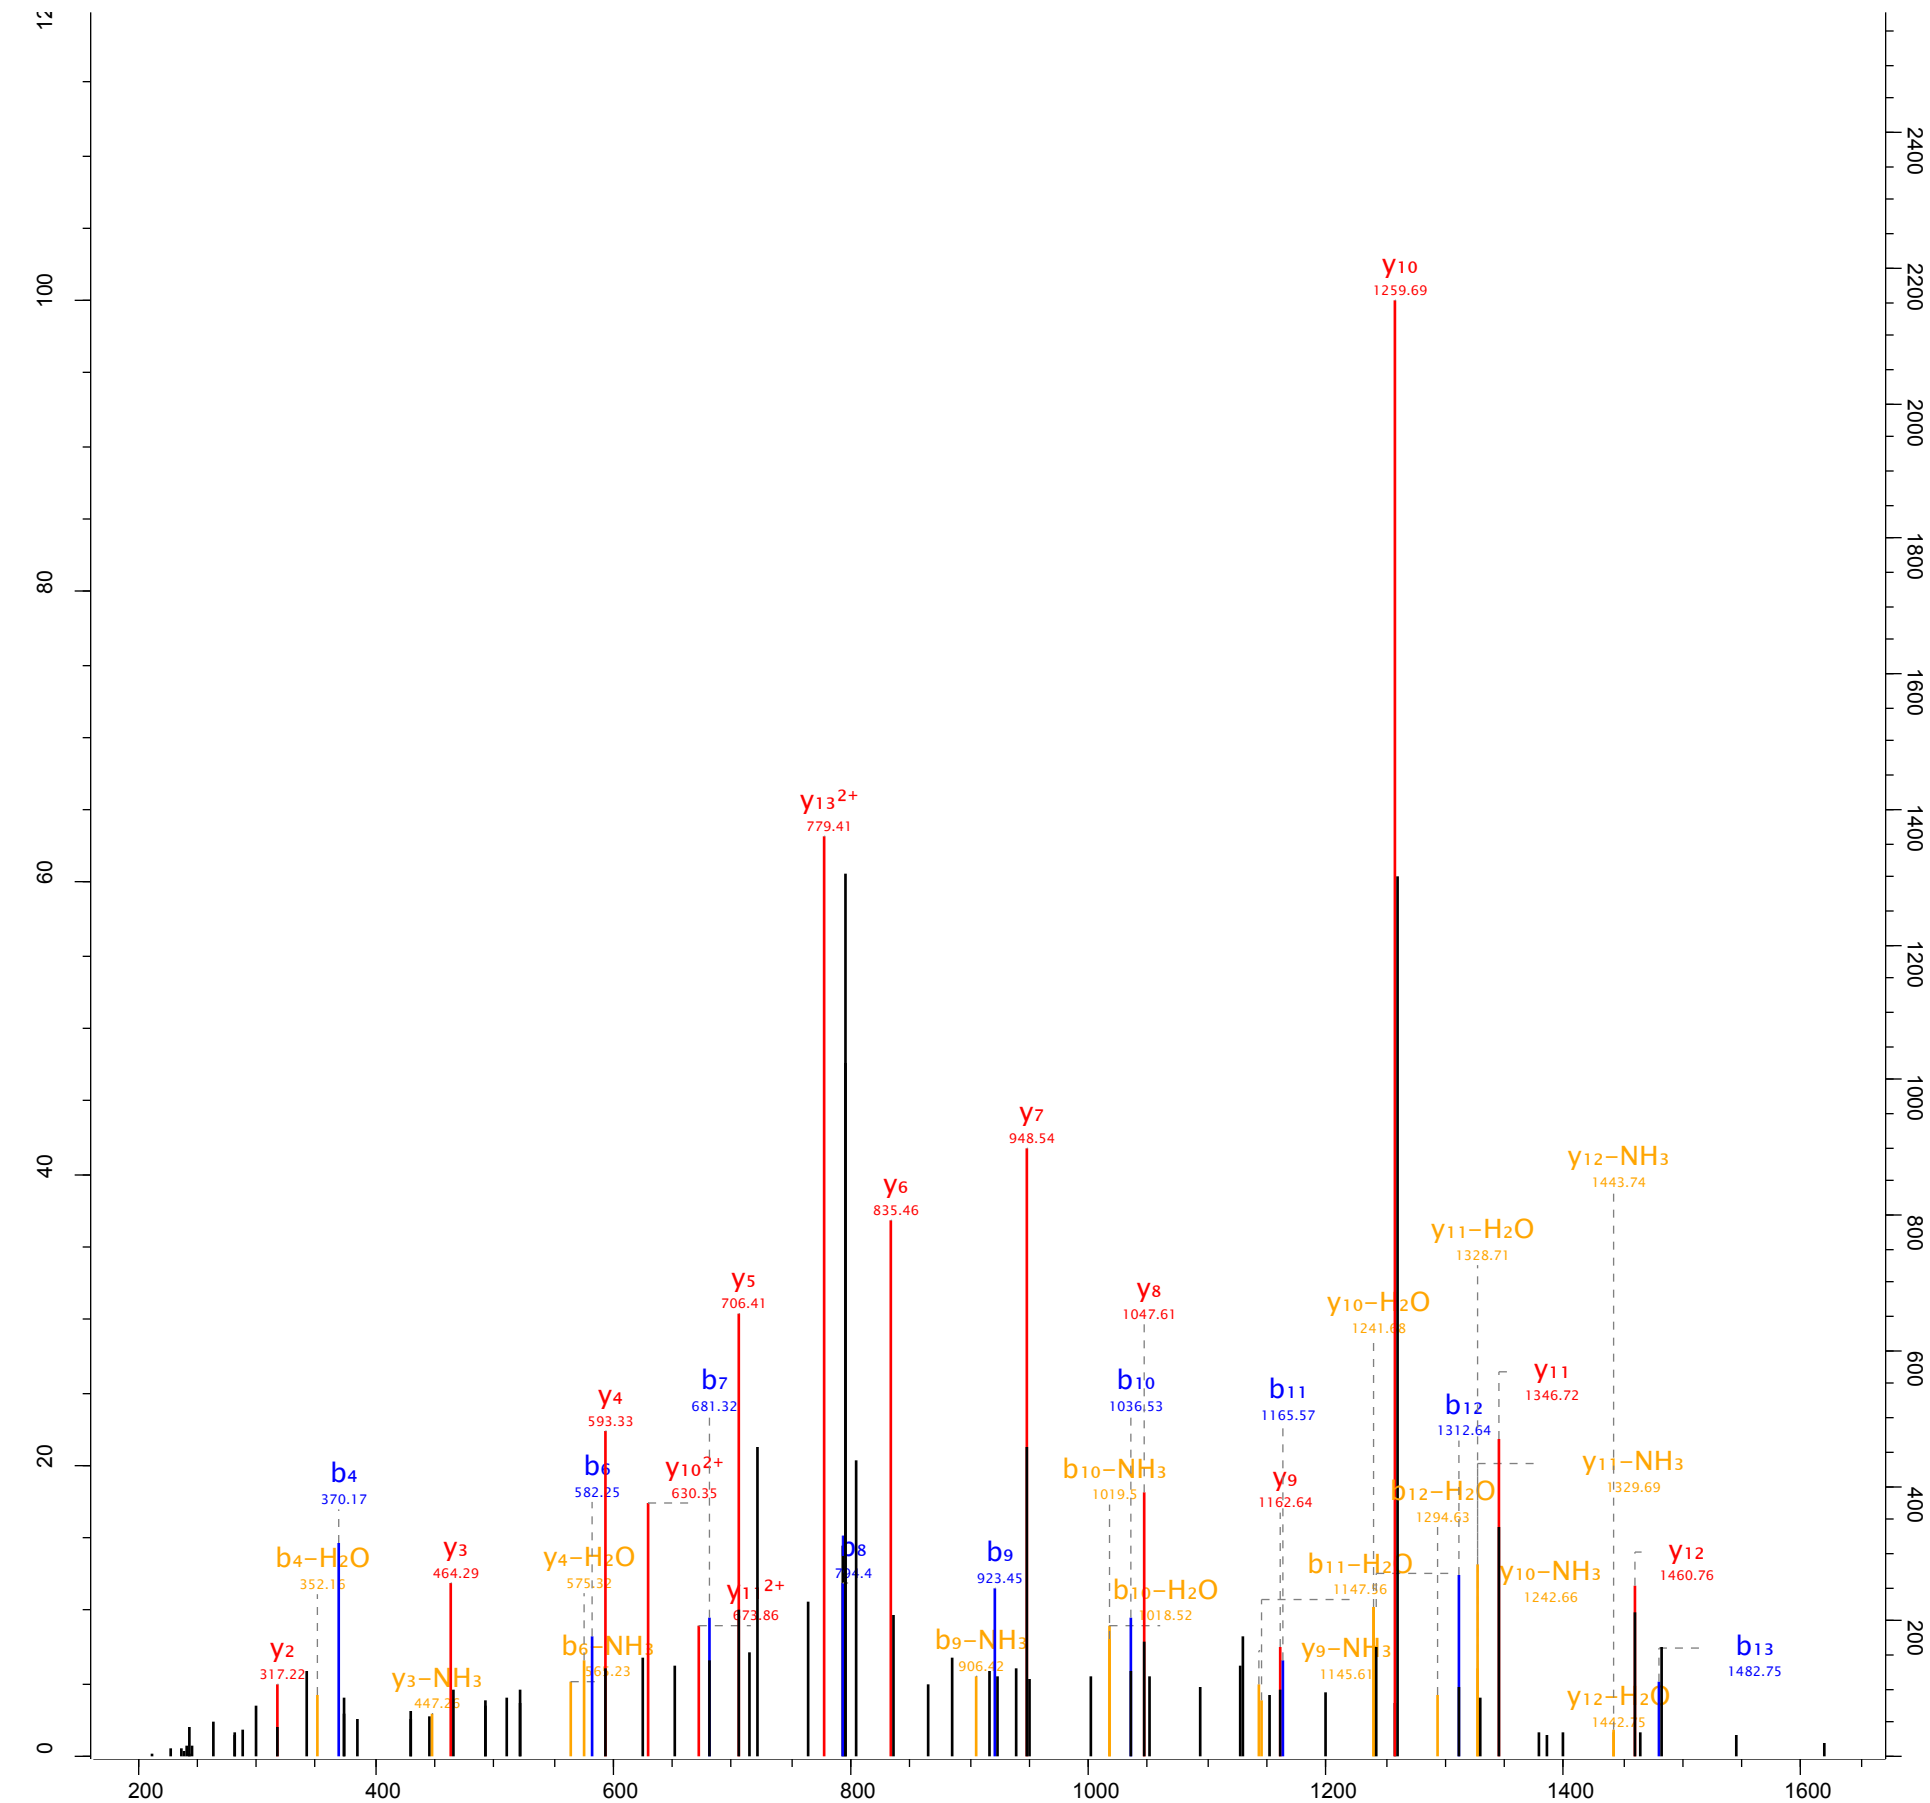

- A P N S P D V L E I E F K K -

y13<sup>2+</sup>
y12
y11
y10
y9
y8
y7
y6
y5
y4
y3
y2
ac

b4
b6
b7
b8
b9
b10
b11
b12
b13

052413\_SCW\_II\_29\_Second\_ZT\_19\_4

15113

ITMS; CID

114.52

826.96

Tuba1b;Tuba1a;Tuba3a;Tuba3b

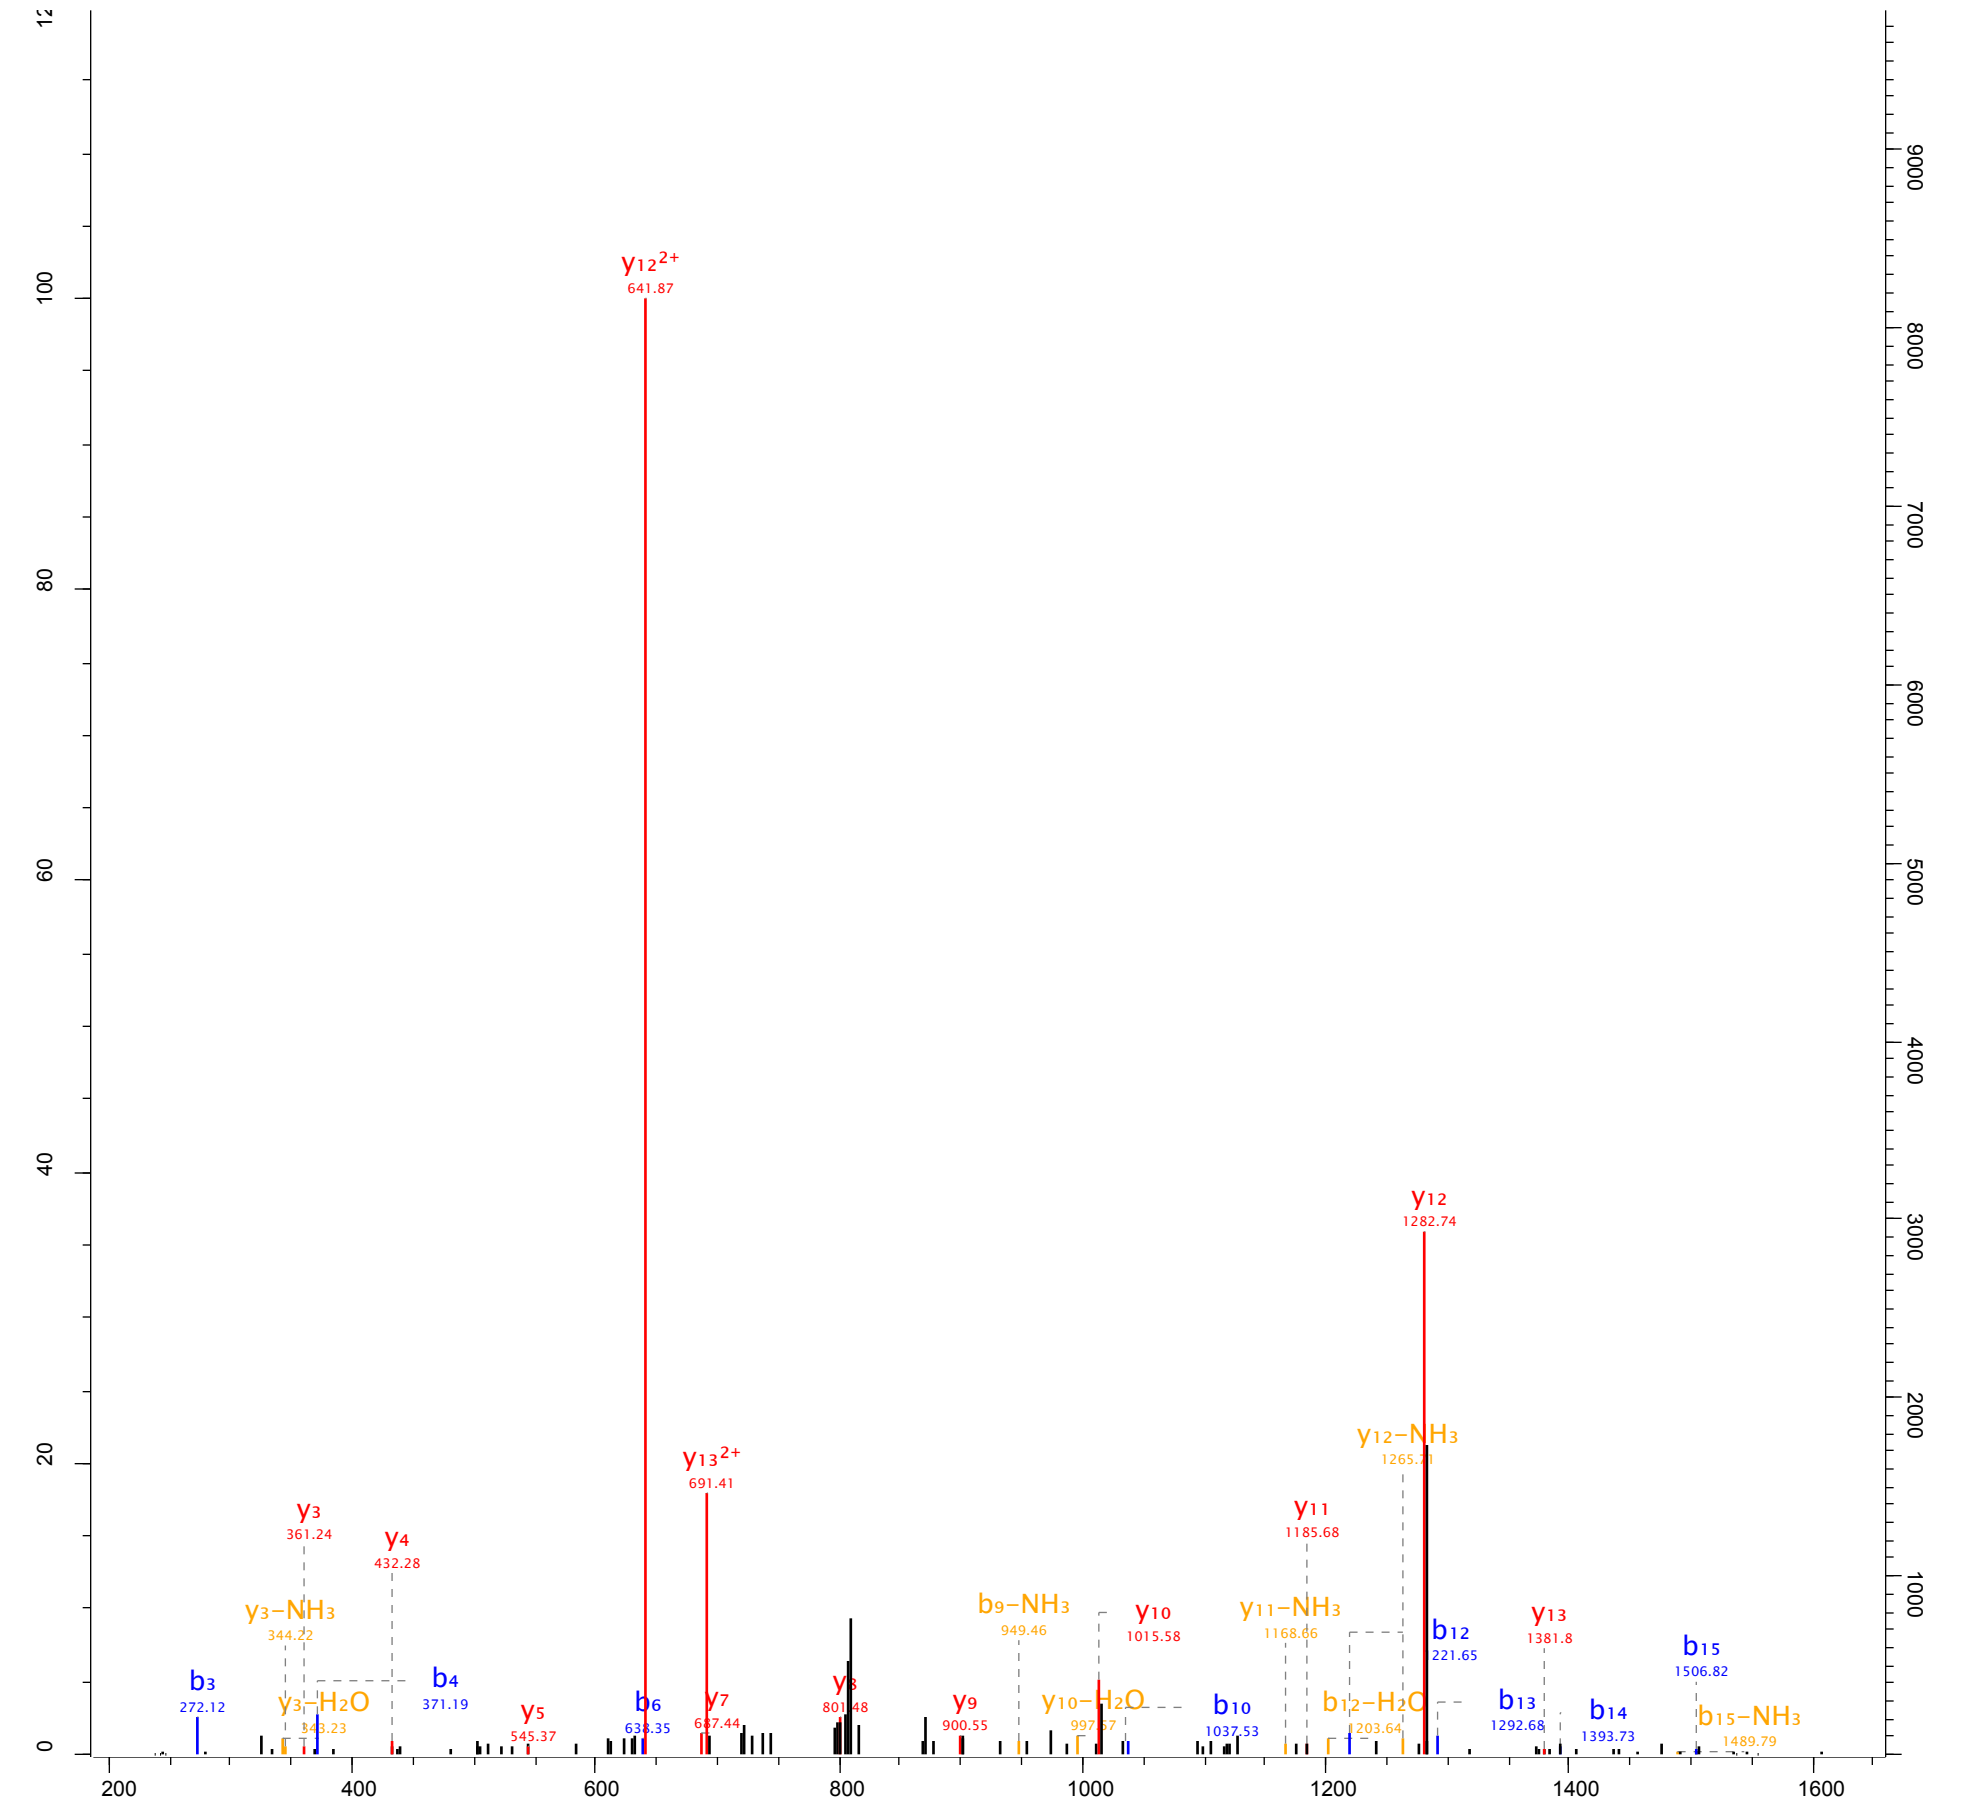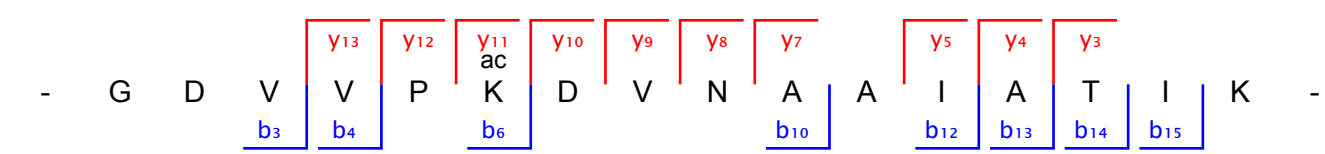

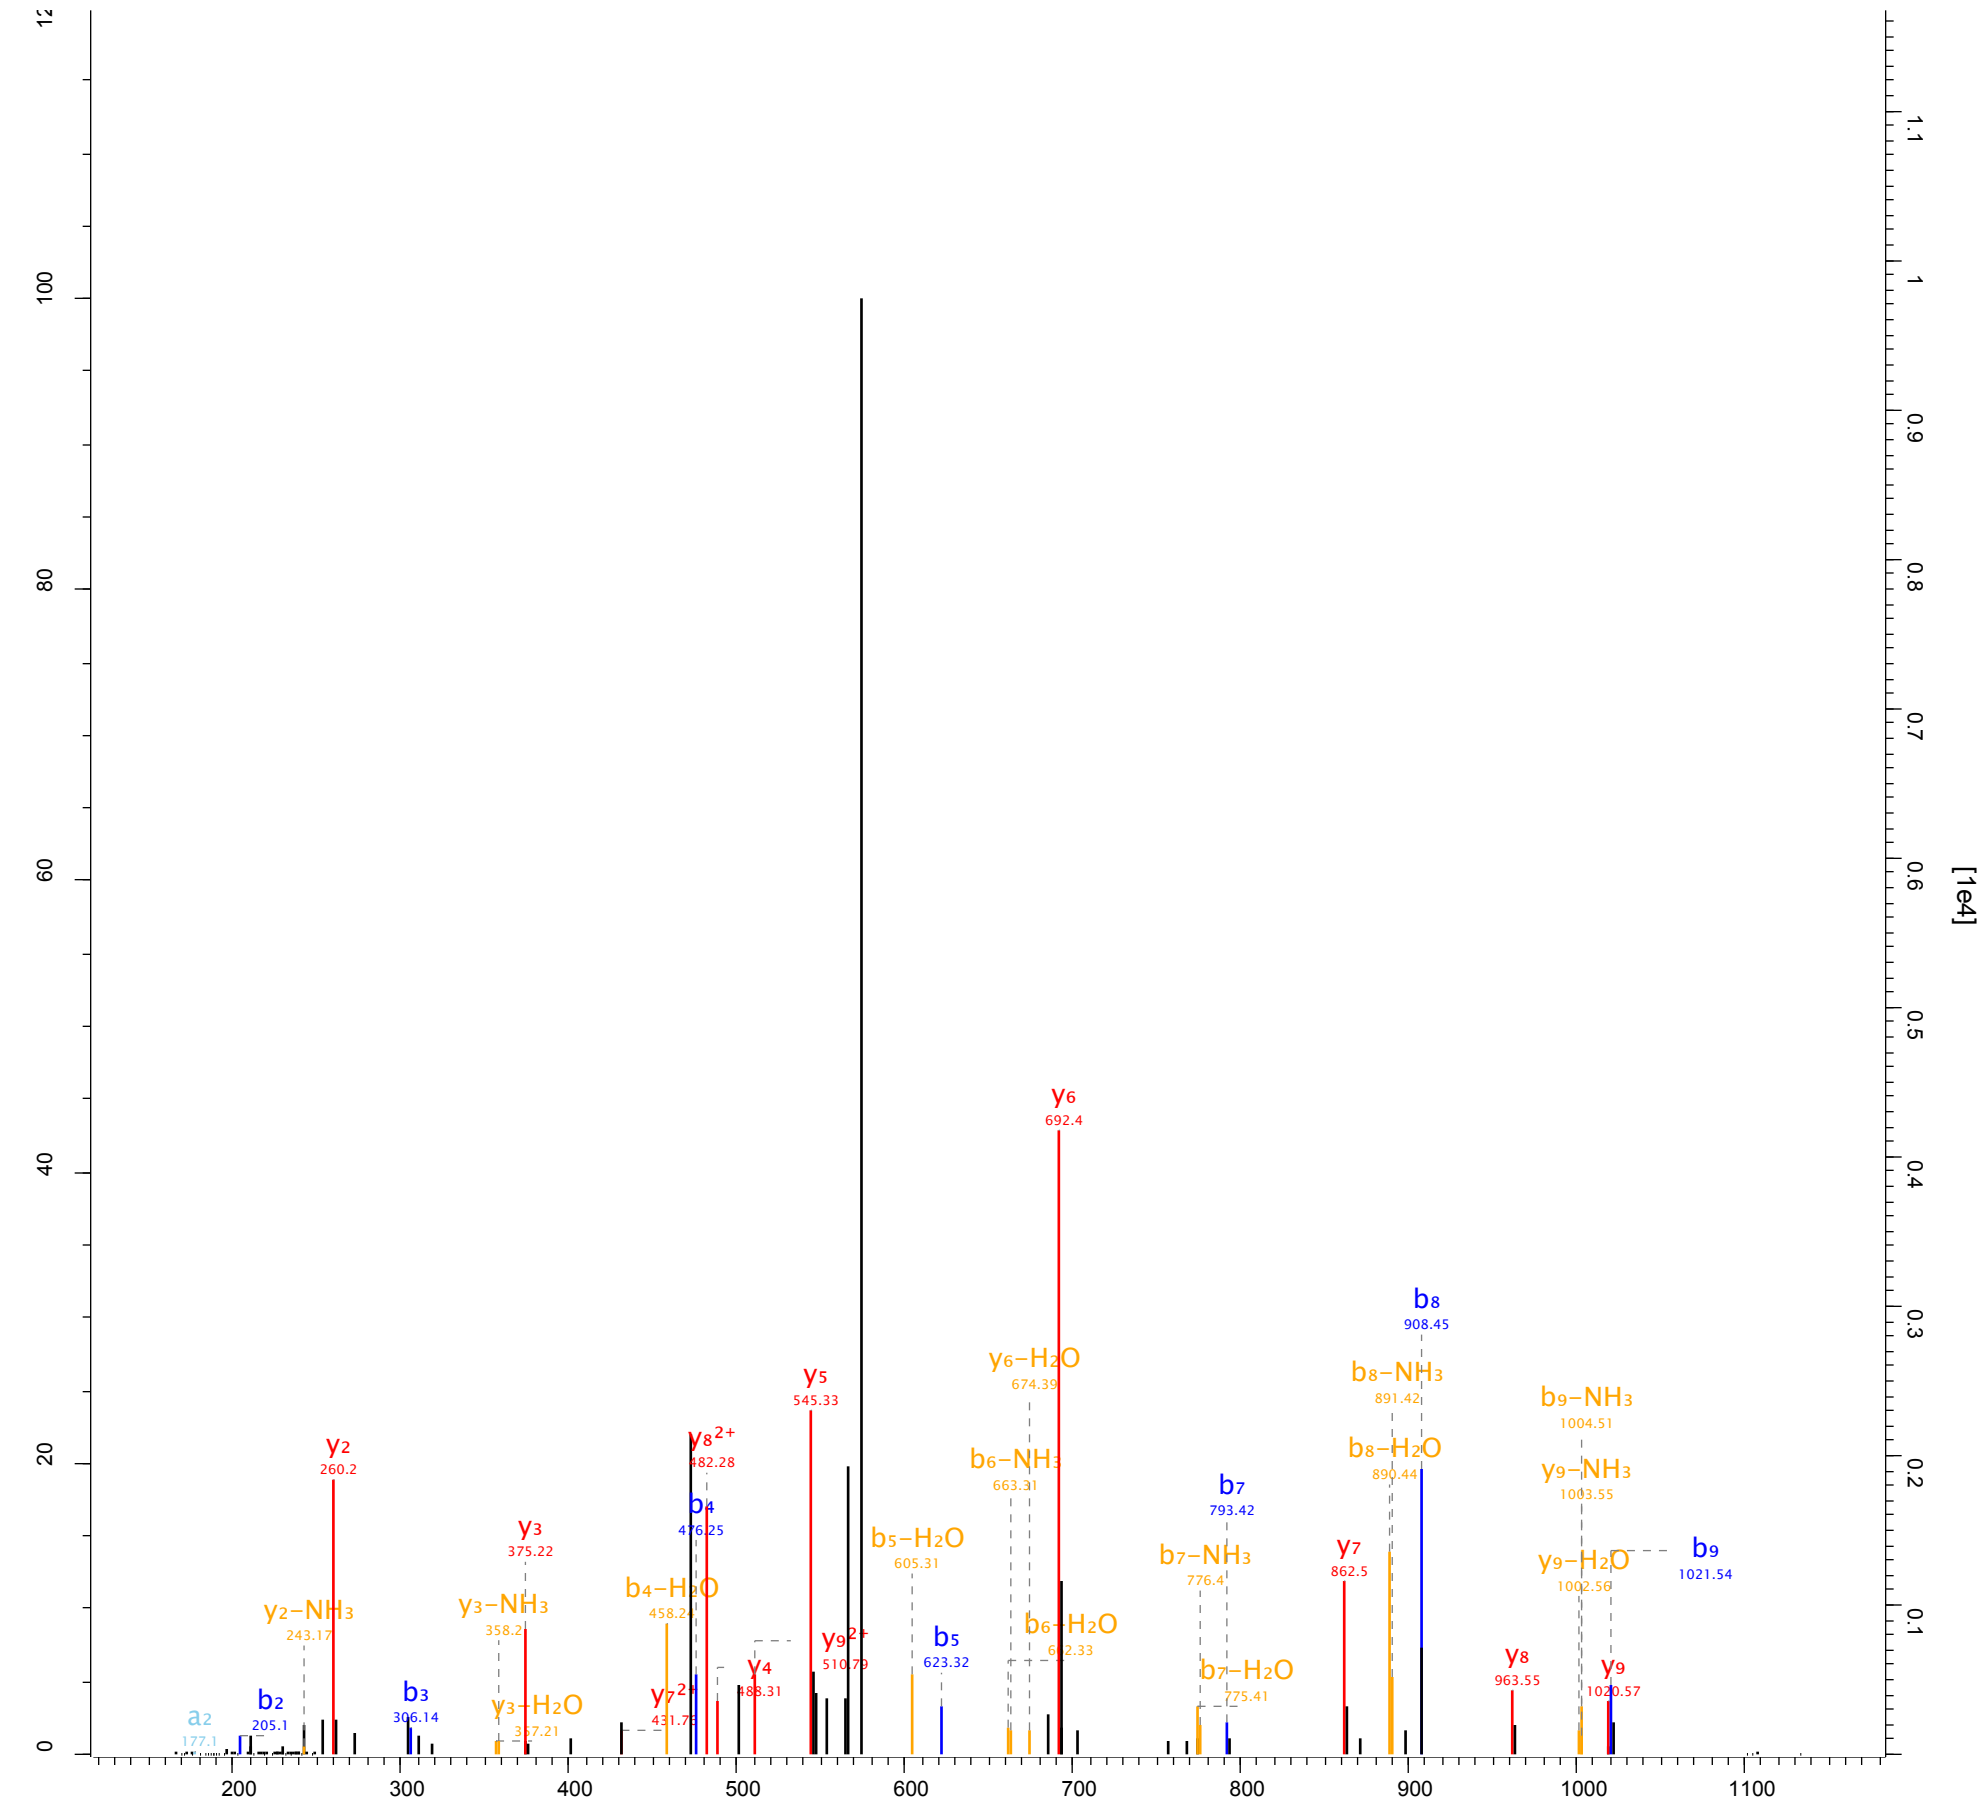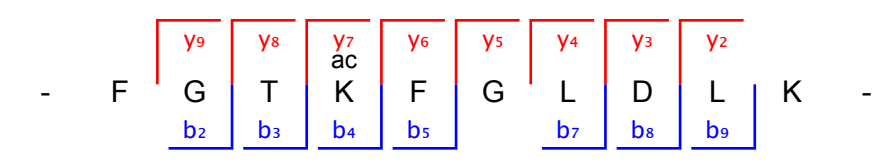

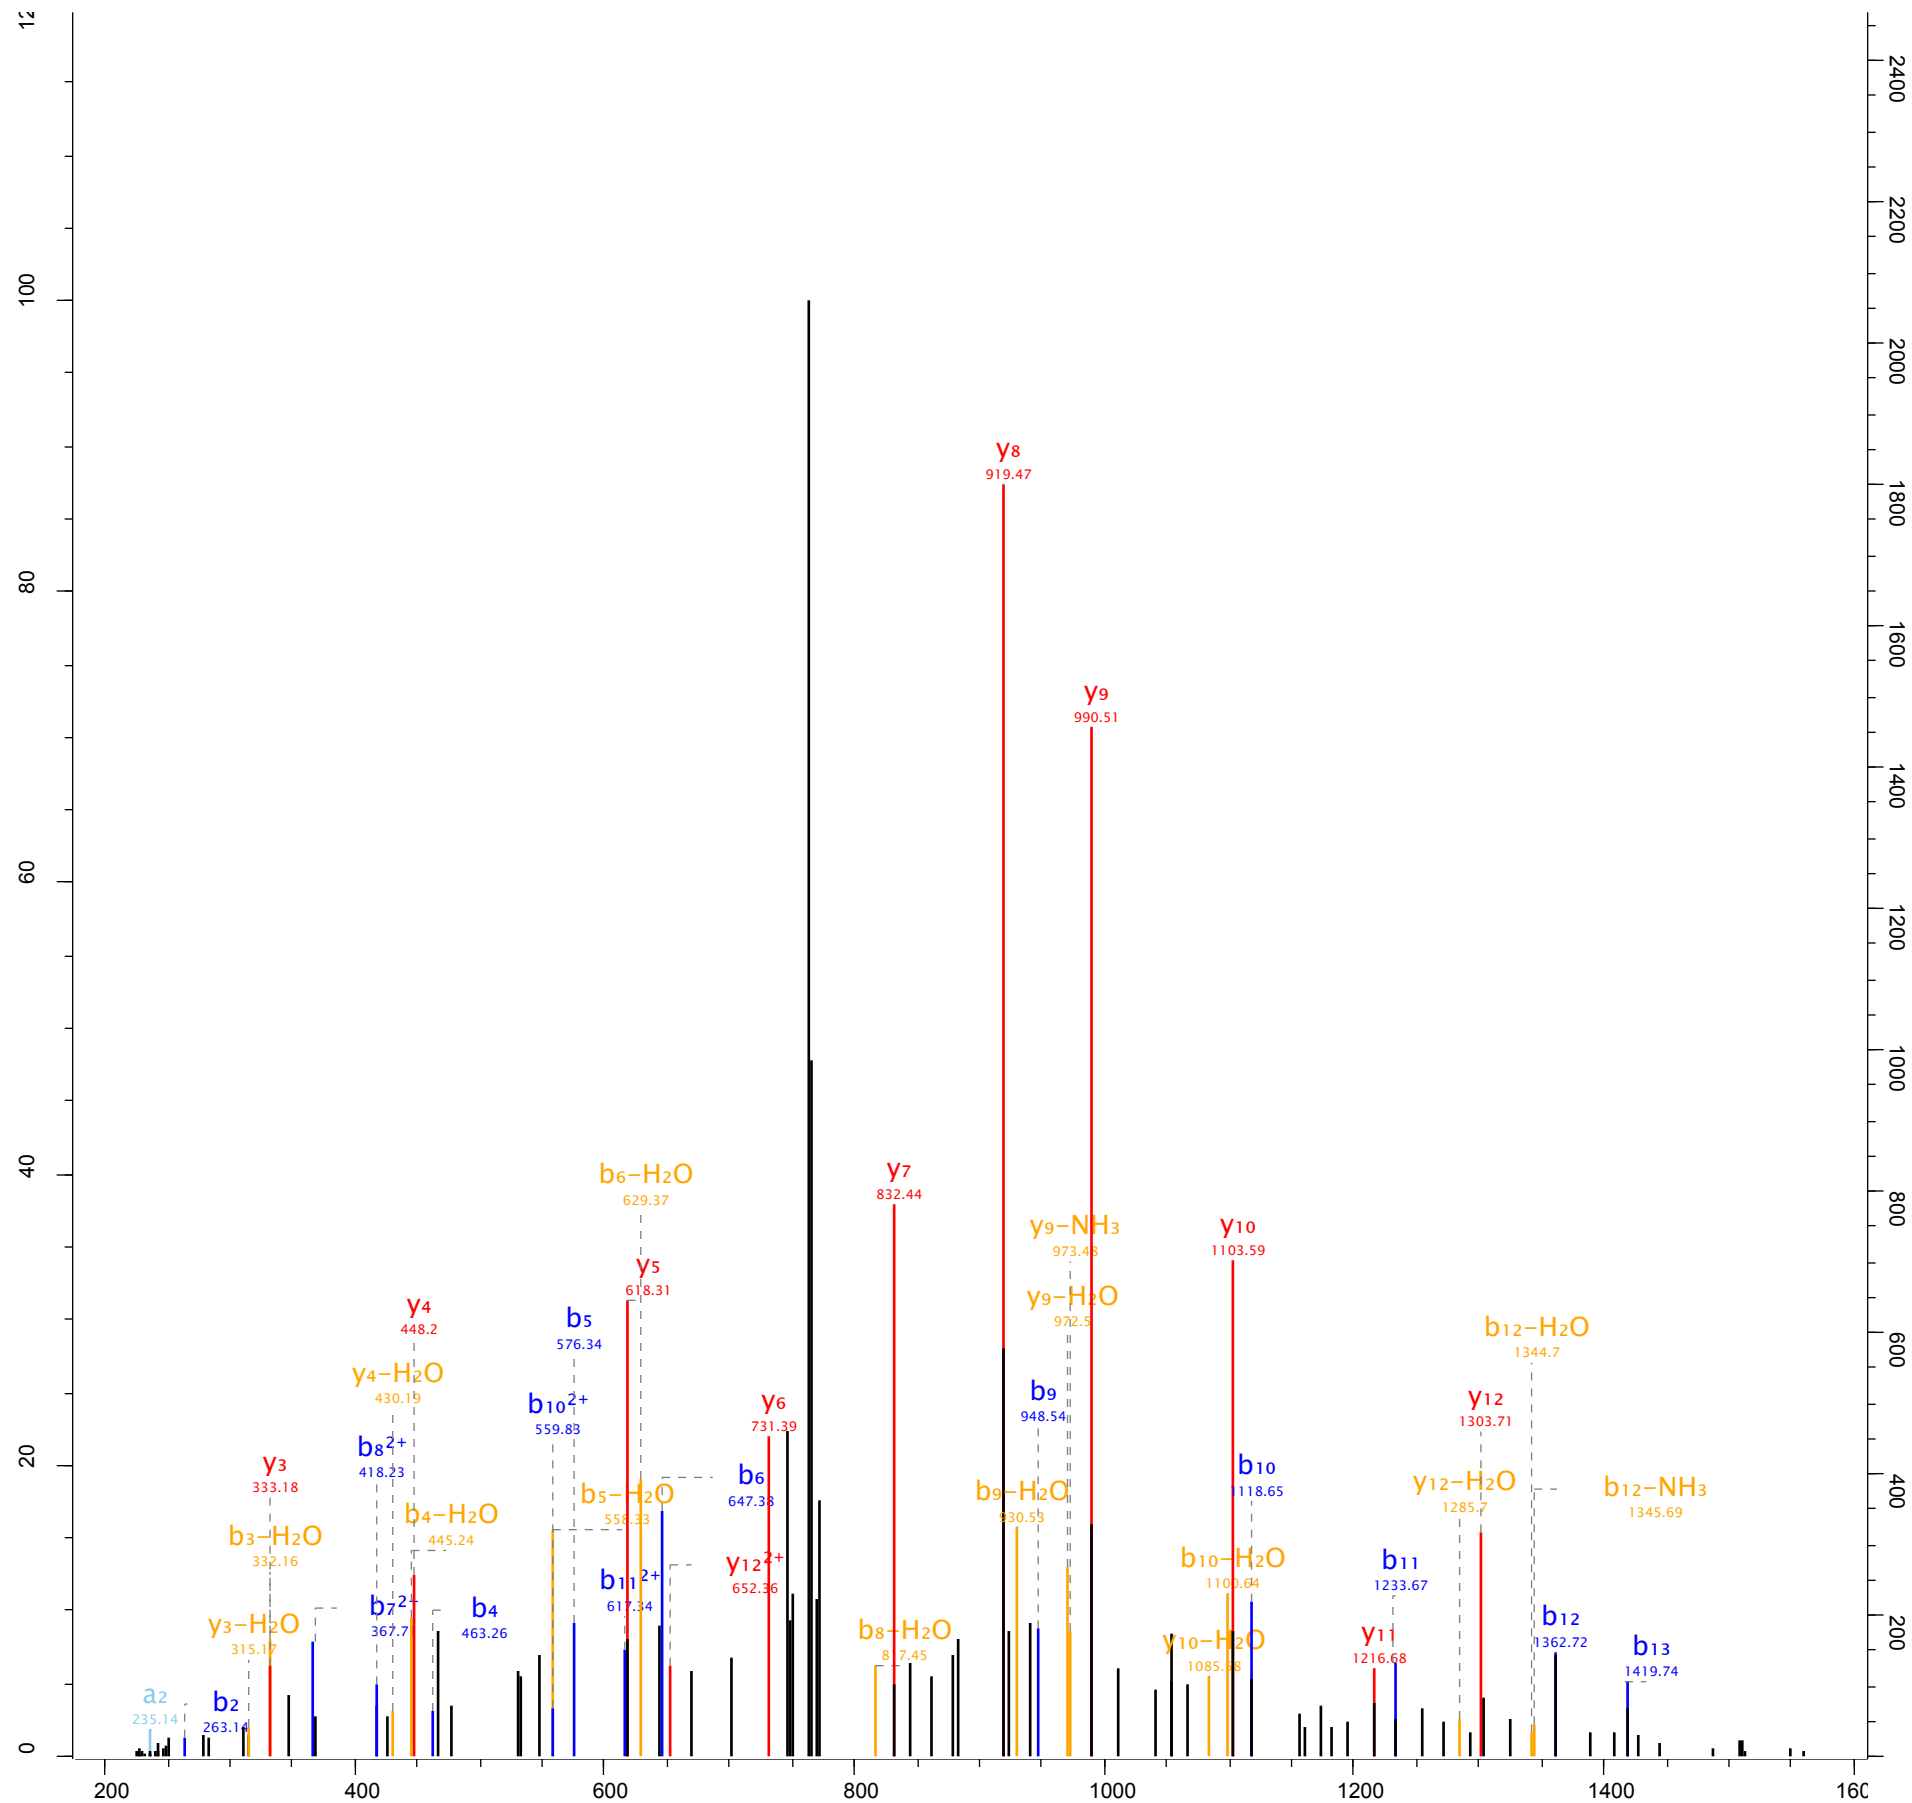

- V Y S I L A S T L K D E G K -  
 b<sub>2</sub> b<sub>4</sub> b<sub>5</sub> b<sub>6</sub> b<sub>7</sub><sup>2+</sup> b<sub>8</sub><sup>2+</sup> b<sub>9</sub> b<sub>10</sub> b<sub>11</sub> b<sub>12</sub> b<sub>13</sub>



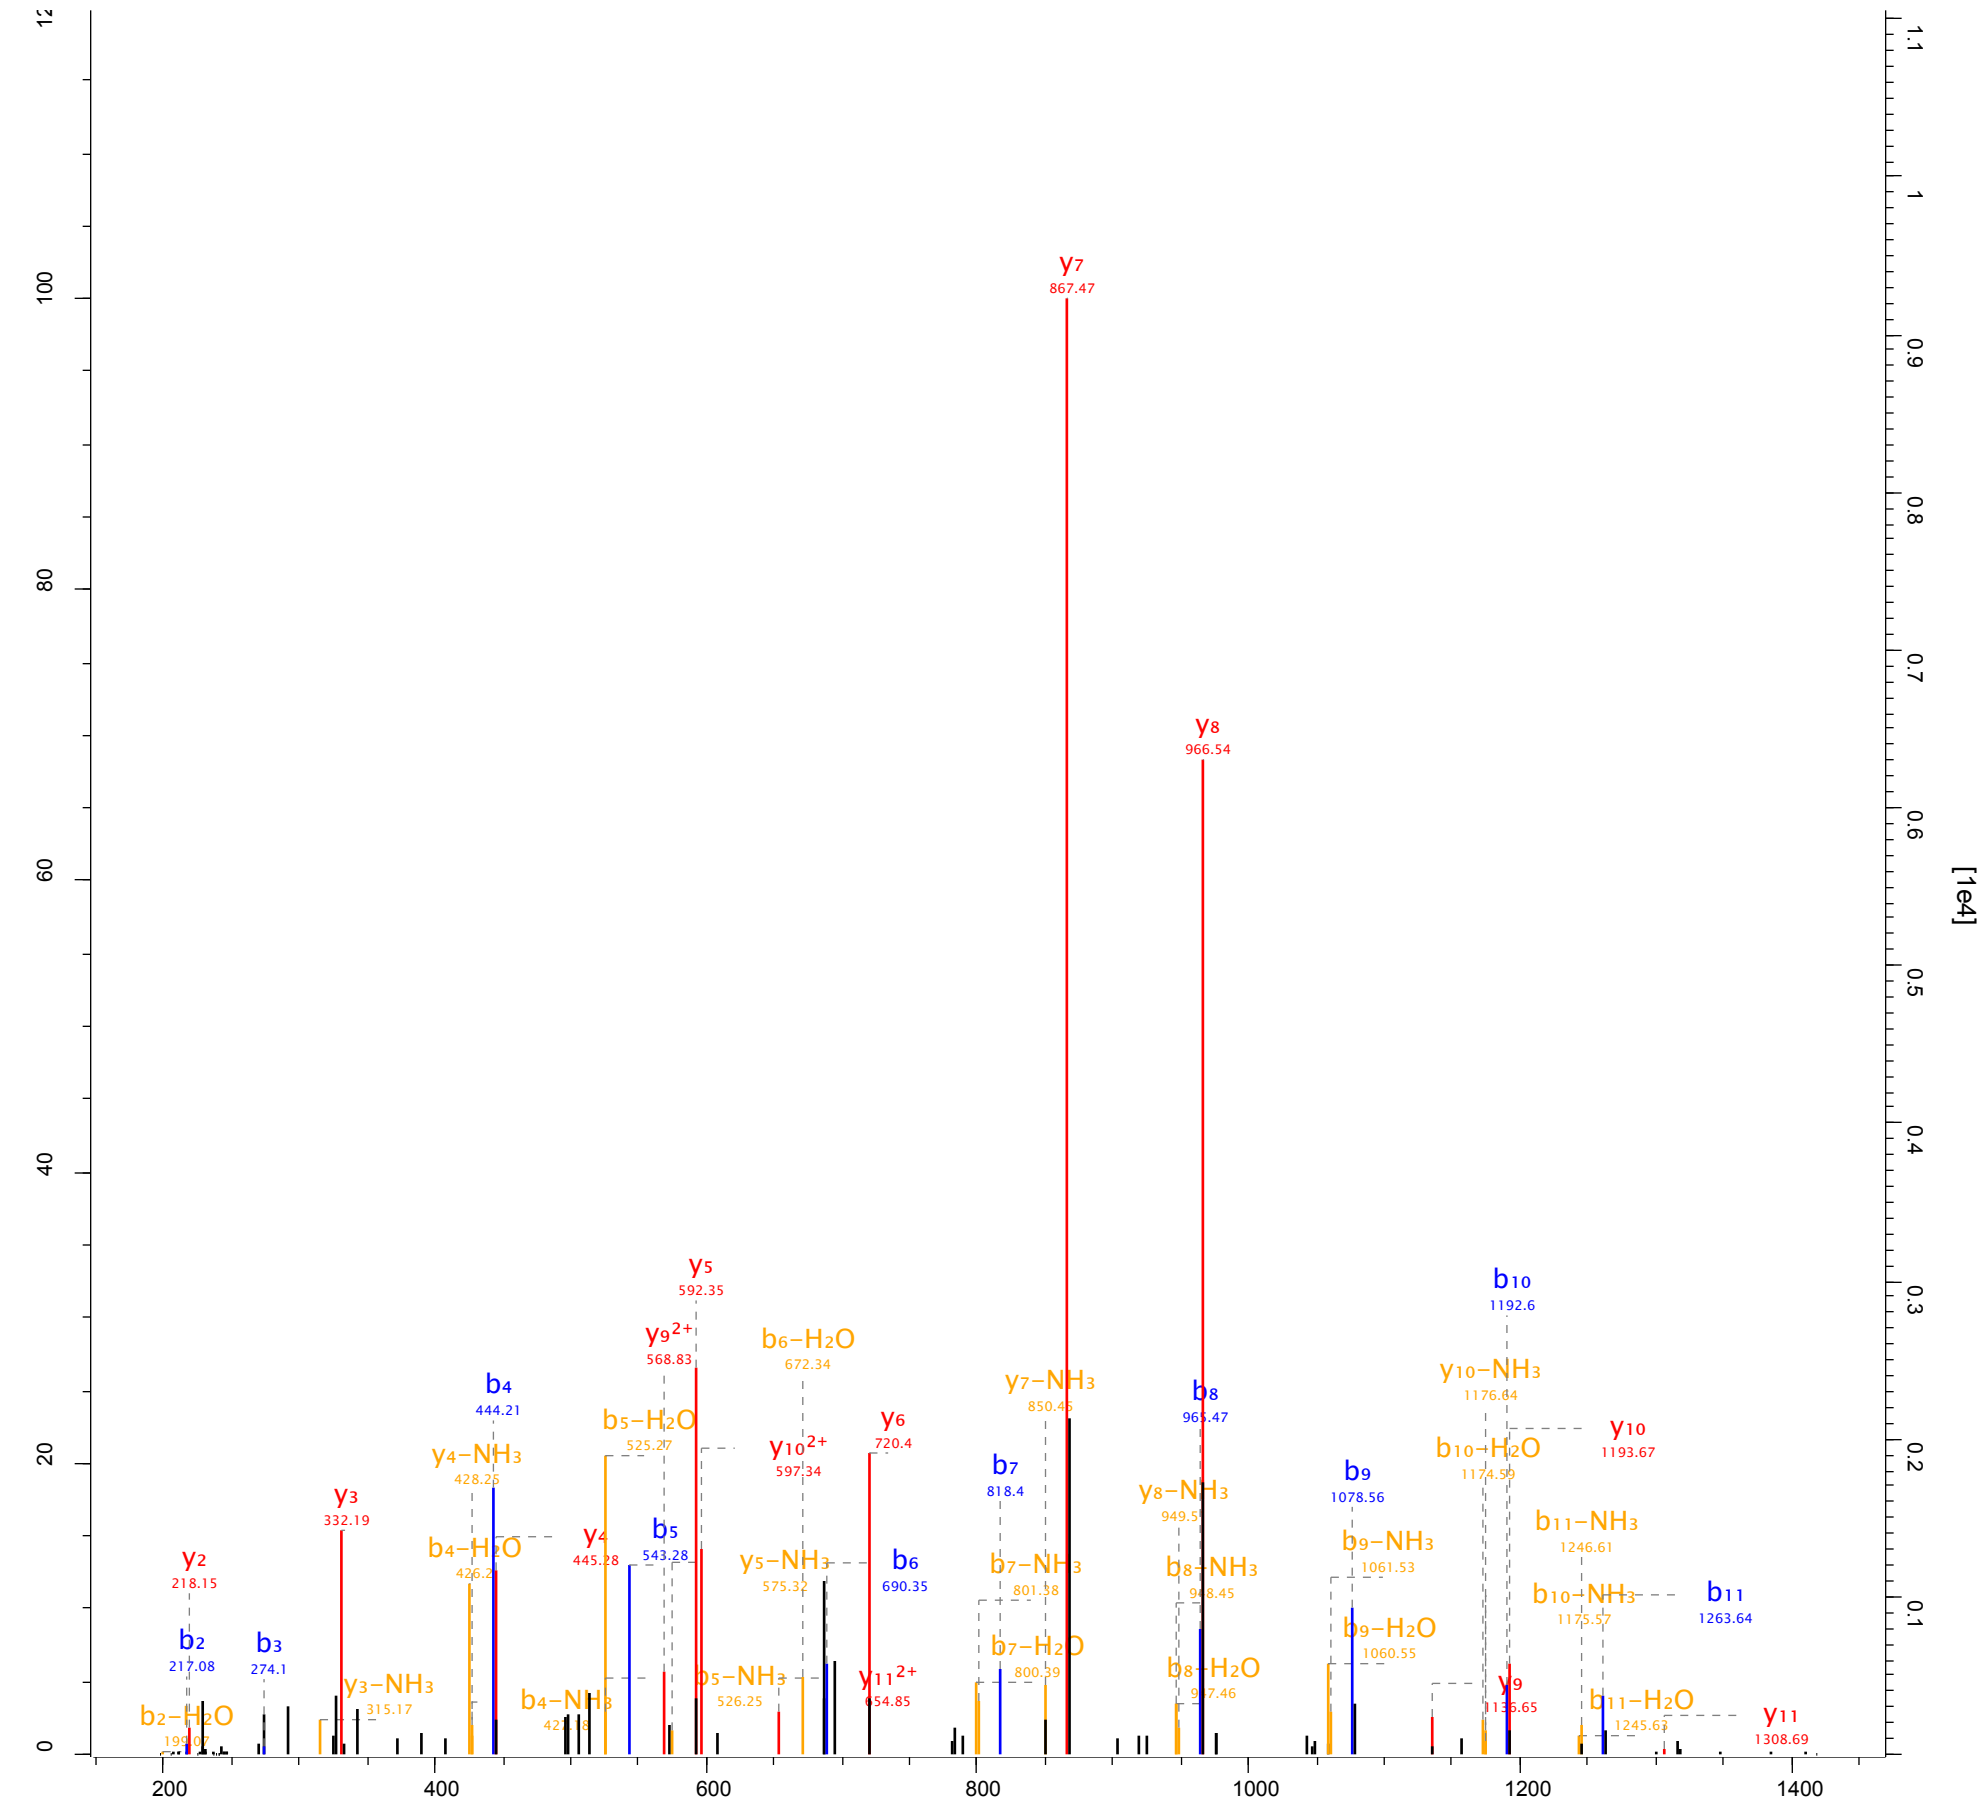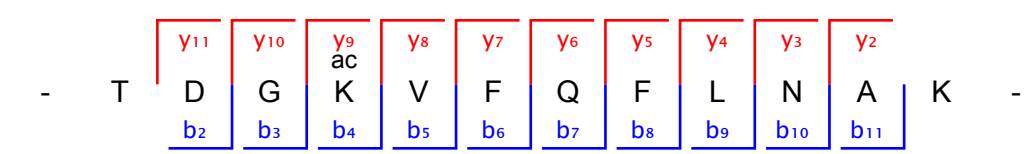

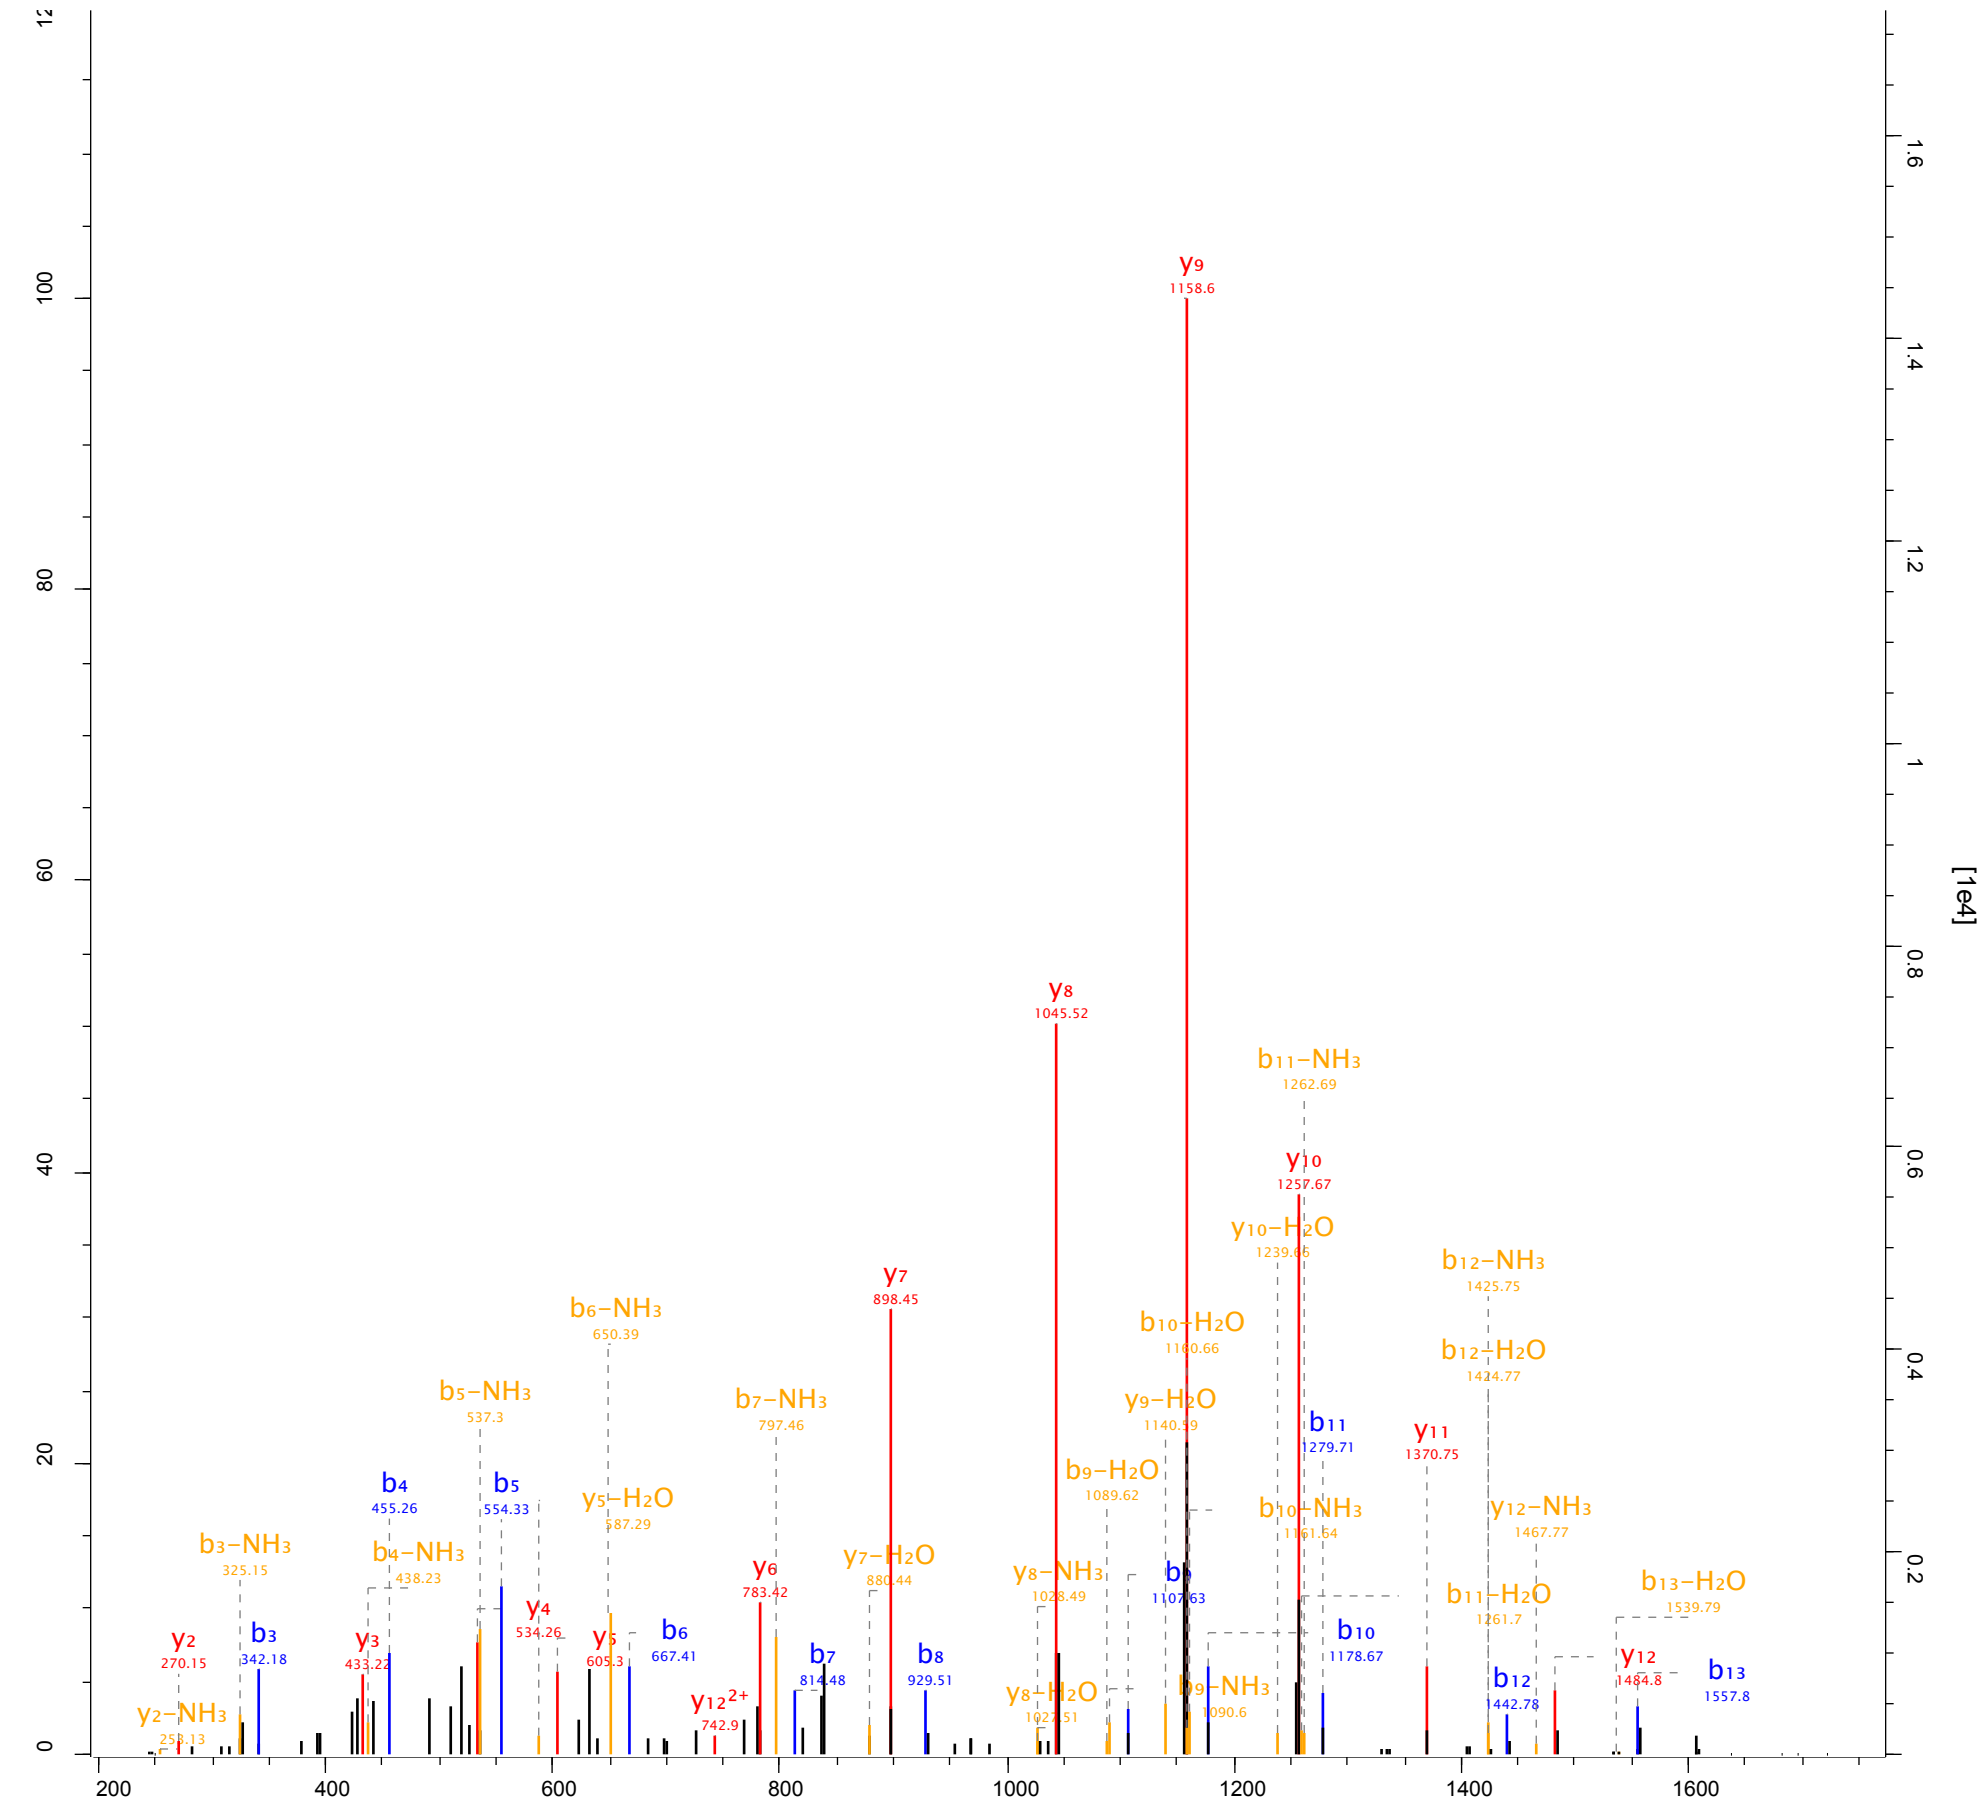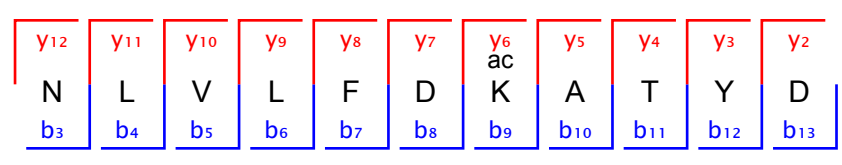

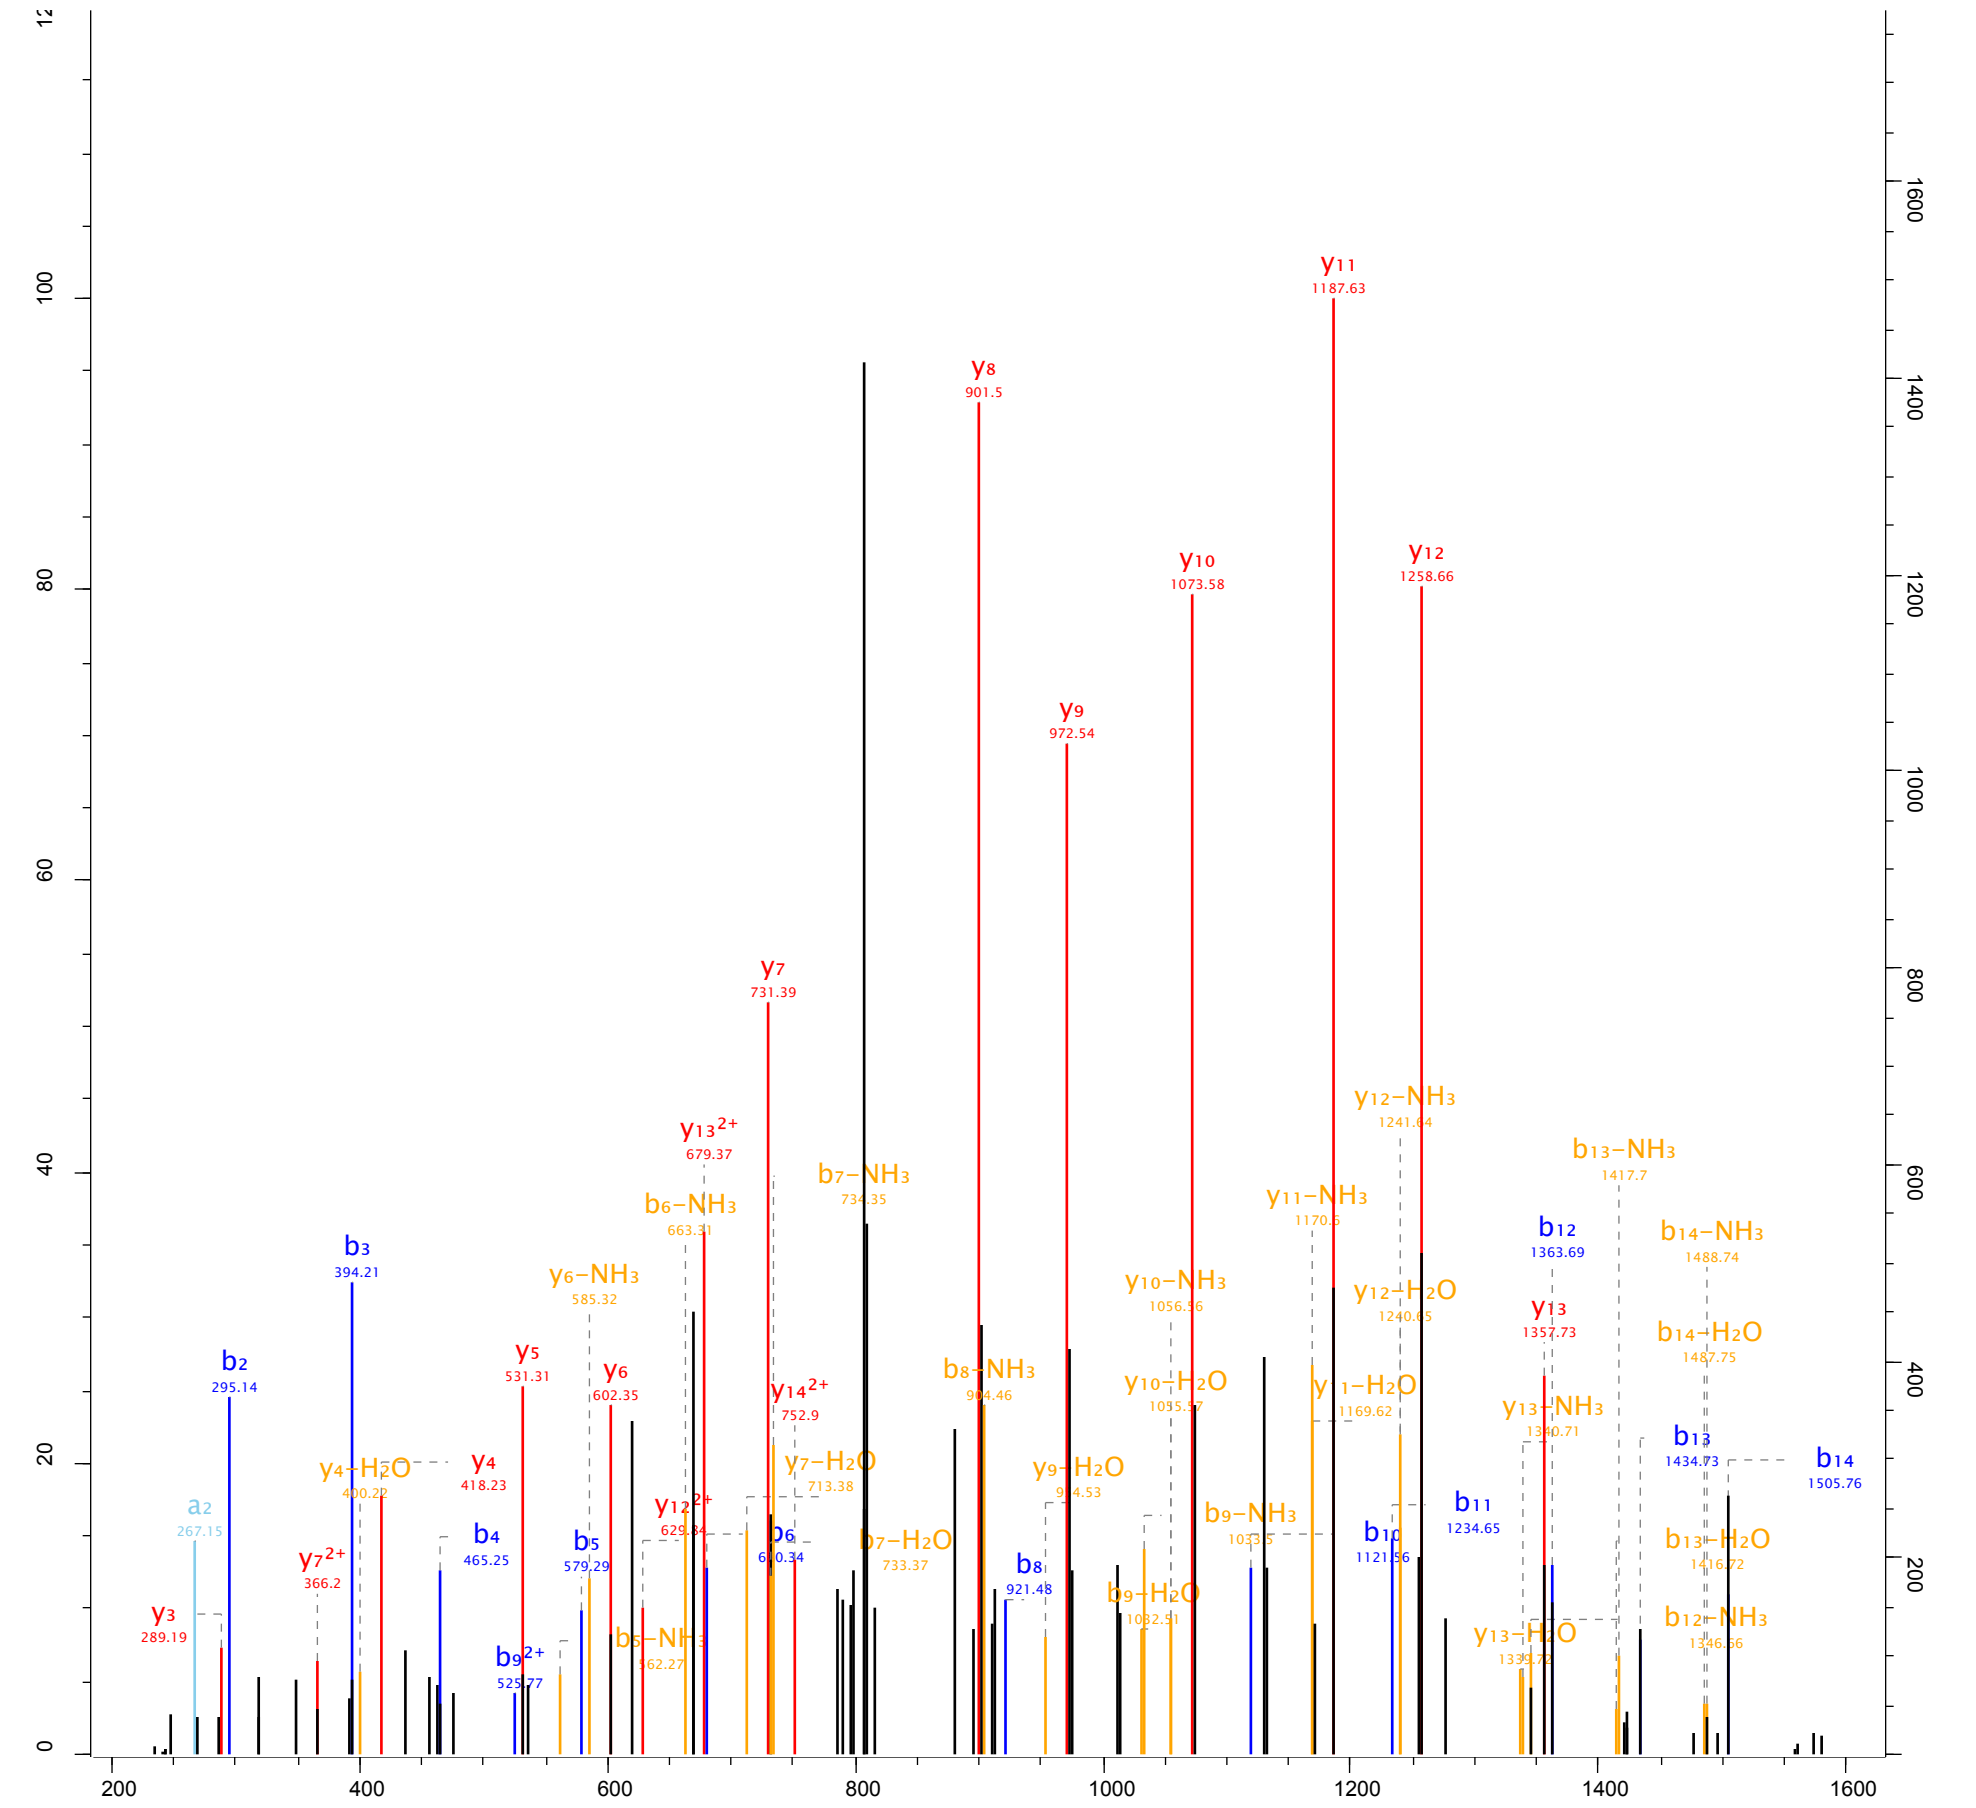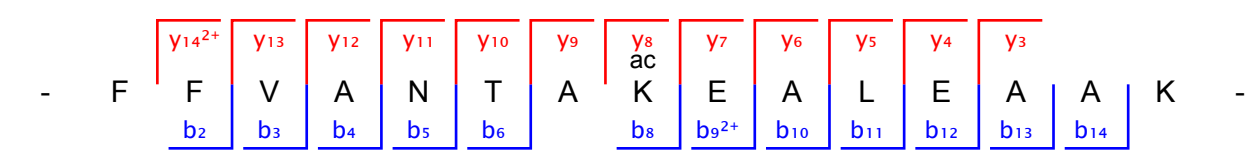

052413\_SCW\_II\_29\_Second\_ZT\_19\_4

16582

ITMS; CID

138.03

975.51

Txn

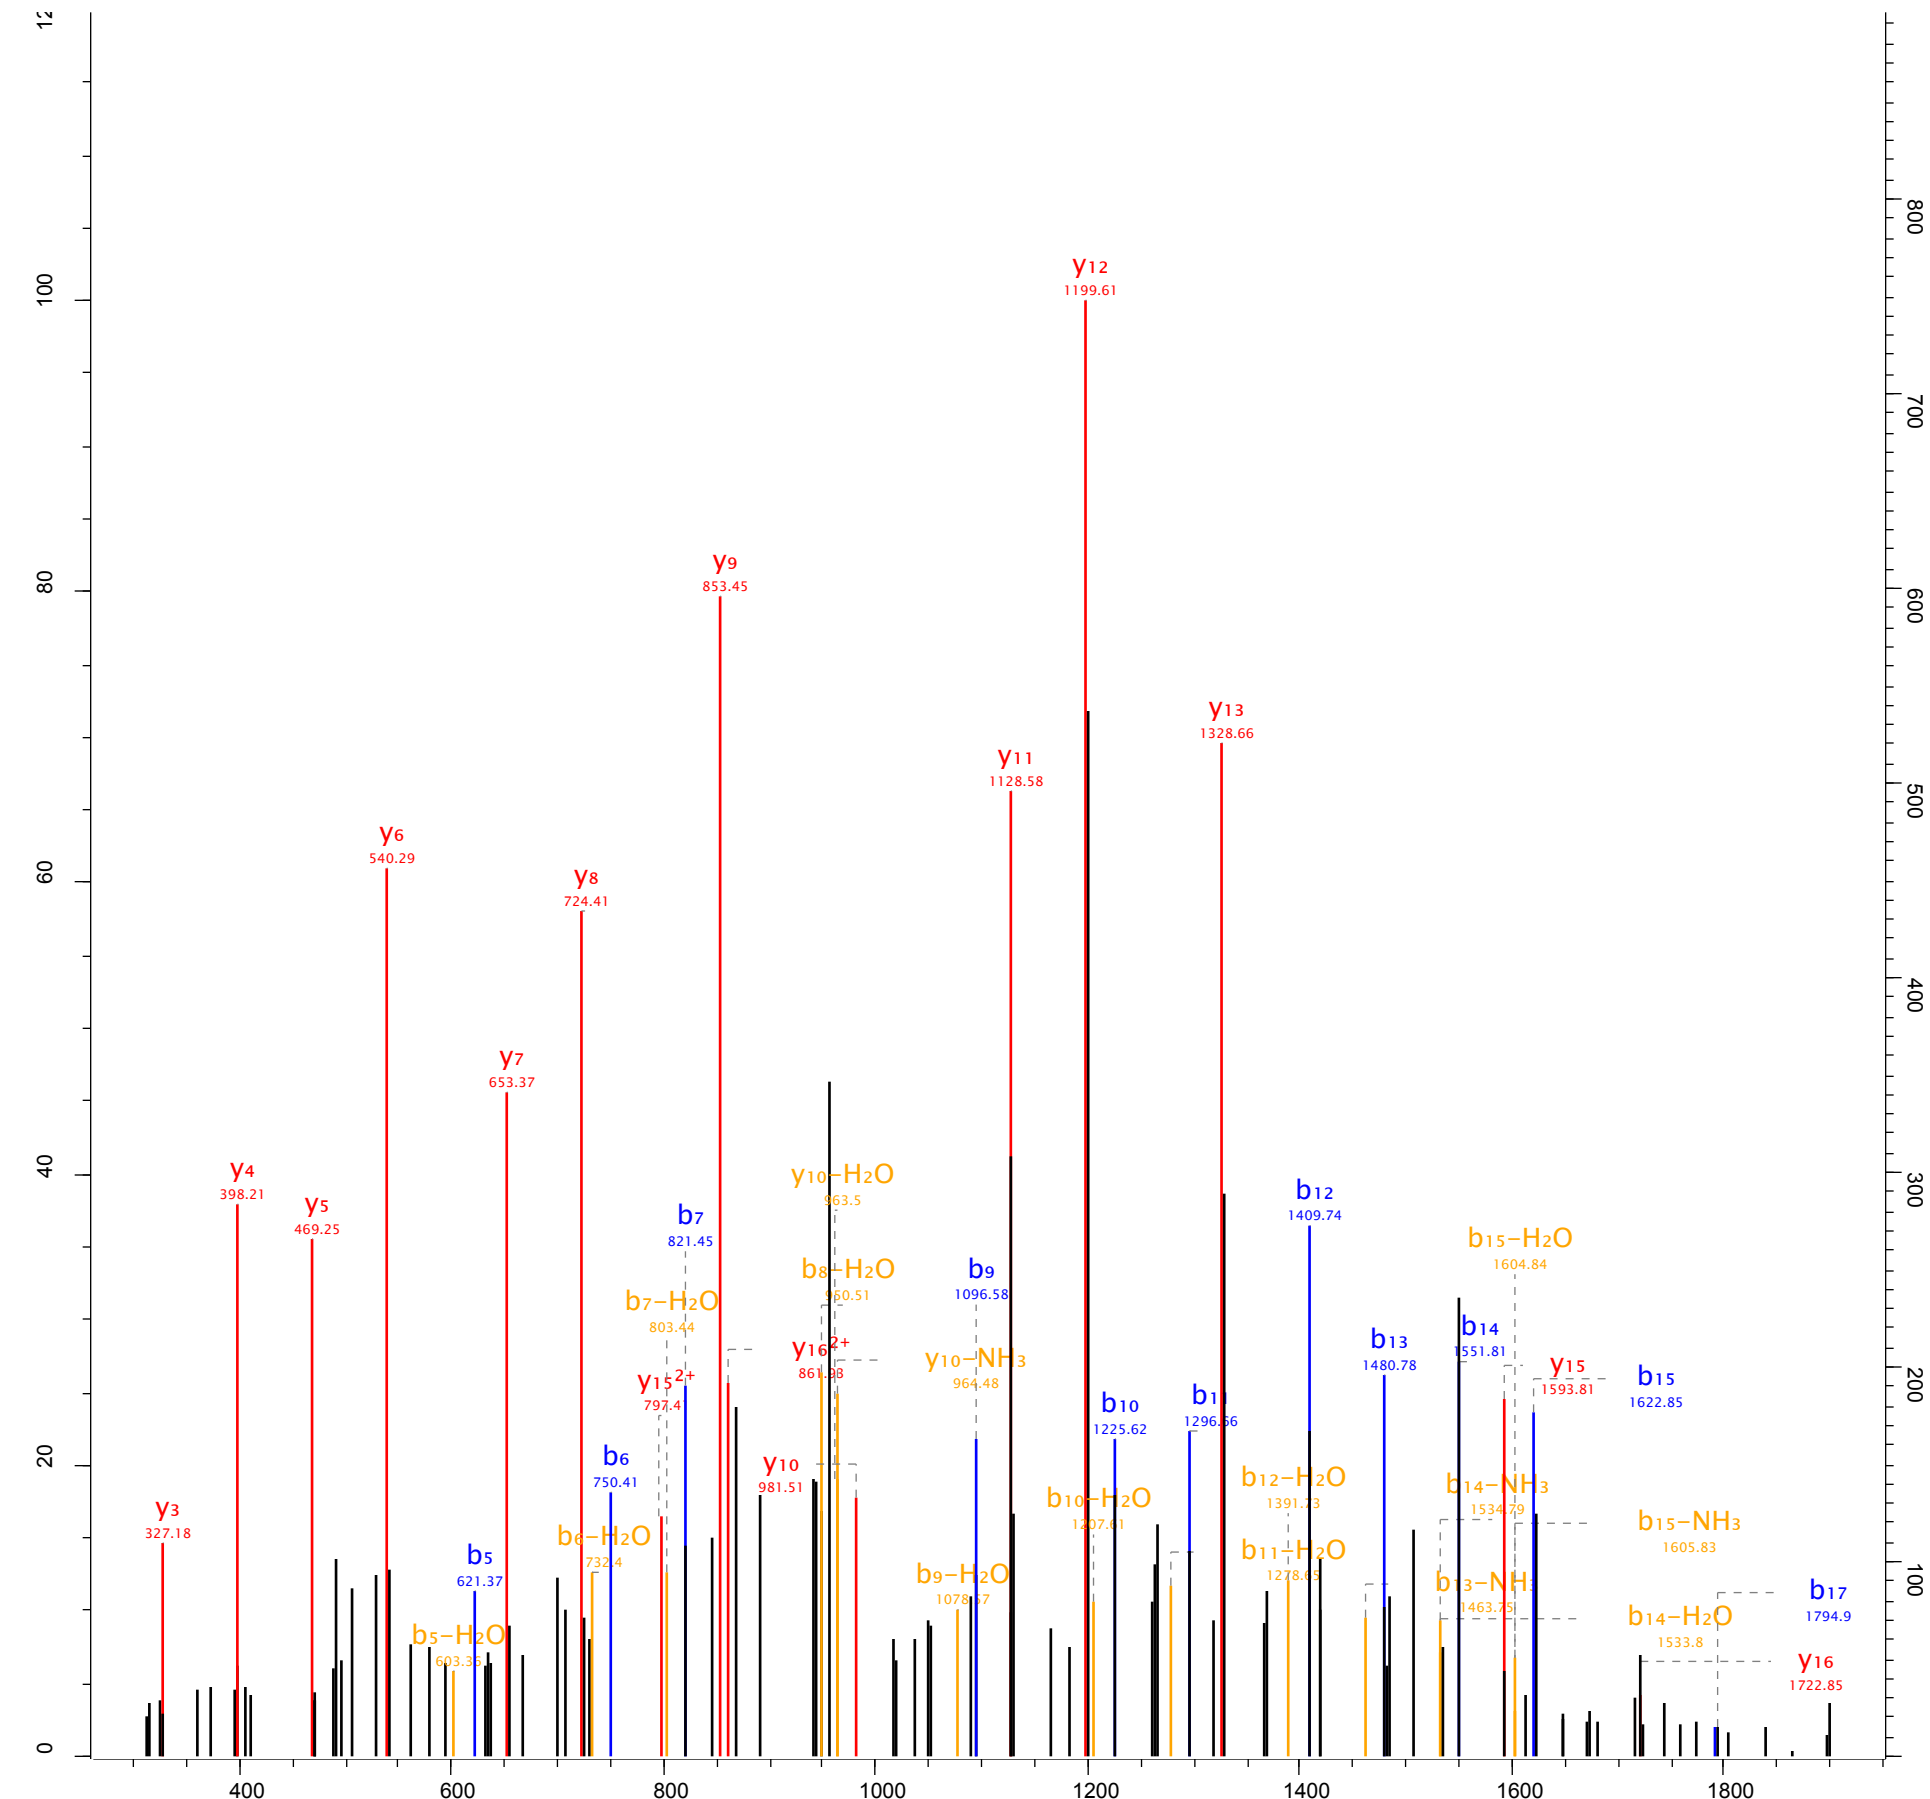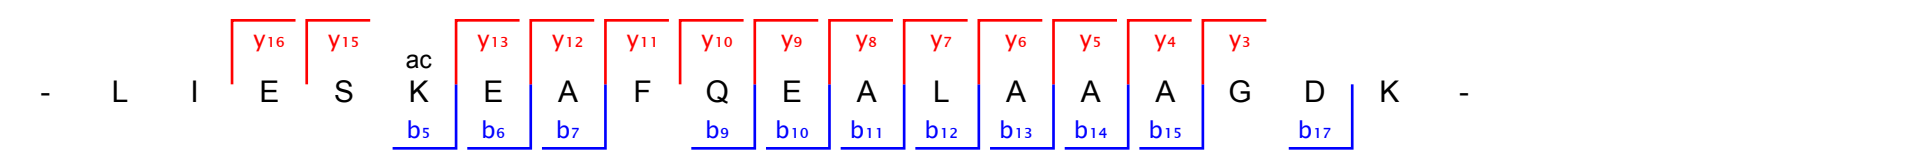

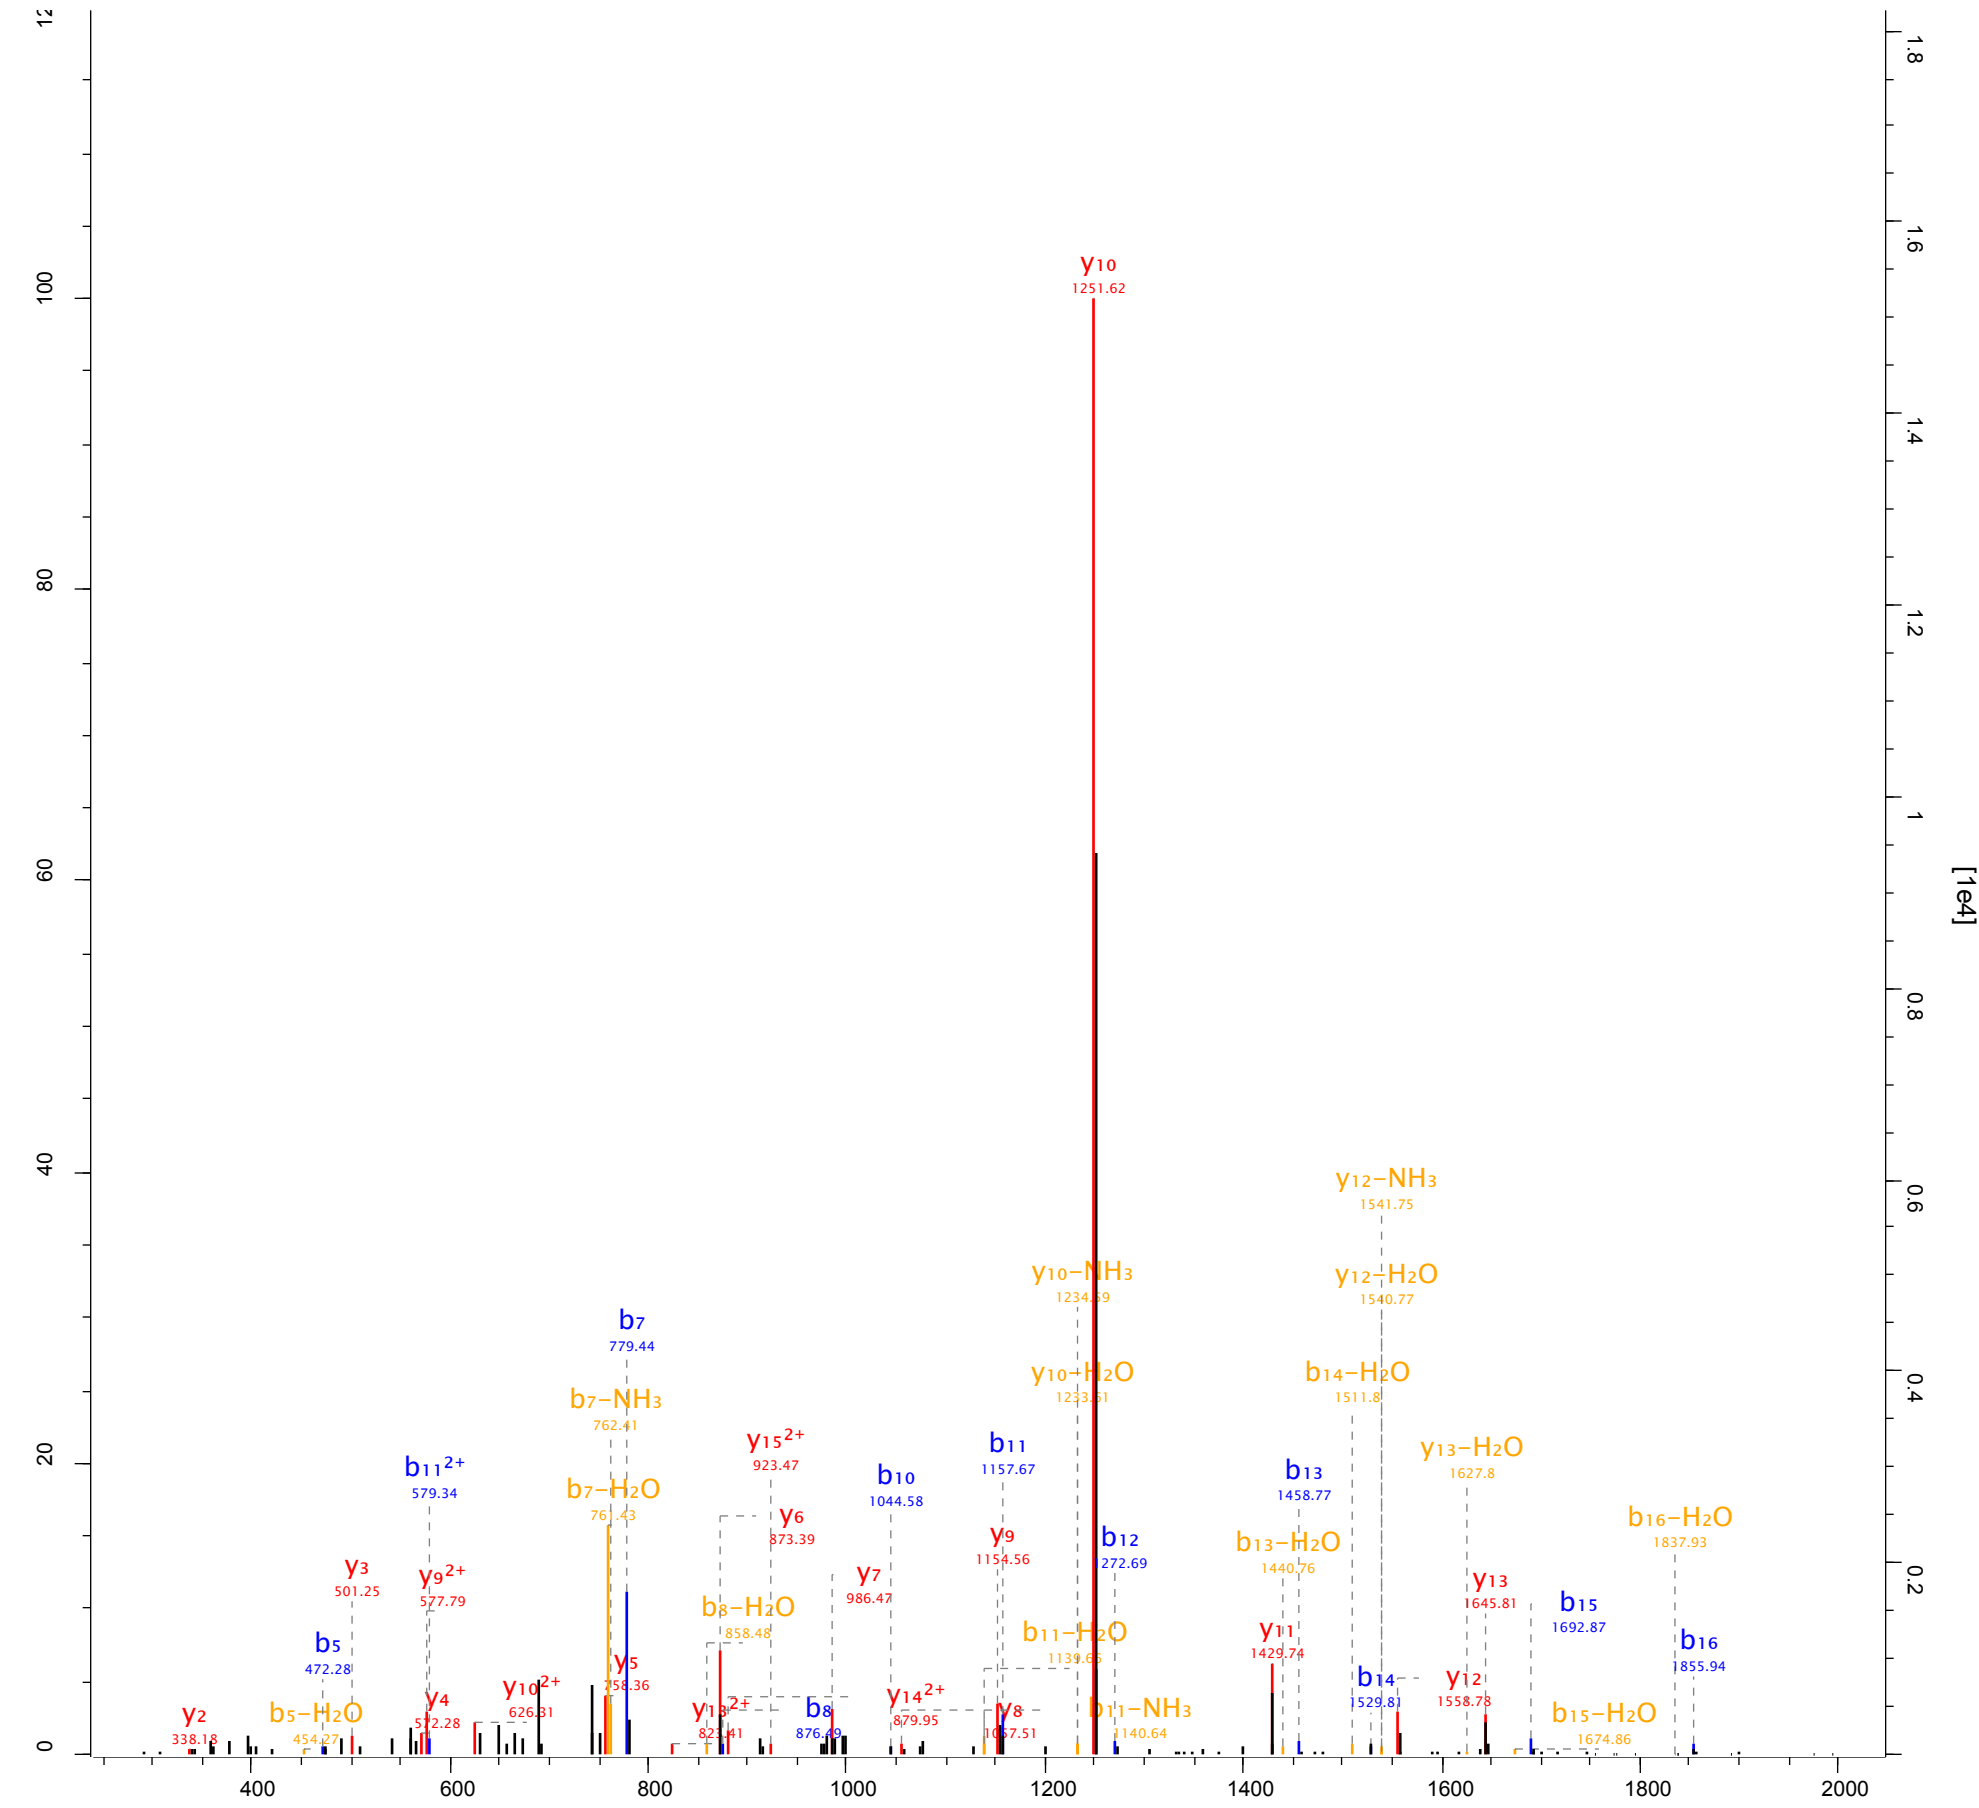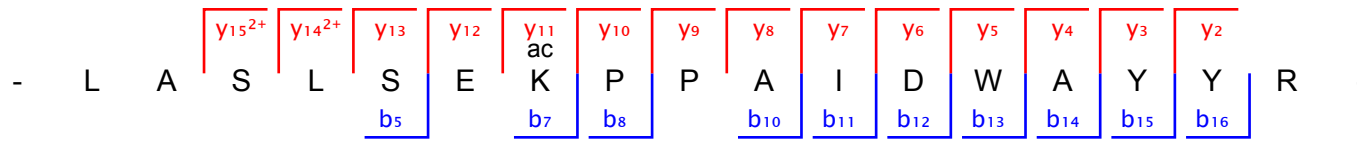

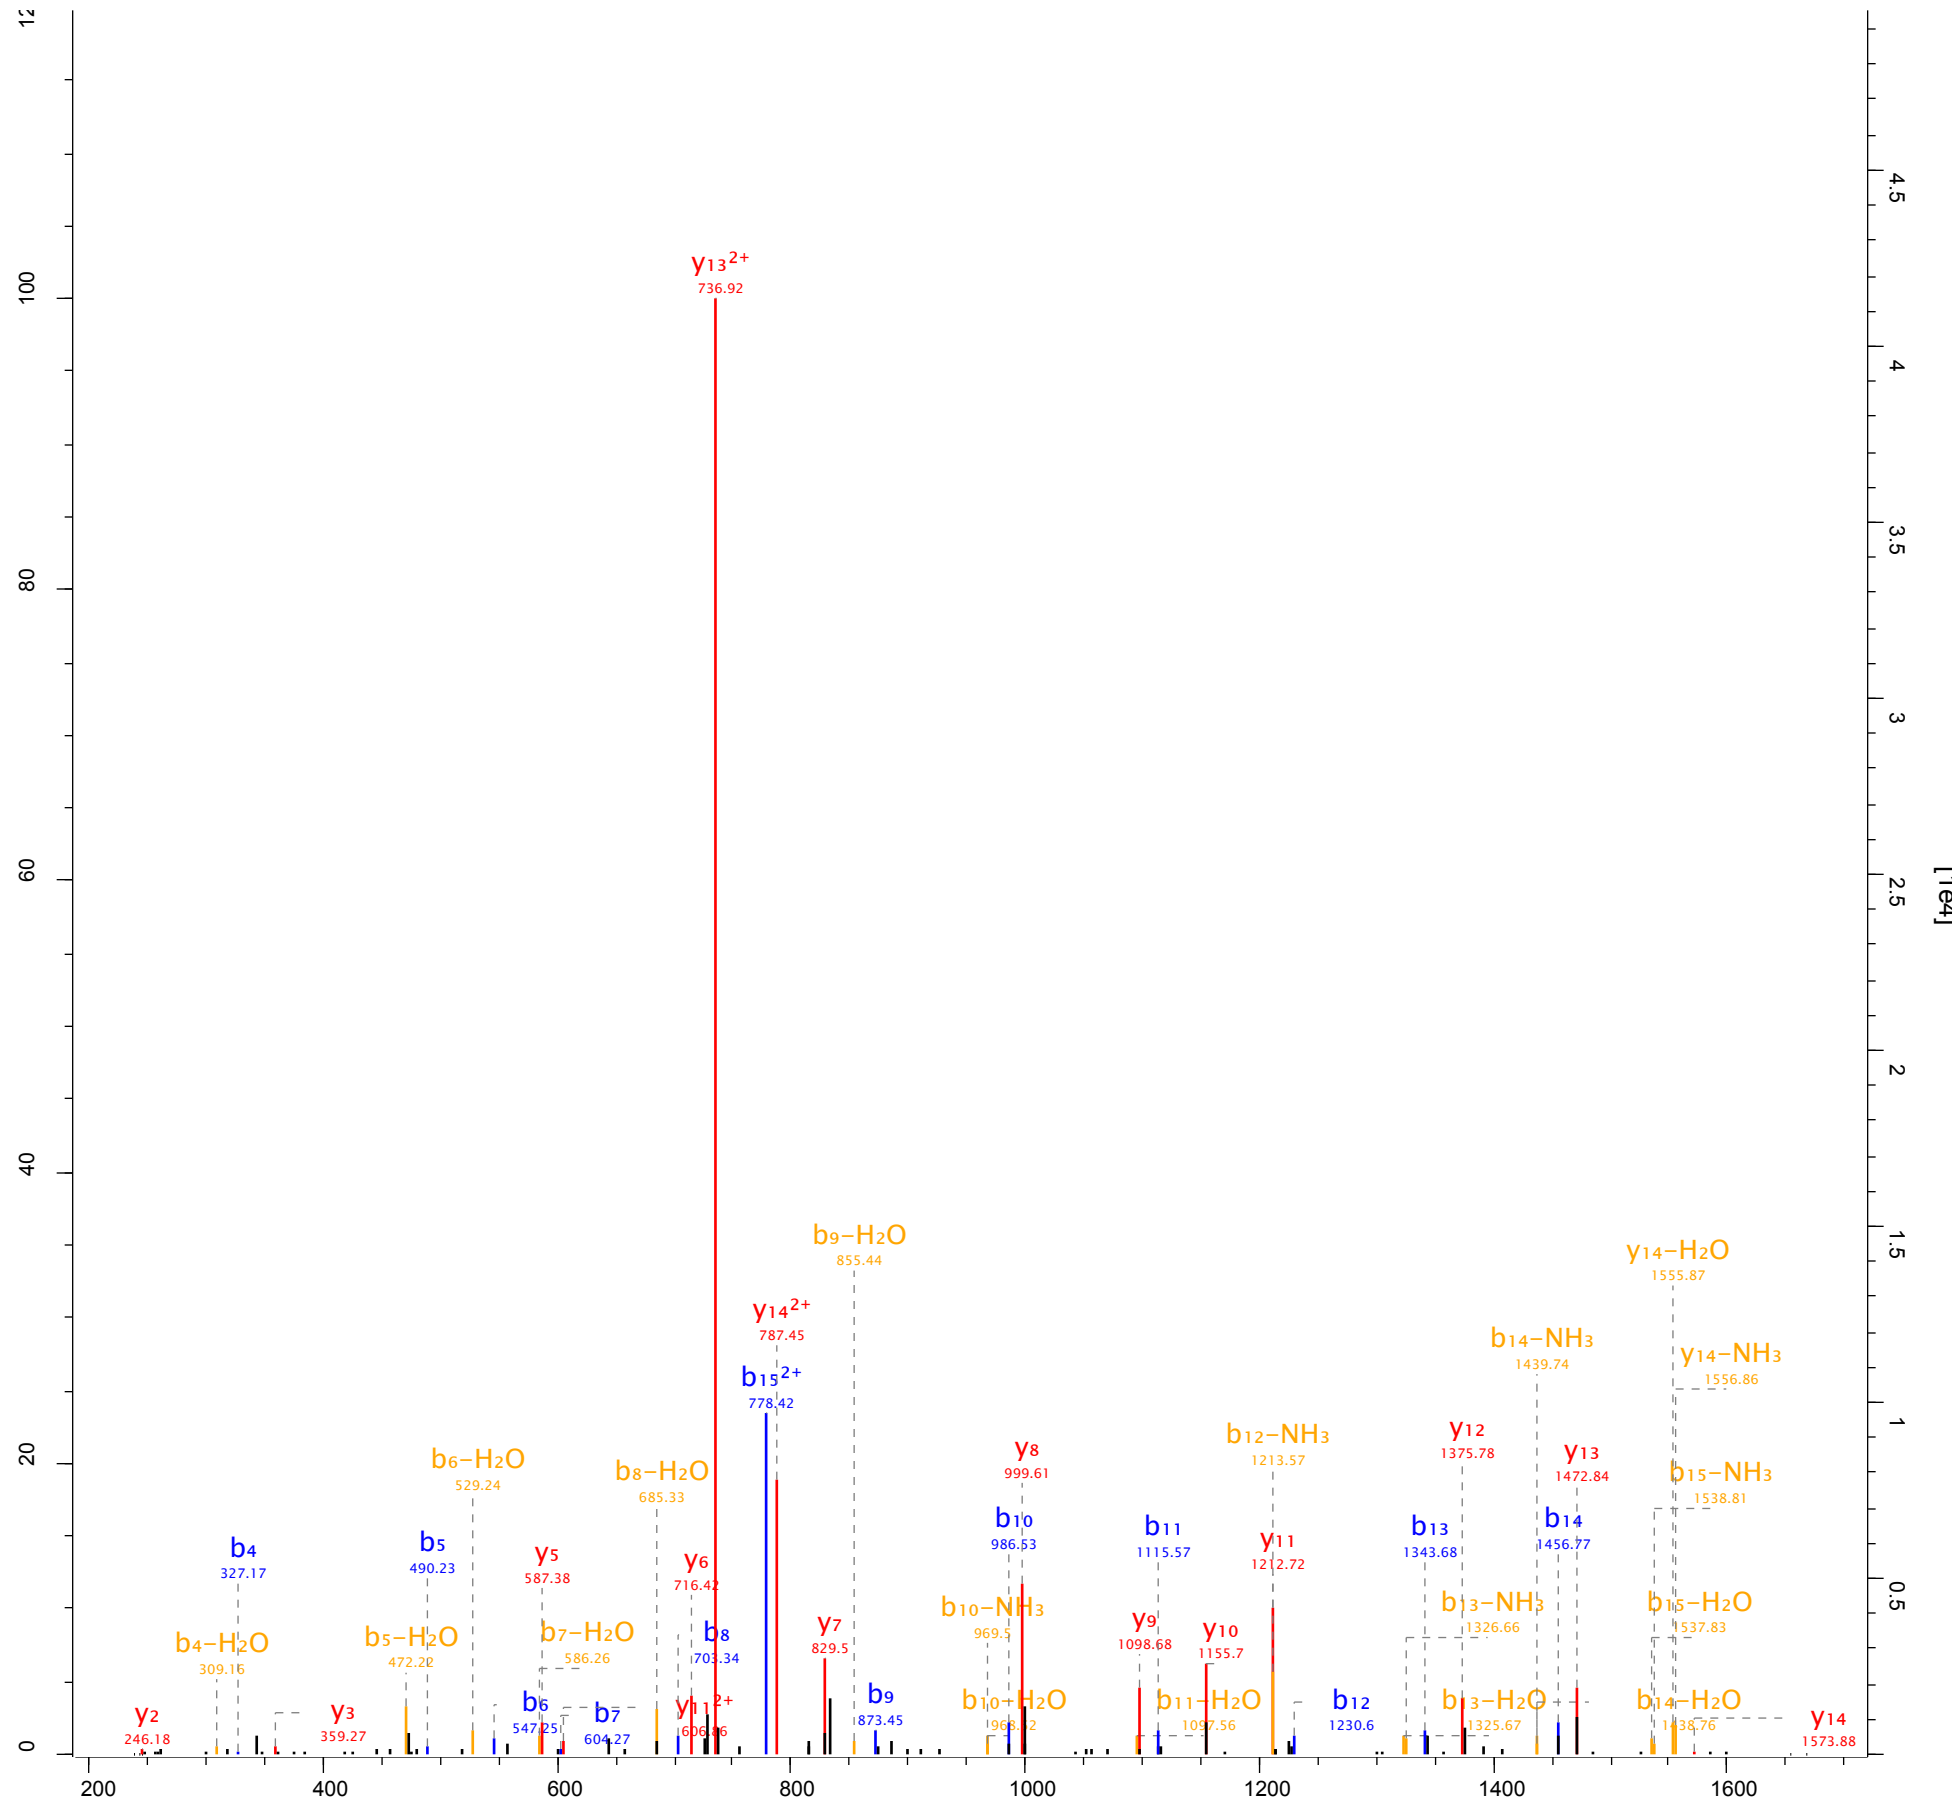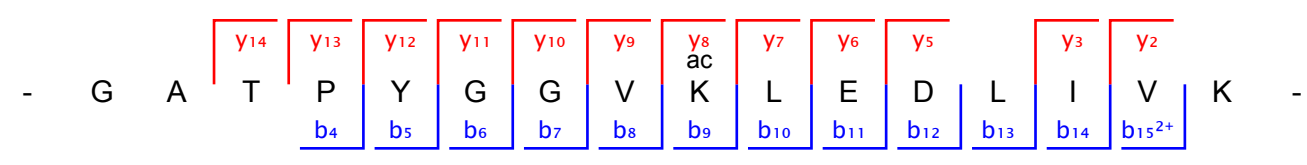

052413\_SCW\_II\_29\_Second\_ZT\_19\_4

16886

ITMS; CID

299.56

937.96

Ppia;Gm5160

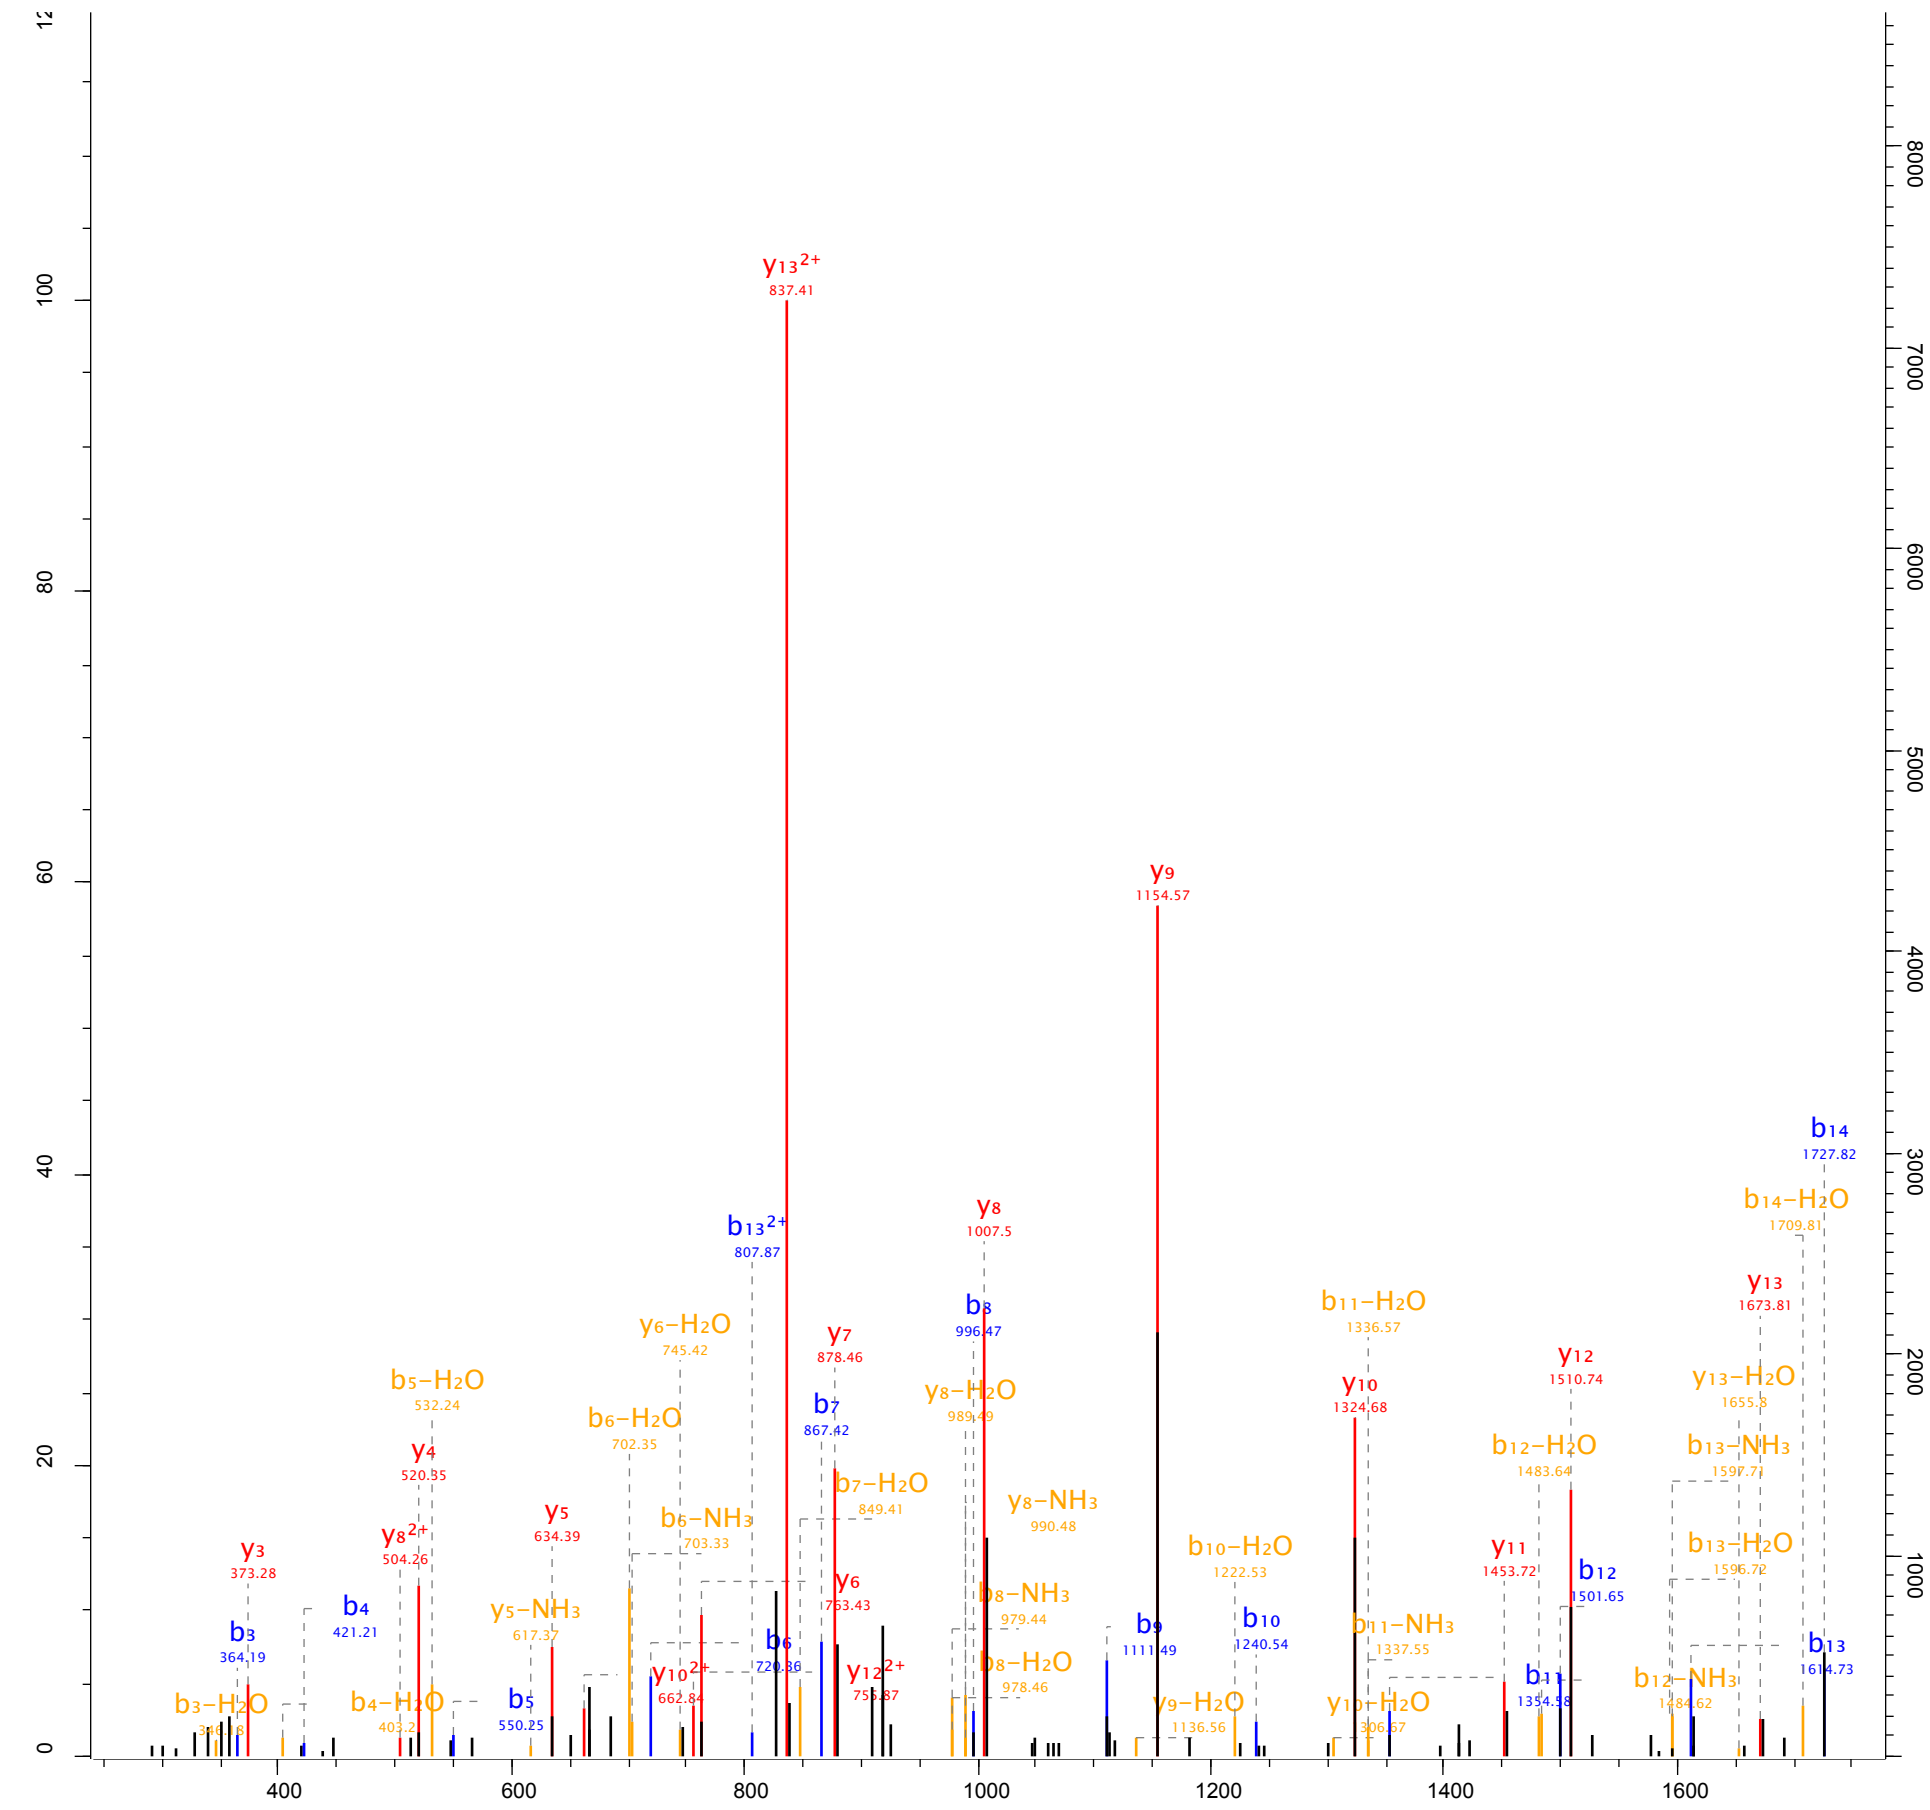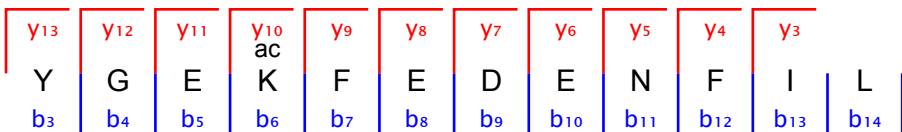

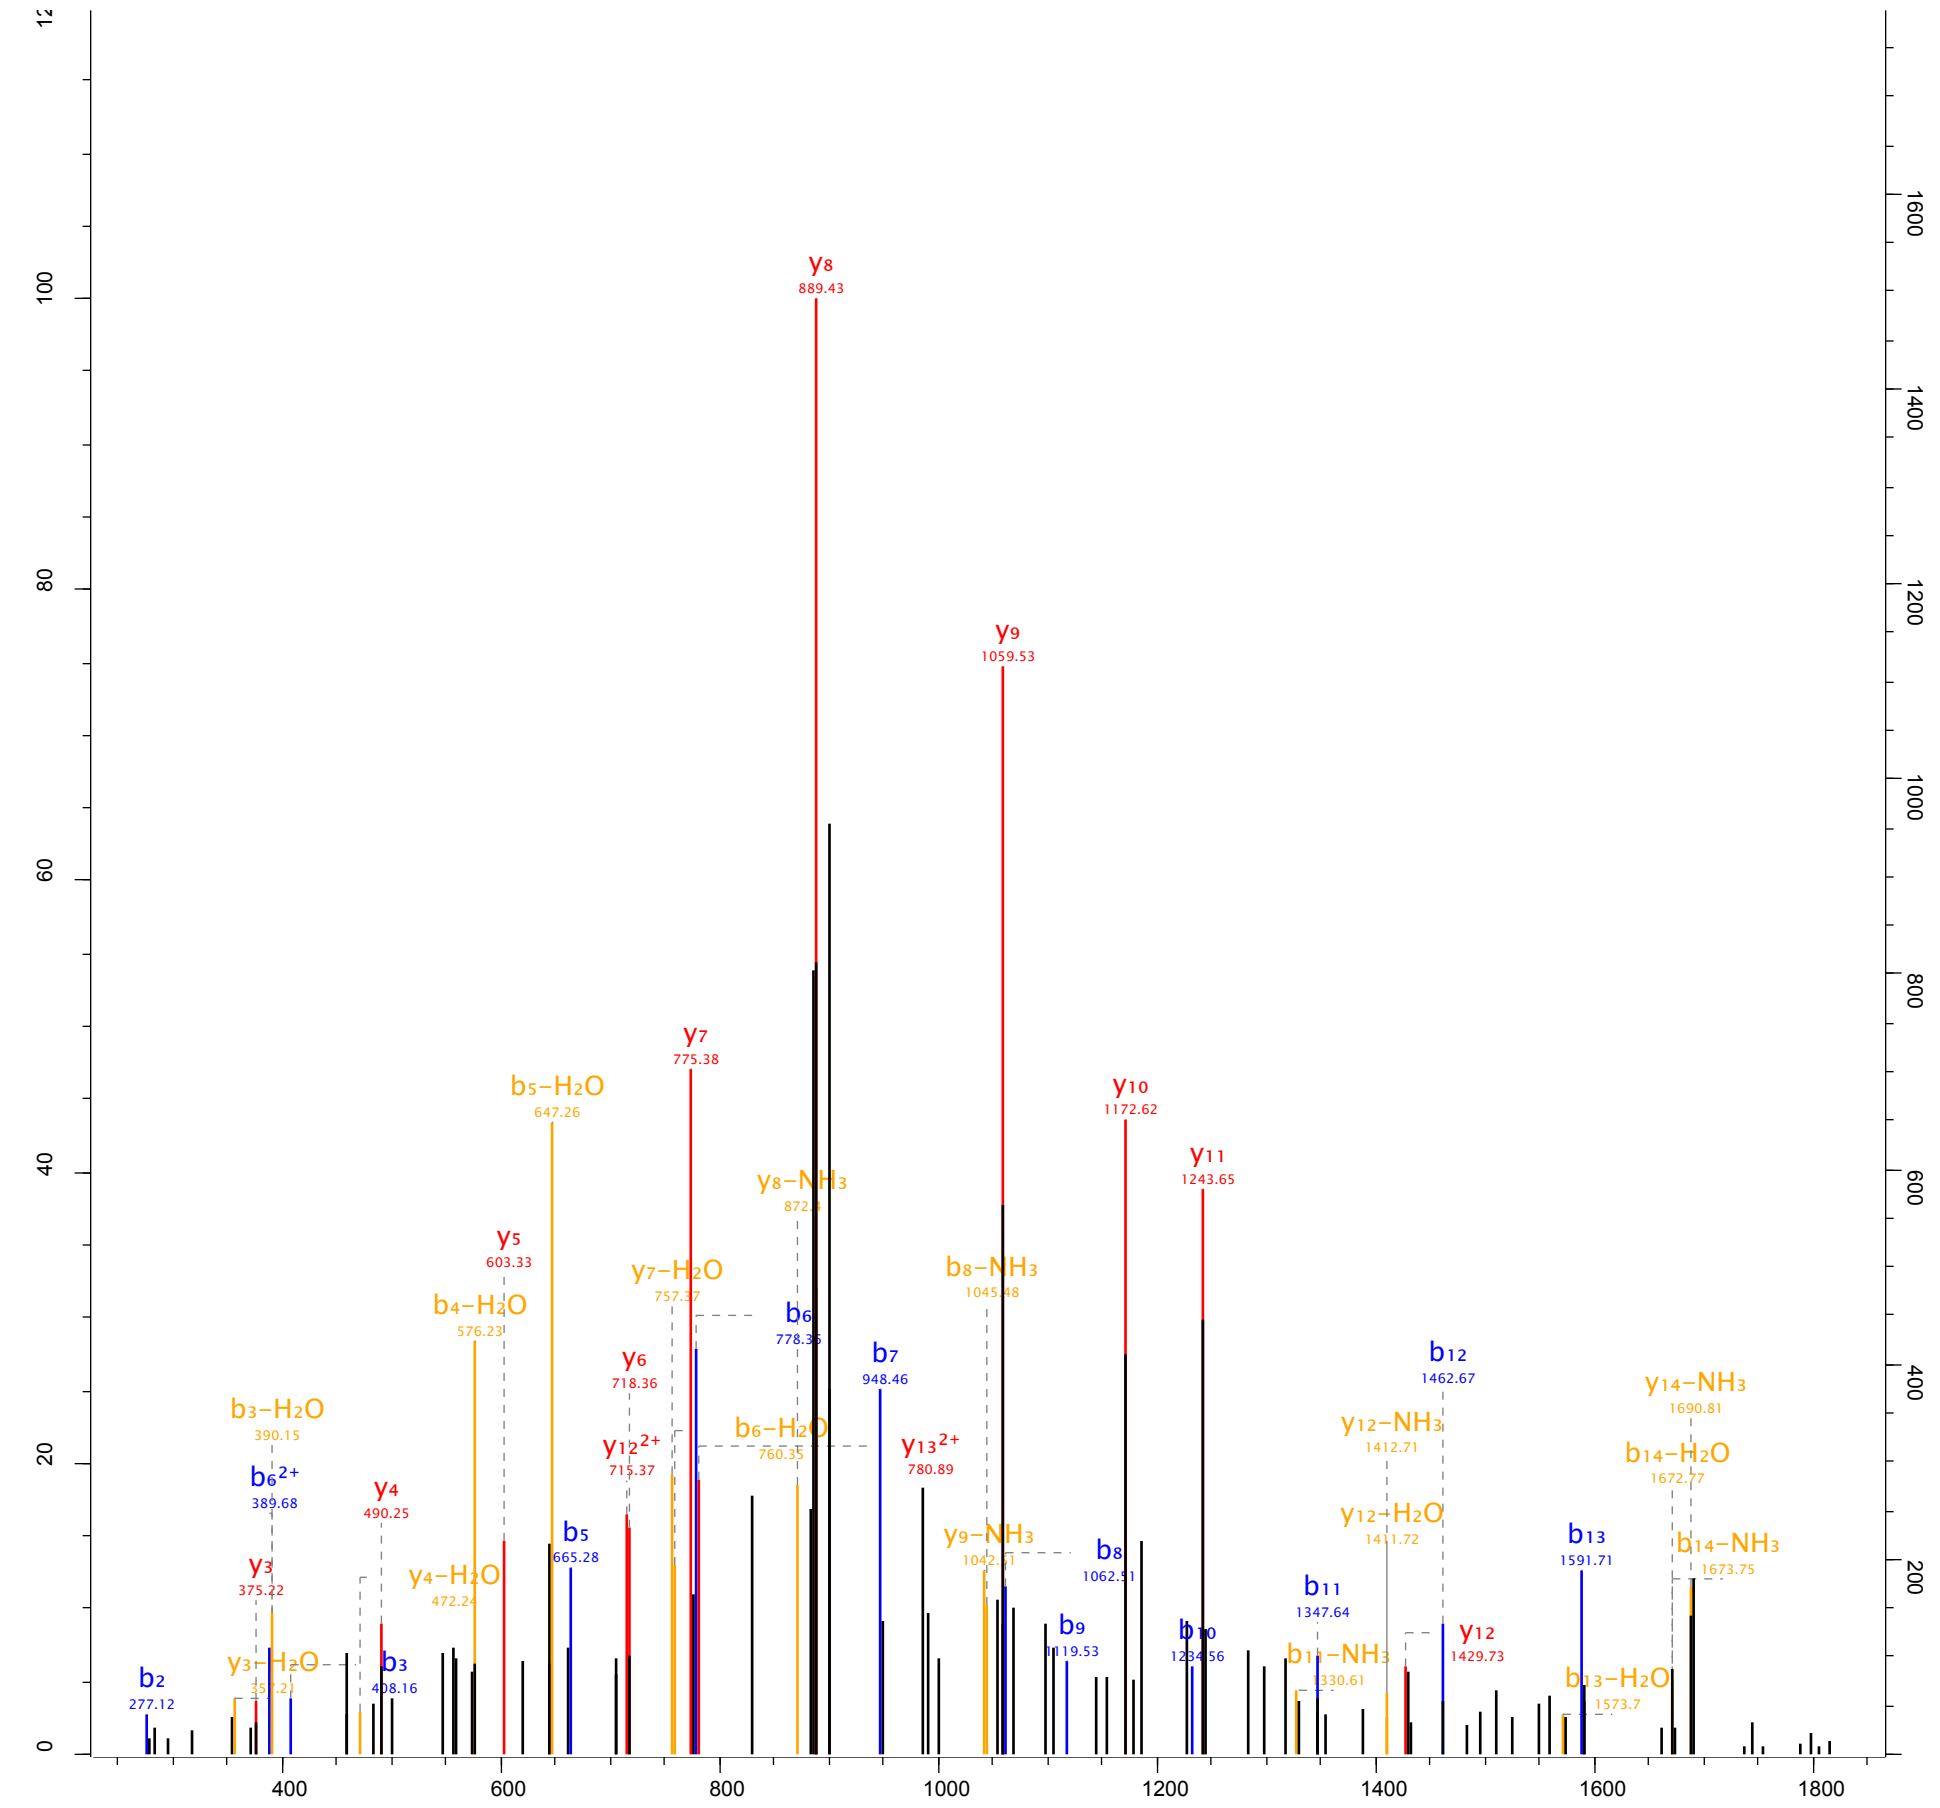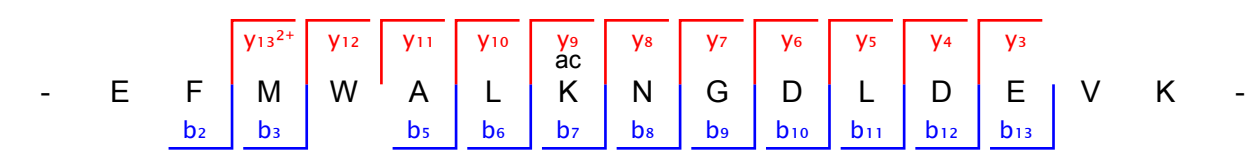



052413\_SCW\_II\_29\_Second\_ZT\_19\_4

17460

ITMS; CID

184.44

640.86

Shmt2

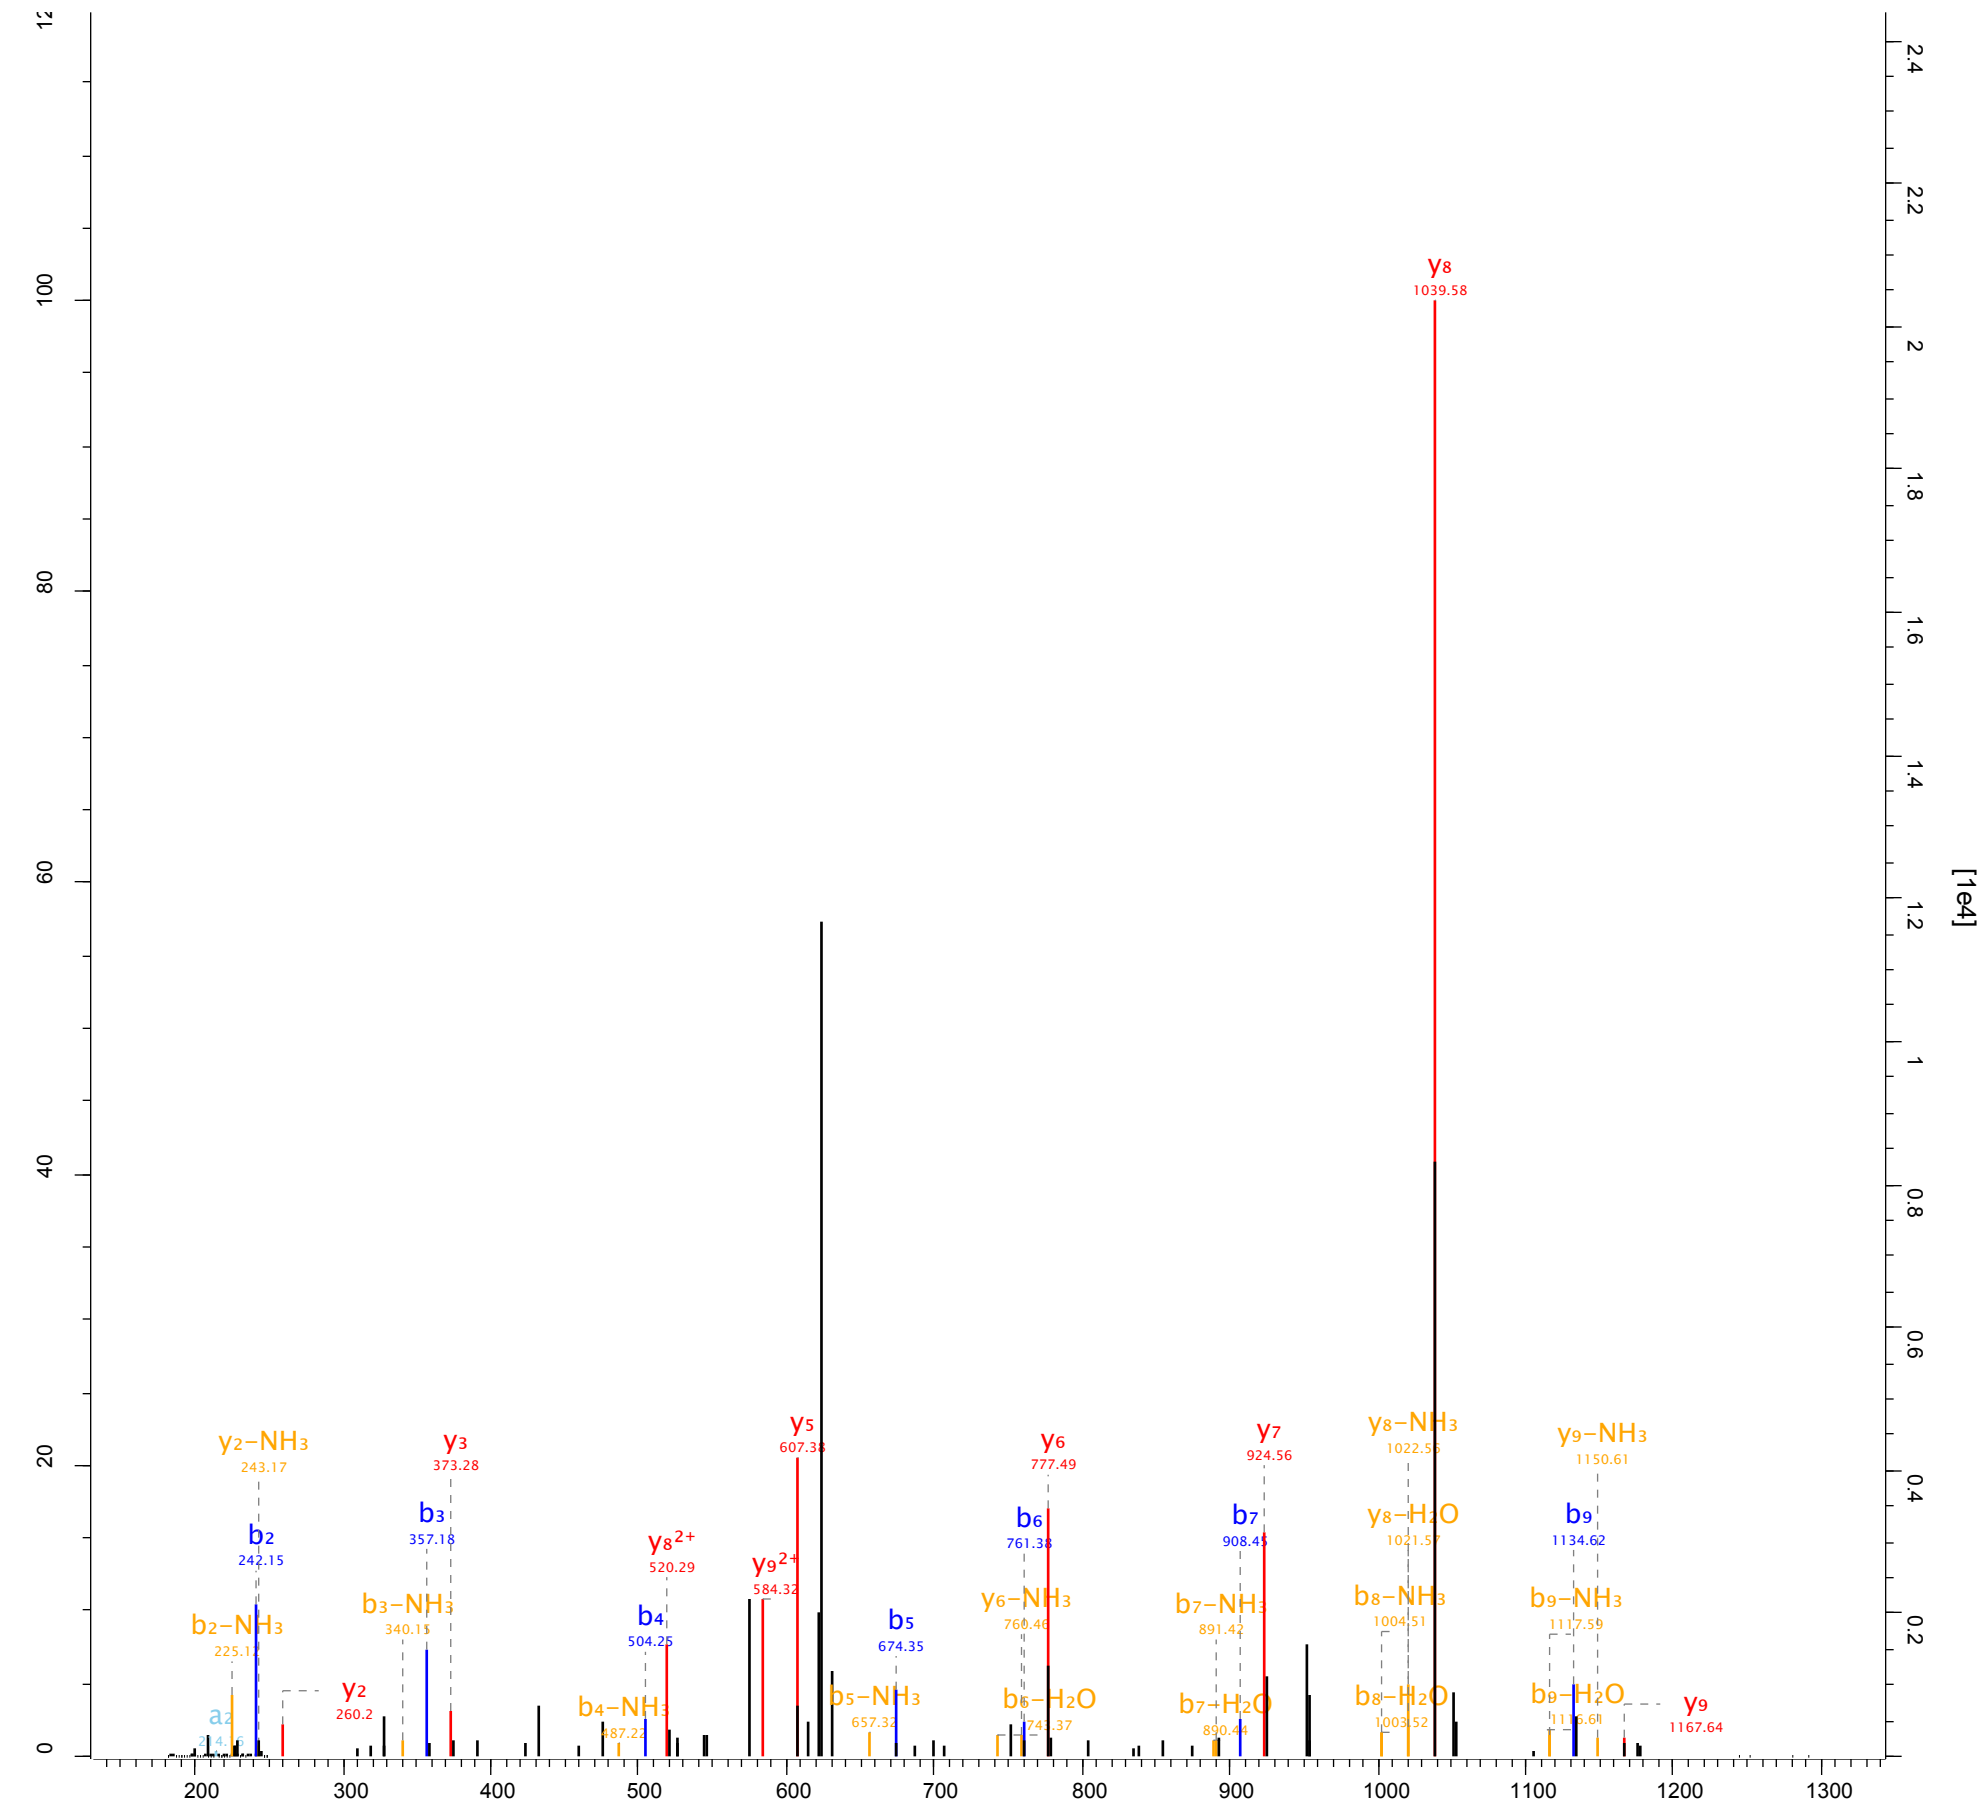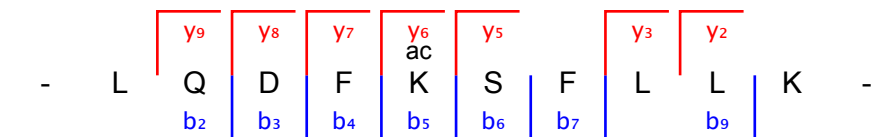

052413\_SCW\_II\_29\_Second\_ZT\_19\_4

17560

ITMS; CID

142.39

752.39

Idh1

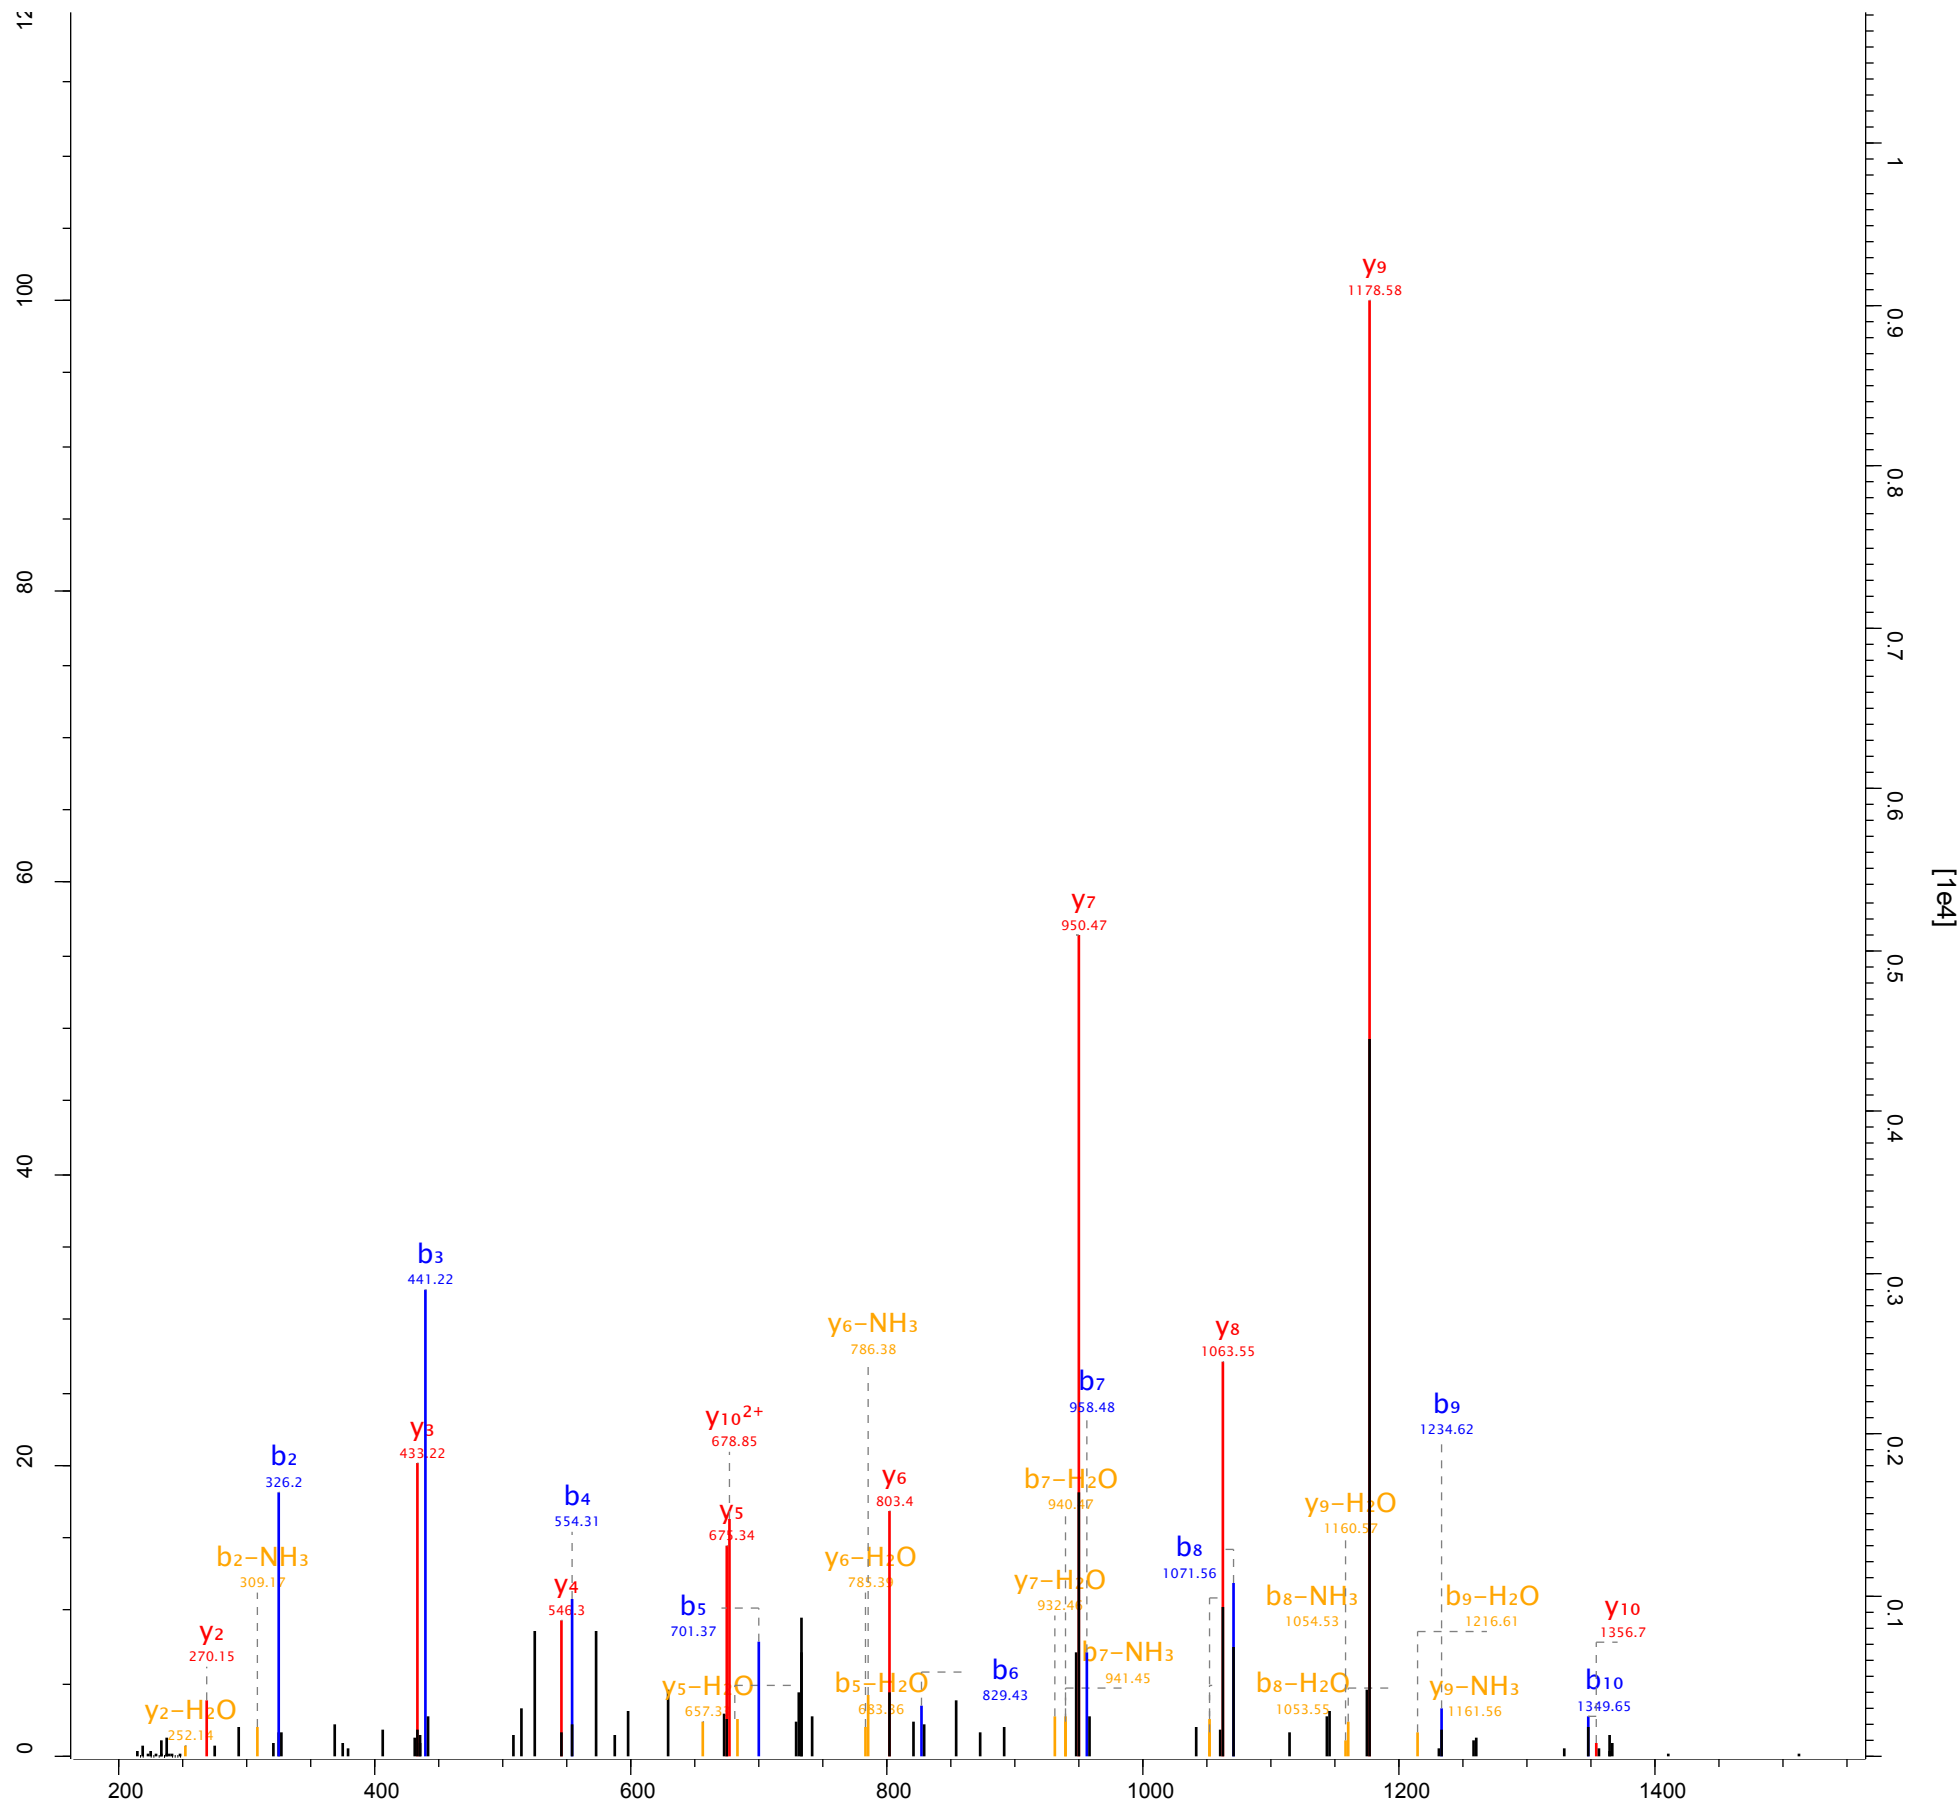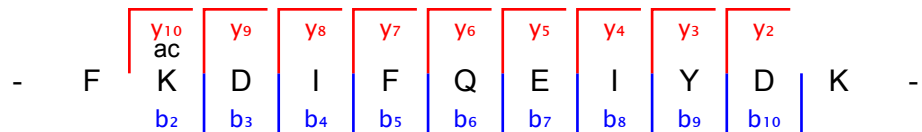

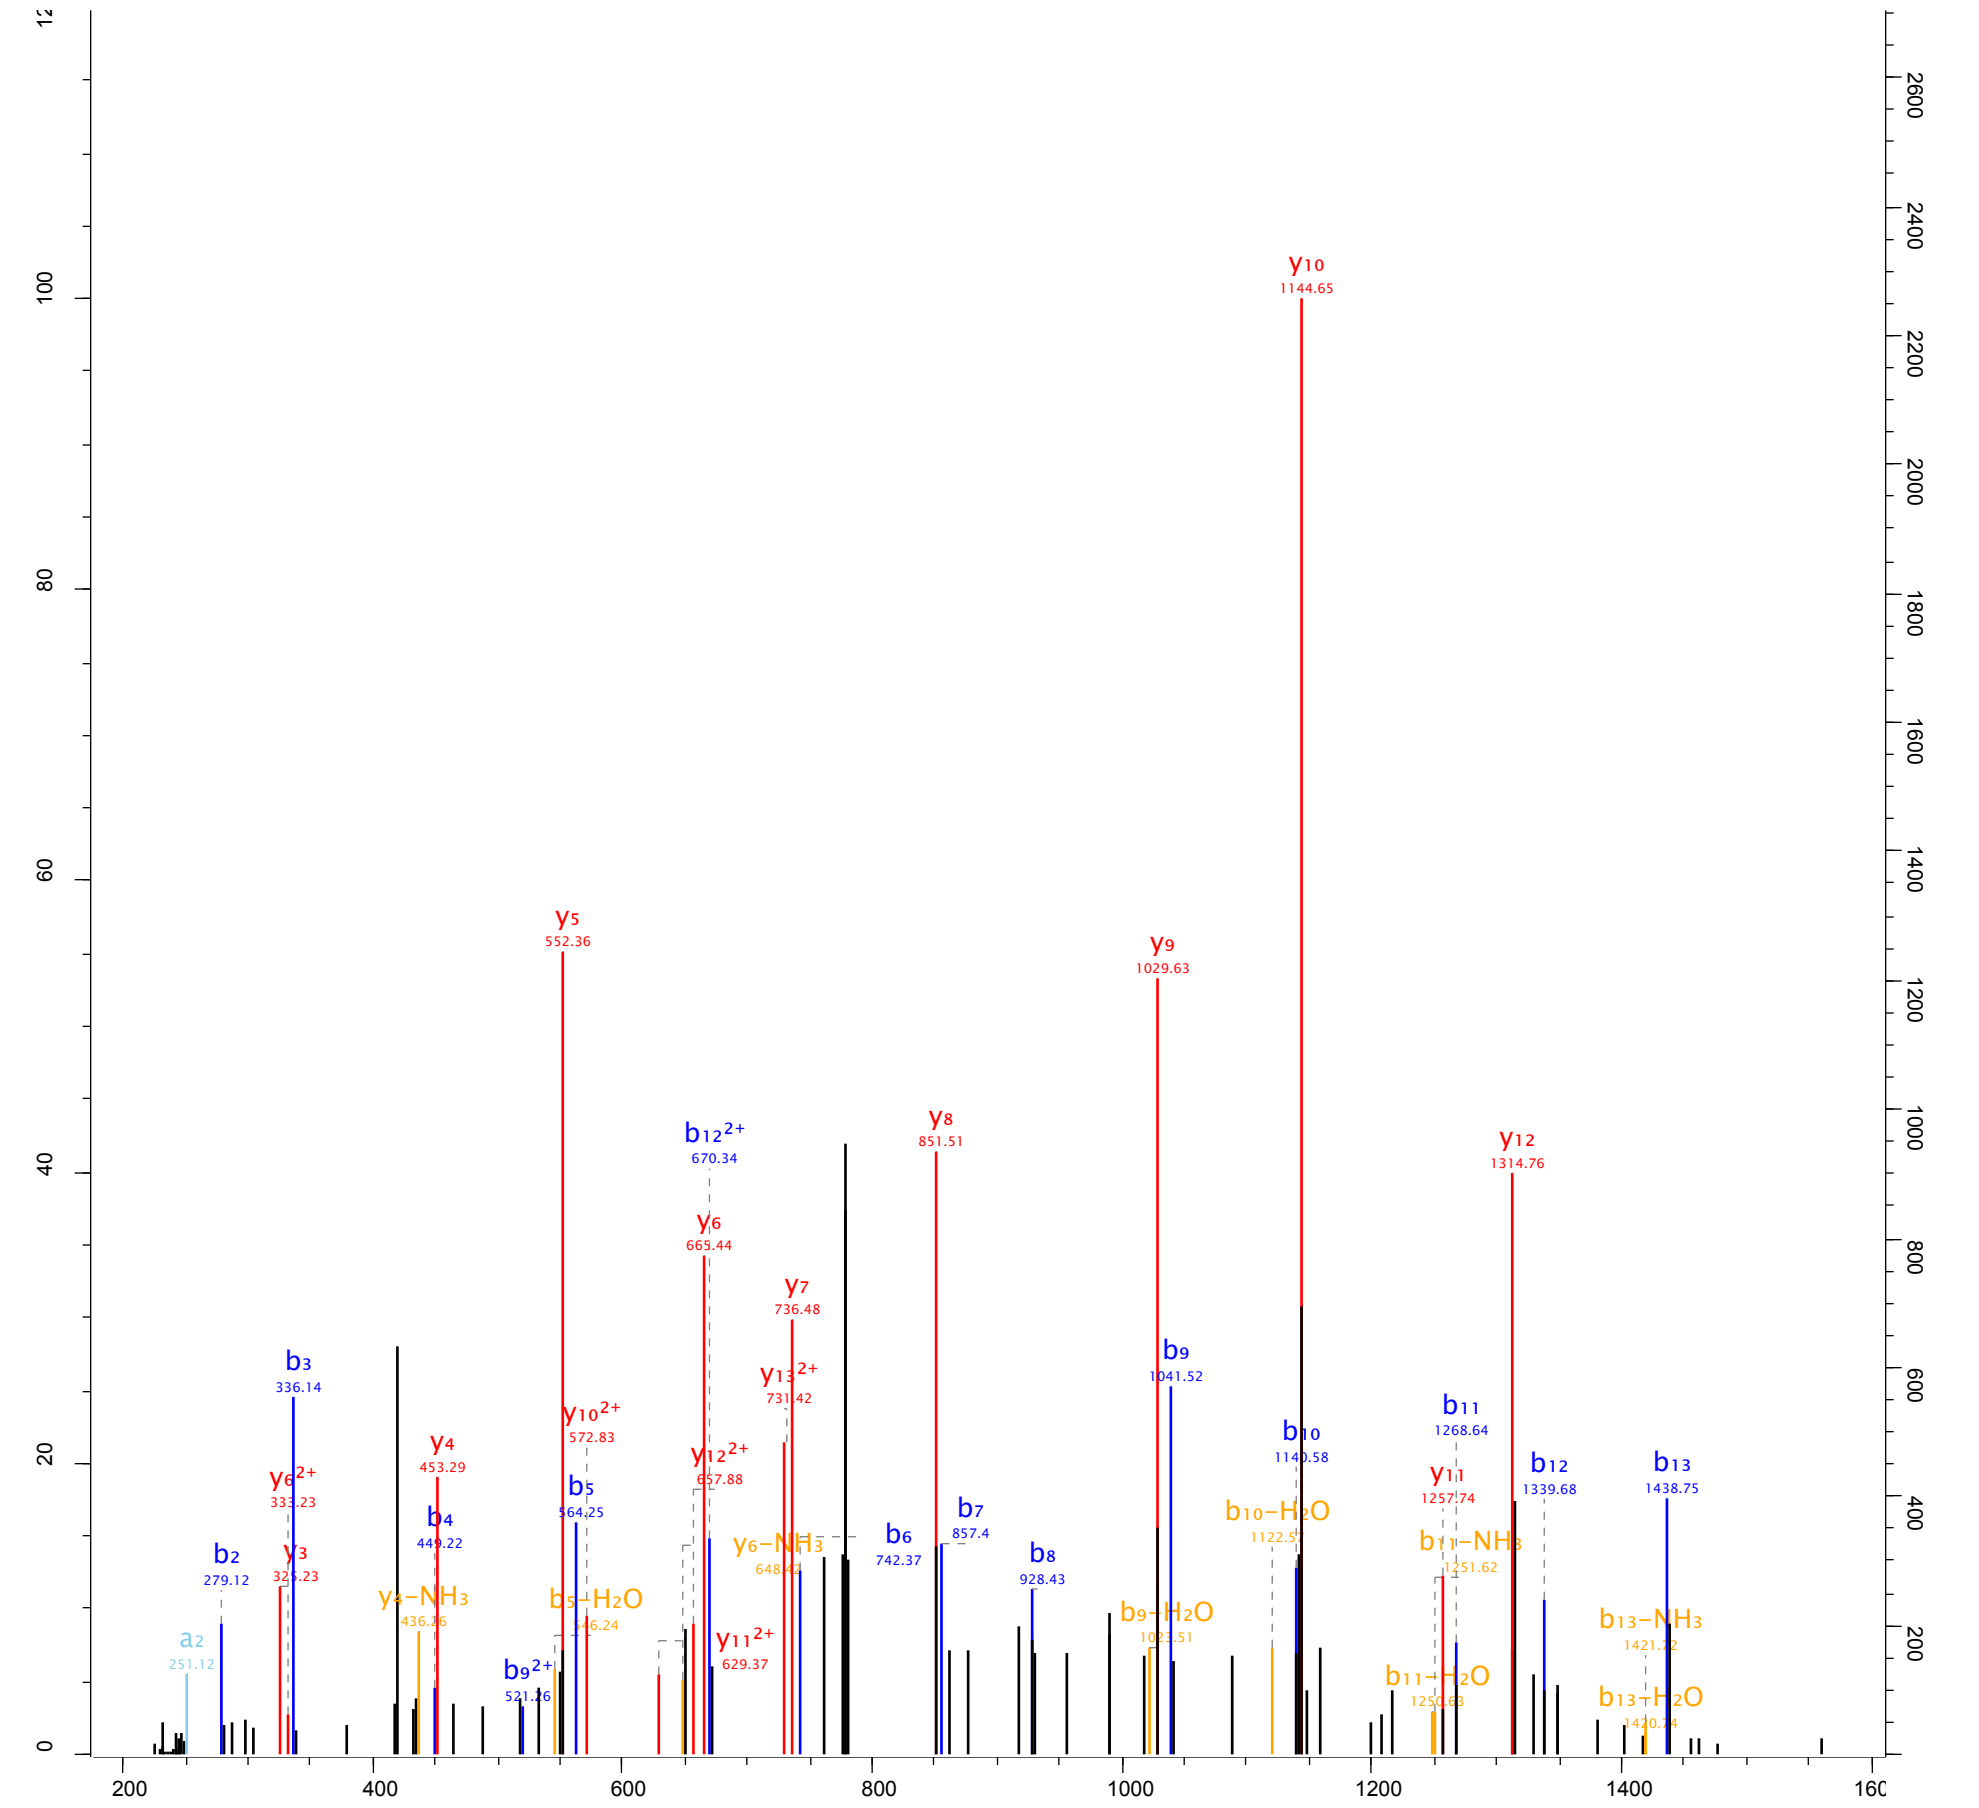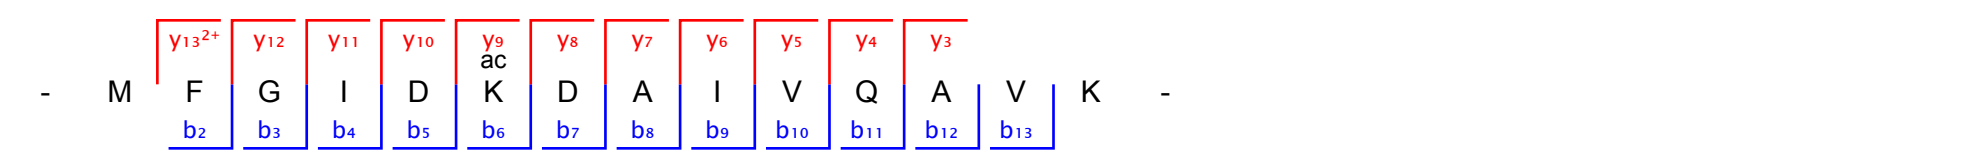

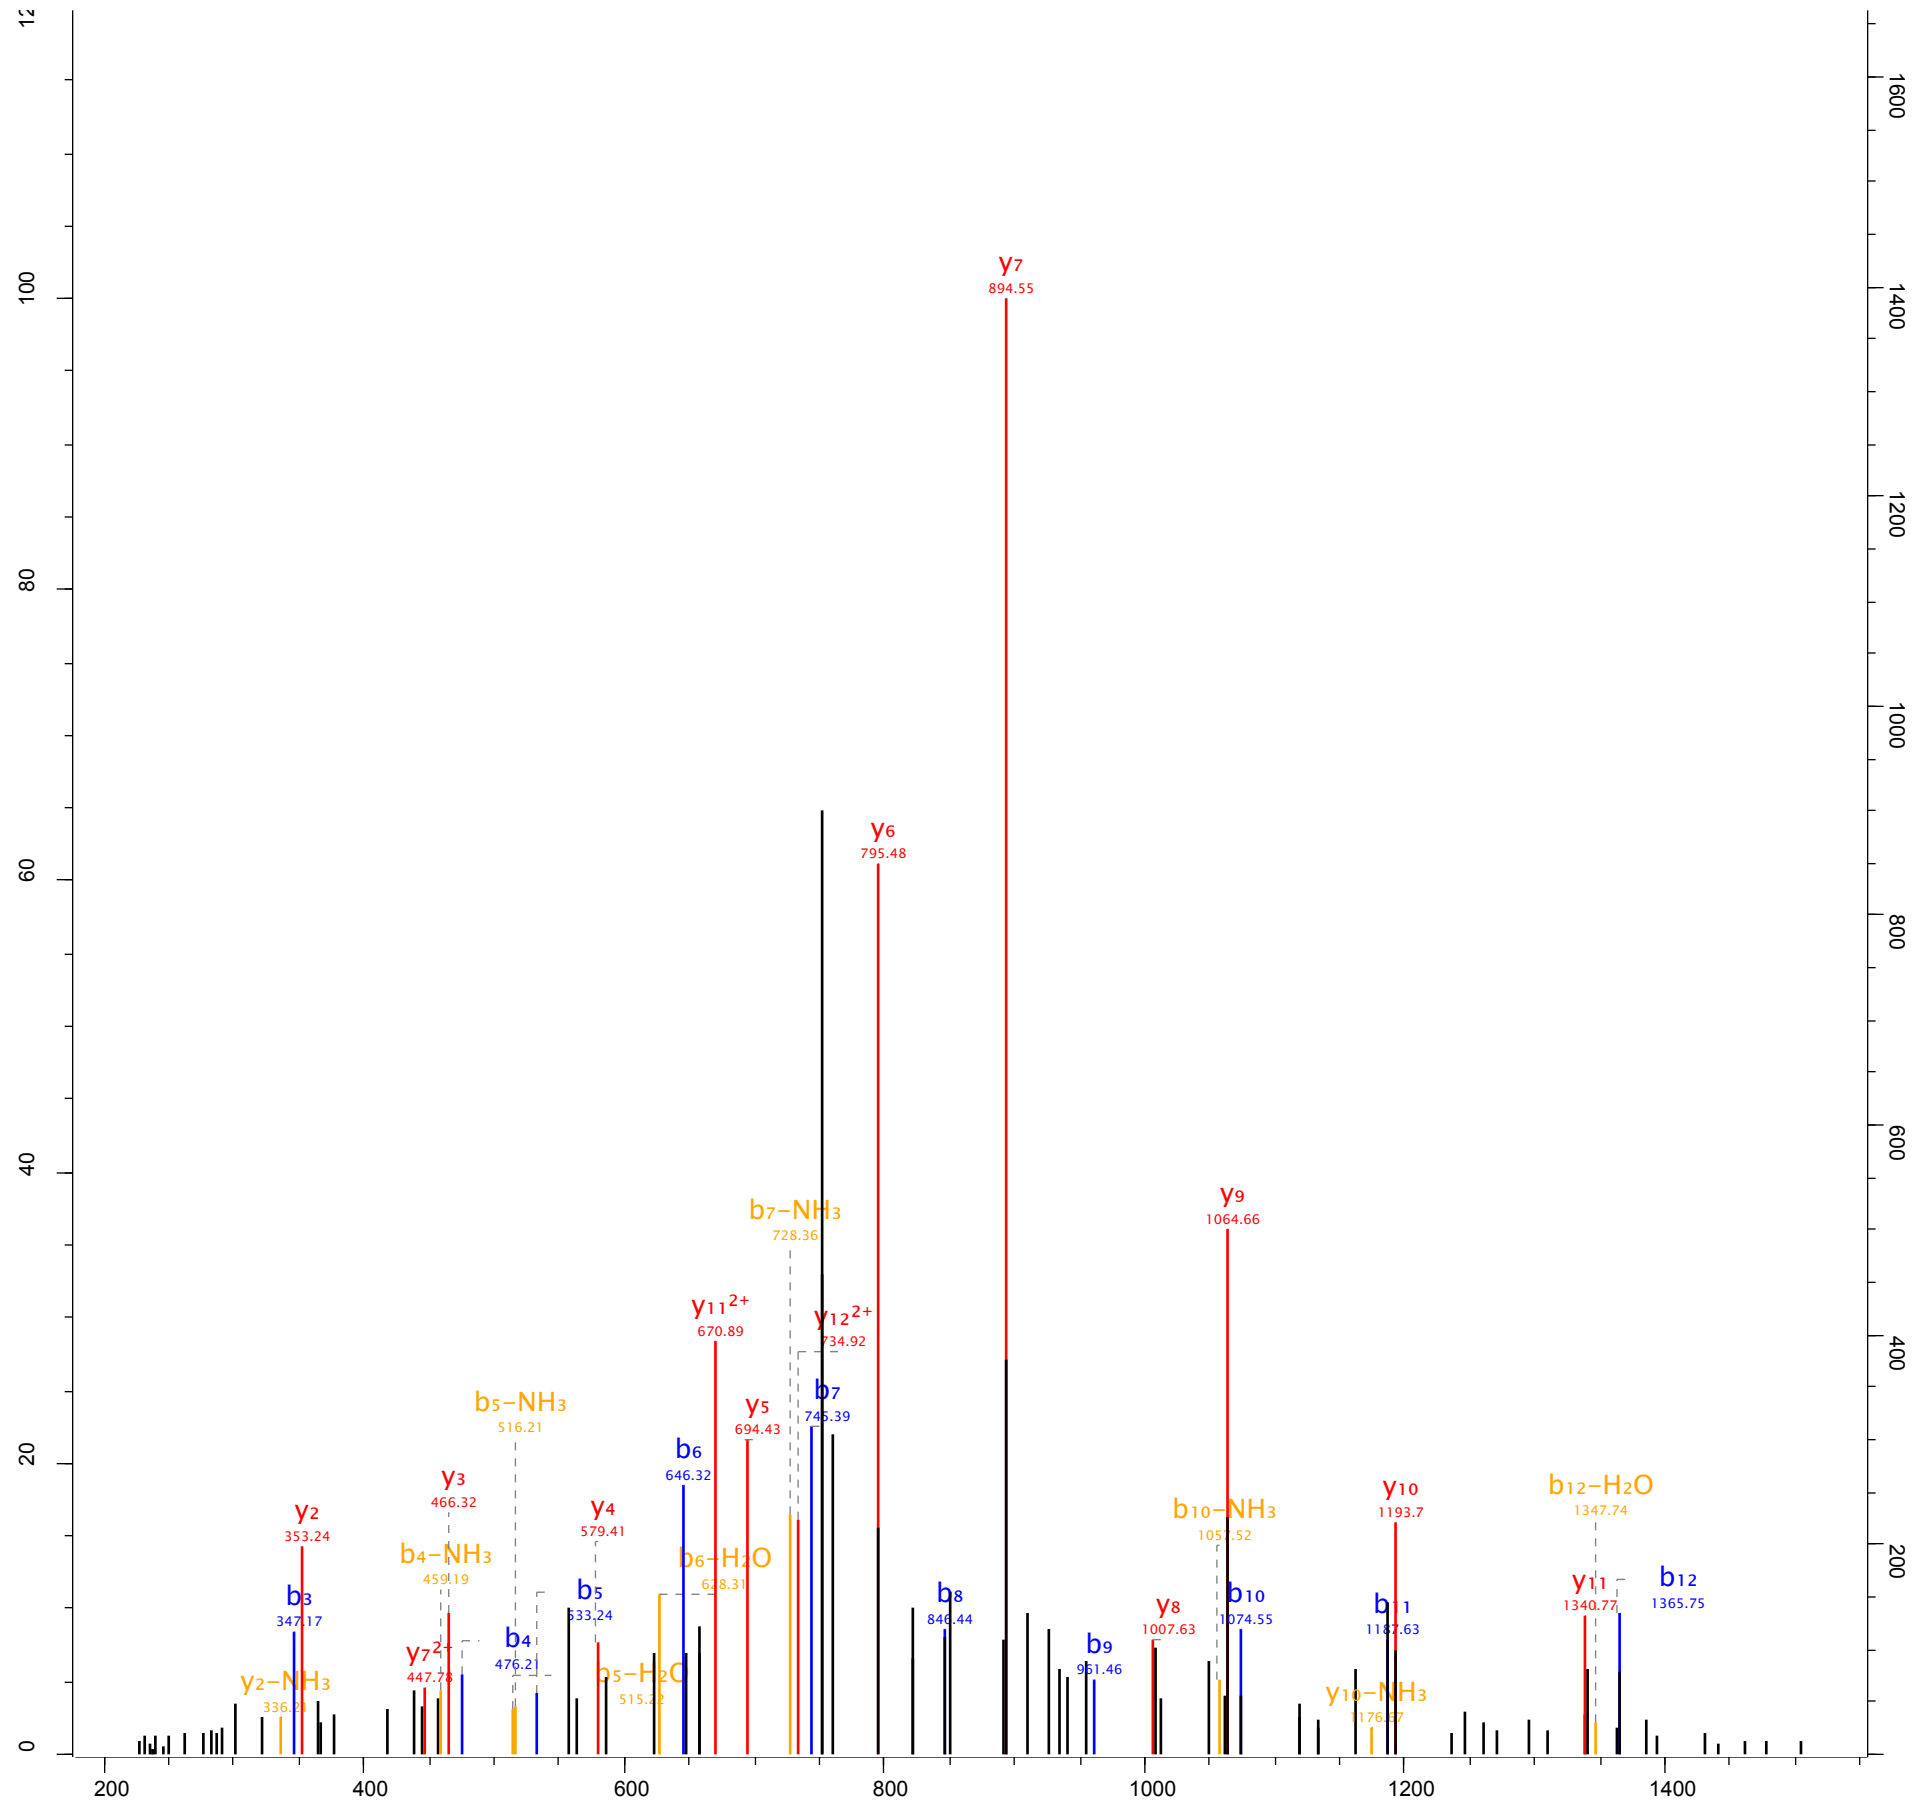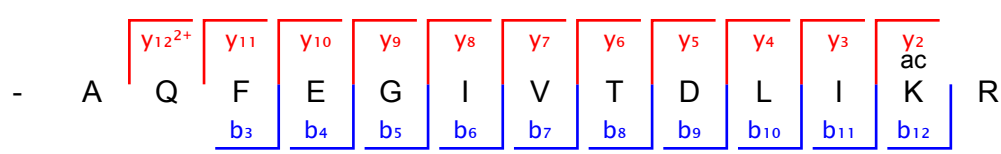

052413\_SCW\_II\_29\_Second\_ZT\_19\_4

17752

ITMS; CID

257.37

916.5

Acads

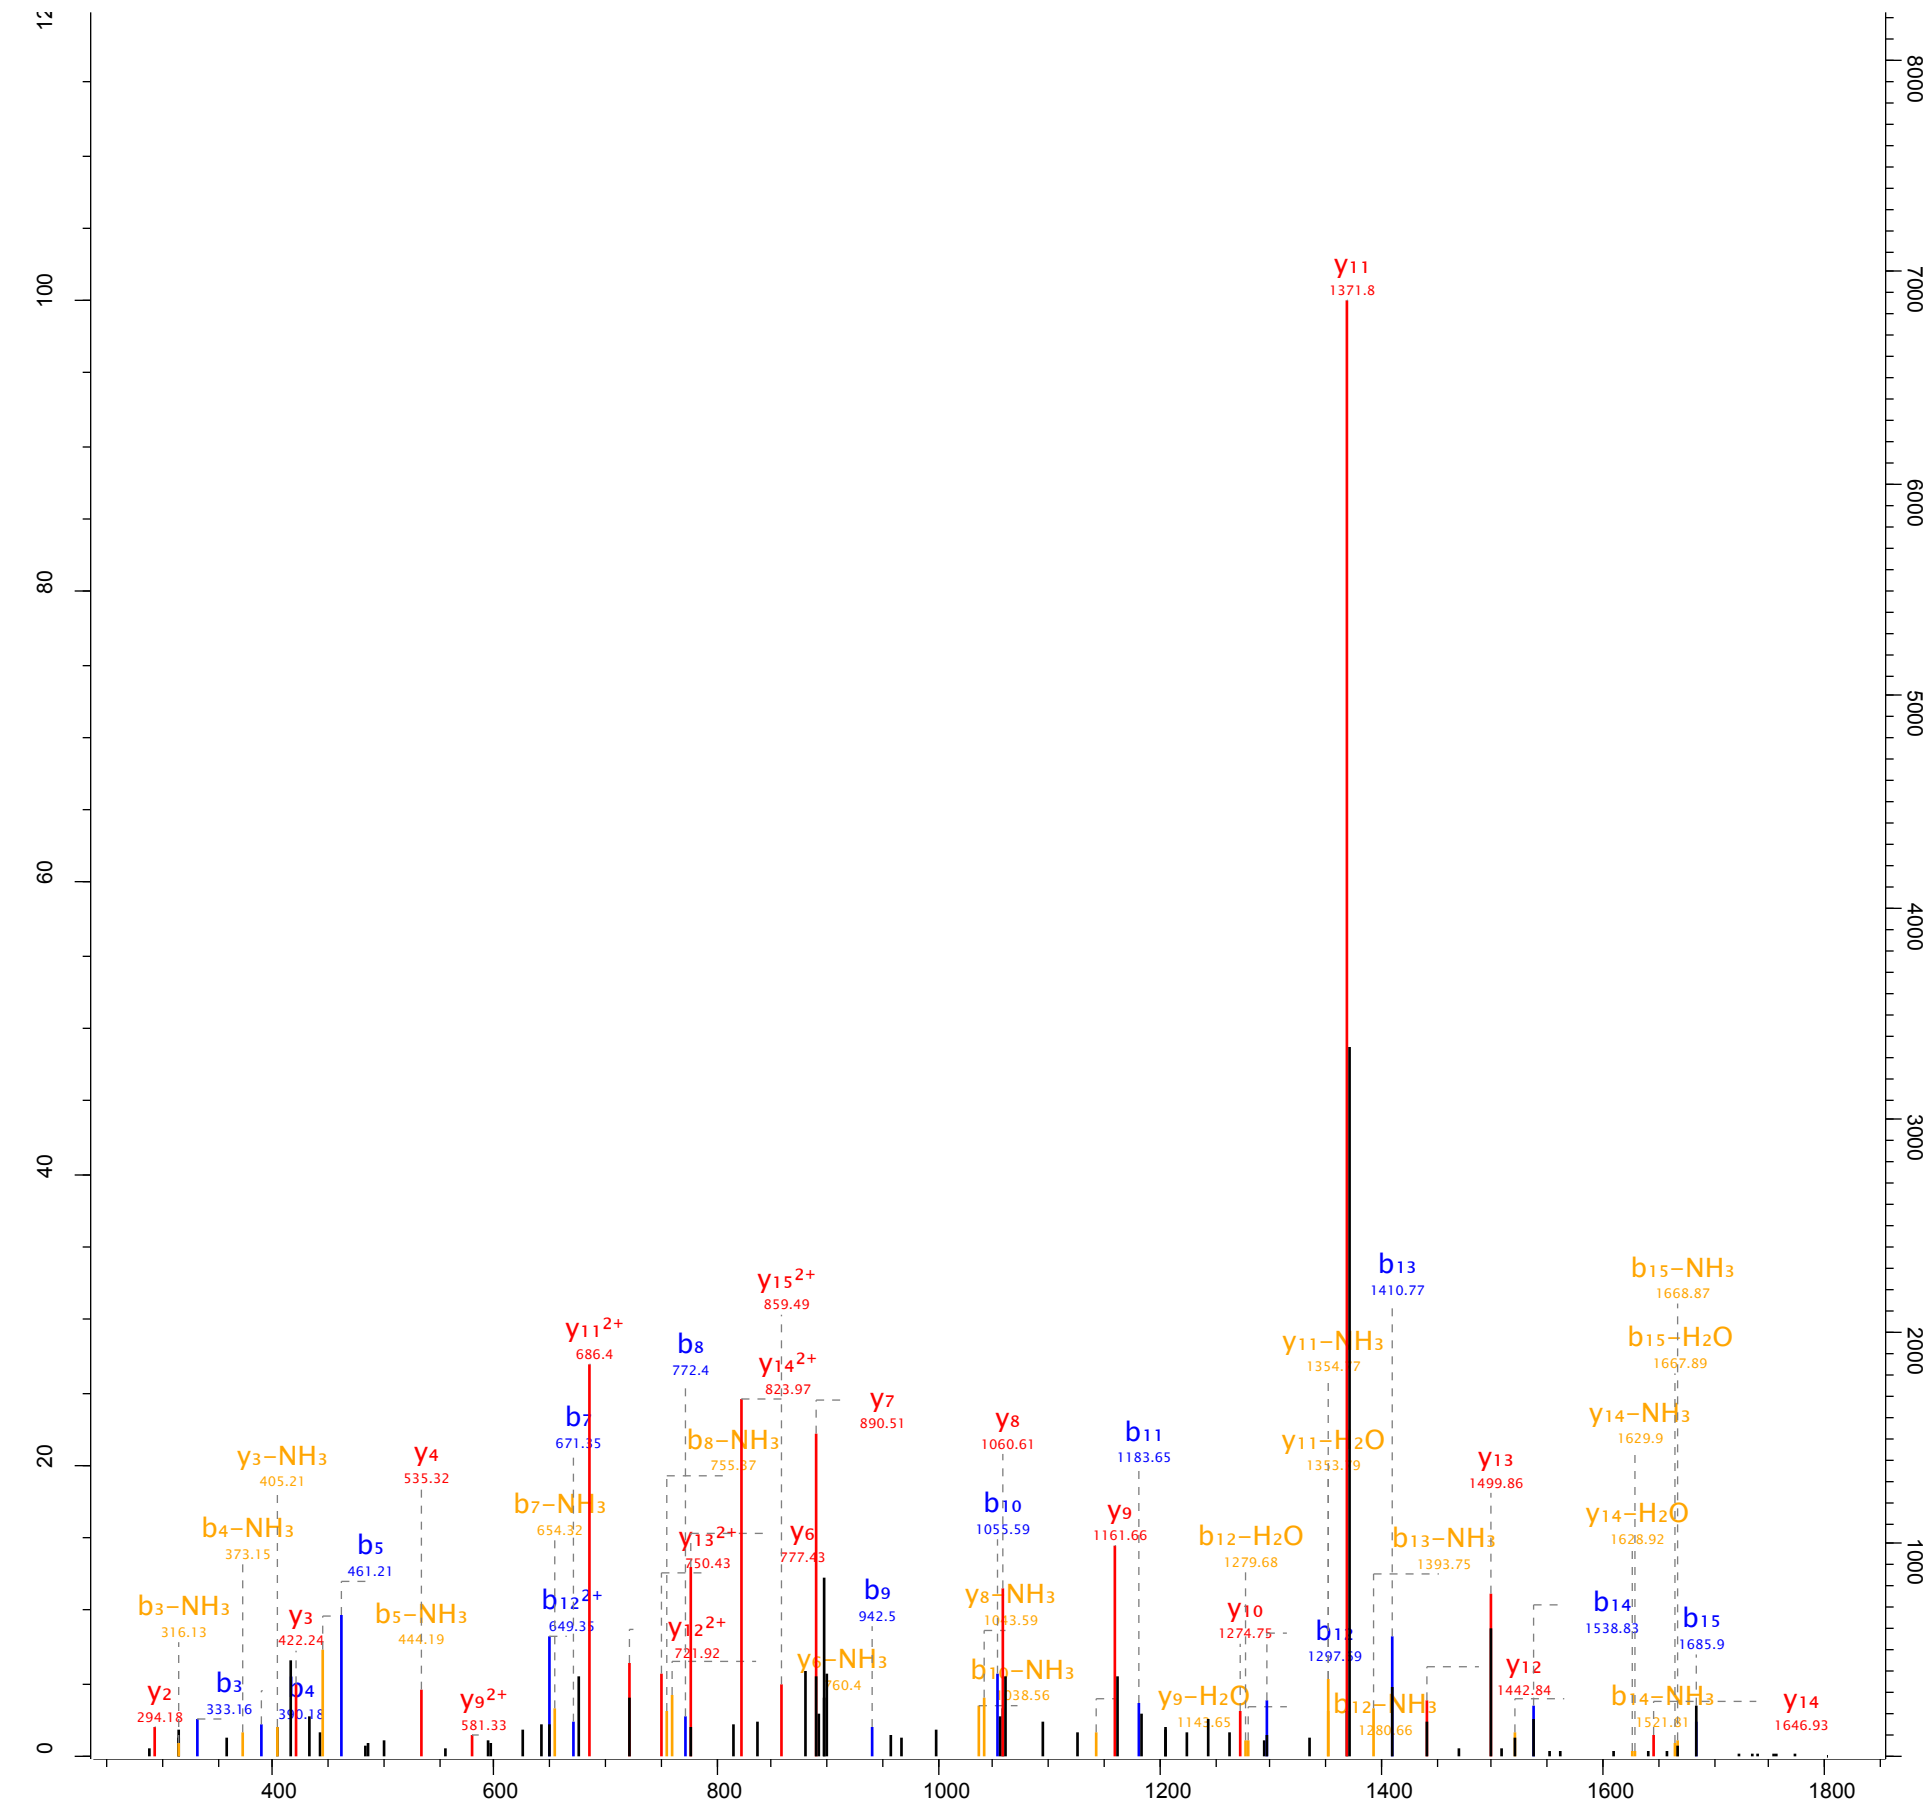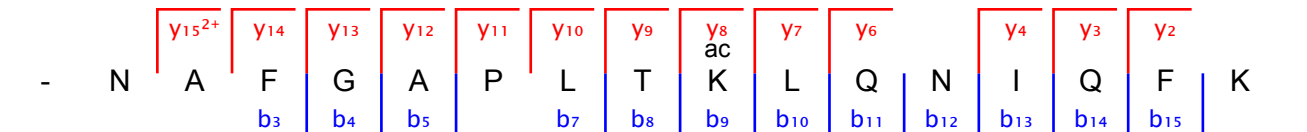

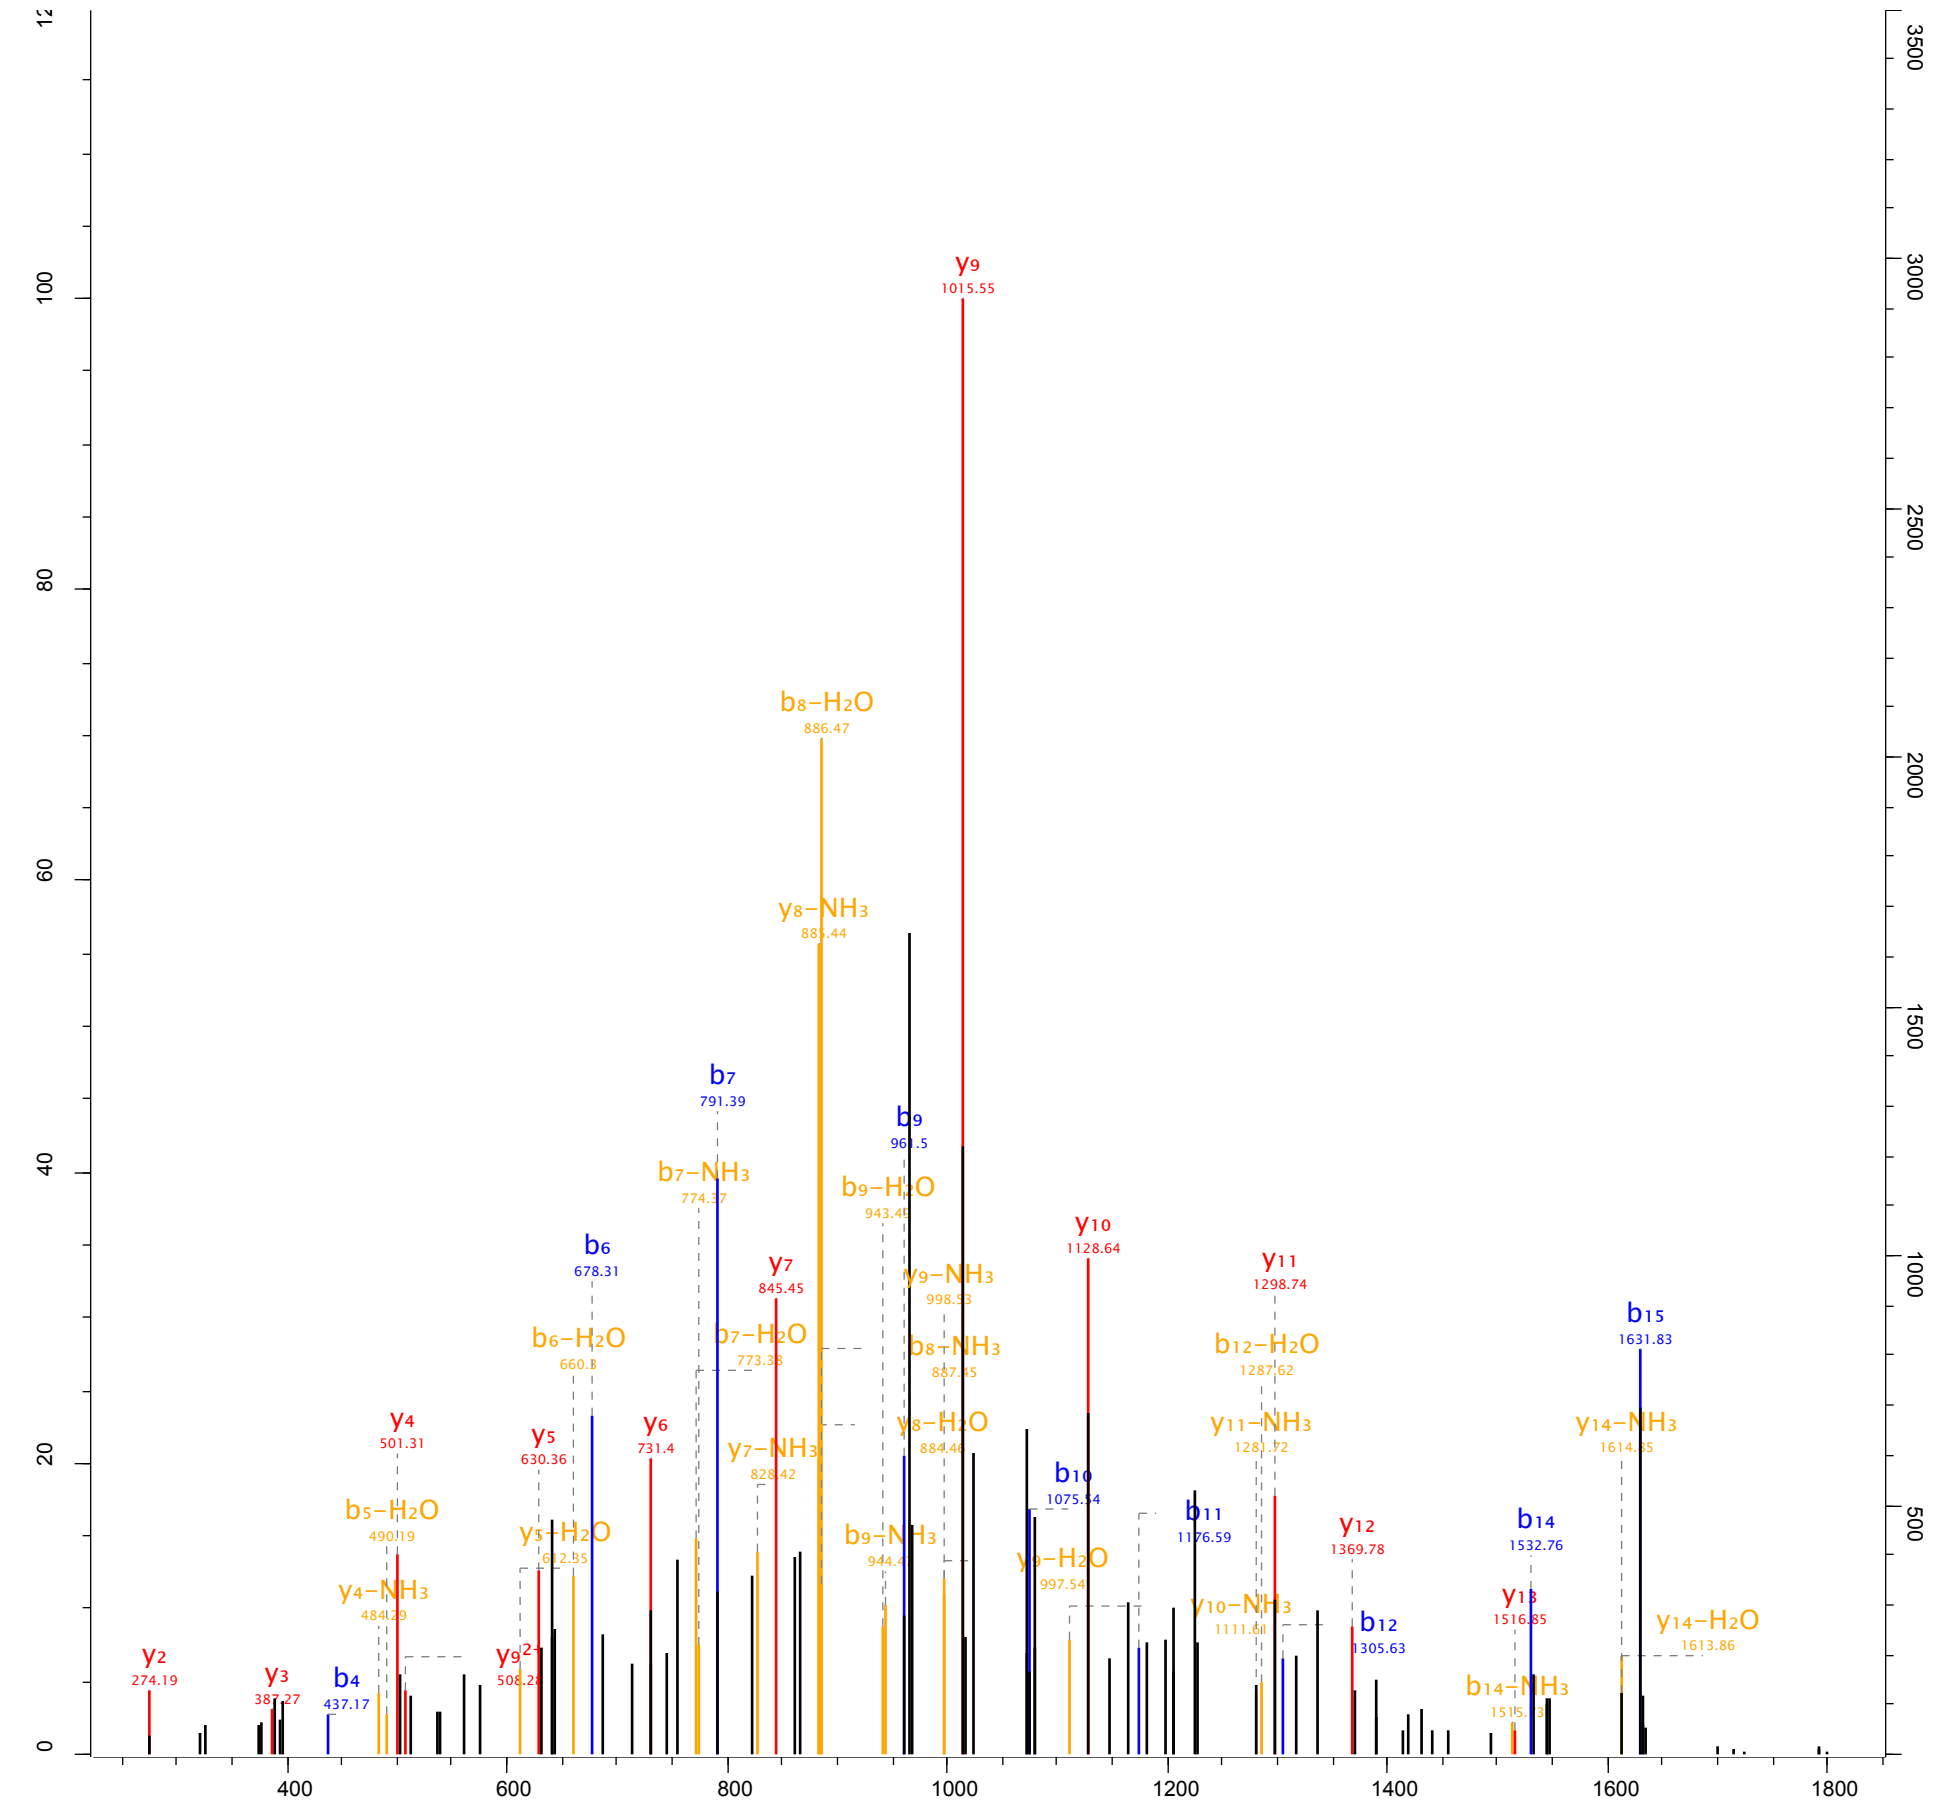

- S S D F A K I I G N T E N L V R -

y13 y12 y11 ac y10 y9 y7 y6 y5 y4 y3 y2  
b4 b6 b7 b9 b10 b11 b12 b14 b15

052413\_SCW\_II\_29\_Second\_ZT\_19\_4

17811

ITMS; CID

211.77

751.91

Vdac1

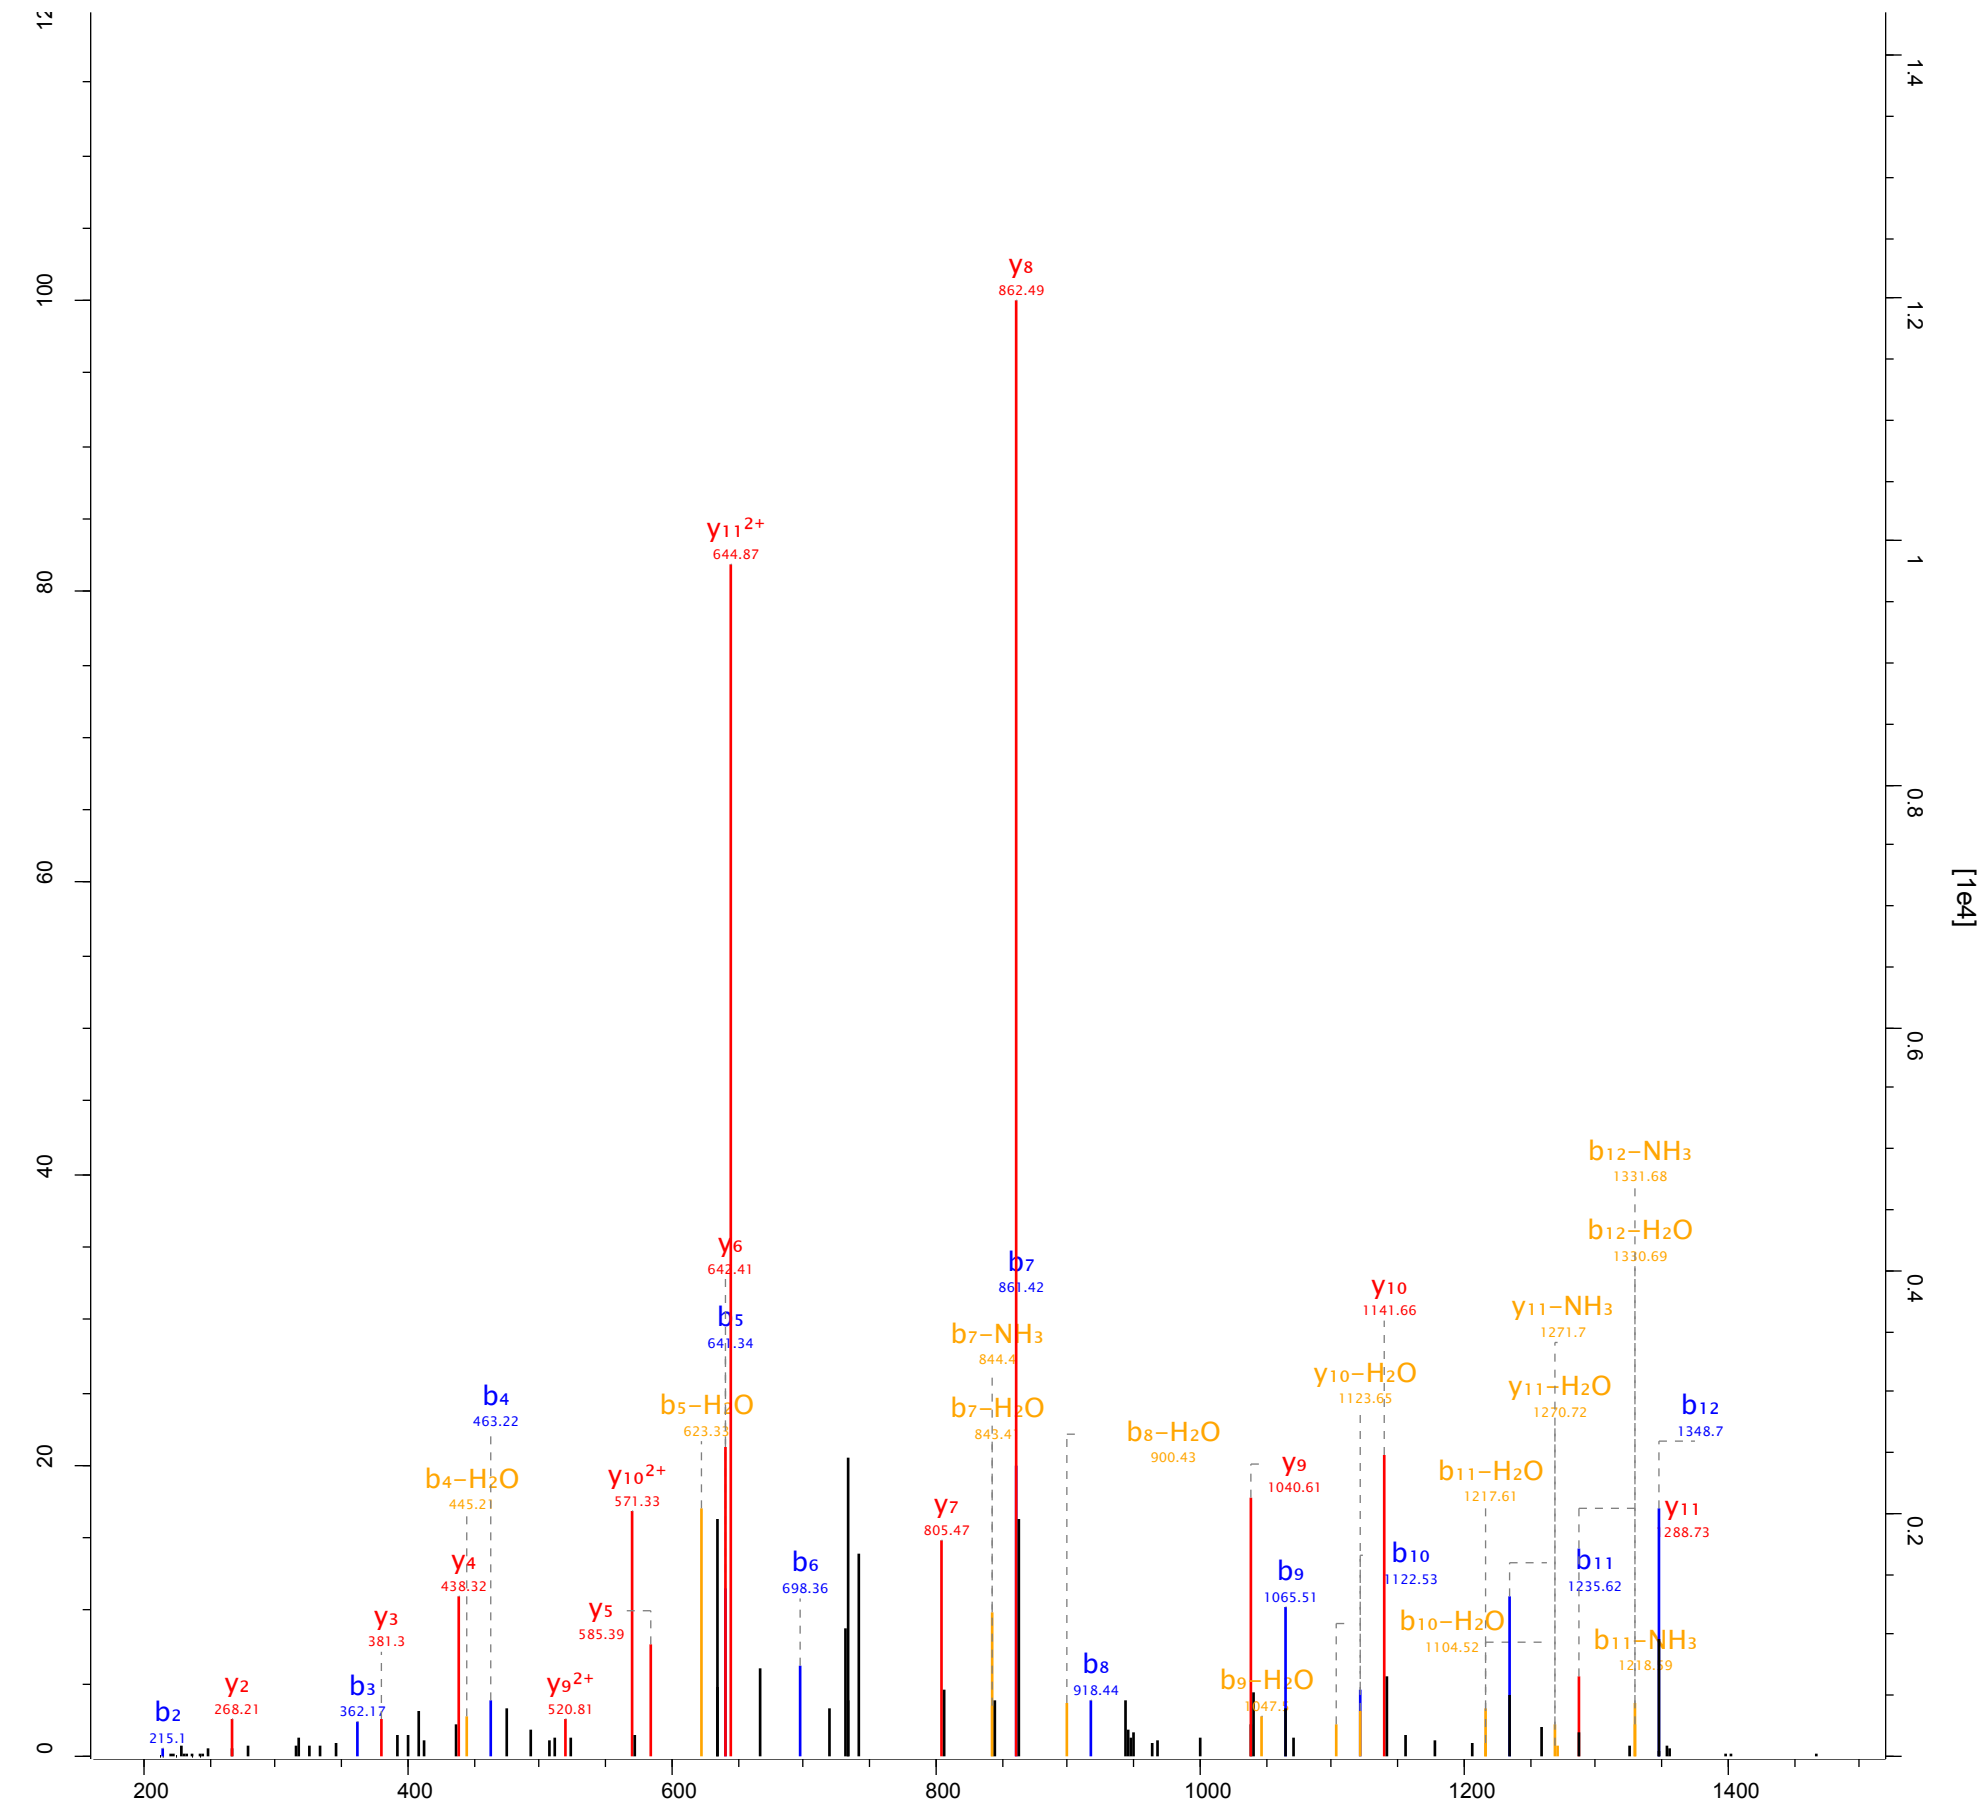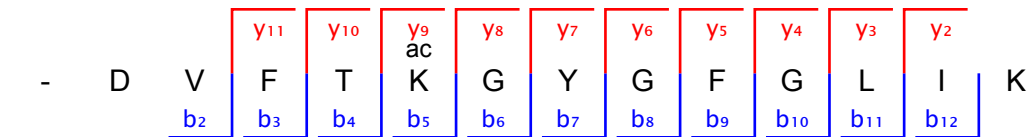

052413\_SCW\_II\_29\_Second\_ZT\_19\_4

18024

ITMS; CID

226.42

743.93

Hdhd3

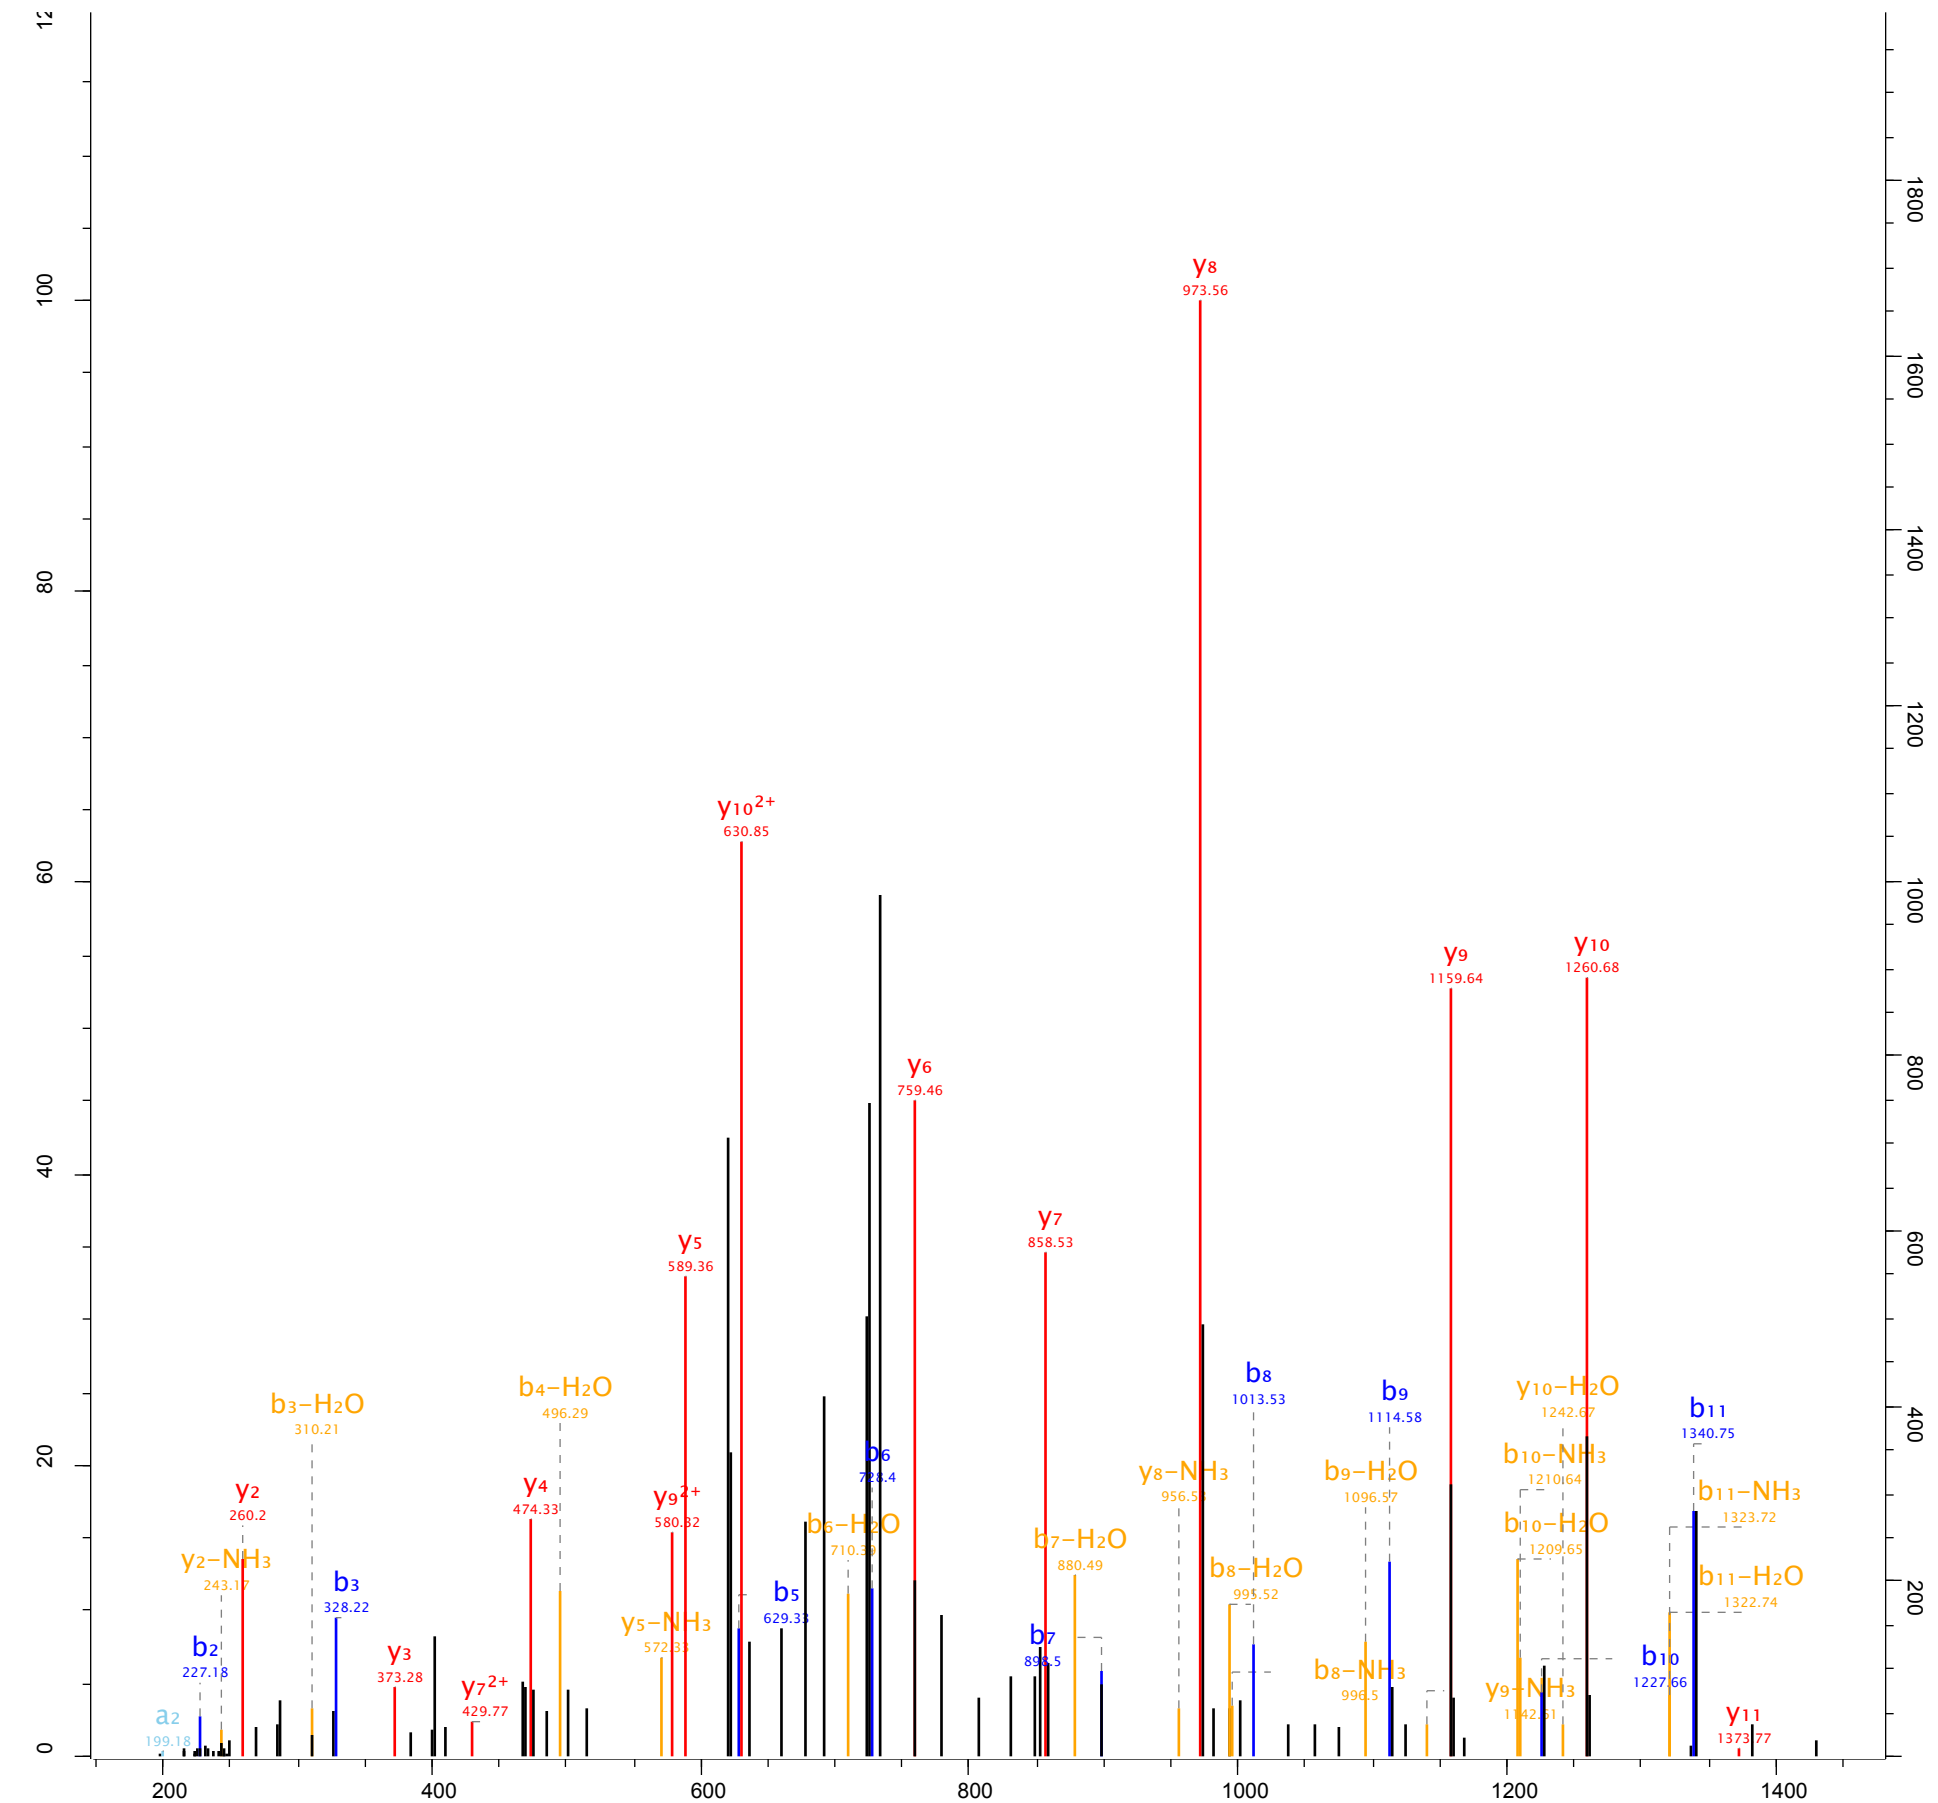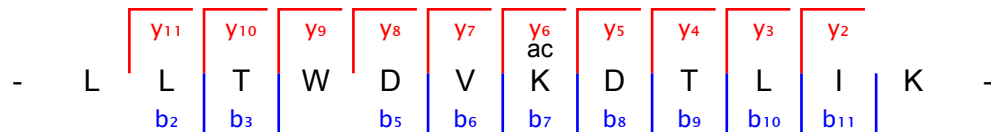



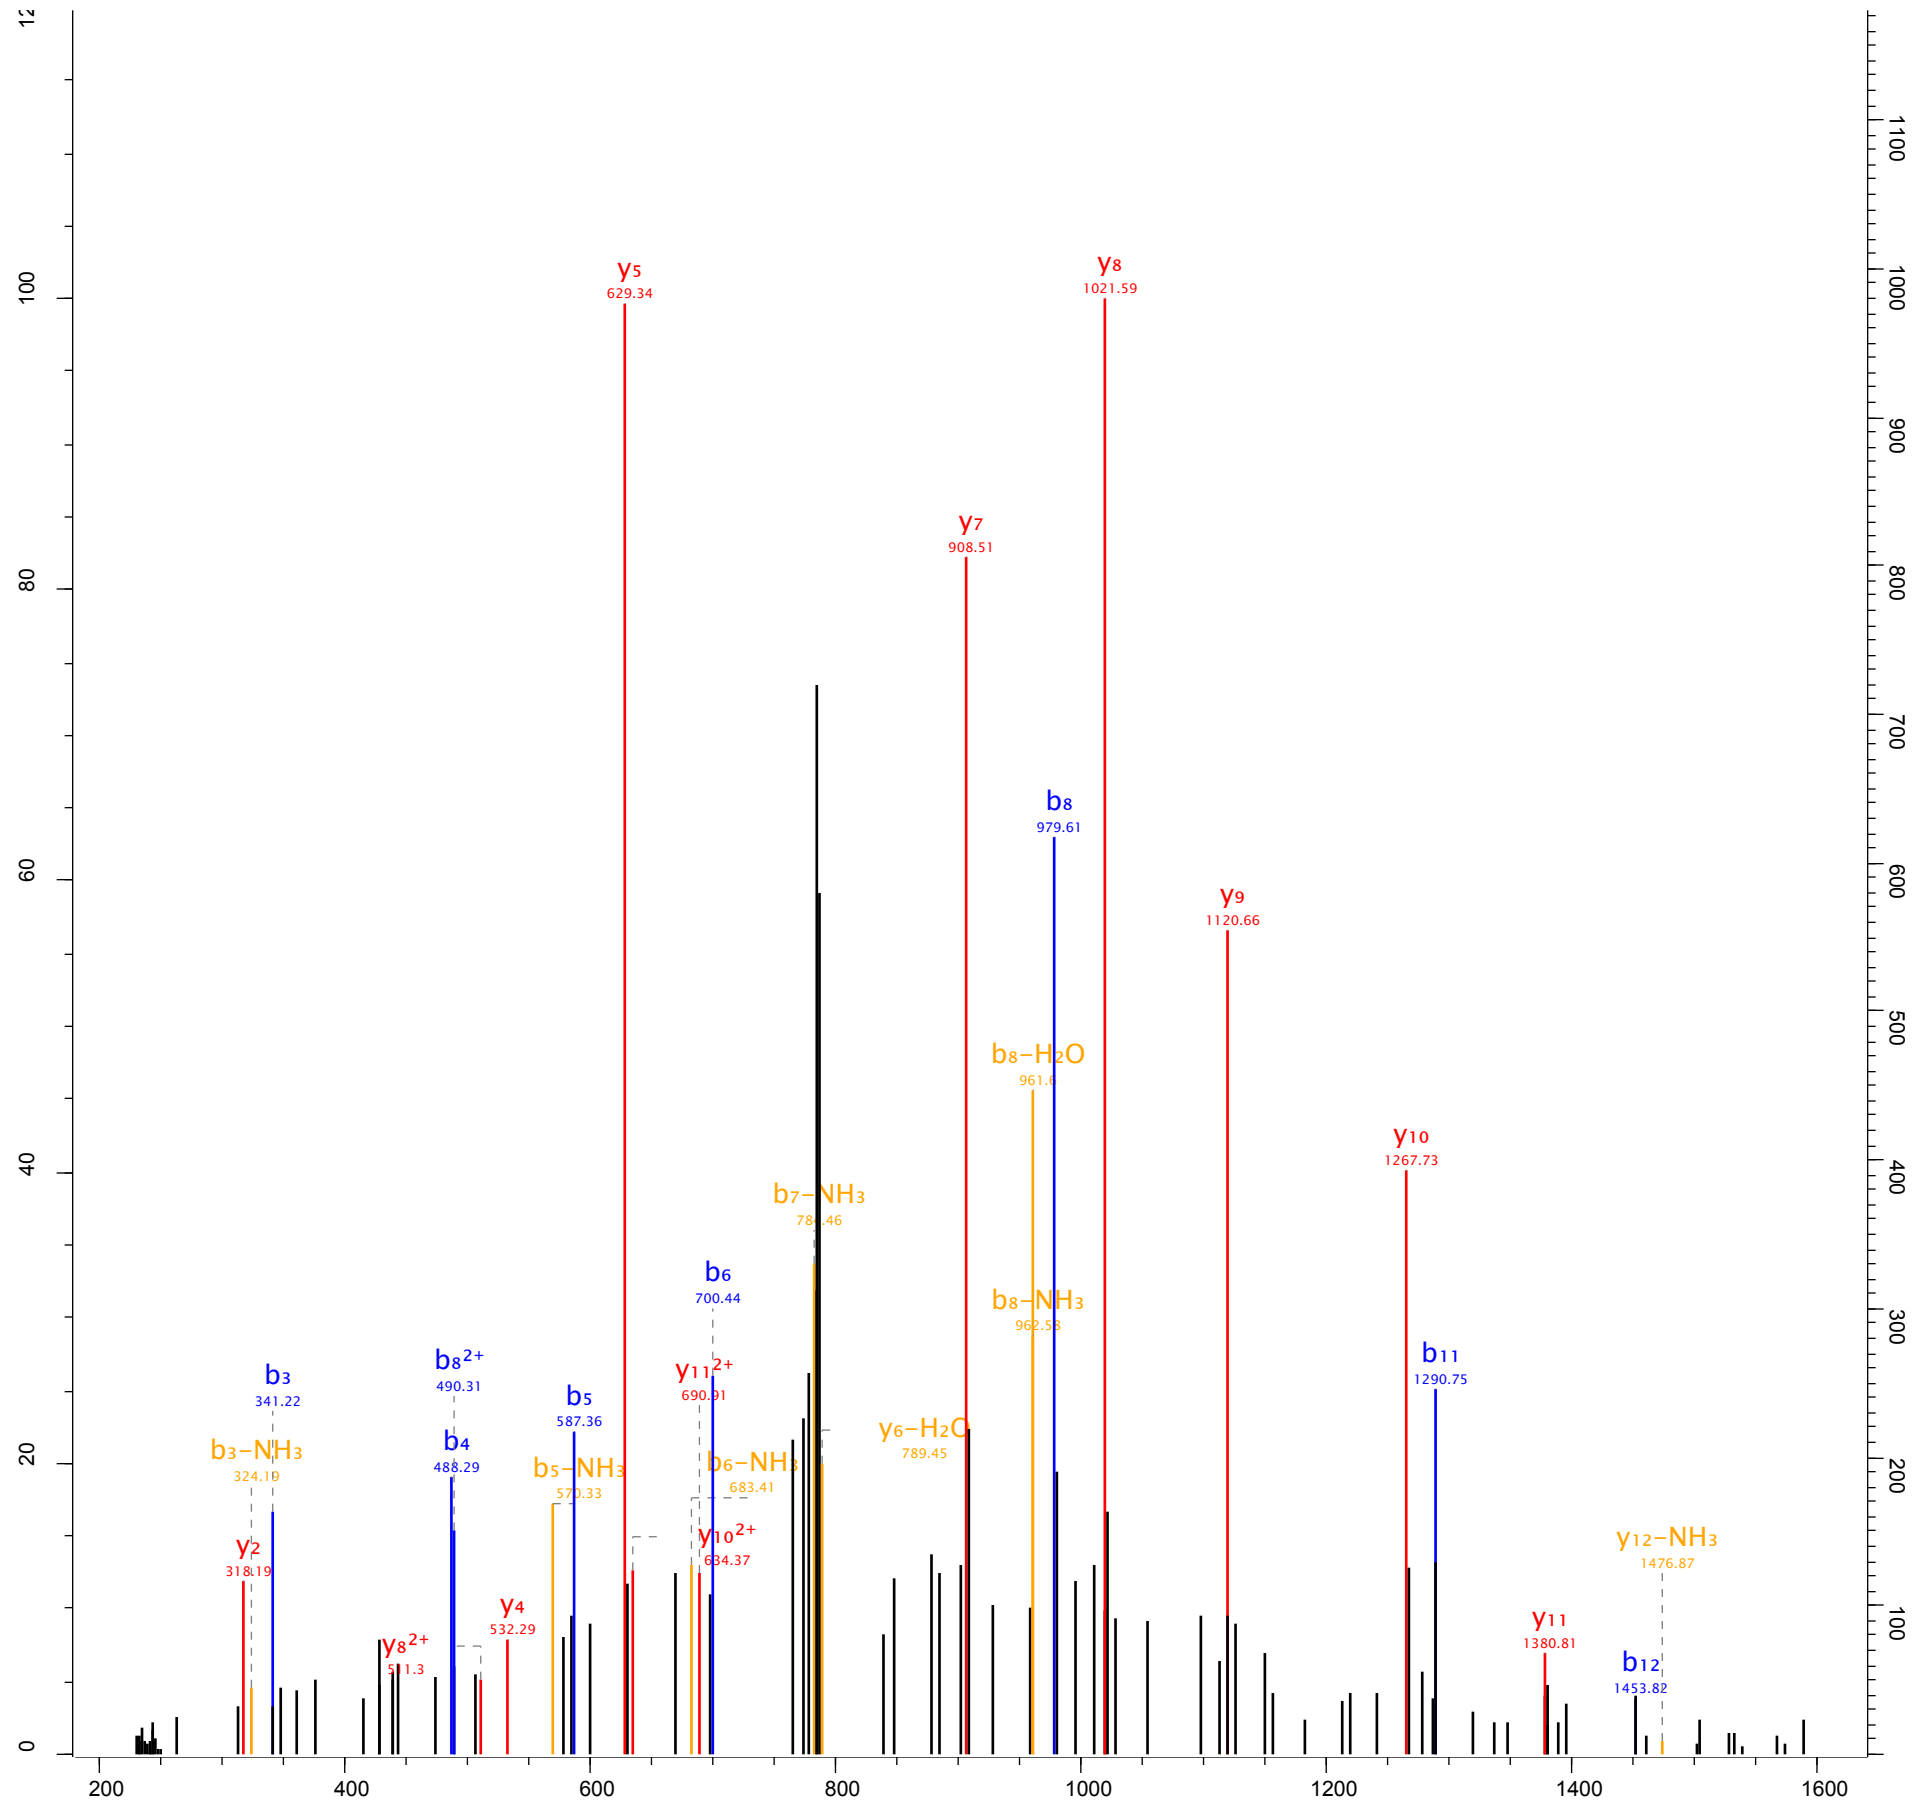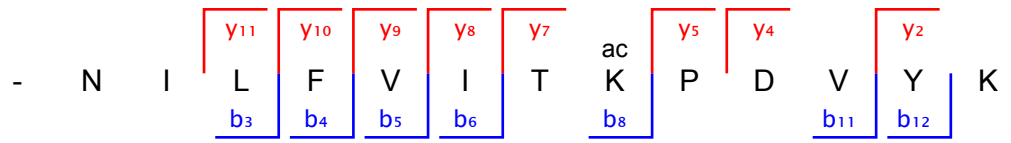

052413\_SCW\_II\_29\_Second\_ZT\_19\_4

18362

ITMS; CID

236.05

870.44

C1qbp

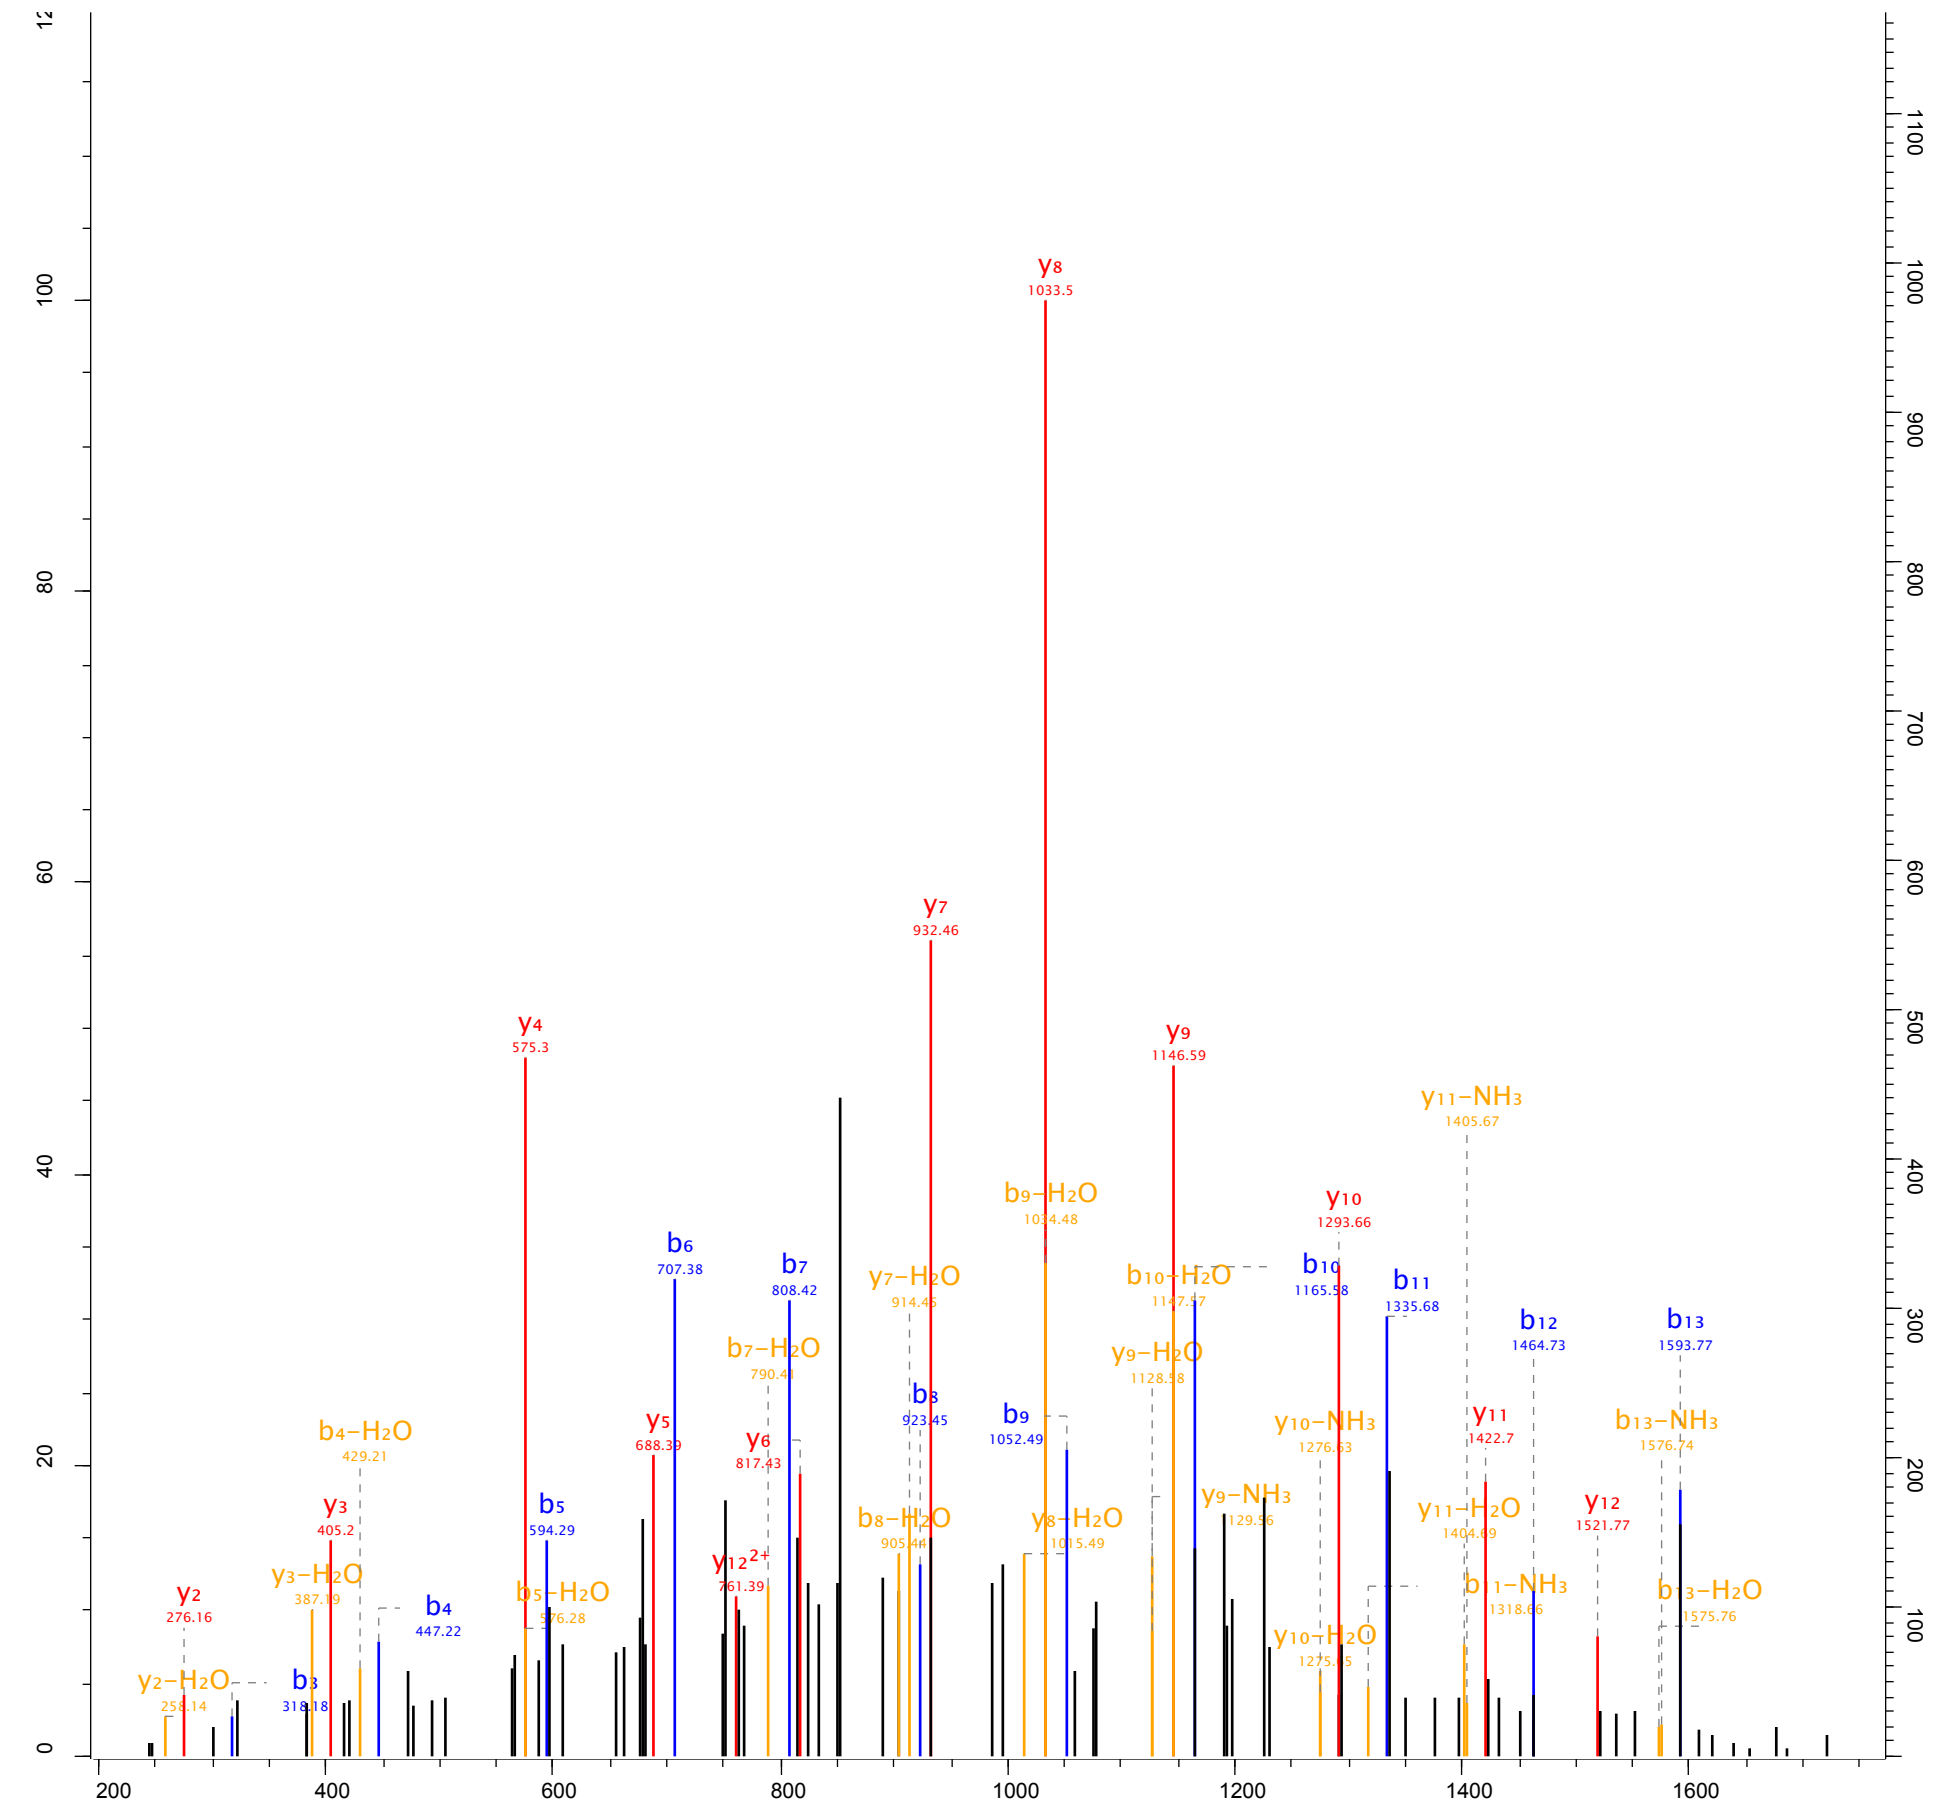

- A F V E F L T D E I K E E K -

y12
y11
y10
y9
y8
y7
y6
y5
y4
ac
y3
y2

b3
b4
b5
b6
b7
b8
b9
b10
b11
b12
b13

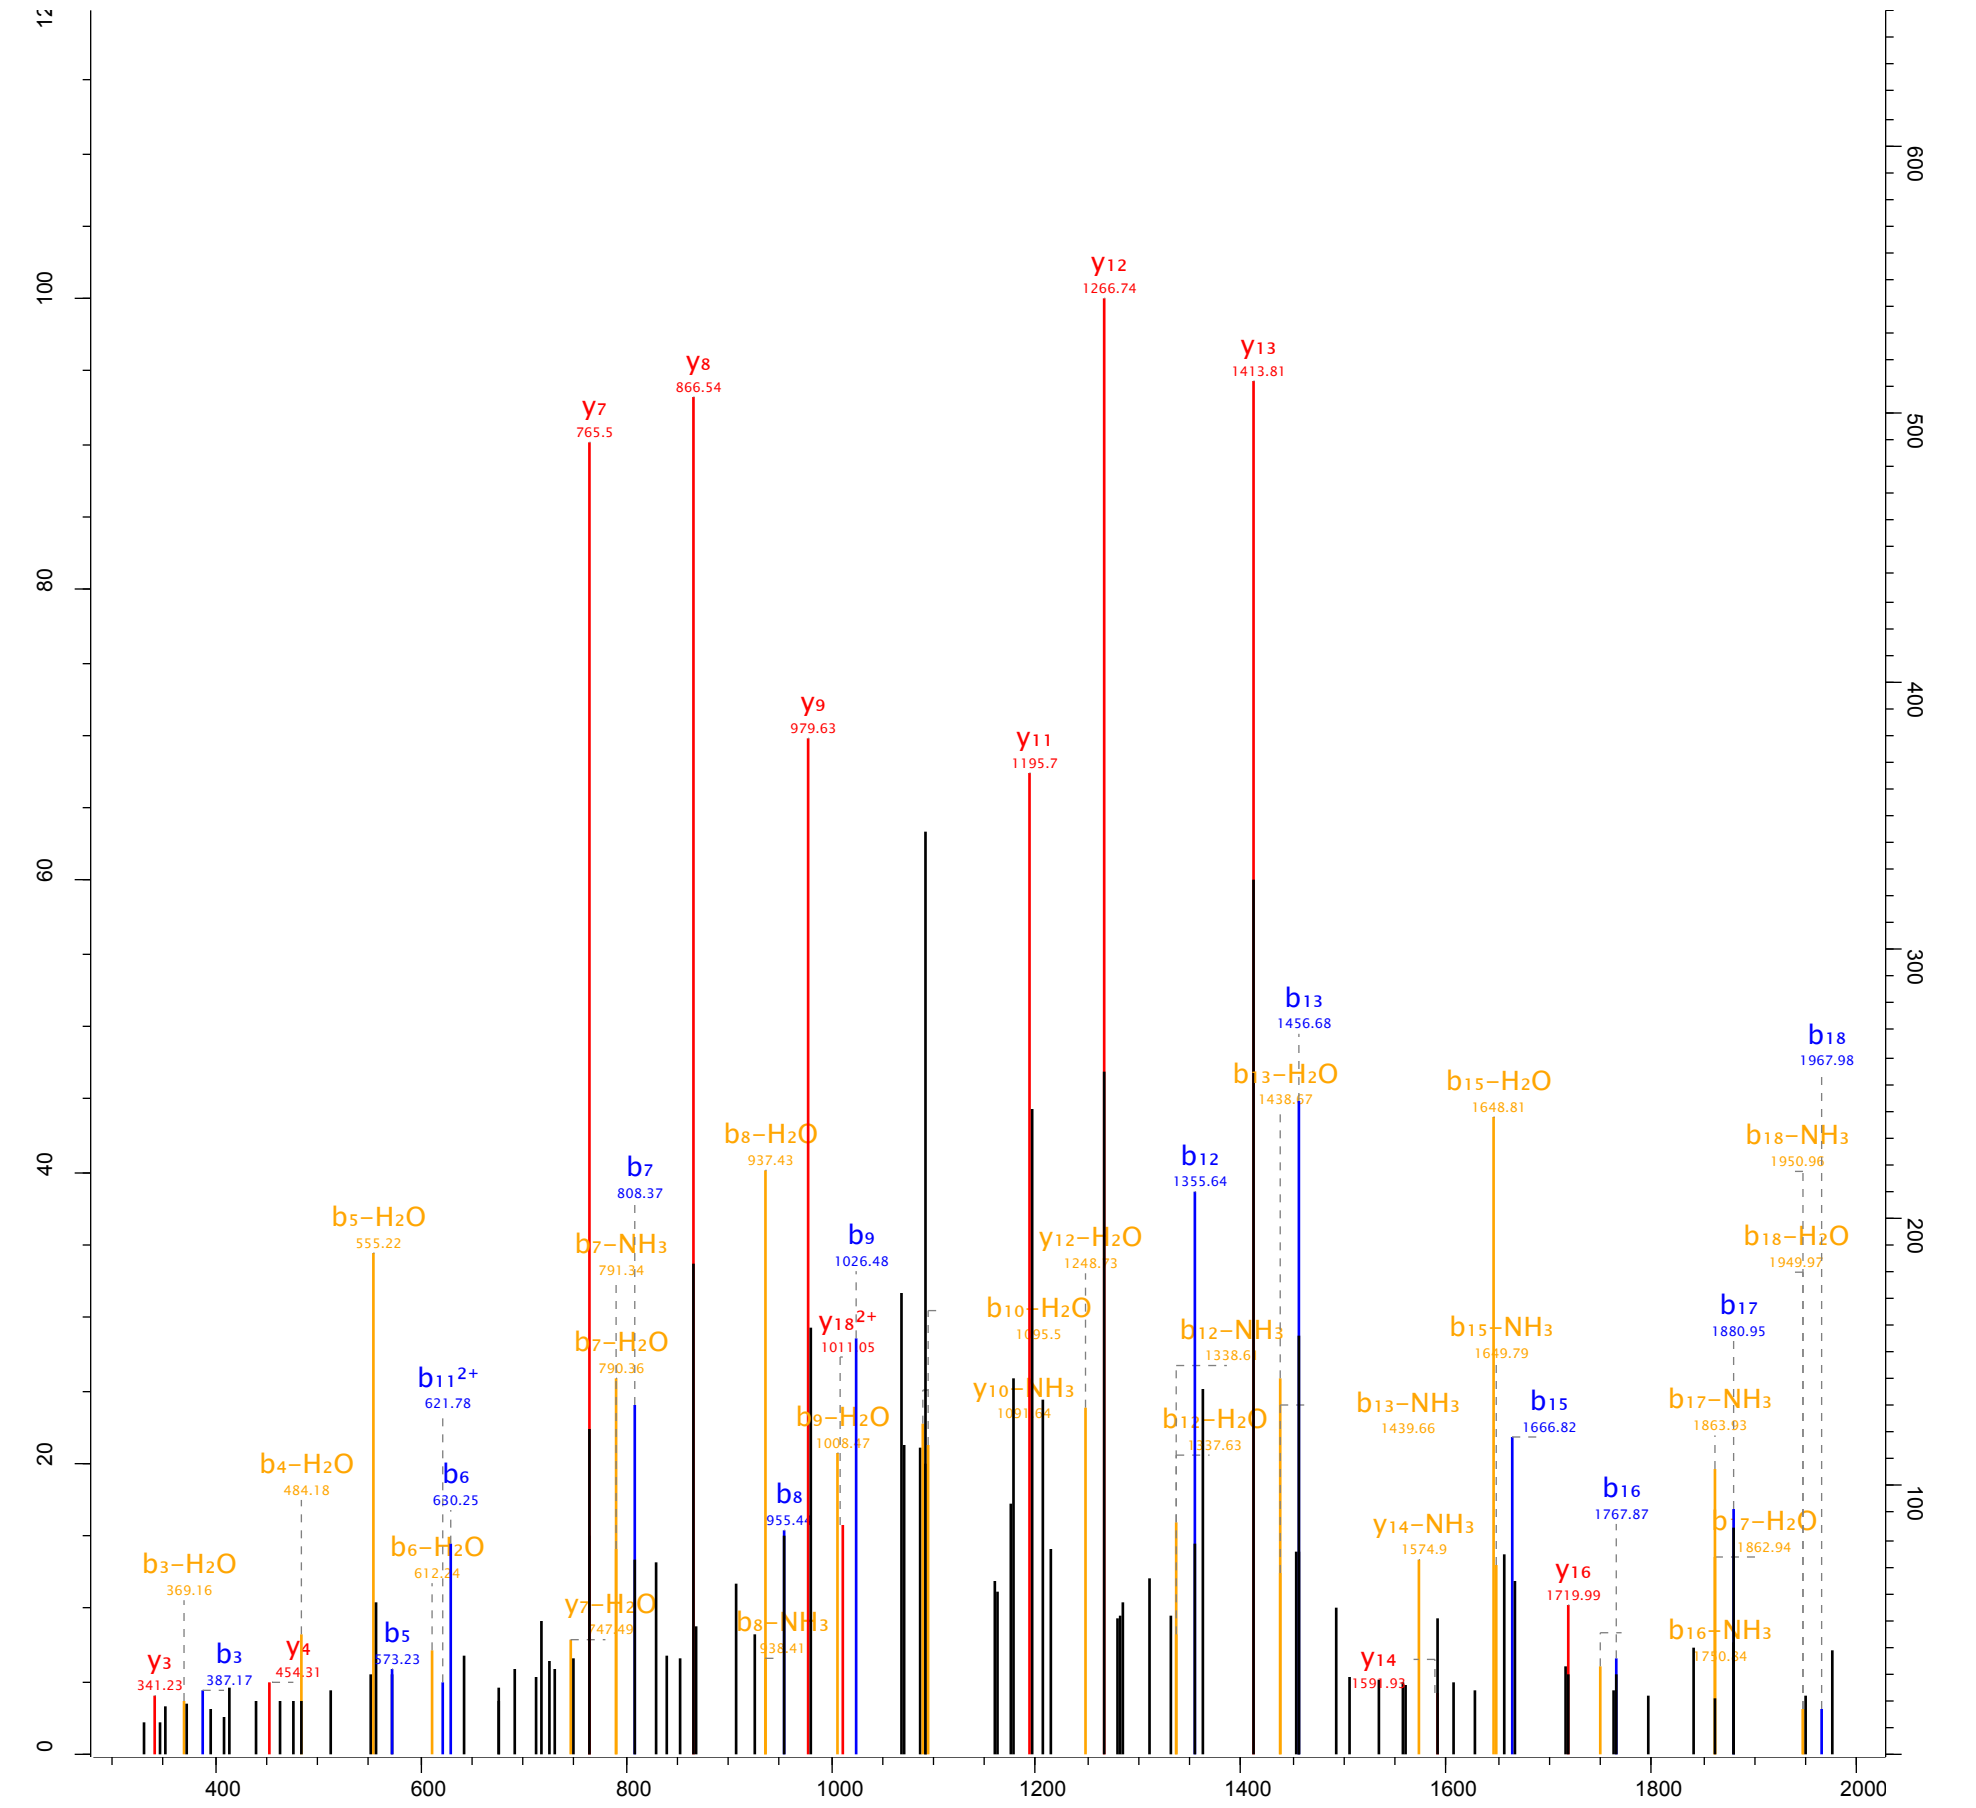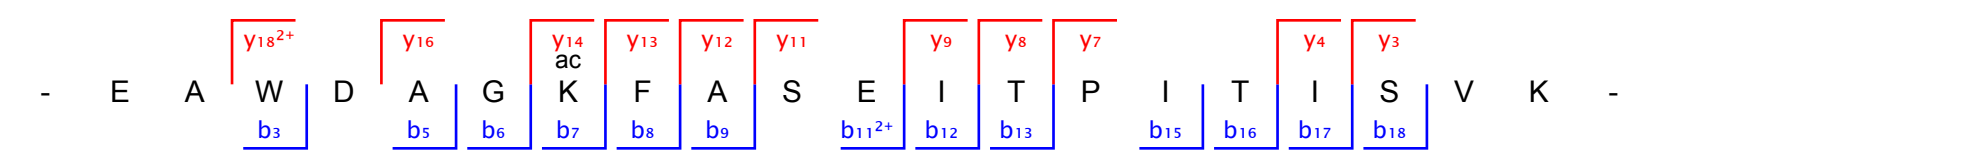

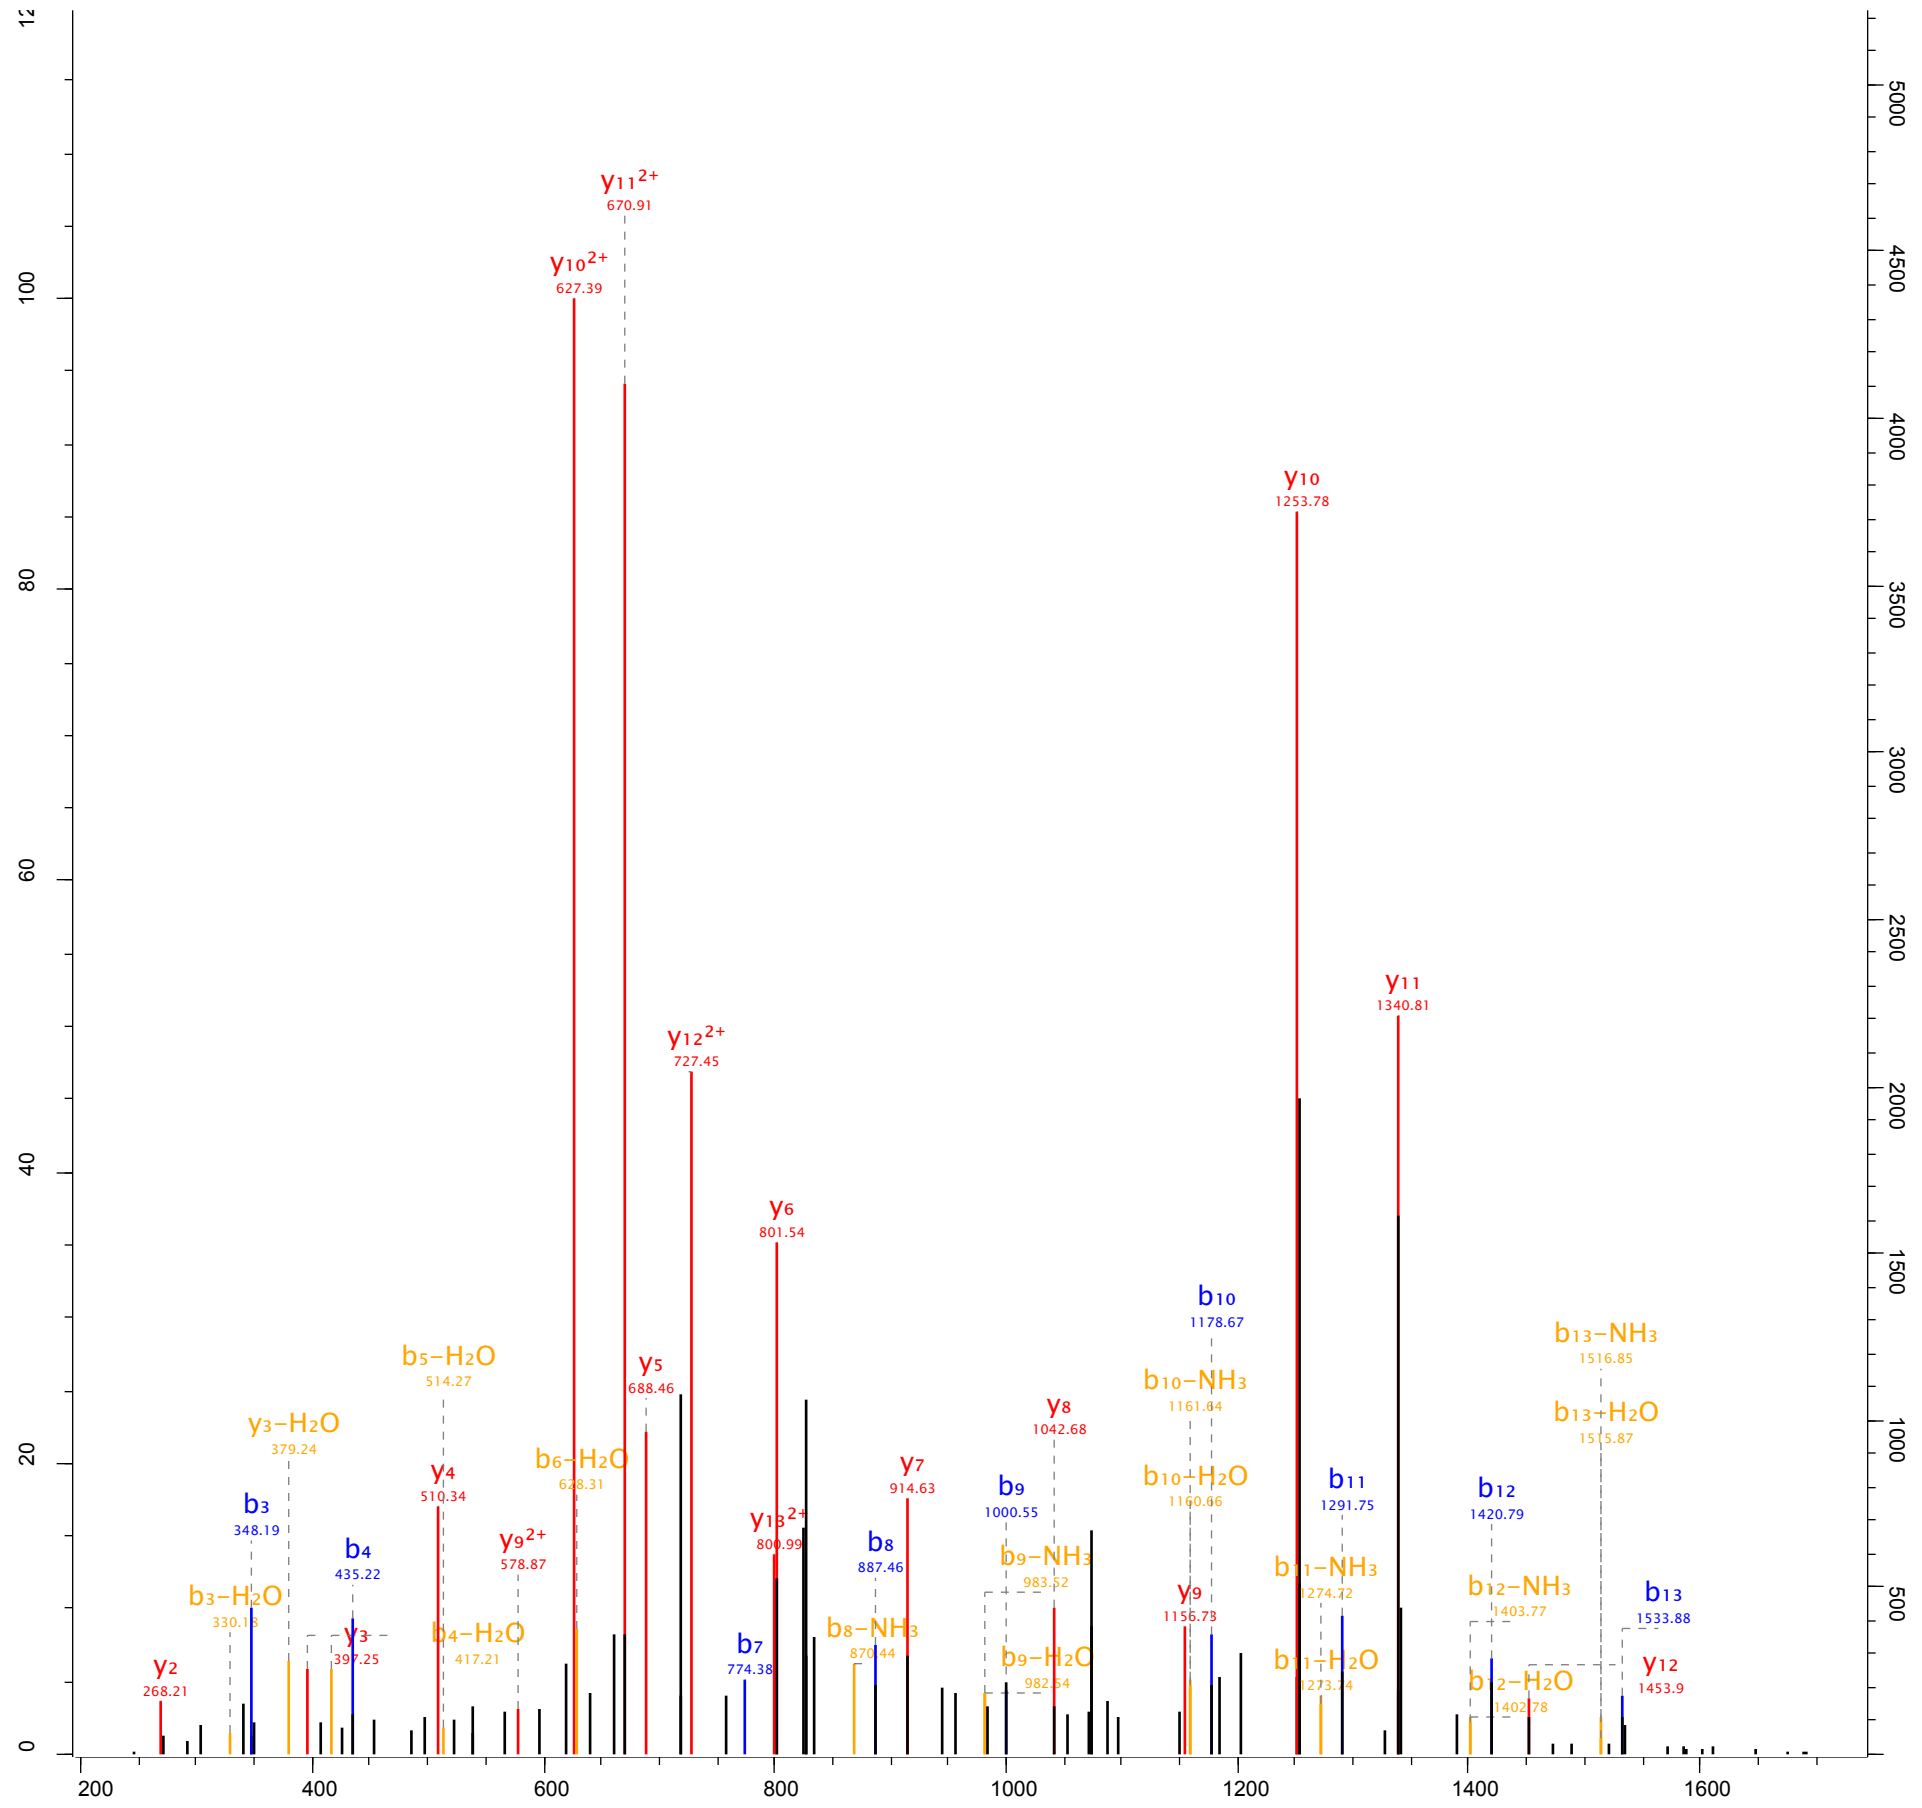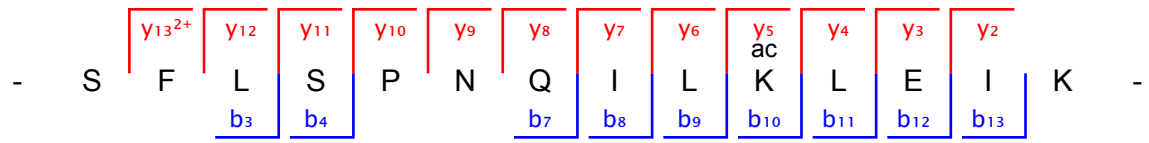

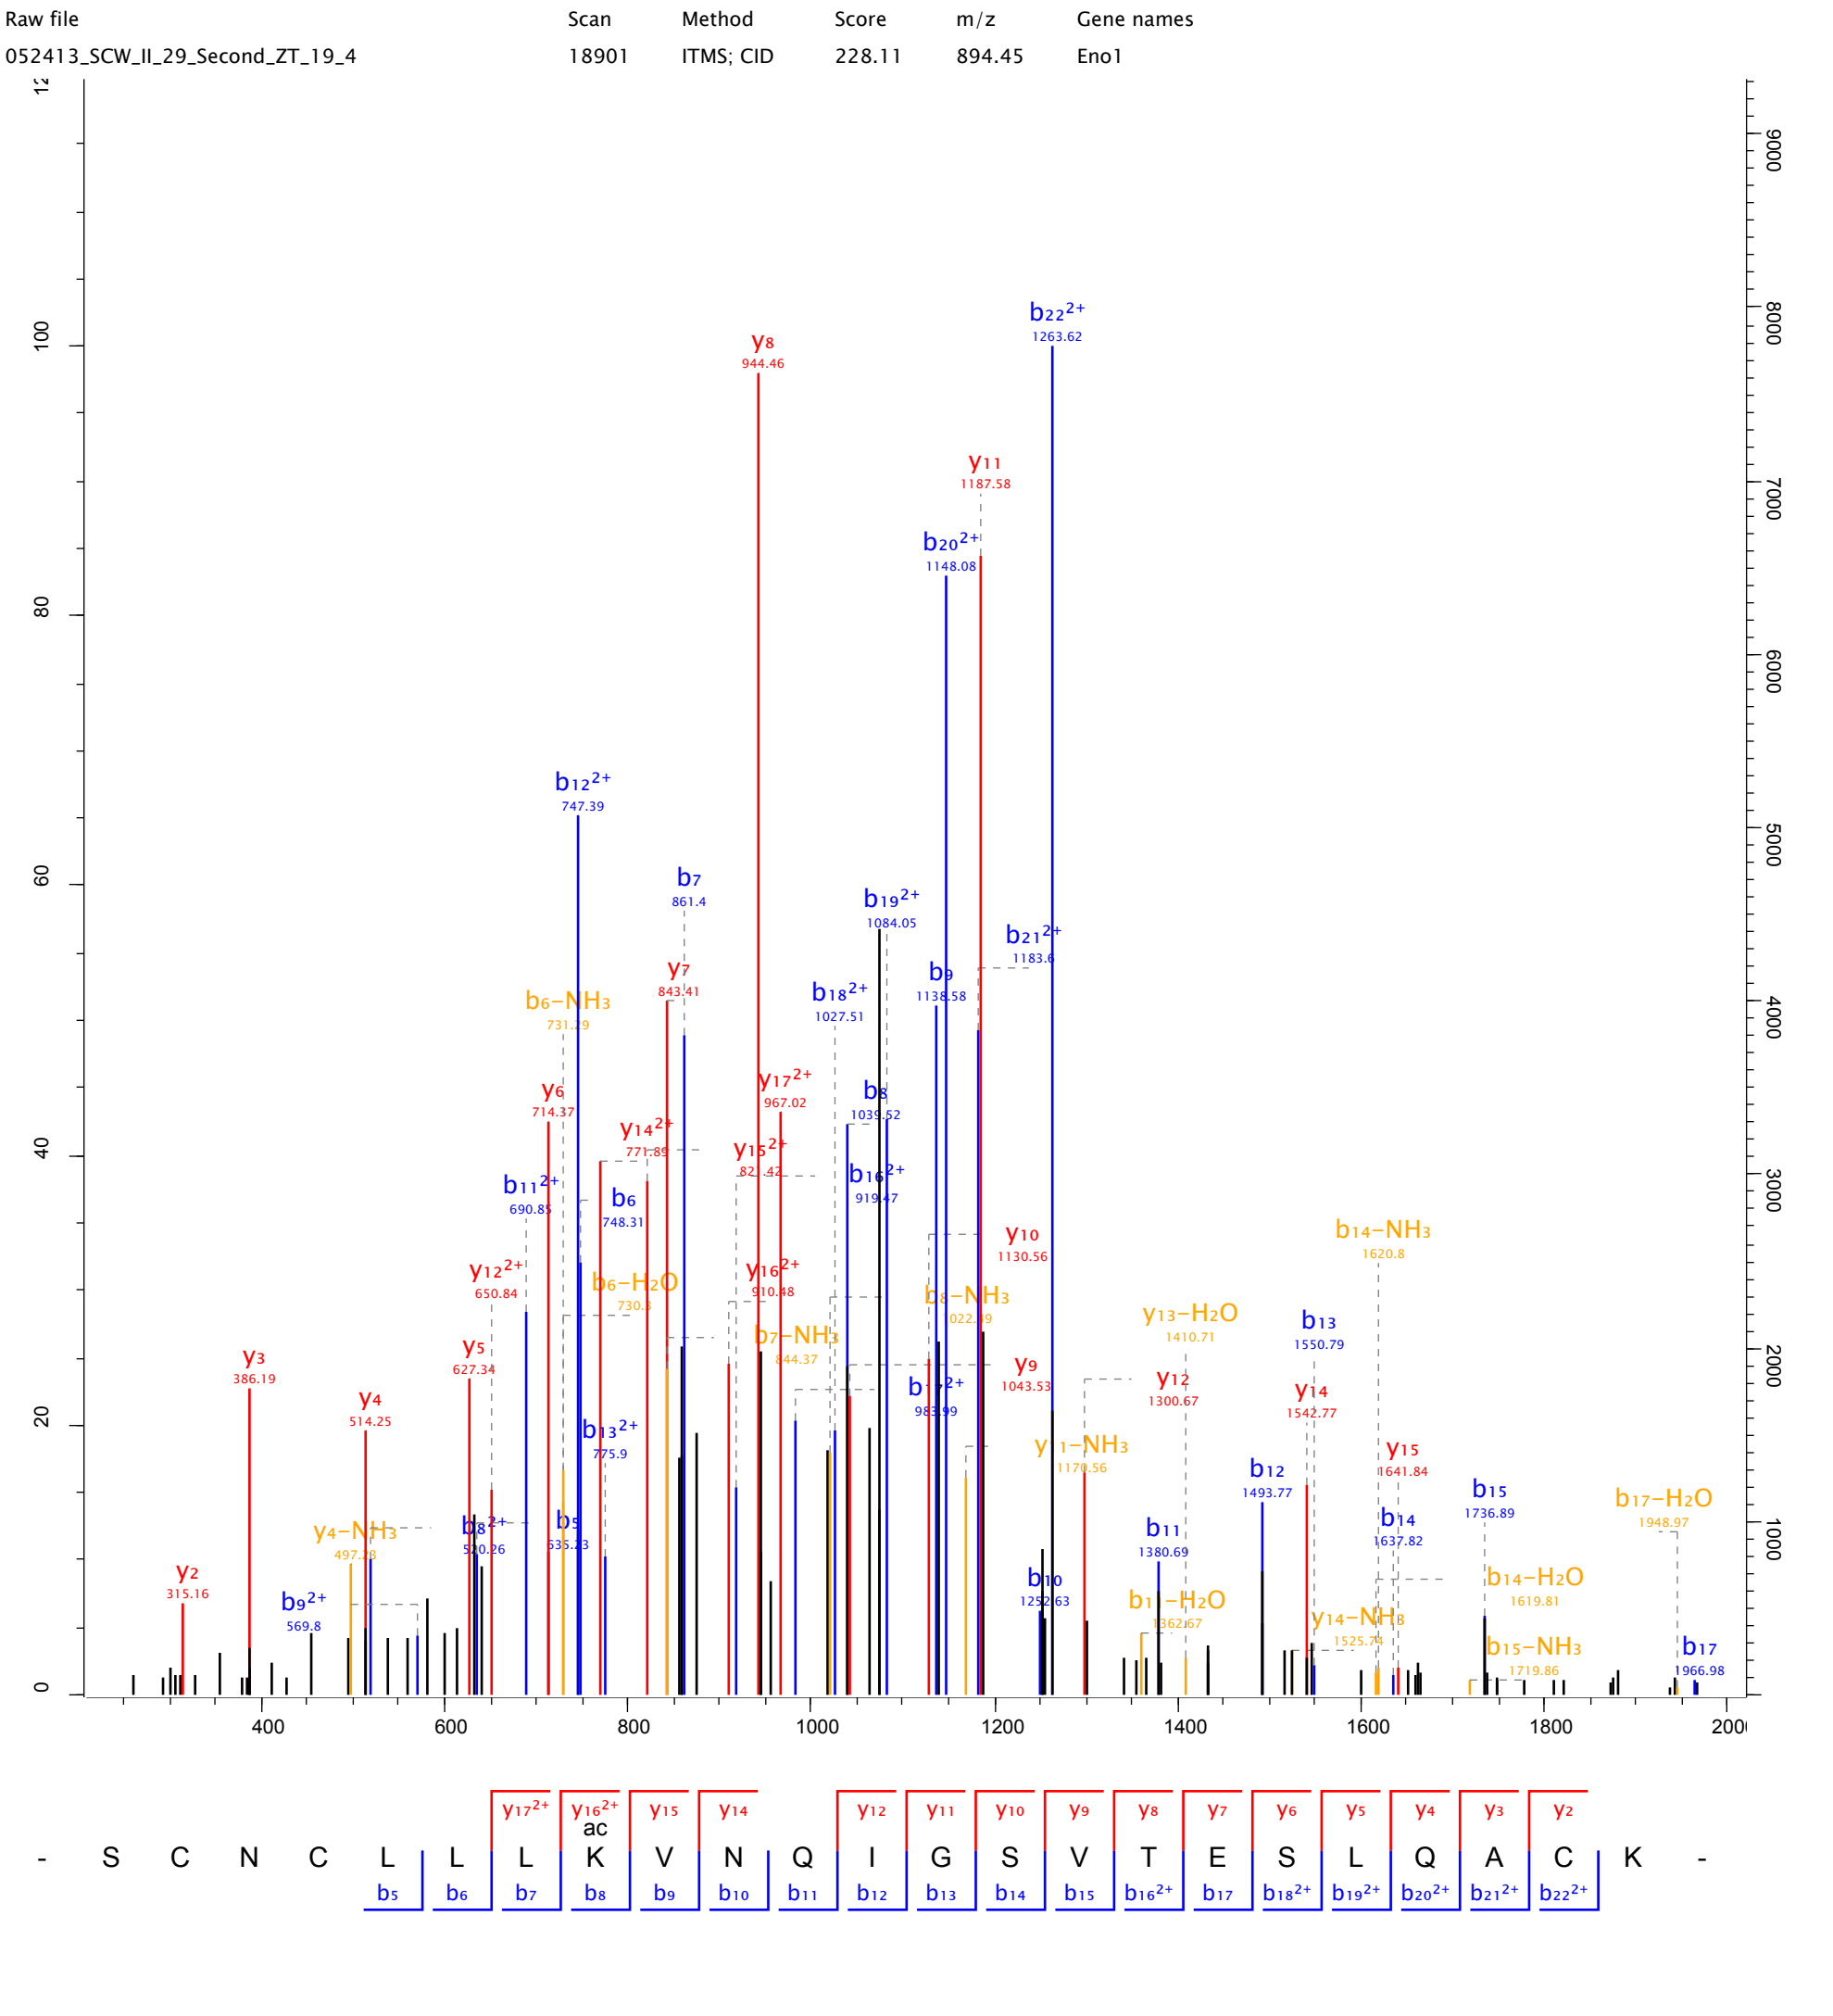

052413\_SCW\_II\_29\_Second\_ZT\_19\_4

18911

ITMS; CID

120.99

926.47

Mdh1

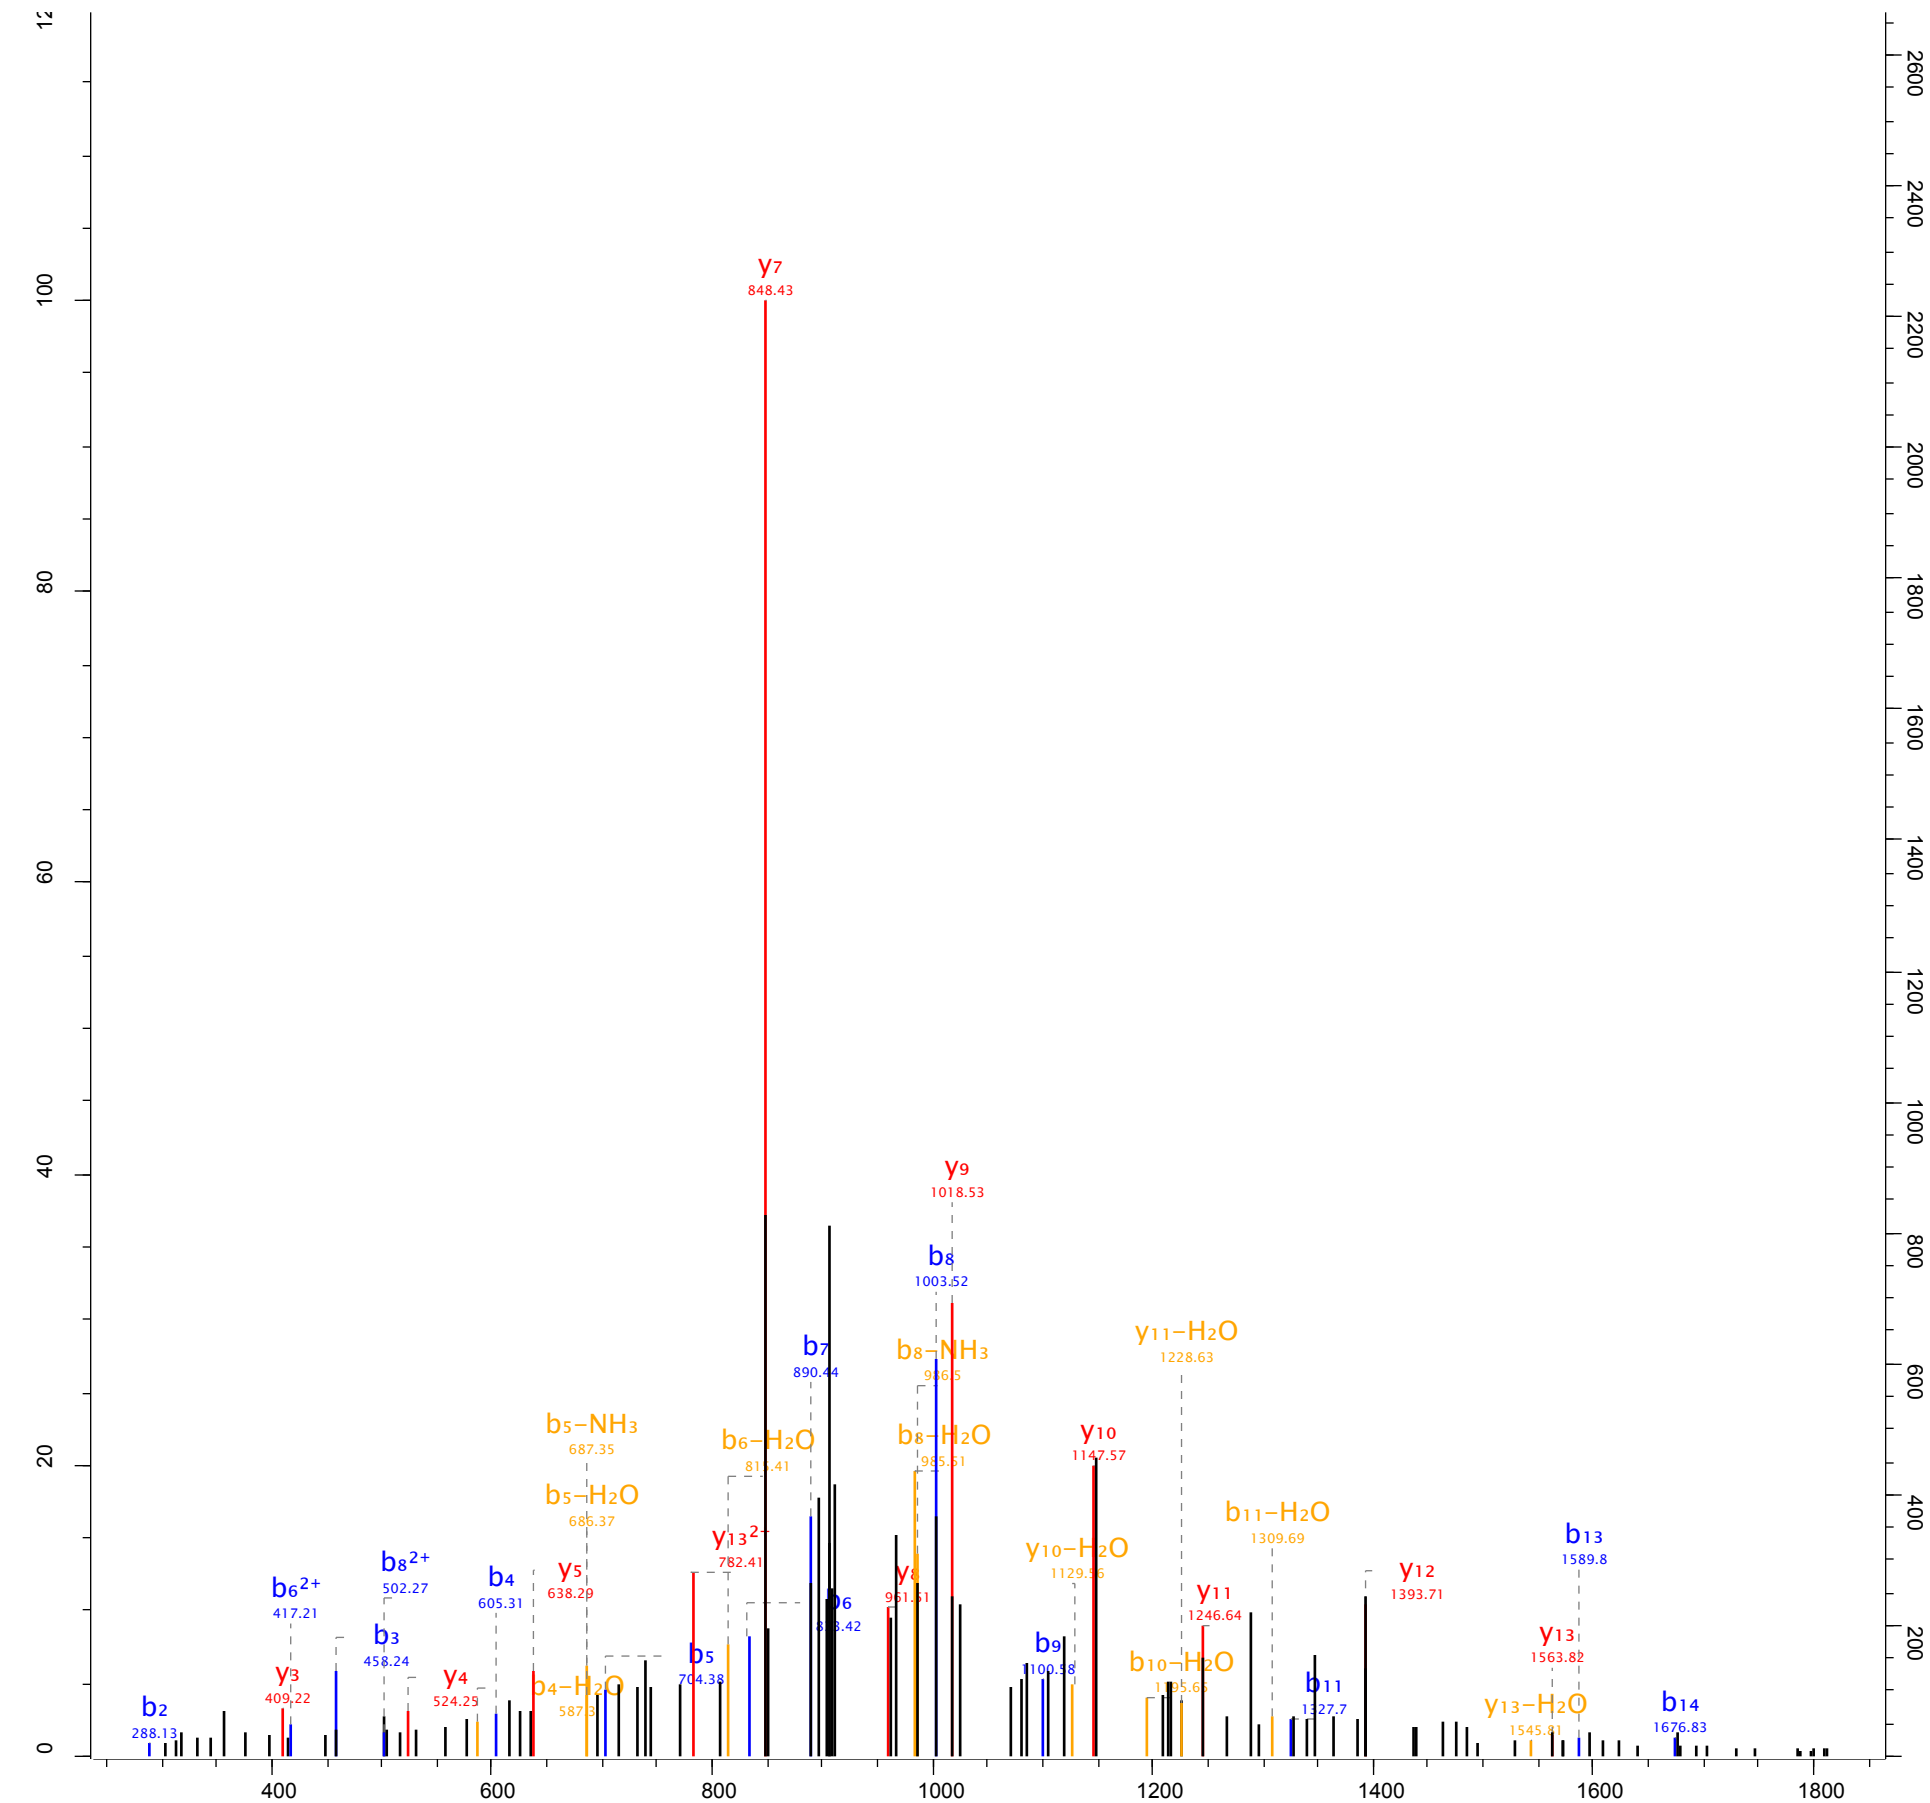

- T W K F V E G L P I N D F S R -

y<sub>13</sub> ac
y<sub>12</sub>
y<sub>11</sub>
y<sub>10</sub>
y<sub>9</sub>
y<sub>8</sub>
y<sub>7</sub>
b<sub>2</sub>
b<sub>3</sub>
b<sub>4</sub>
b<sub>5</sub>
b<sub>6</sub>
b<sub>7</sub>
b<sub>8</sub>
b<sub>9</sub>
b<sub>11</sub>
b<sub>13</sub>
b<sub>14</sub>

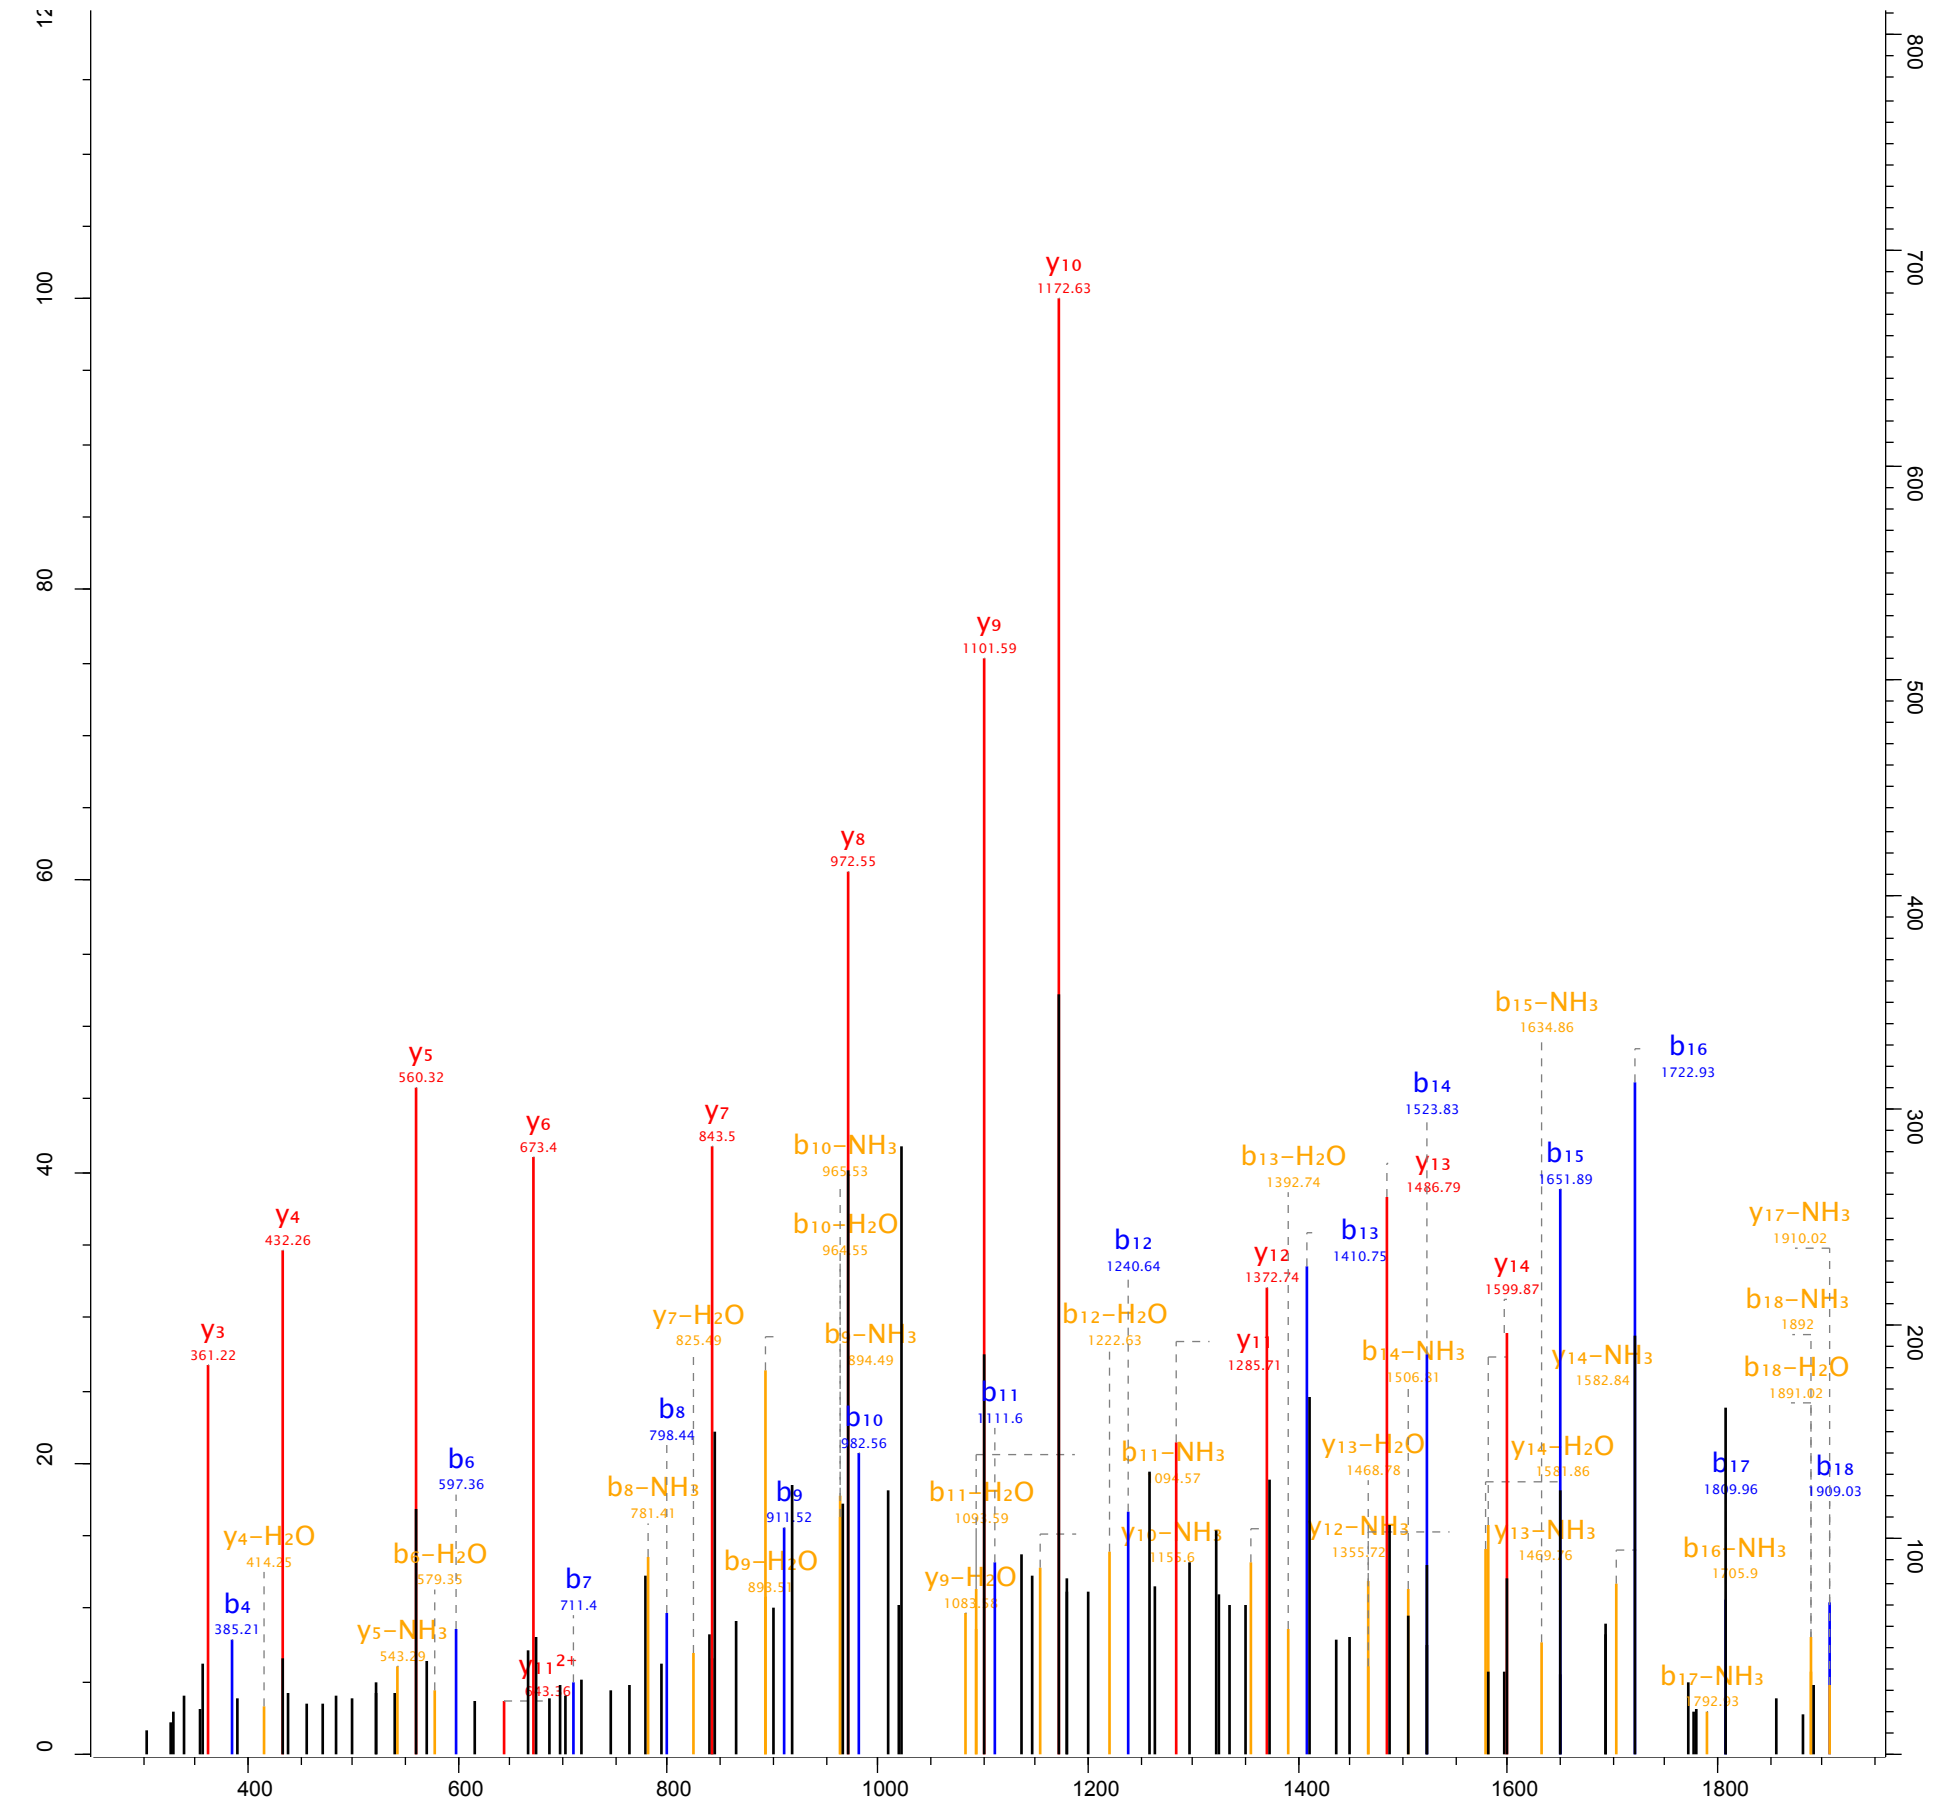

- G V D L V L N S L A E E K L Q A S V R -

b4 b6 b7 b8 b9 b10 b11 b12 b13 b14 b15 b16 b17 b18

y14 y13 y12 y11 y10 y9 y8 y7 ac y6 y5 y4 y3

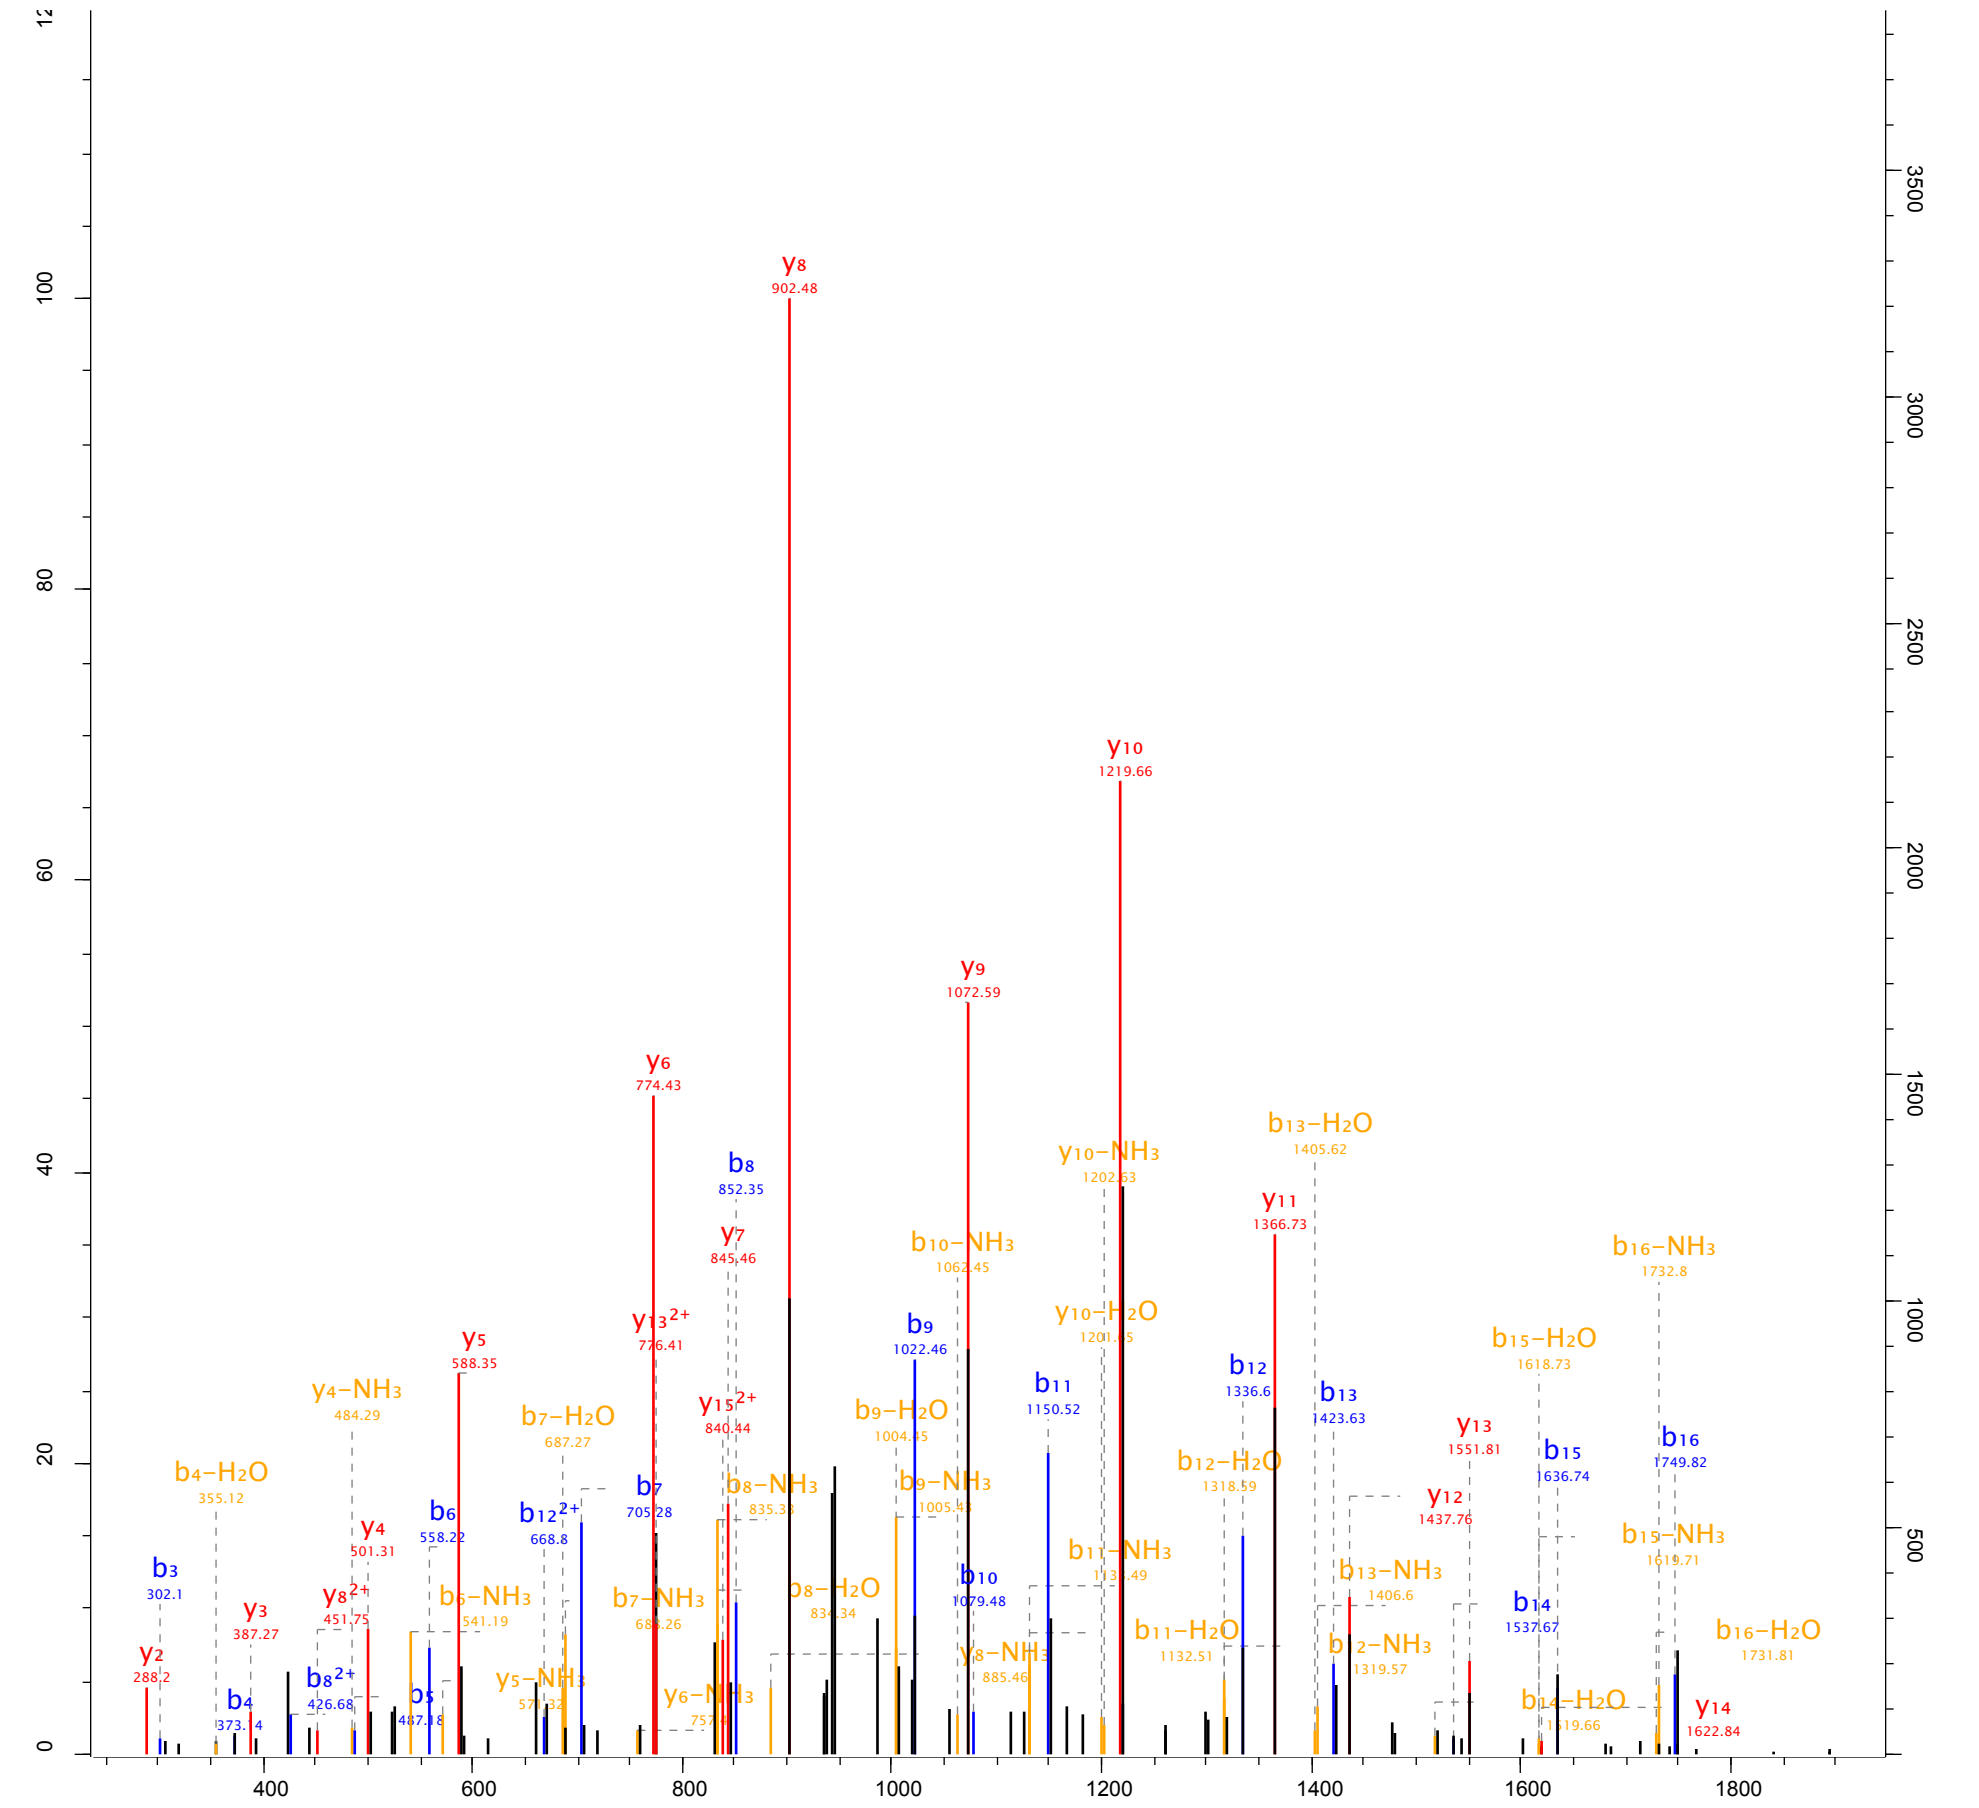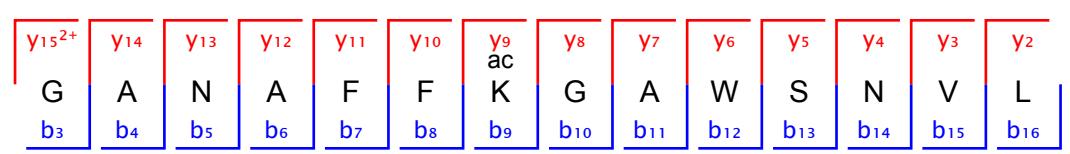



Raw file 052413\_SCW\_II\_29\_Second\_ZT\_19\_4 Scan 19642 Method ITMS; CID Score 133.16 m/z 806.44 Gene names Uqcrb

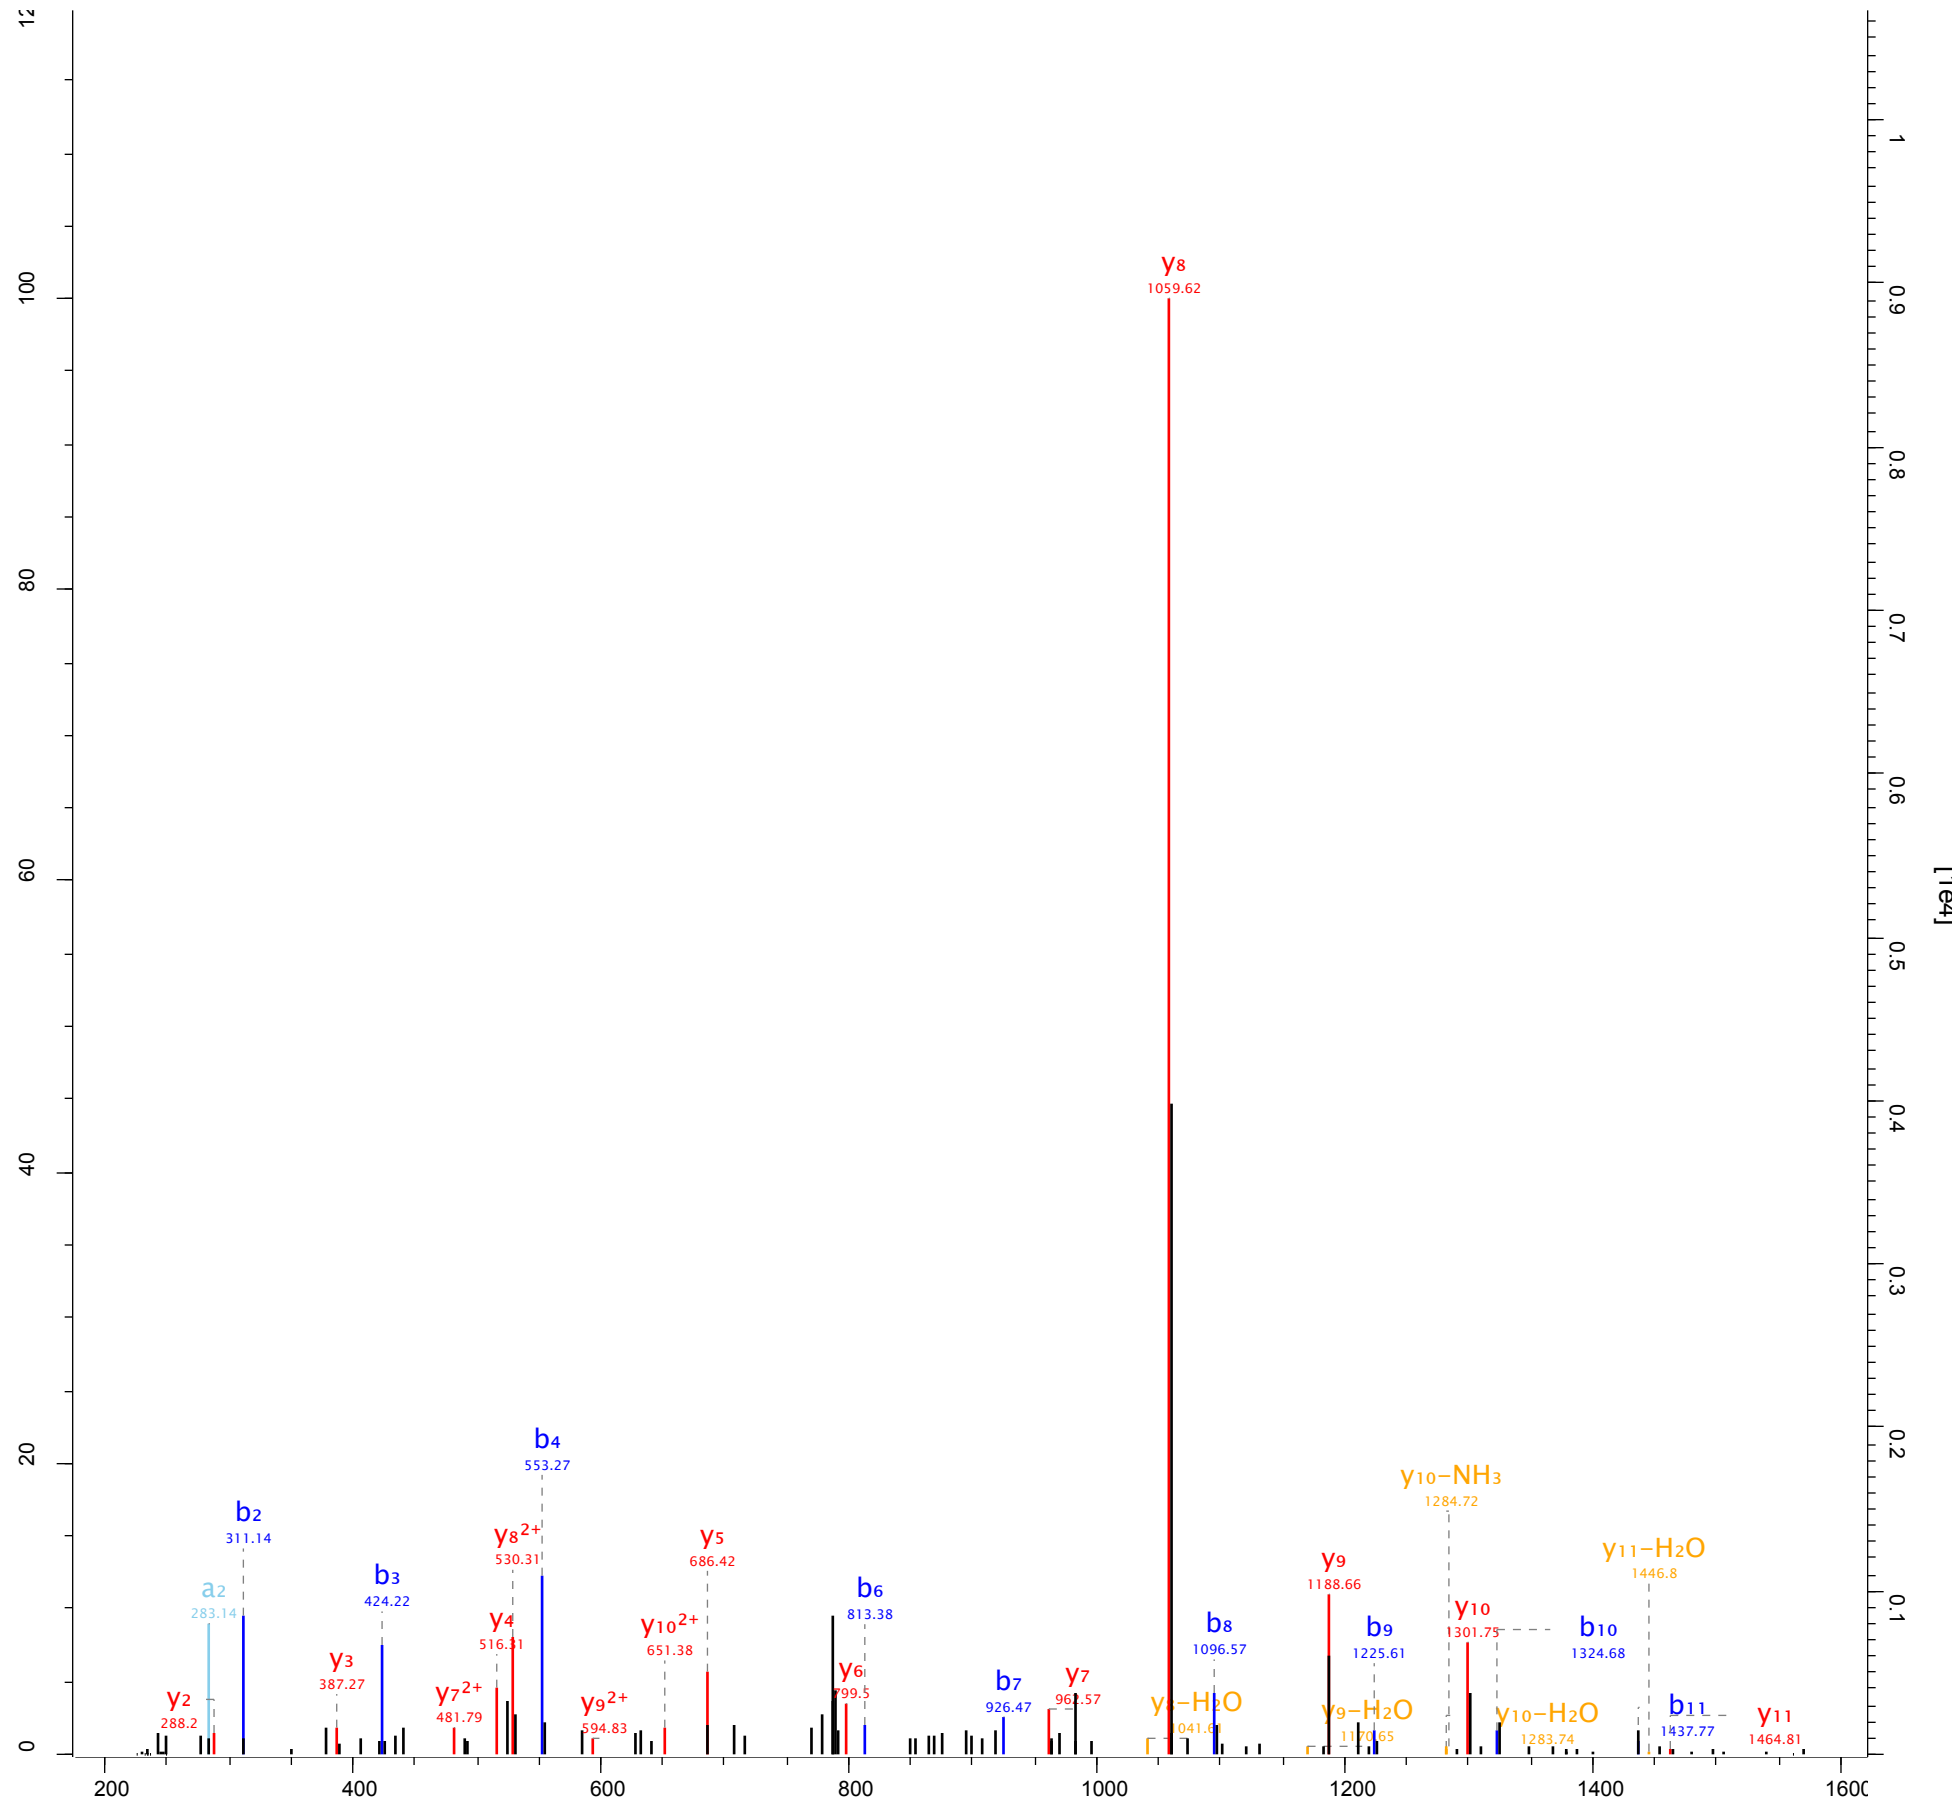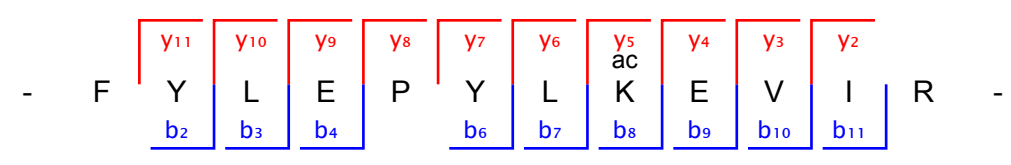

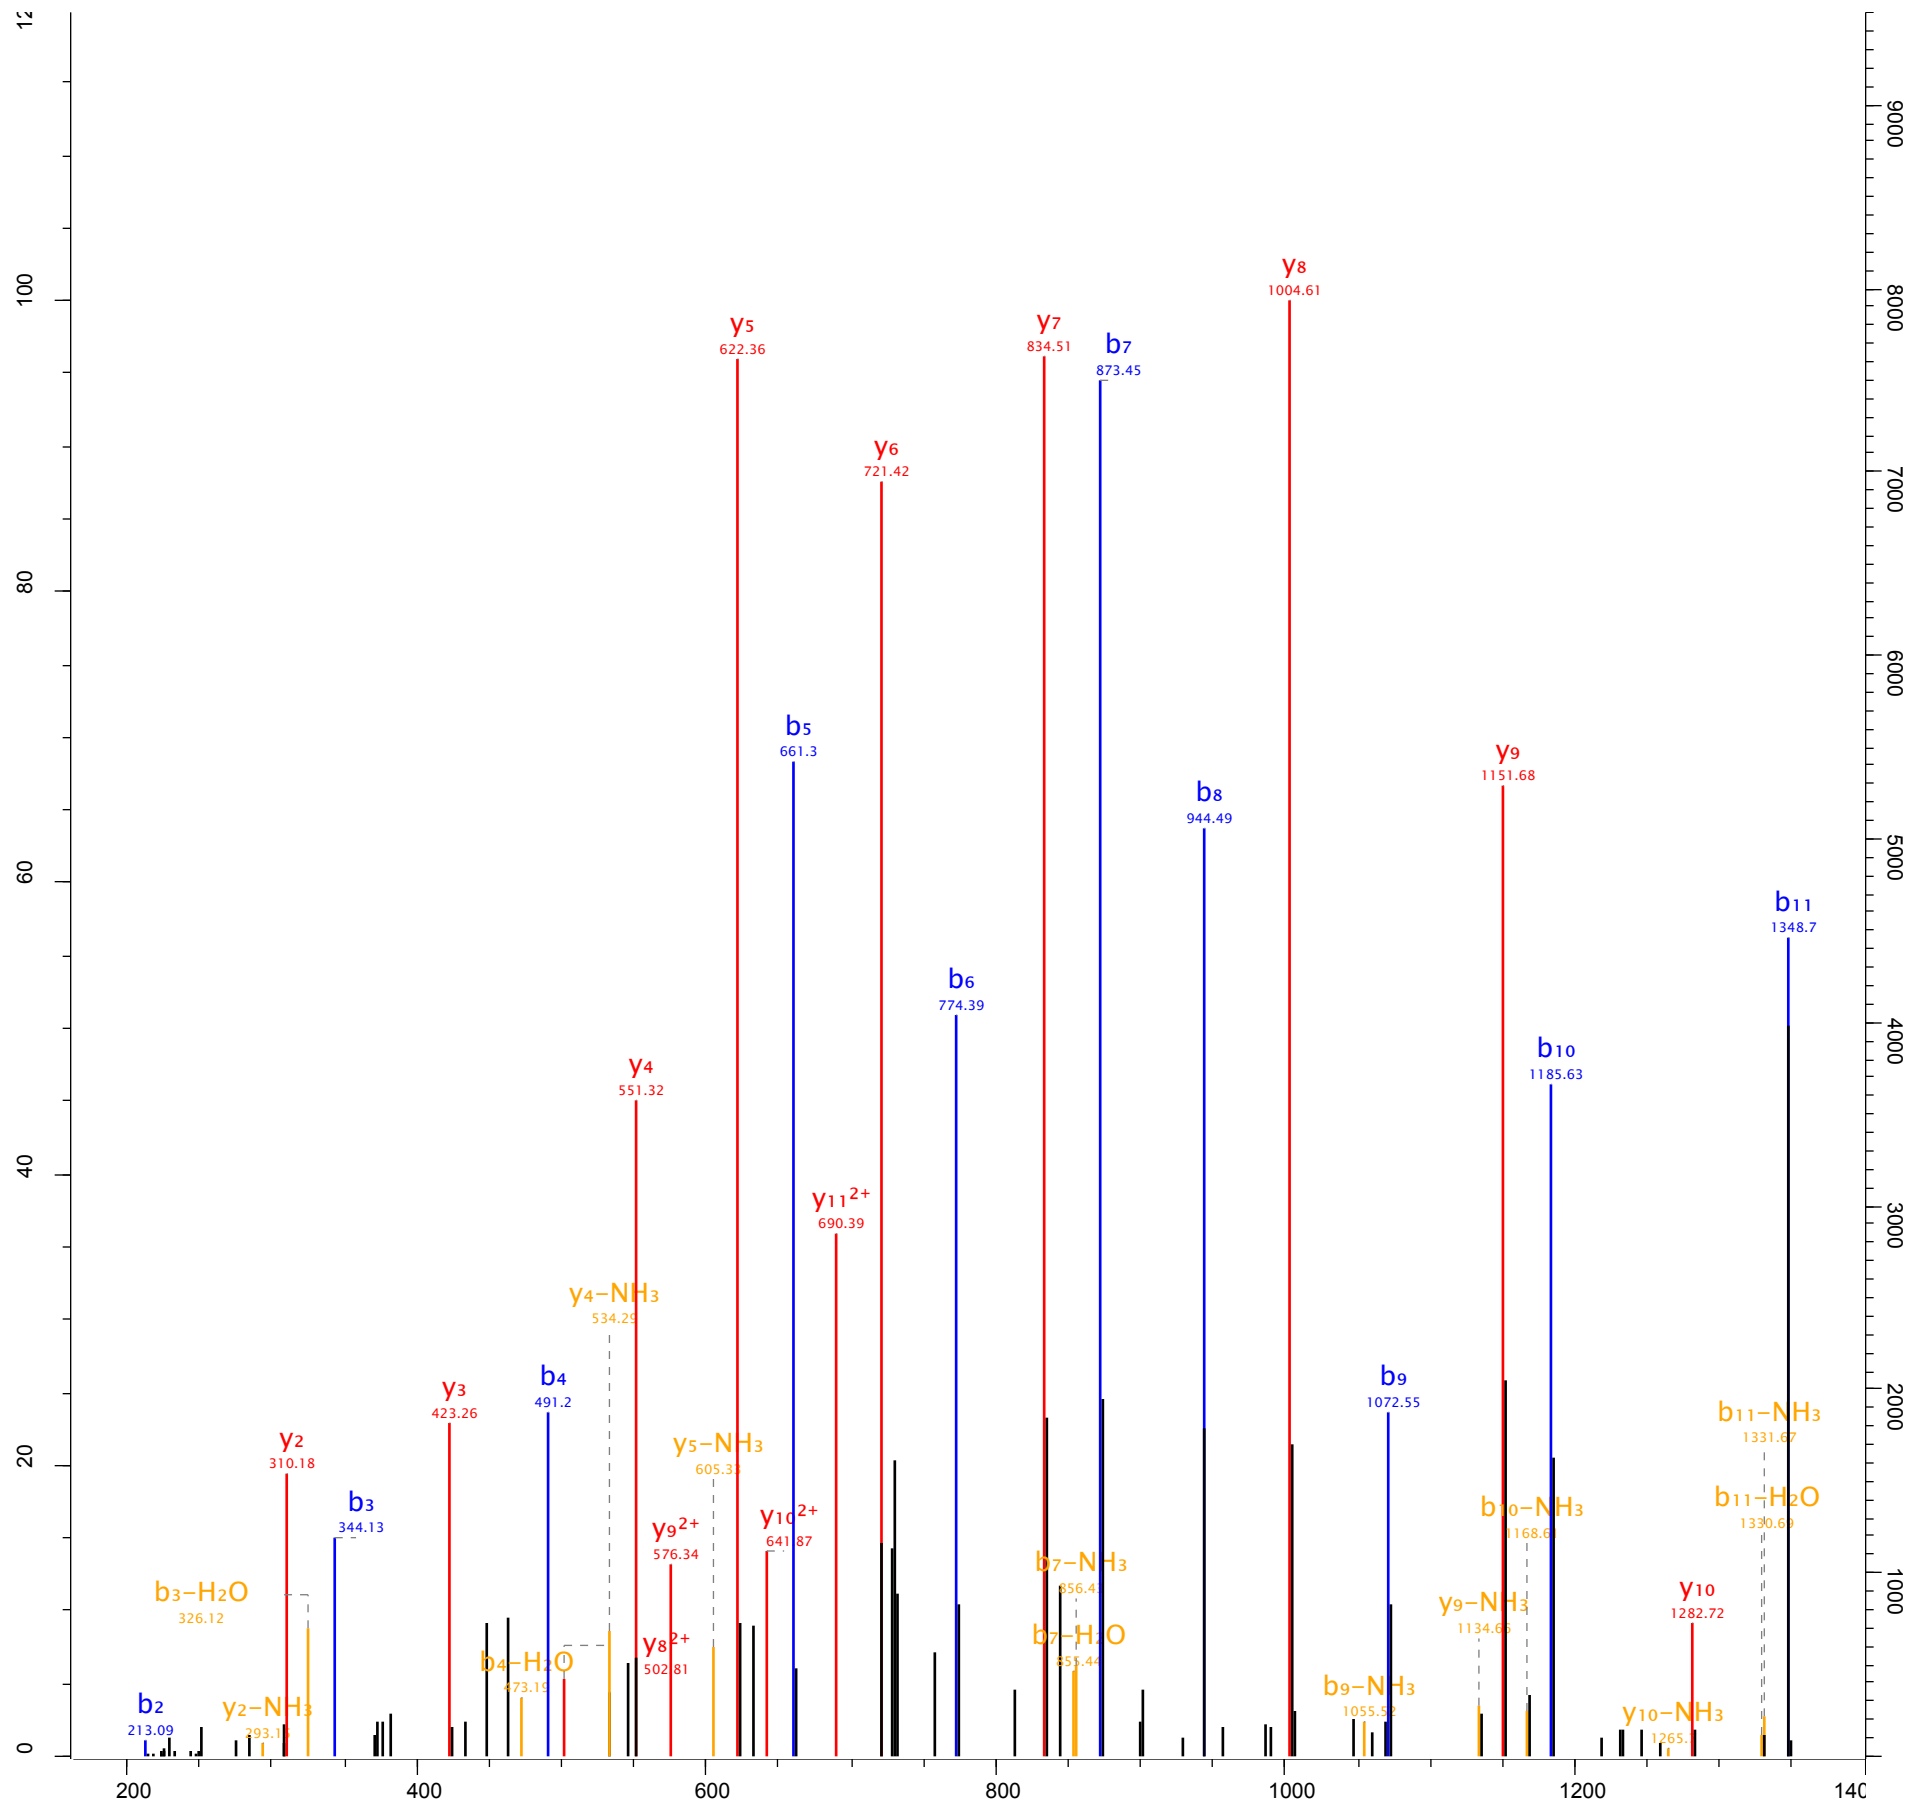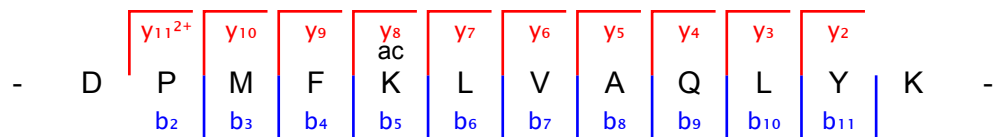

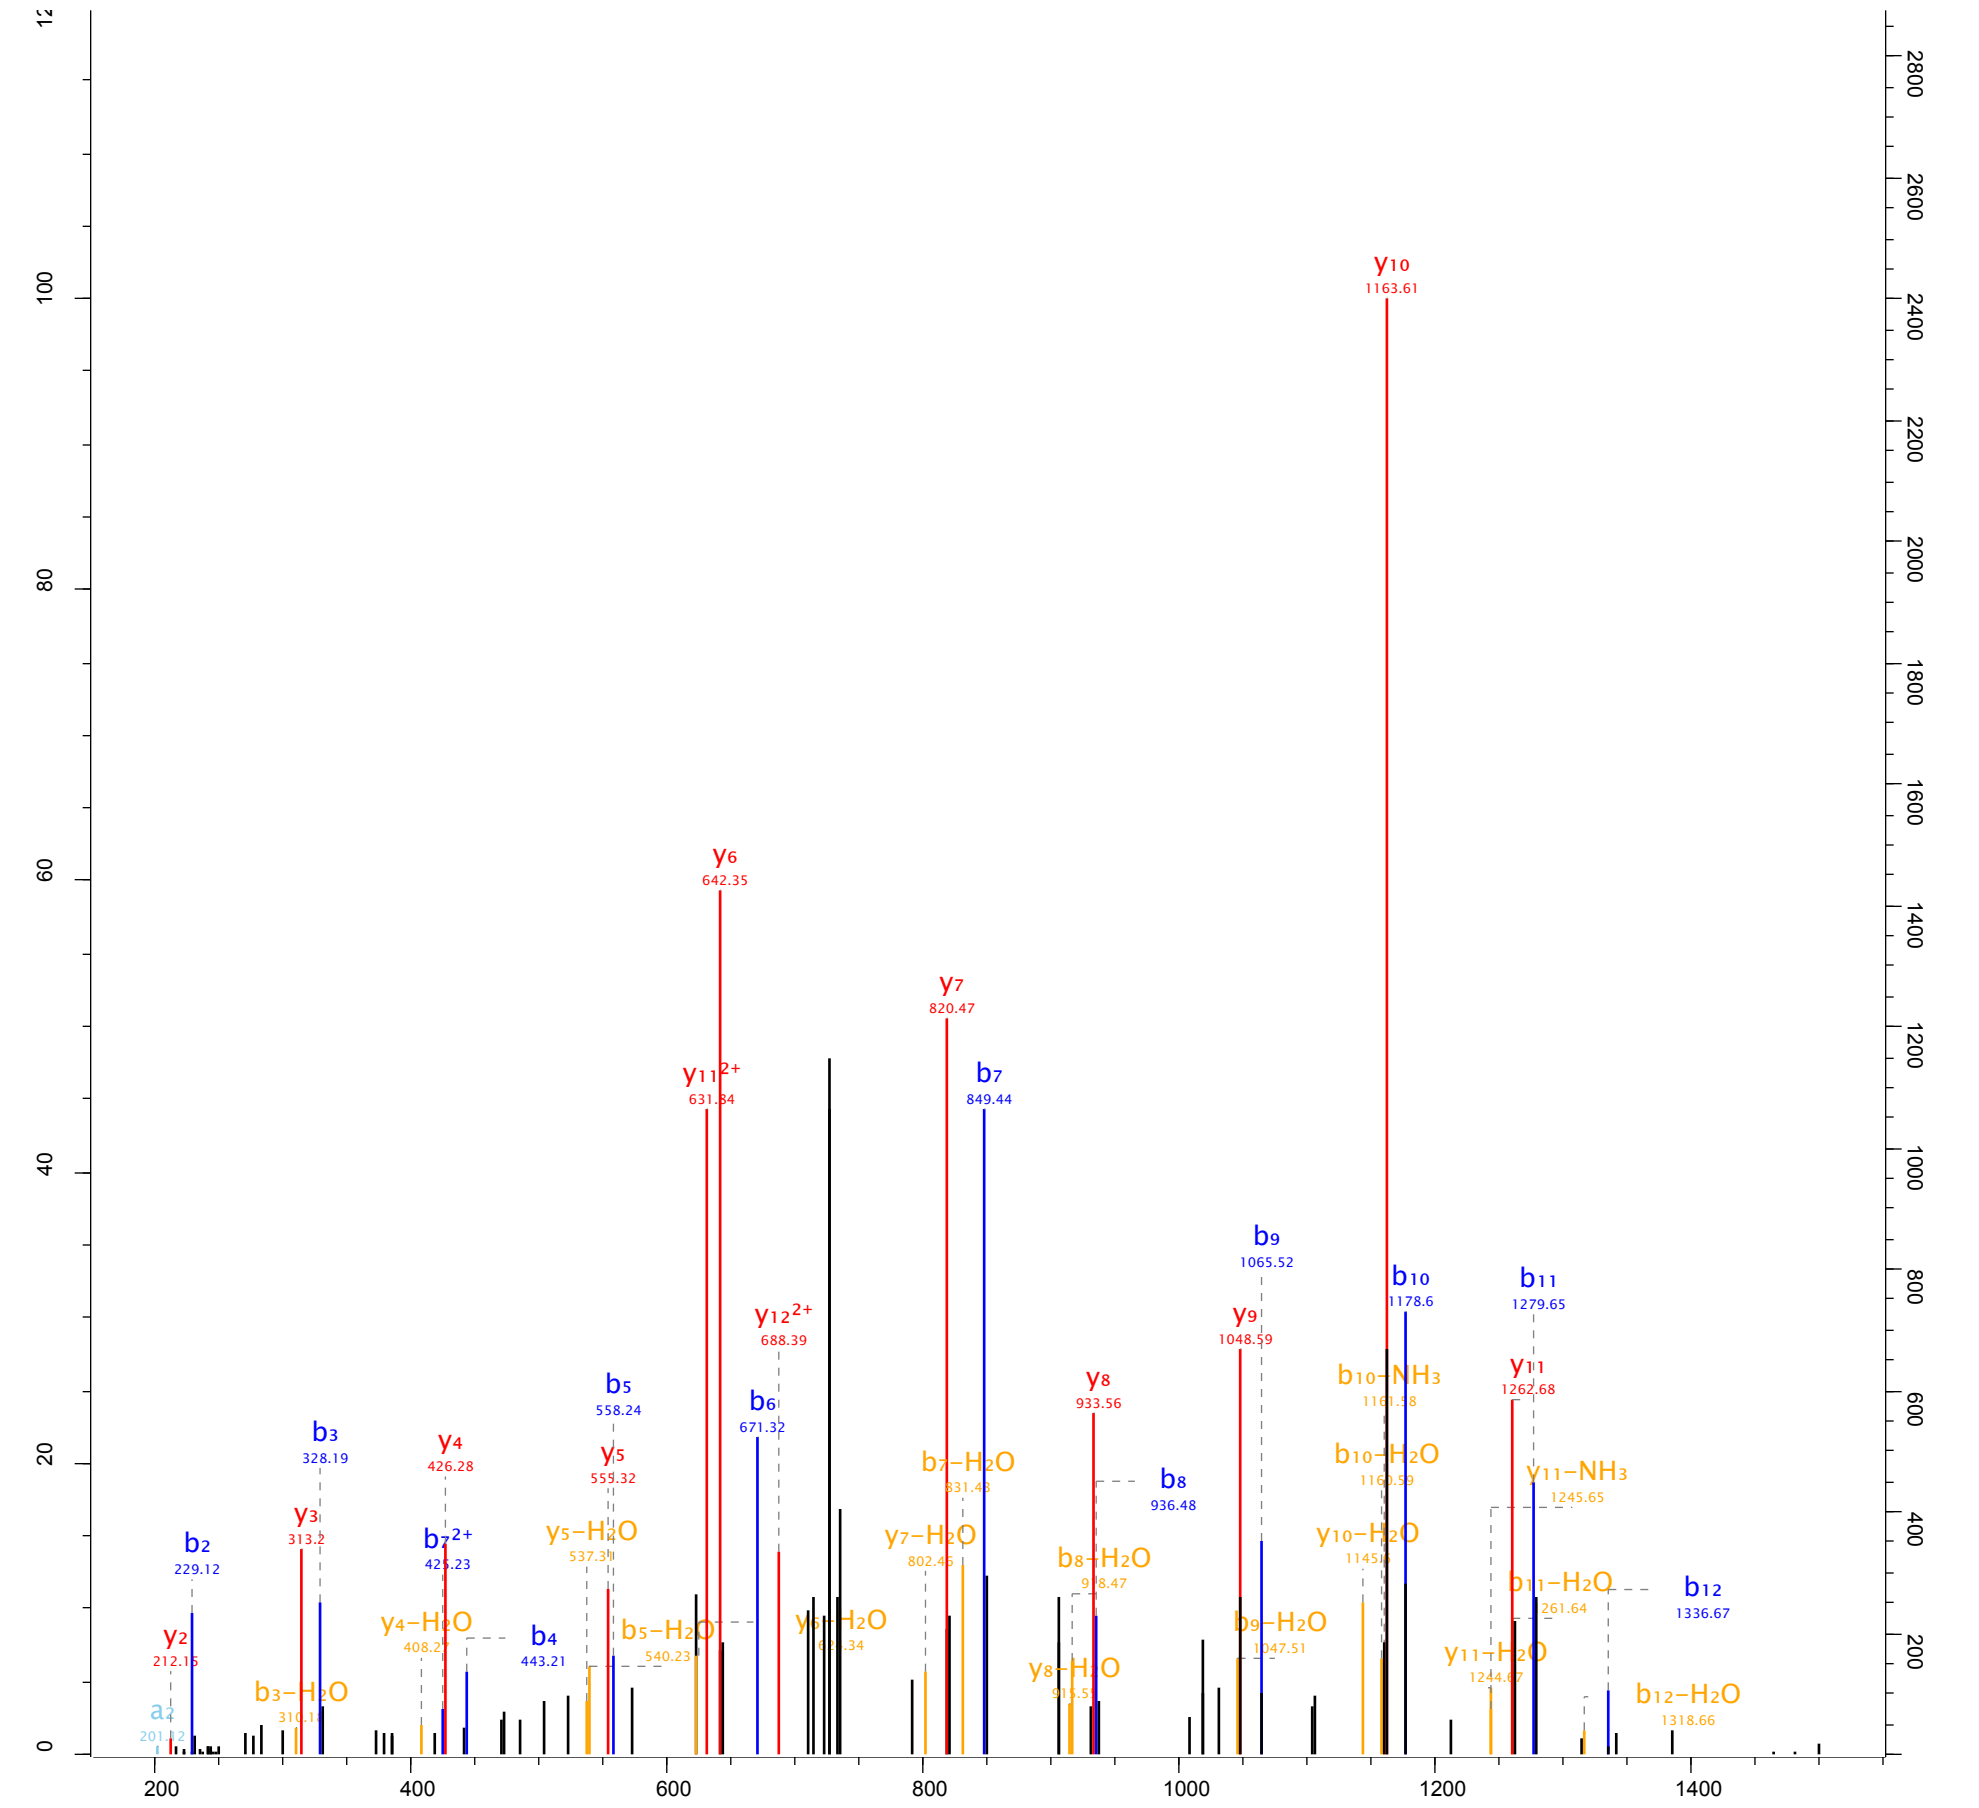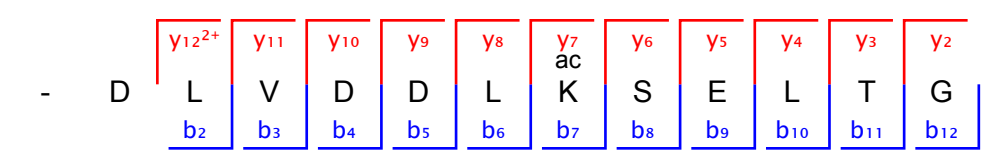

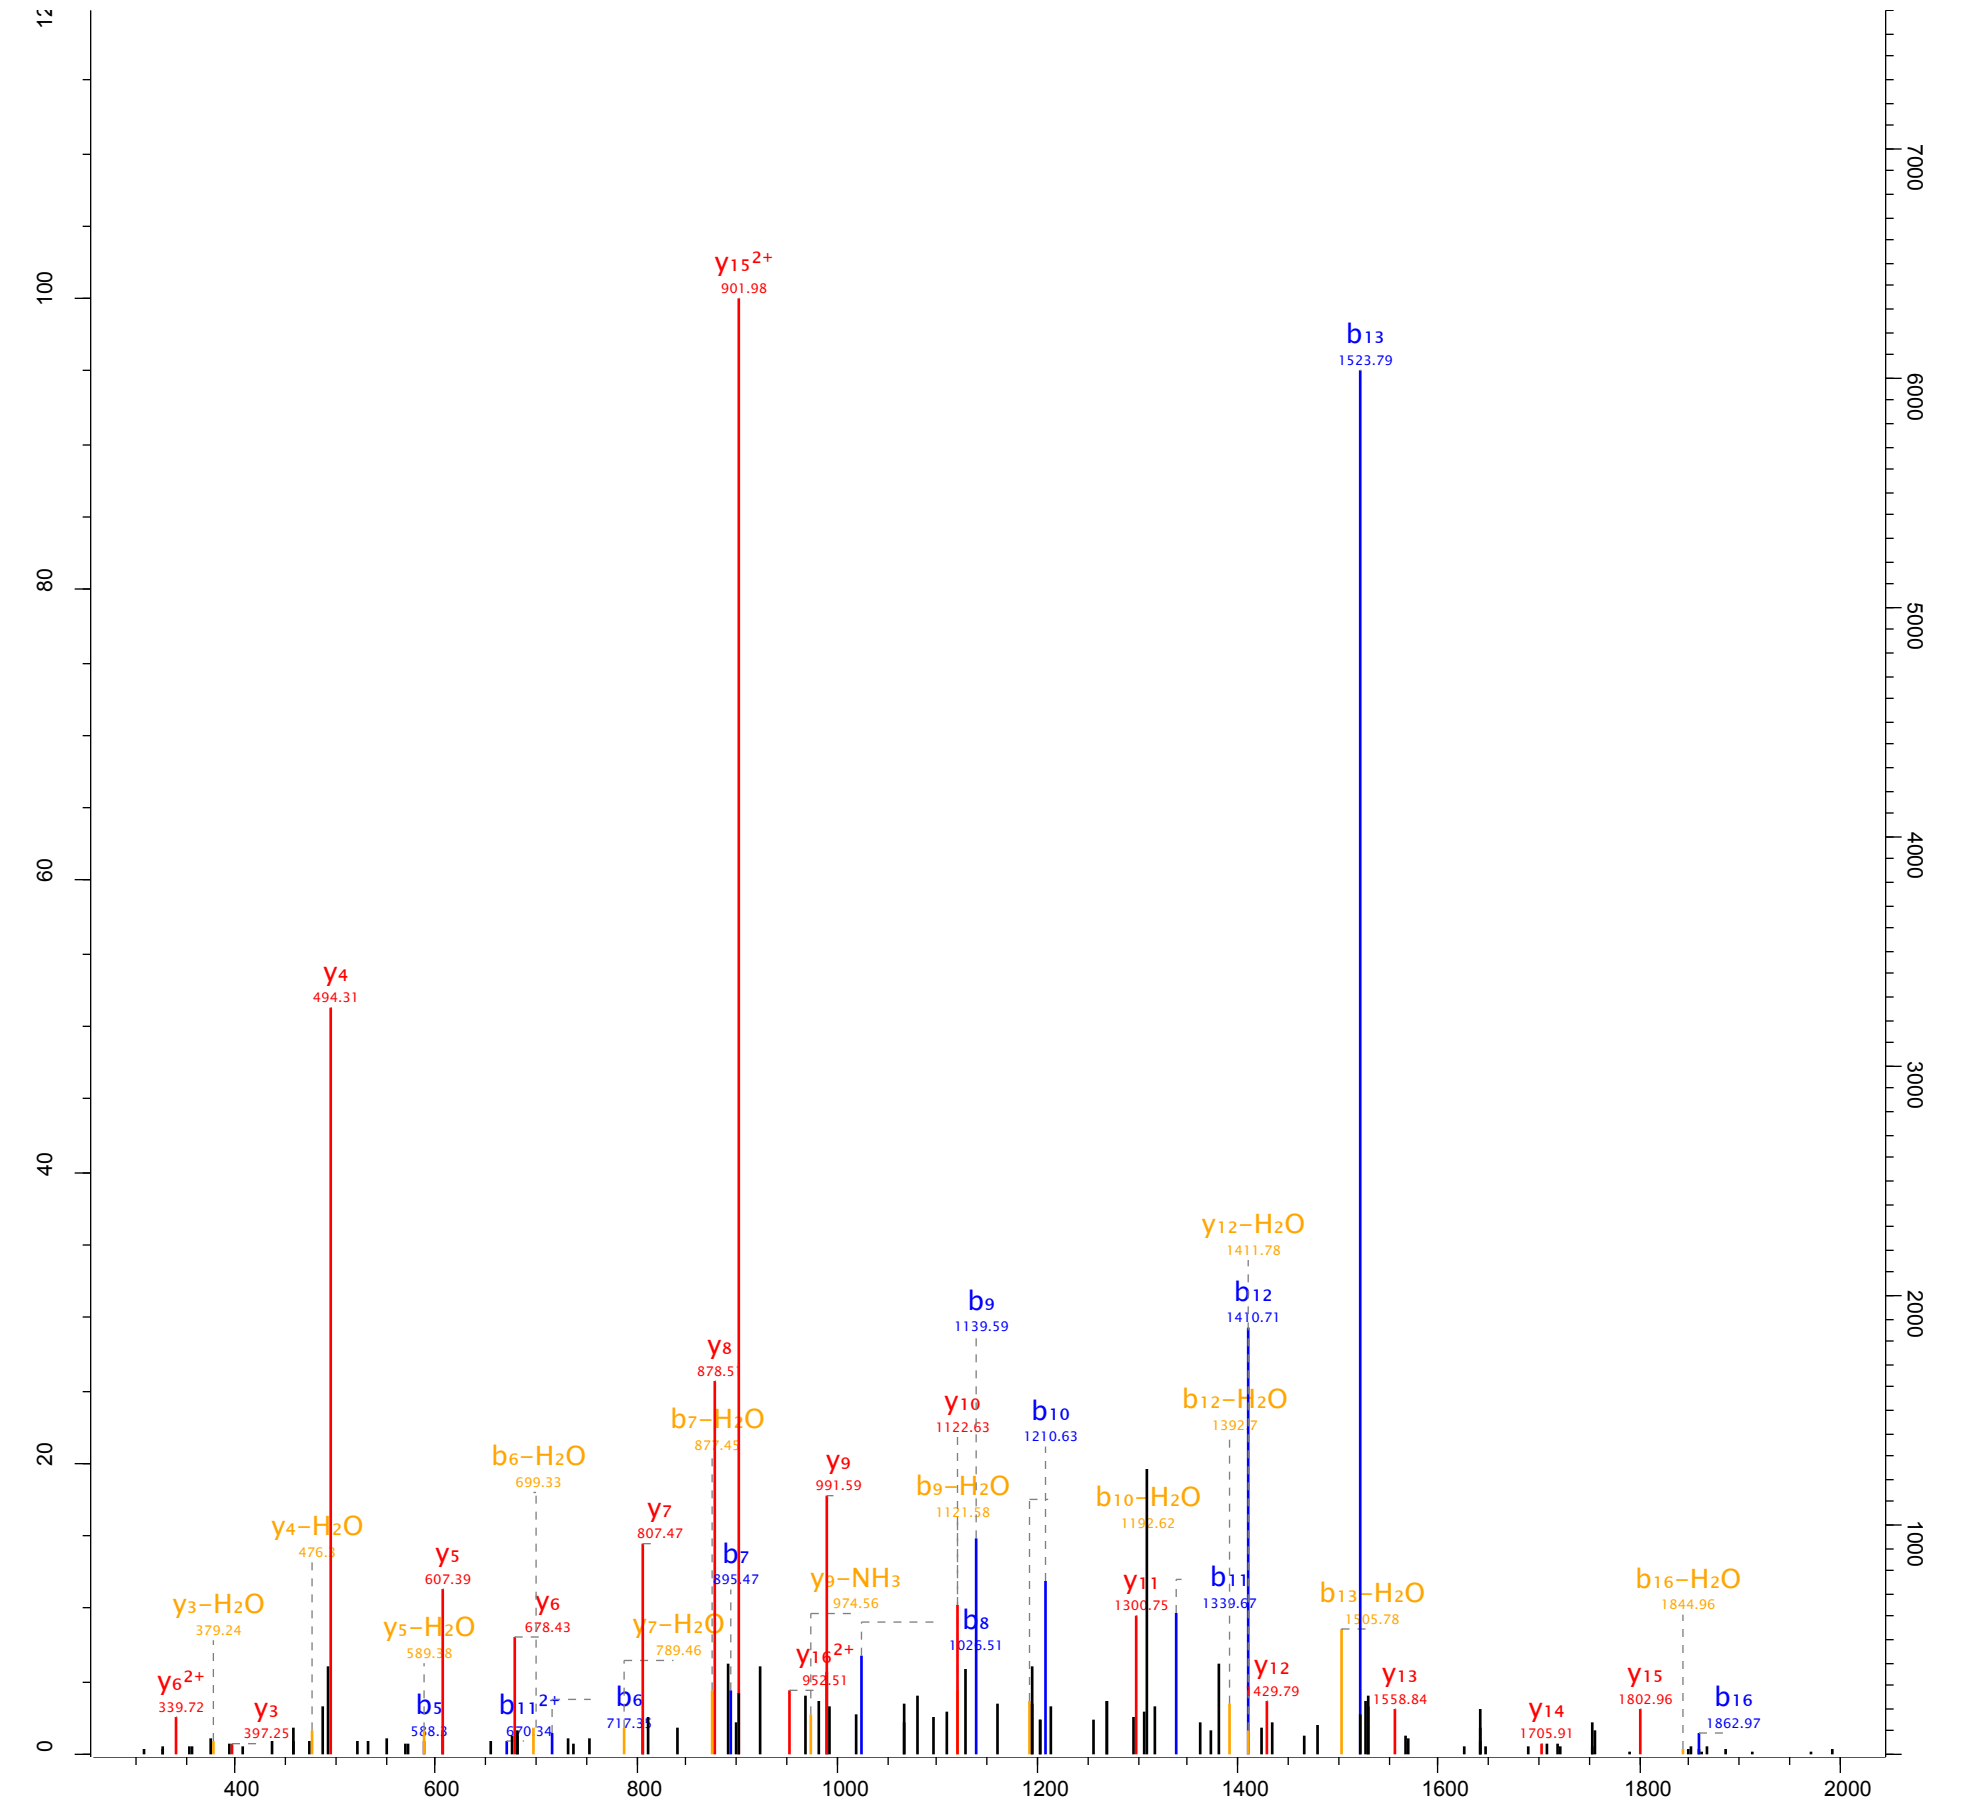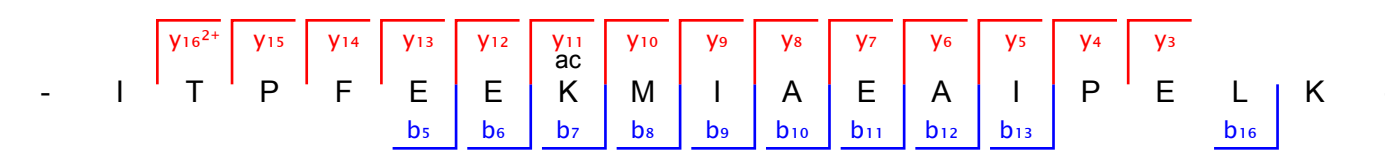

052413\_SCW\_II\_29\_Second\_ZT\_19\_4

21501

ITMS; CID

175.21

859.52

Ldhb

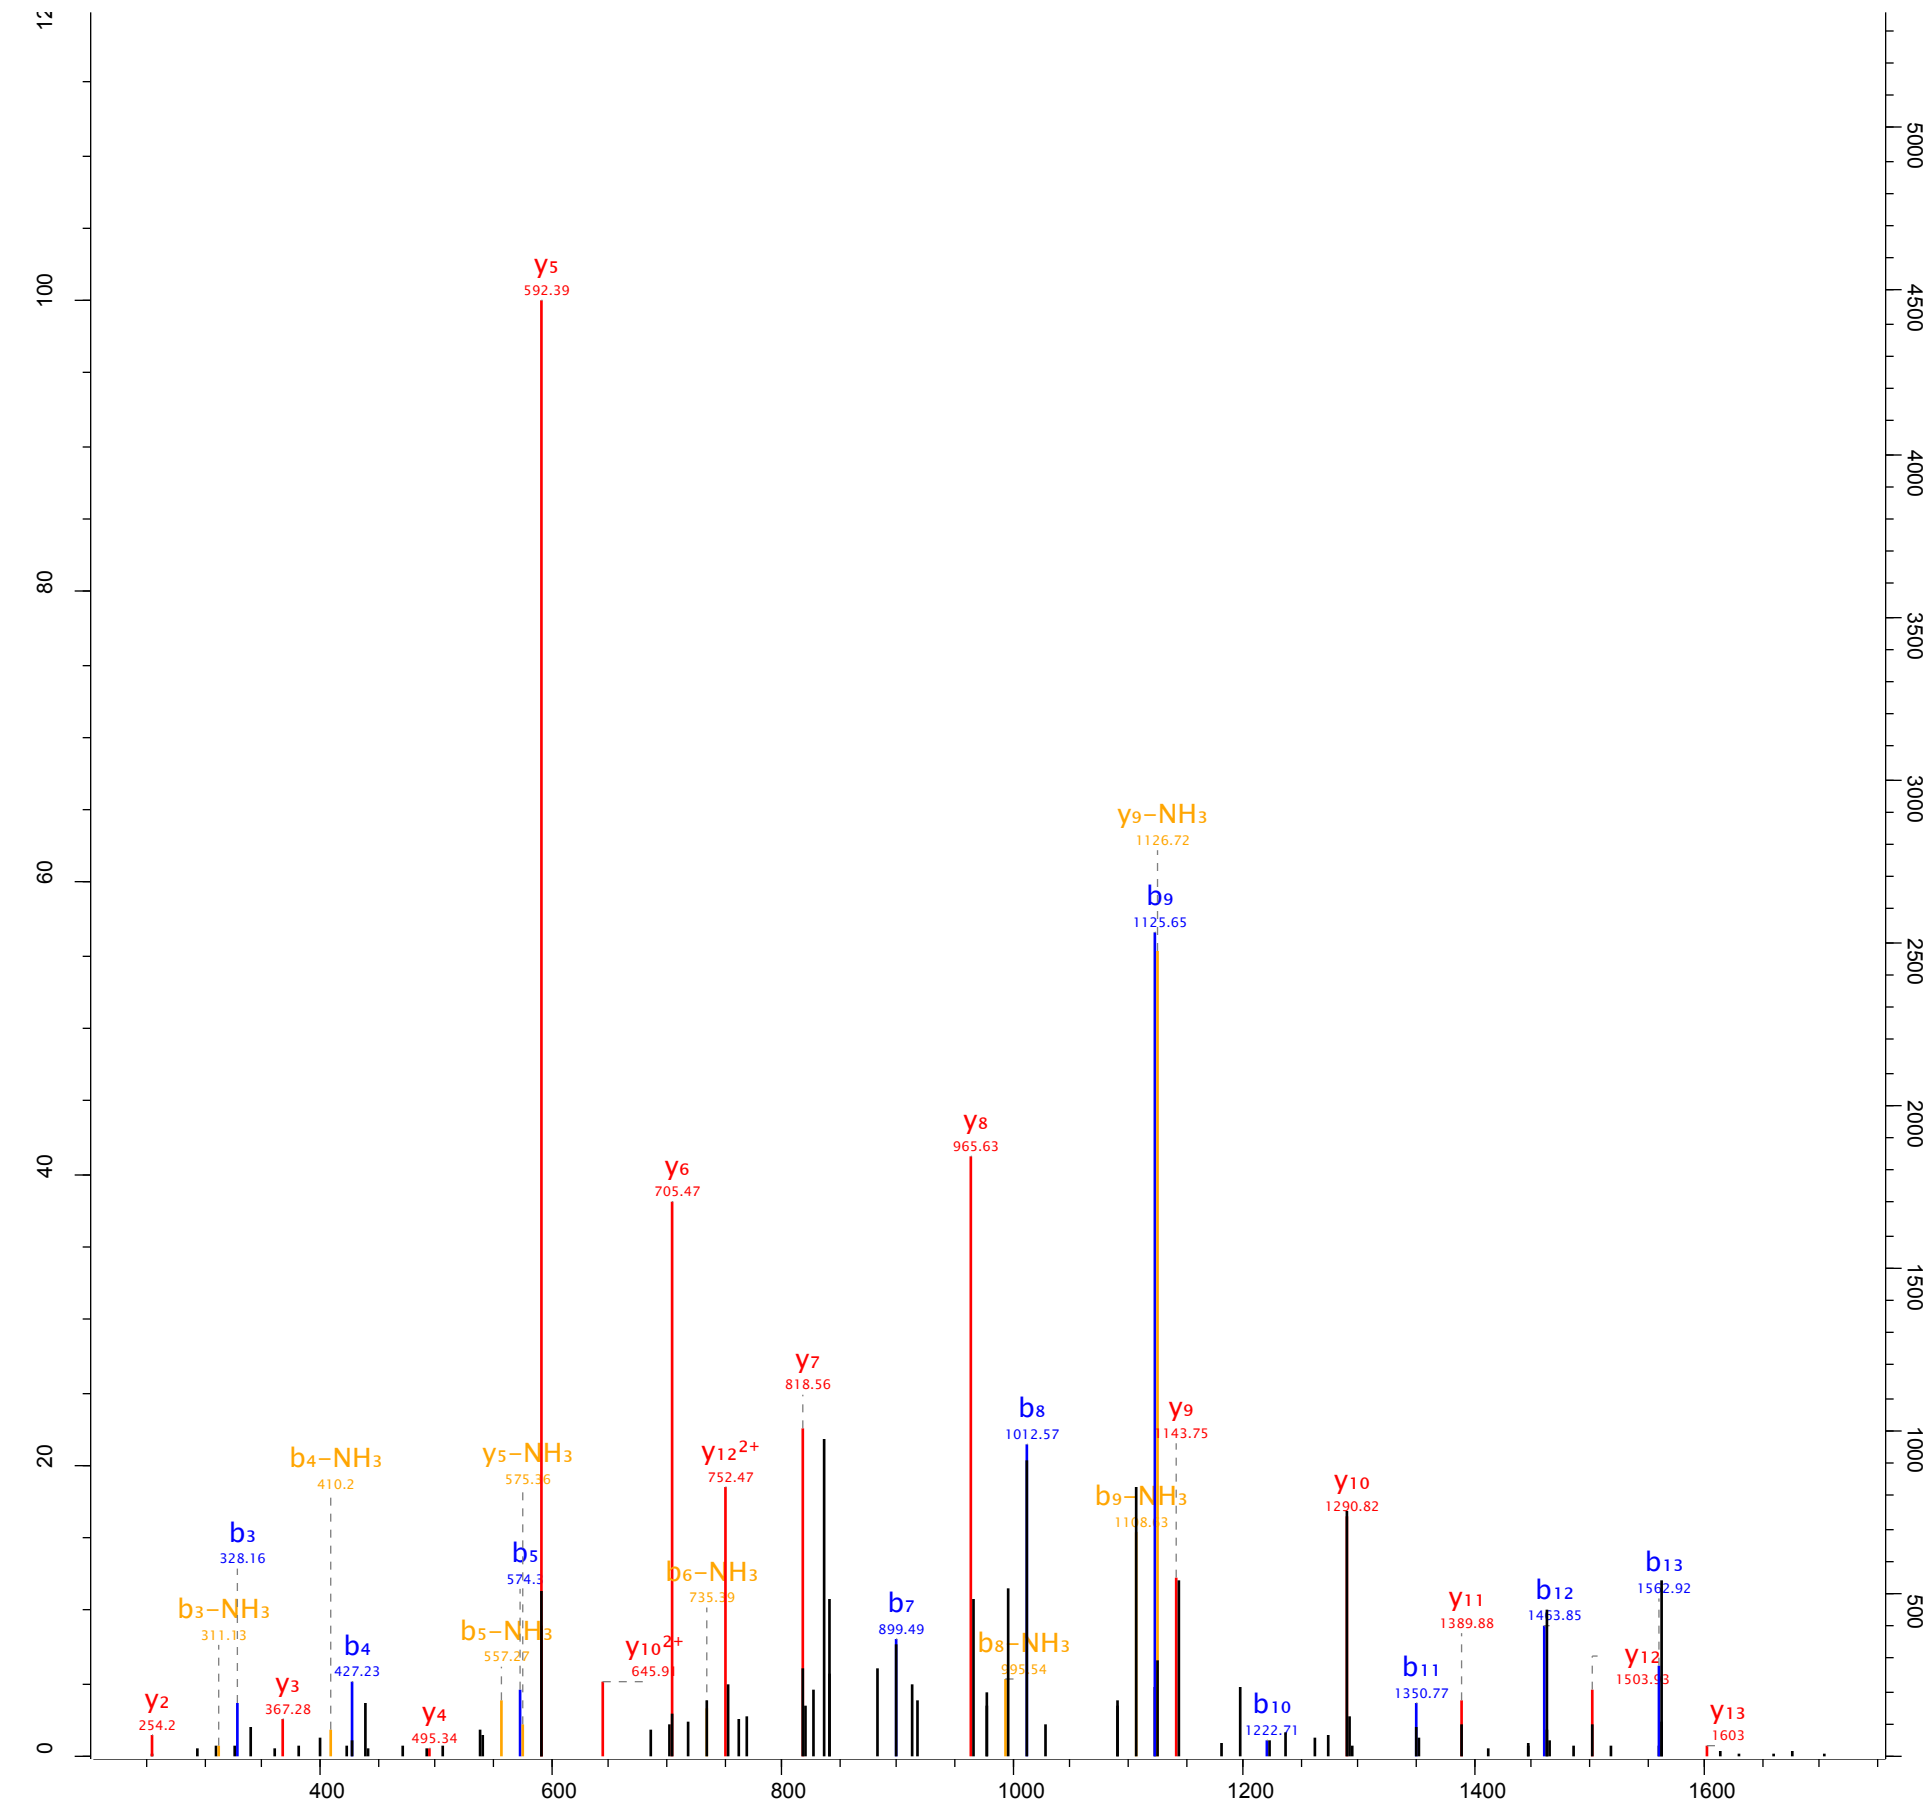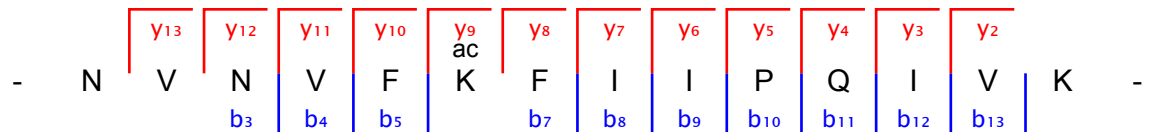

052413\_SCW\_II\_29\_Second\_ZT\_22\_5

5529

ITMS; CID

134.77

616.8

Lasp1

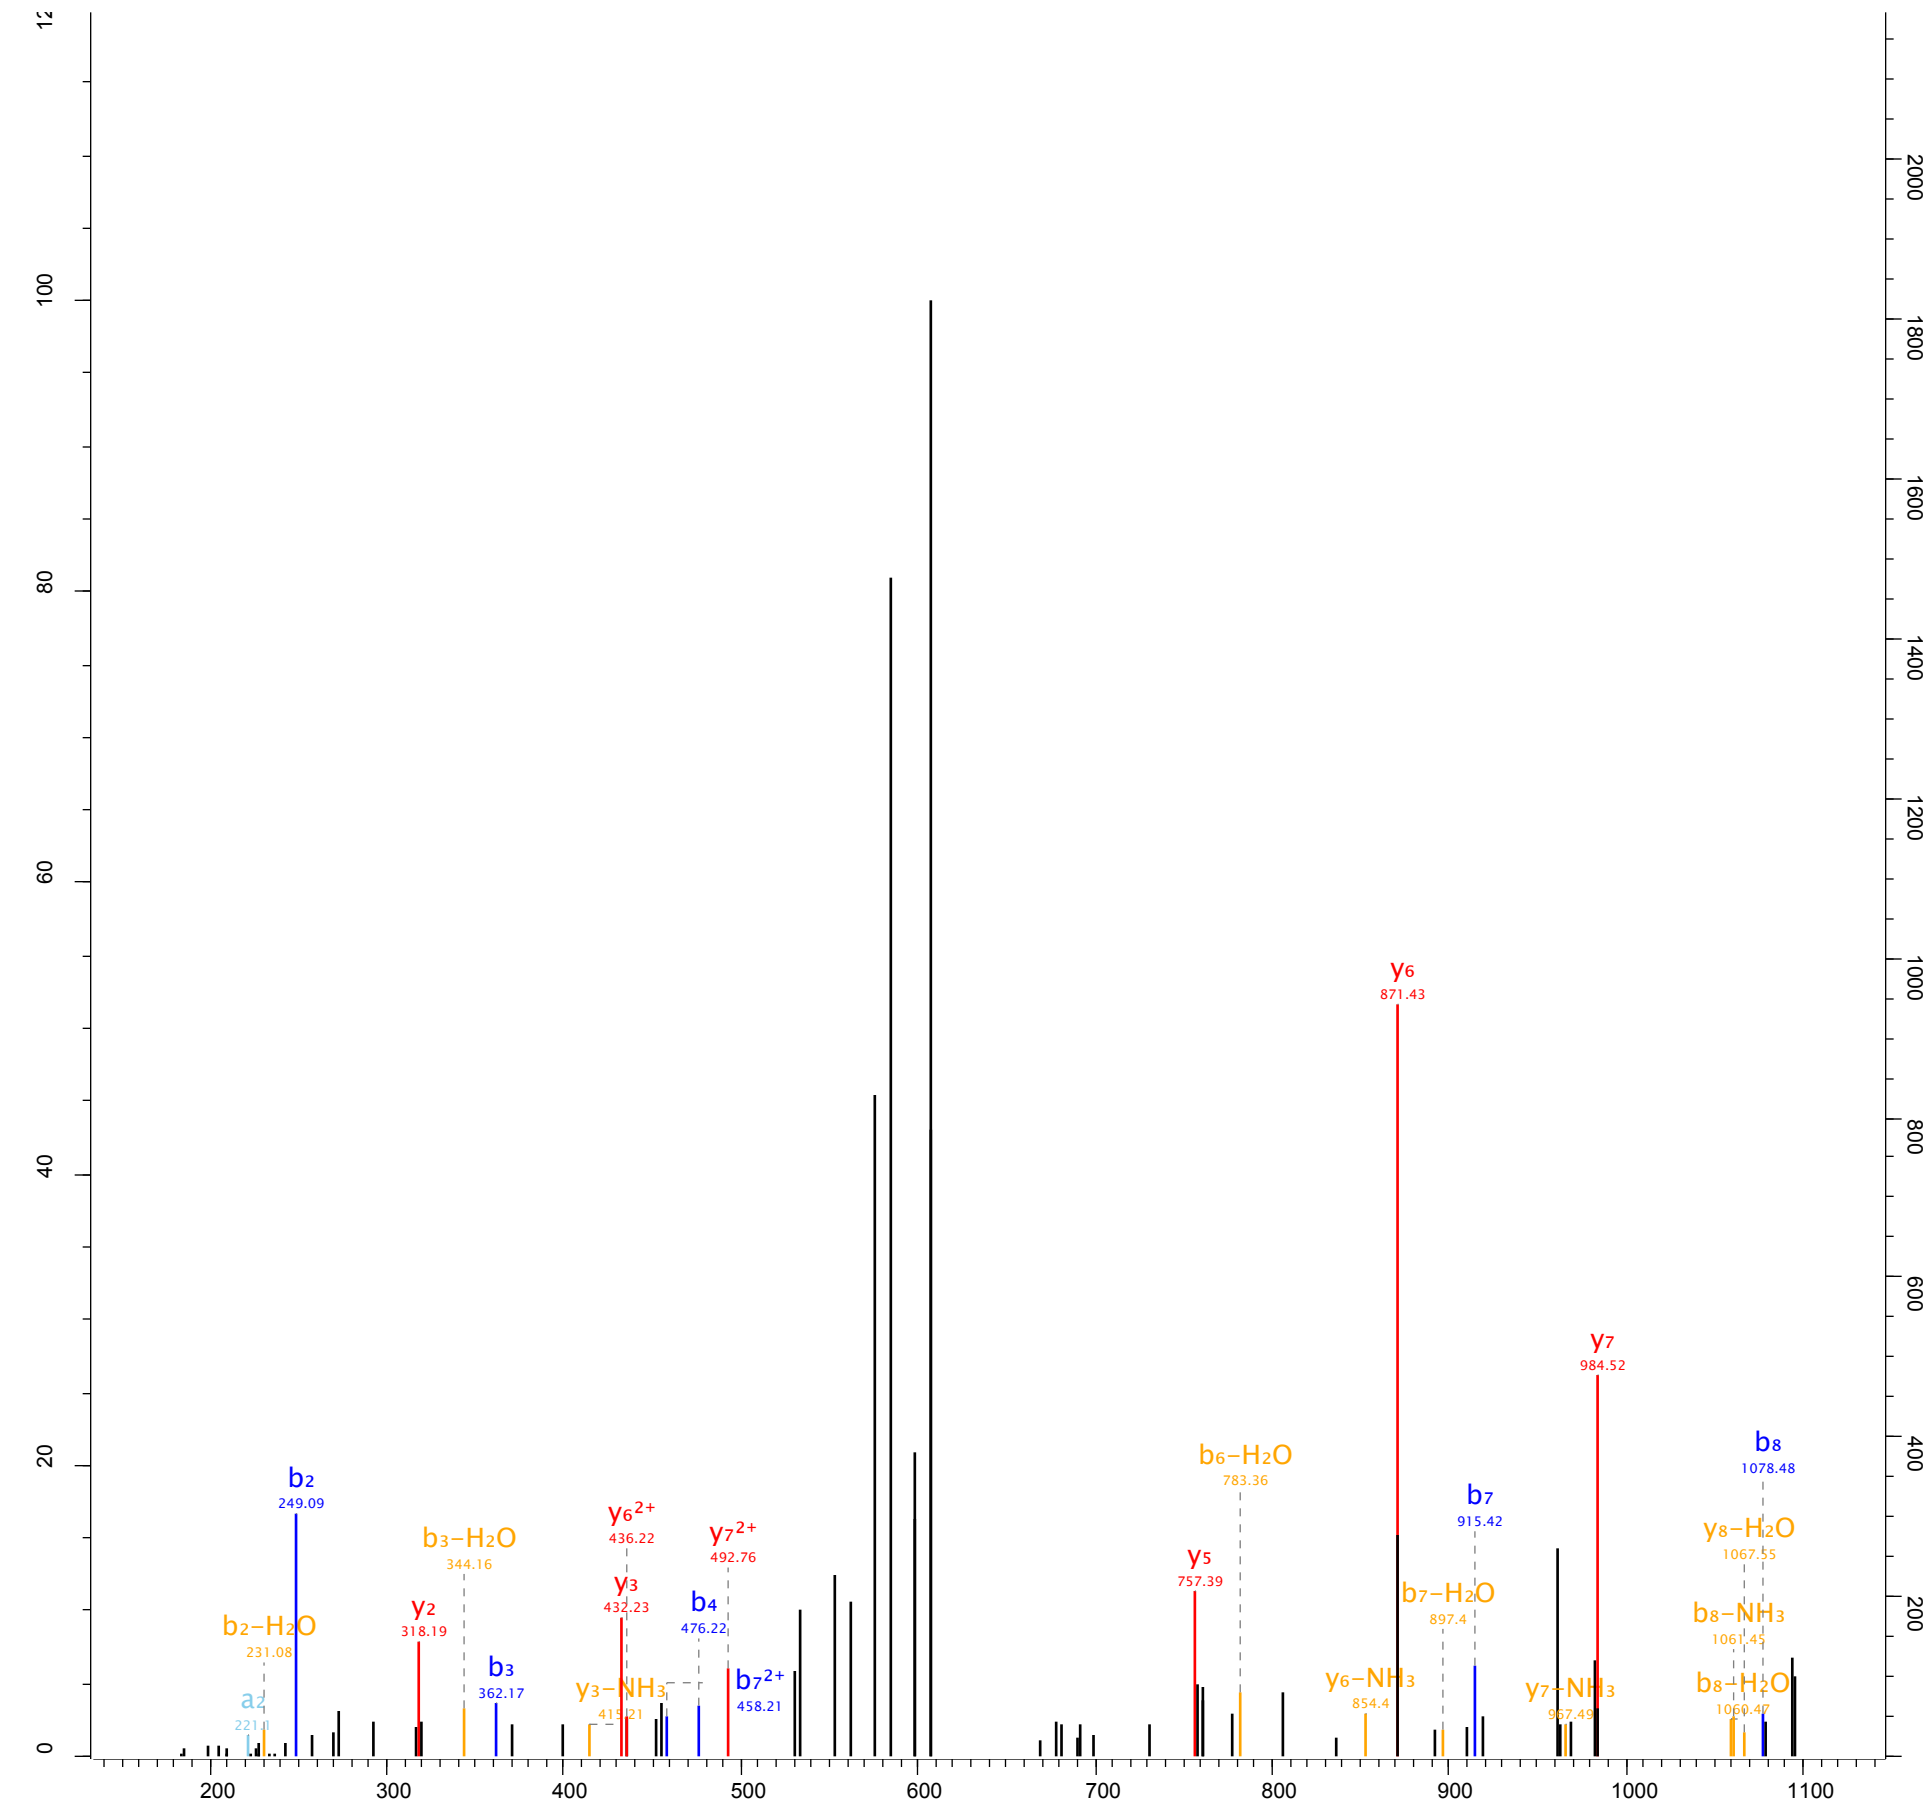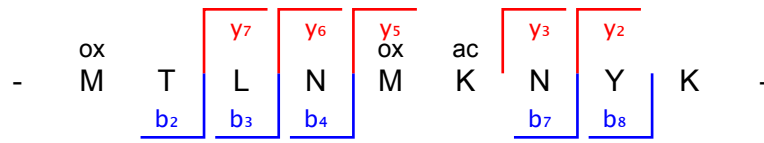

052413\_SCW\_II\_29\_Second\_ZT\_22\_5

5775 ITMS; CID 187.78 530.8 Rpl35;Gm10269

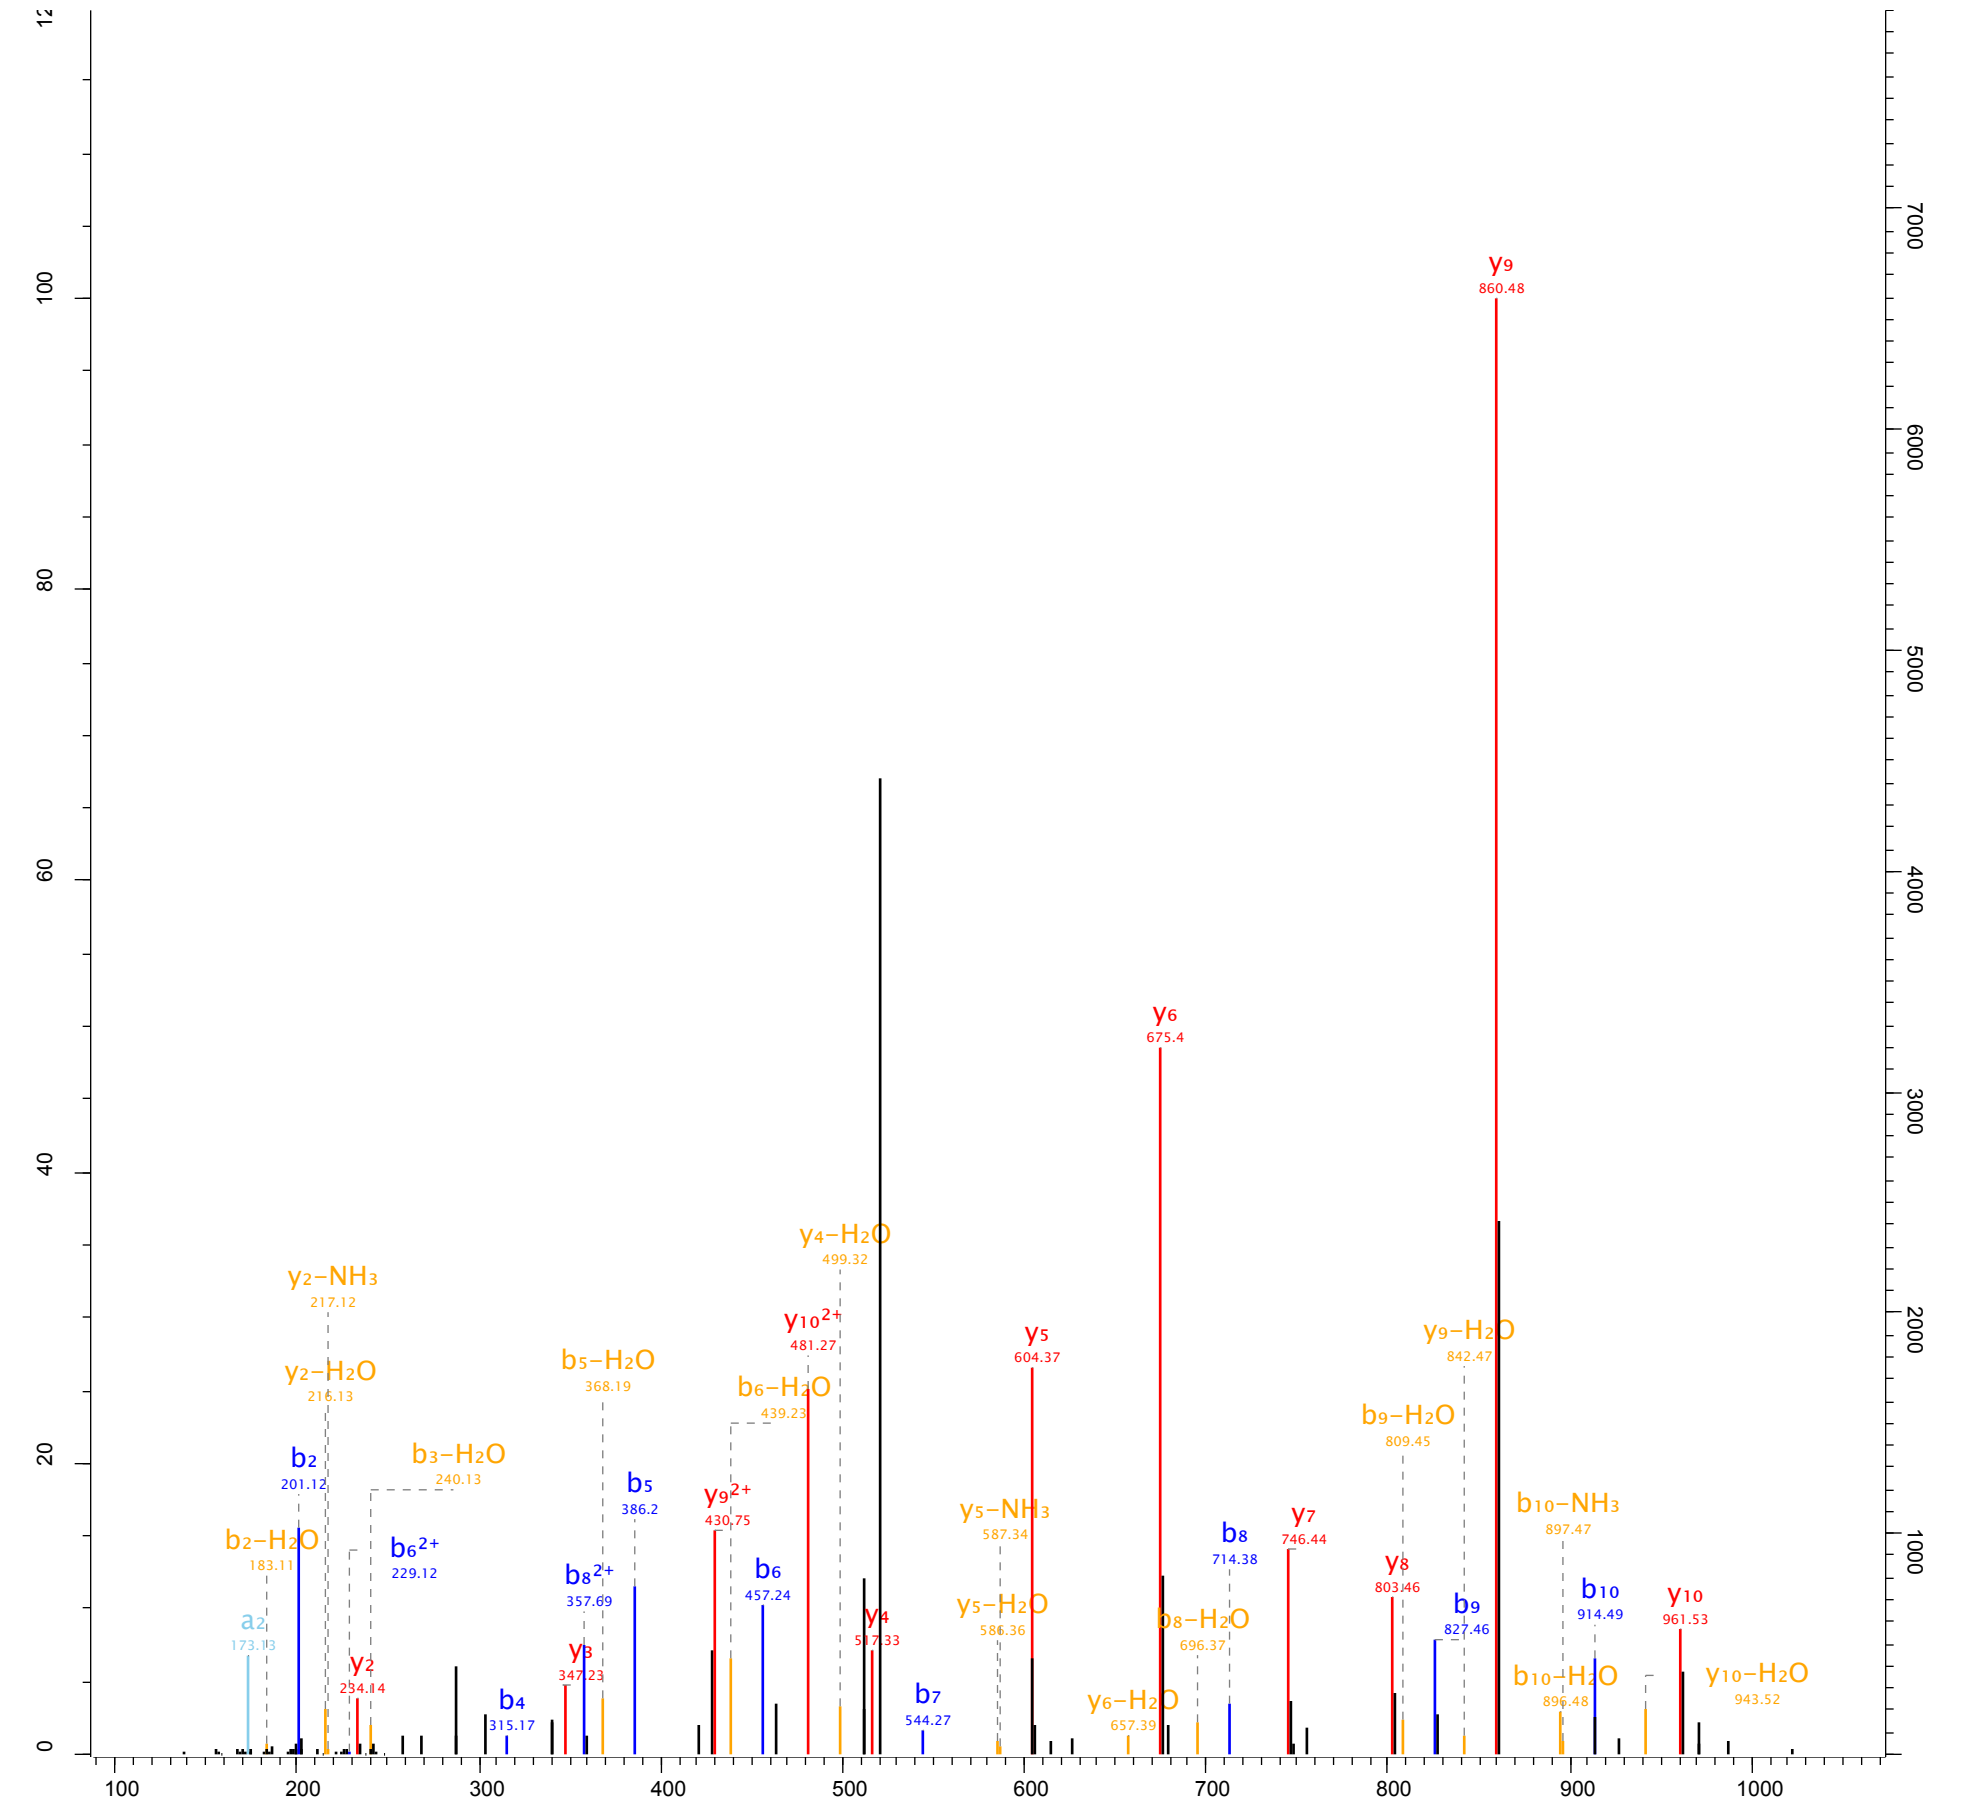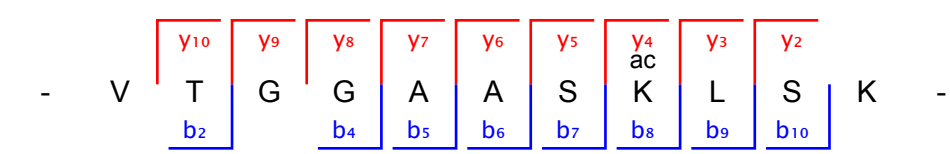

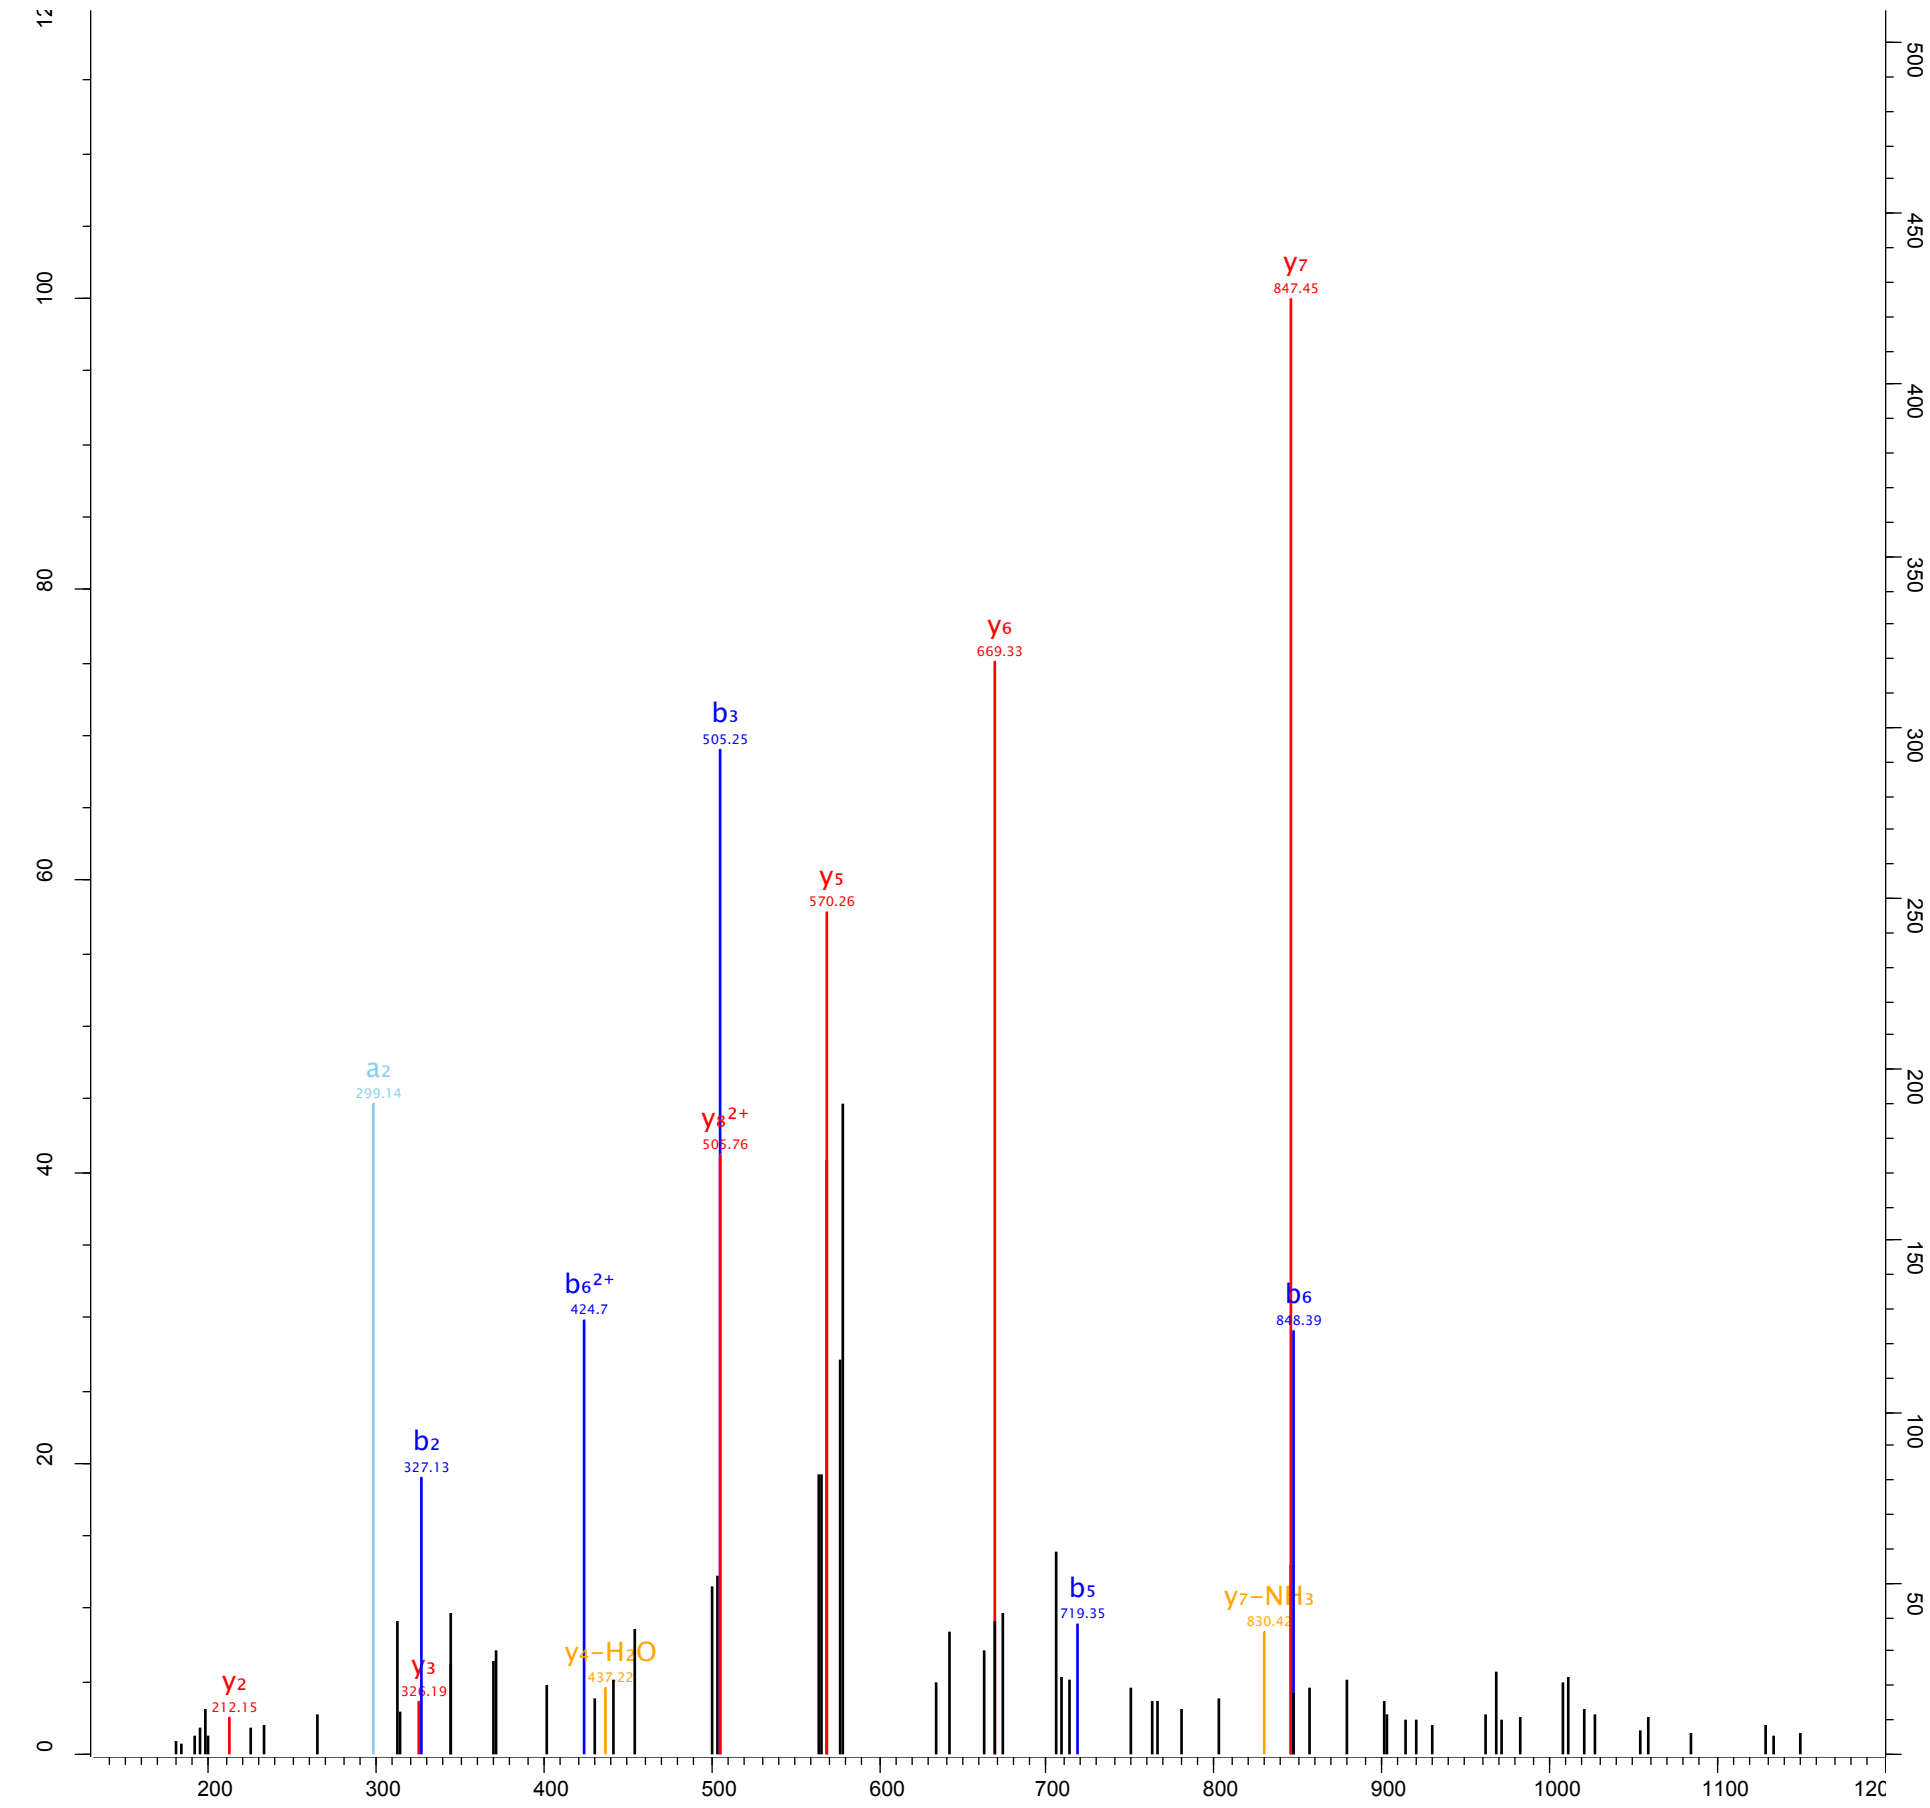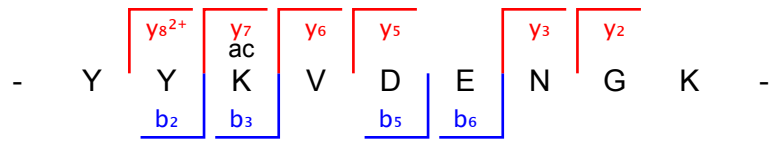



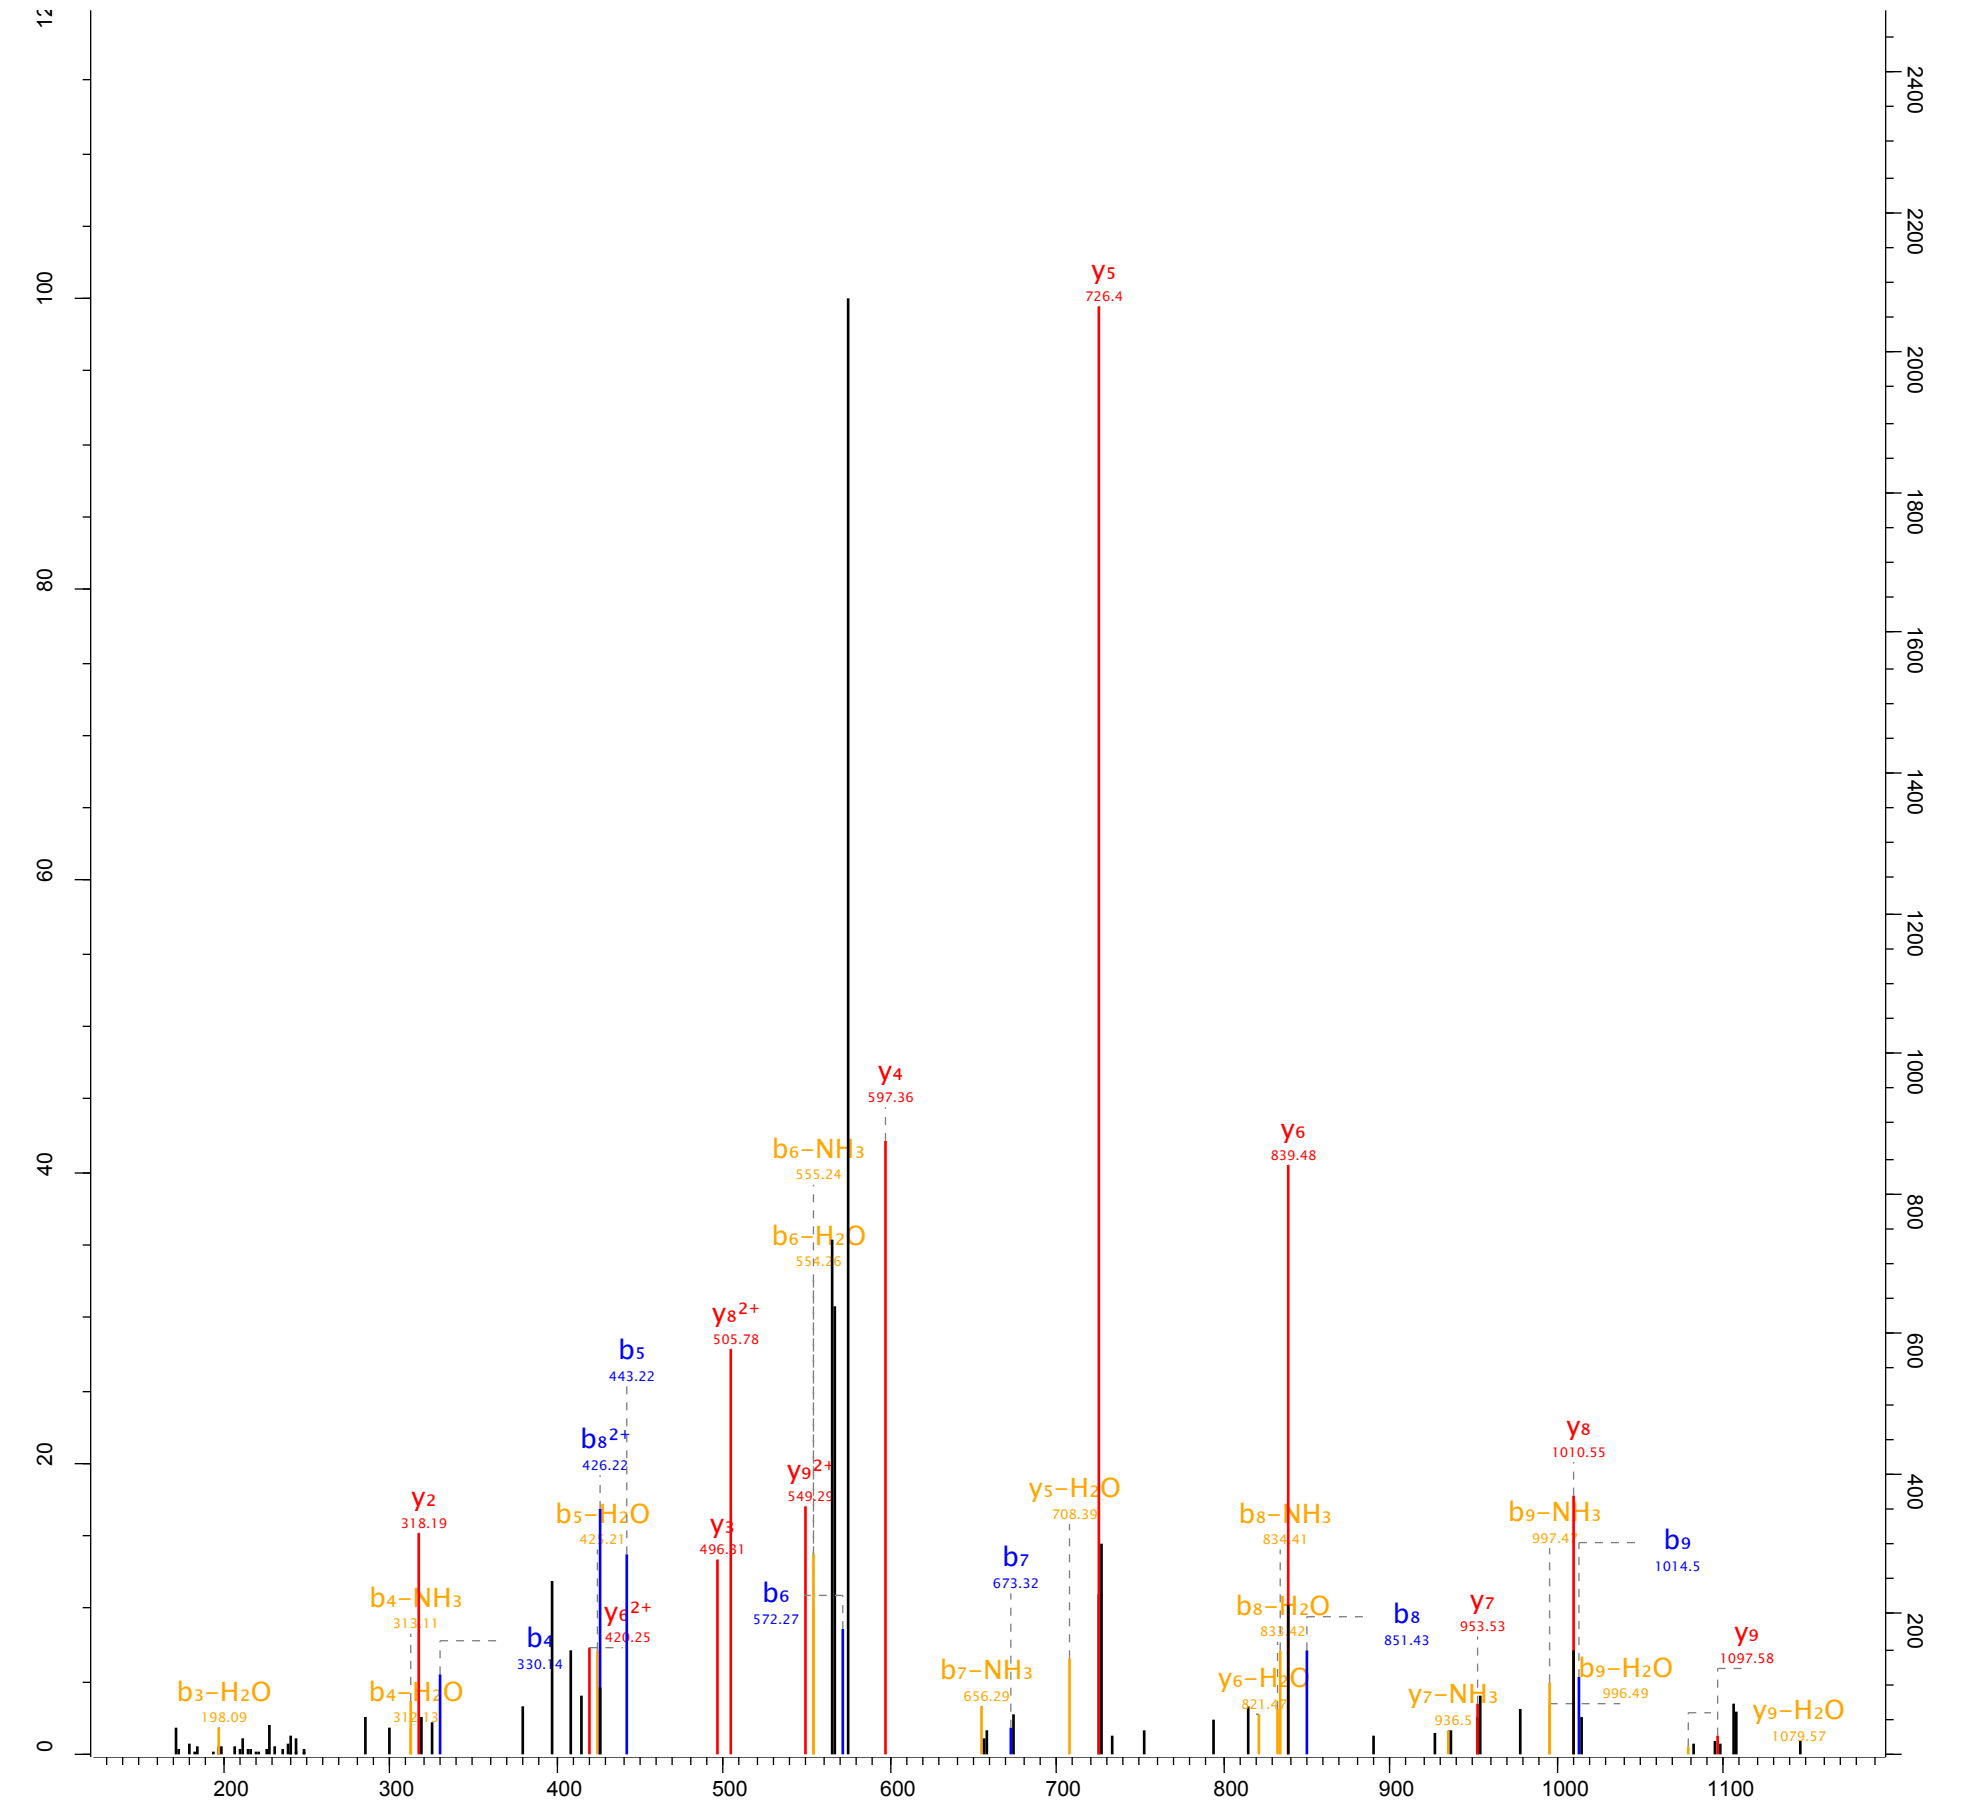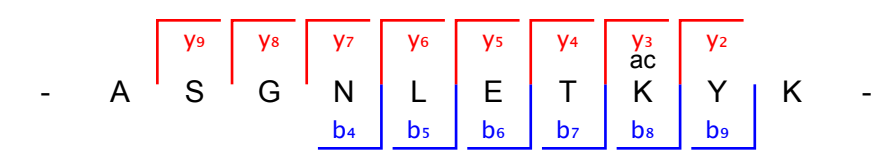

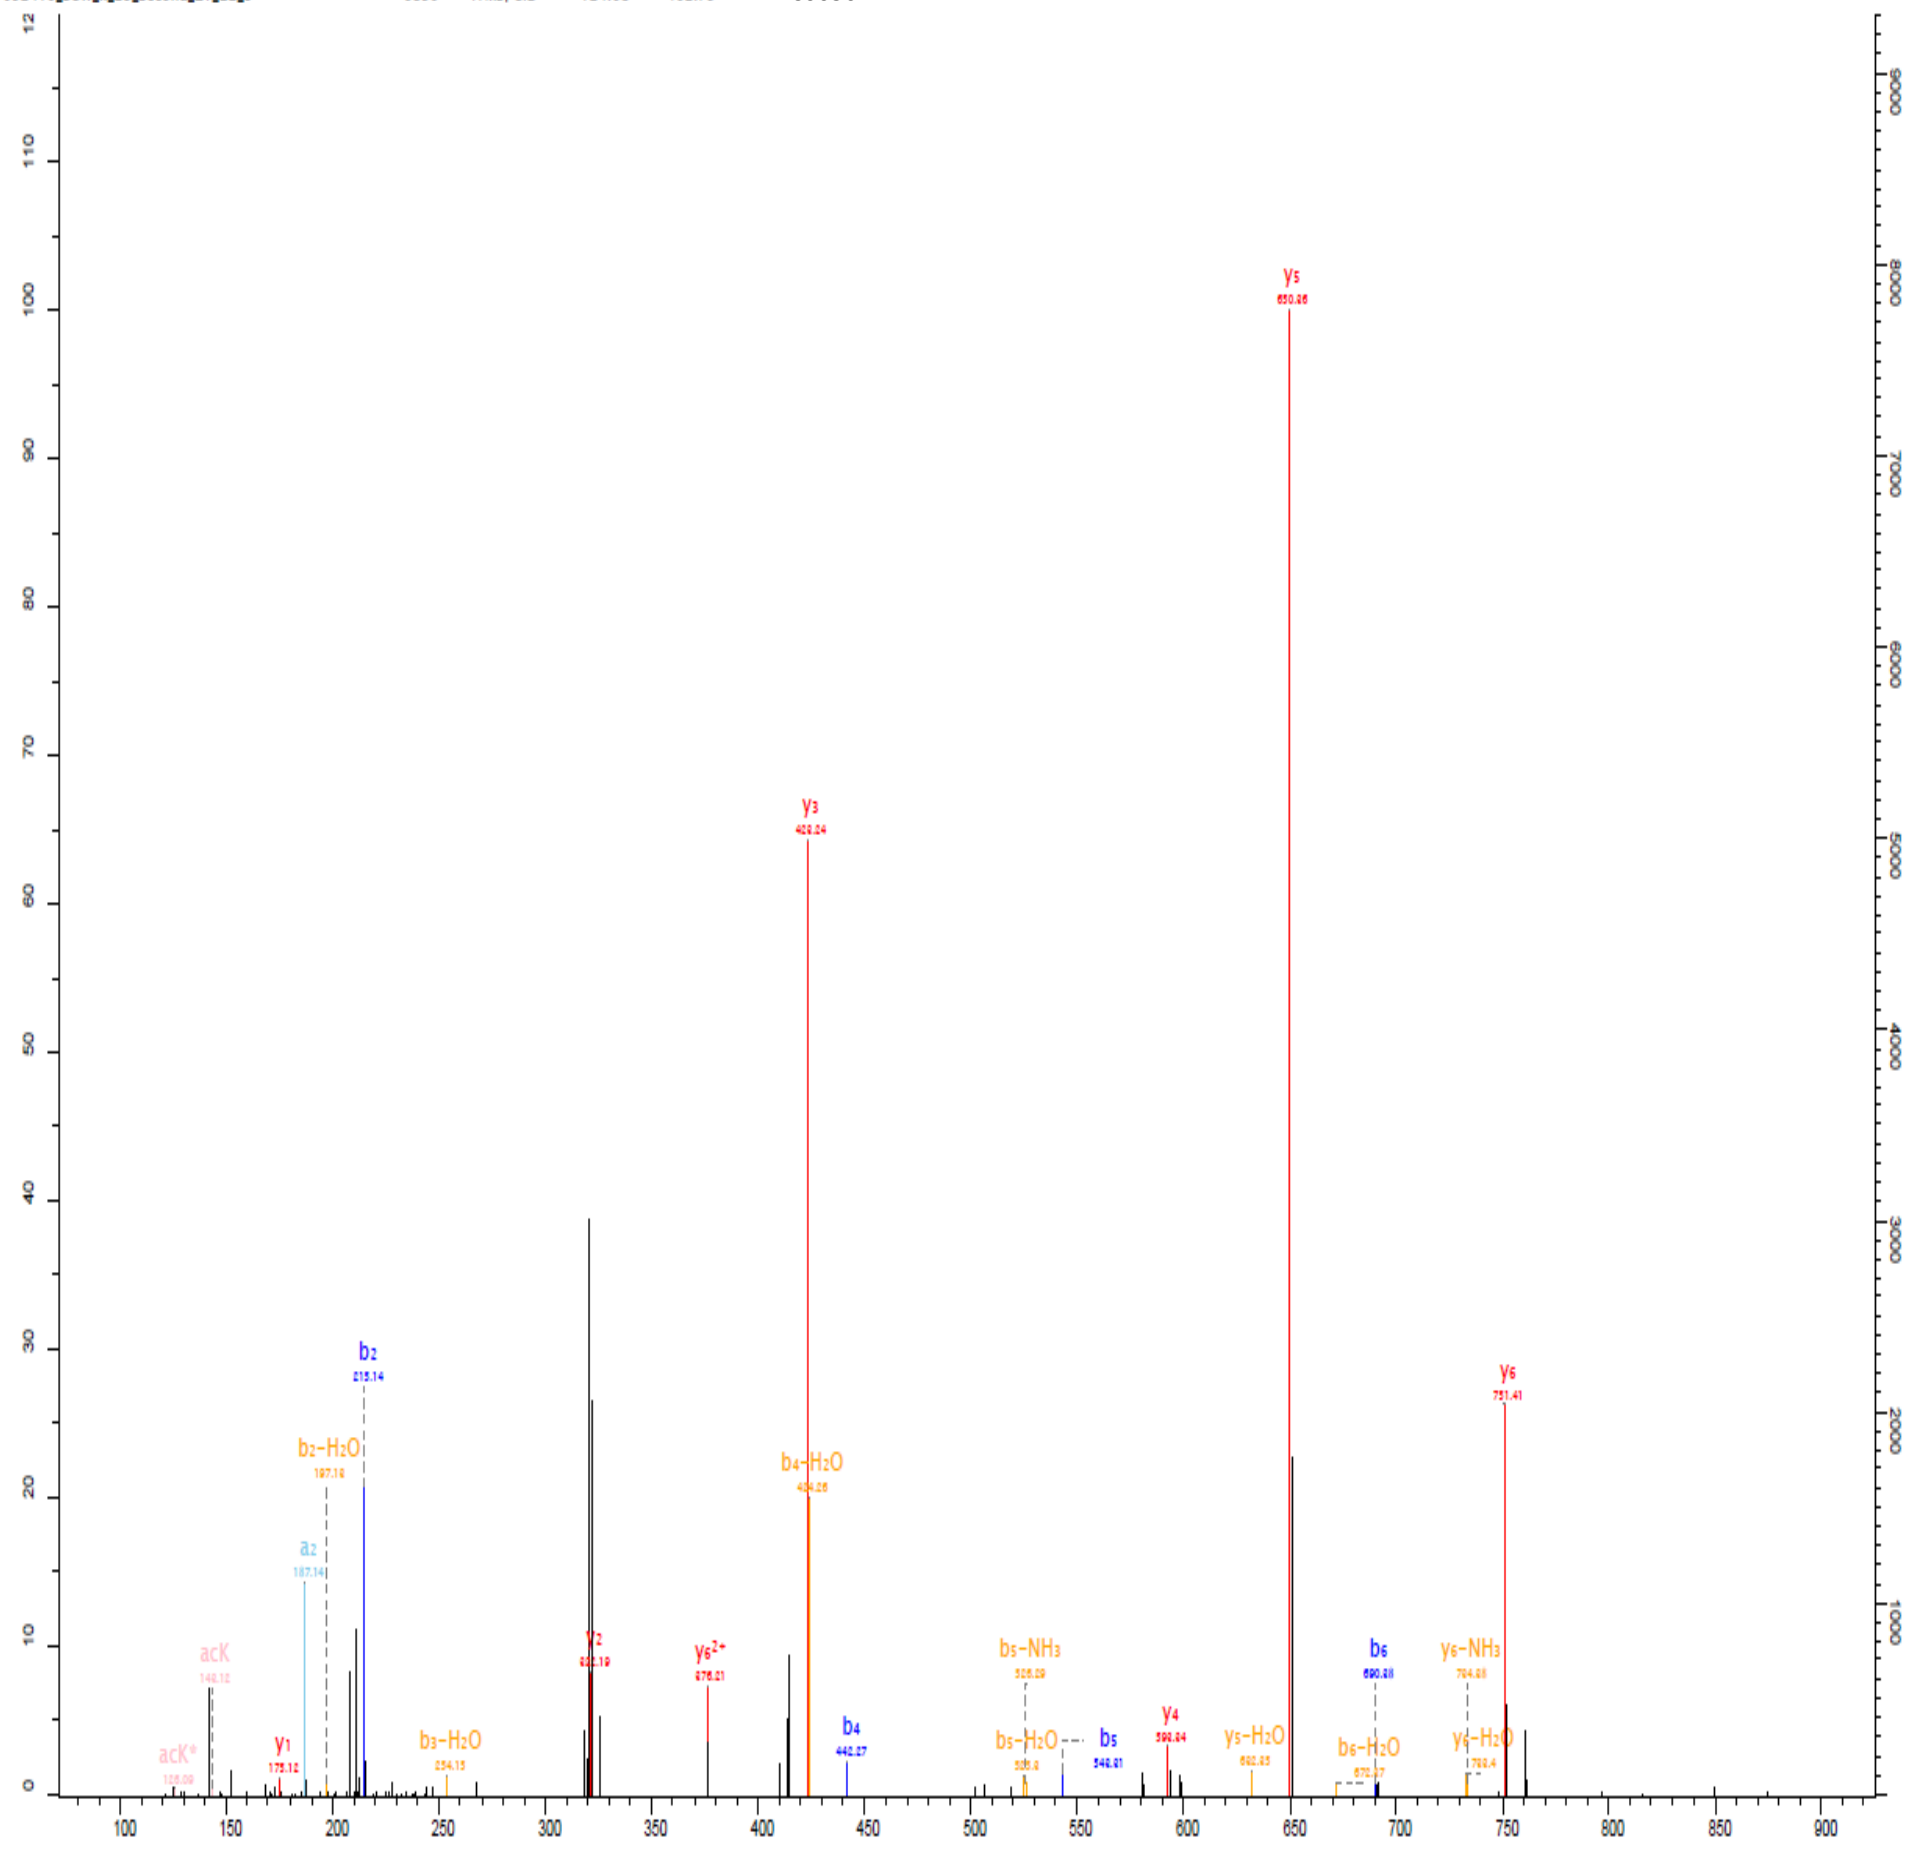

- I T G K T F R -  
 b2 ac b4 b5 b6

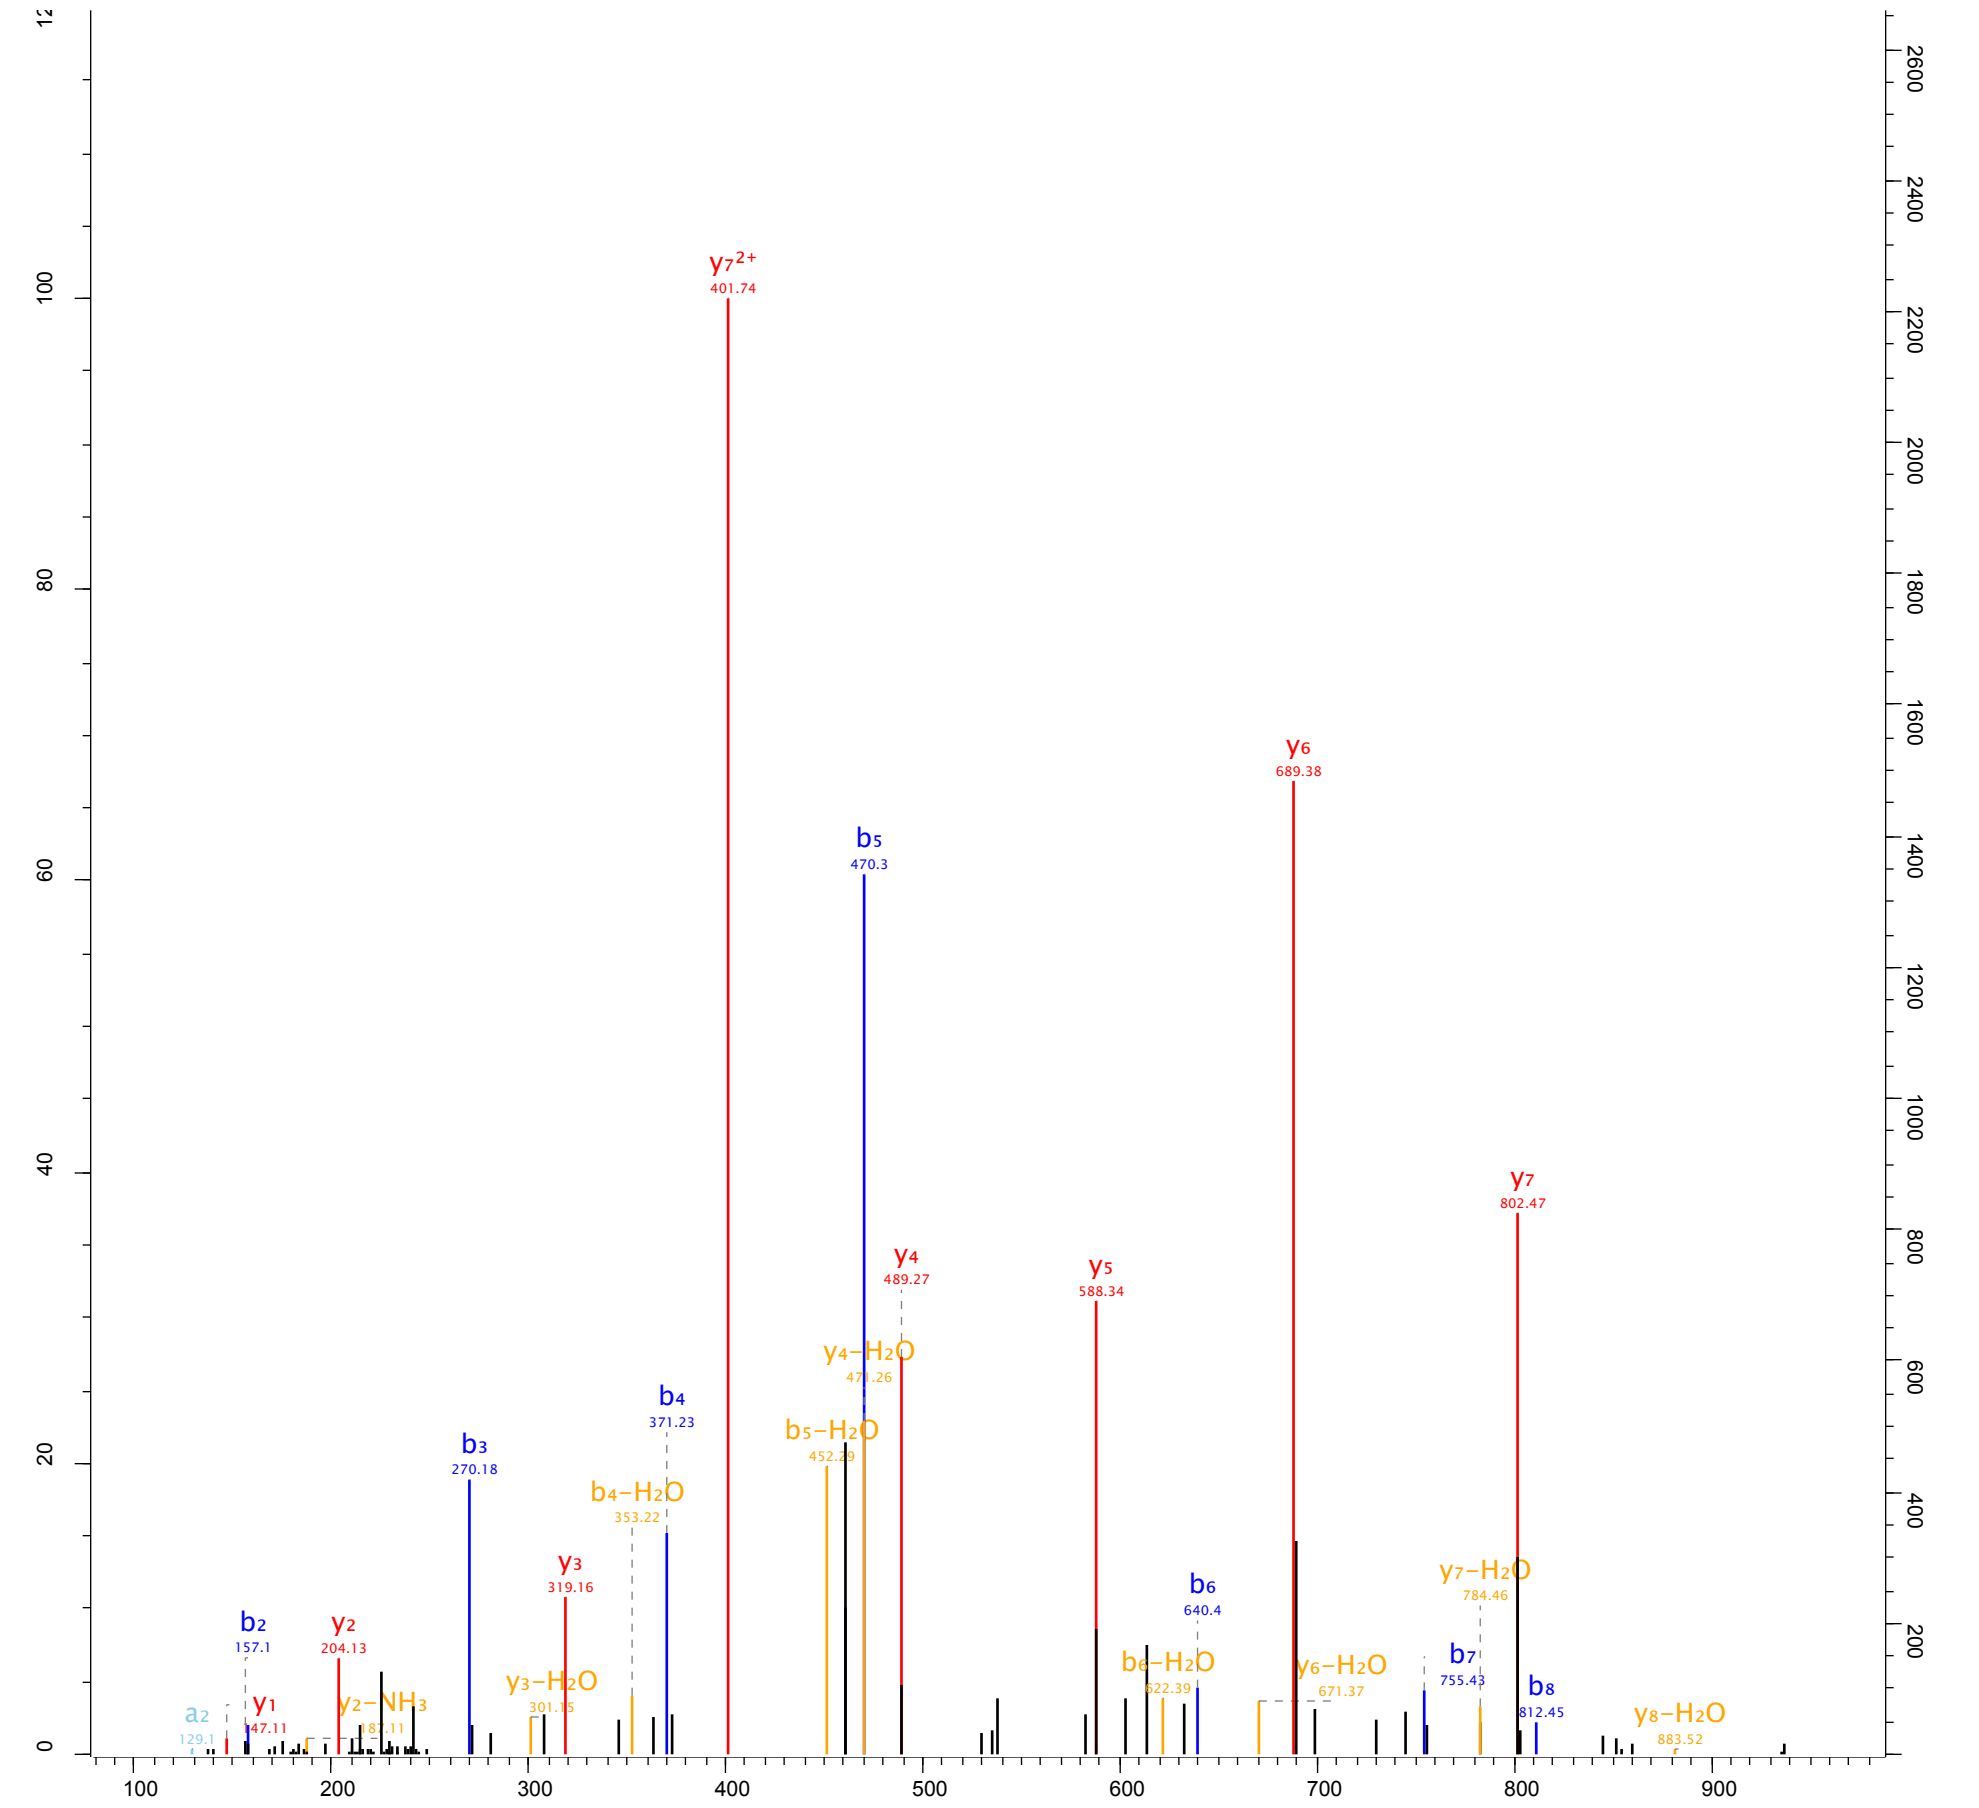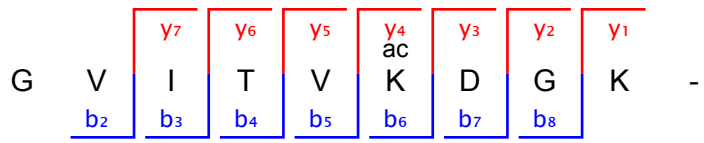

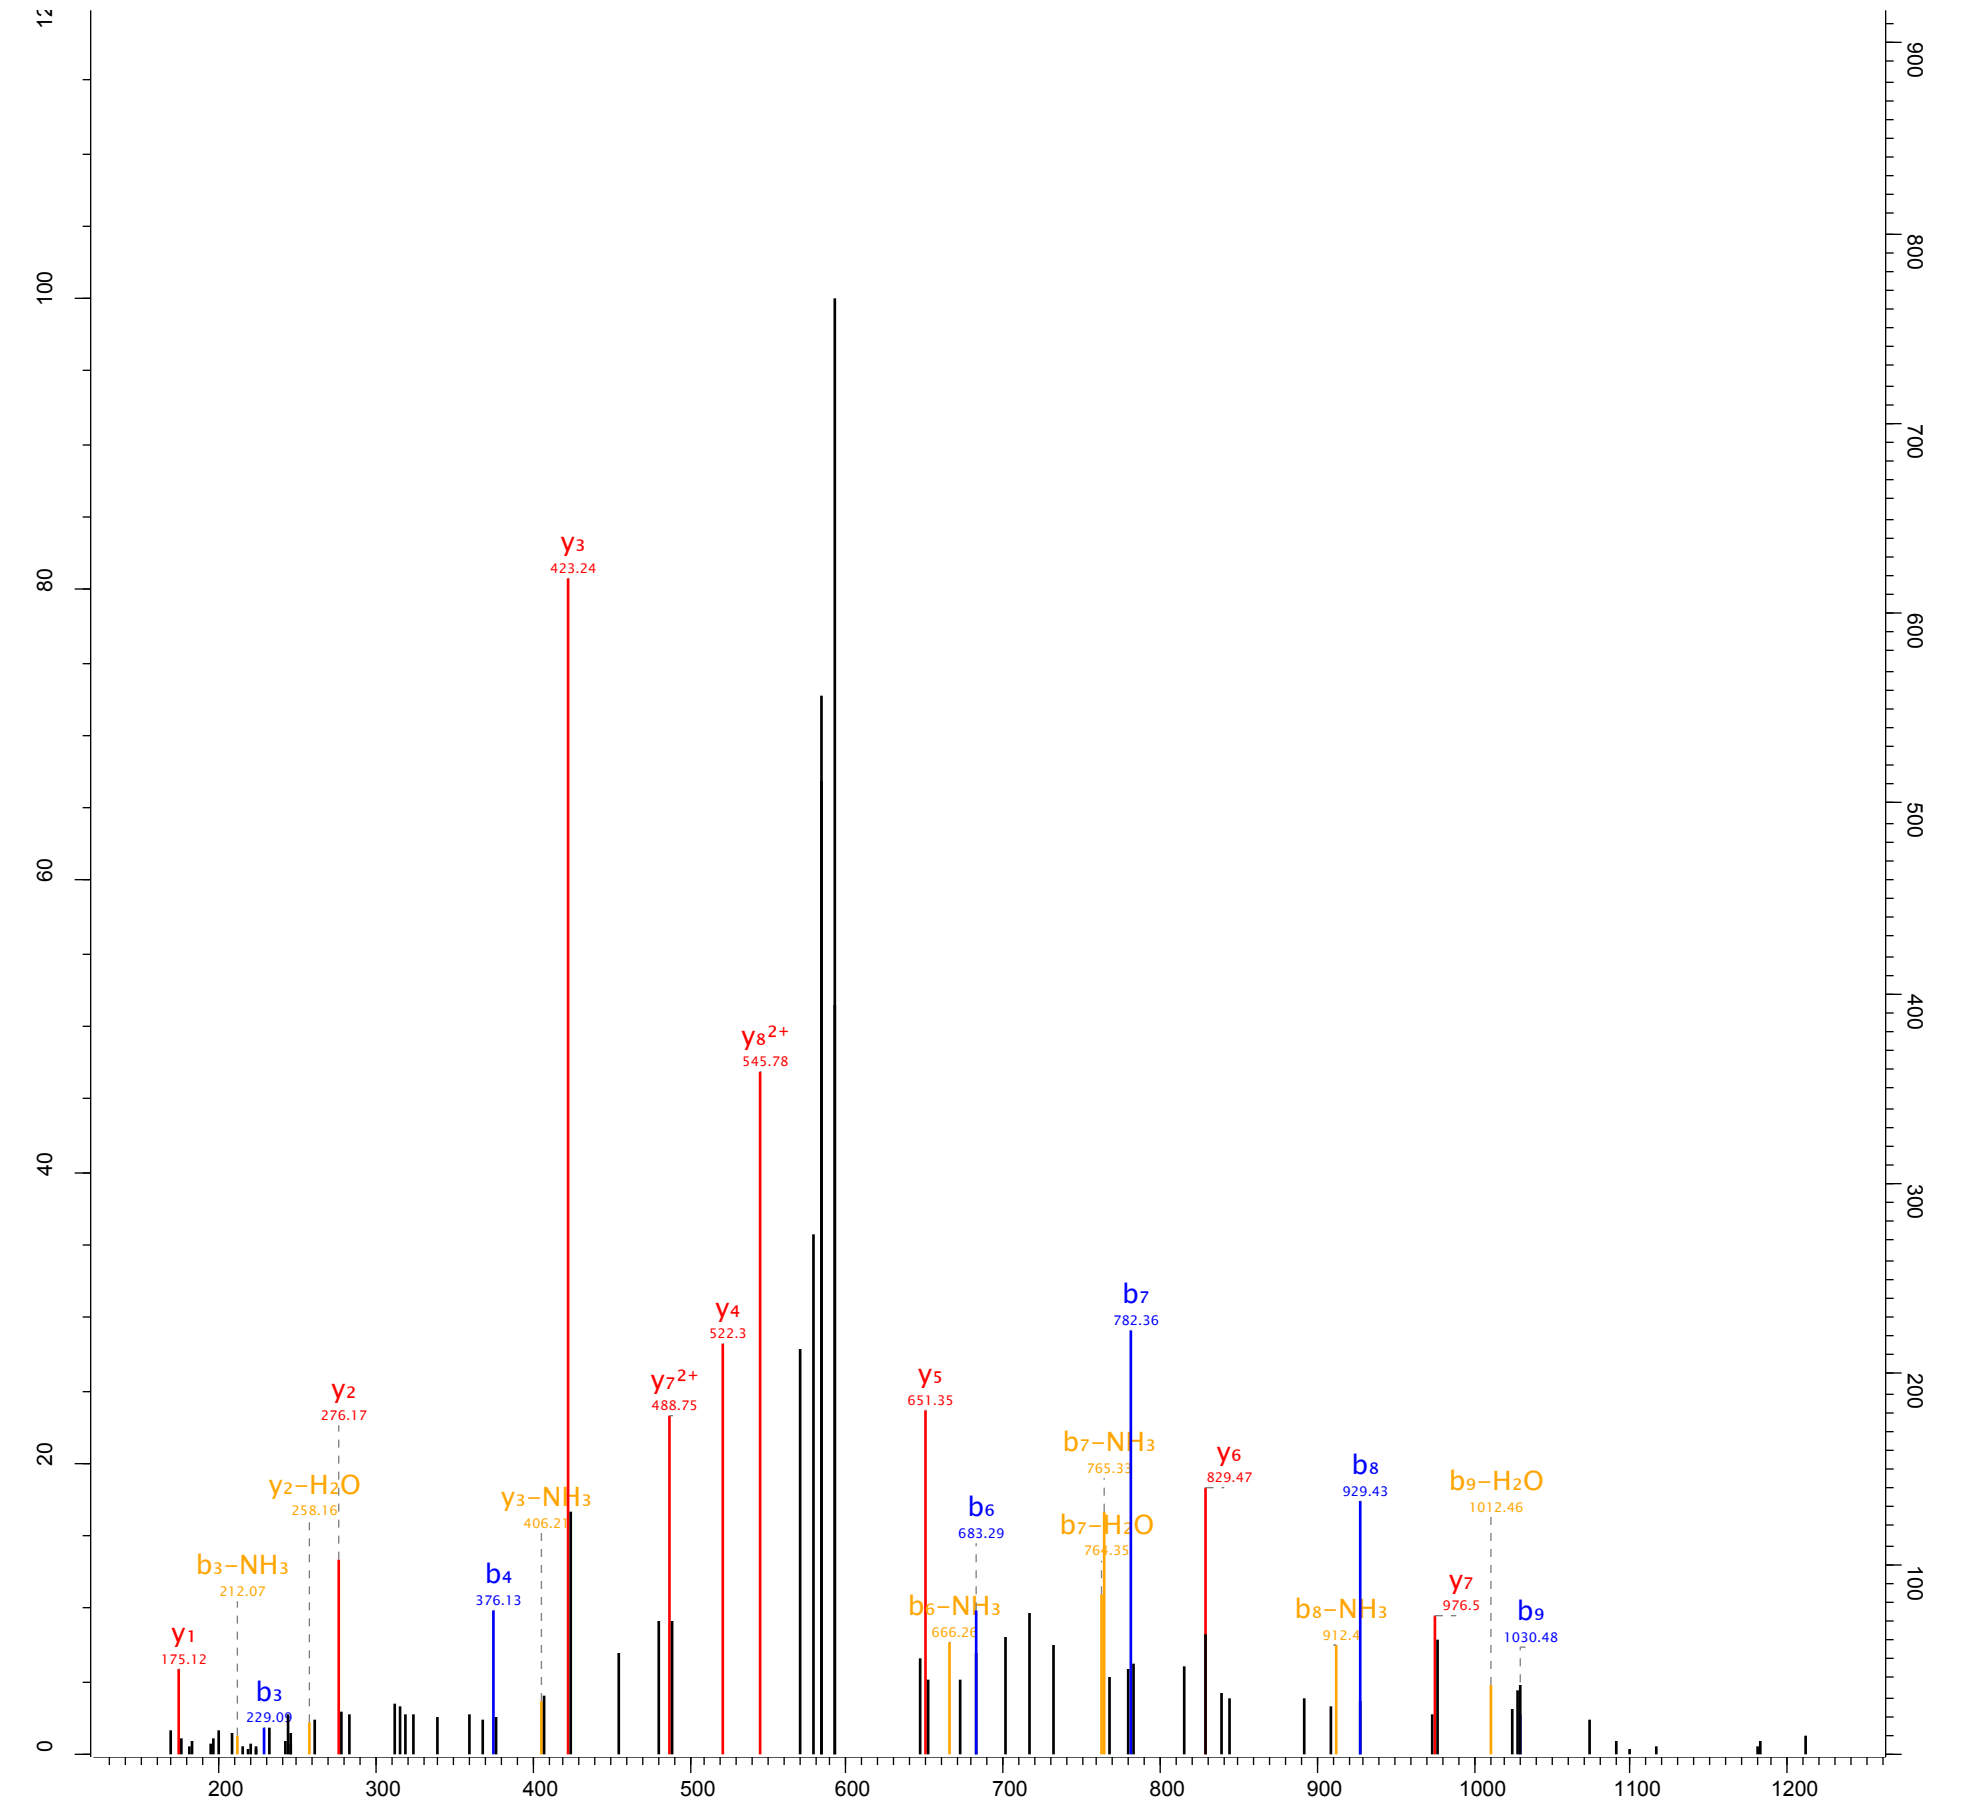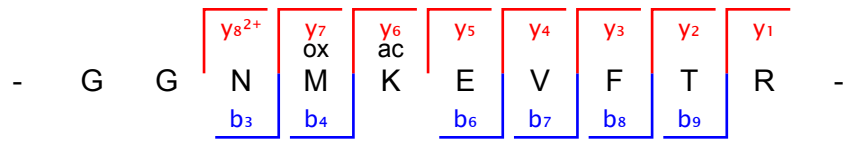

Raw file 052413\_SCW\_II\_29\_Second\_ZT\_22\_5 Scan 7541 Method ITMS; CID Score 141.52 m/z 476.77 Gene names Eef1a1;Eef1a2

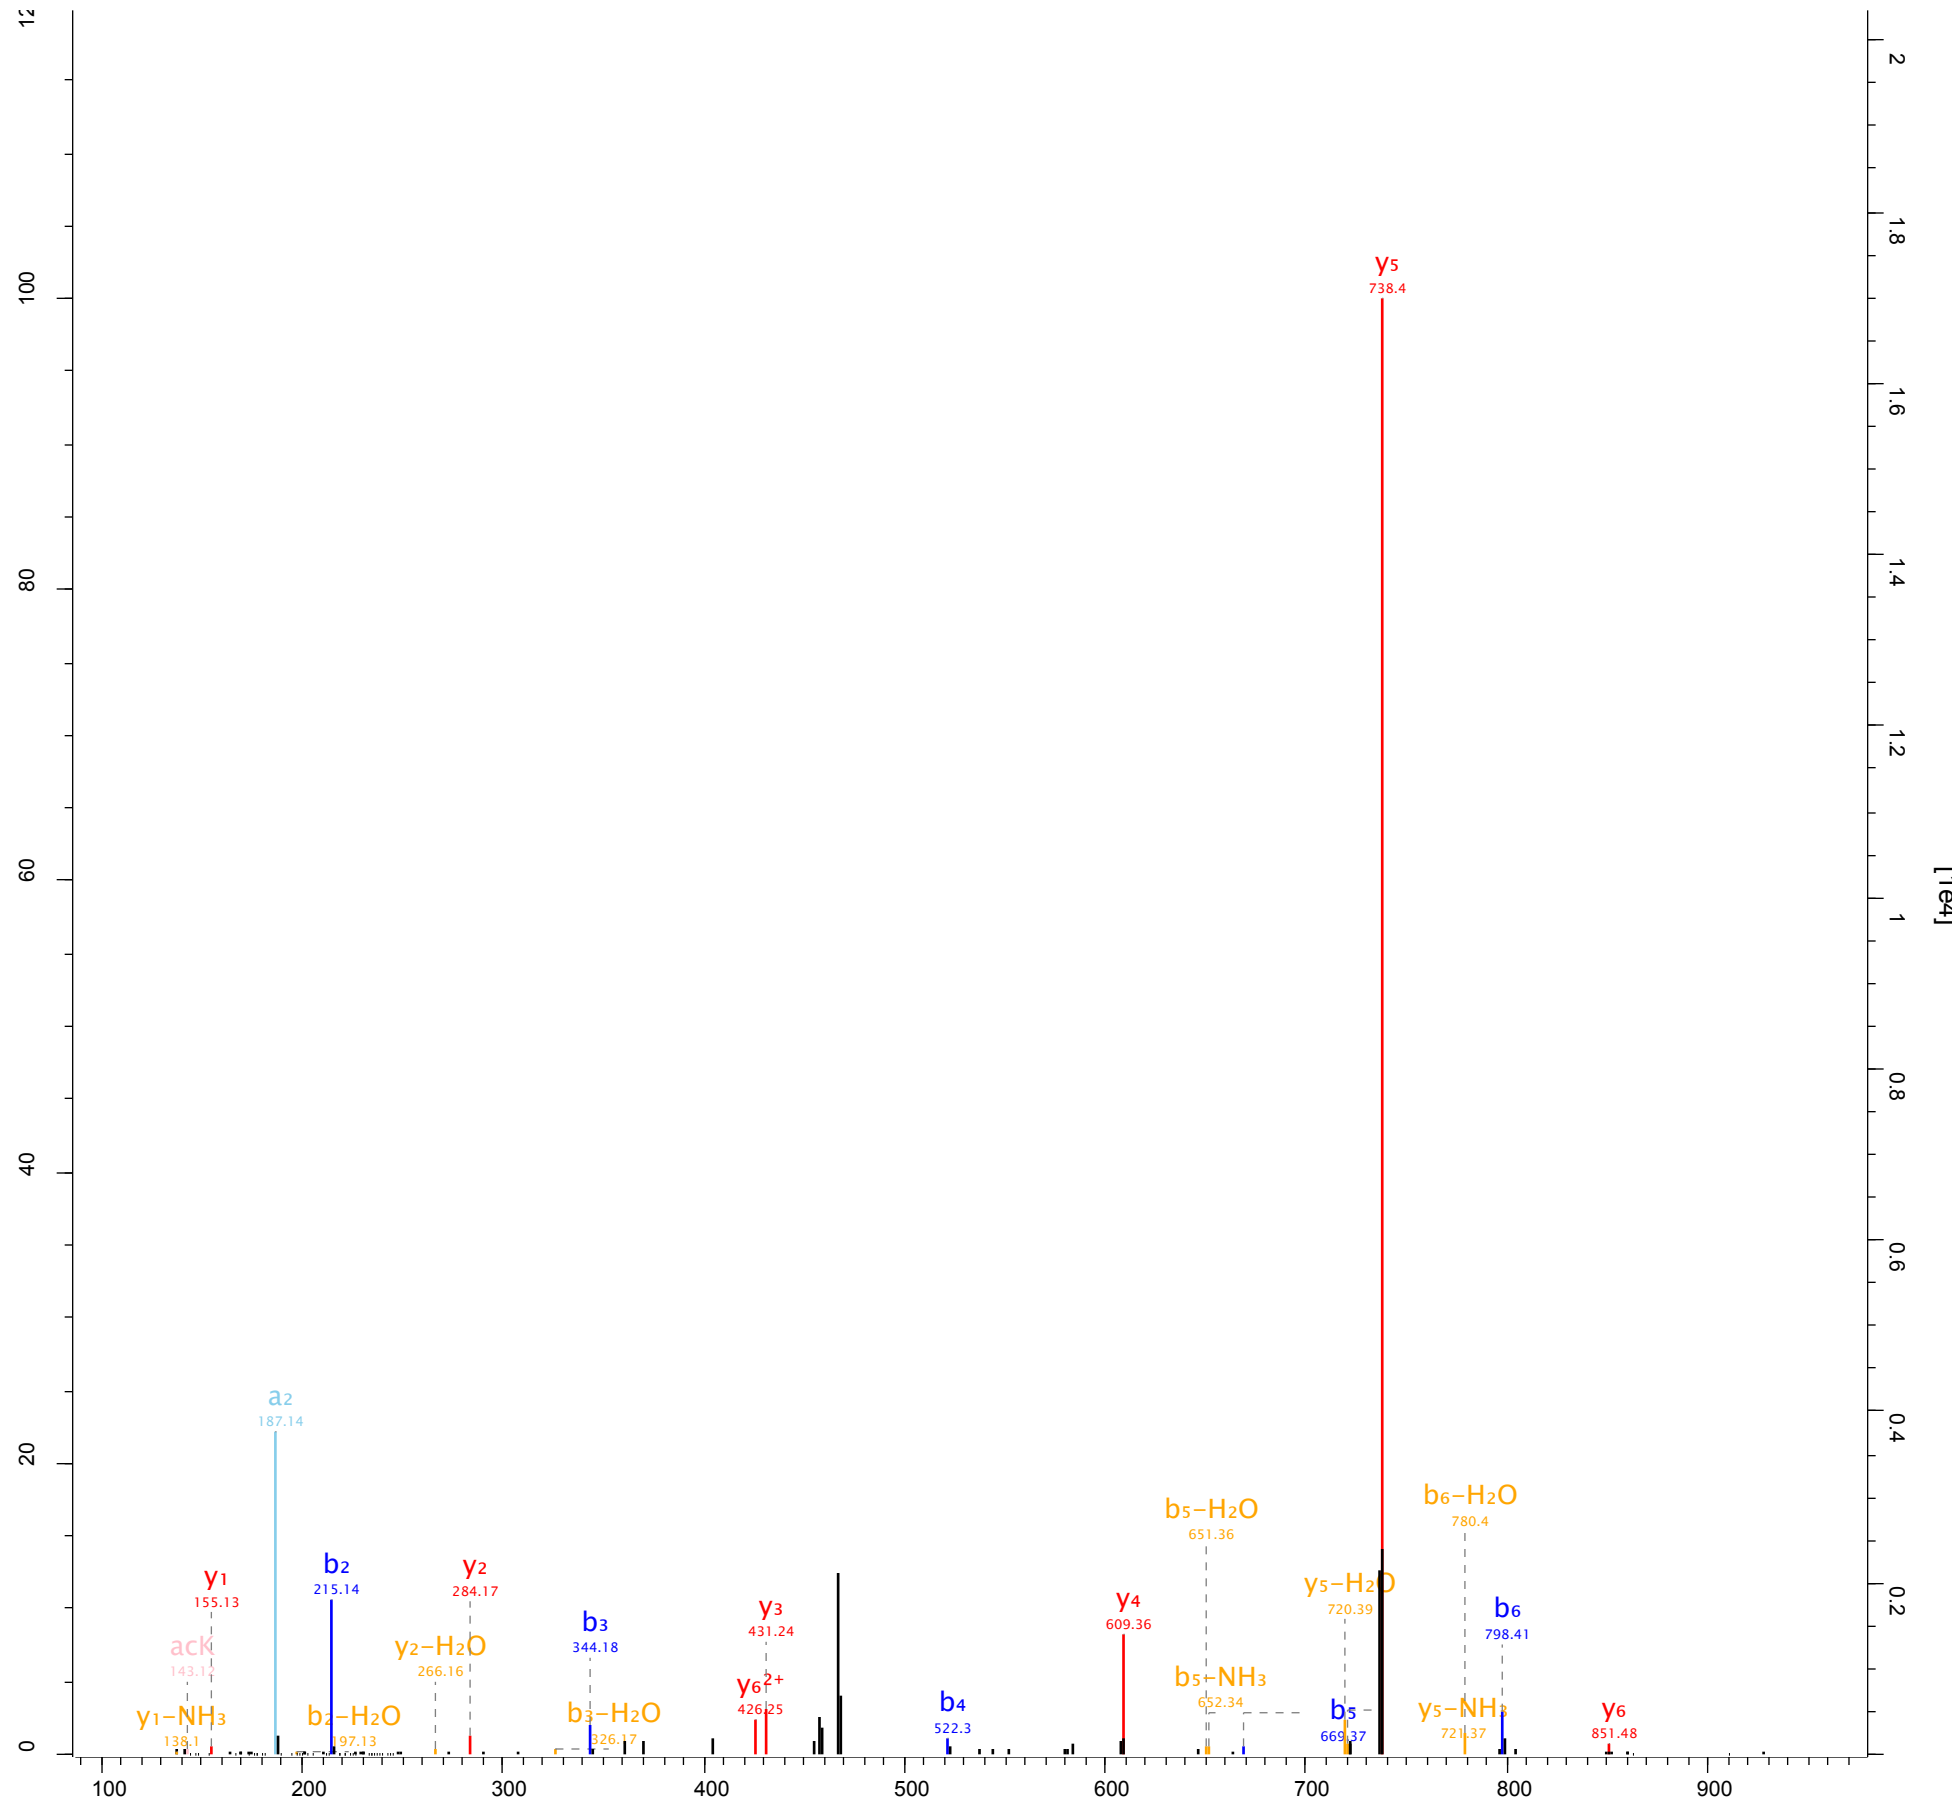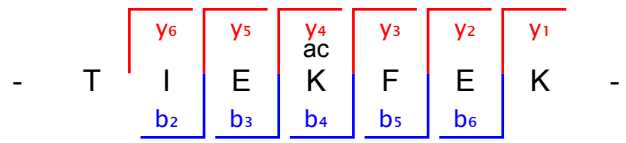

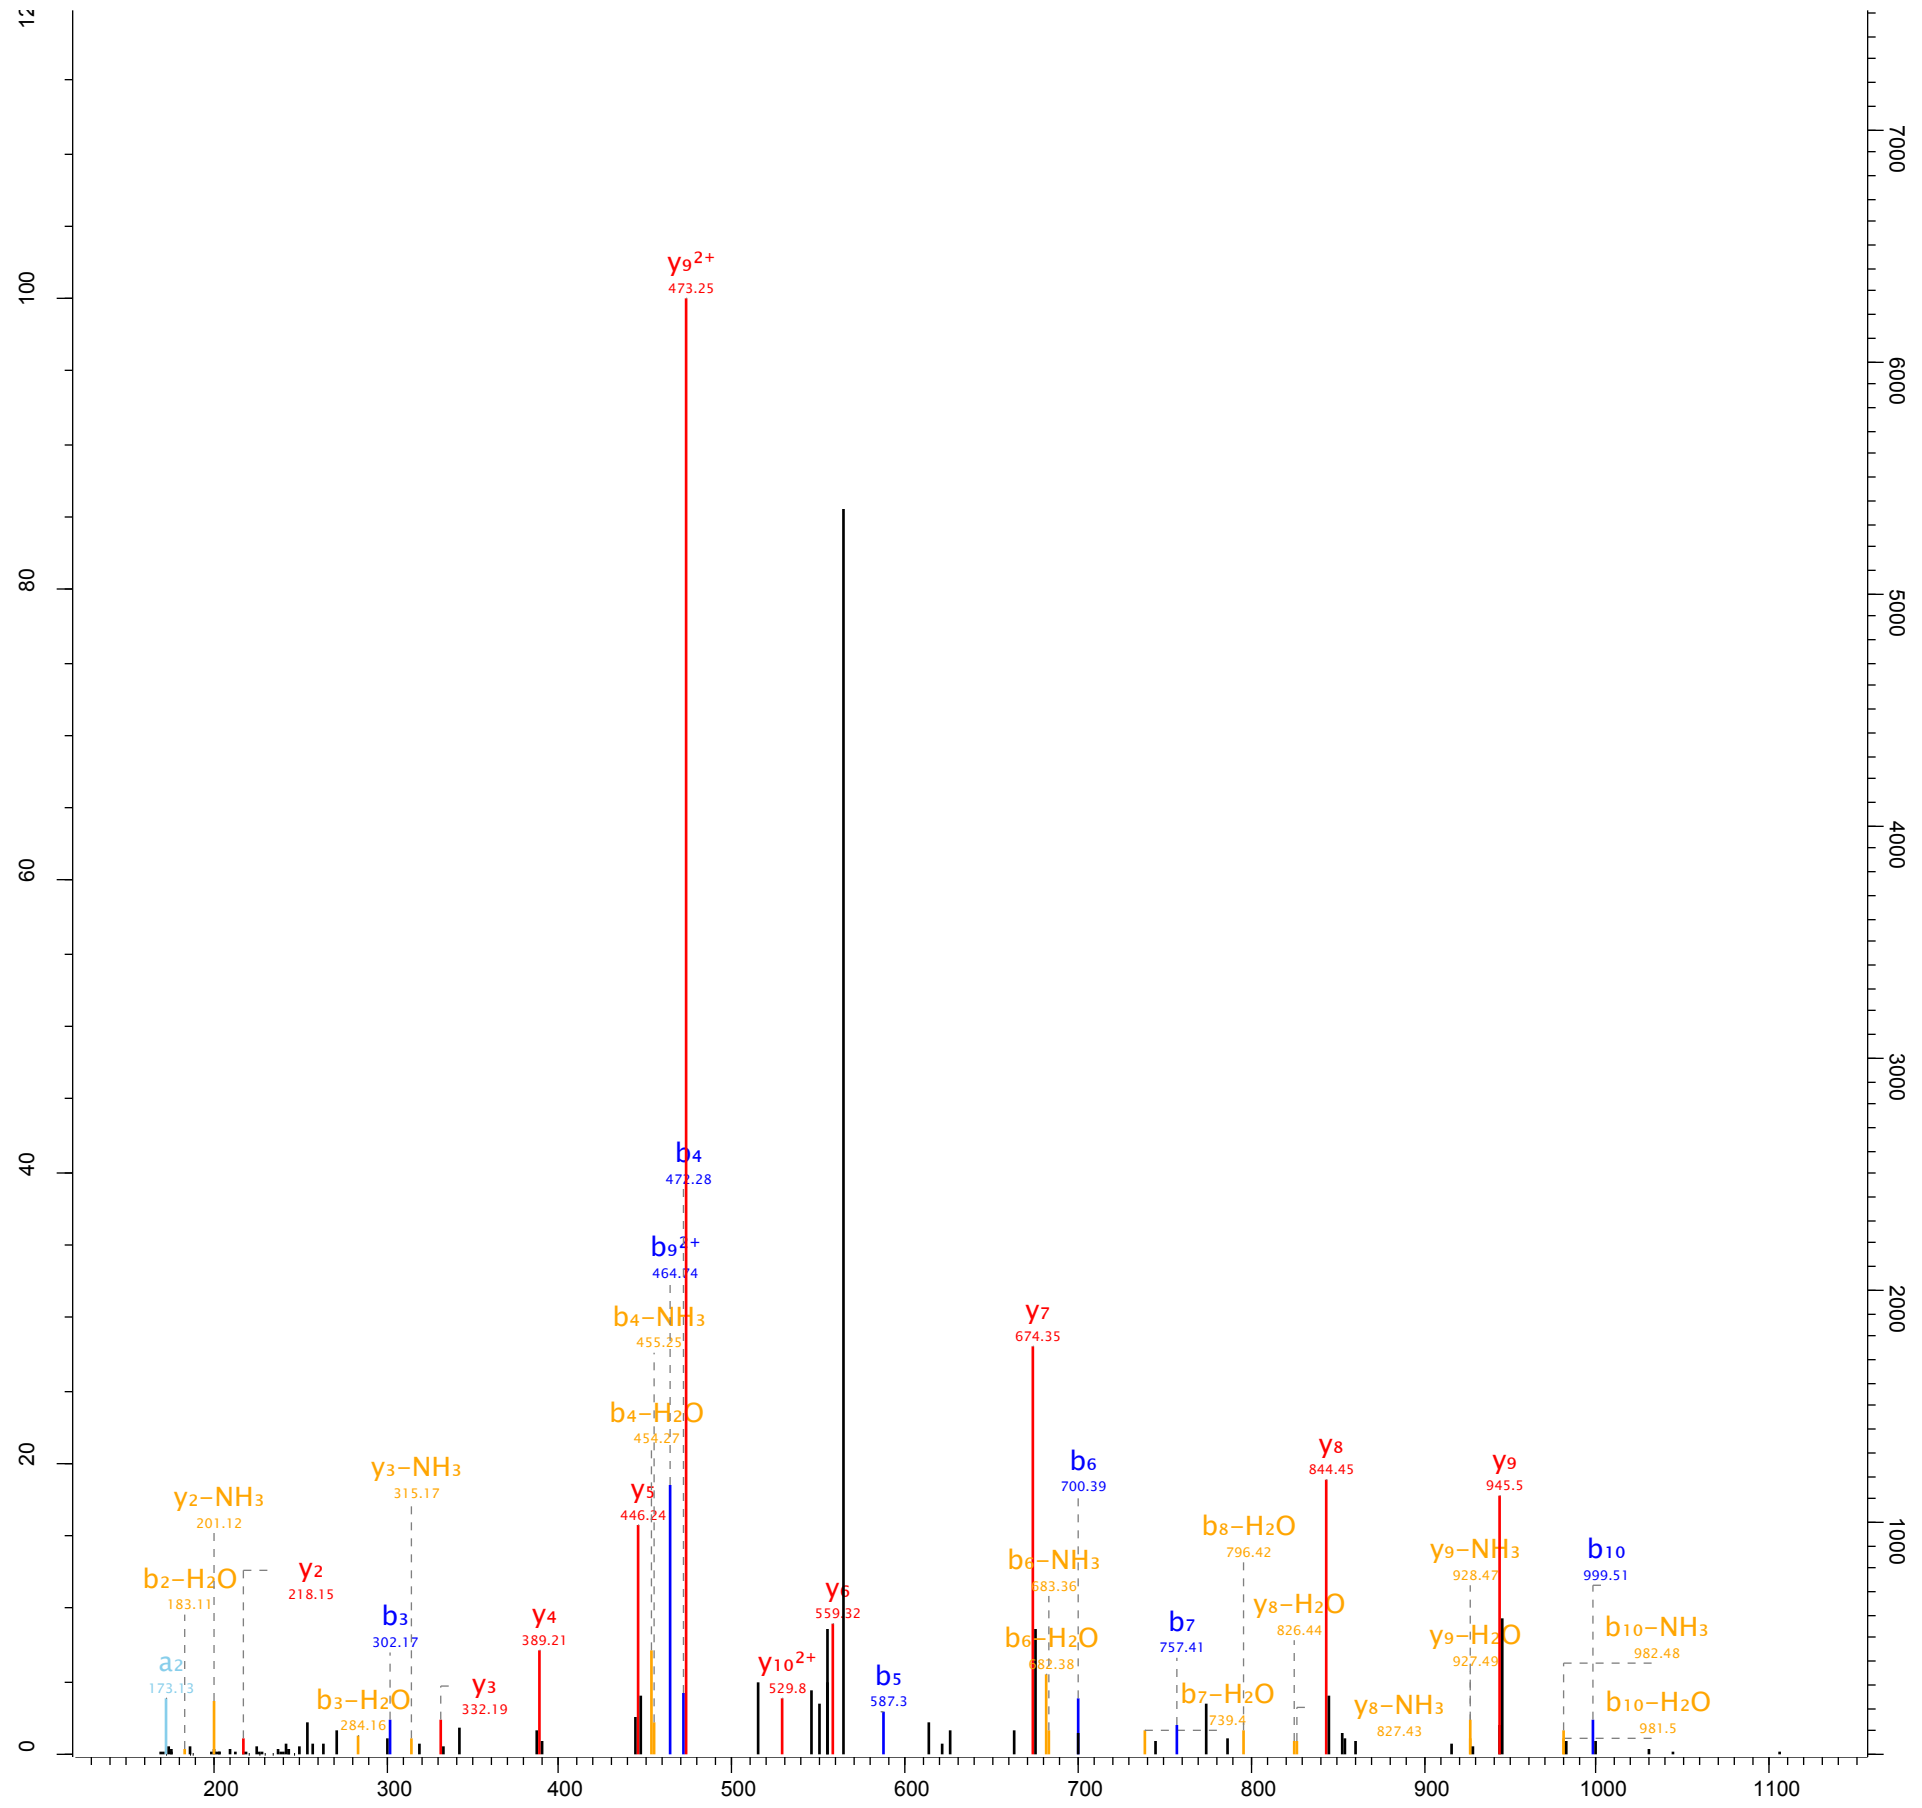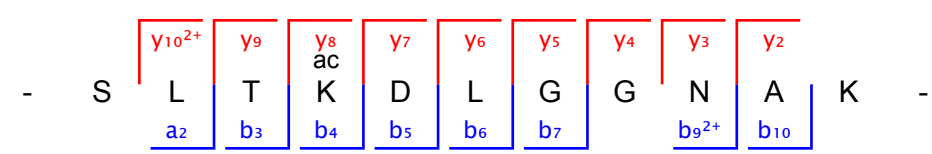

052413\_SCW\_II\_29\_Second\_ZT\_22\_5

7564

ITMS; CID

150.51

604.82

Hist1h1b;Hist1h1c;Hist1h1e;Hist1h1d

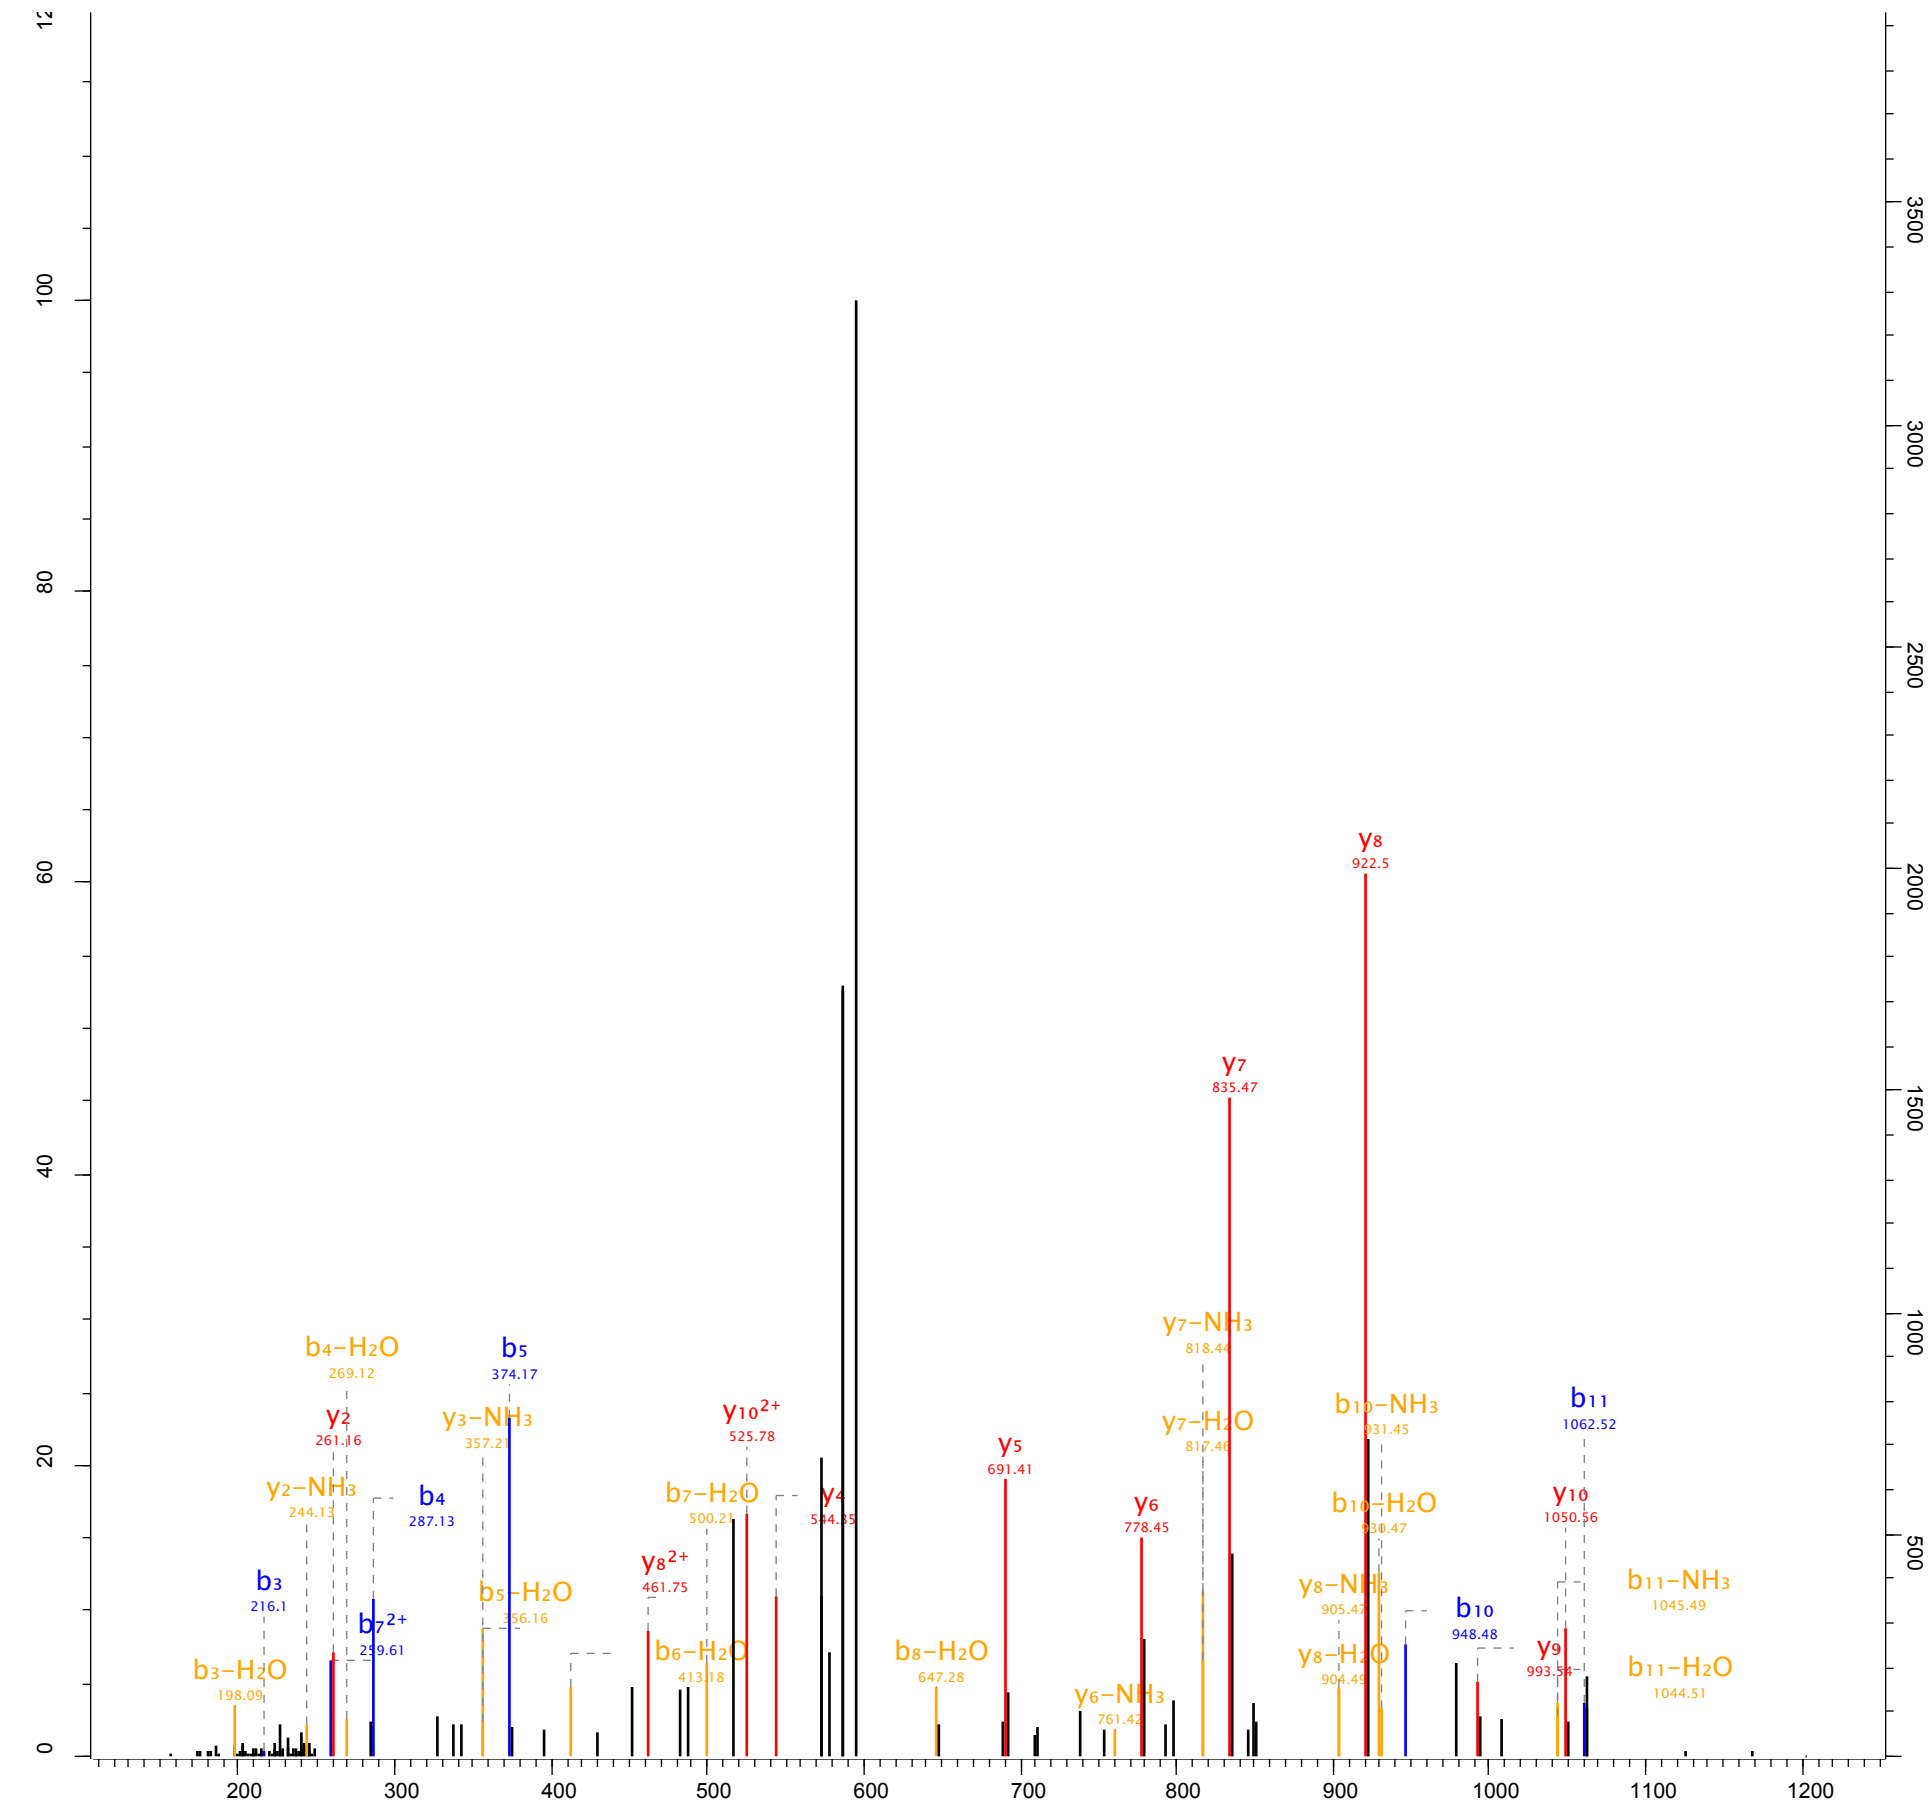

- G T G A S G S F K L N K -

b<sub>3</sub> b<sub>4</sub> b<sub>5</sub> b<sub>7</sub><sup>2+</sup> b<sub>10</sub> b<sub>11</sub>

052413\_SCW\_II\_29\_Second\_ZT\_22\_5

7868 ITMS; CID 86.34 589.8 Slc25a3

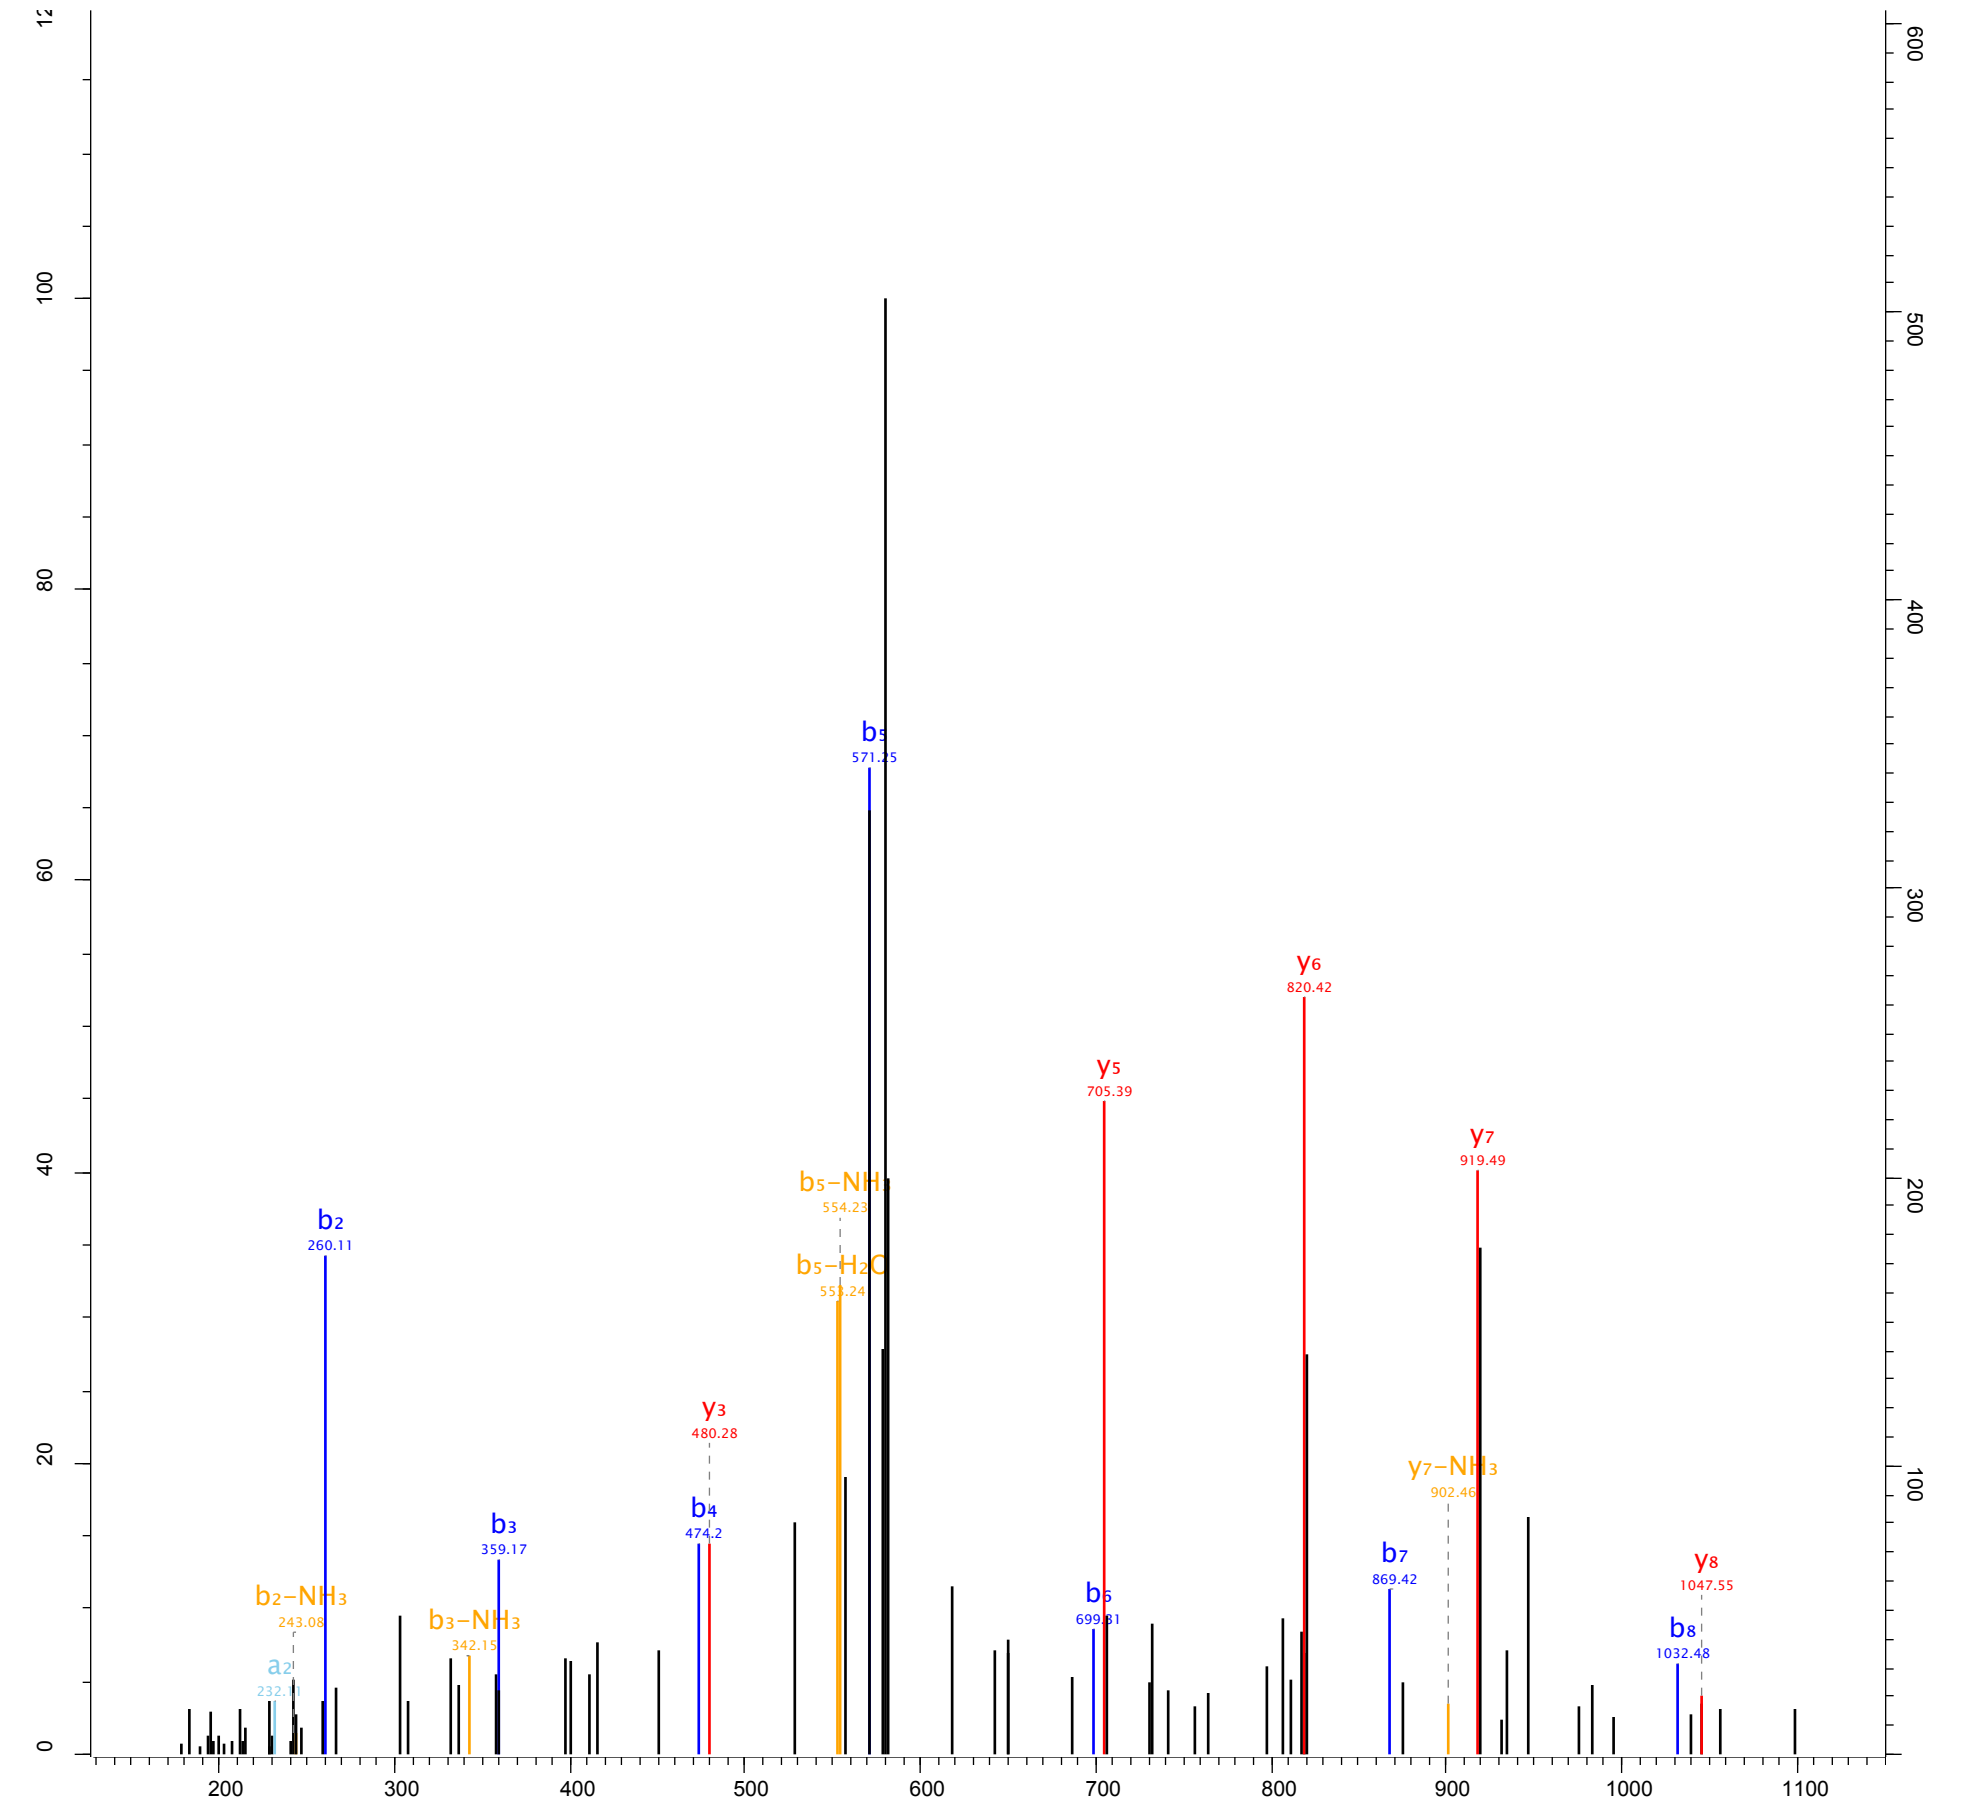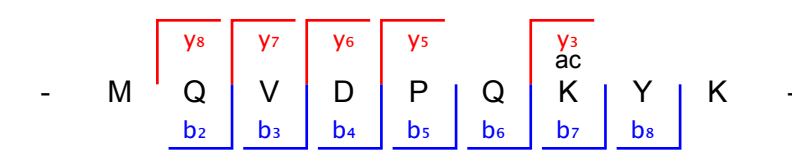



052413\_SCW\_II\_29\_Second\_ZT\_22\_5

8131

ITMS; CID

133.13

457.27

Uqcrc1

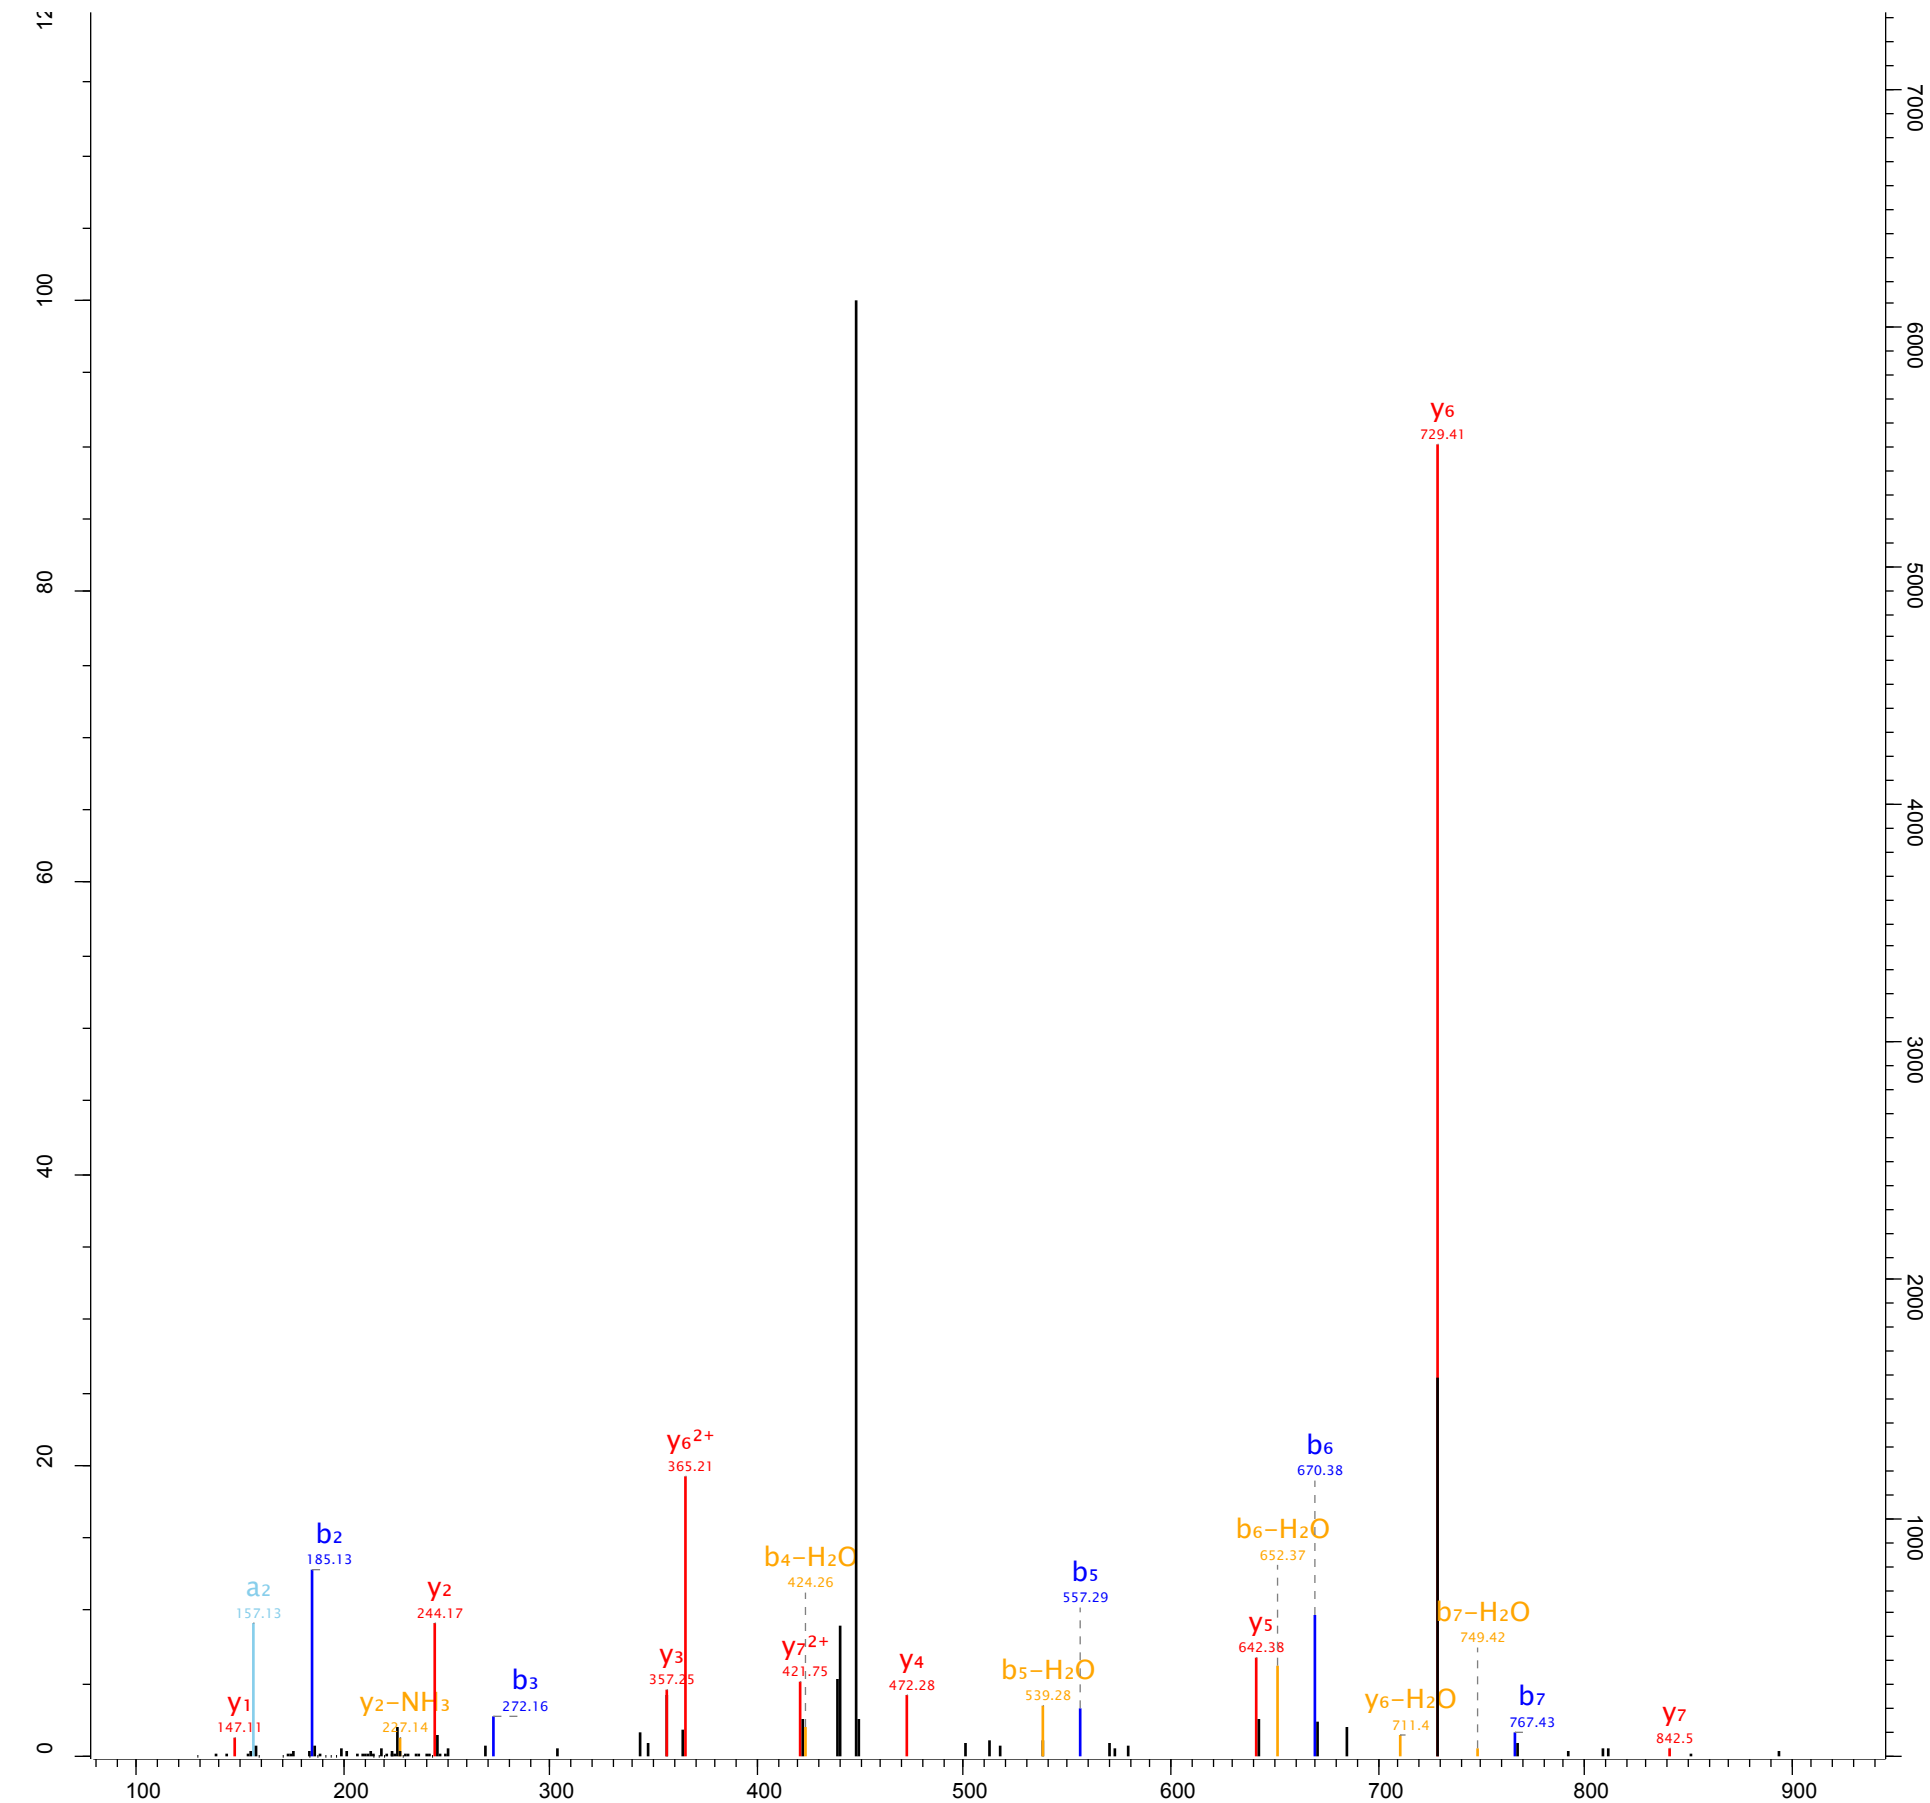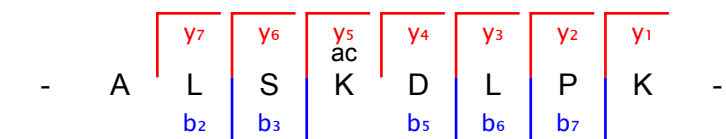

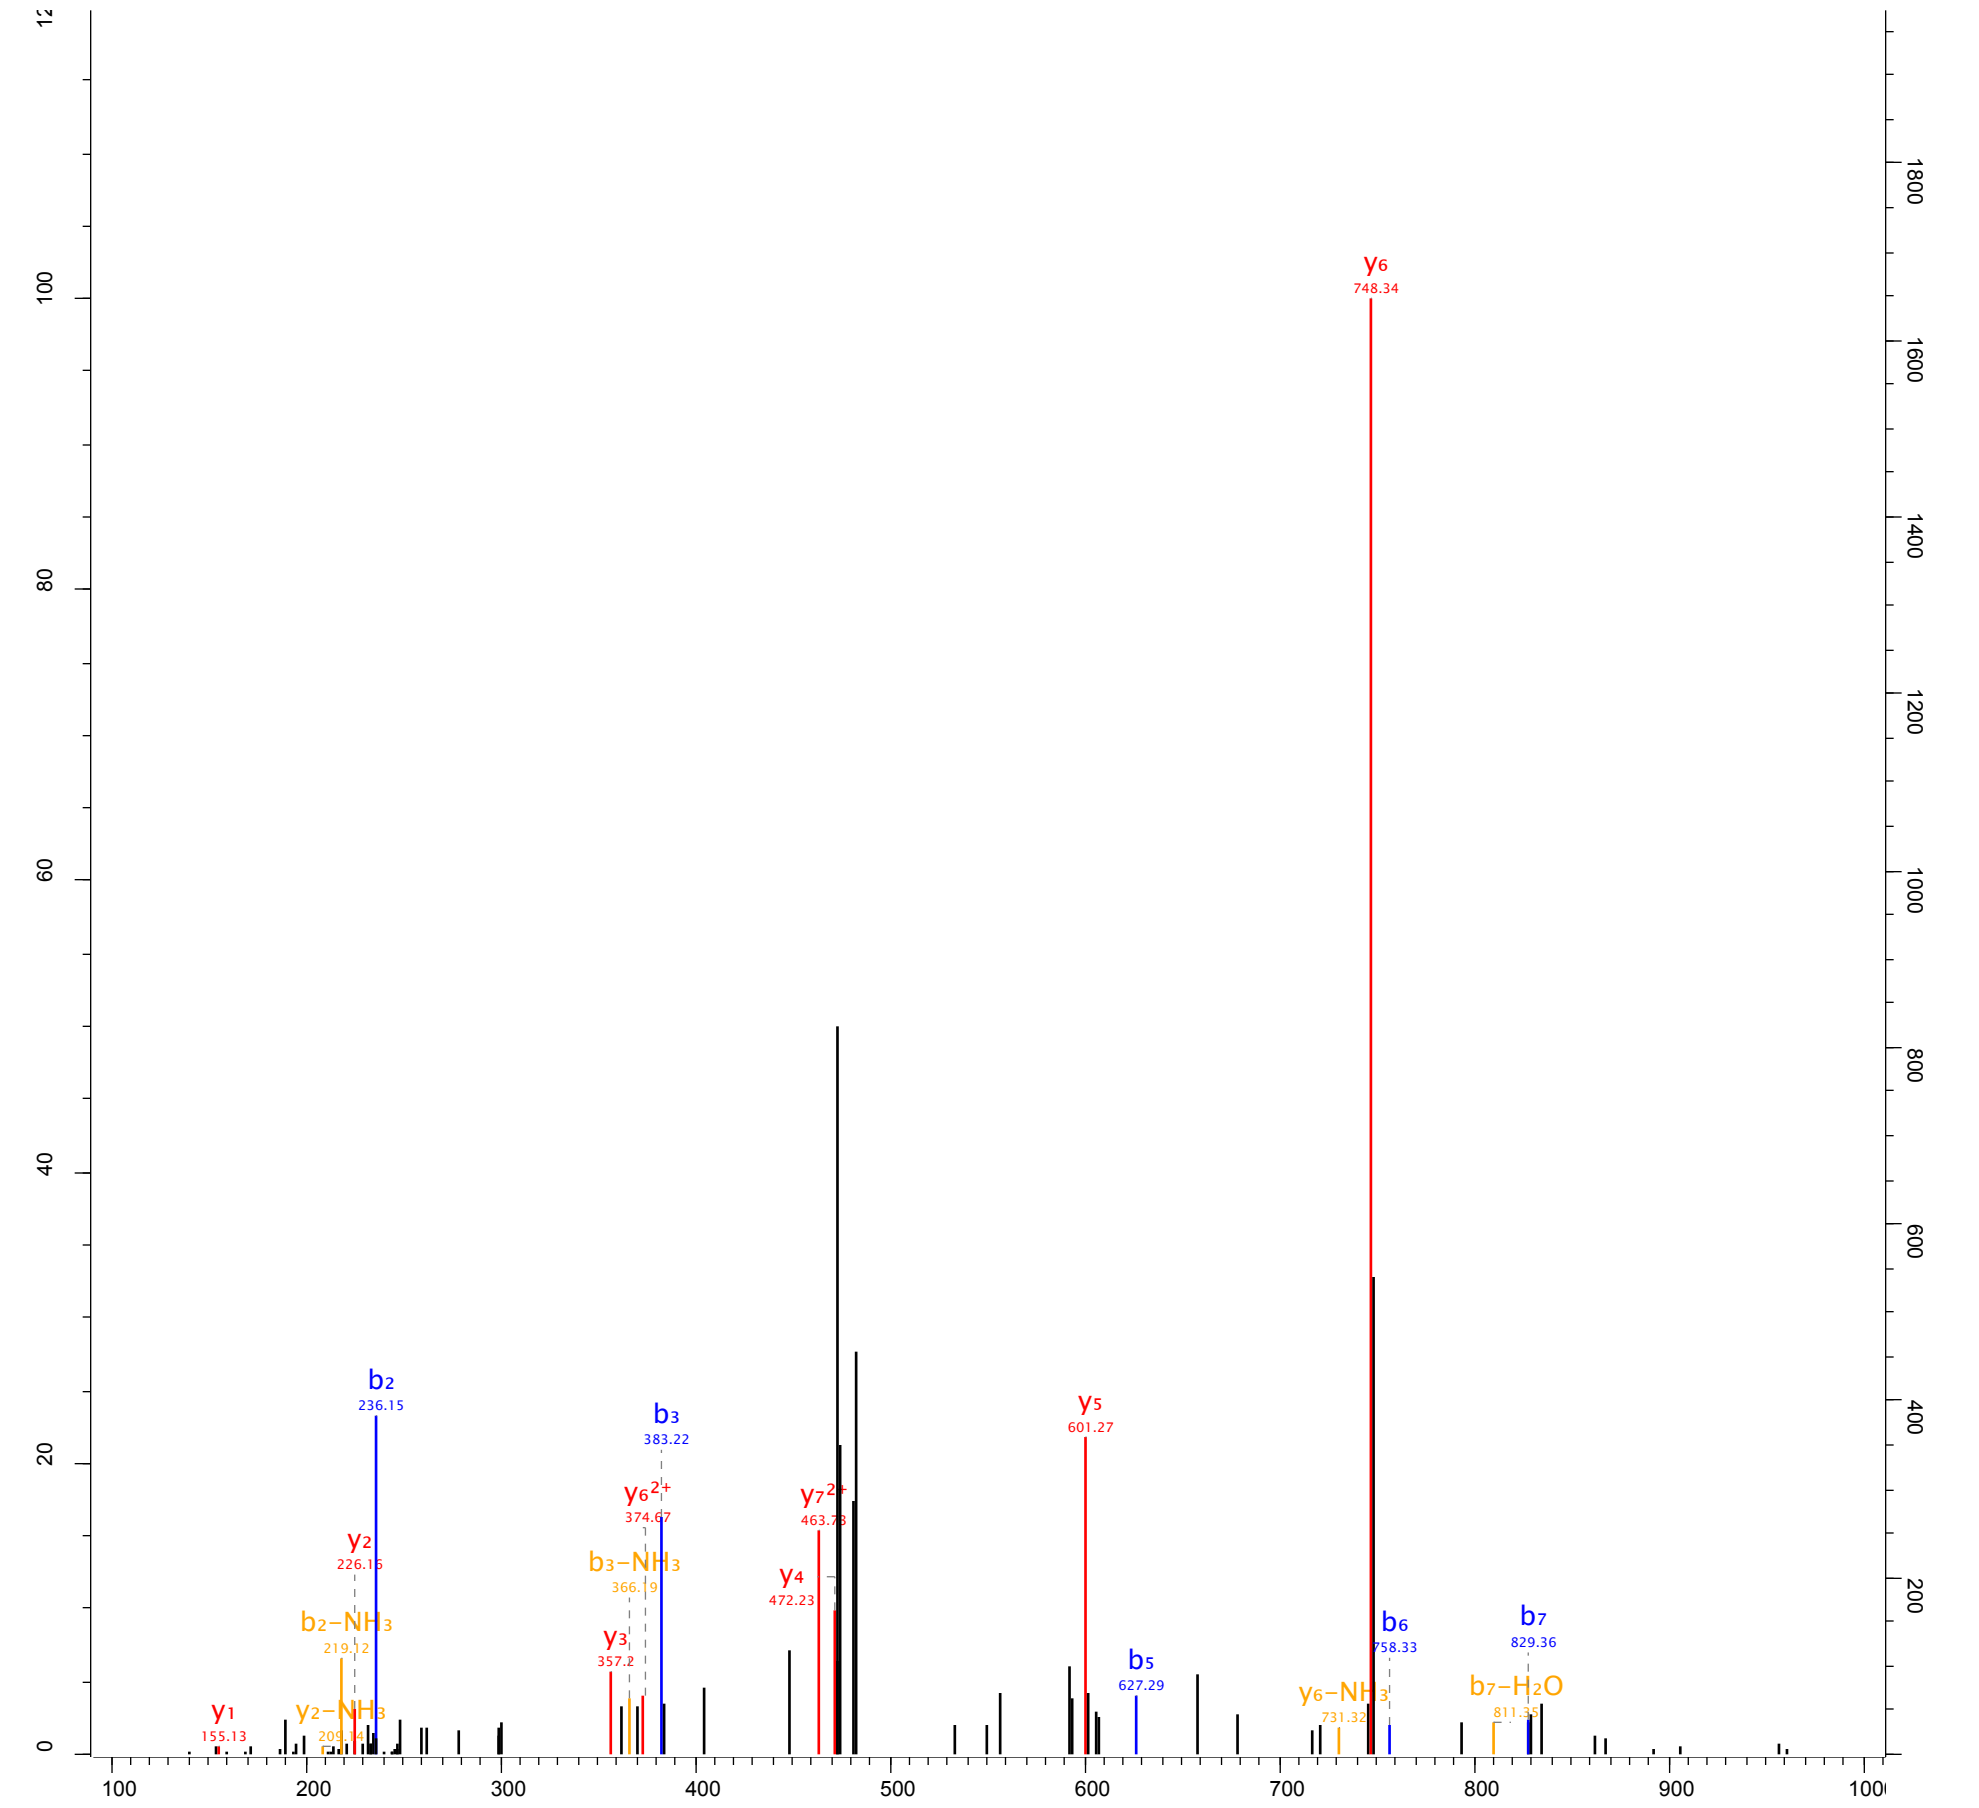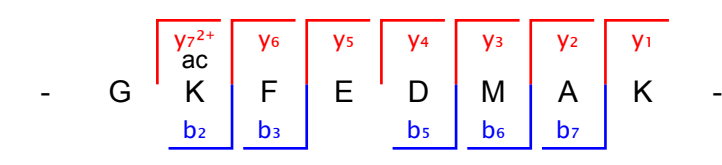

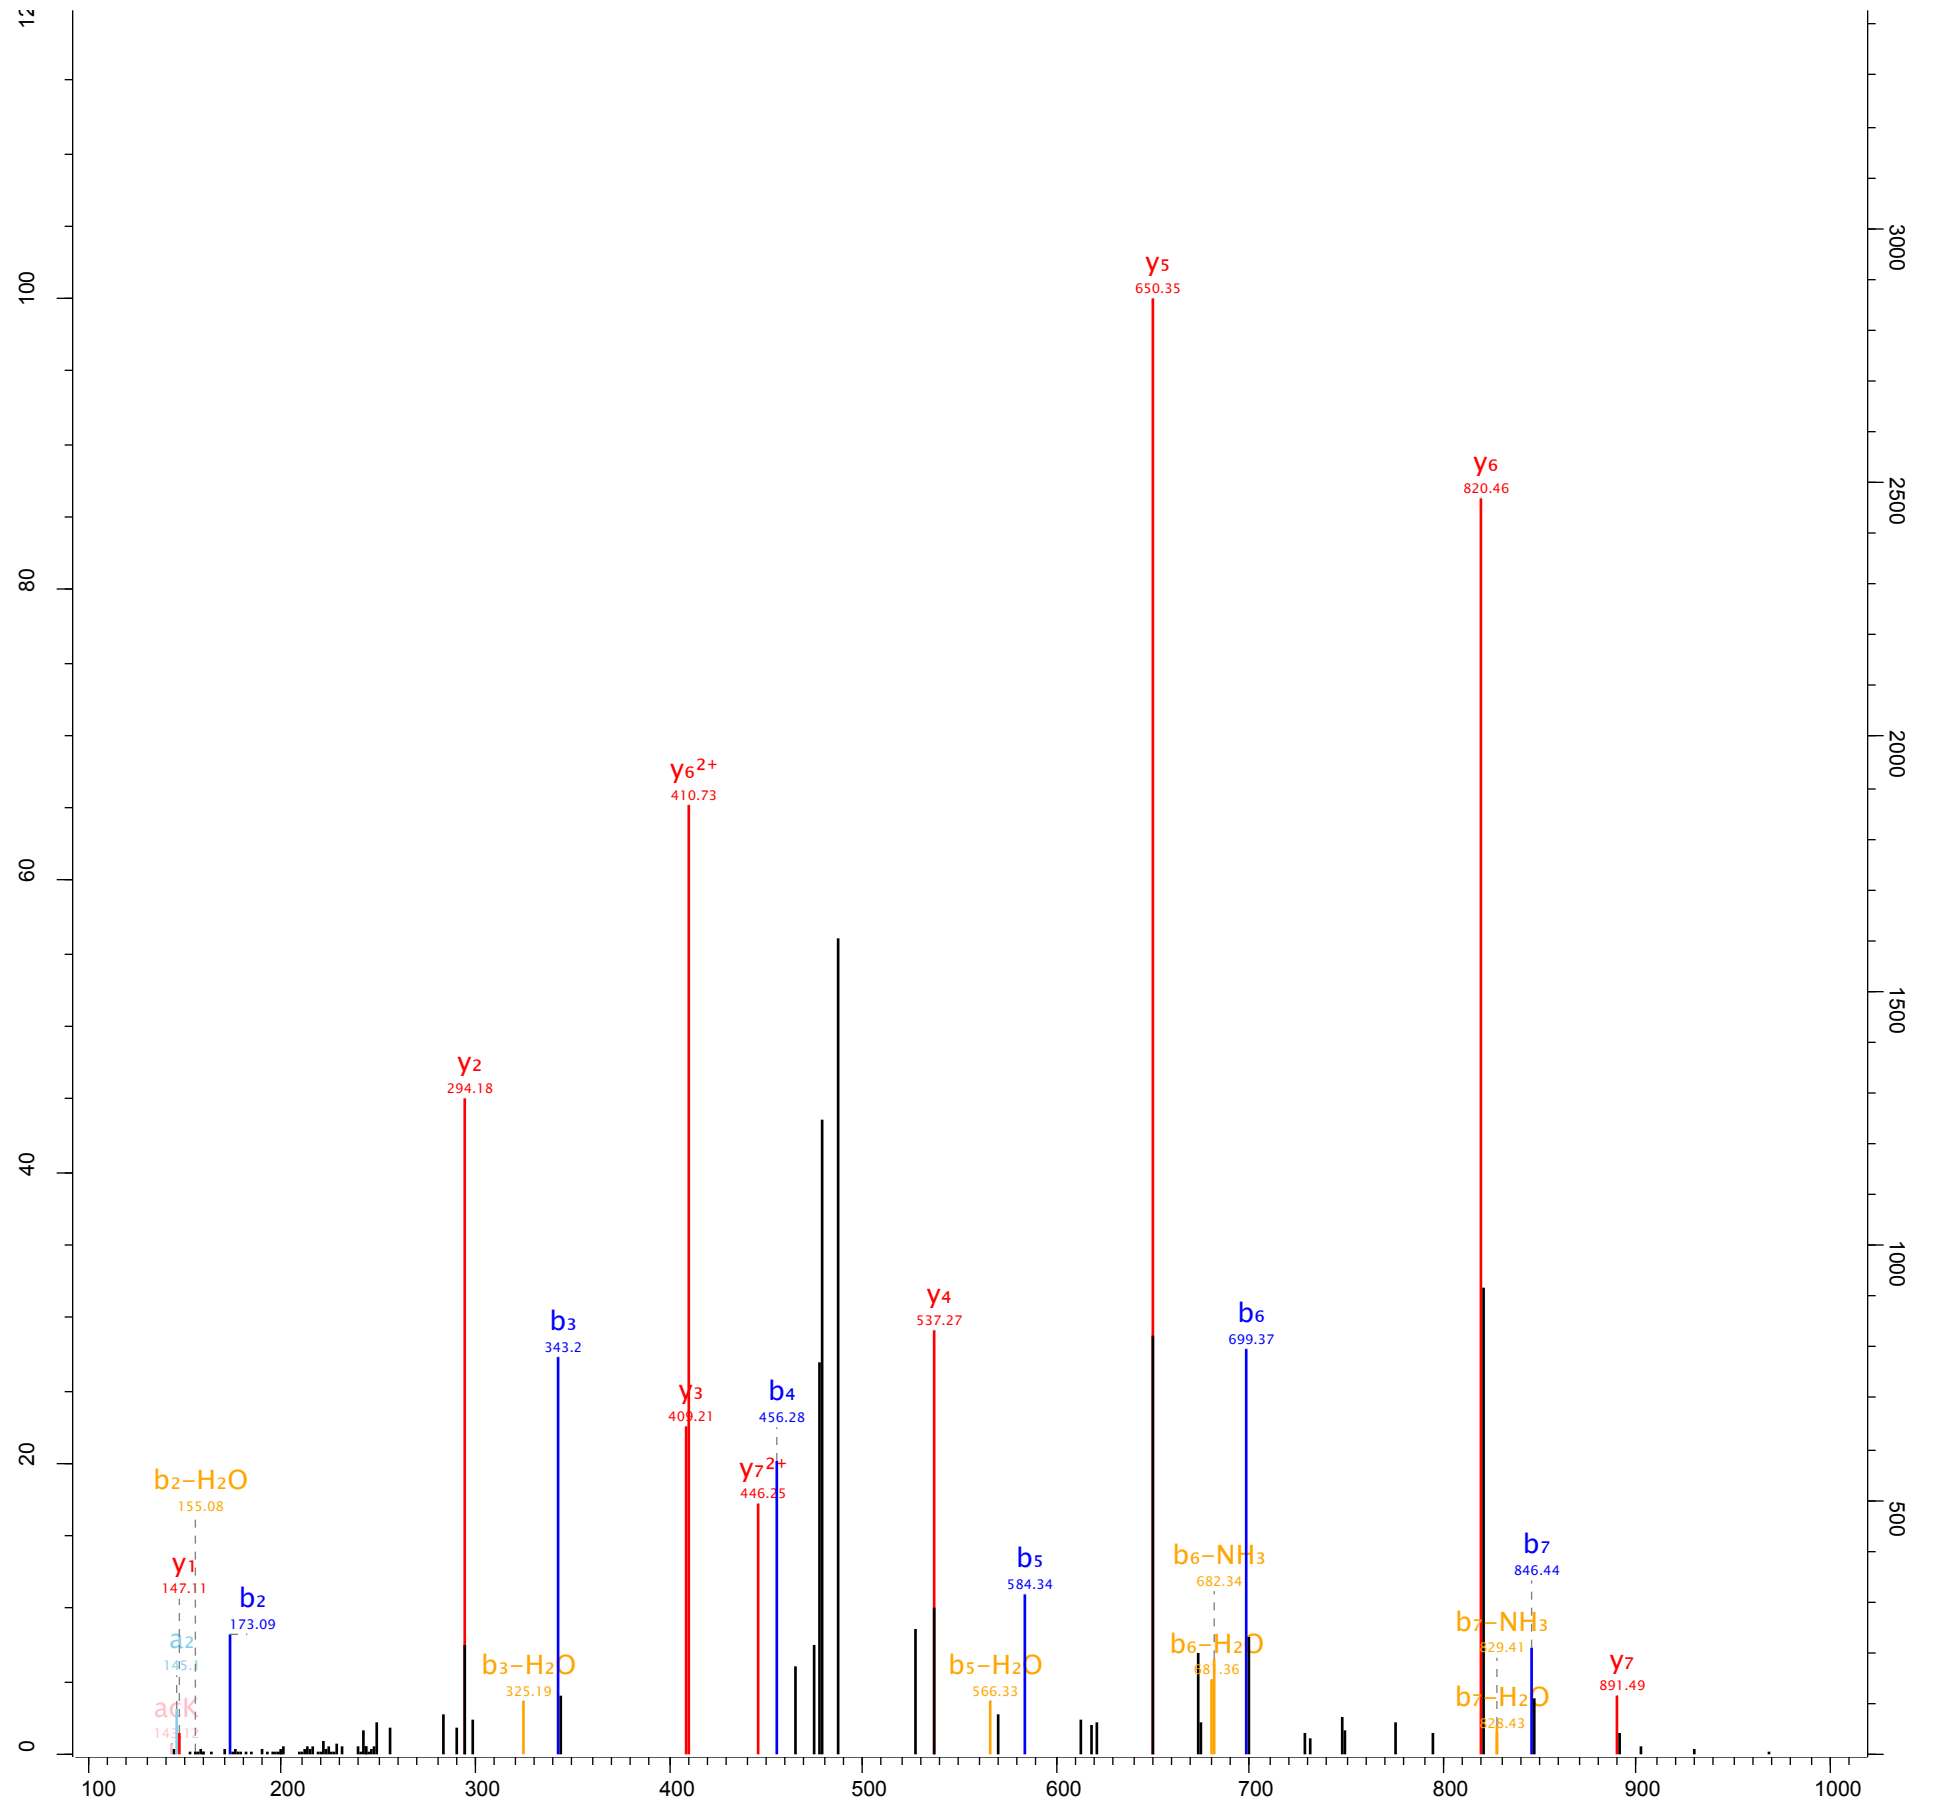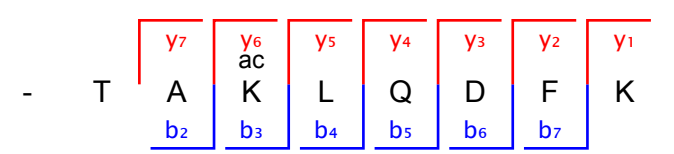

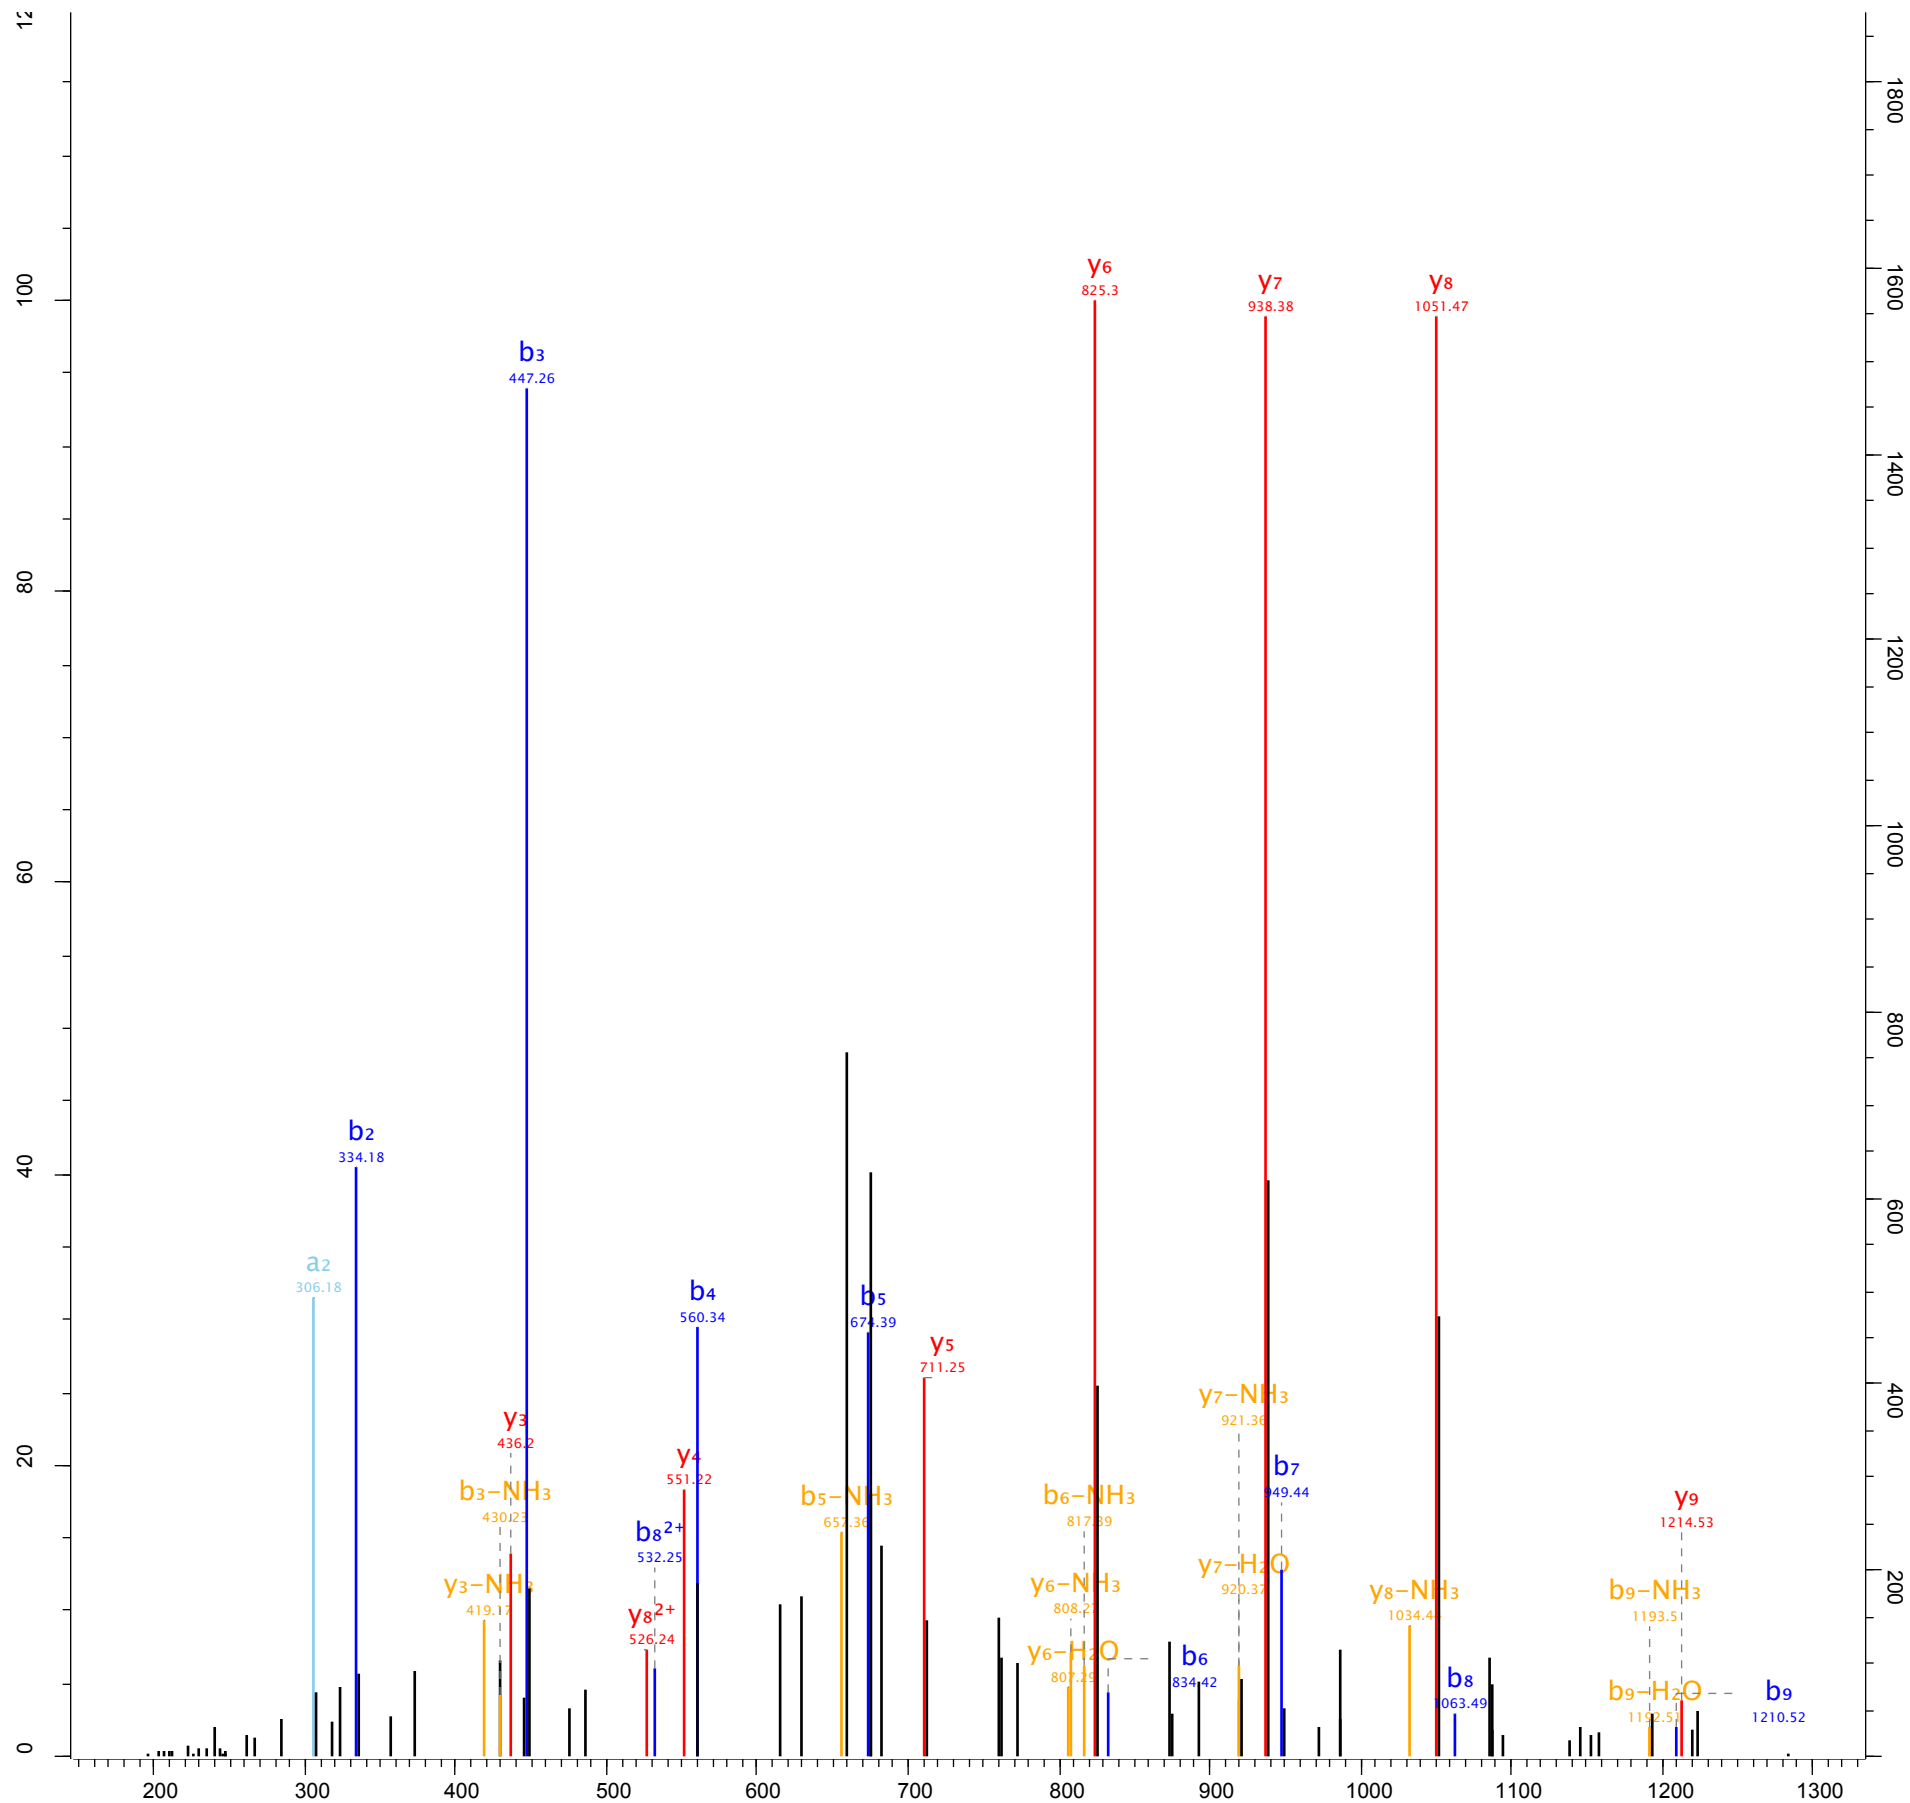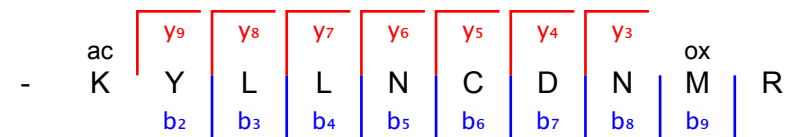

052413\_SCW\_II\_29\_Second\_ZT\_22\_5

8878

ITMS; CID

111.27

519.8

Myh9;Myh10;Myh11

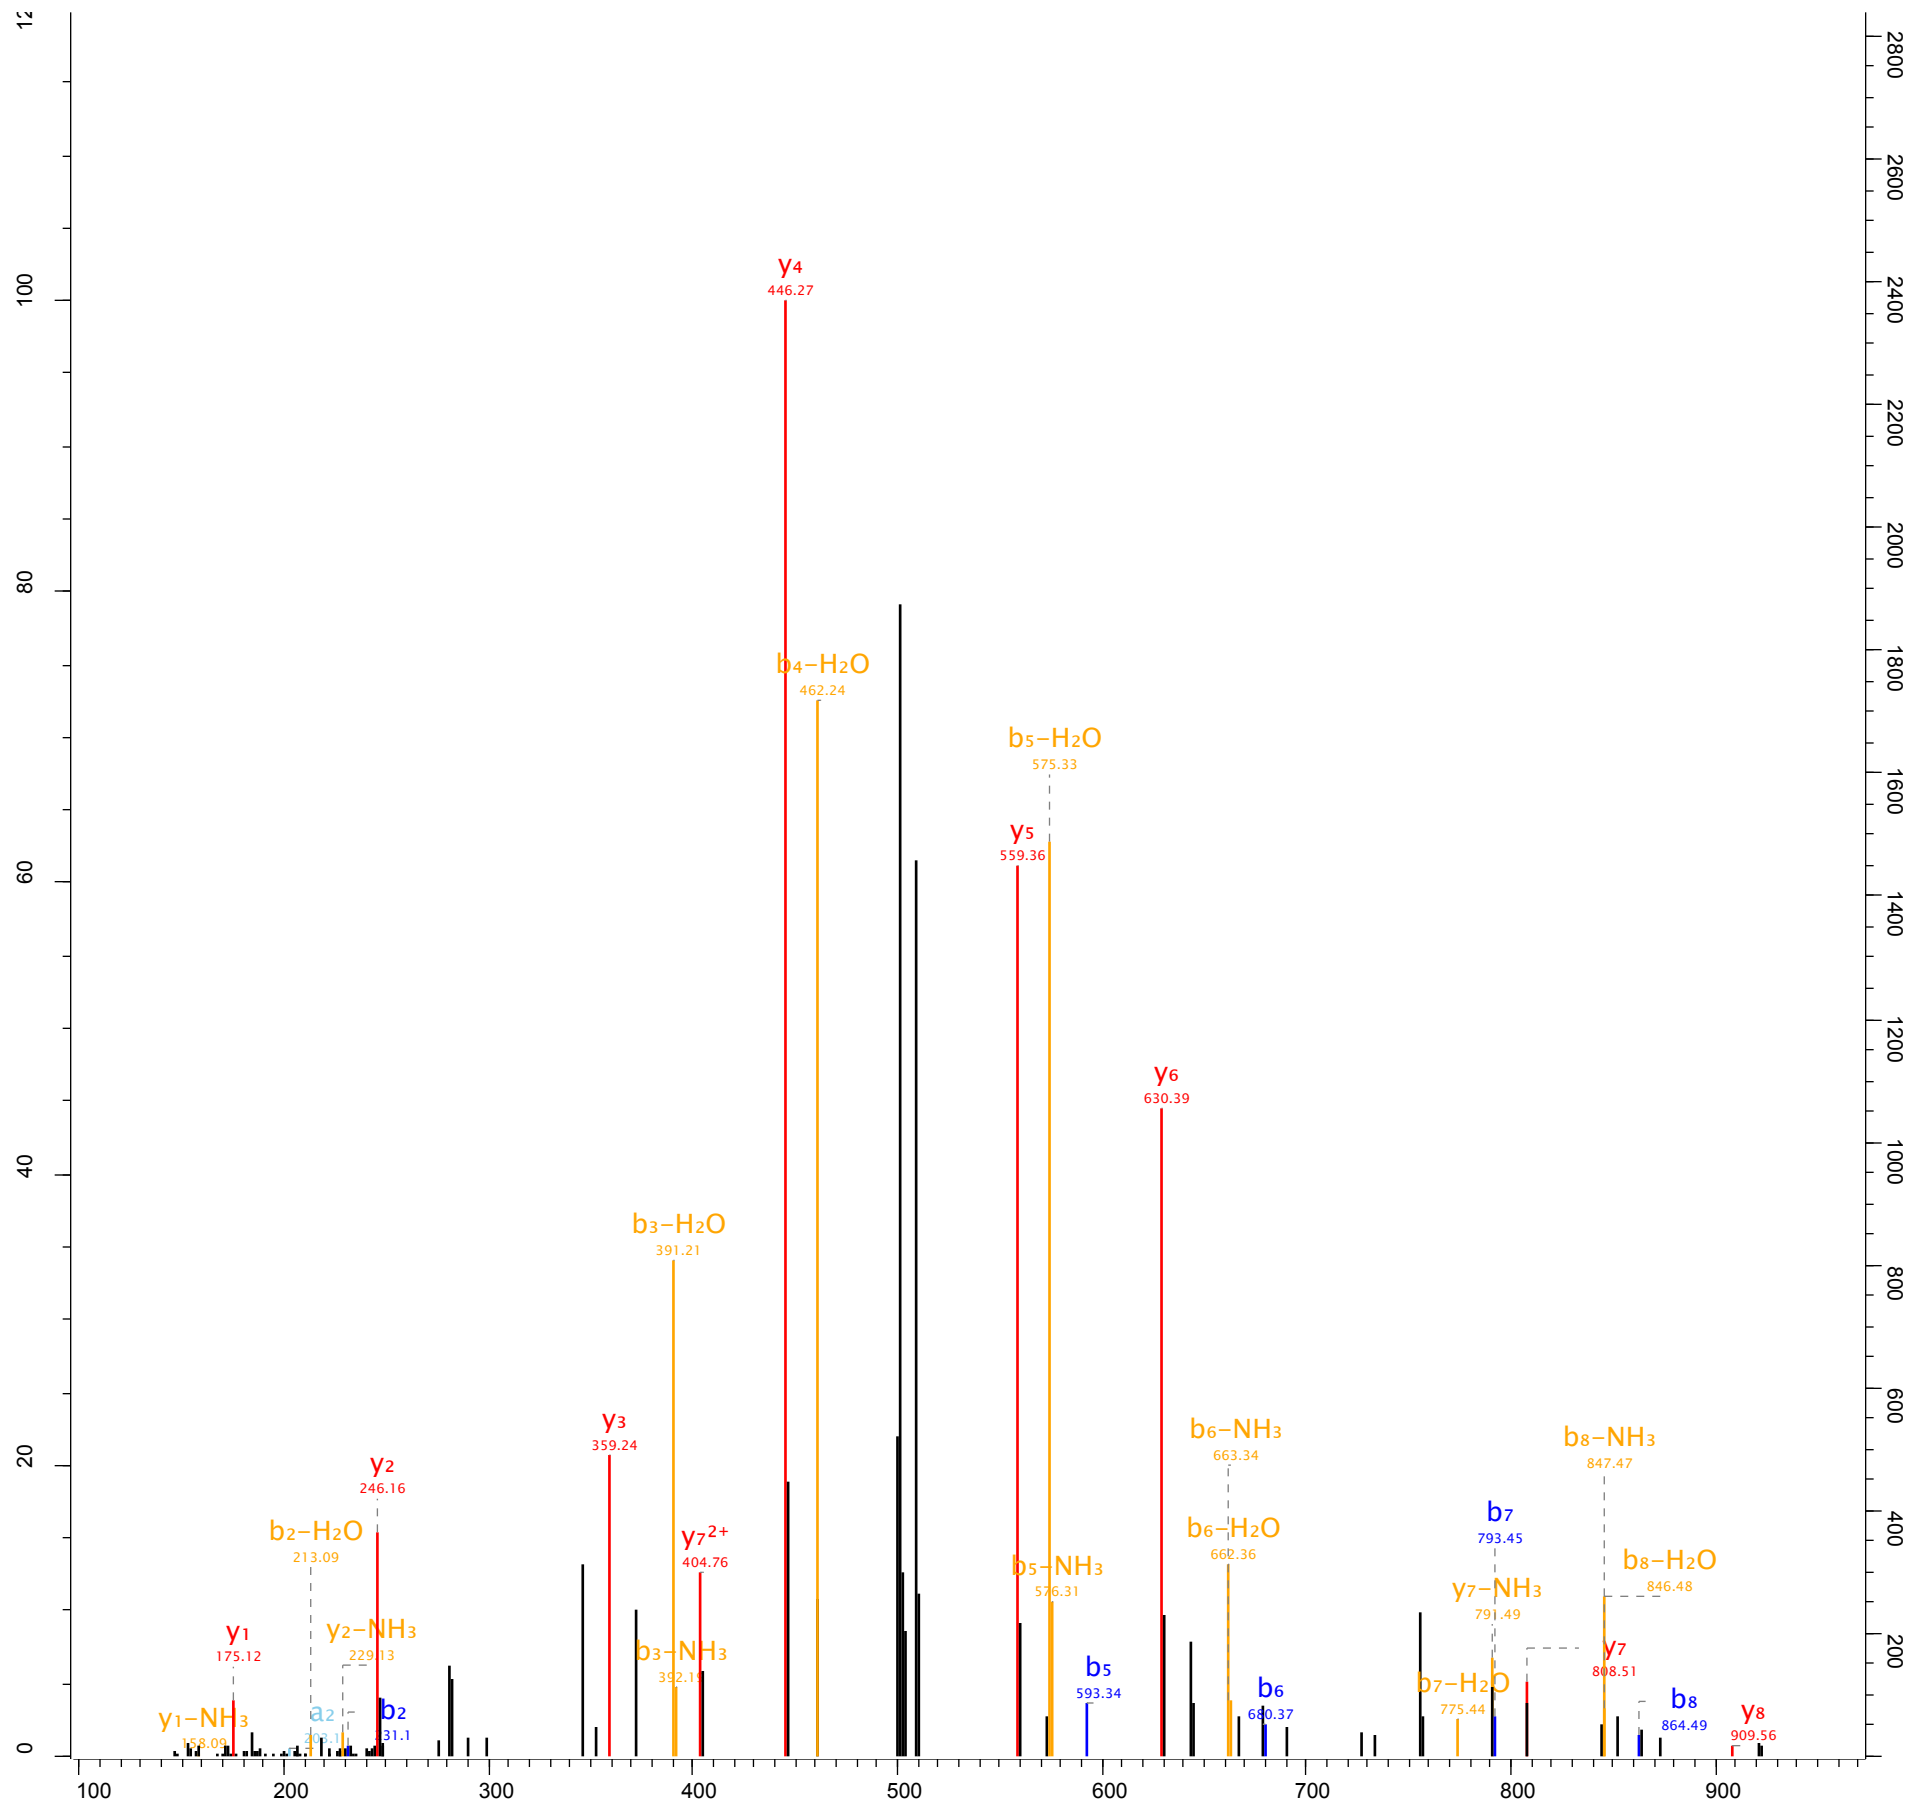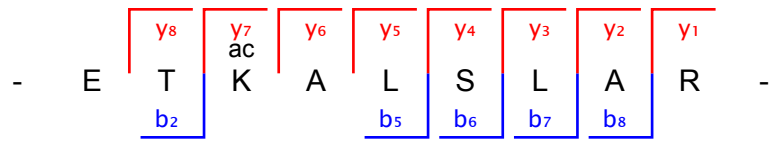

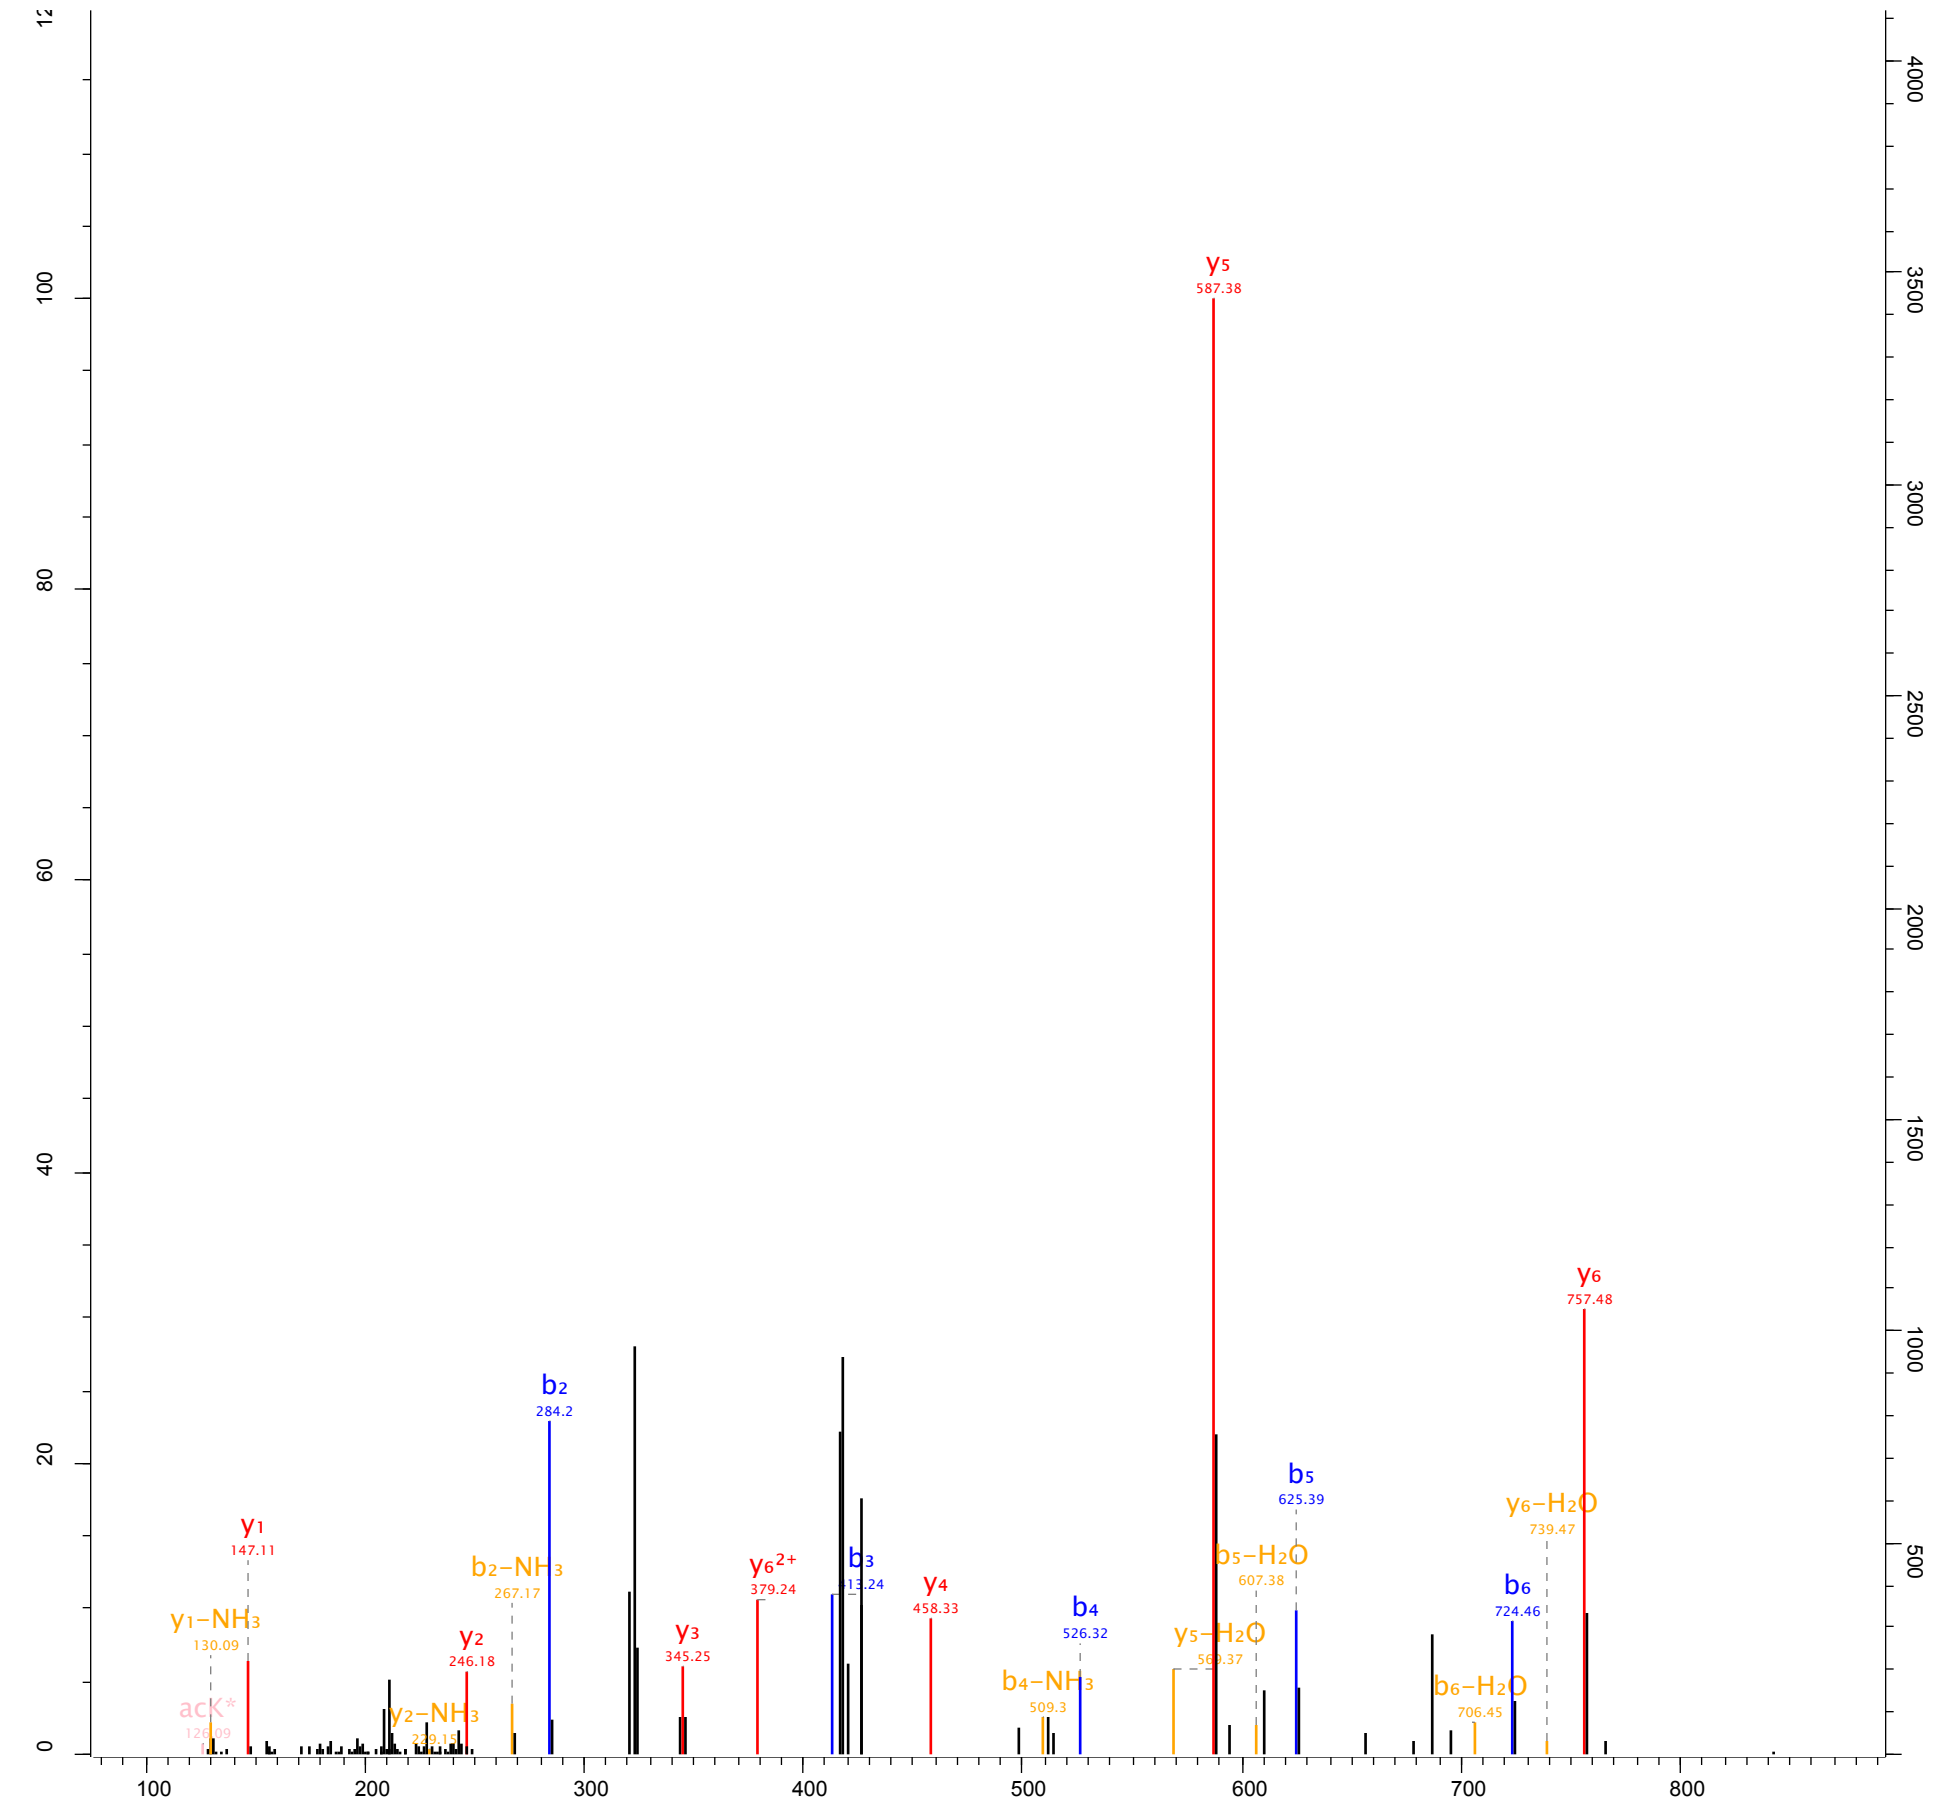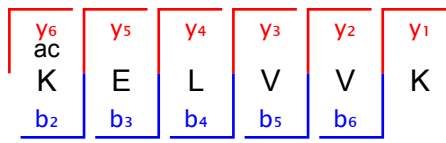

052413\_SCW\_II\_29\_Second\_ZT\_22\_5

9132

ITMS; CID

114.89

540.78

Anxa5

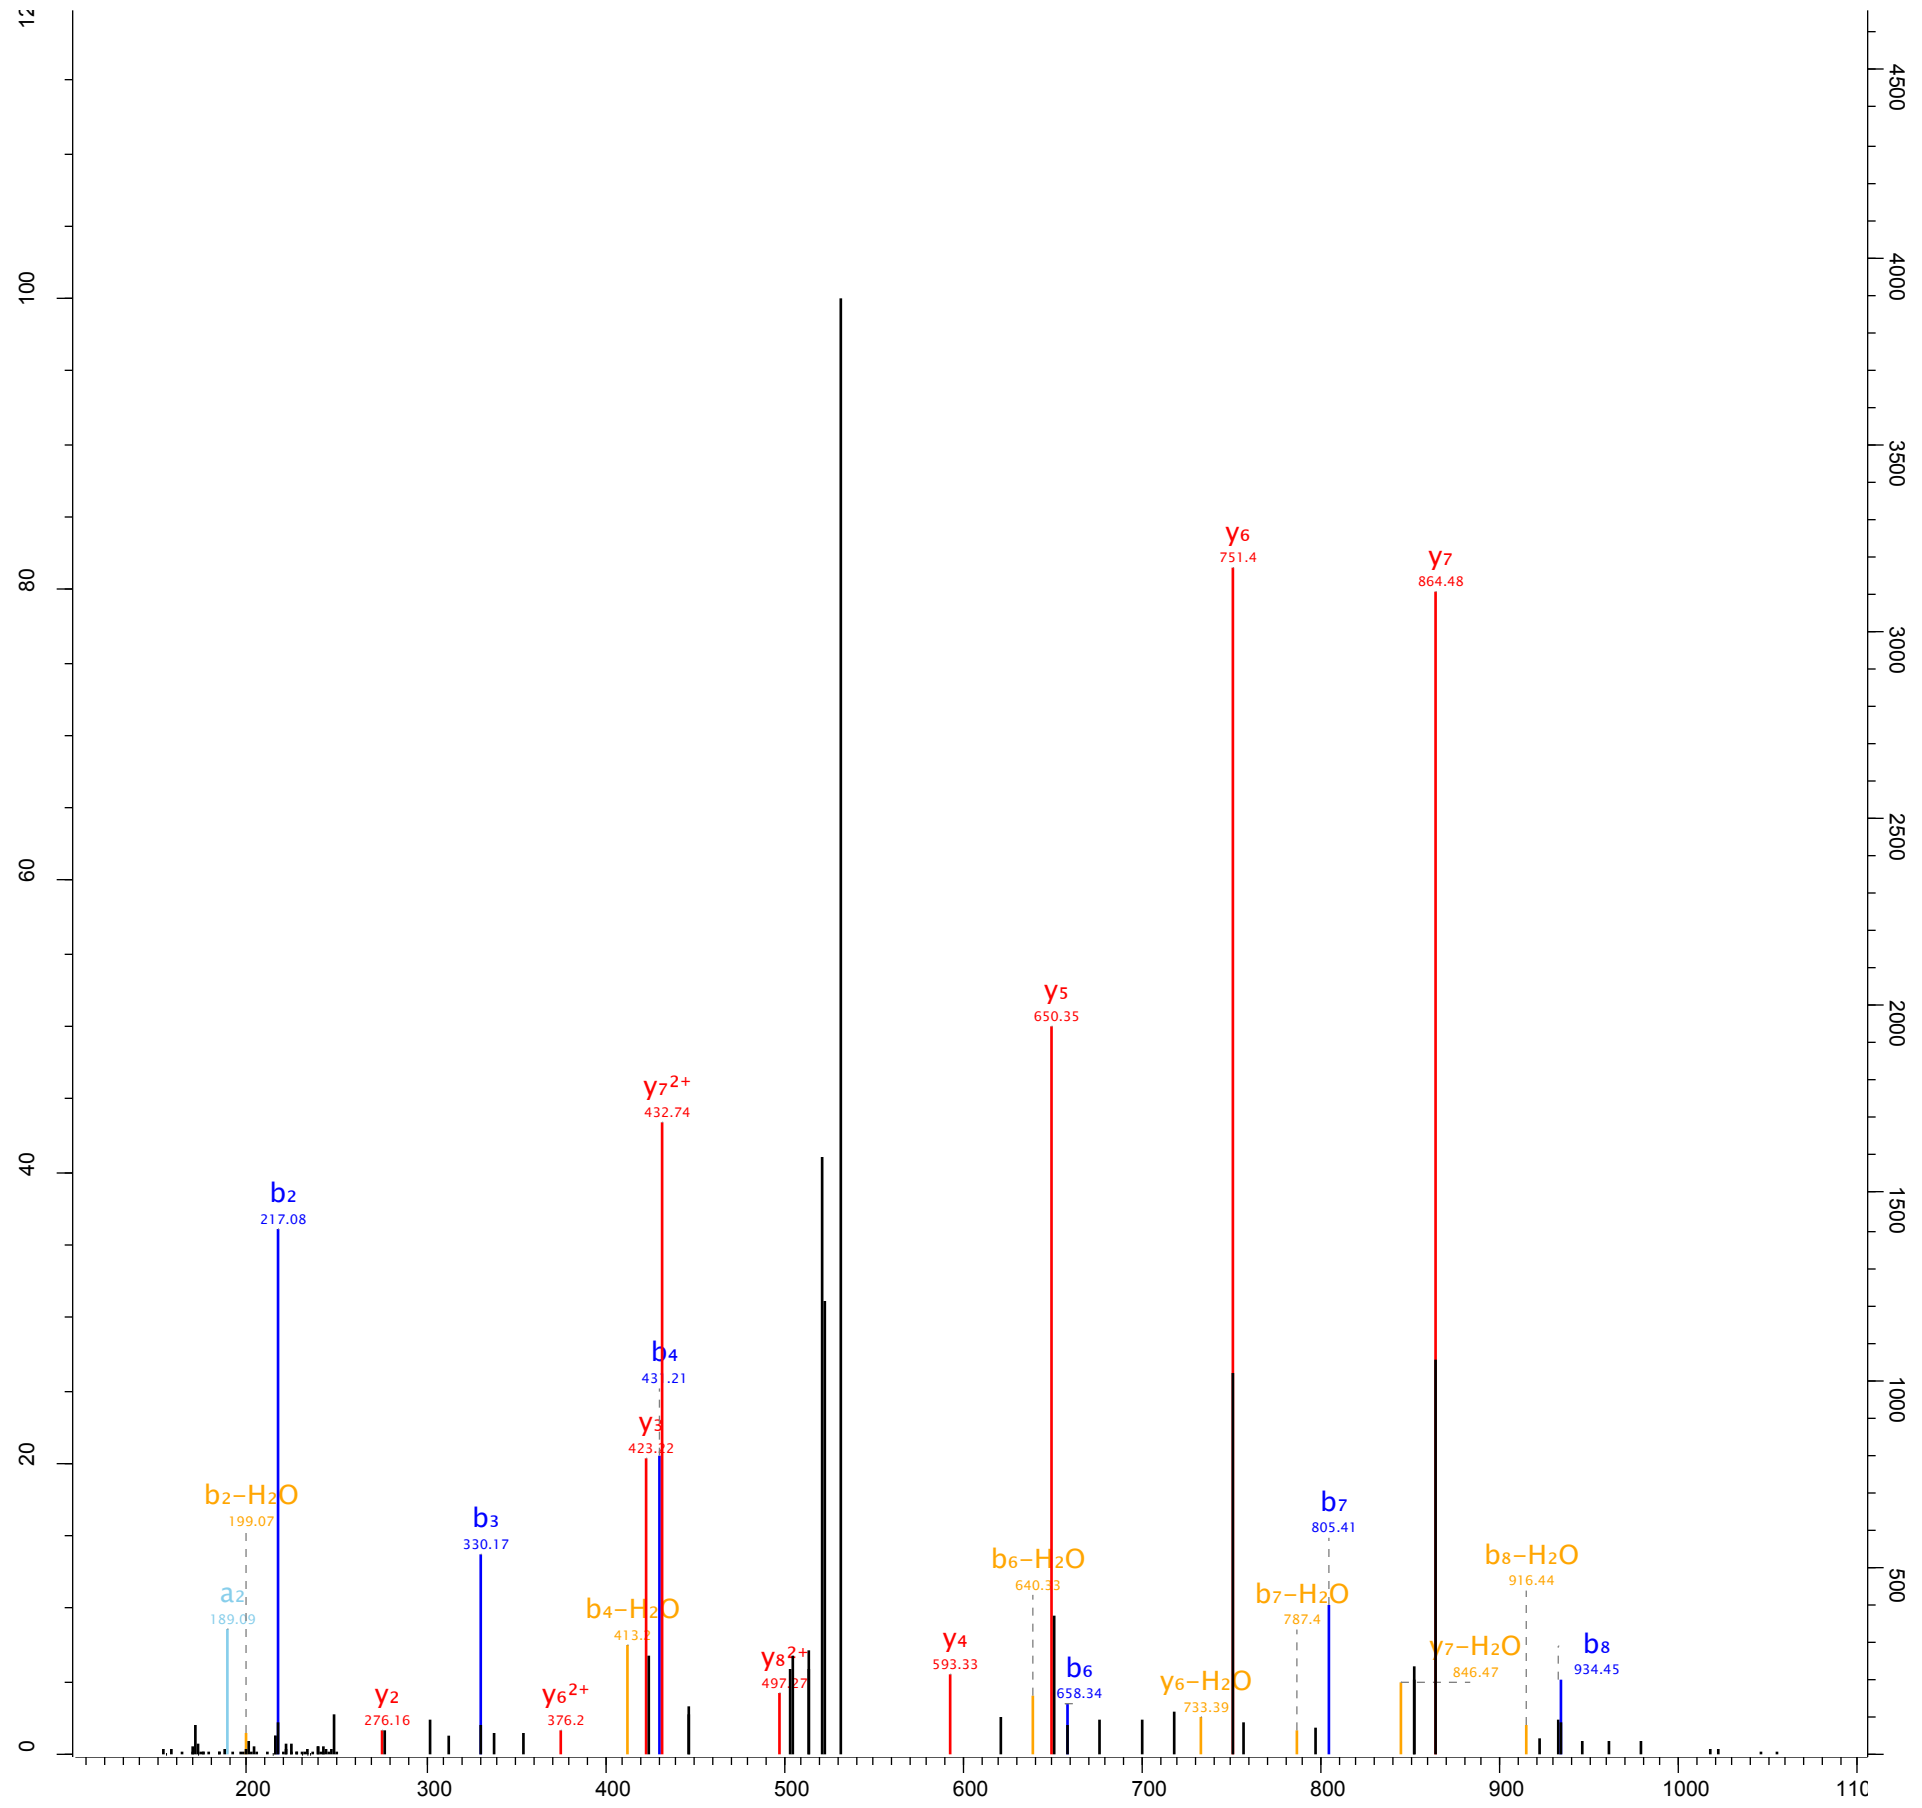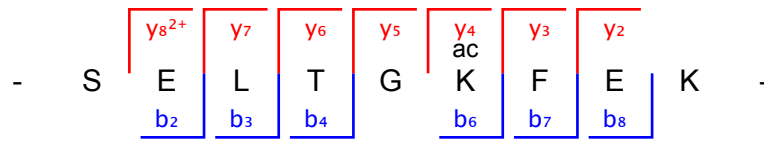

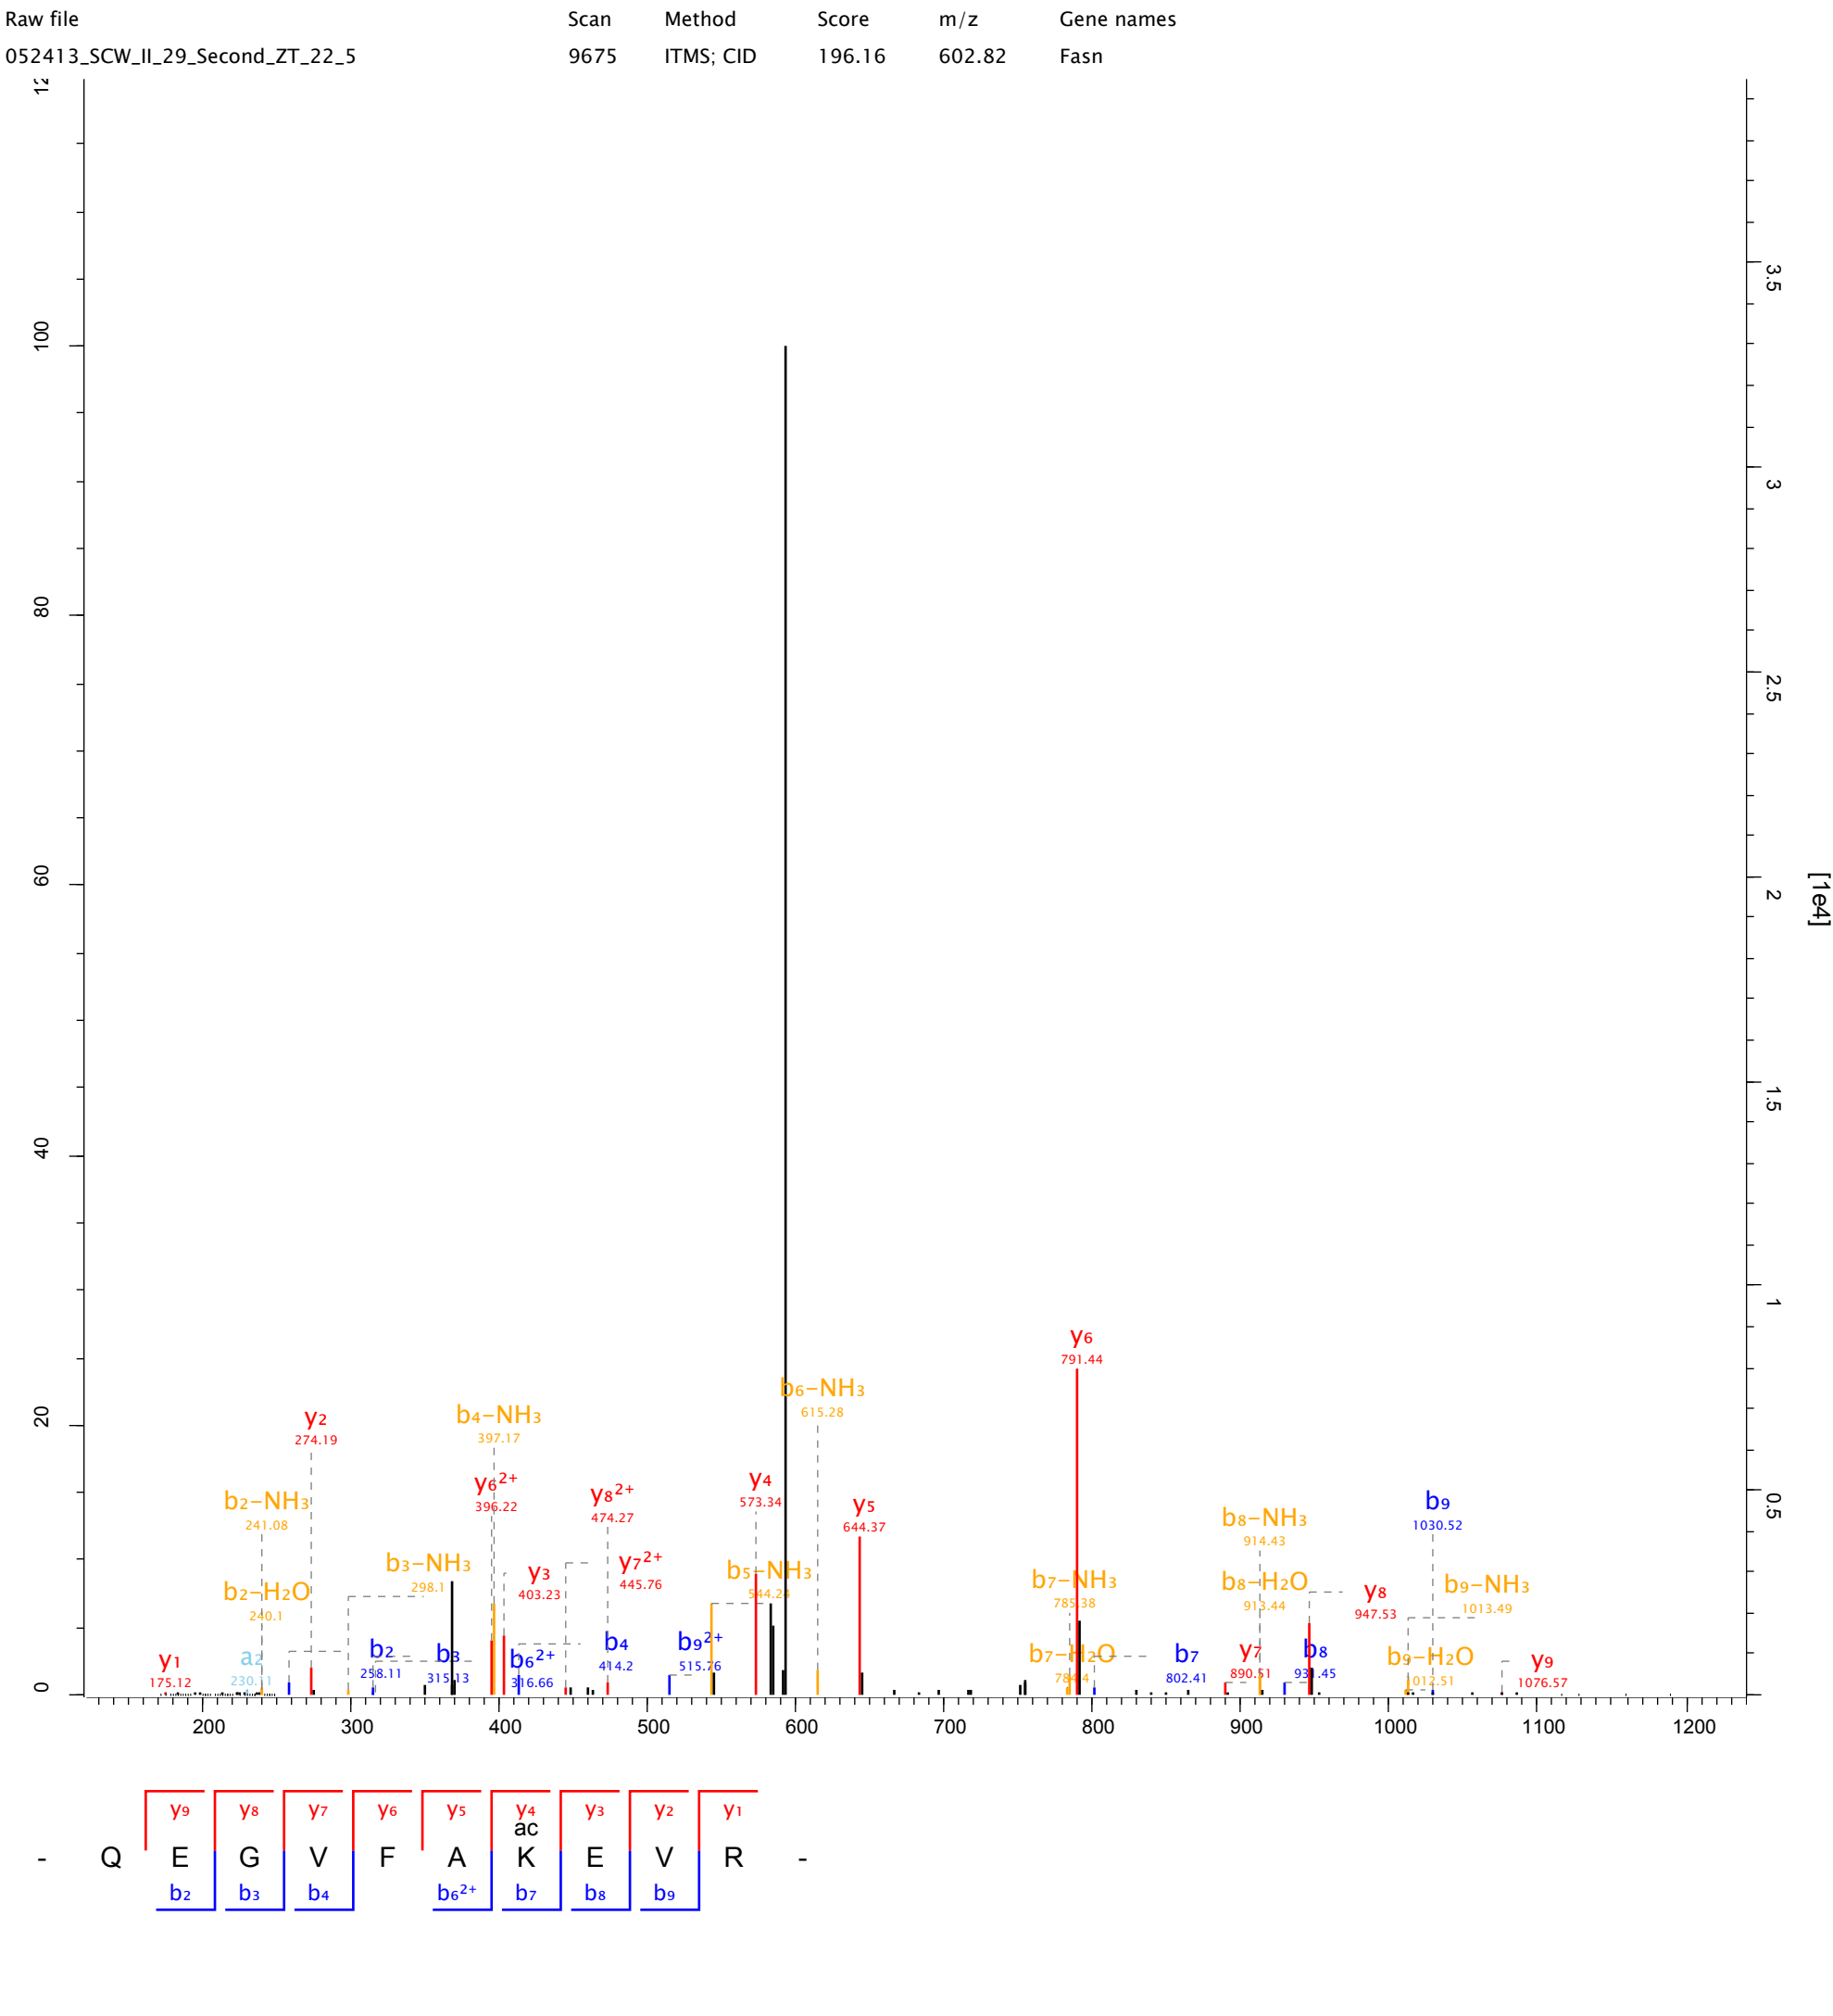



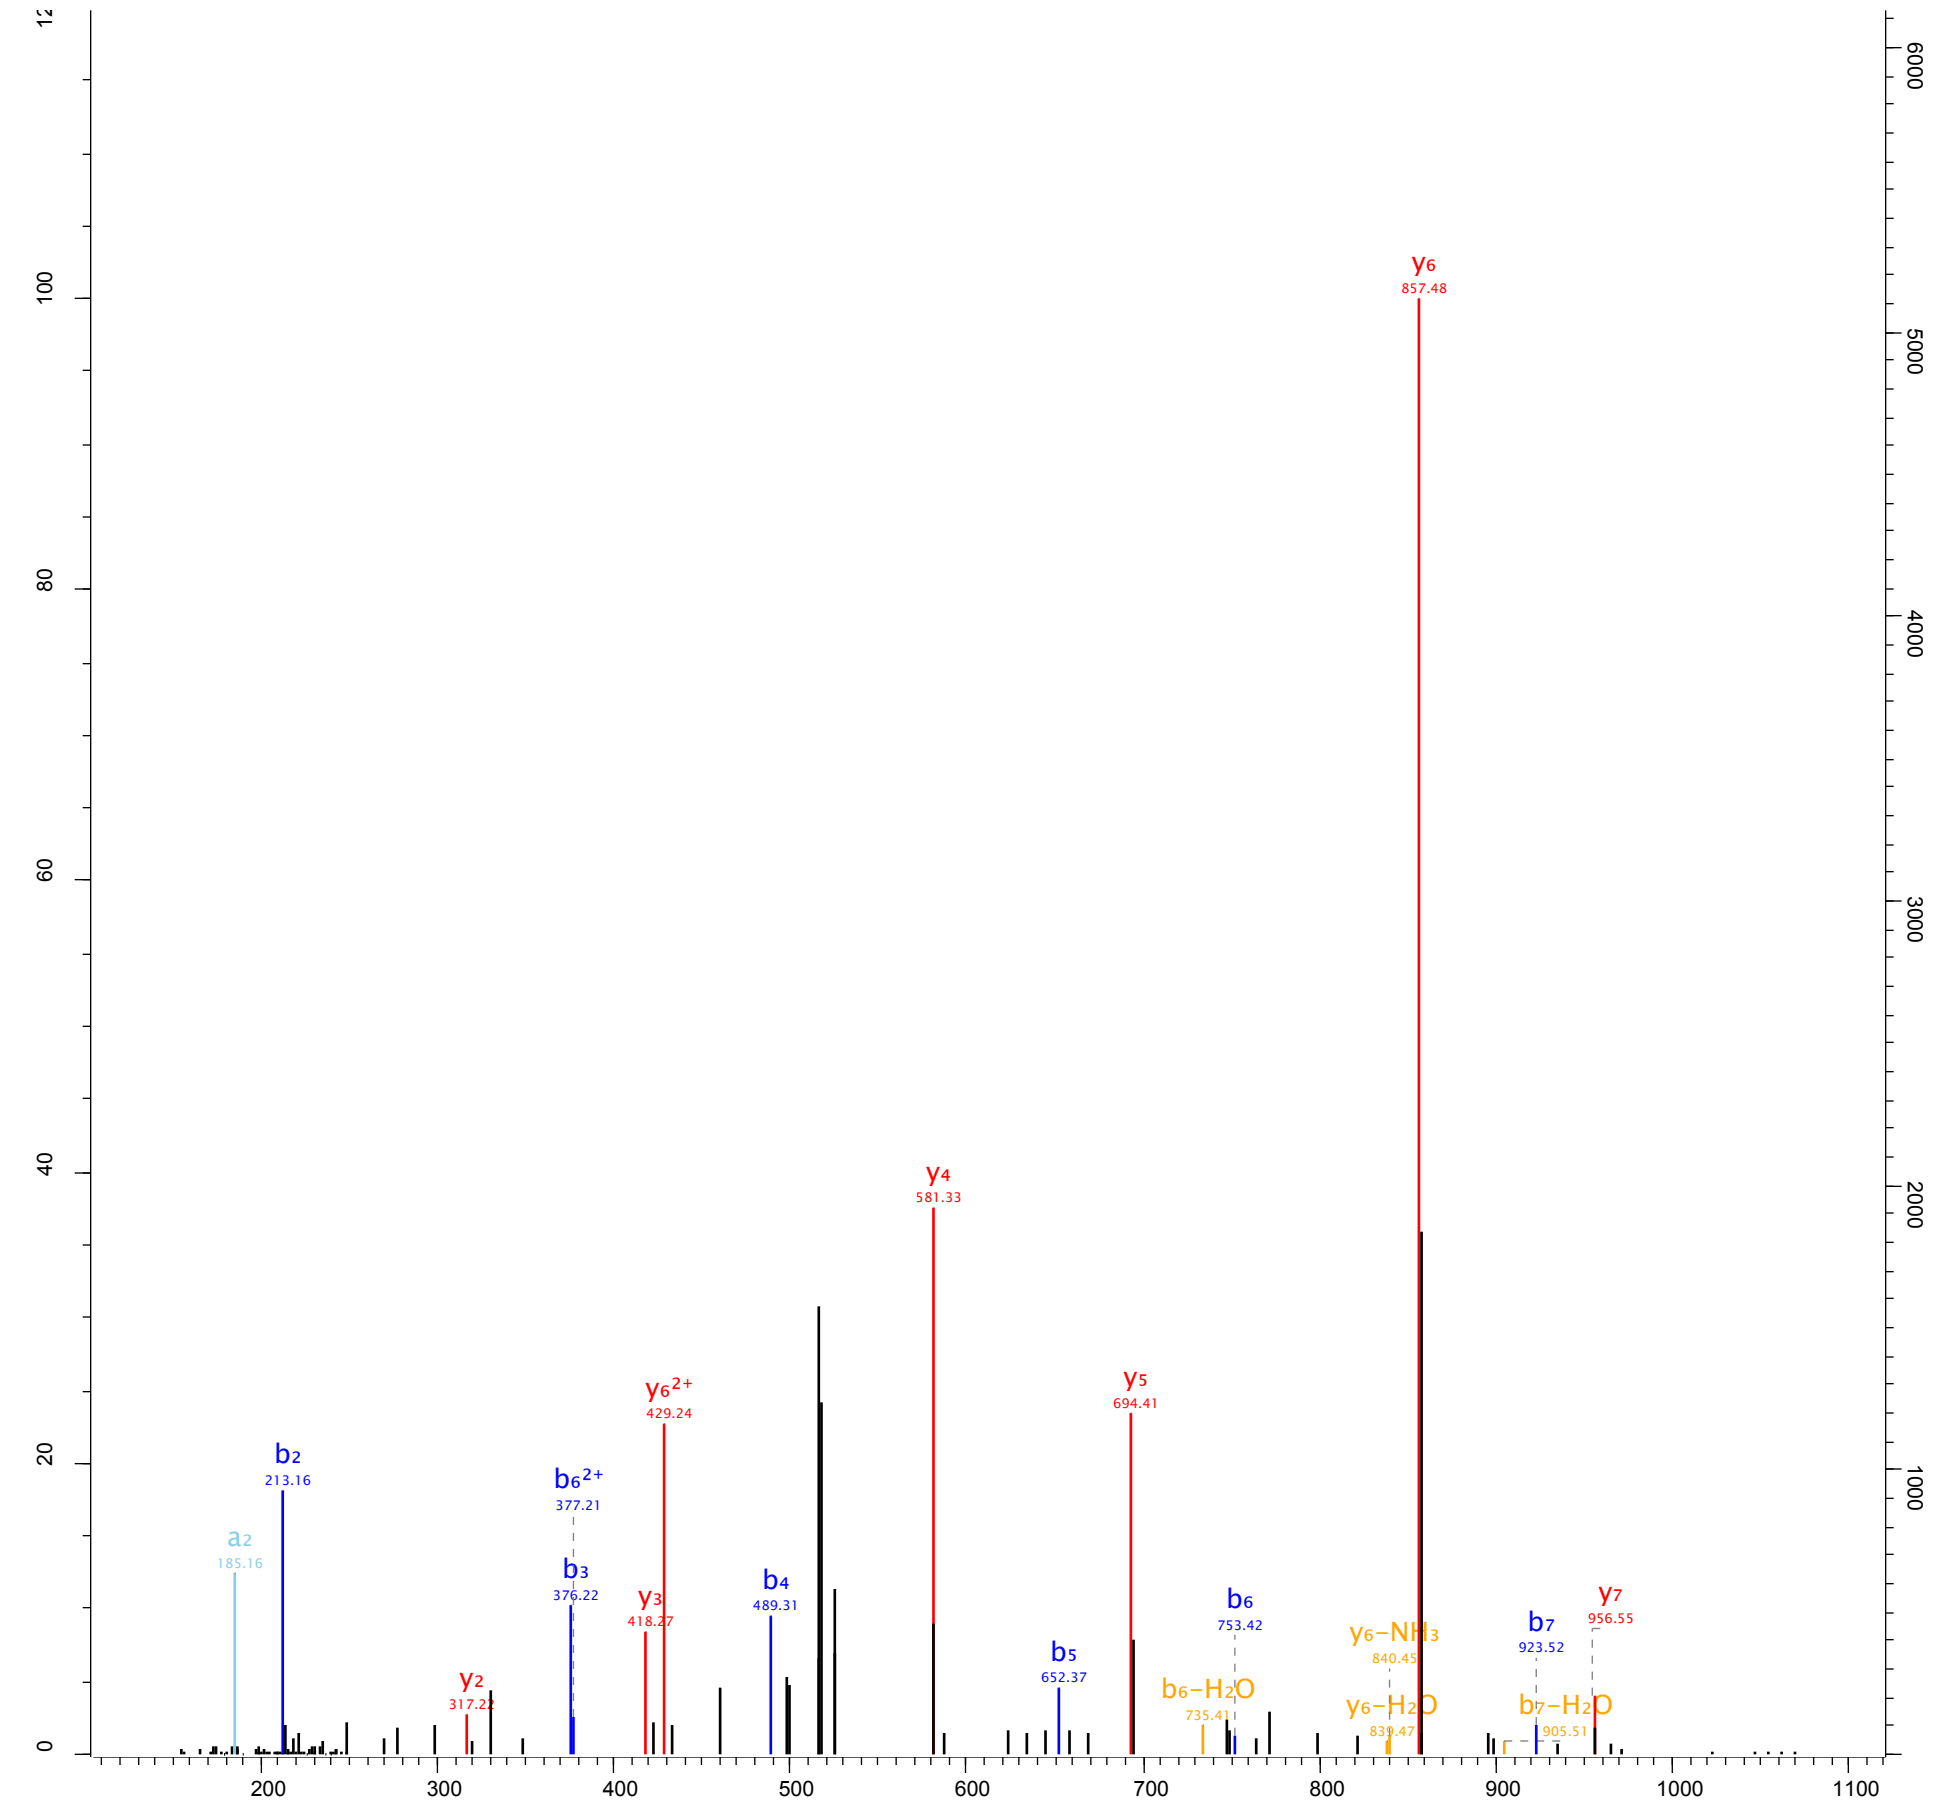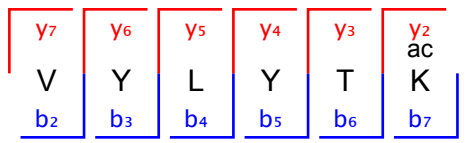

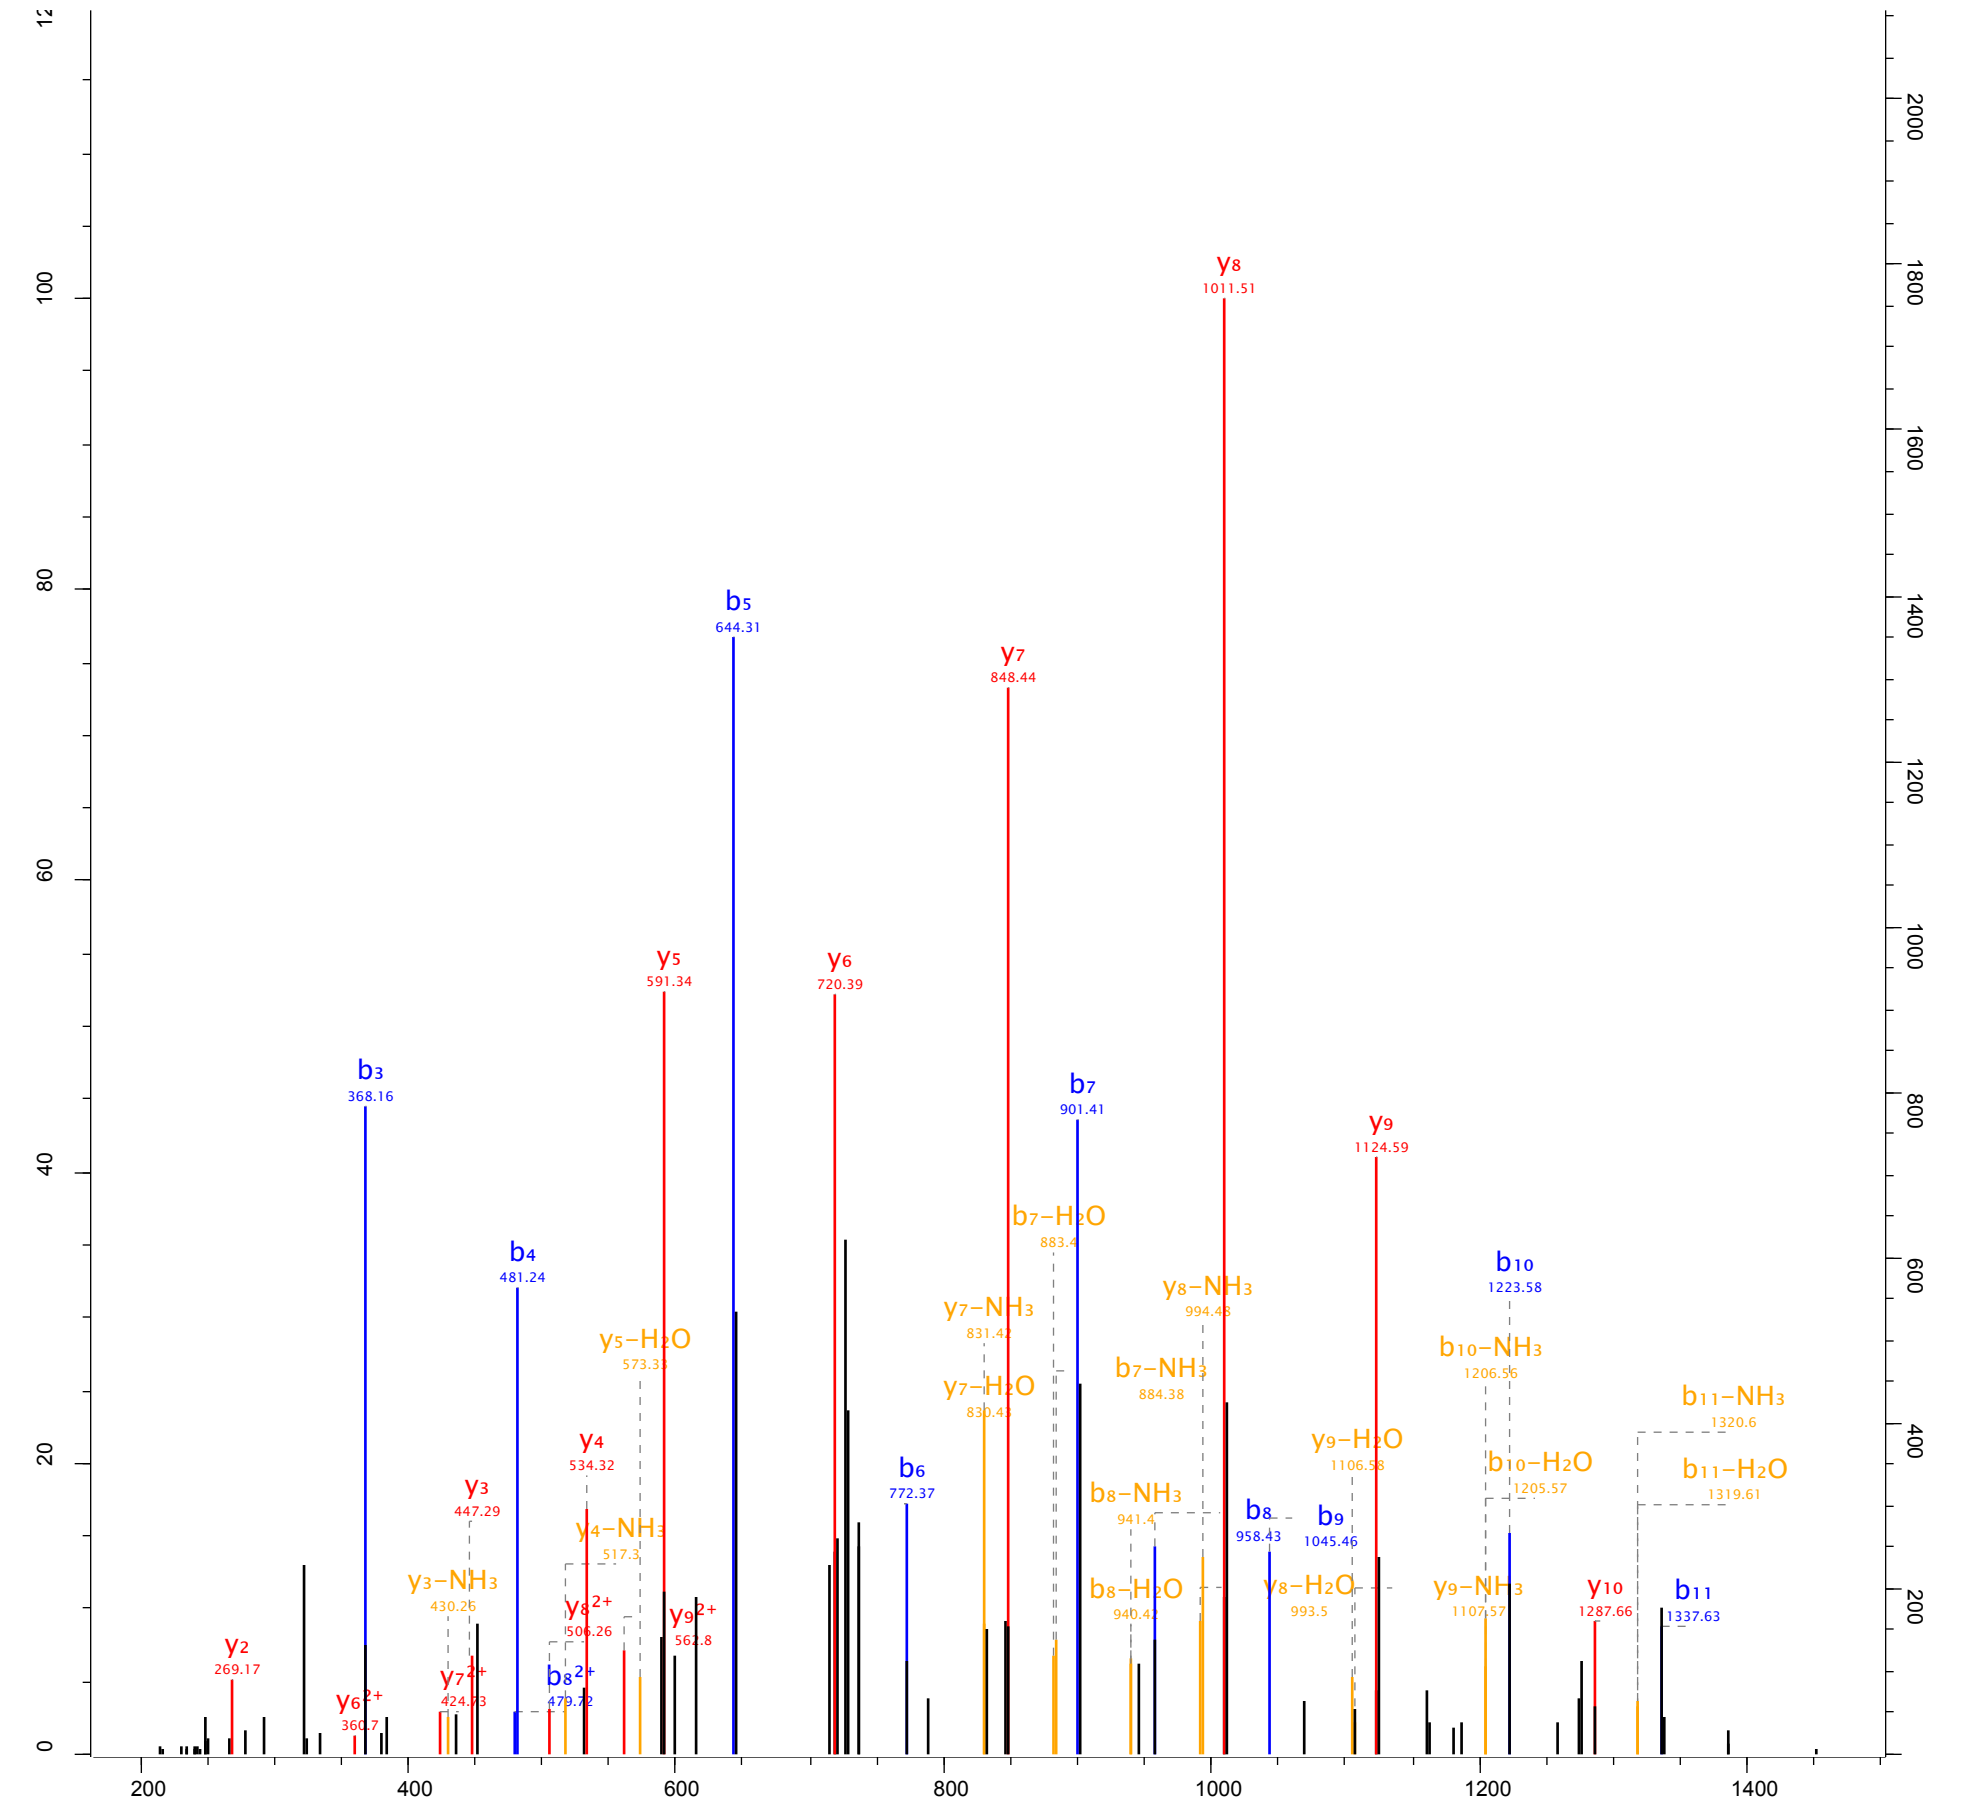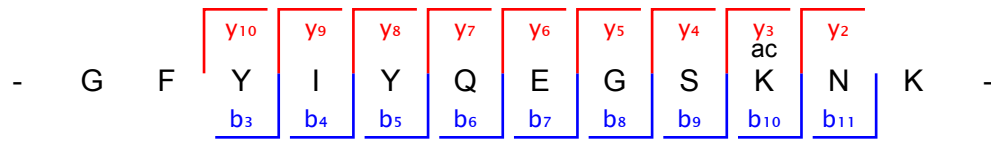

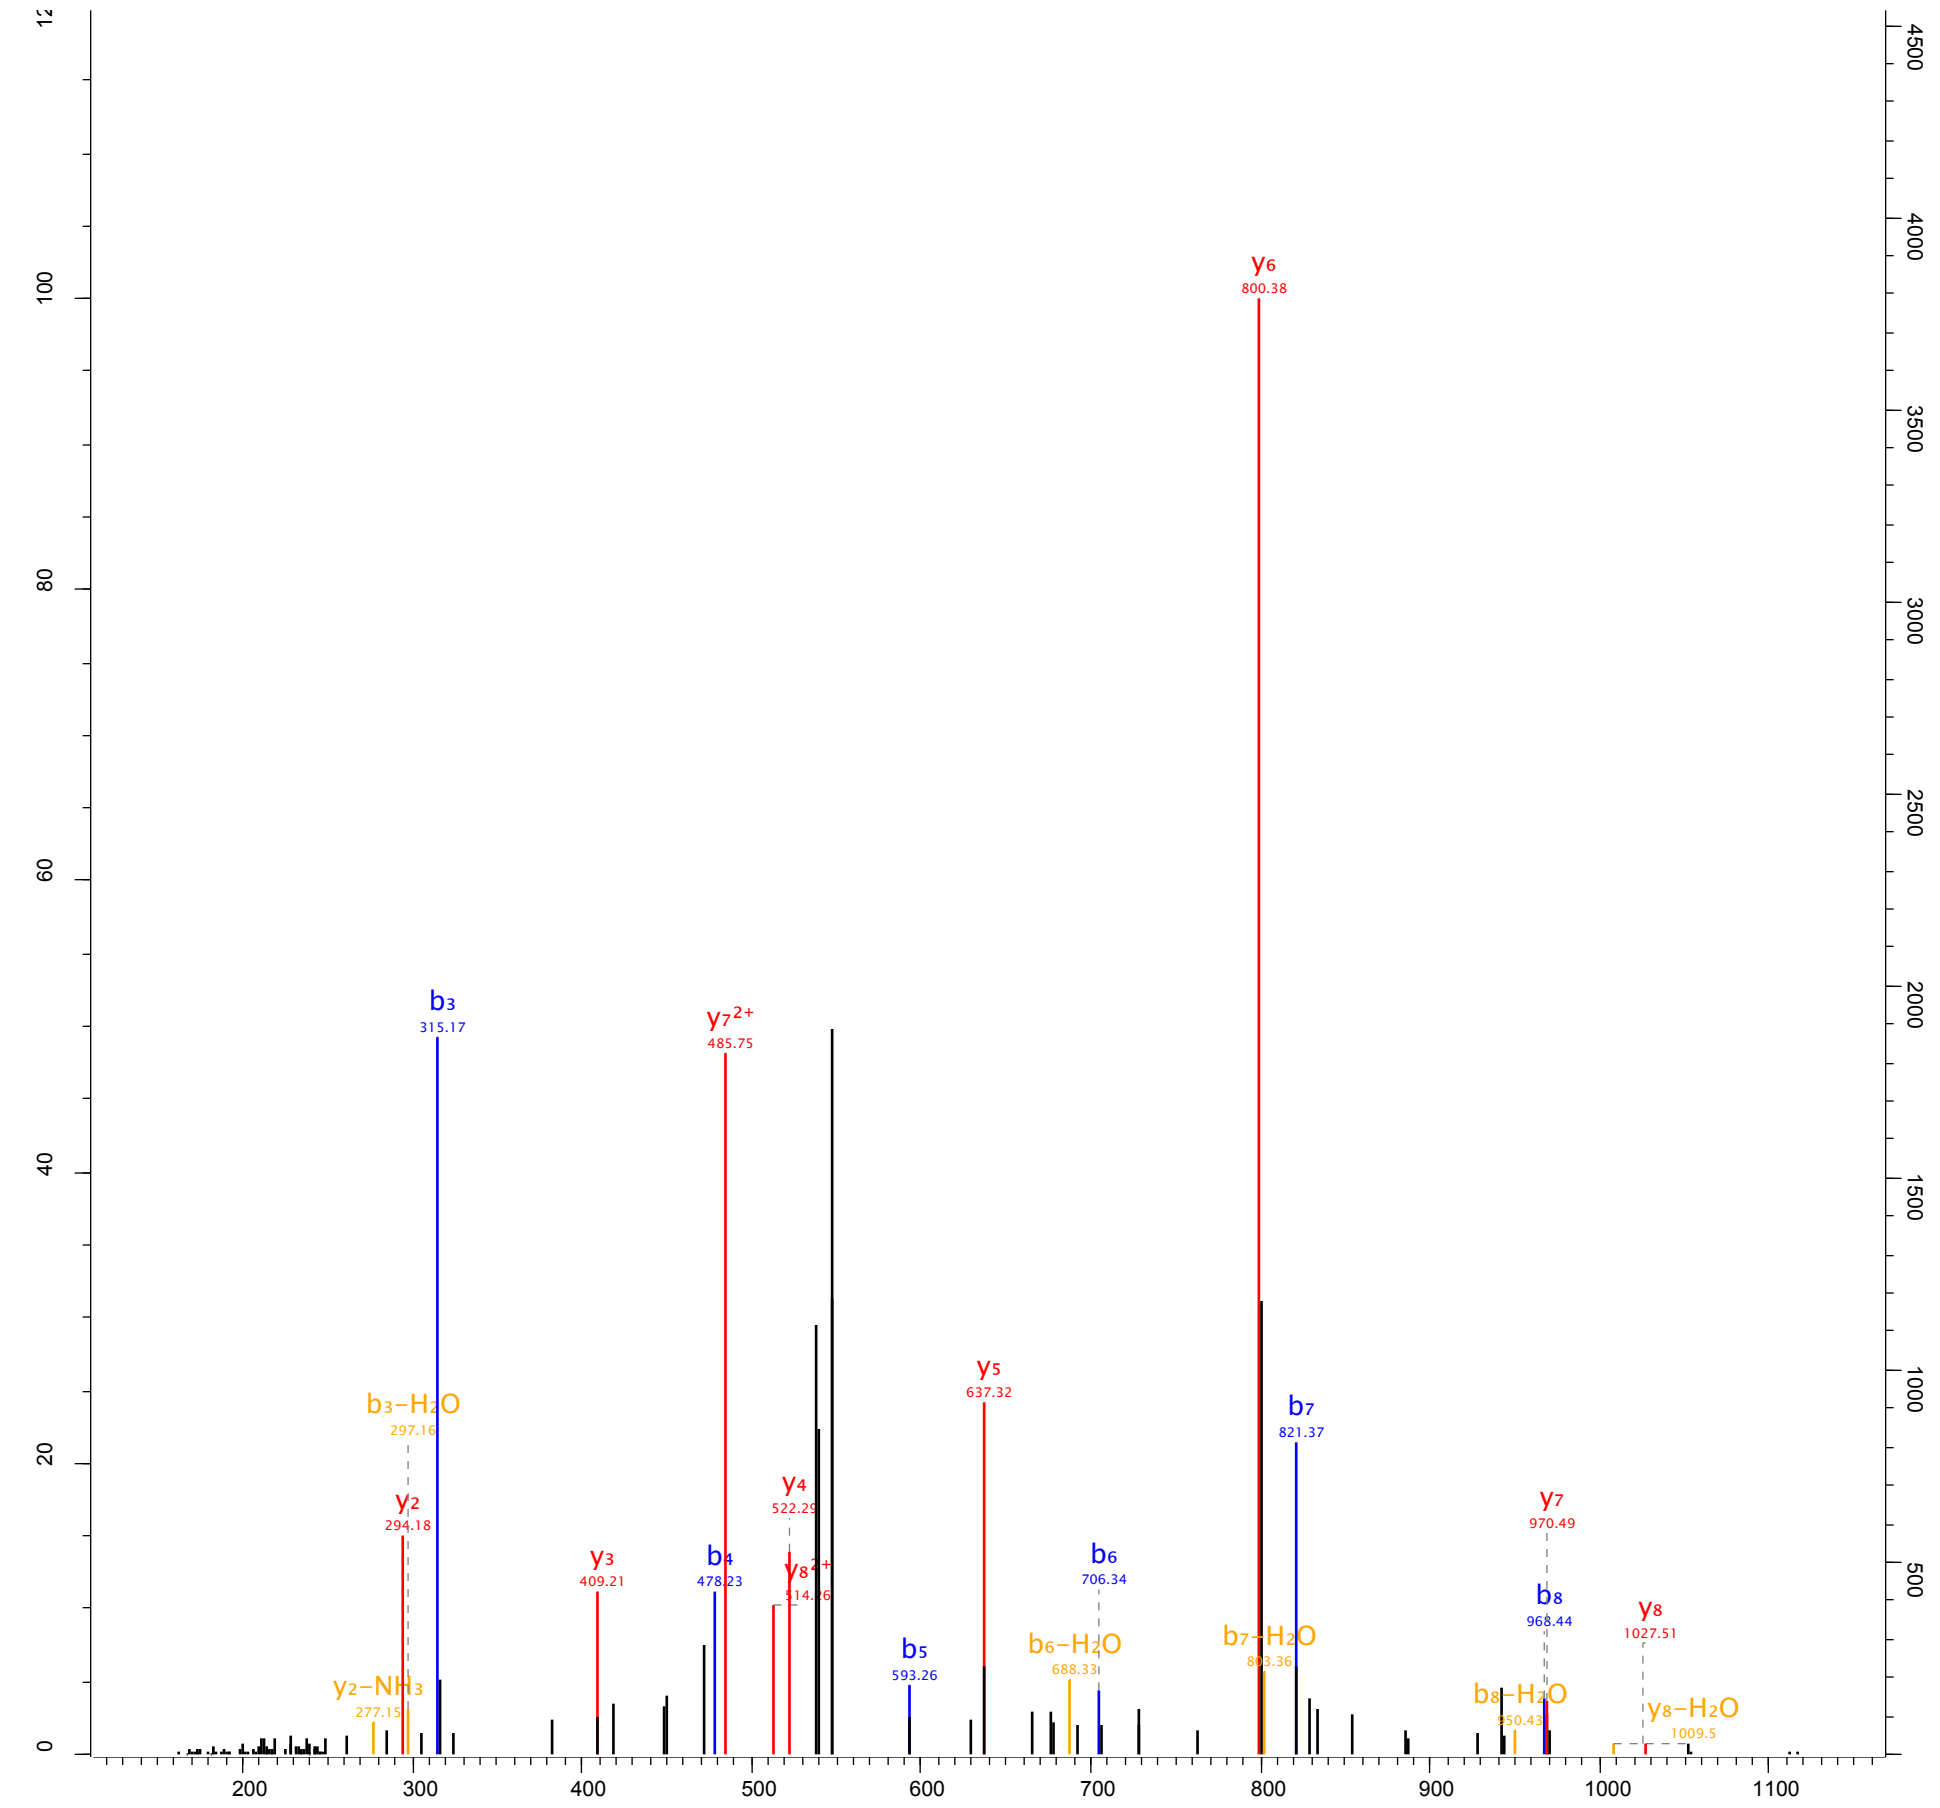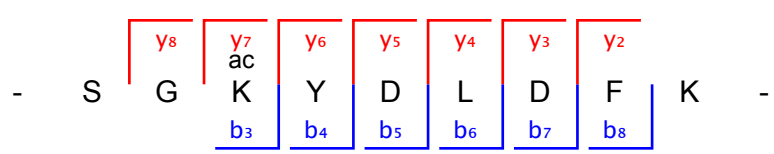

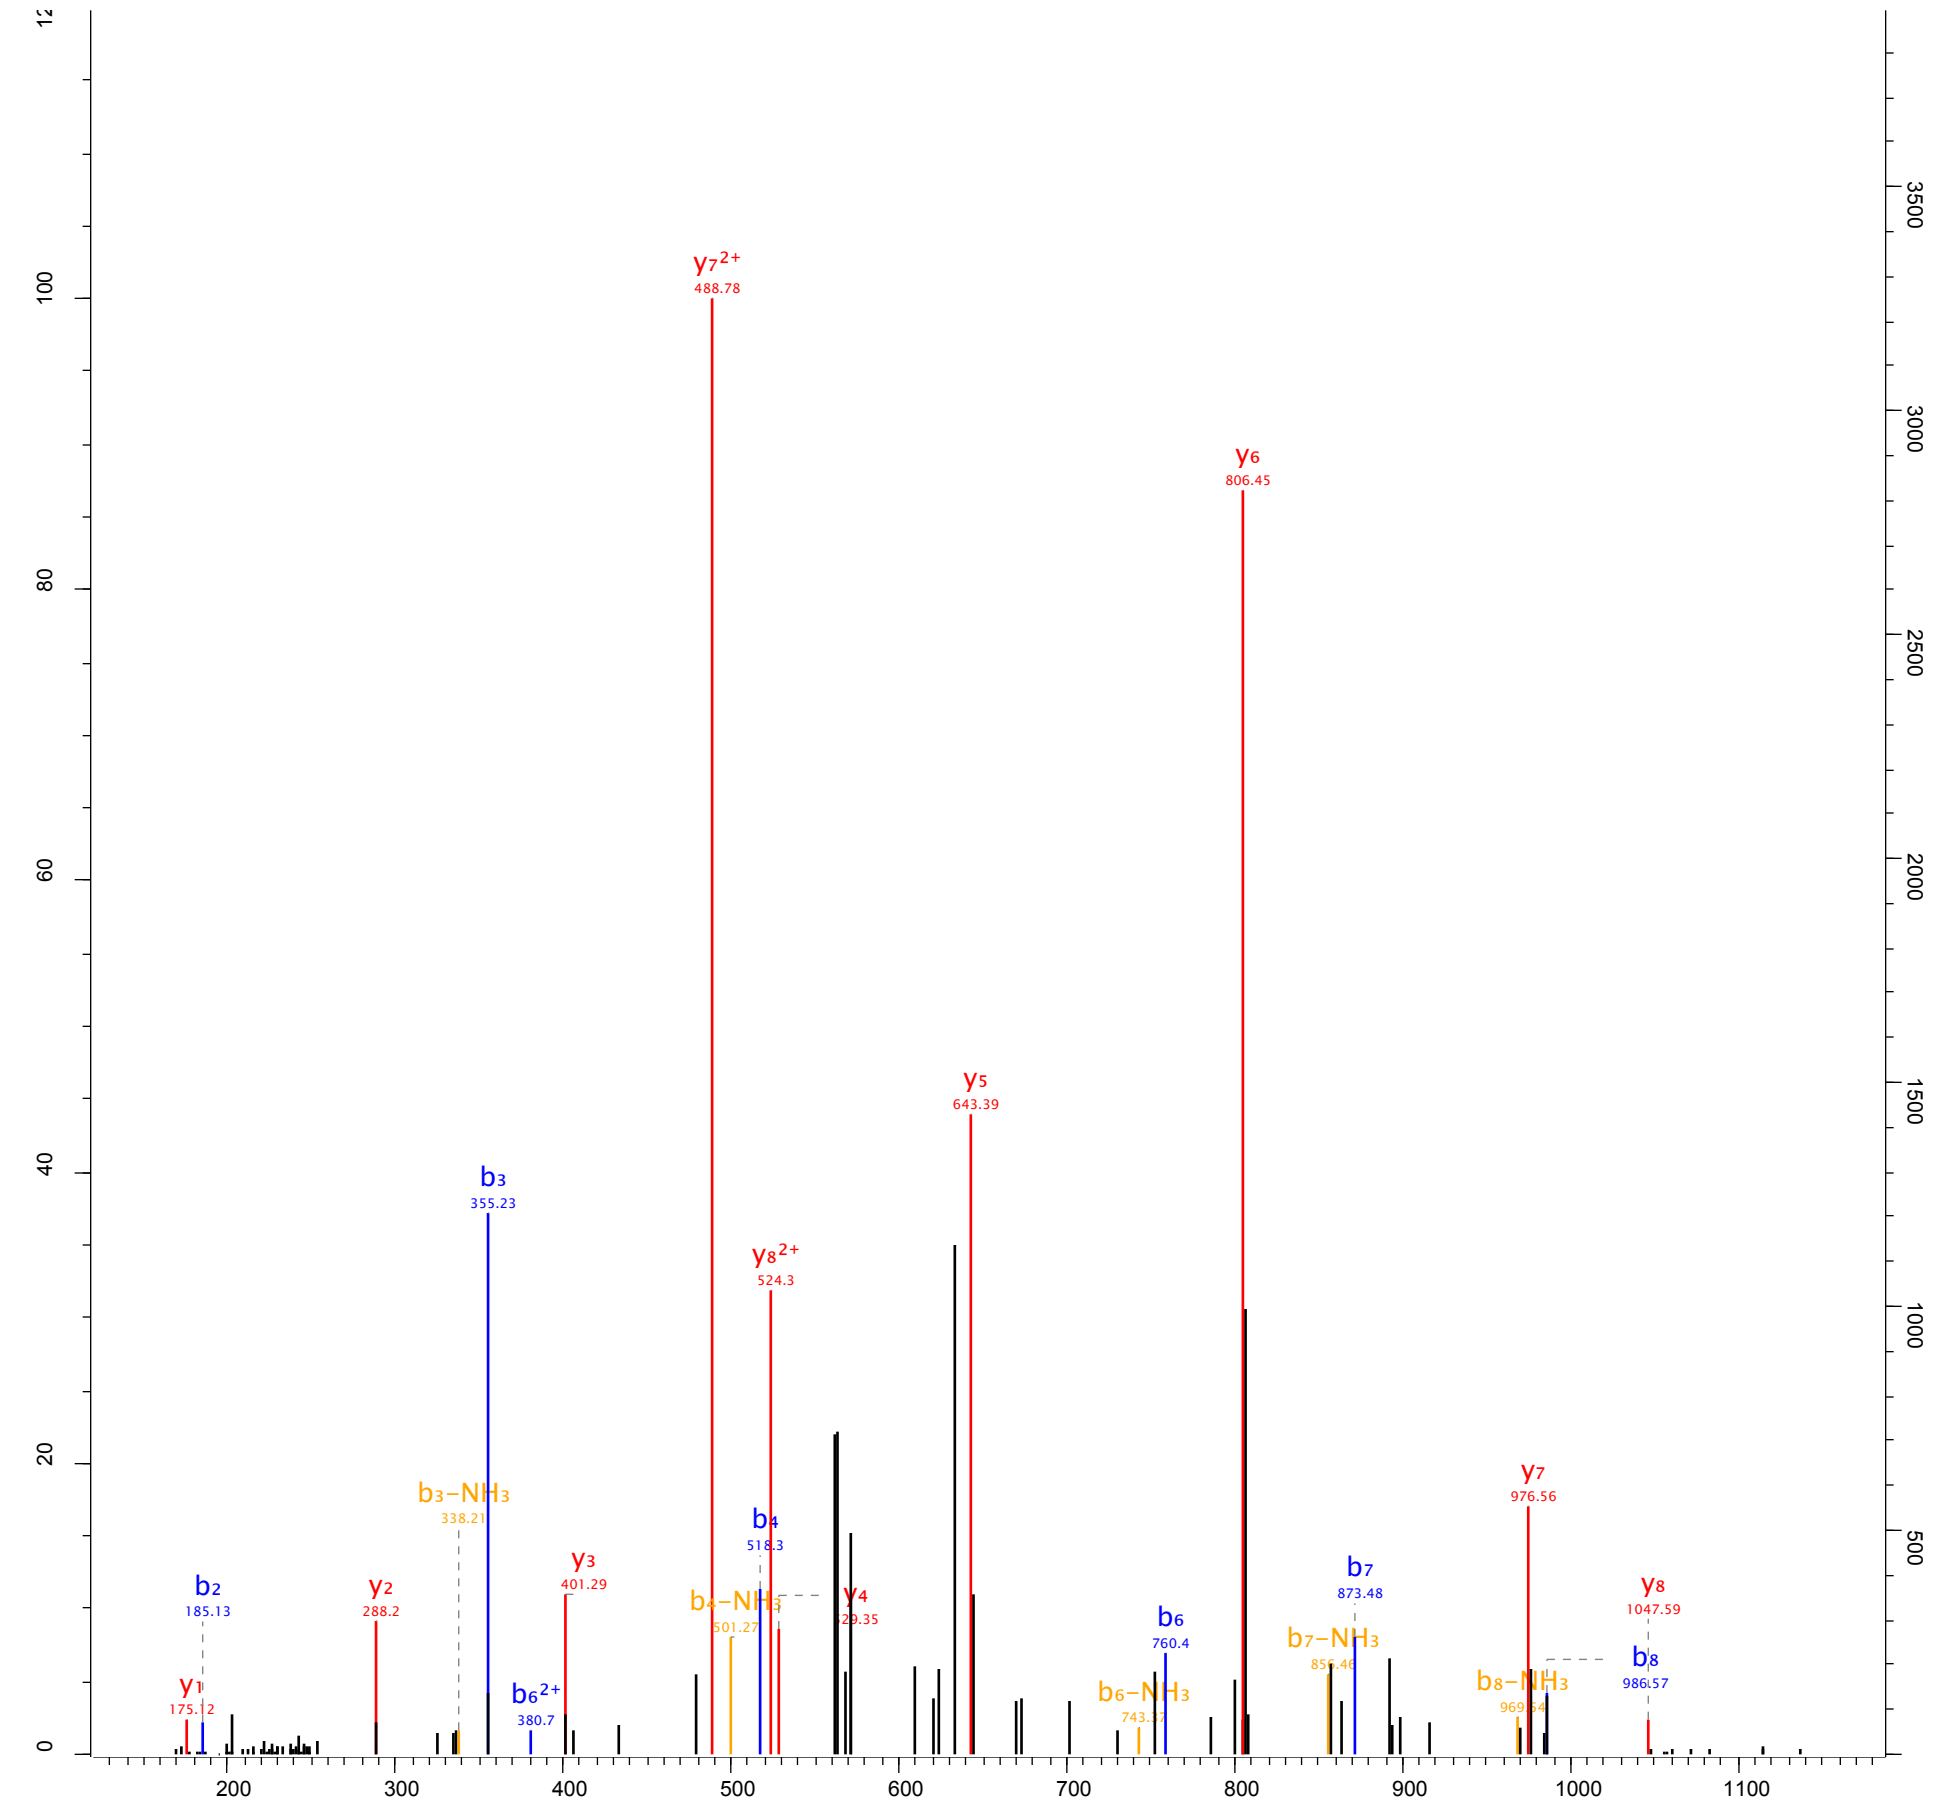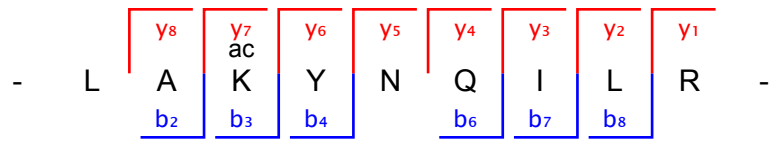

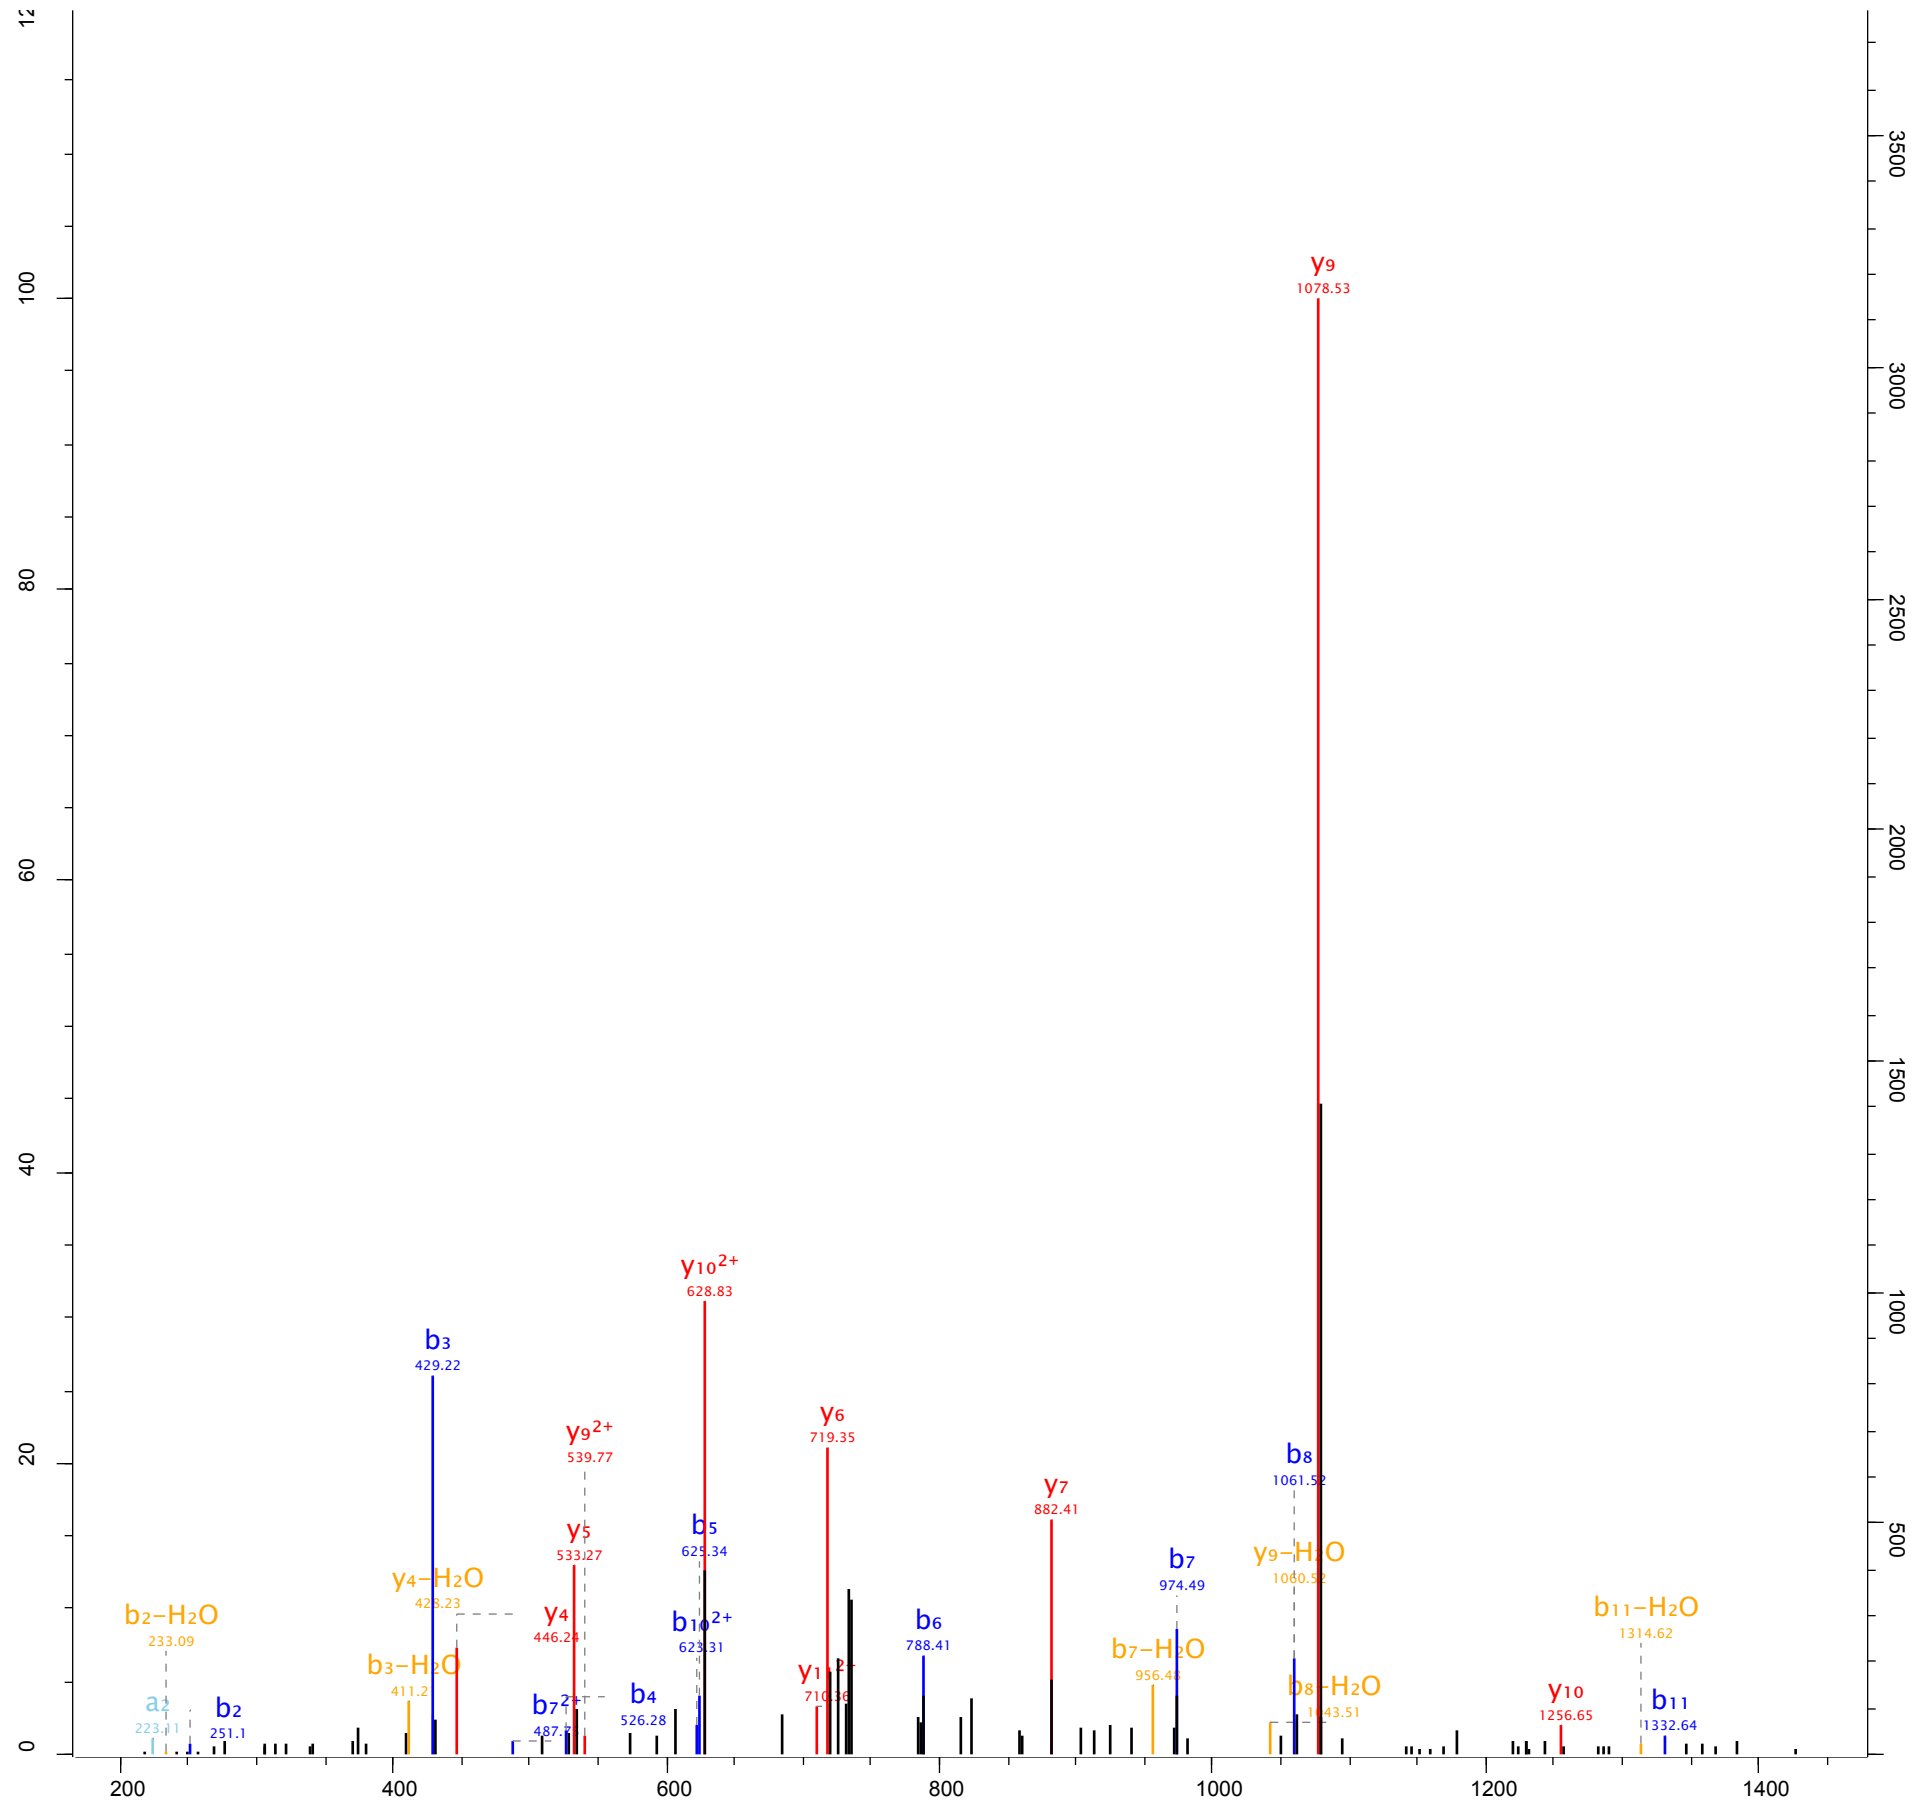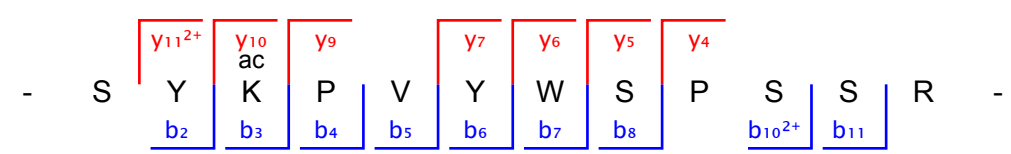

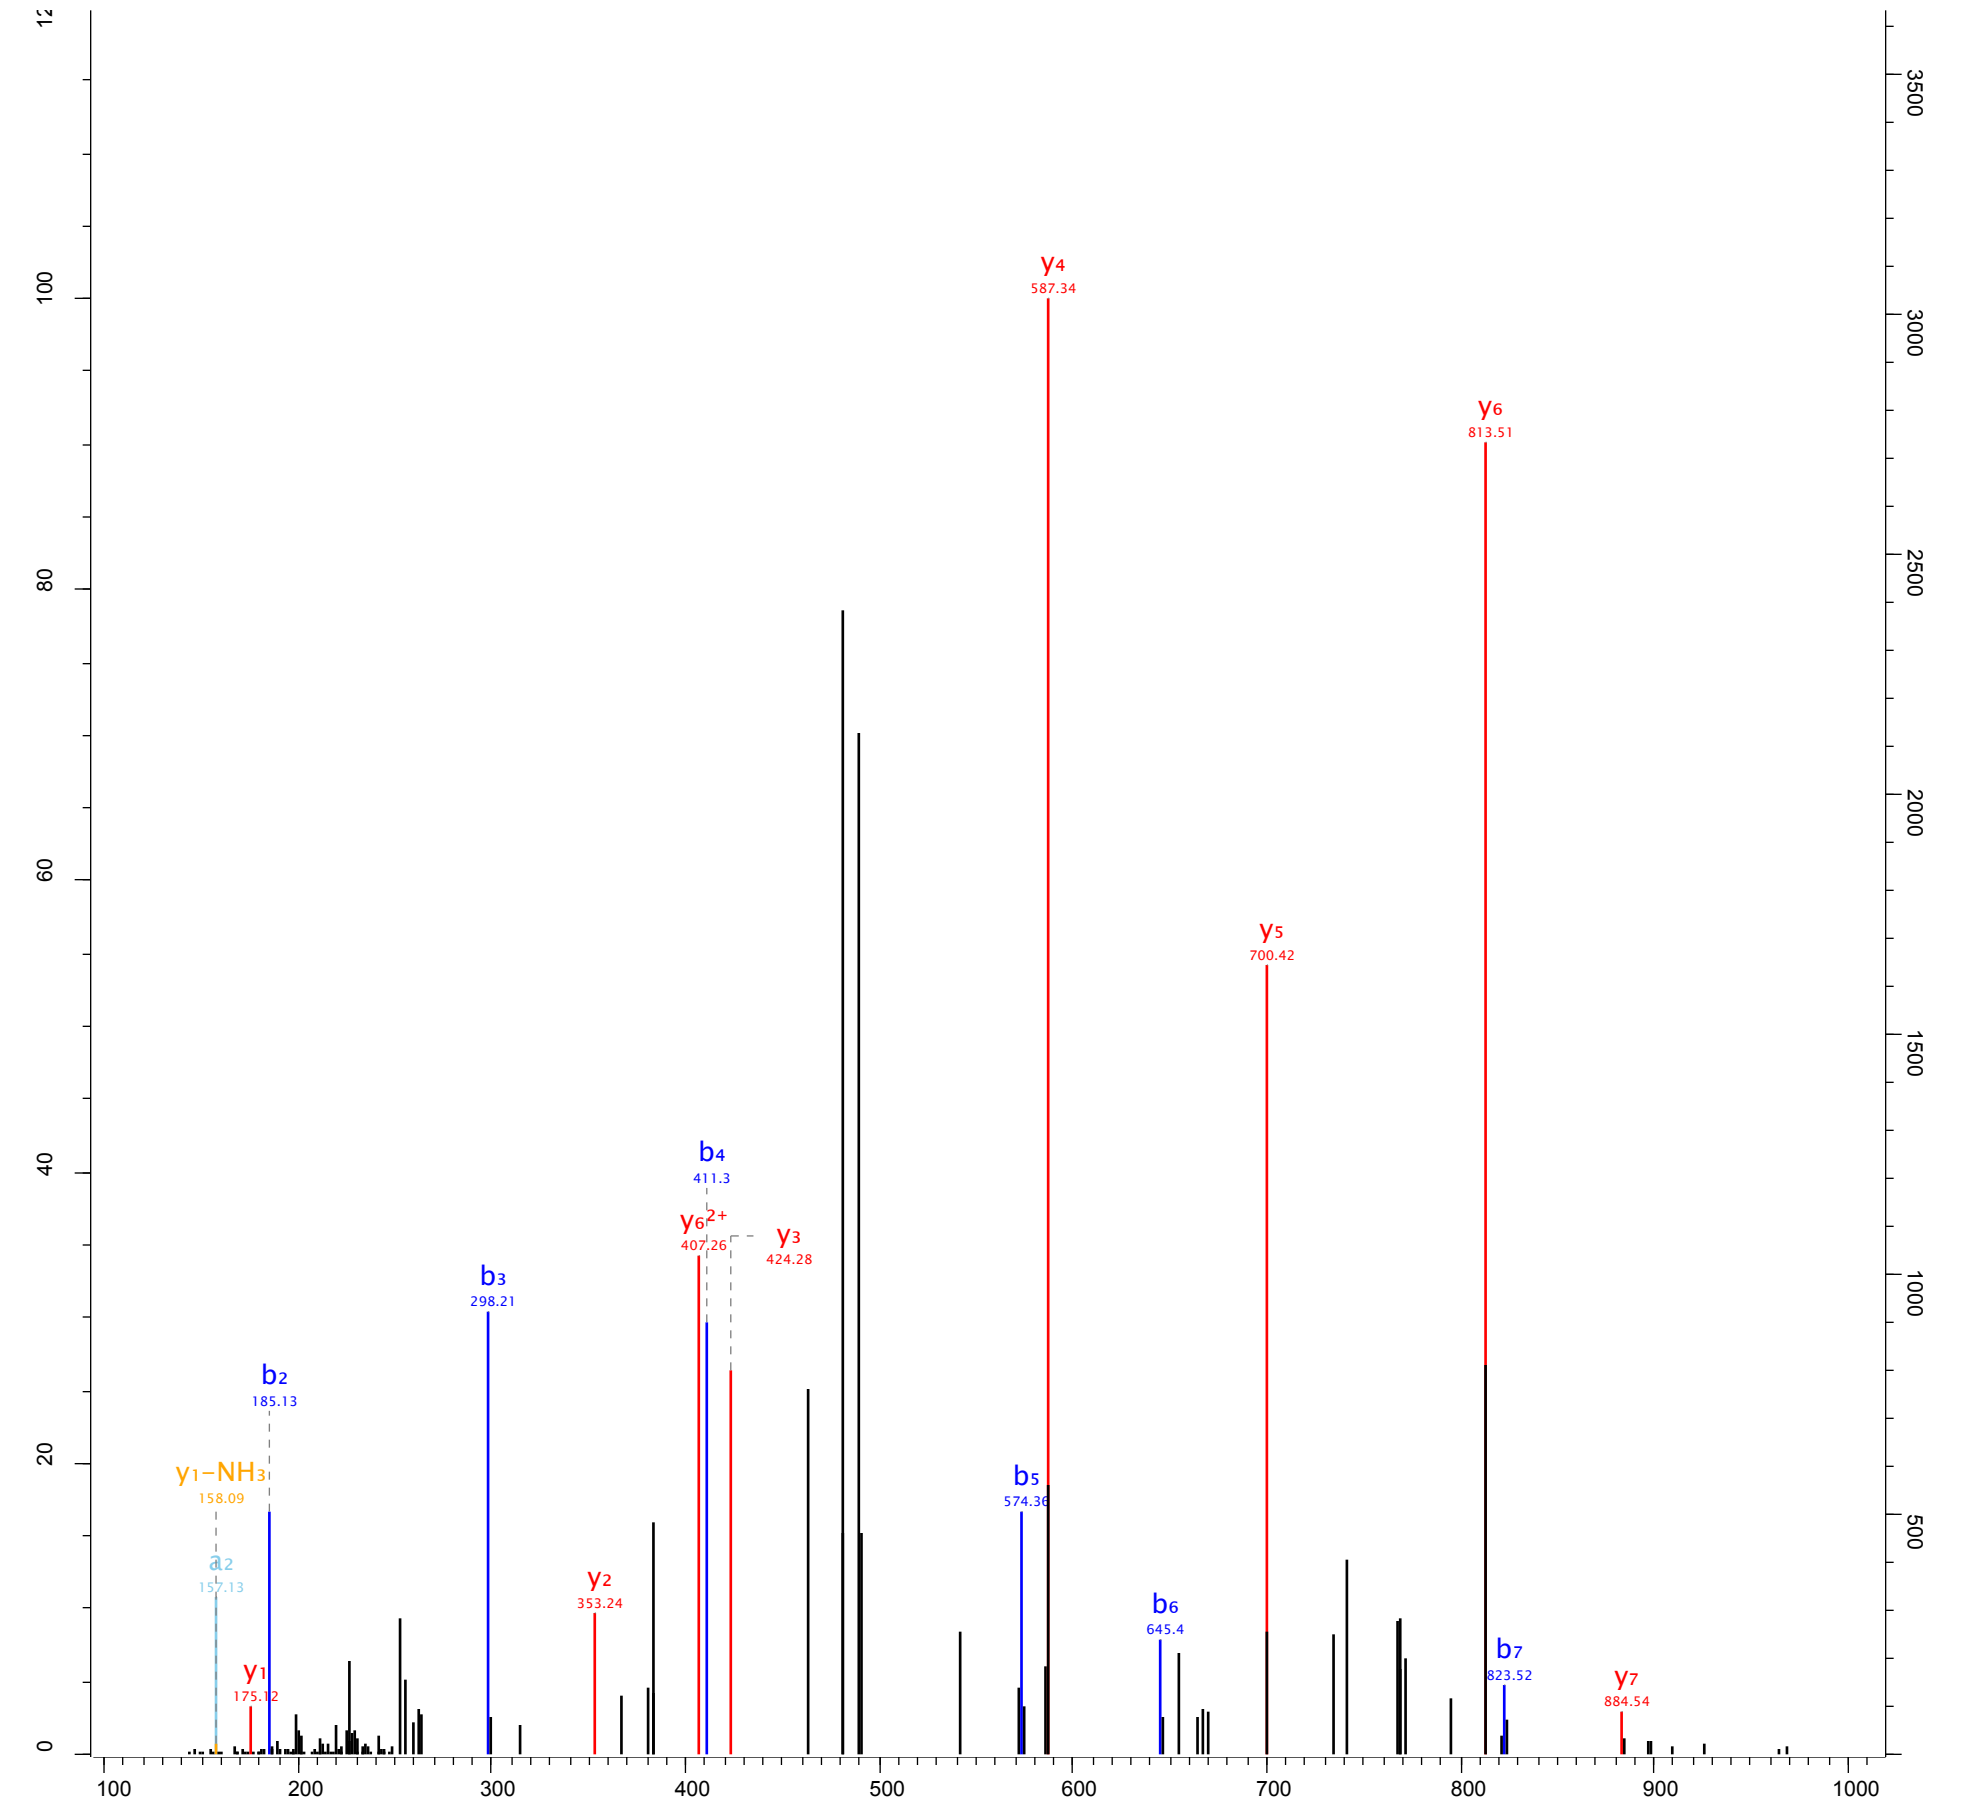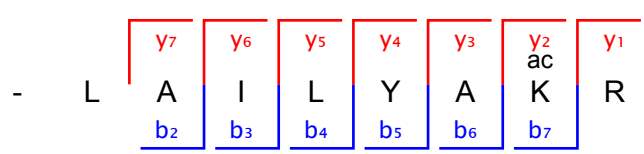

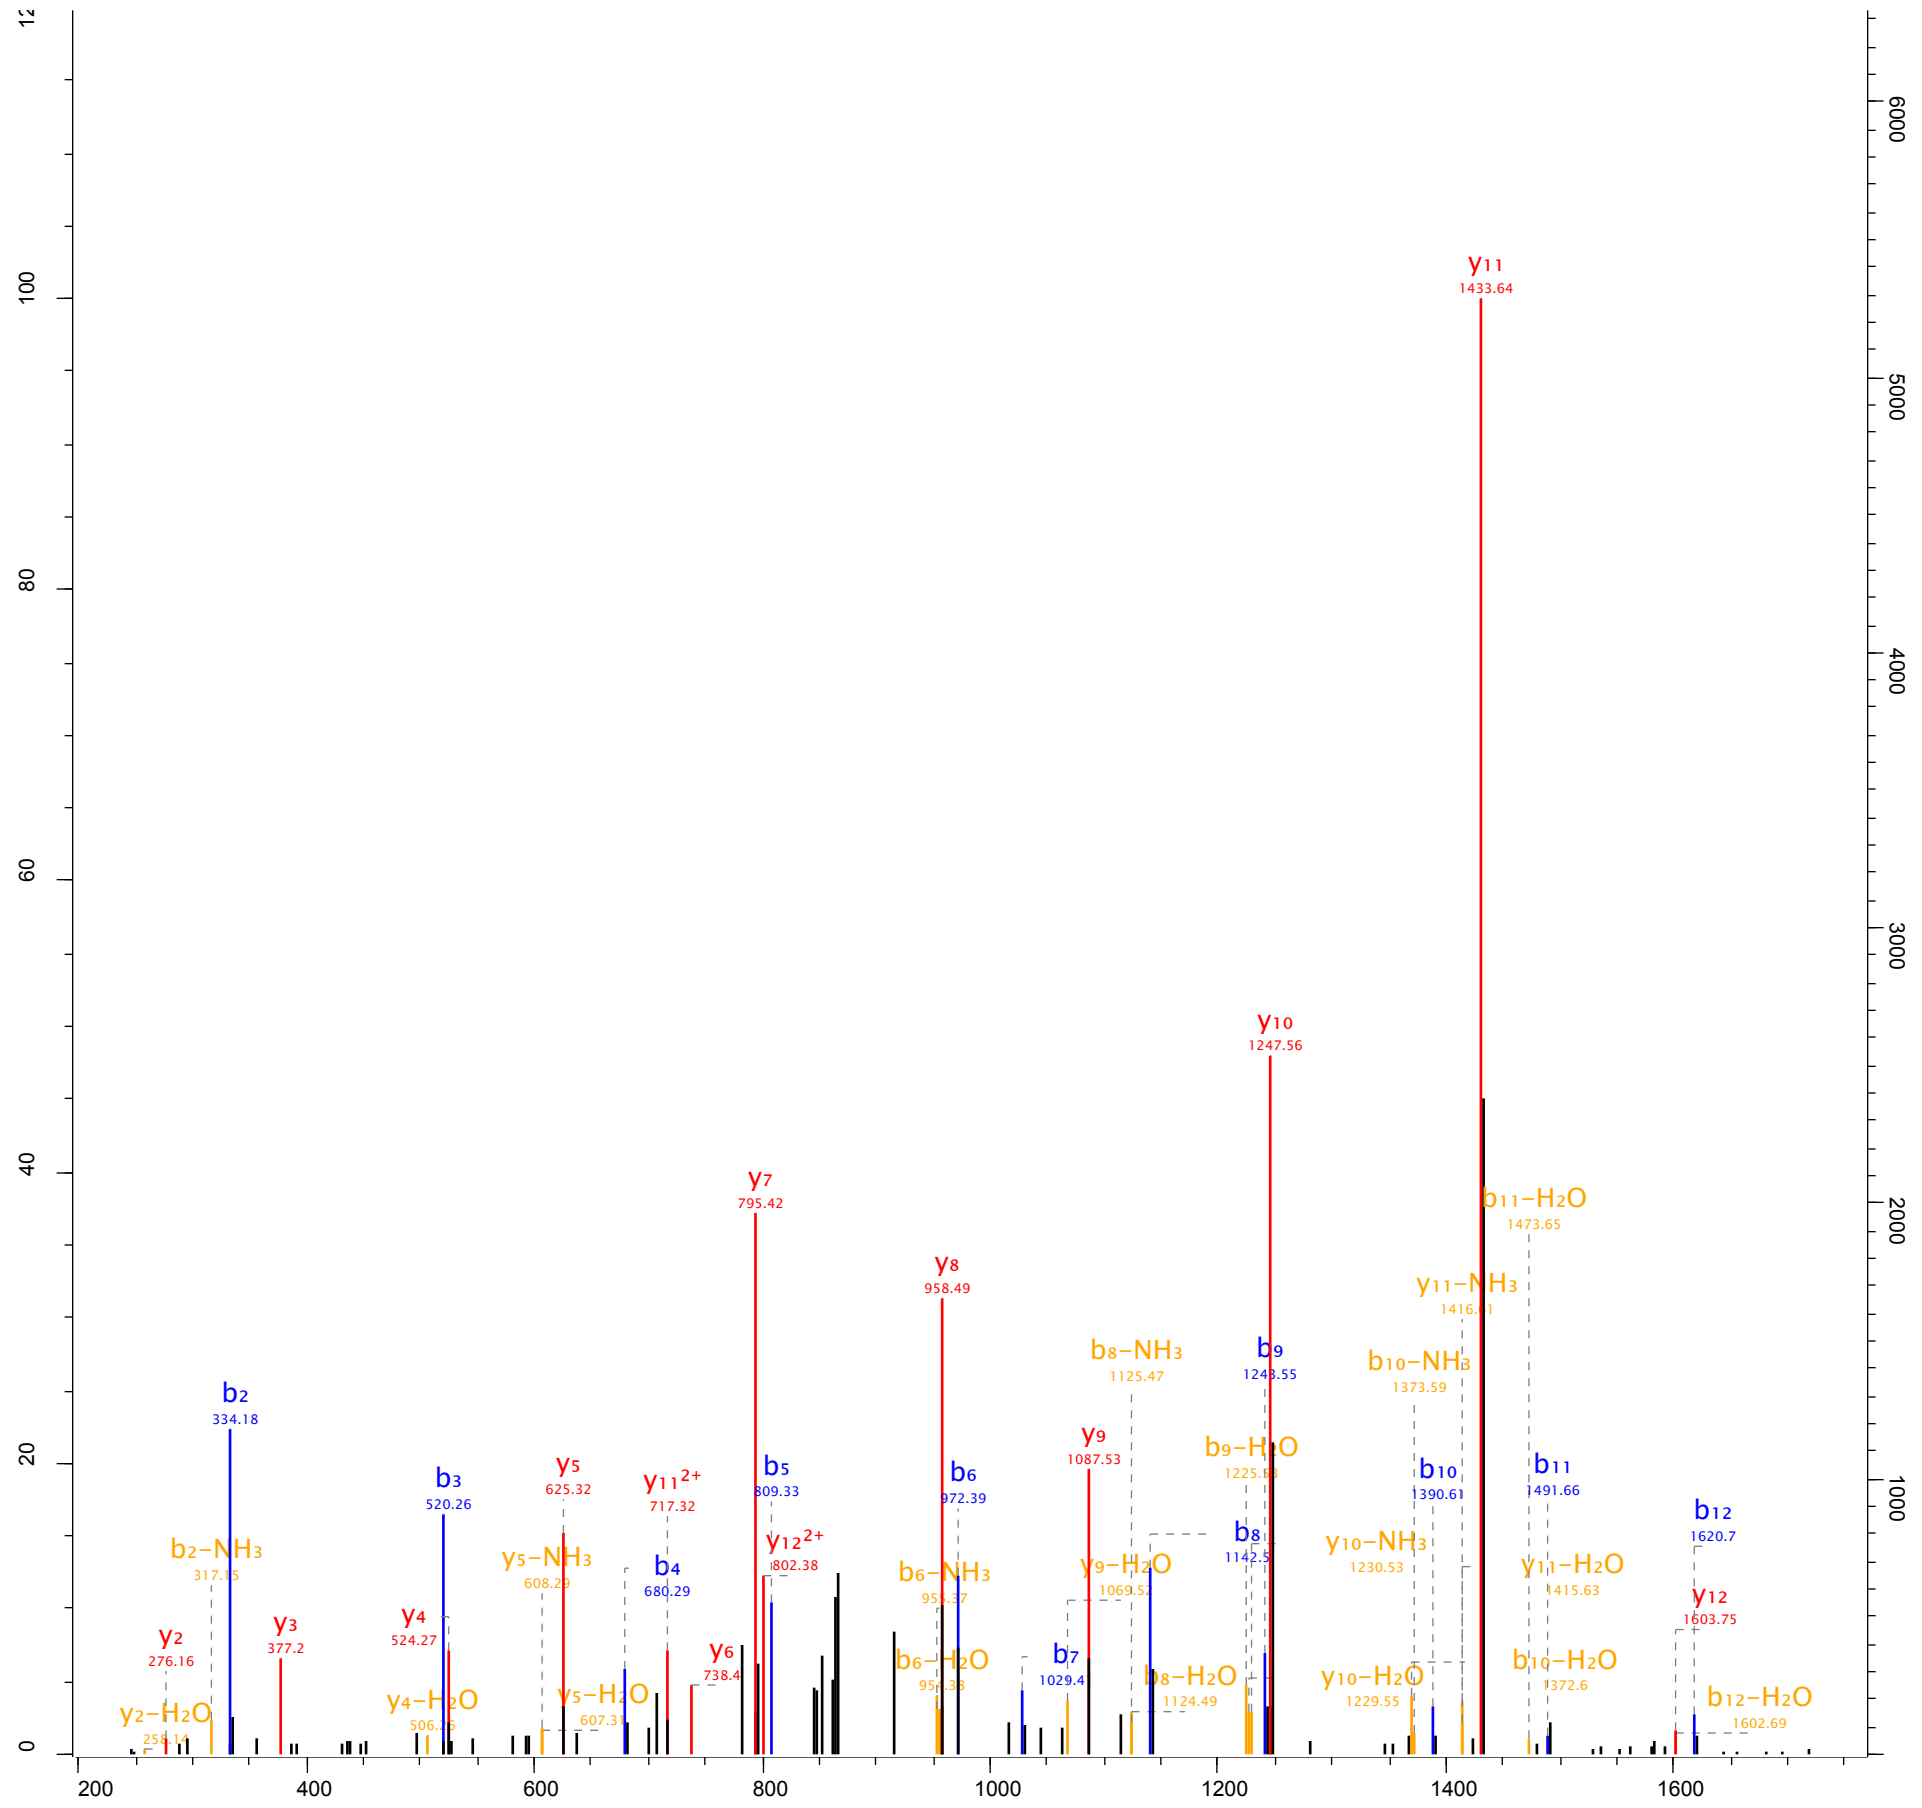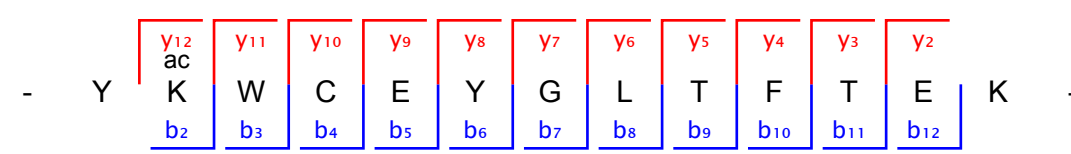

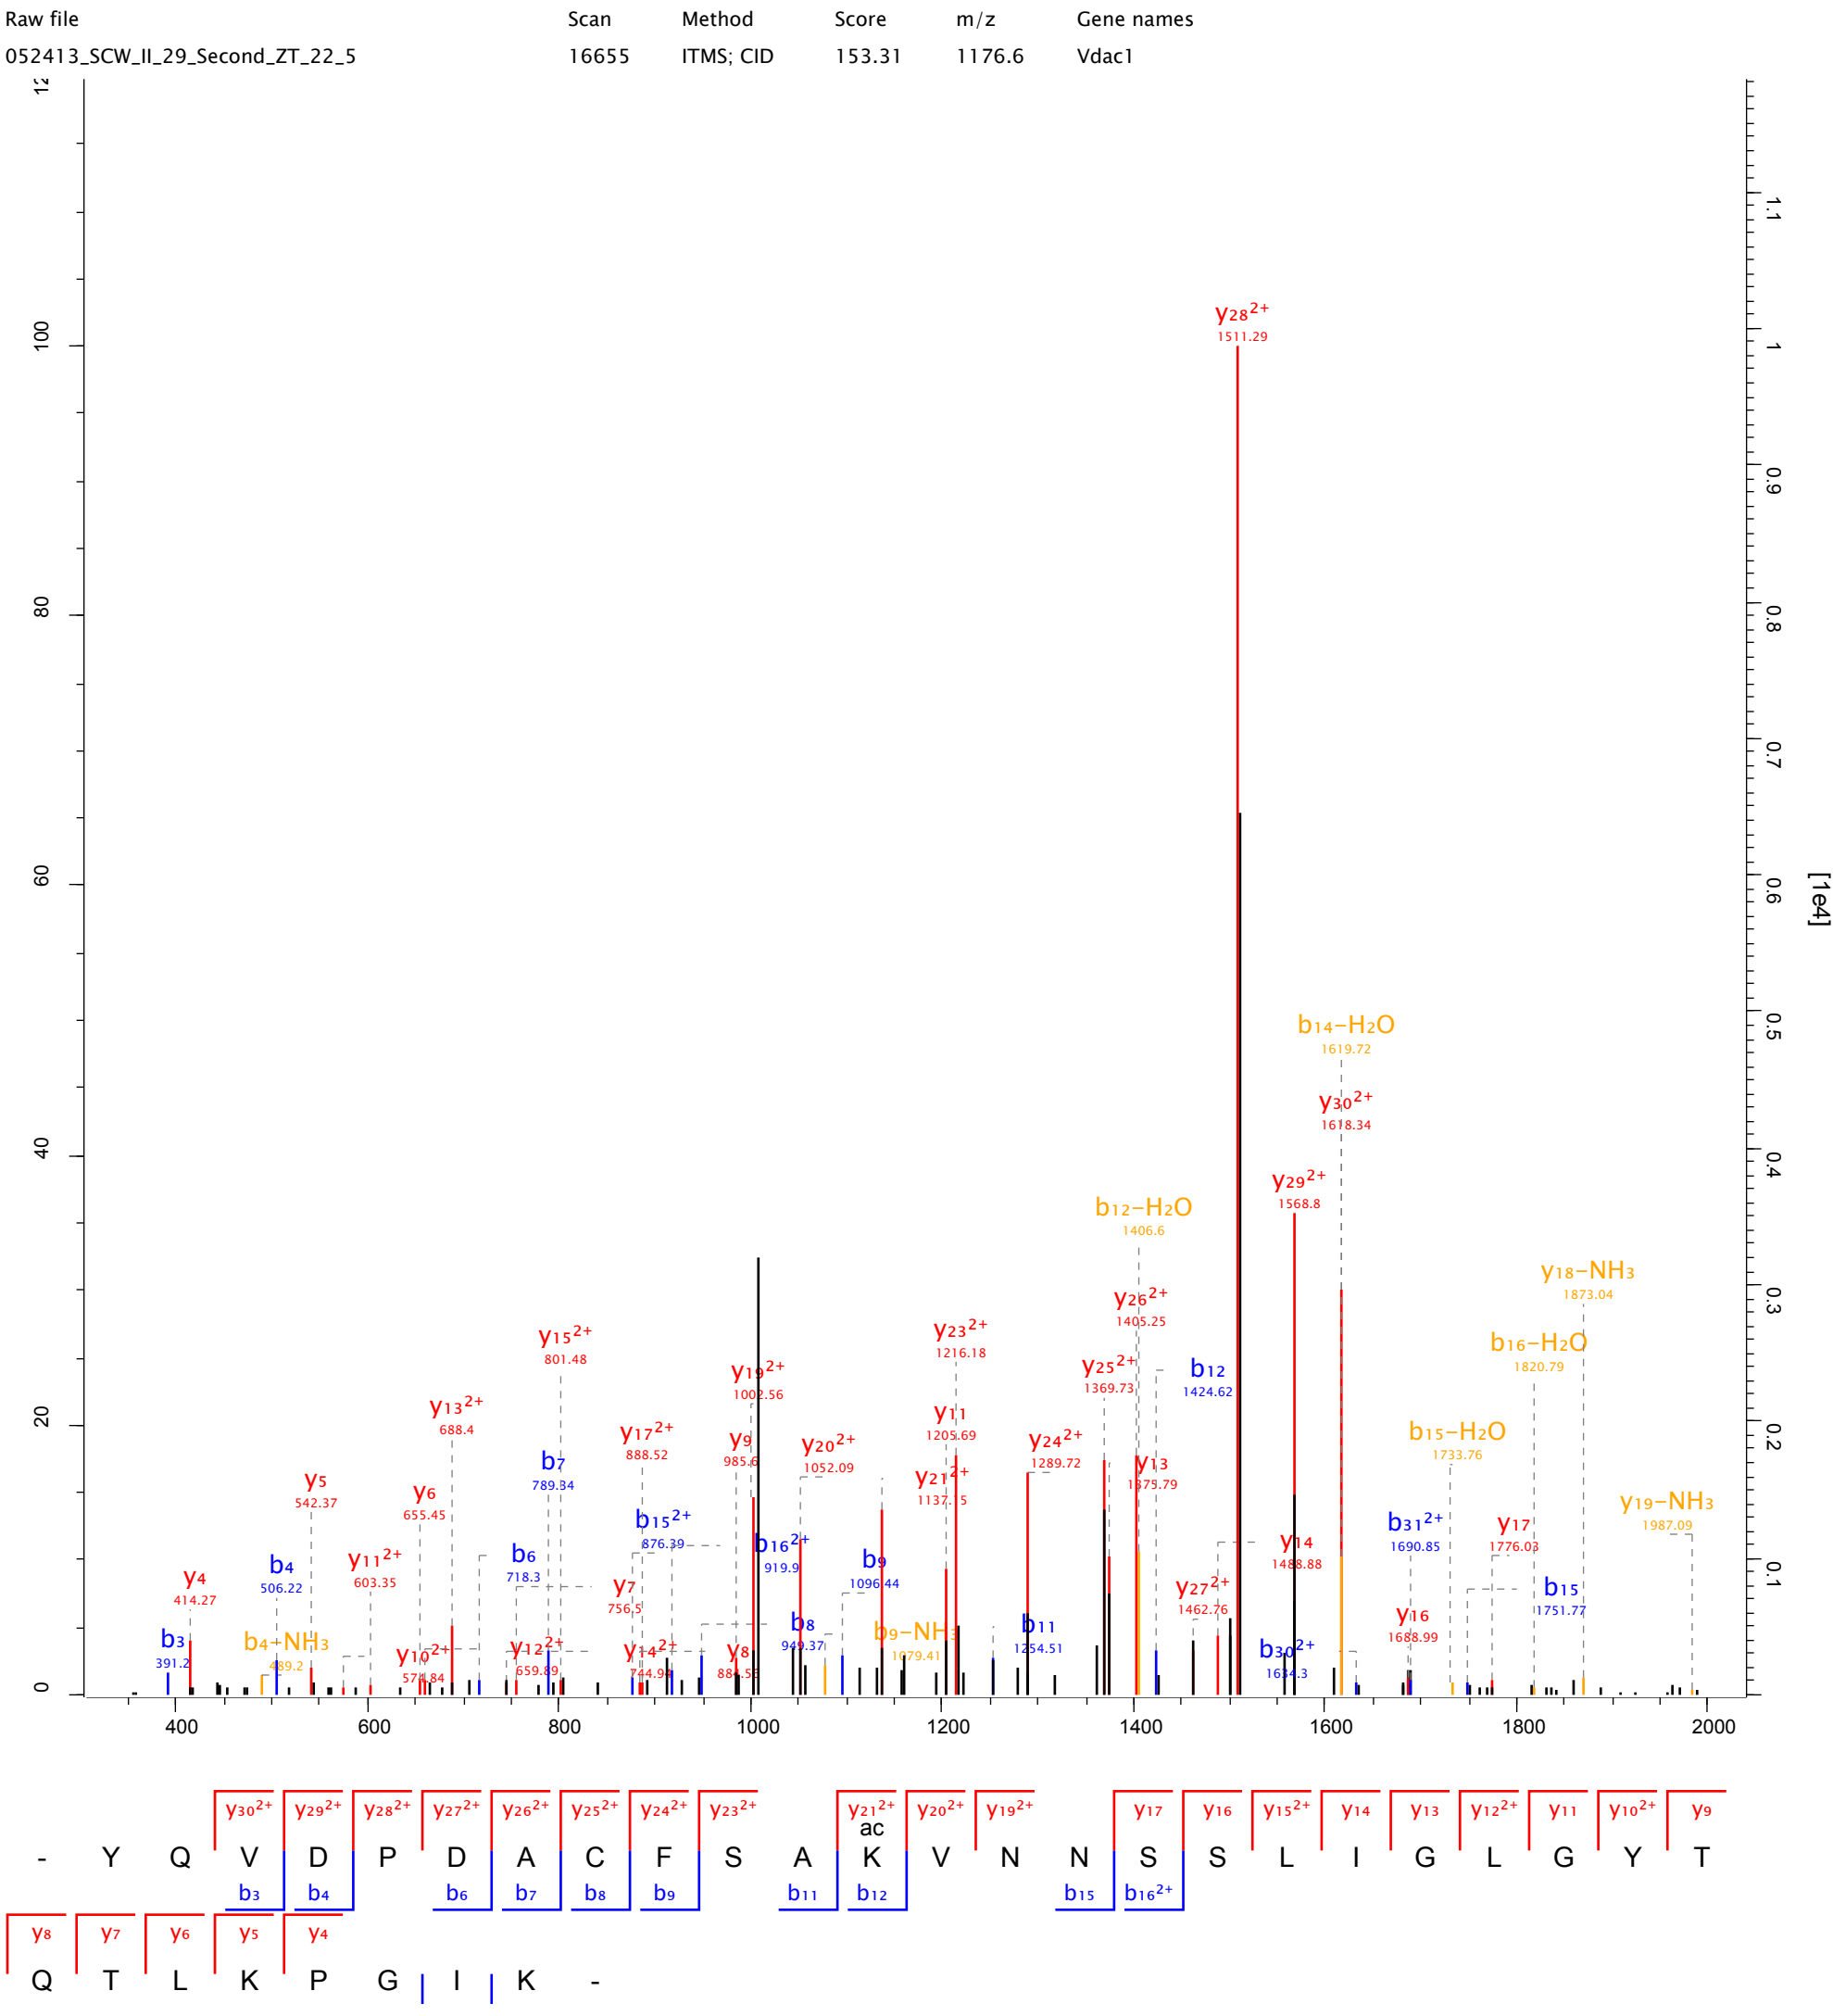



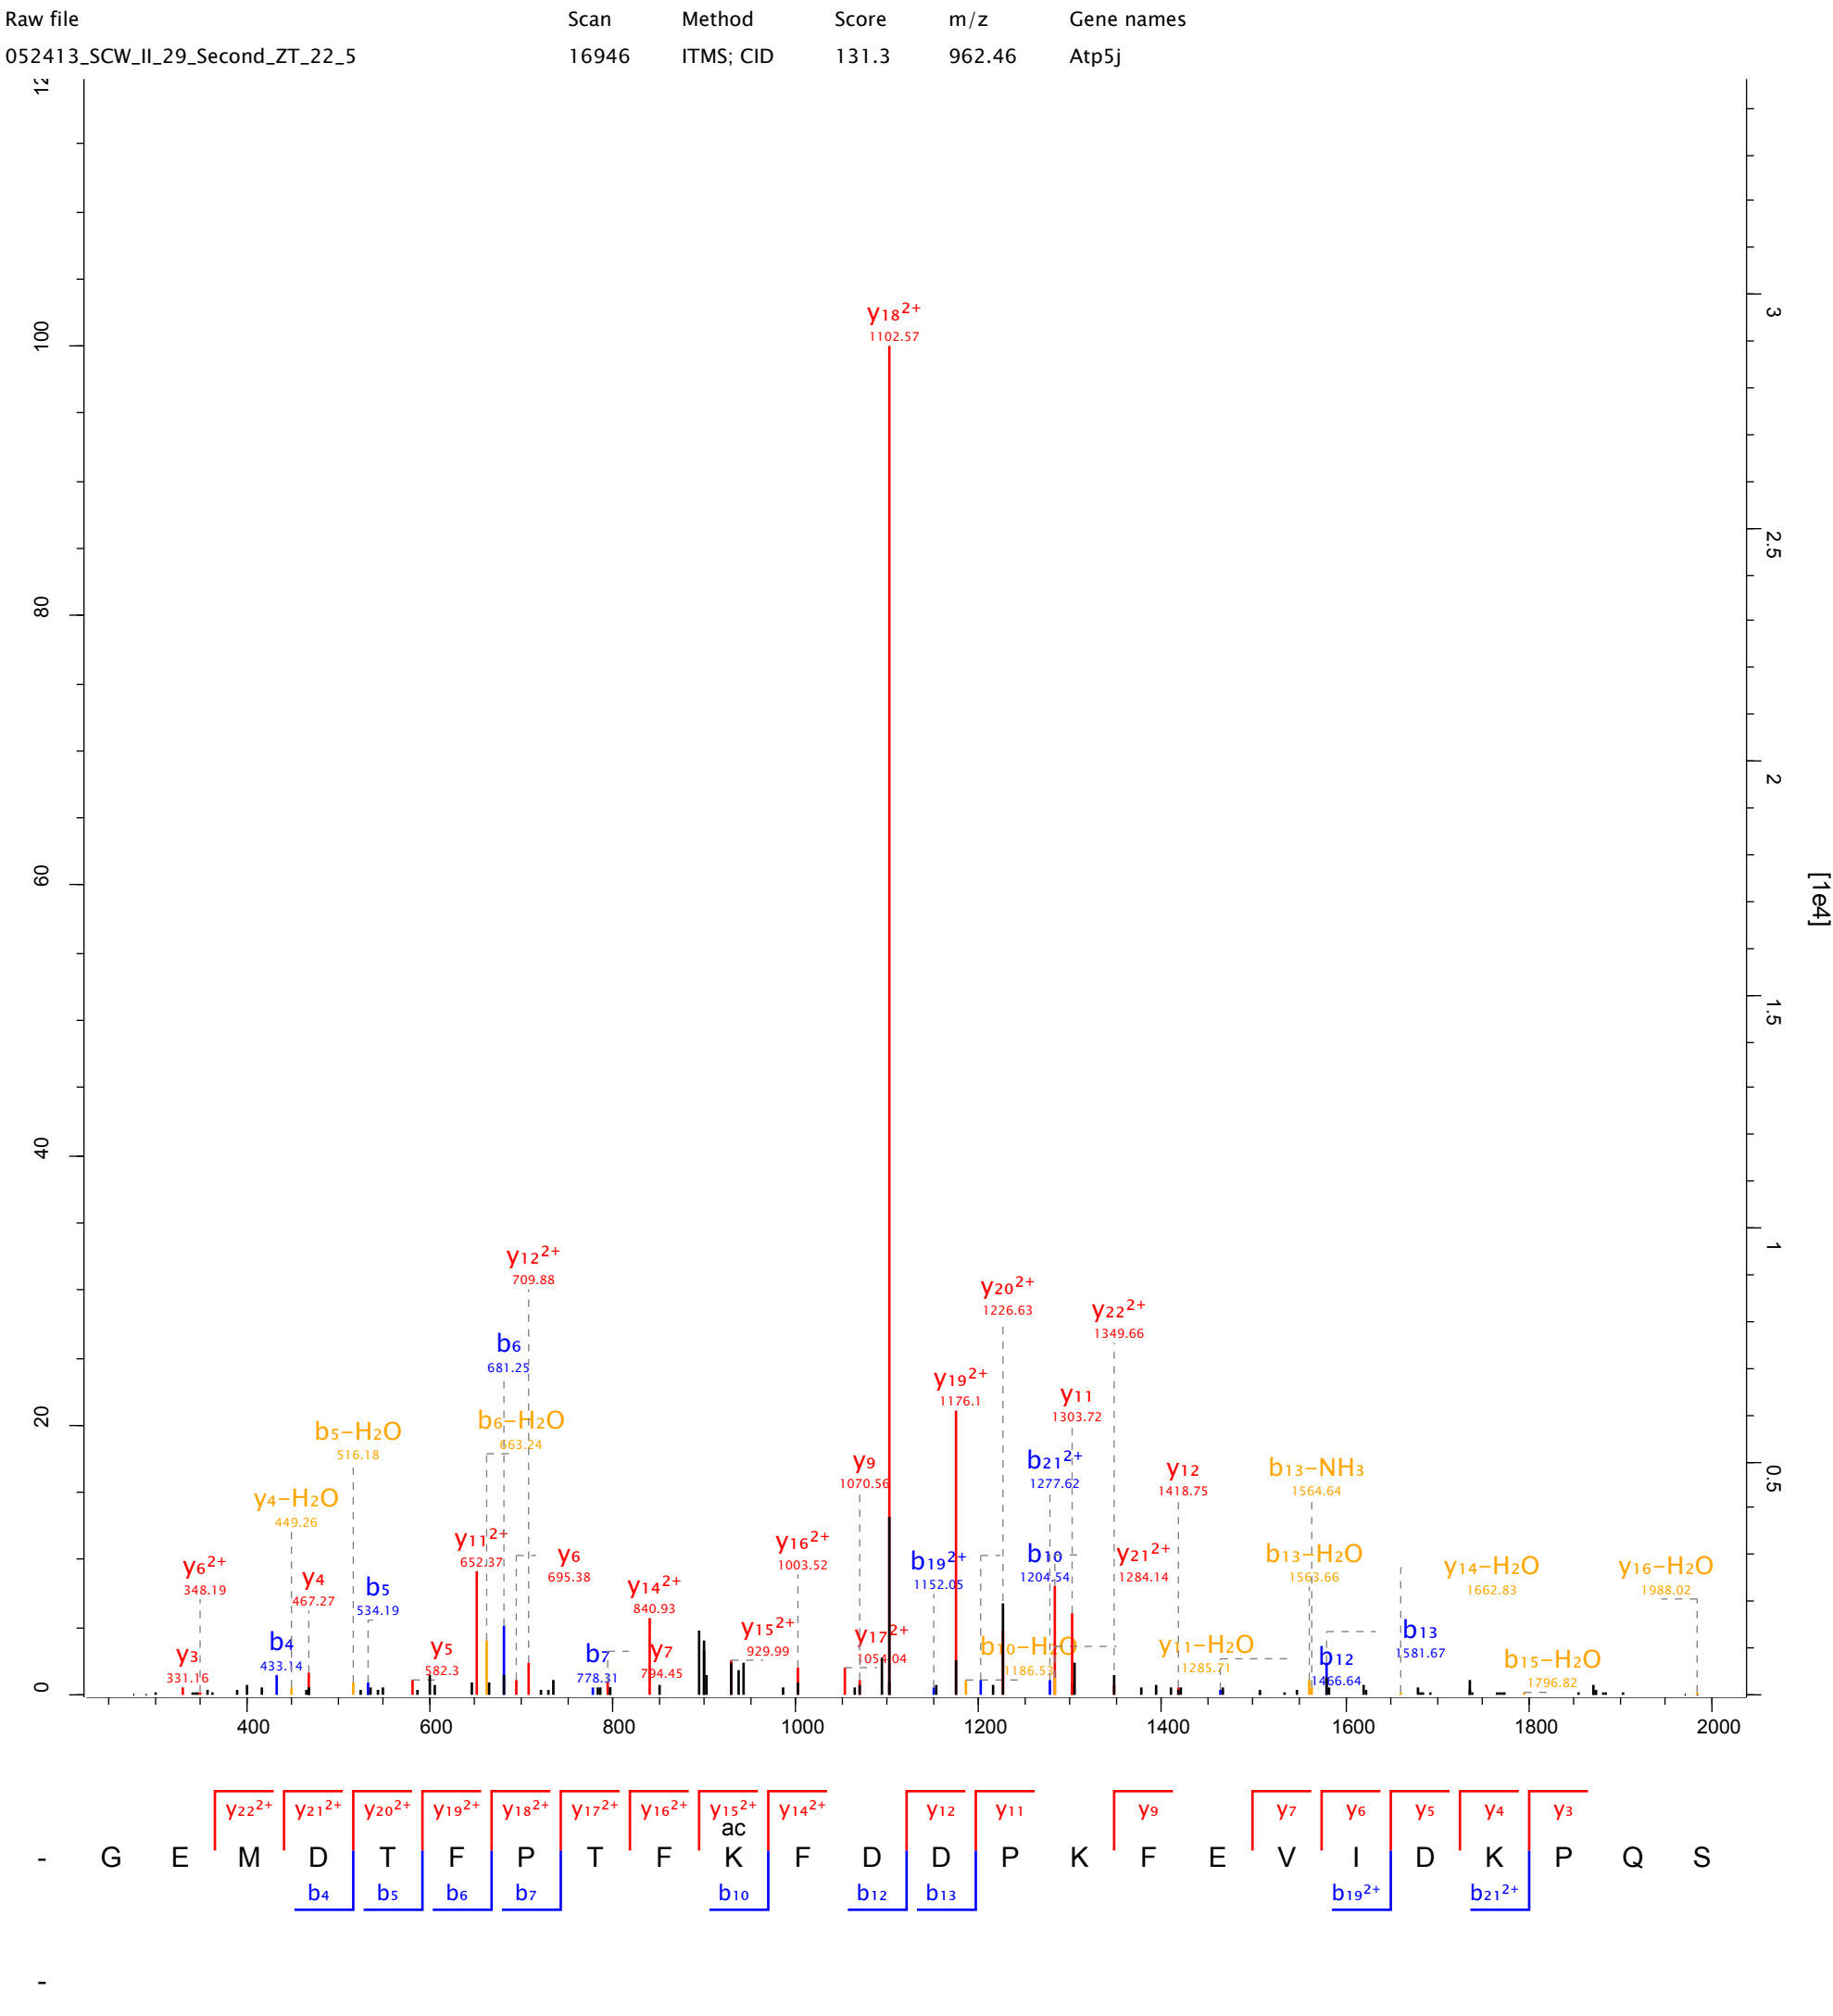

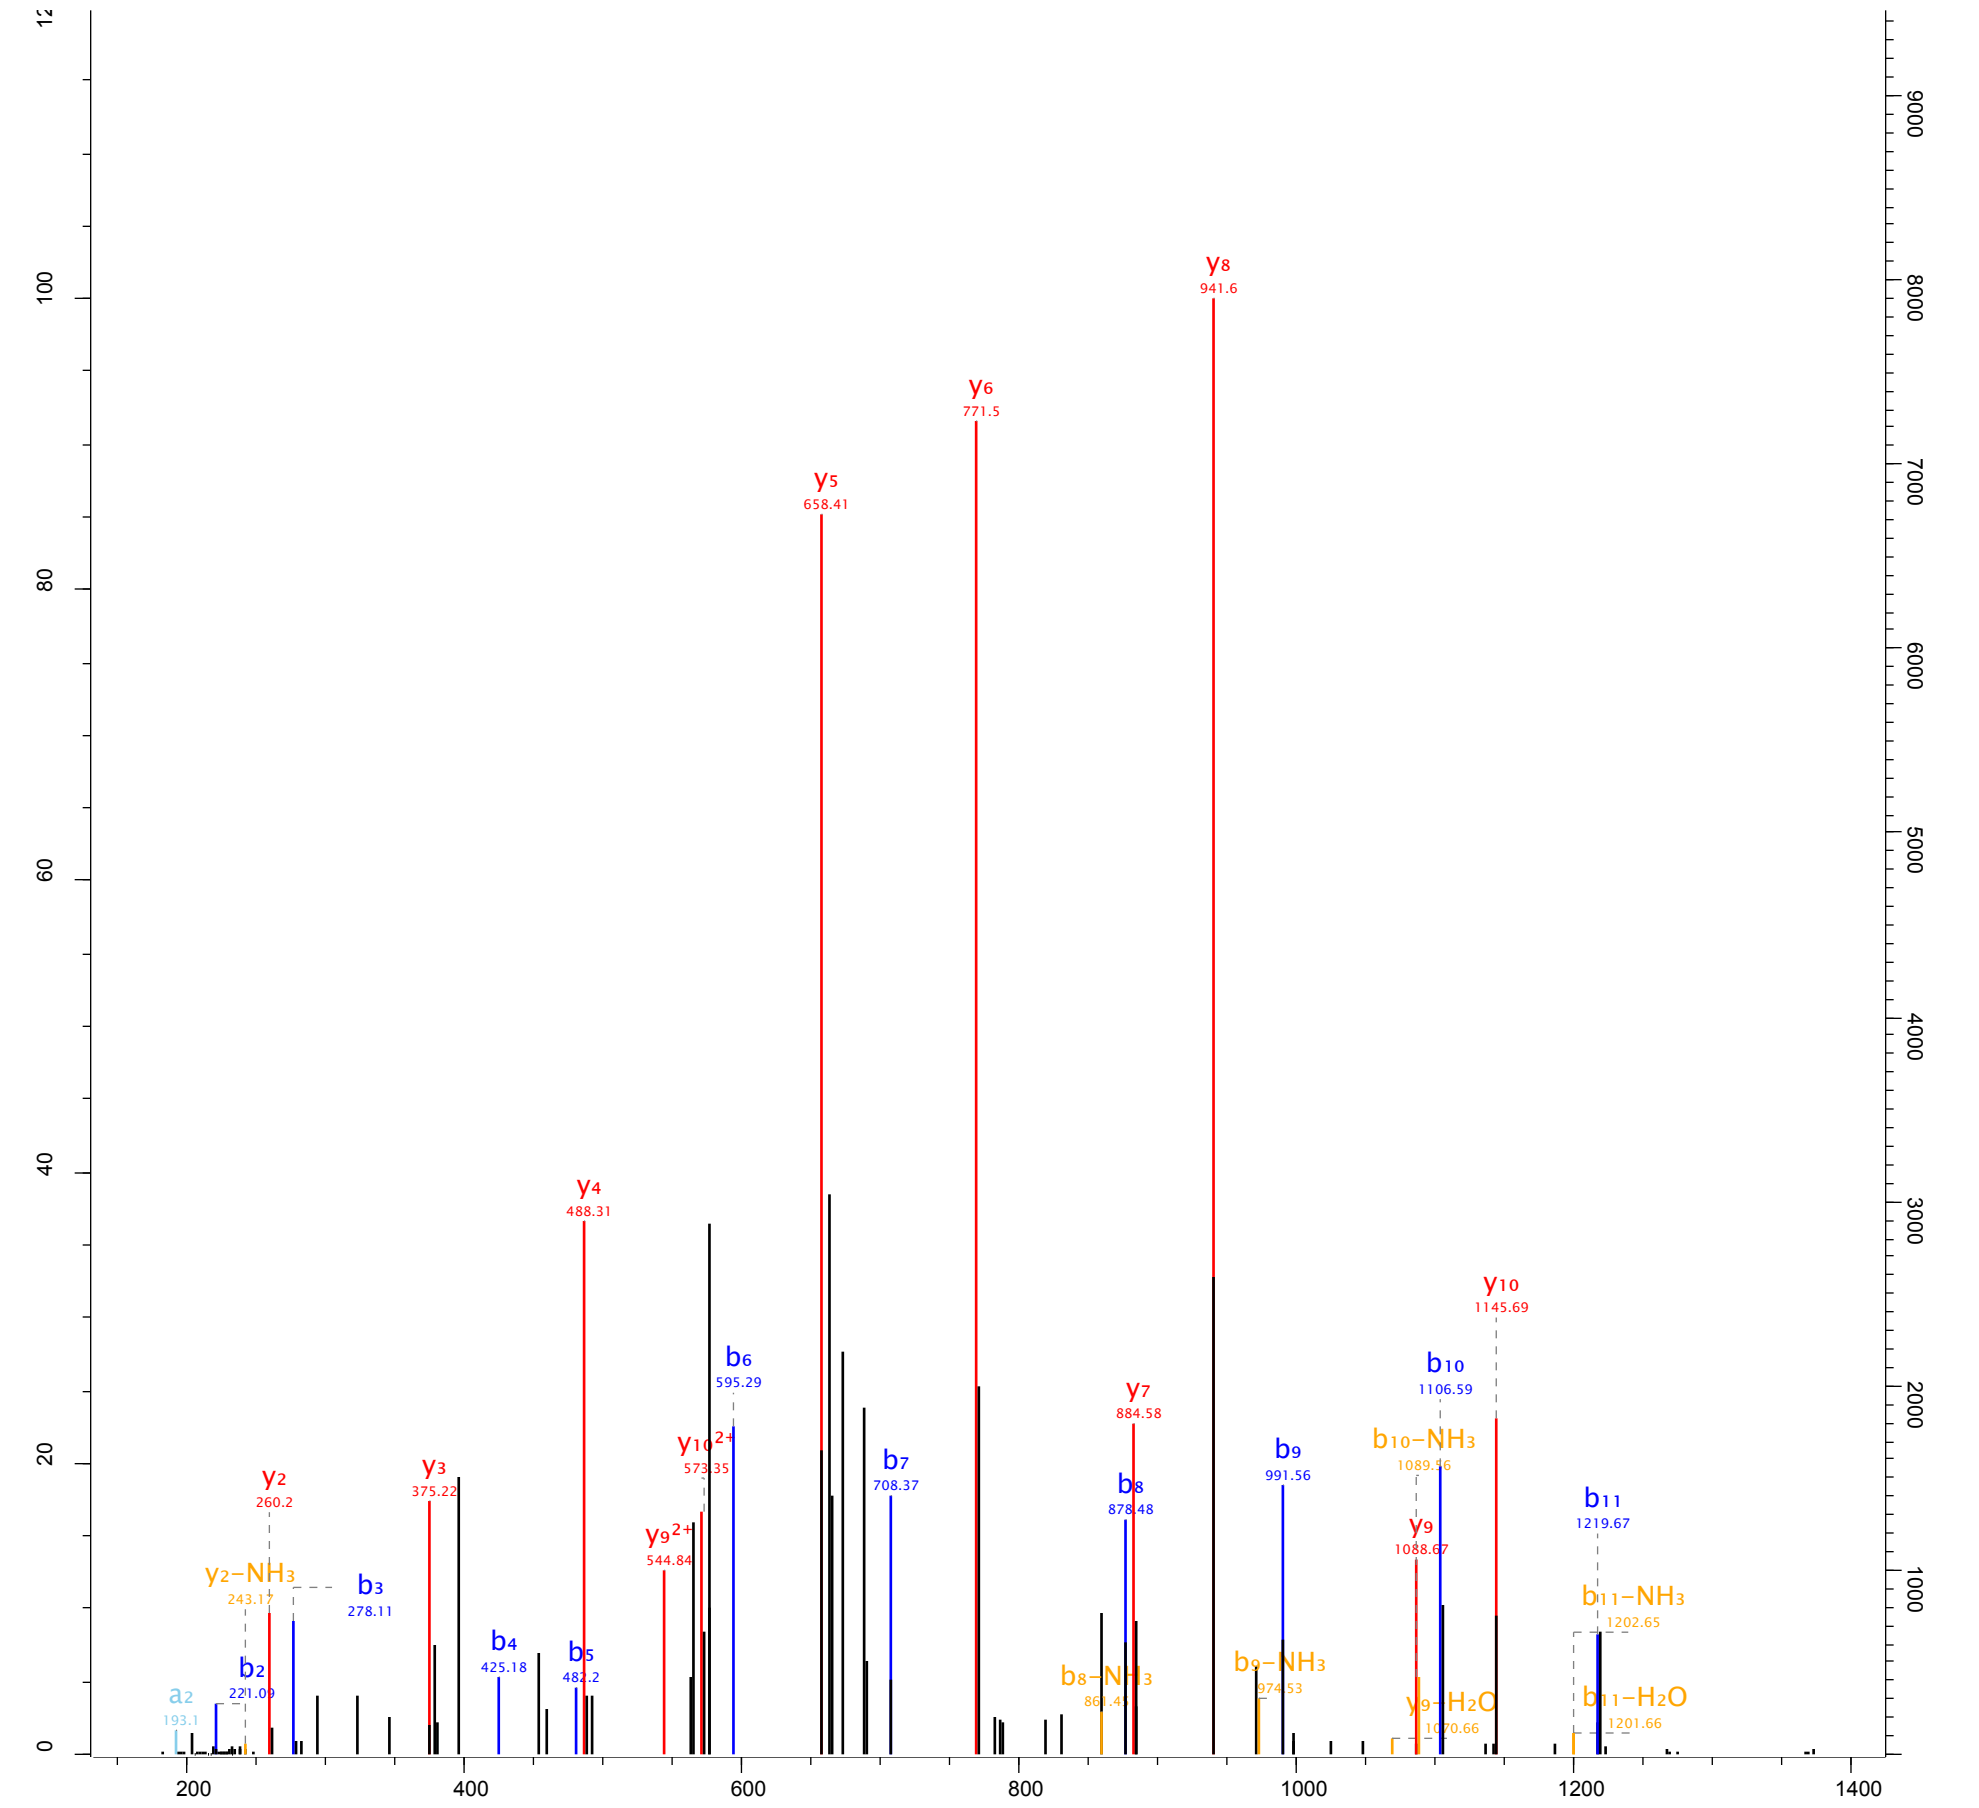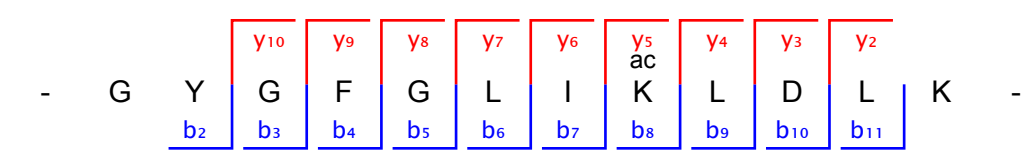

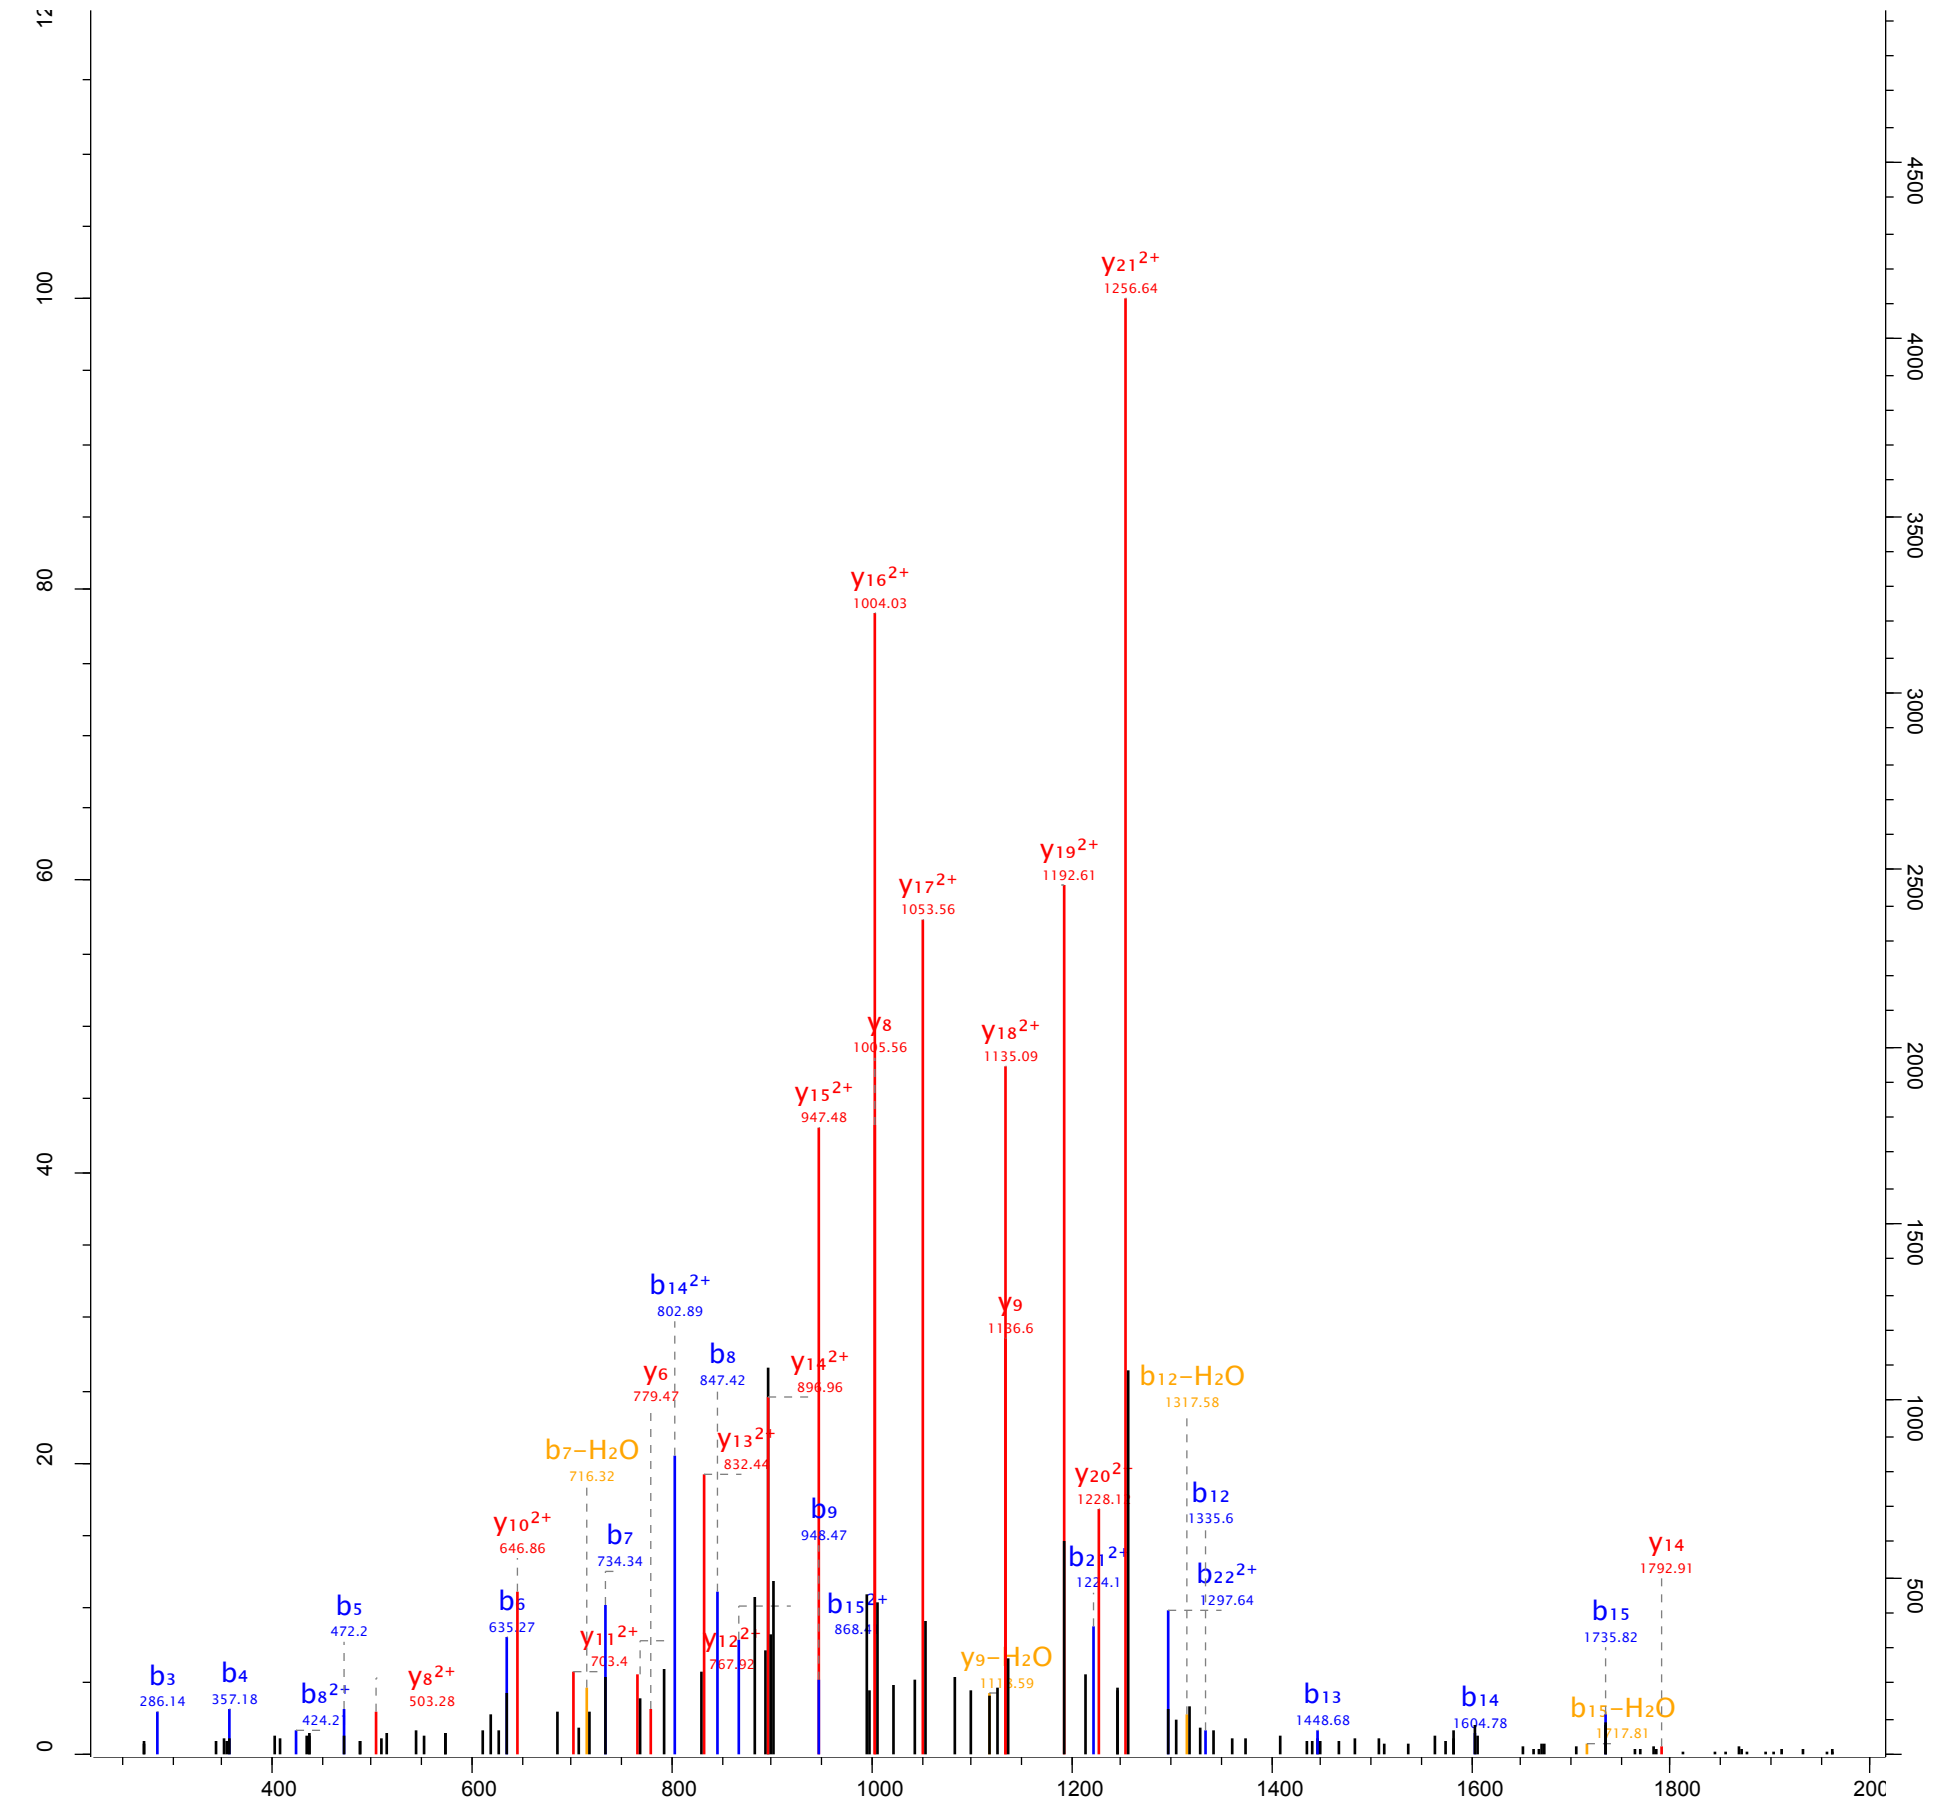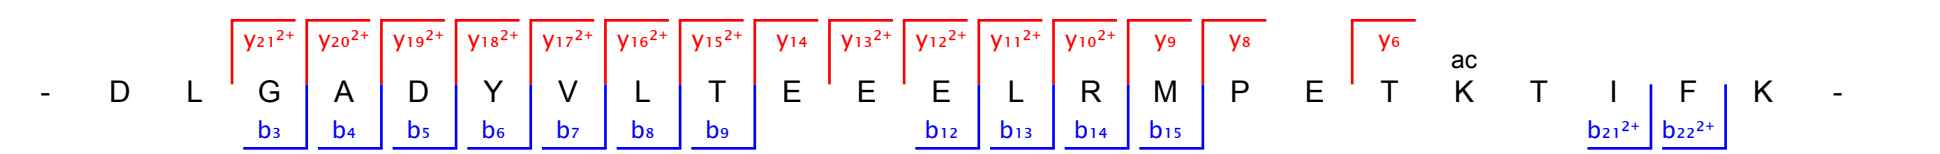

052413\_SCW\_II\_29\_Second\_ZT\_22\_5

18197 ITMS; CID 174.04 1227.58 Fscn1

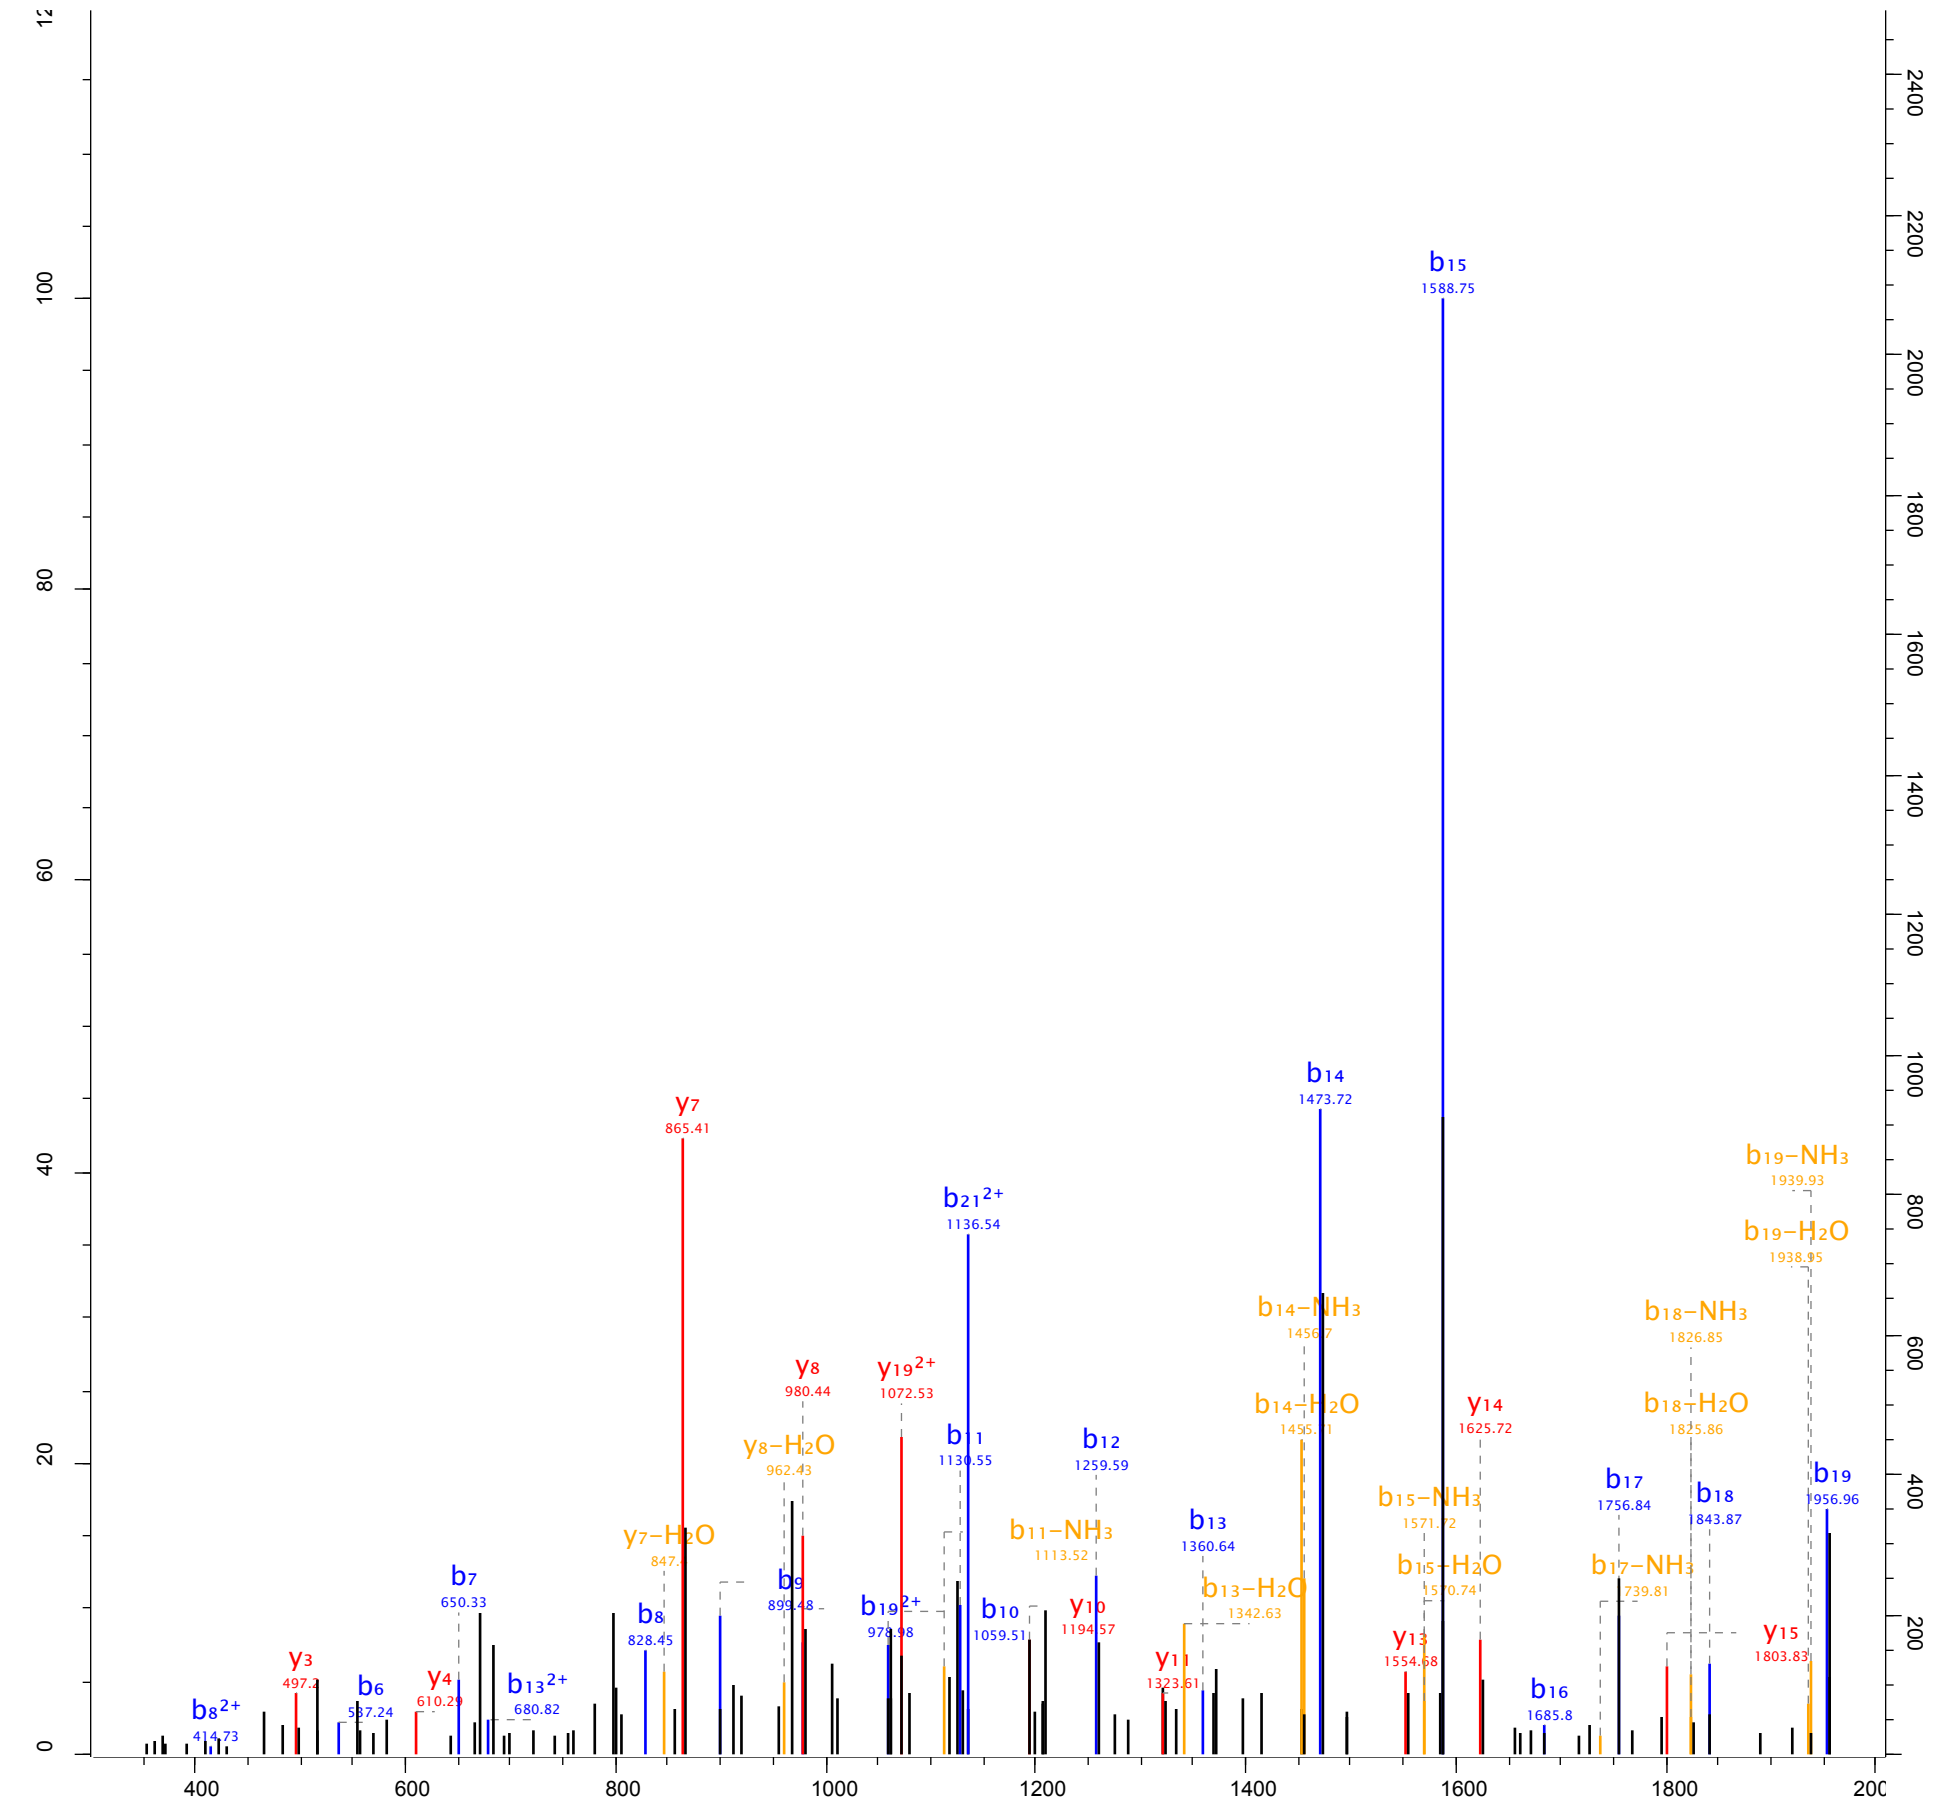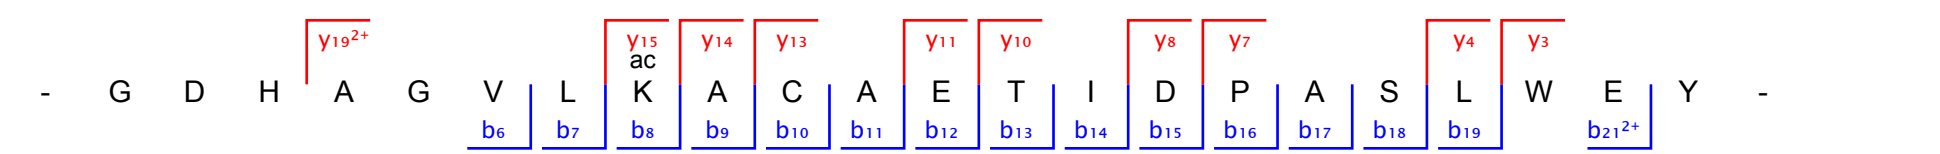

052413\_SCW\_II\_29\_Second\_ZT\_25\_6

6105 ITMS; CID 128.27 487.76 Arhgdia

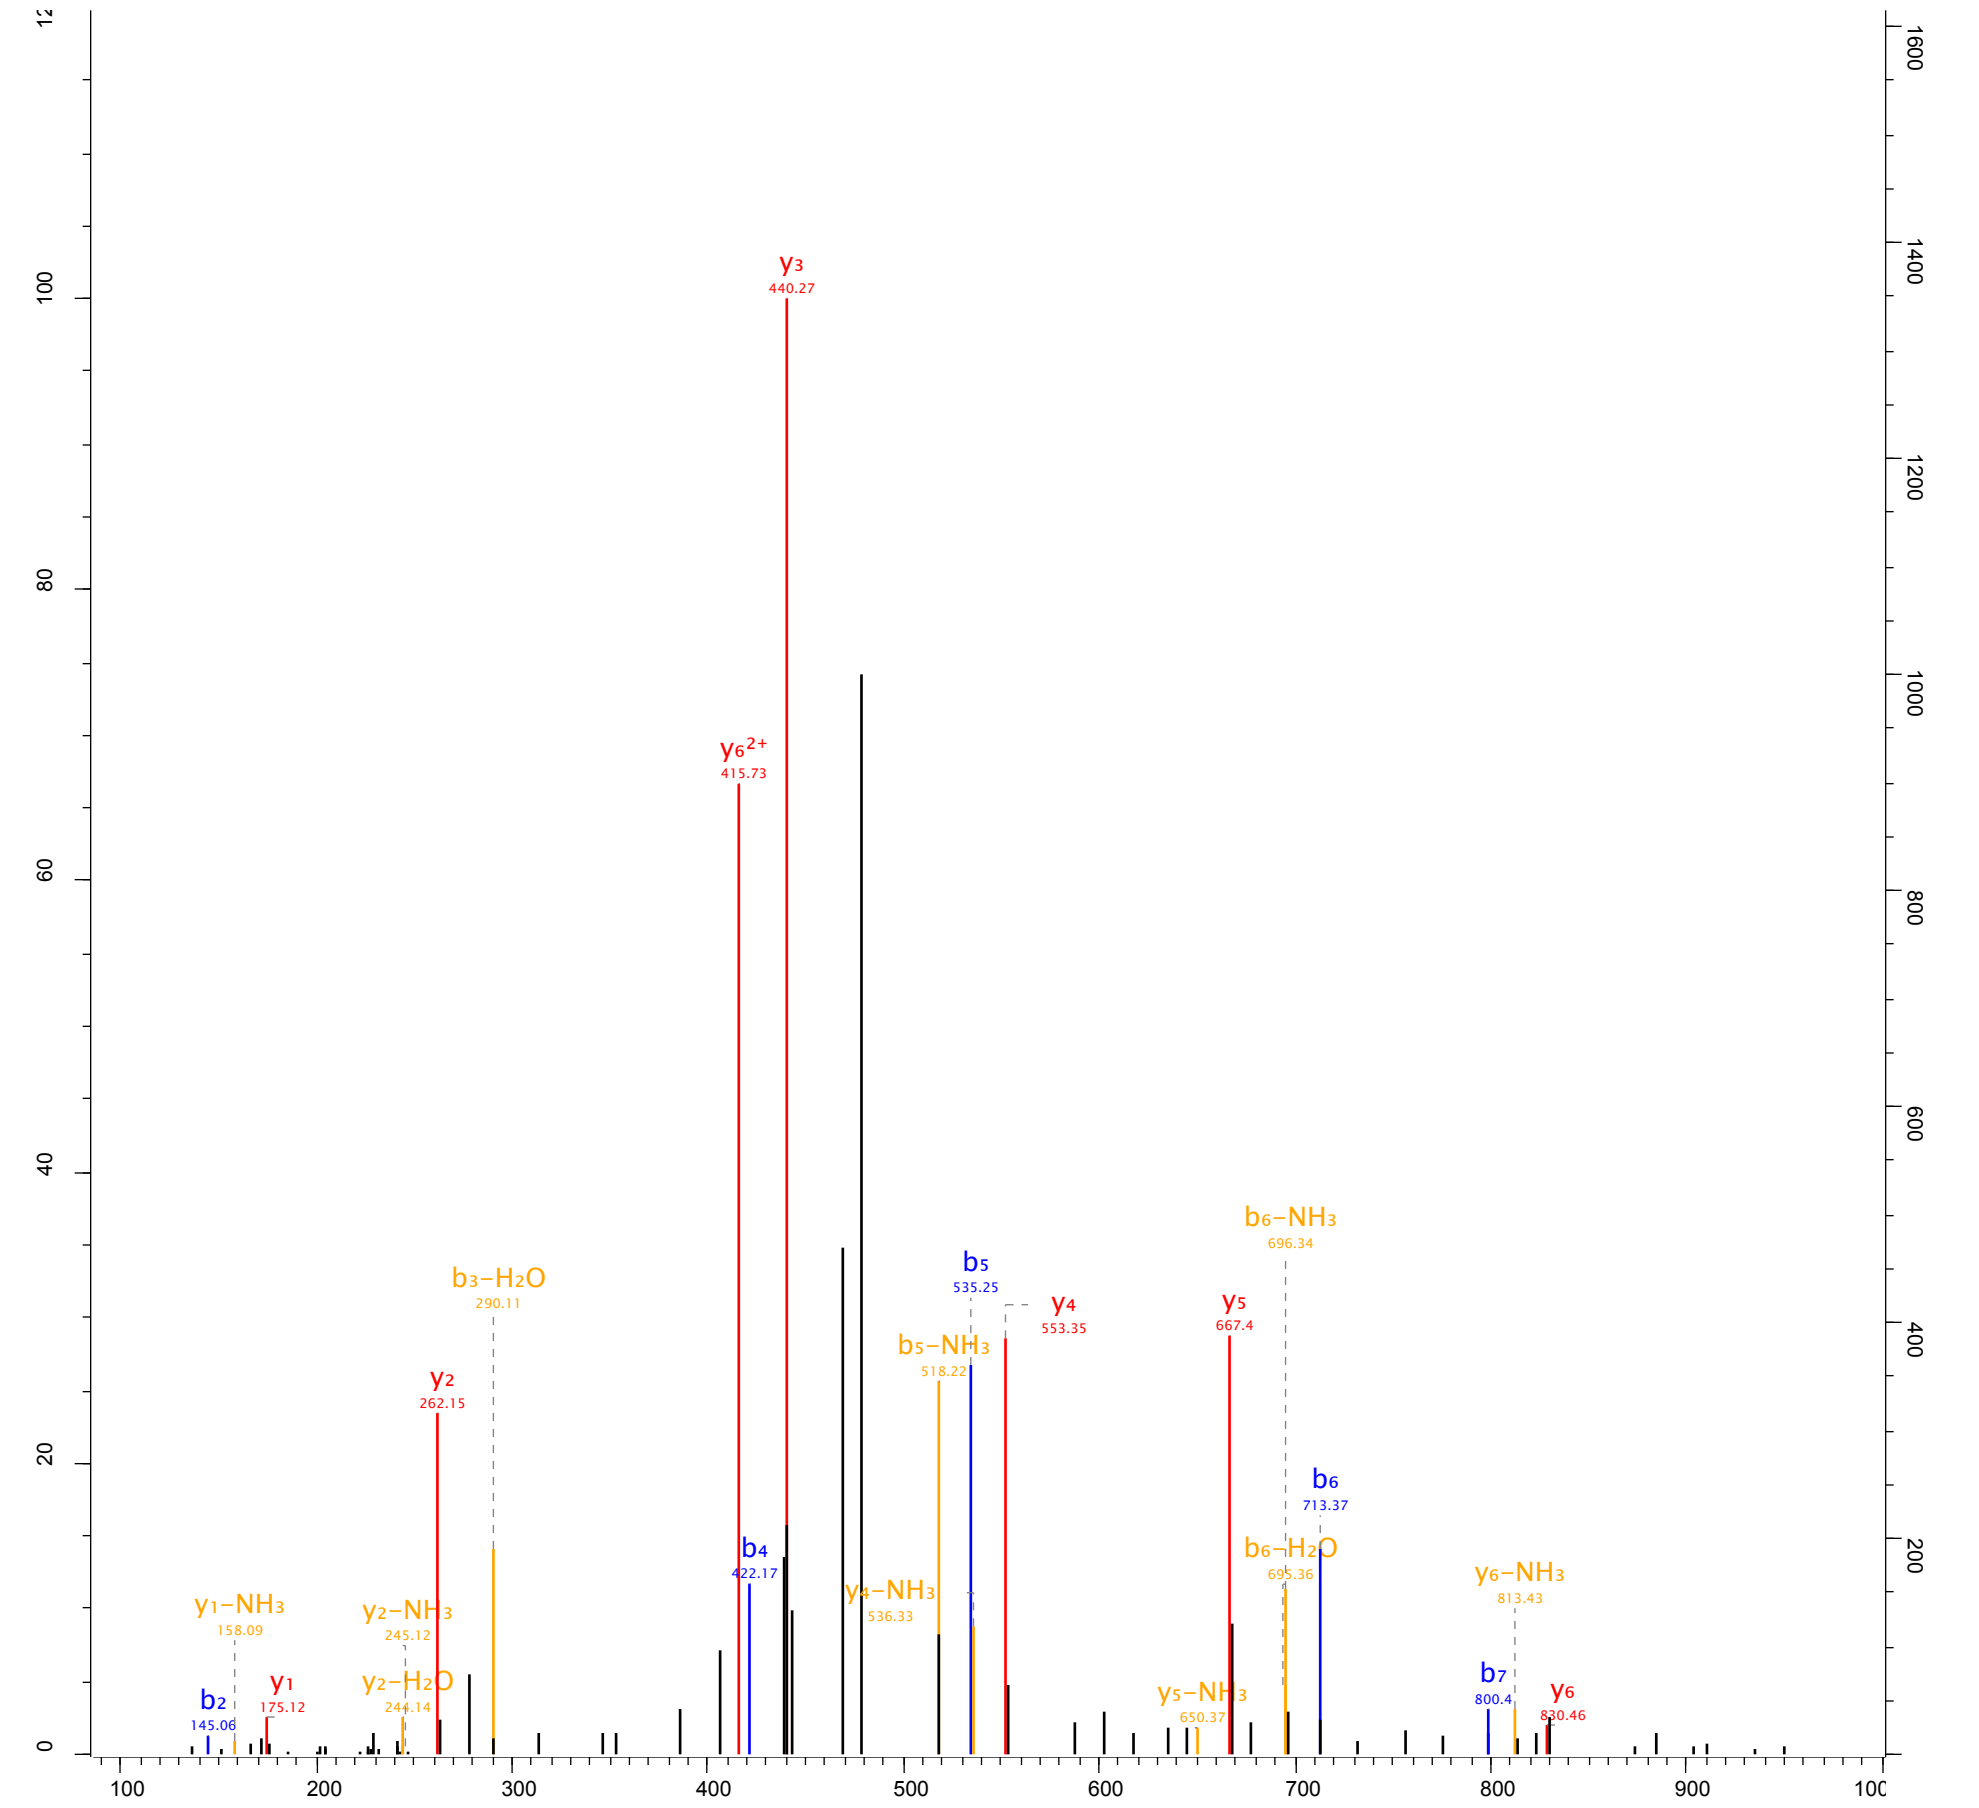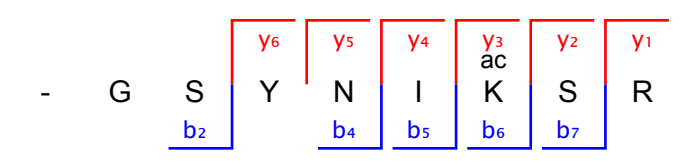

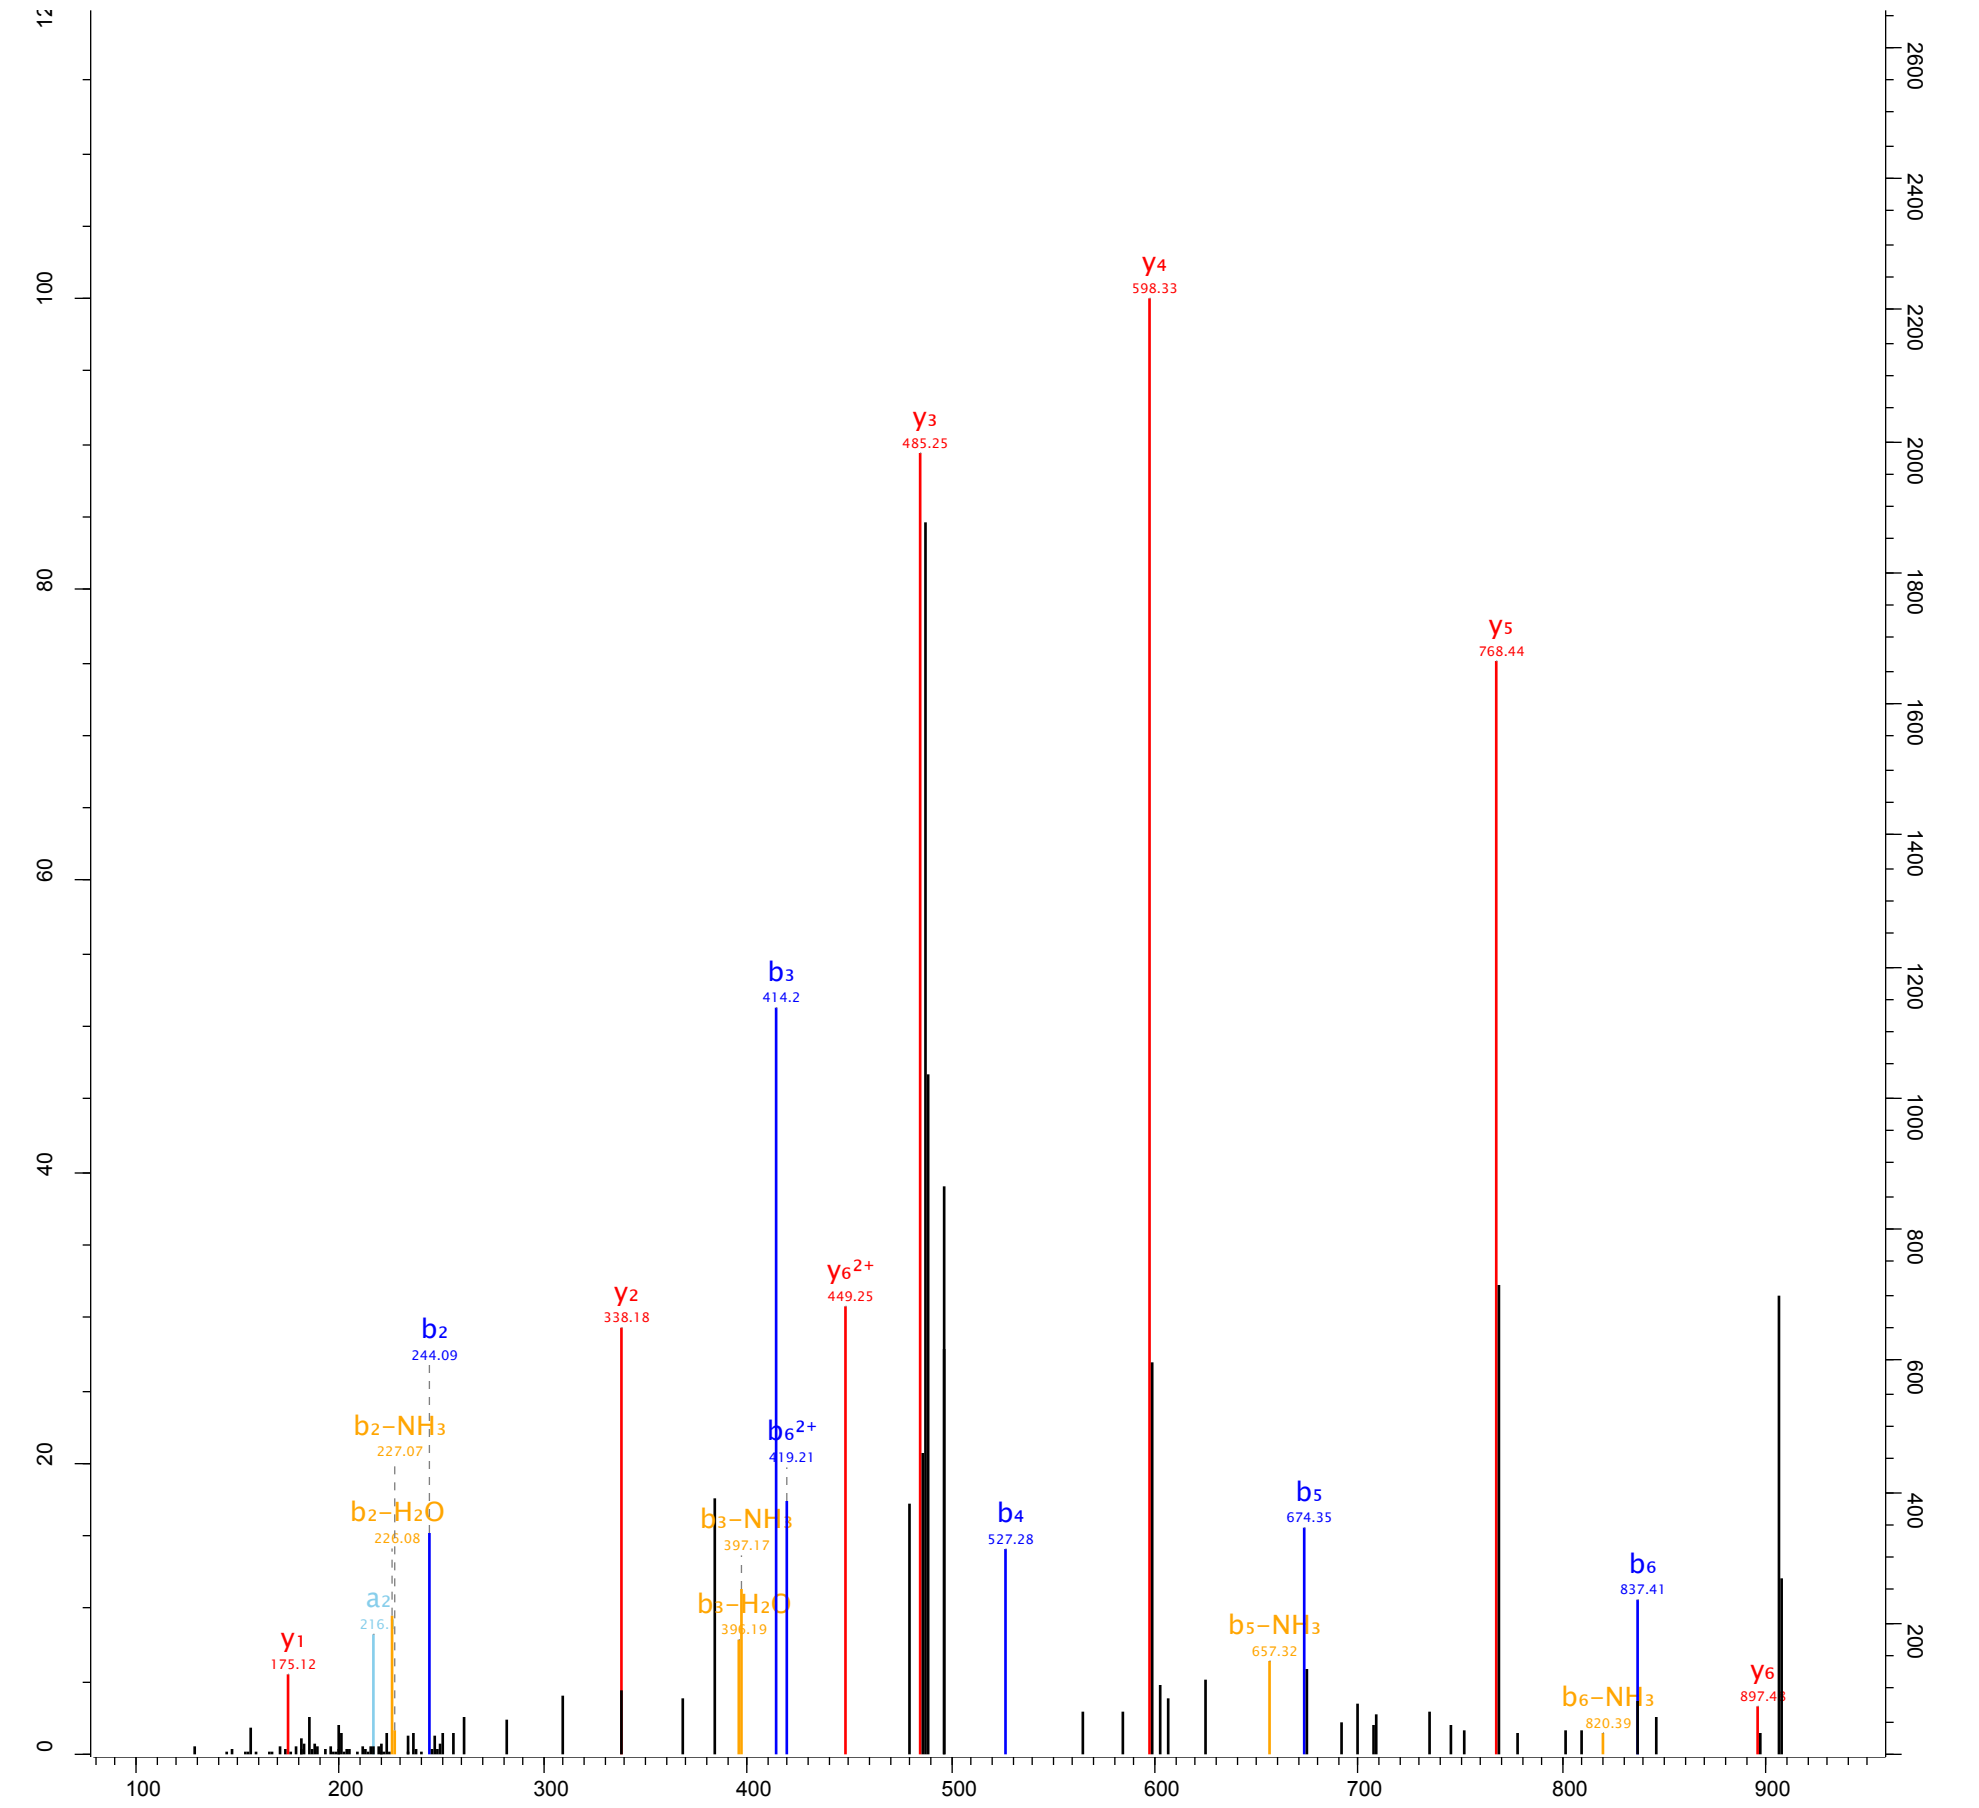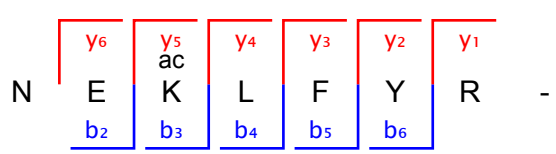

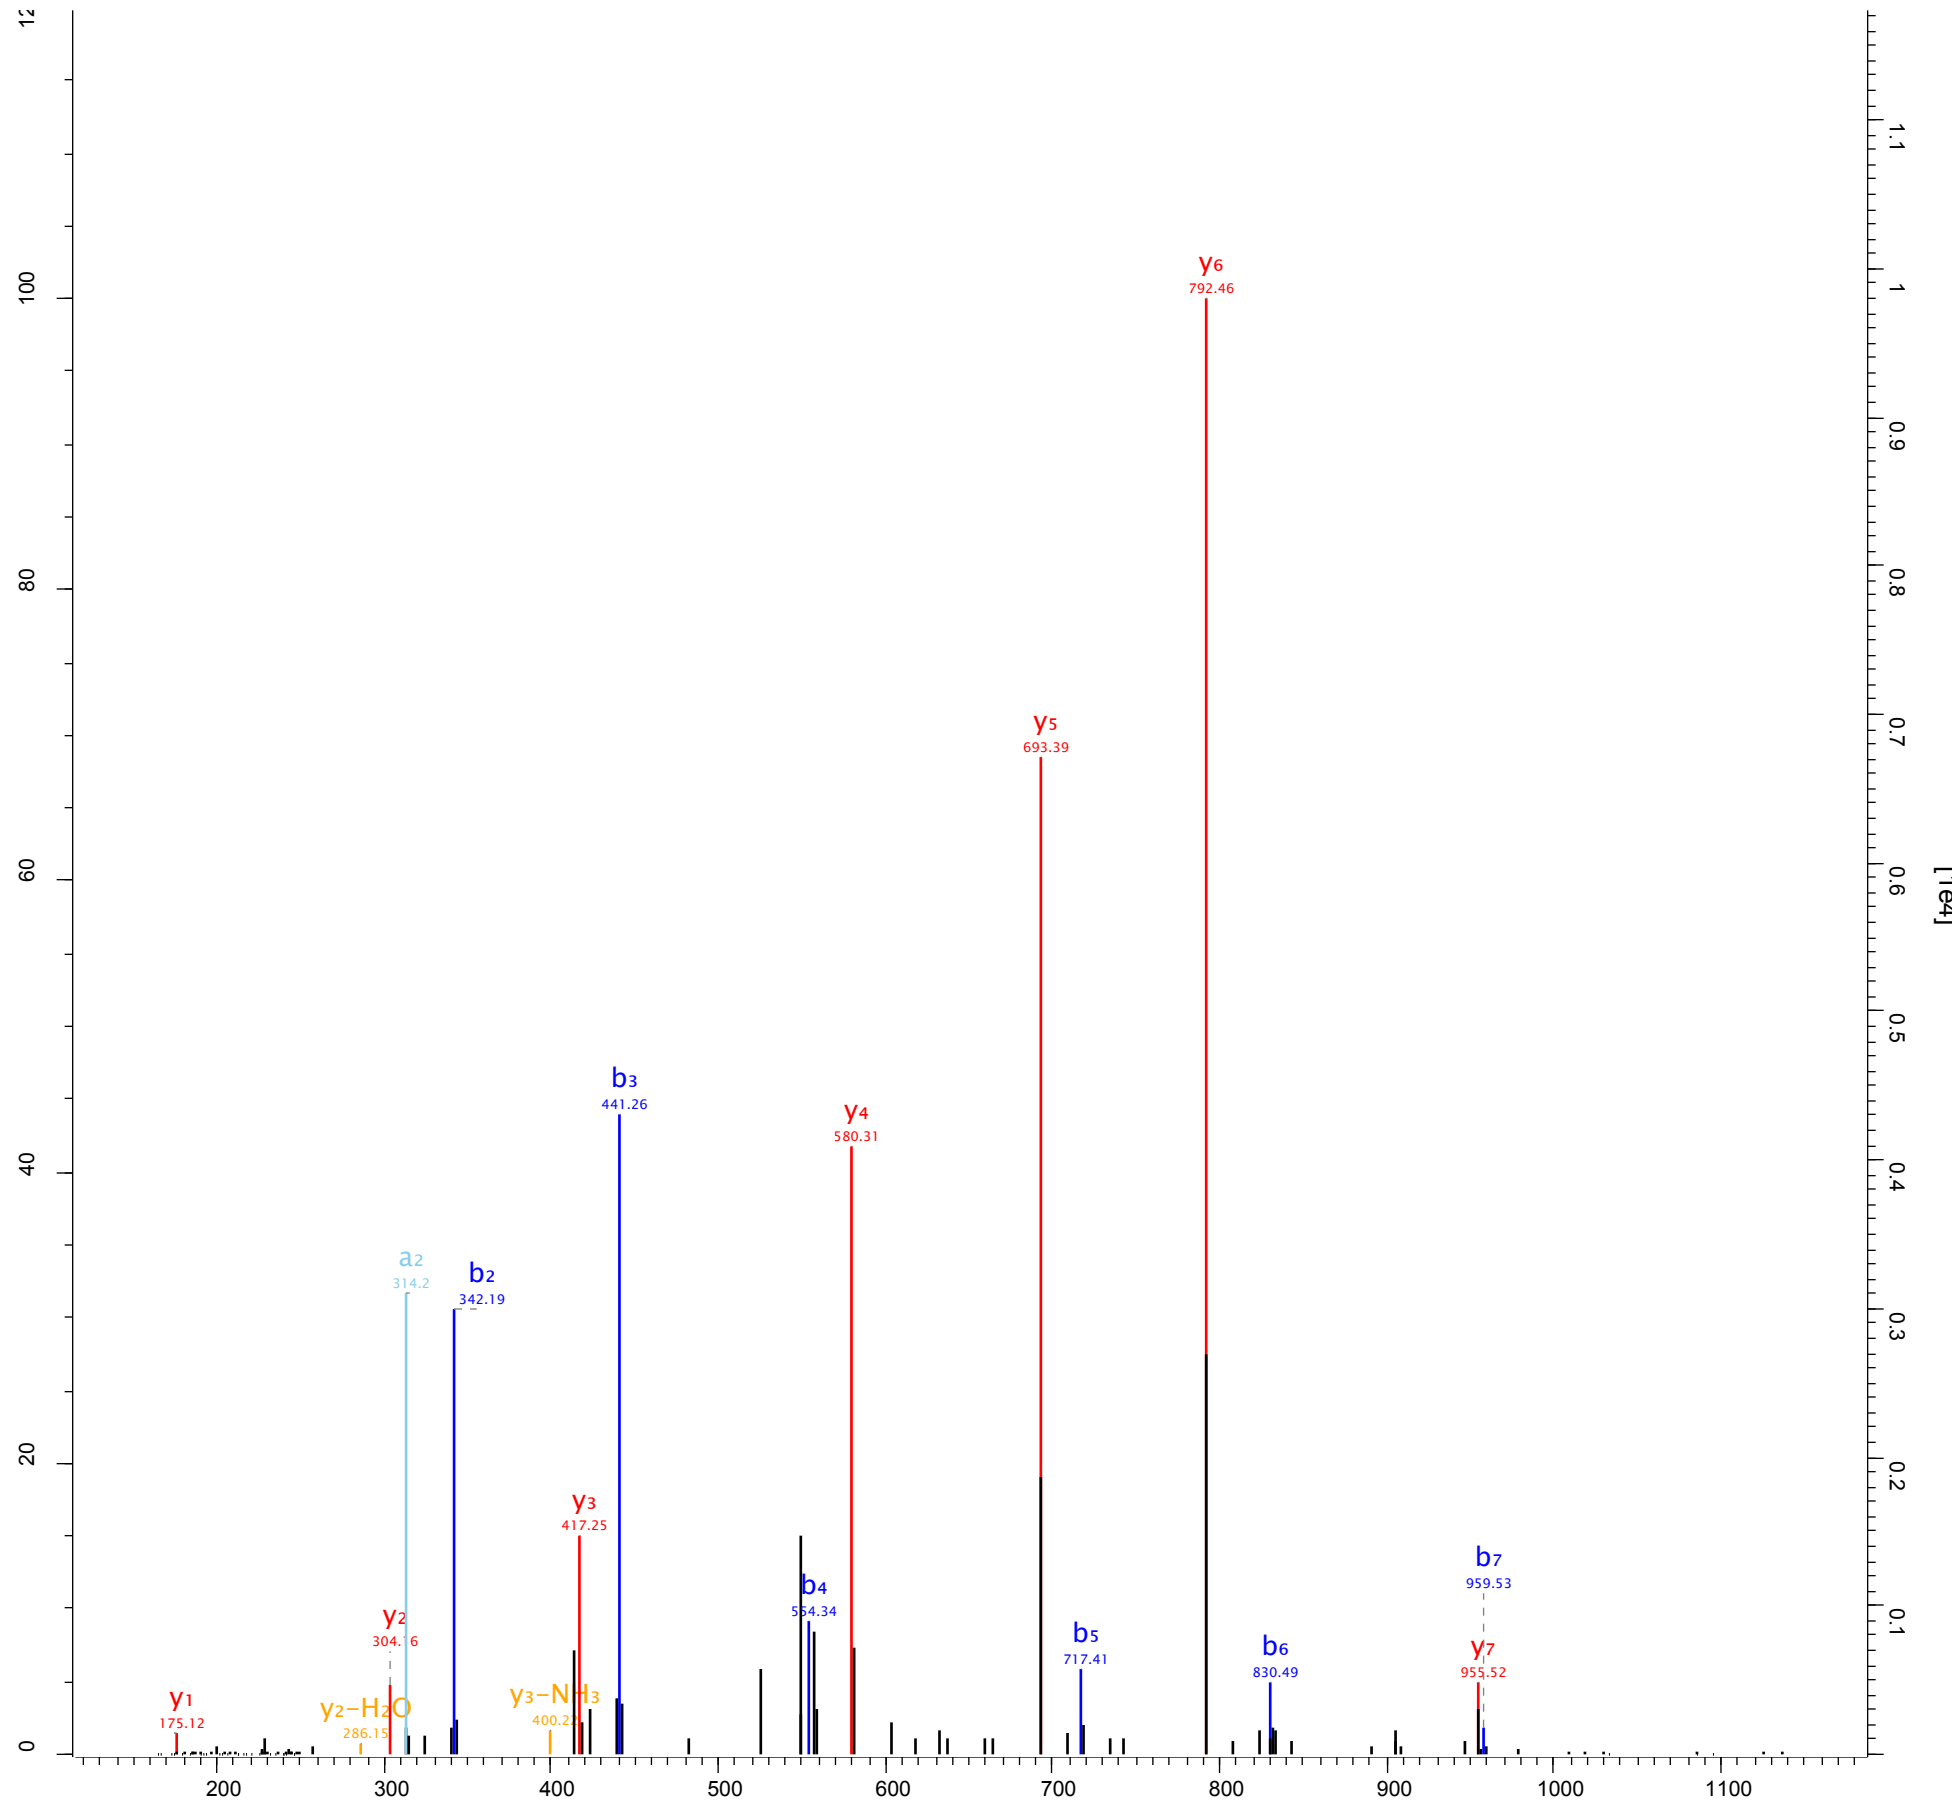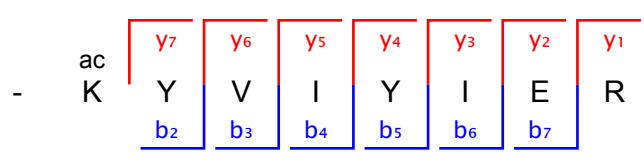

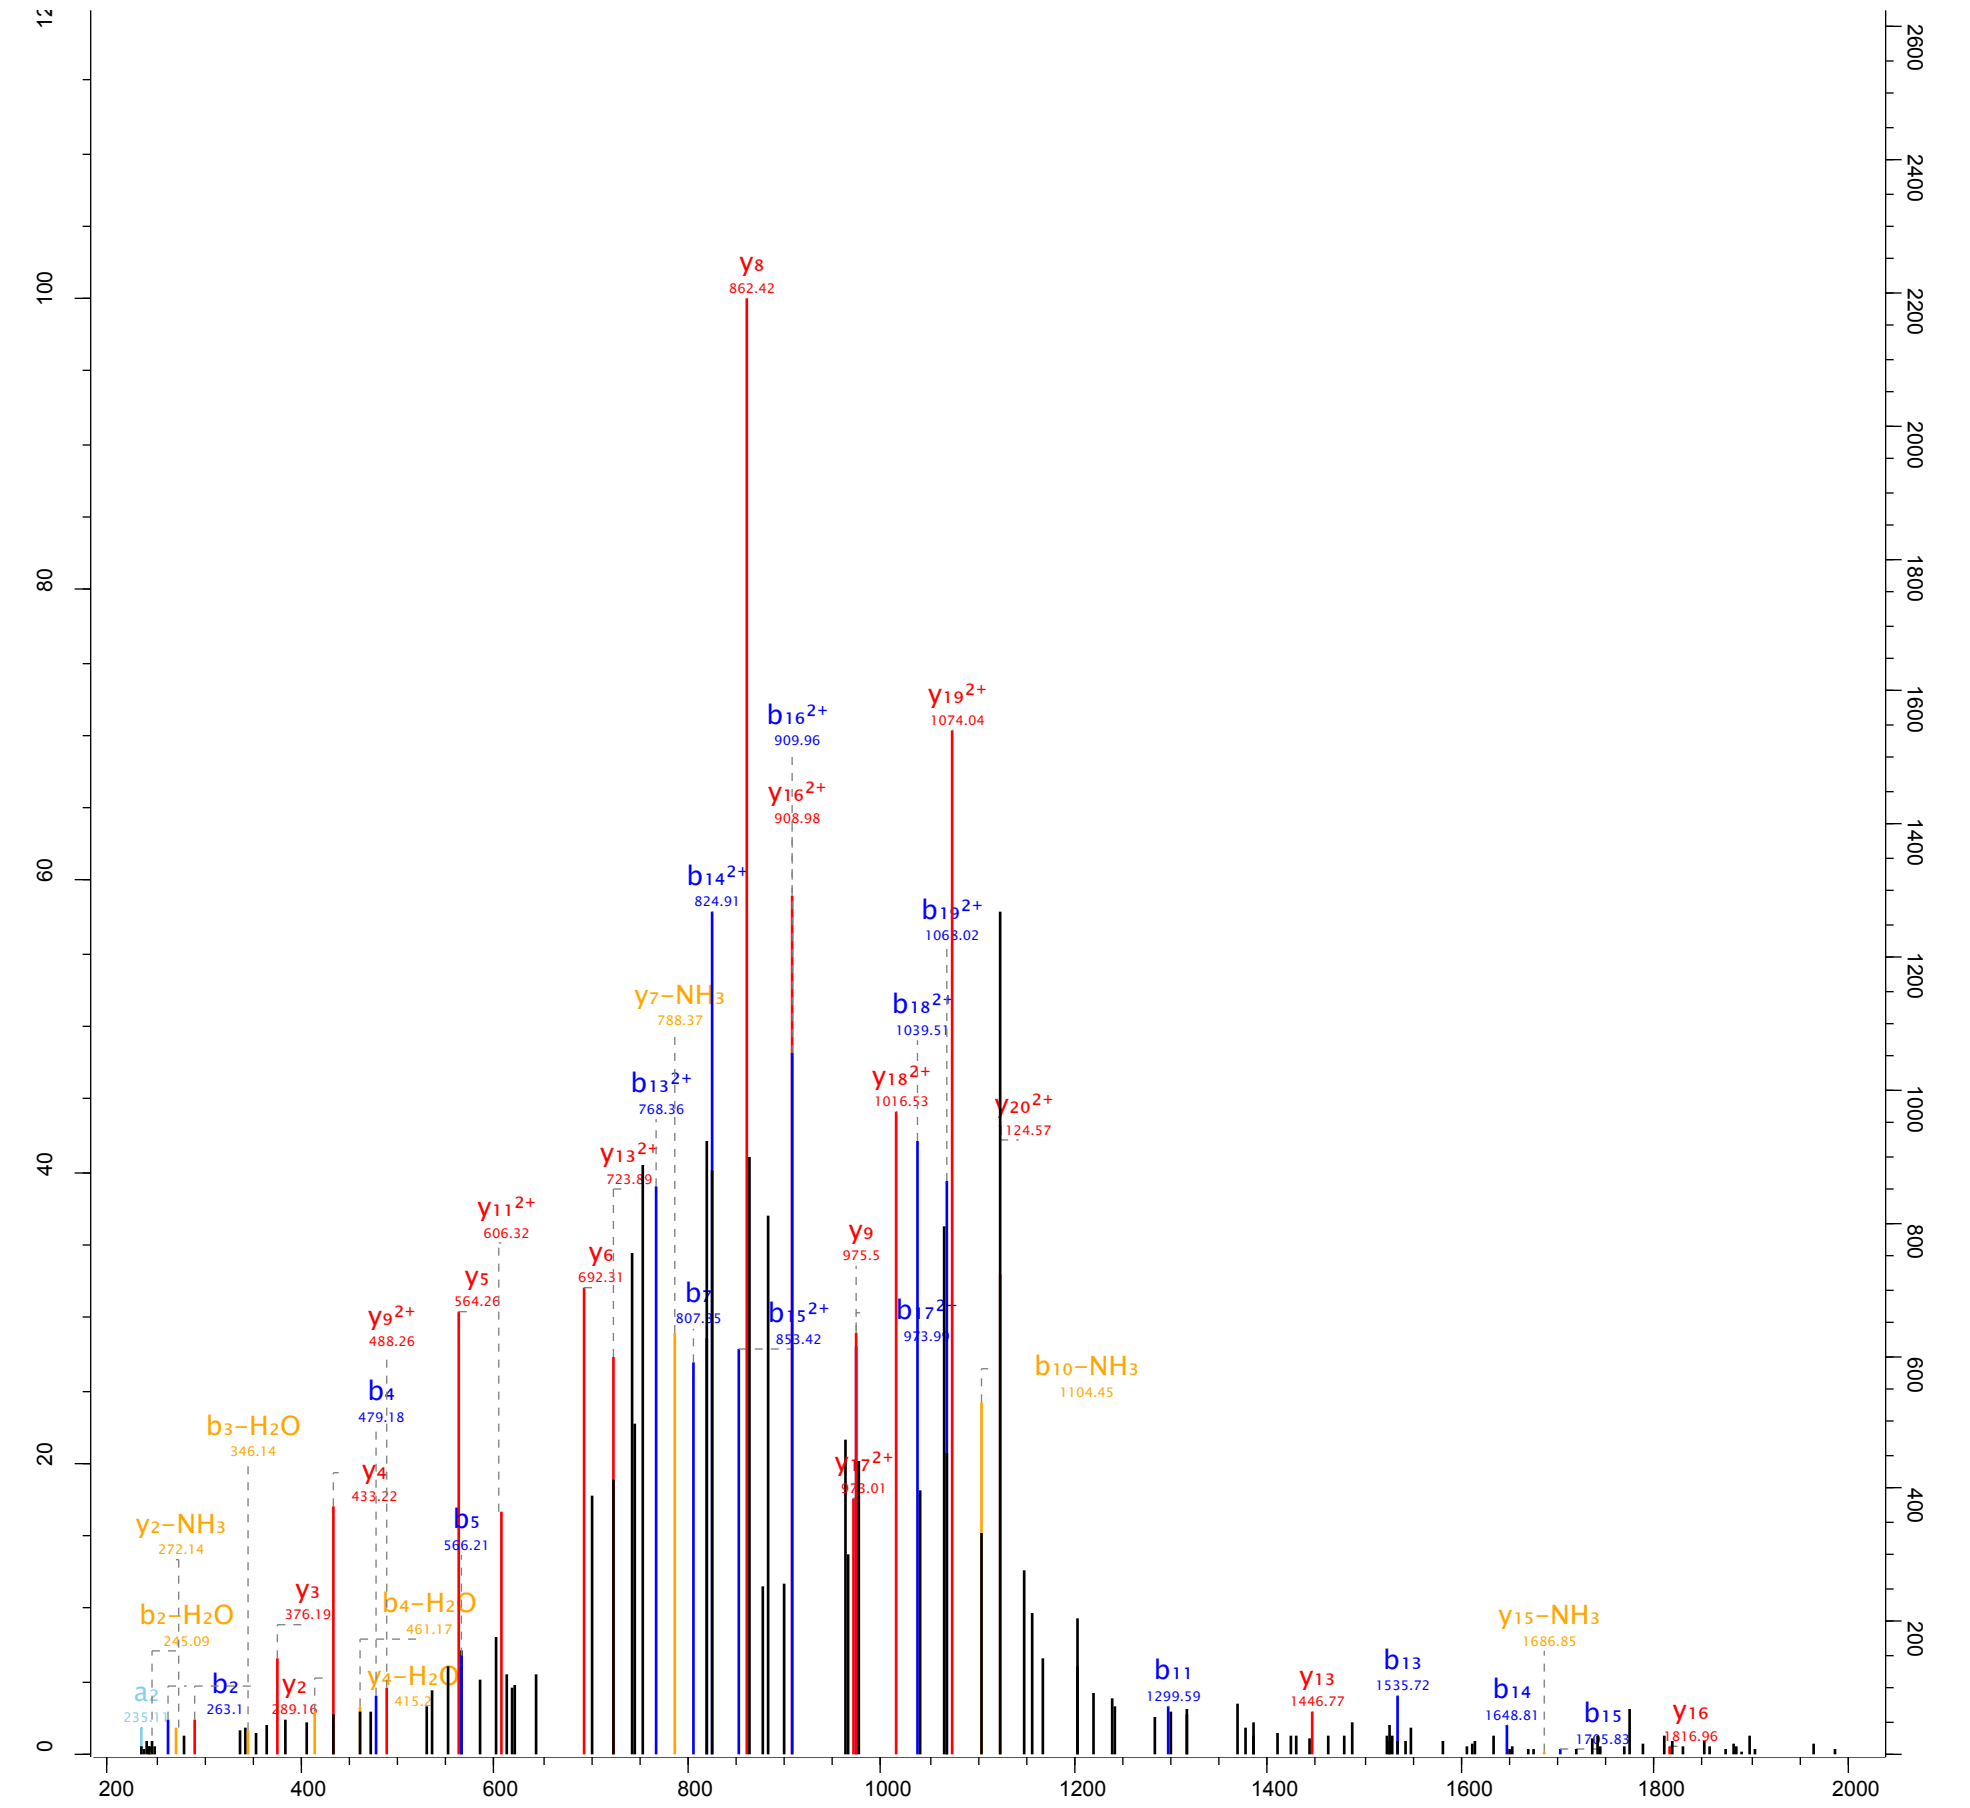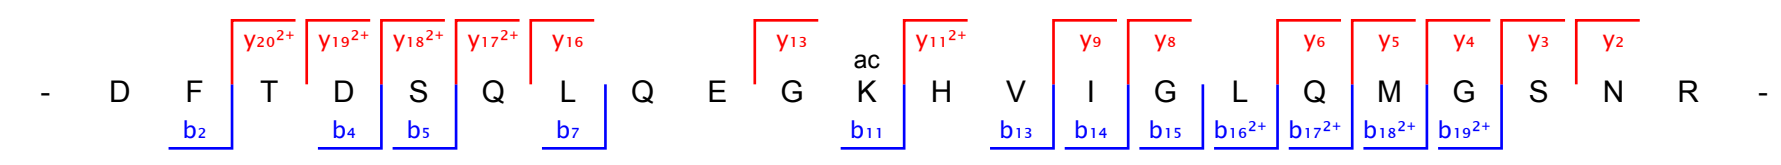



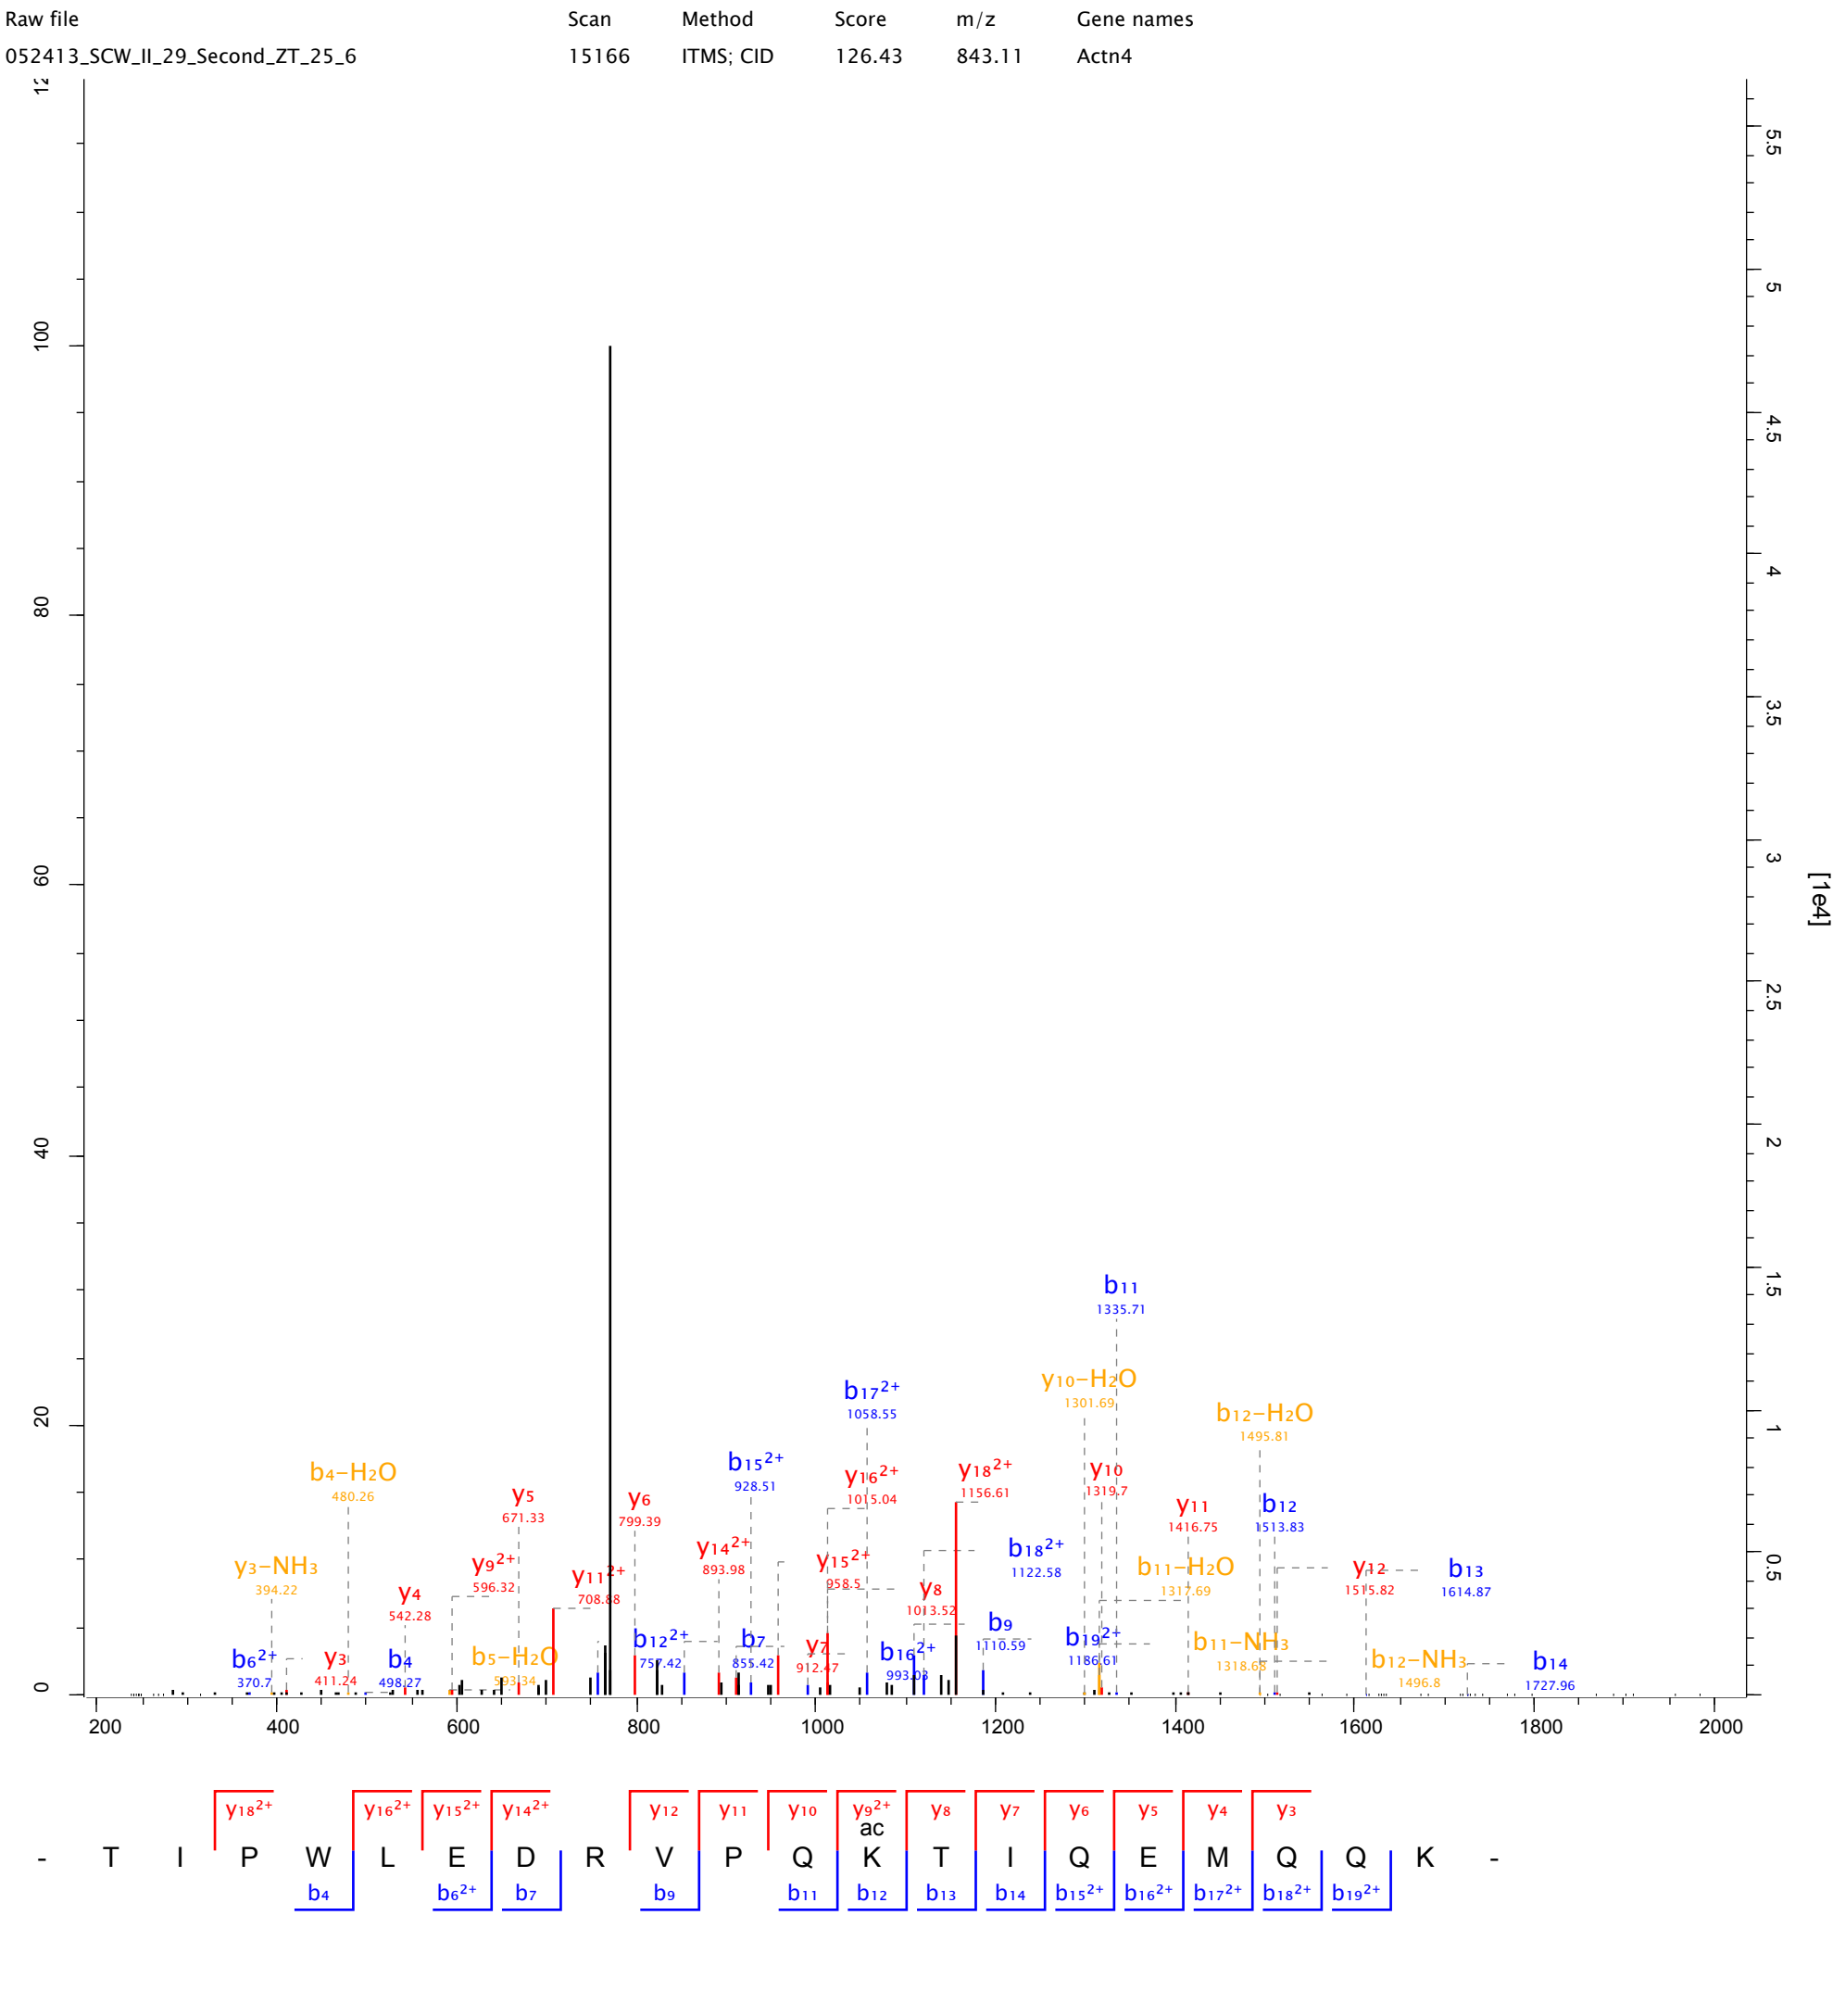

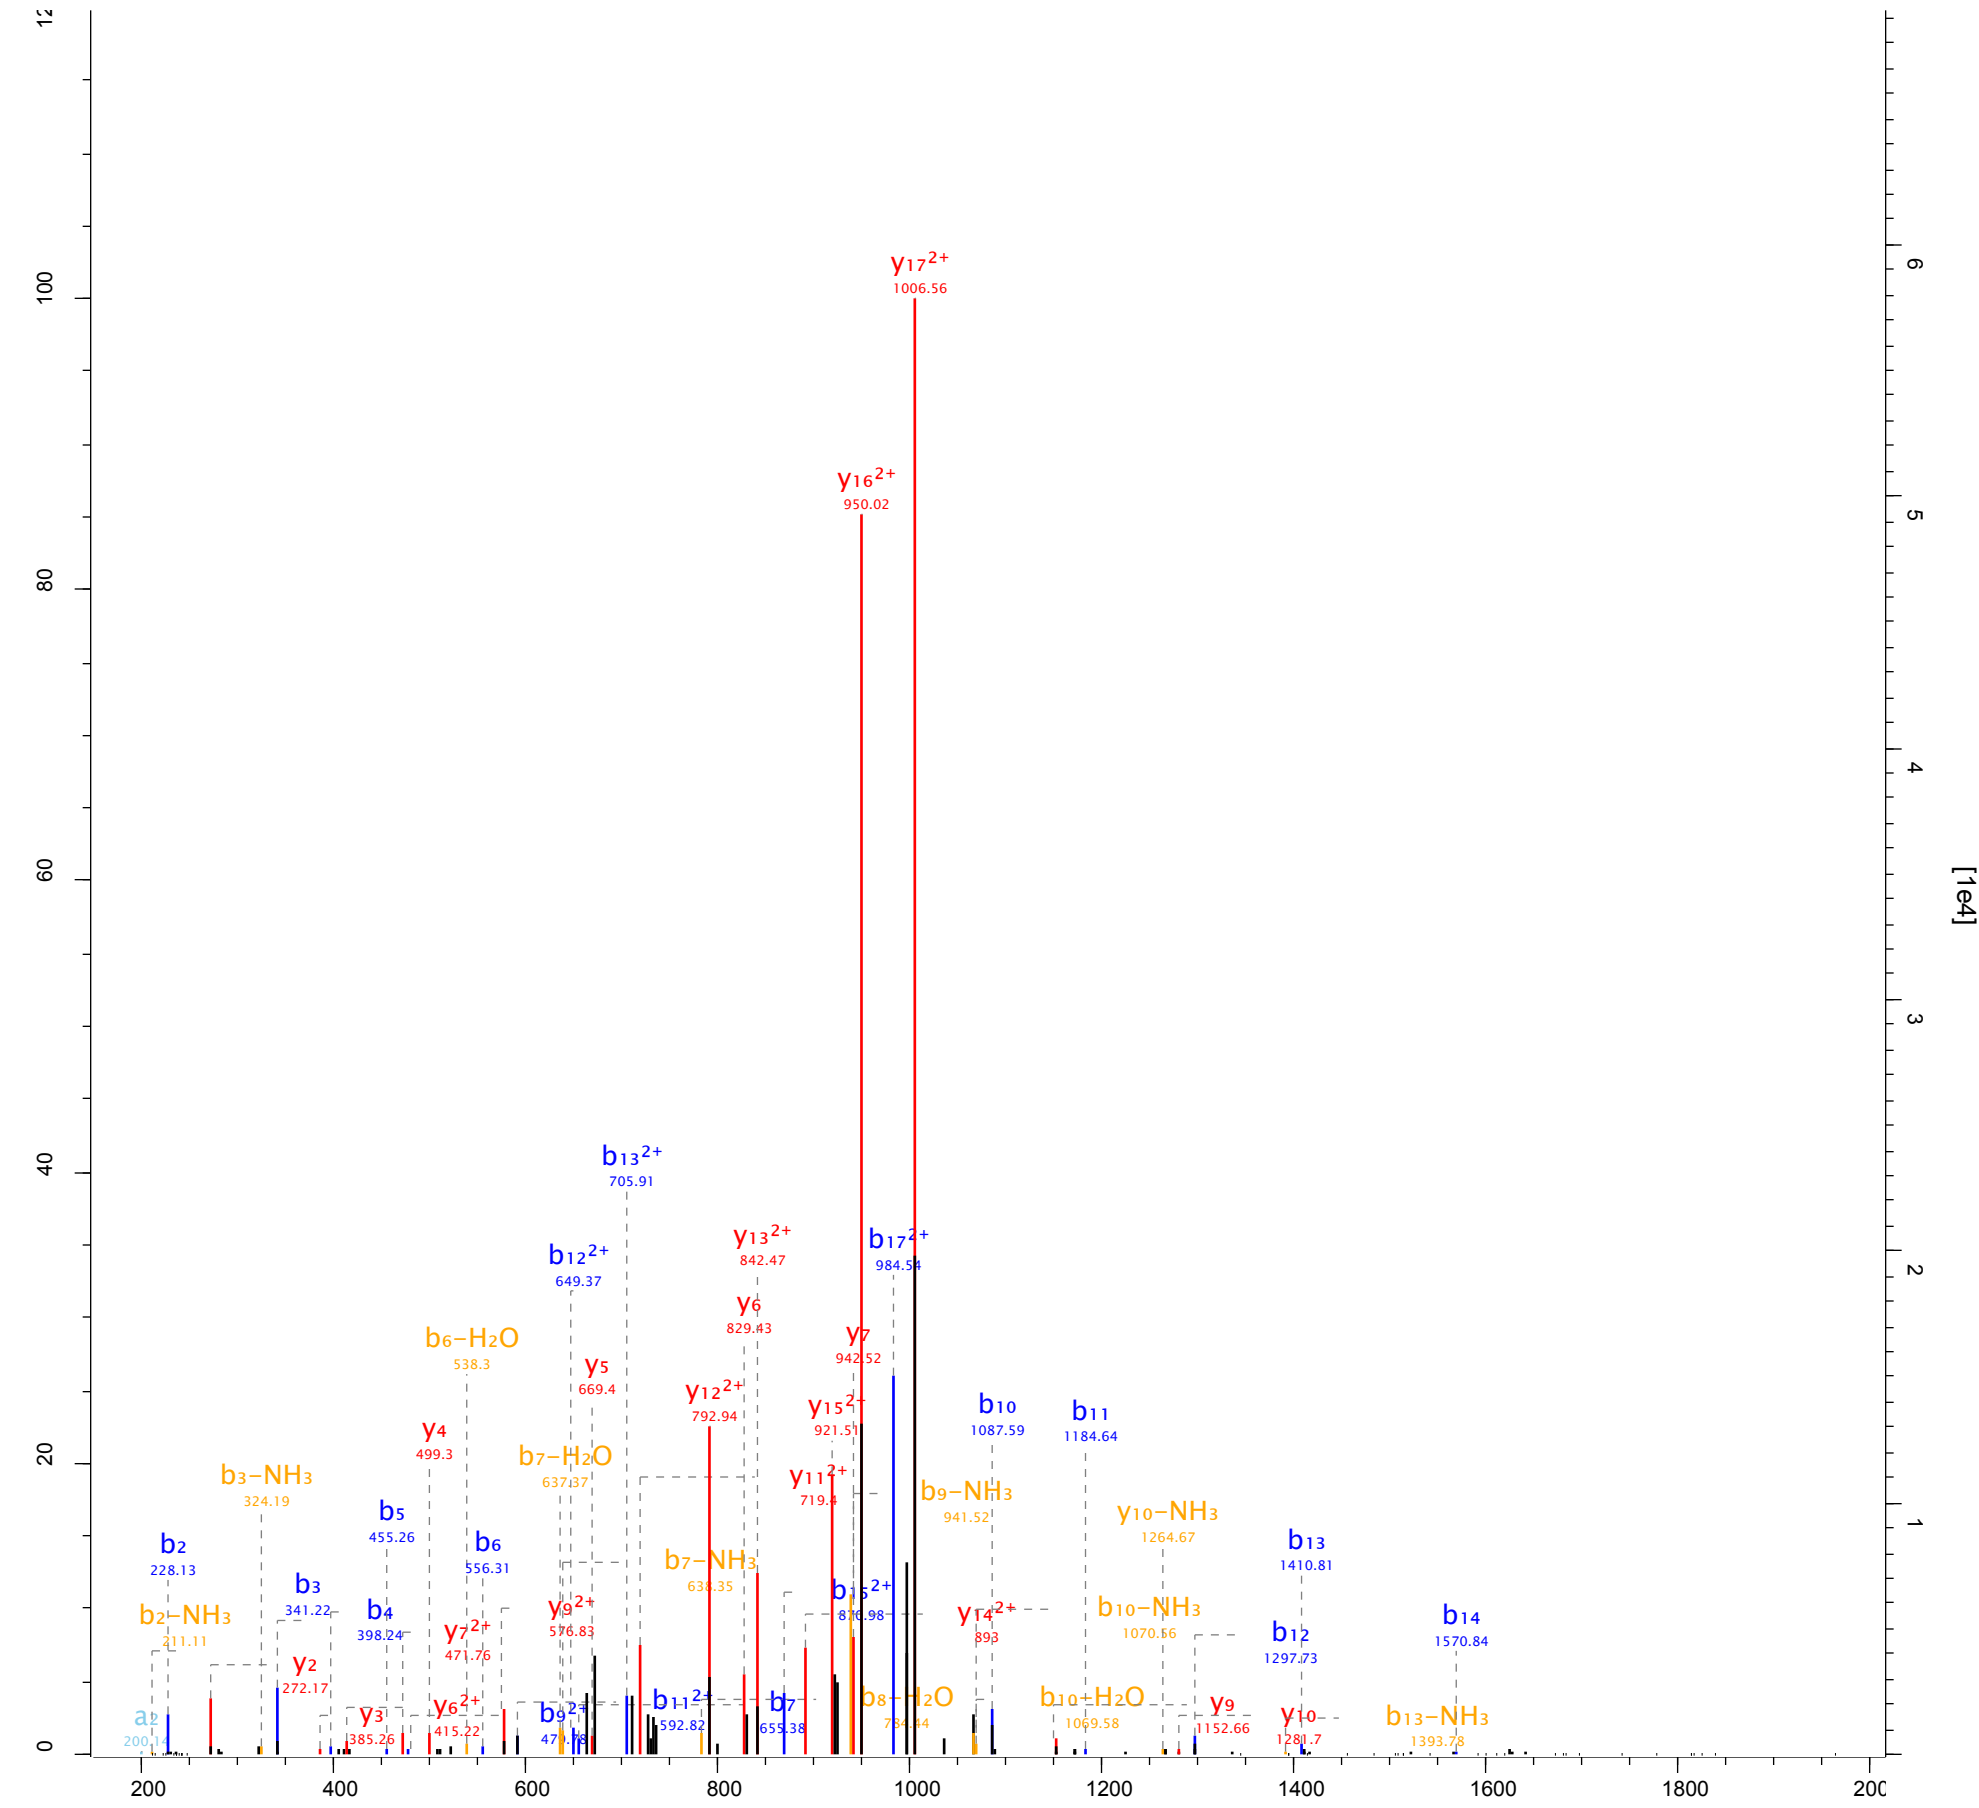

- N I L G G T V F R E P I I C K N I P R -

b<sub>2</sub>
y<sub>17</sub><sup>2+</sup>
b<sub>3</sub>
y<sub>16</sub><sup>2+</sup>
b<sub>4</sub>
y<sub>15</sub><sup>2+</sup>
b<sub>5</sub>
y<sub>14</sub><sup>2+</sup>
b<sub>6</sub>
y<sub>13</sub><sup>2+</sup>
b<sub>7</sub>
y<sub>12</sub><sup>2+</sup>
b<sub>9</sub><sup>2+</sup>
y<sub>11</sub><sup>2+</sup>
b<sub>10</sub>
y<sub>10</sub>
b<sub>11</sub>
y<sub>9</sub>
b<sub>12</sub>
y<sub>7</sub>
b<sub>13</sub>
y<sub>6</sub>
b<sub>14</sub>
y<sub>5</sub><sub>ac</sub>
b<sub>15</sub><sup>2+</sup>
y<sub>4</sub>
b<sub>17</sub><sup>2+</sup>
y<sub>3</sub>
b<sub>12</sub><sup>2+</sup>
y<sub>2</sub>

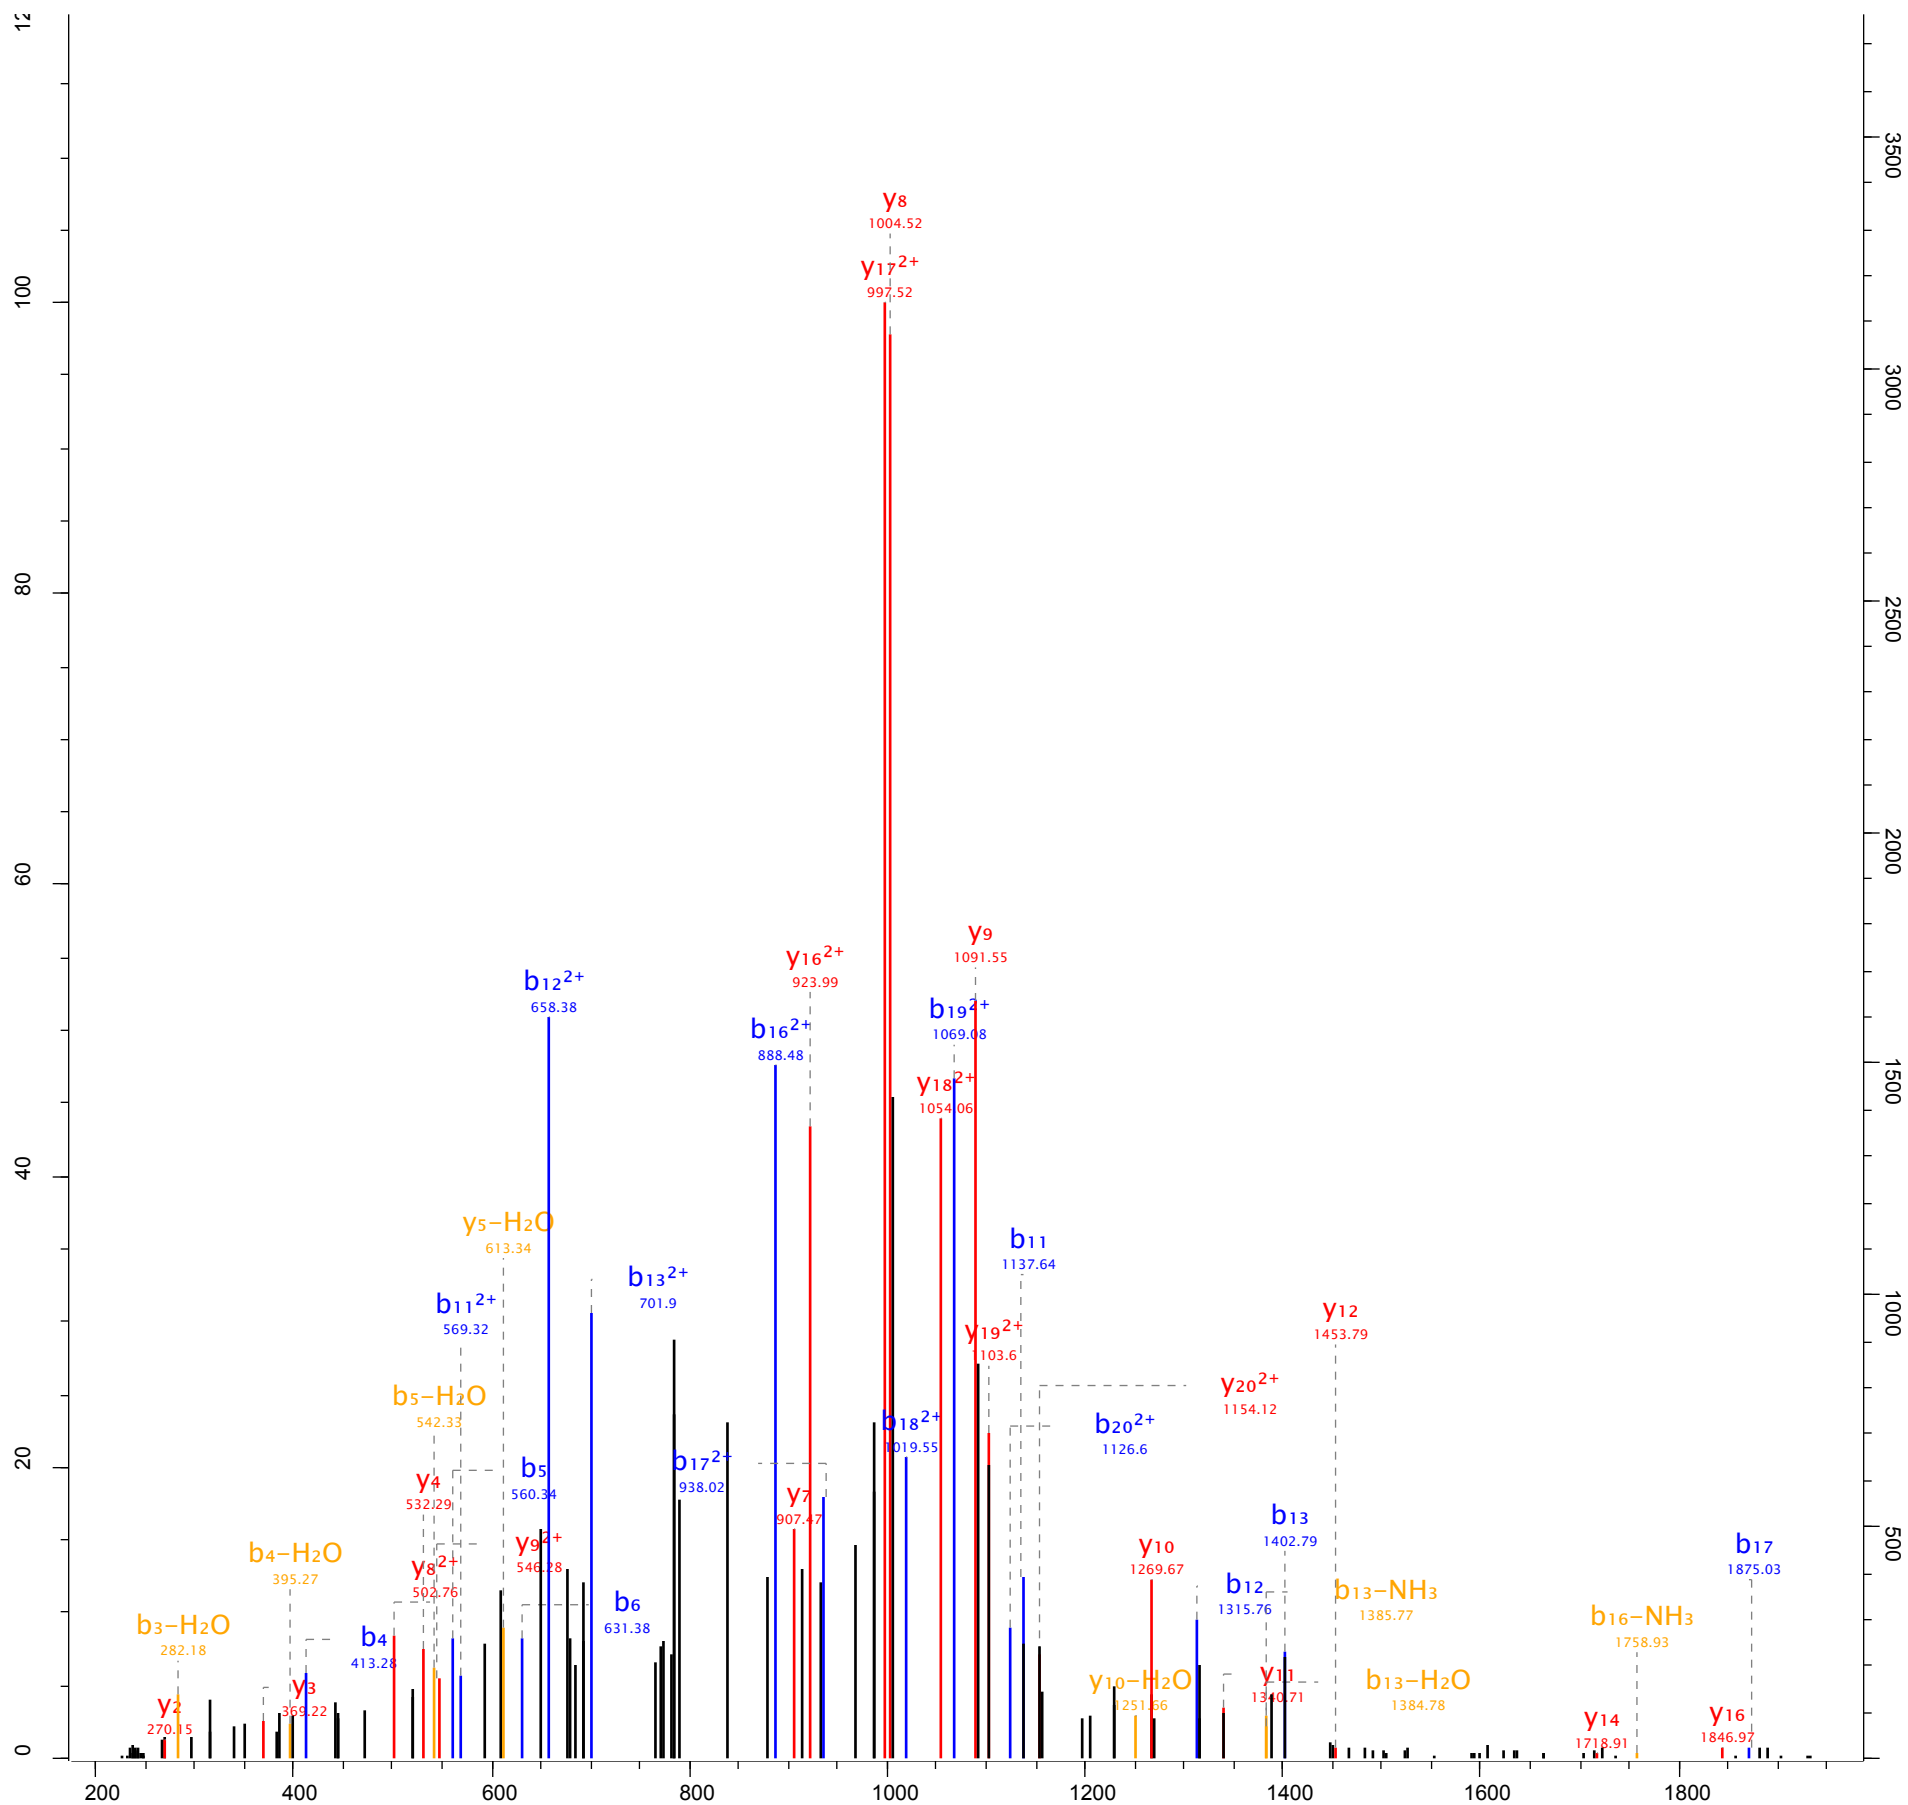

- V T V L F A G Q H I A K S P F E V Y V D K -

y20<sup>2+</sup> y19<sup>2+</sup> y18<sup>2+</sup> y17<sup>2+</sup> y16 y14 y12 y11 y10 ac y9 y8 y7 y4 y3 y2

b4 b5 b6 b11 b12 b13 b16<sup>2+</sup> b17 b18<sup>2+</sup> b19<sup>2+</sup> b20<sup>2+</sup>

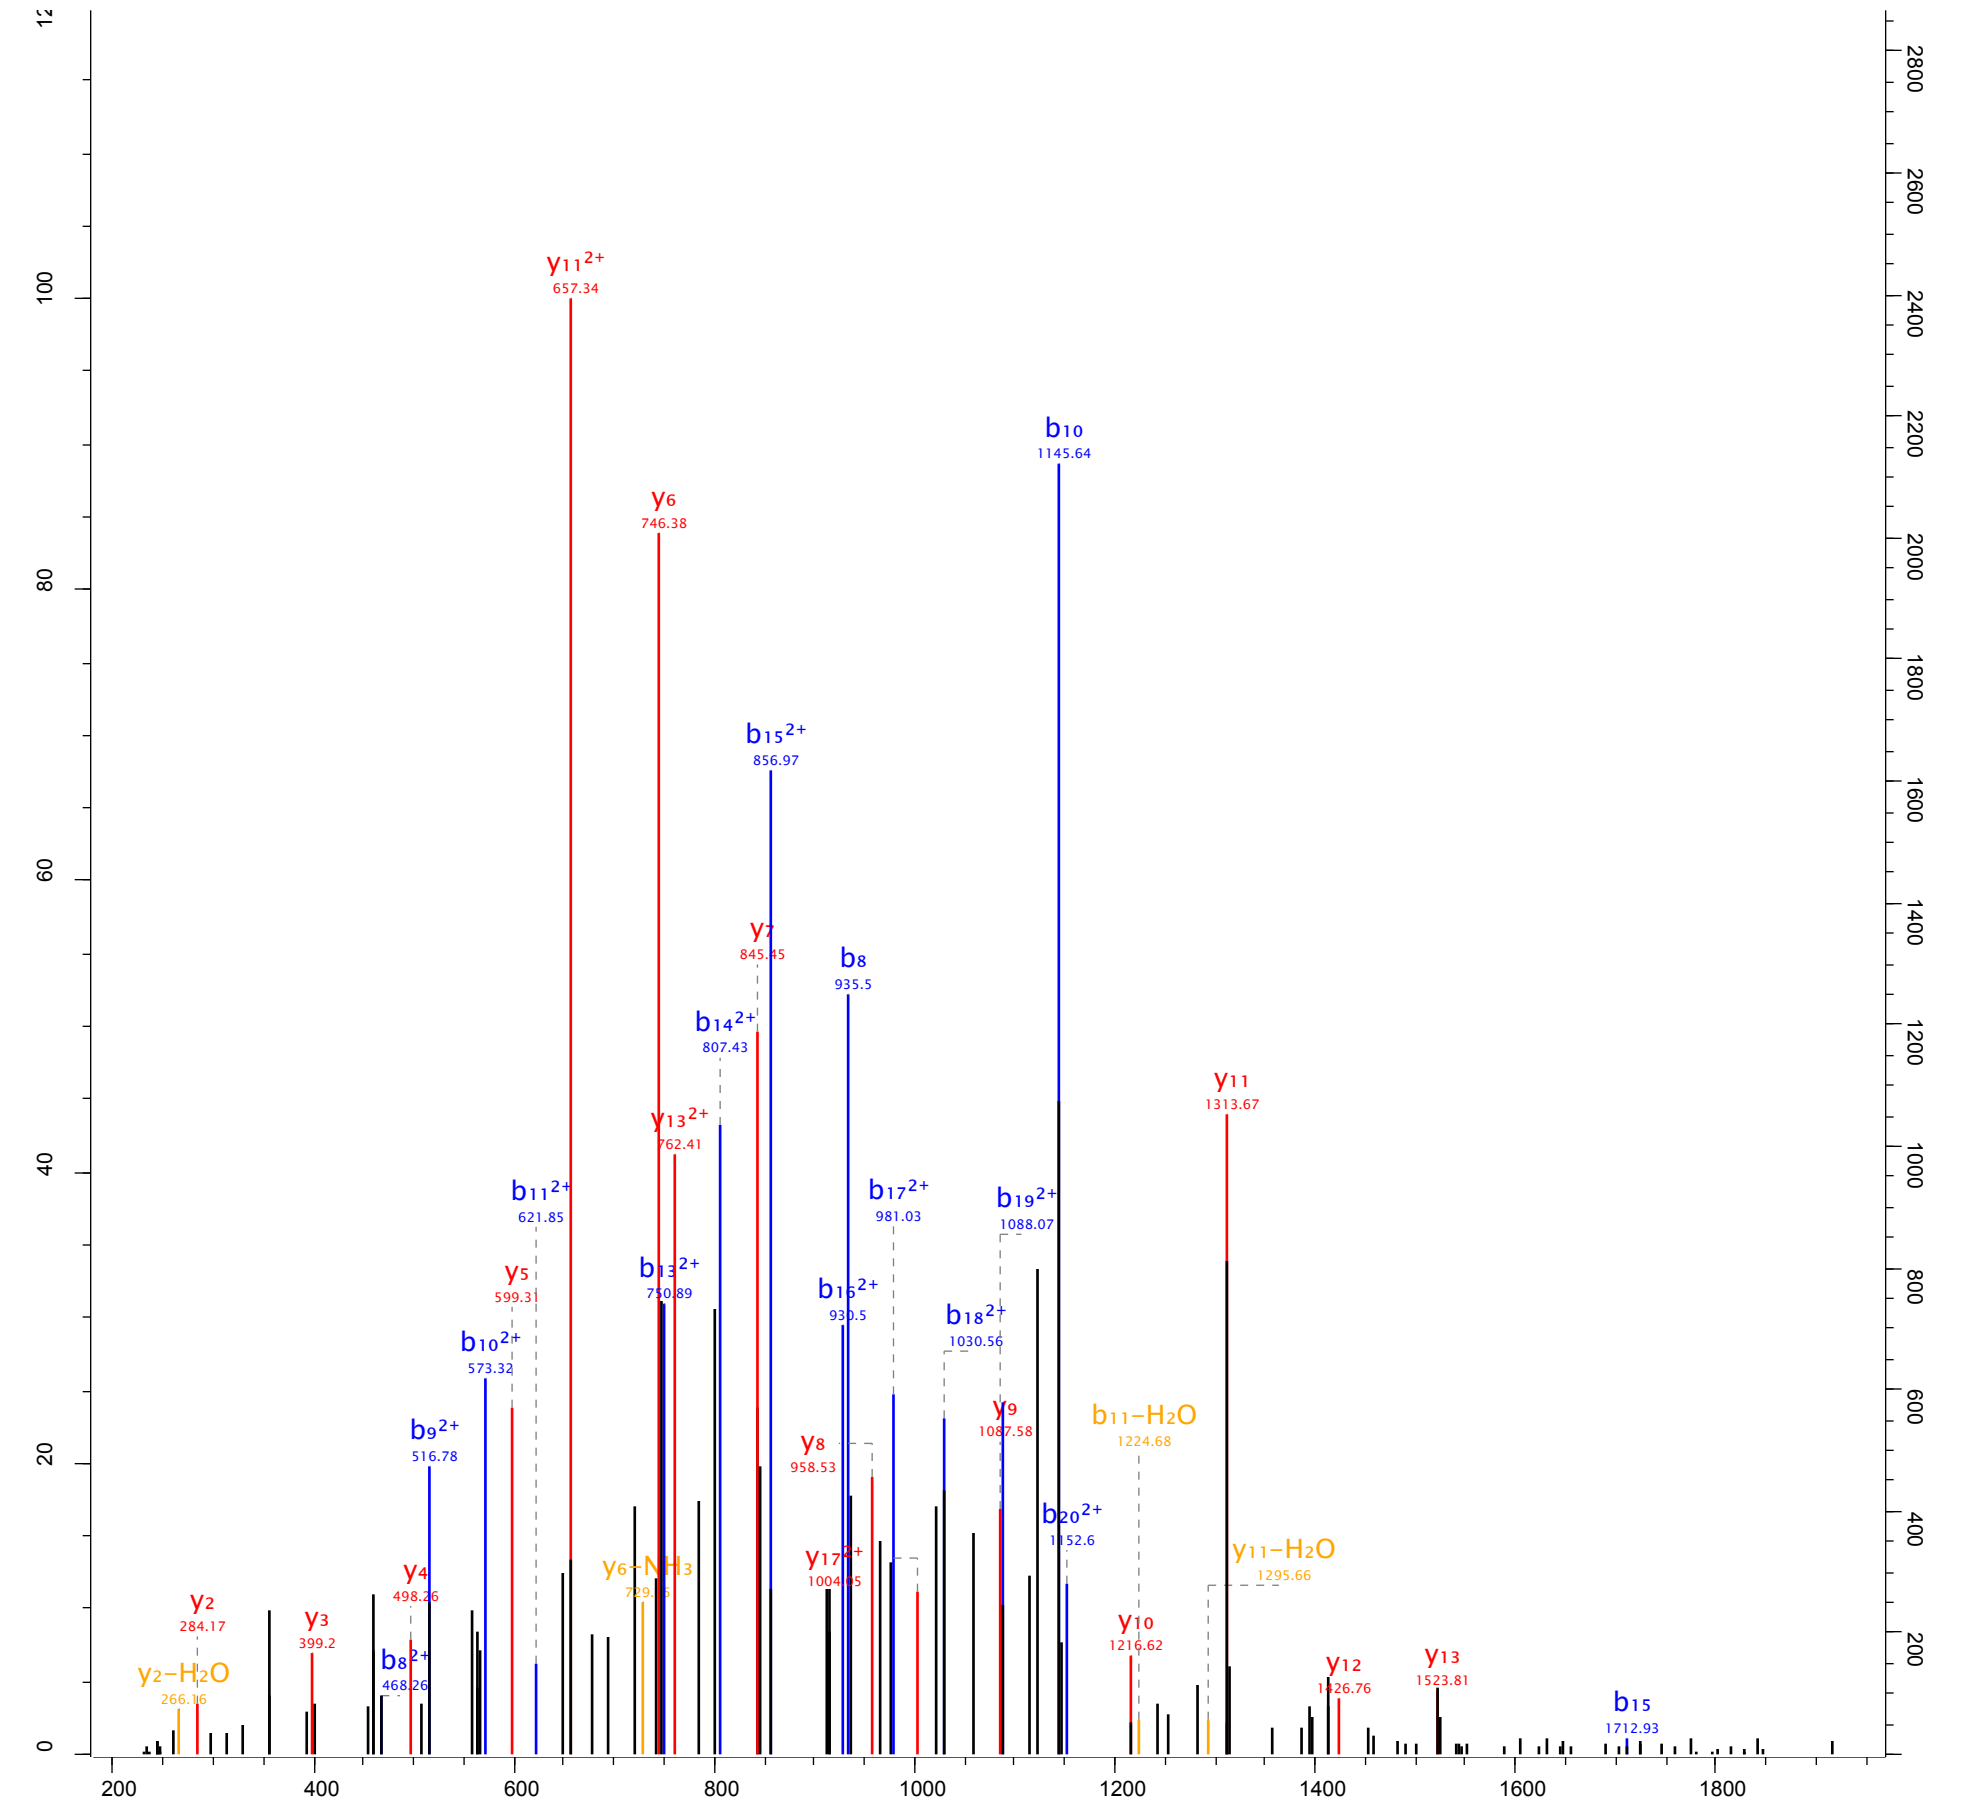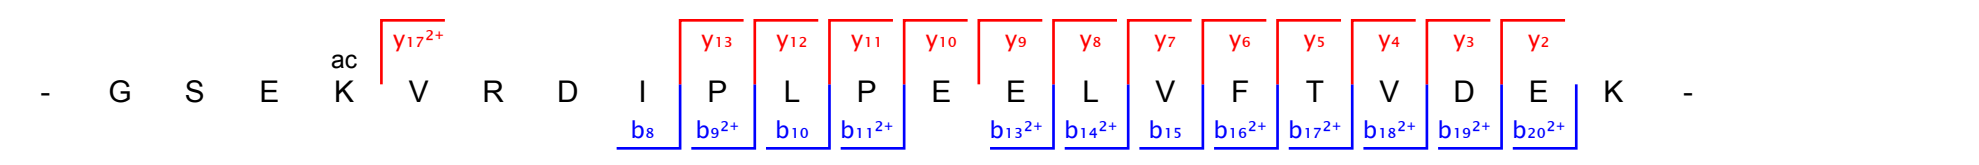

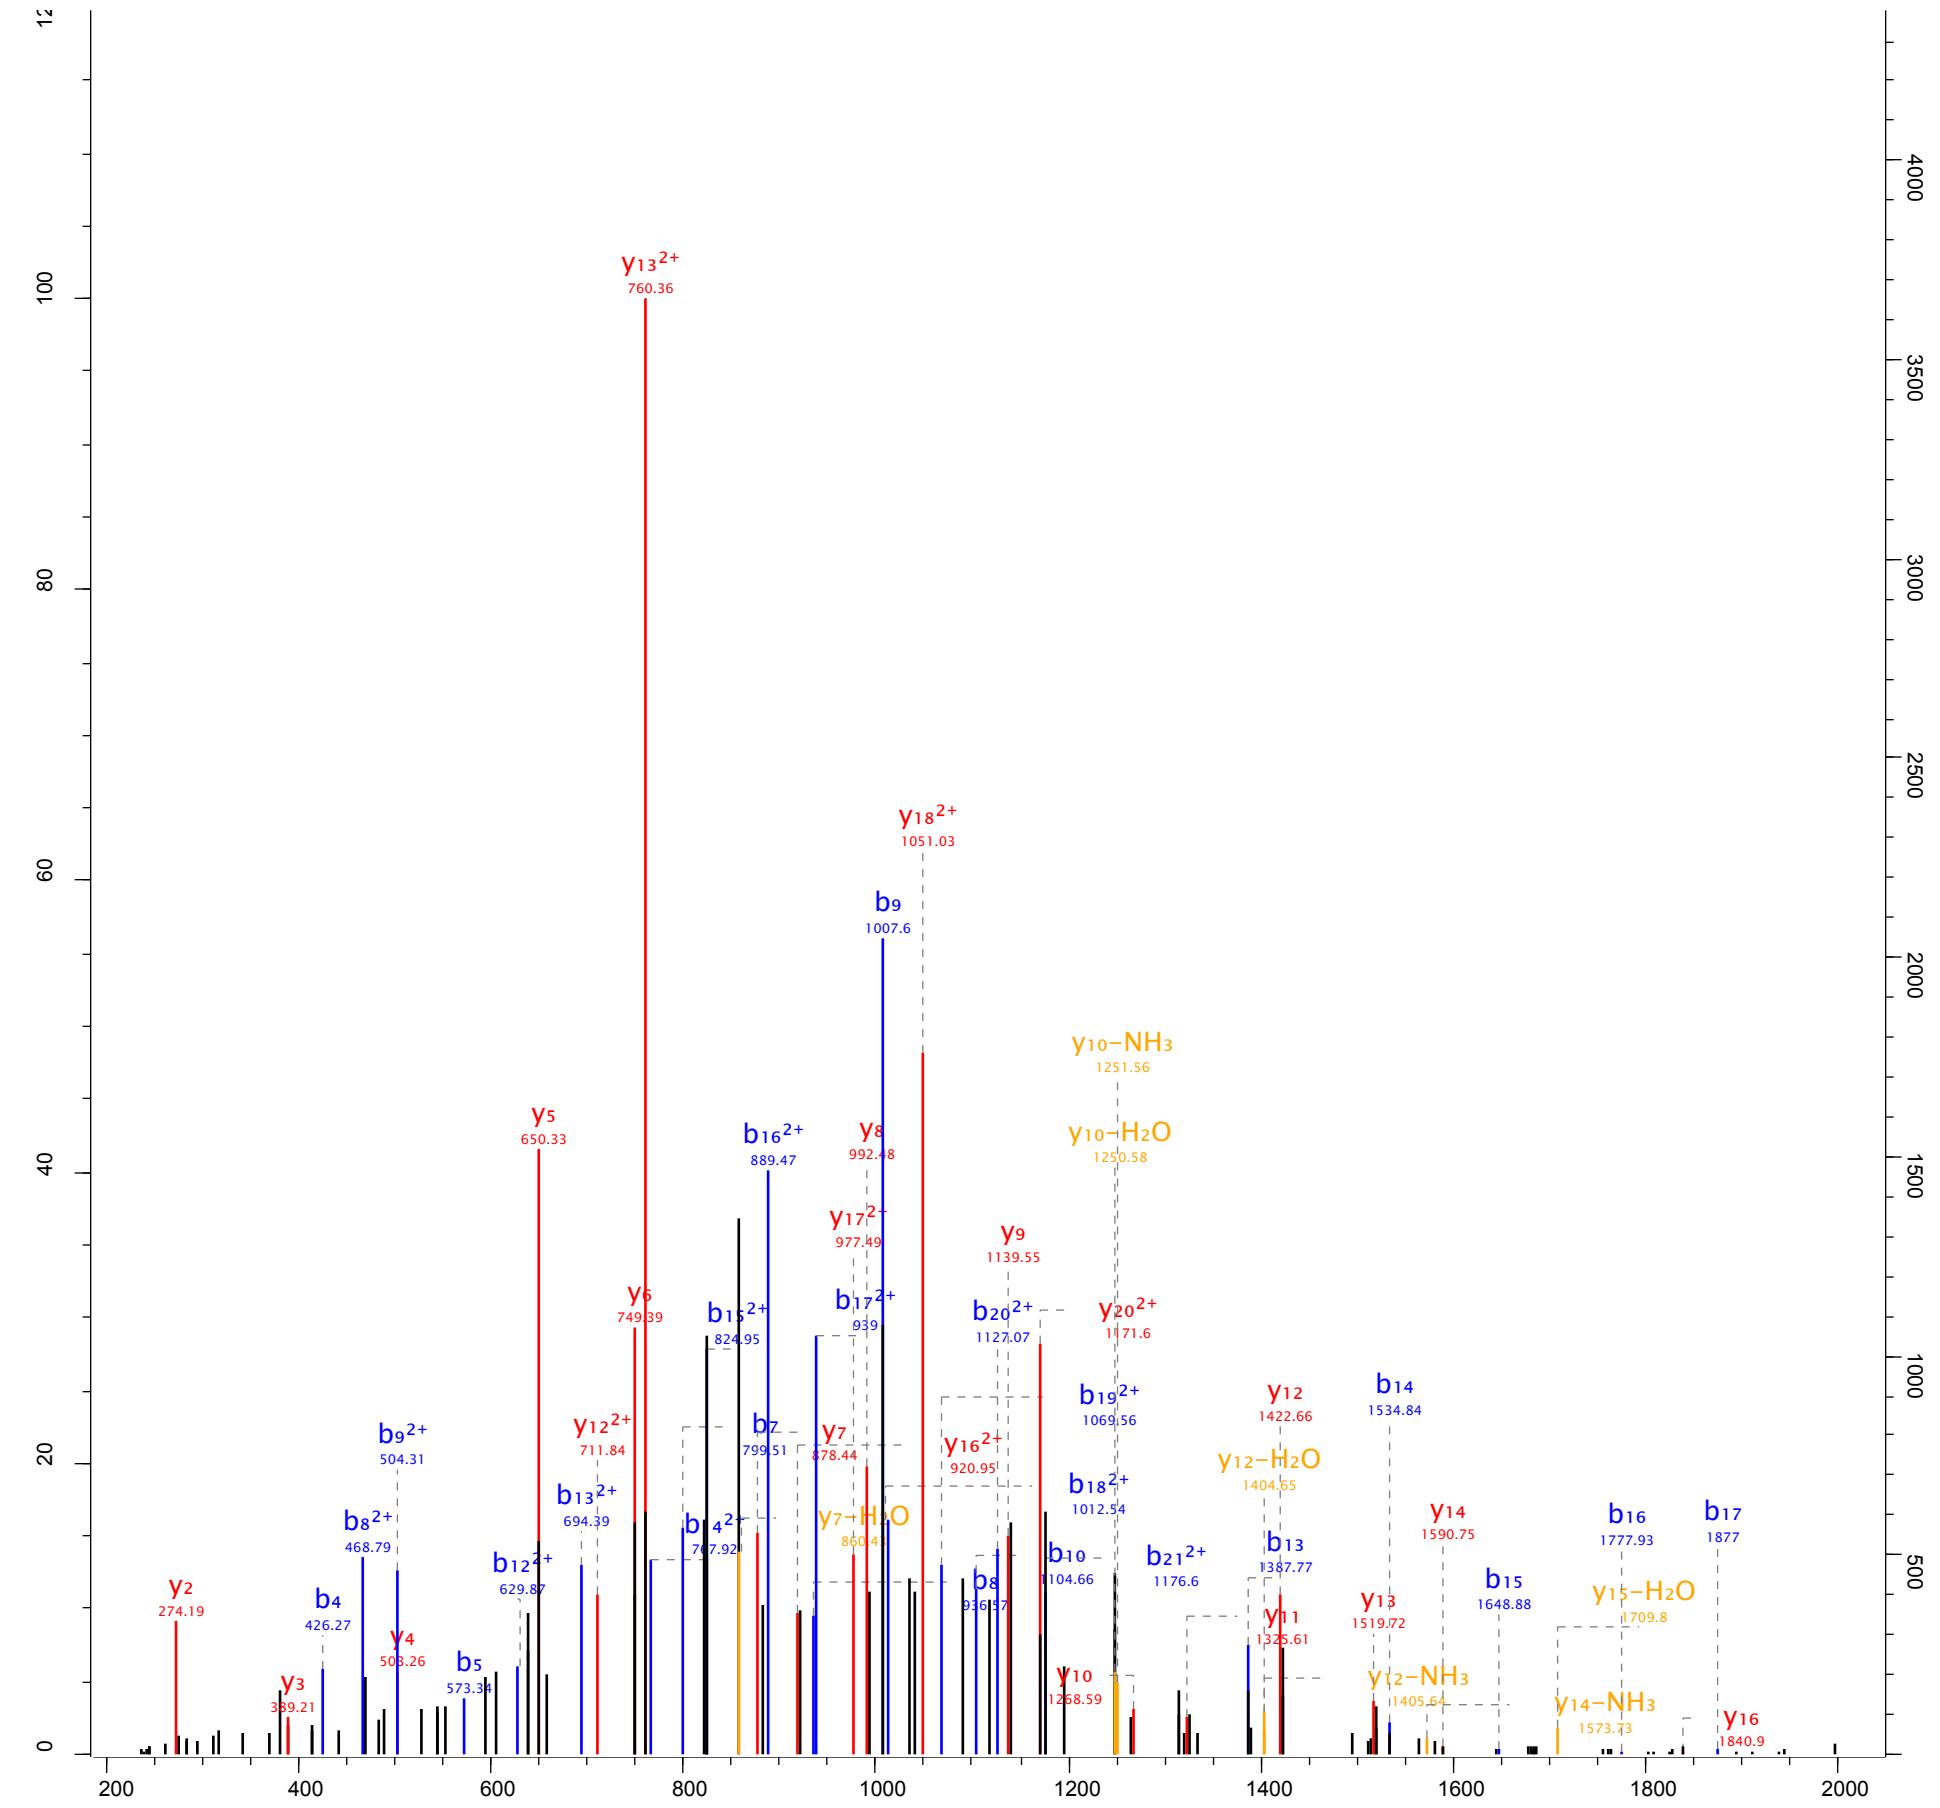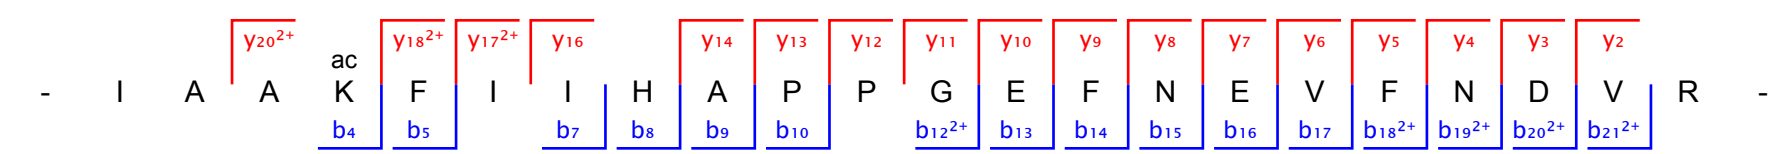

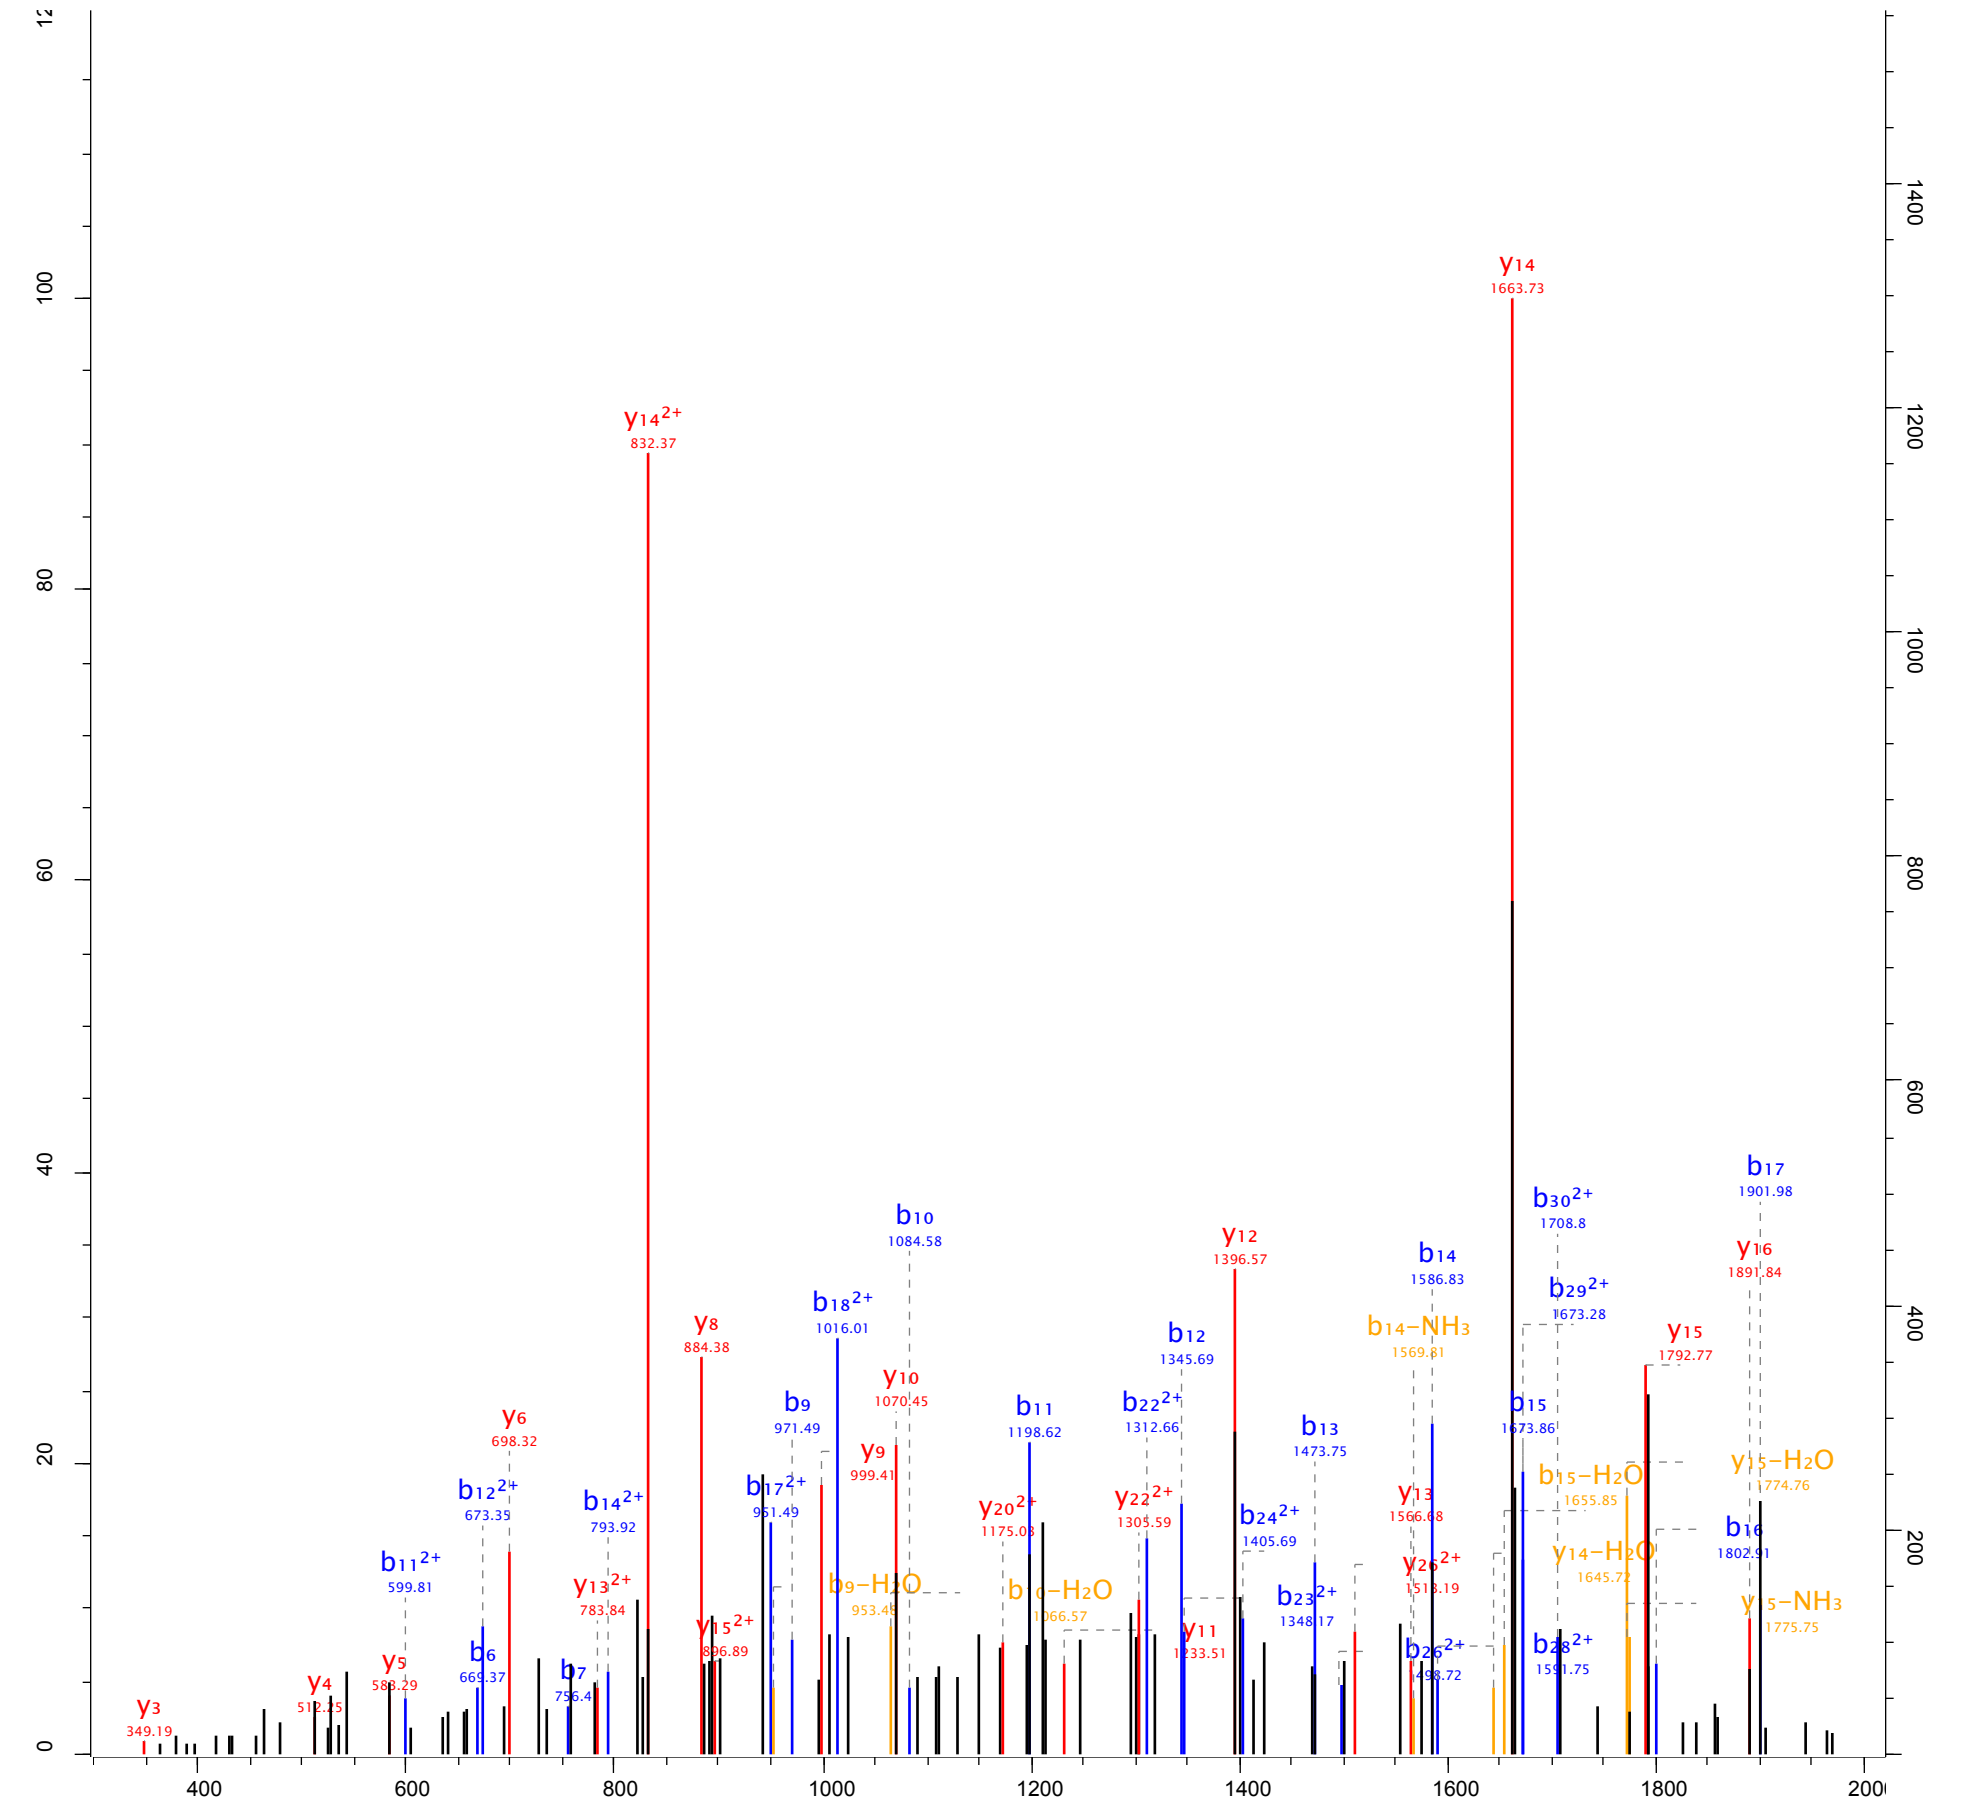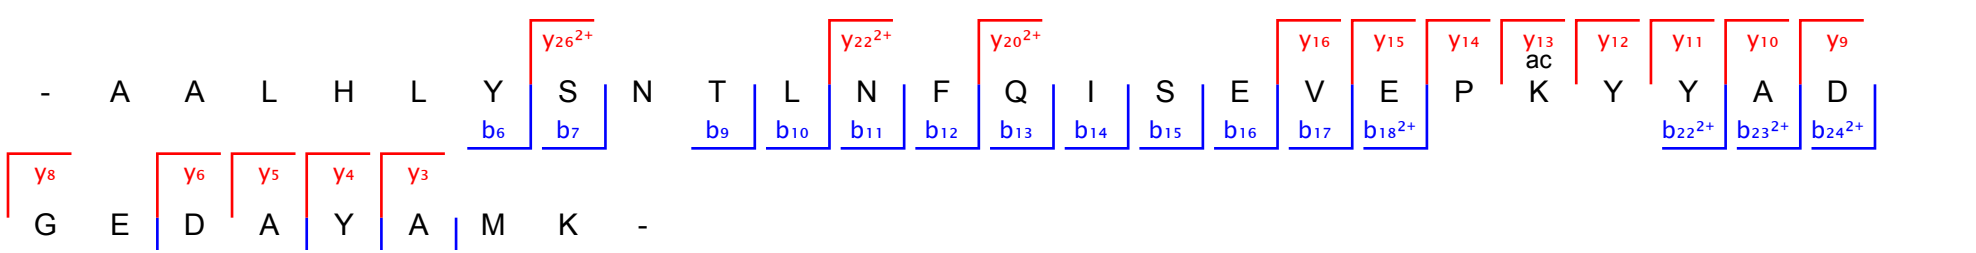

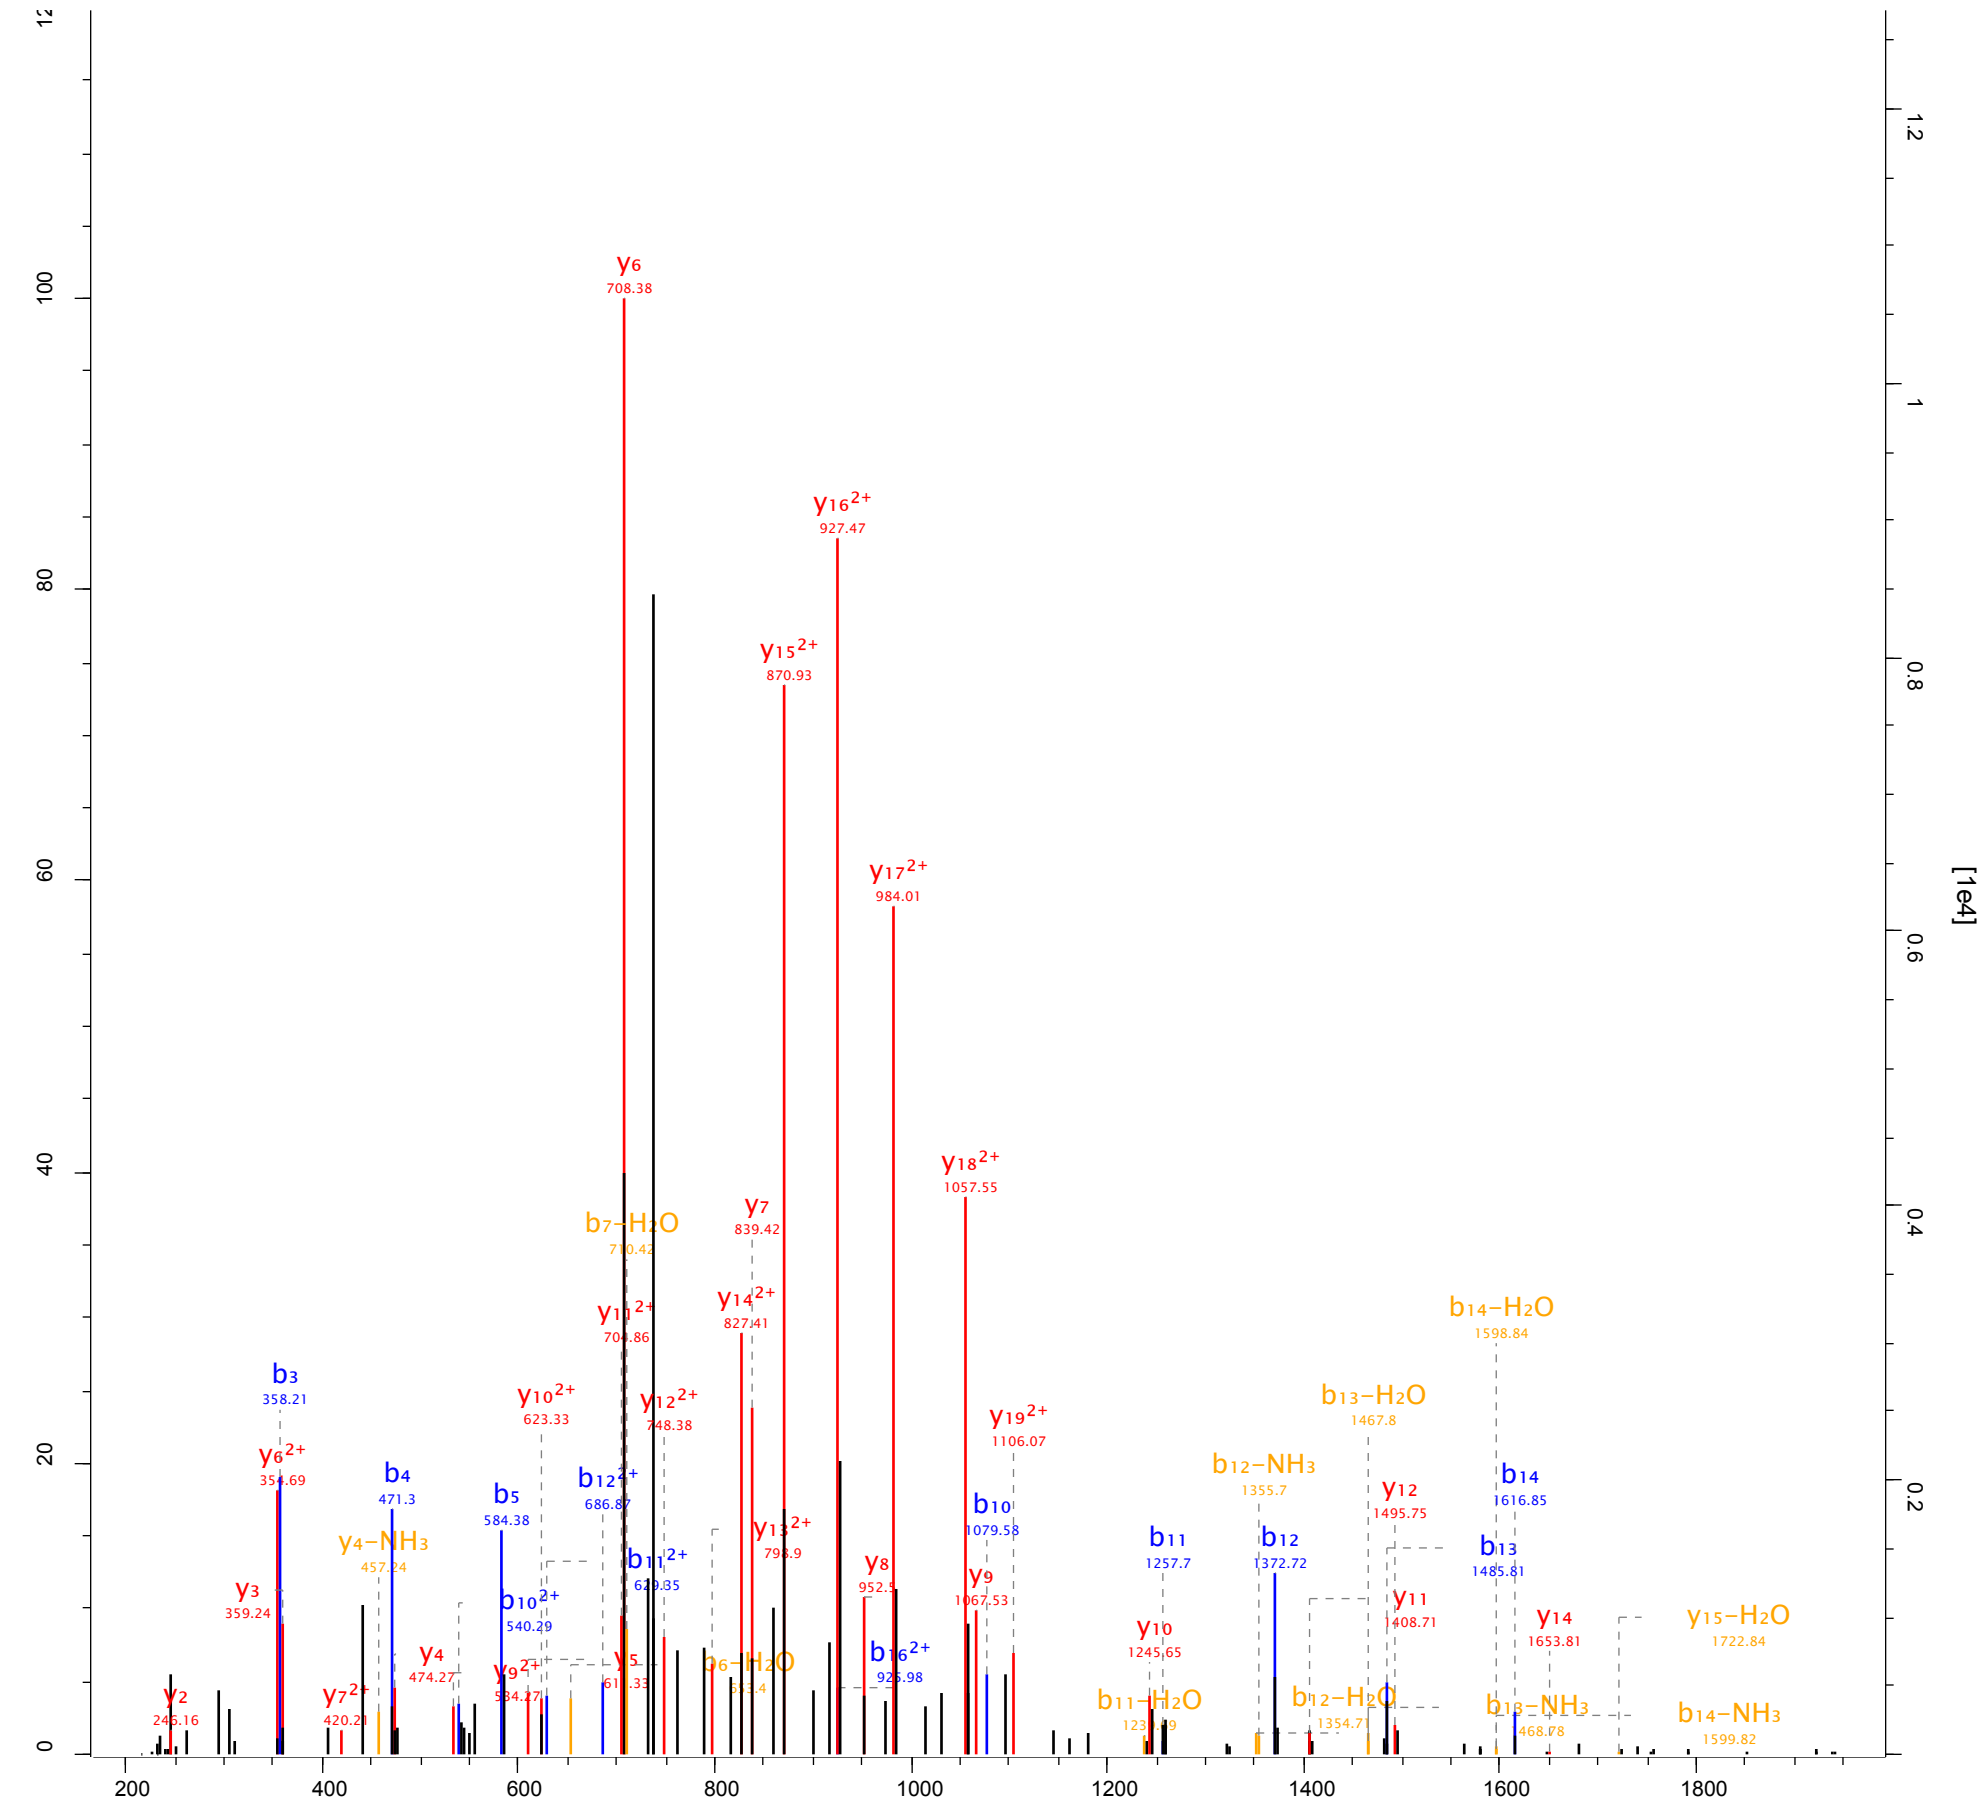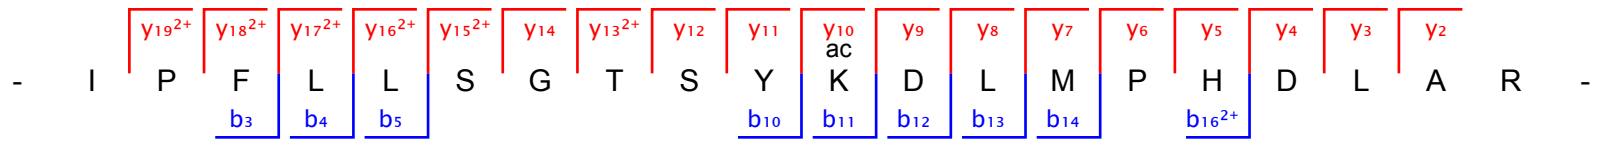

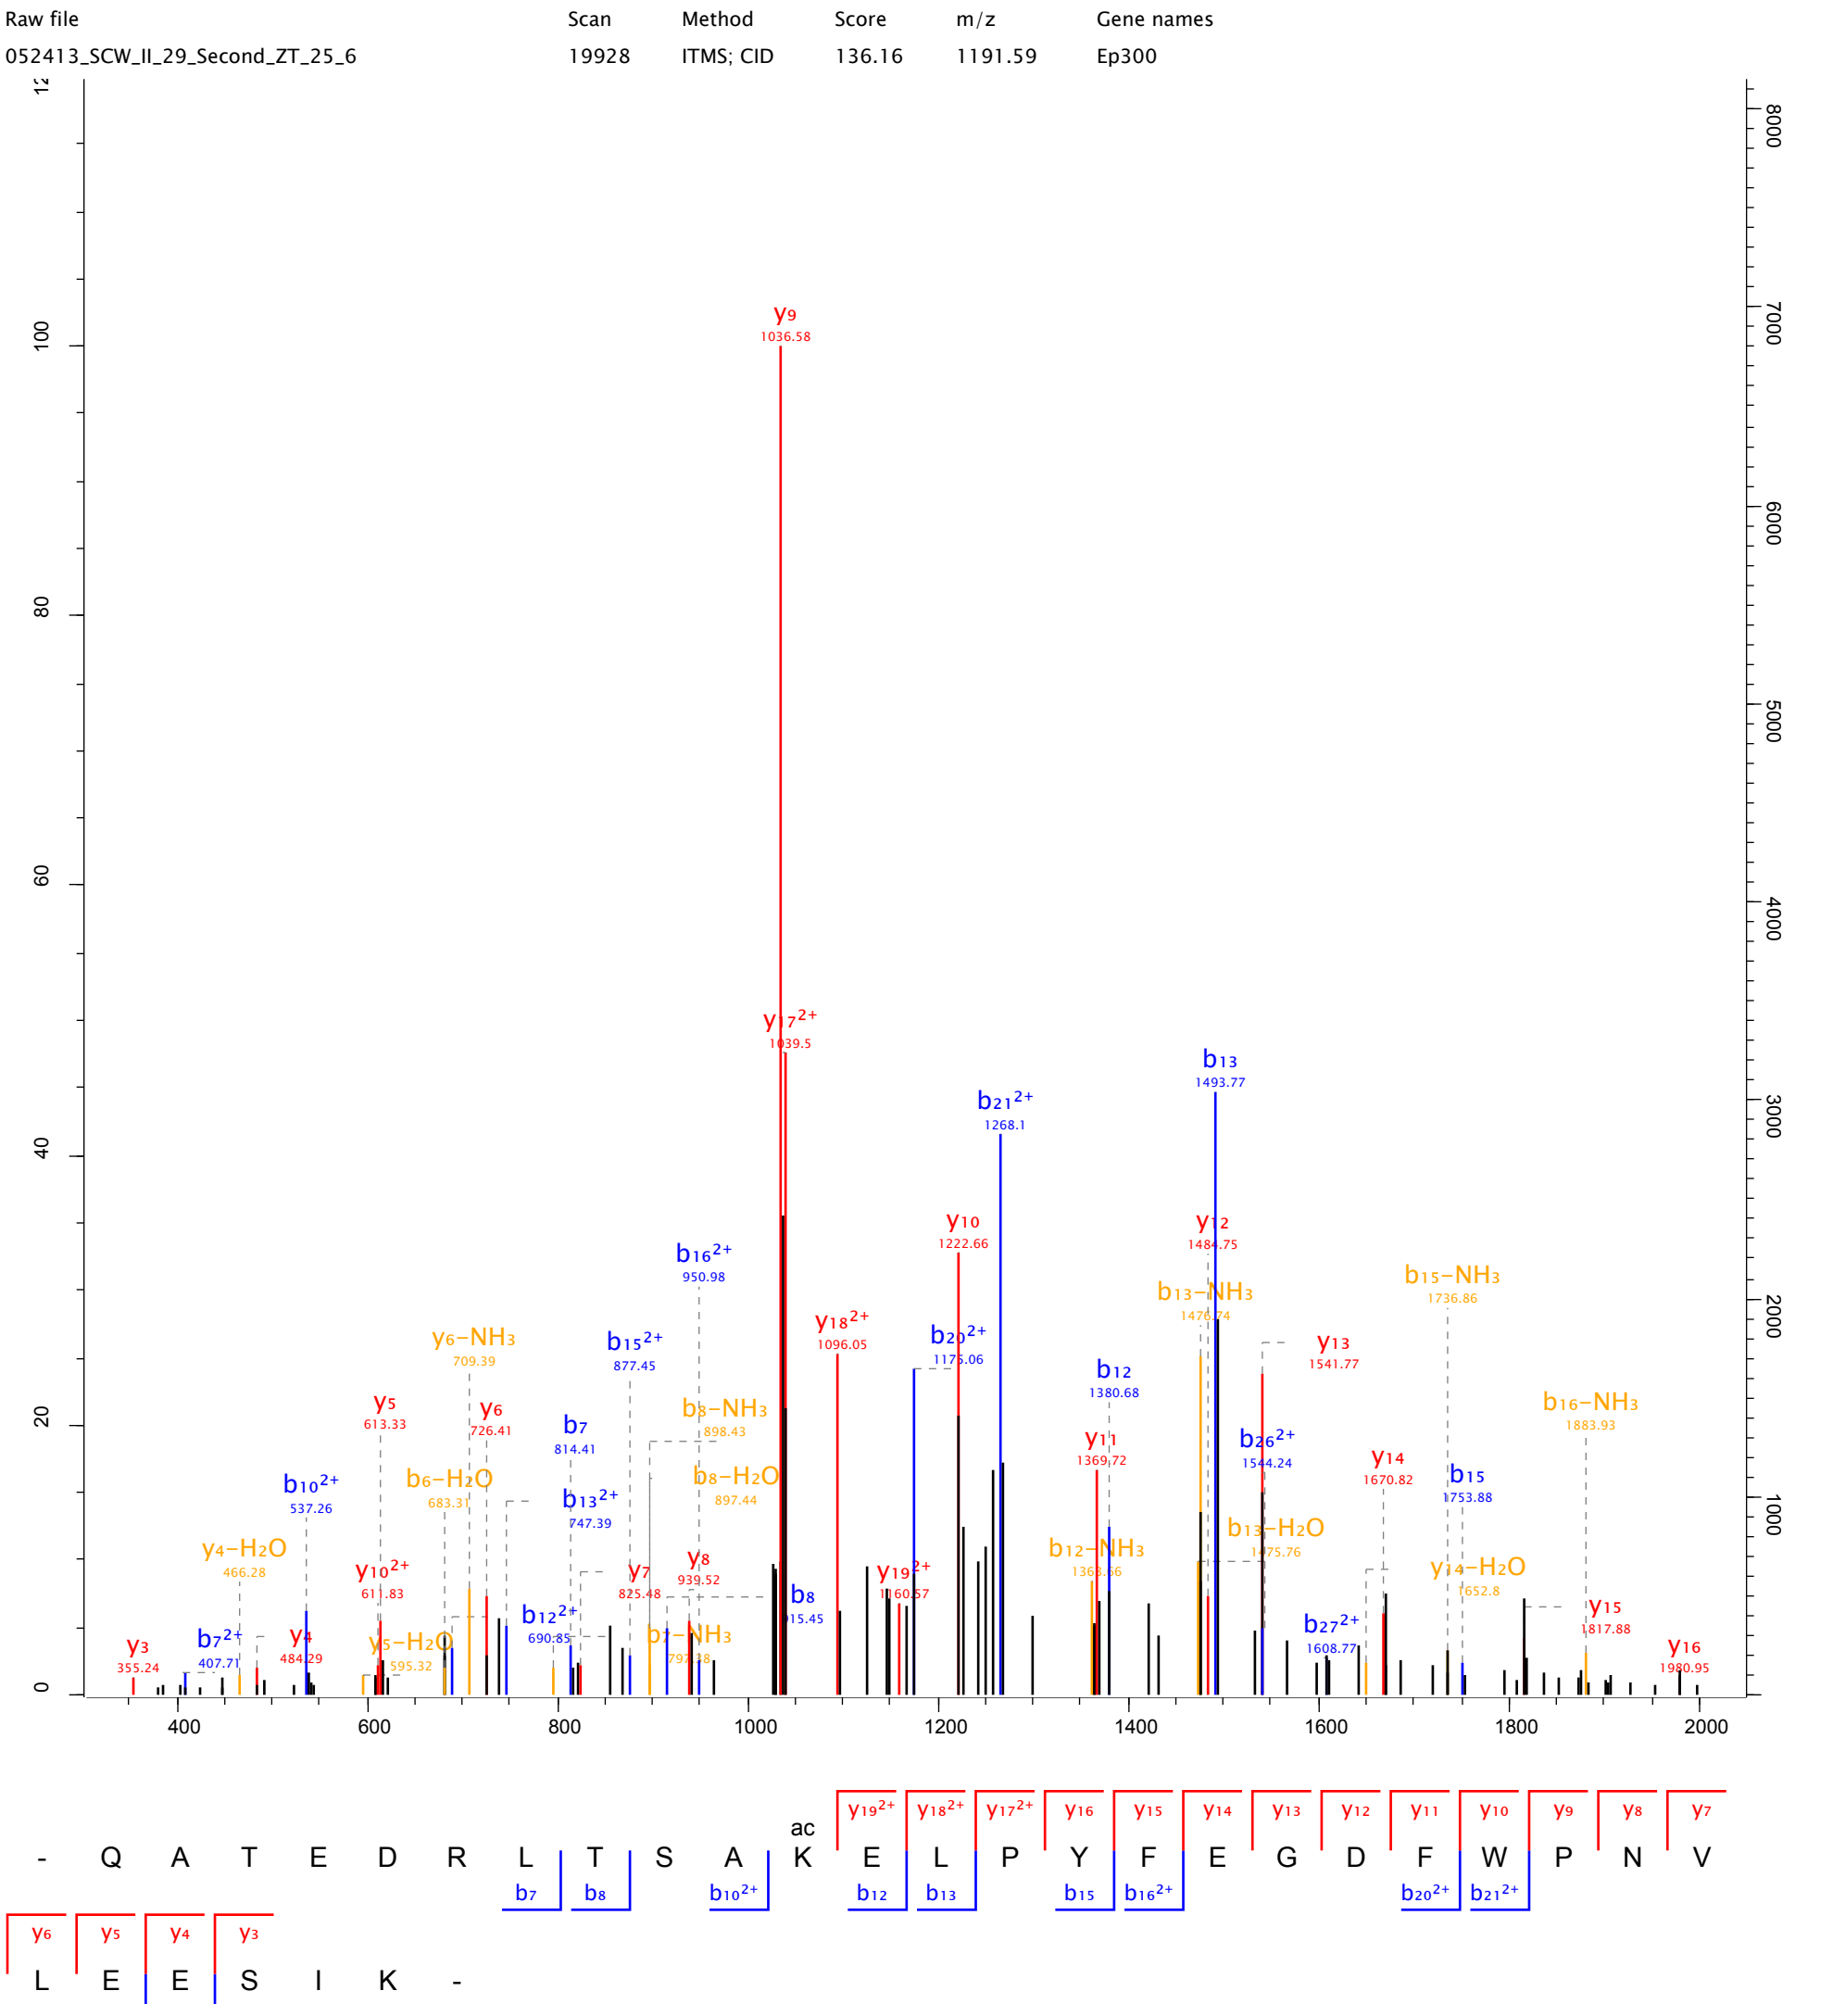



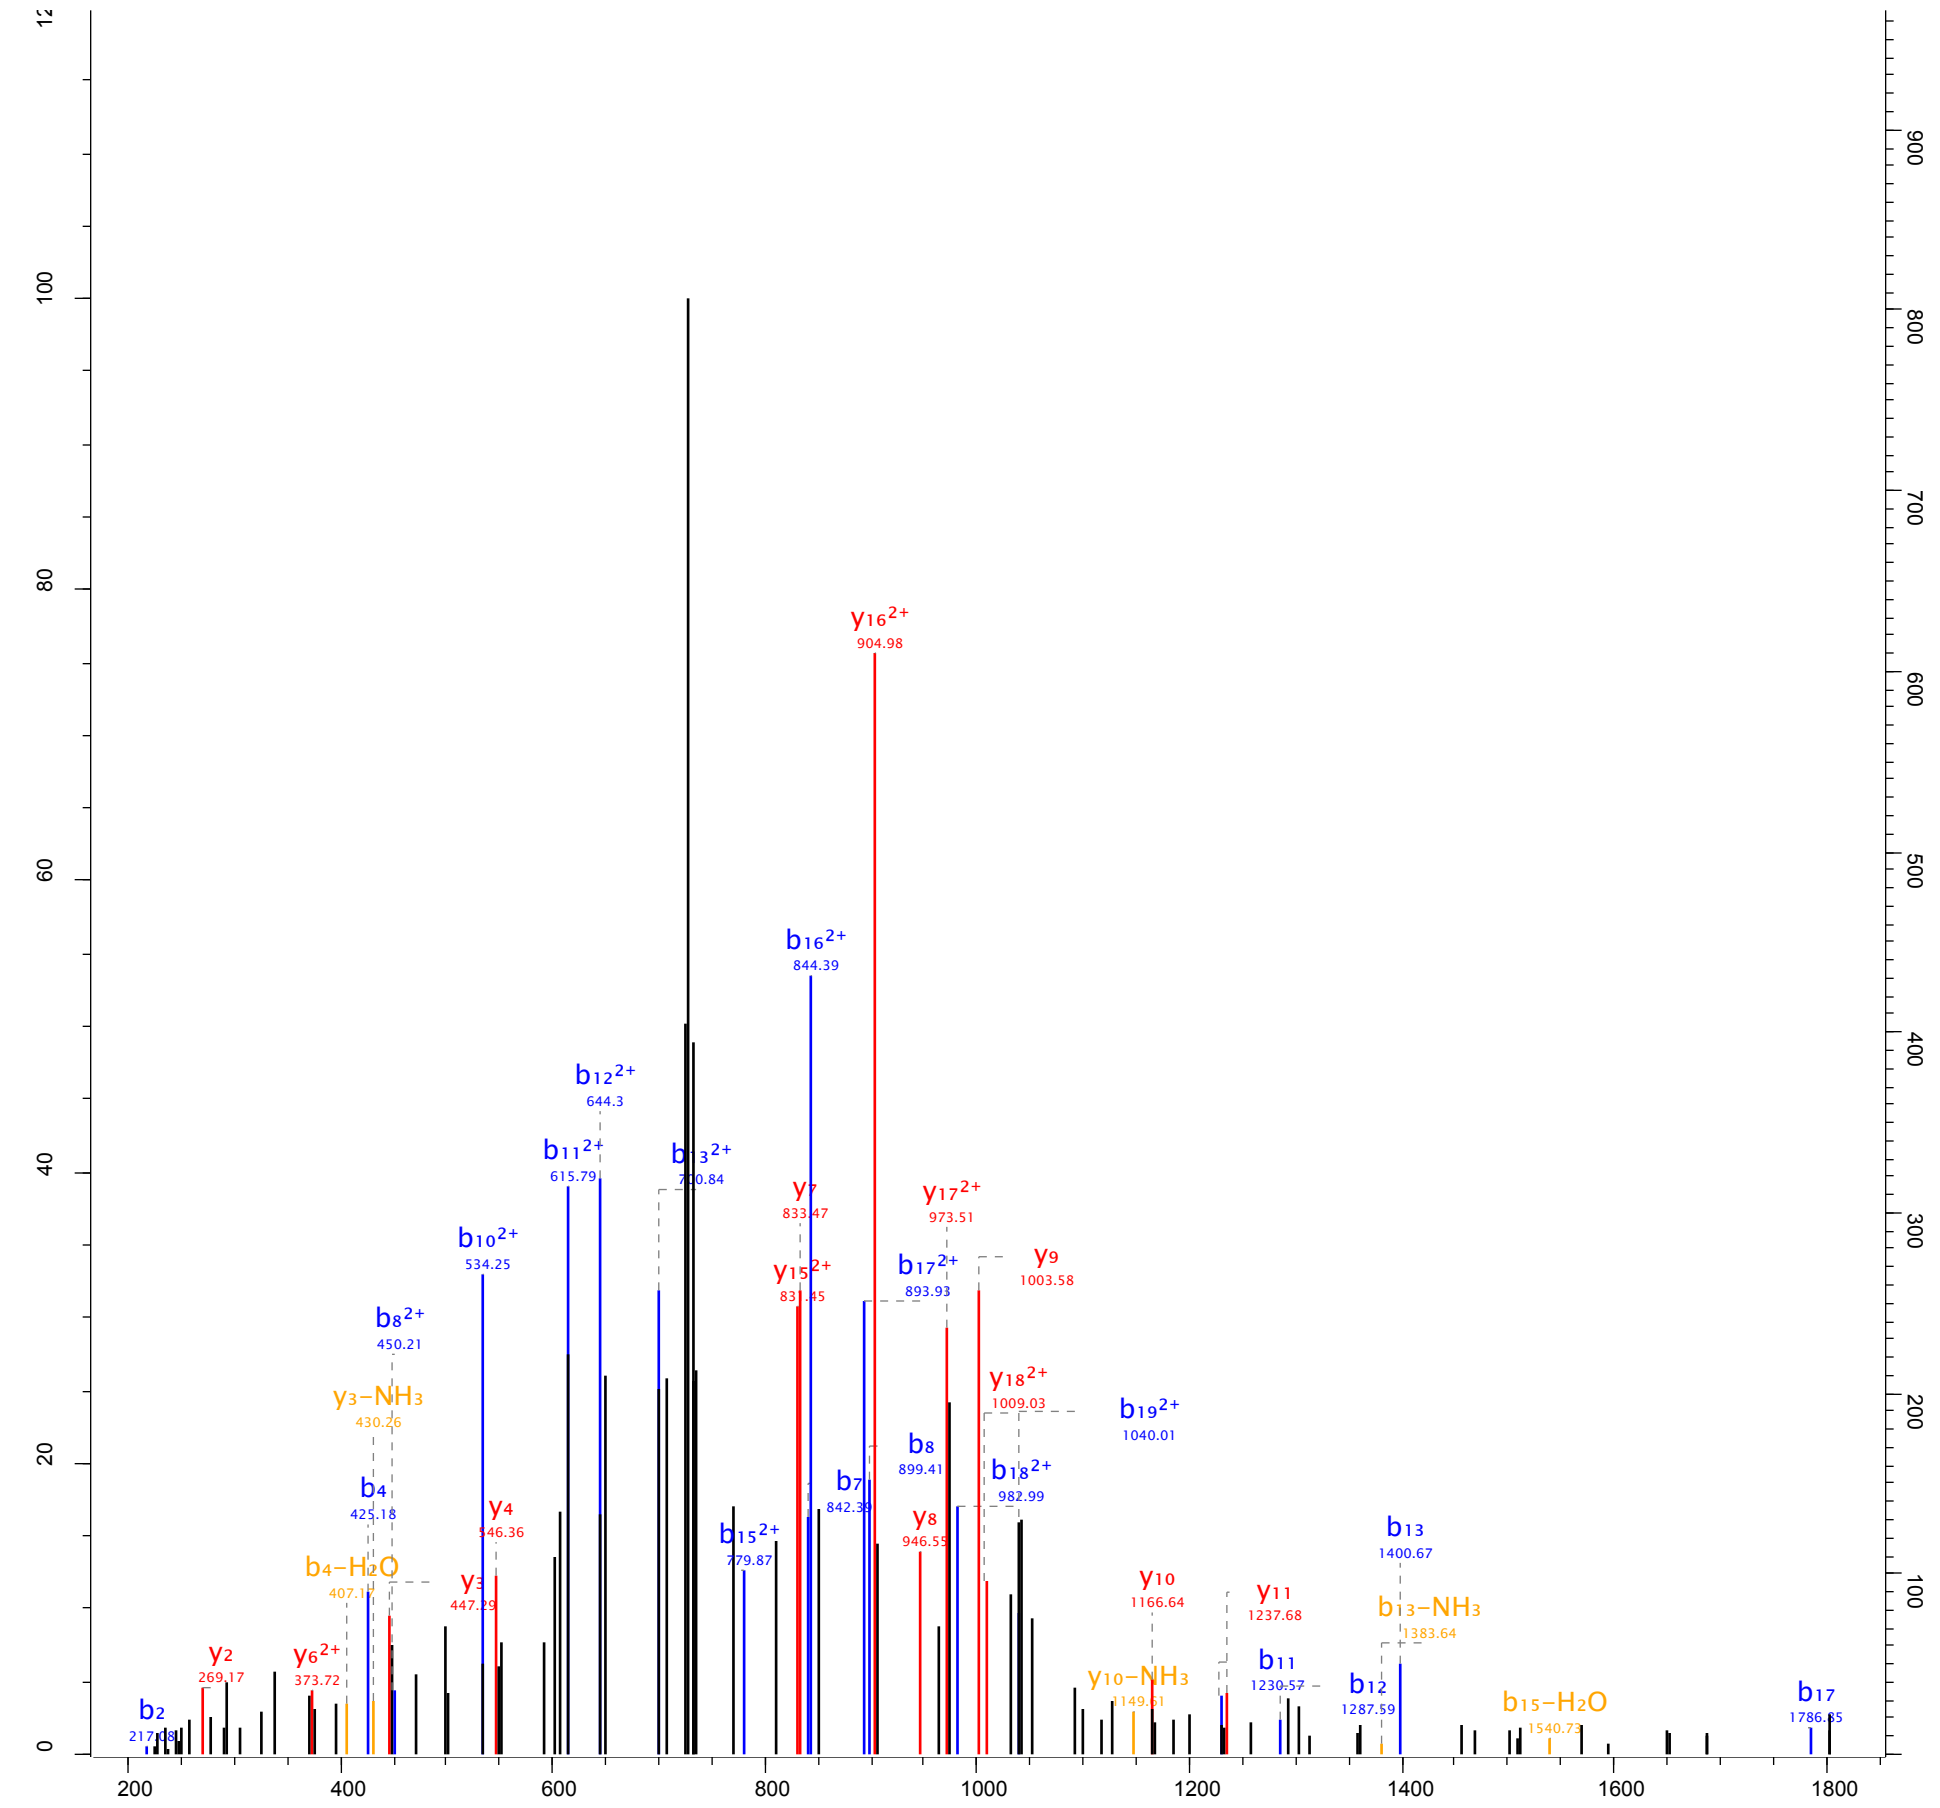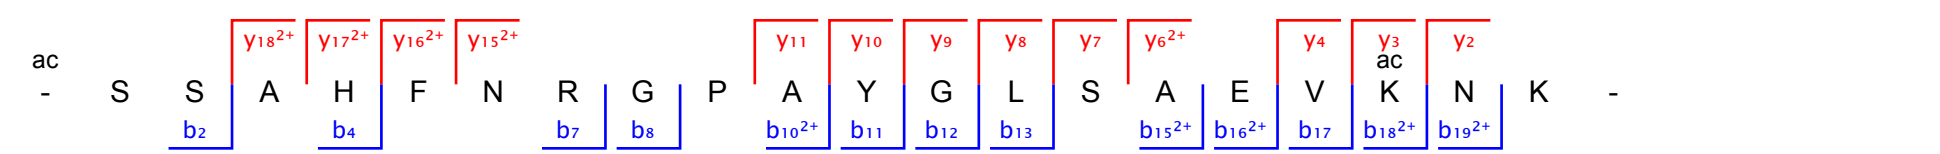

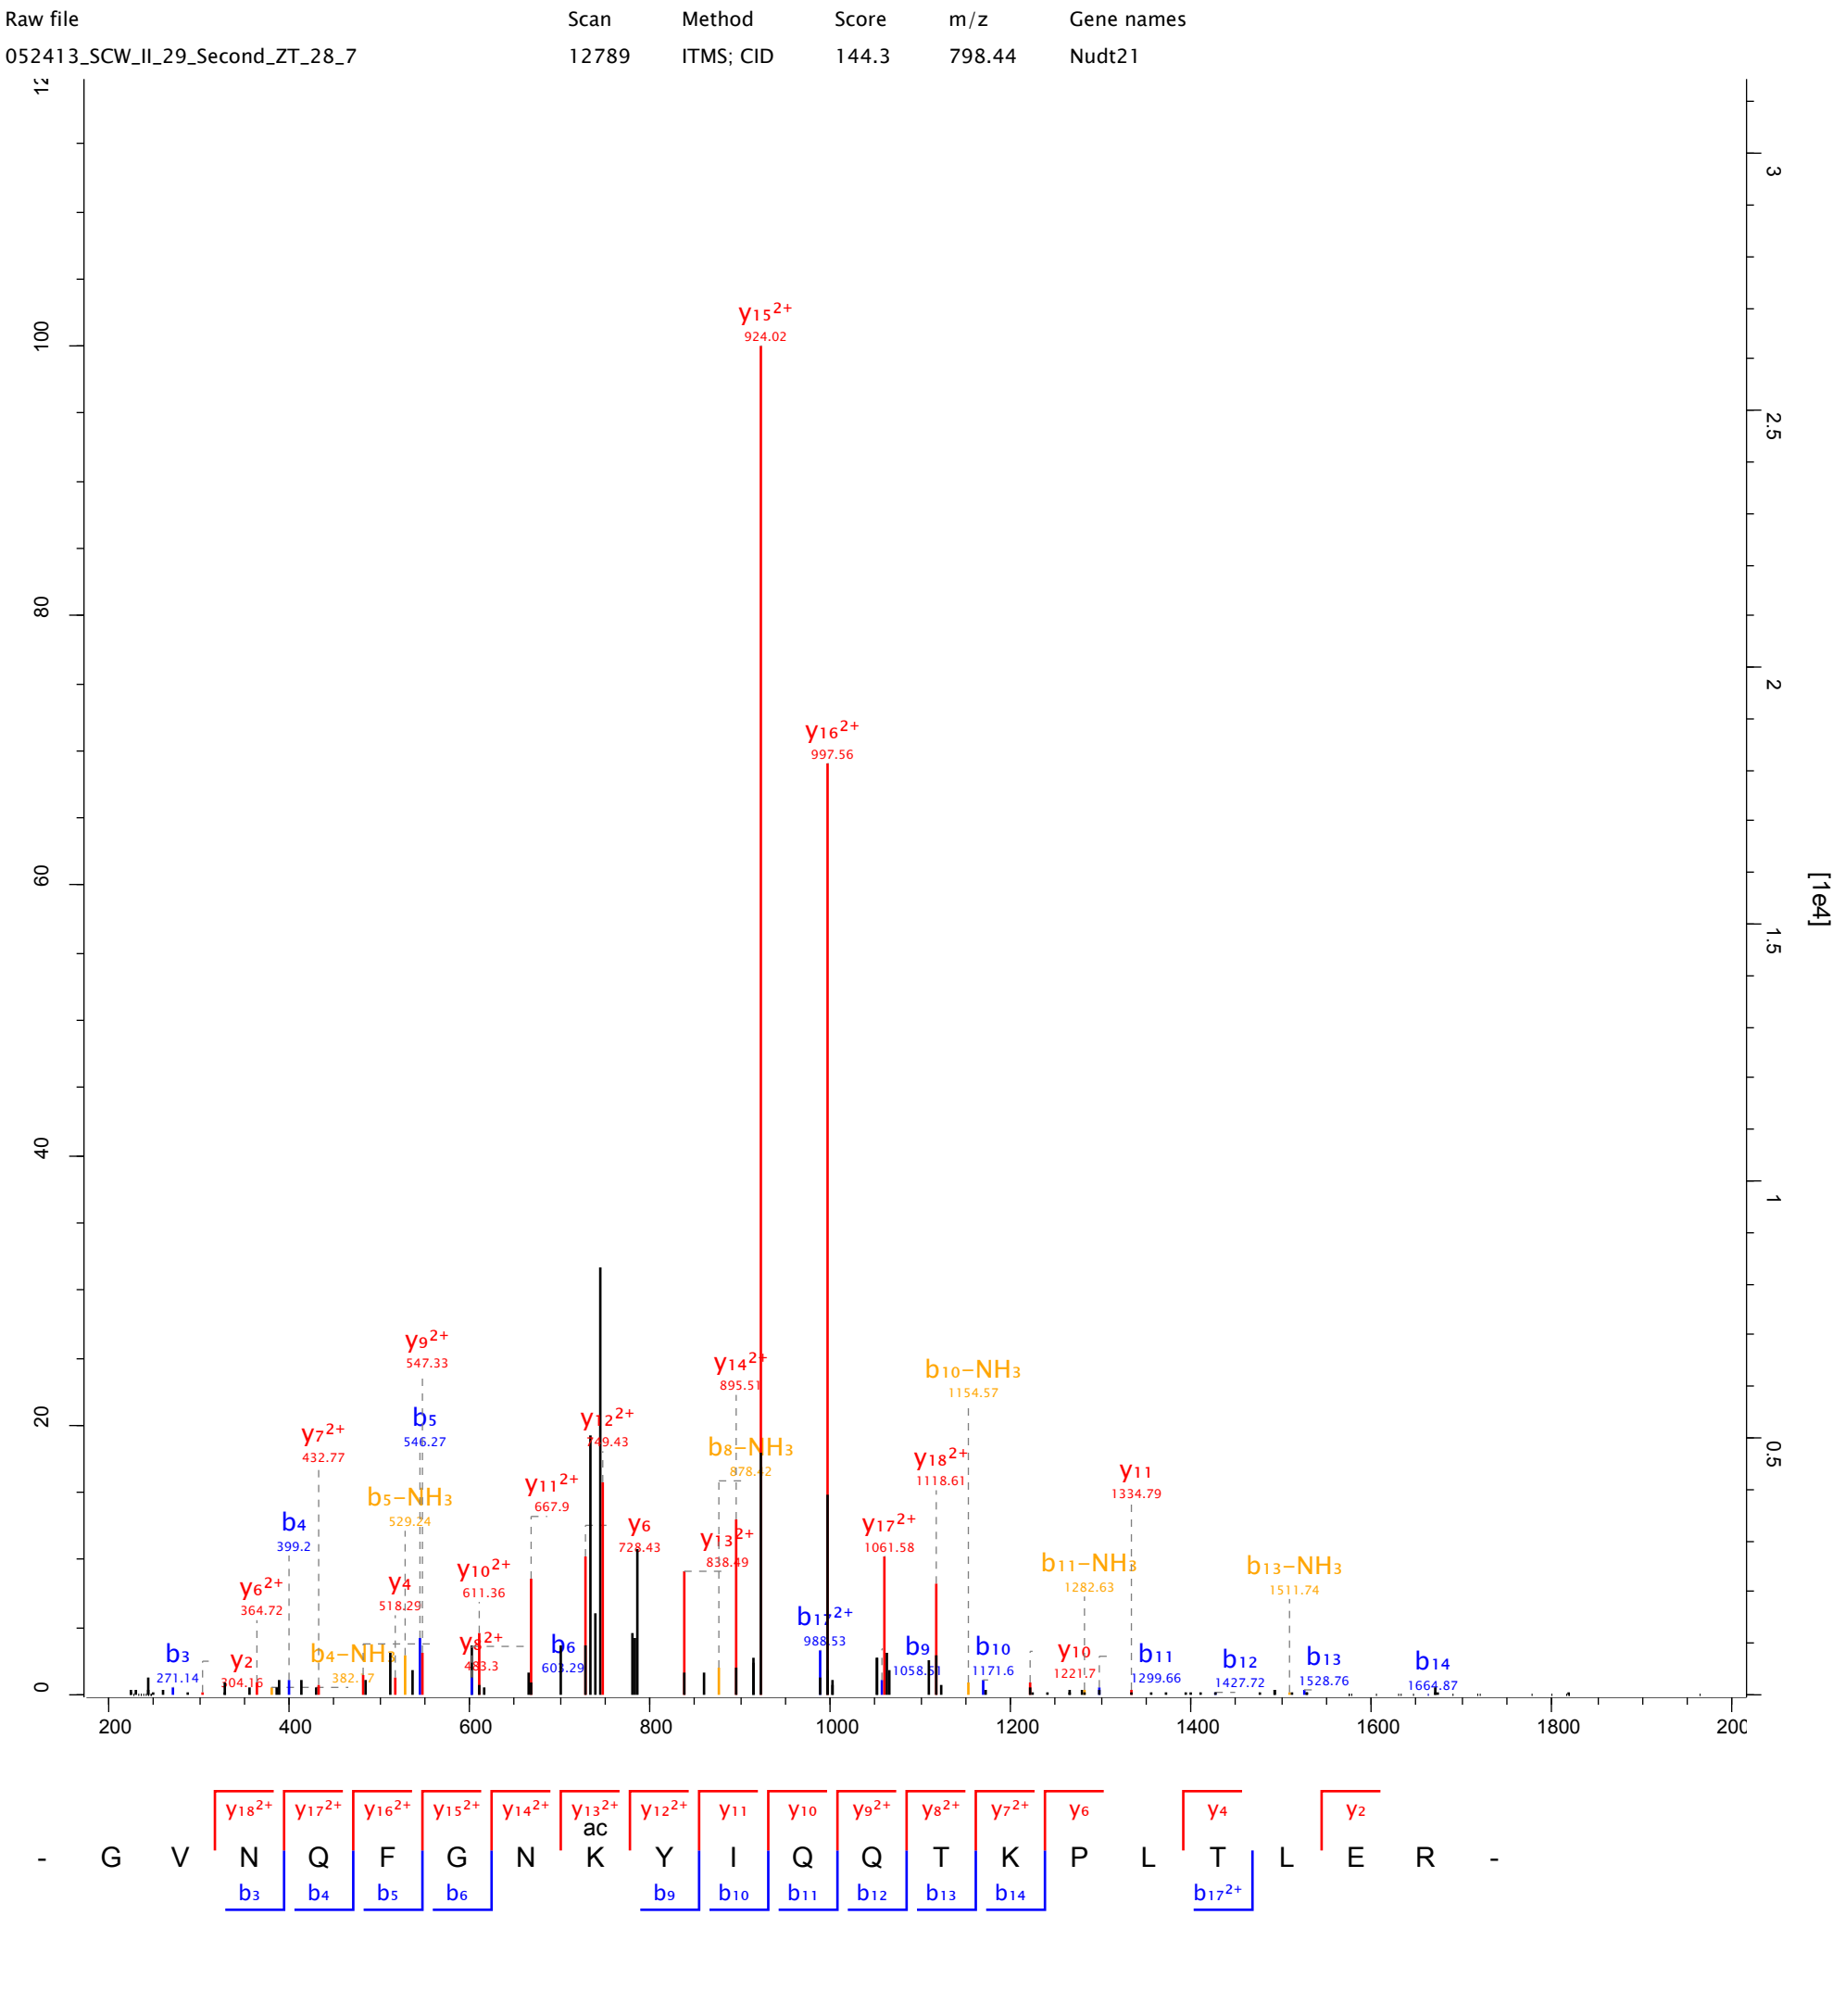

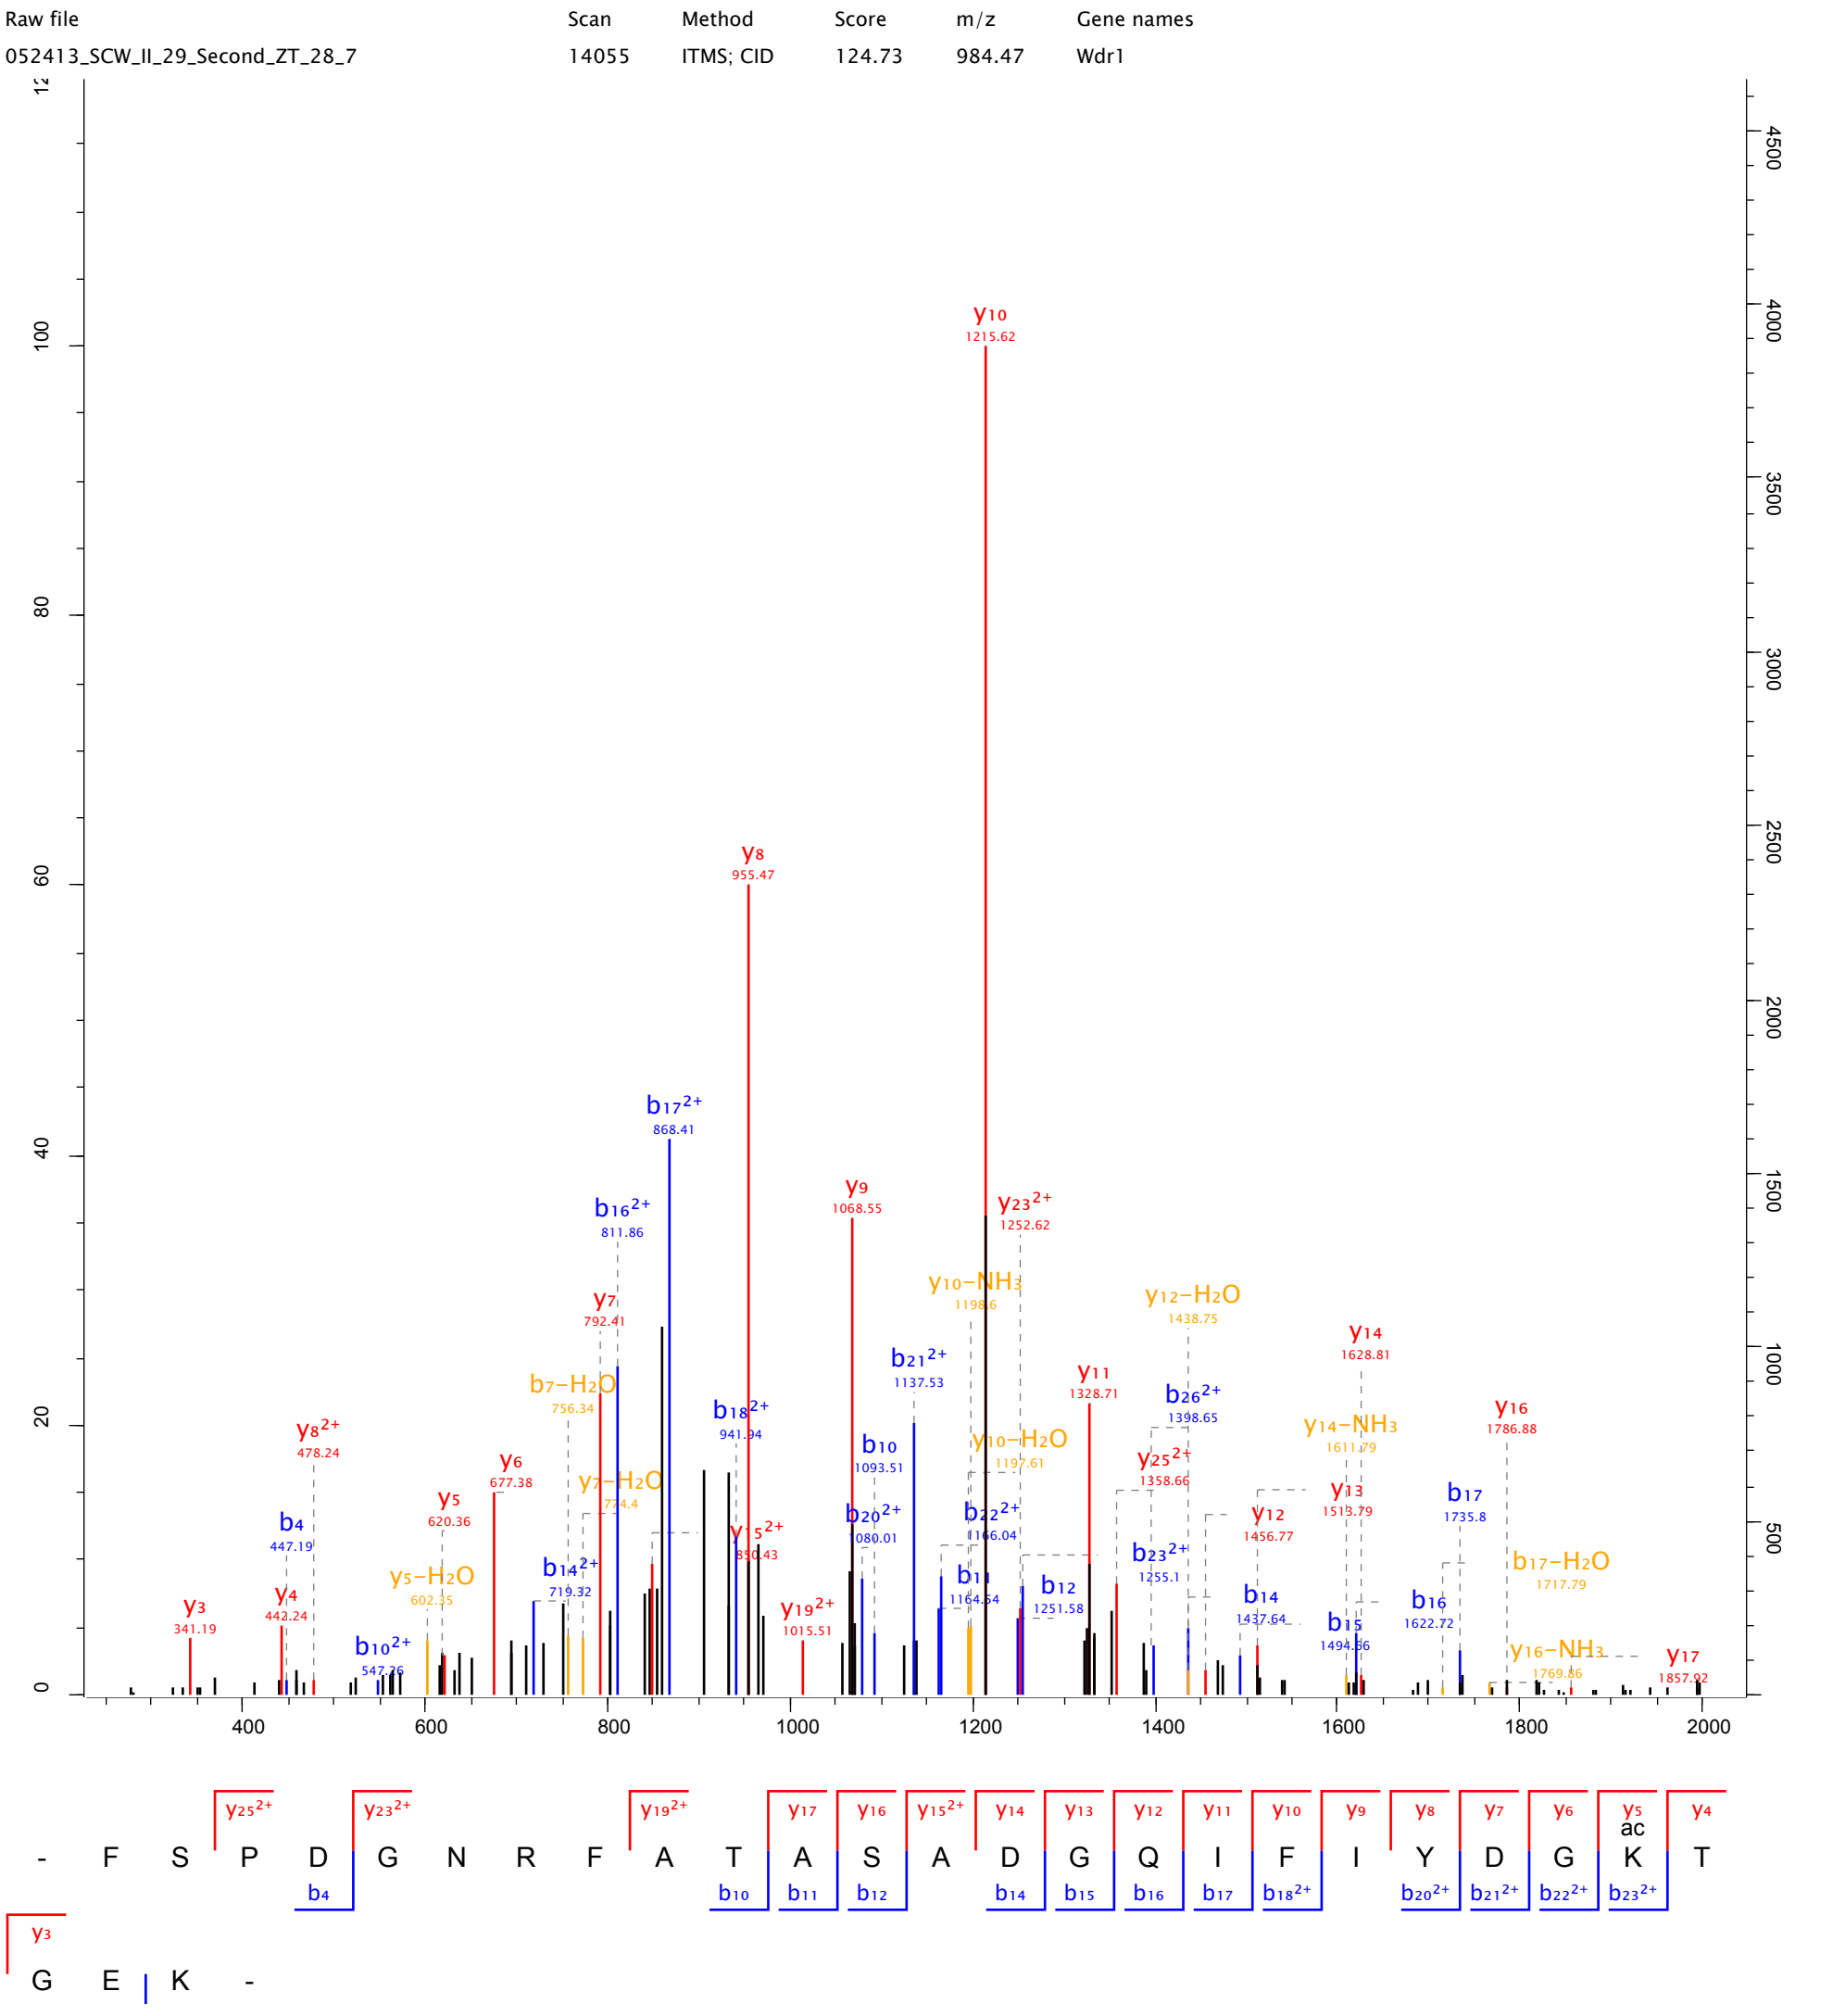

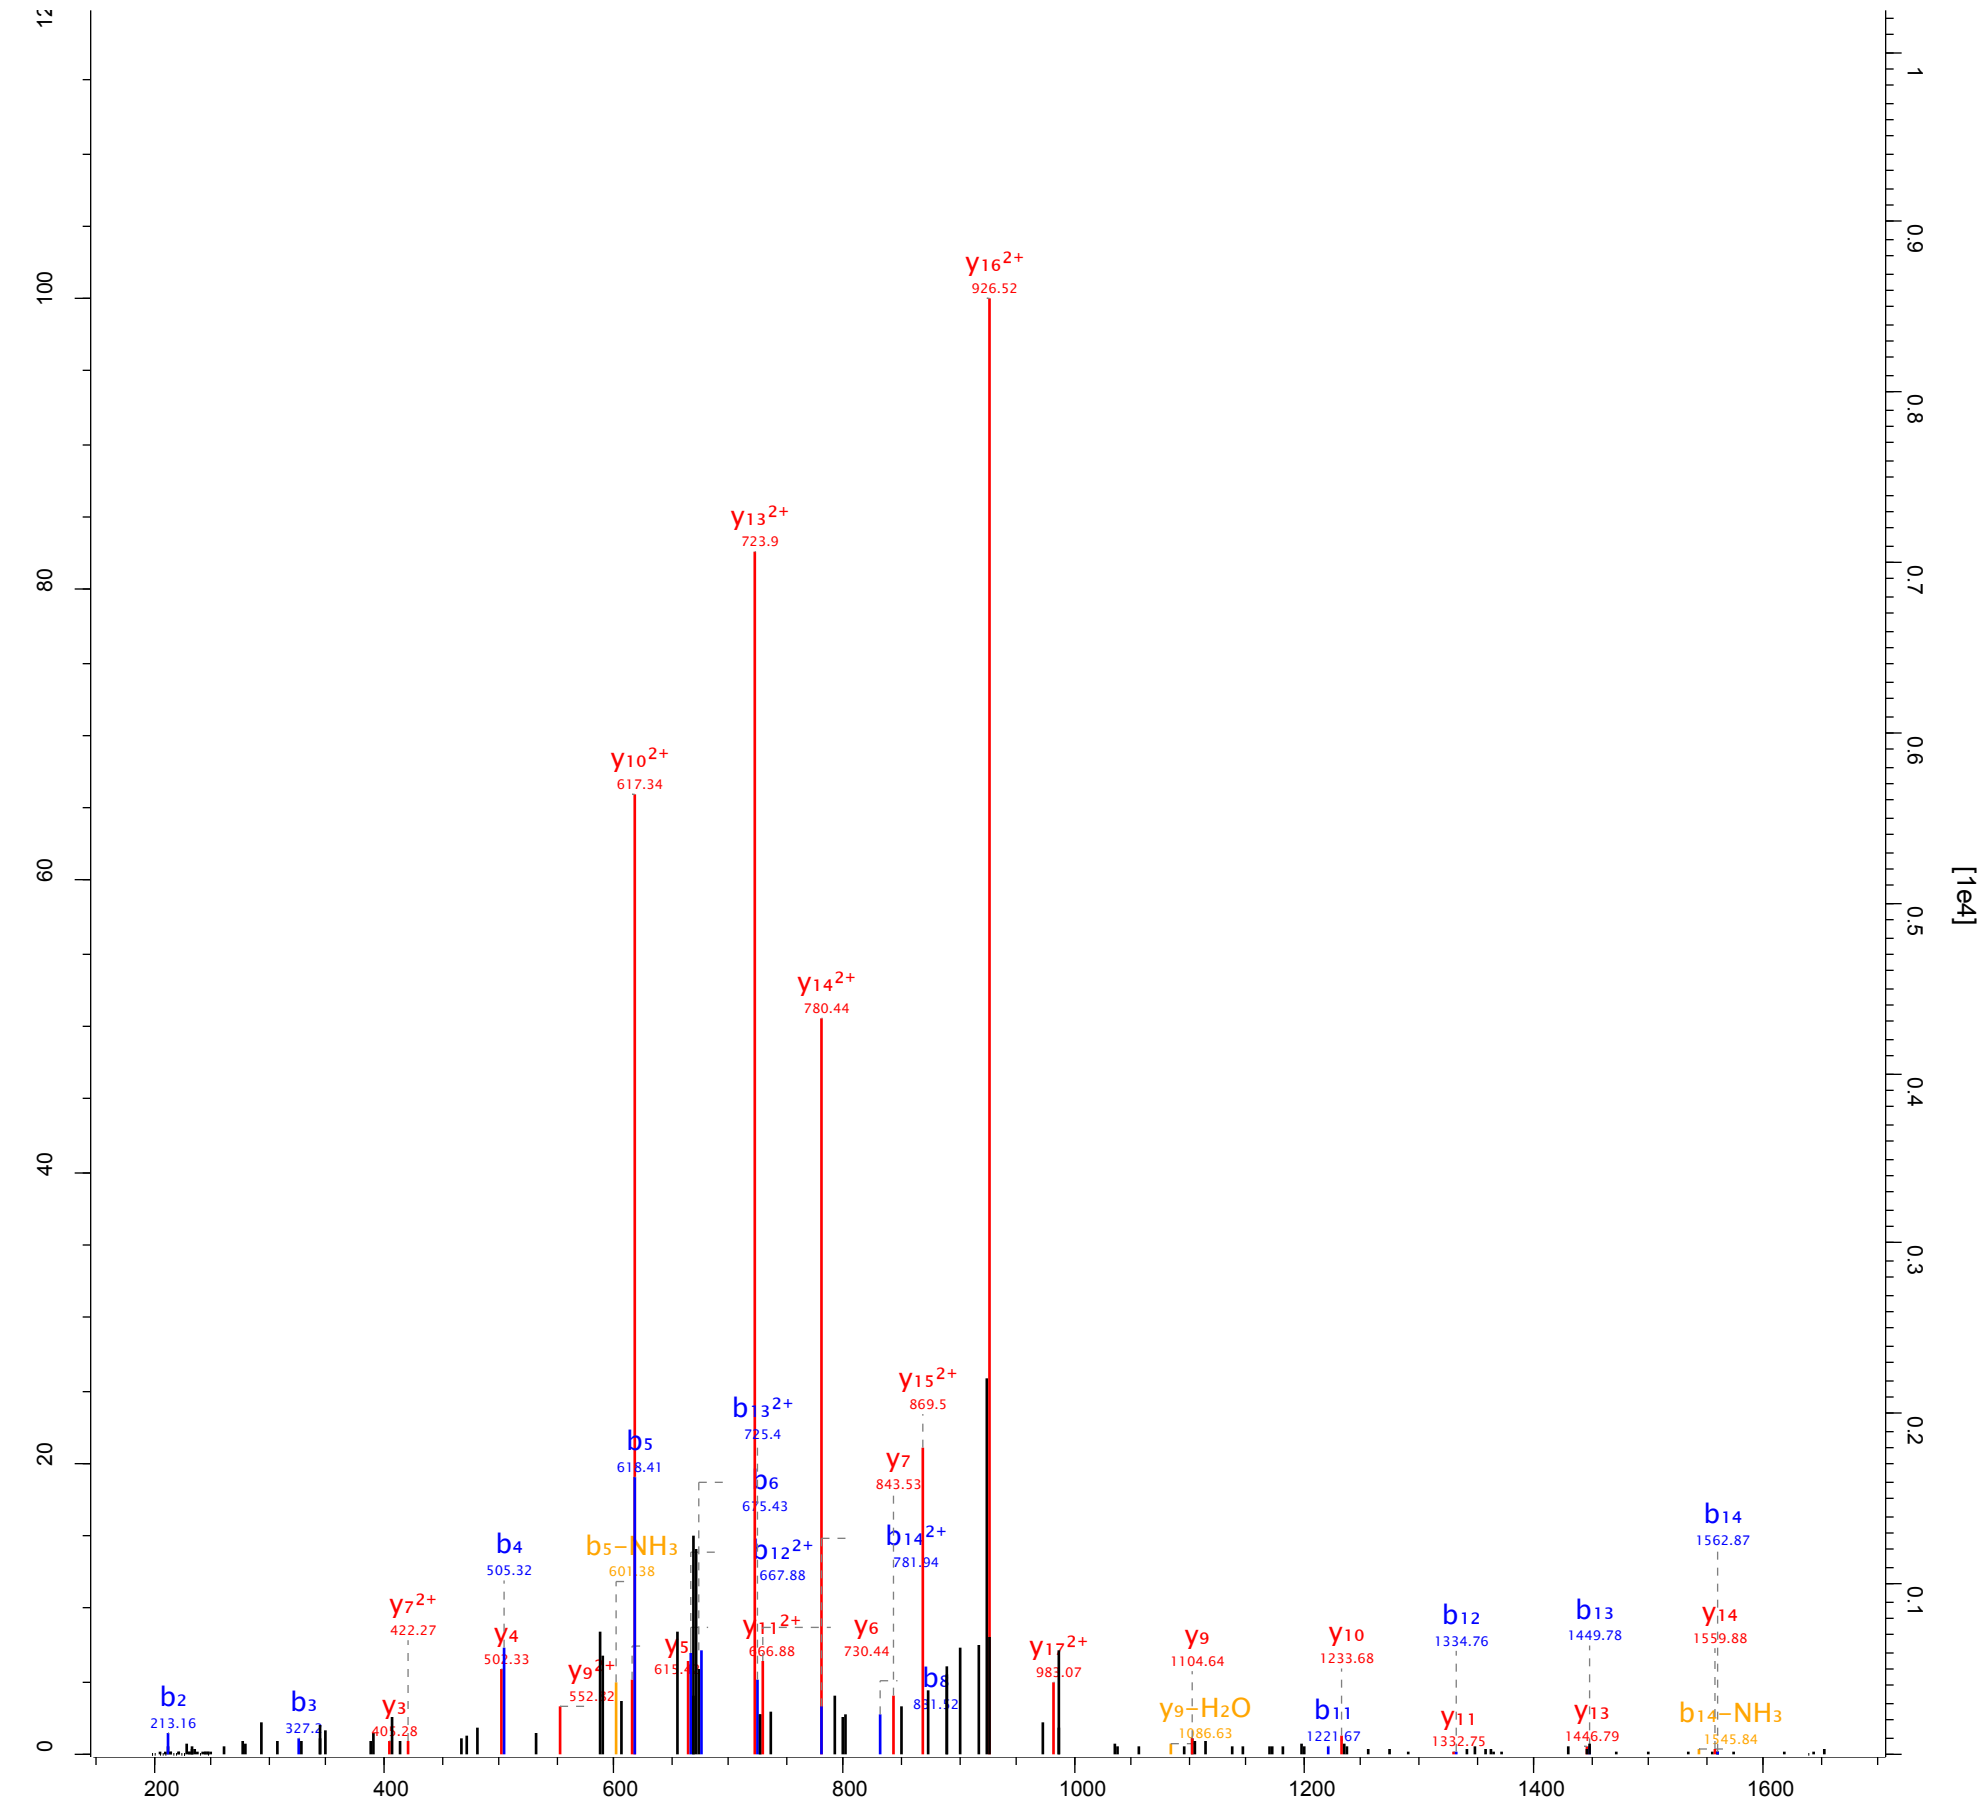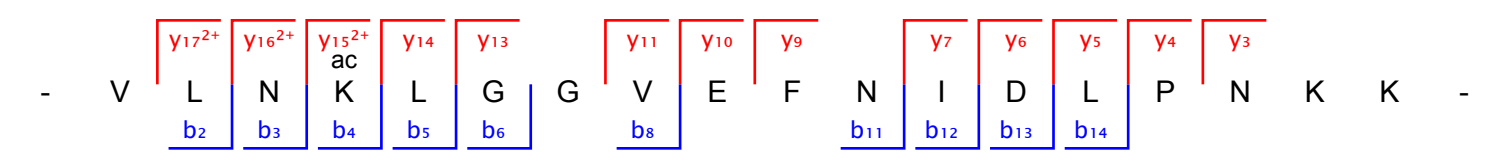

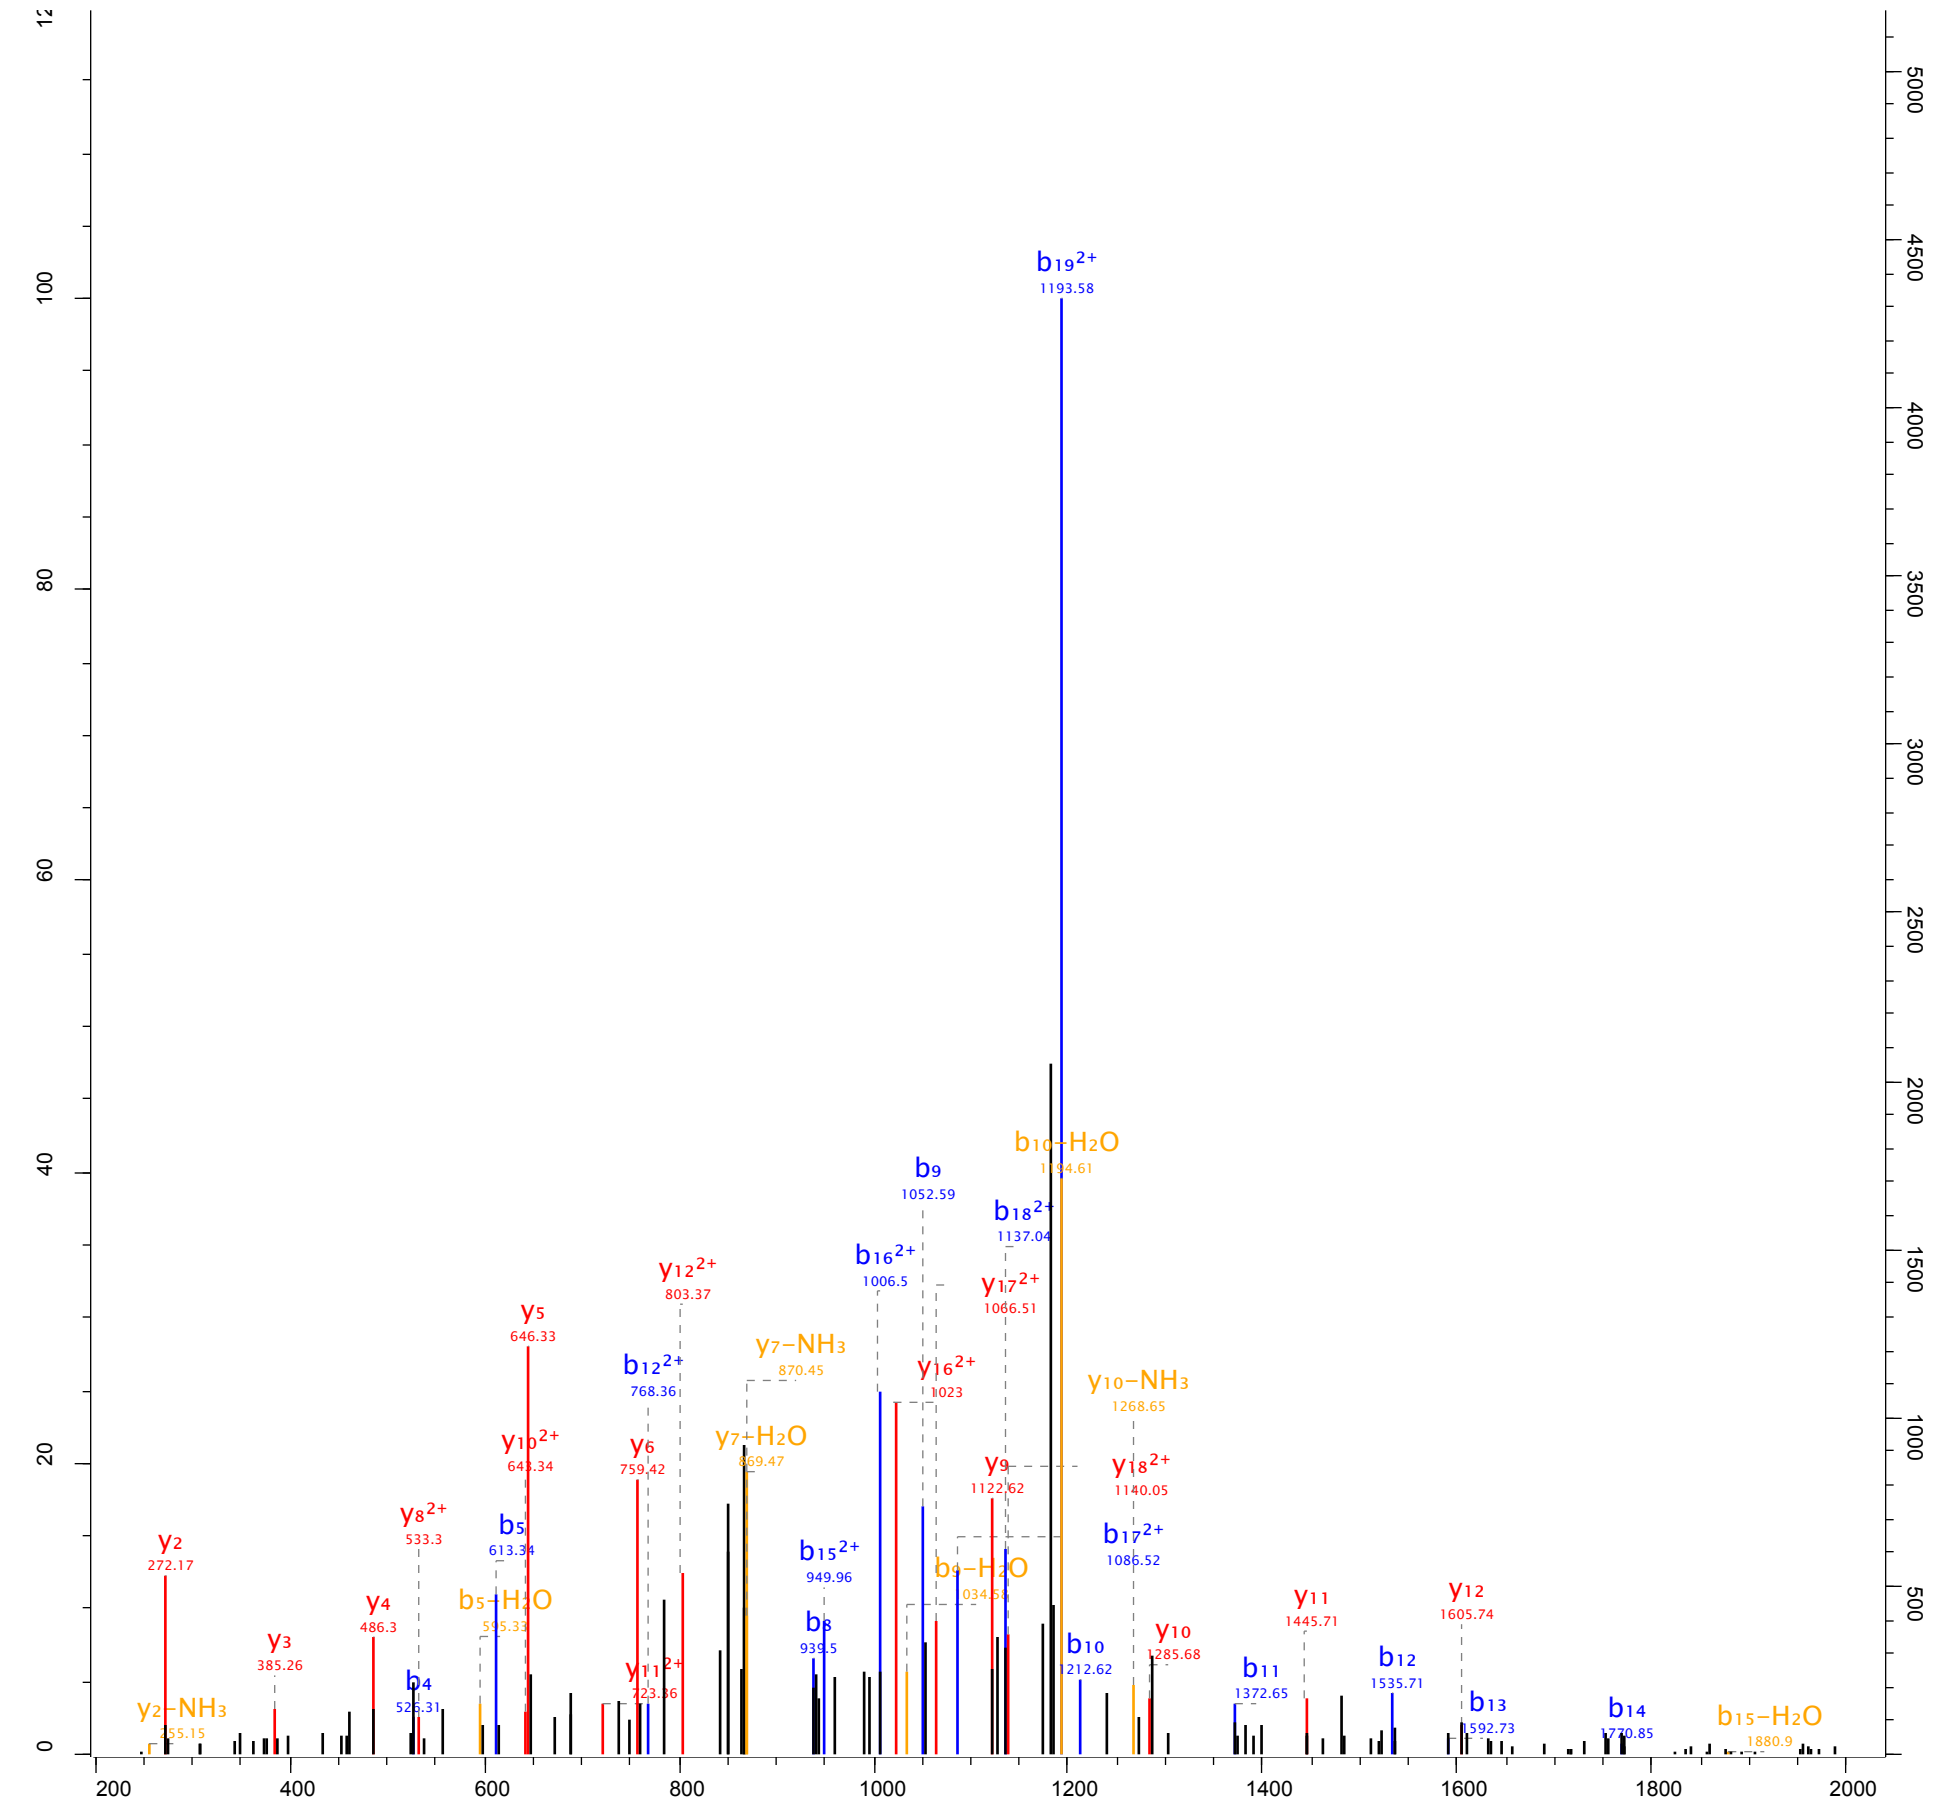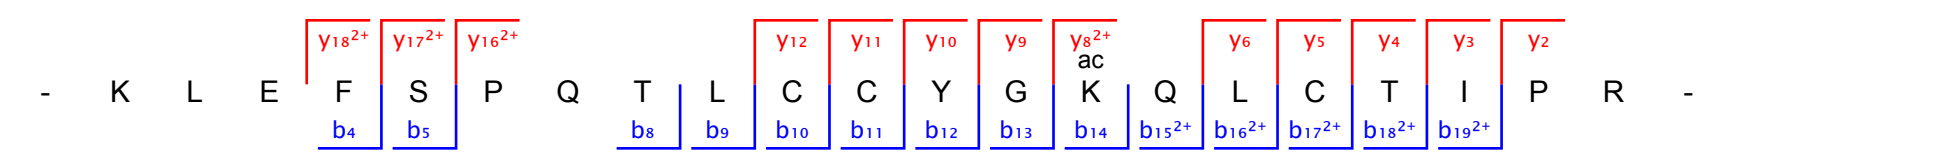

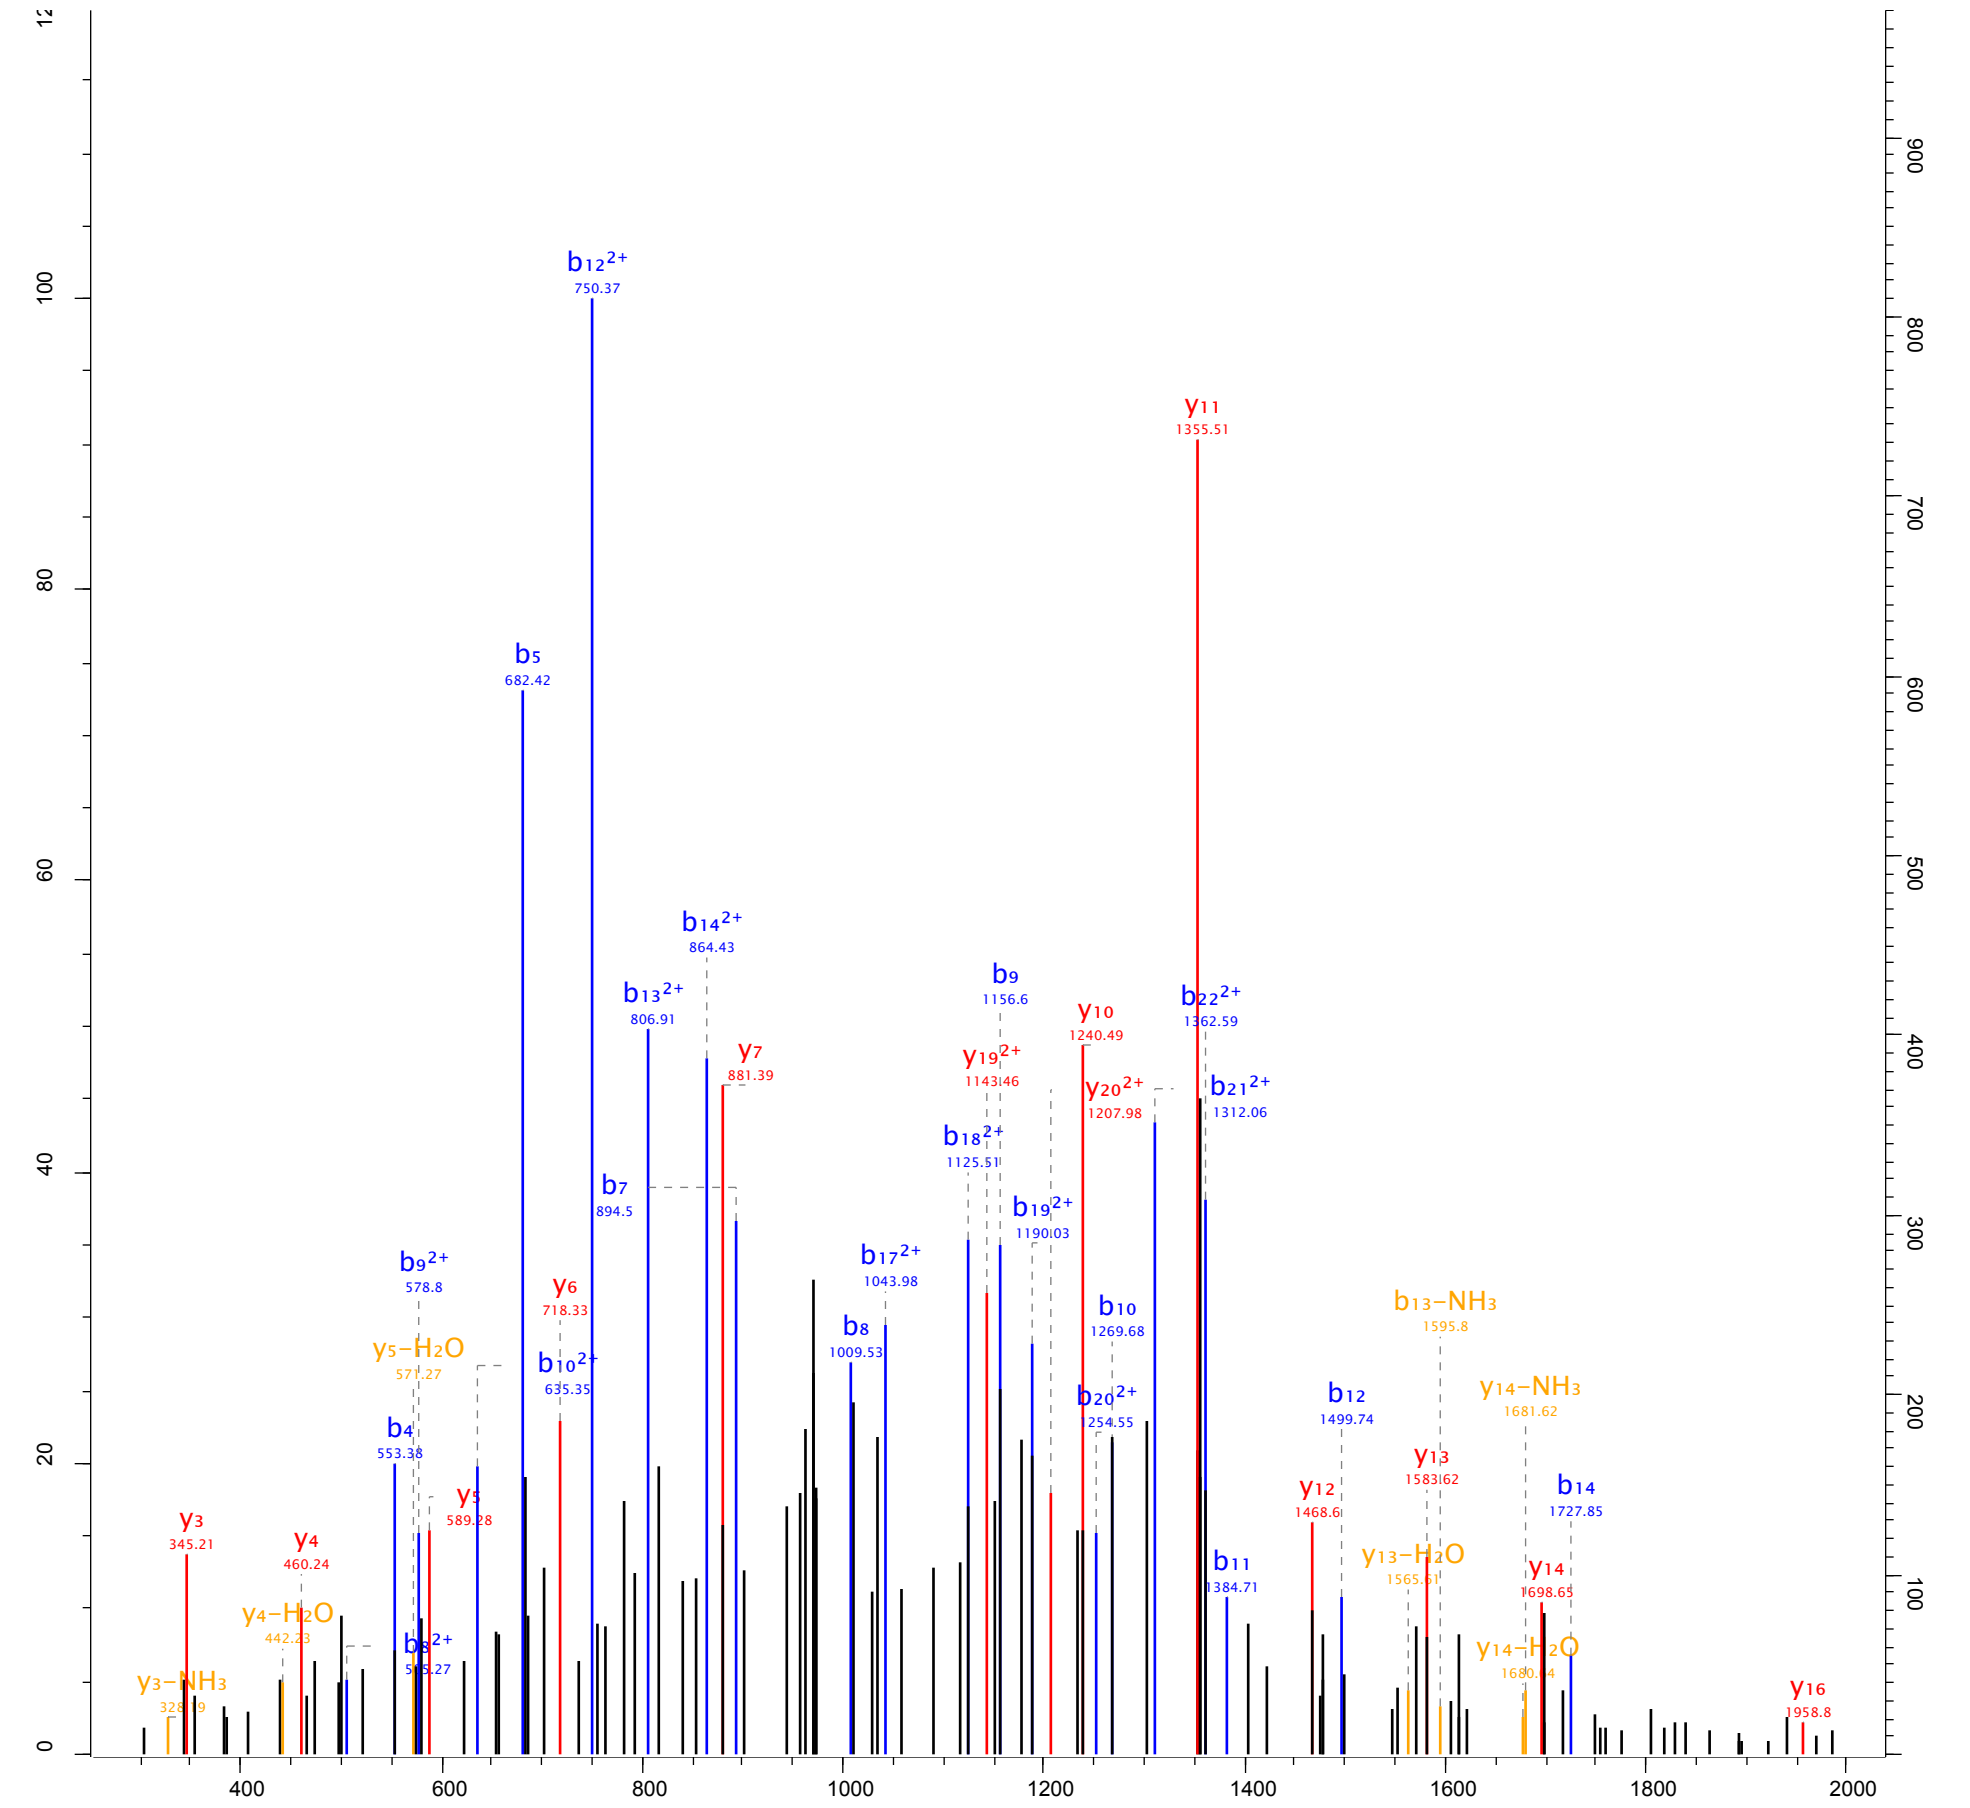

ac  
 - K R I I E P D D F L D D L D D E D Y E E D T P K  
 - b4 b5 b7 b8 b9 b10 b11 b12 b13<sup>2+</sup> b14 b17<sup>2+</sup> b18<sup>2+</sup> b19<sup>2+</sup> b20<sup>2+</sup> b21<sup>2+</sup> b22<sup>2+</sup> y20<sup>2+</sup> y19<sup>2+</sup> y16 y14 y13 y12 y11 y10 y7 y6 y5 y4 y3

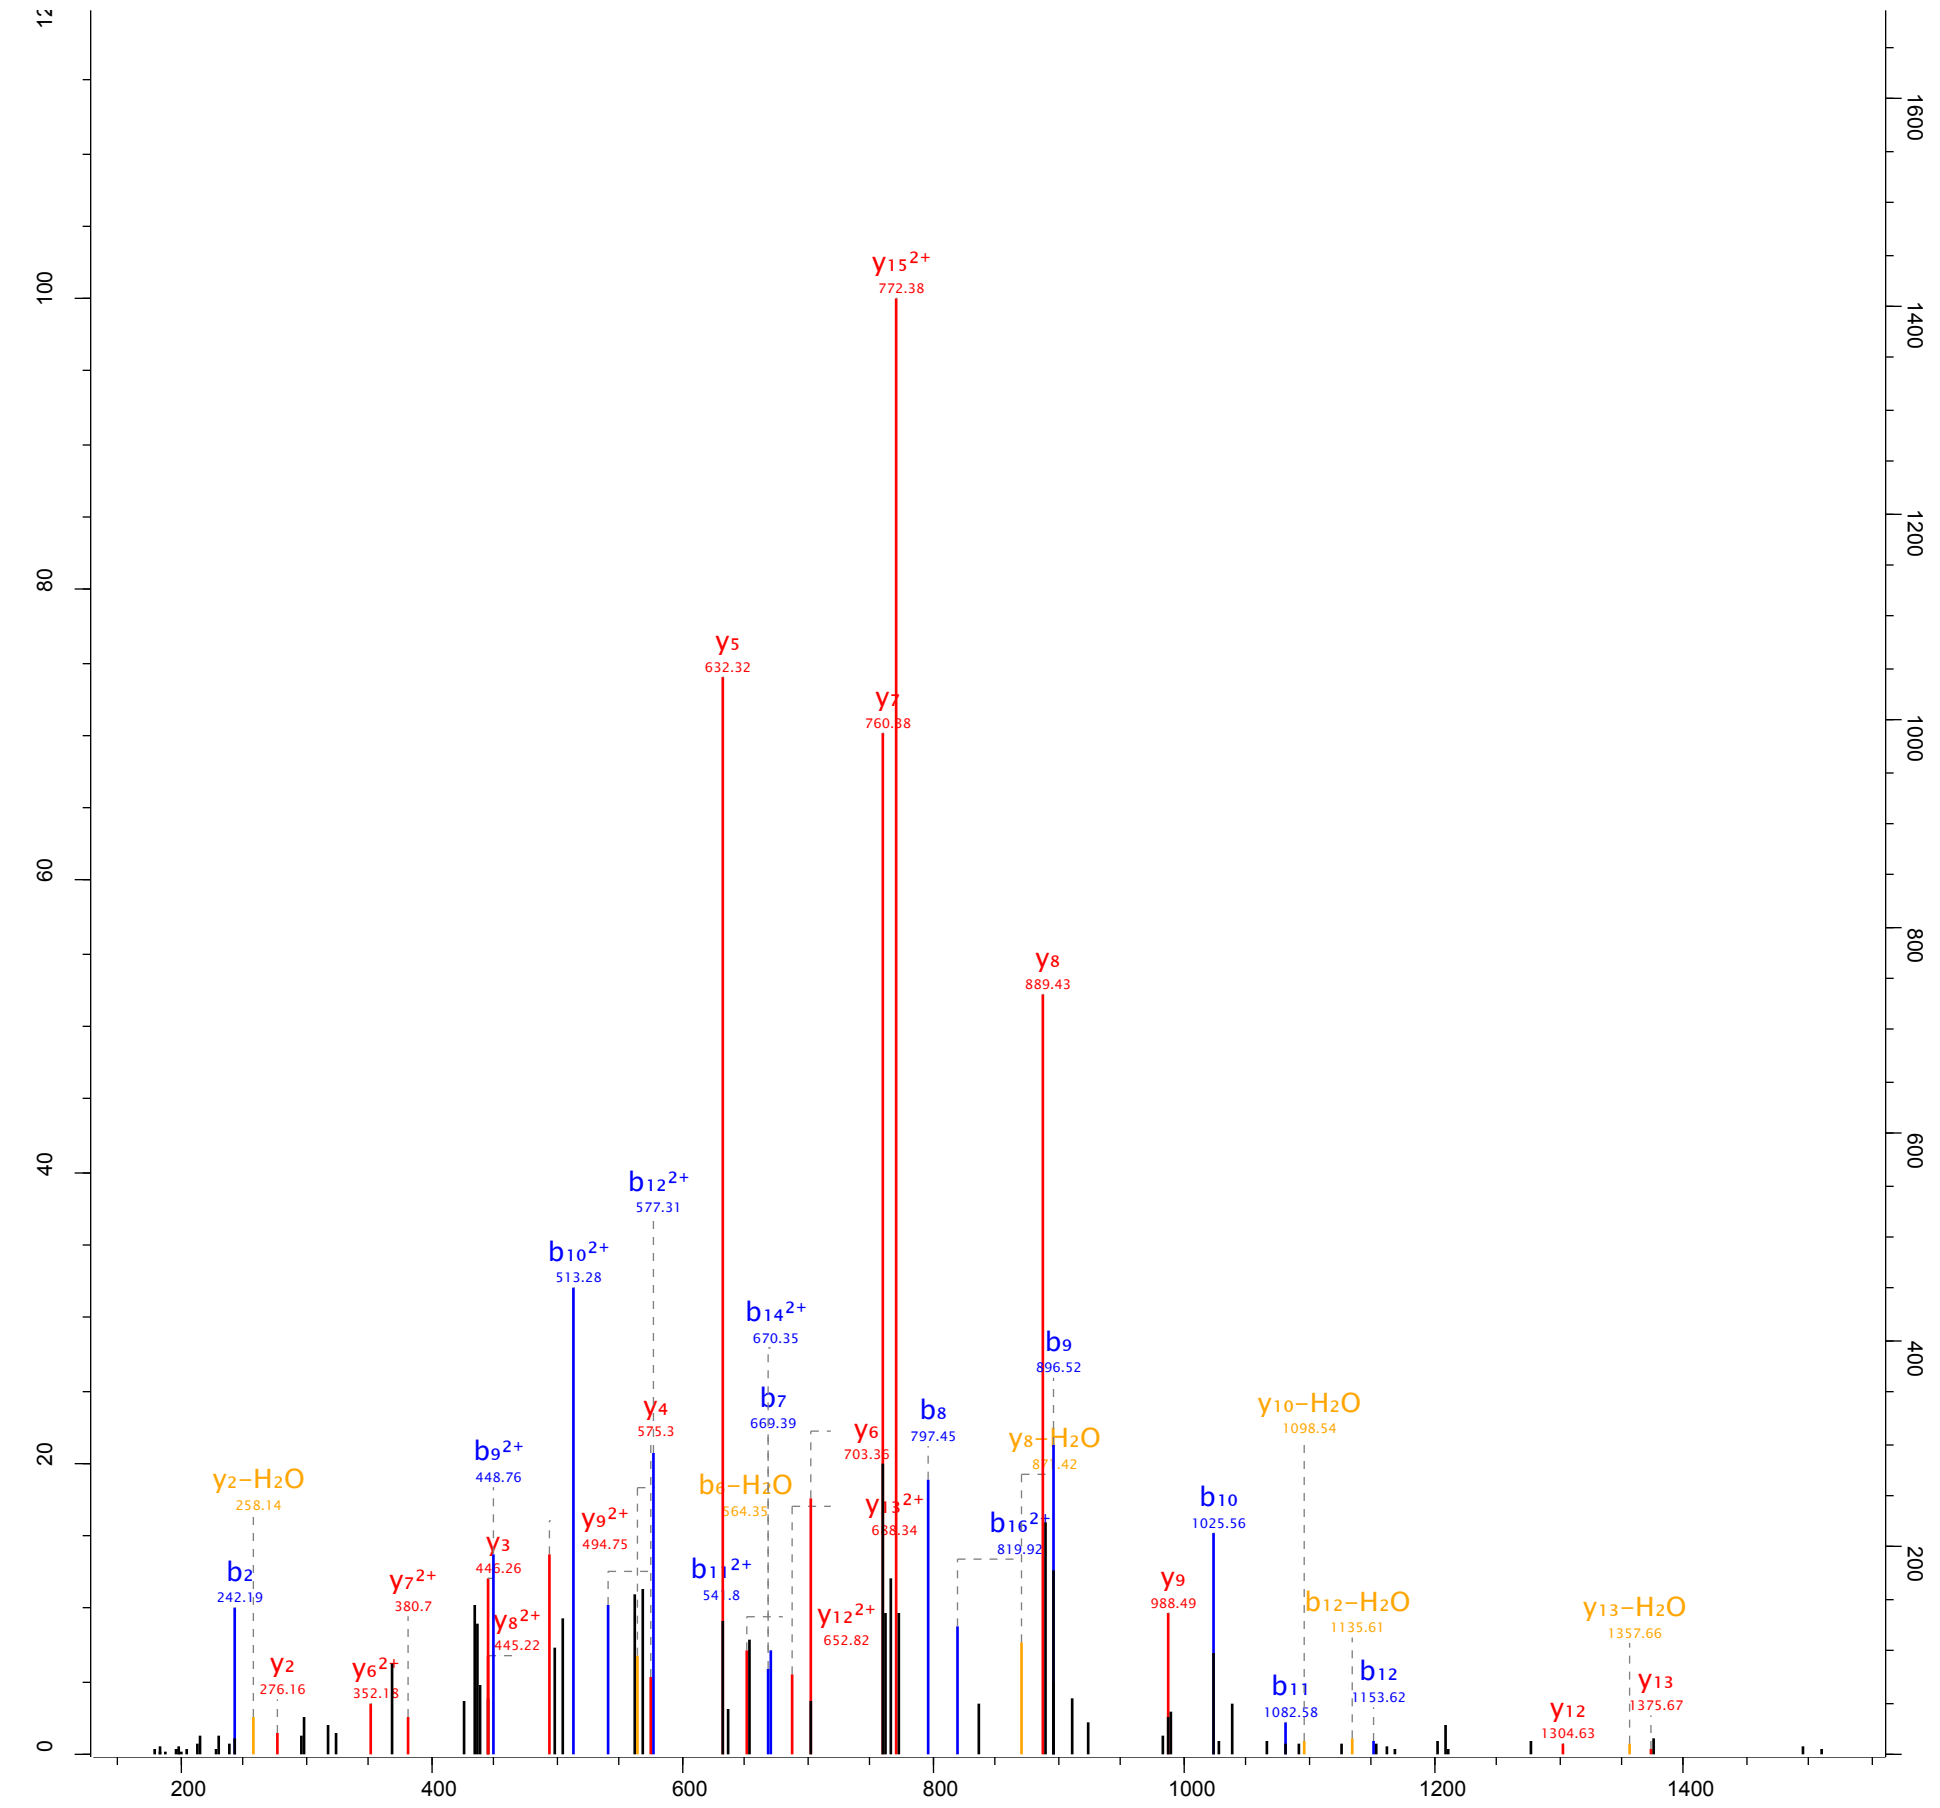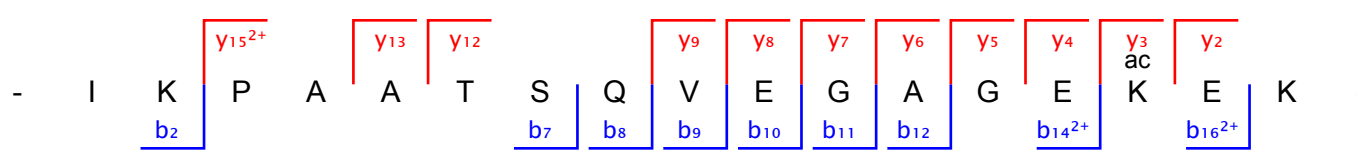

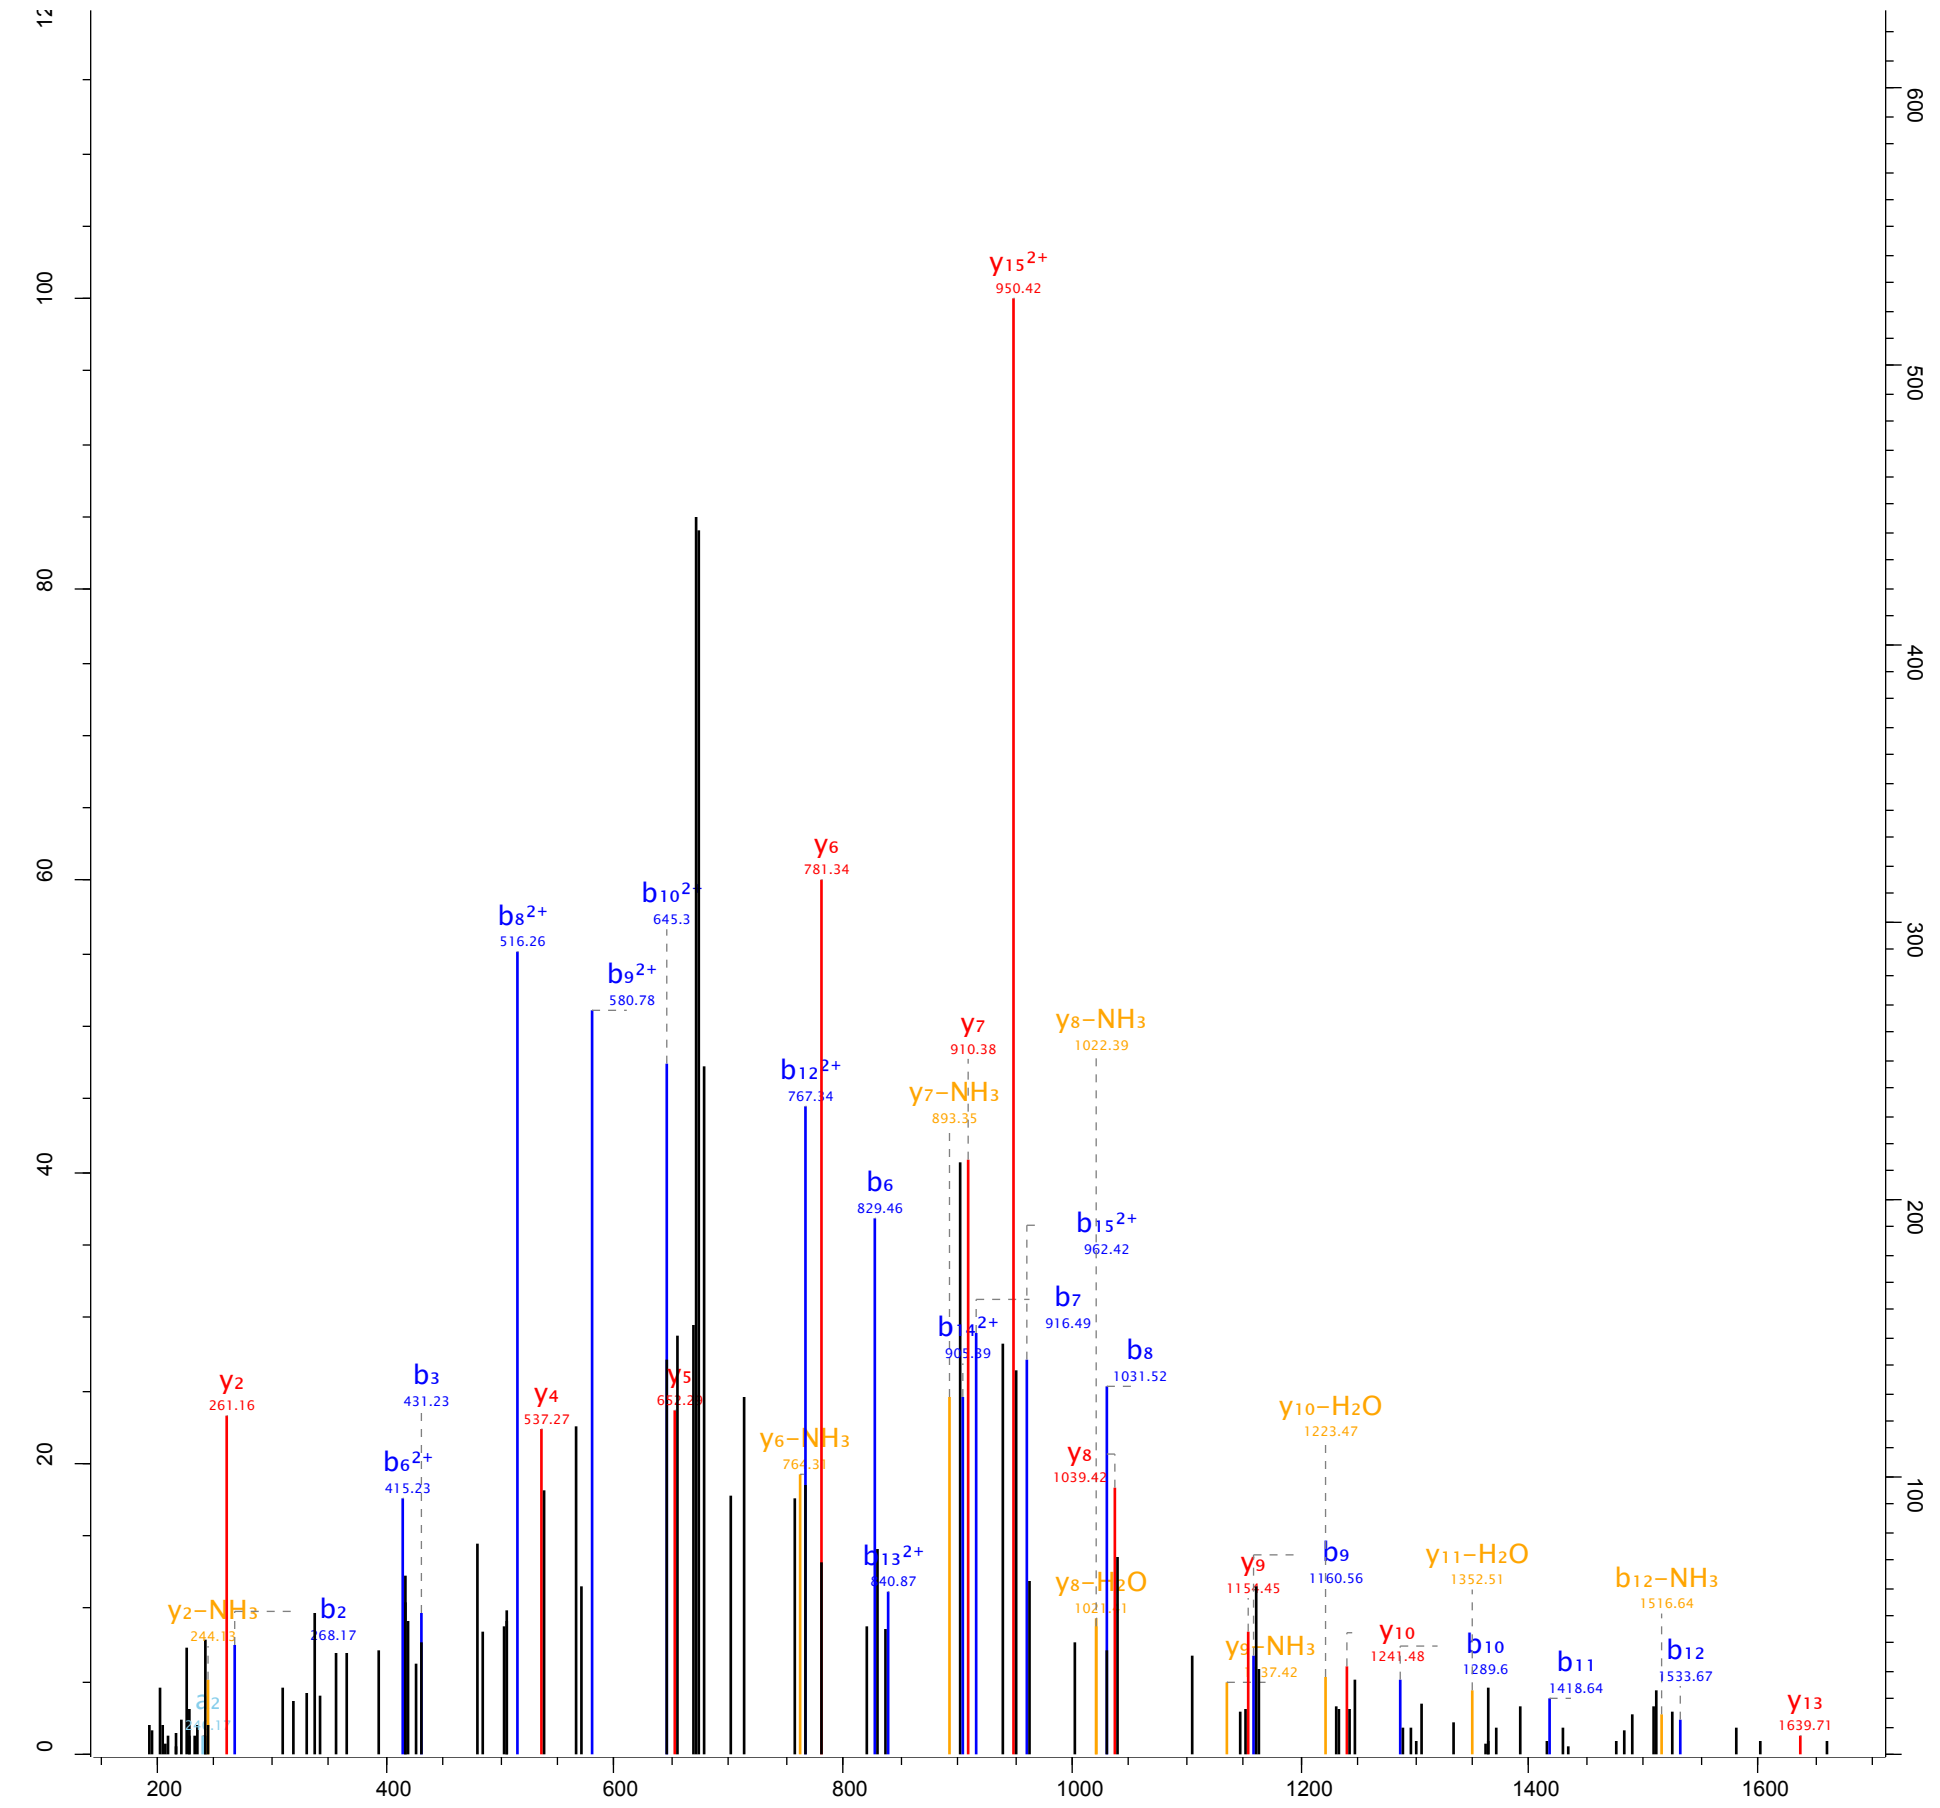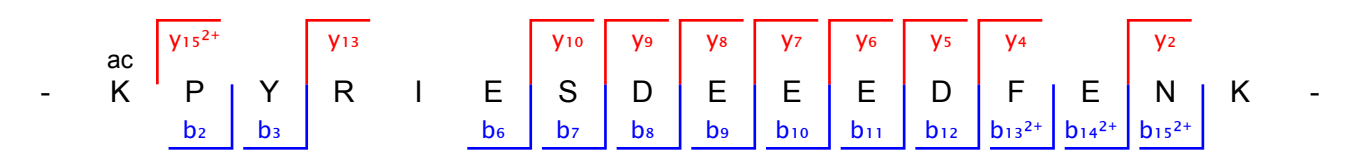



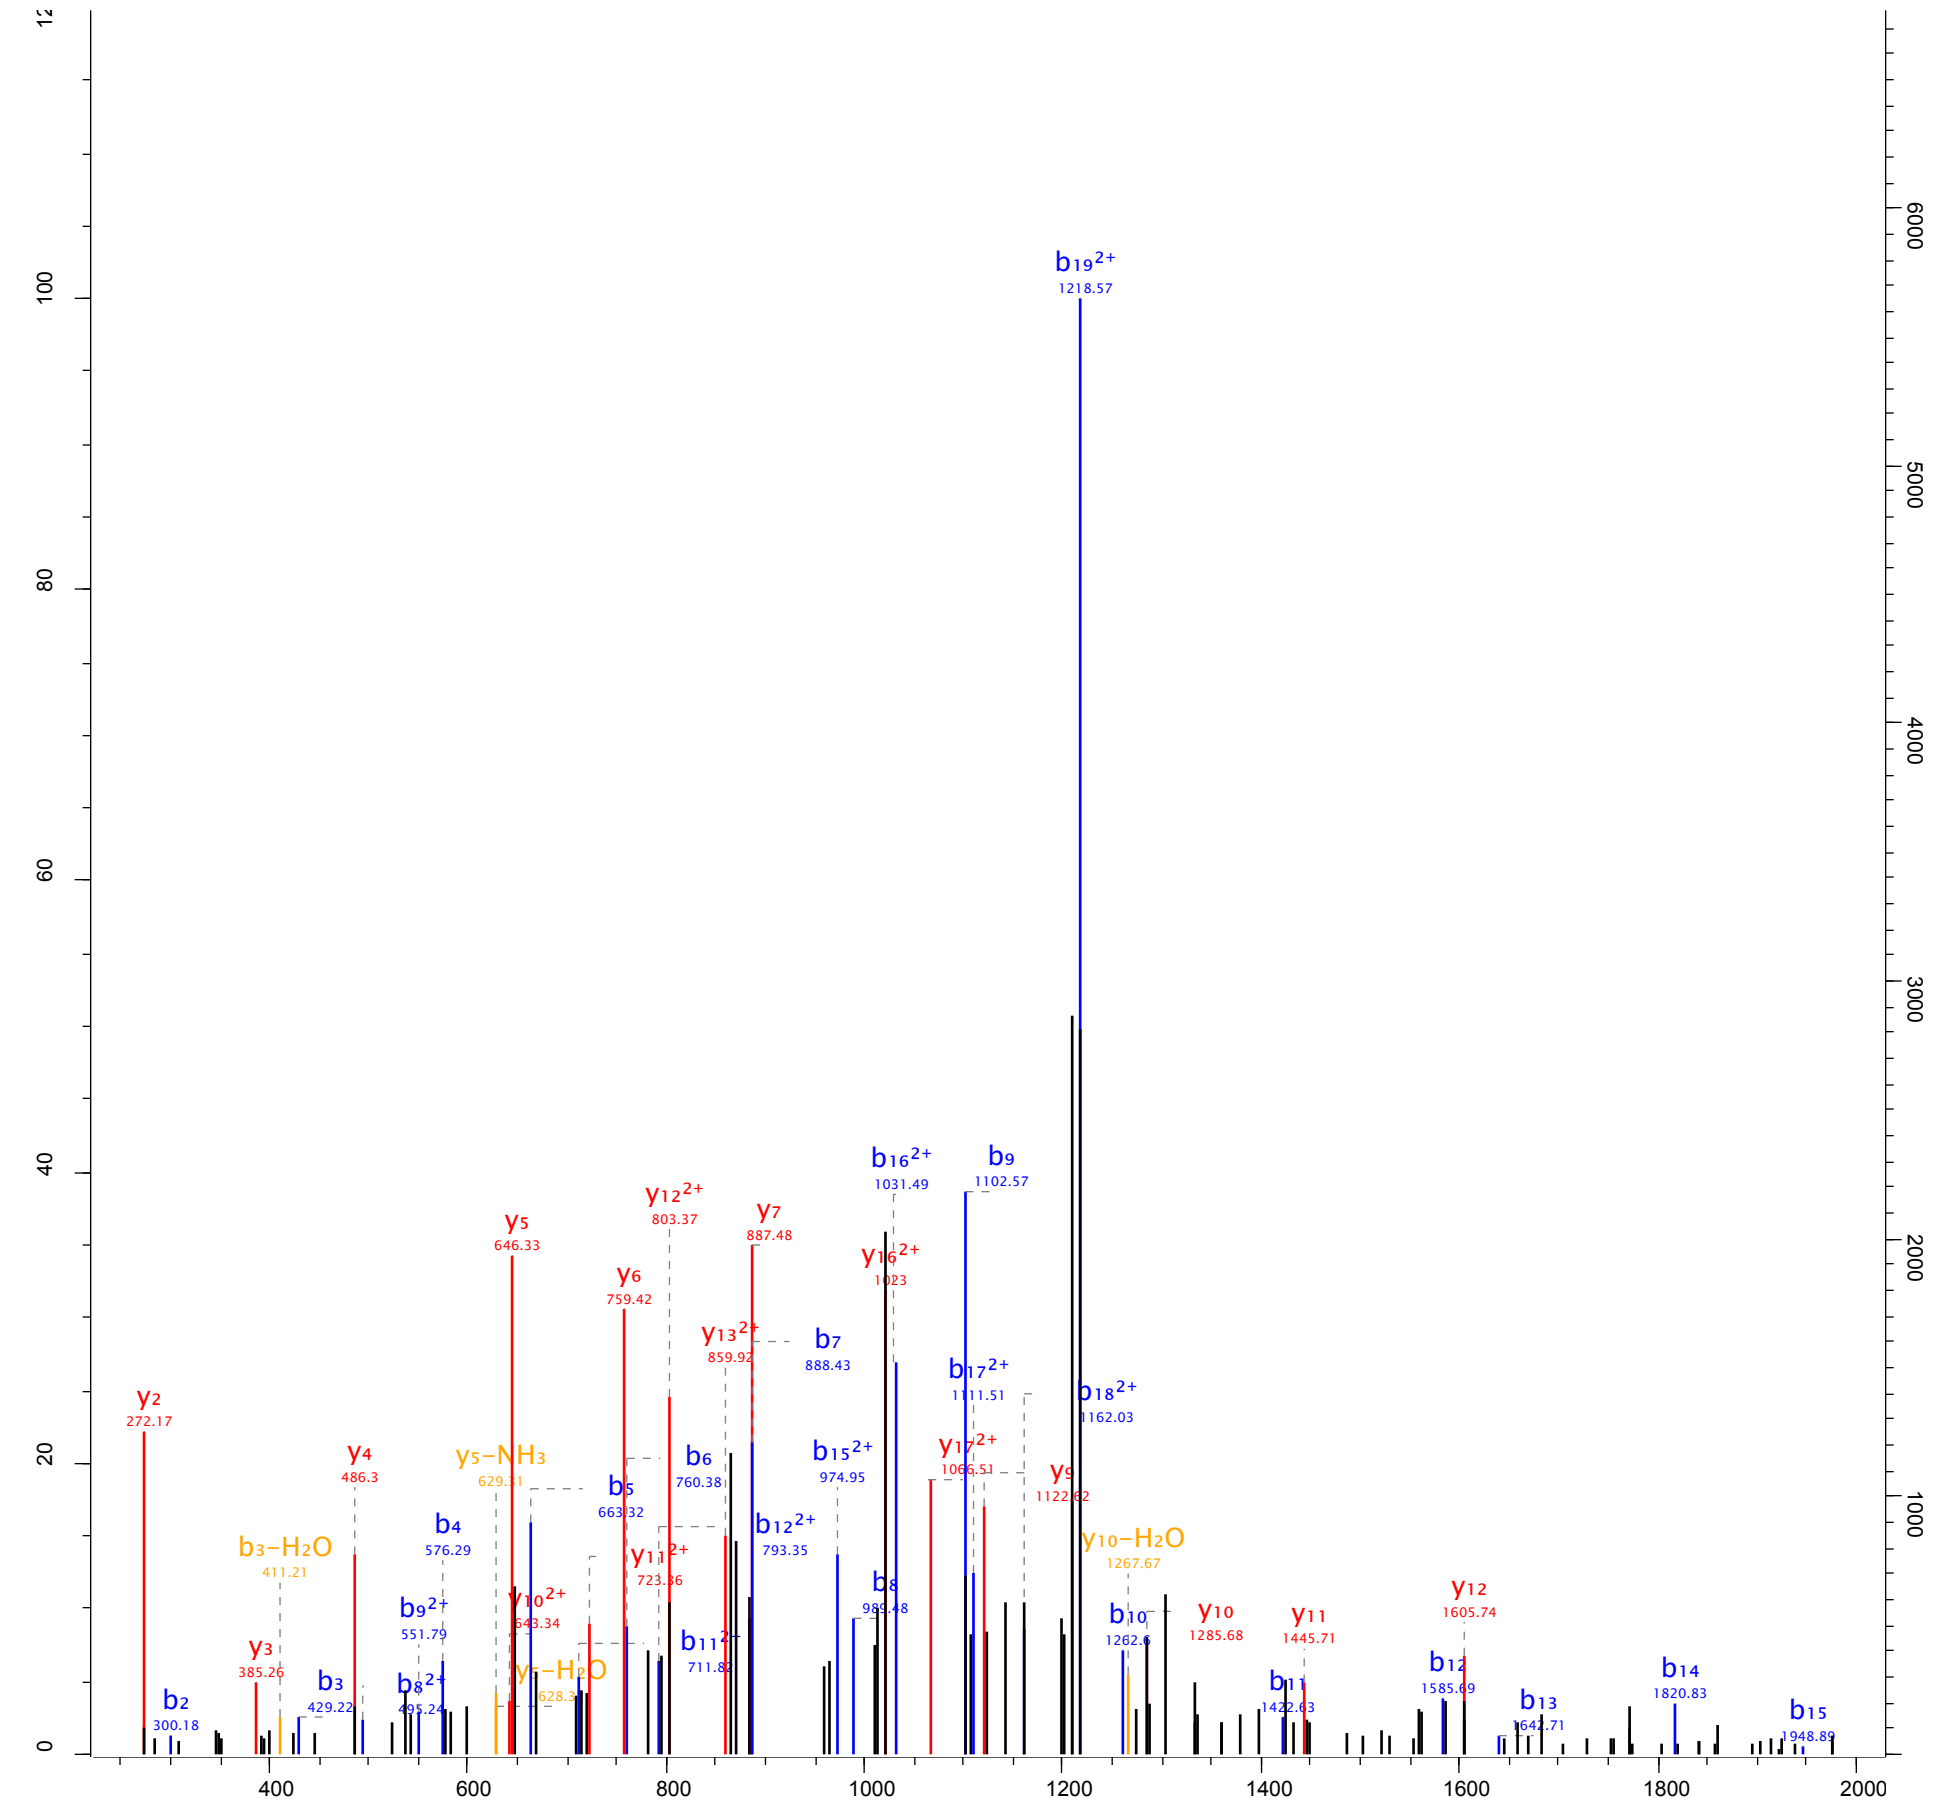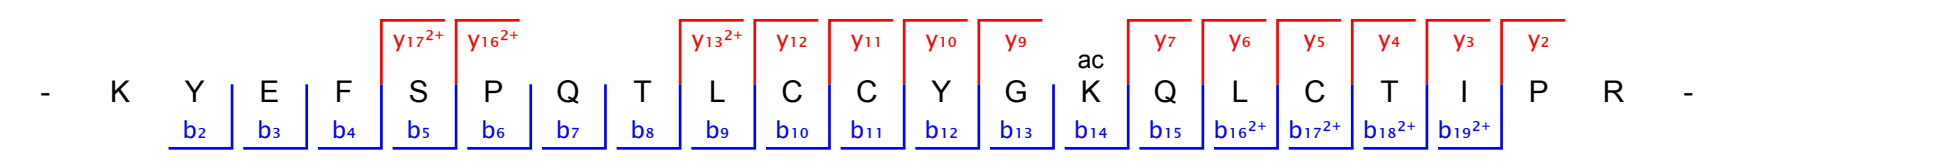

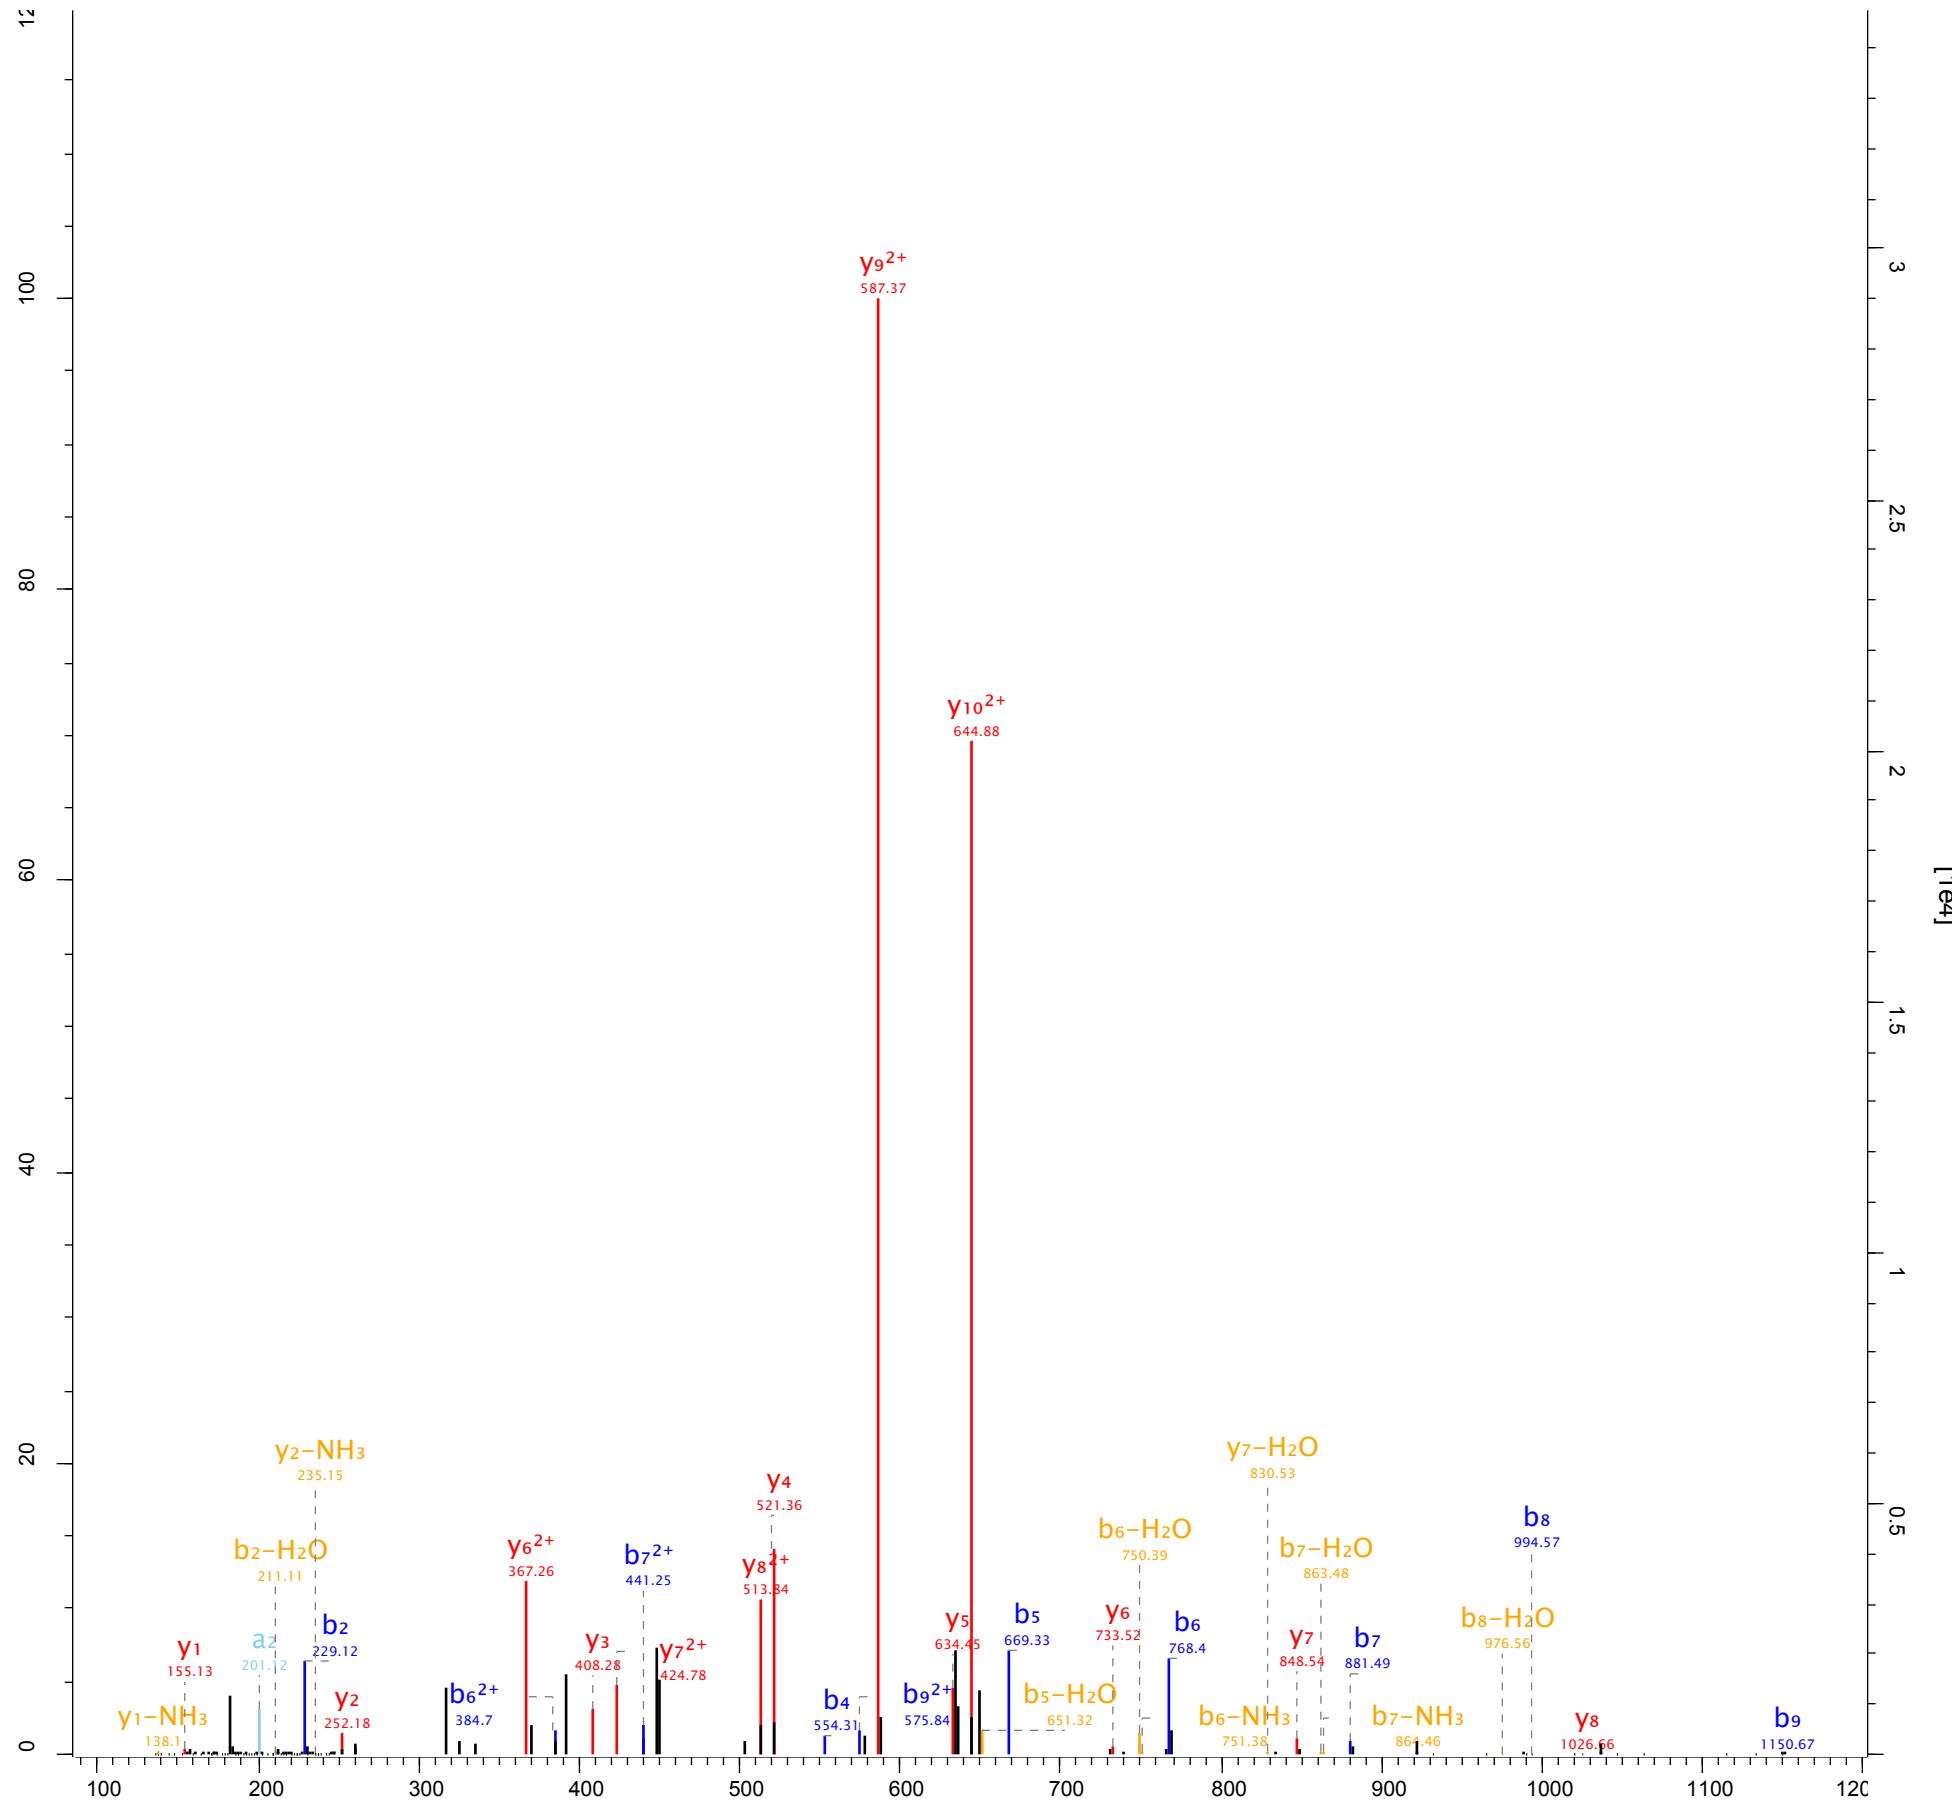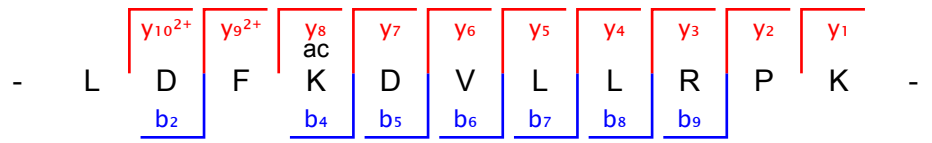

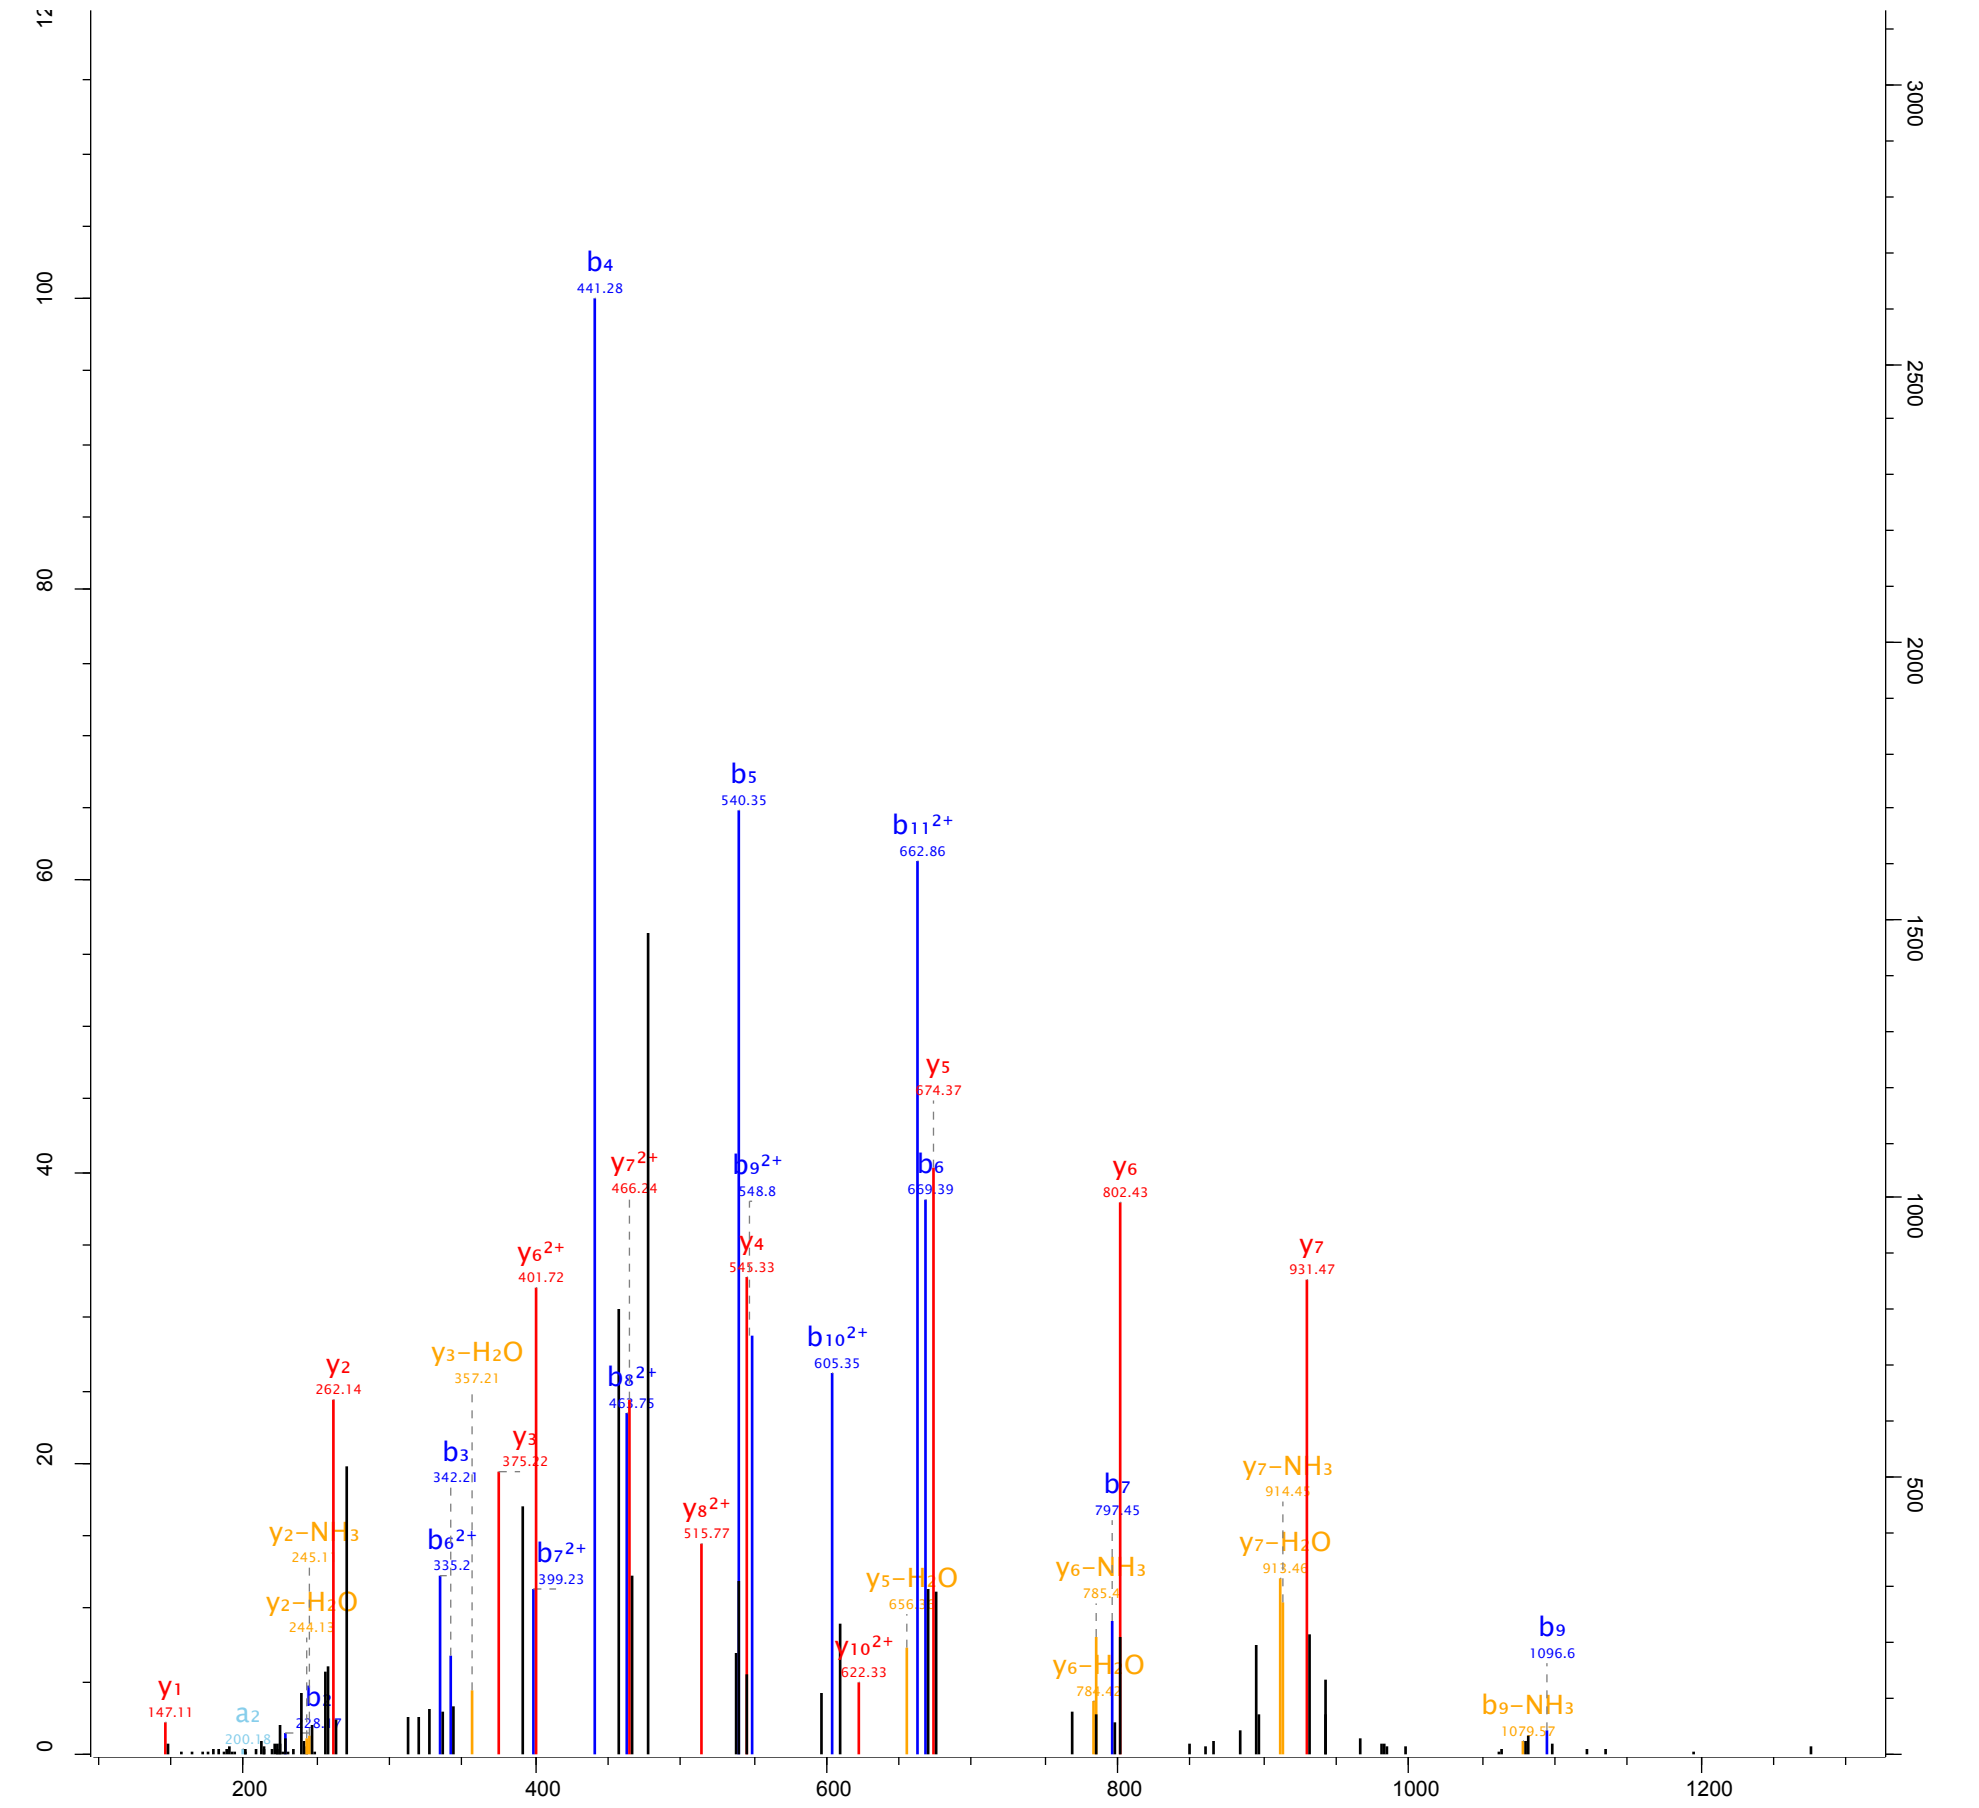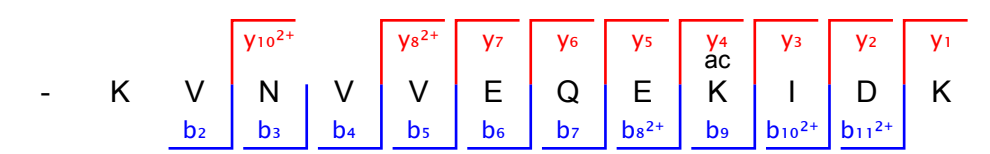

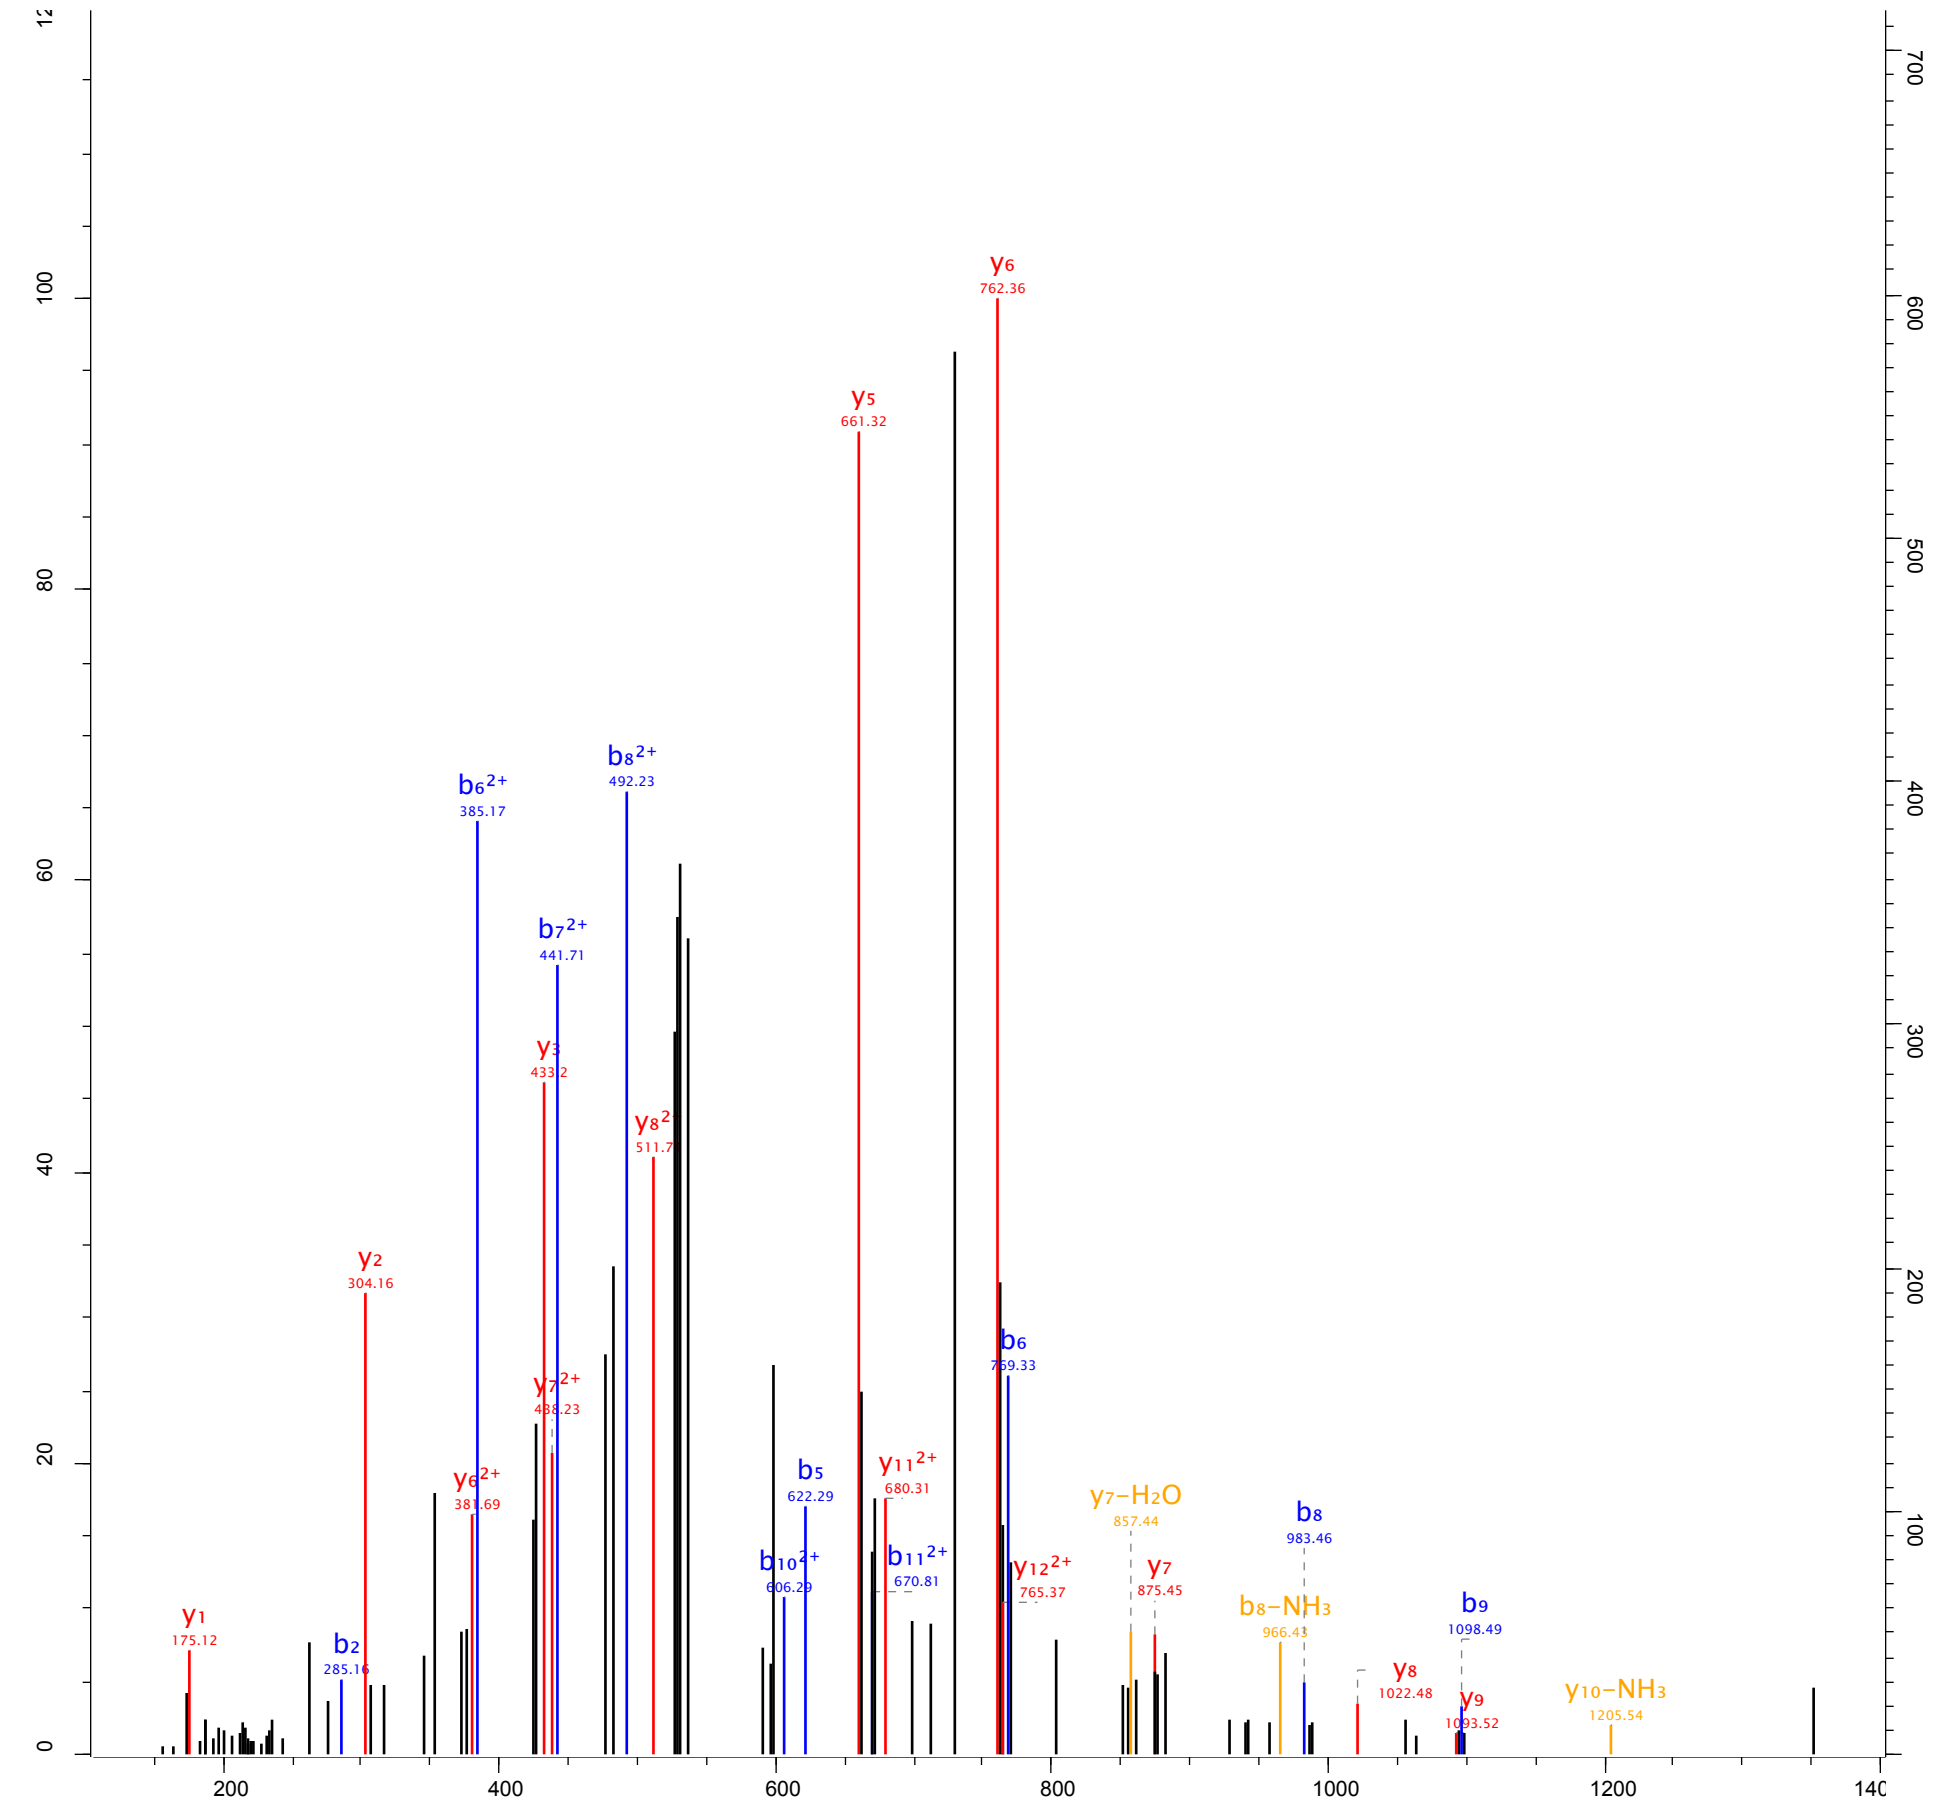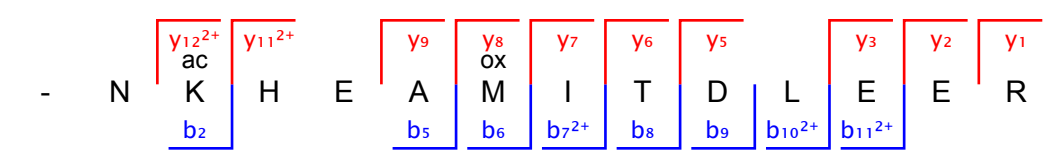

052413\_SCW\_II\_29\_Second\_ZT\_35\_9

9115

ITMS; CID

143.64

592.31

Myh9

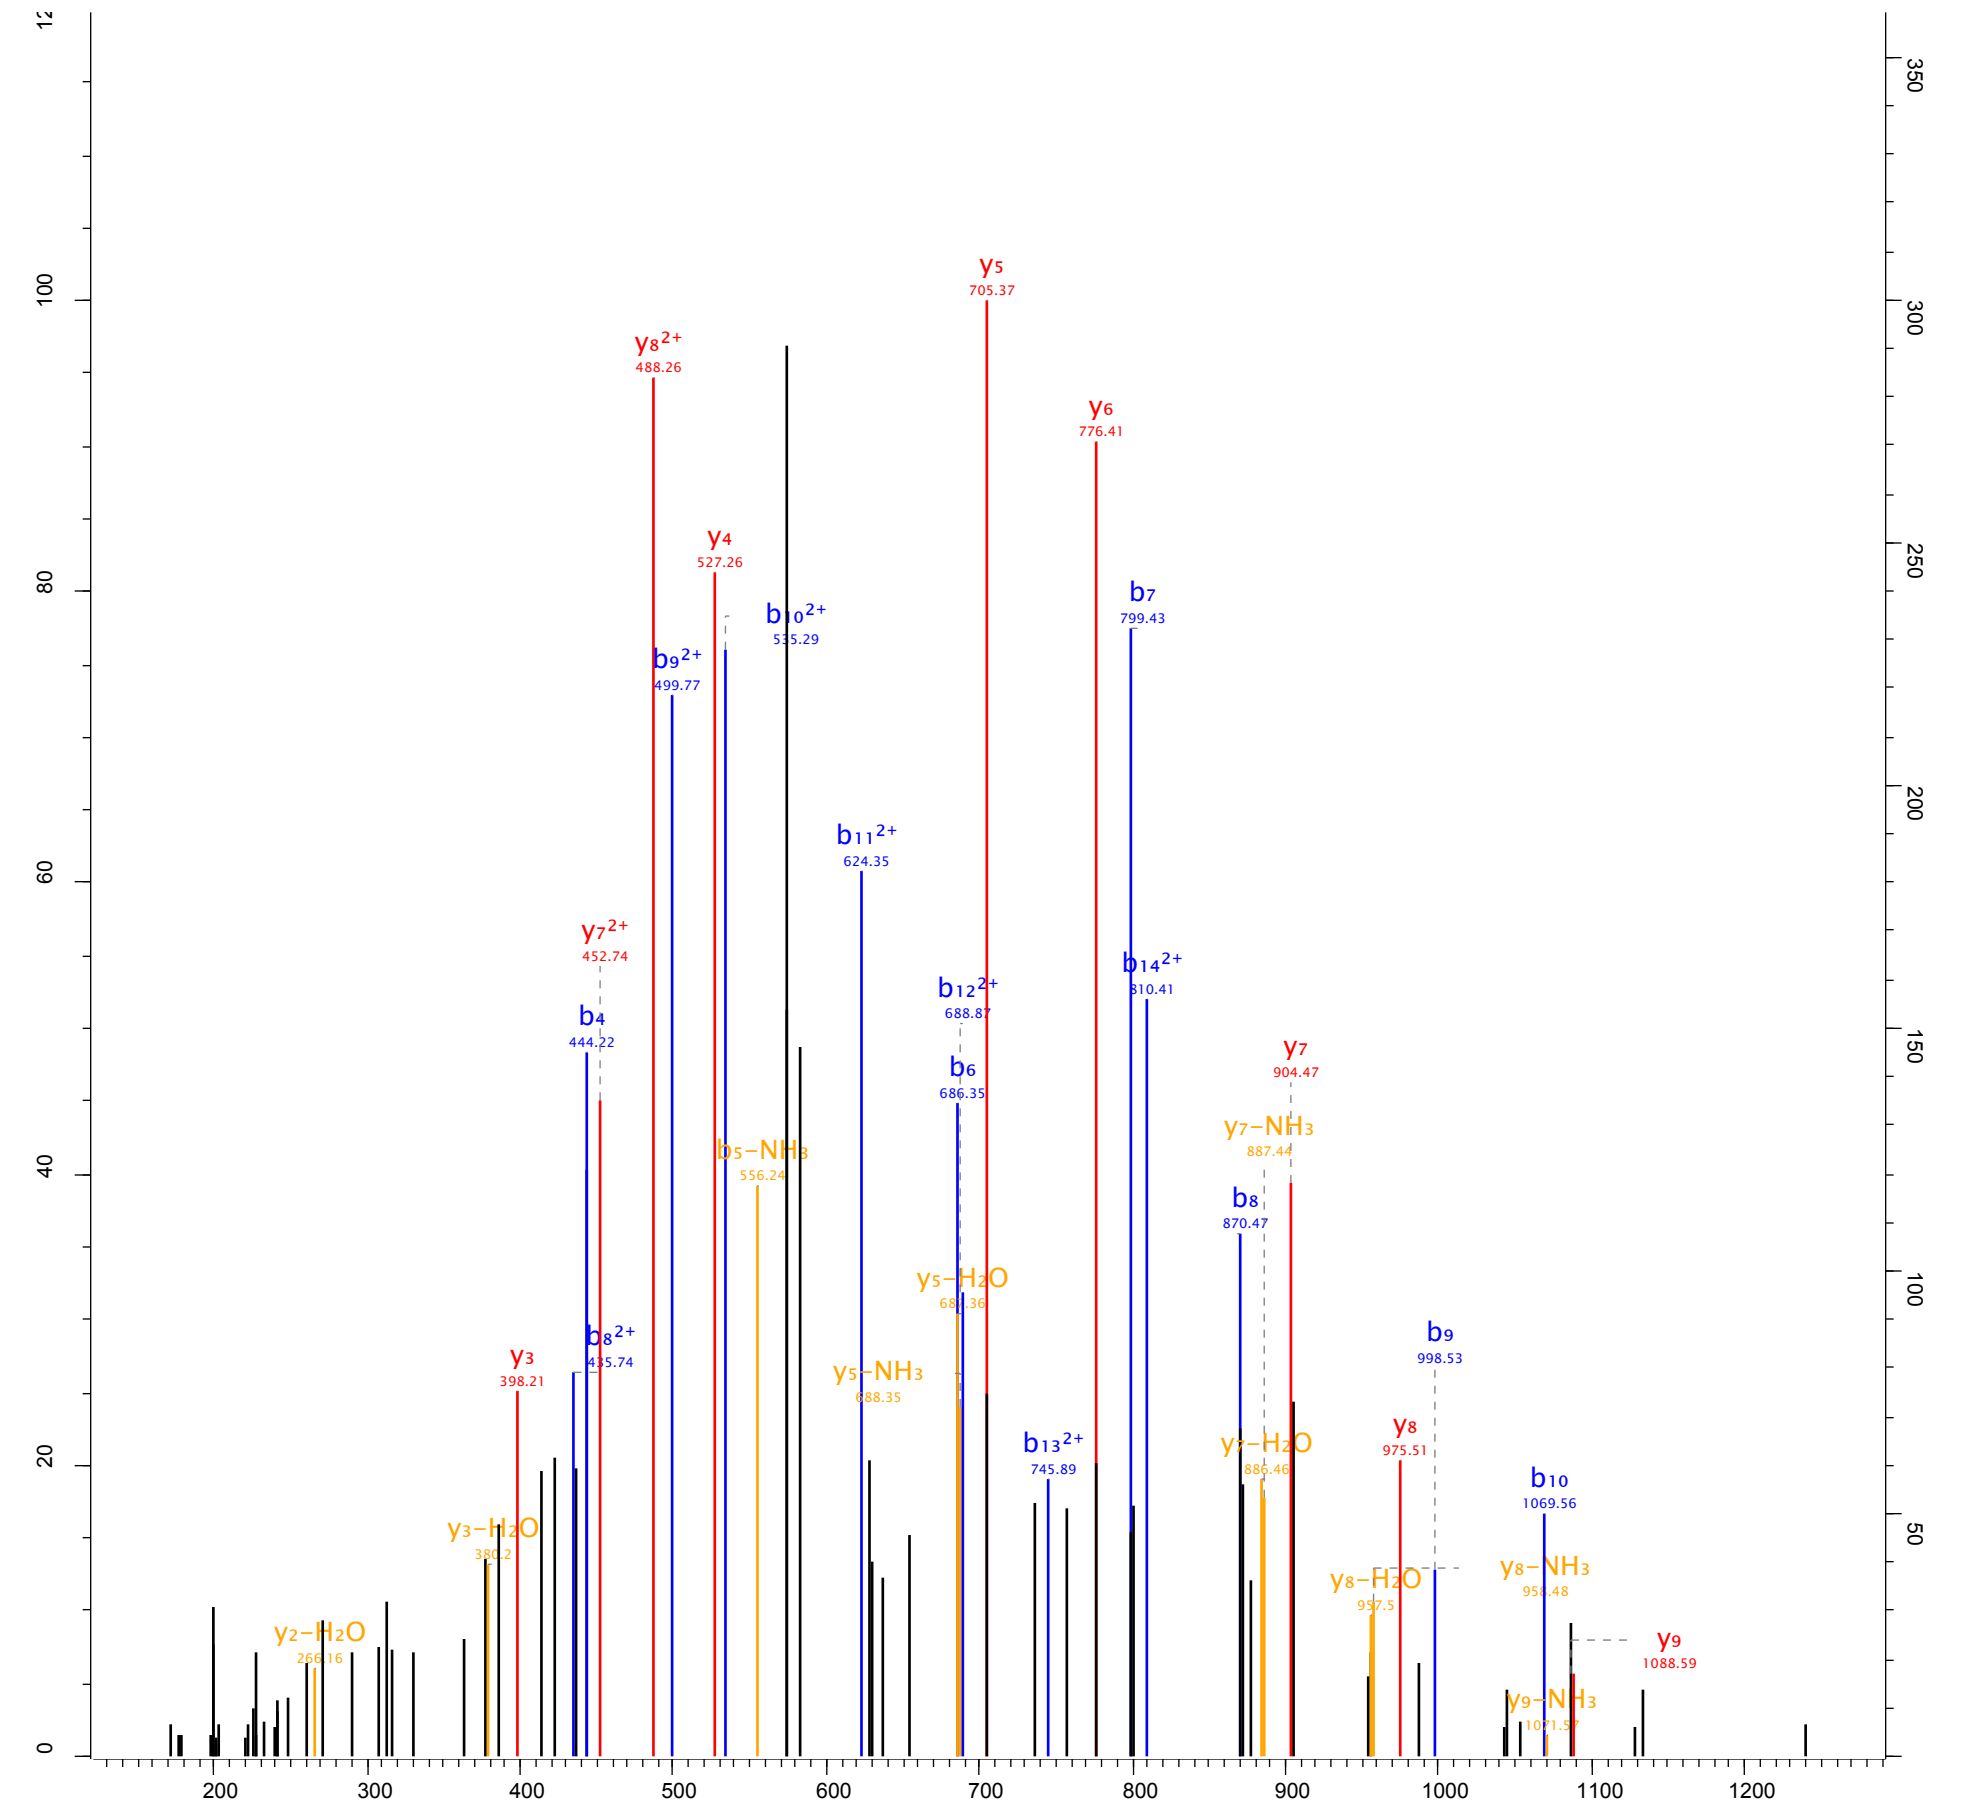

- A S R E E I L A Q A K E N E K -

b4
b6
b7
b8
b9
b10
b11<sup>2+</sup>
b12<sup>2+</sup>
b13<sup>2+</sup>
b14<sup>2+</sup>

y9
y8
y7
y6
y5  
ac
y4
y3

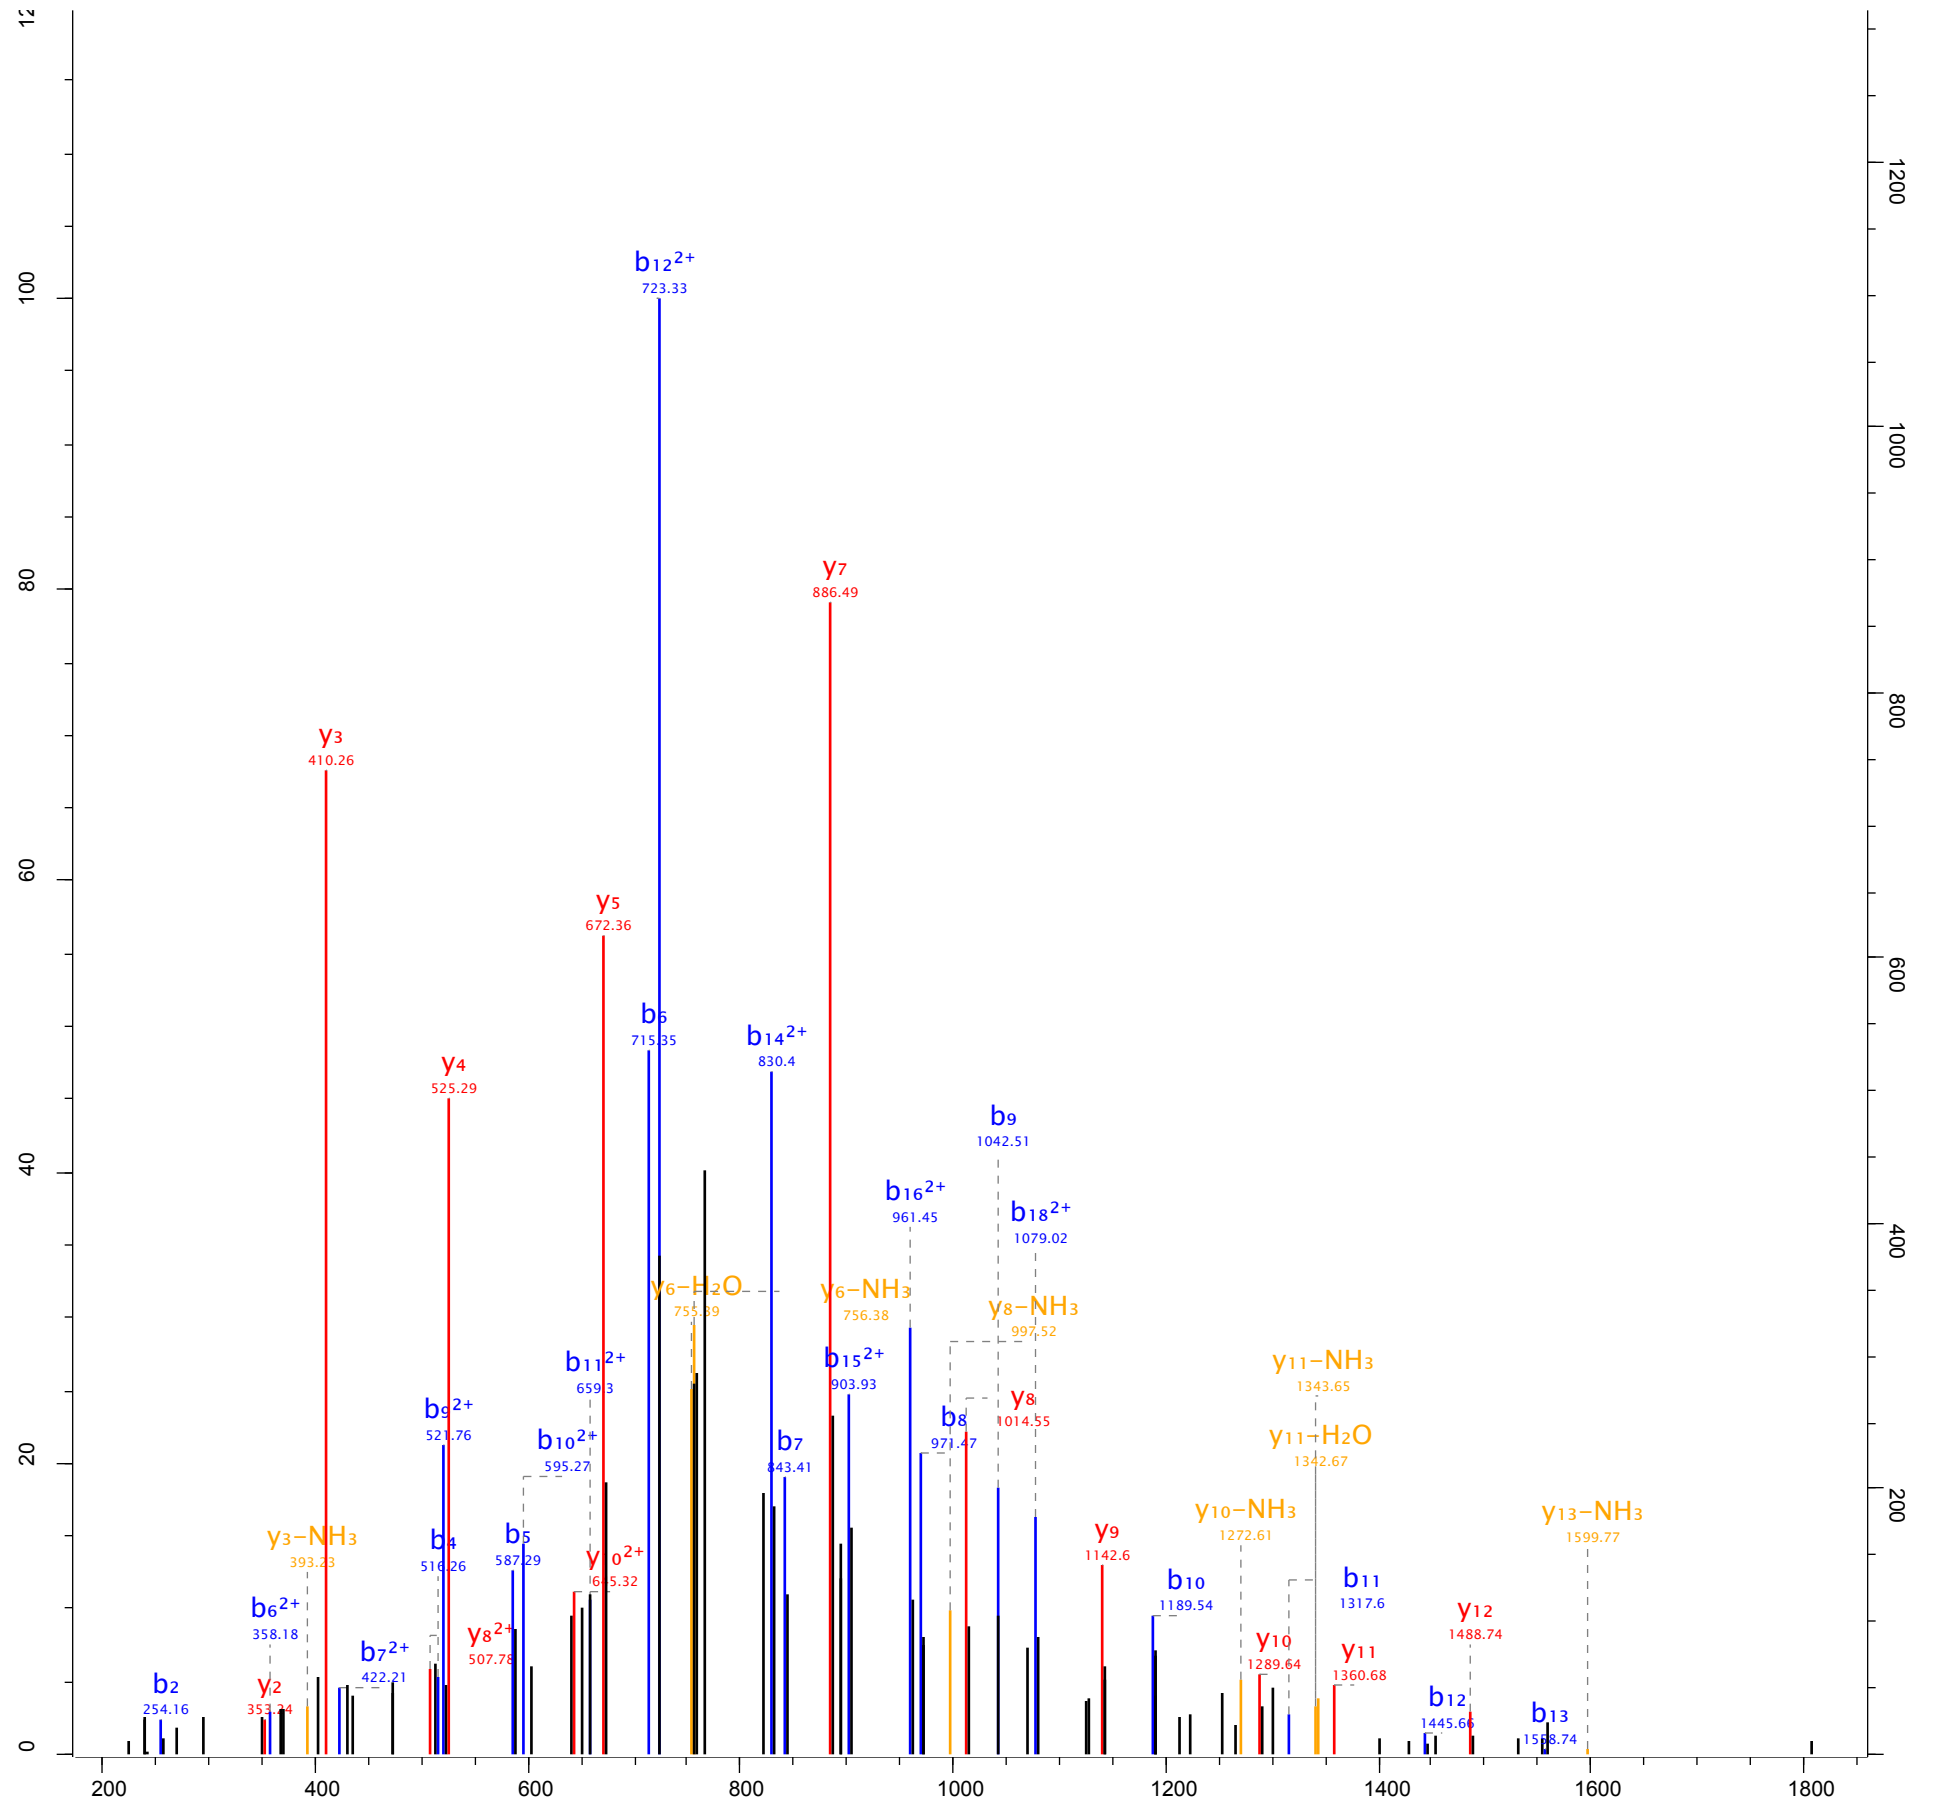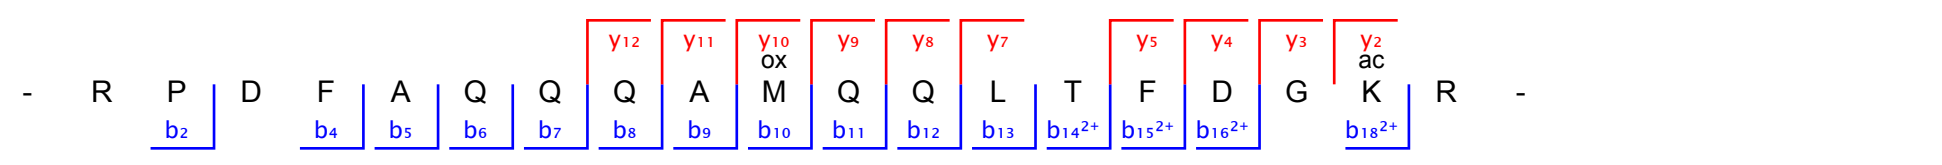

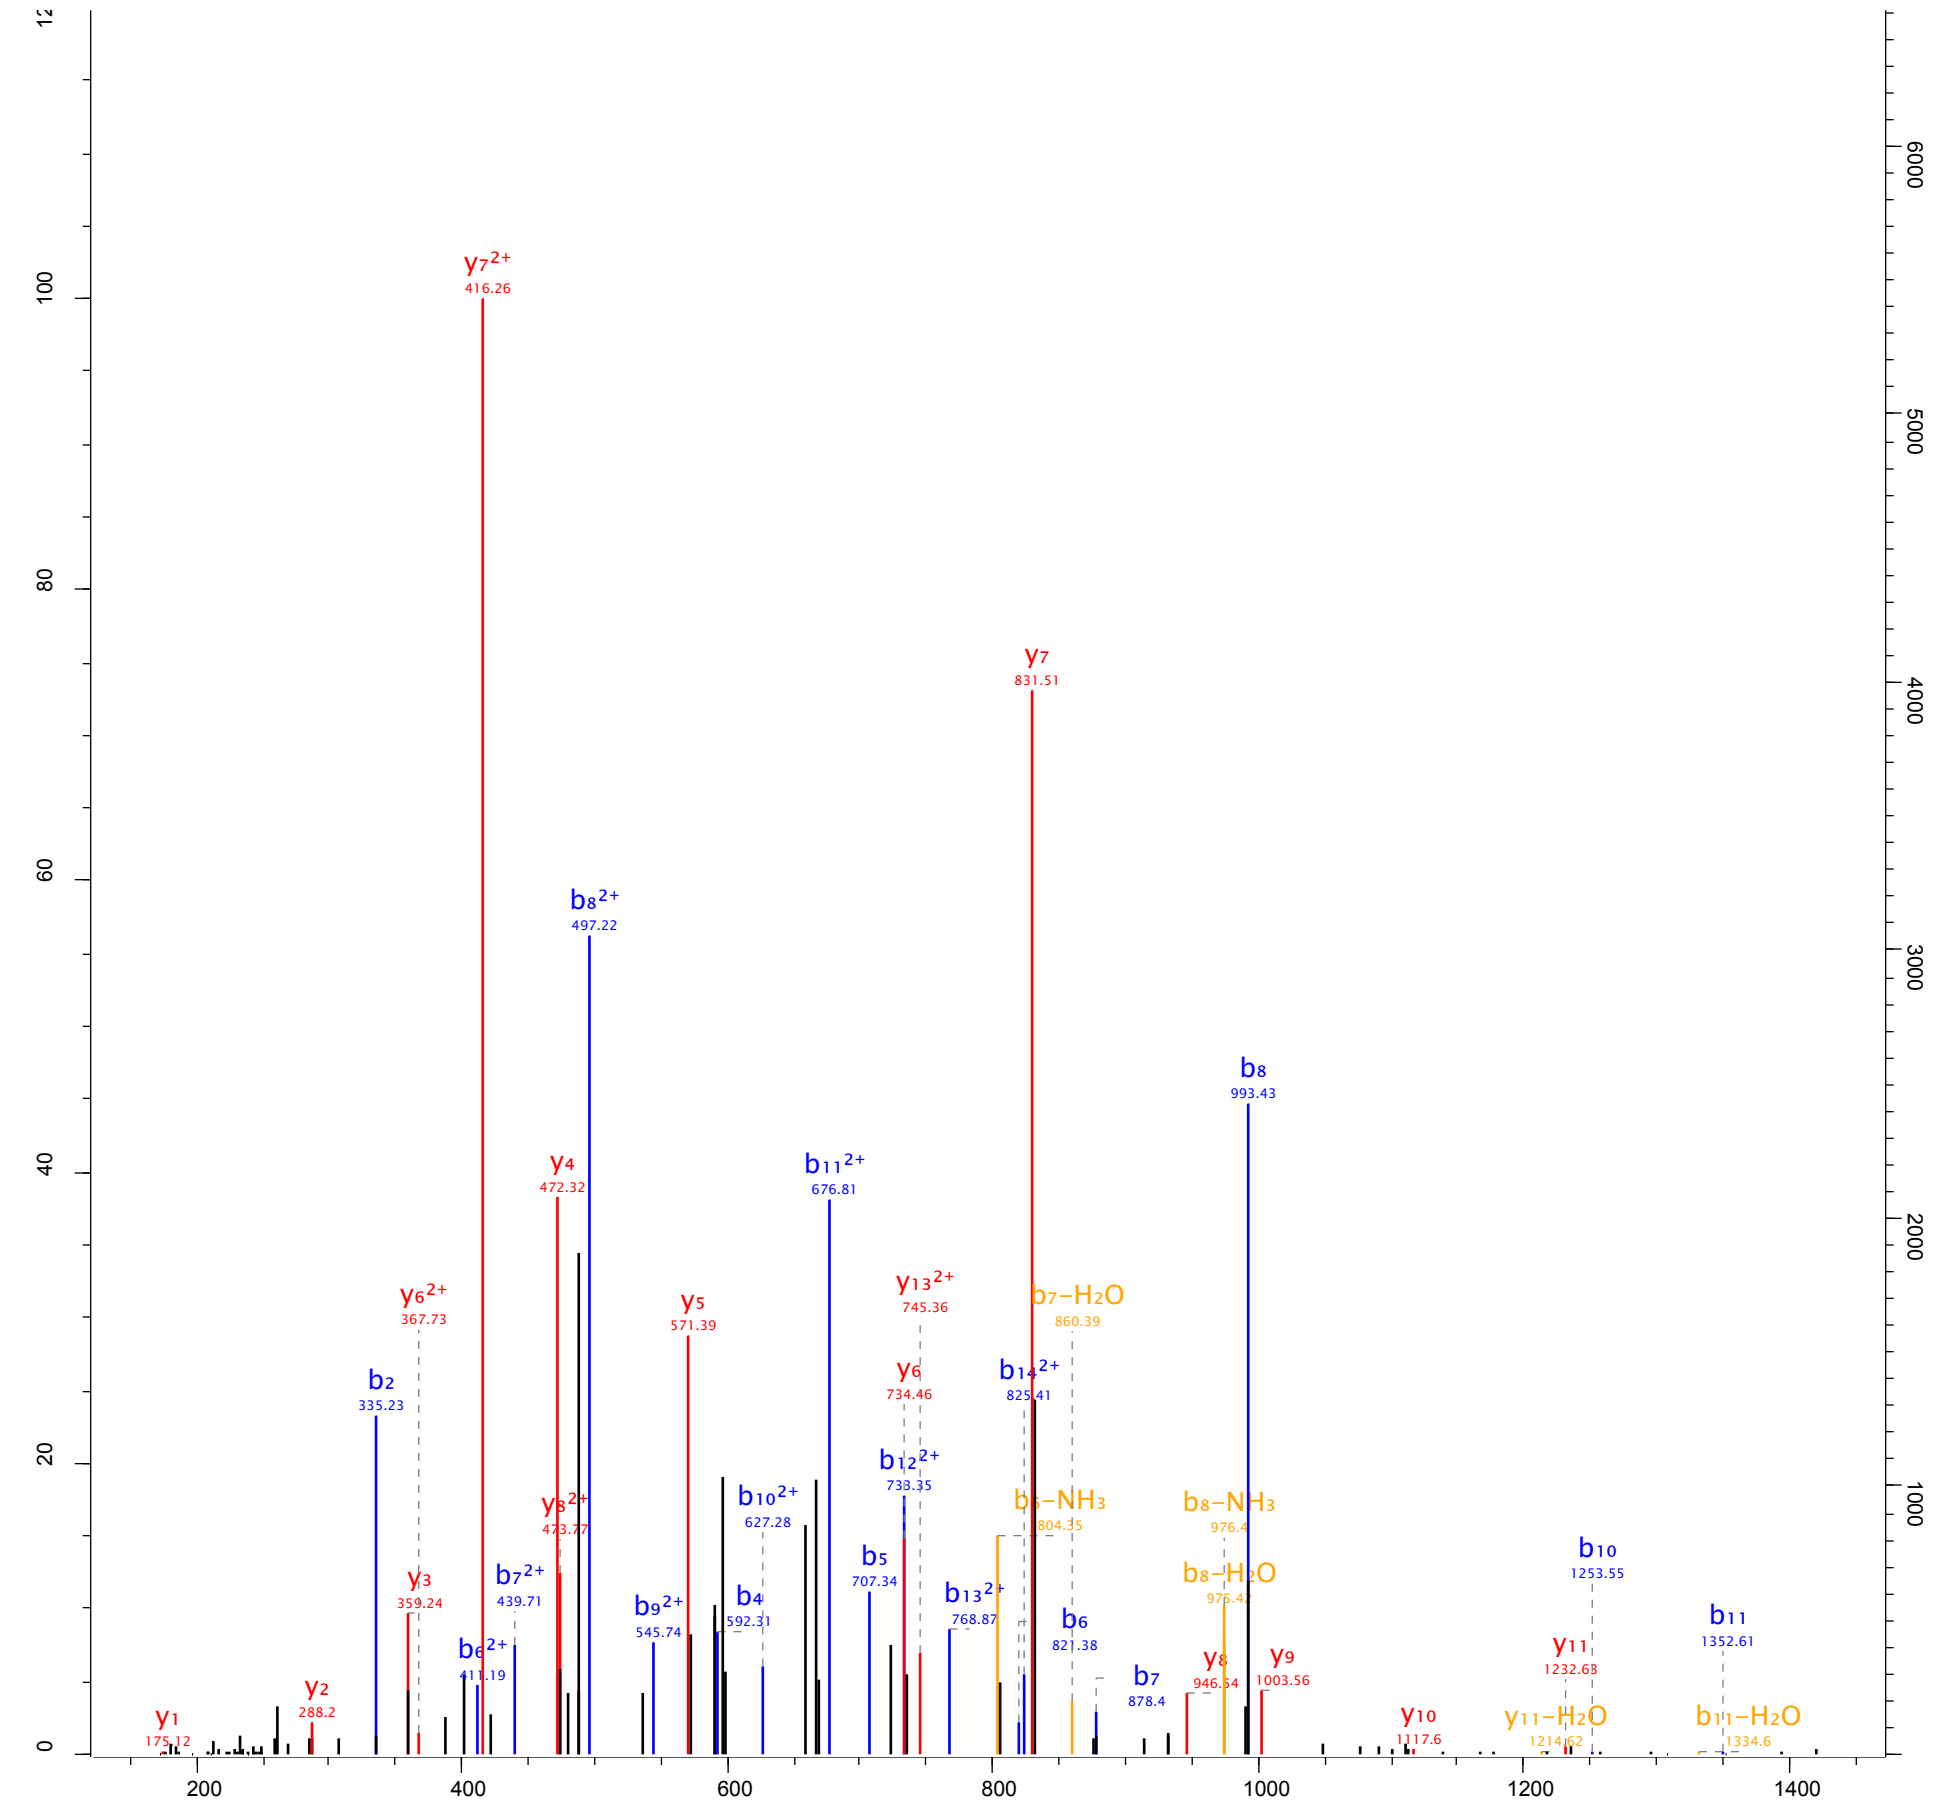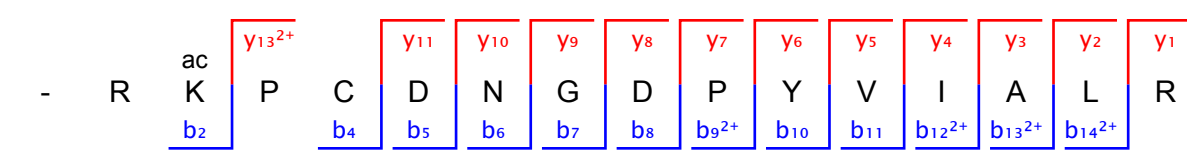

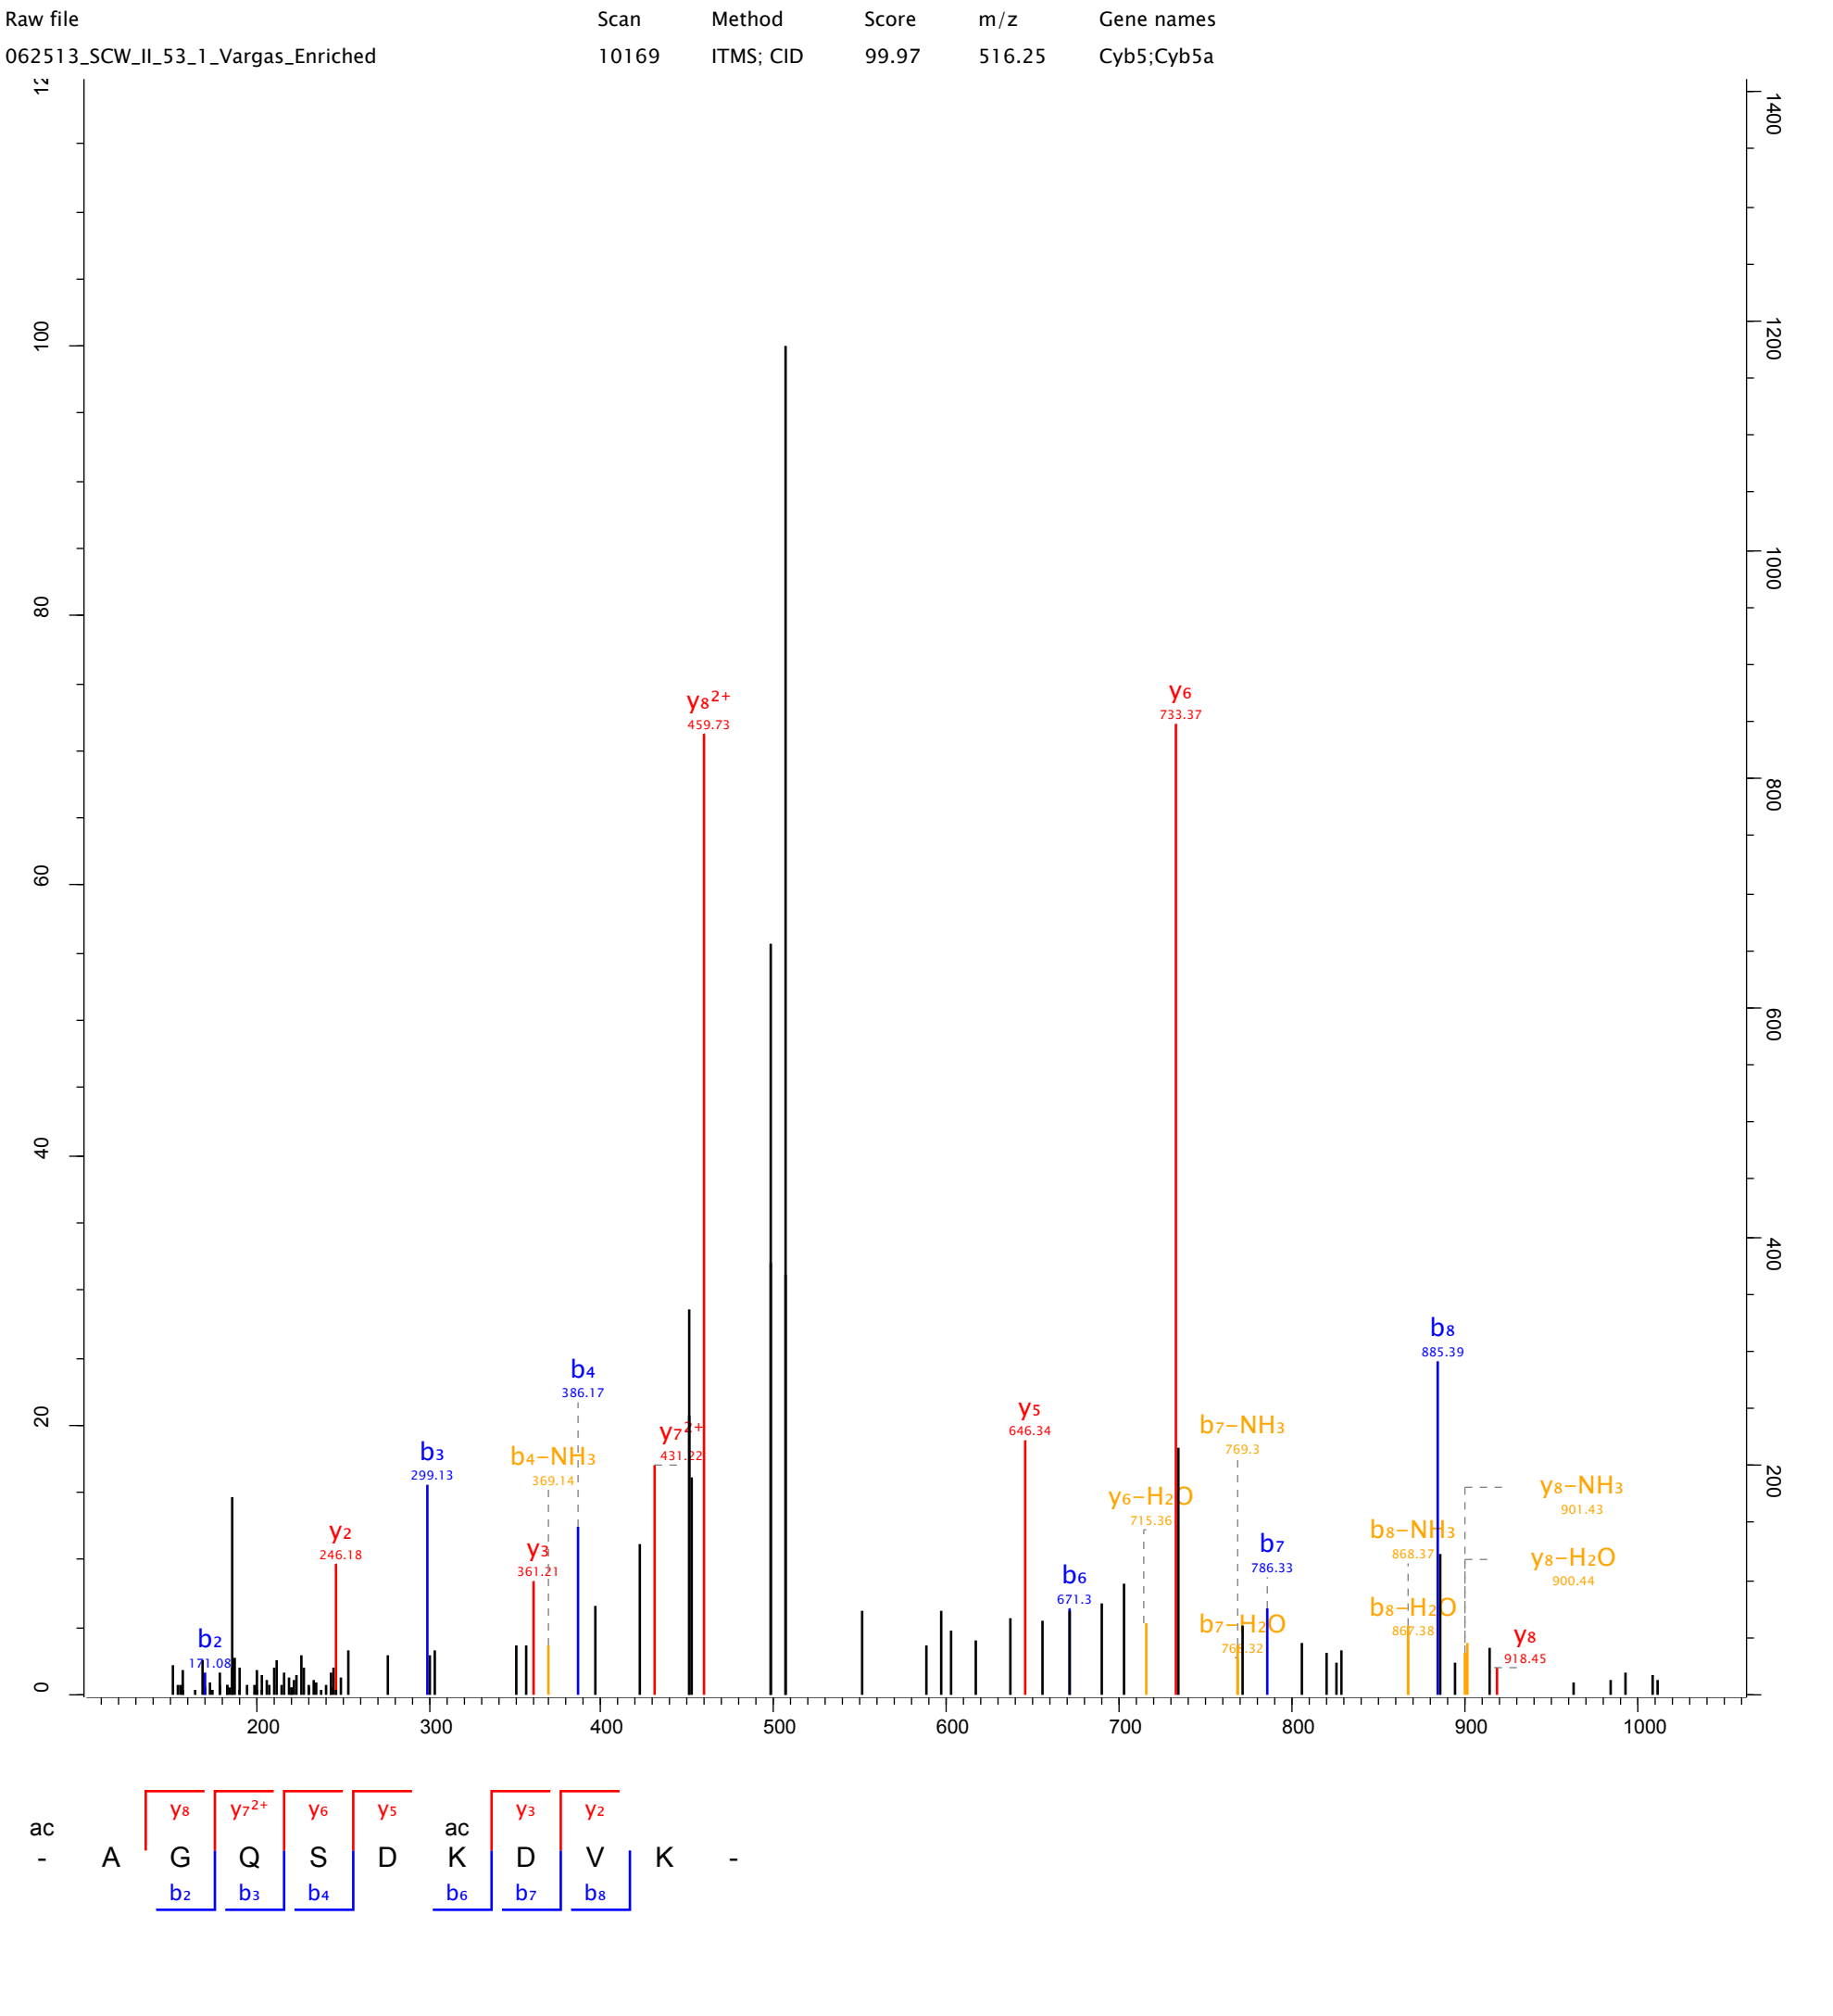



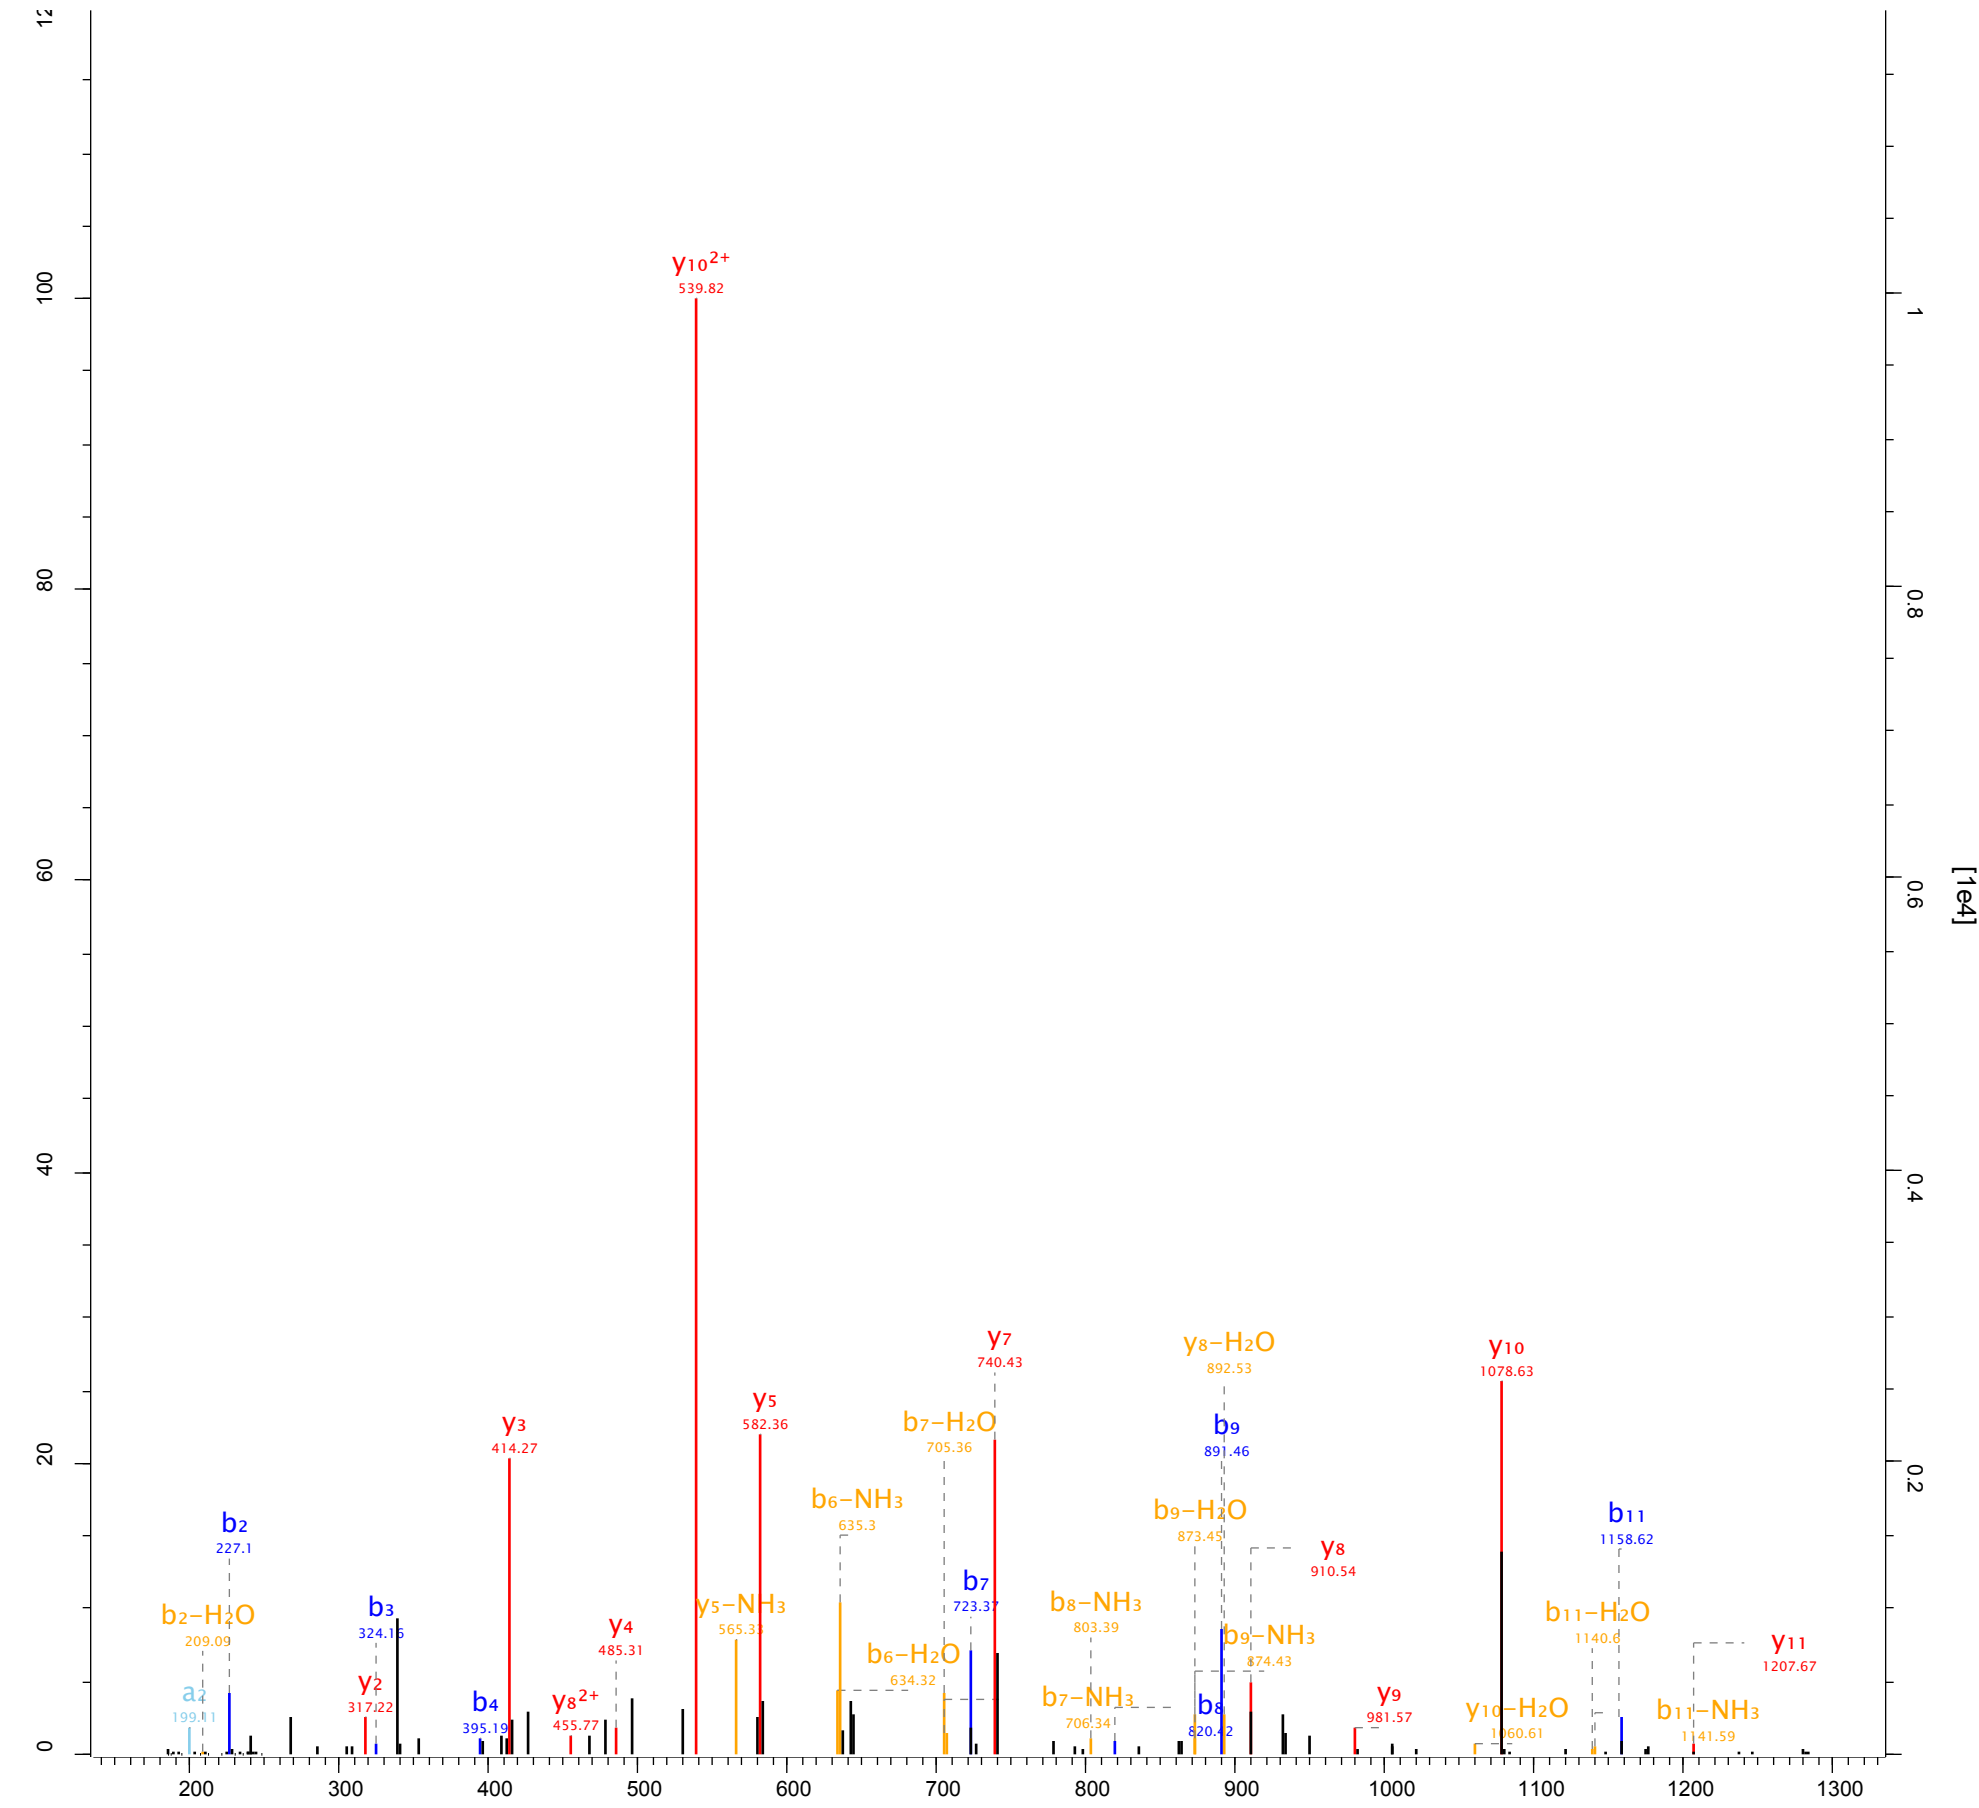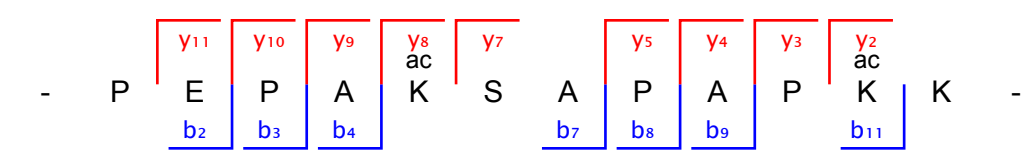

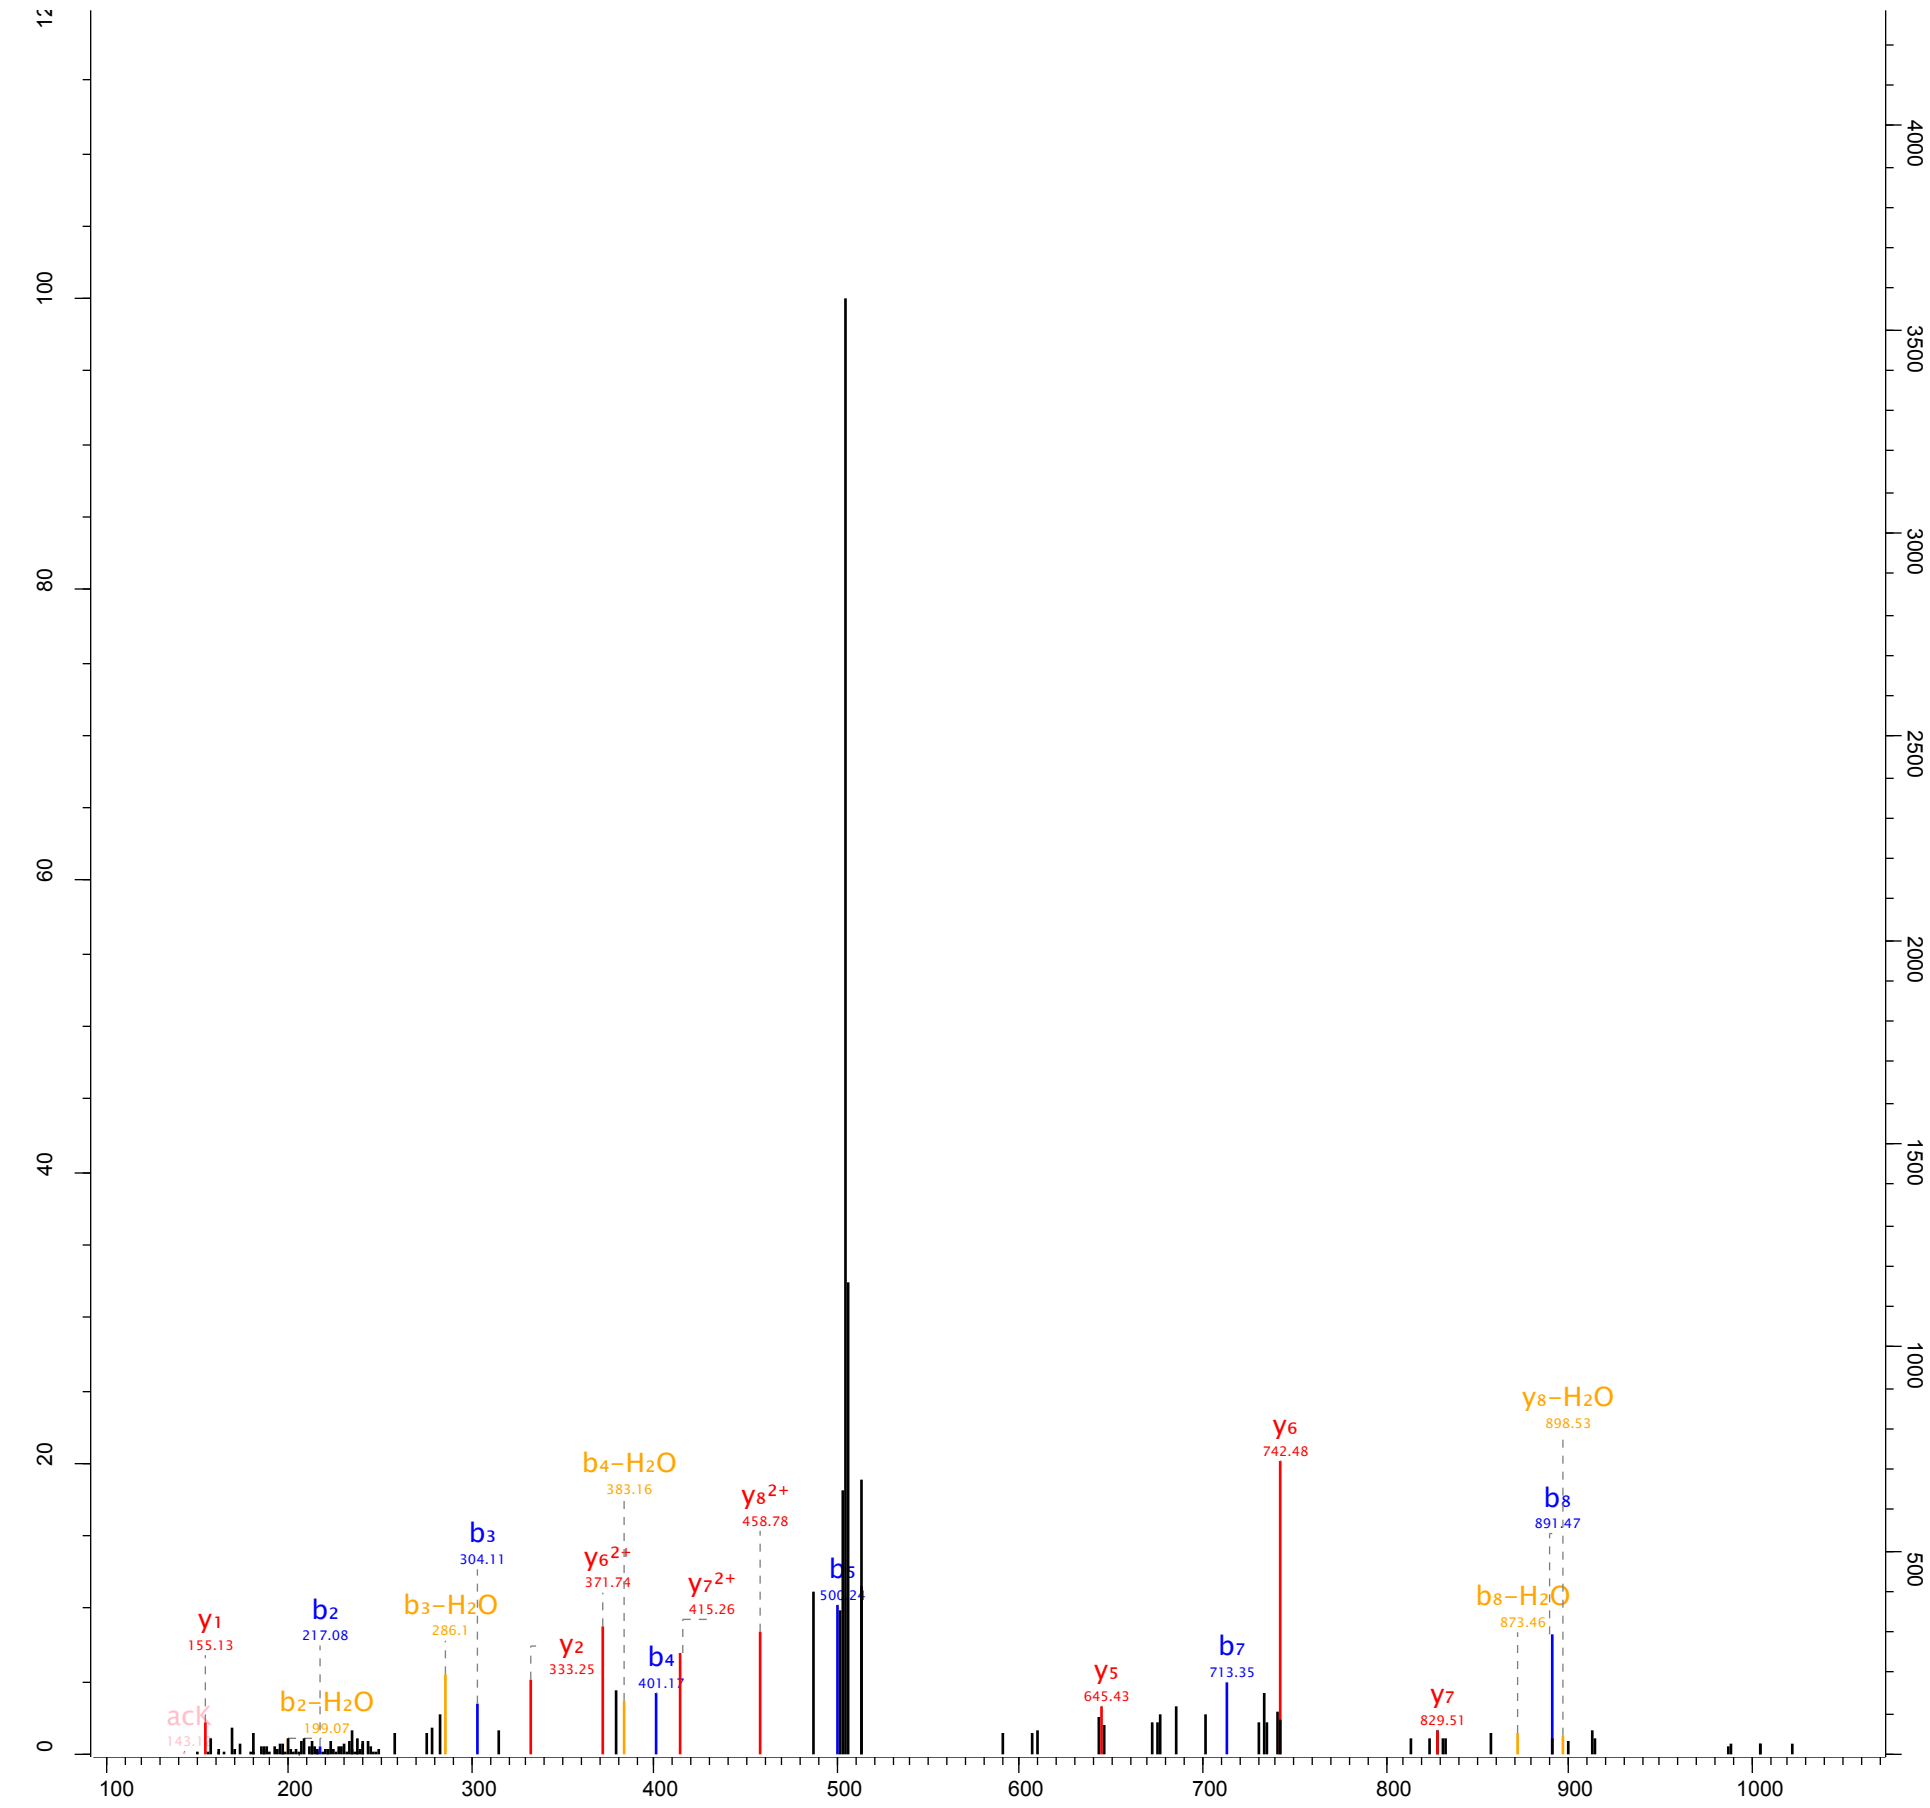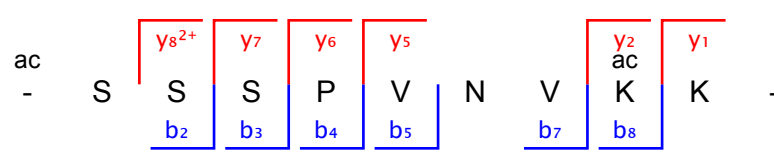

Raw file: 062513\_SCW\_II\_53\_1\_Vargas\_Enriched  
 Scan: 13435  
 Method: ITMS; CID  
 Score: 73.44  
 m/z: 576.8  
 Gene names: Gng5

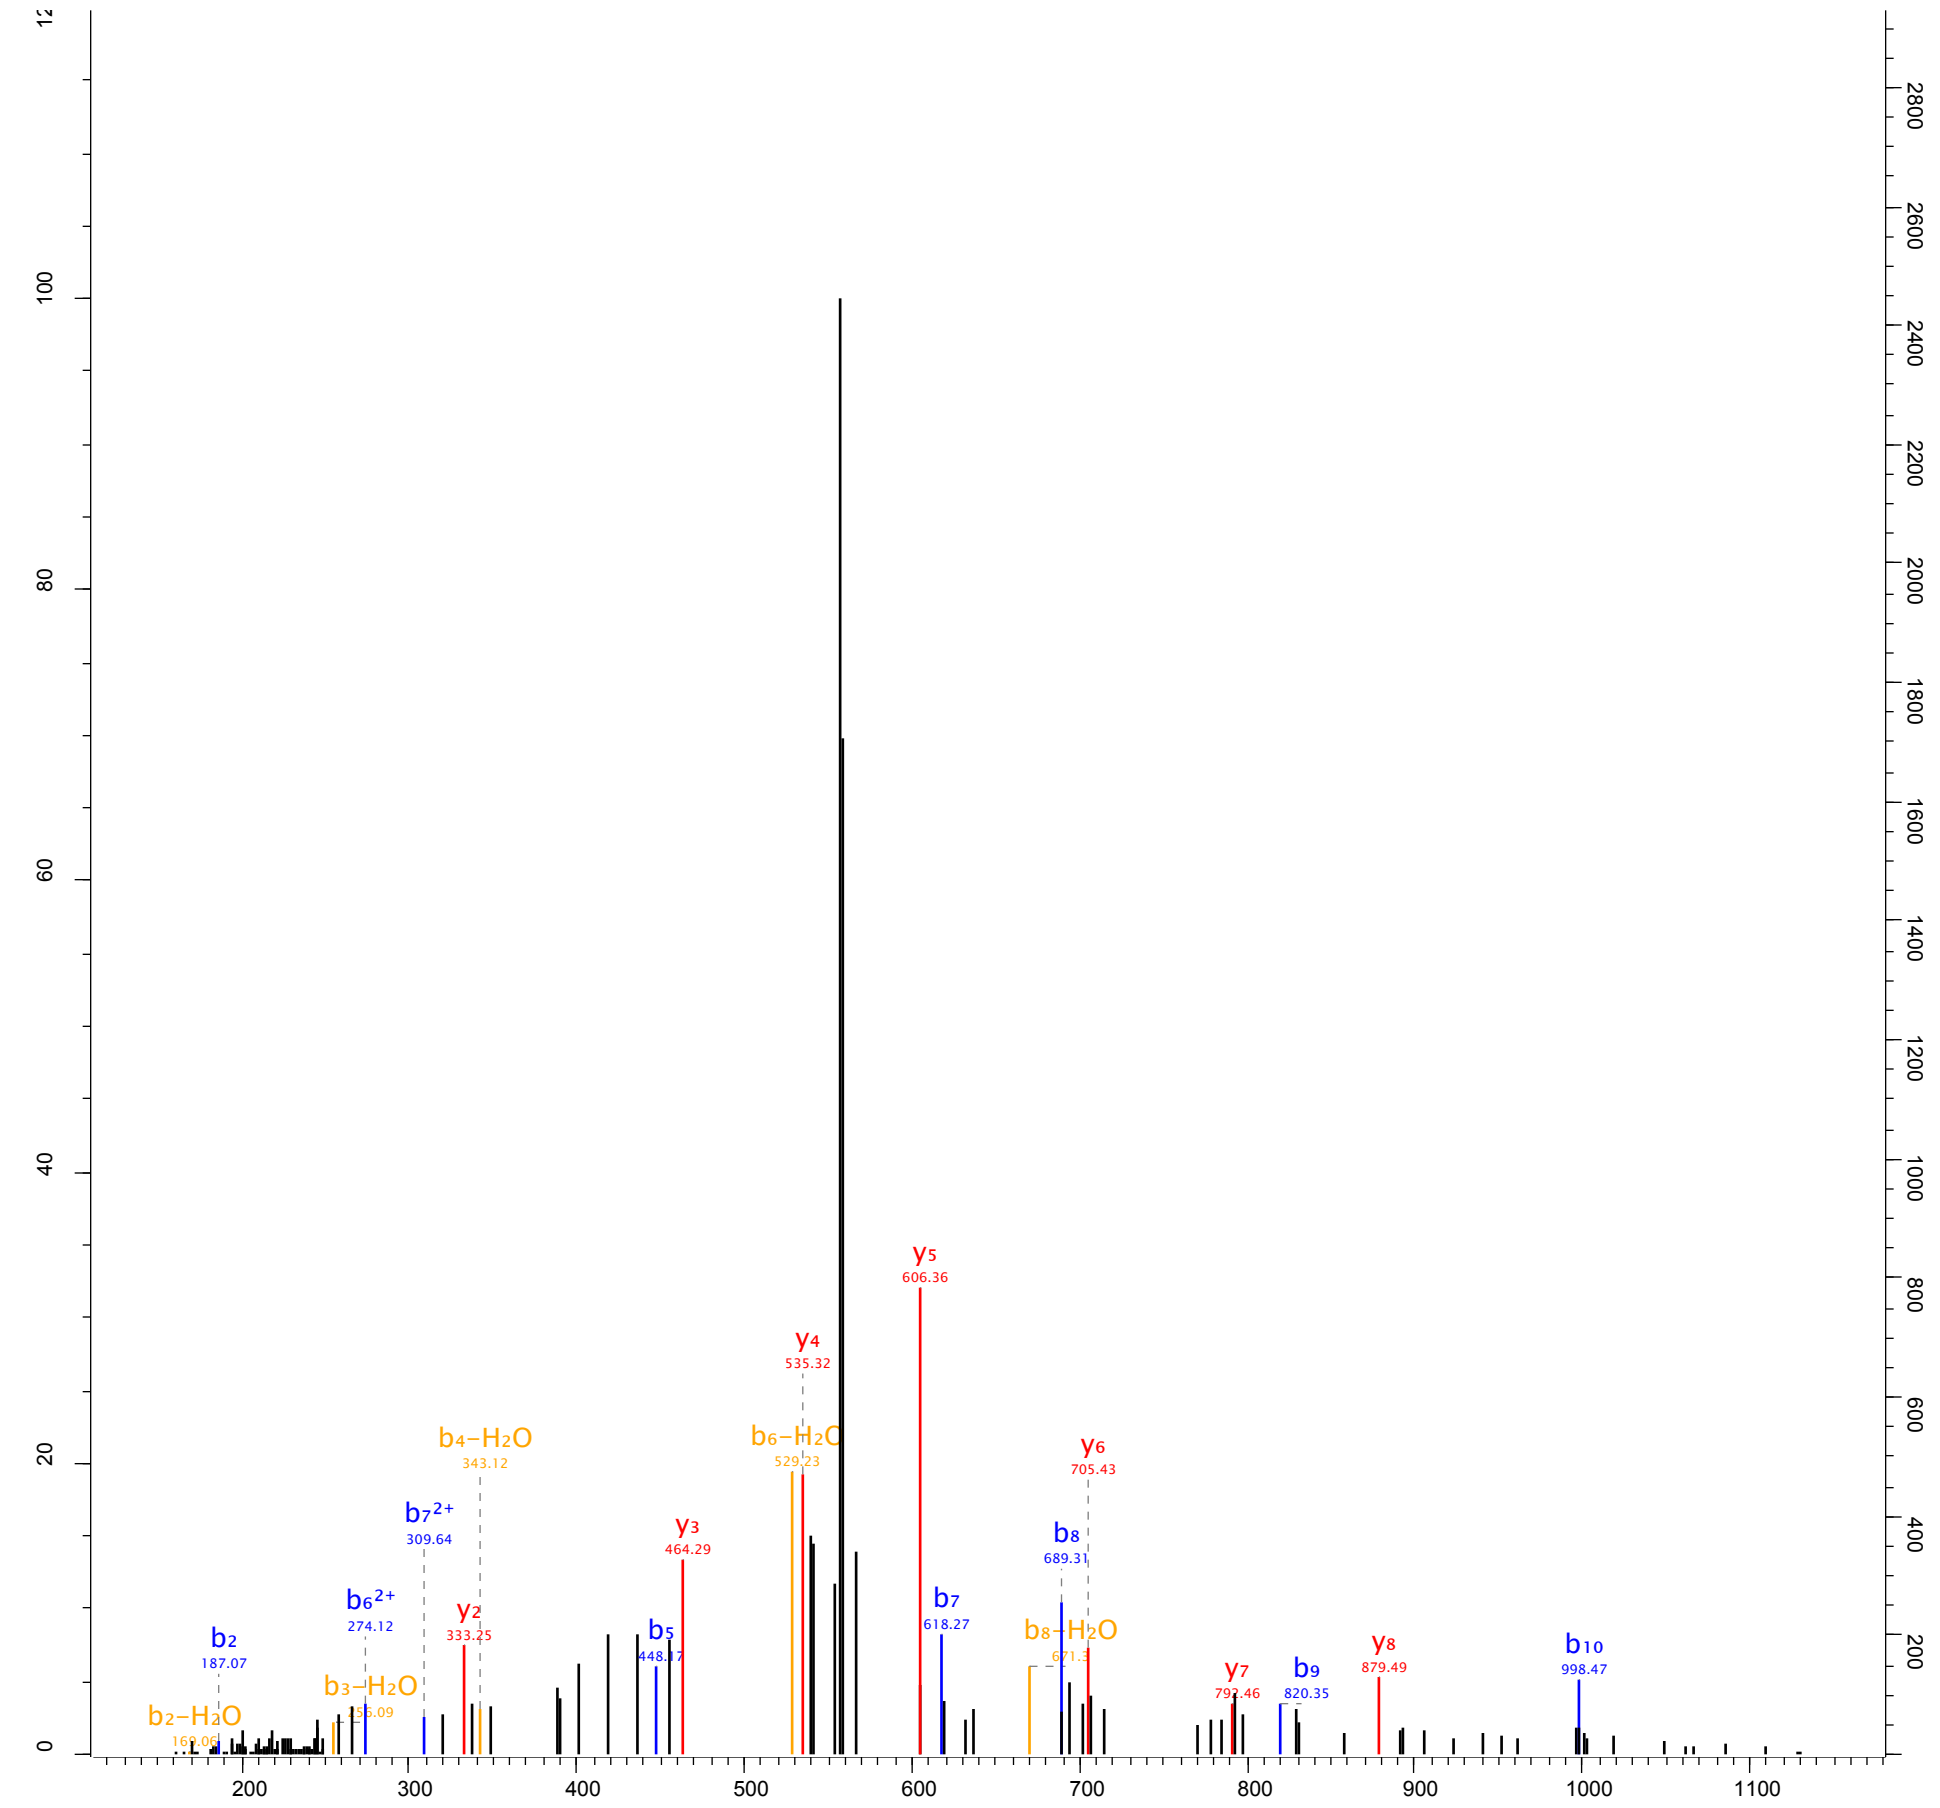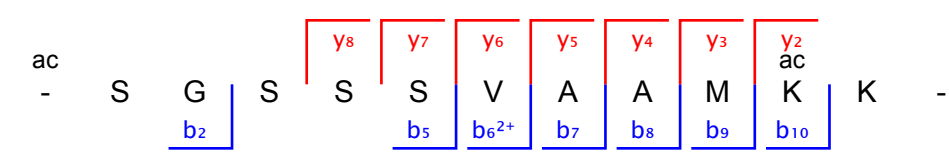

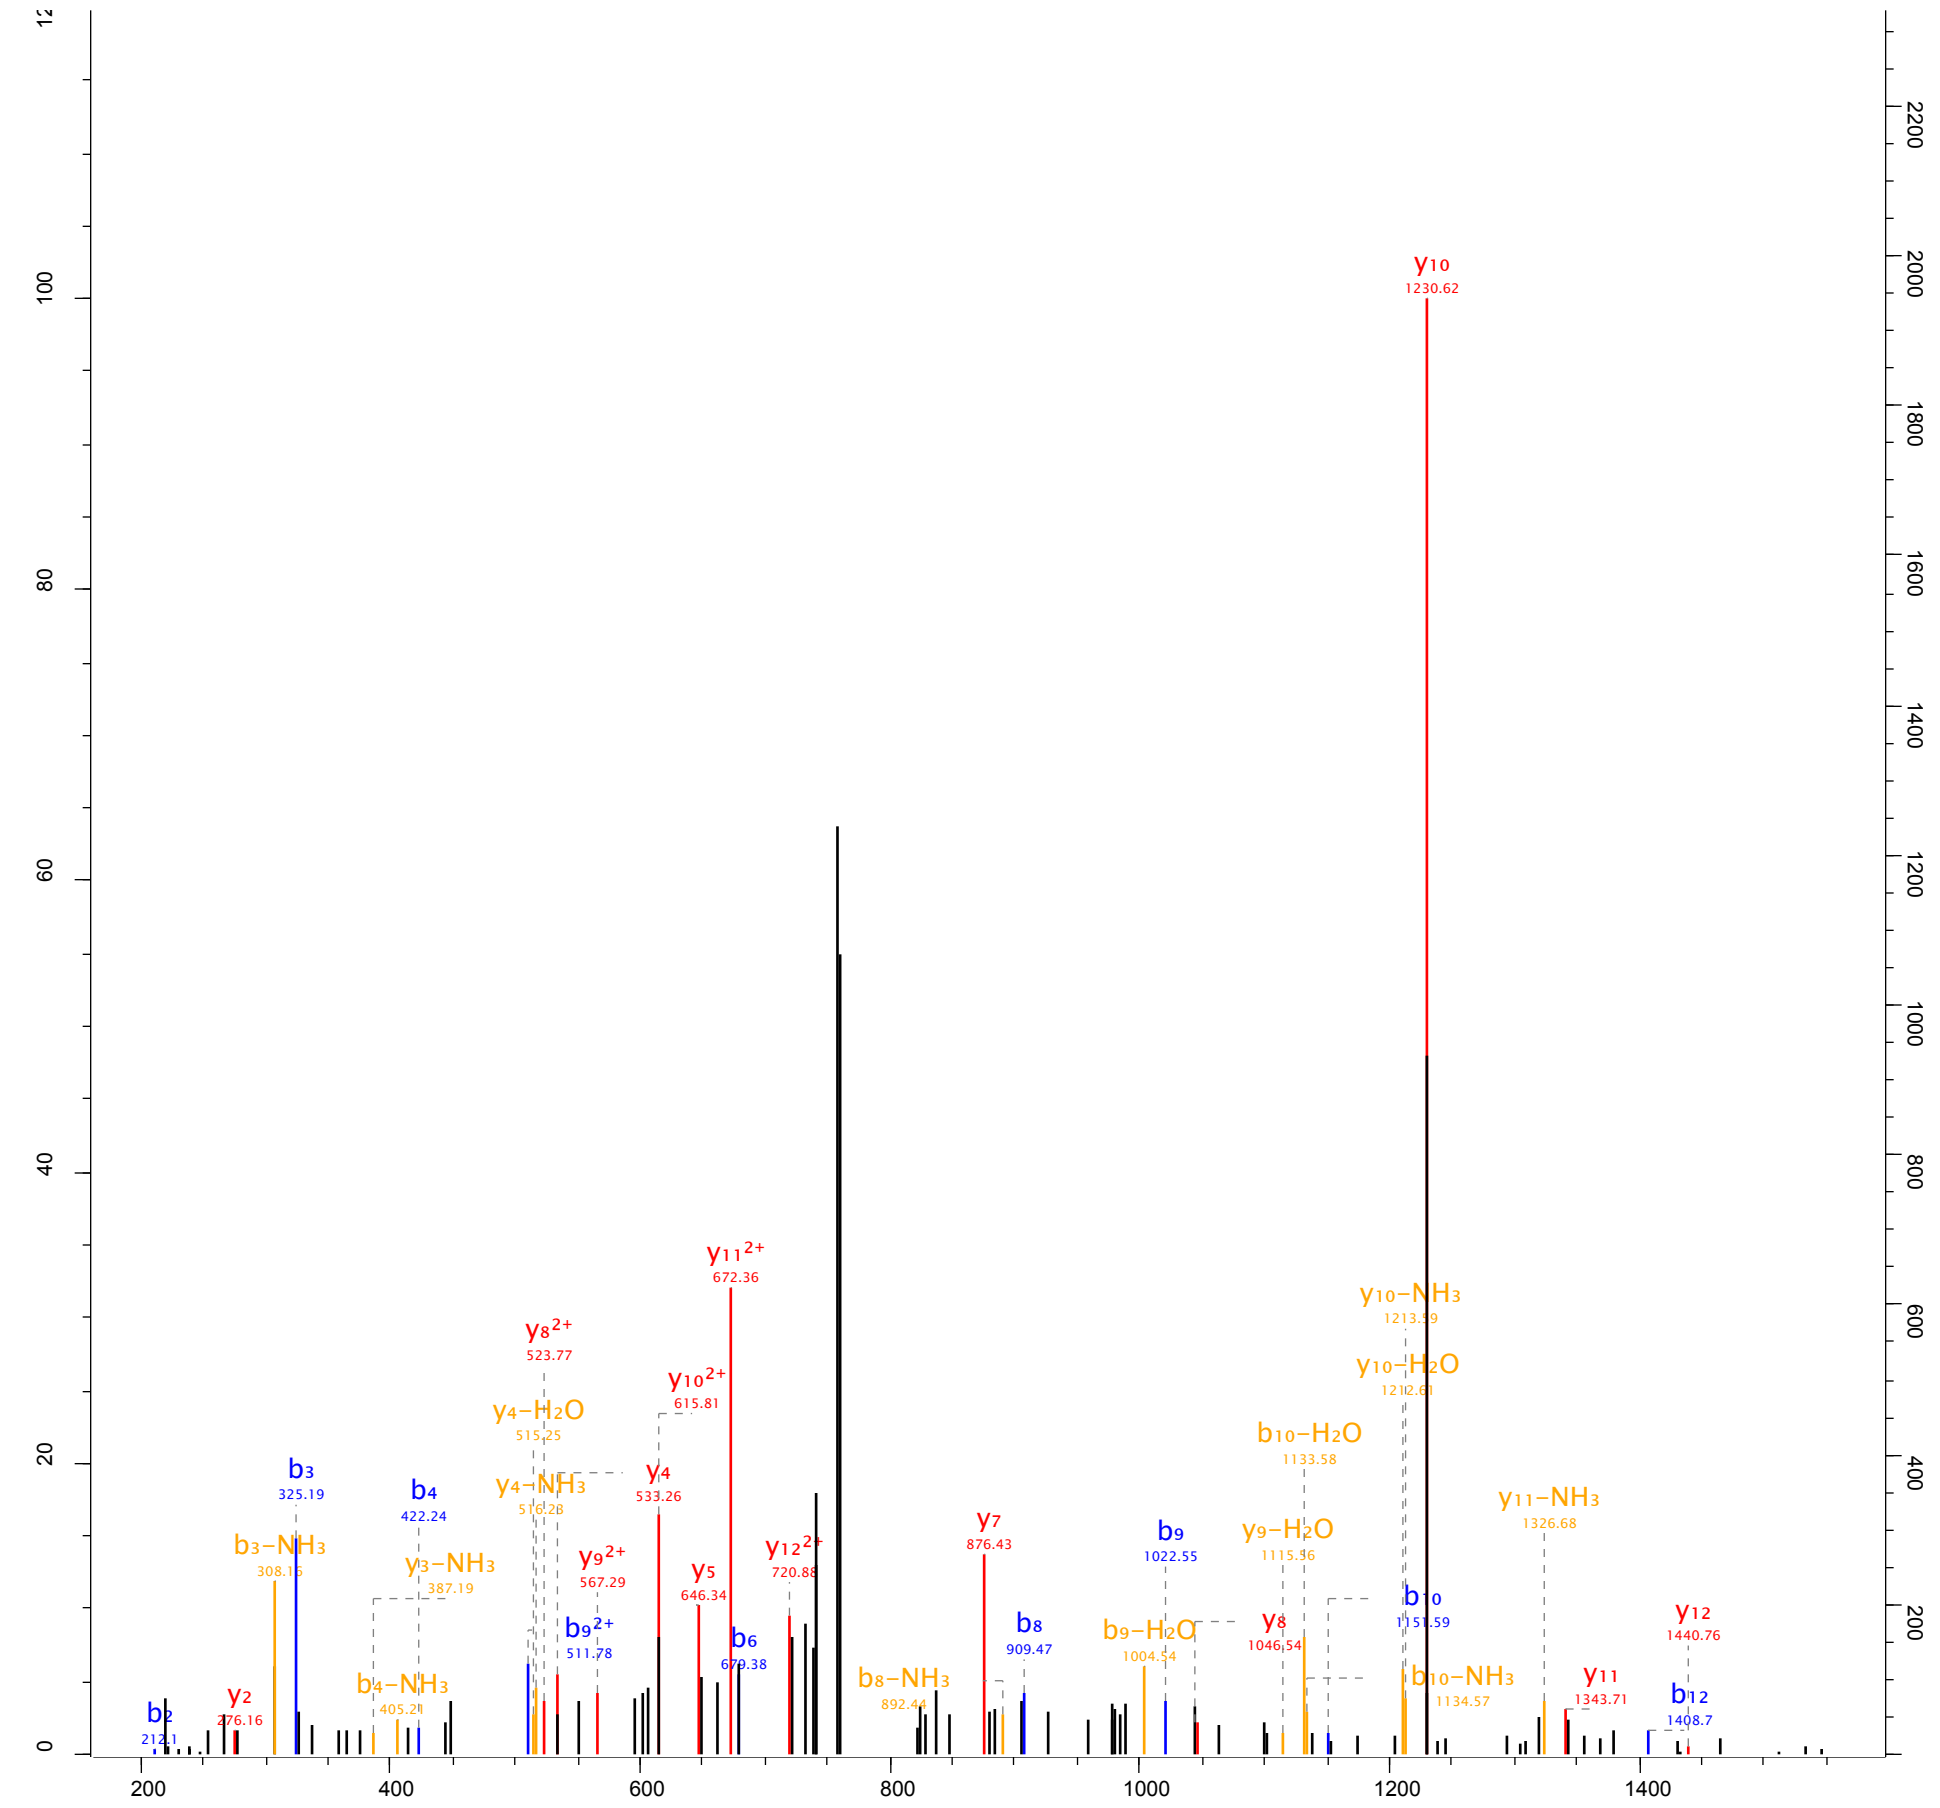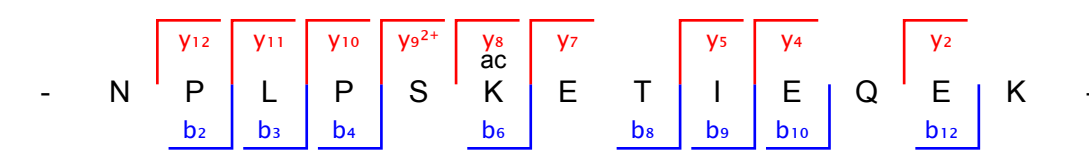

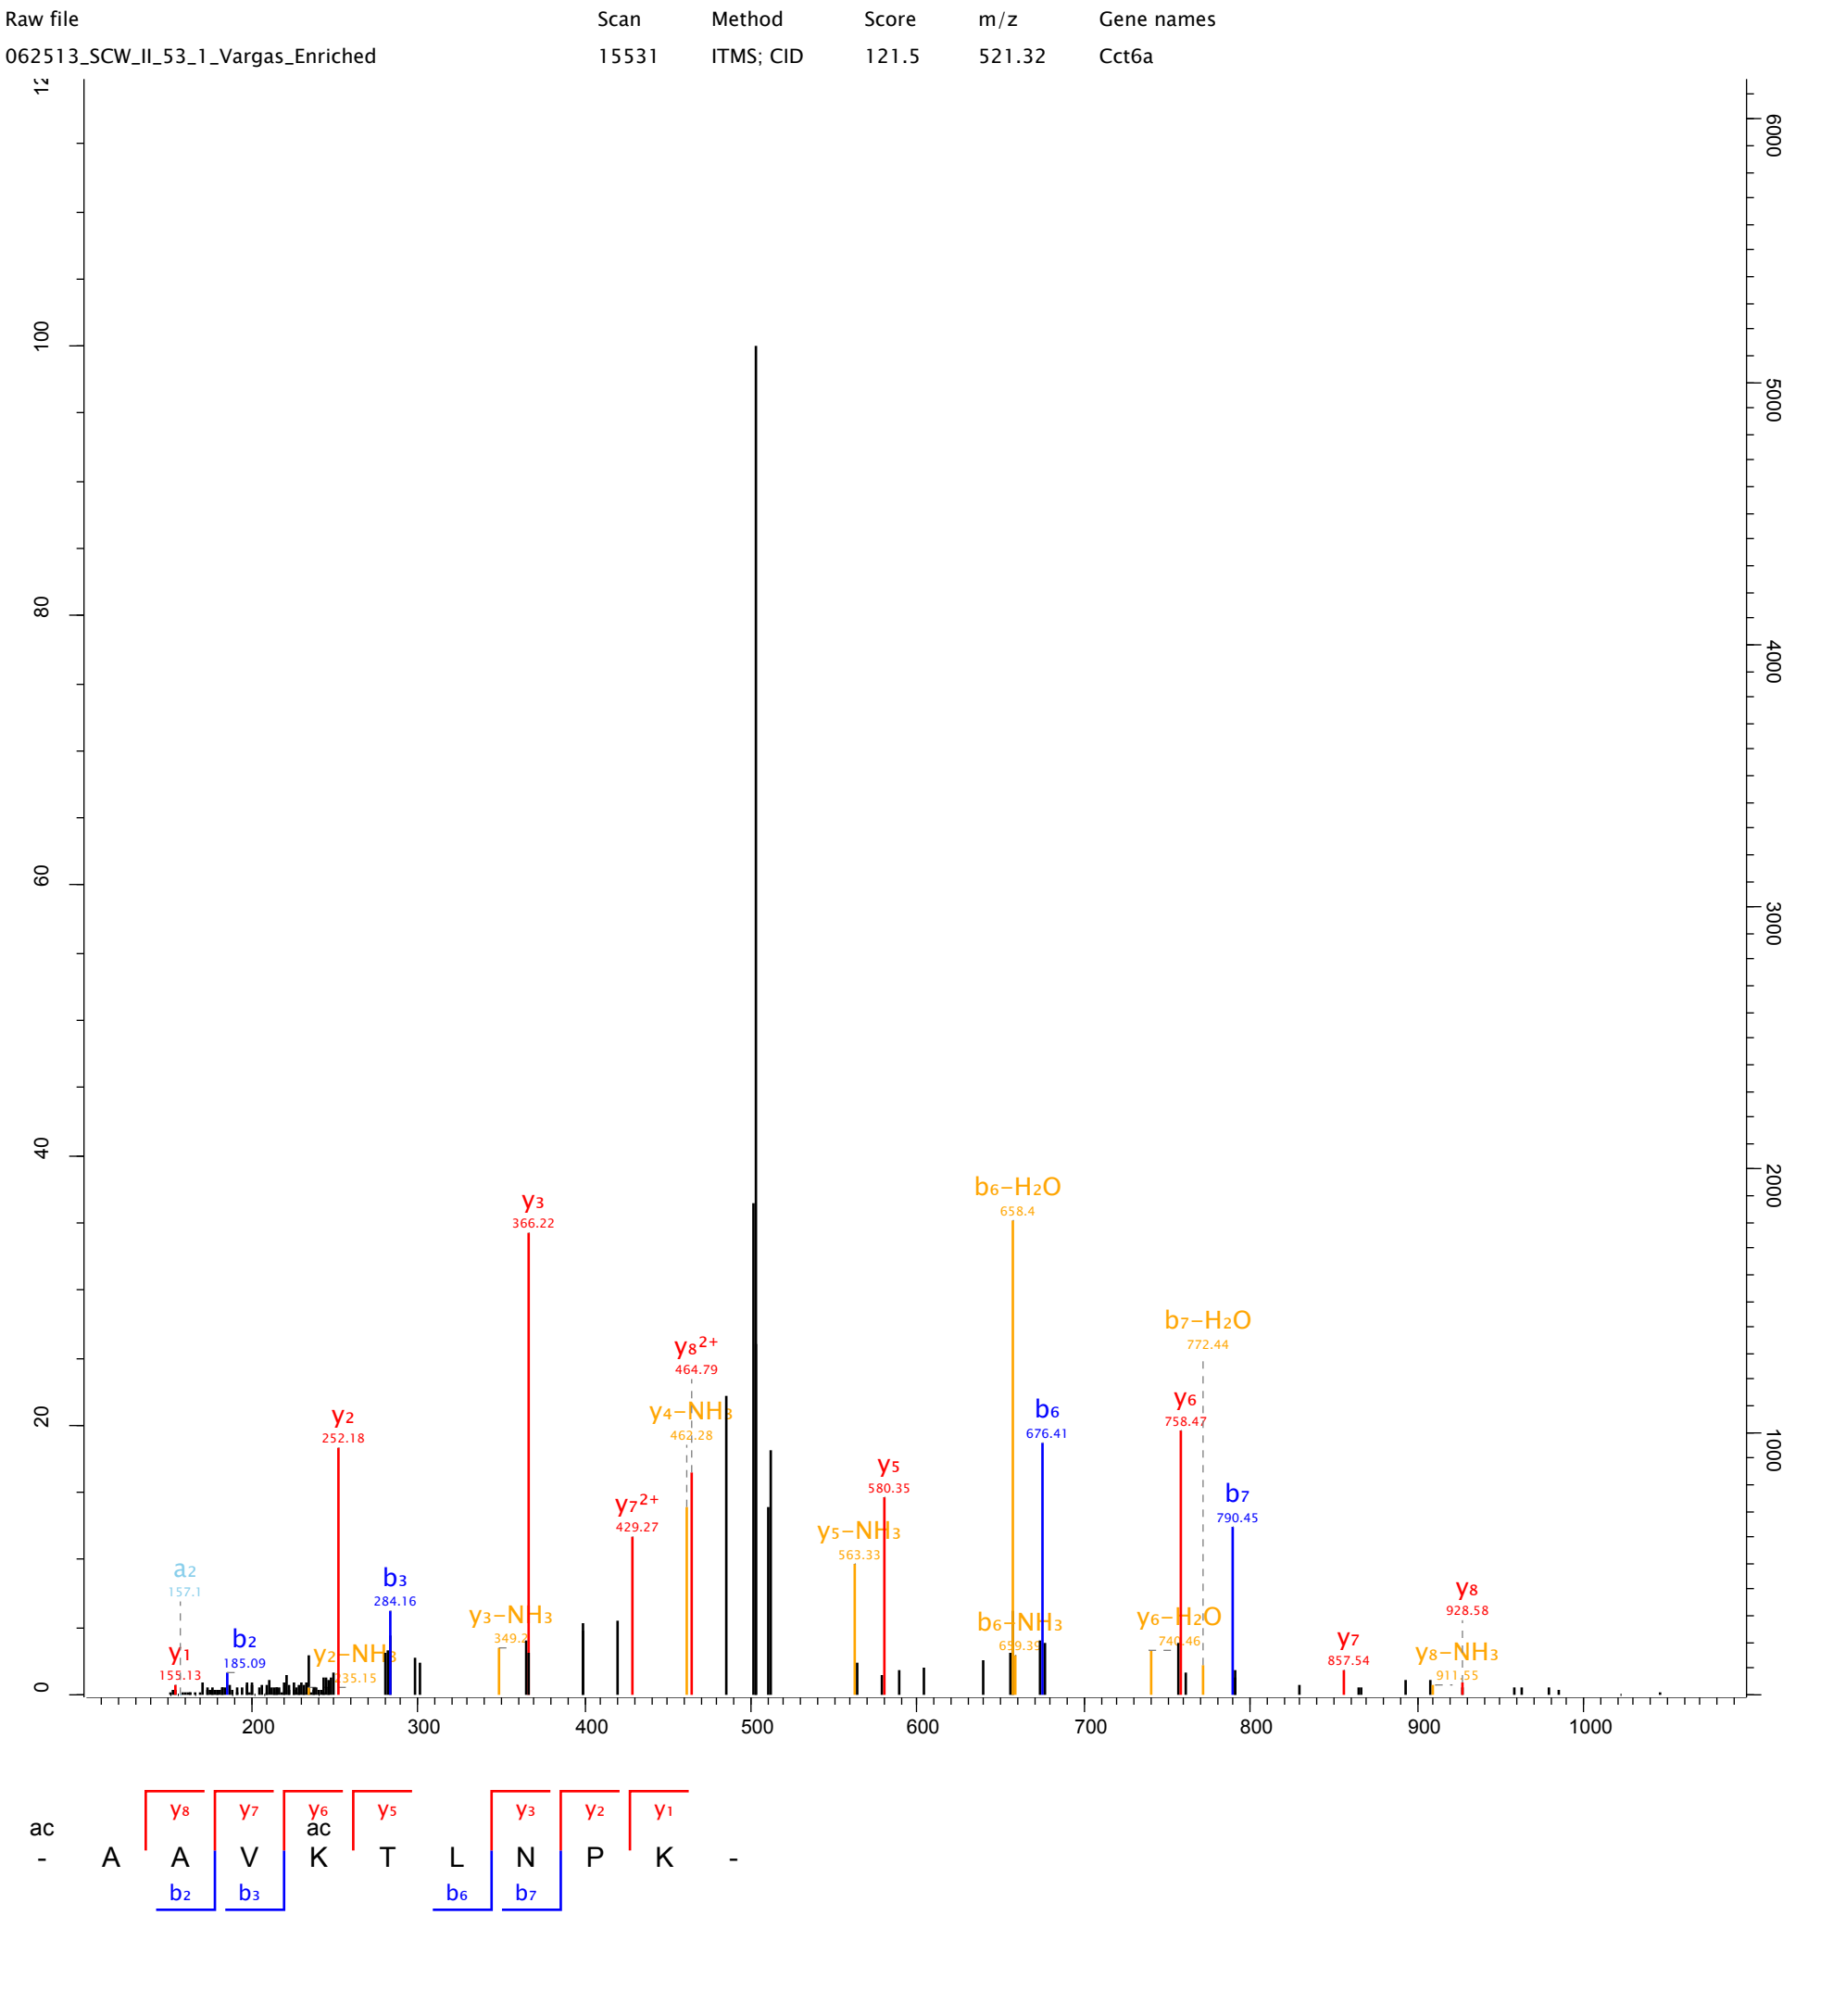

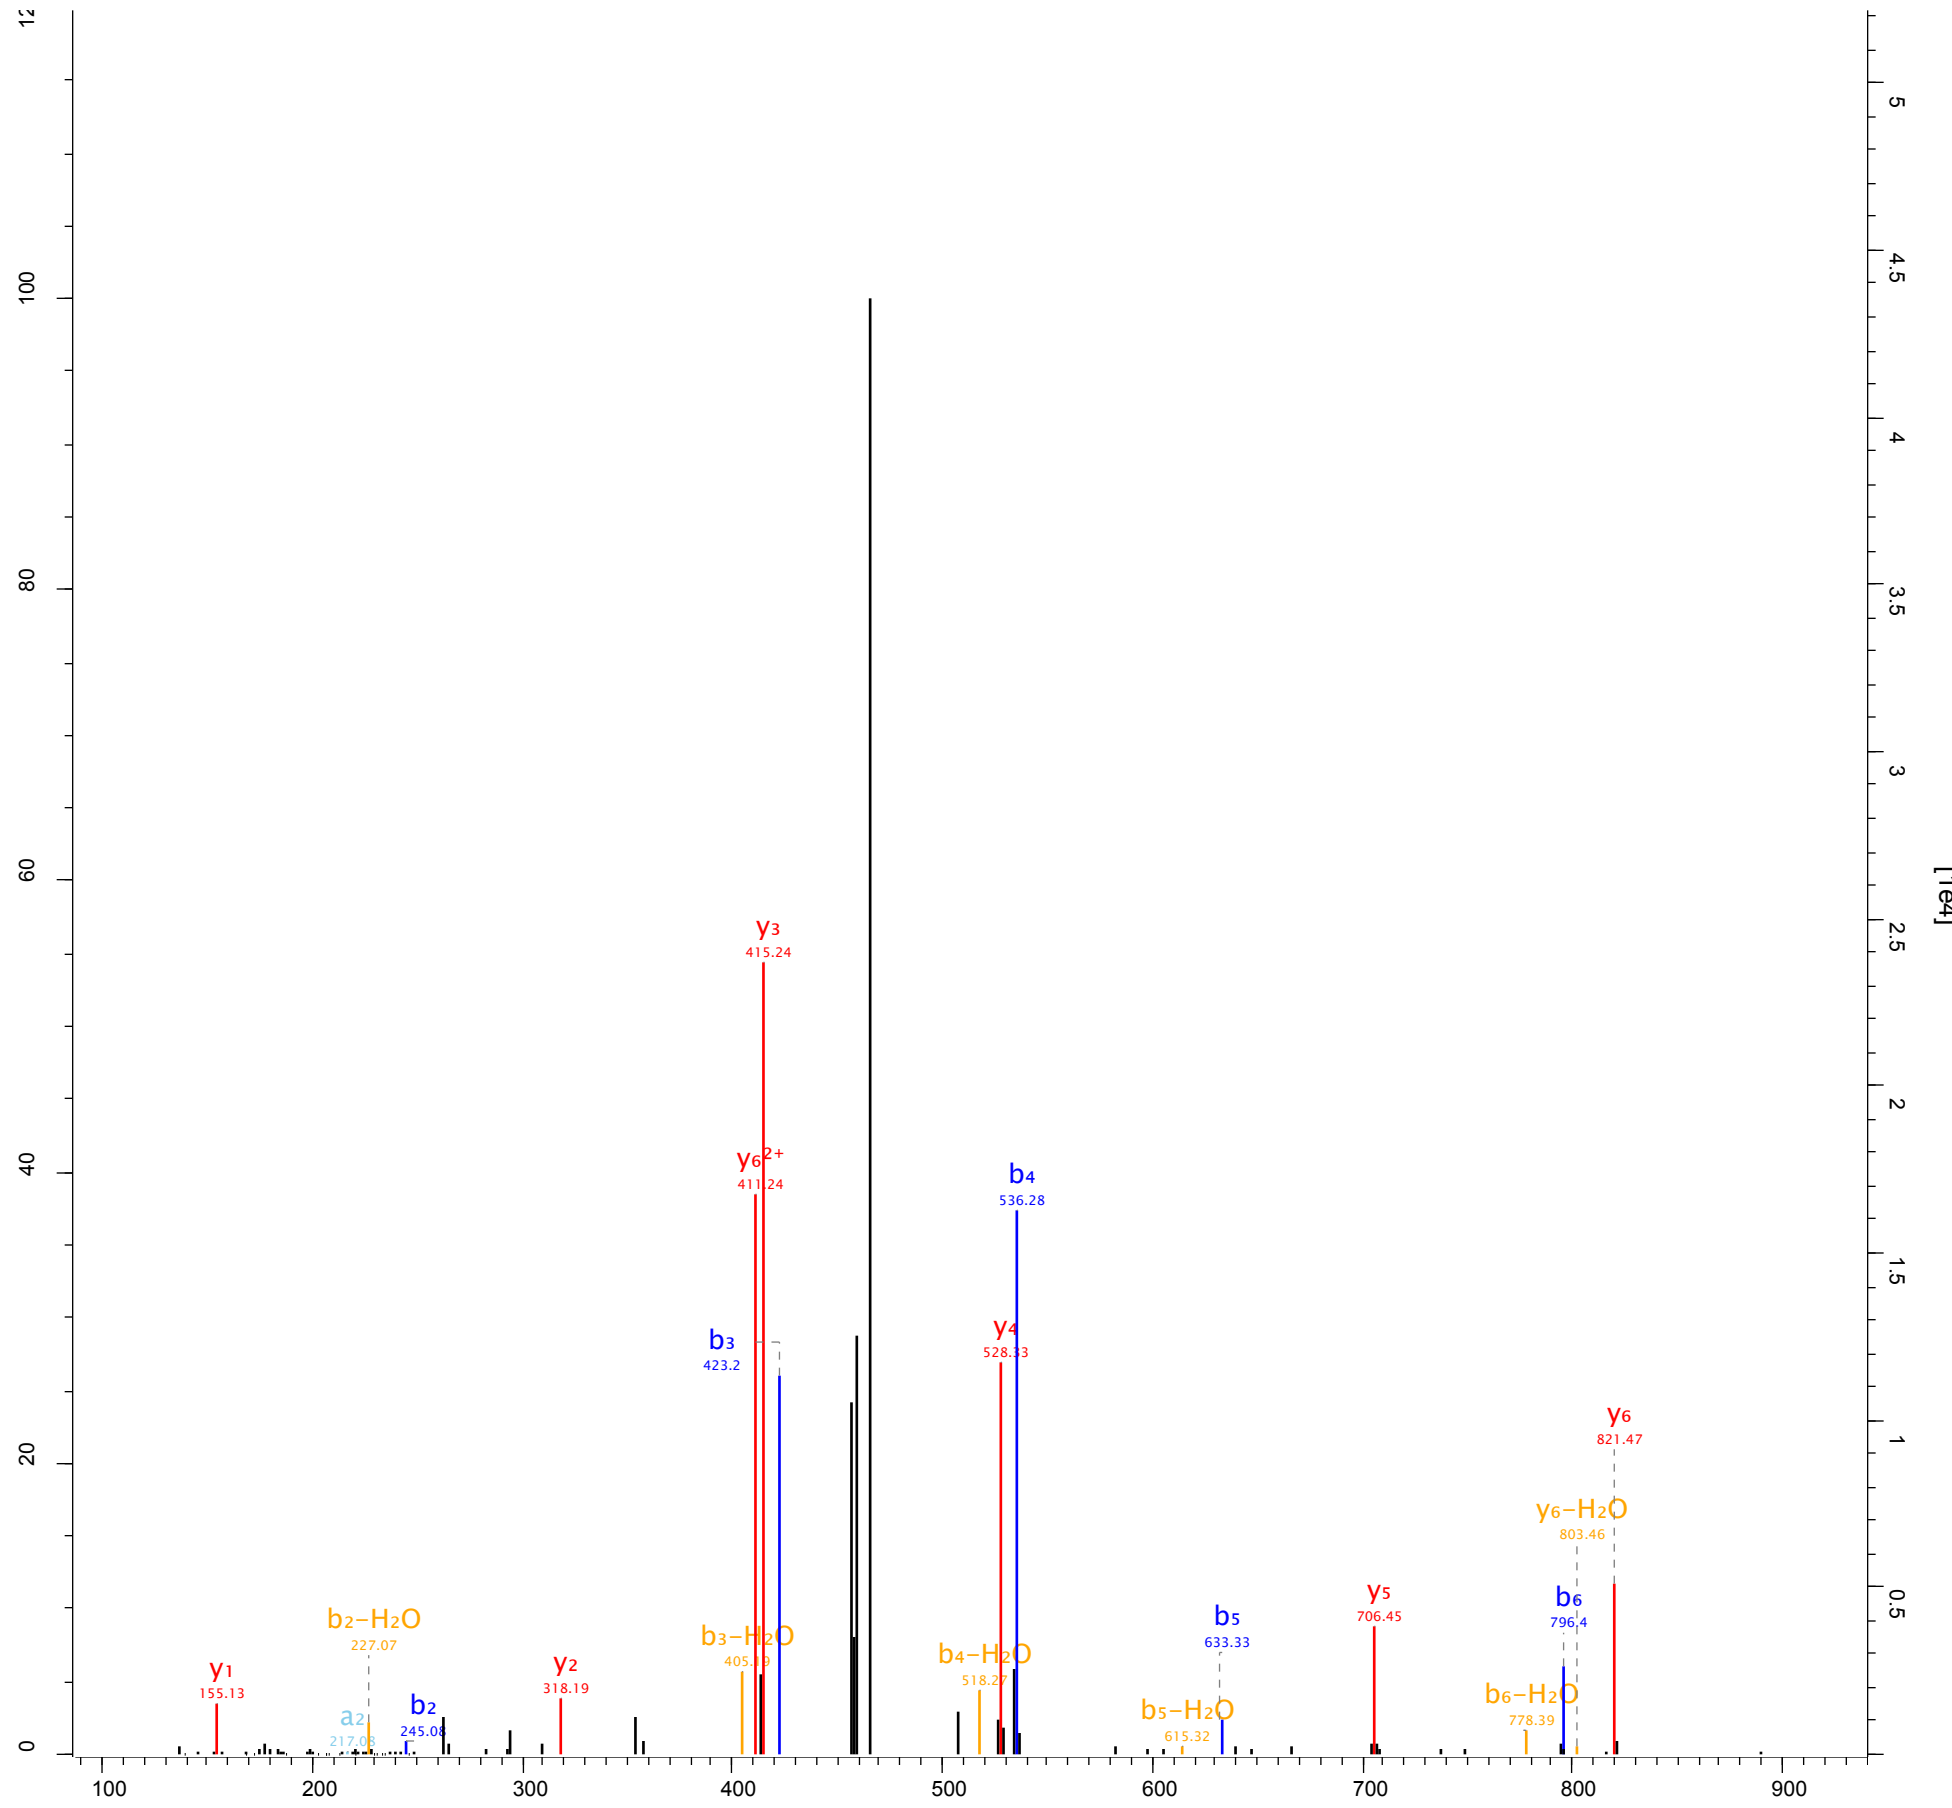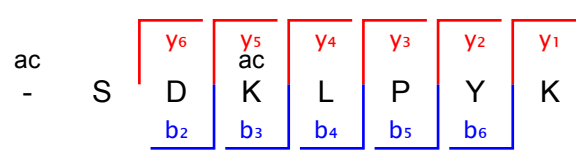

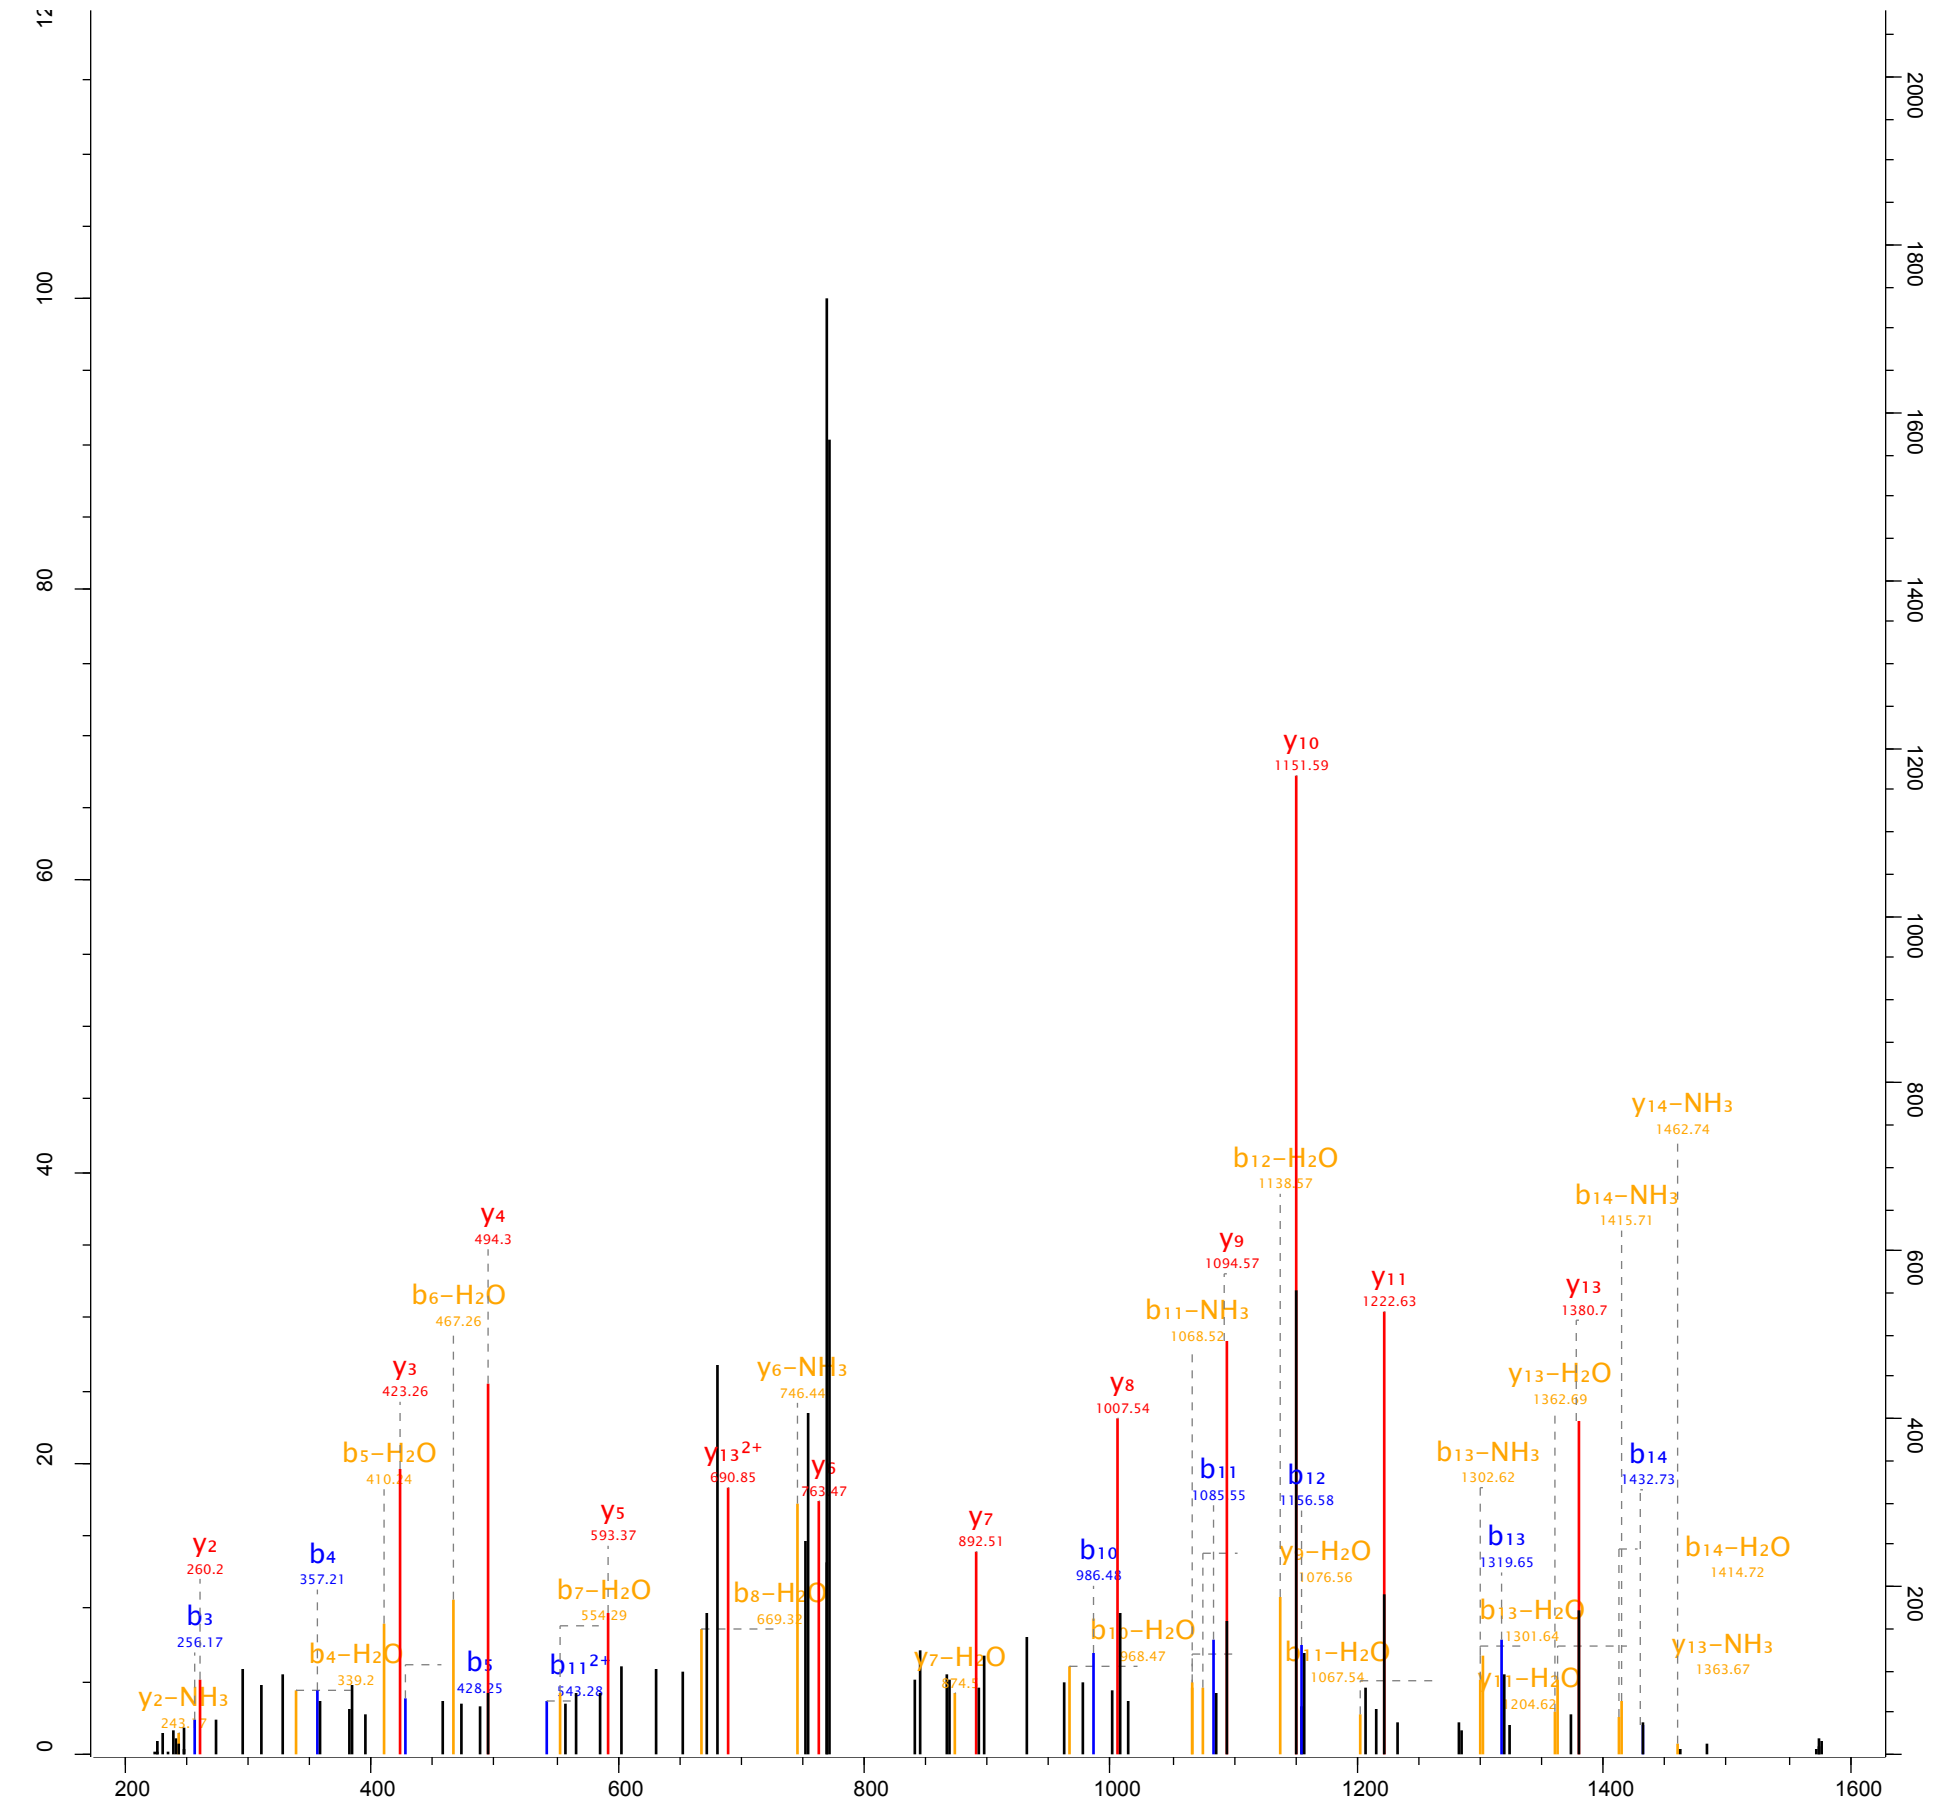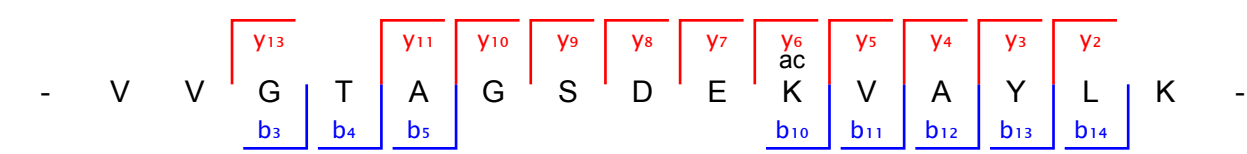

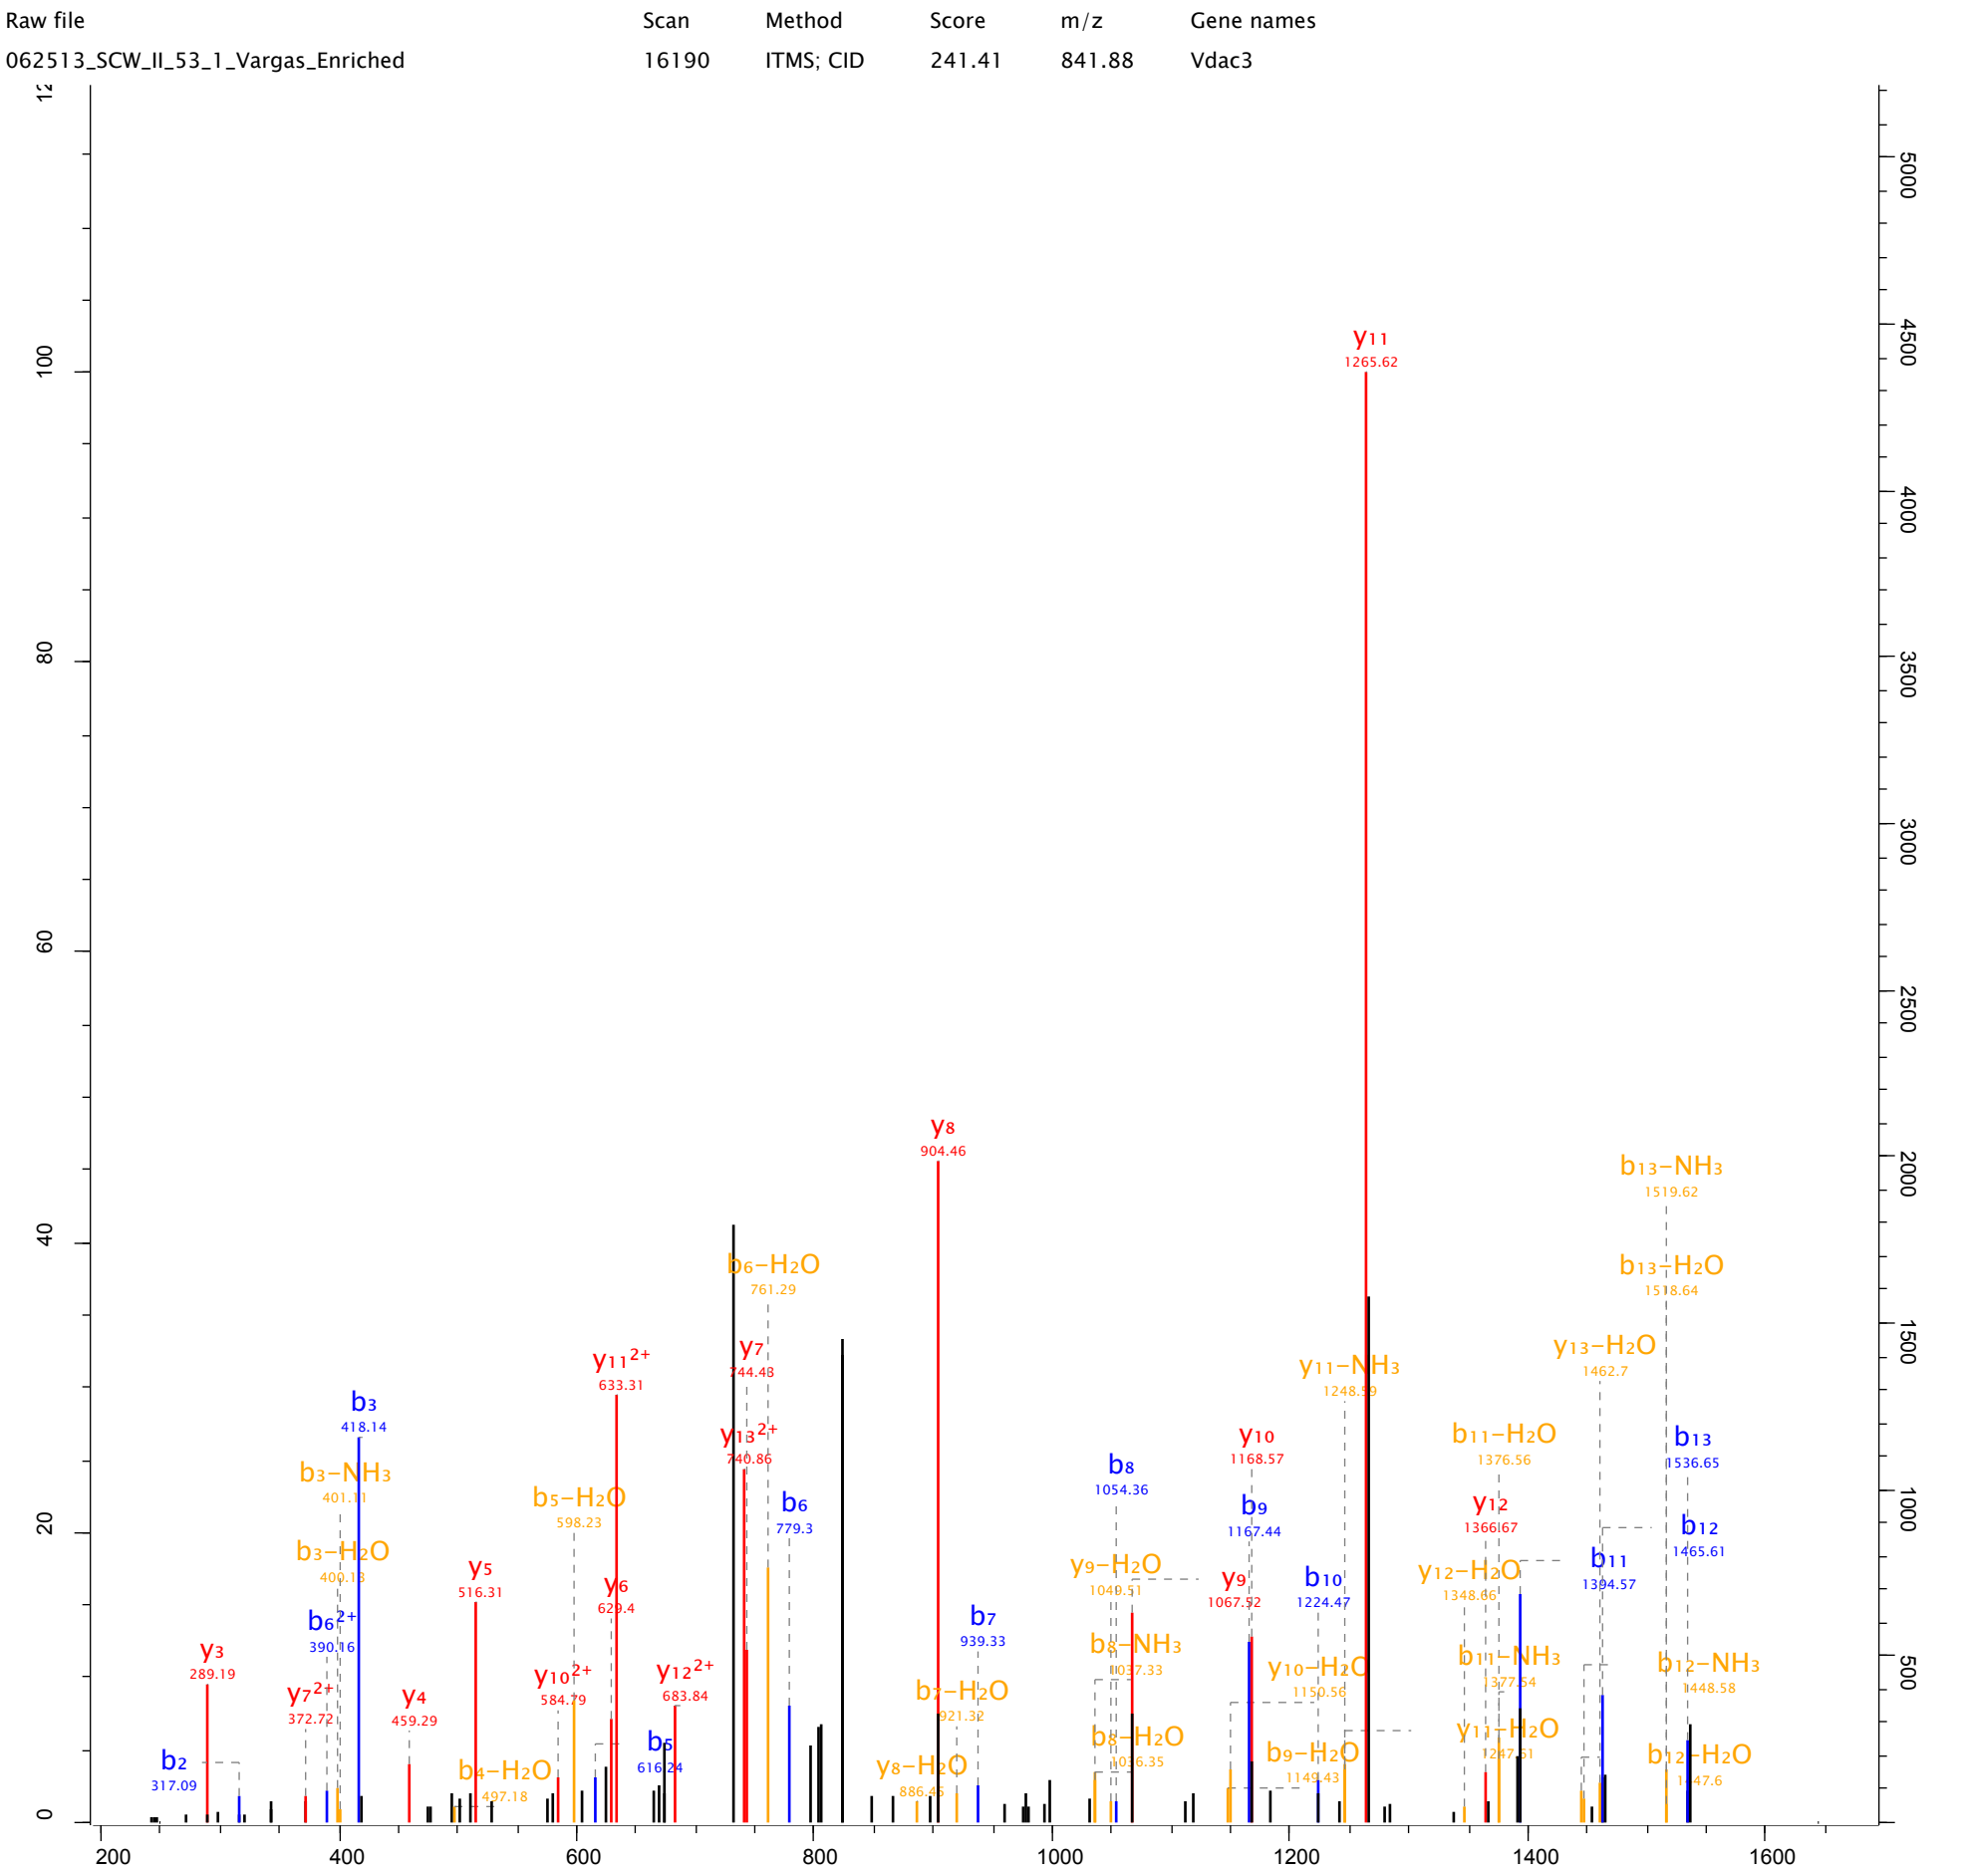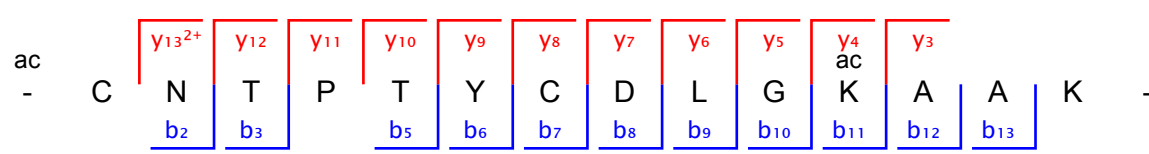



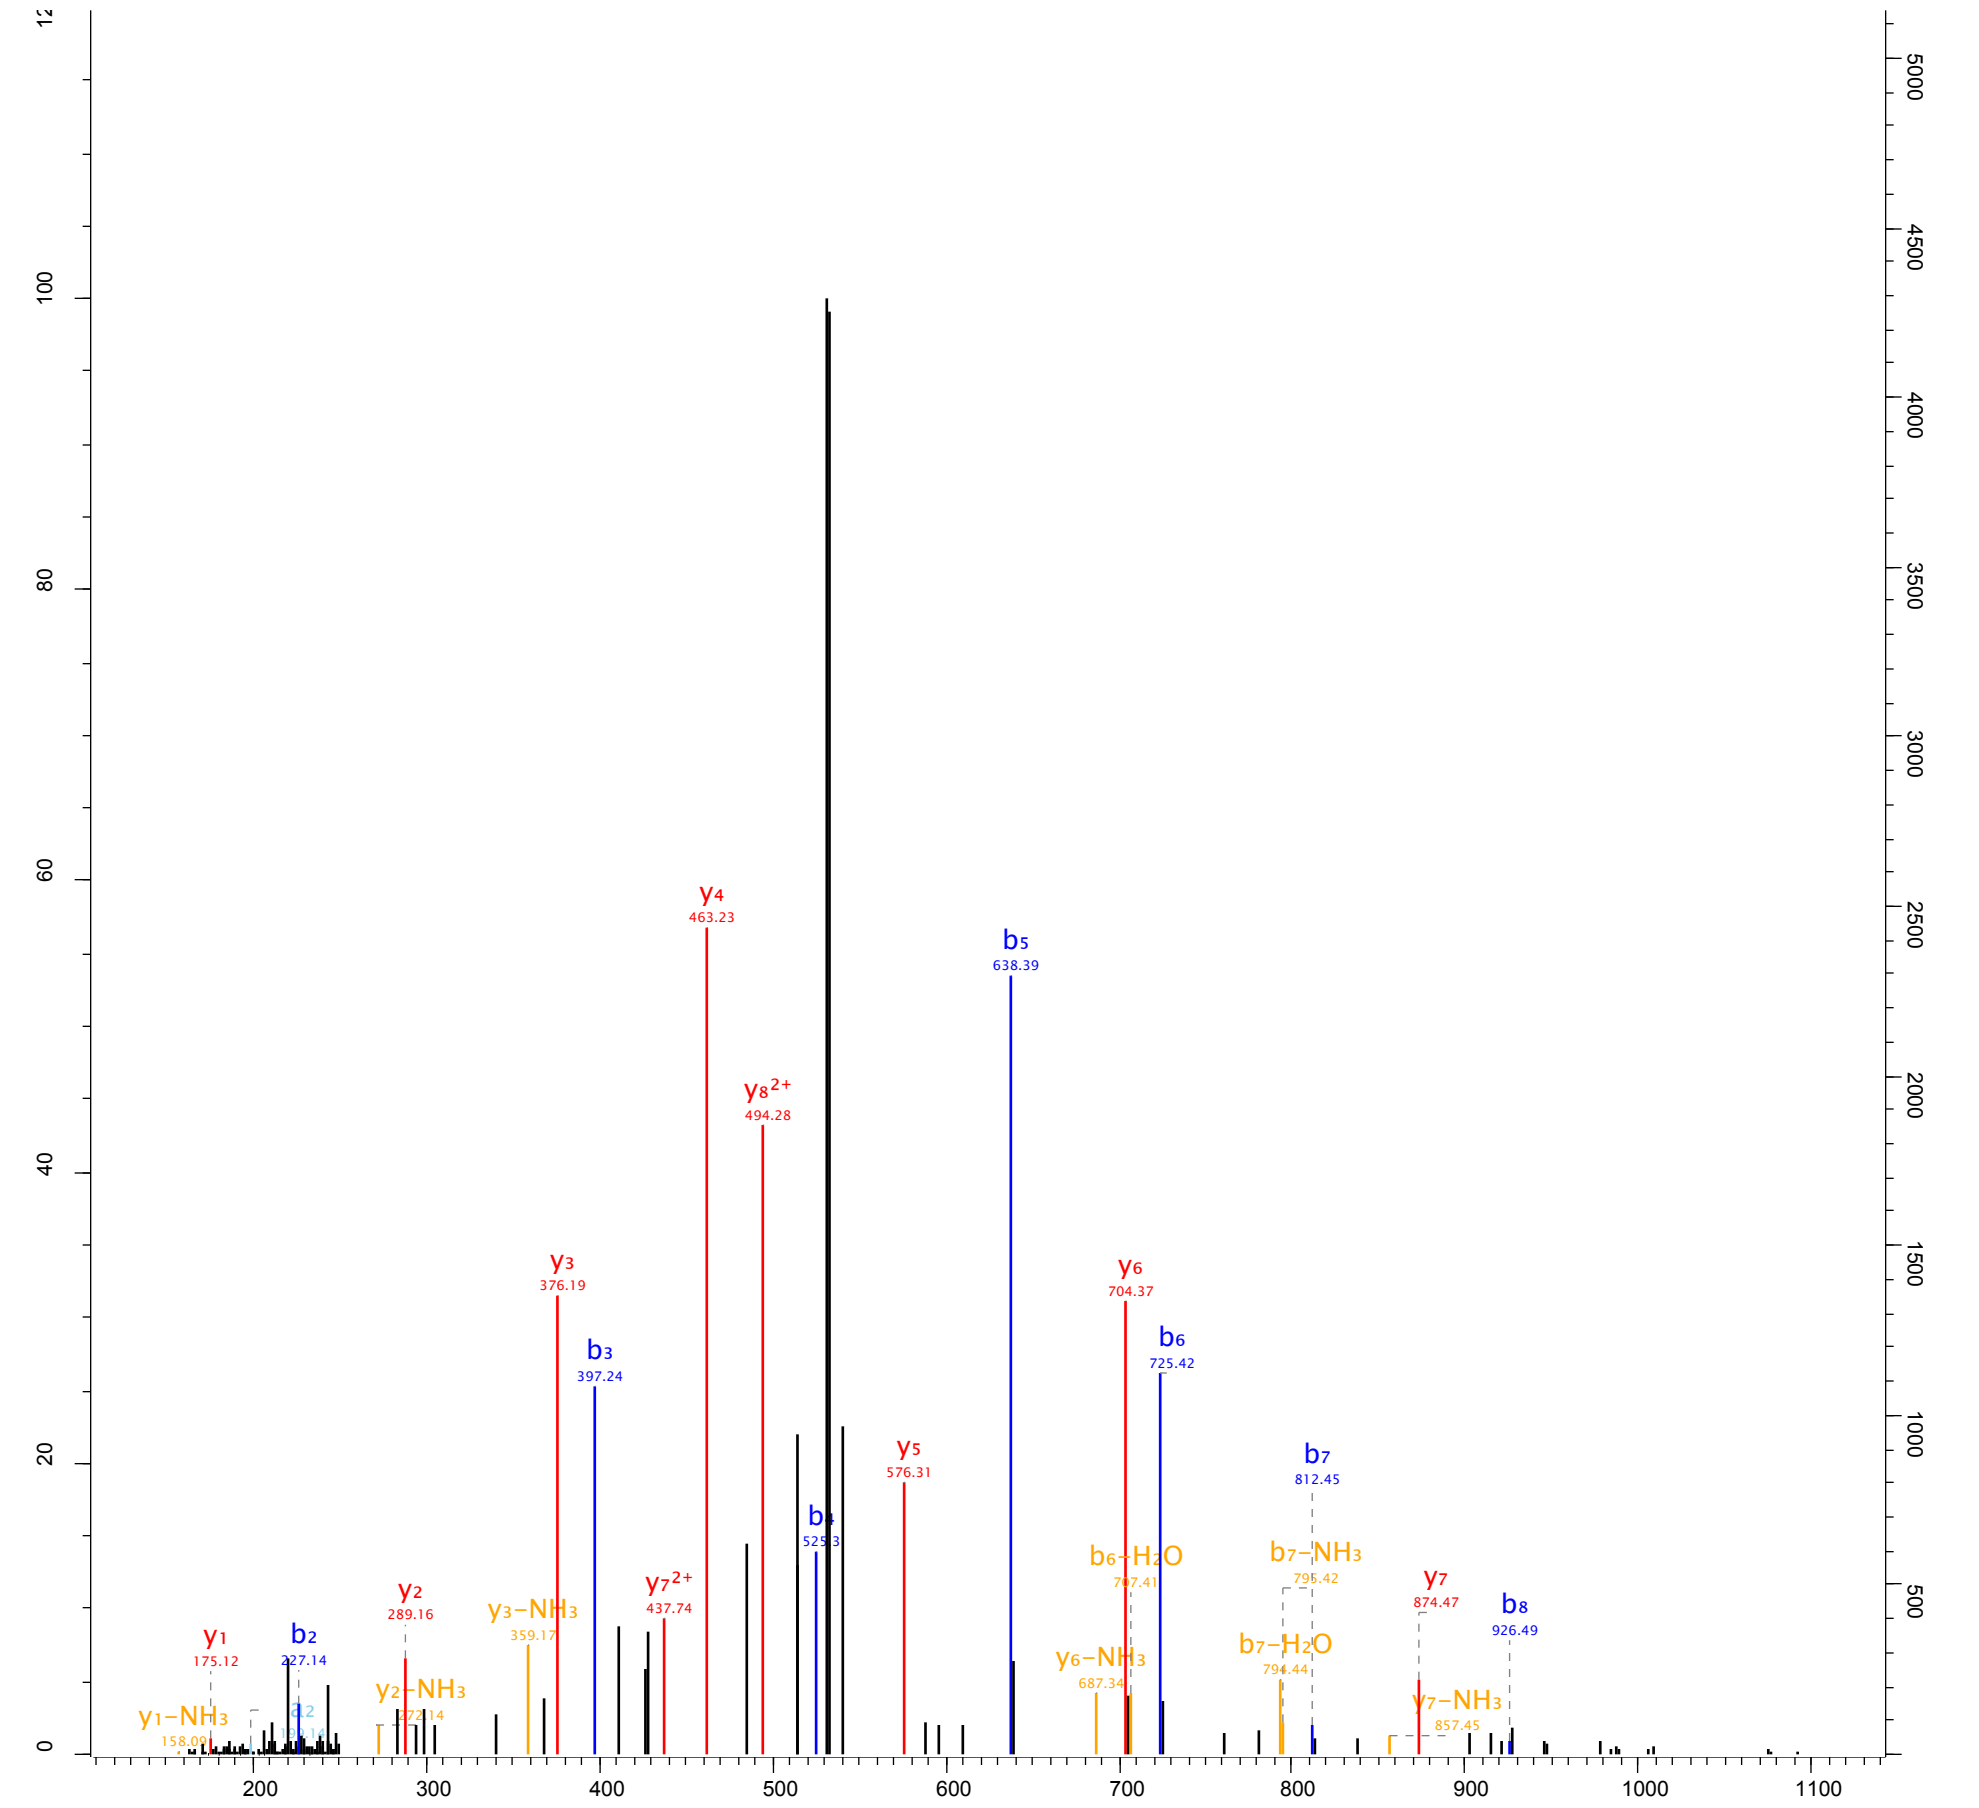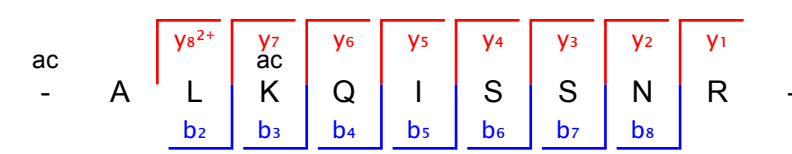

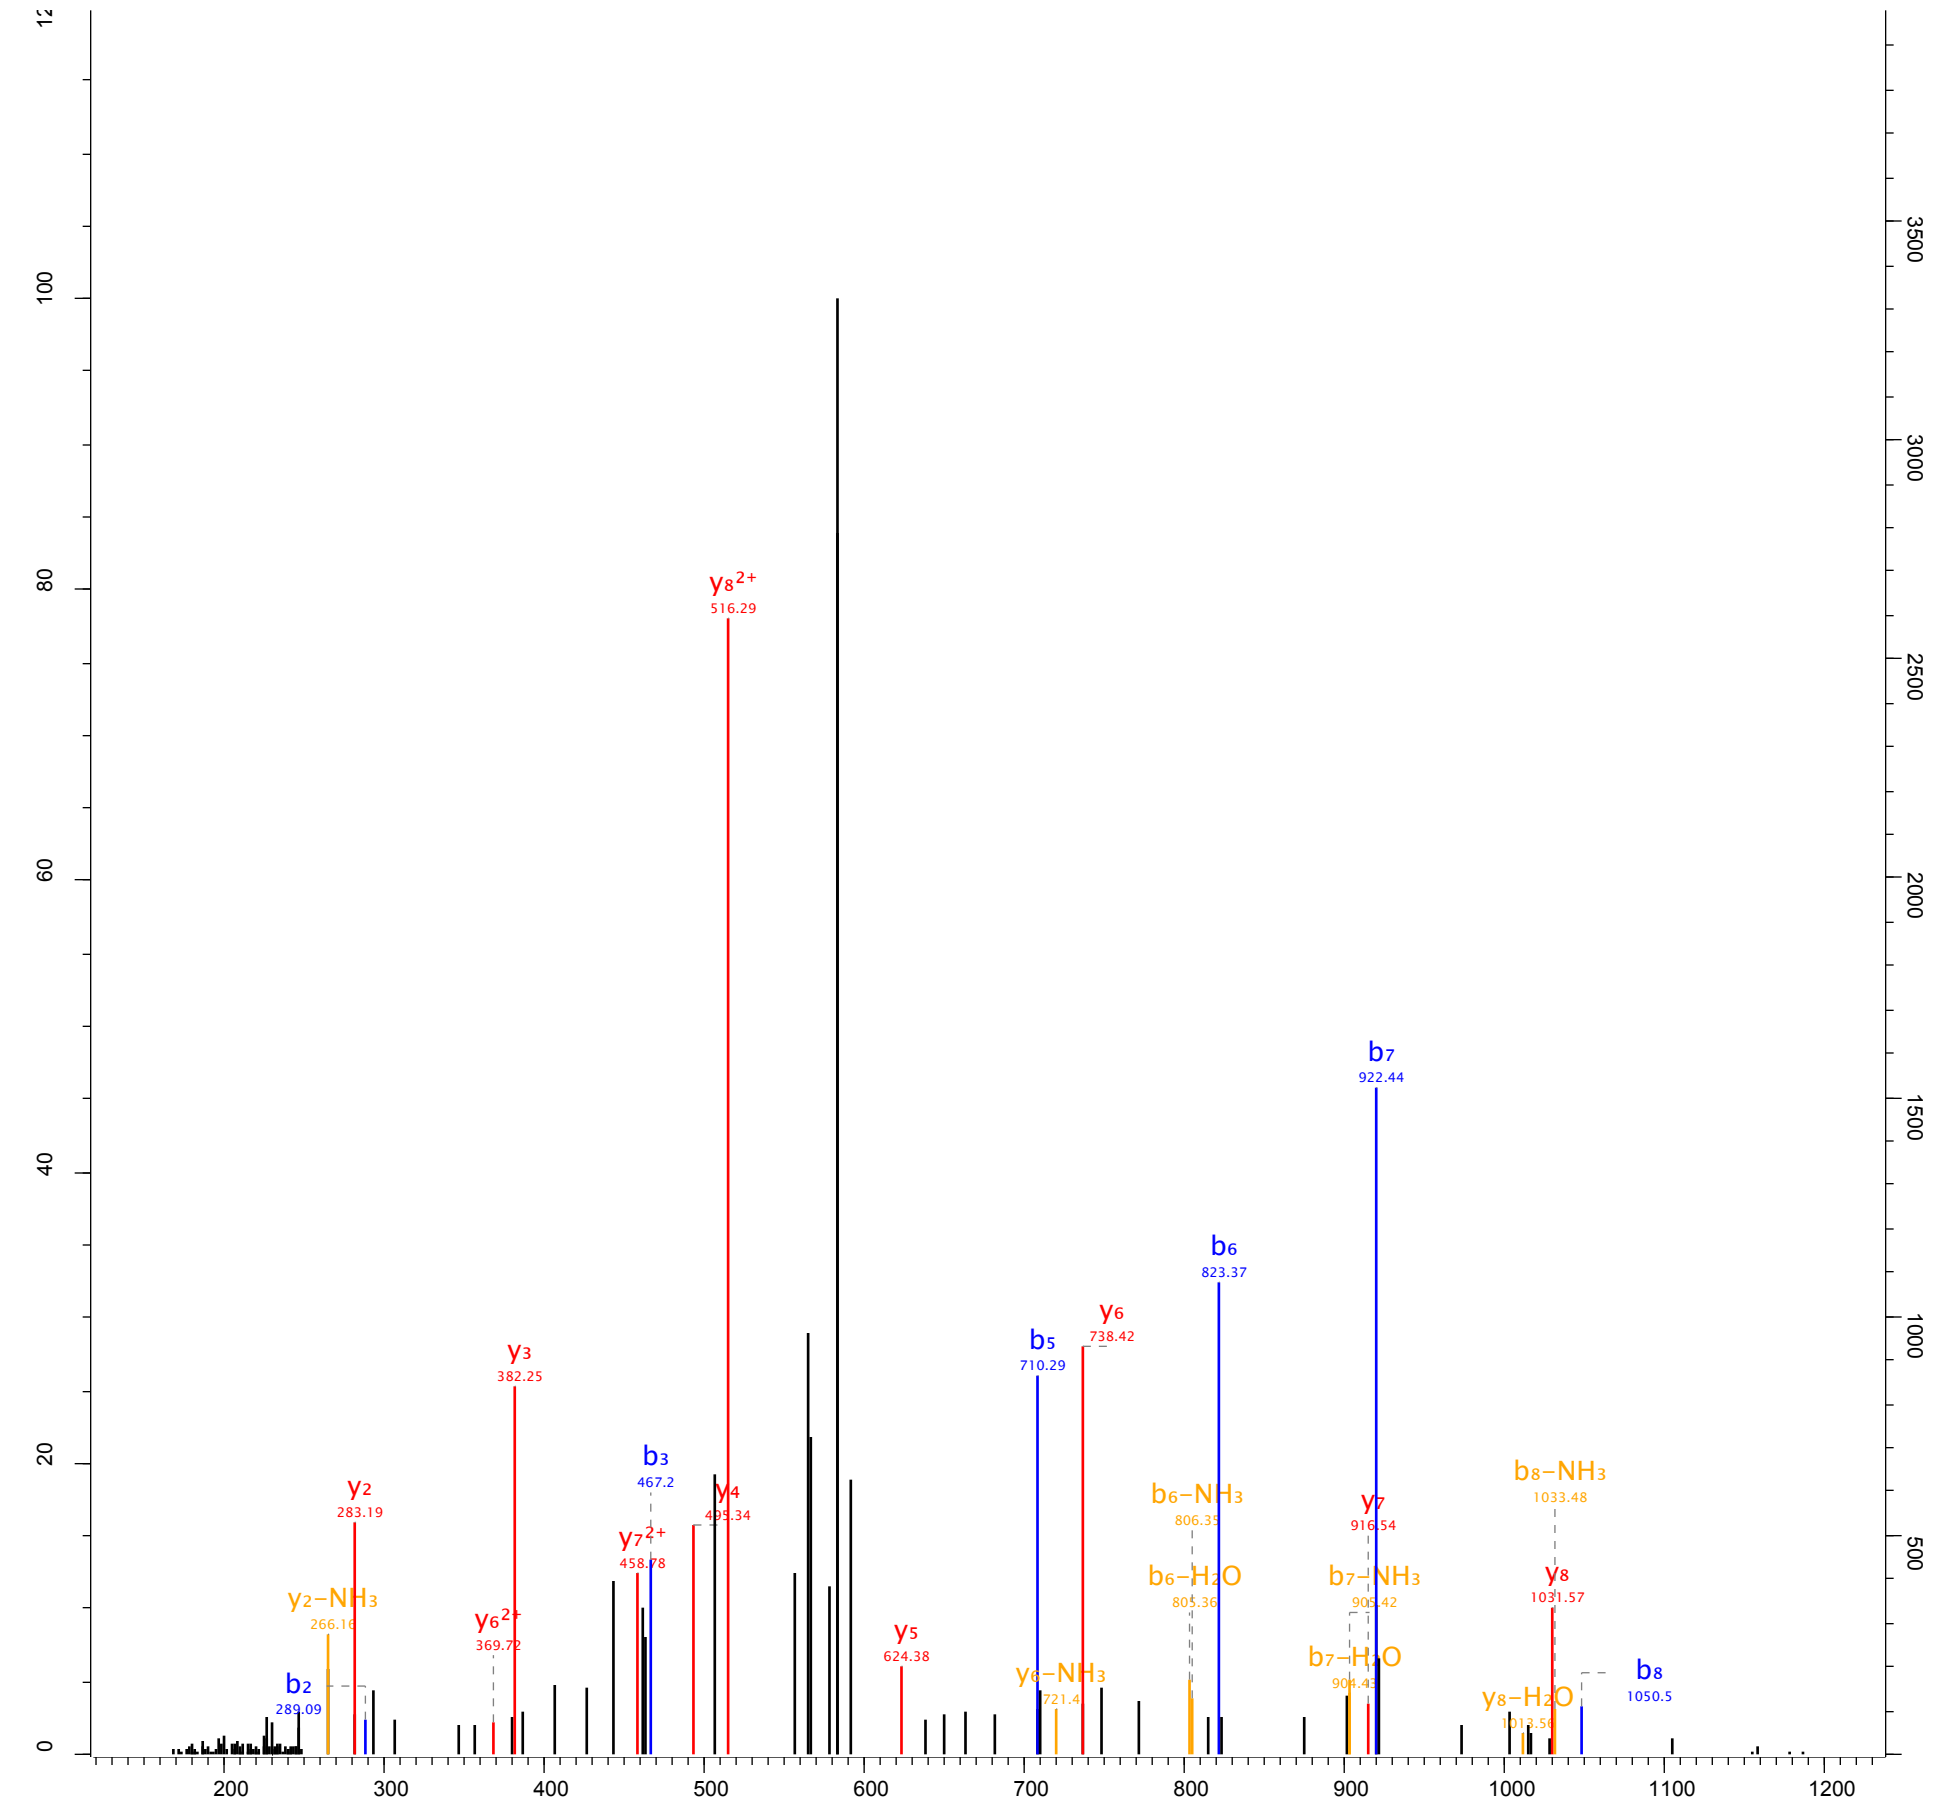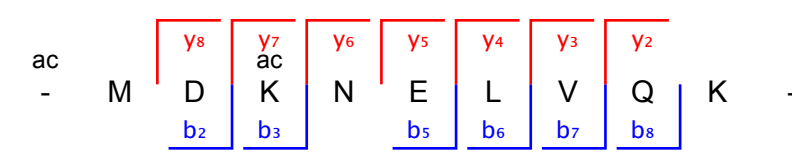

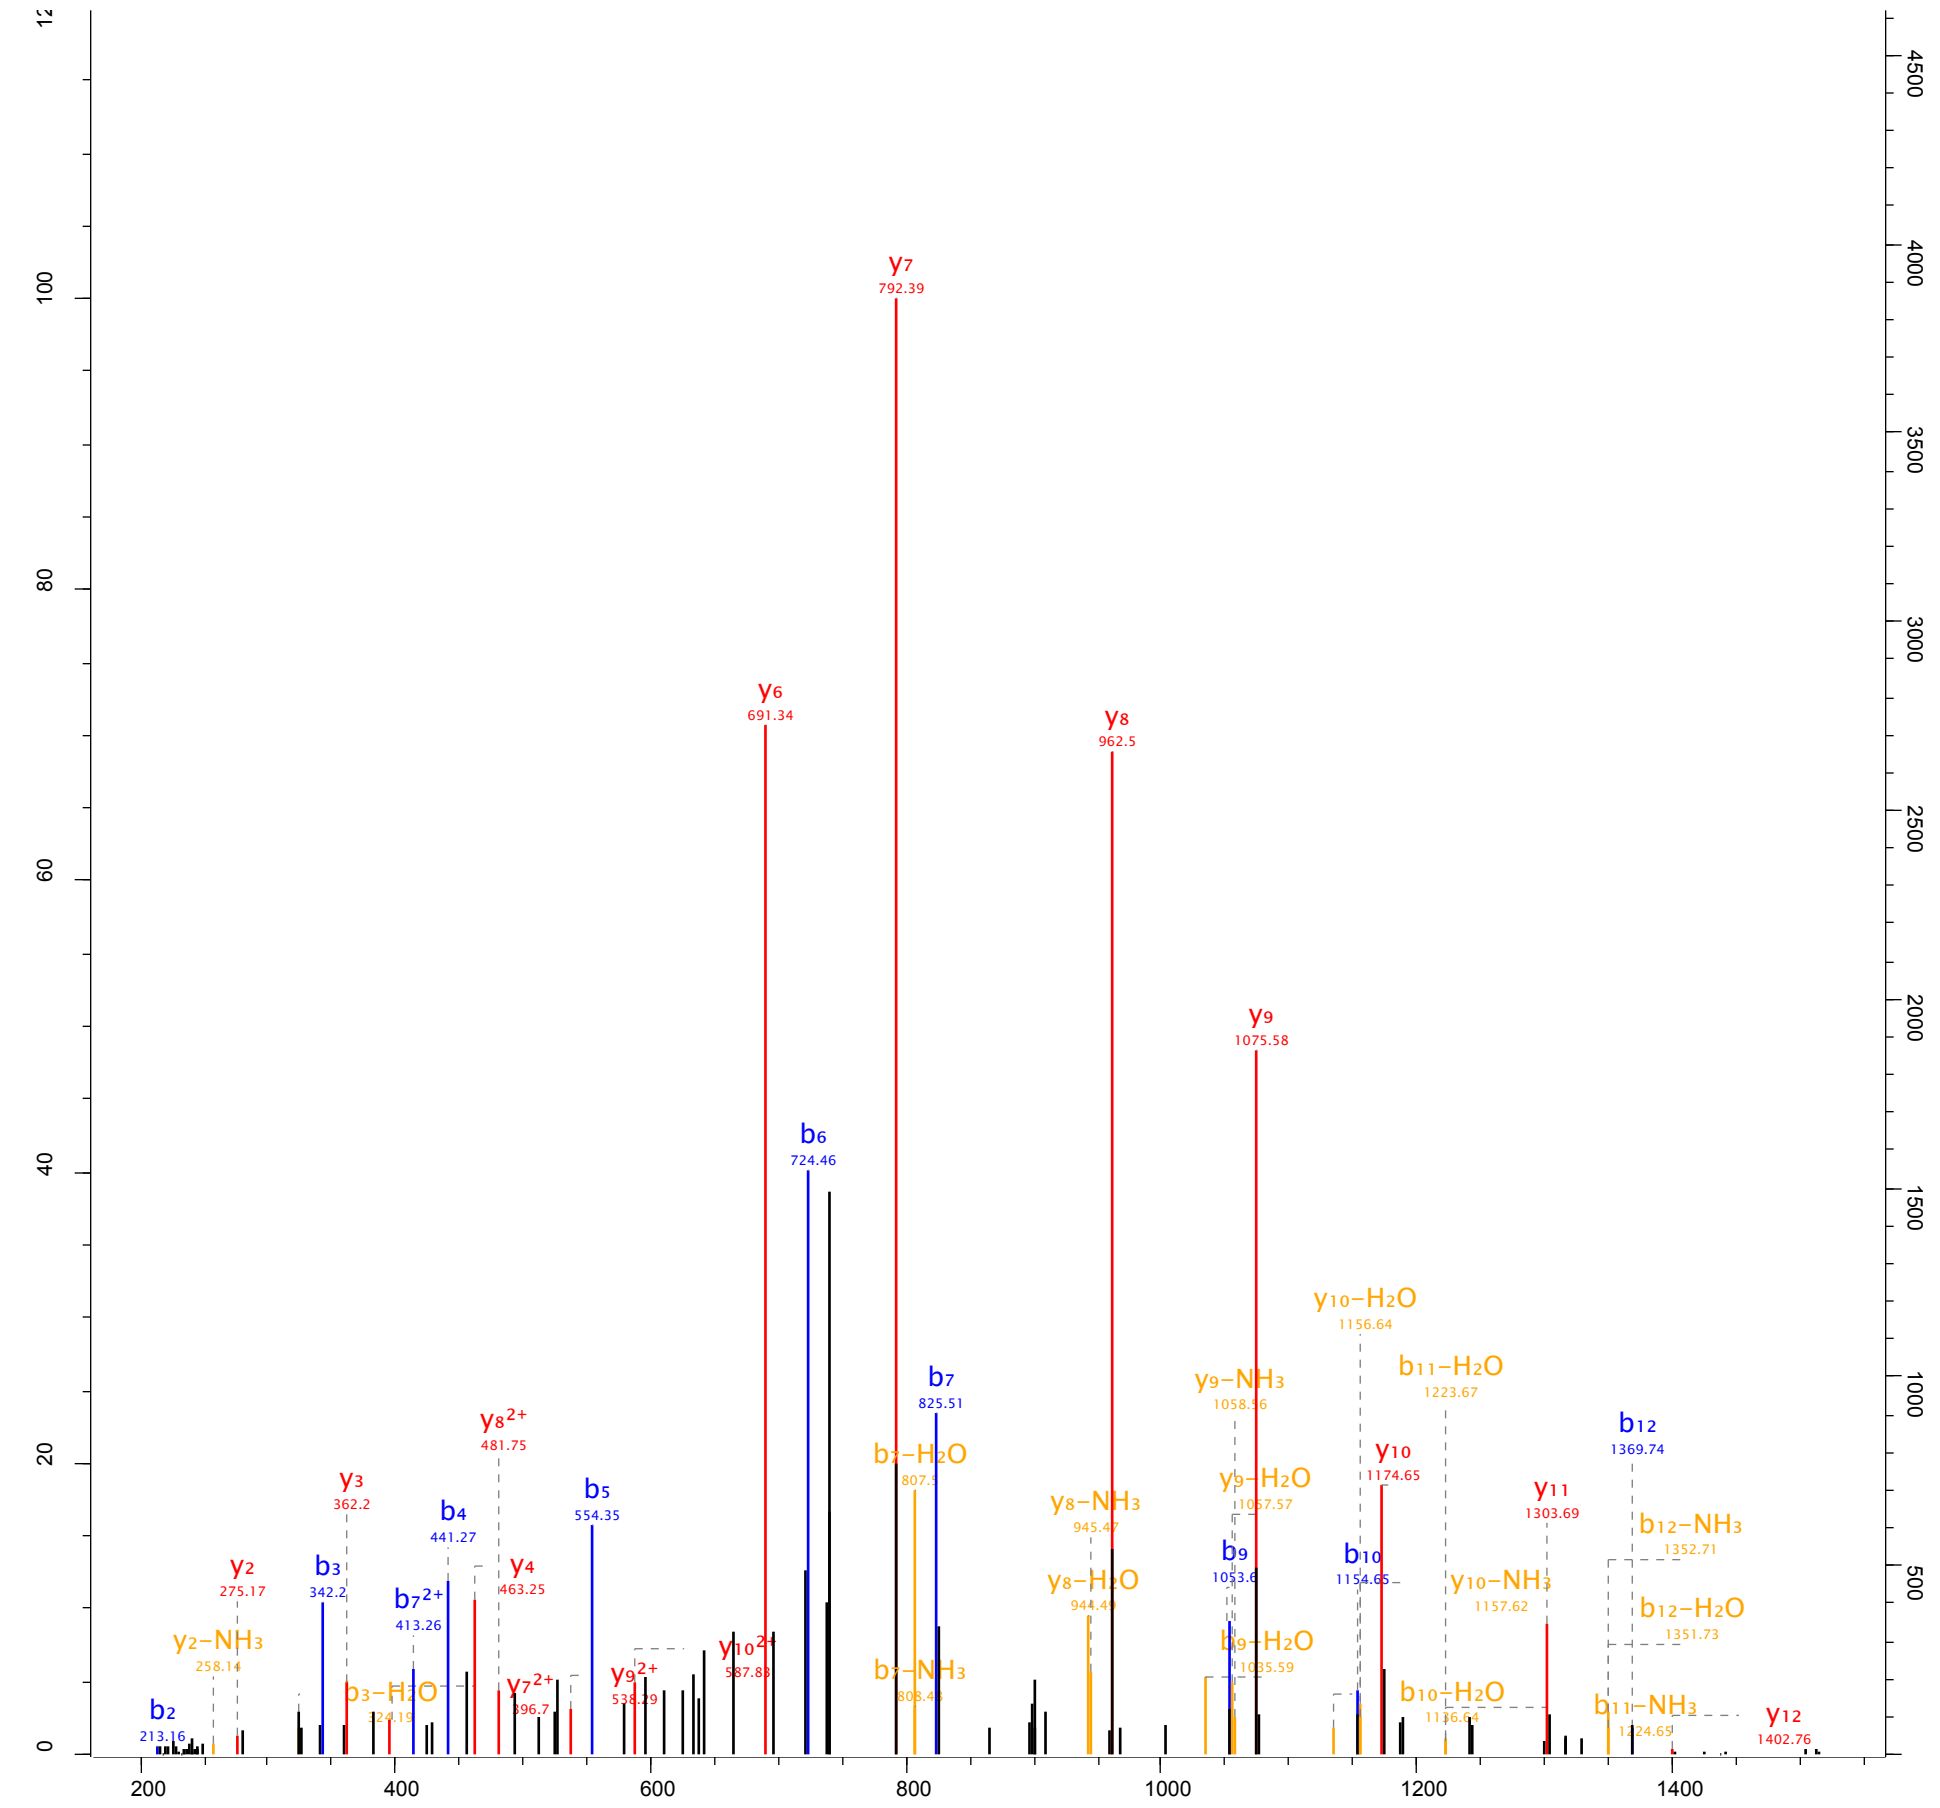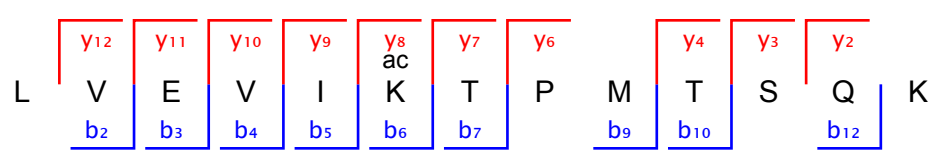

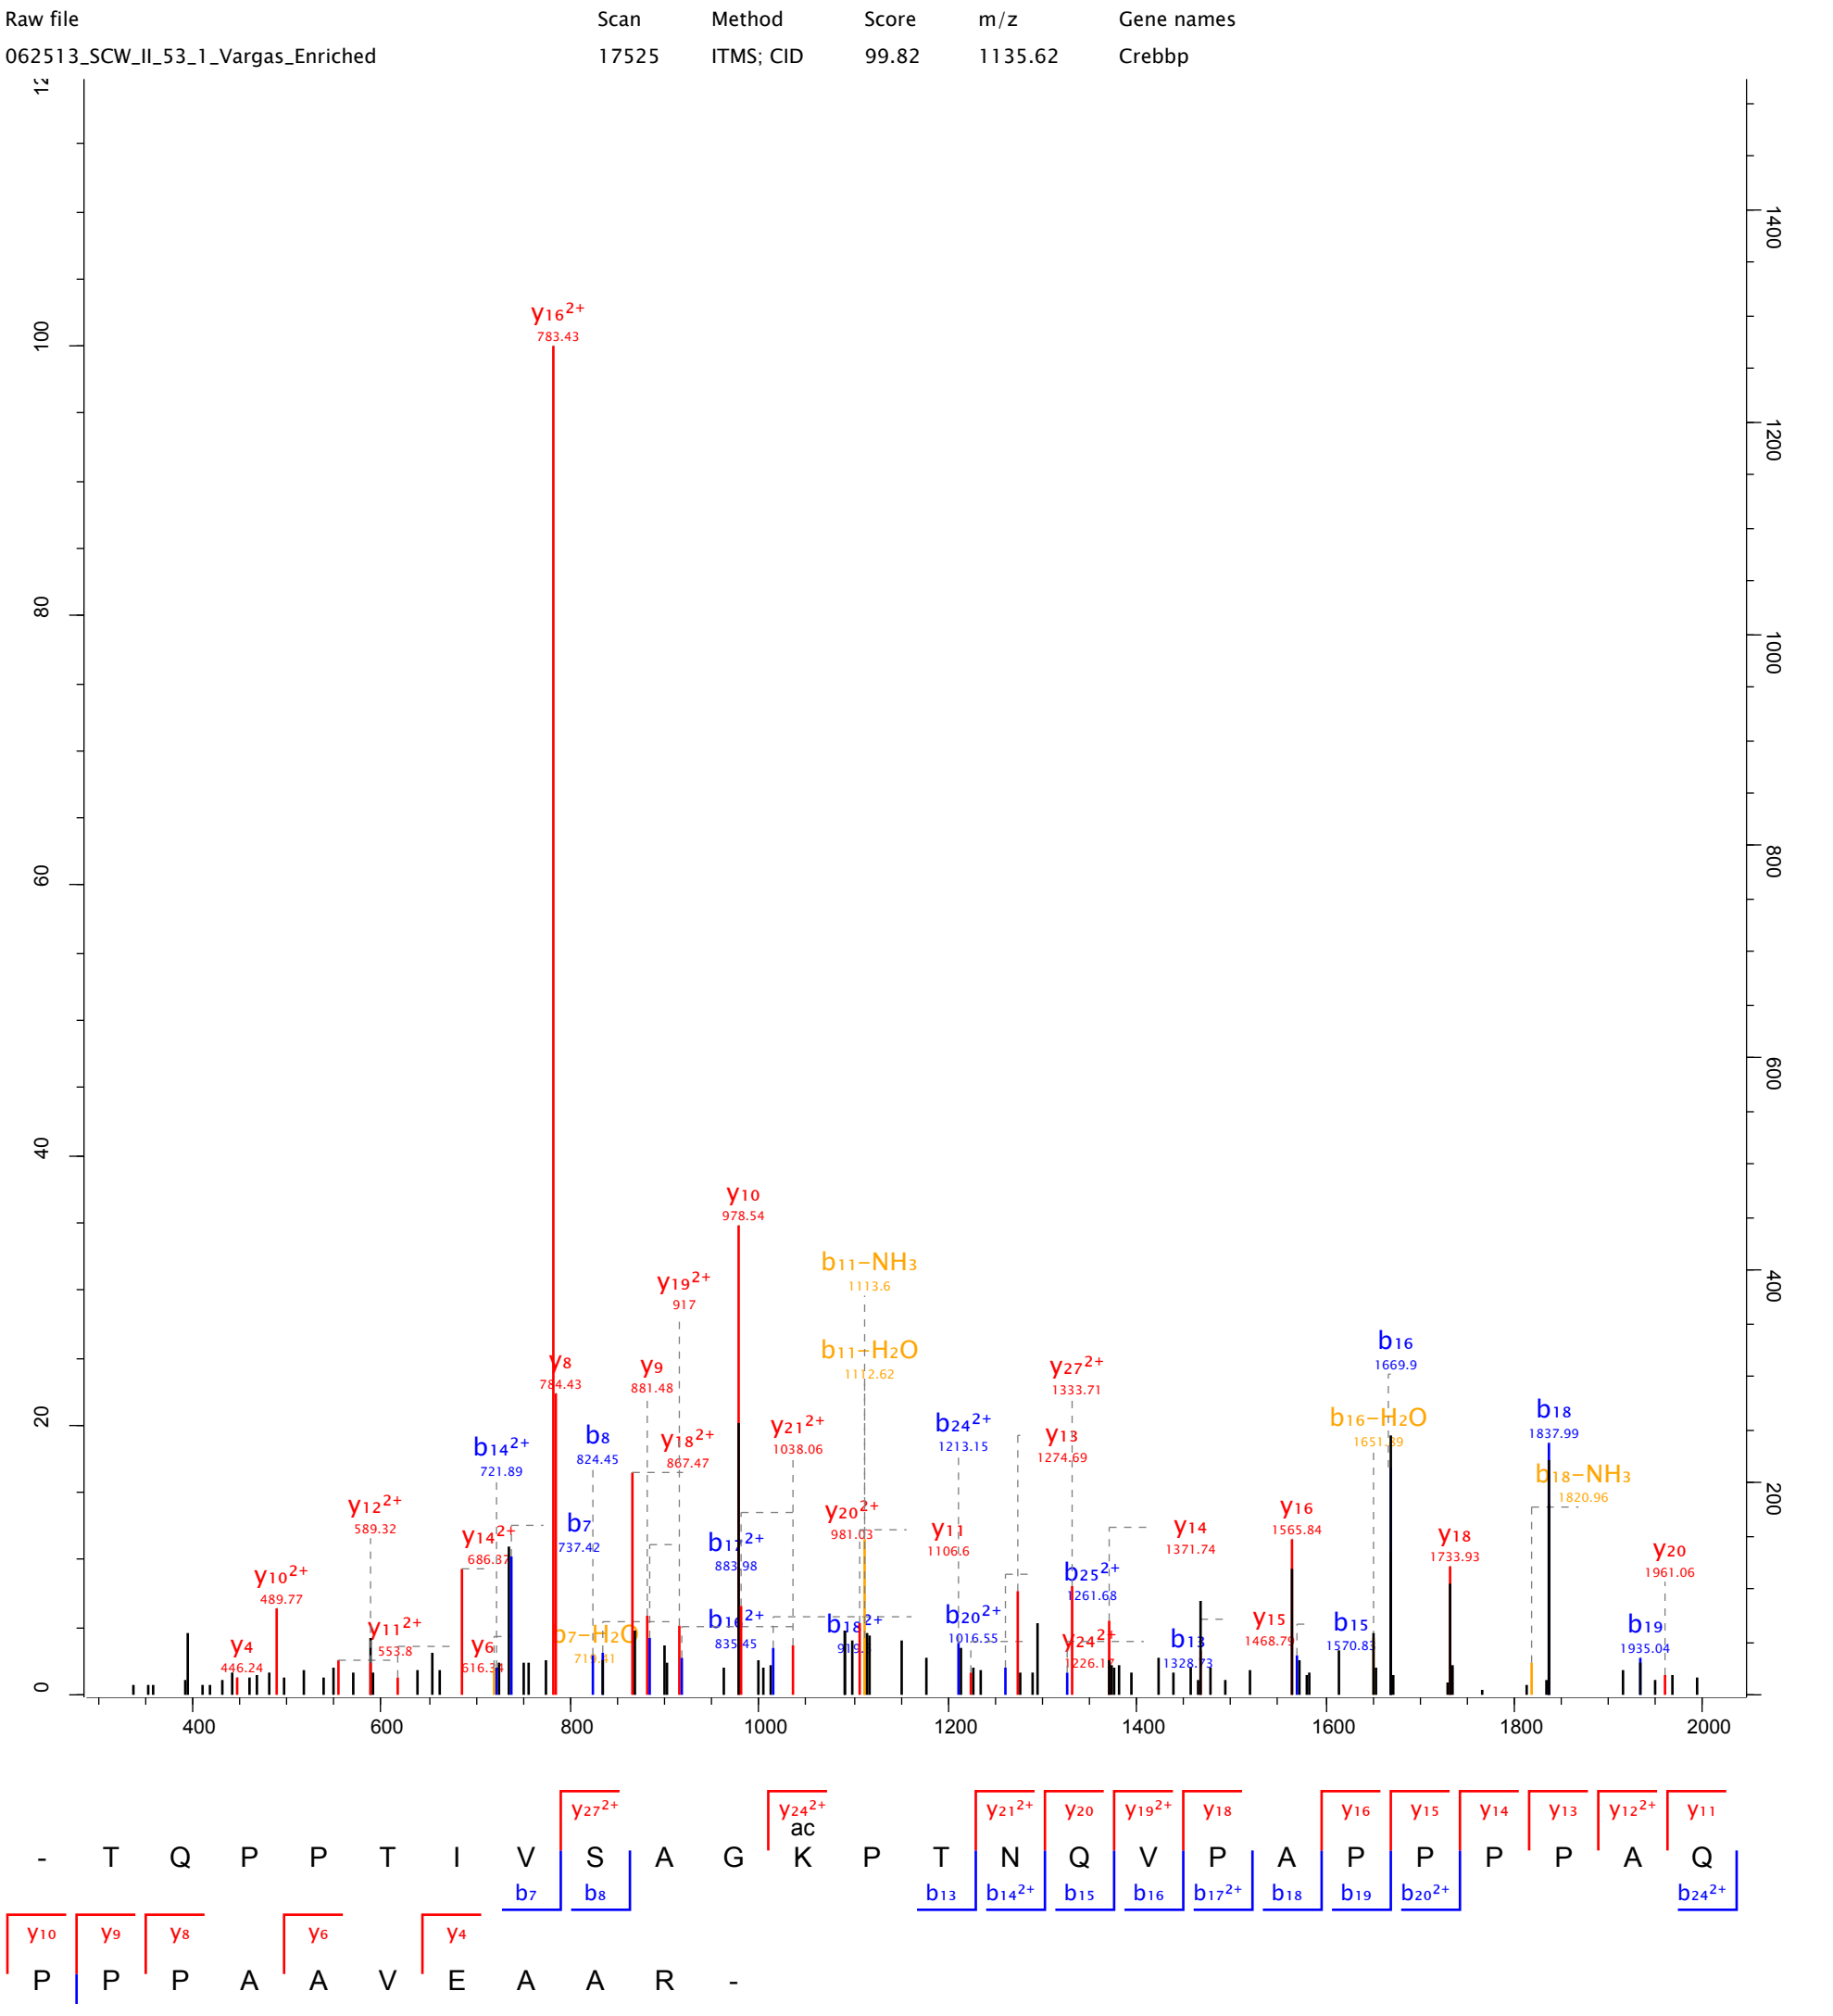

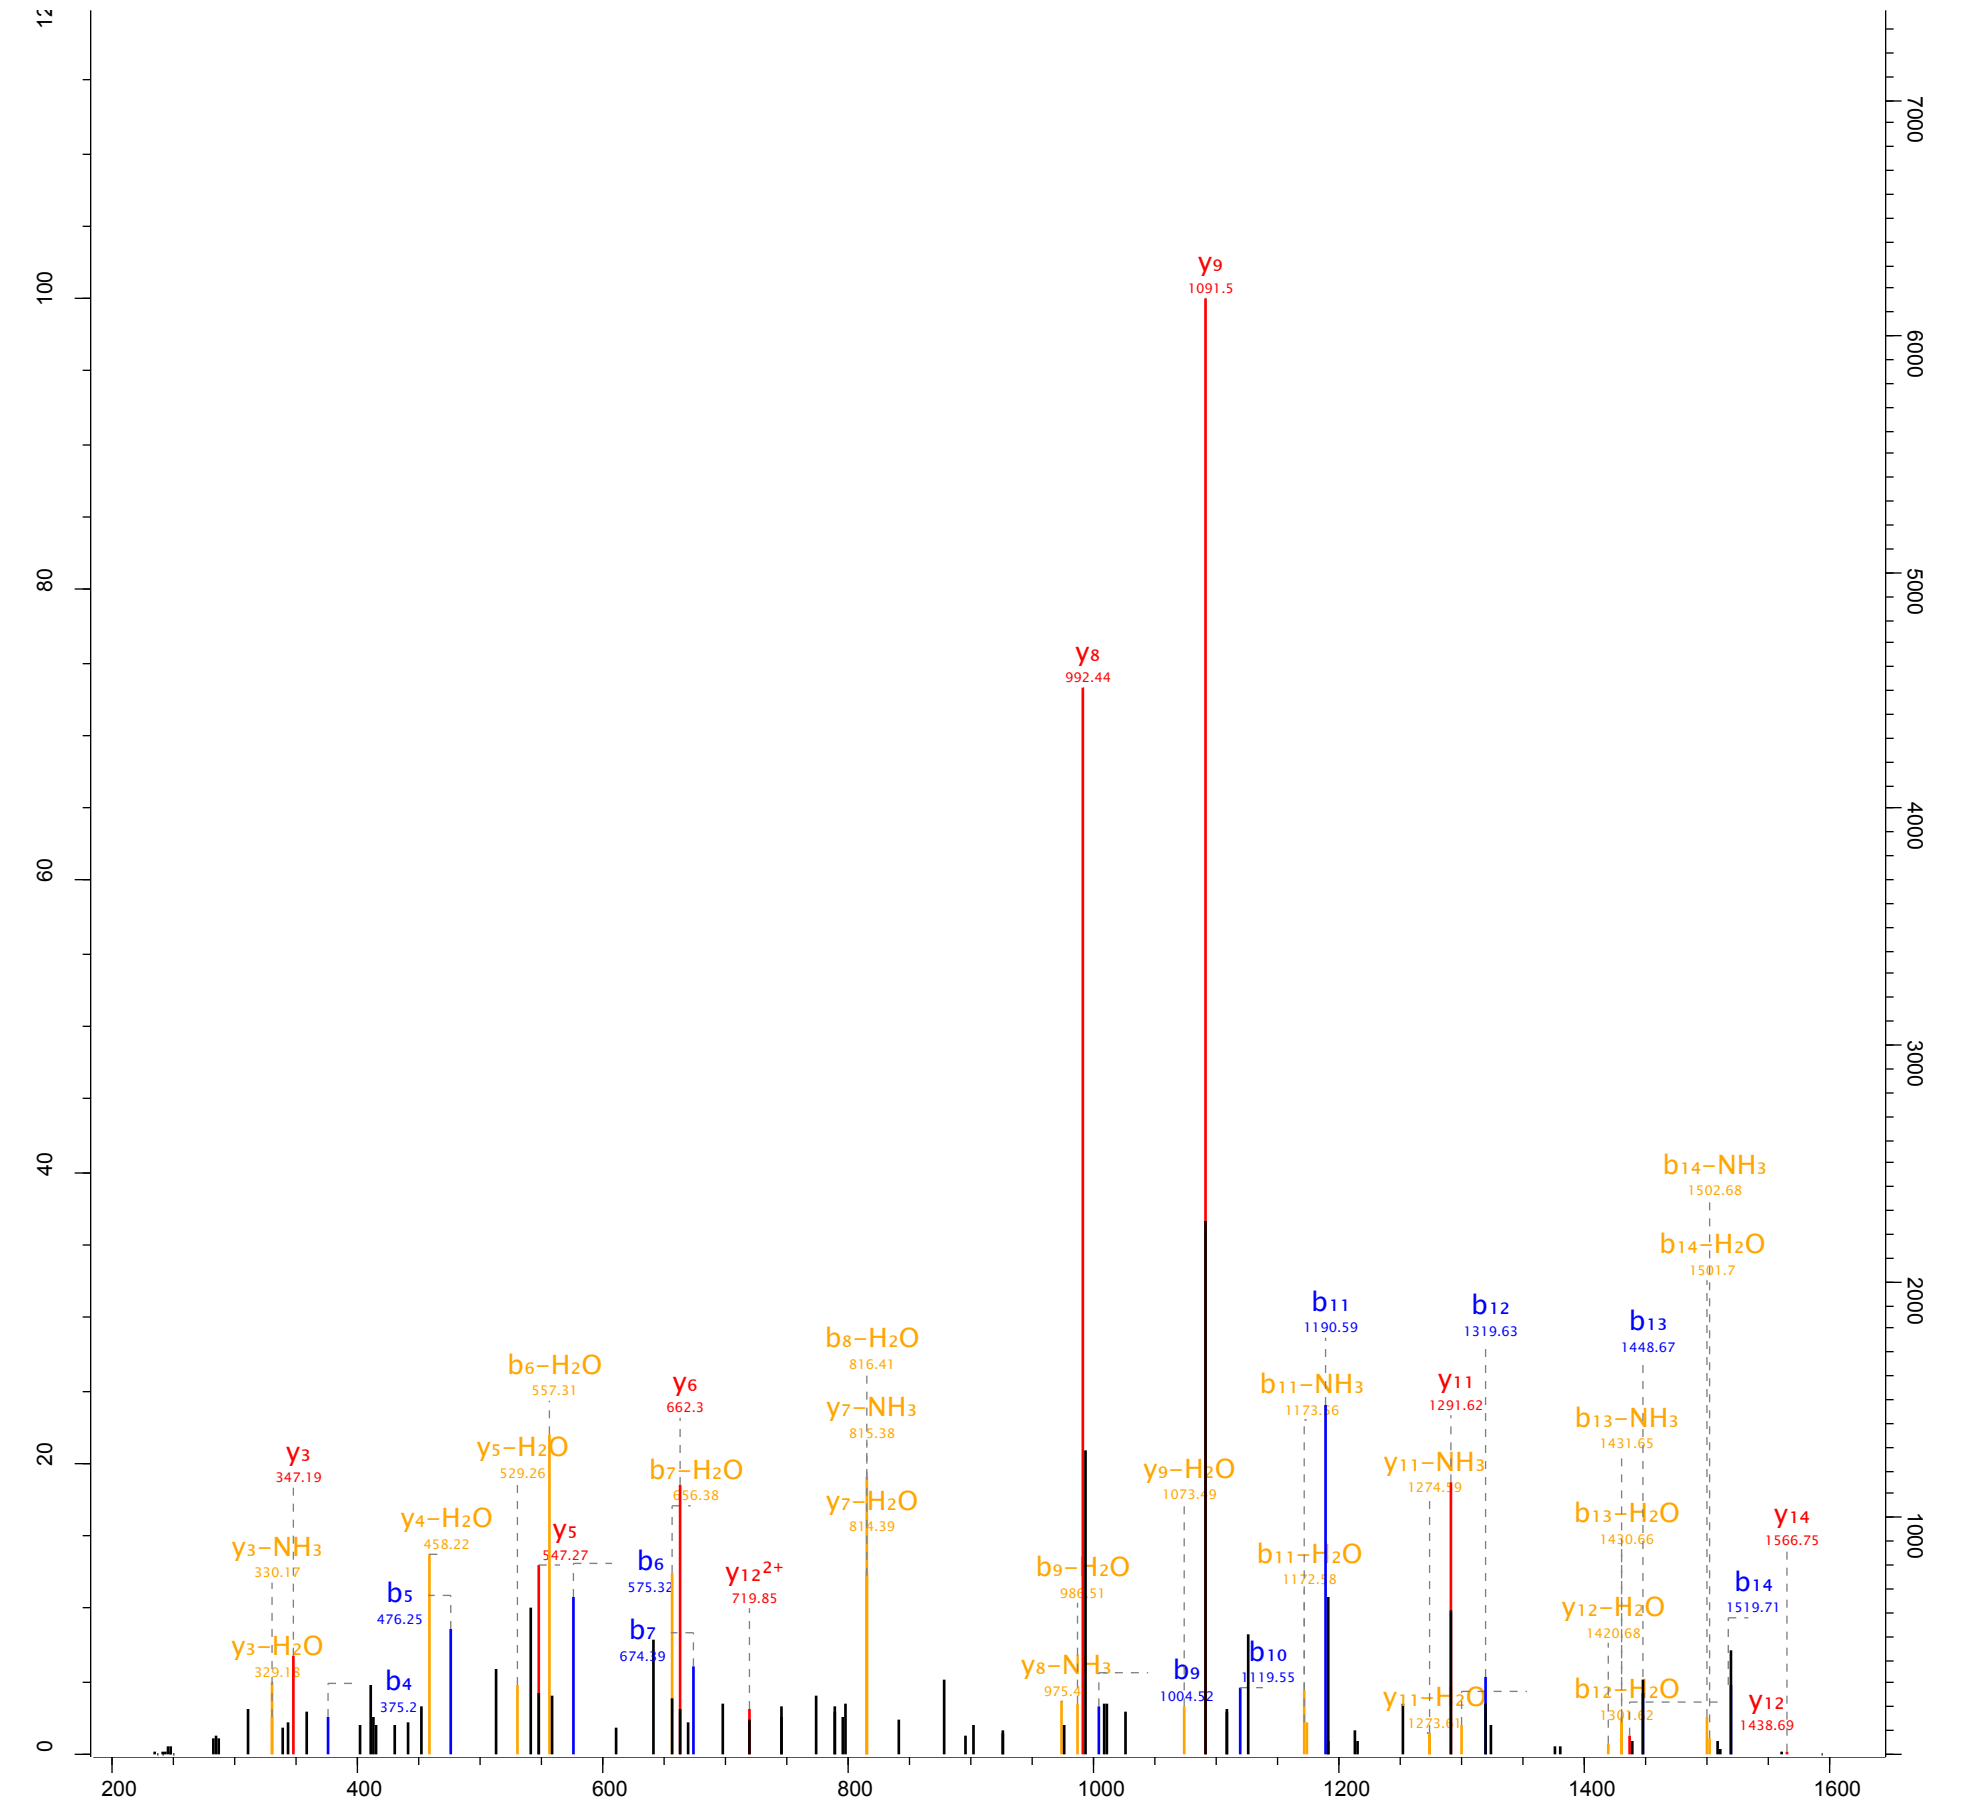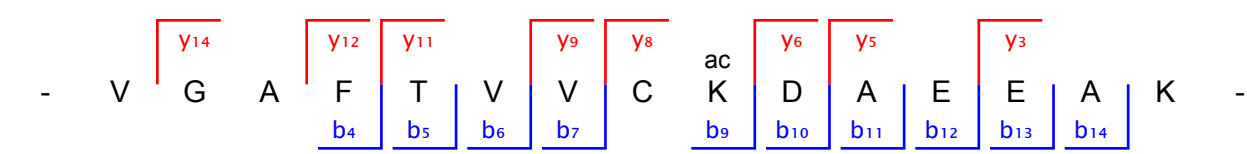

Raw file  
062513\_SCW\_II\_53\_1\_Vargas\_Enriched

Scan 17639 Method ITMS; CID 265.08 m/z 1037.51 Gene names Pgk1;Pgk2

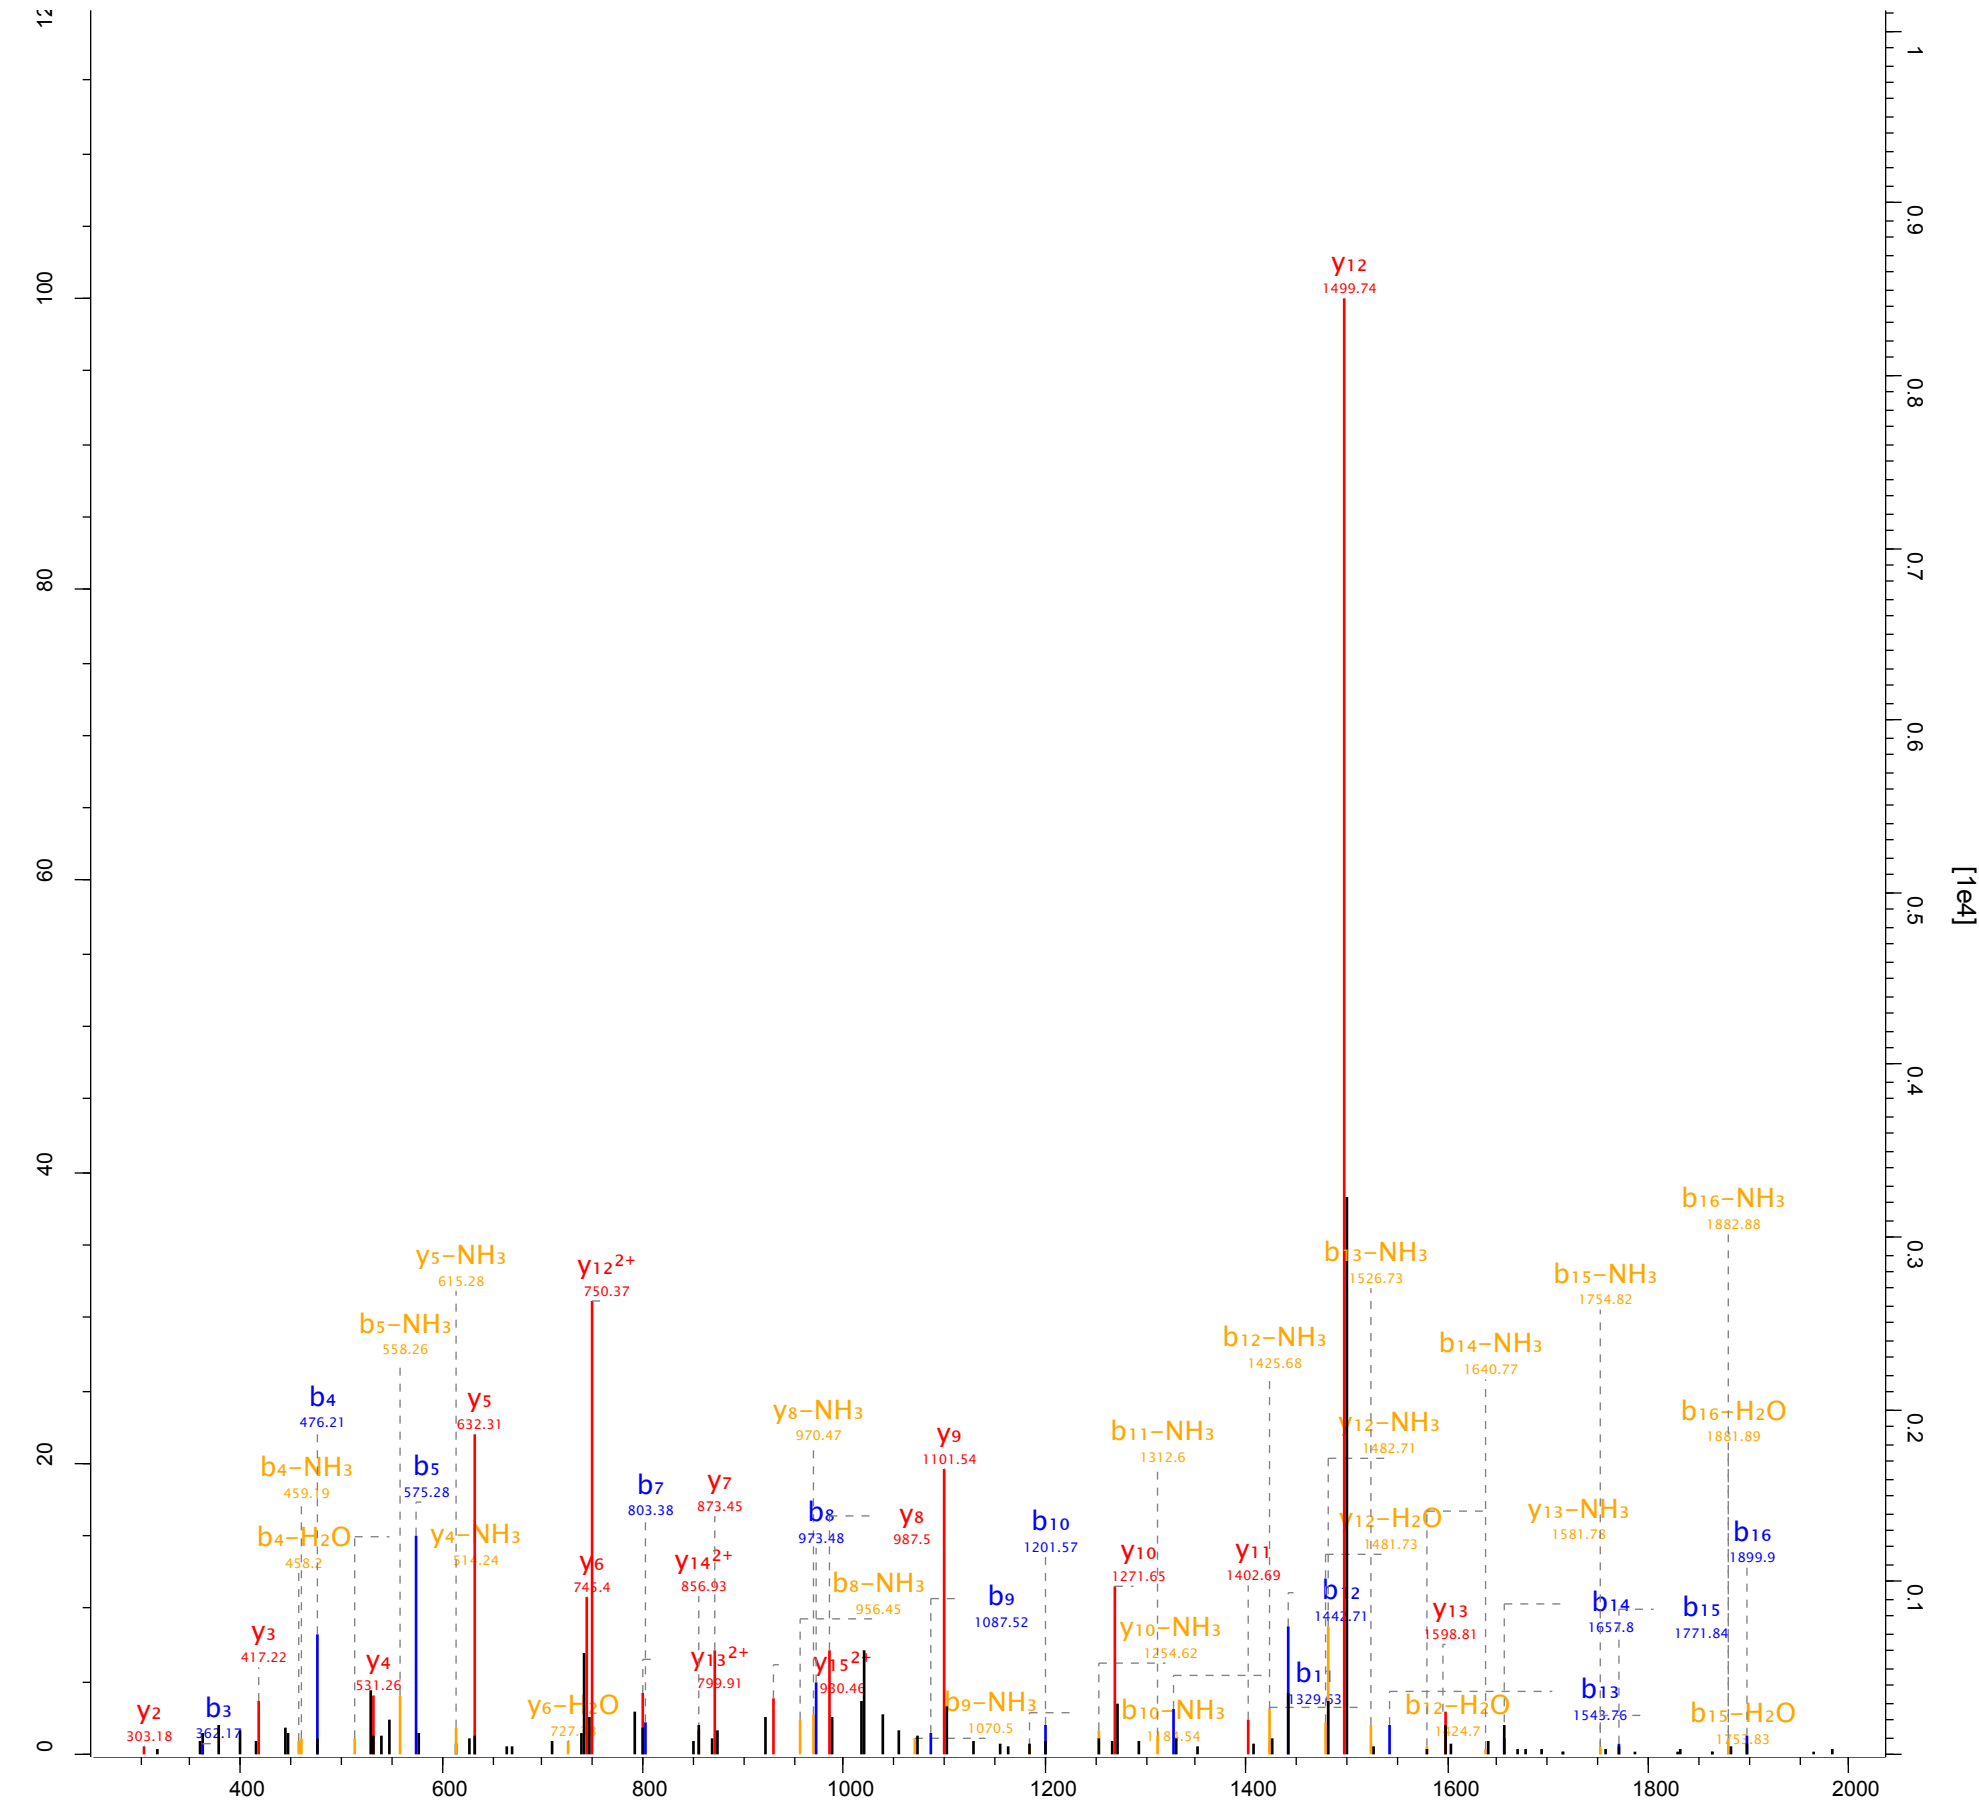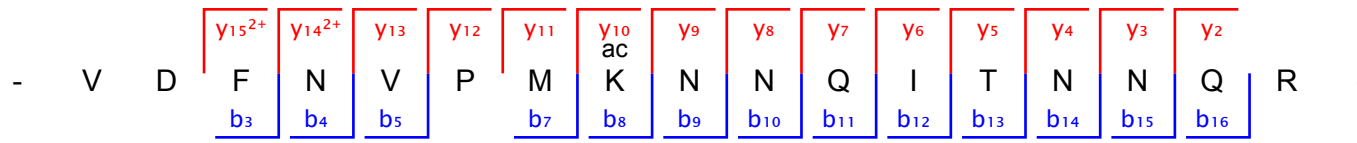

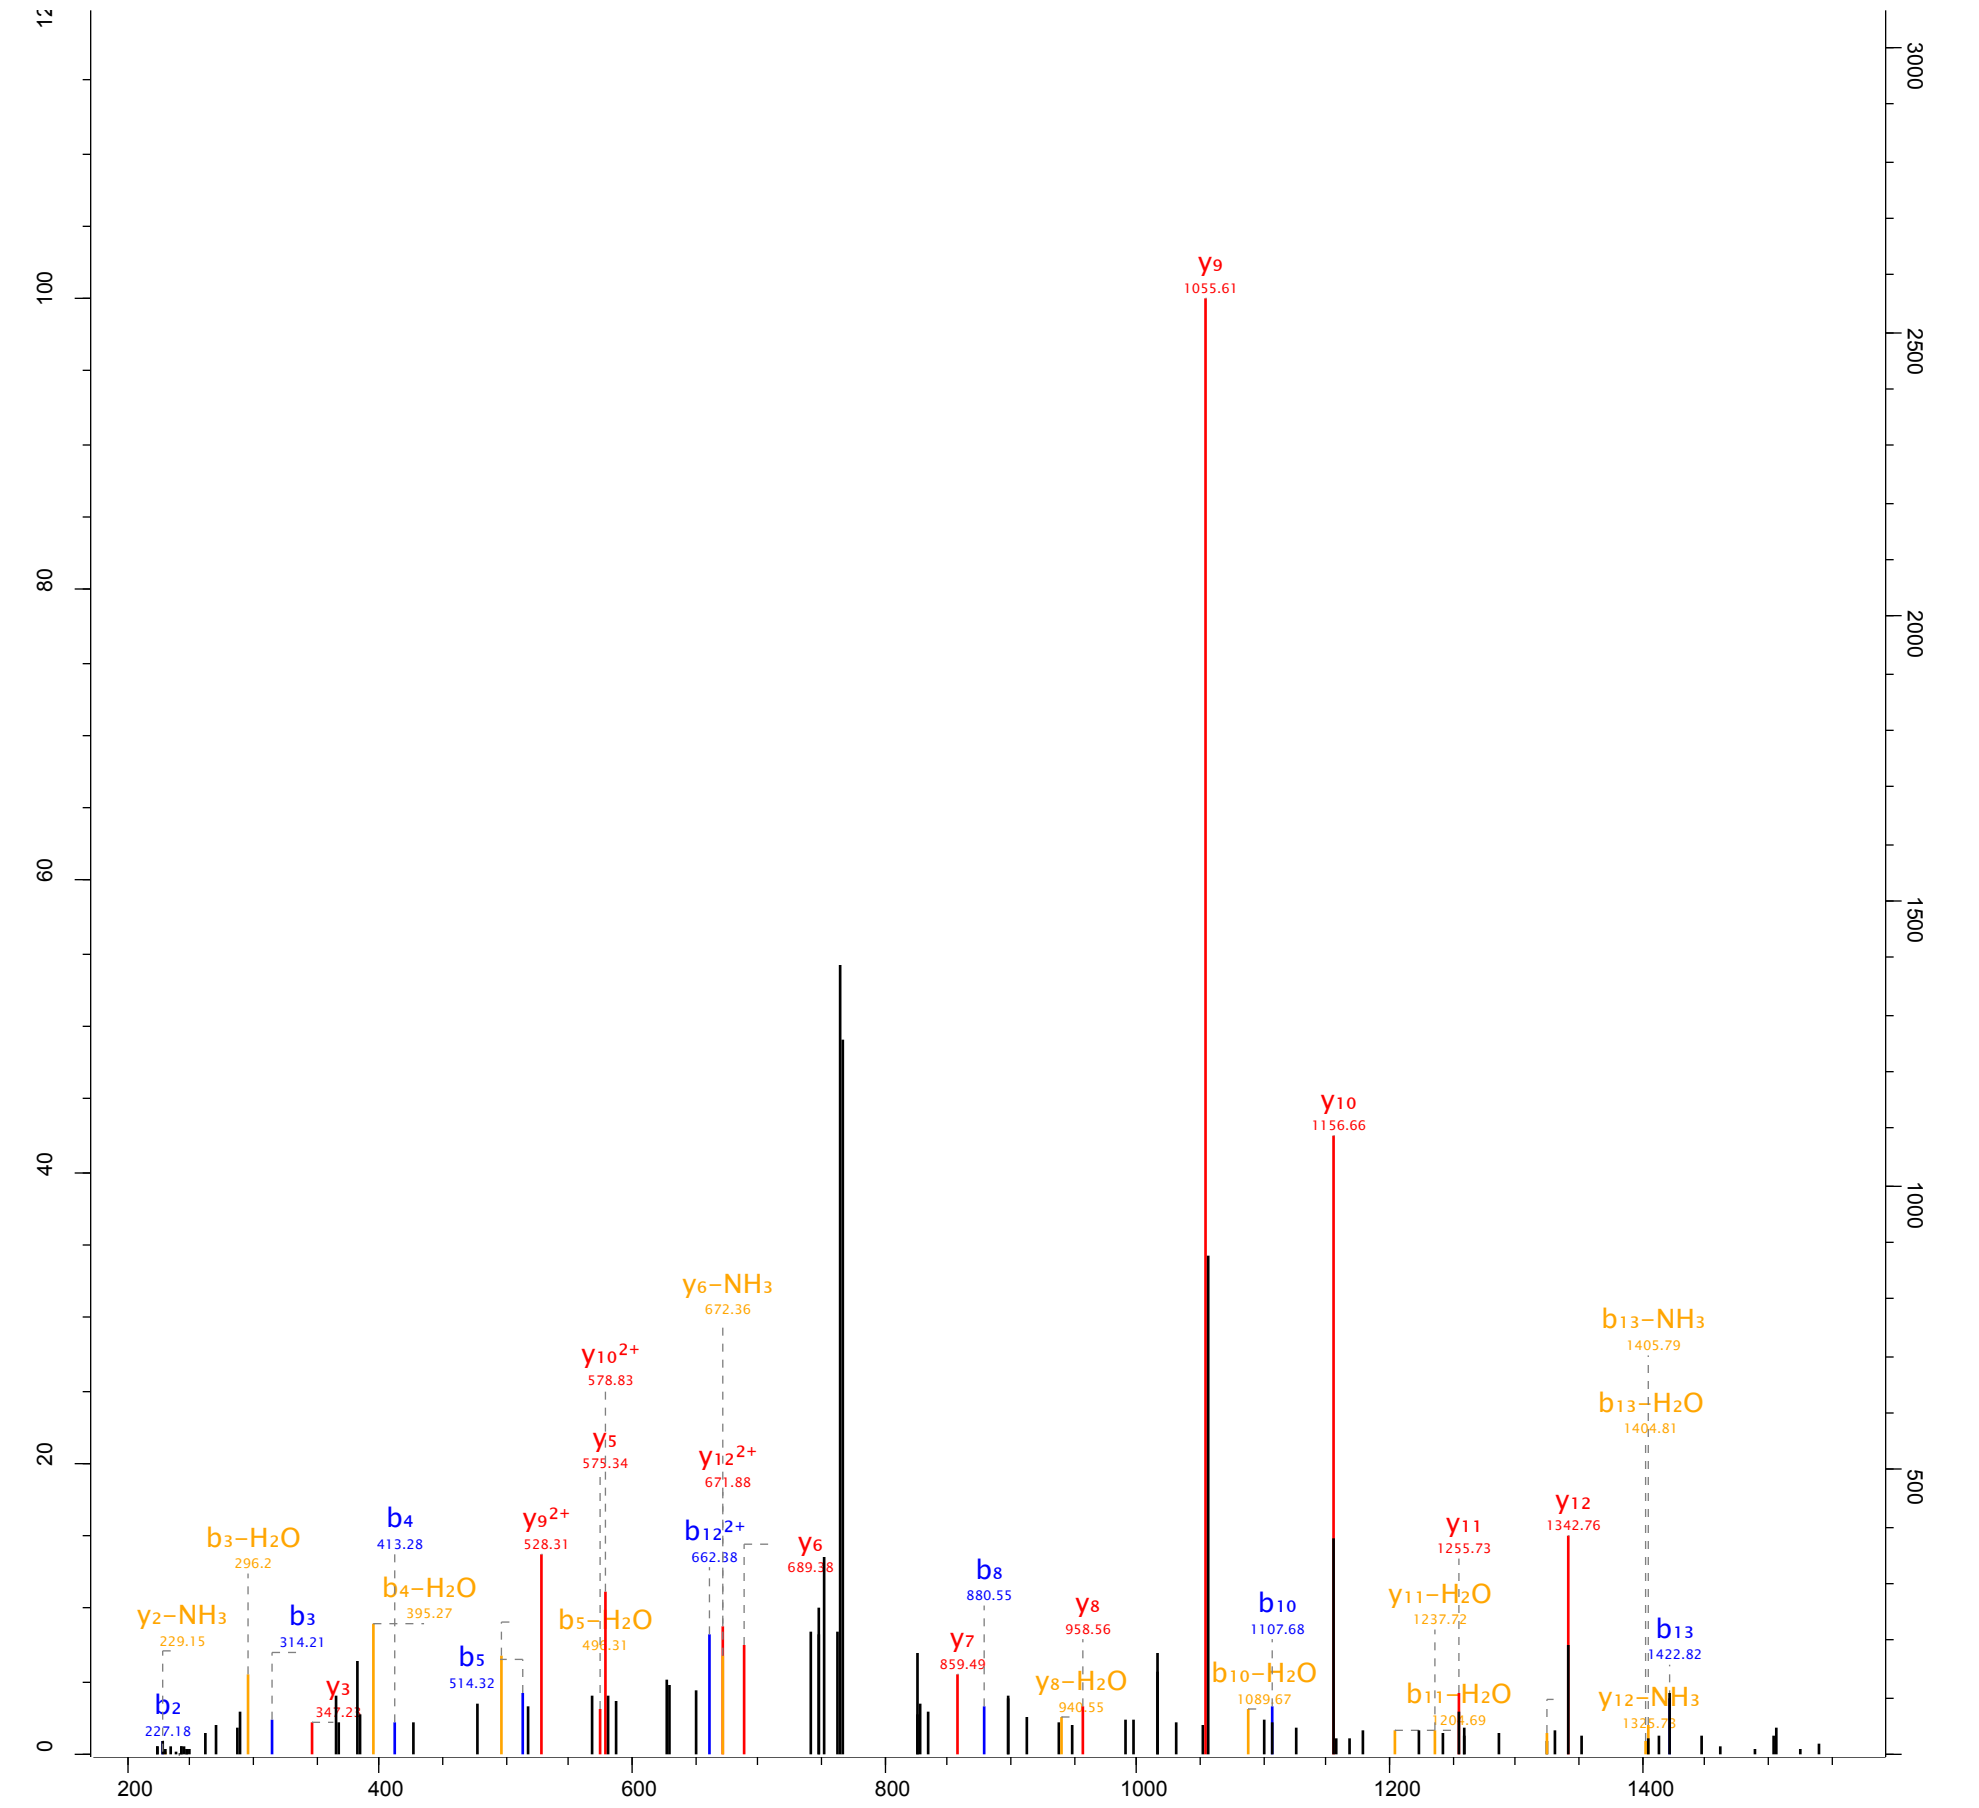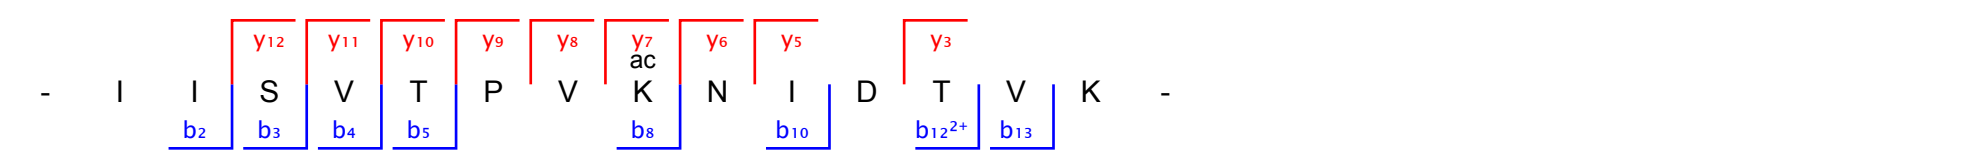

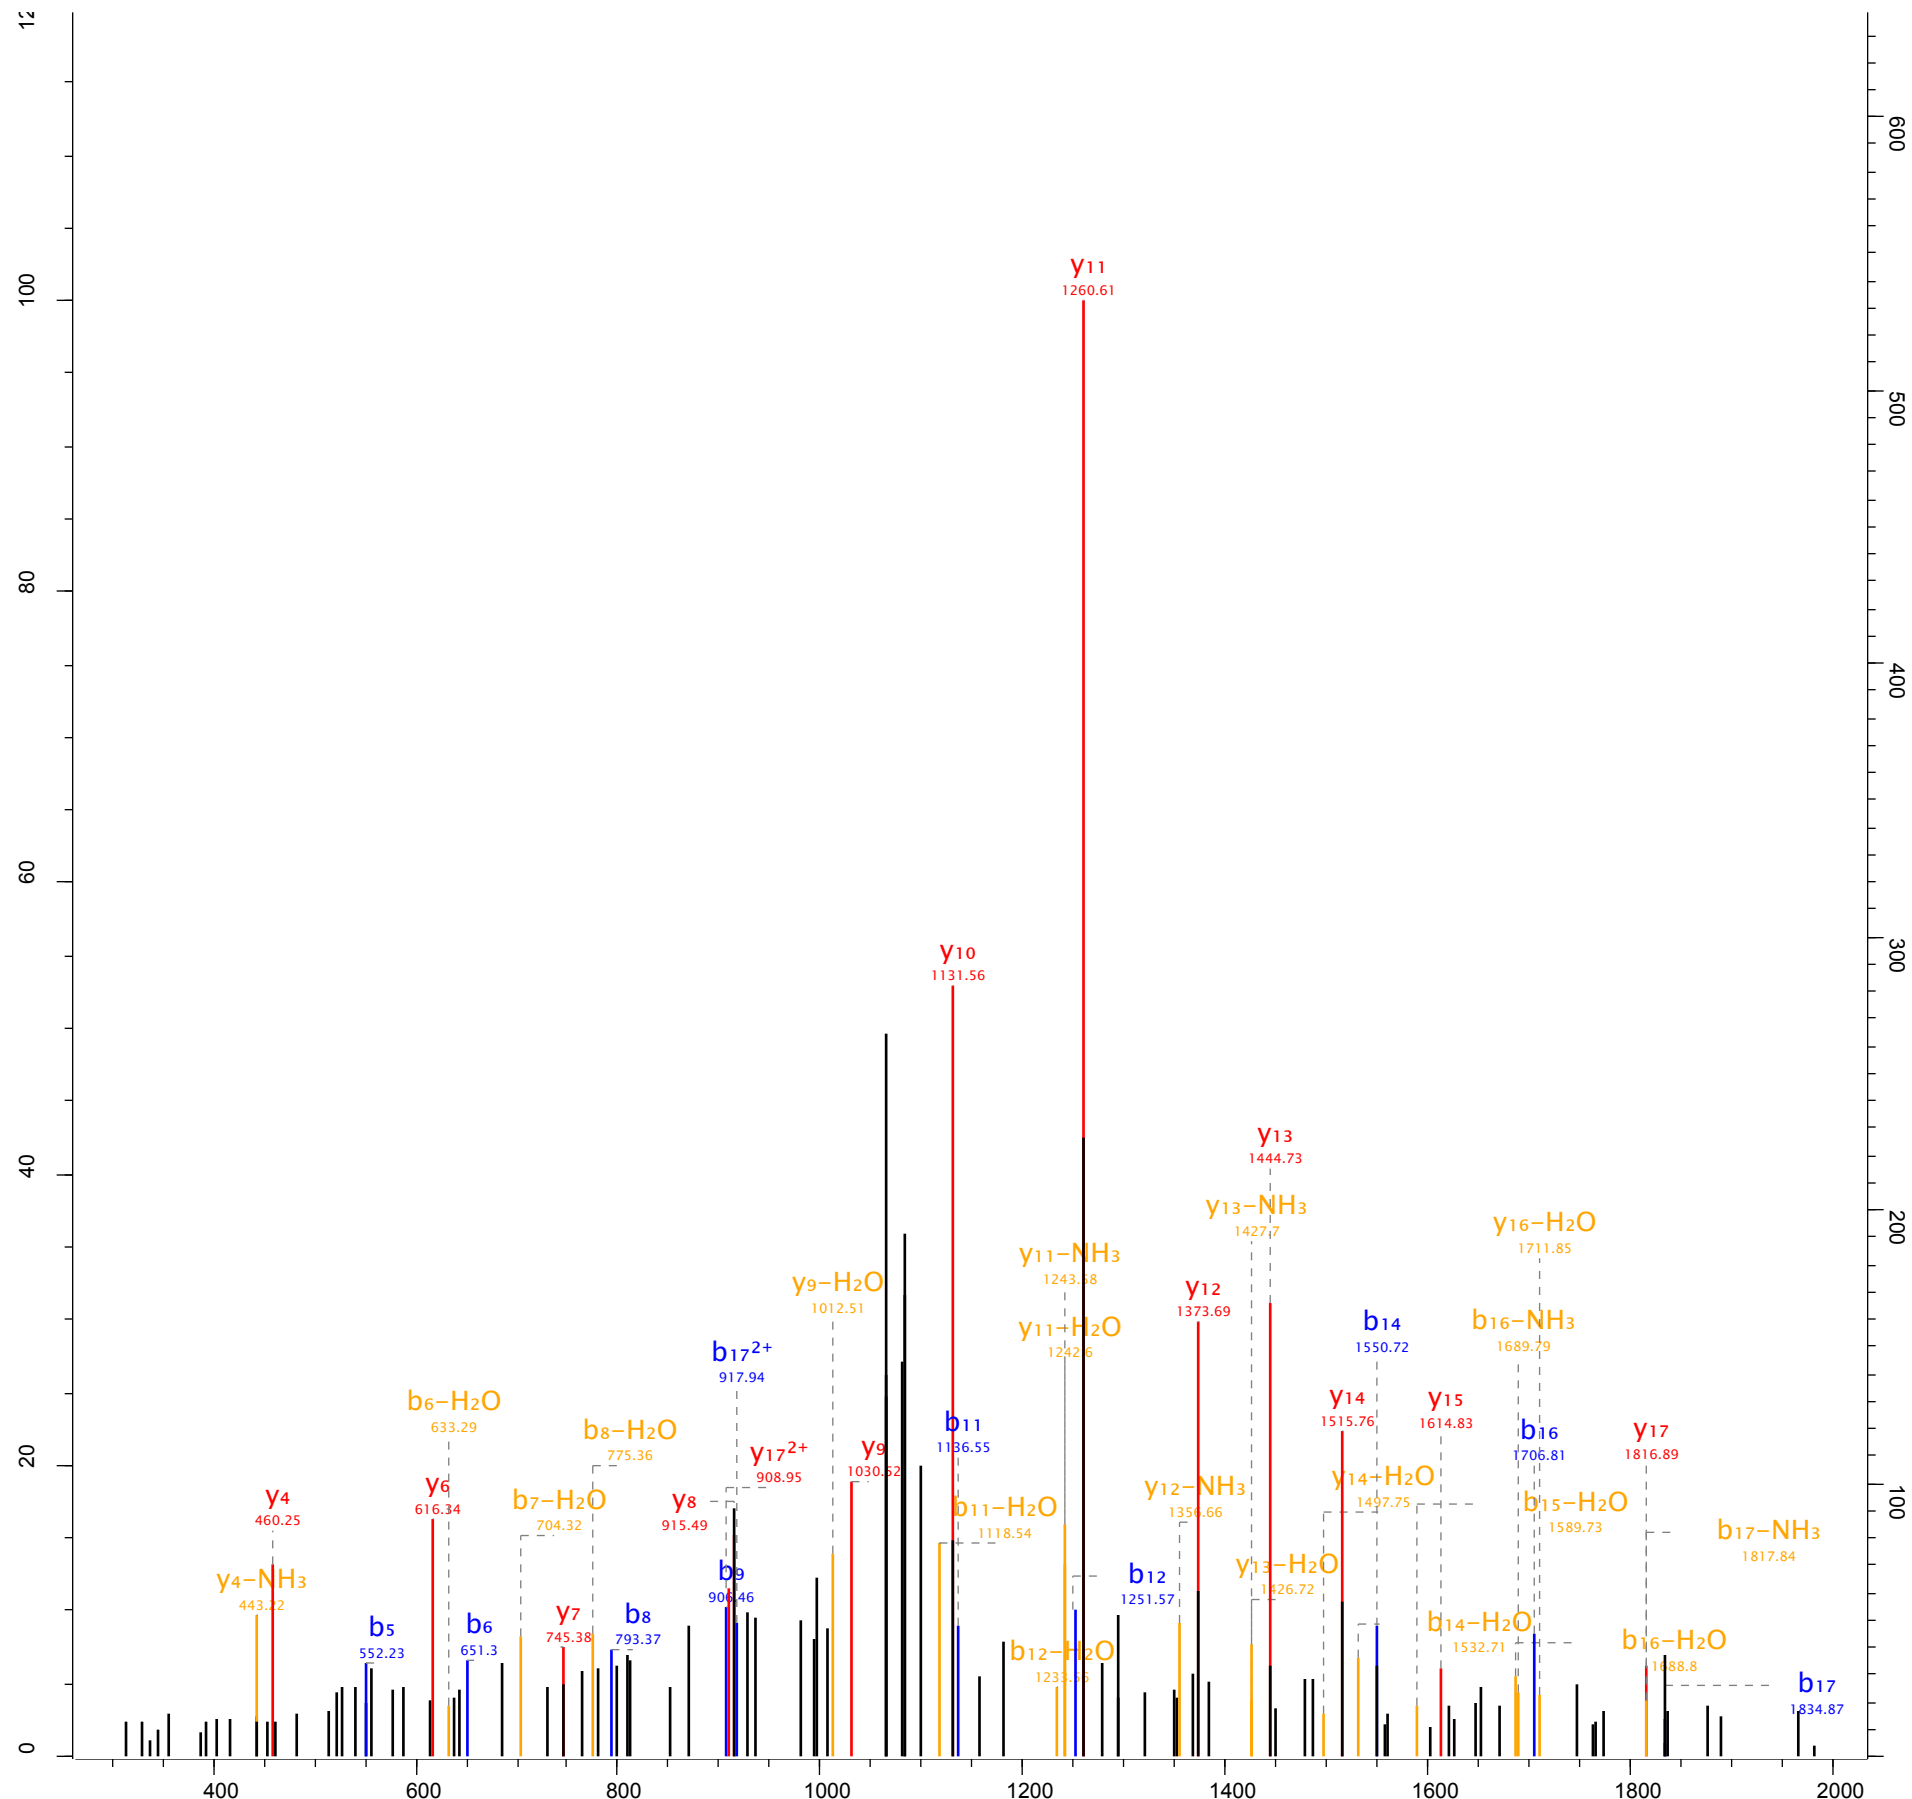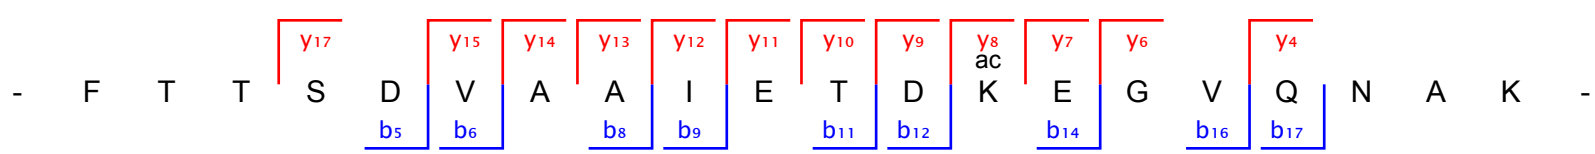



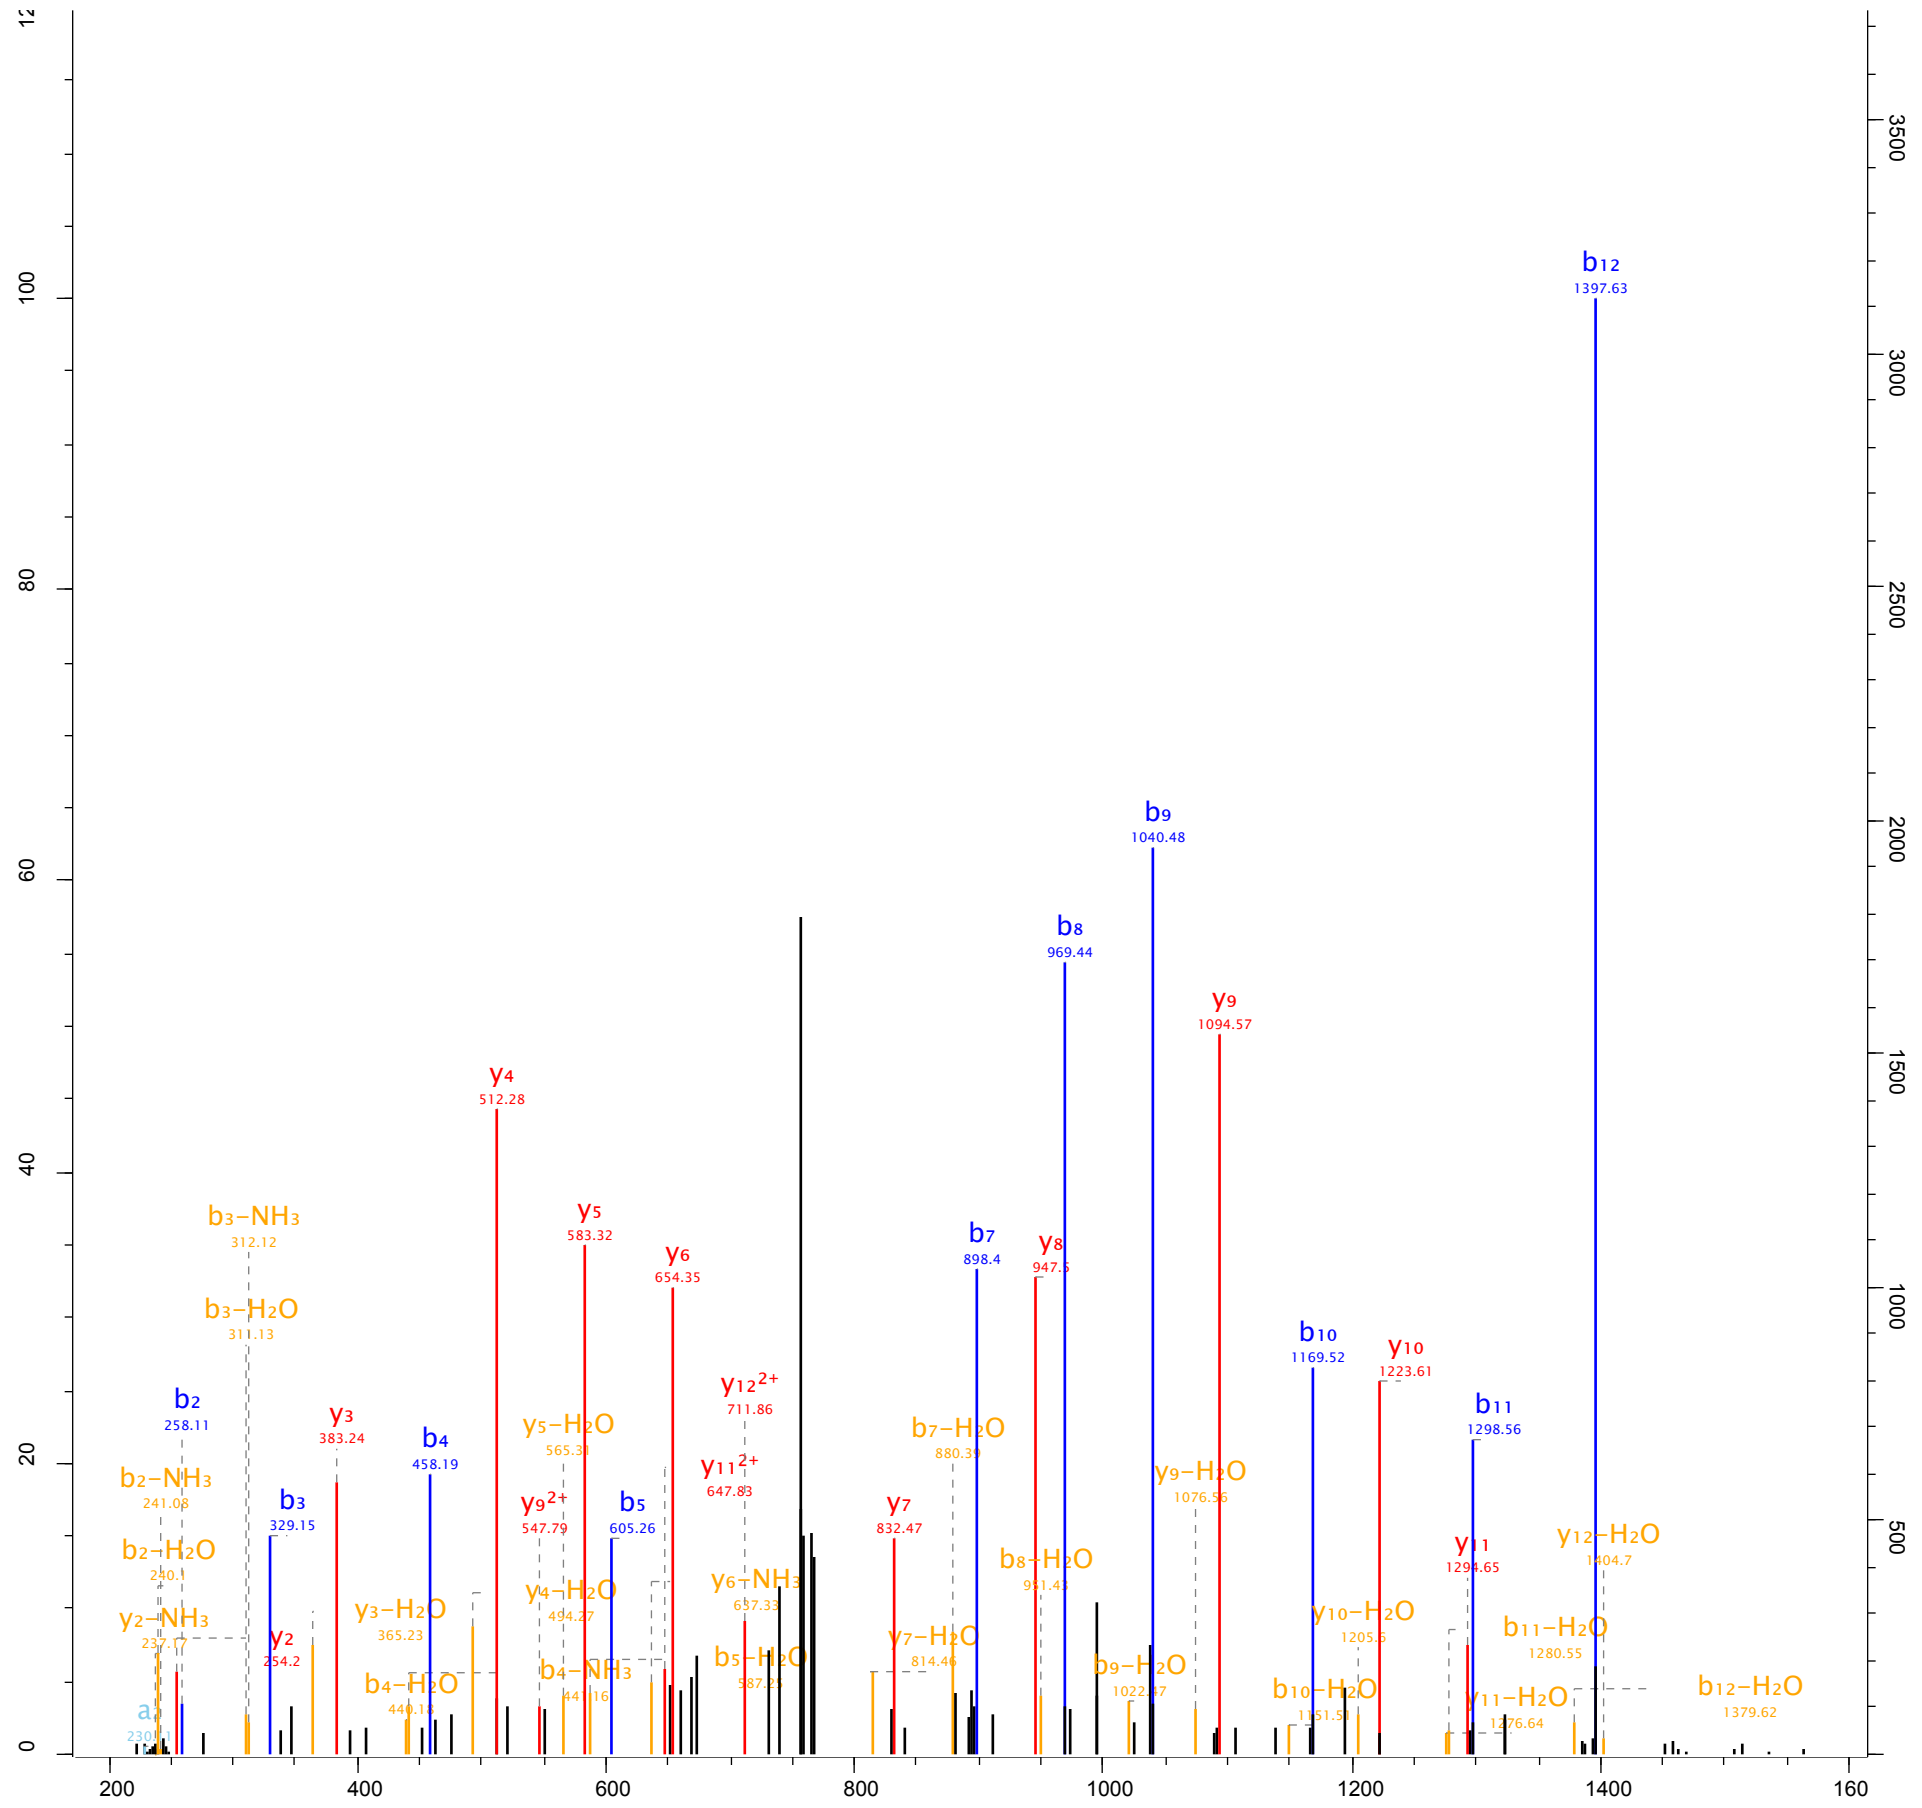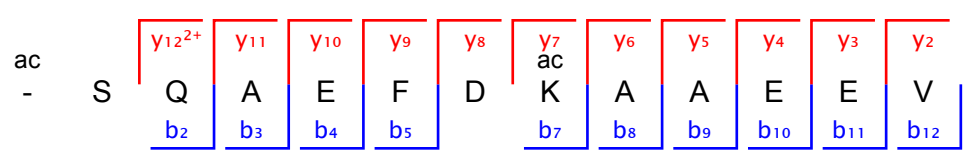

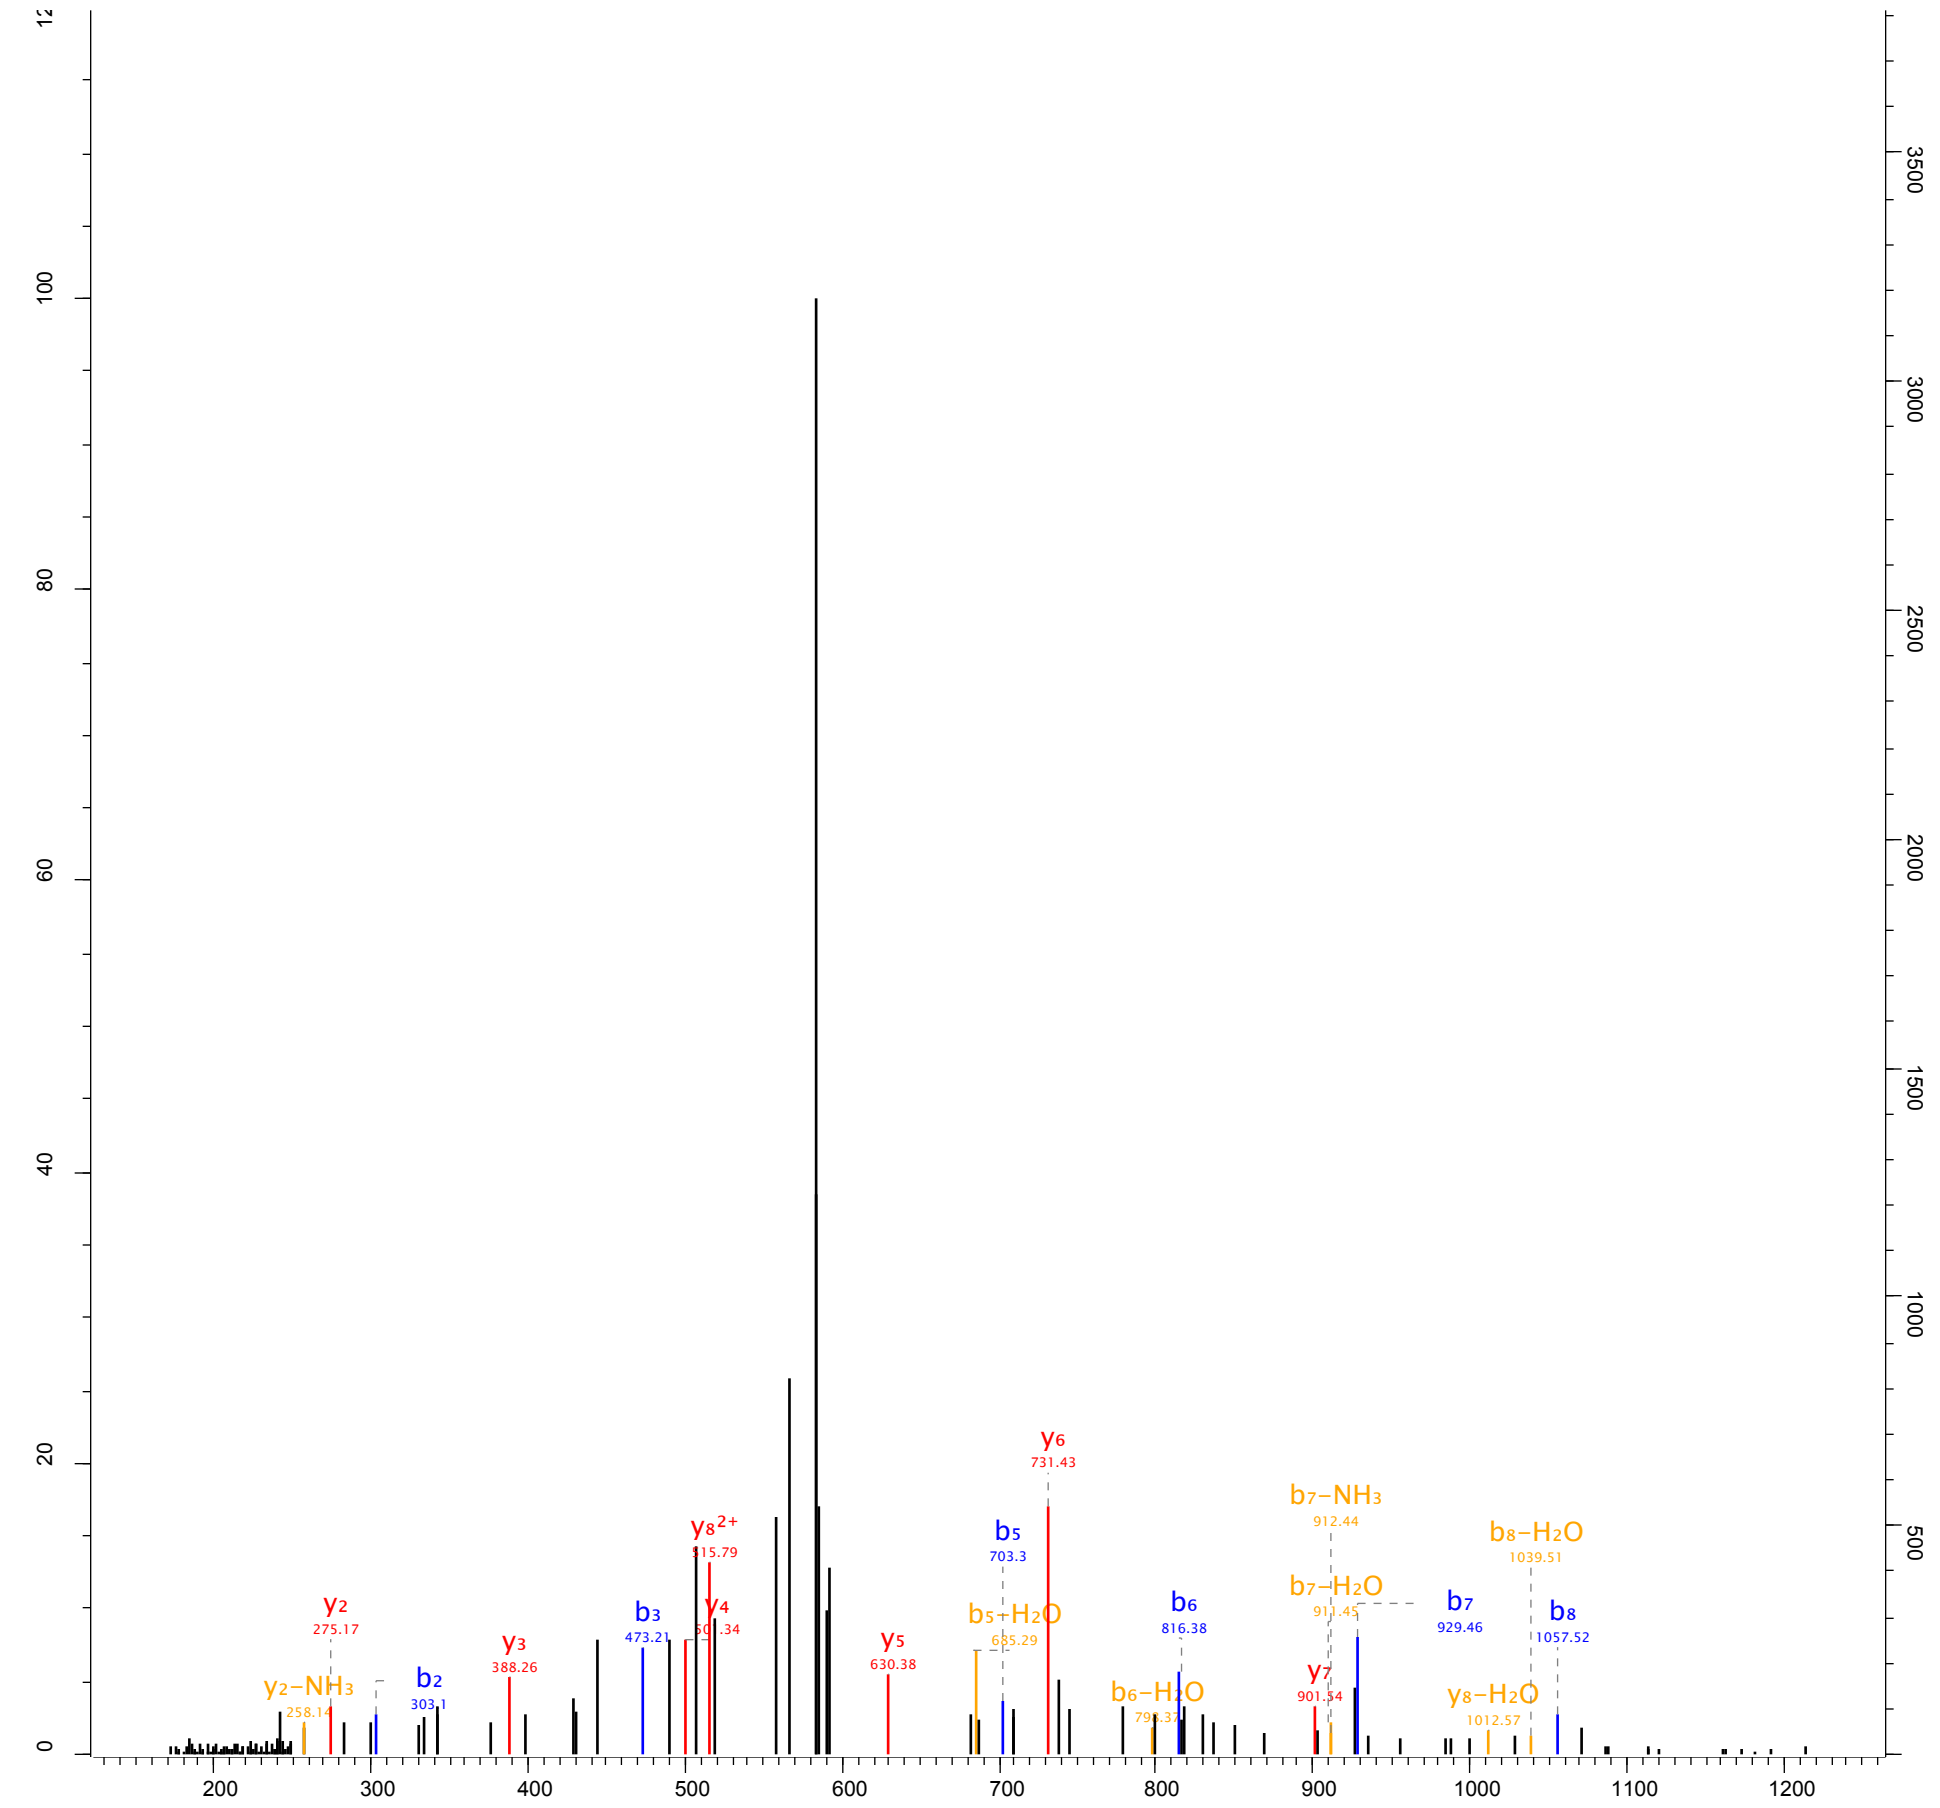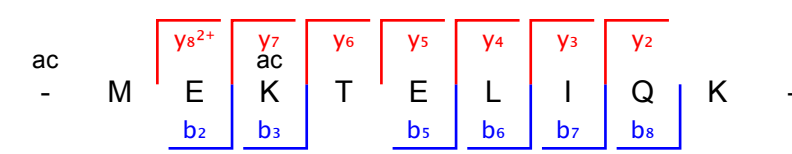

Raw file  
062513\_SCW\_II\_53\_1\_Vargas\_Enriched

Scan 18538 Method ITMS; CID Score 84.17 m/z 615.32 Gene names Ankfy1

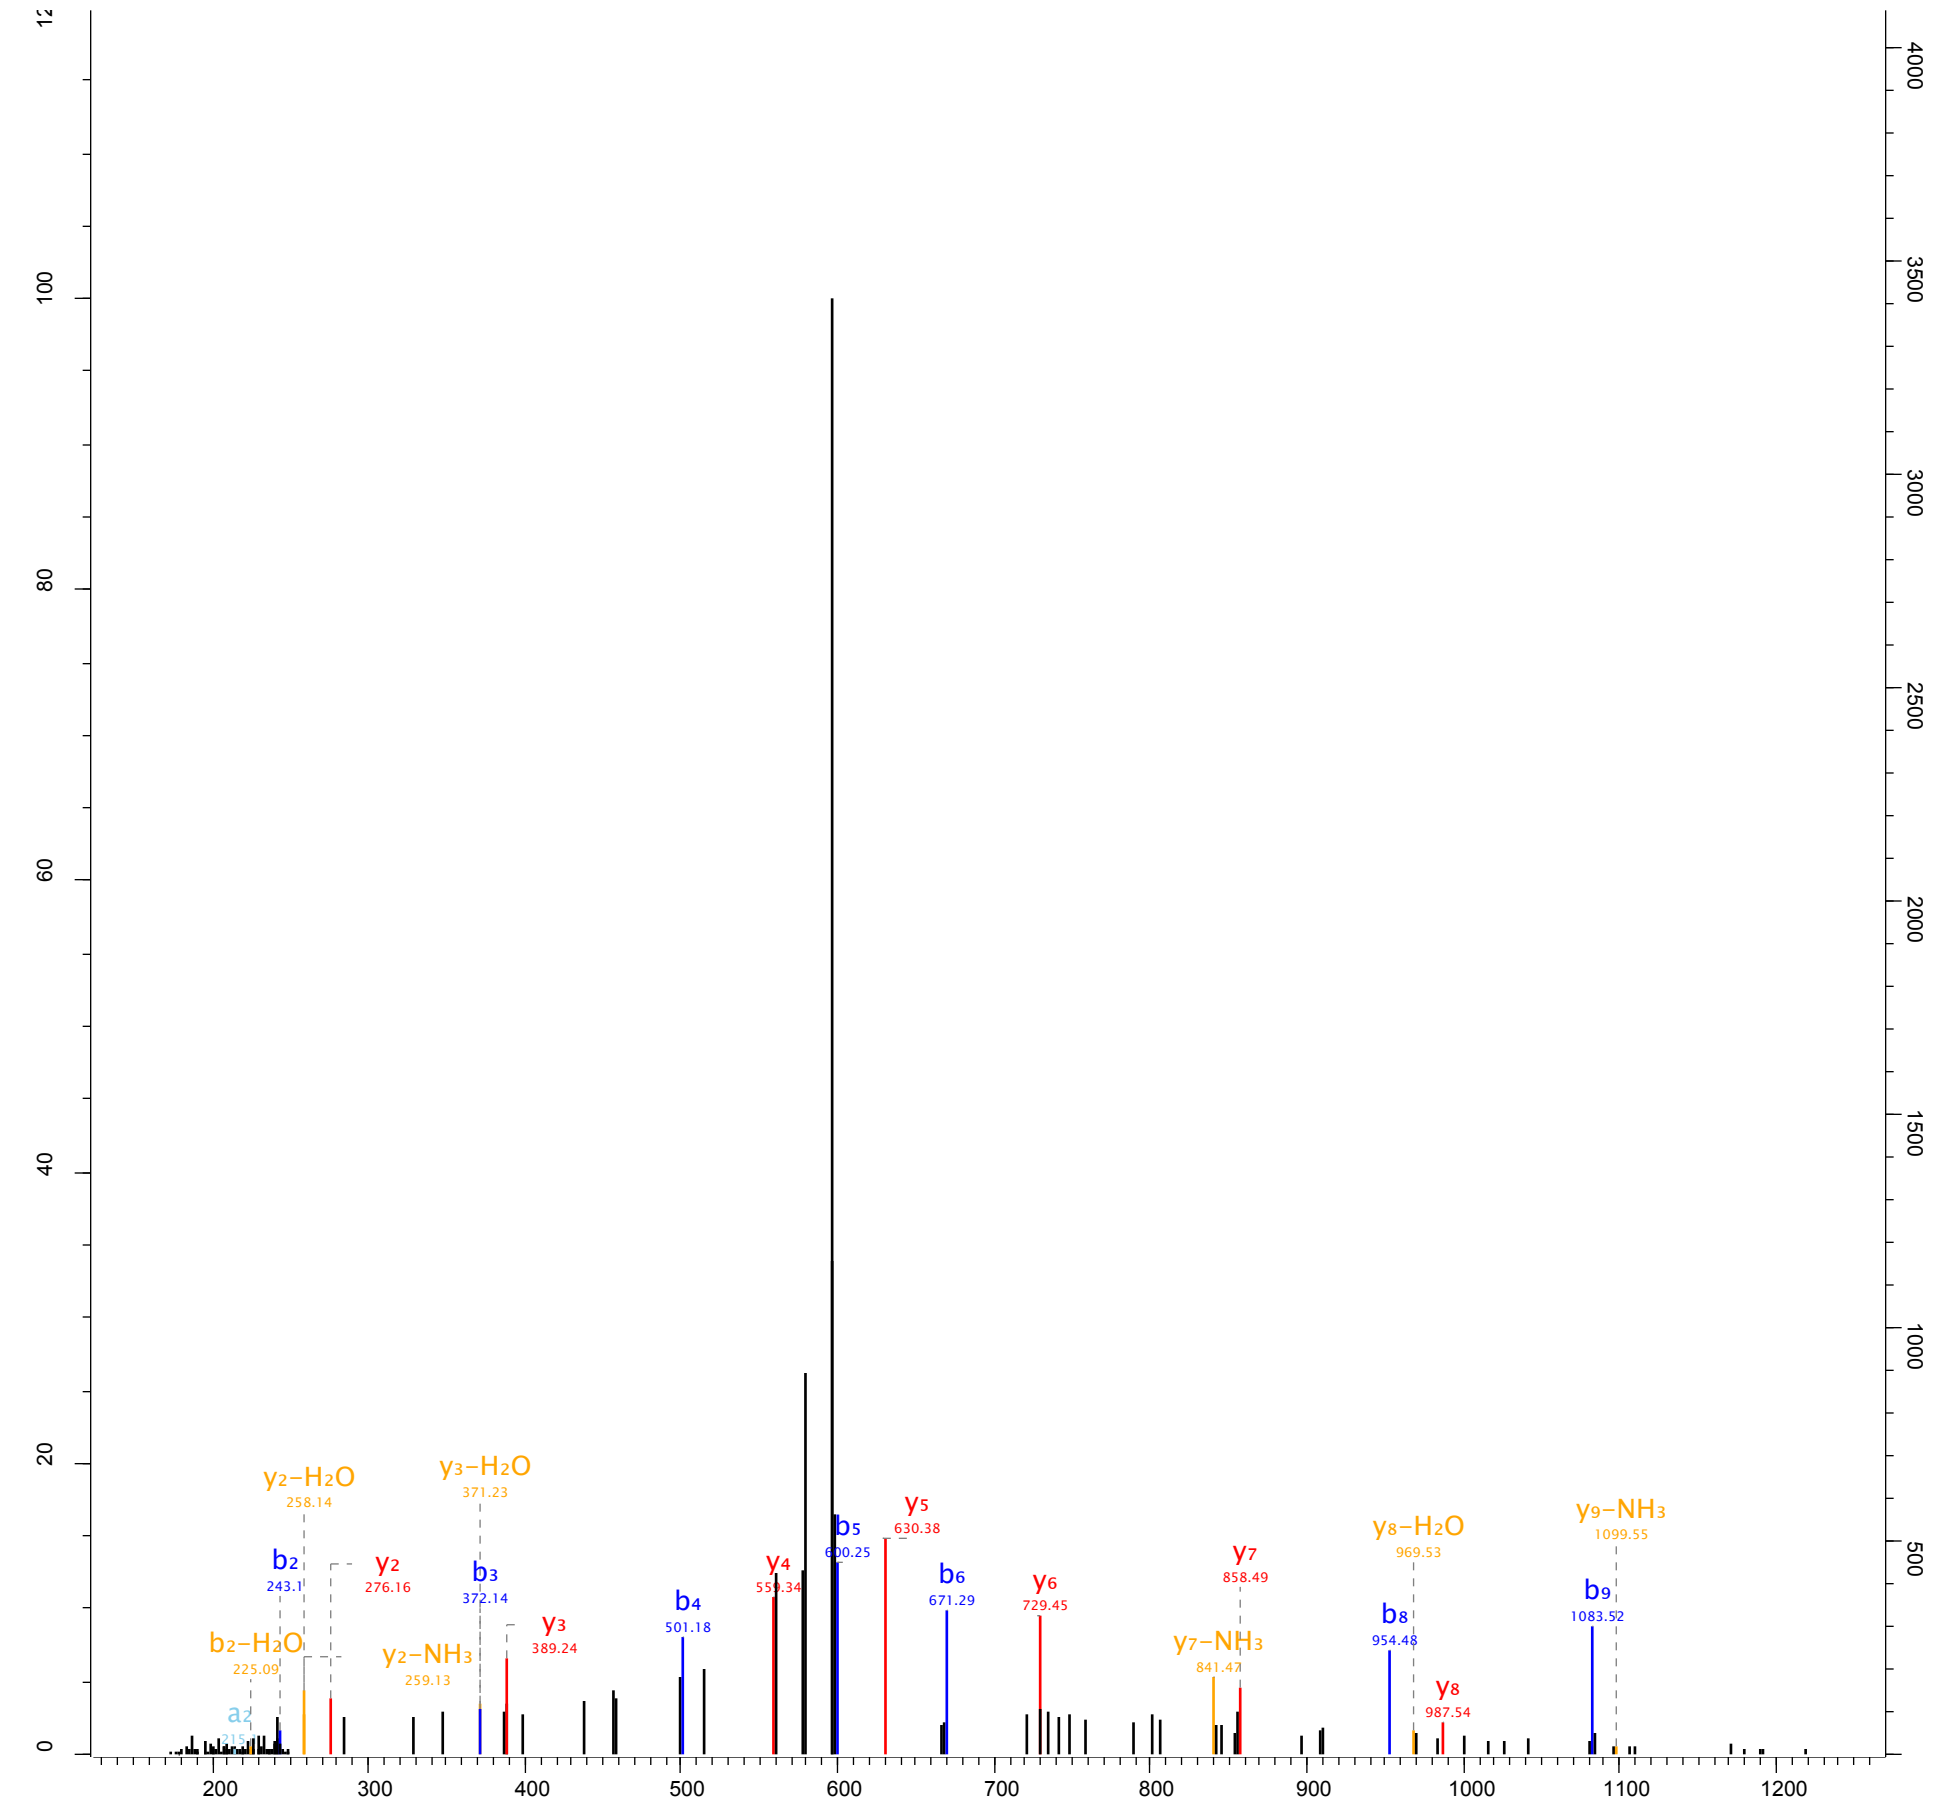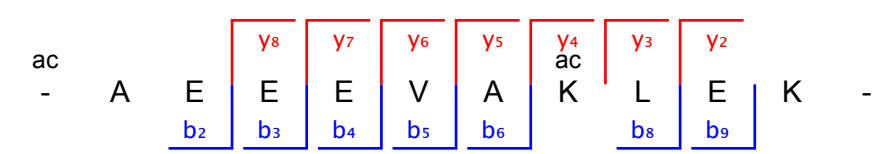

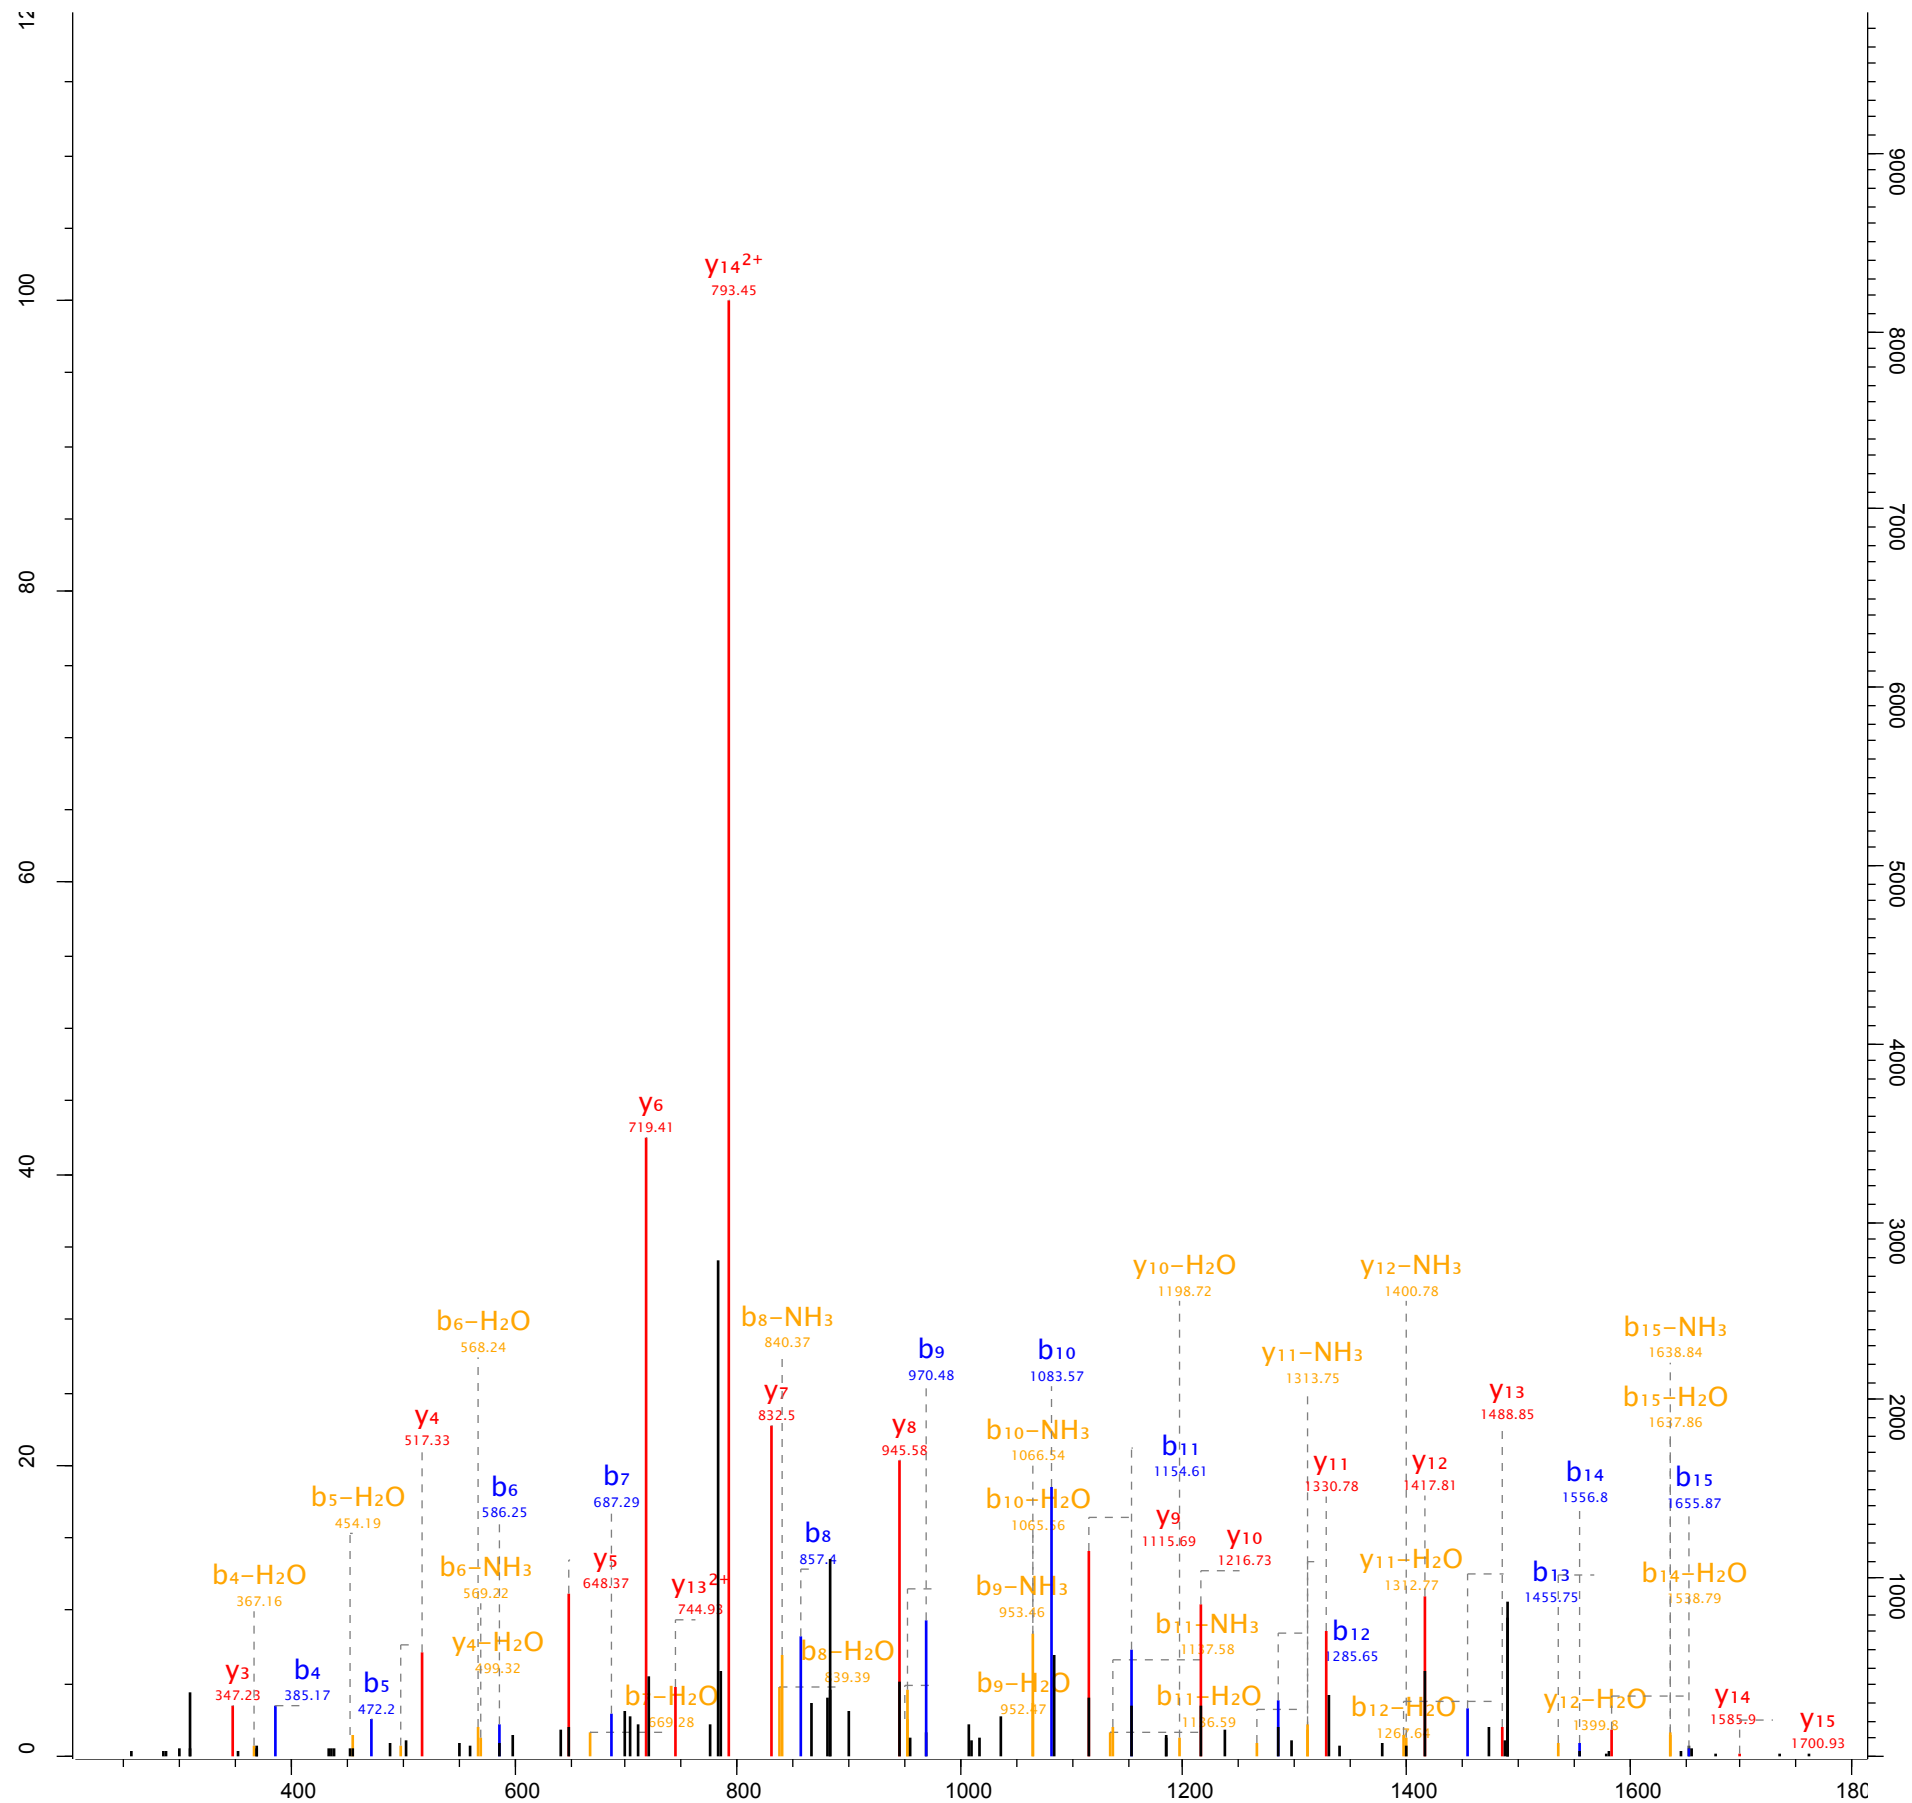

- T D P A S N T K L I A M K T V K -

y15
y14
y13
y12
y11
y10
y9
y8
y7
y6
y5
y4
y3

b4
b5
b6
b7
b8
b9
b10
b11
b12
b13
b14
b15

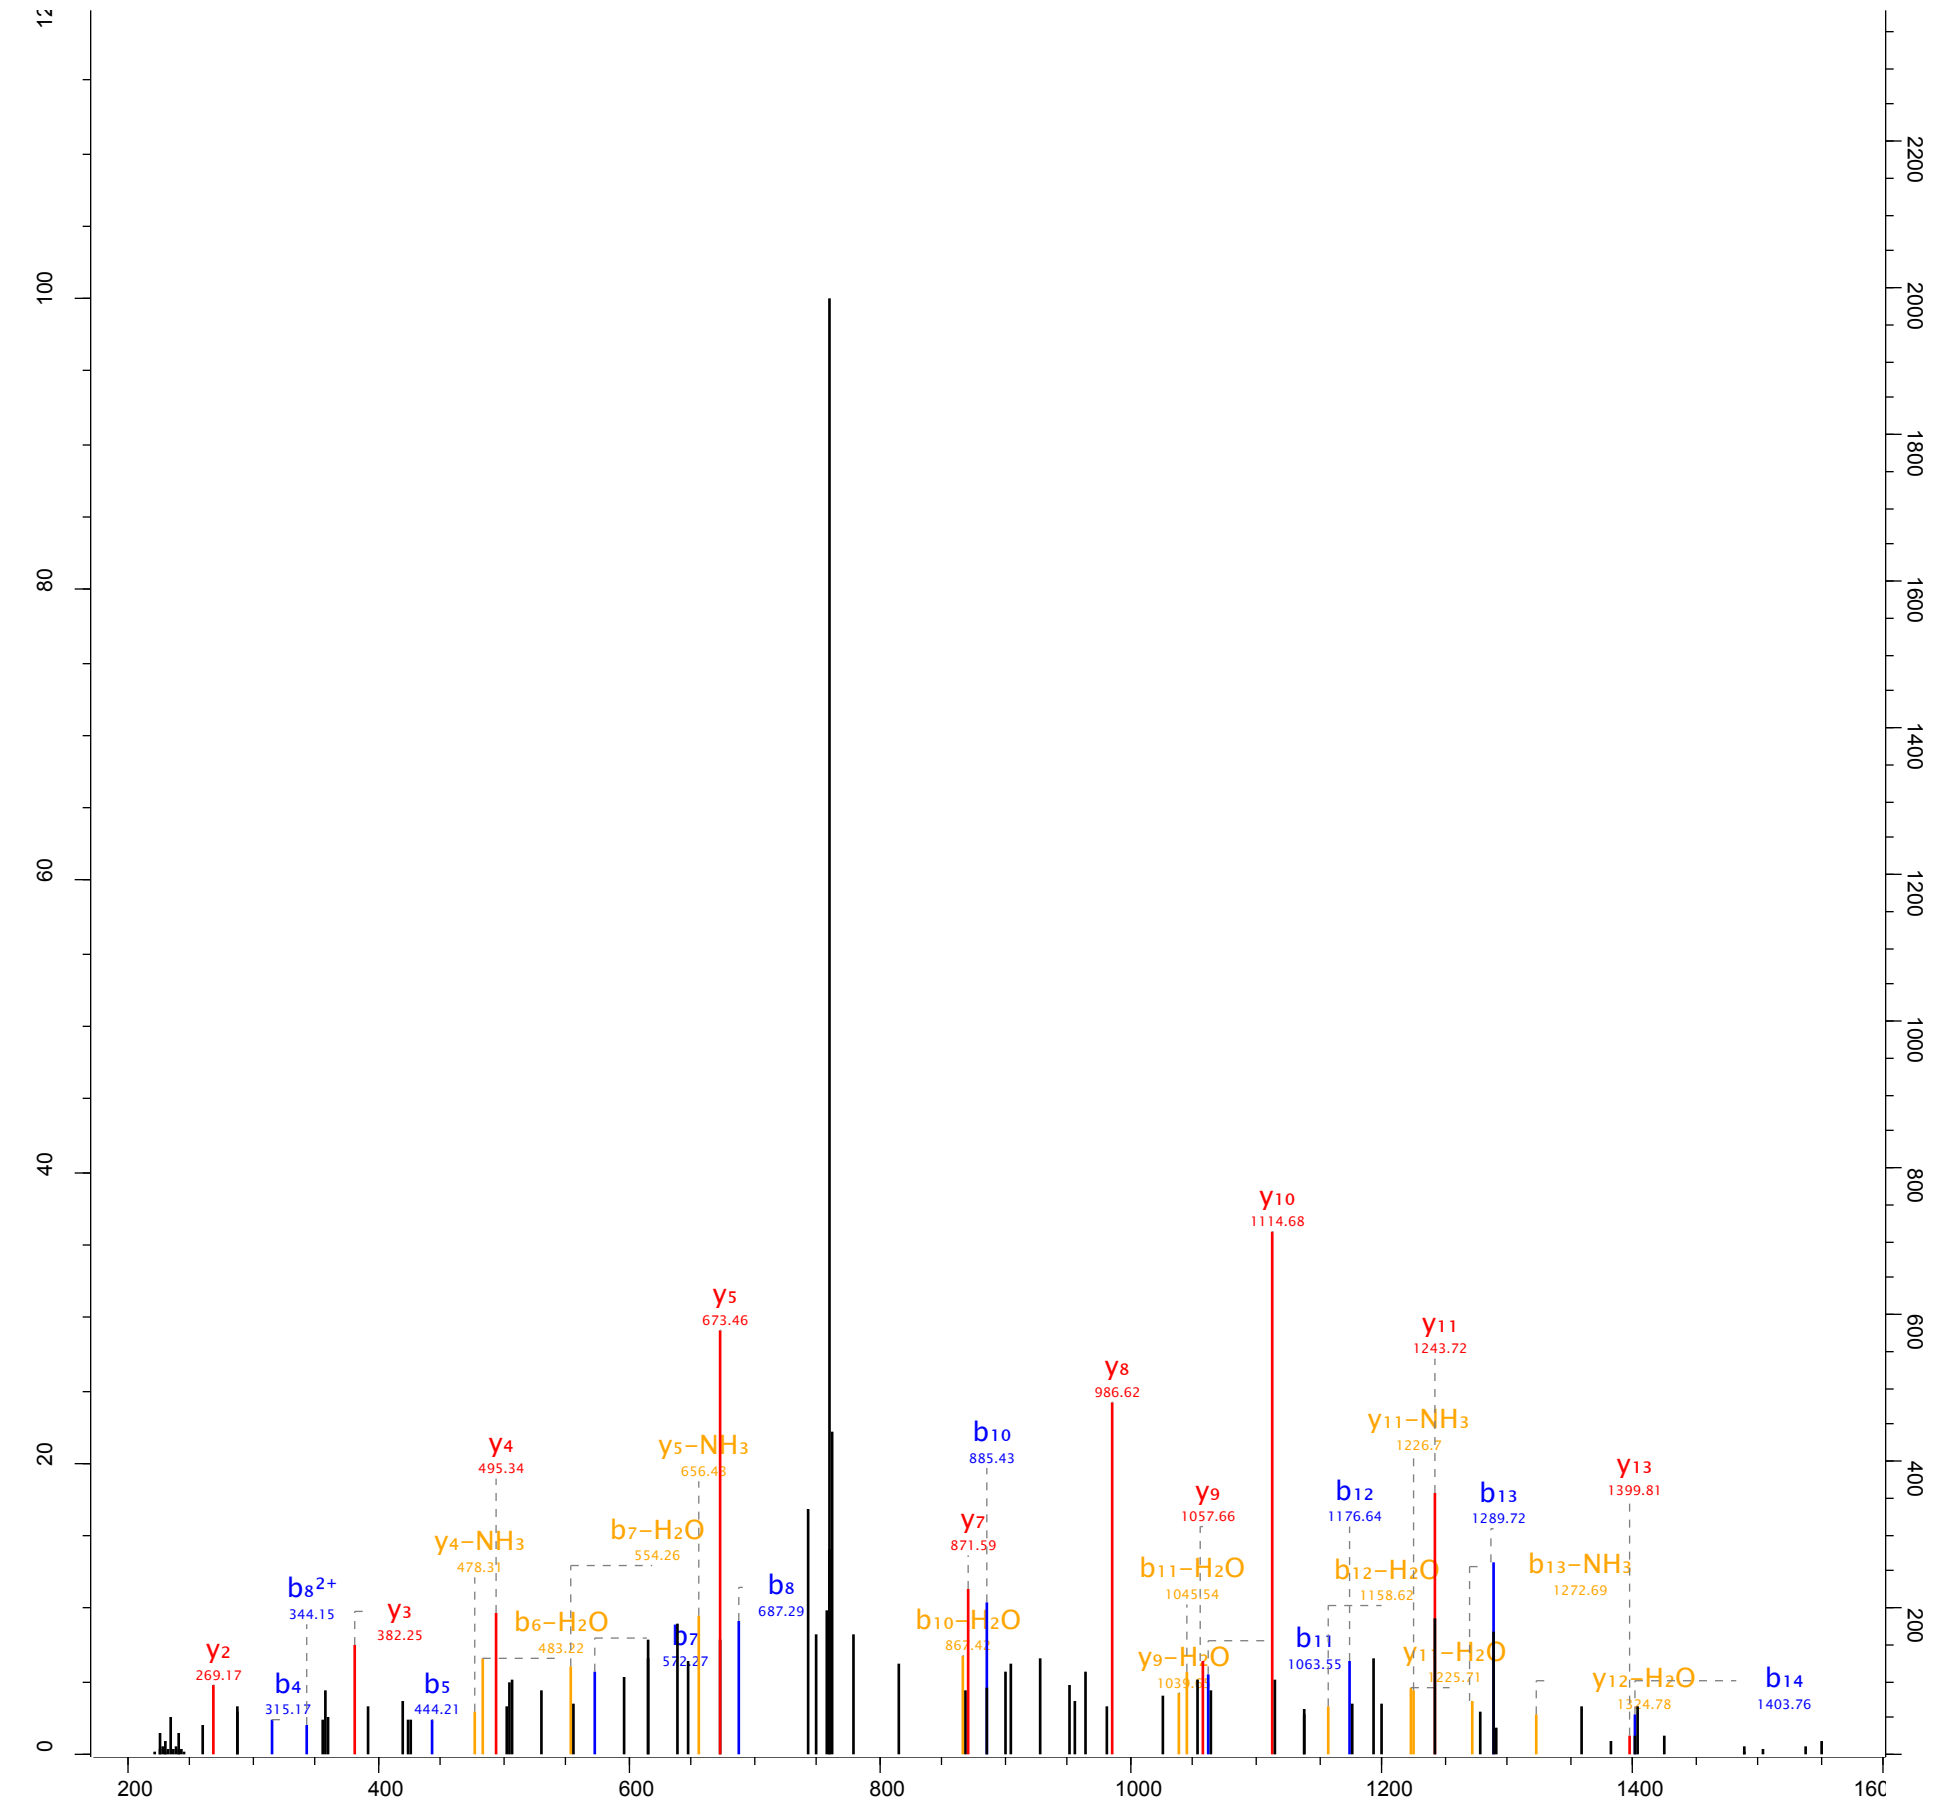

- A S G V E G A D V V K L L N K -

y<sub>13</sub>
y<sub>11</sub>
y<sub>10</sub>
y<sub>9</sub>
y<sub>8</sub>
y<sub>7</sub>
y<sub>5</sub>
y<sub>4</sub>
y<sub>3</sub>
y<sub>2</sub>

b<sub>4</sub>
b<sub>5</sub>
b<sub>7</sub>
b<sub>8</sub>
b<sub>10</sub>
b<sub>11</sub>
b<sub>12</sub>
b<sub>13</sub>
b<sub>14</sub>

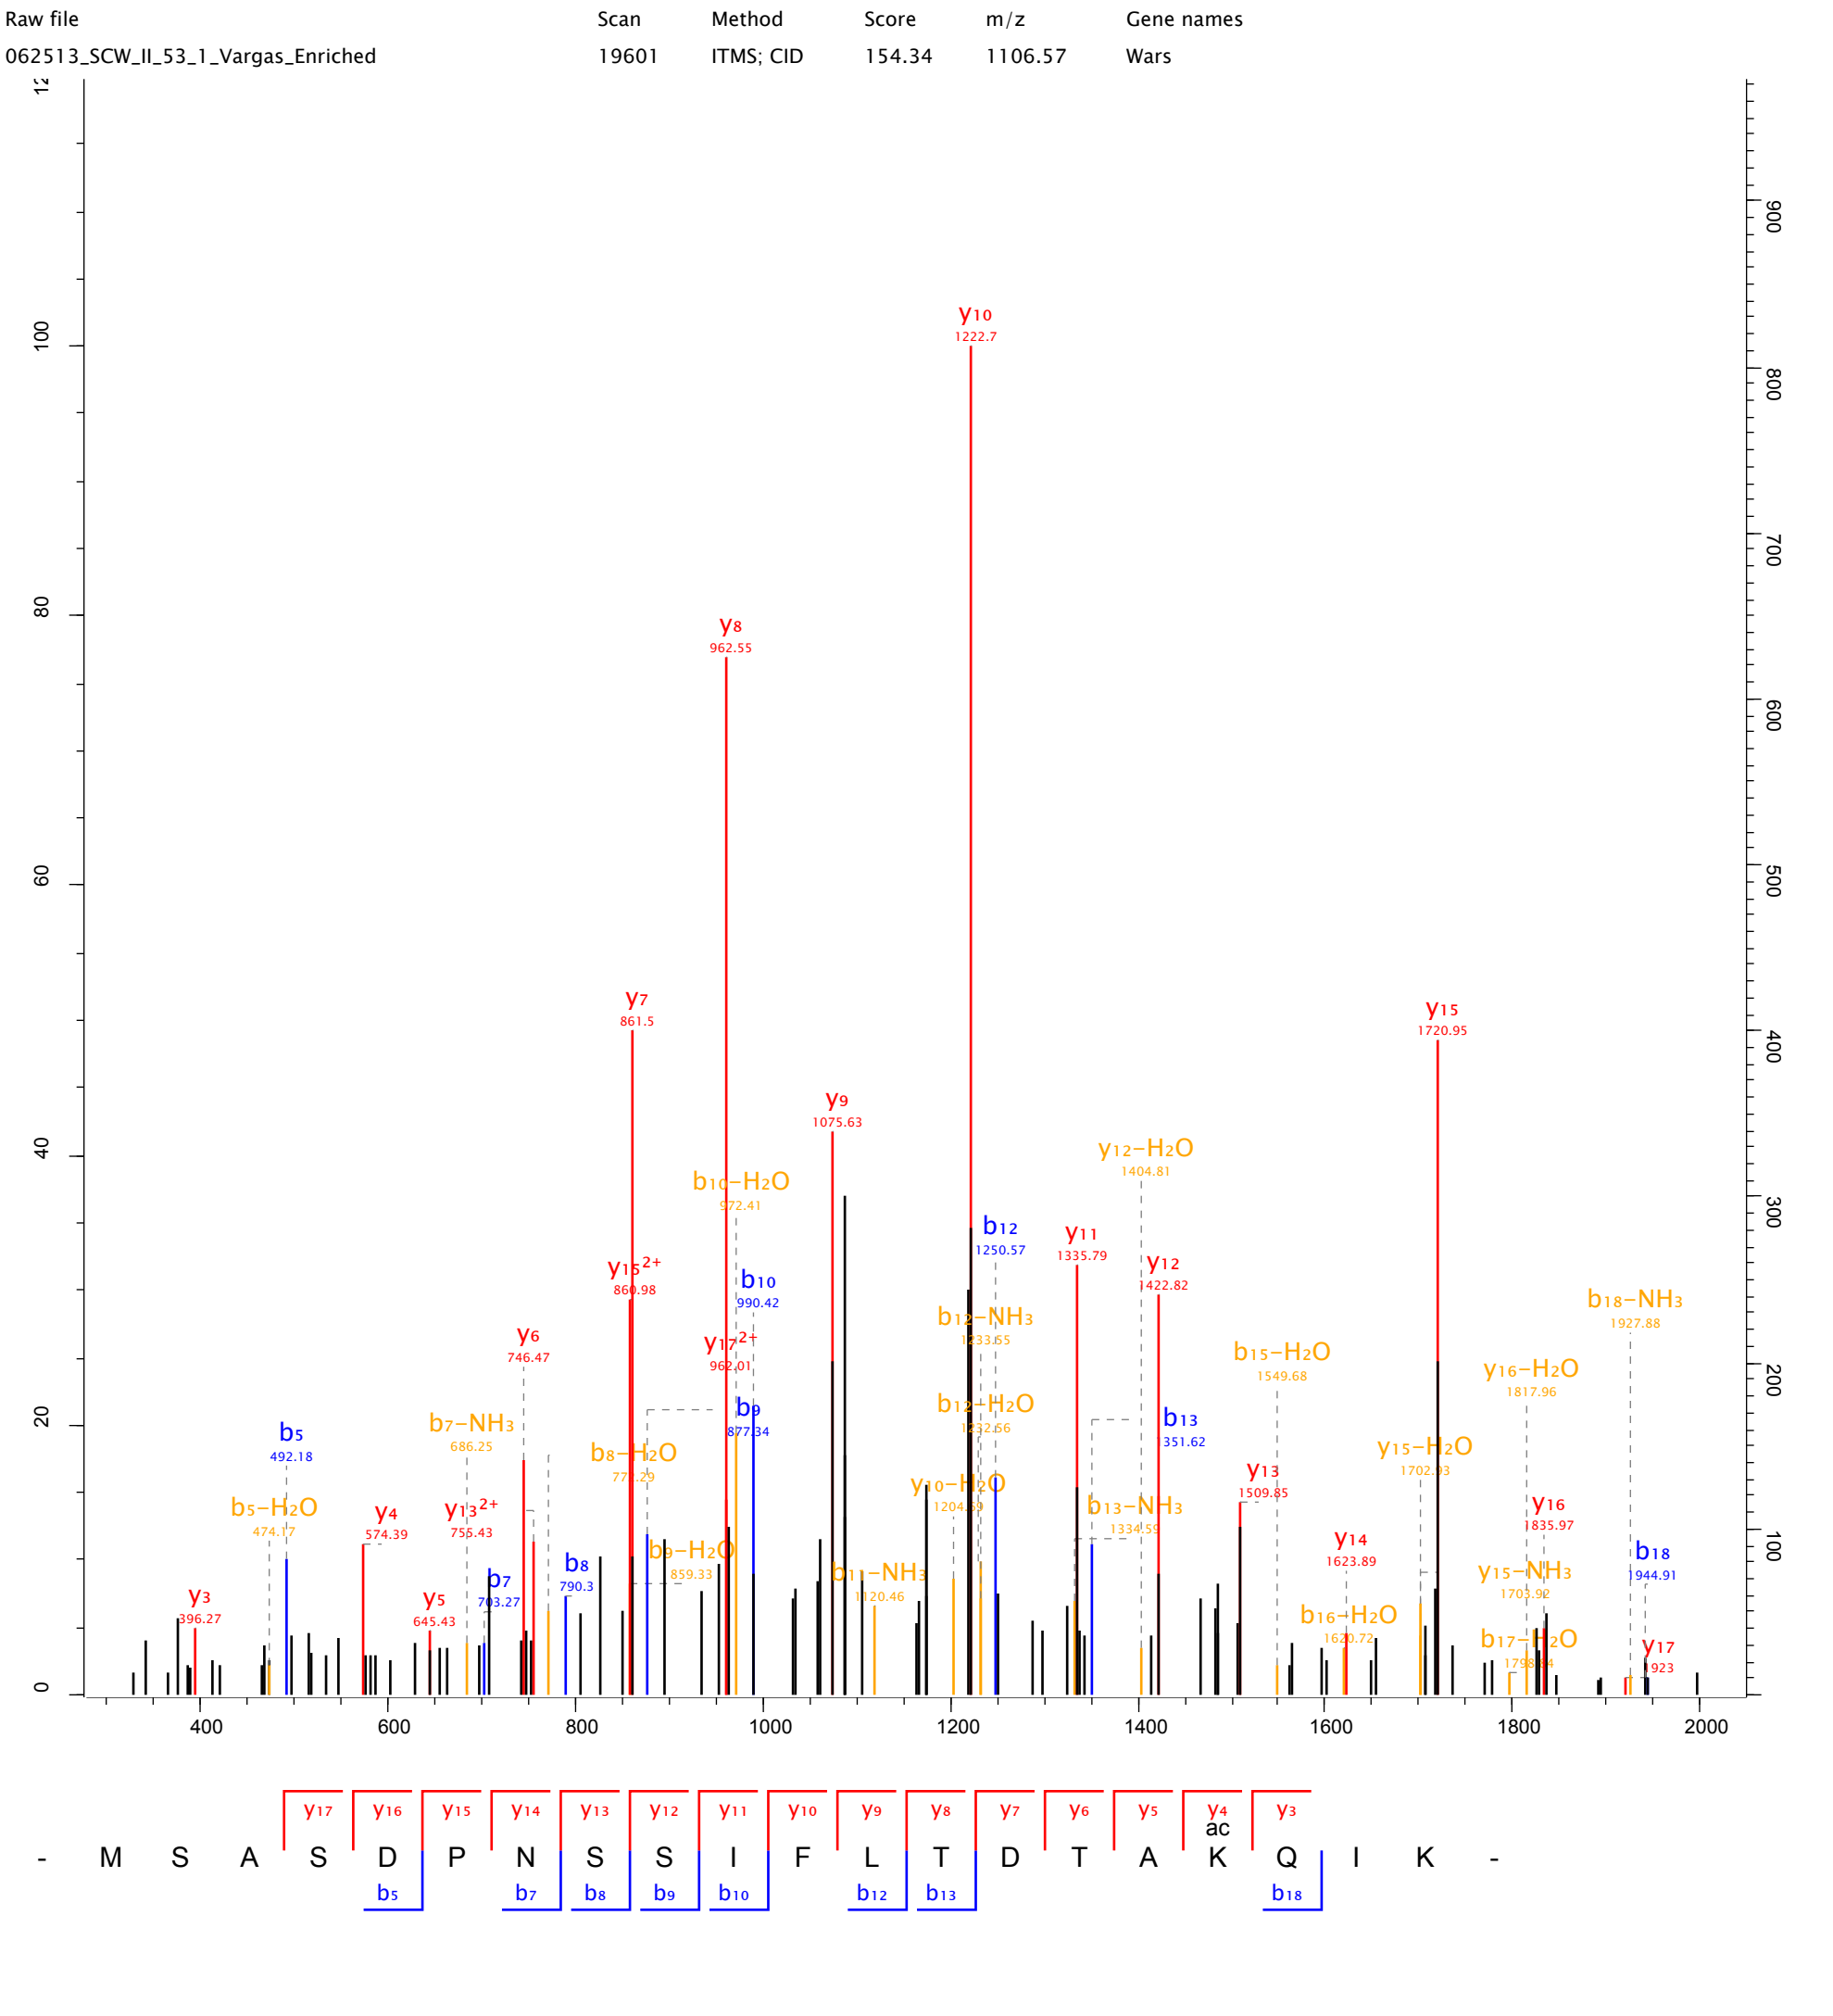

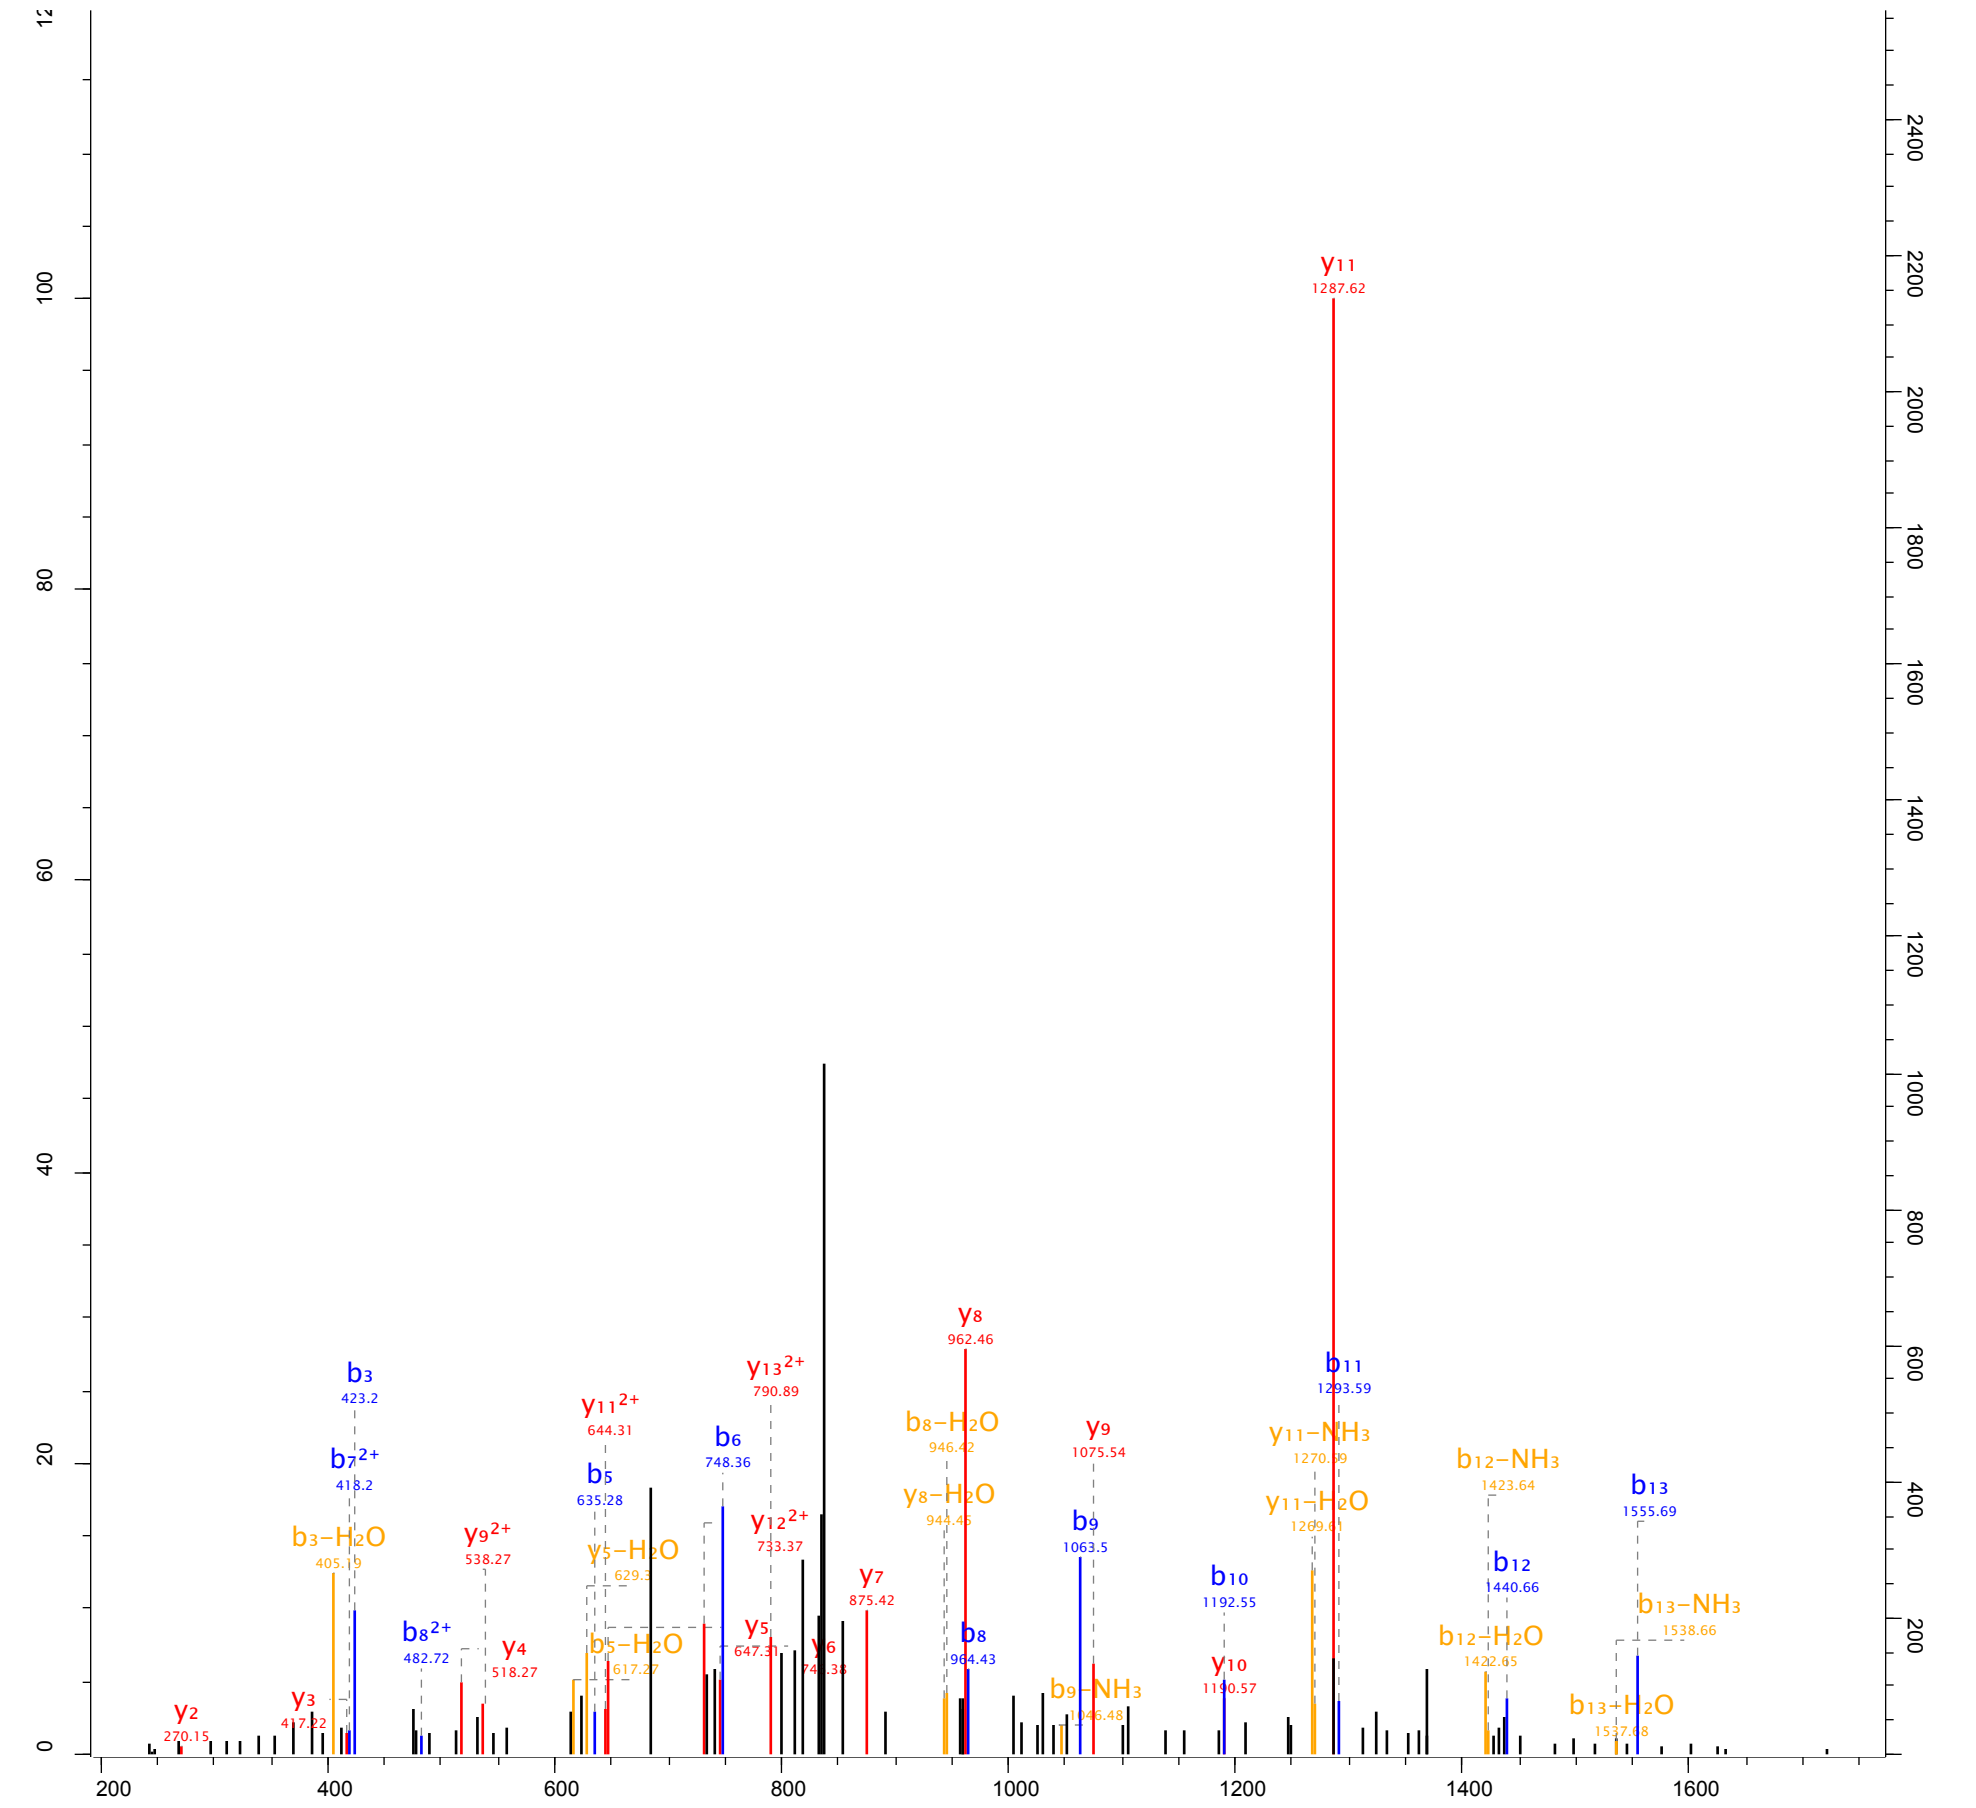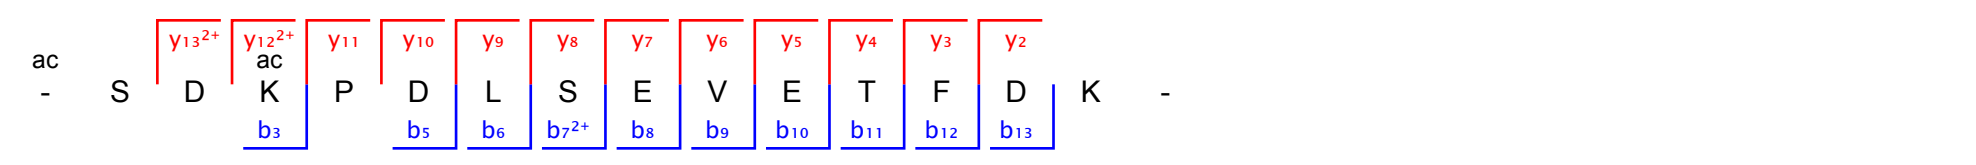

Raw file  
062513\_SCW\_II\_53\_1\_Vargas\_Enriched

Scan 20301 Method ITMS; CID Score 206.67 m/z 831.87 Gene names Rbbp7

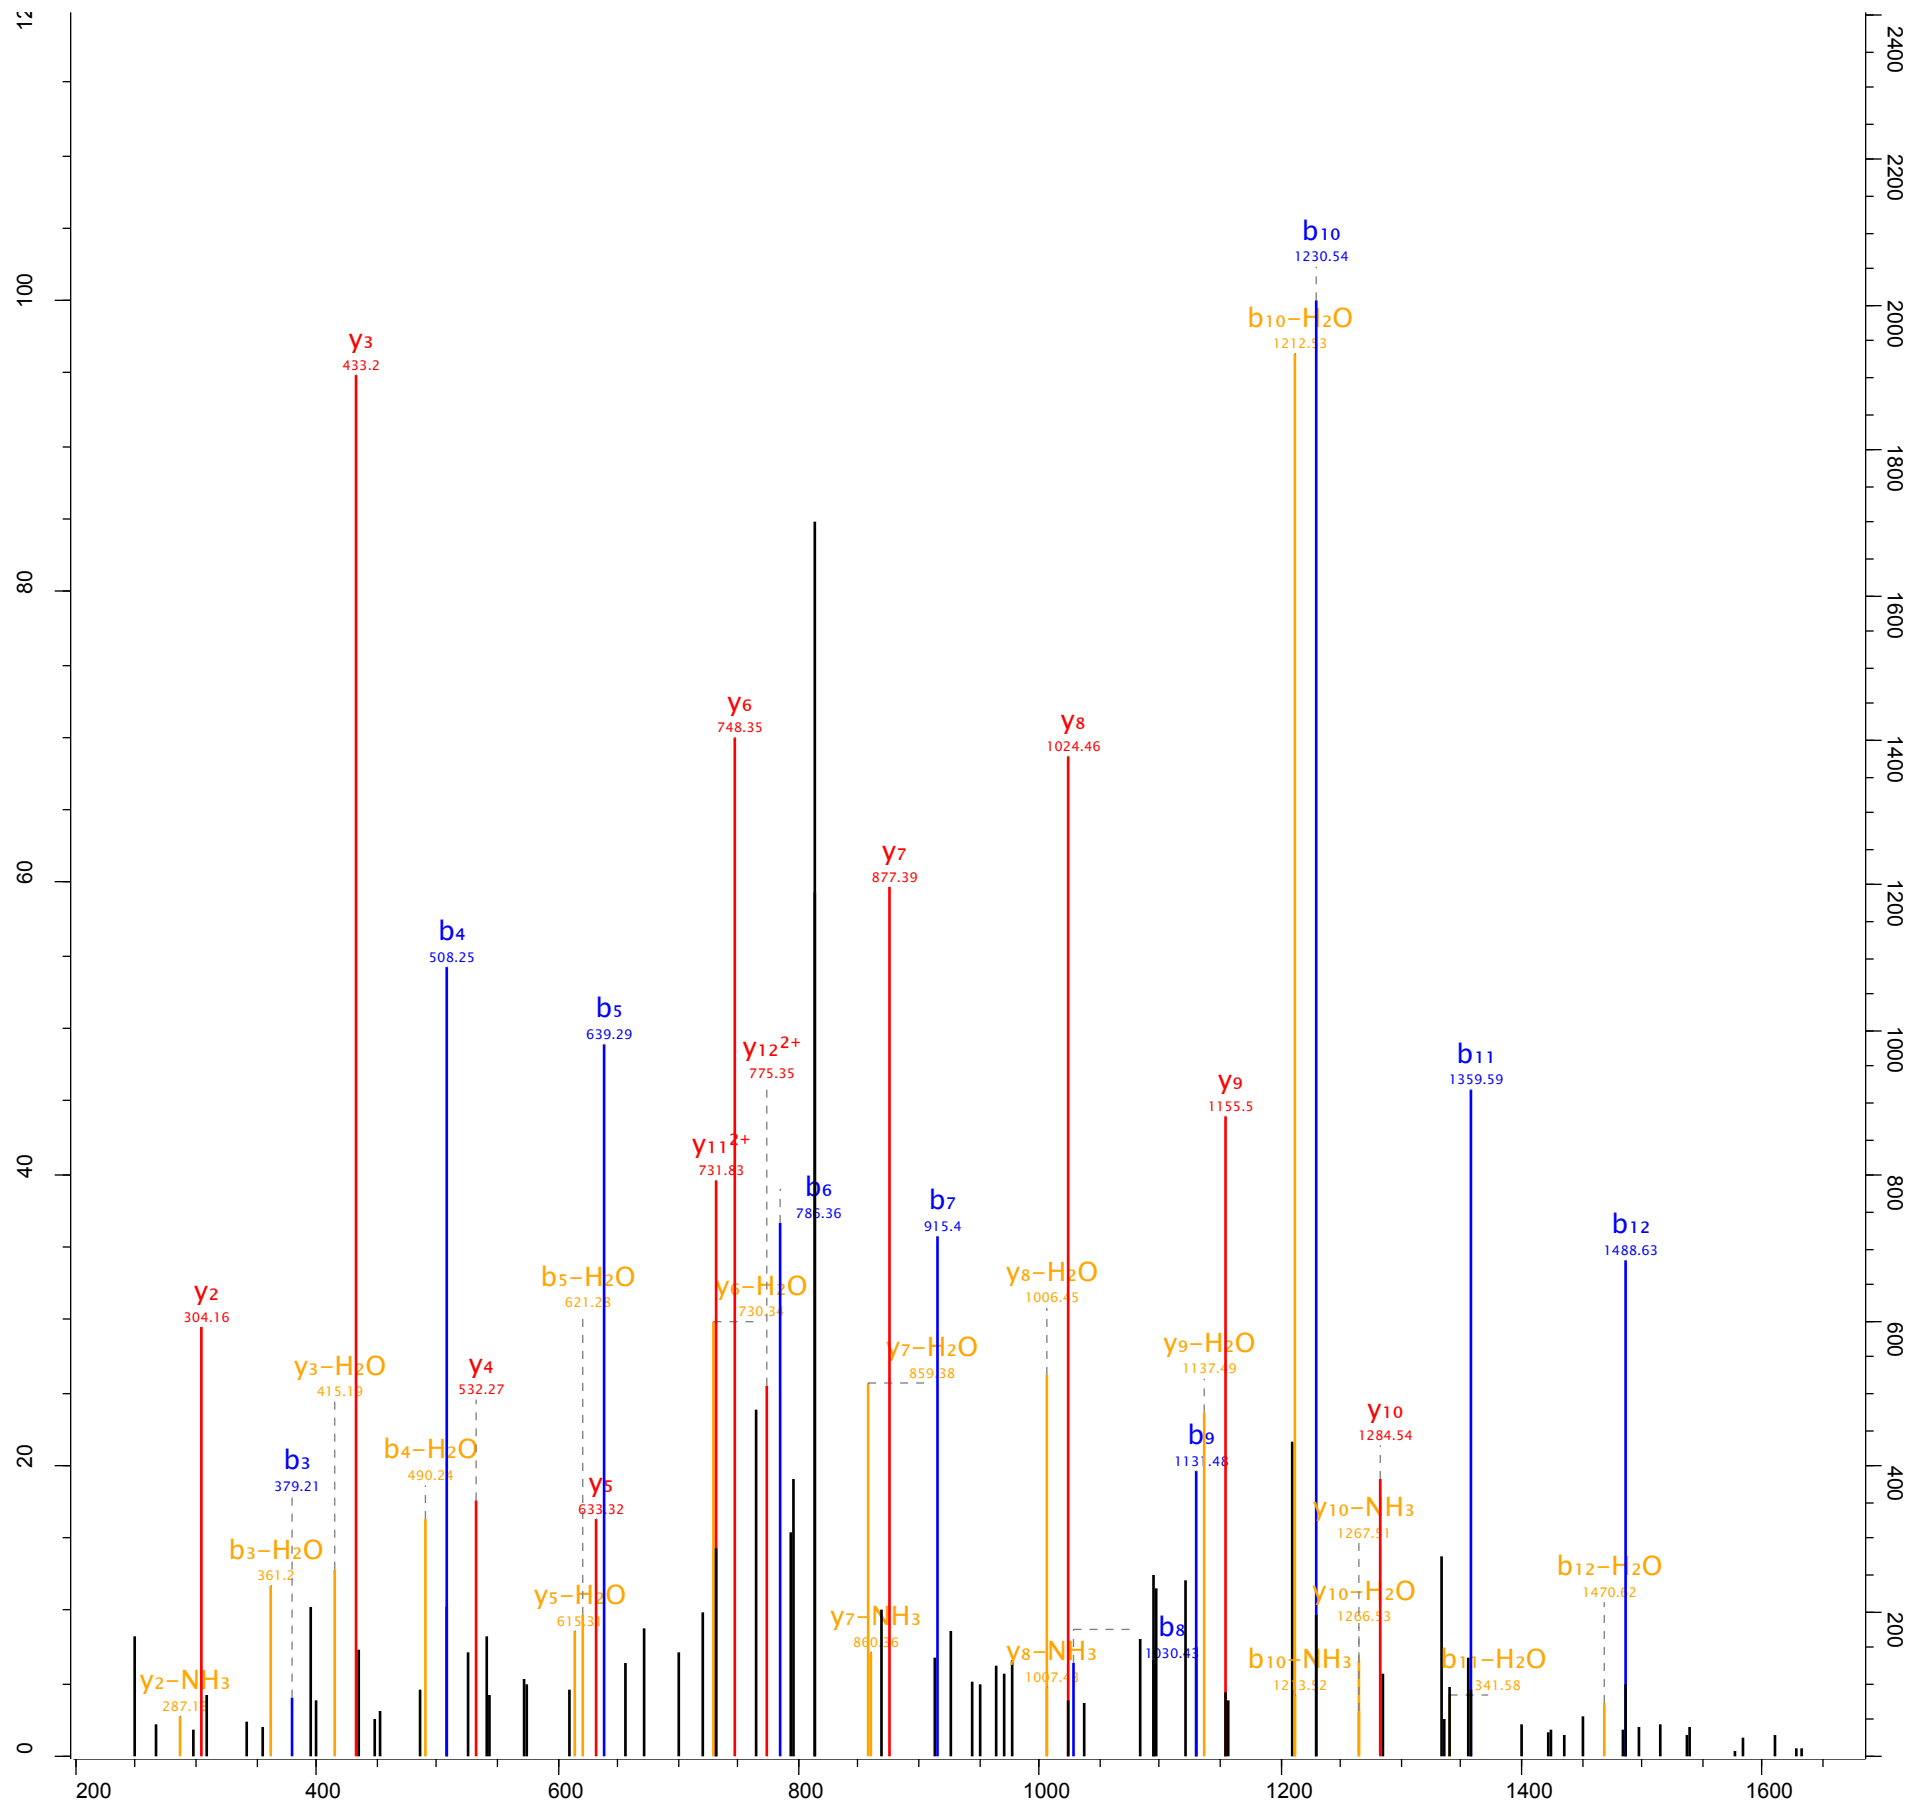

ac  
- A S K E M F E D T V E E R -

Fragmentation mapping:  
- y12<sup>2+</sup> (S) - y11<sup>2+</sup> (K) - y10 (E) - y9 (M) - y8 (F) - y7 (E) - y6 (D) - y5 (T) - y4 (V) - y3 (E) - y2 (E)  
- b3 (K) - b4 (E) - b5 (M) - b6 (F) - b7 (E) - b8 (D) - b9 (T) - b10 (V) - b11 (E) - b12 (E)



Raw file  
062513\_SCW\_II\_53\_1\_Vargas\_Enriched

Scan 20333 Method ITMS; CID Score 178.52 m/z 1003.56 Gene names Myl6;Myl6b

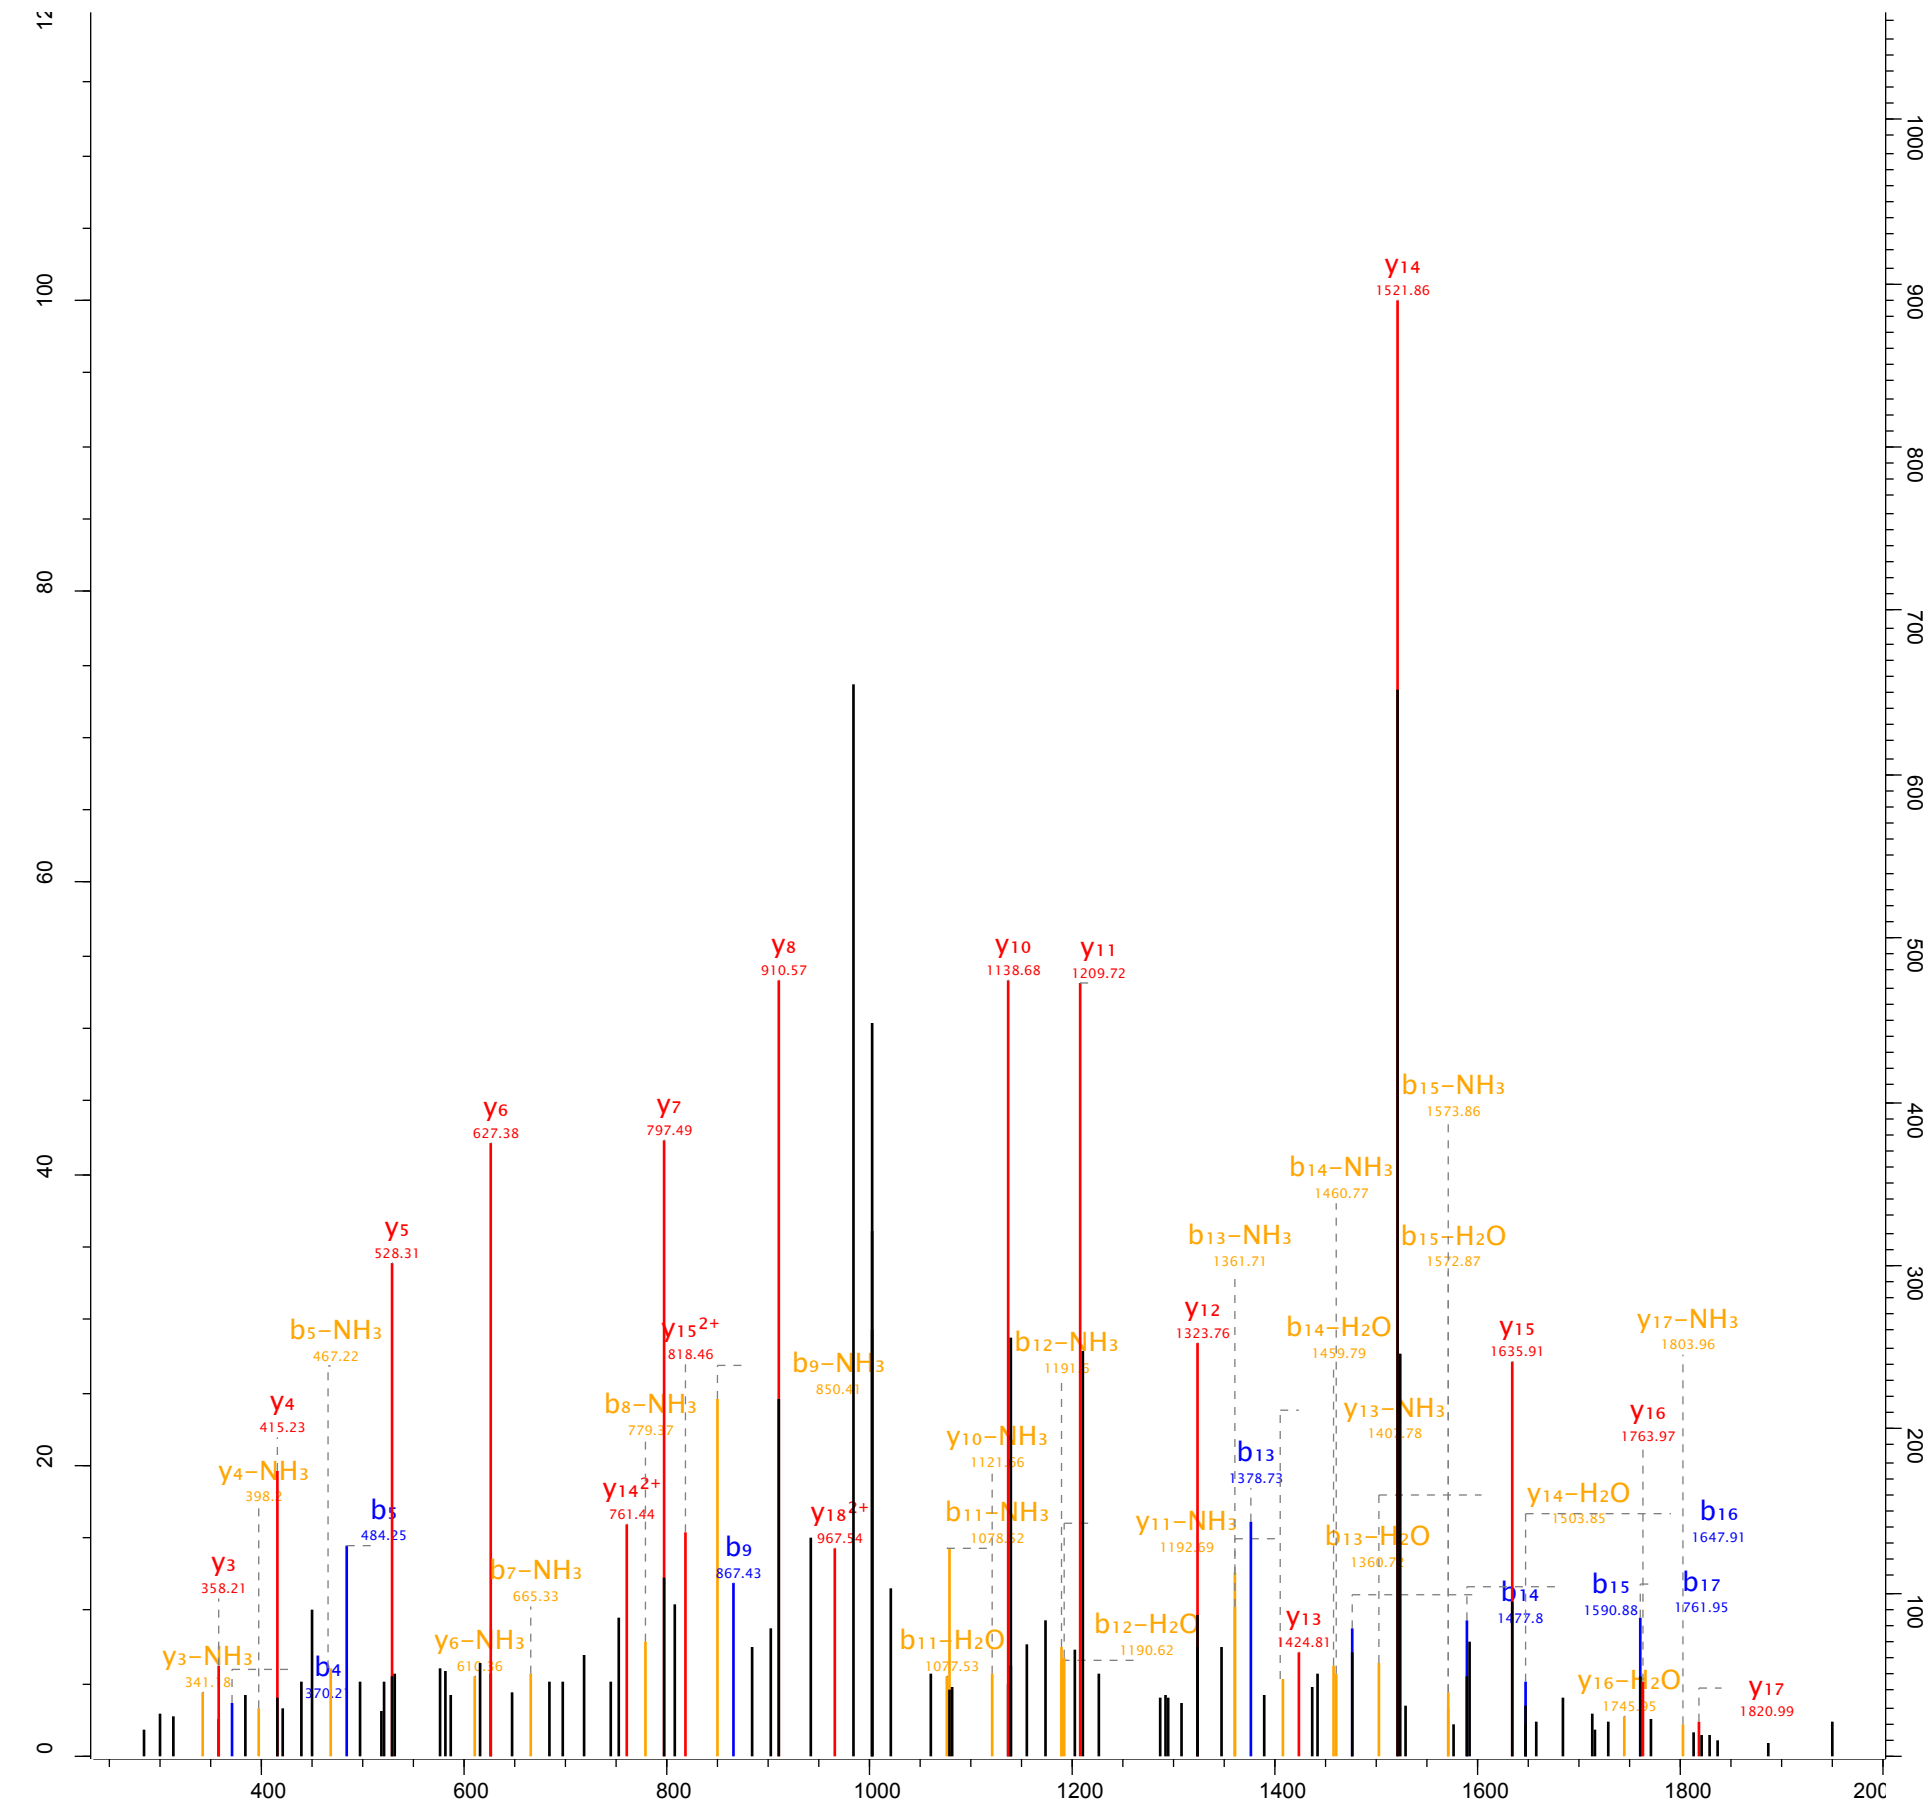

- A L G Q N P T N A E V L K V L G N P K -

Annotations: y18<sup>2+</sup>, y17, y16, y15, y14, y13, y12, y11, y10, y8, y7, y6, y5, y4, y3, b4, b5, b9, b13, b14, b15, b16, b17

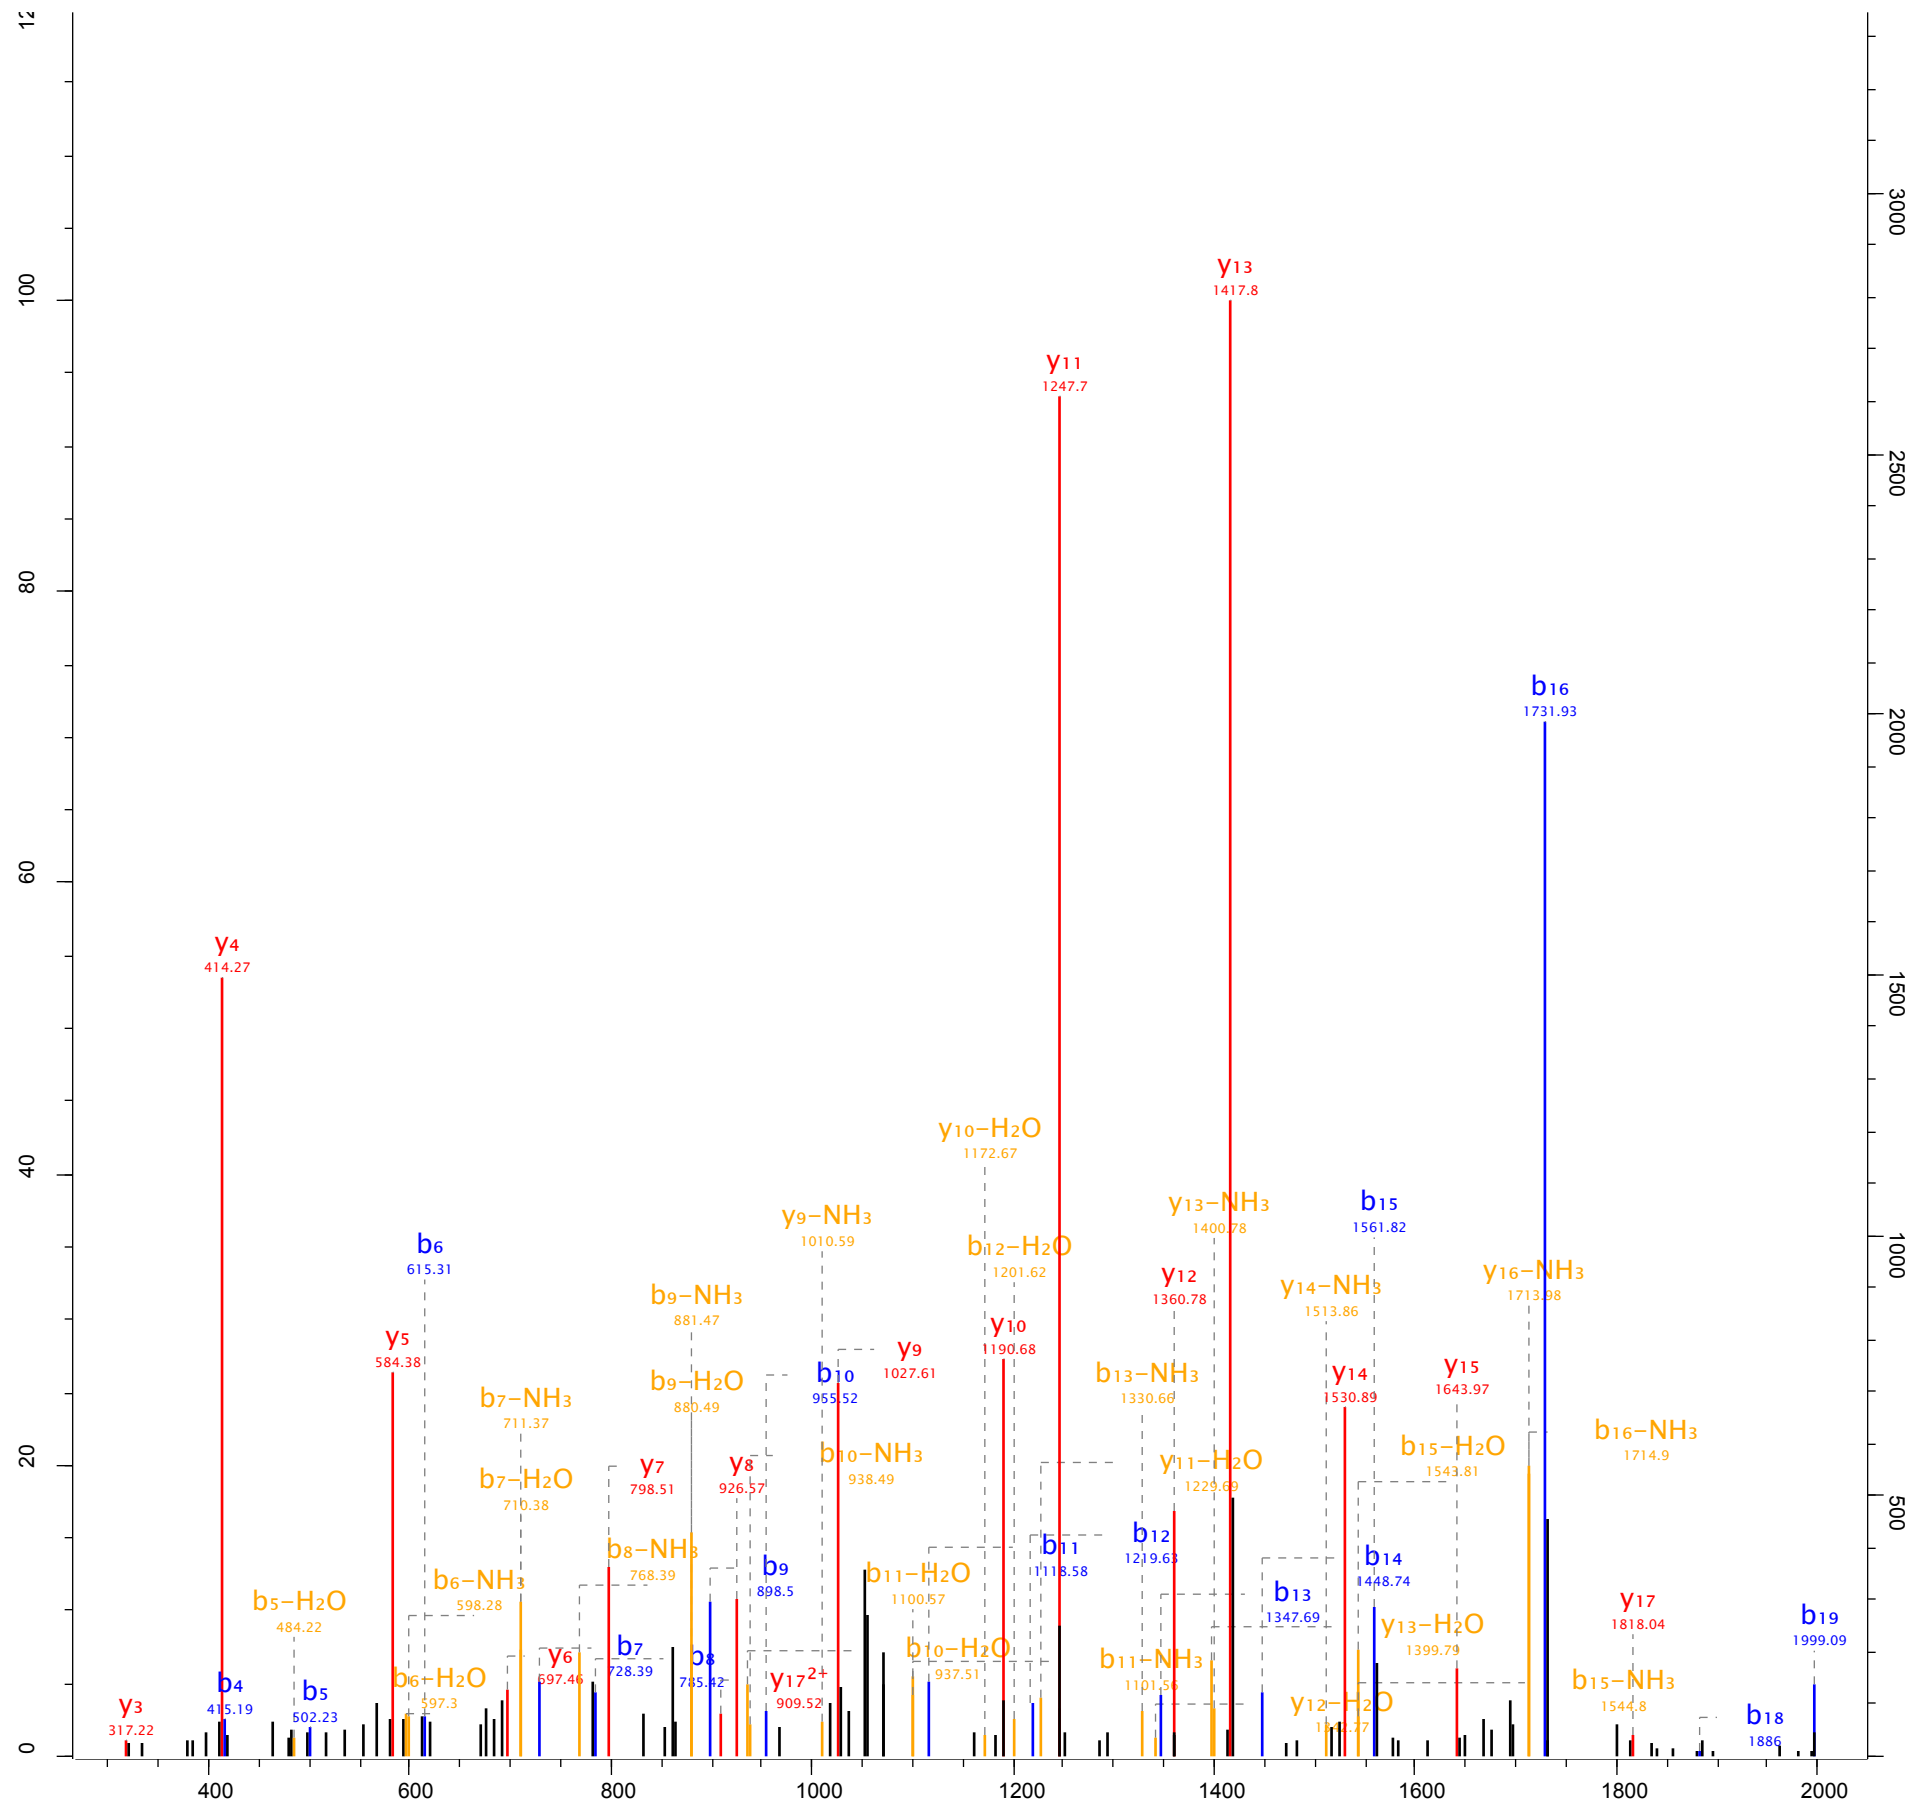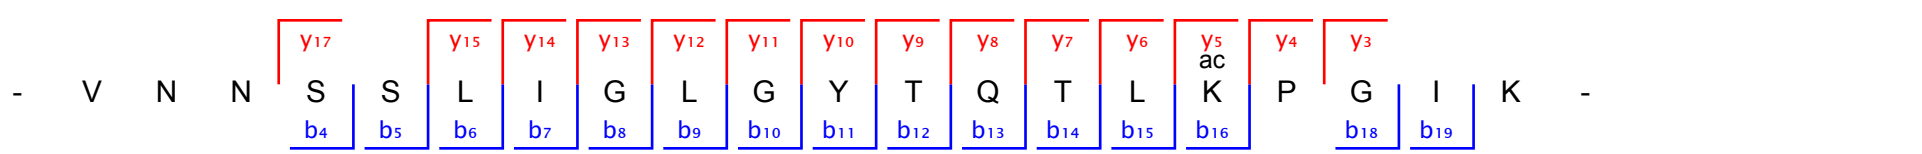

062513\_SCW\_II\_53\_1\_Vargas\_Enriched

20591

ITMS; CID

111.86

626.81

Cdk1

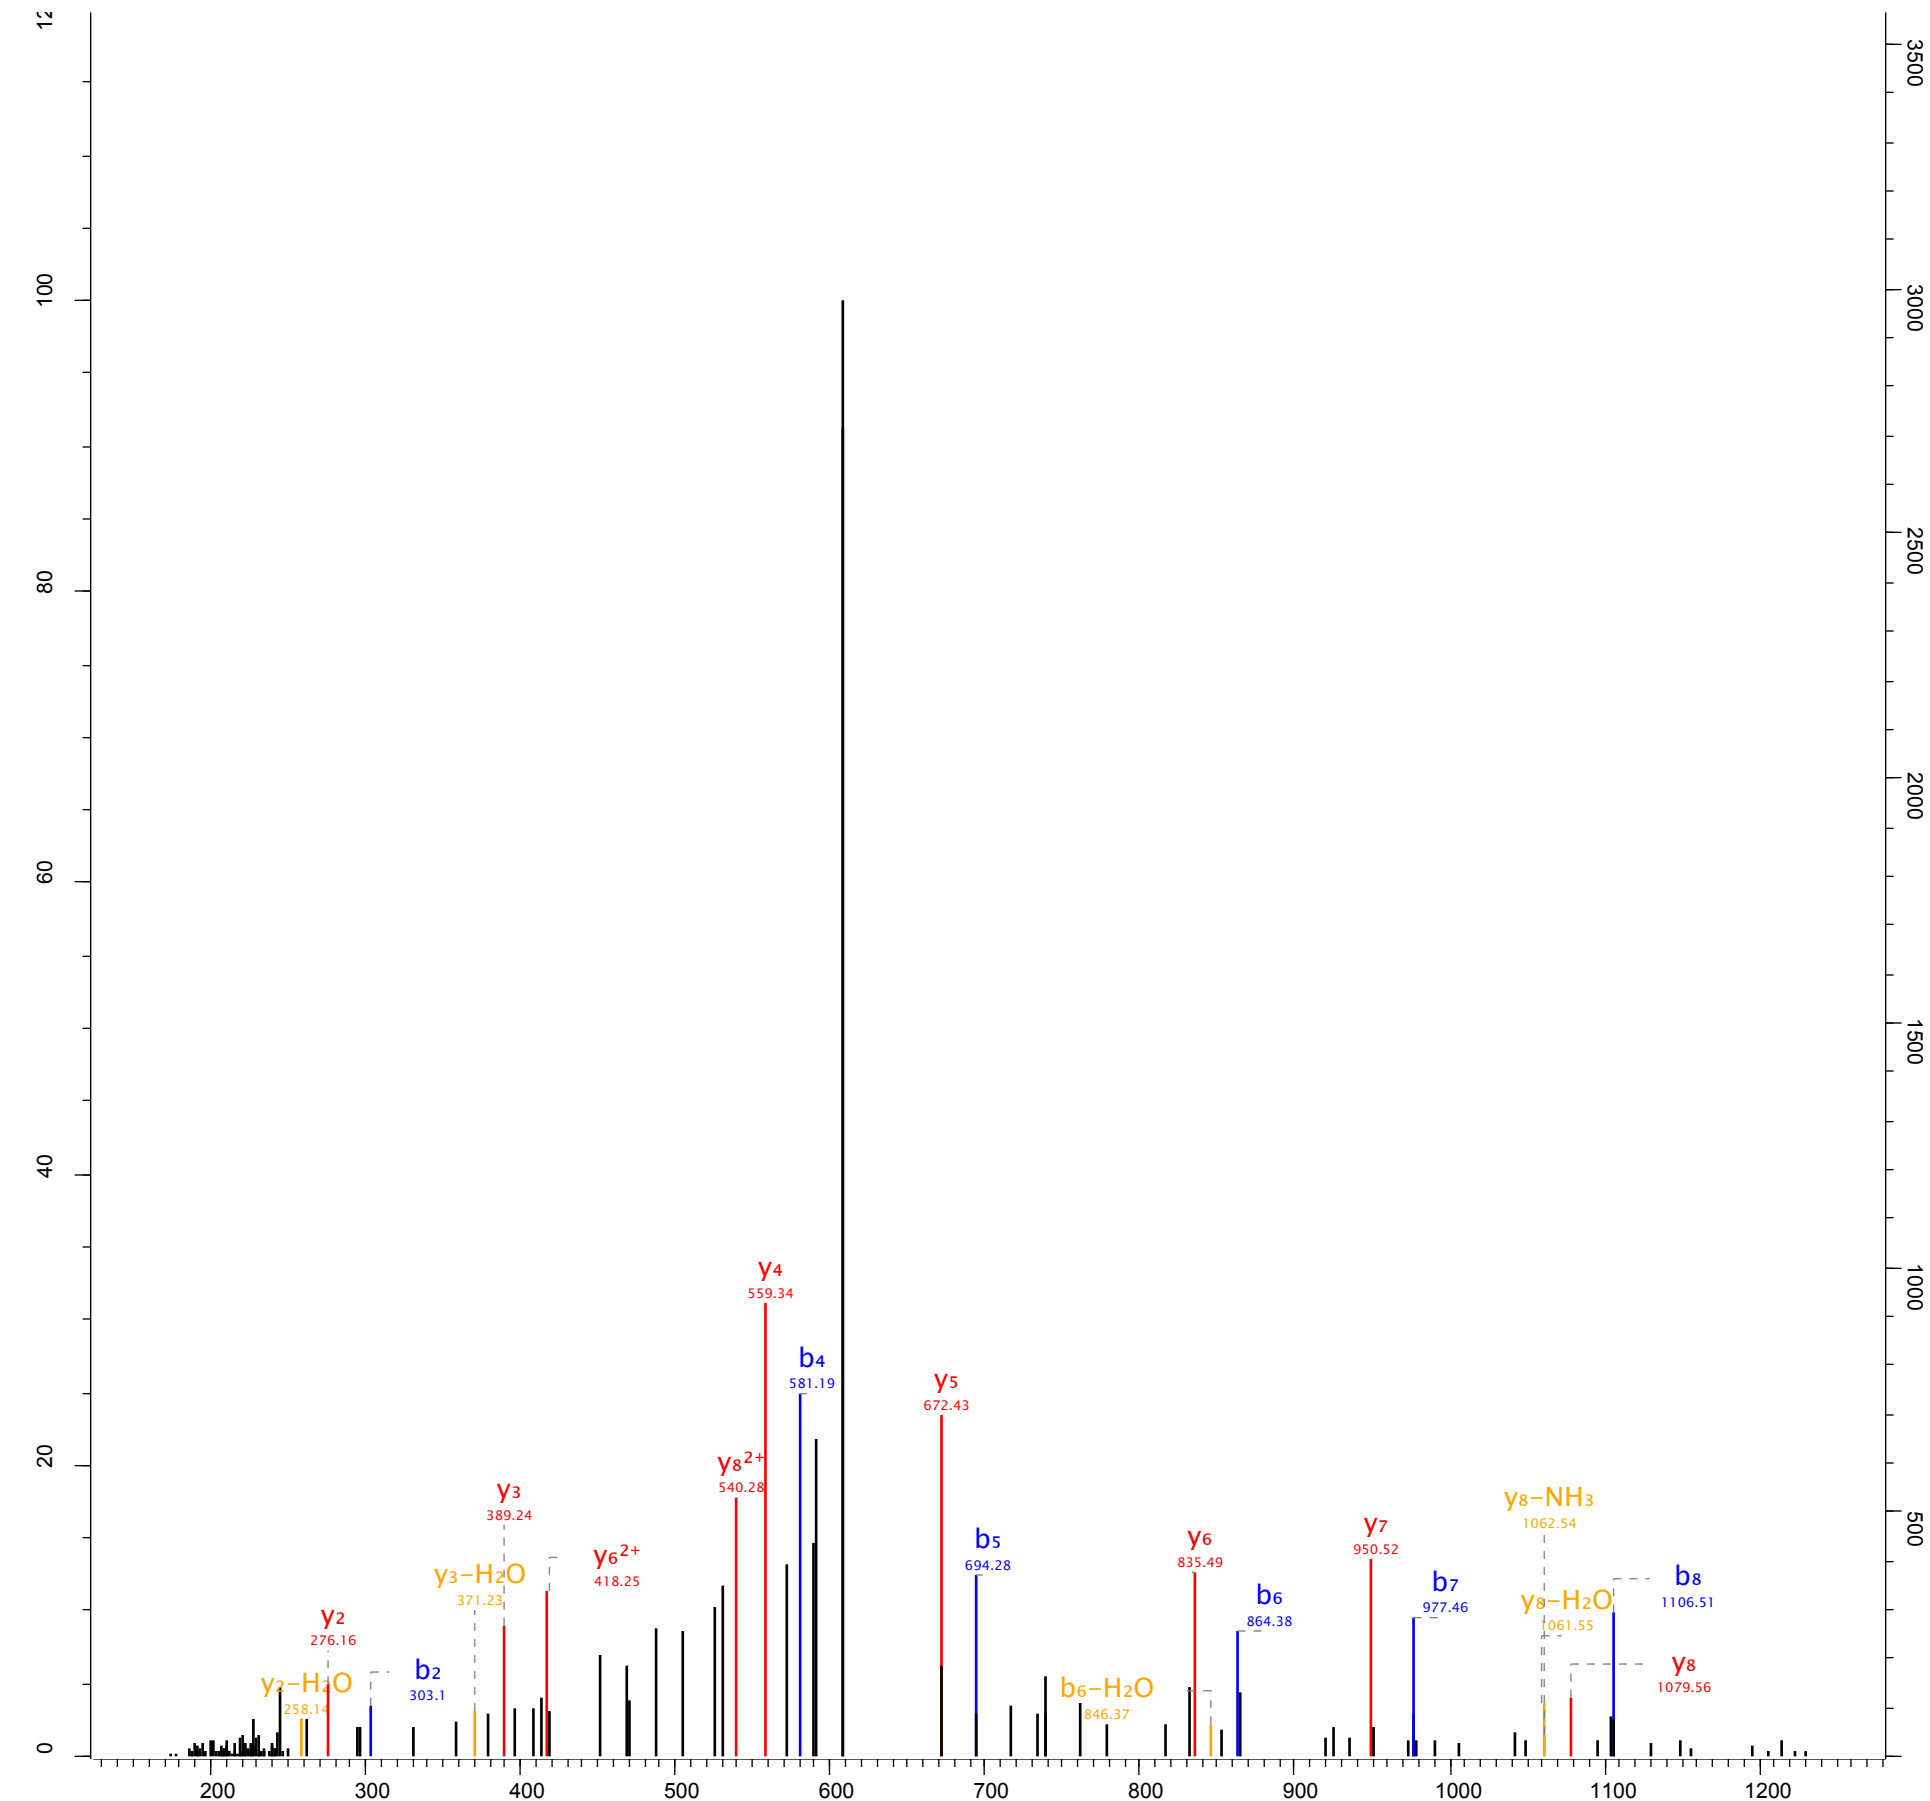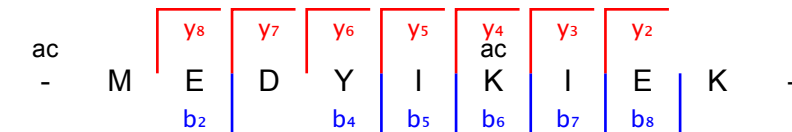

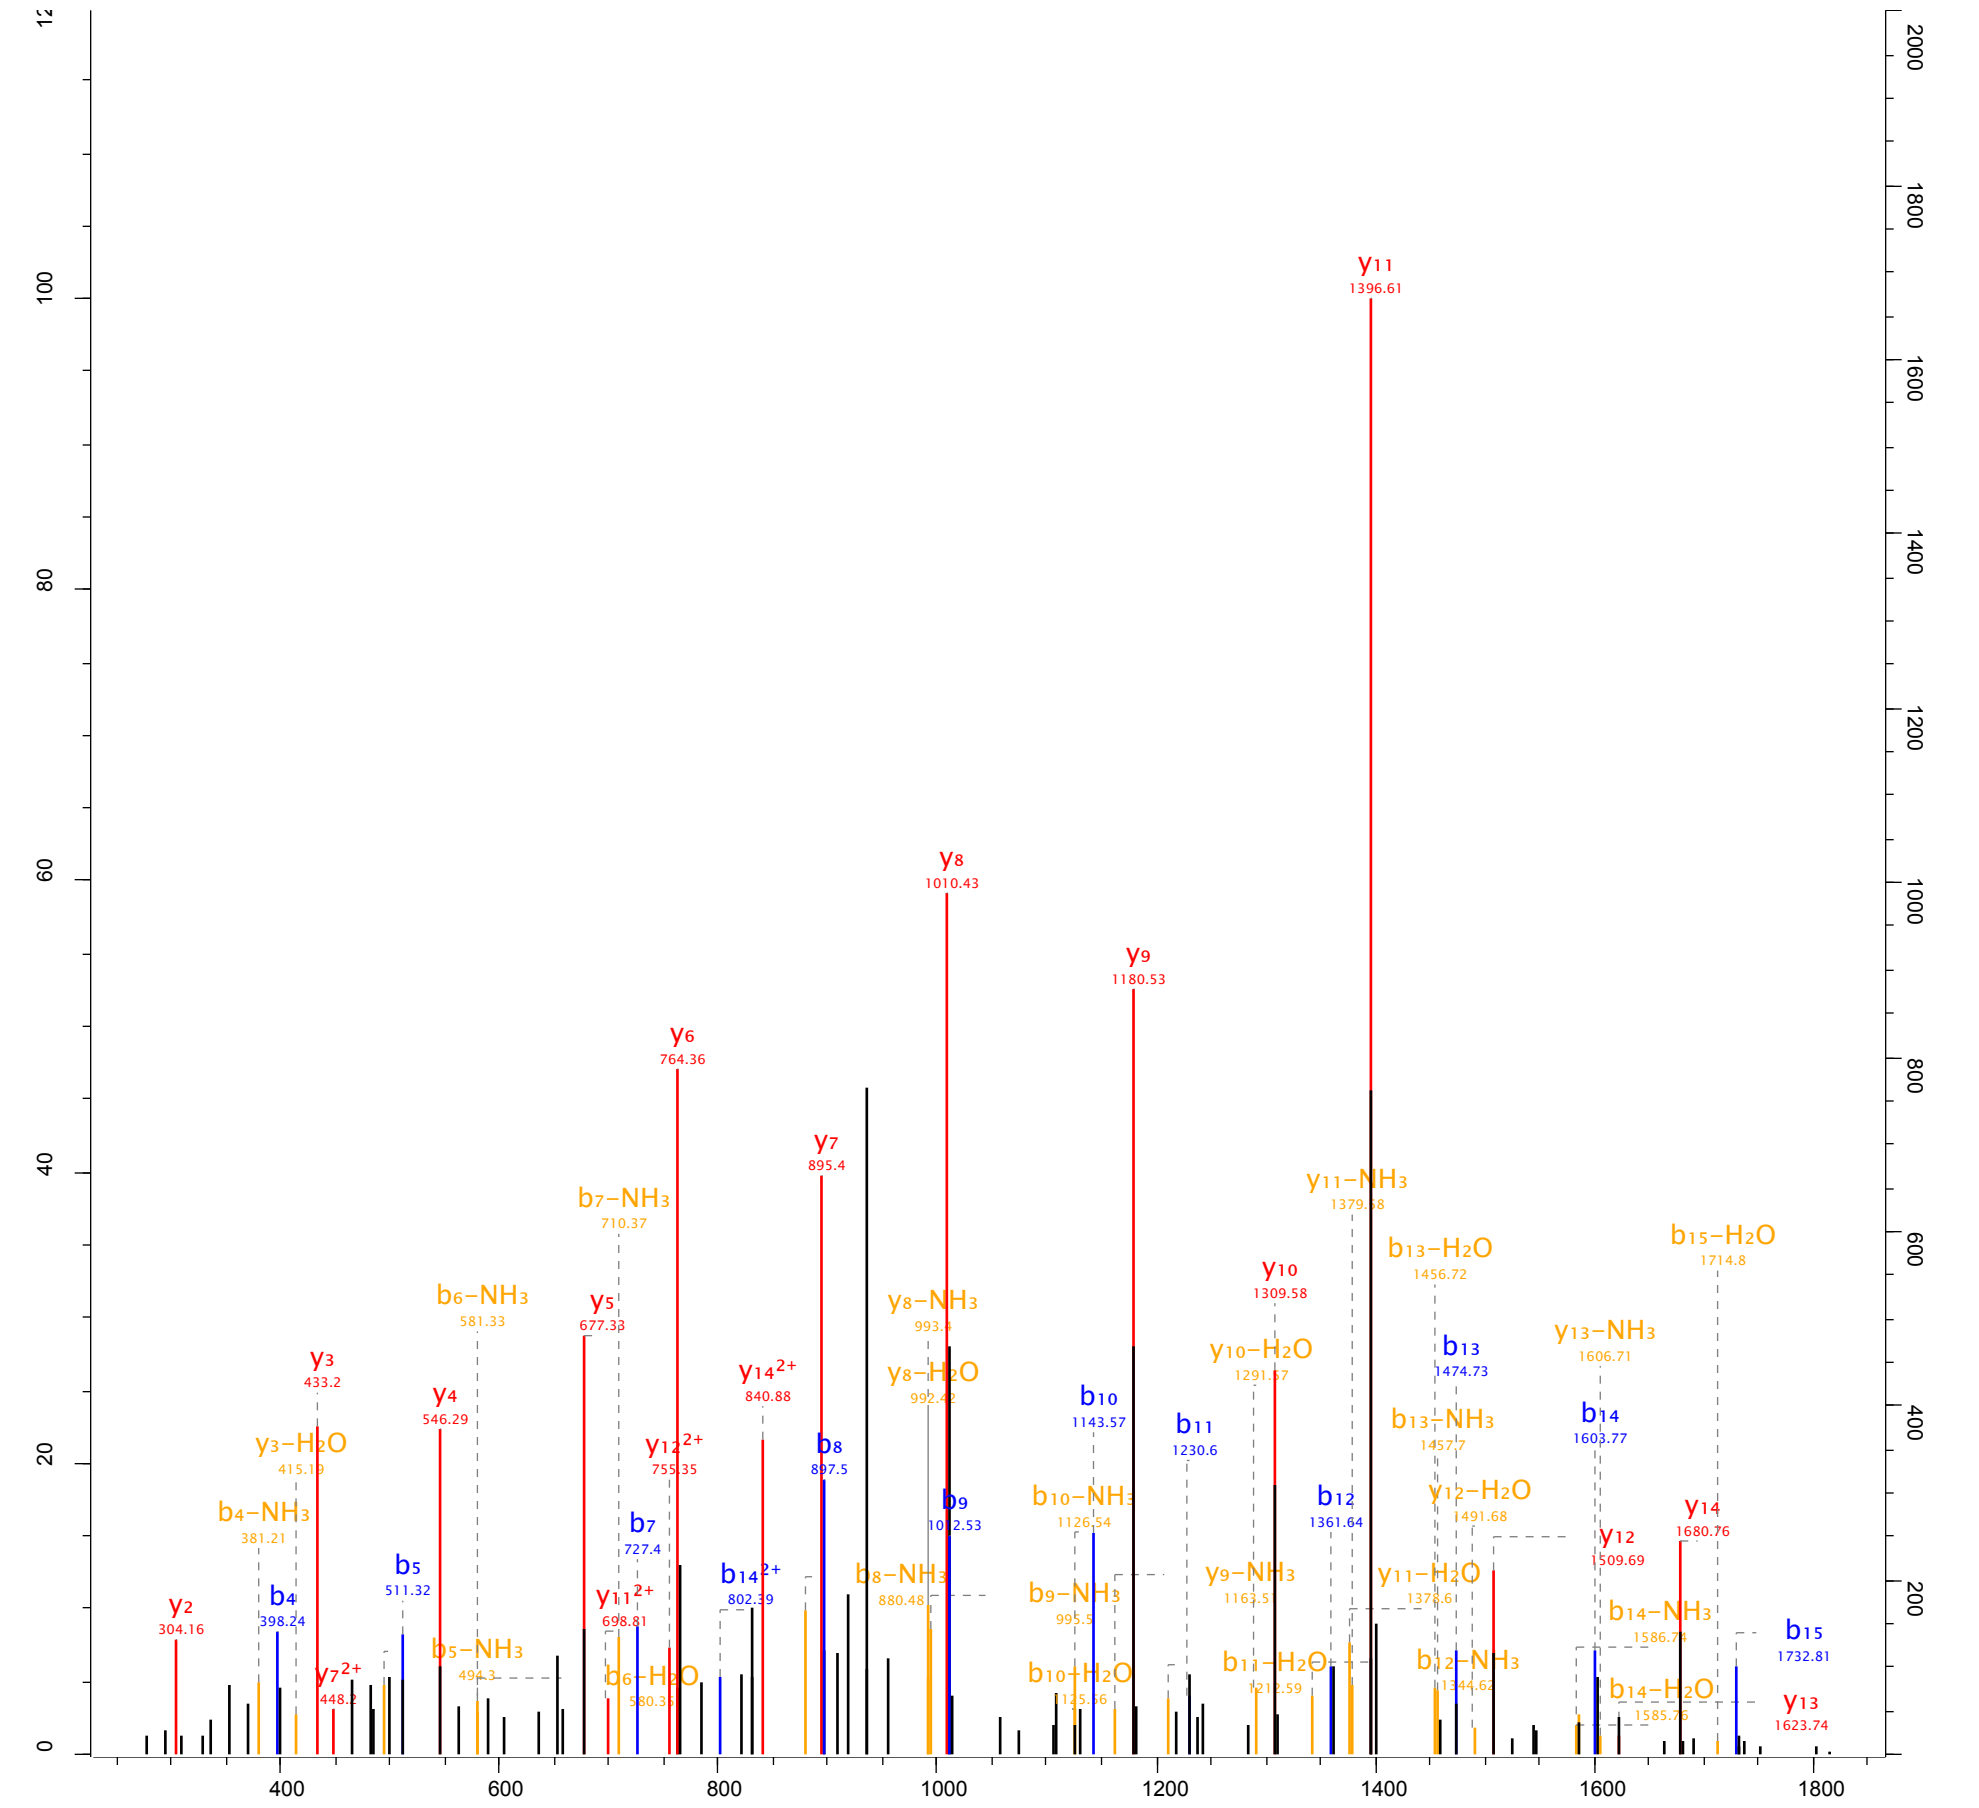

- L I G N L S E K D M S M L E E R -

y14
y13
y12
y11
y10
y9 ac
y8
y7
y6
y5
y4
y3
y2

b4
b5
b7
b8
b9
b10
b11
b12
b13
b14
b15

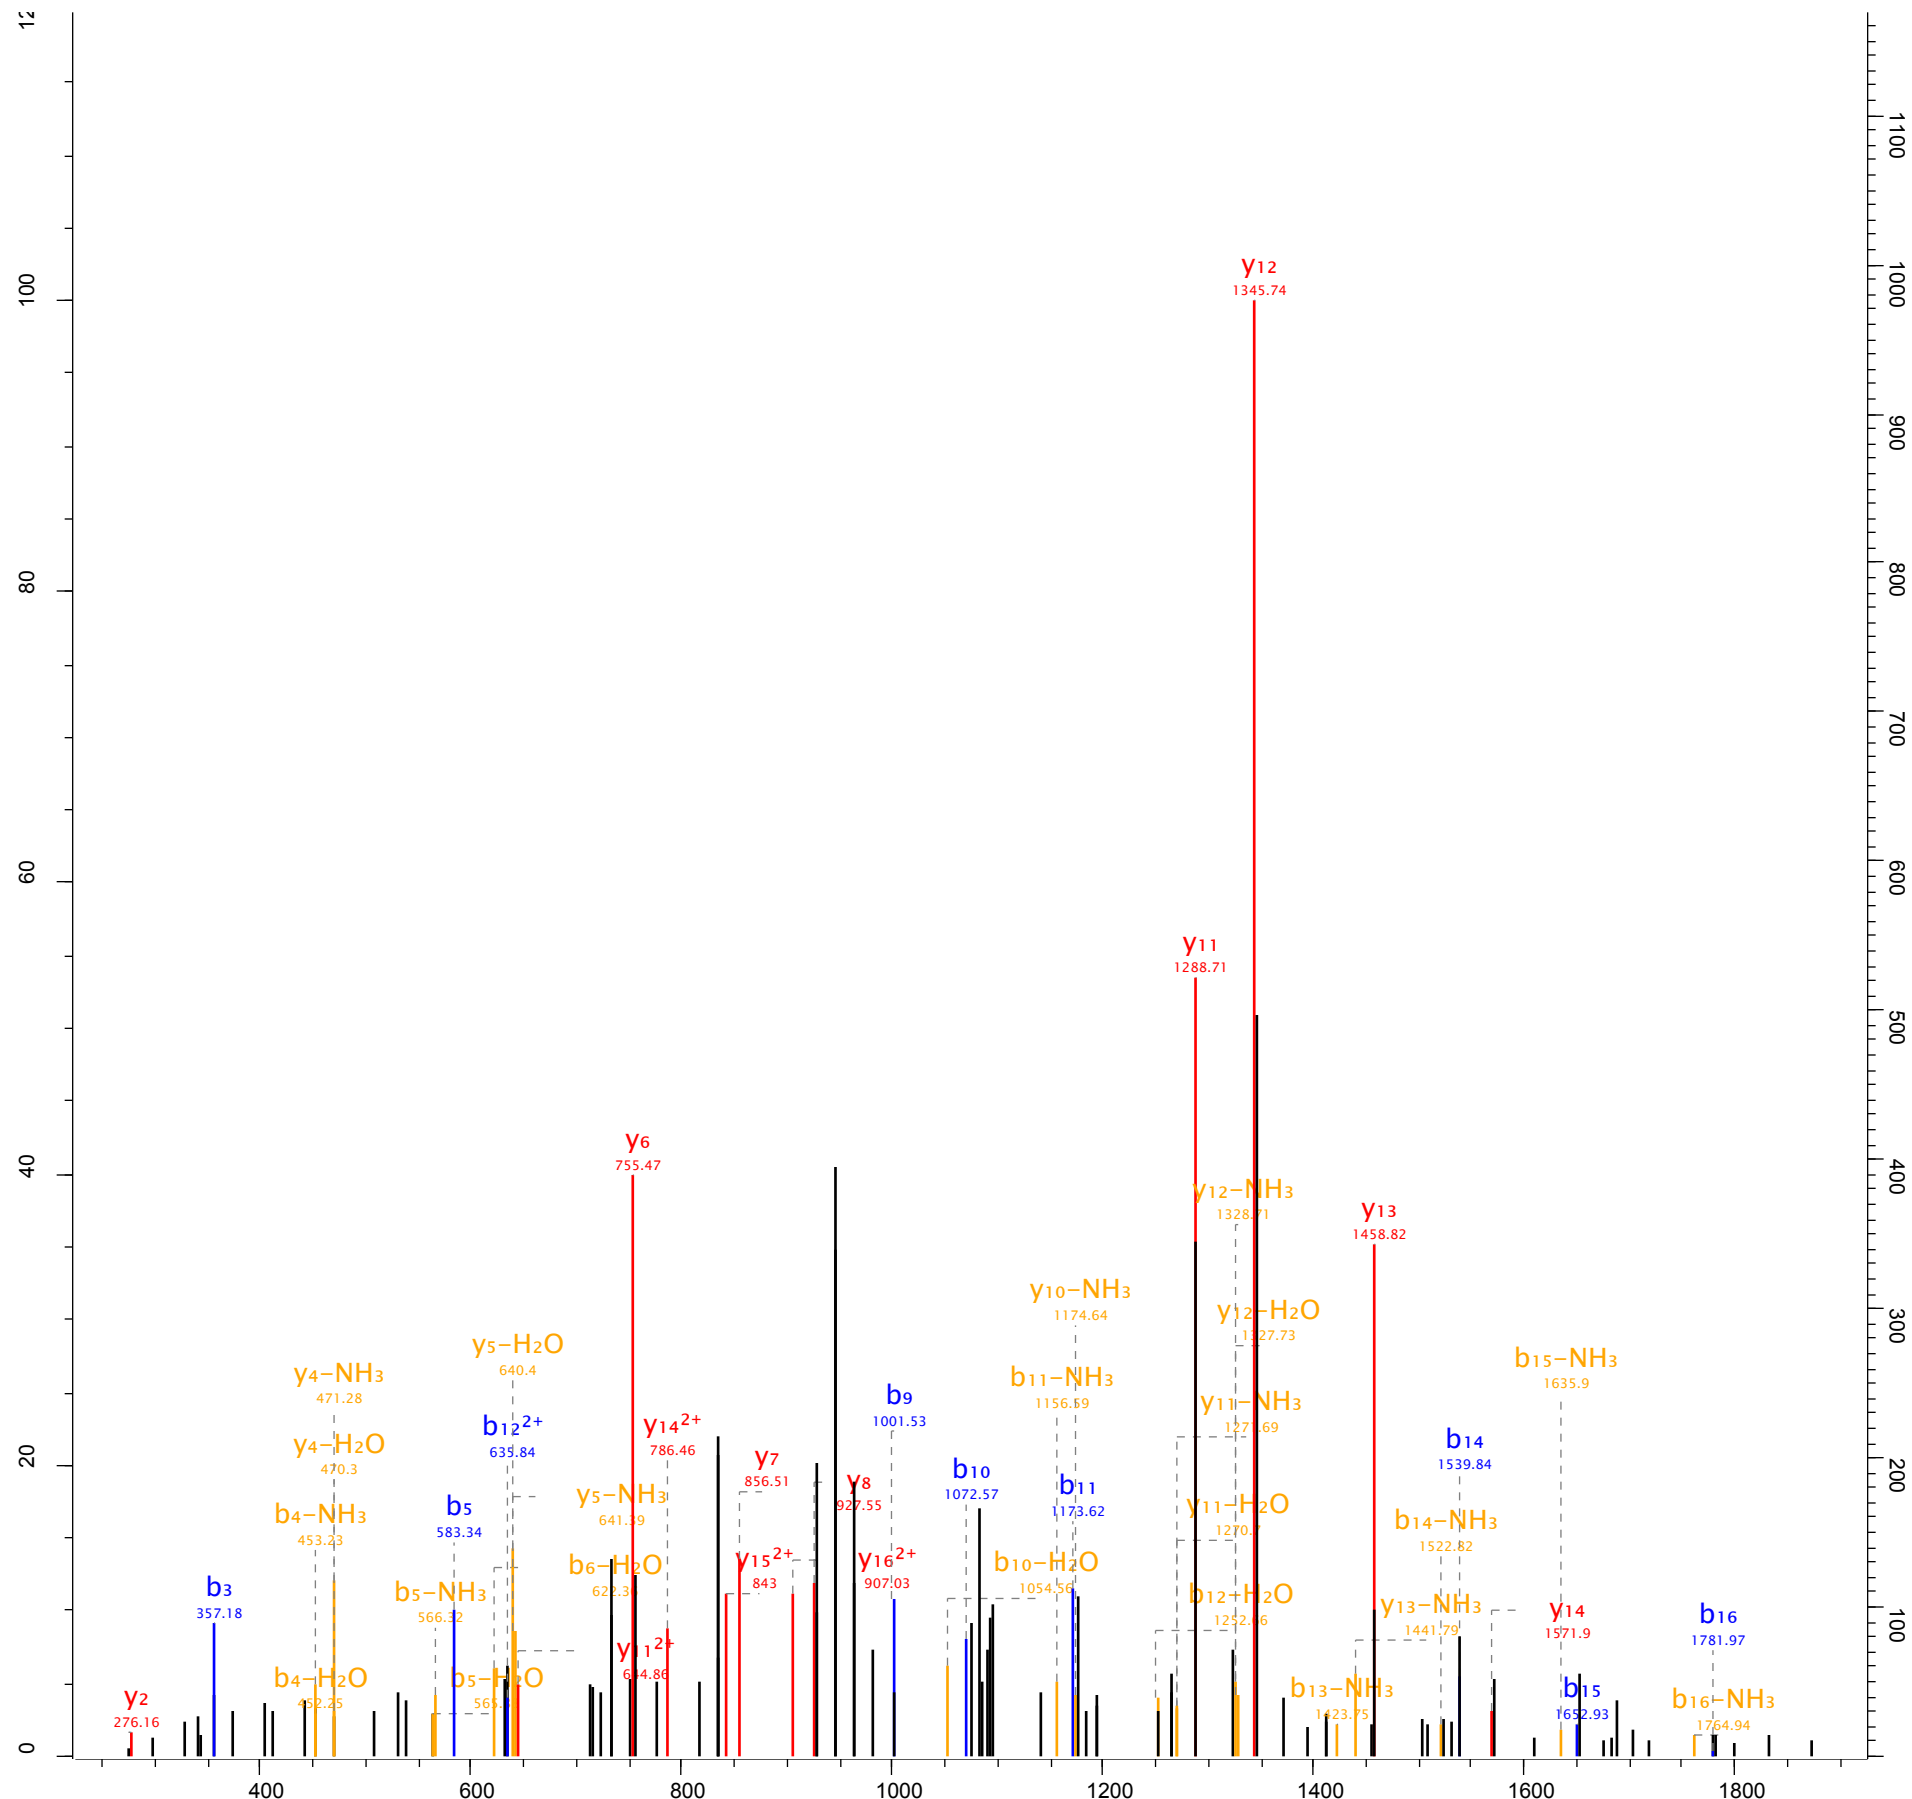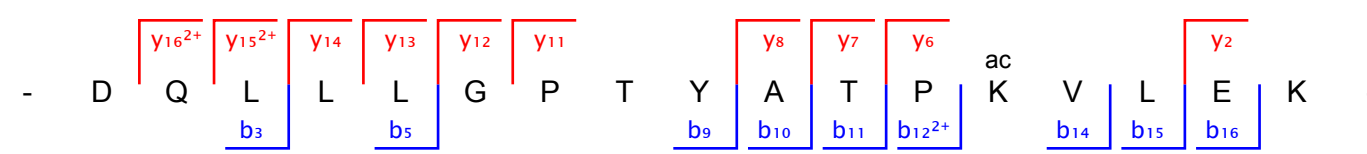

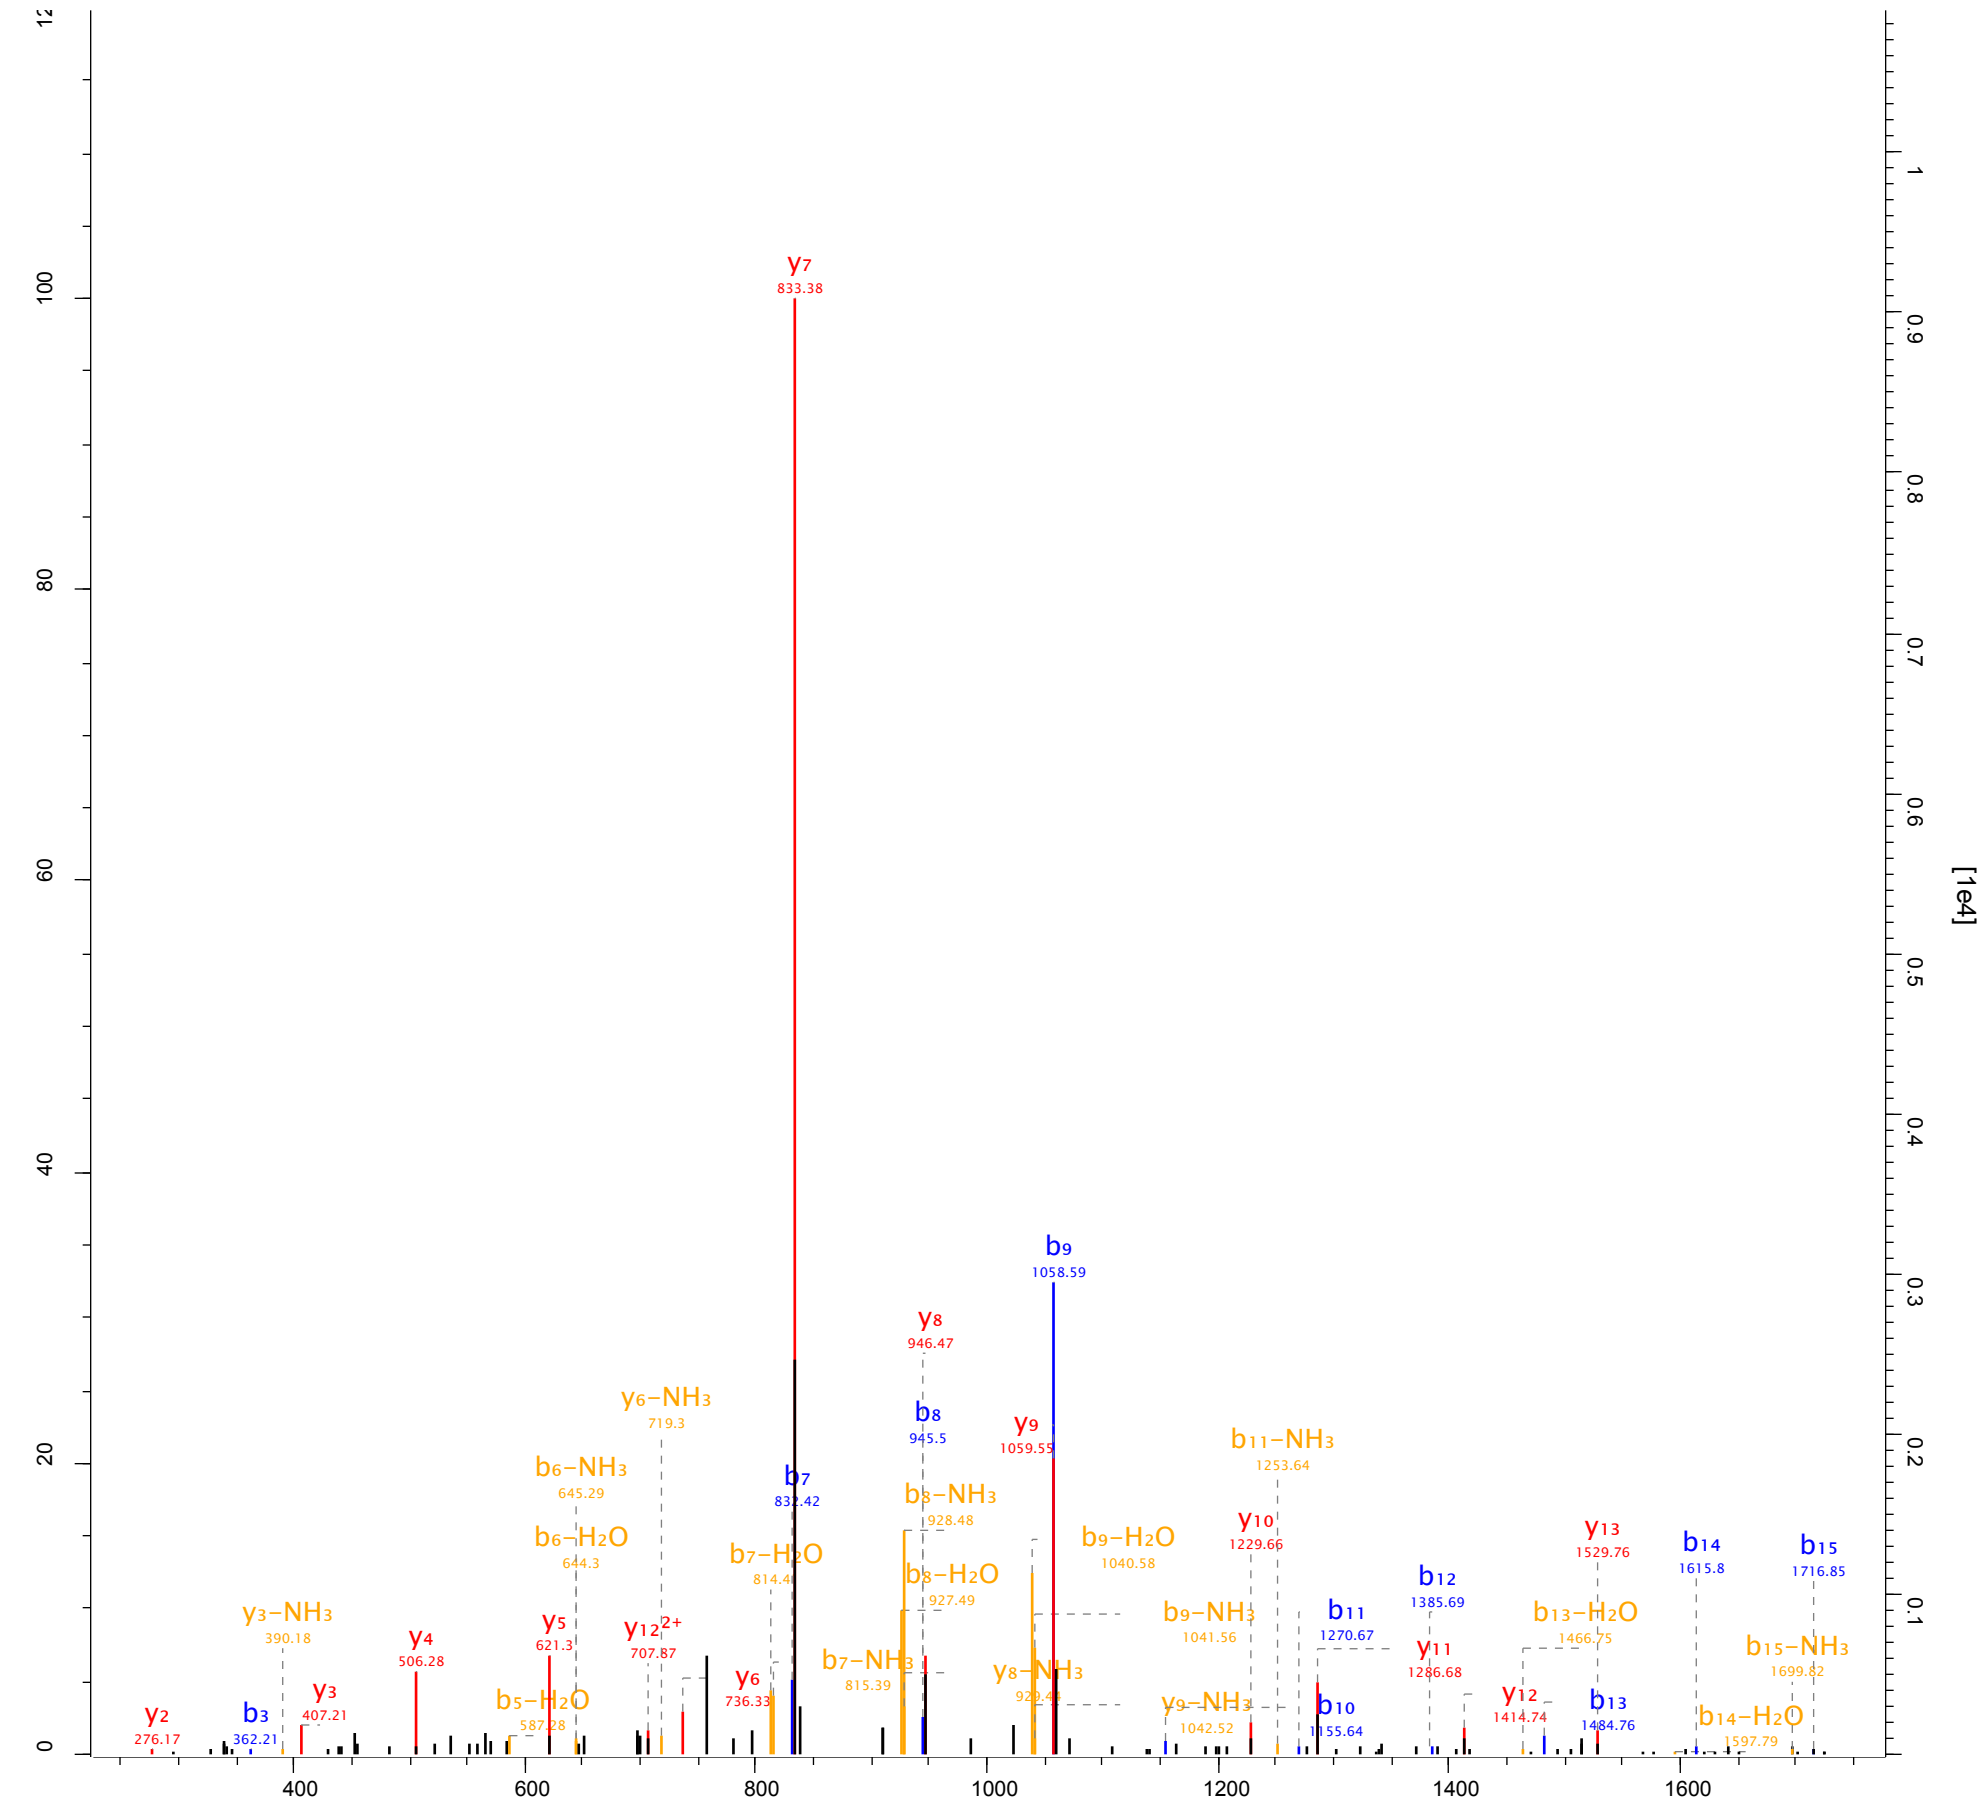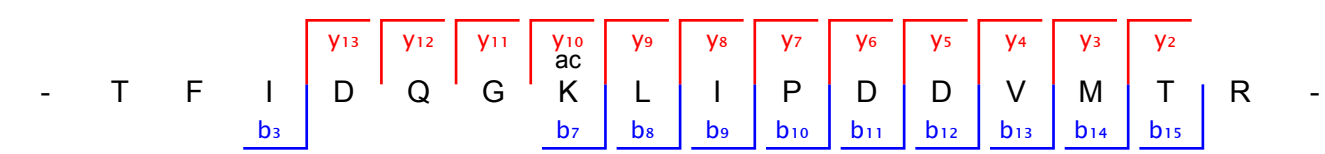

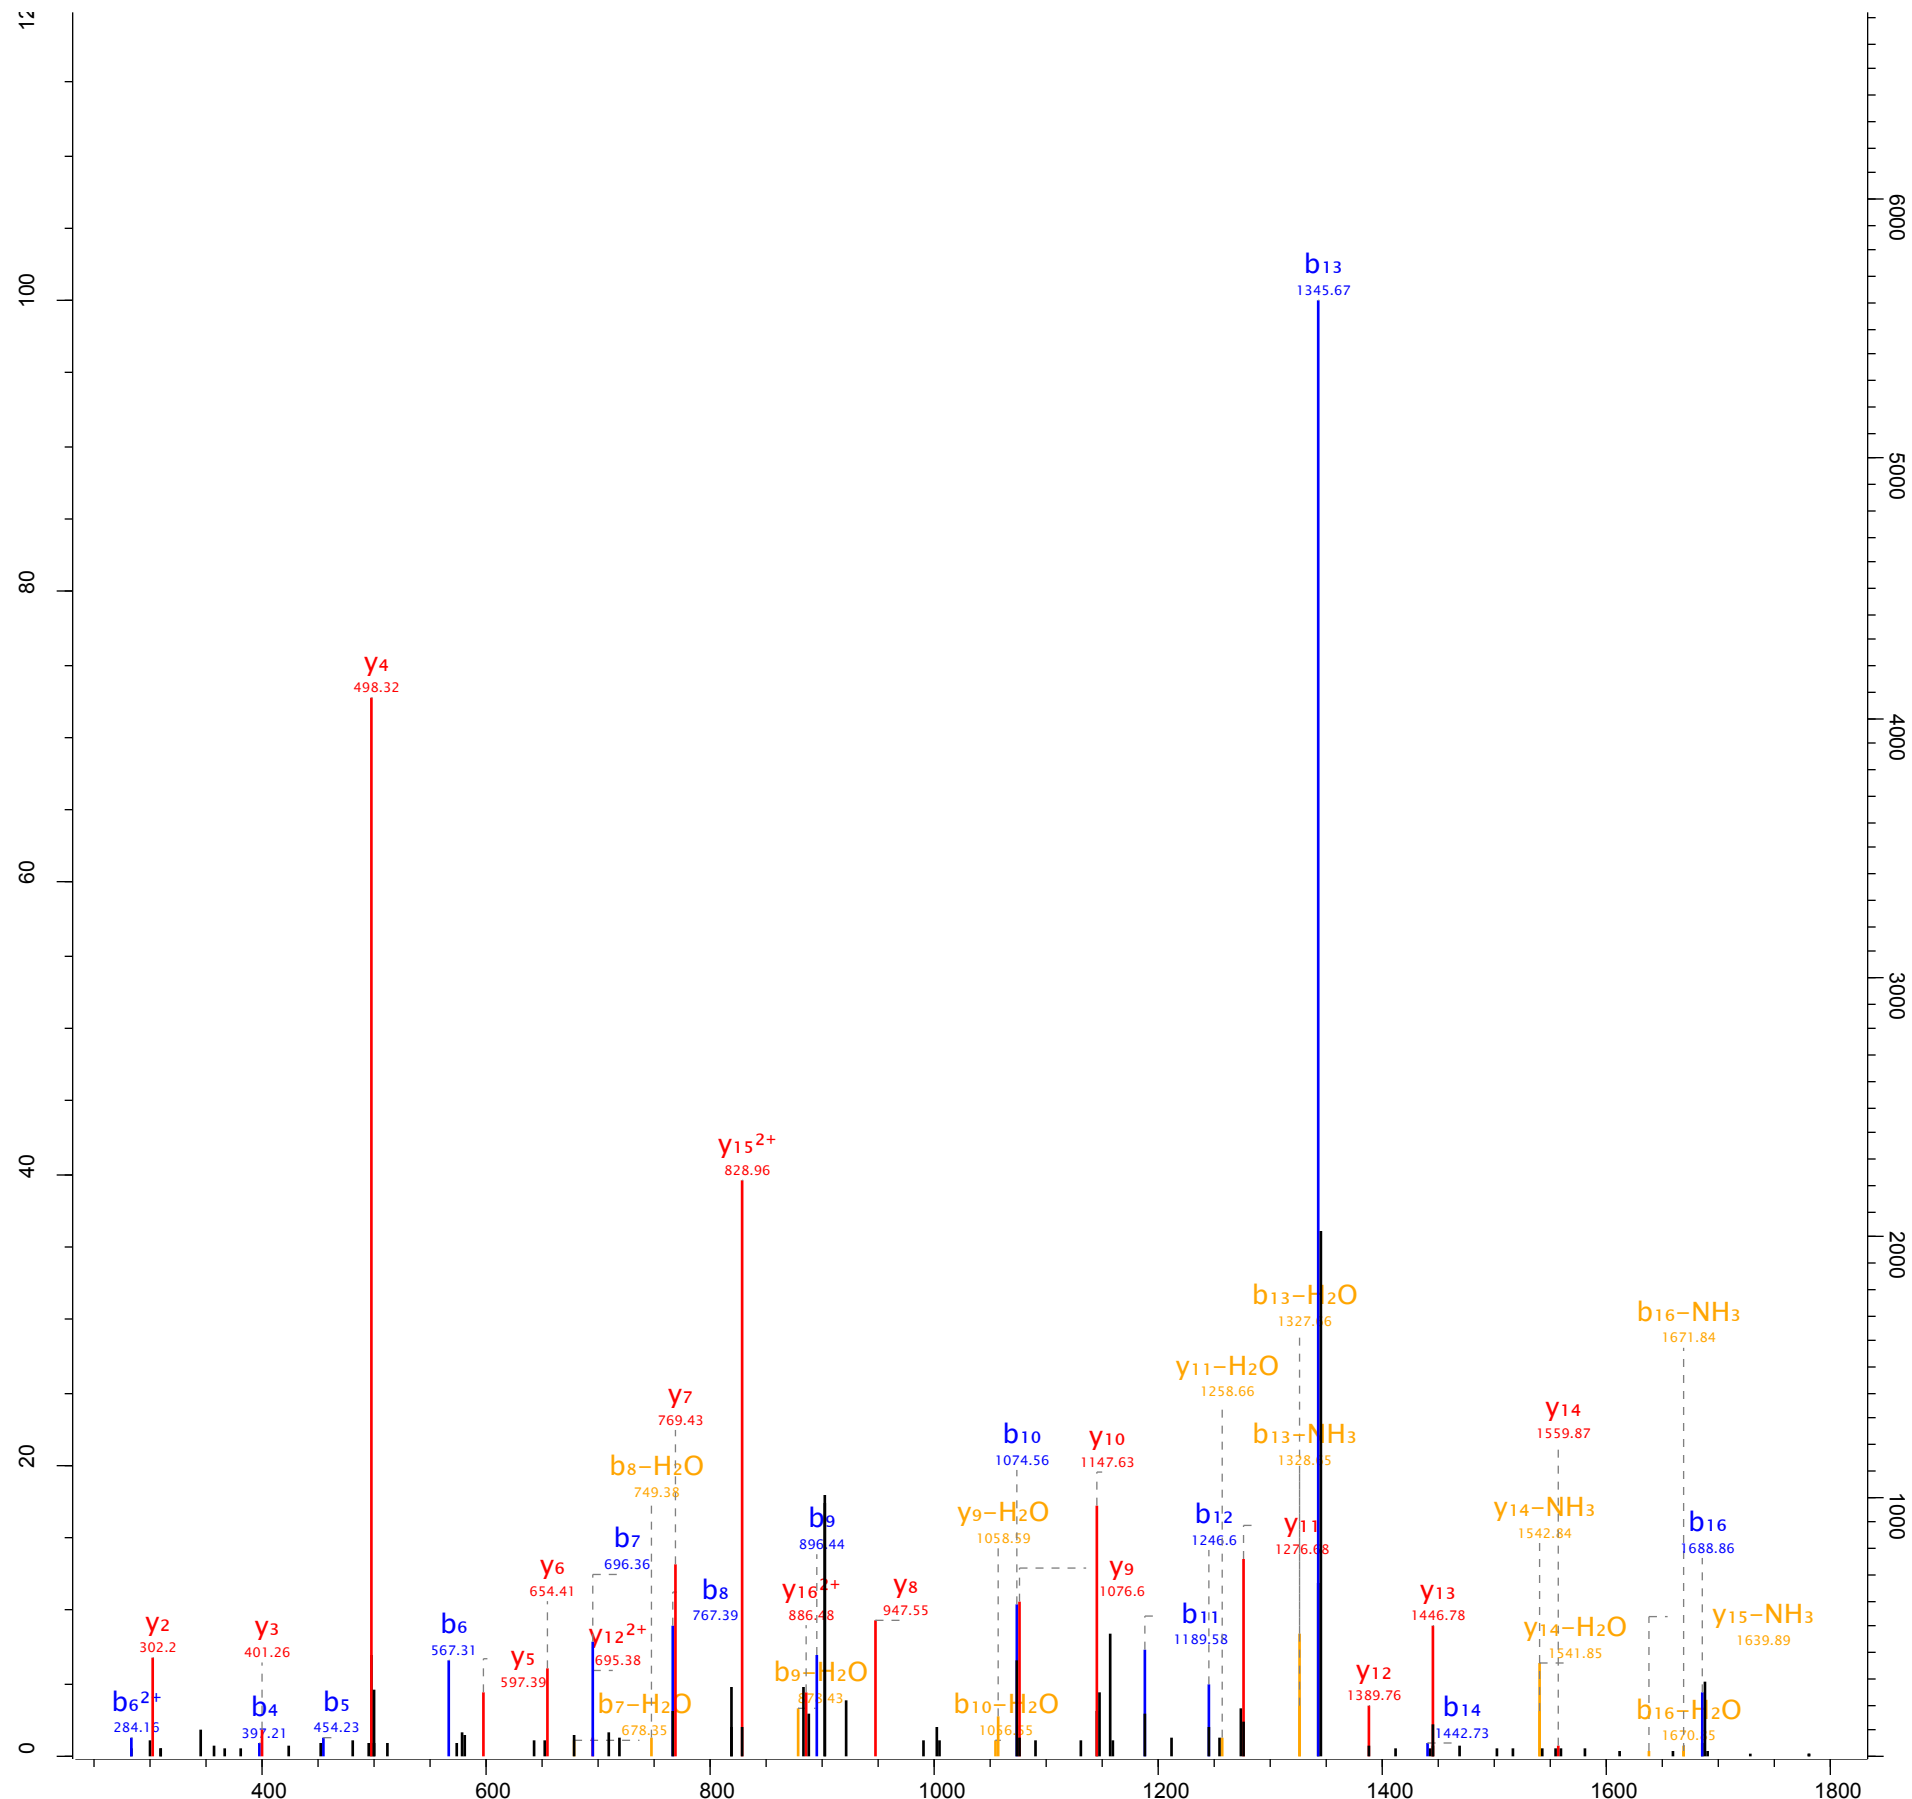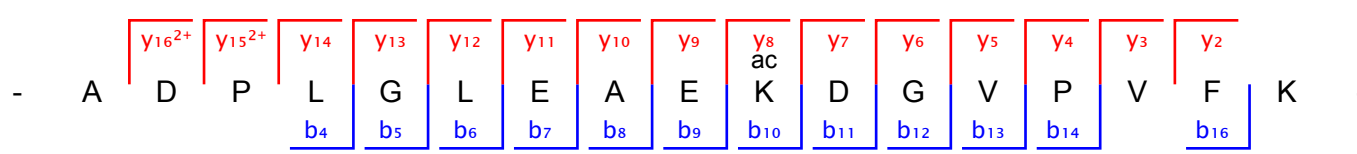

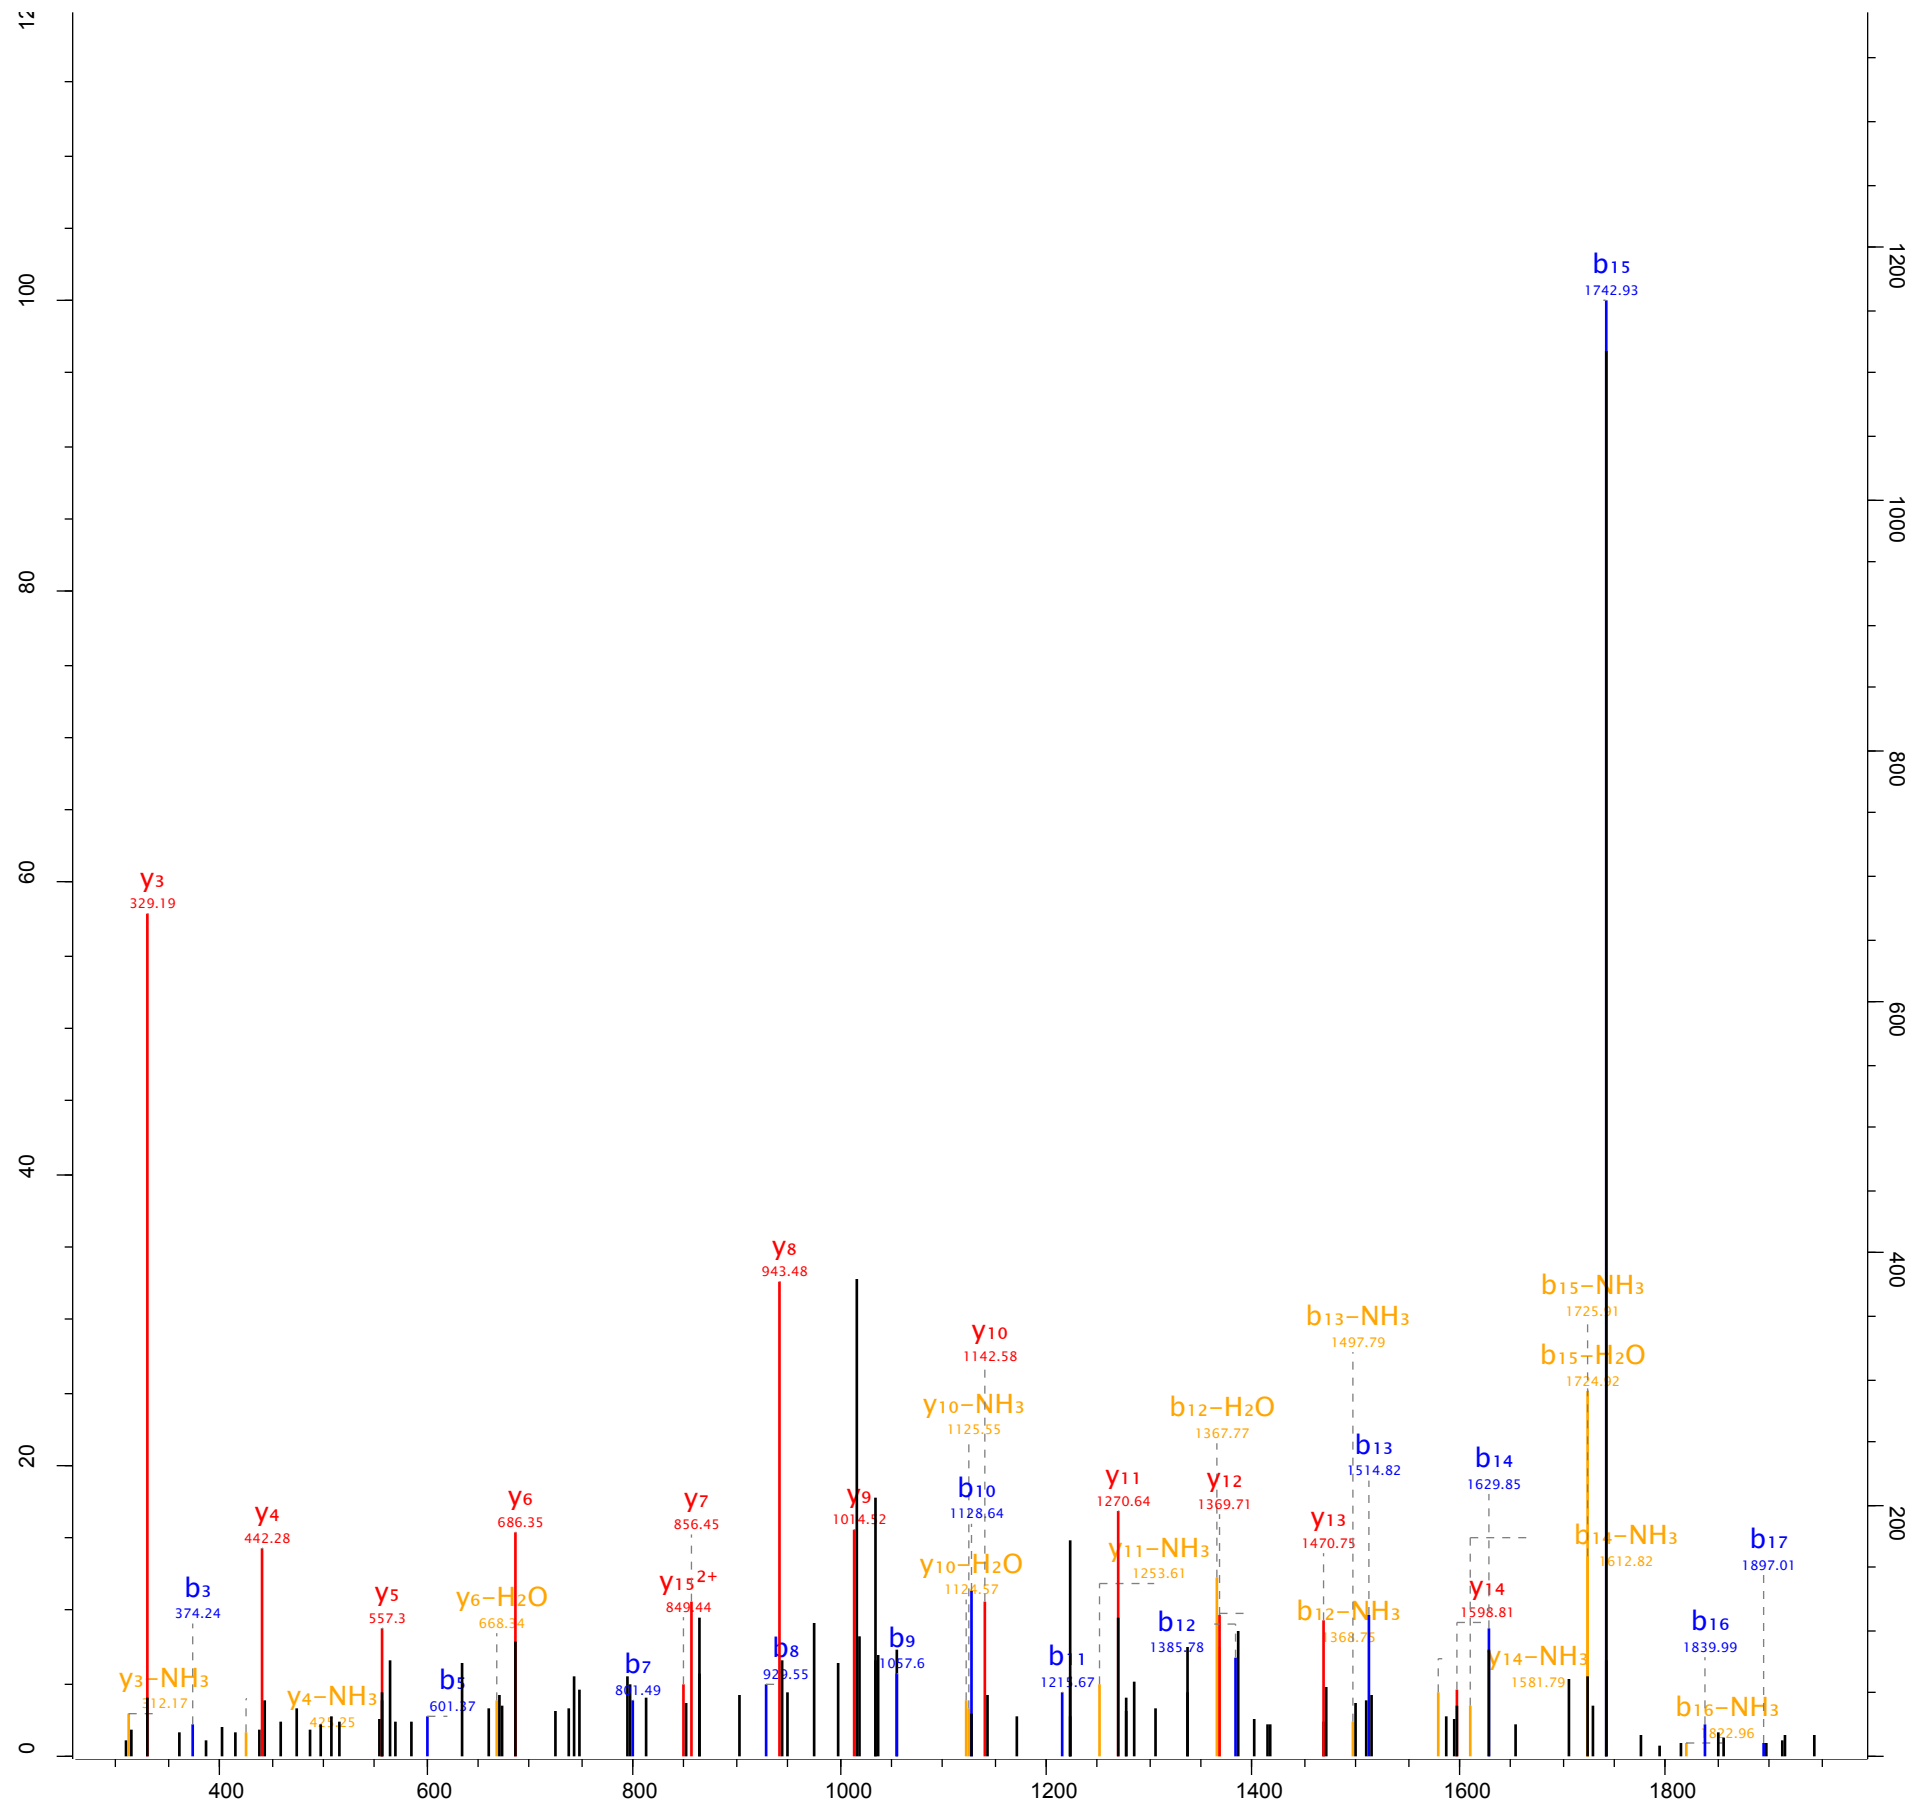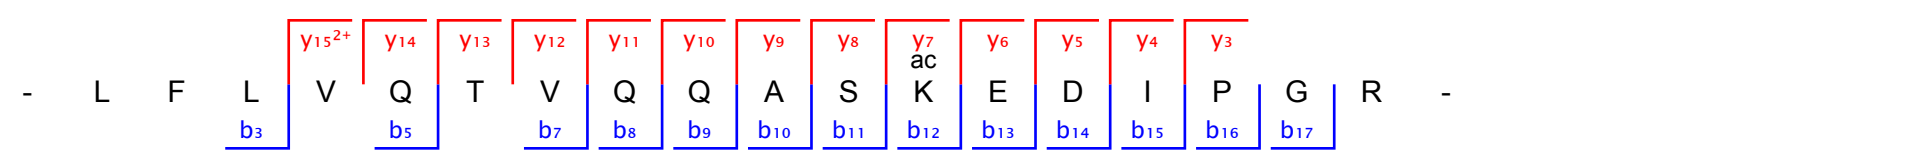



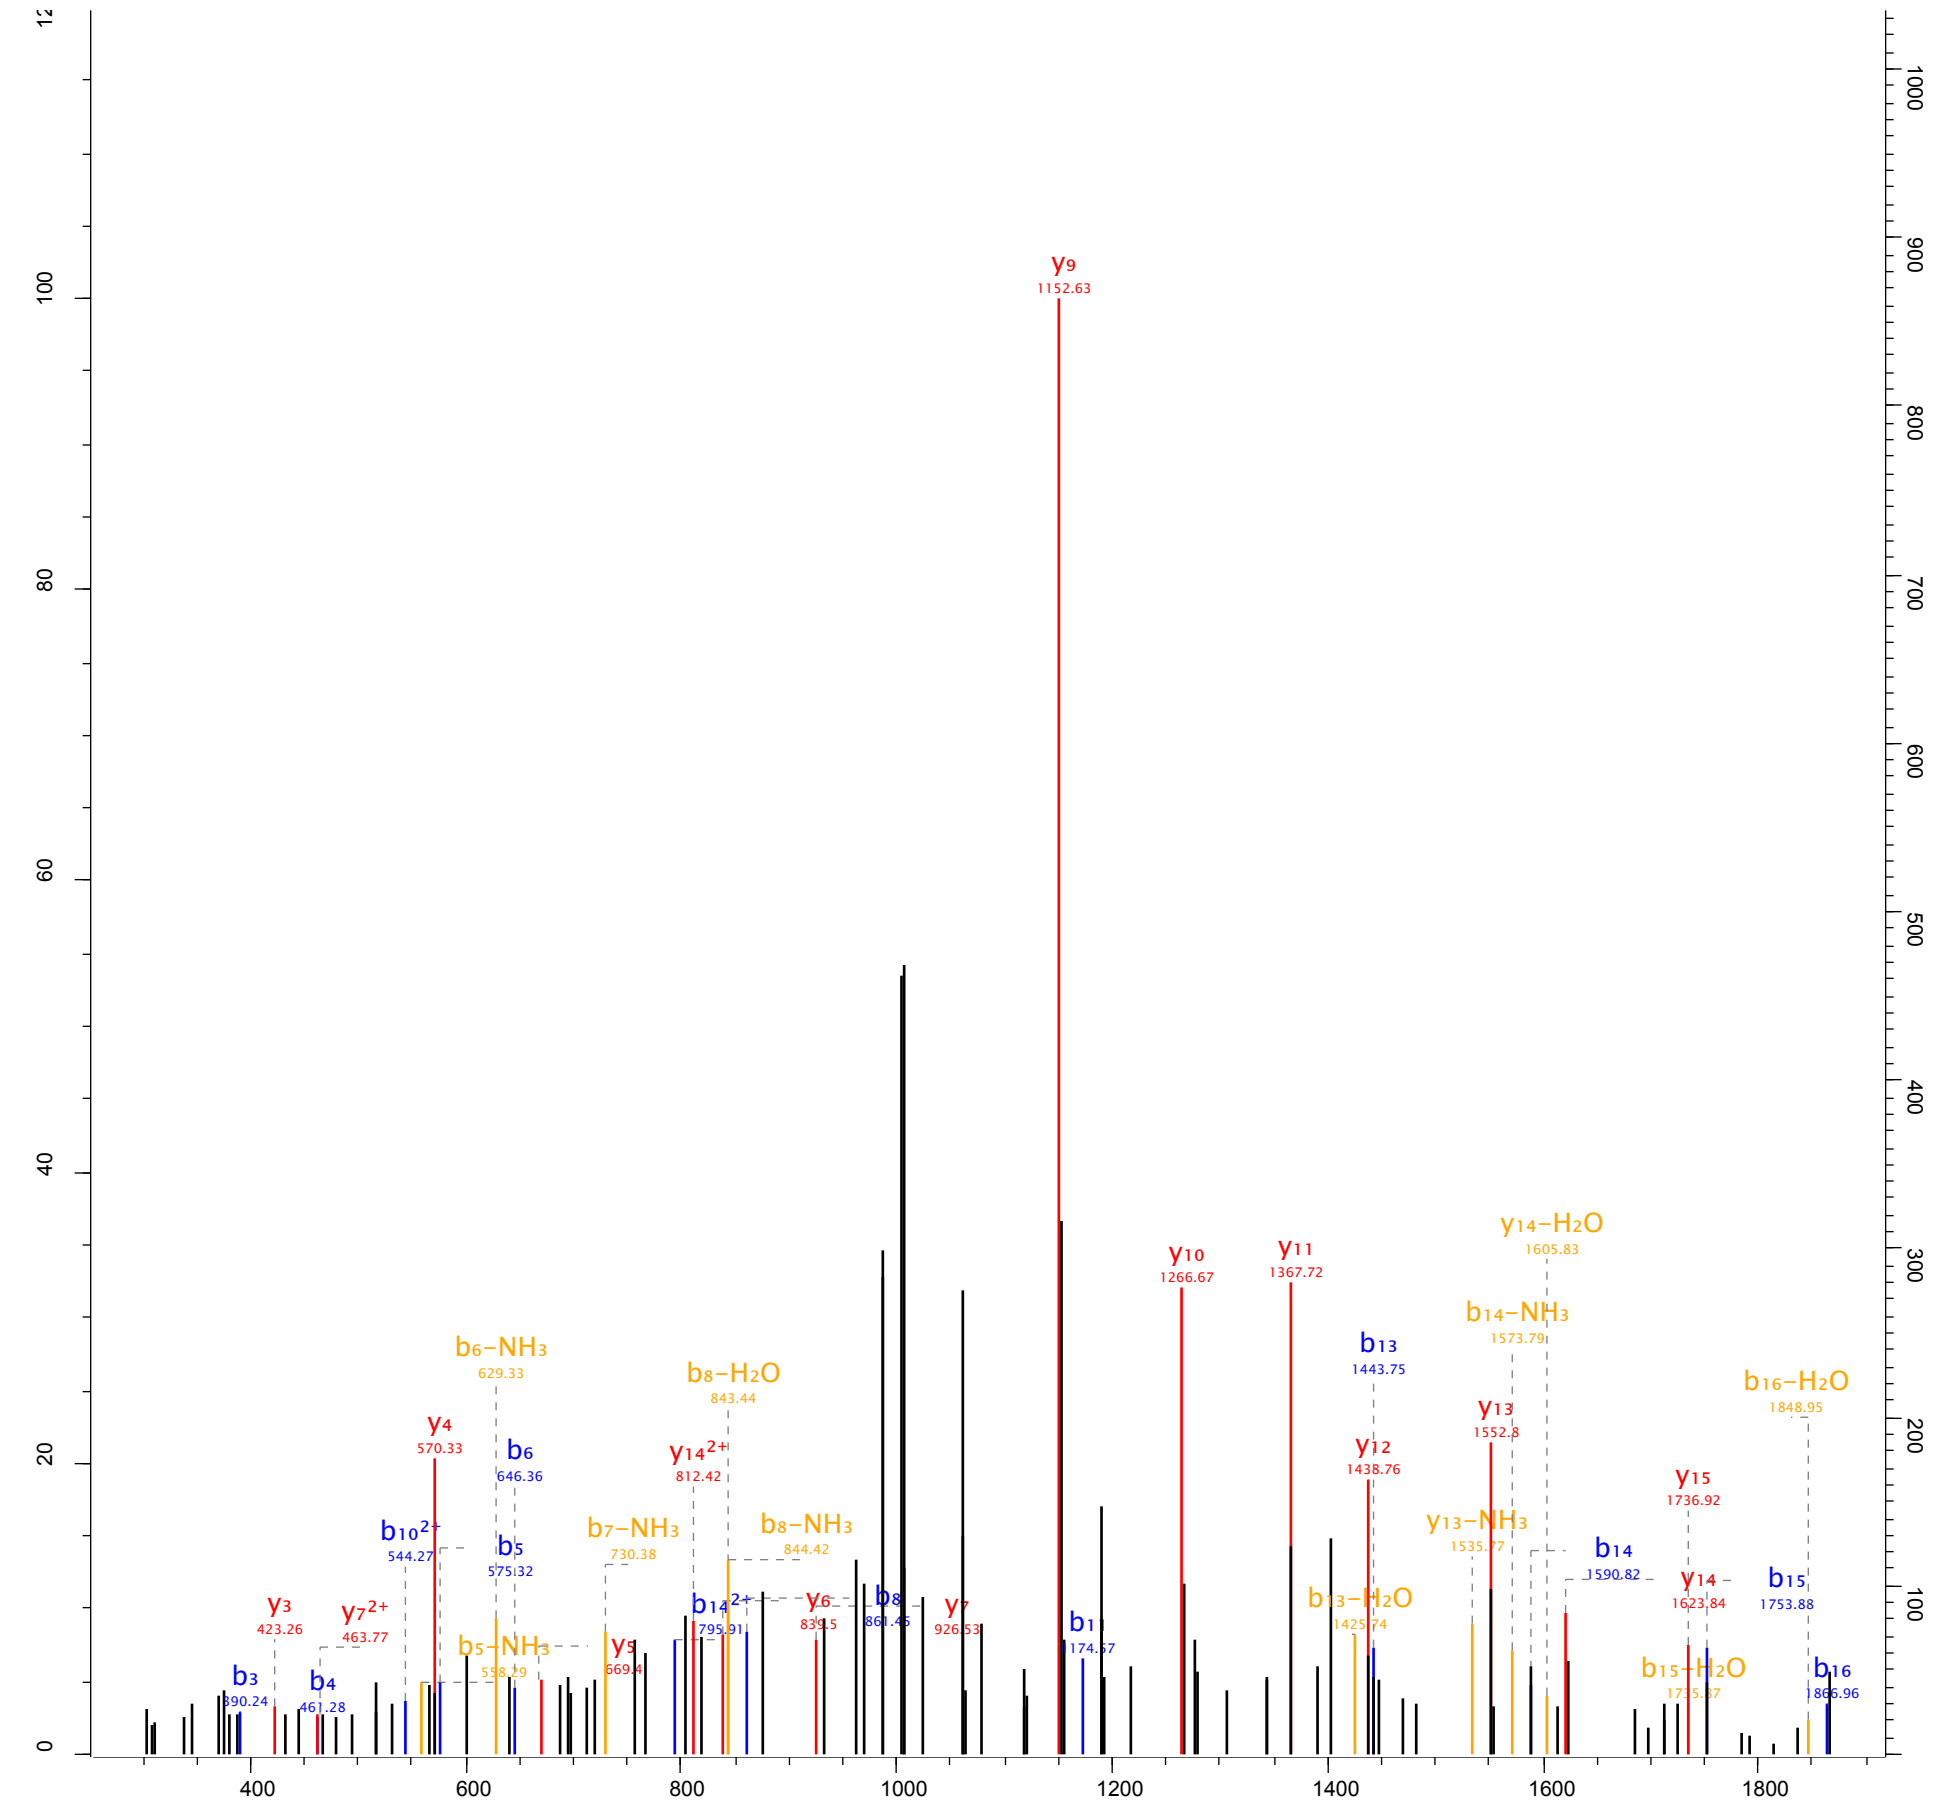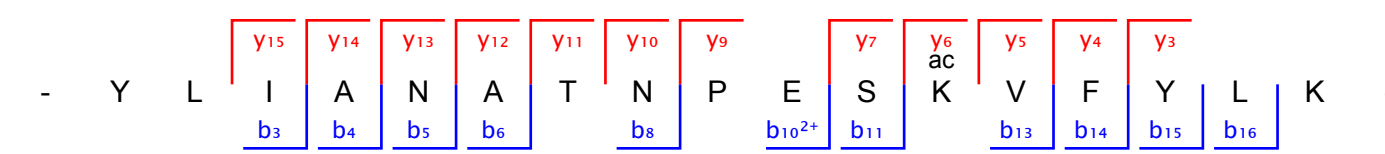

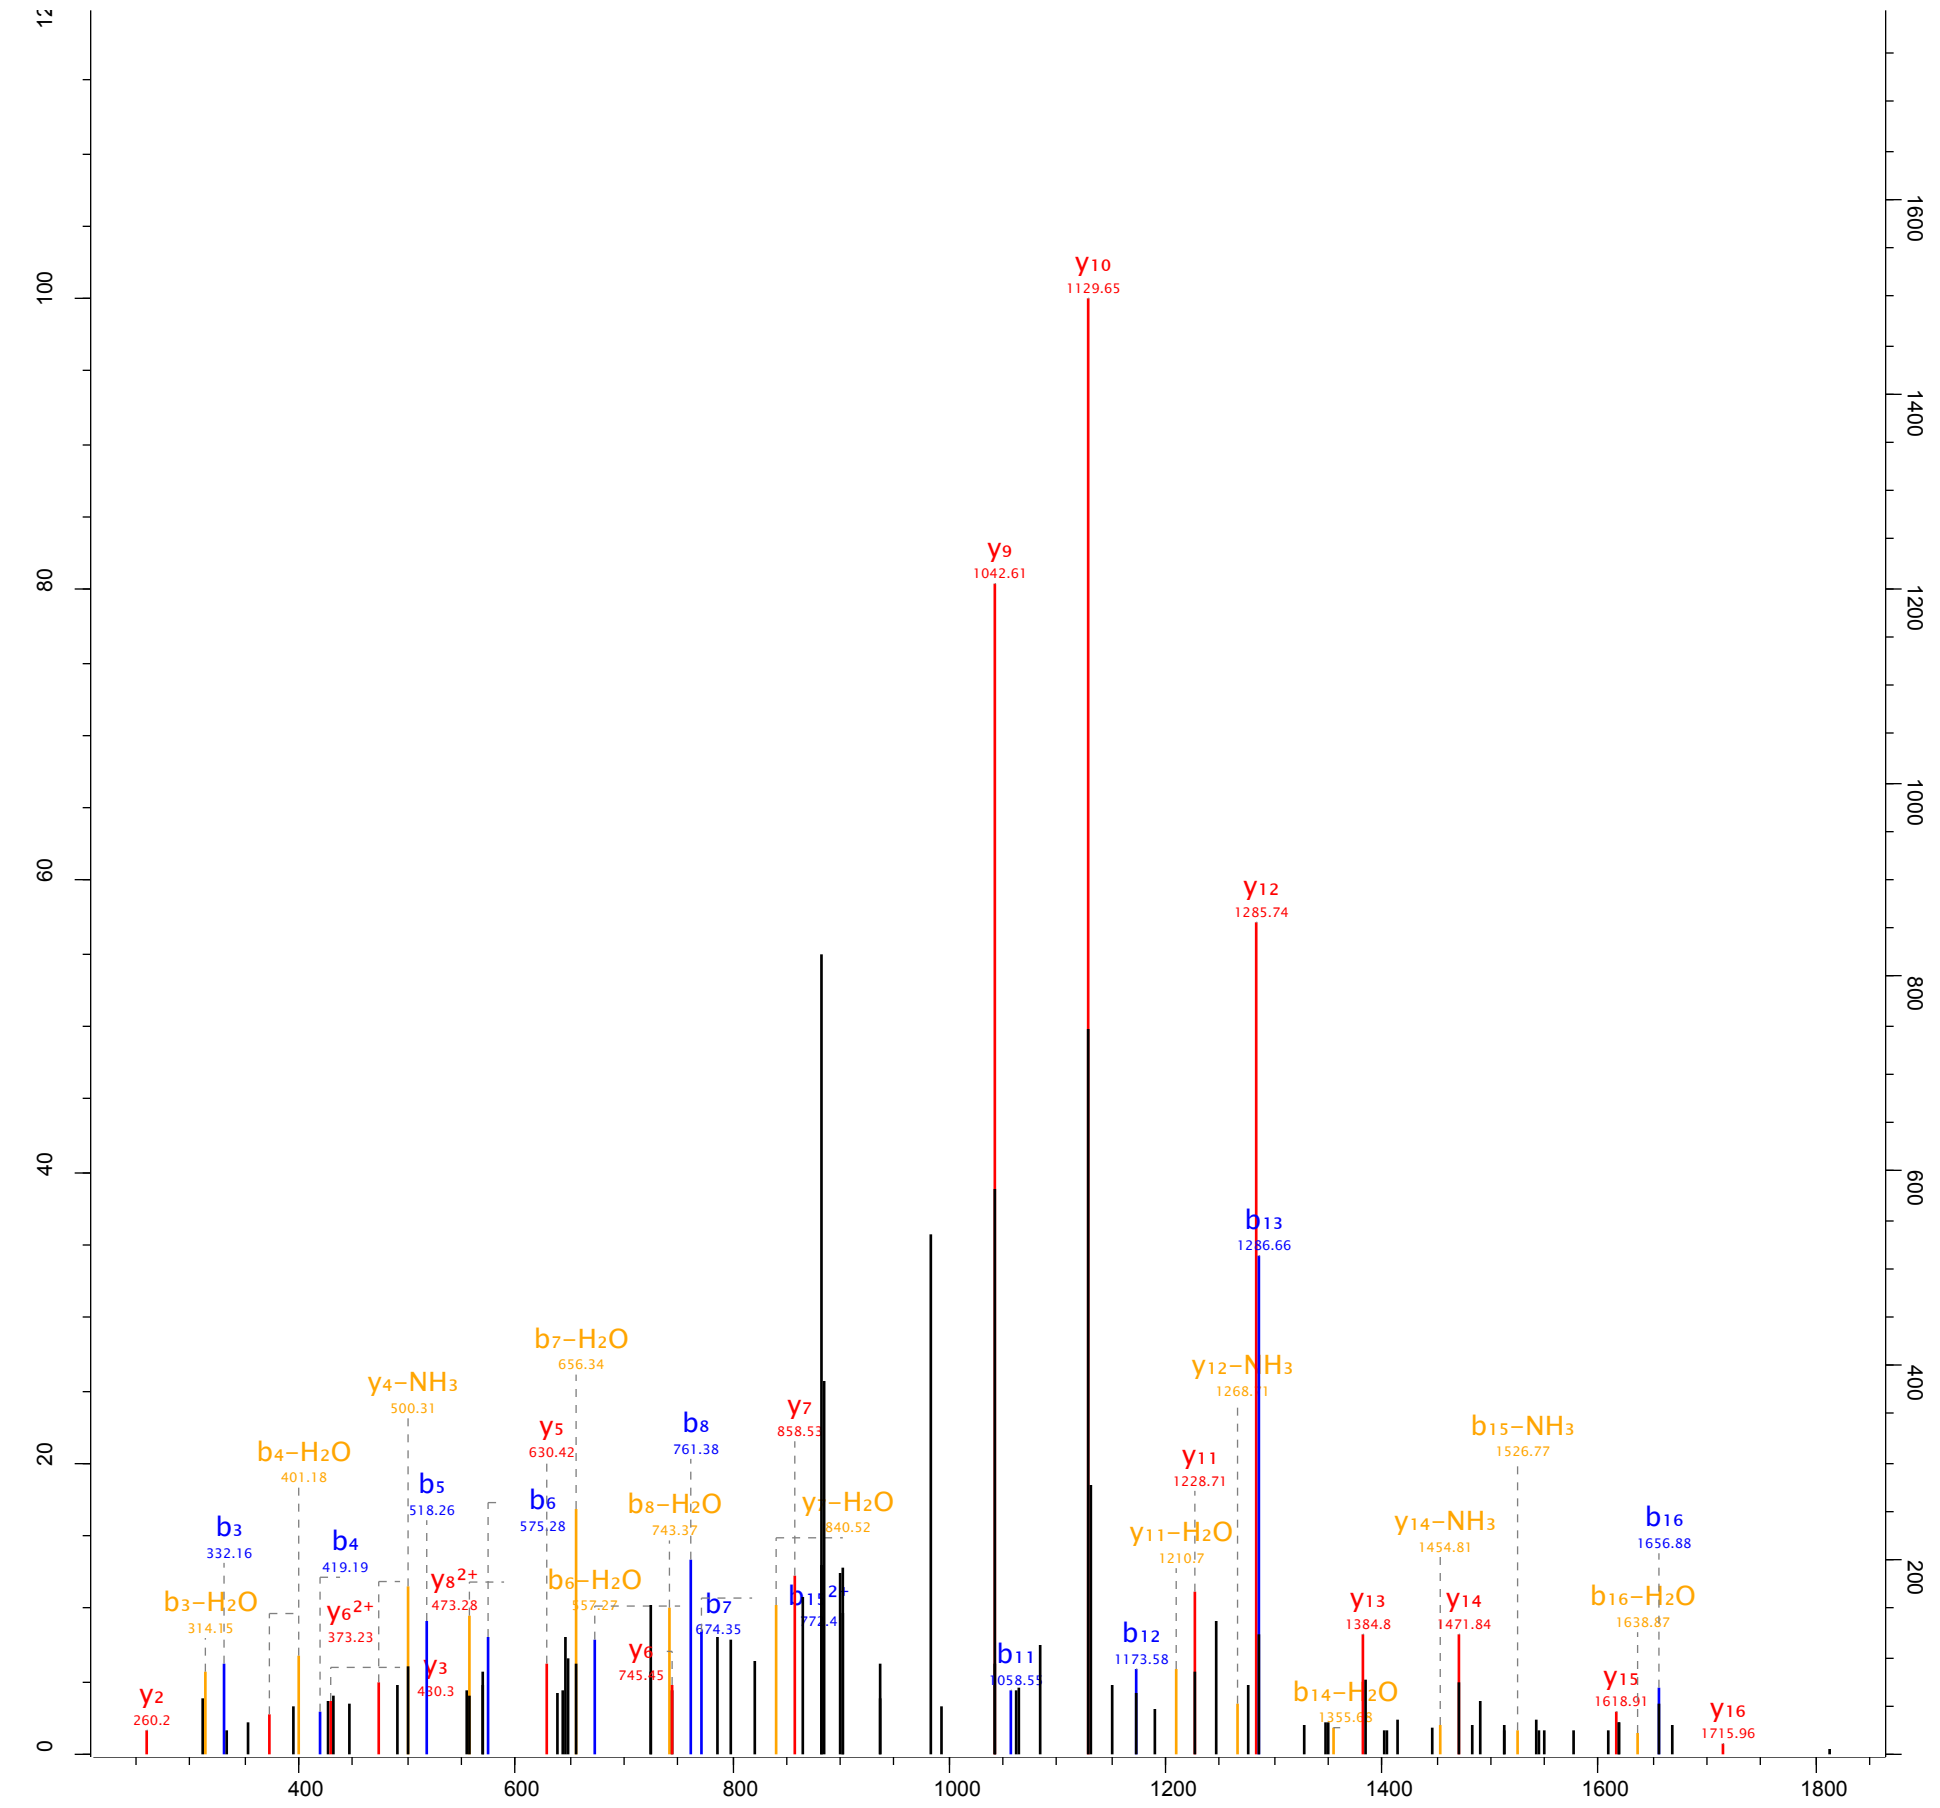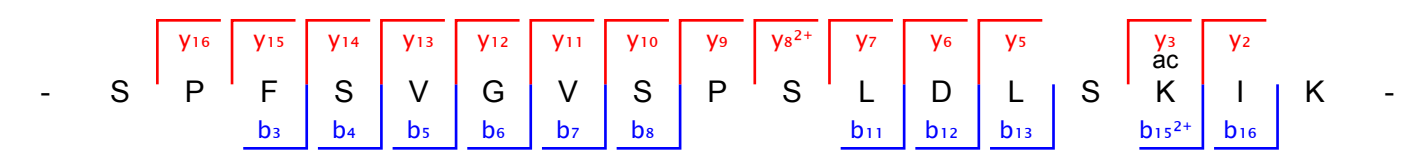

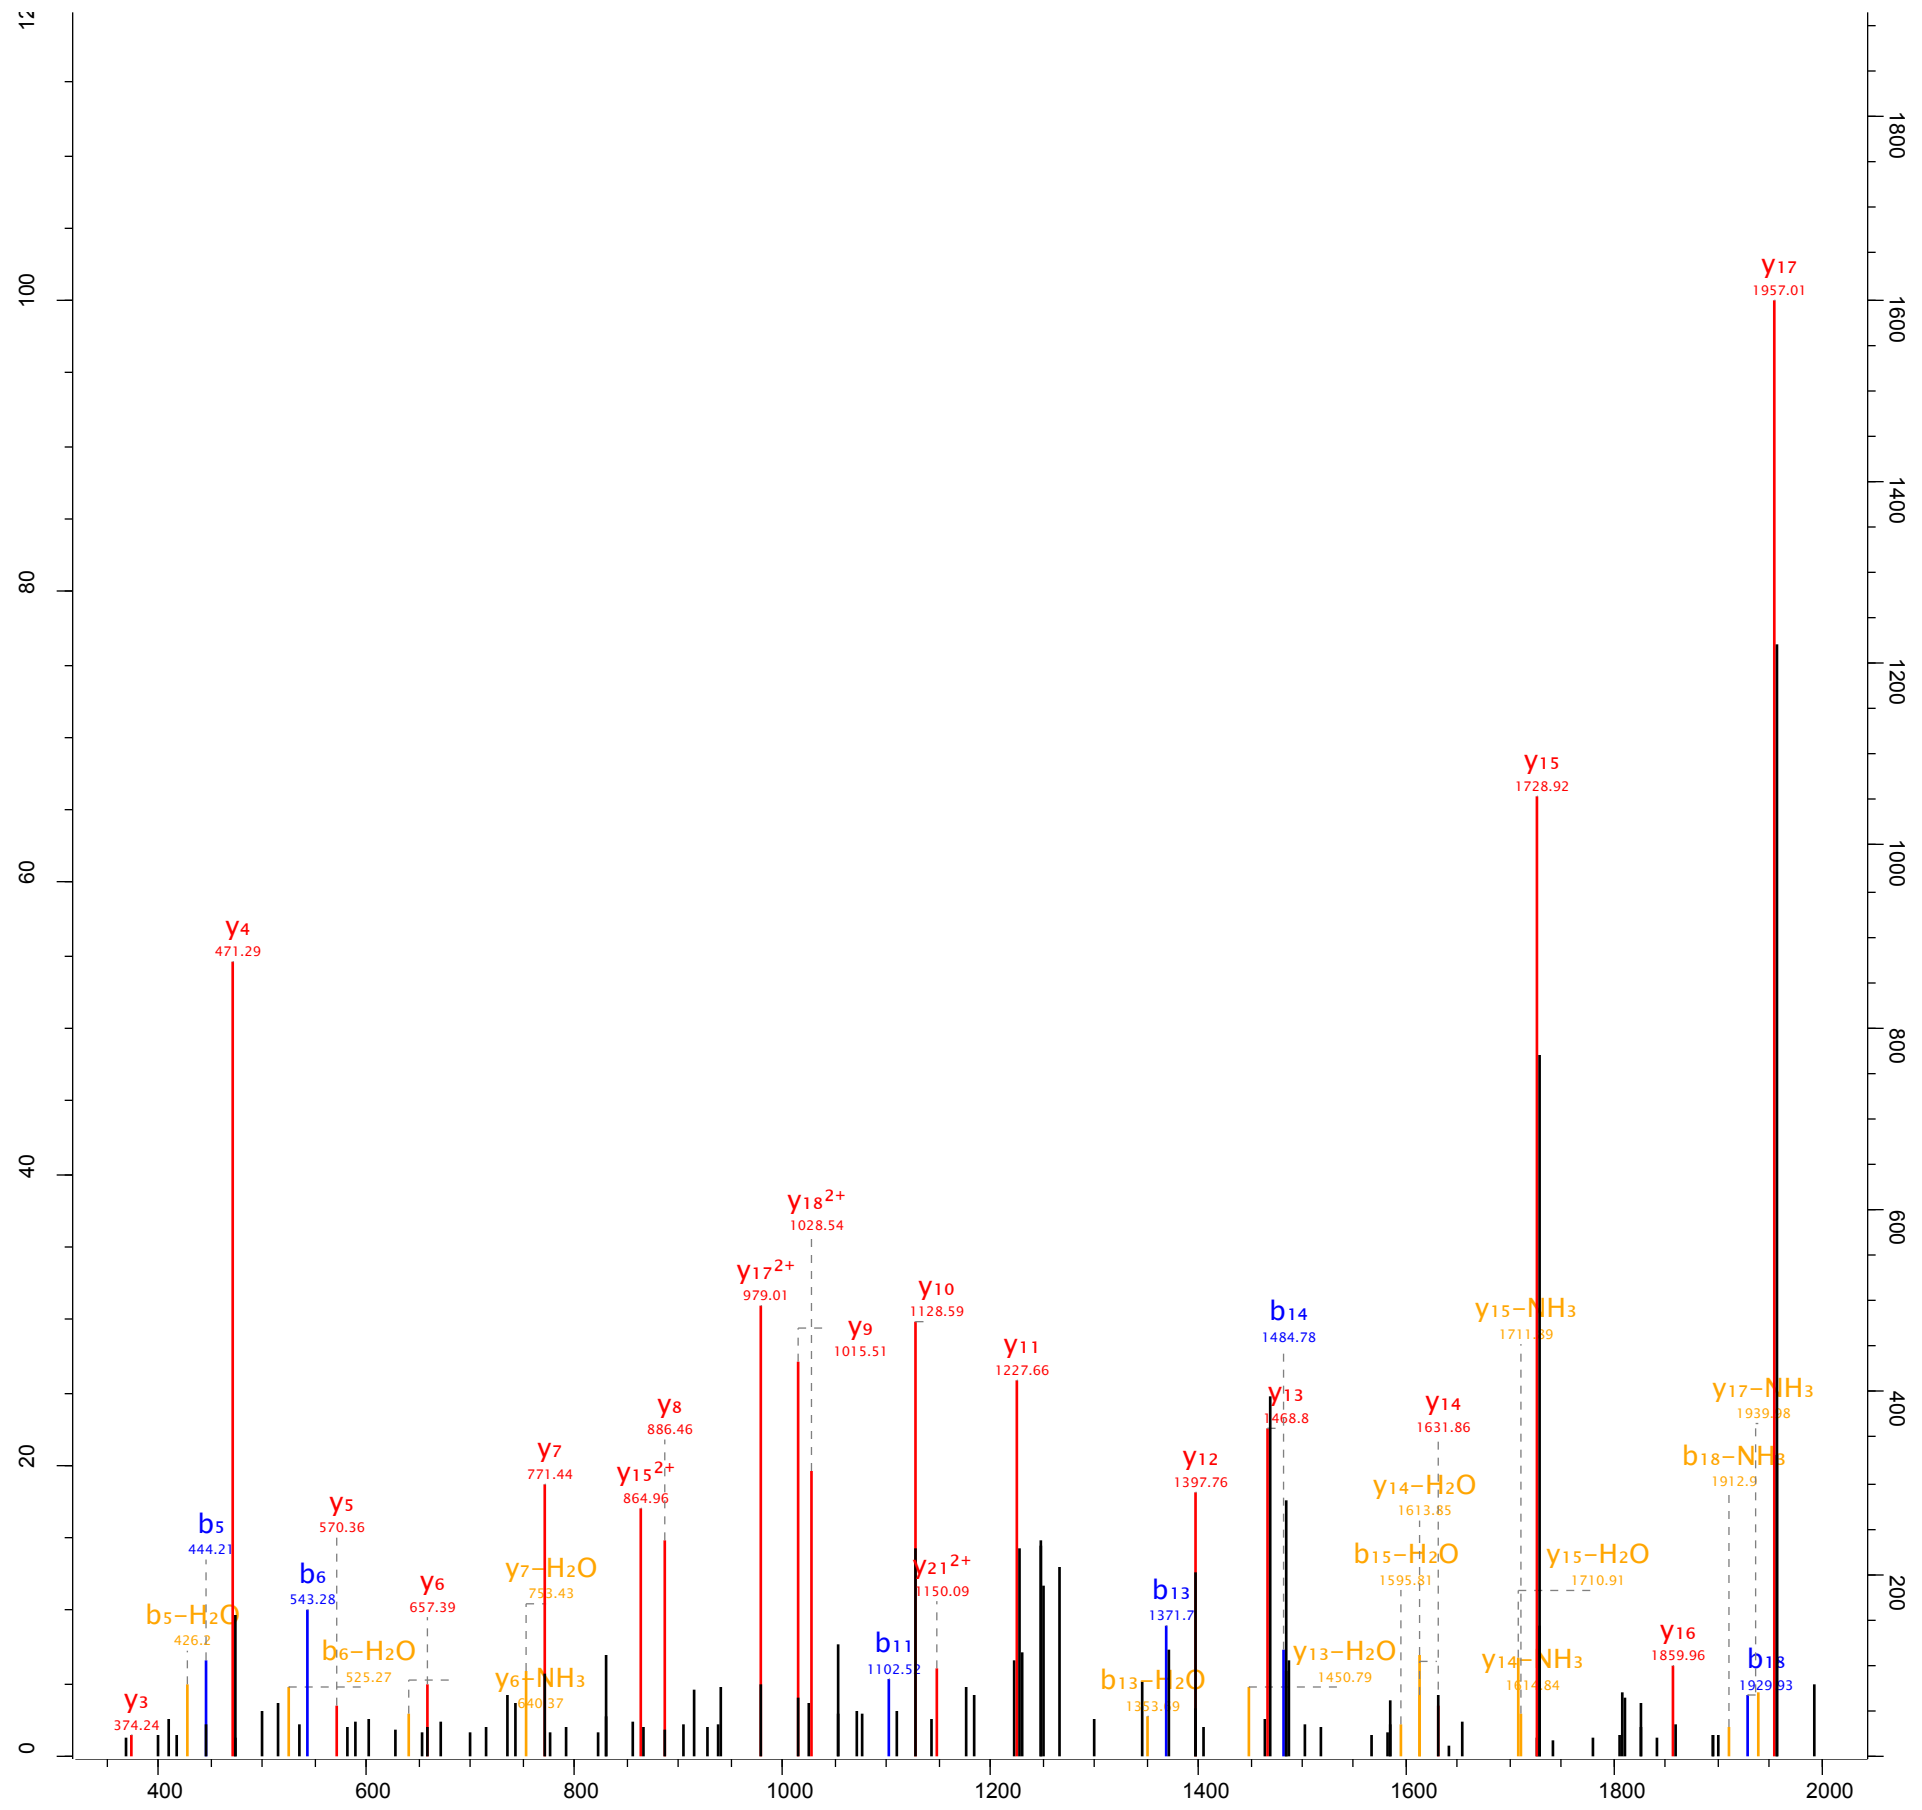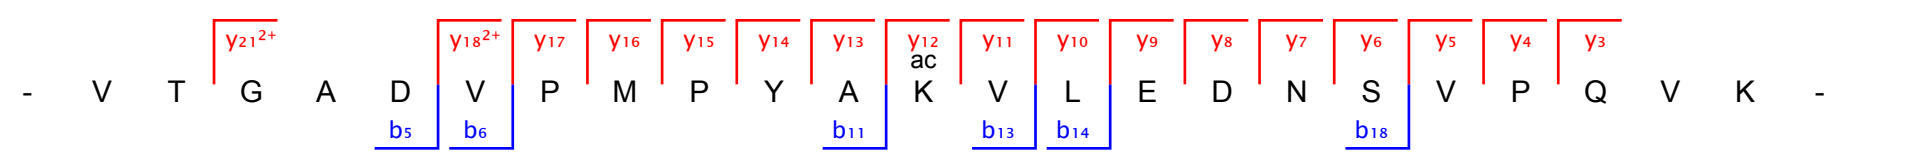

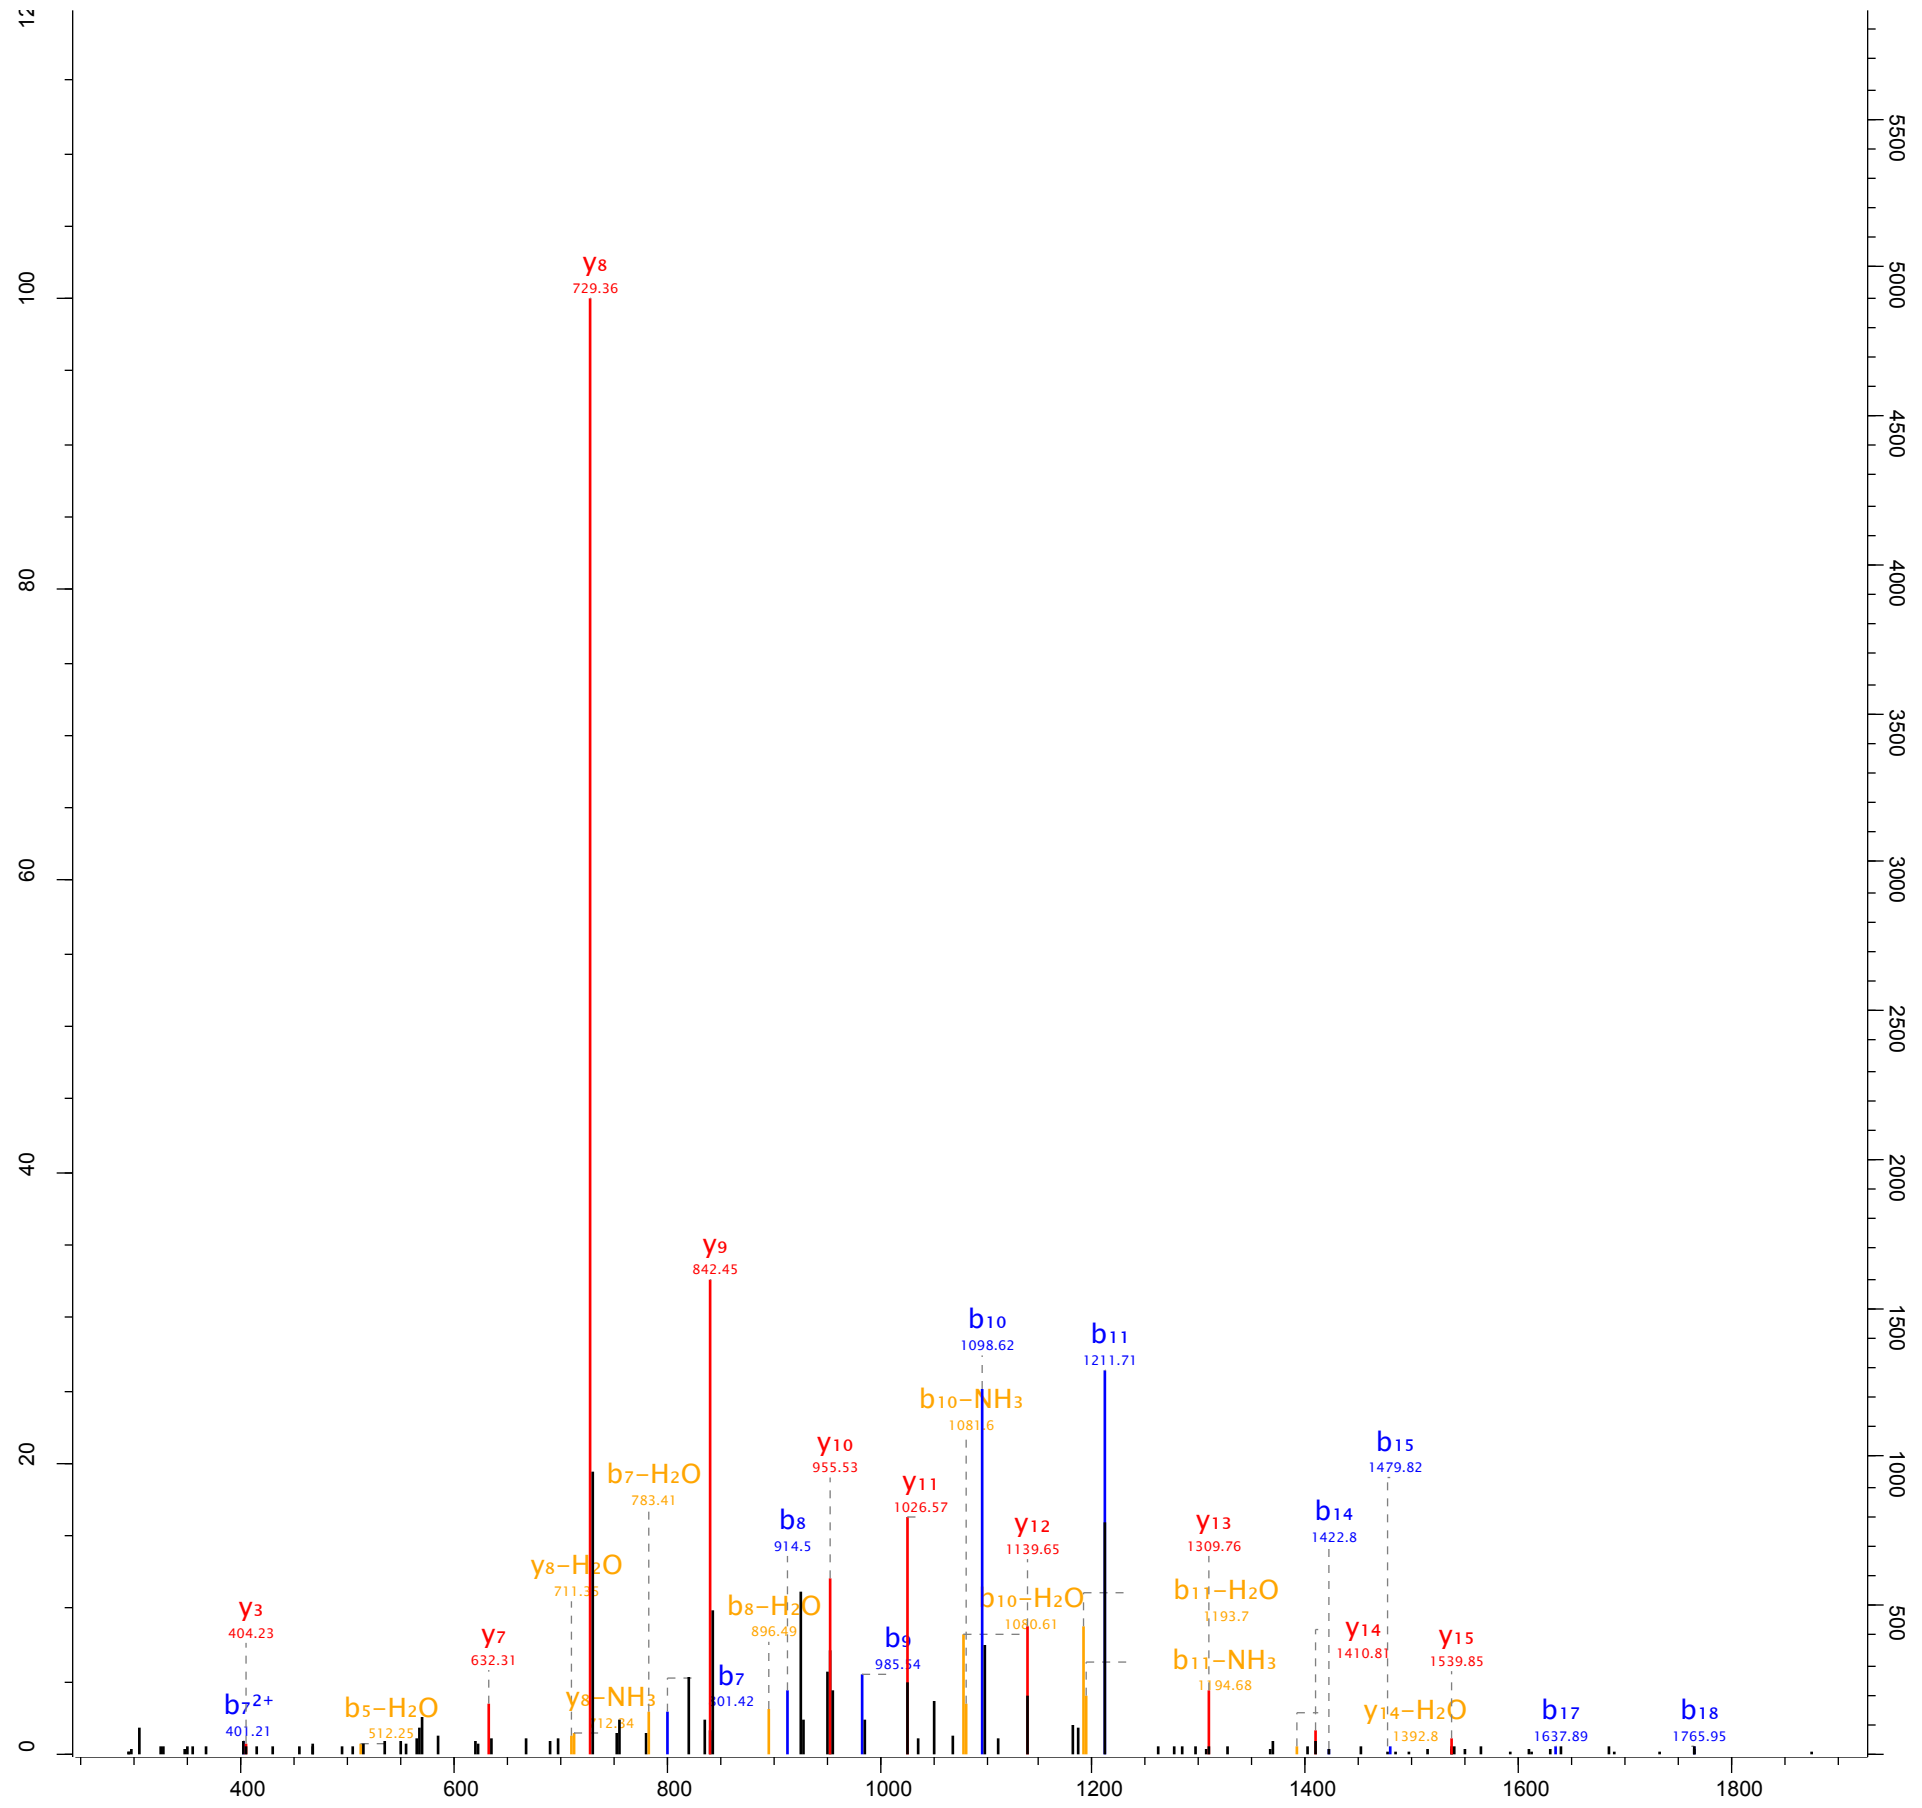

- M G L V E T K L A I I P G G G T Q R -

Annotations above the sequence:

- Red boxes: y15, y14, y13 ac, y12, y11, y10, y9, y8, y7, y3
- Blue boxes: b7, b8, b9, b10, b11, b14, b15, b17, b18

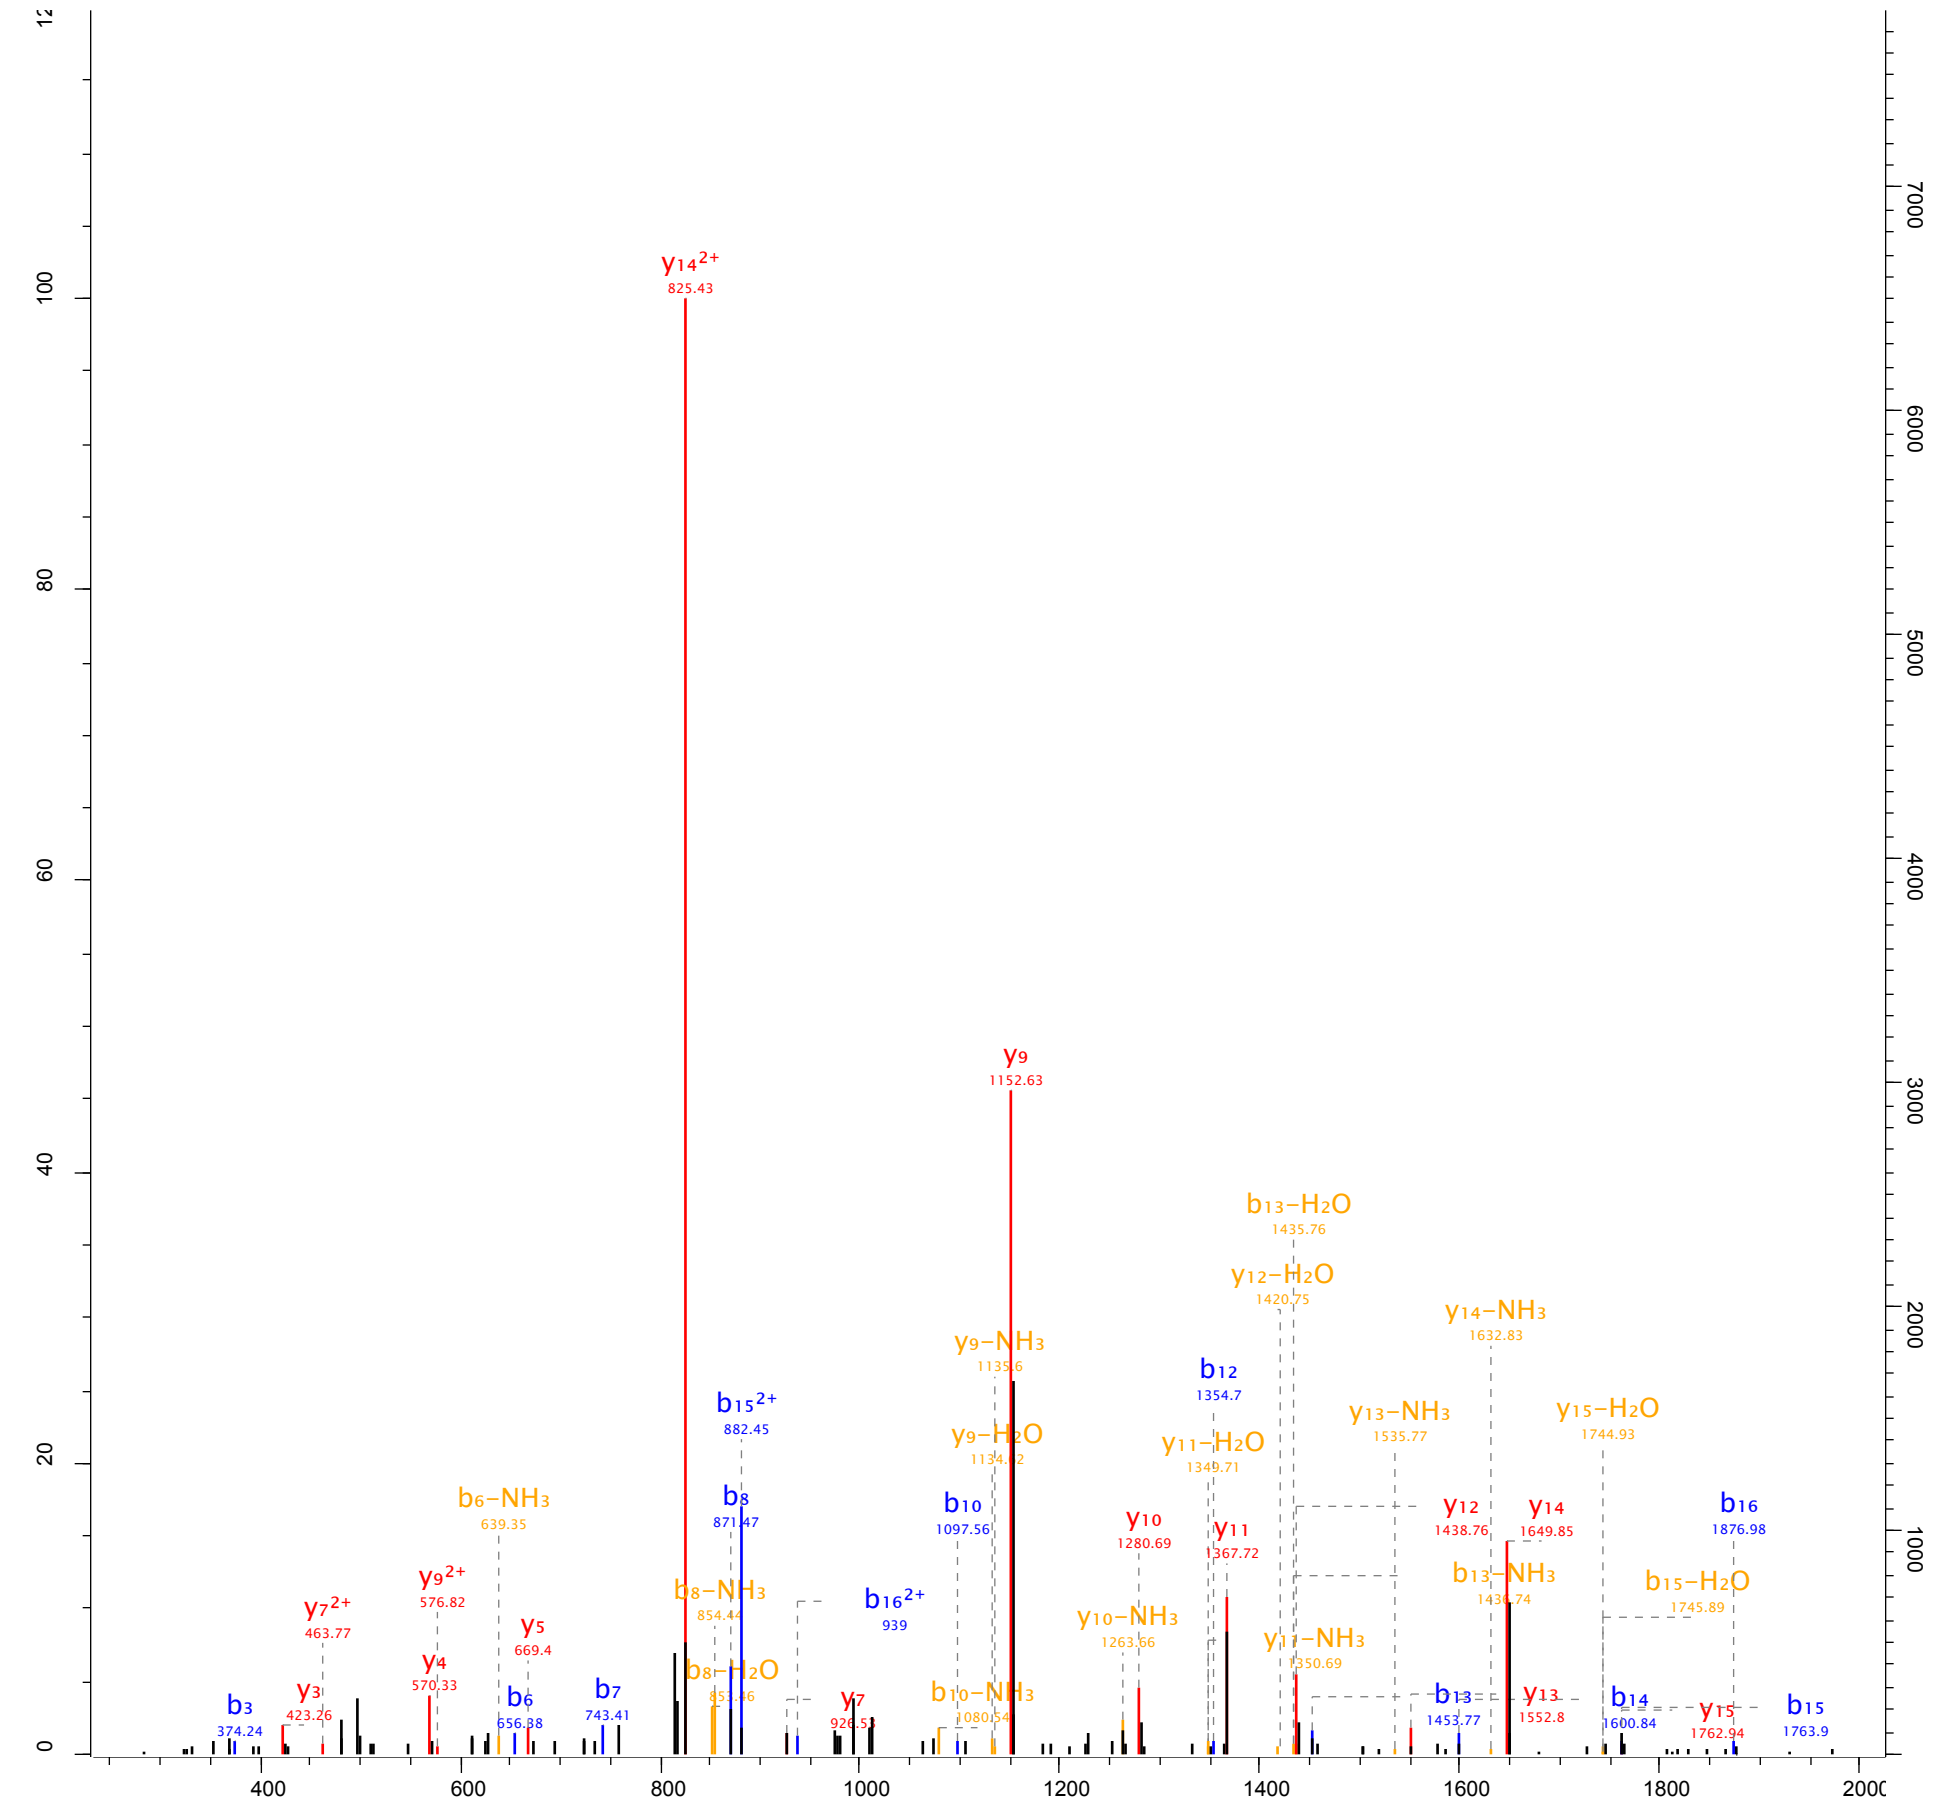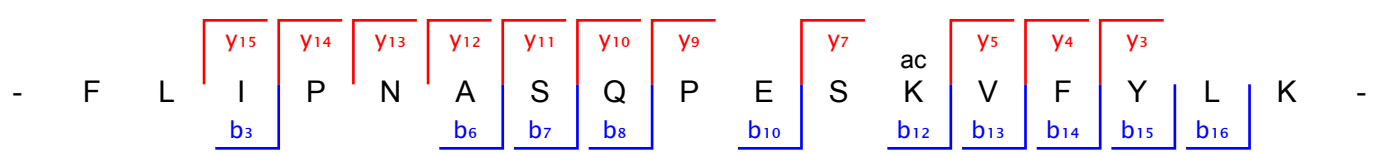

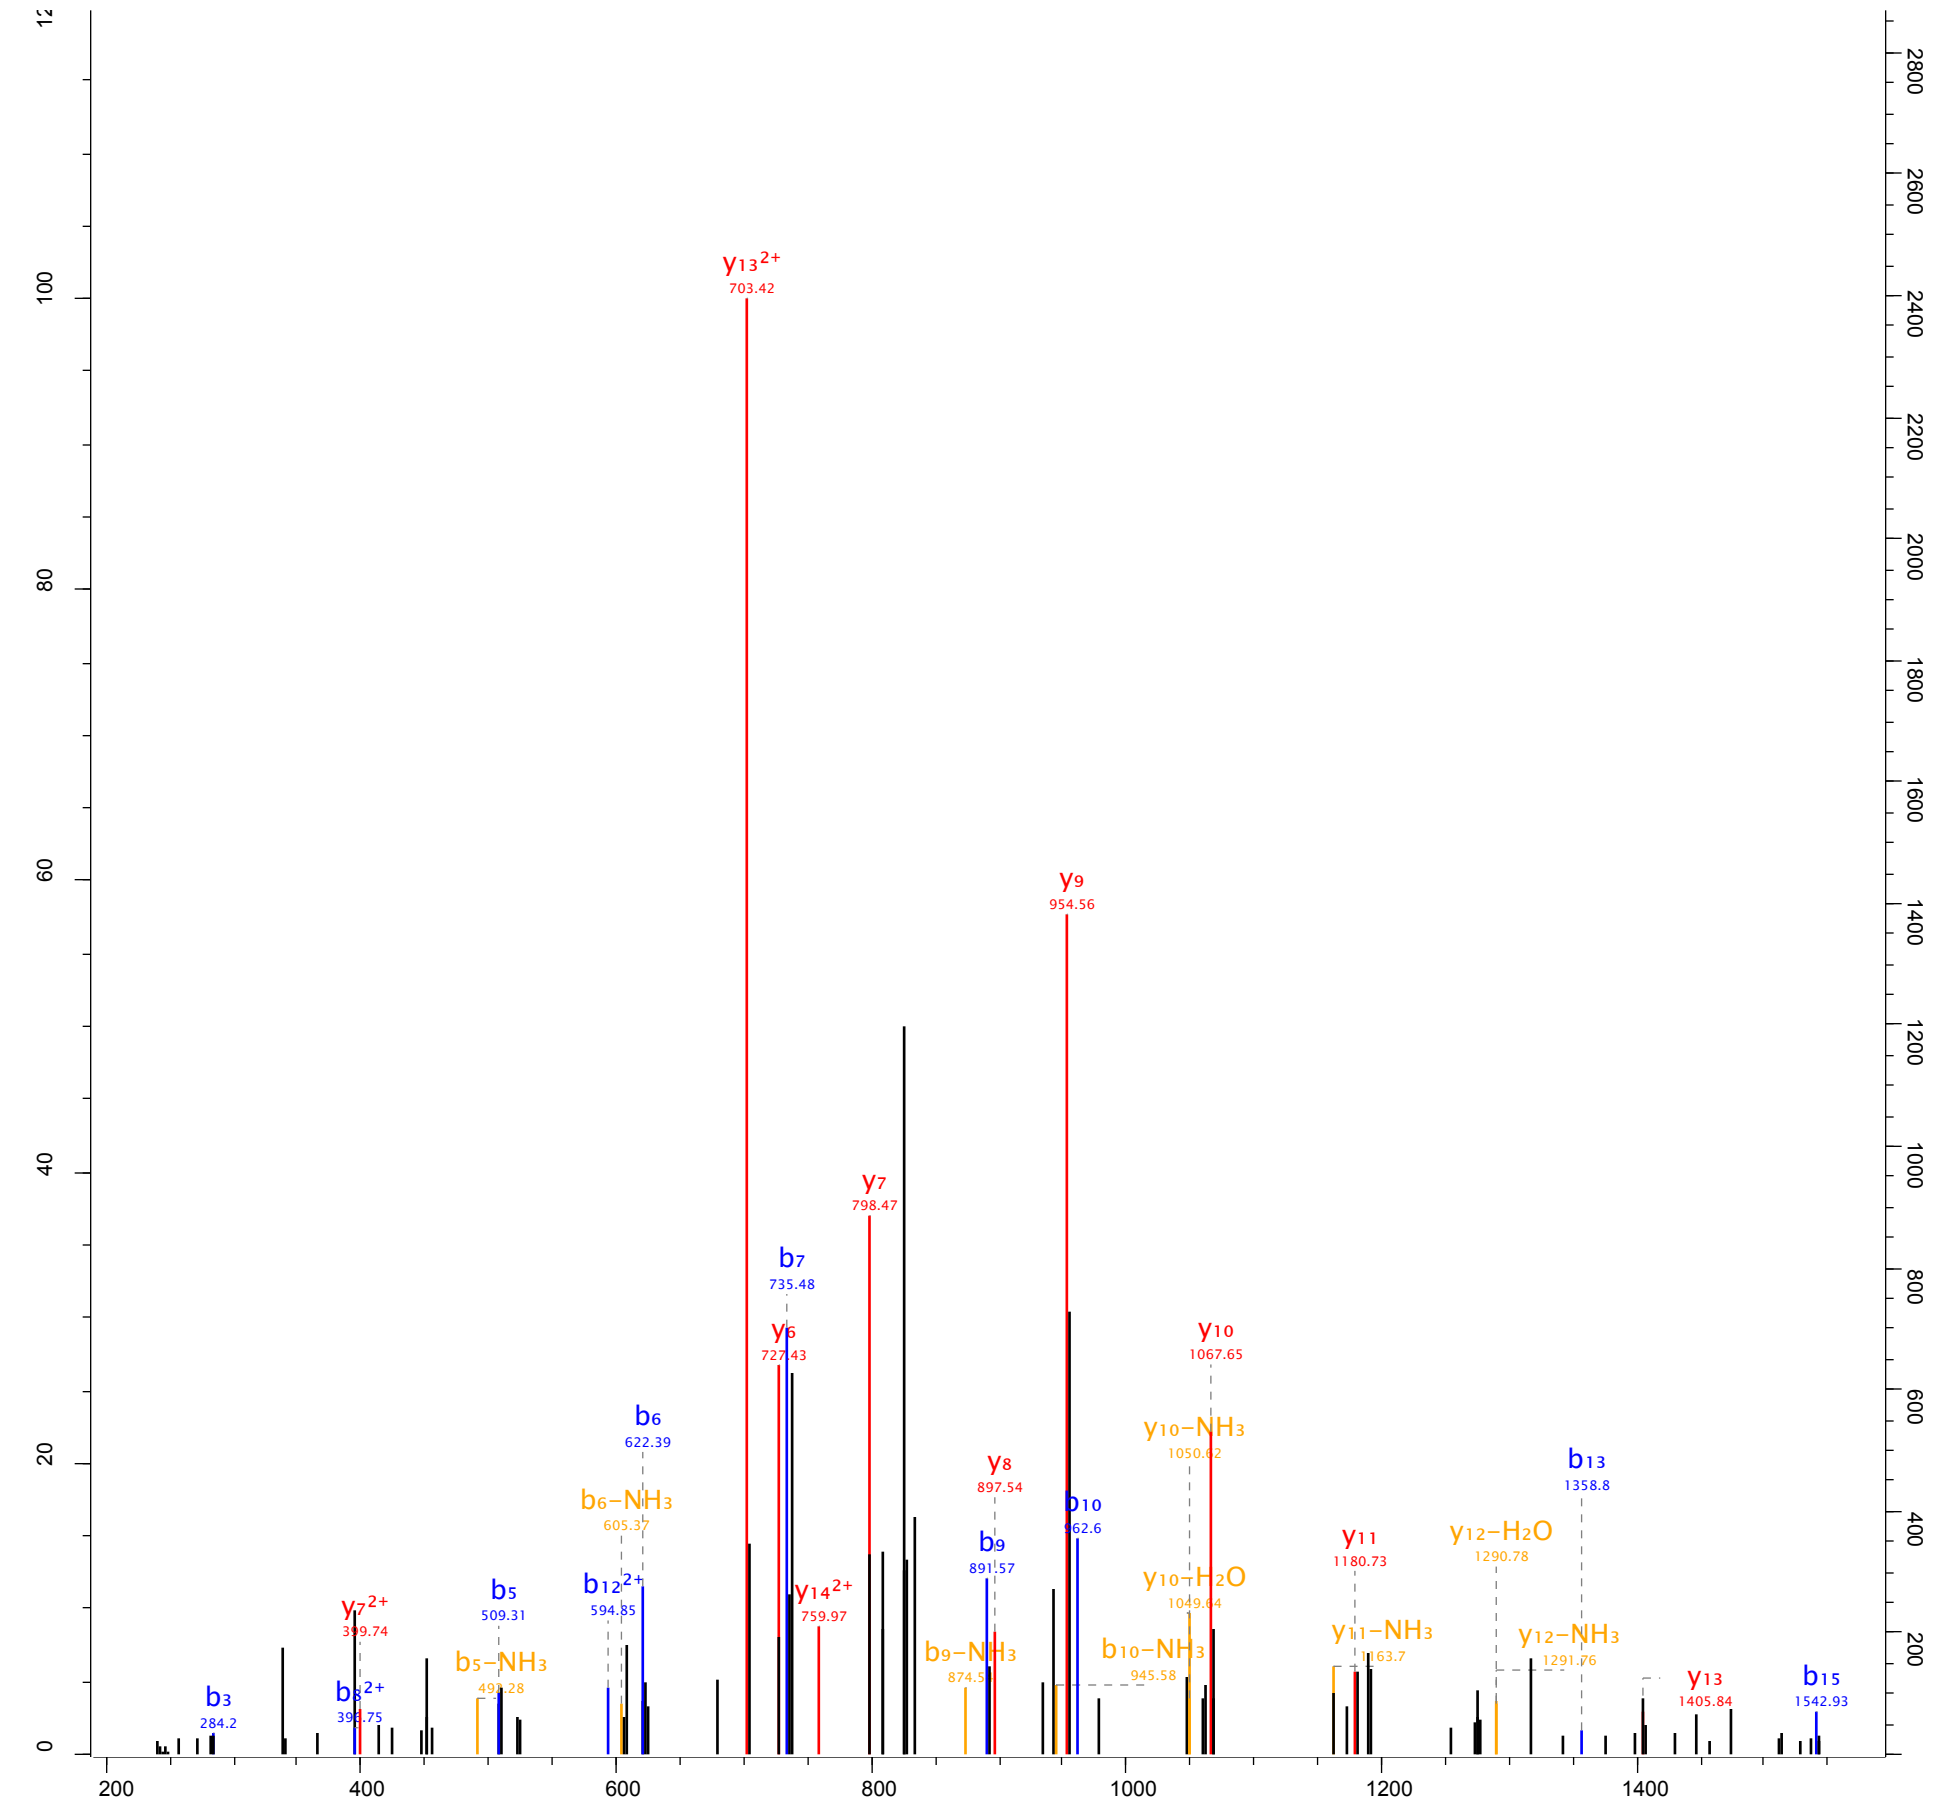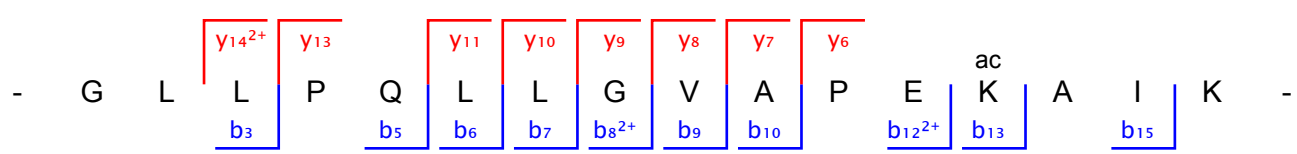

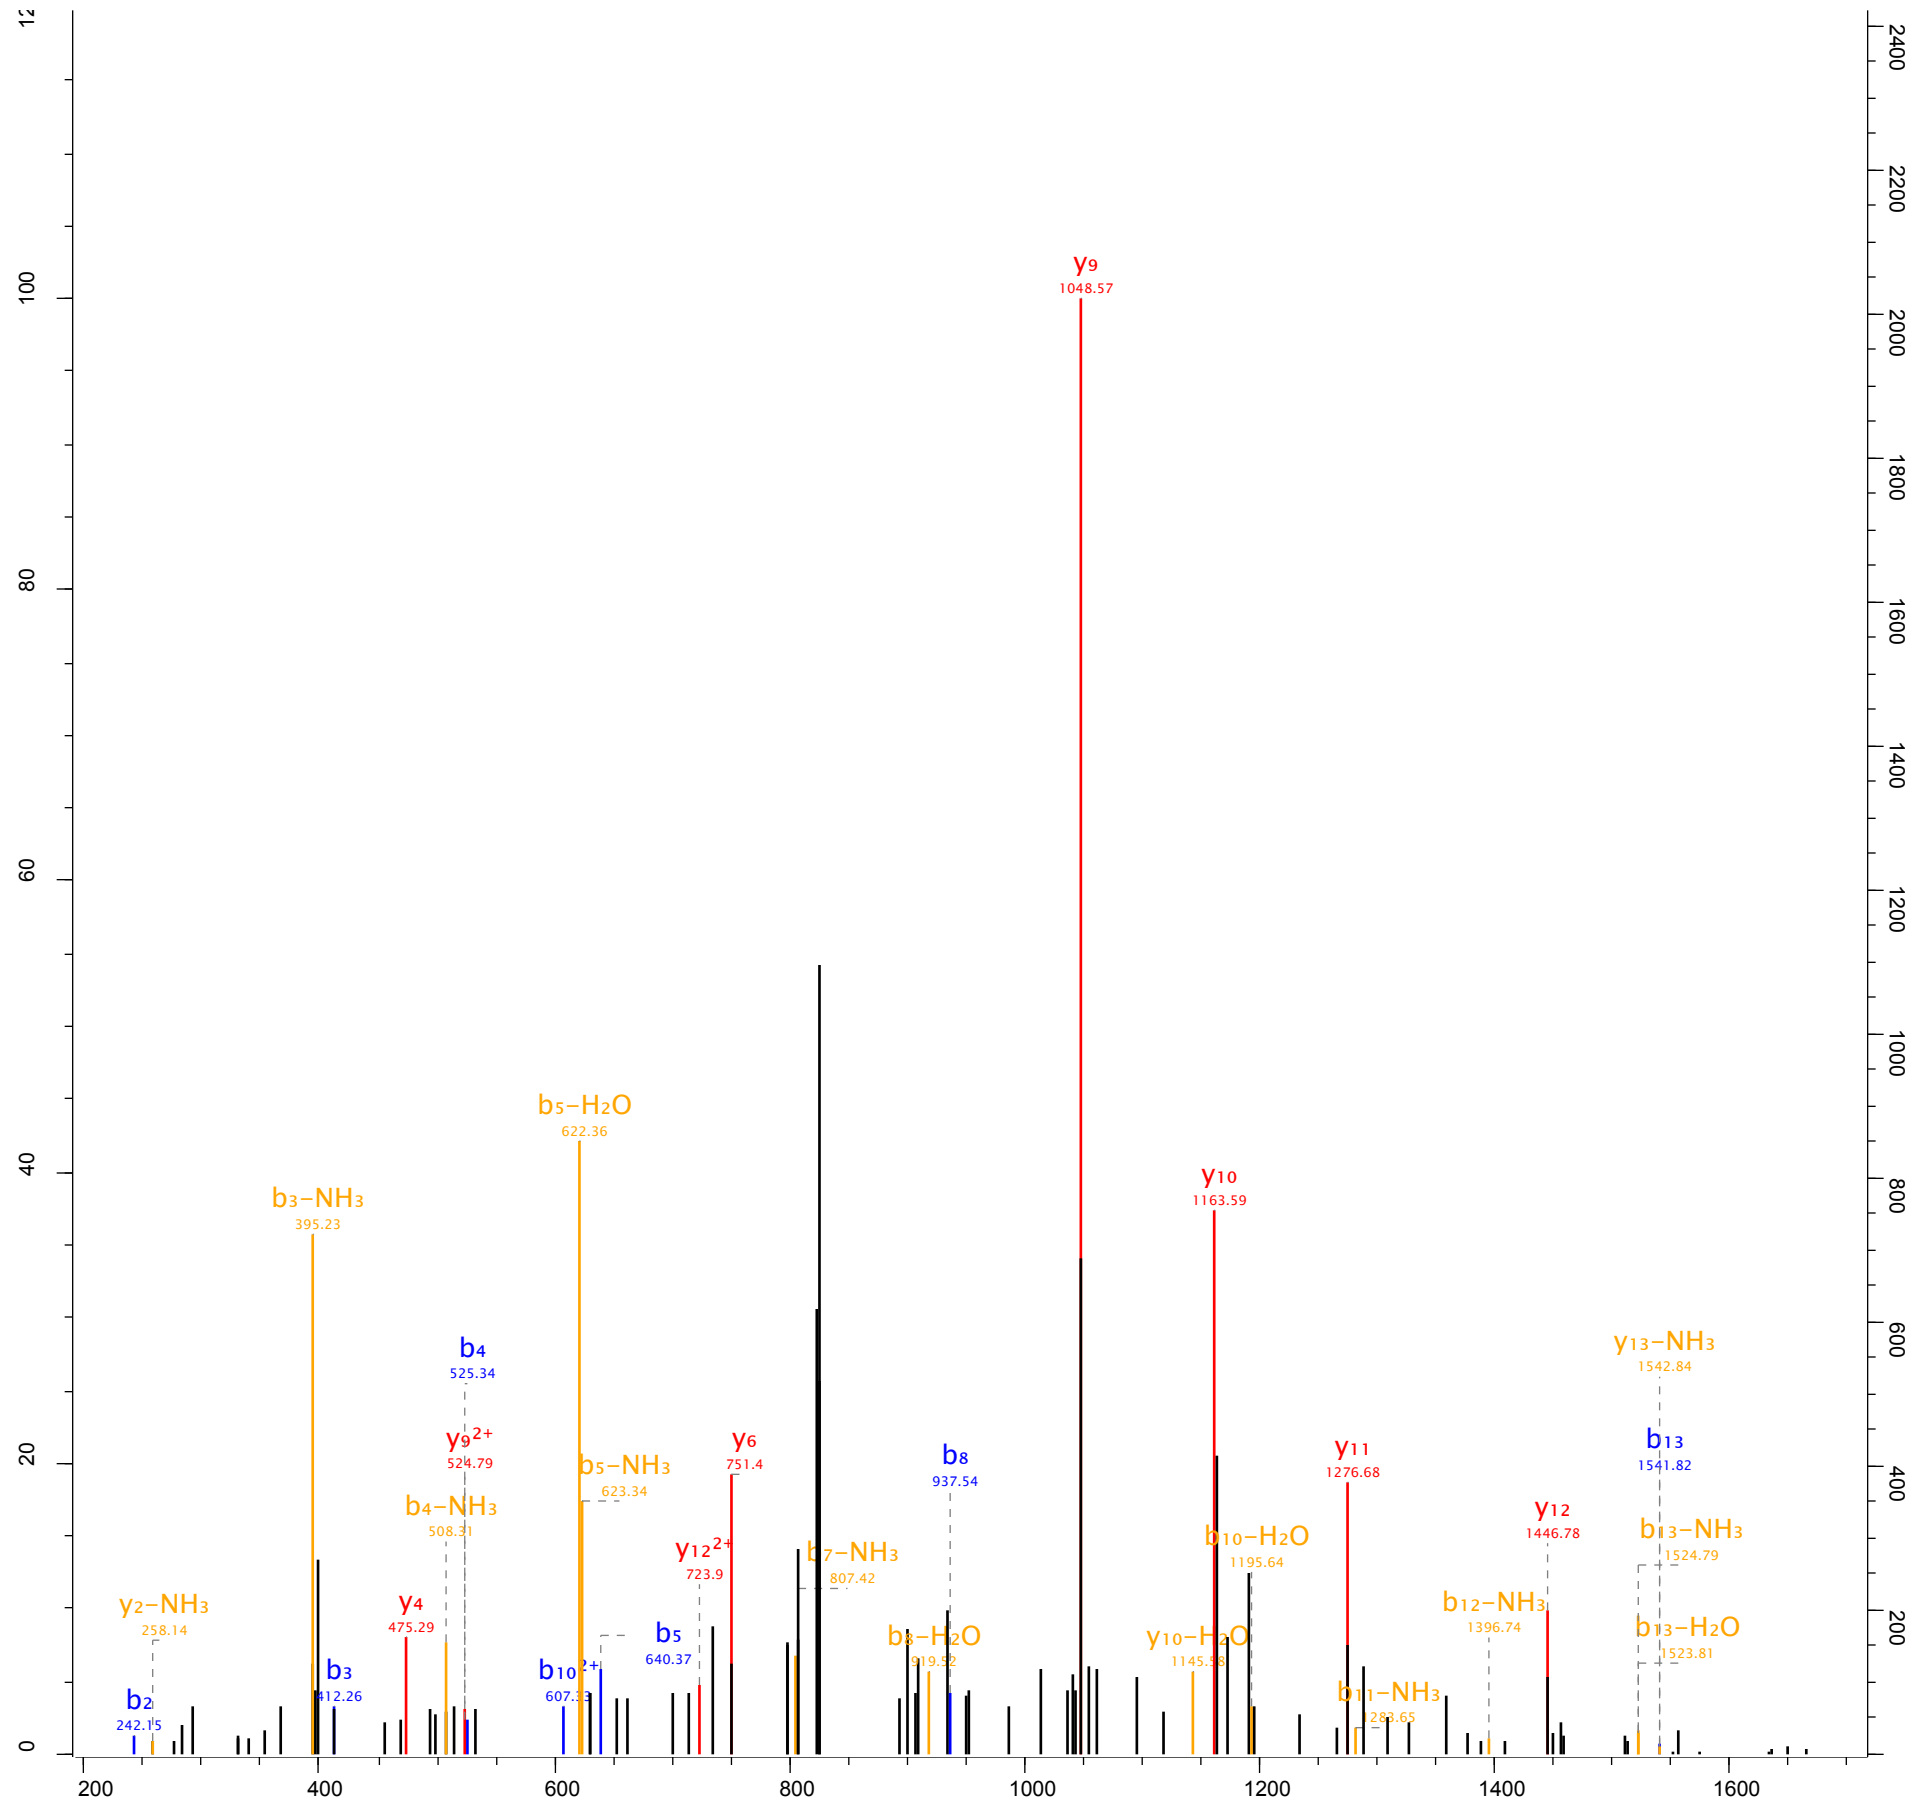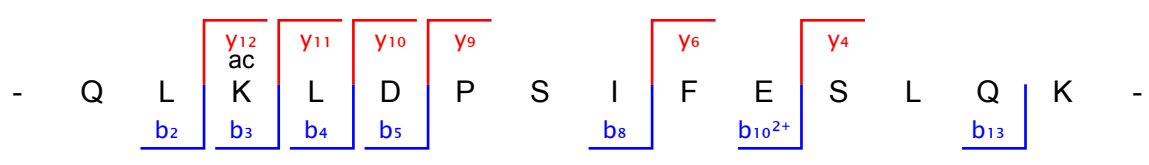

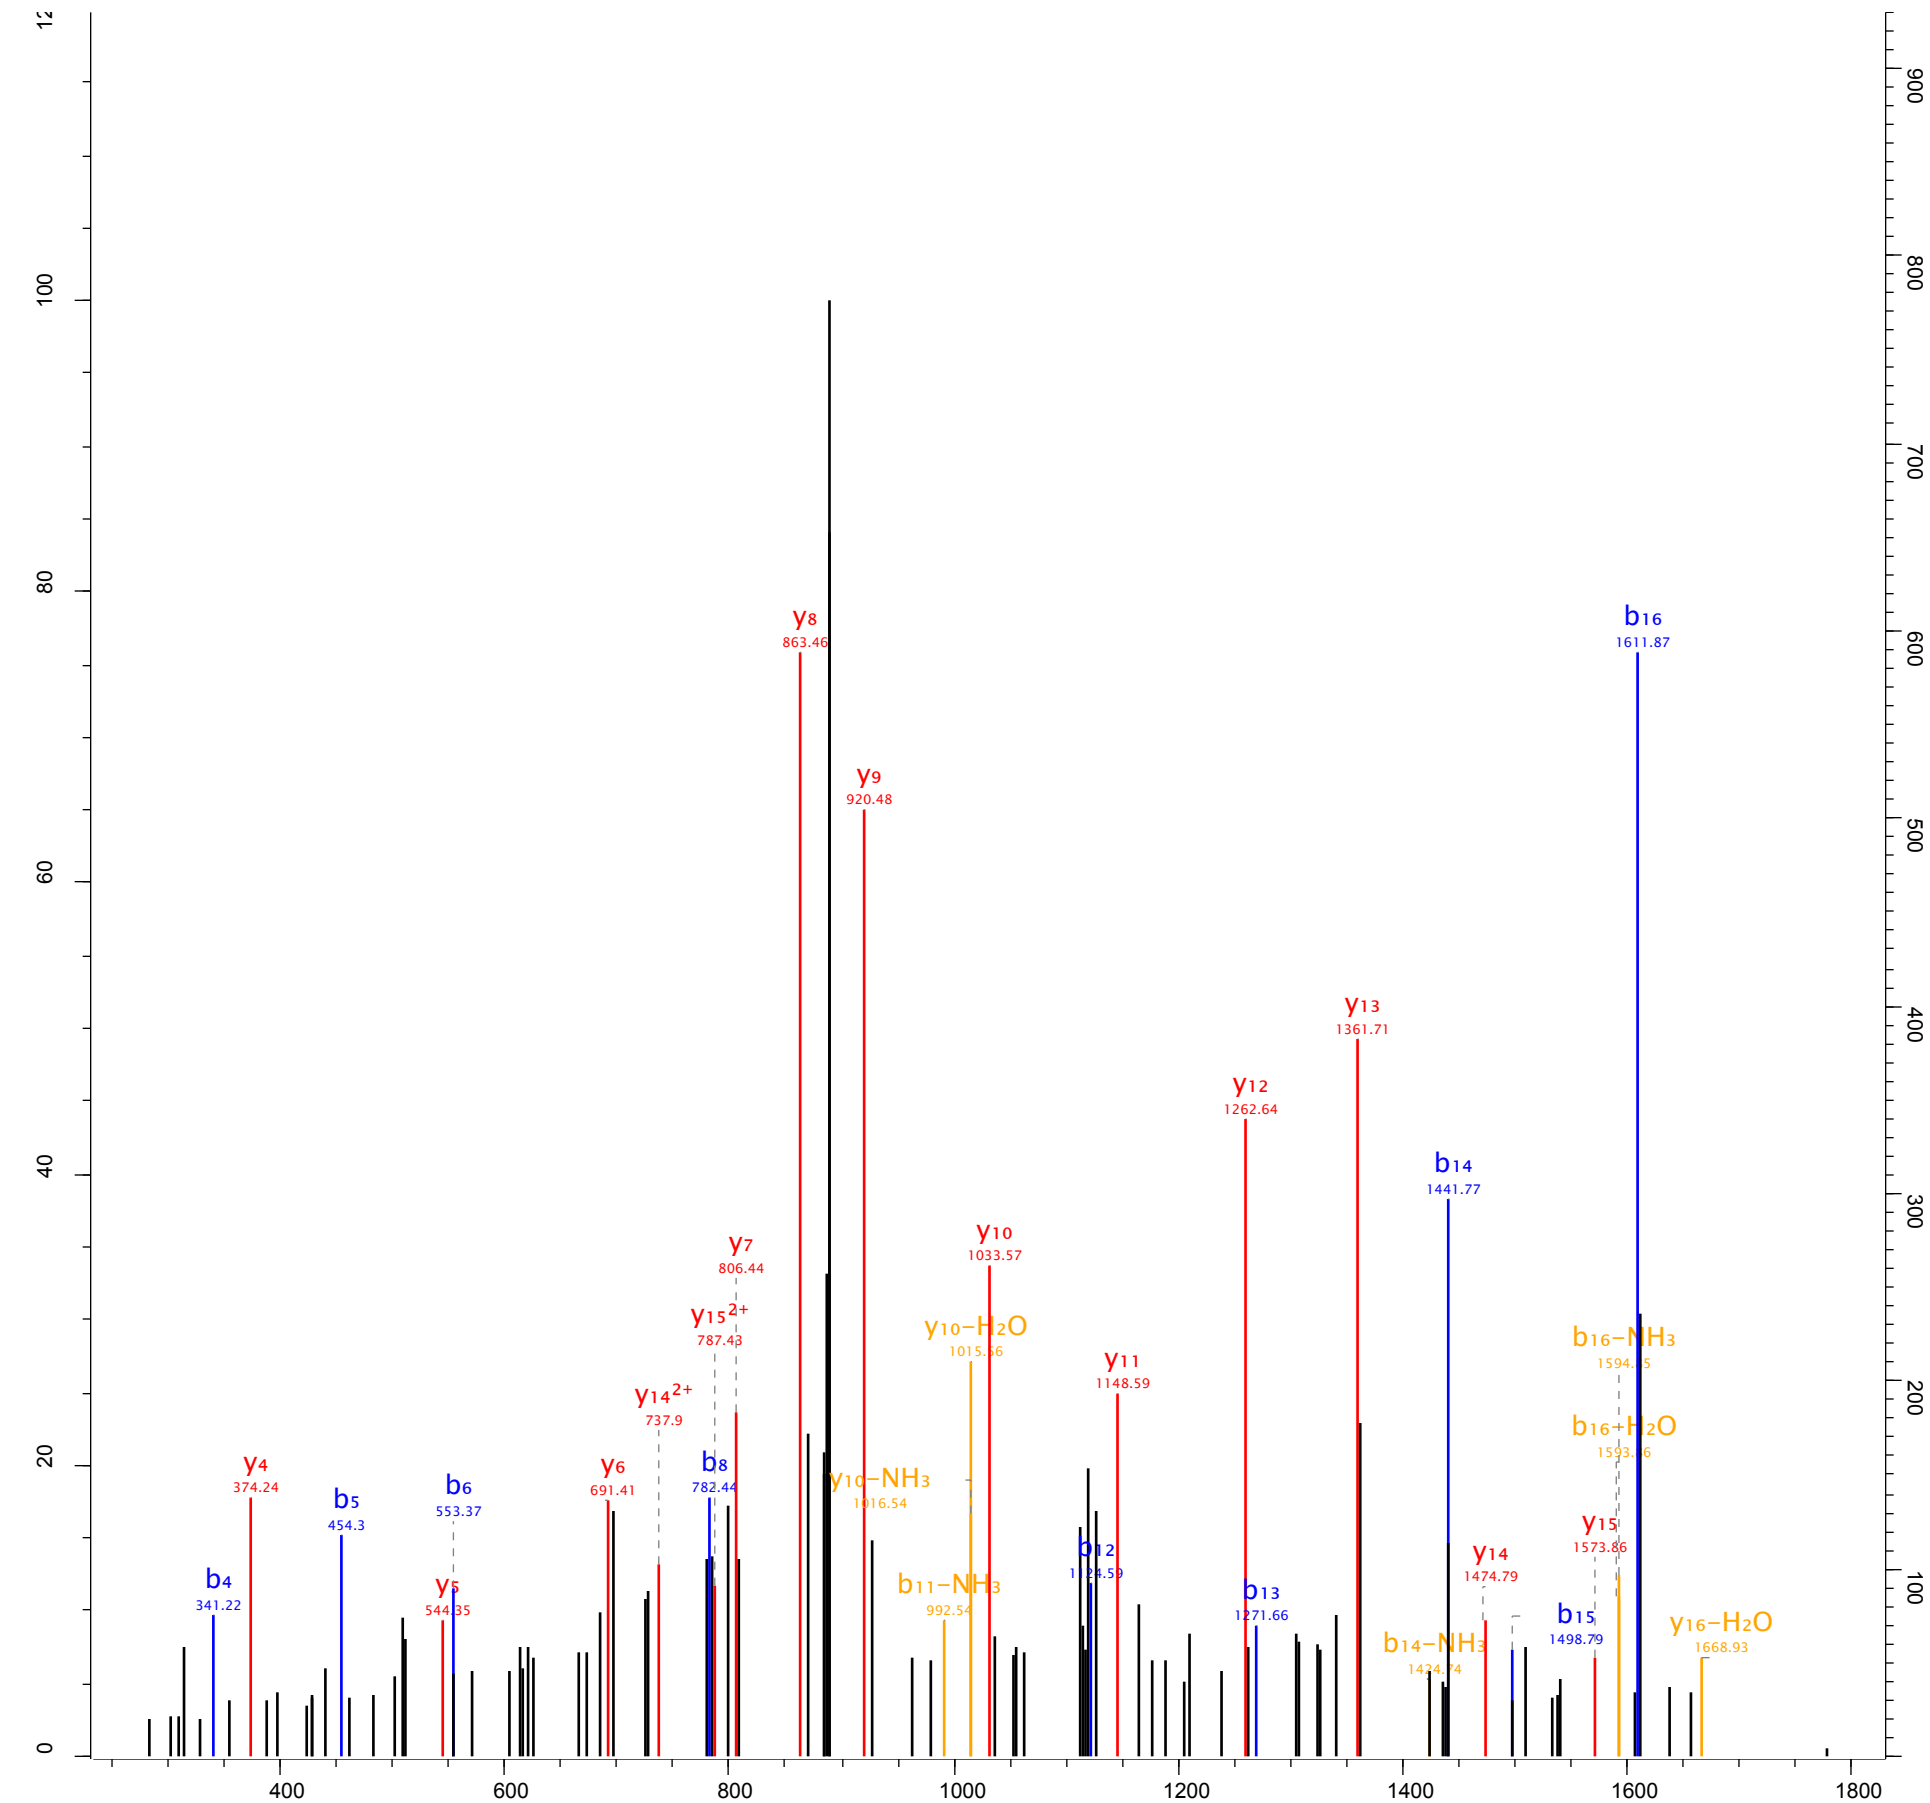

- G A L V I V N D L G G D F K G I G K -

y15
y14
y13
y12
y11
y10
y9
y8
y7
y6
y5
ac
y4

b4
b5
b6
b8
b12
b13
b14
b15
b16



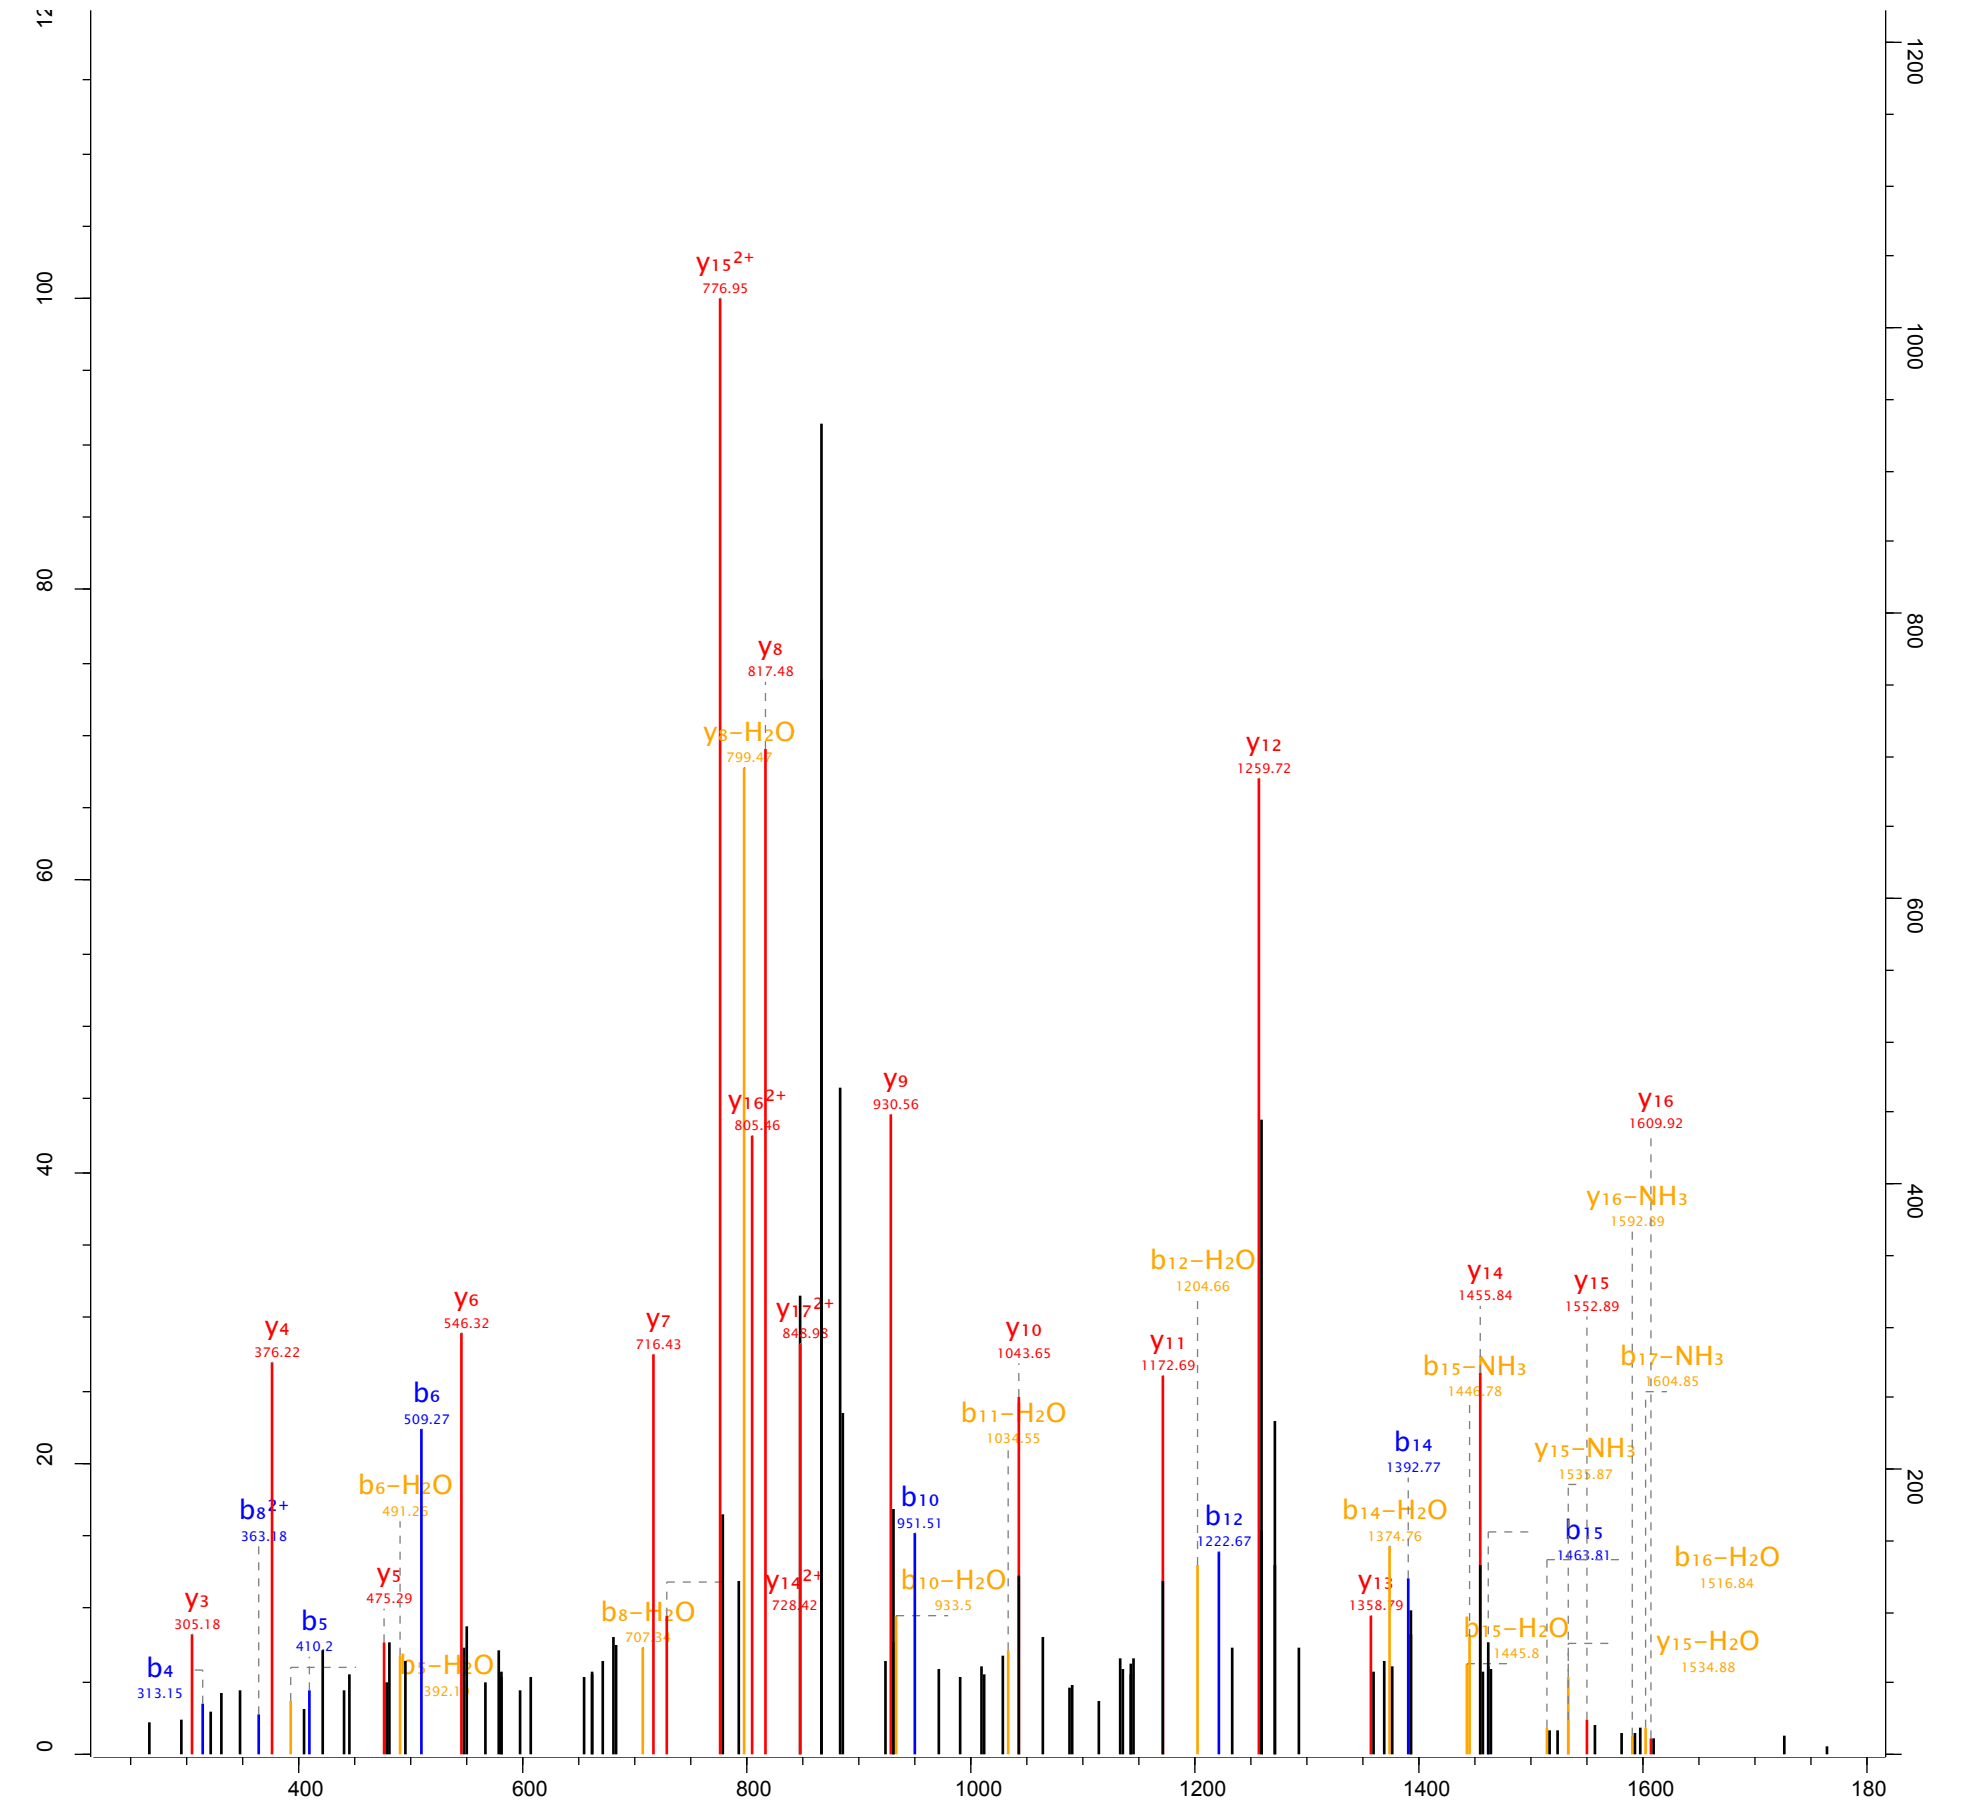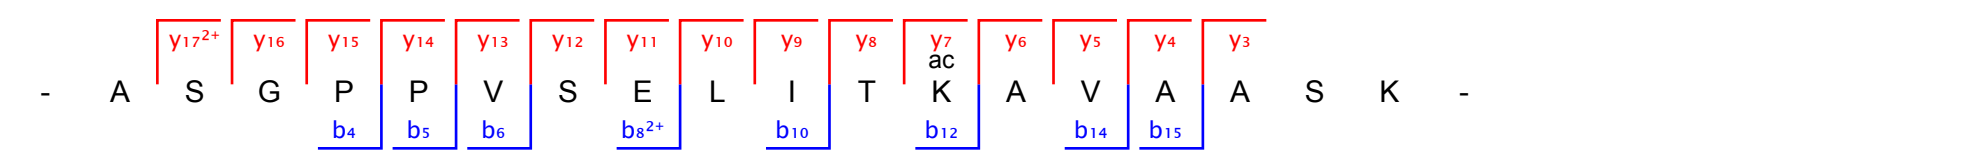

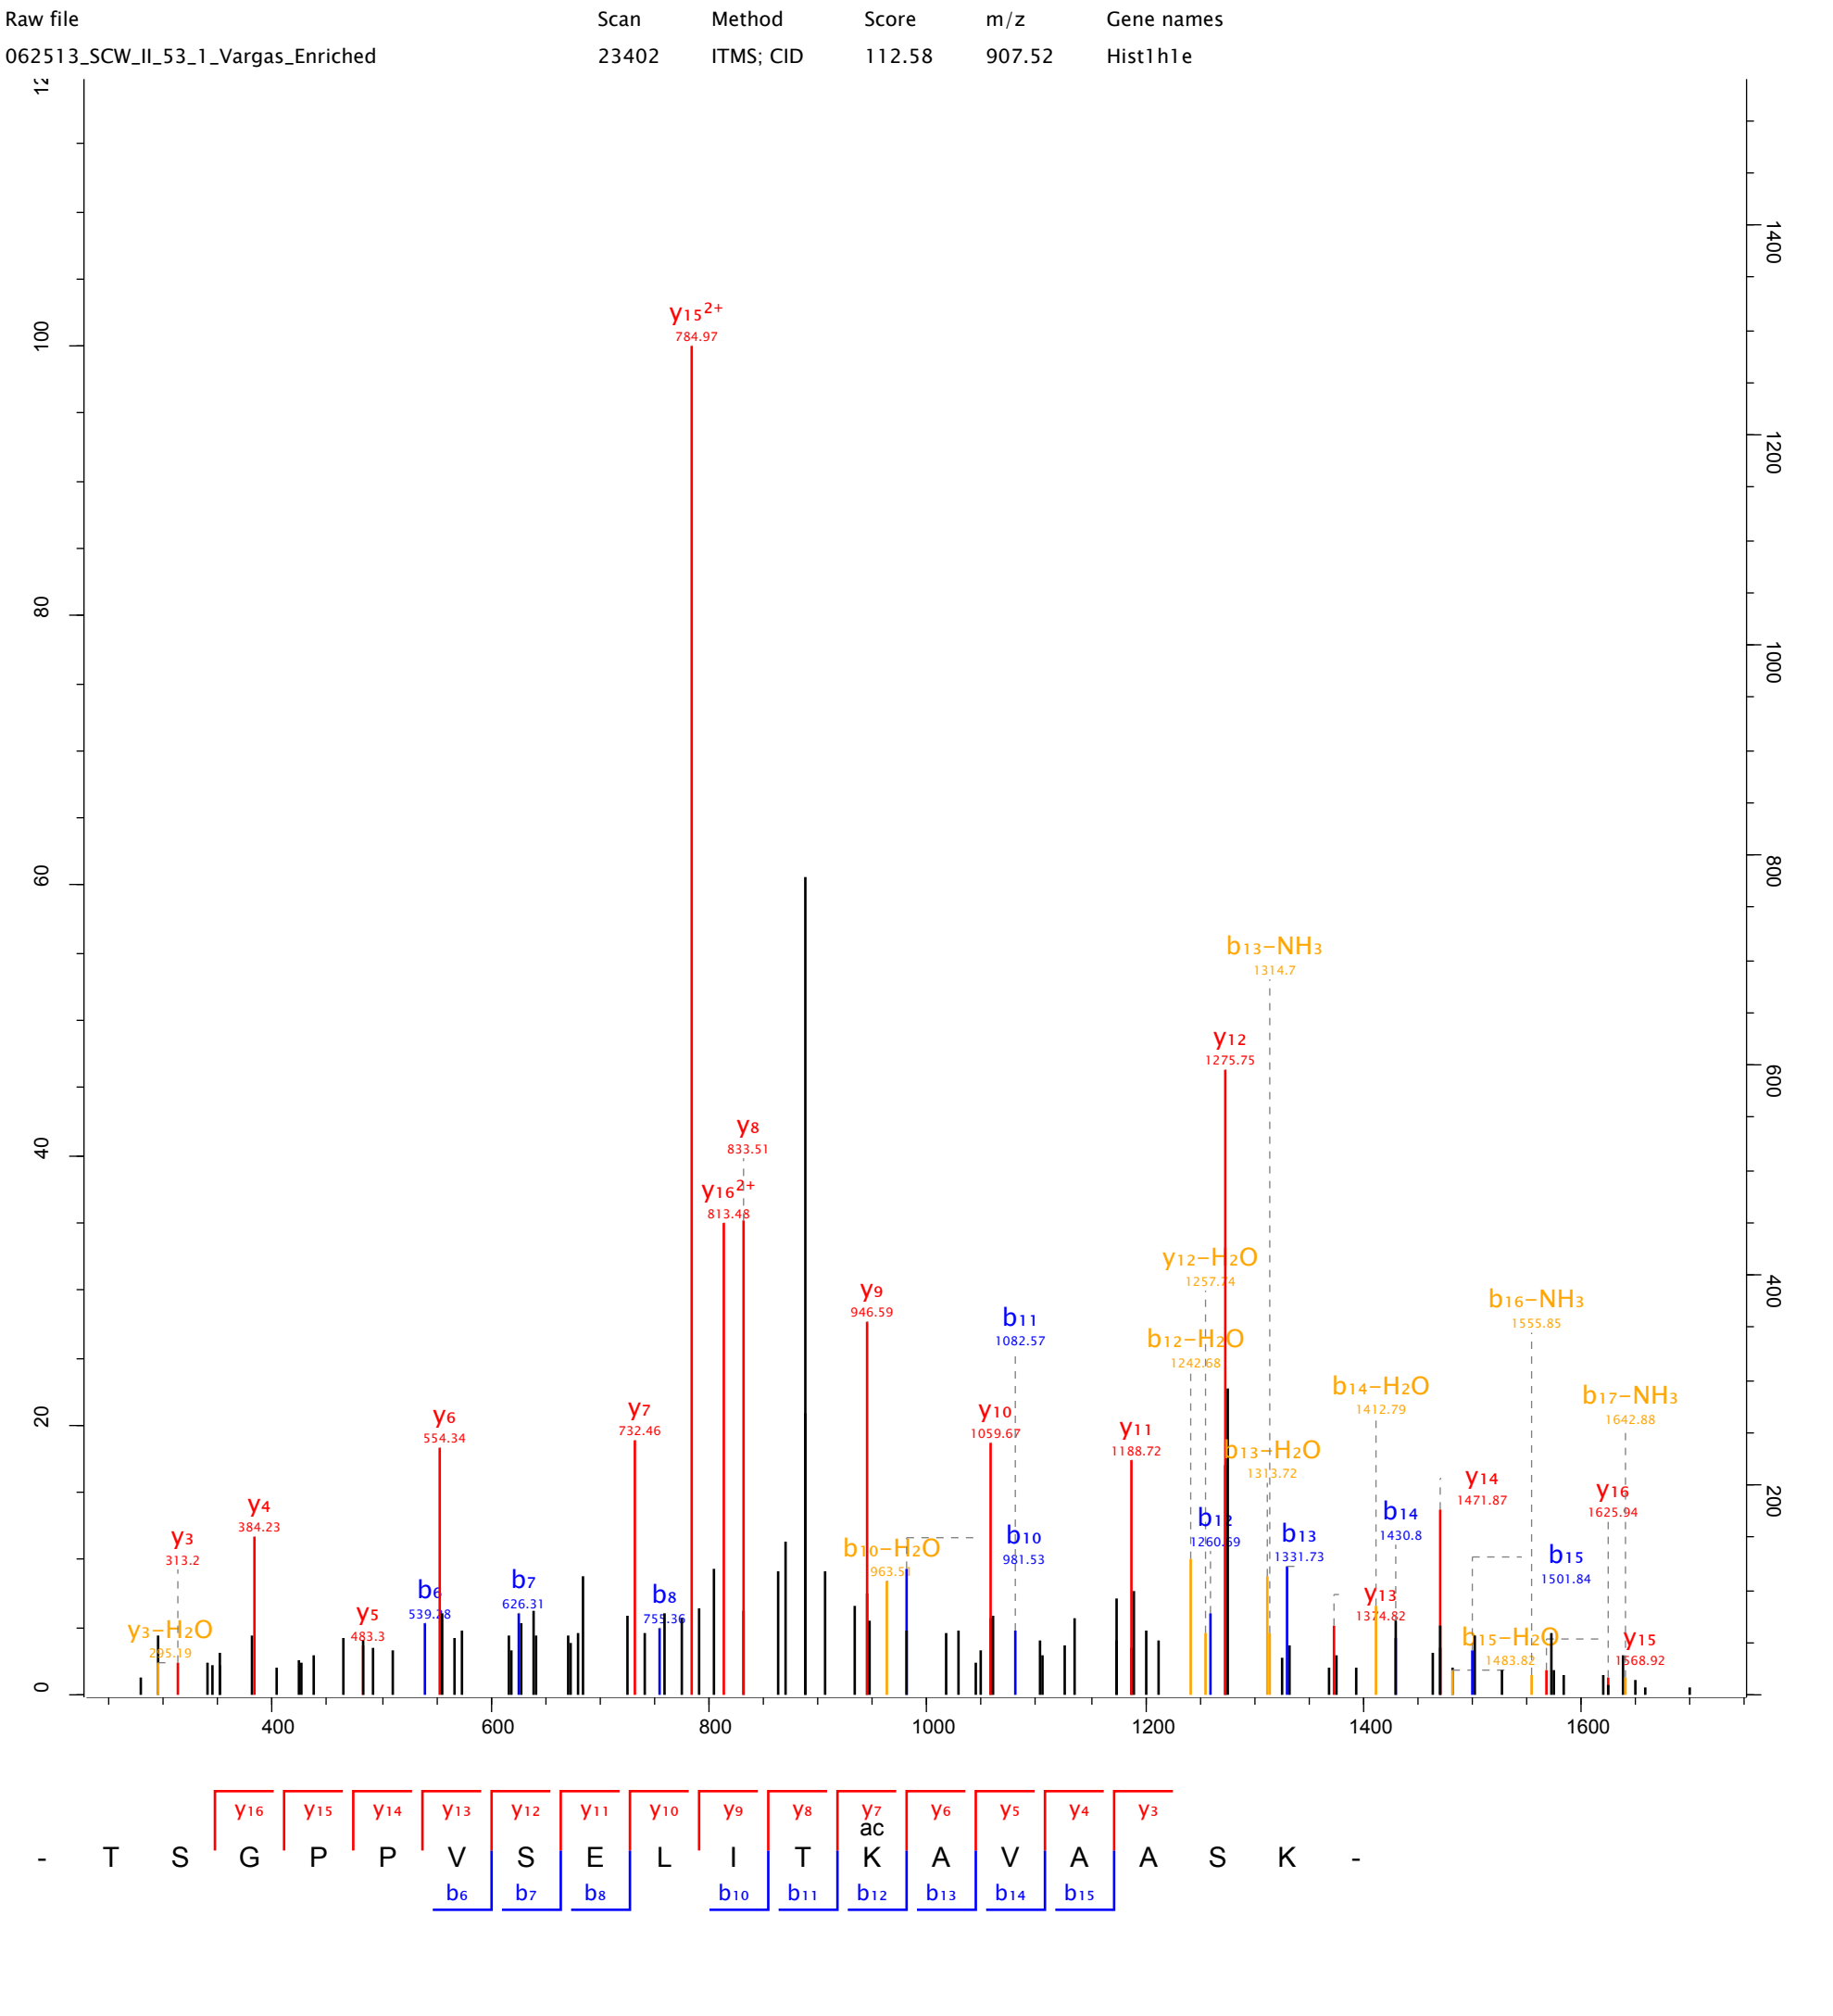

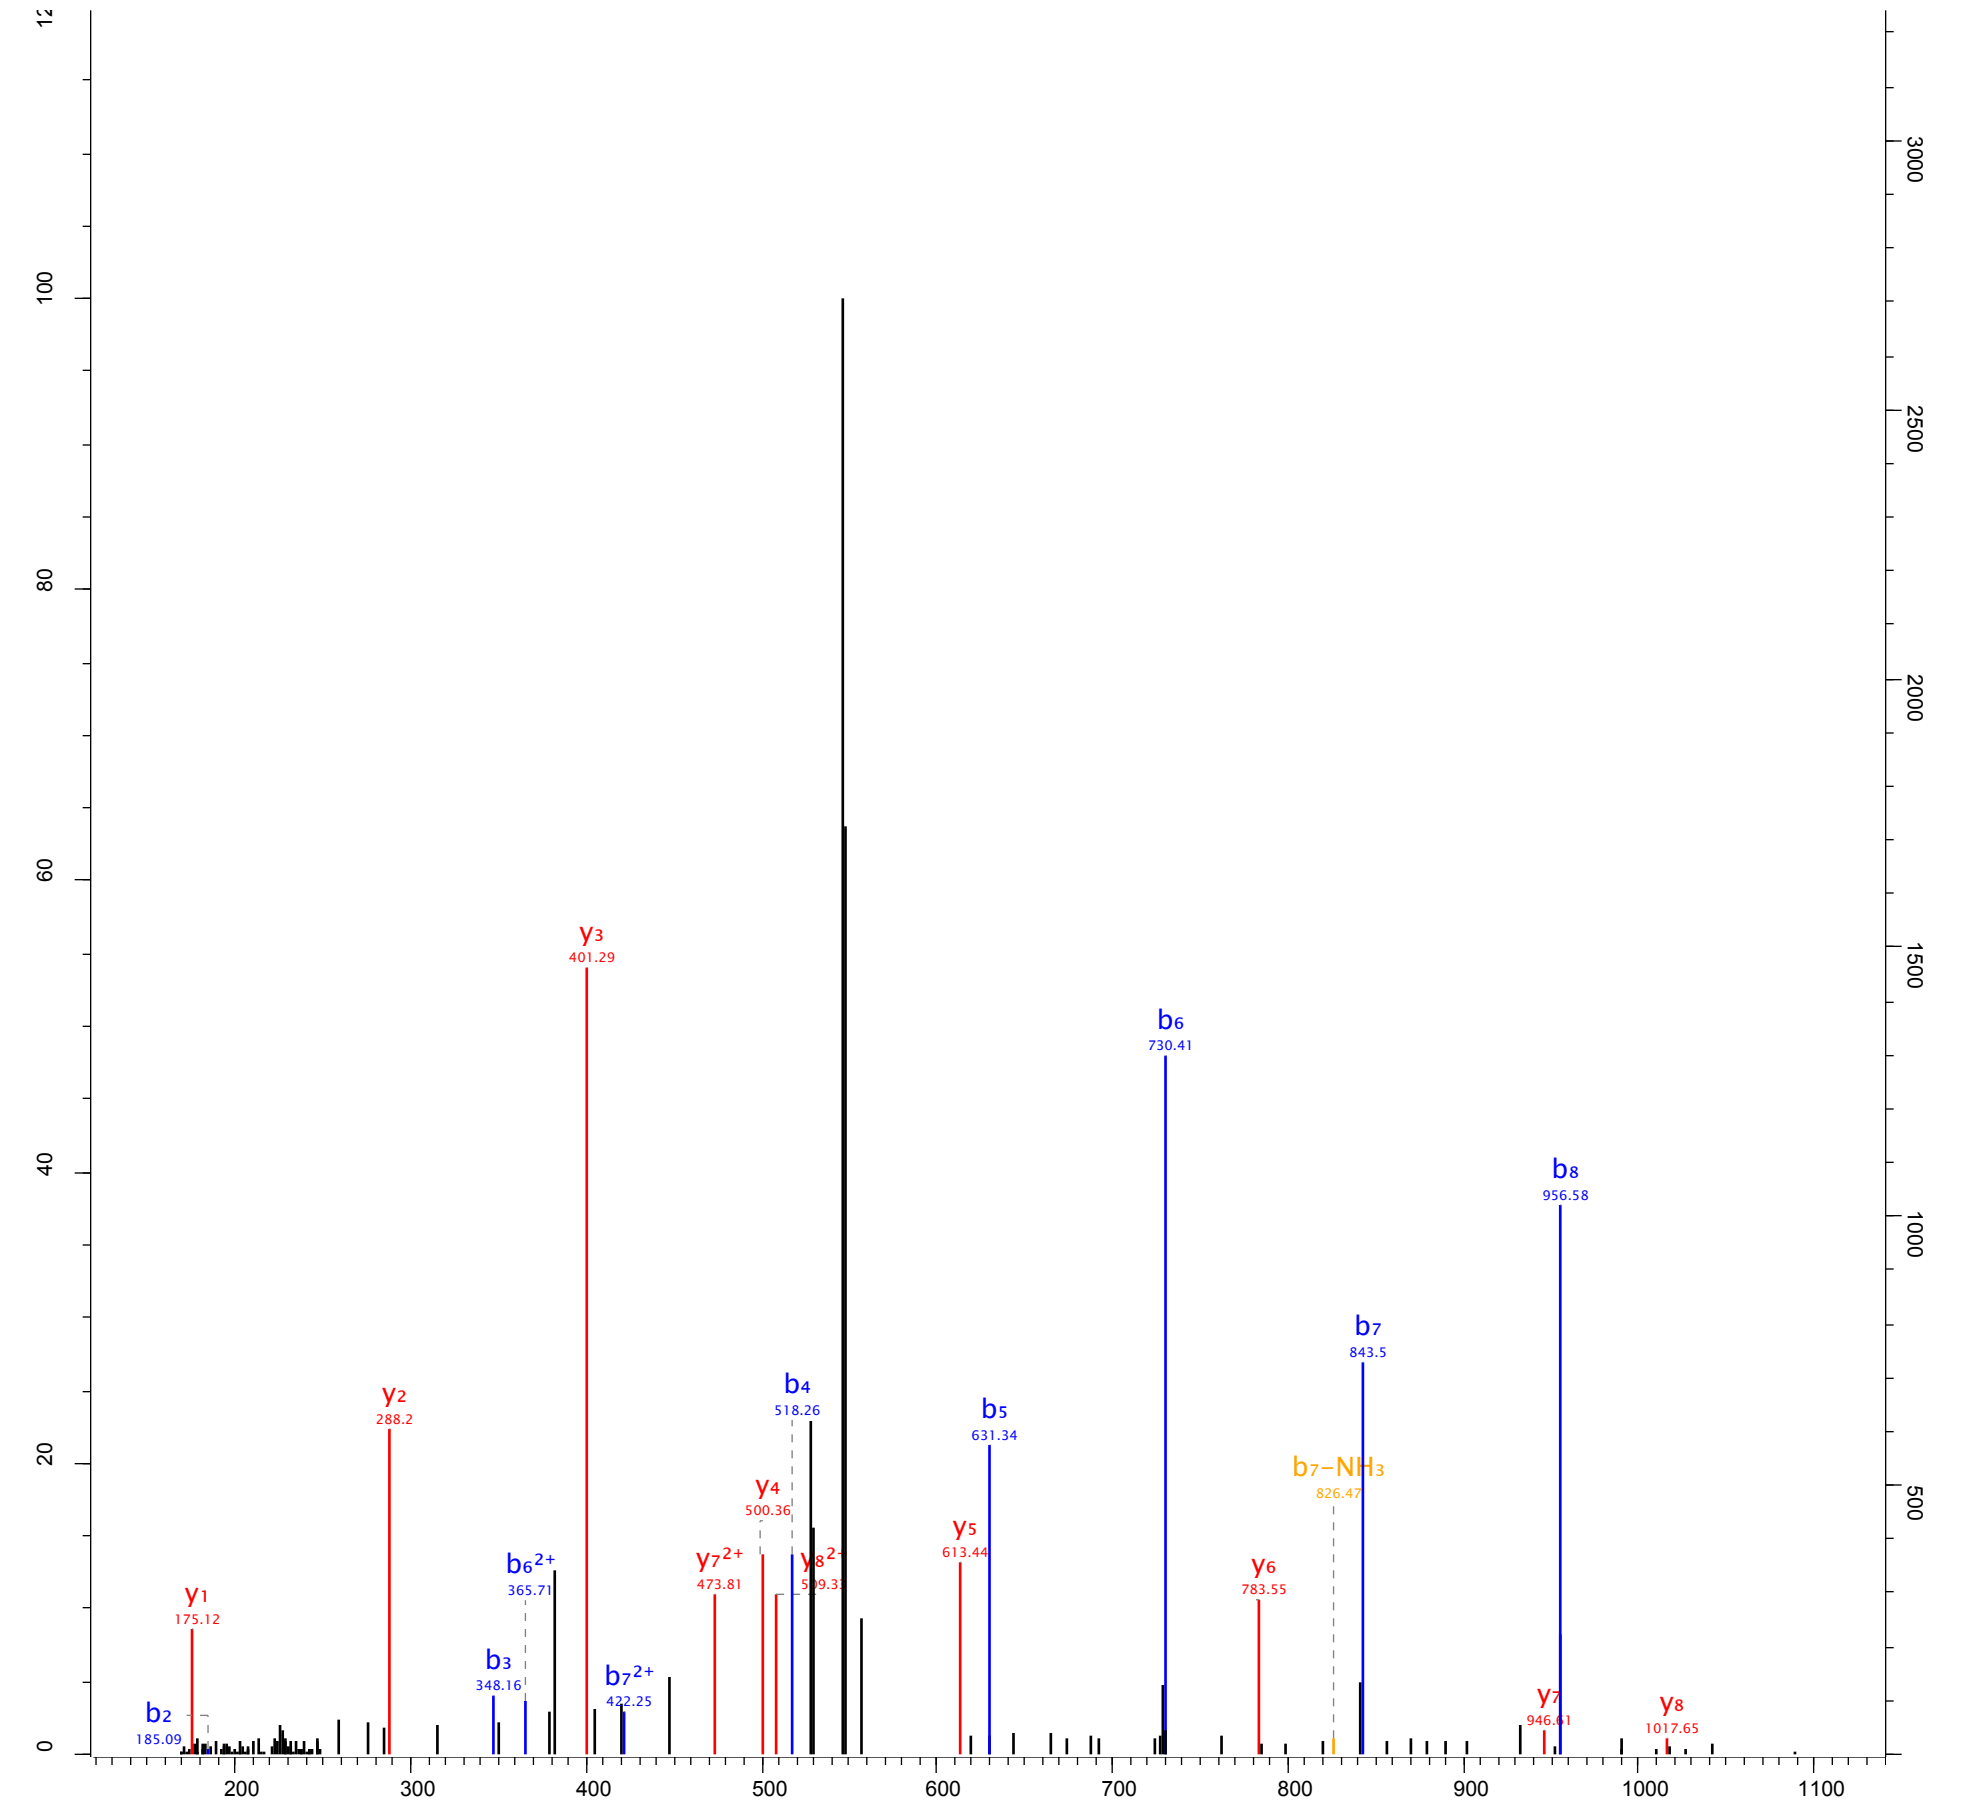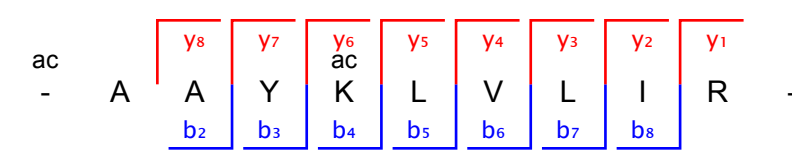

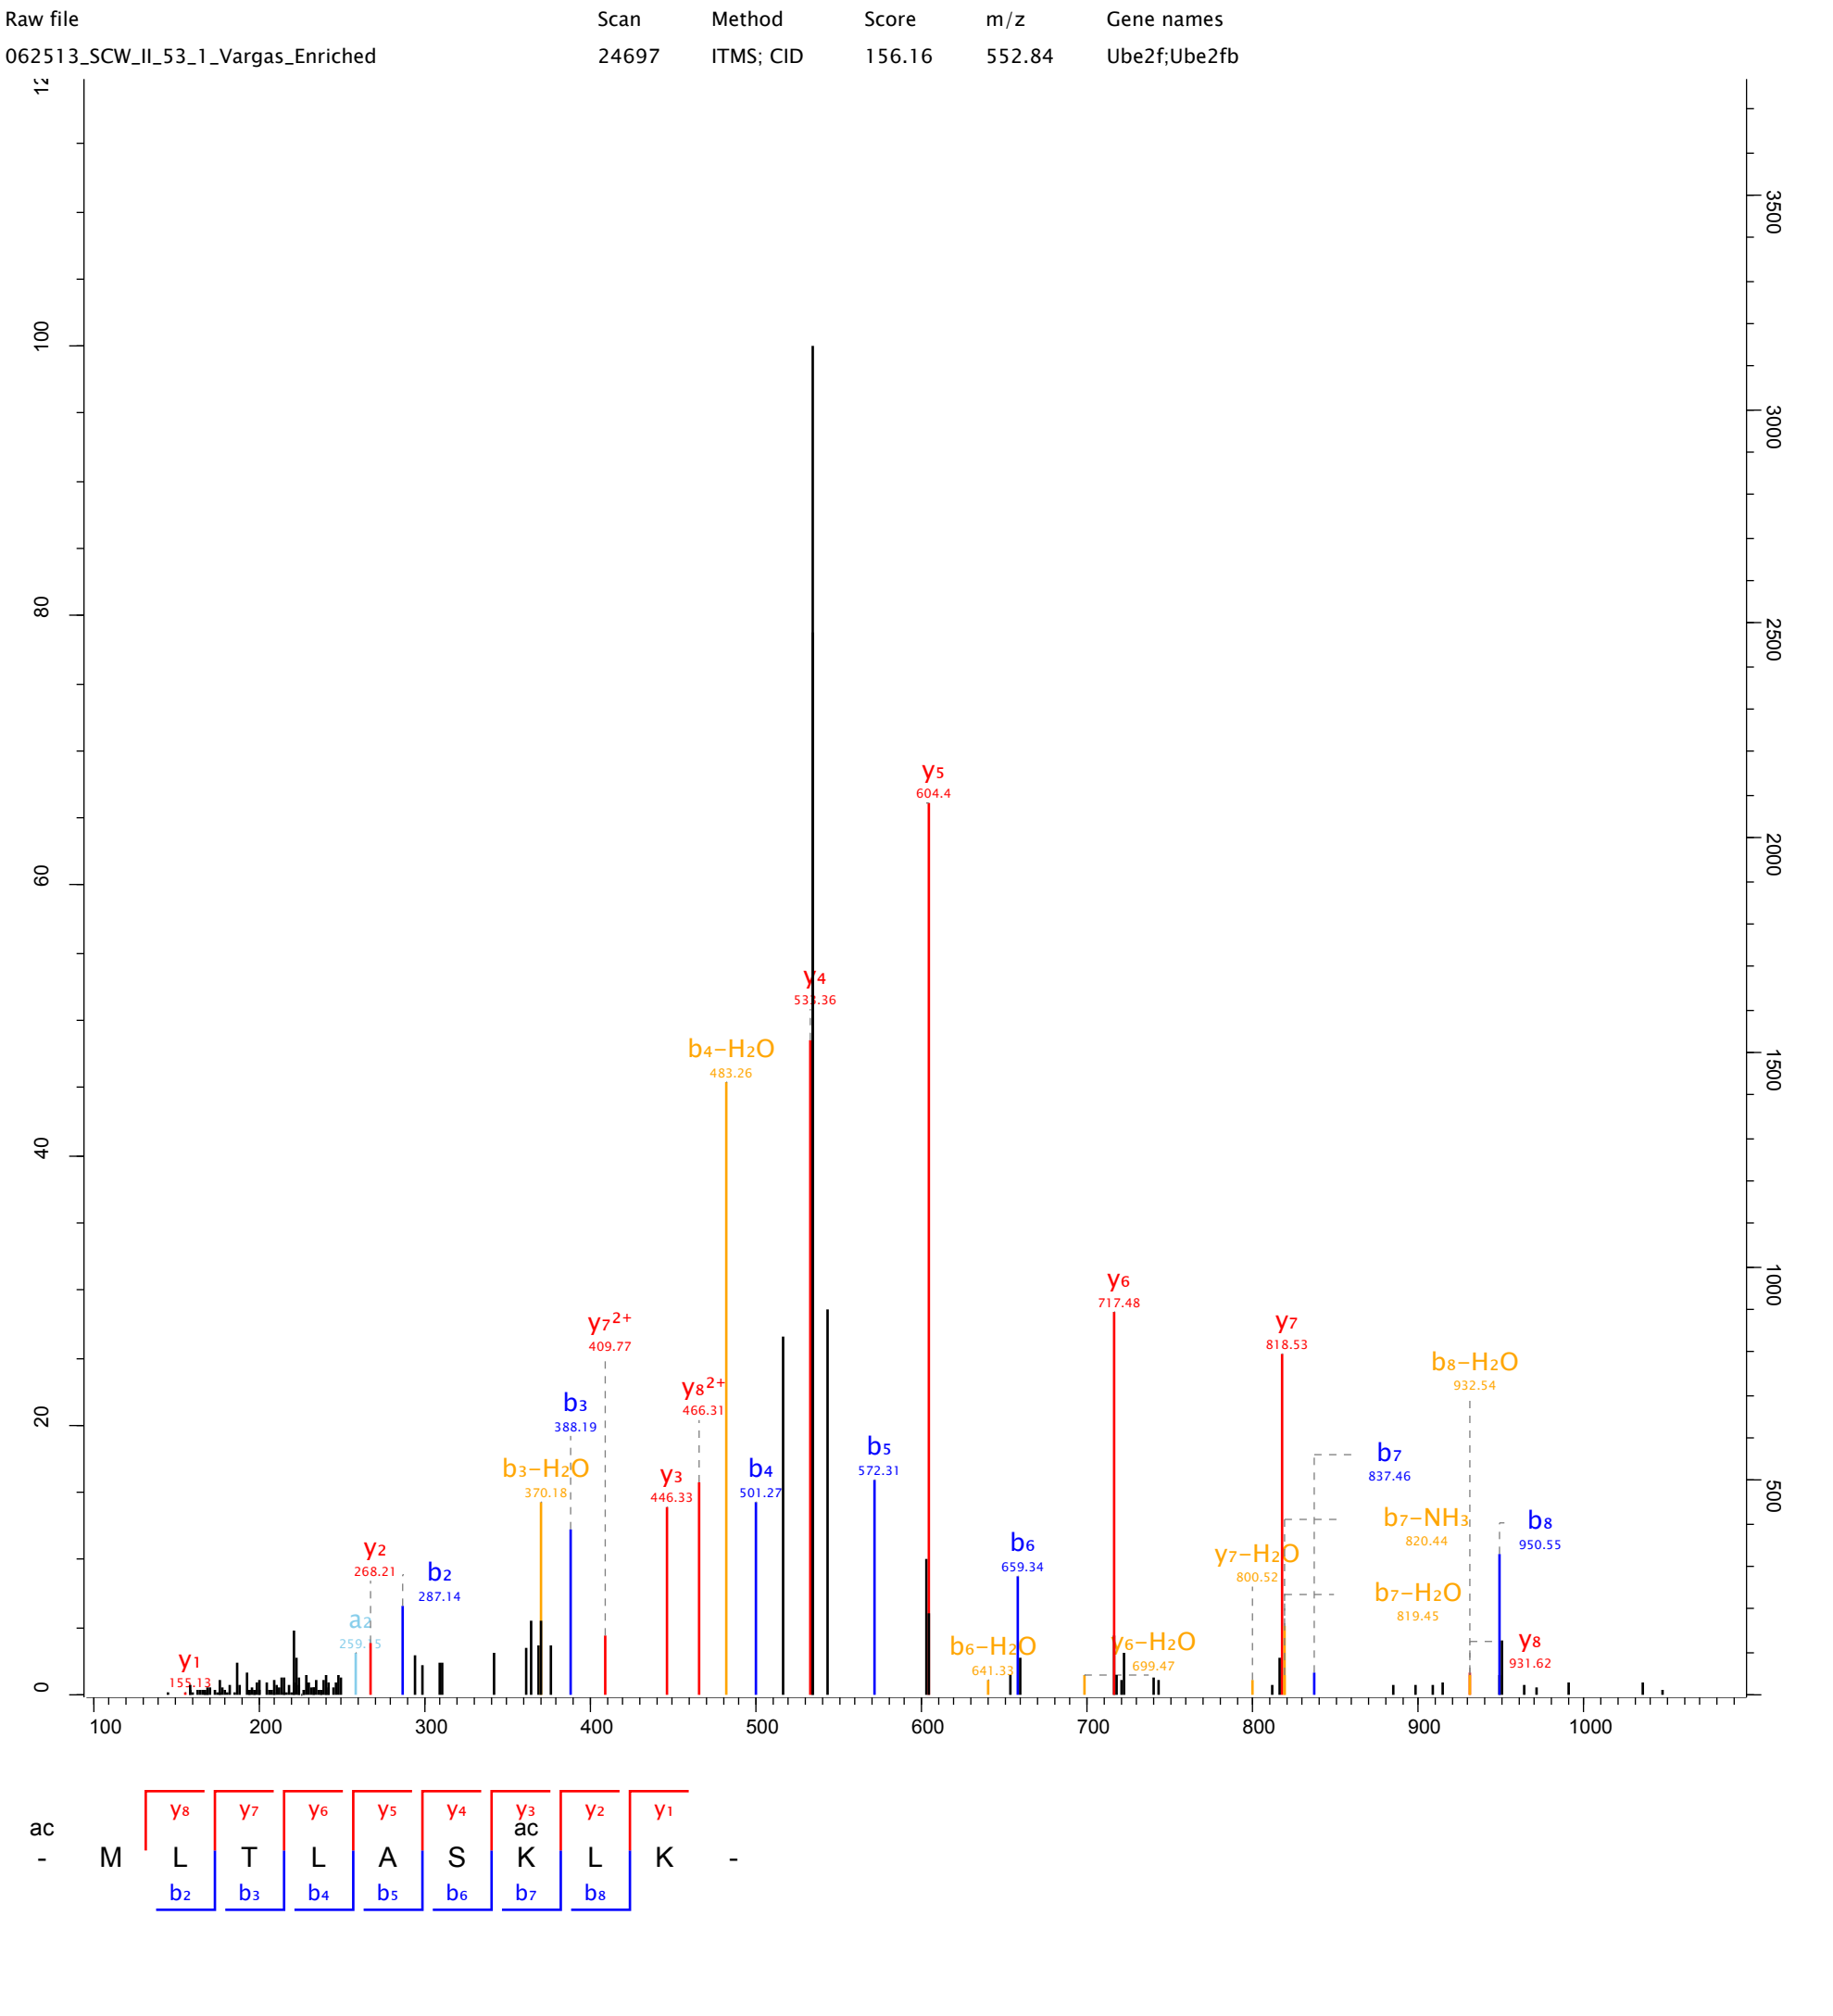

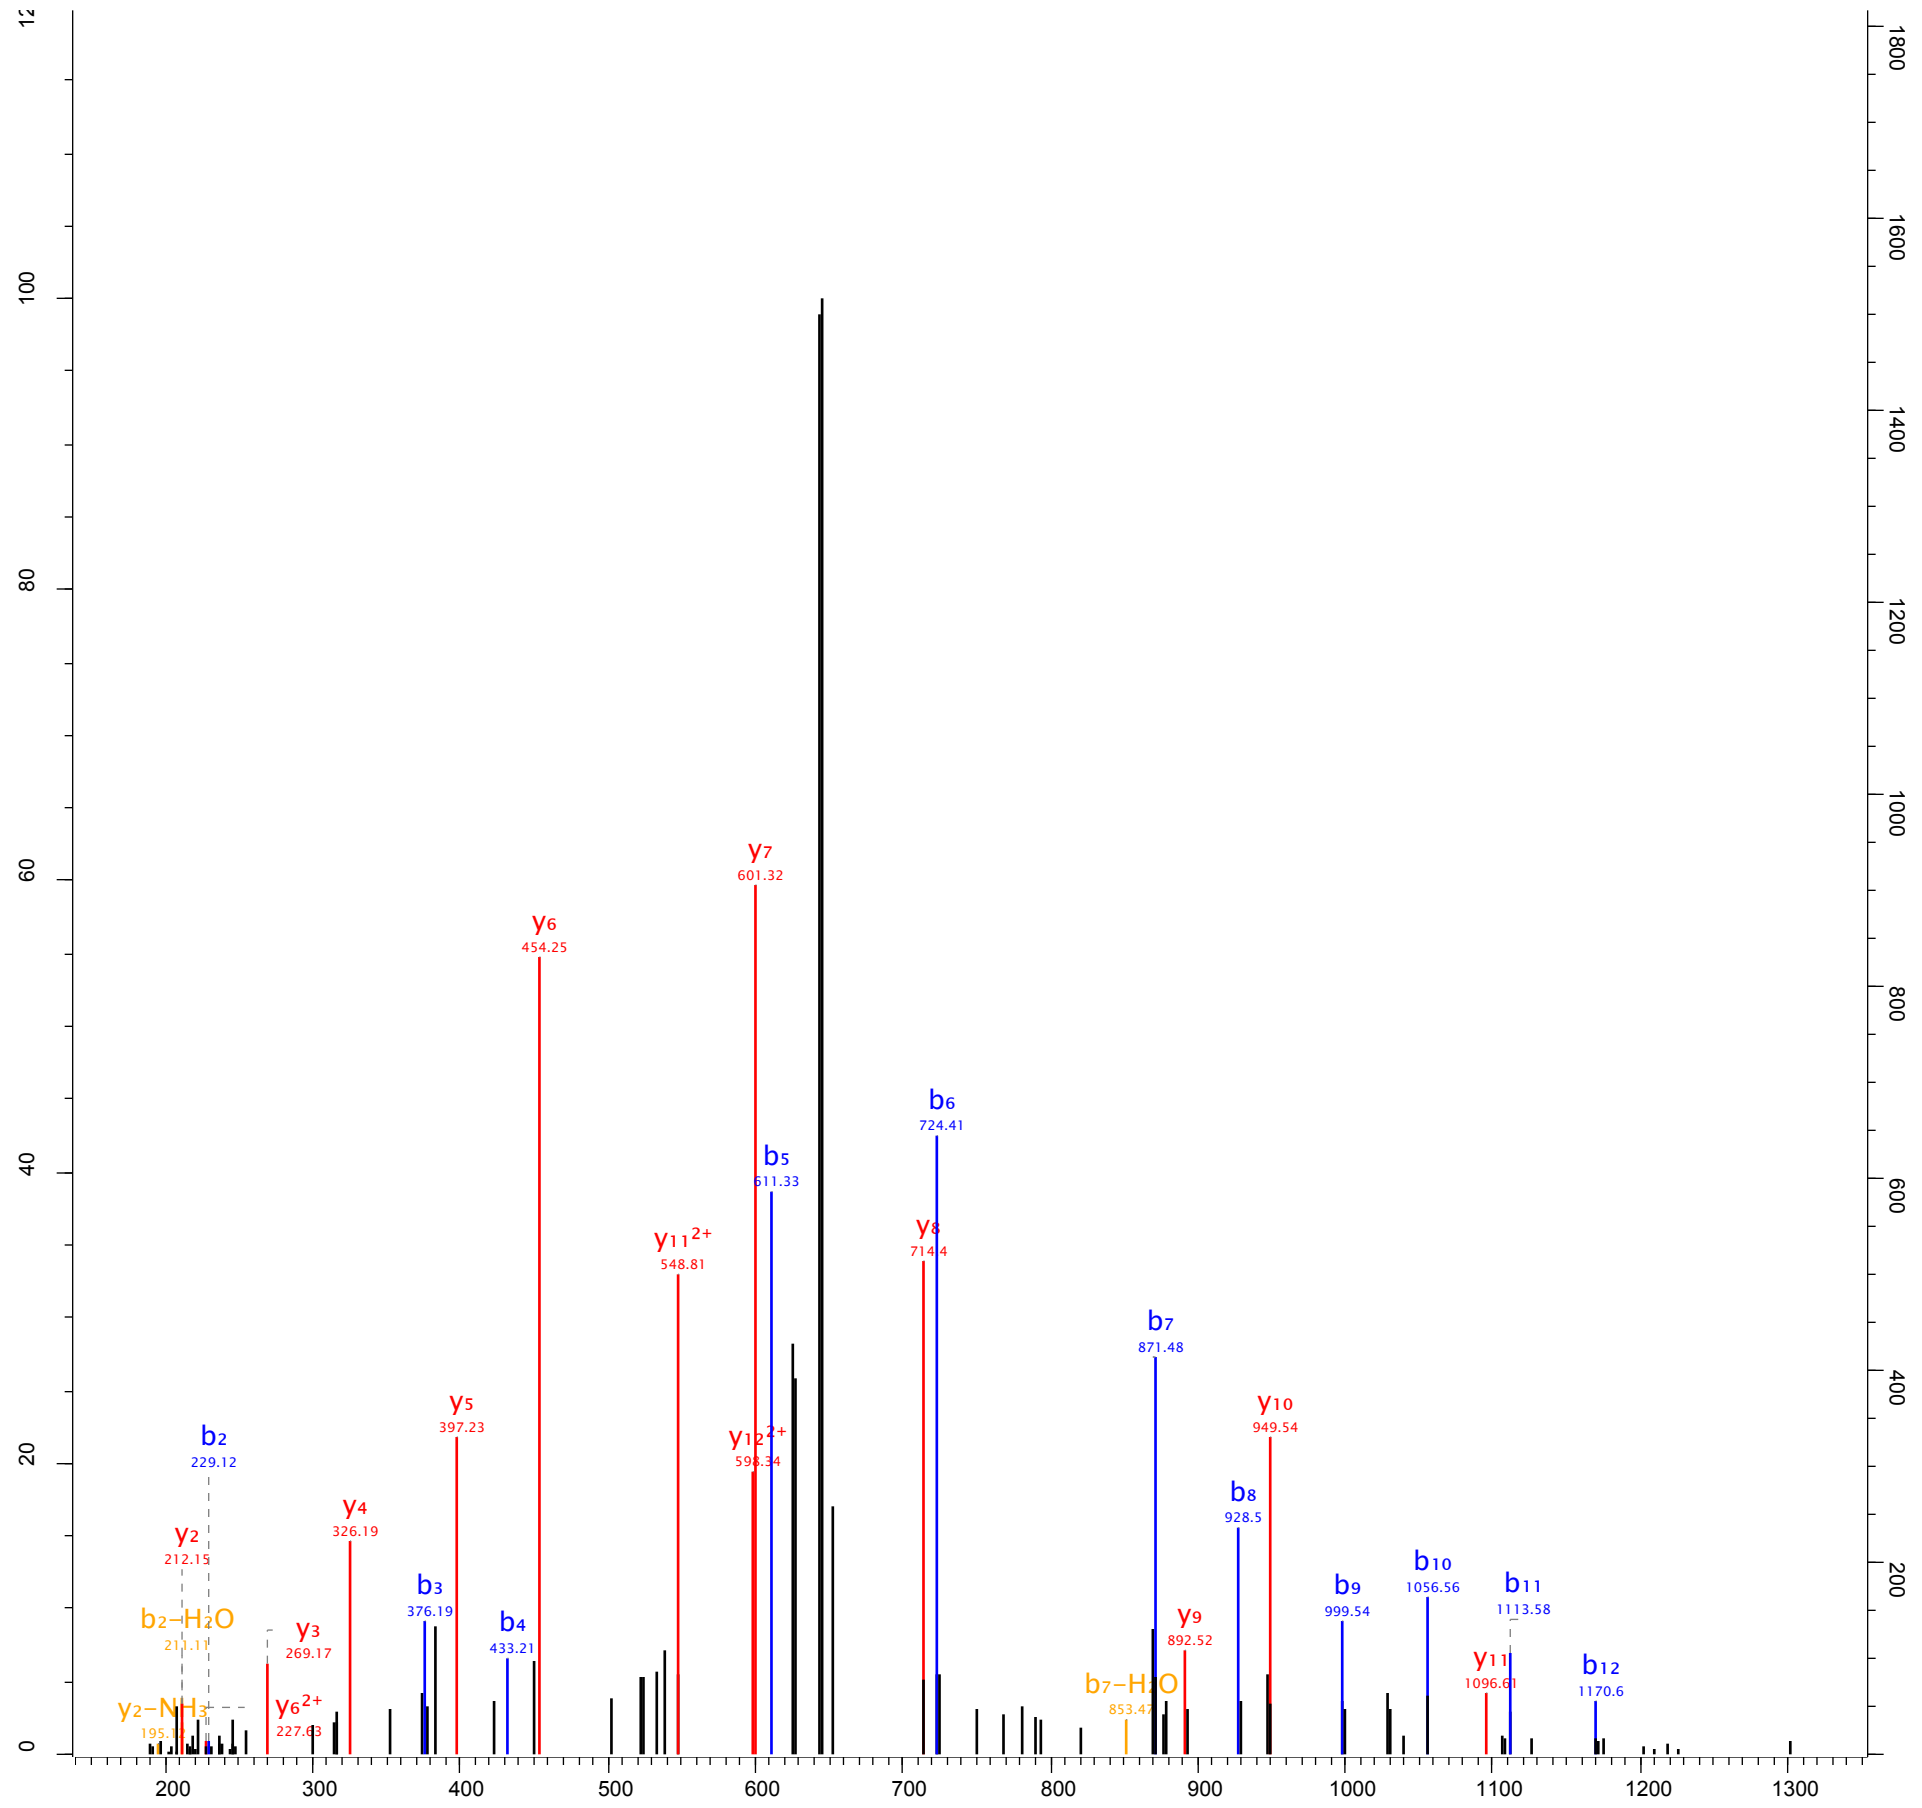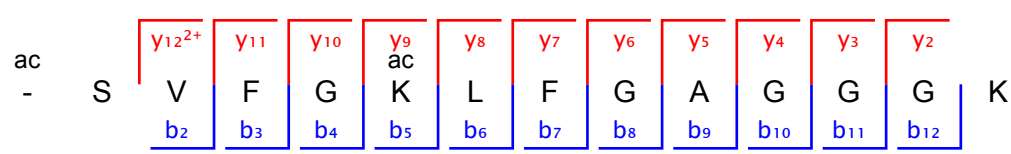

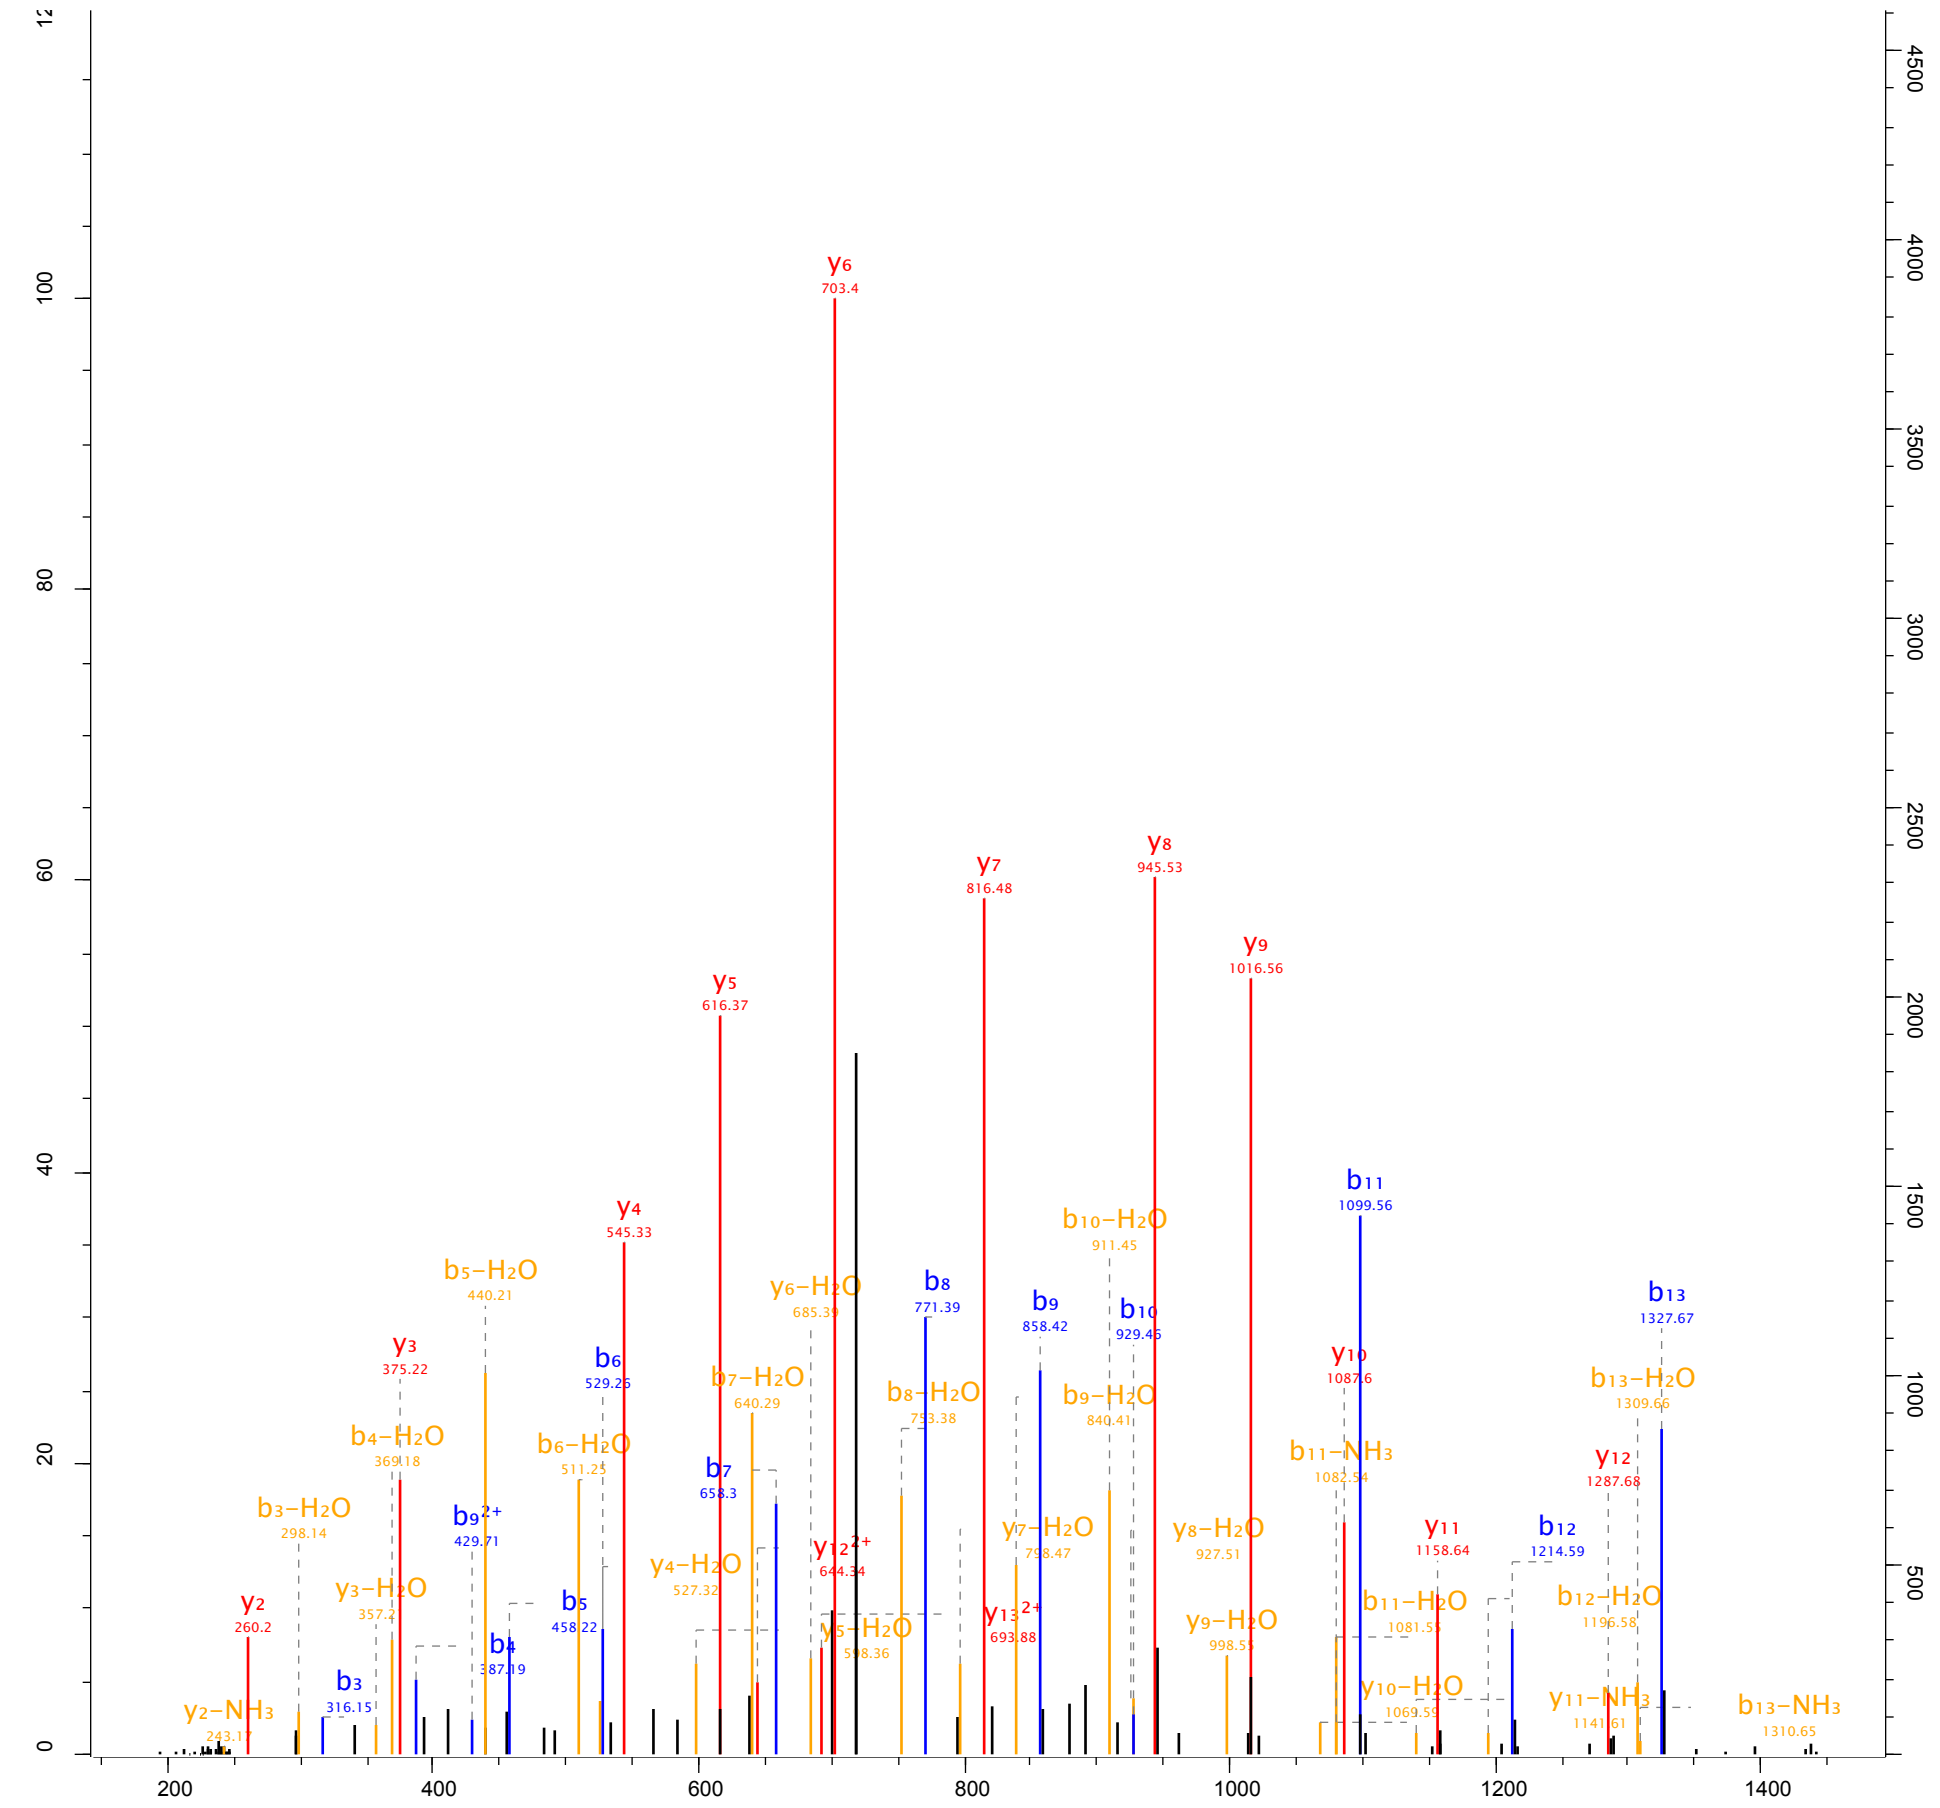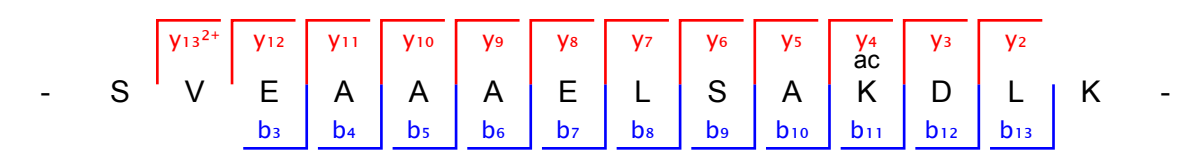

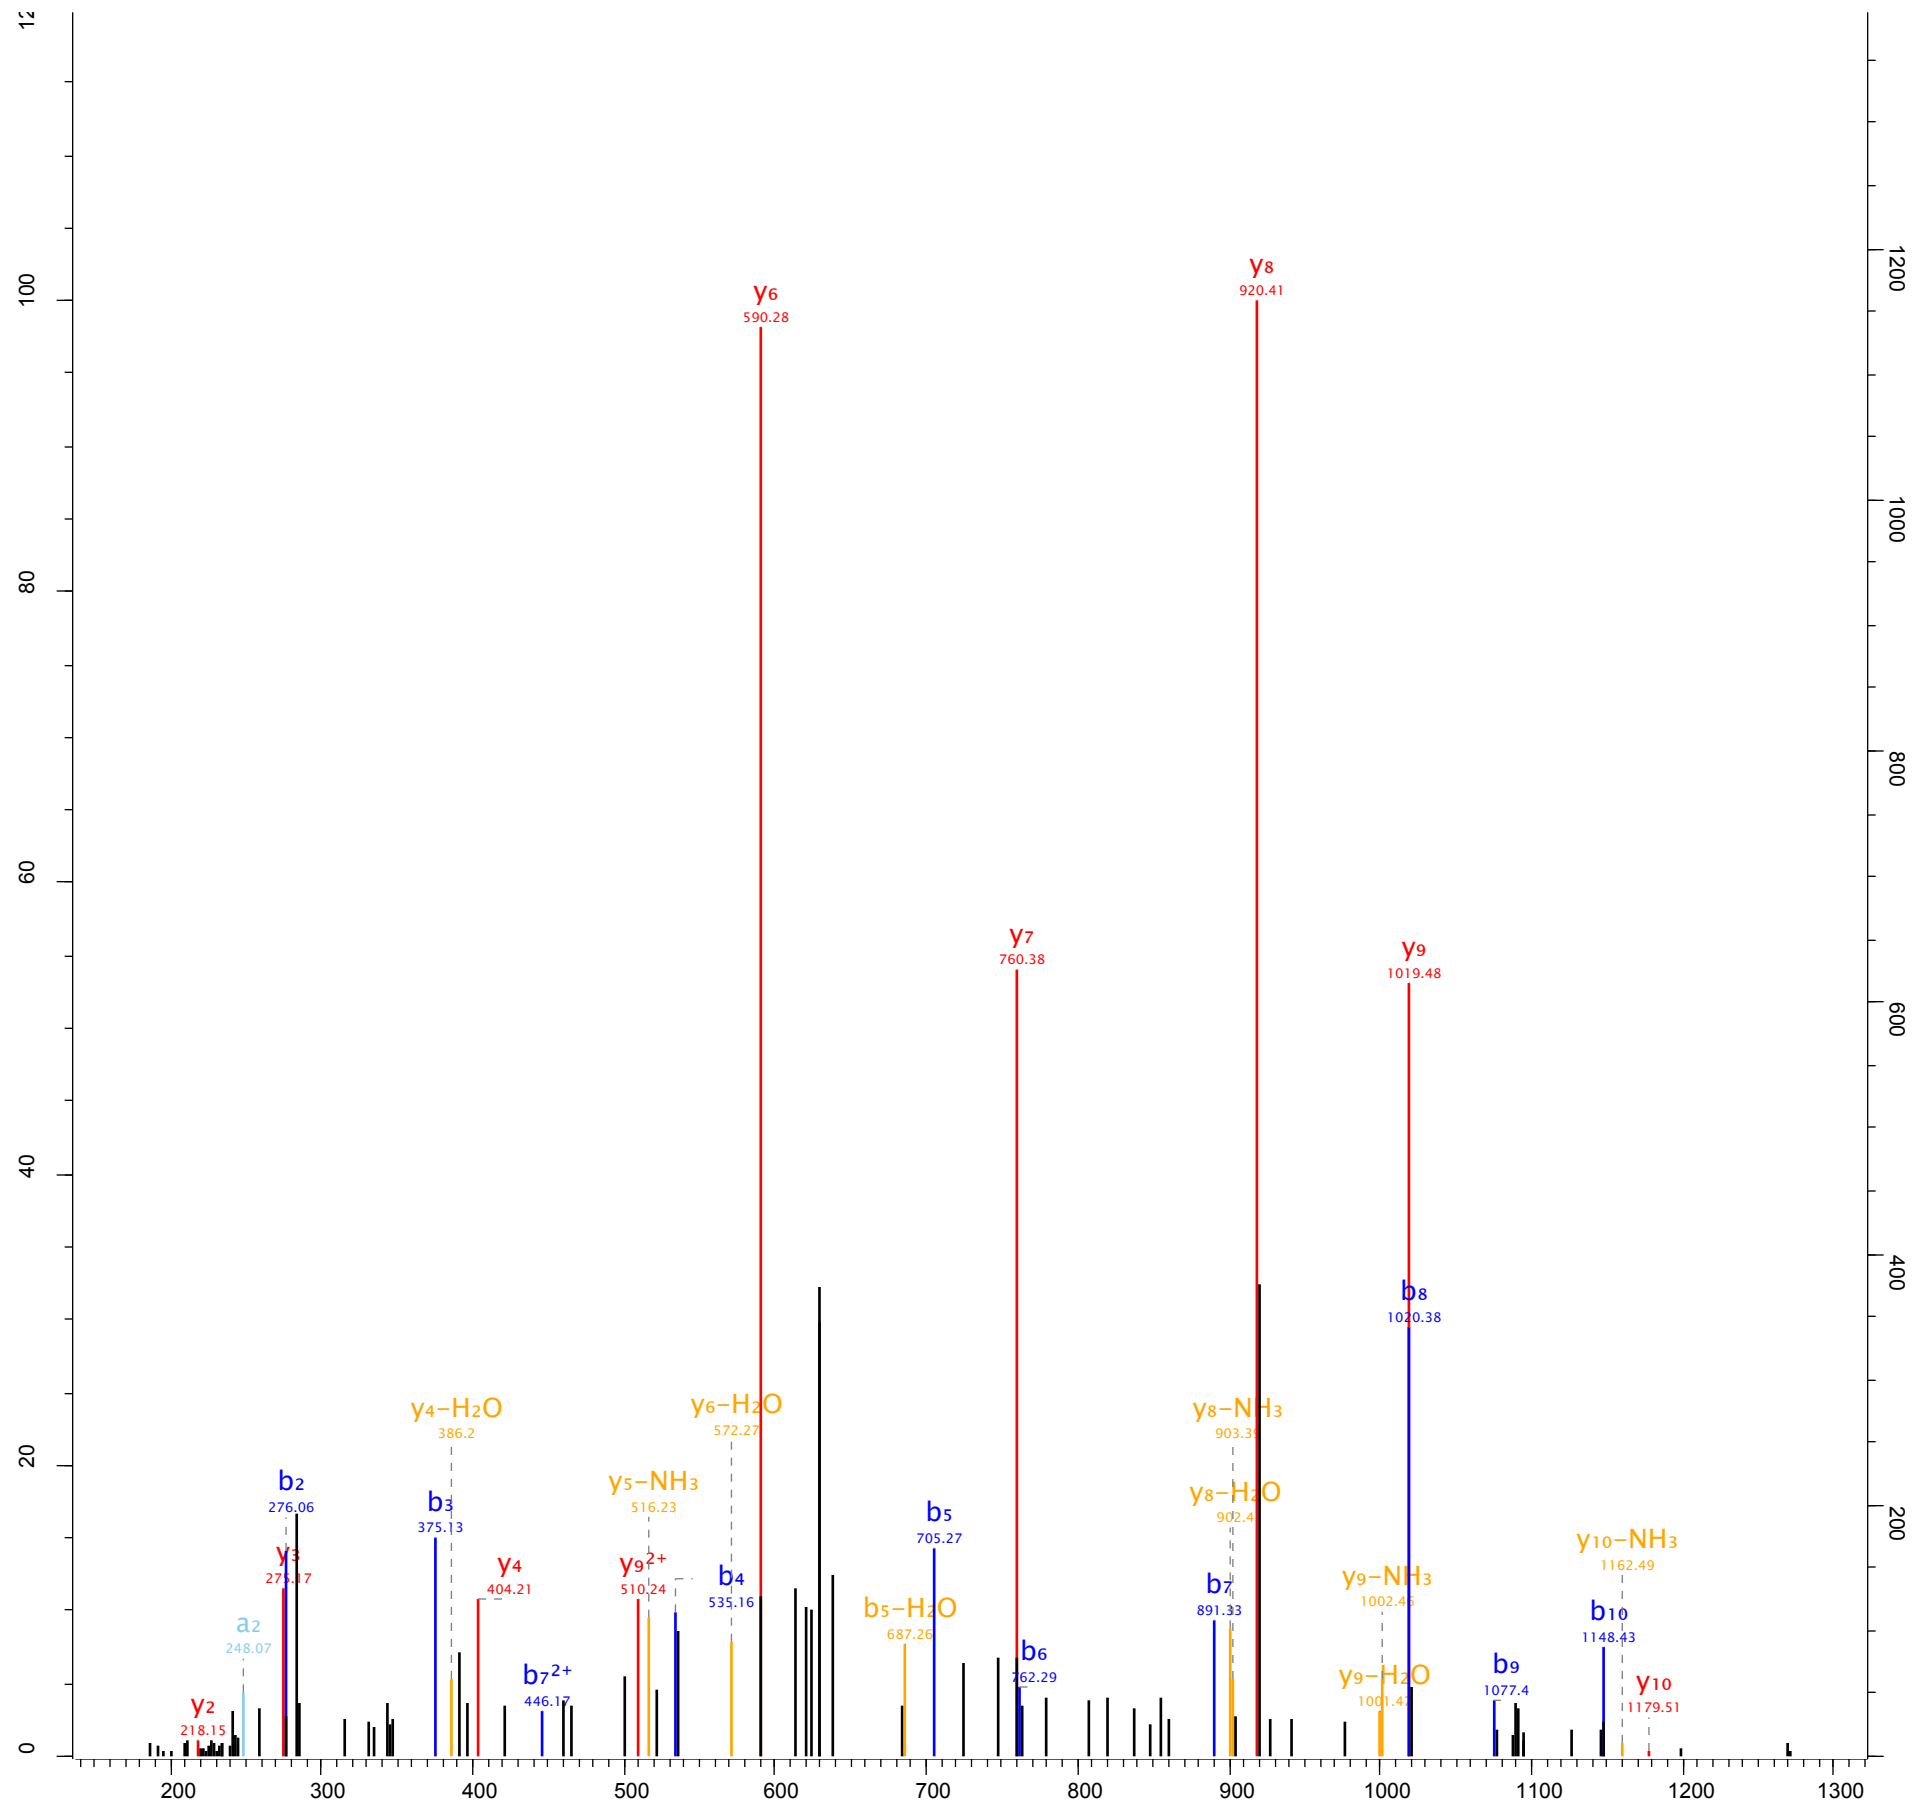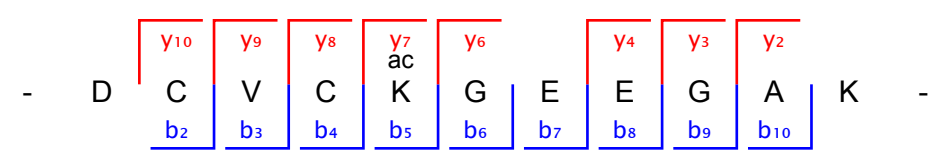

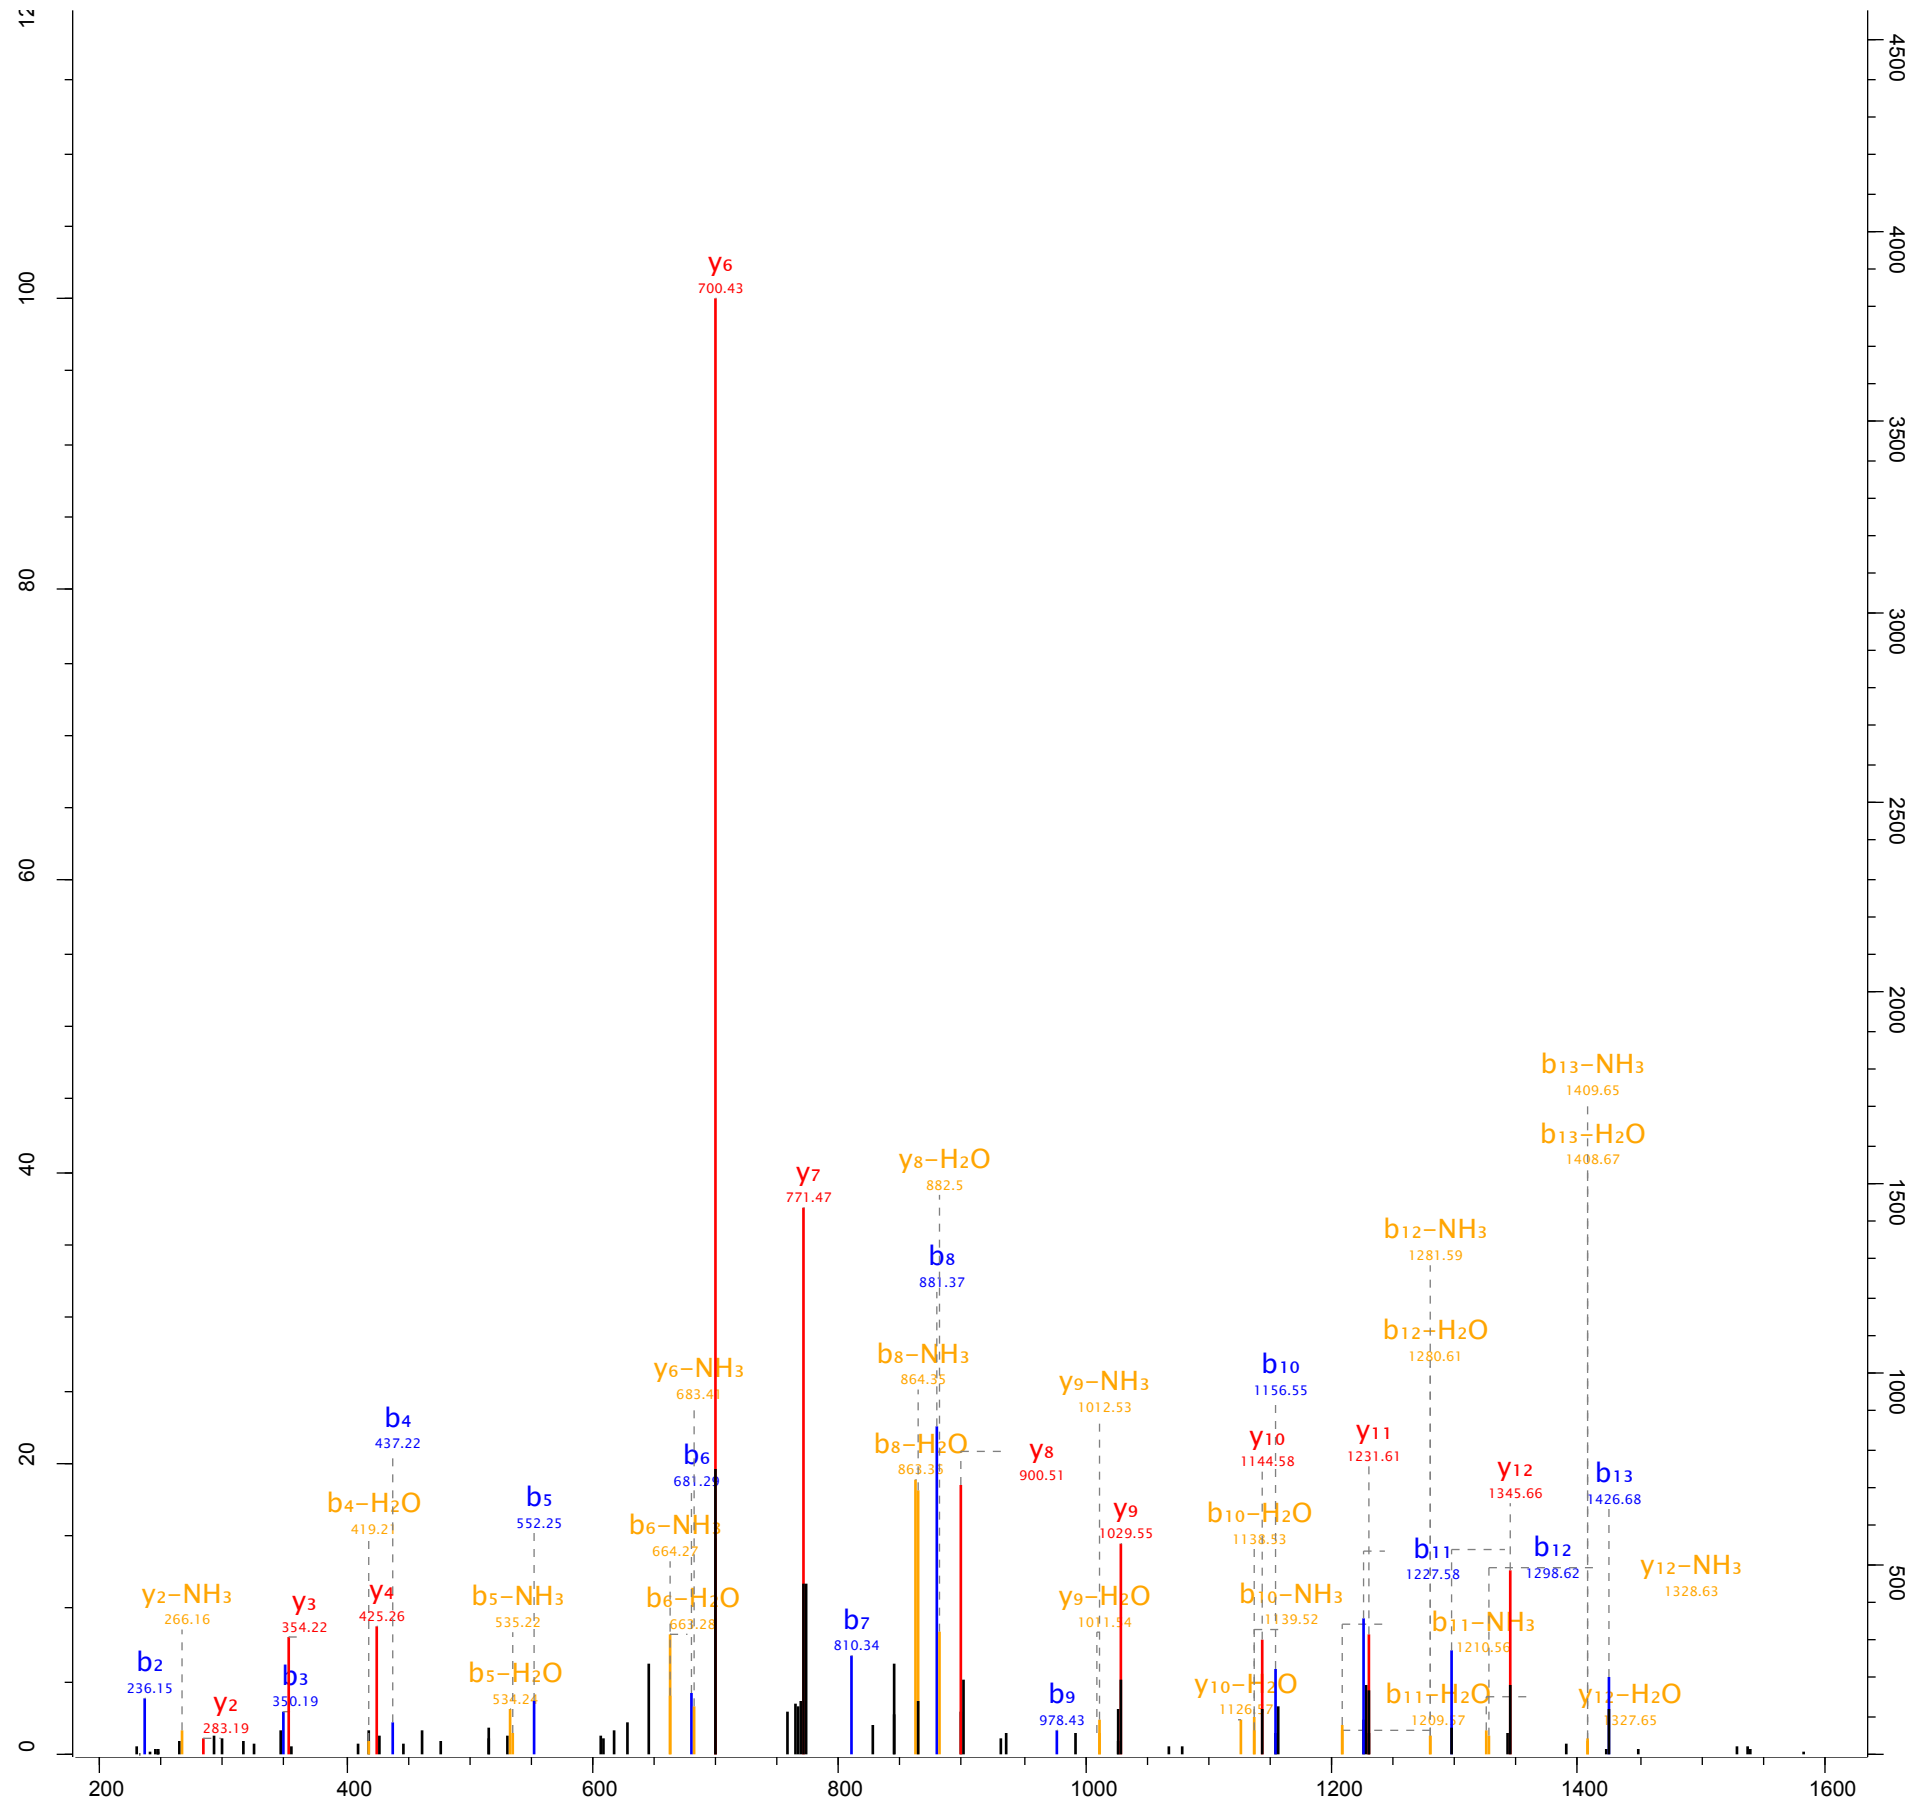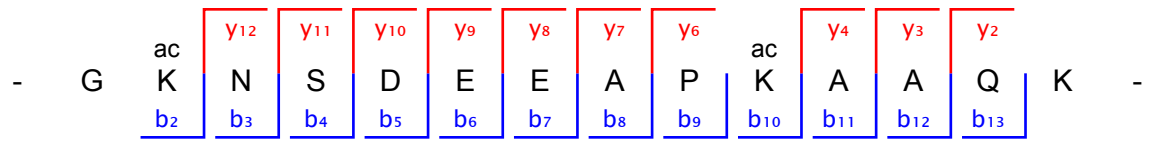



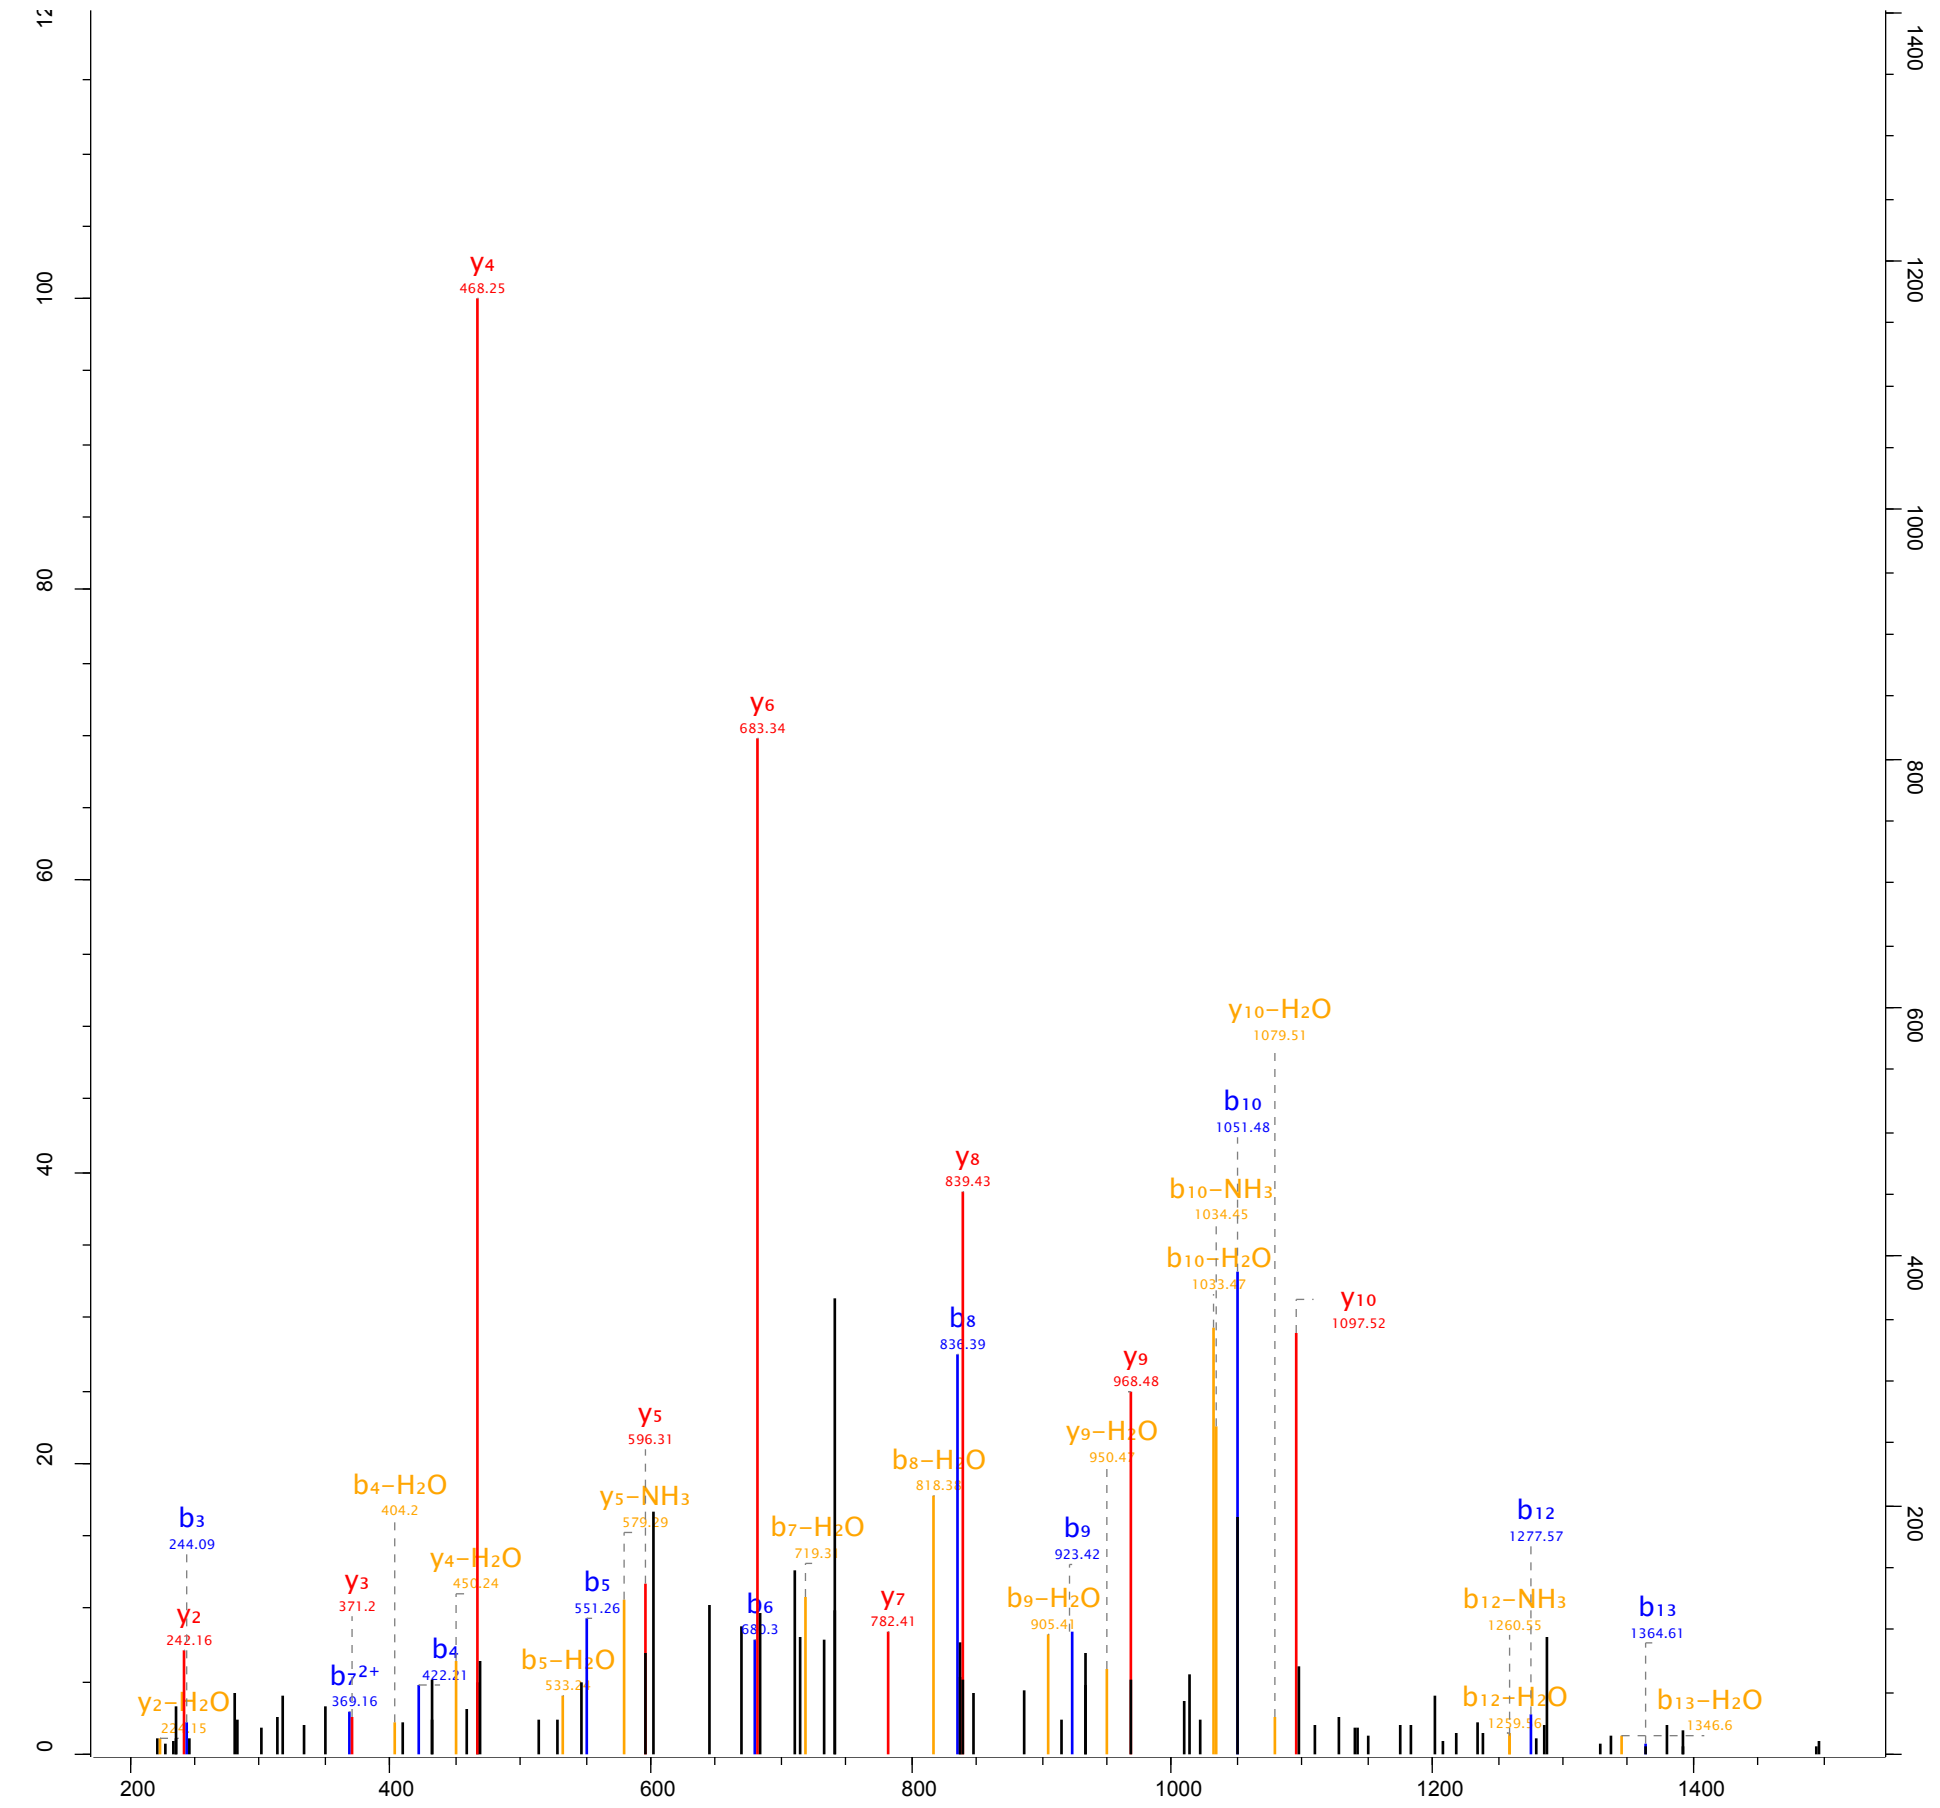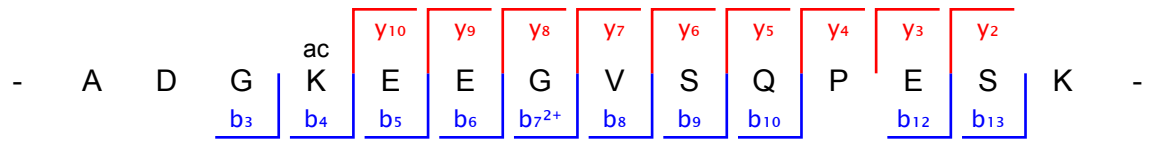

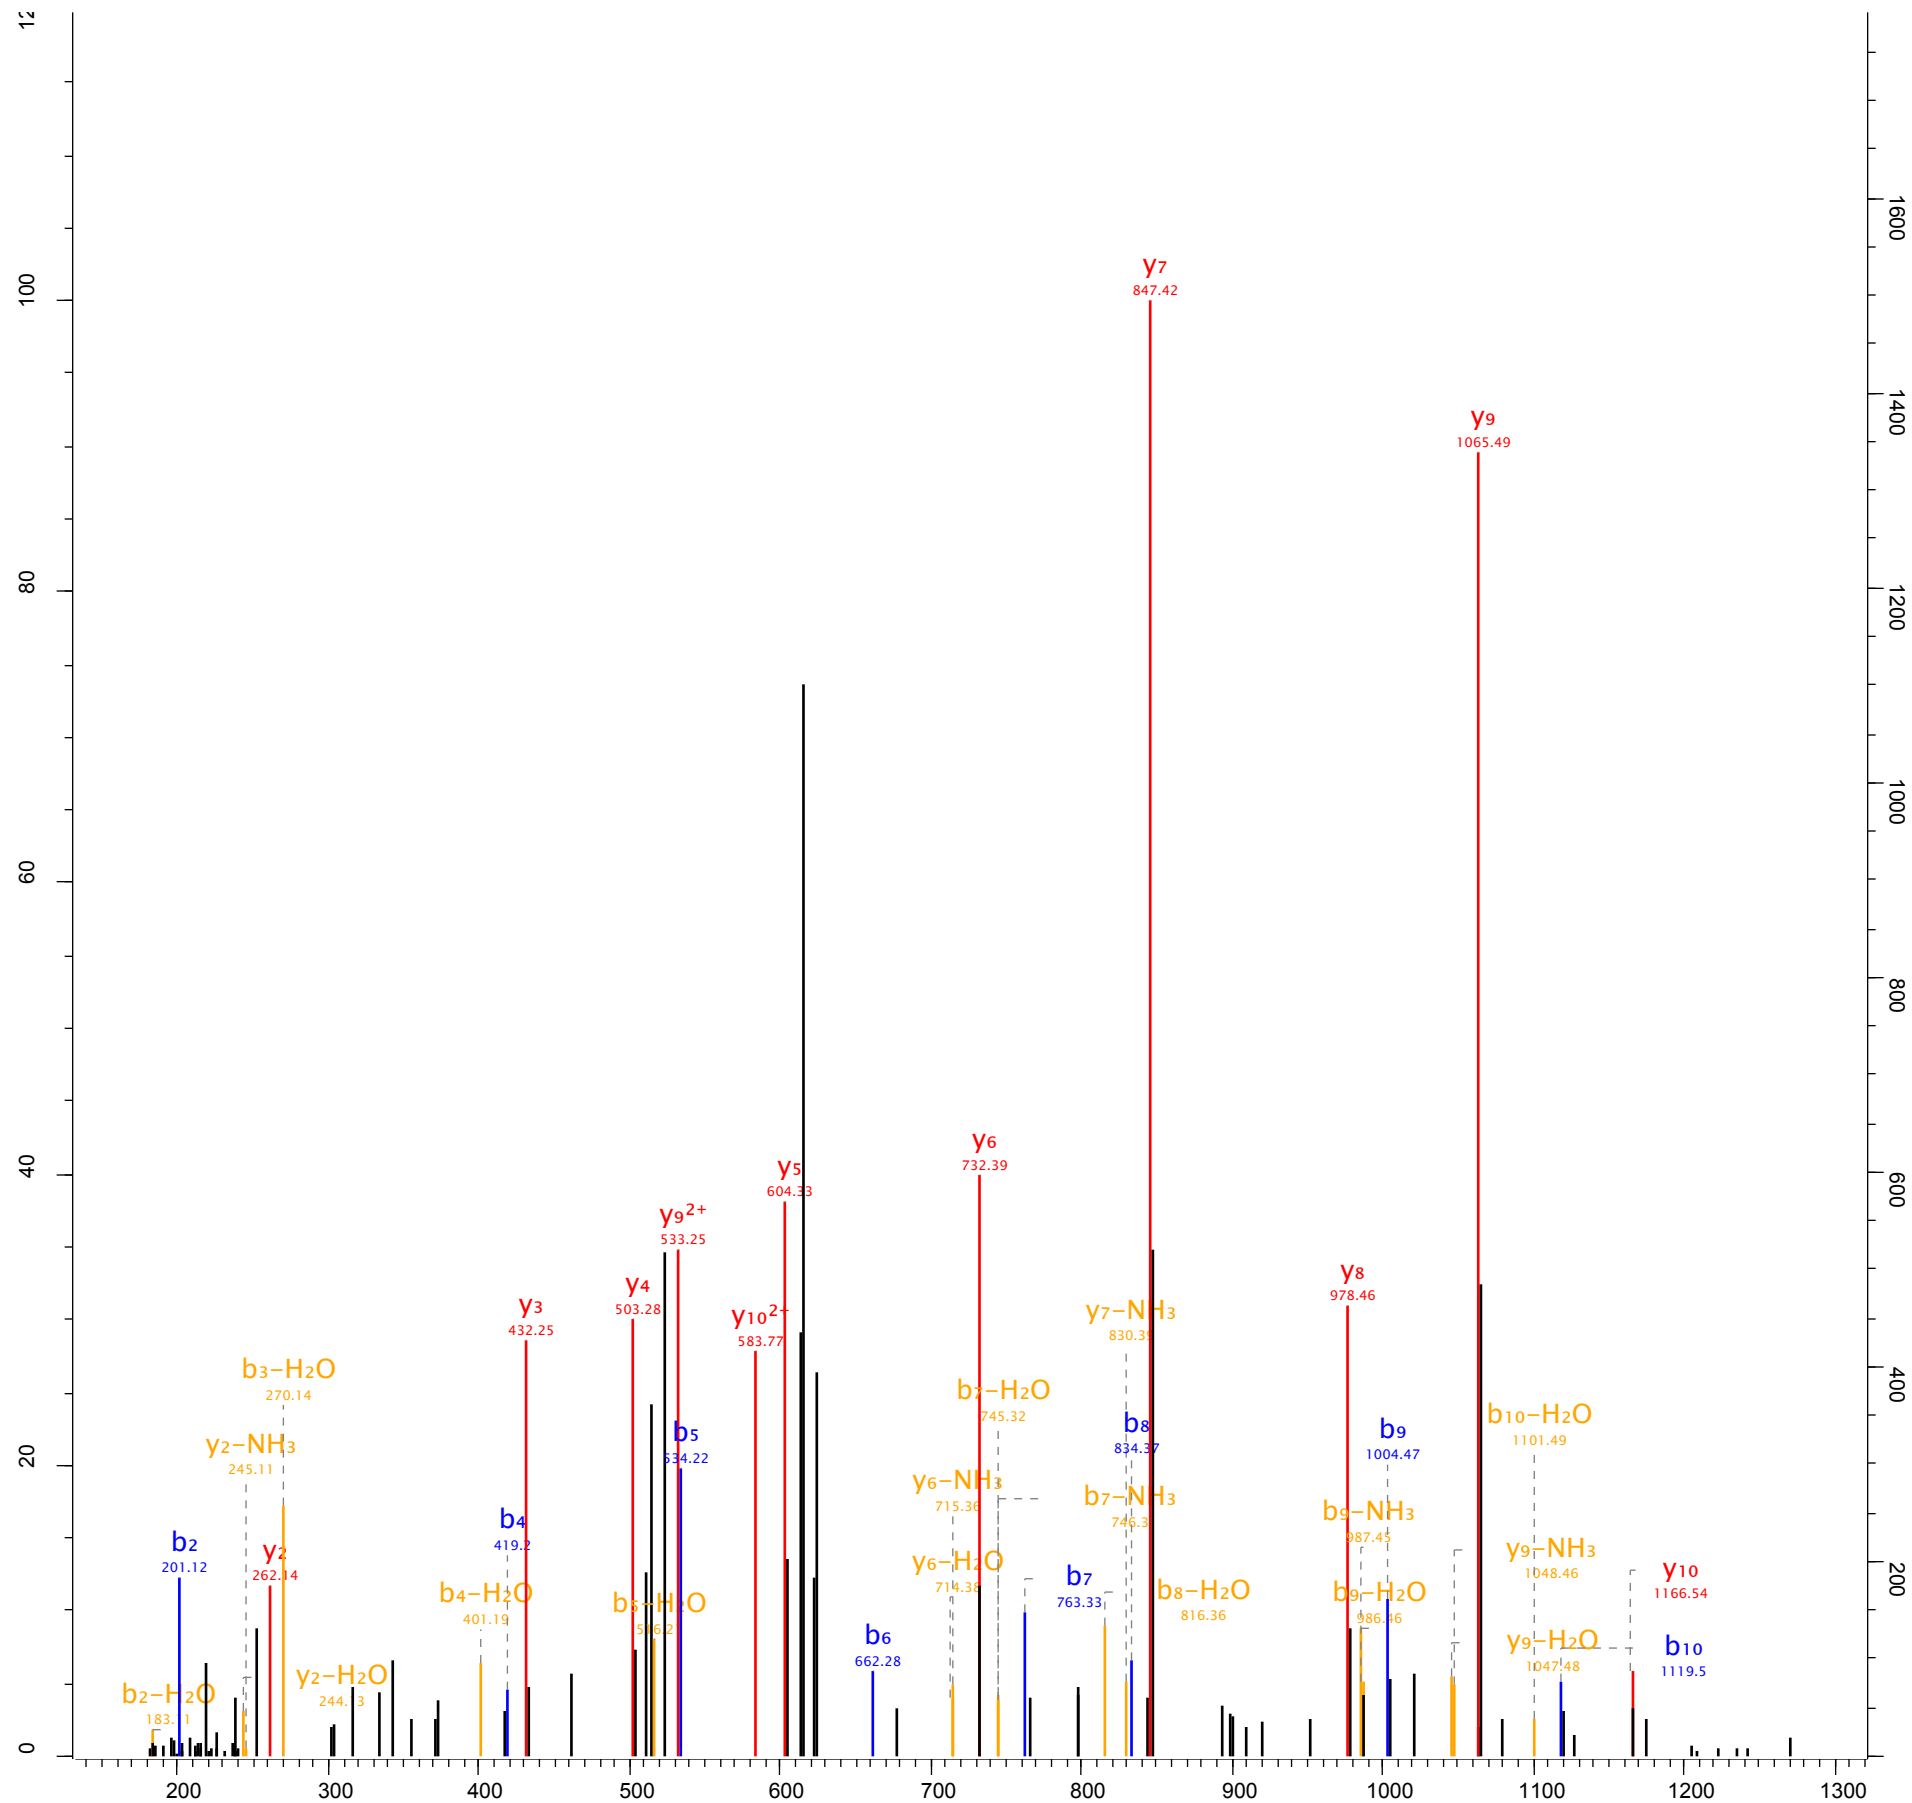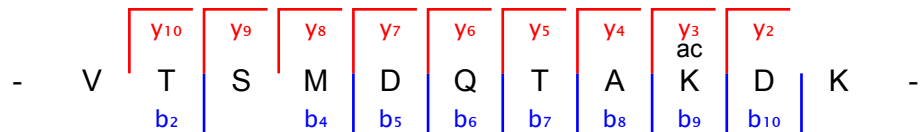

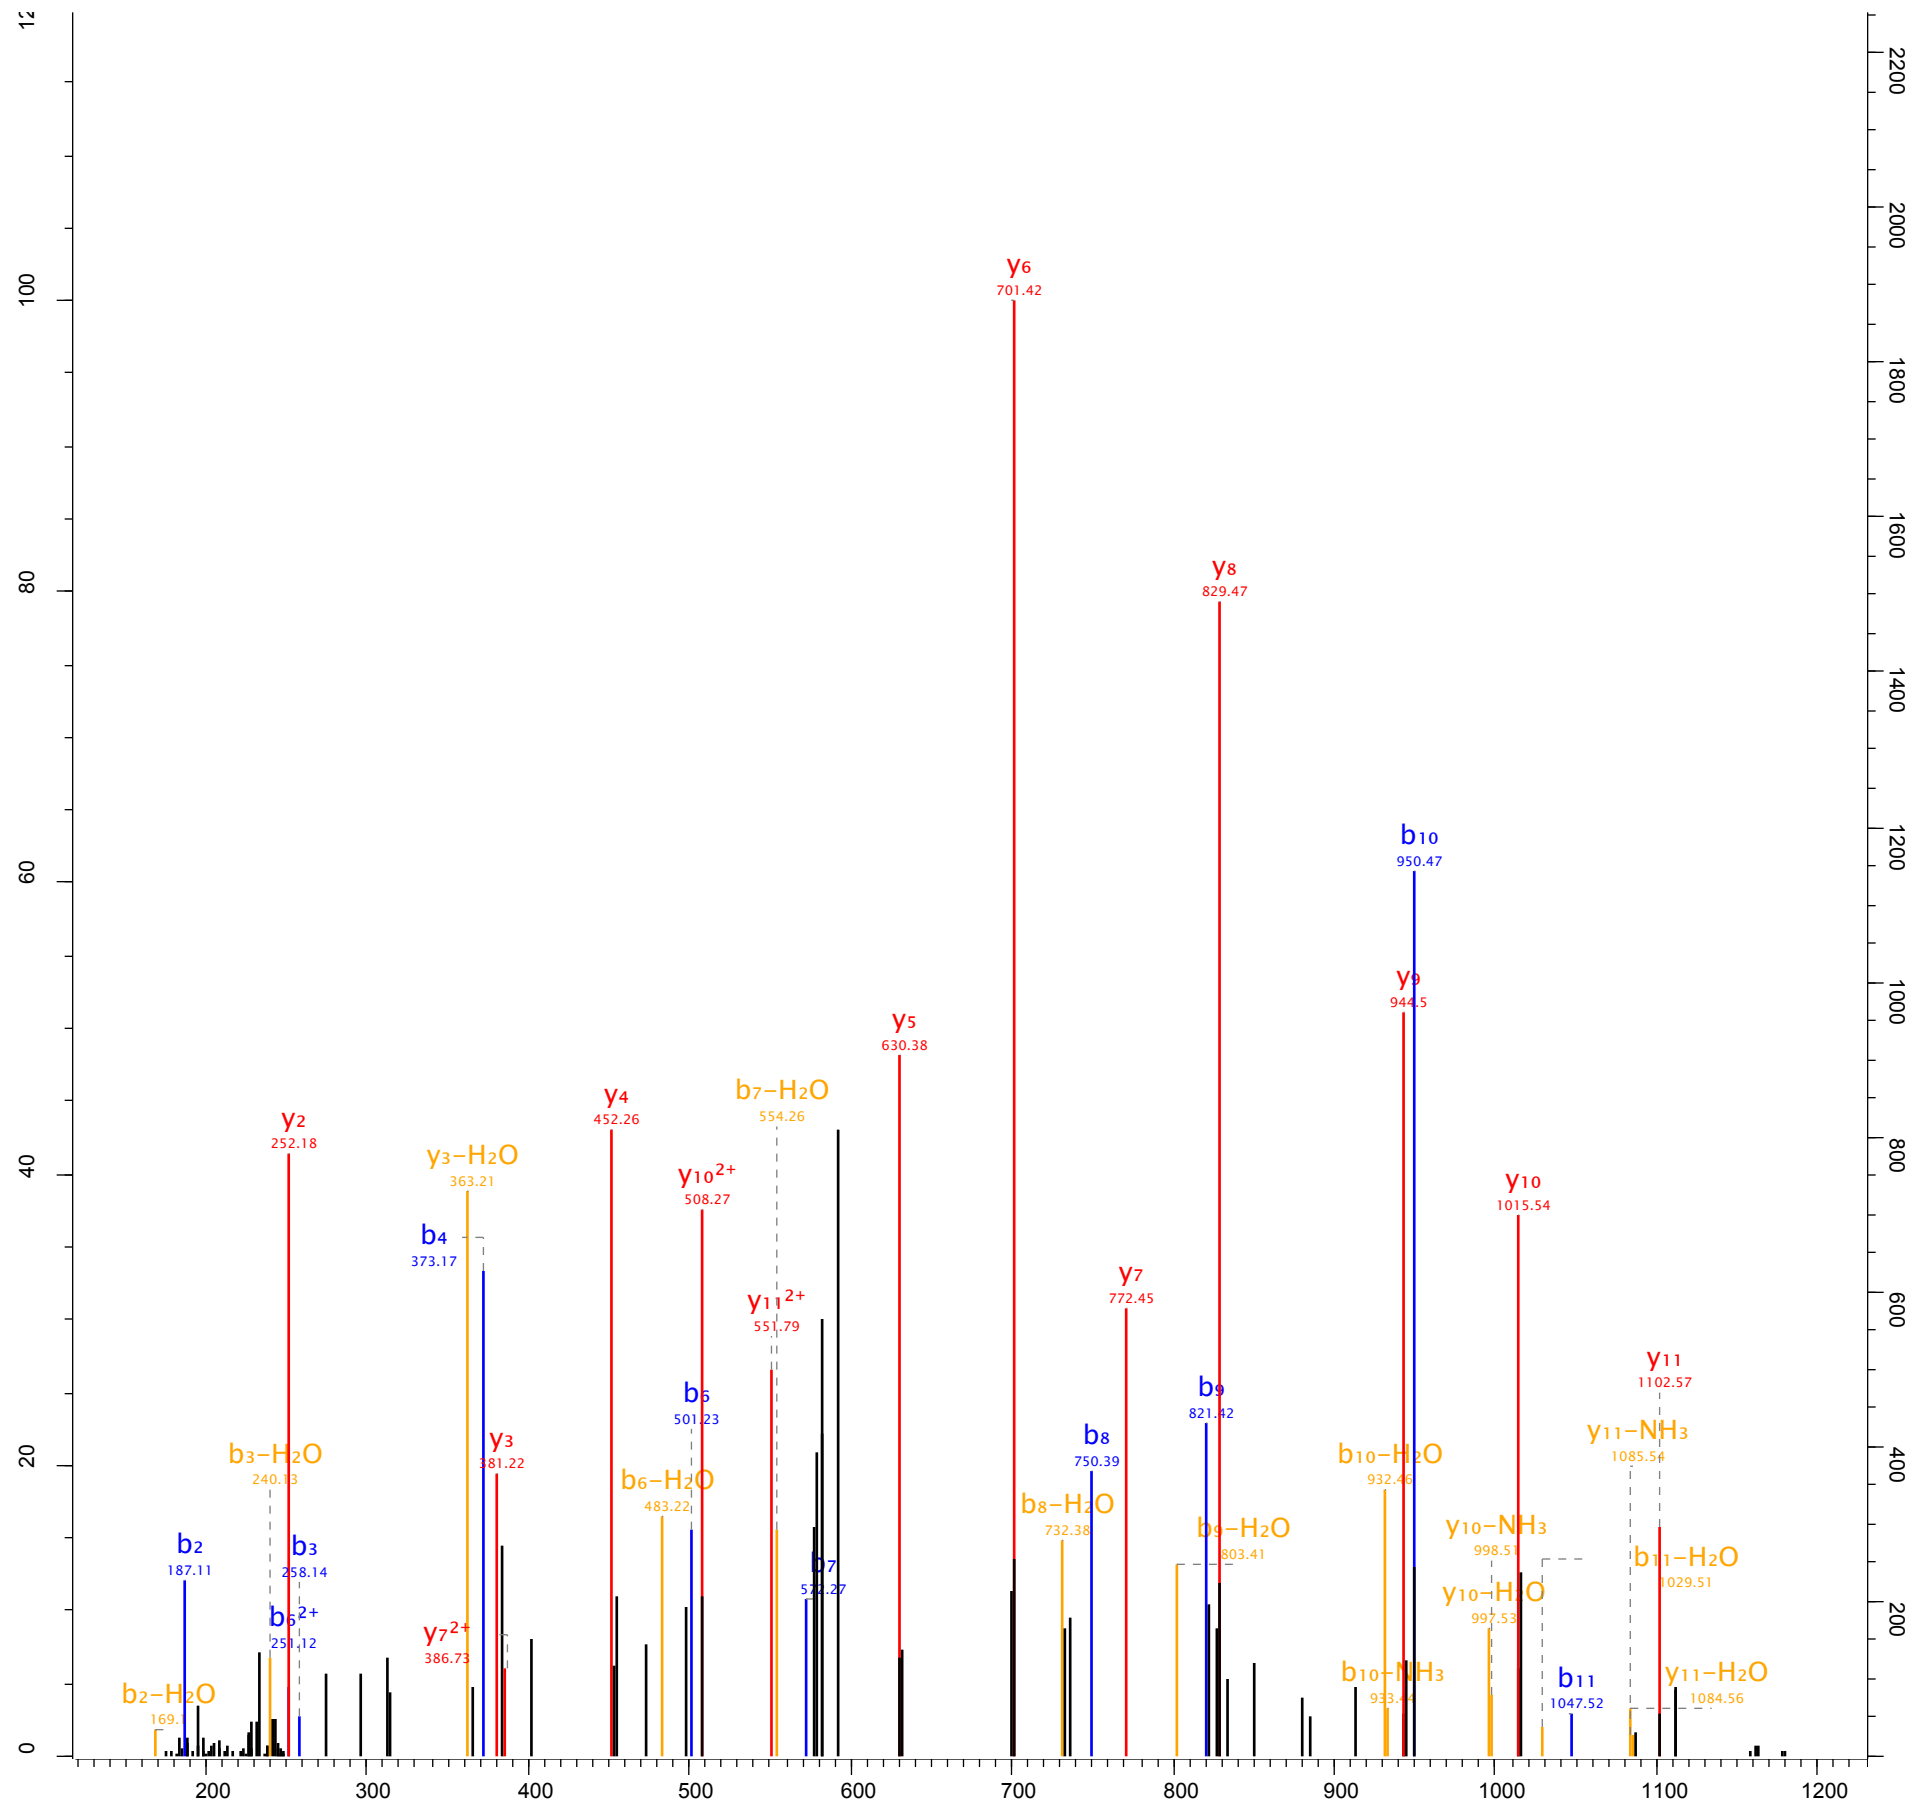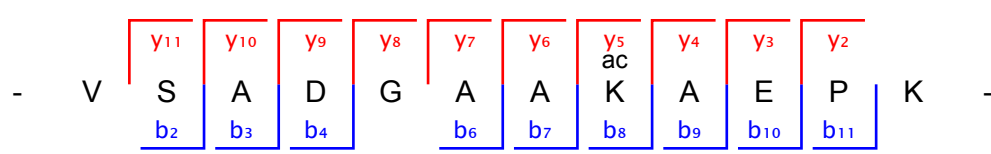

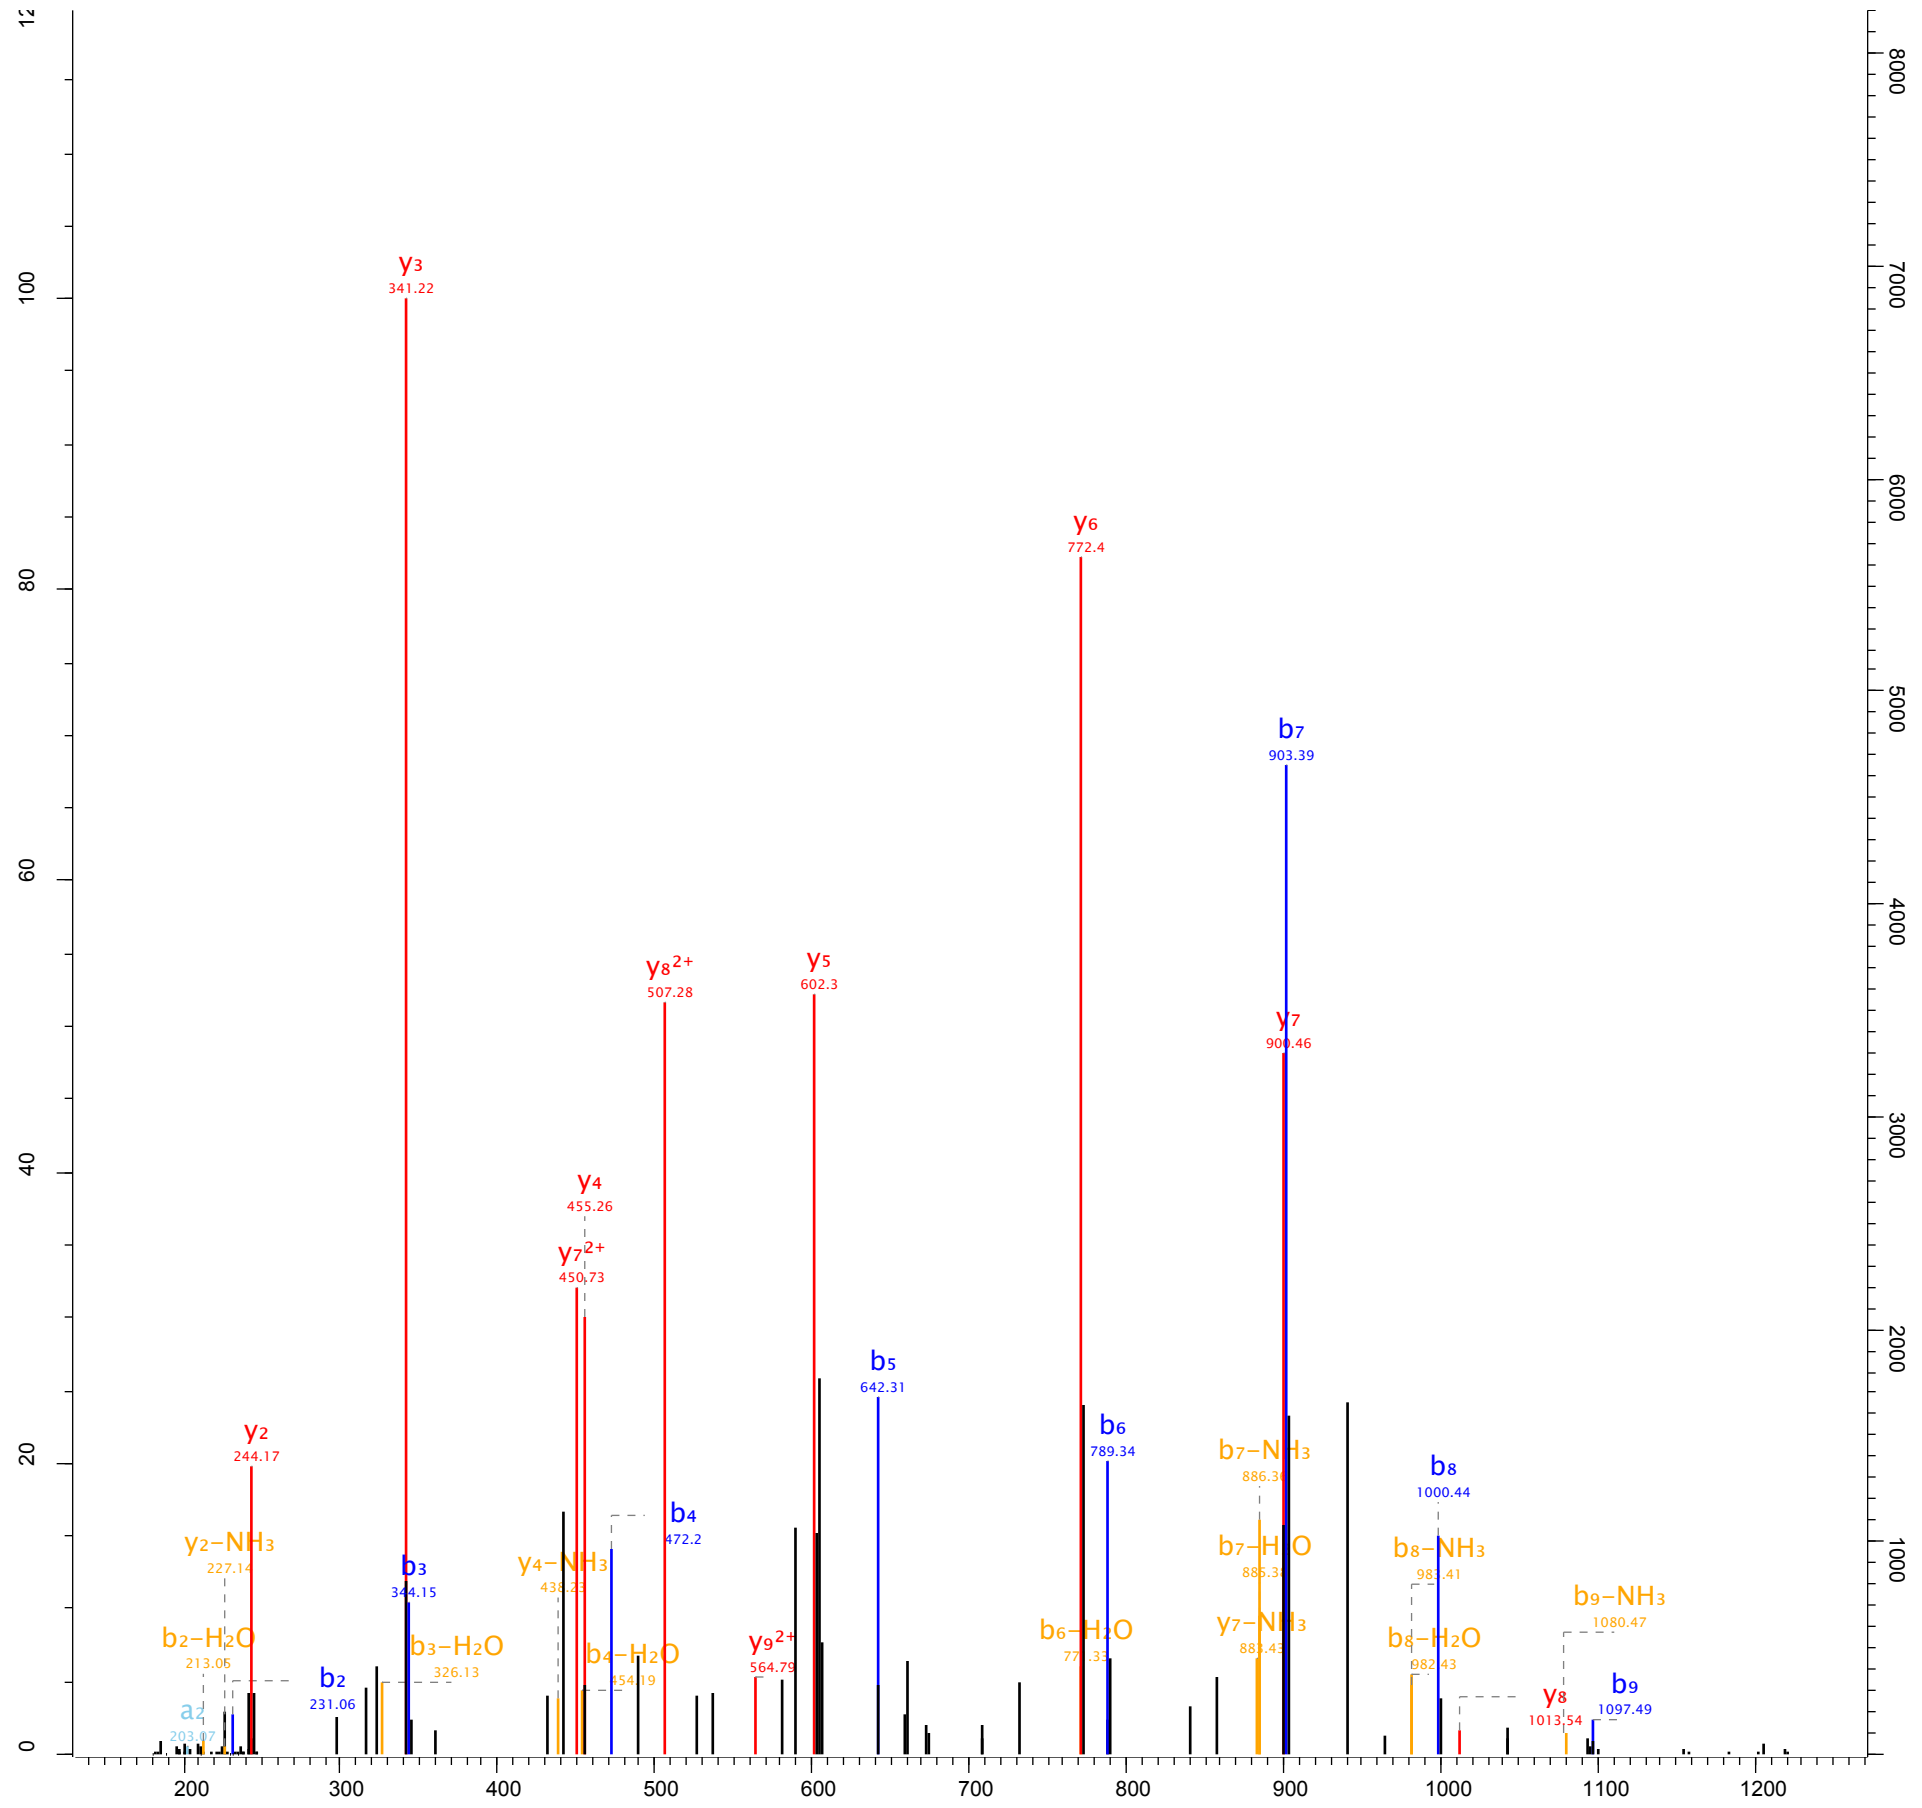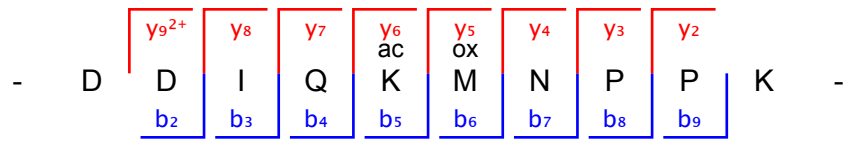

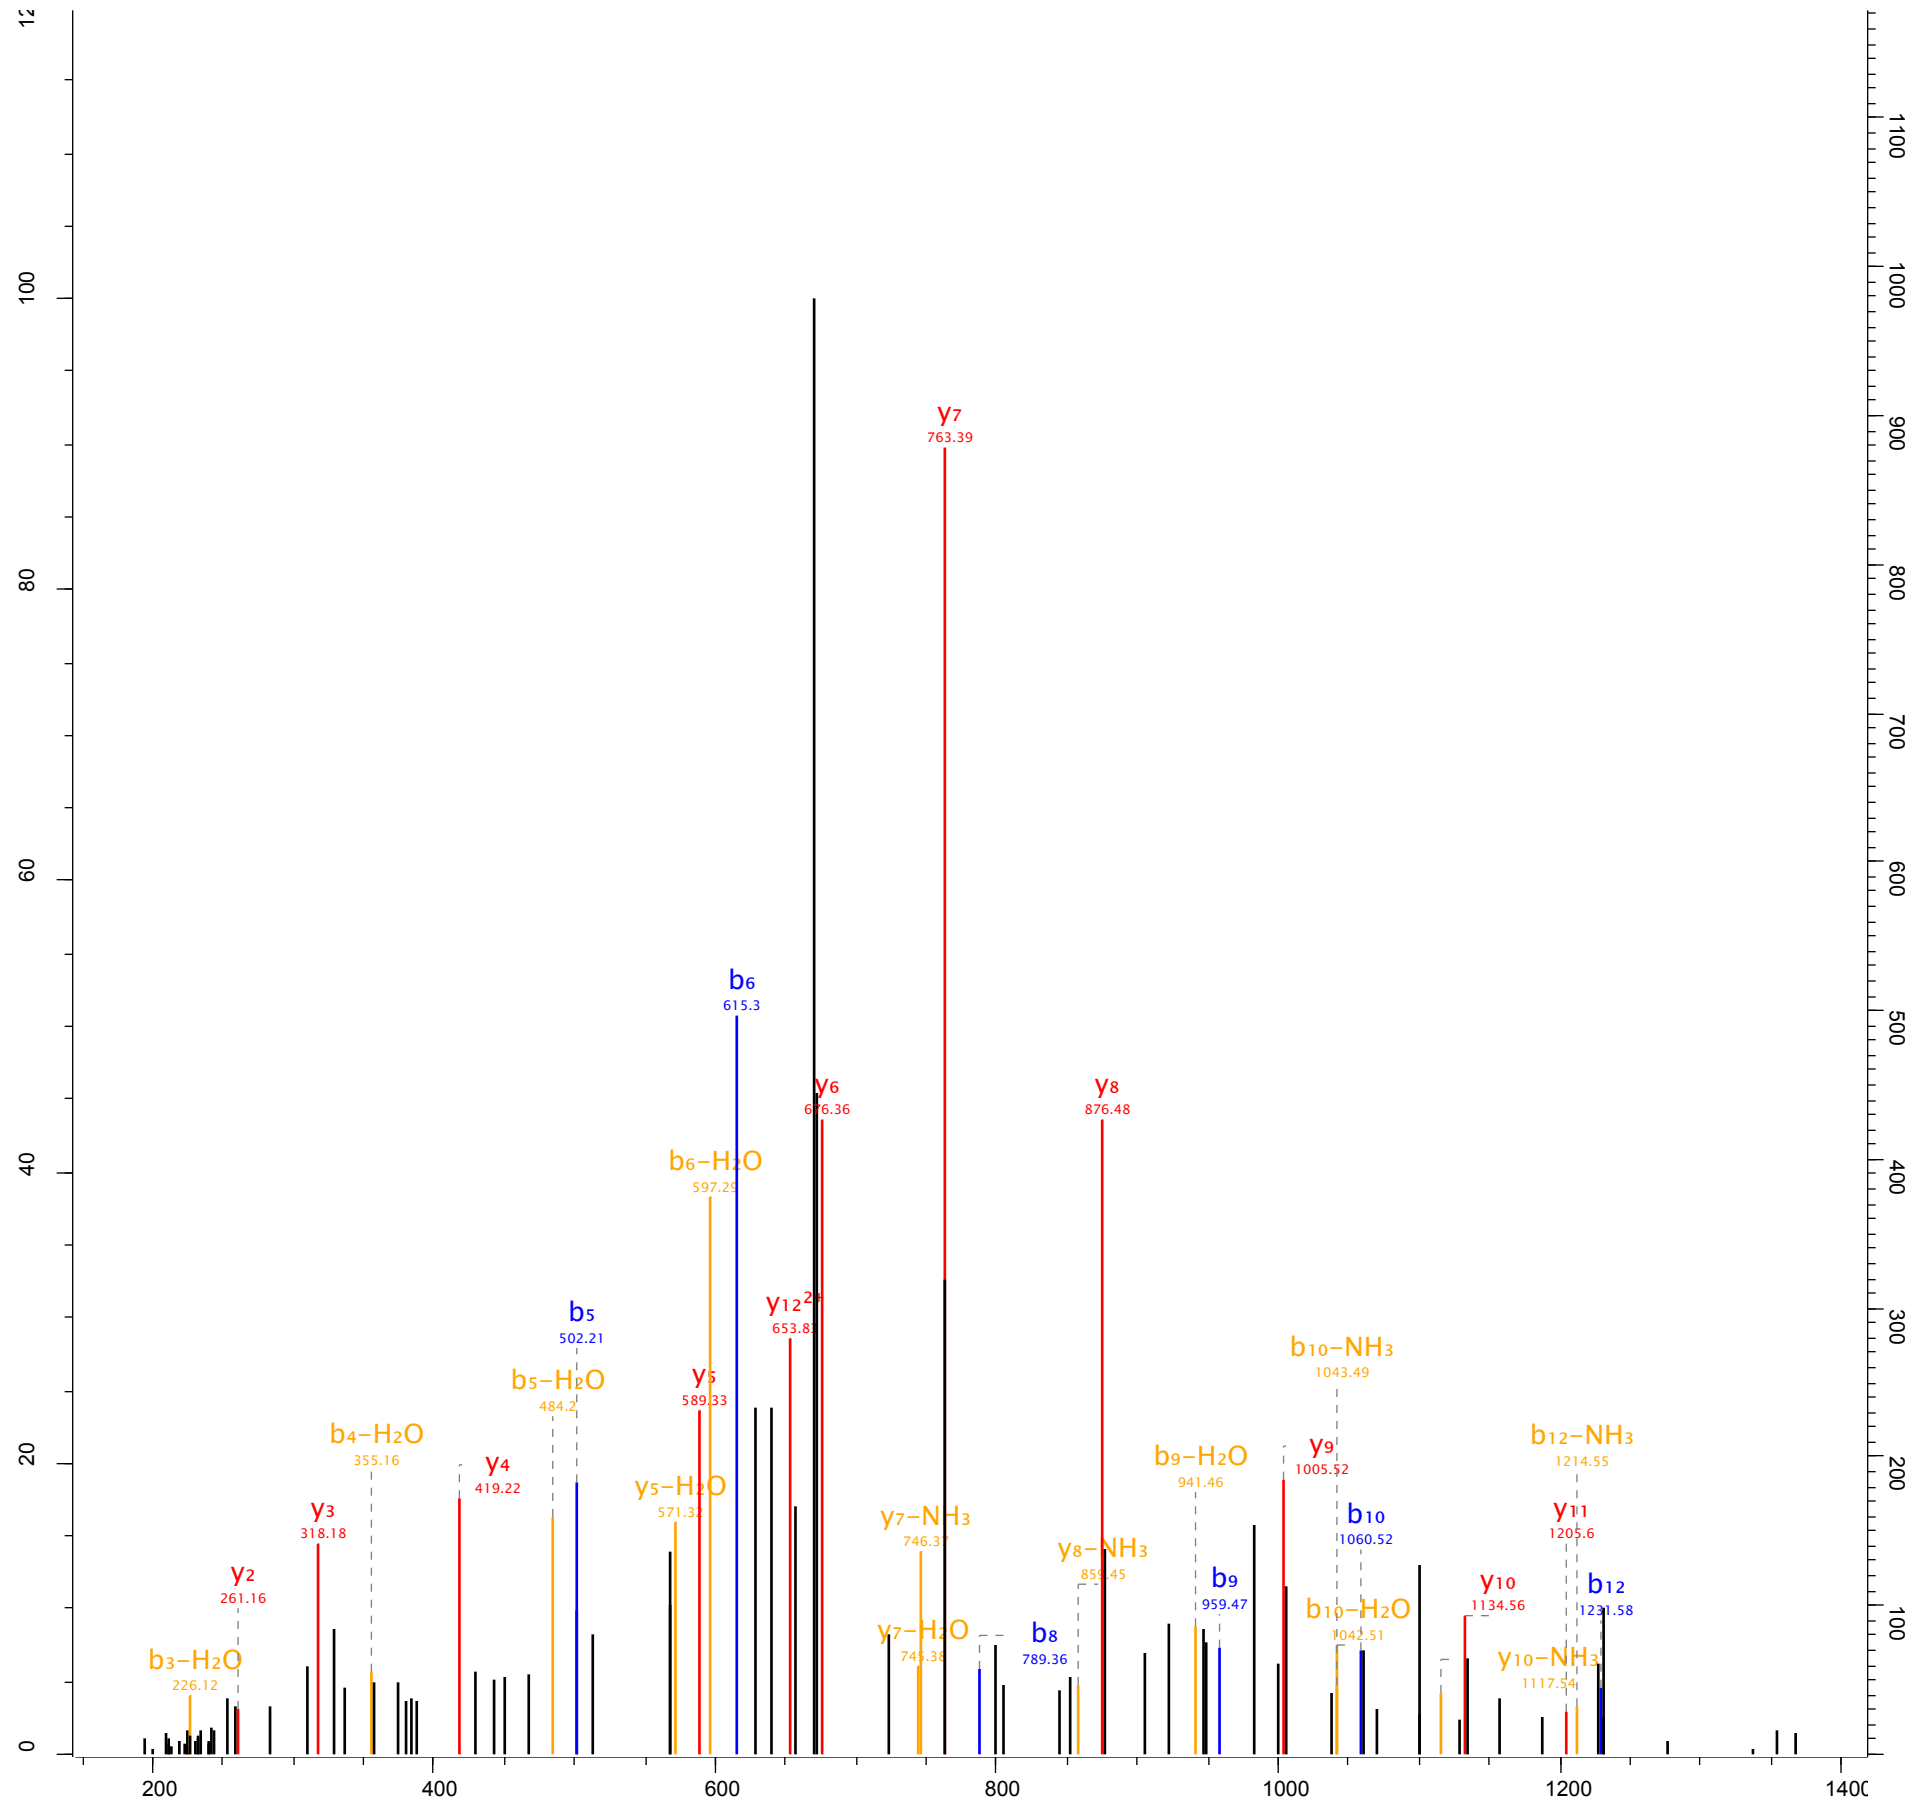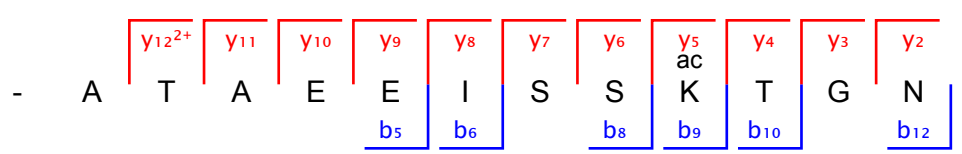

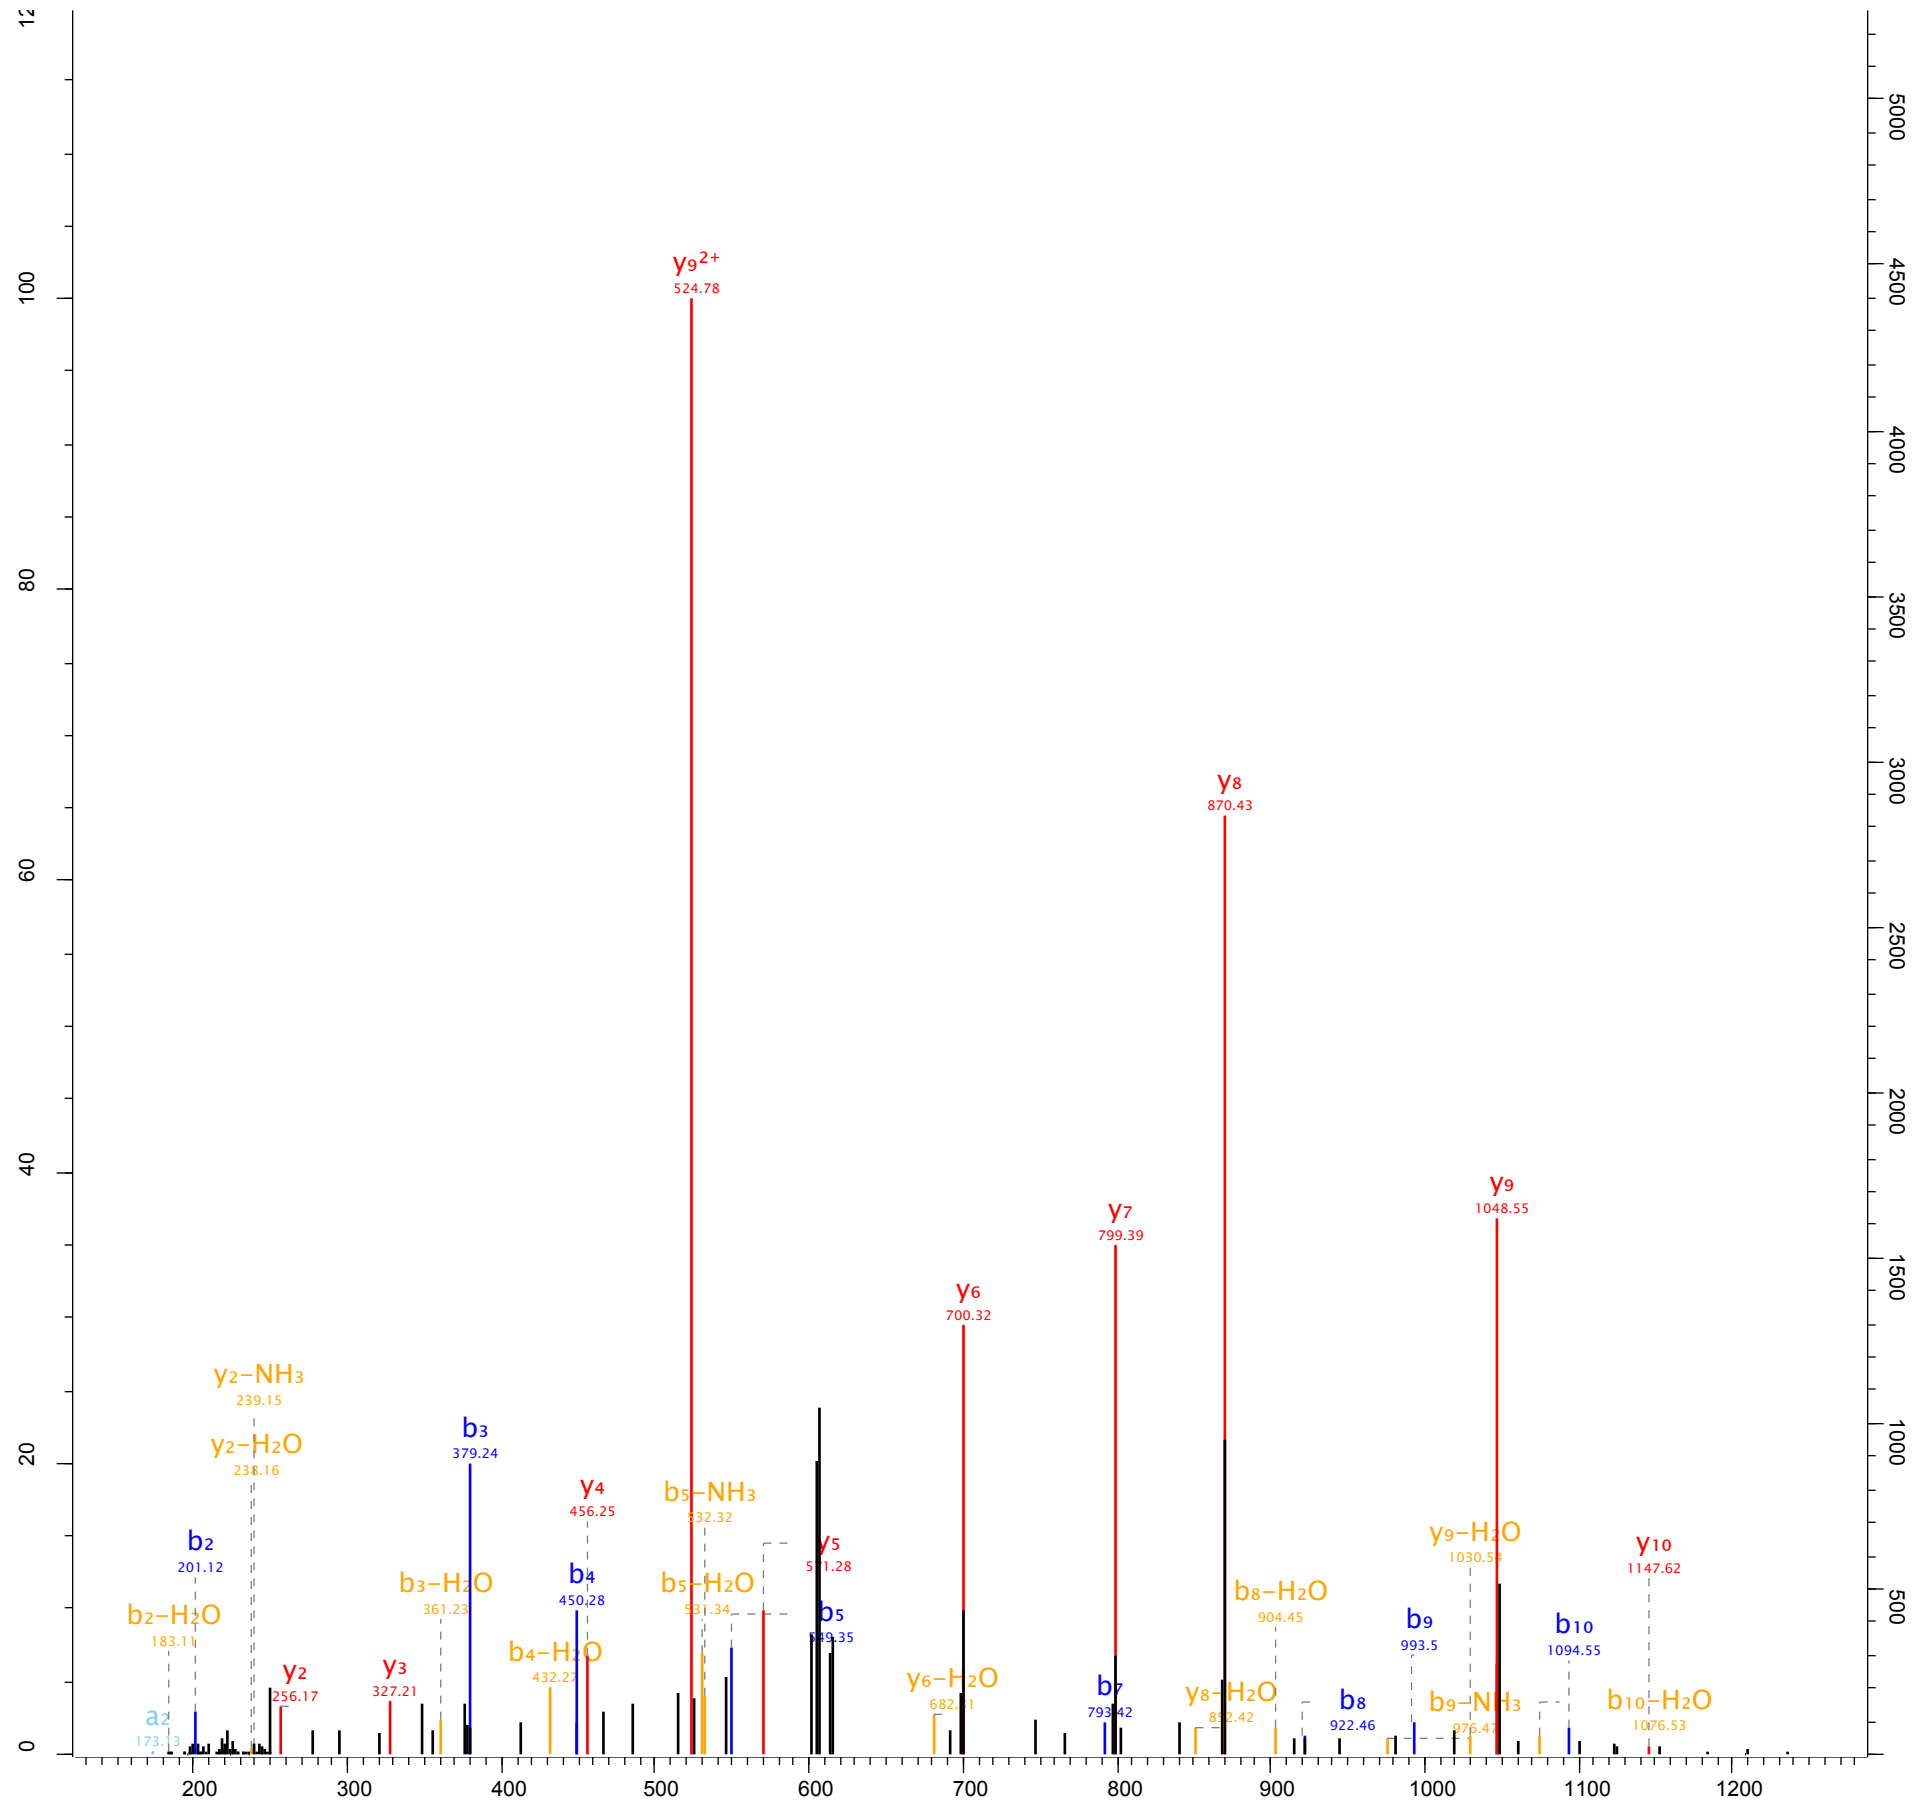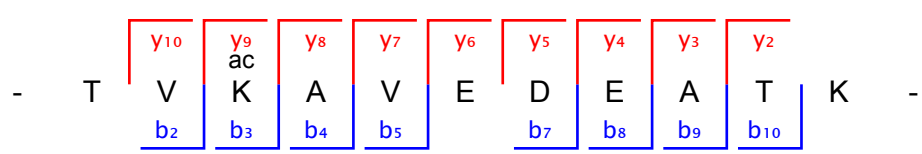

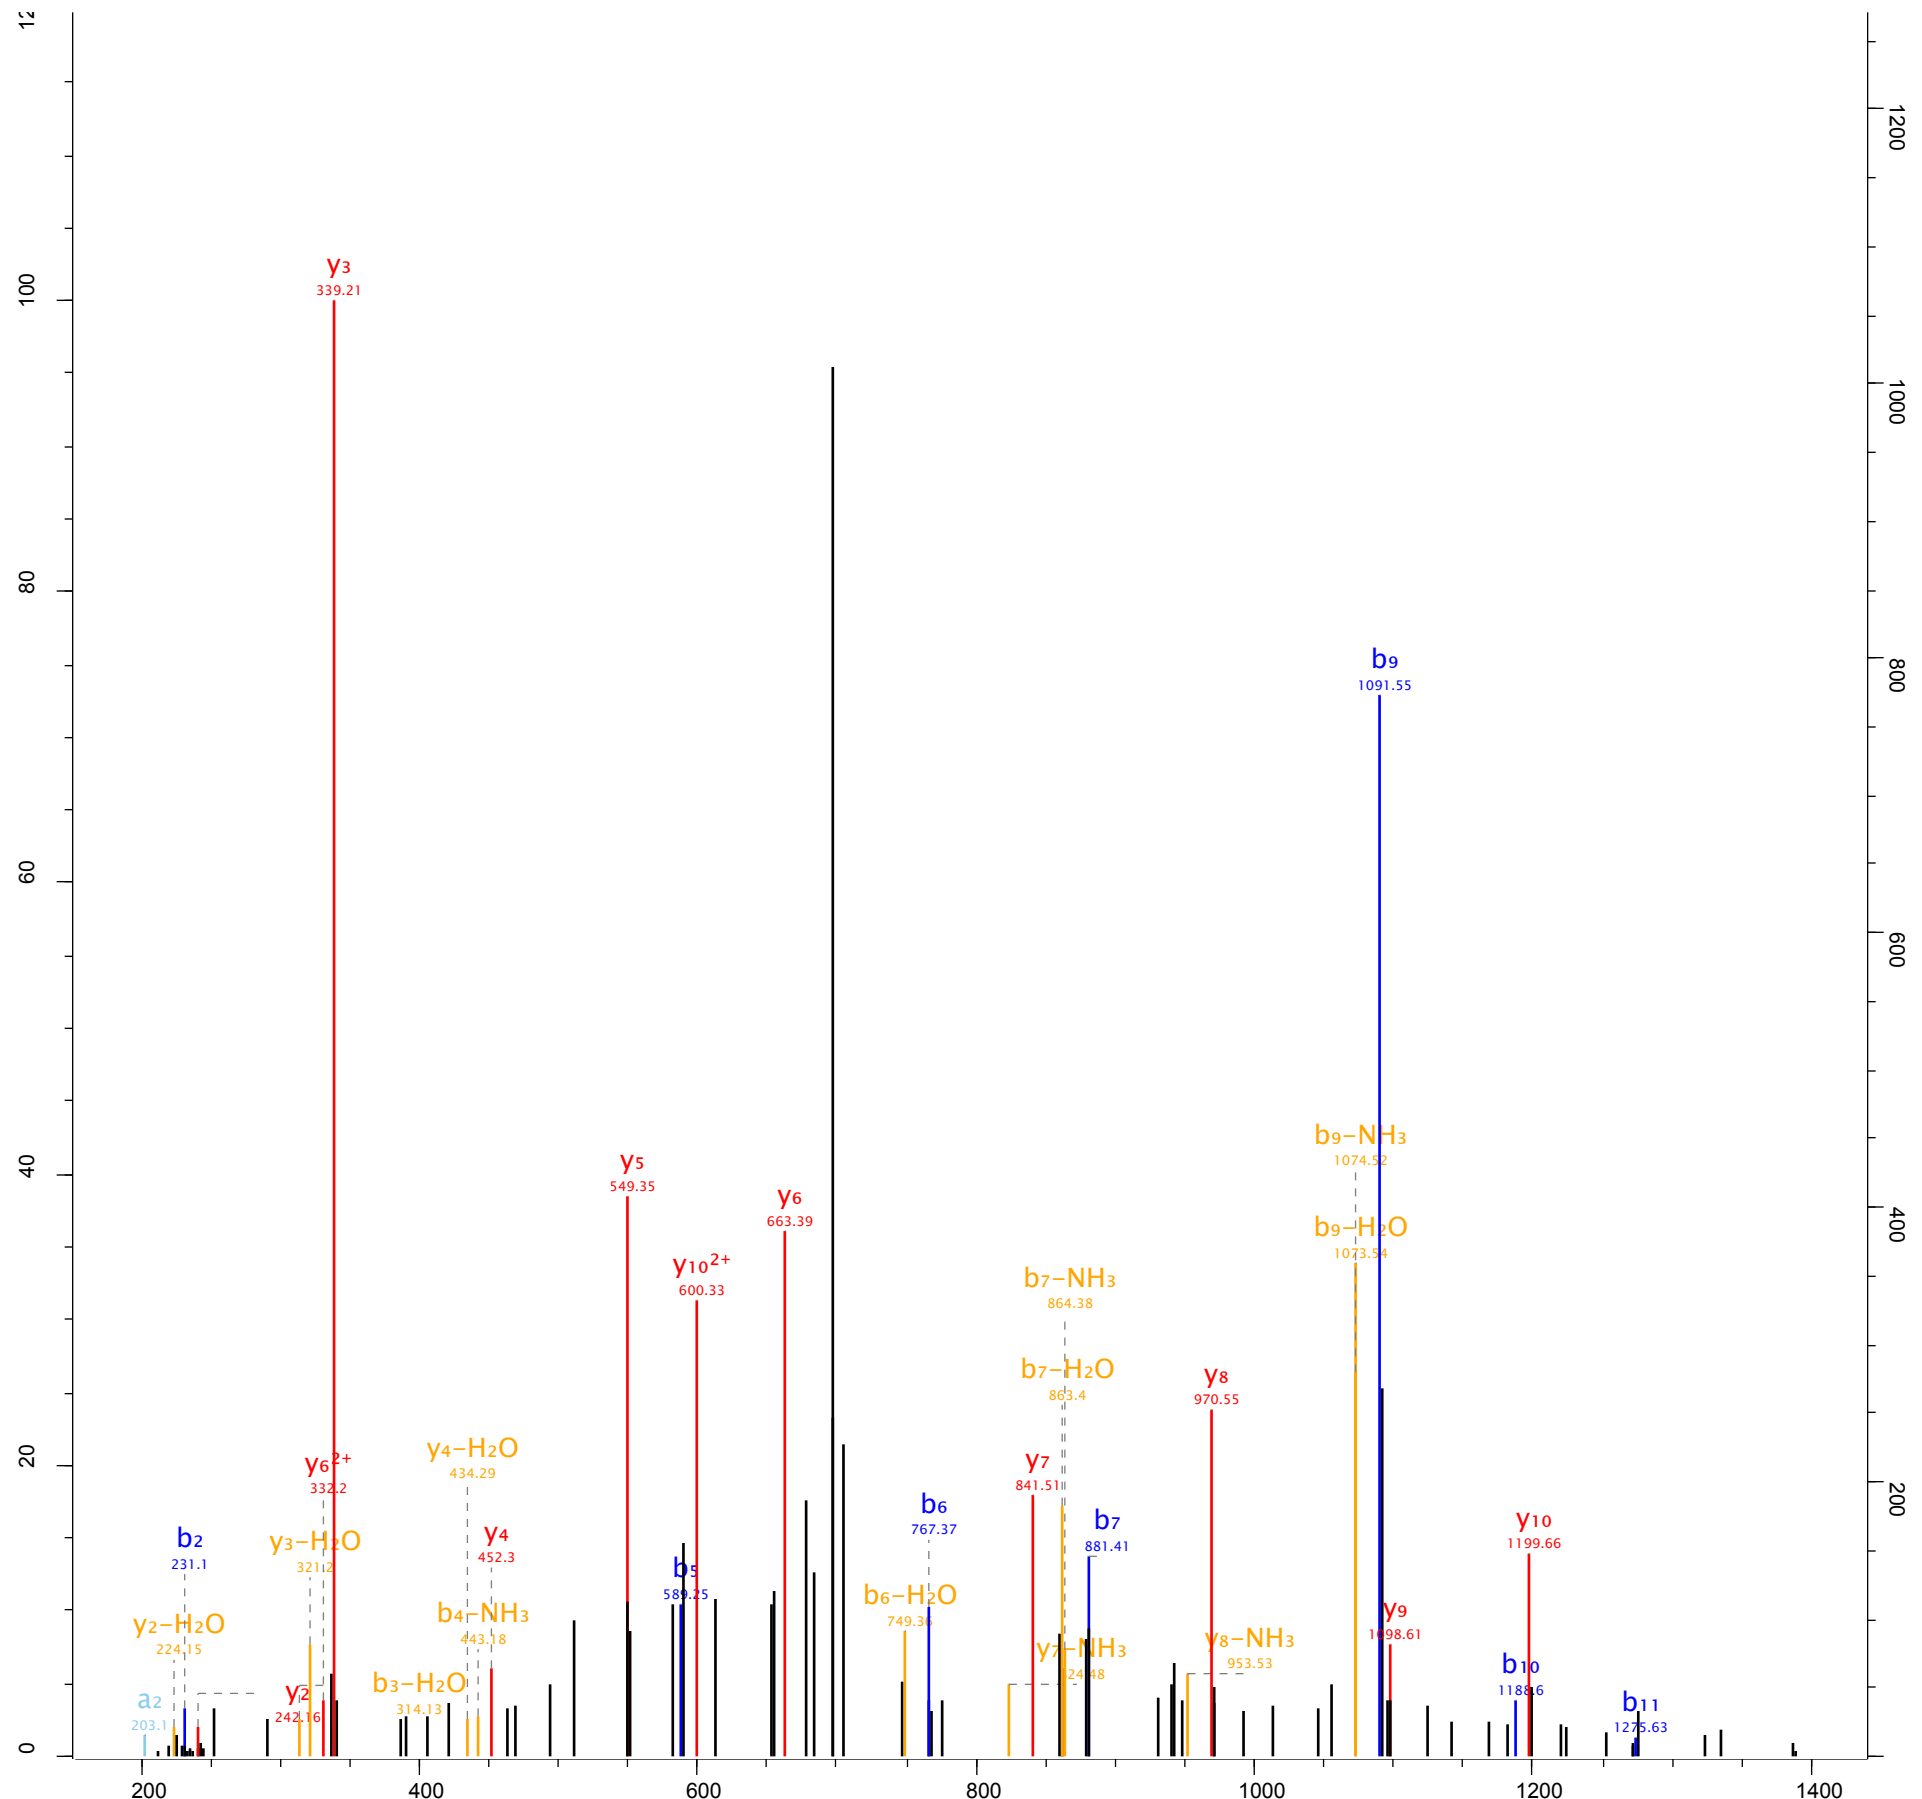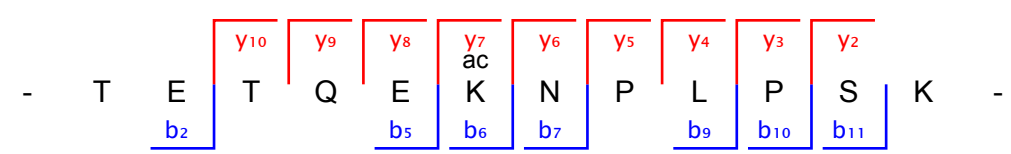

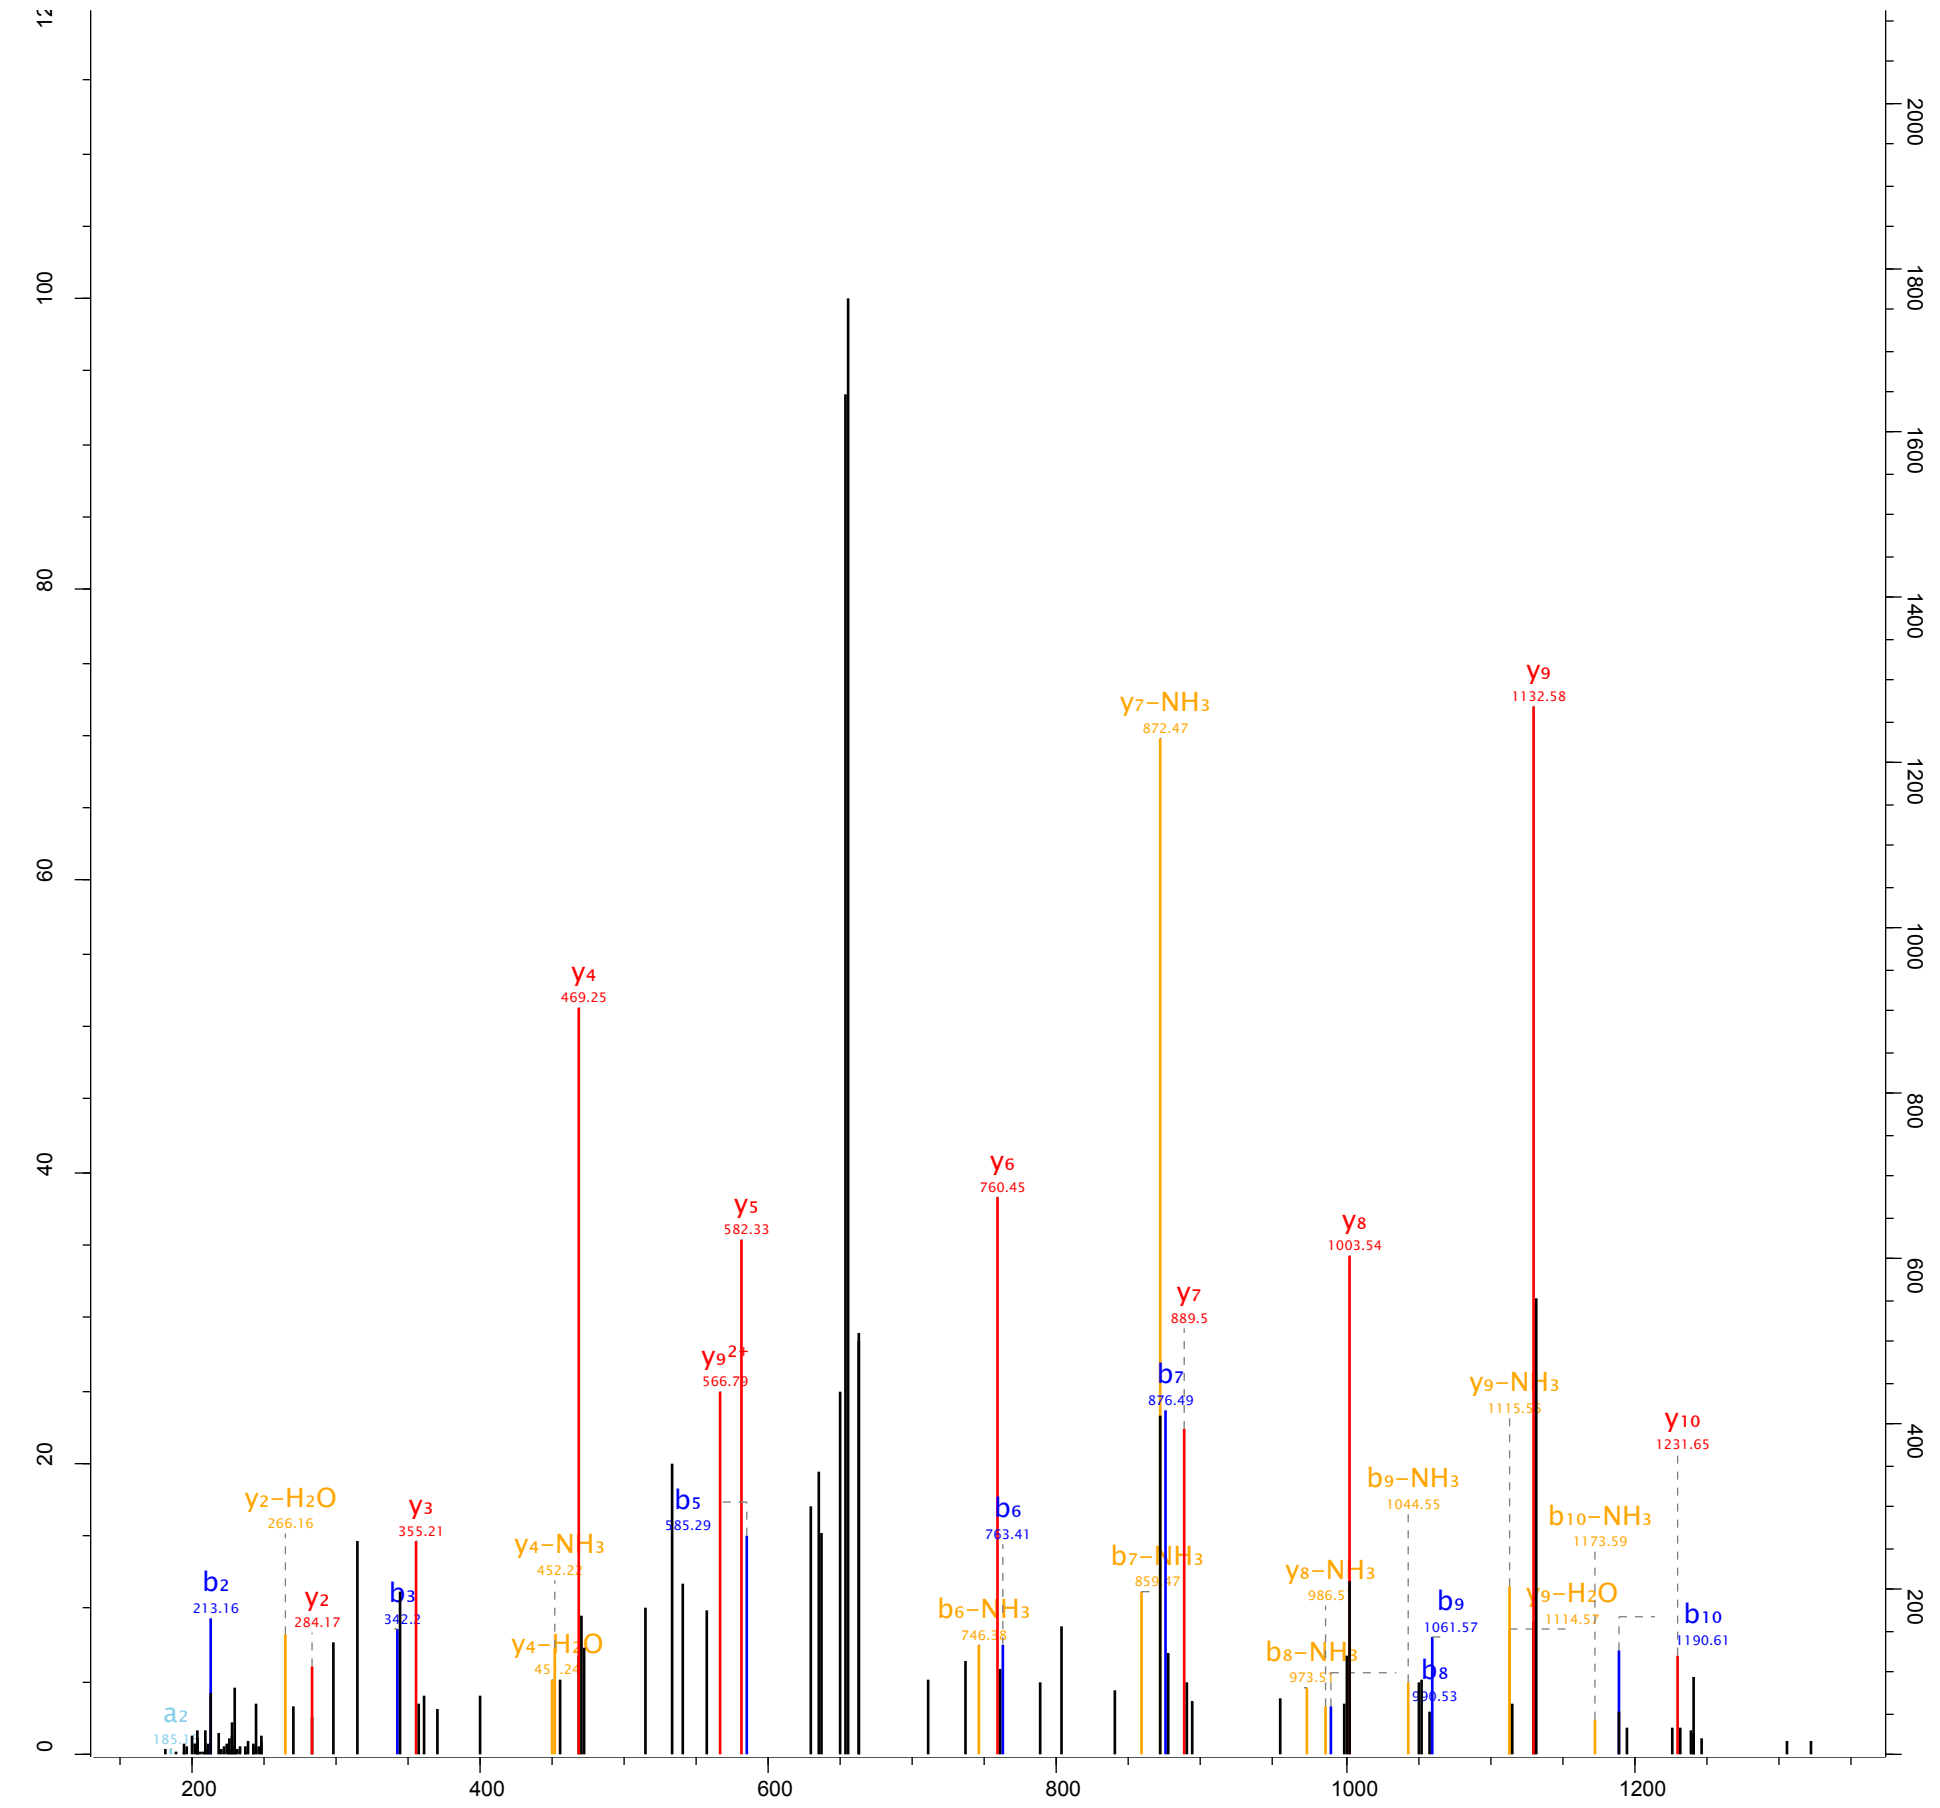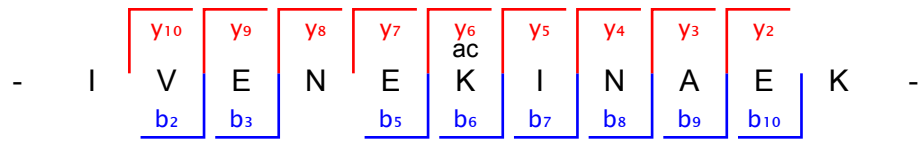



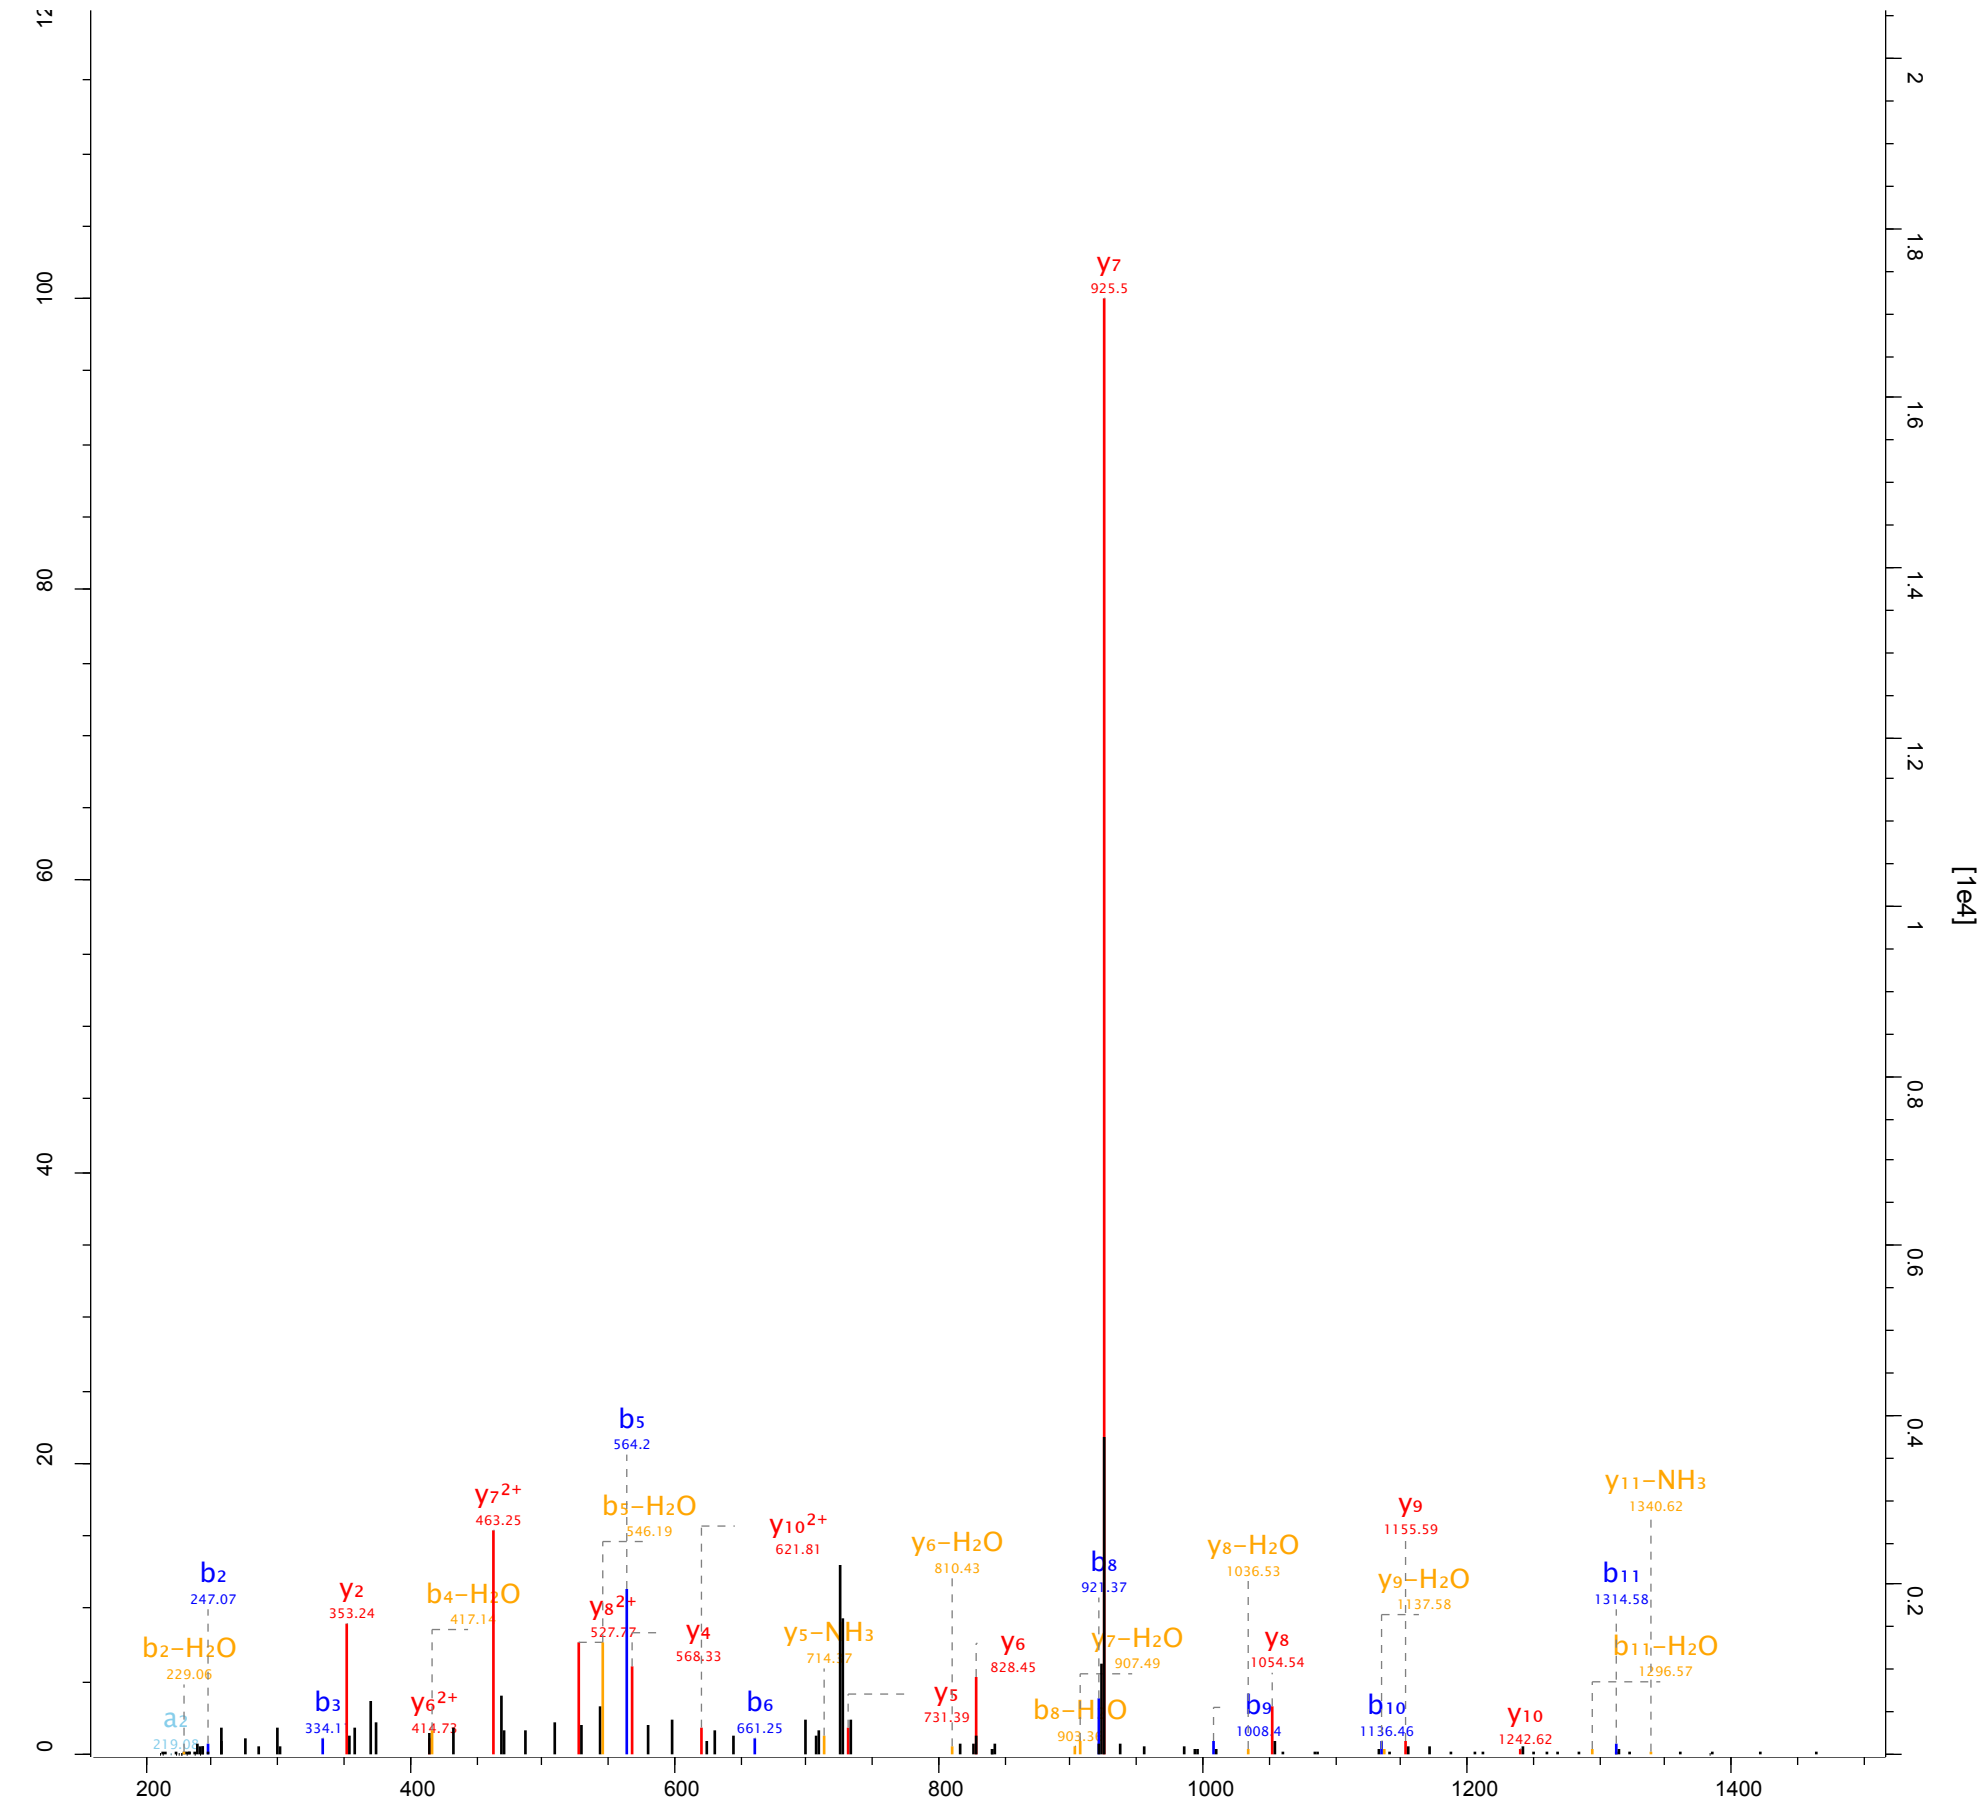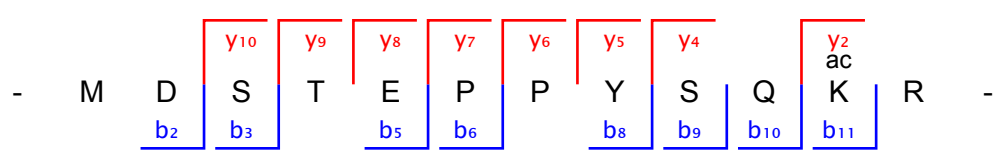

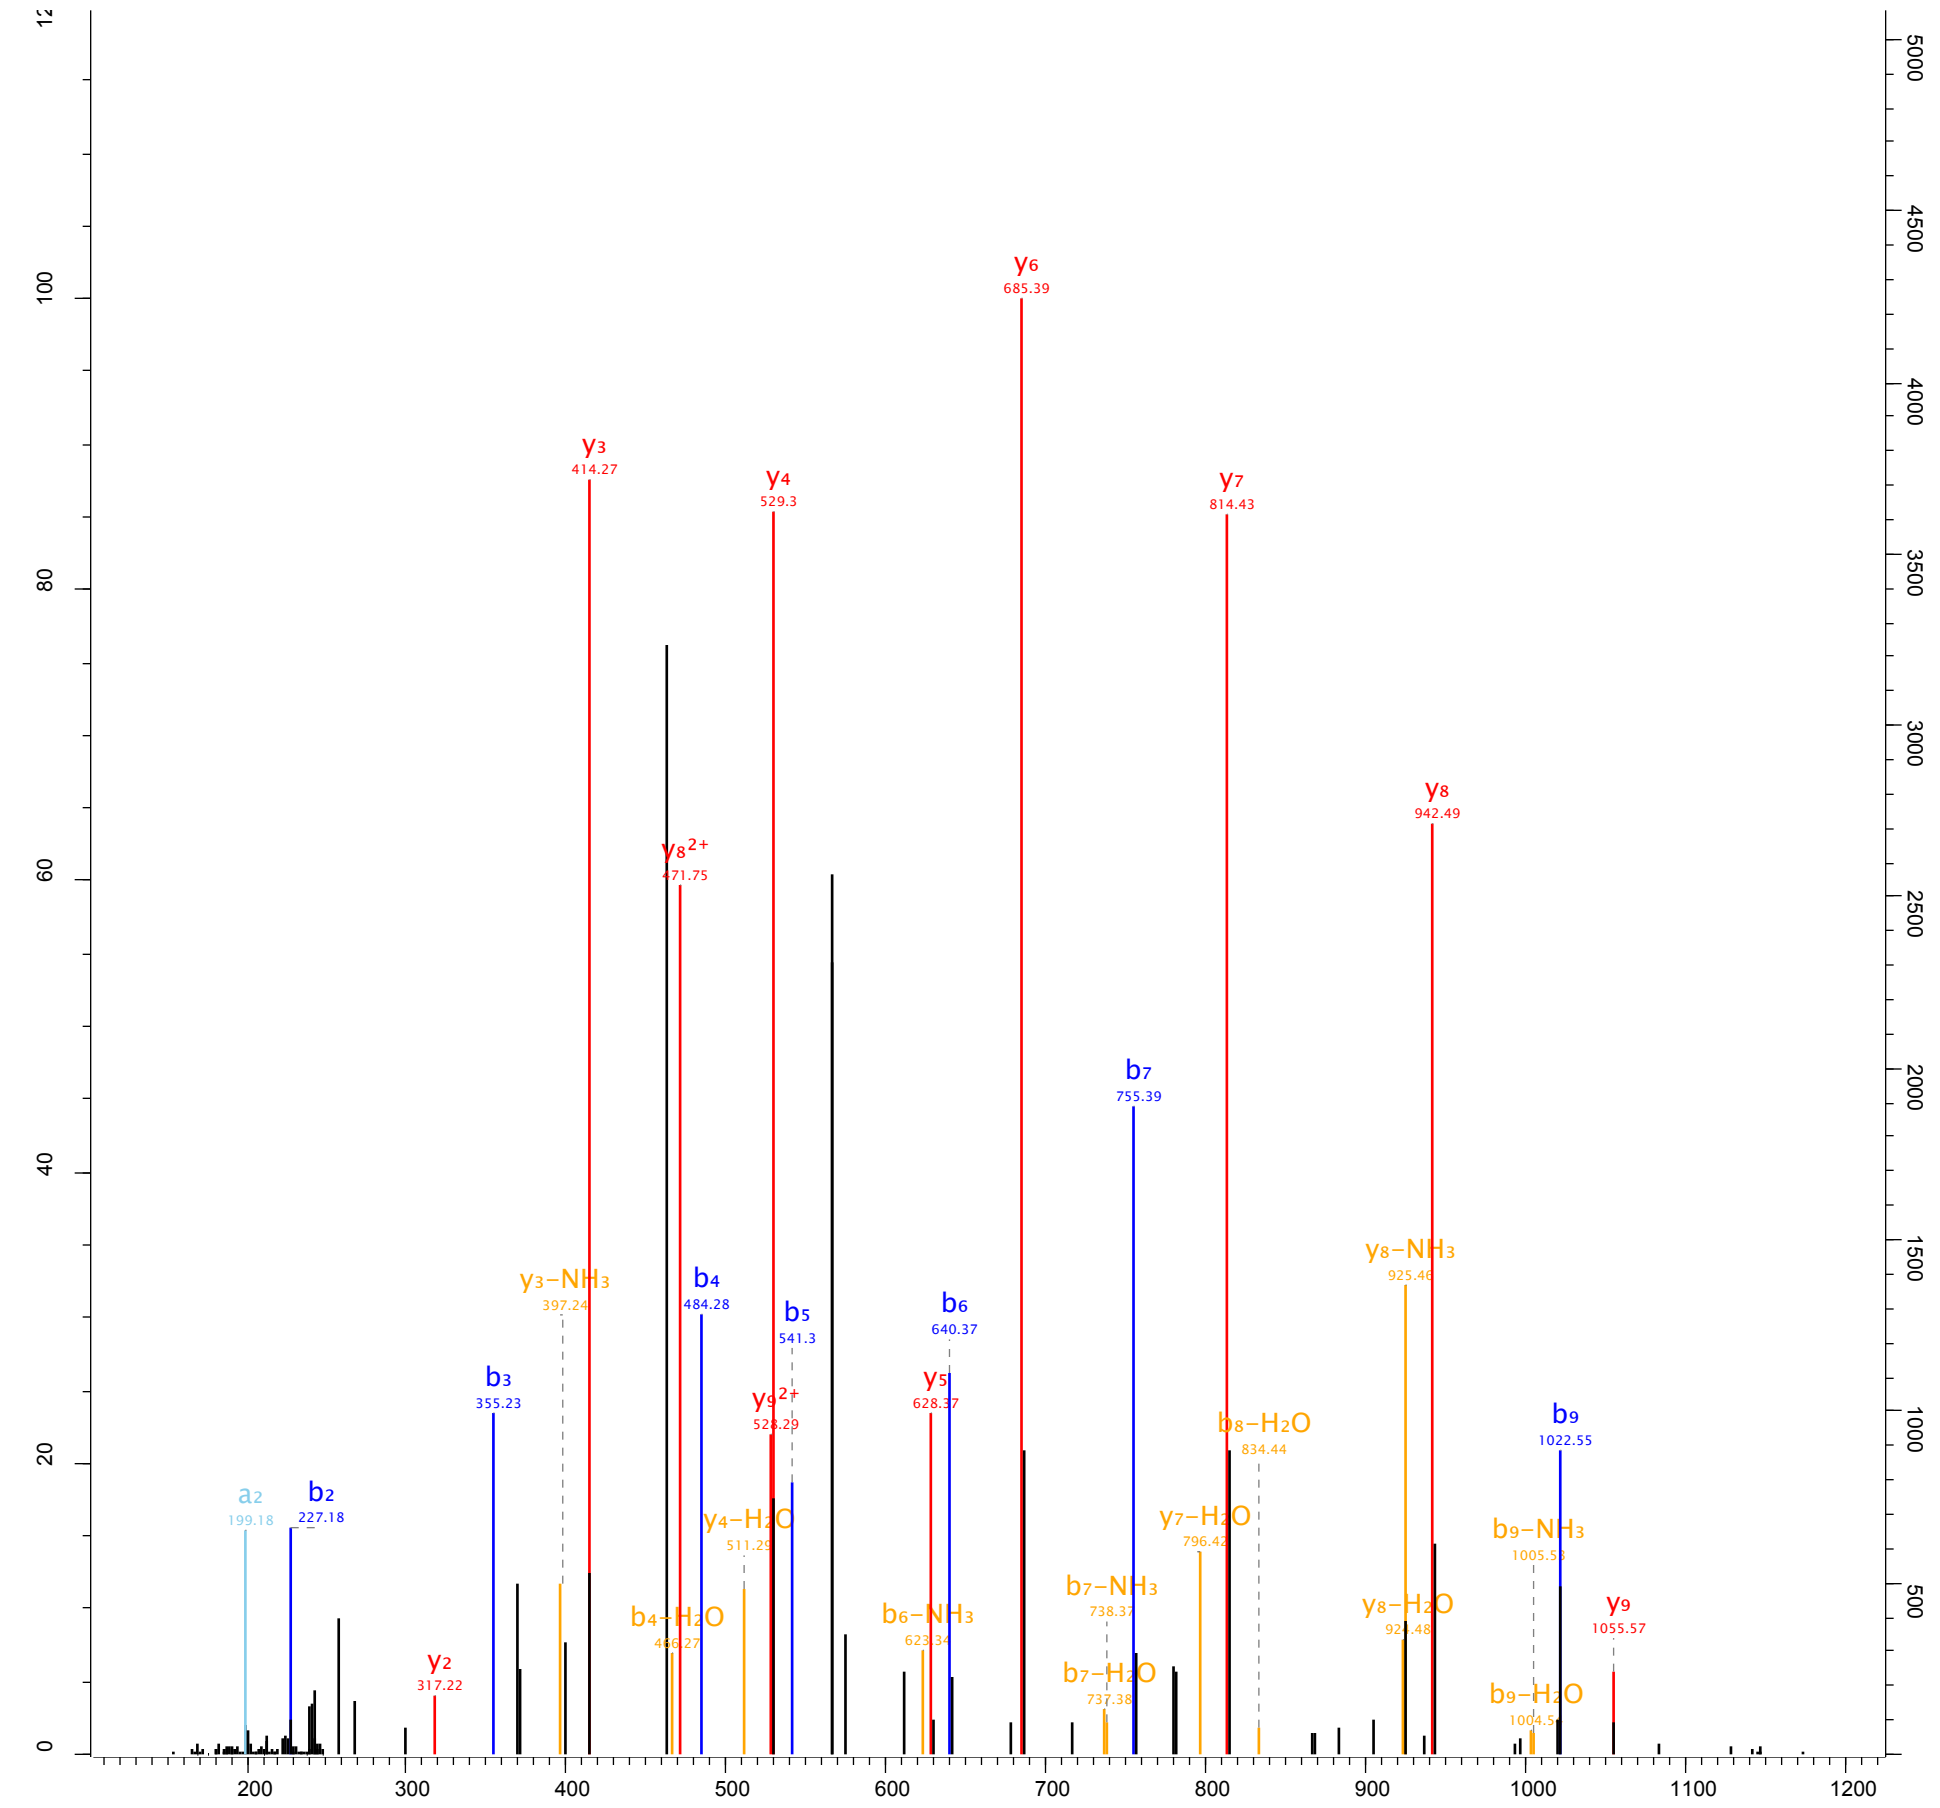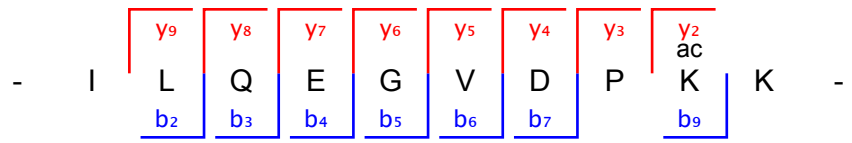

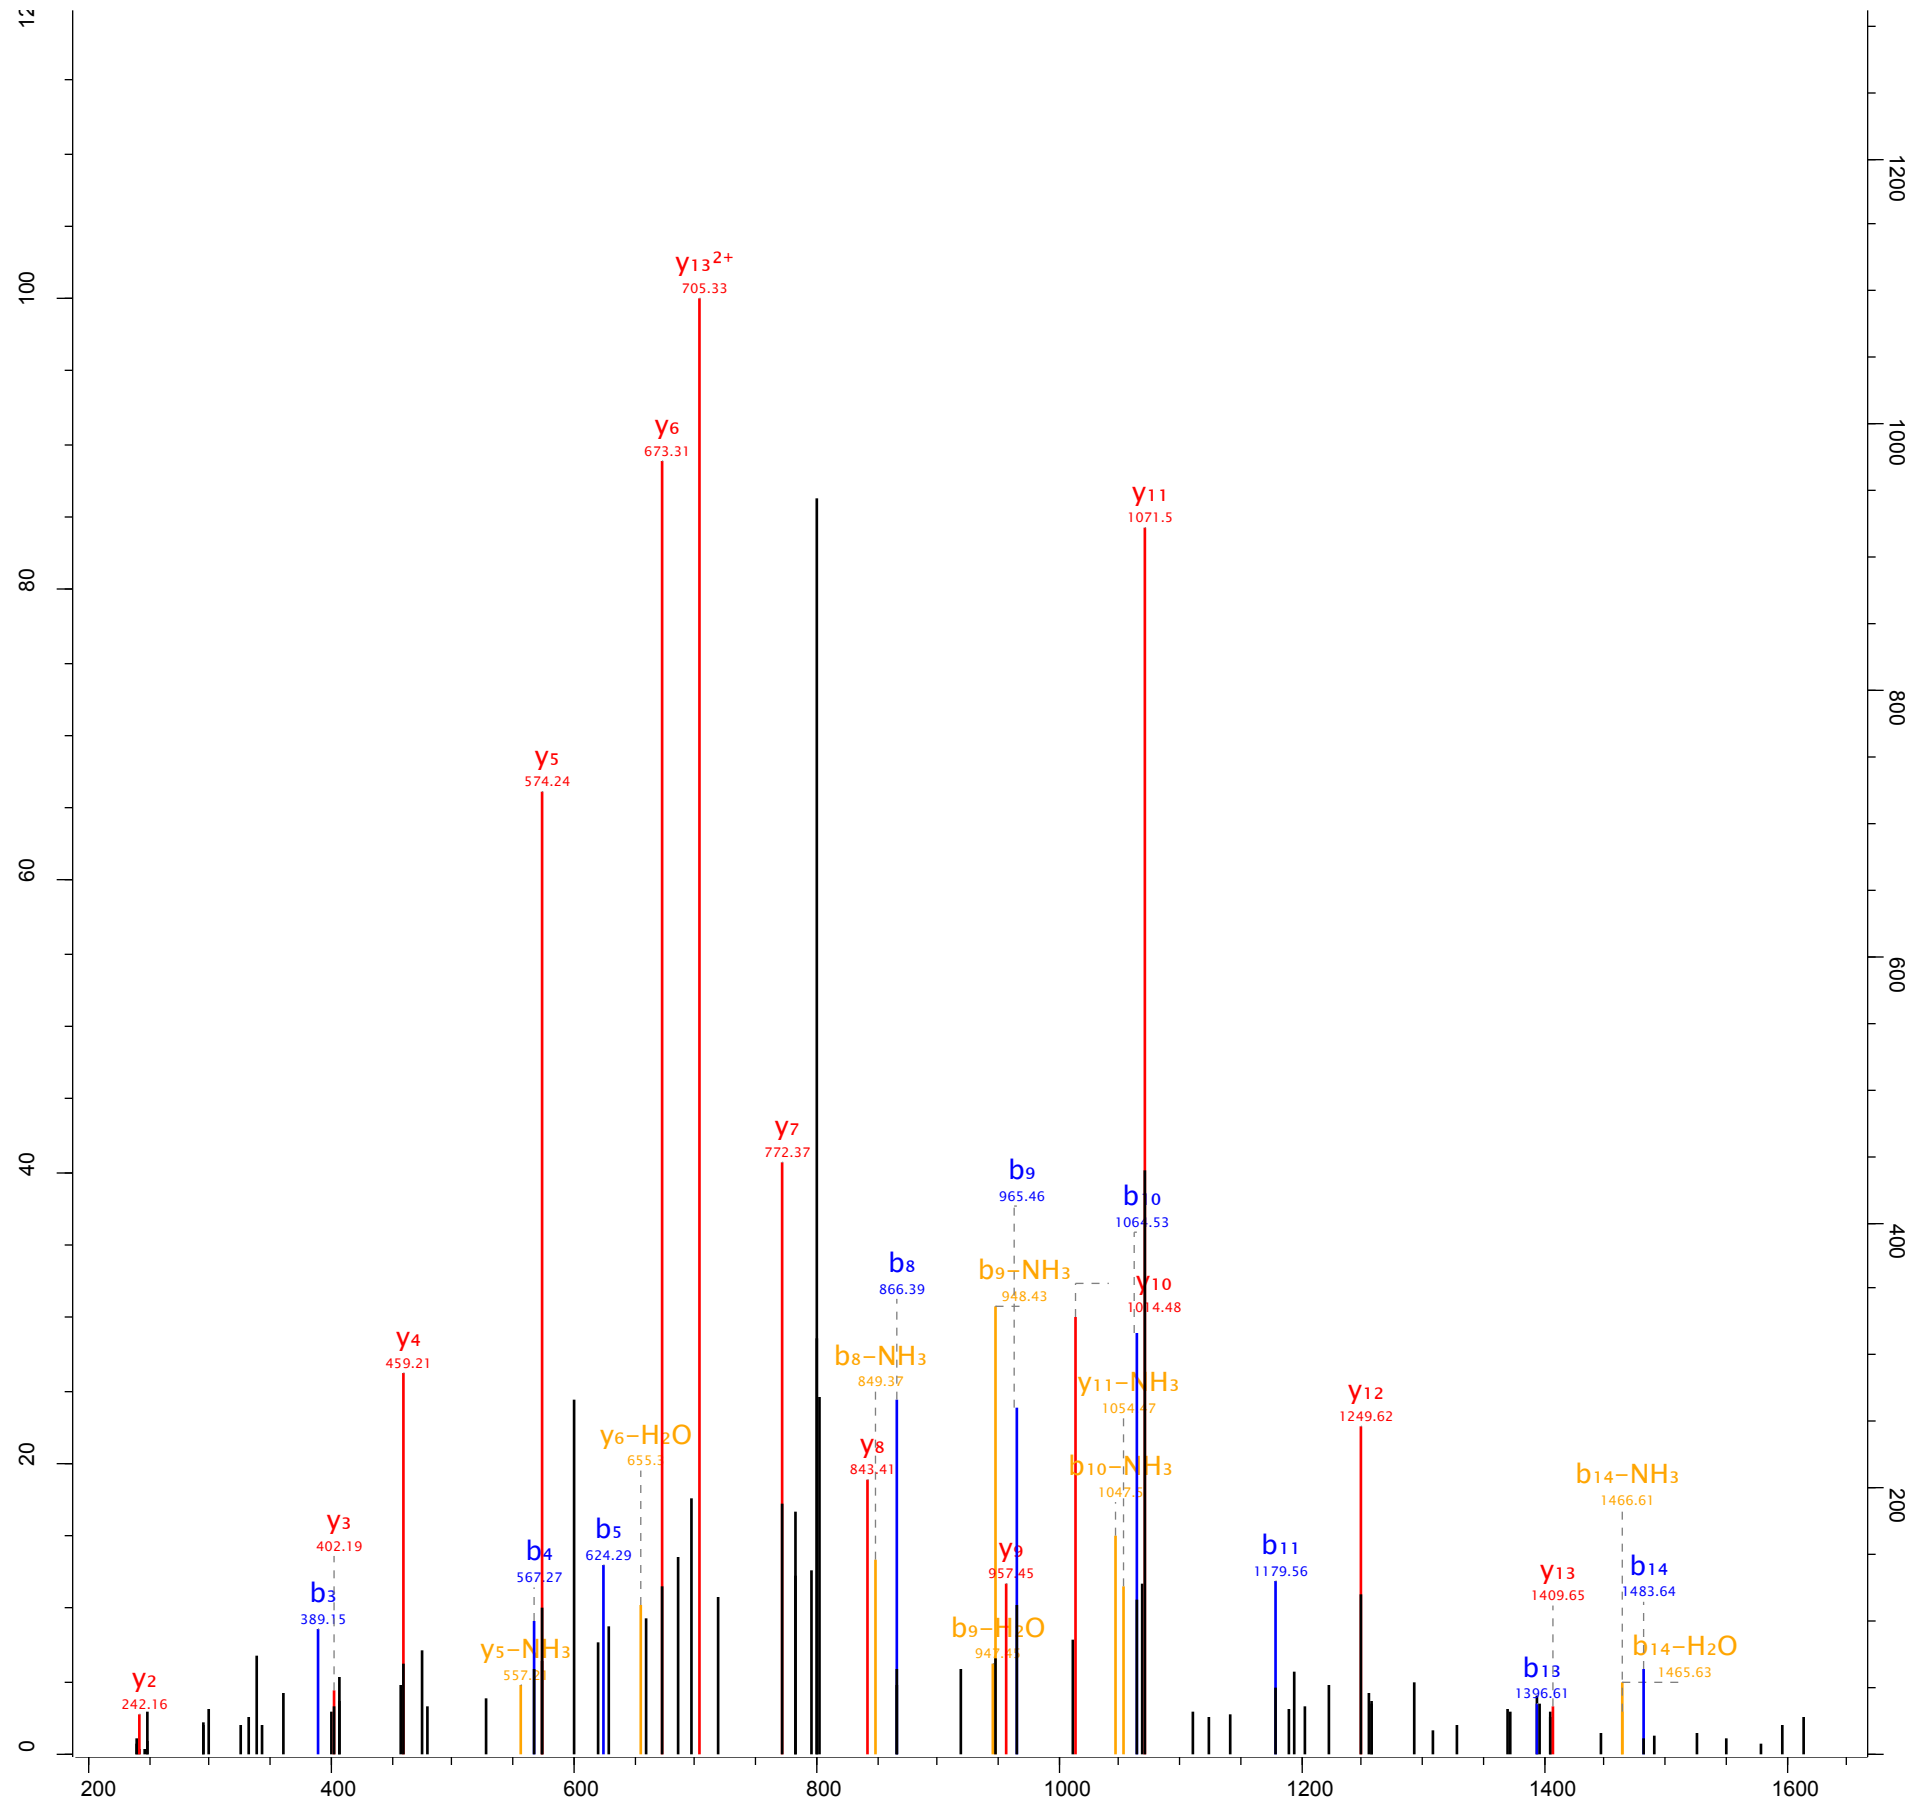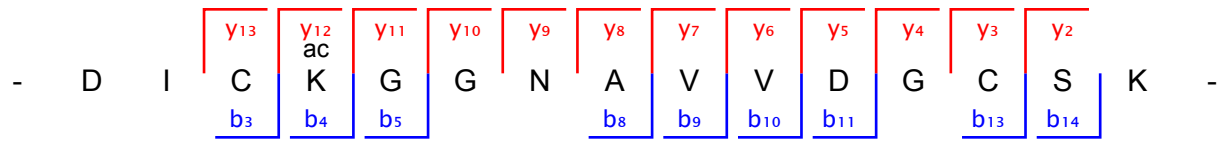

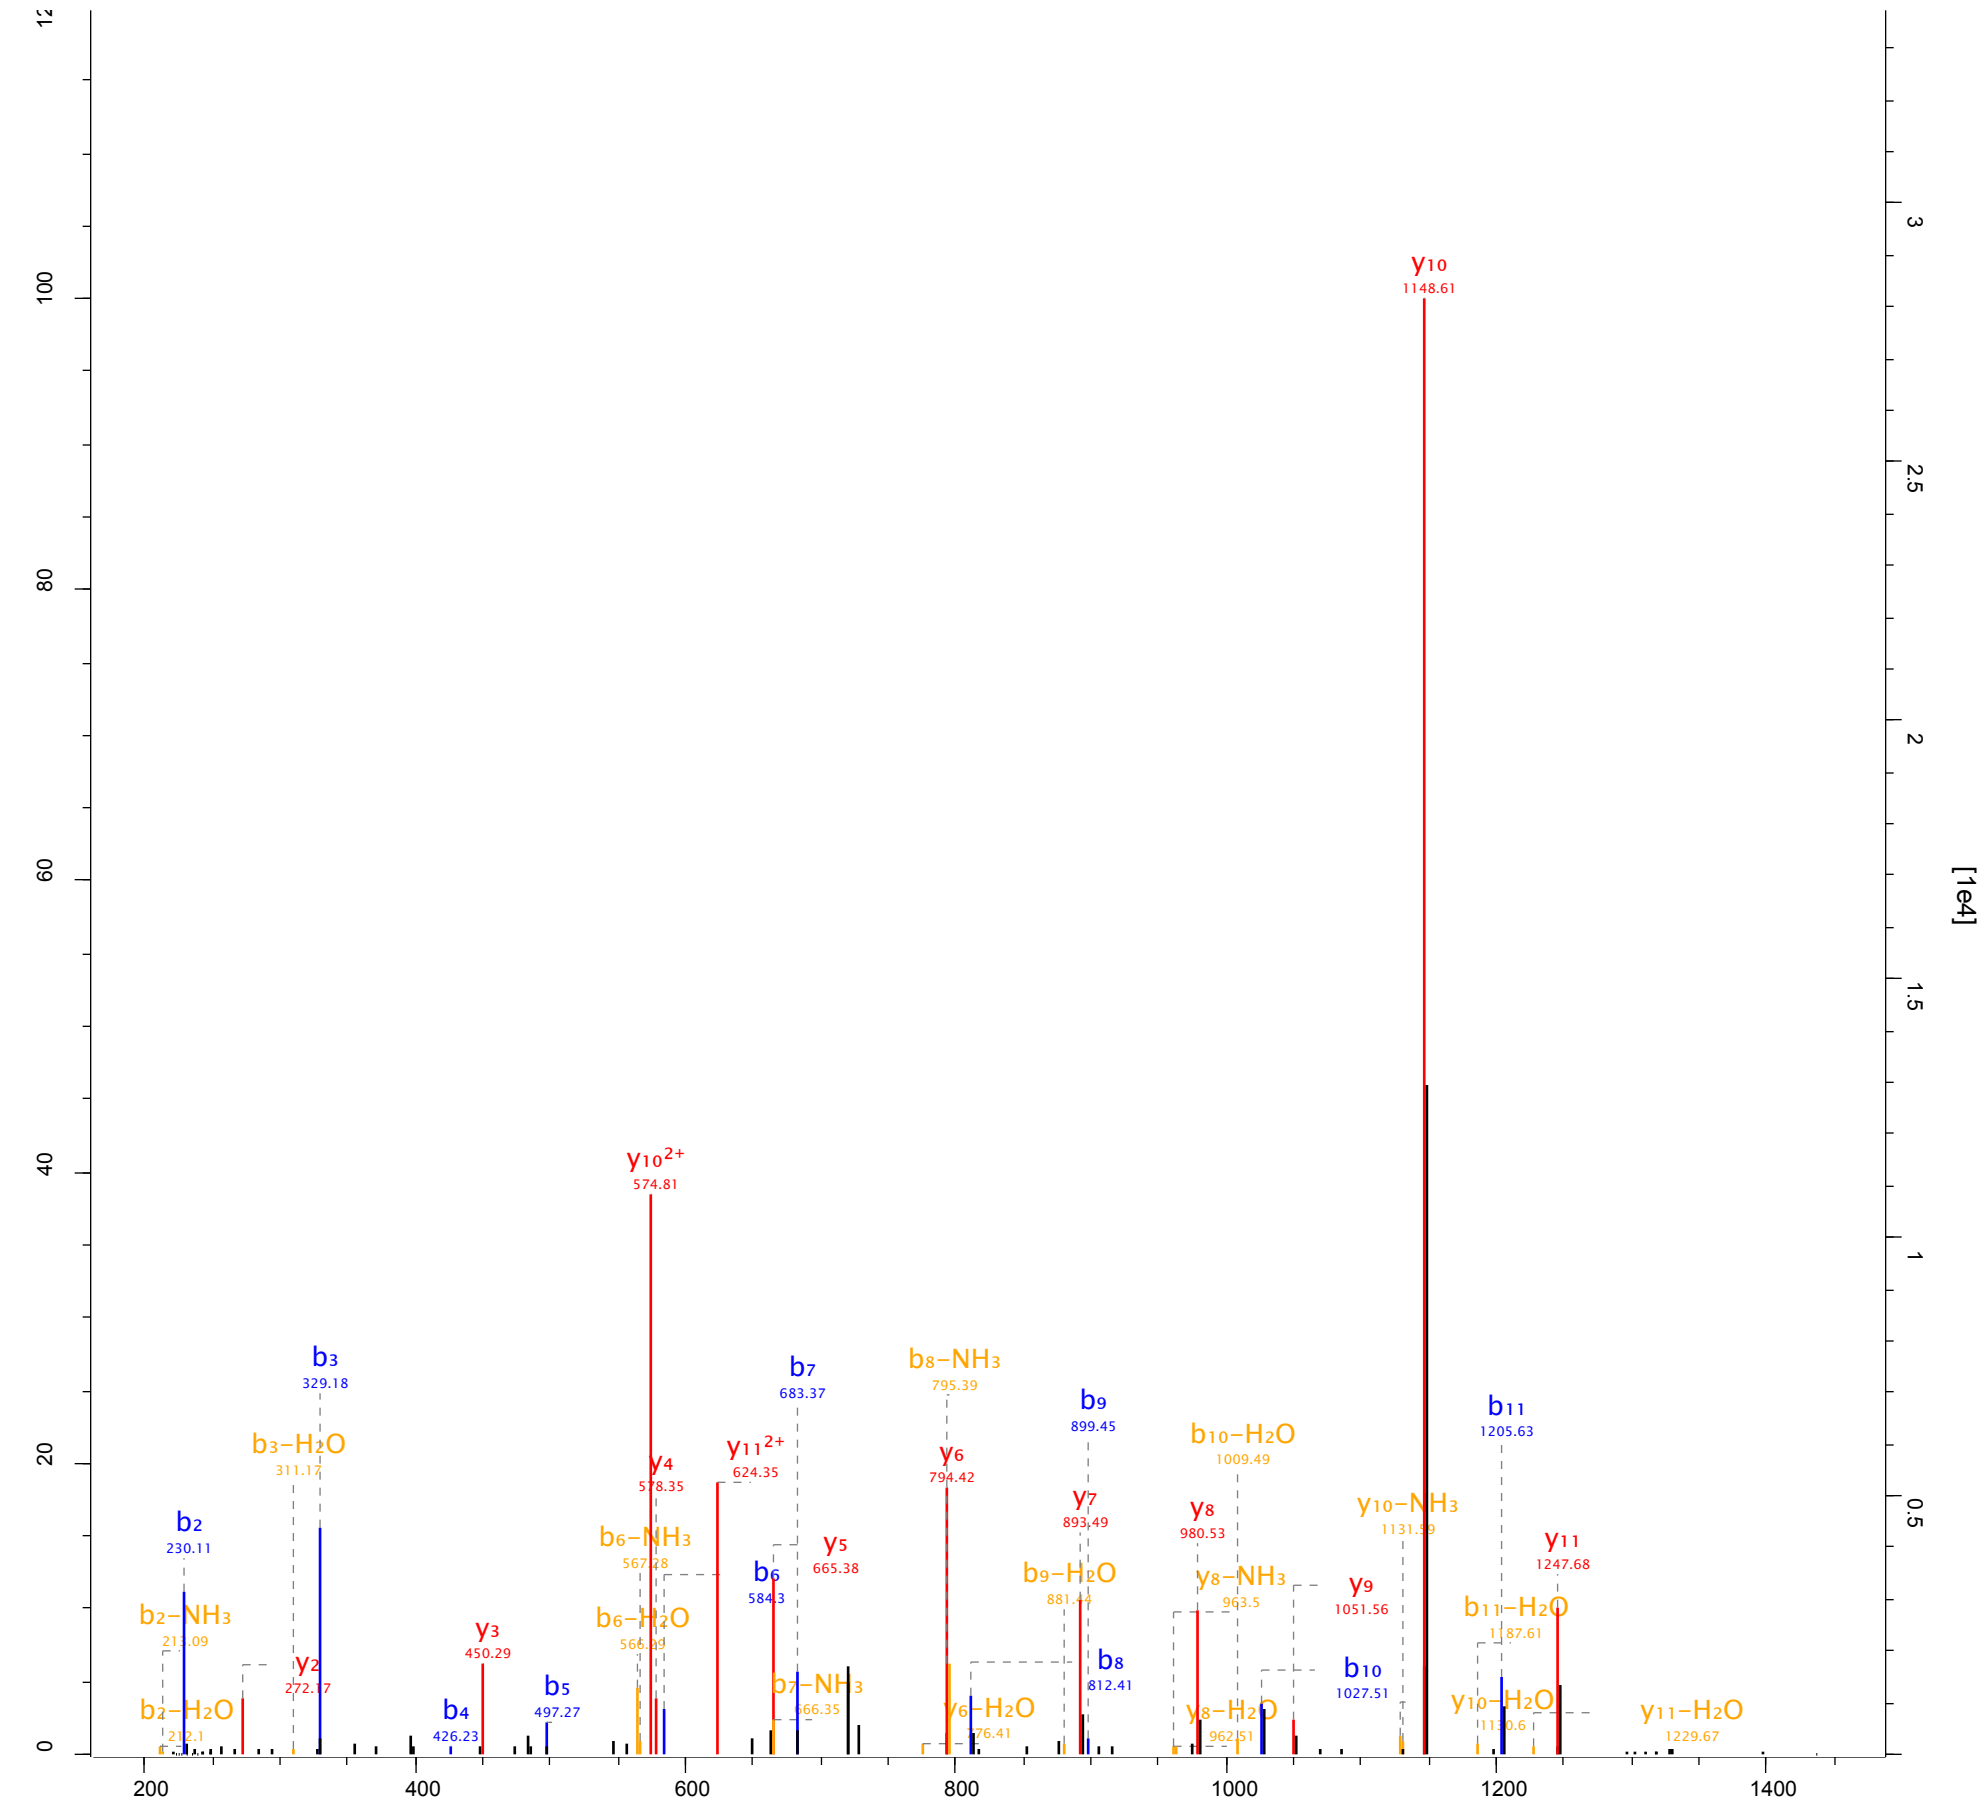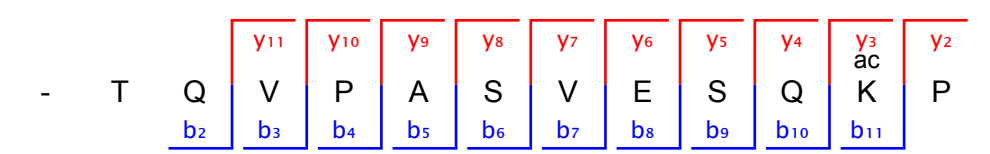

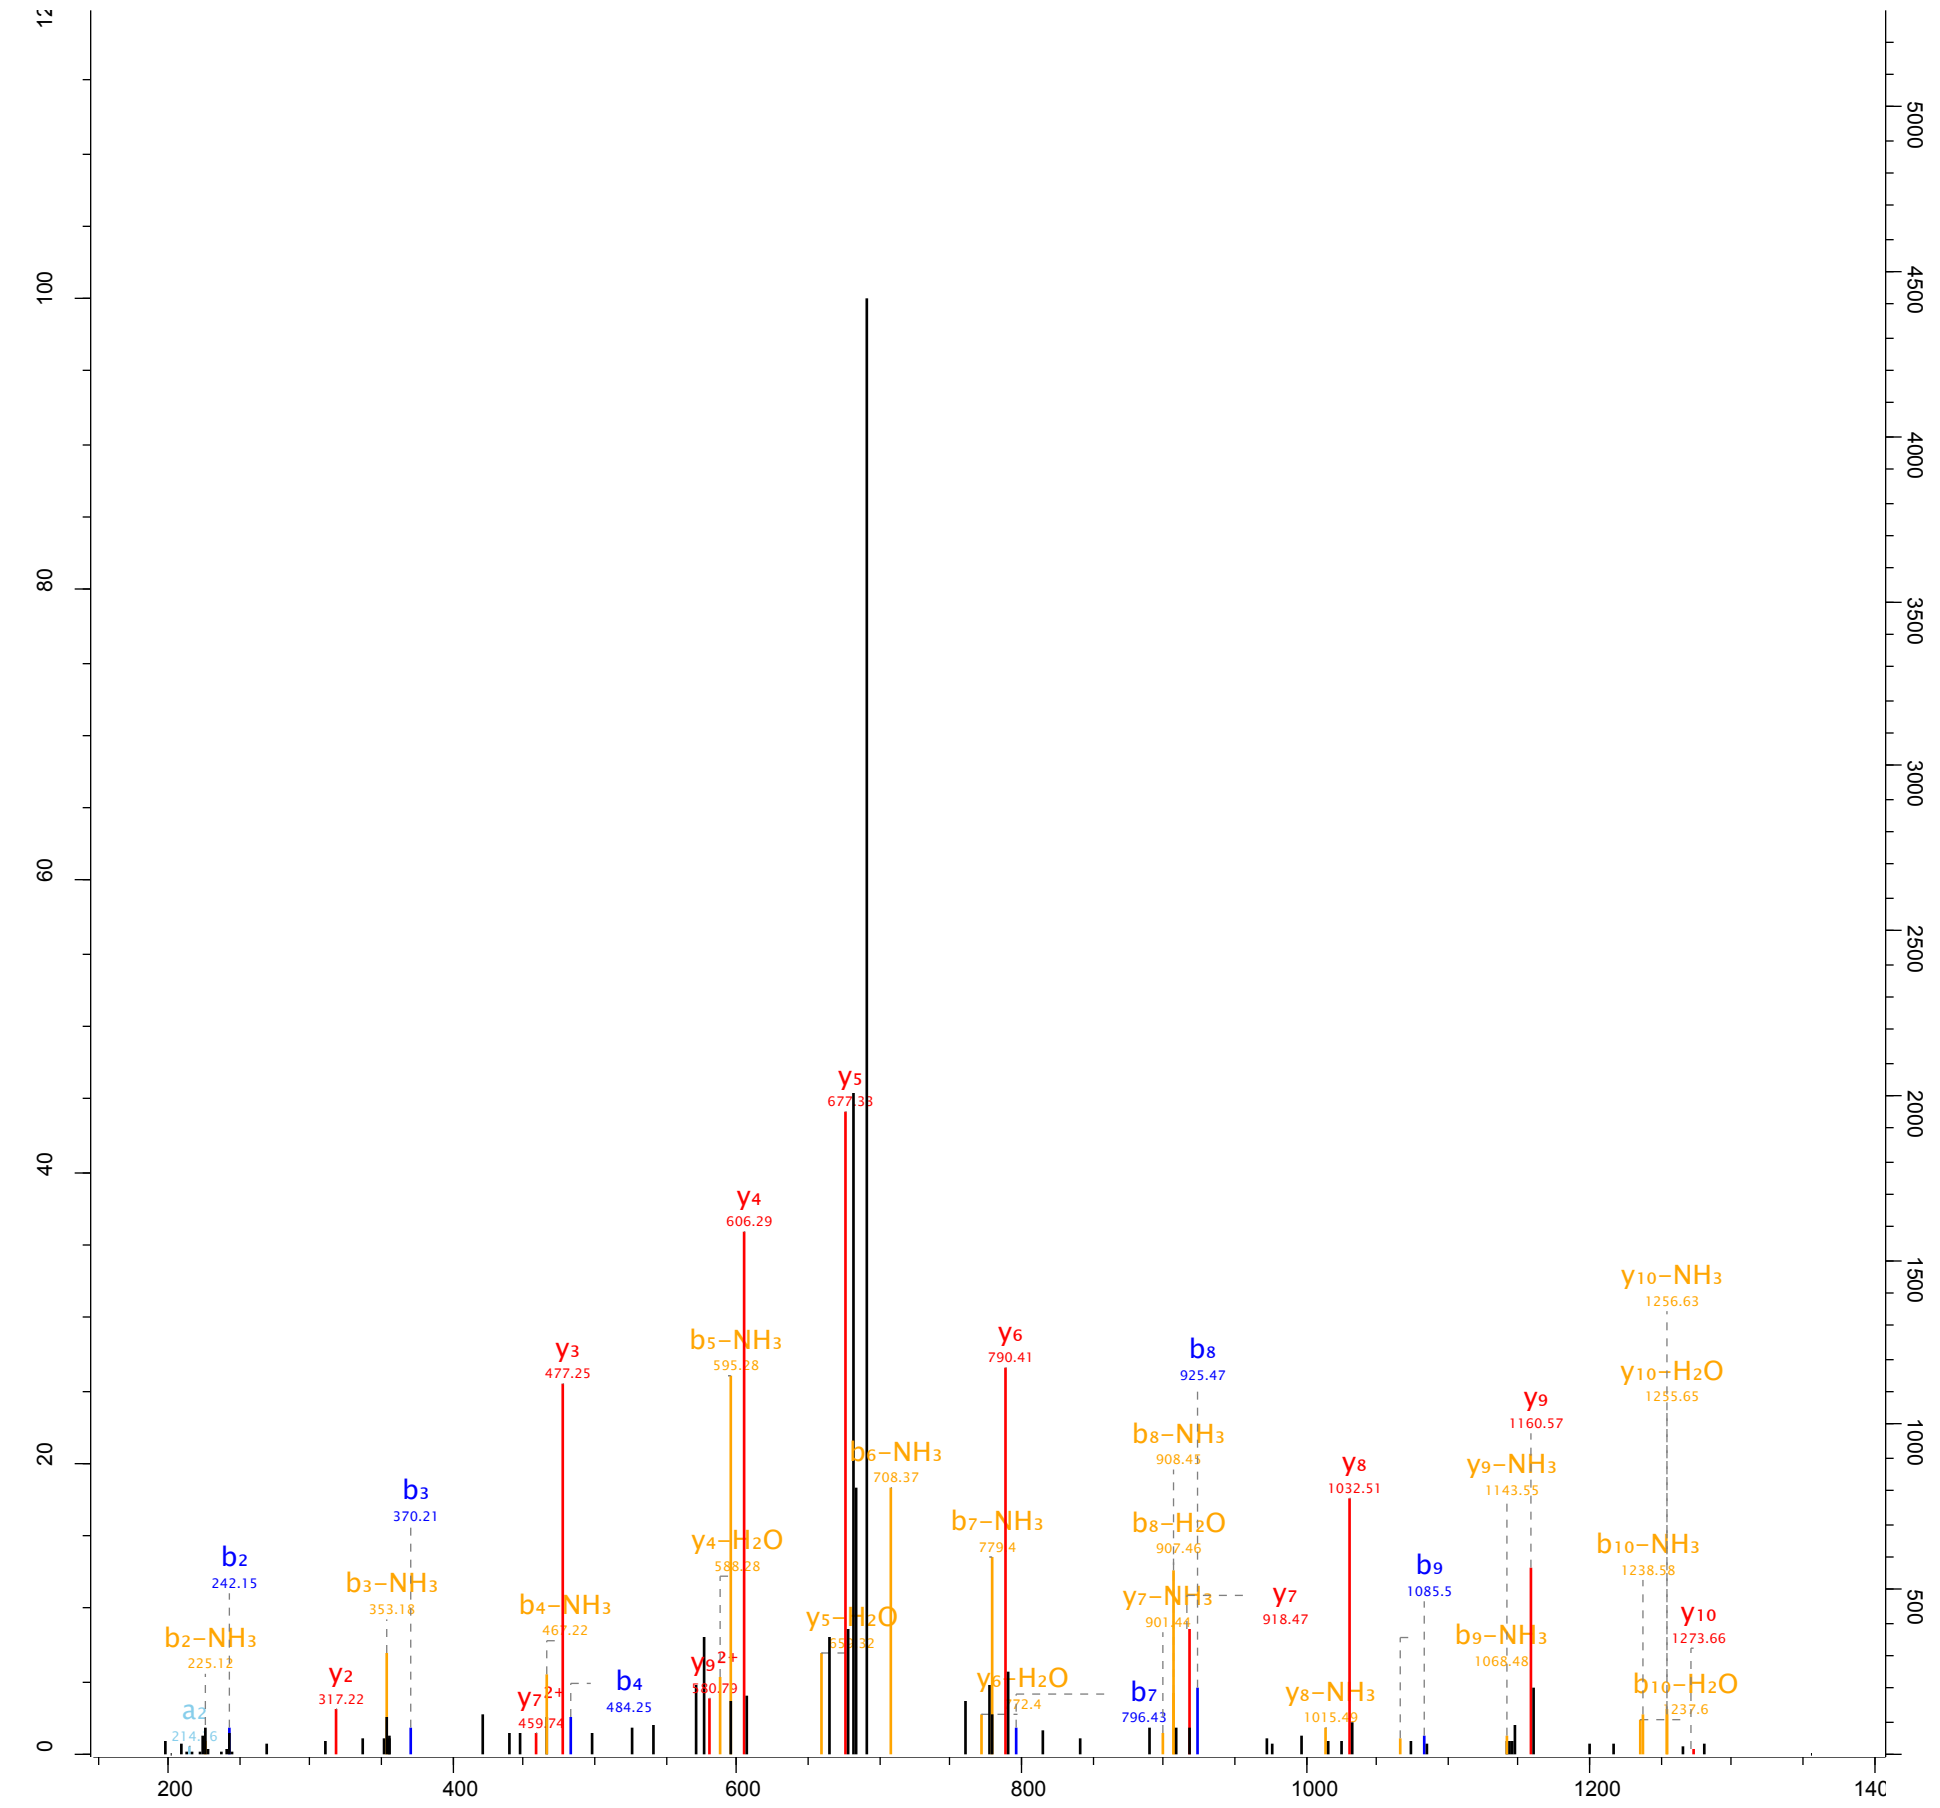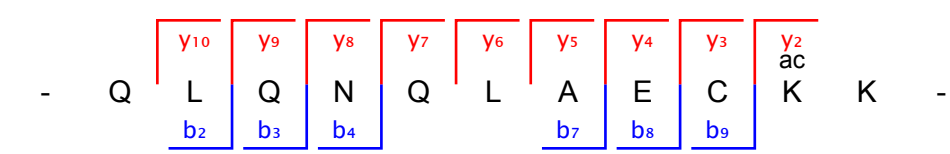

Raw file: 062513\_SCW\_II\_53\_4\_Vargas\_Enriched  
 Scan: 13711 Method: ITMS; CID Score: 97.63 m/z: 790.86 Gene names: Crebbp;Ep300

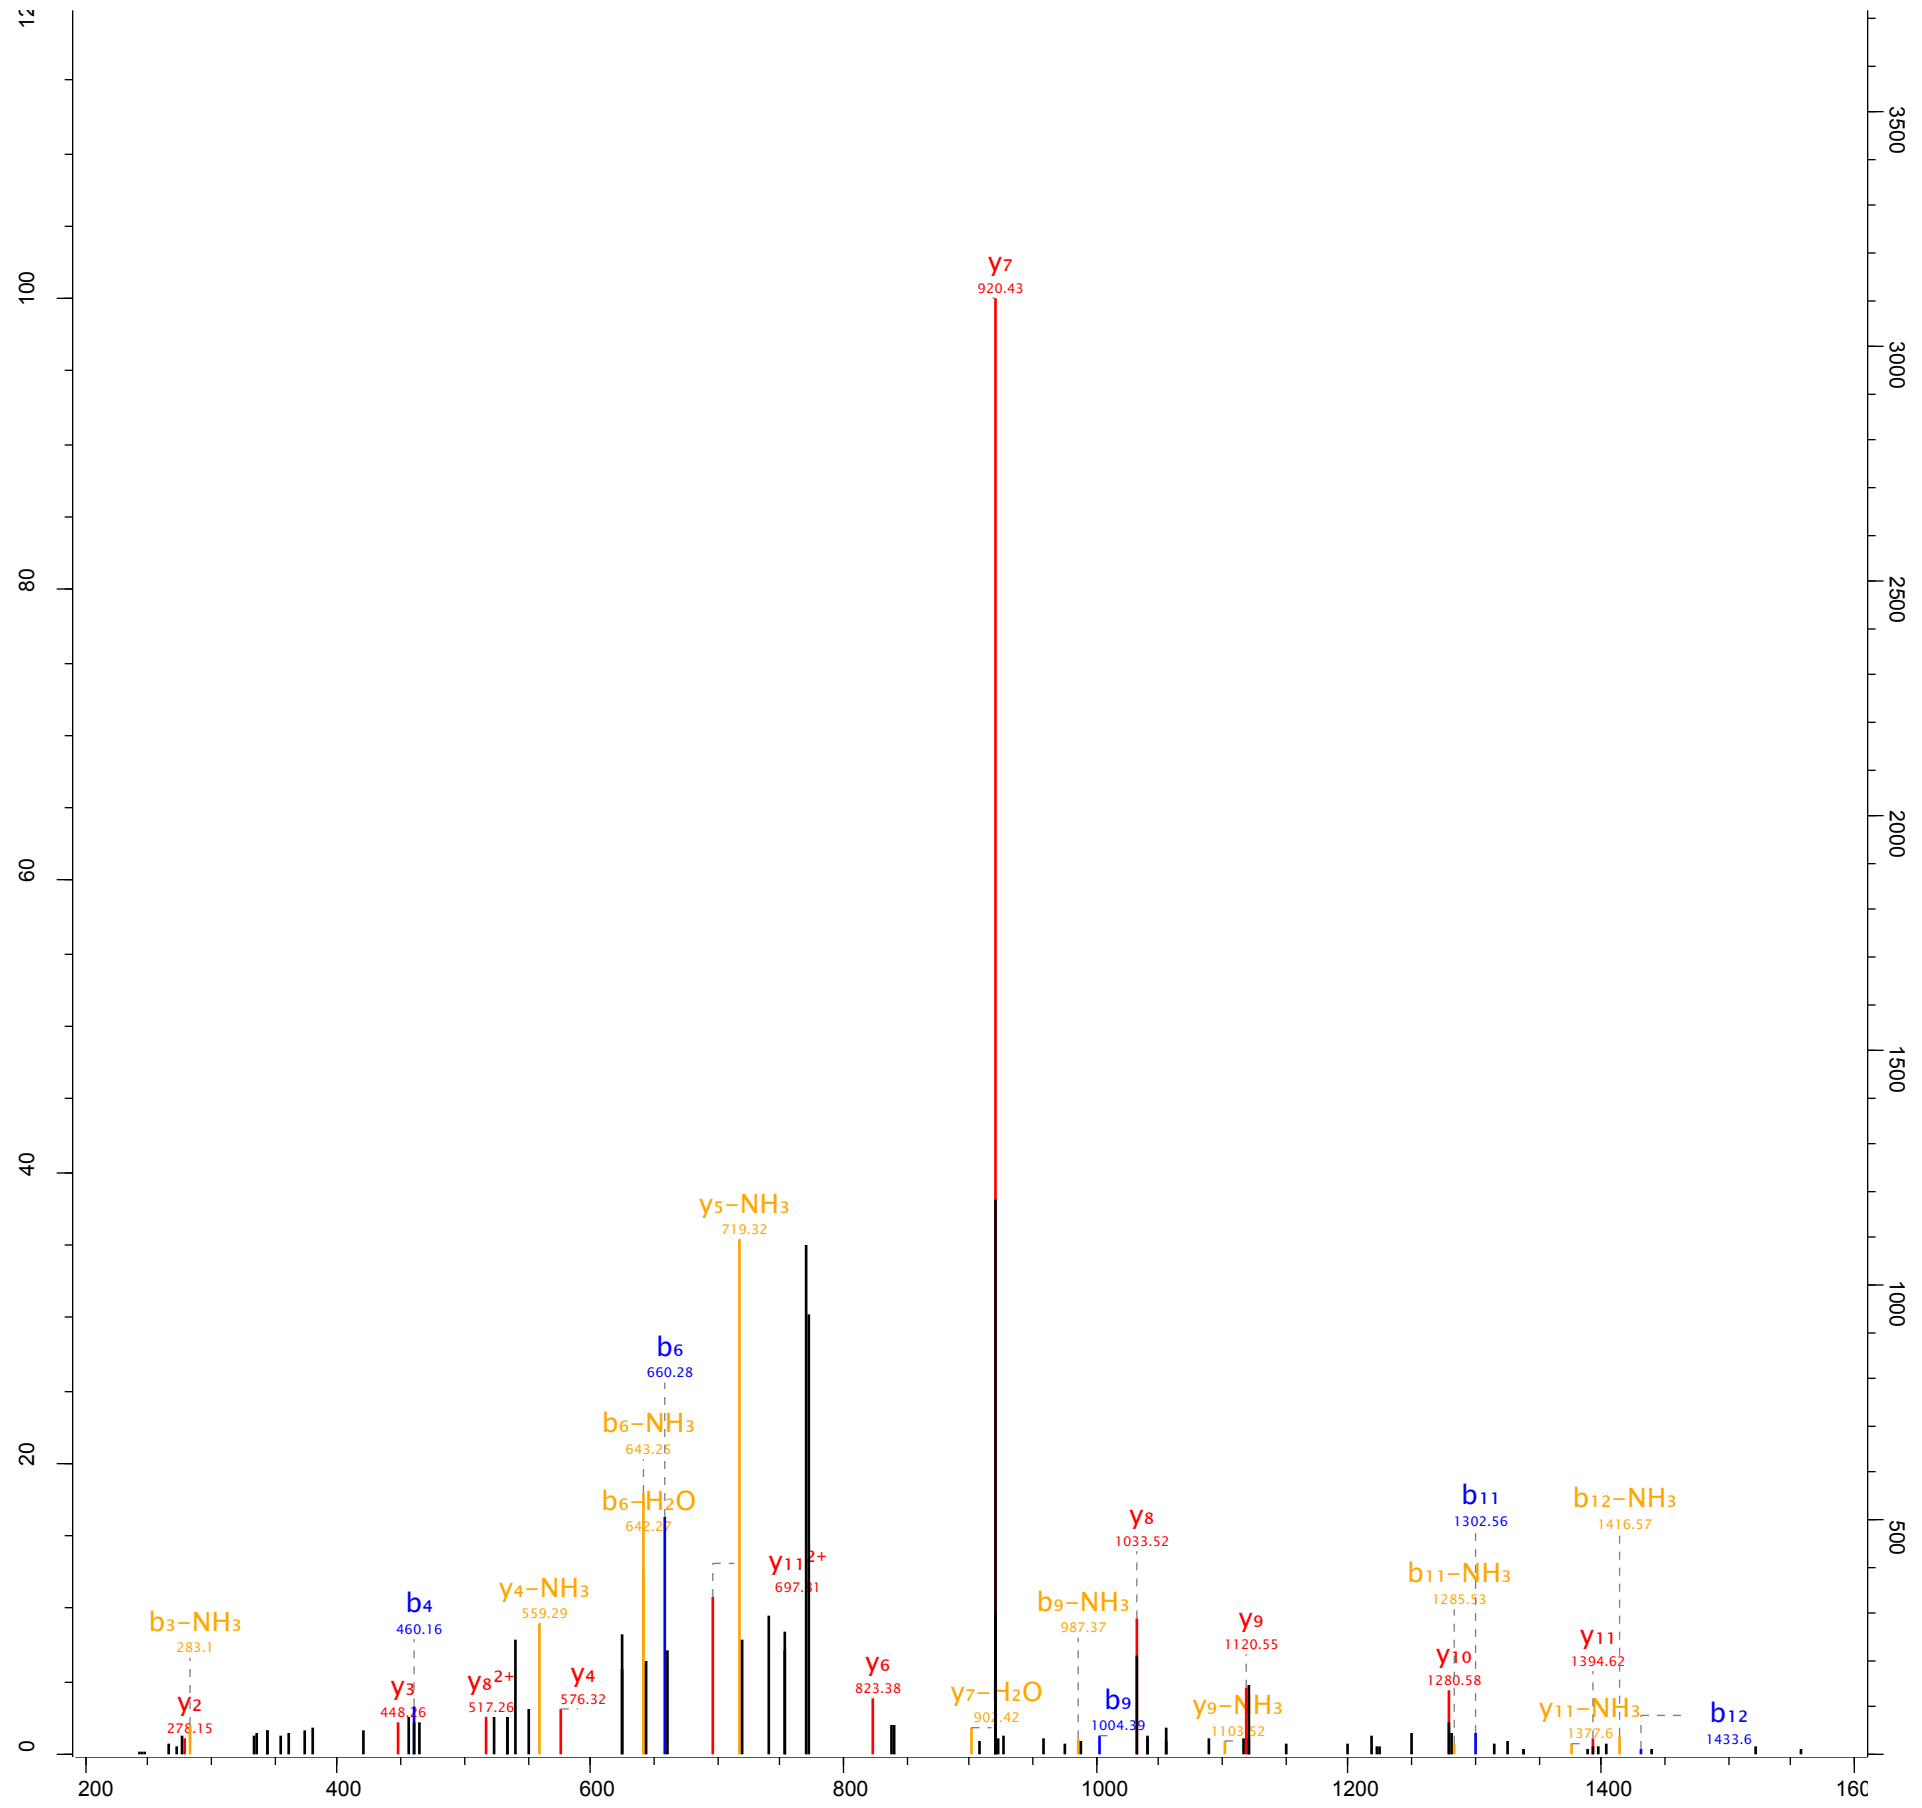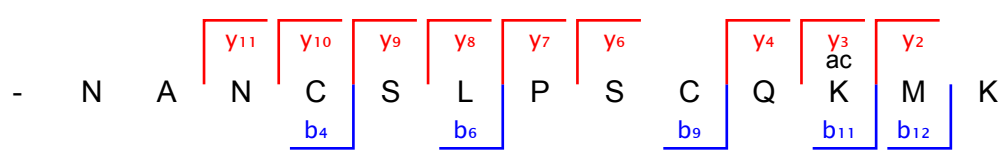

062513\_SCW\_II\_53\_4\_Vargas\_Enriched

13978

ITMS; CID

126.12

643.85

Ccdc51

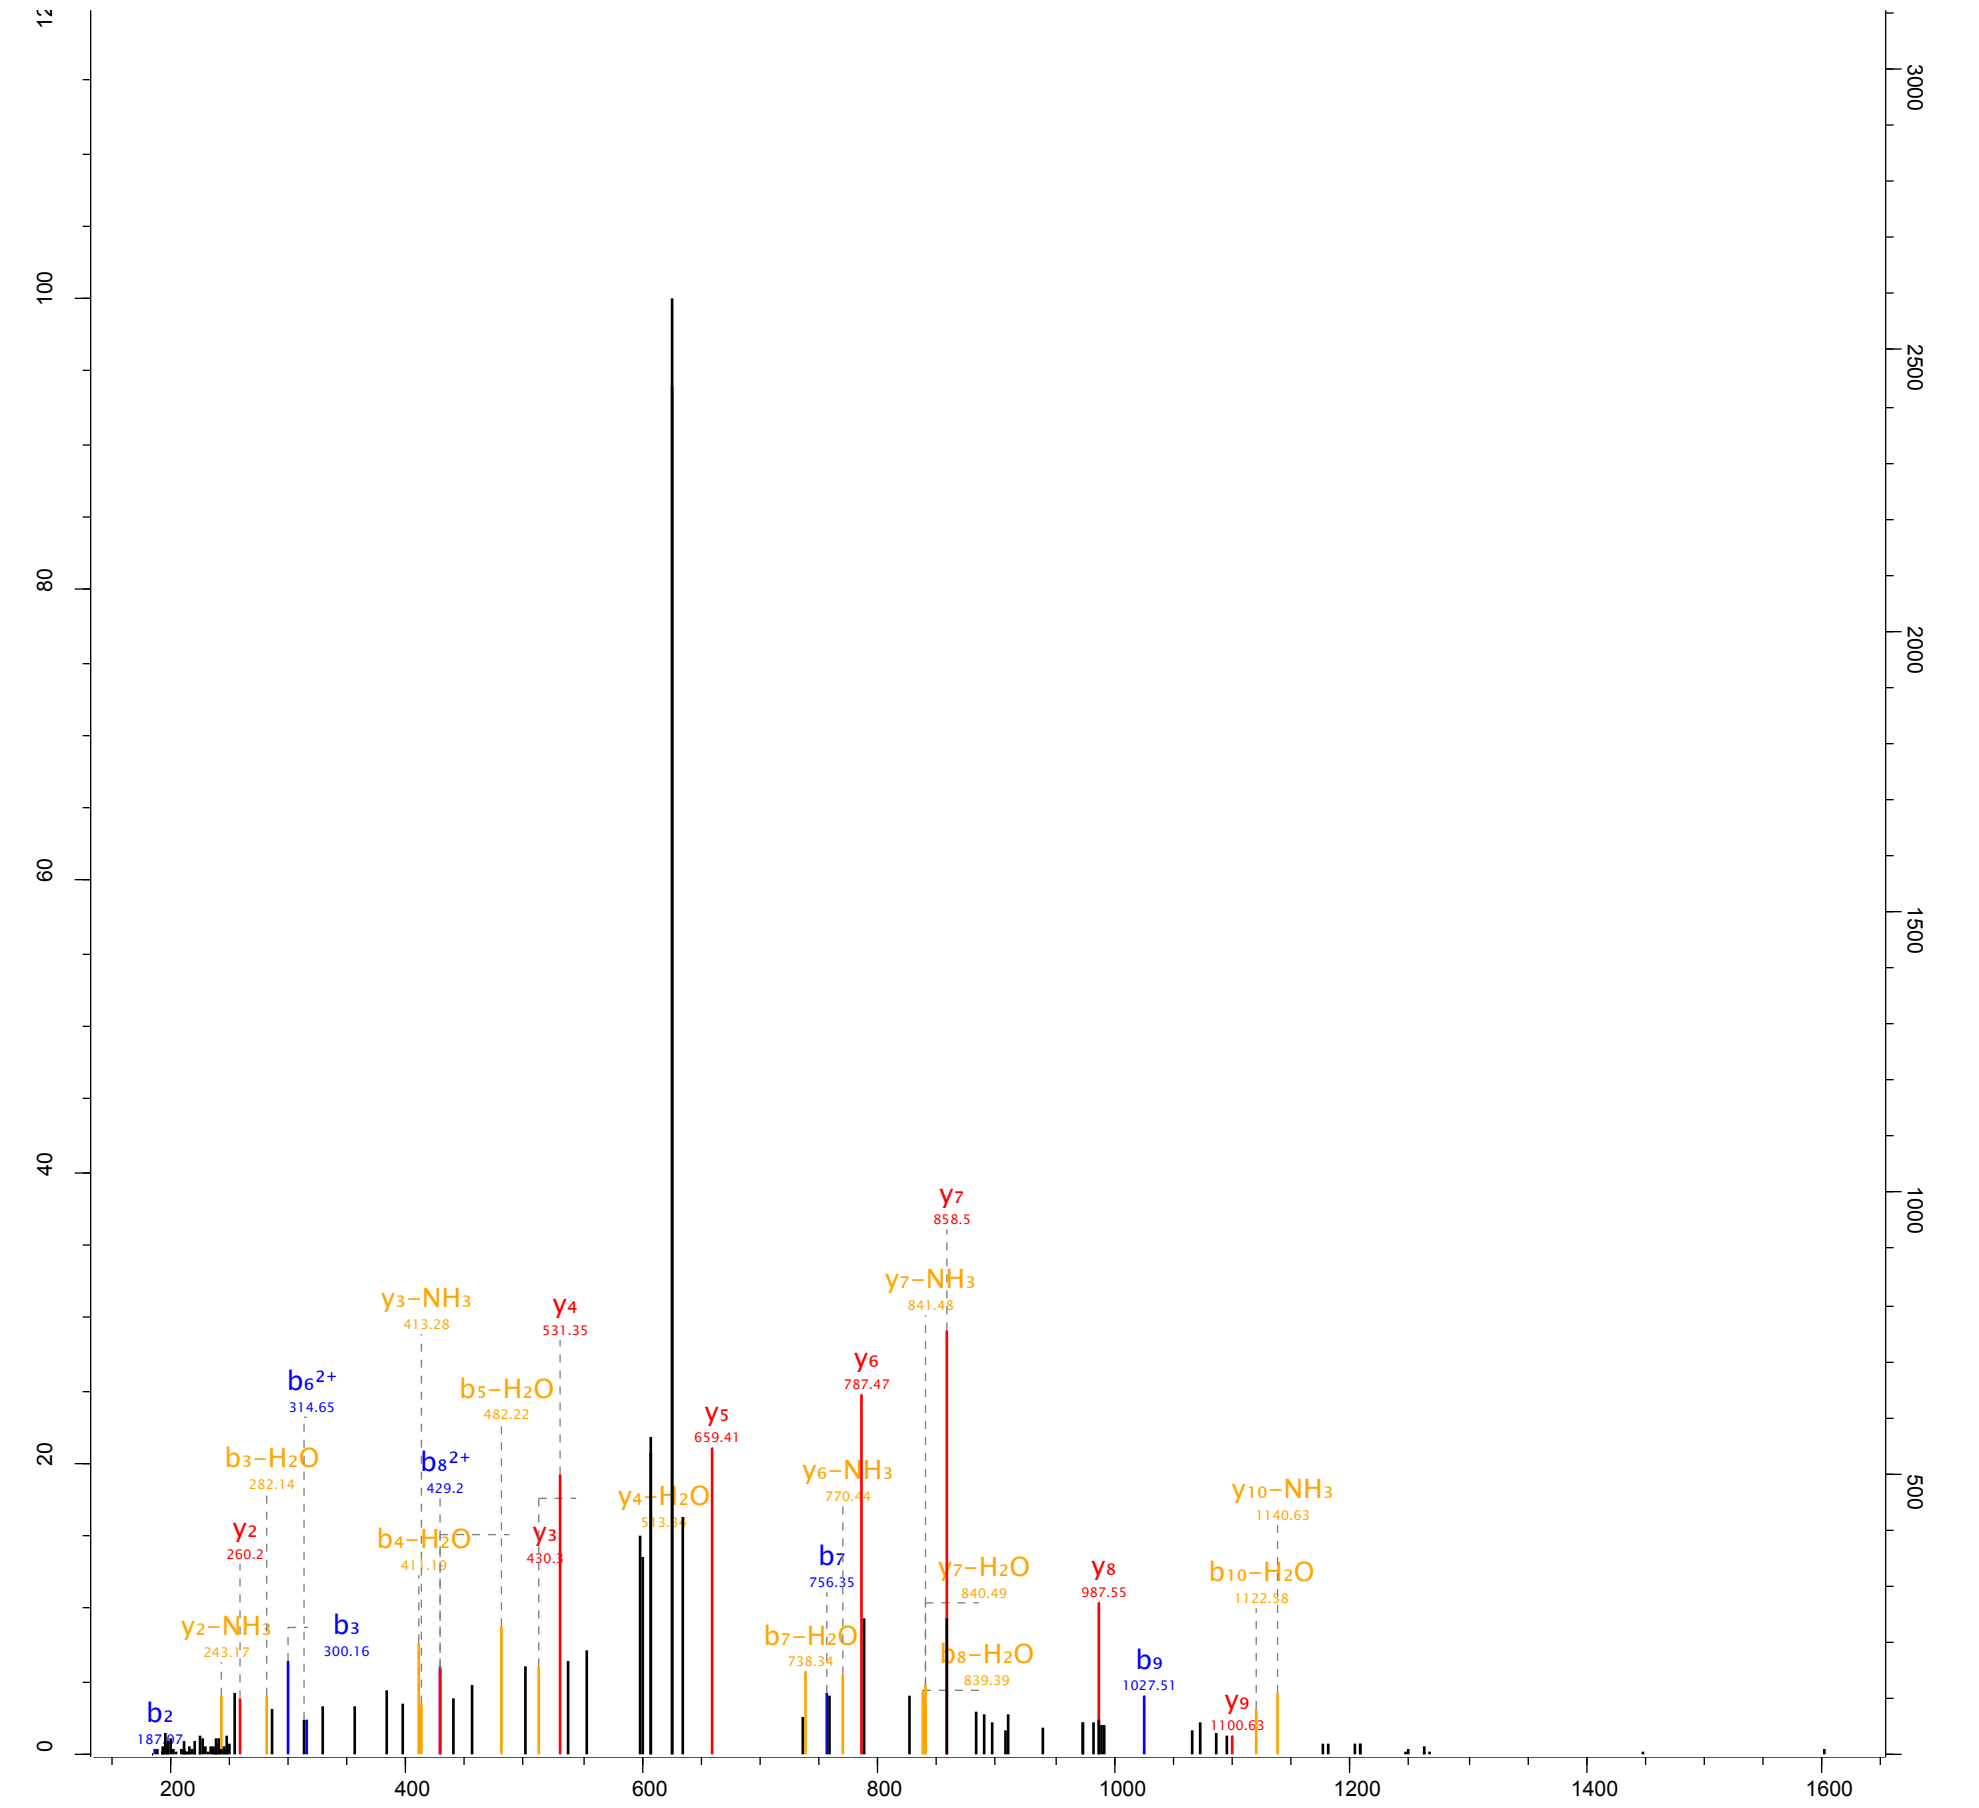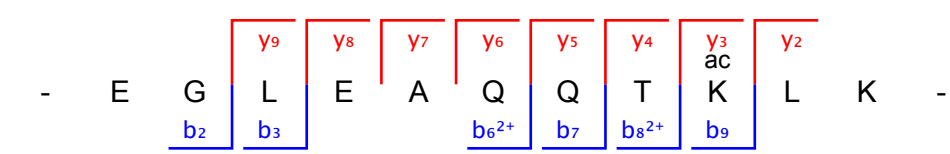

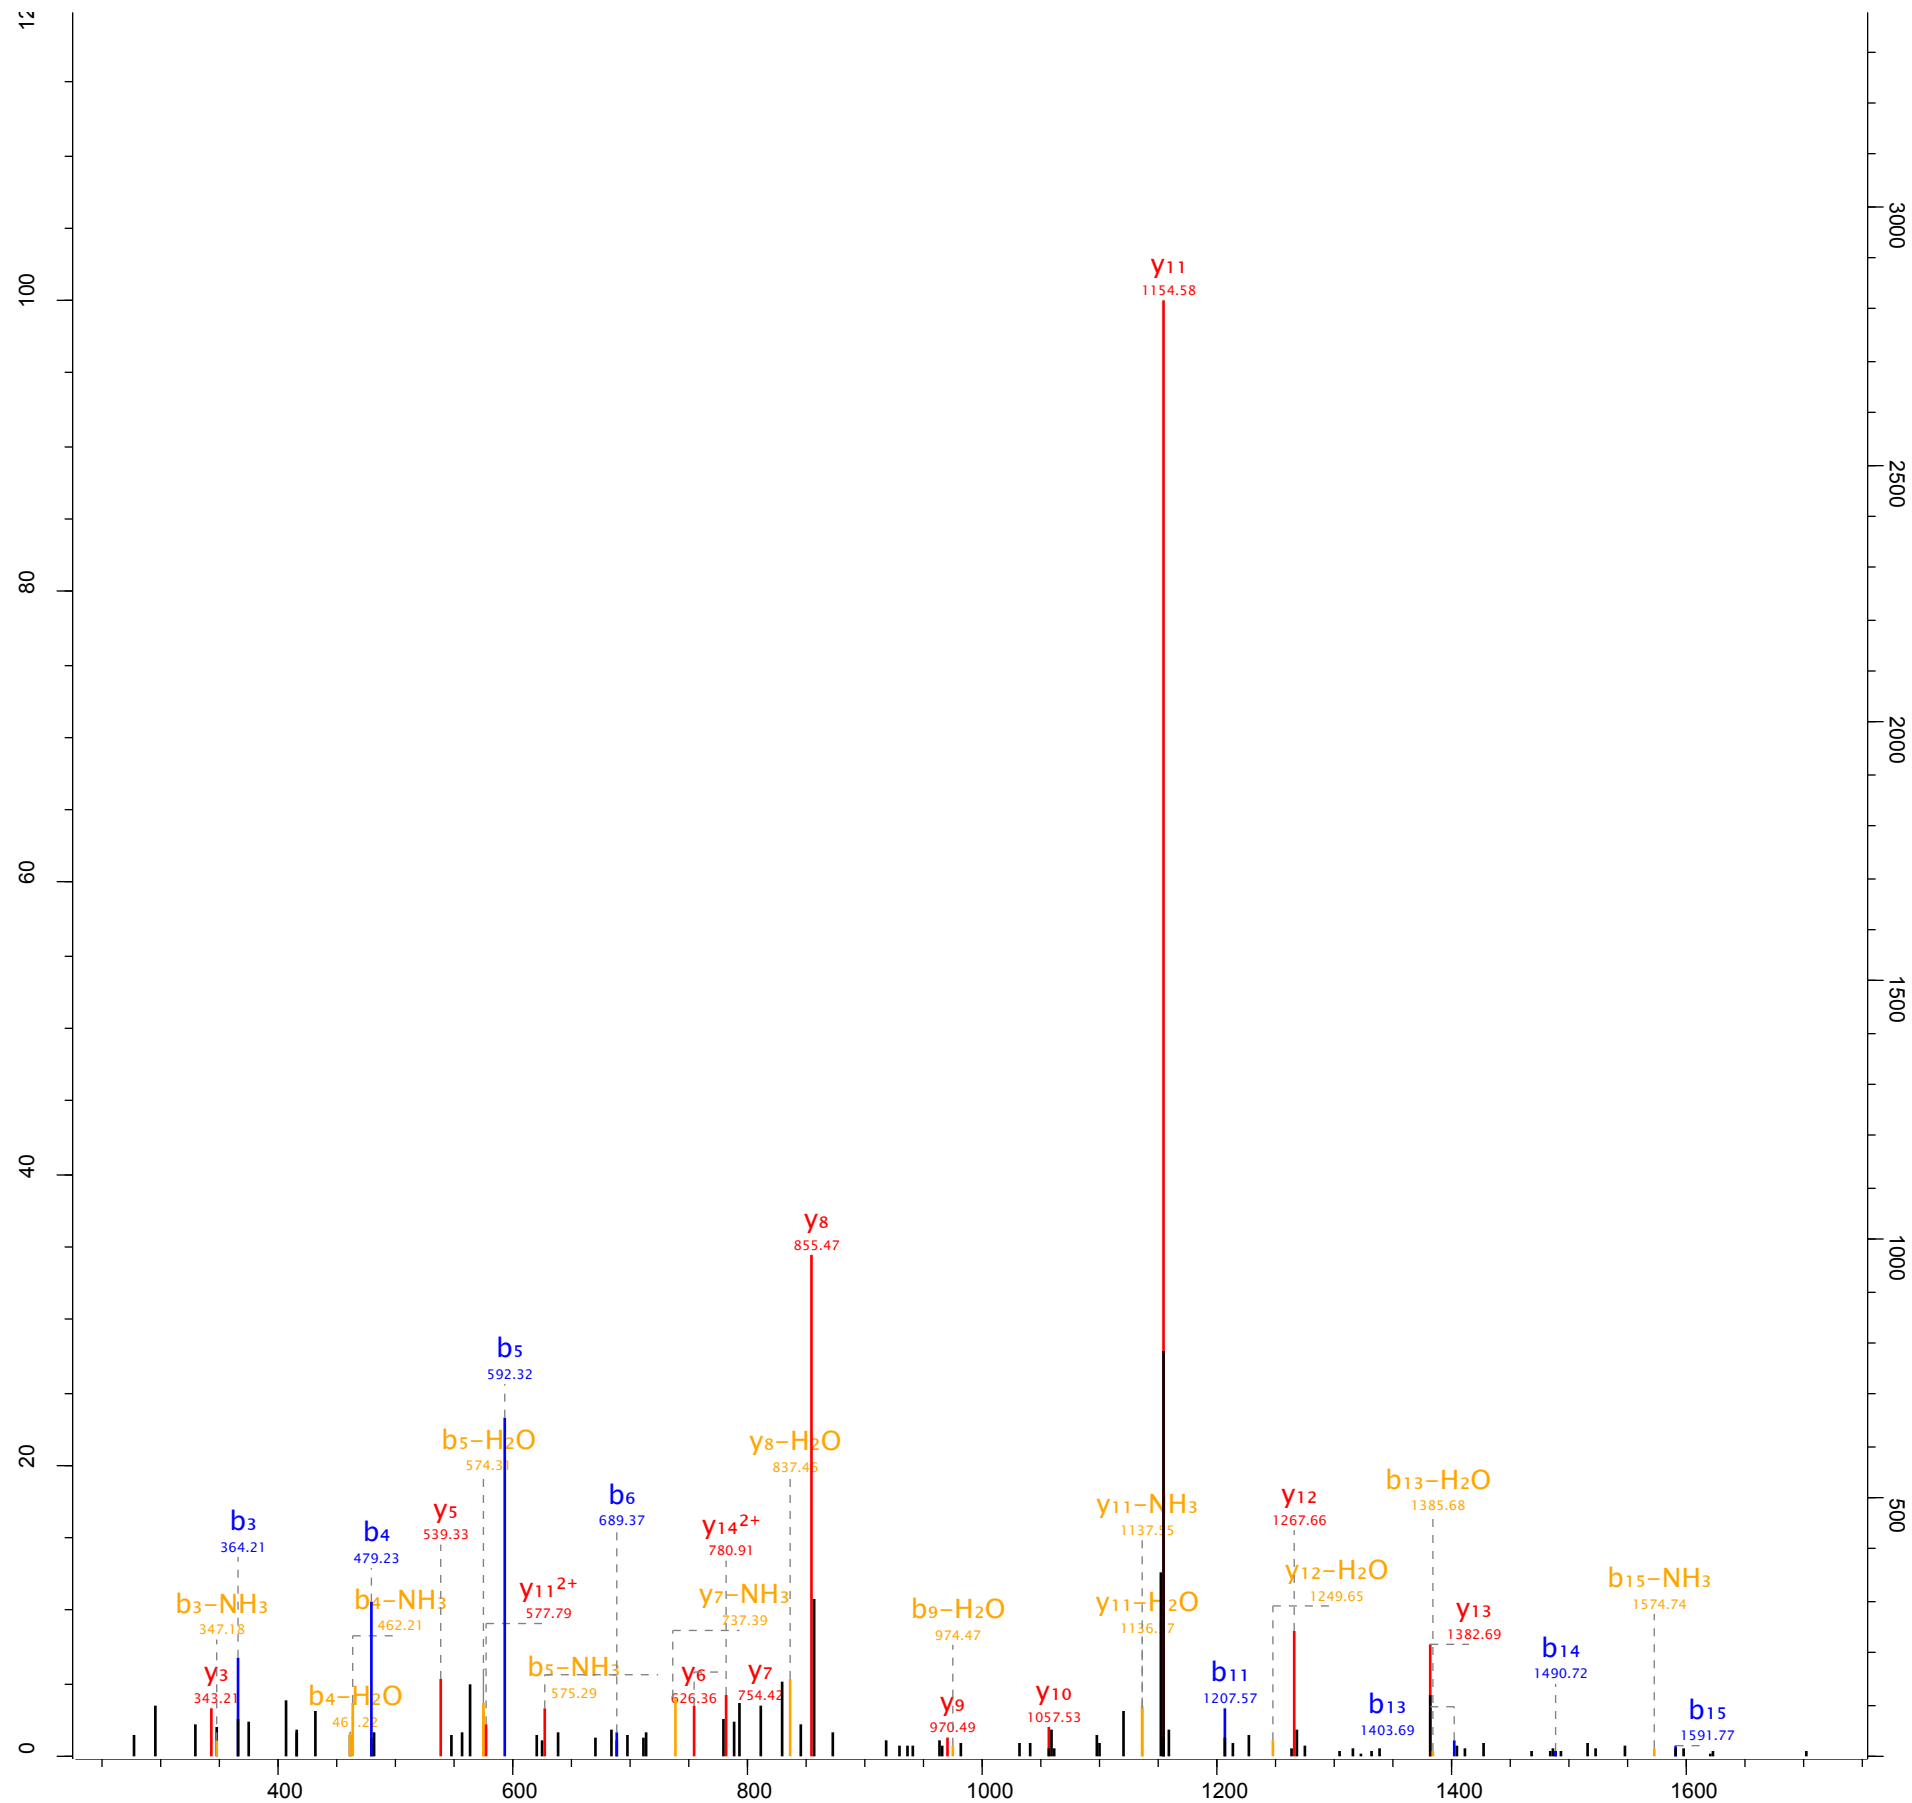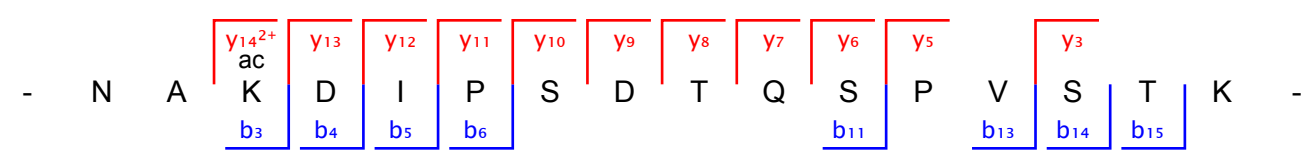



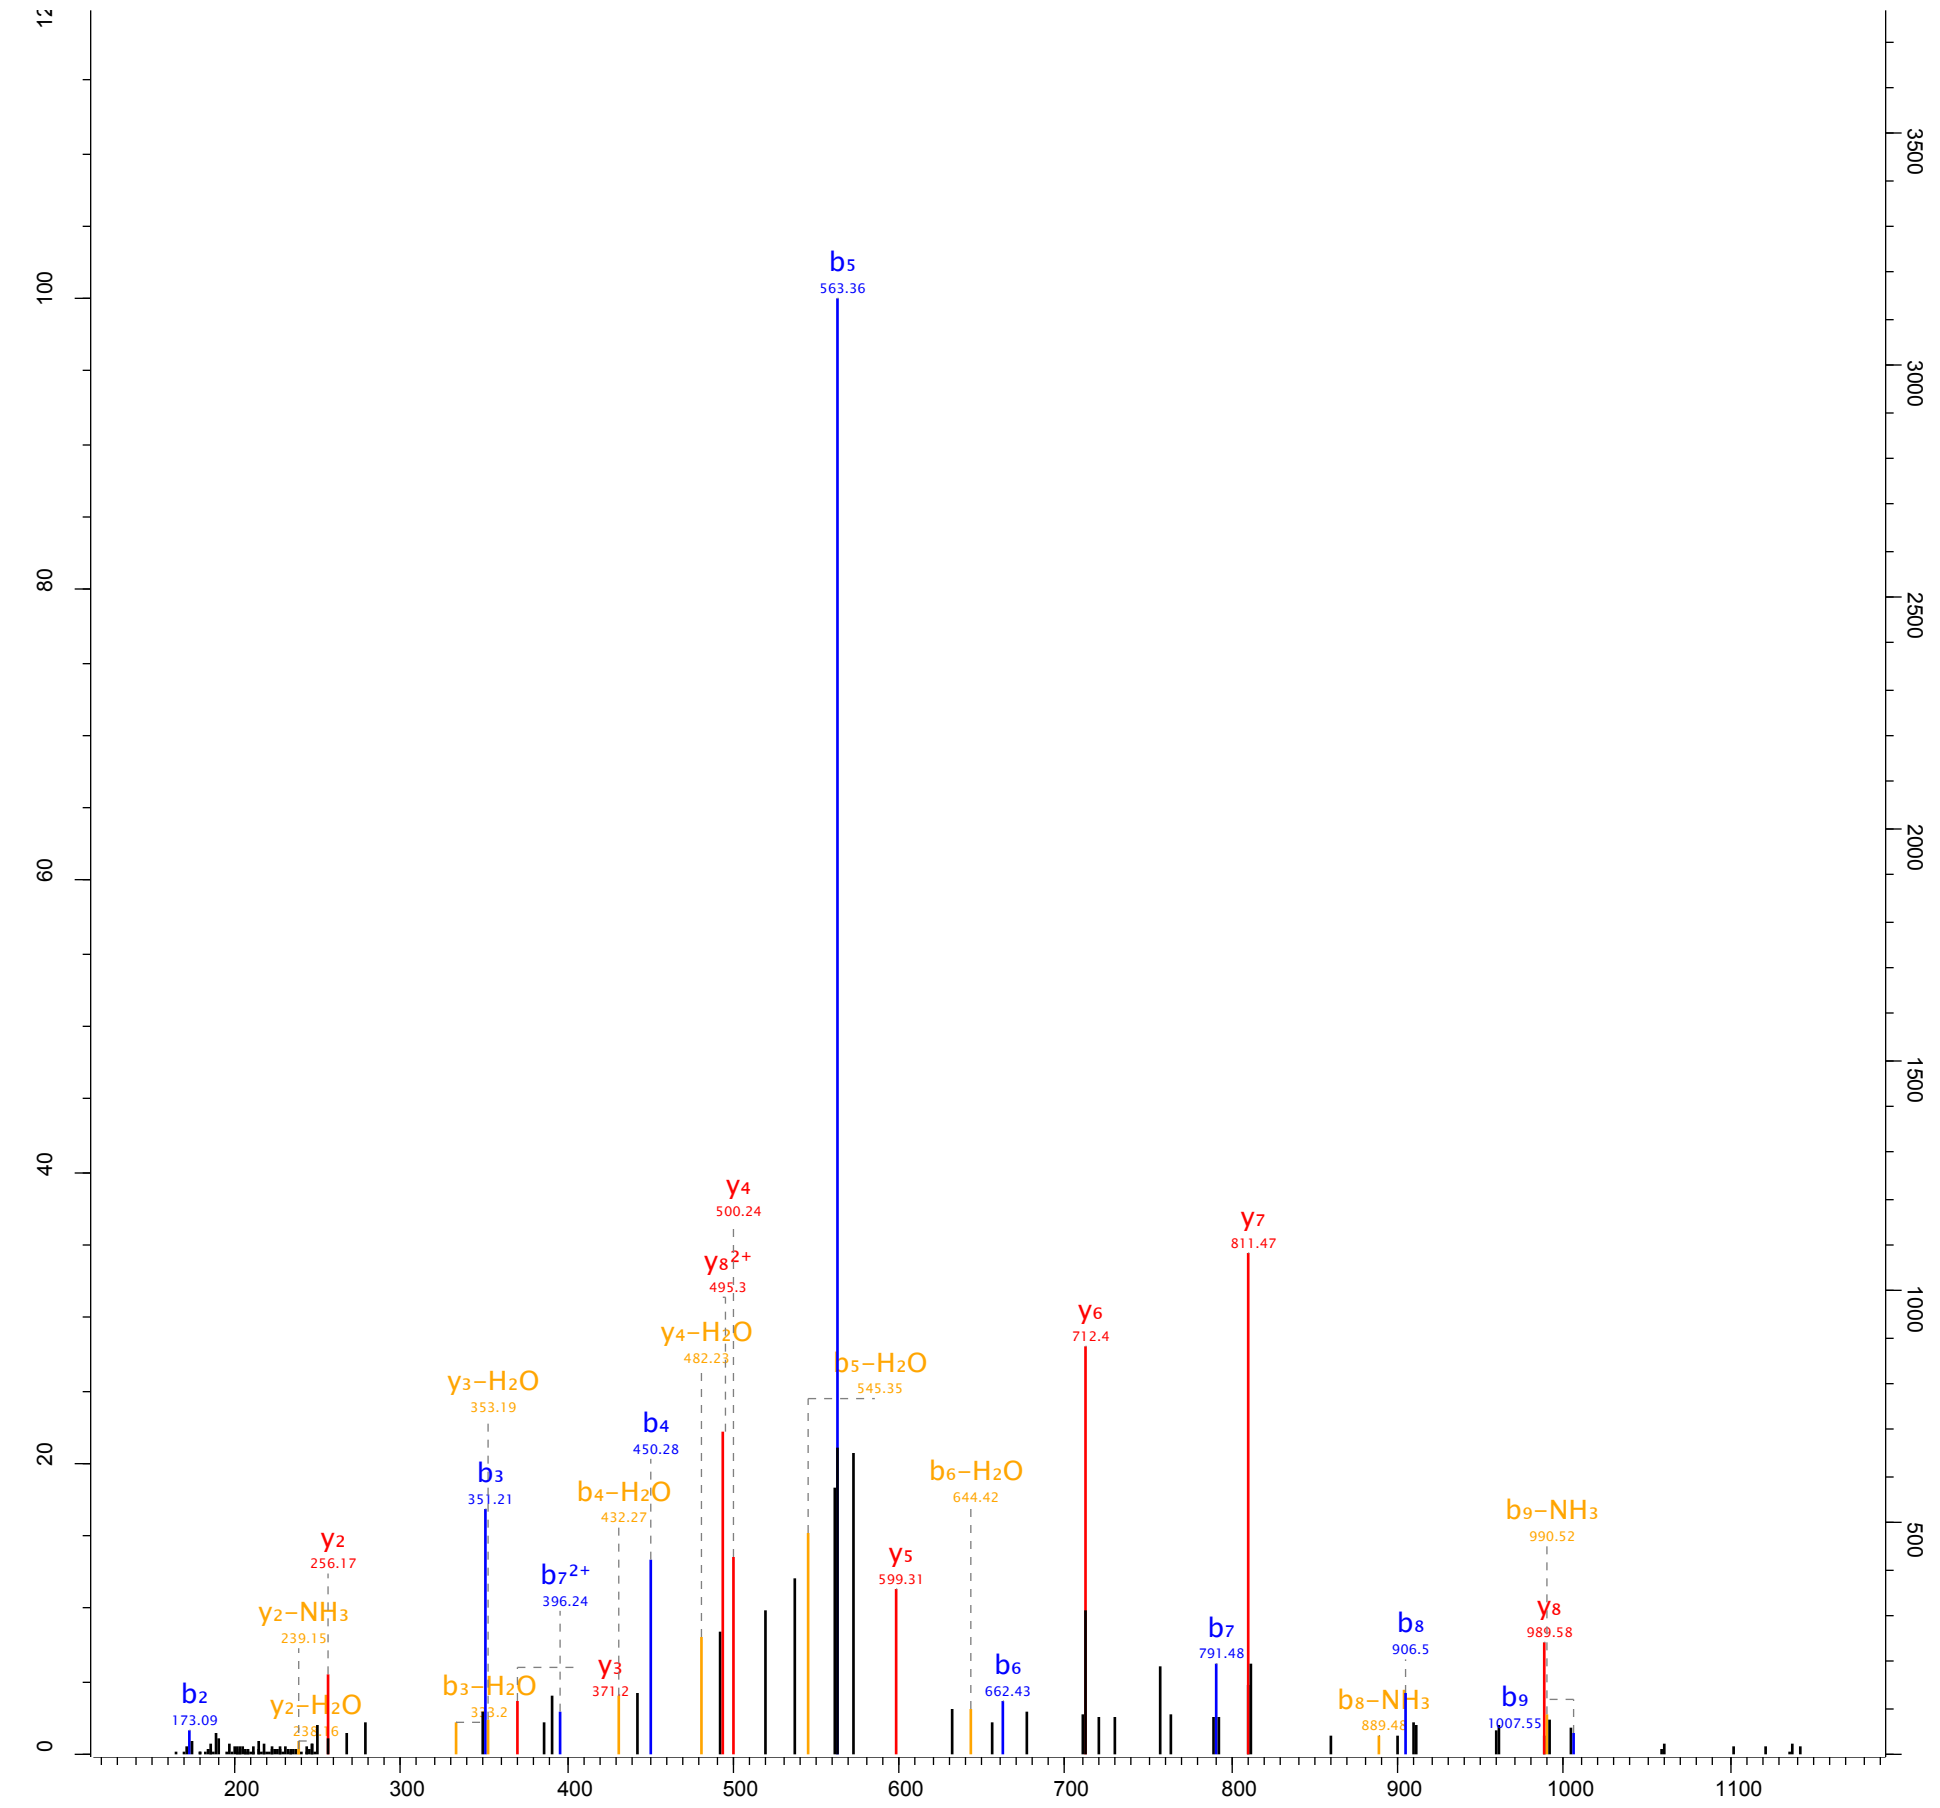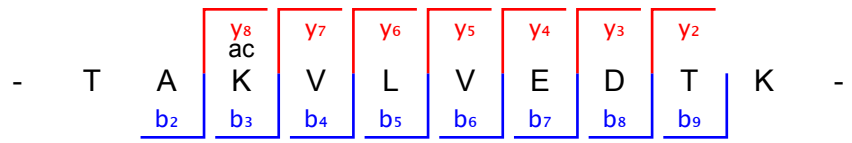

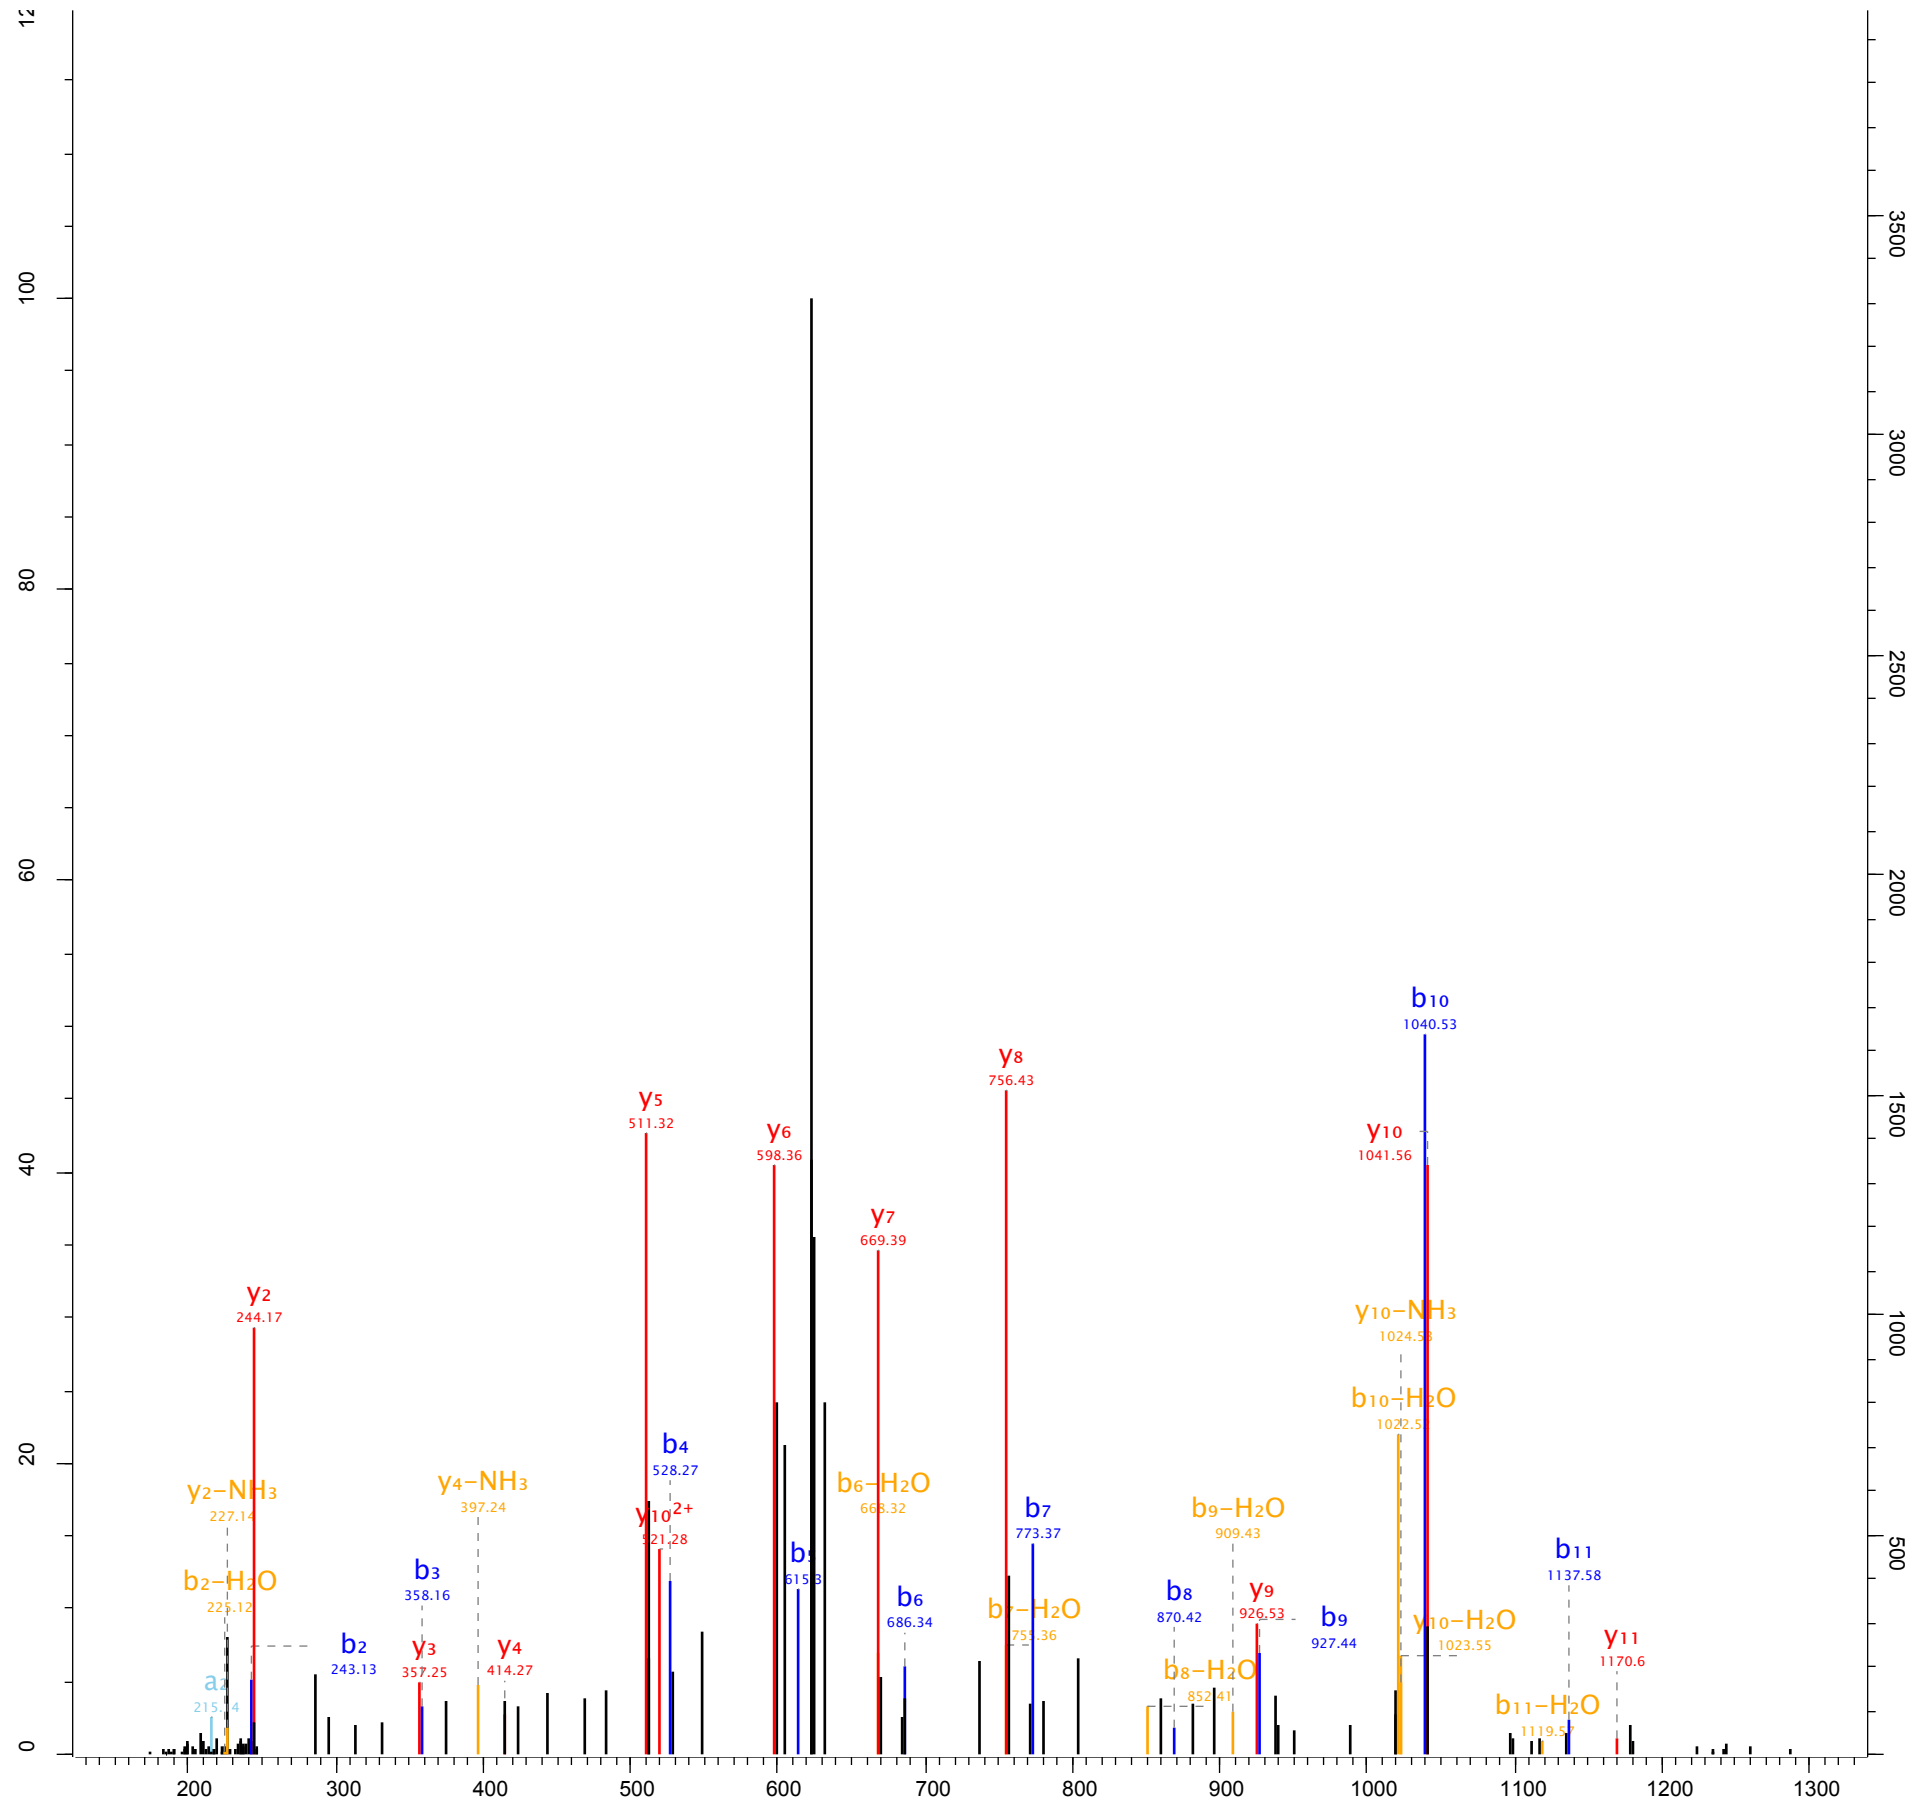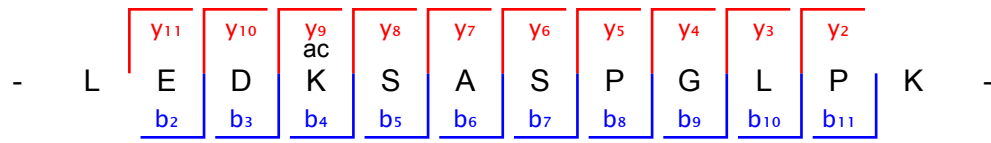

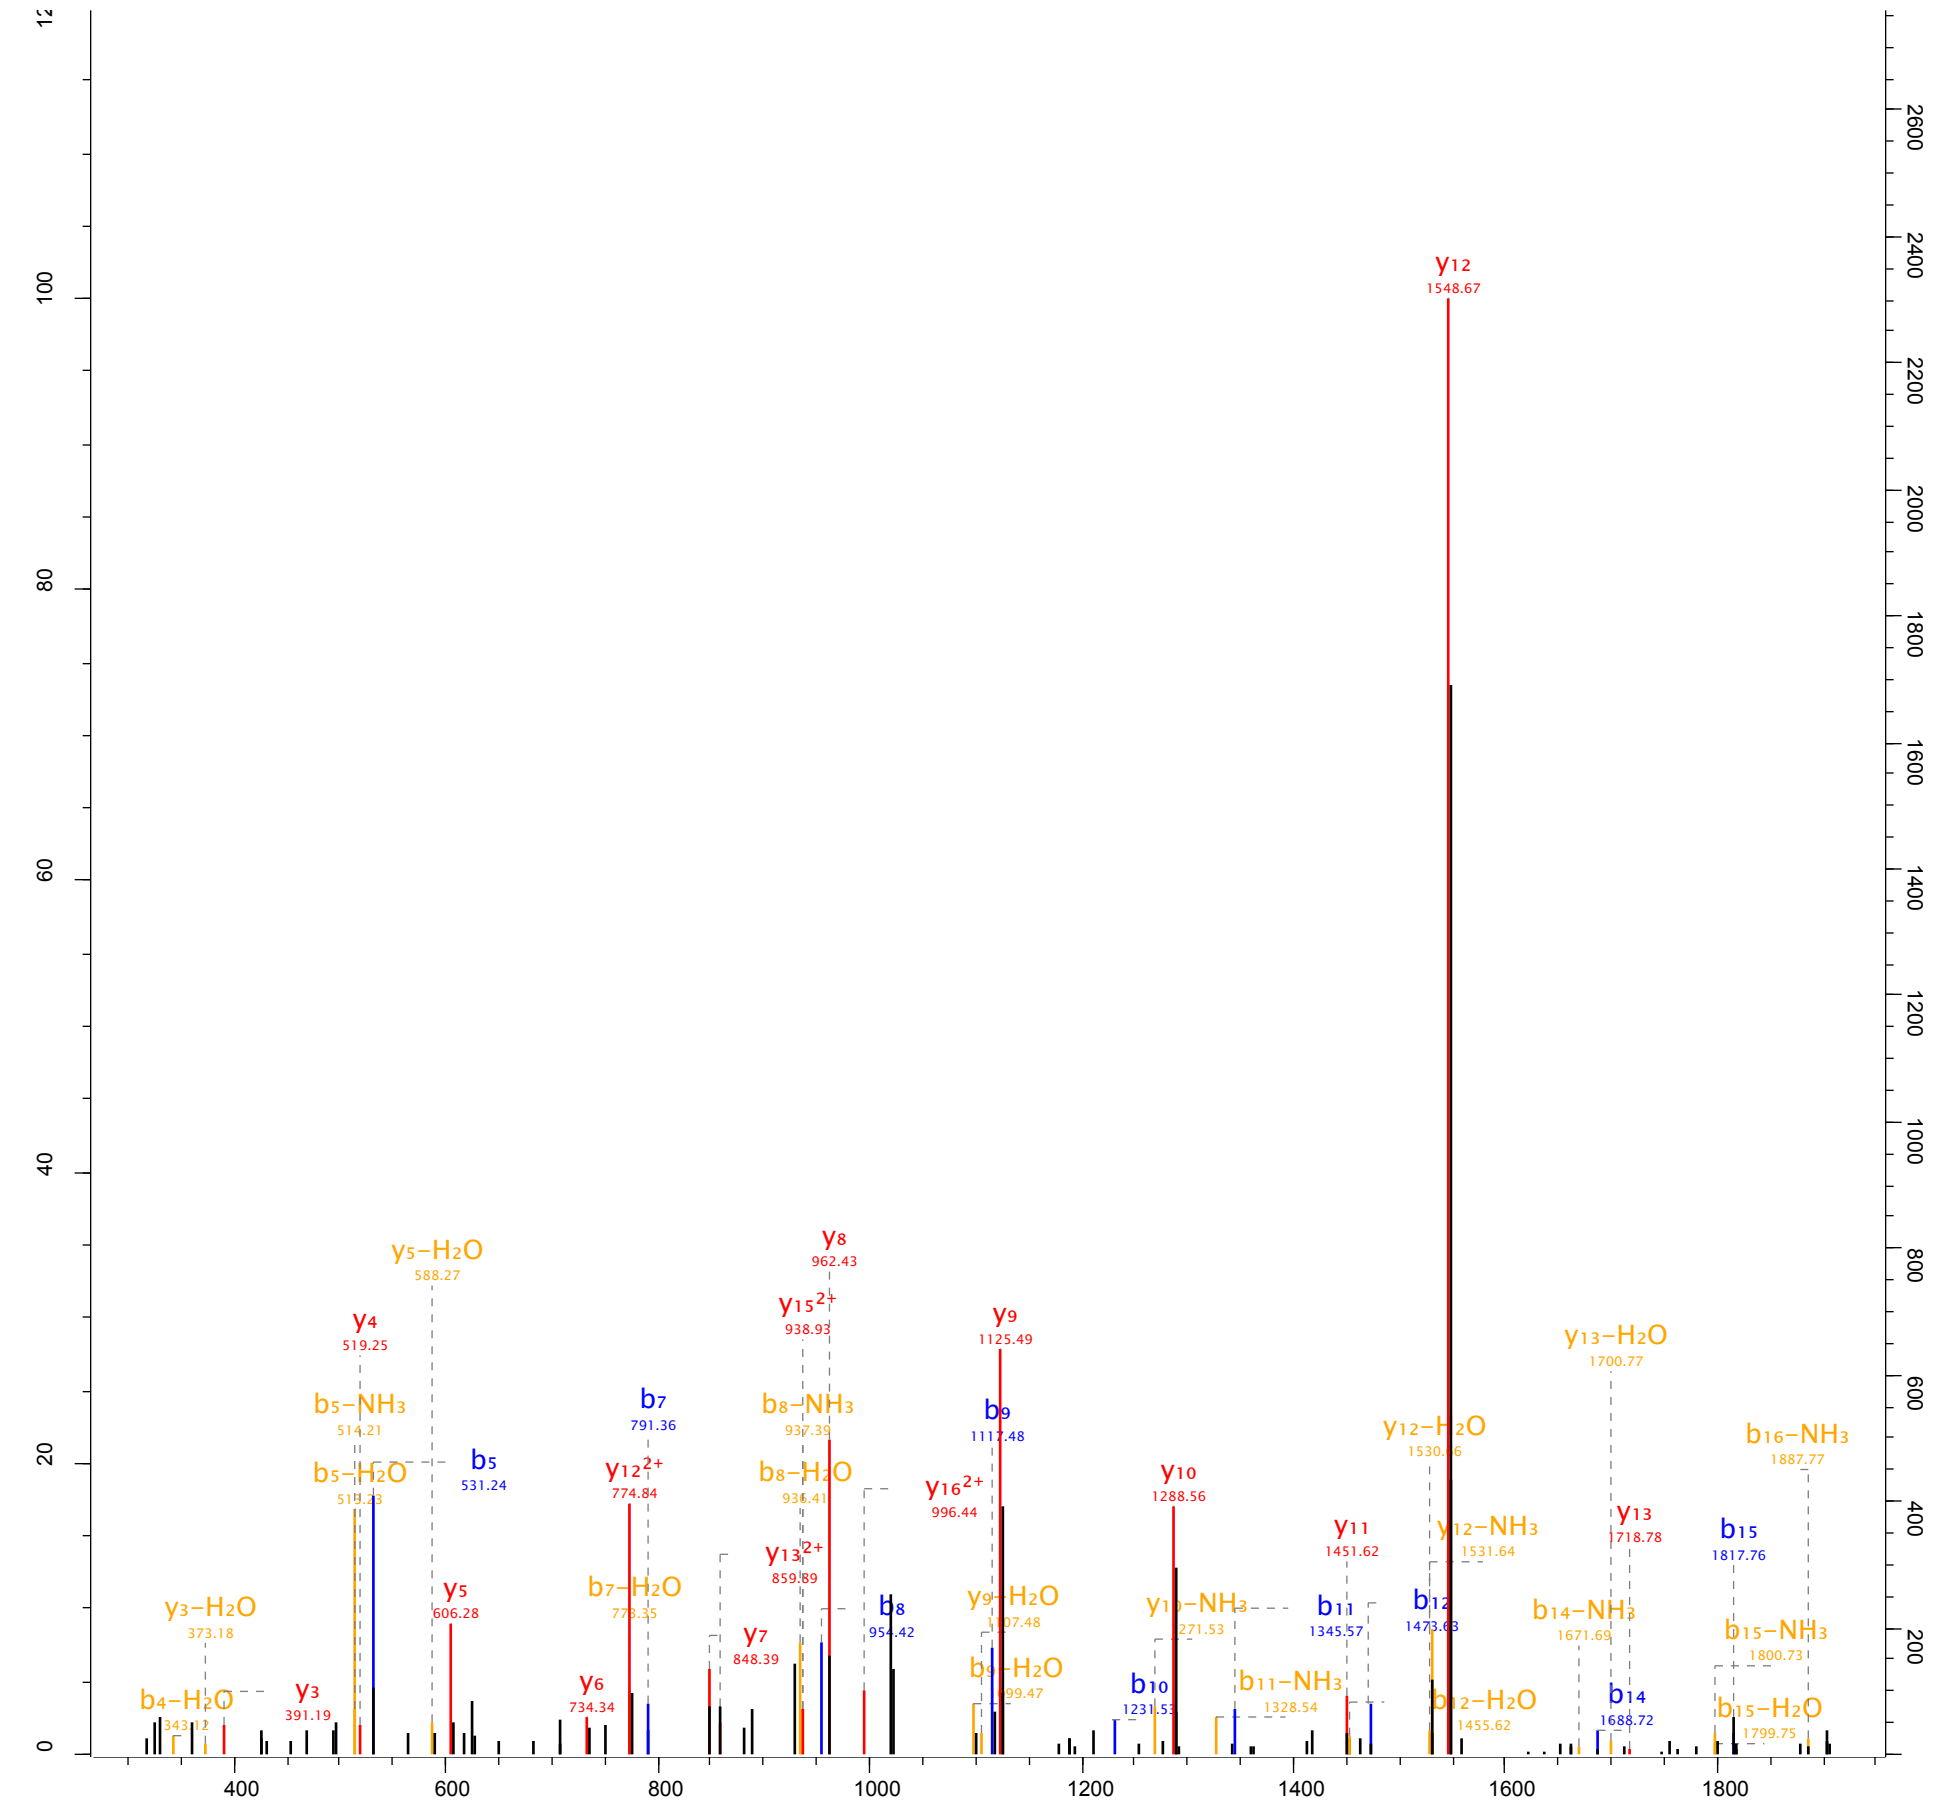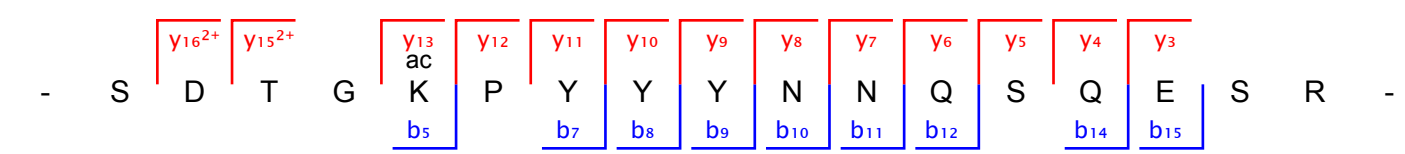

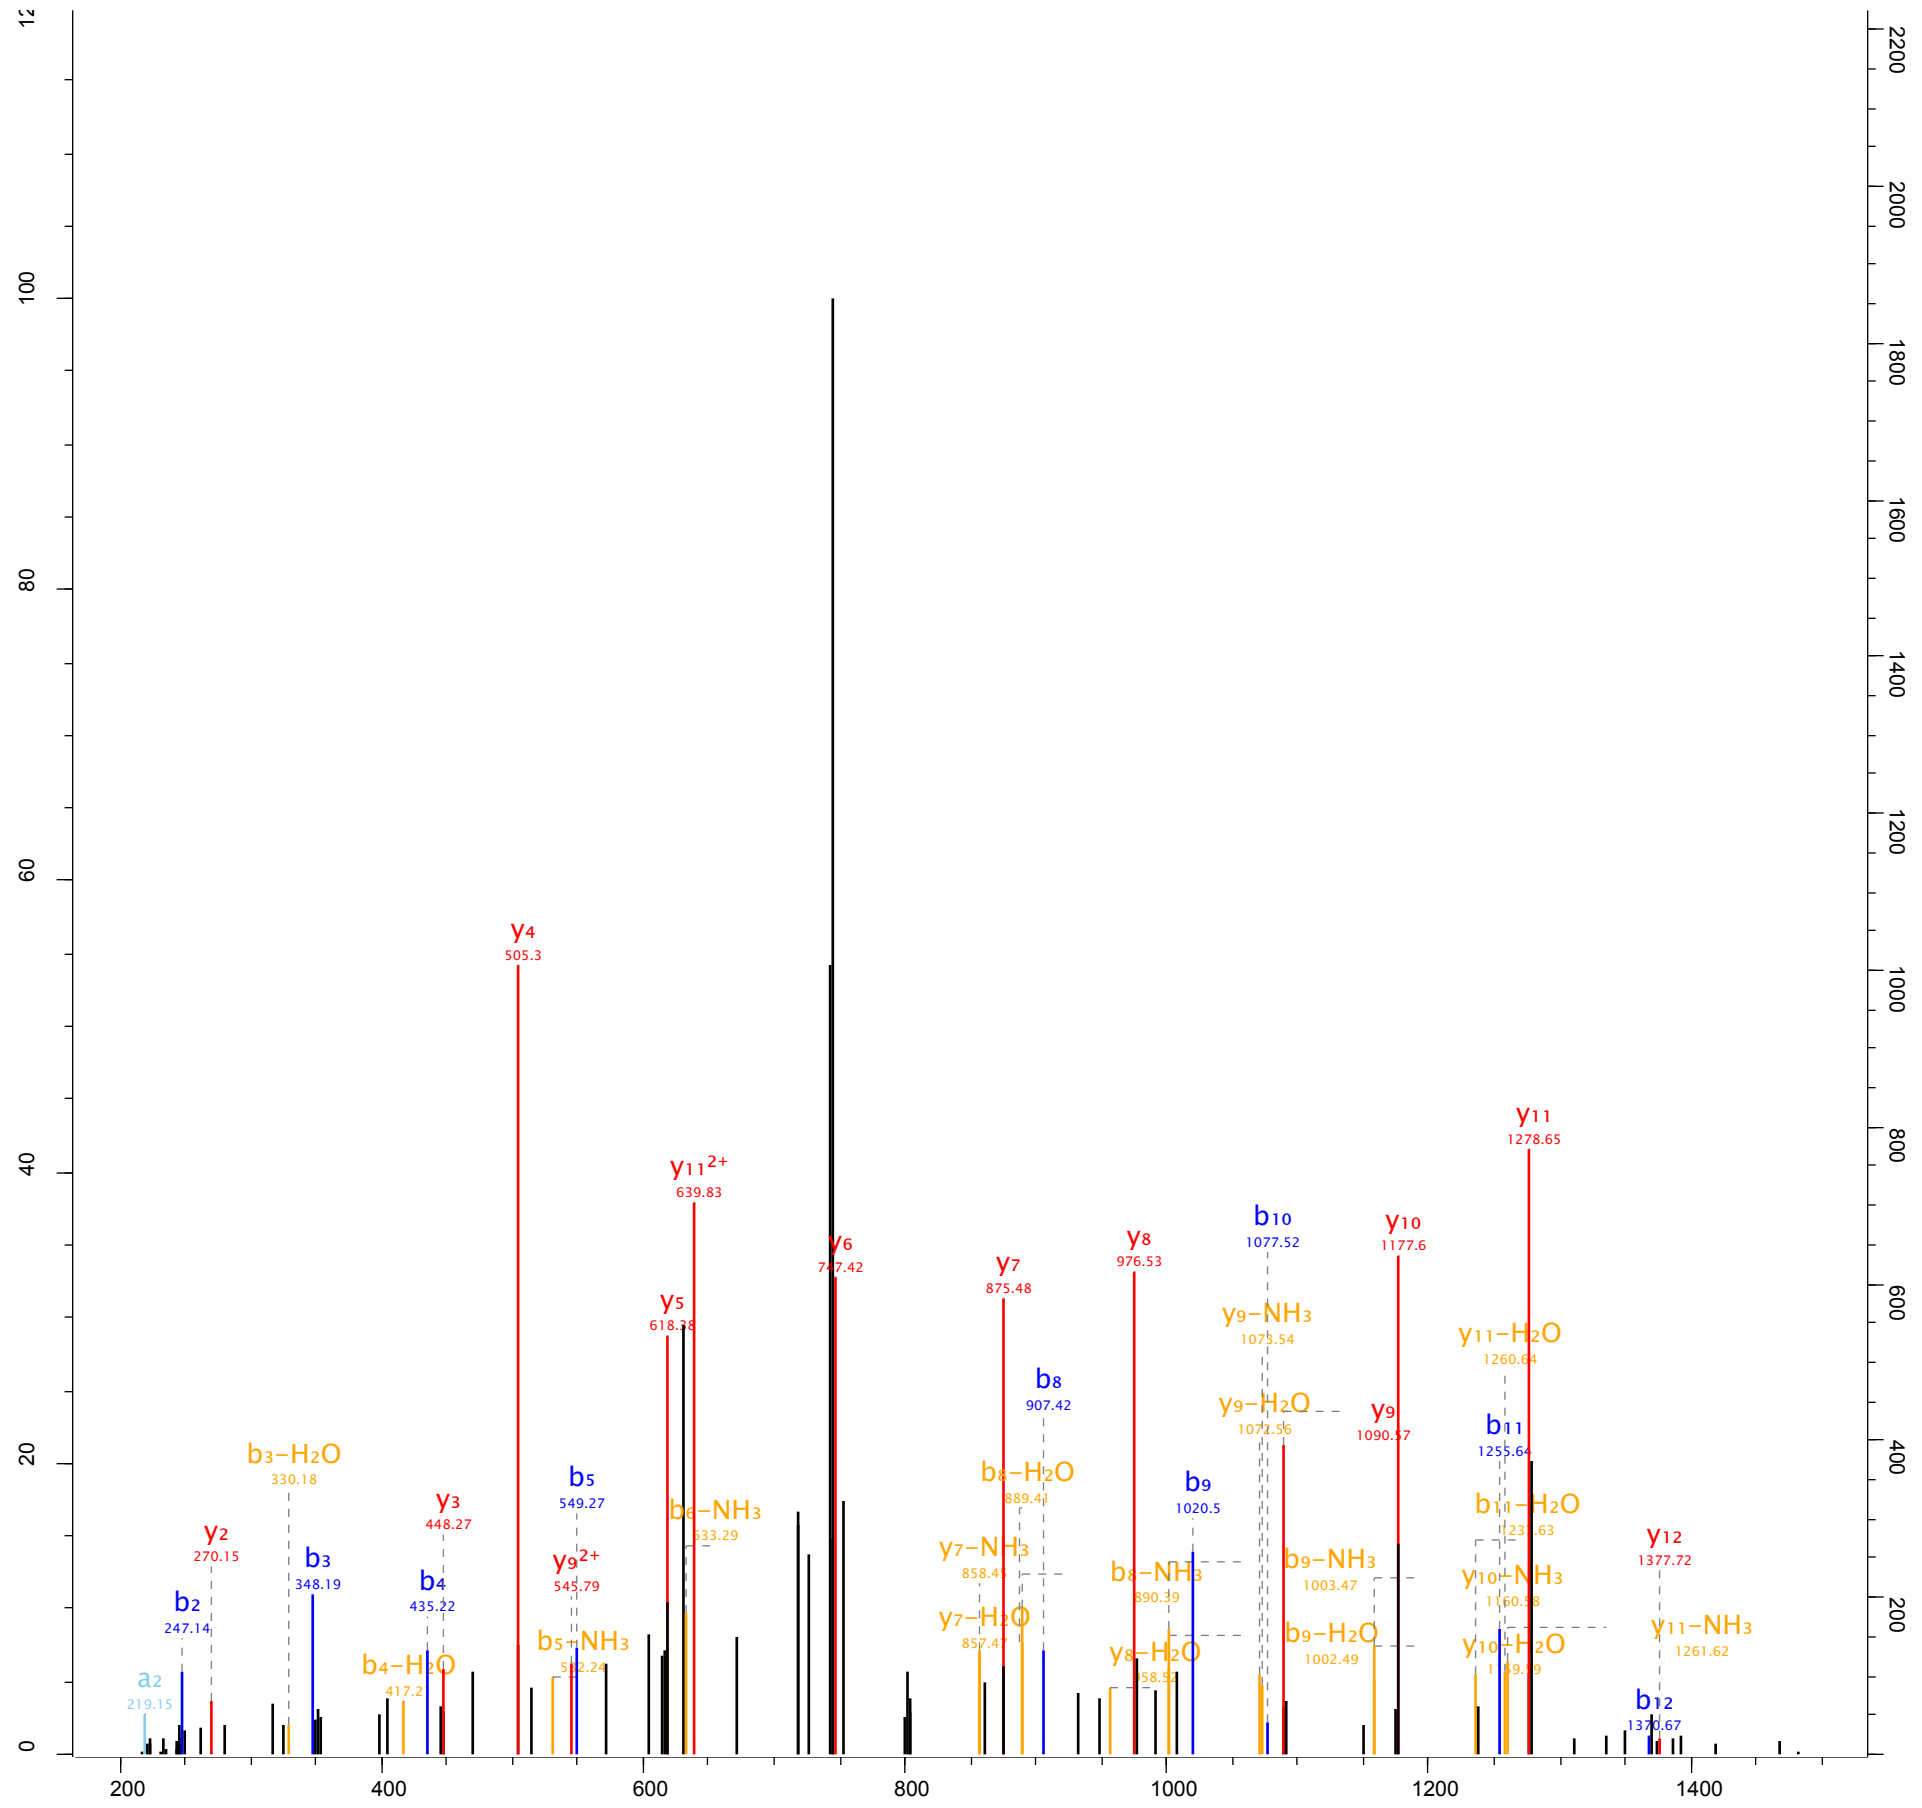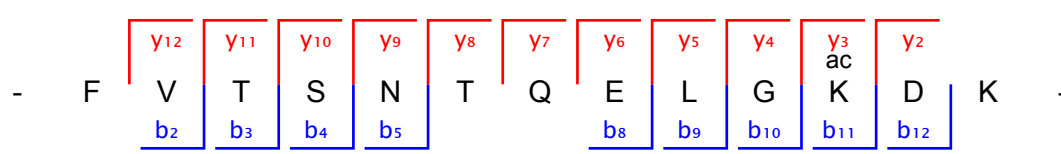

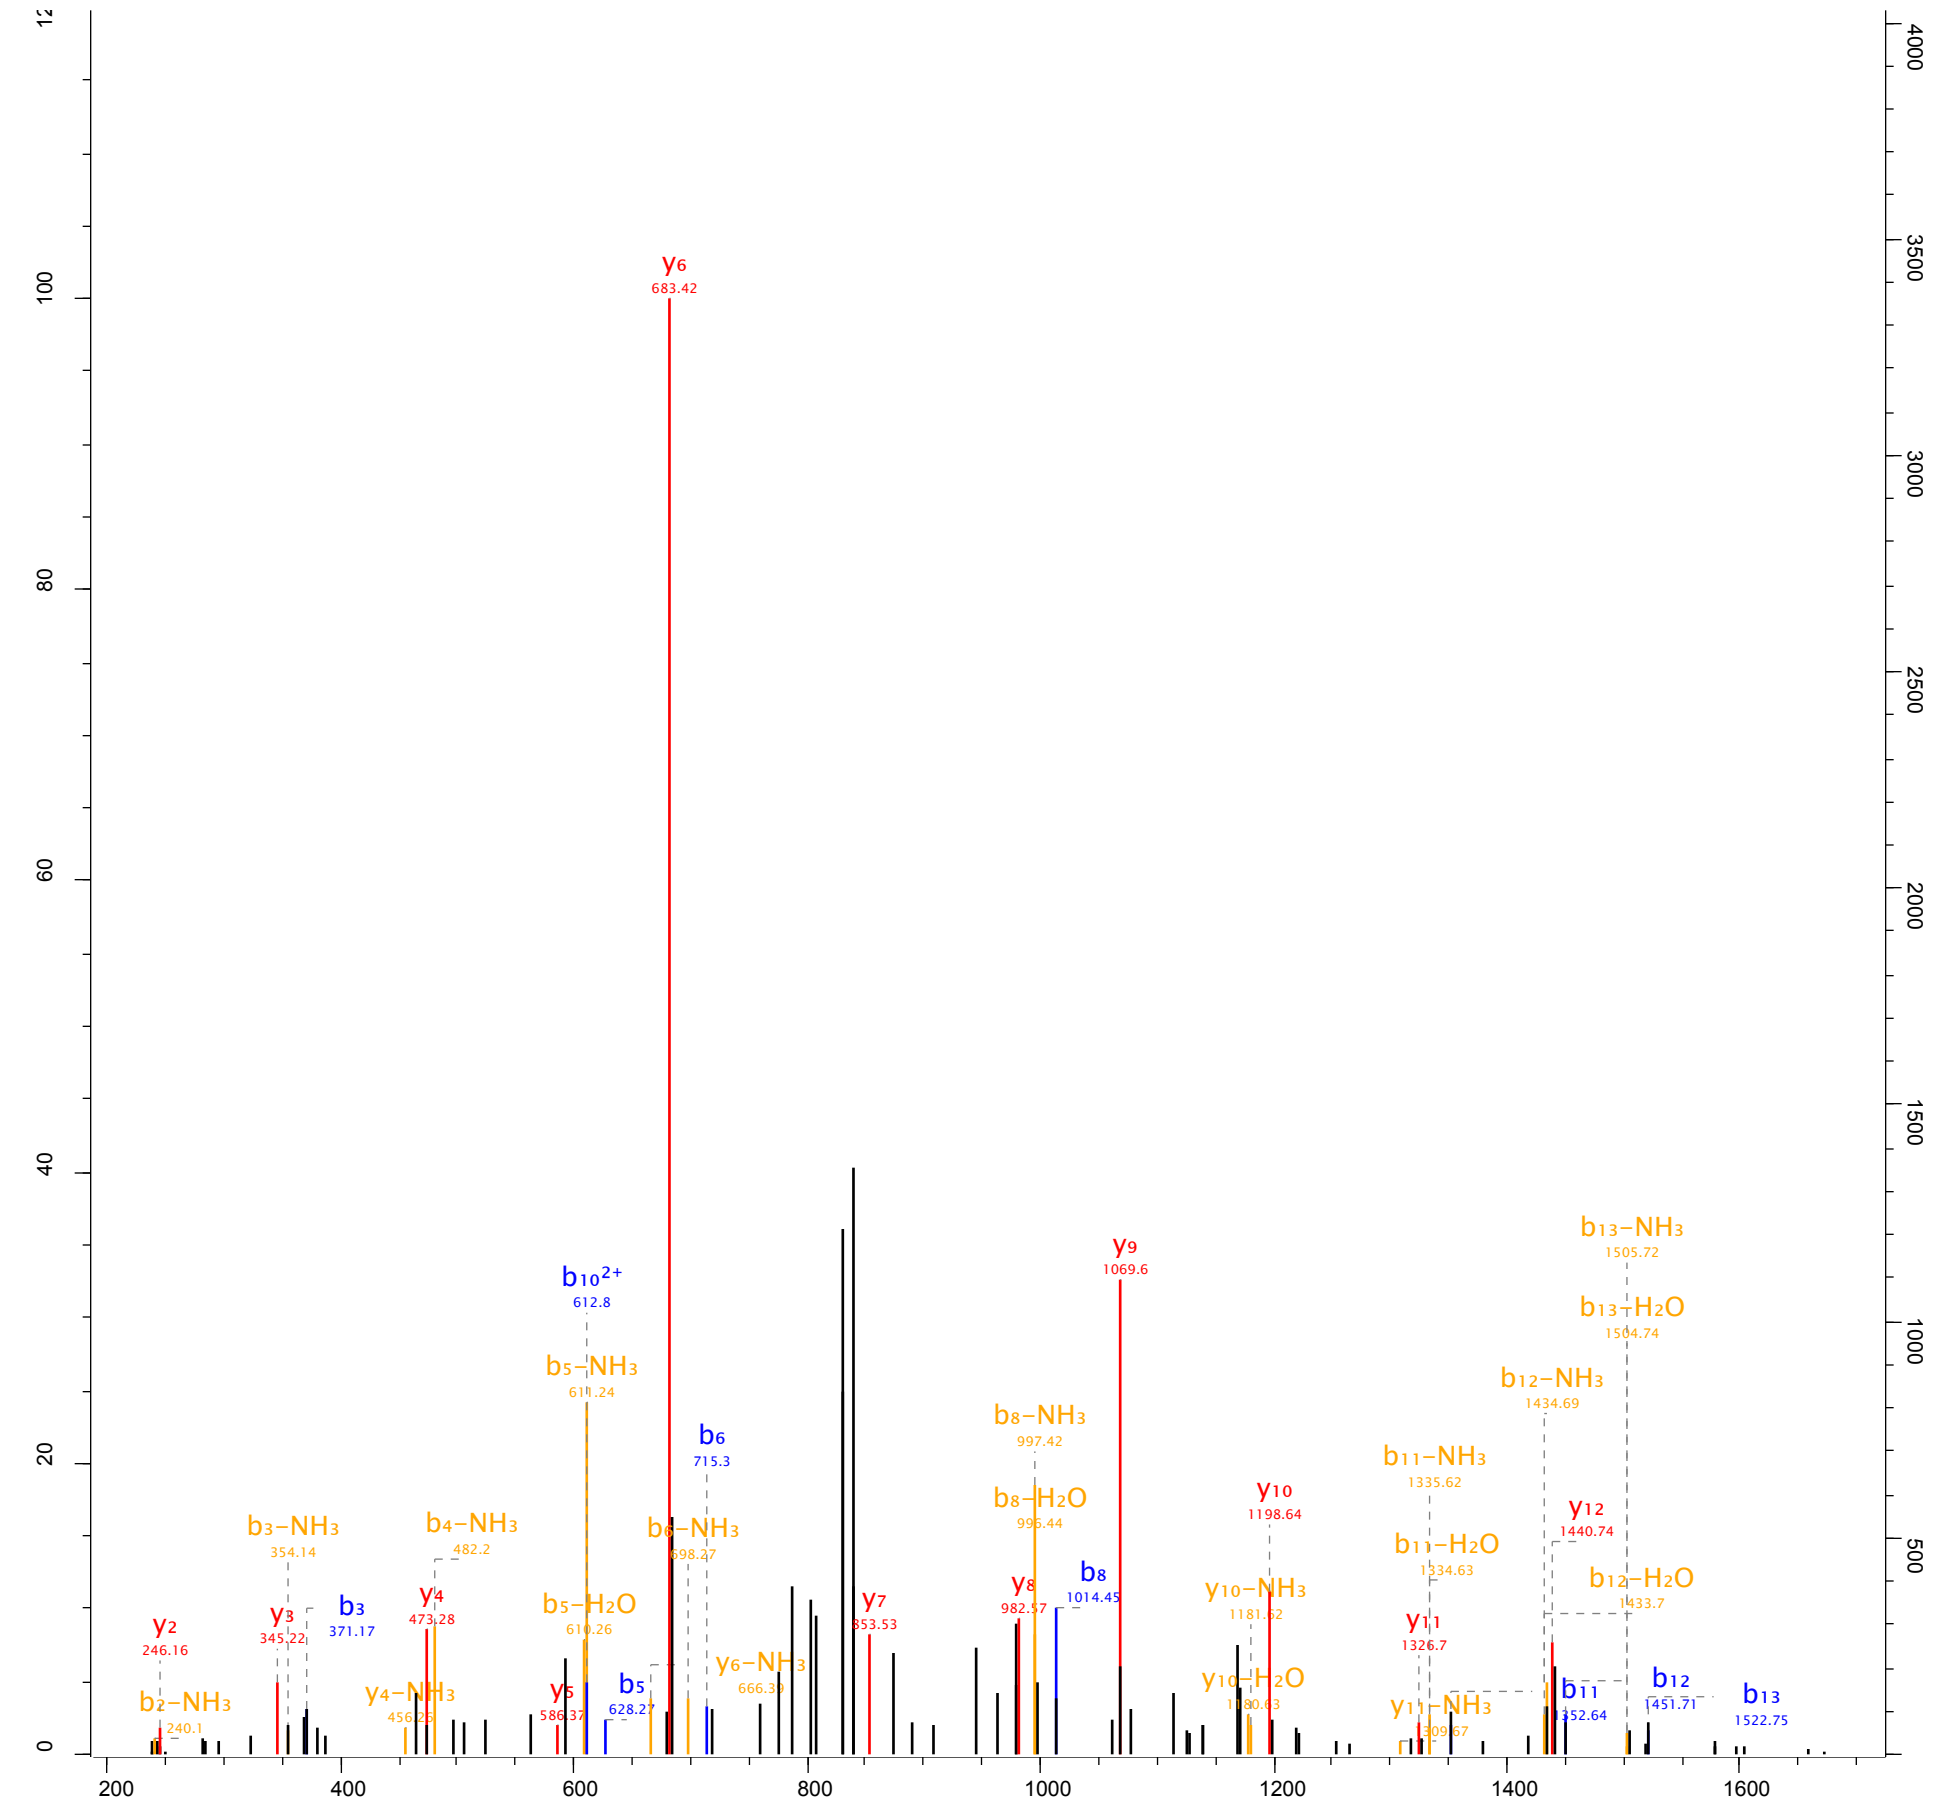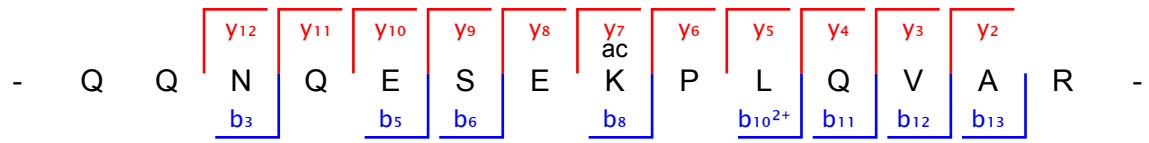

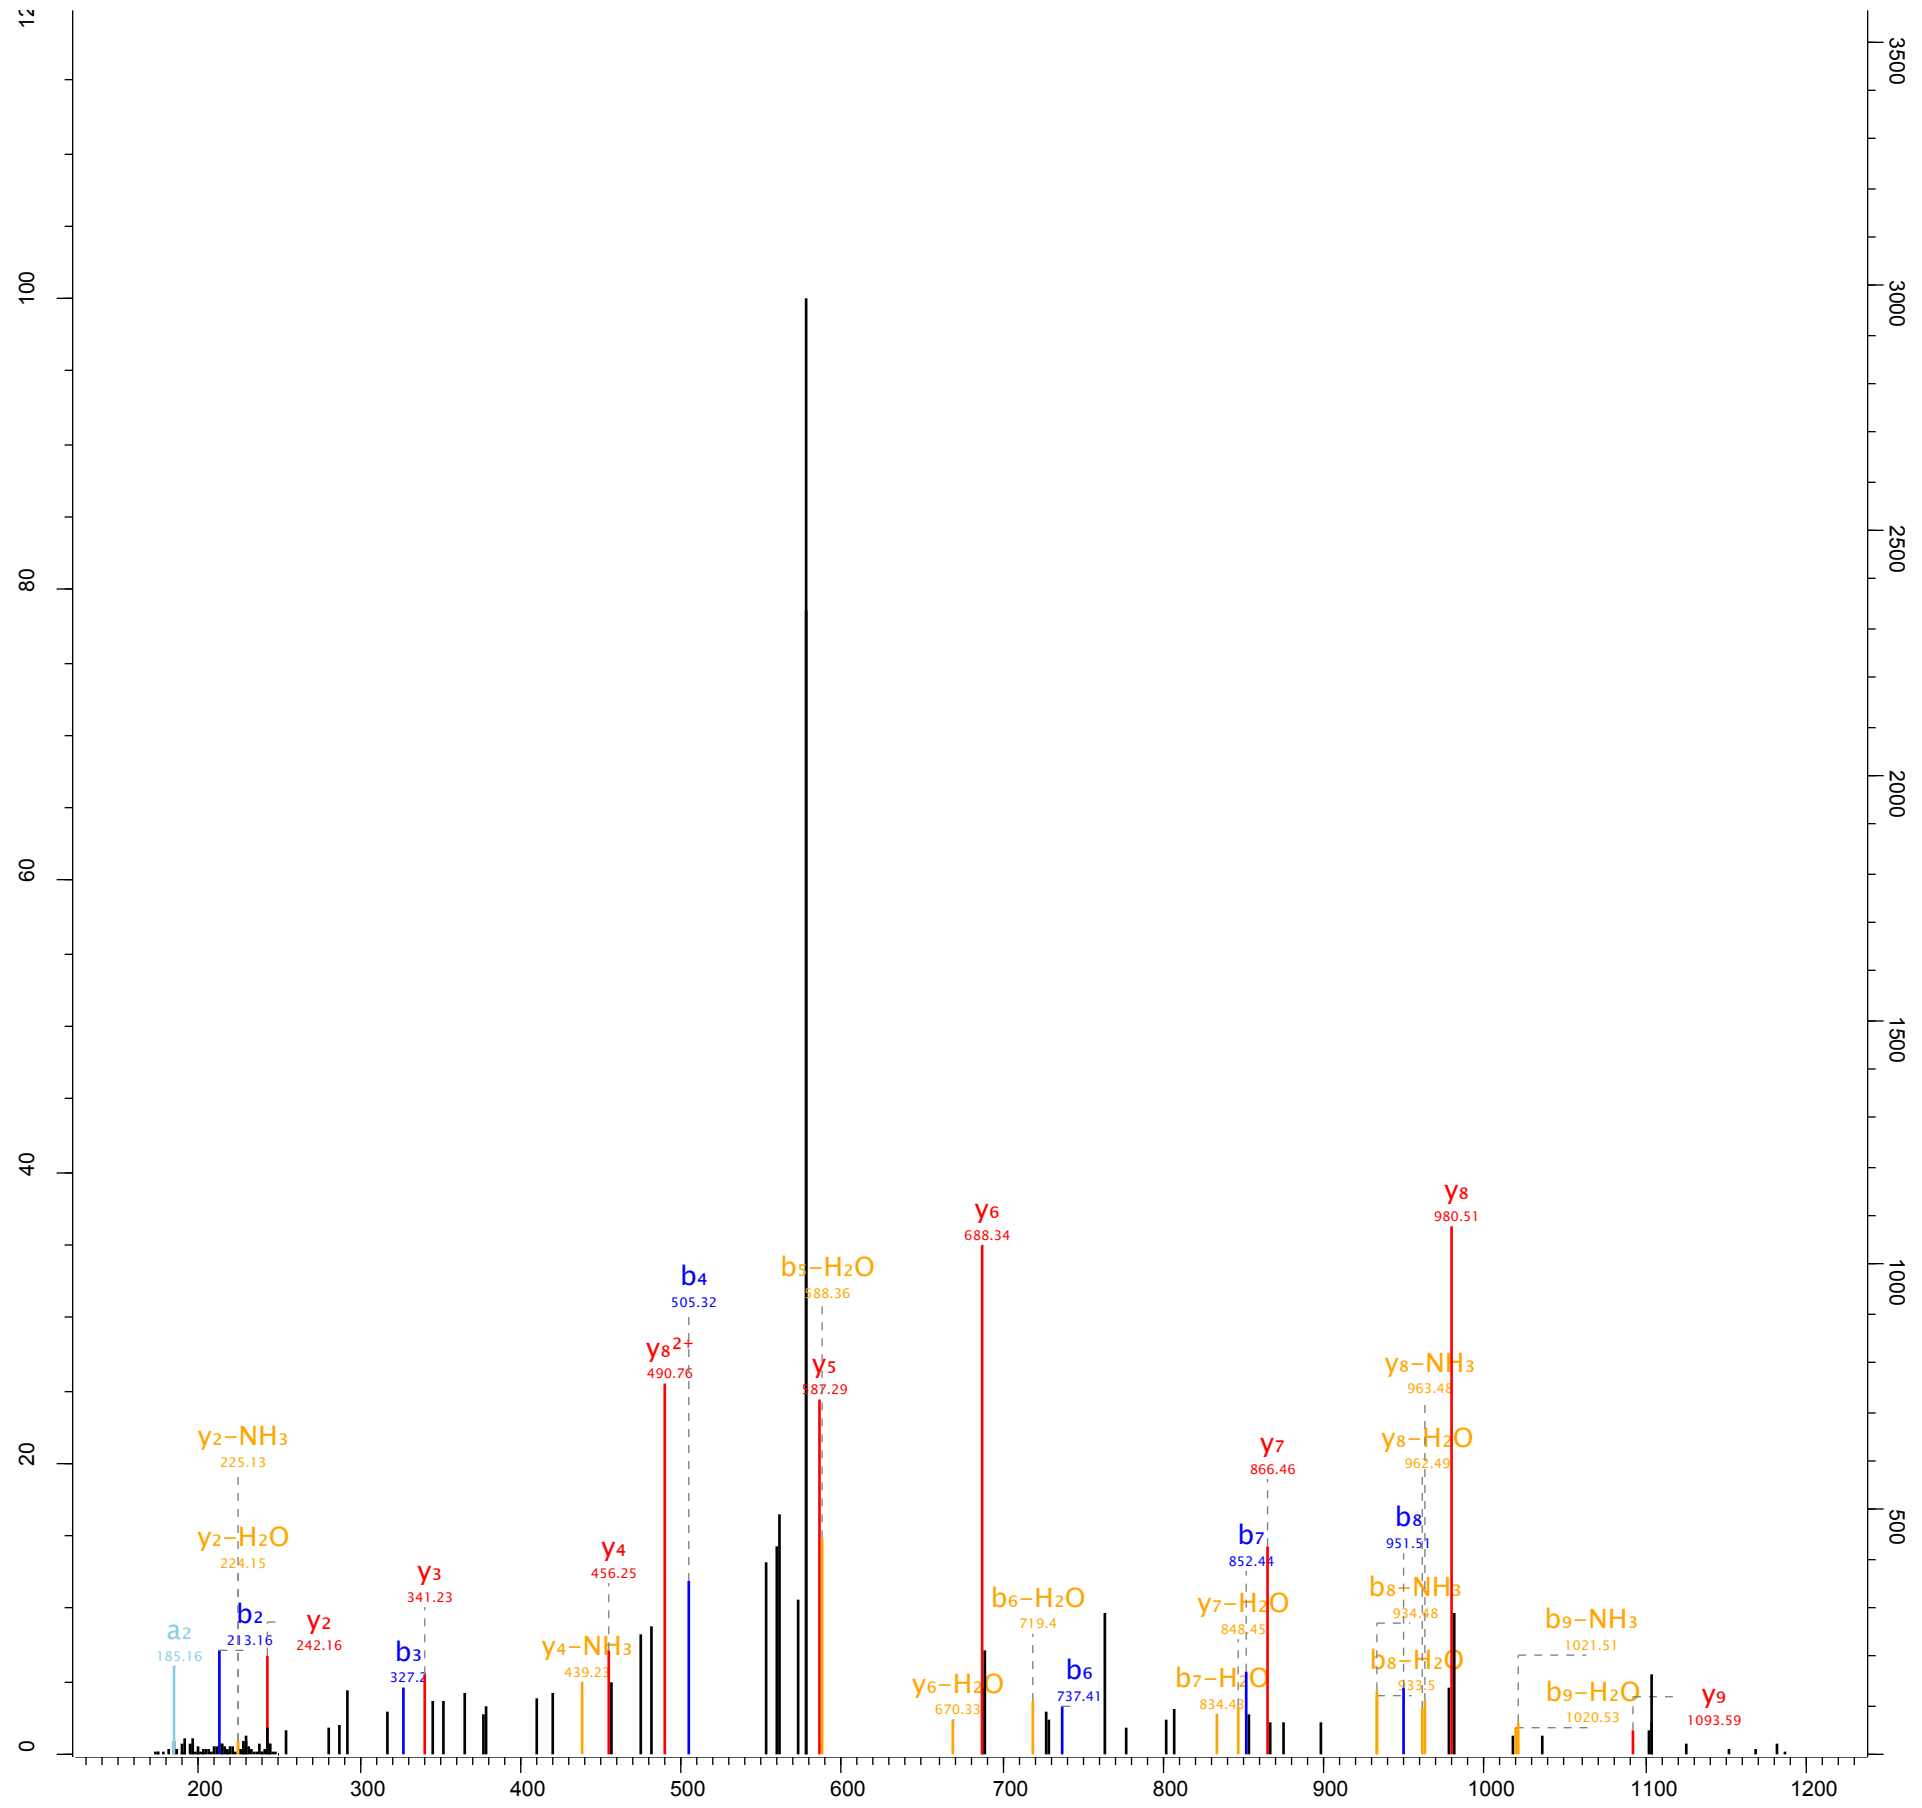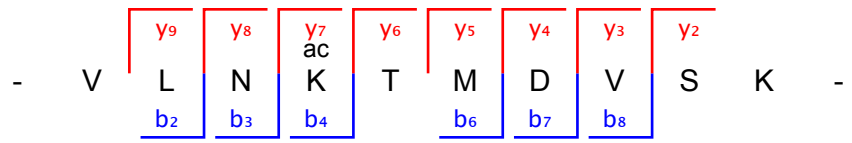

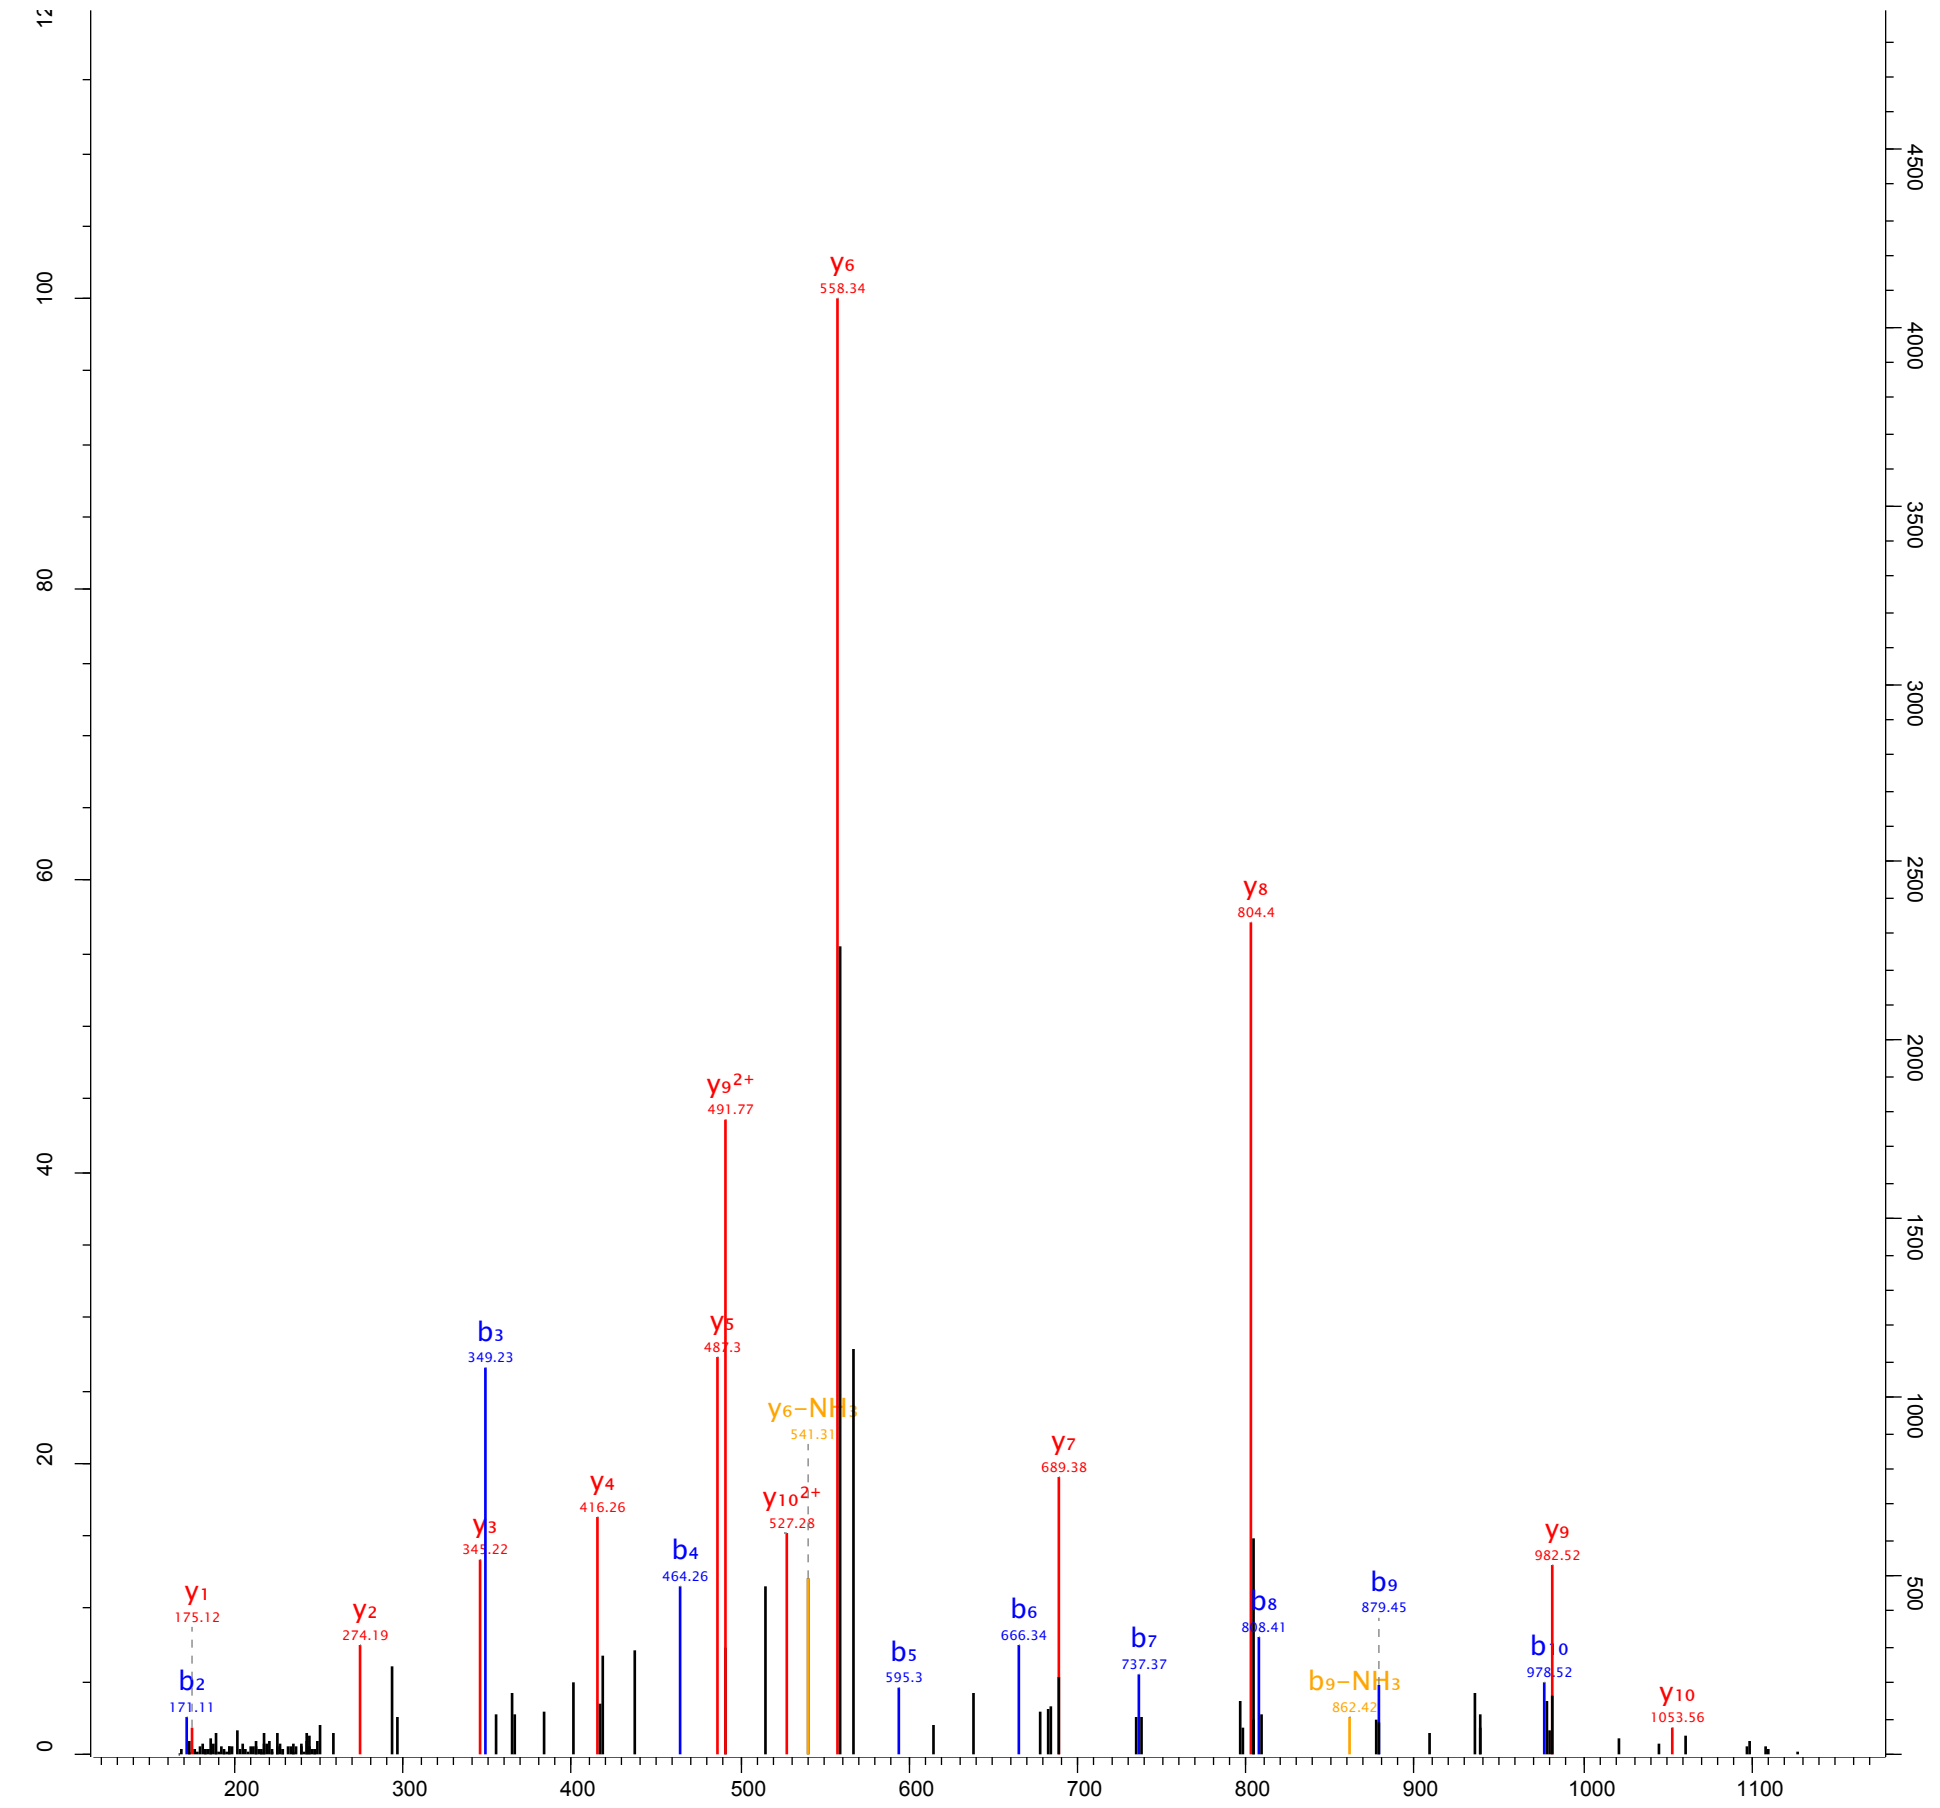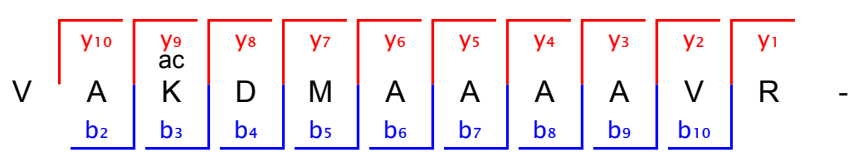

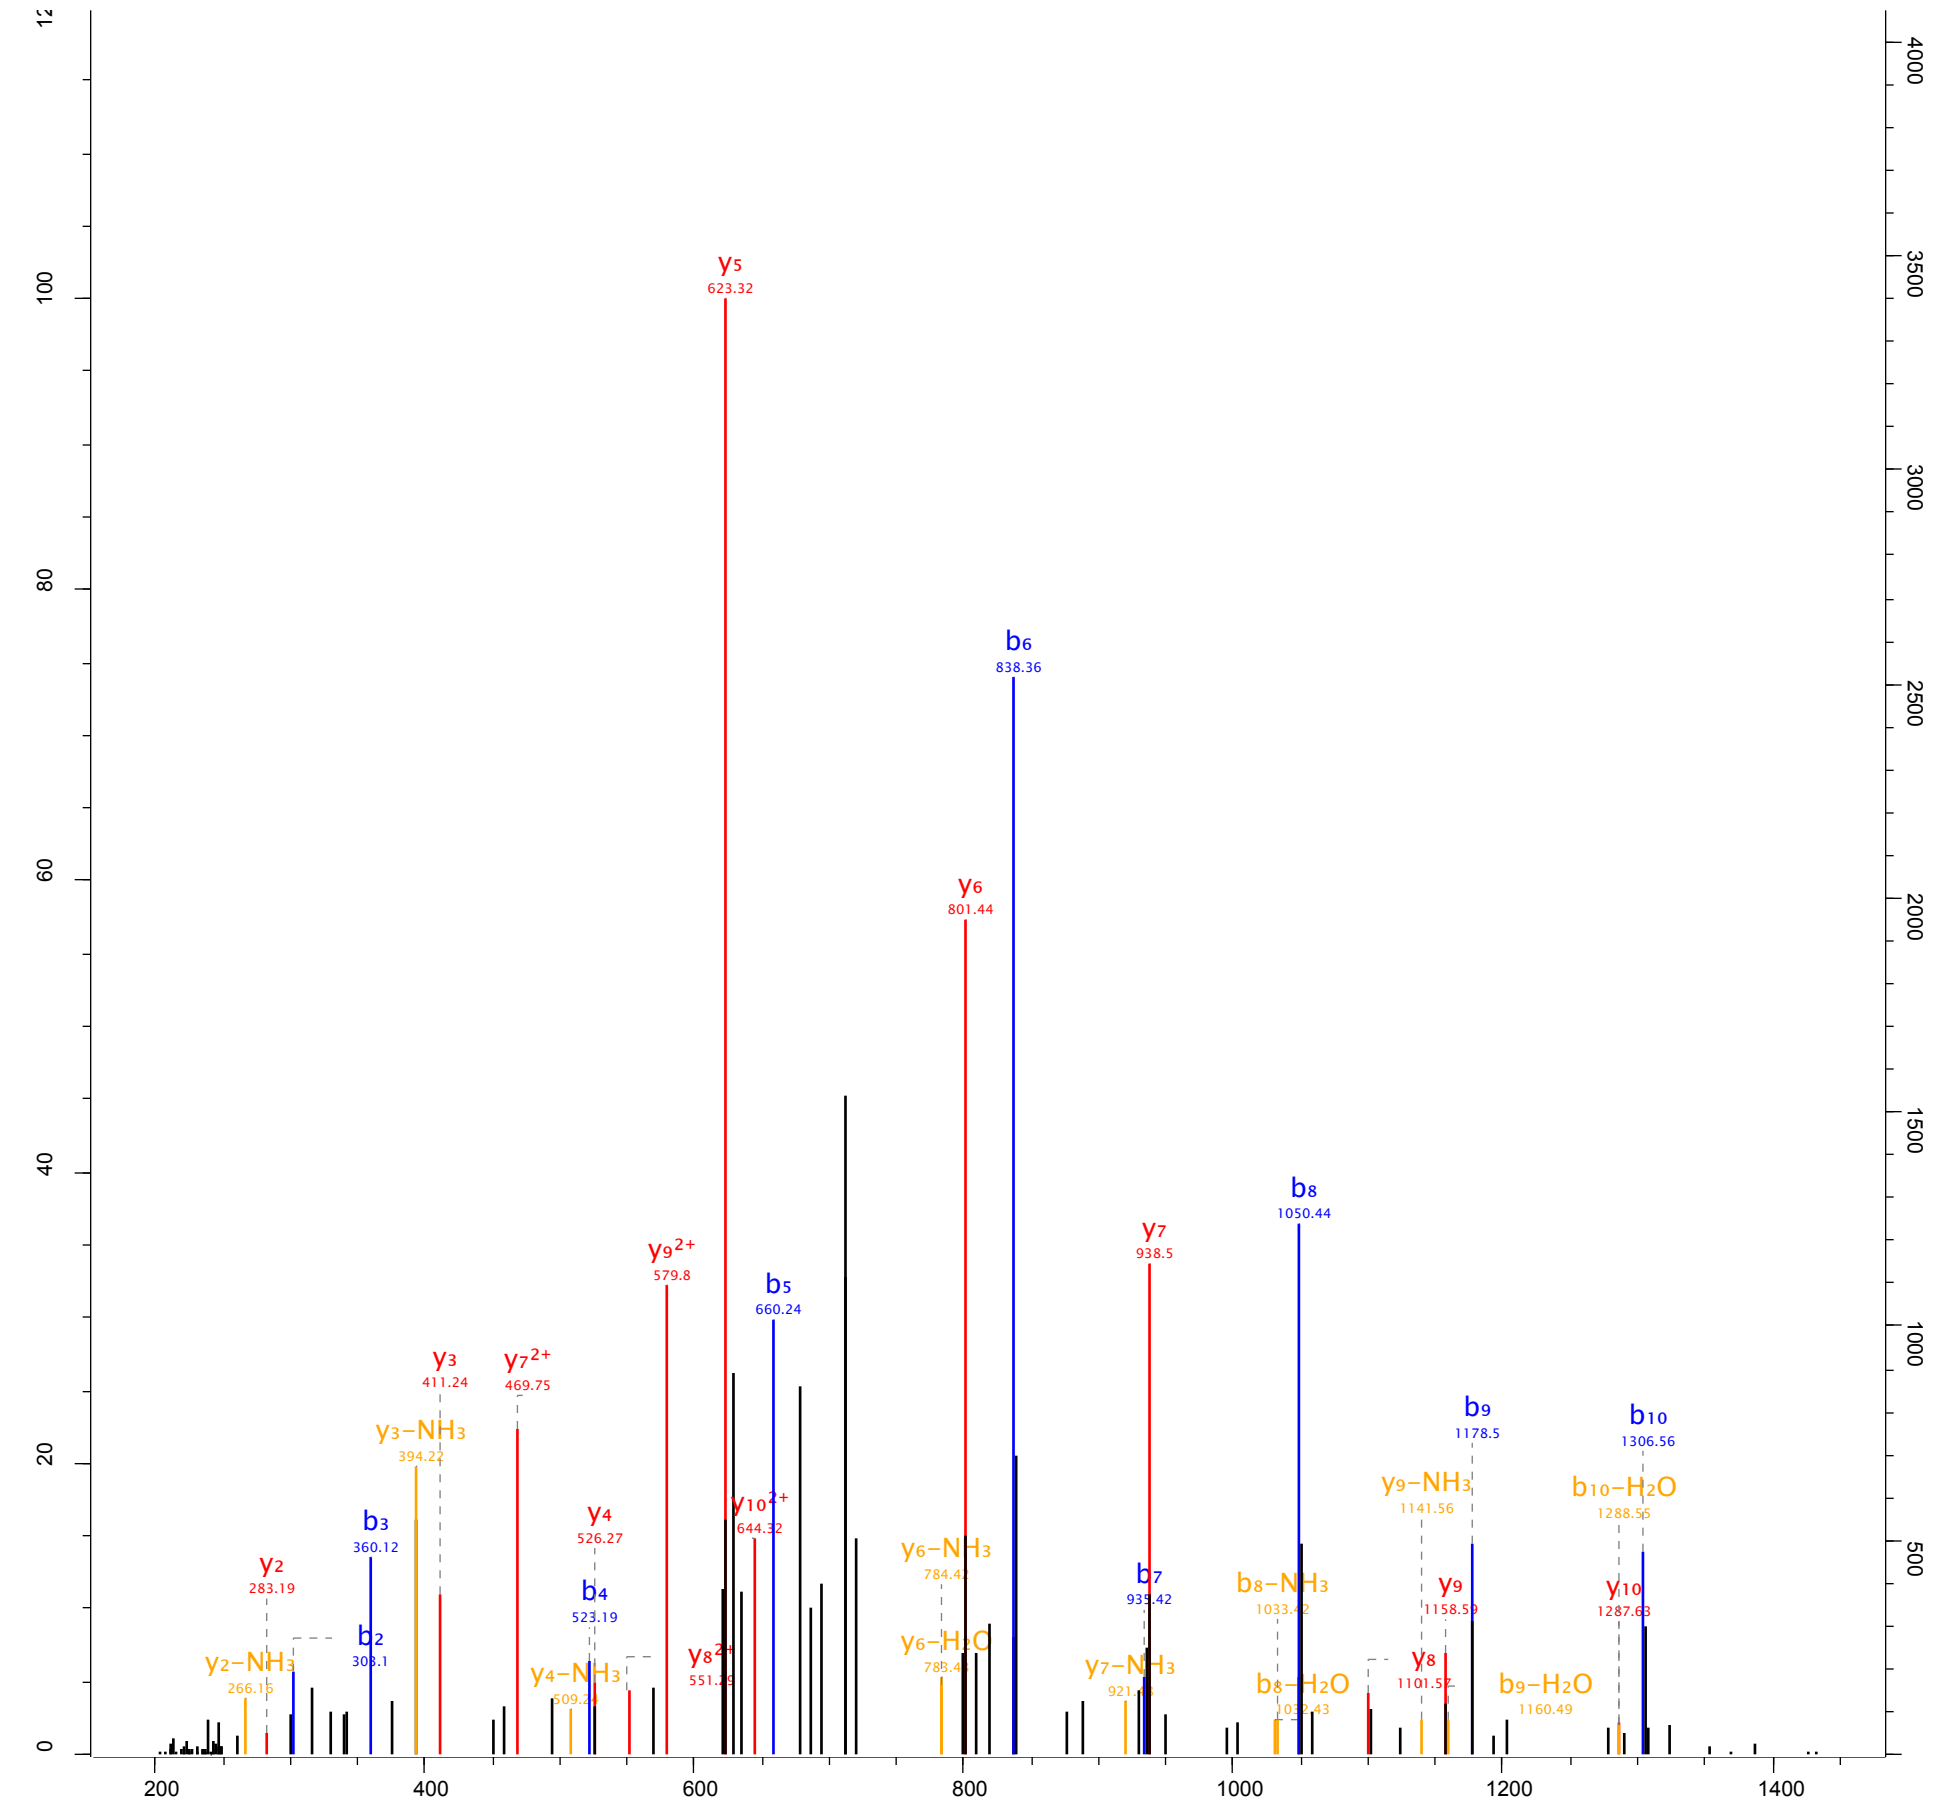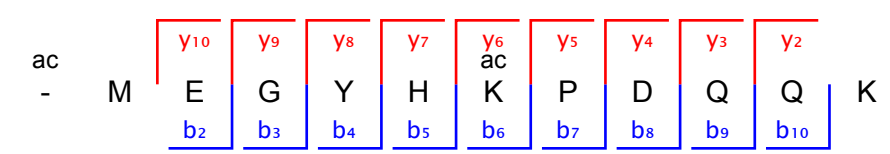



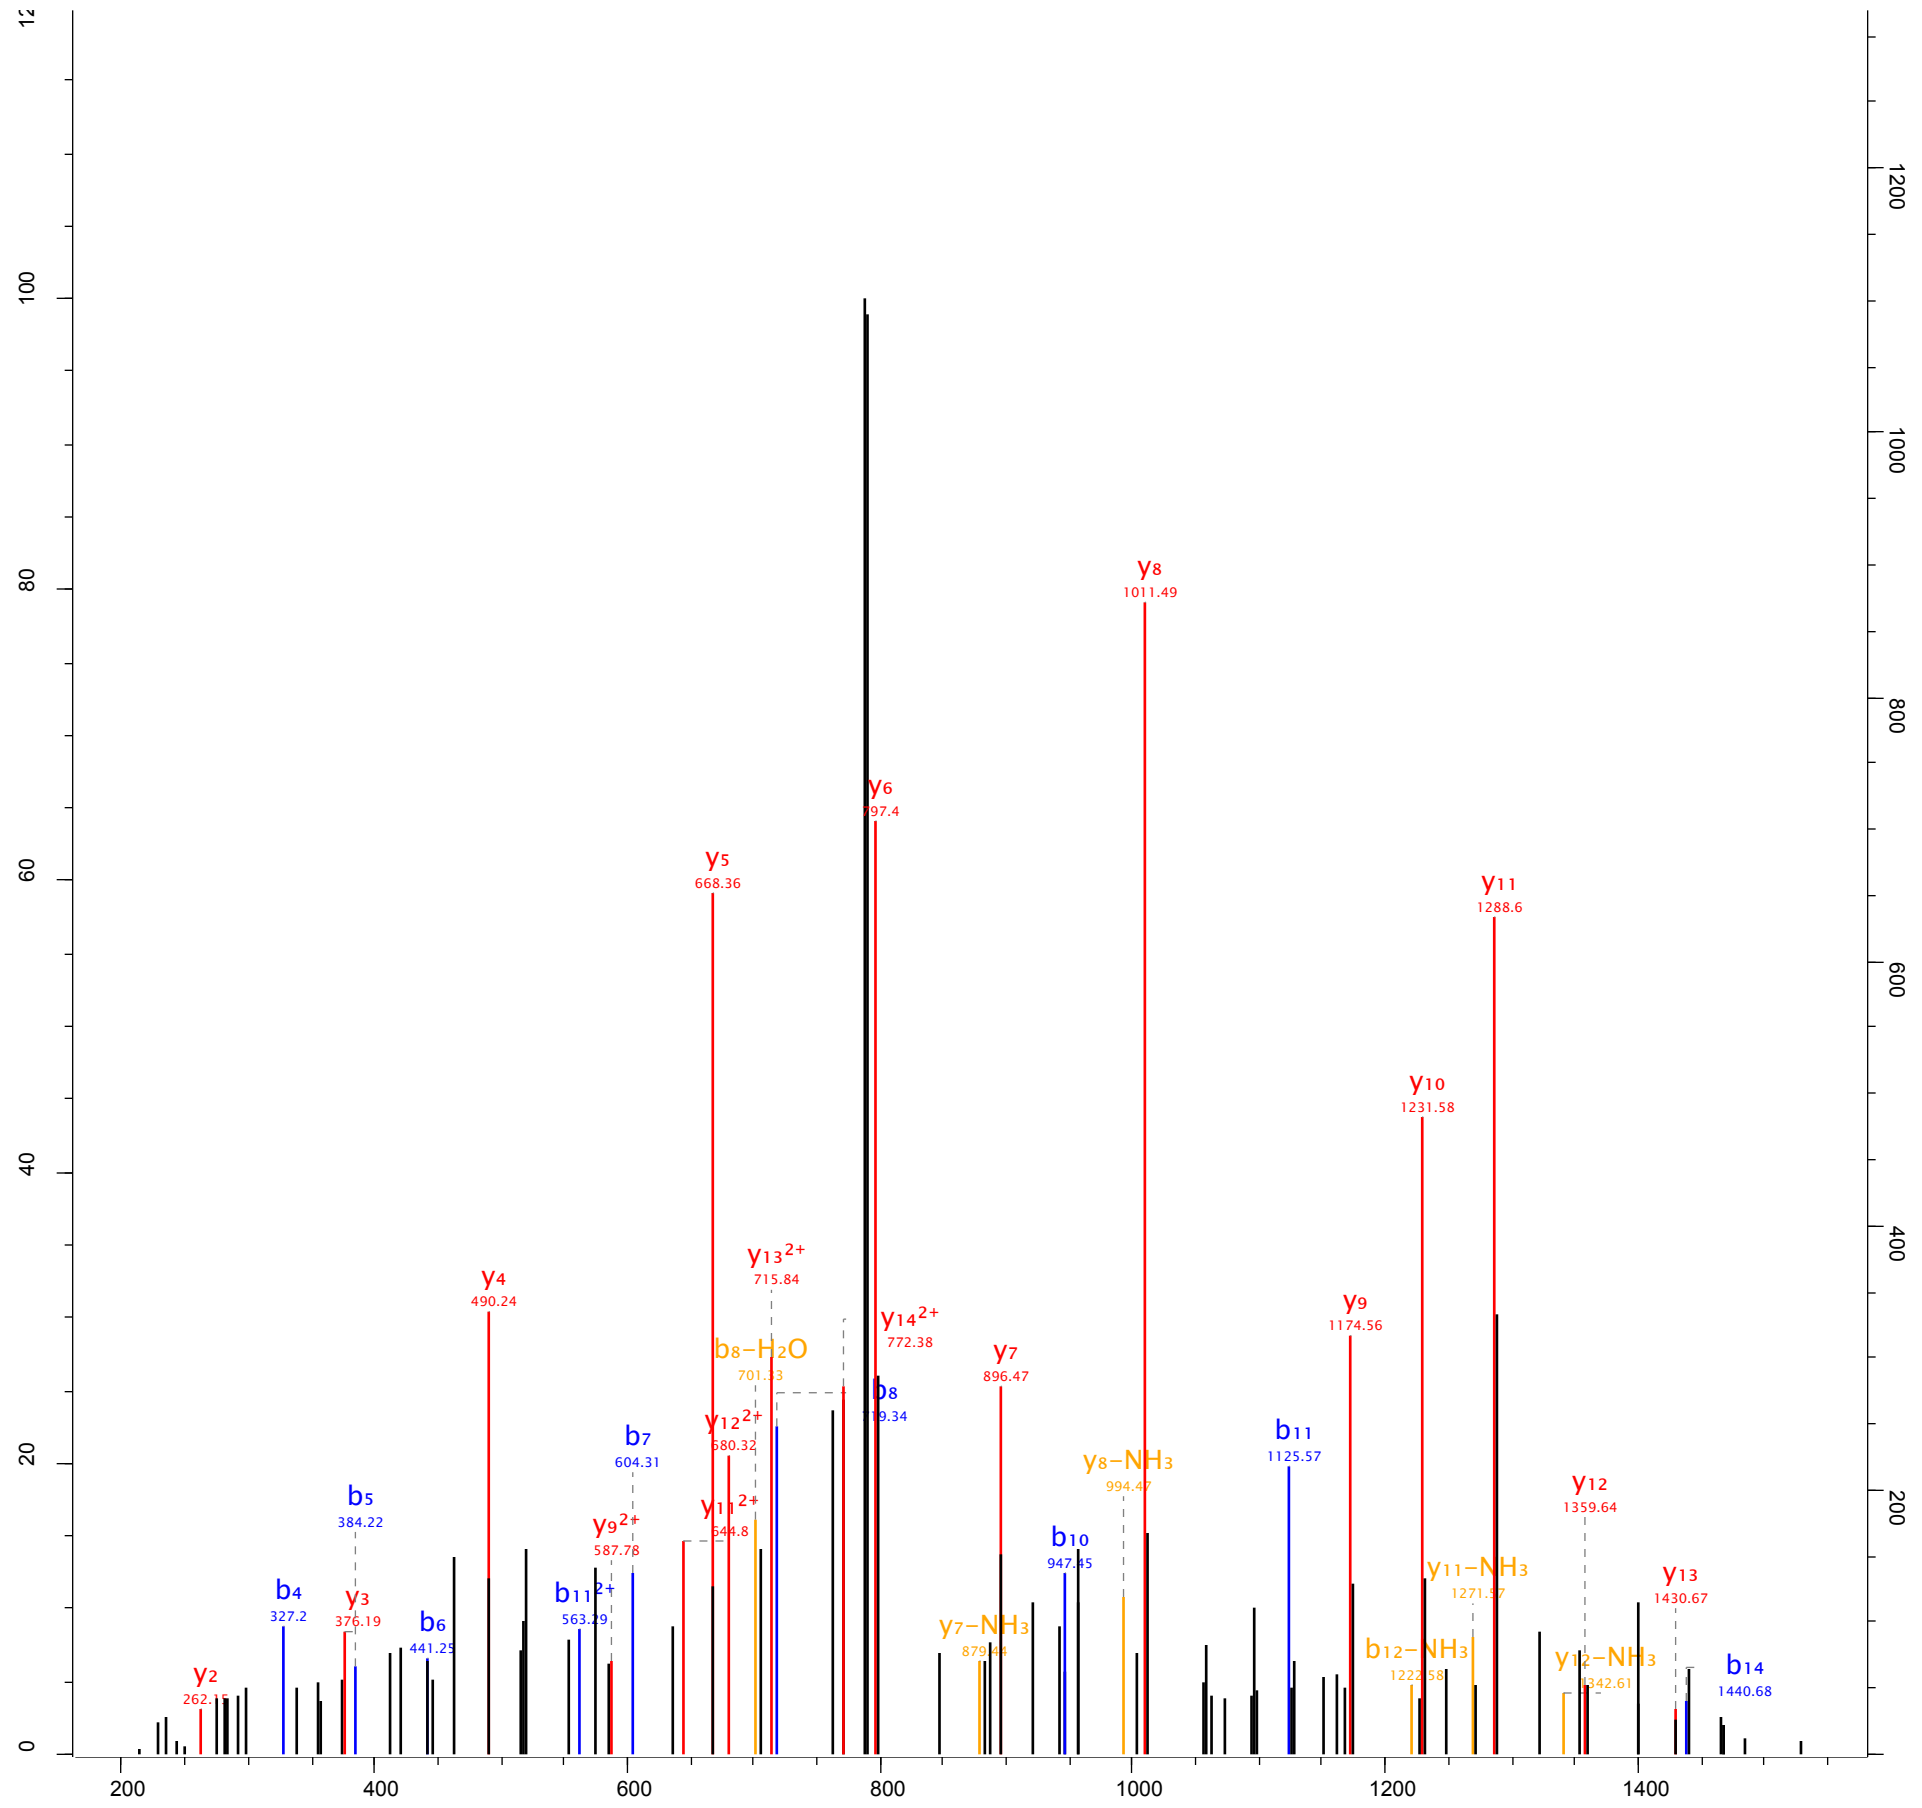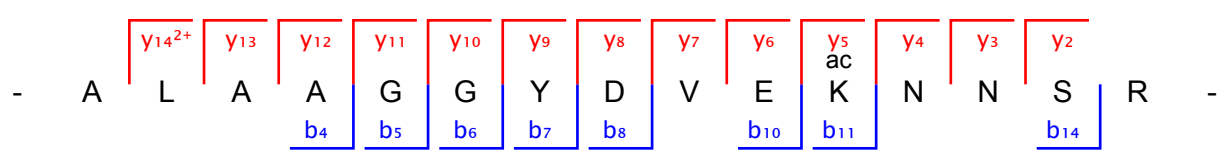

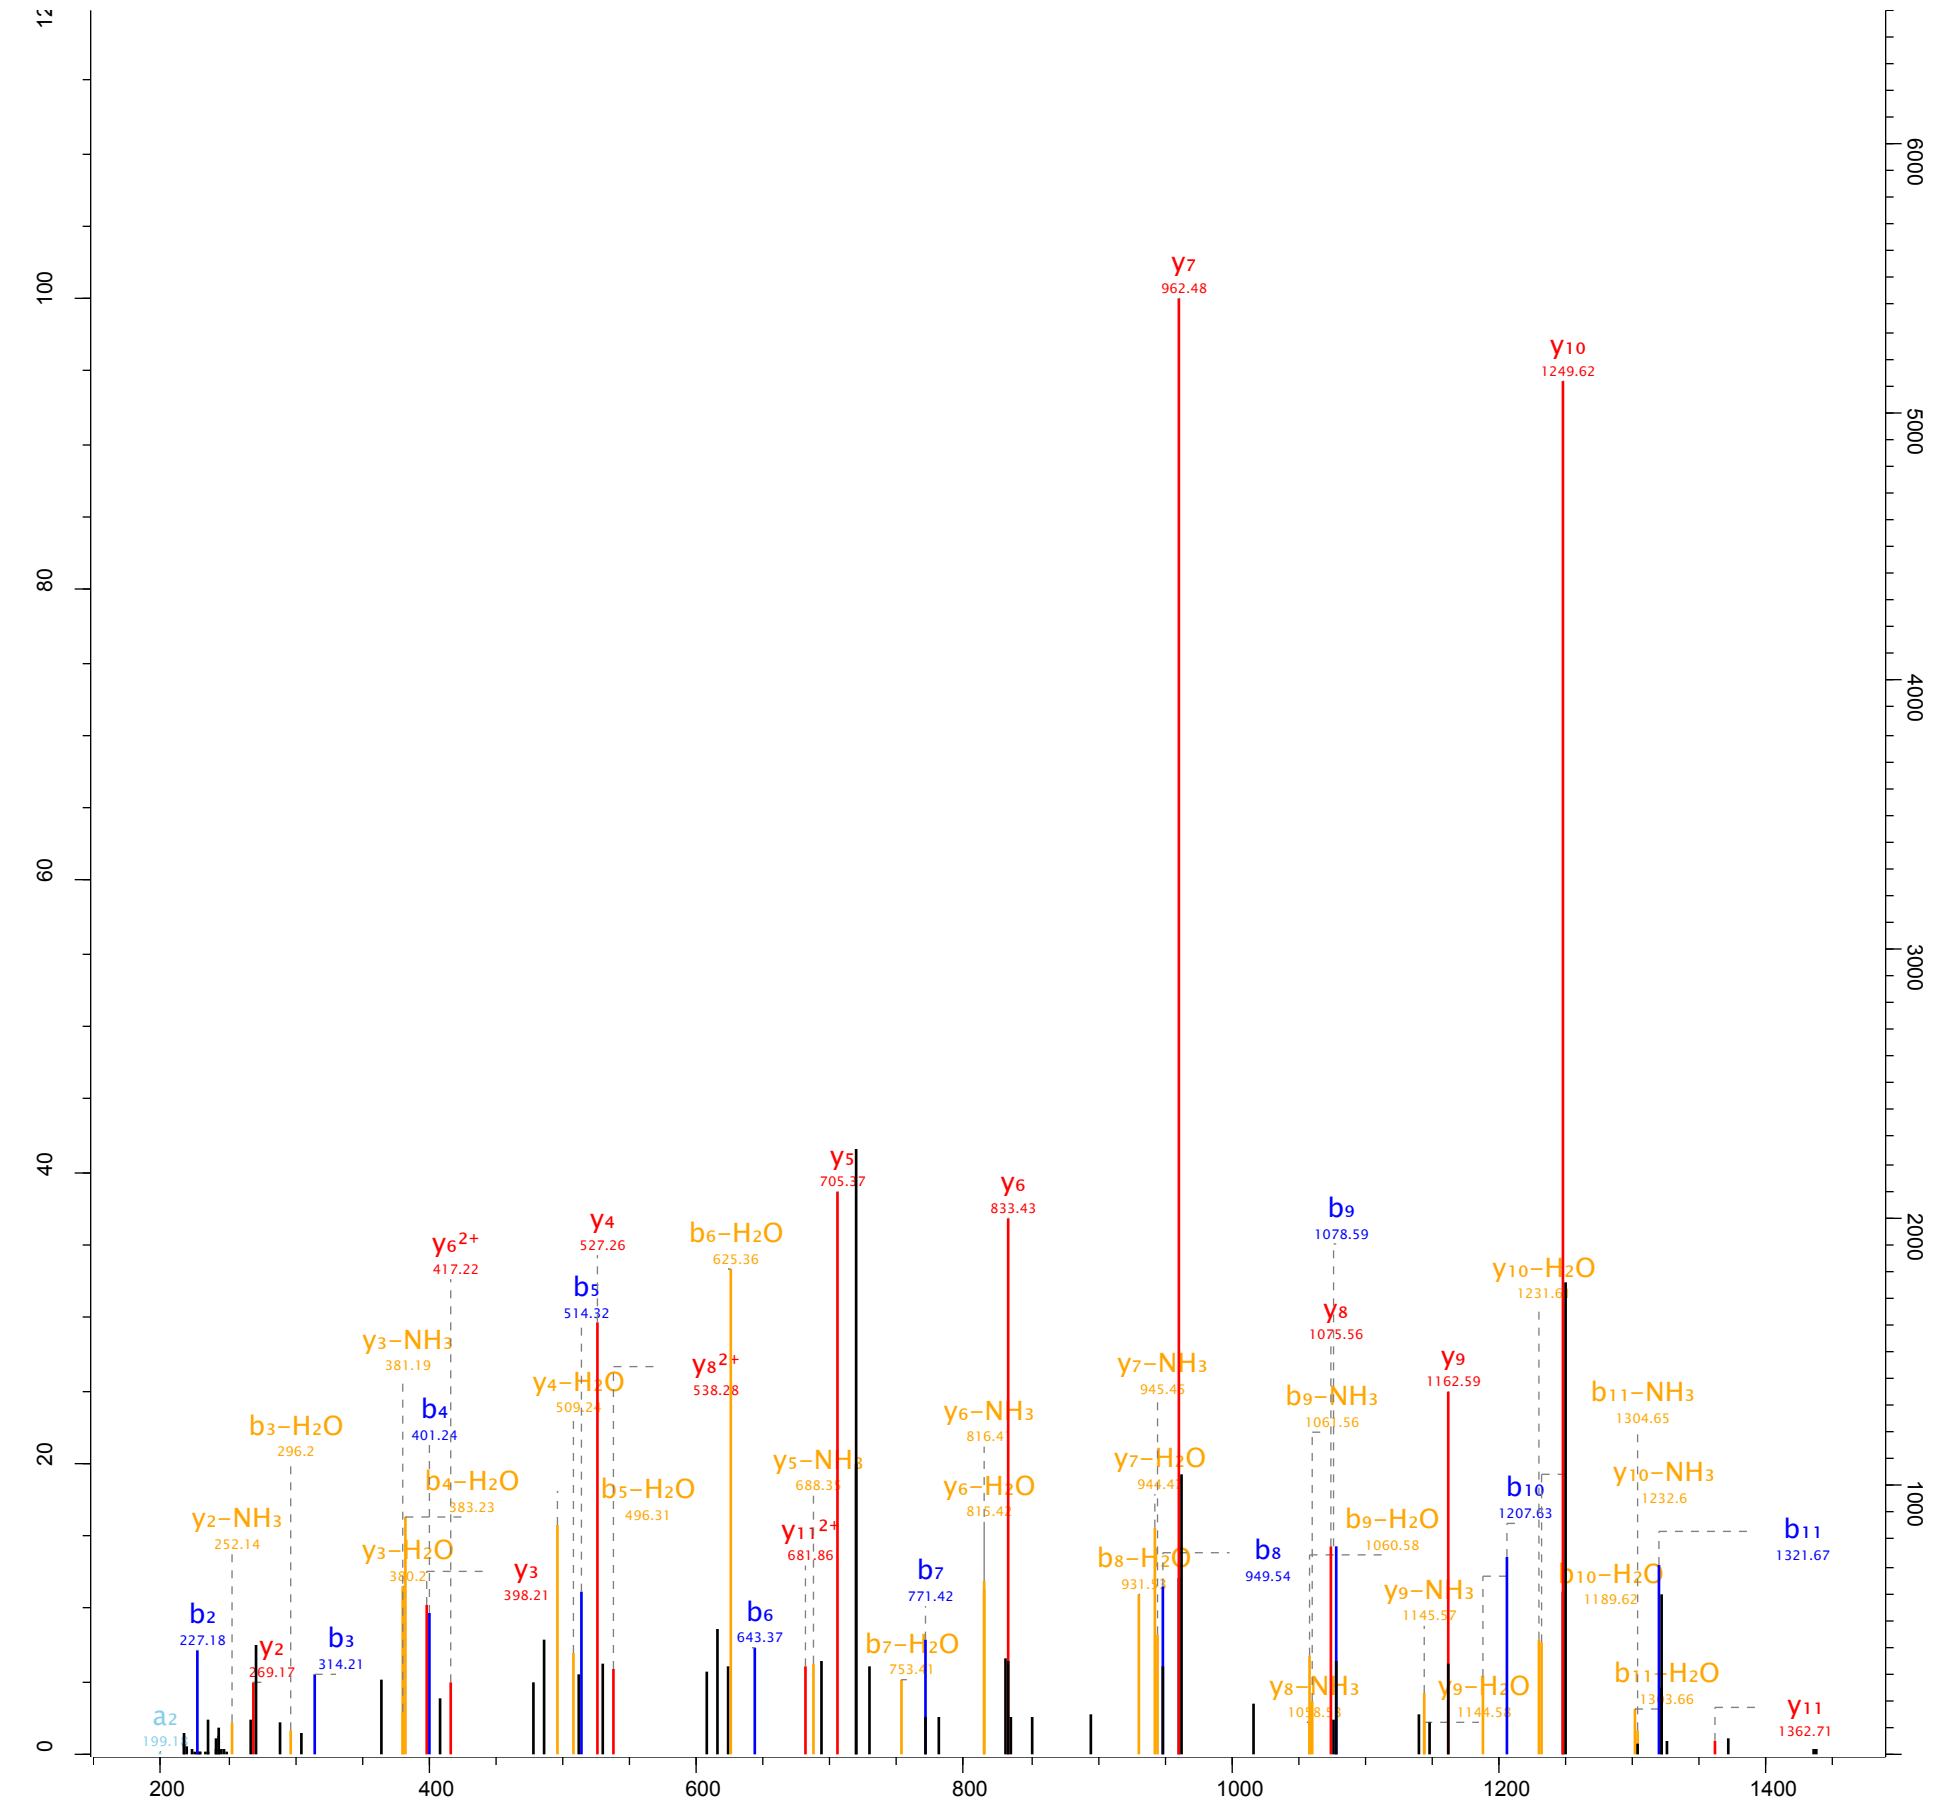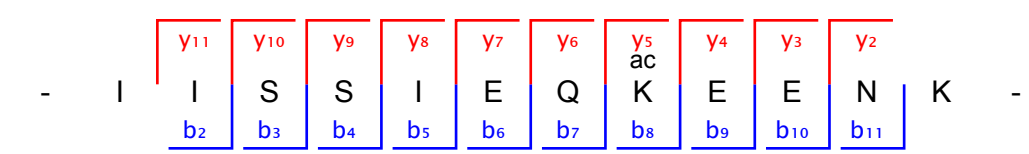

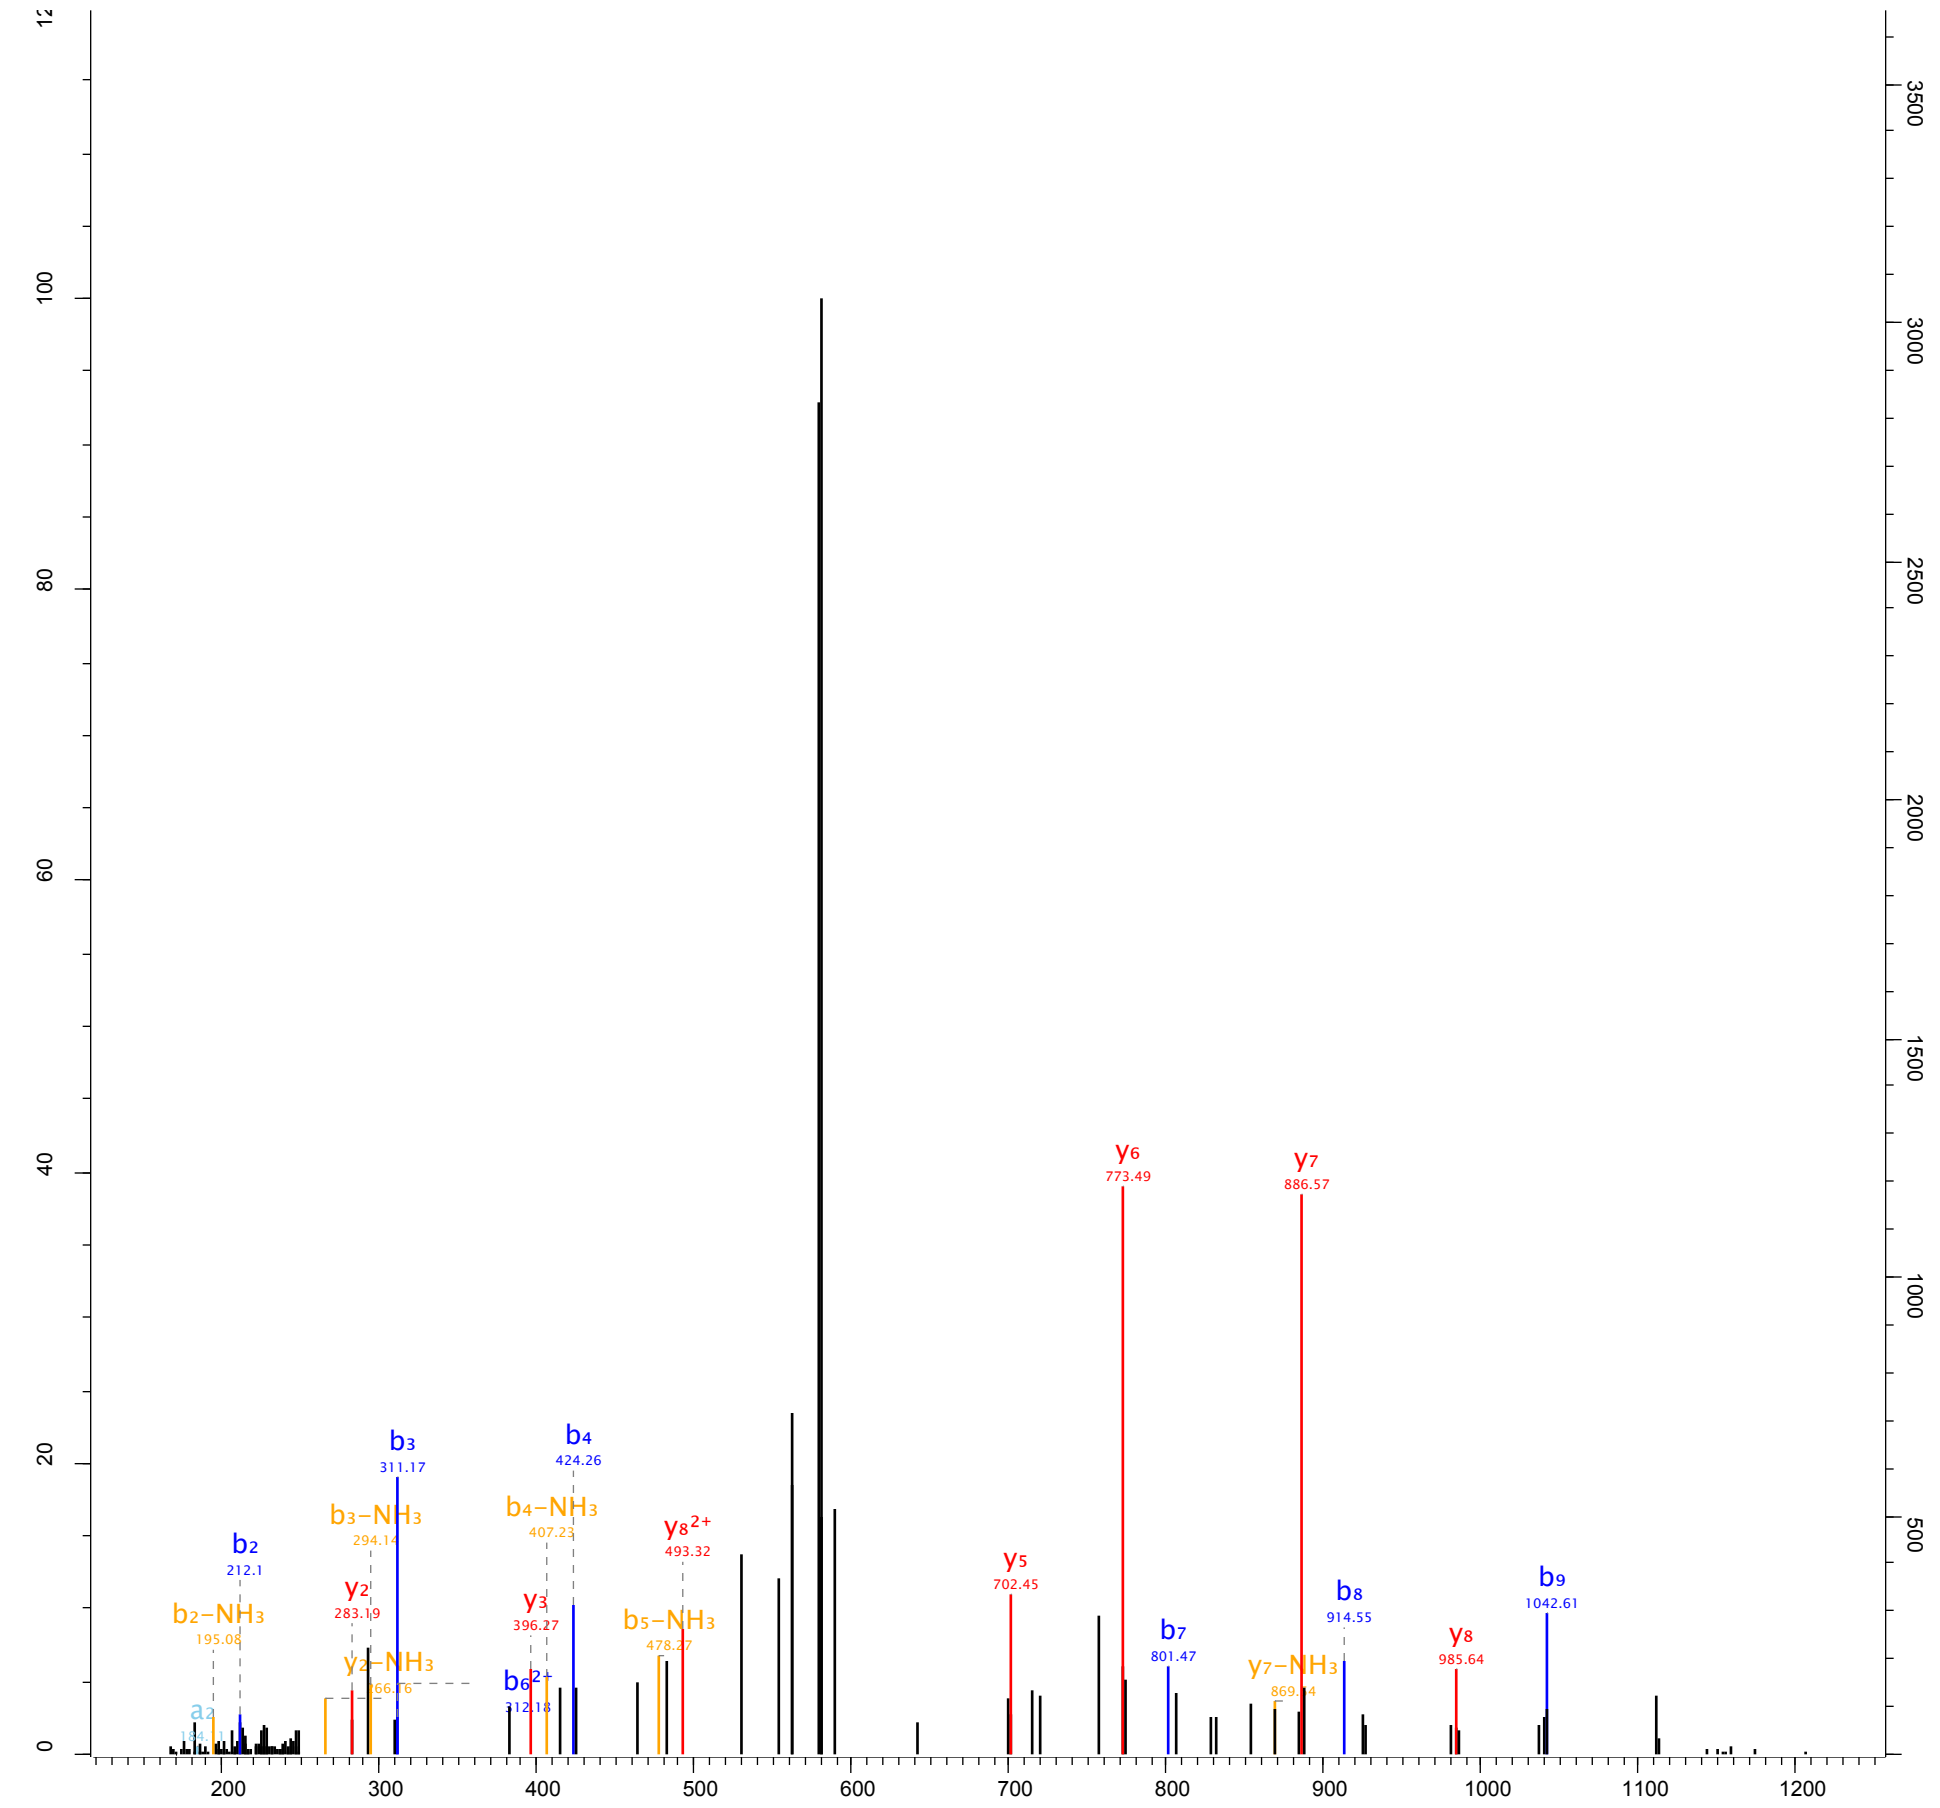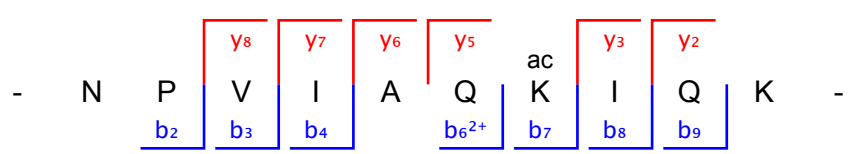

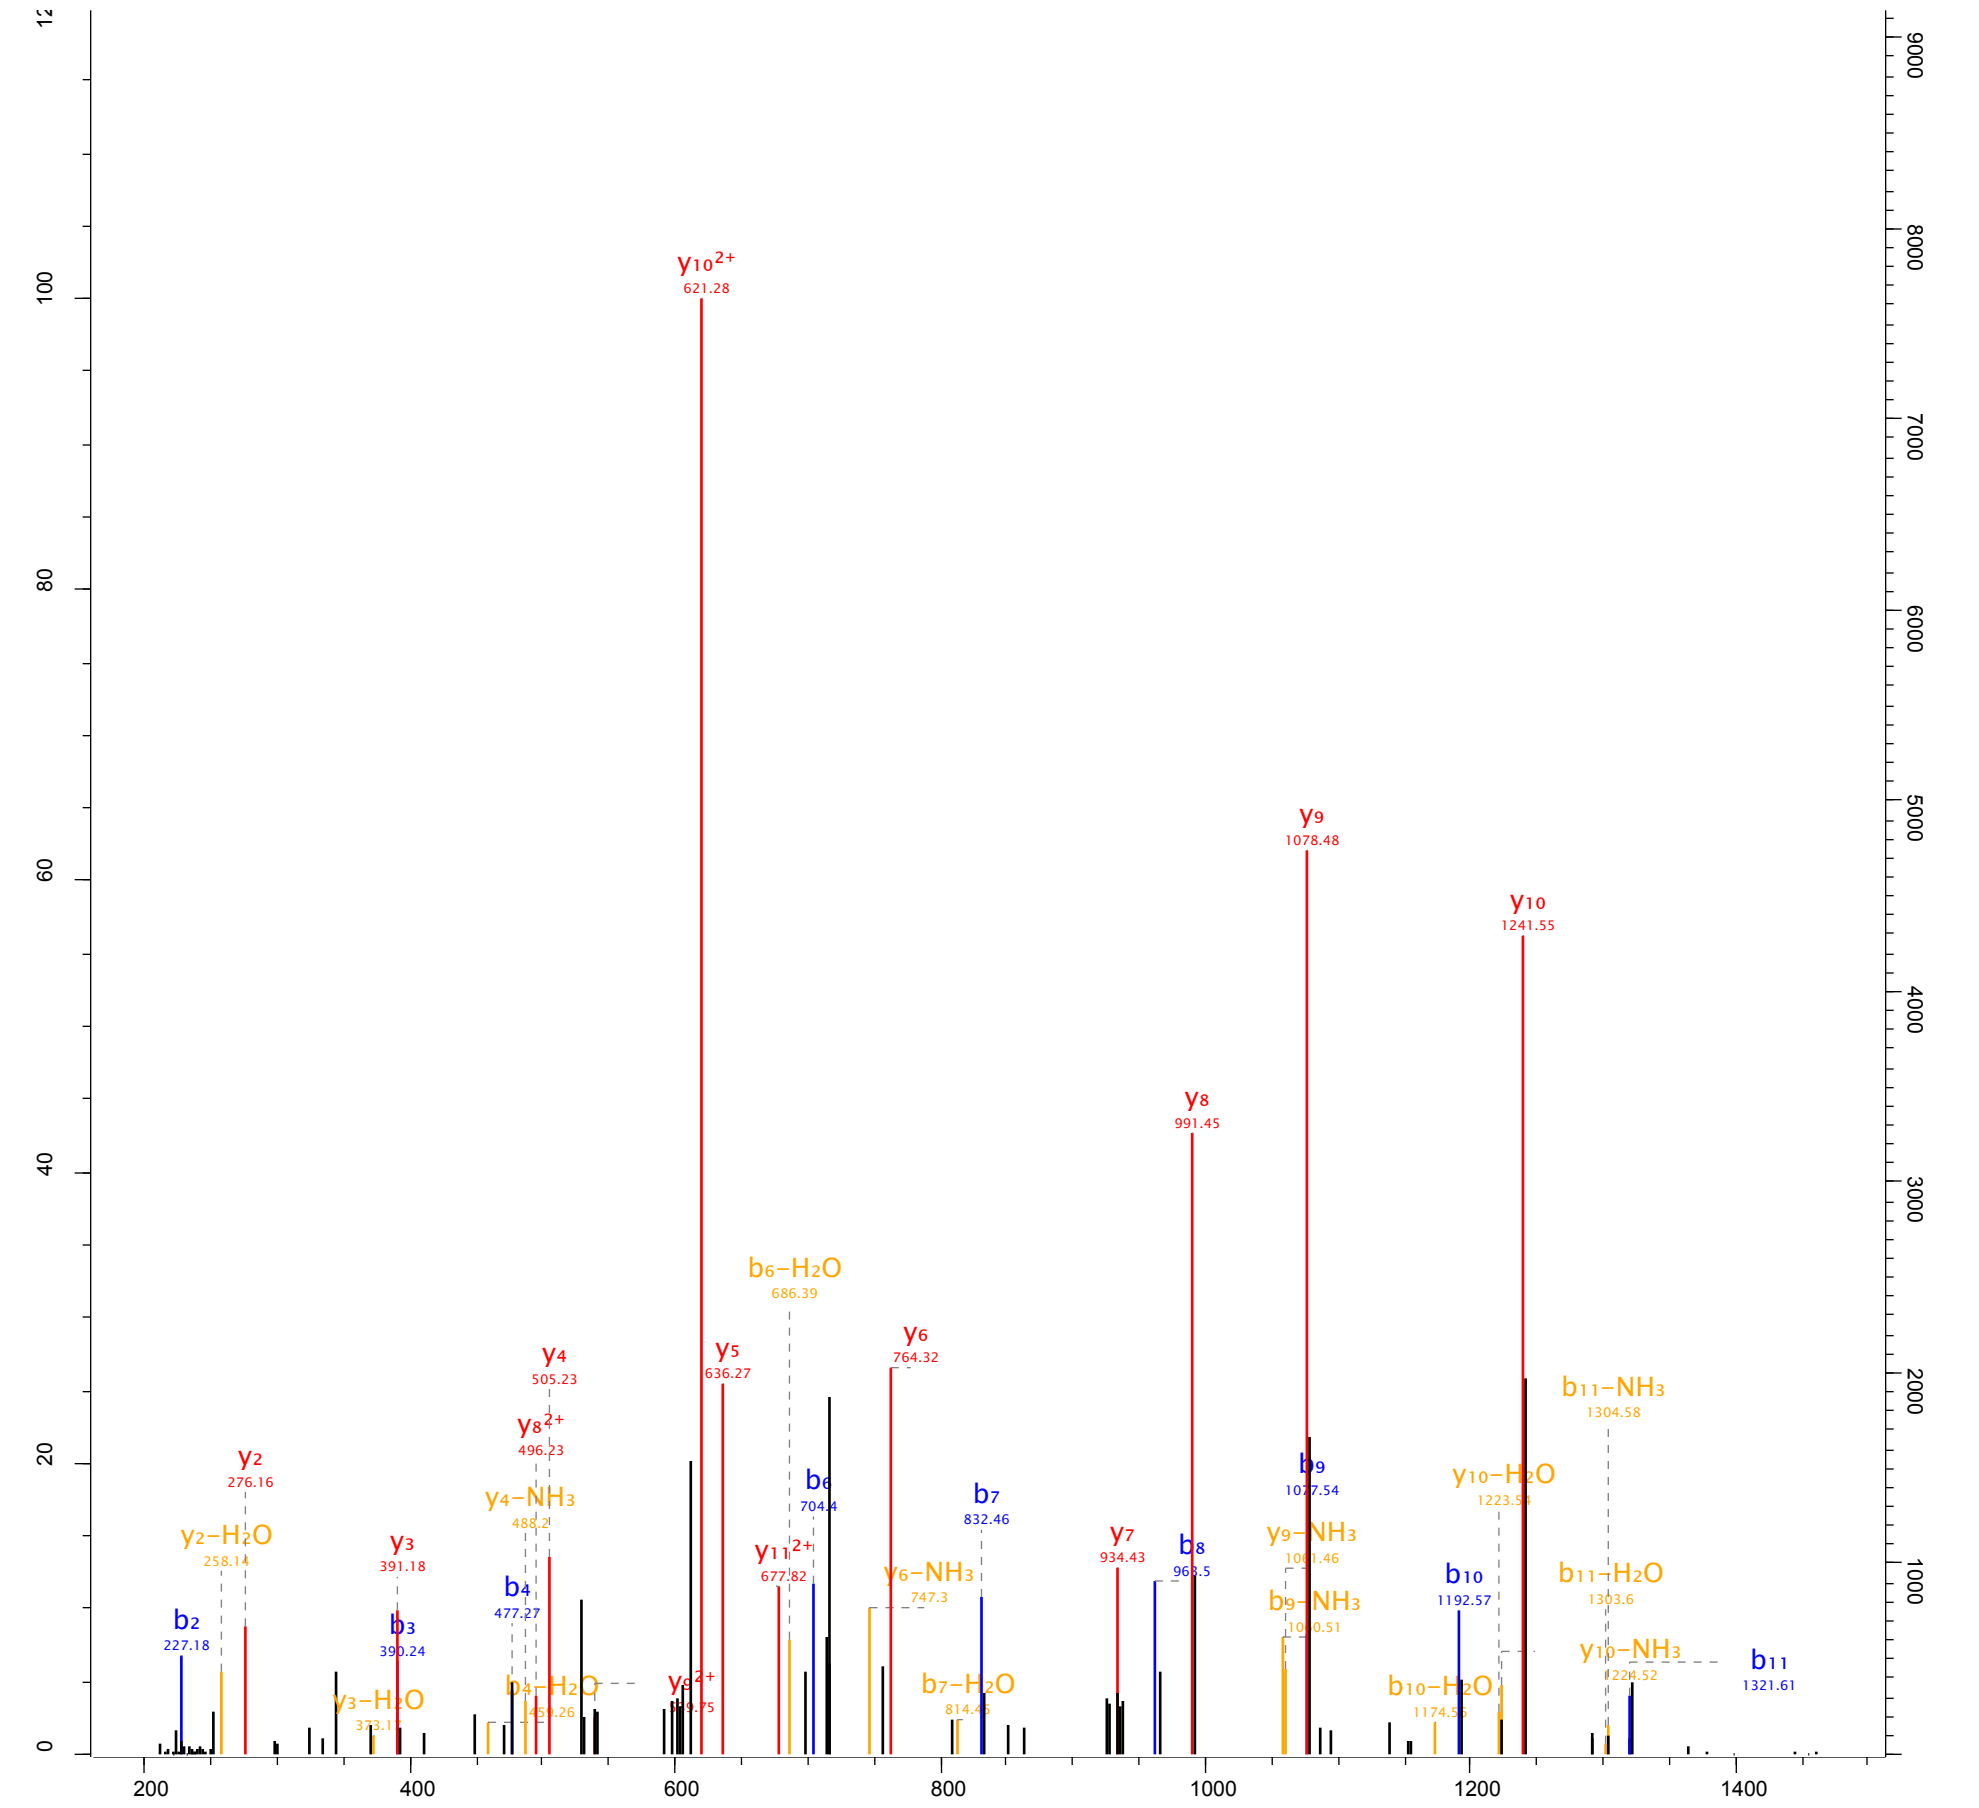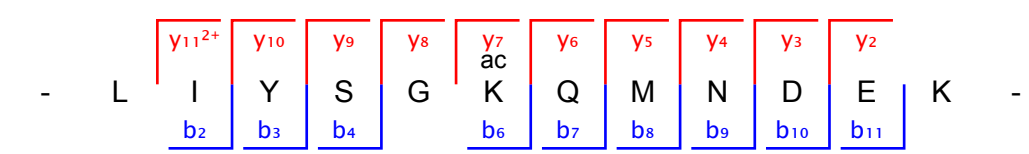

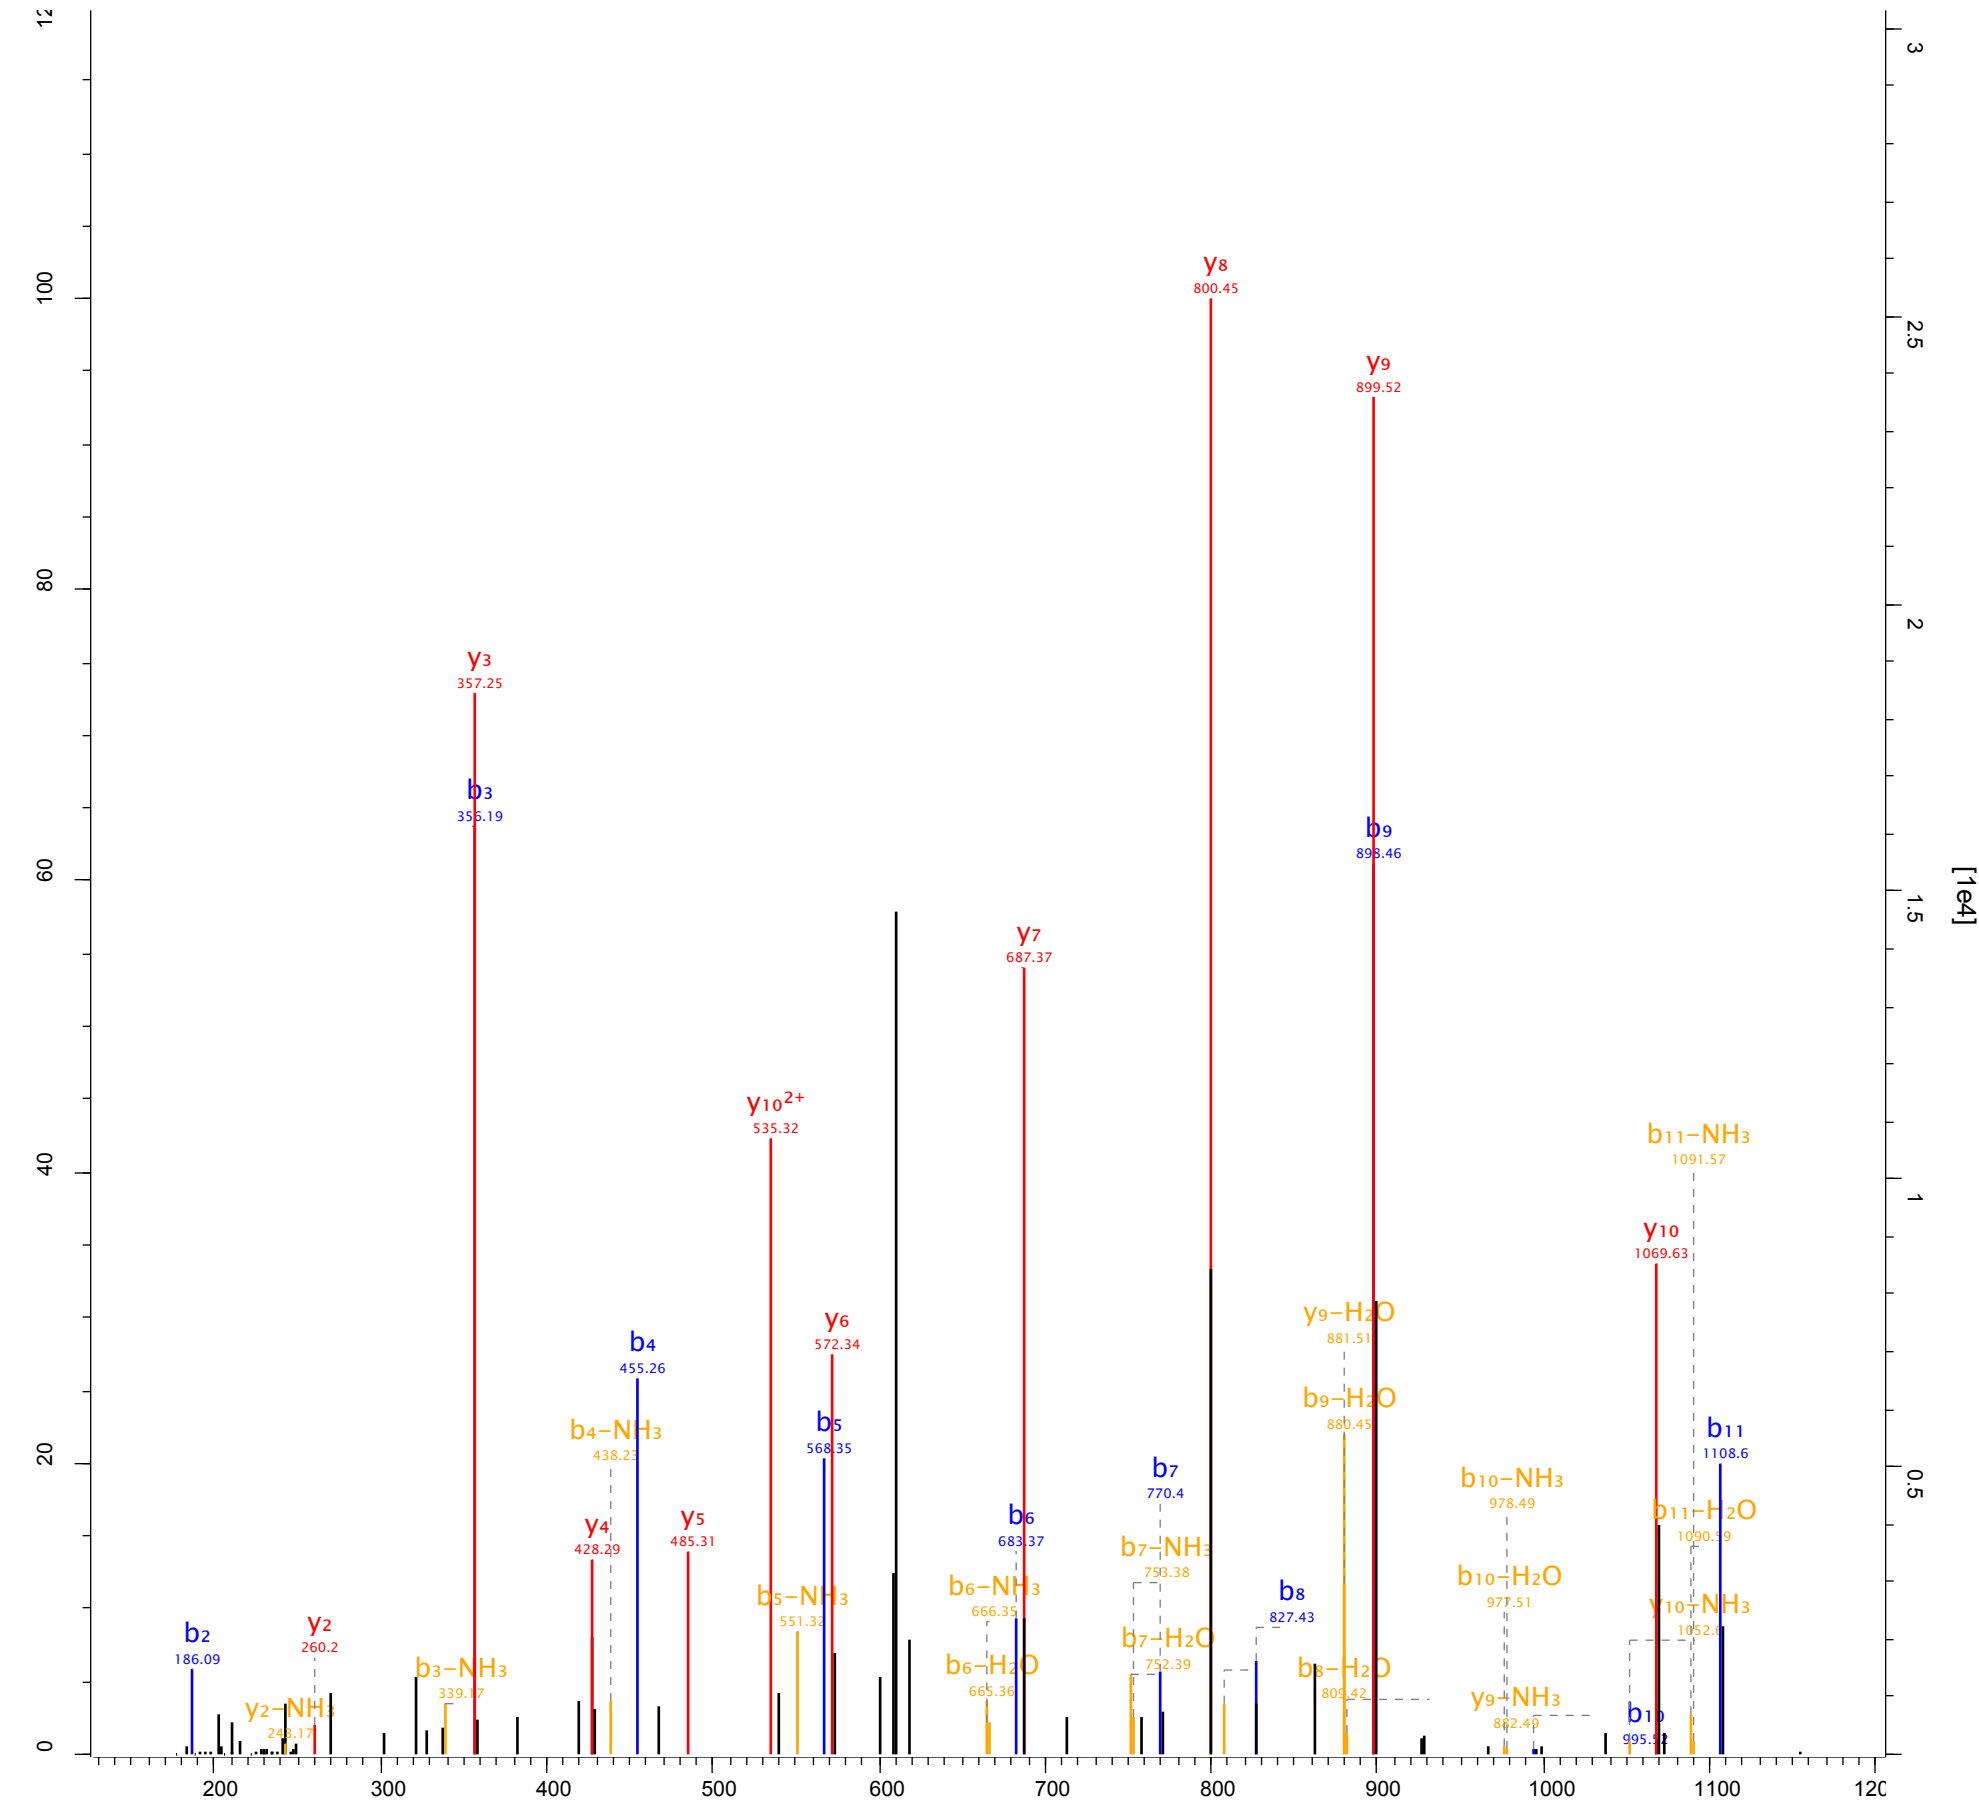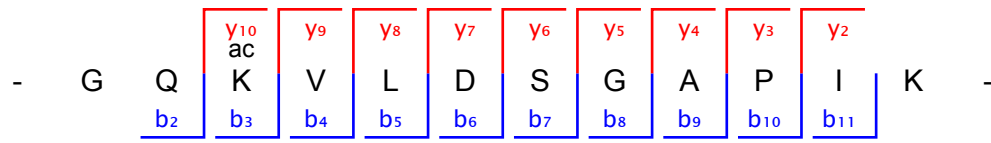

062513\_SCW\_II\_53\_4\_Vargas\_Enriched

14904

ITMS; CID

201.3

711.82

Hadh

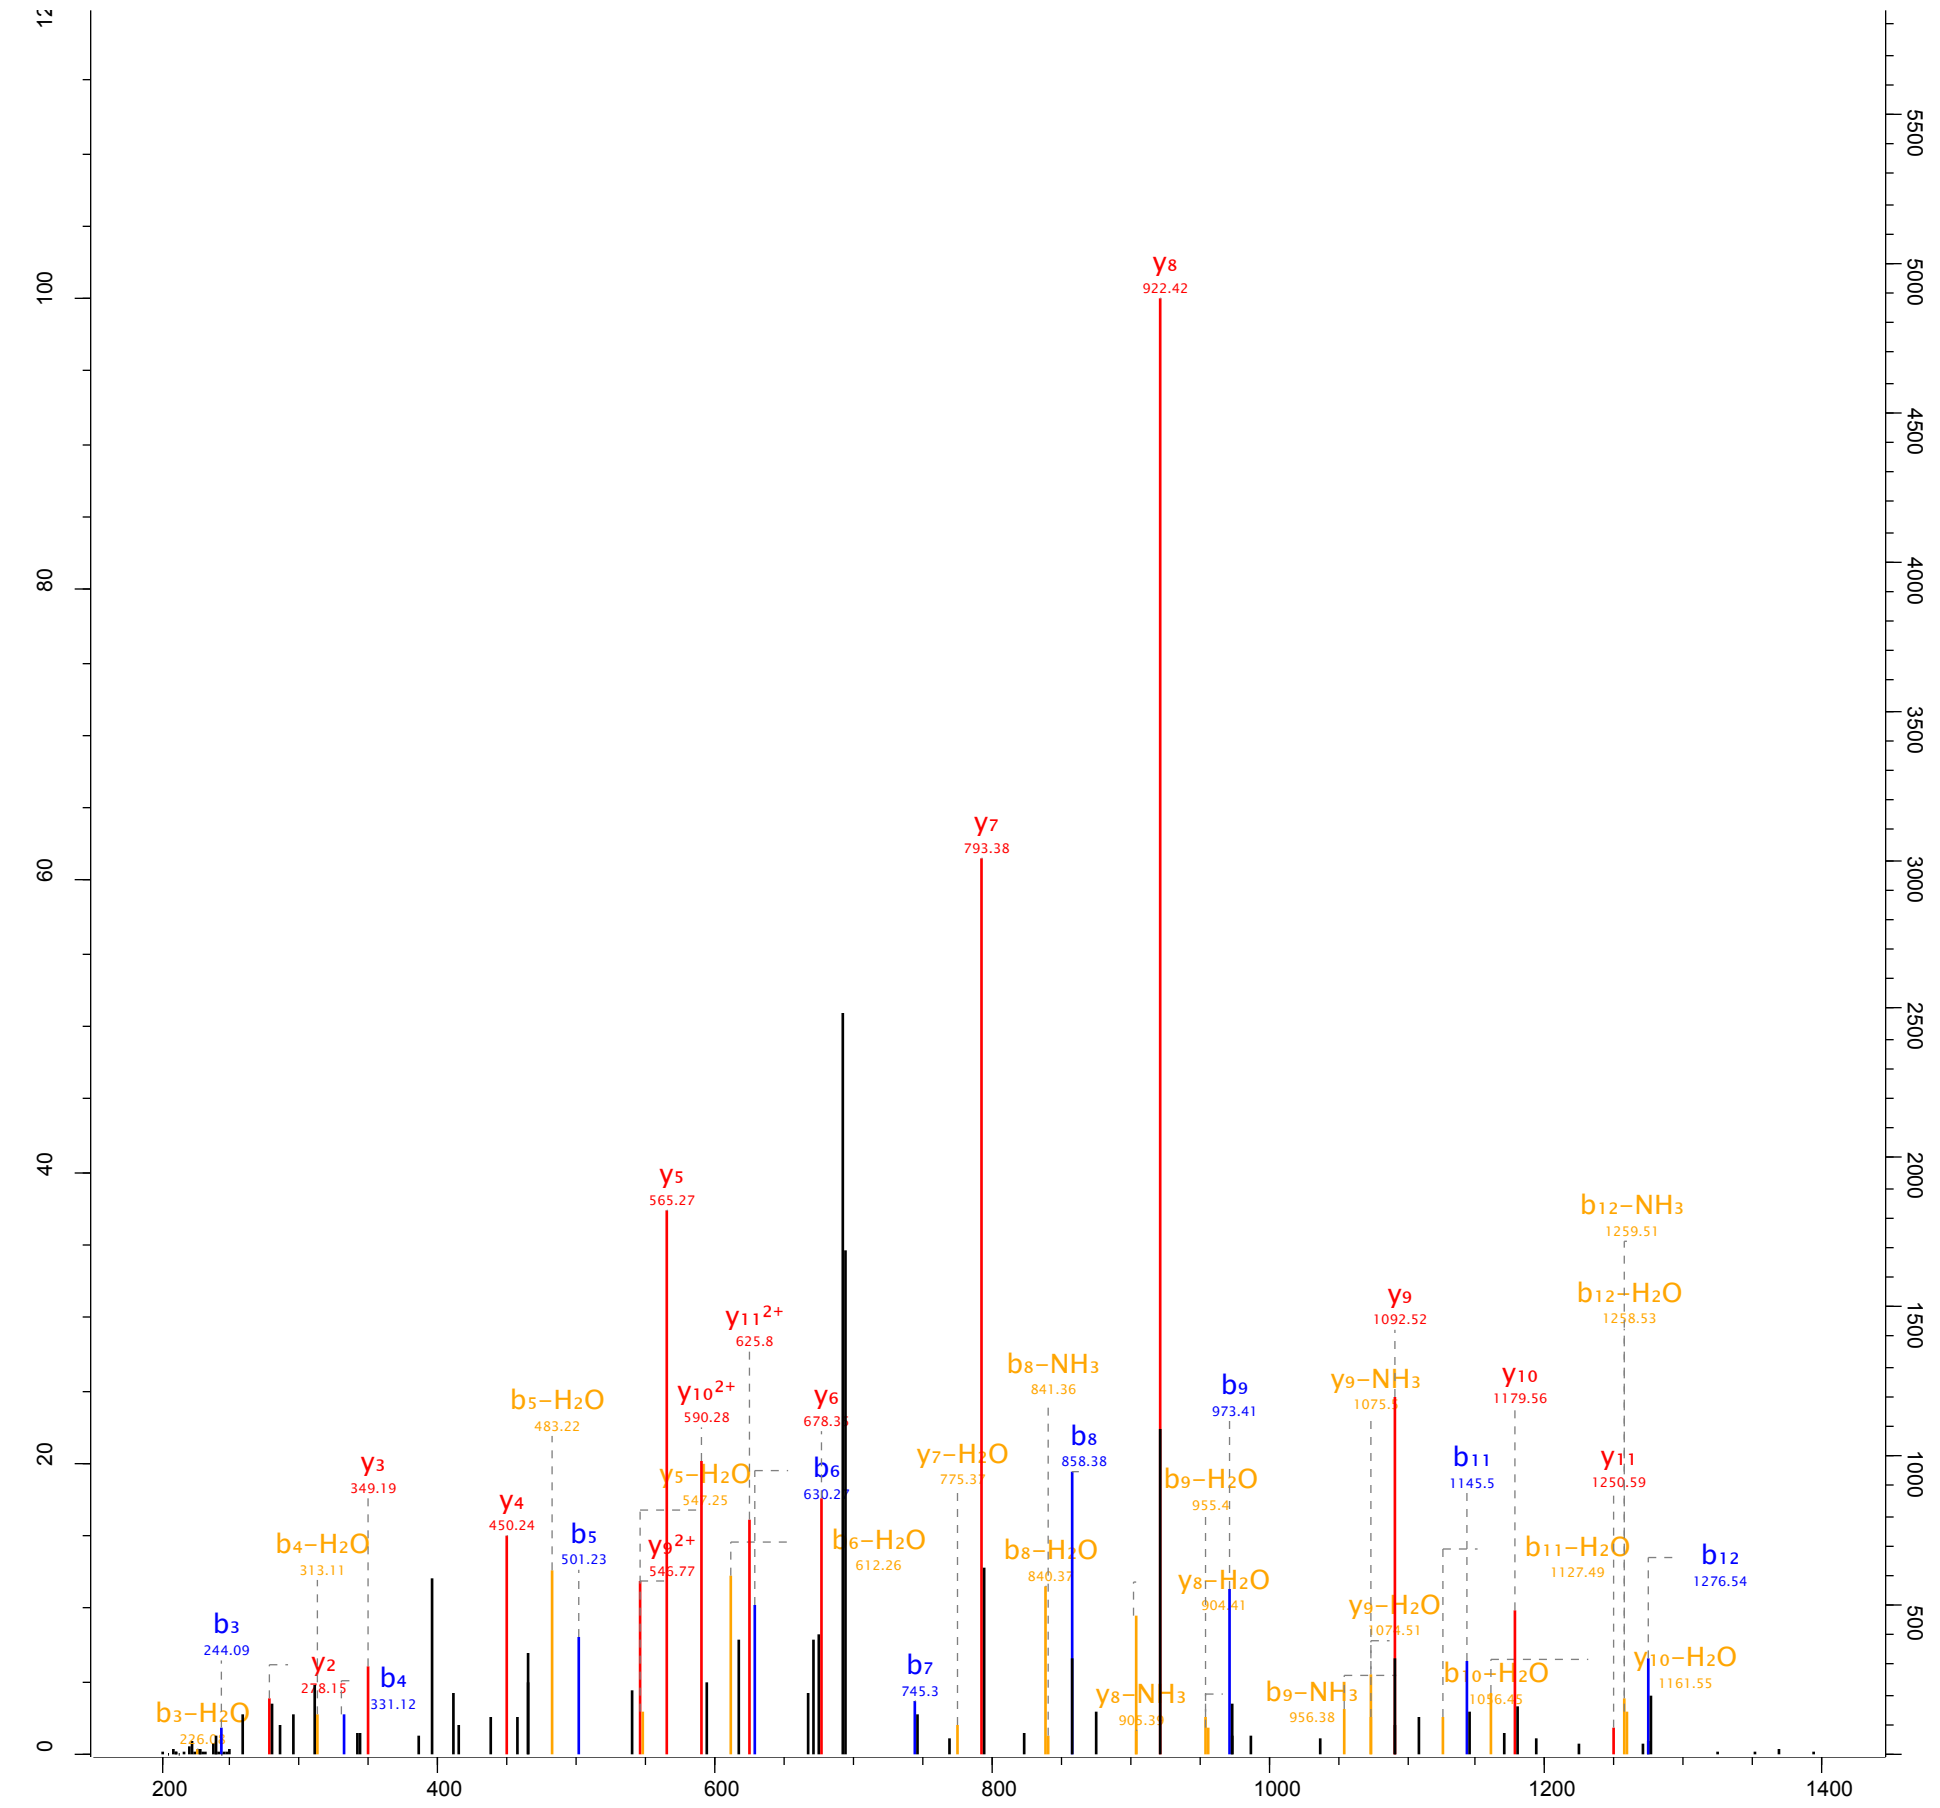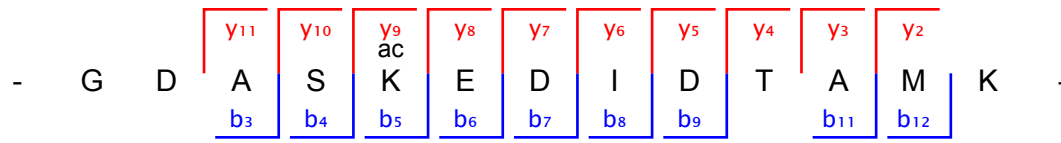

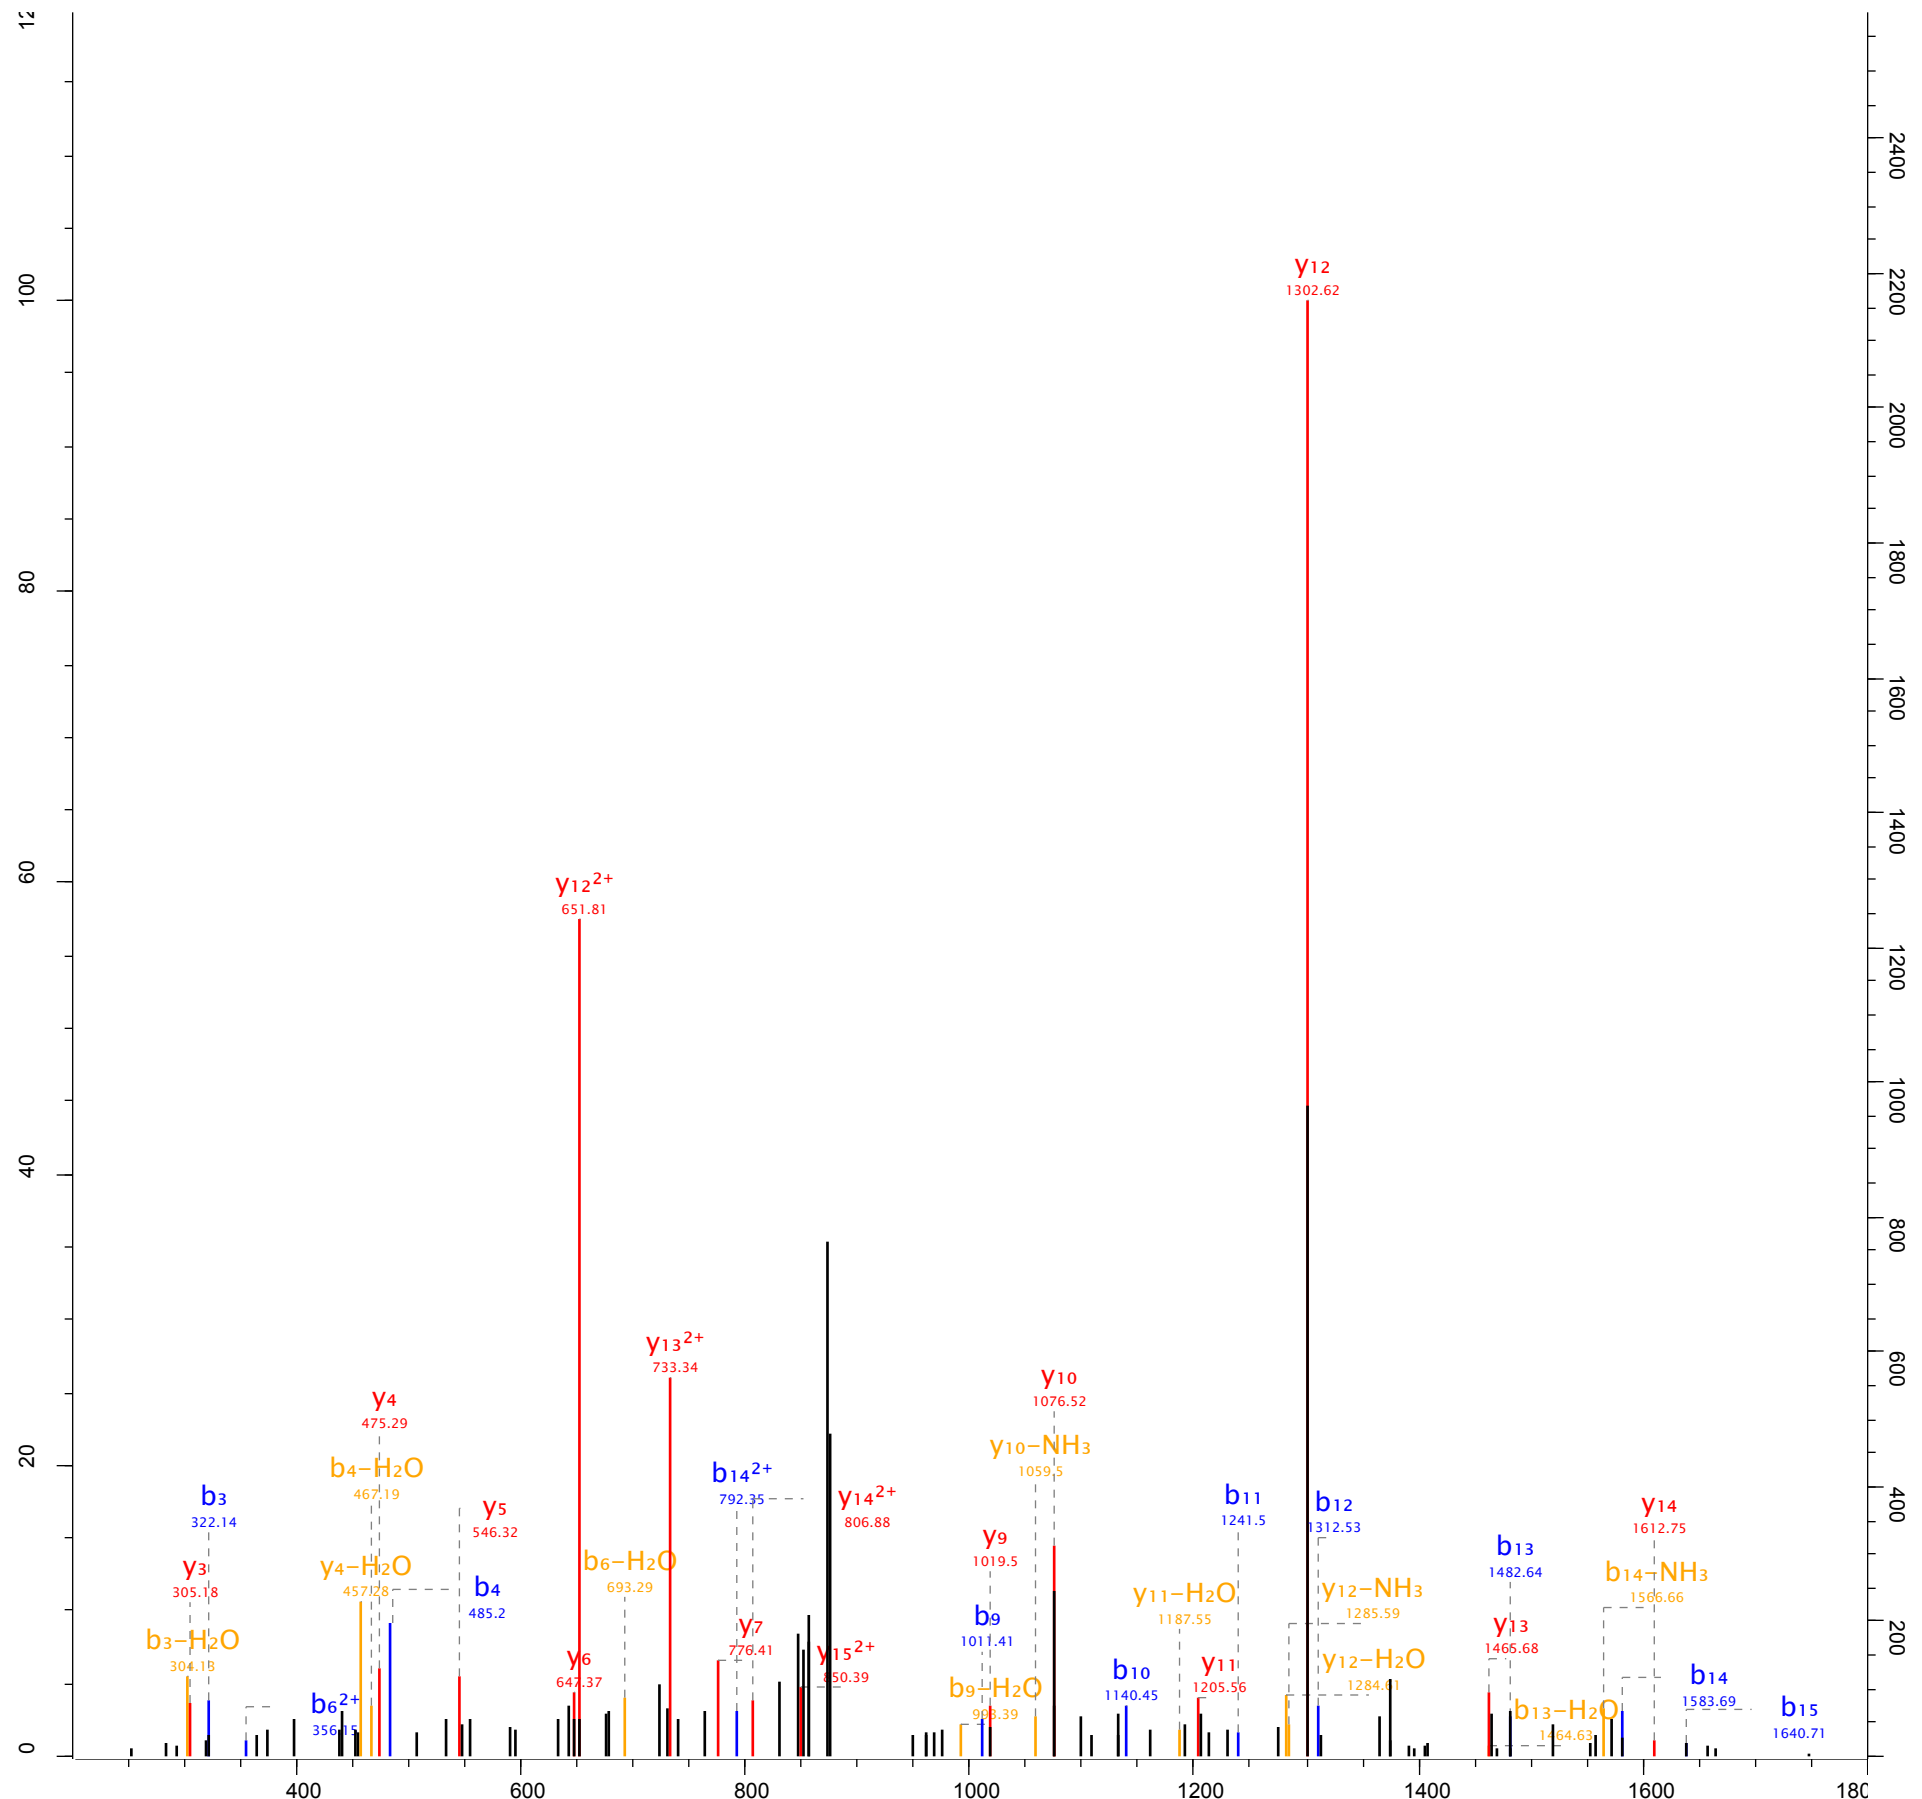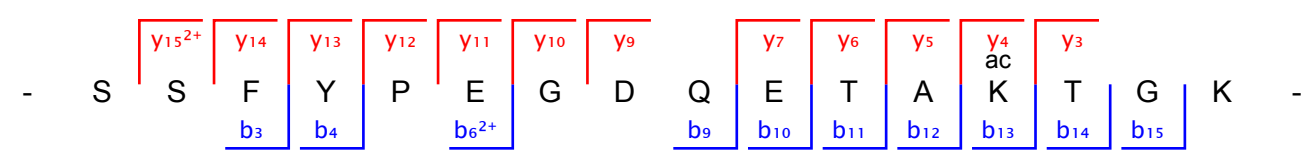

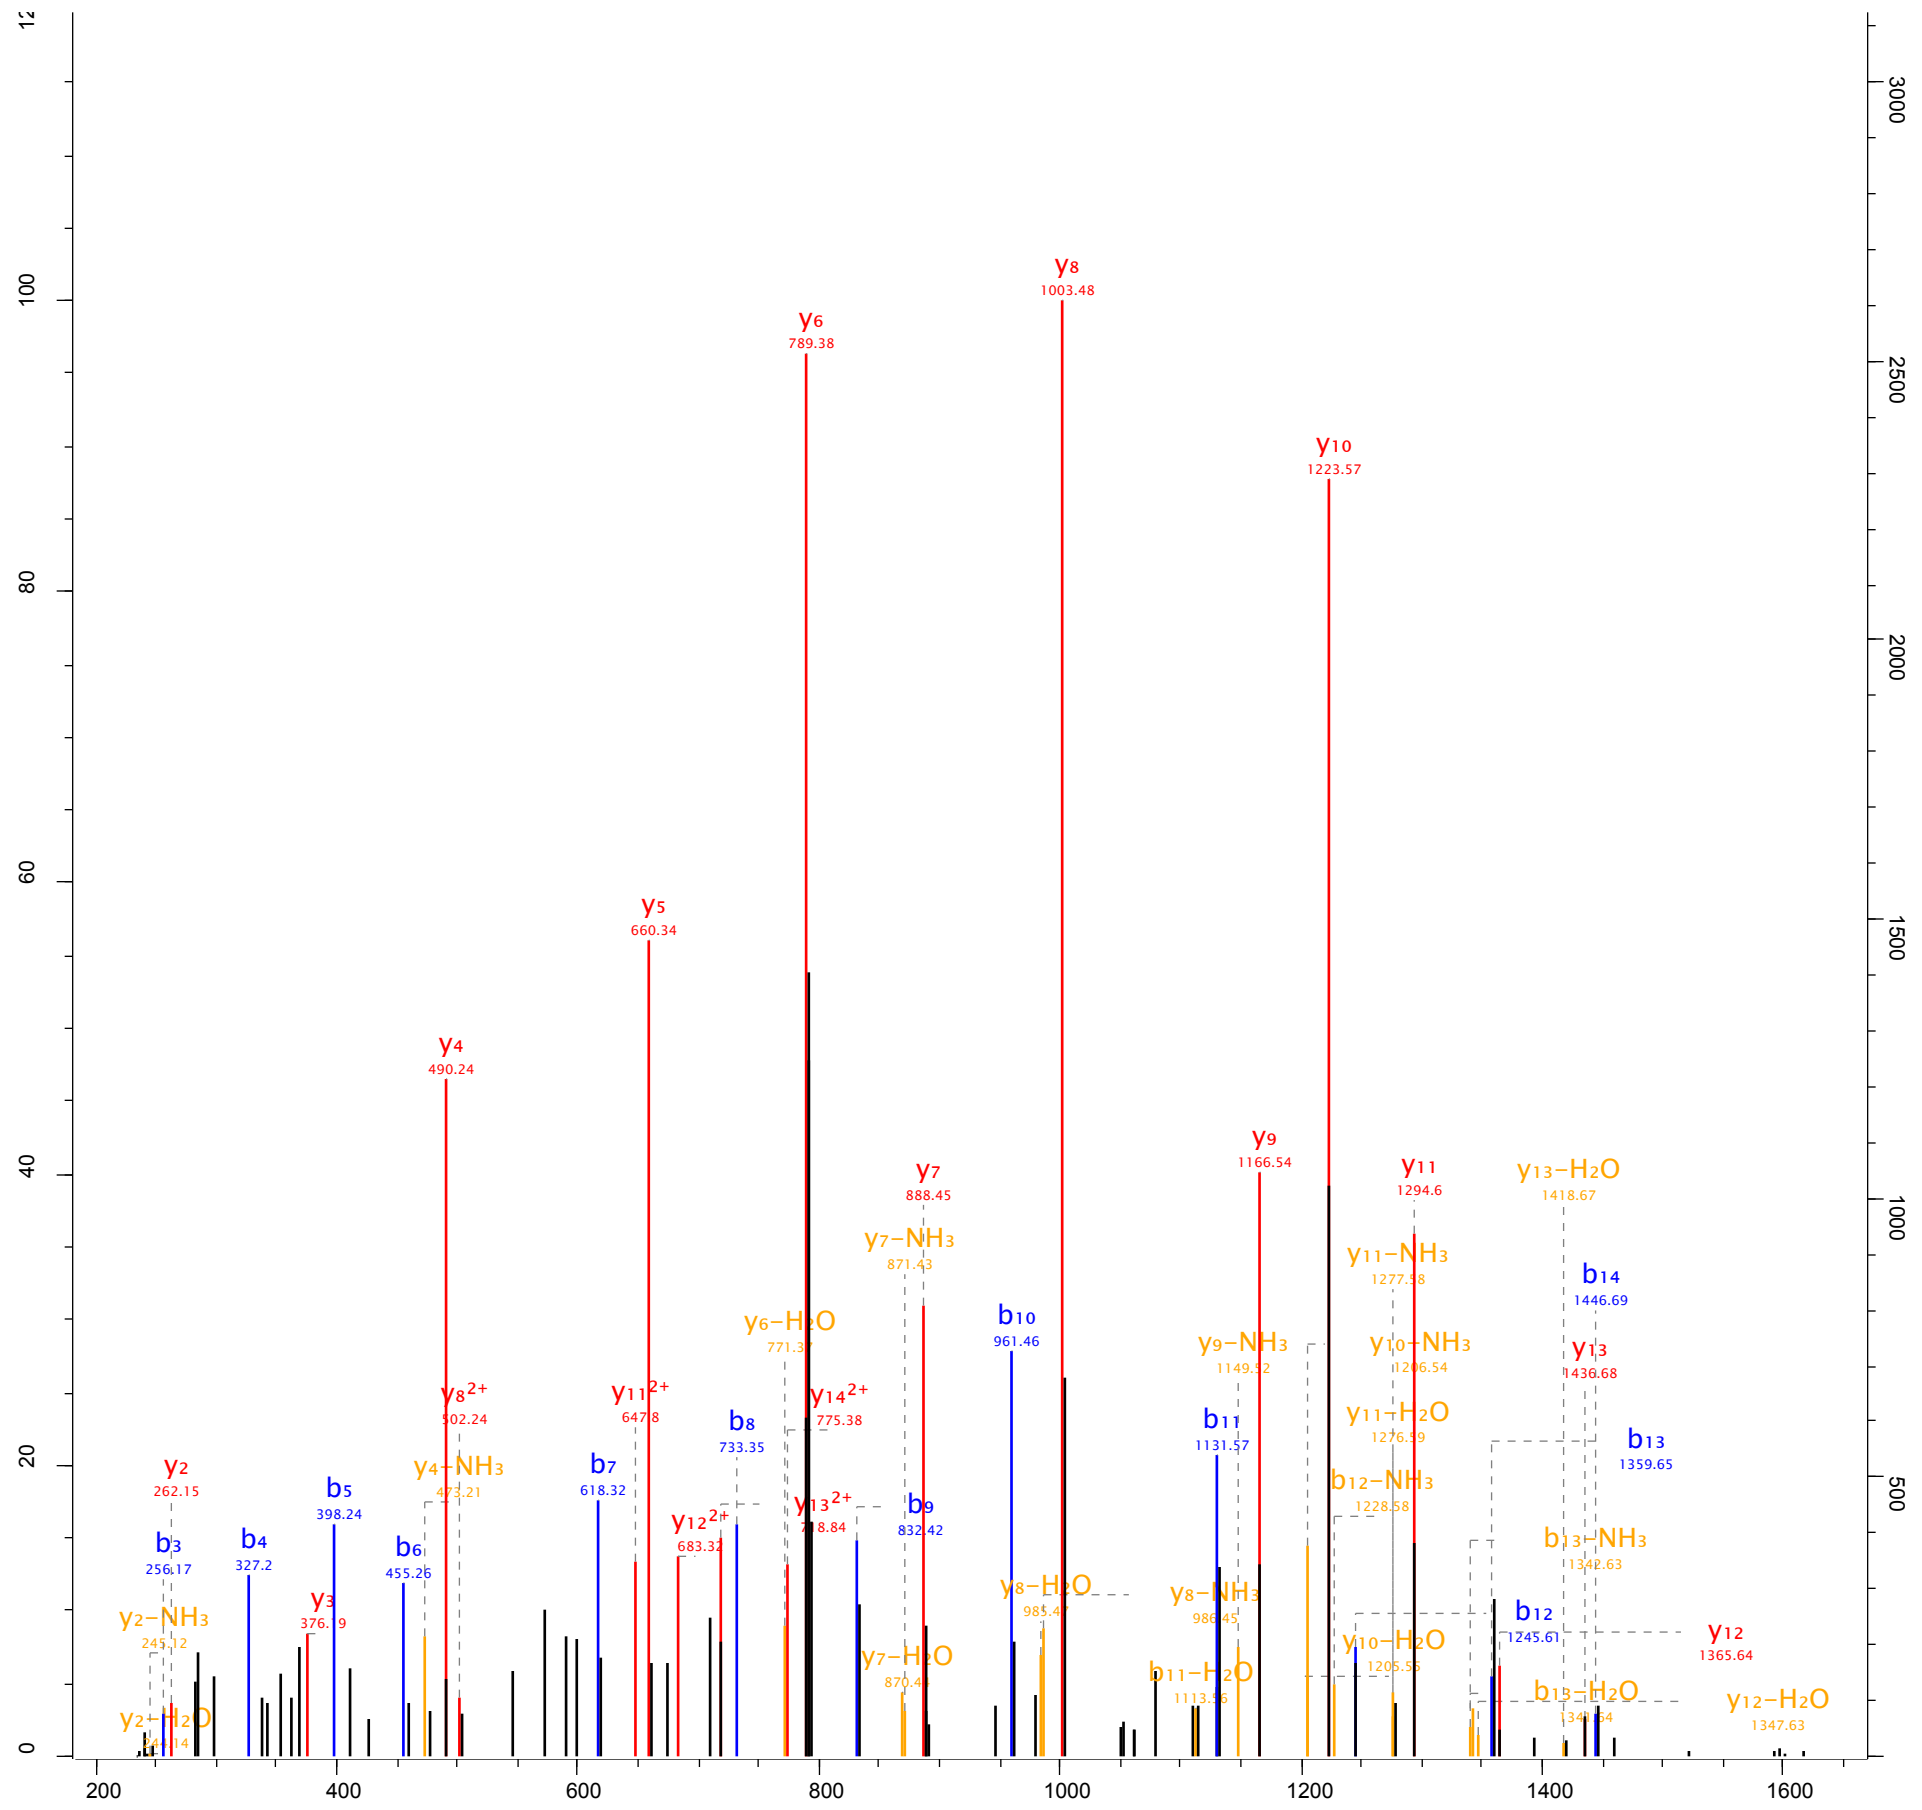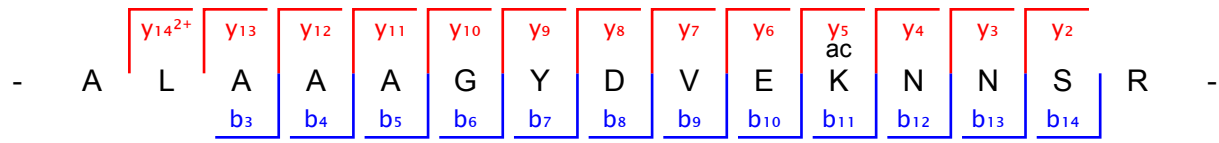



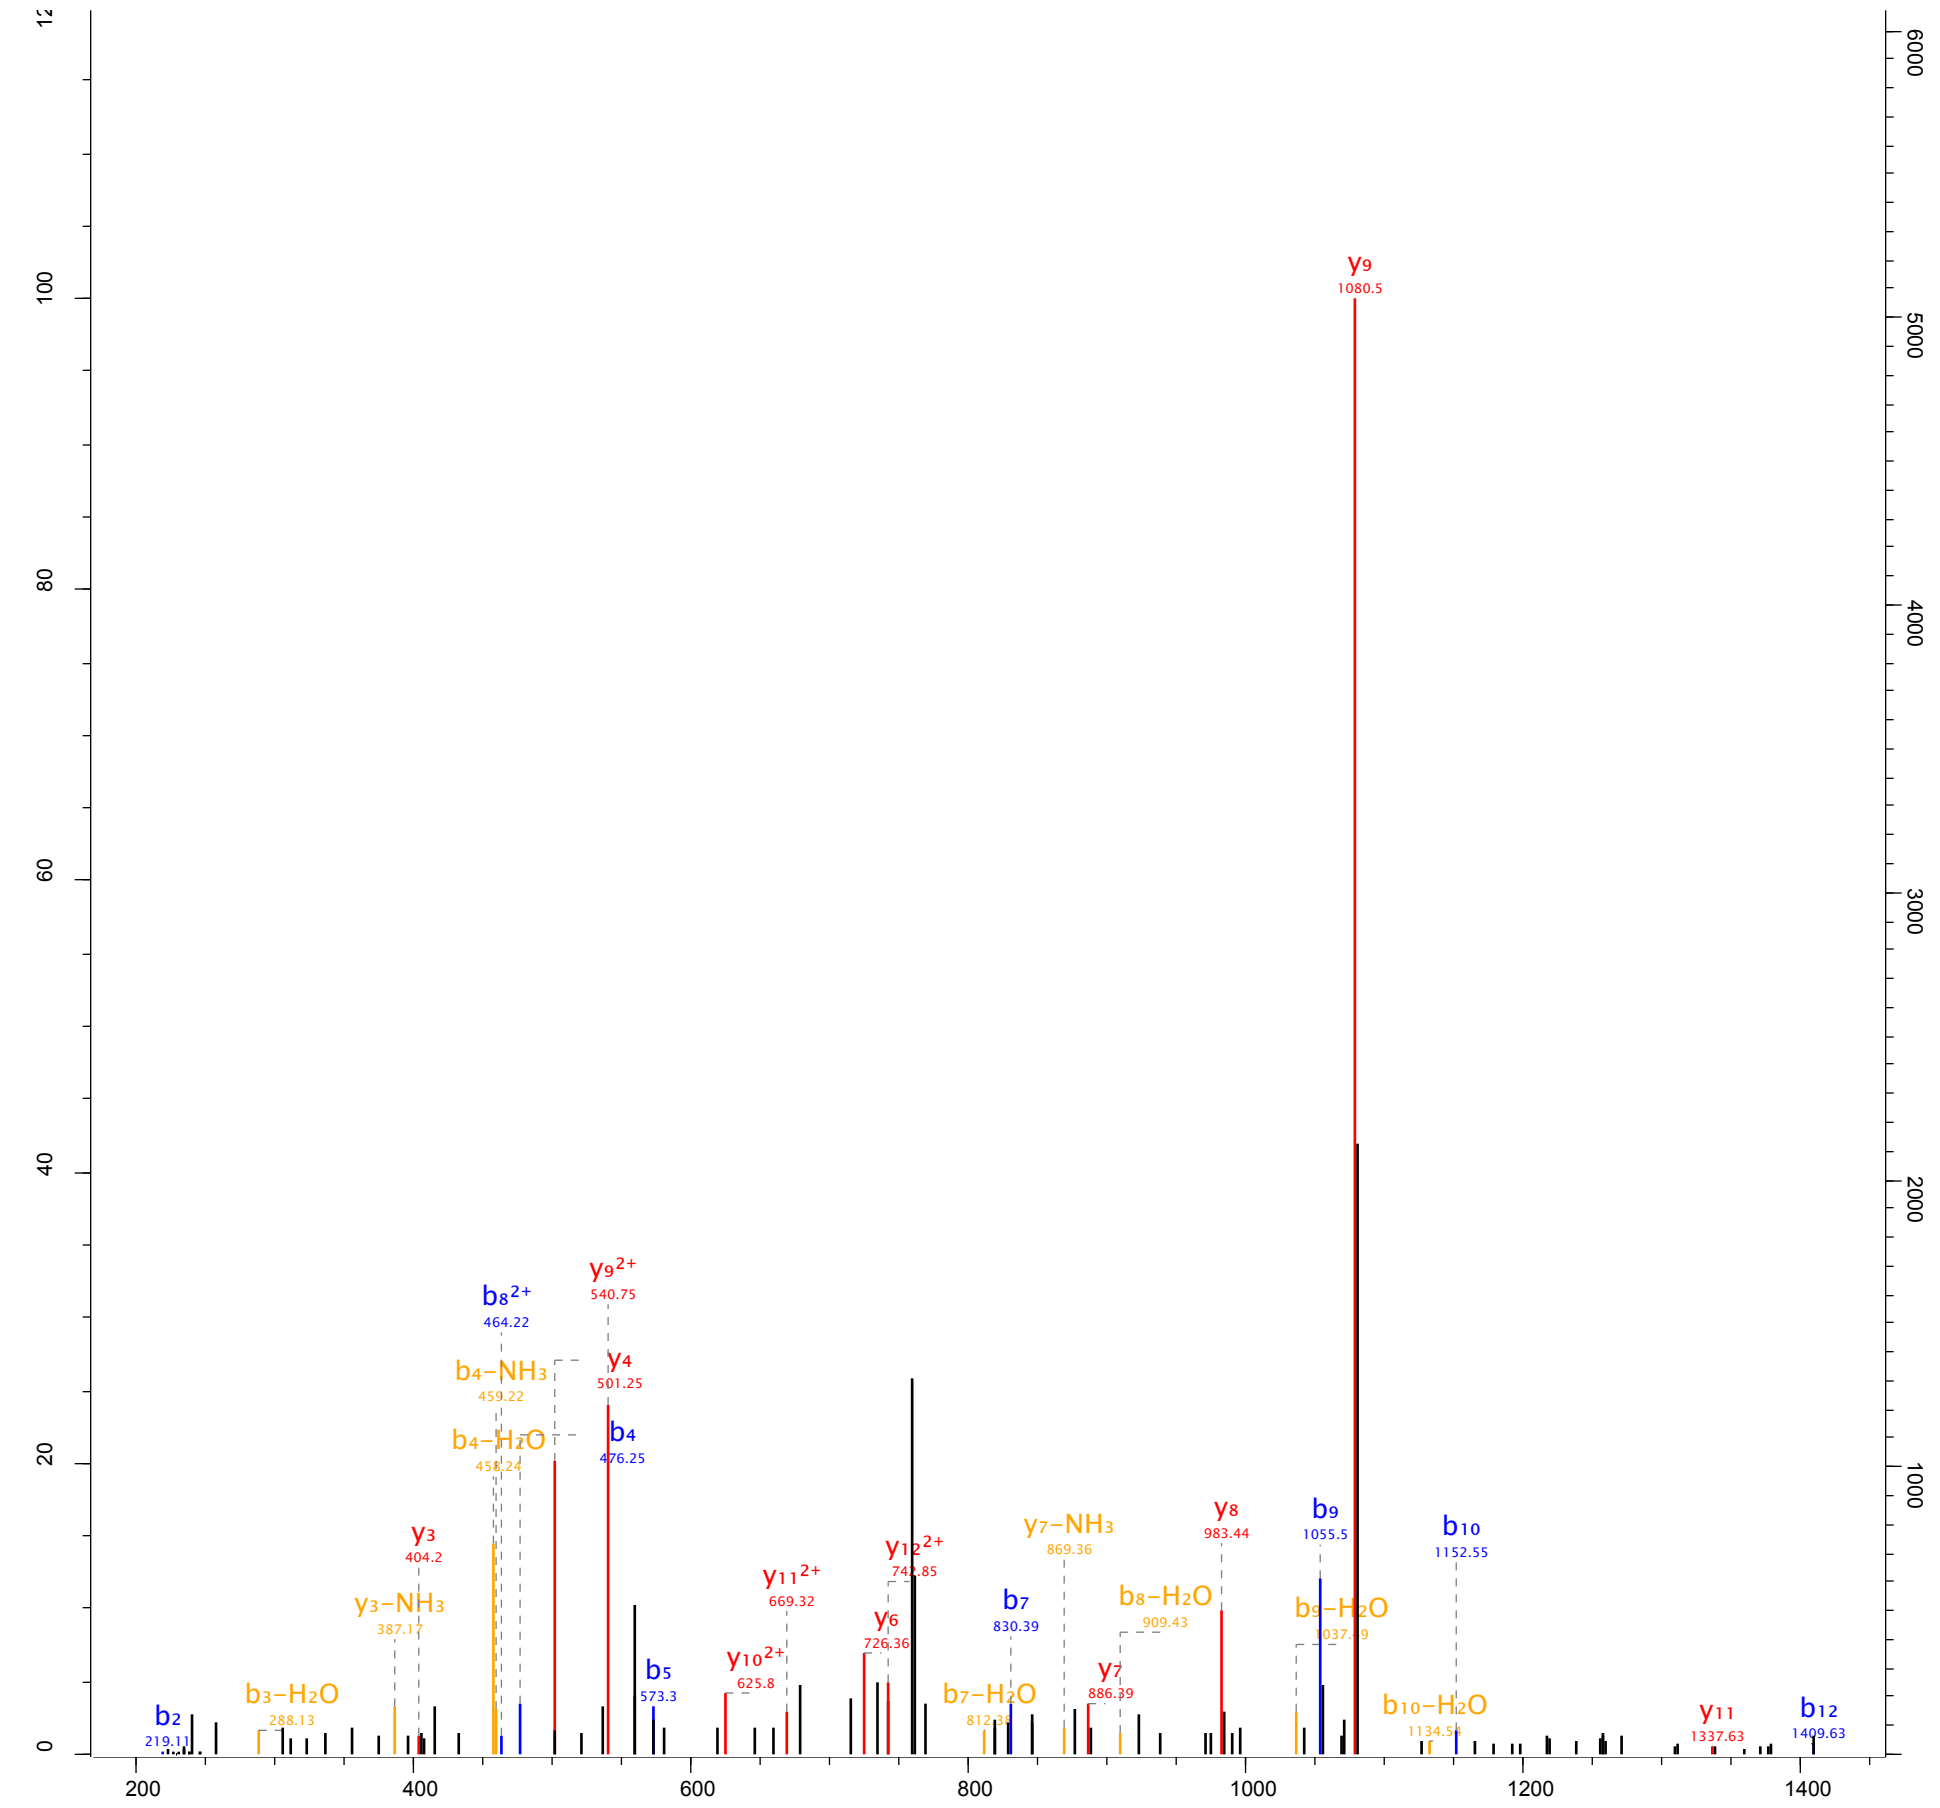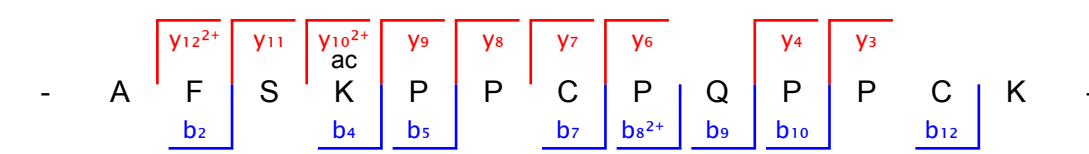

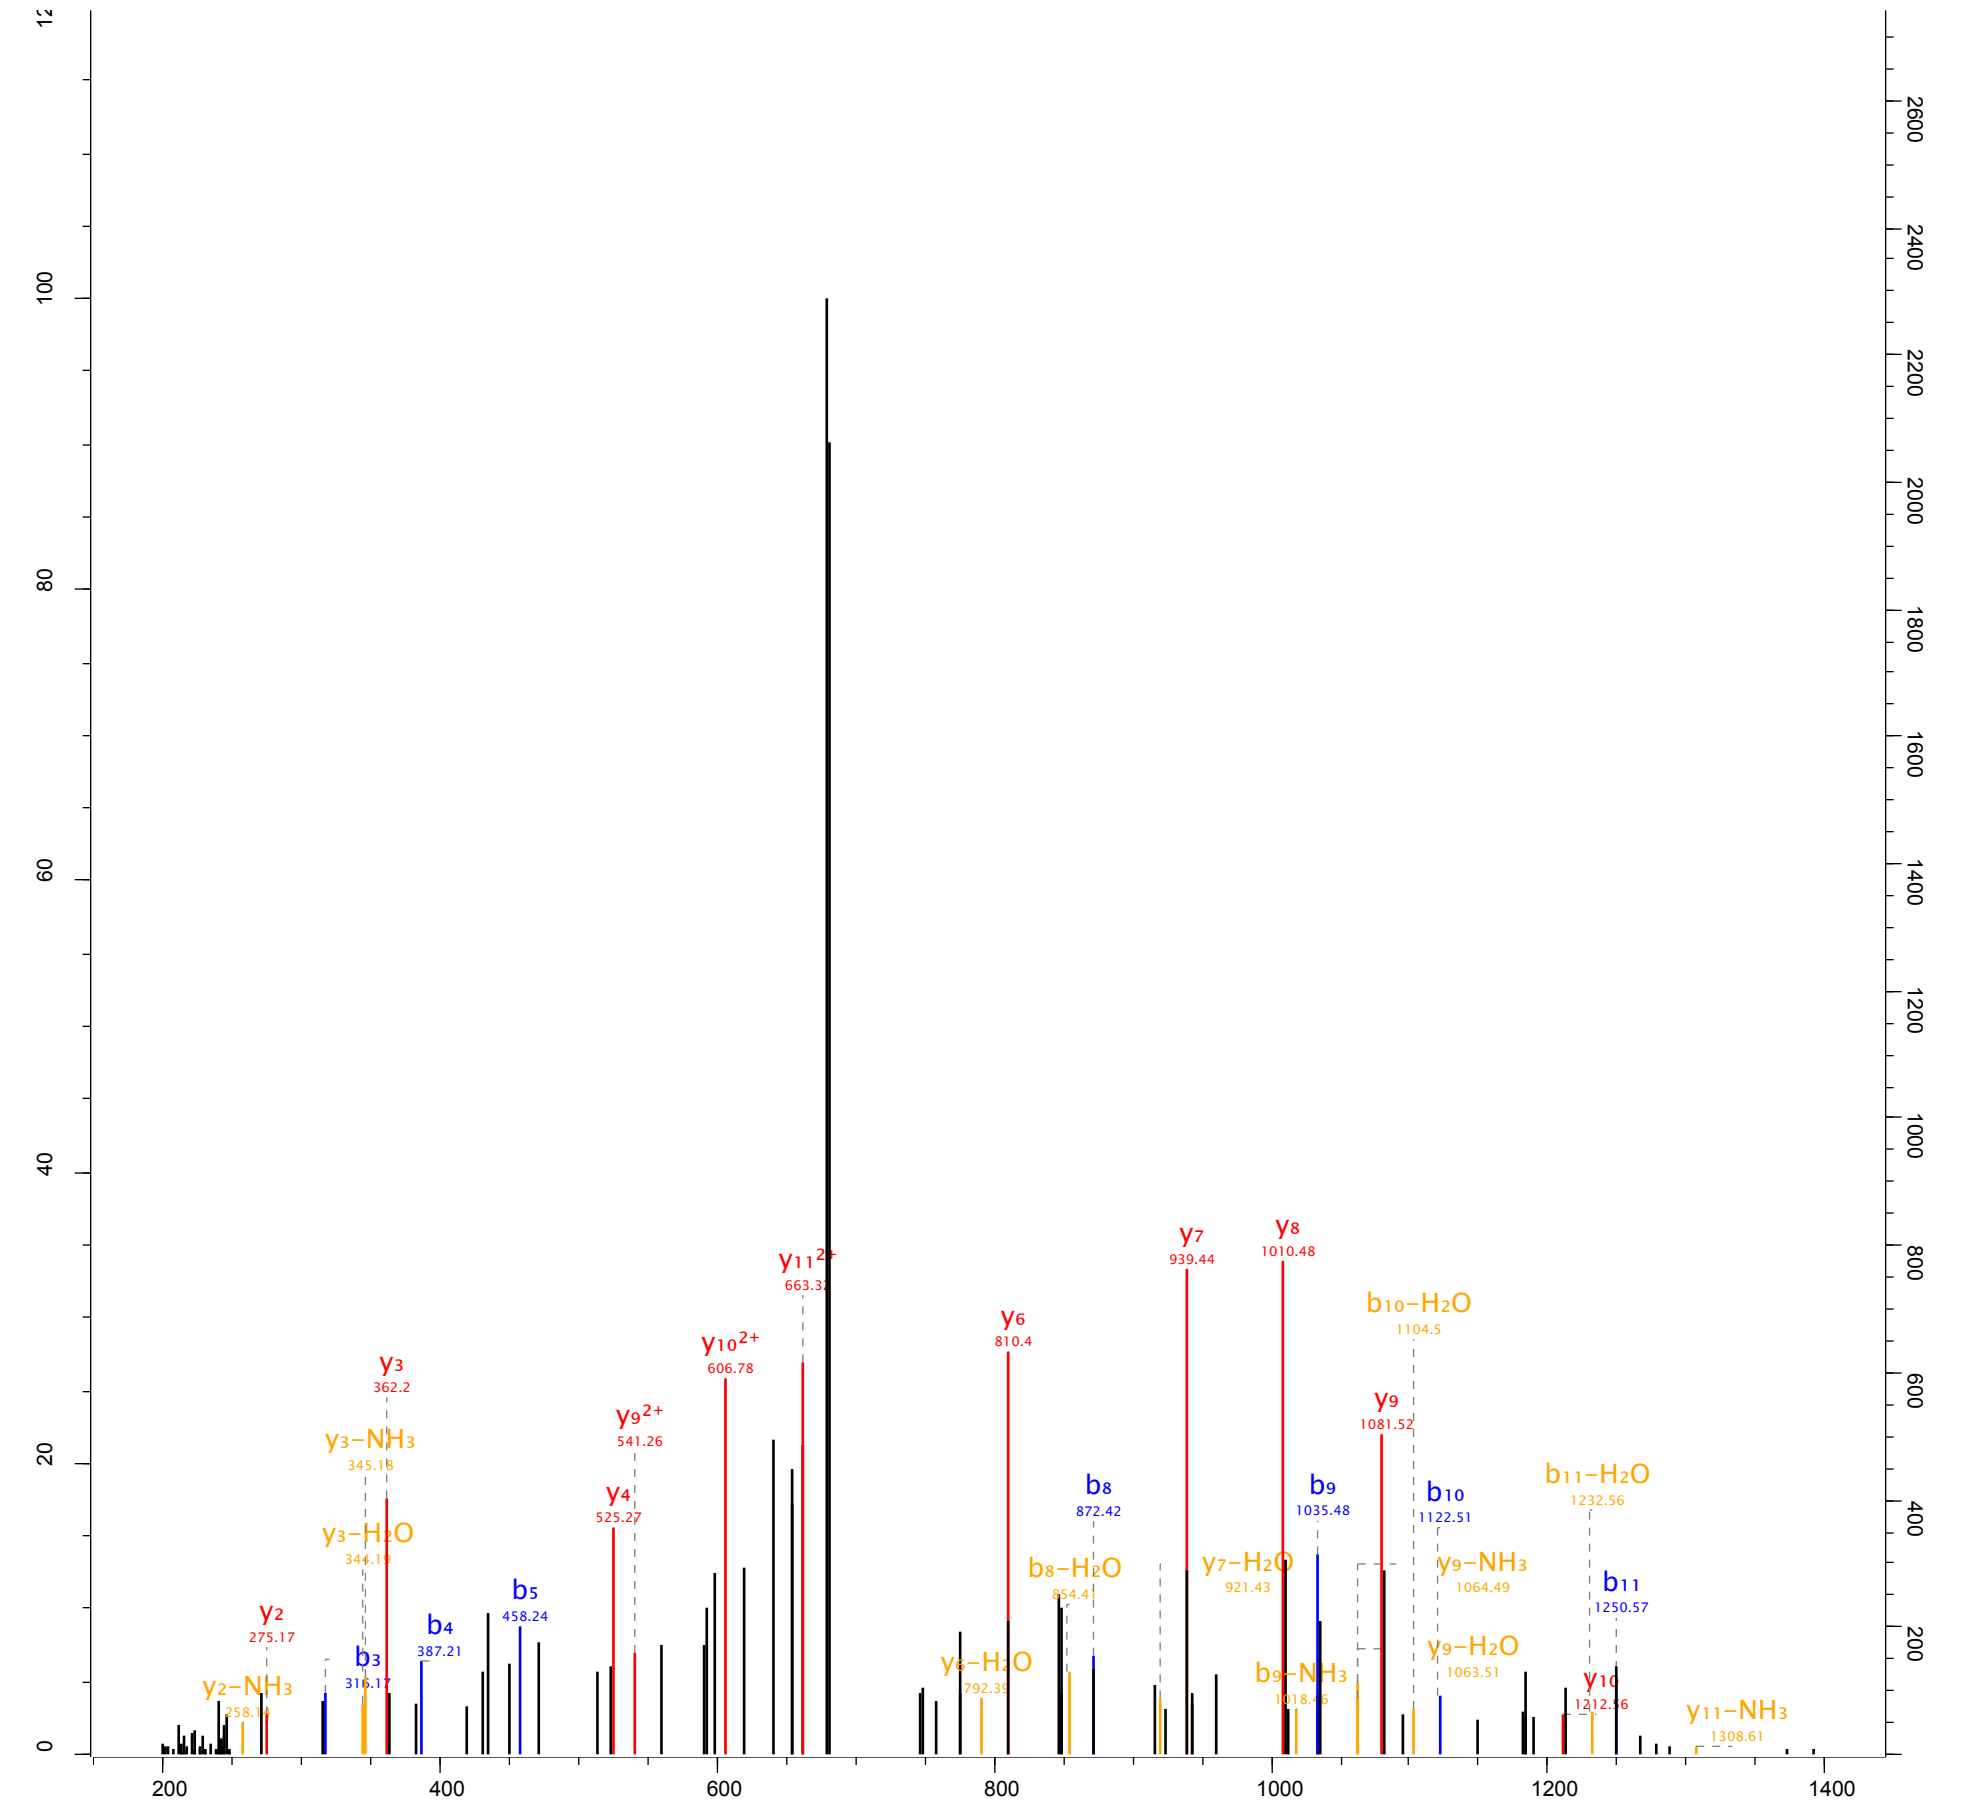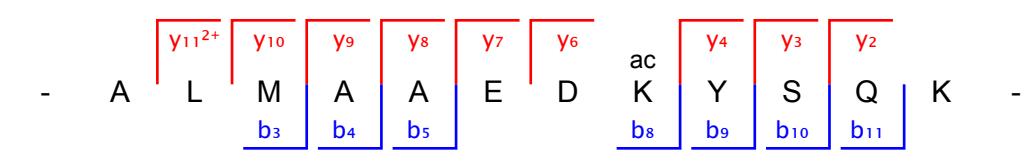

062513\_SCW\_II\_53\_4\_Vargas\_Enriched

15157

ITMS; CID

227.92

763.91

Uchl1

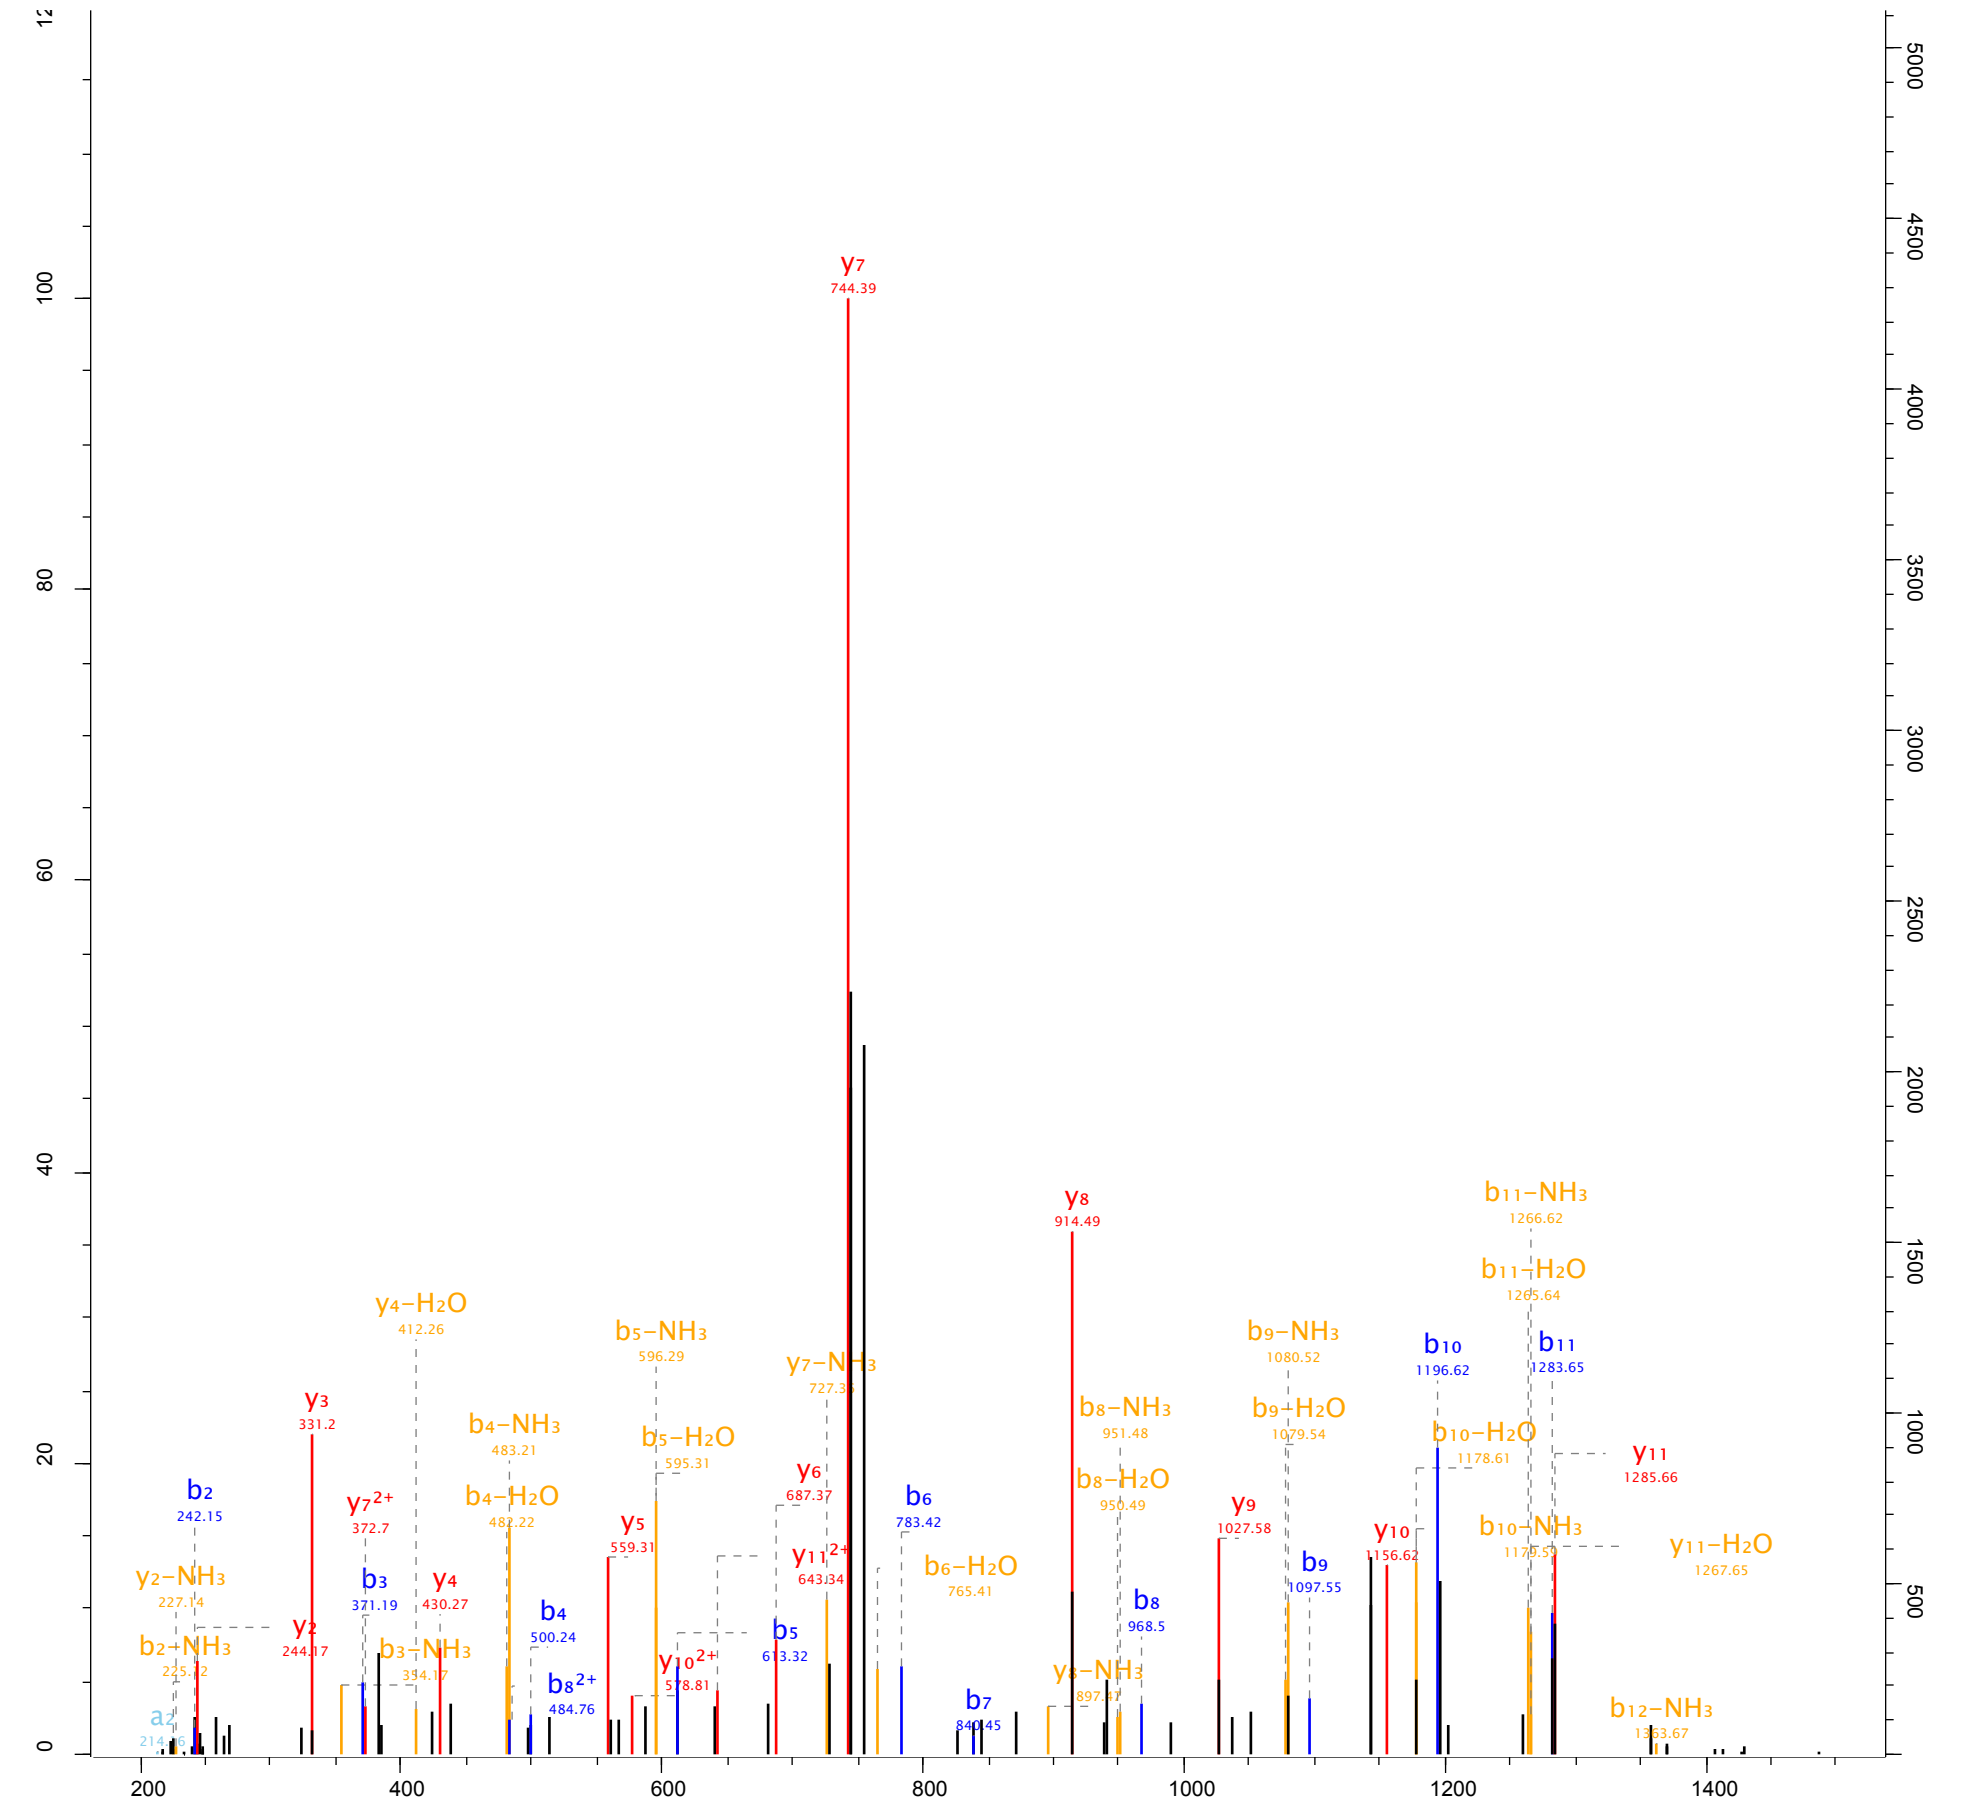

- Q I E E L K G Q E V S P K -

b<sub>2</sub> b<sub>3</sub> b<sub>4</sub> b<sub>5</sub> b<sub>6</sub> b<sub>7</sub> b<sub>8</sub> b<sub>9</sub> b<sub>10</sub> b<sub>11</sub>

y<sub>11</sub> y<sub>10</sub> y<sub>9</sub> y<sub>8</sub> ac y<sub>7</sub> y<sub>6</sub> y<sub>5</sub> y<sub>4</sub> y<sub>3</sub> y<sub>2</sub>

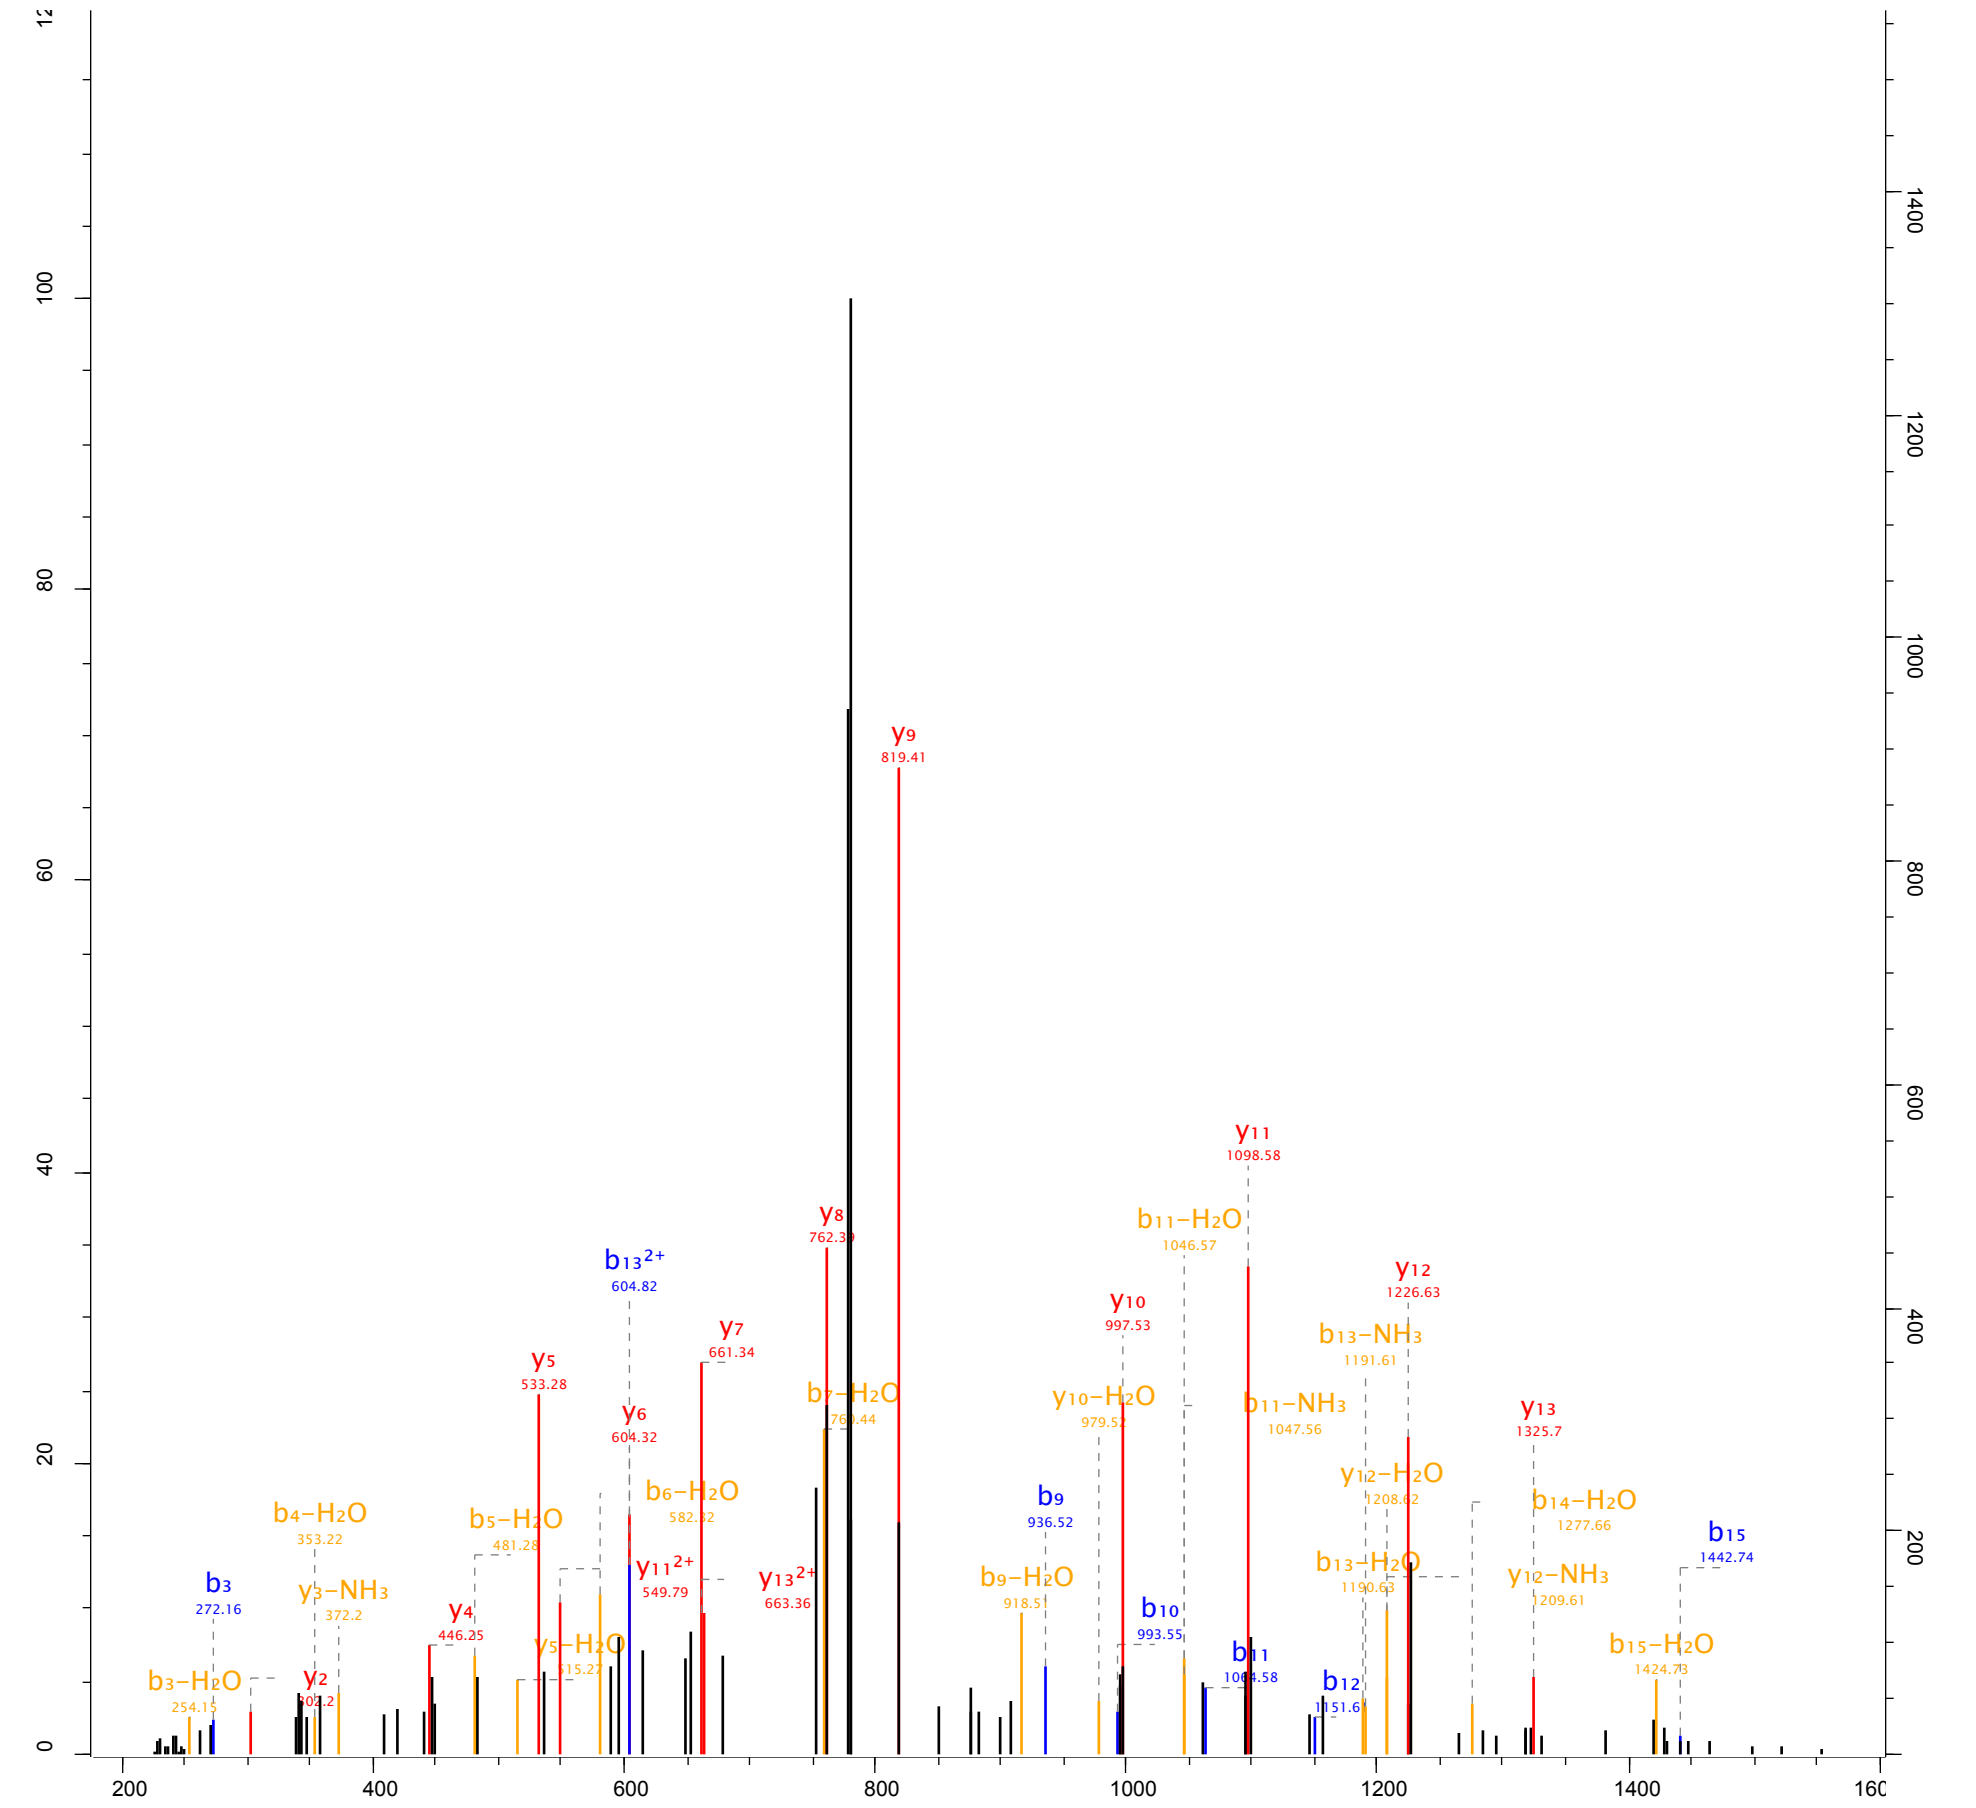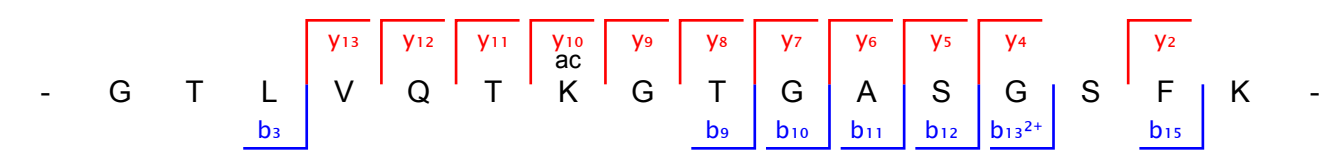

062513\_SCW\_II\_53\_4\_Vargas\_Enriched

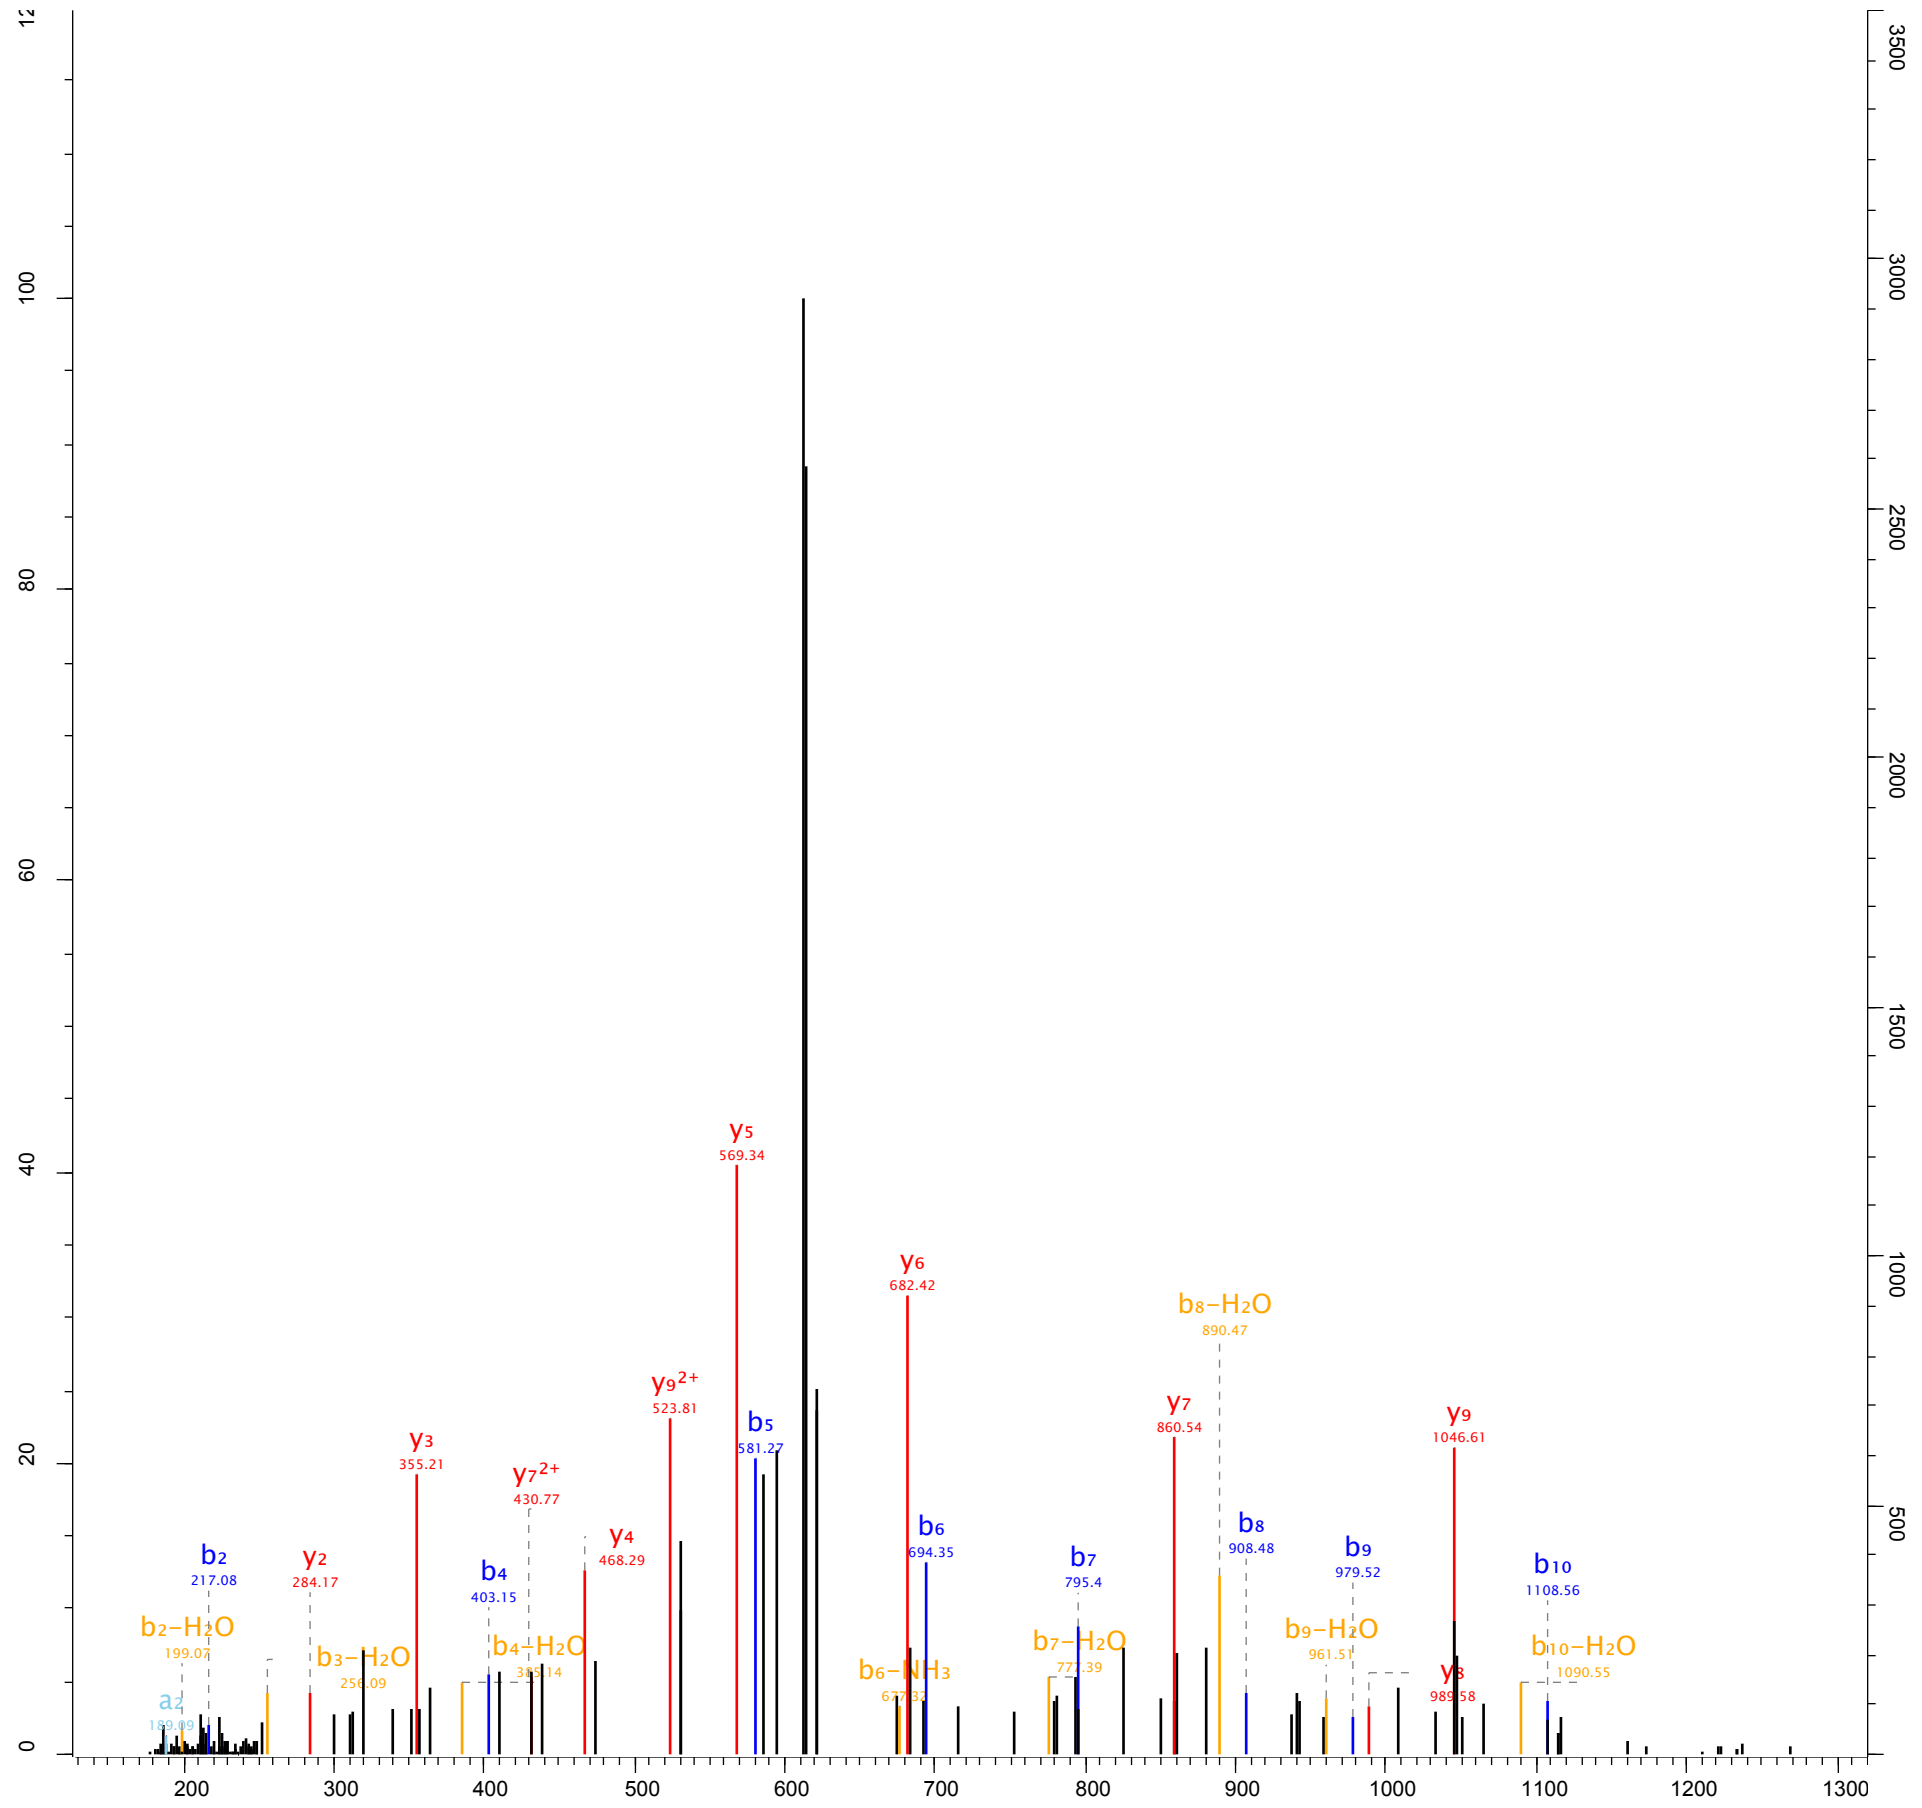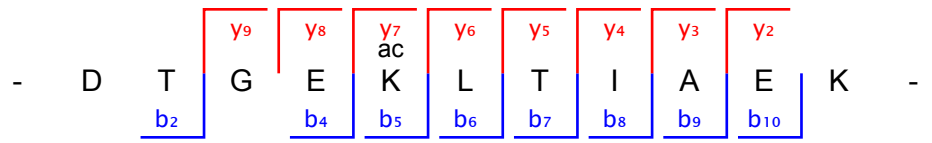

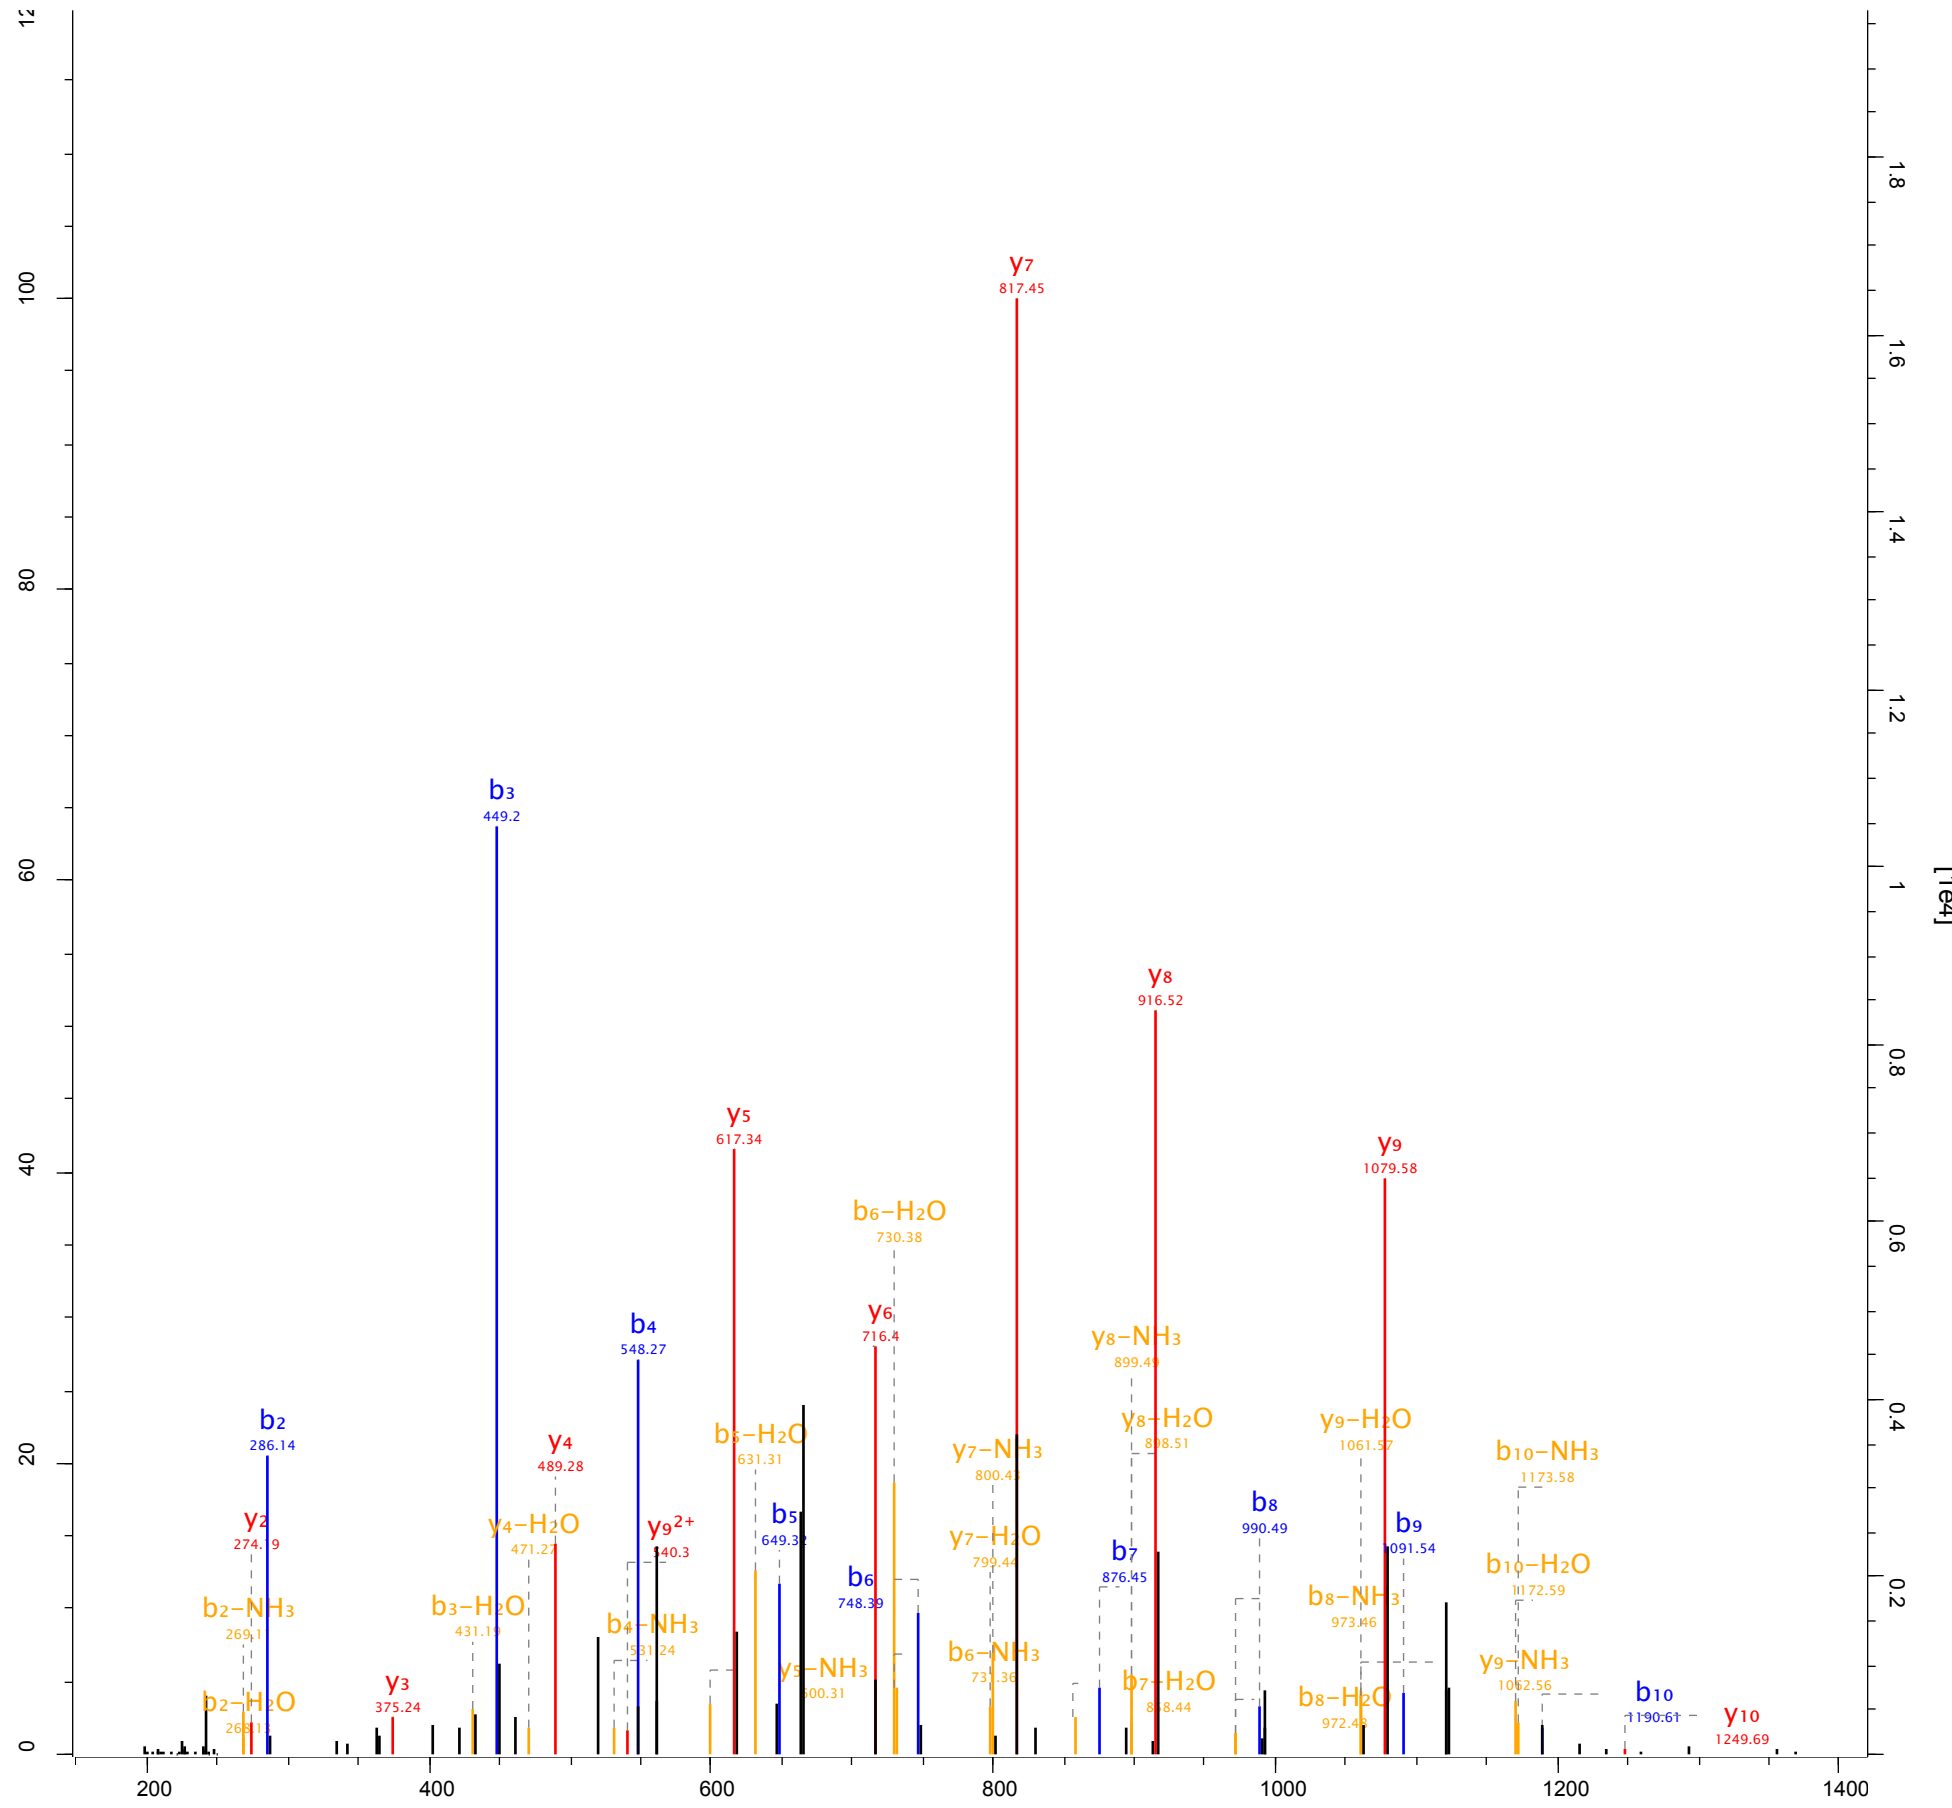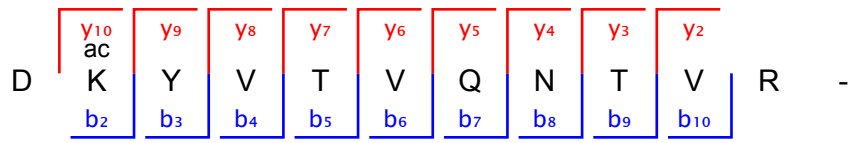

062513\_SCW\_II\_53\_4\_Vargas\_Enriched

15432

ITMS; CID

137.01

623.83

Hspa8;Hspa2

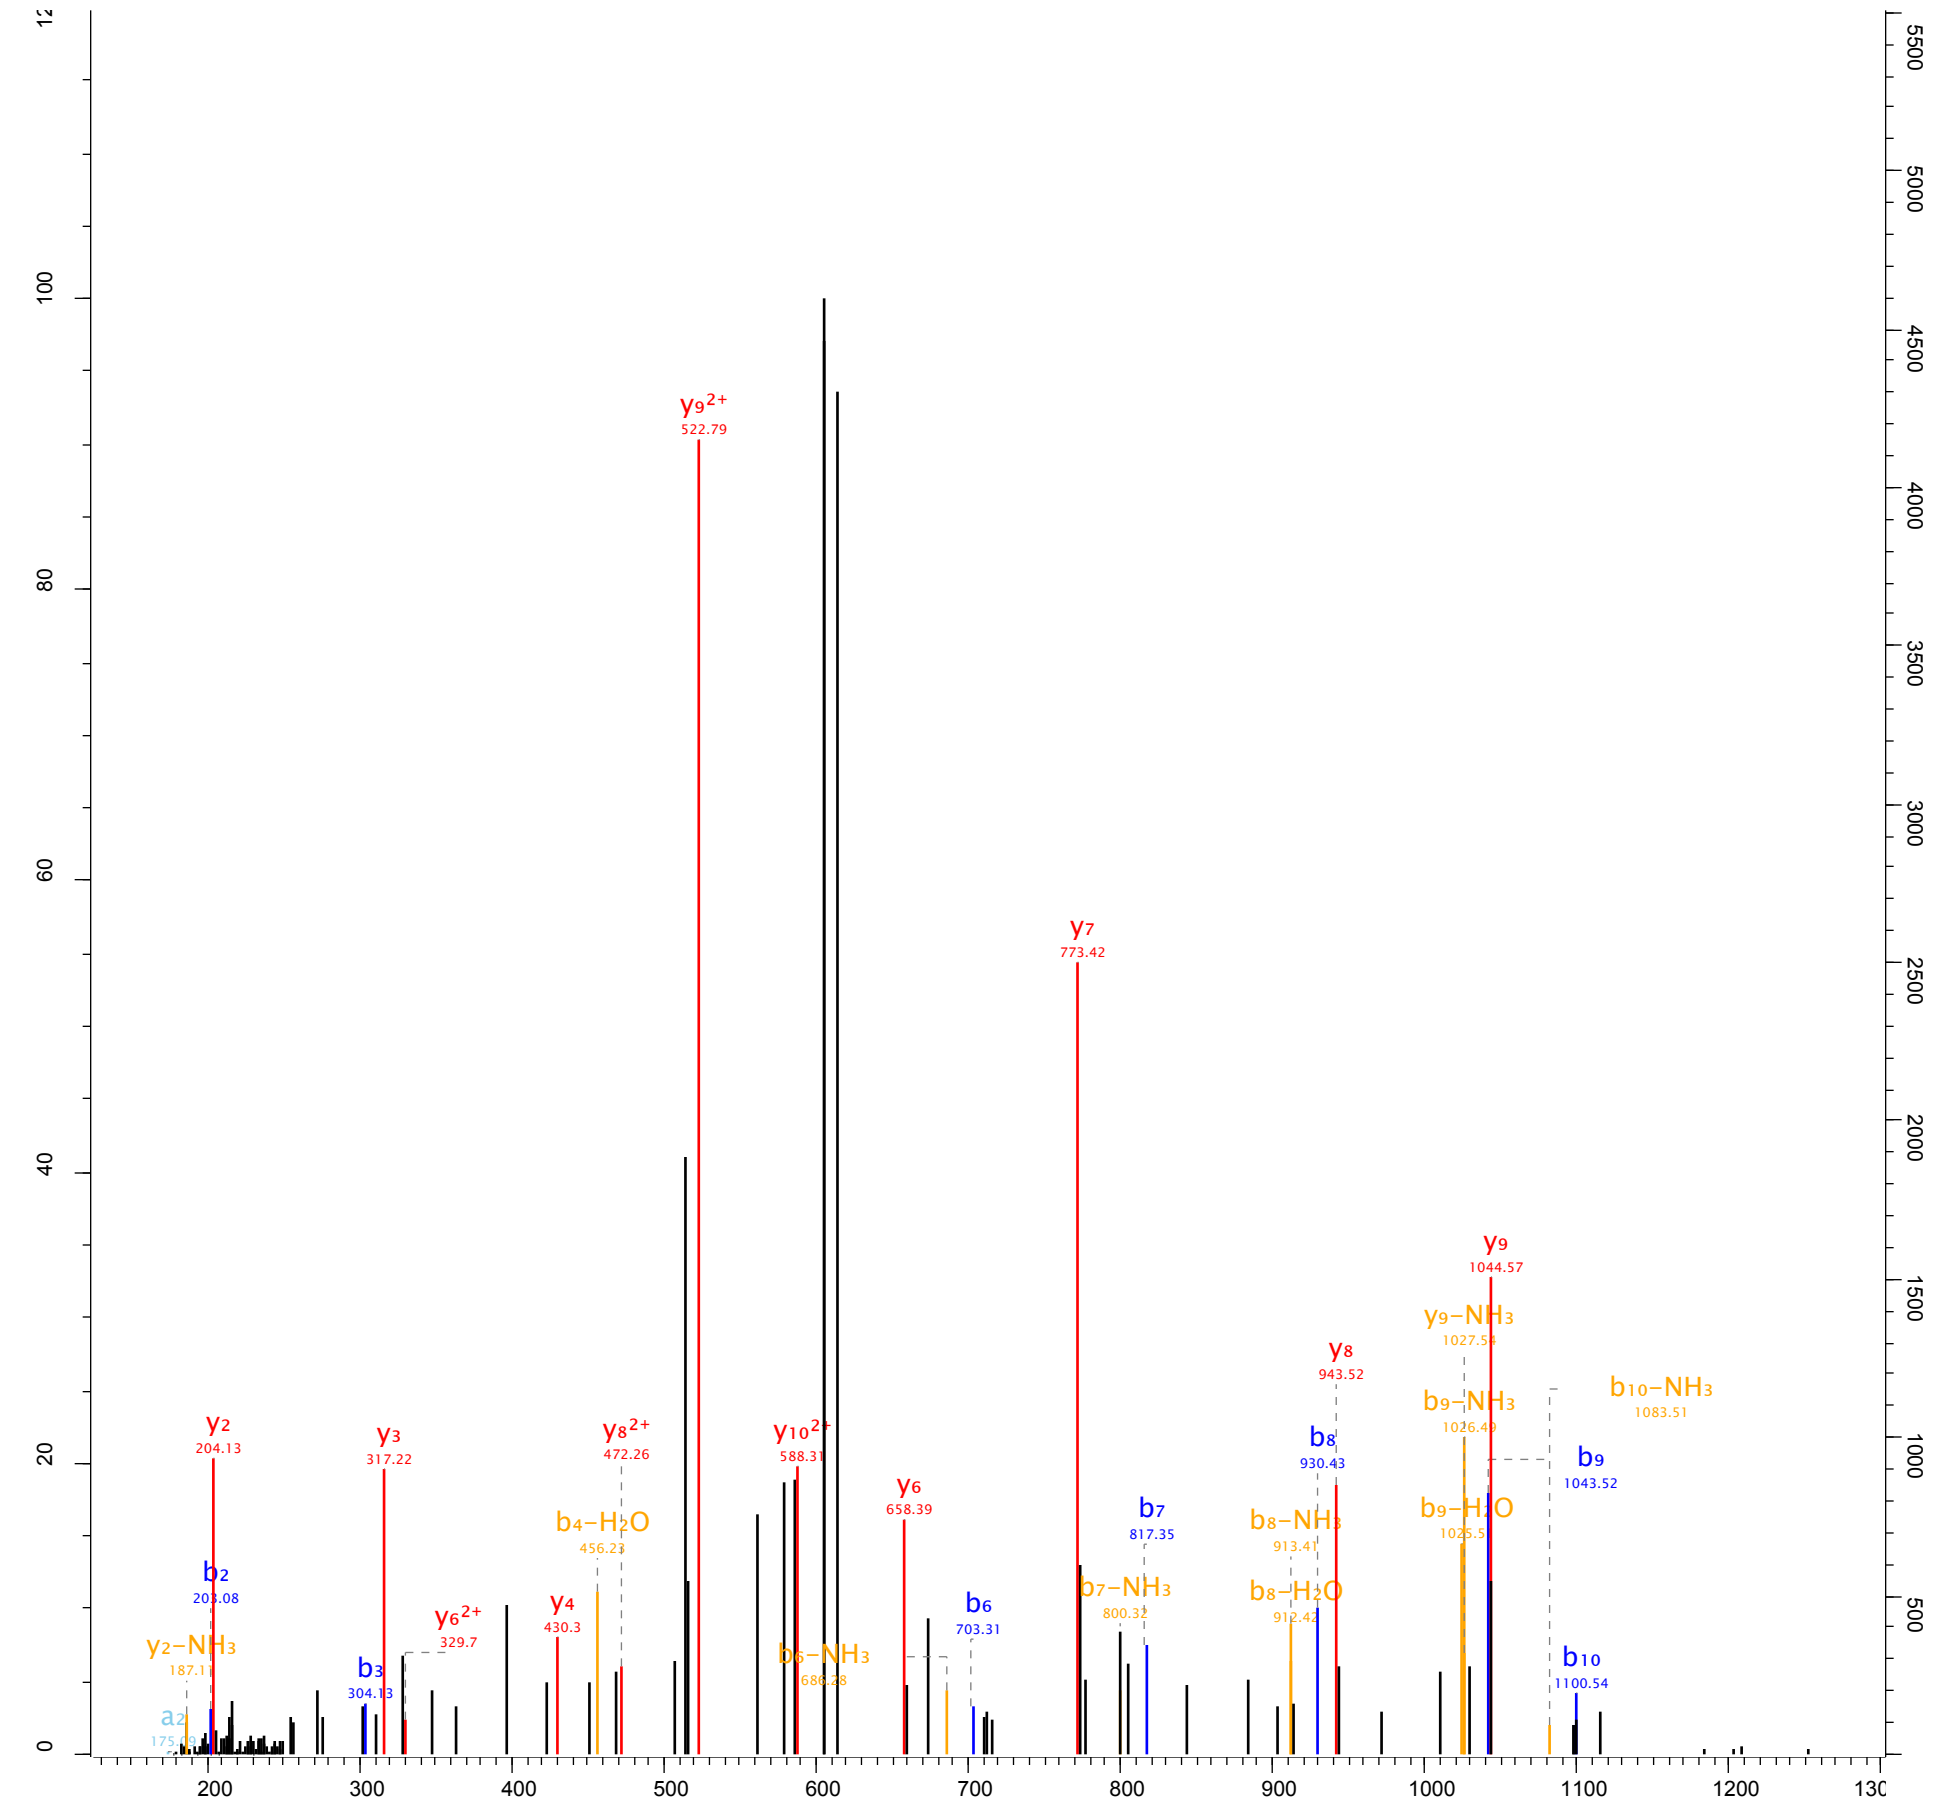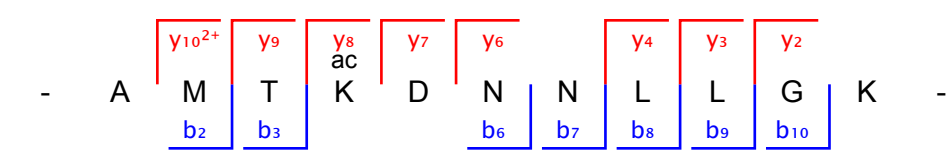

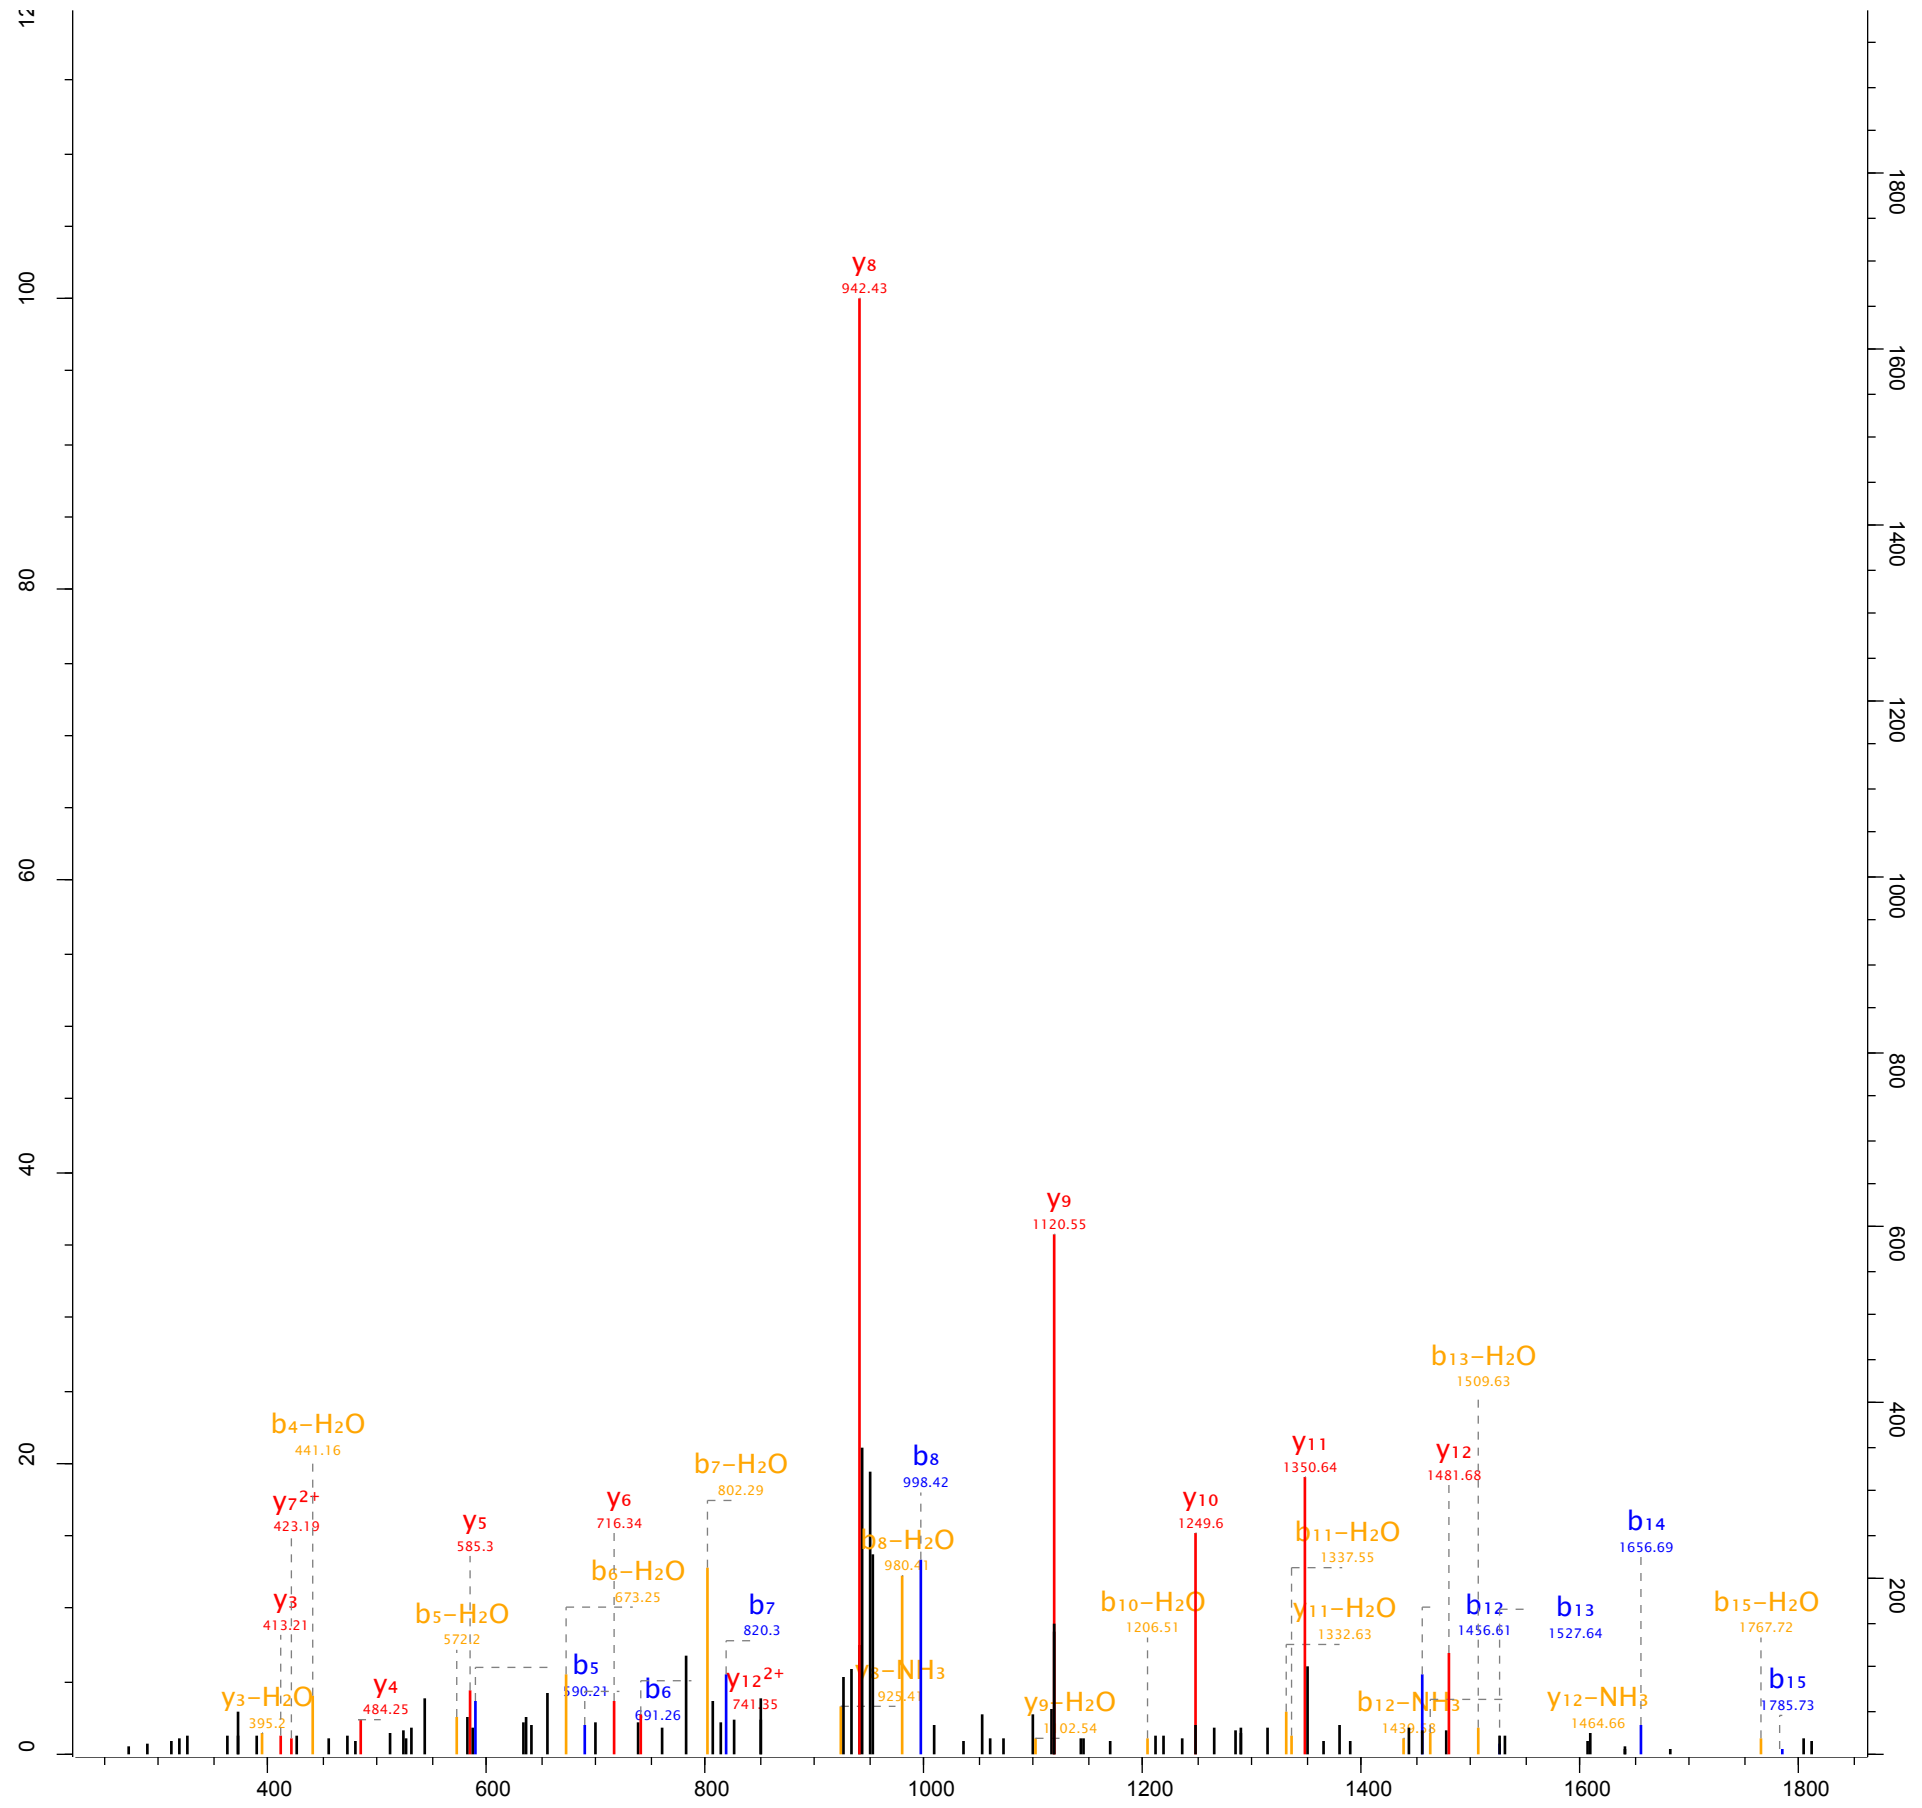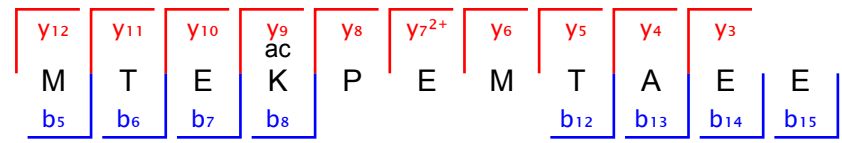



062513\_SCW\_II\_53\_4\_Vargas\_Enriched

15585

ITMS; CID

101.38

681.34

Tkt

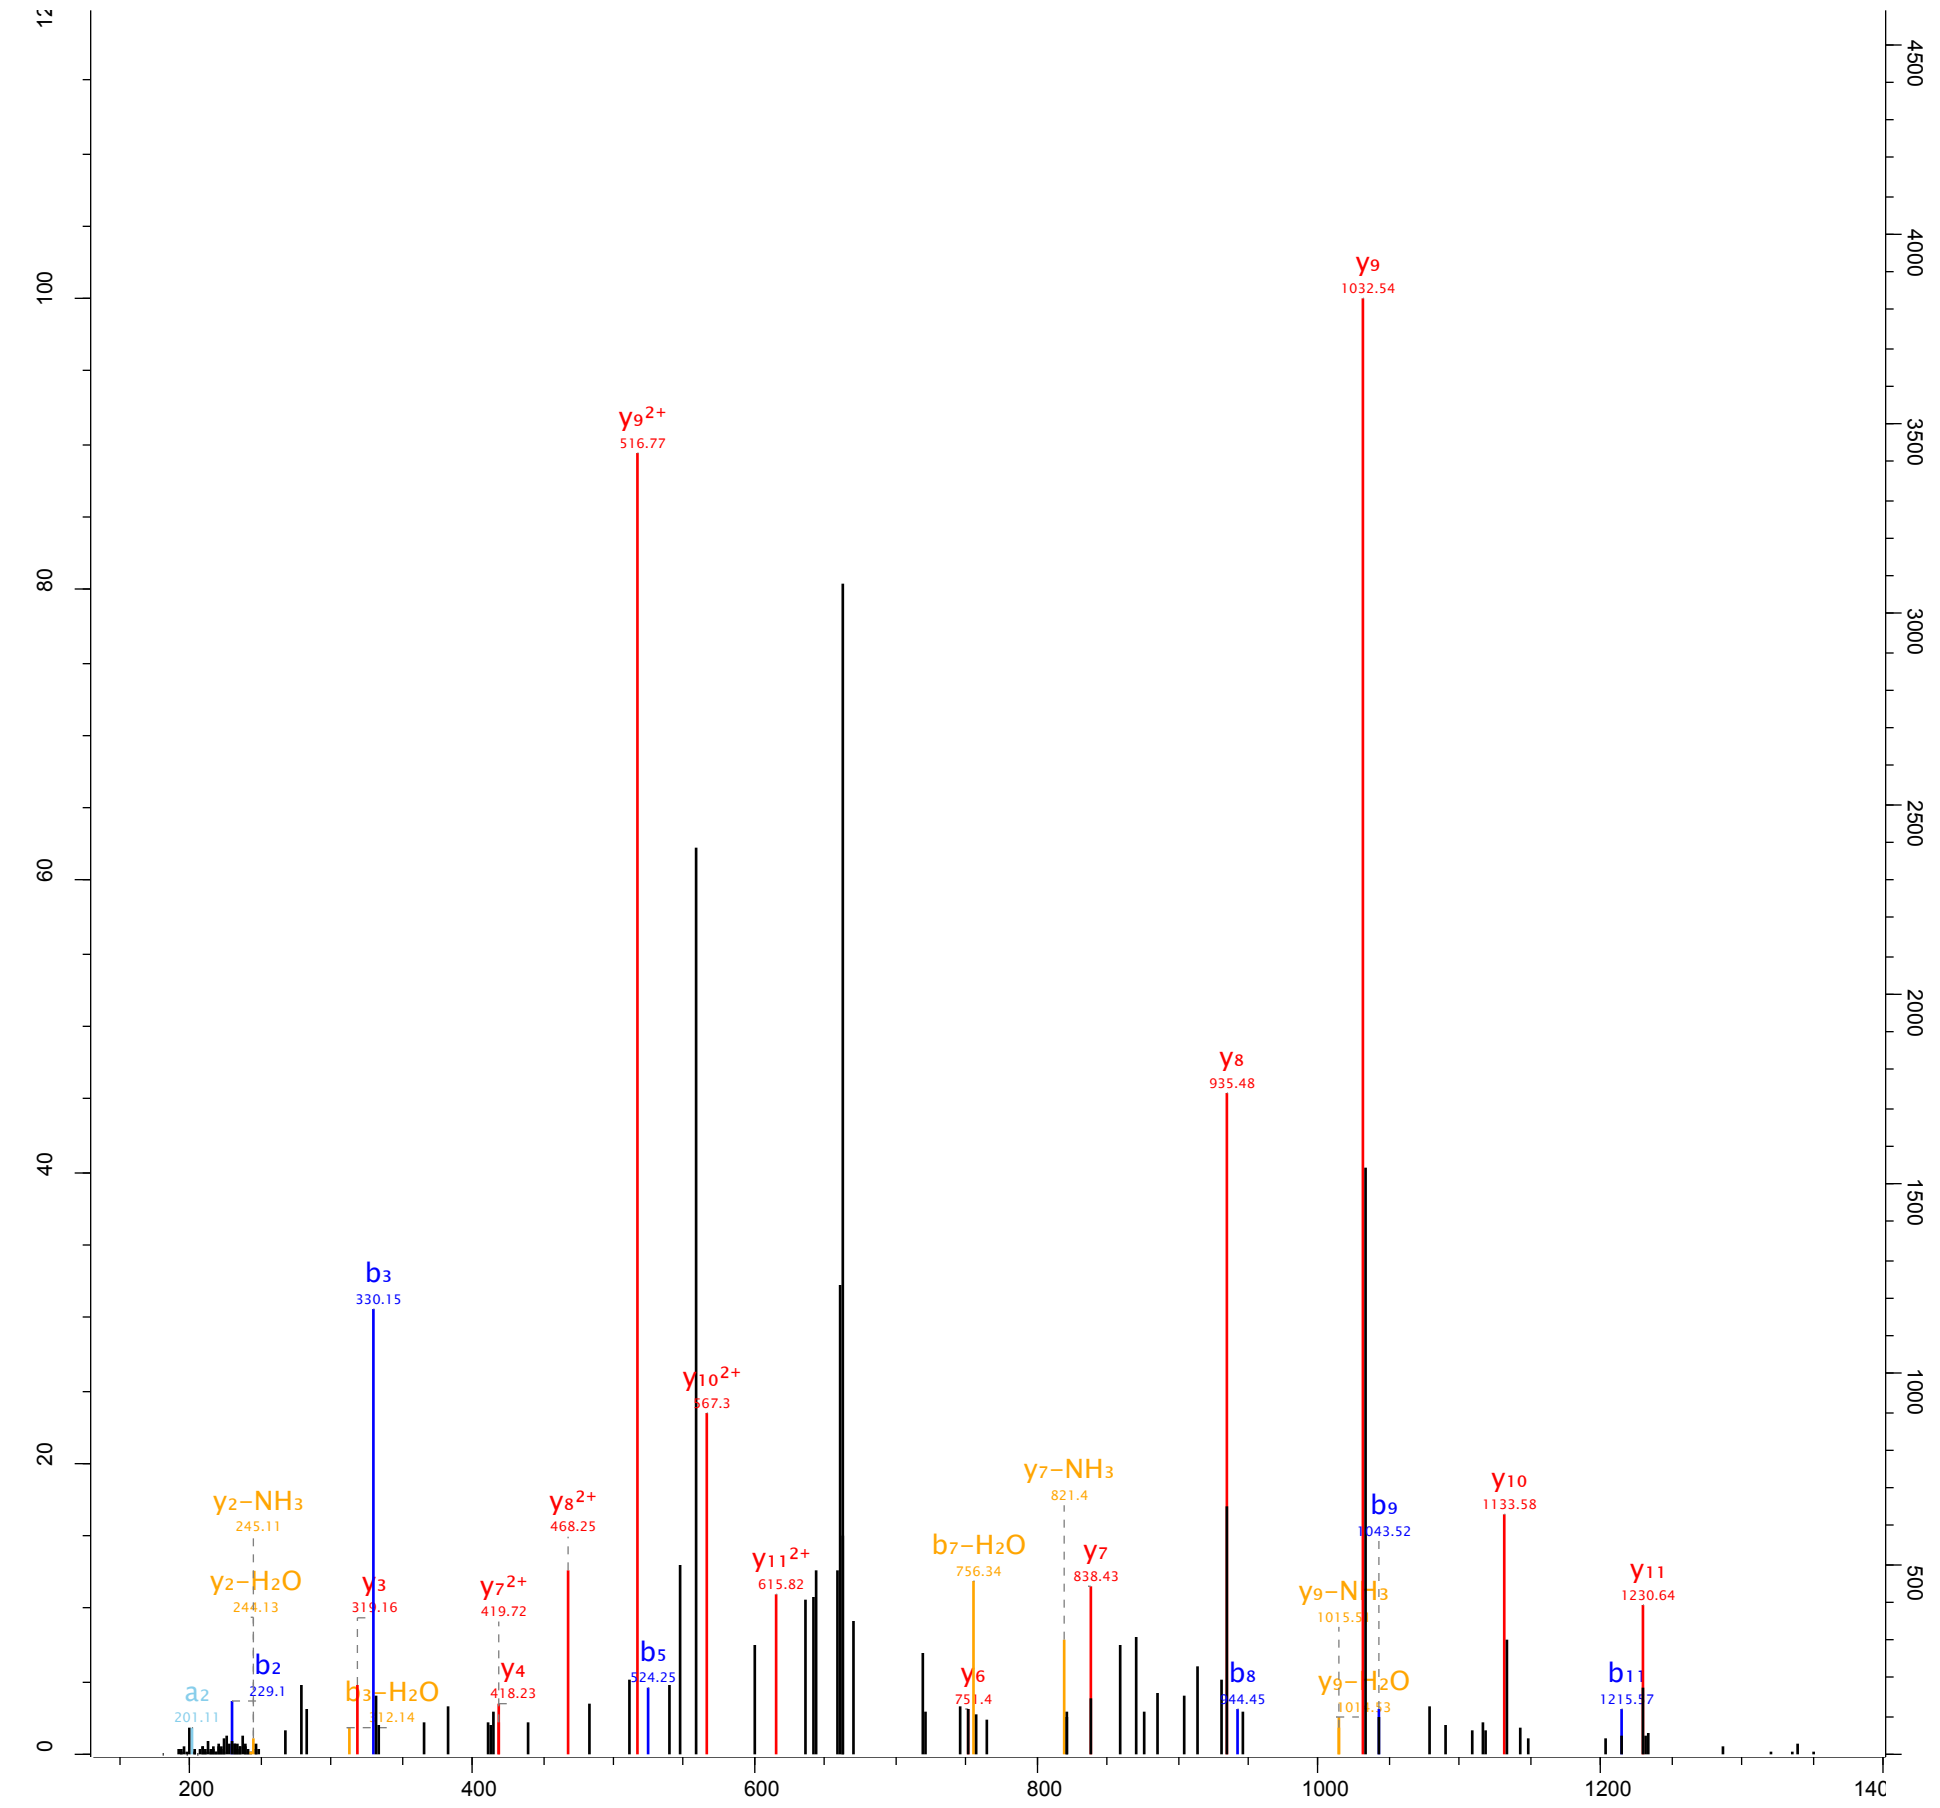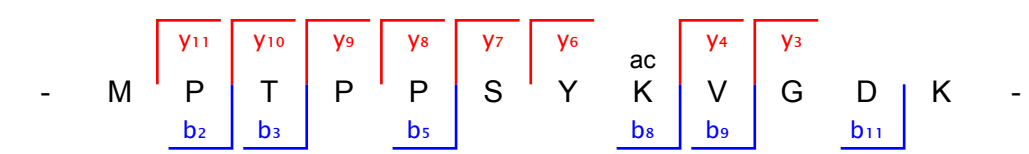

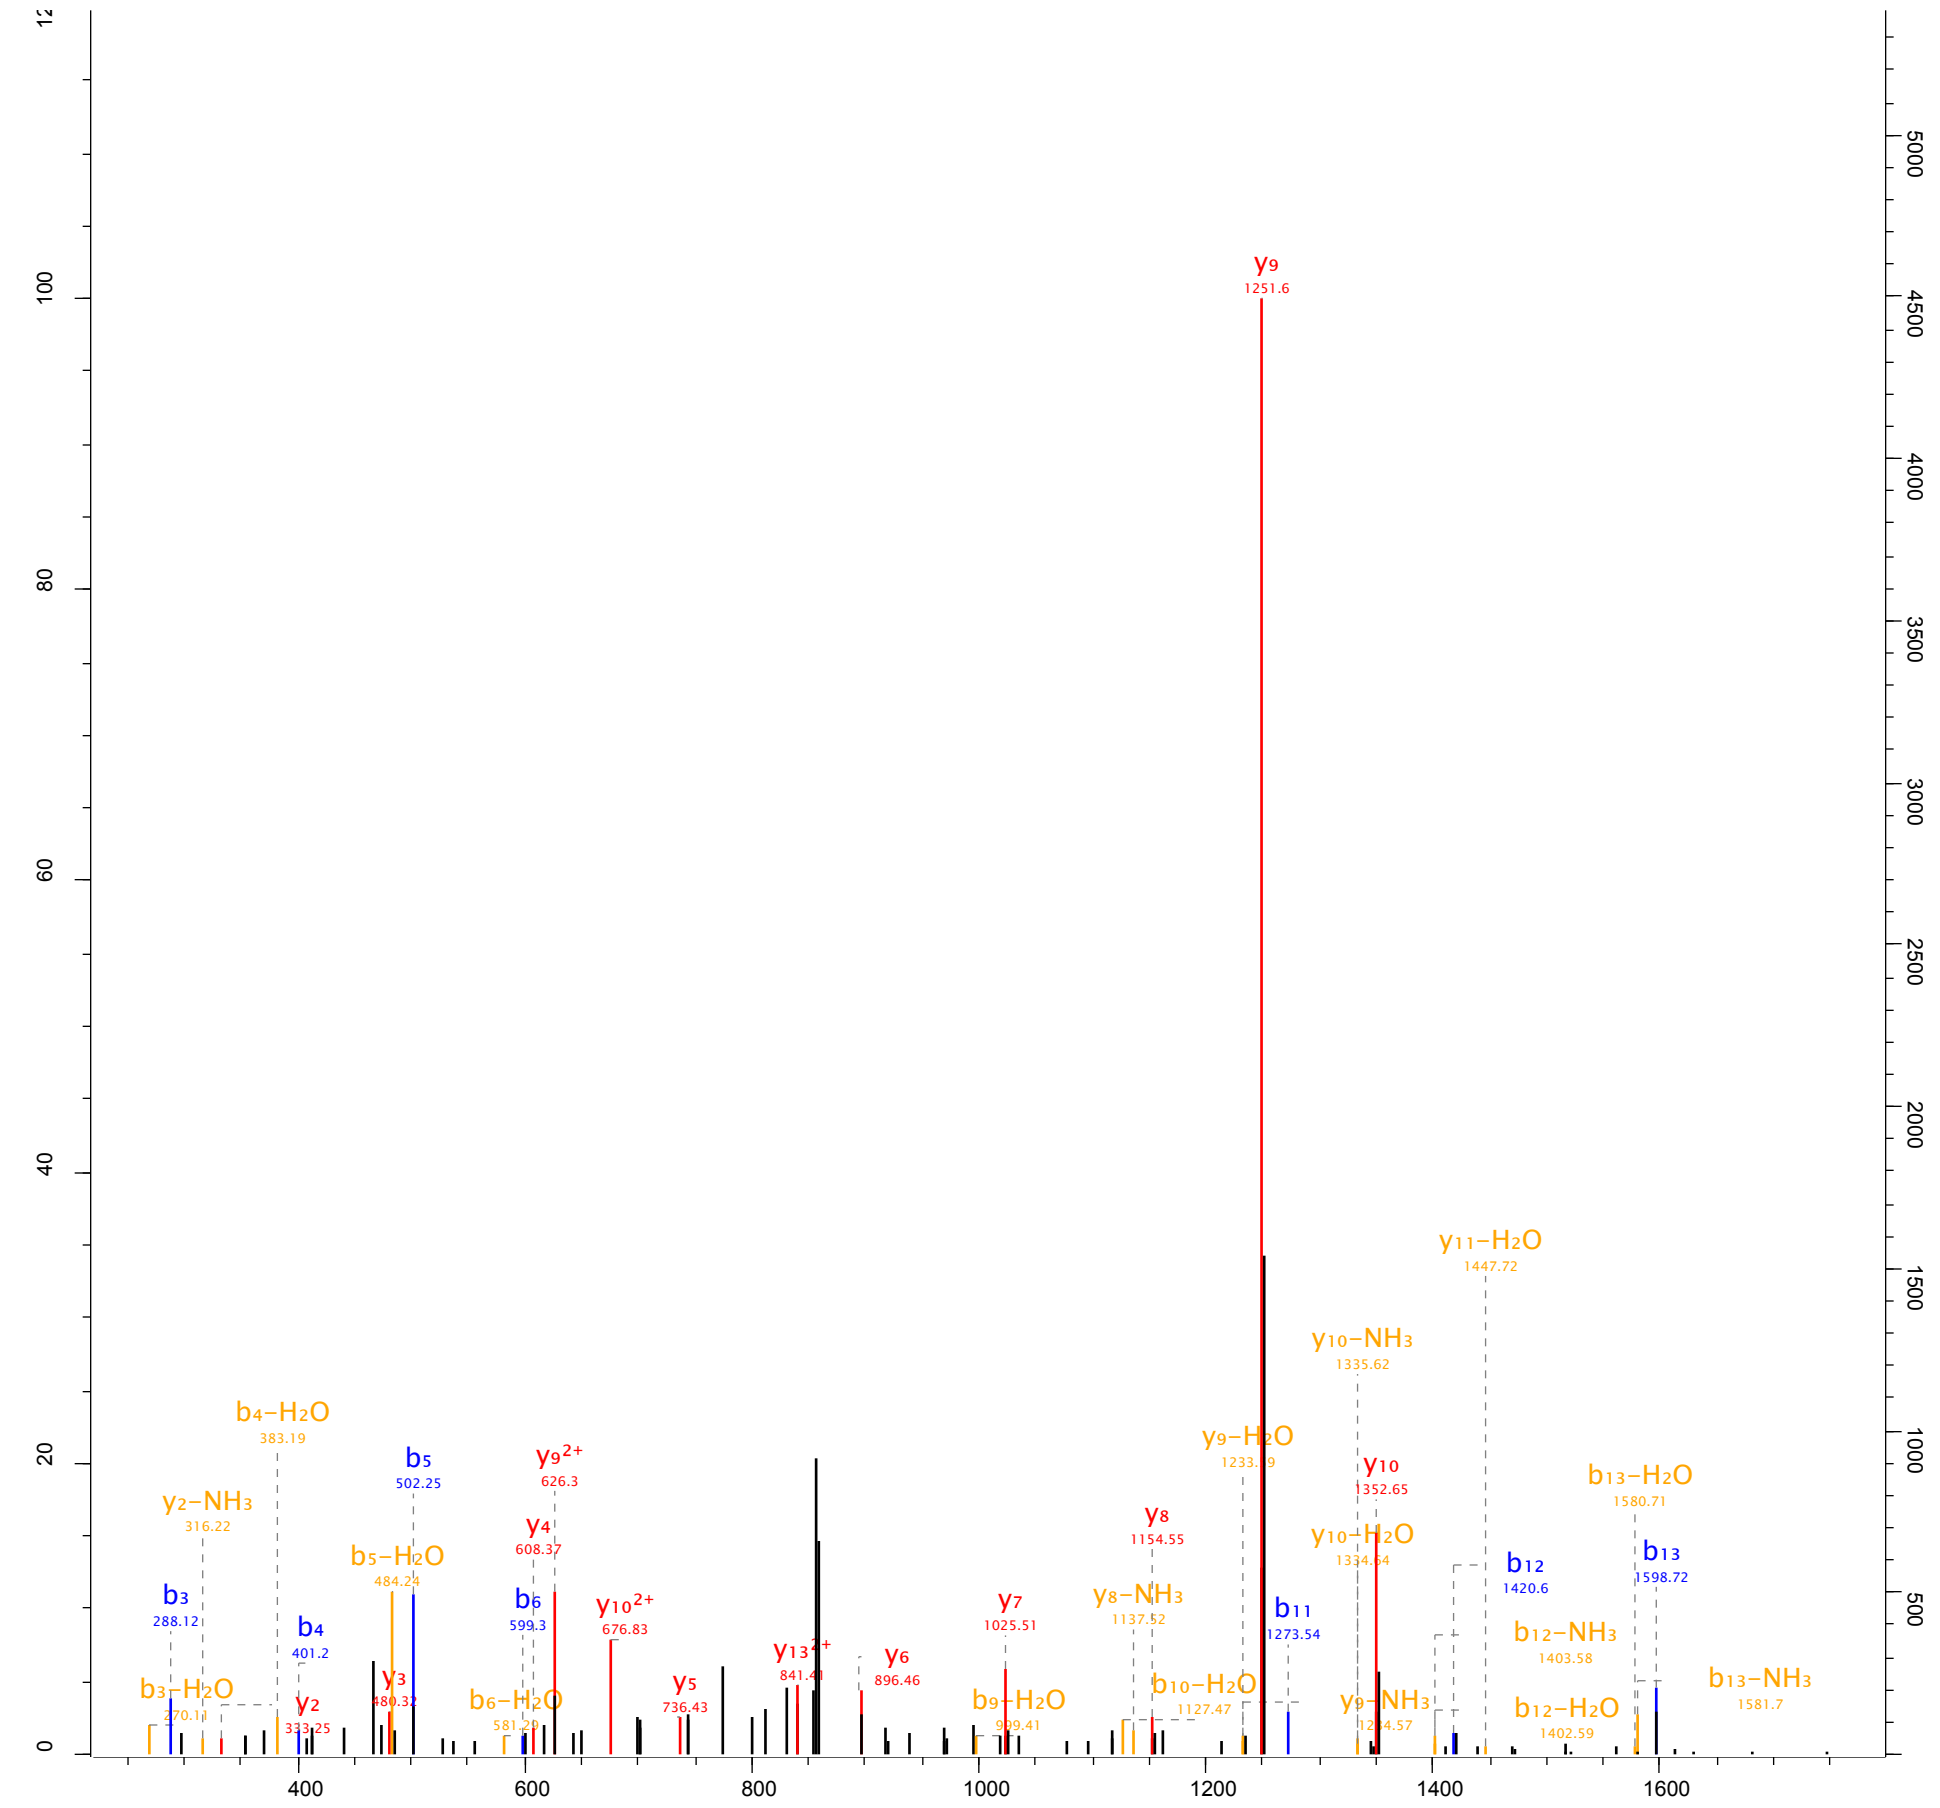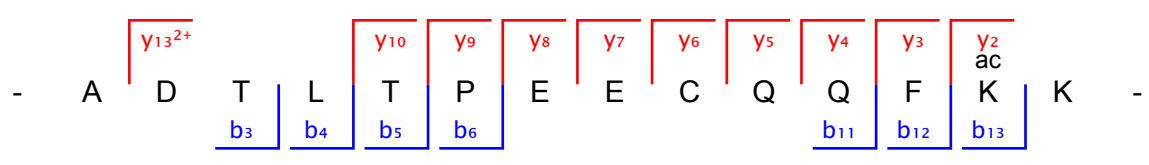

062513\_SCW\_II\_53\_4\_Vargas\_Enriched

15685

ITMS; CID

140.45

628.86

Csnk2a2

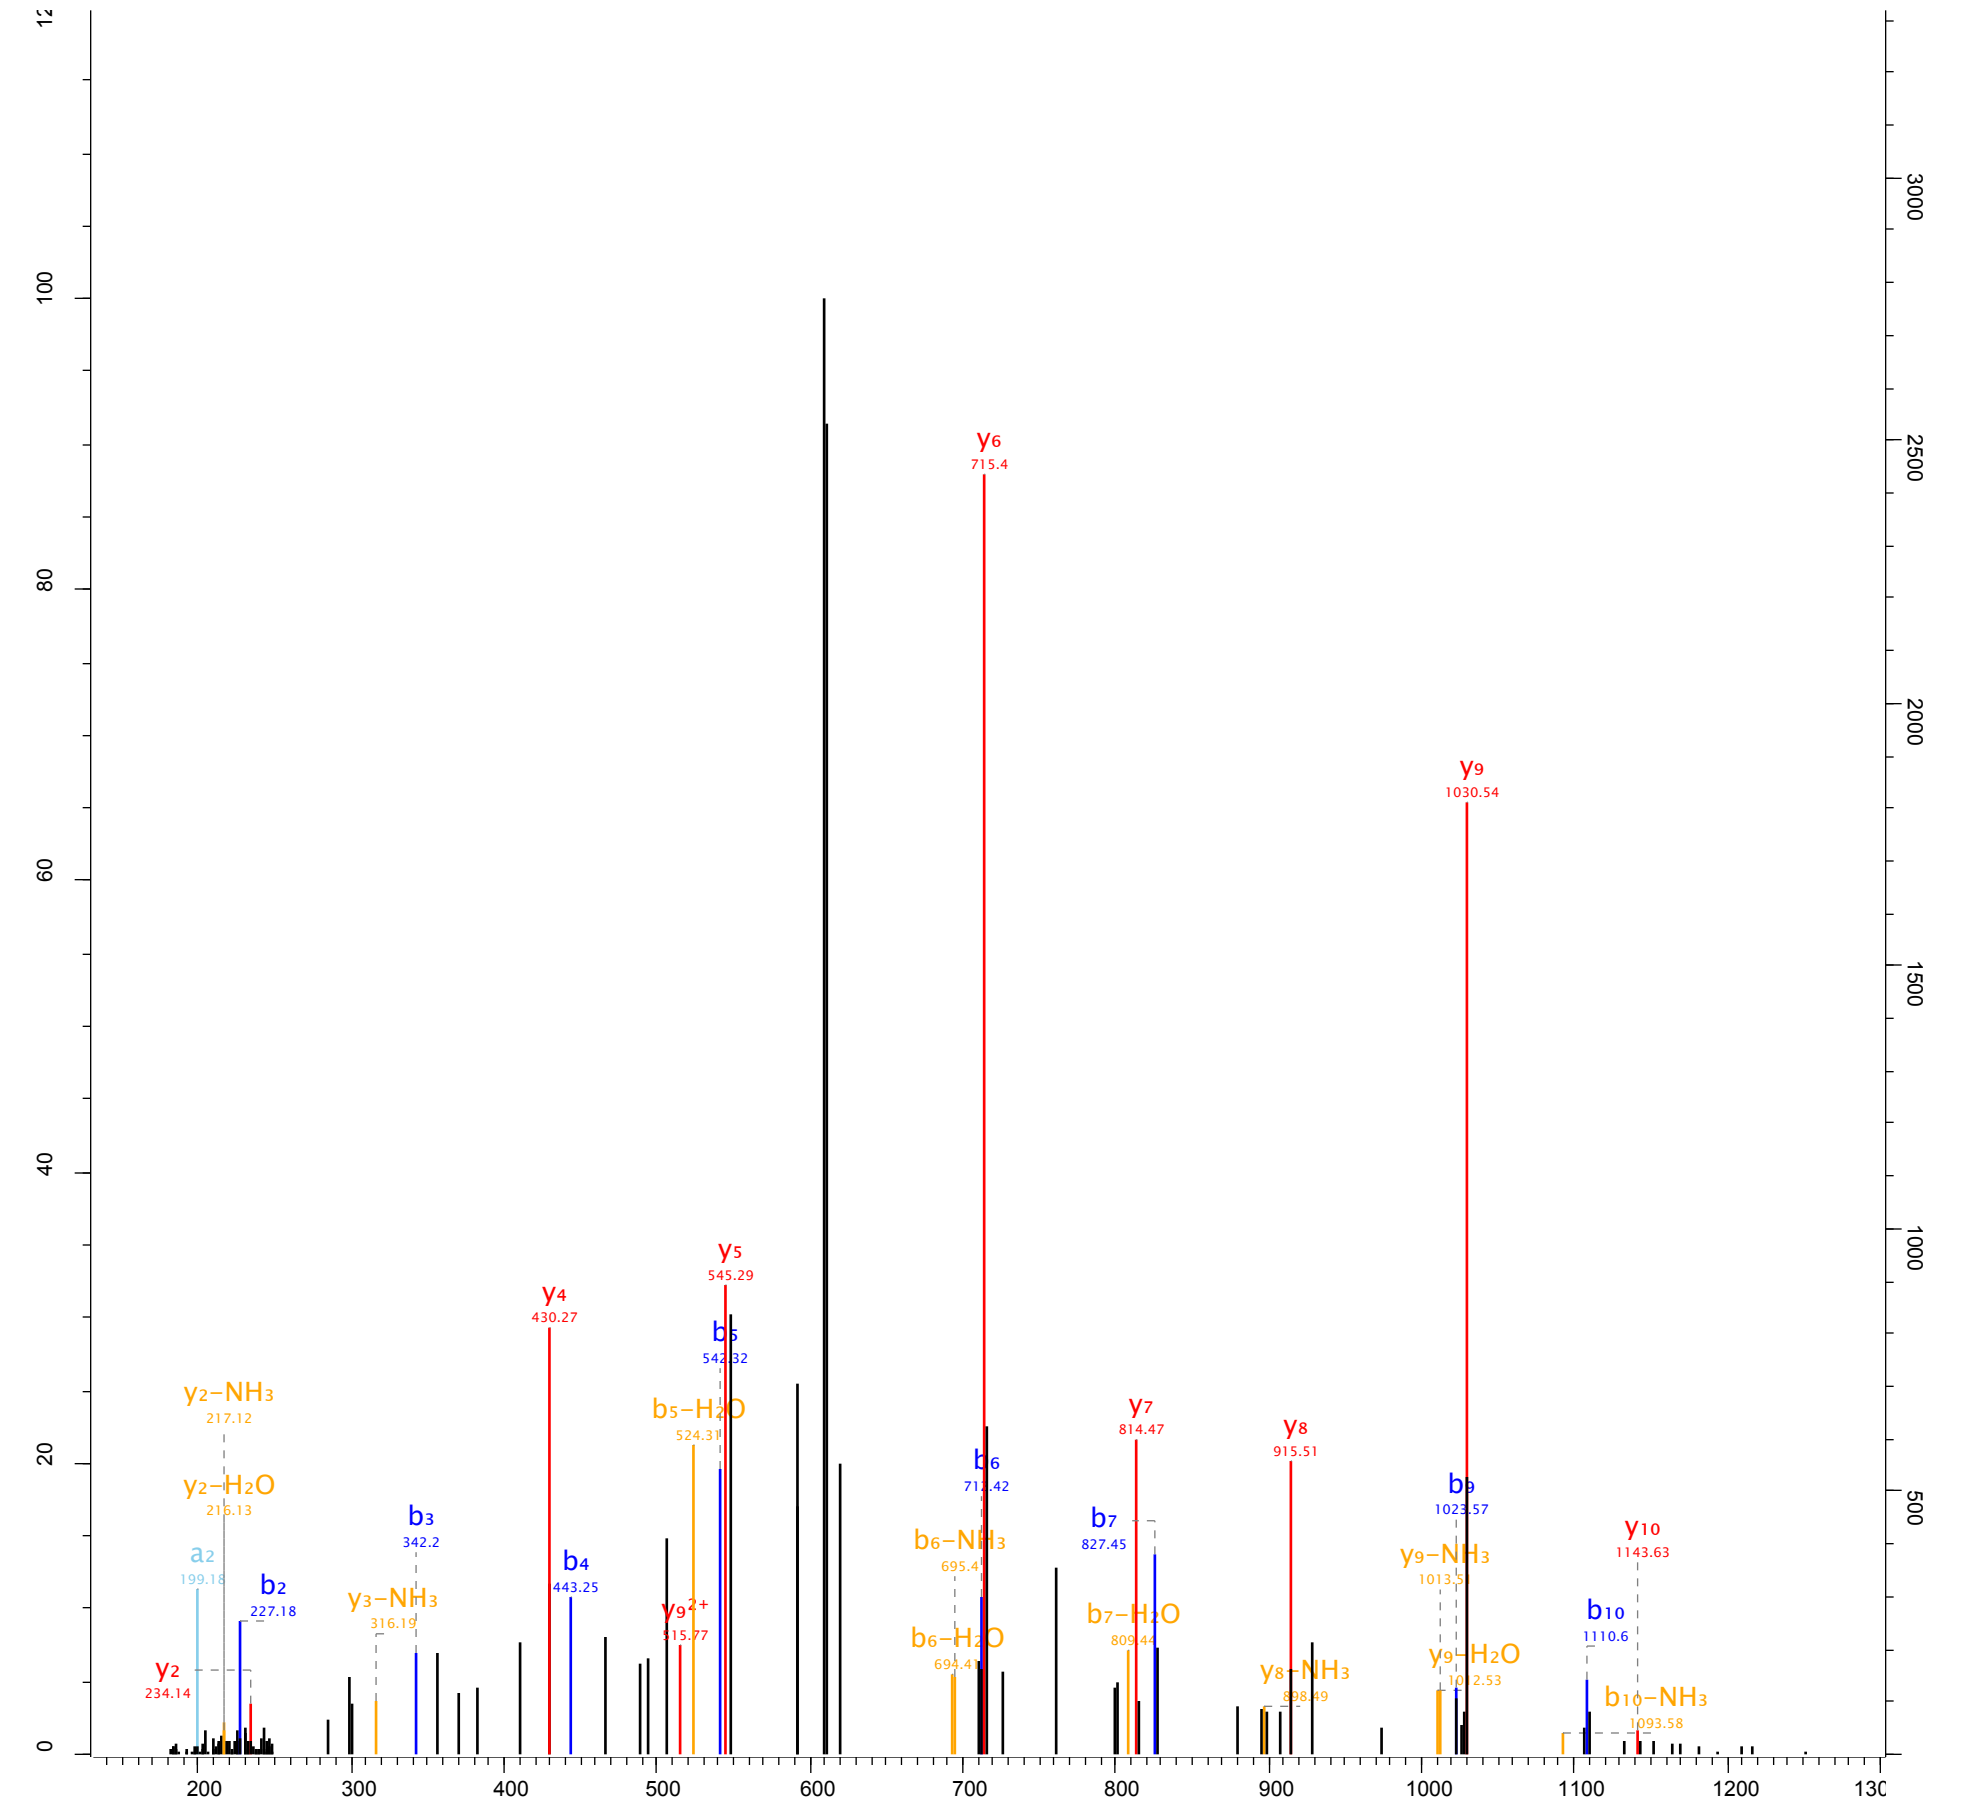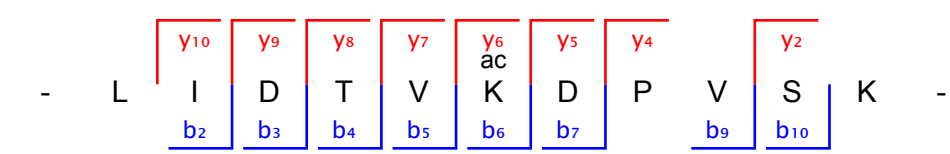

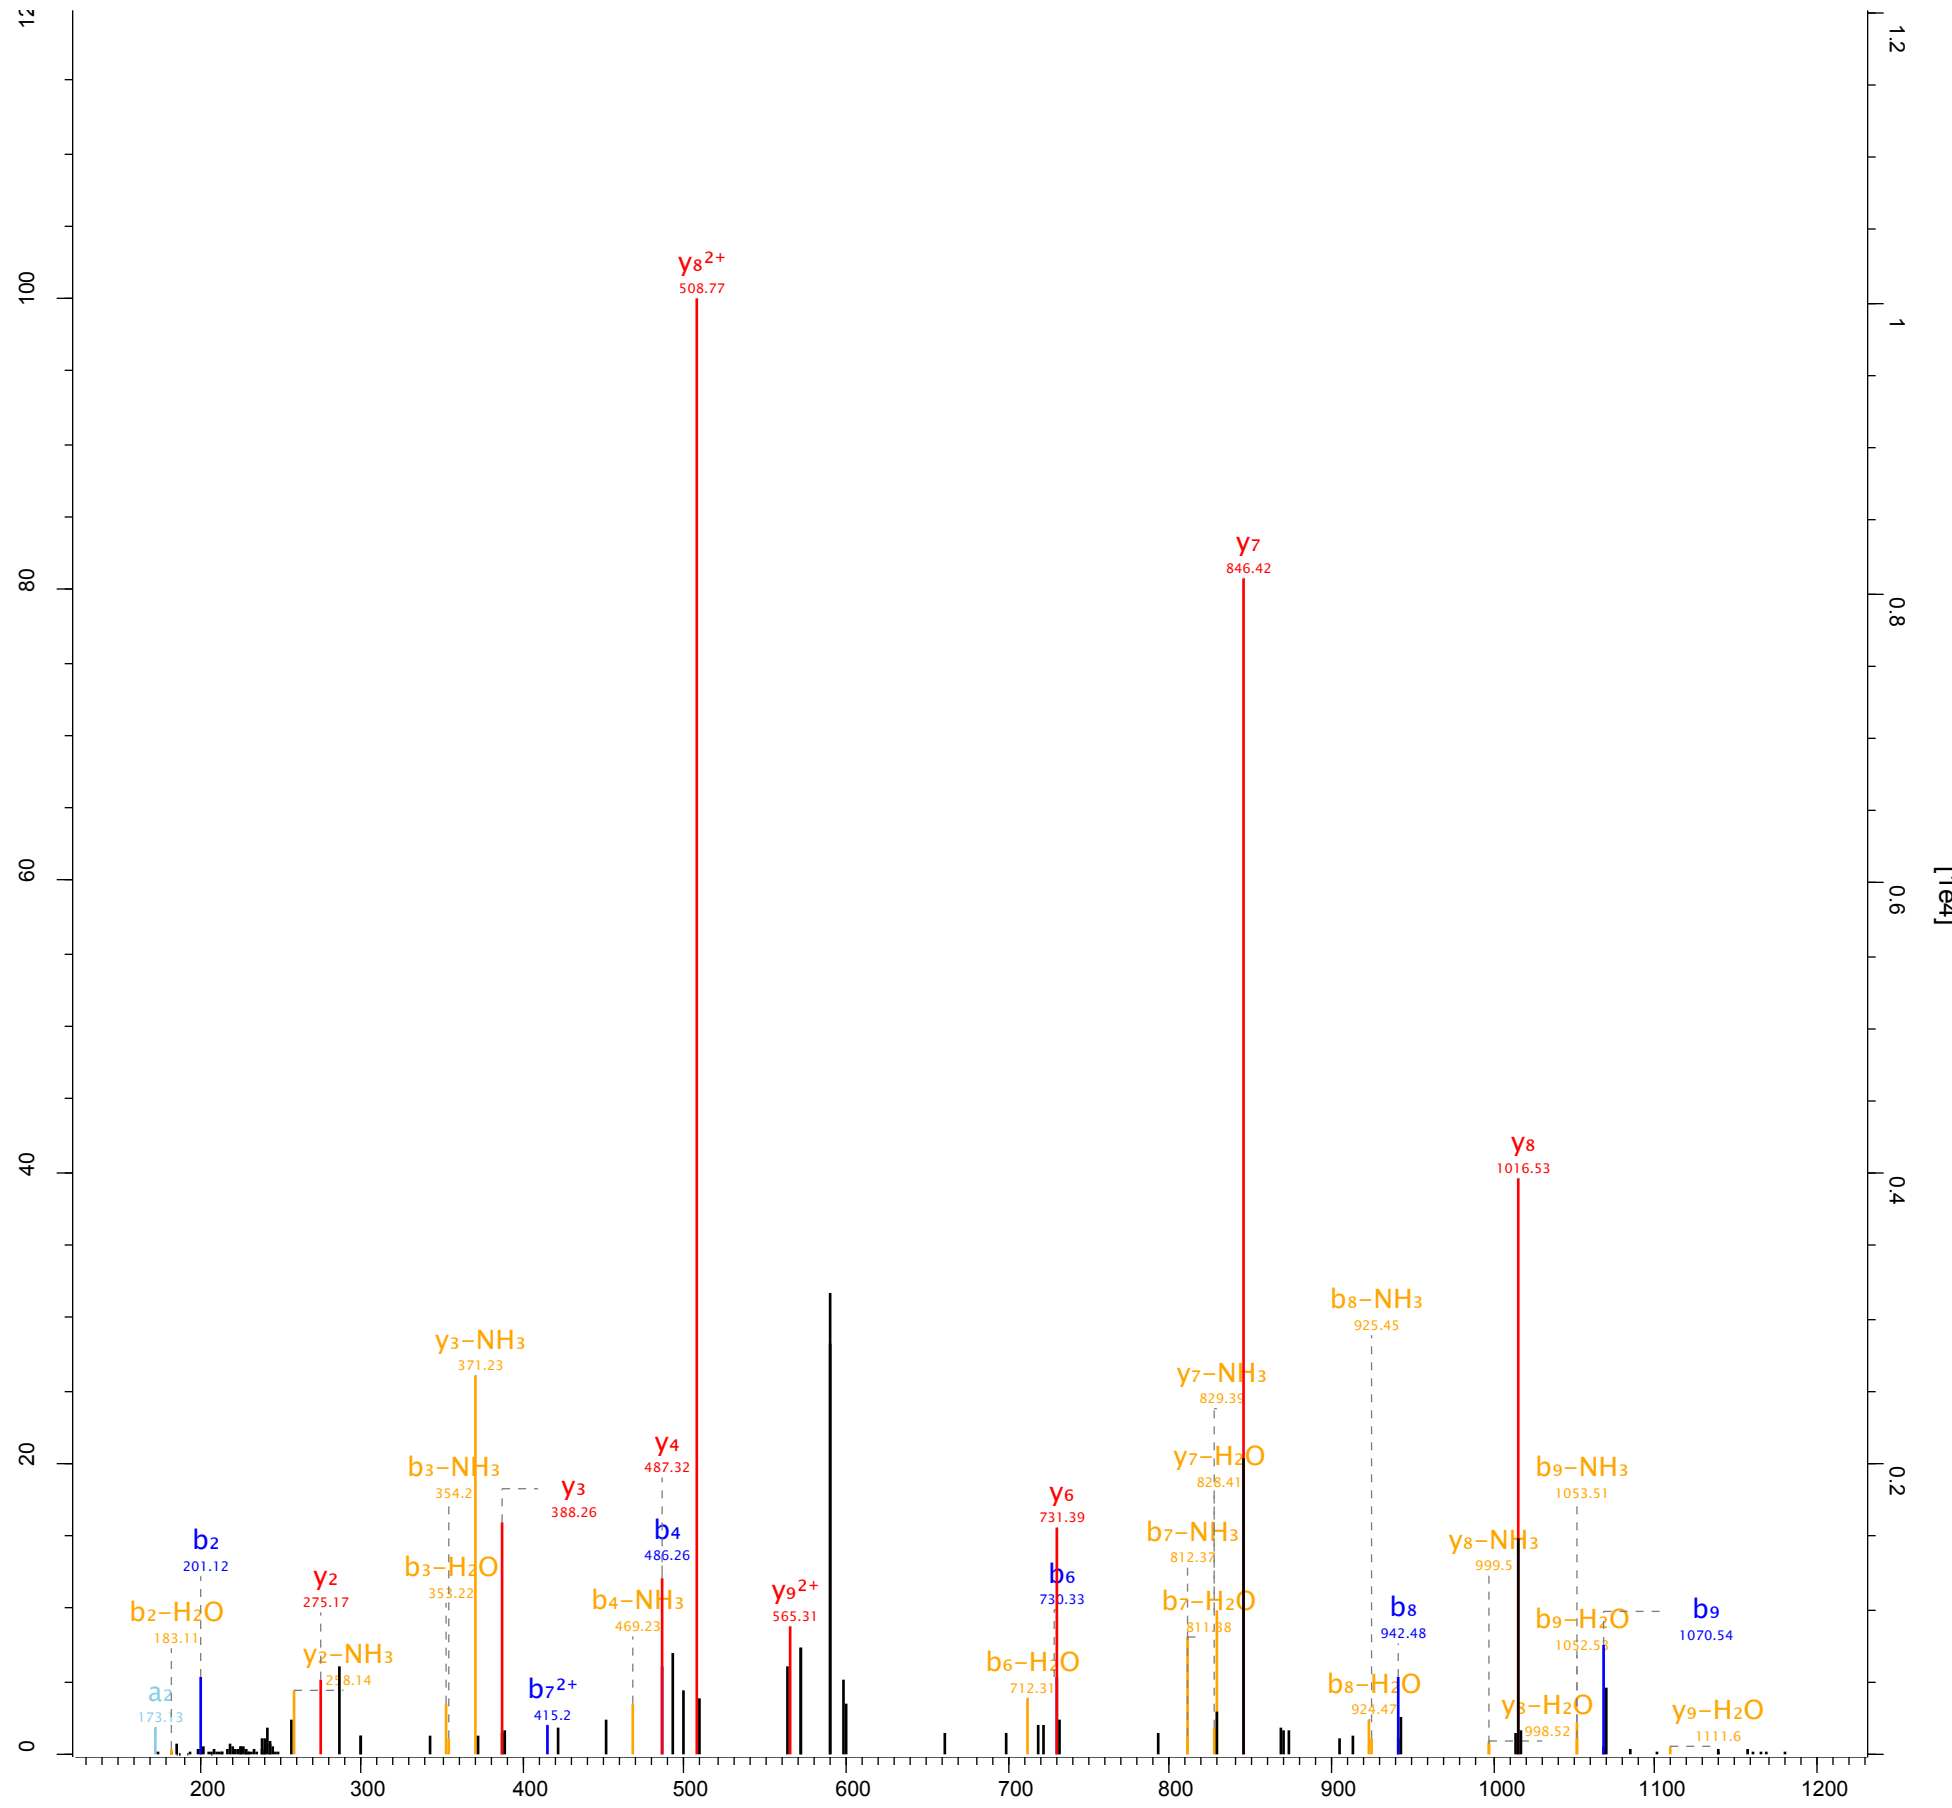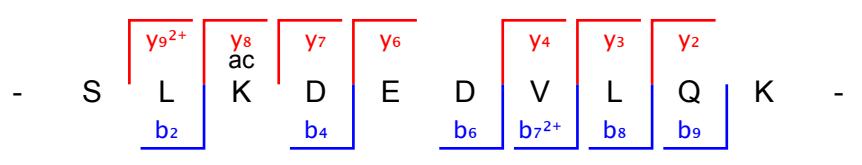

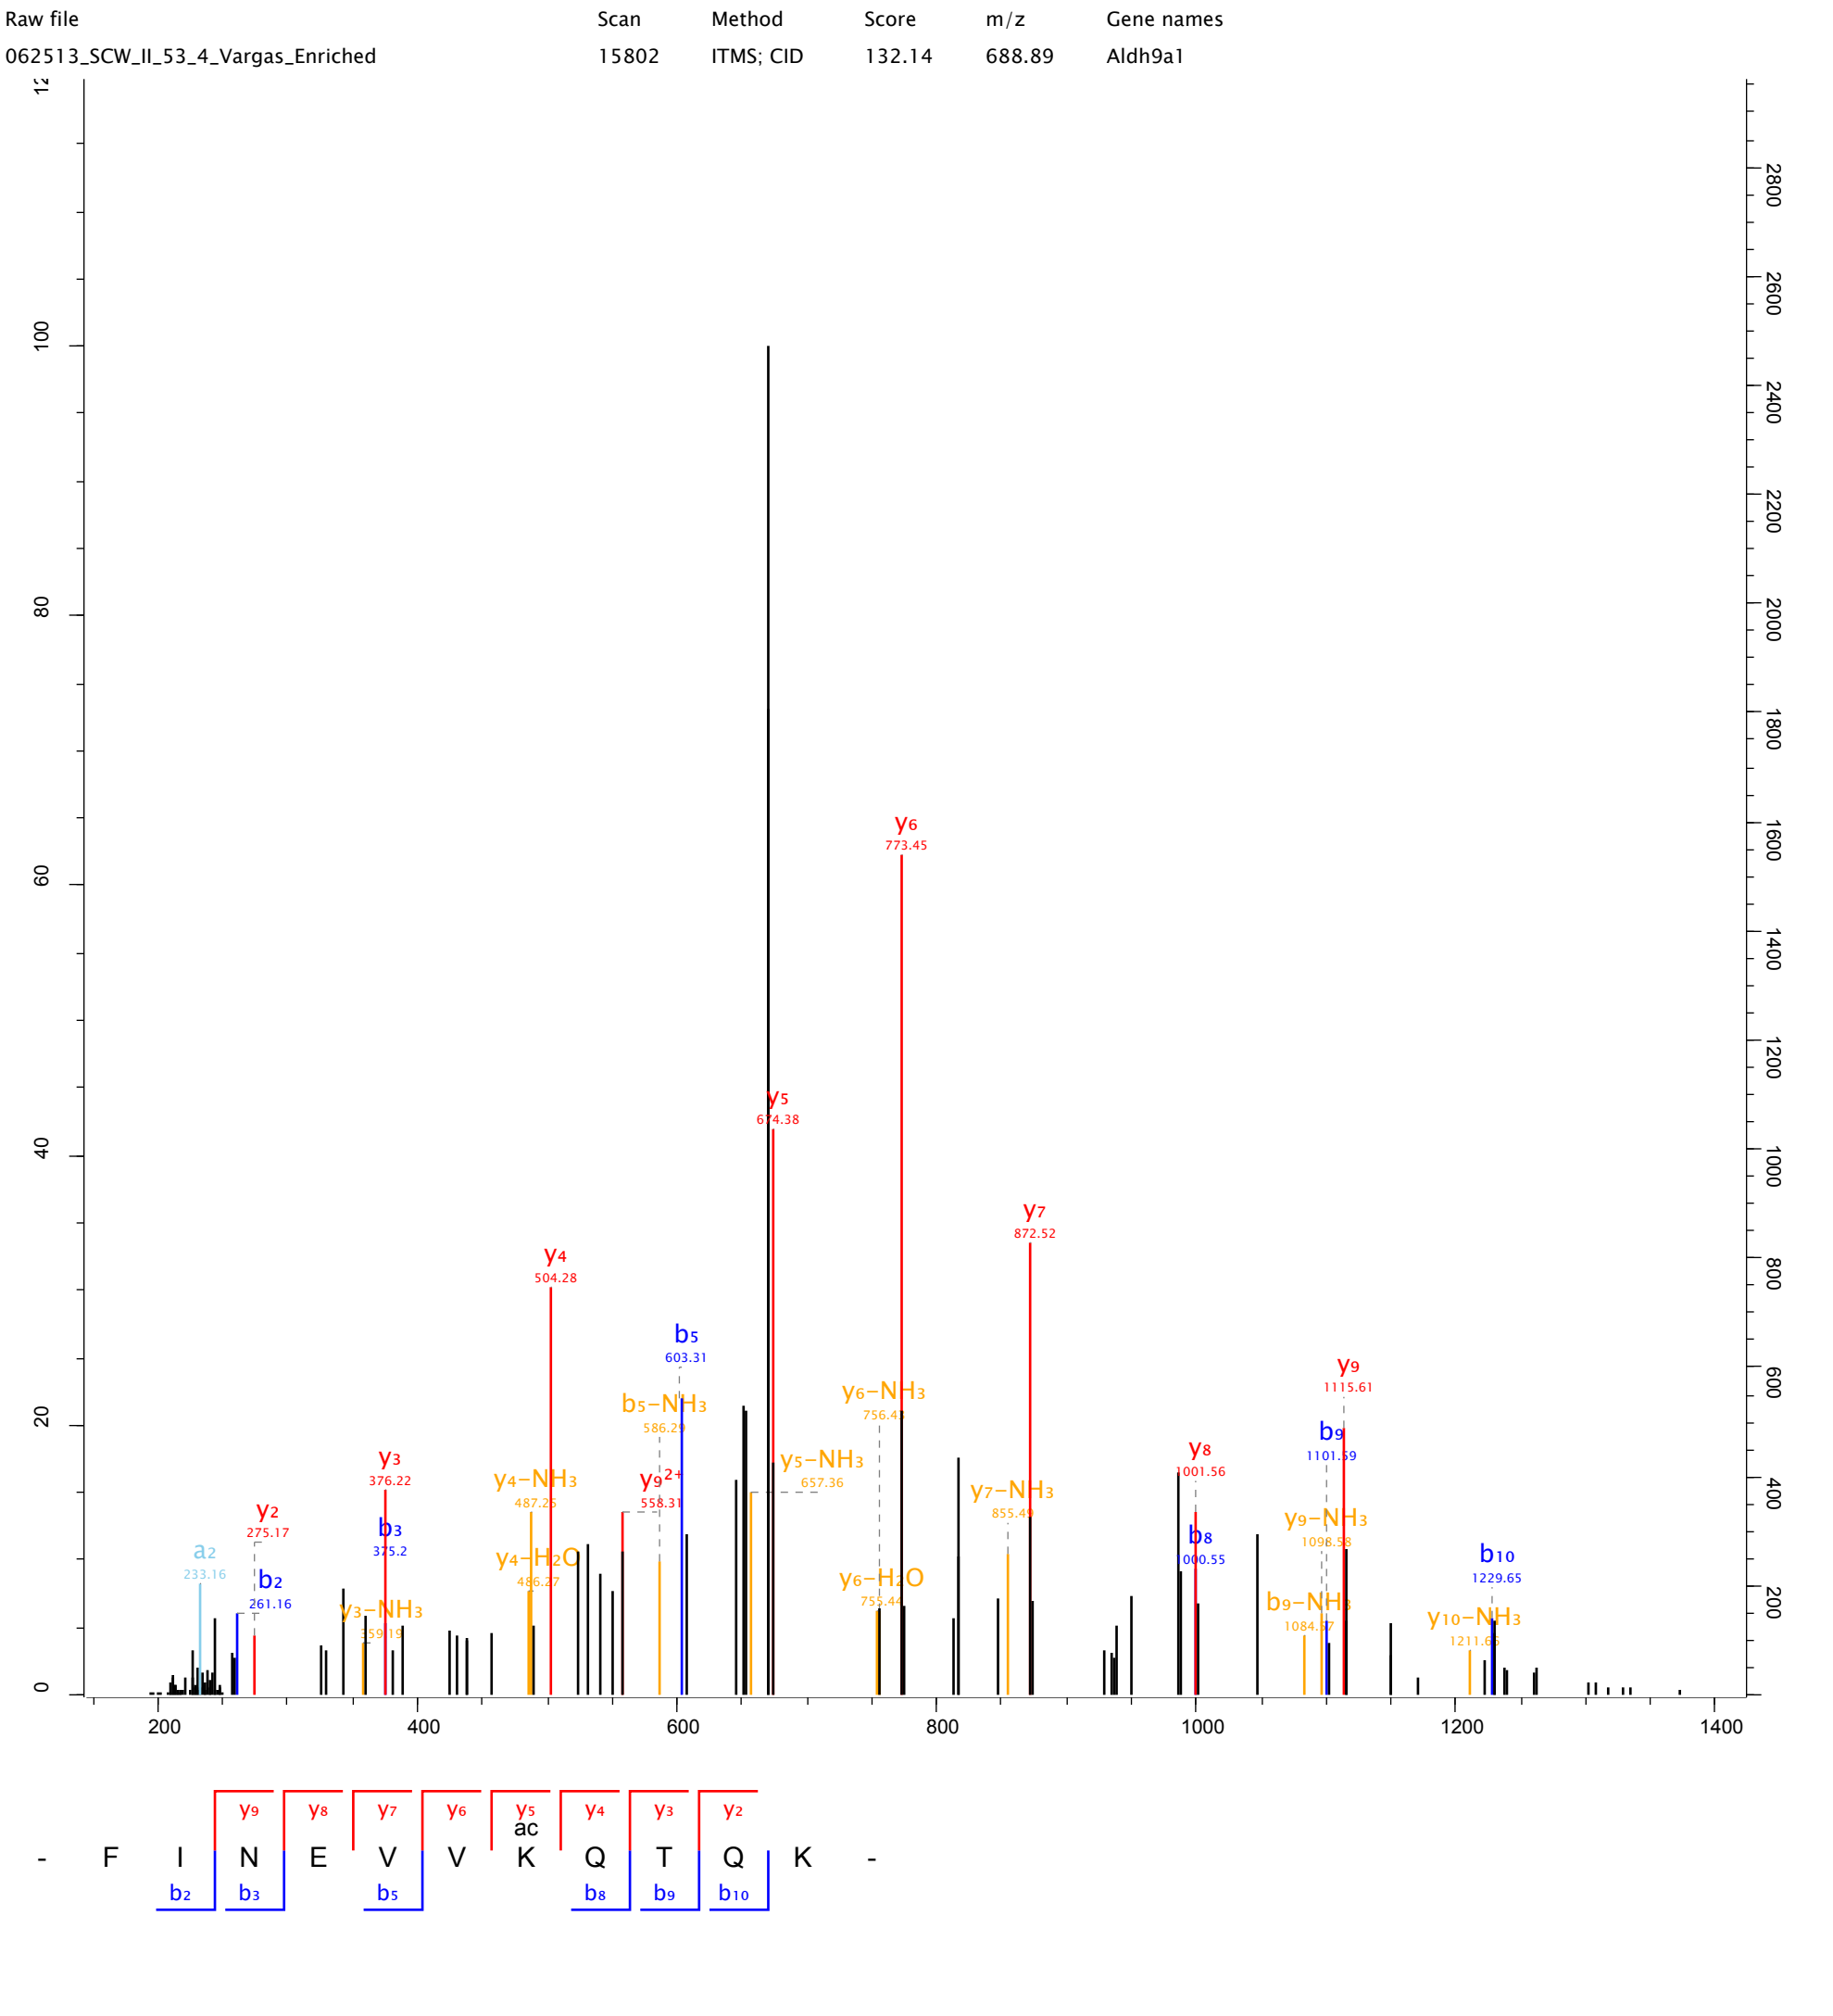

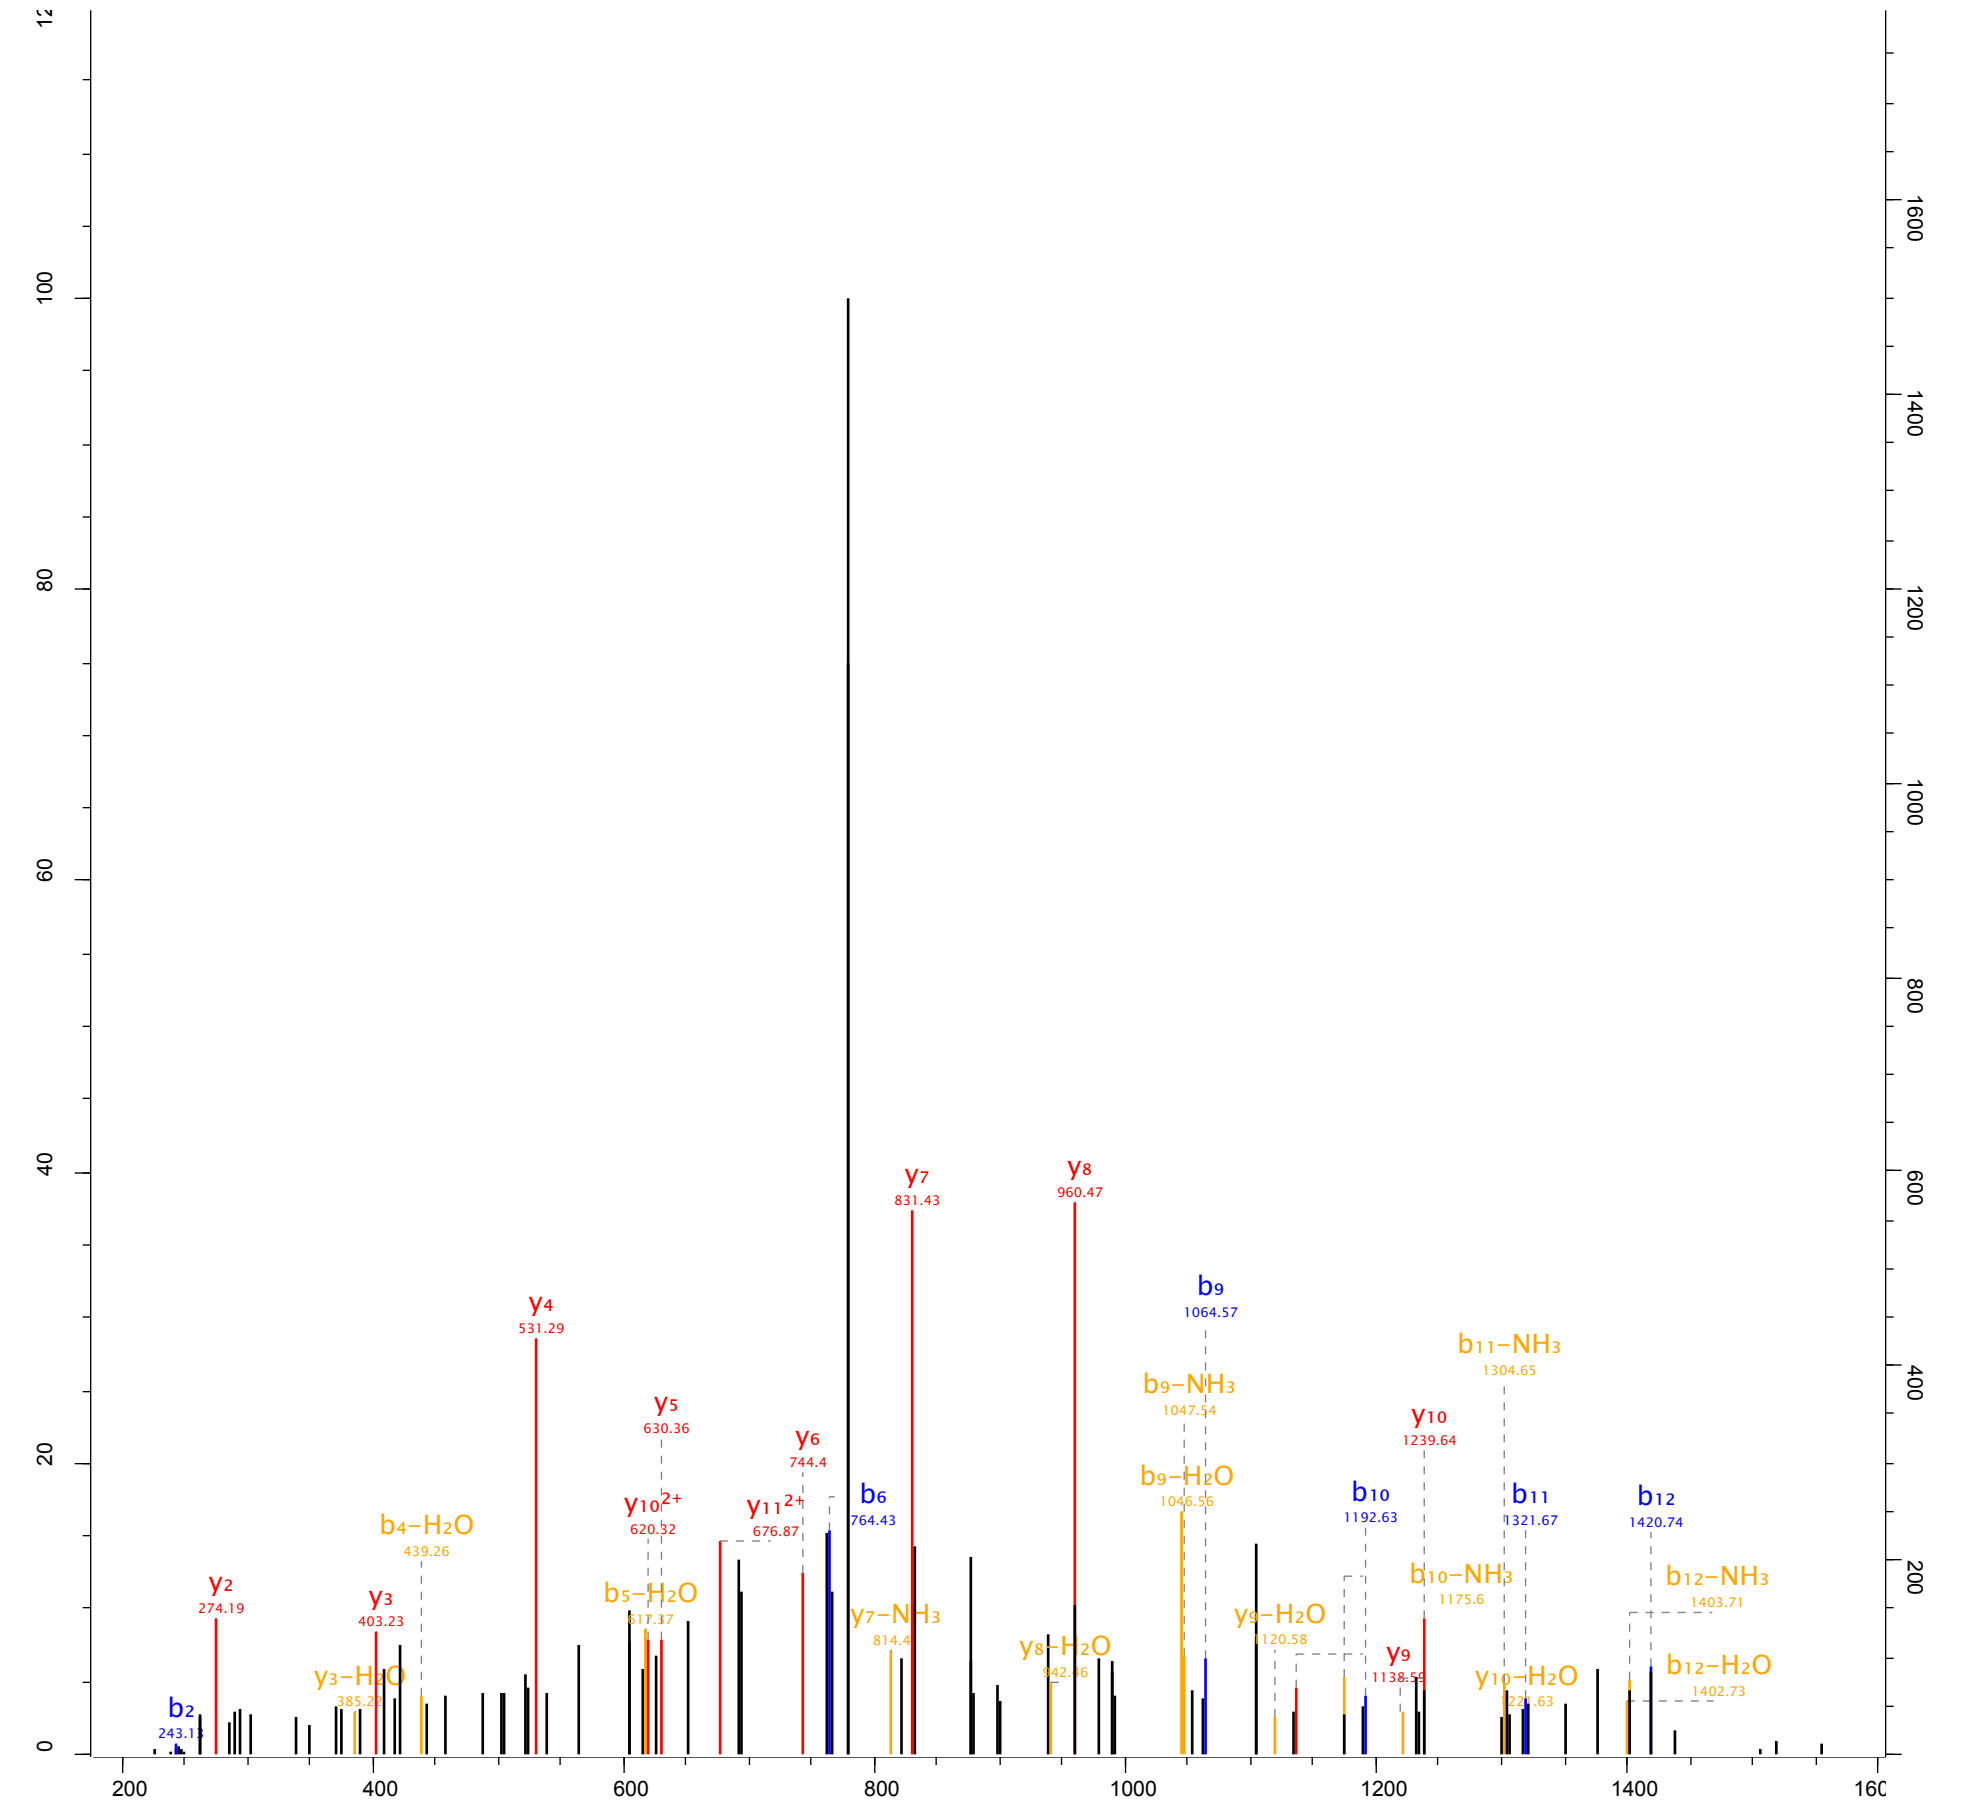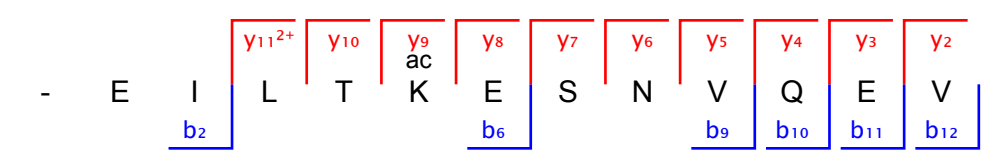

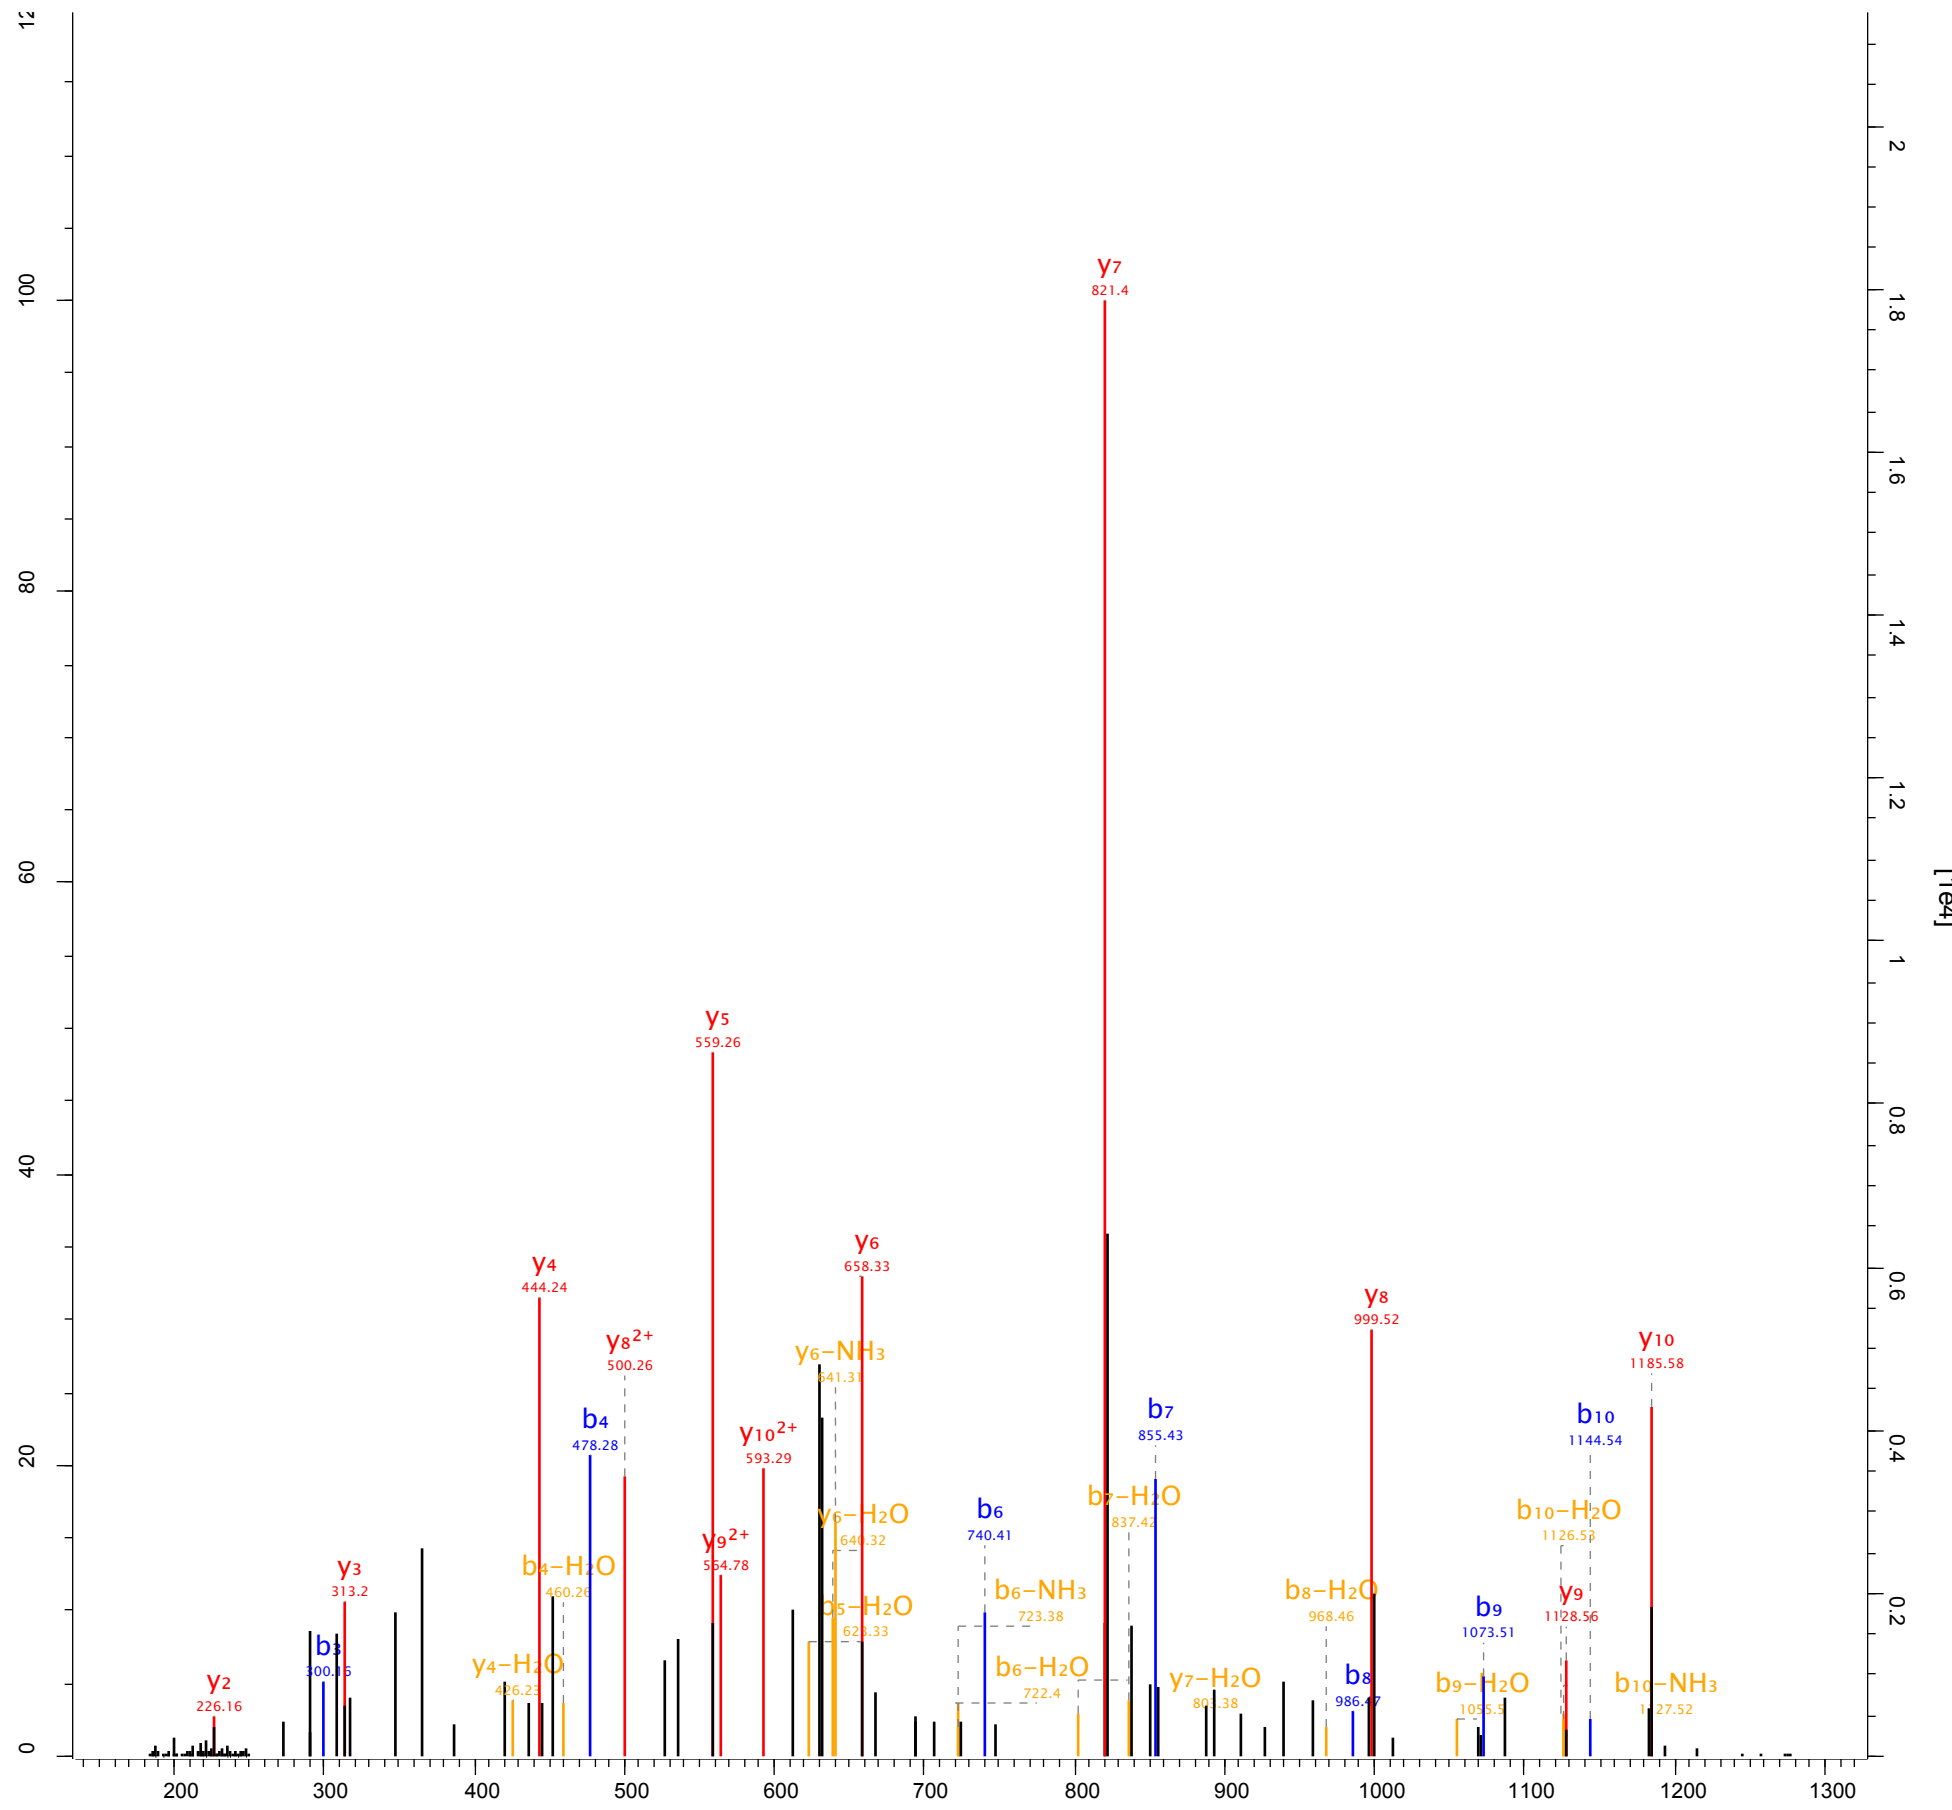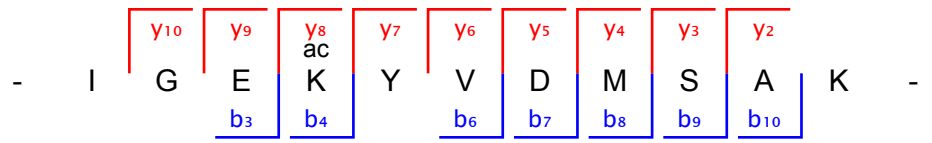

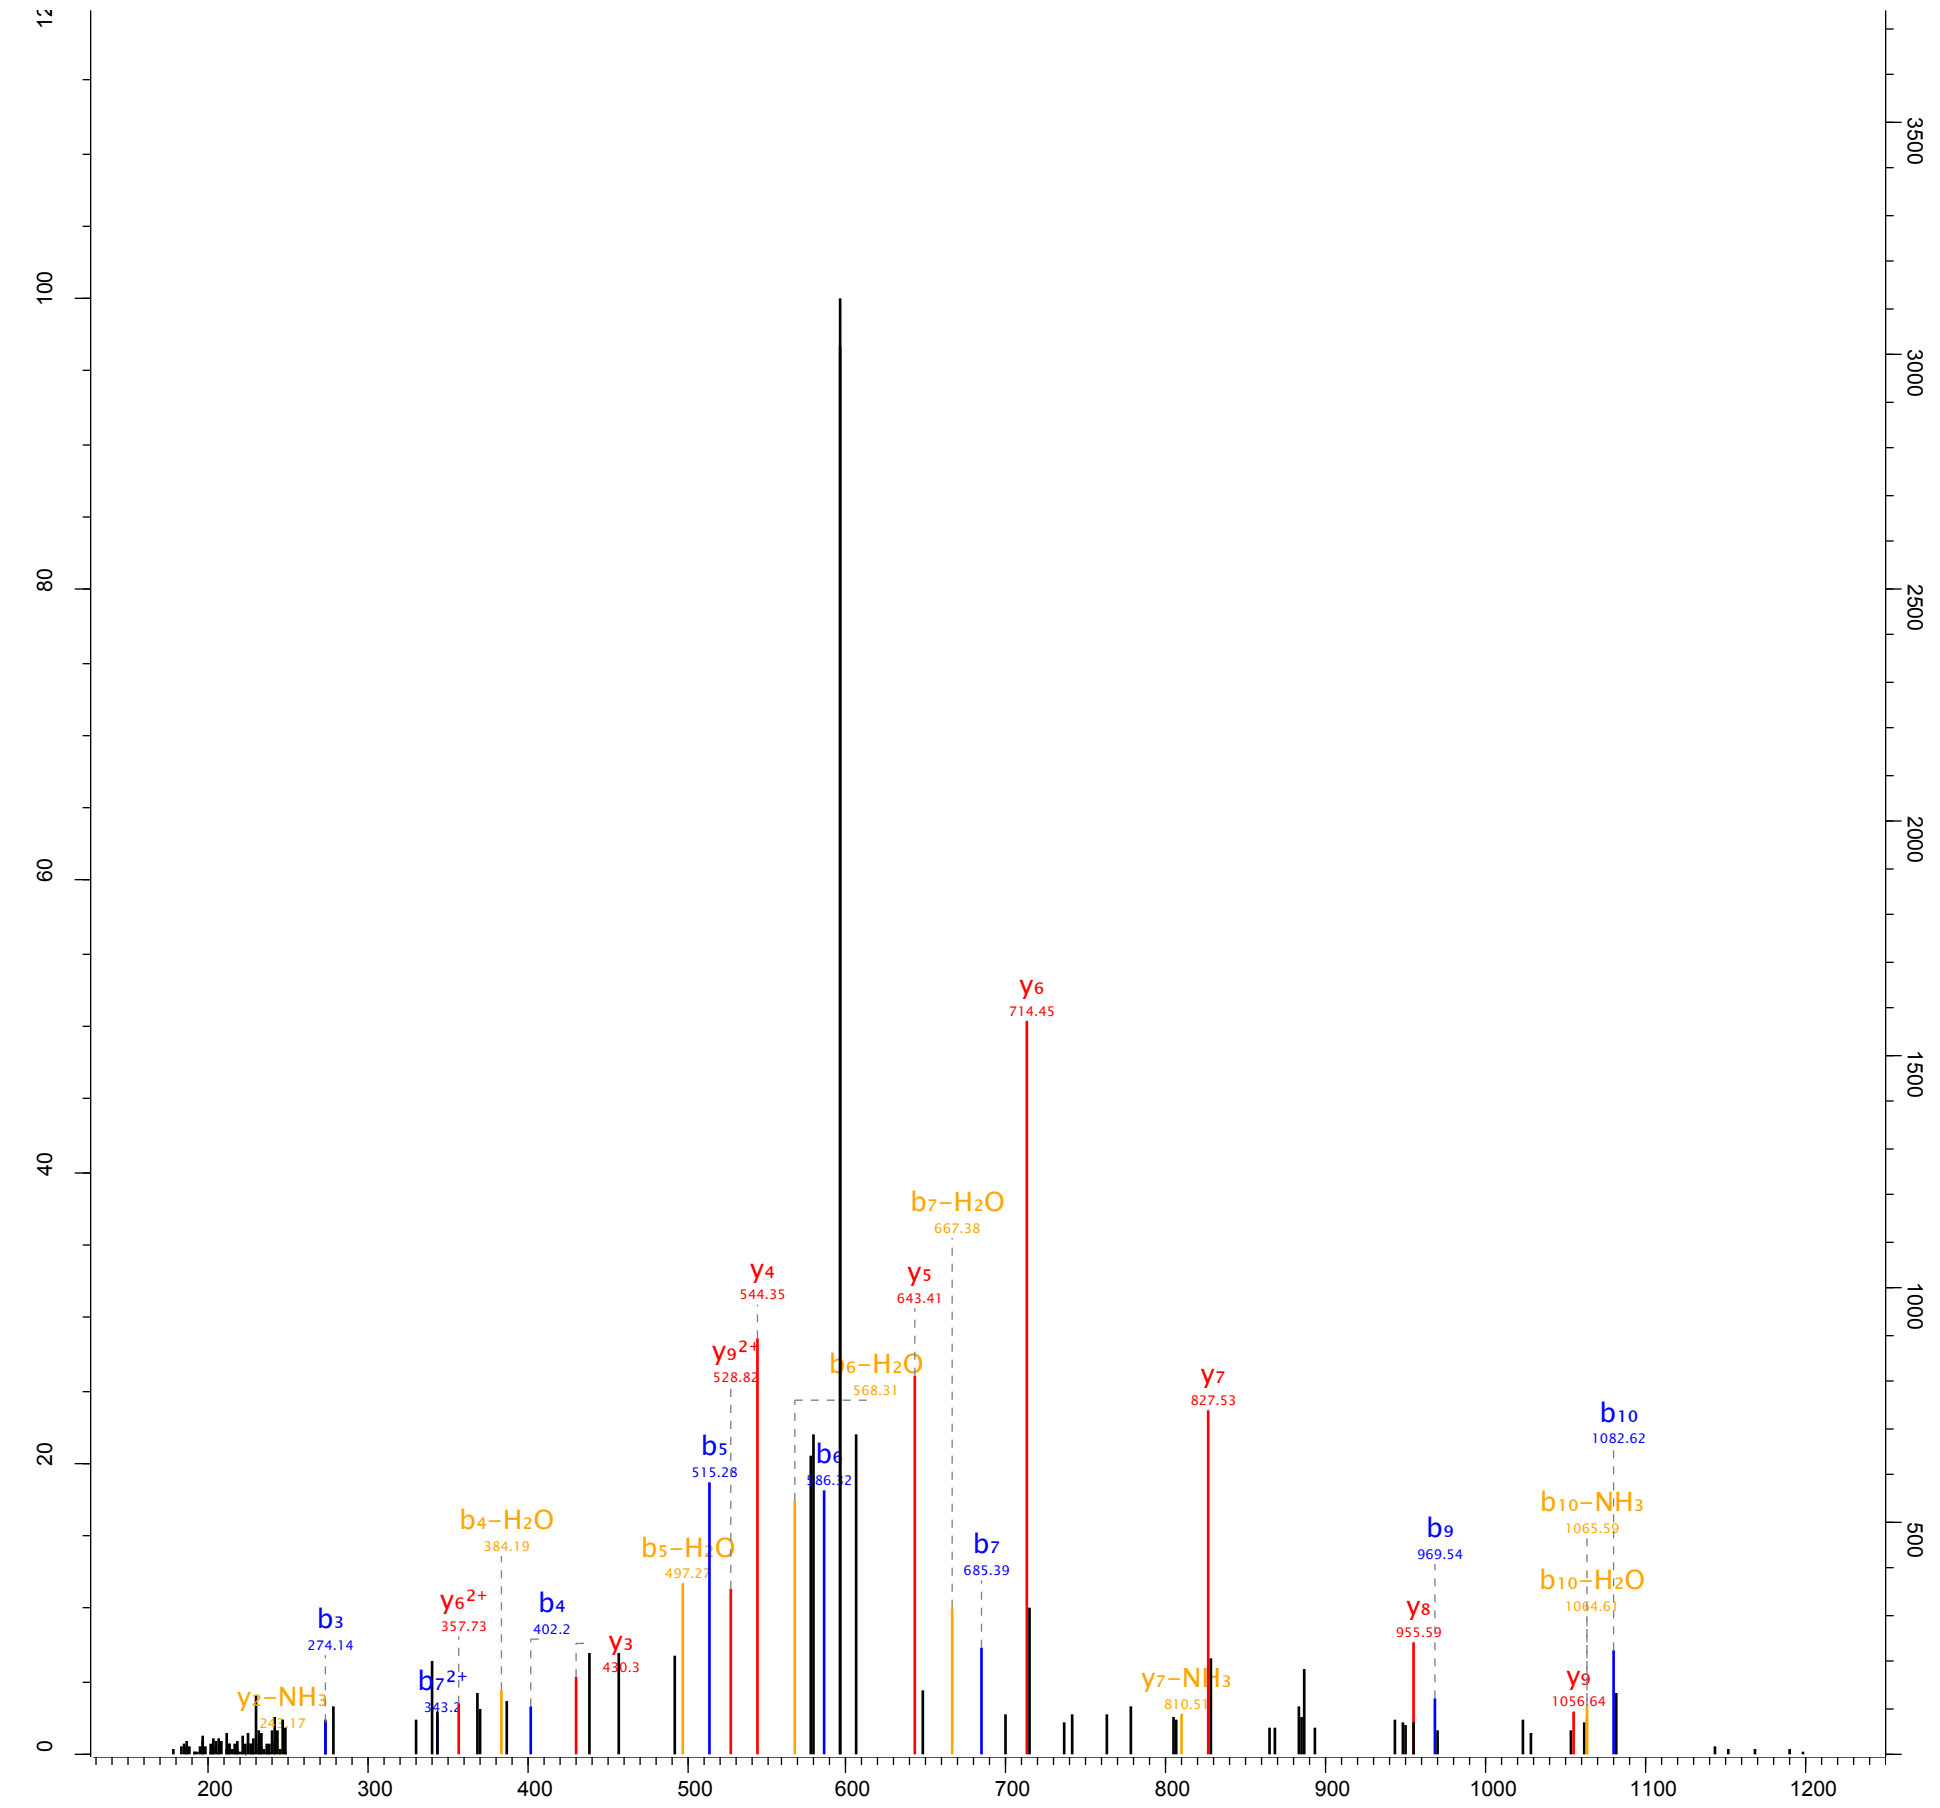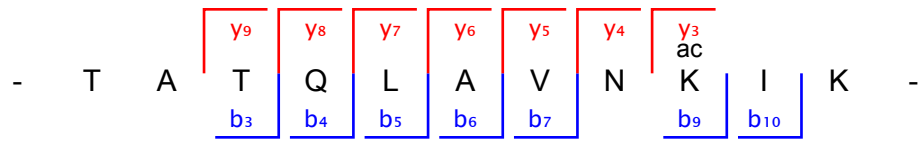



Raw file 062513\_SCW\_II\_53\_4\_Vargas\_Enriched Scan 16036 Method ITMS; CID 330.04 m/z 854.92 Gene names Gm10250;Atp5h

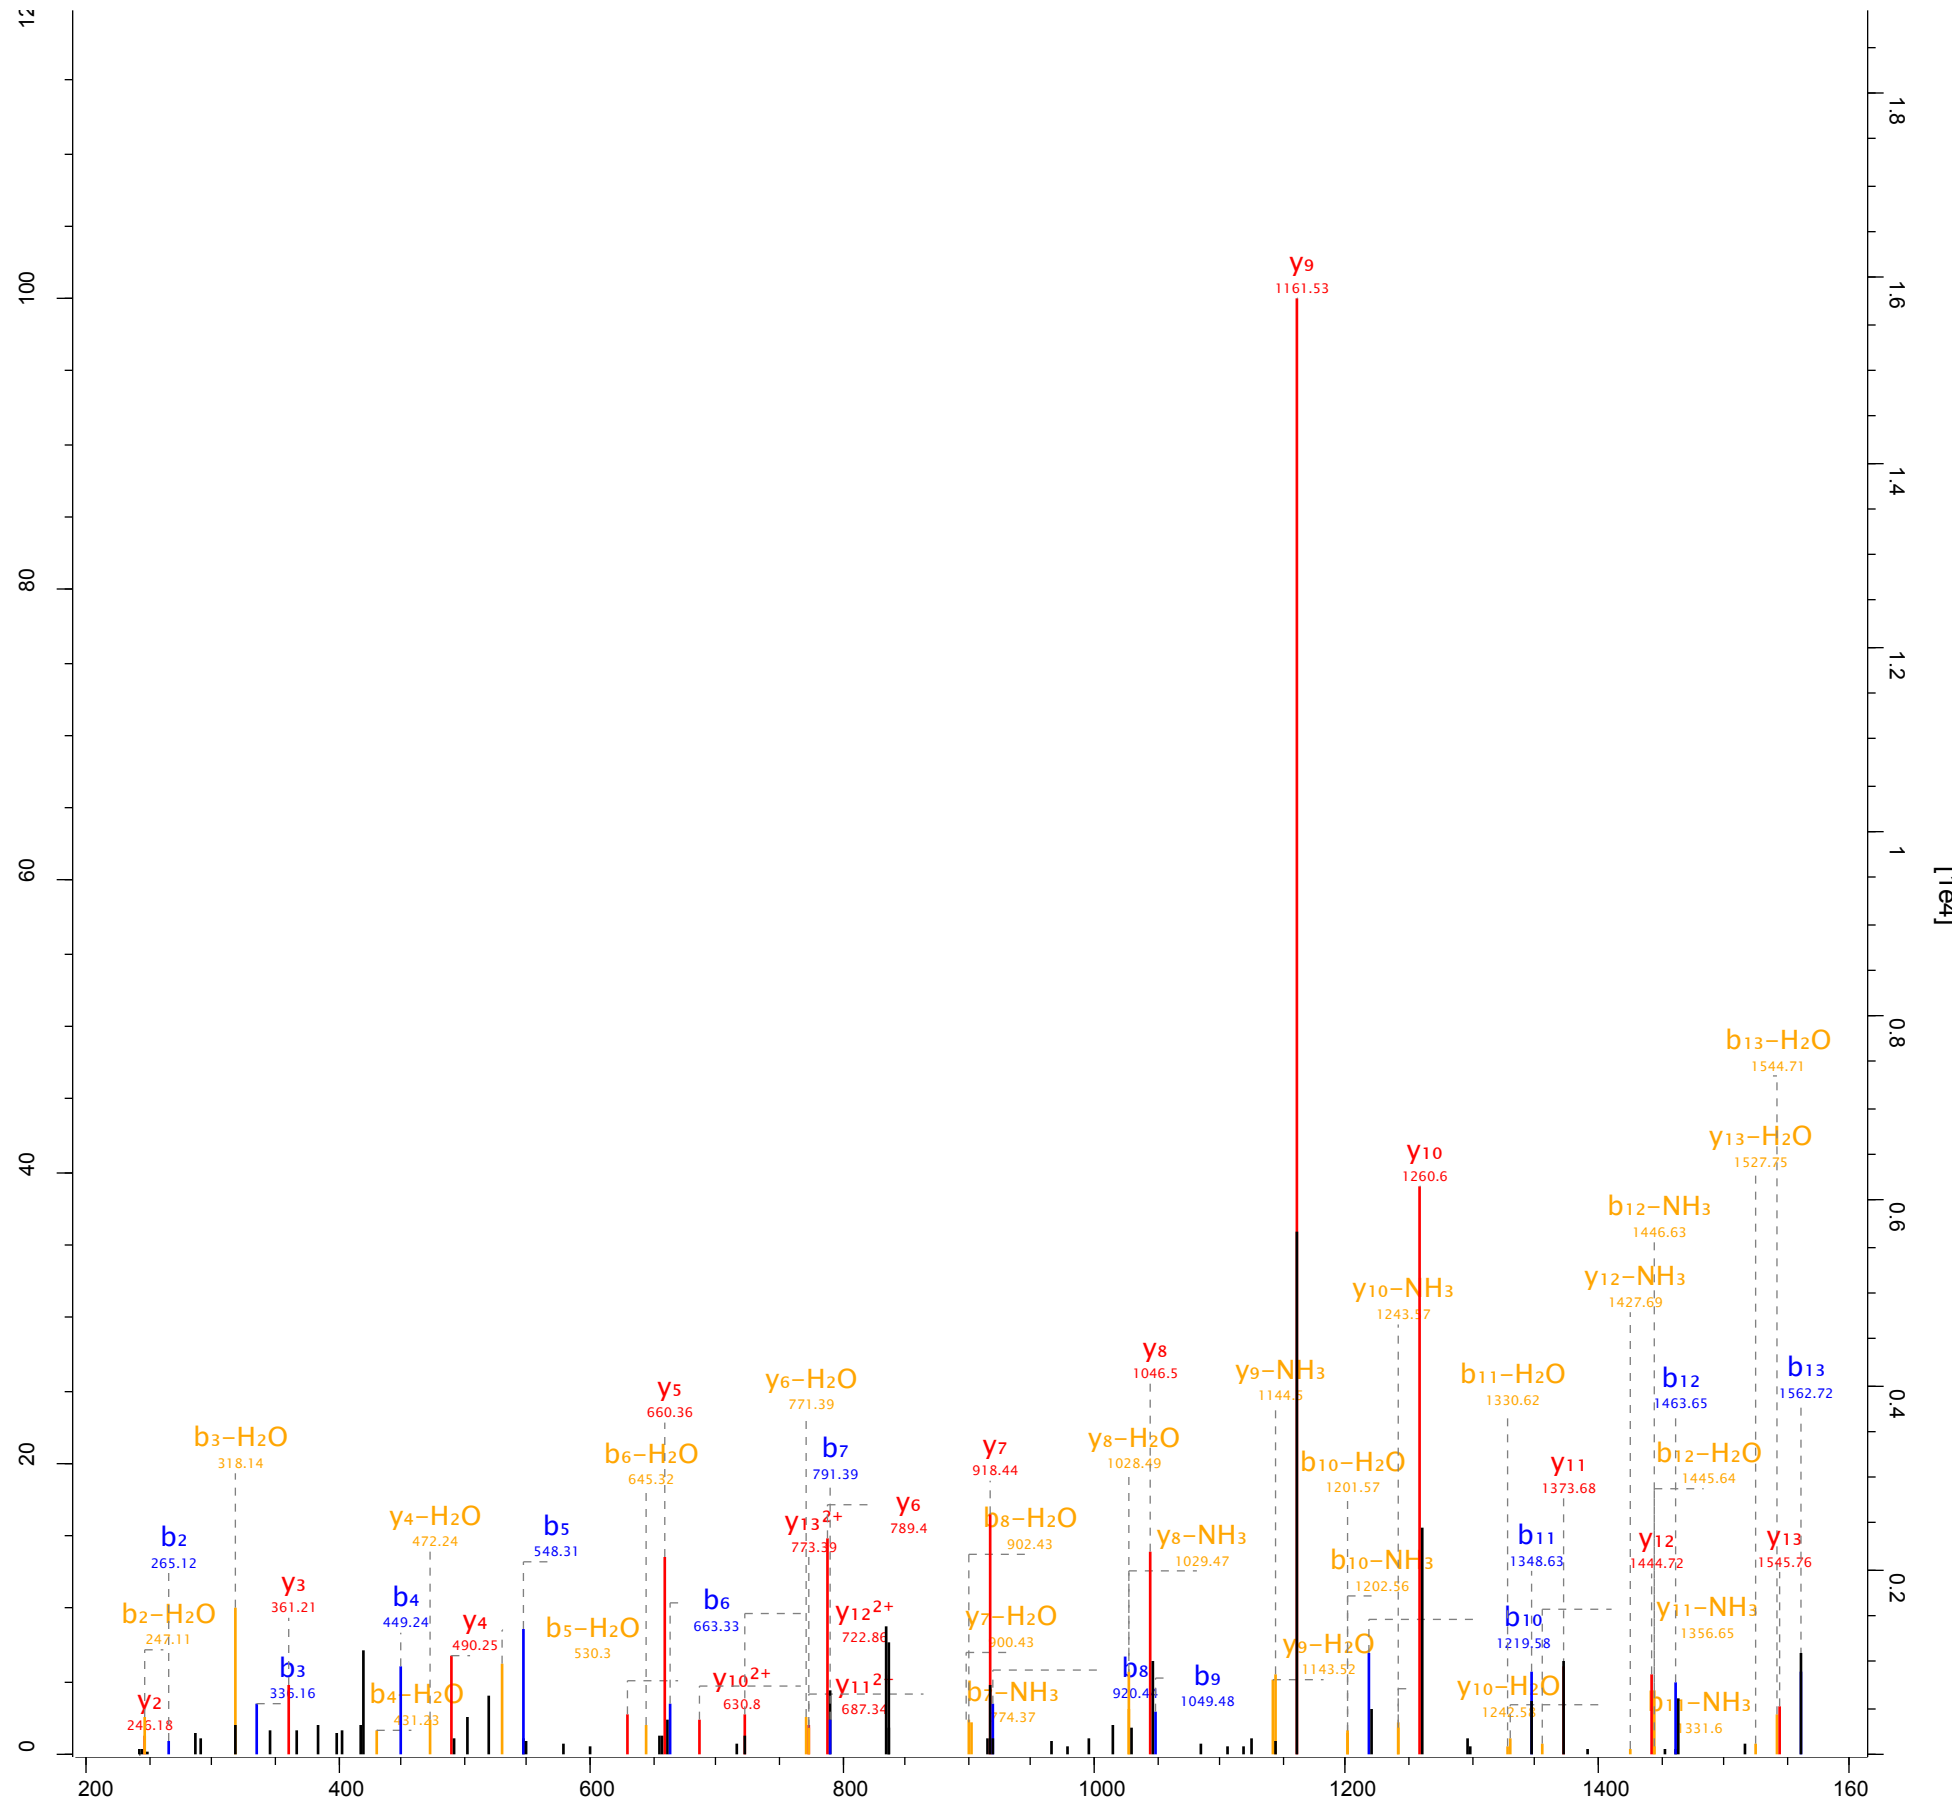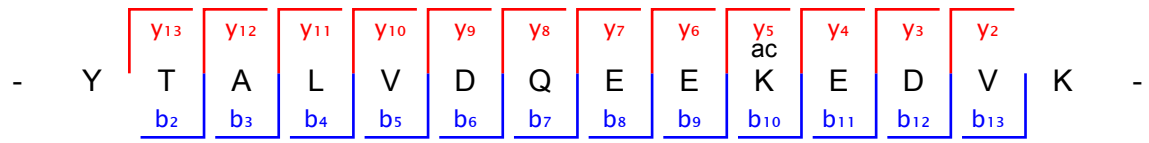

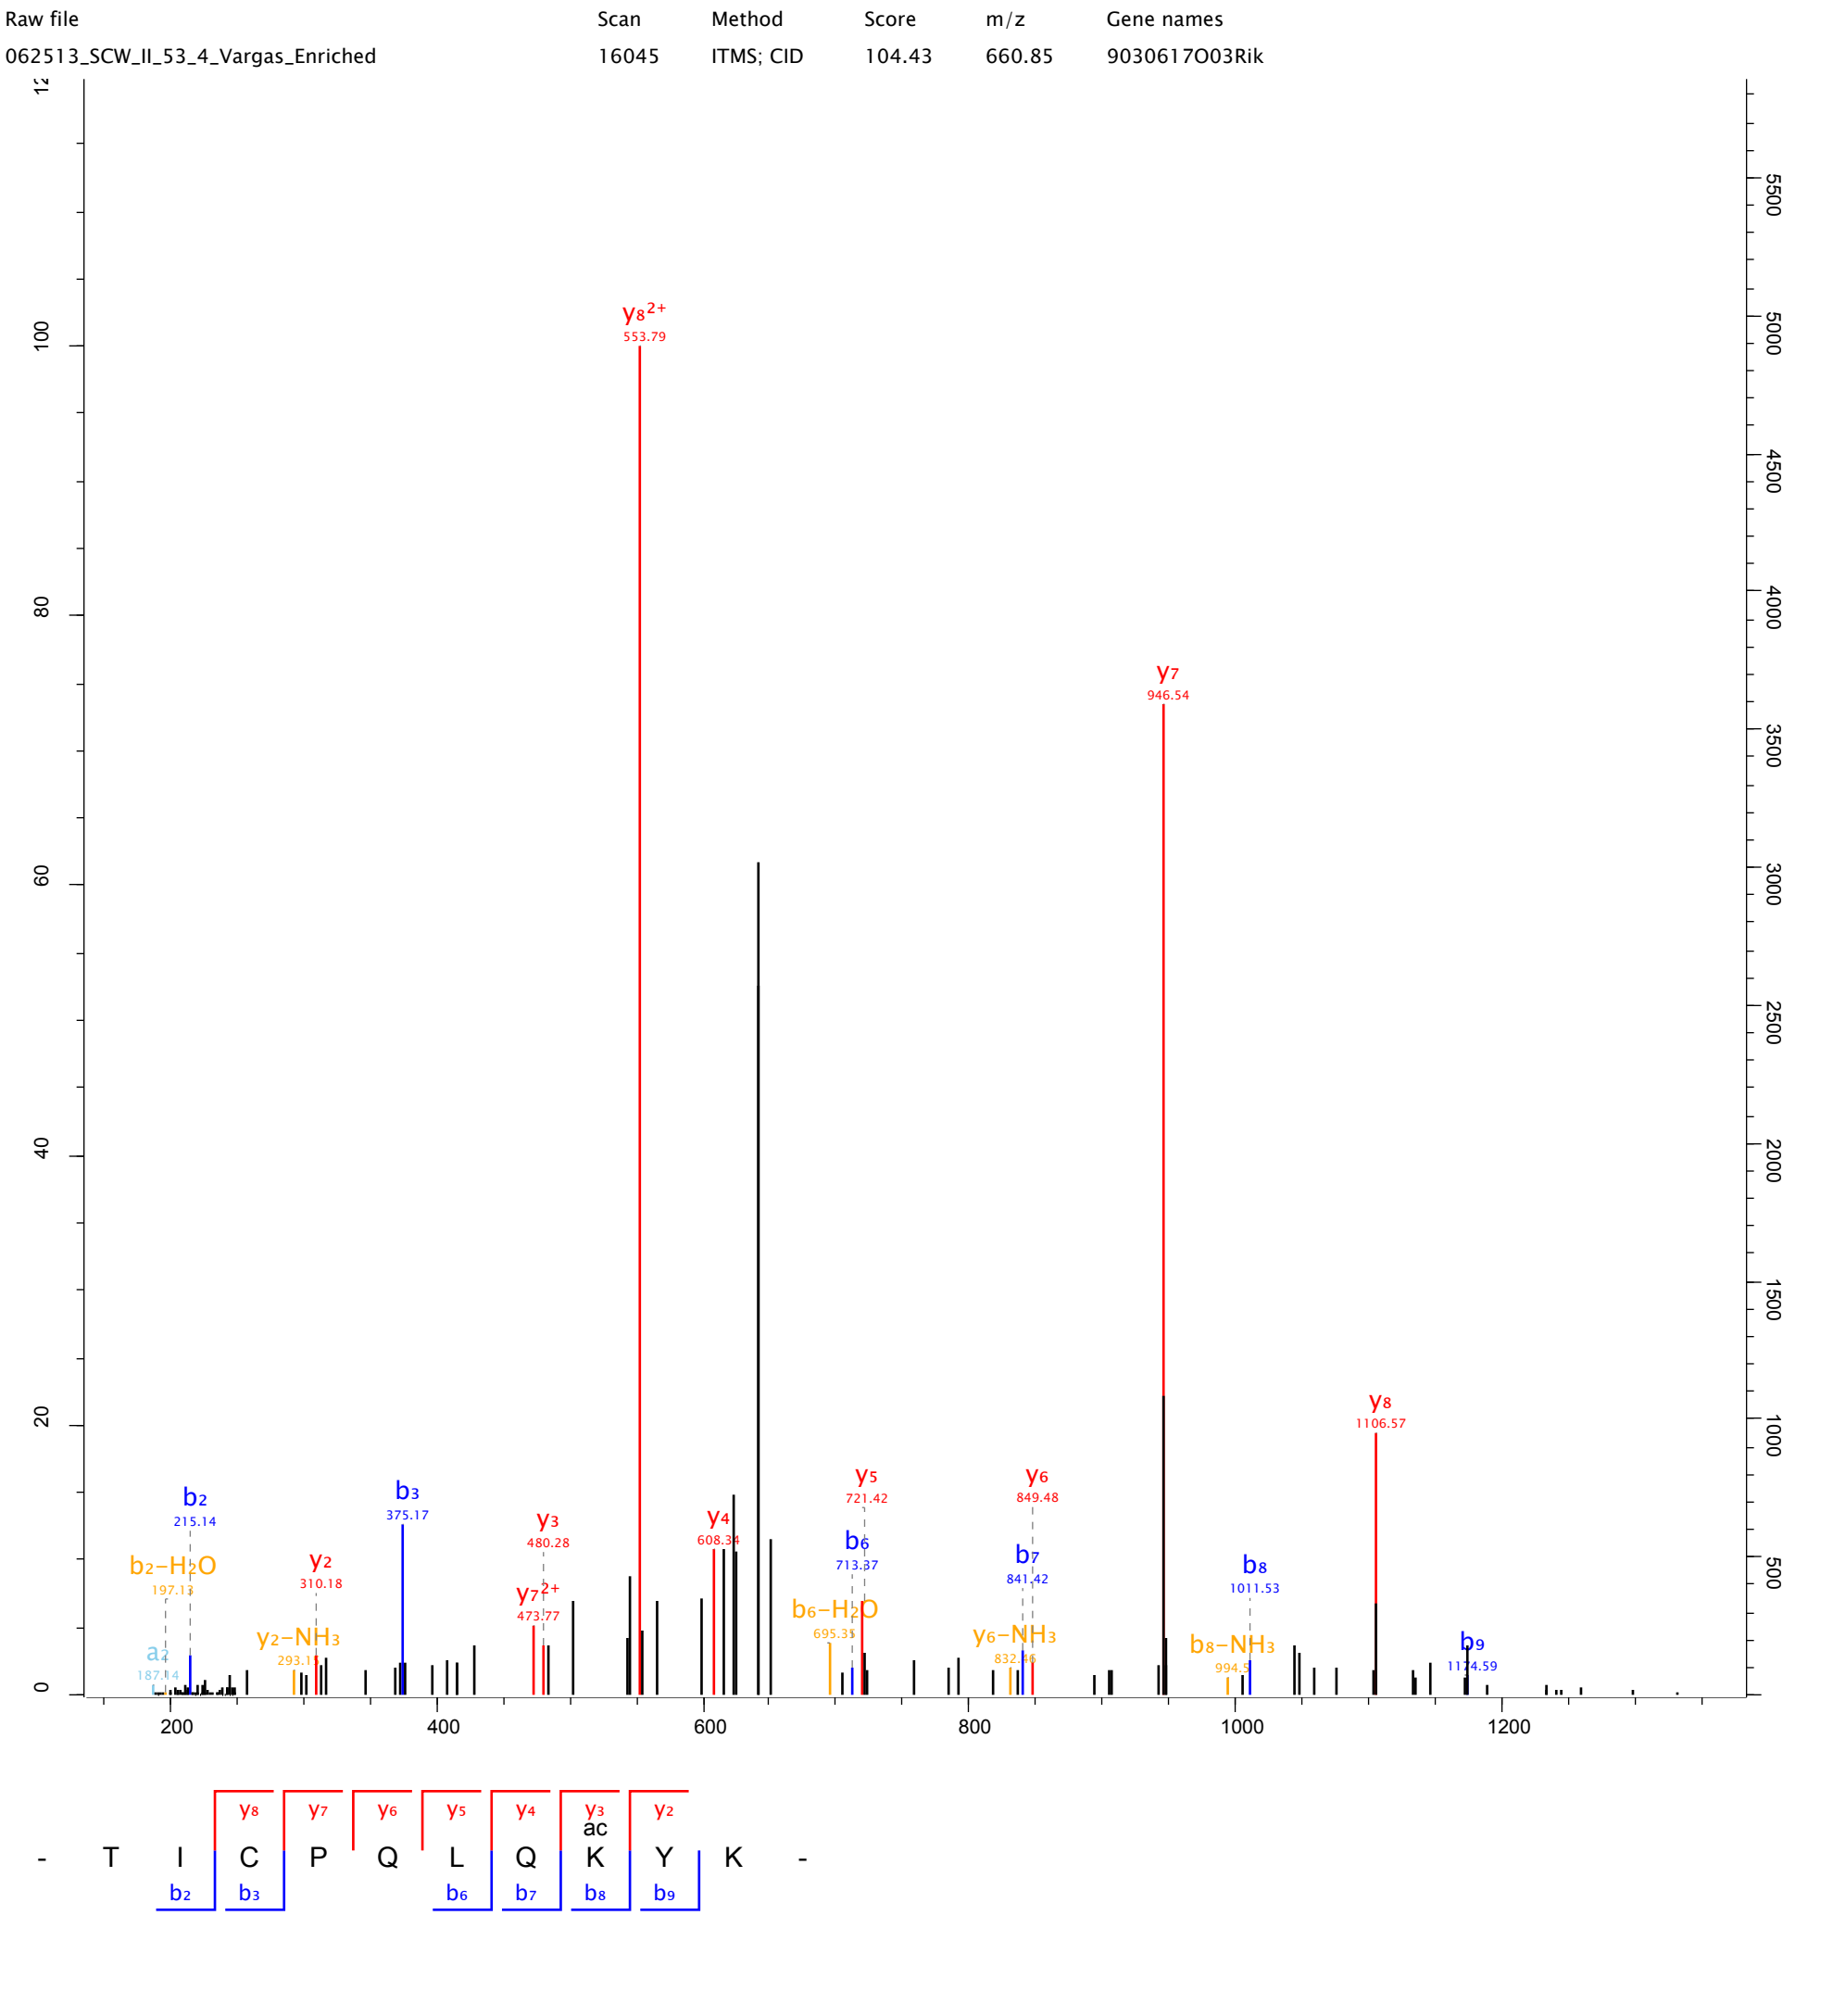

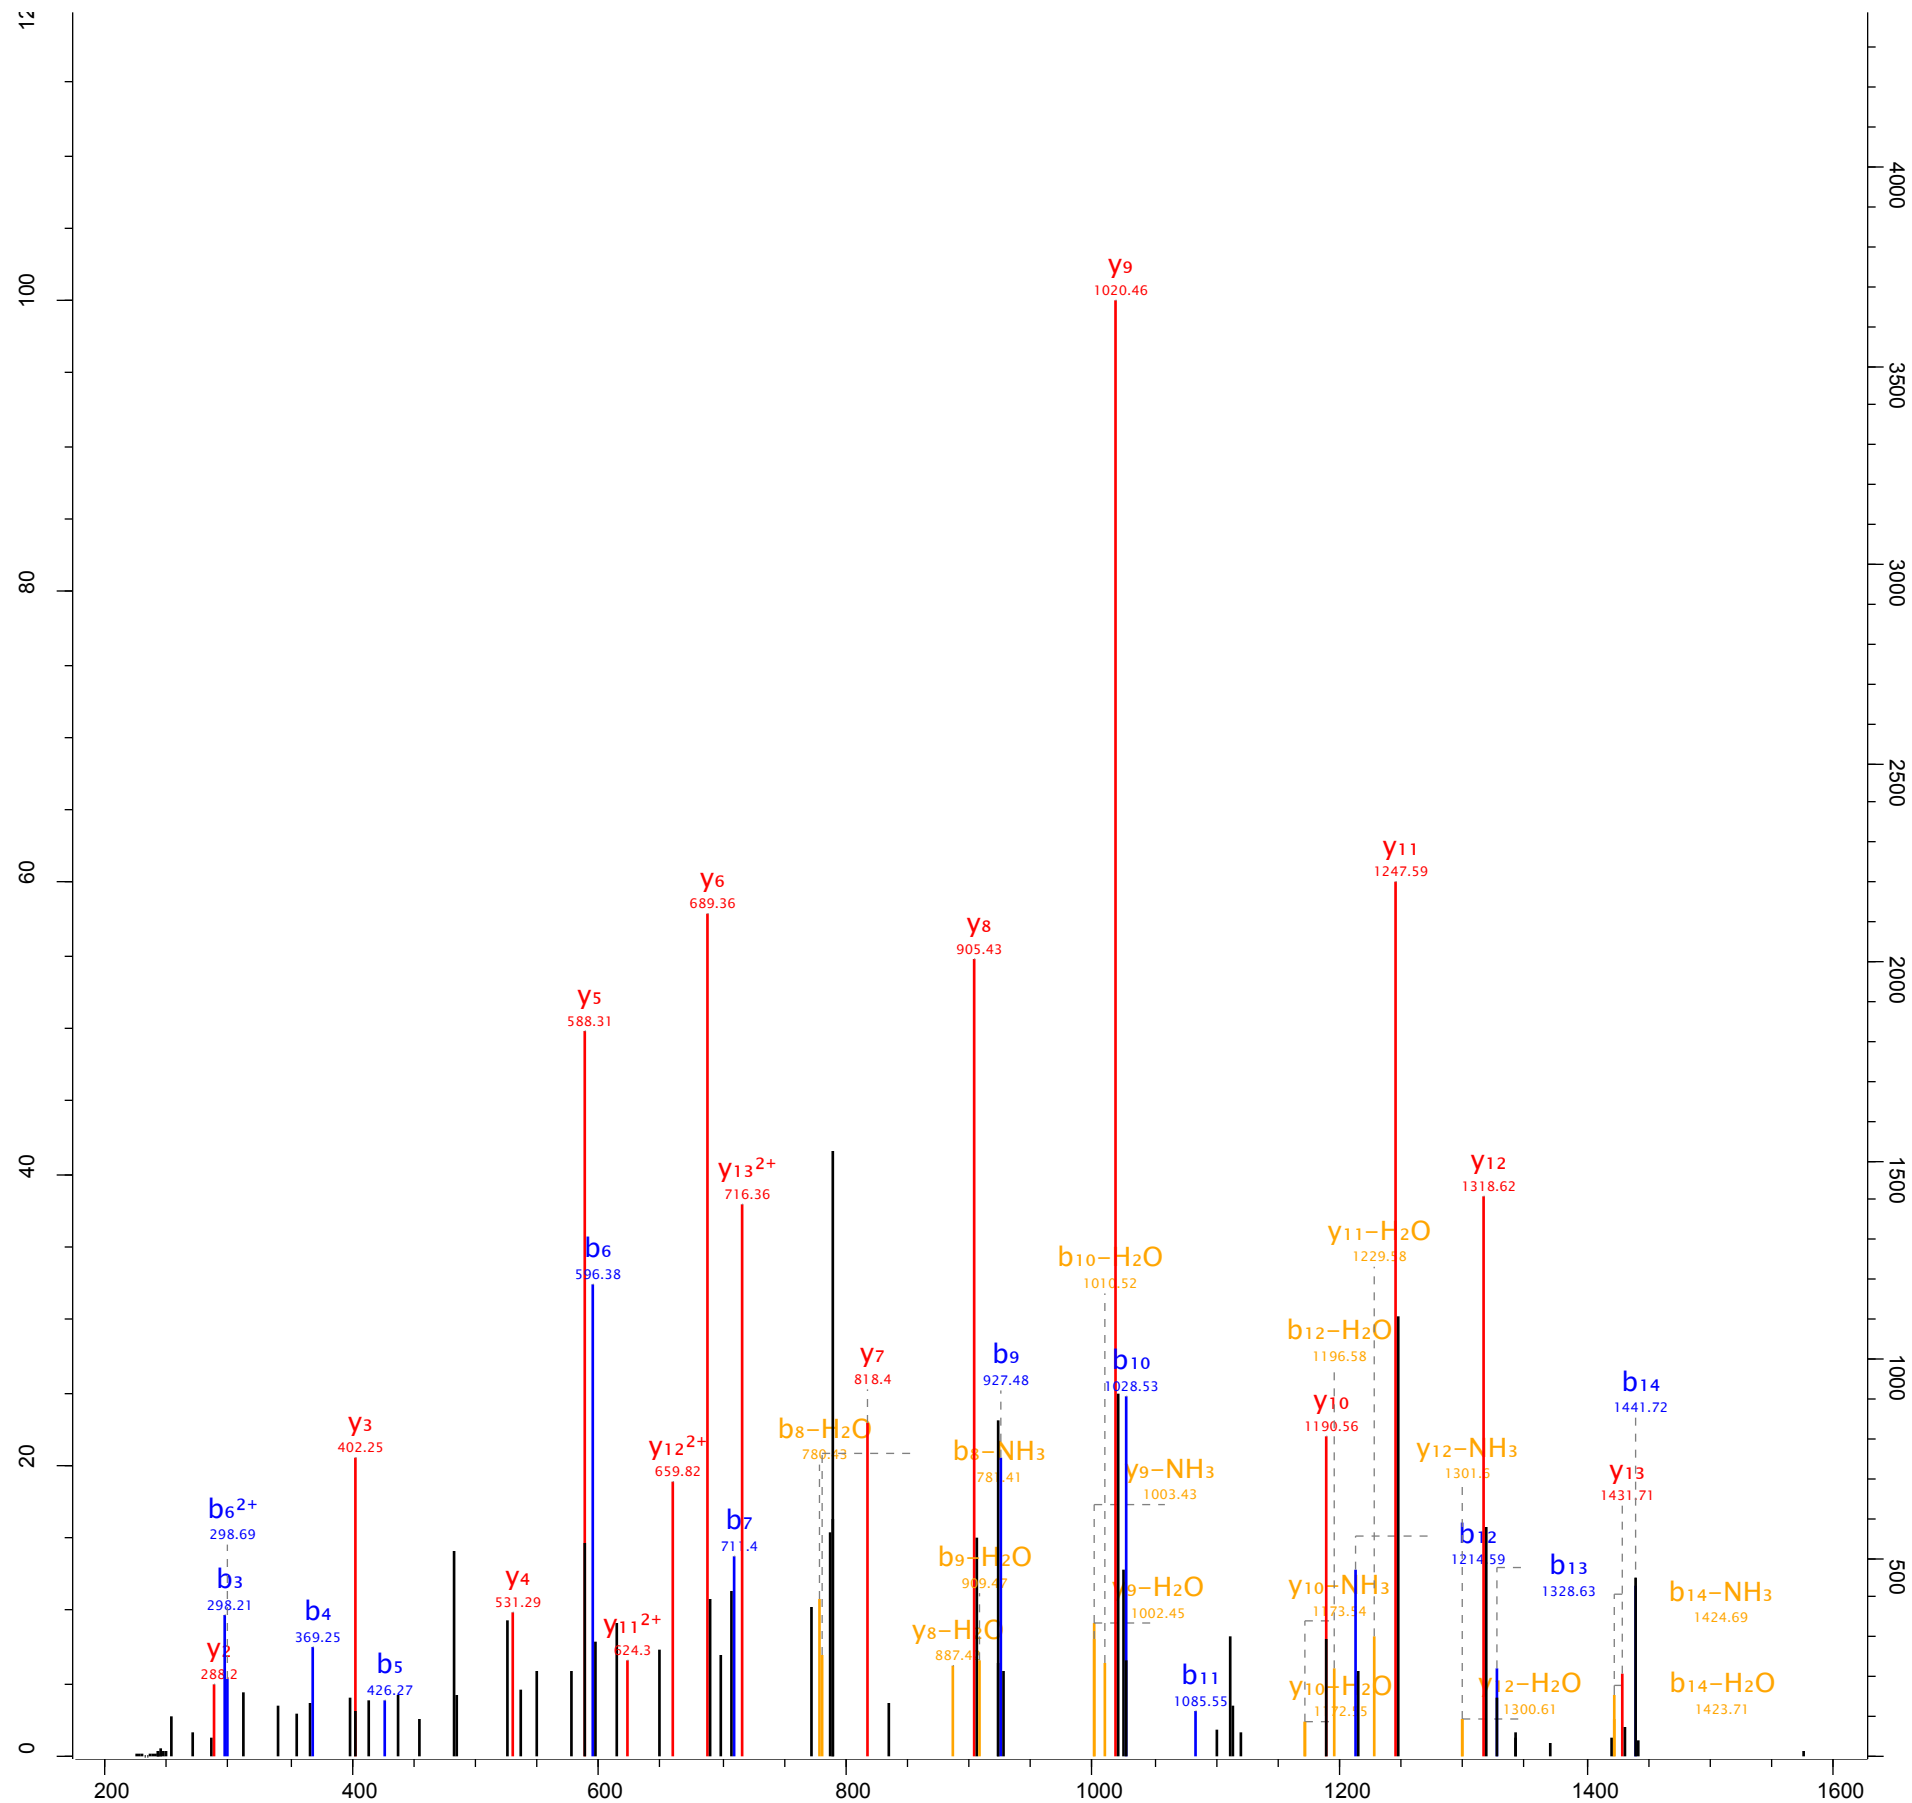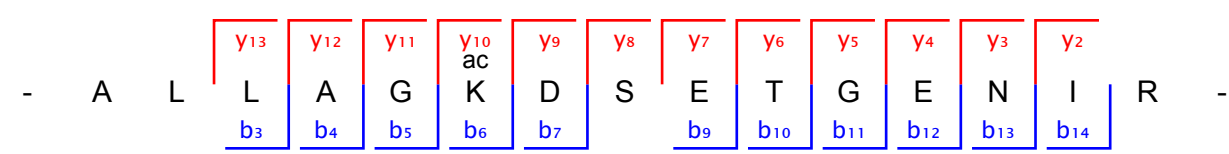

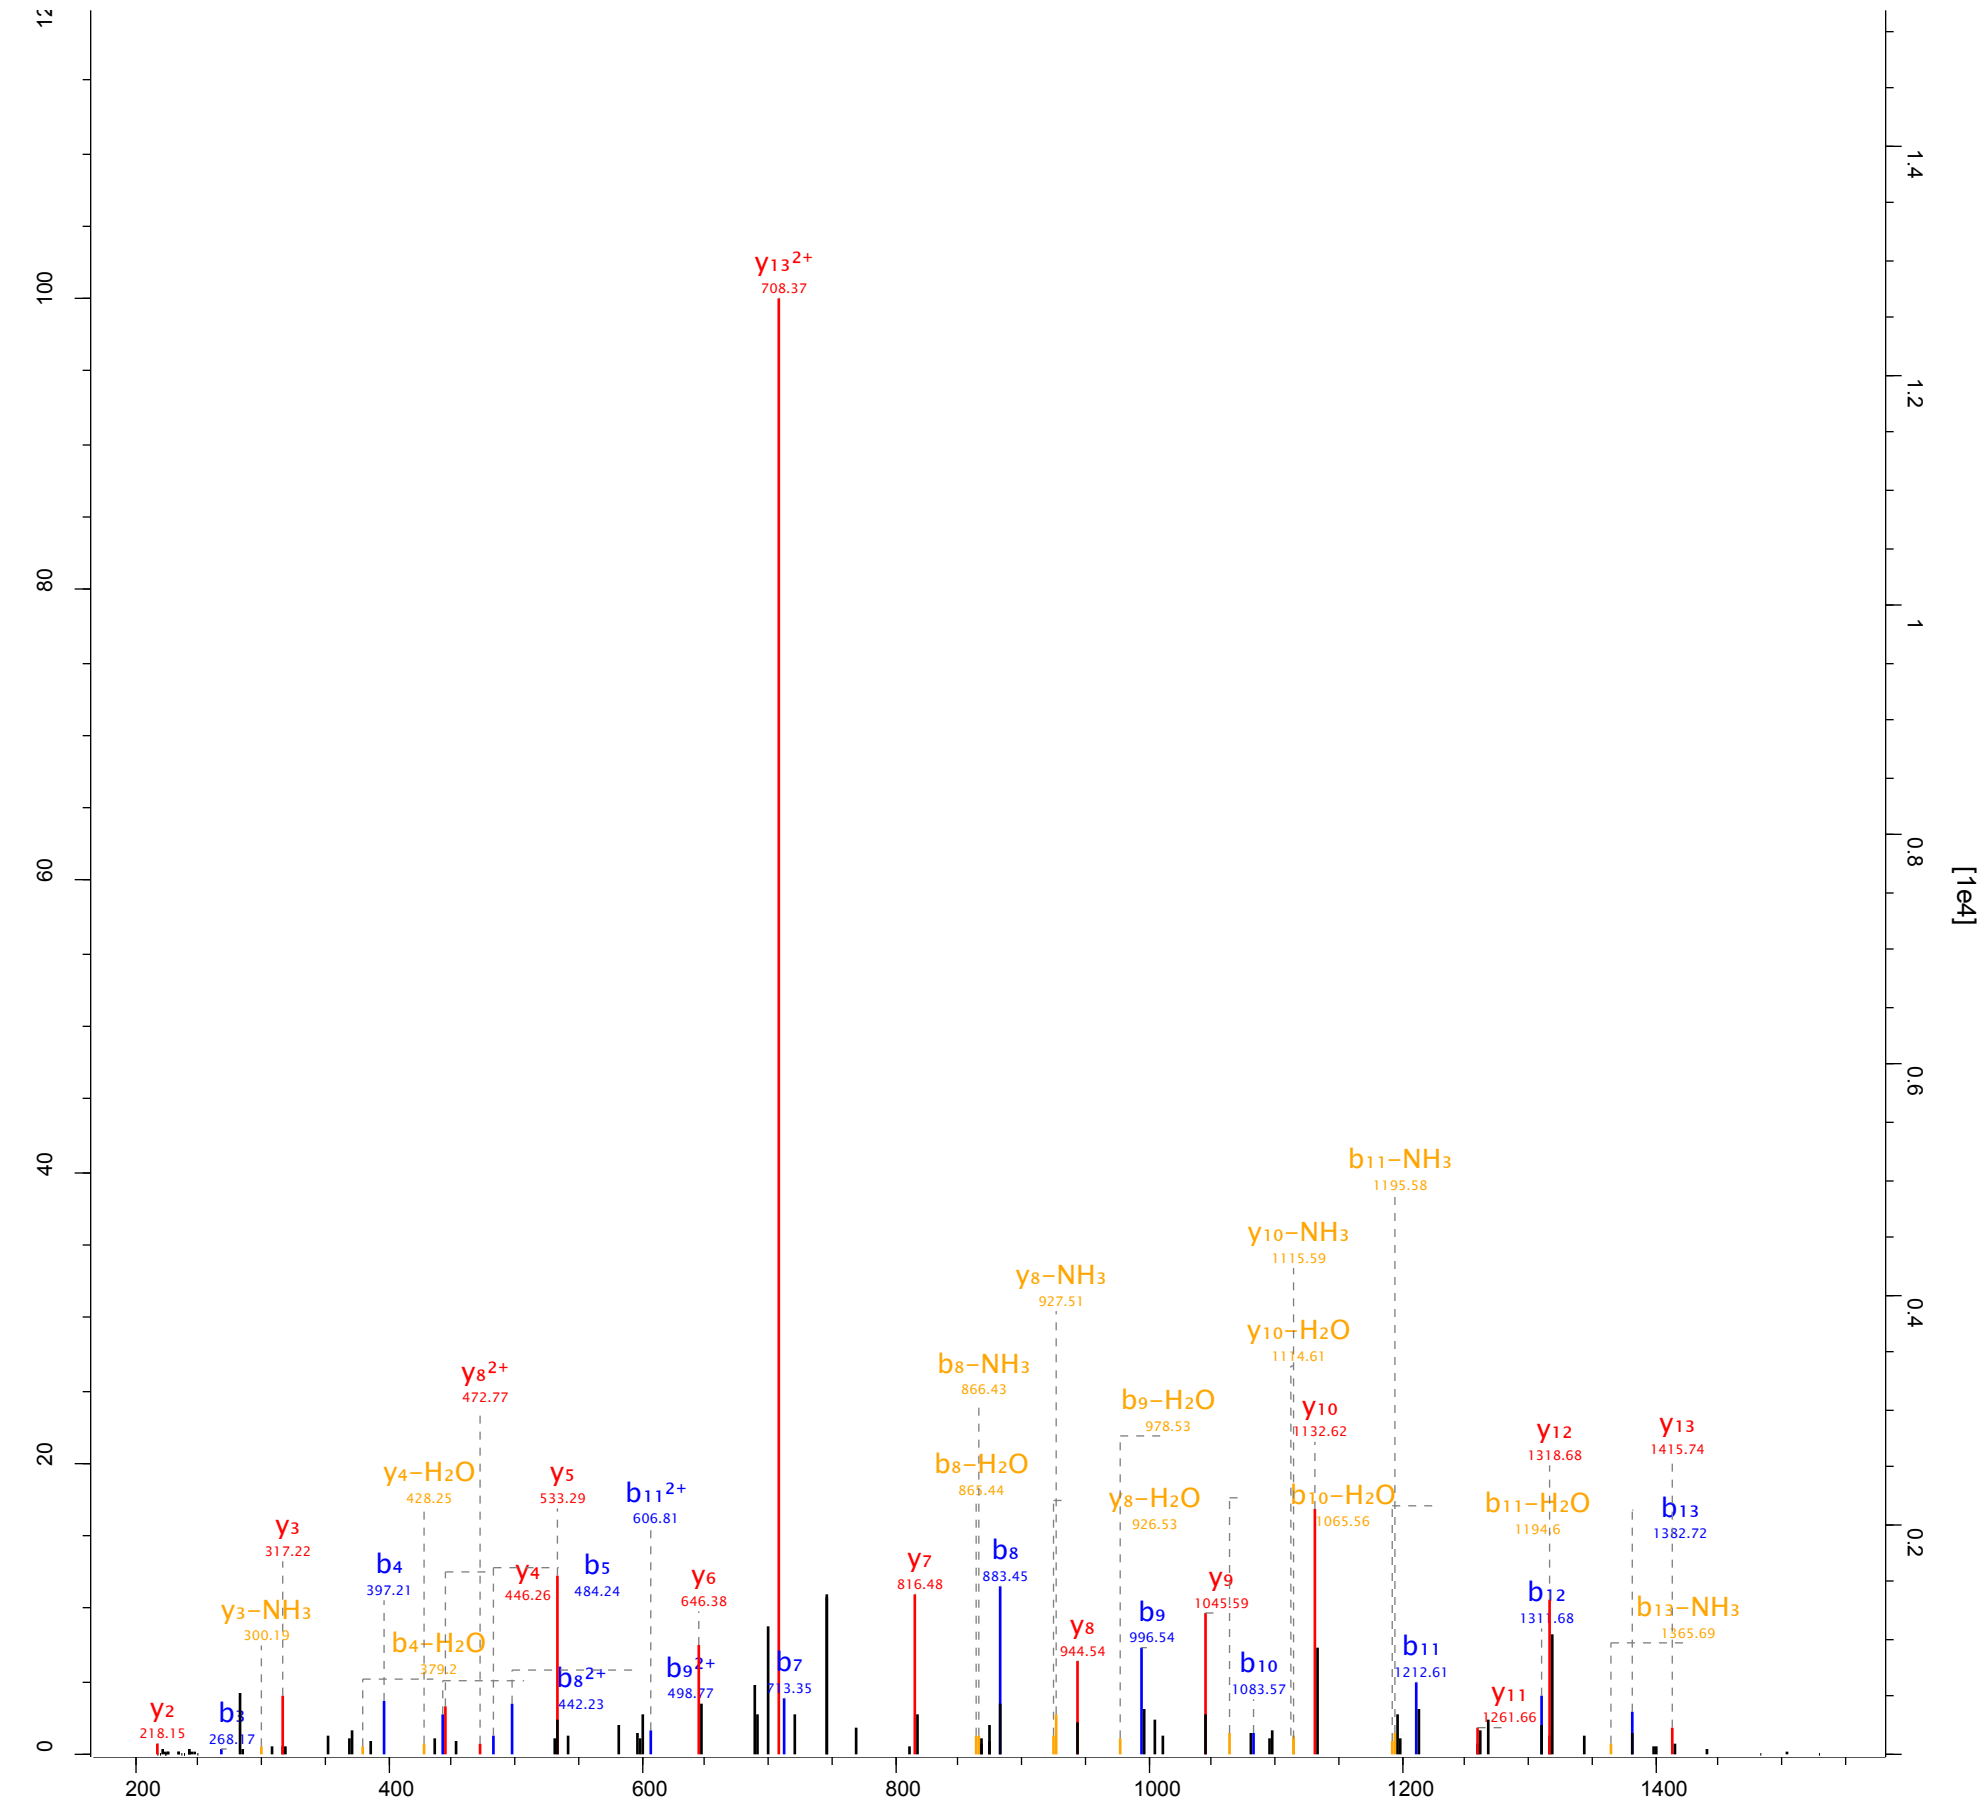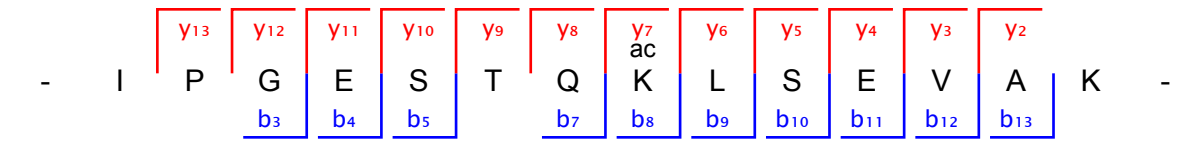

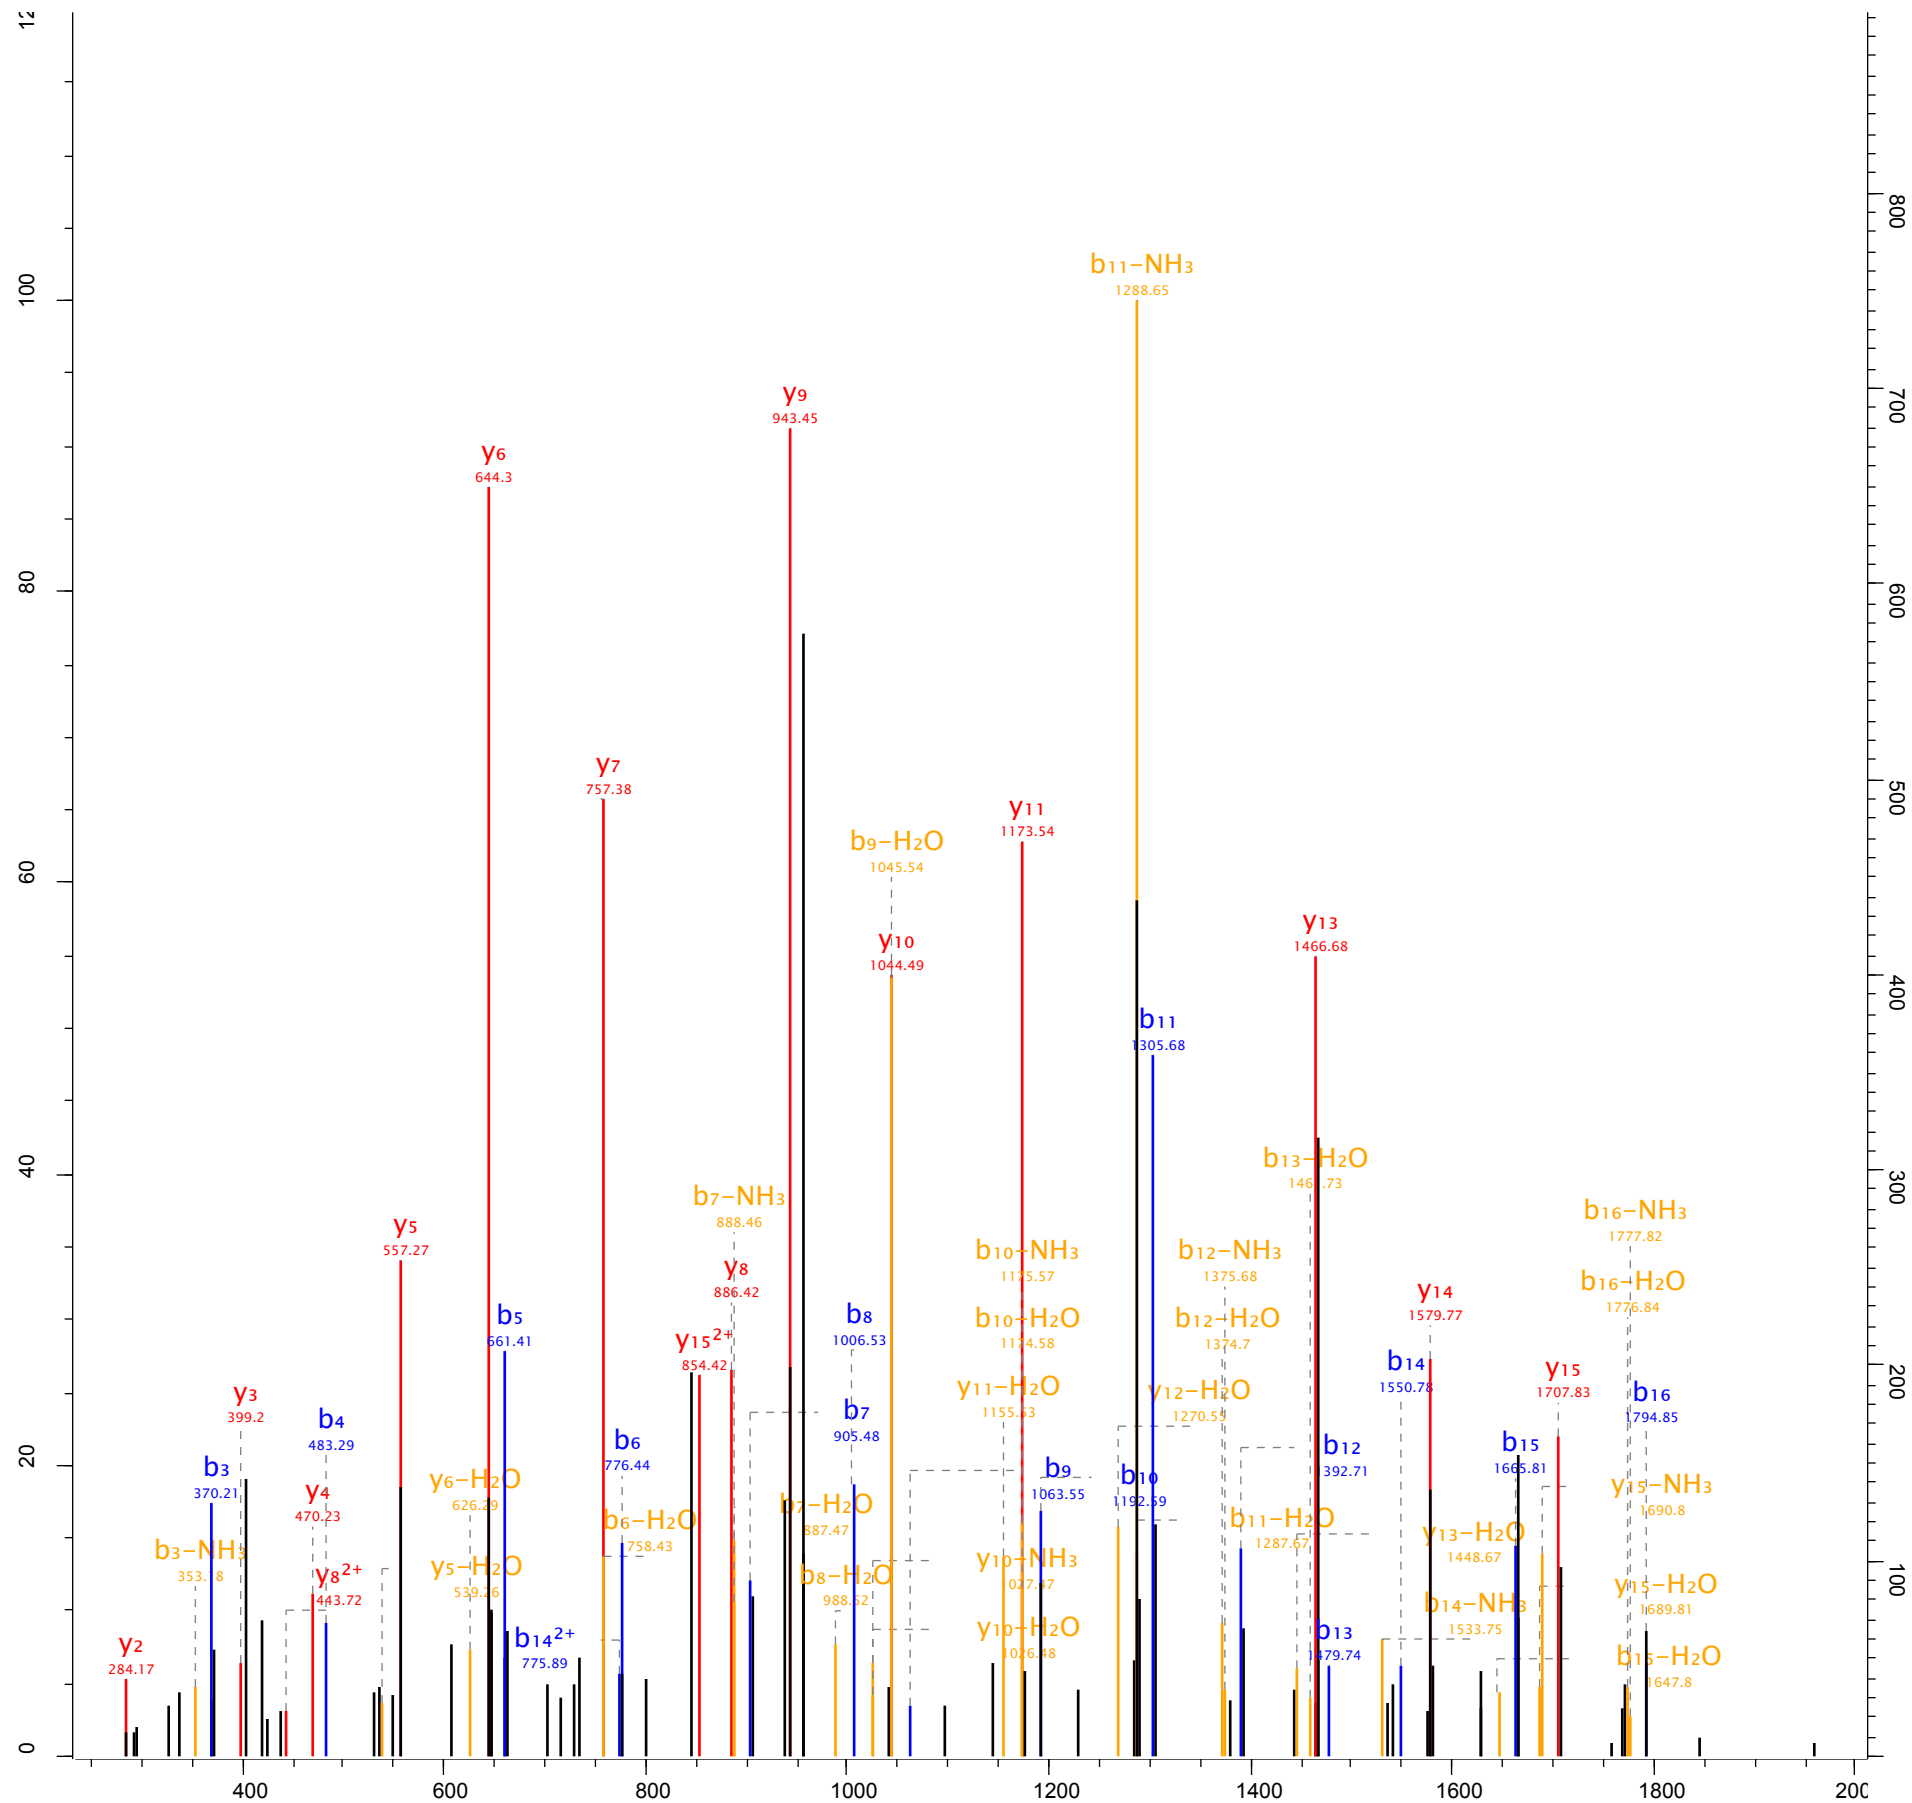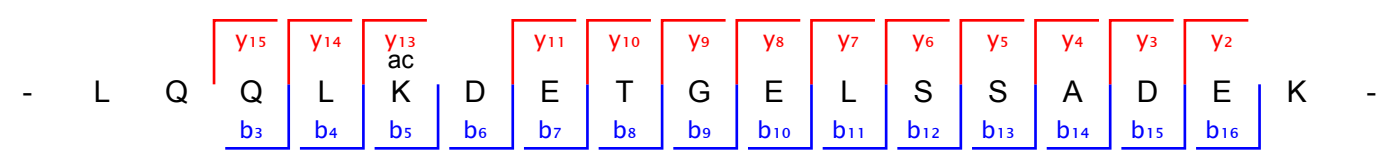

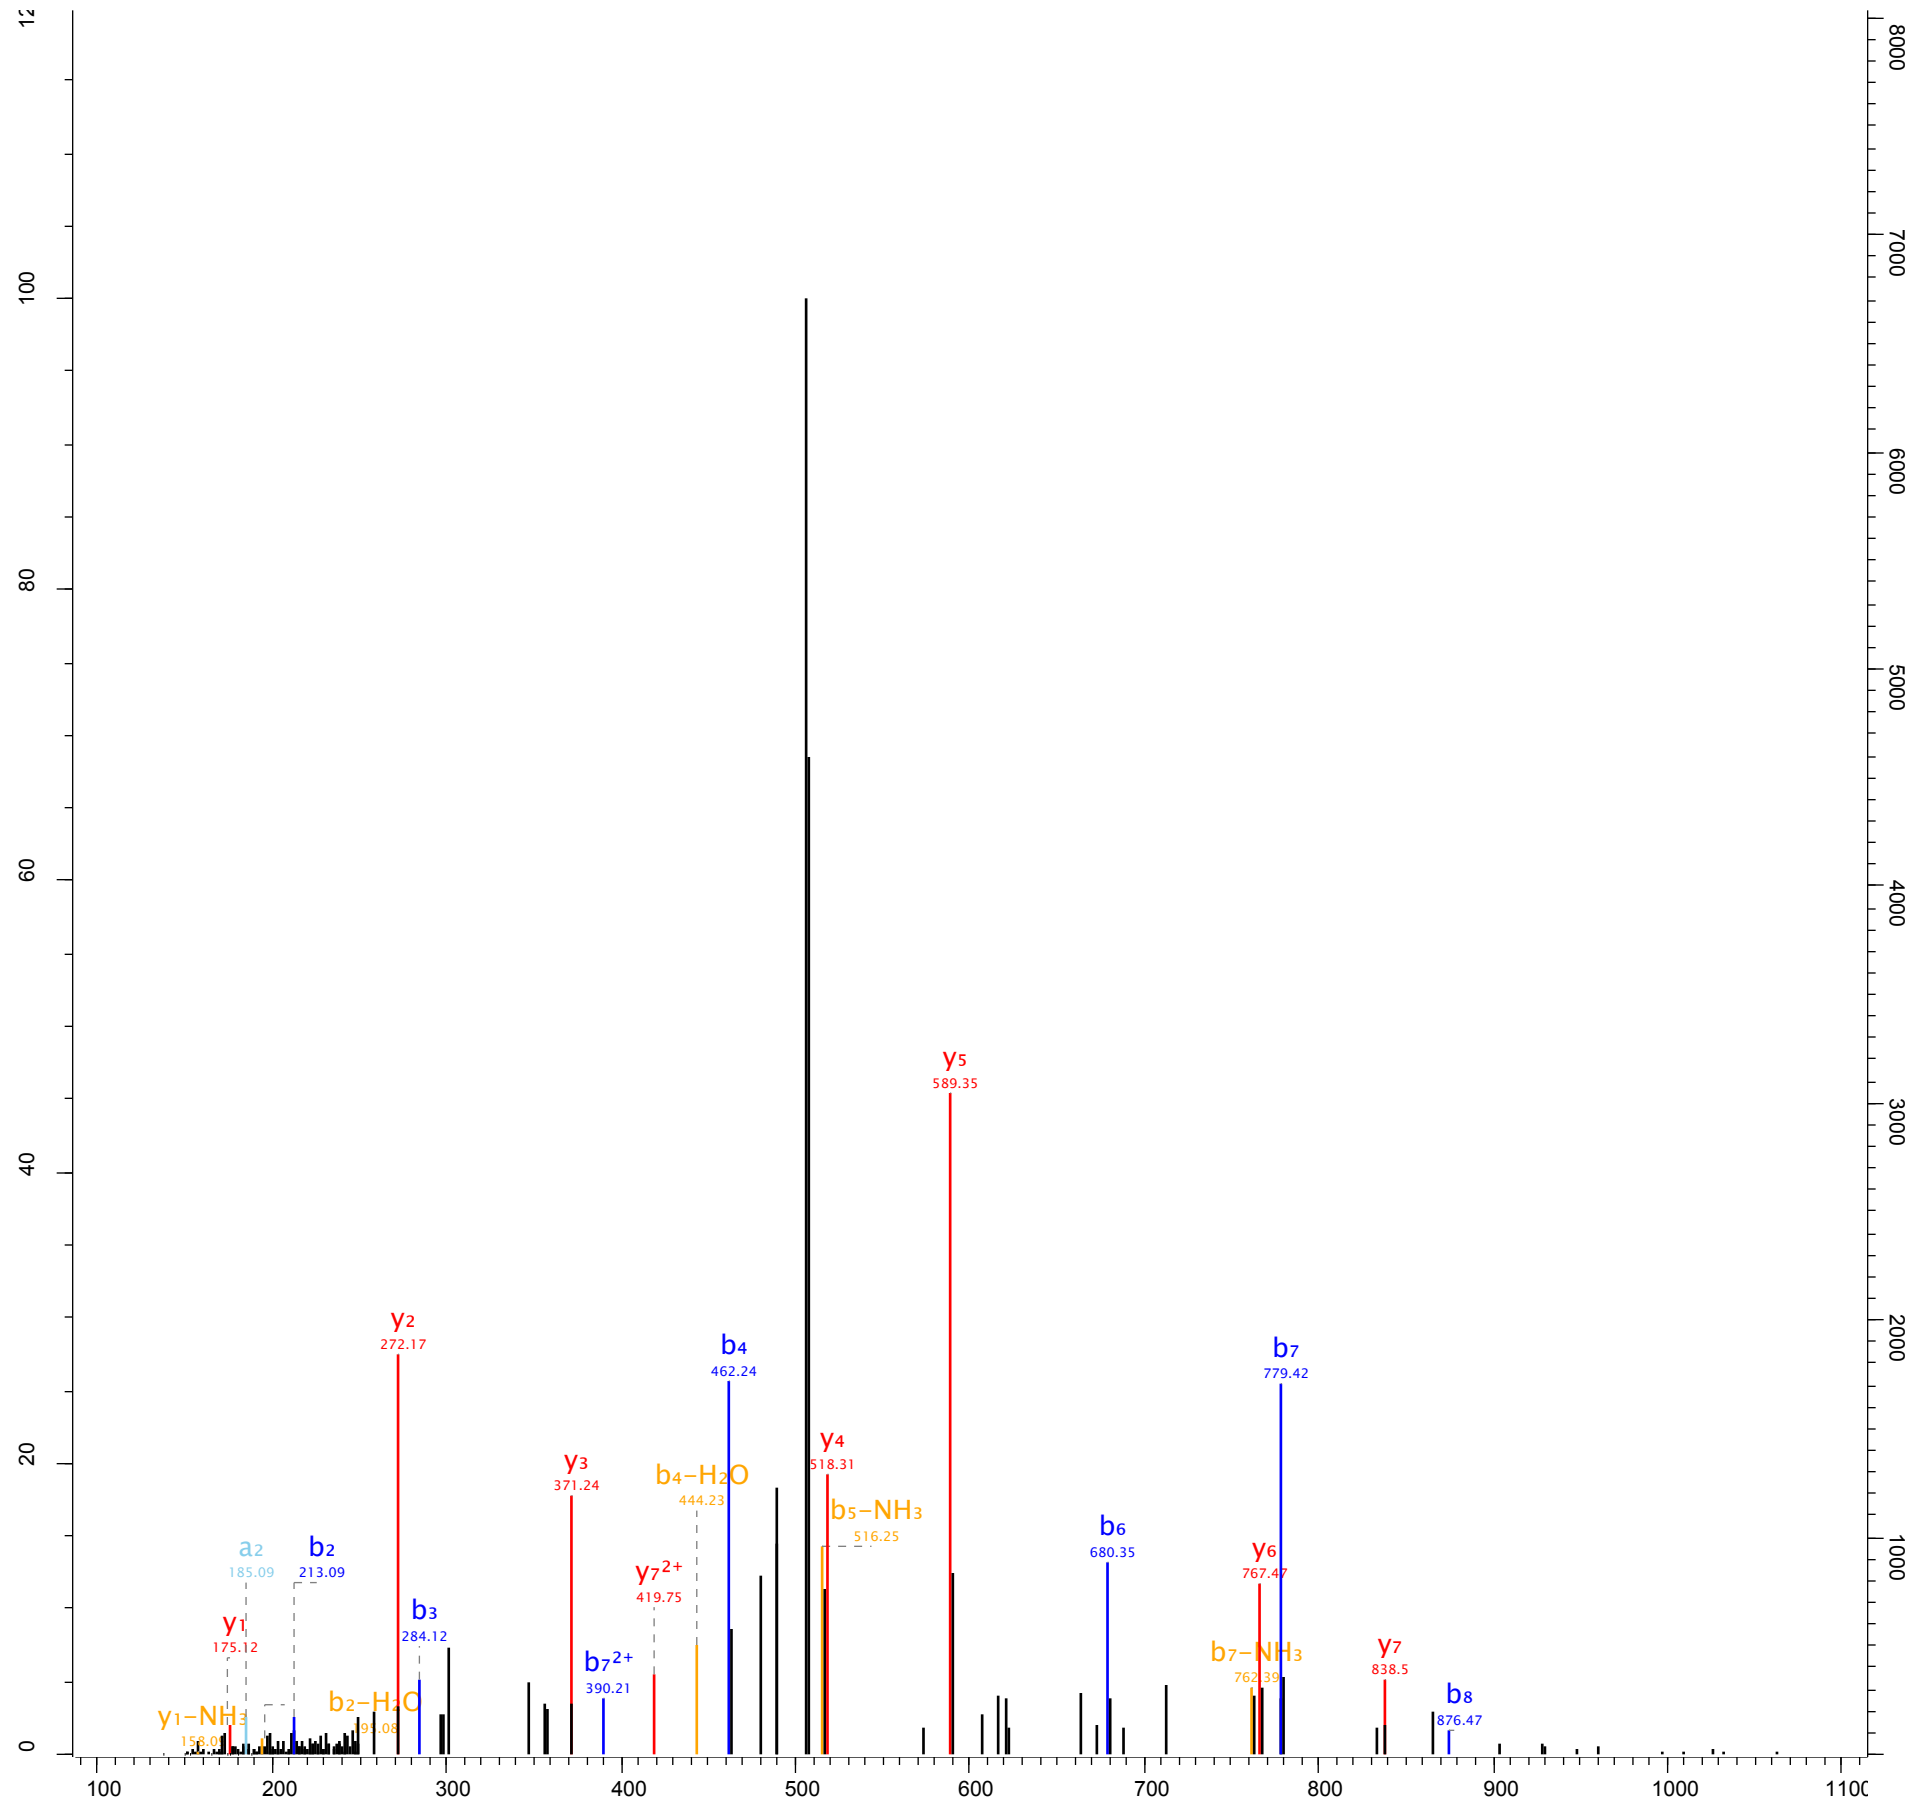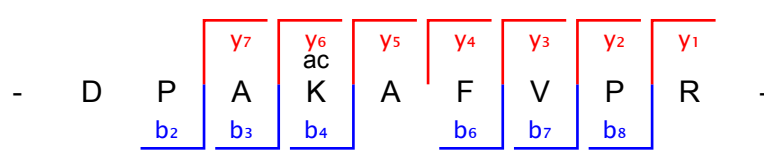

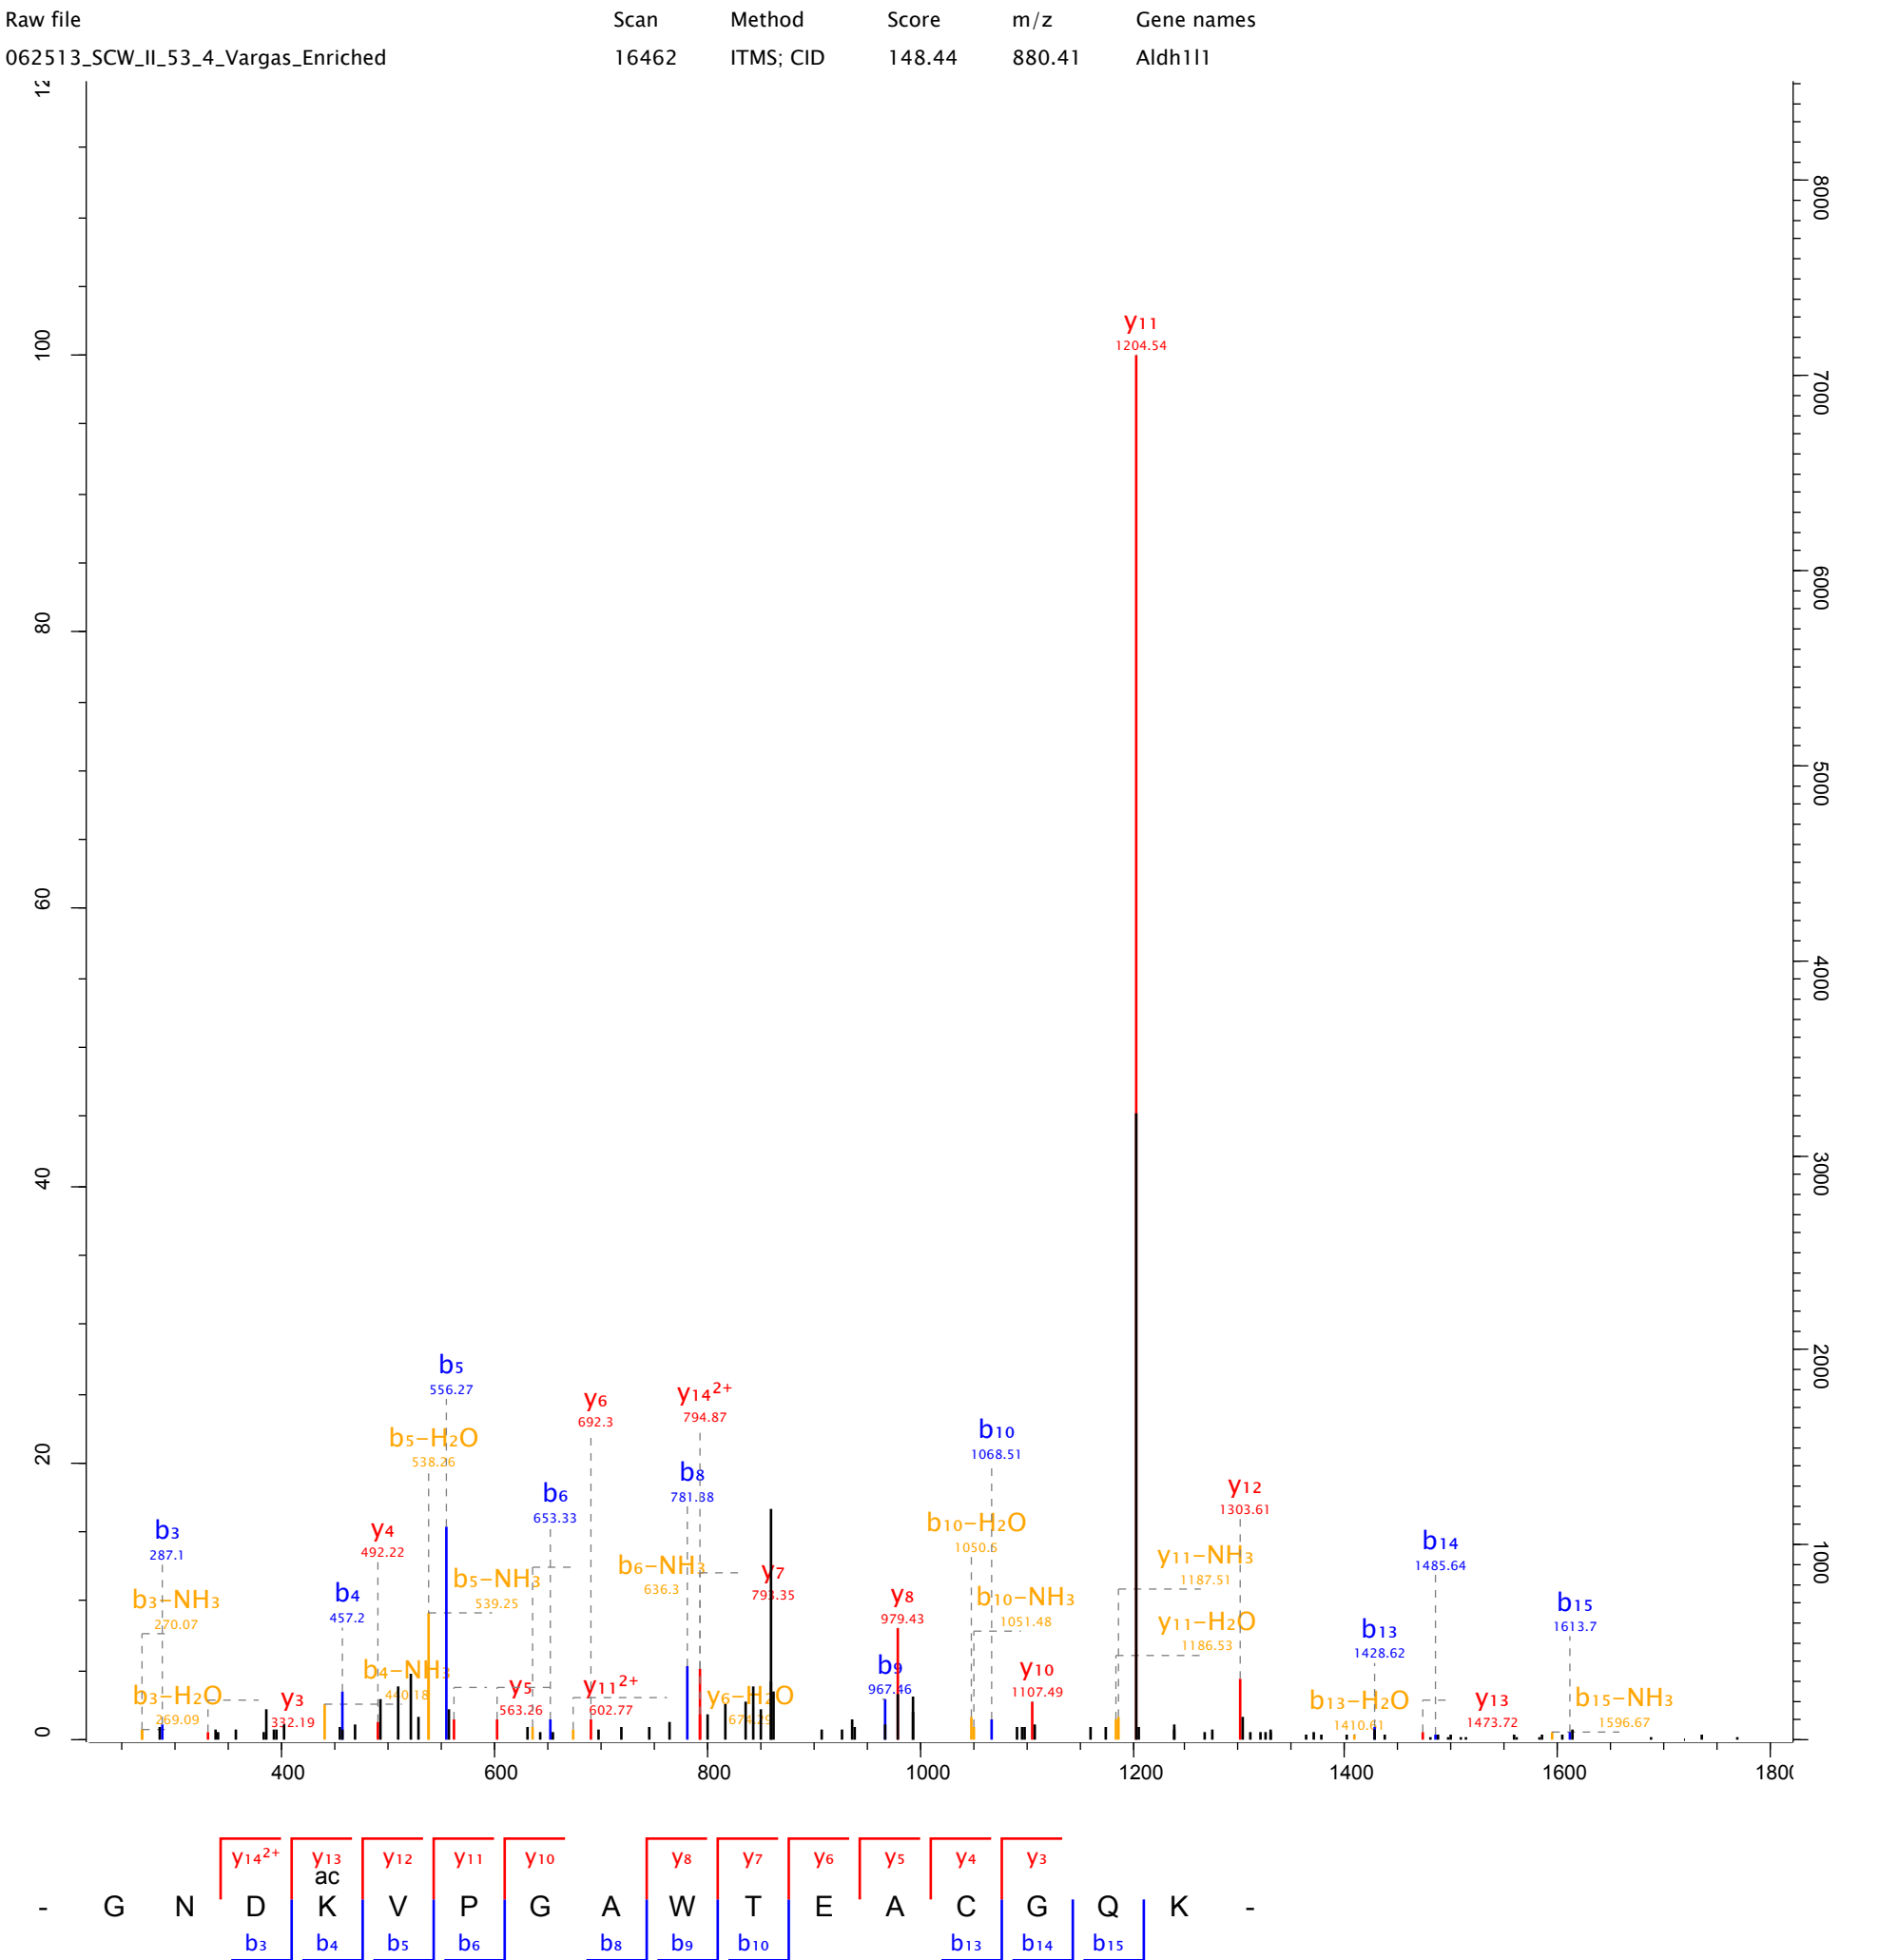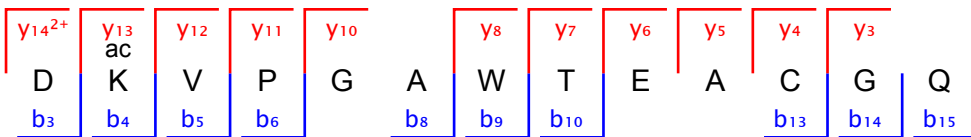

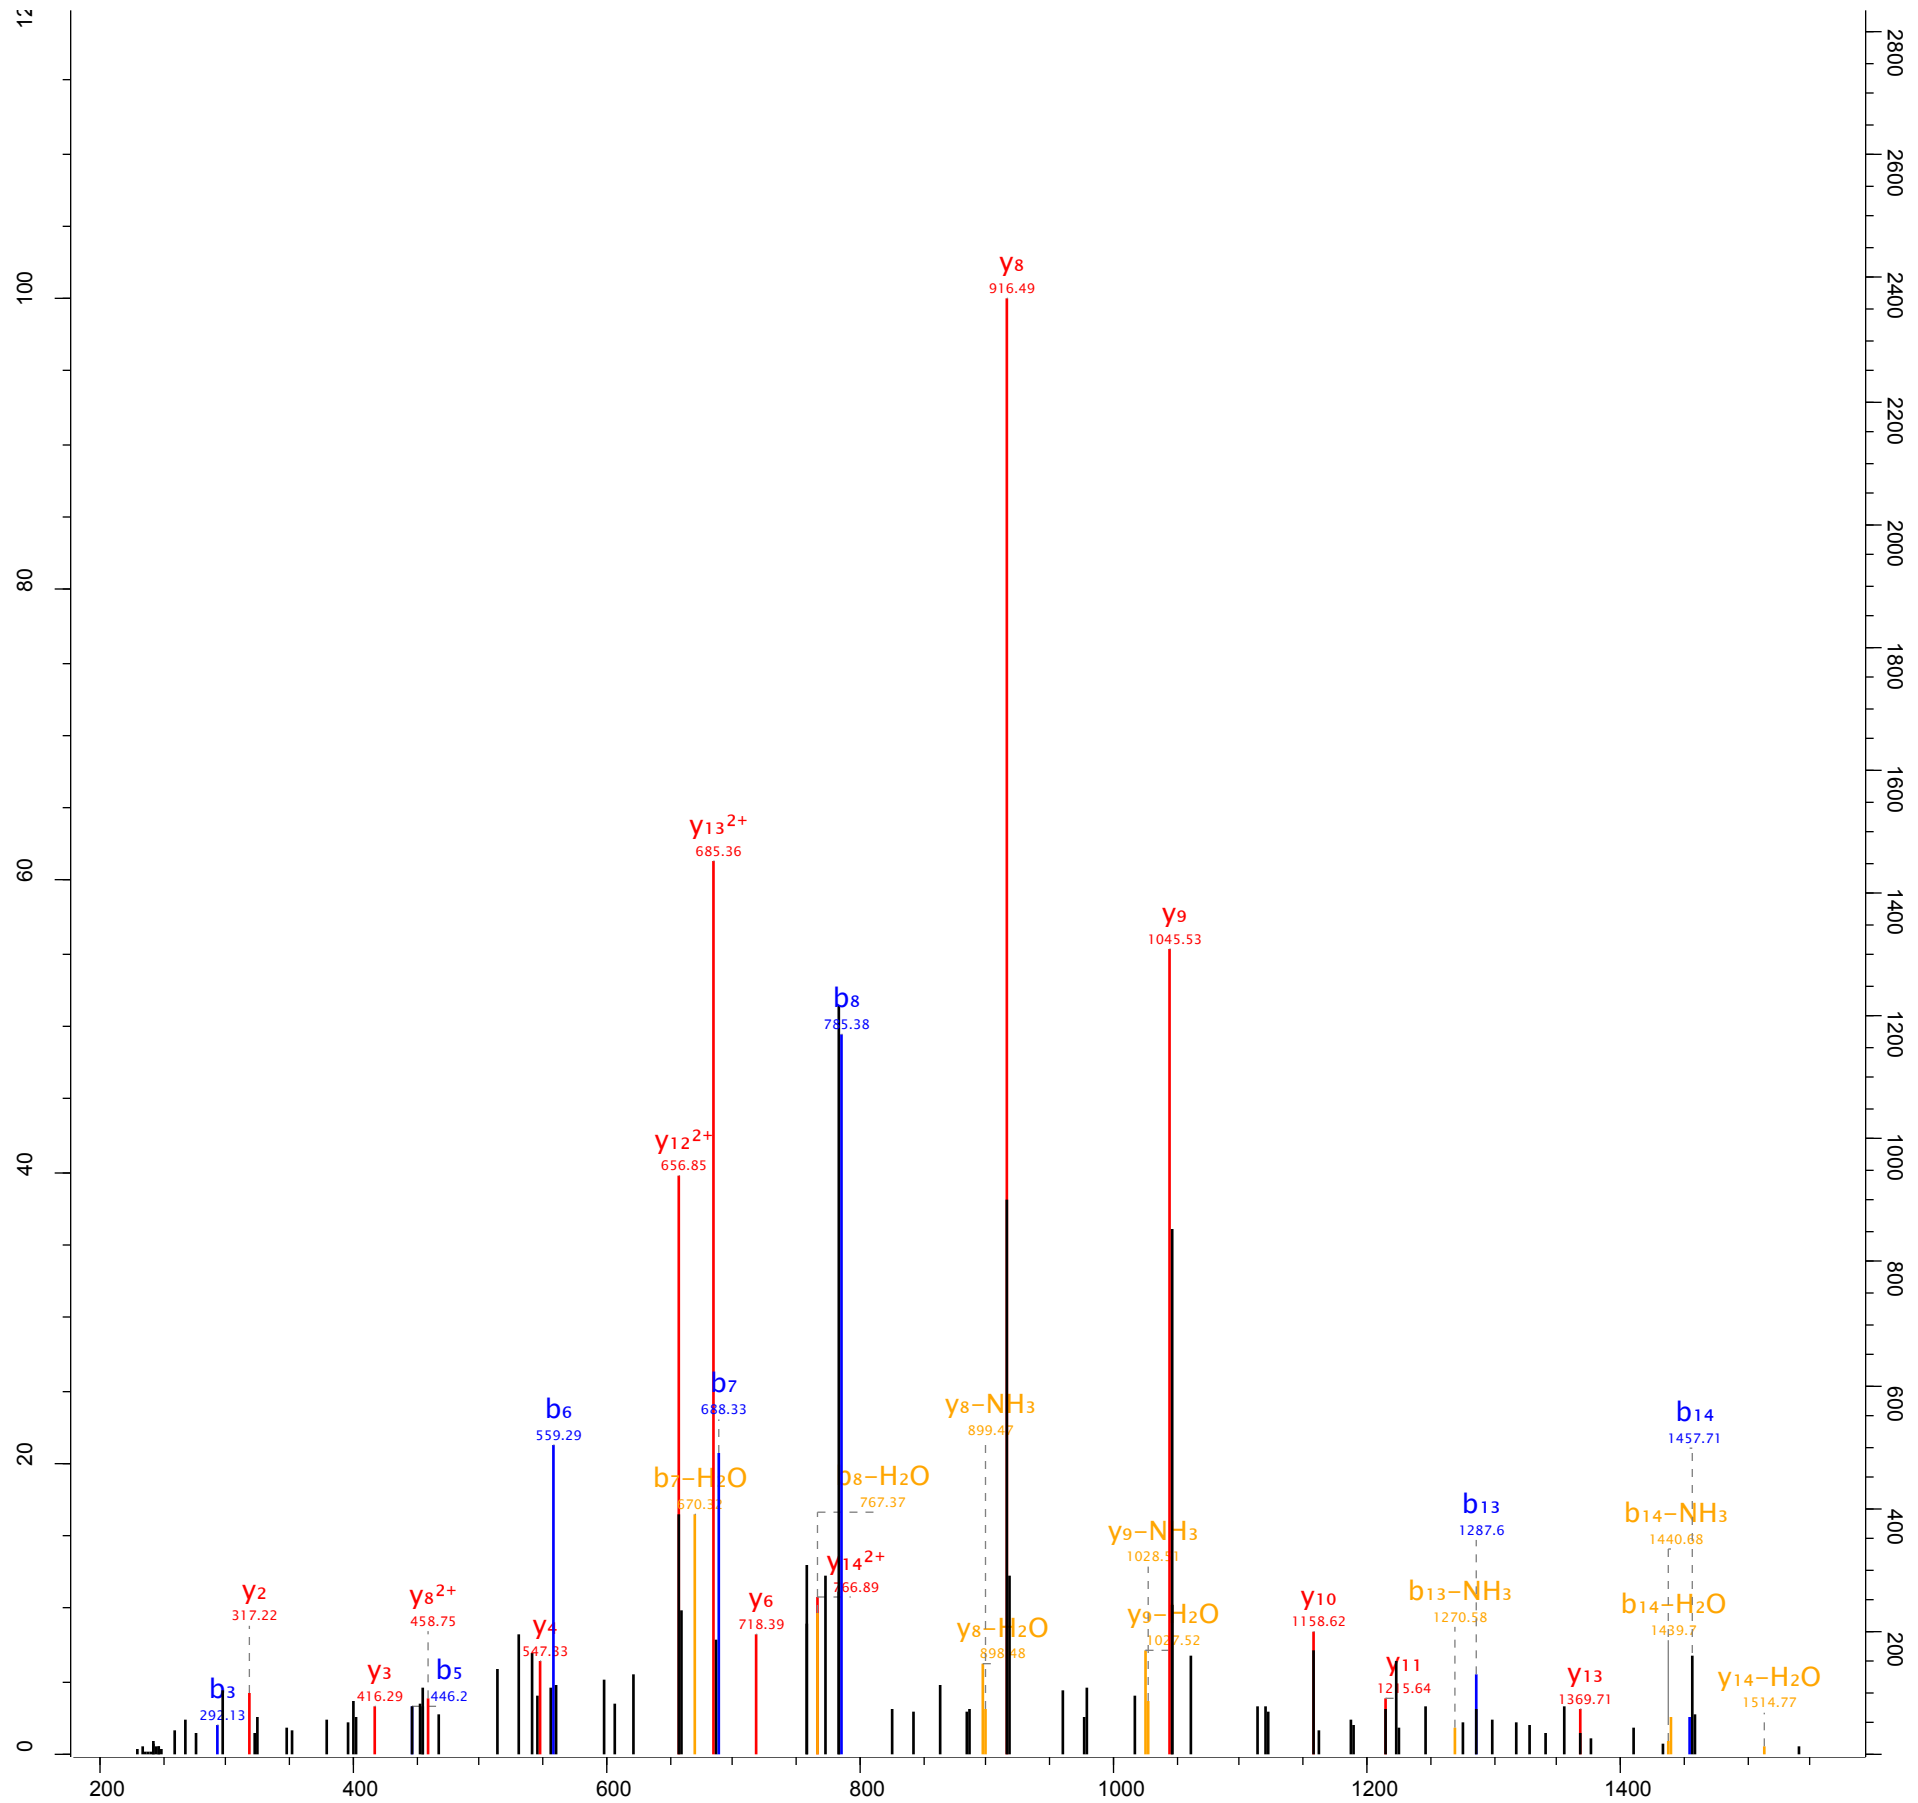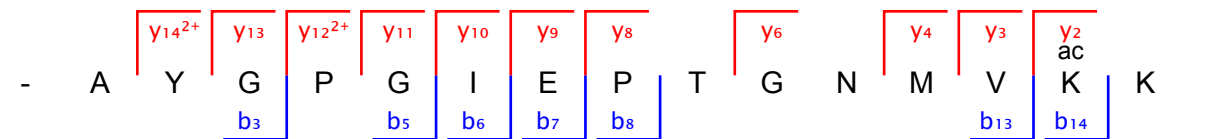



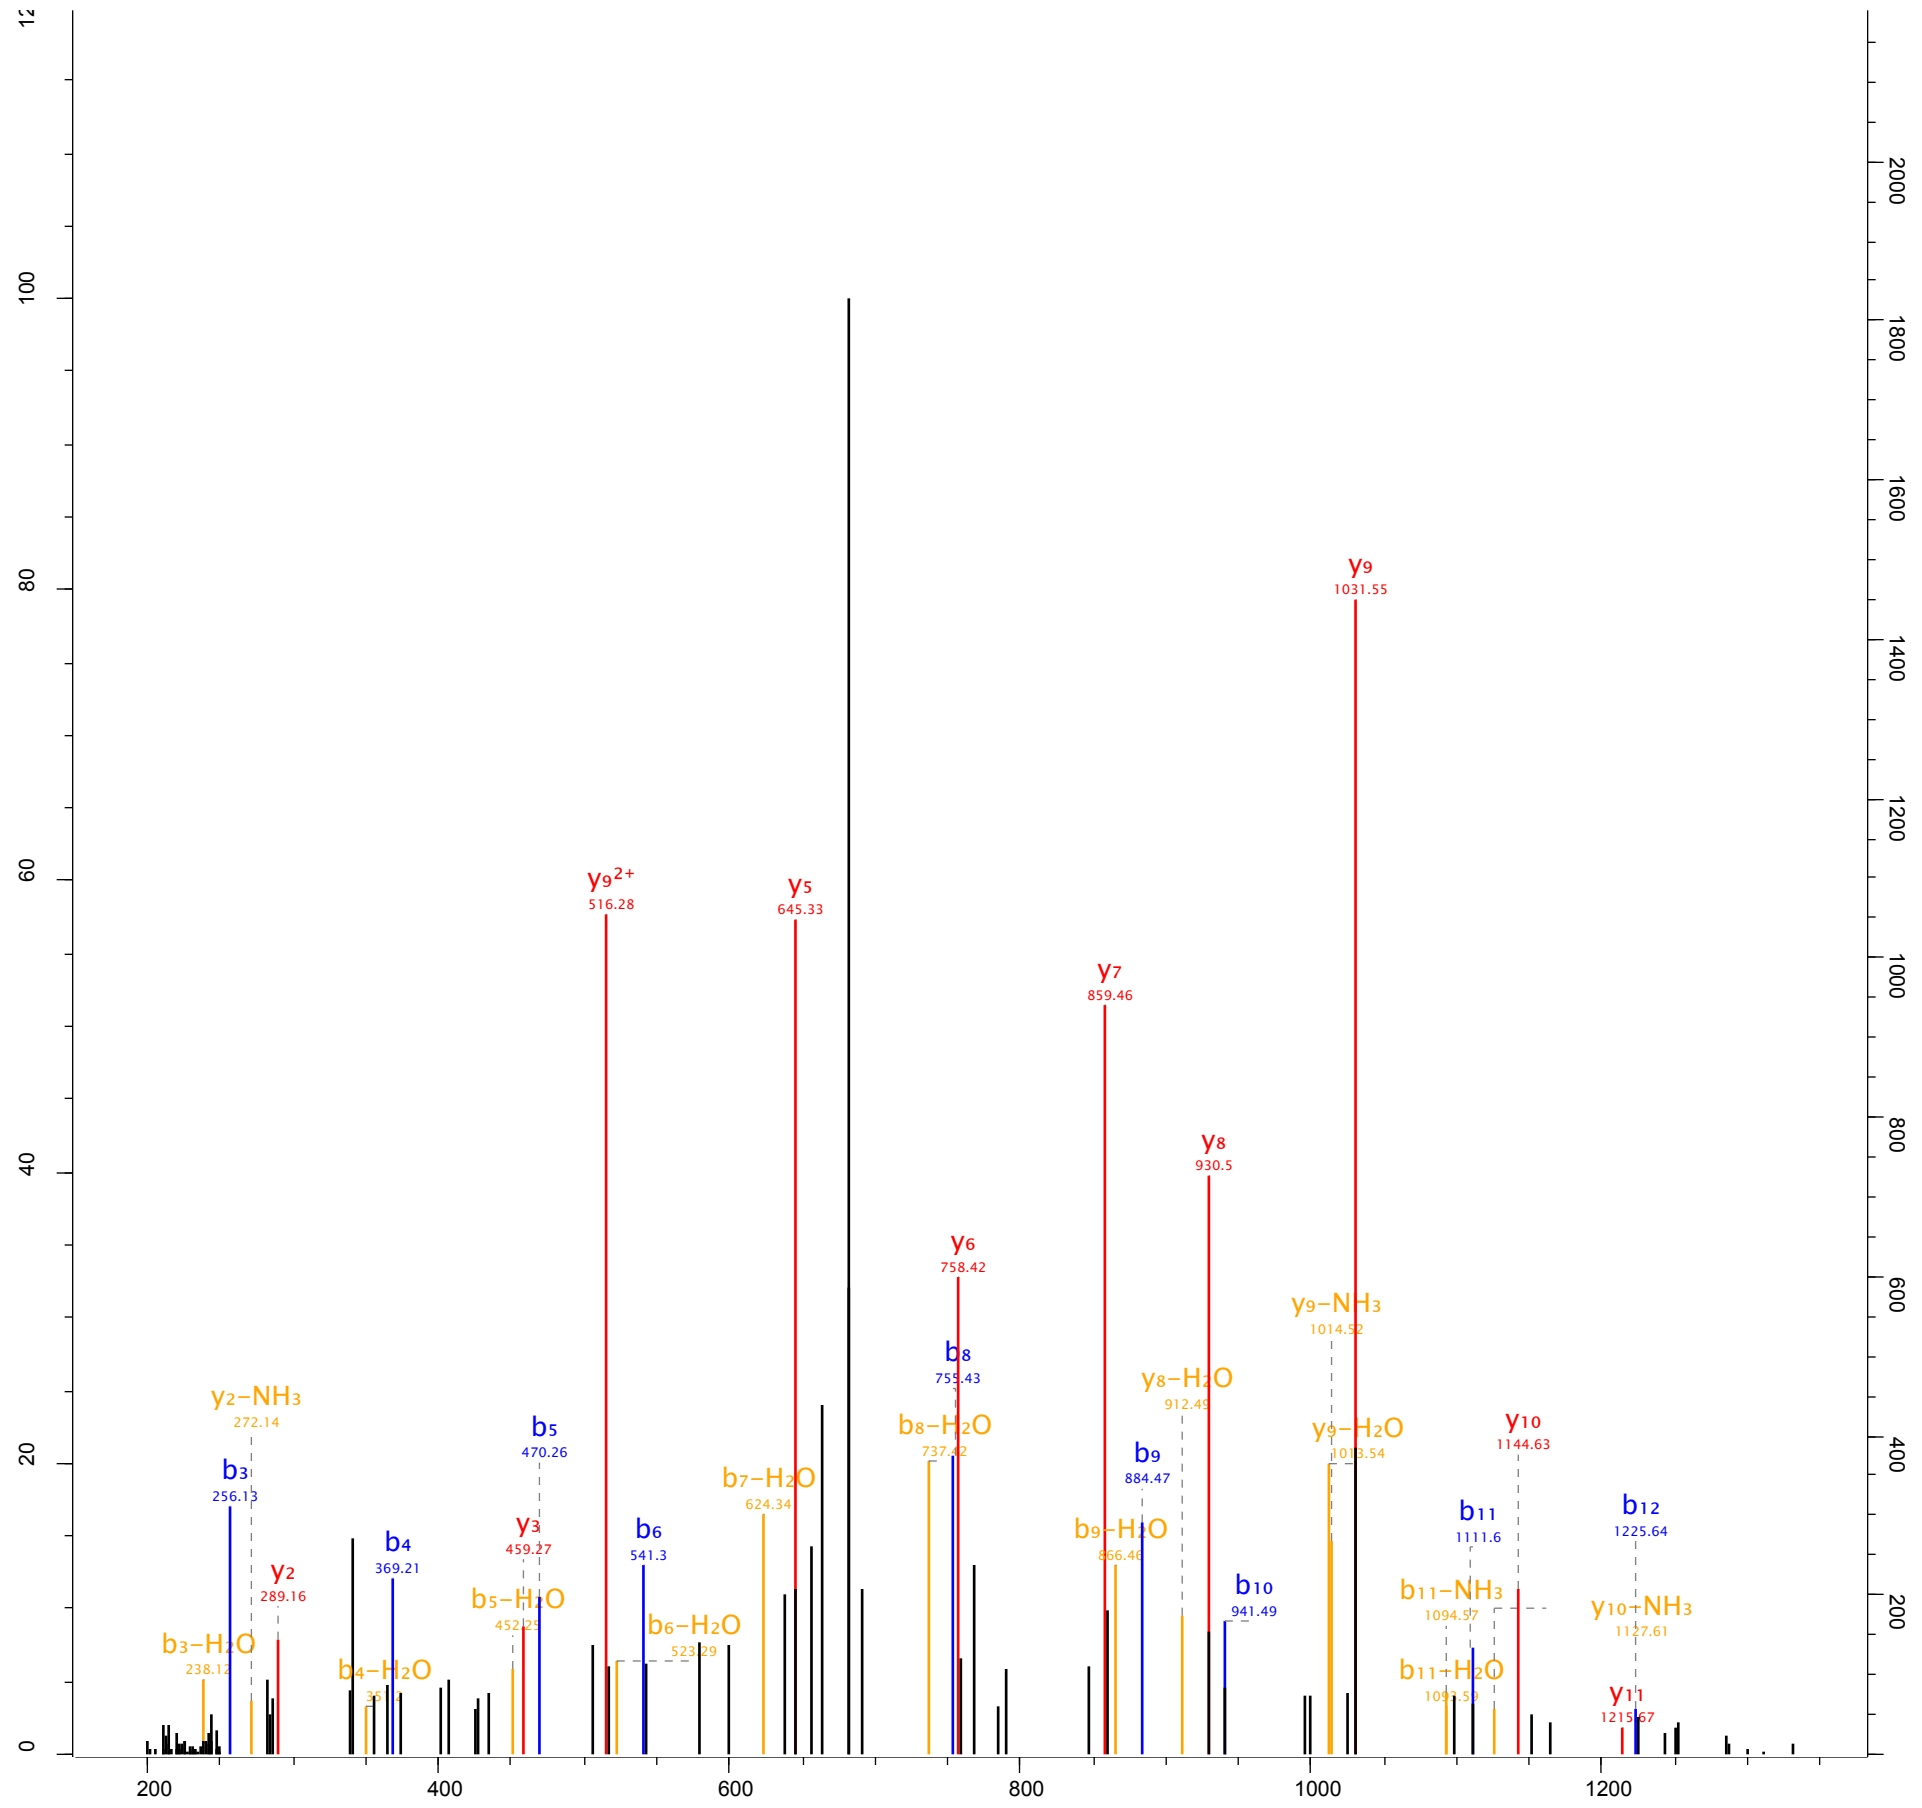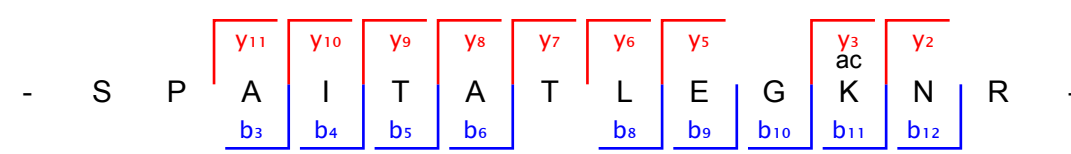

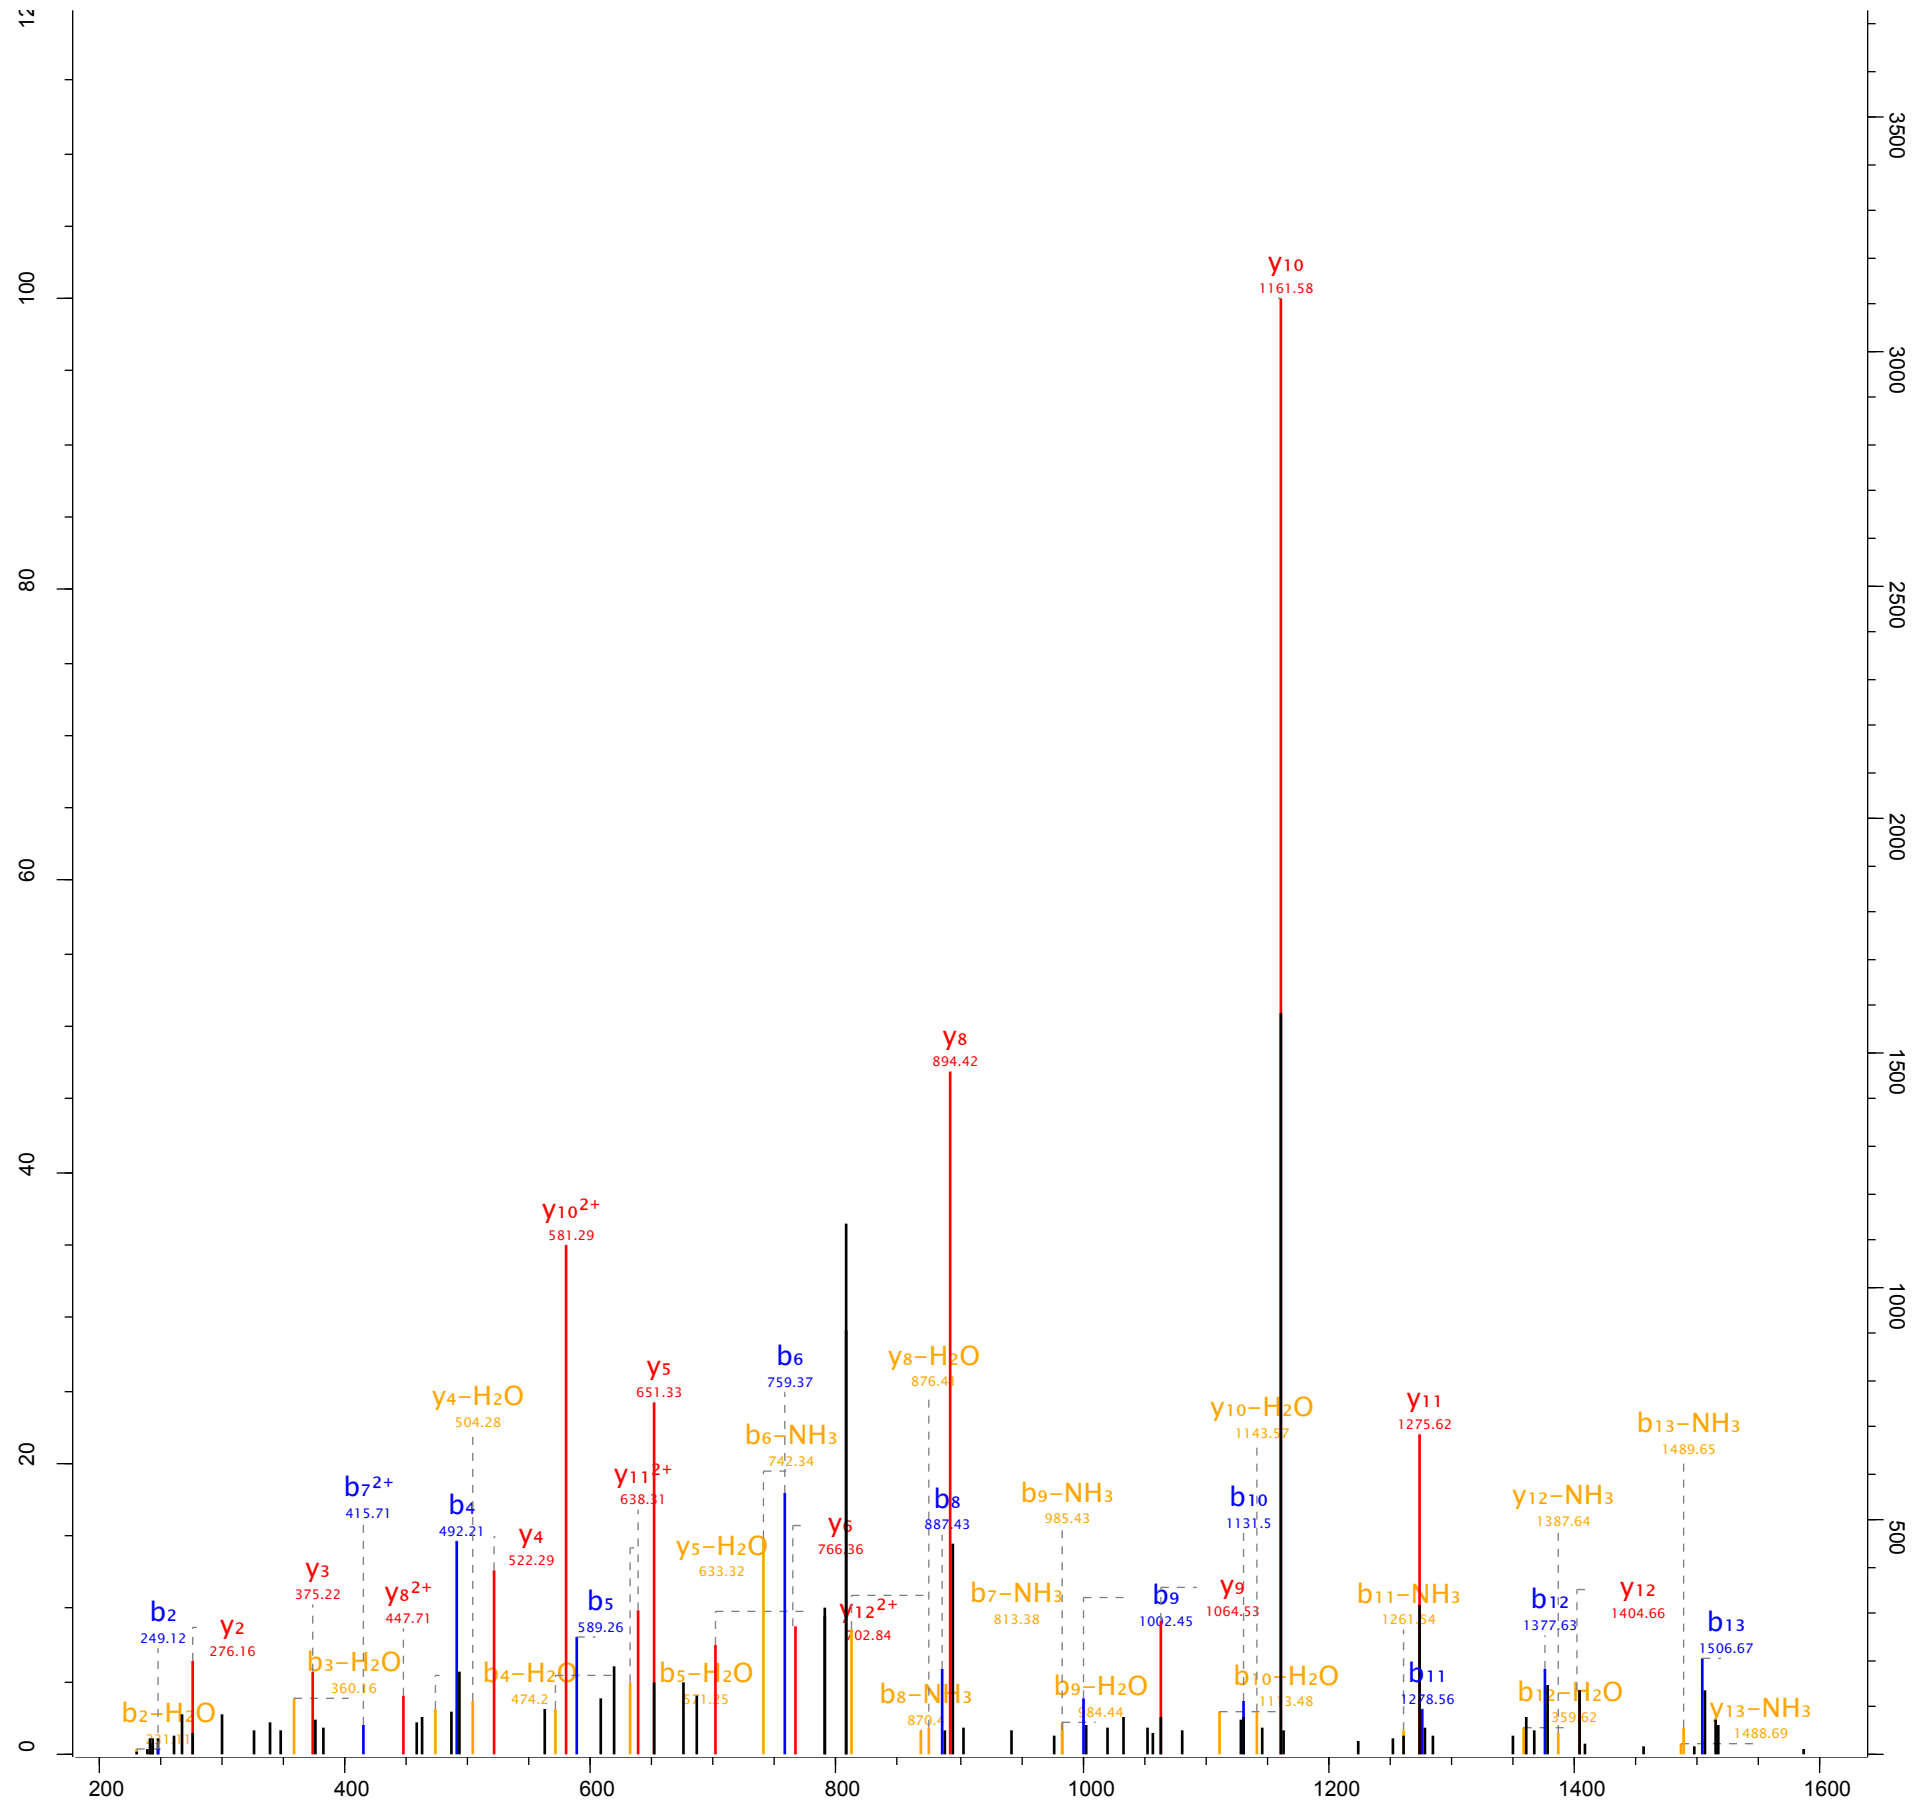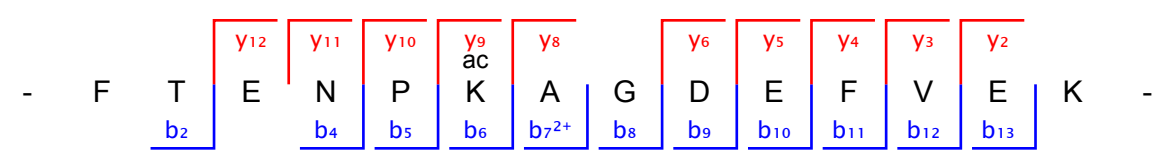

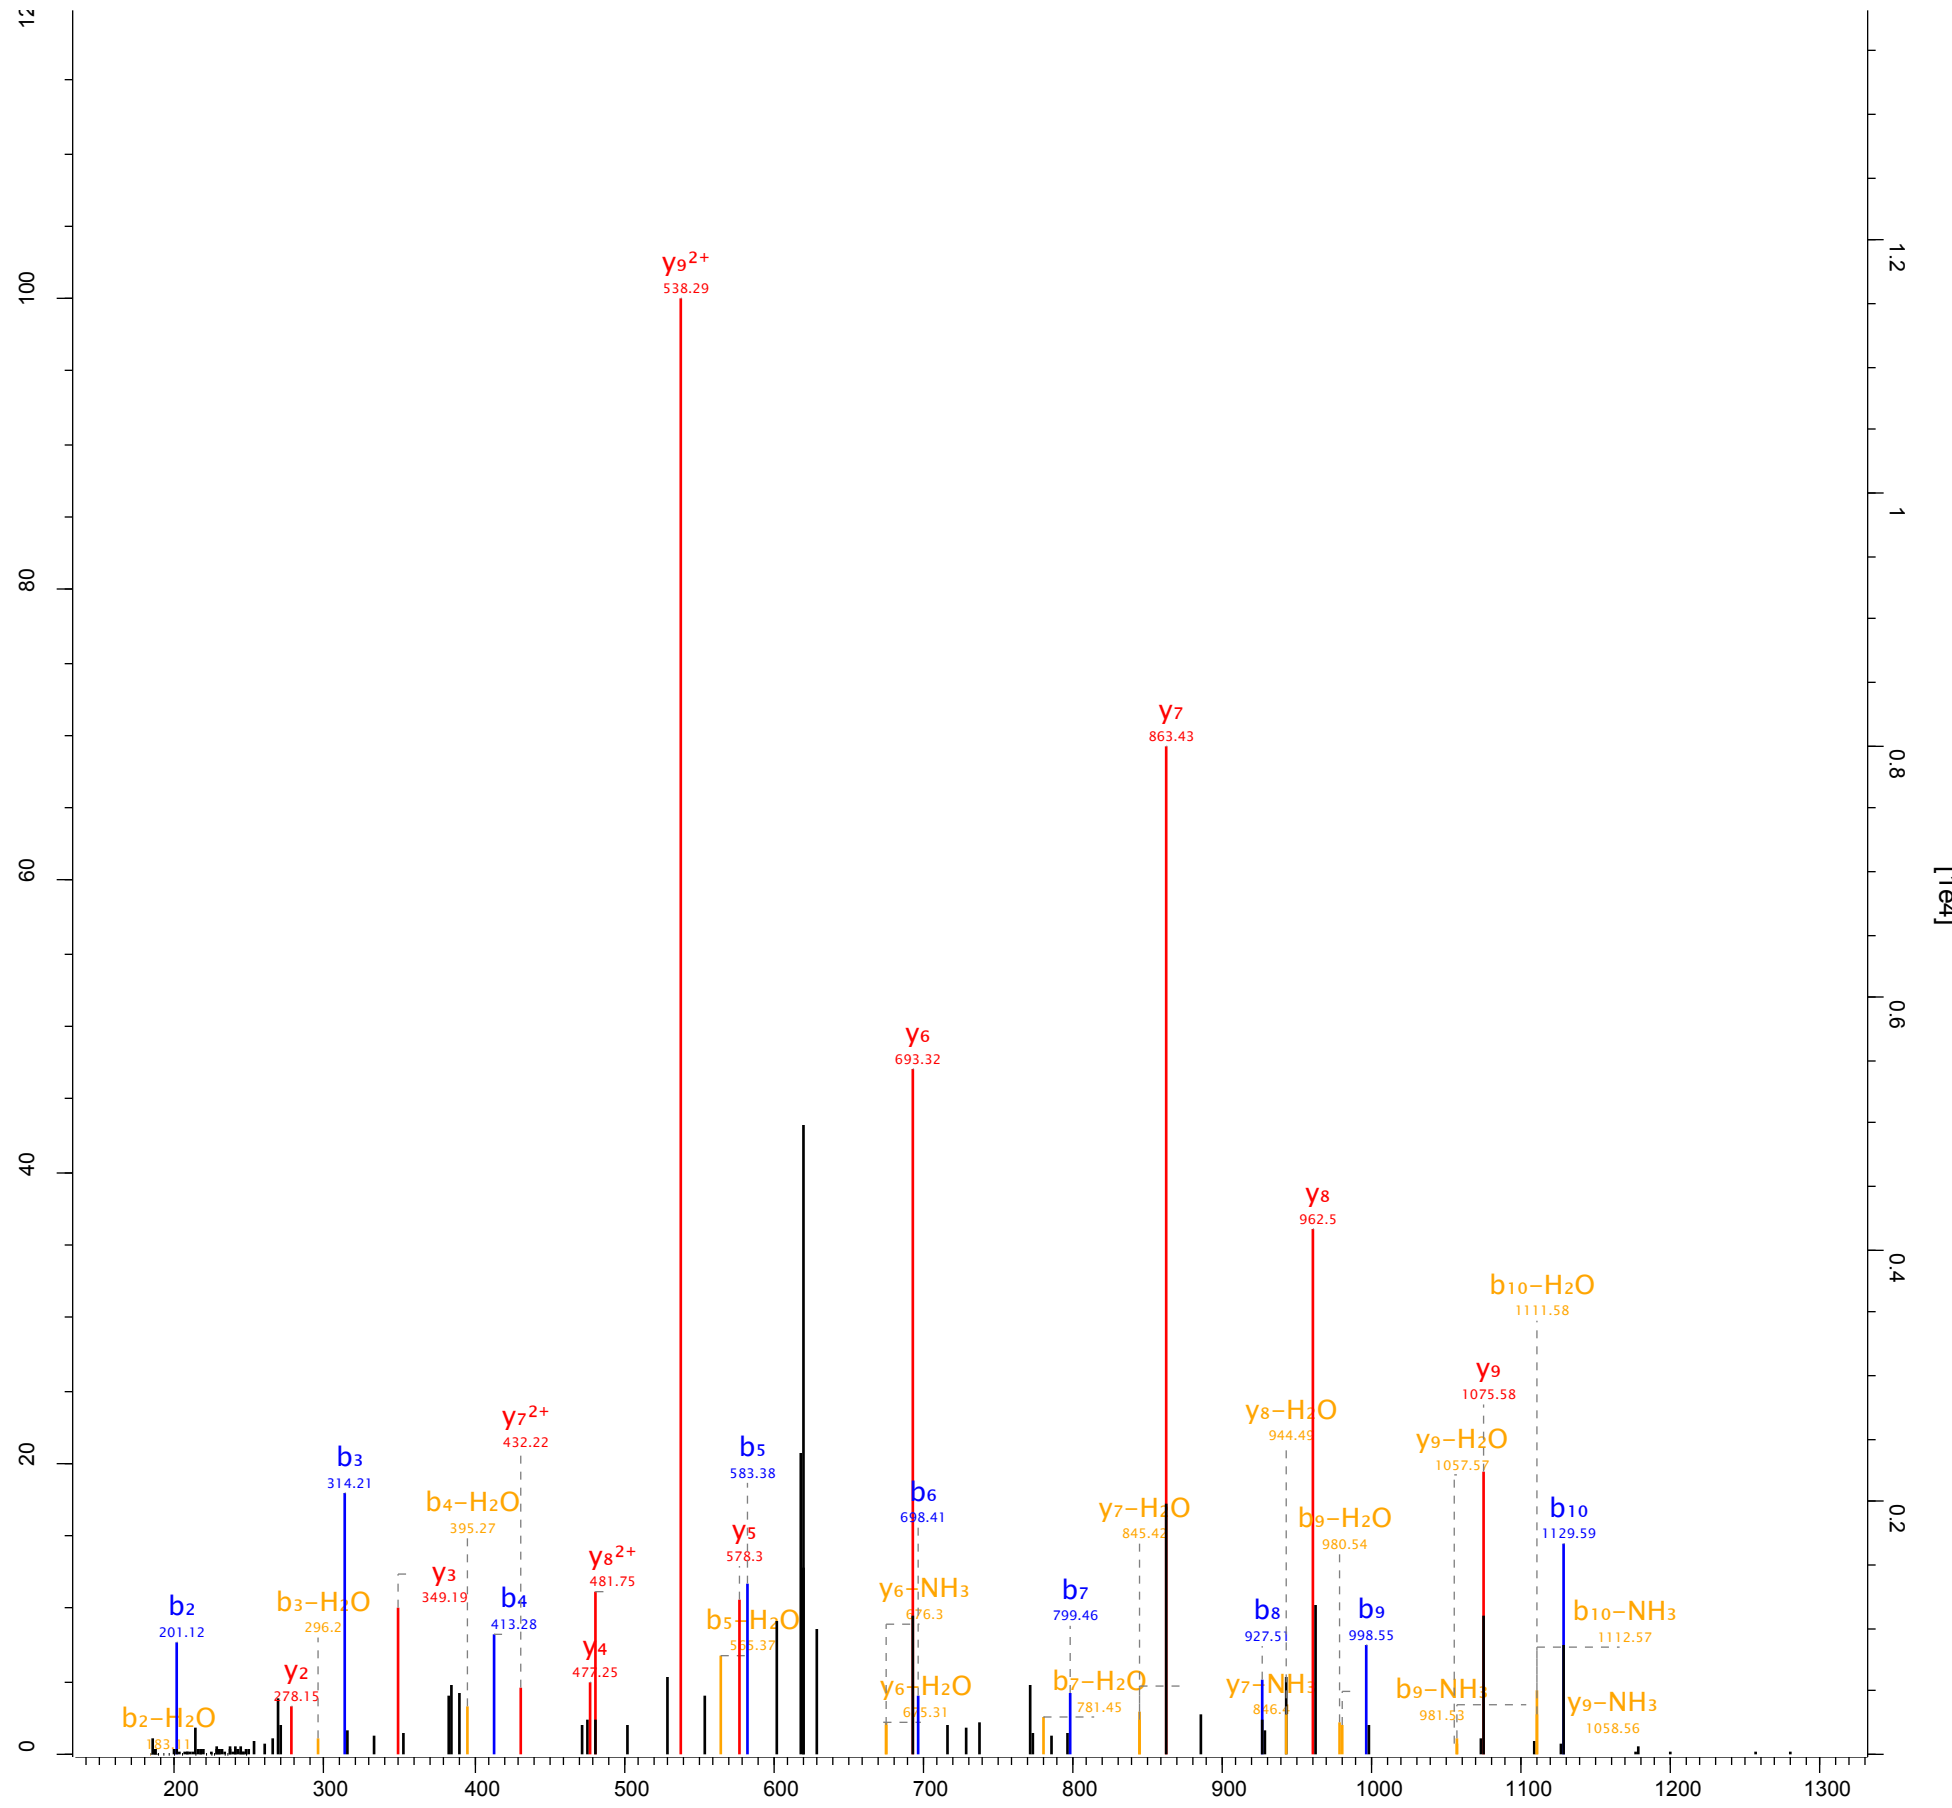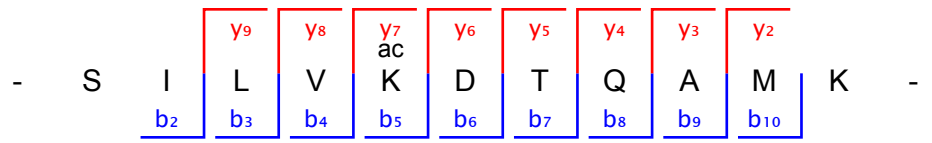

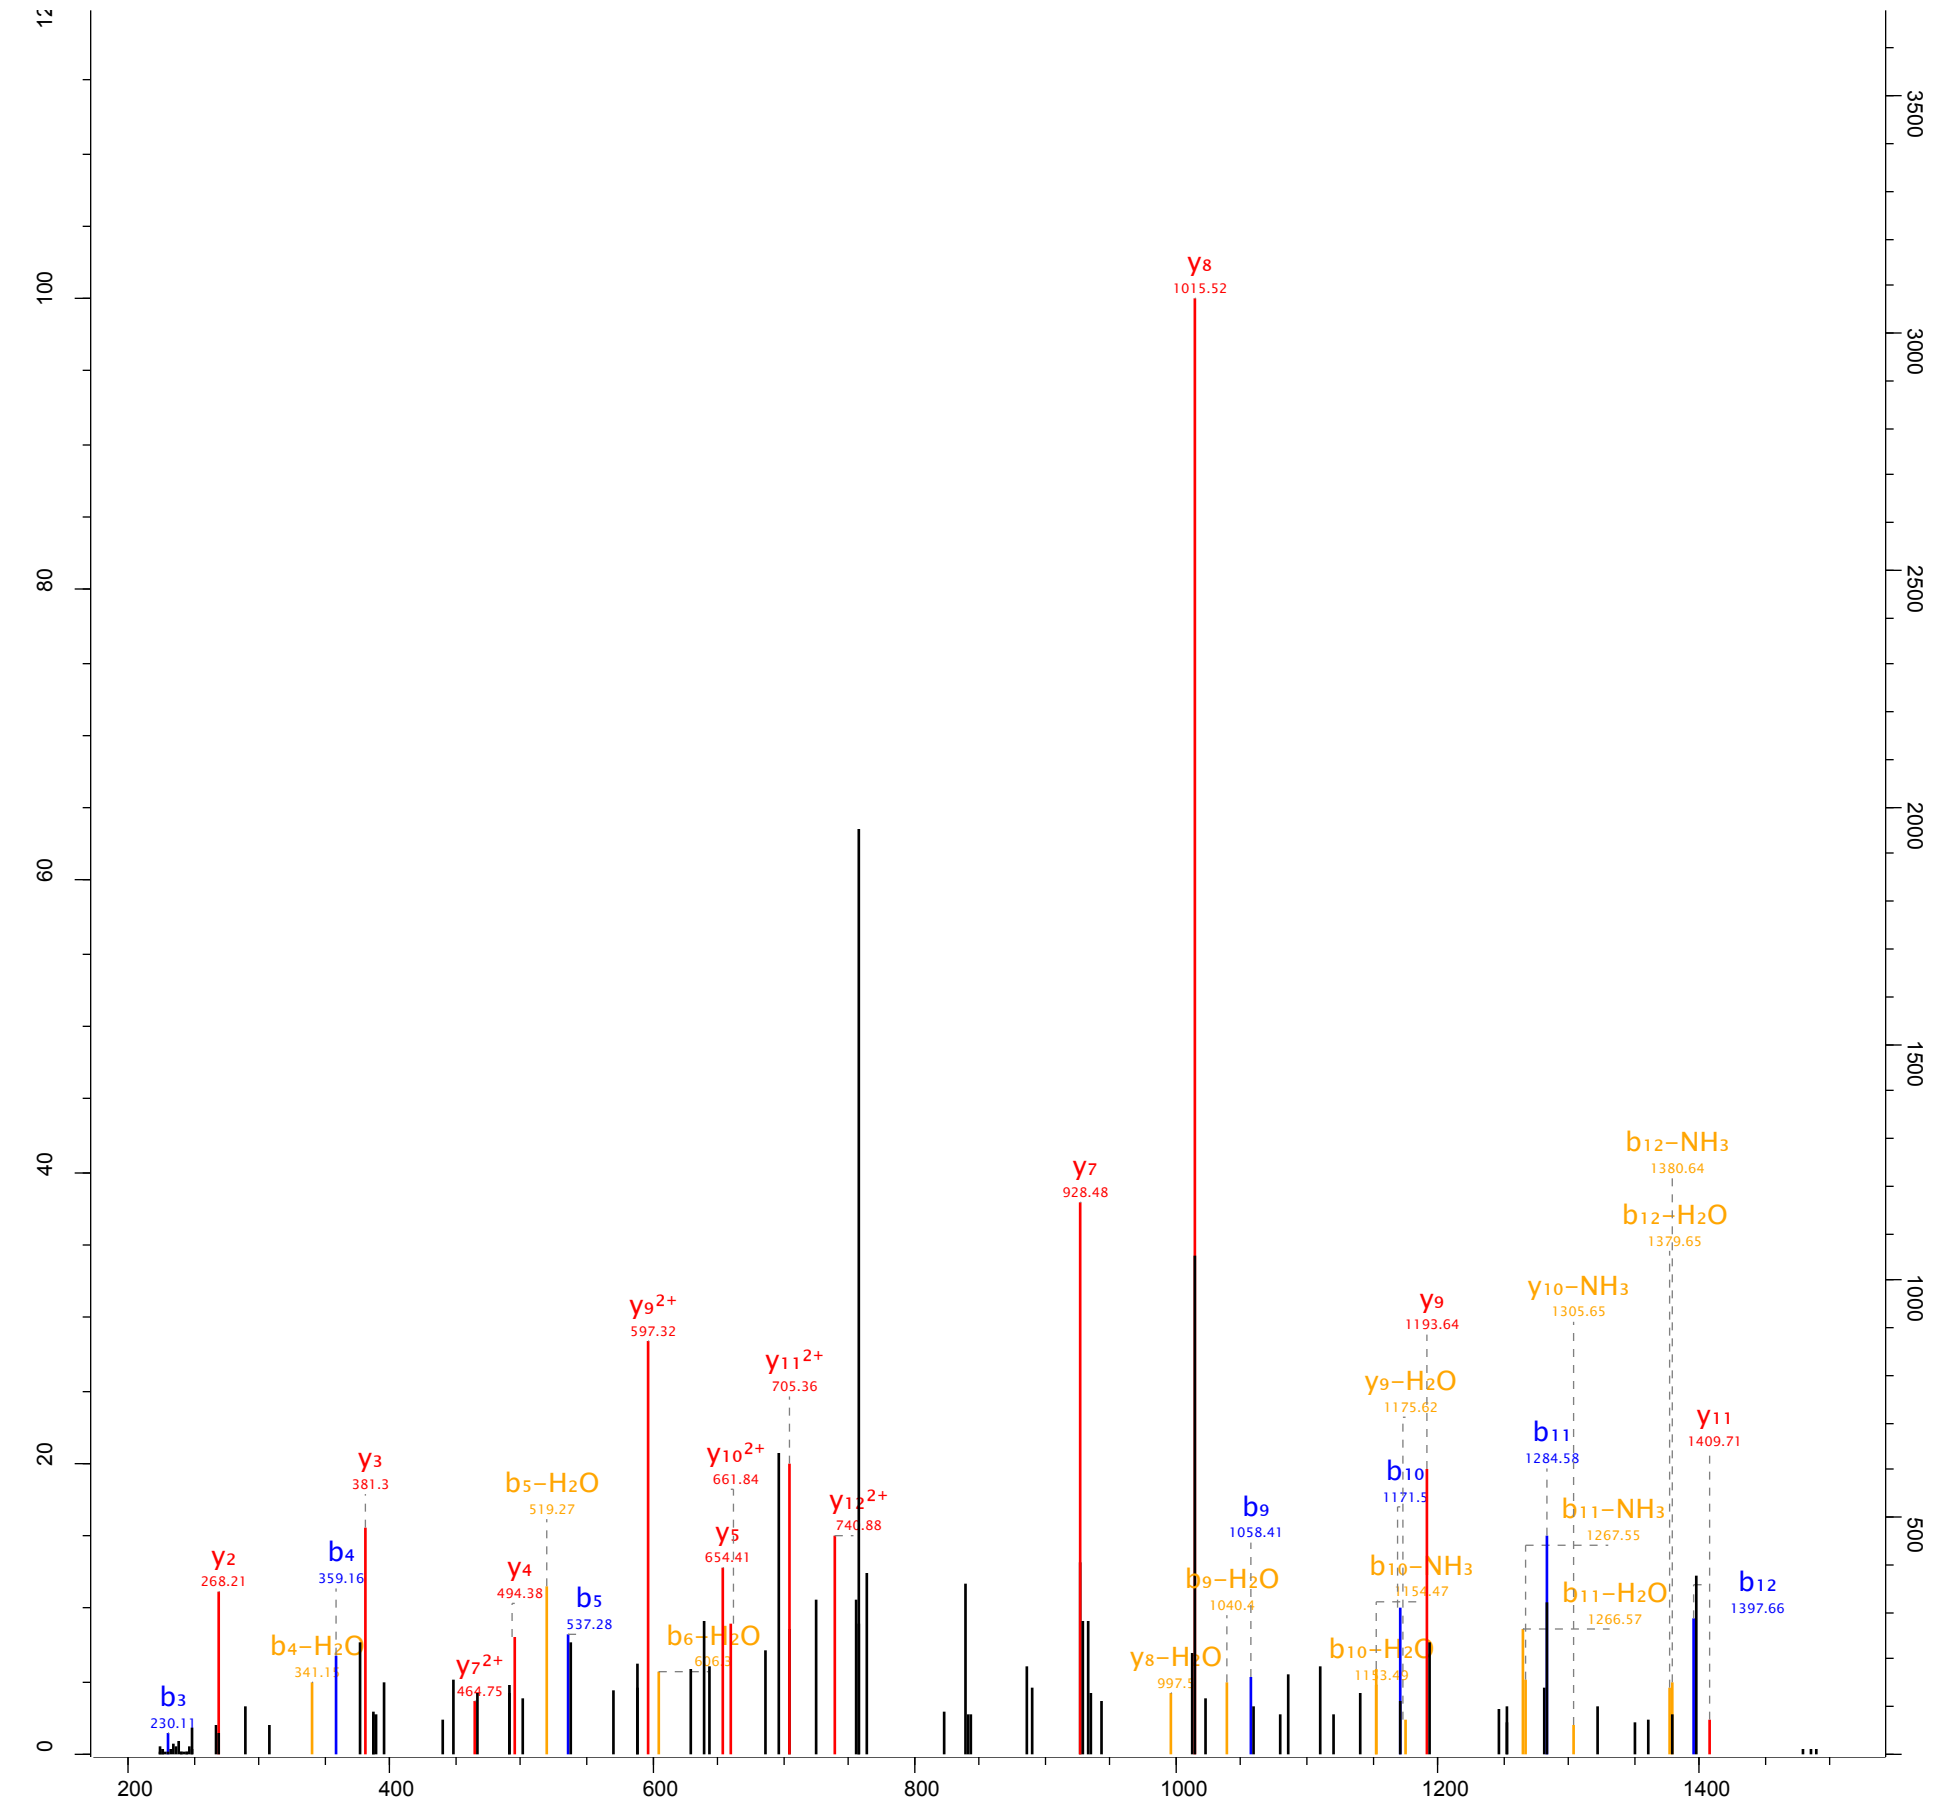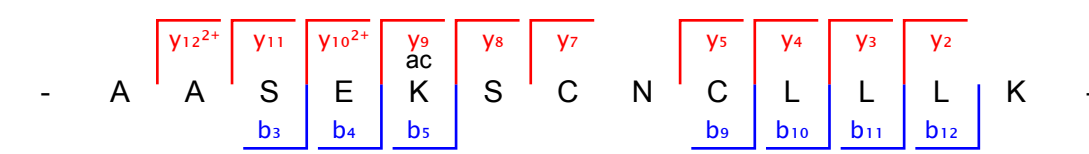

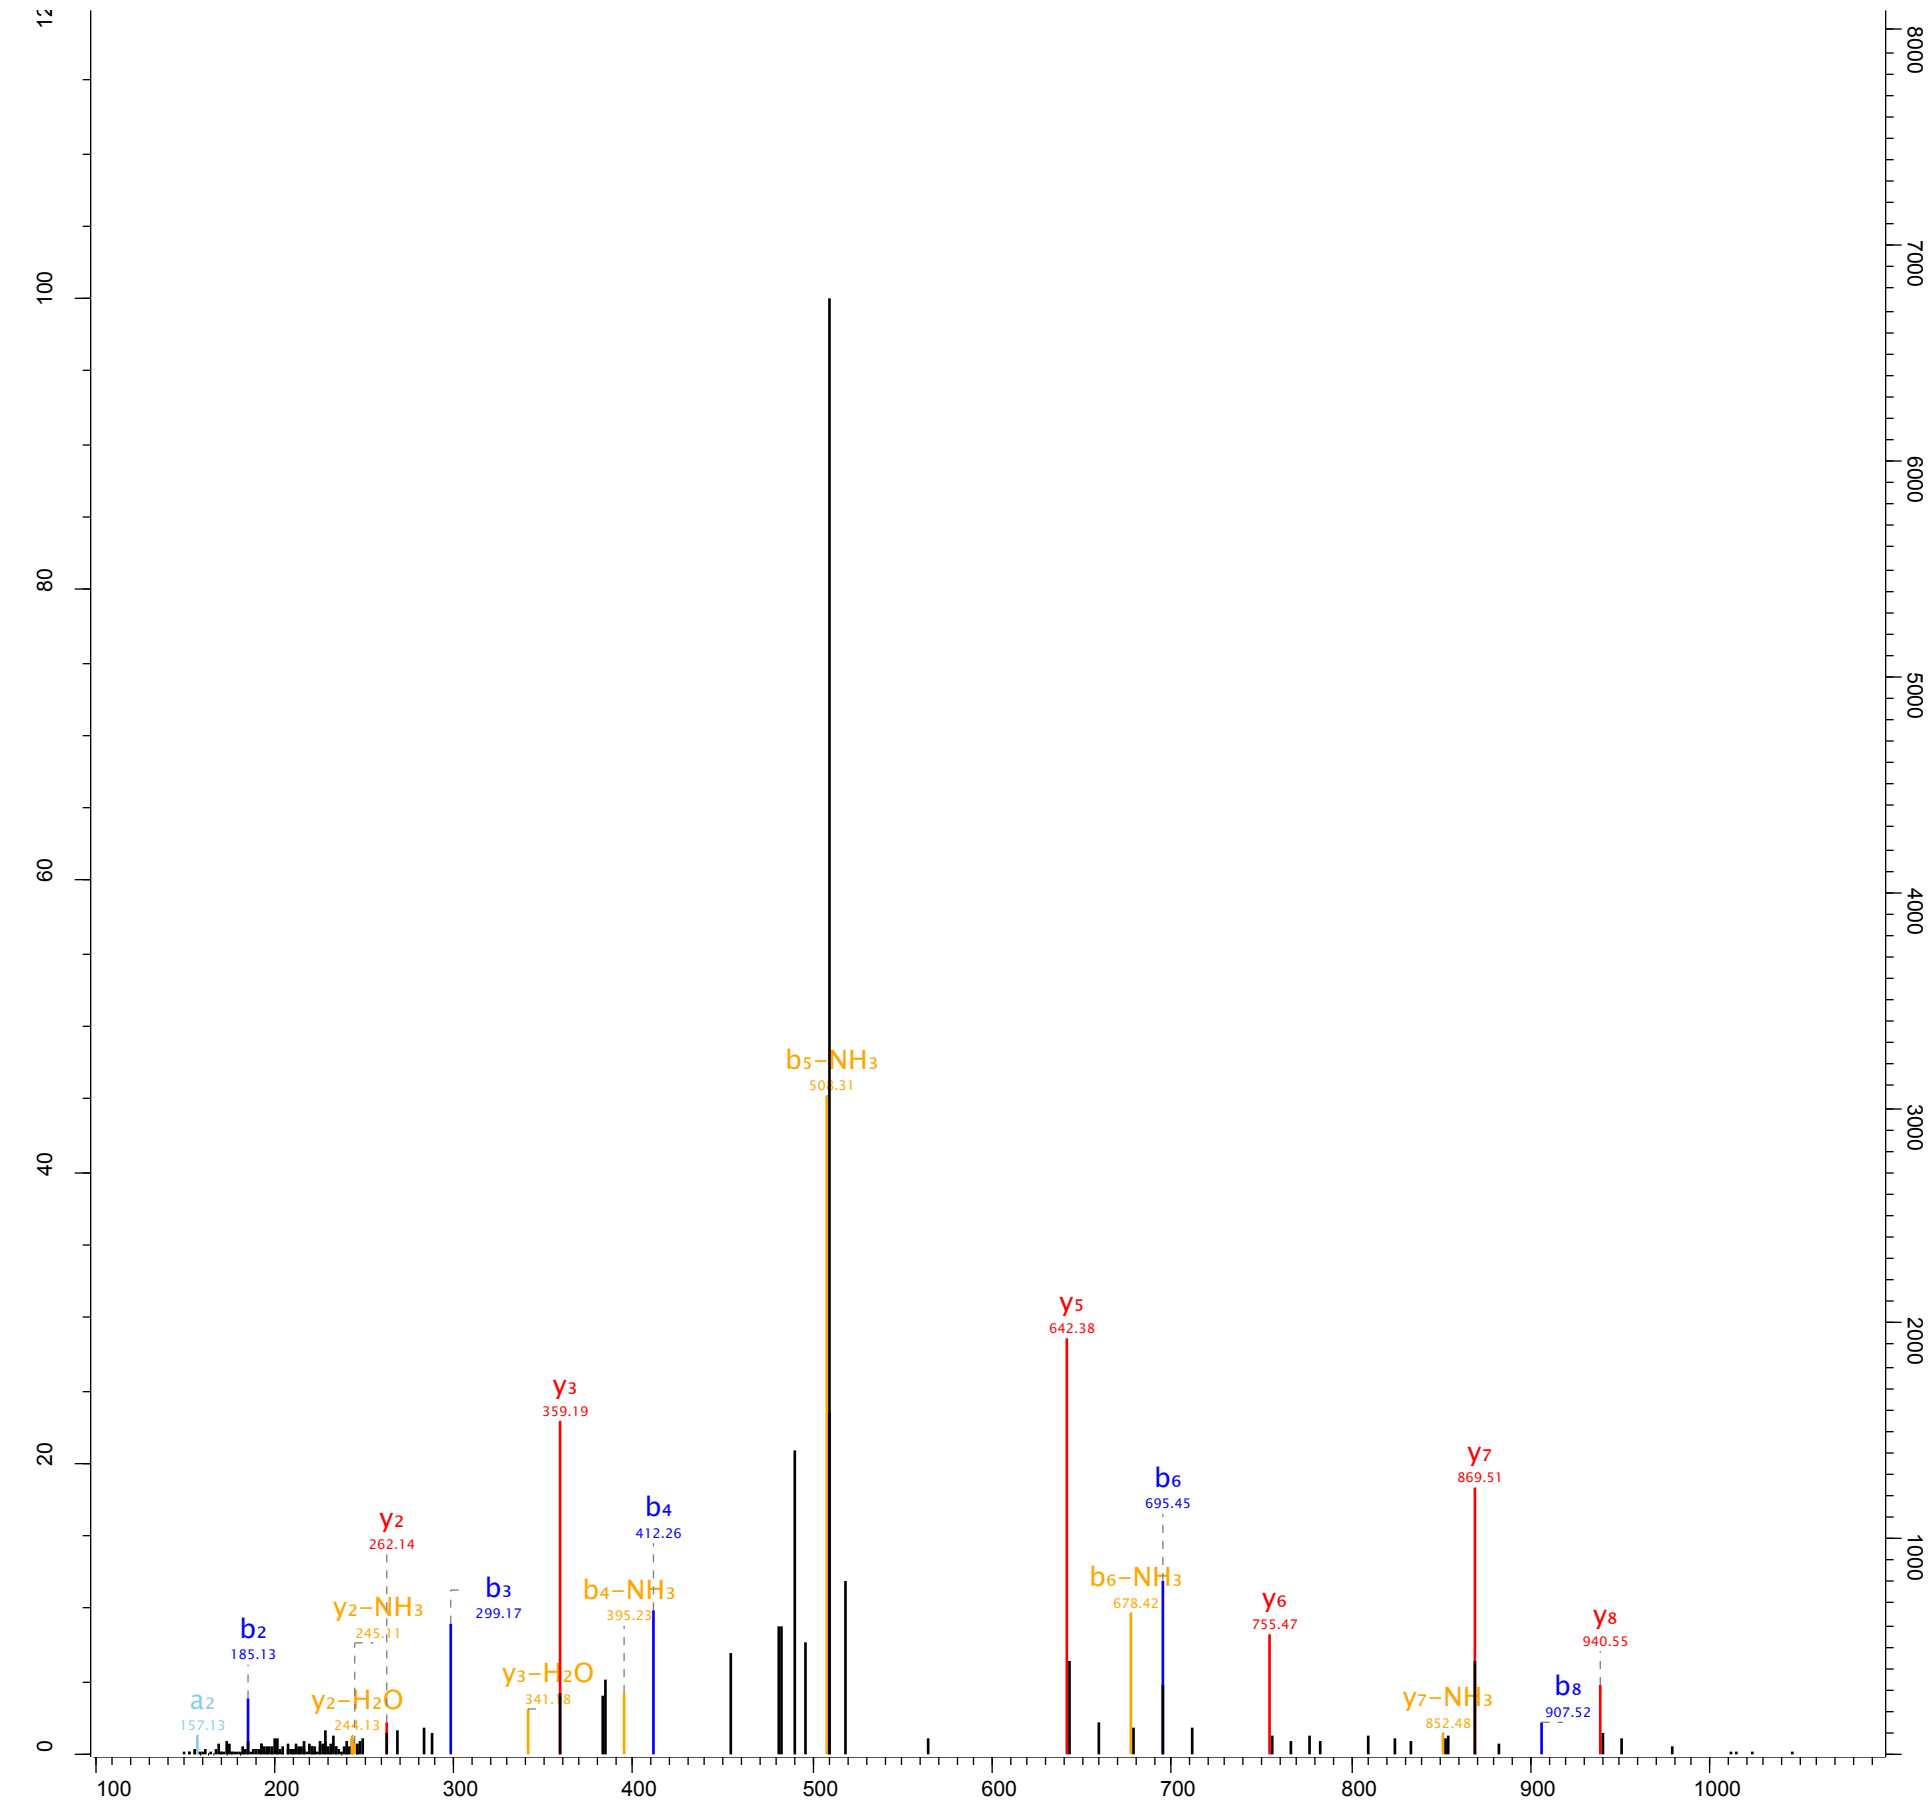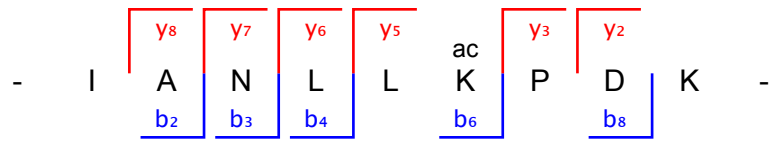

Raw file 062513\_SCW\_II\_53\_4\_Vargas\_Enriched

Scan 16917 Method ITMS; CID Score 167.73 m/z 680.85 Gene names Tpm3;Tpm3-rs7

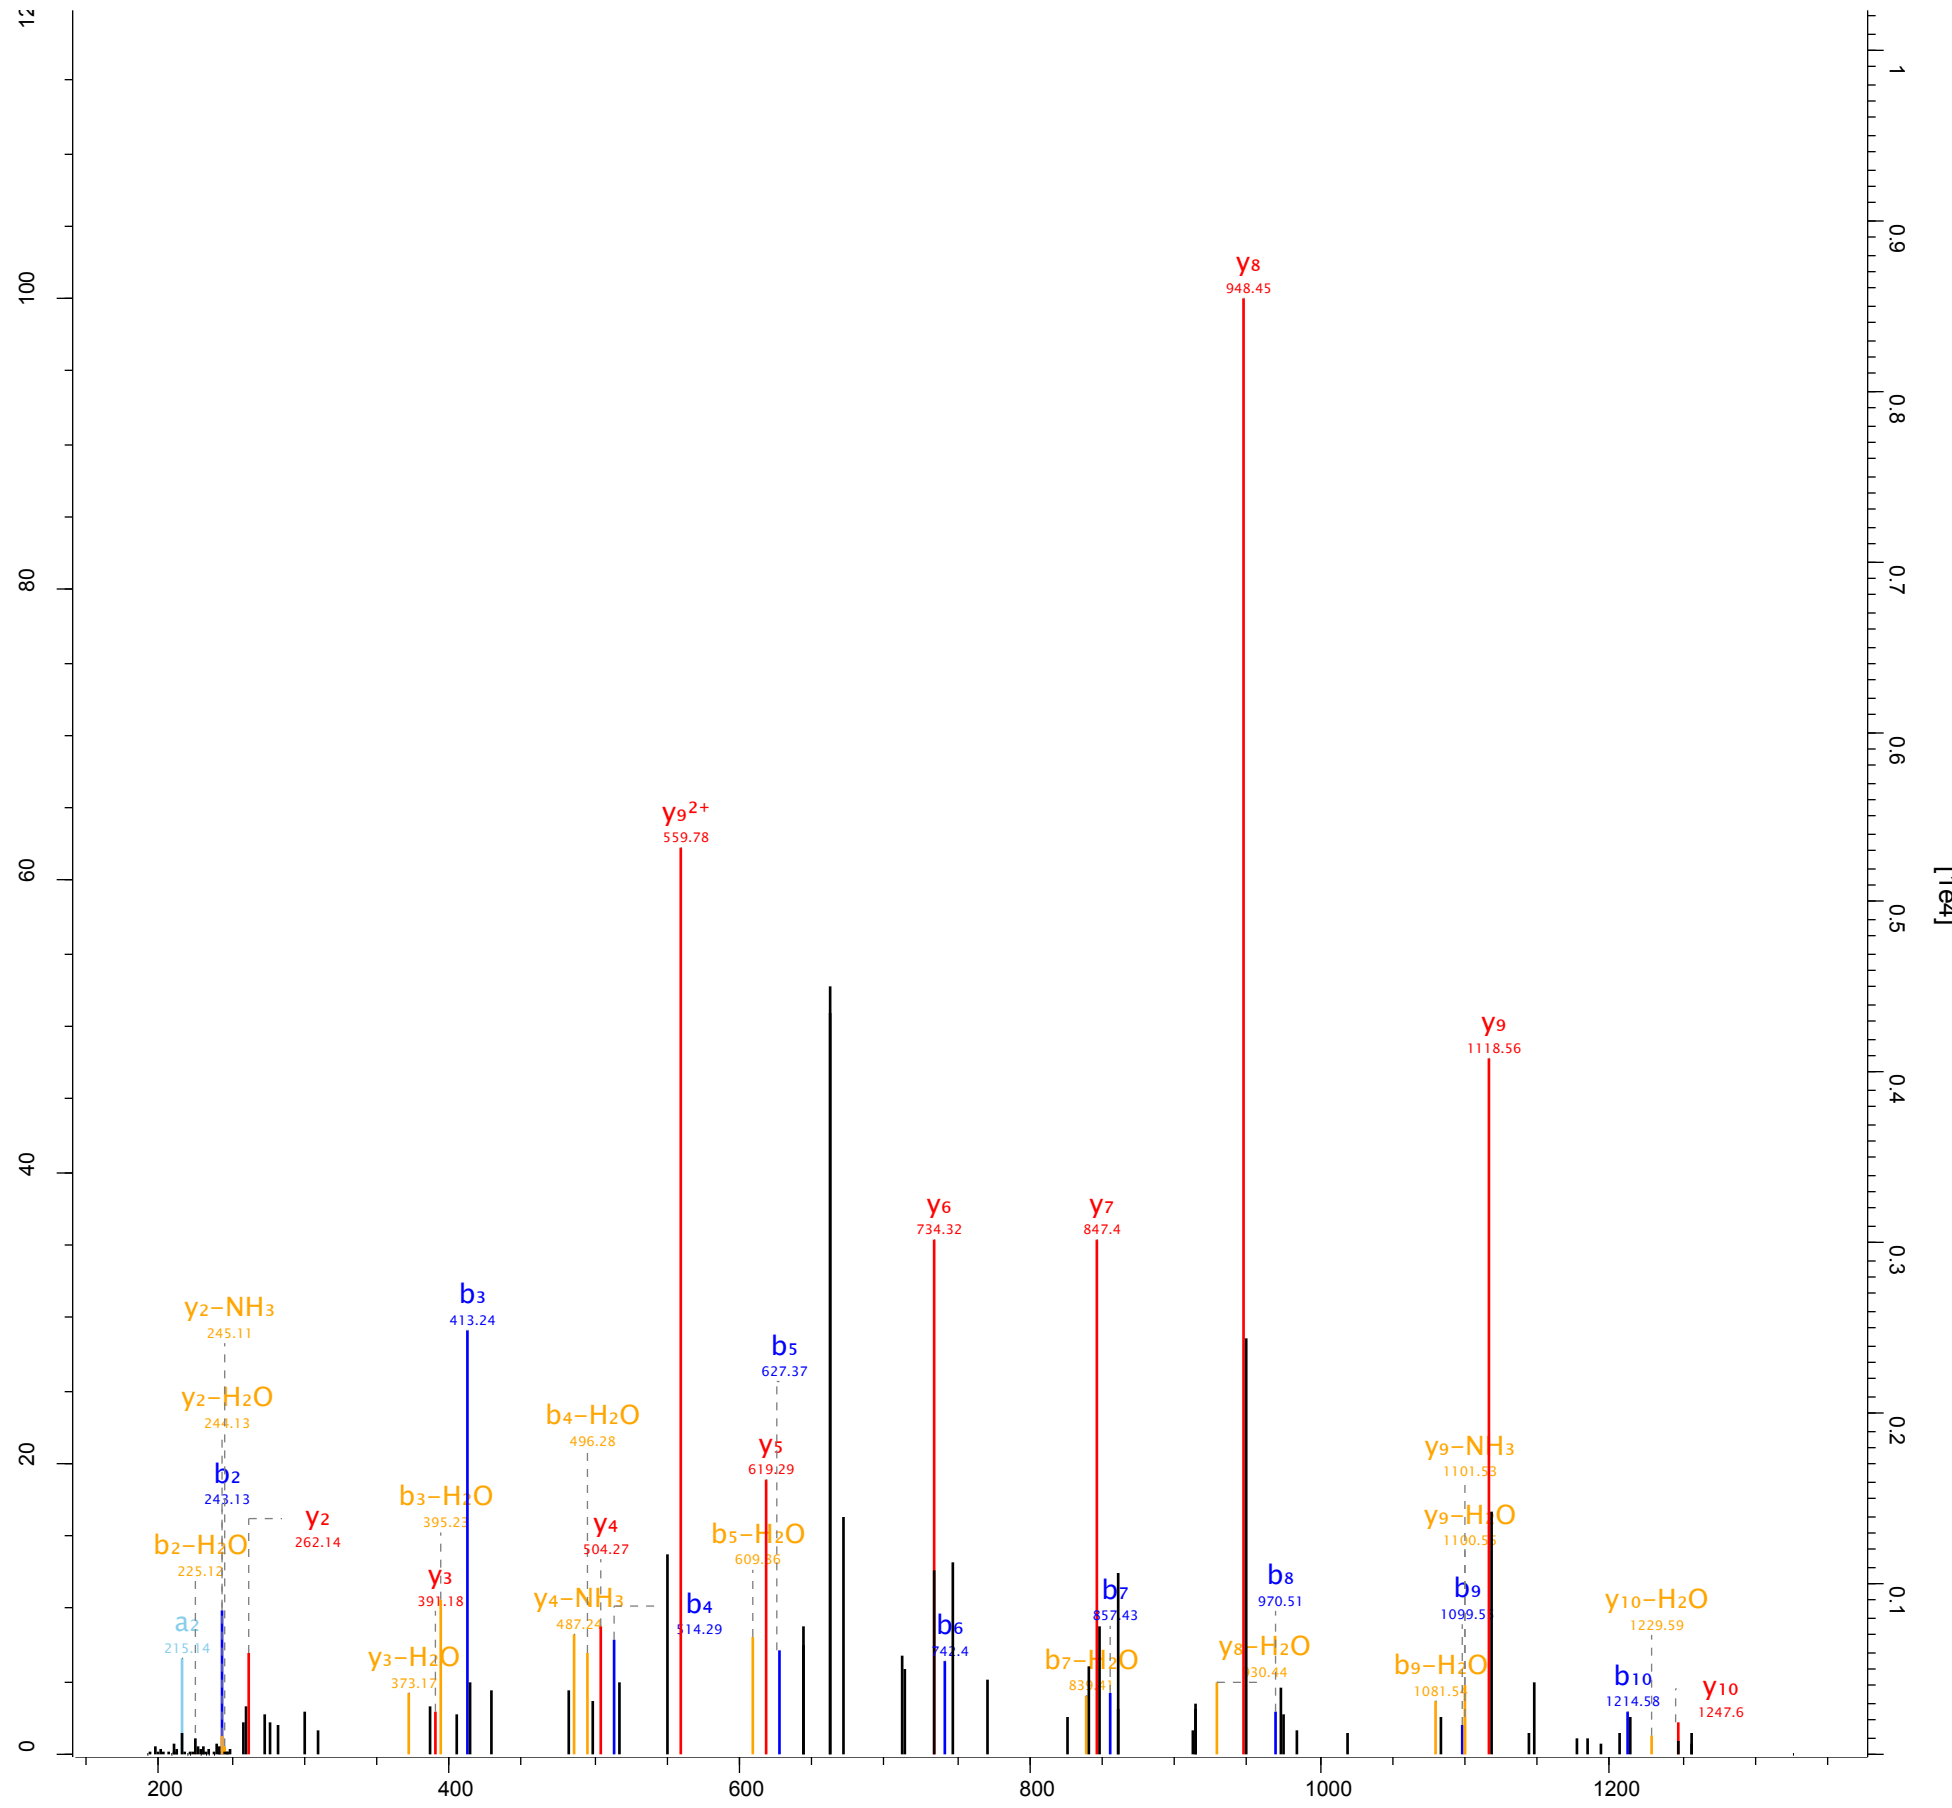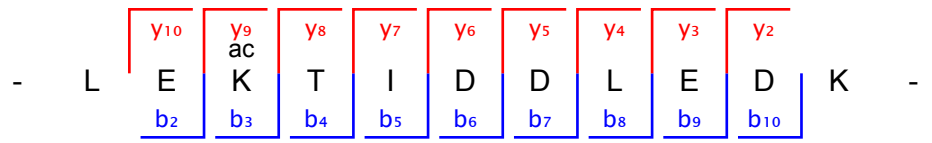

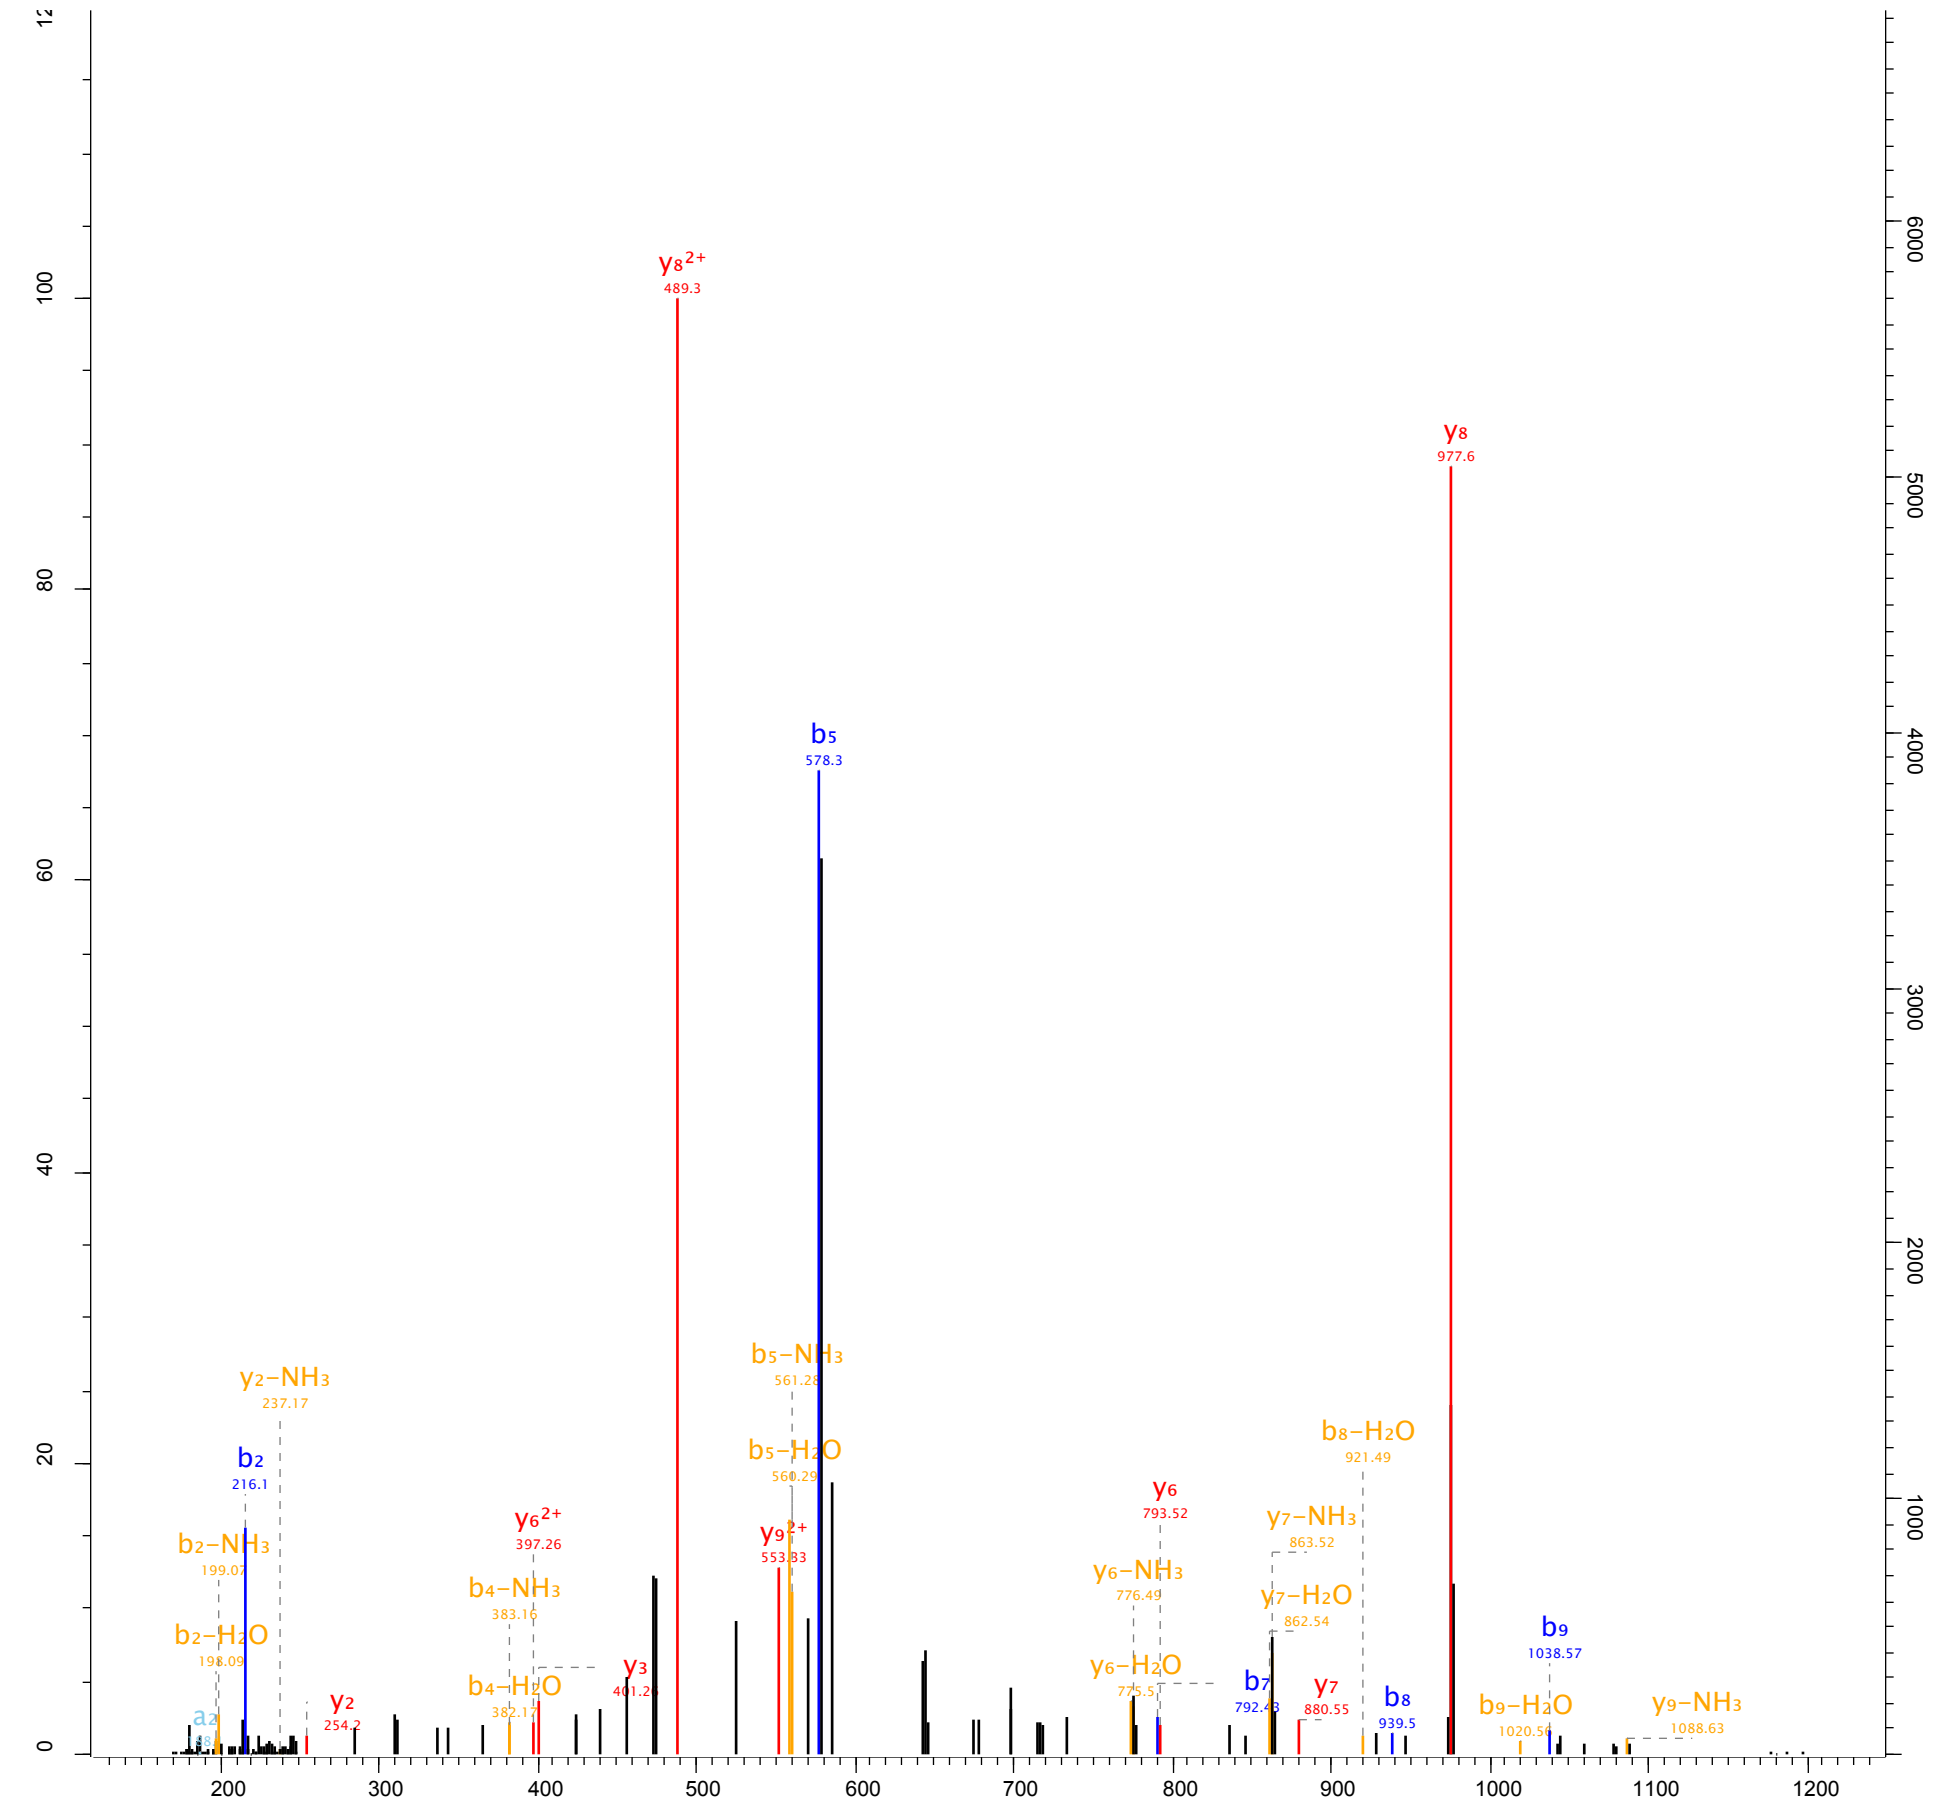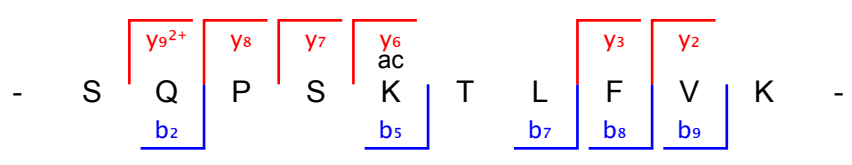

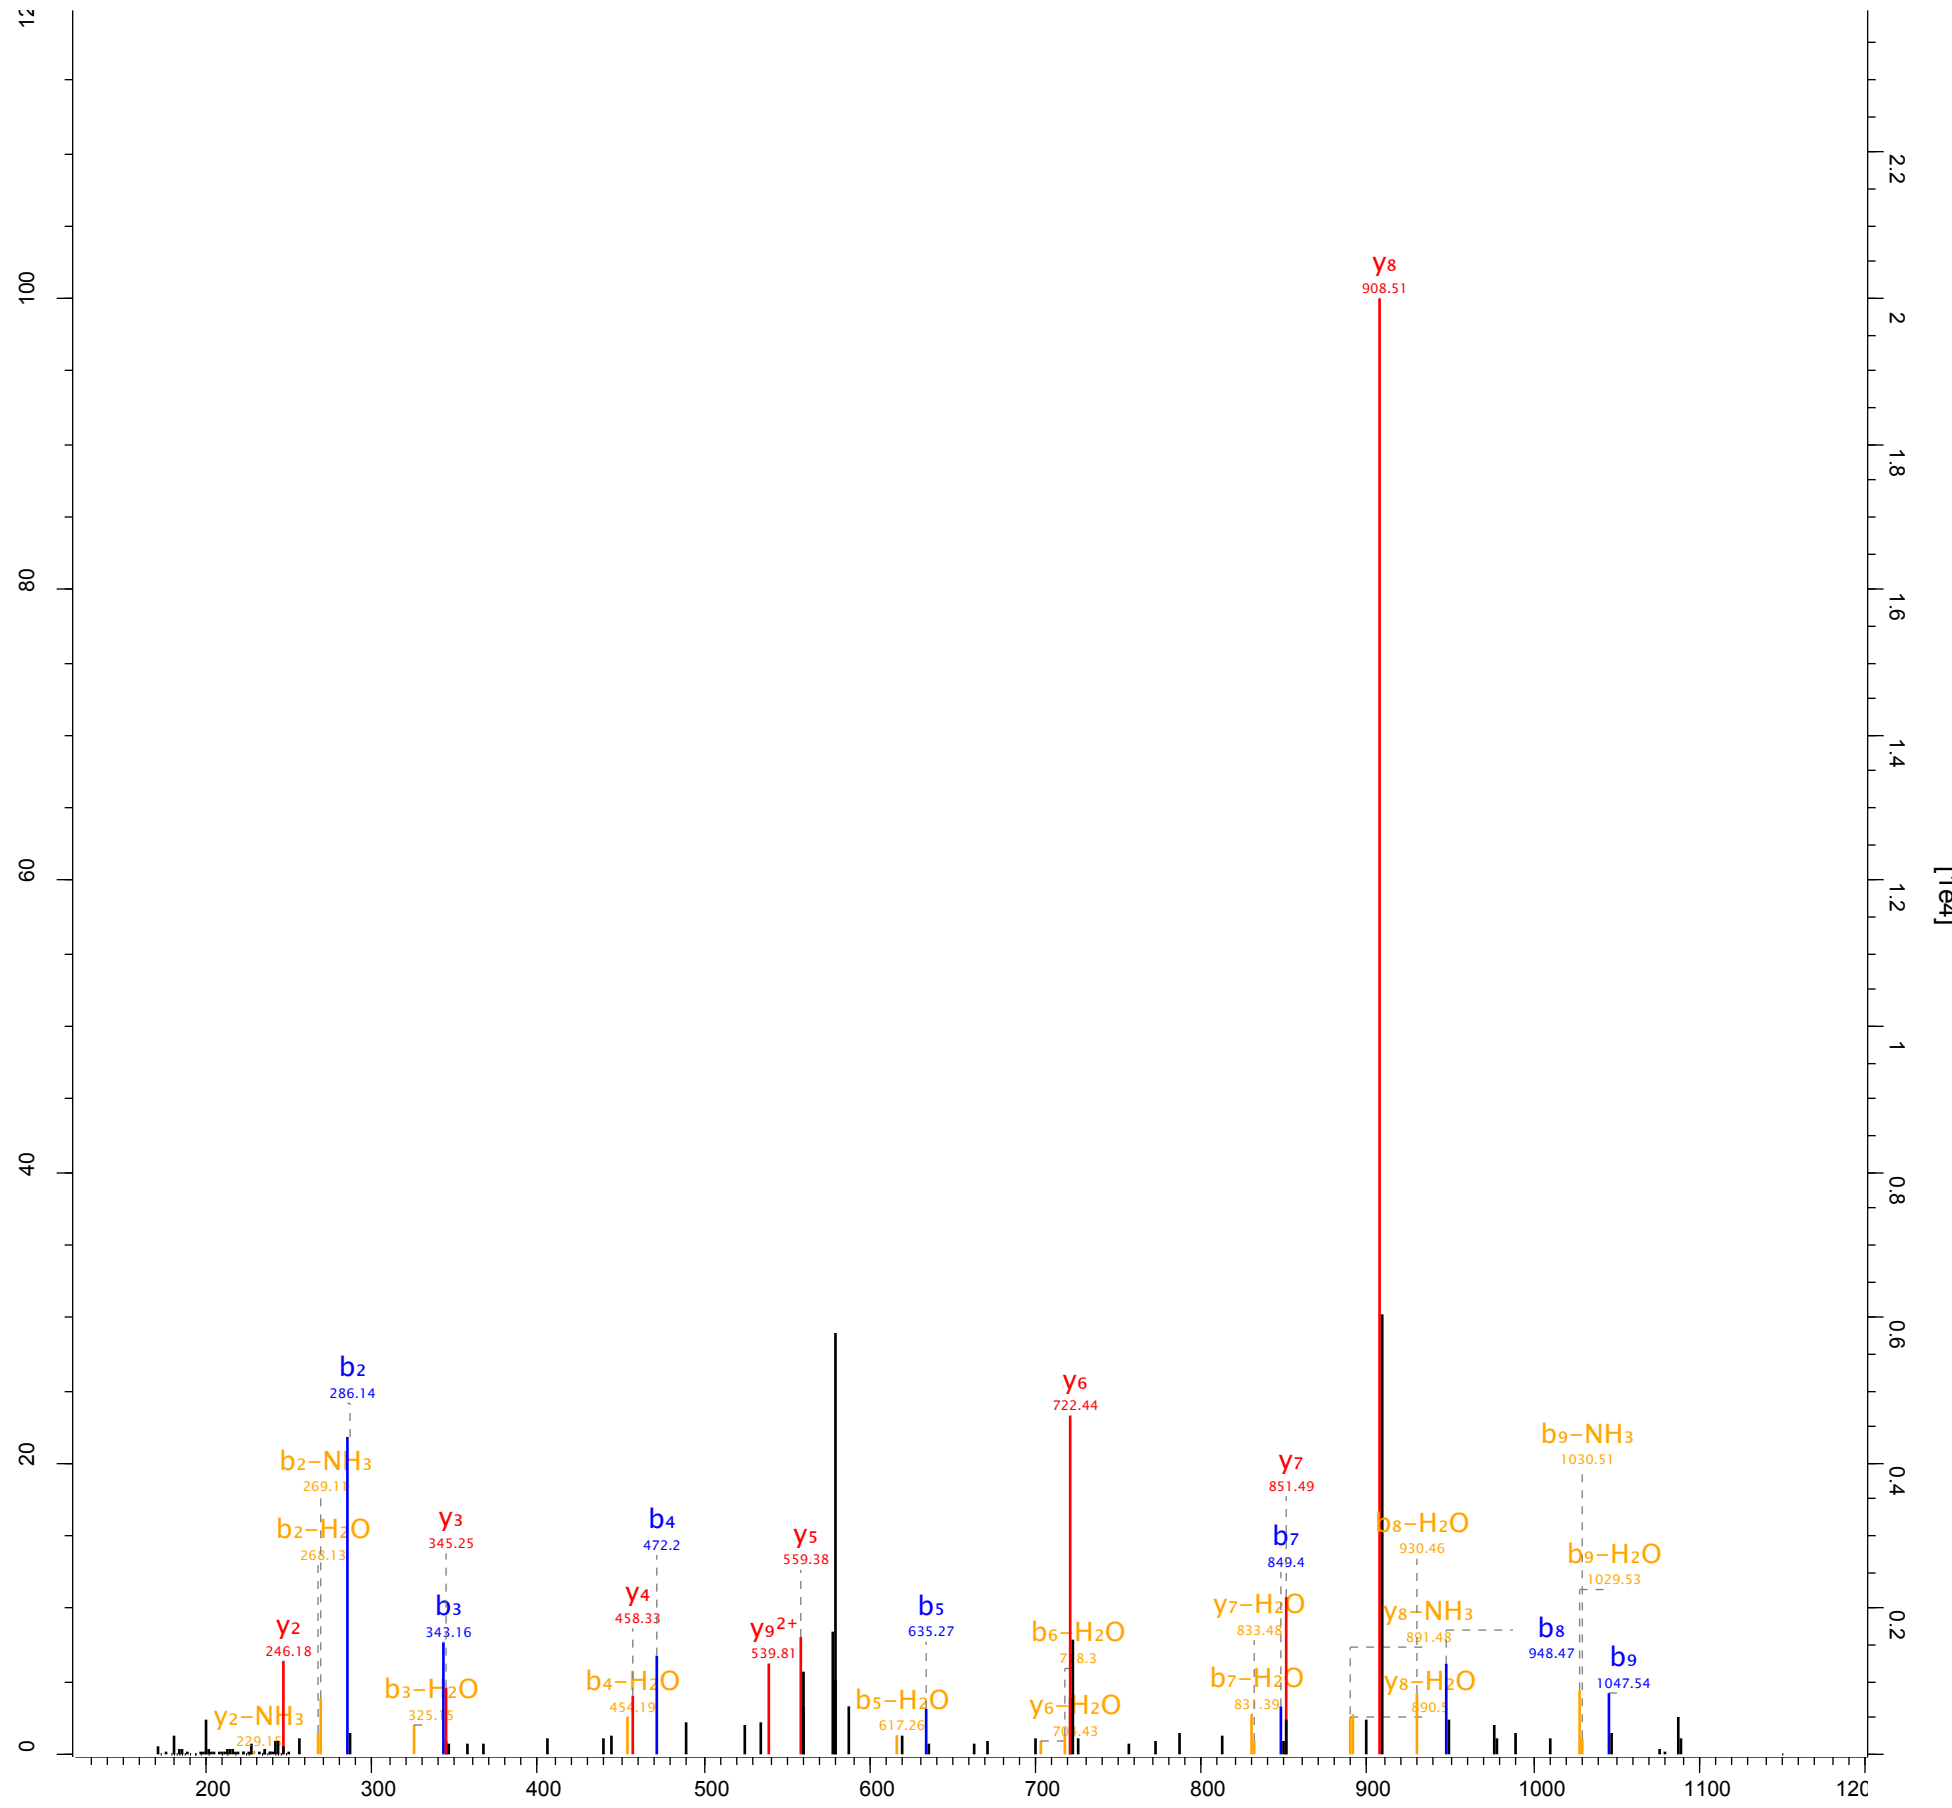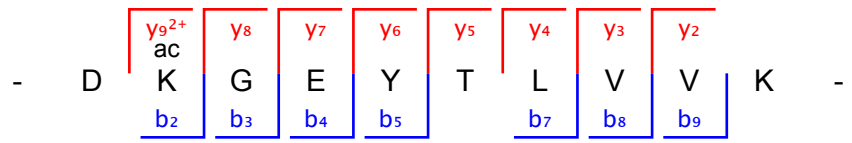



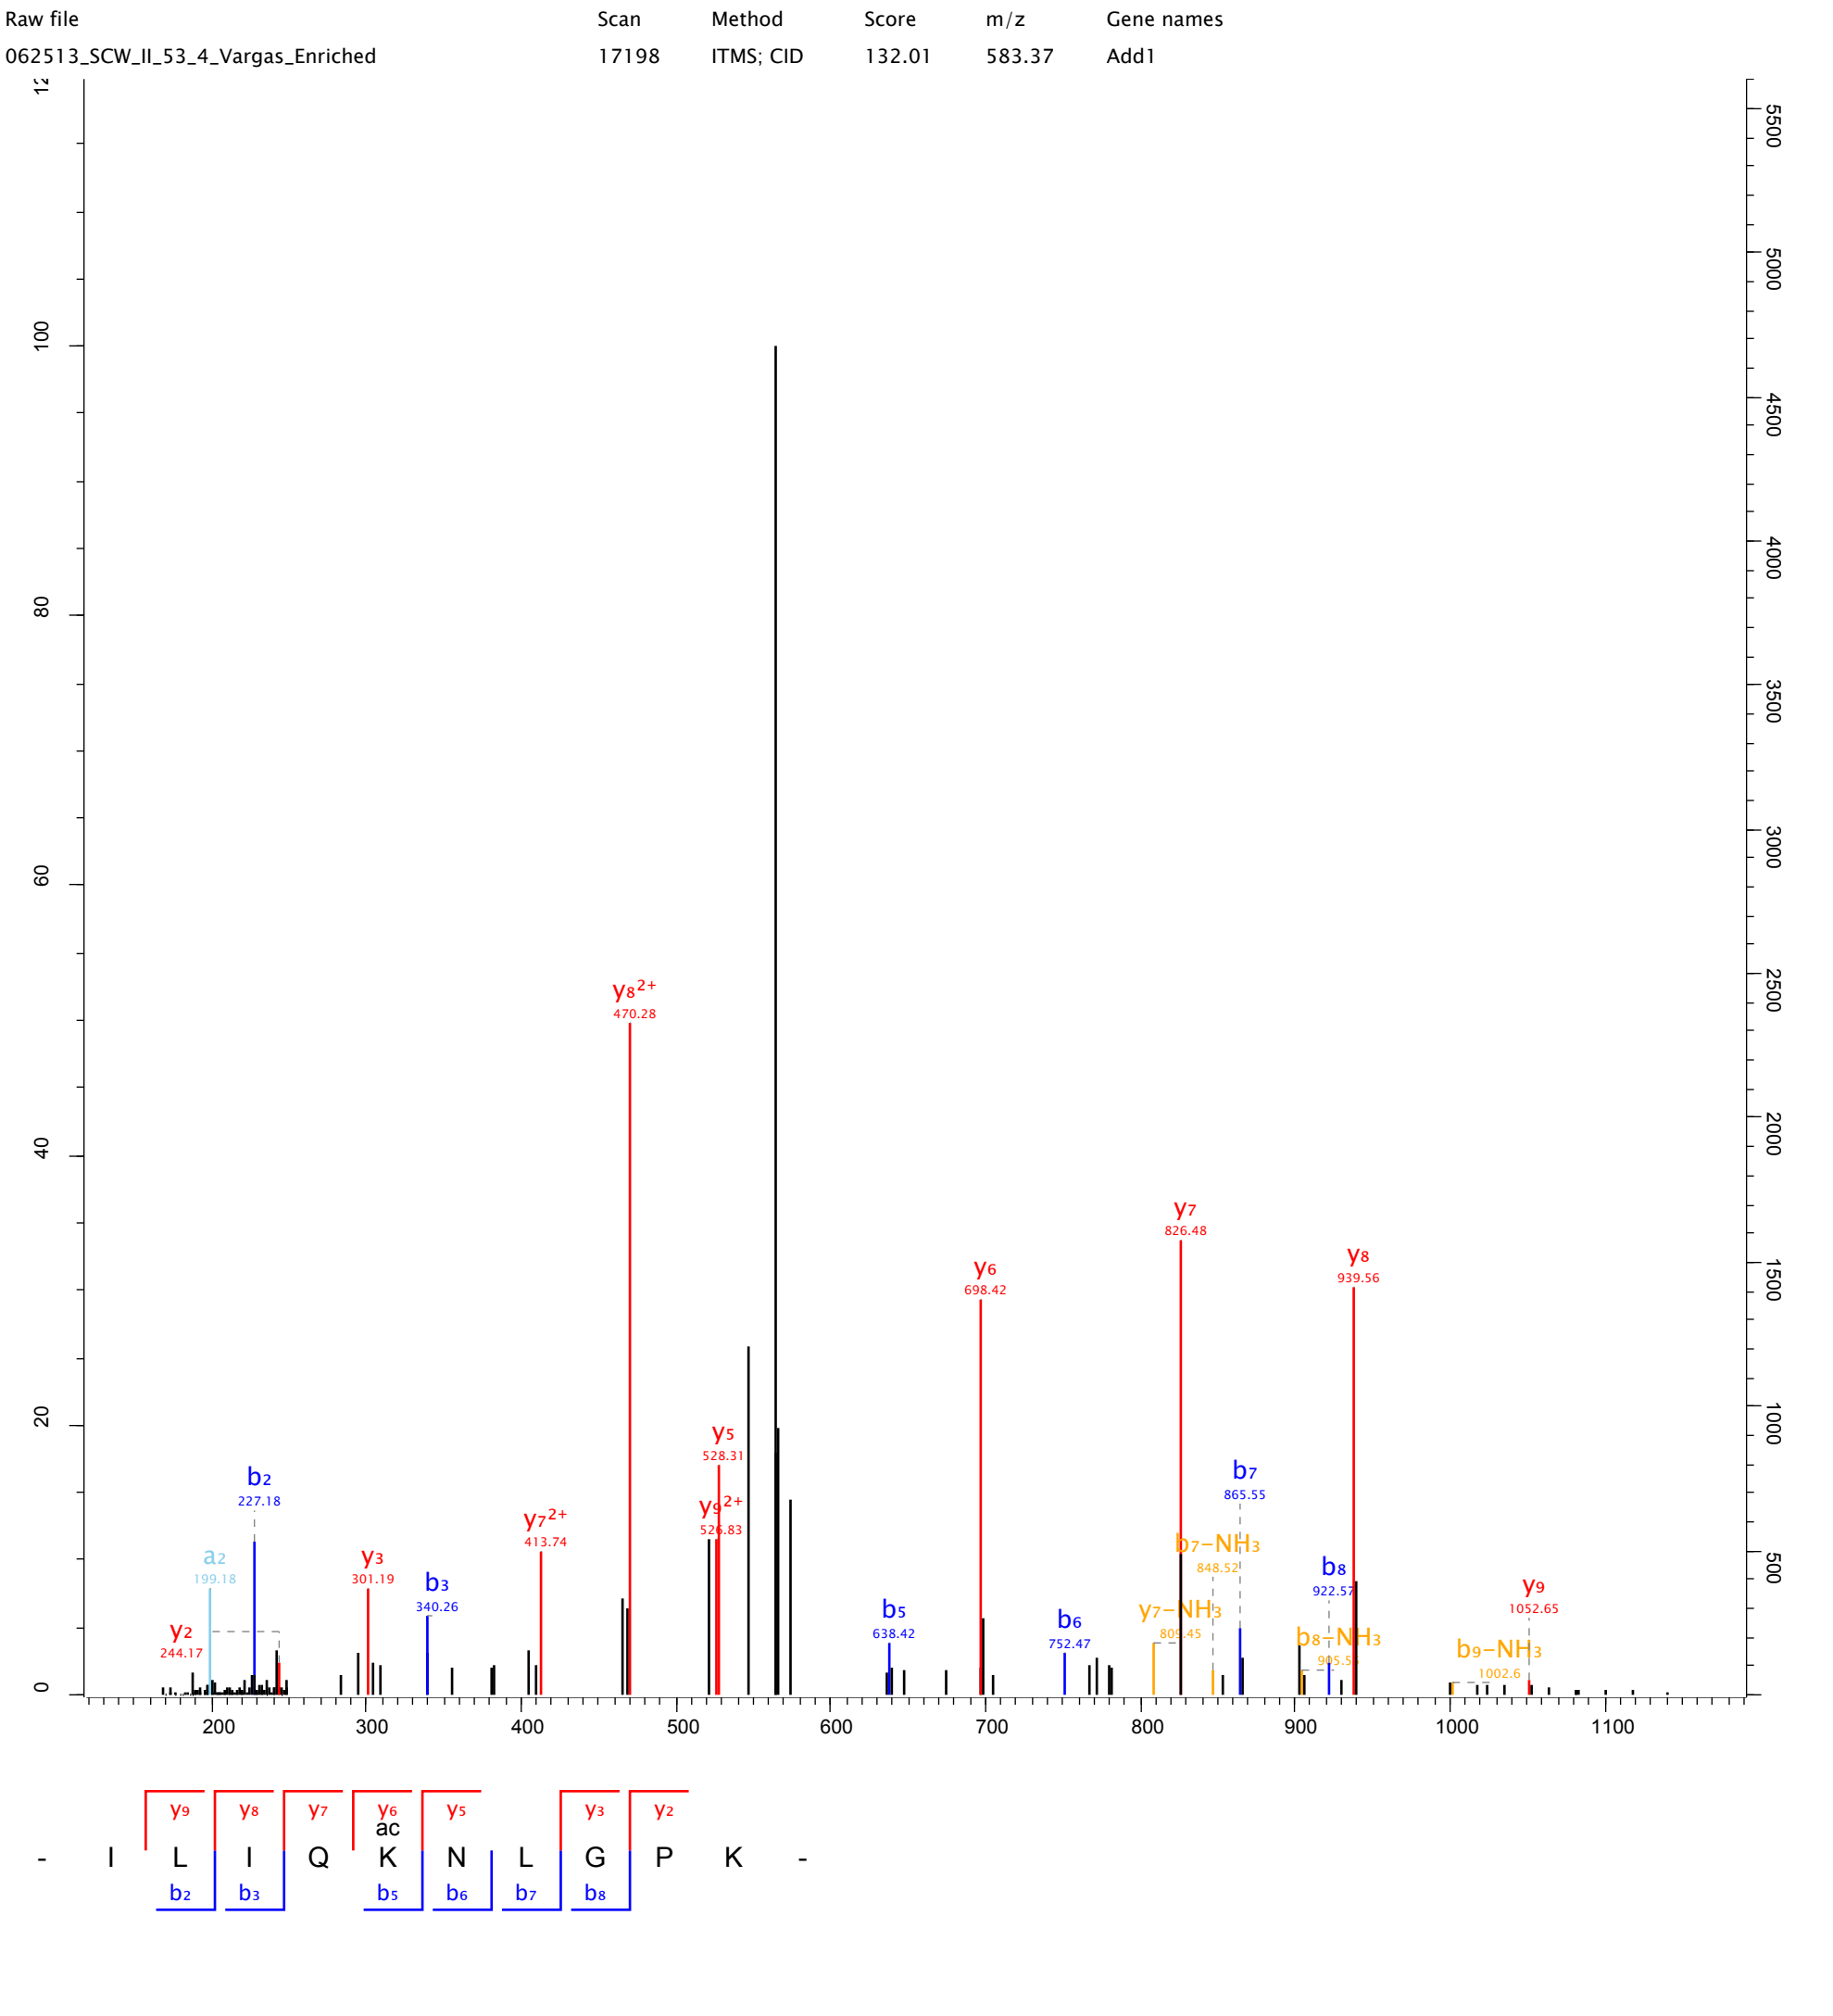

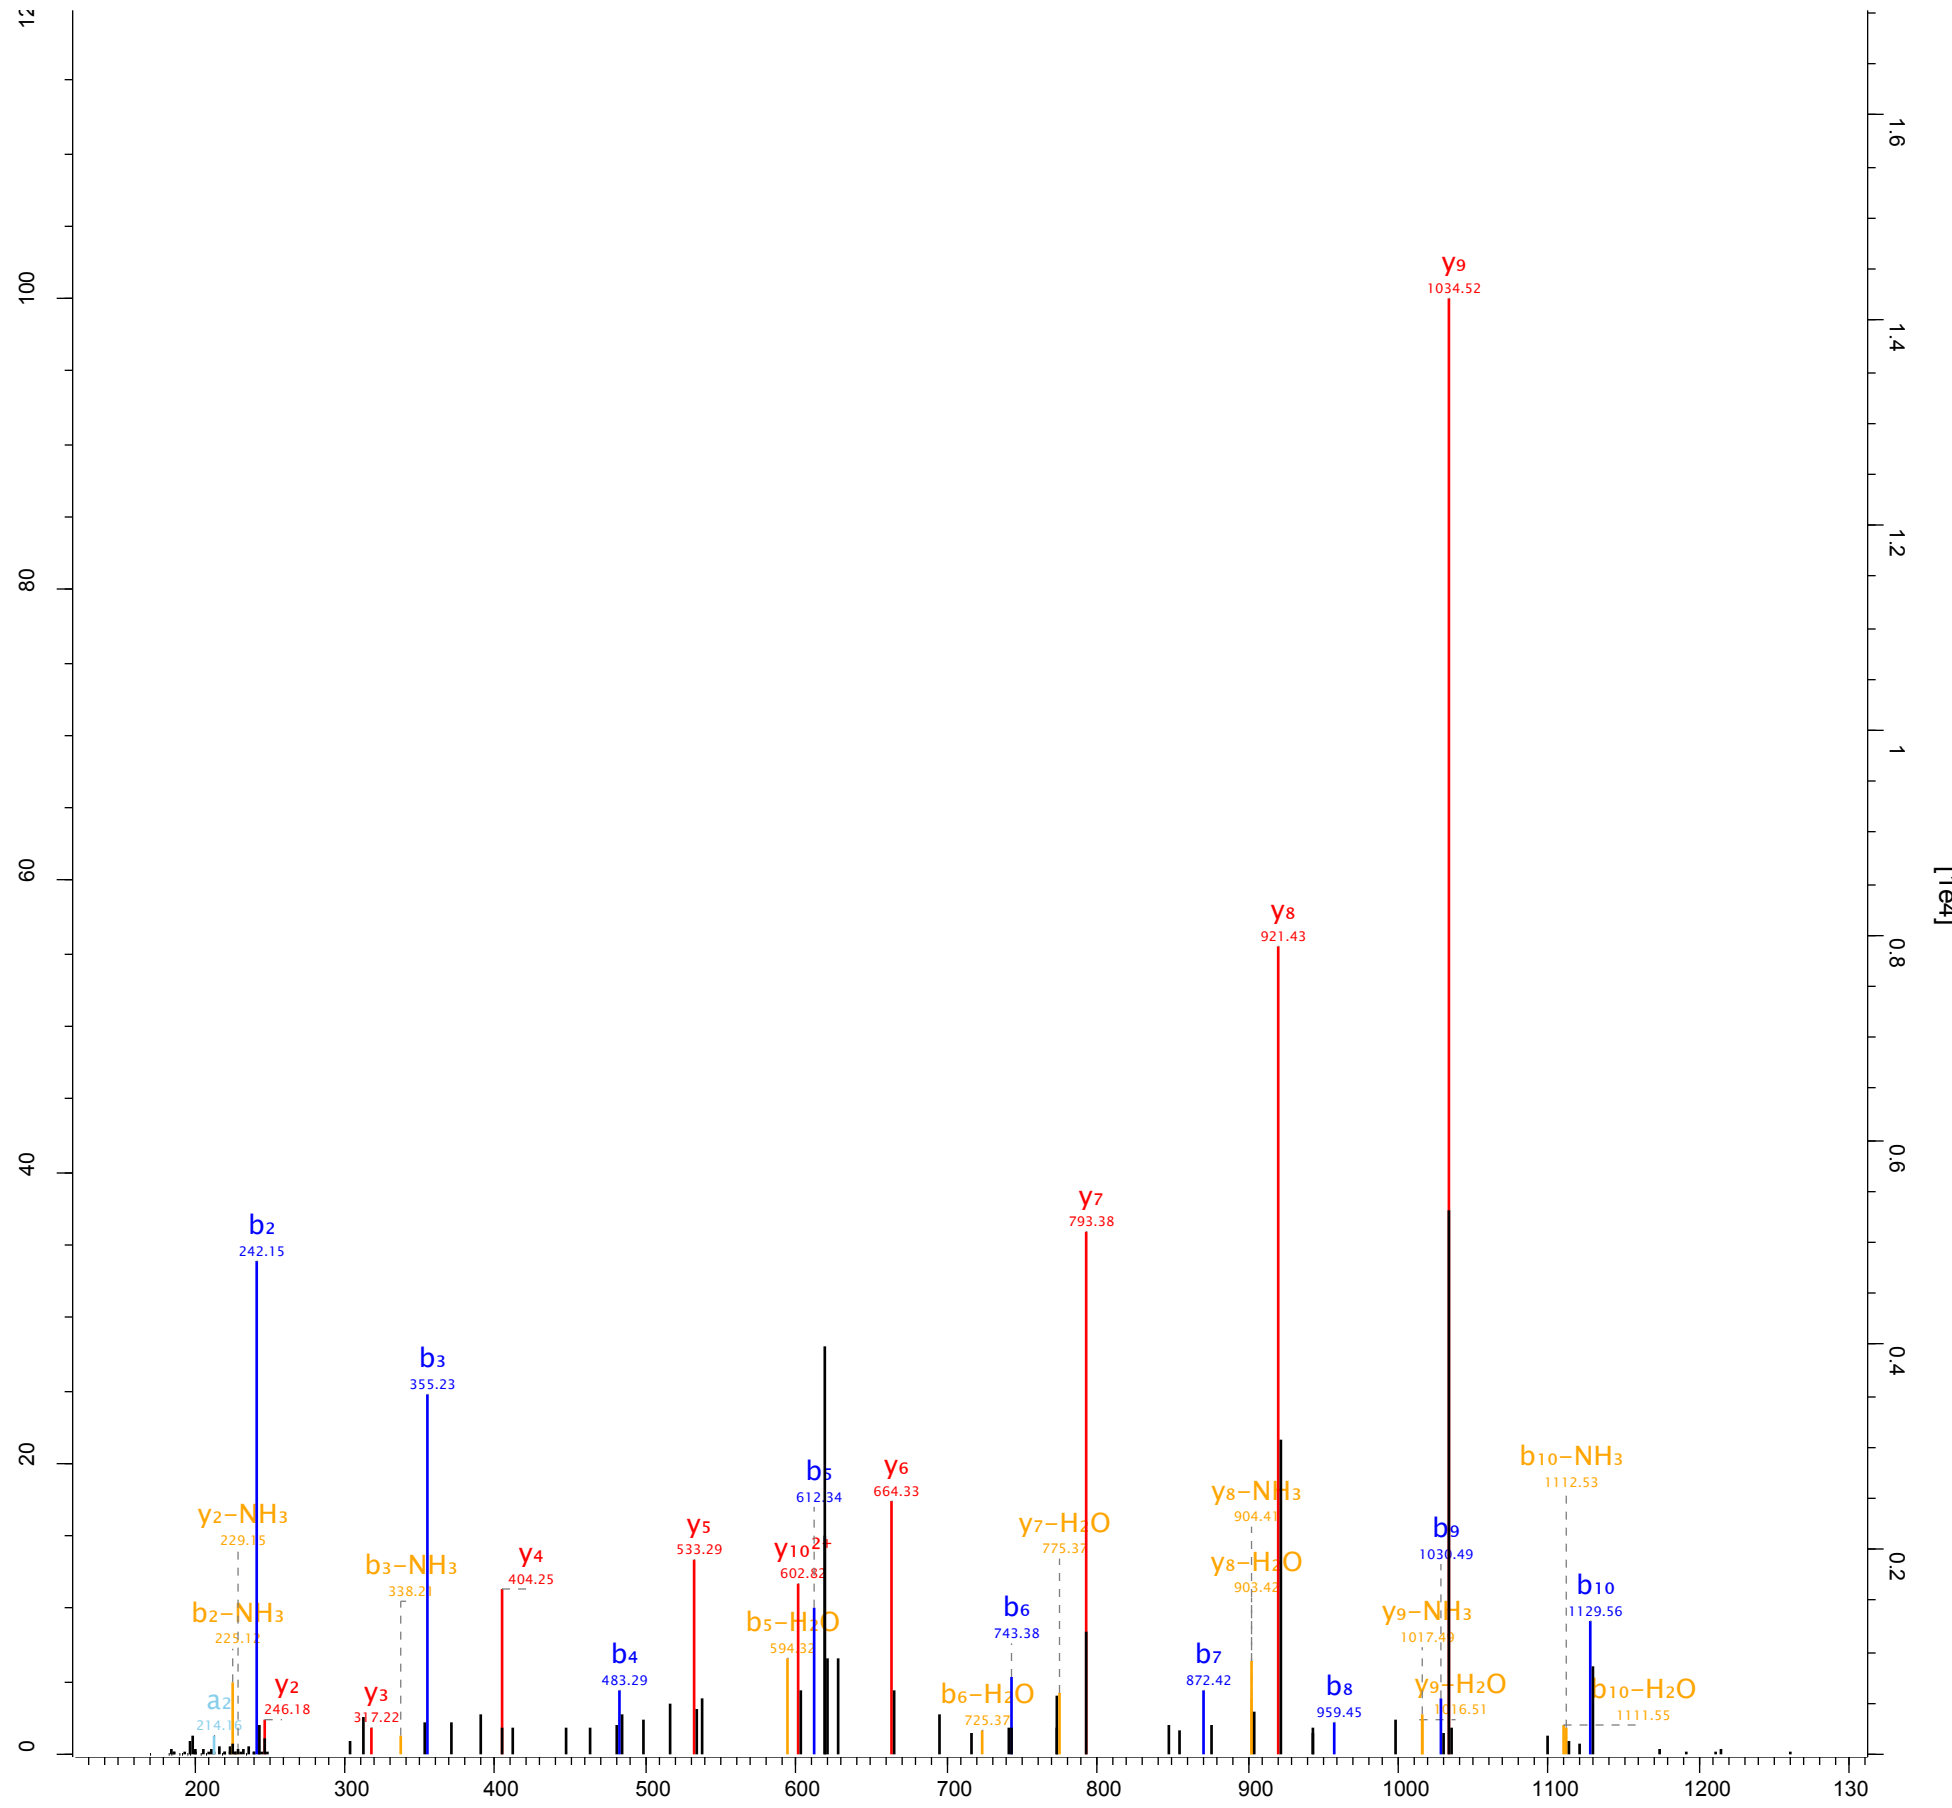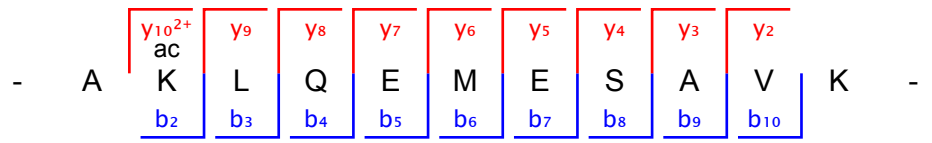

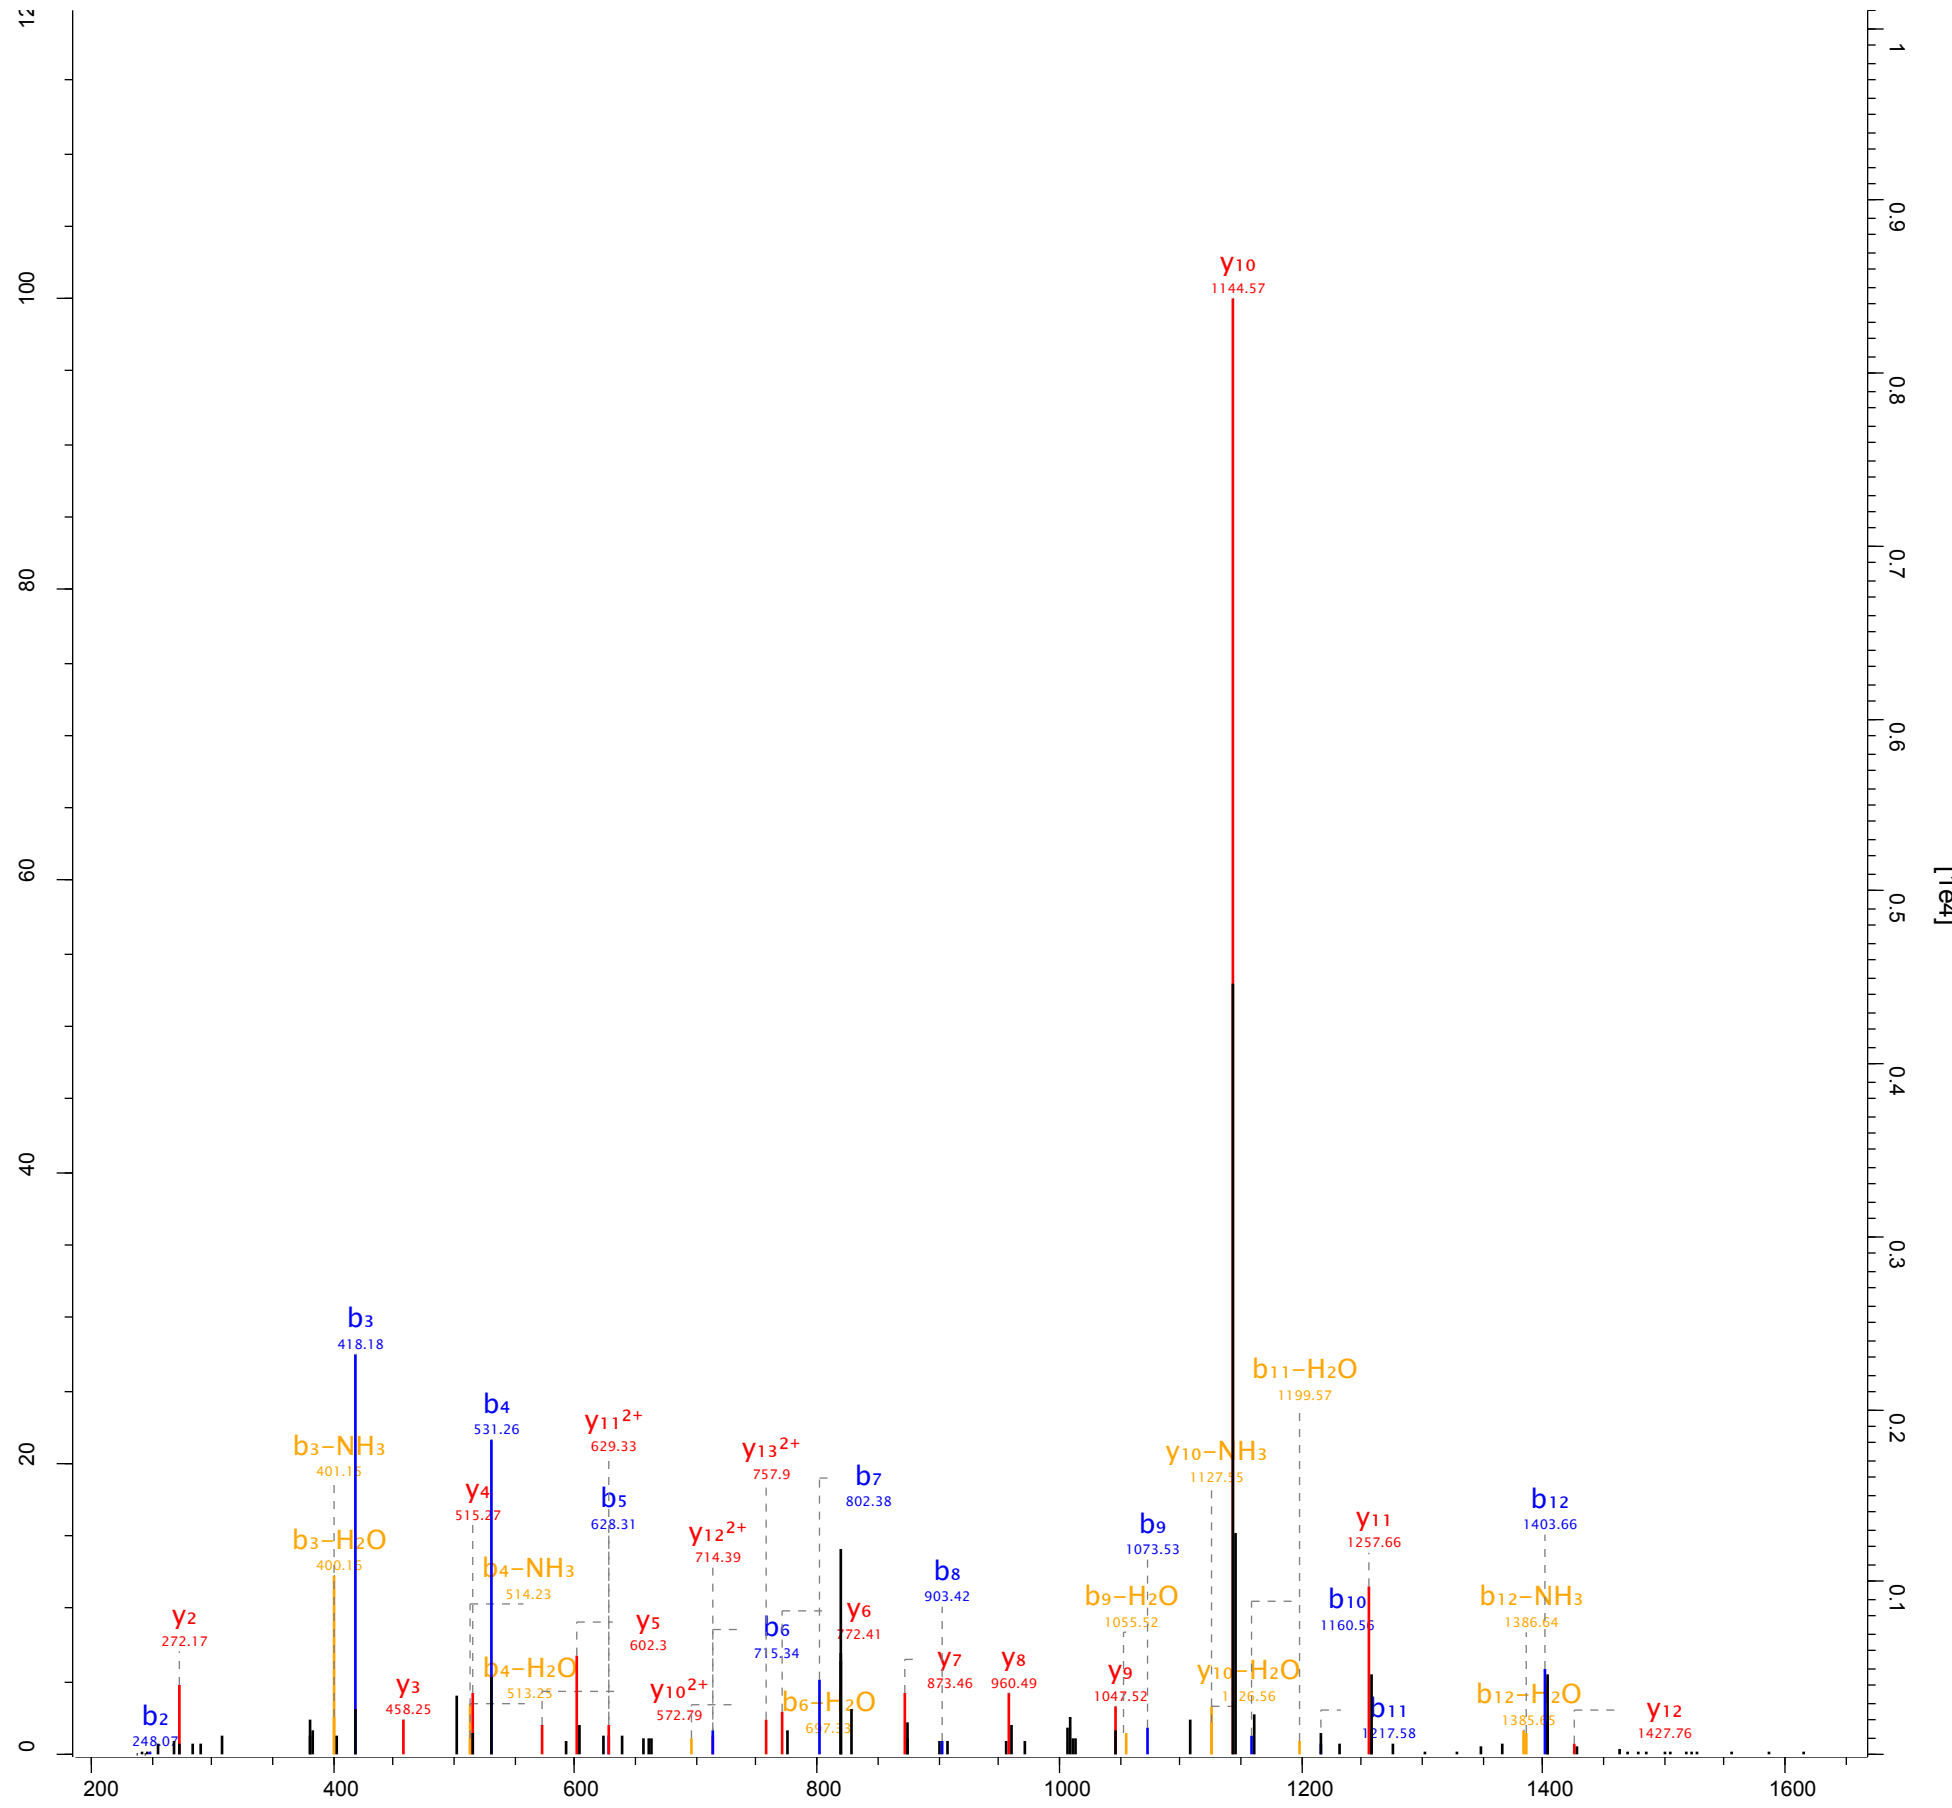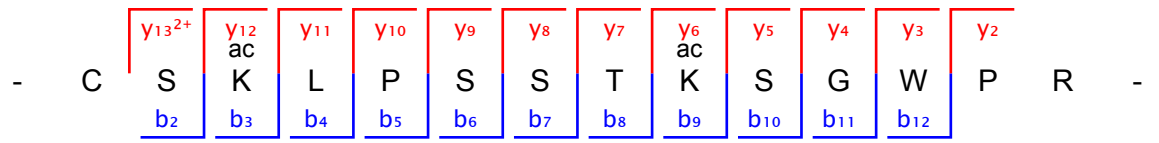

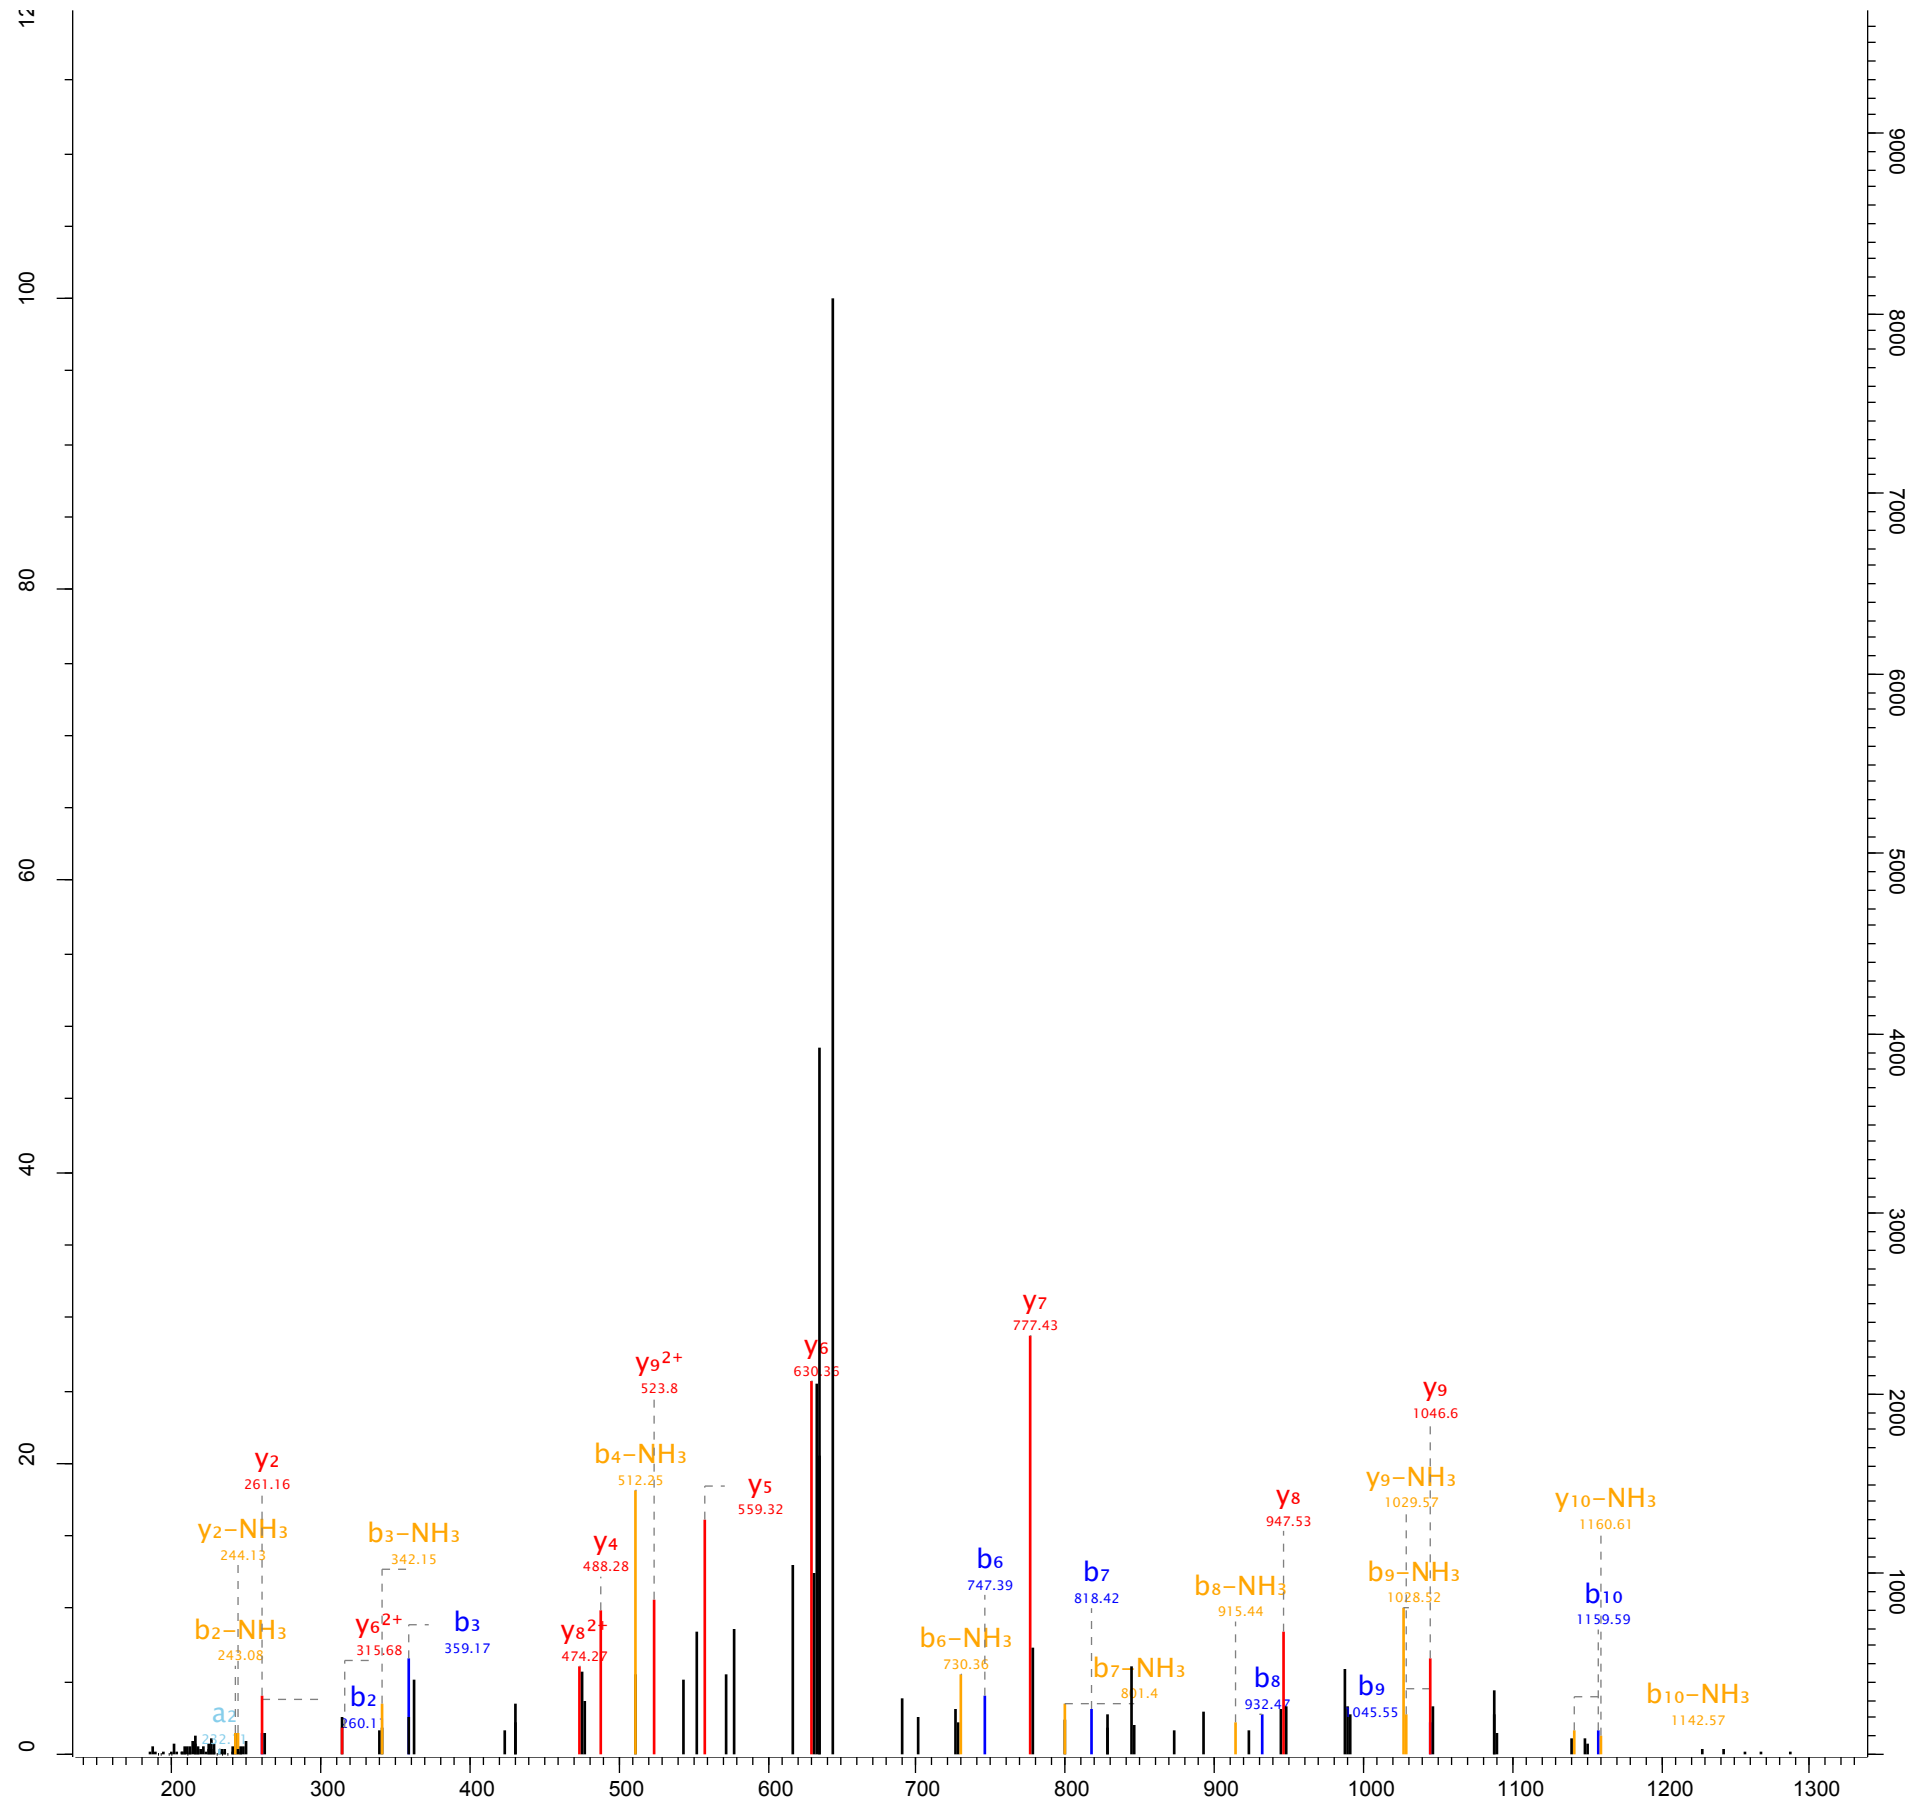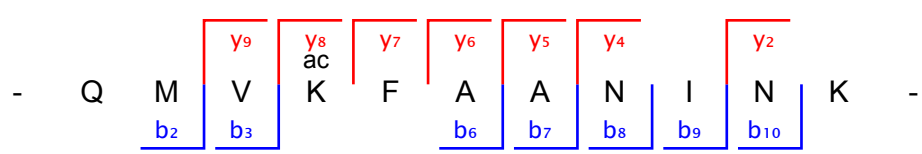

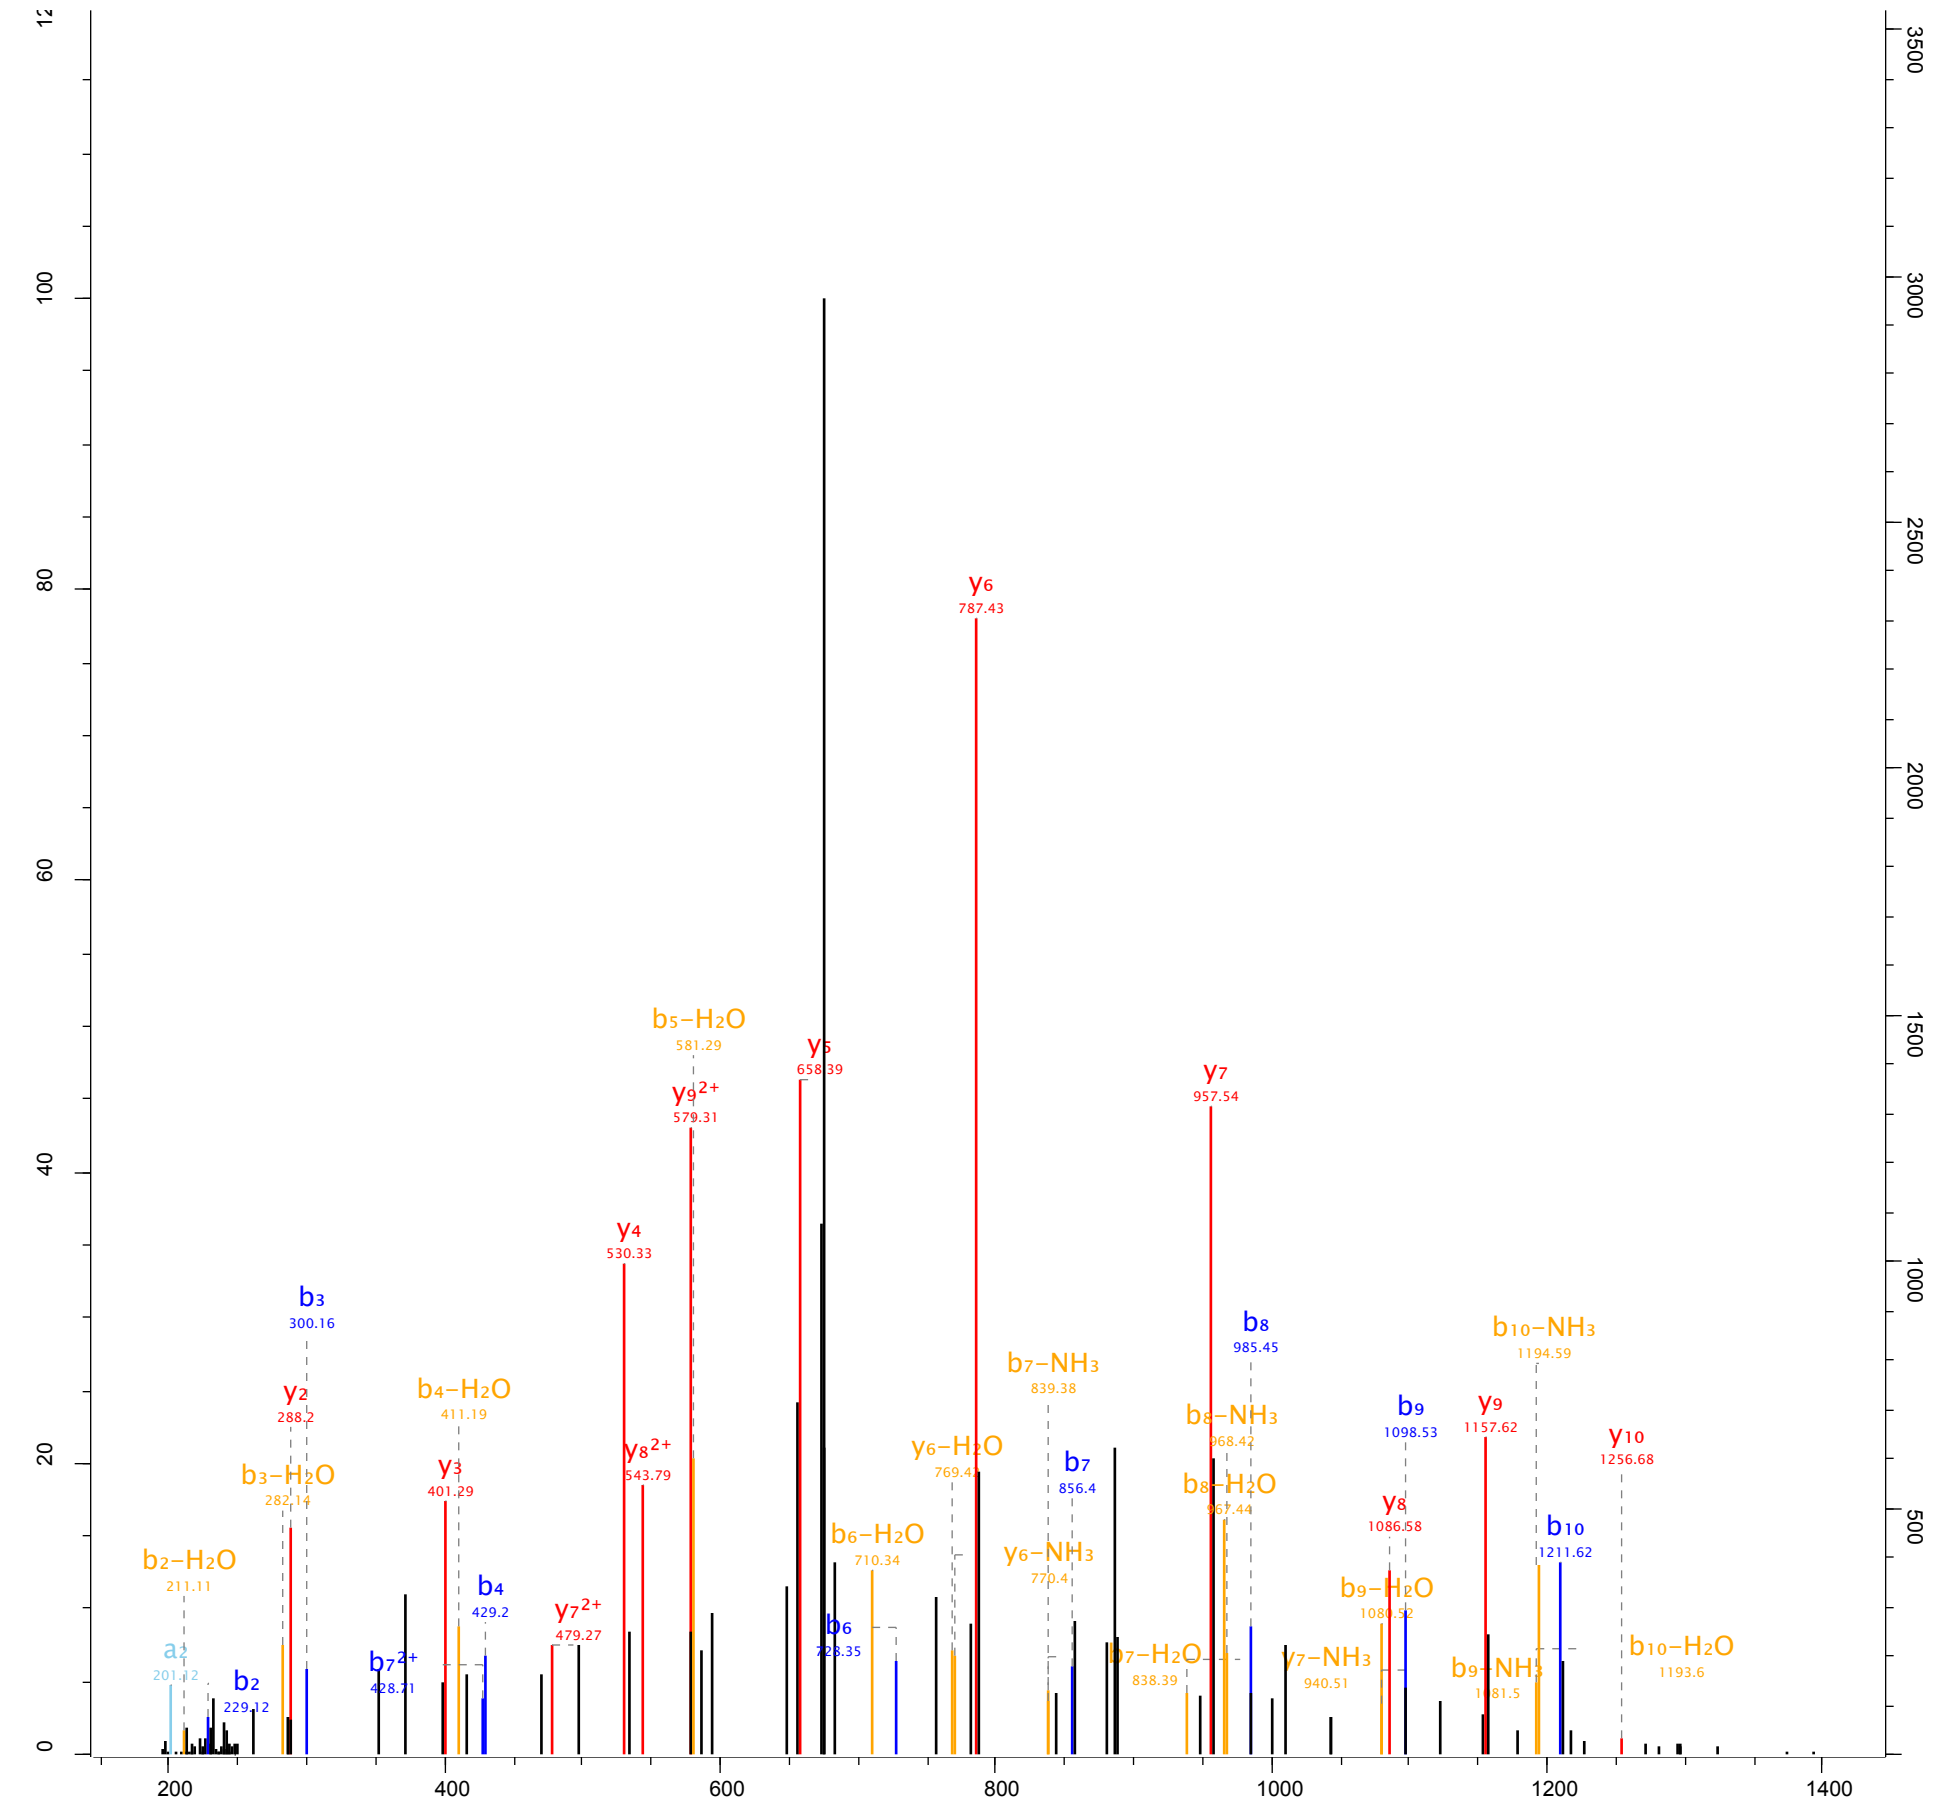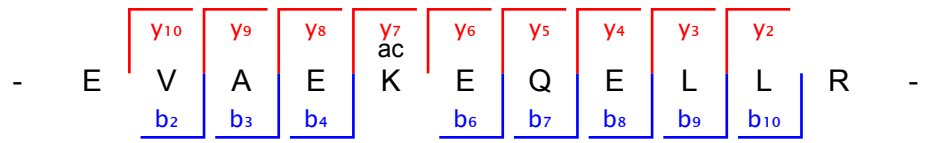

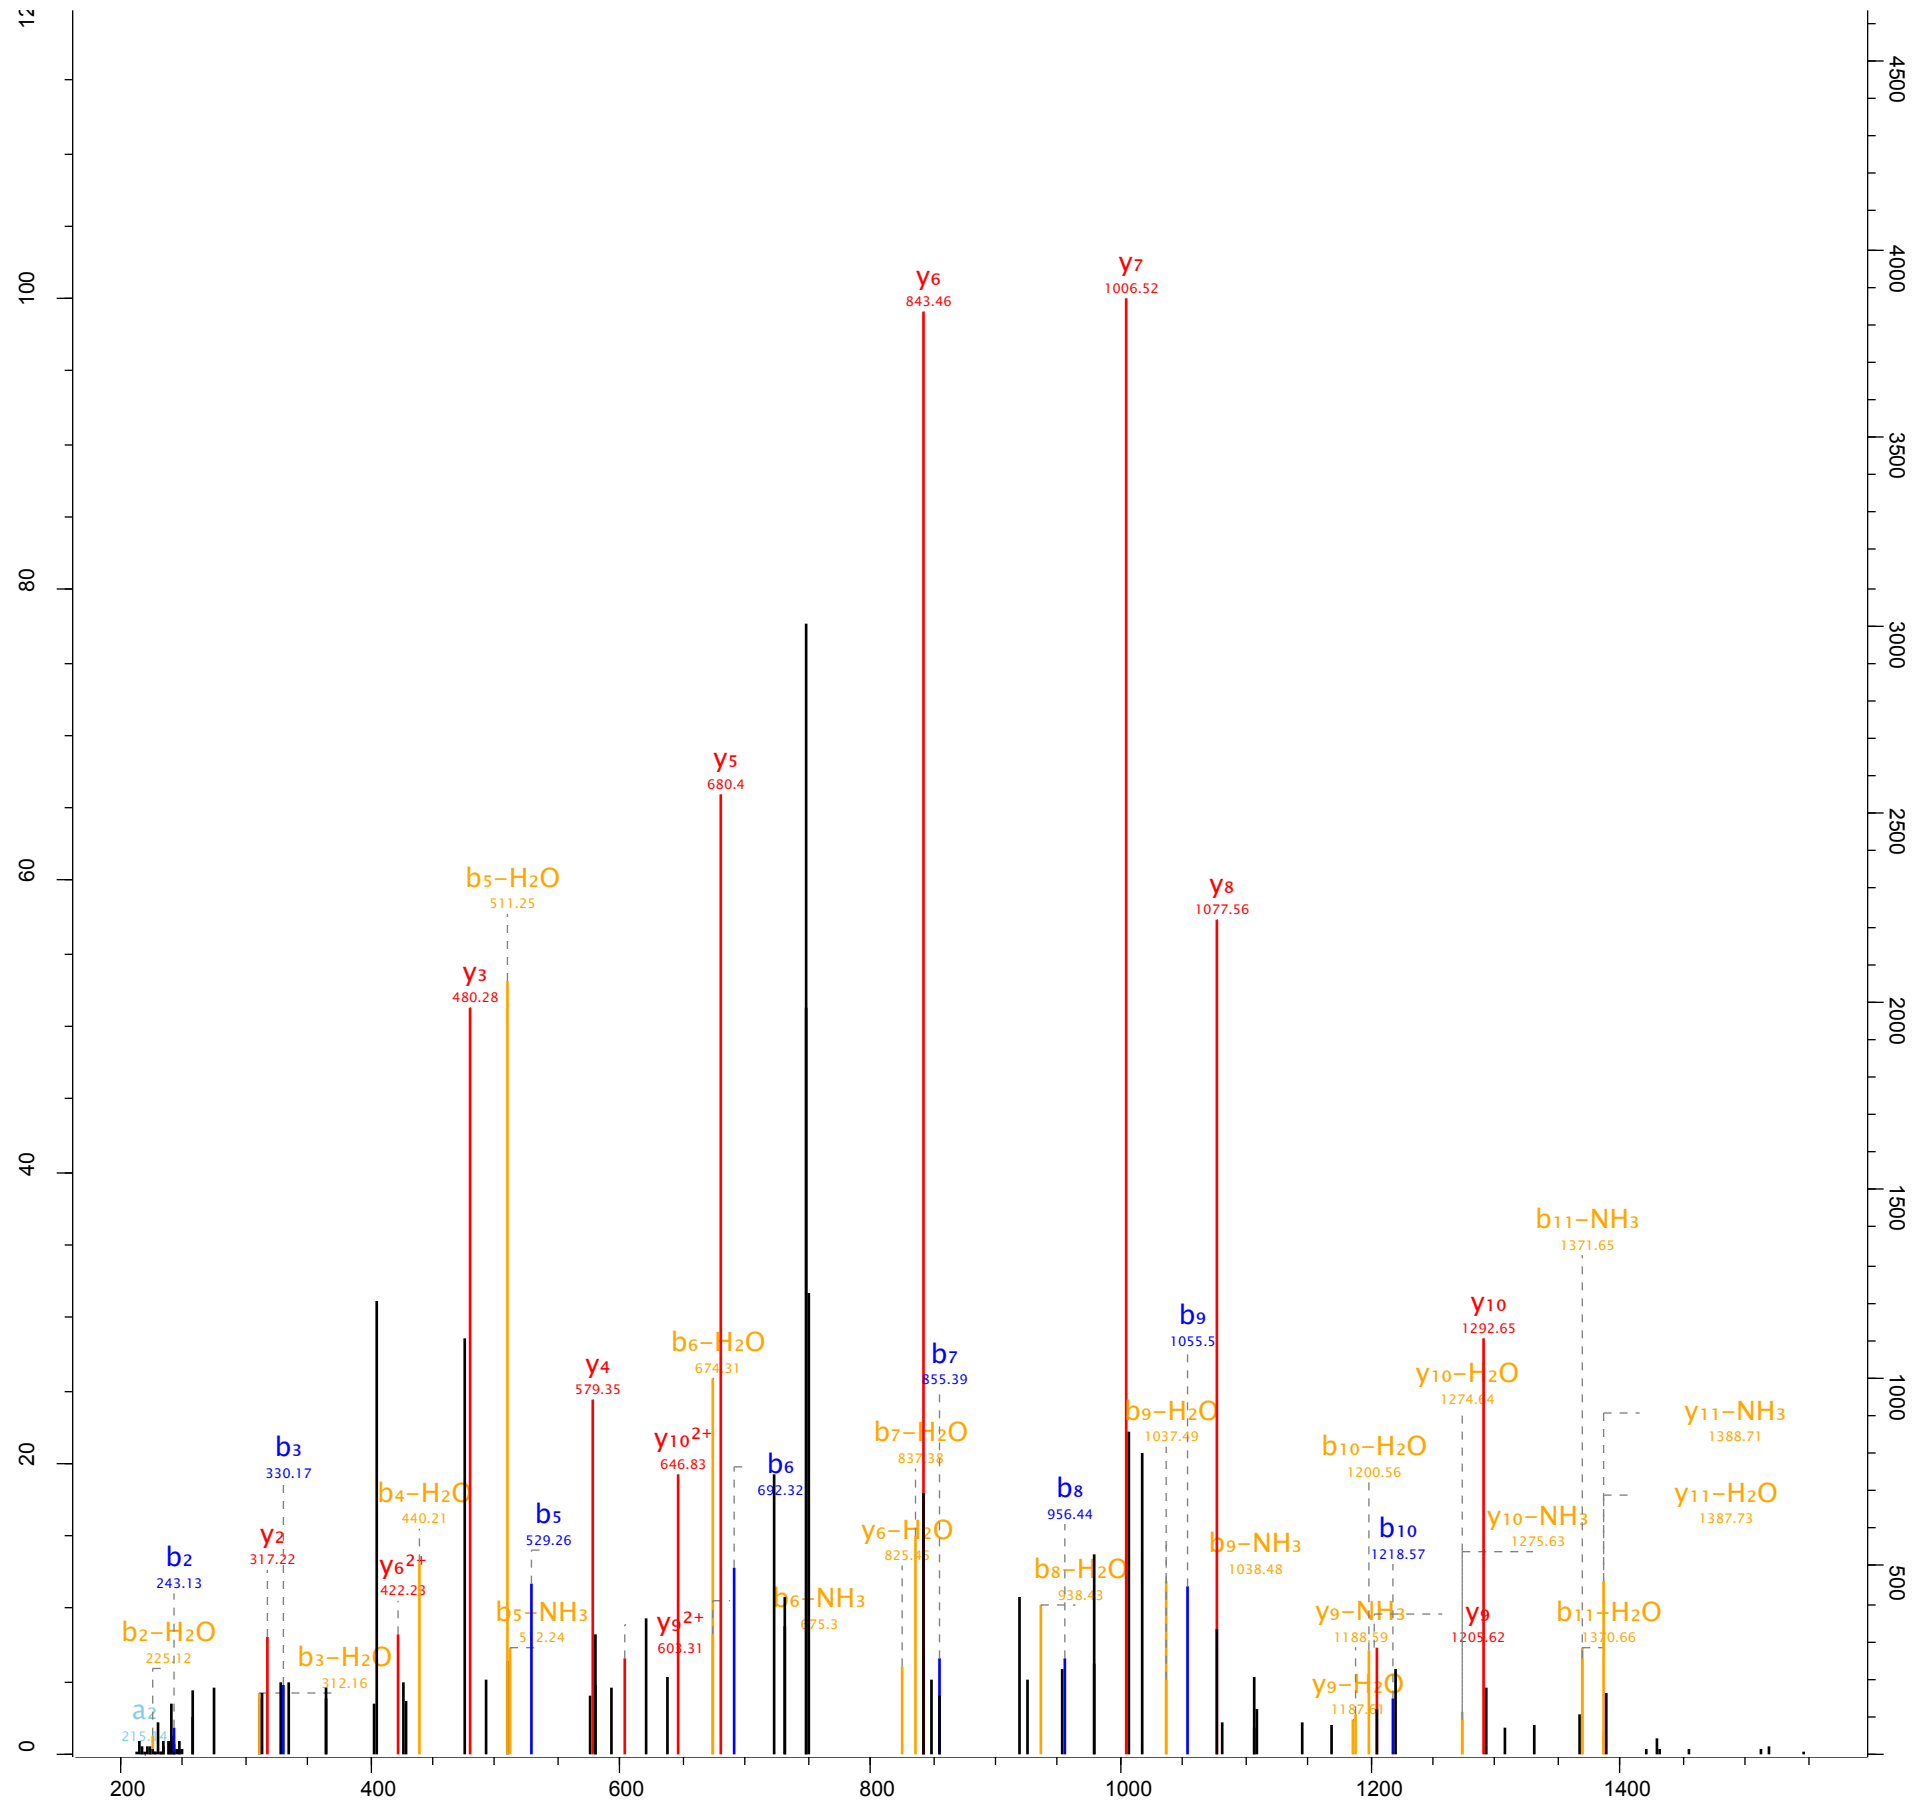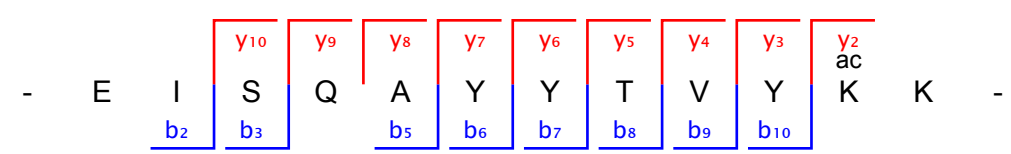

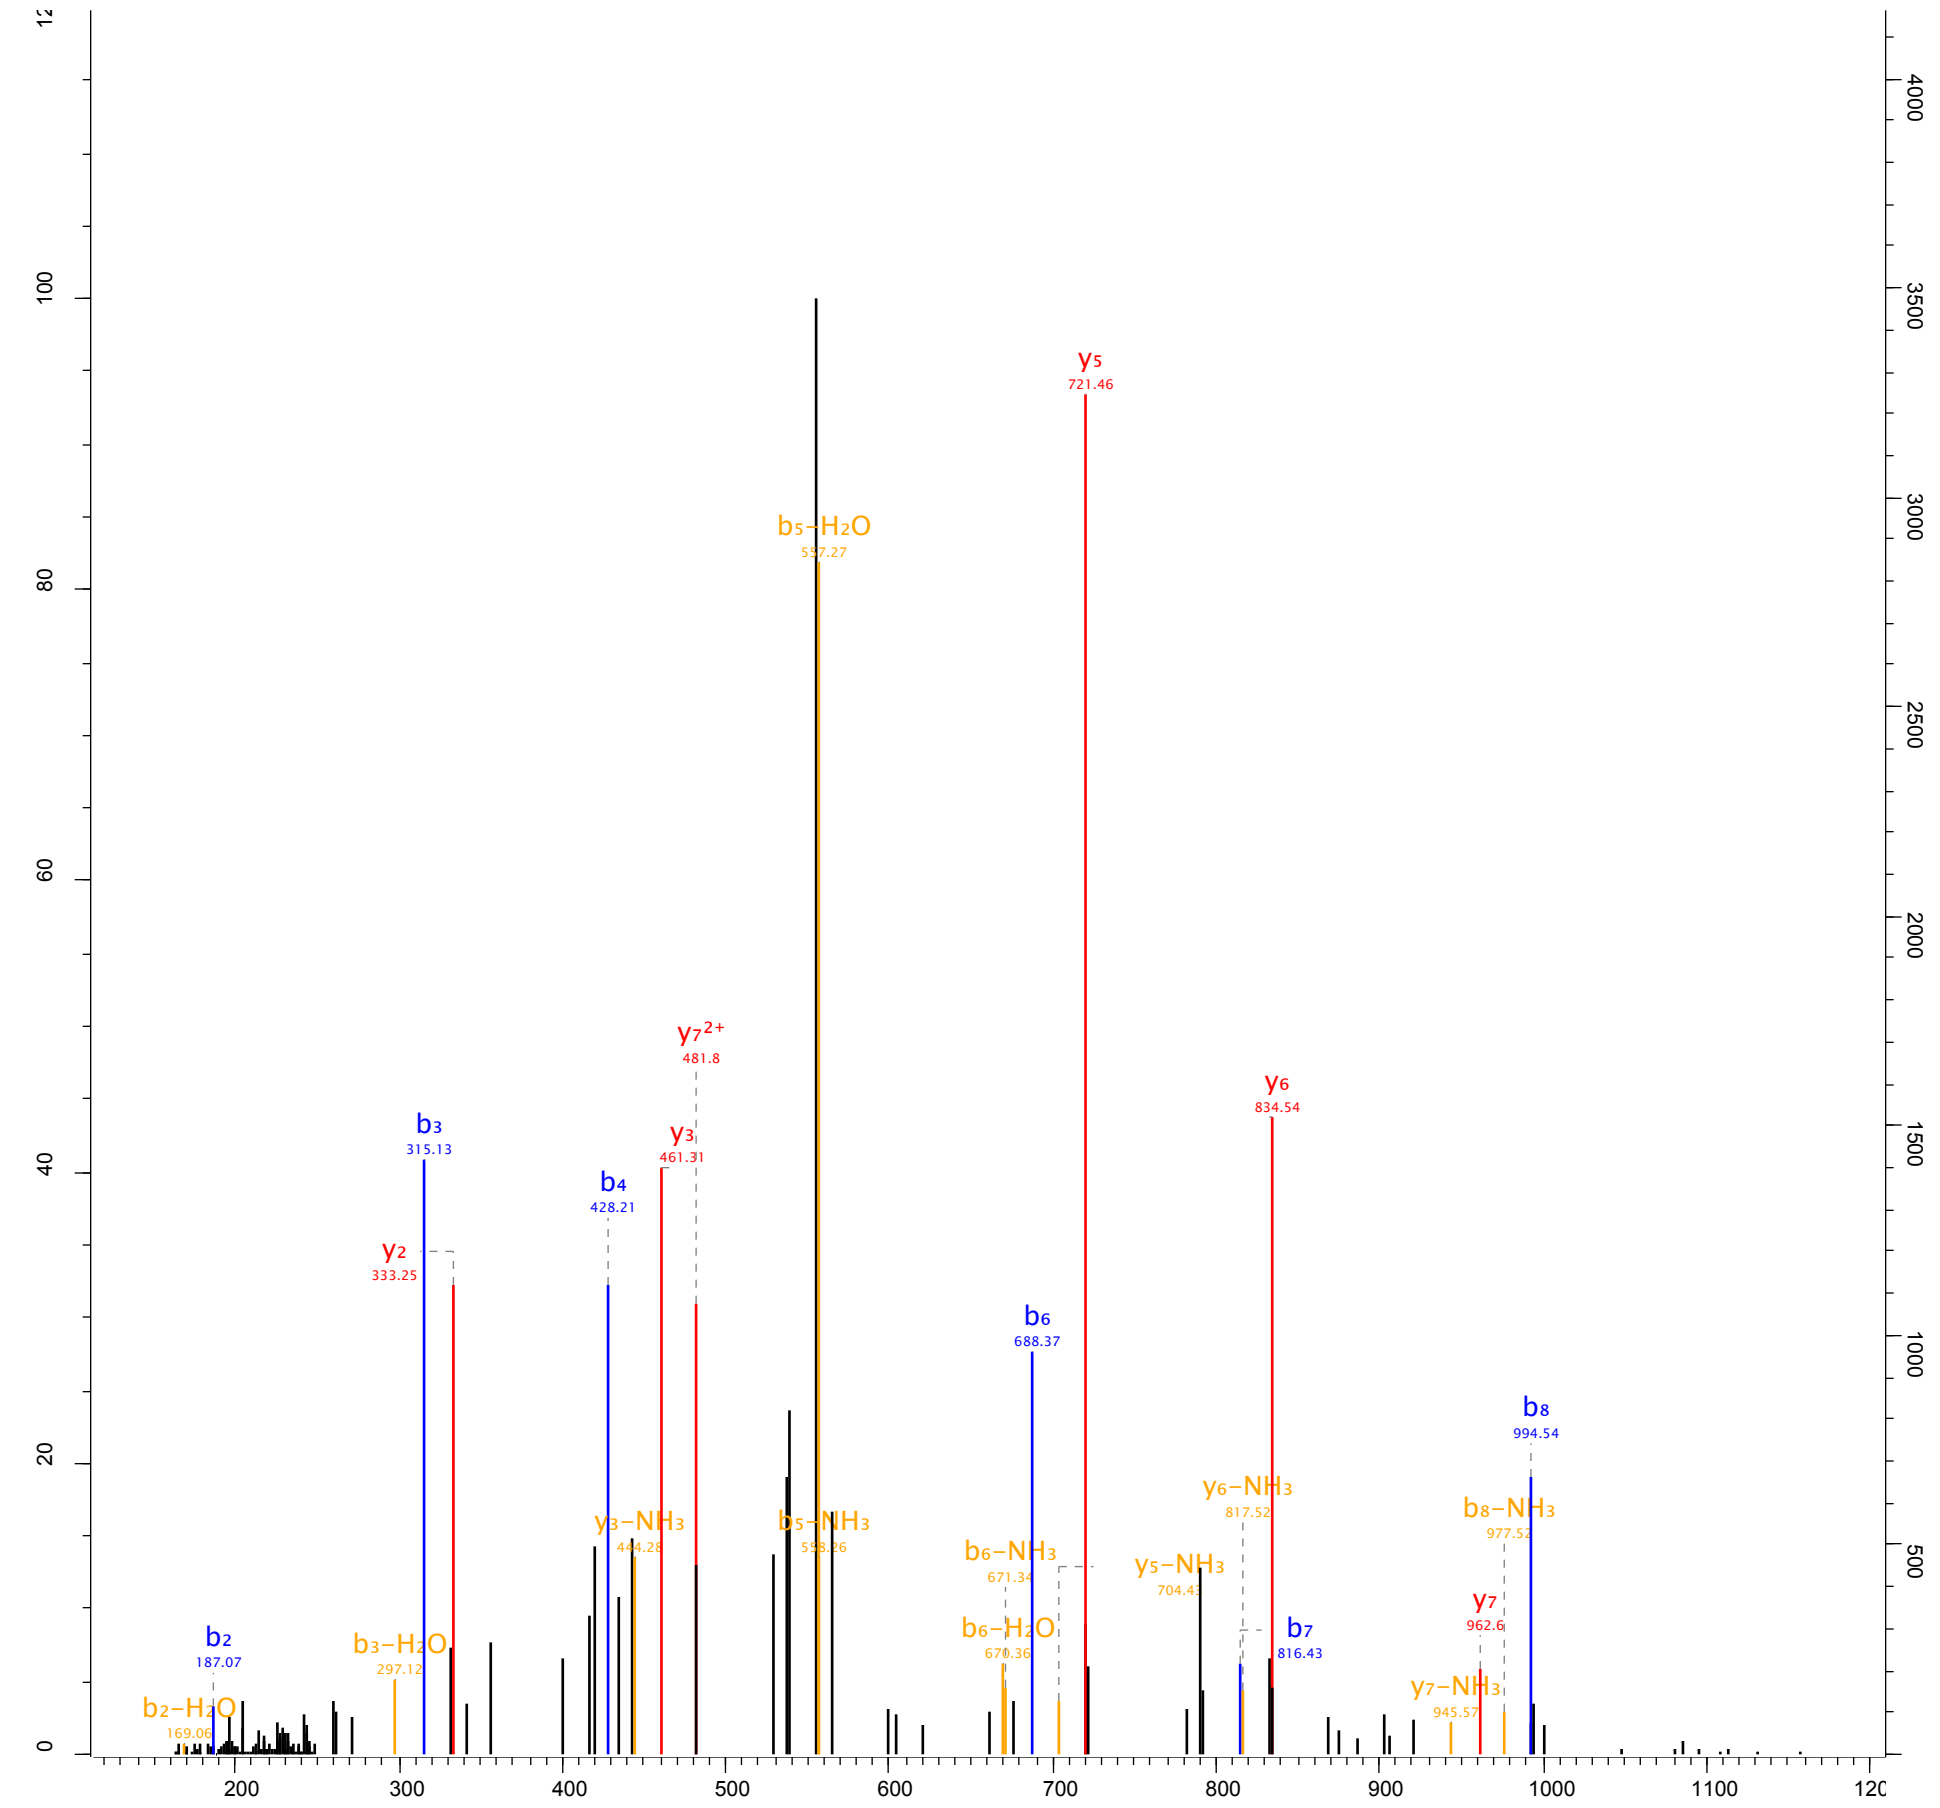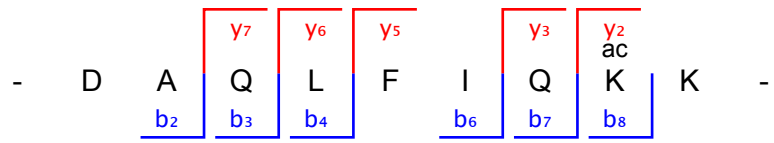

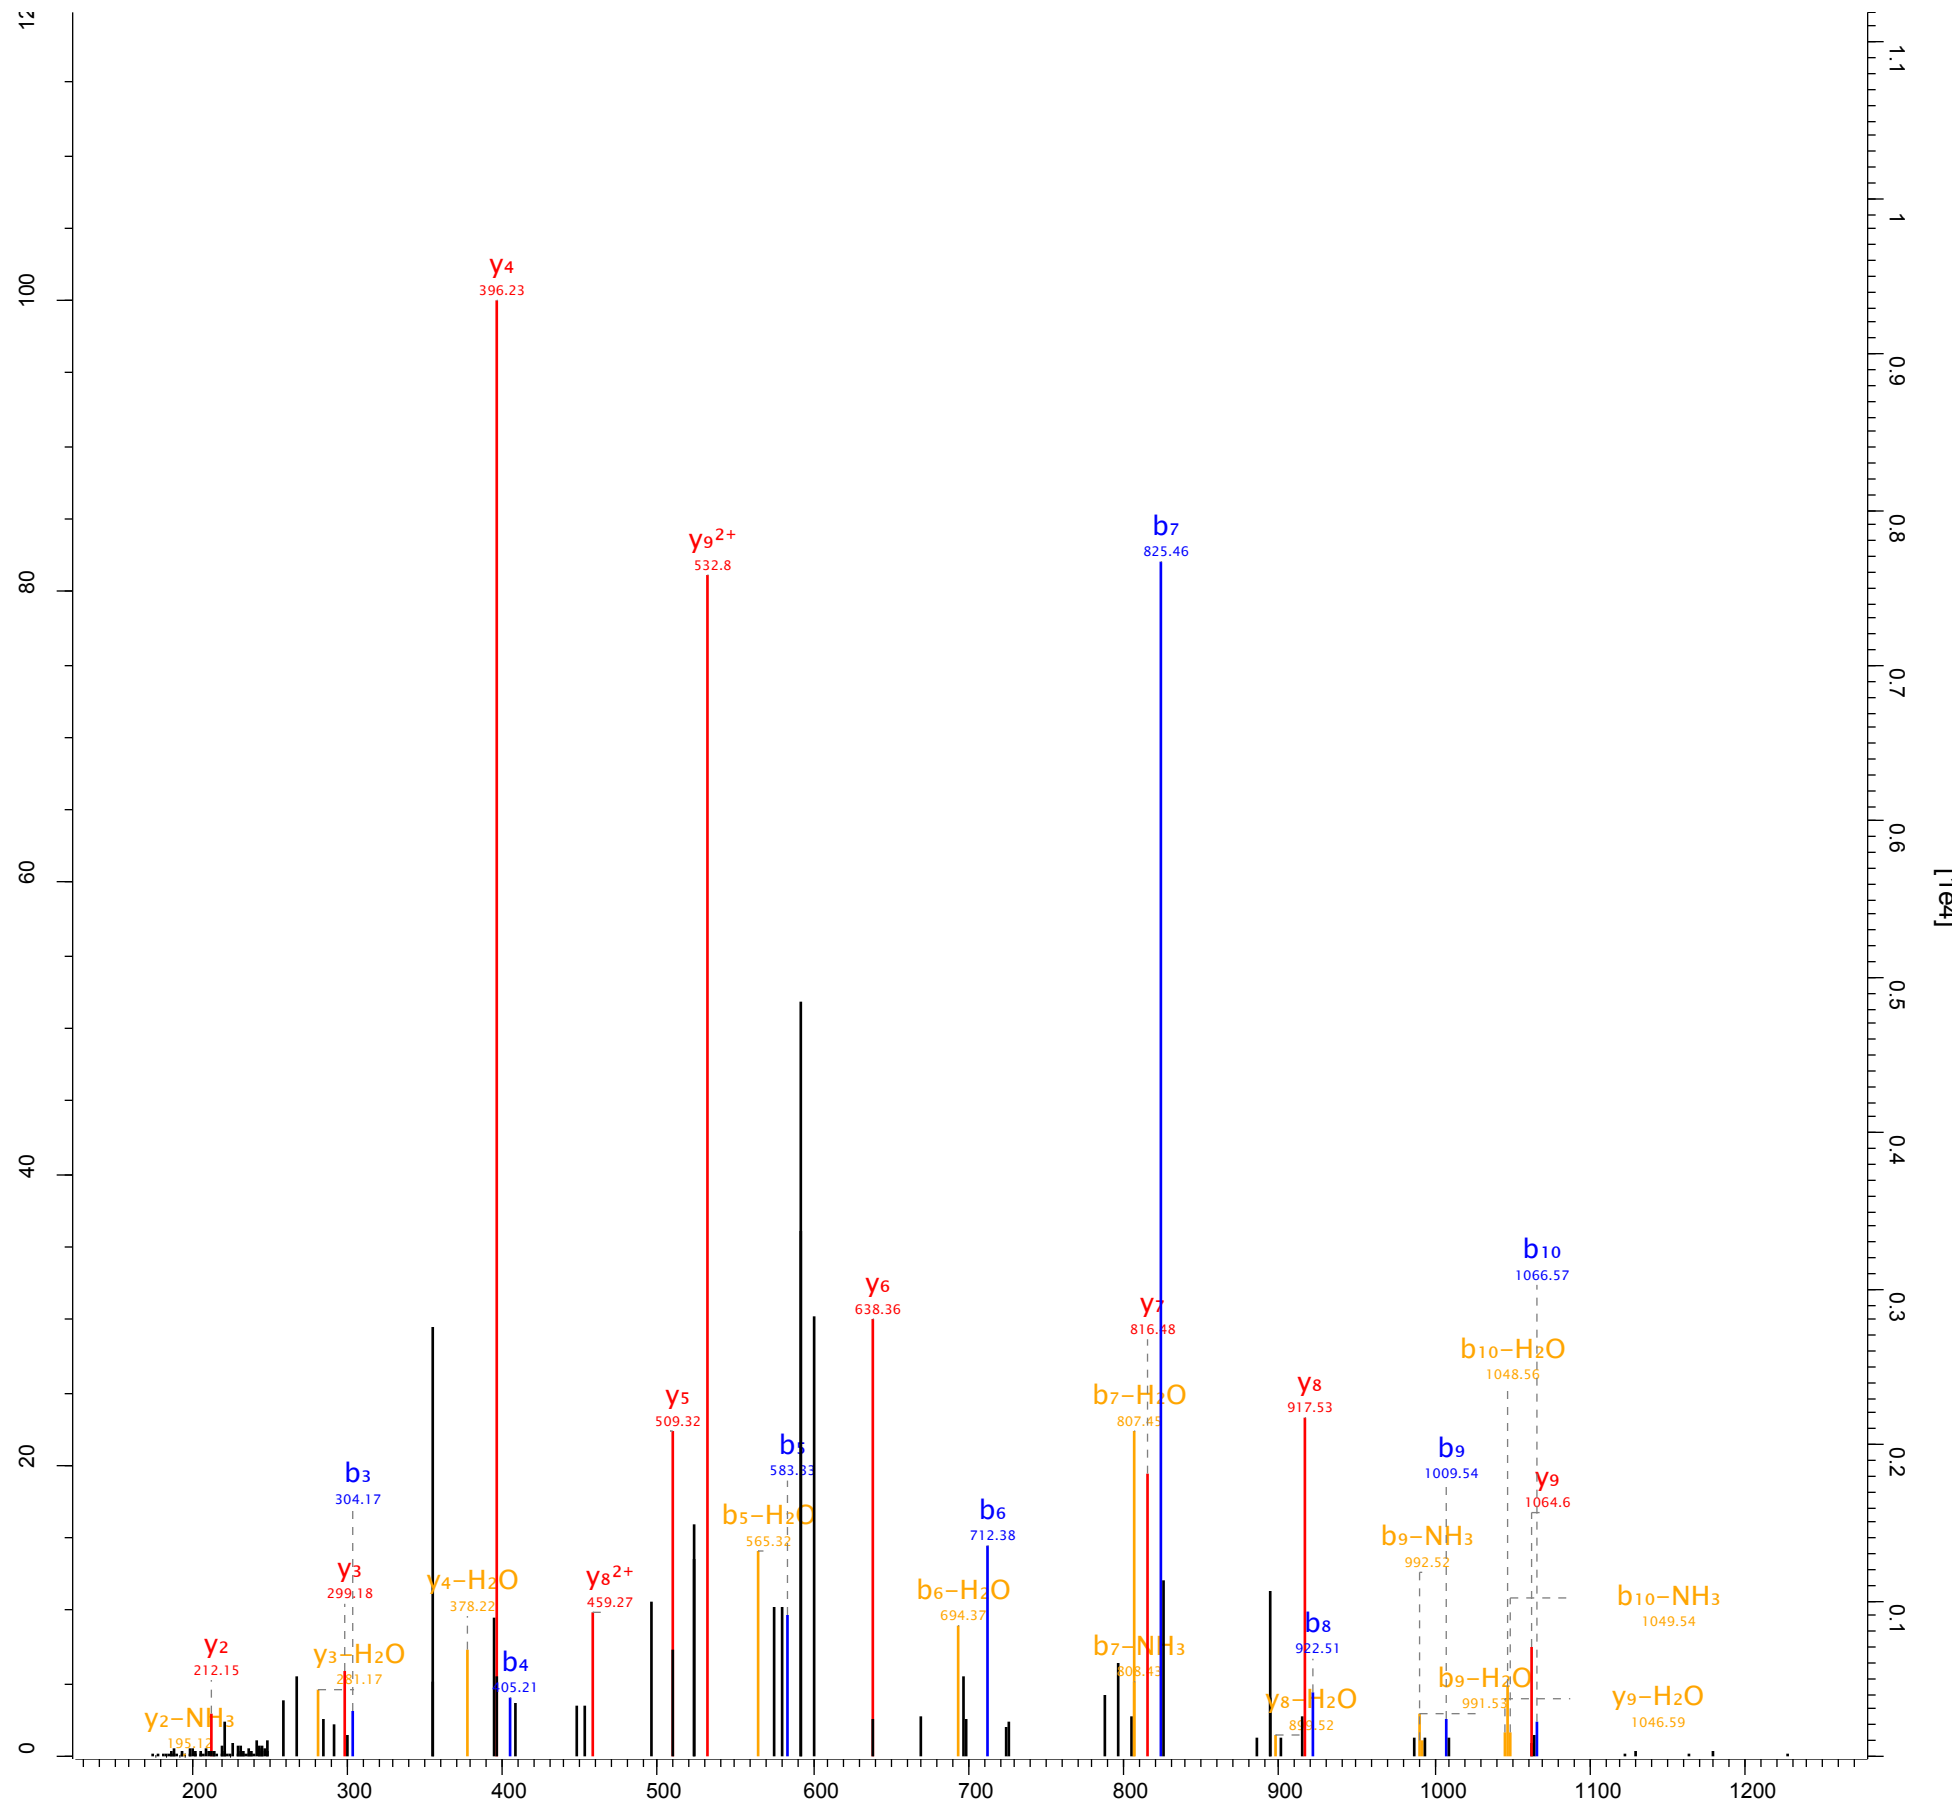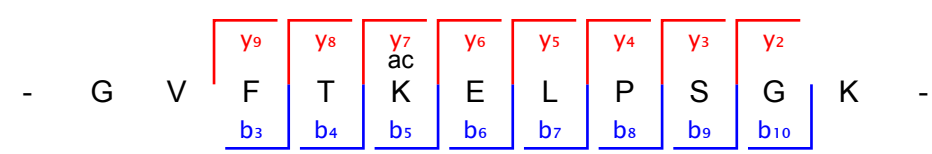



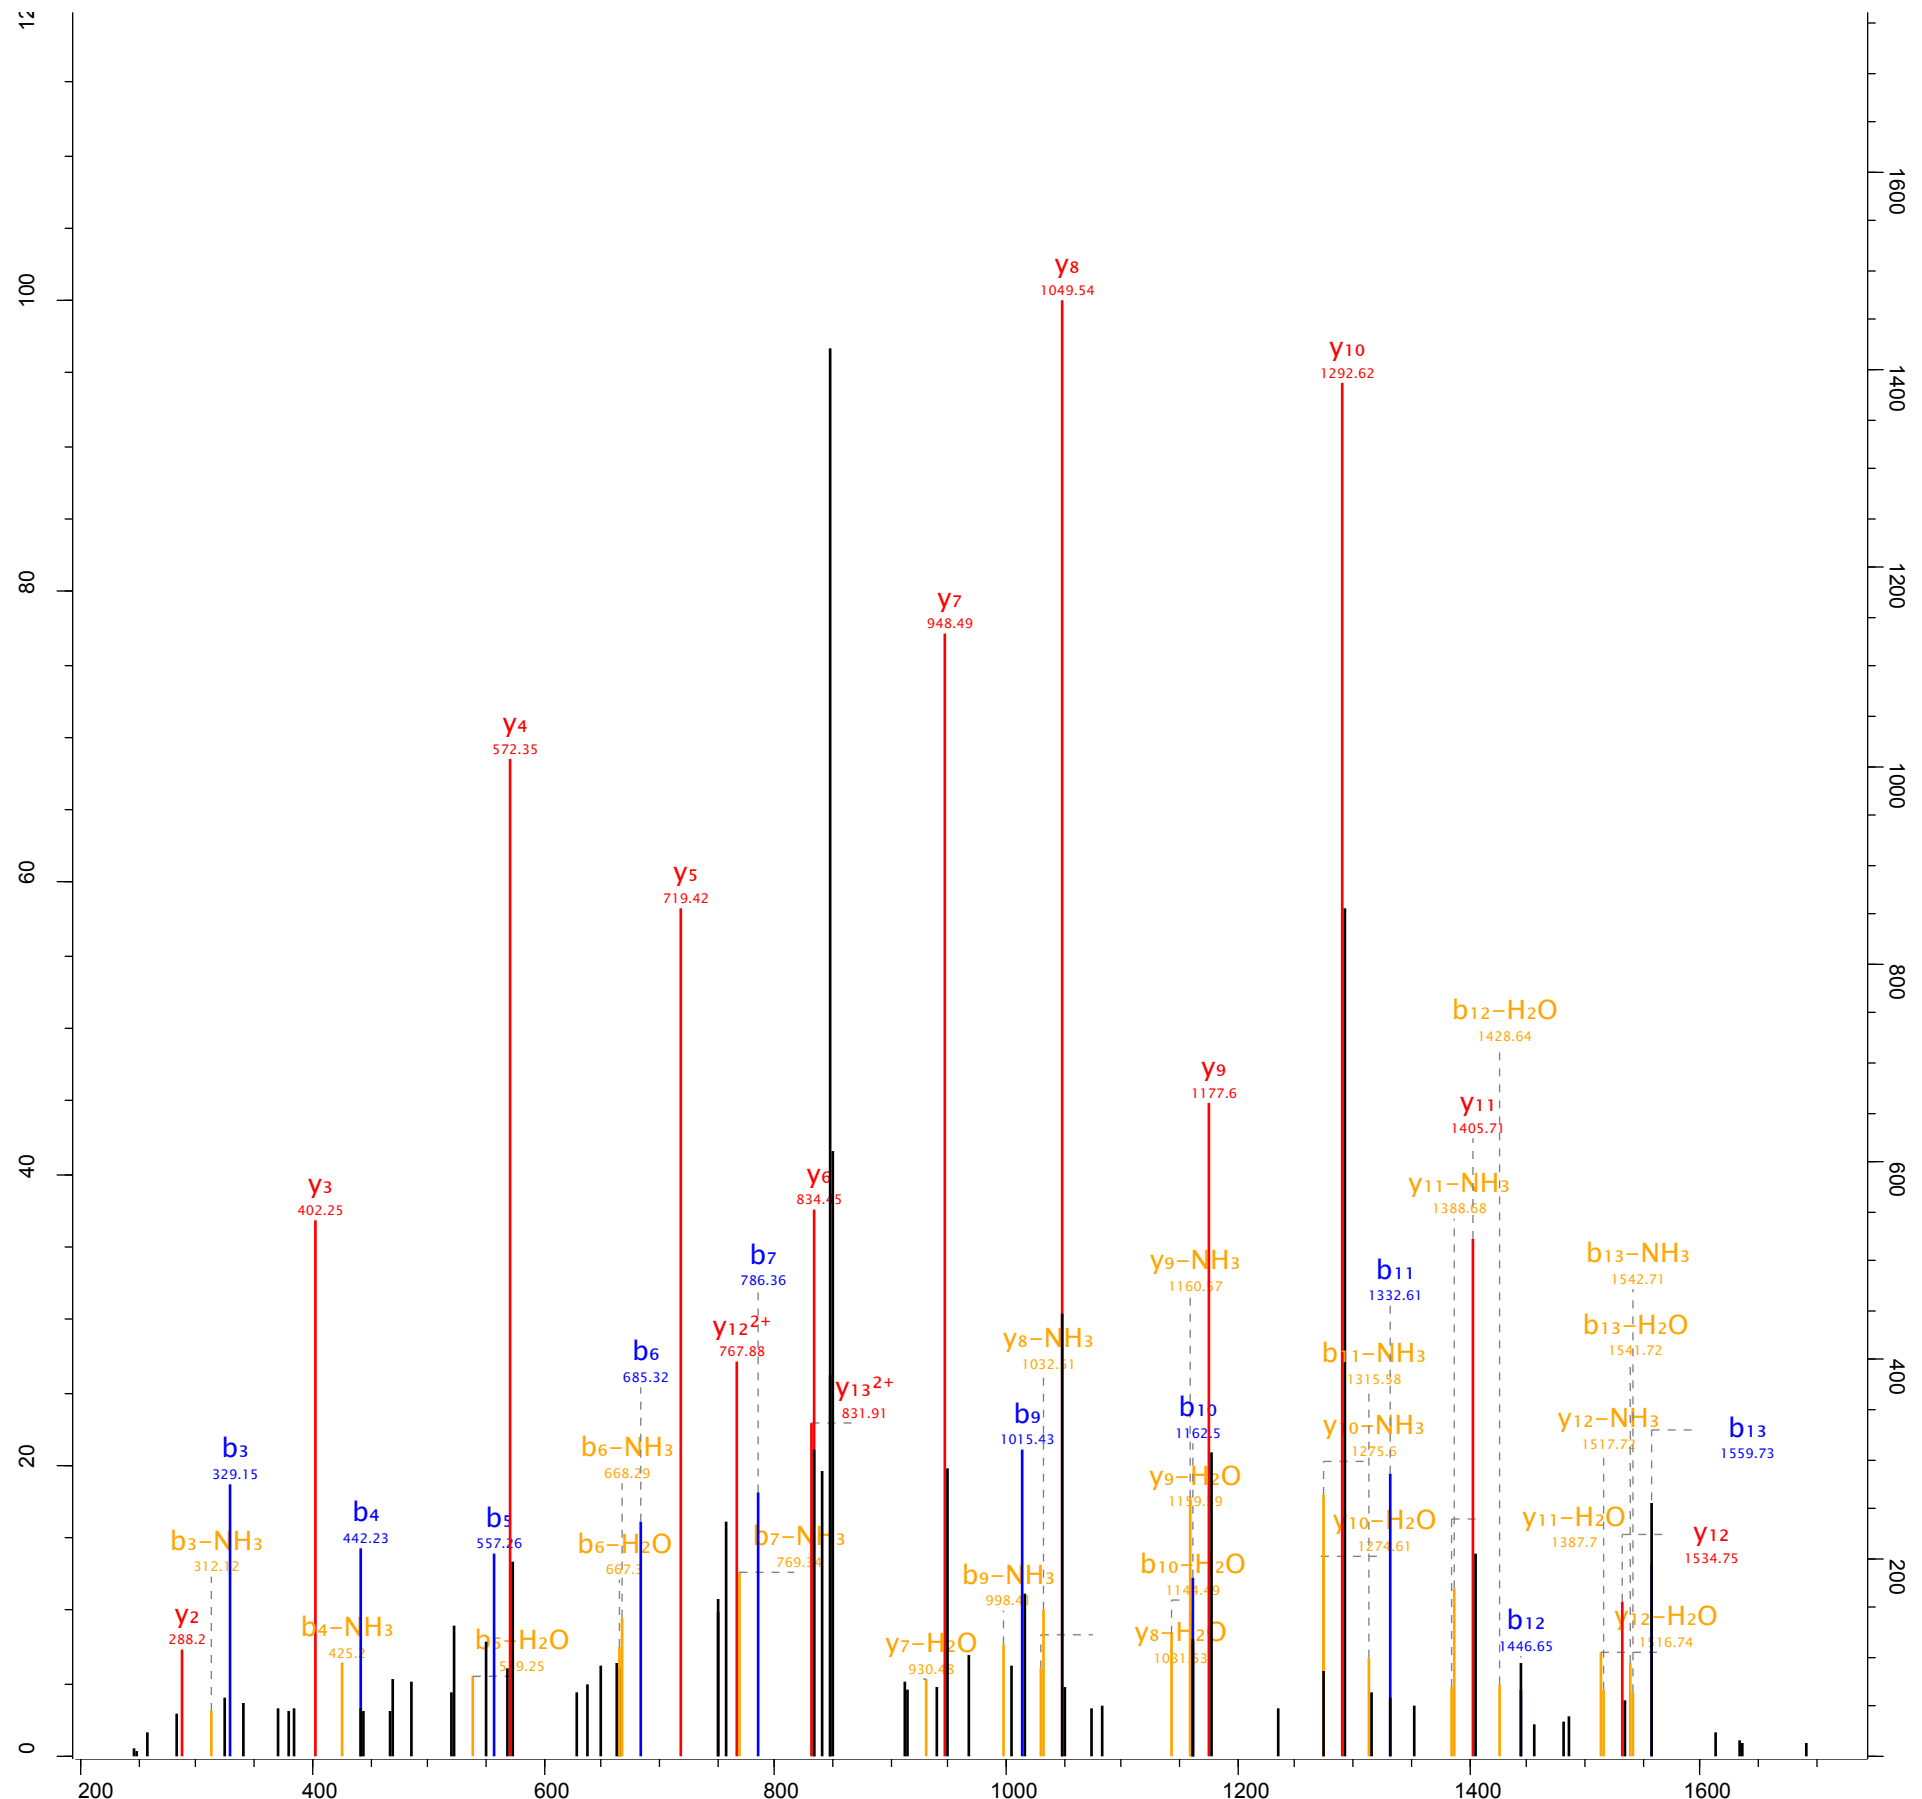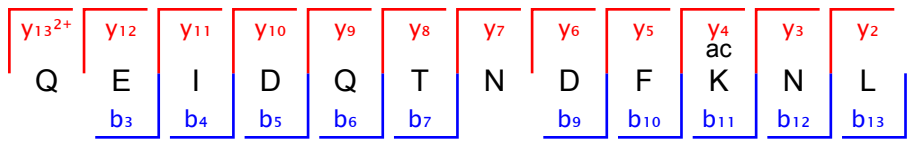

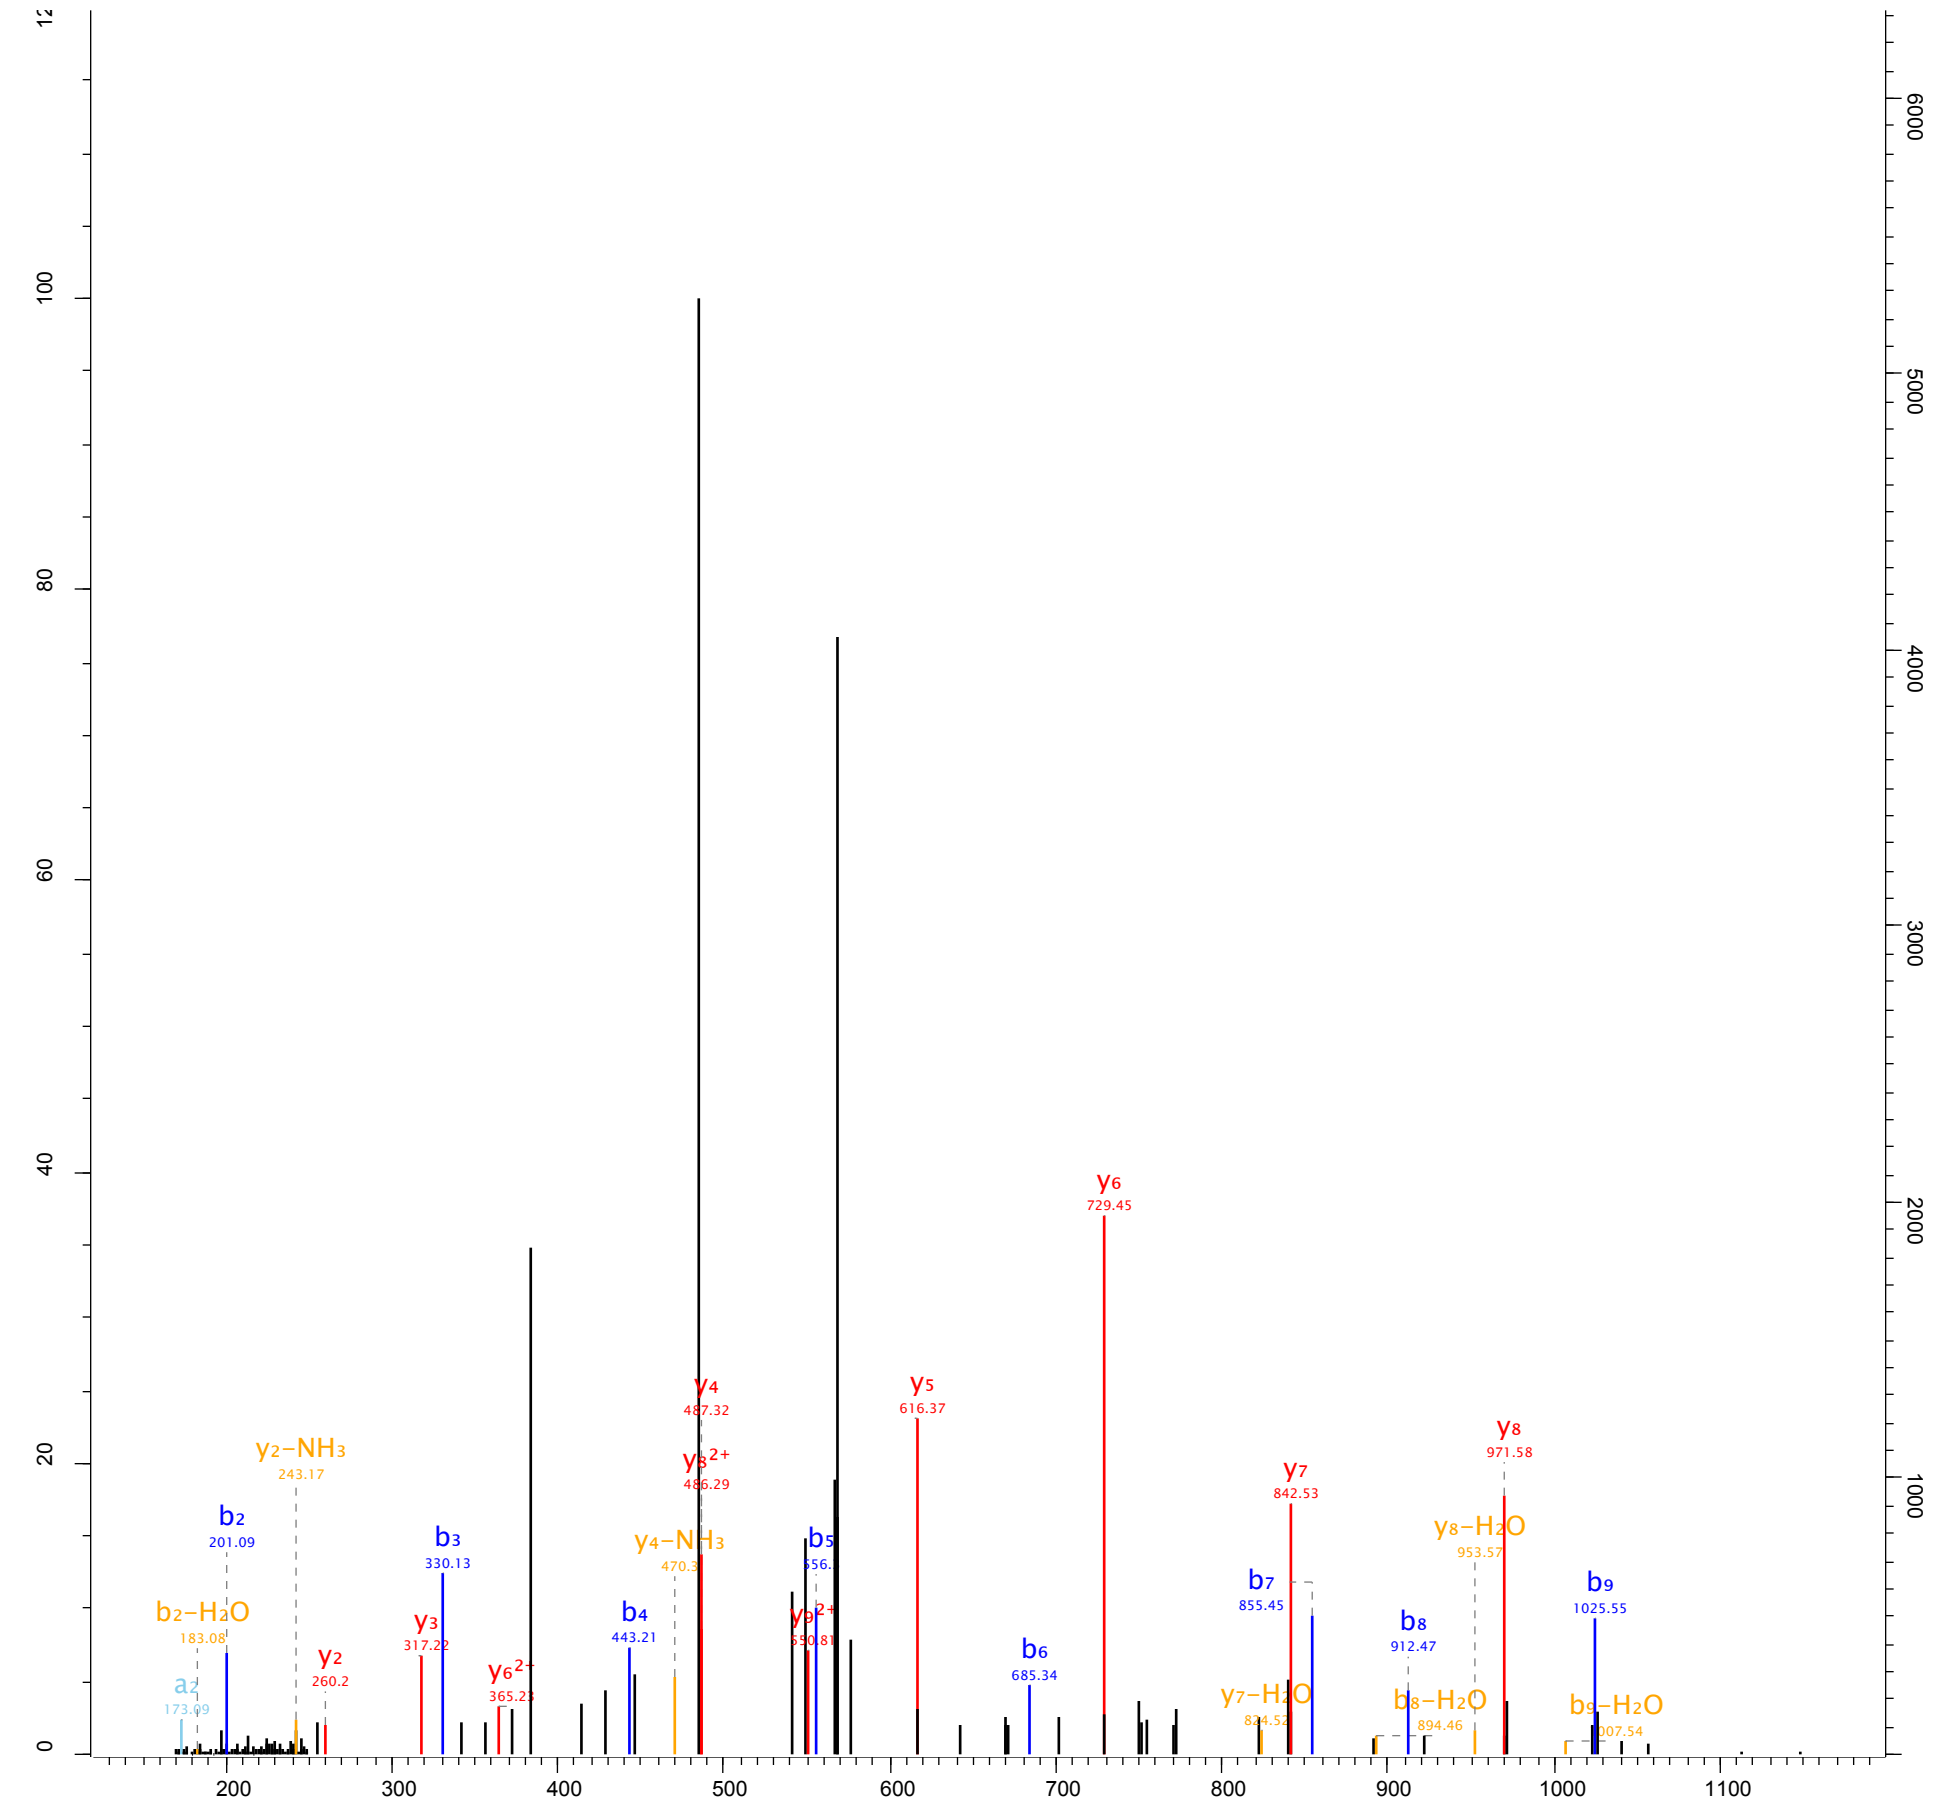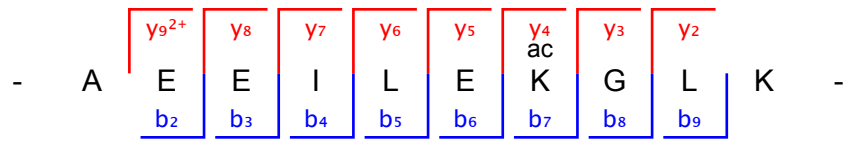

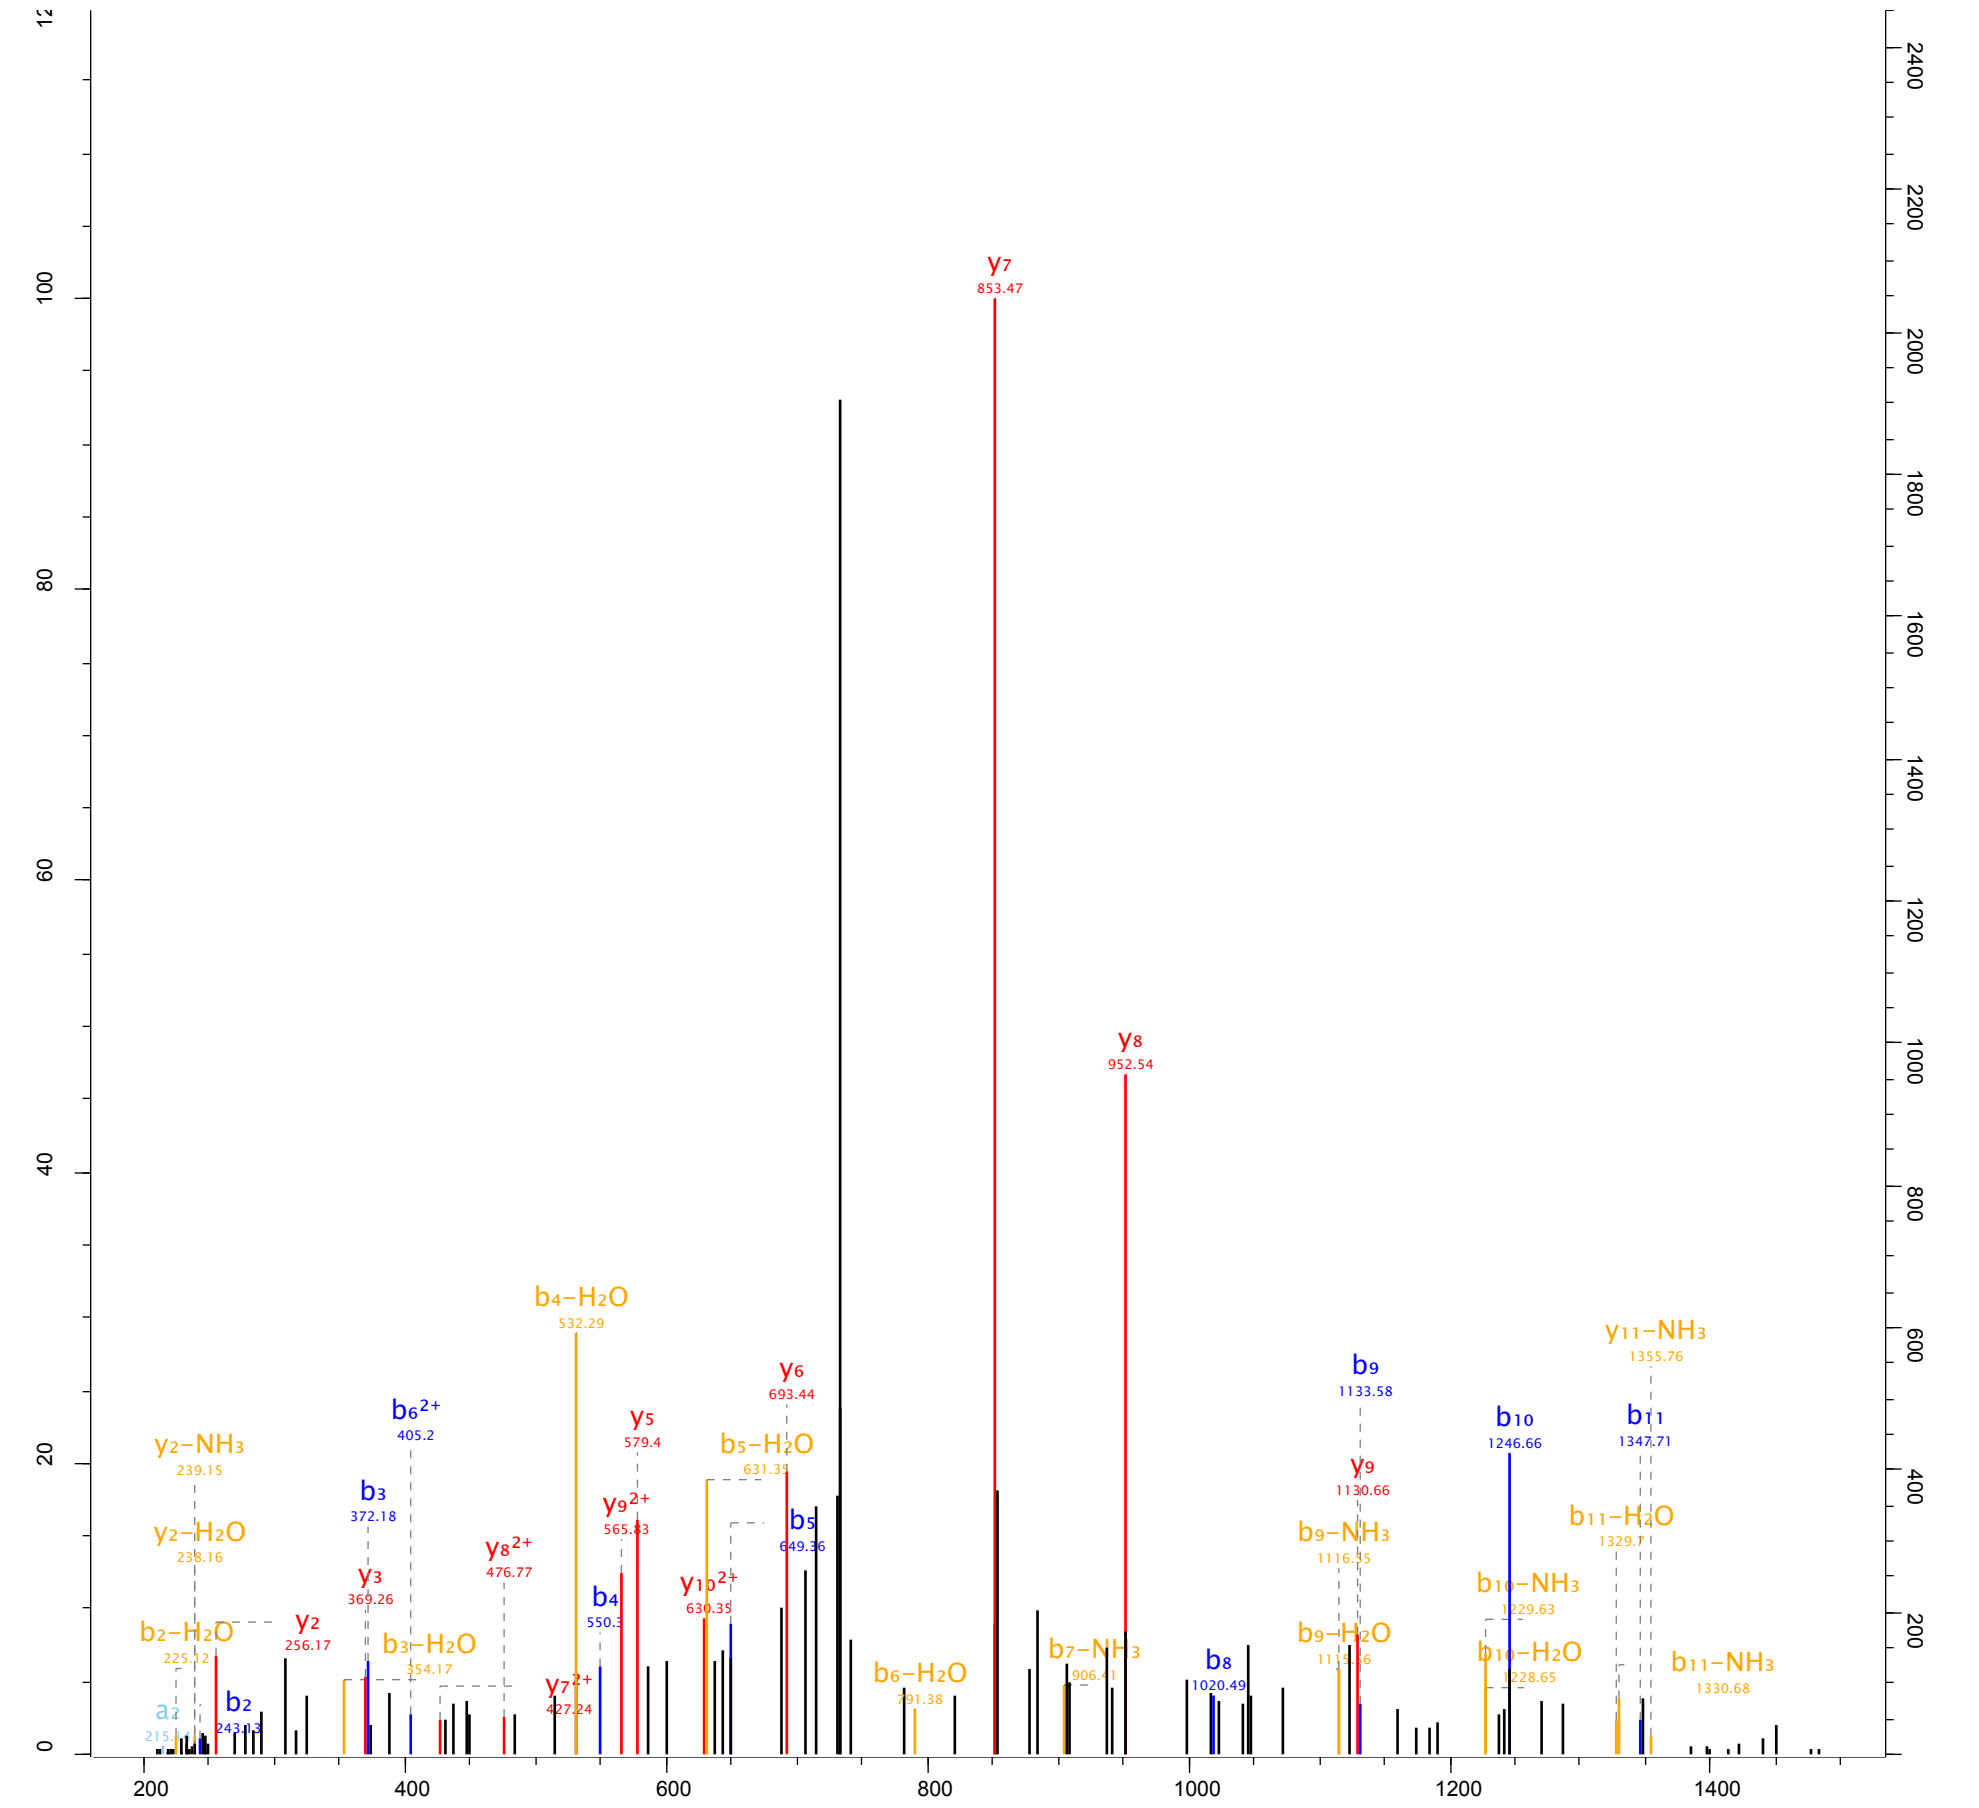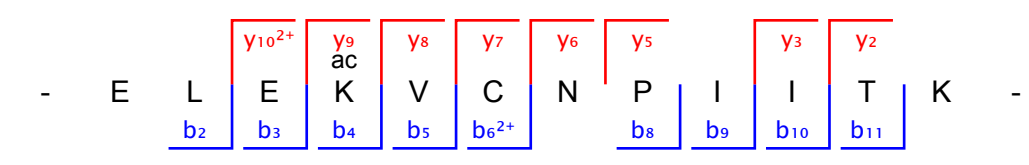

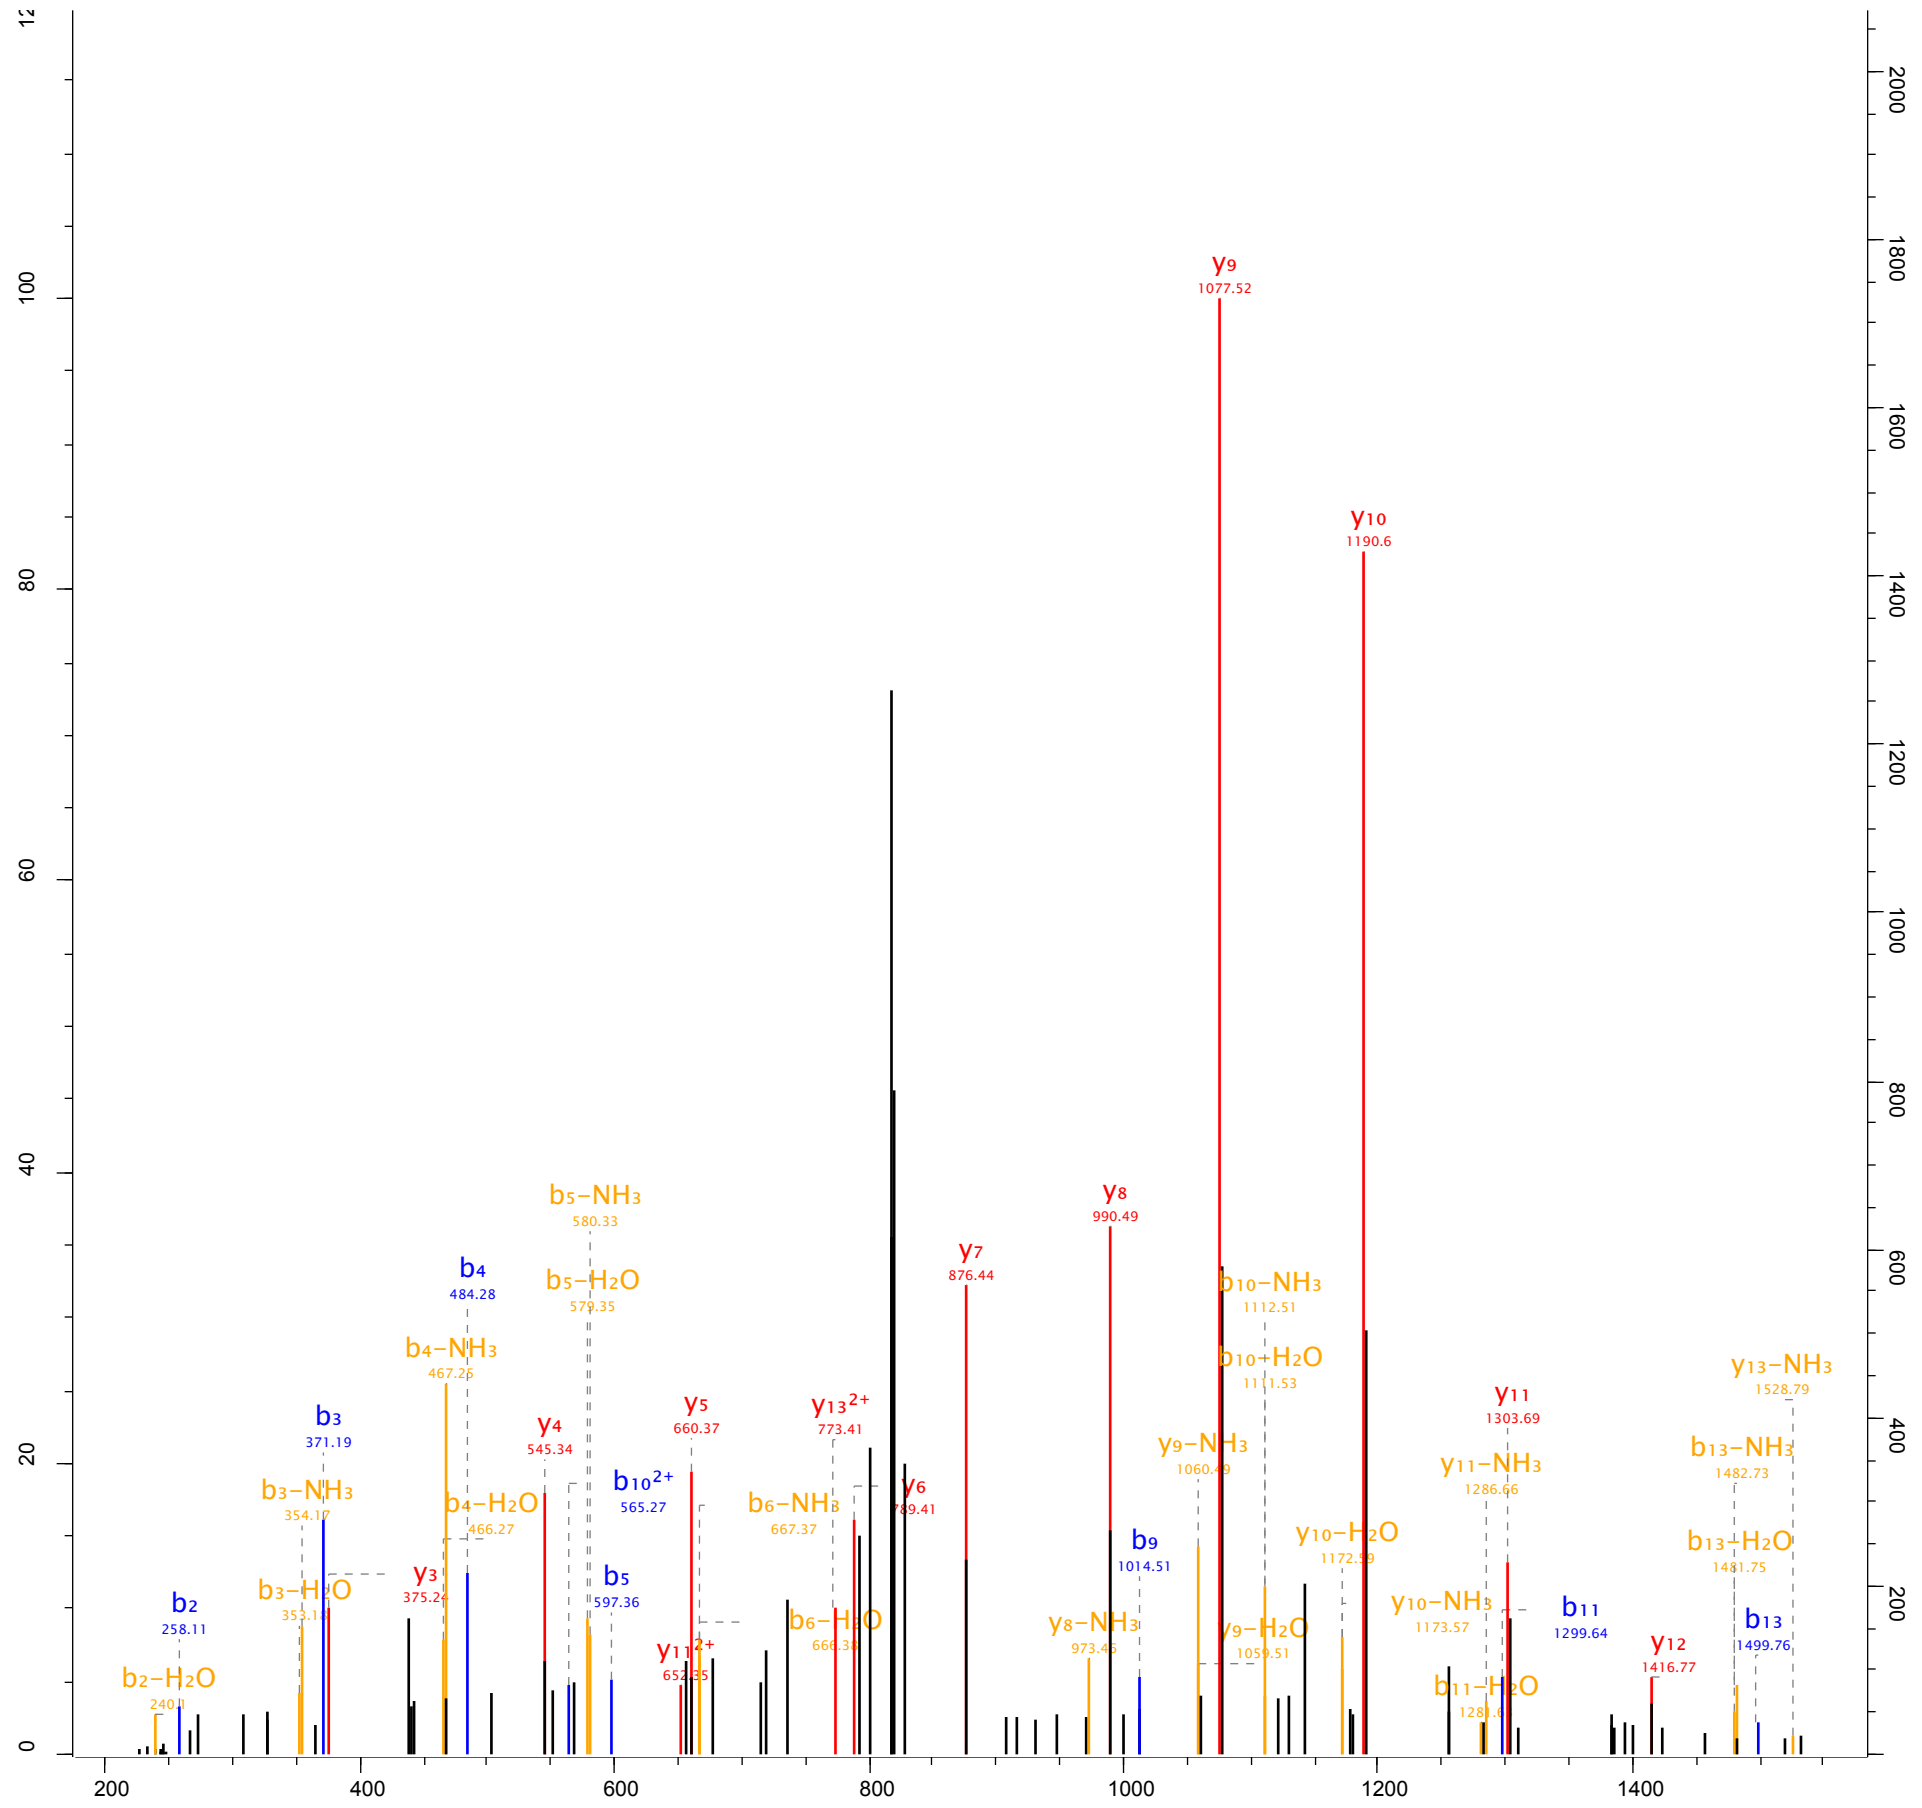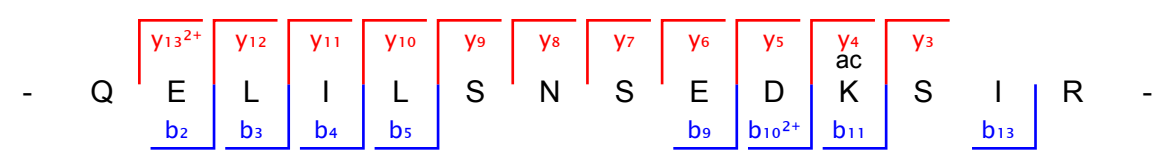

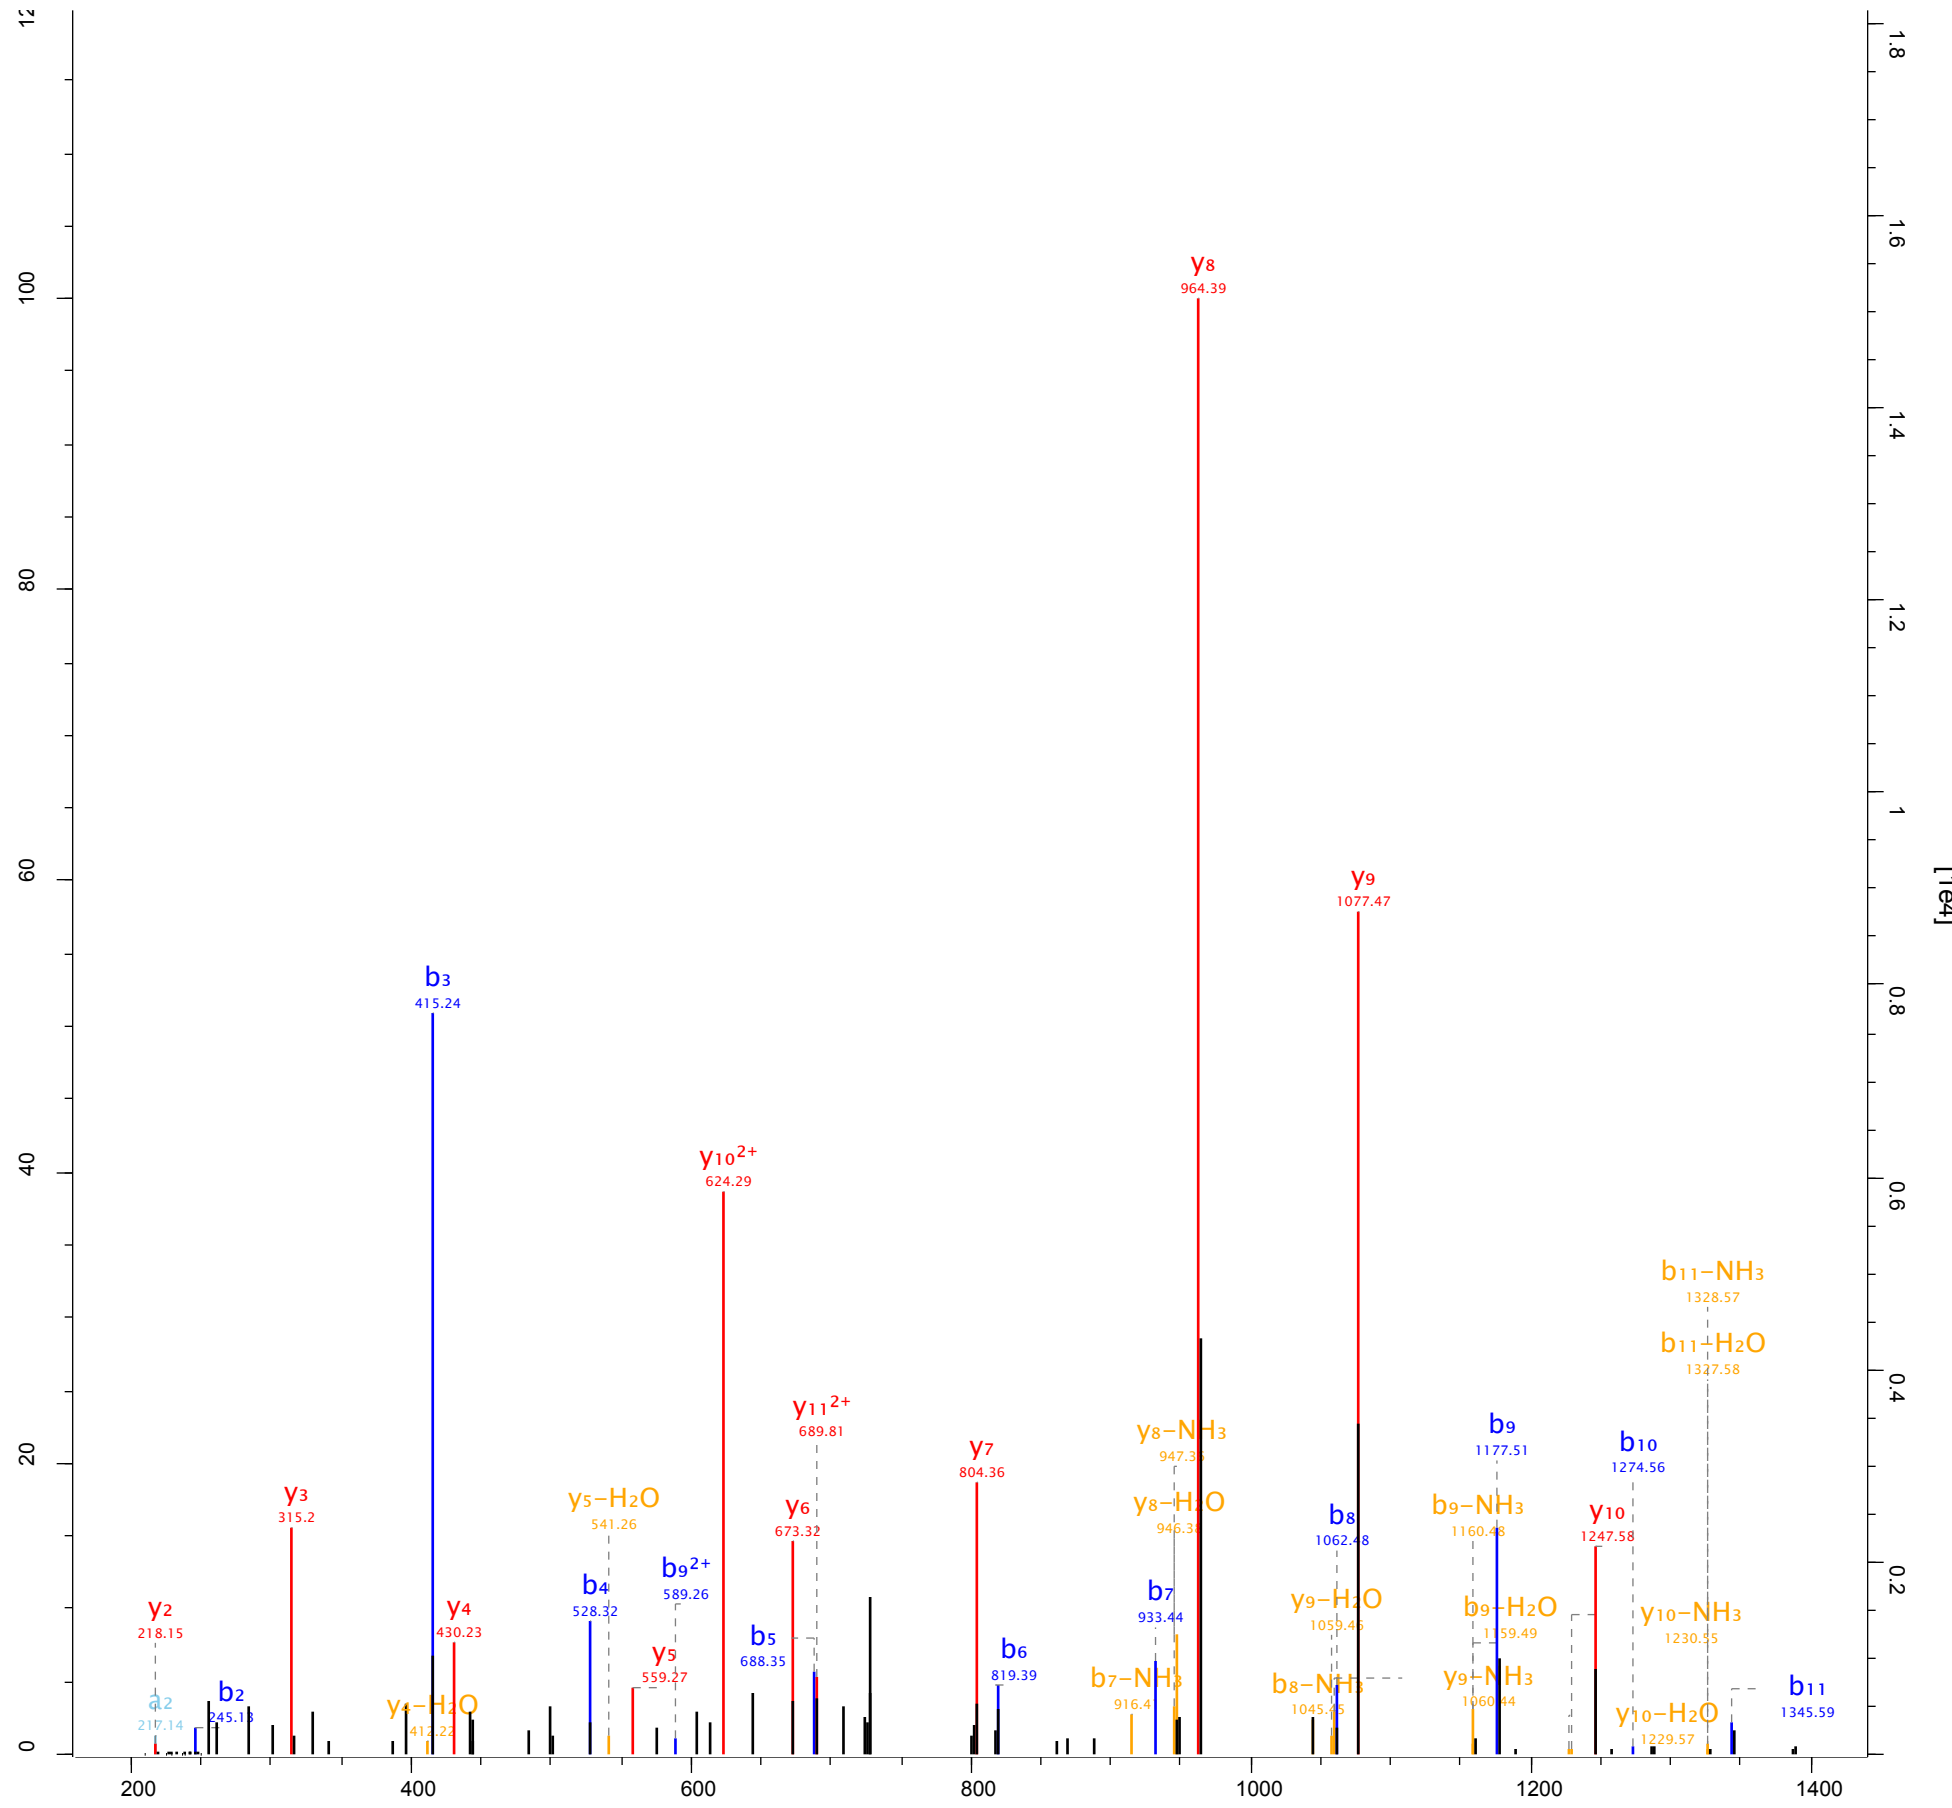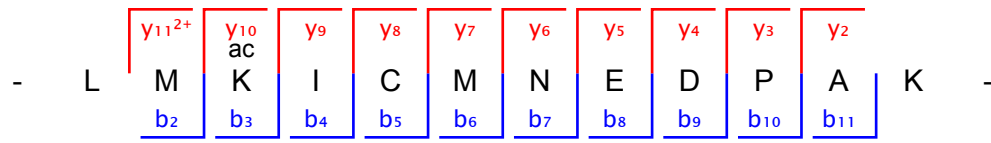

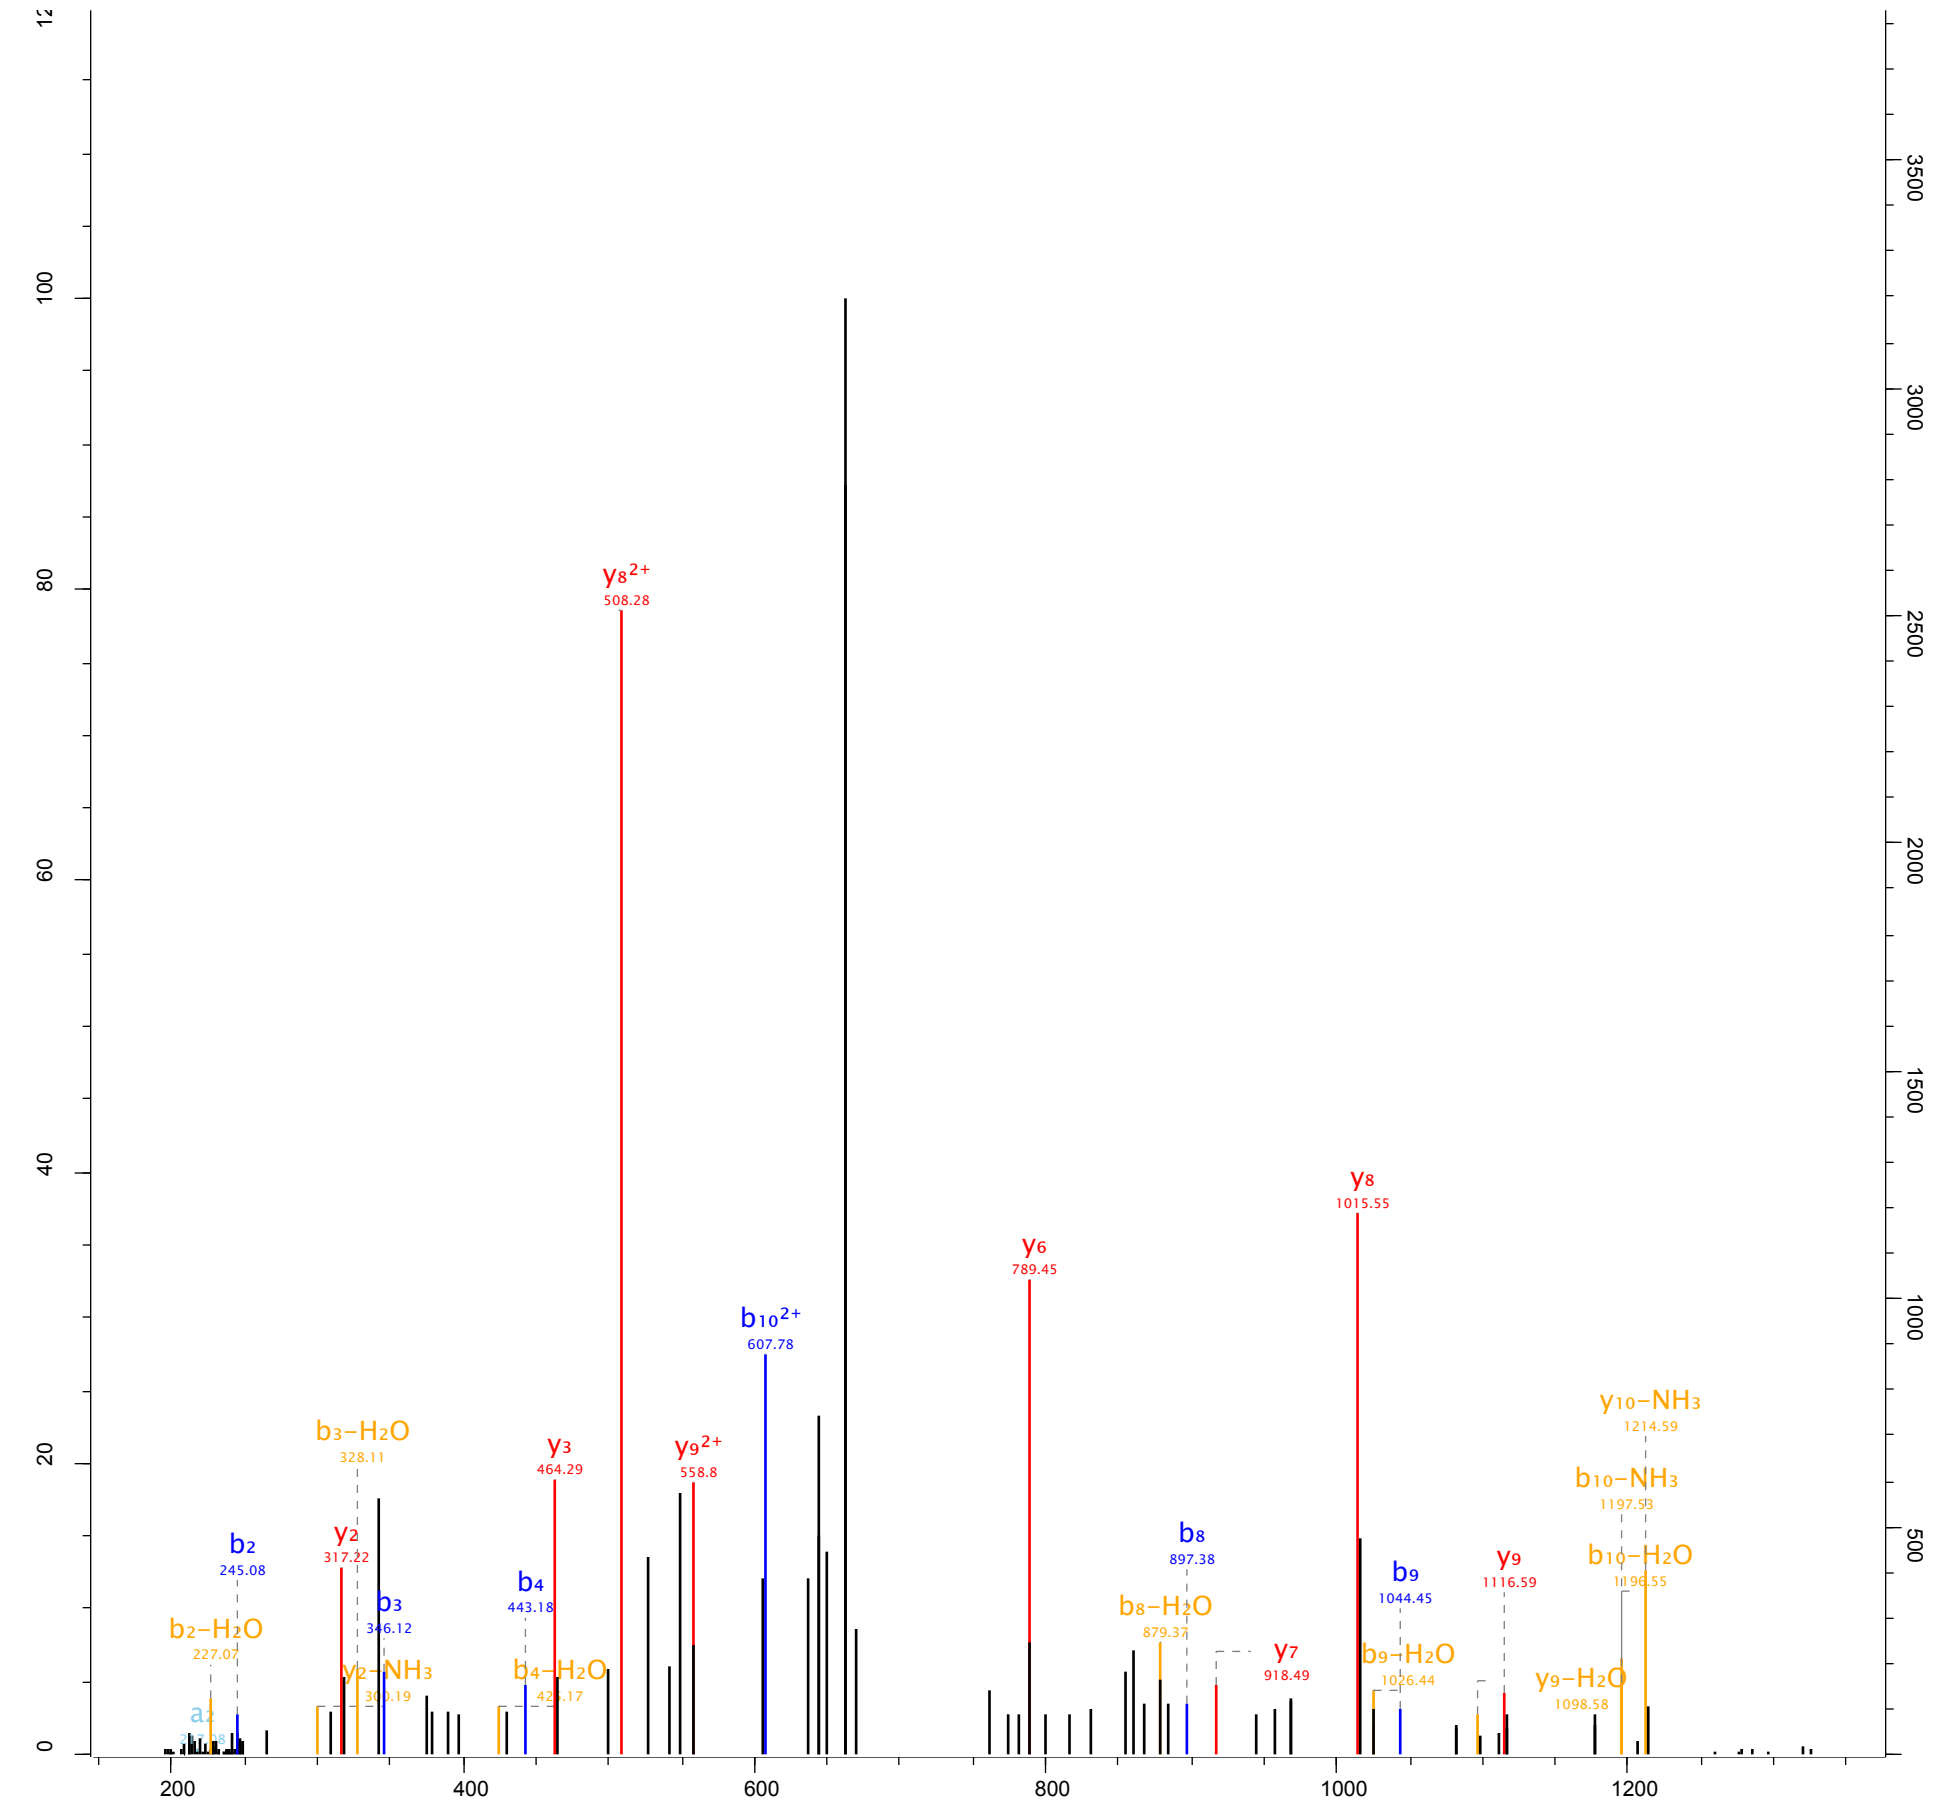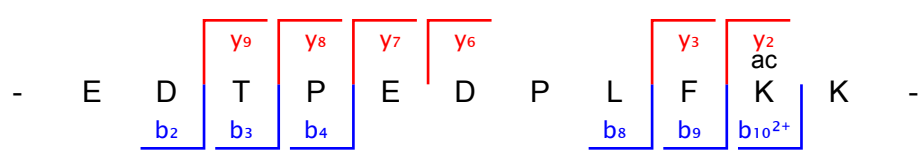

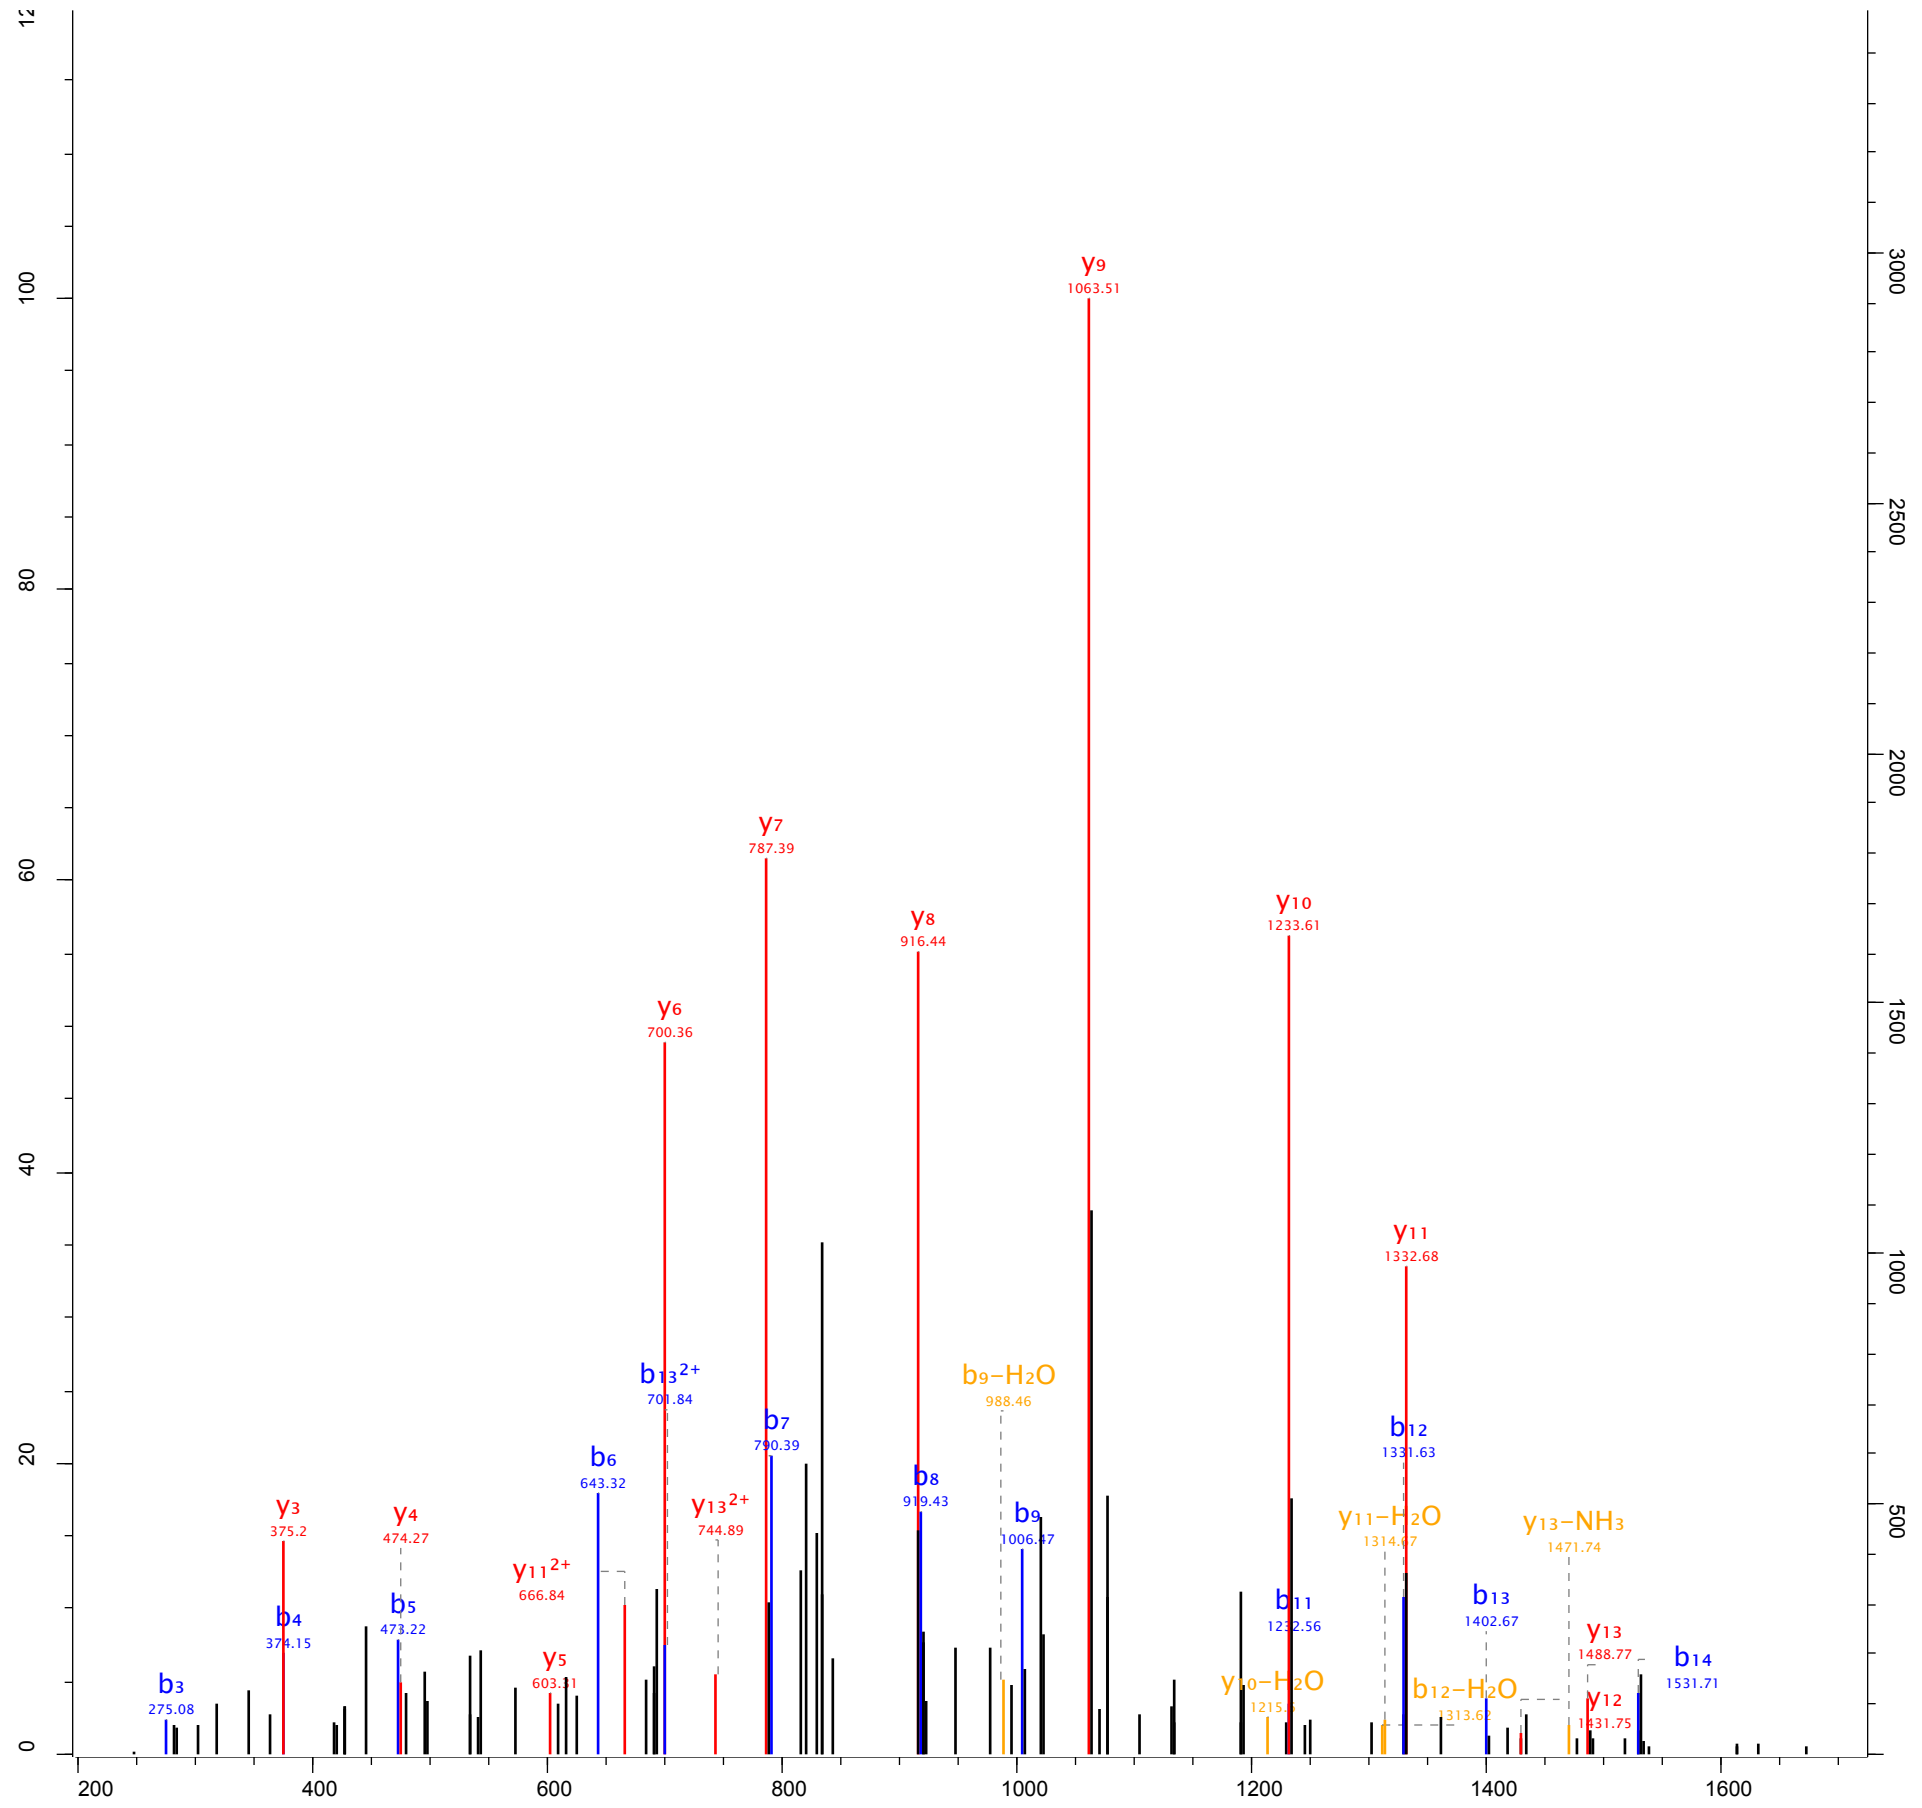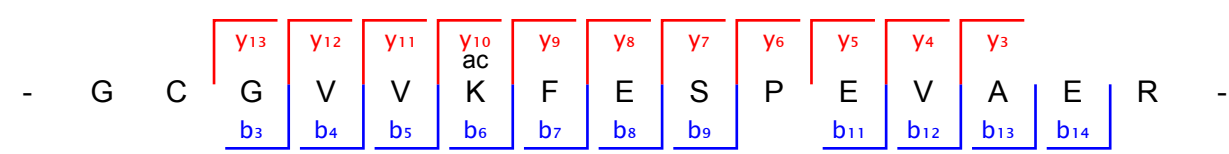

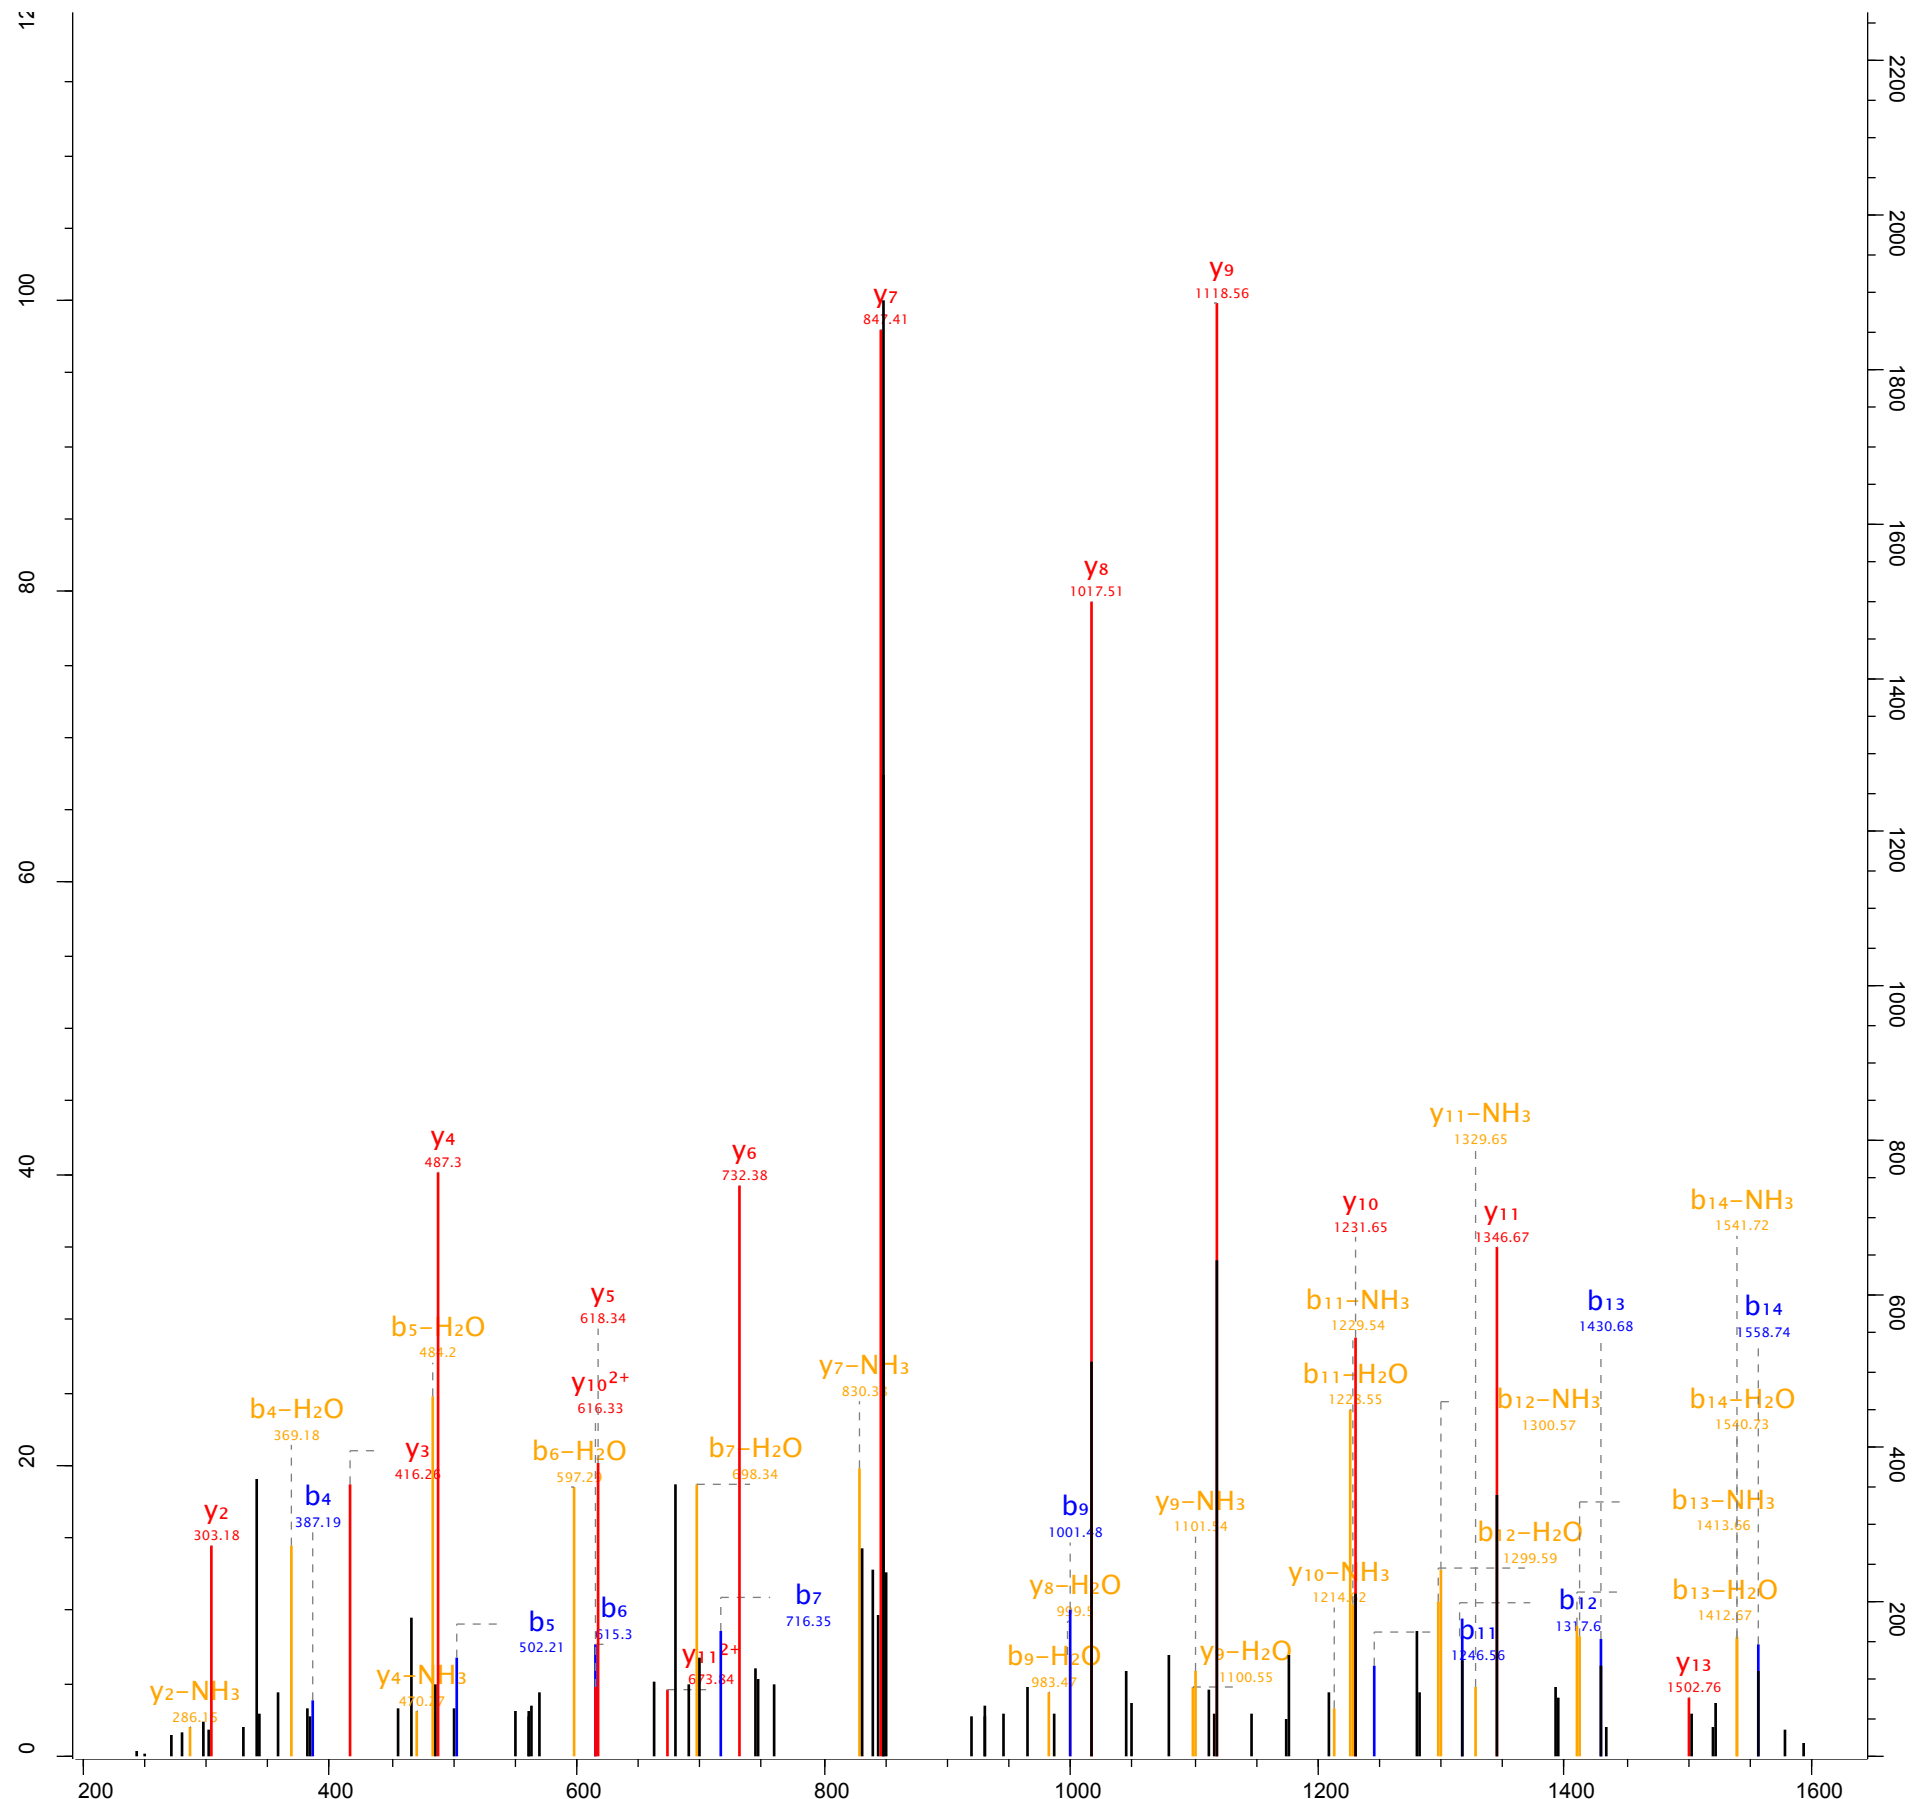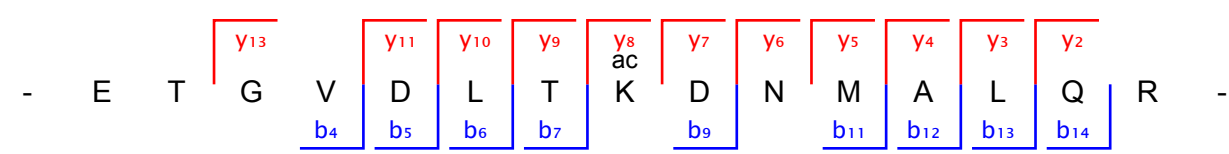



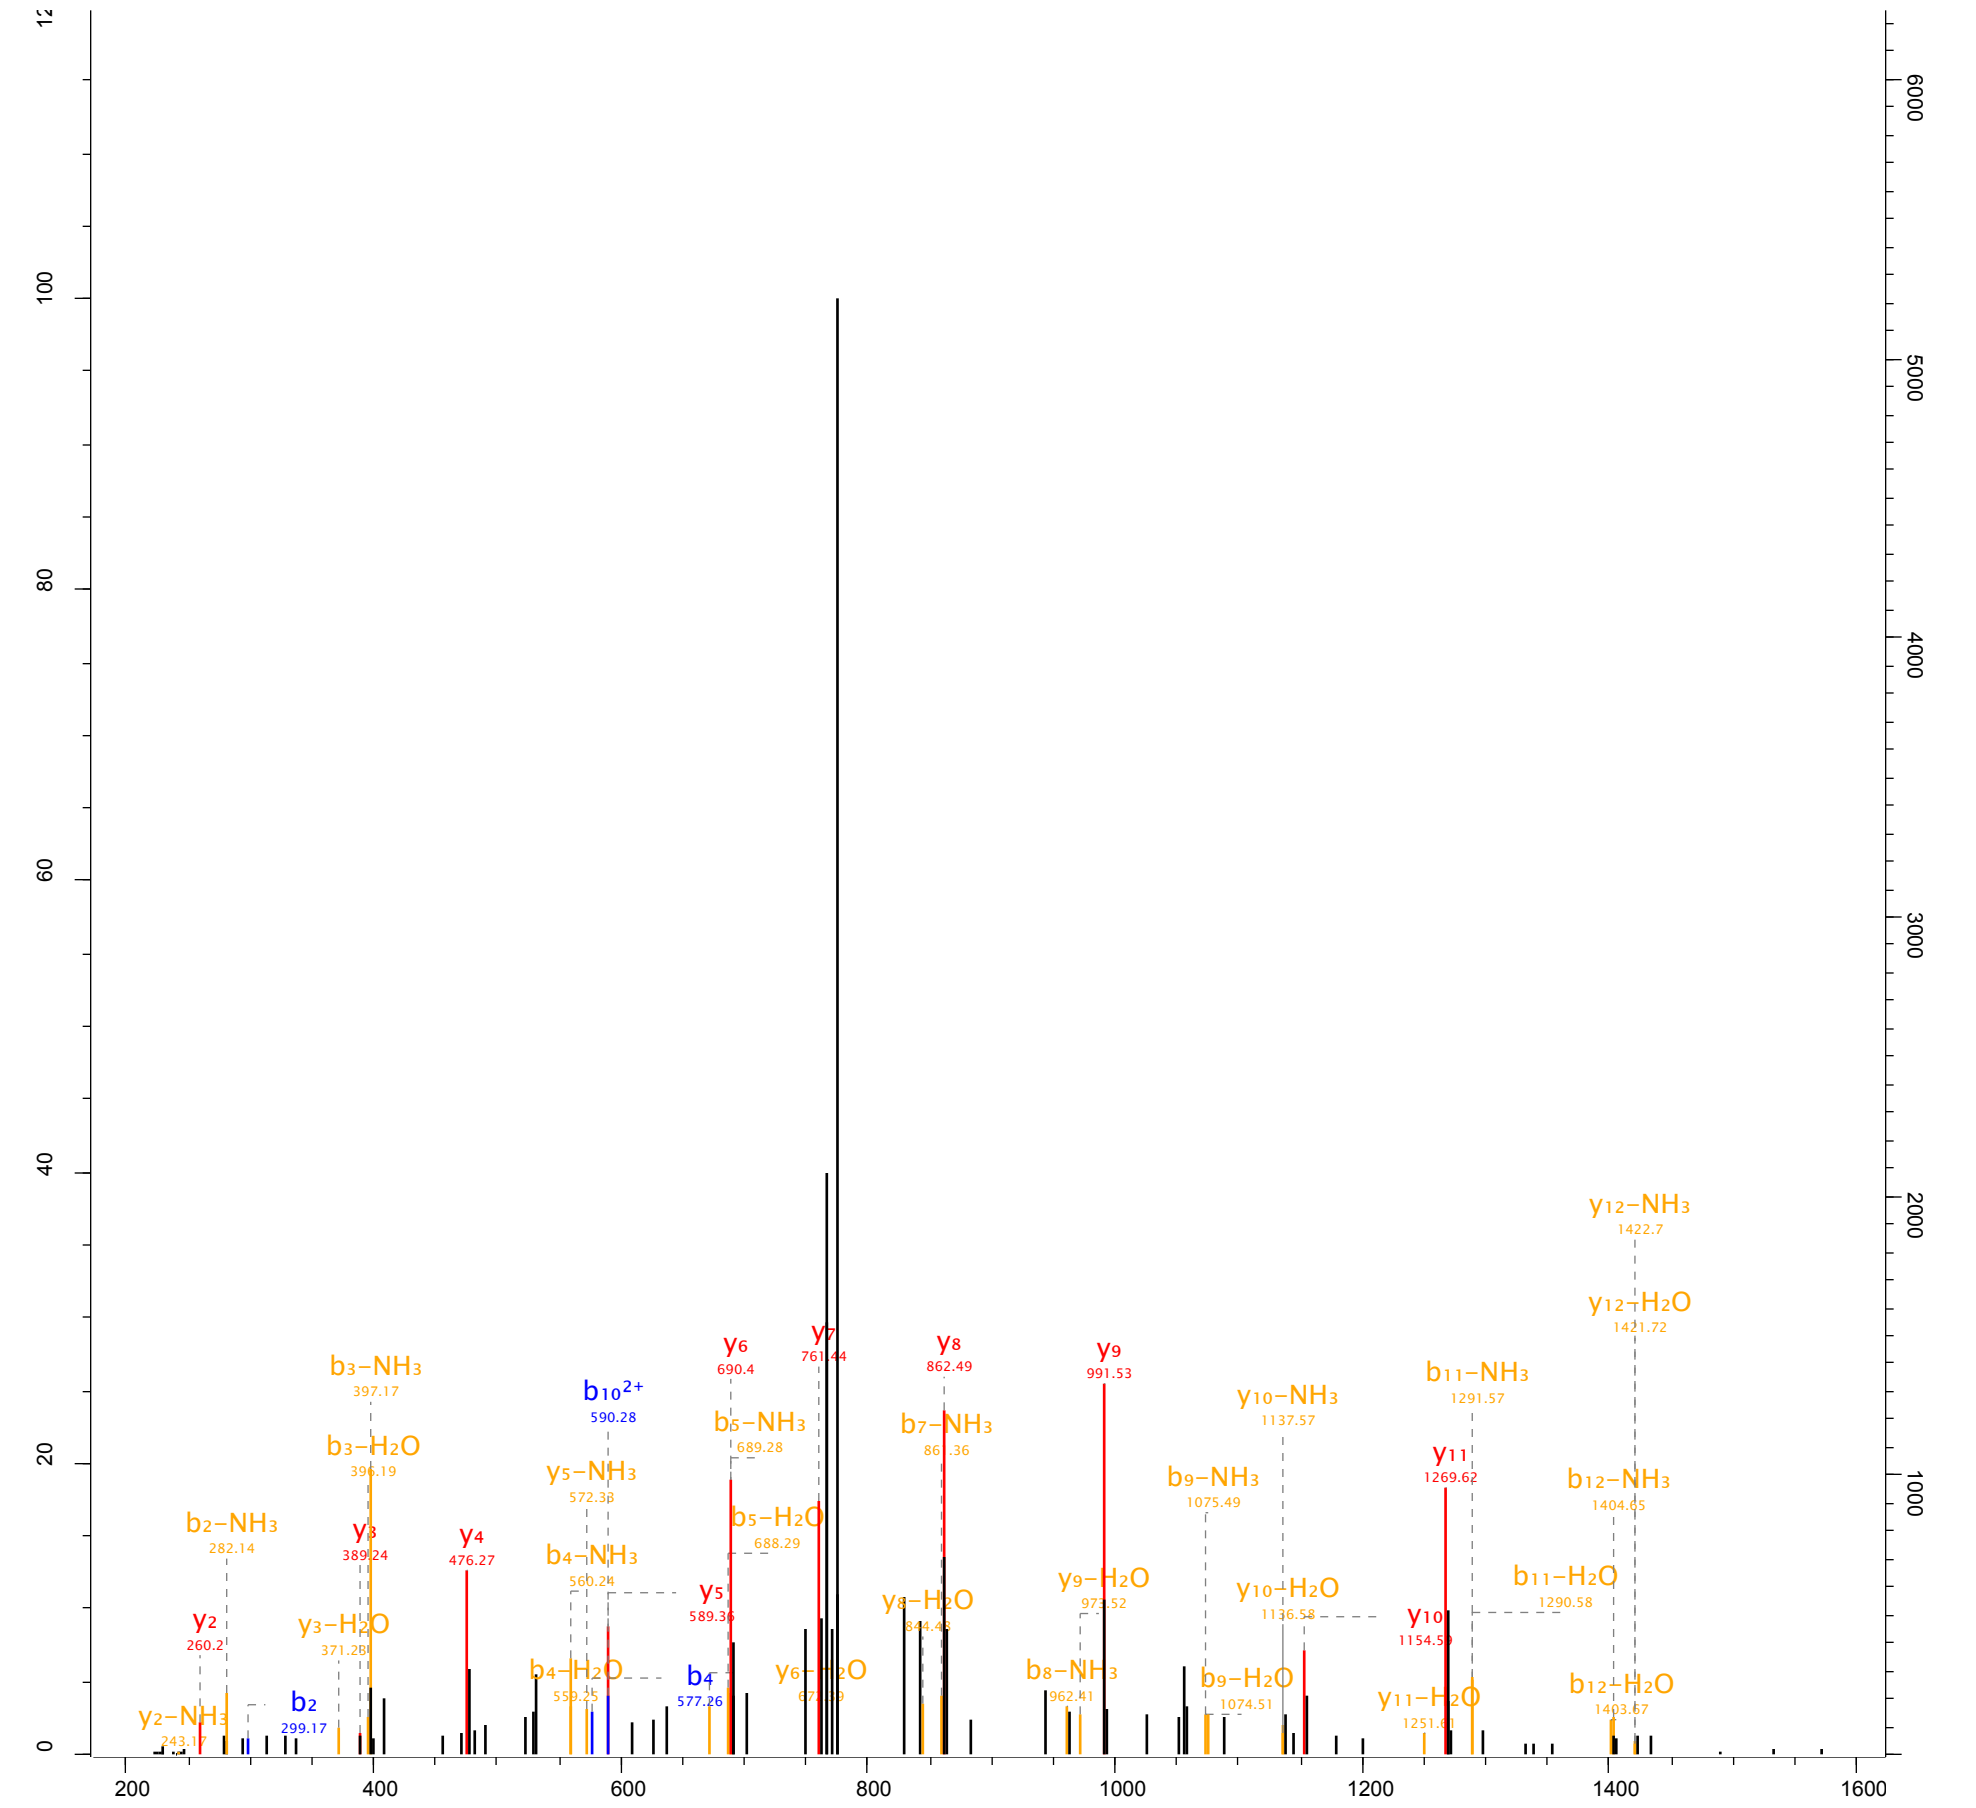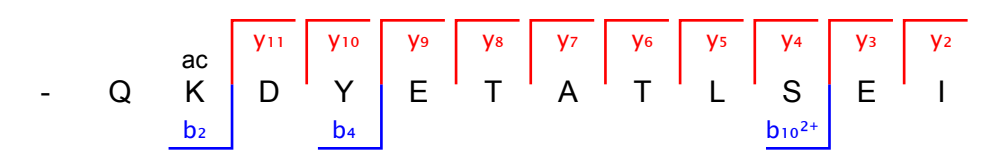

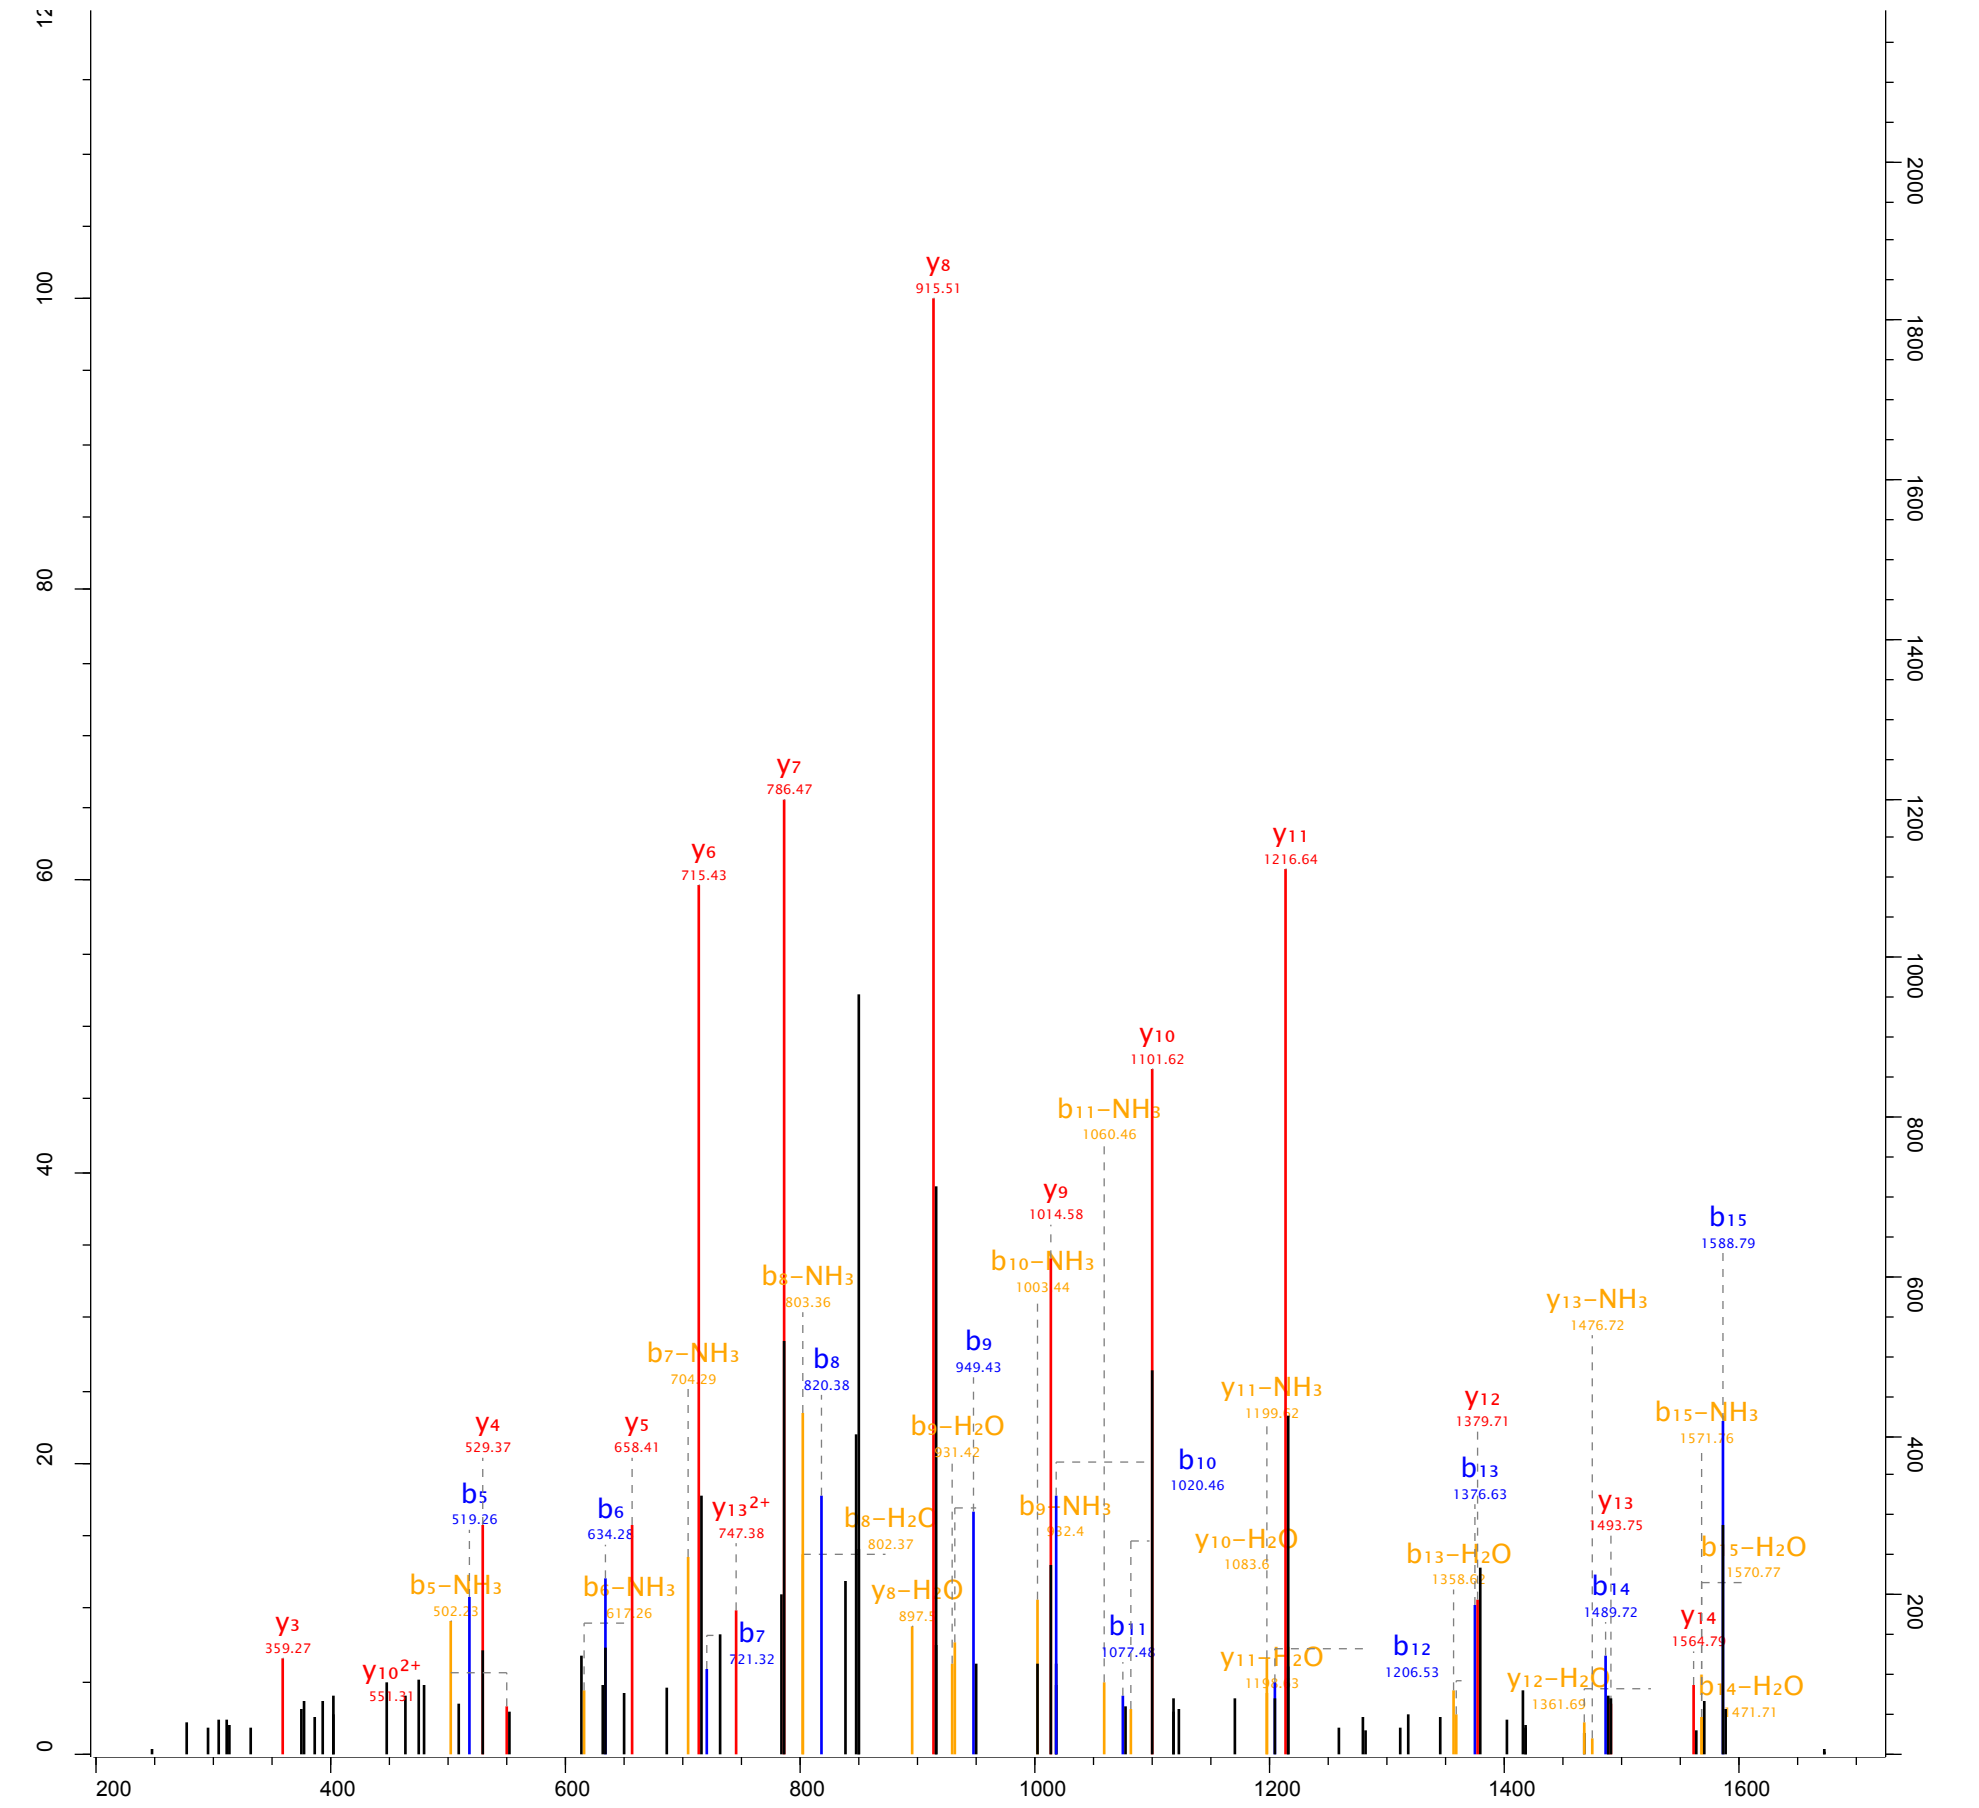

- A V A N Y D S V E A G E K L V K -

y14
y13
y12
y11
y10
y9
y8
y7
y6
y5
y4
y3

b5
b6
b7
b8
b9
b10
b11
b12
b13
b14
b15

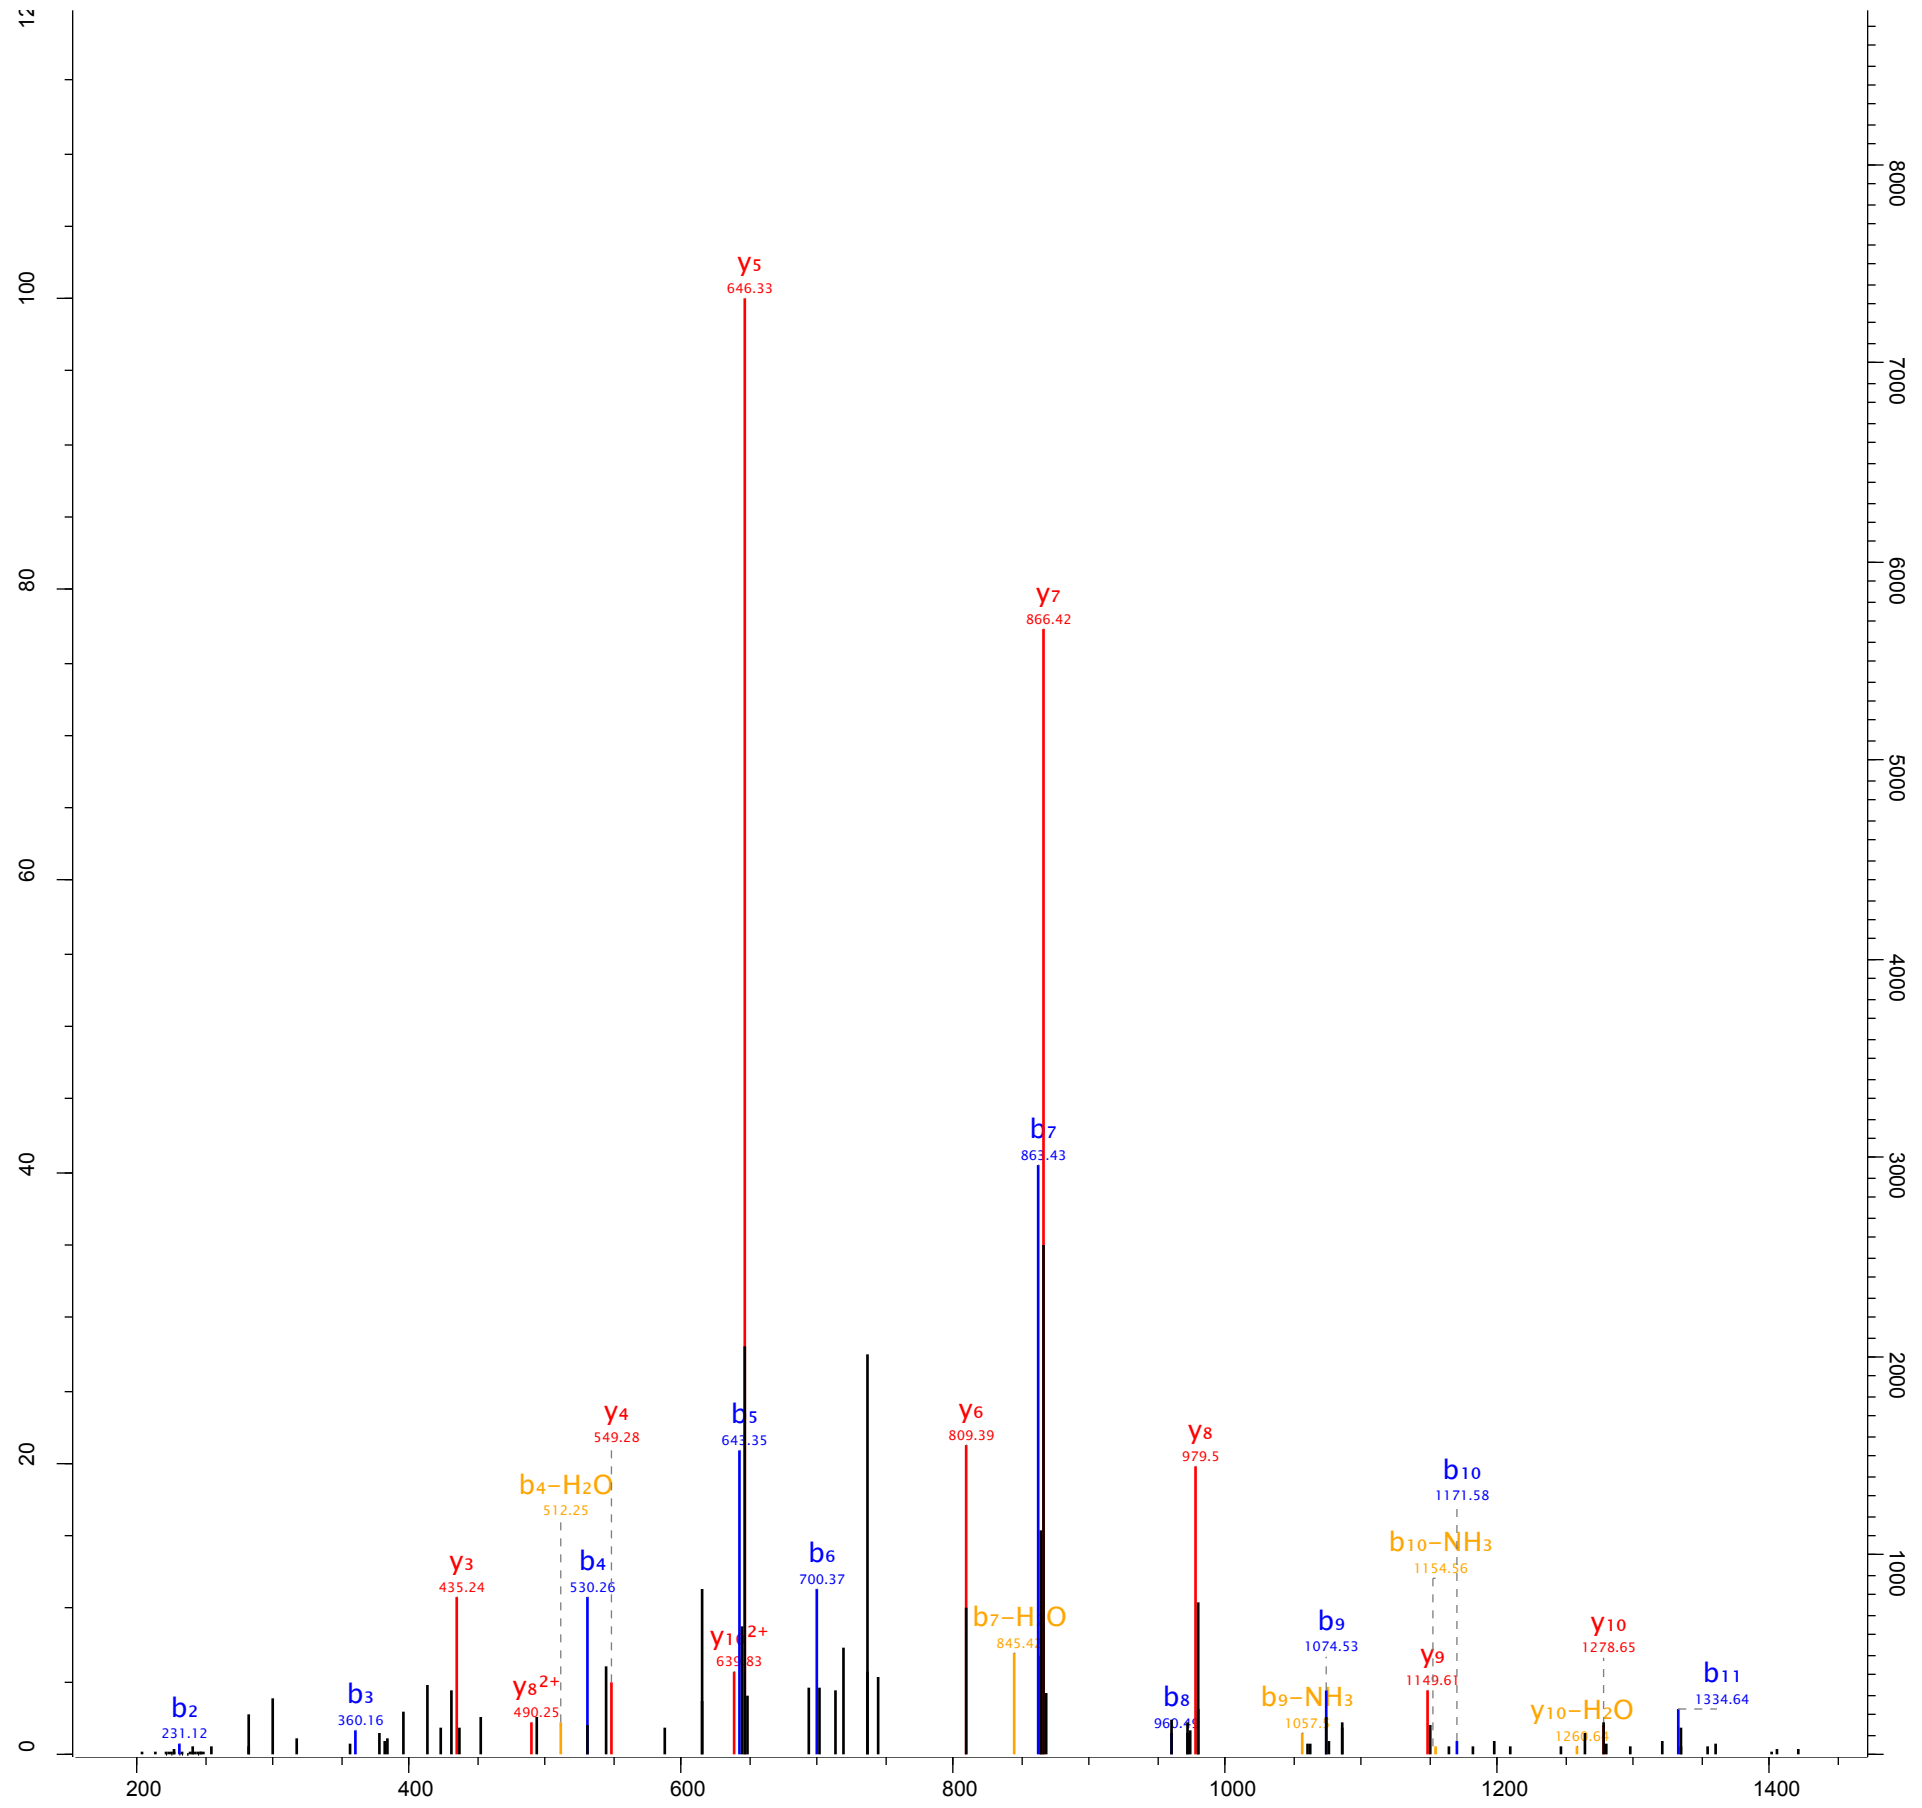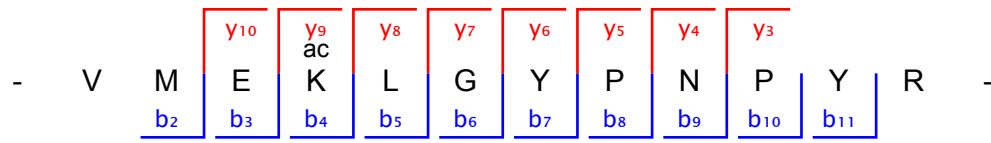

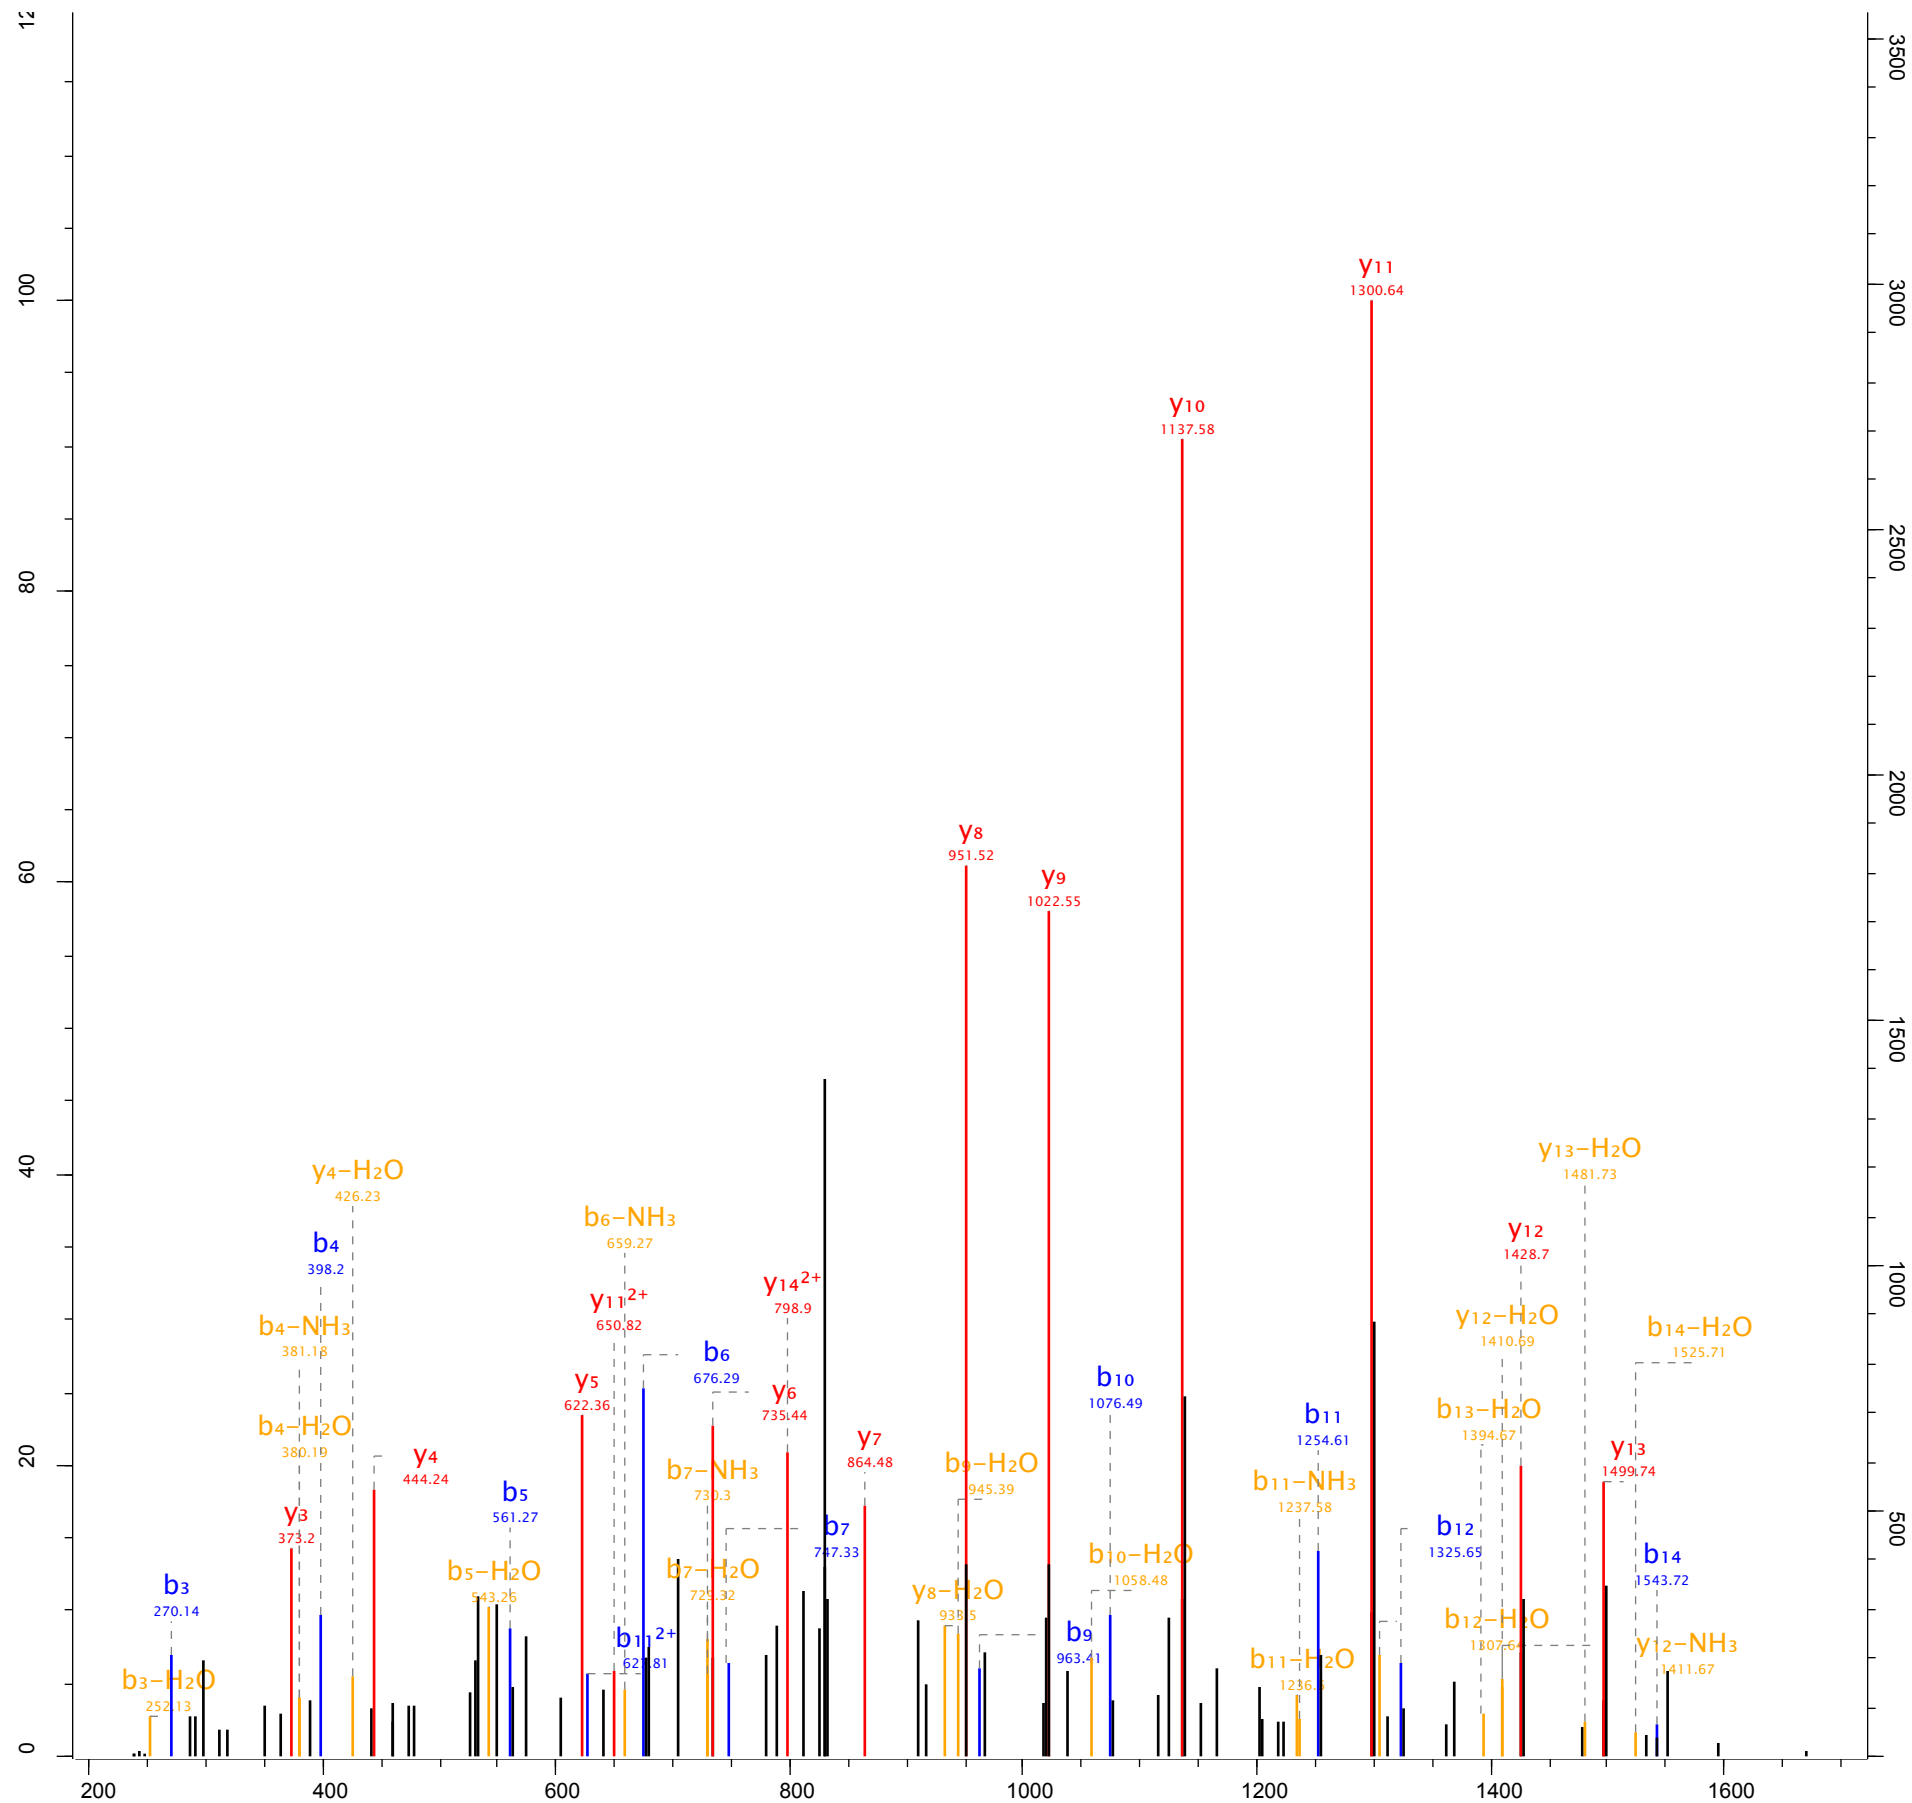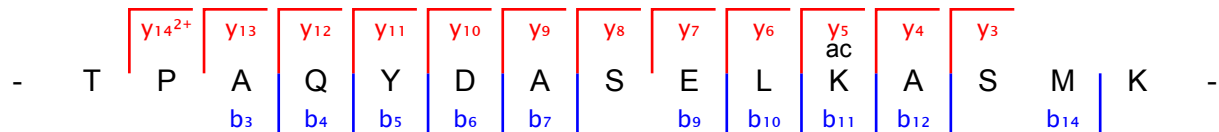

Raw file: 062513\_SCW\_II\_53\_4\_Vargas\_Enriched  
 Scan: 18433 Method: ITMS; CID Score: 117.27 m/z: 713.4 Gene names: Akr1a1

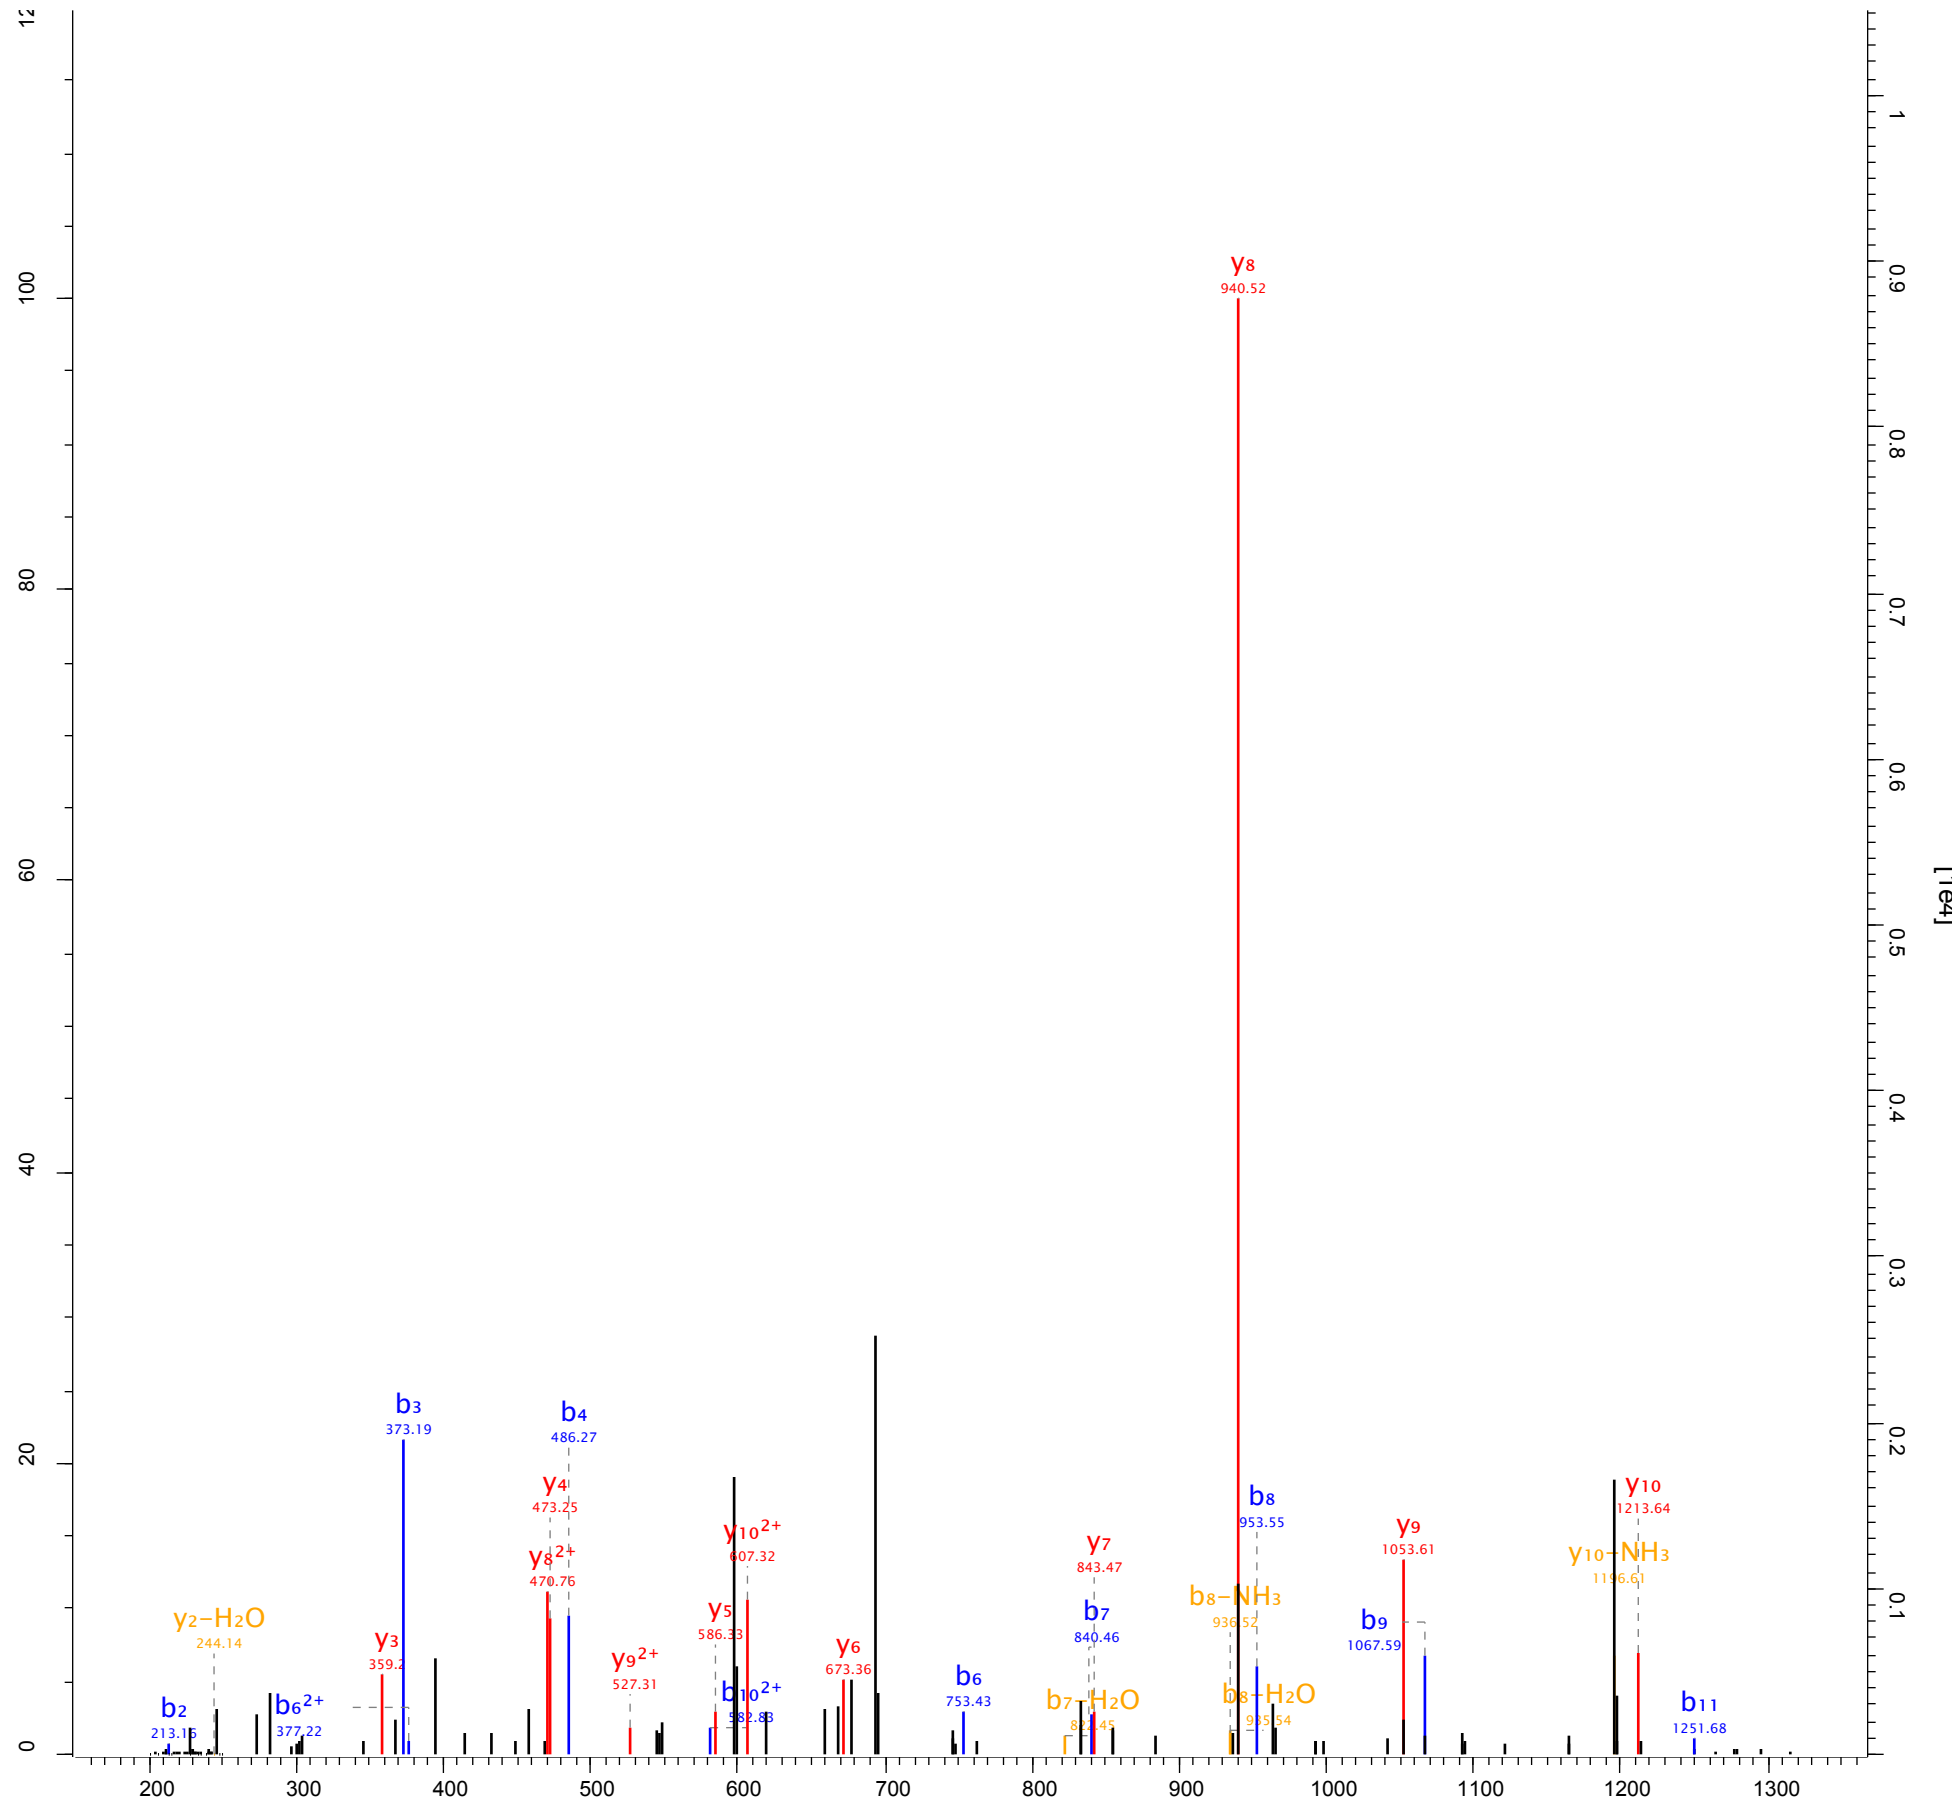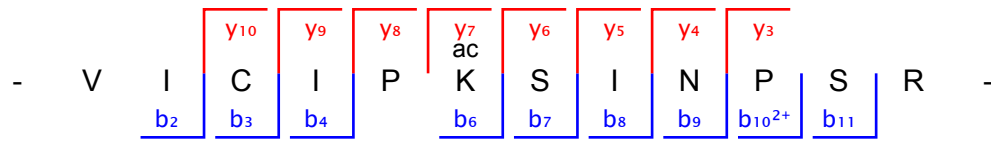

062513\_SCW\_II\_53\_4\_Vargas\_Enriched

18510 ITMS; CID 98.94 773.41 Aldh5a1

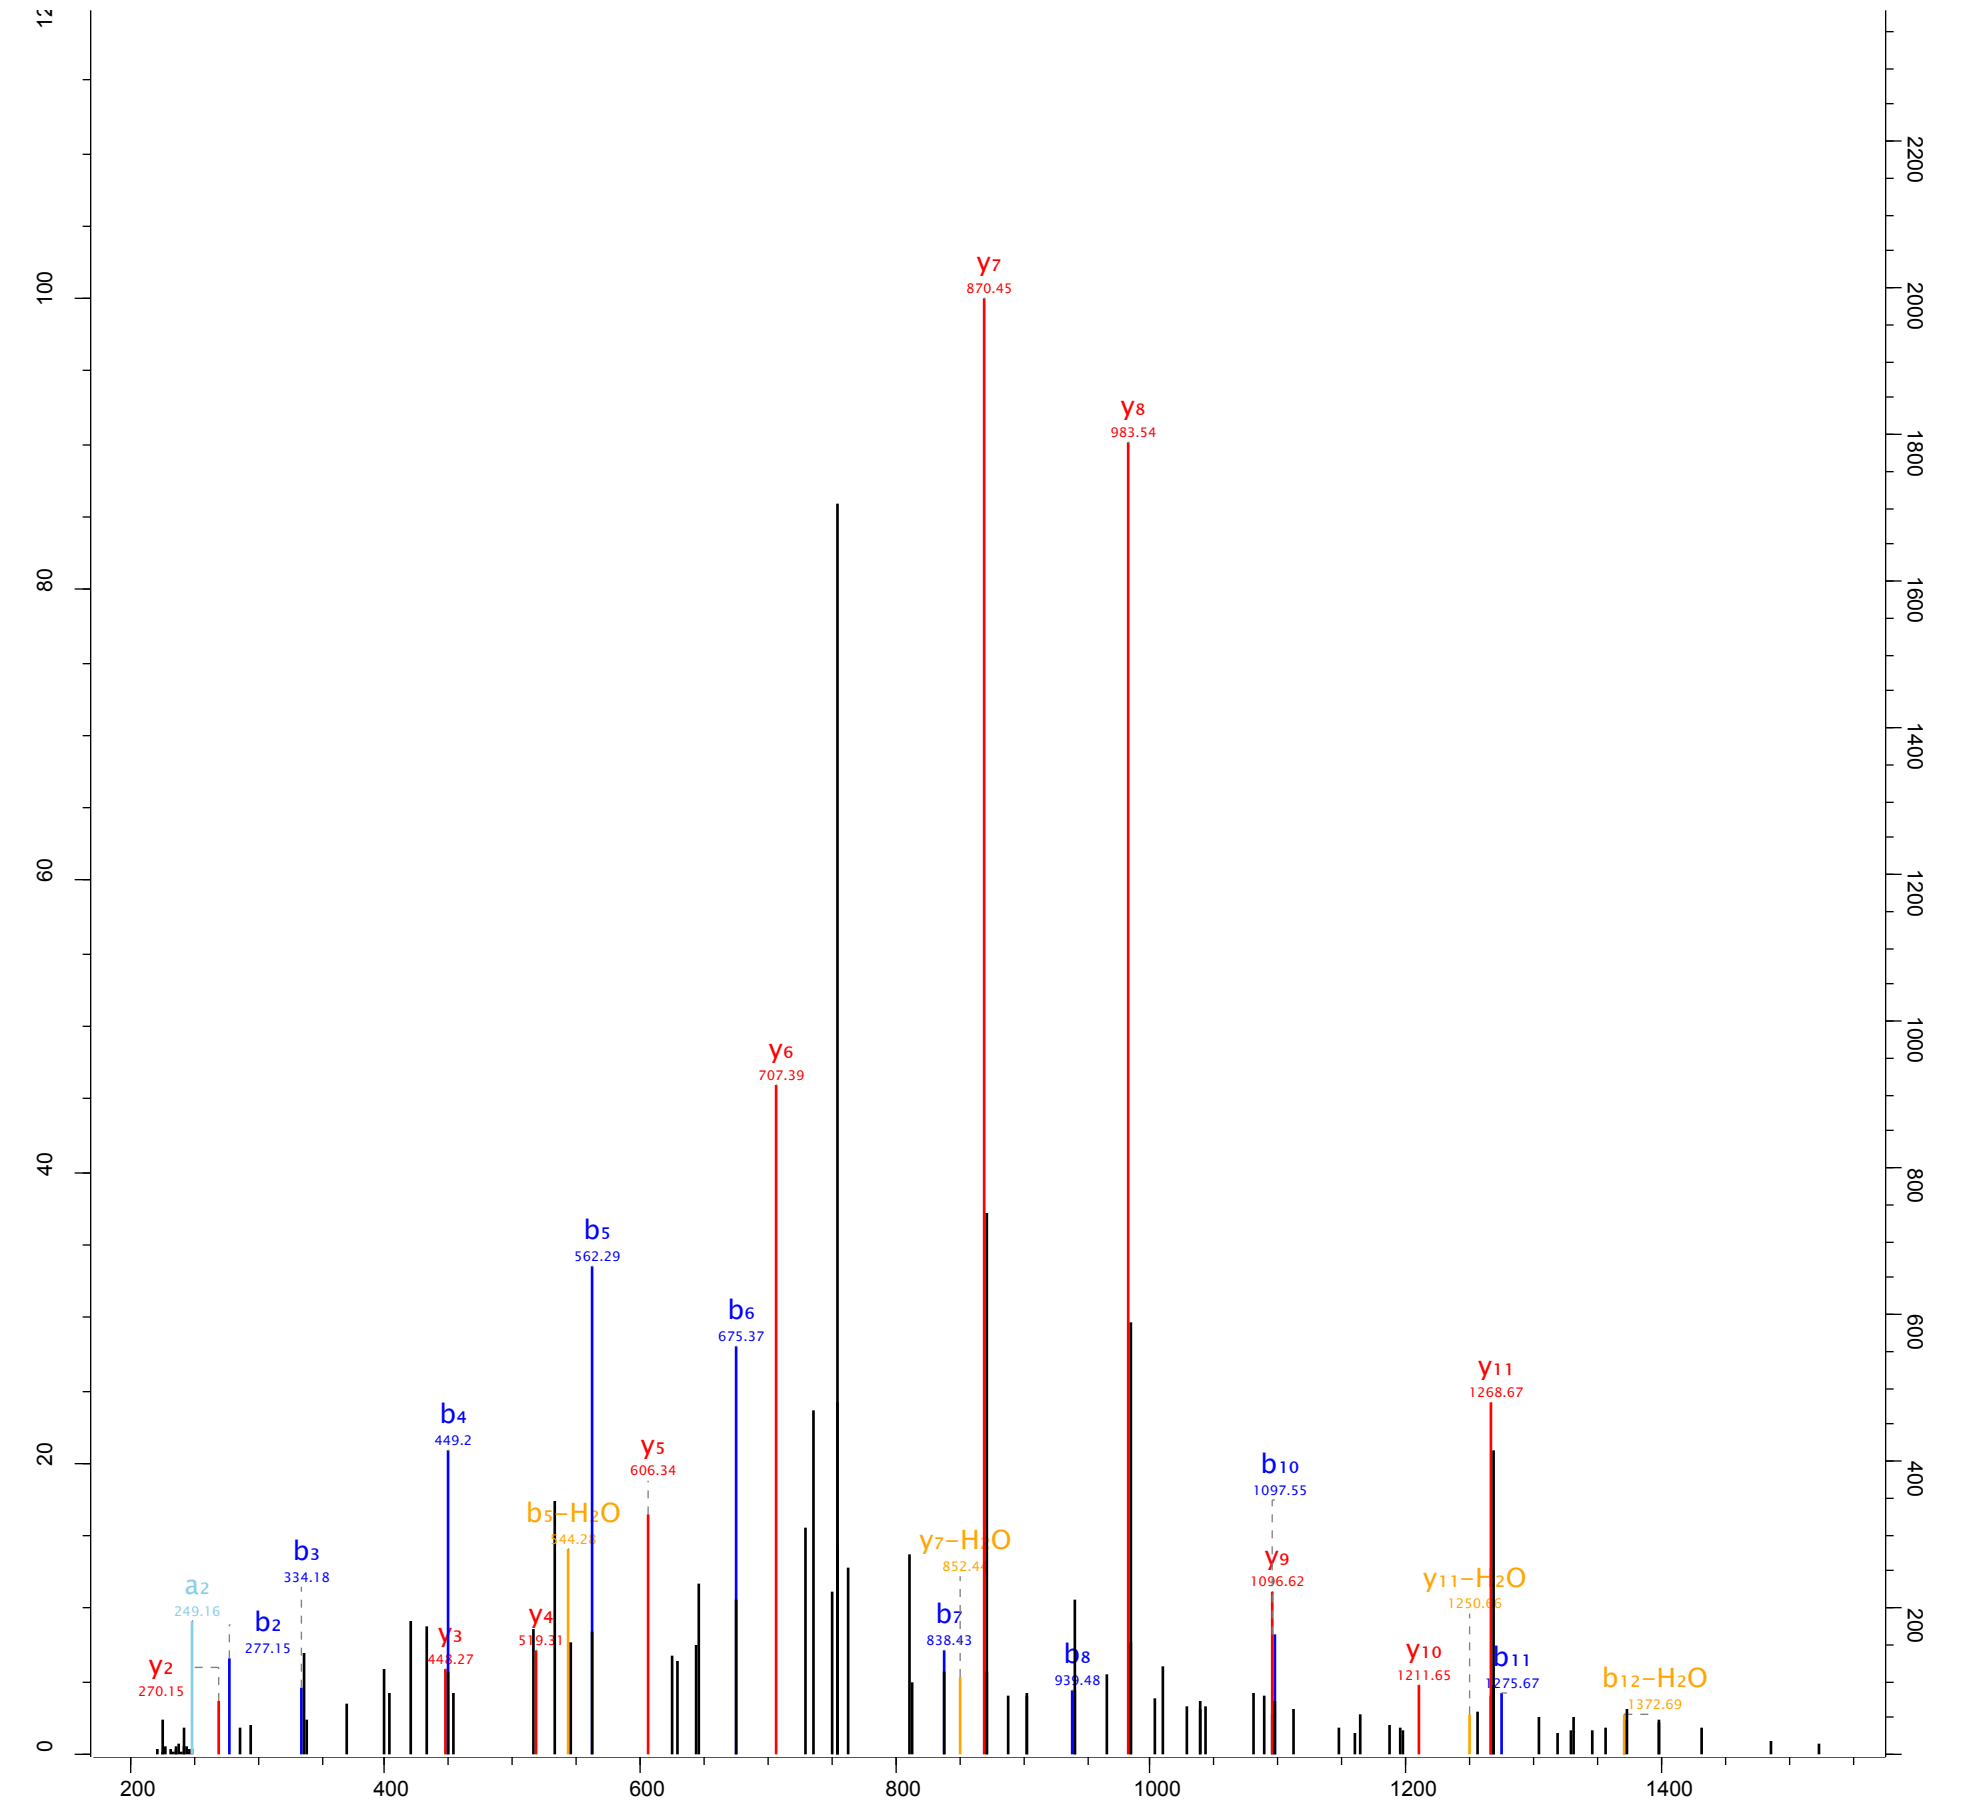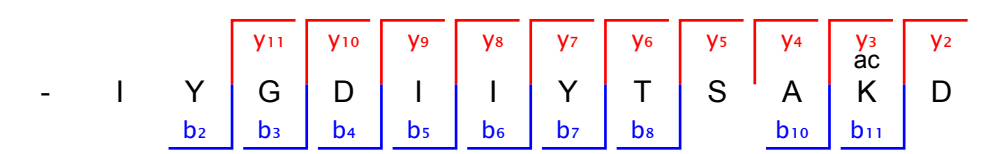

062513\_SCW\_II\_53\_4\_Vargas\_Enriched

18522

ITMS; CID

80.39

733.37

Idh3a

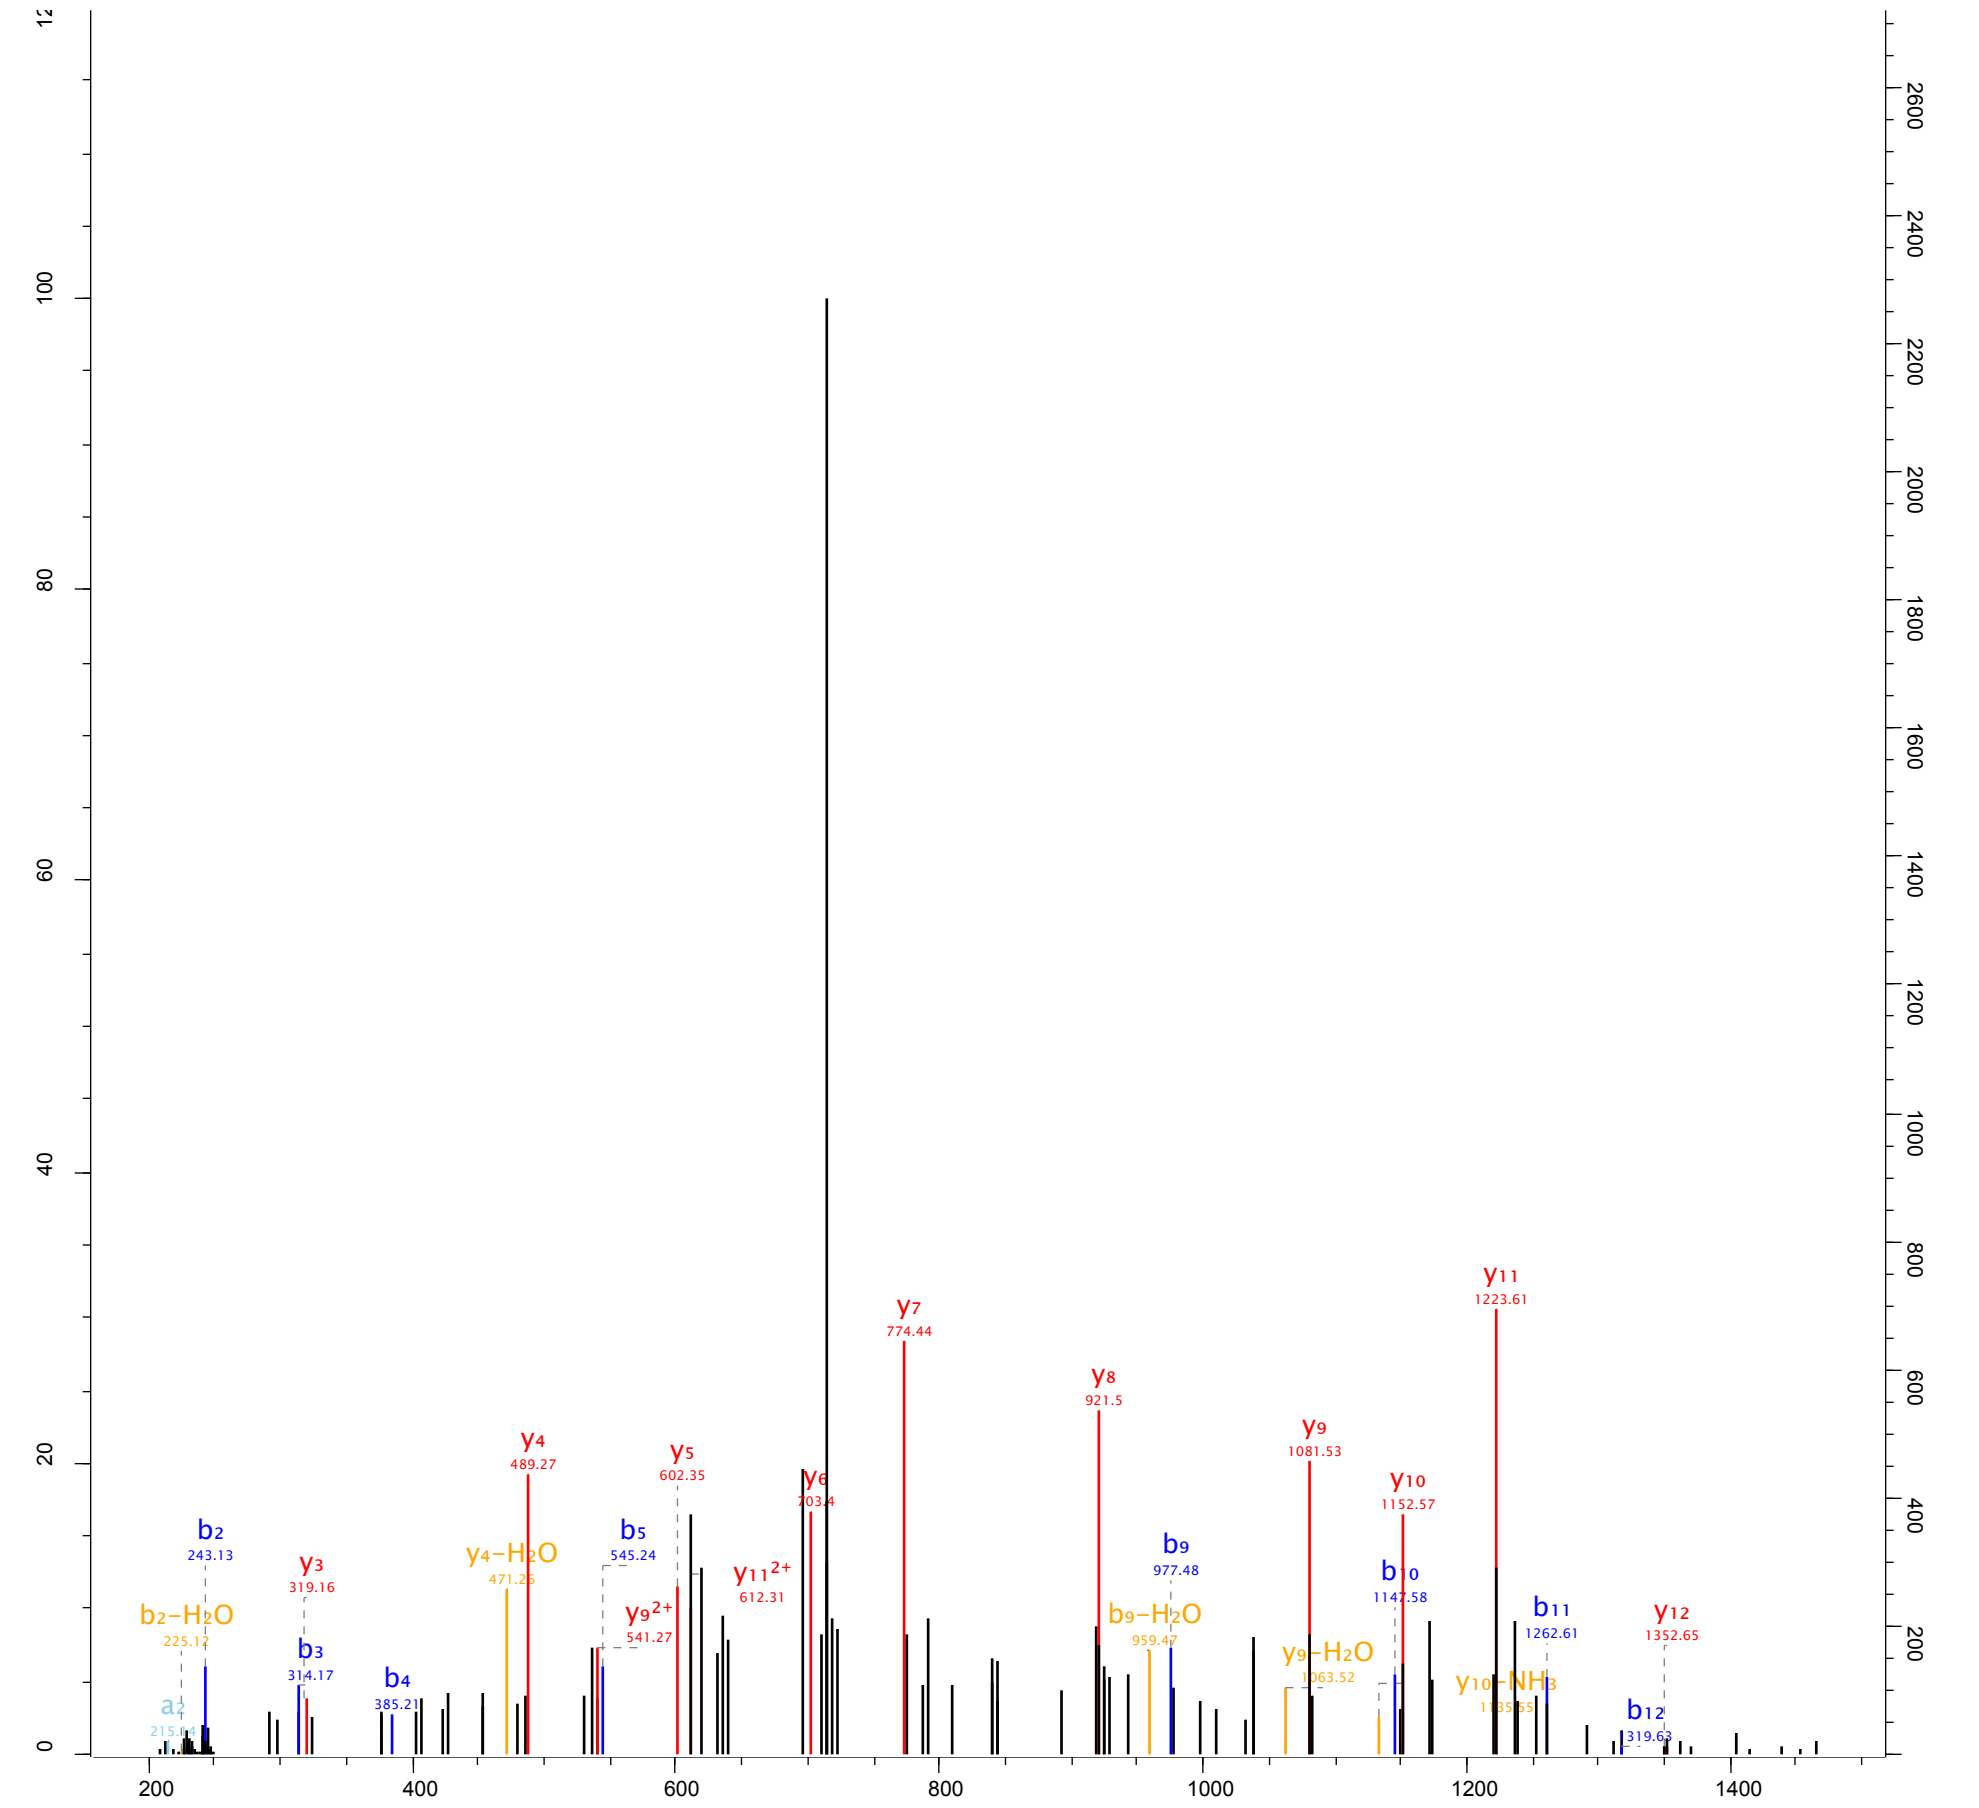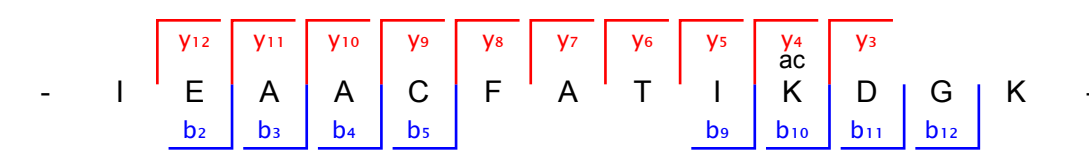

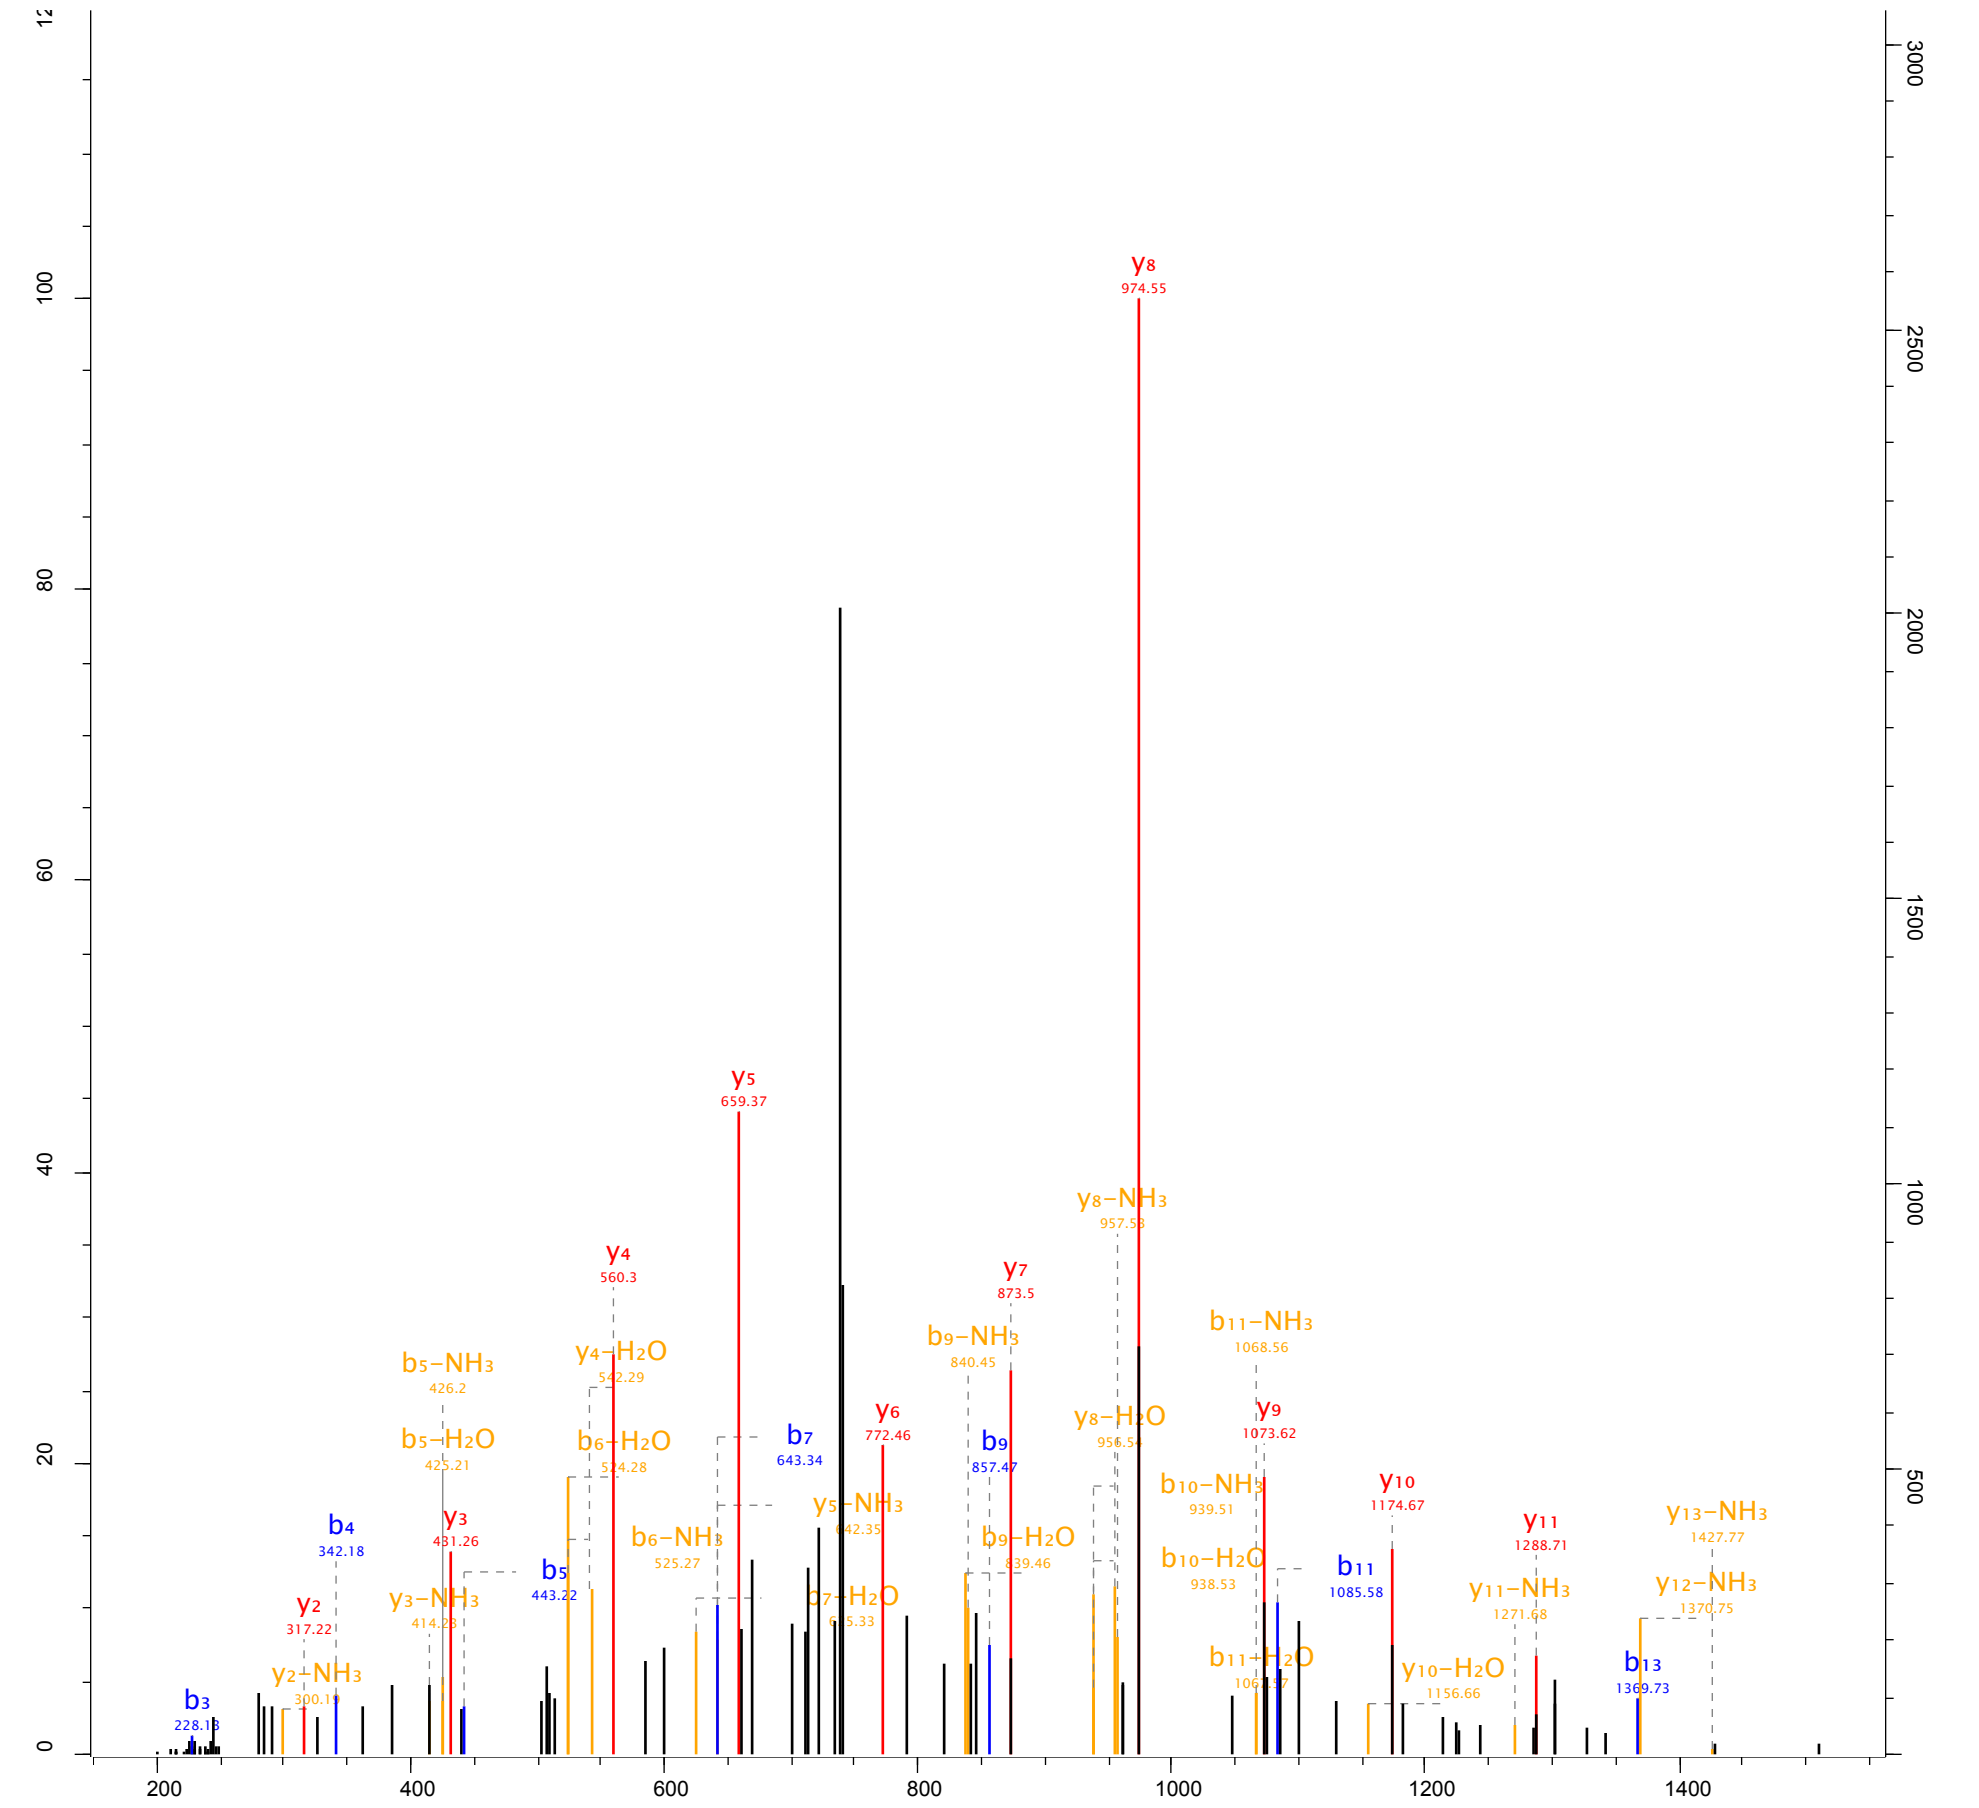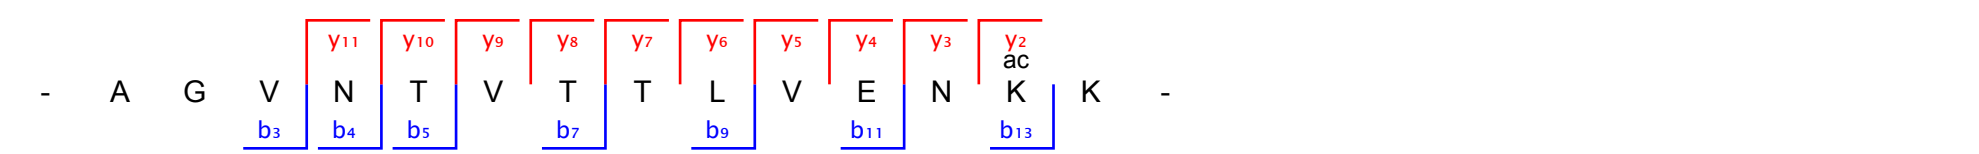



Raw file  
062513\_SCW\_II\_53\_4\_Vargas\_Enriched

Scan 18548 Method ITMS; CID Score 128.85 m/z 861.42 Gene names Uchl1

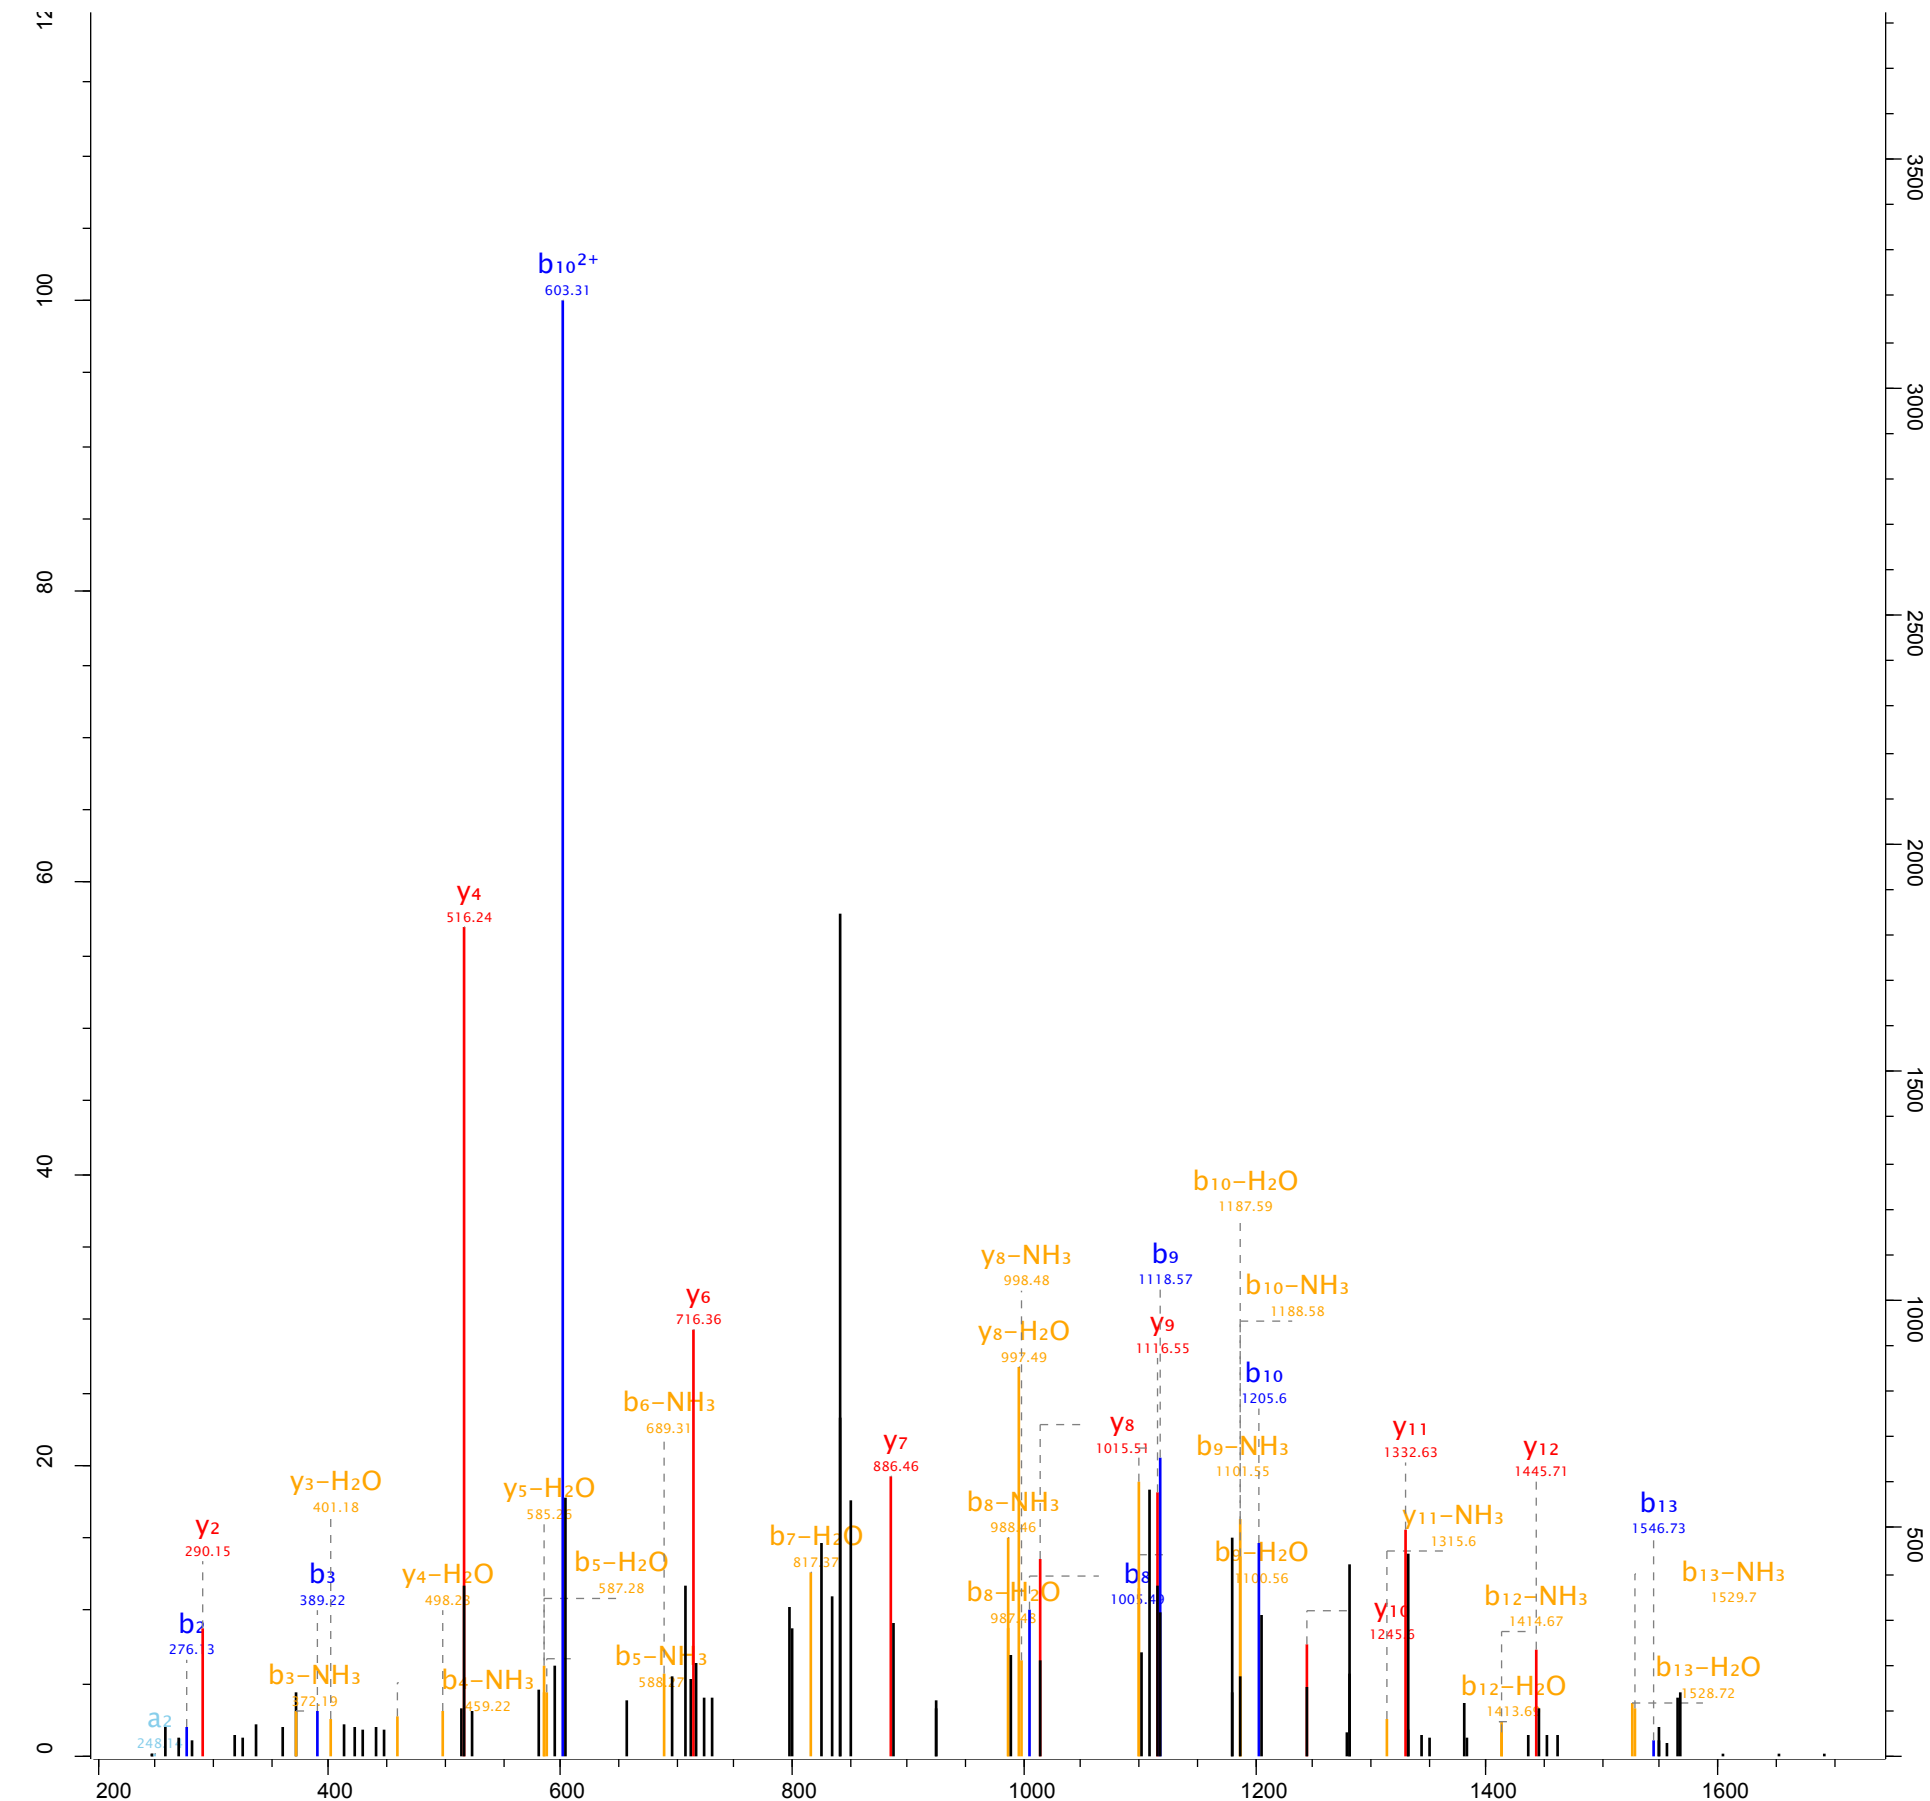

- Q F L S E T E K L S P E D R -

b<sub>2</sub> b<sub>3</sub> y<sub>12</sub> y<sub>11</sub> y<sub>10</sub> y<sub>9</sub> y<sub>8</sub> y<sub>7</sub> ac y<sub>6</sub> y<sub>2</sub>  
b<sub>8</sub> b<sub>9</sub> b<sub>10</sub> b<sub>13</sub>

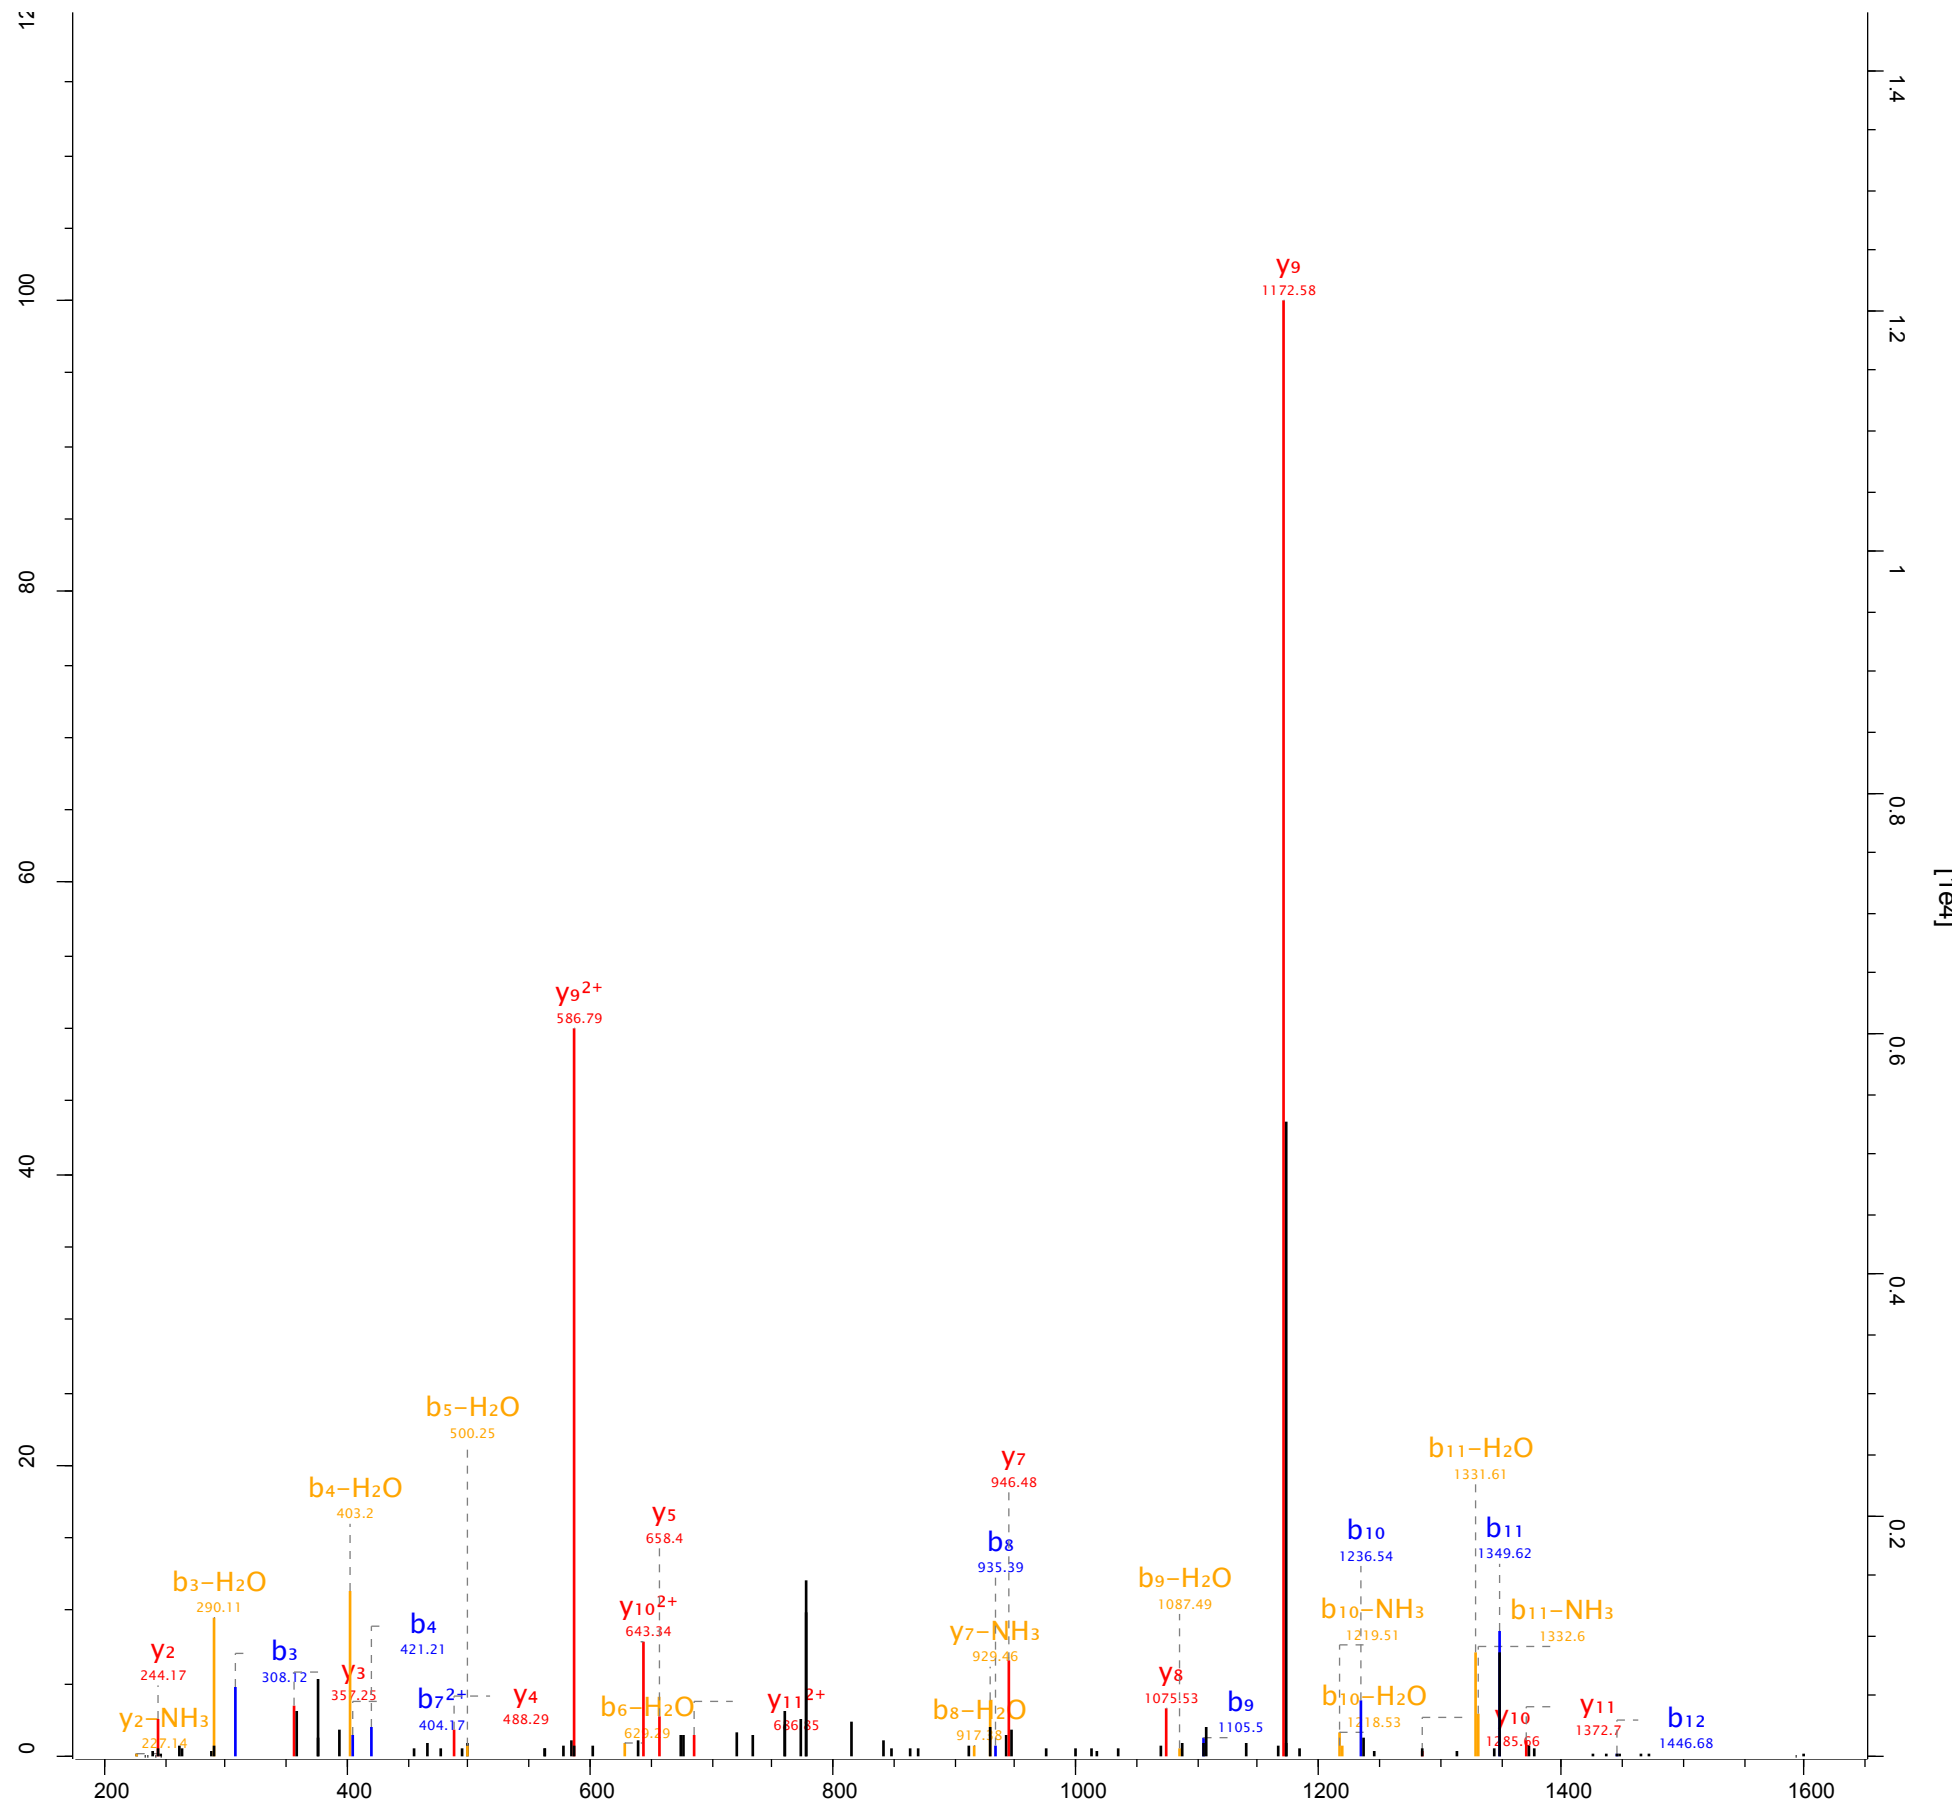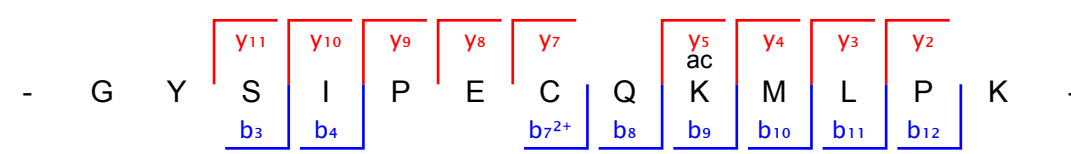

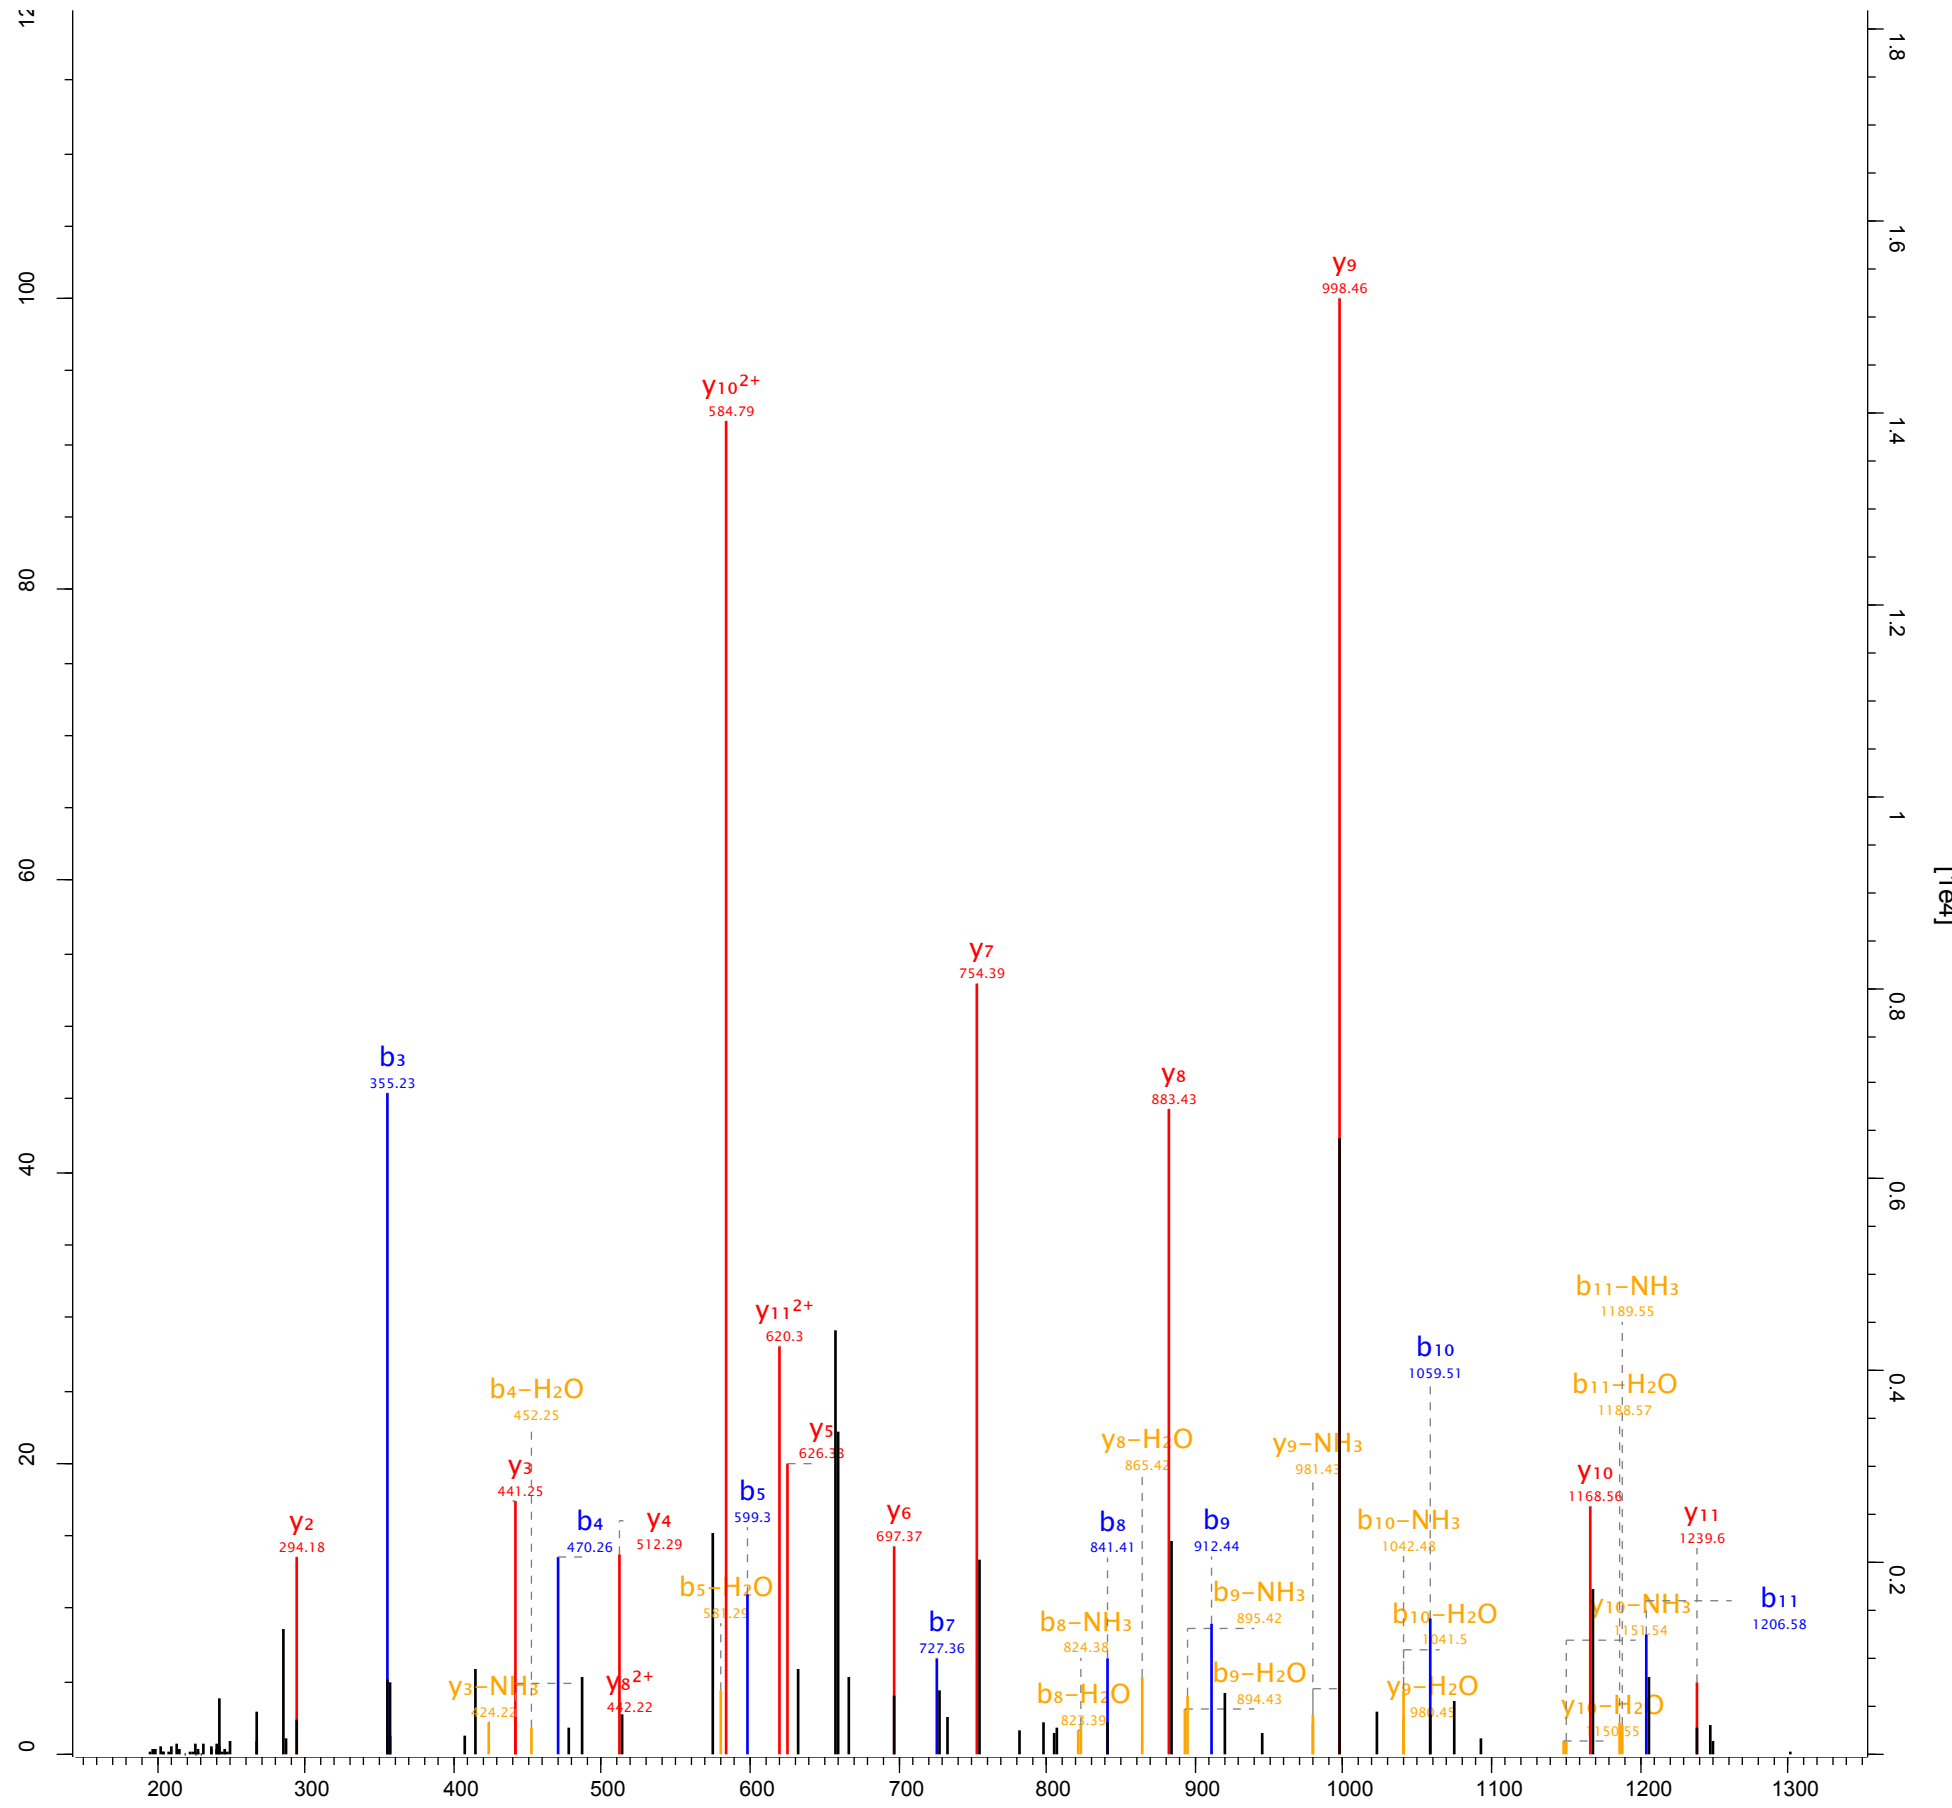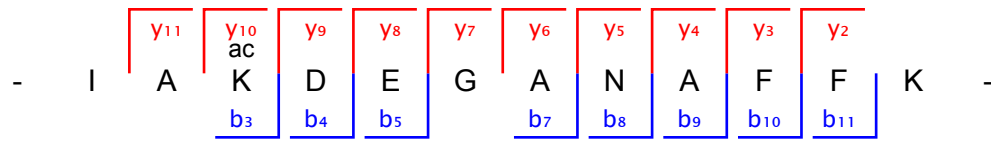

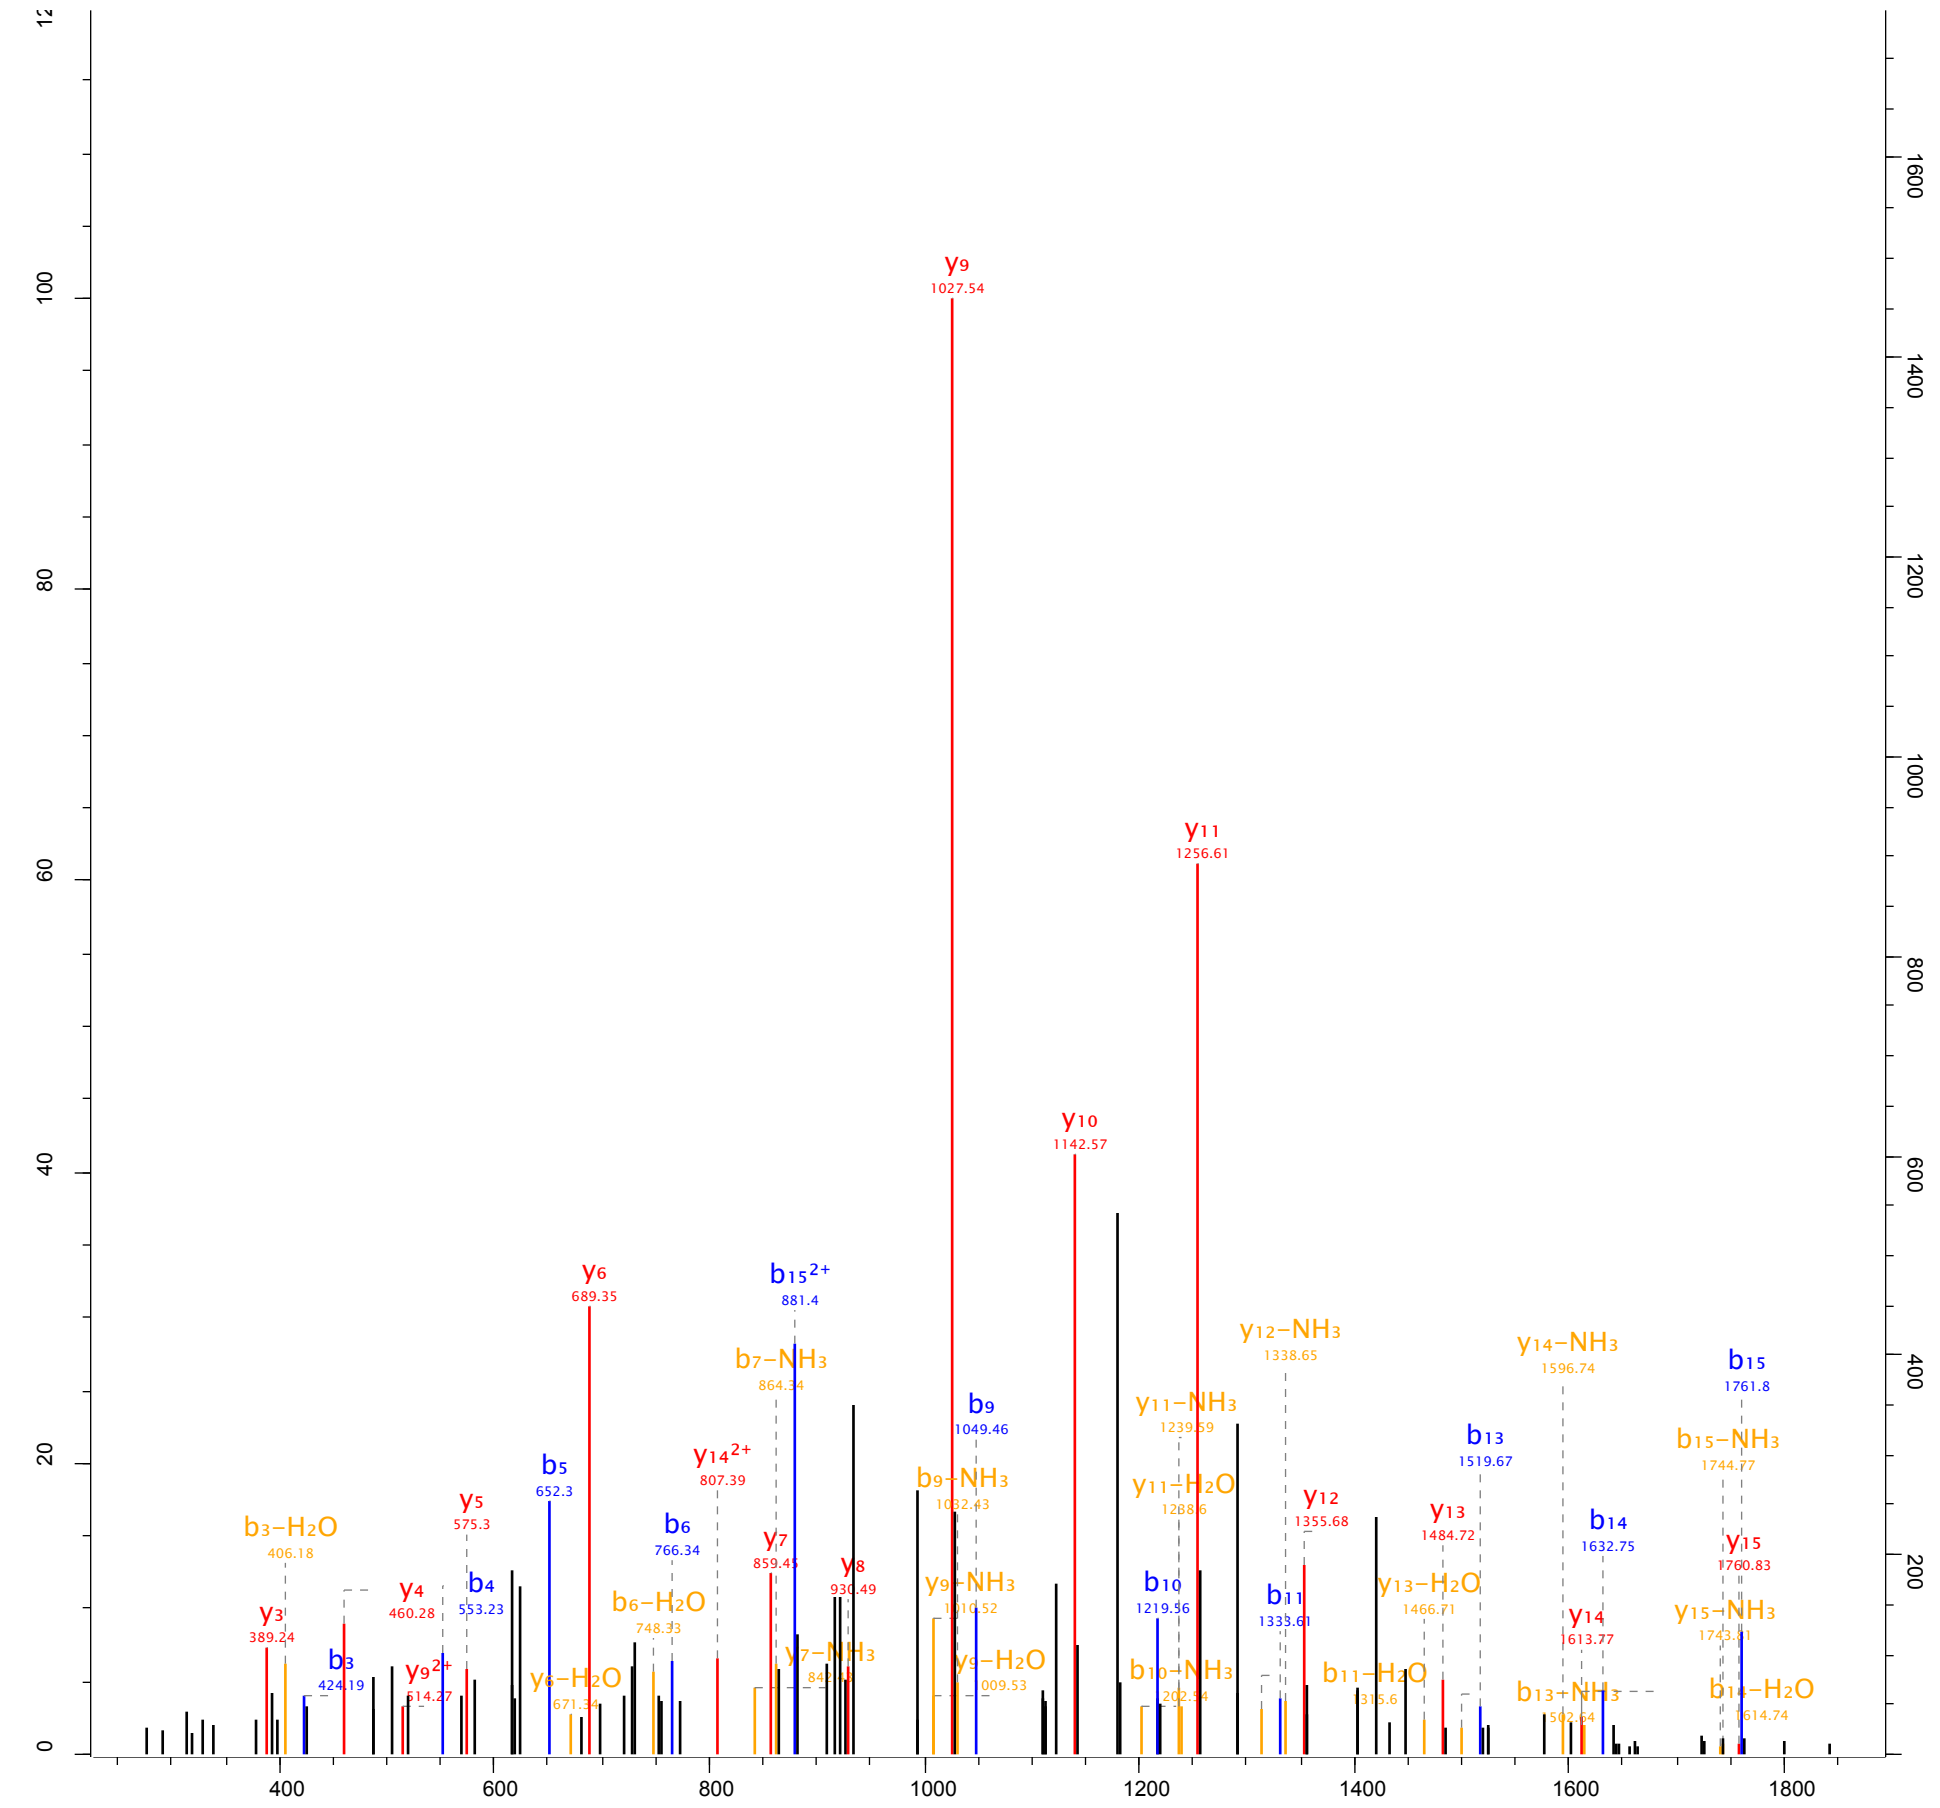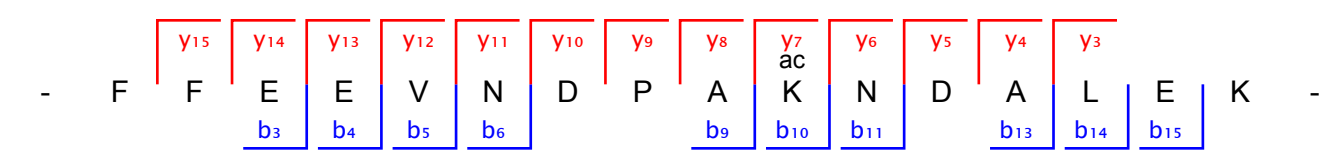

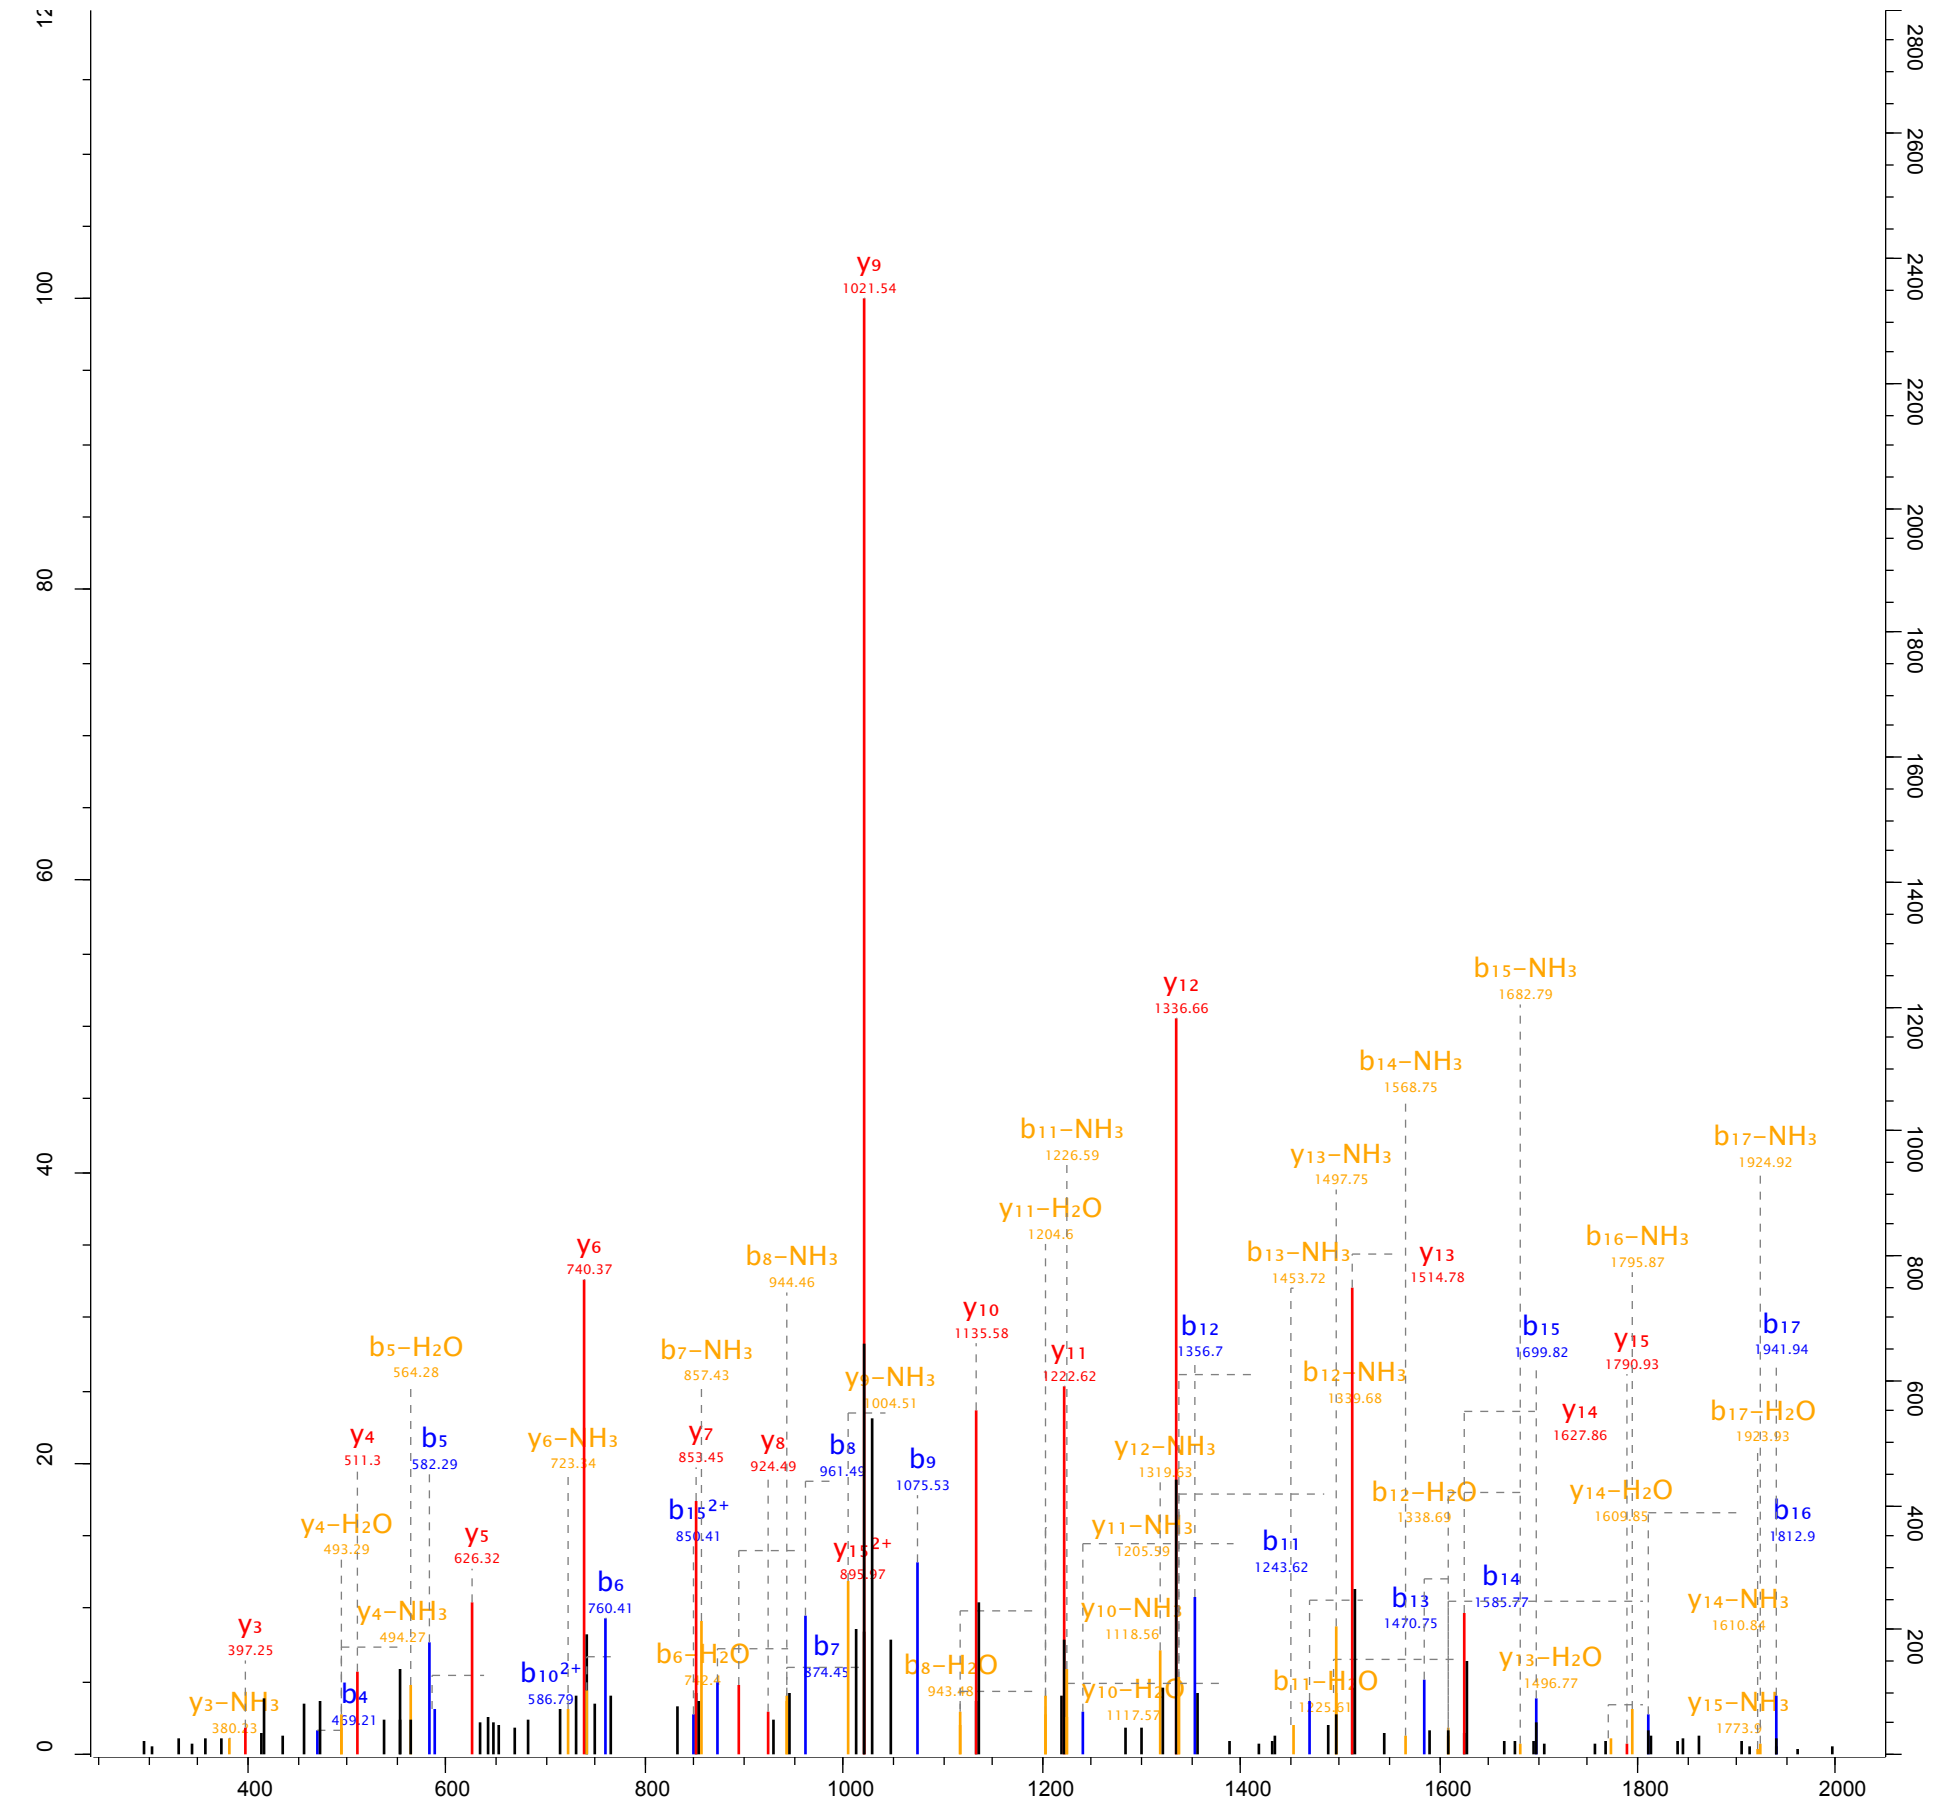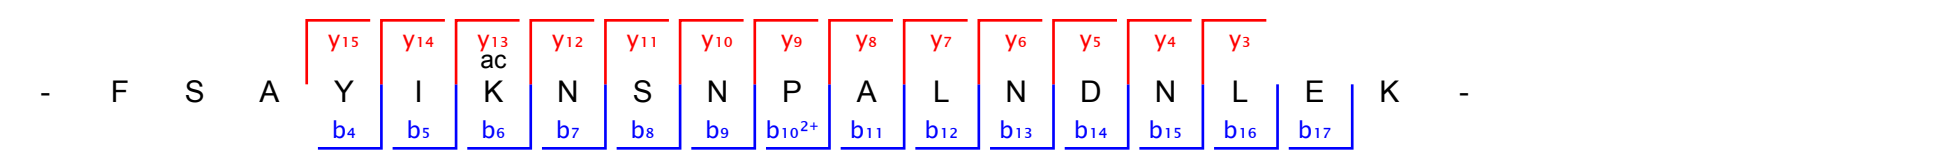

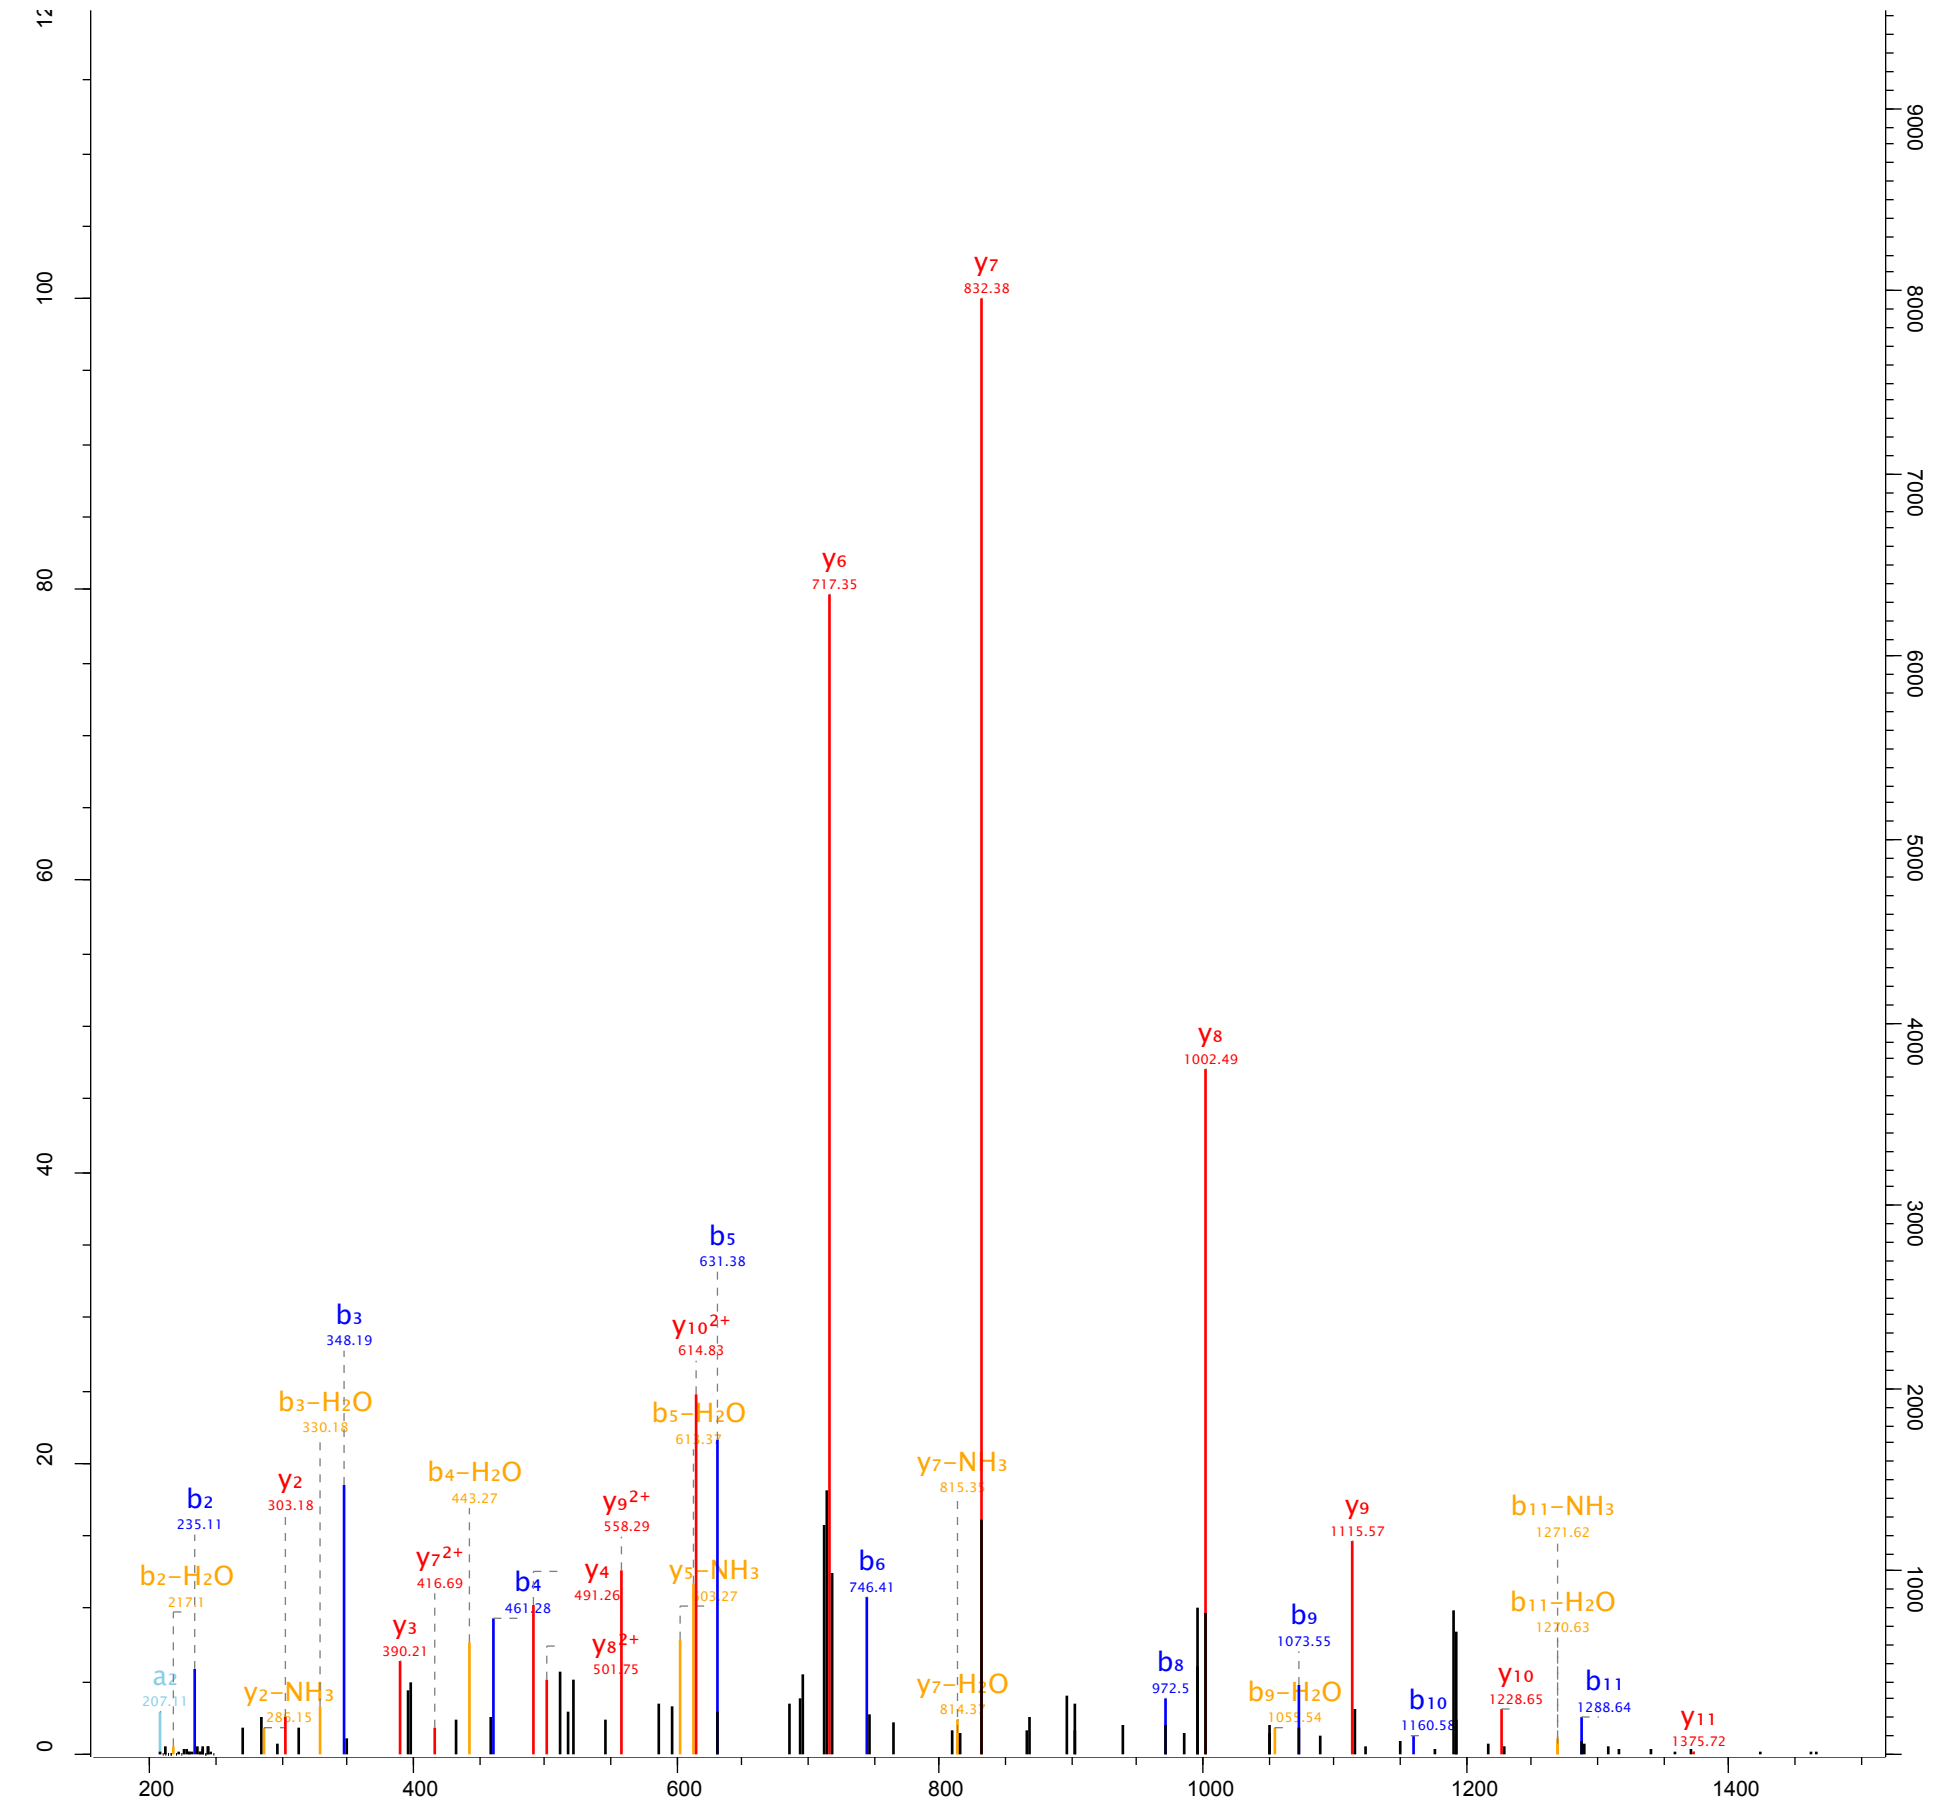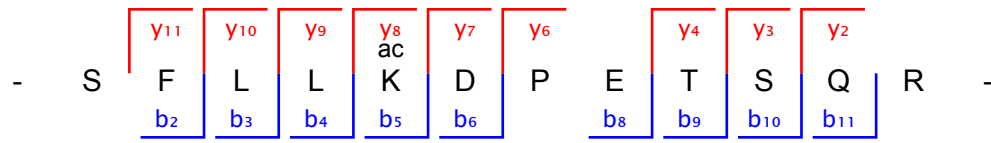

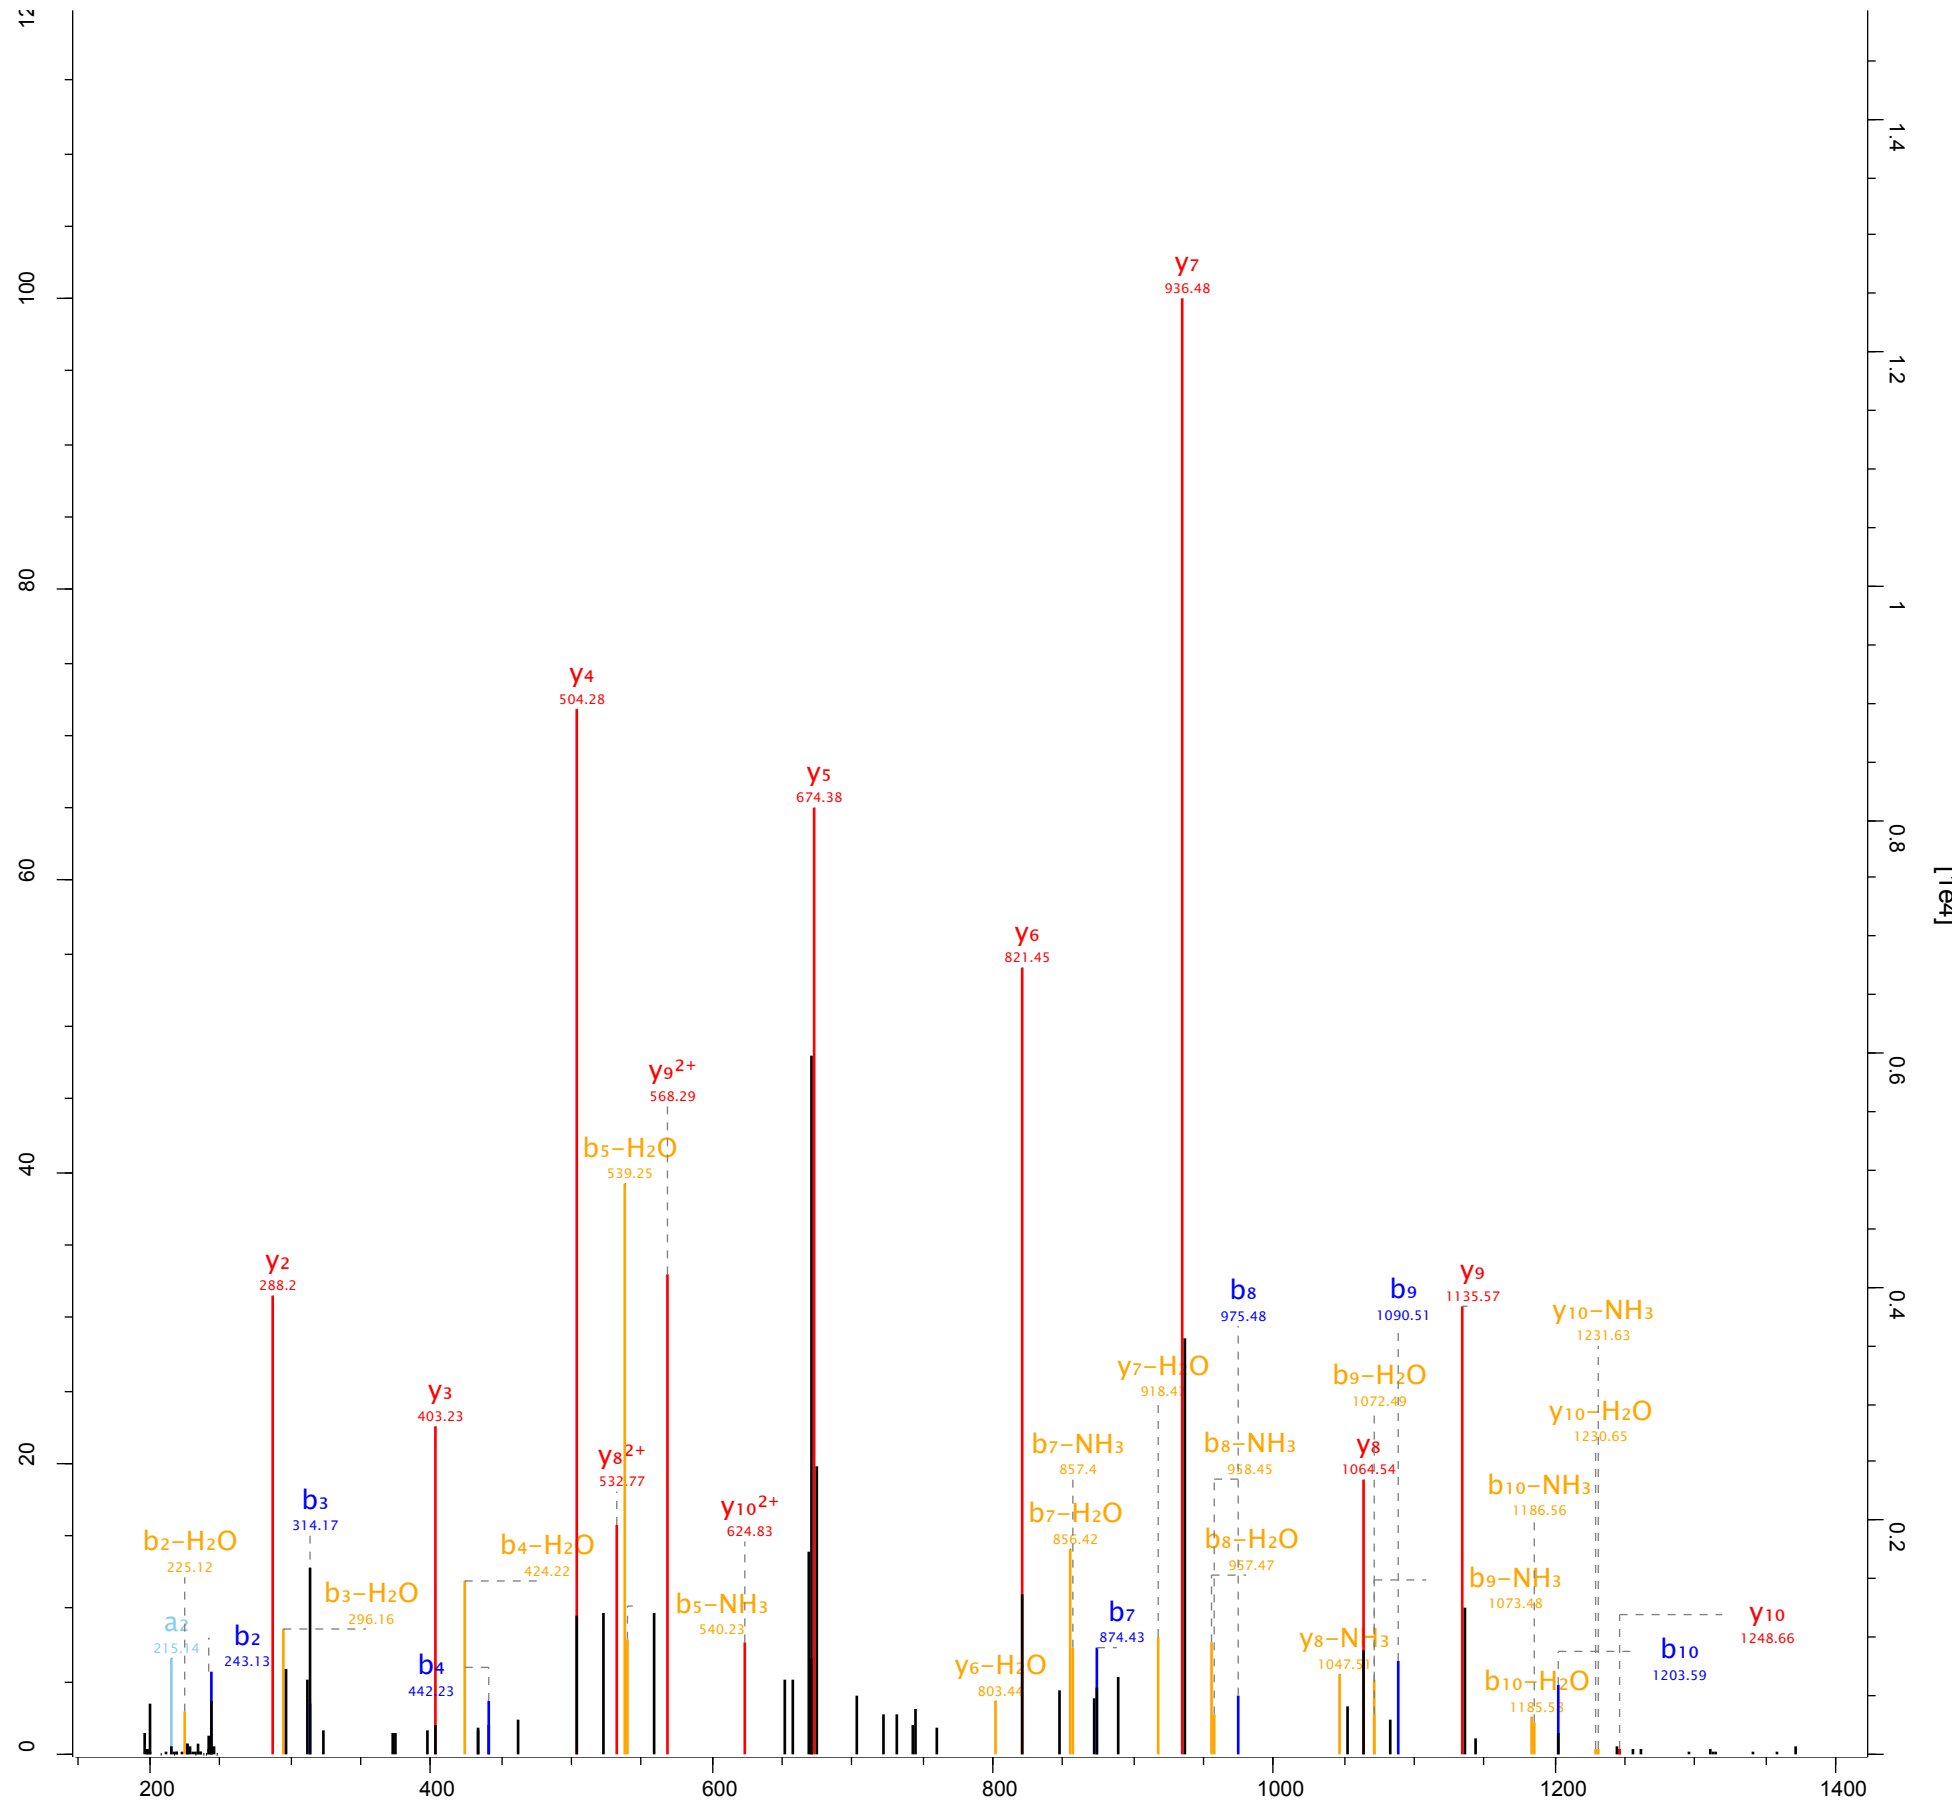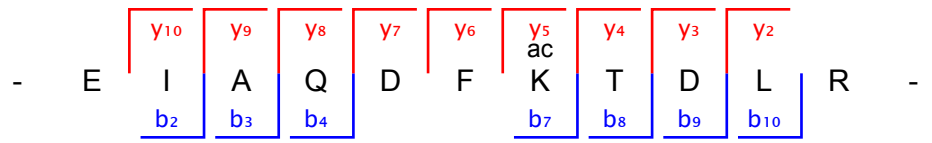

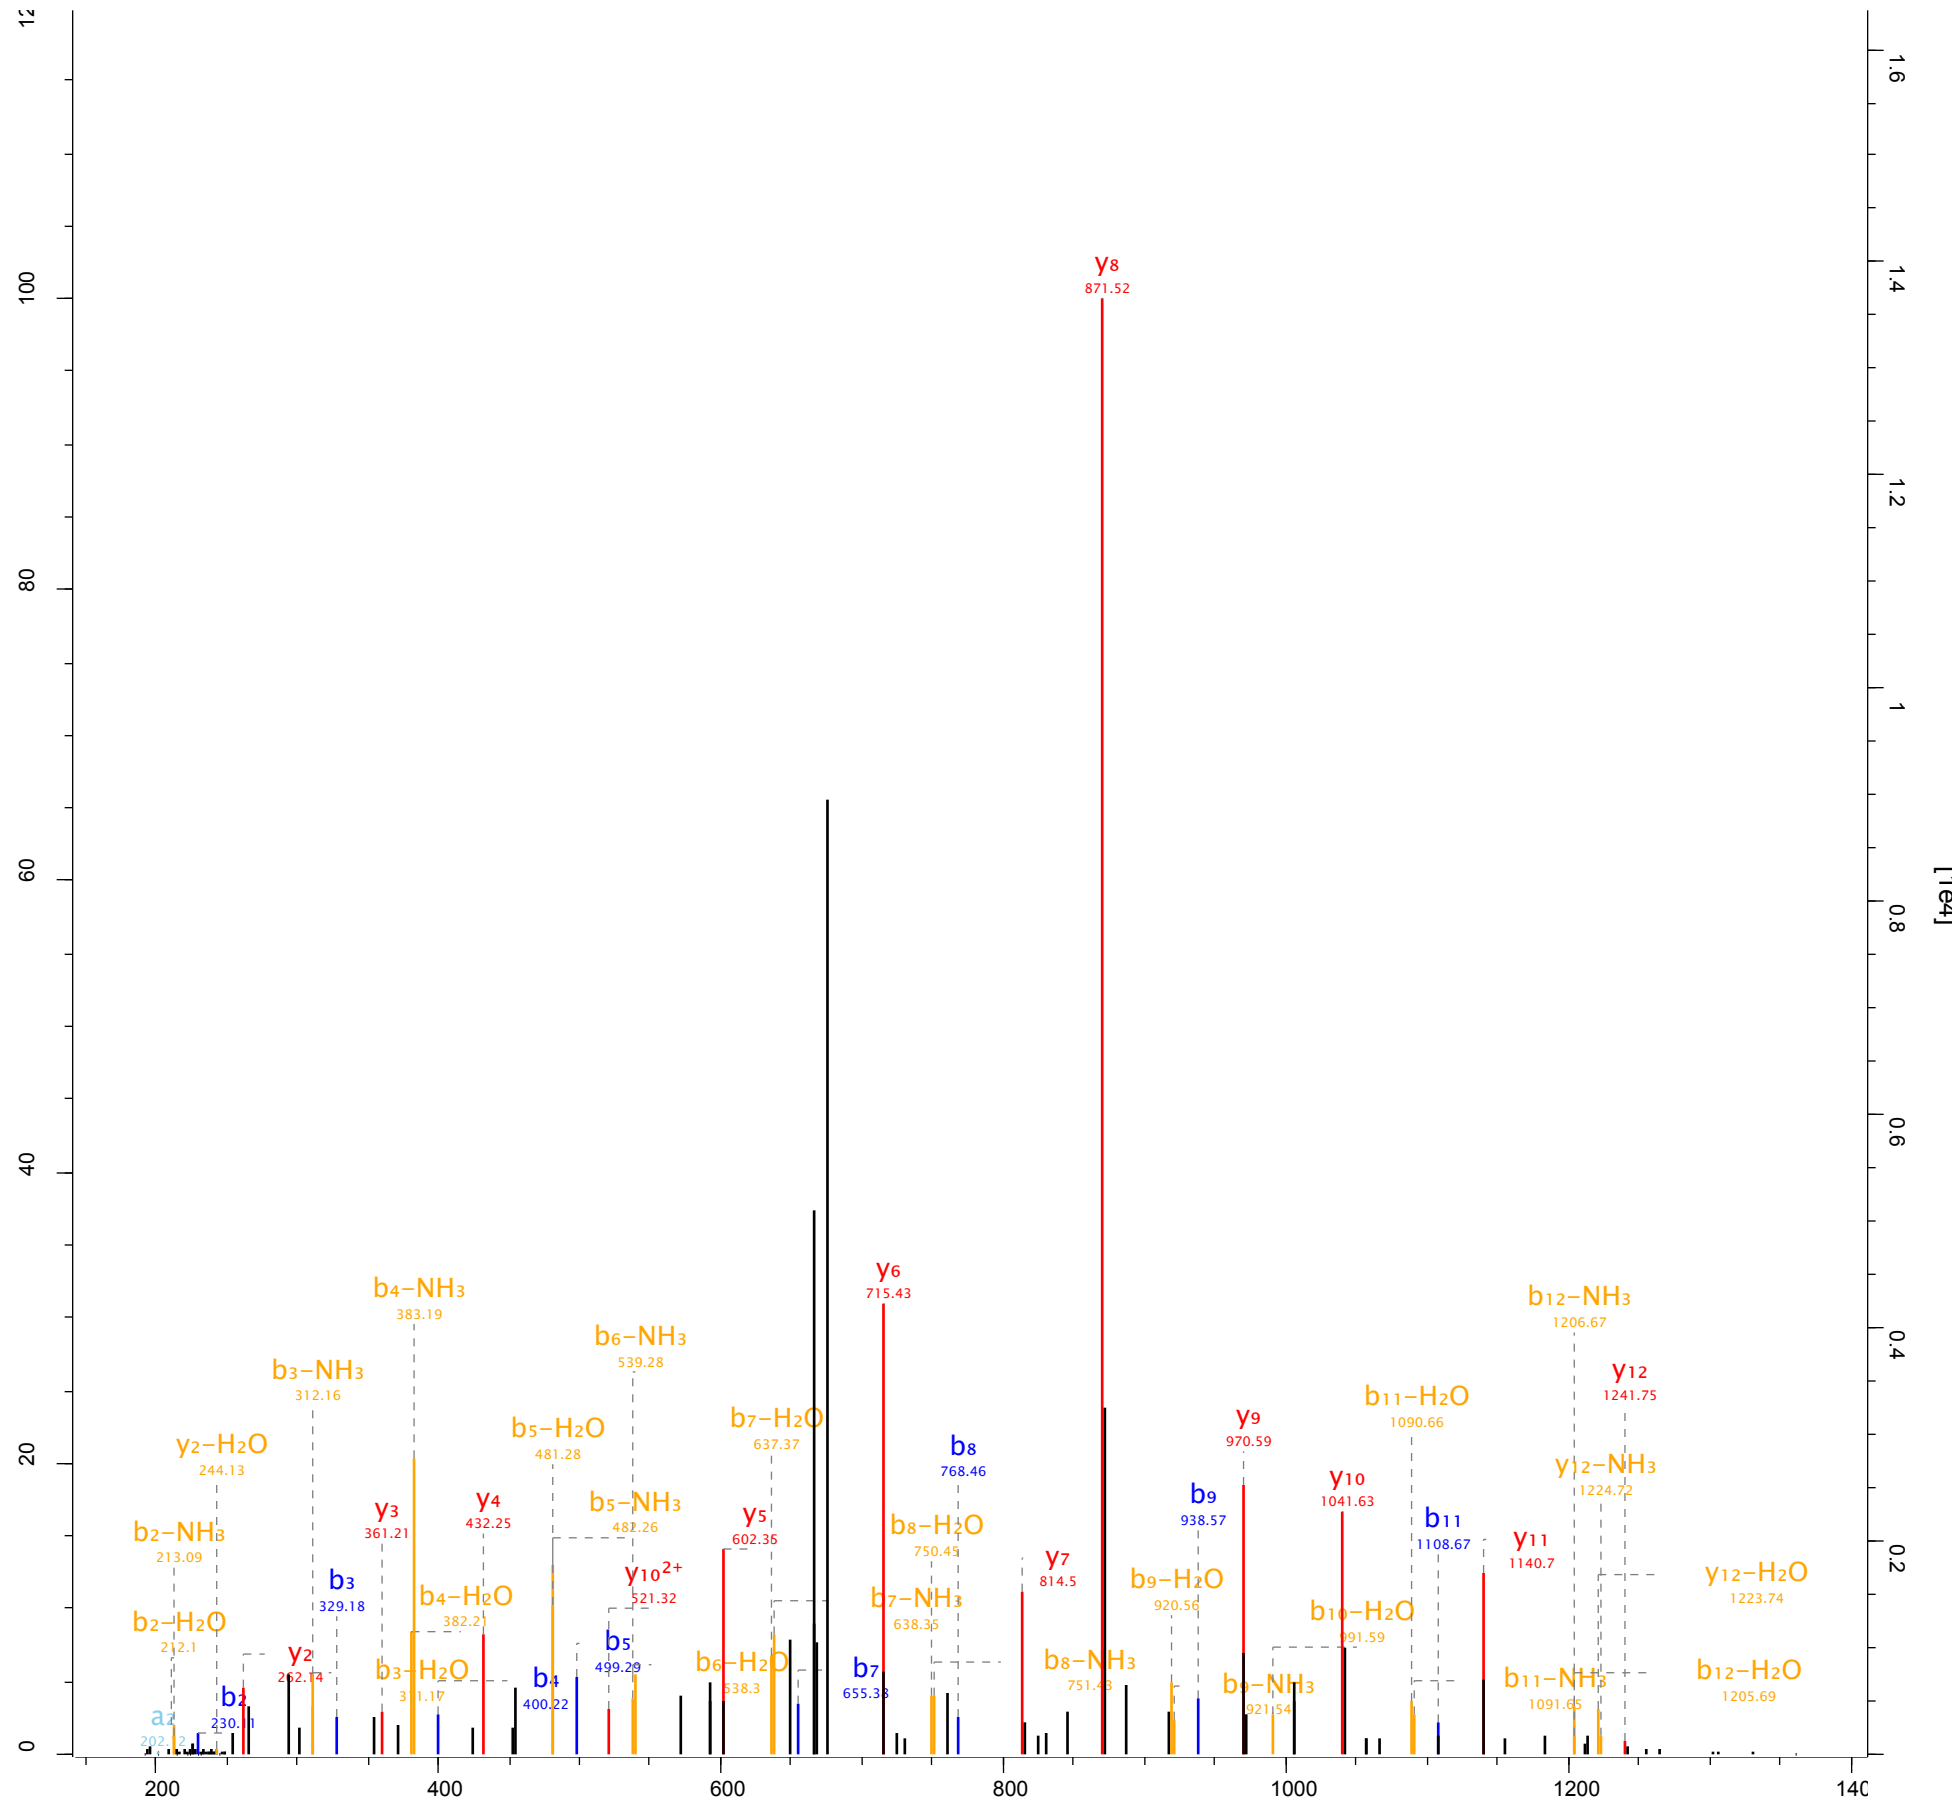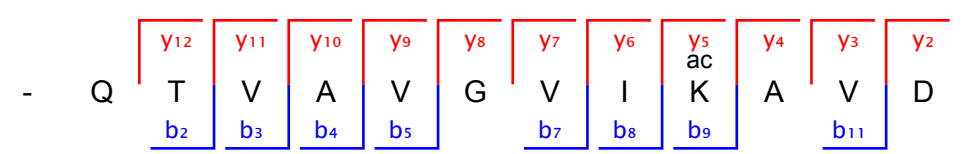



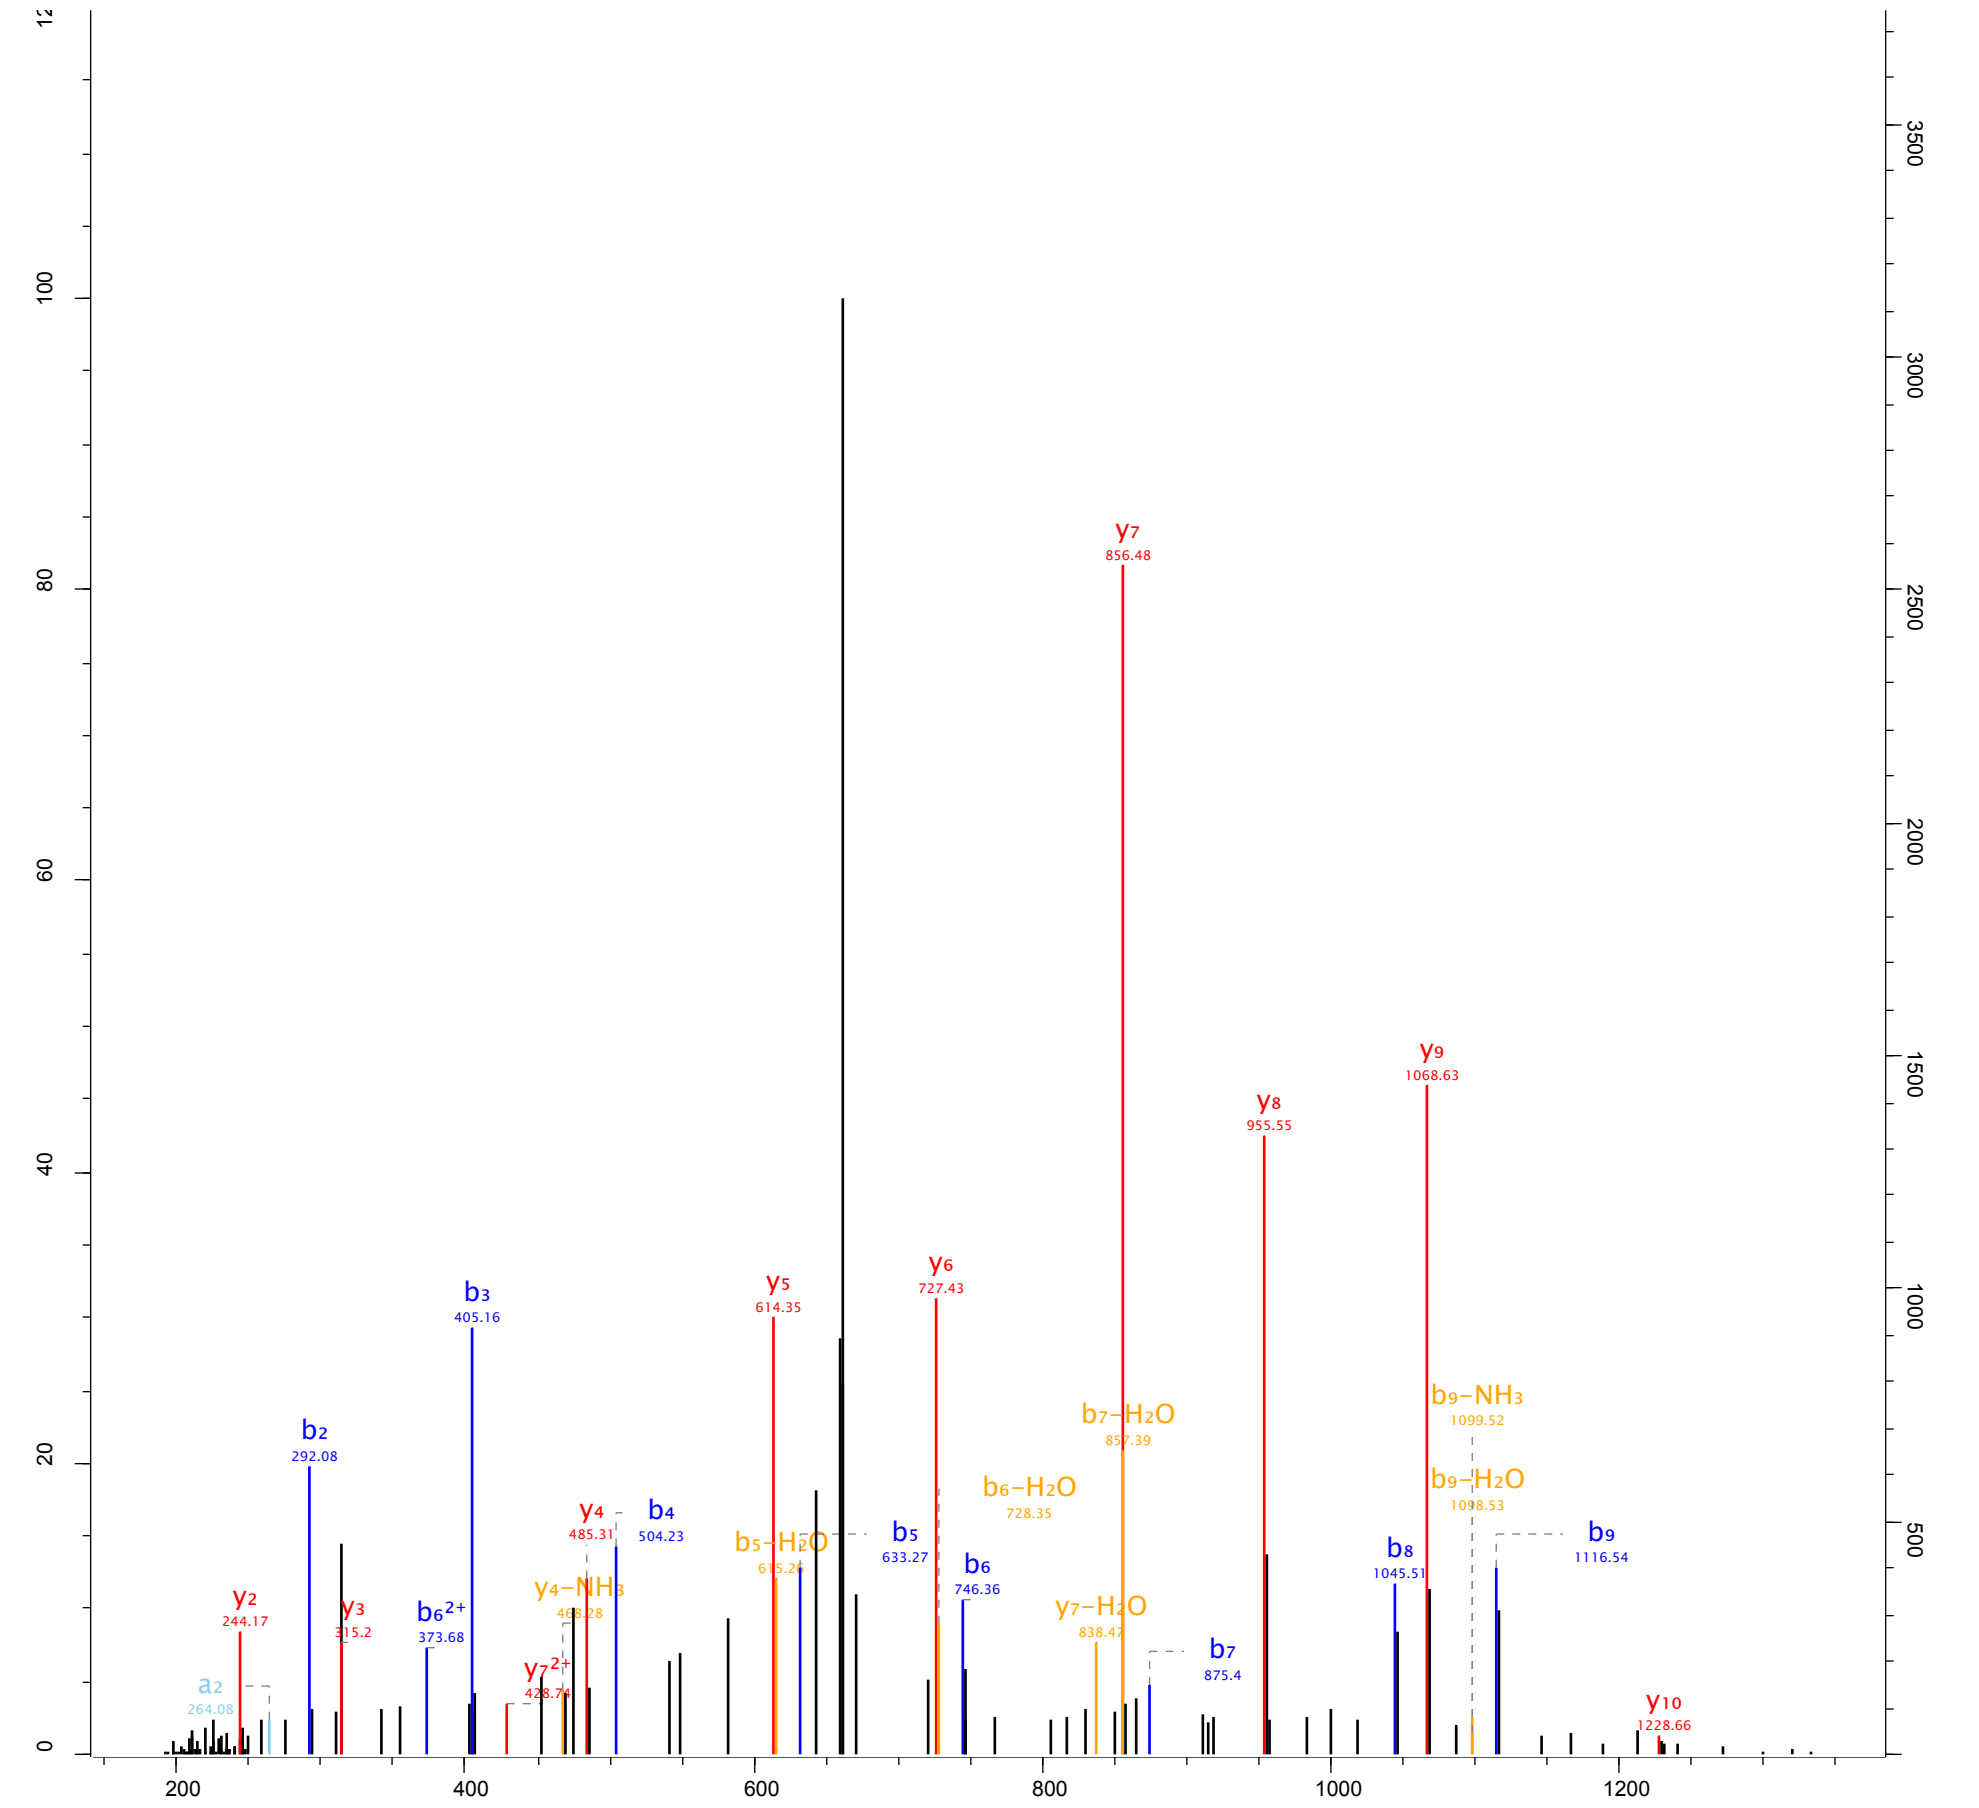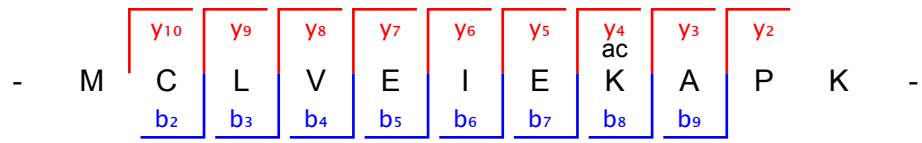

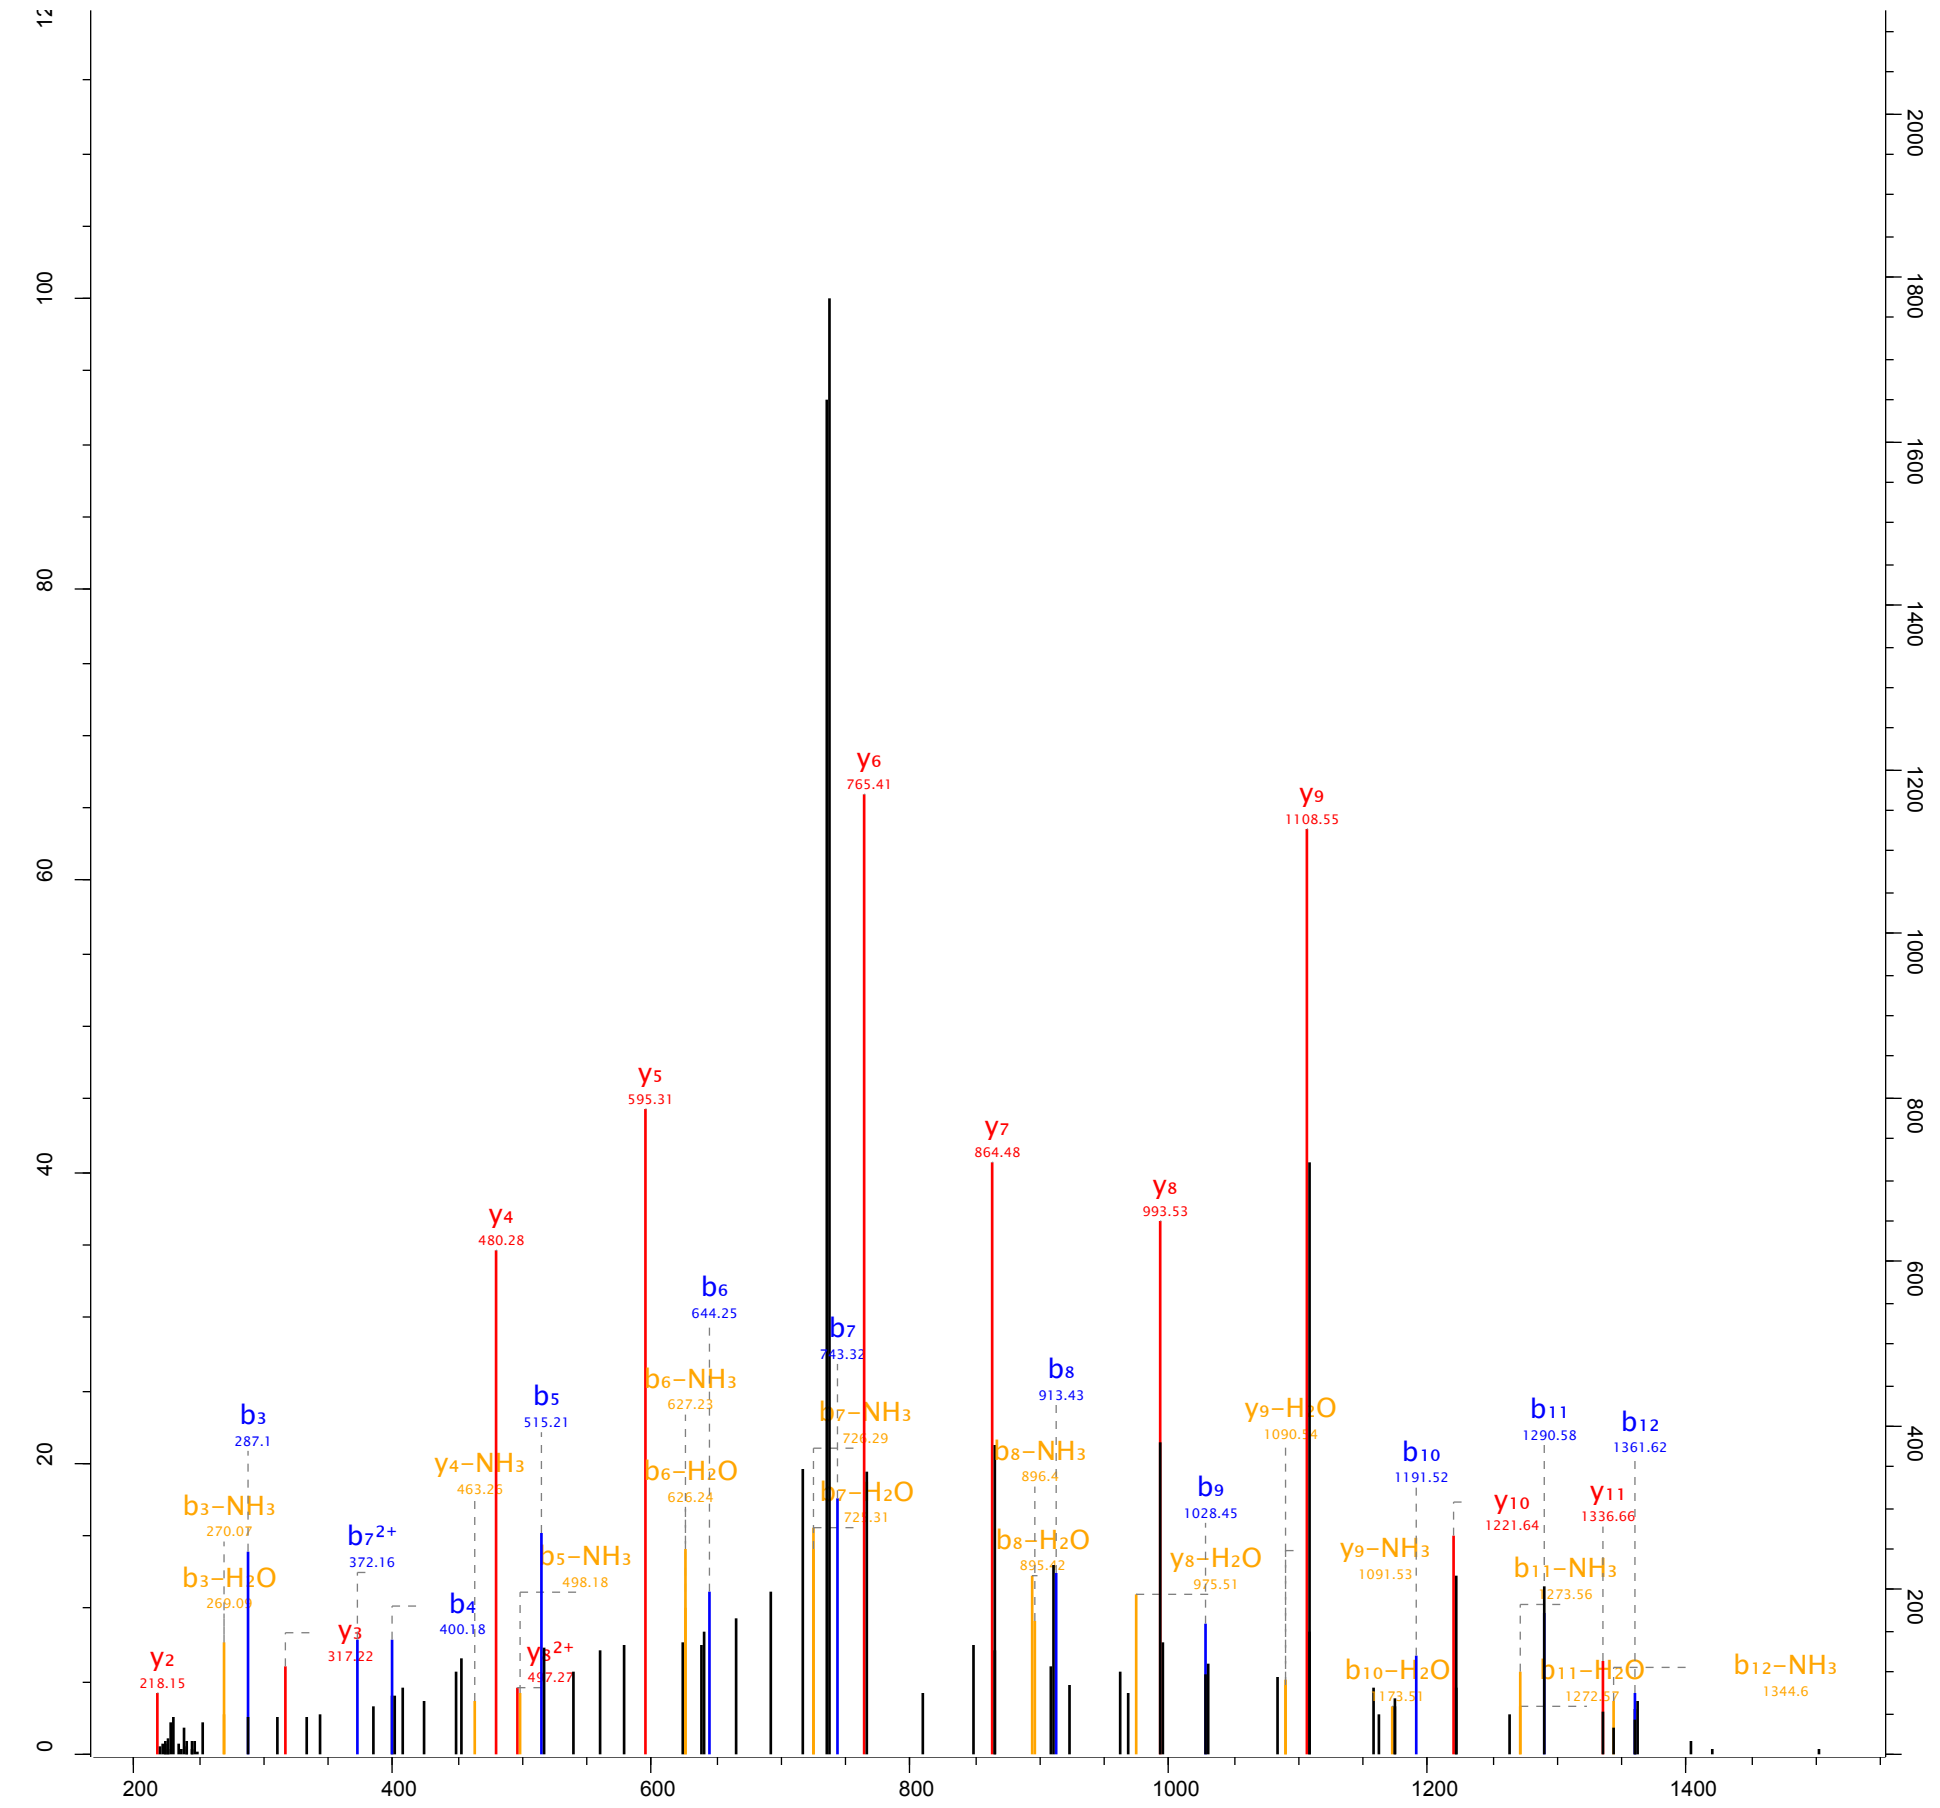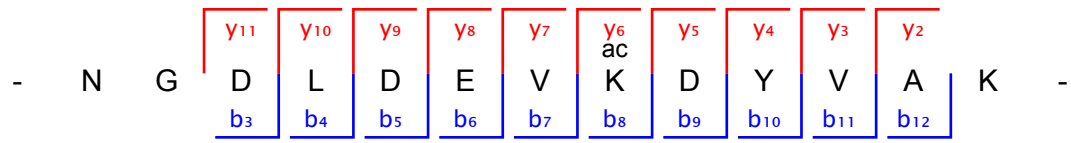

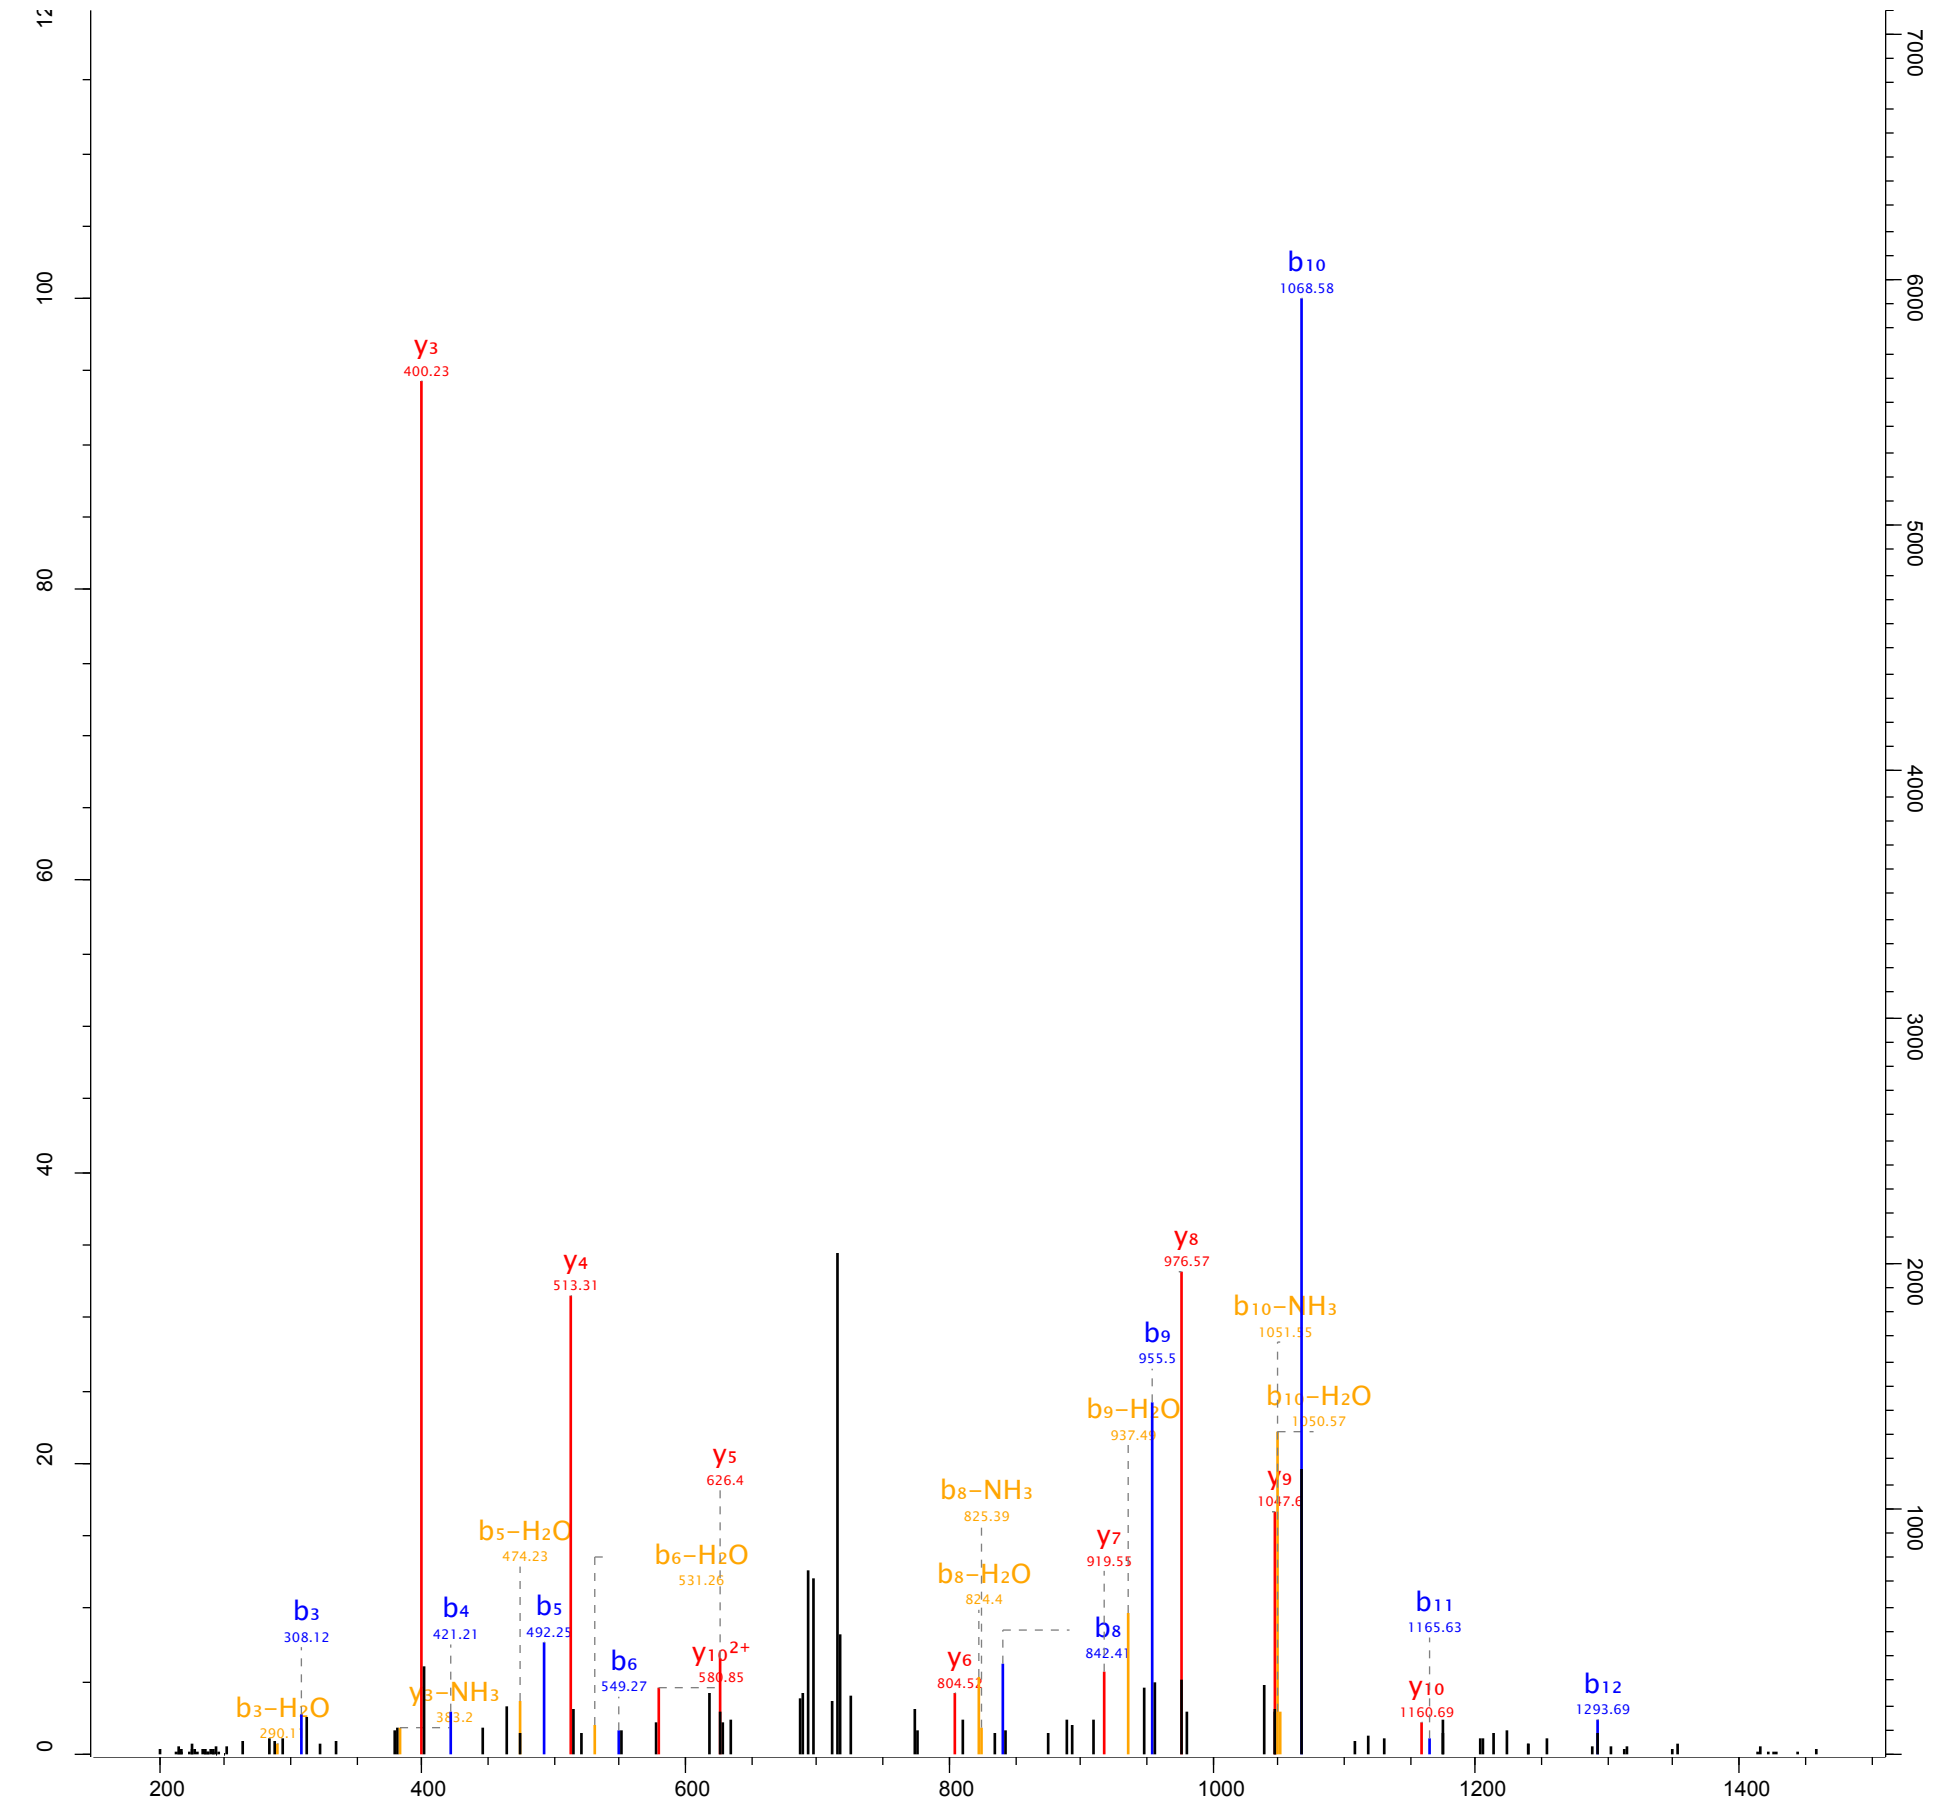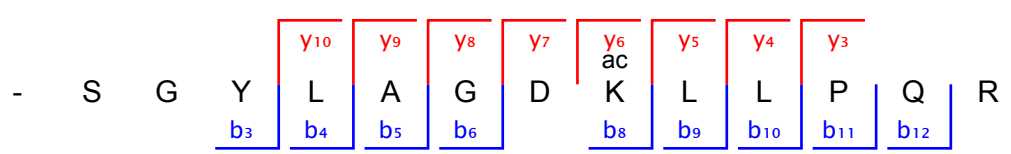

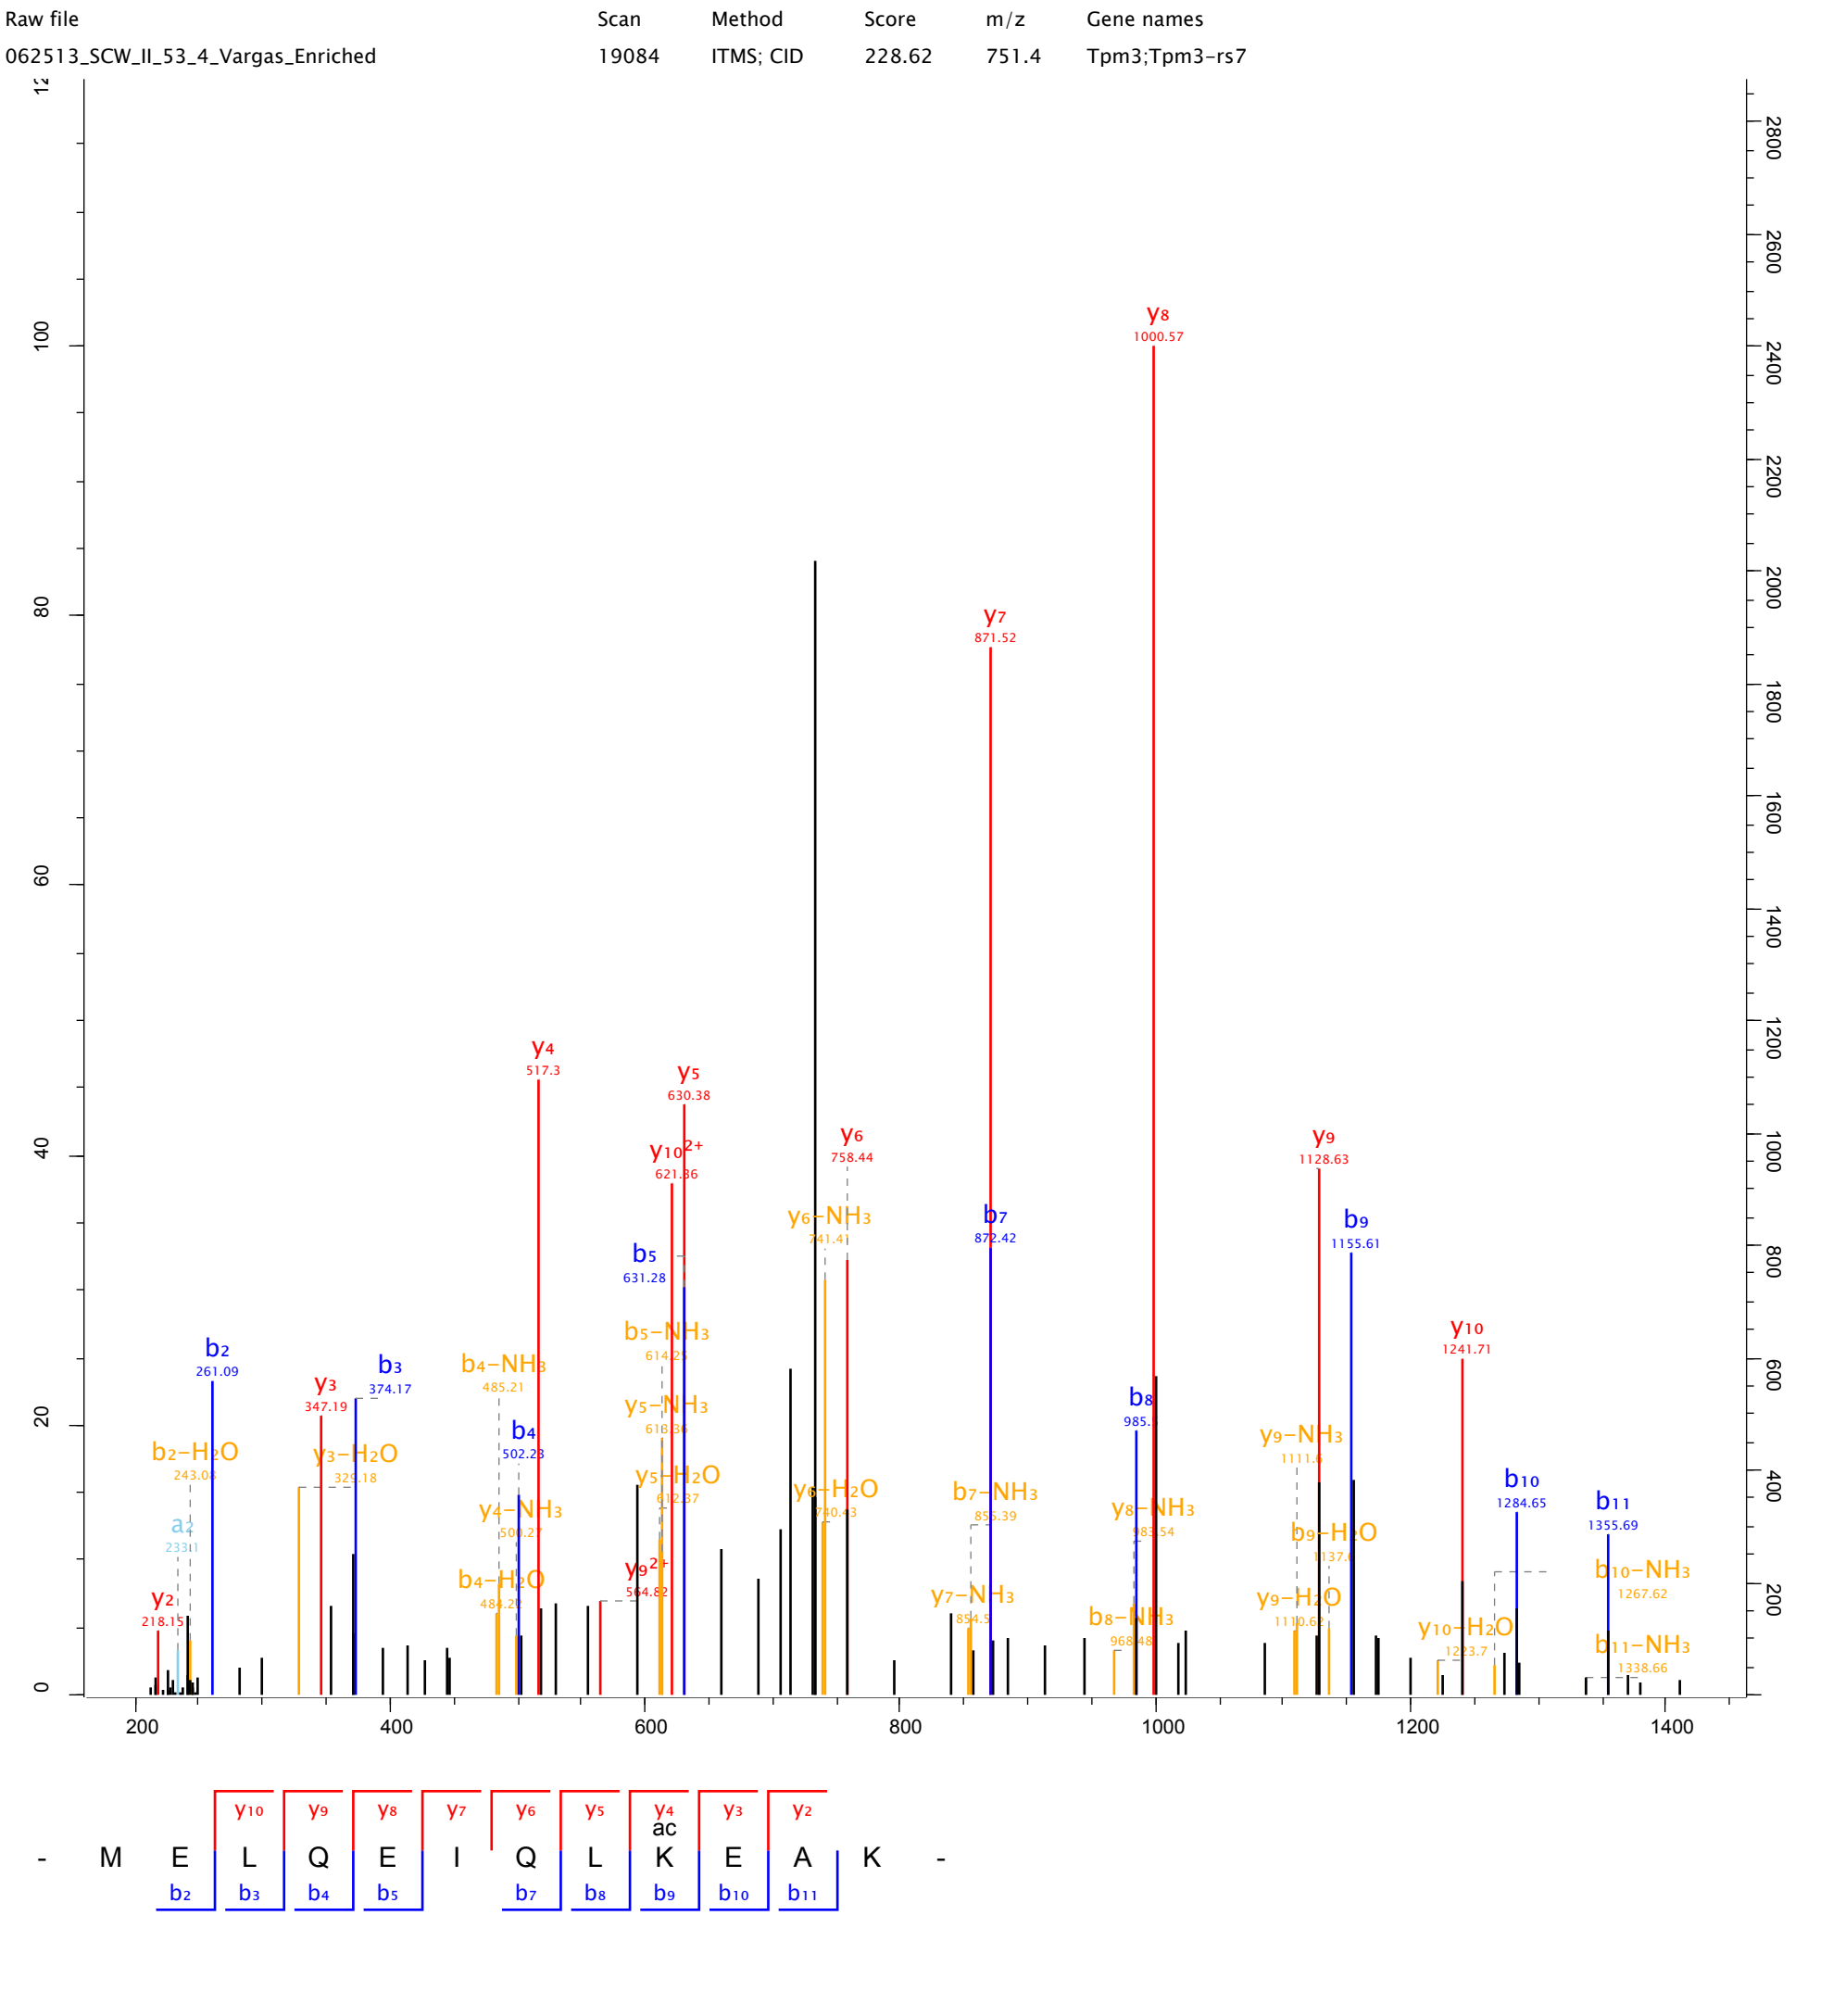

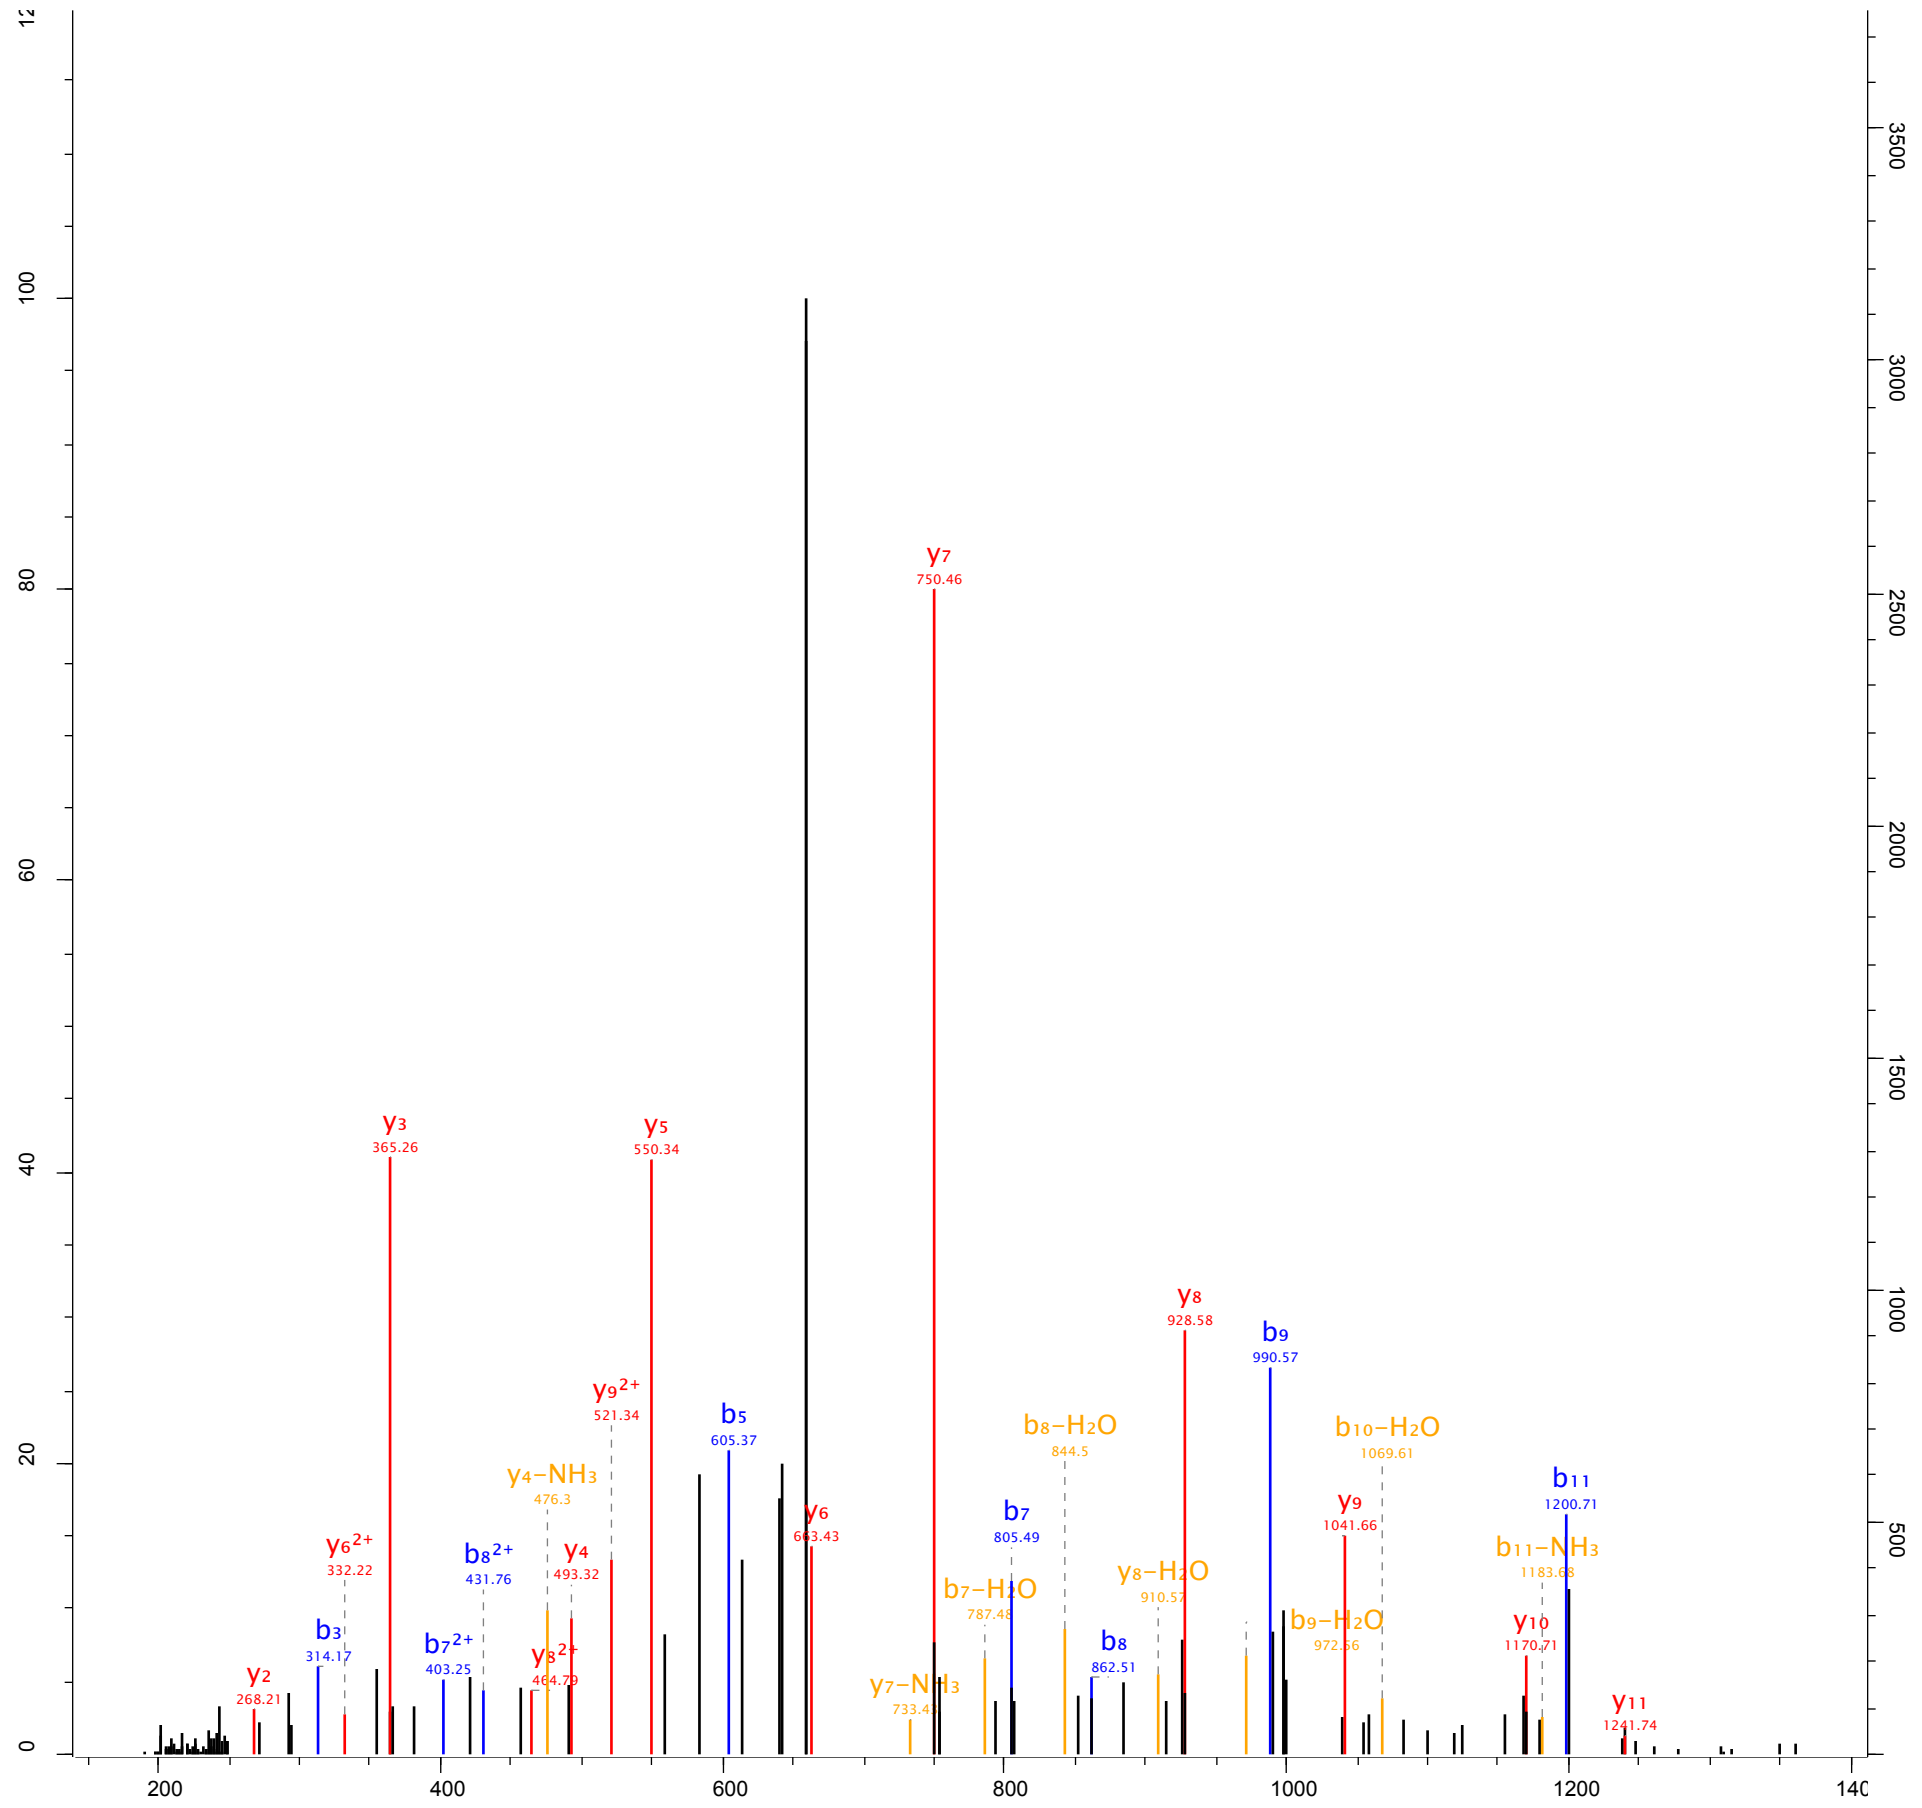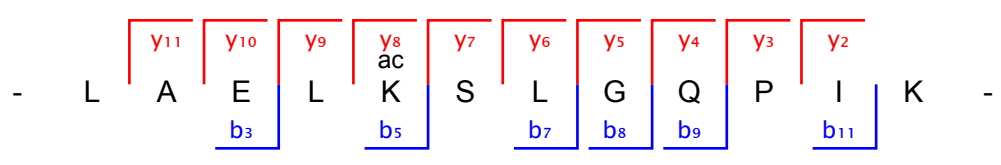

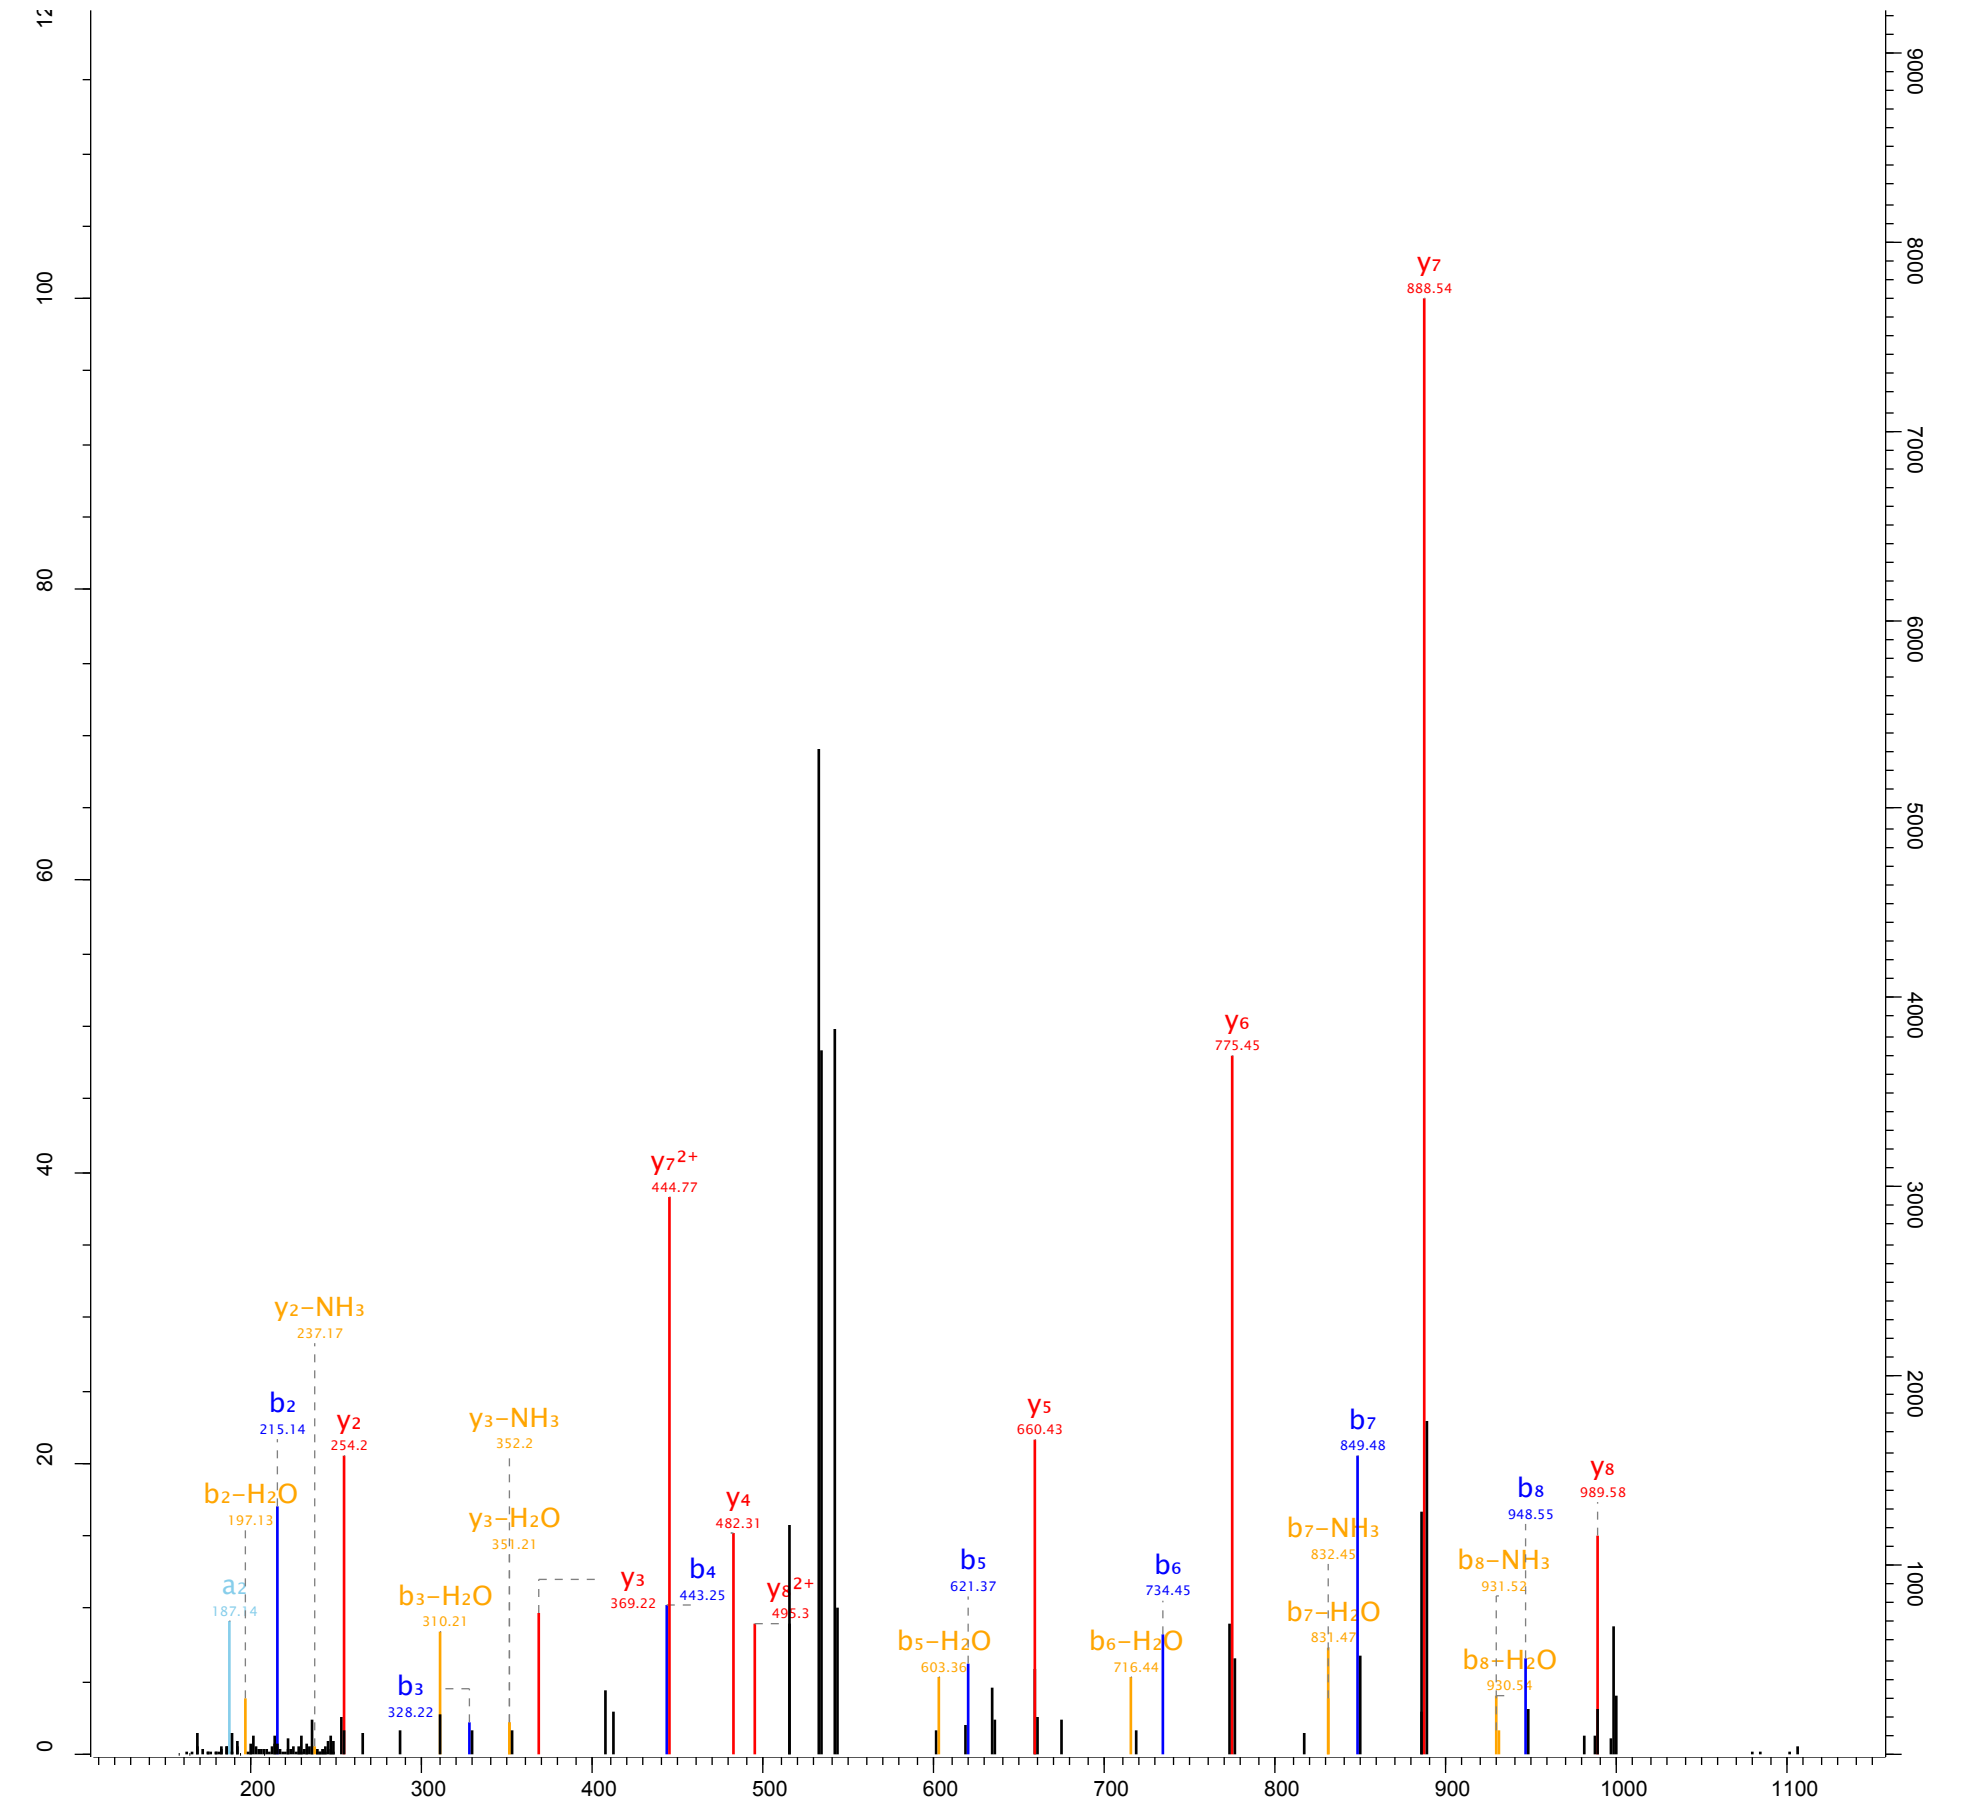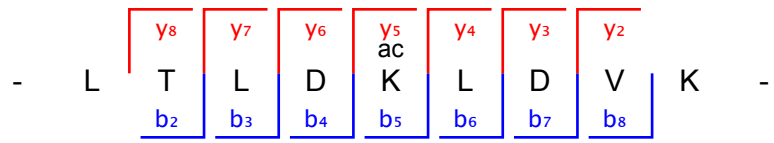

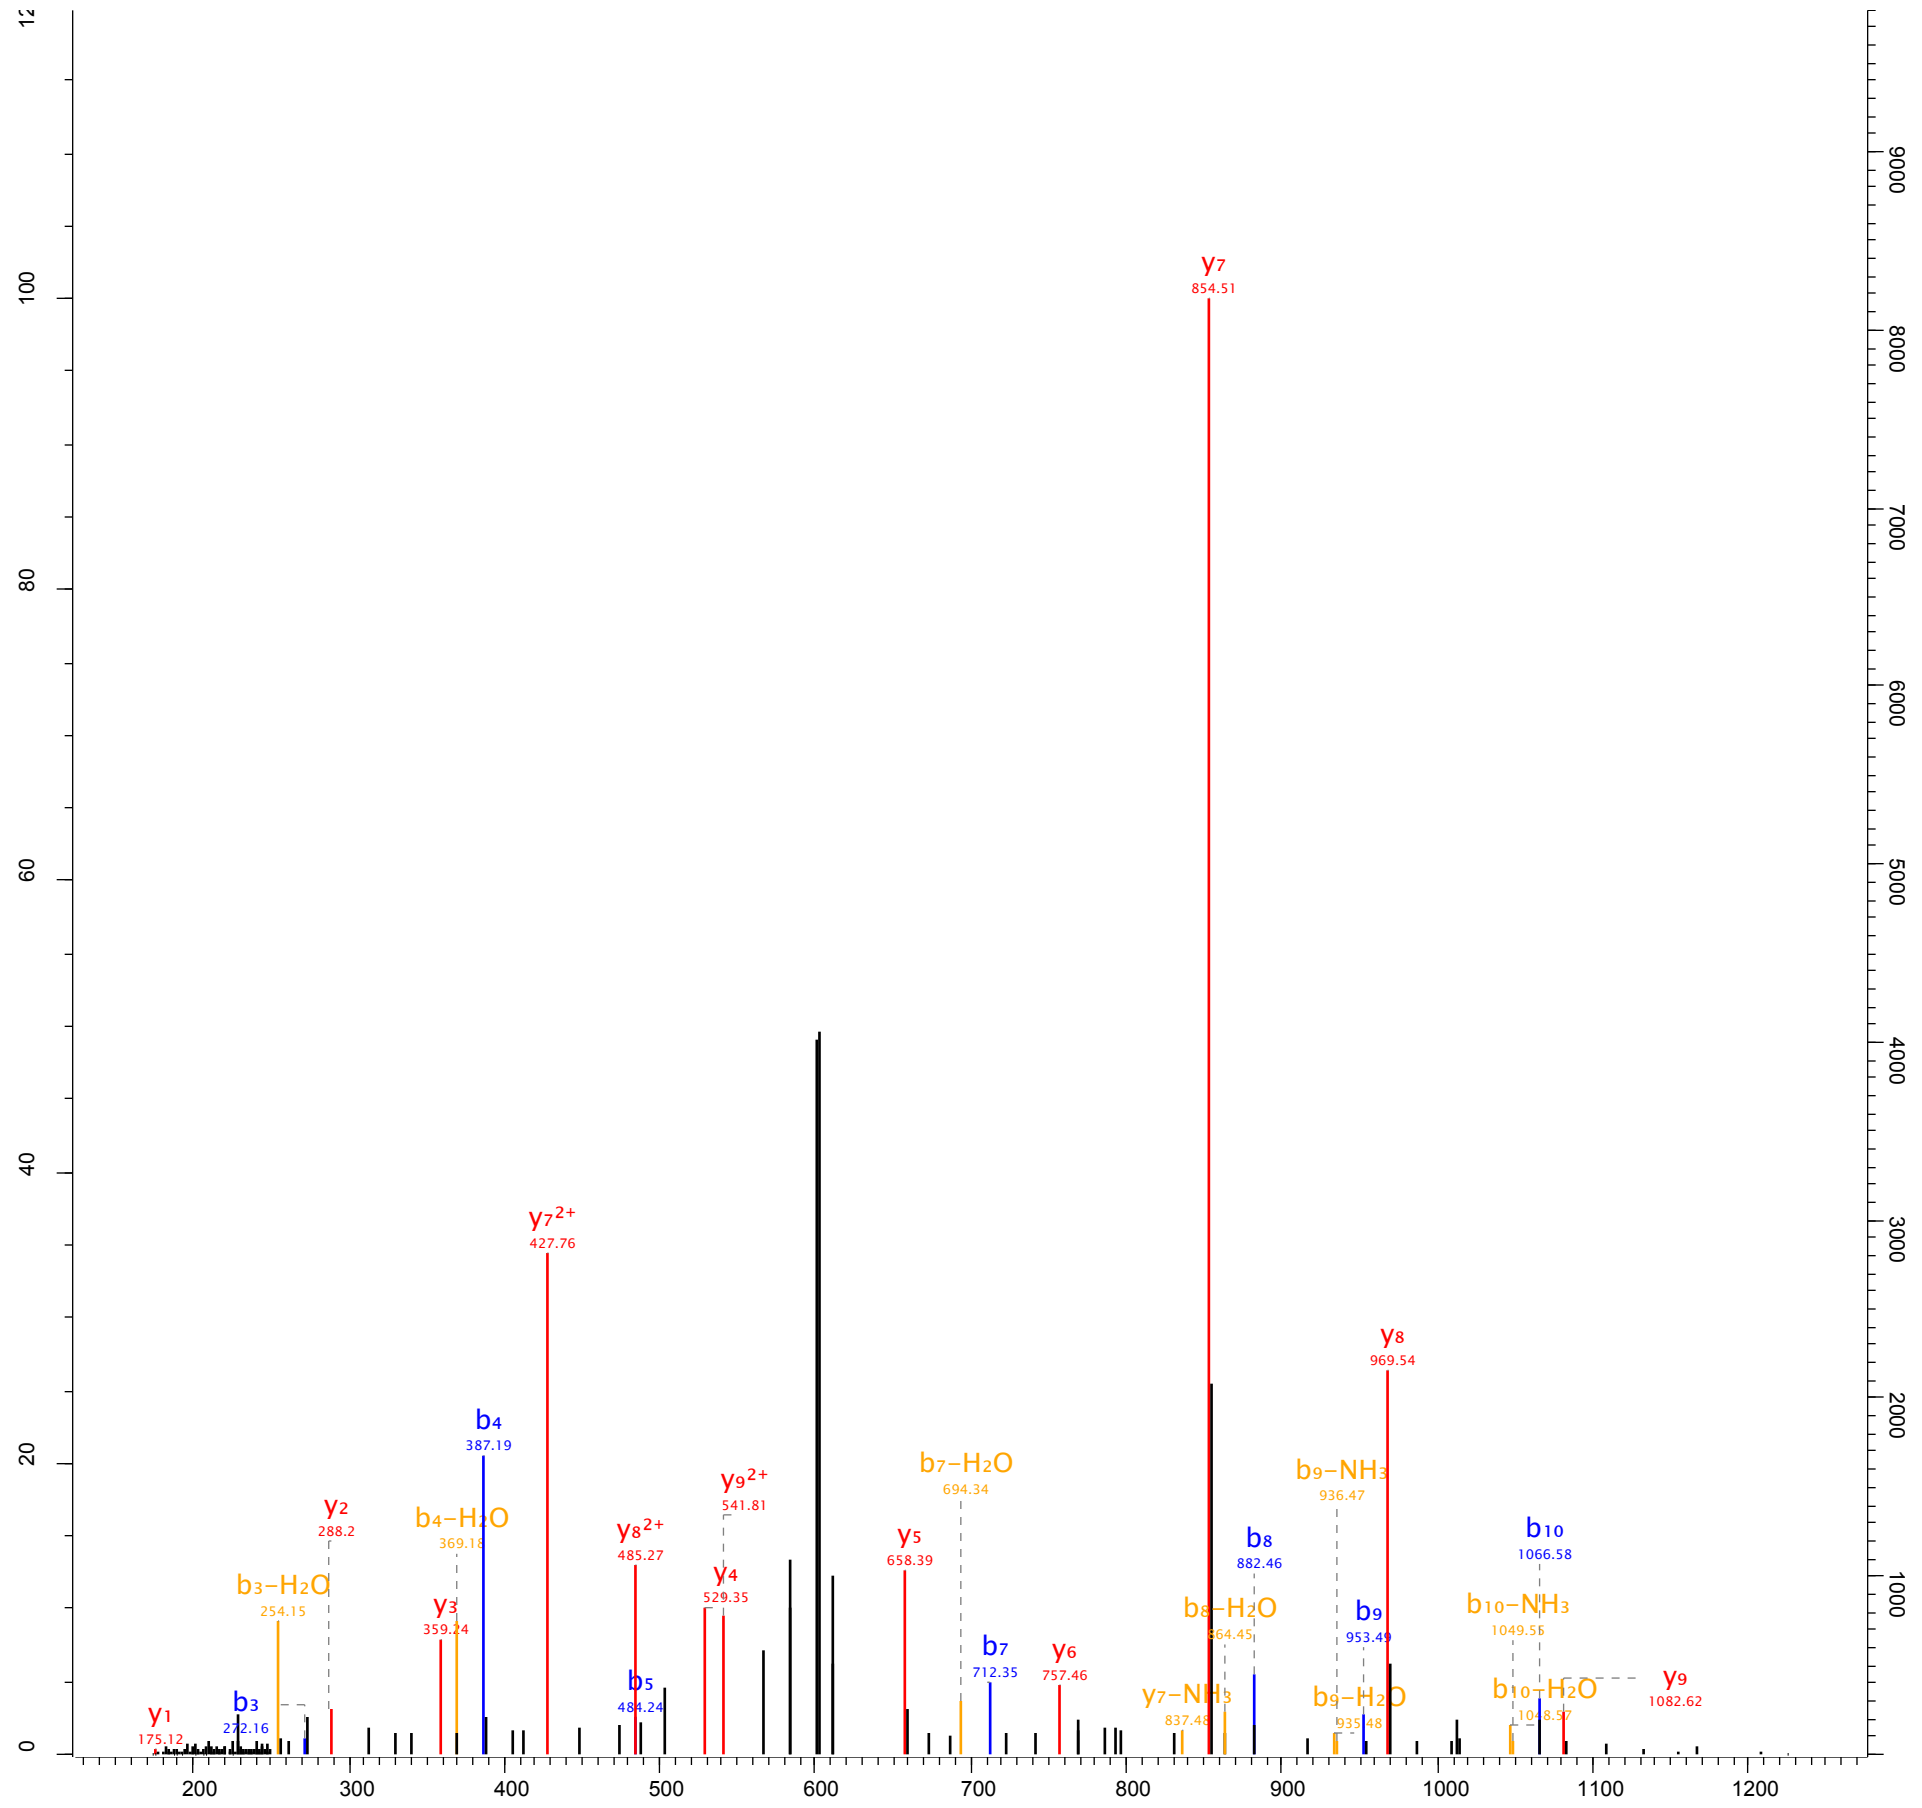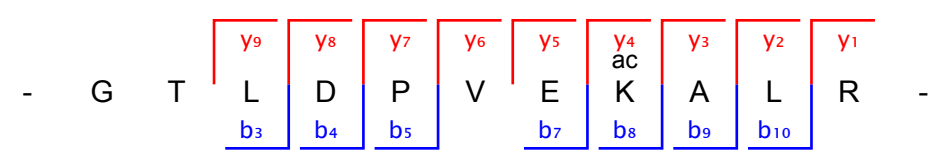

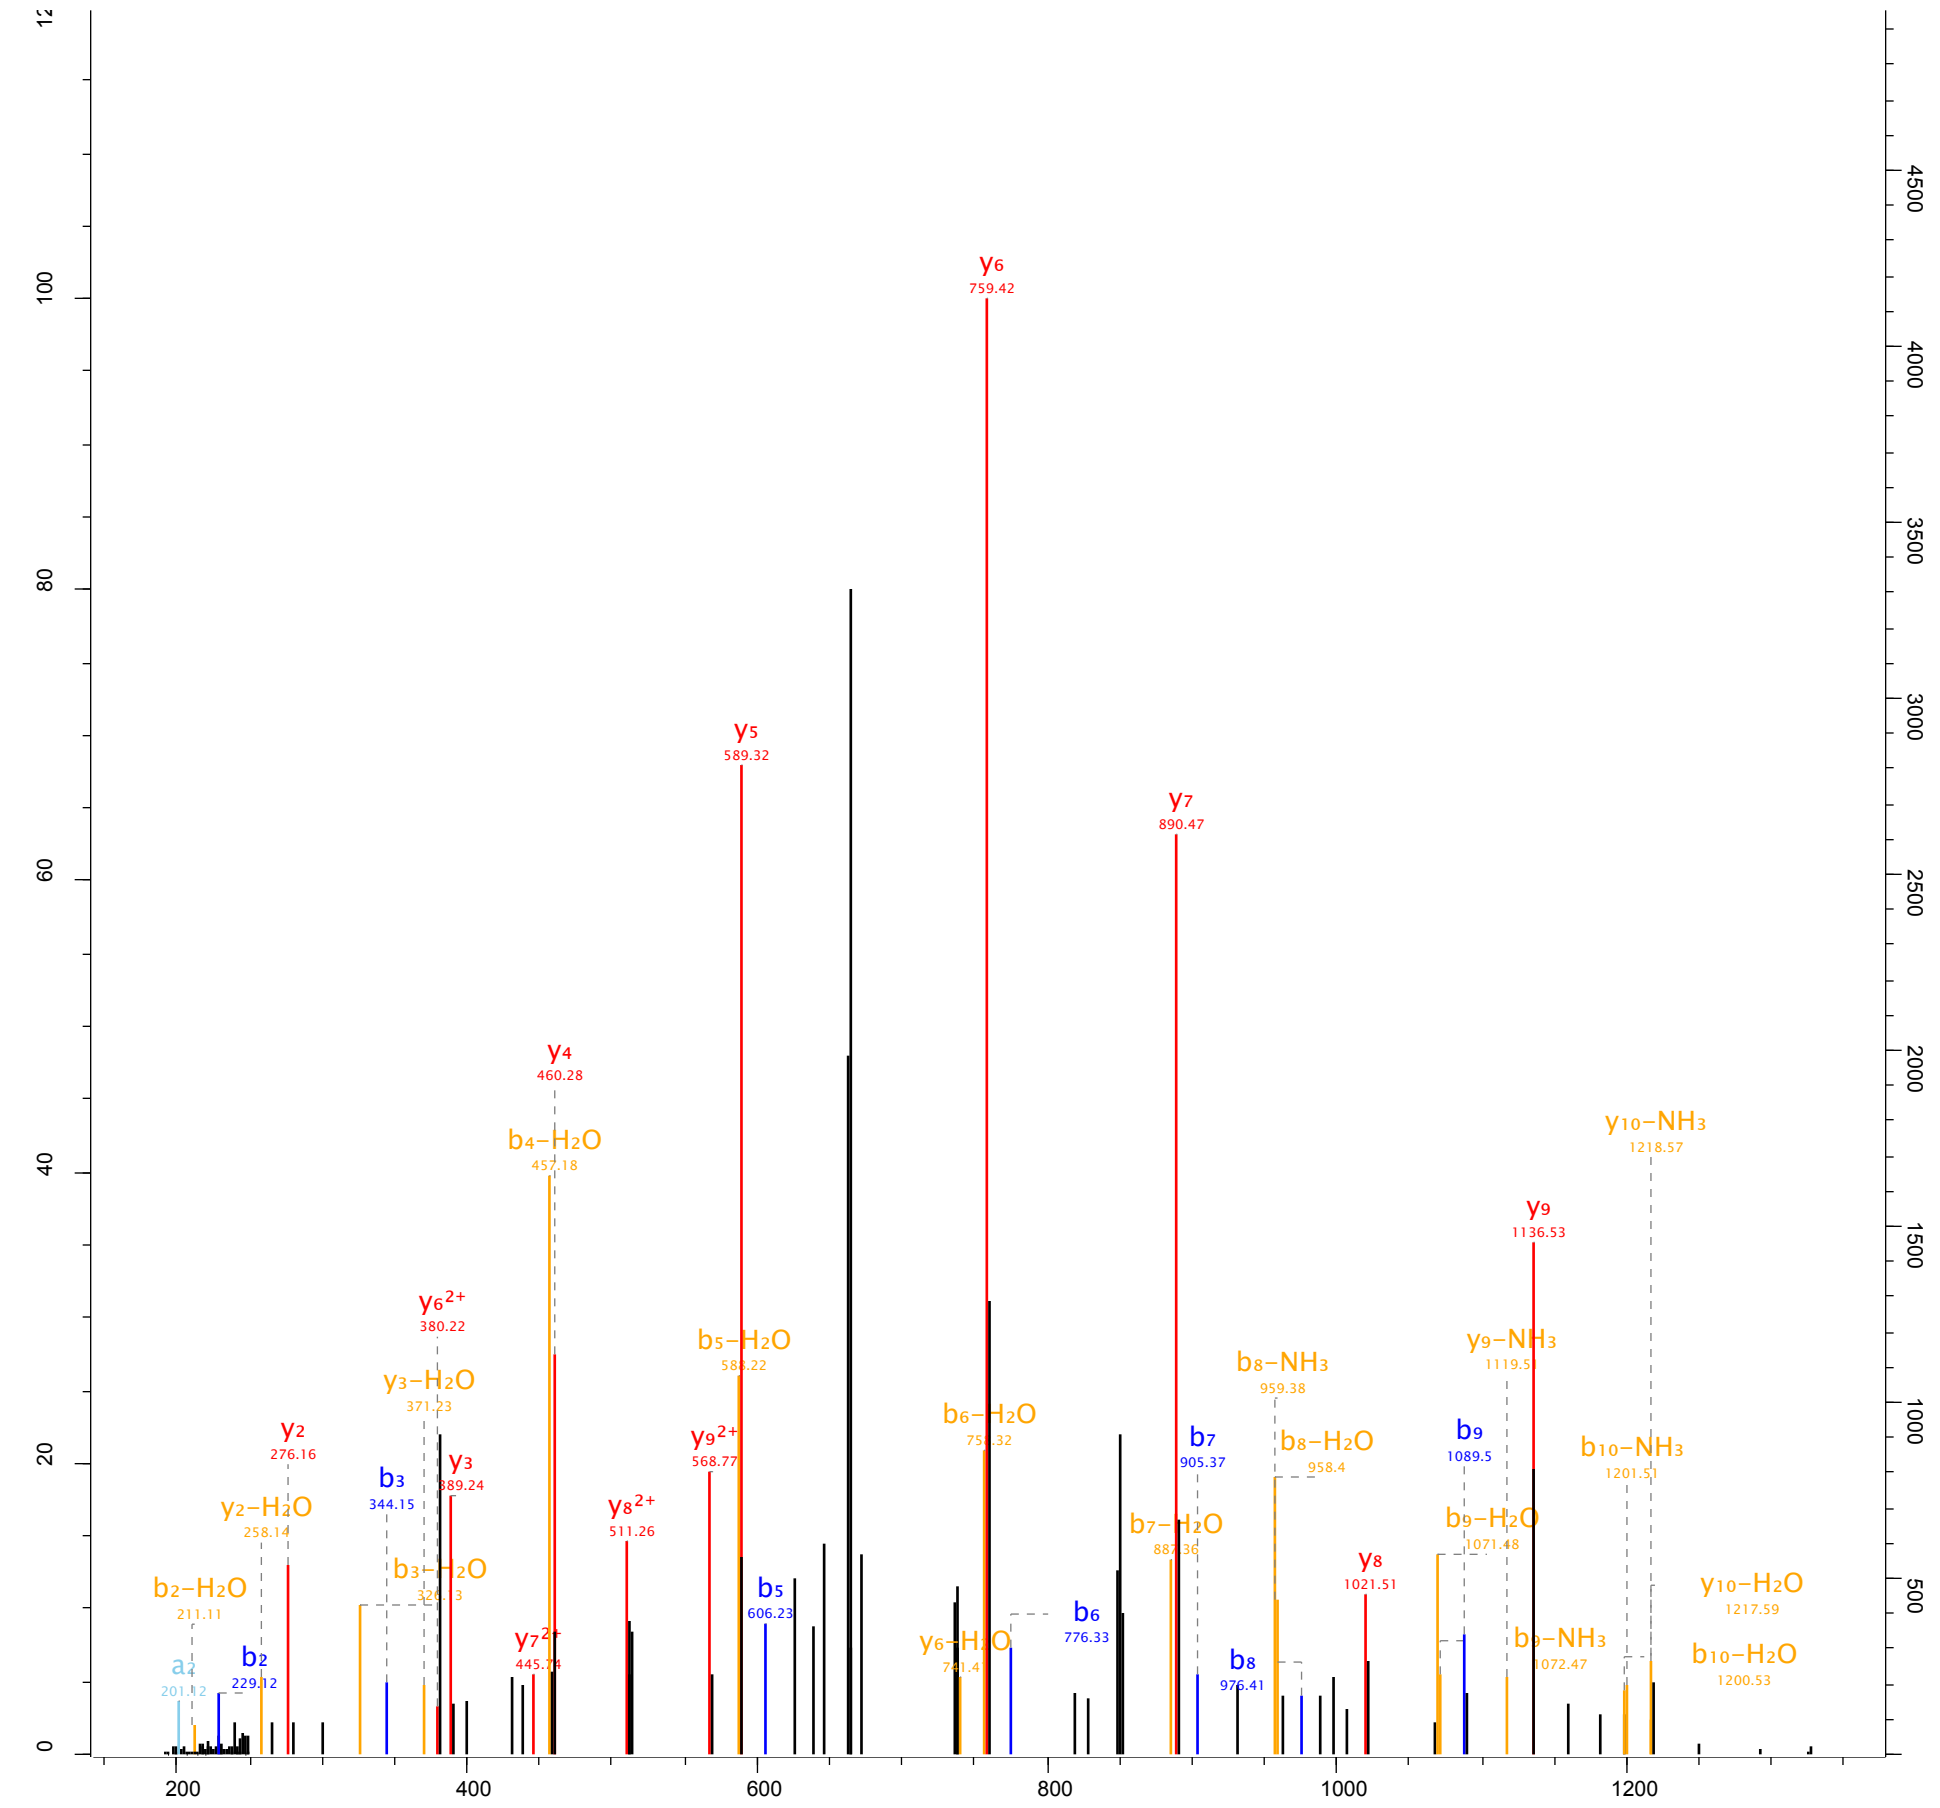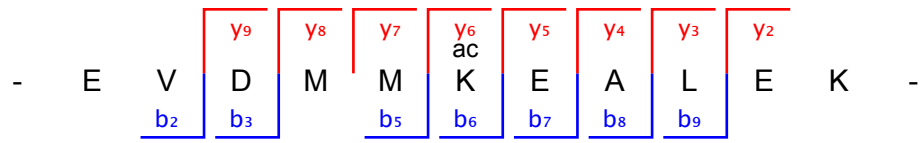



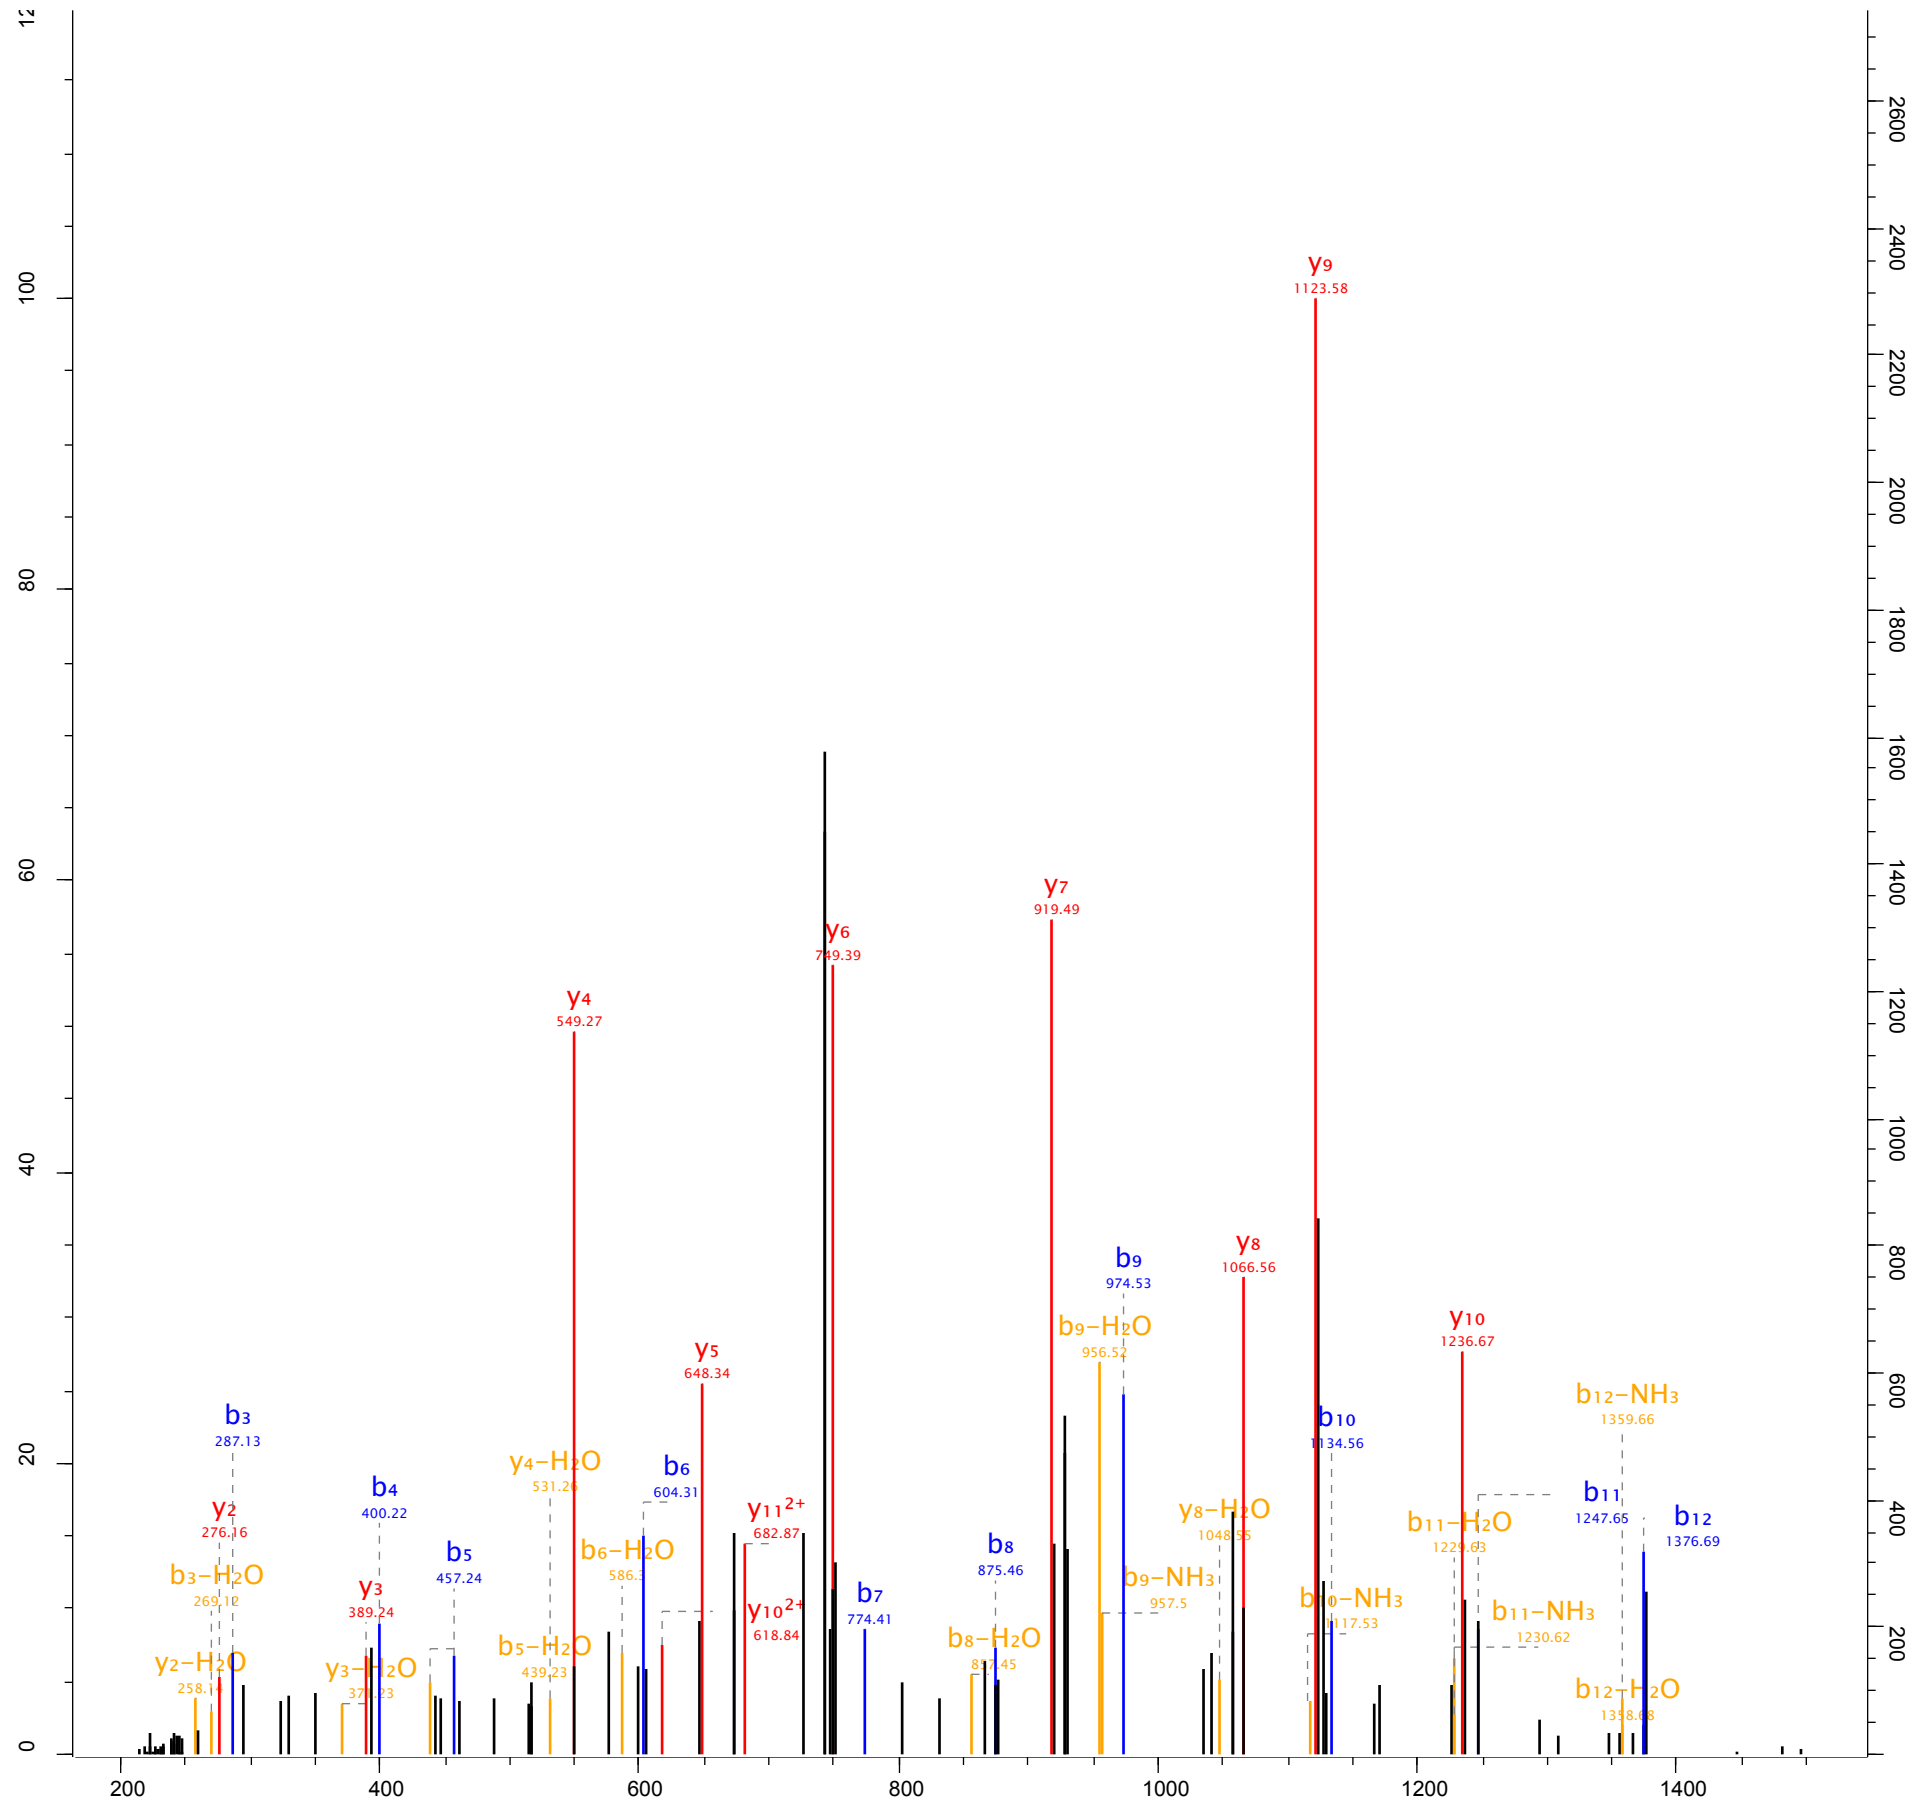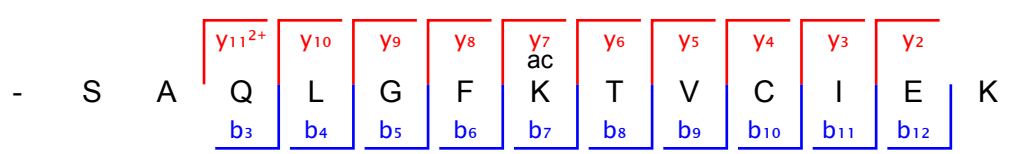

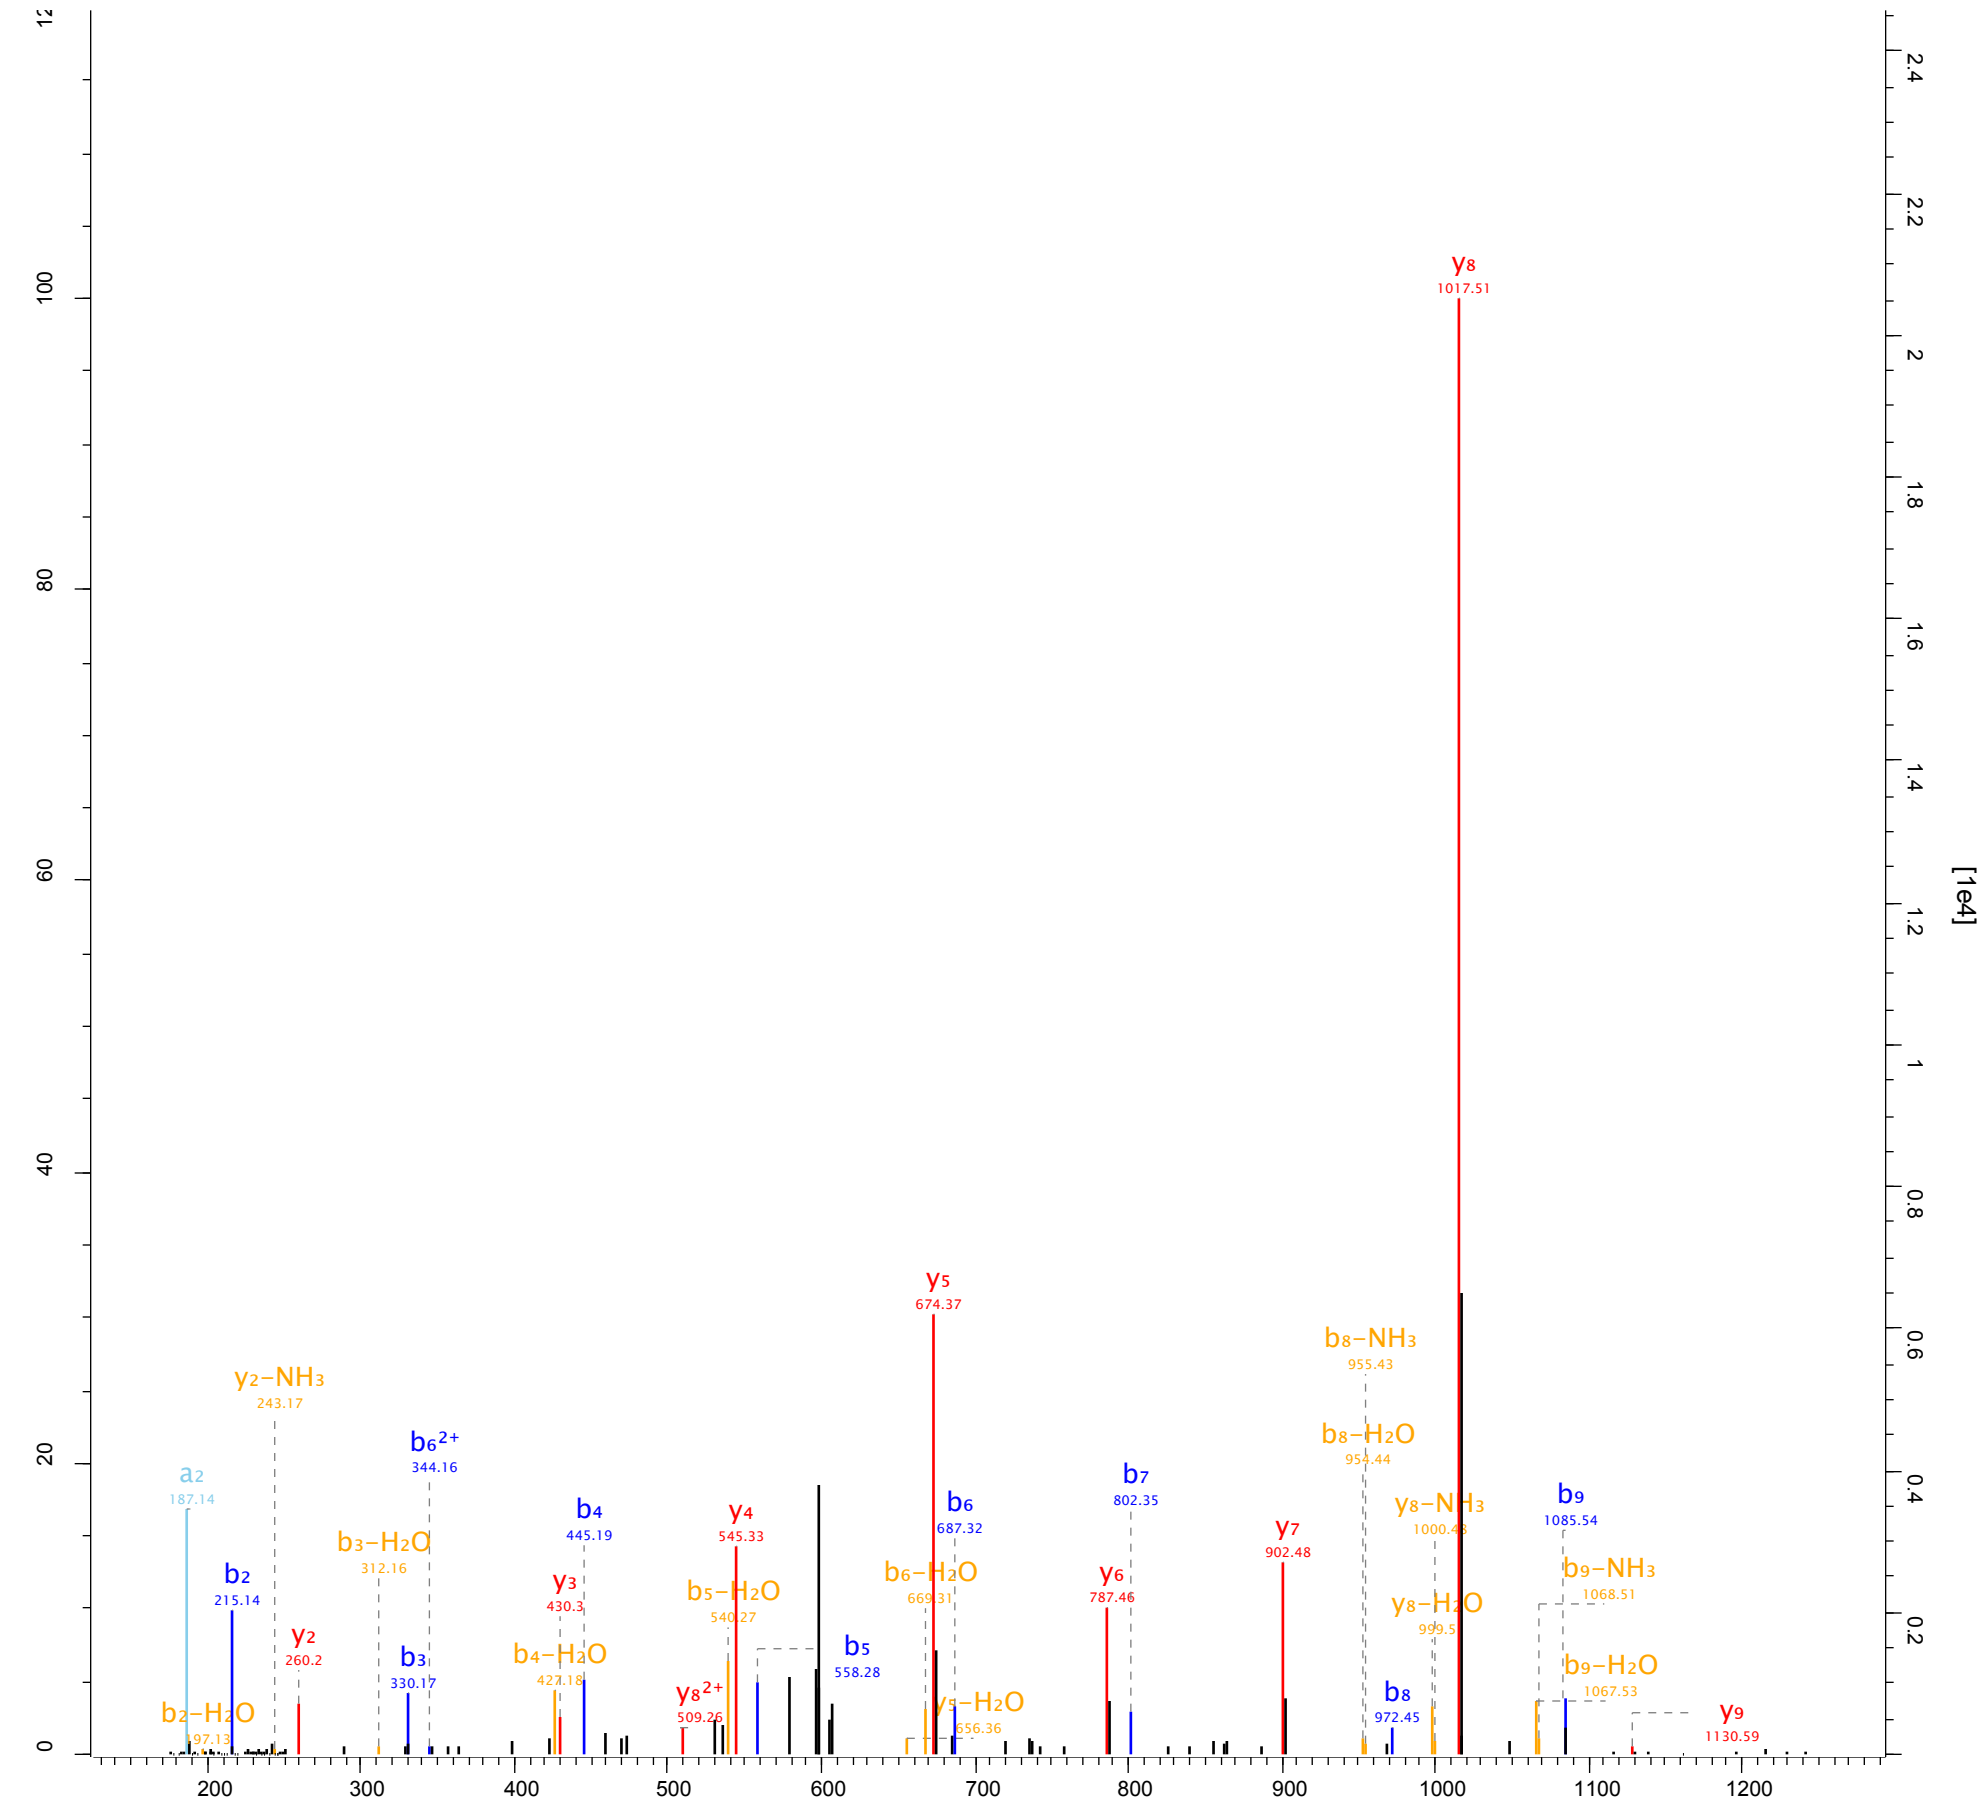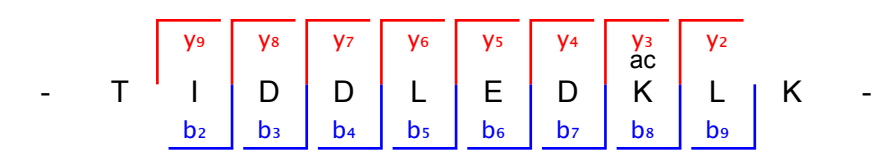

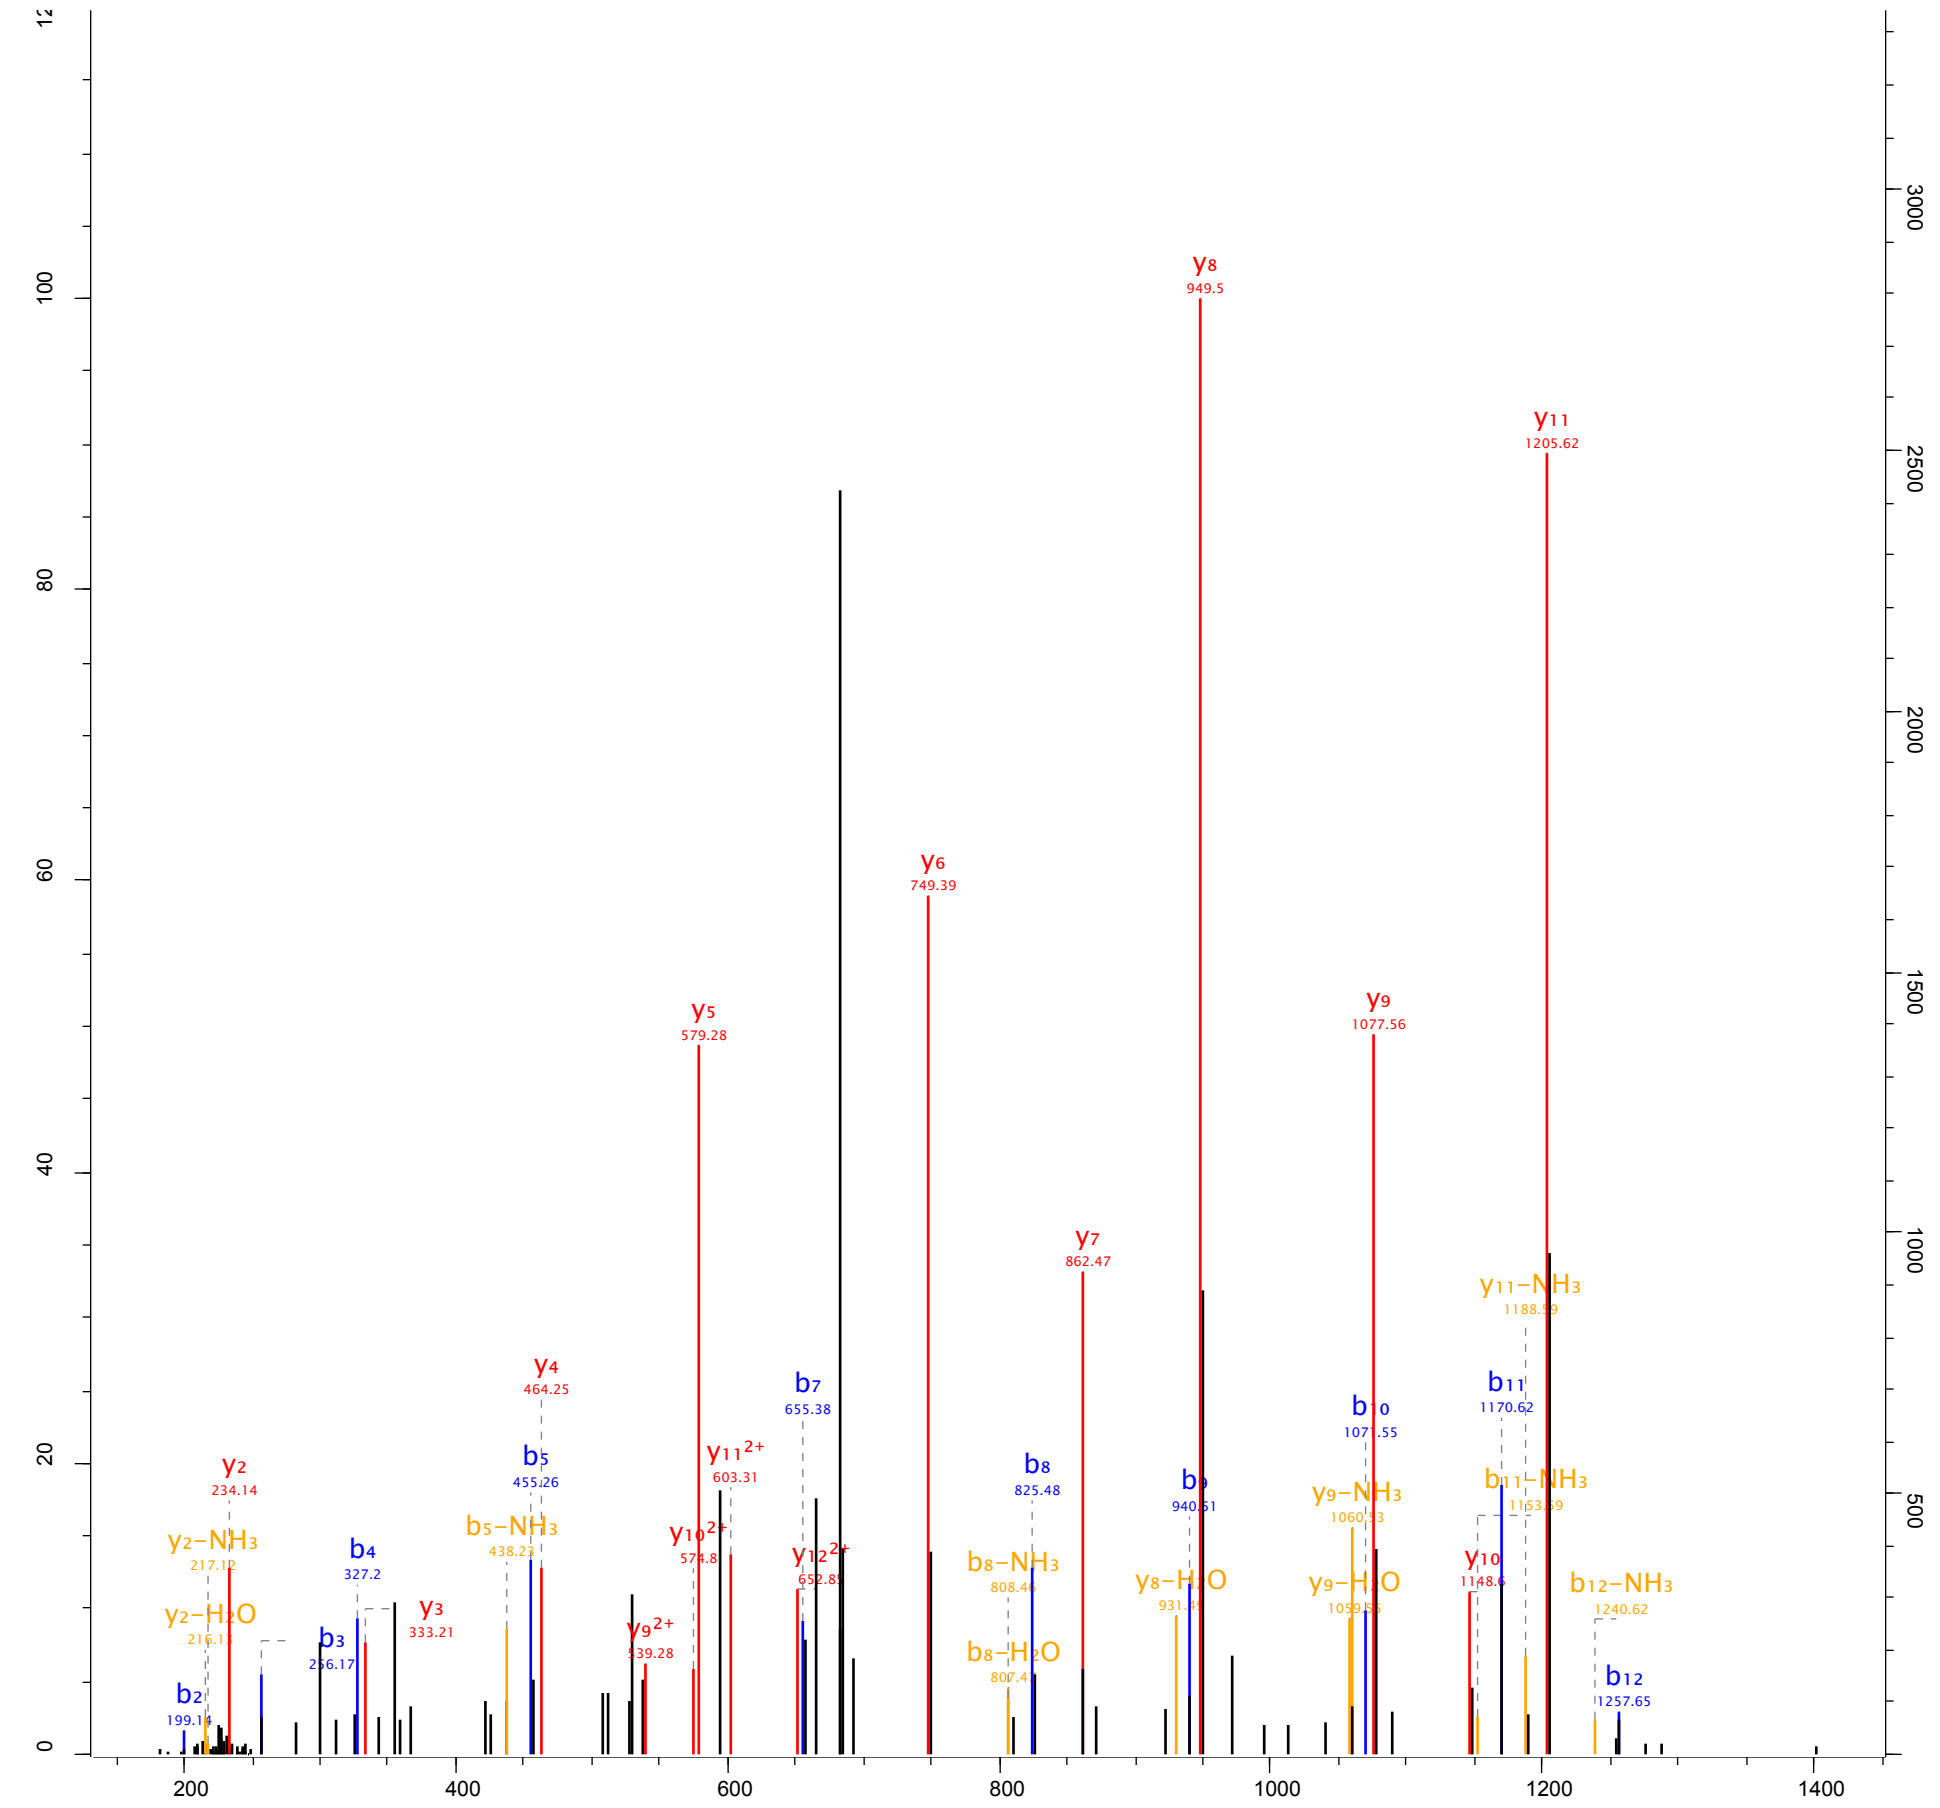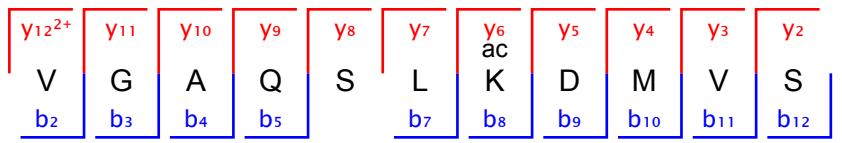

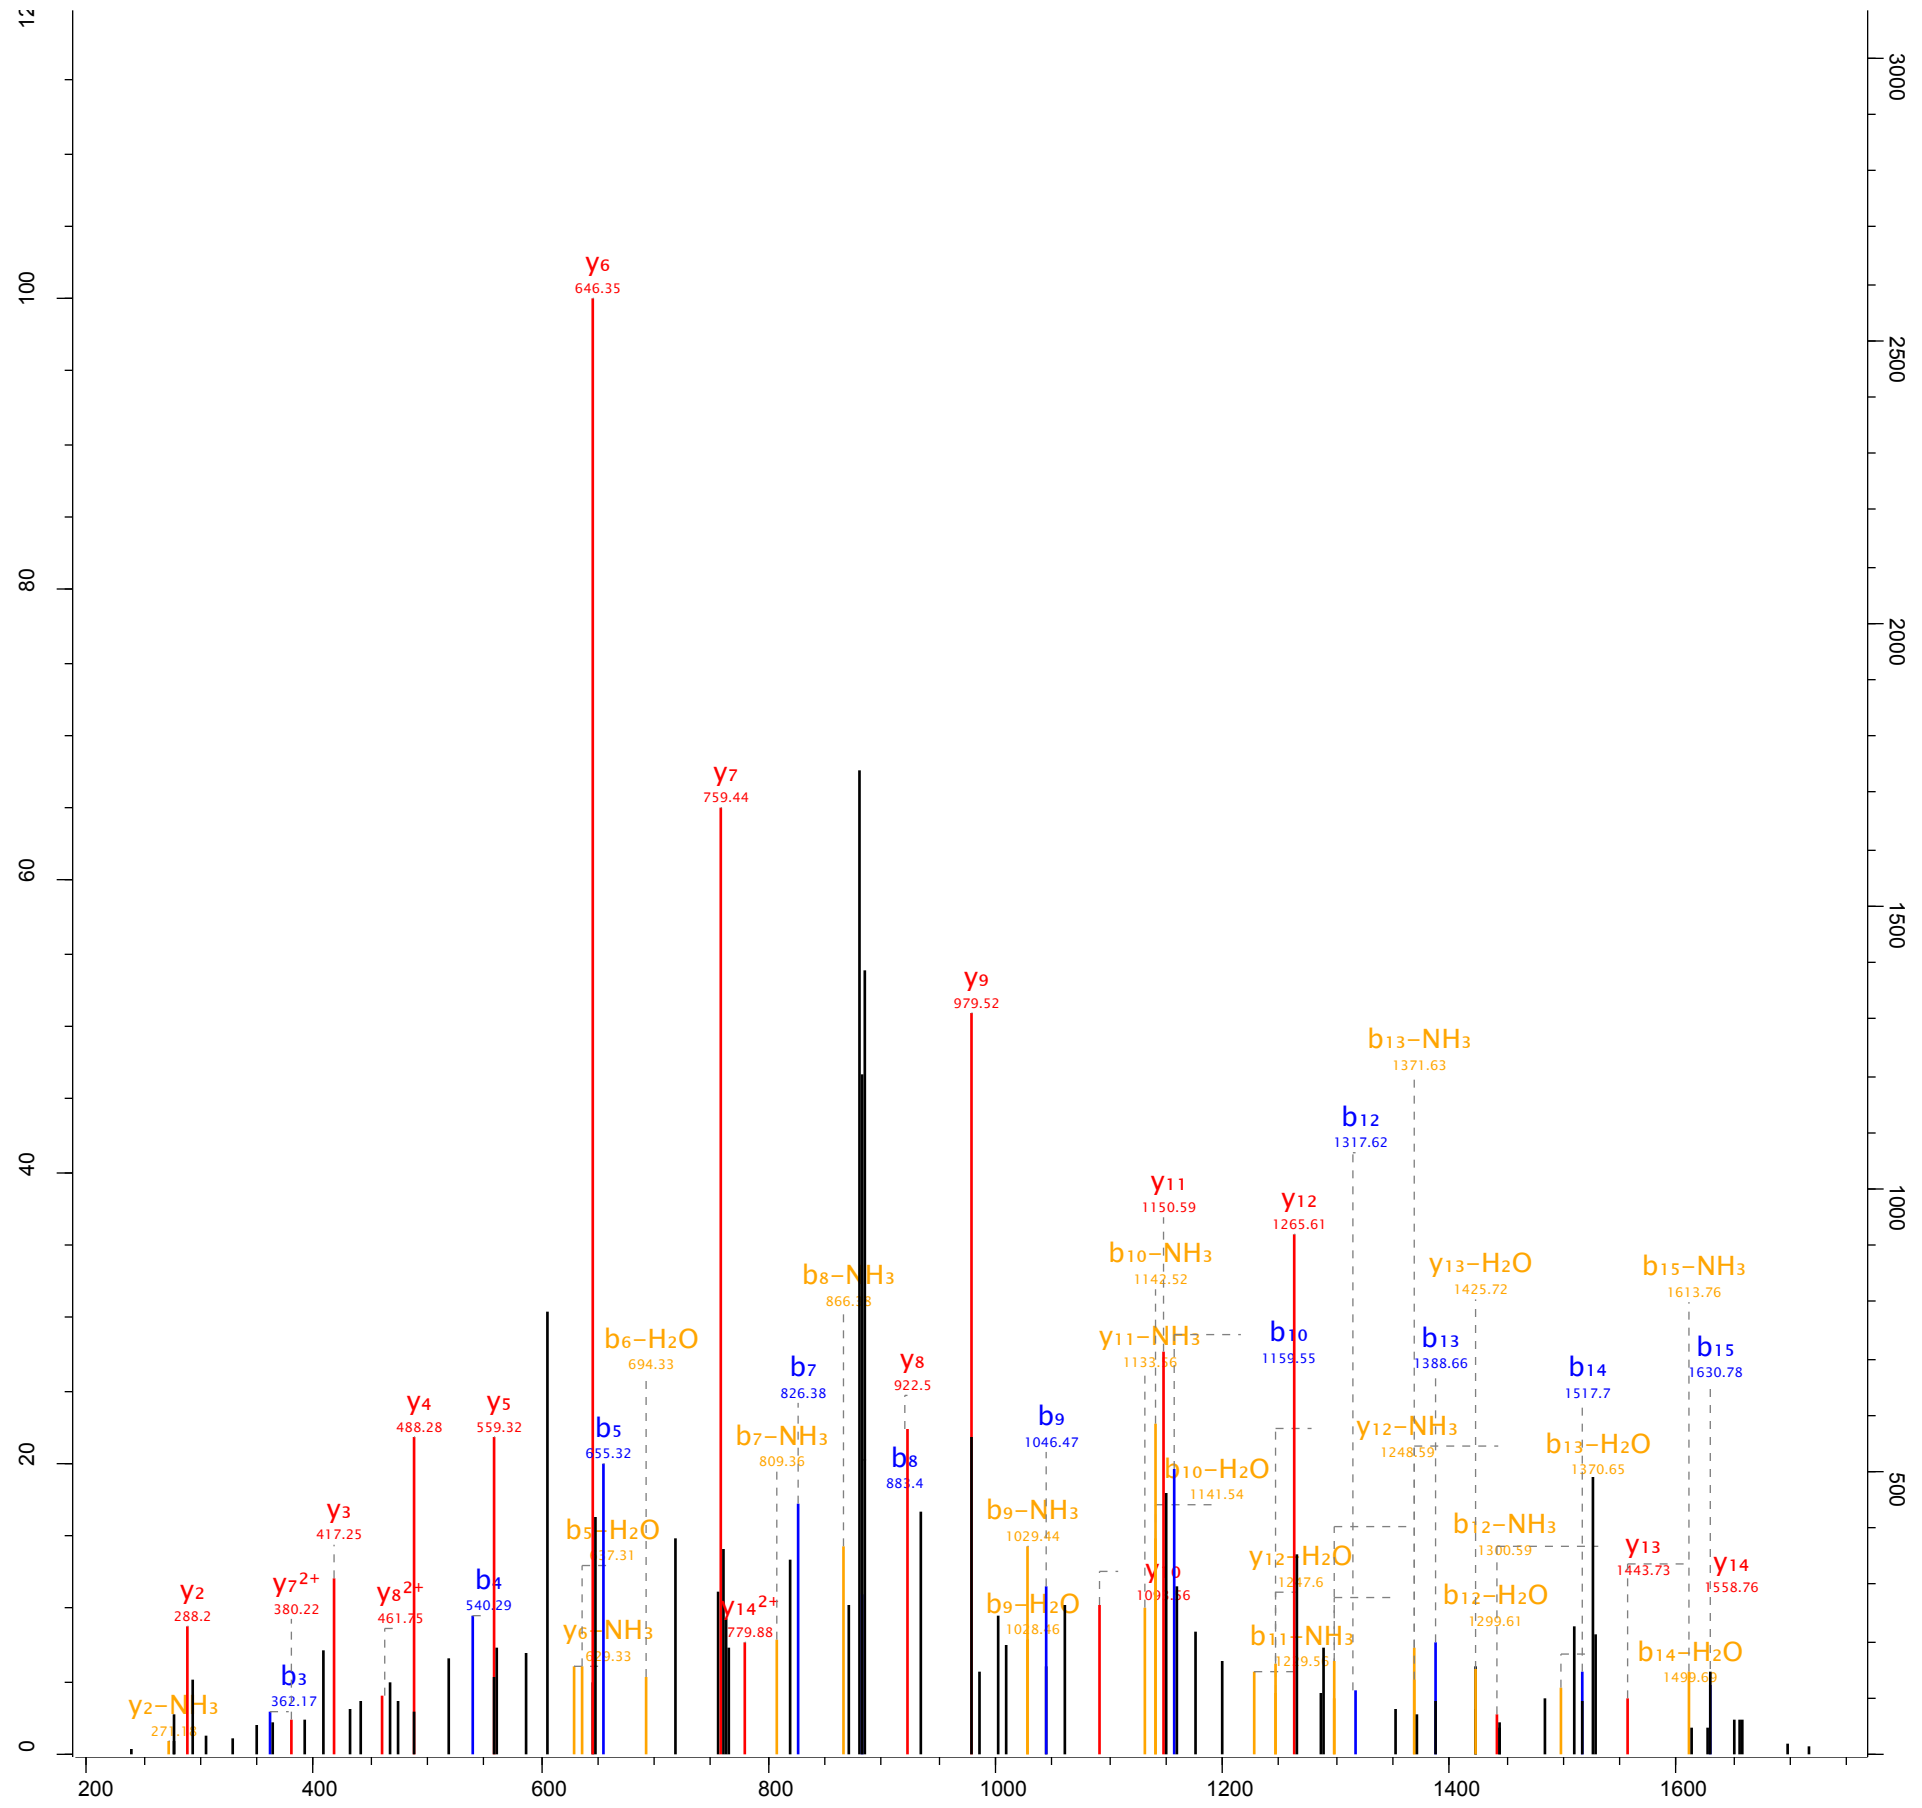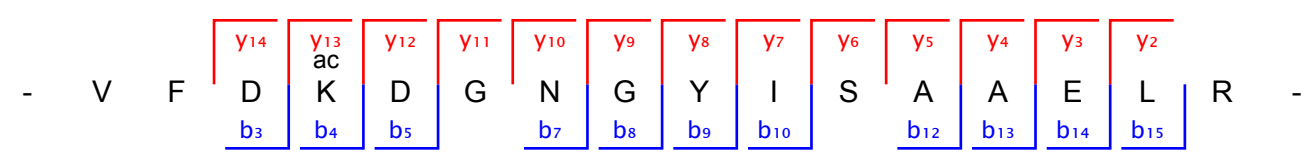

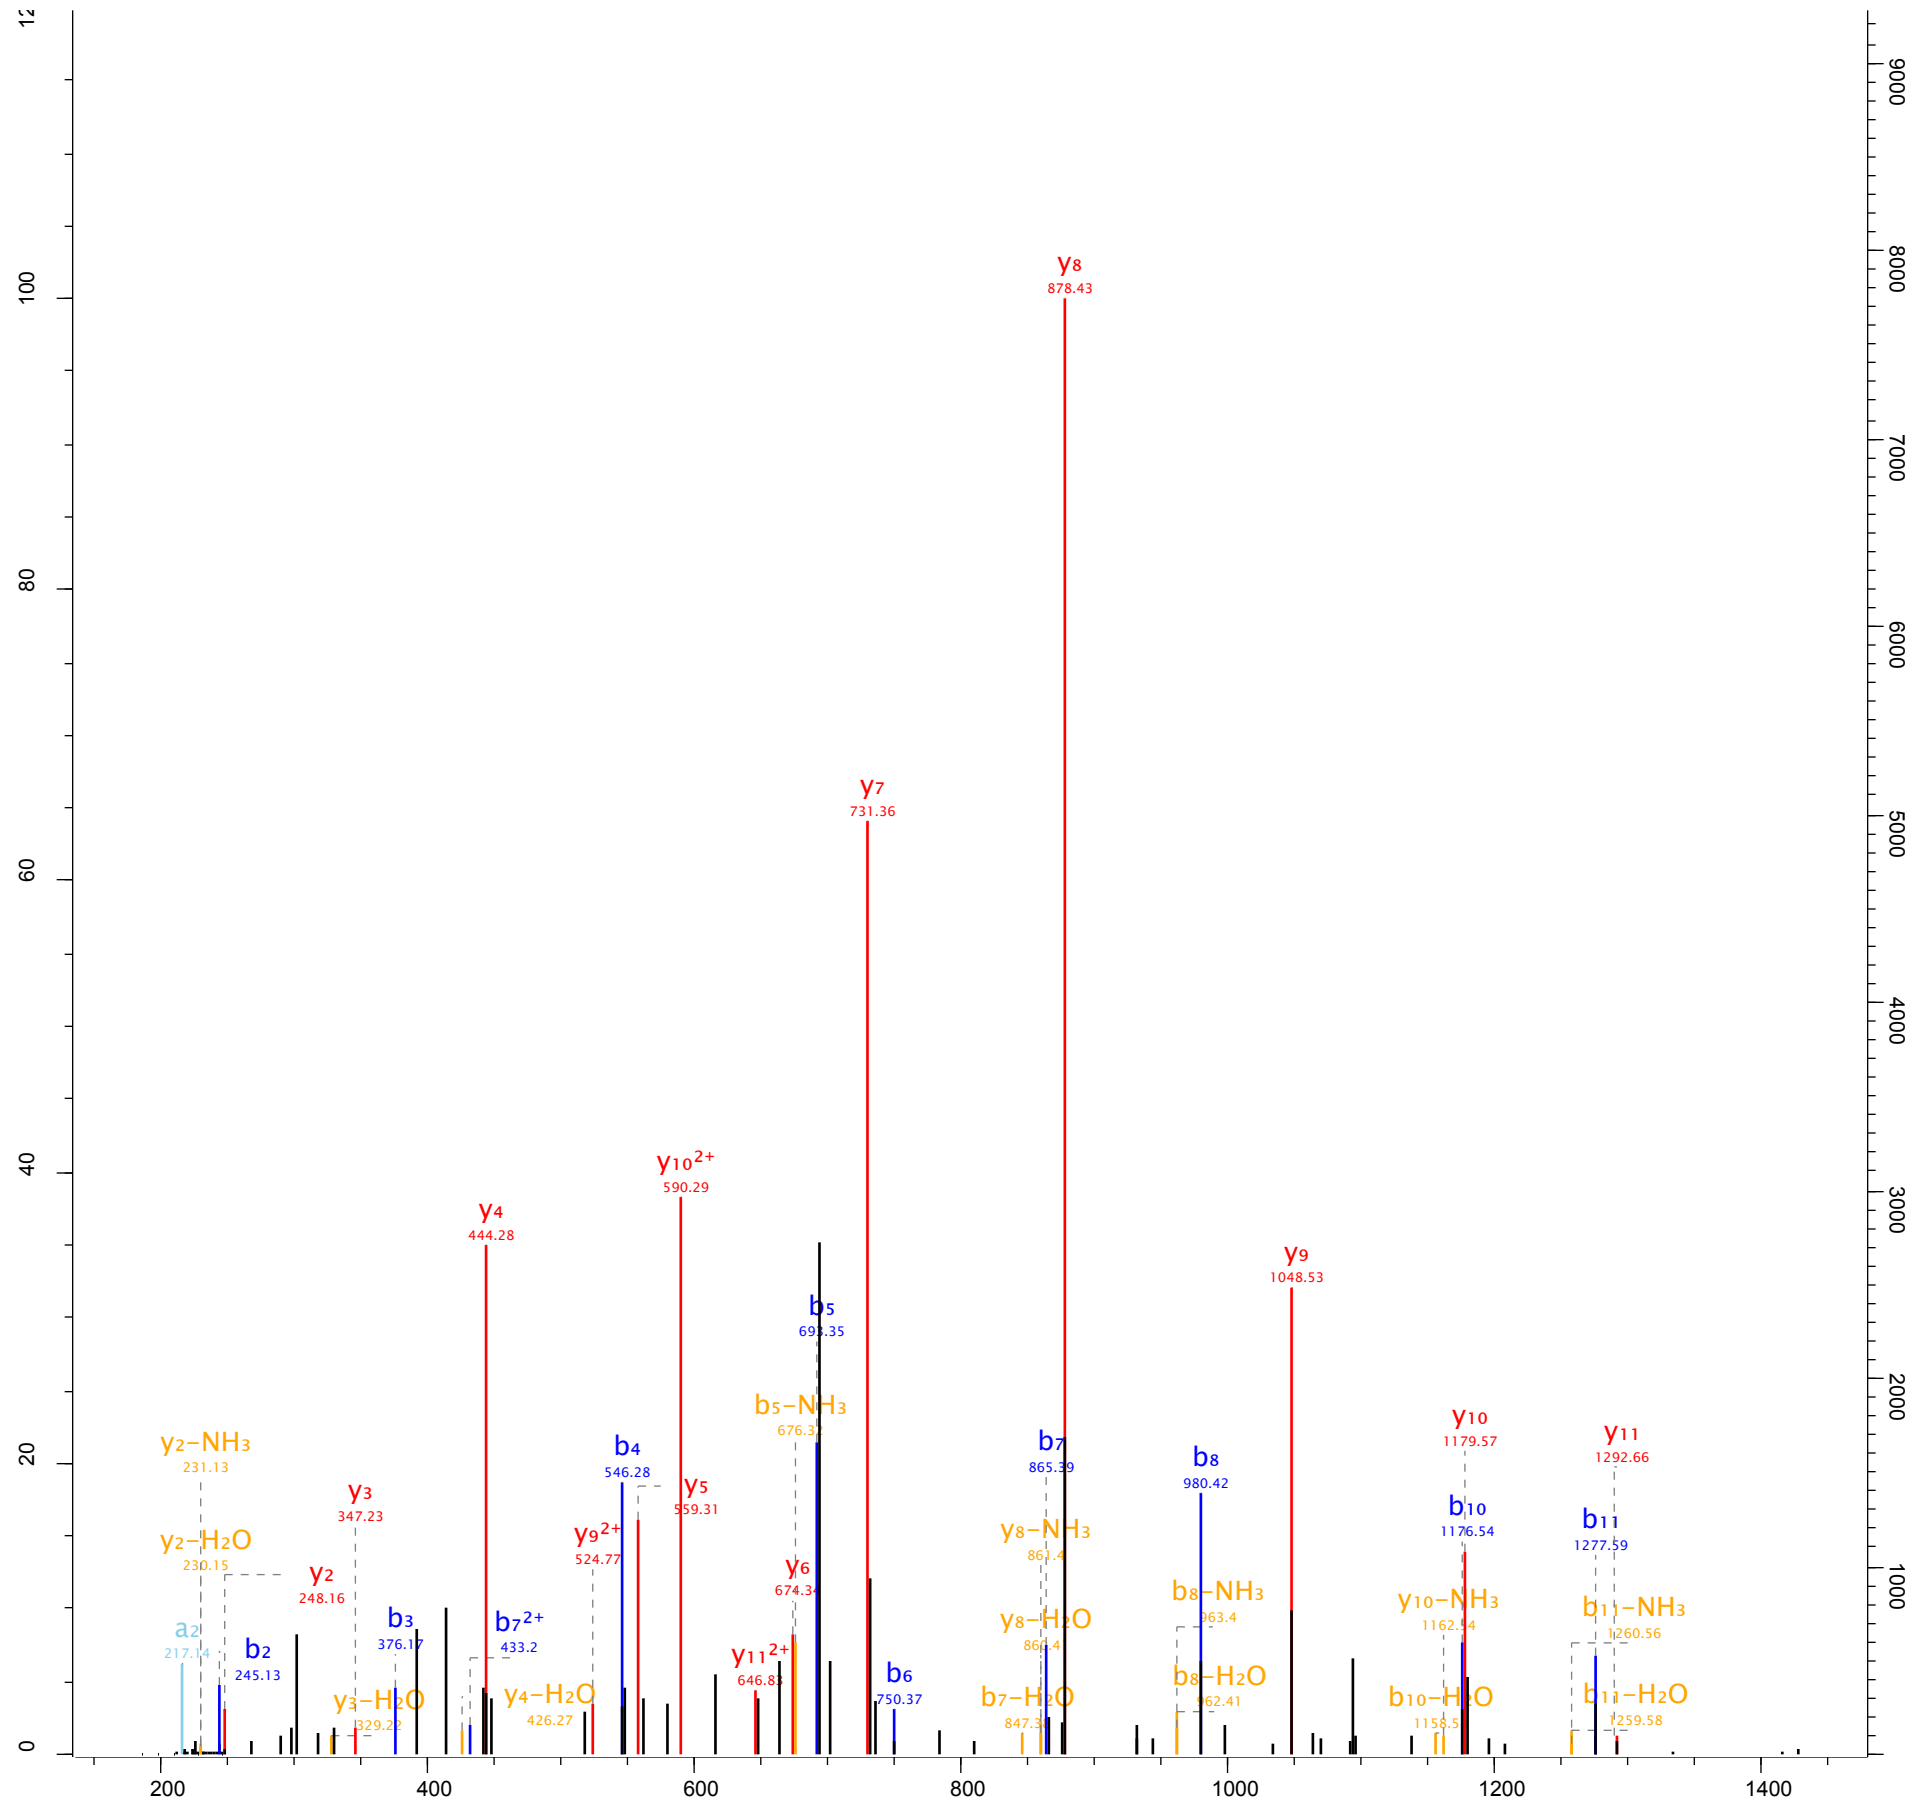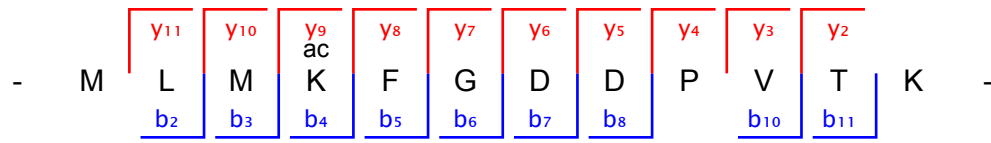

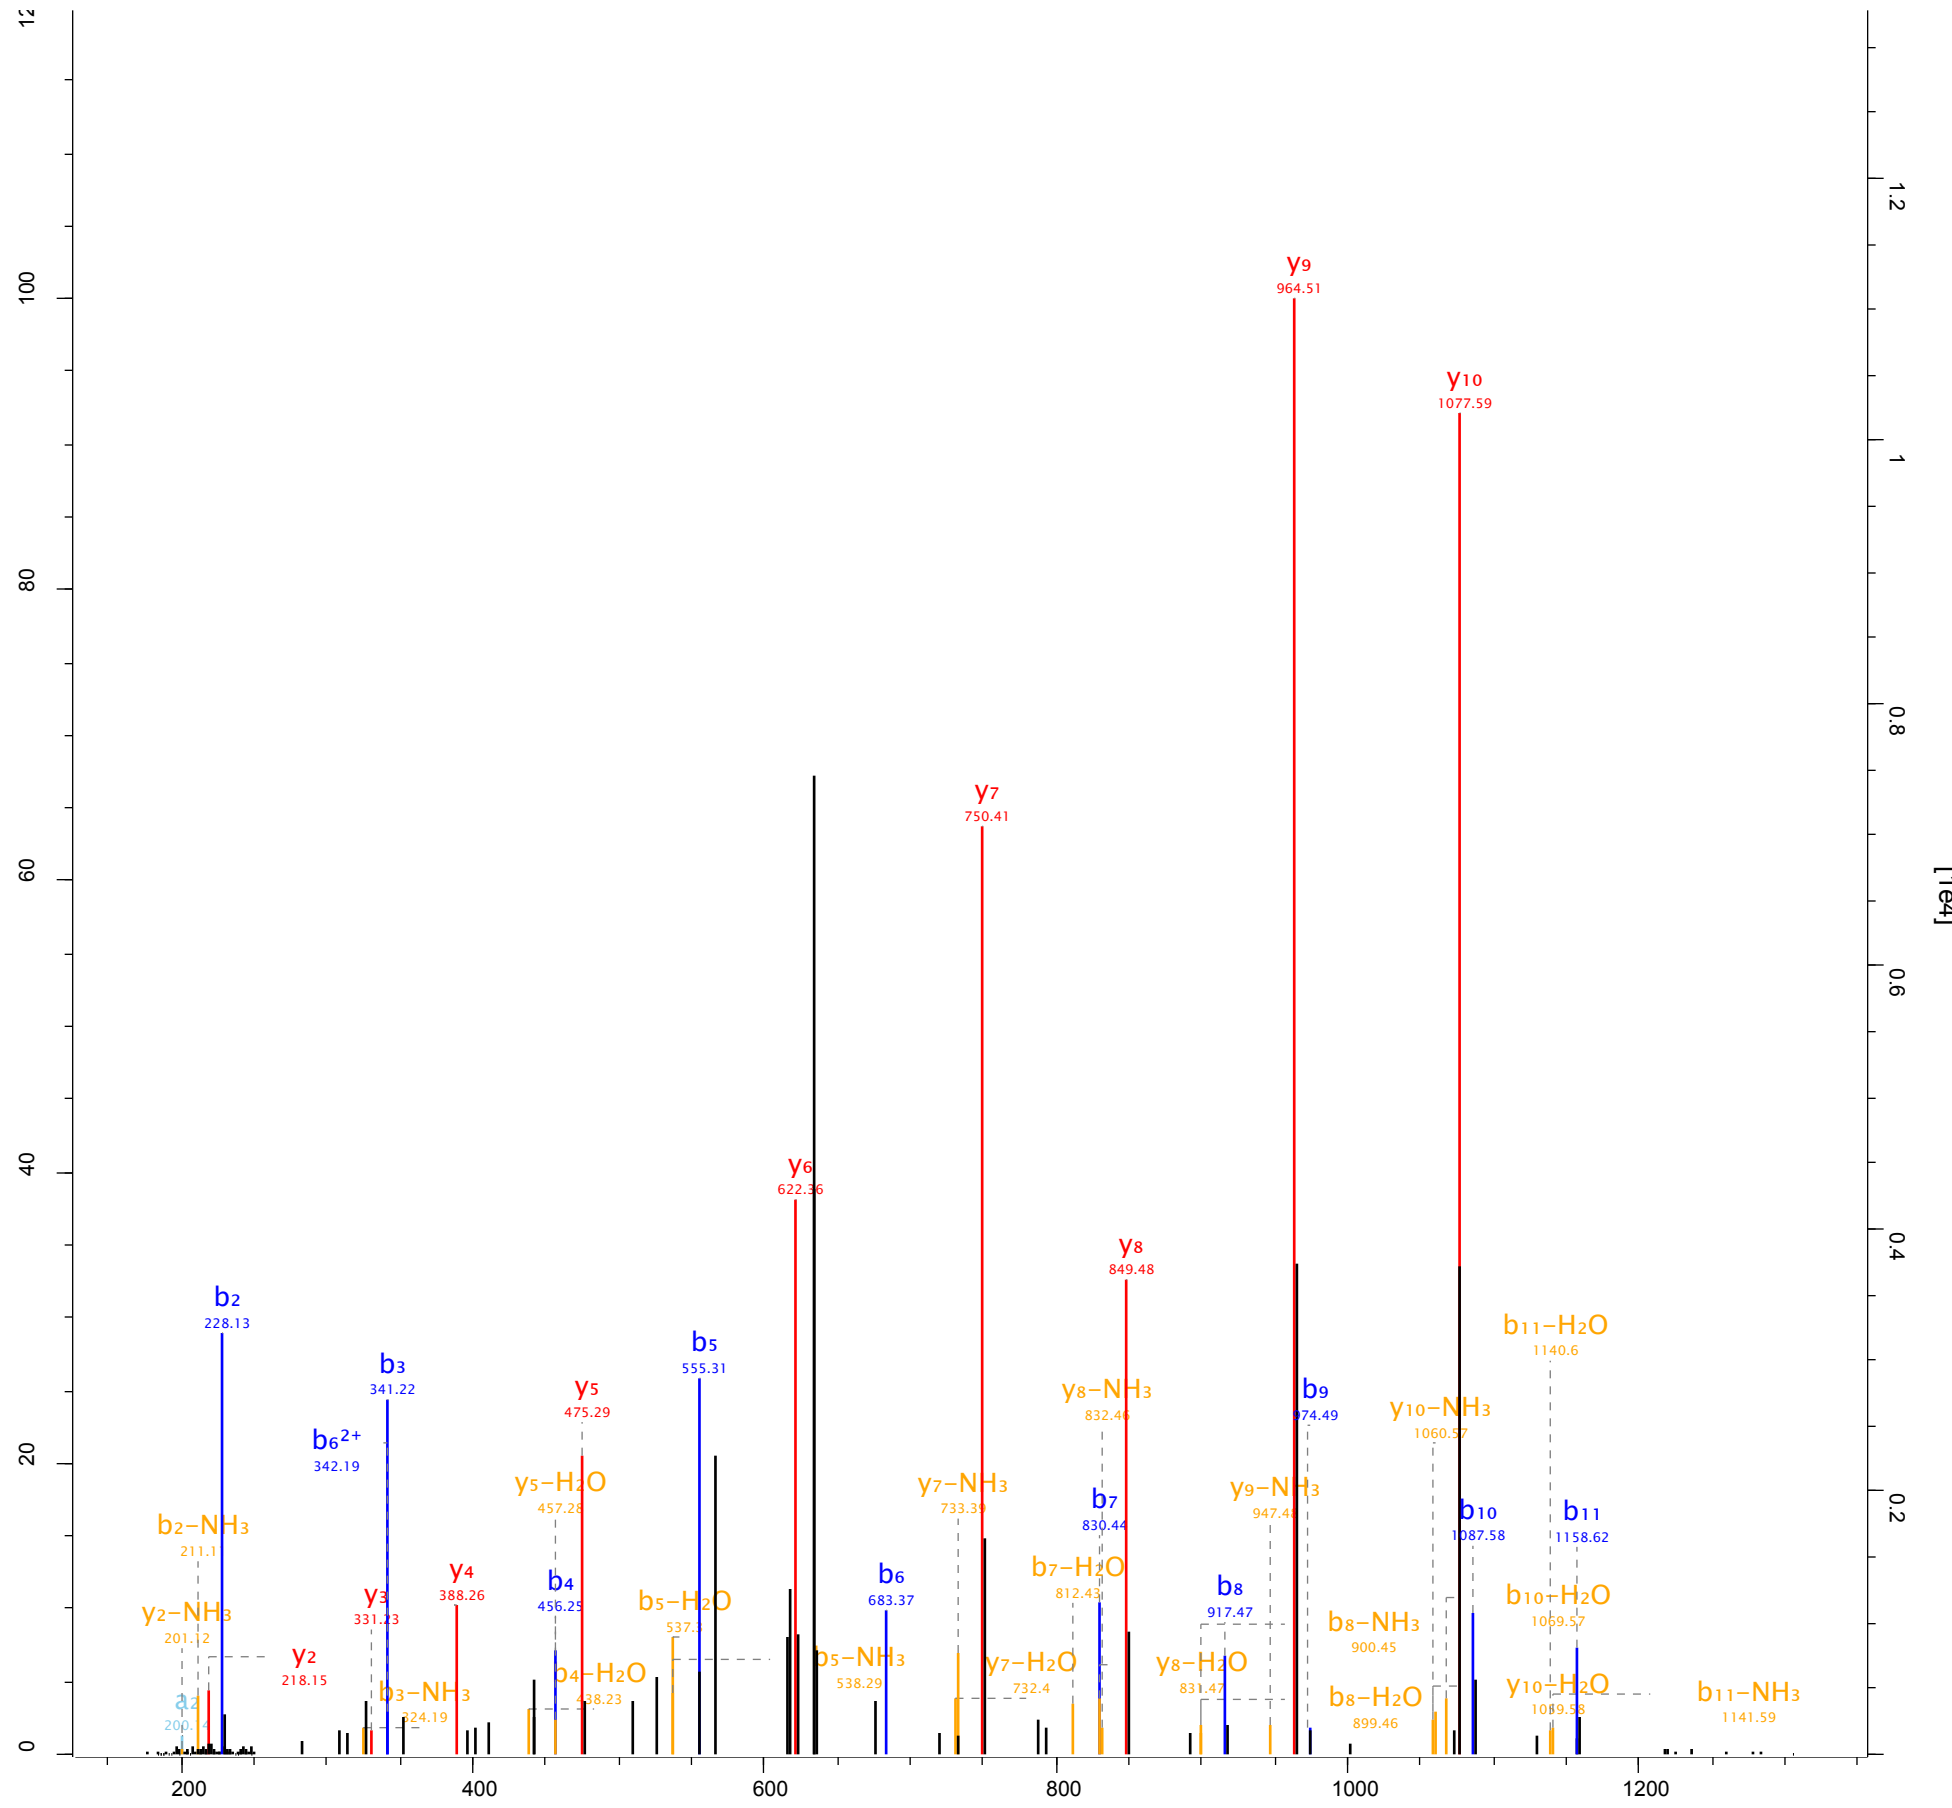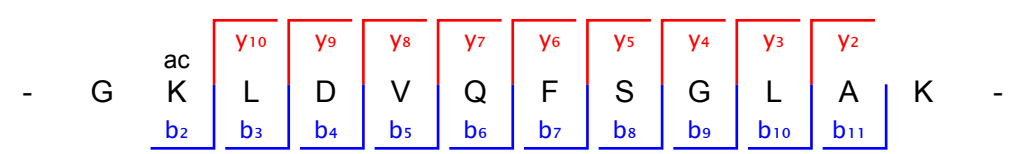

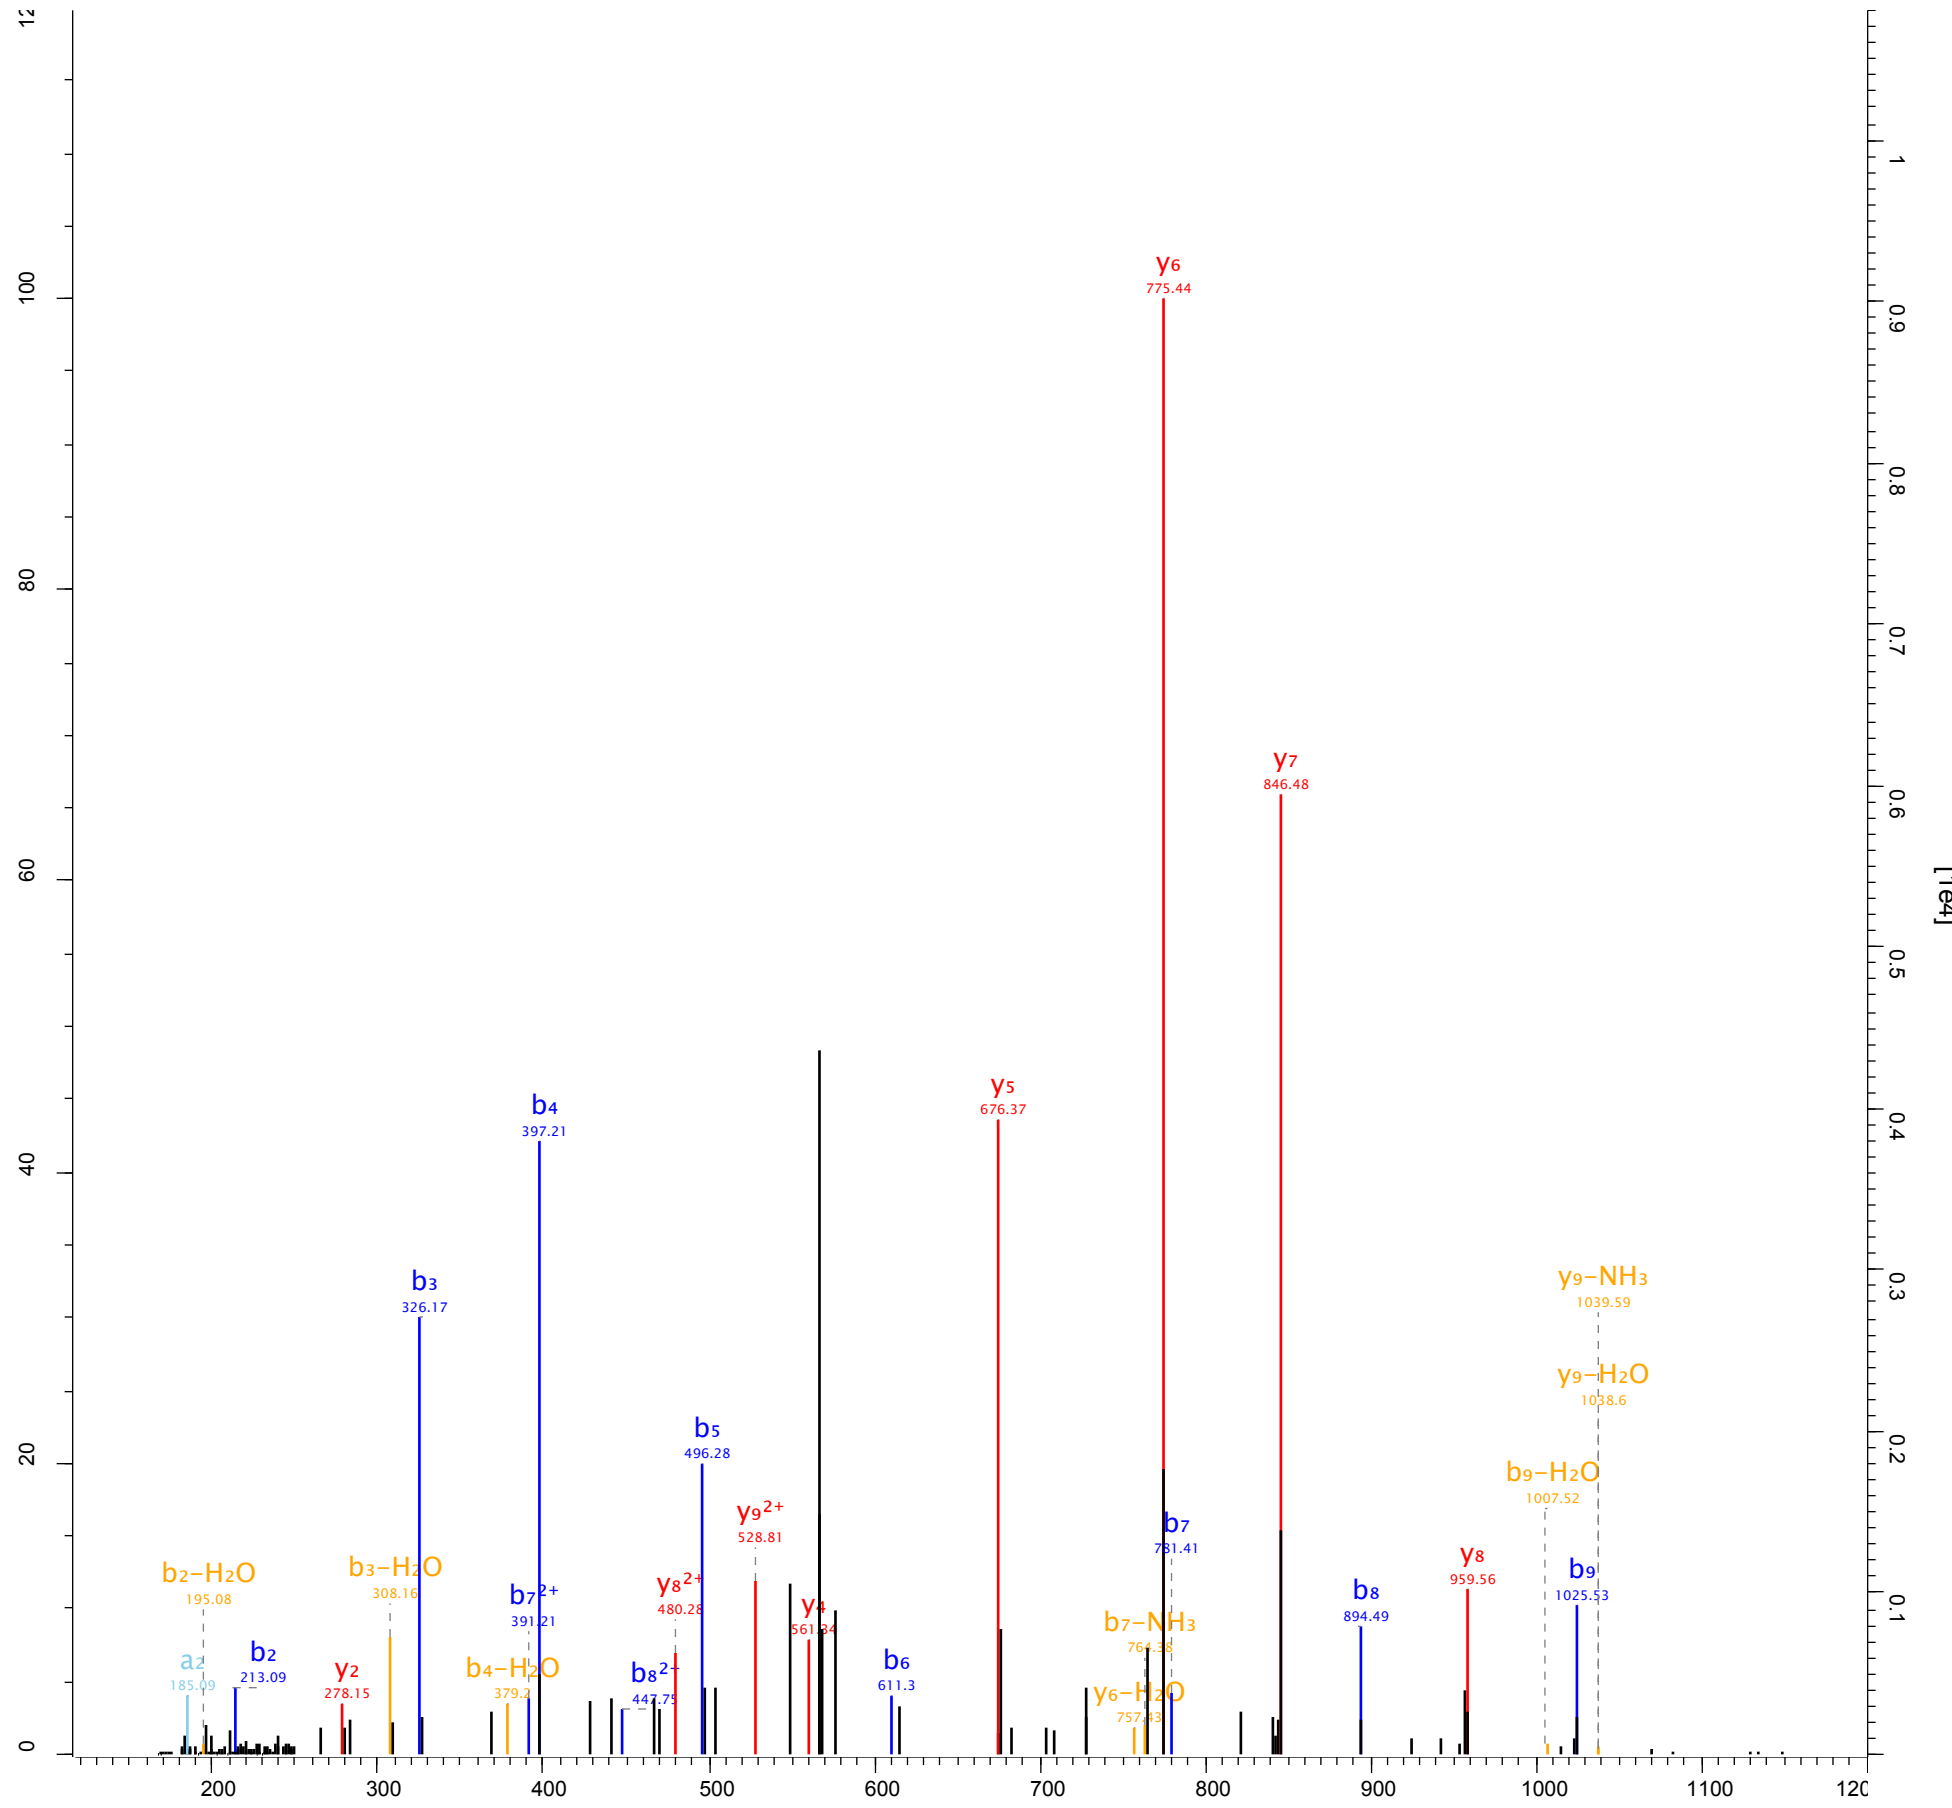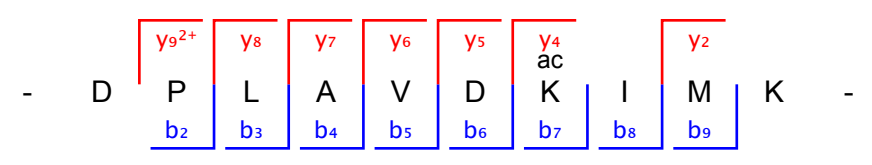

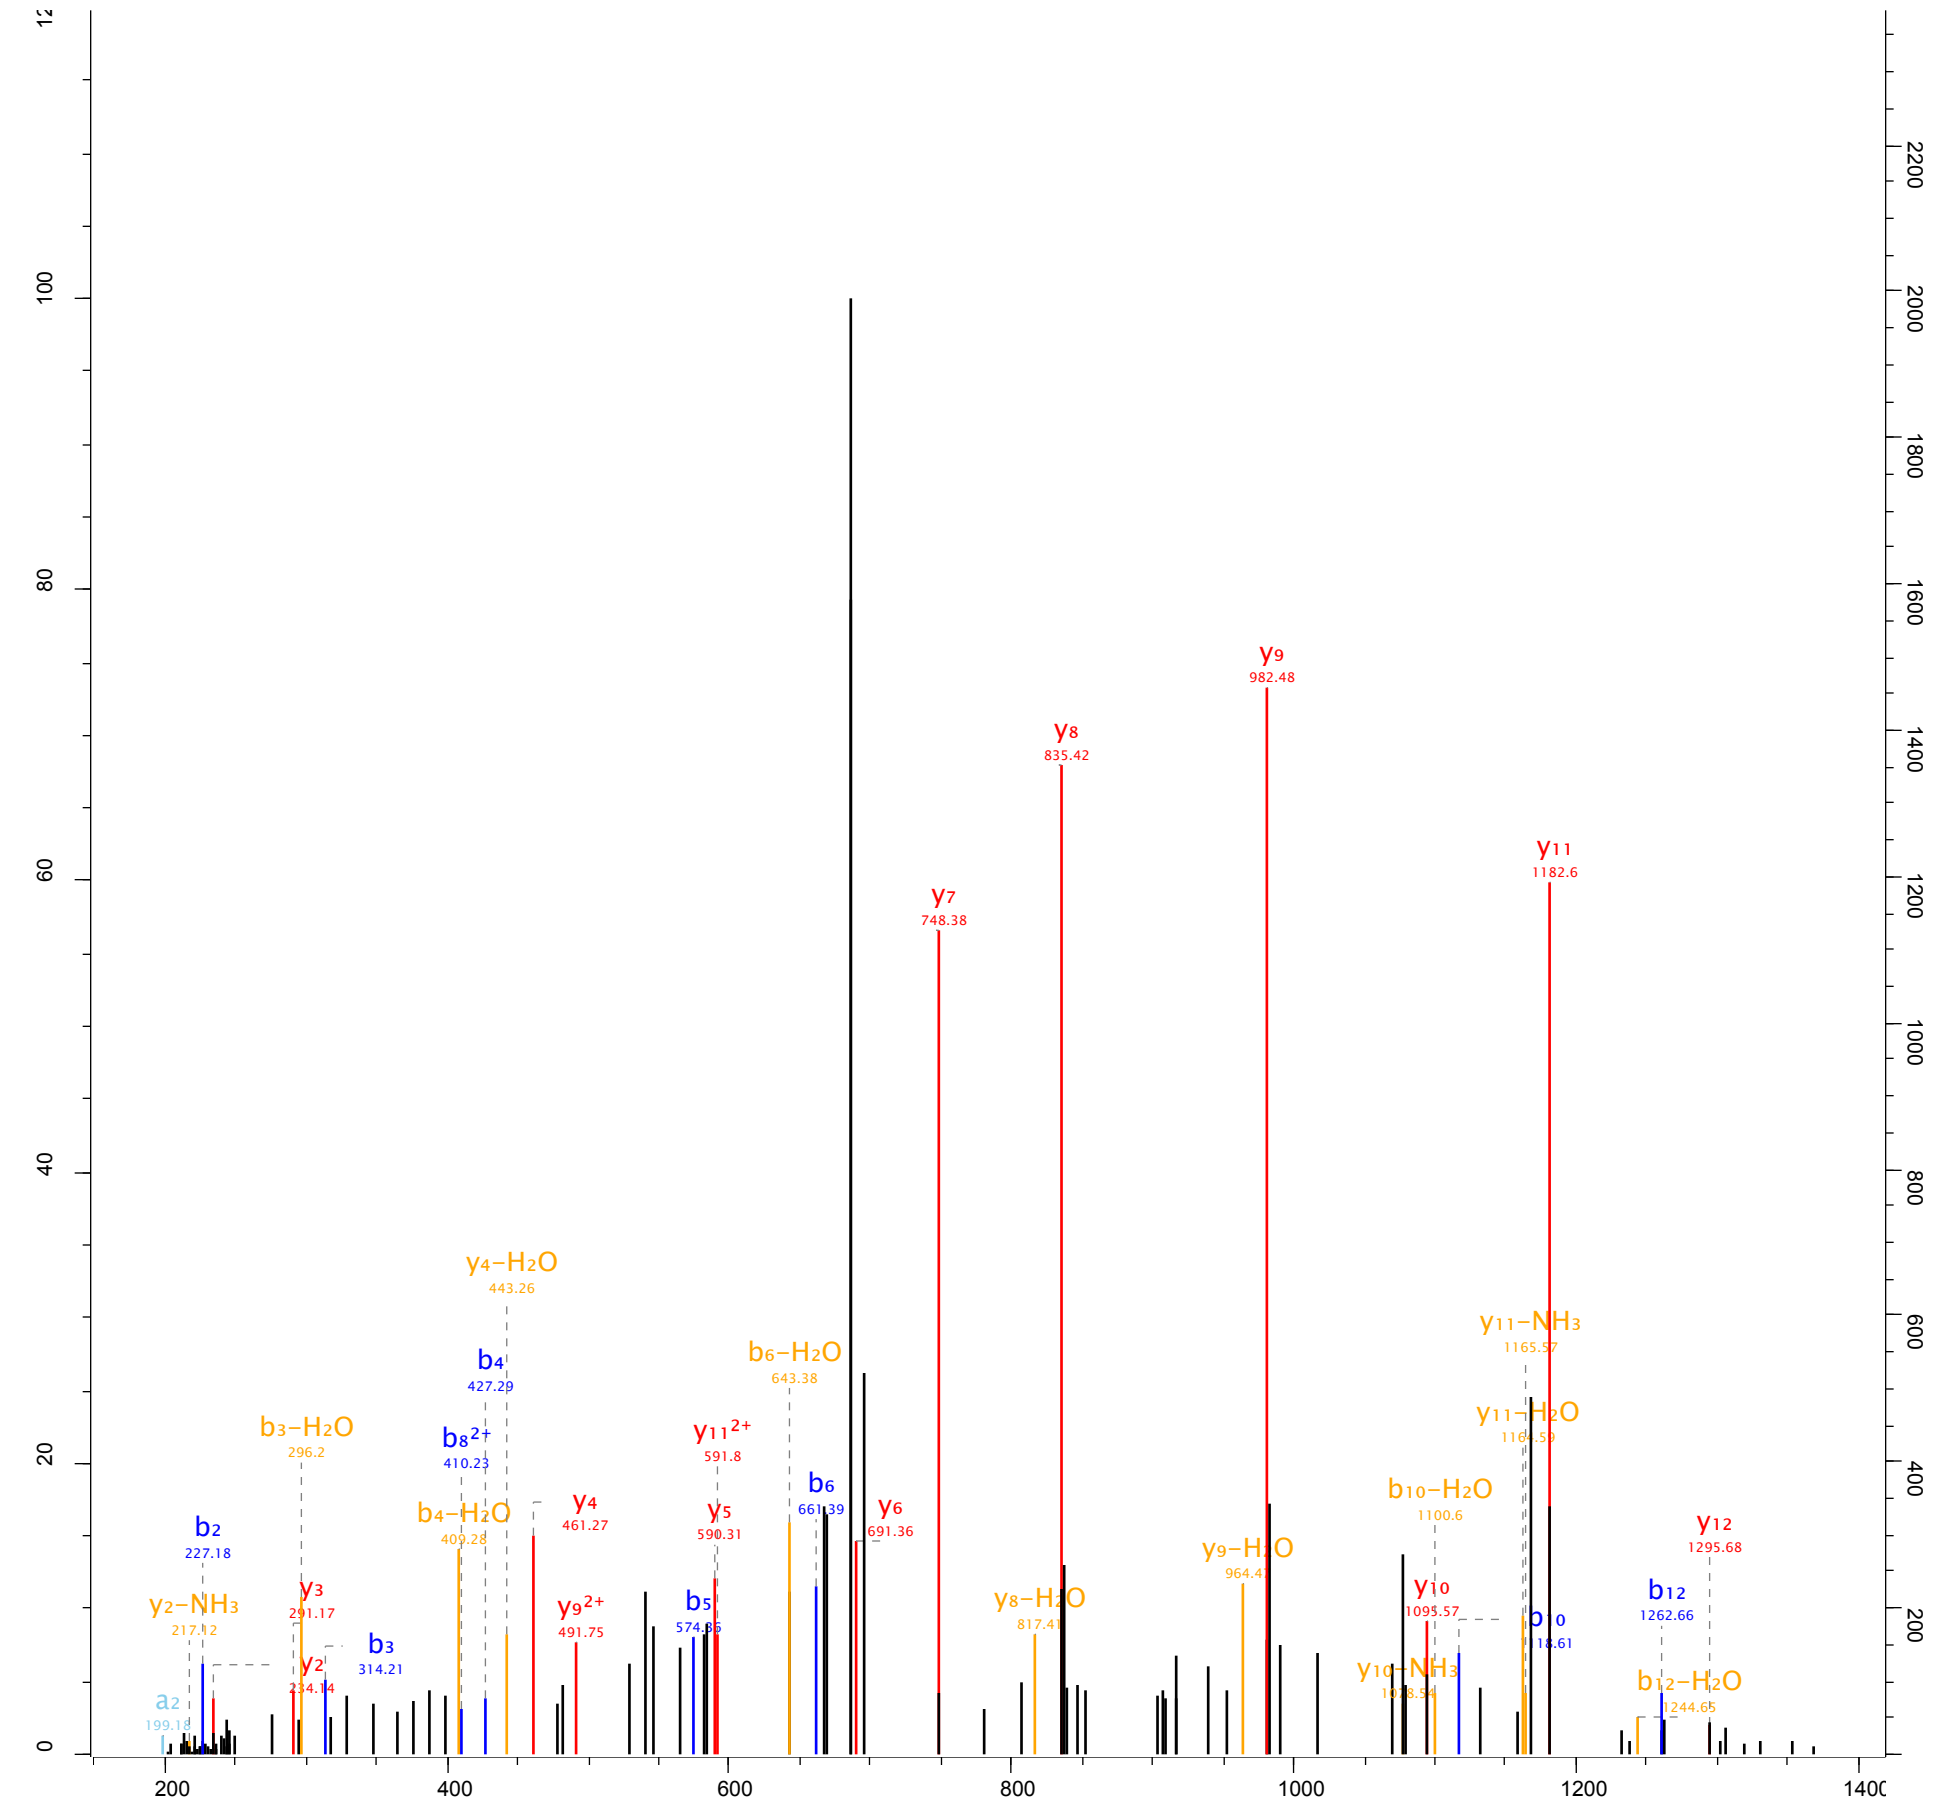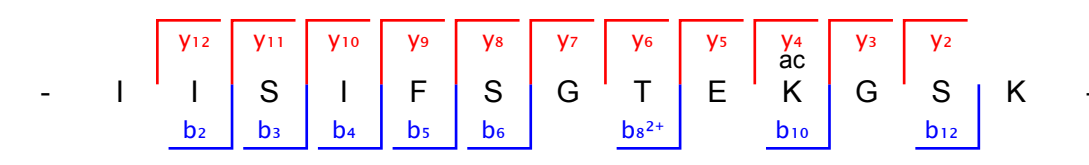



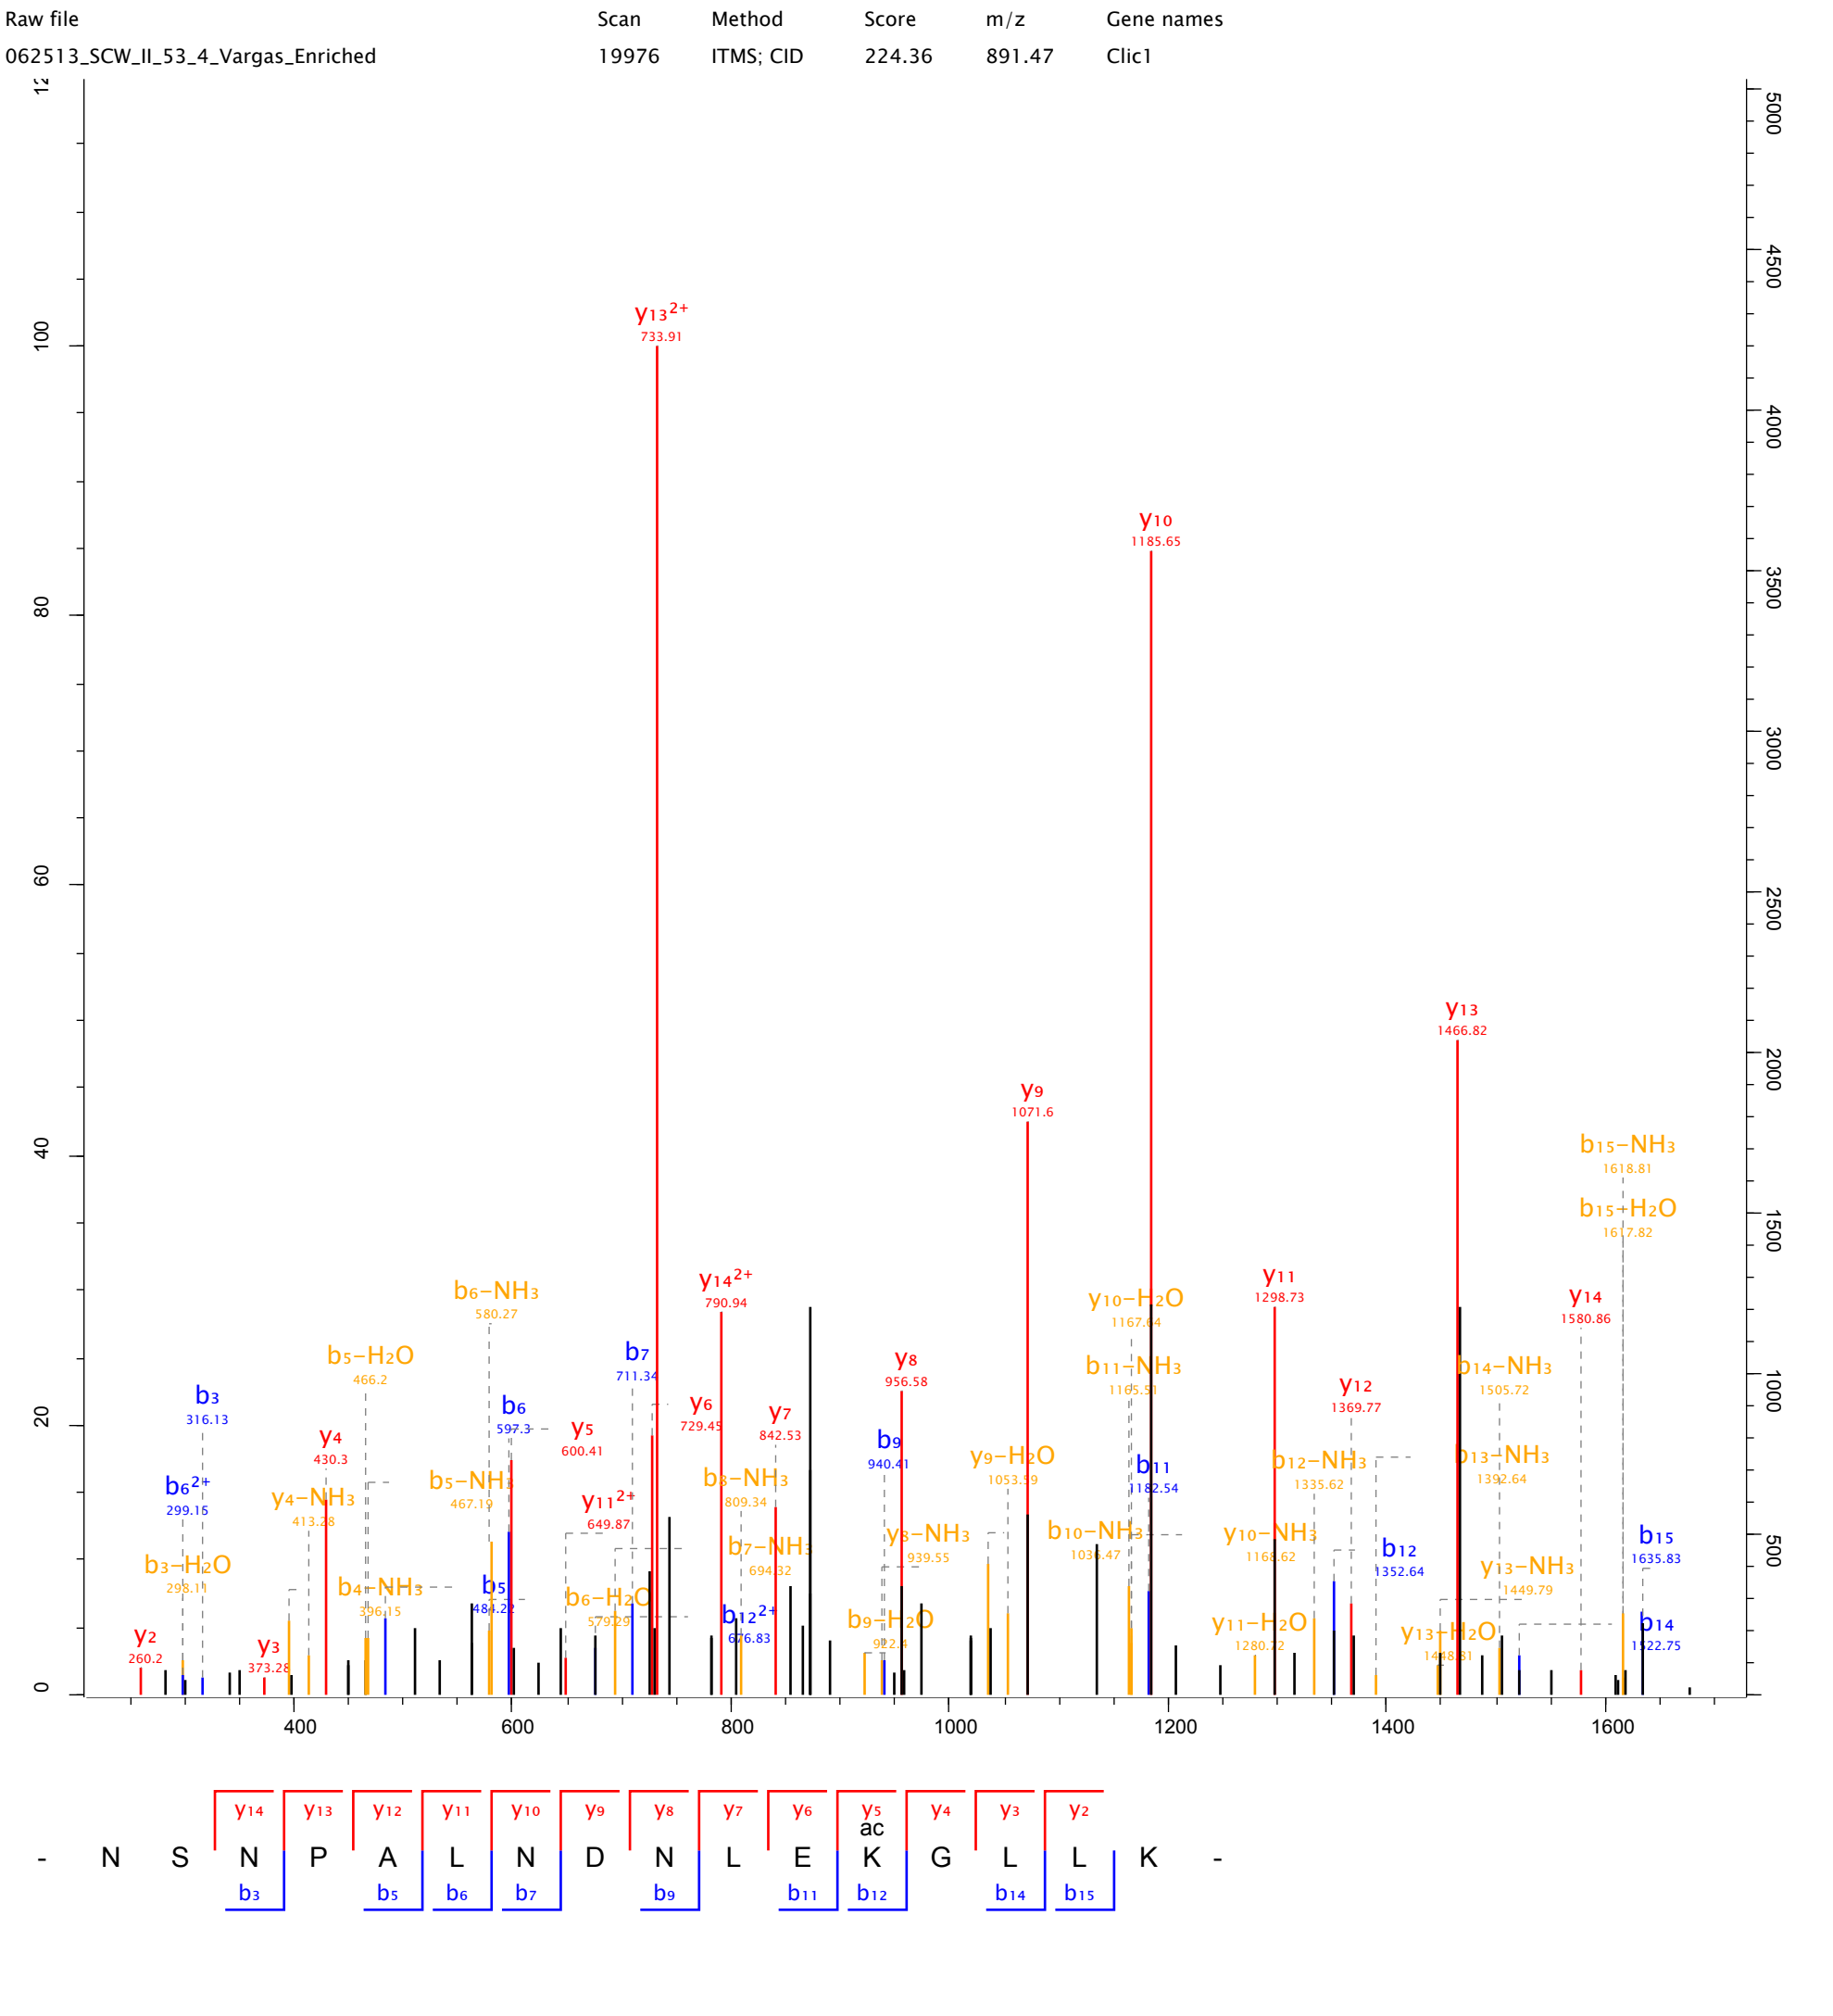

062513\_SCW\_II\_53\_4\_Vargas\_Enriched

19978

ITMS; CID

189.04

844.92

Sdha

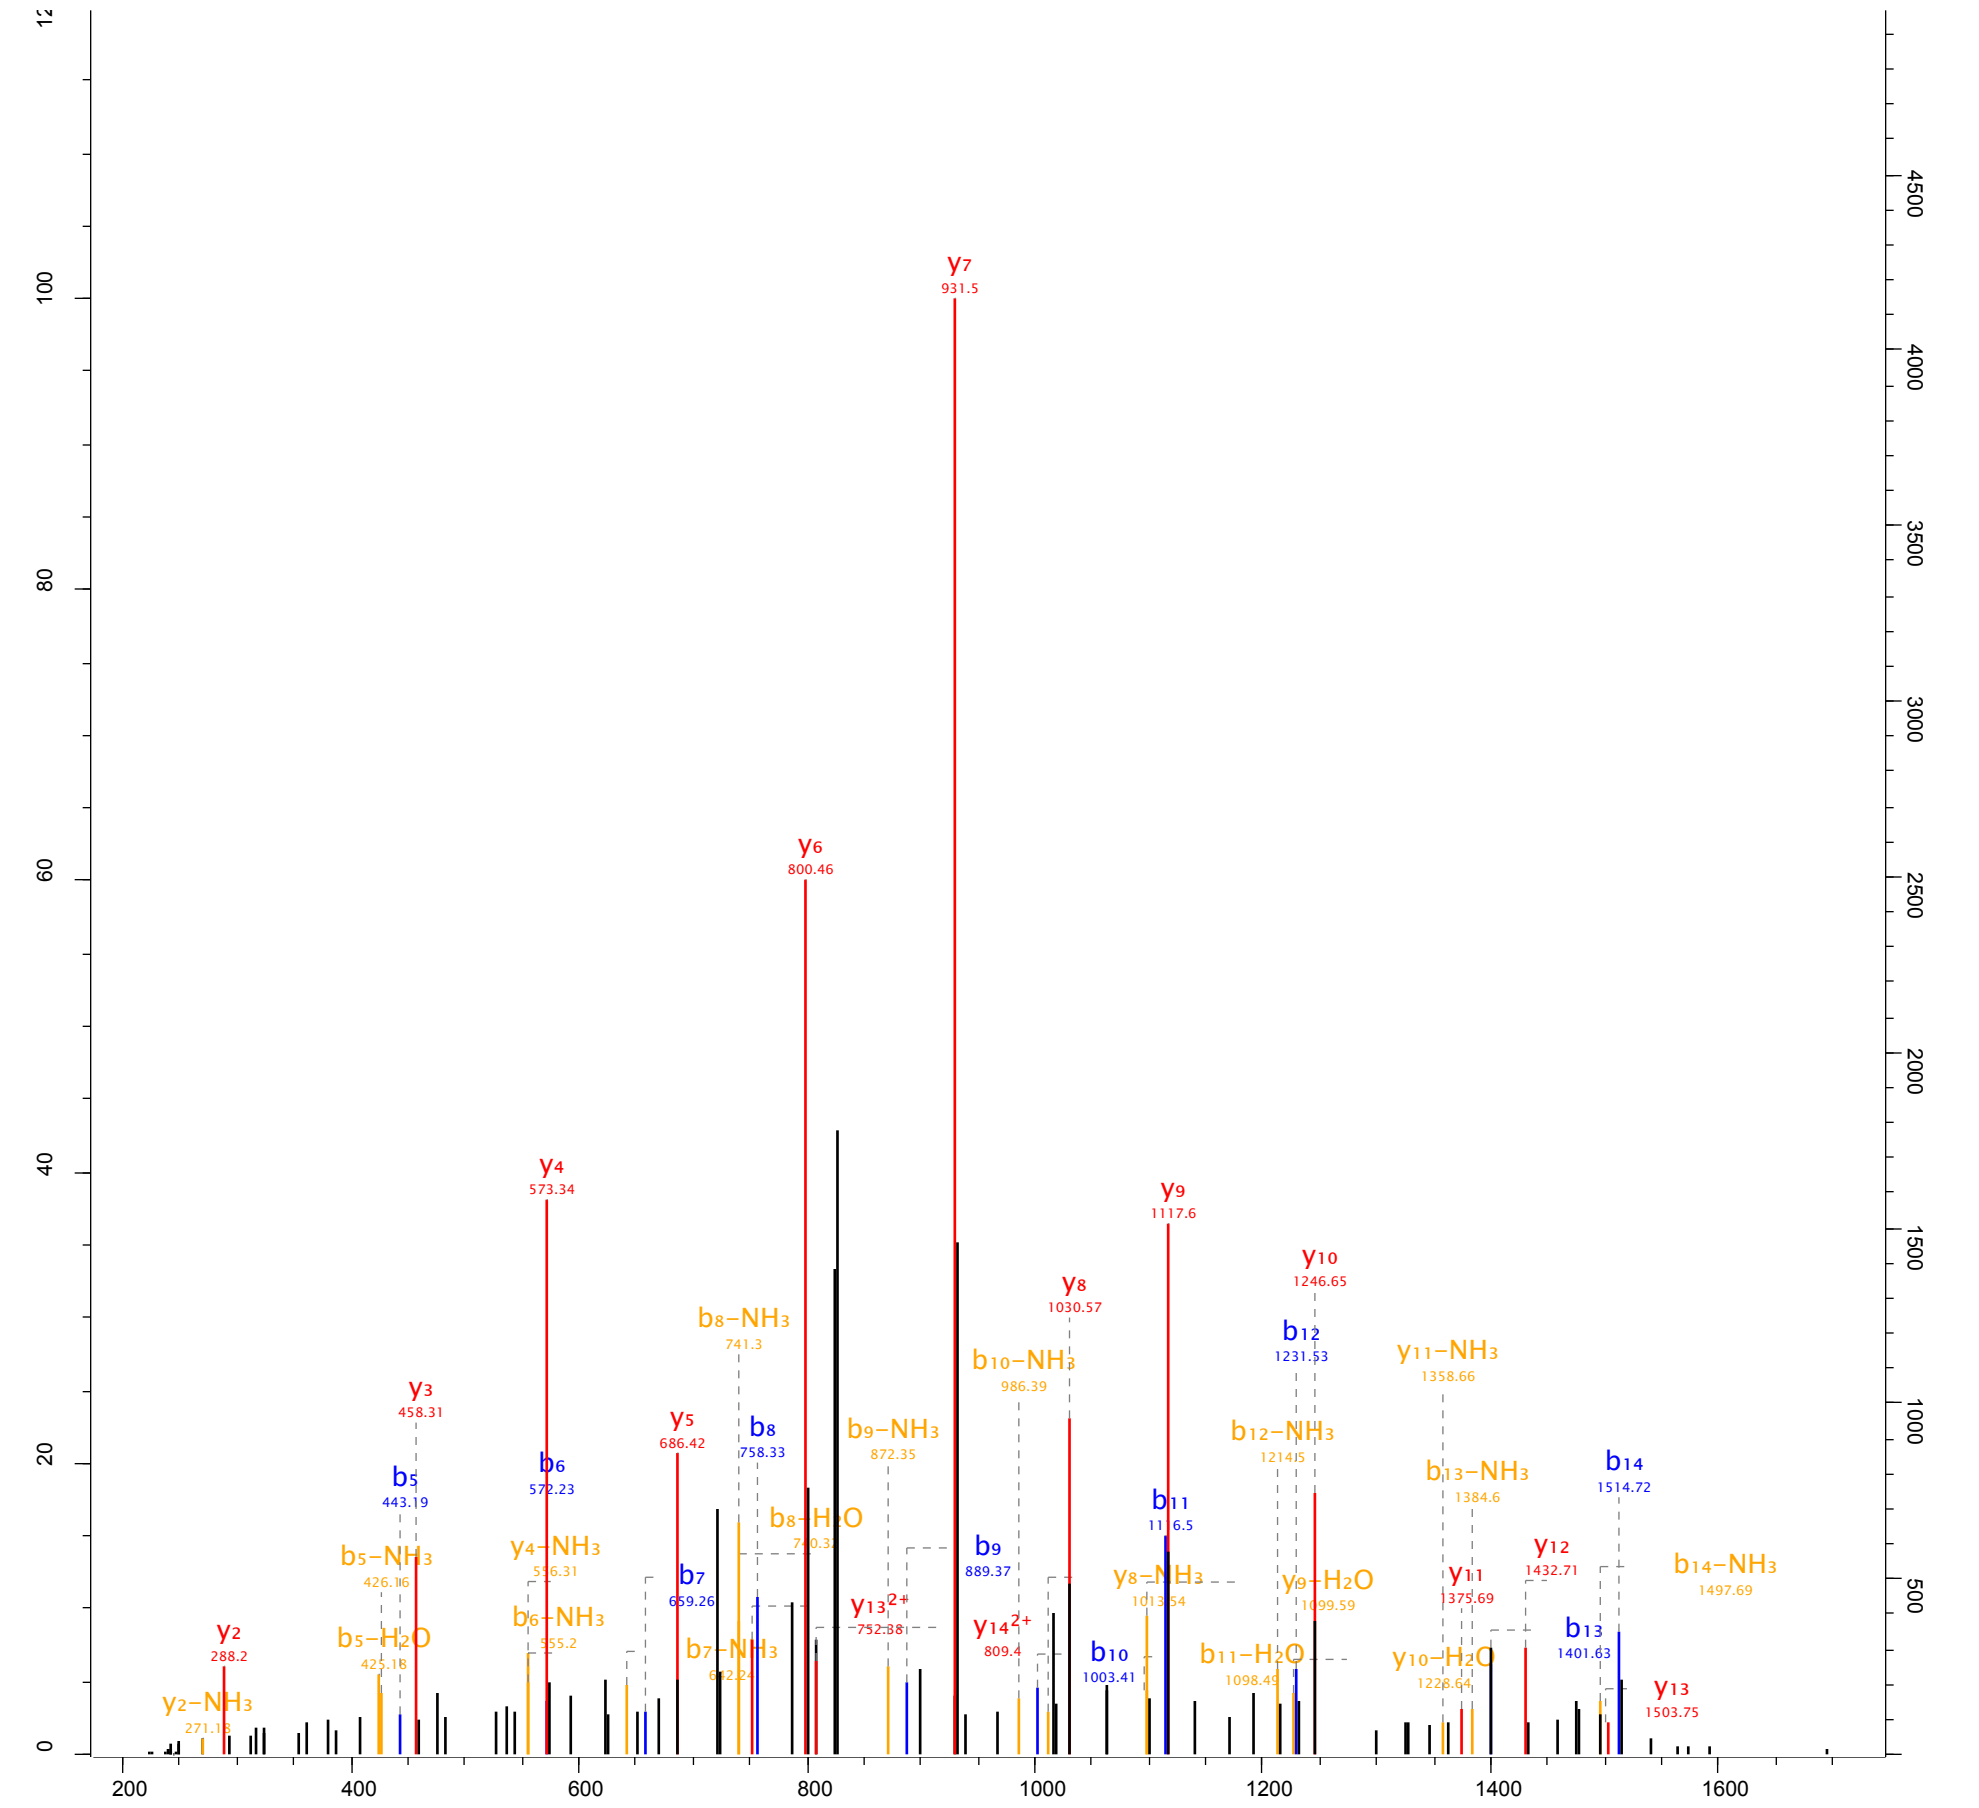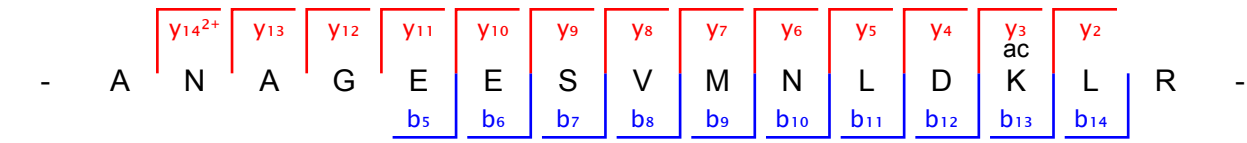

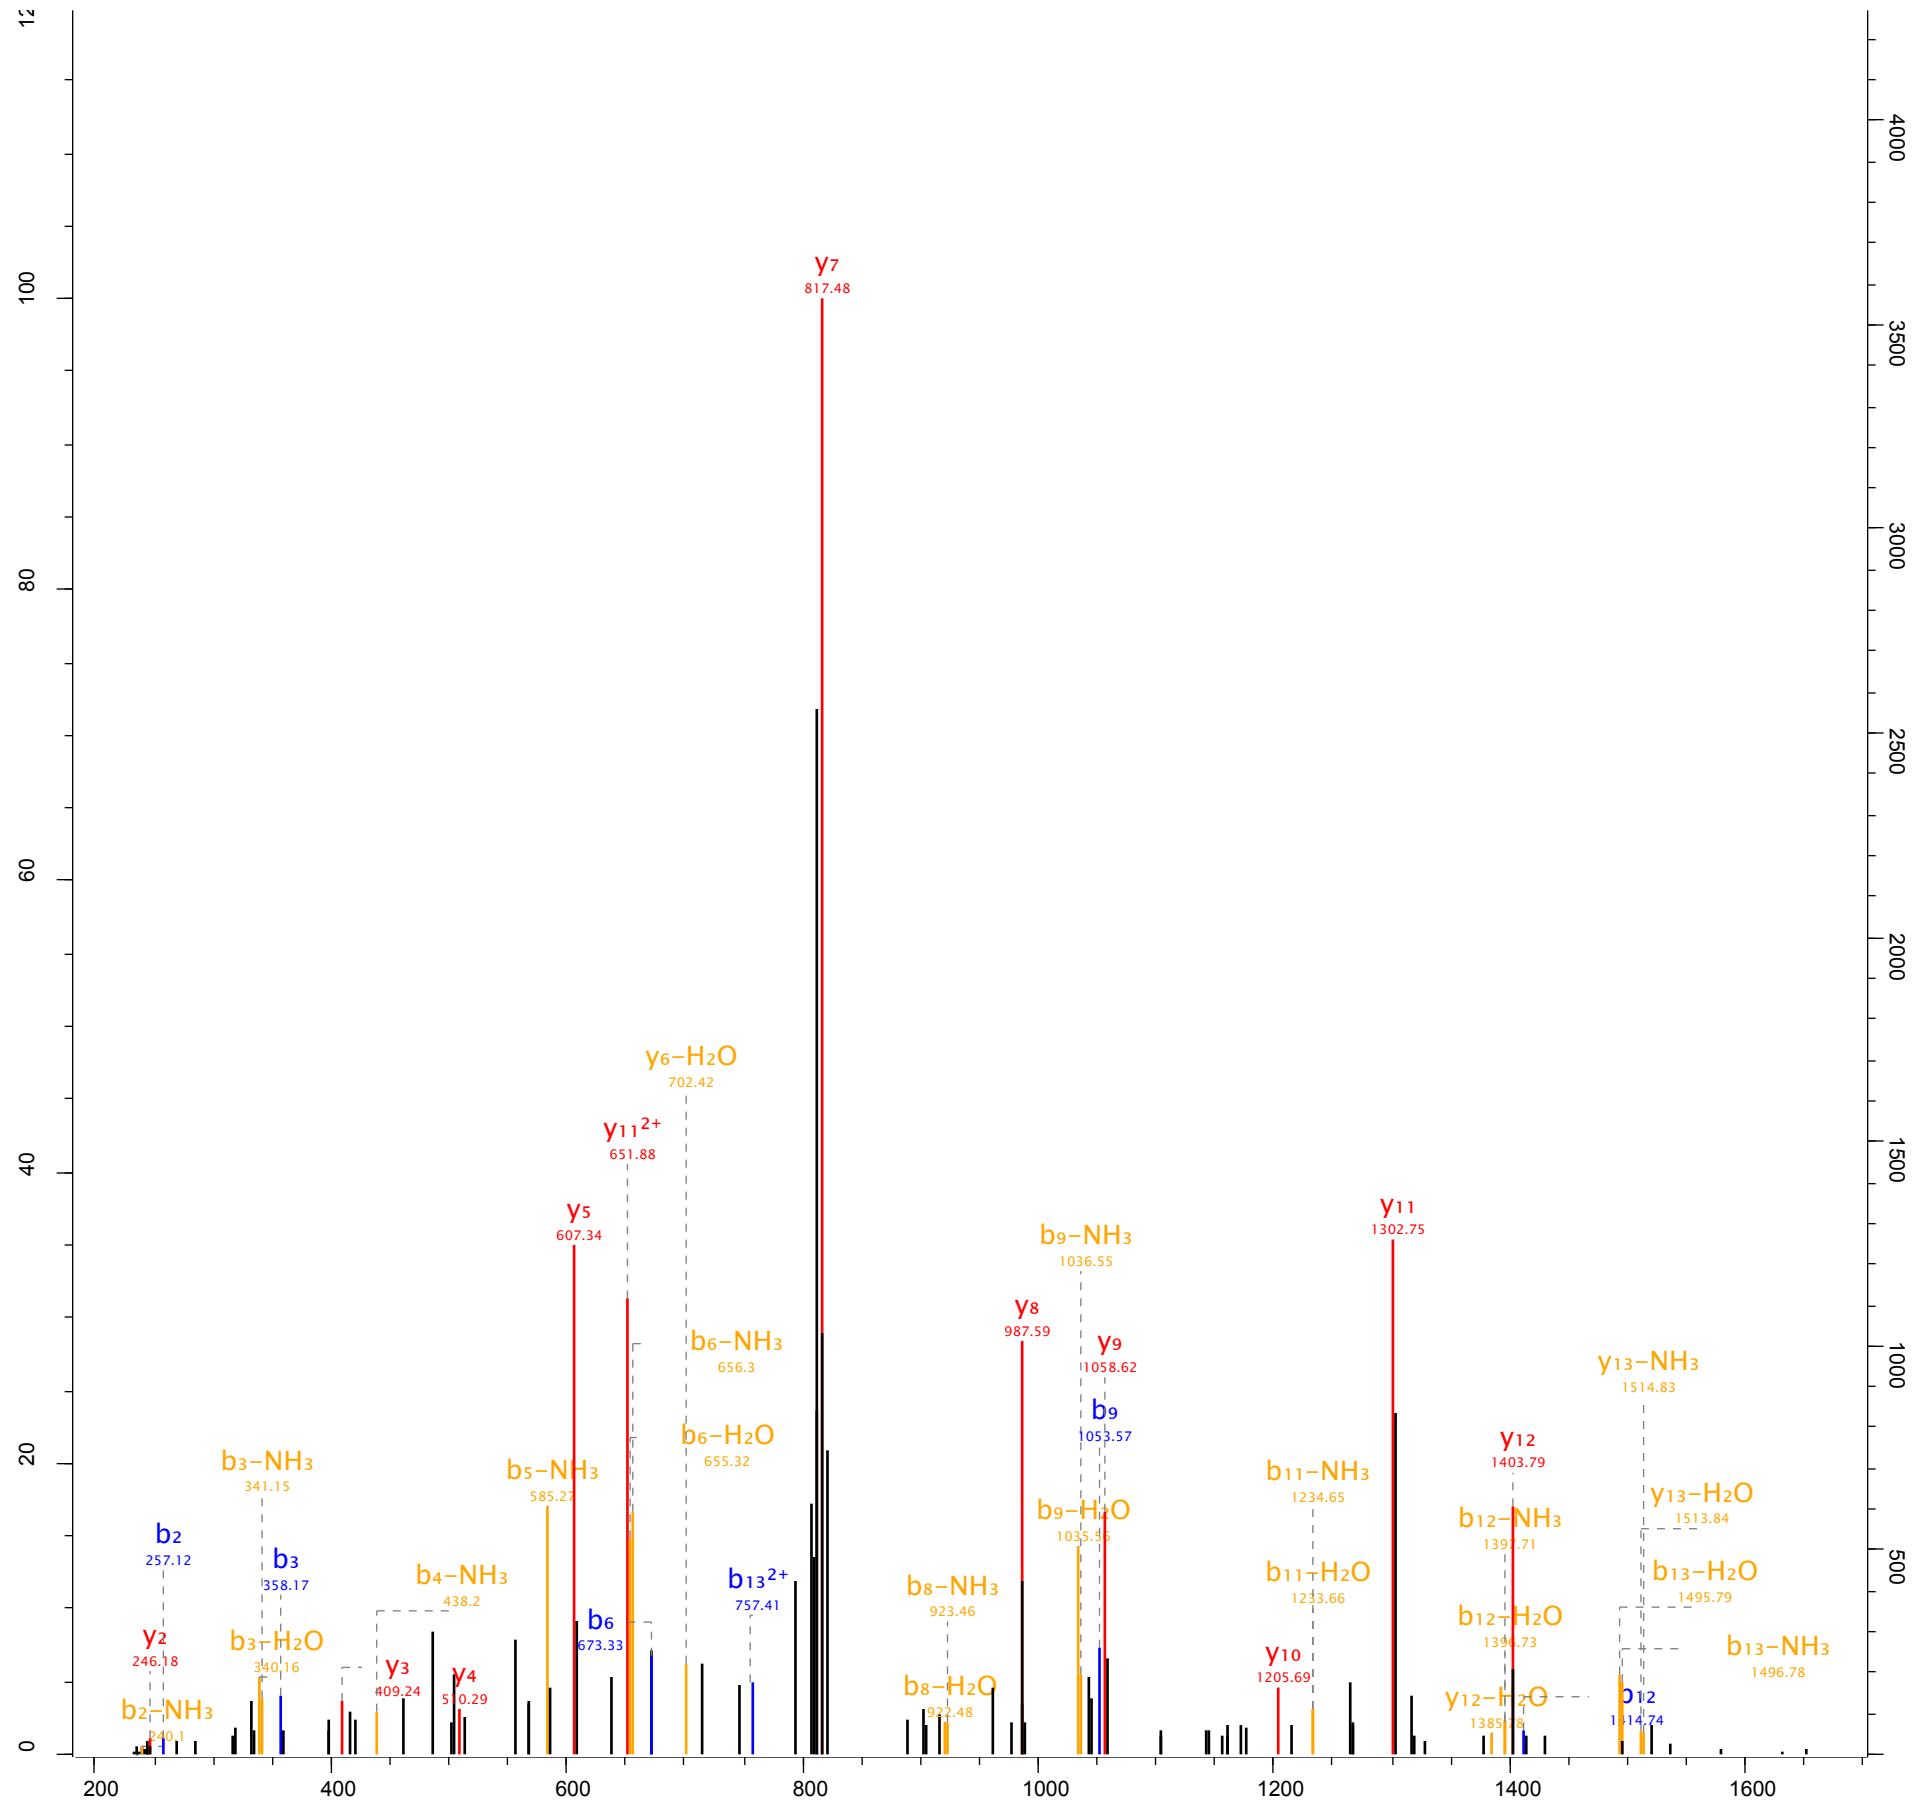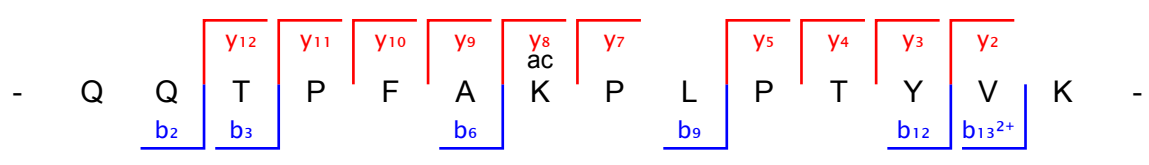

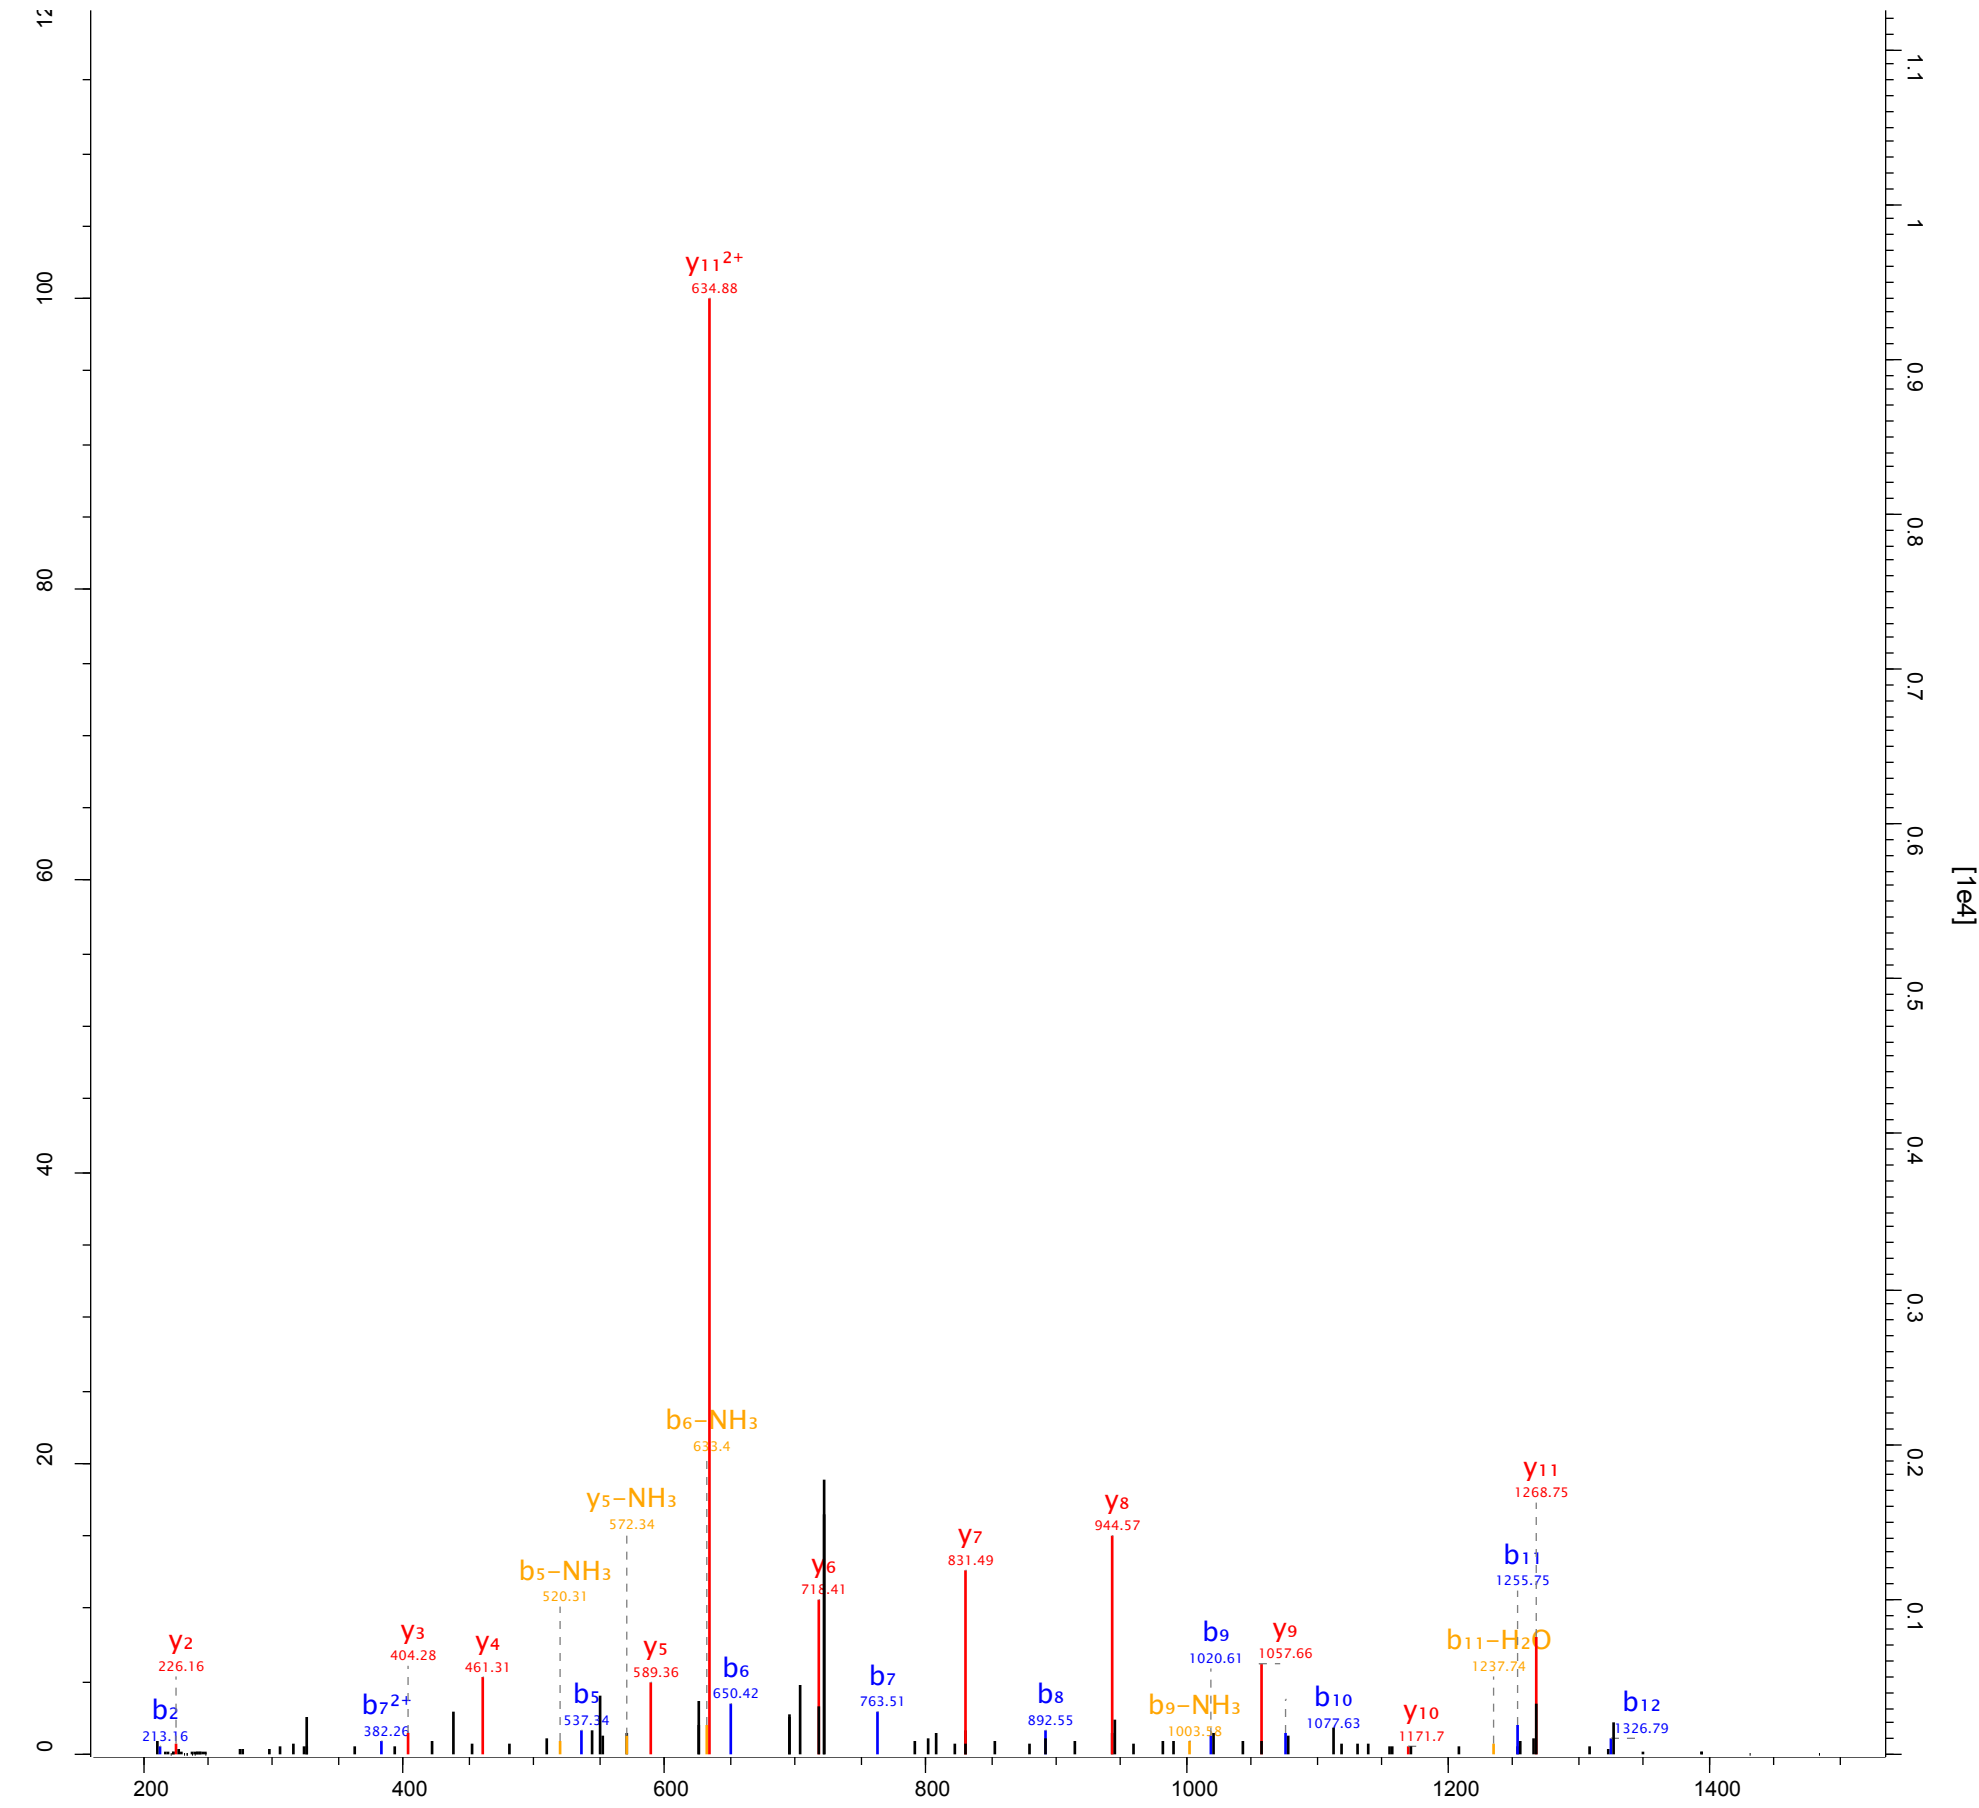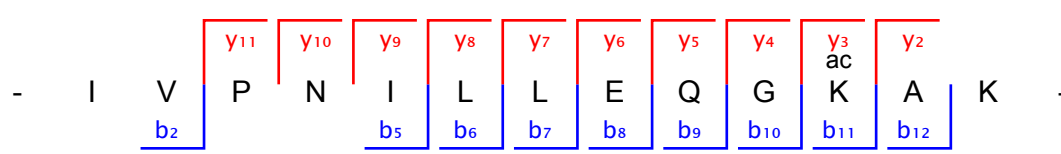

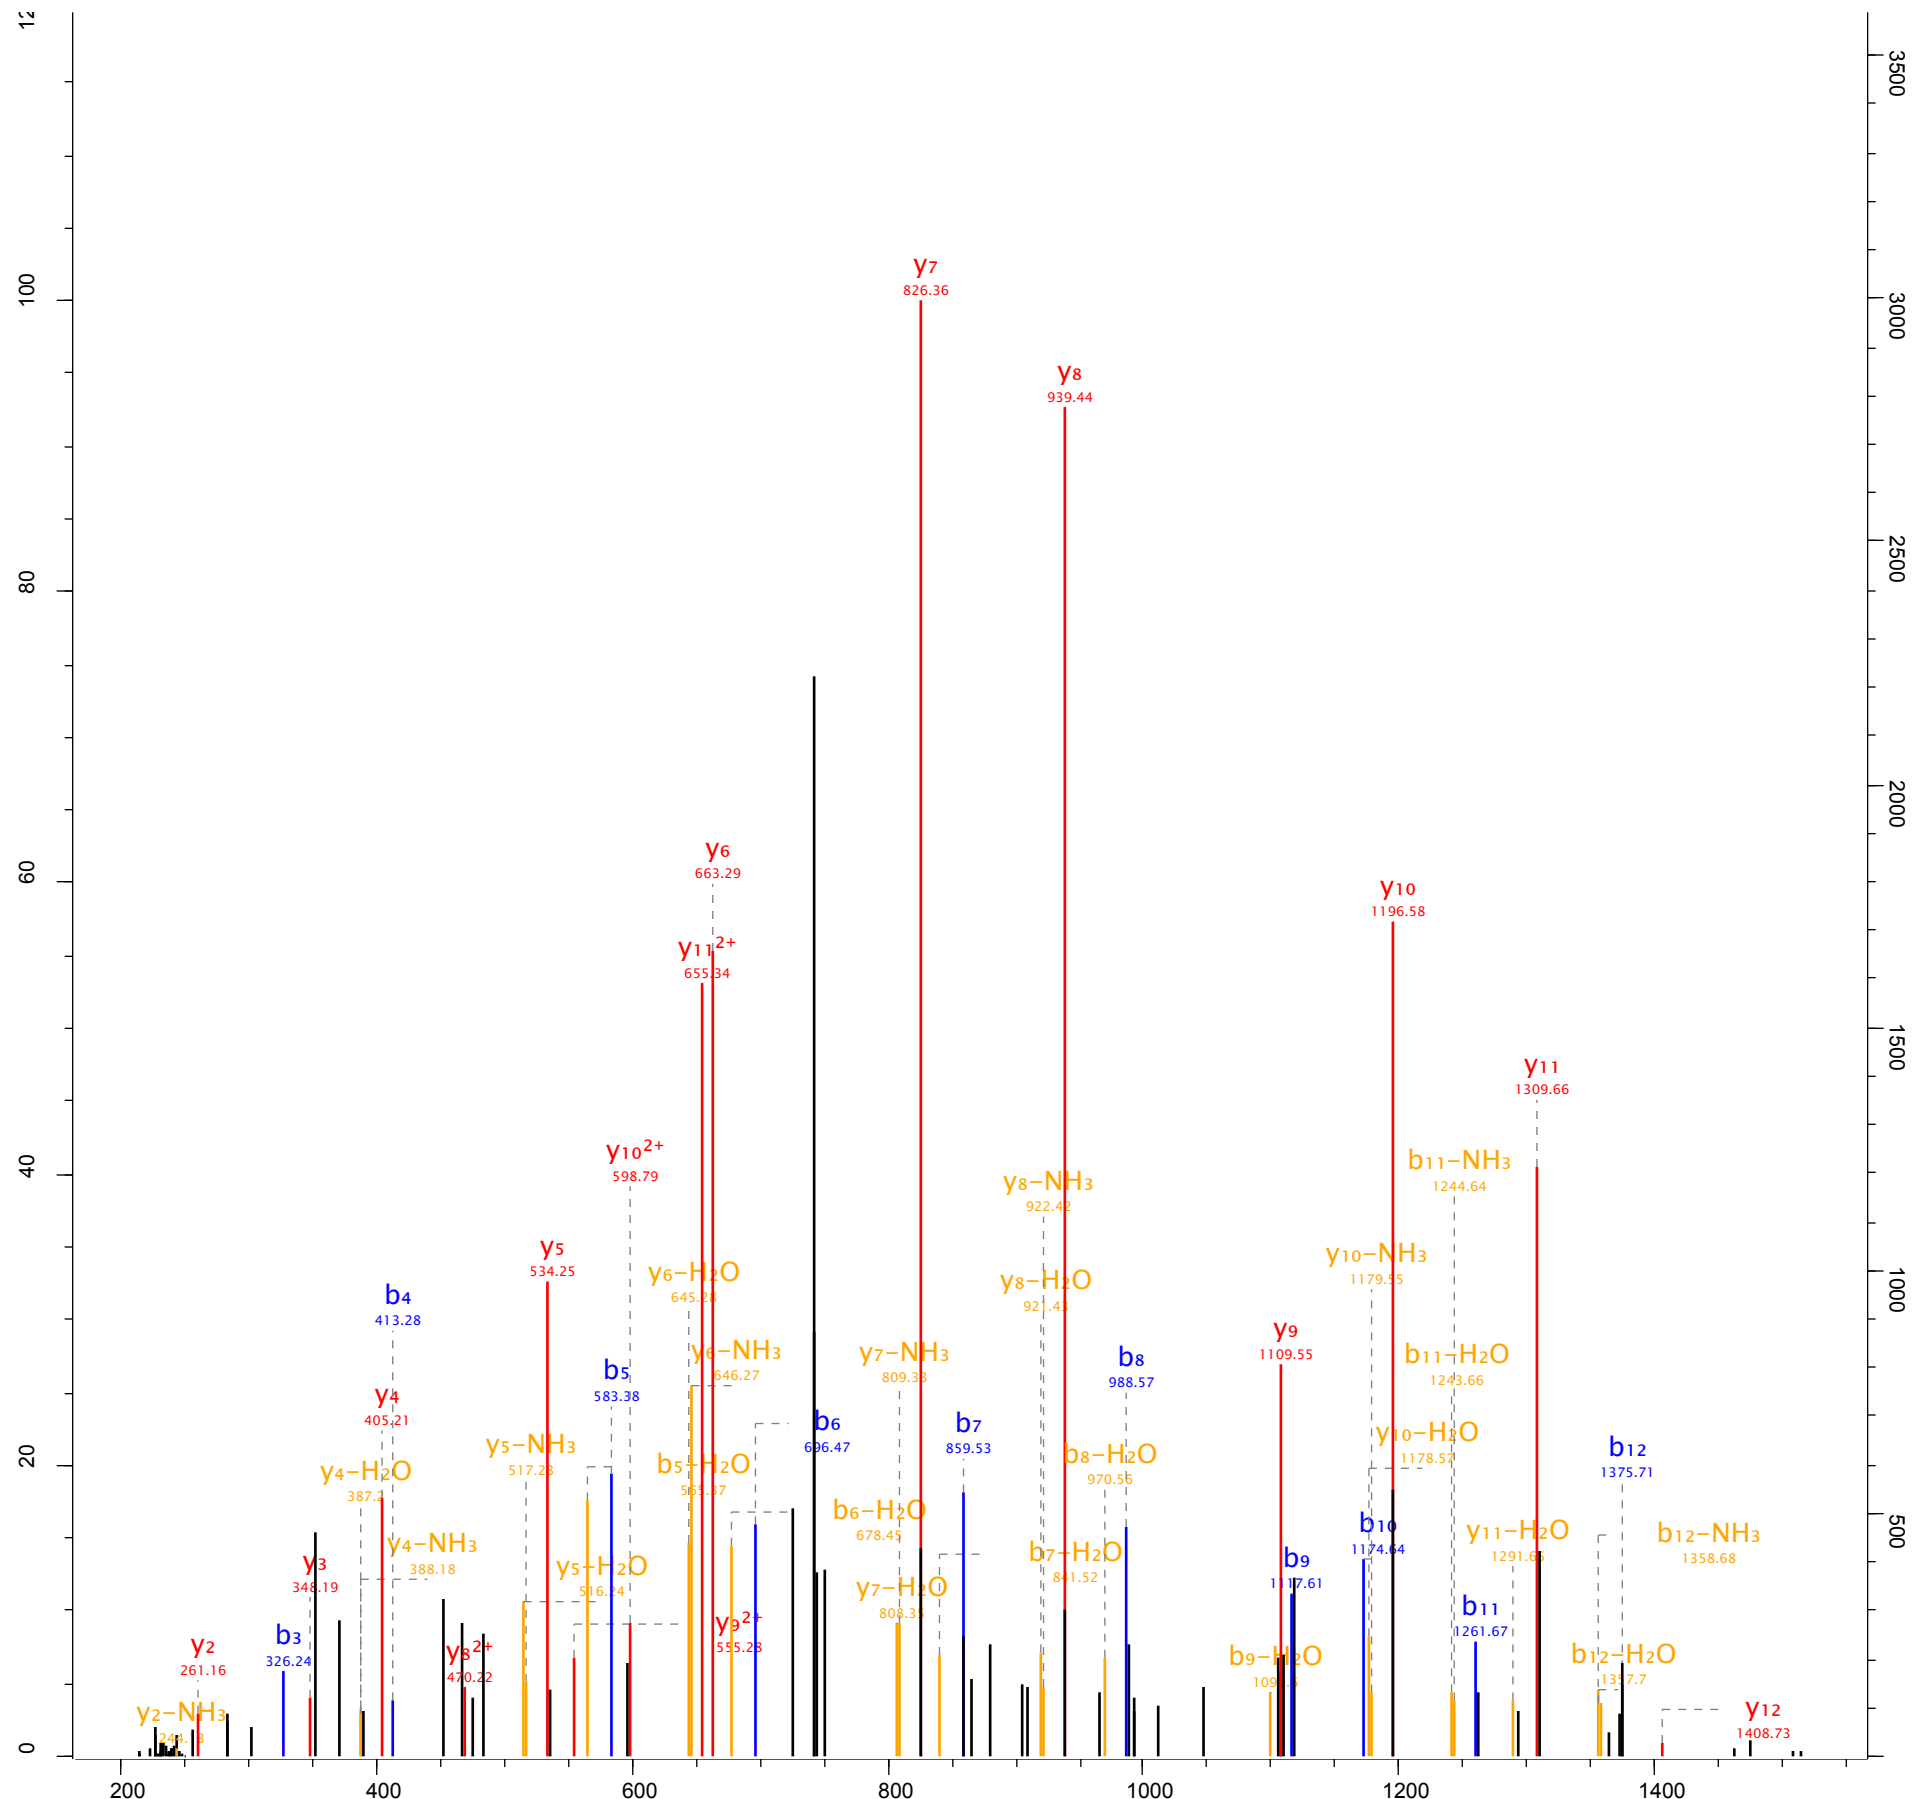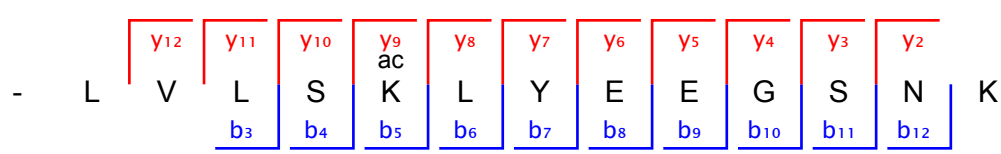

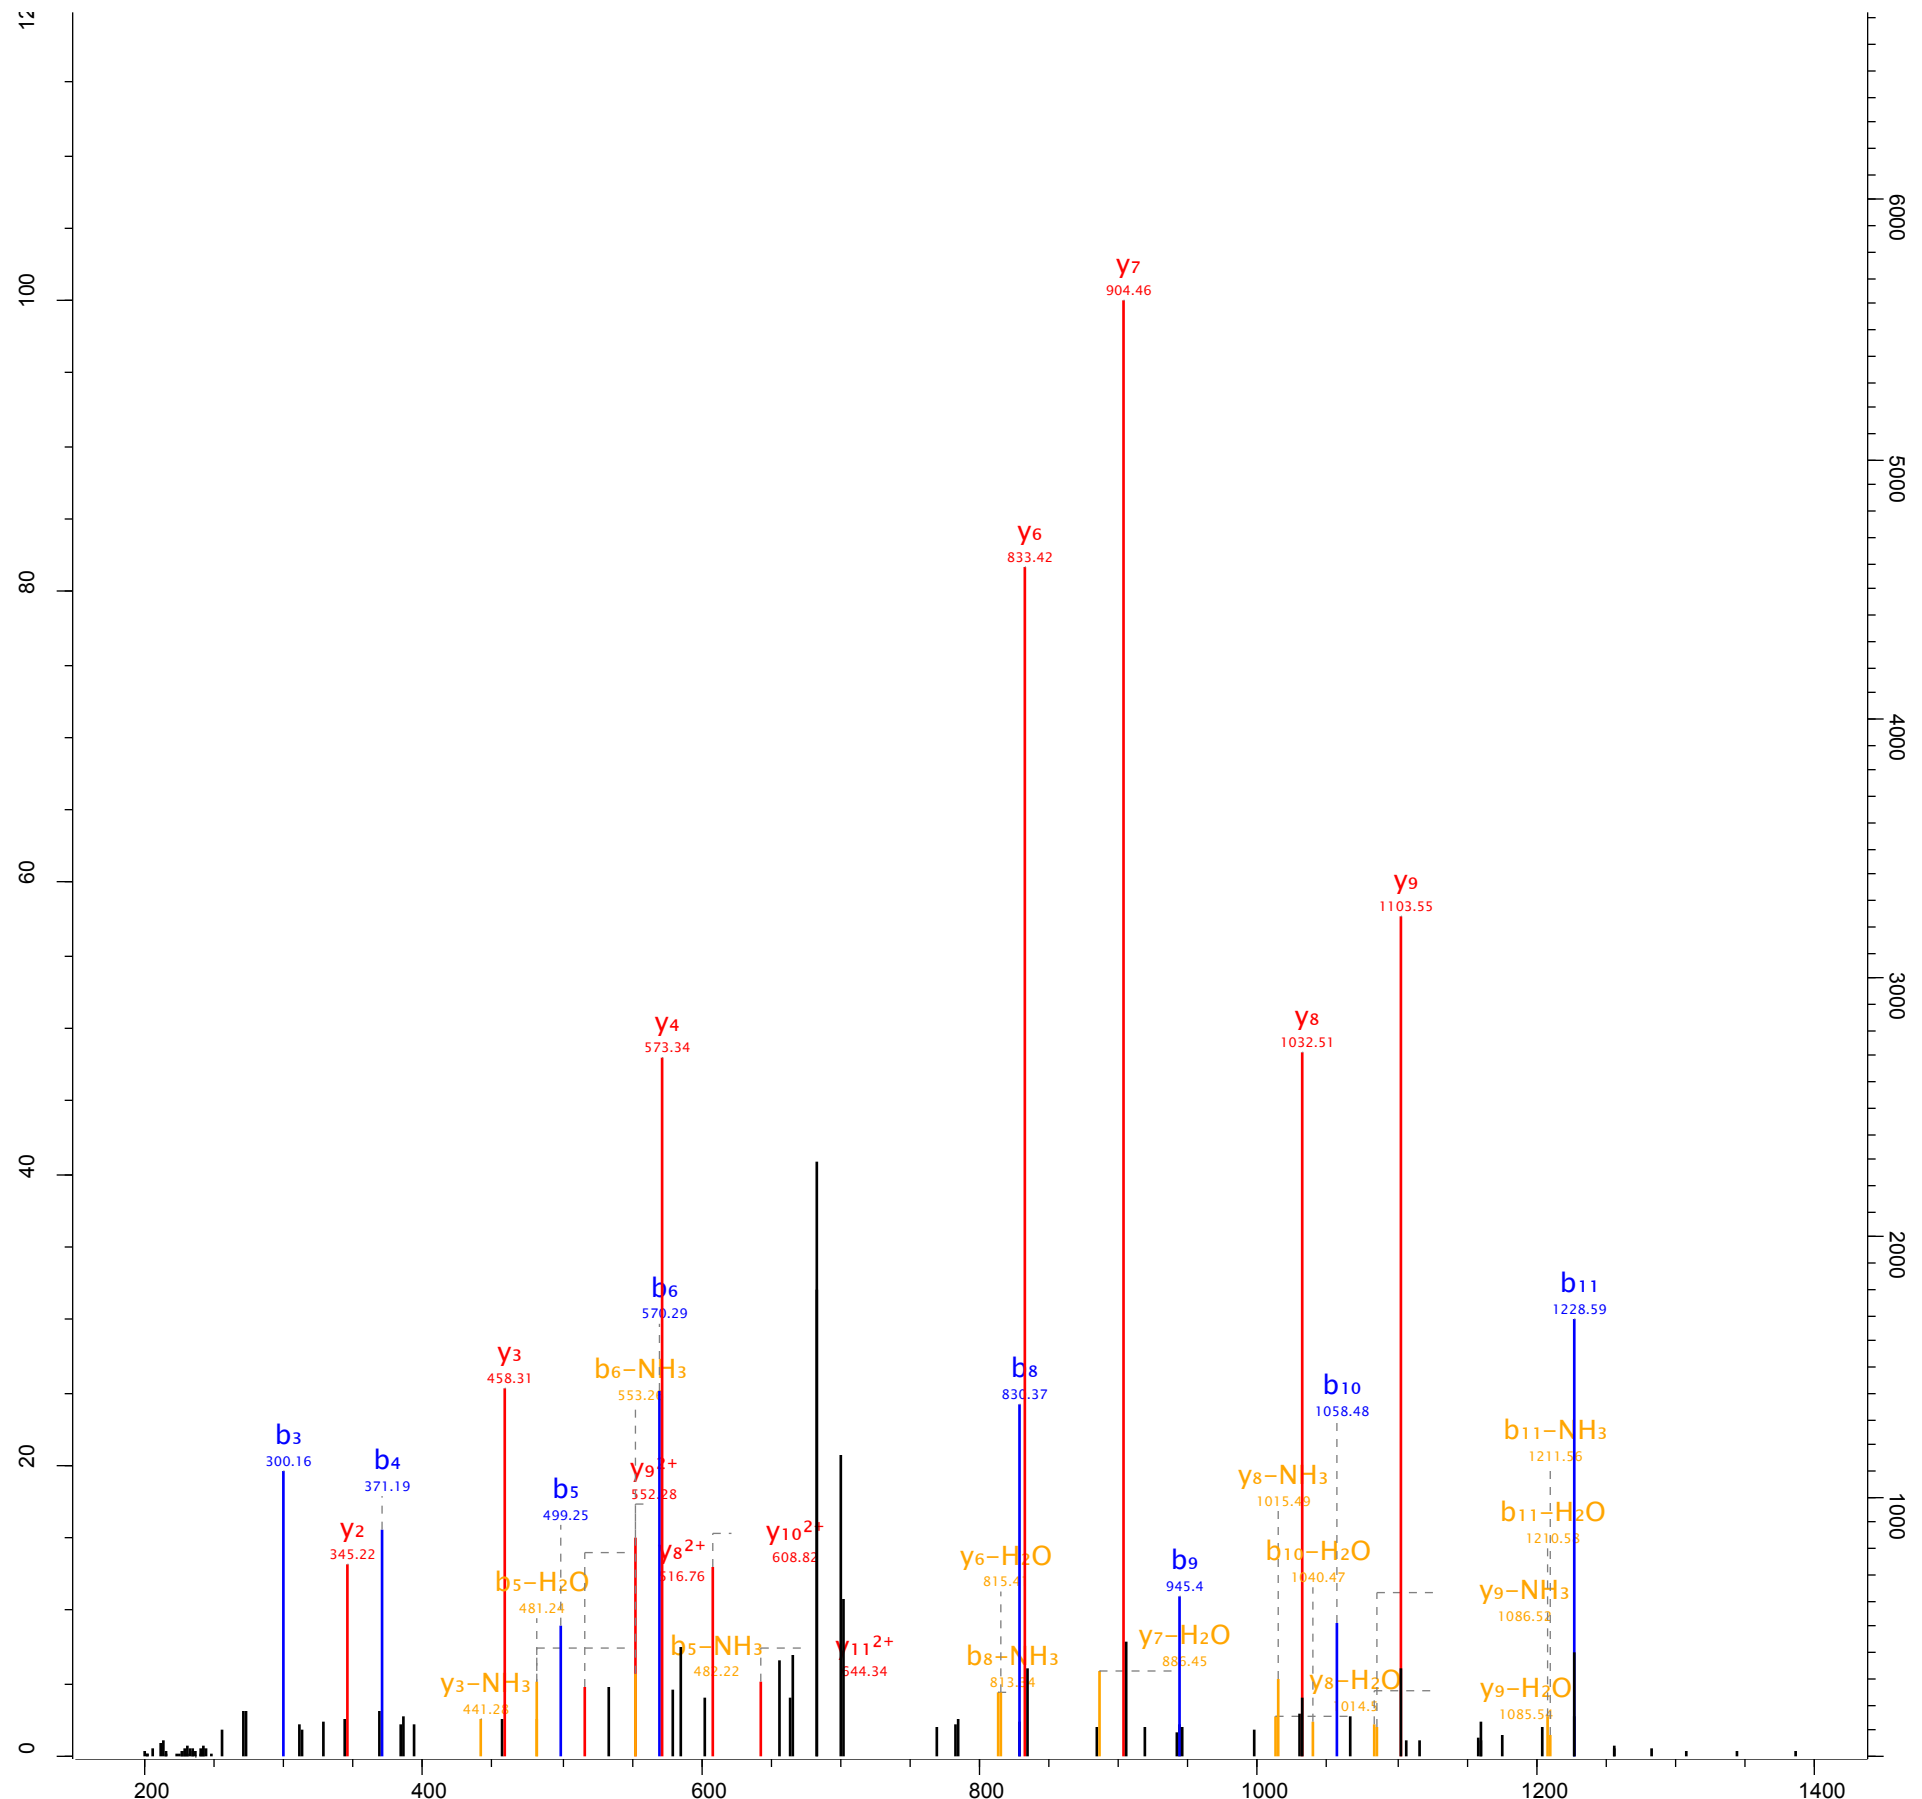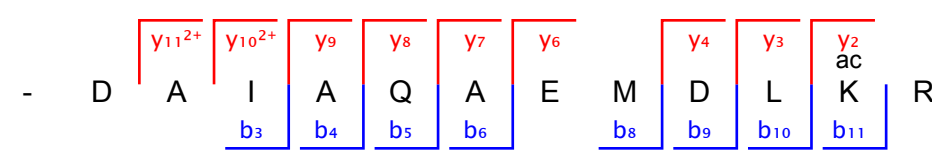

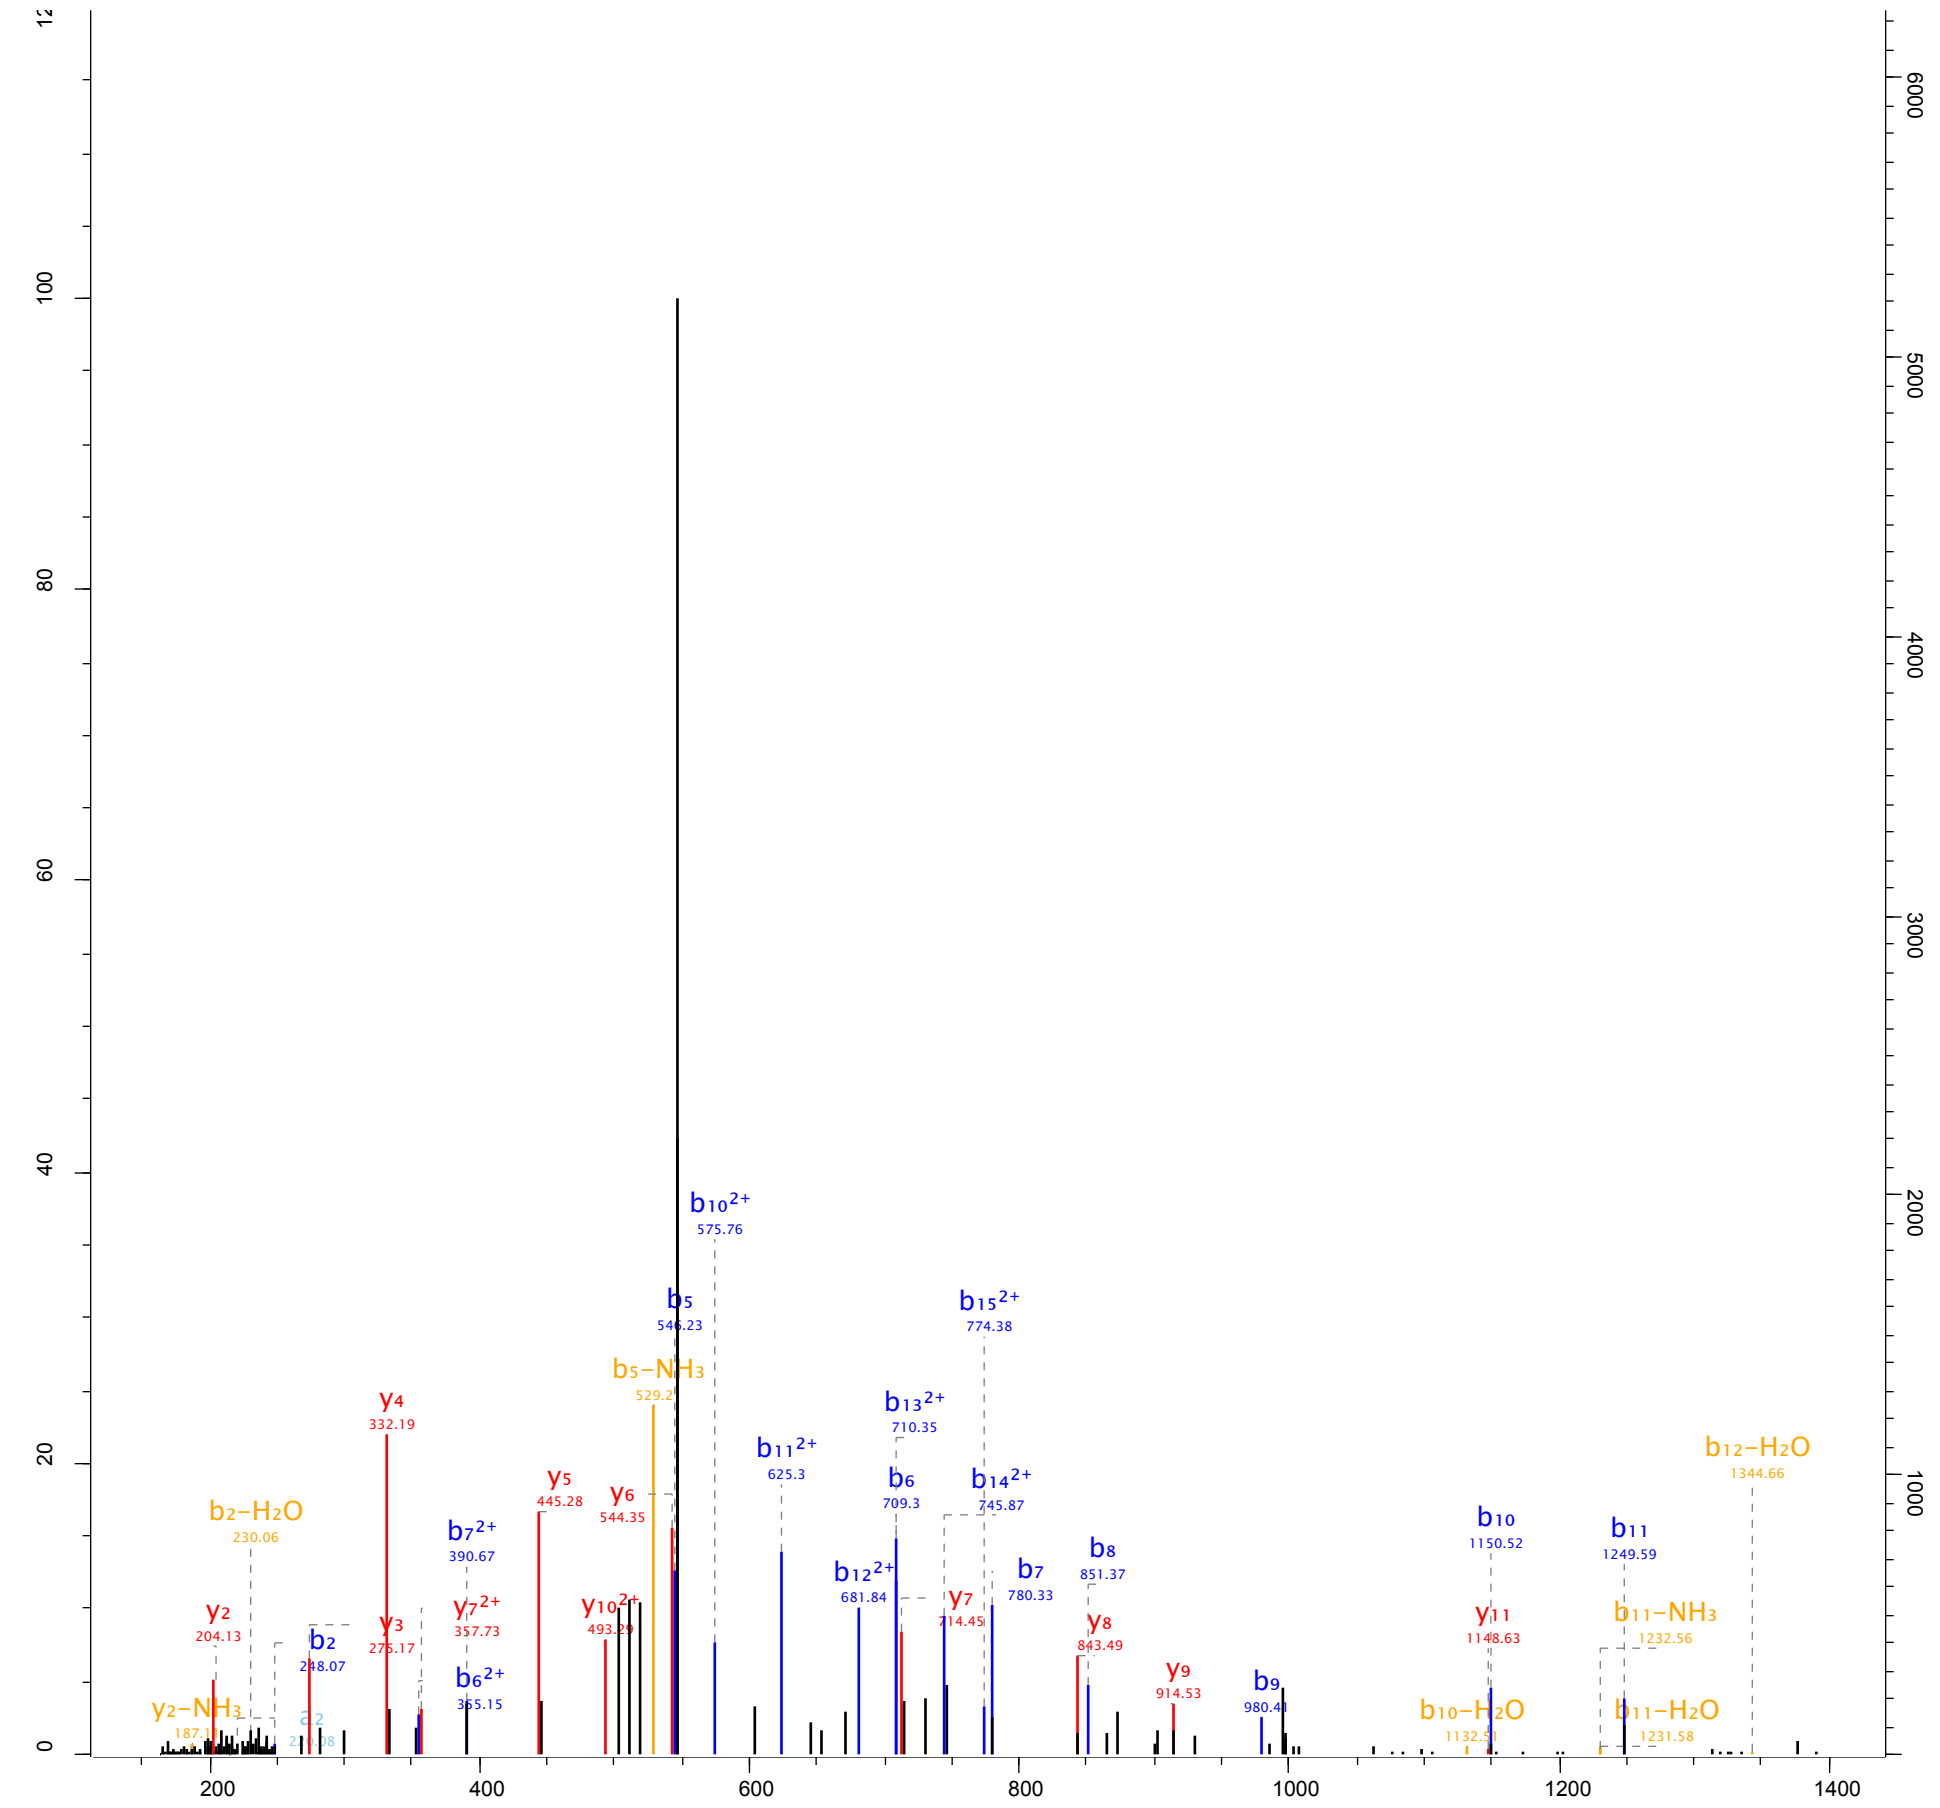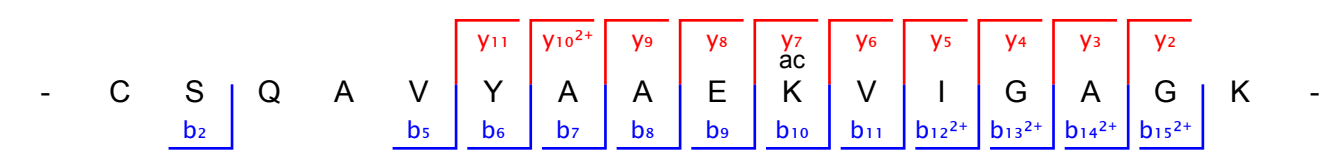

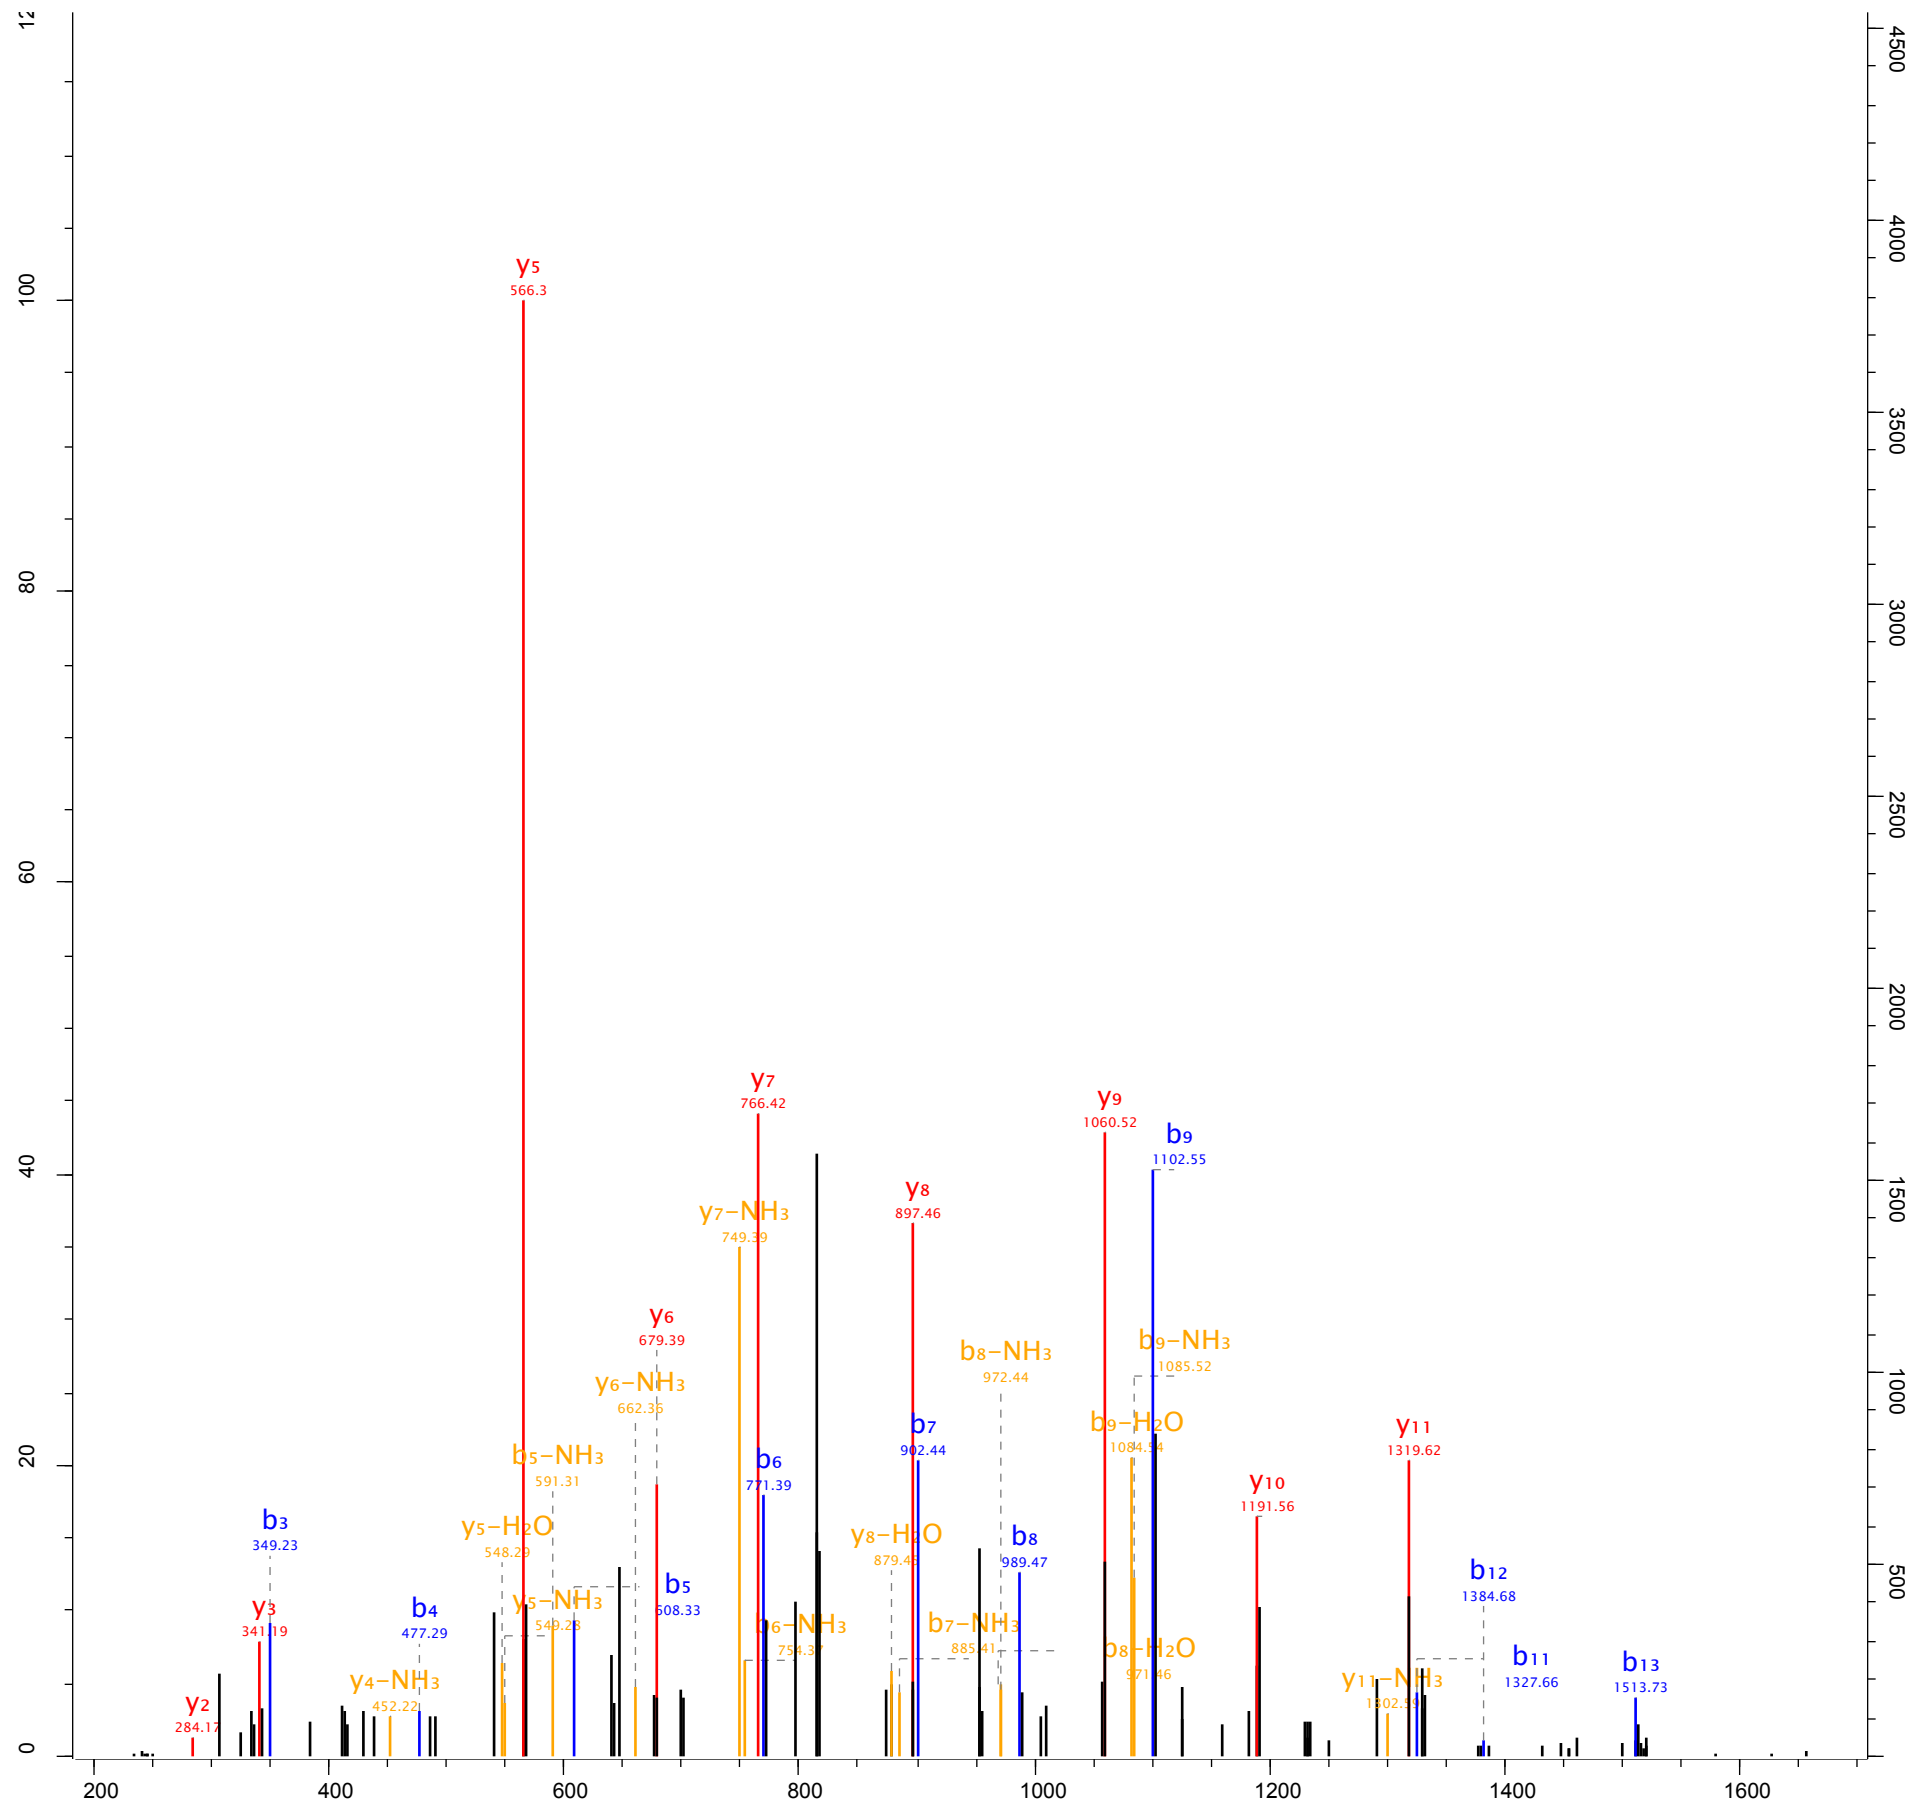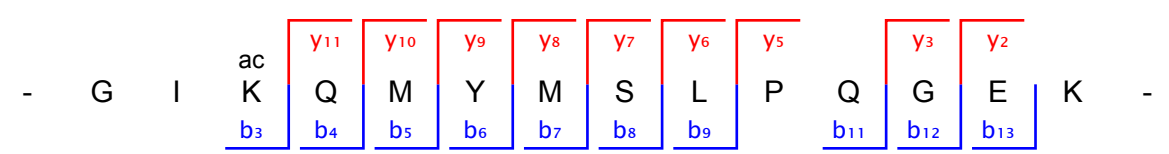



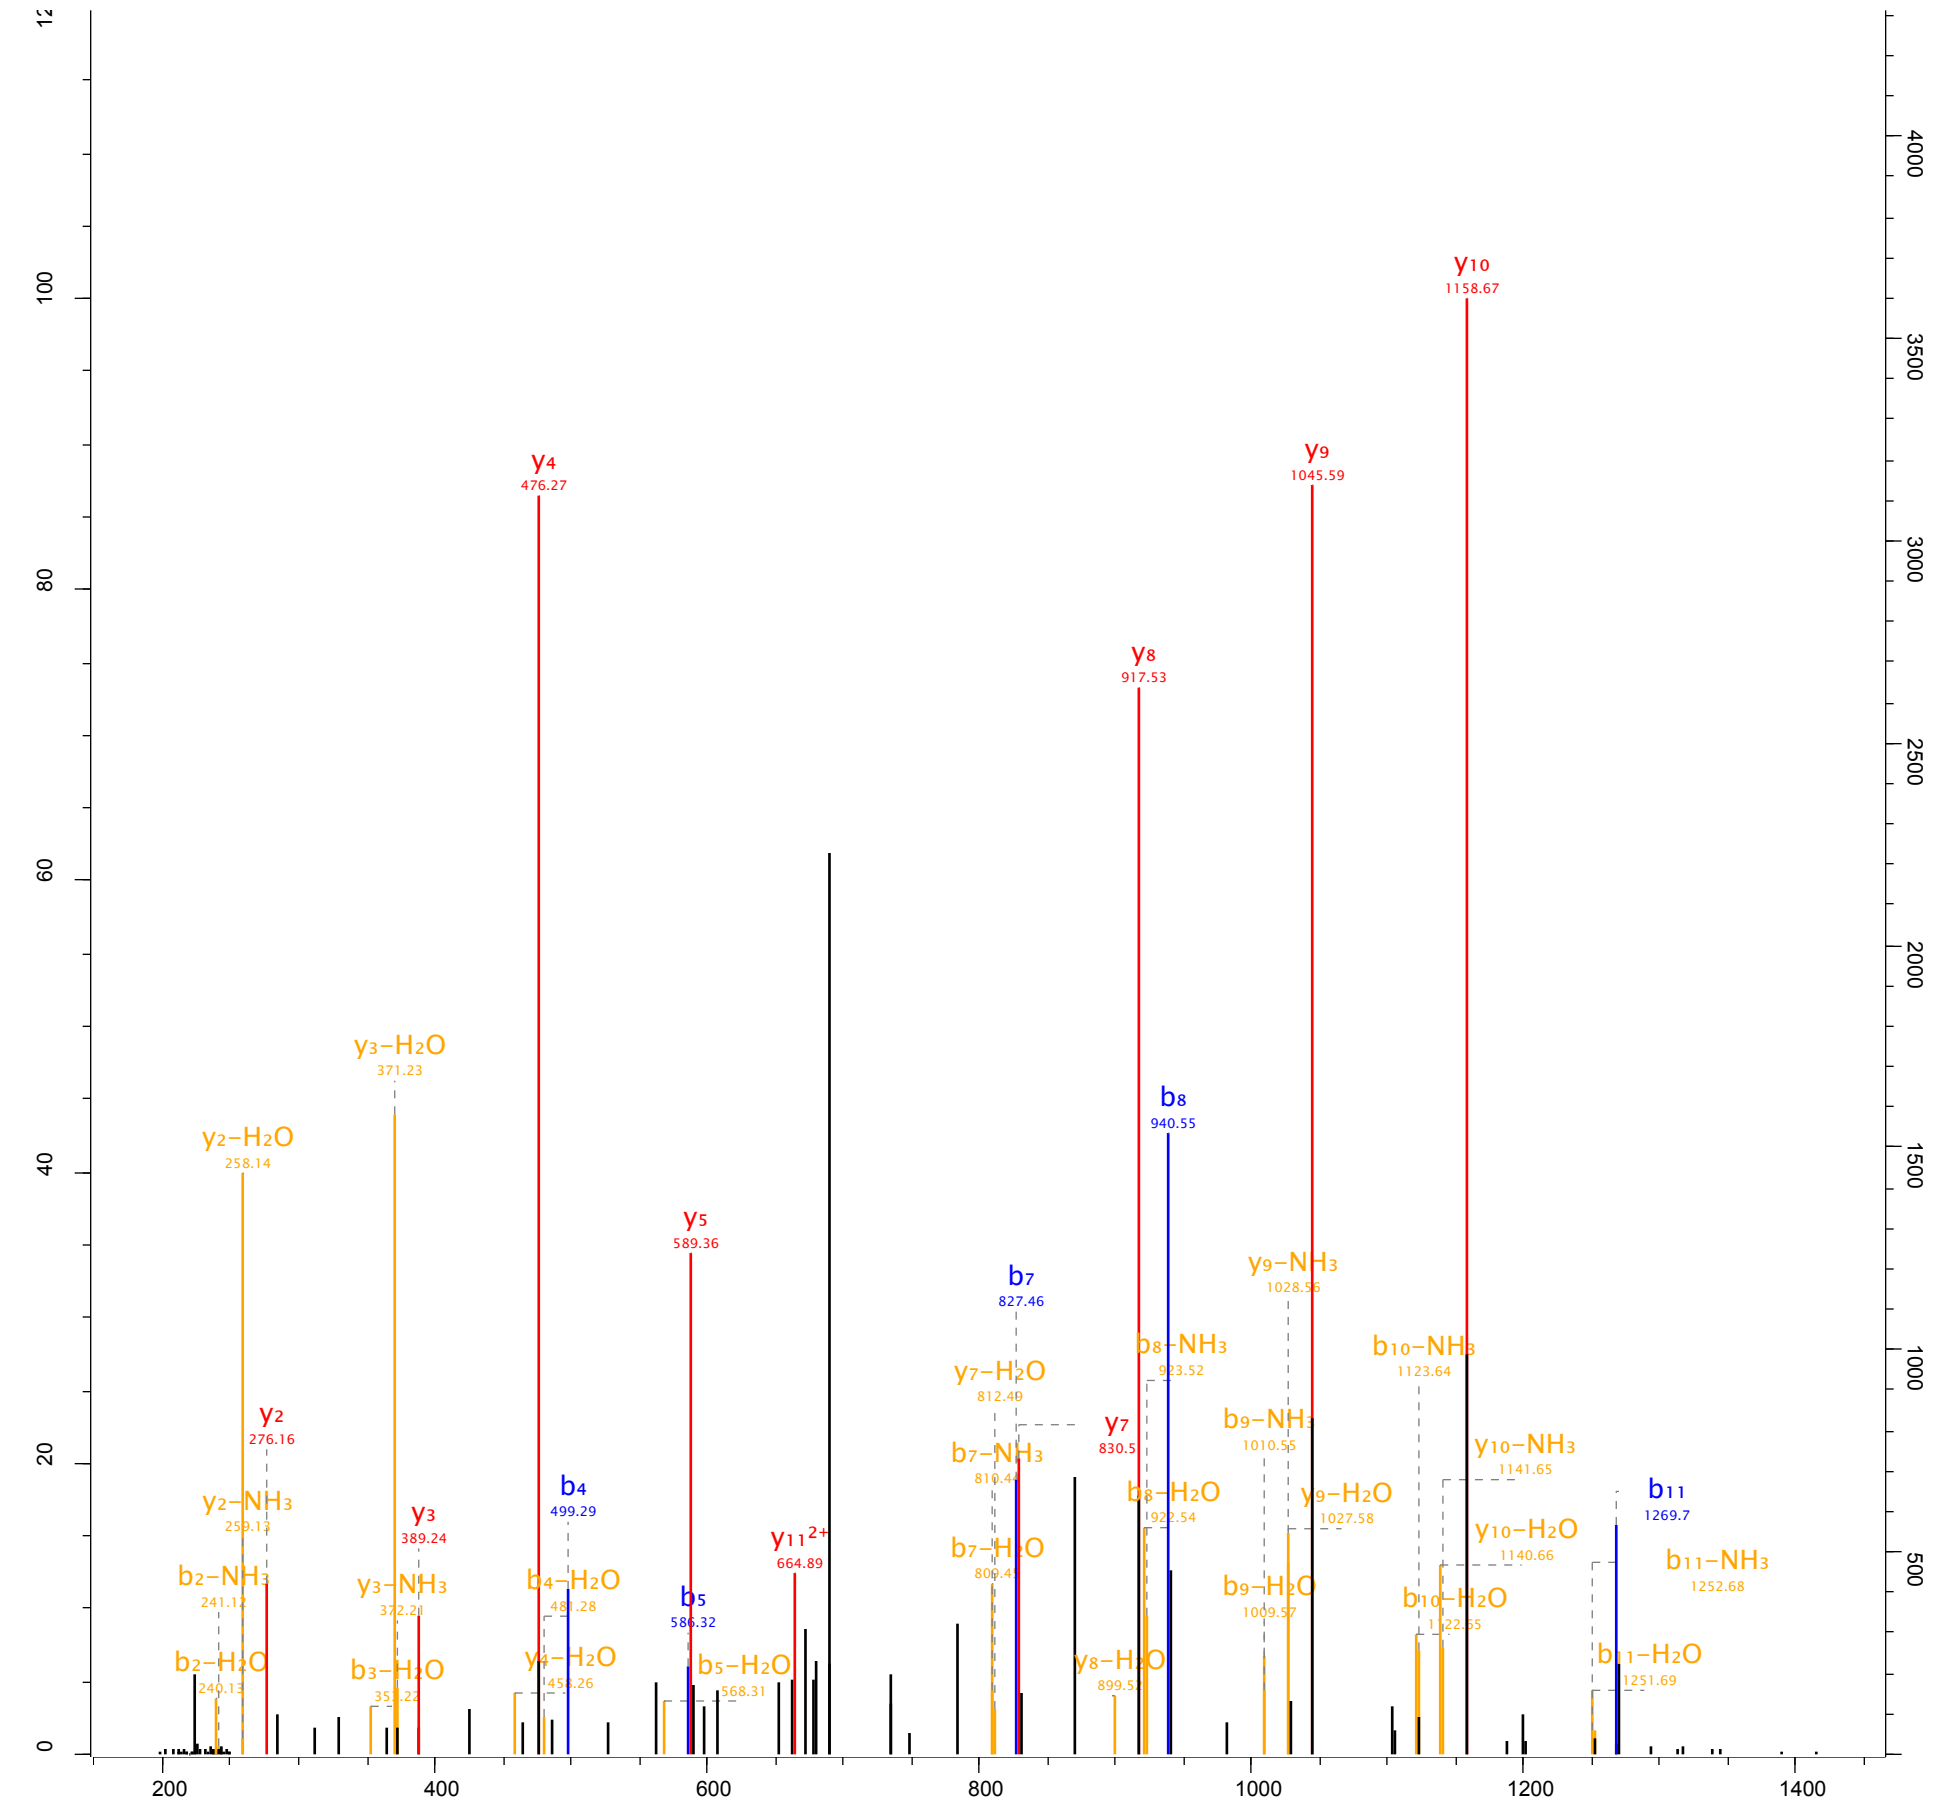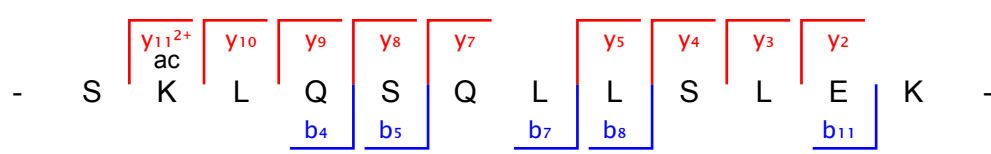

- S K L Q S Q L L S L E K -

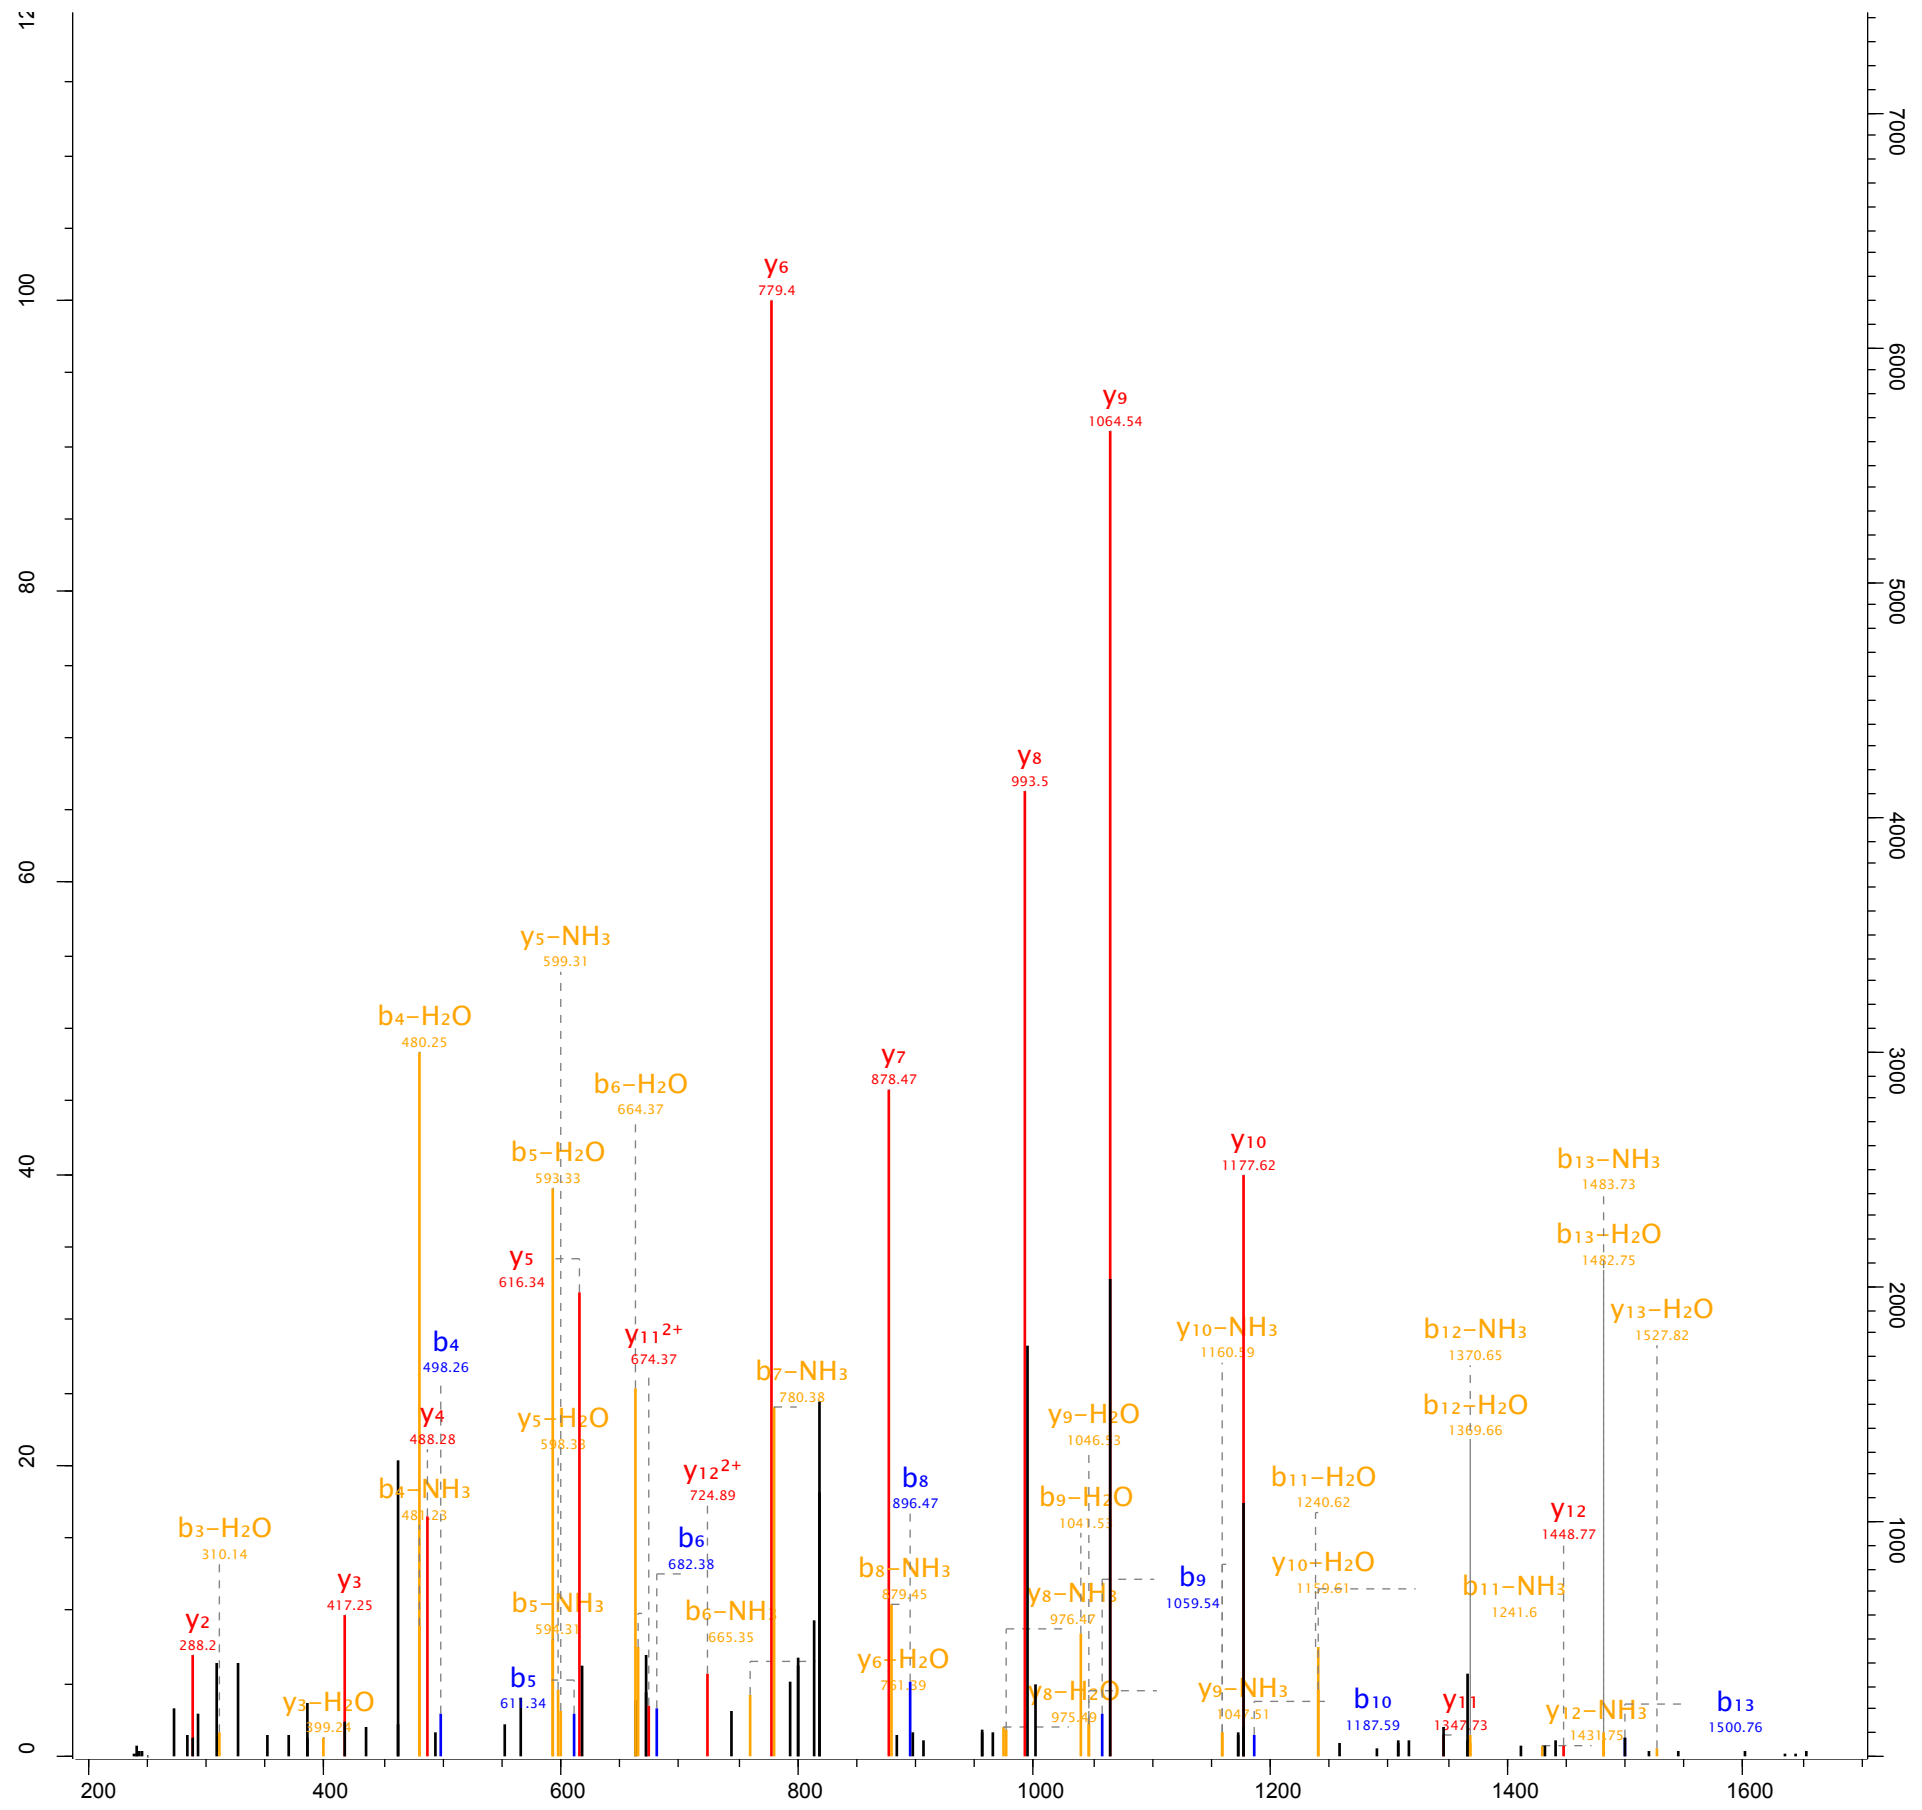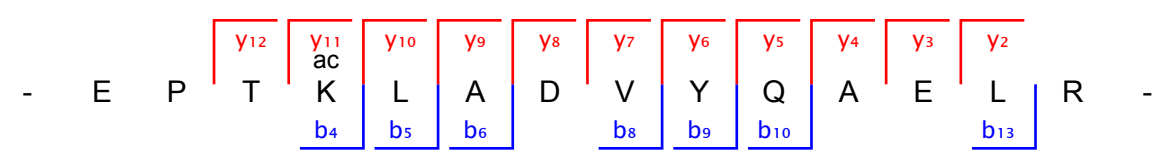

Supplement: 10.1074_M115.049288_mcp.M115.049288-7.pdf [file 10.1074_M115.049288_mcp.M115.049288-7.pdf]
