# Supplementary material
Source: PubMed Central journal article supplement (PMC4739669)

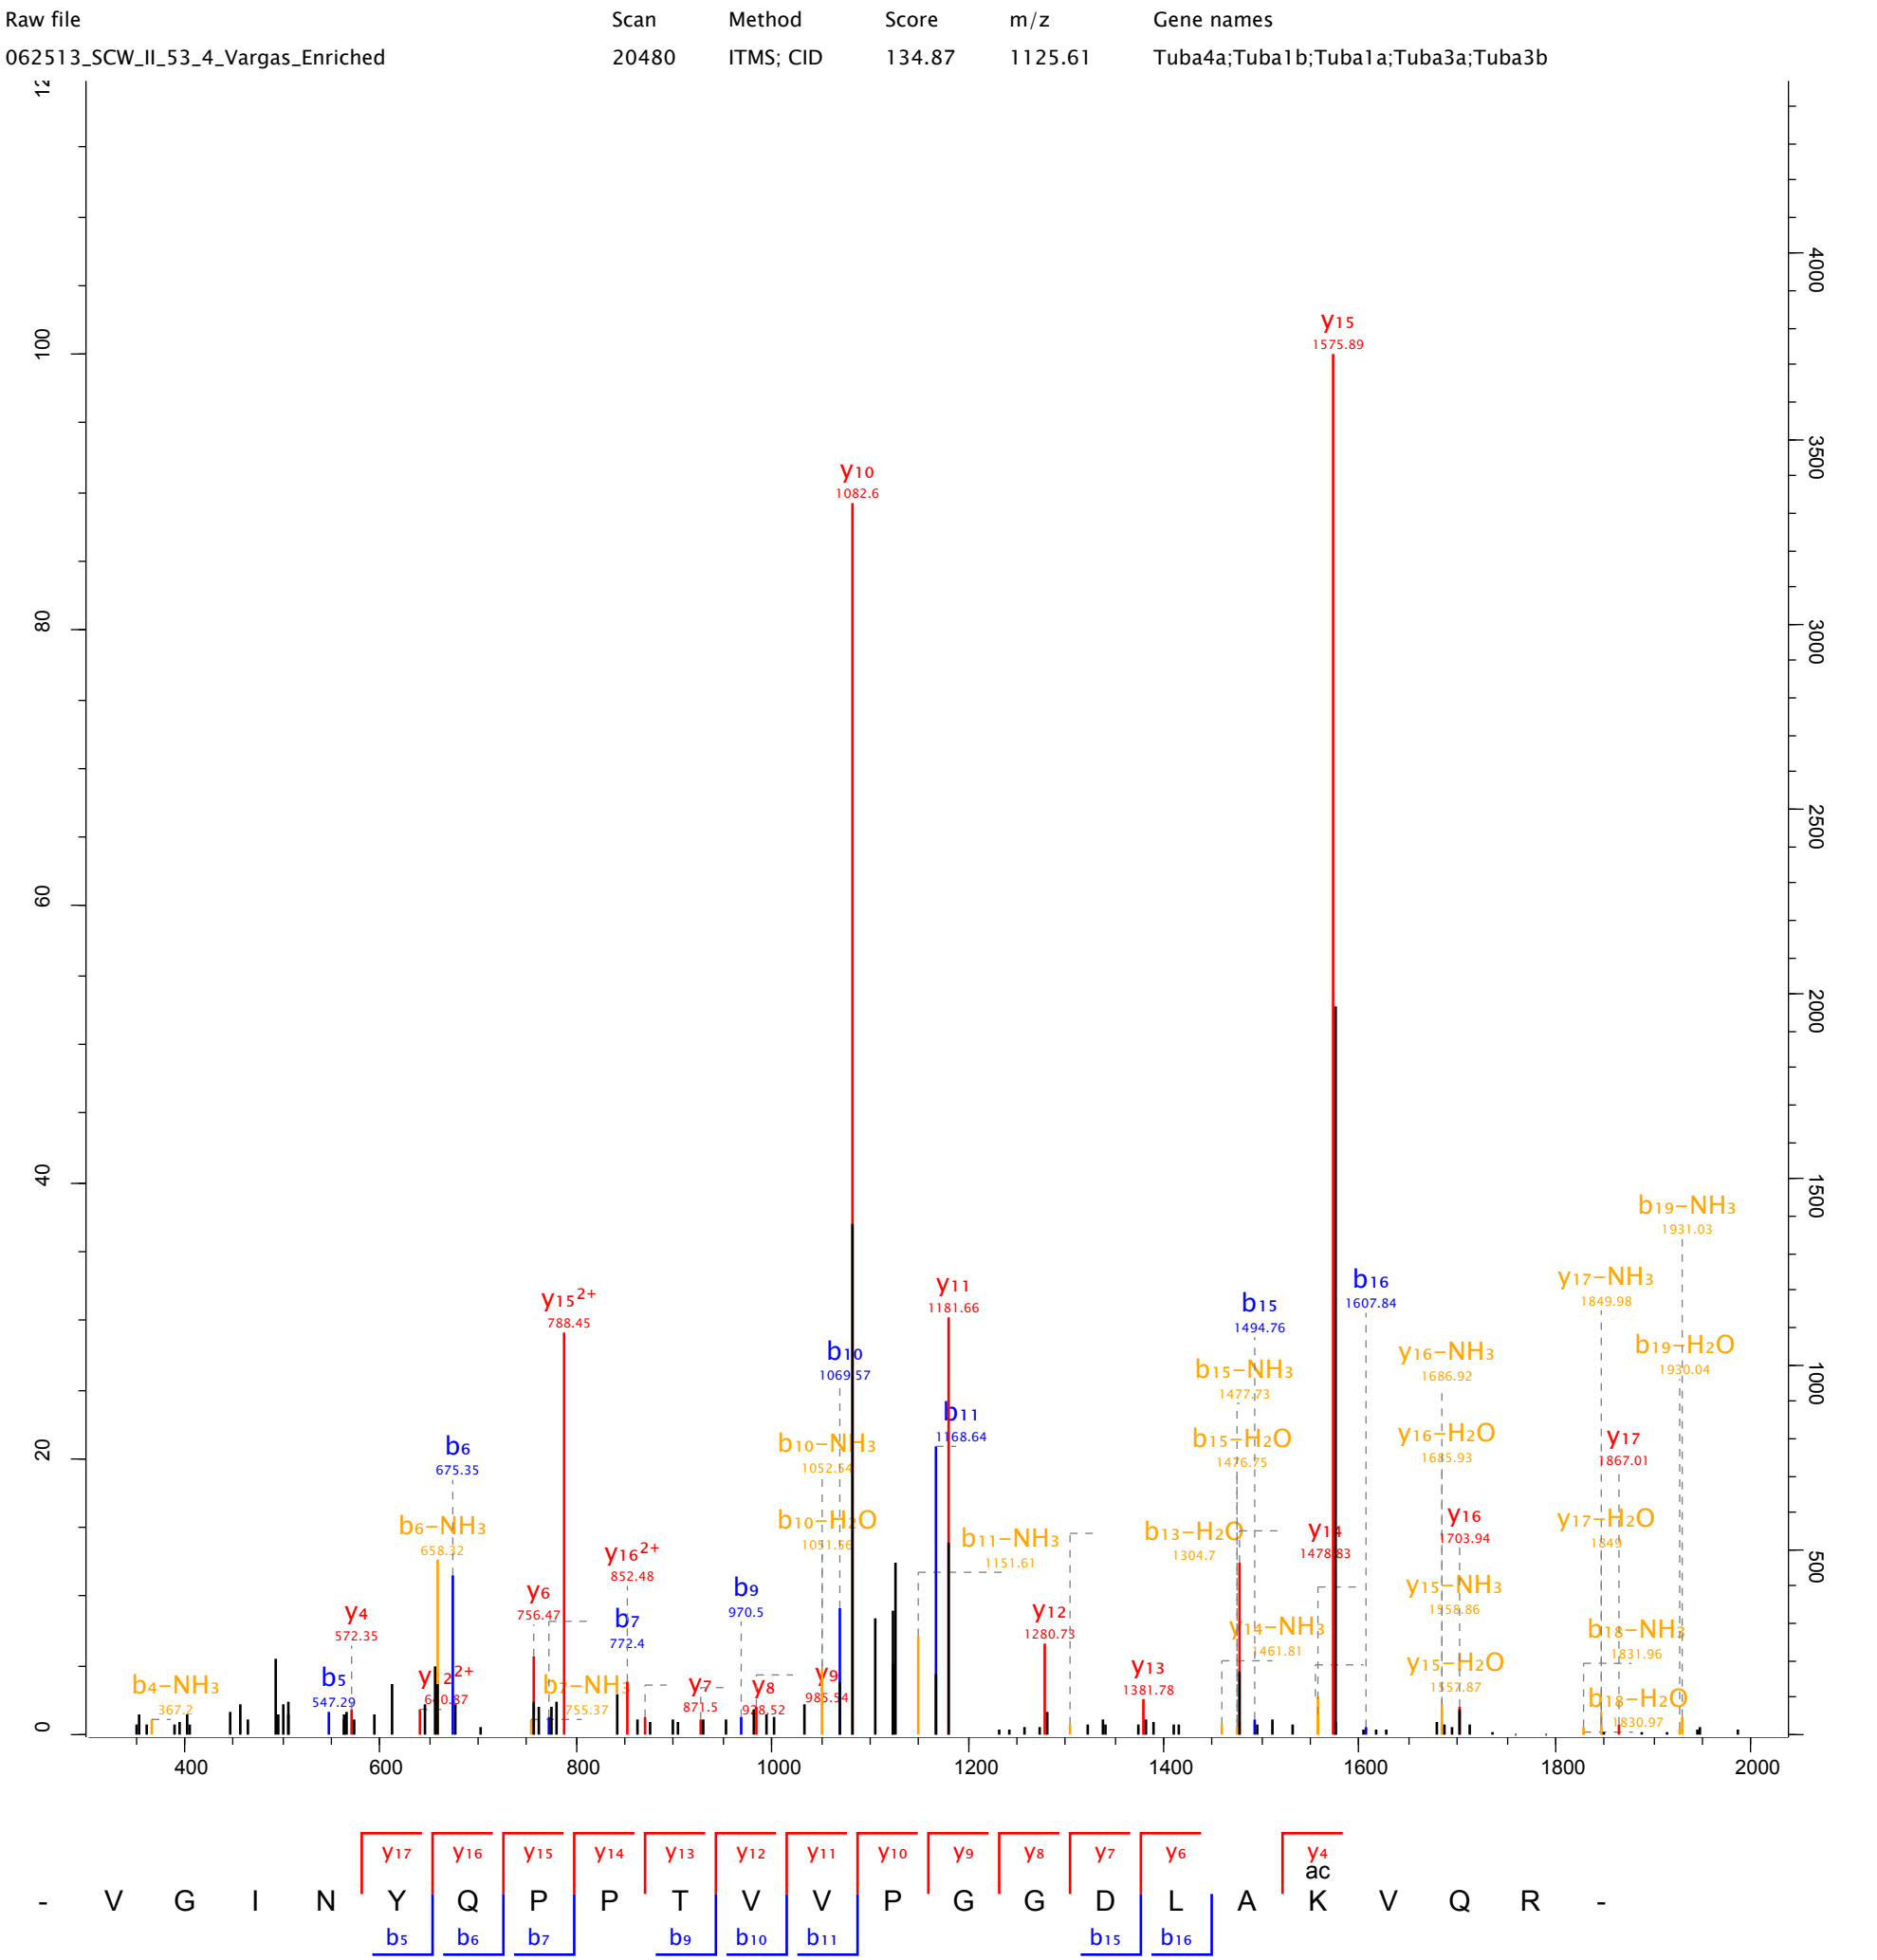

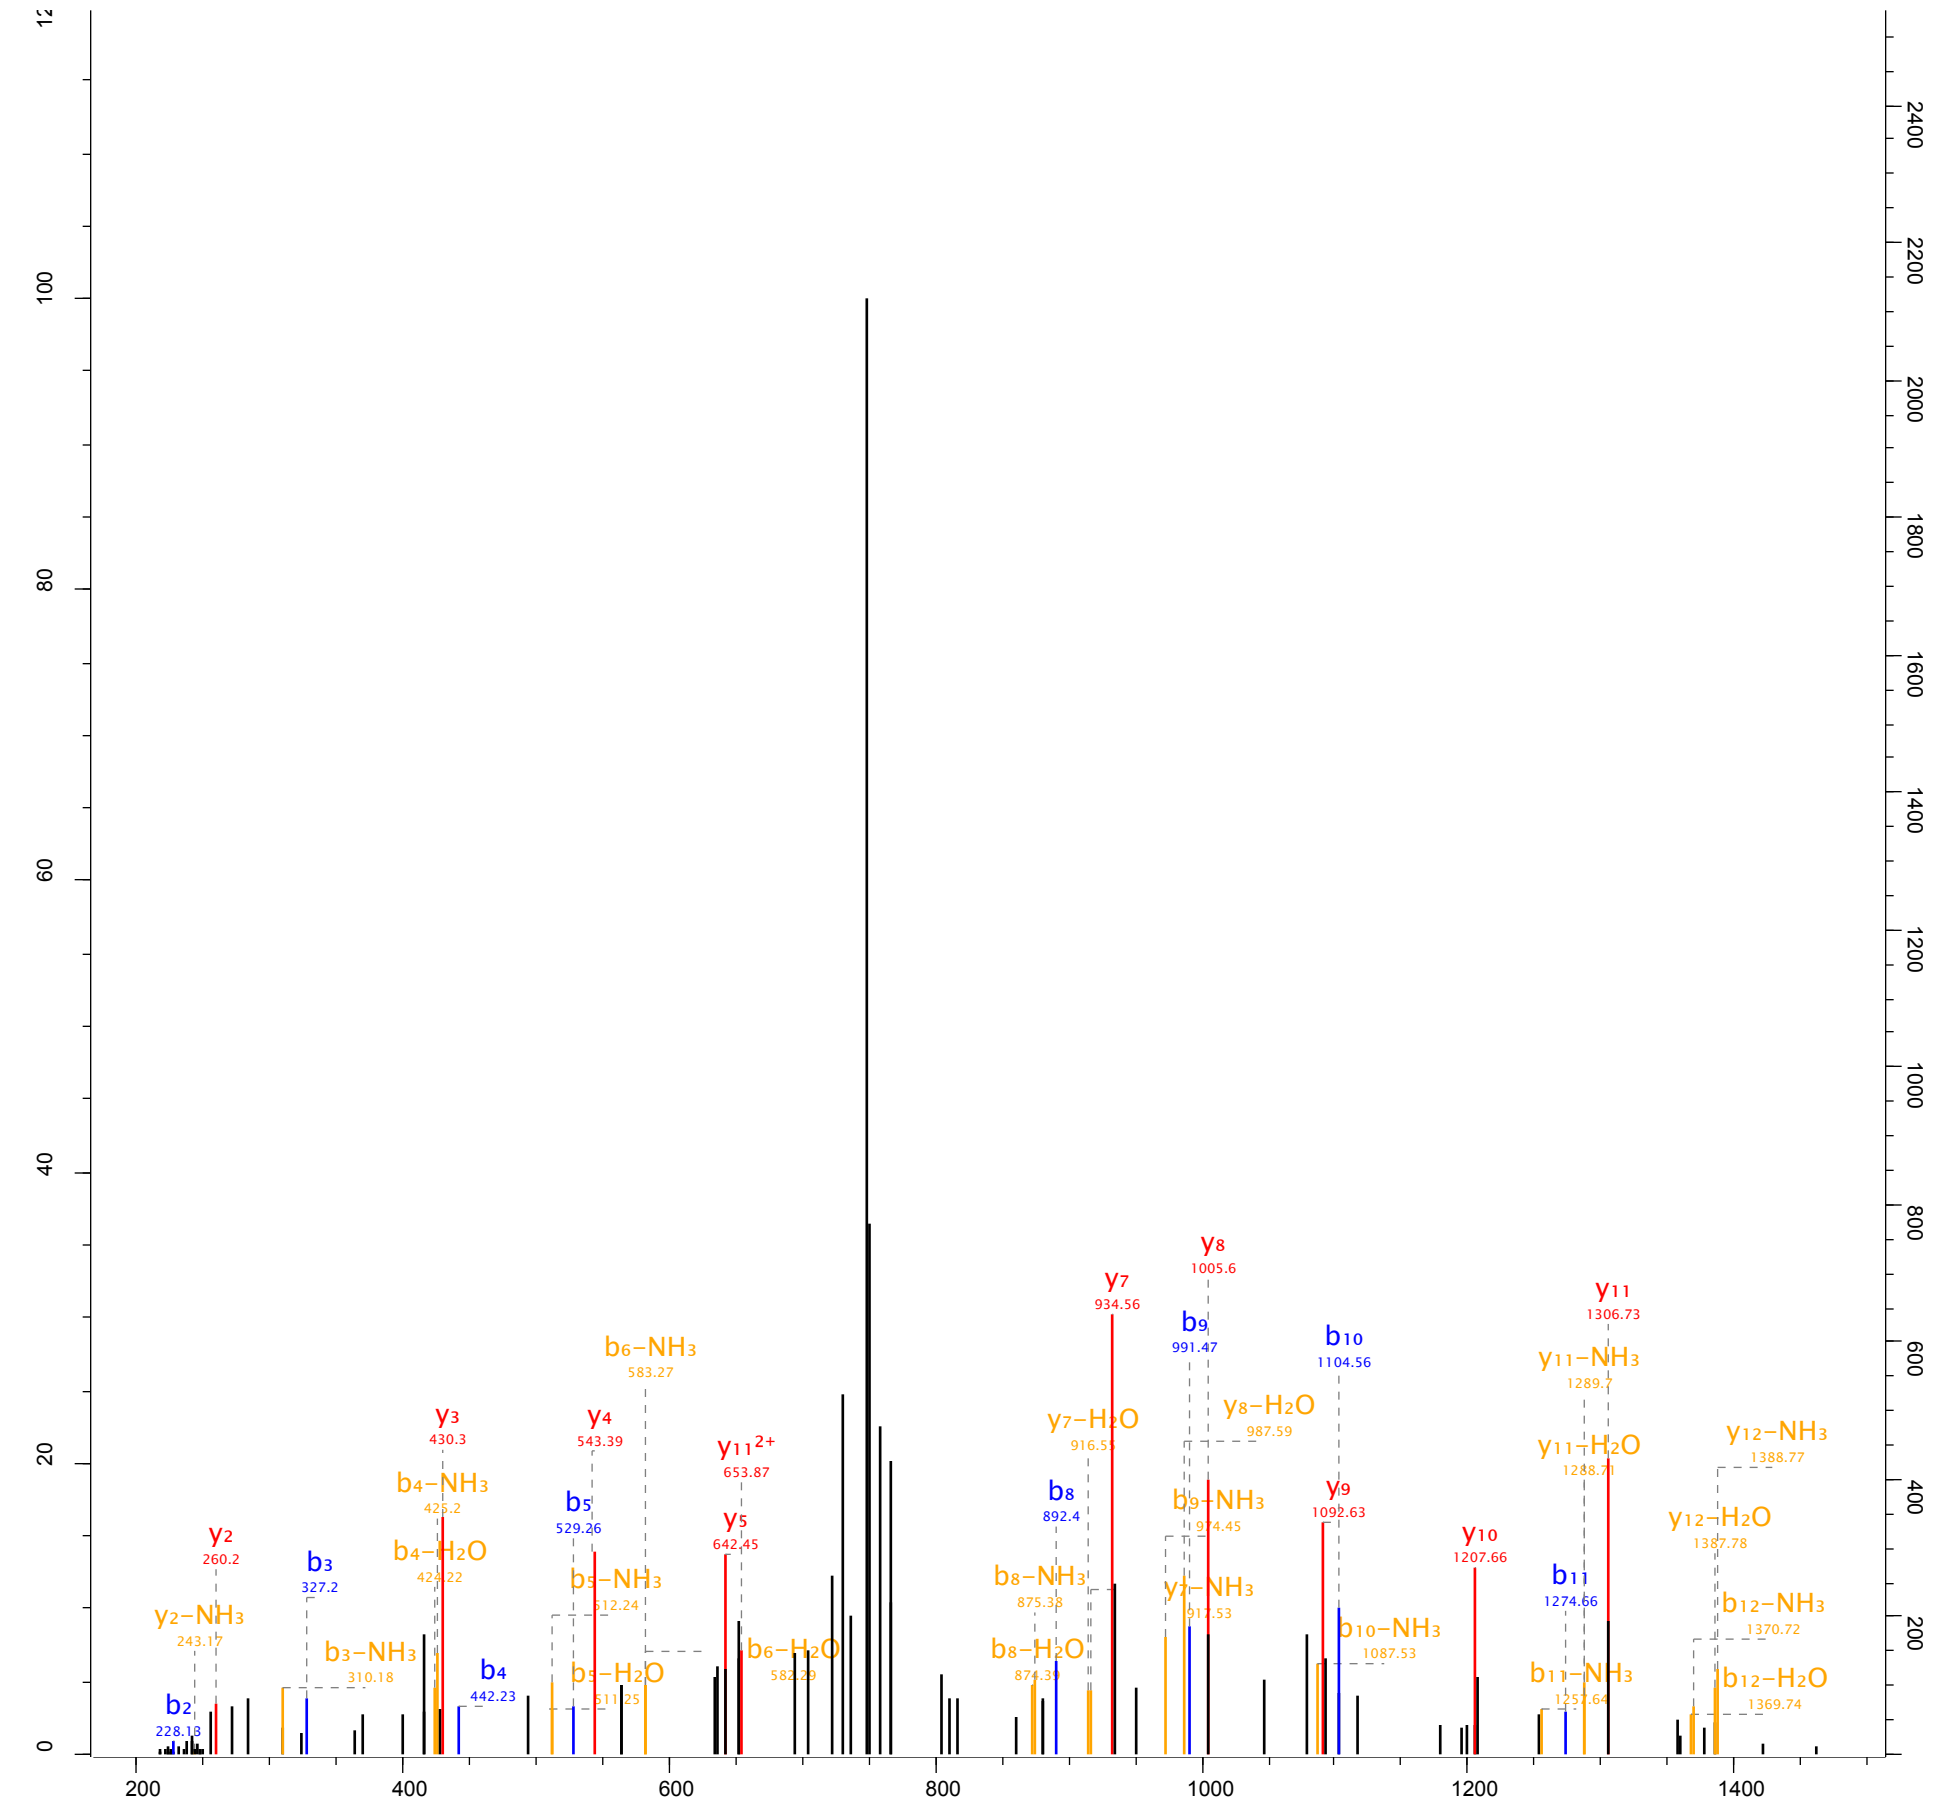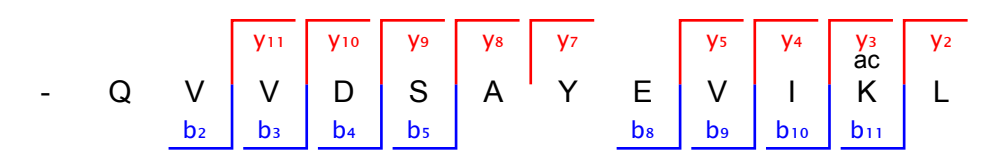

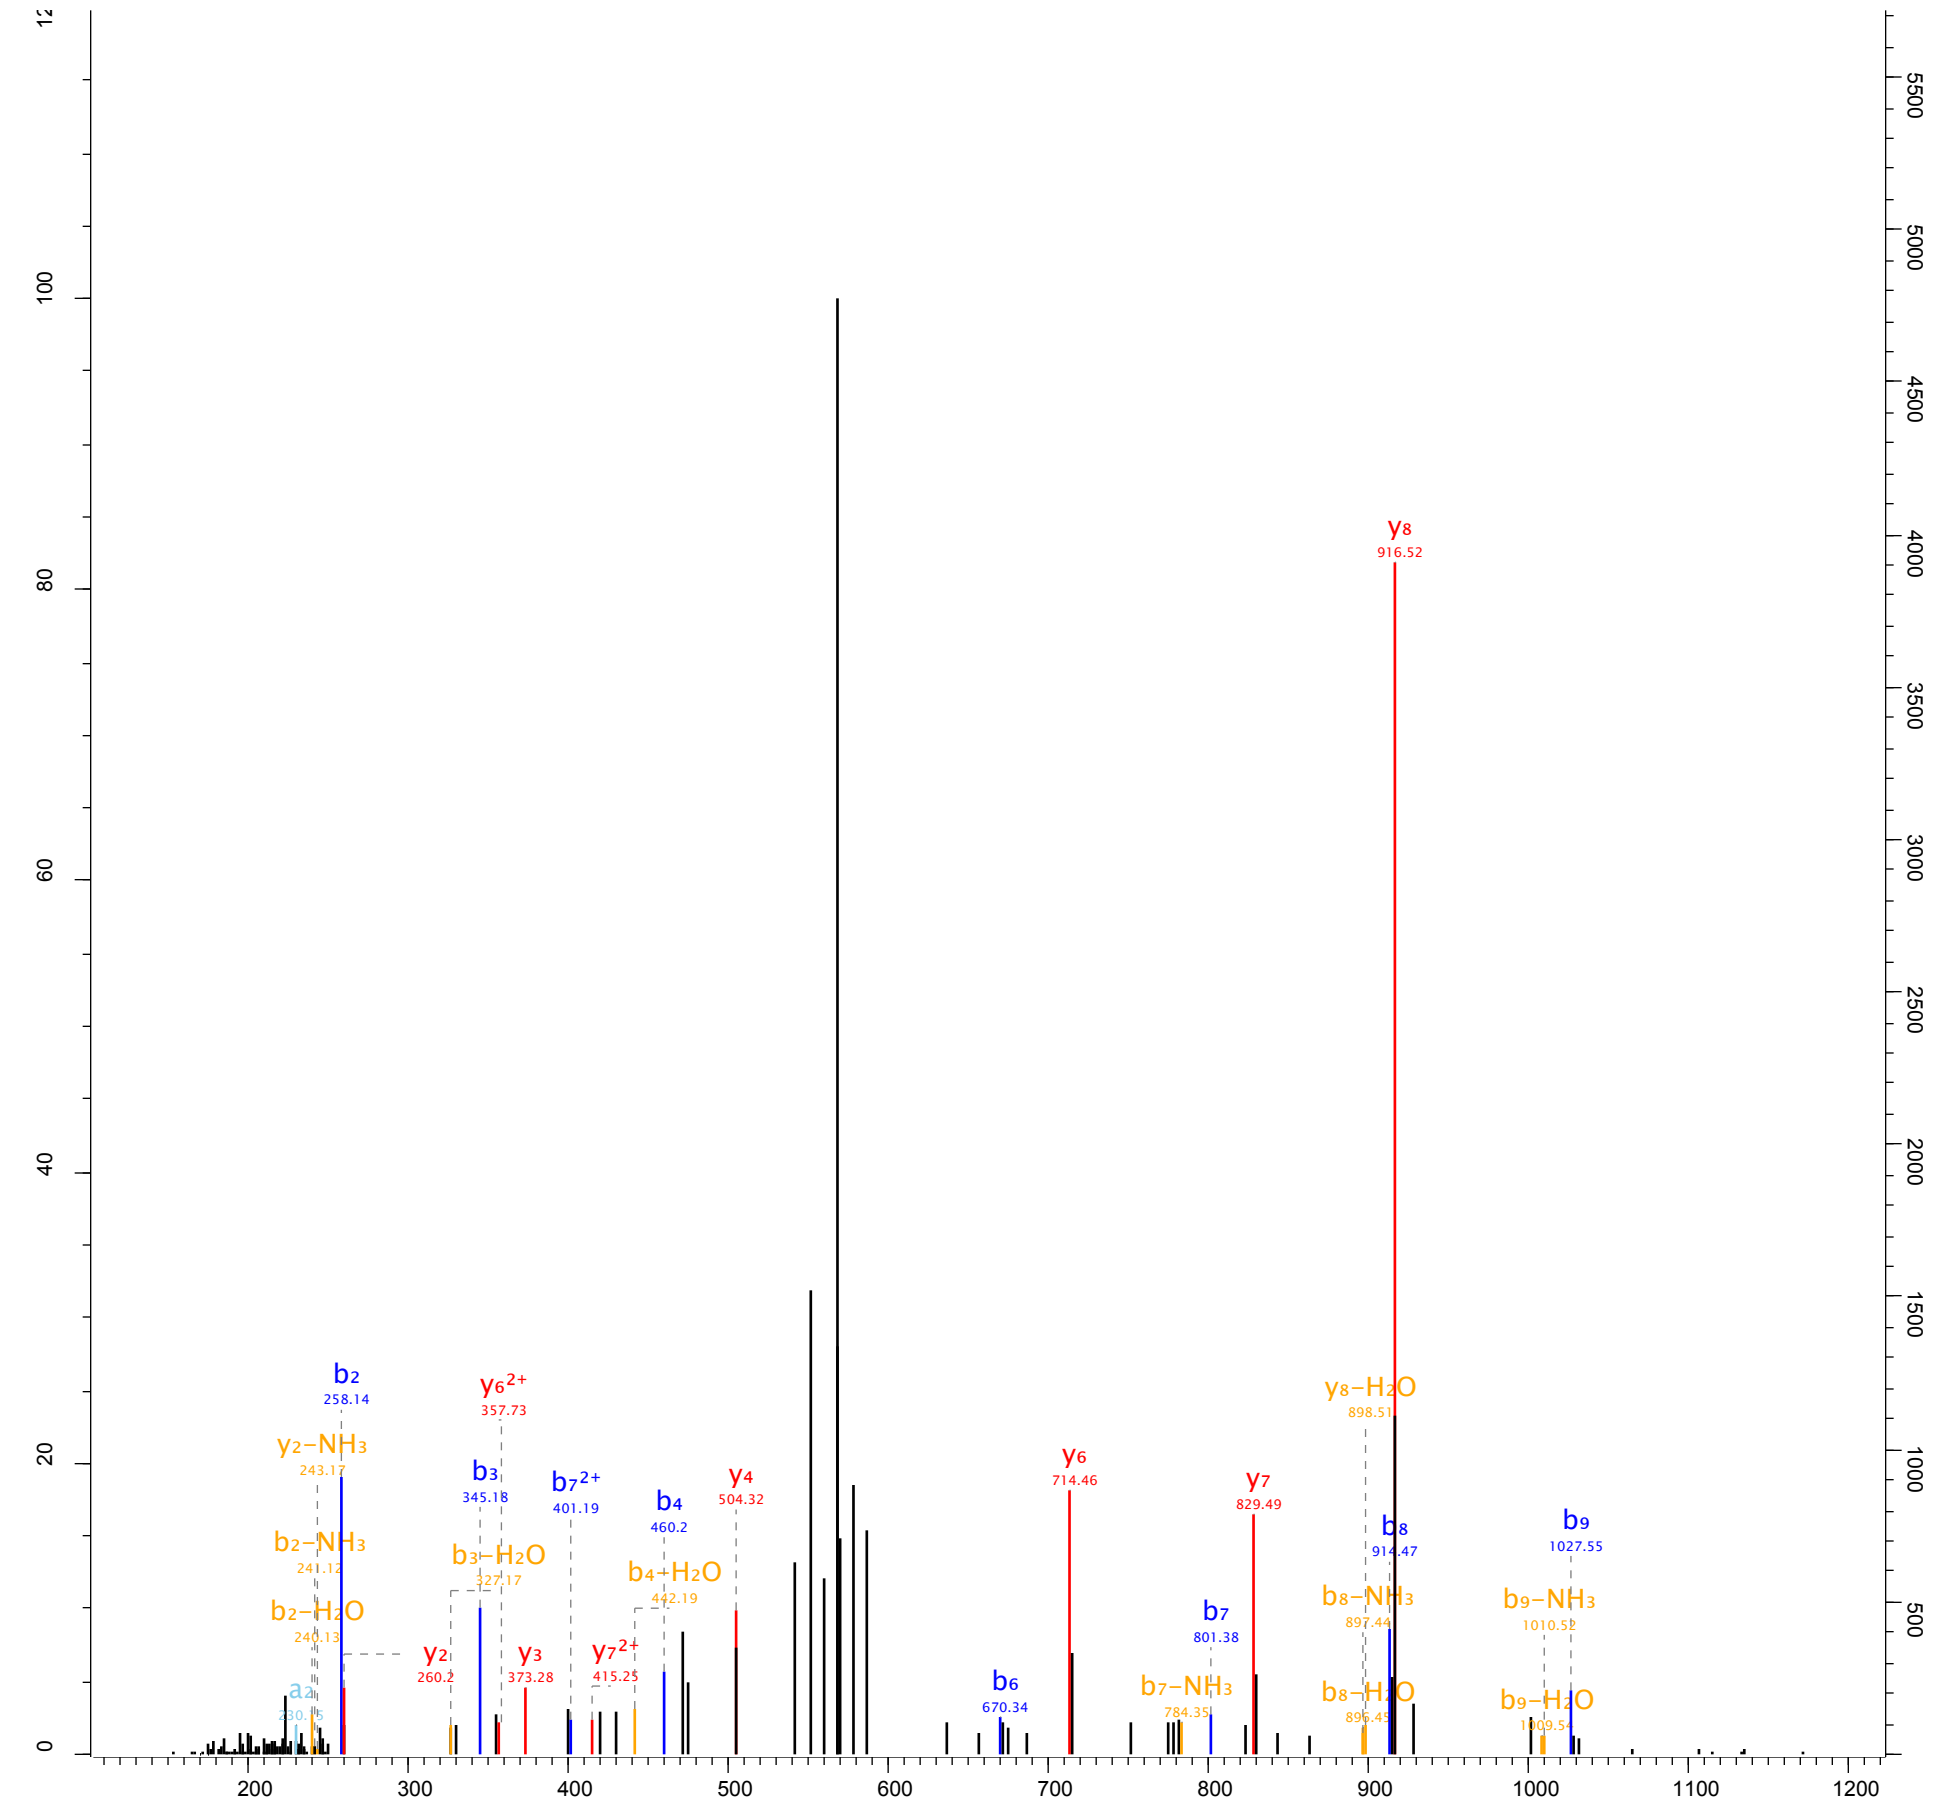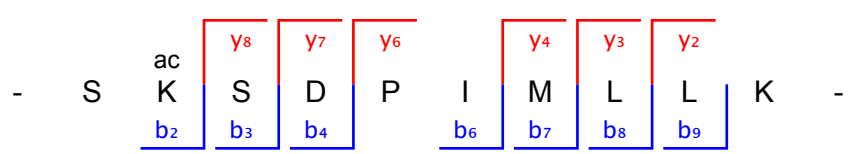

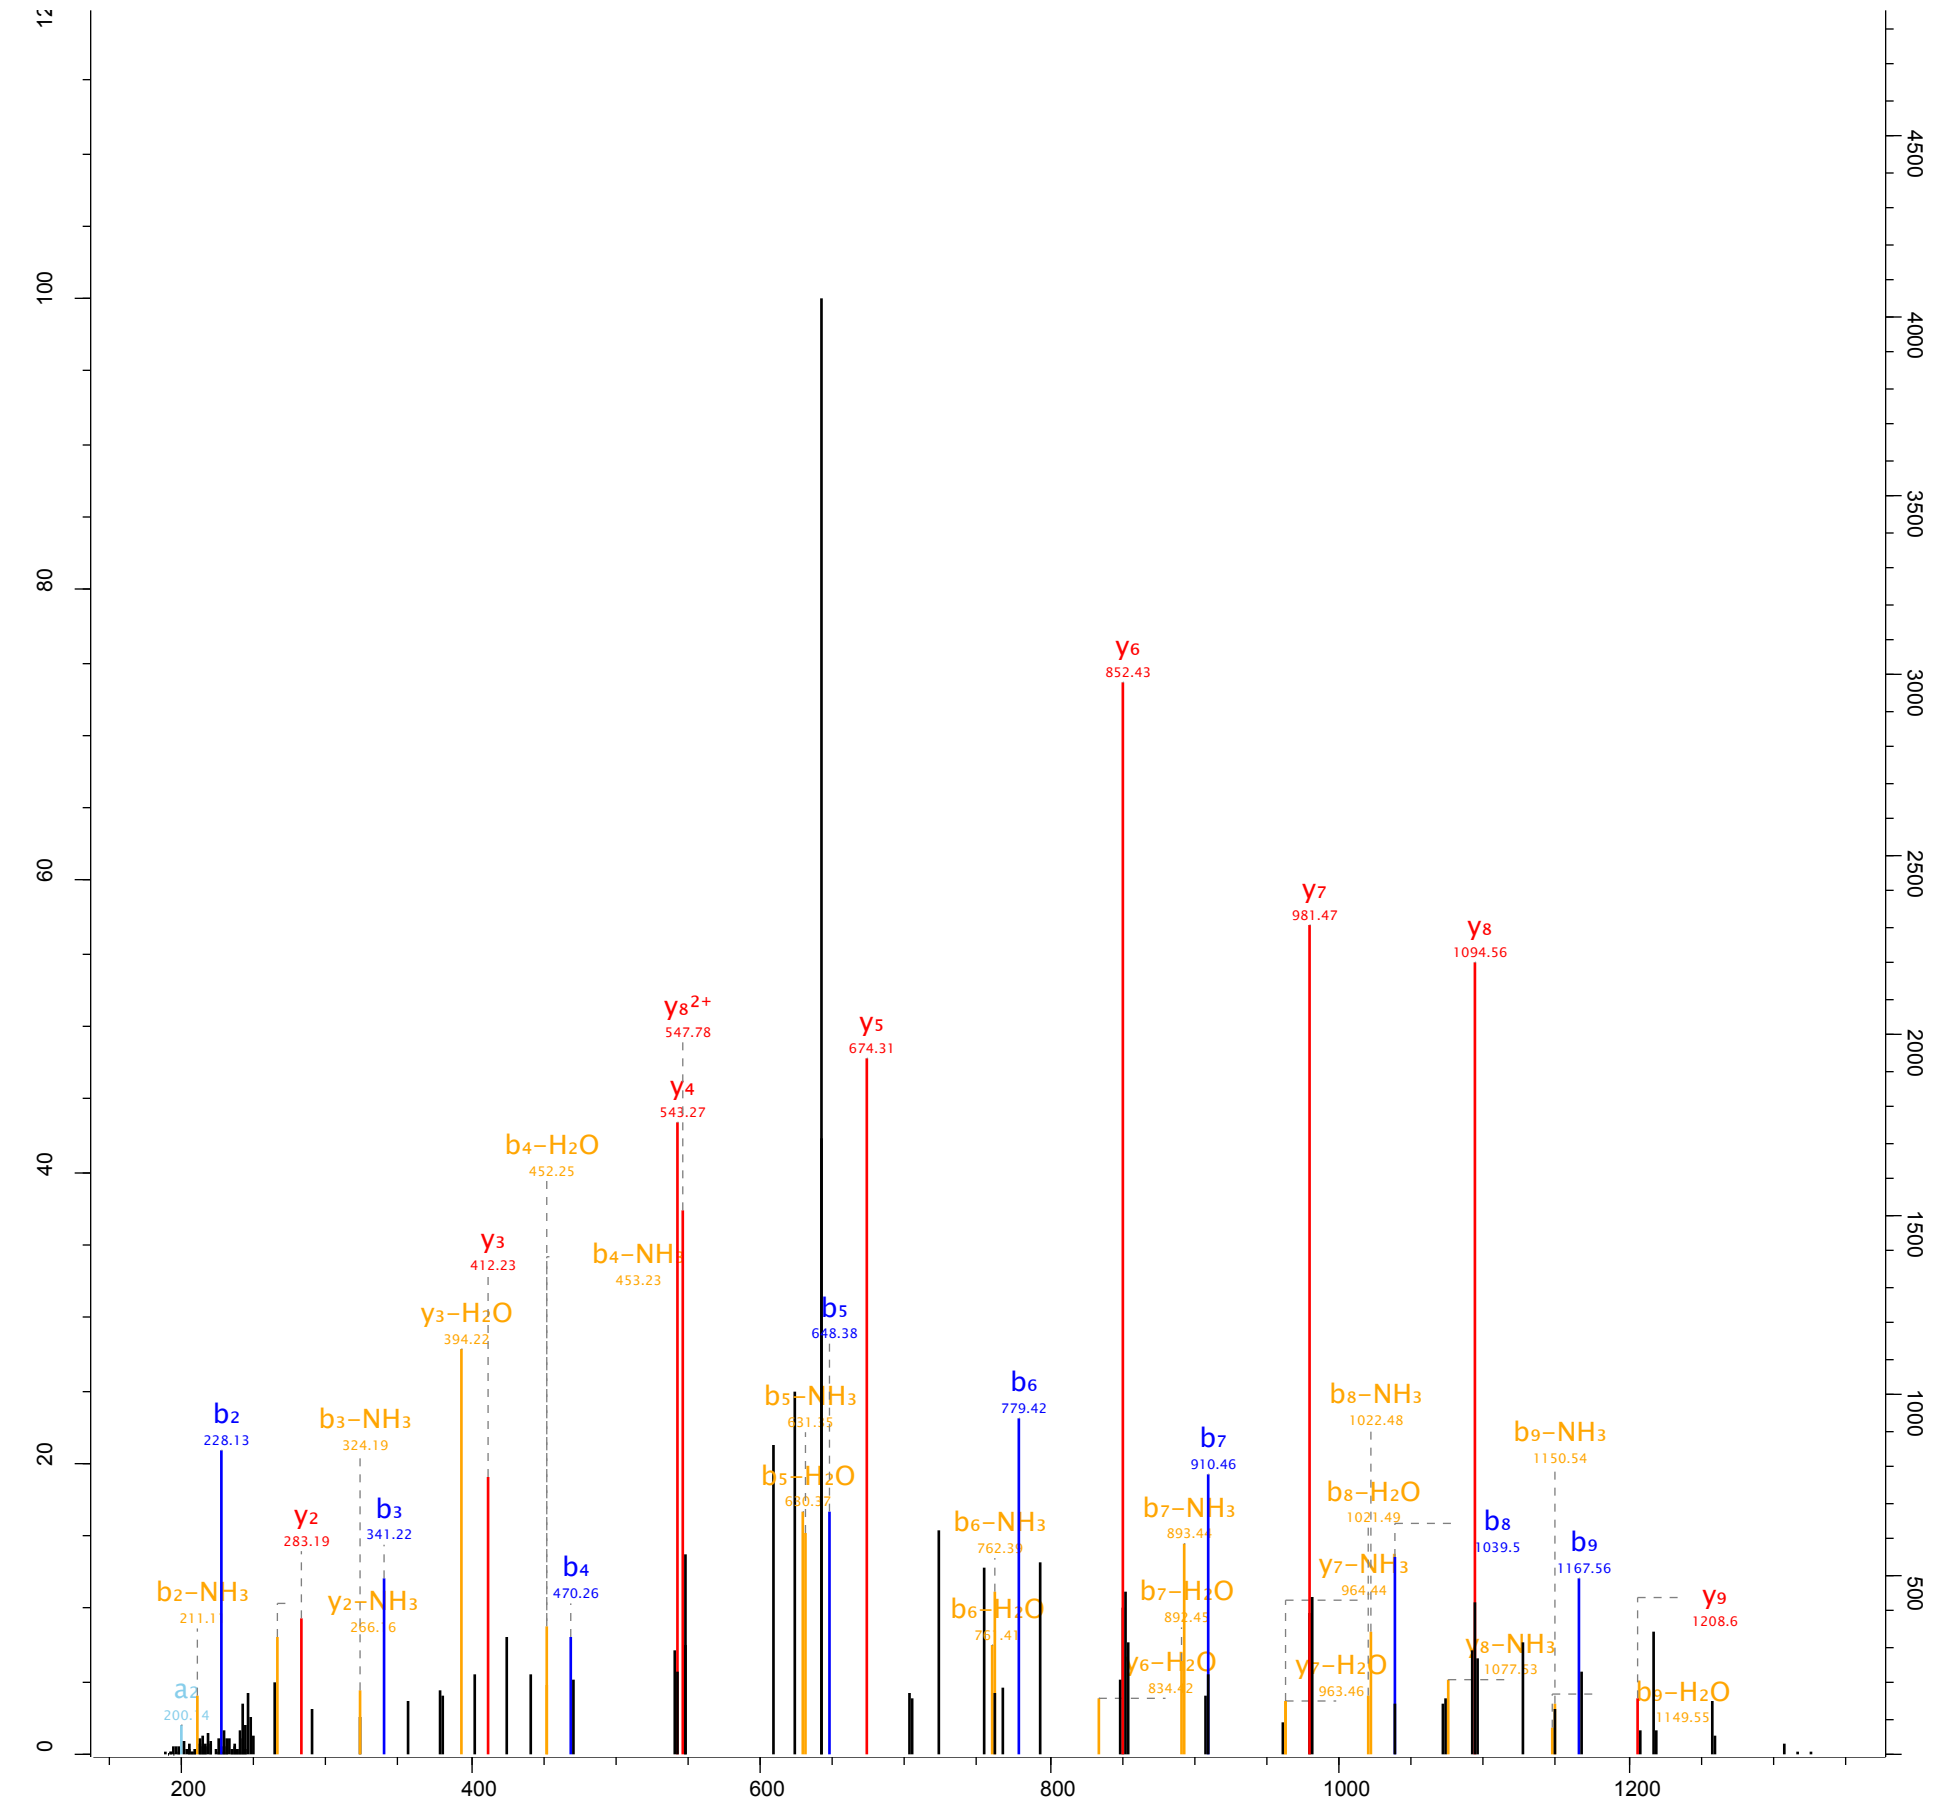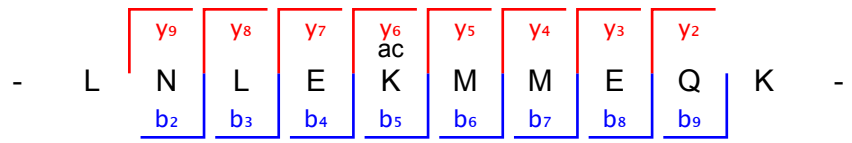

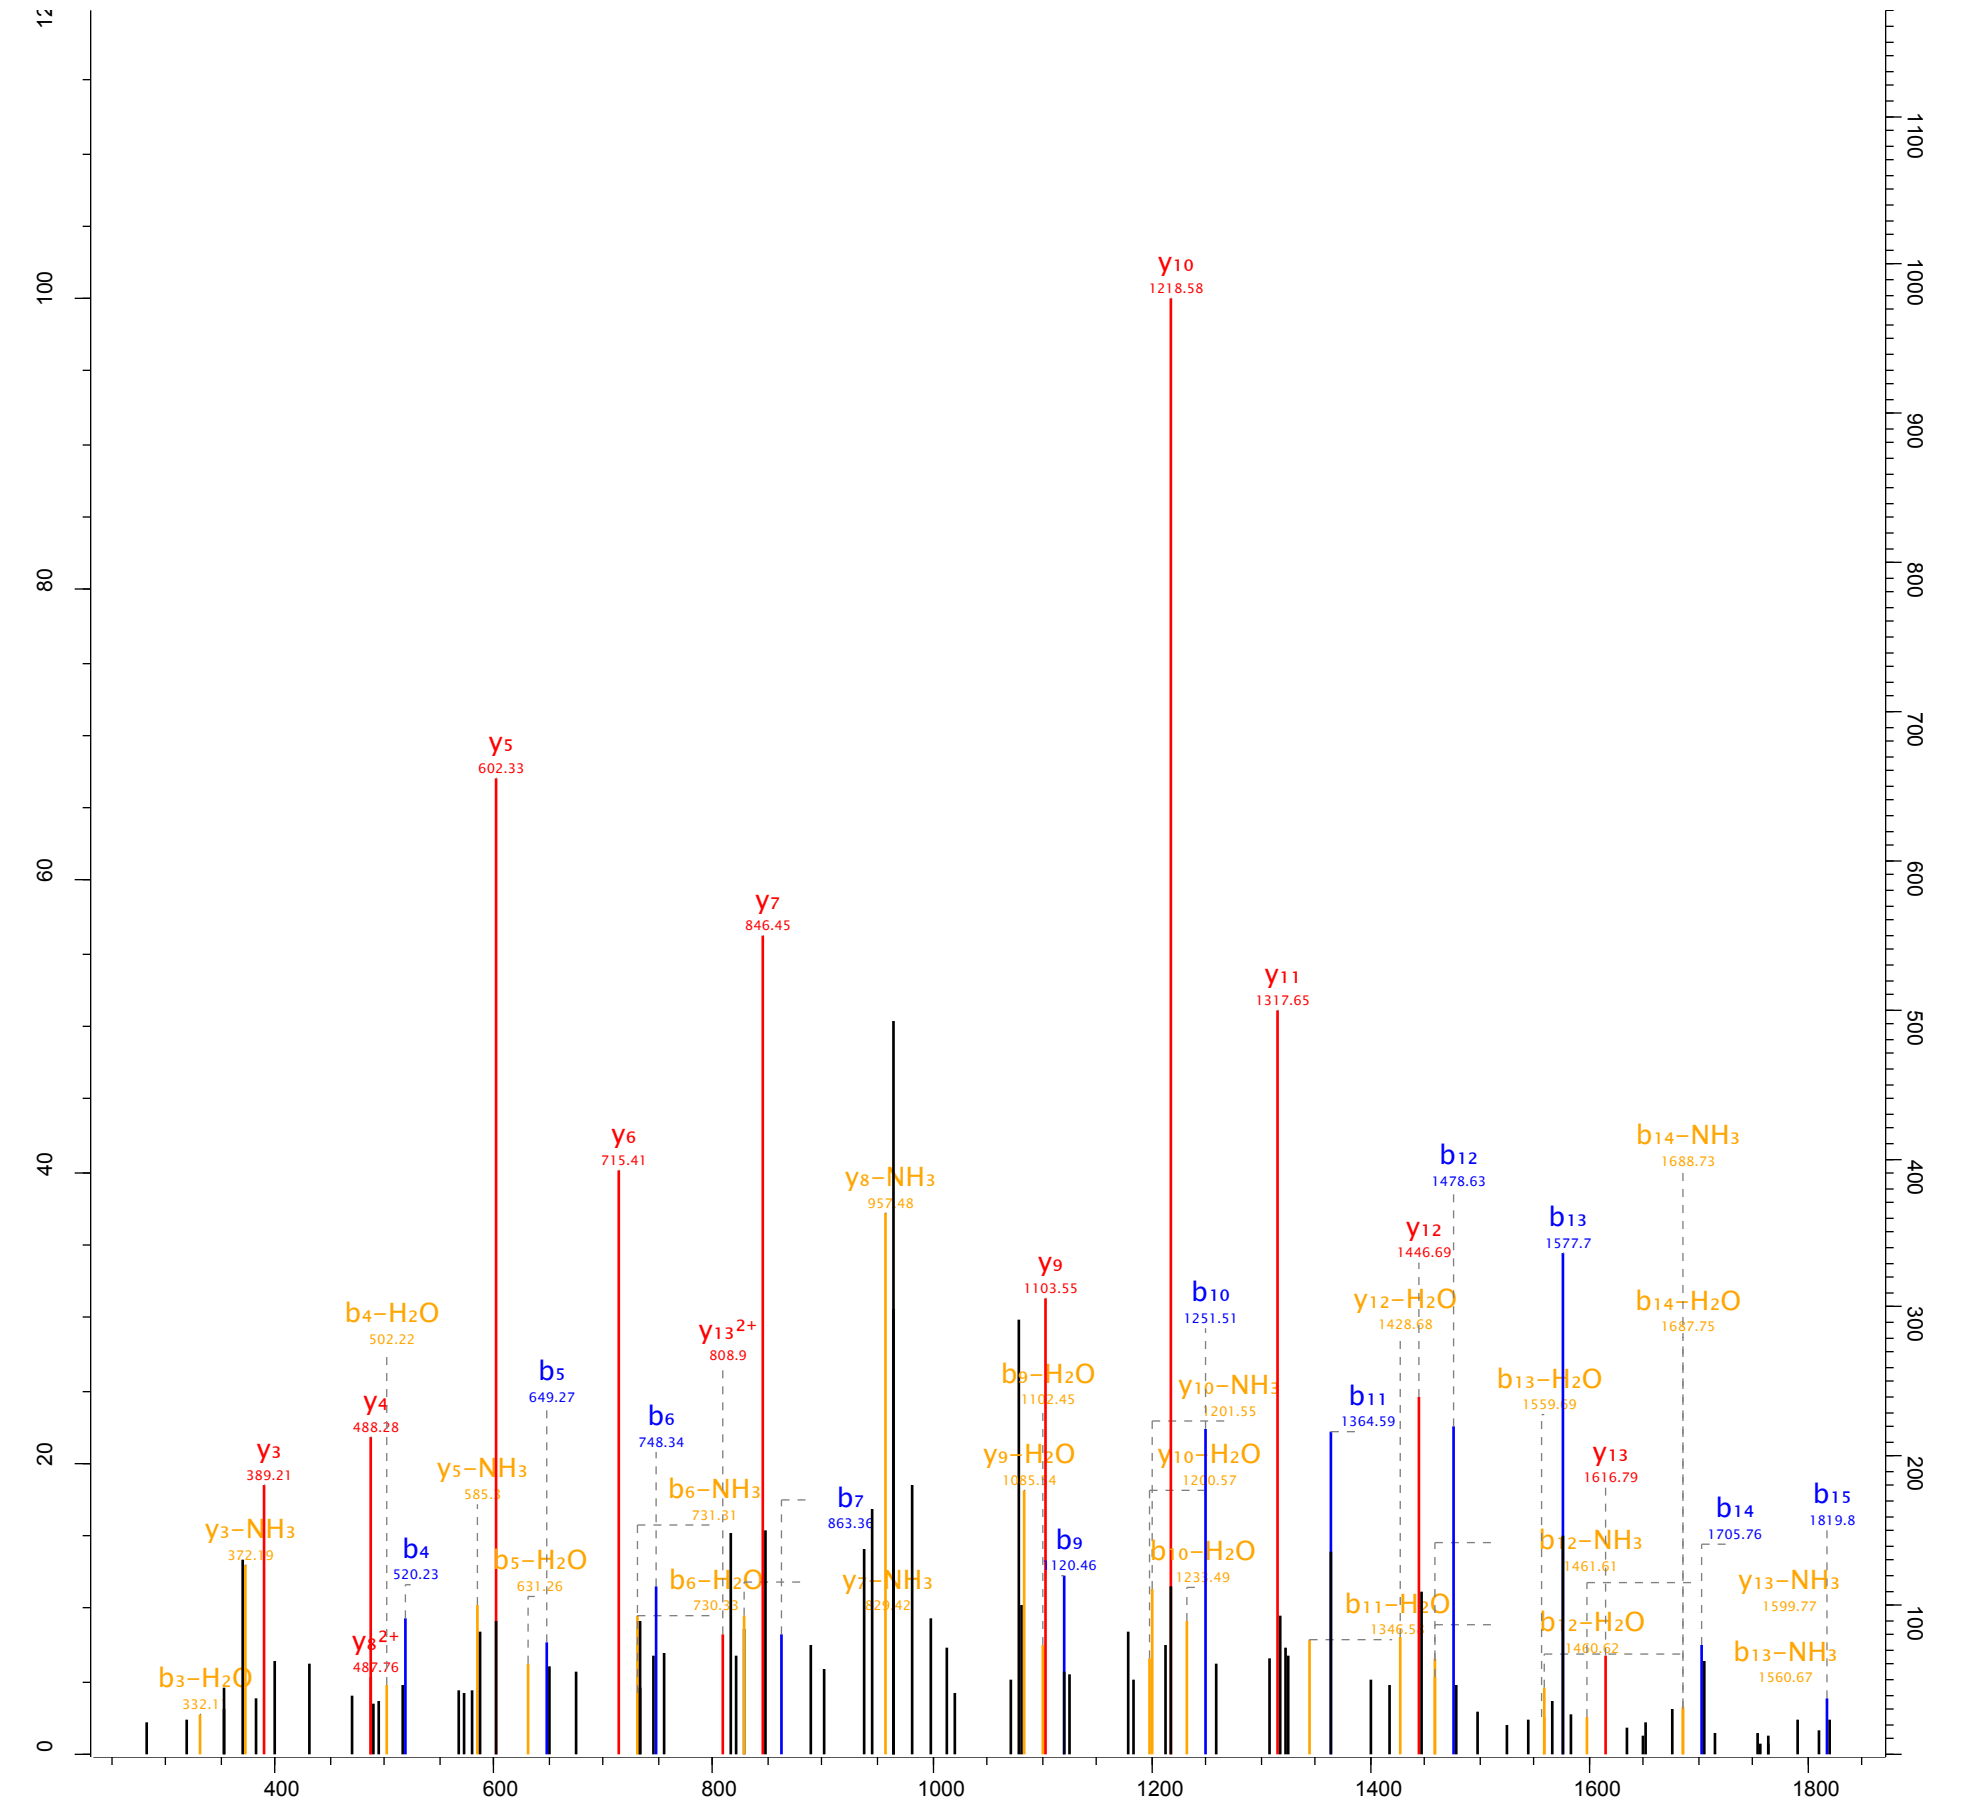

- M S M y13  
ac y12 y11 y10 y9 y8<sup>2+</sup> y7 y6 y5 y4 y3  
 - M S M K E V D E Q M L N V Q N K -  
b4 b5 b6 b7 b9 b10 b11 b12 b13 b14 b15

062513\_SCW\_II\_53\_4\_Vargas\_Enriched

20689

ITMS; CID

133.87

887.48

Stip1

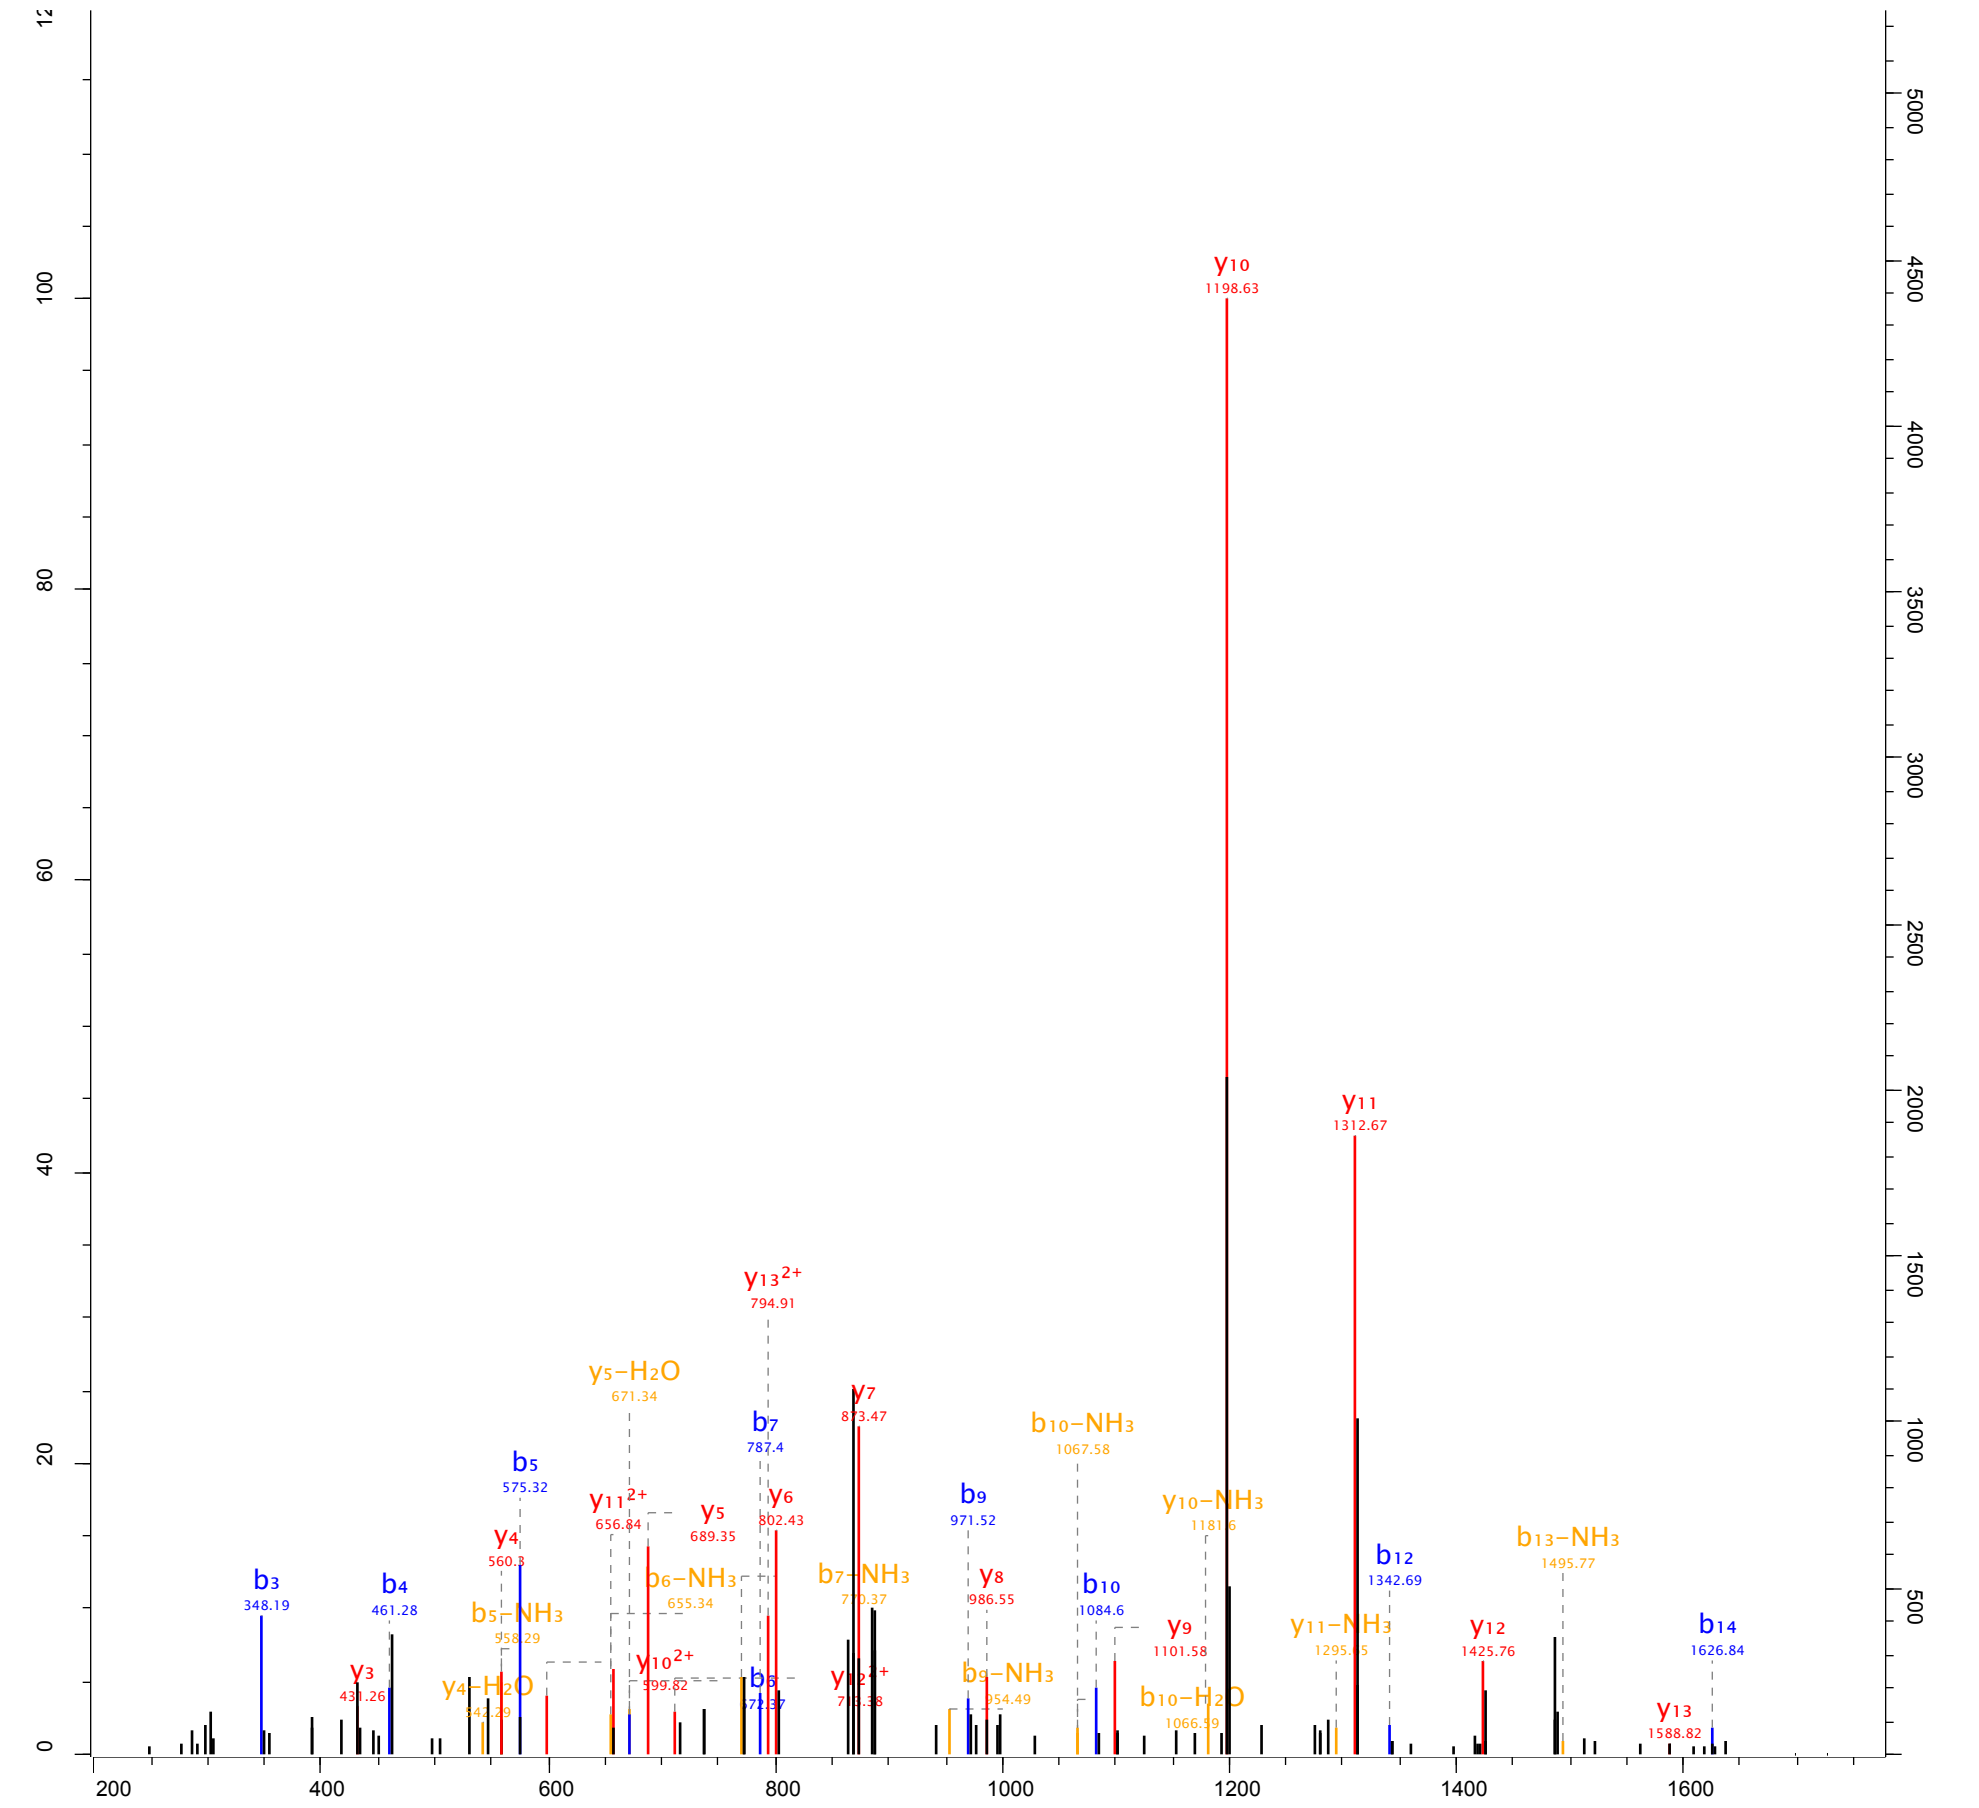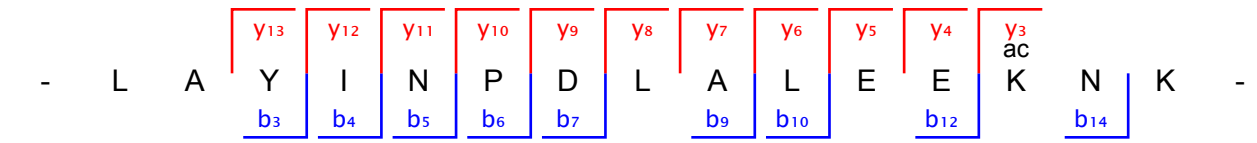

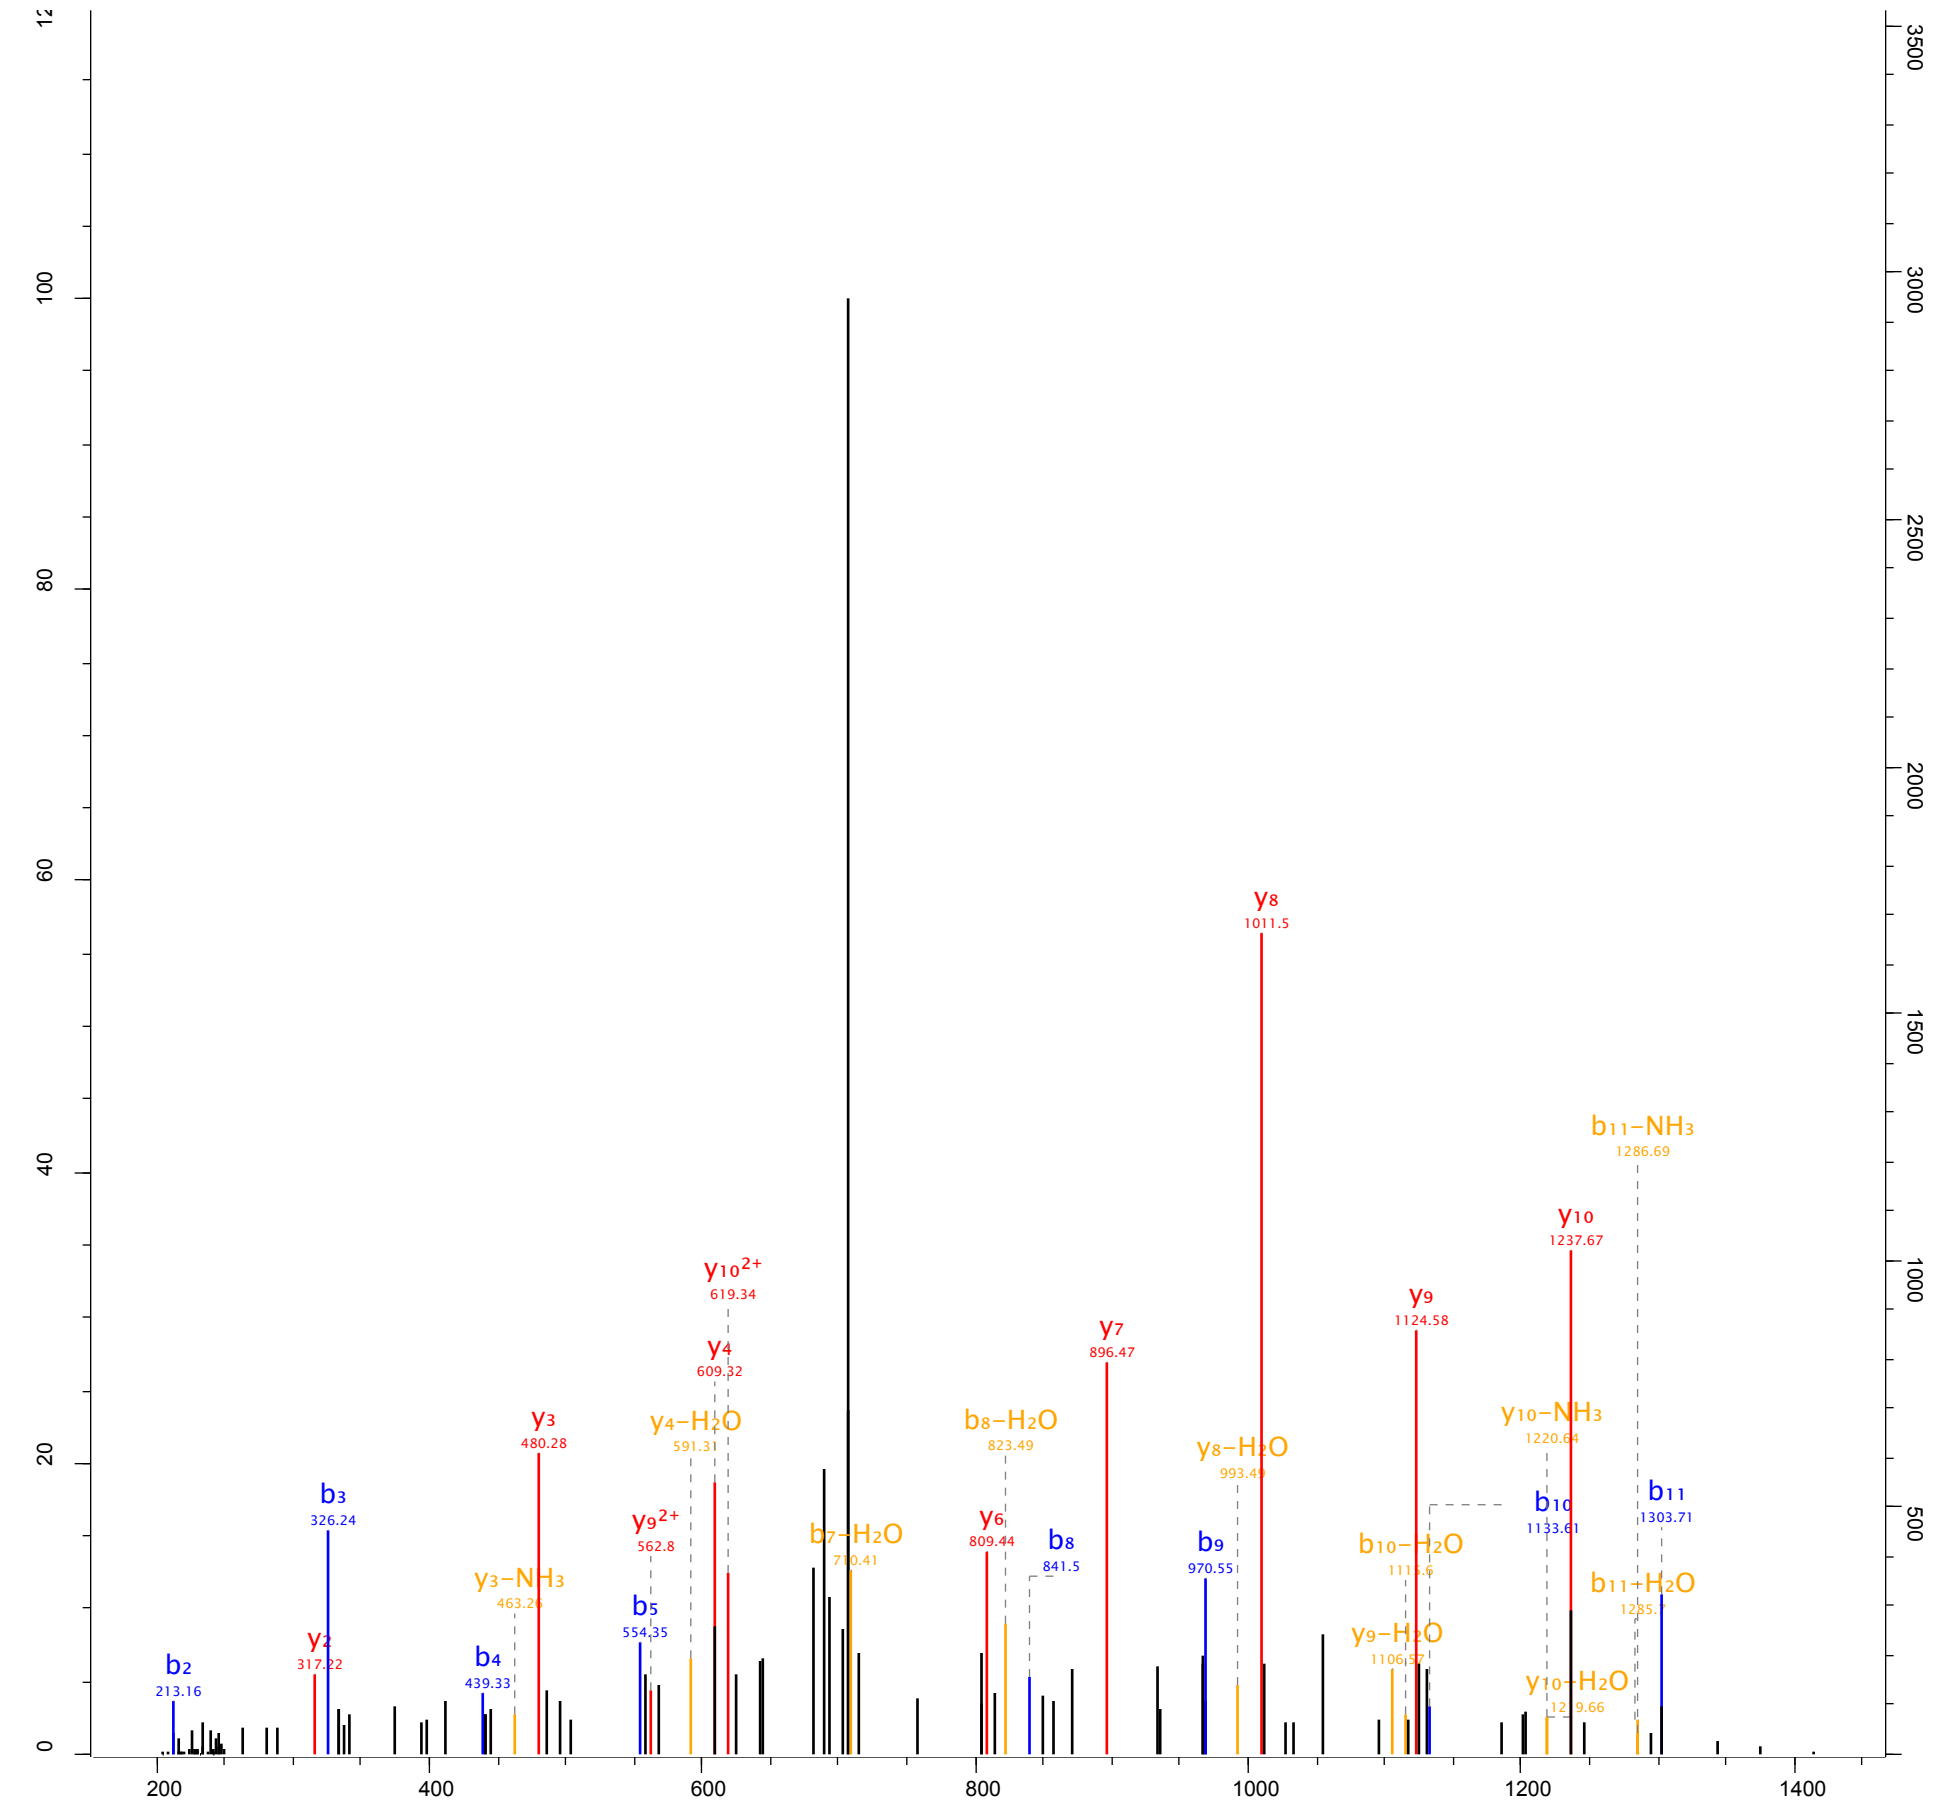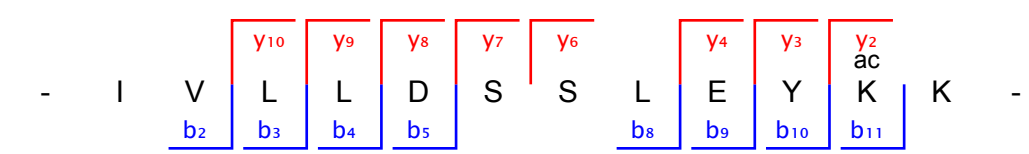

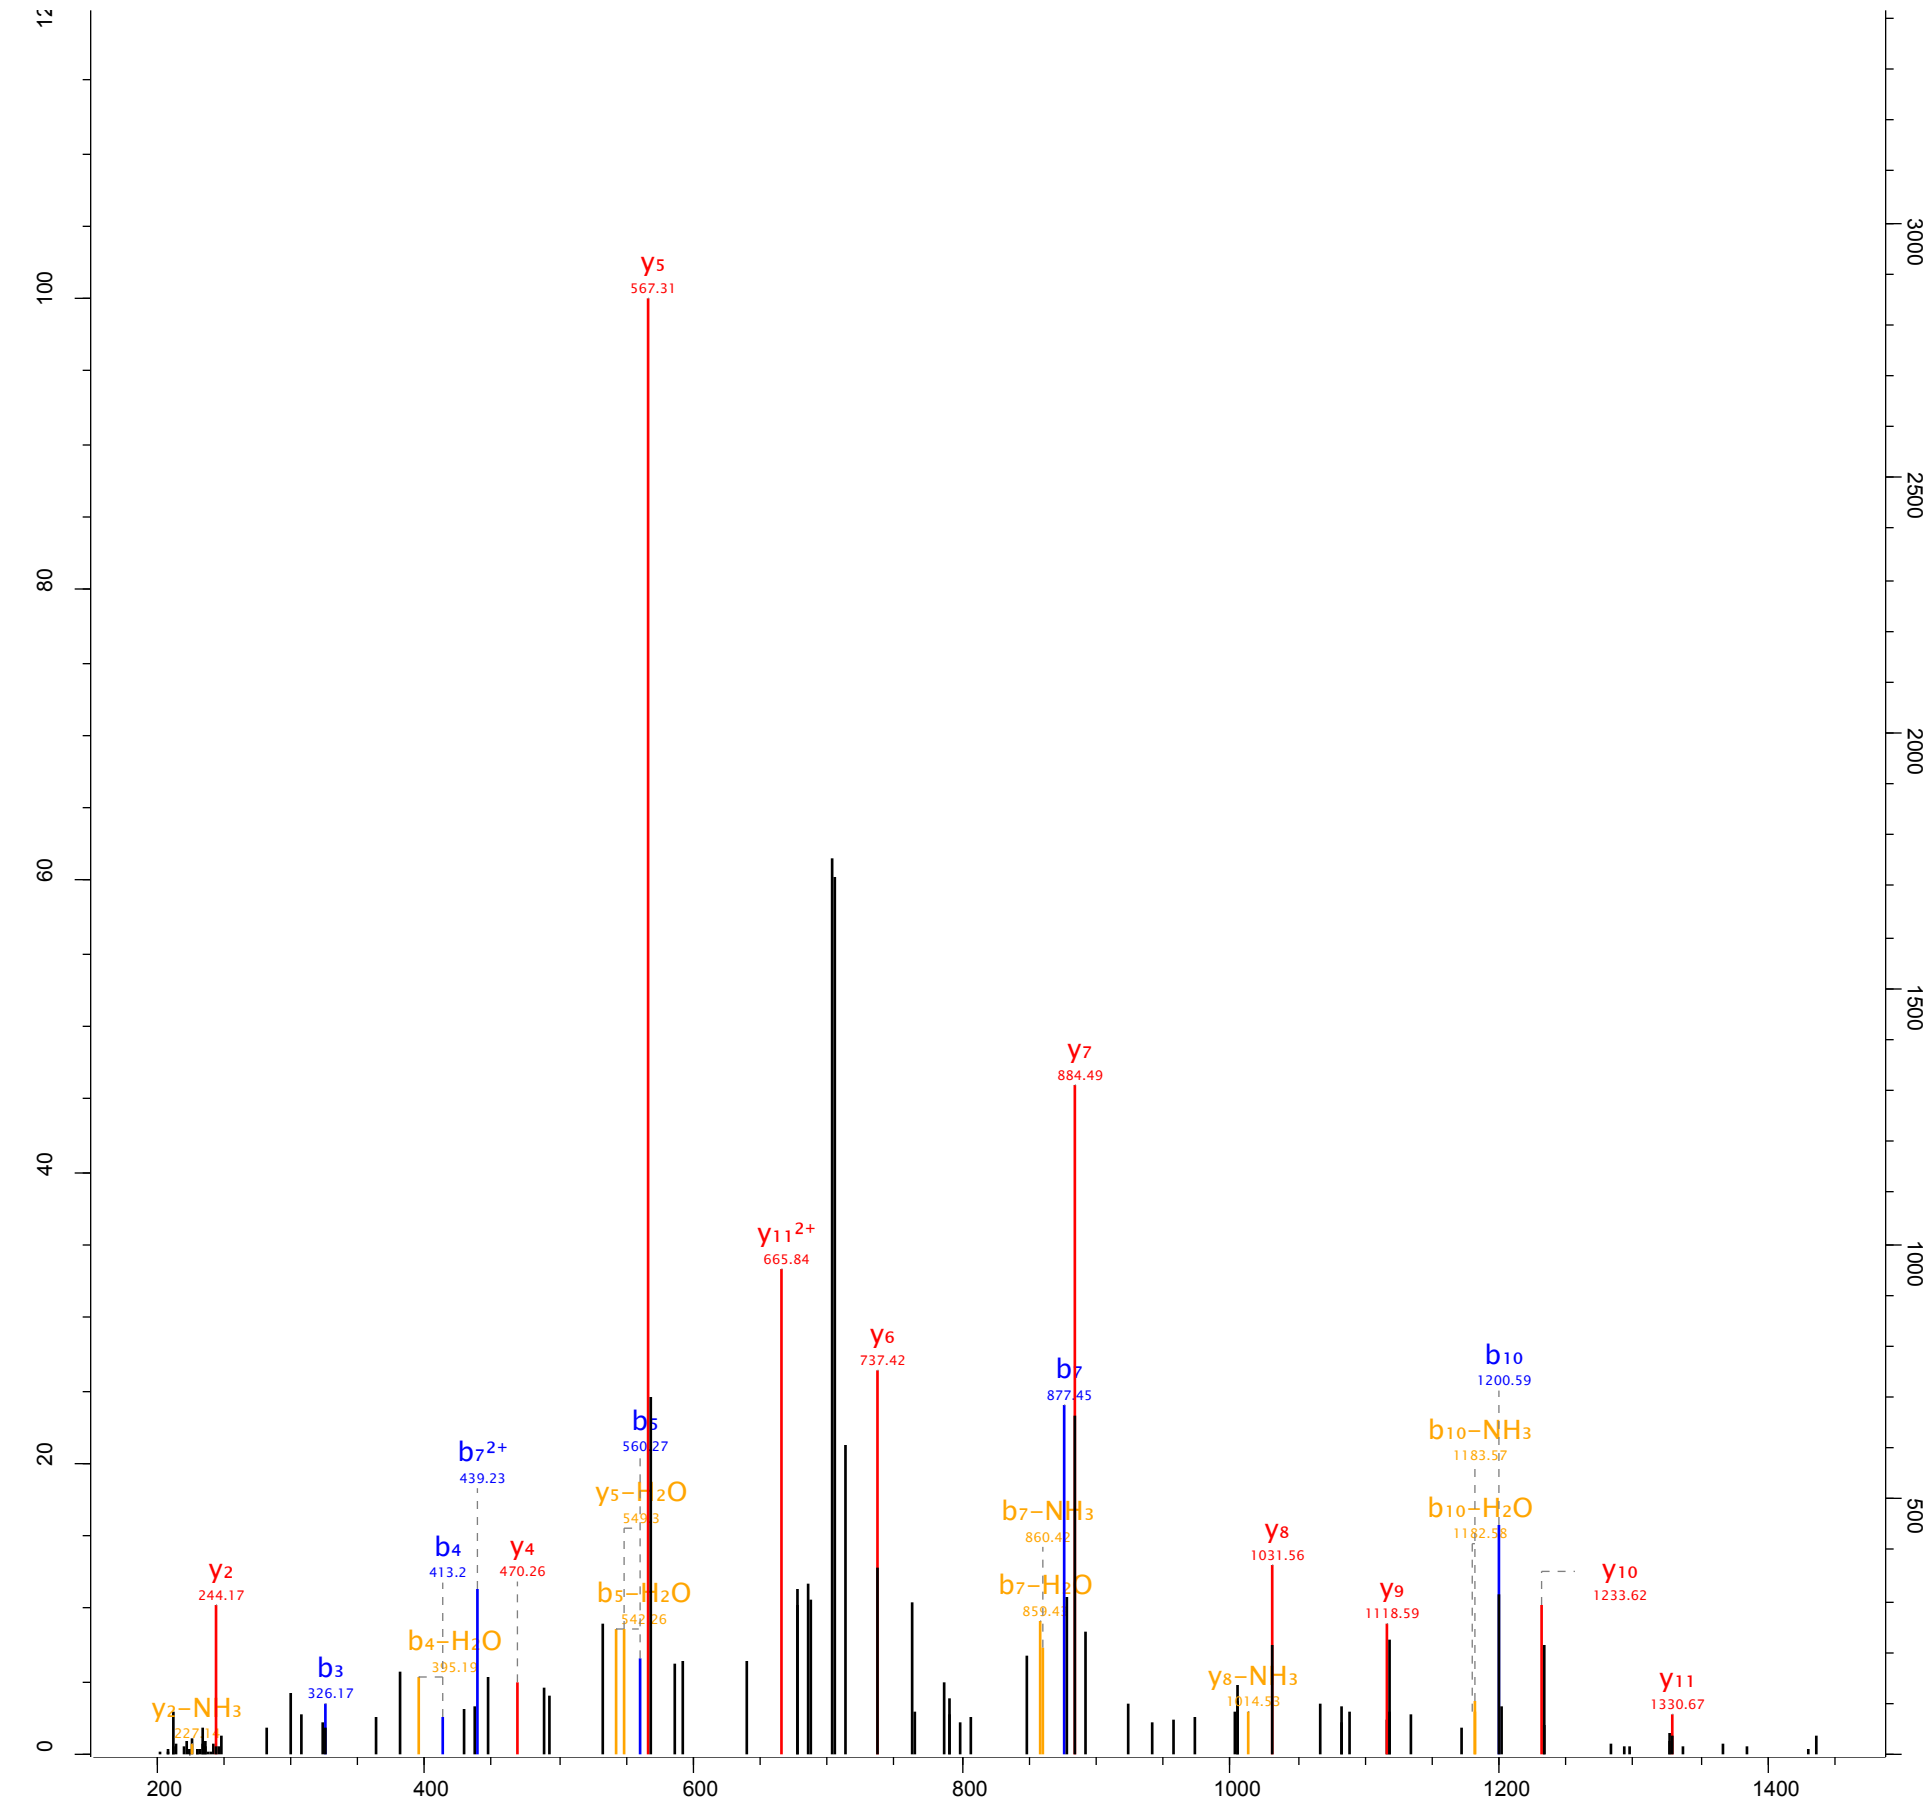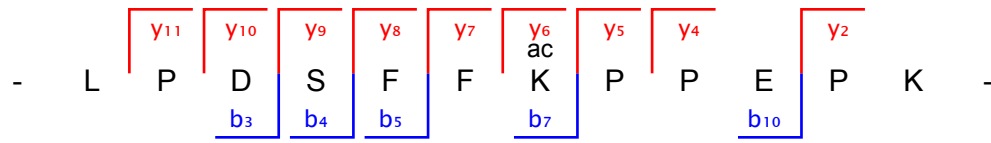



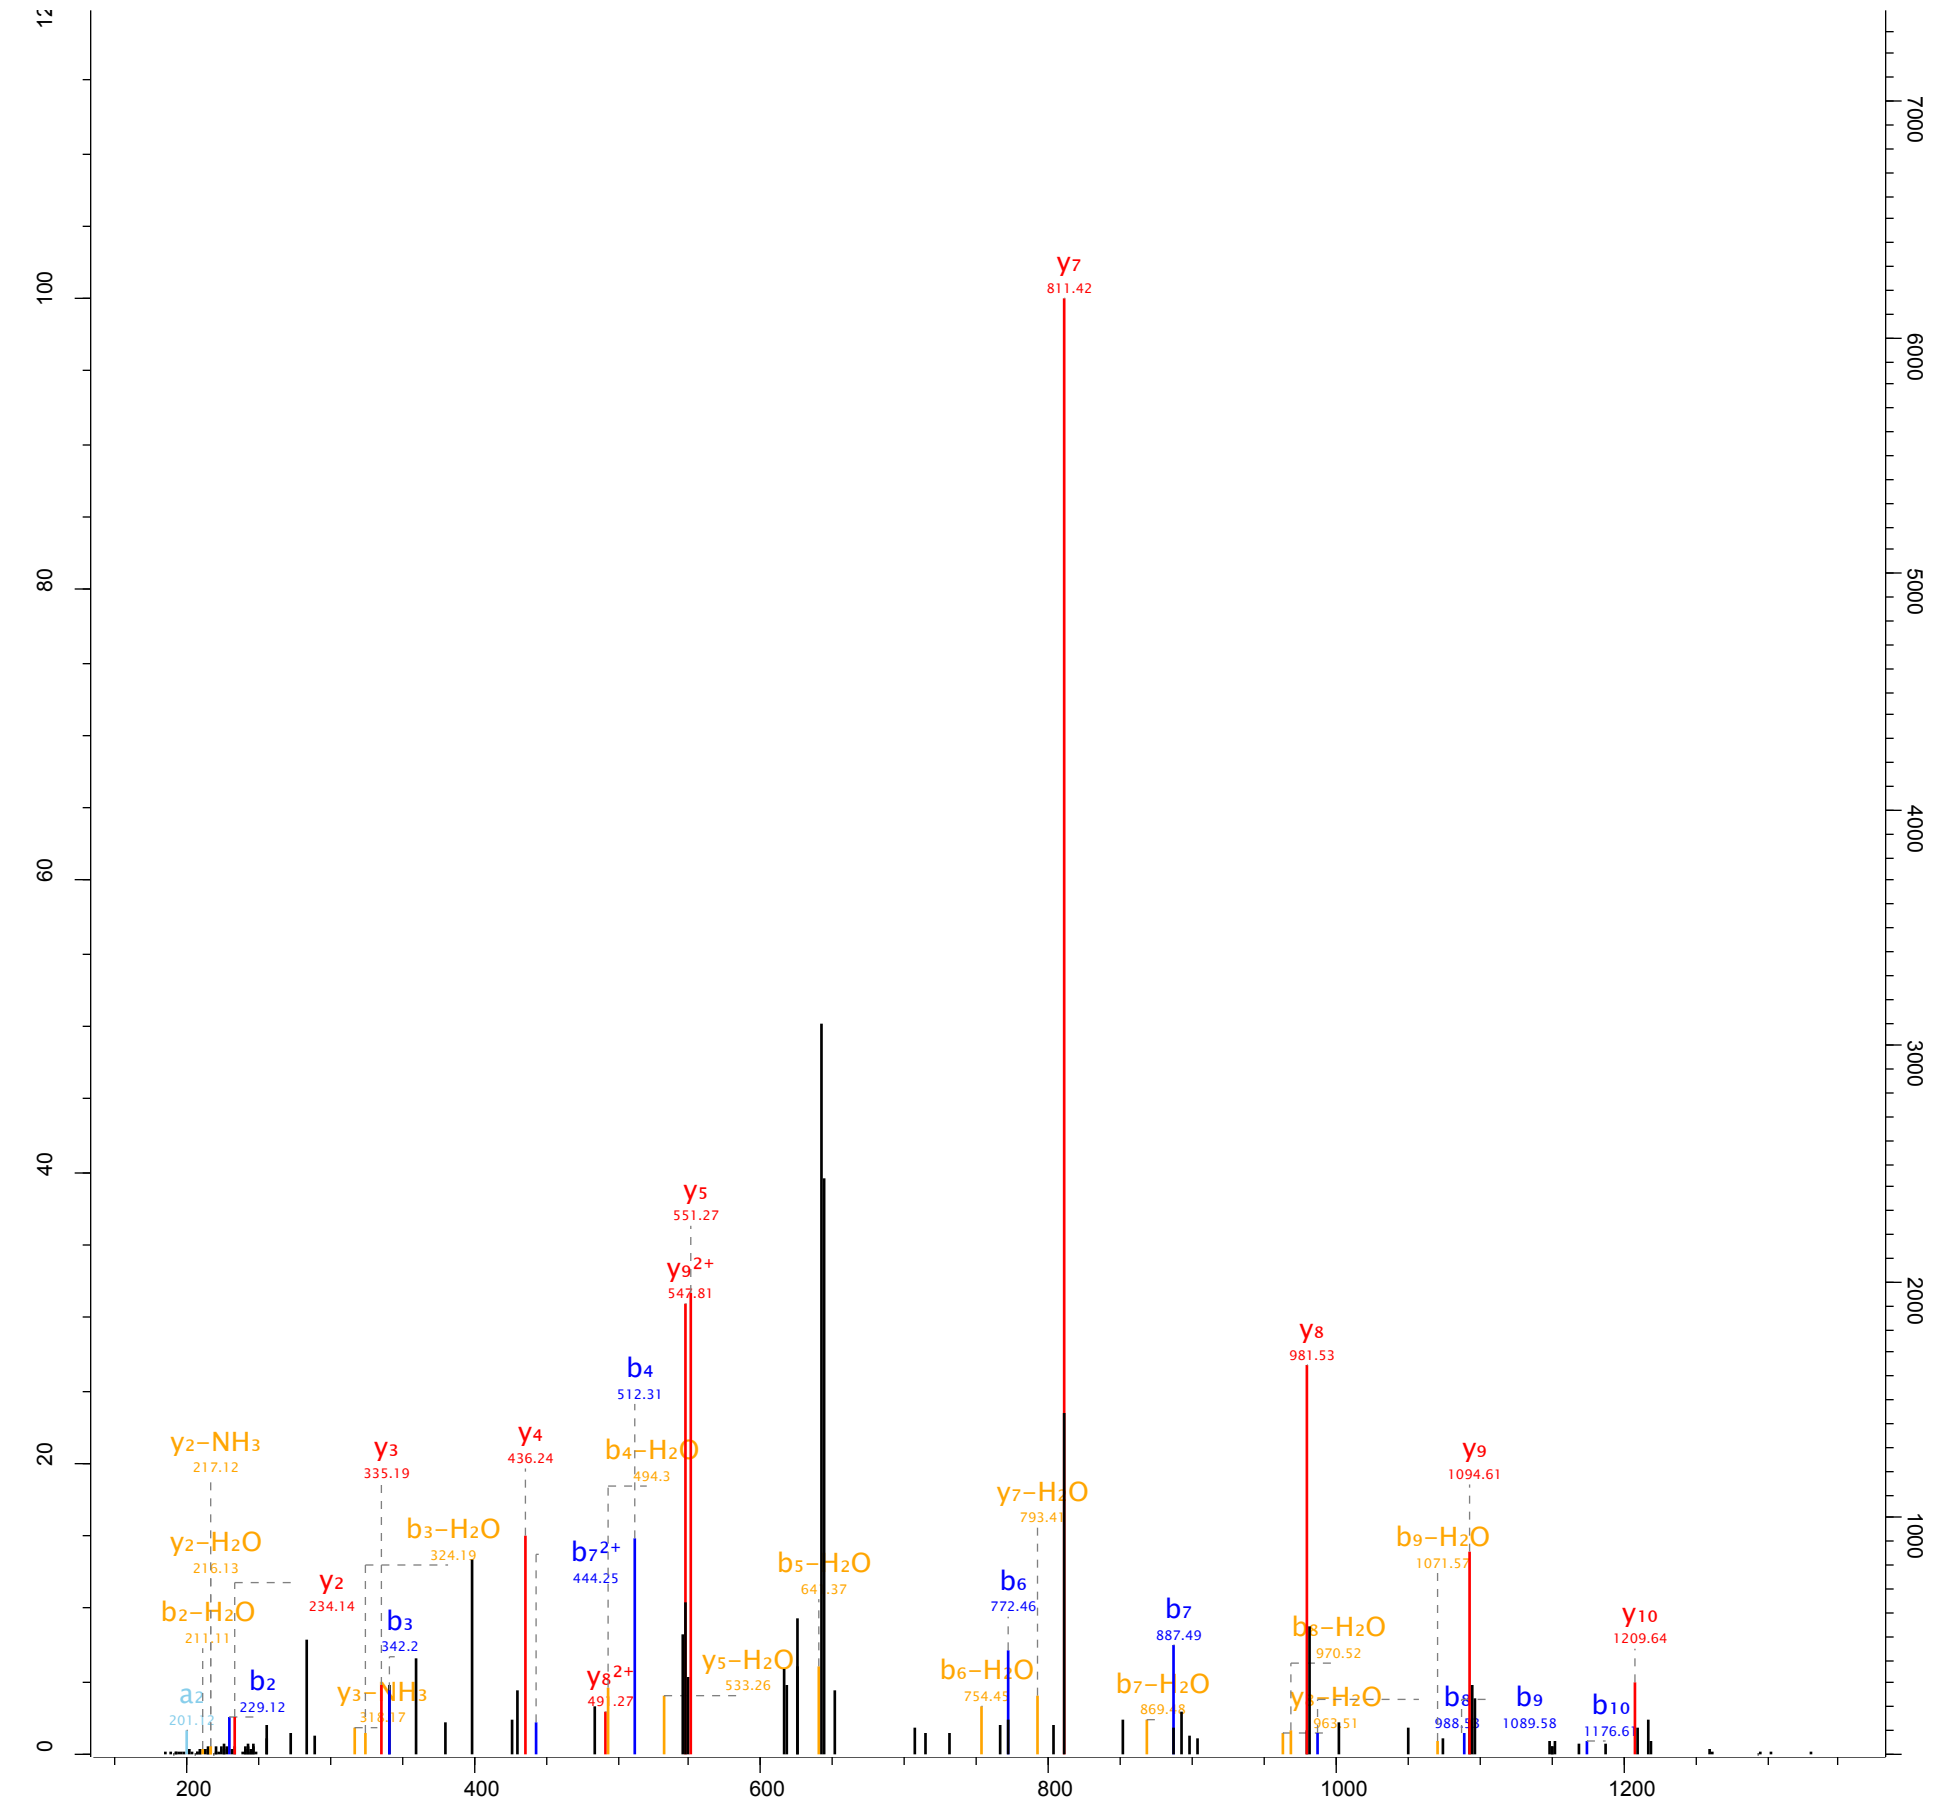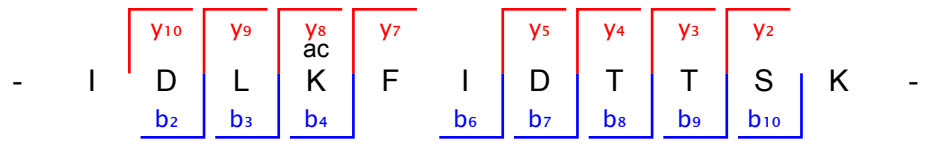

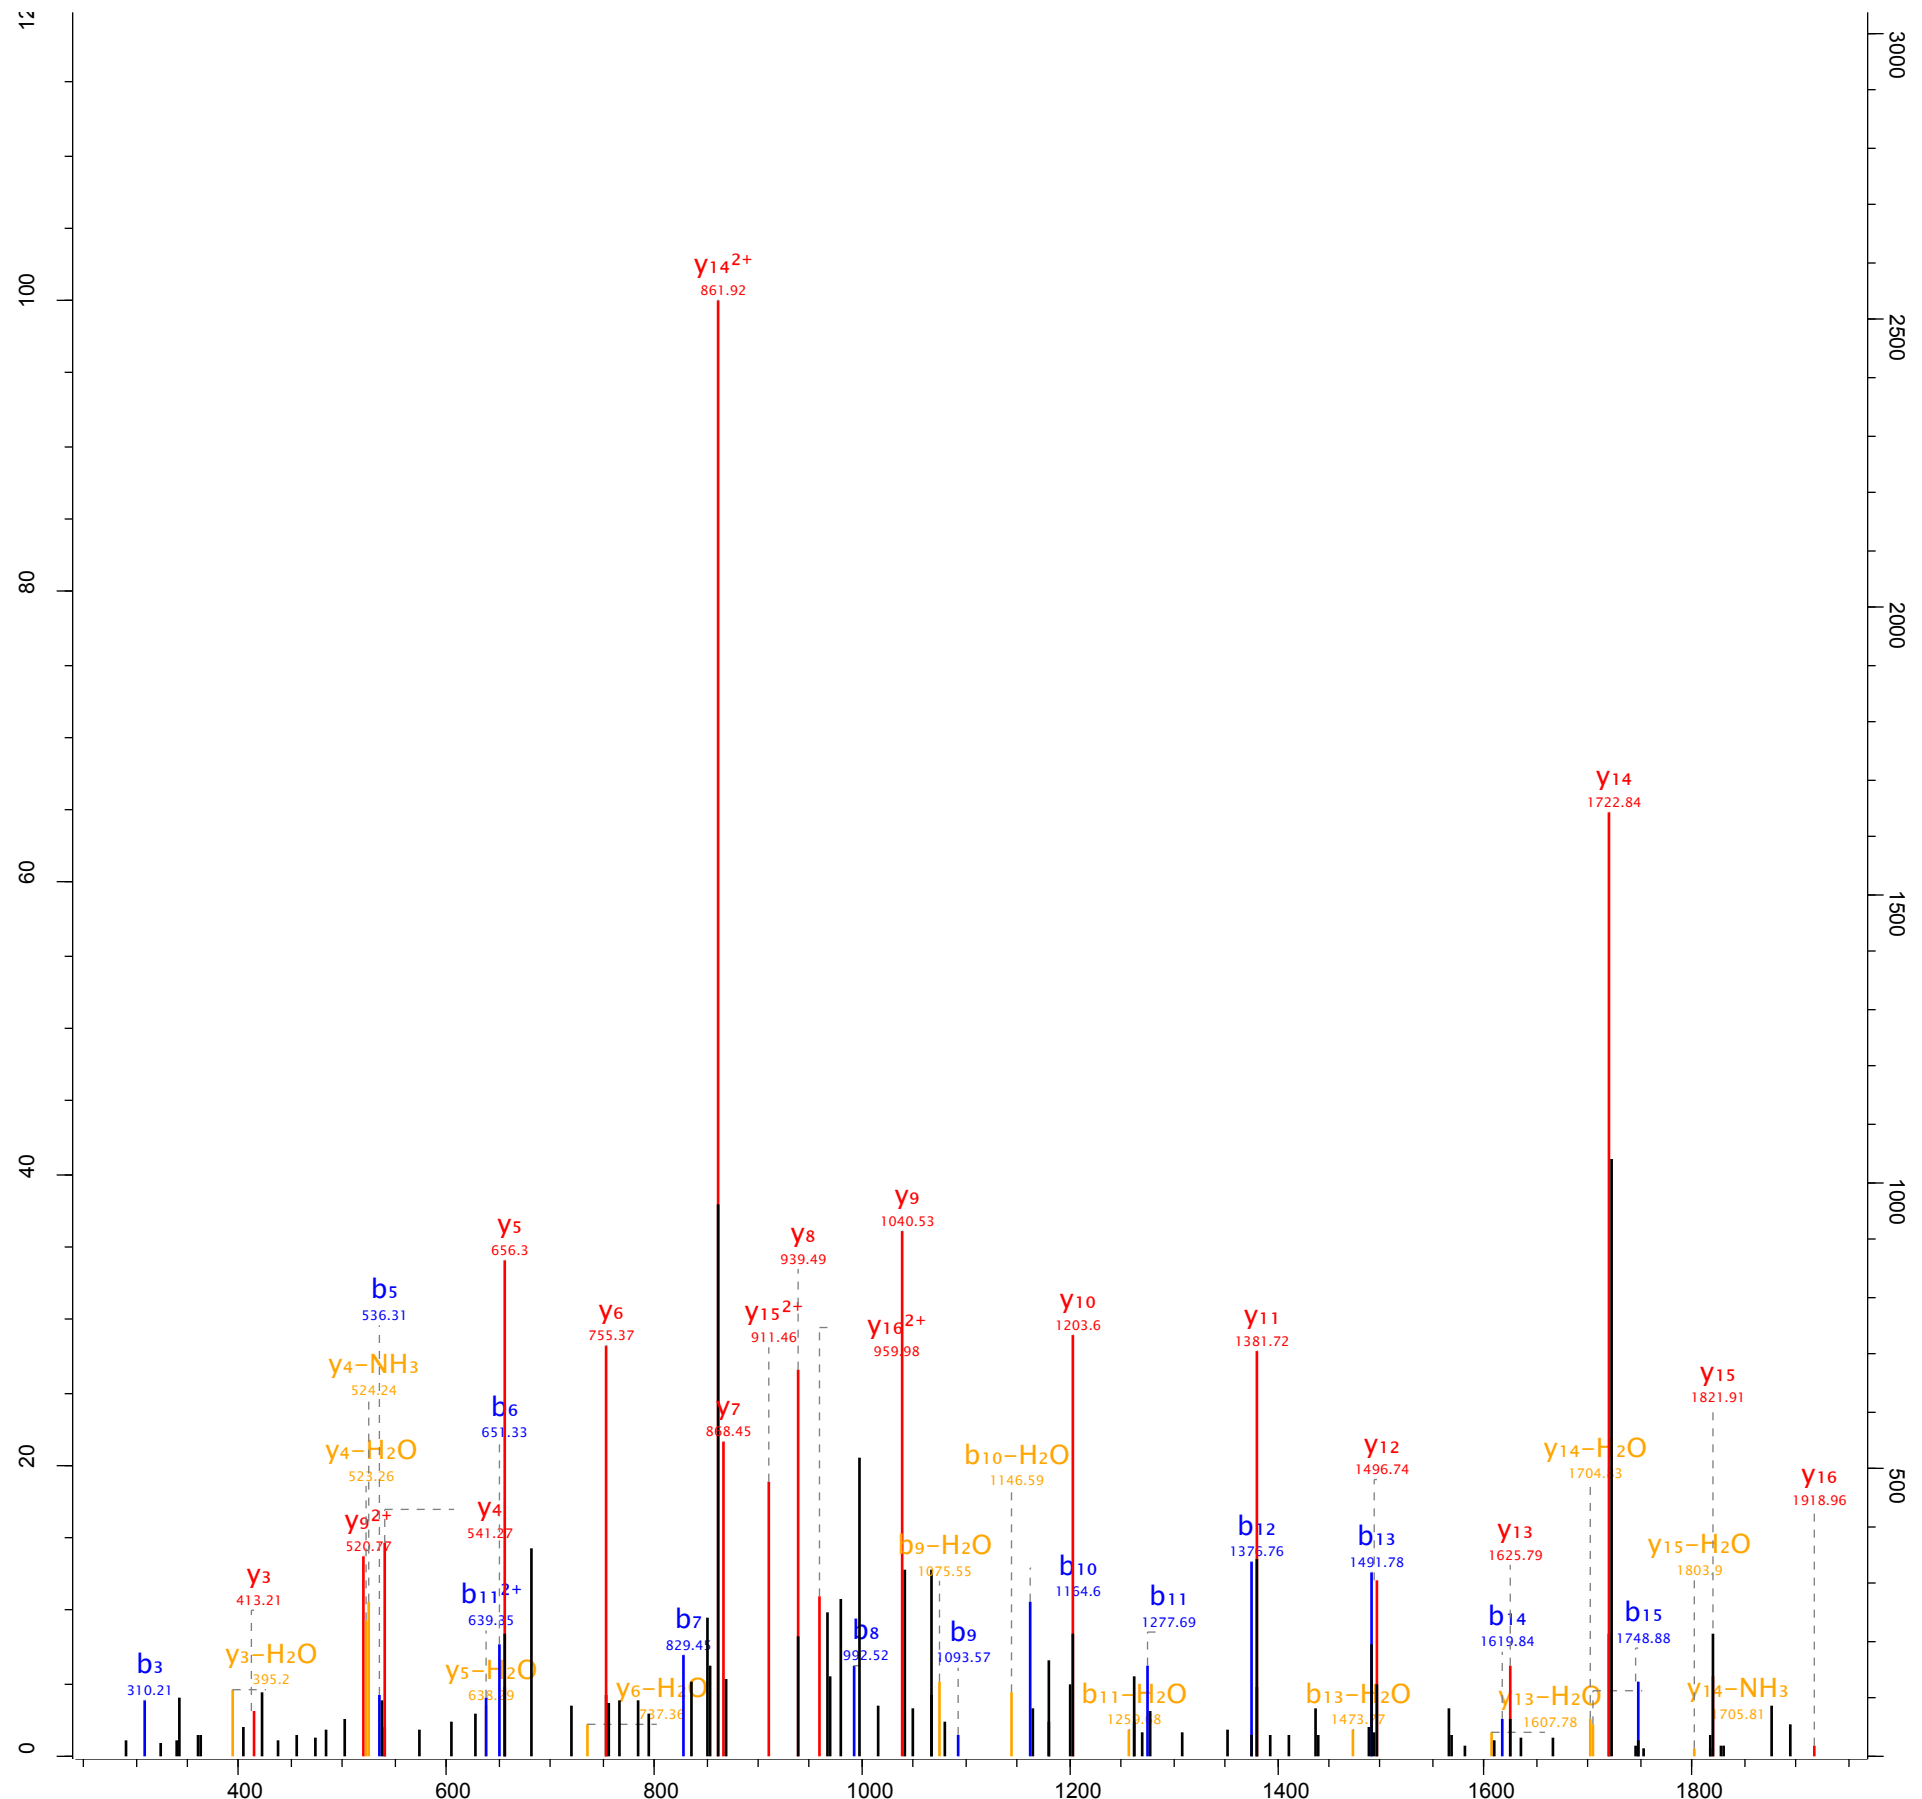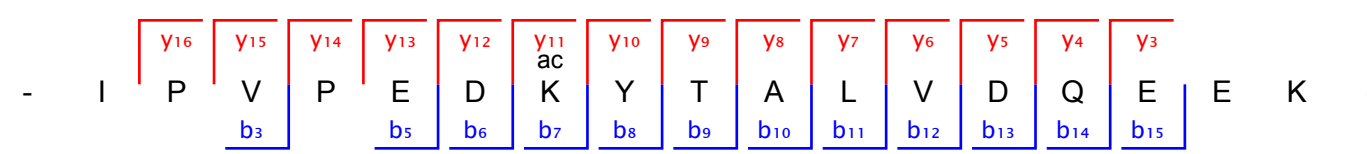

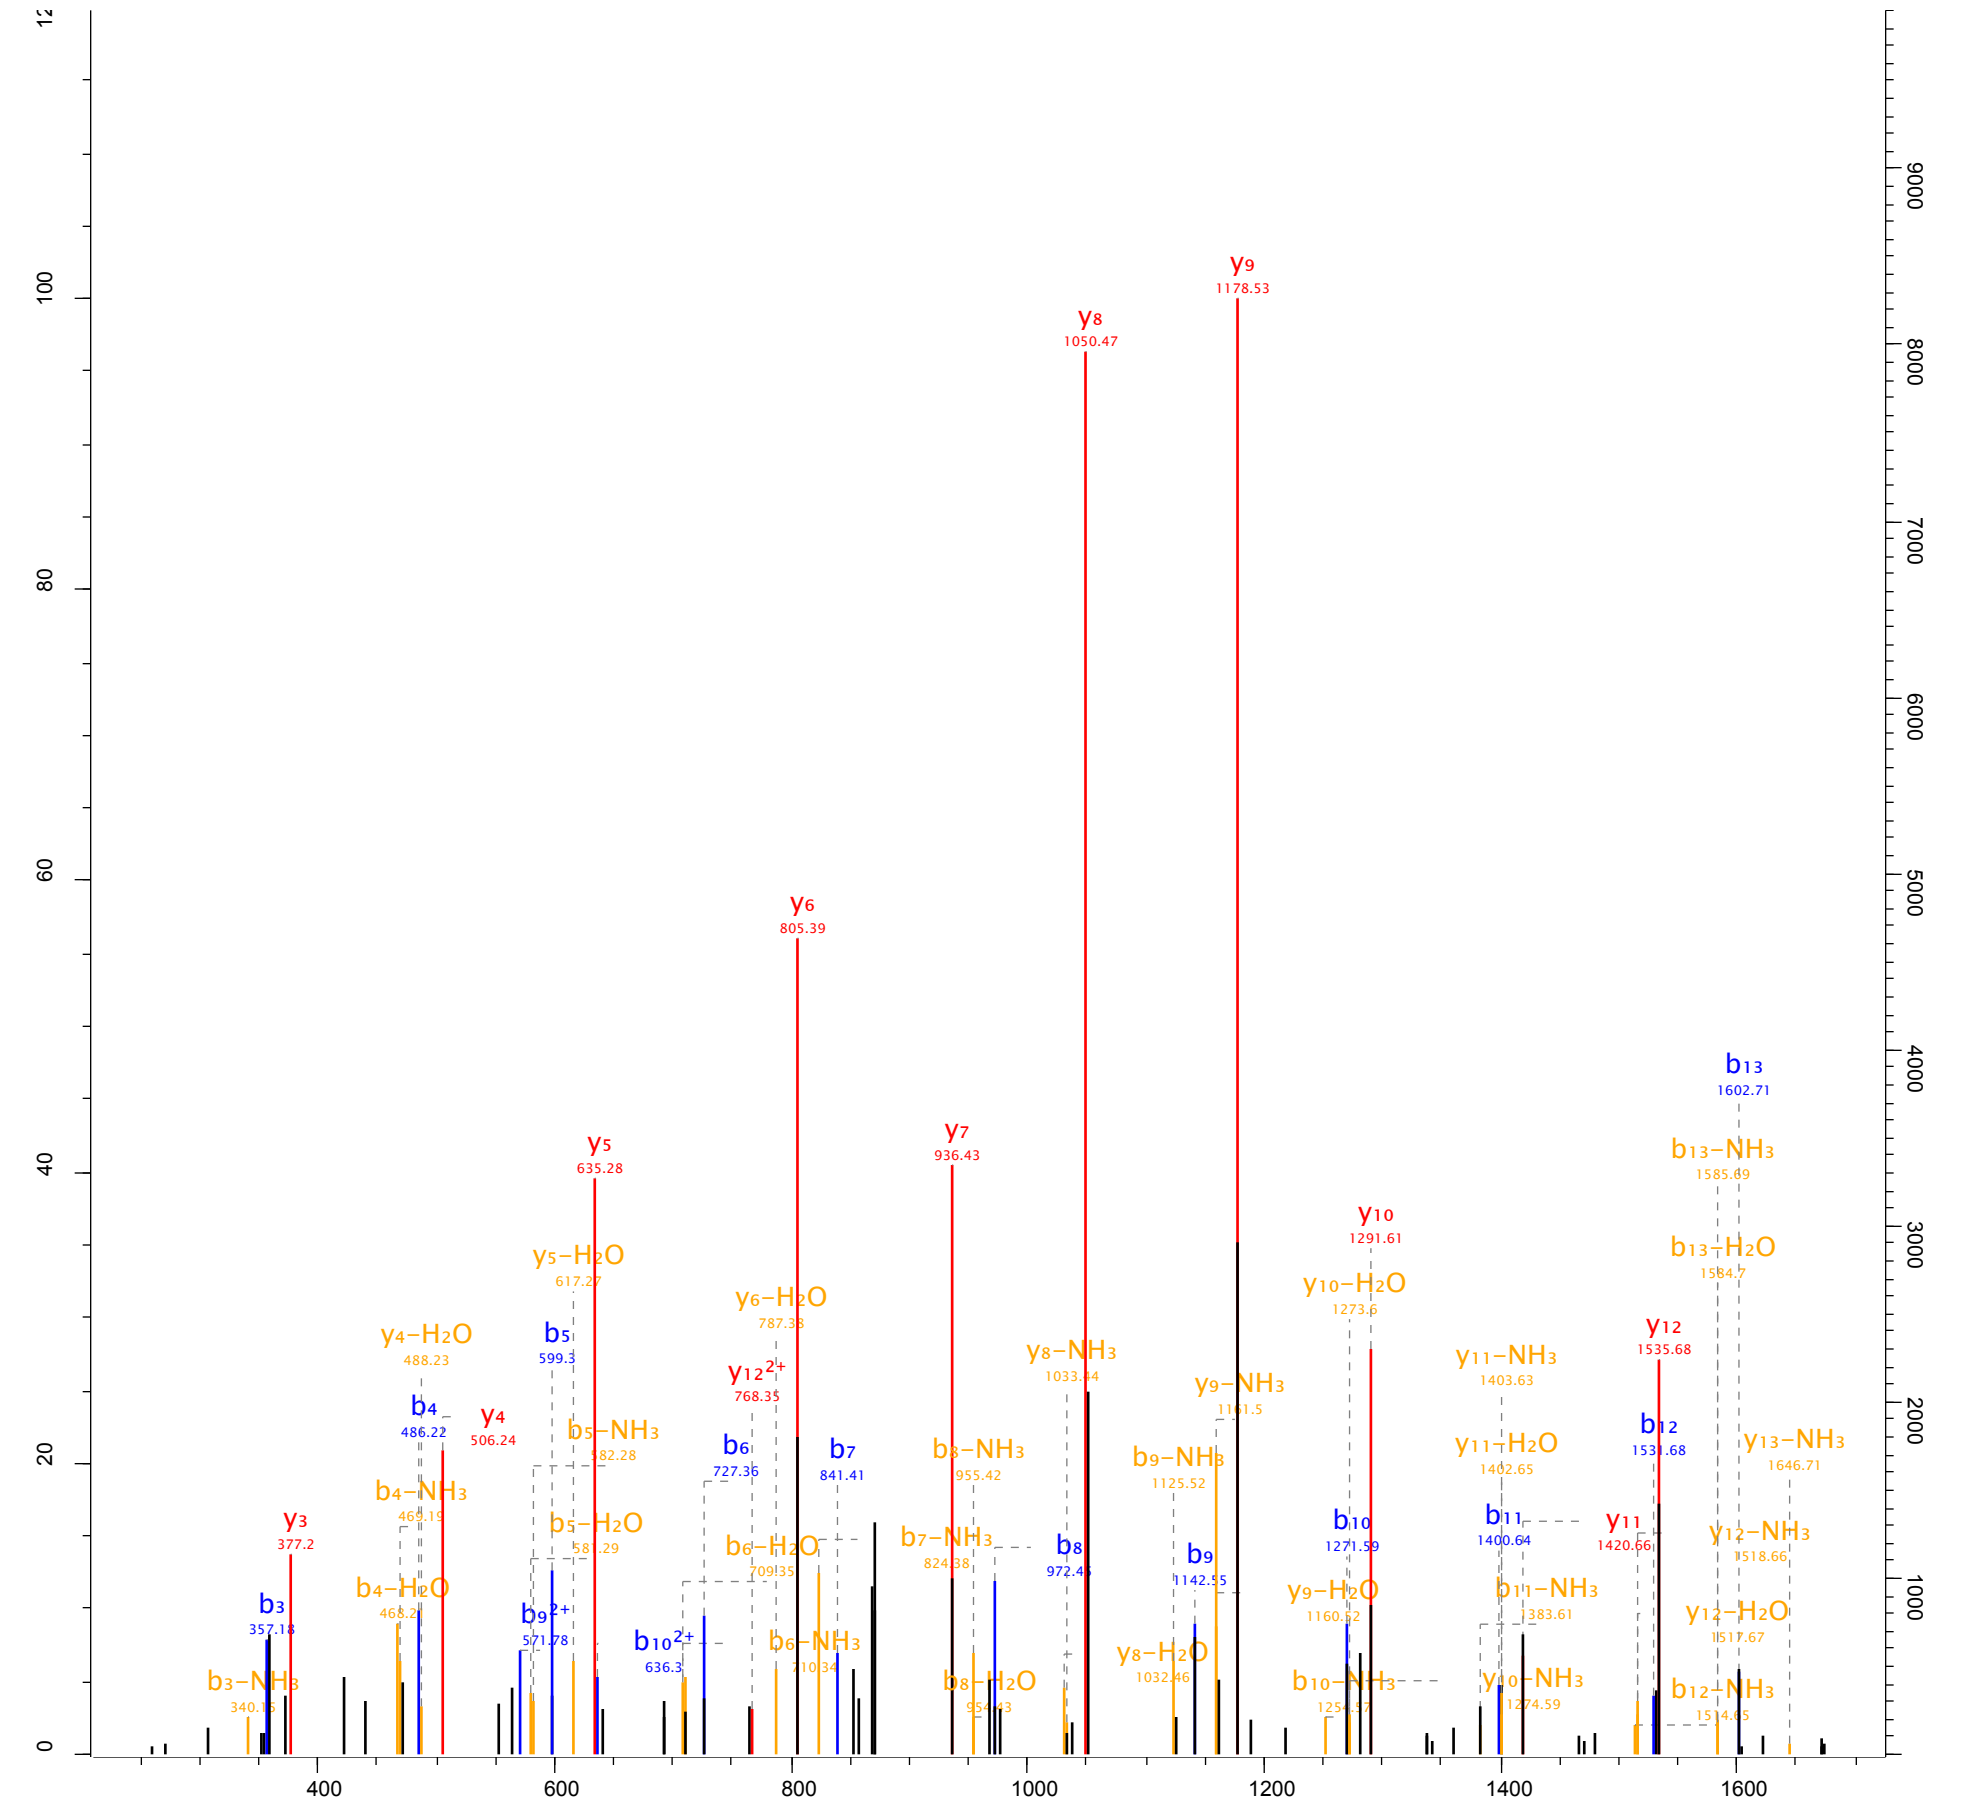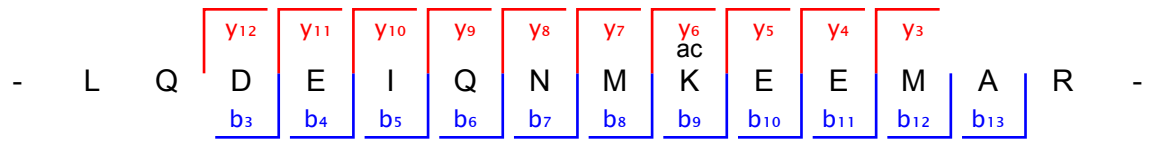

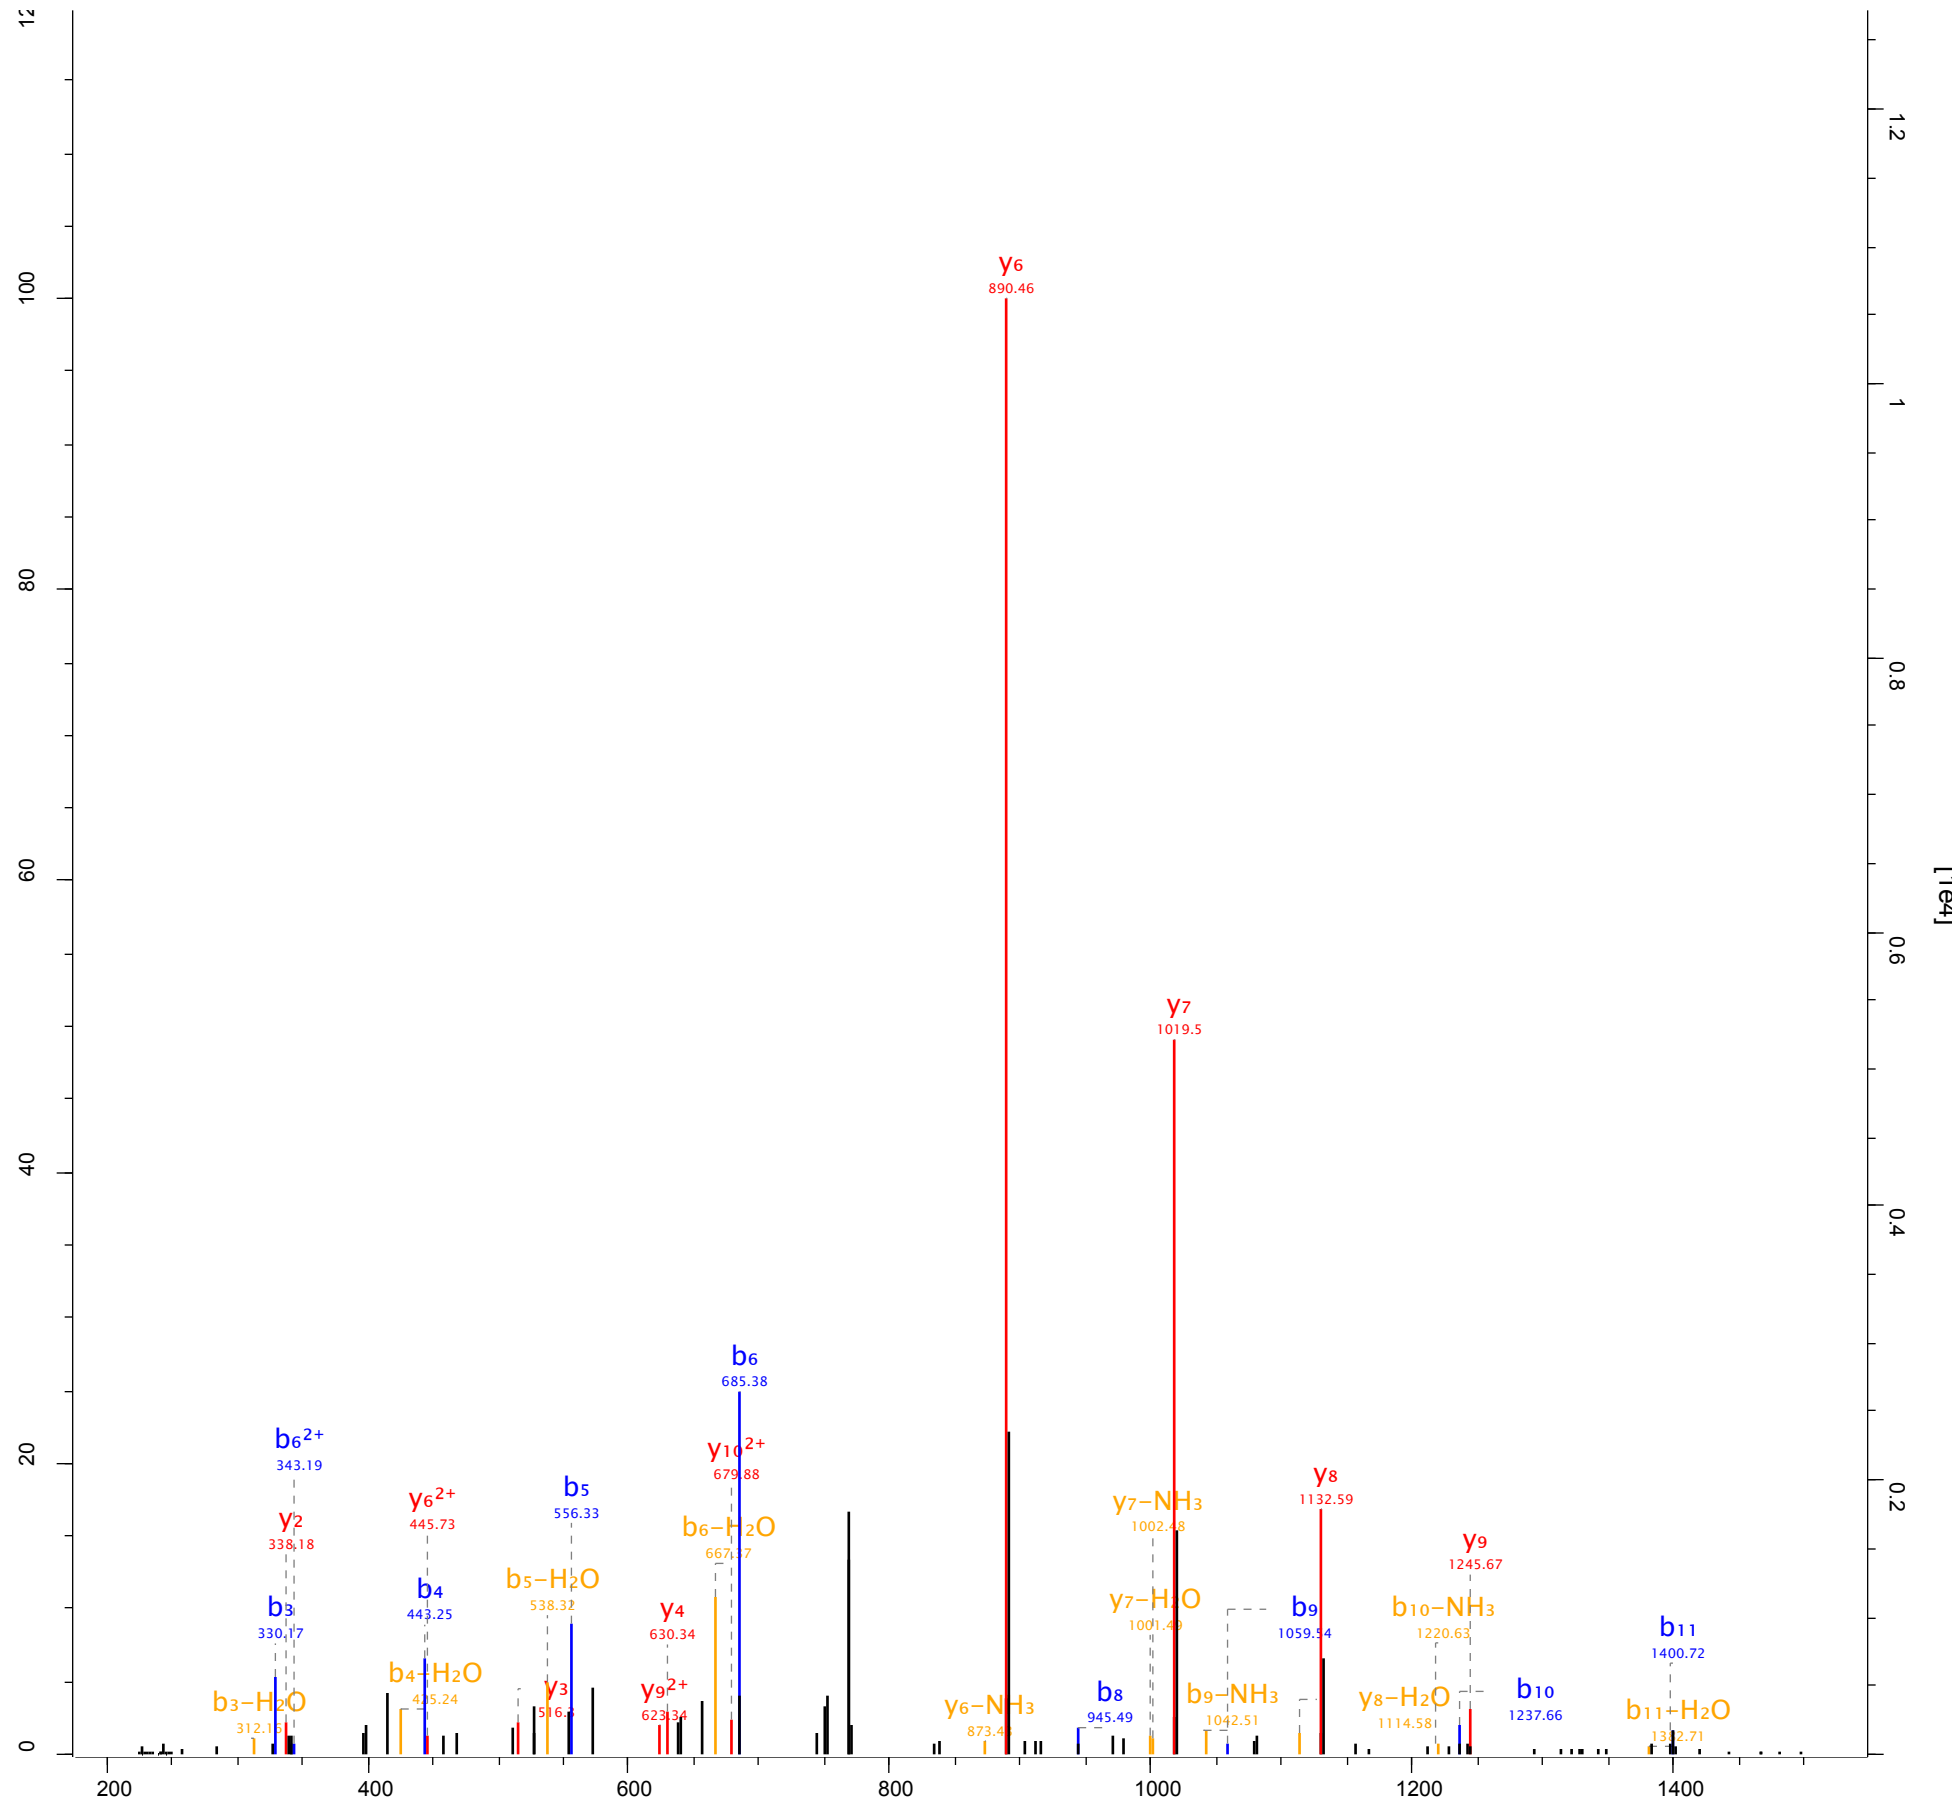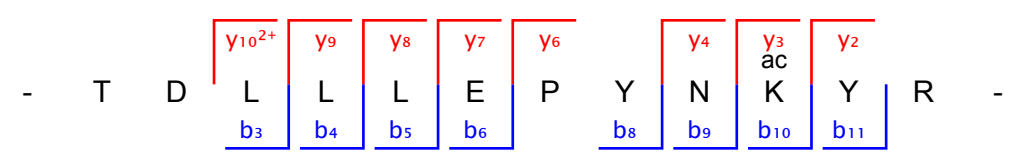

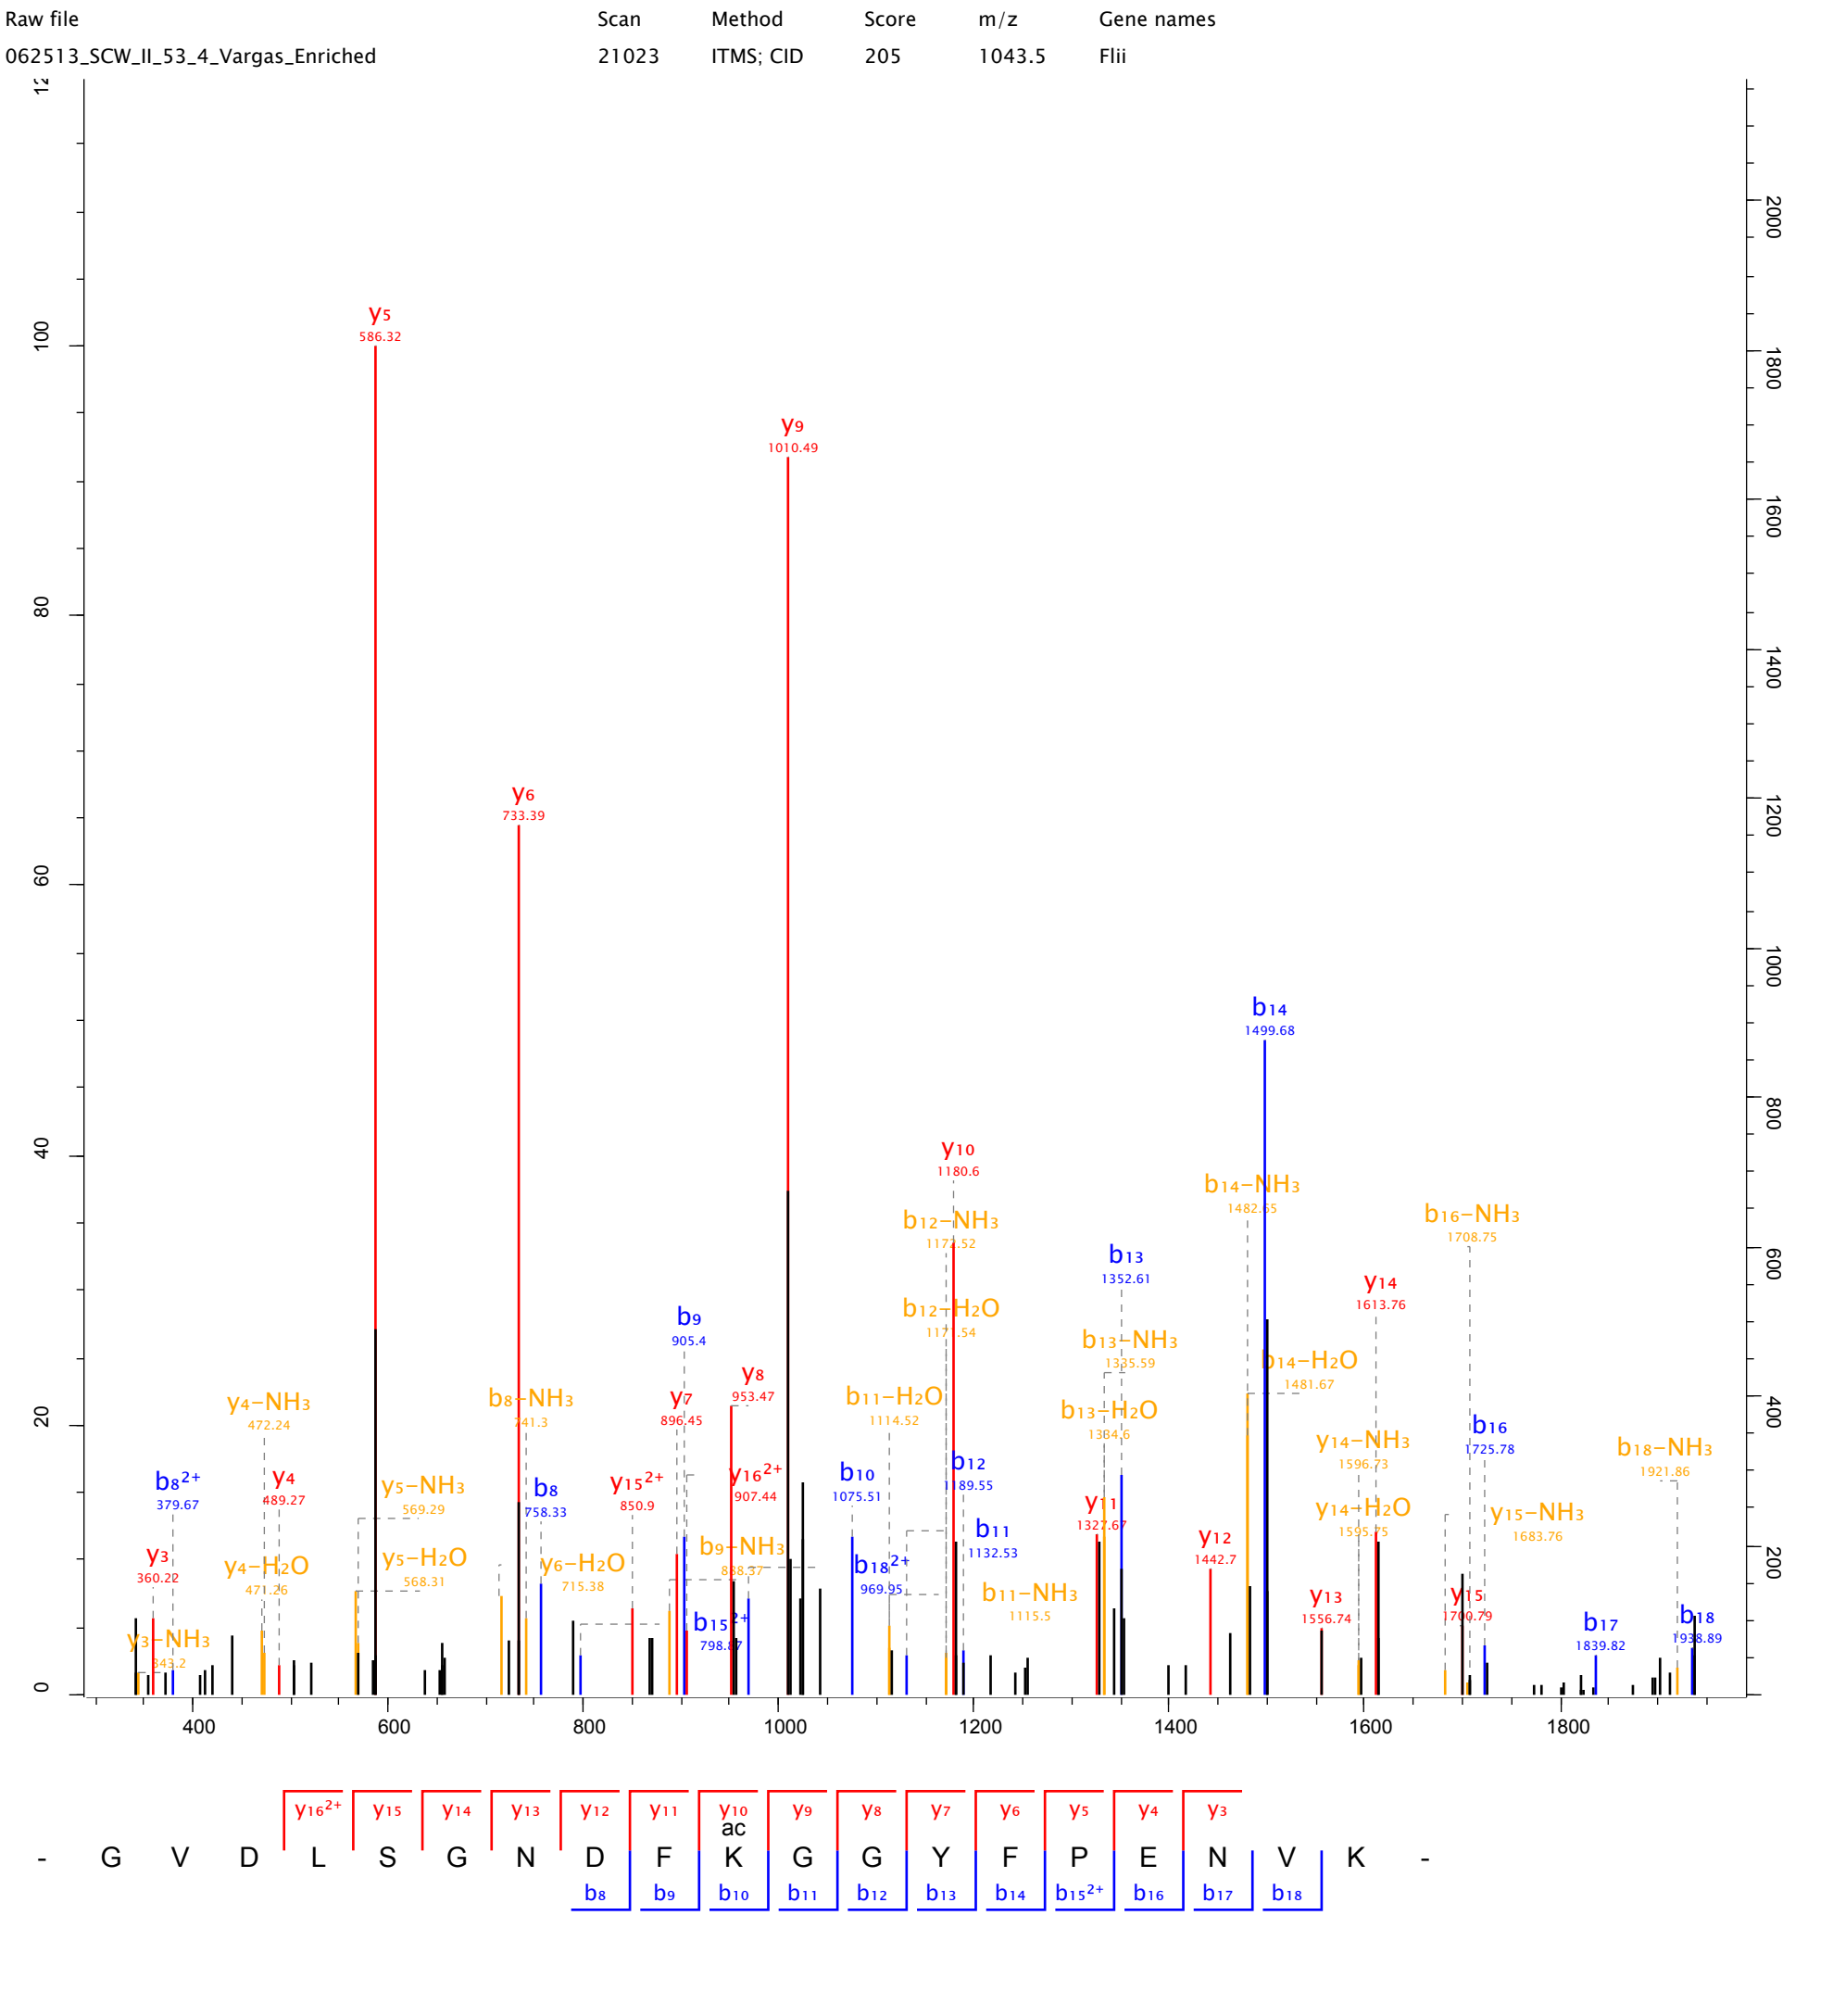

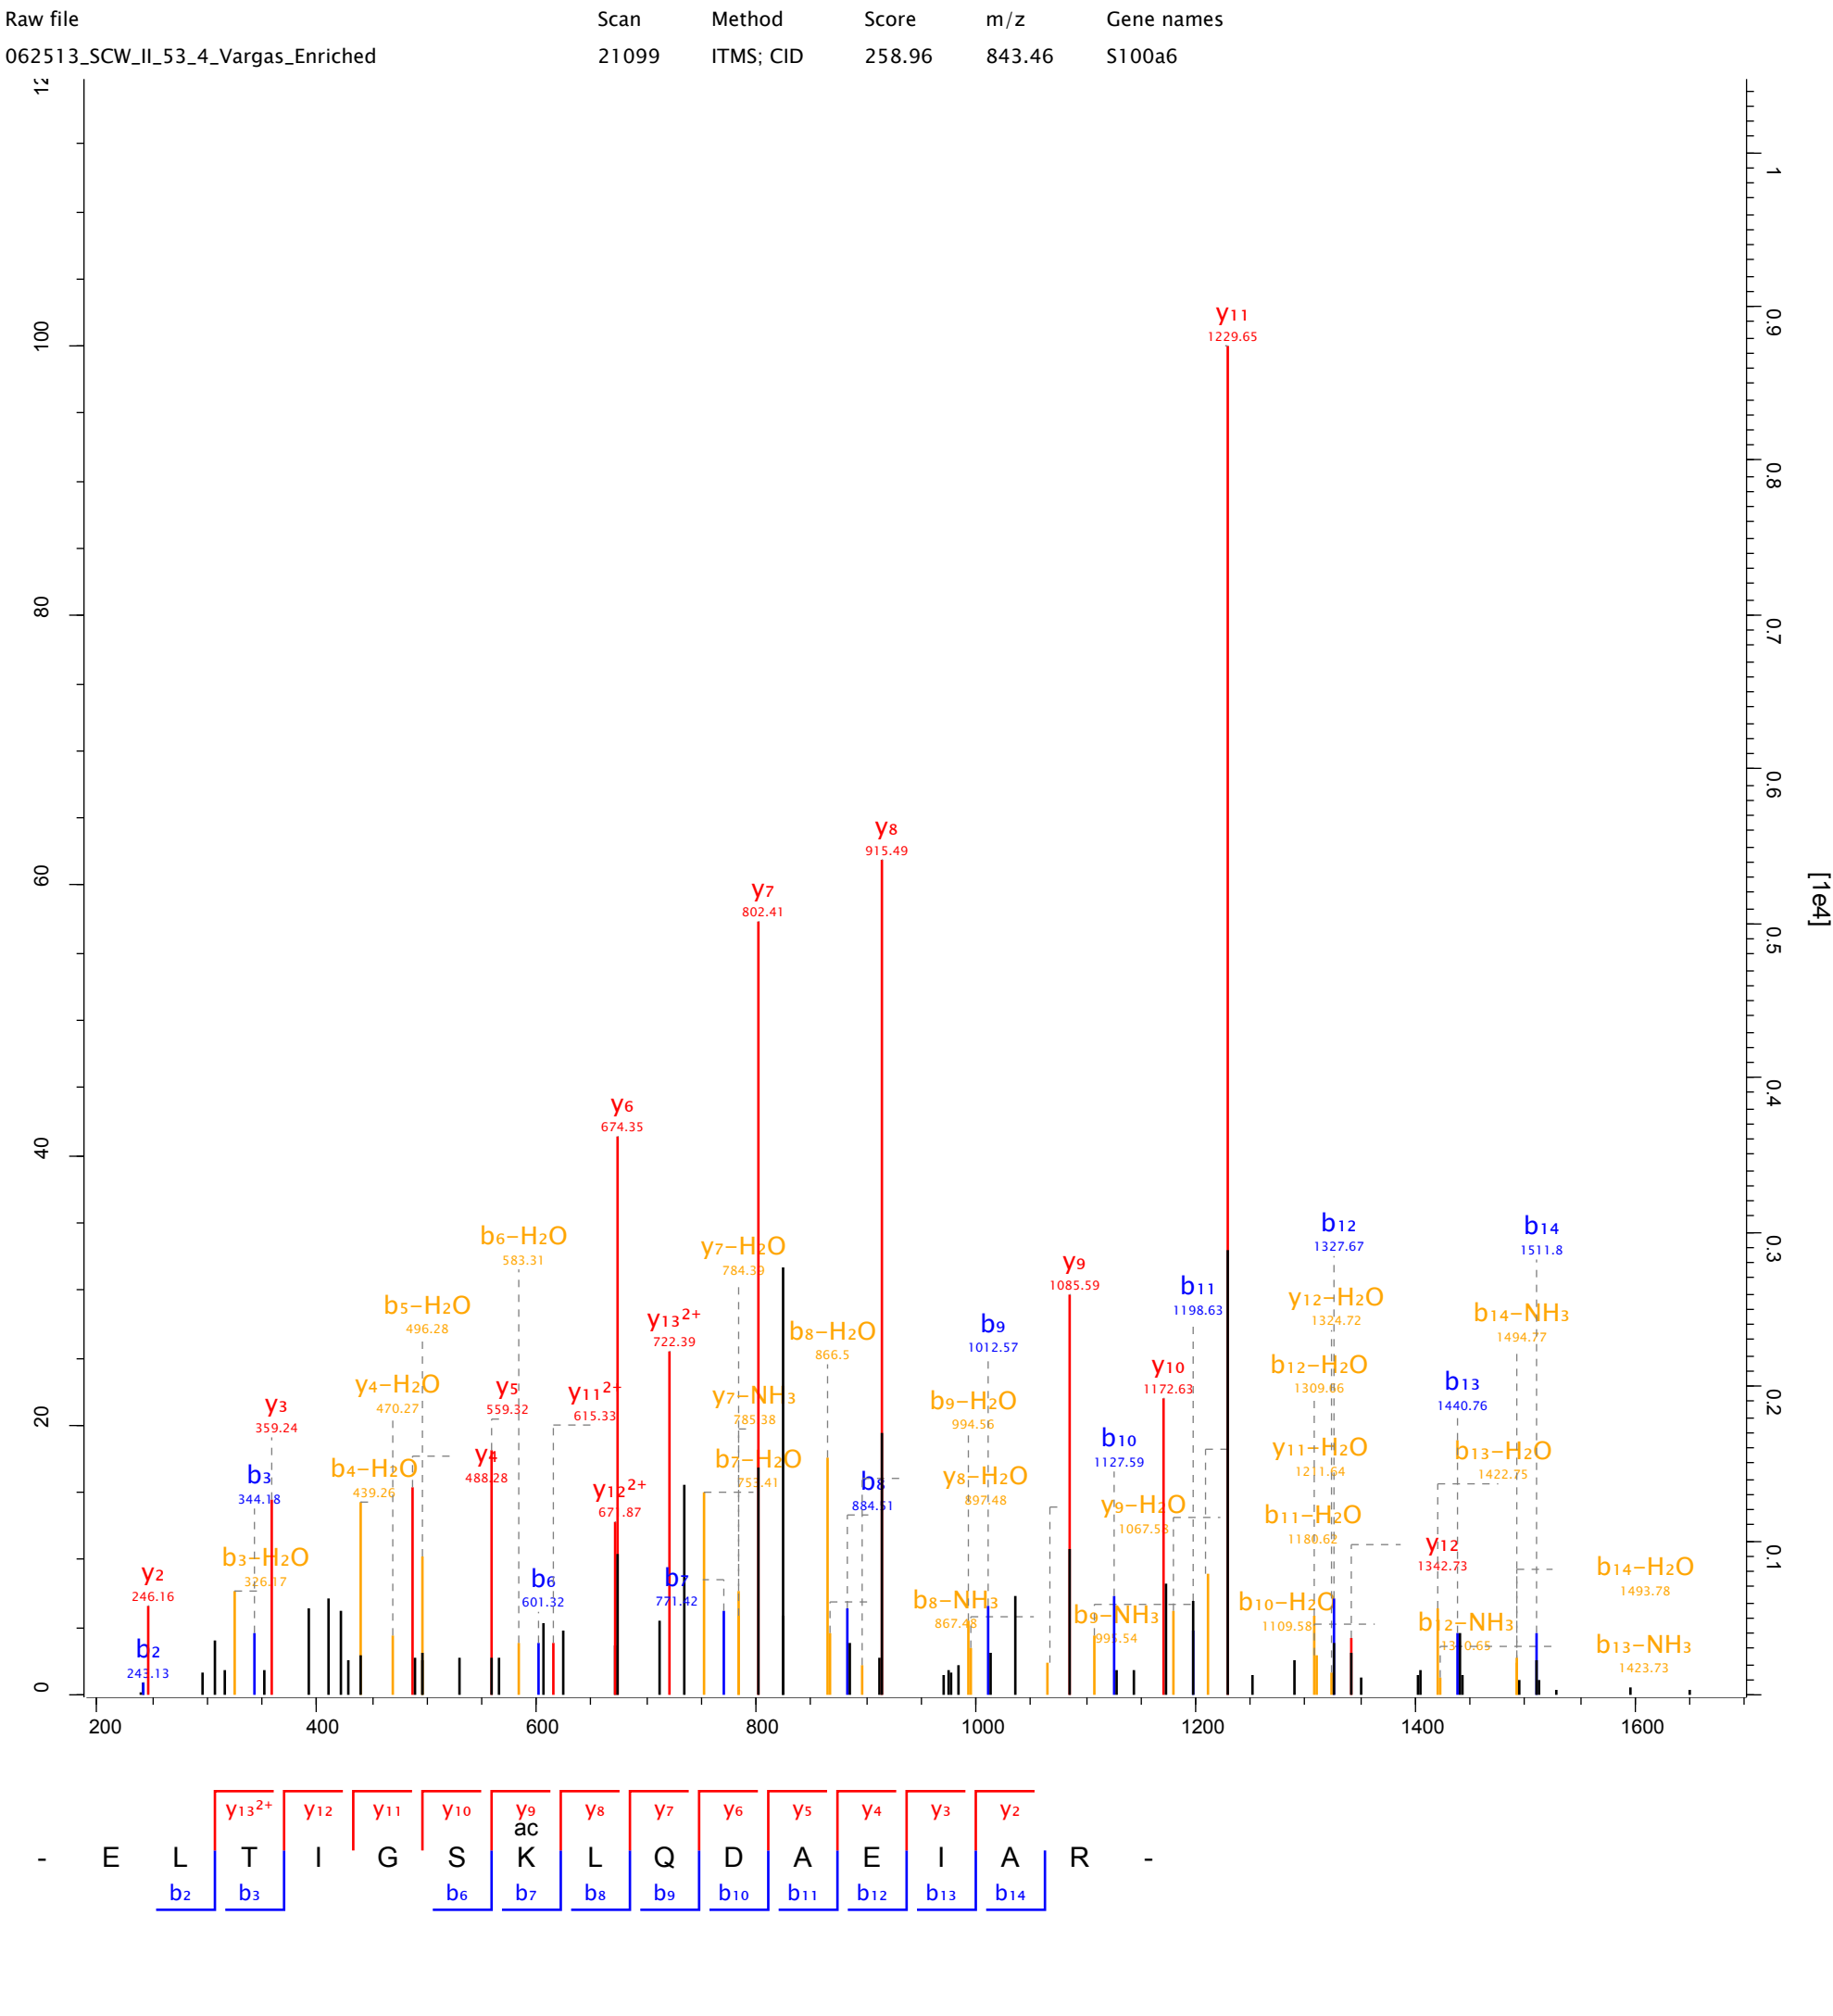

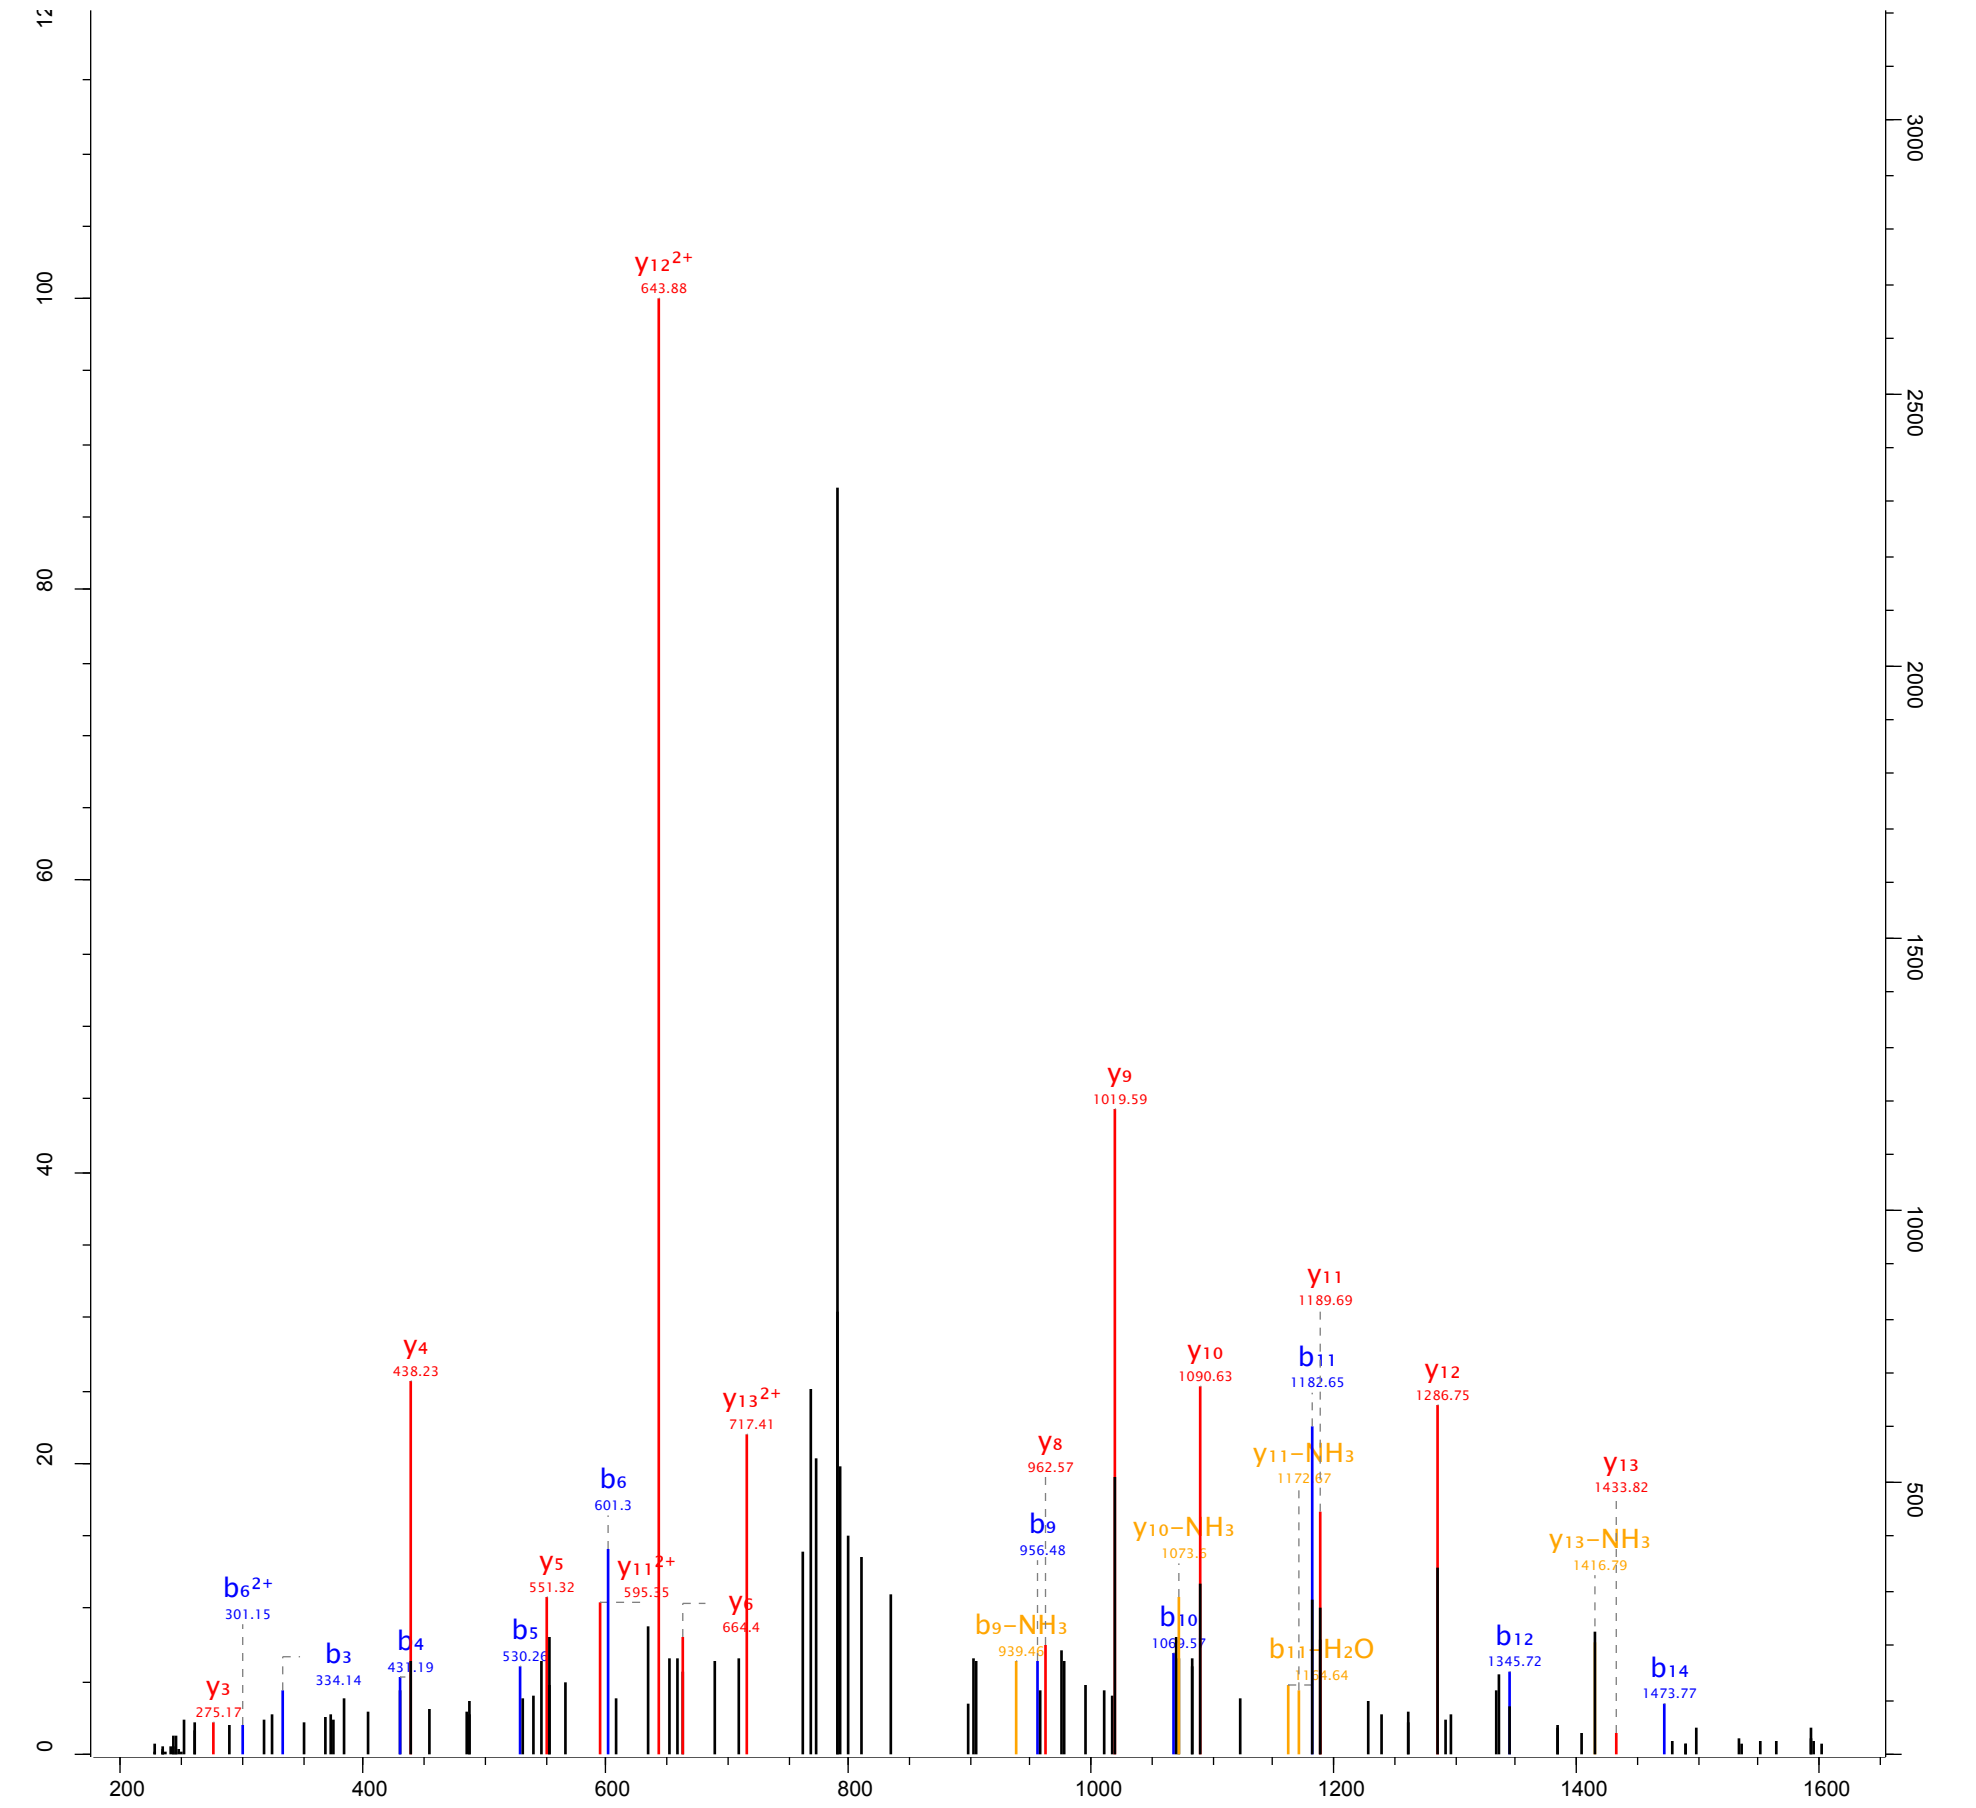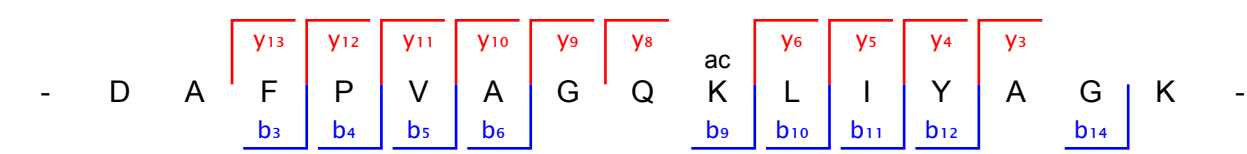

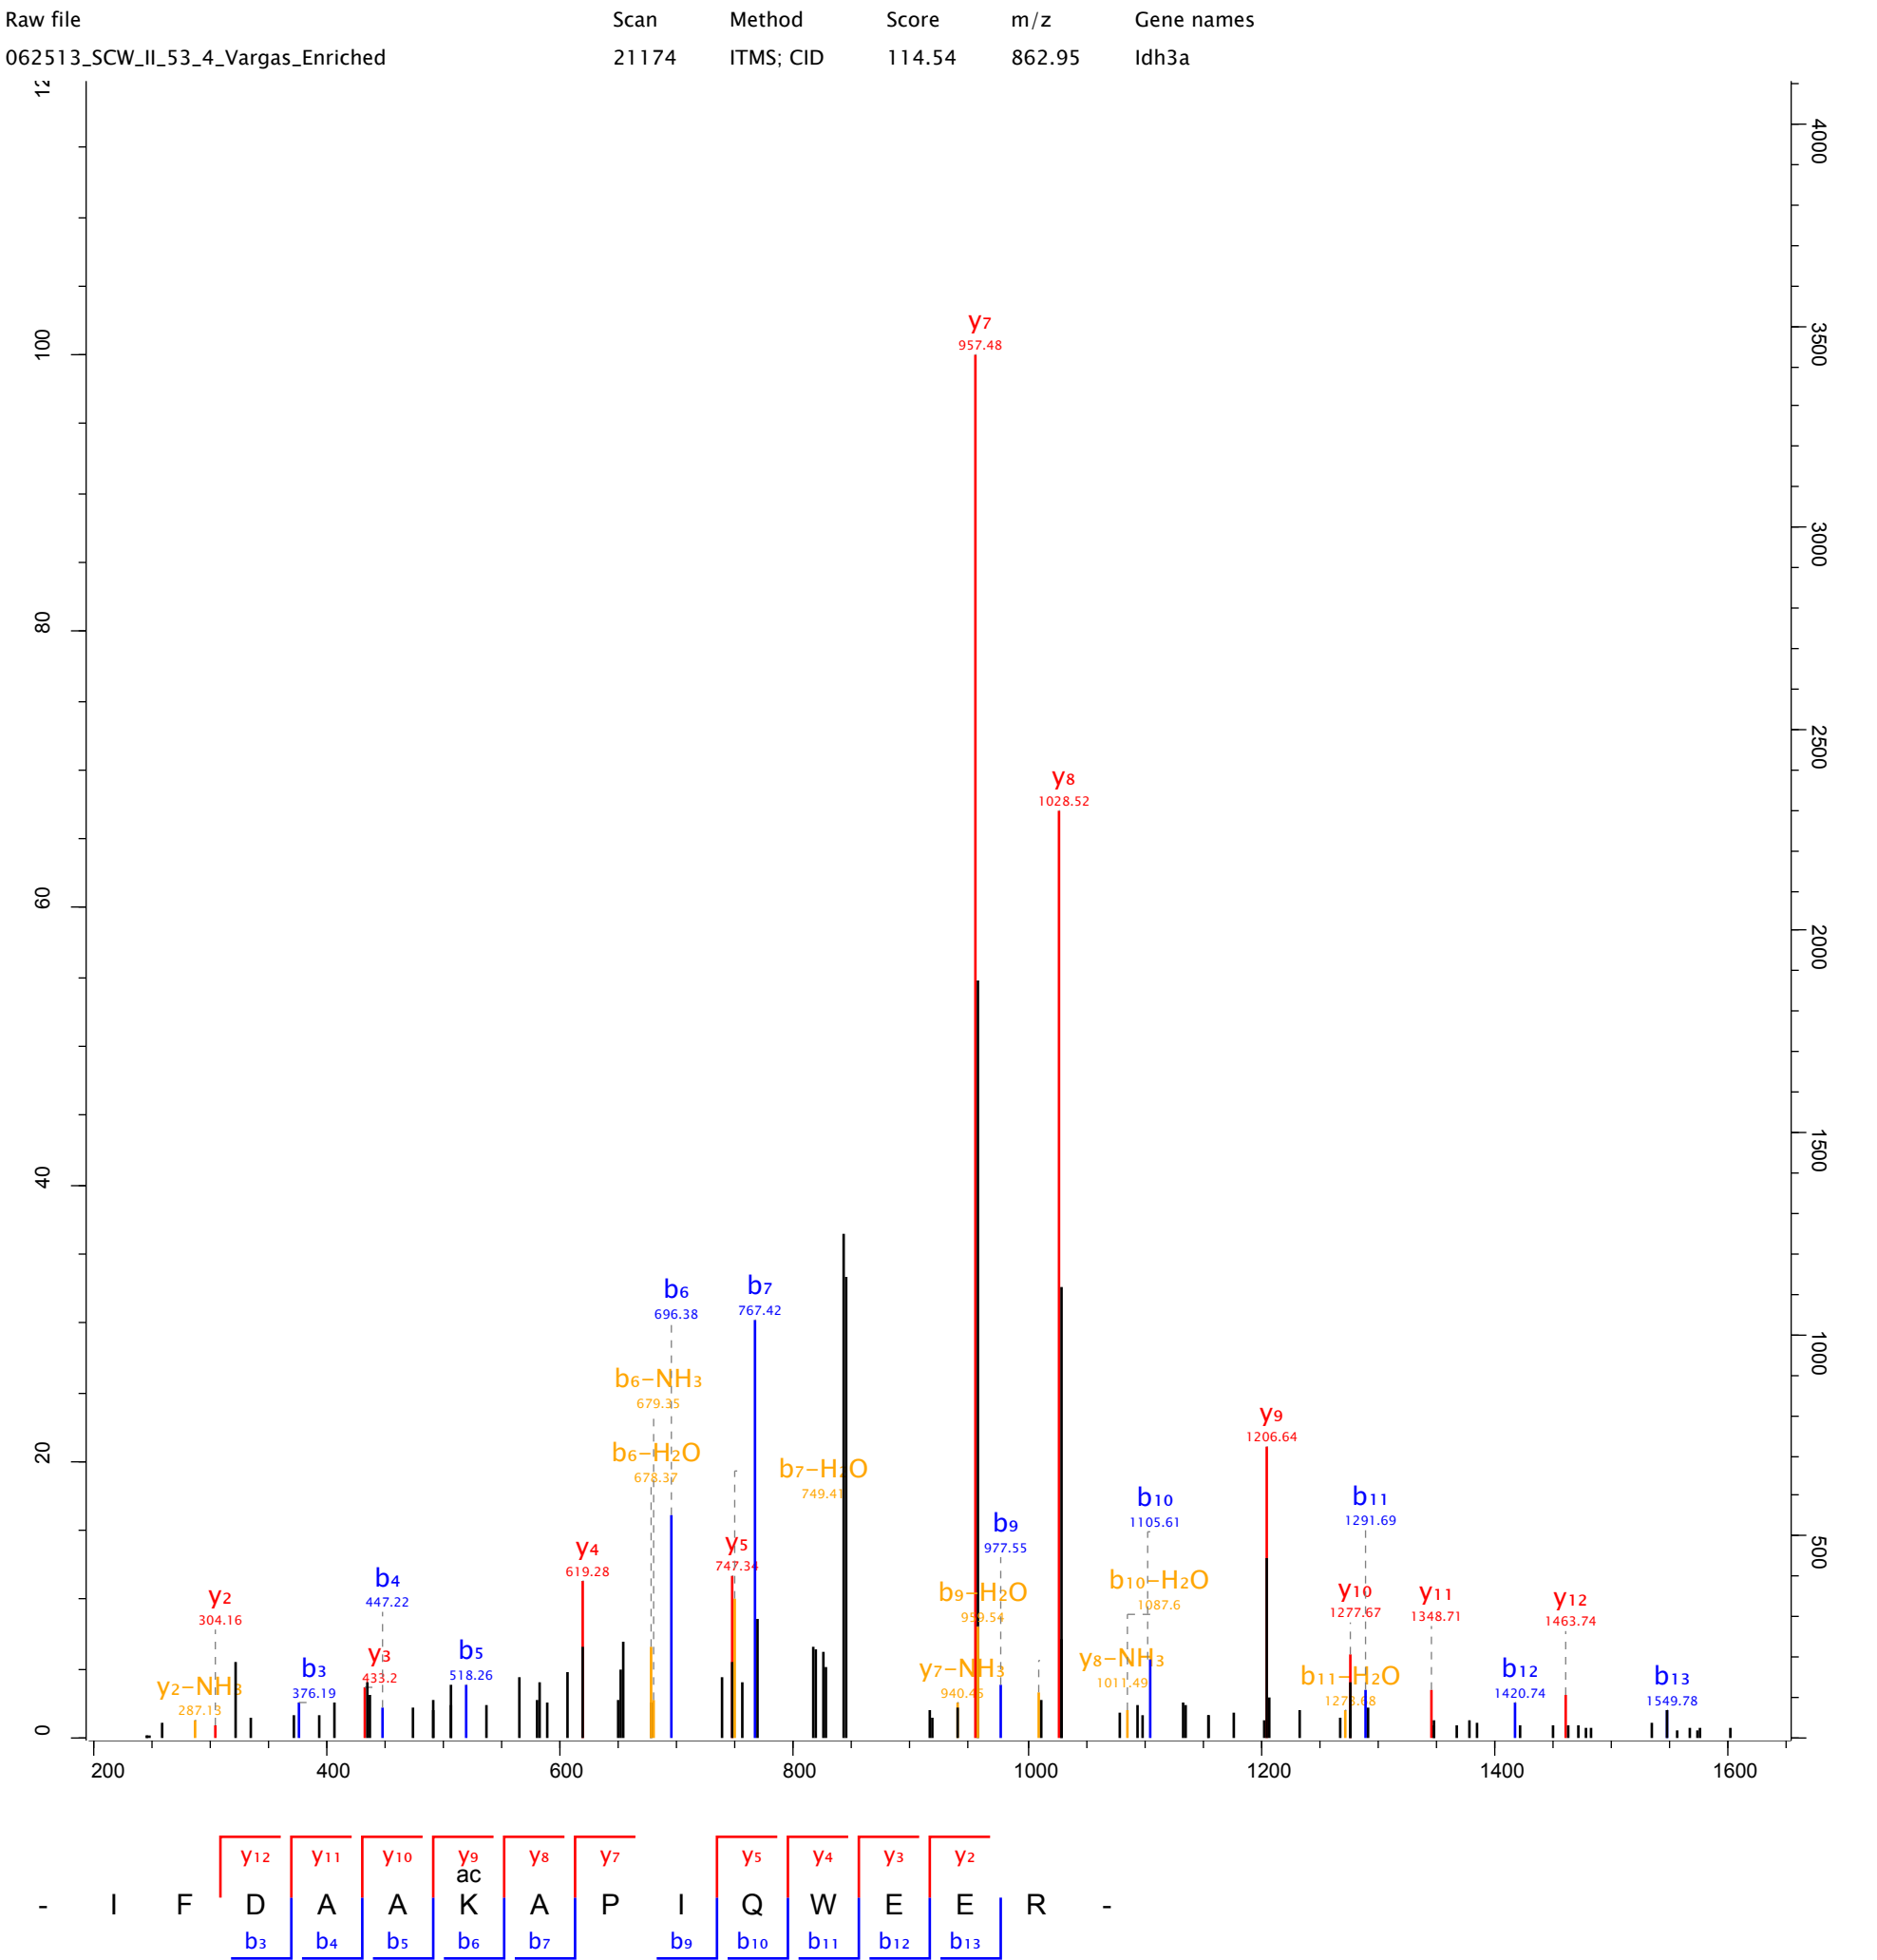



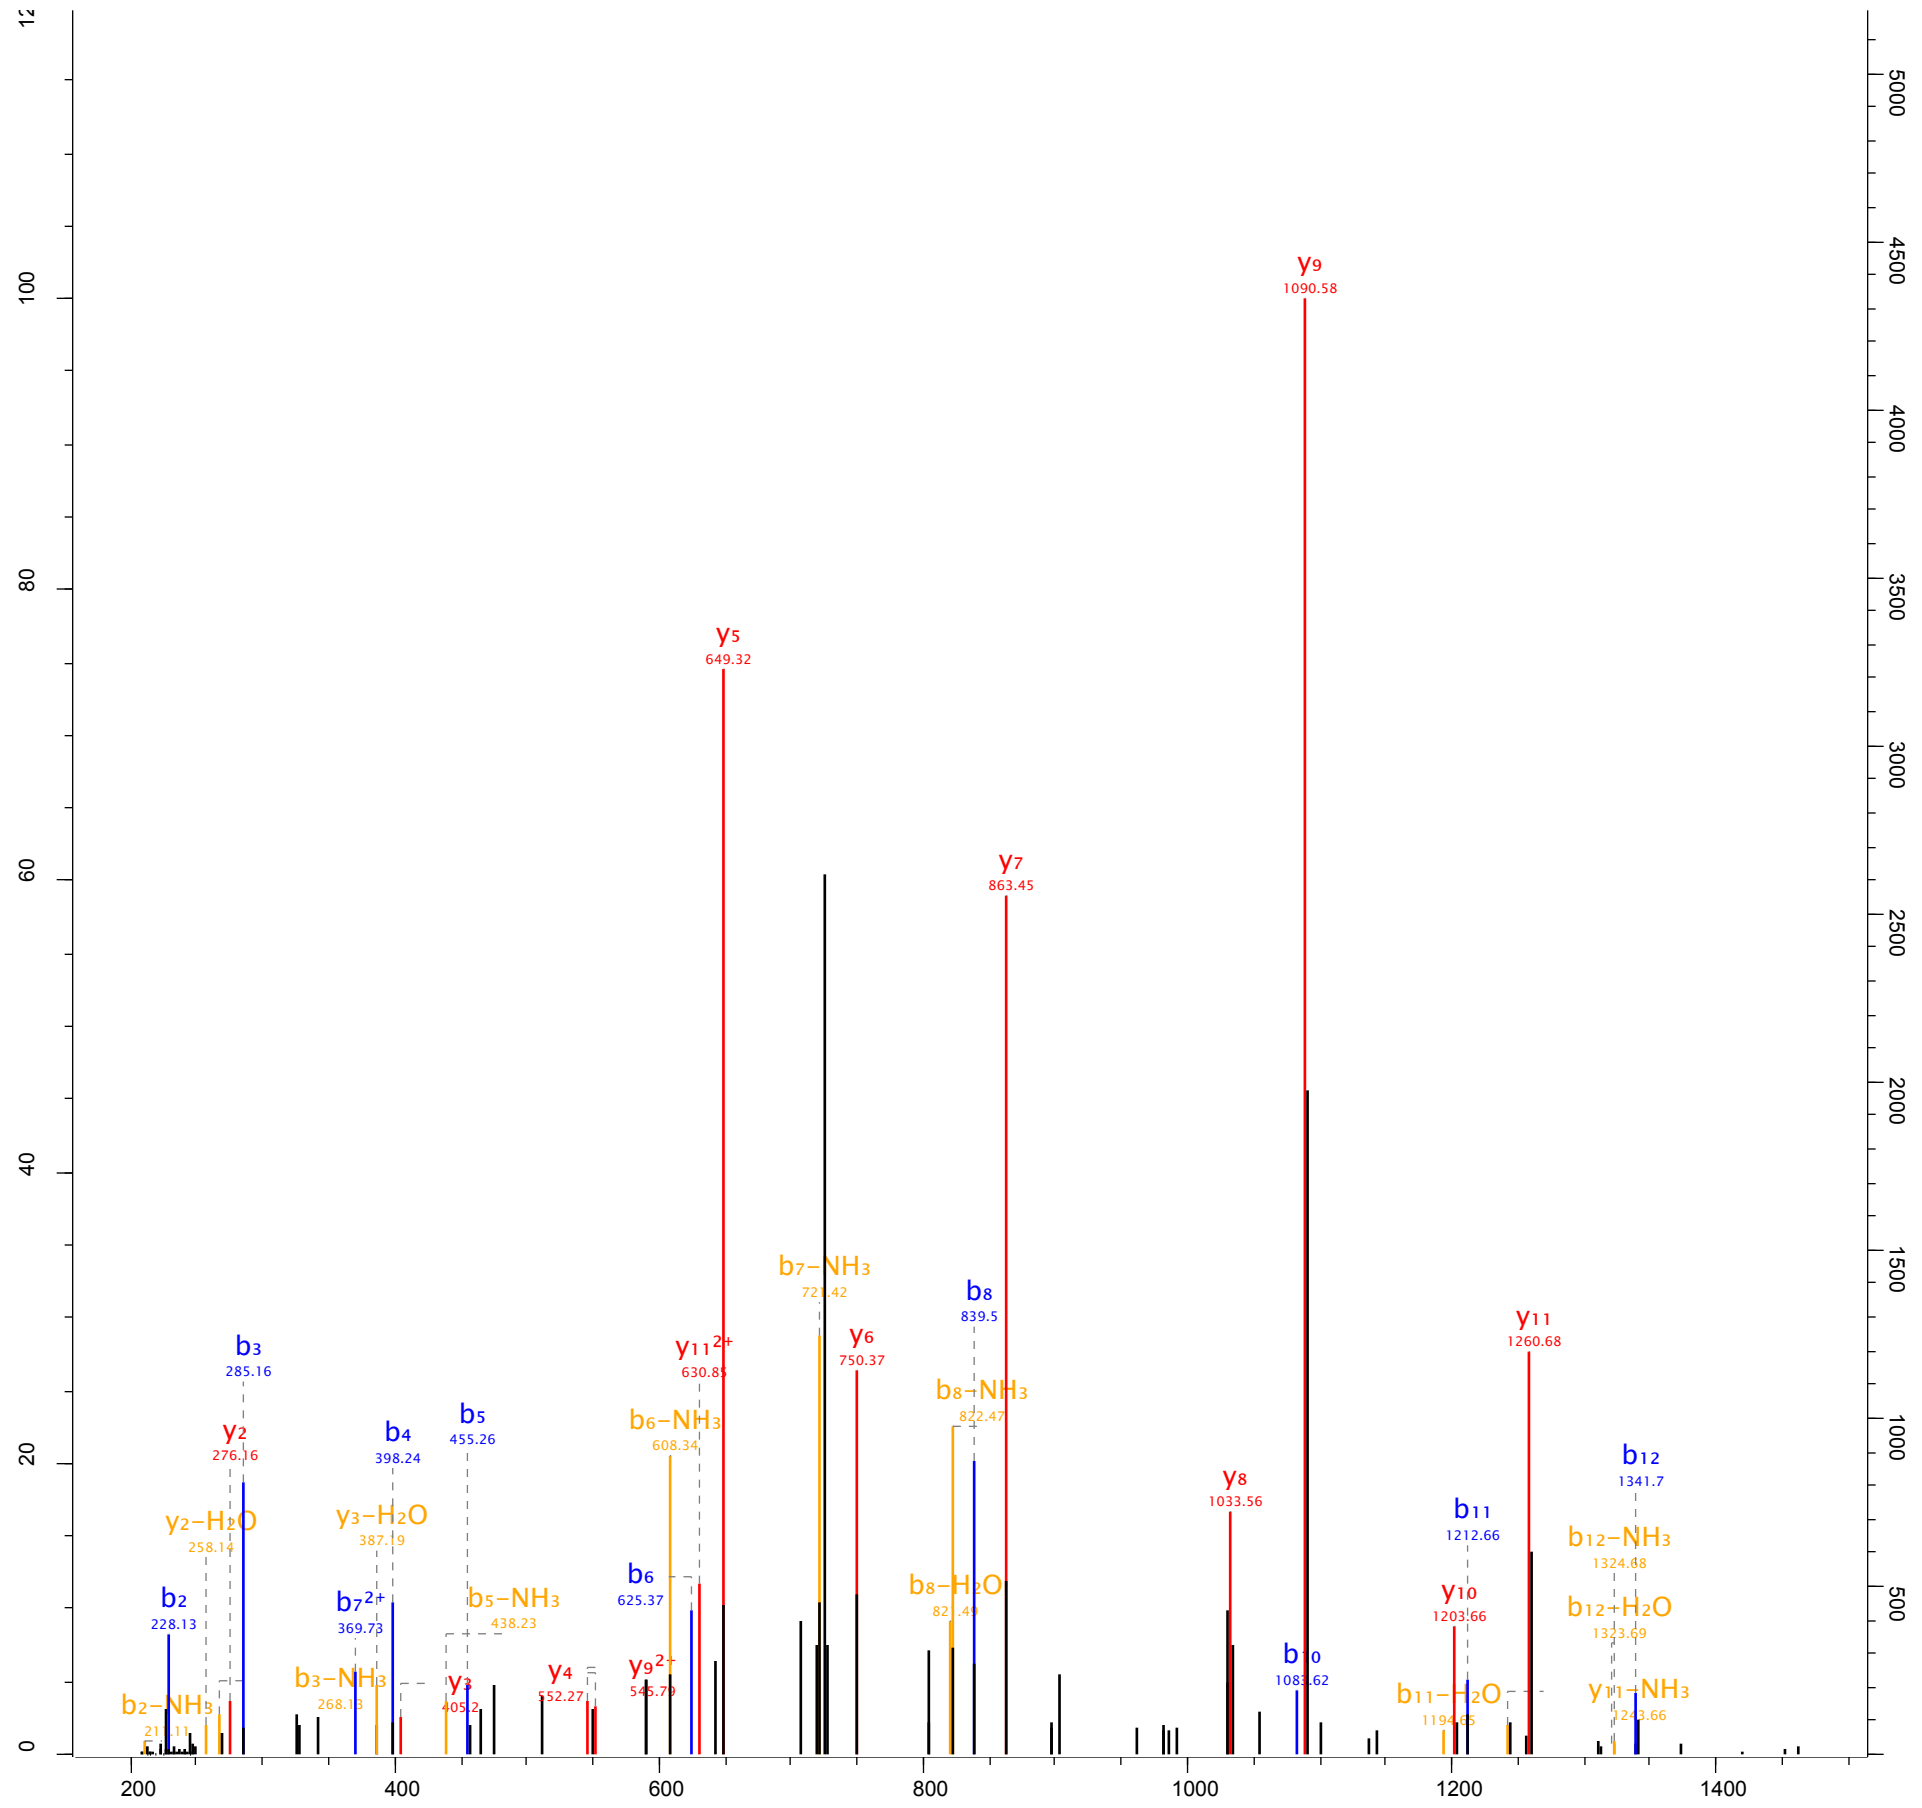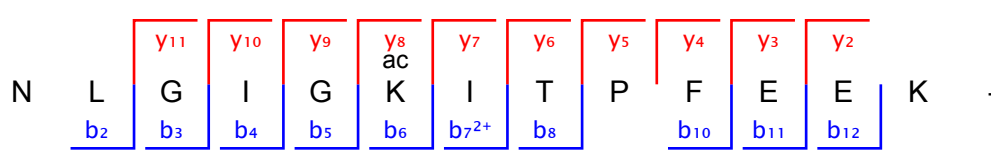

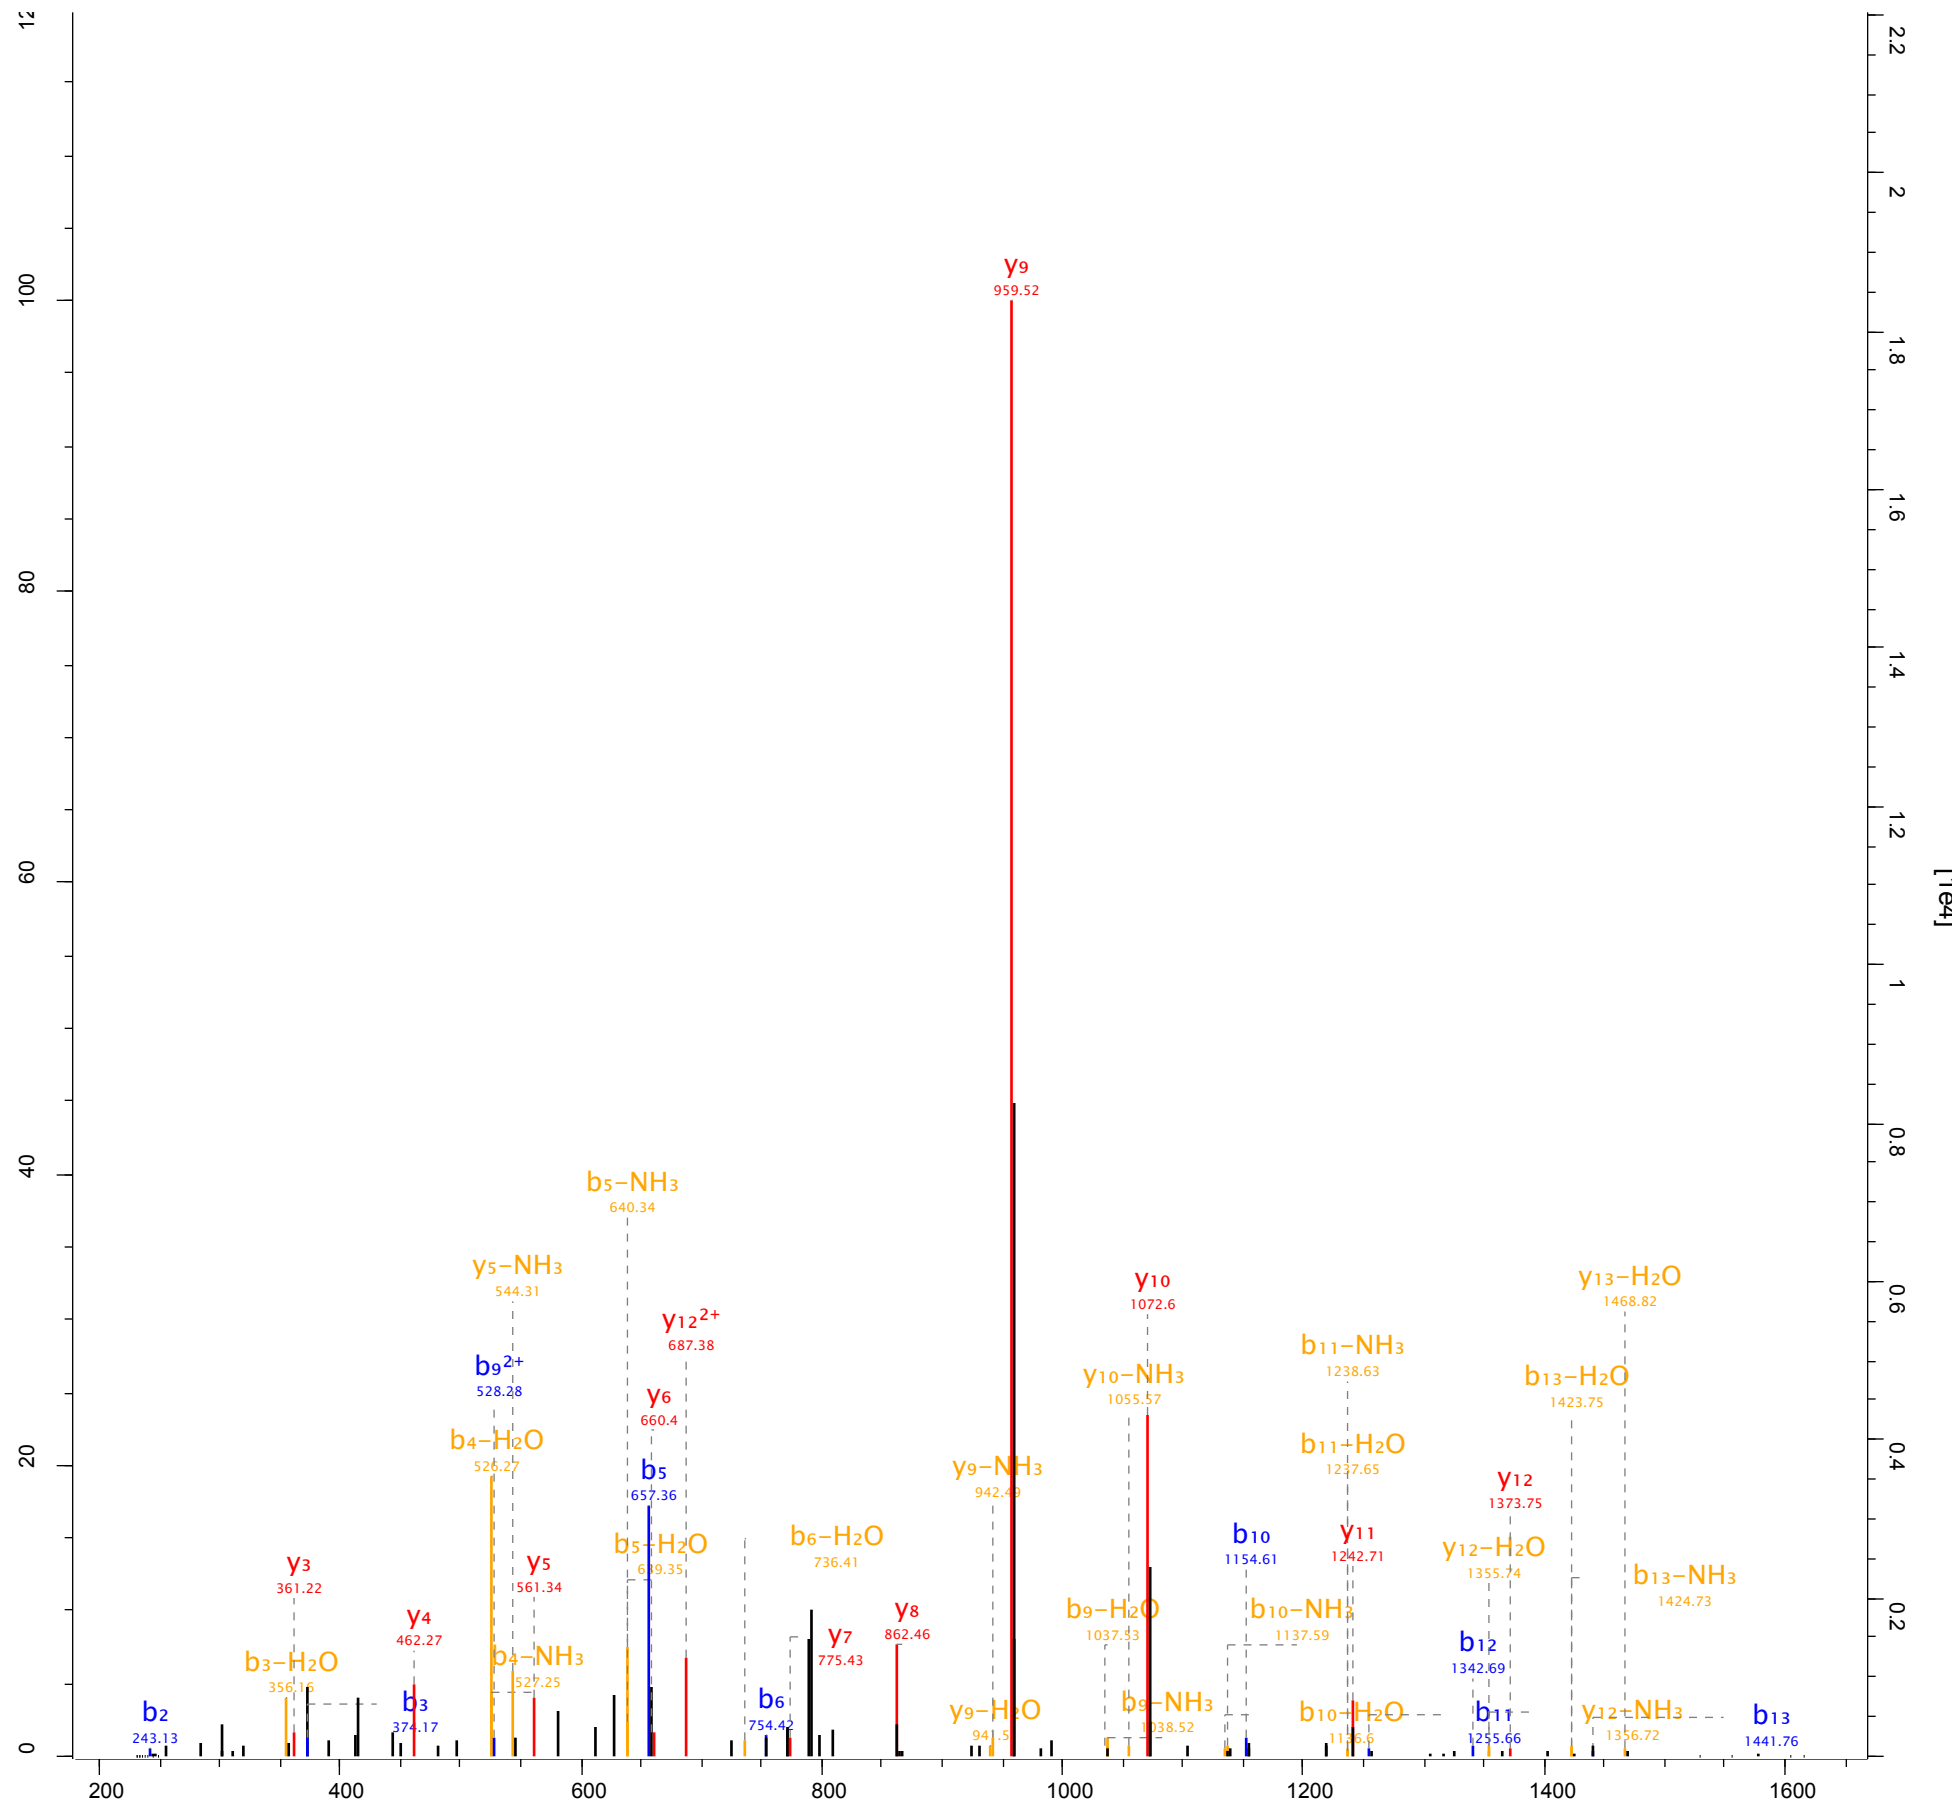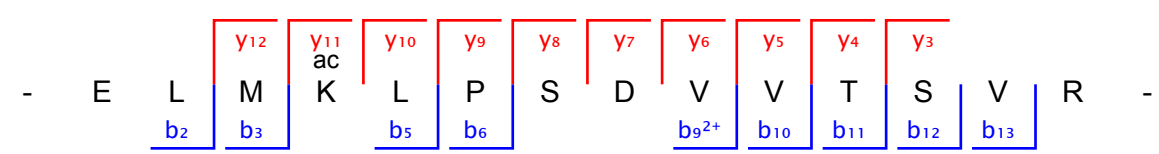

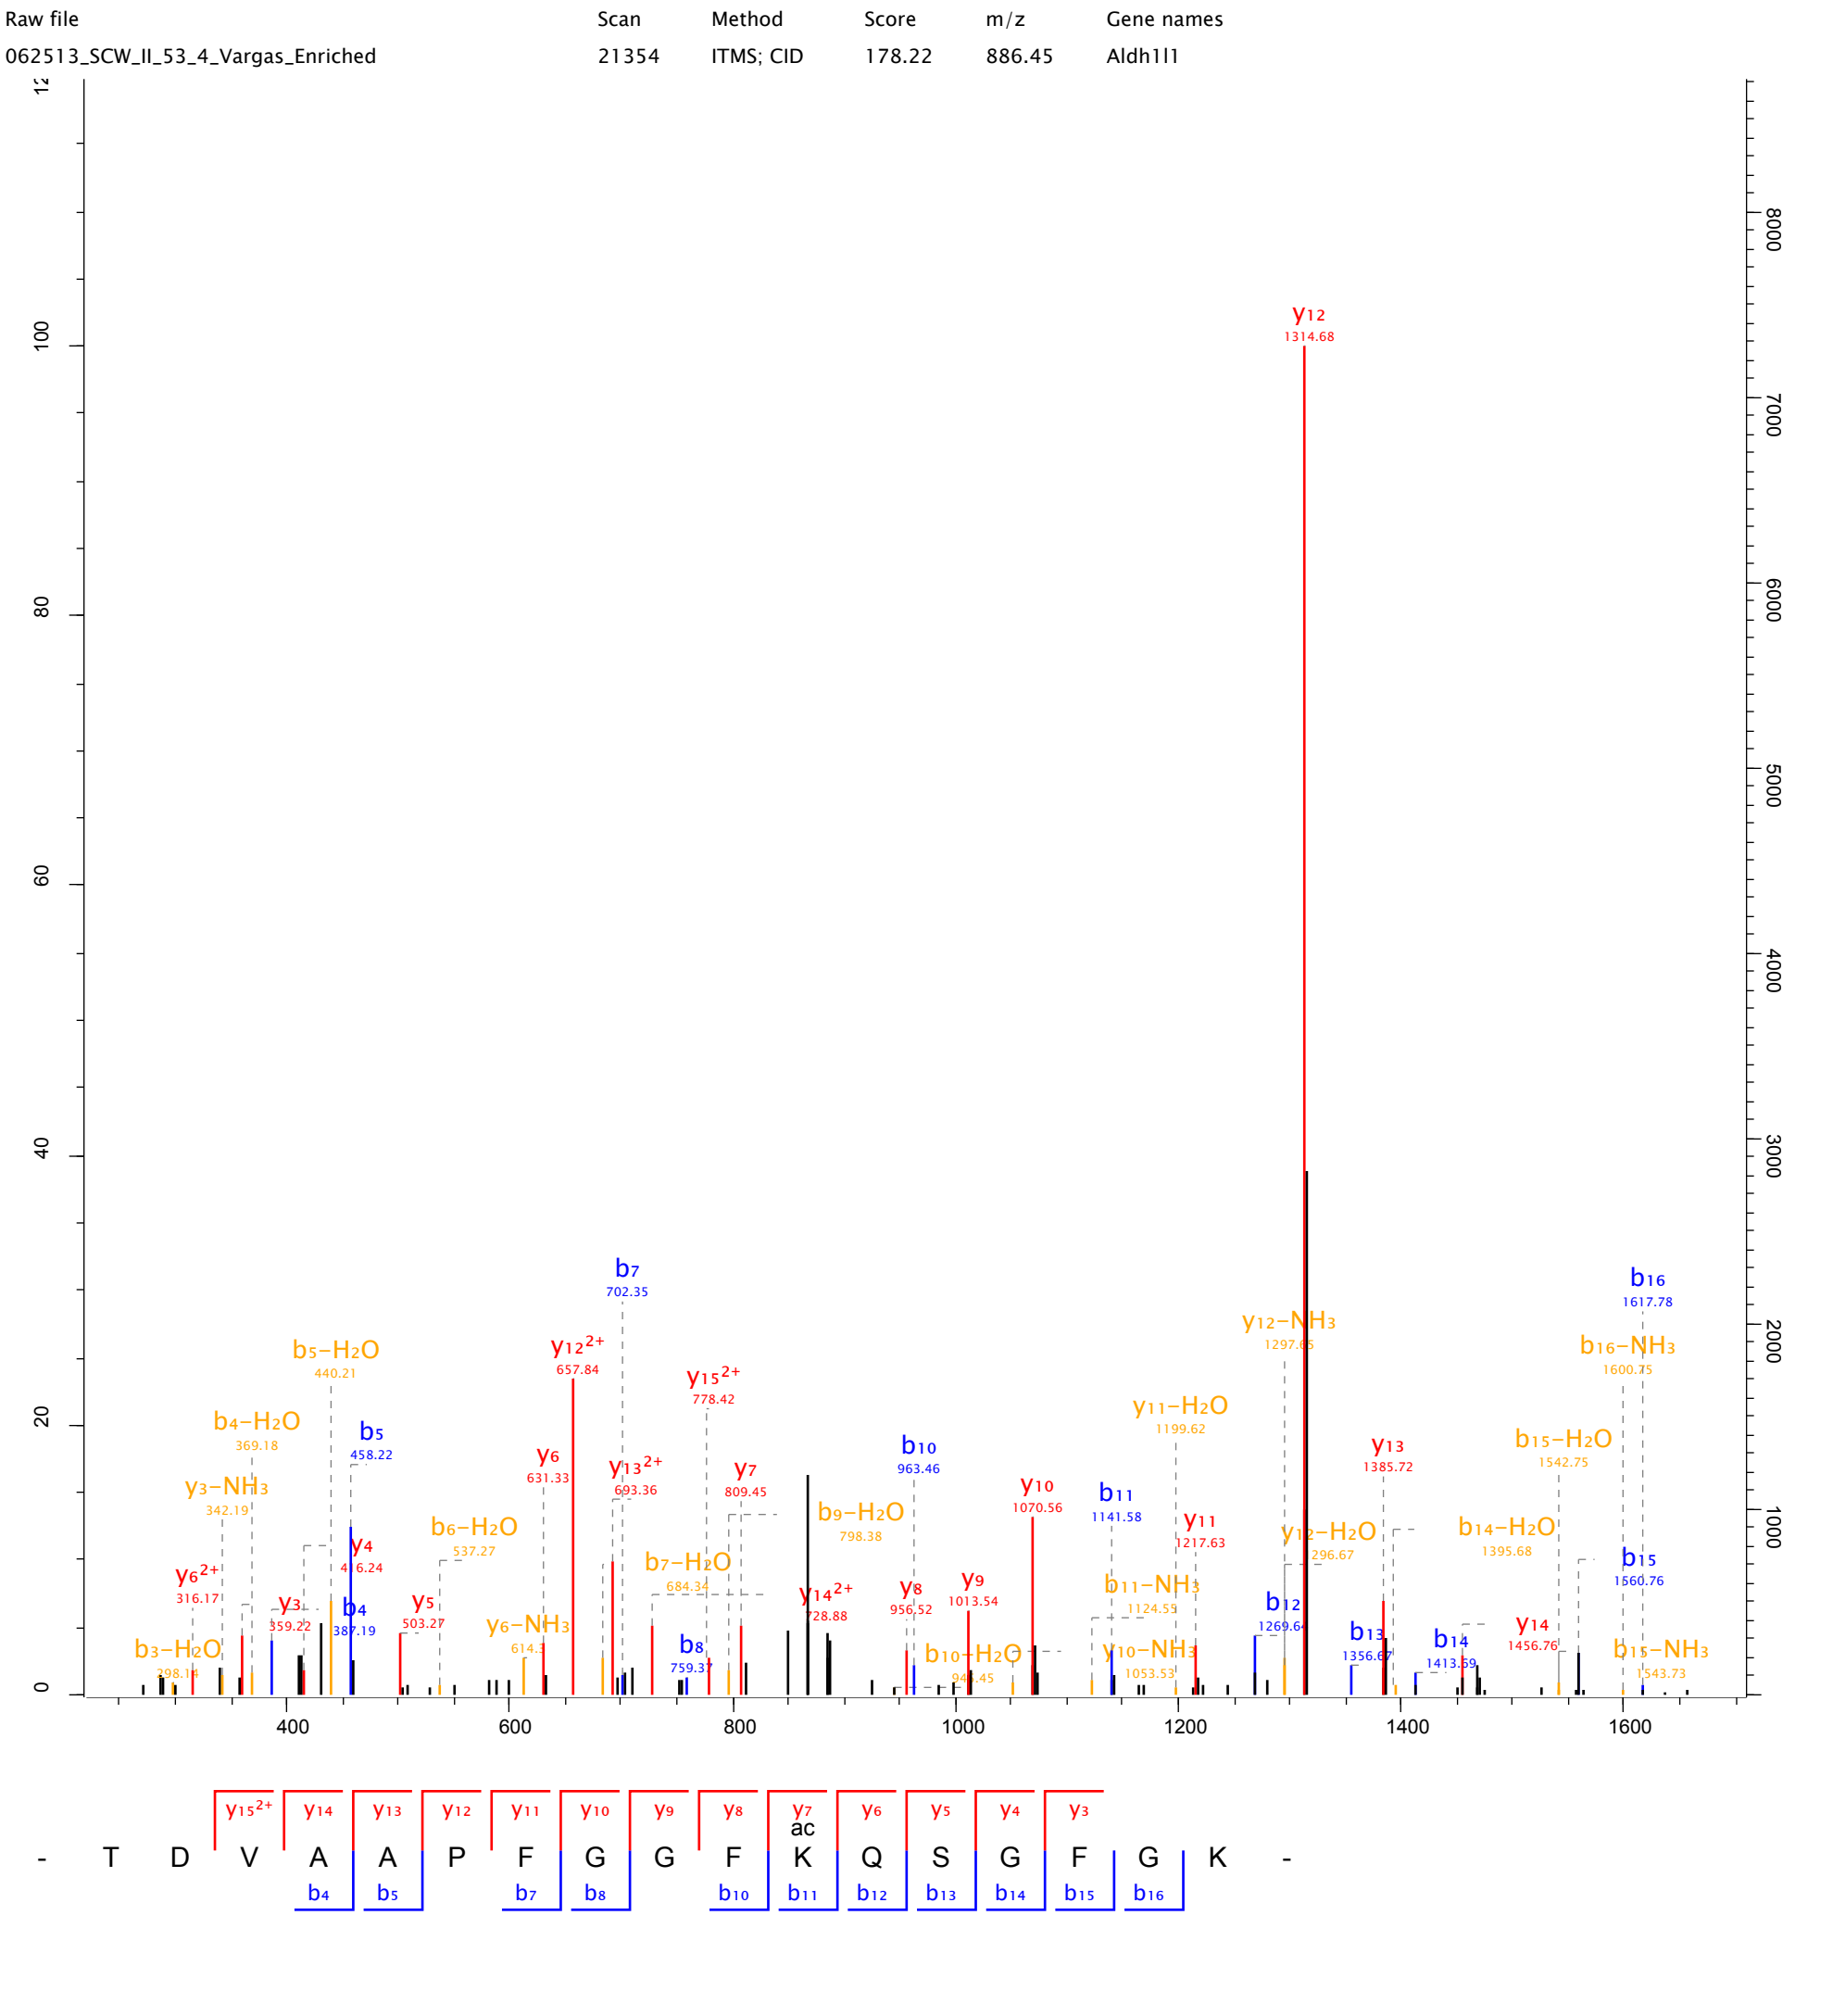

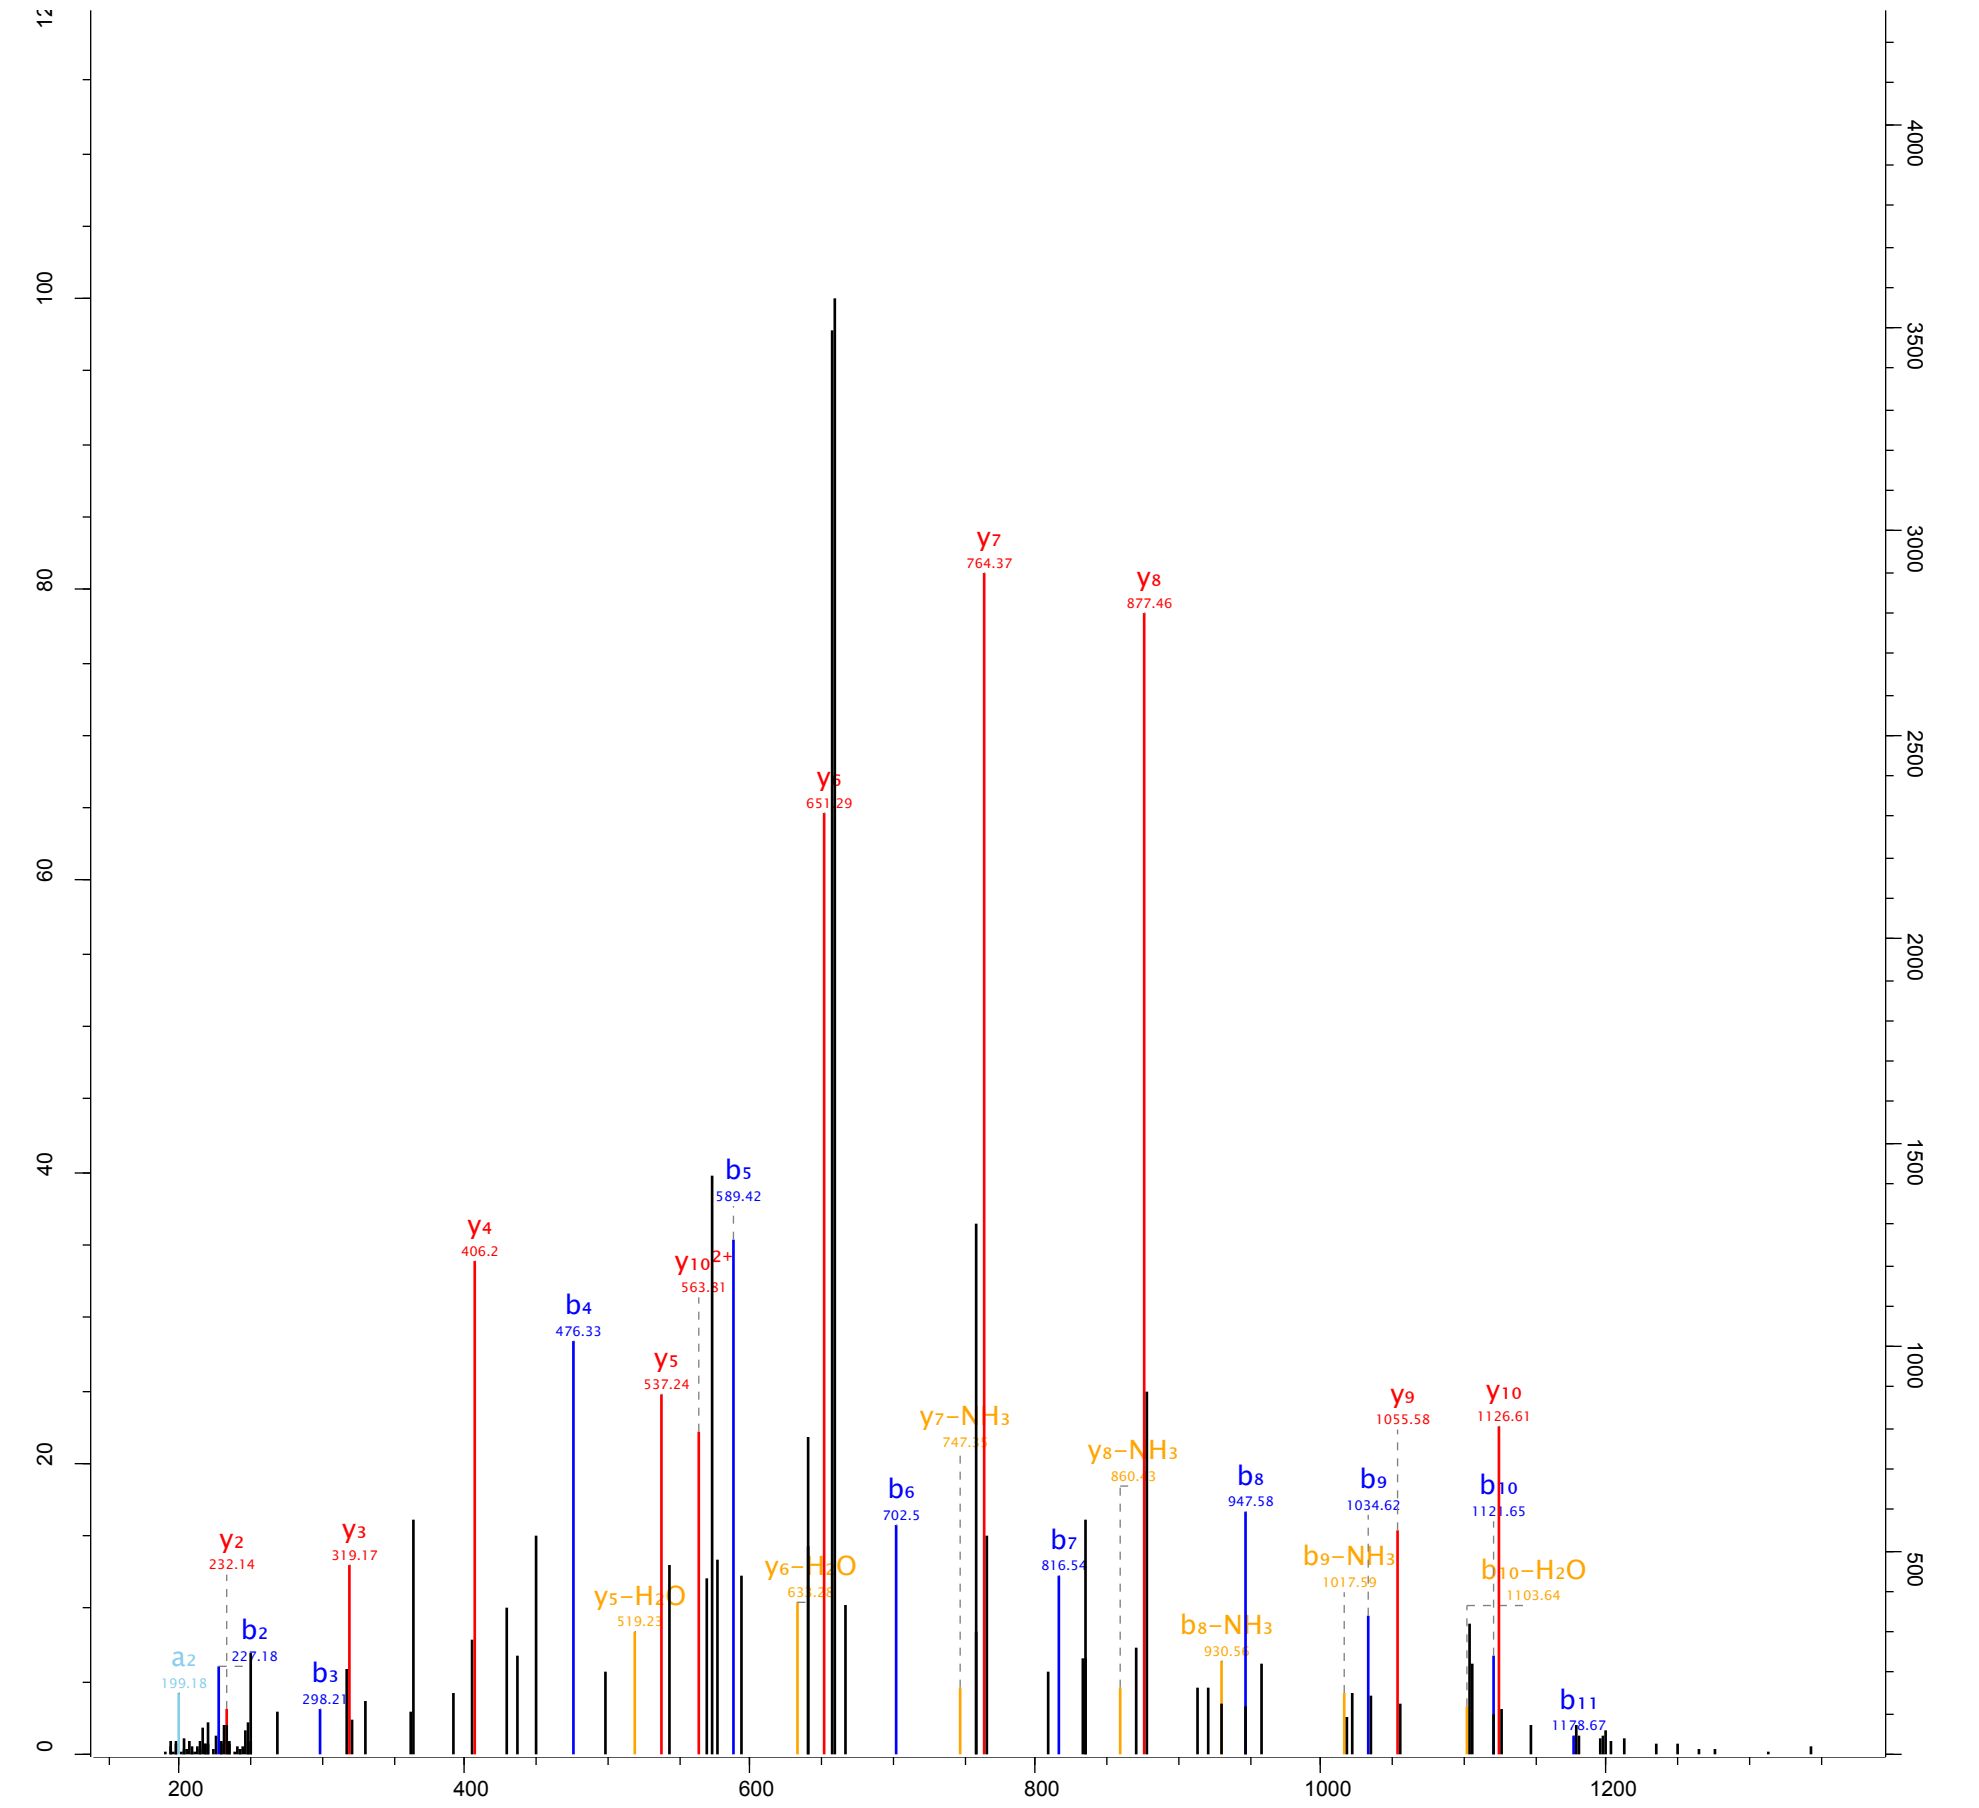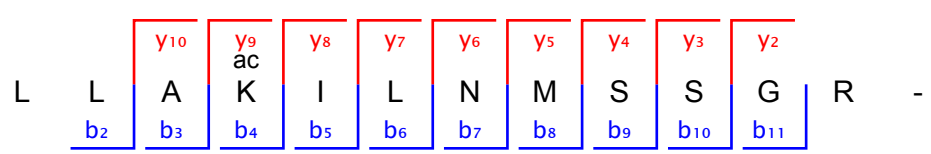

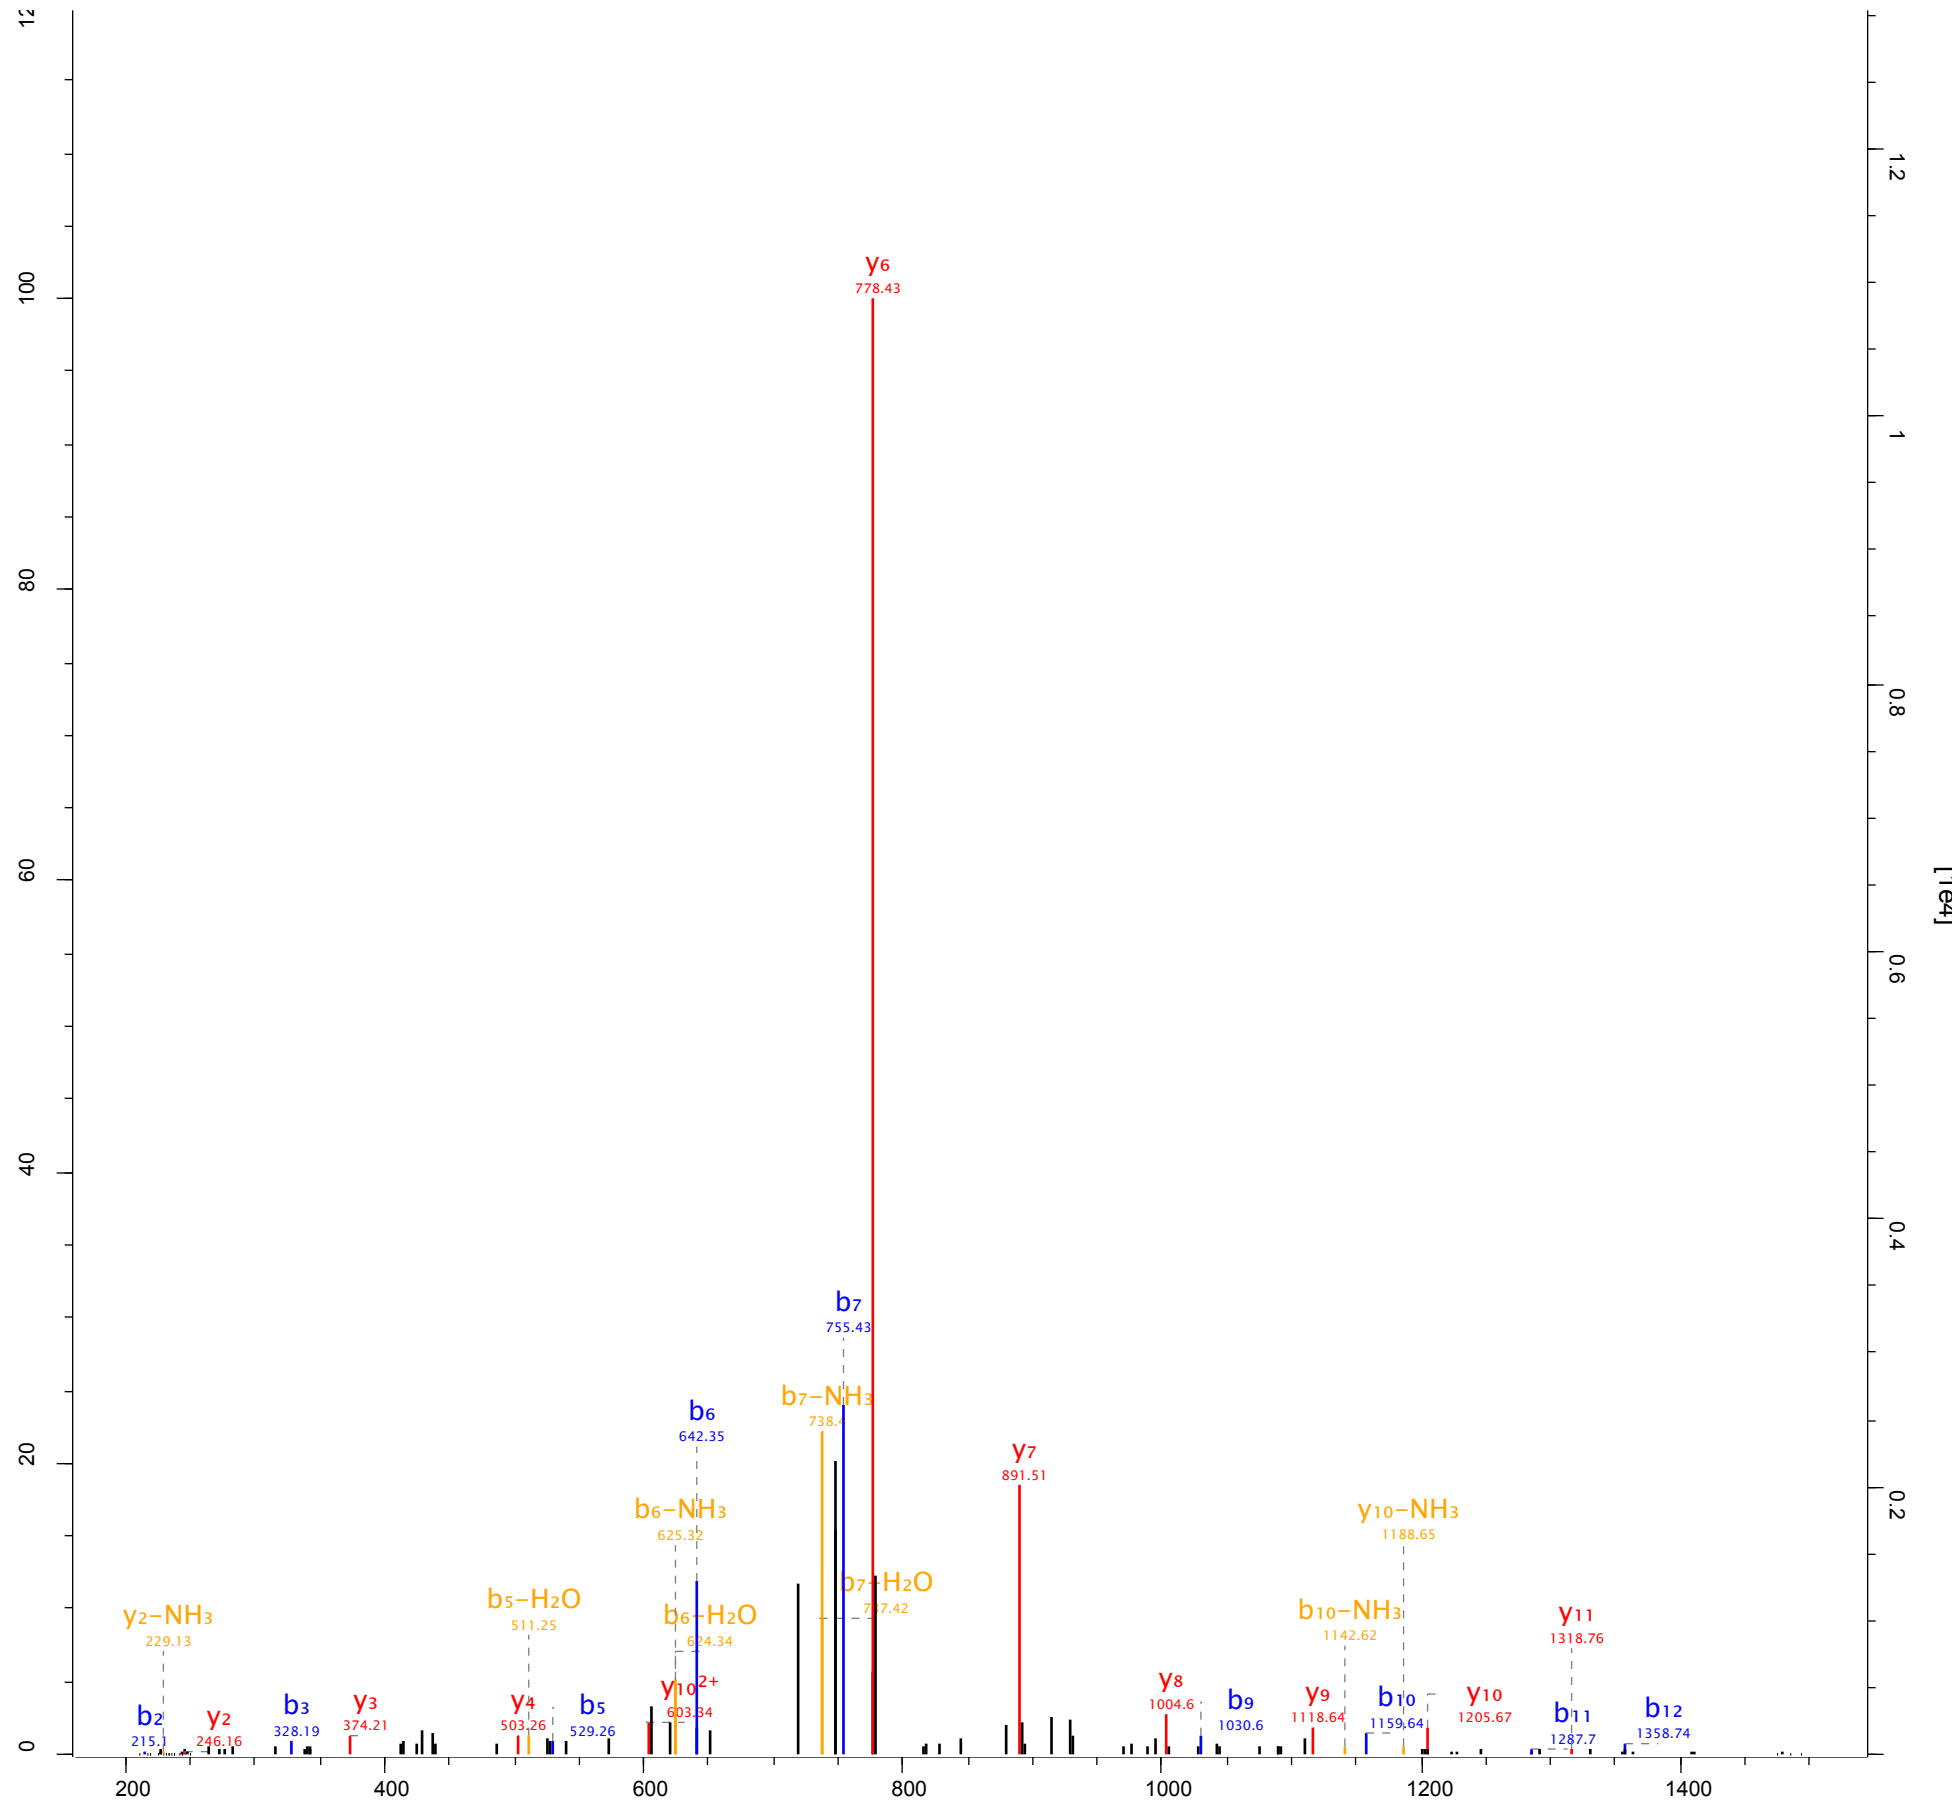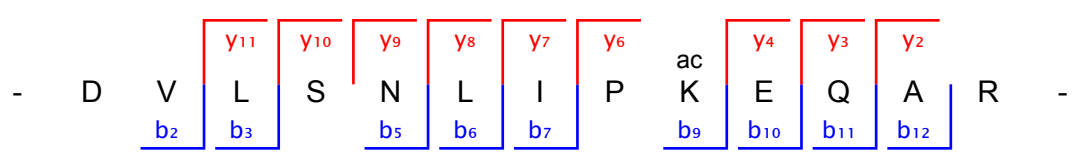

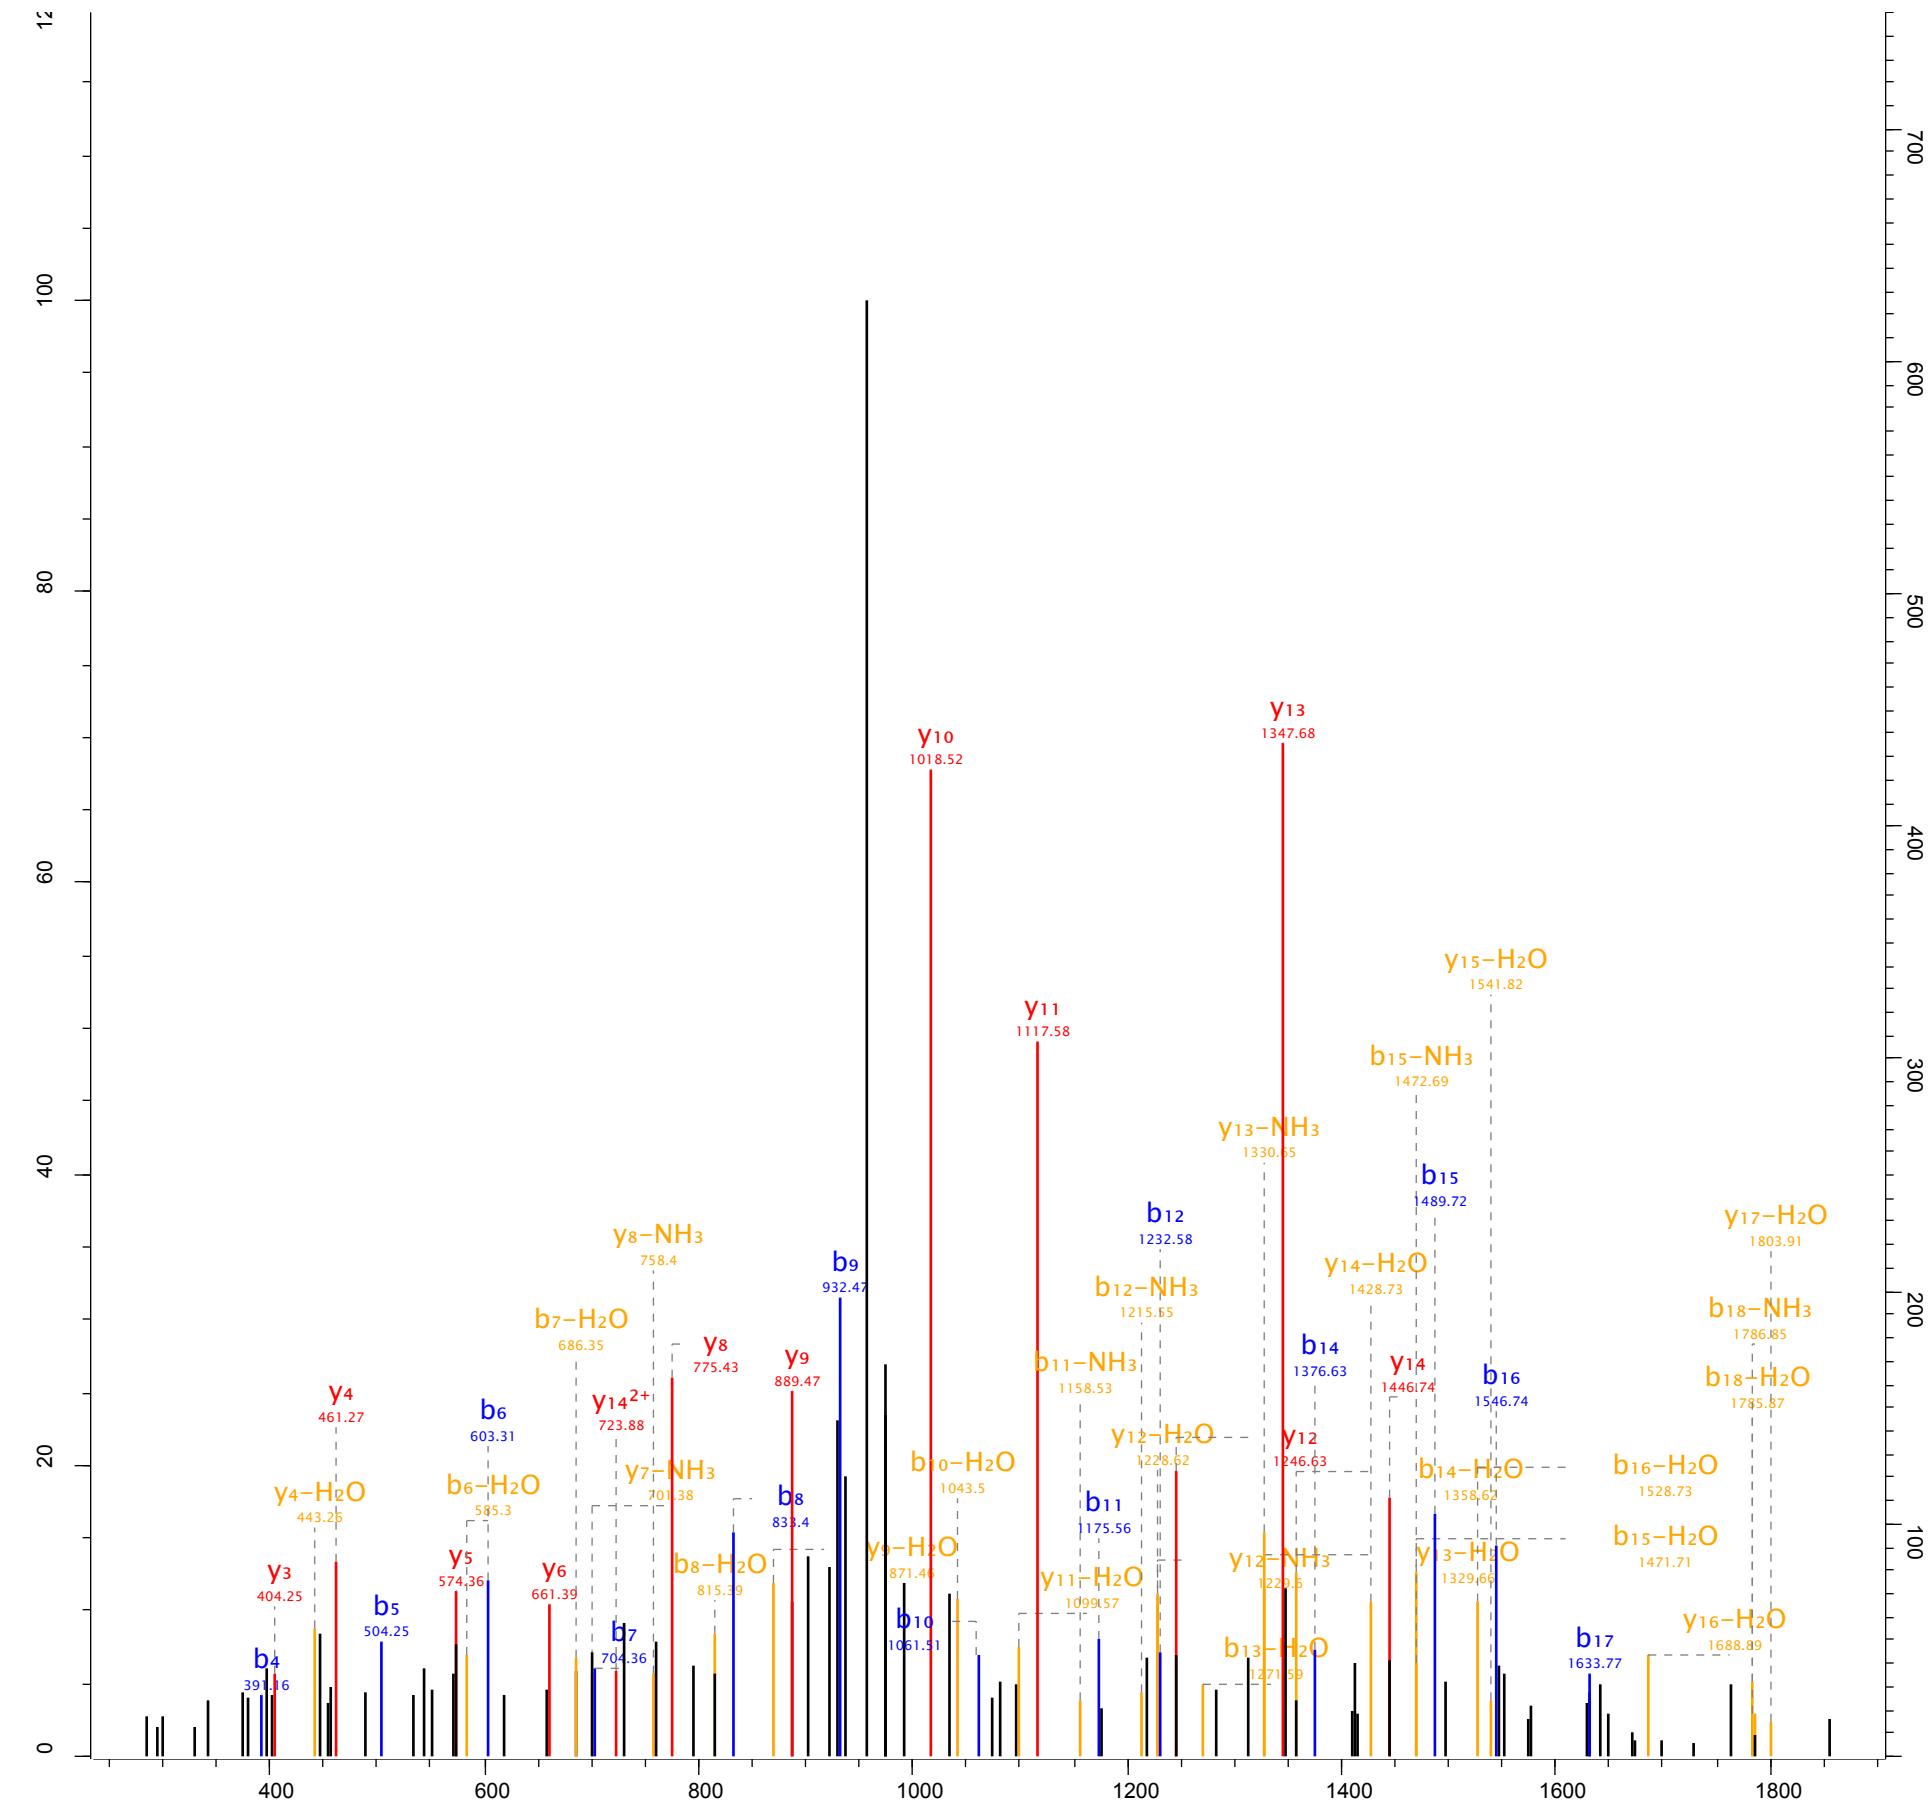

- G A D F L V T E V E N G G S L G S ac K K -

b4 b5 b6 b7 b8 b9 b10 b11 b12 b14 b15 b16 b17

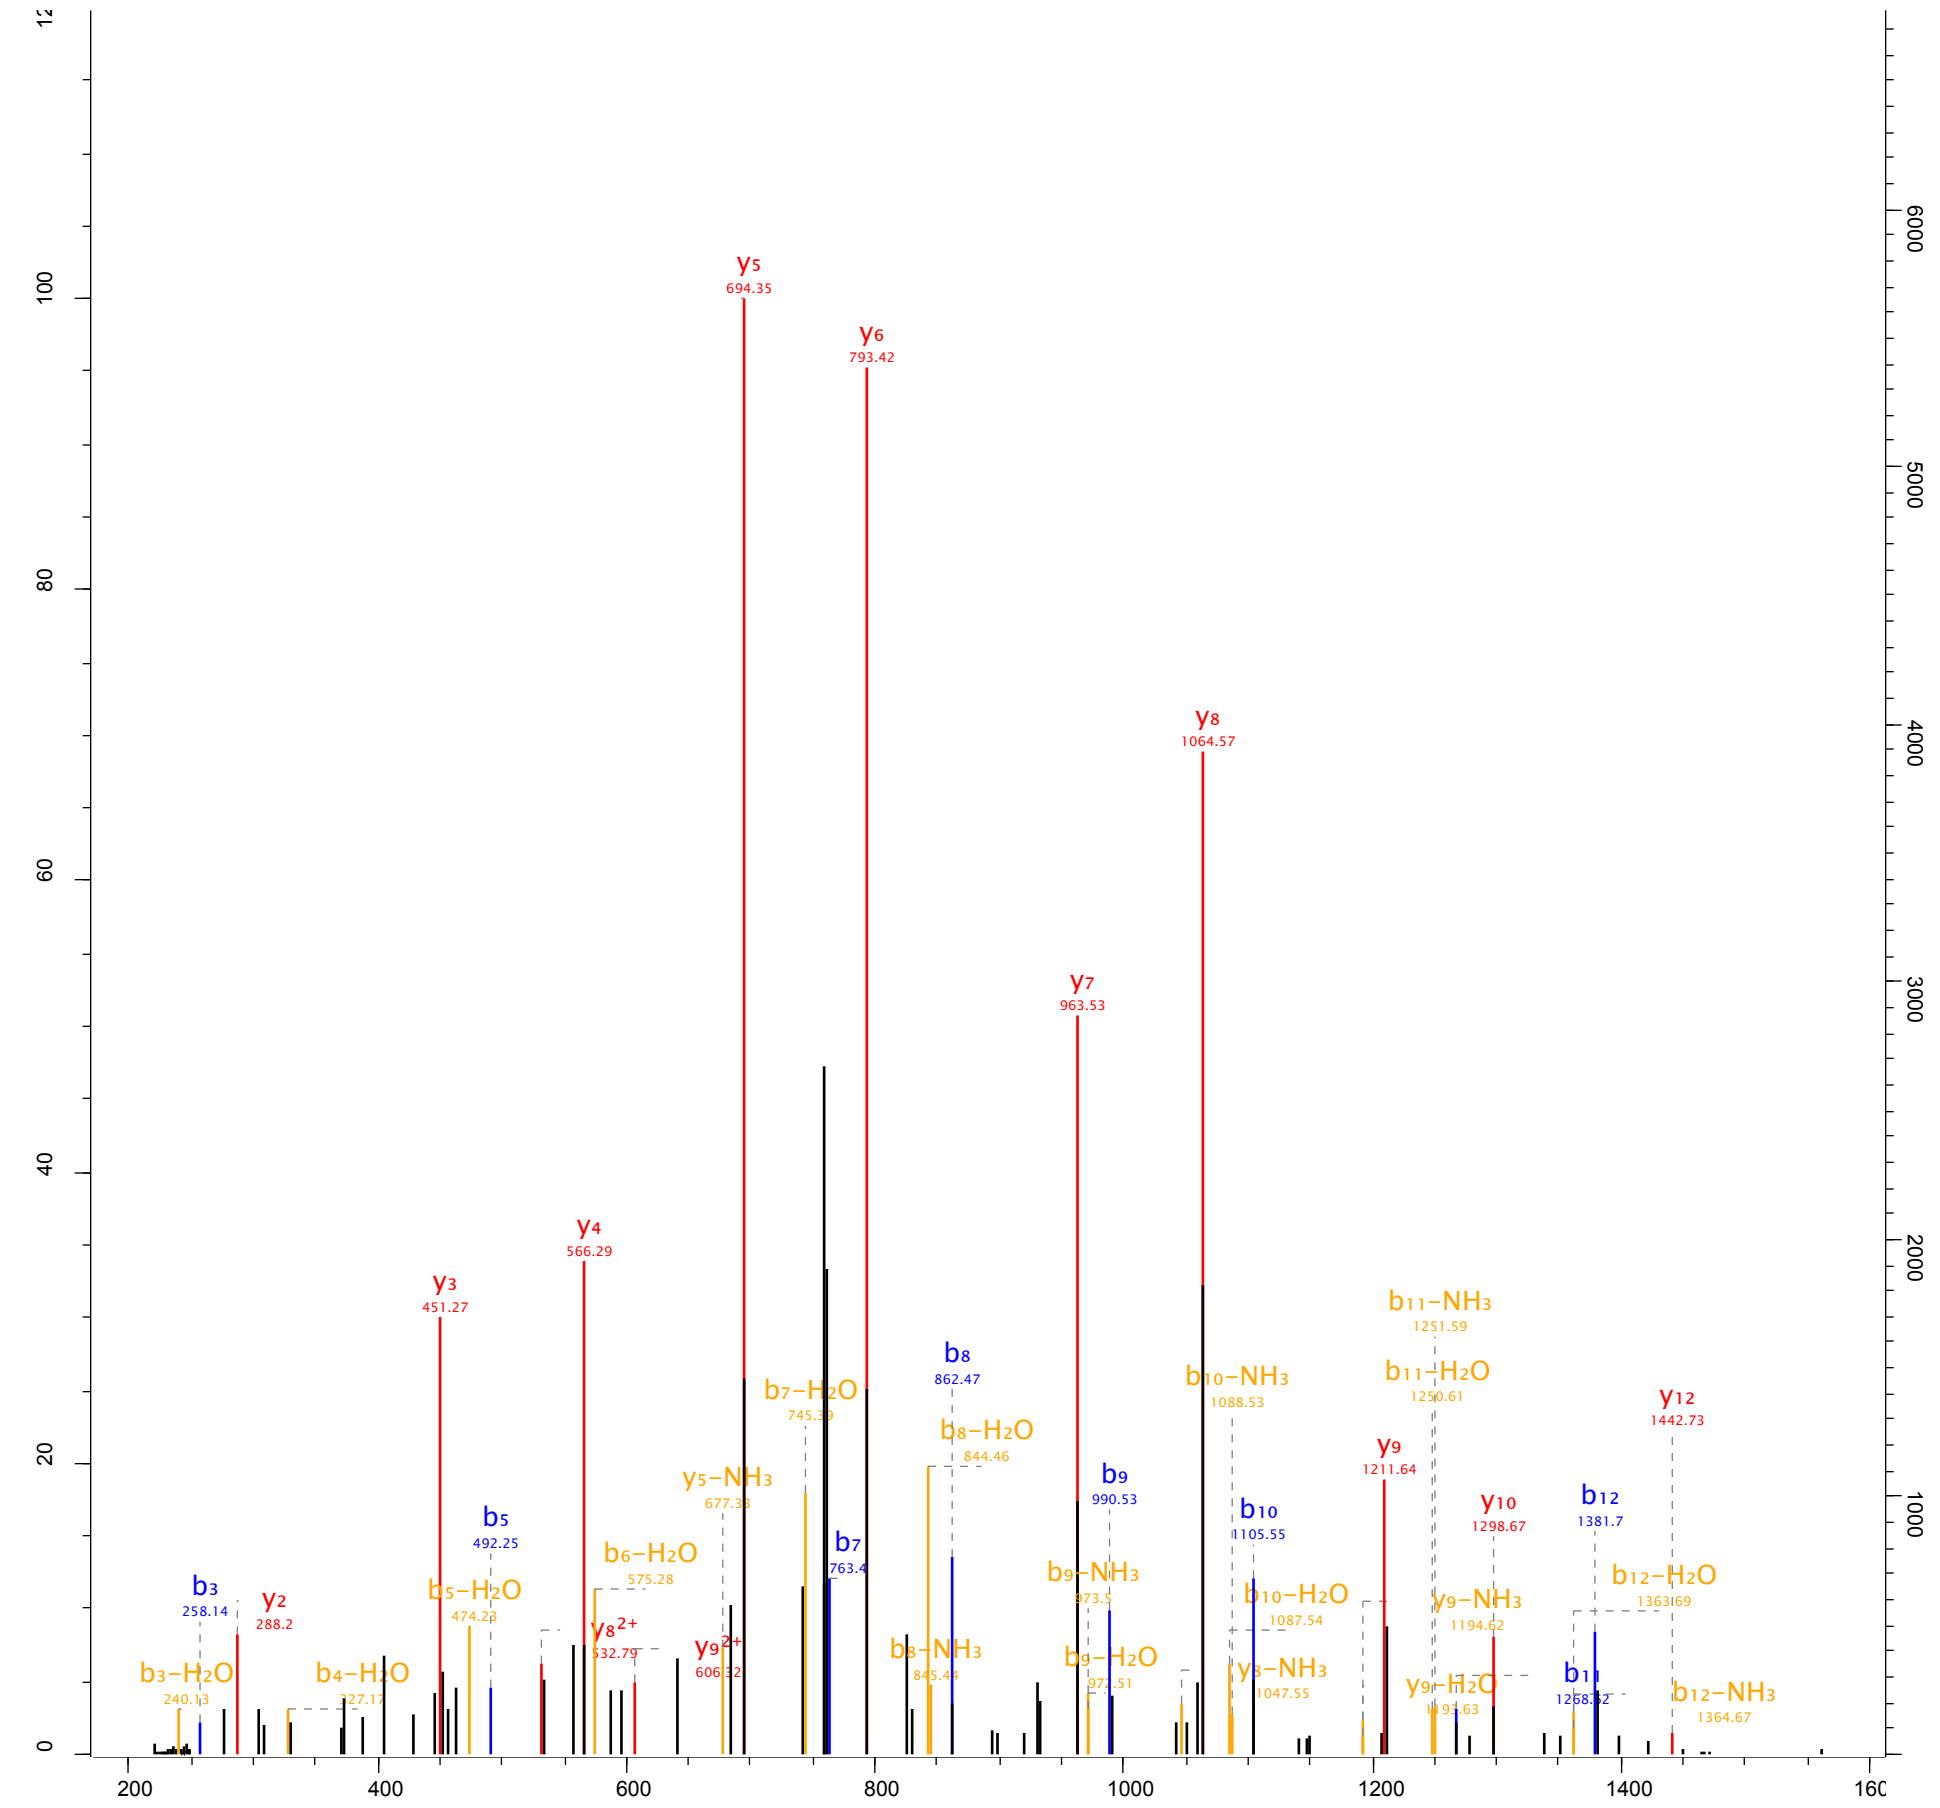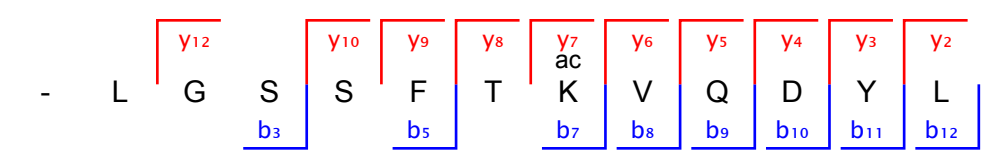

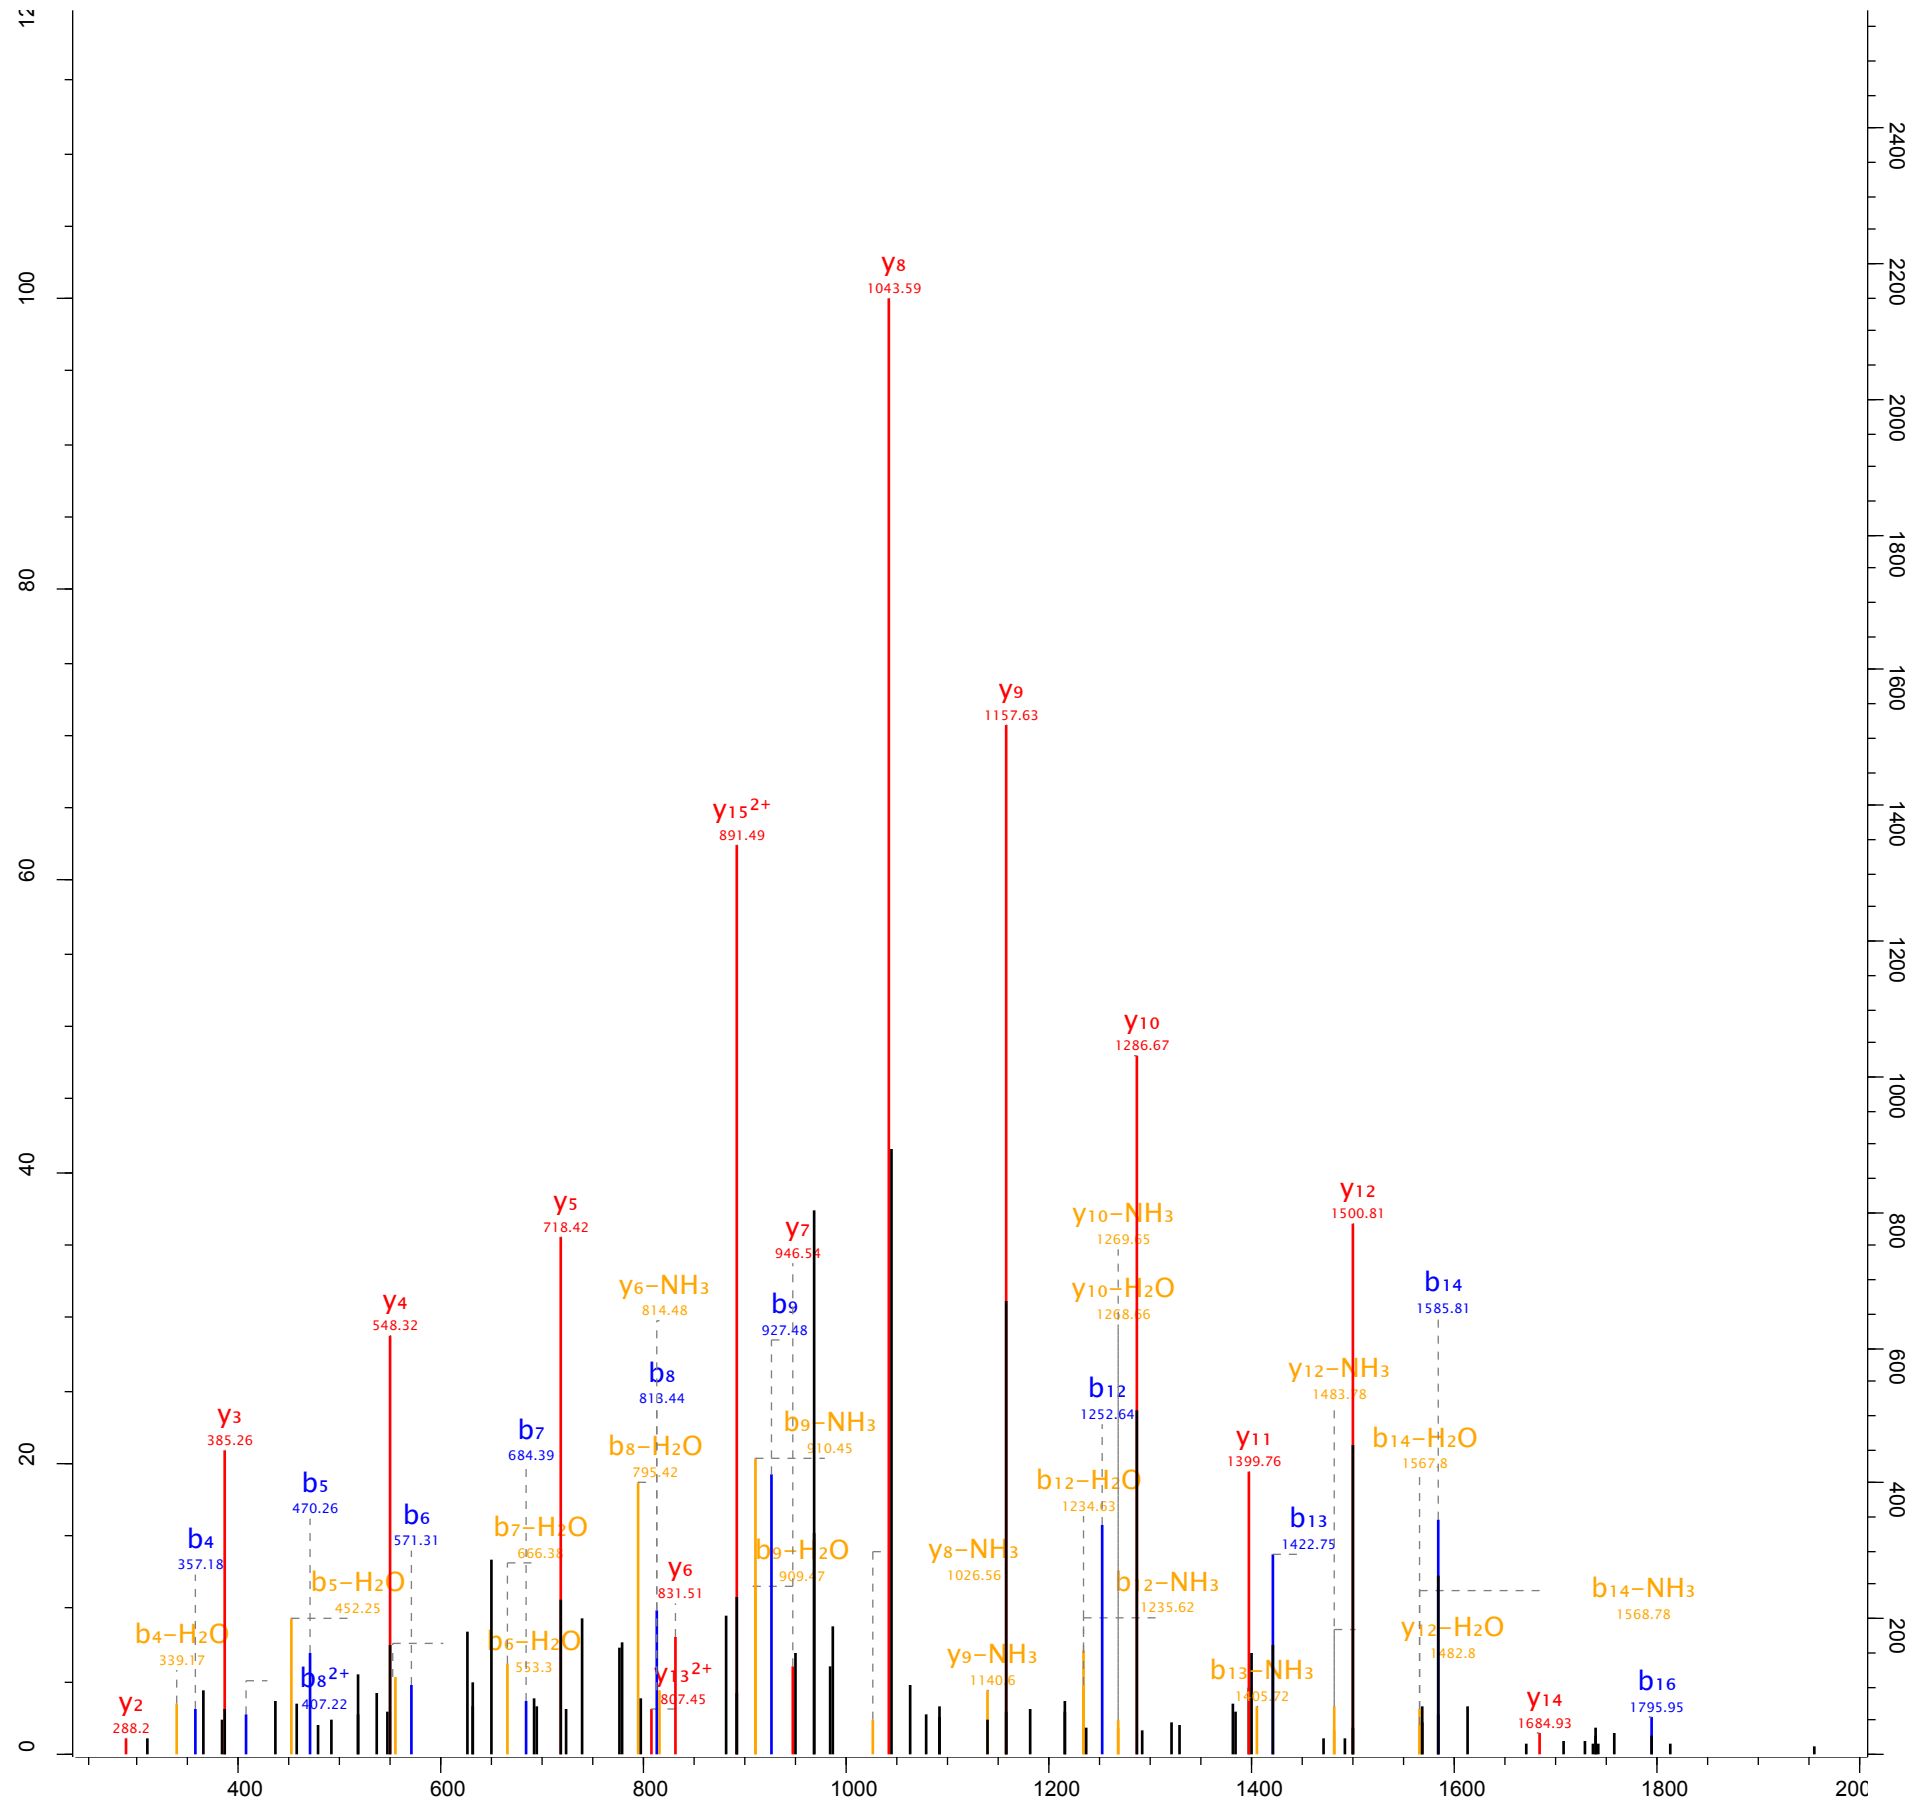

- S T P A I T L E N P D I K Y P L R -

y15<sup>2+</sup>
y14
y13<sup>2+</sup>
y12
y11
y10
y9
y8
y7
y6
y5
y4
y3
y2

b4
b5
b6
b7
b8
b9
b12
b13
b14
b16



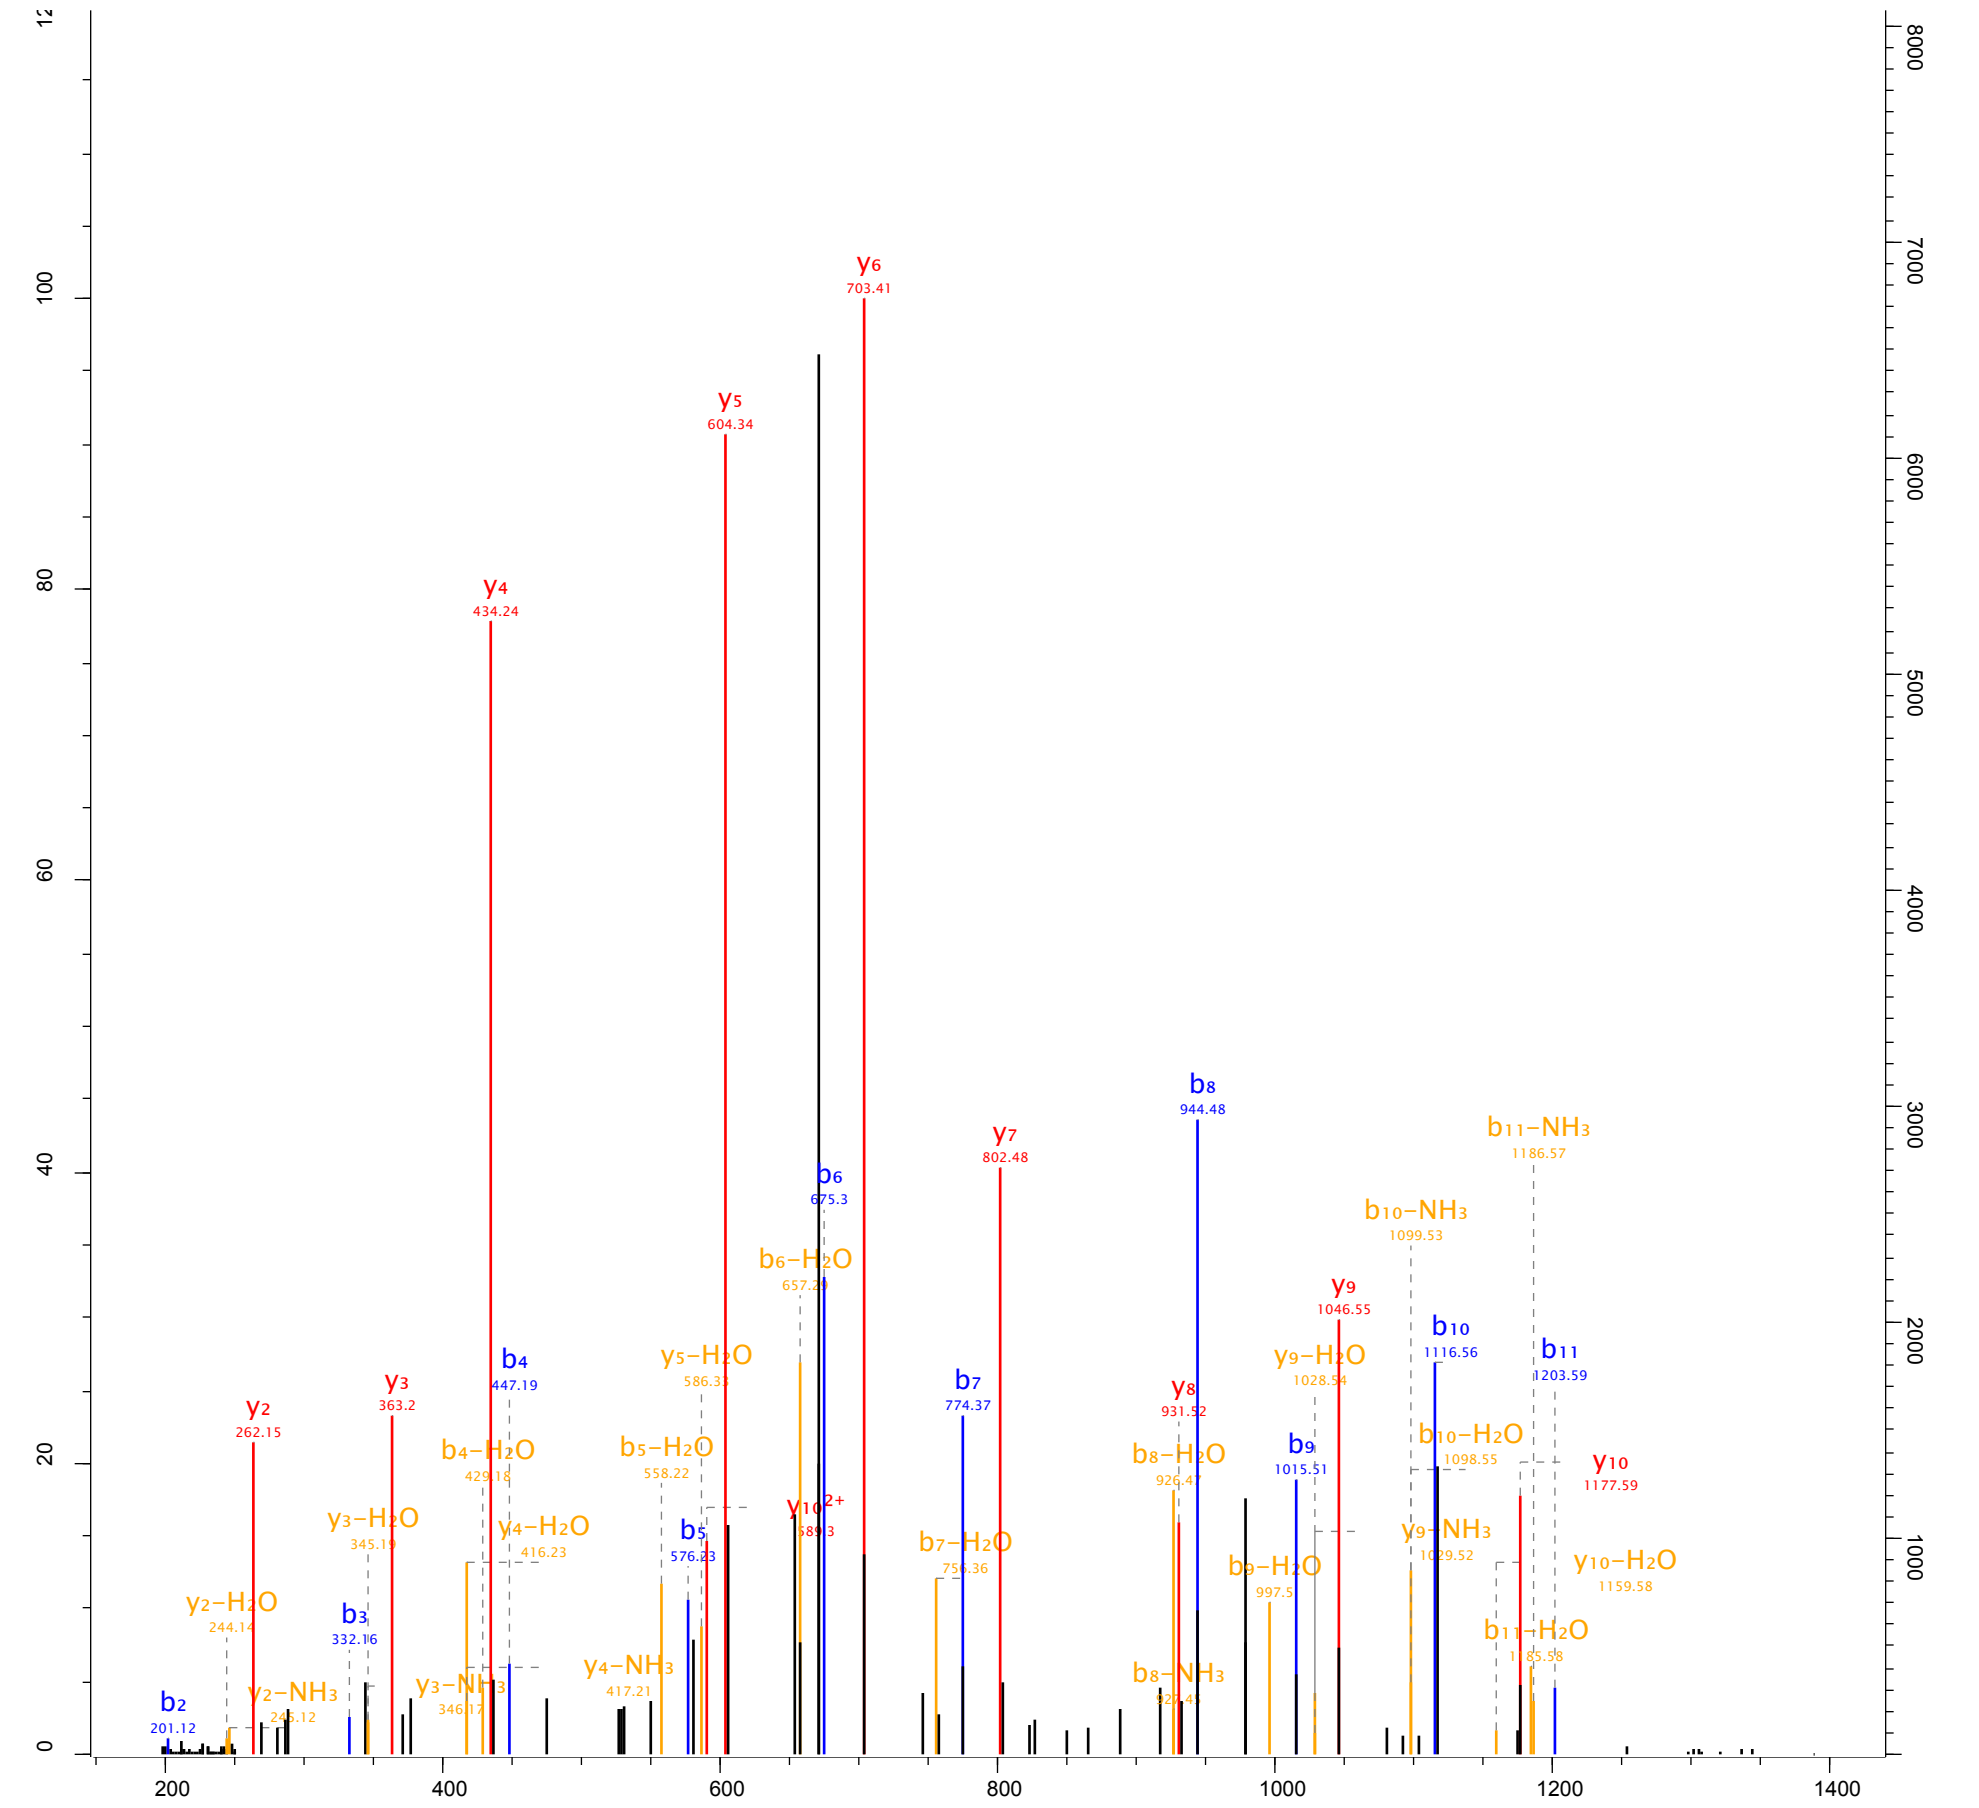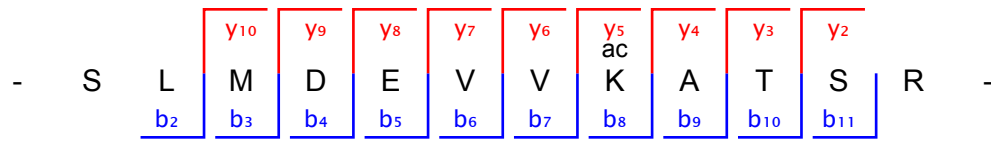

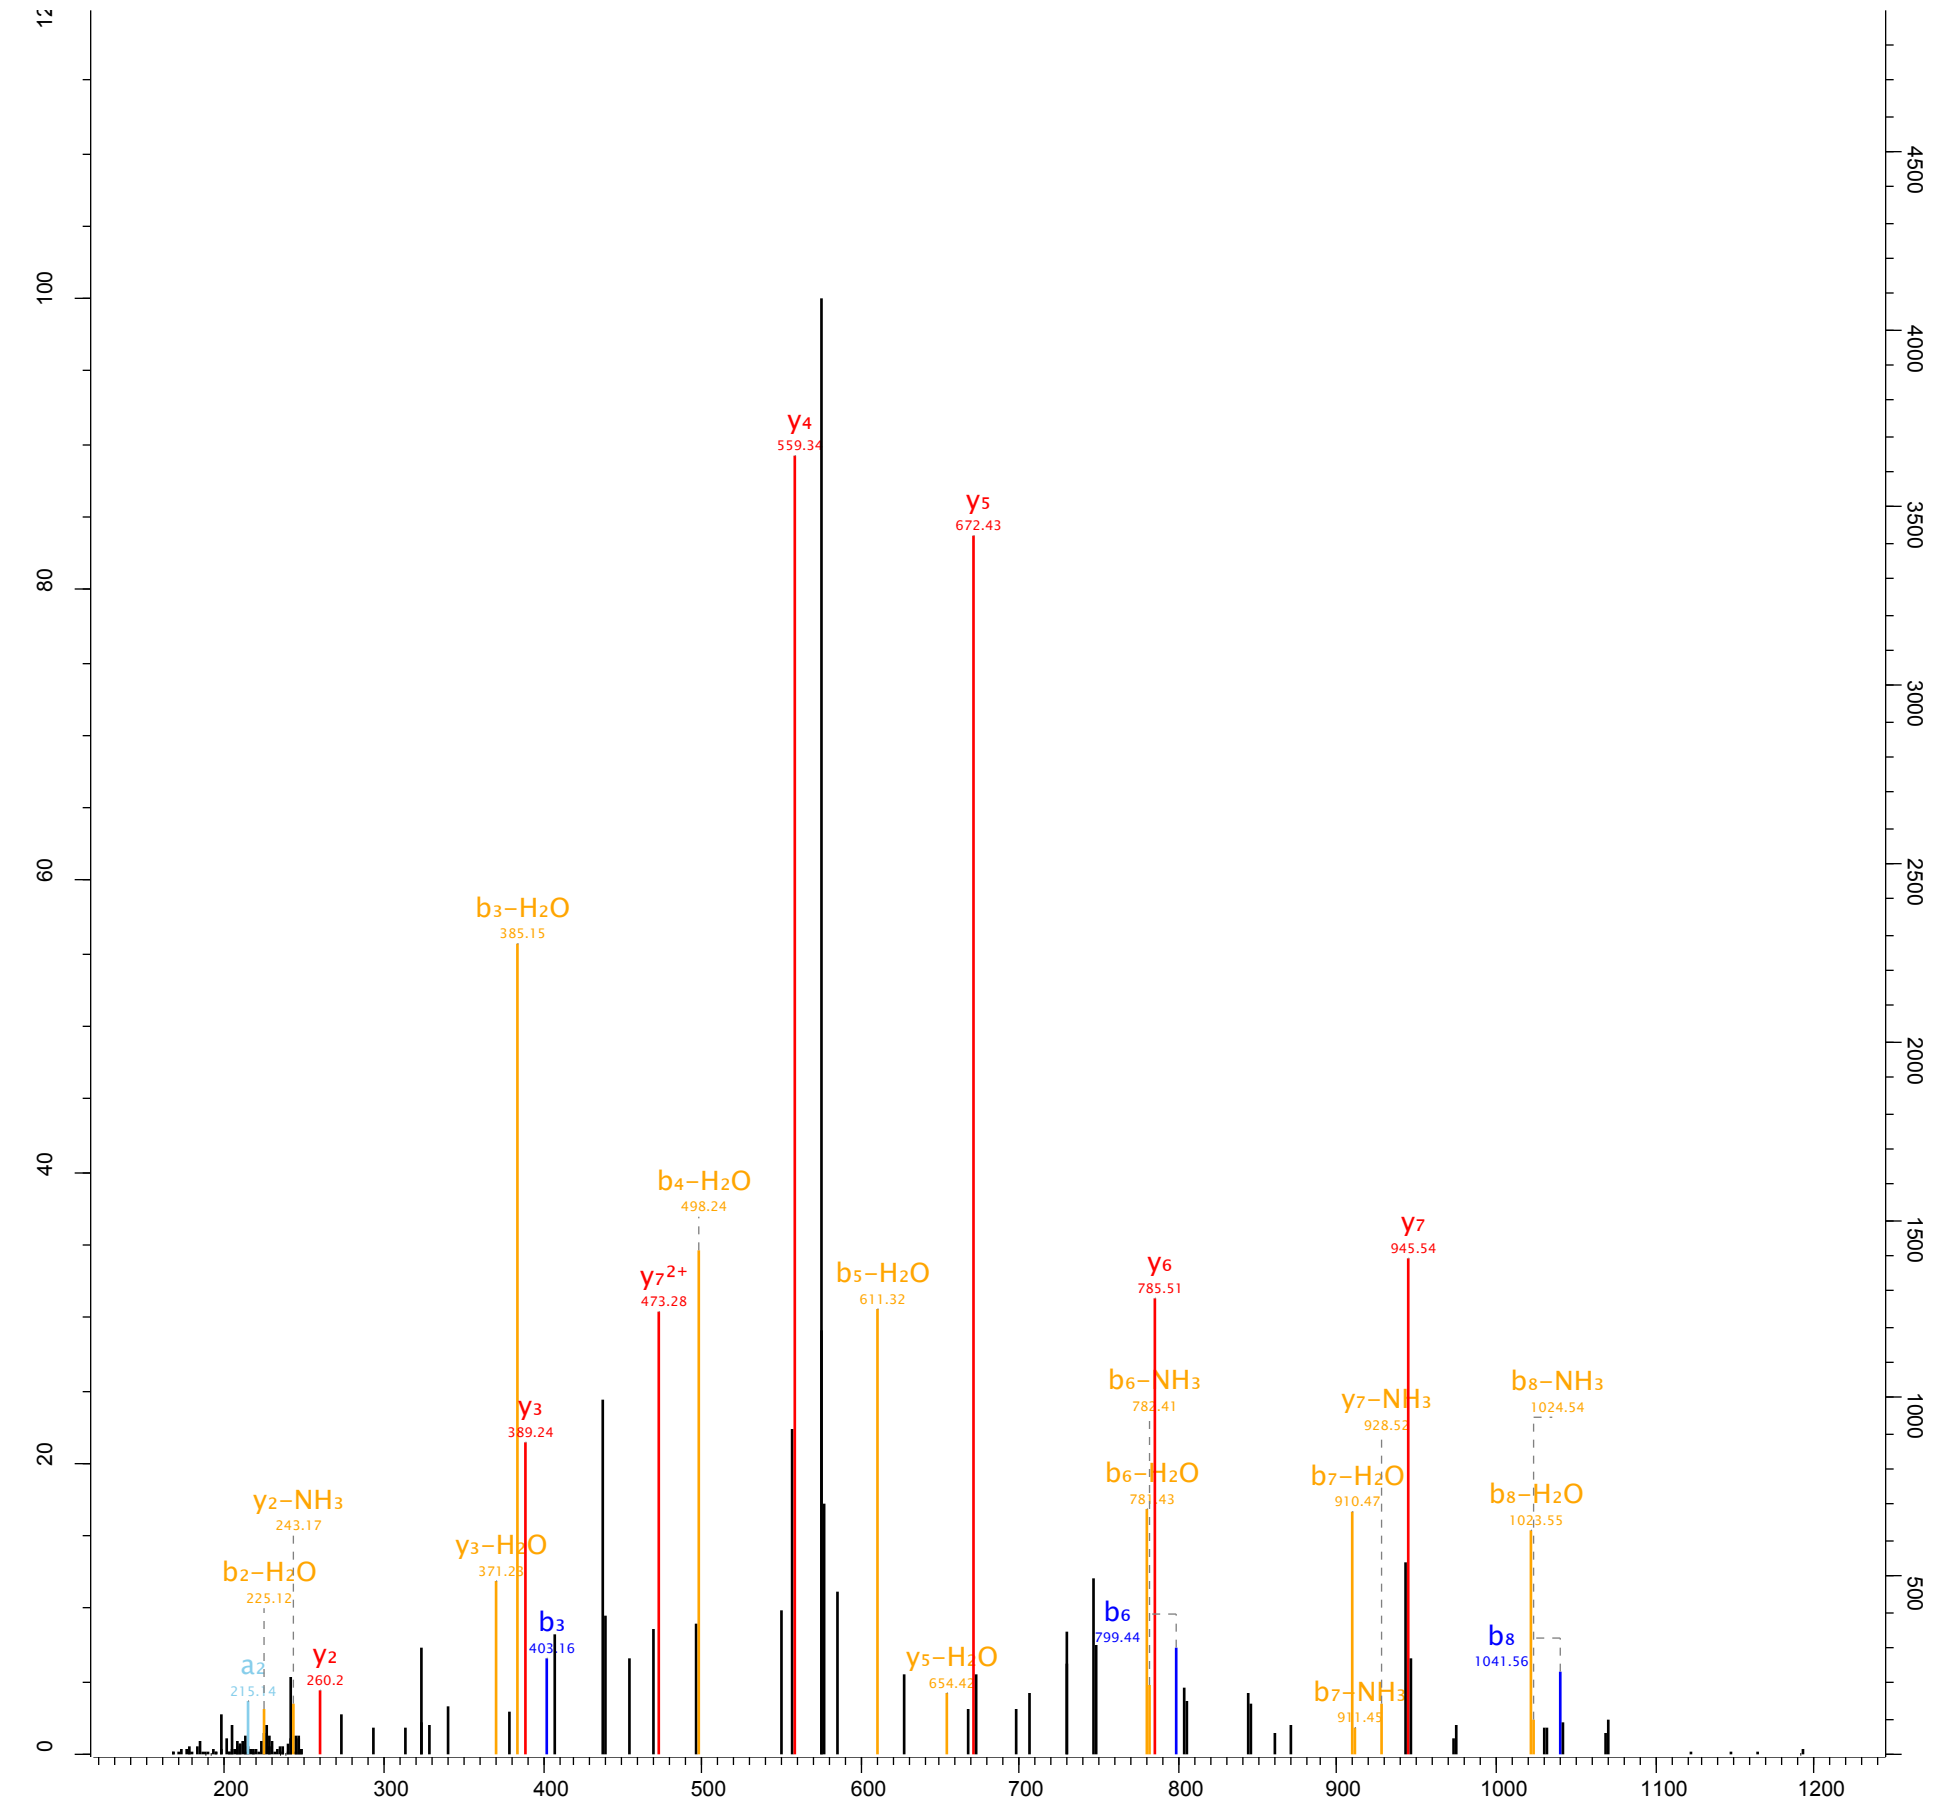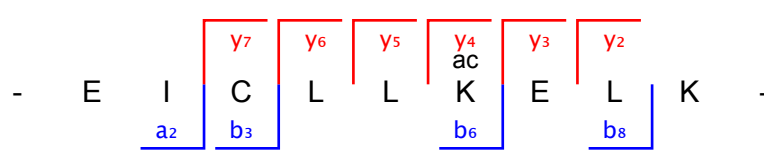

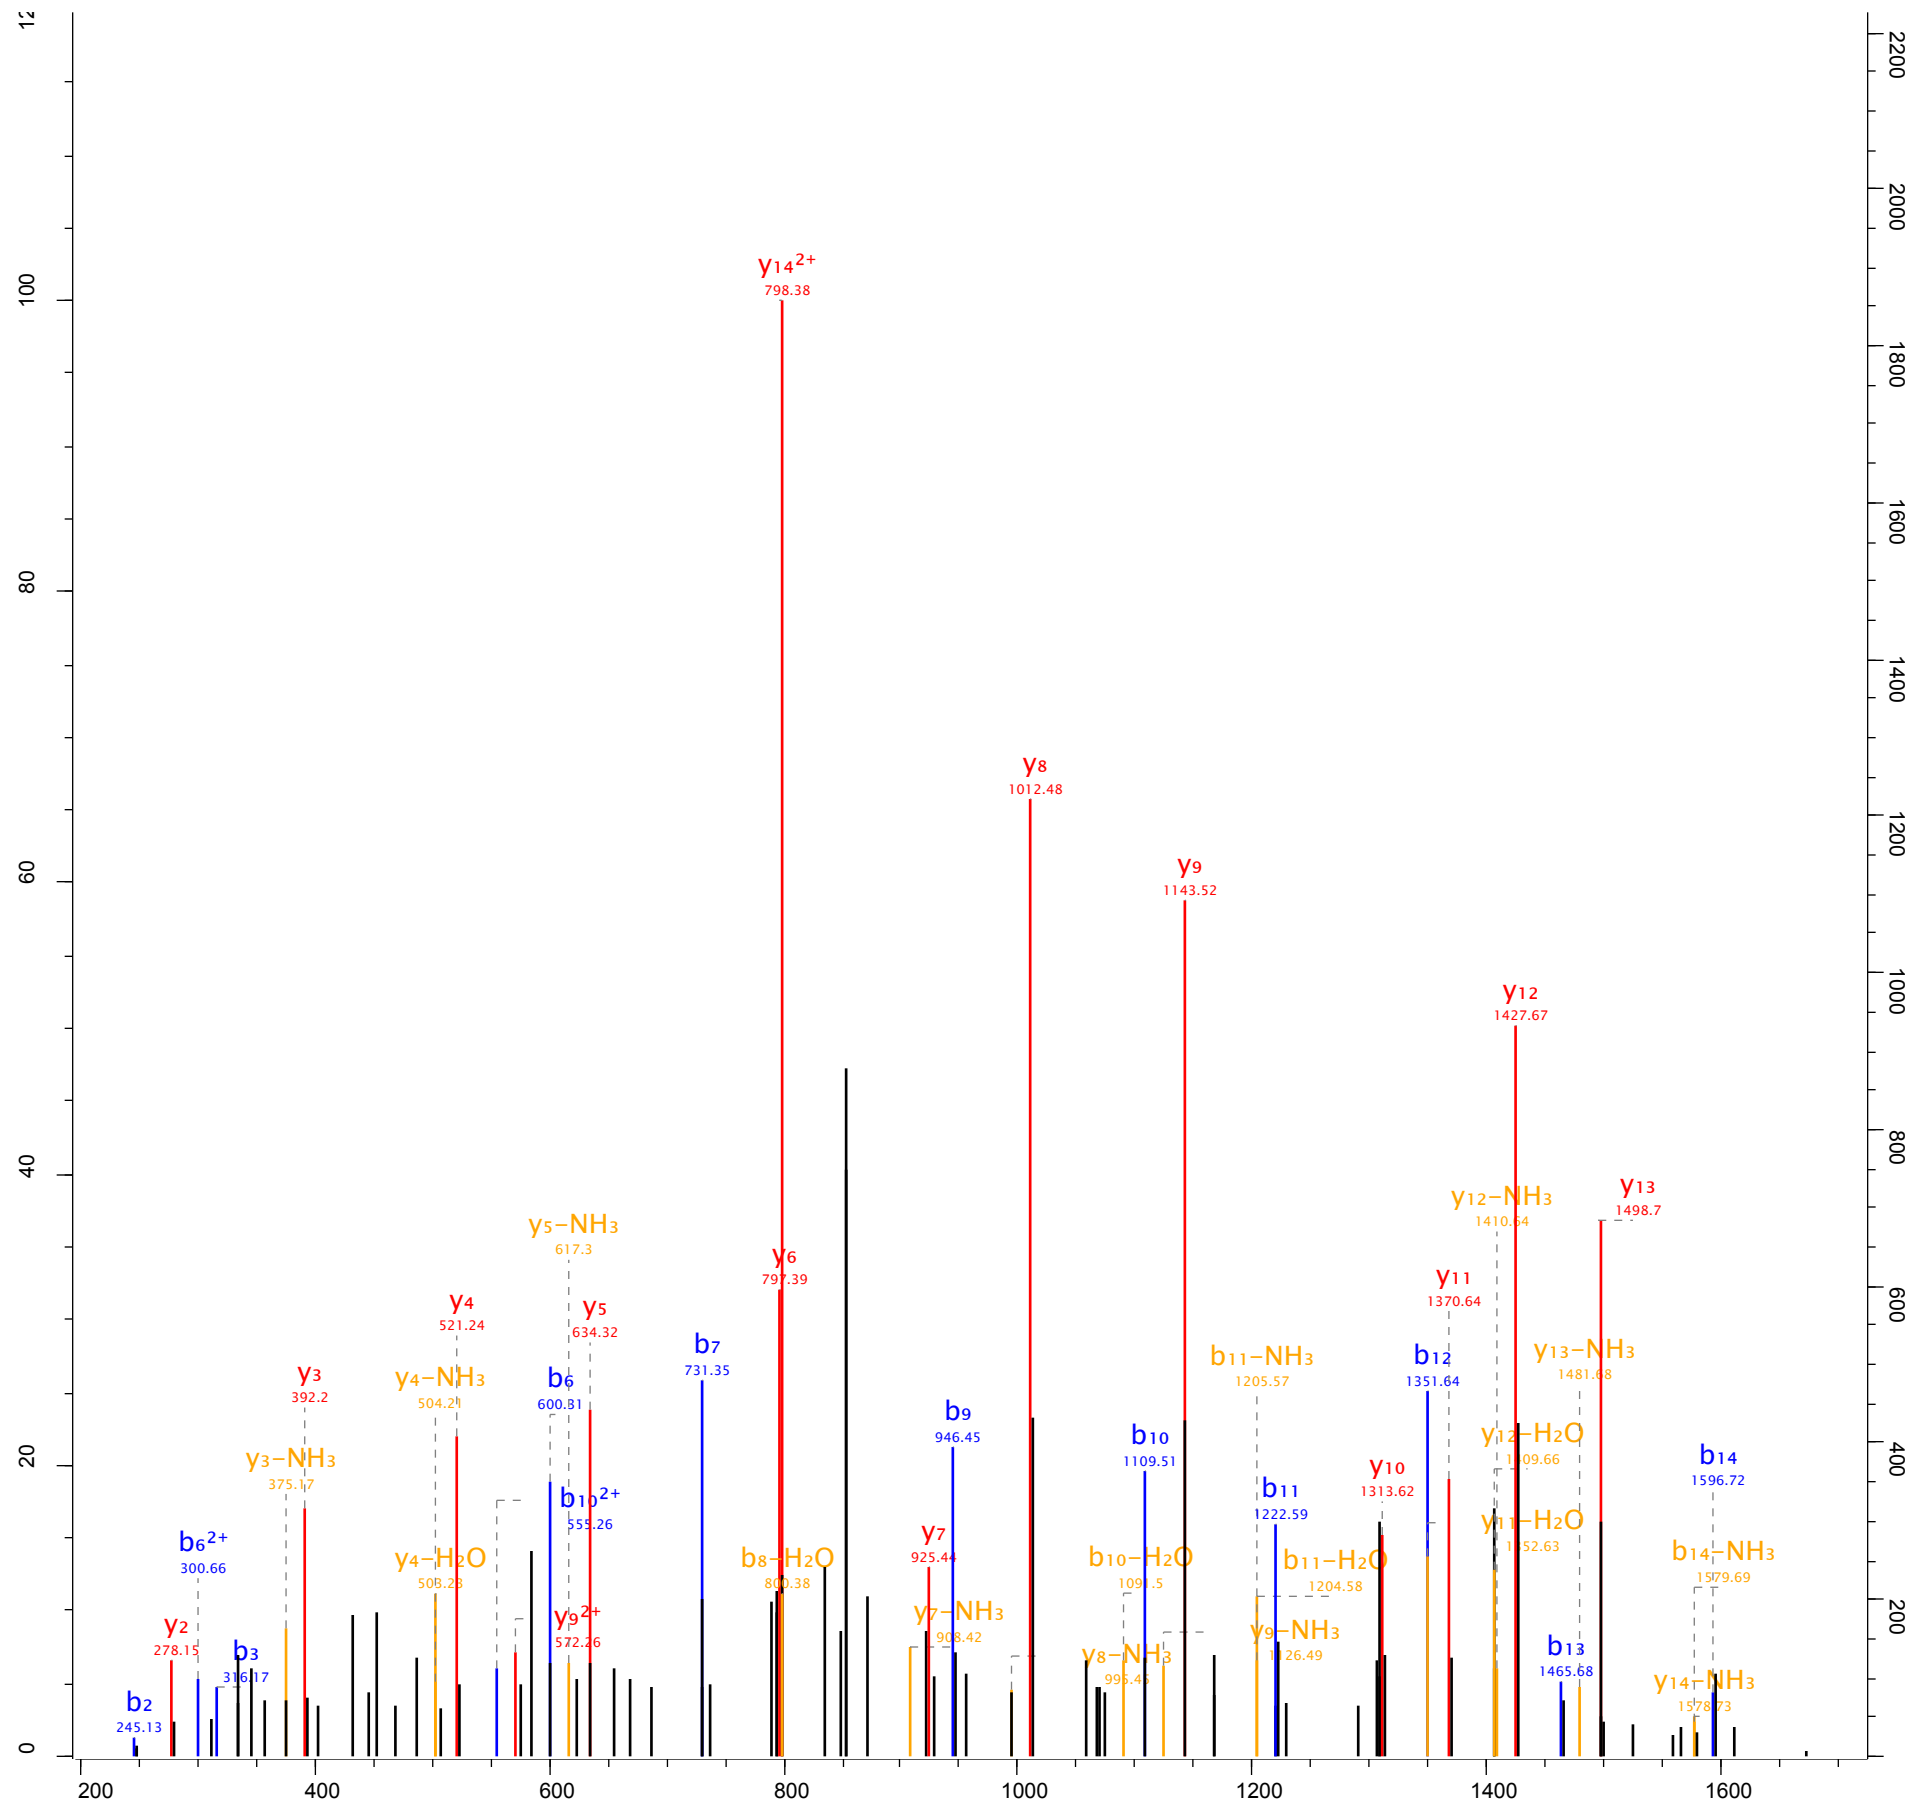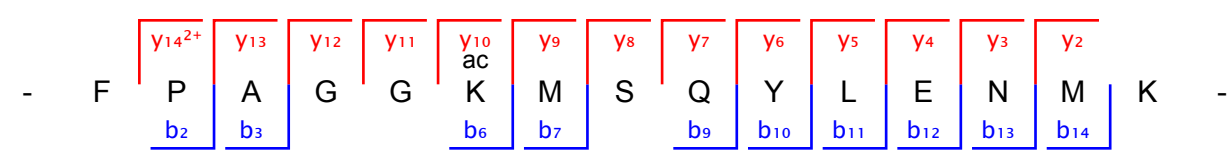

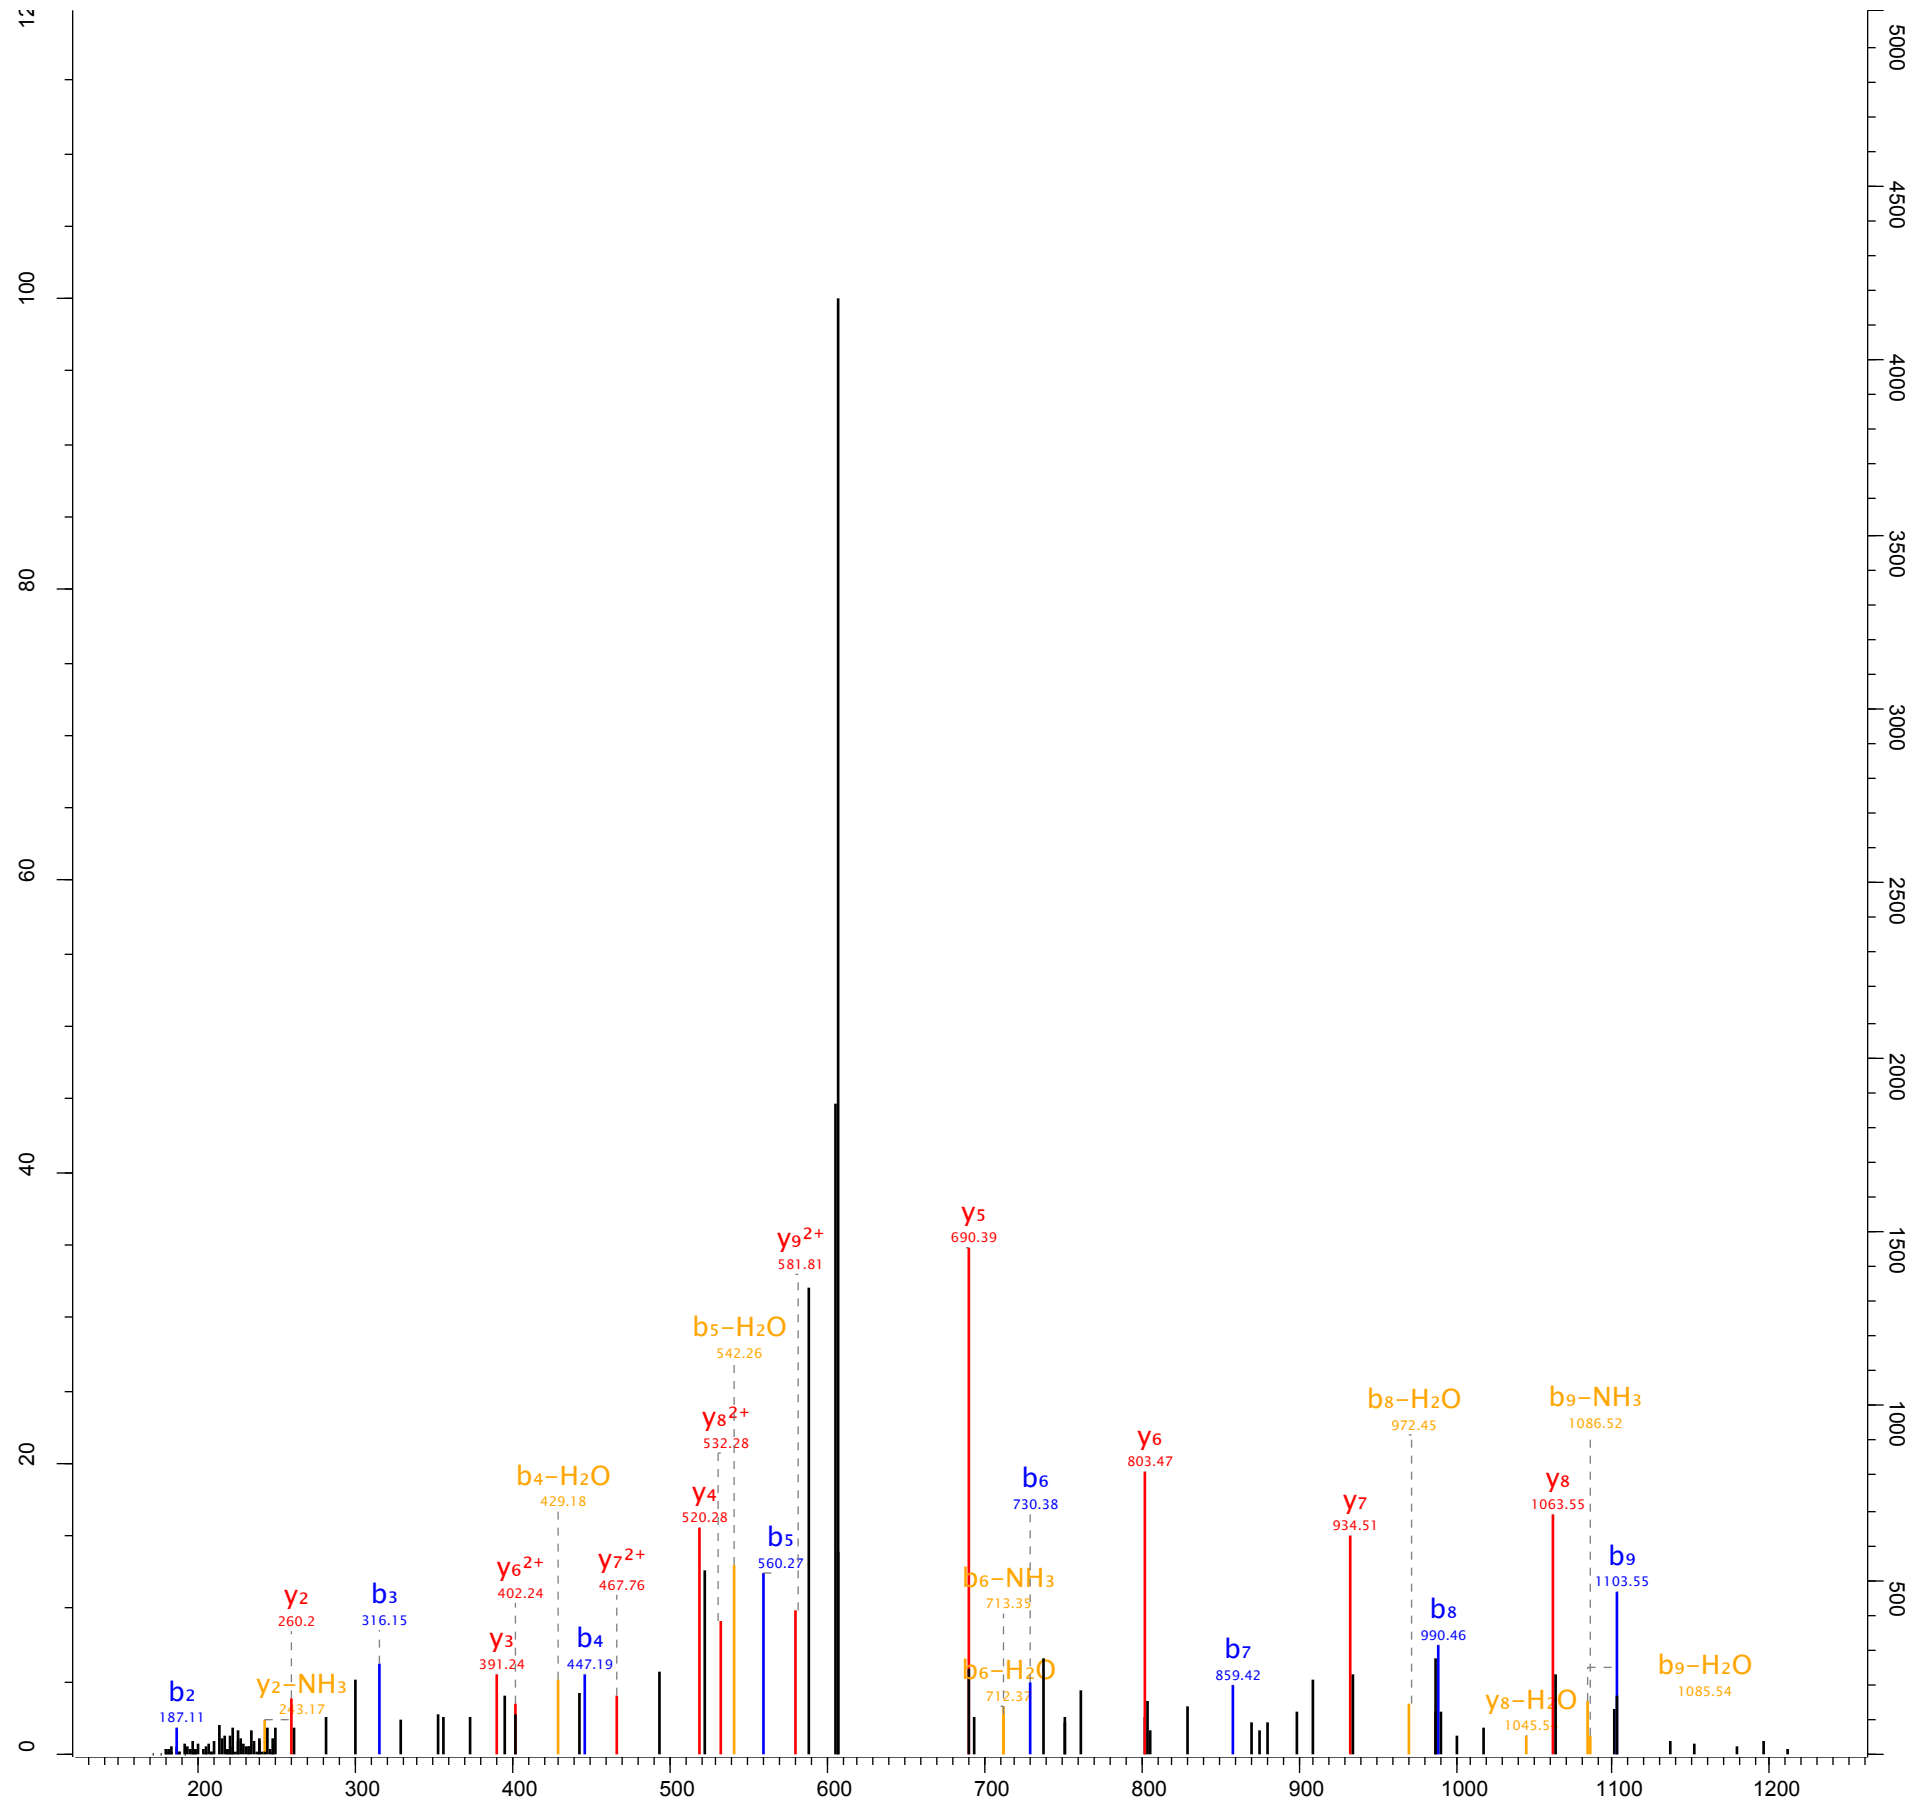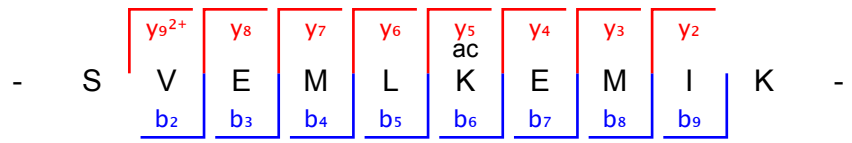

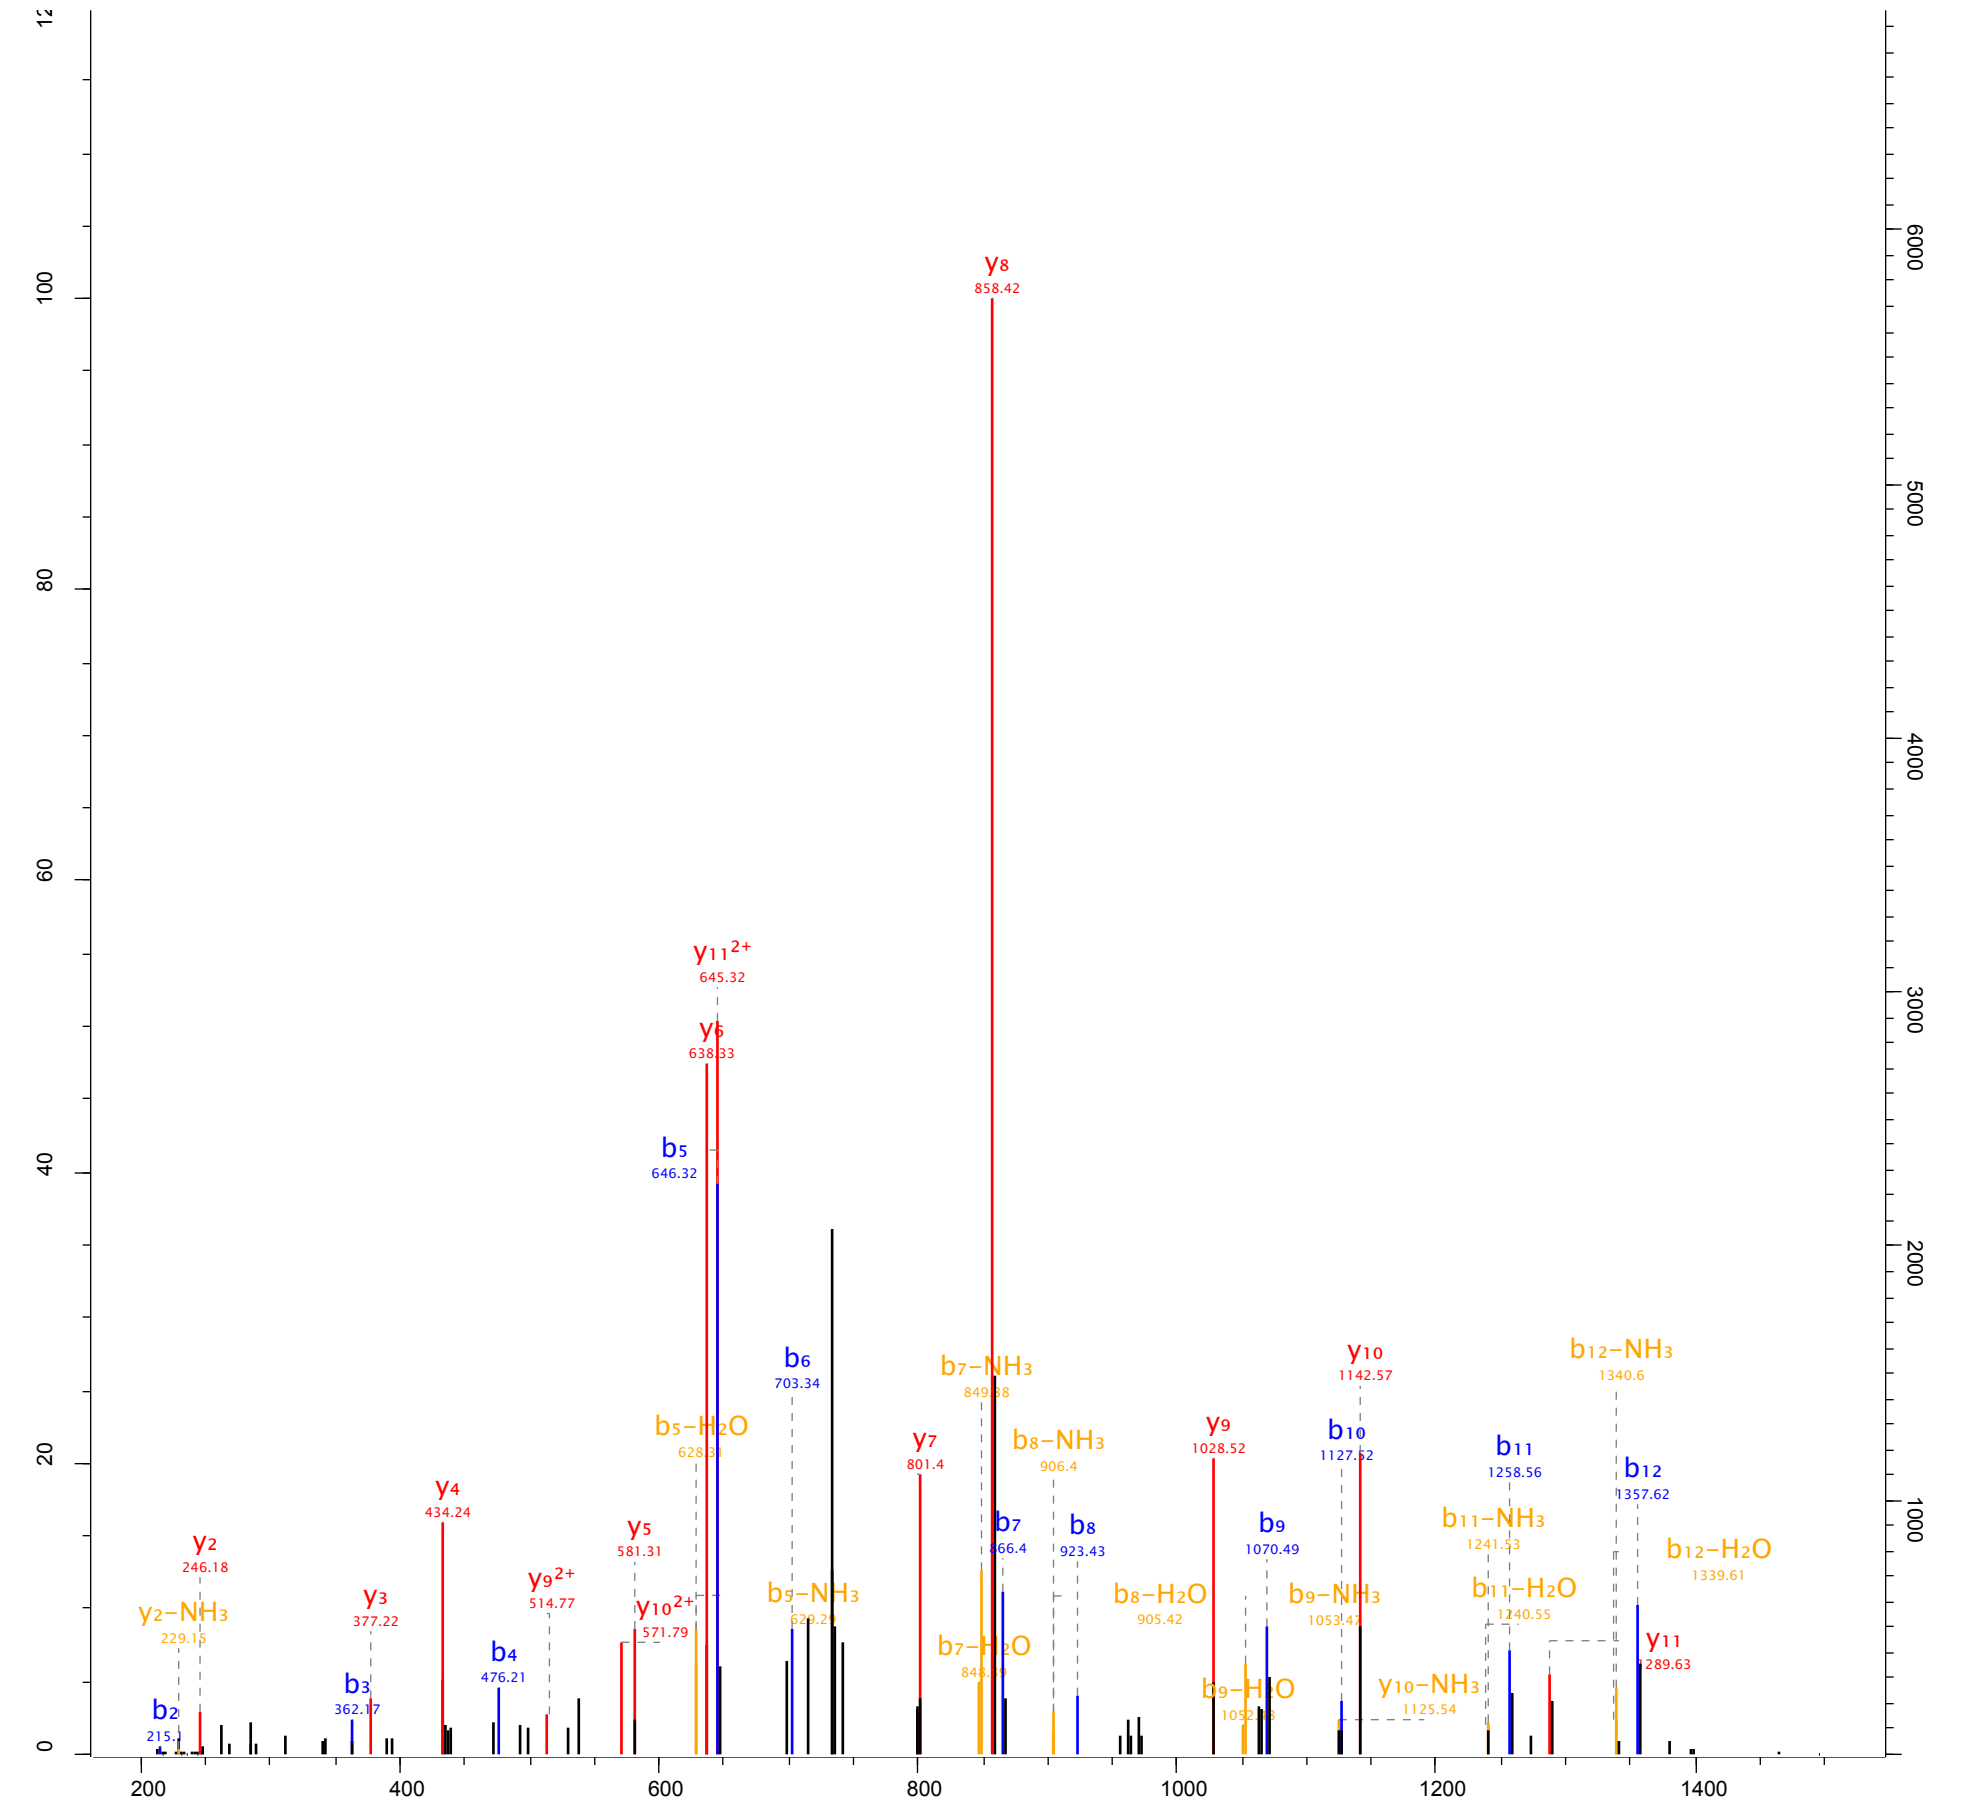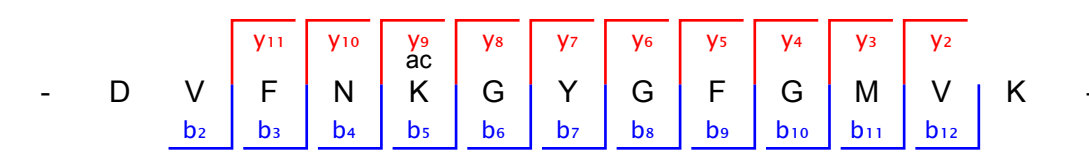

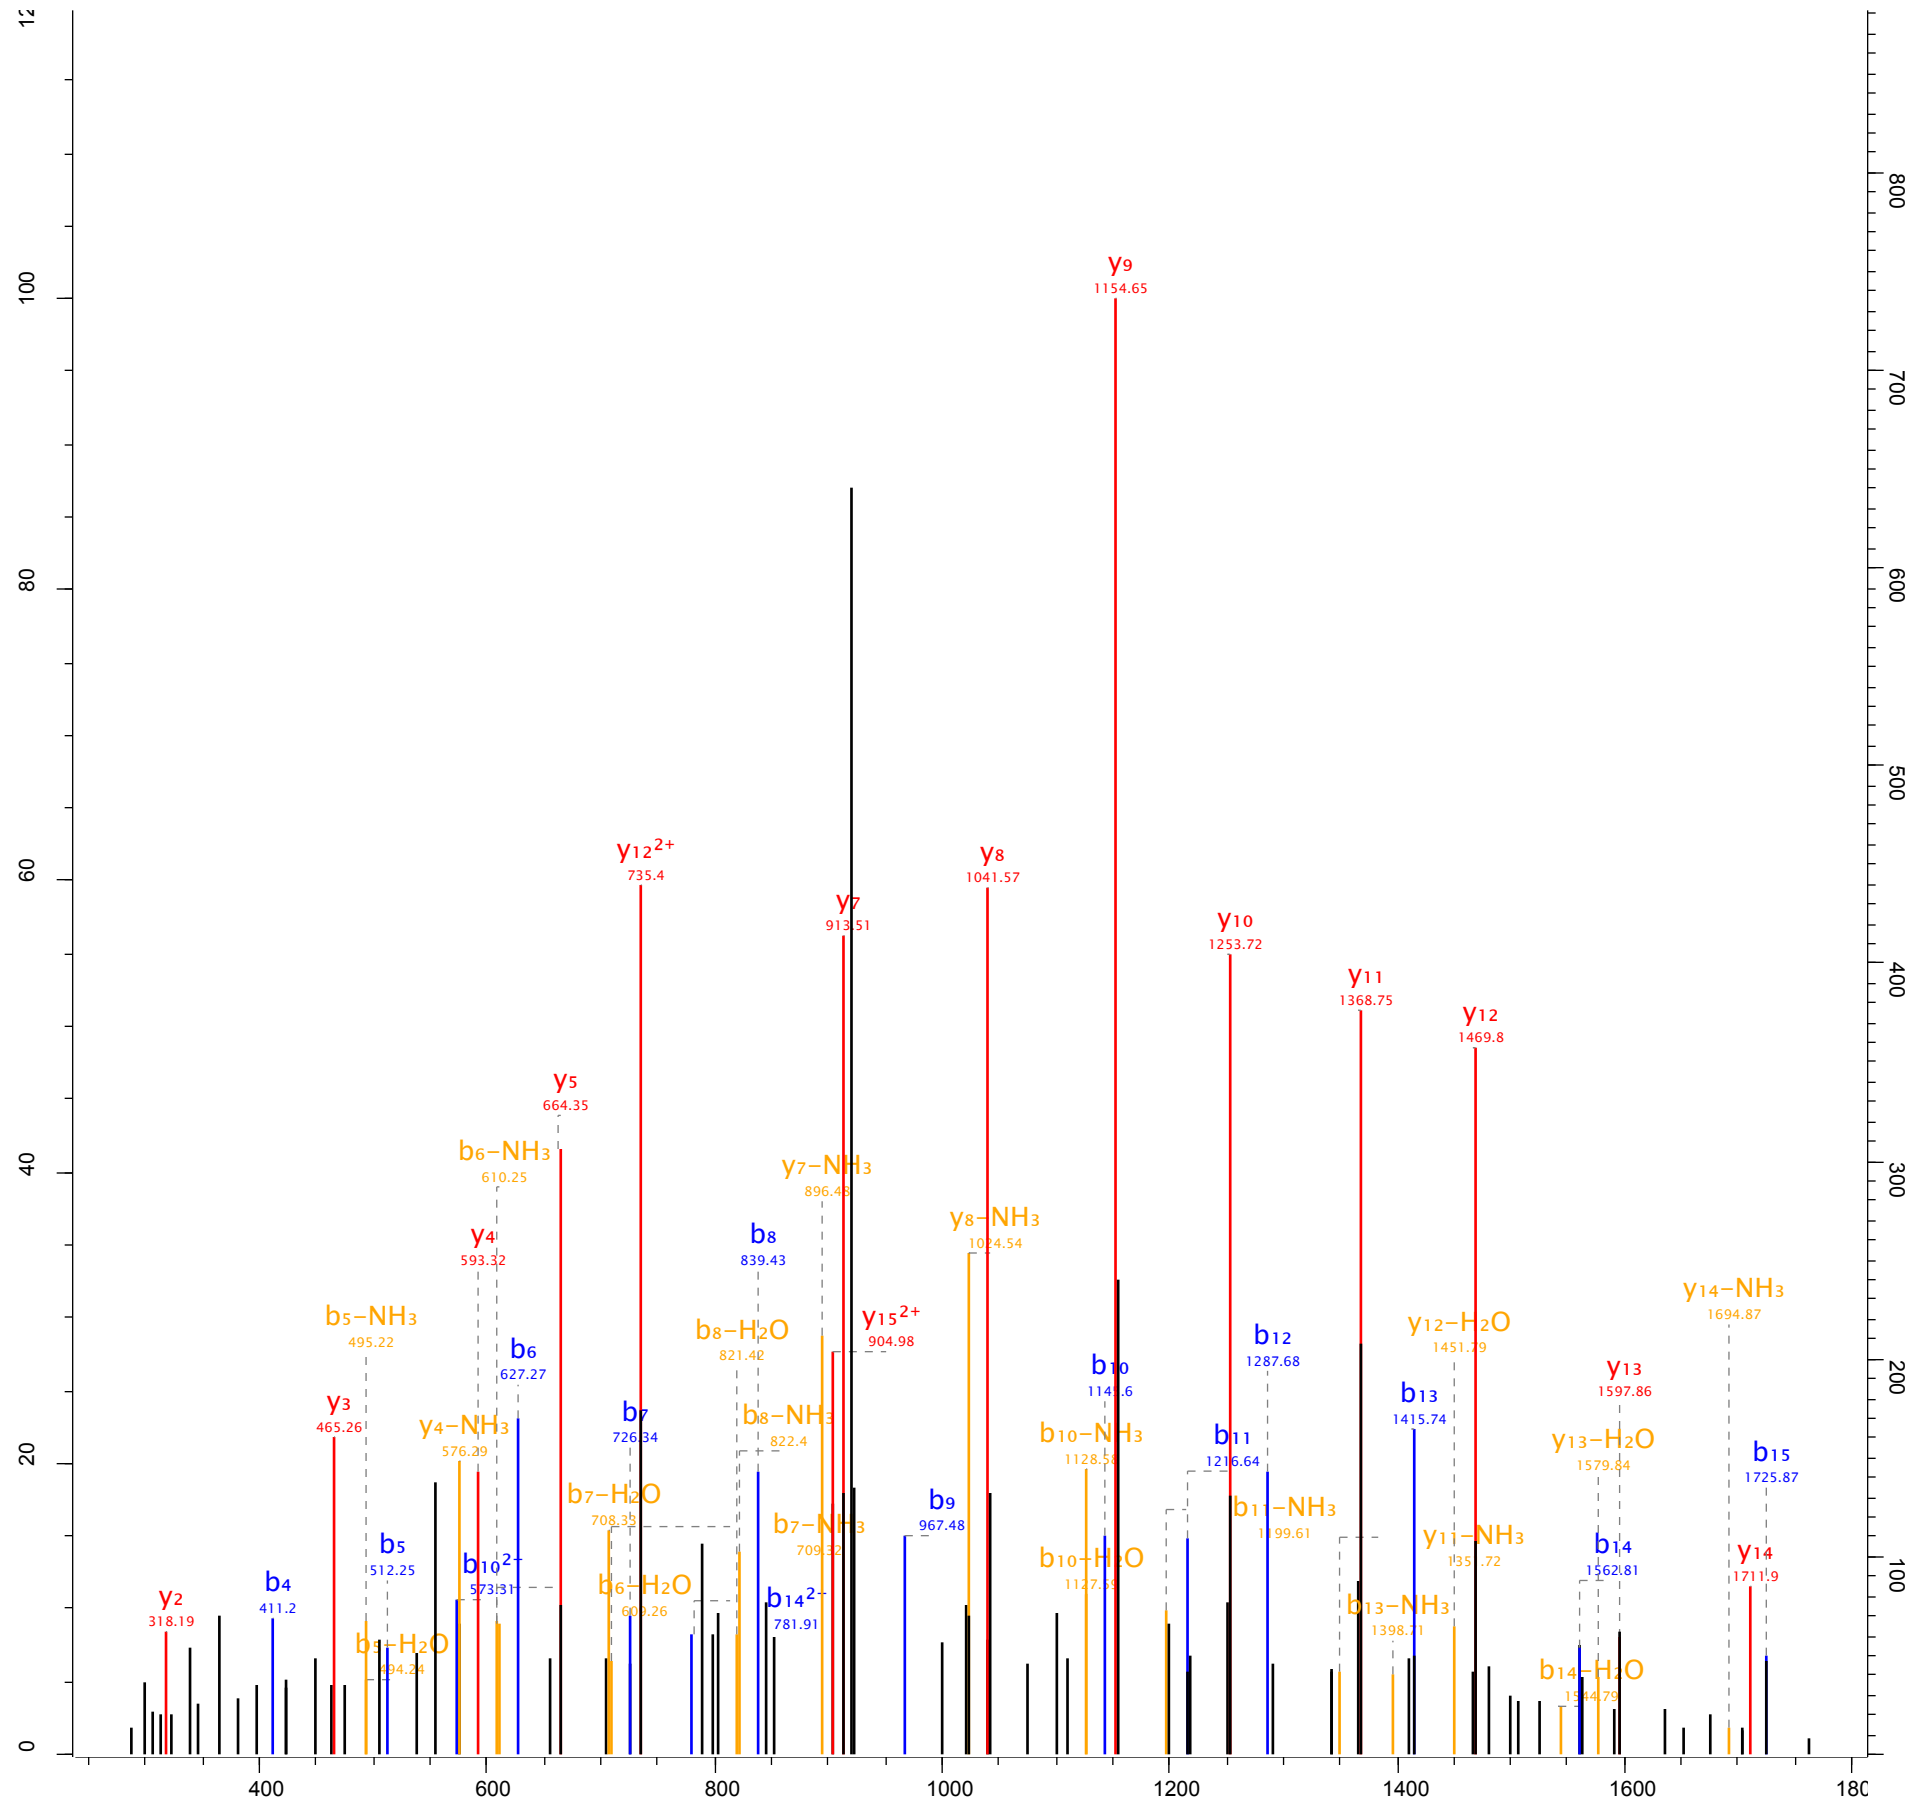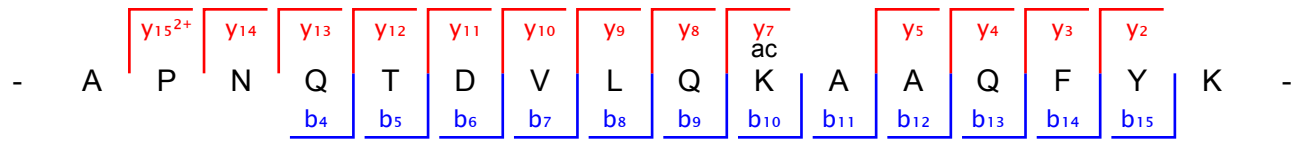

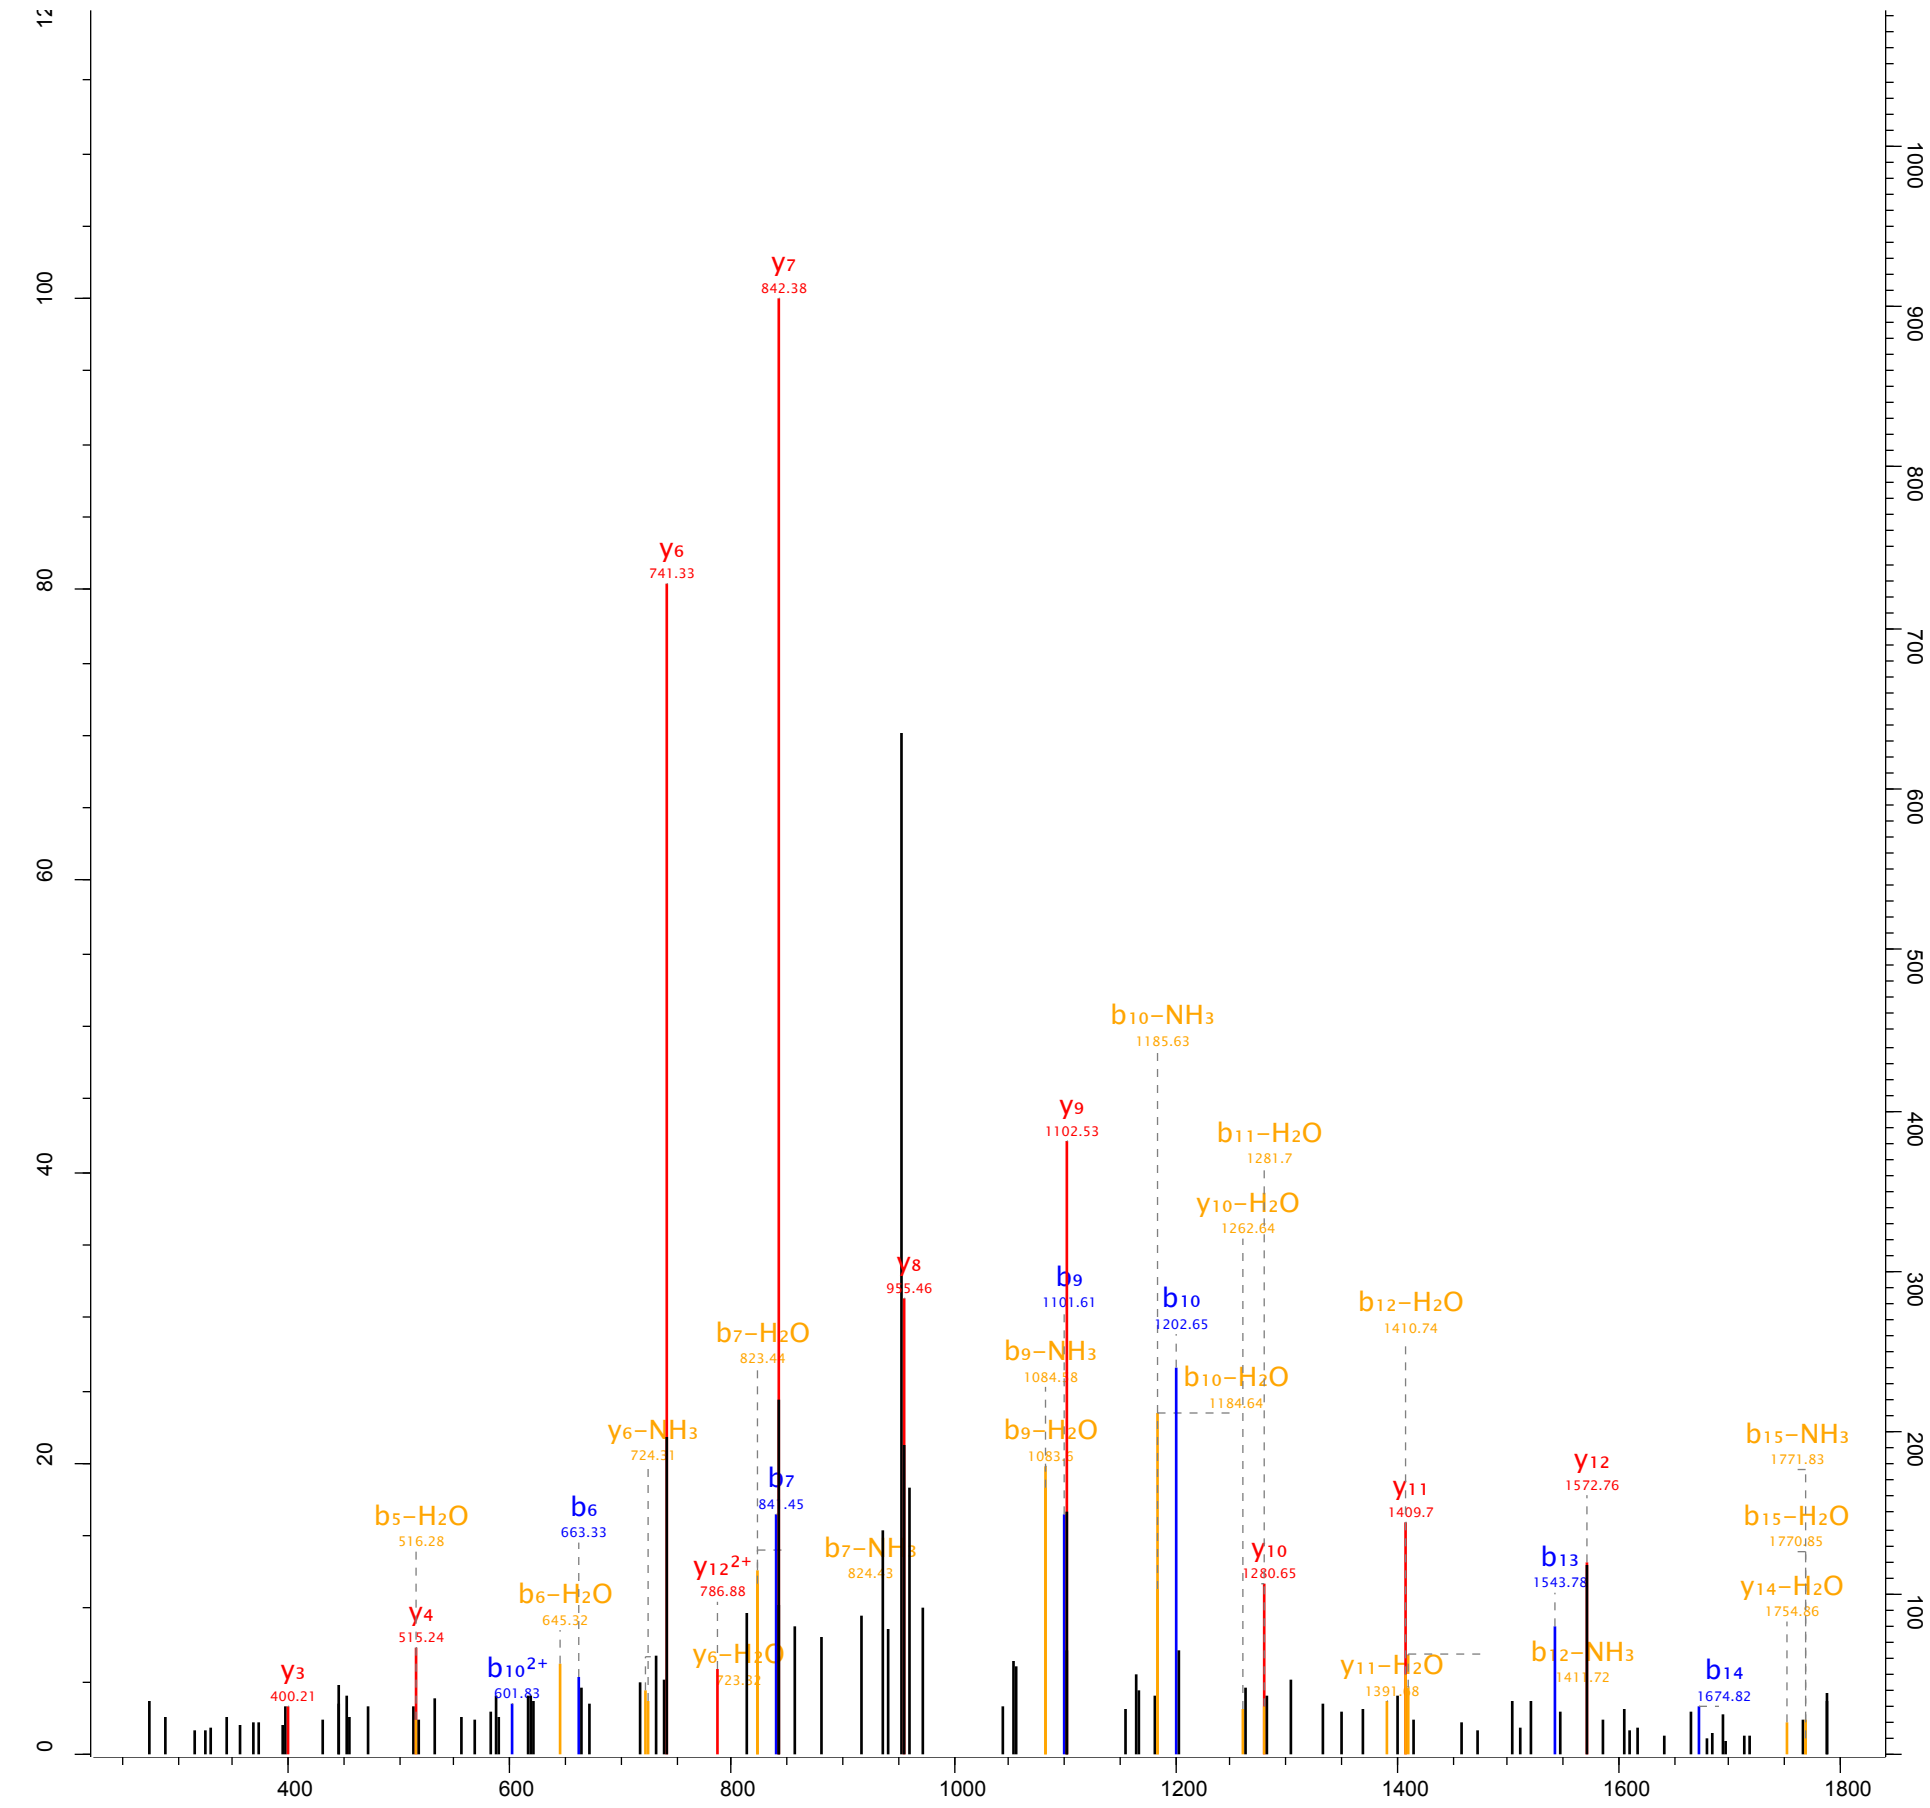

- L G T V **Y** **E** **K** F **I** **T** P E **D** **M** N K -

Fragmentation labels: **y12**, **y11**, **y10 ac**, **y9**, **y8**, **y7**, **y6**, **y4**, **y3**, **b6**, **b7**, **b9**, **b10**, **b13**, **b14**

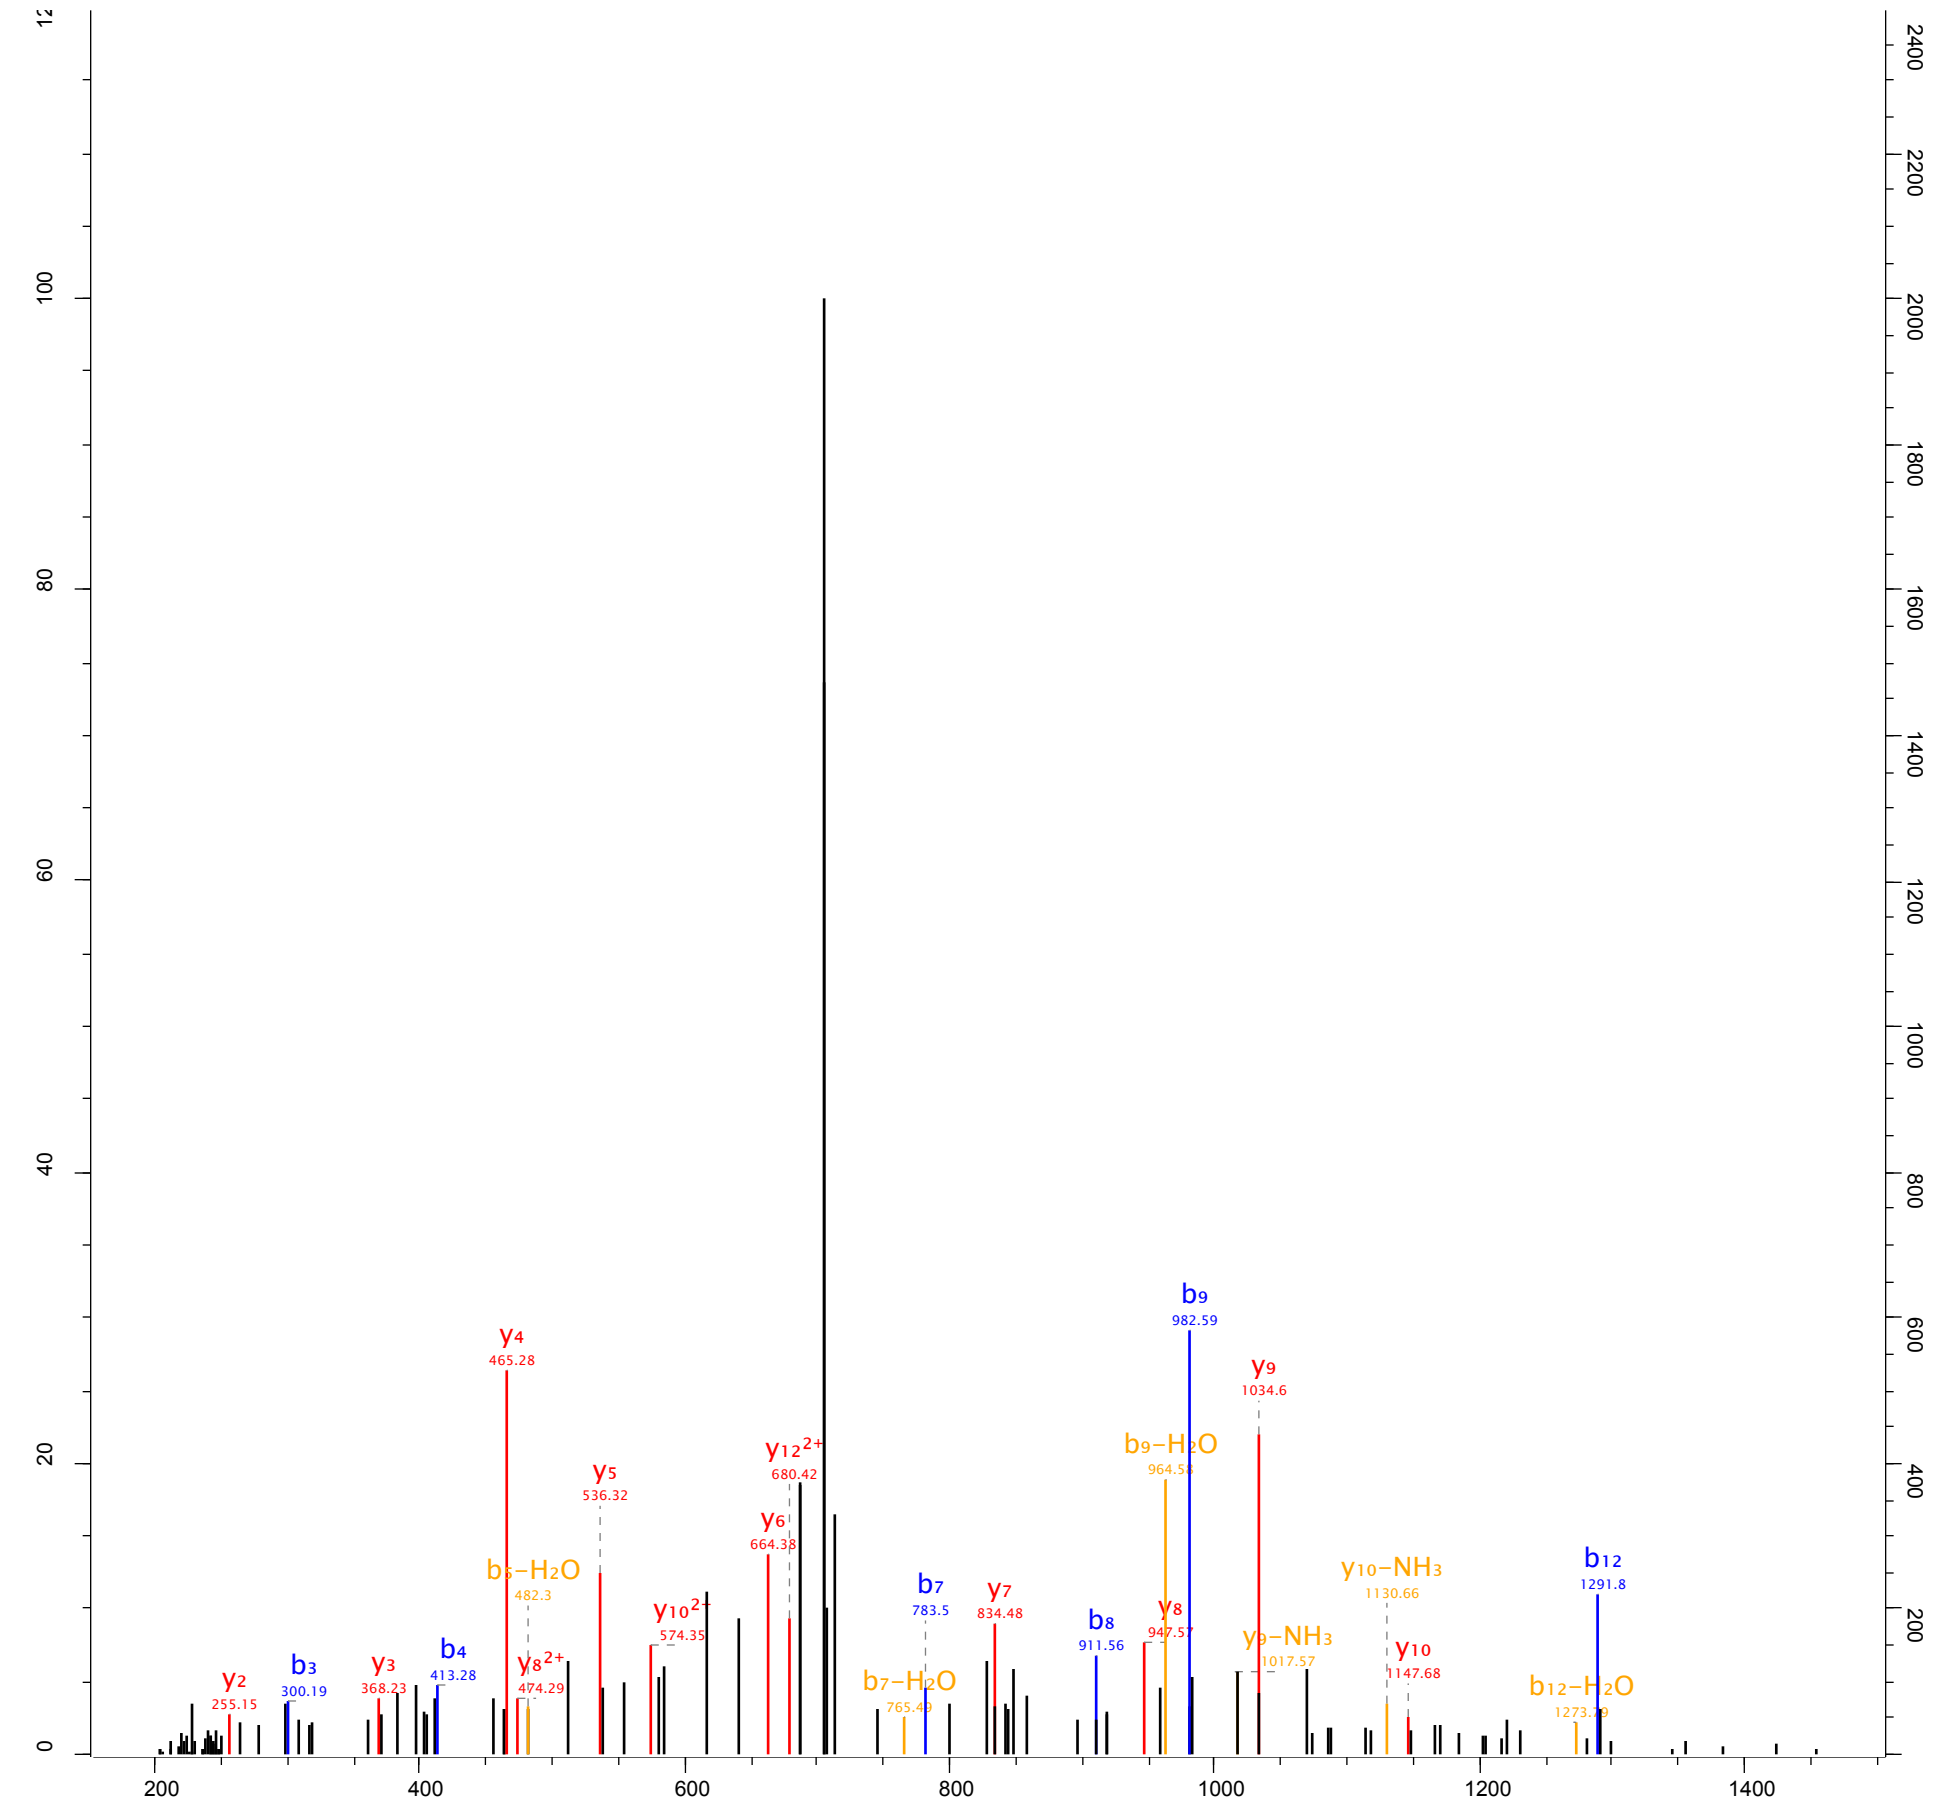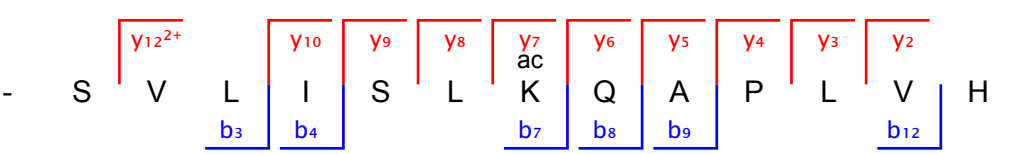



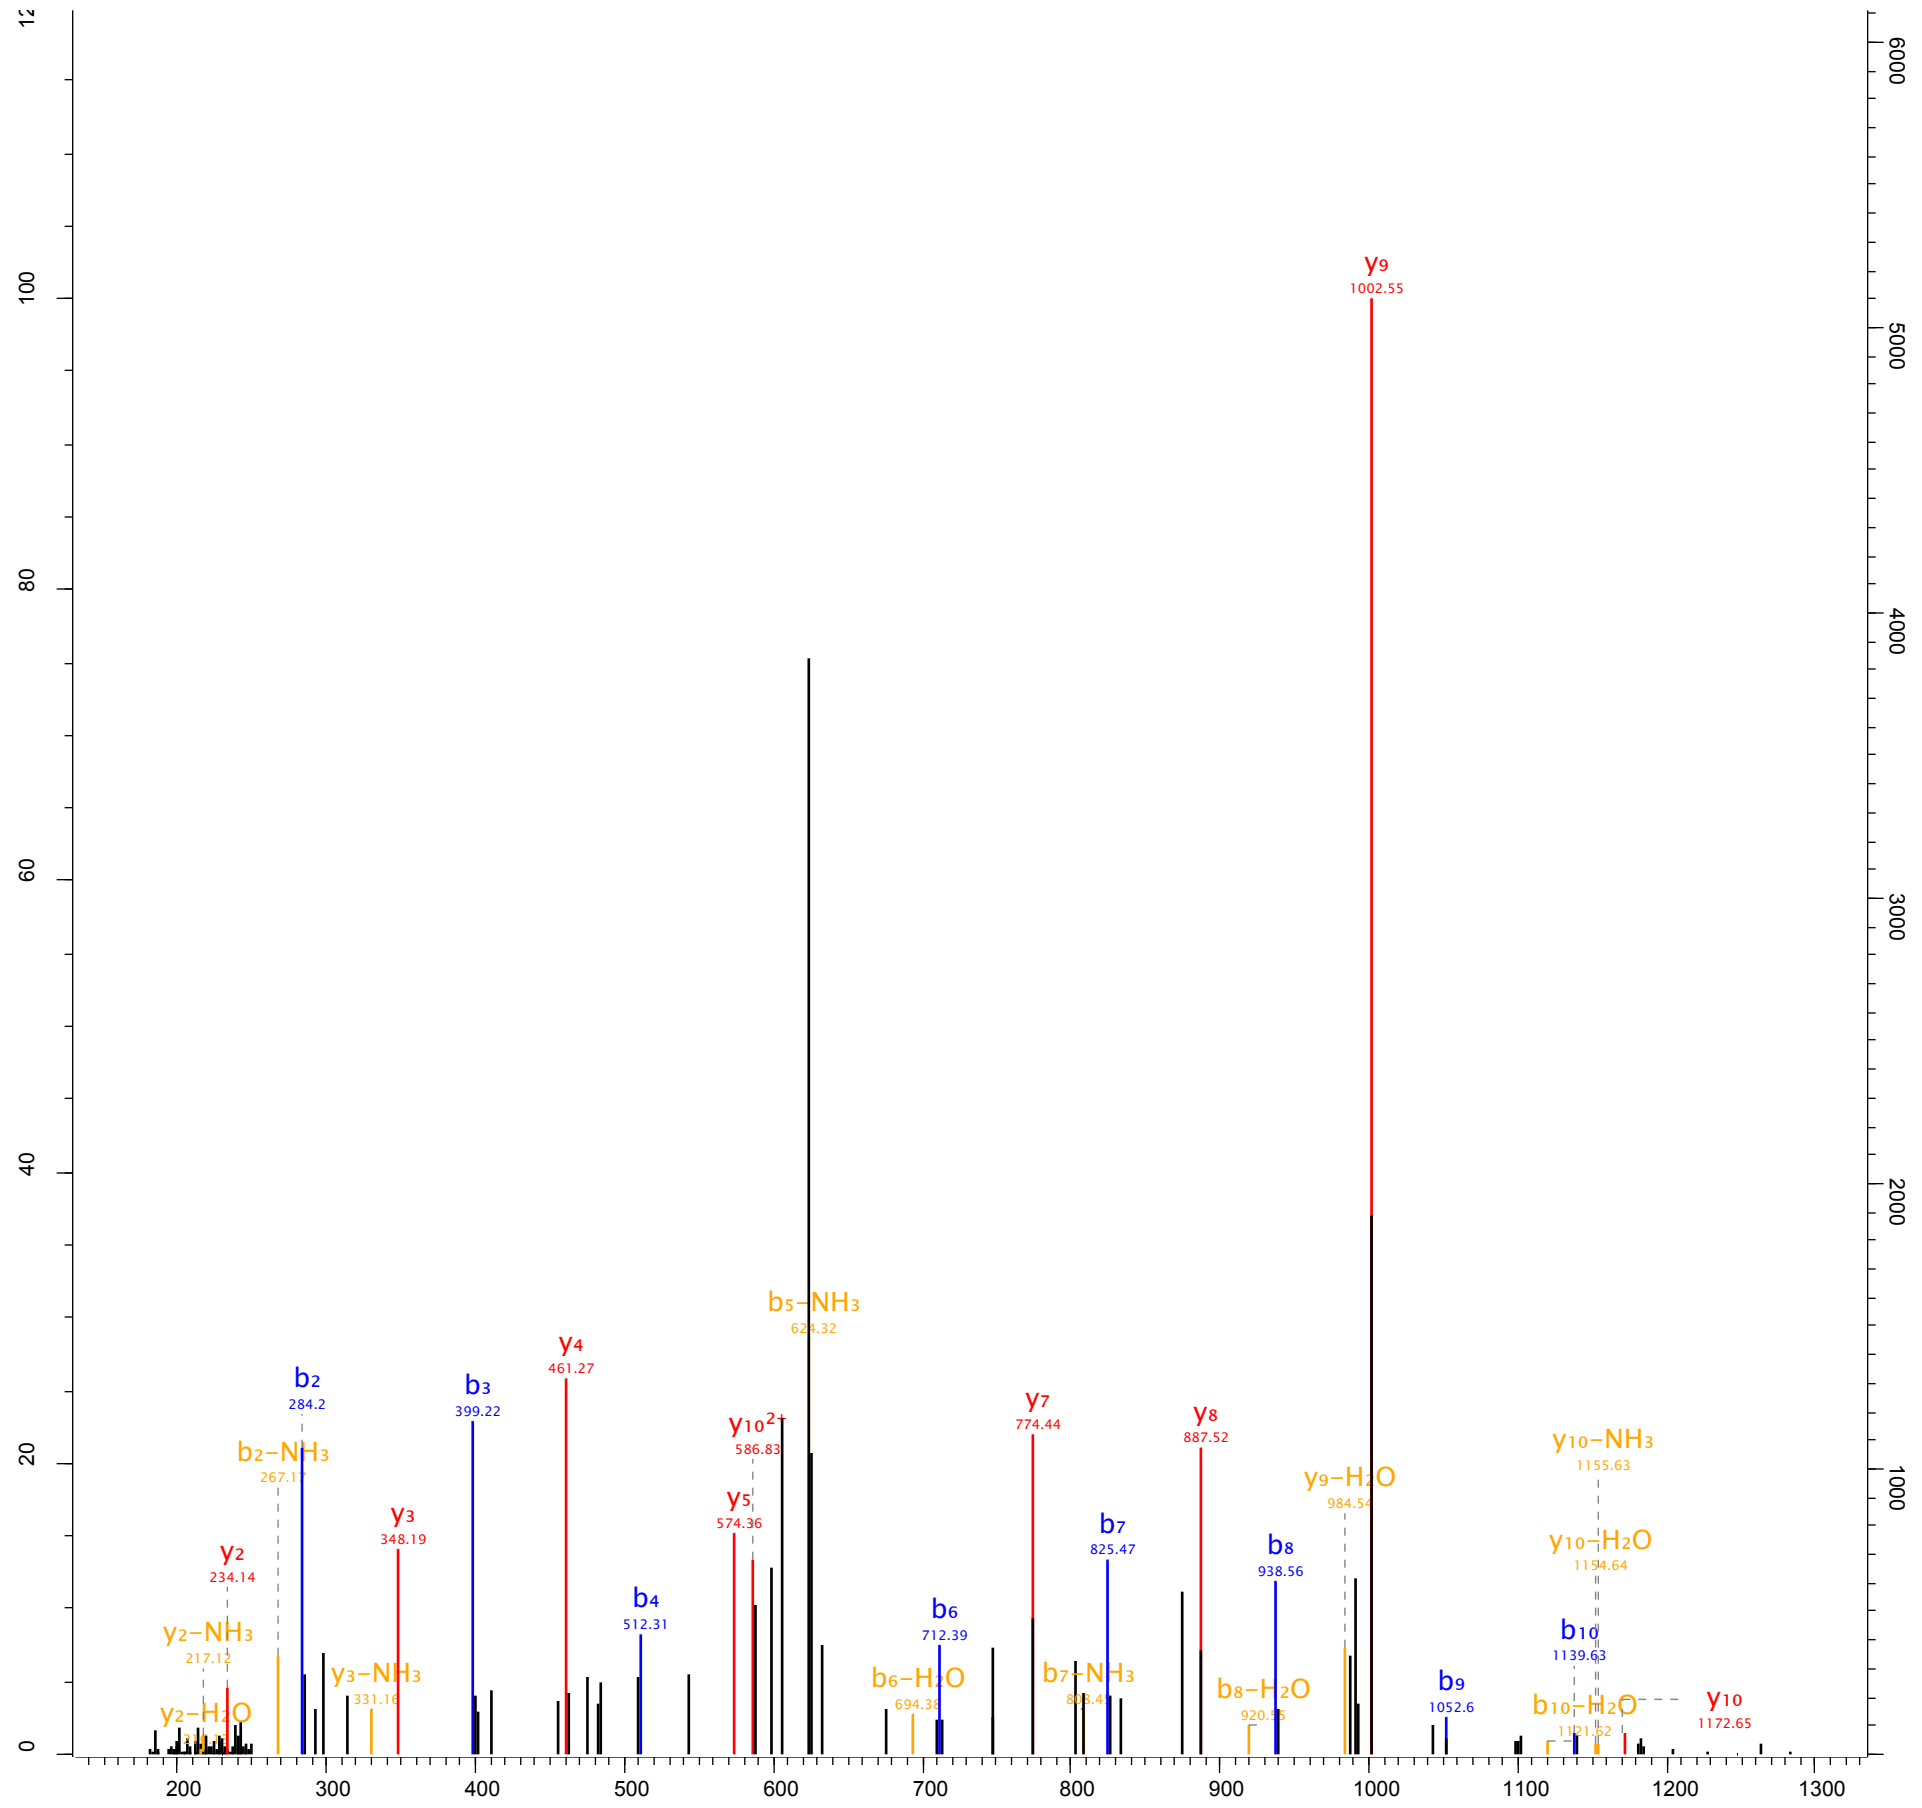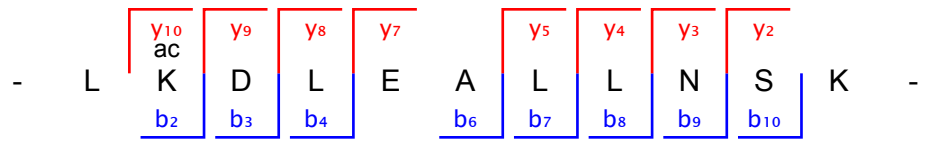

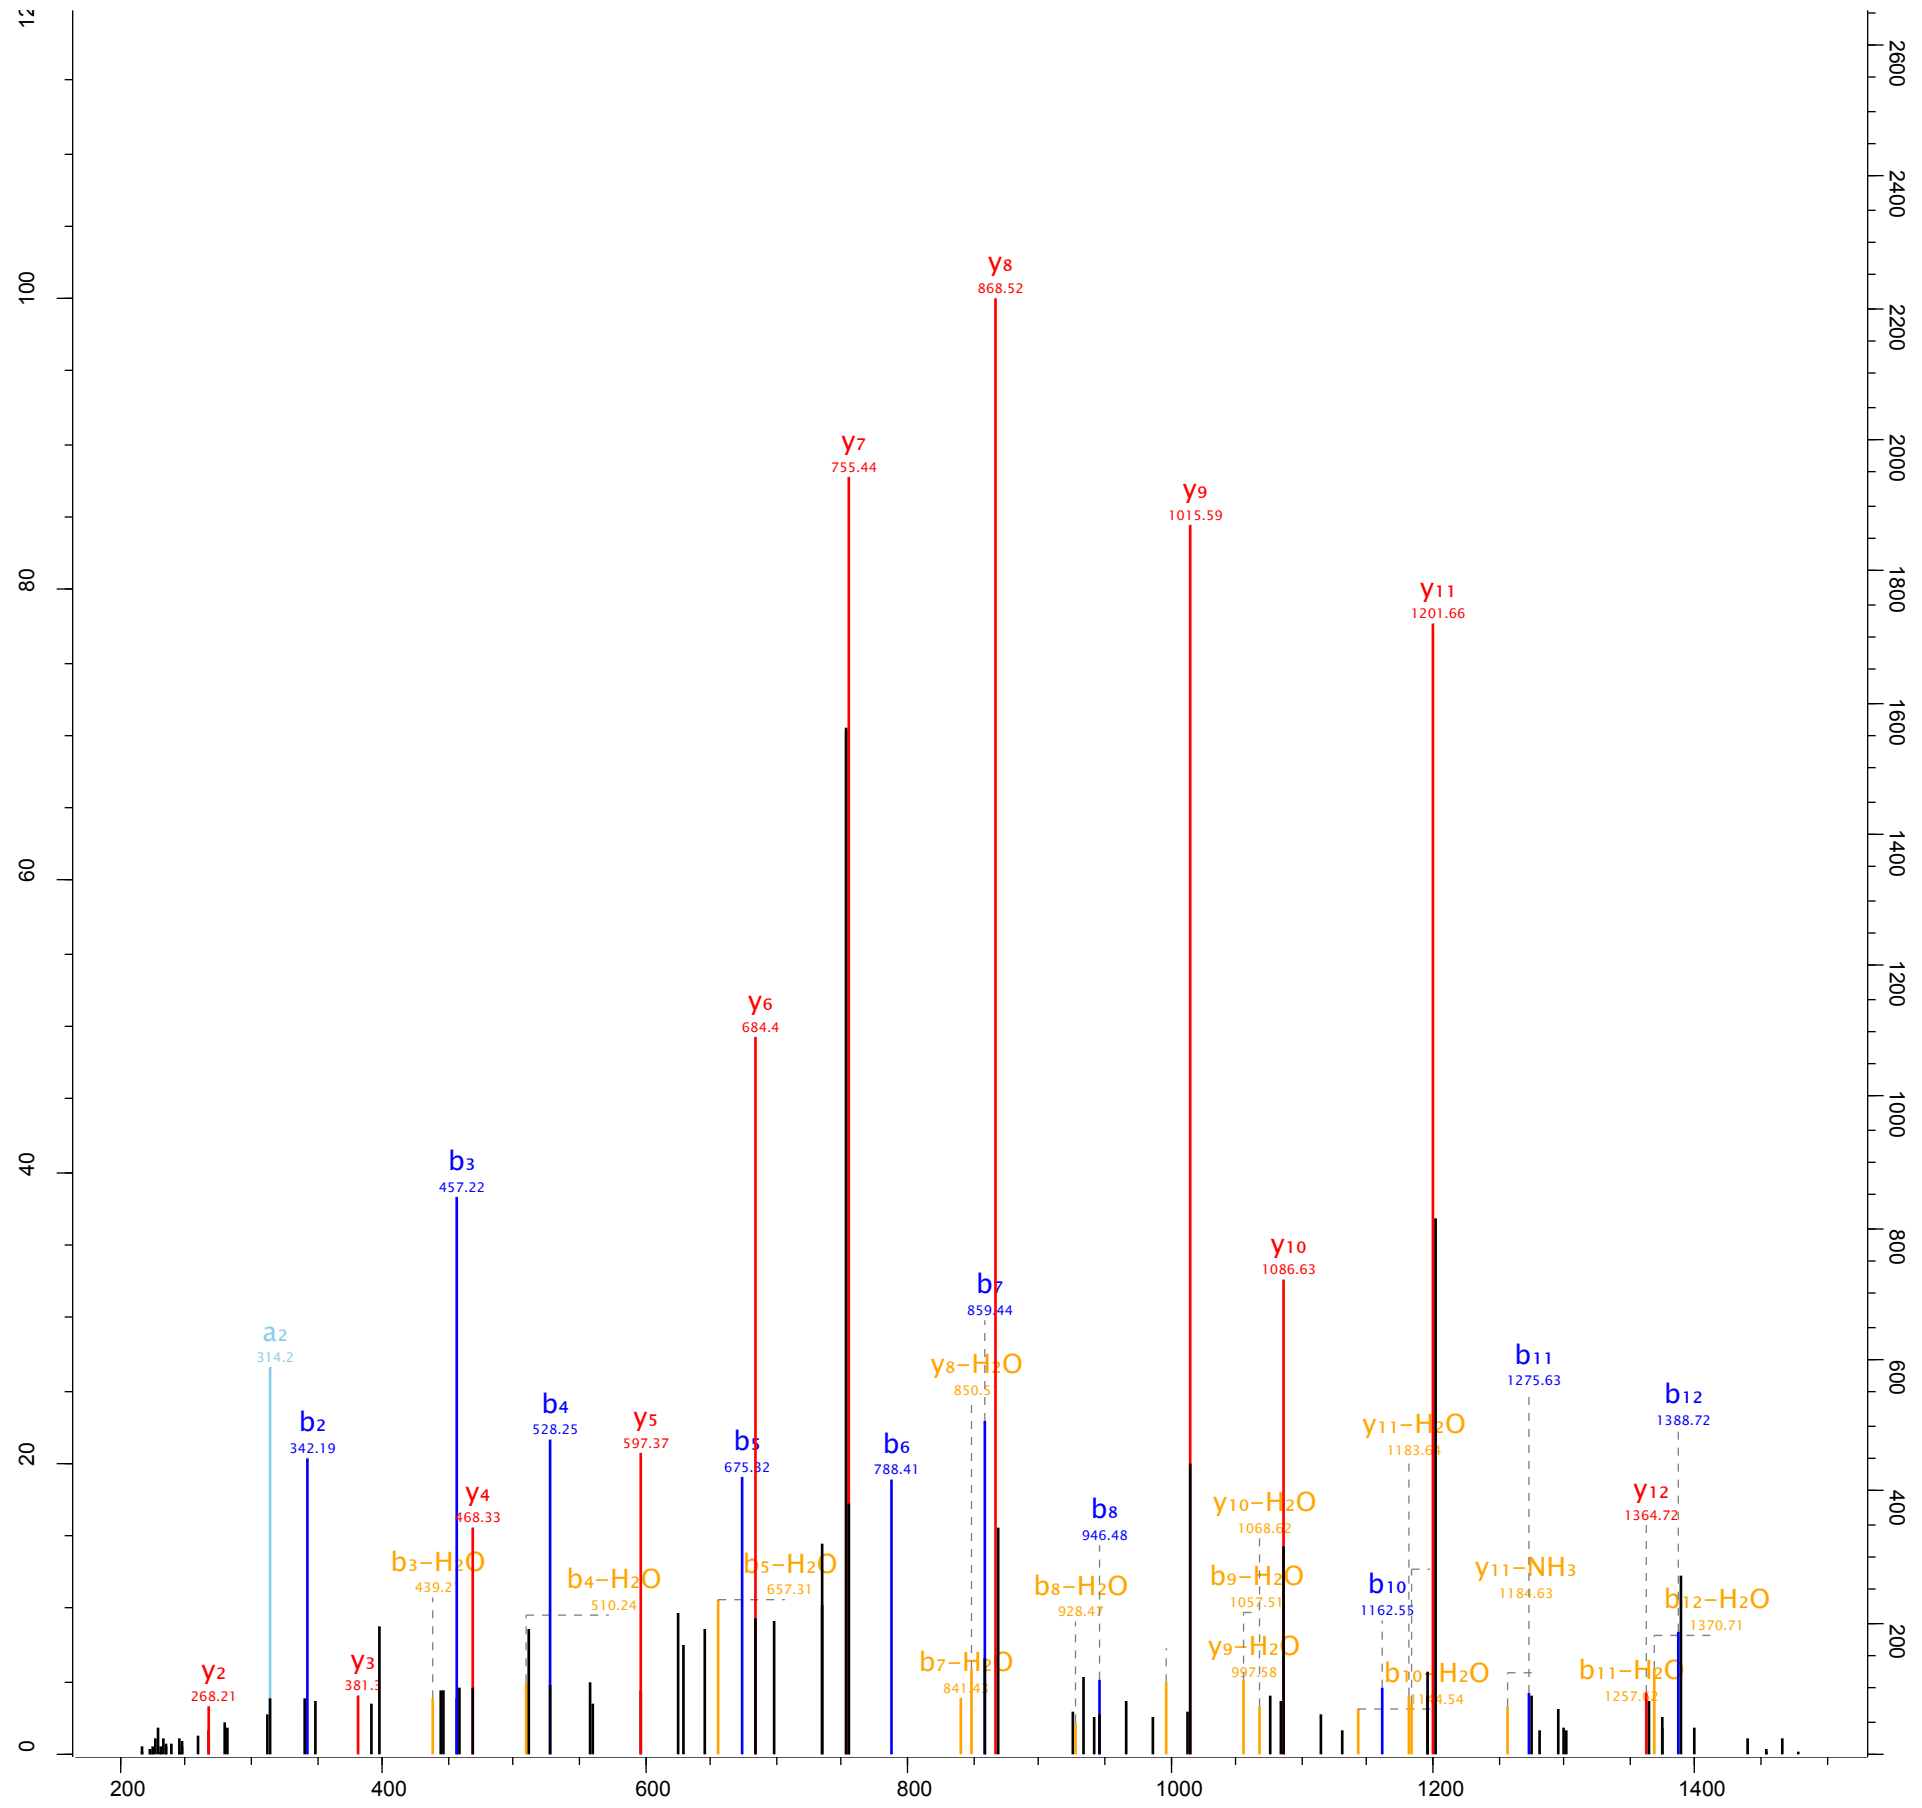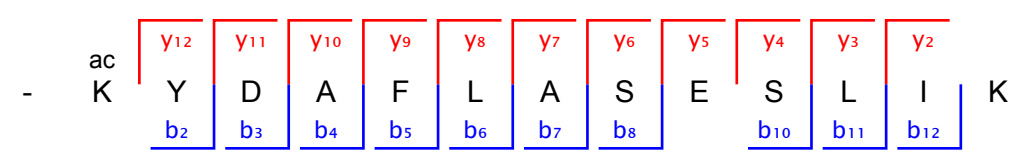

Raw file: 062513\_SCW\_II\_53\_4\_Vargas\_Enriched  
 Scan: 22415 Method: ITMS; CID Score: 114.54 m/z: 728.43 Gene names: Gnai2;Gnai1;Gnai3

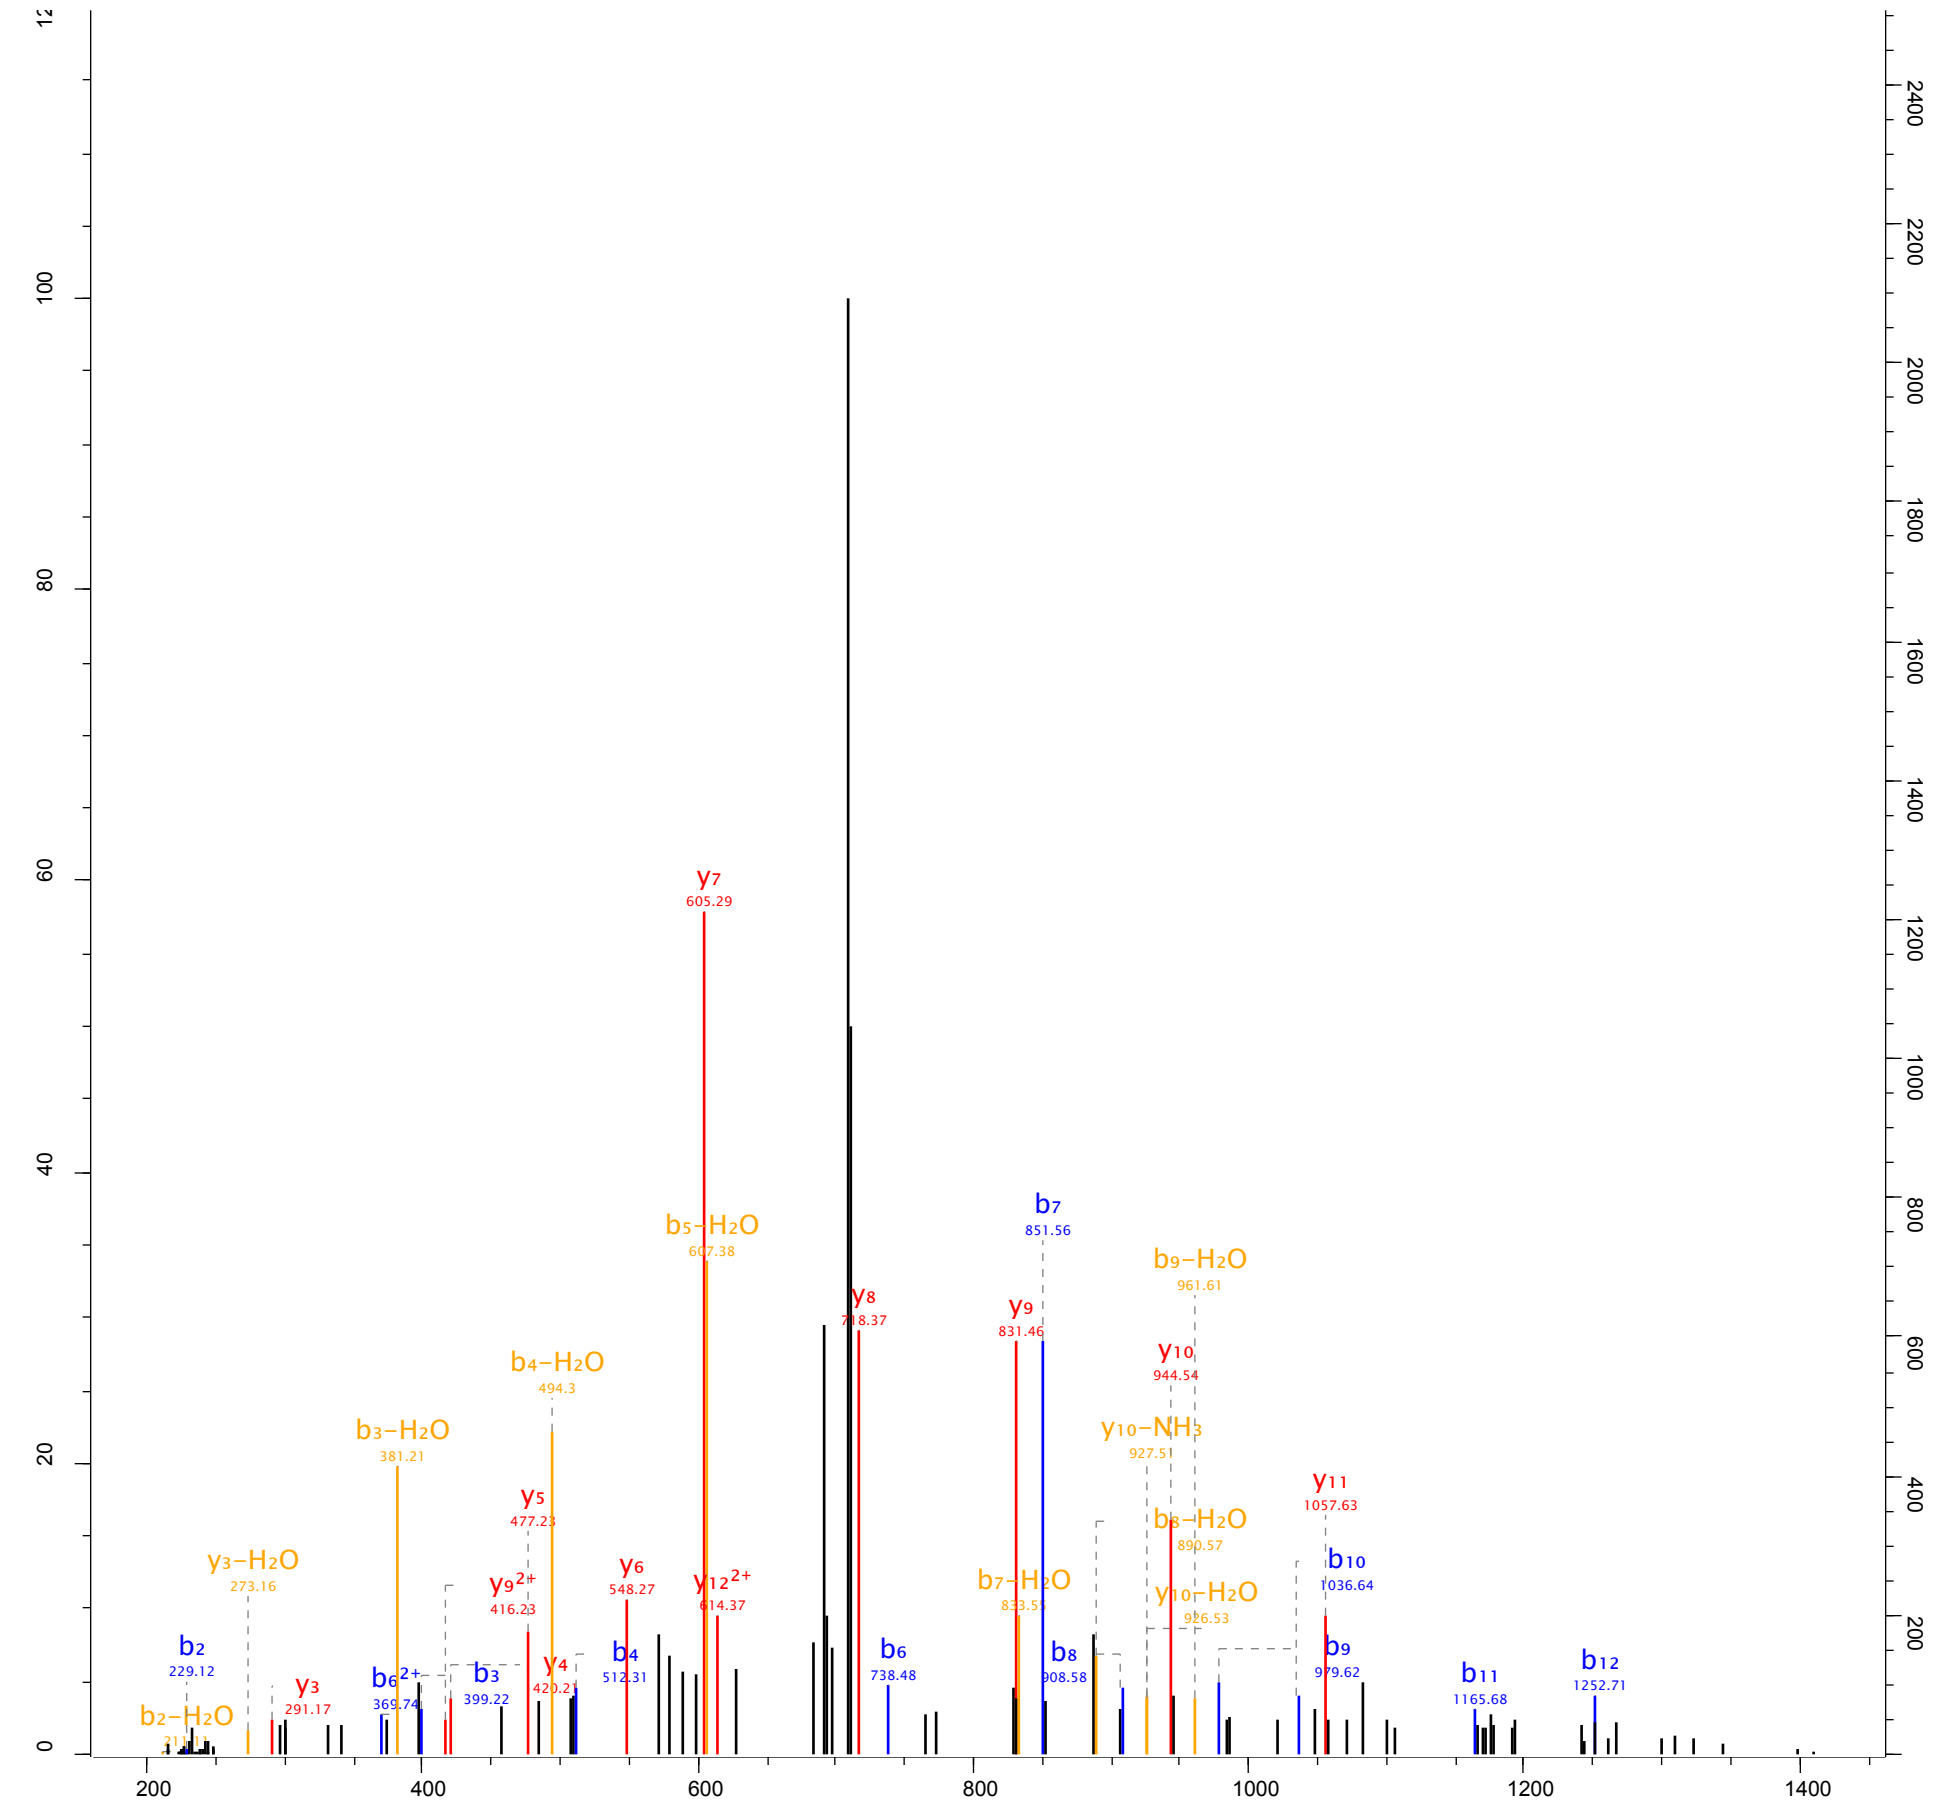

- E V y<sub>12</sub>2<sup>+</sup>  
ac  
K y<sub>11</sub>  
L y<sub>10</sub>  
L y<sub>9</sub>  
L y<sub>8</sub>  
L y<sub>7</sub>  
G y<sub>6</sub>  
A y<sub>5</sub>  
G y<sub>4</sub>  
E y<sub>3</sub>  
S G K -

b<sub>2</sub> b<sub>3</sub> b<sub>4</sub> b<sub>6</sub> b<sub>7</sub> b<sub>8</sub> b<sub>9</sub> b<sub>10</sub> b<sub>11</sub> b<sub>12</sub>

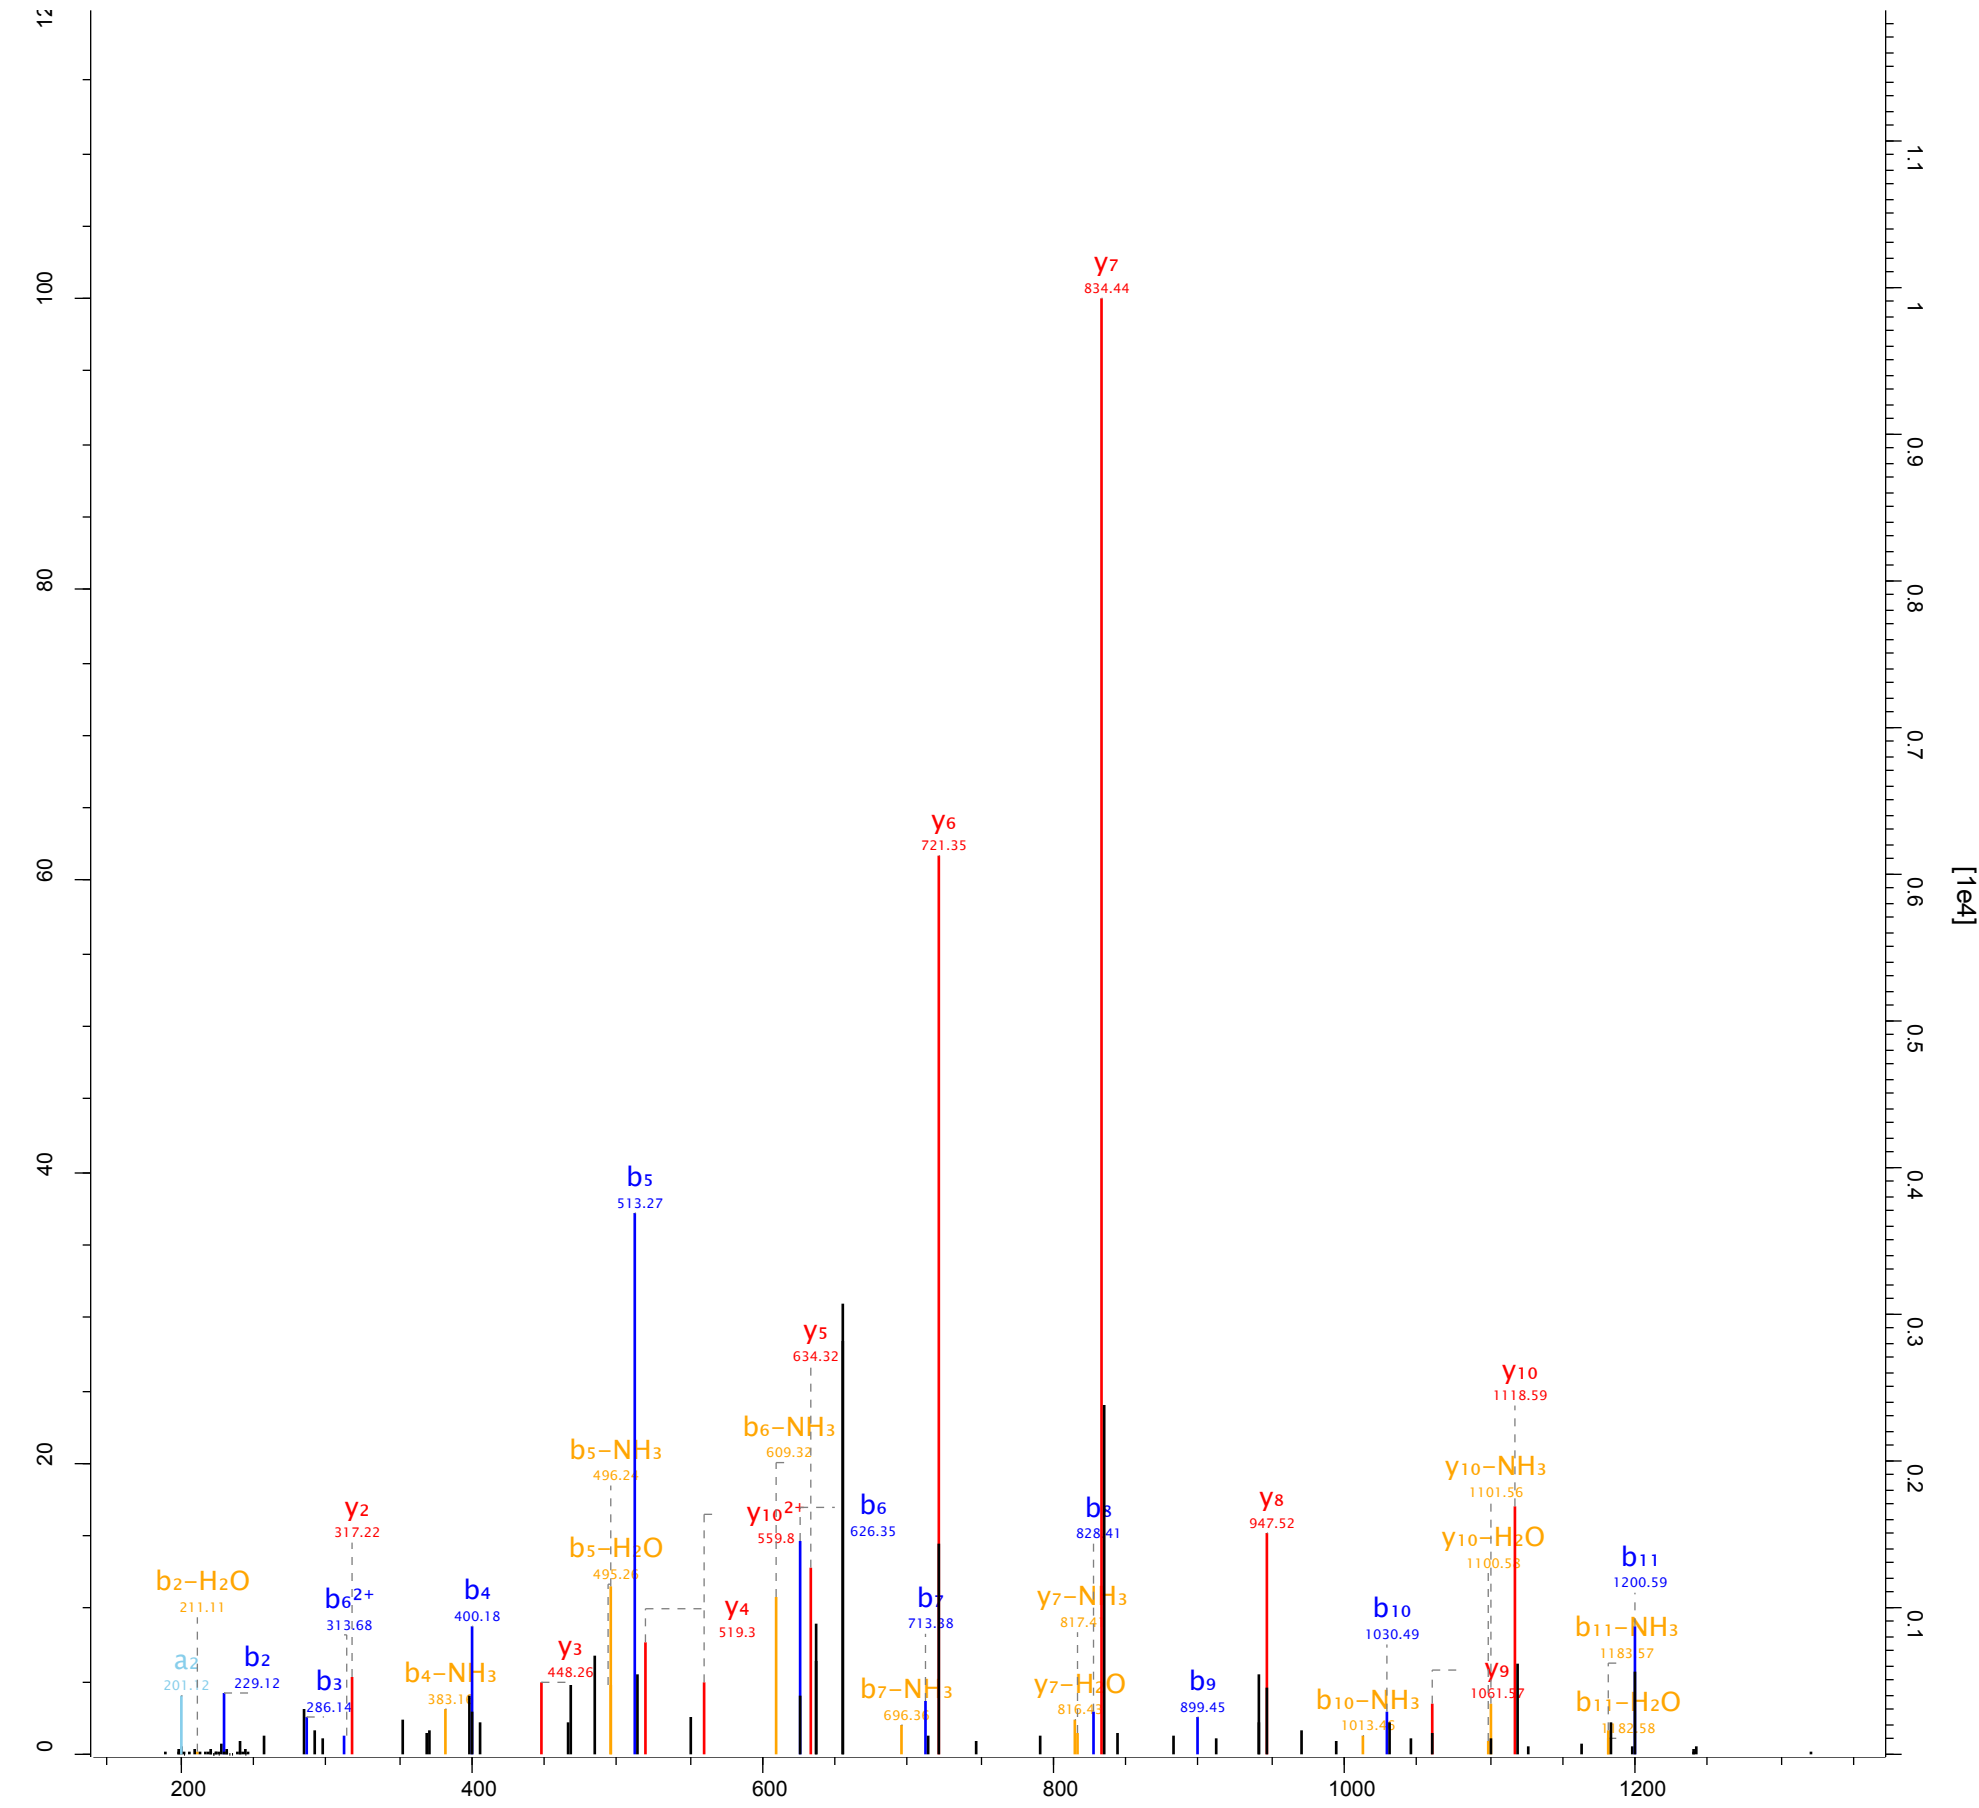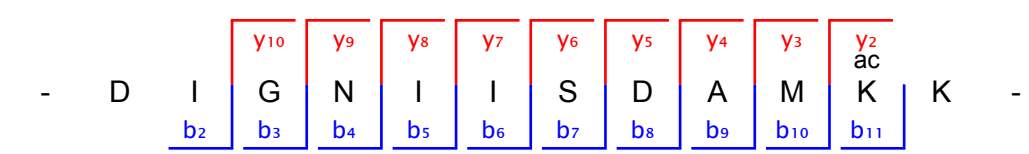

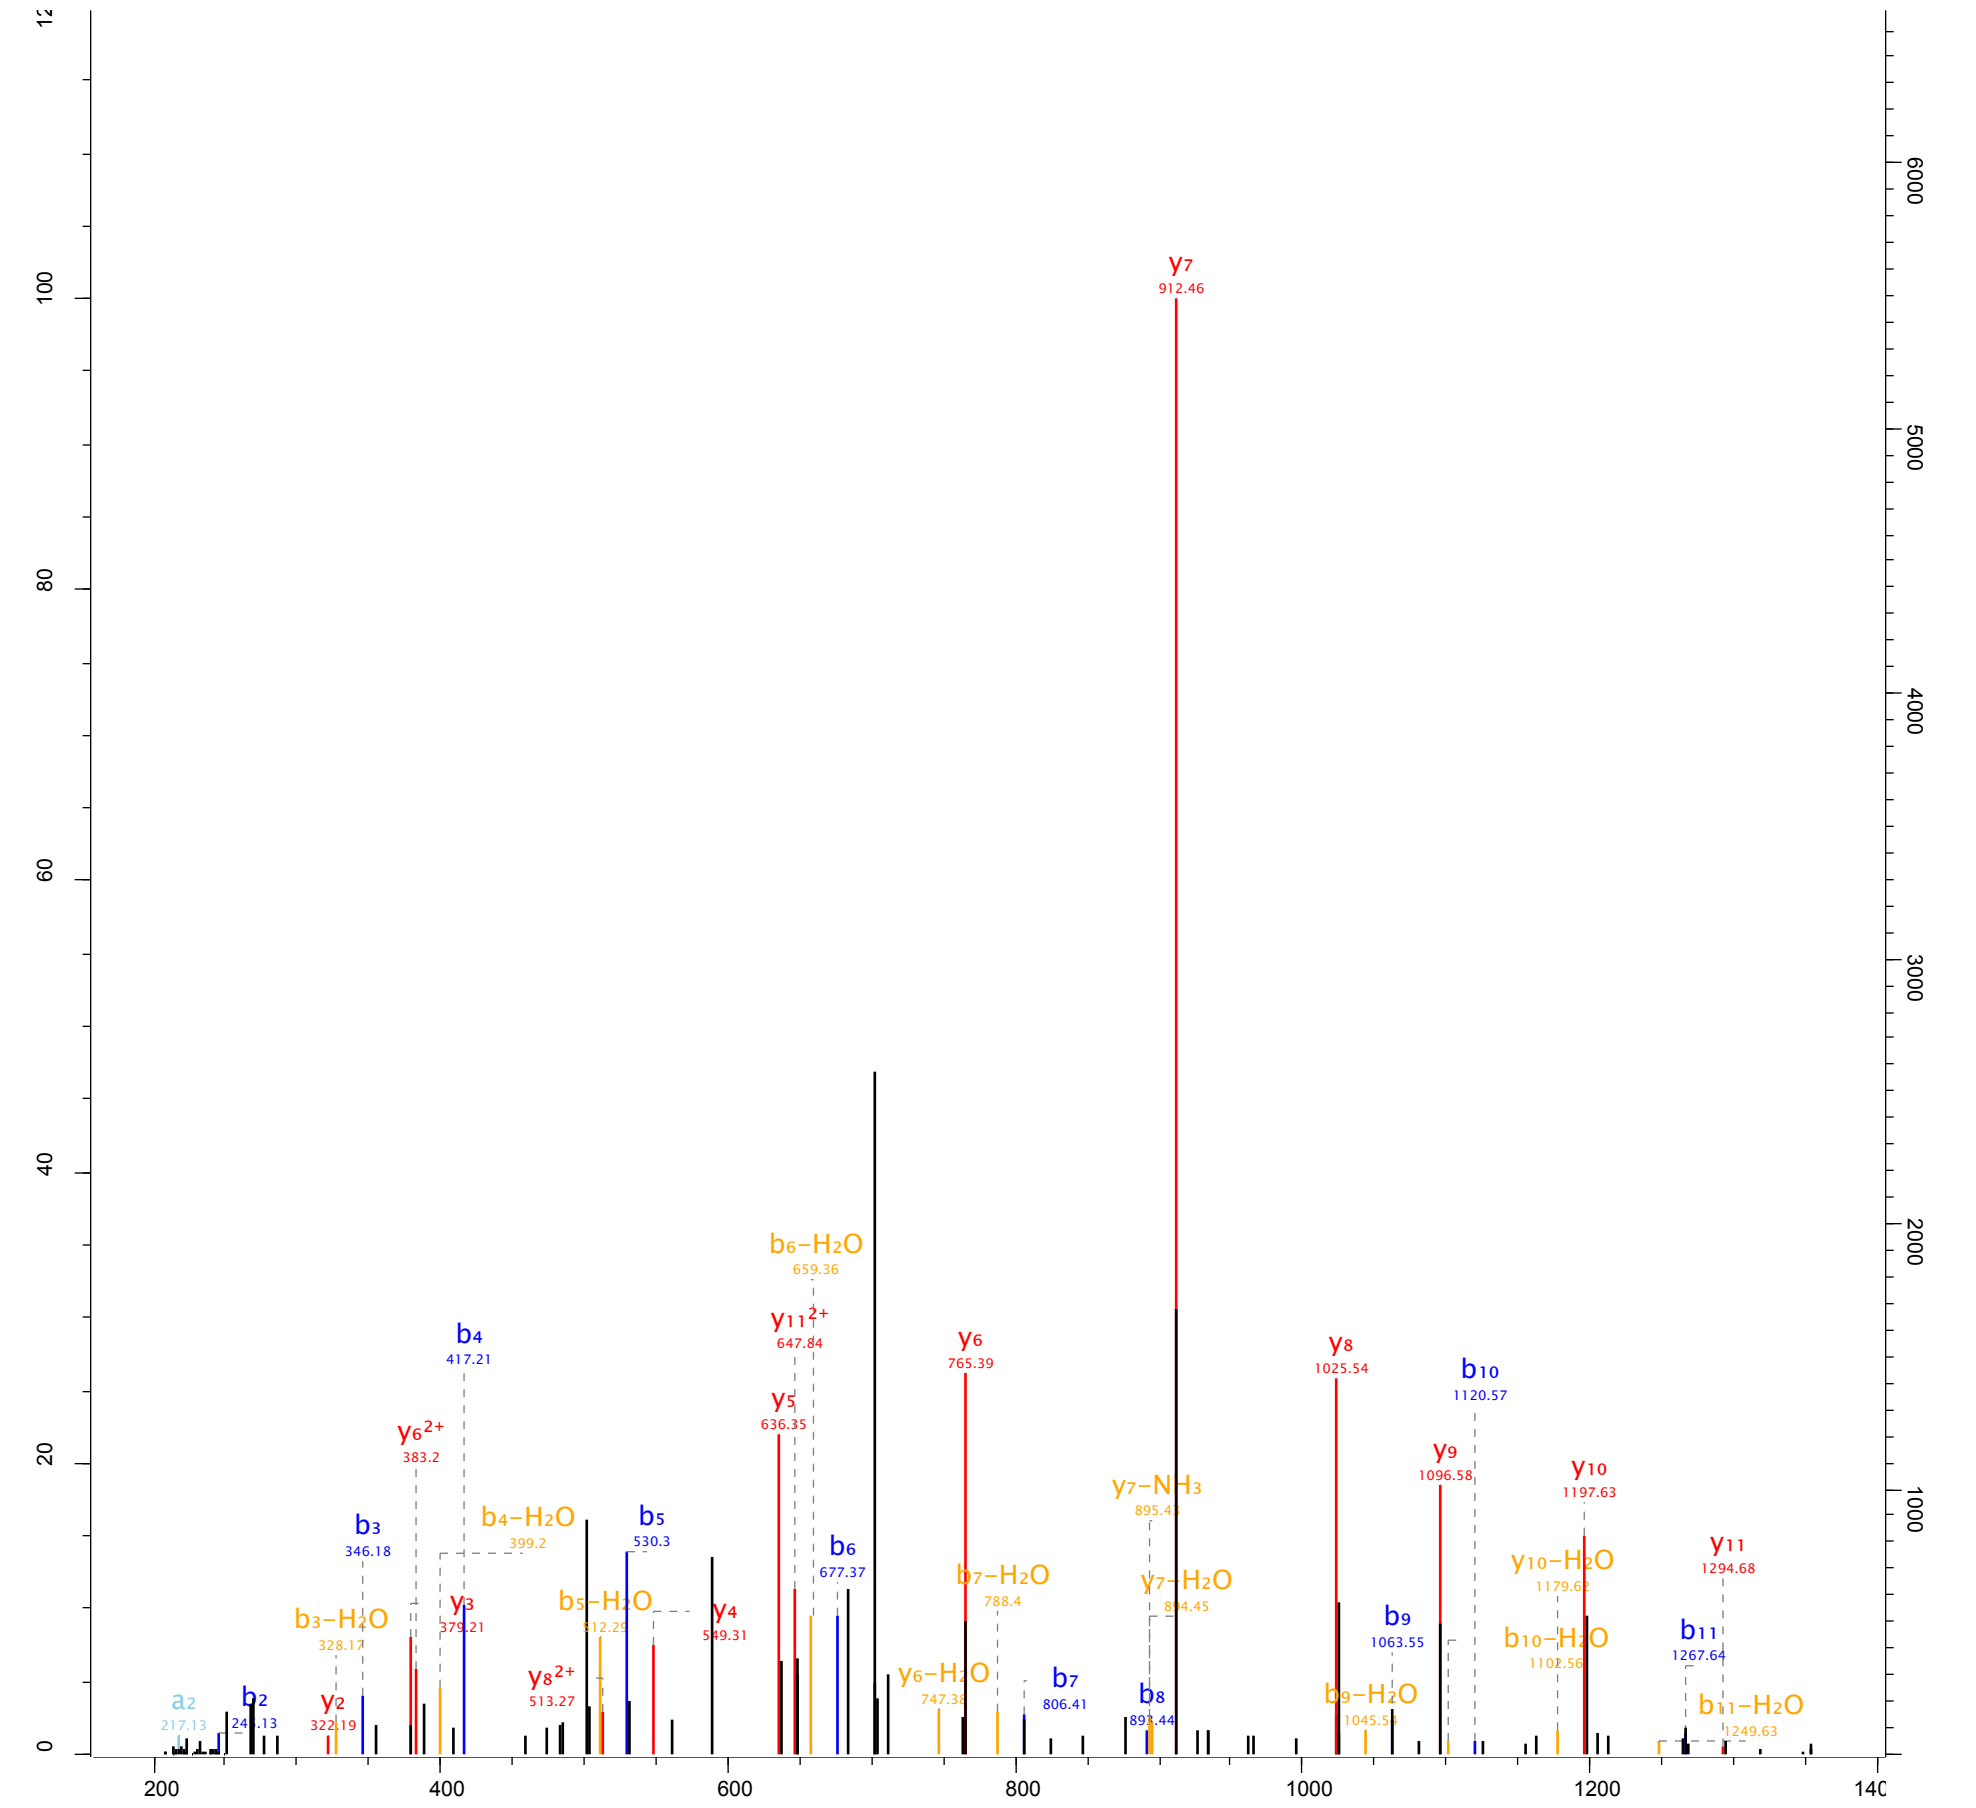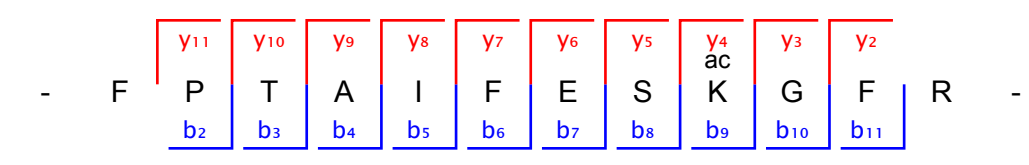

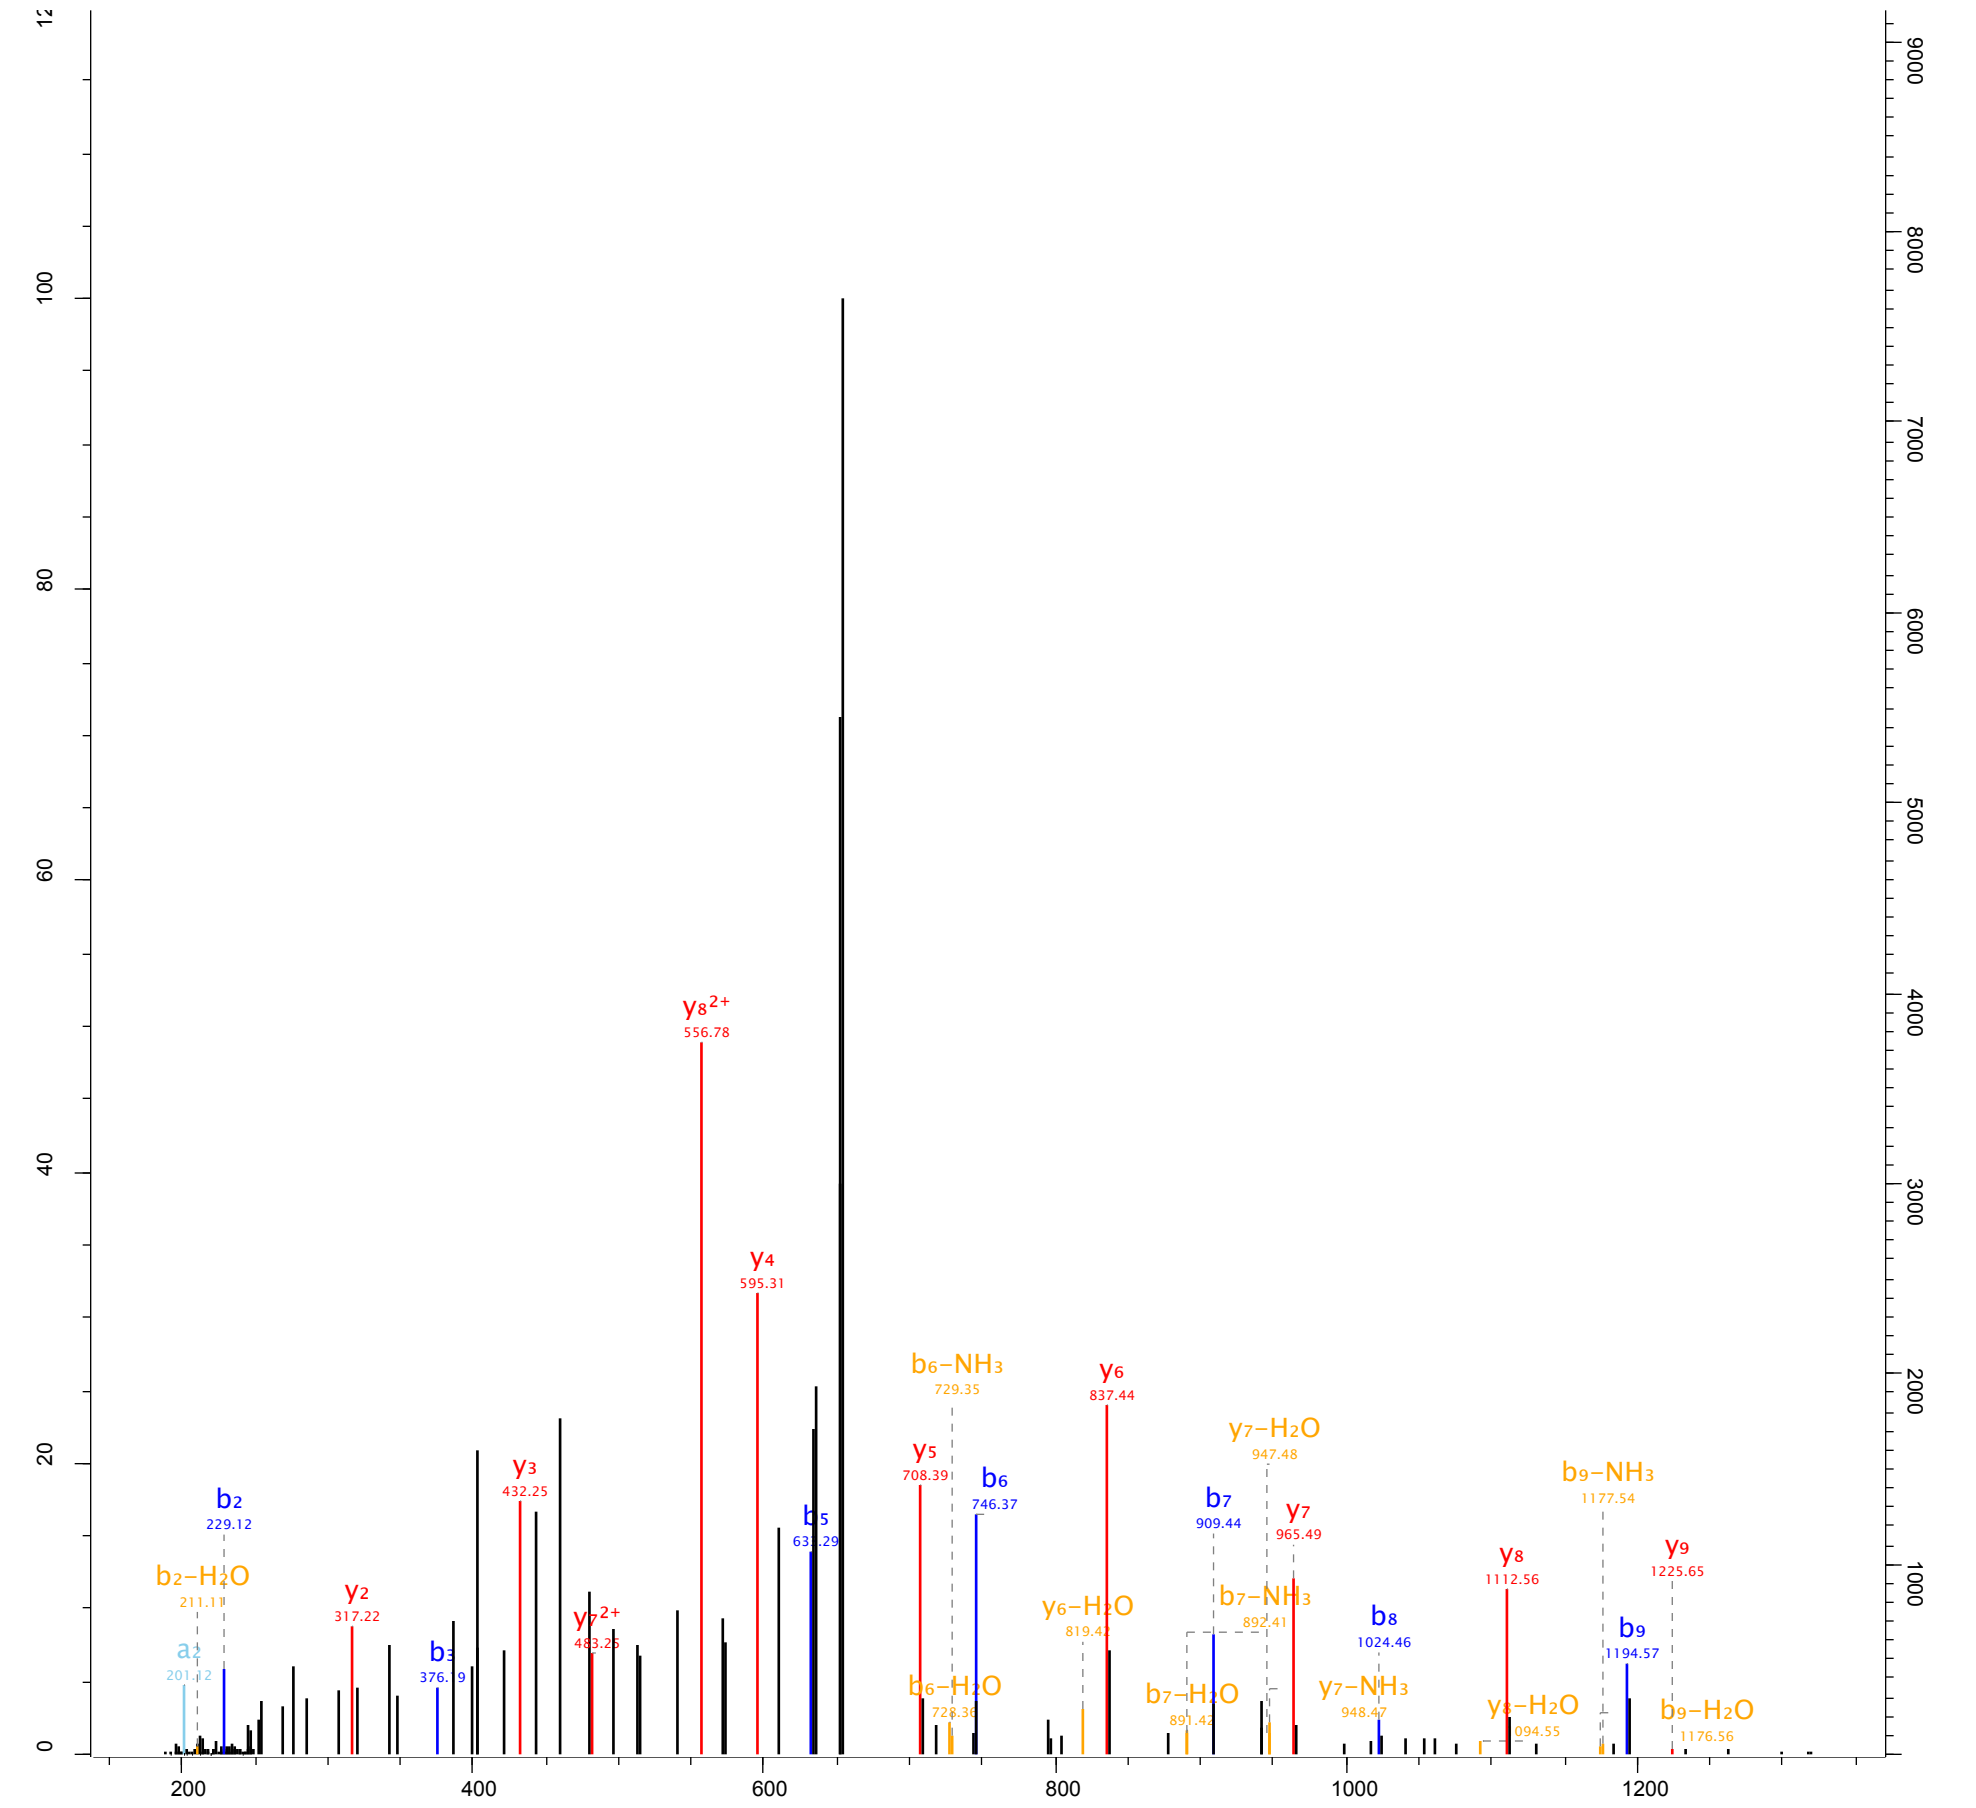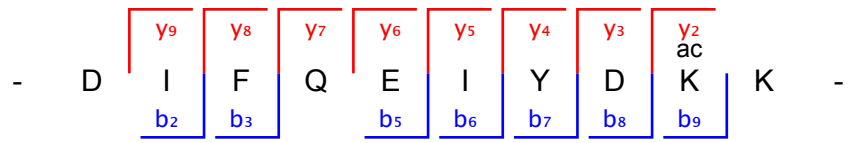

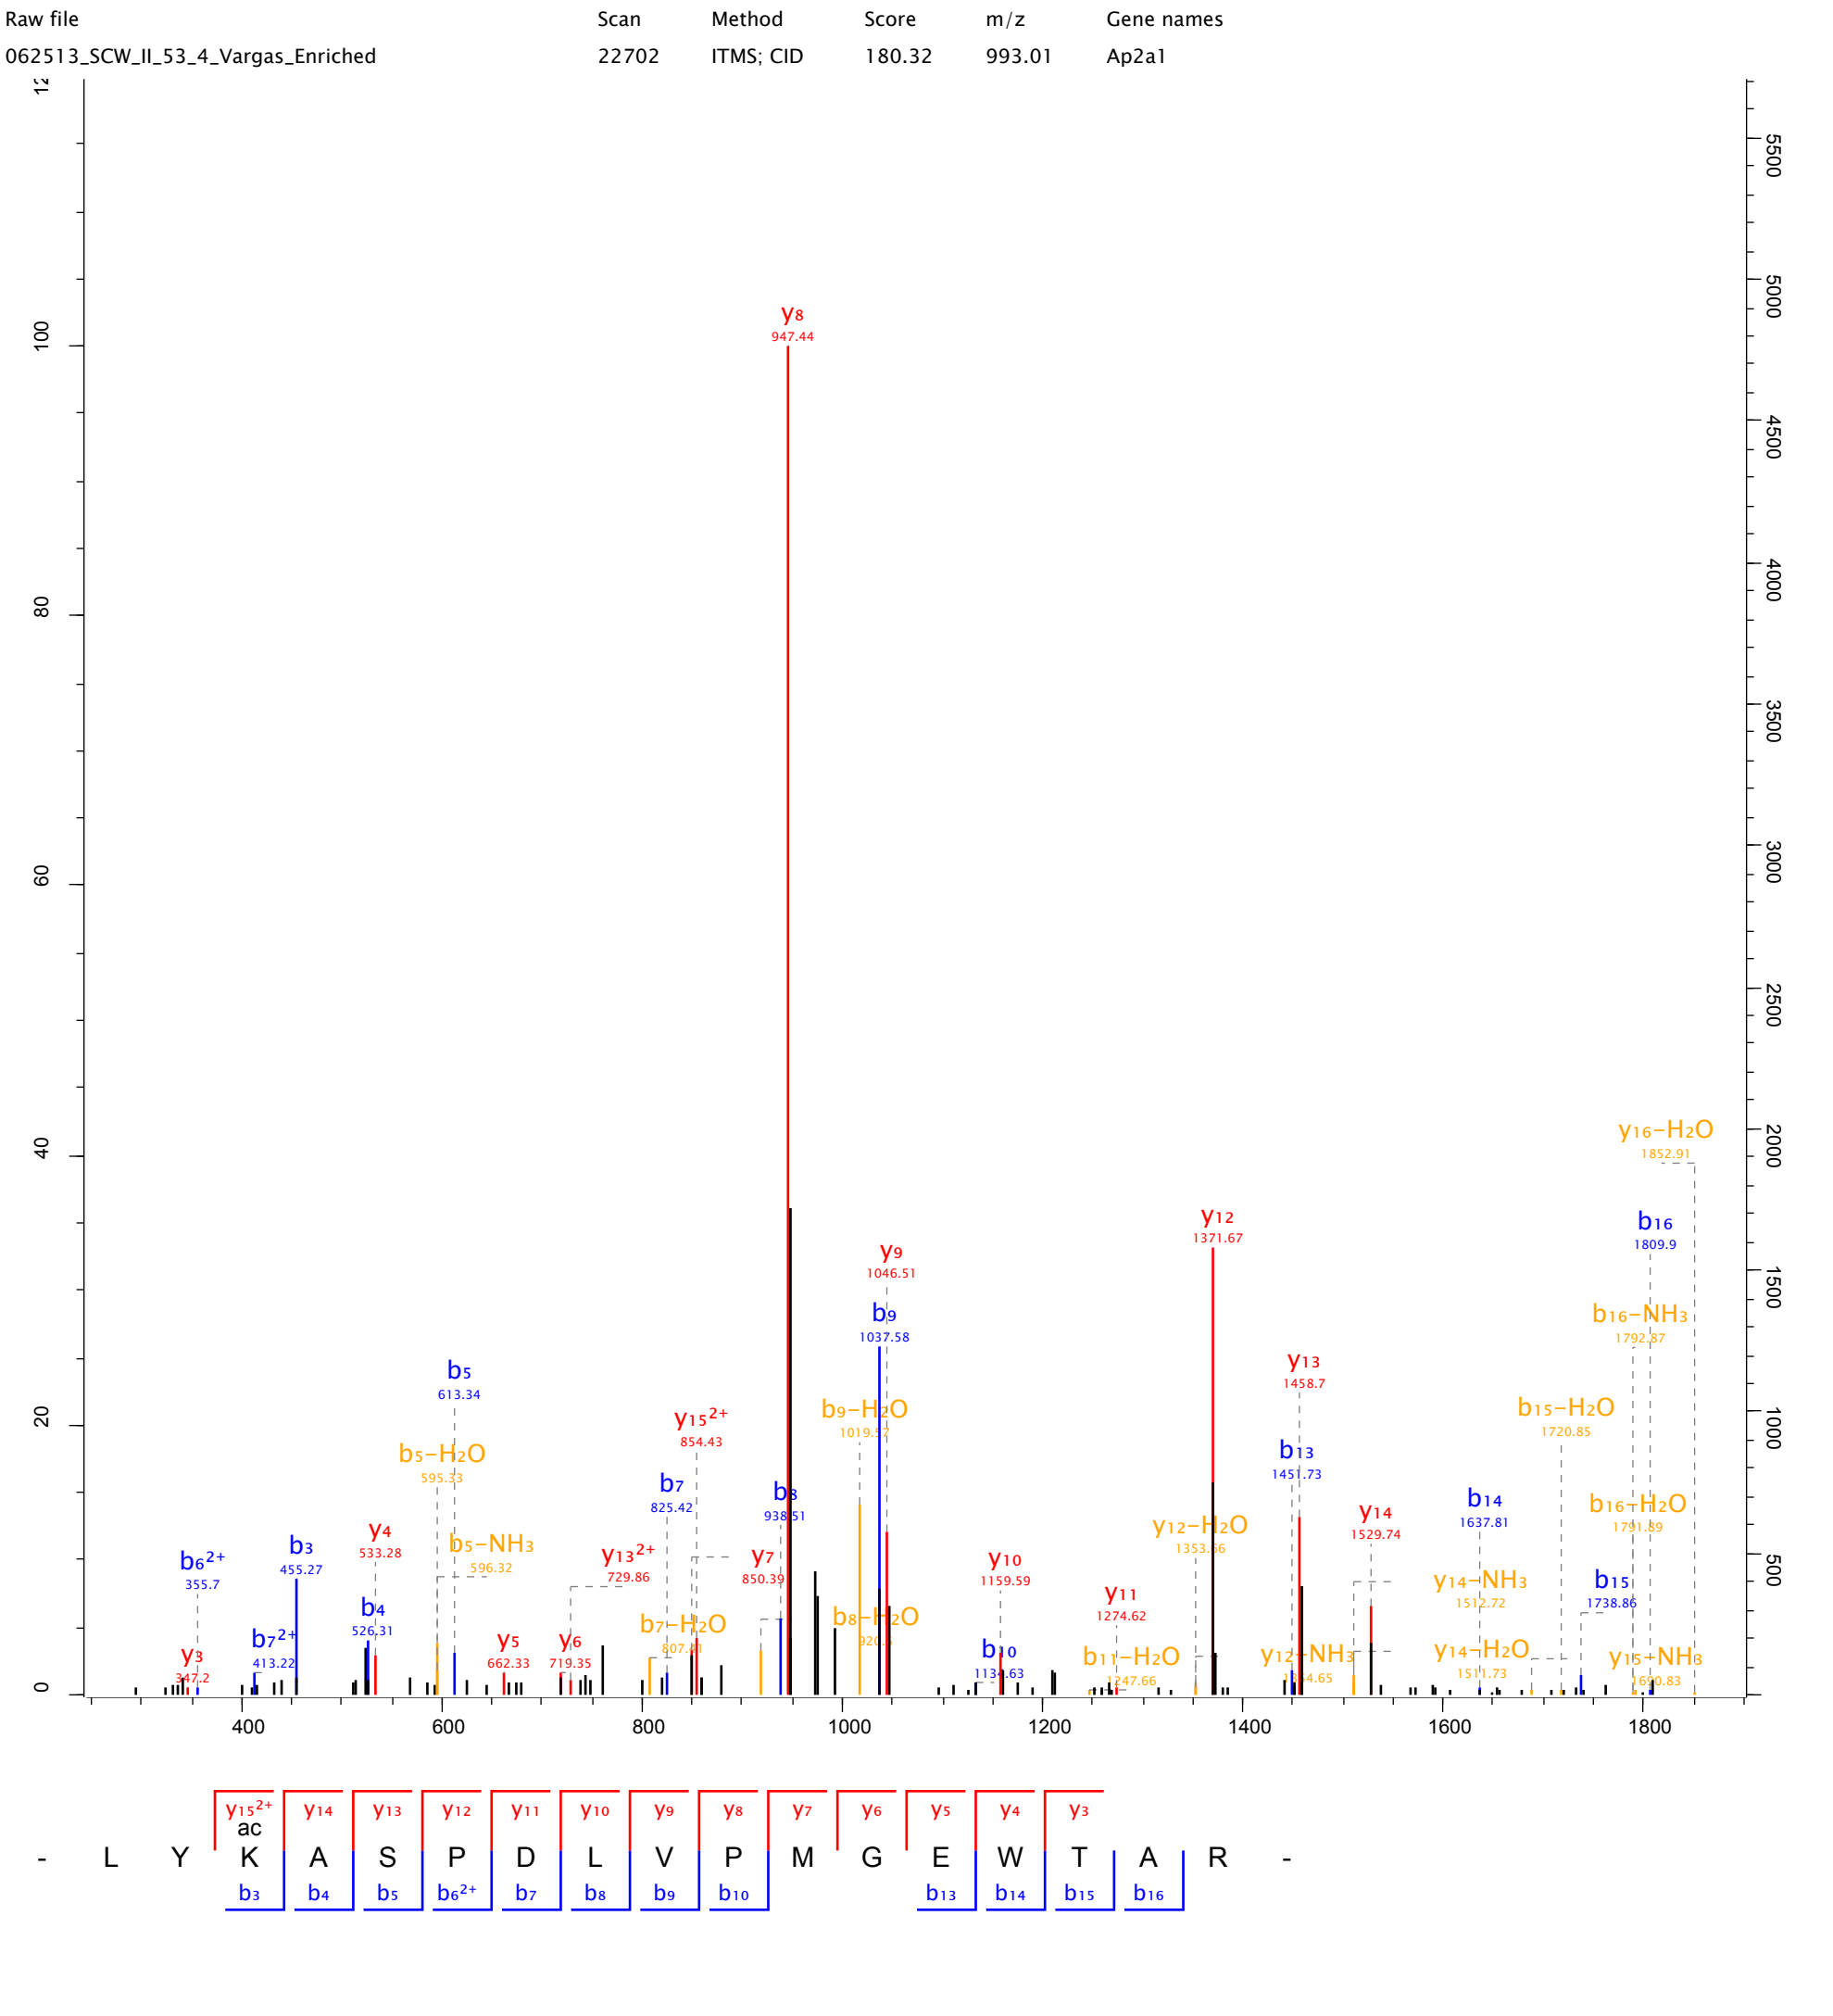

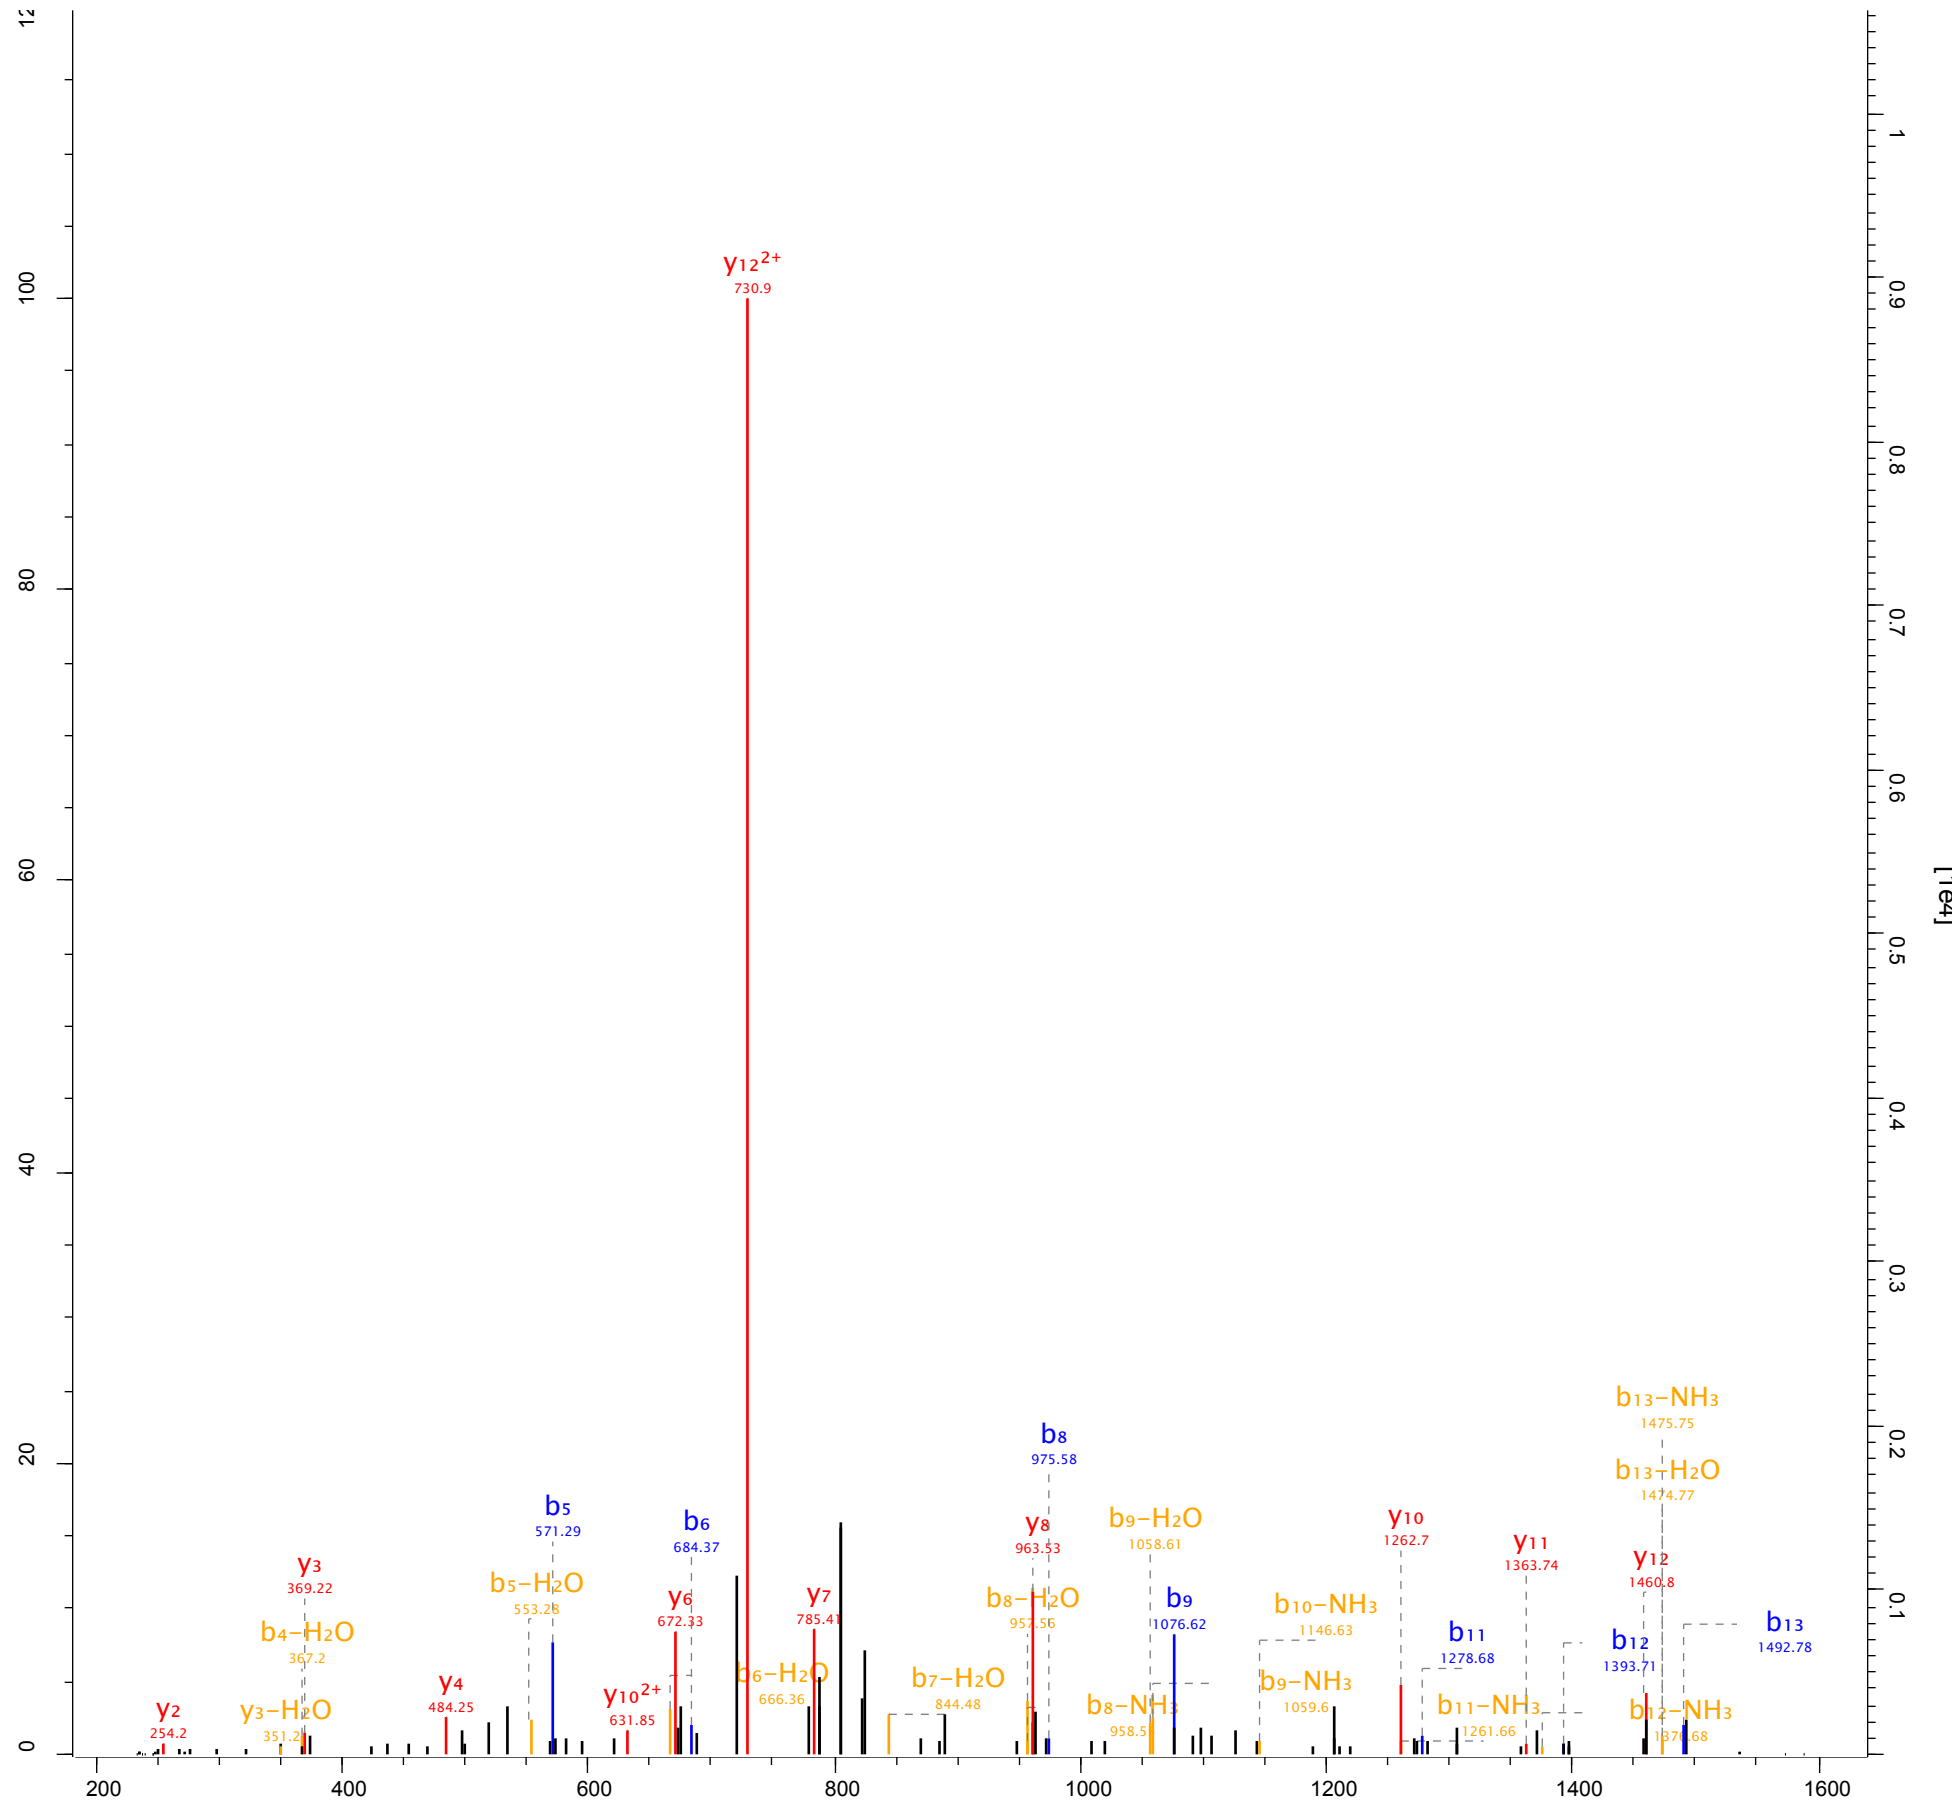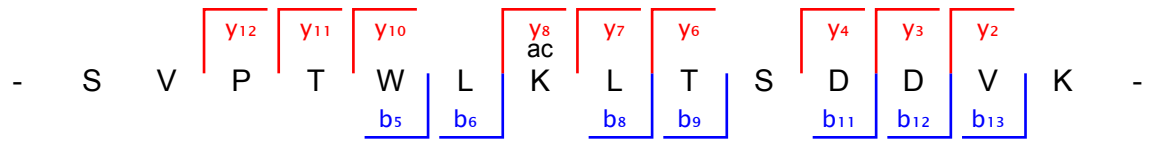



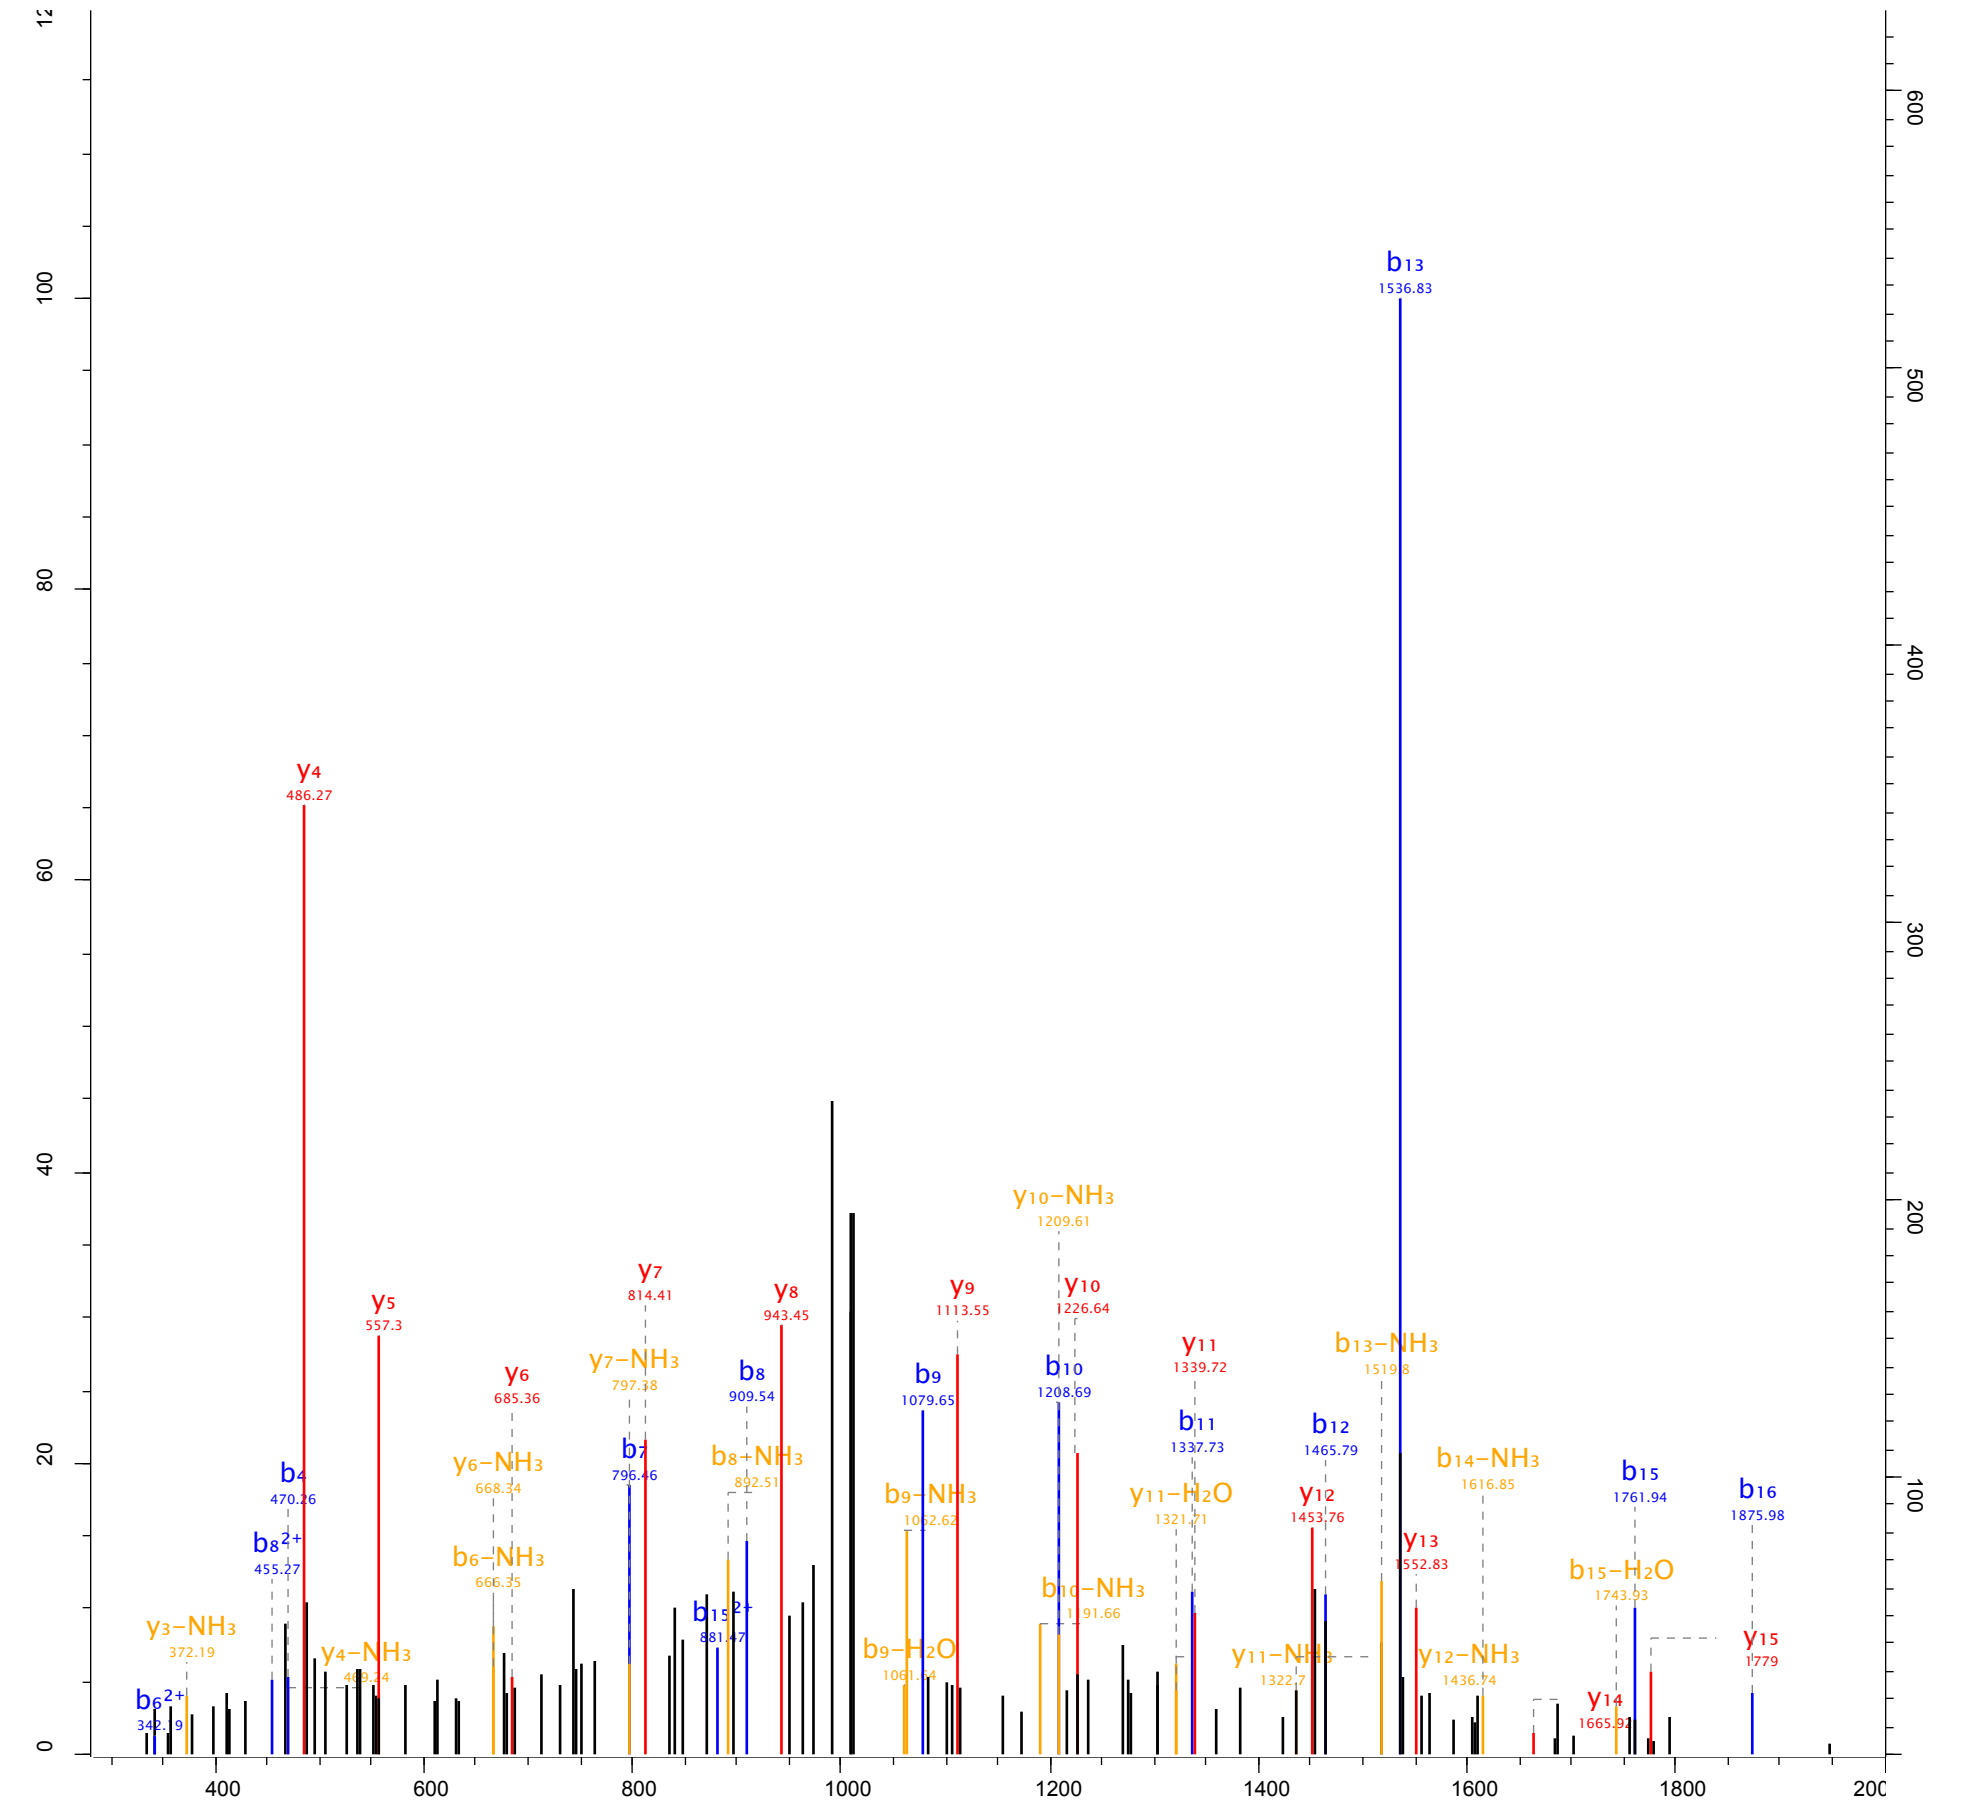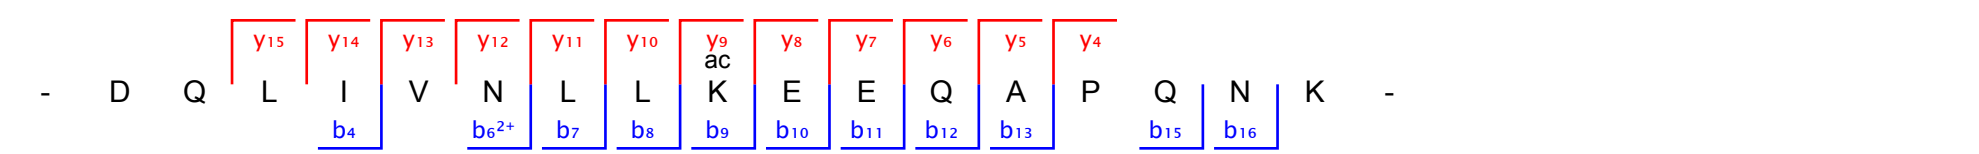

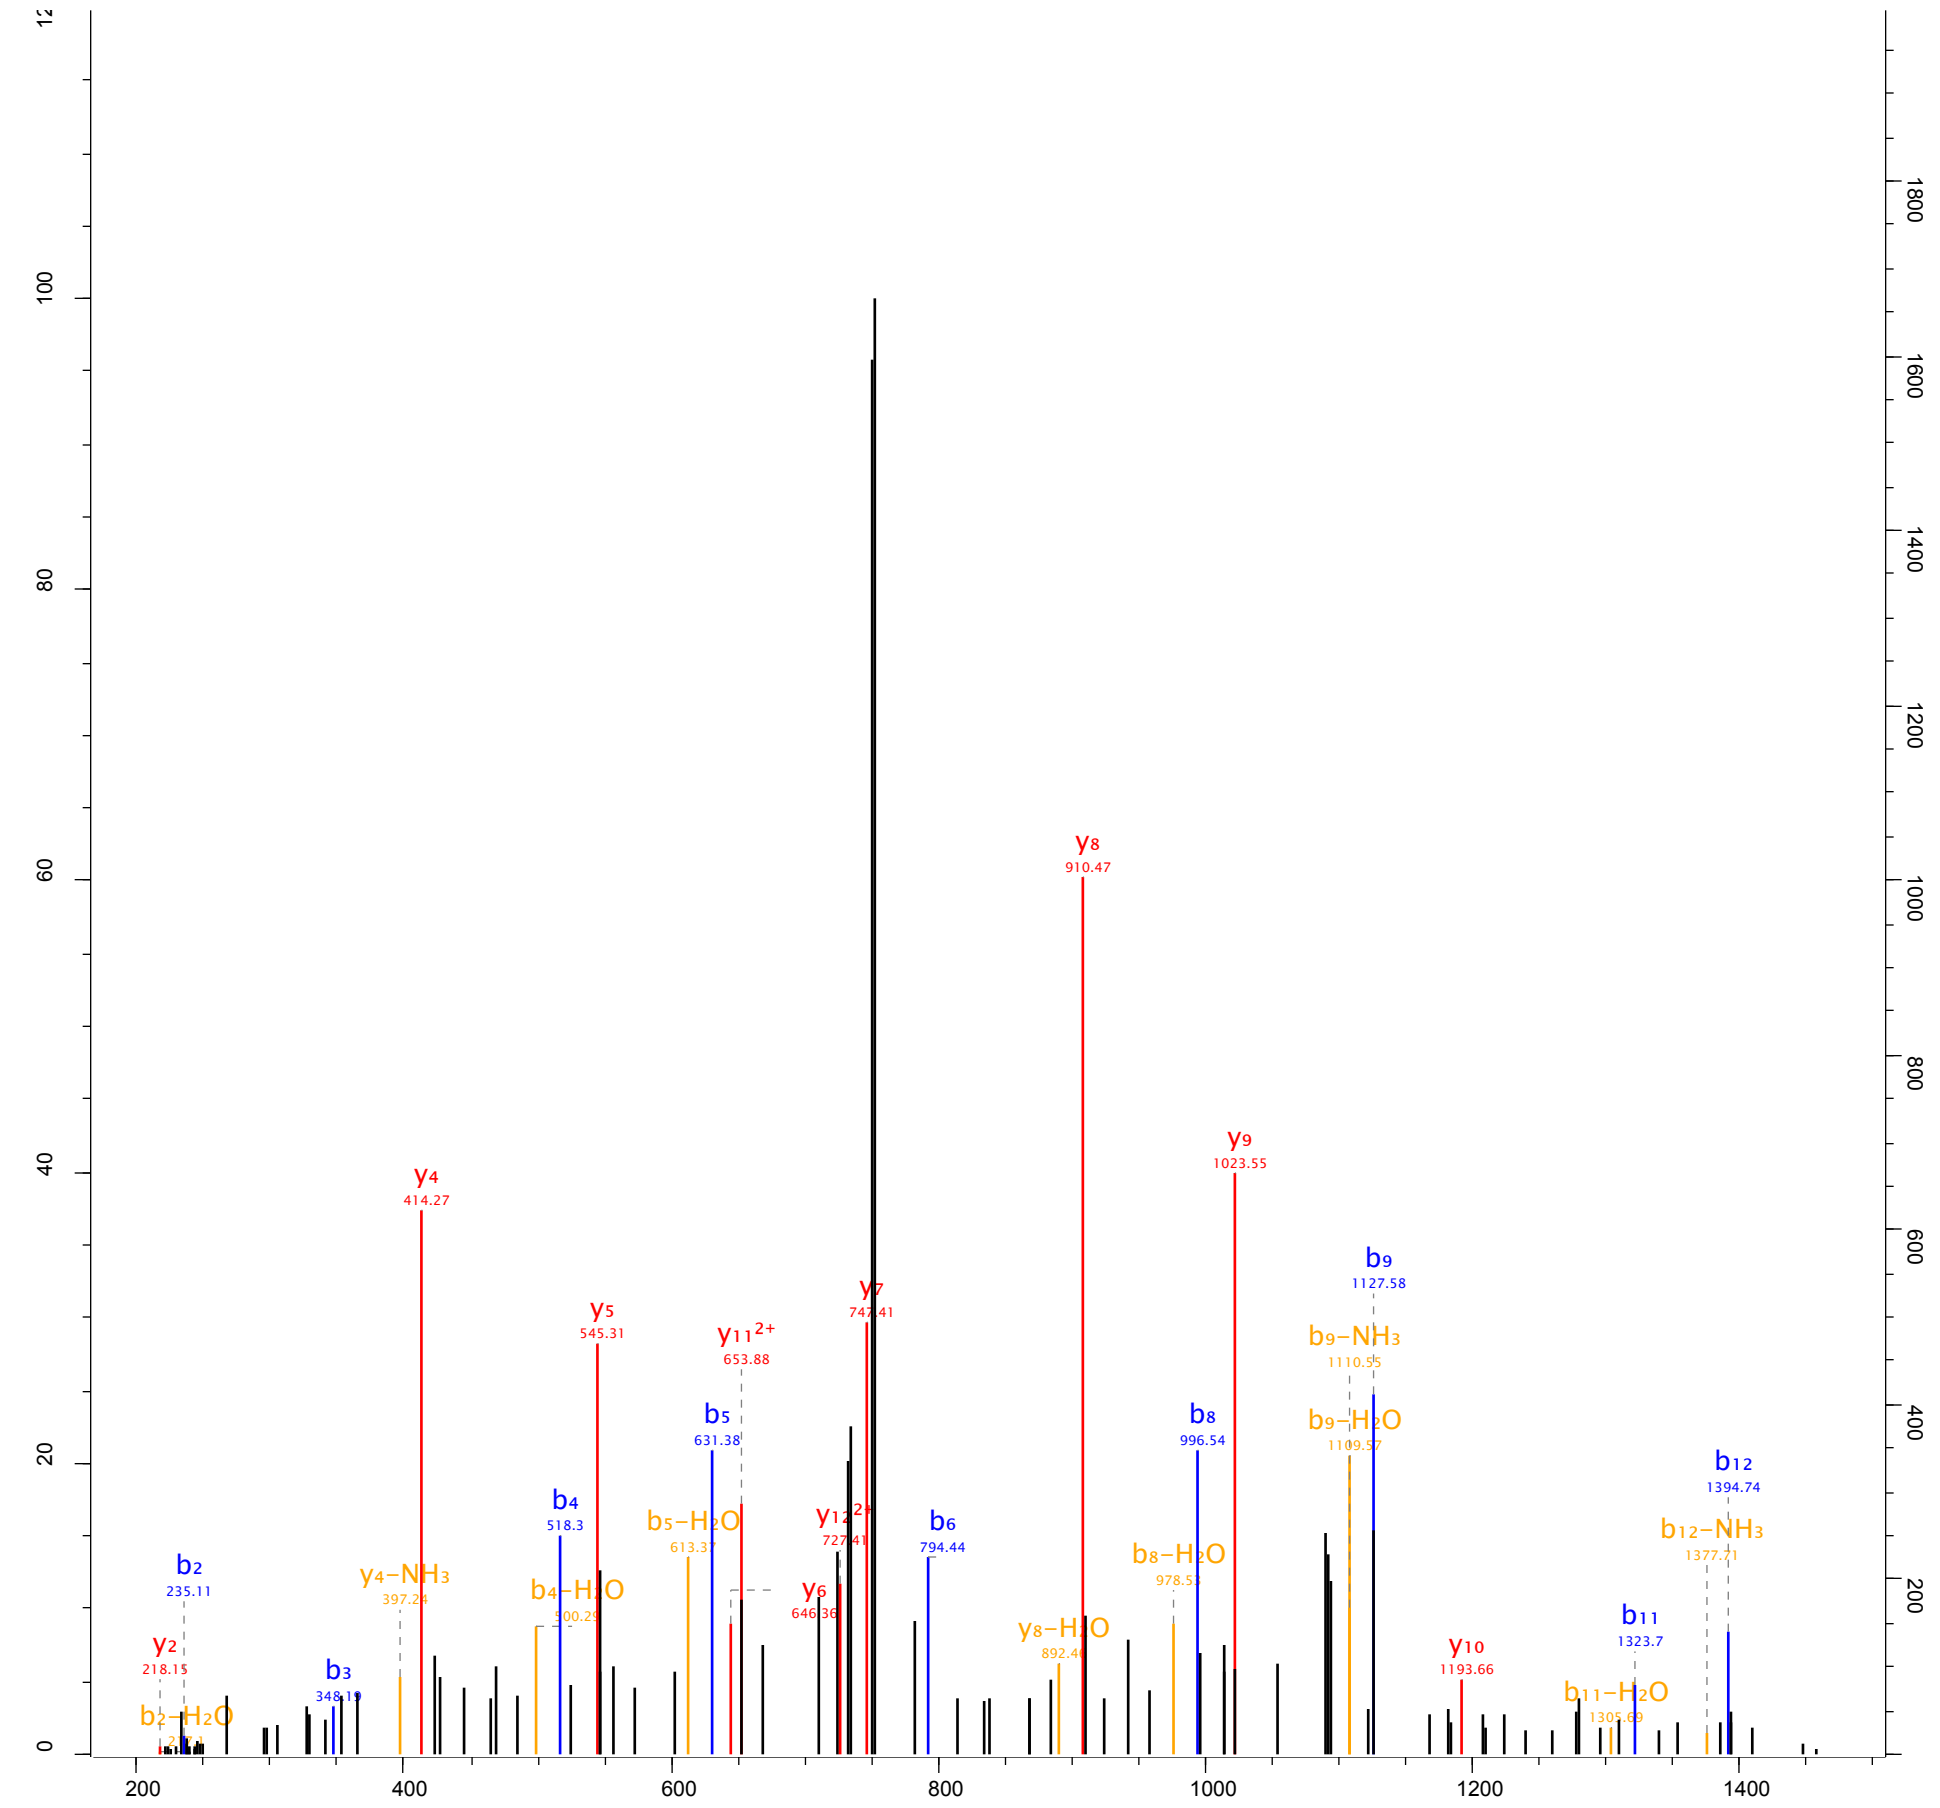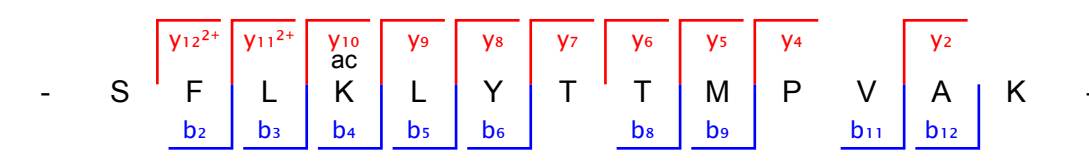

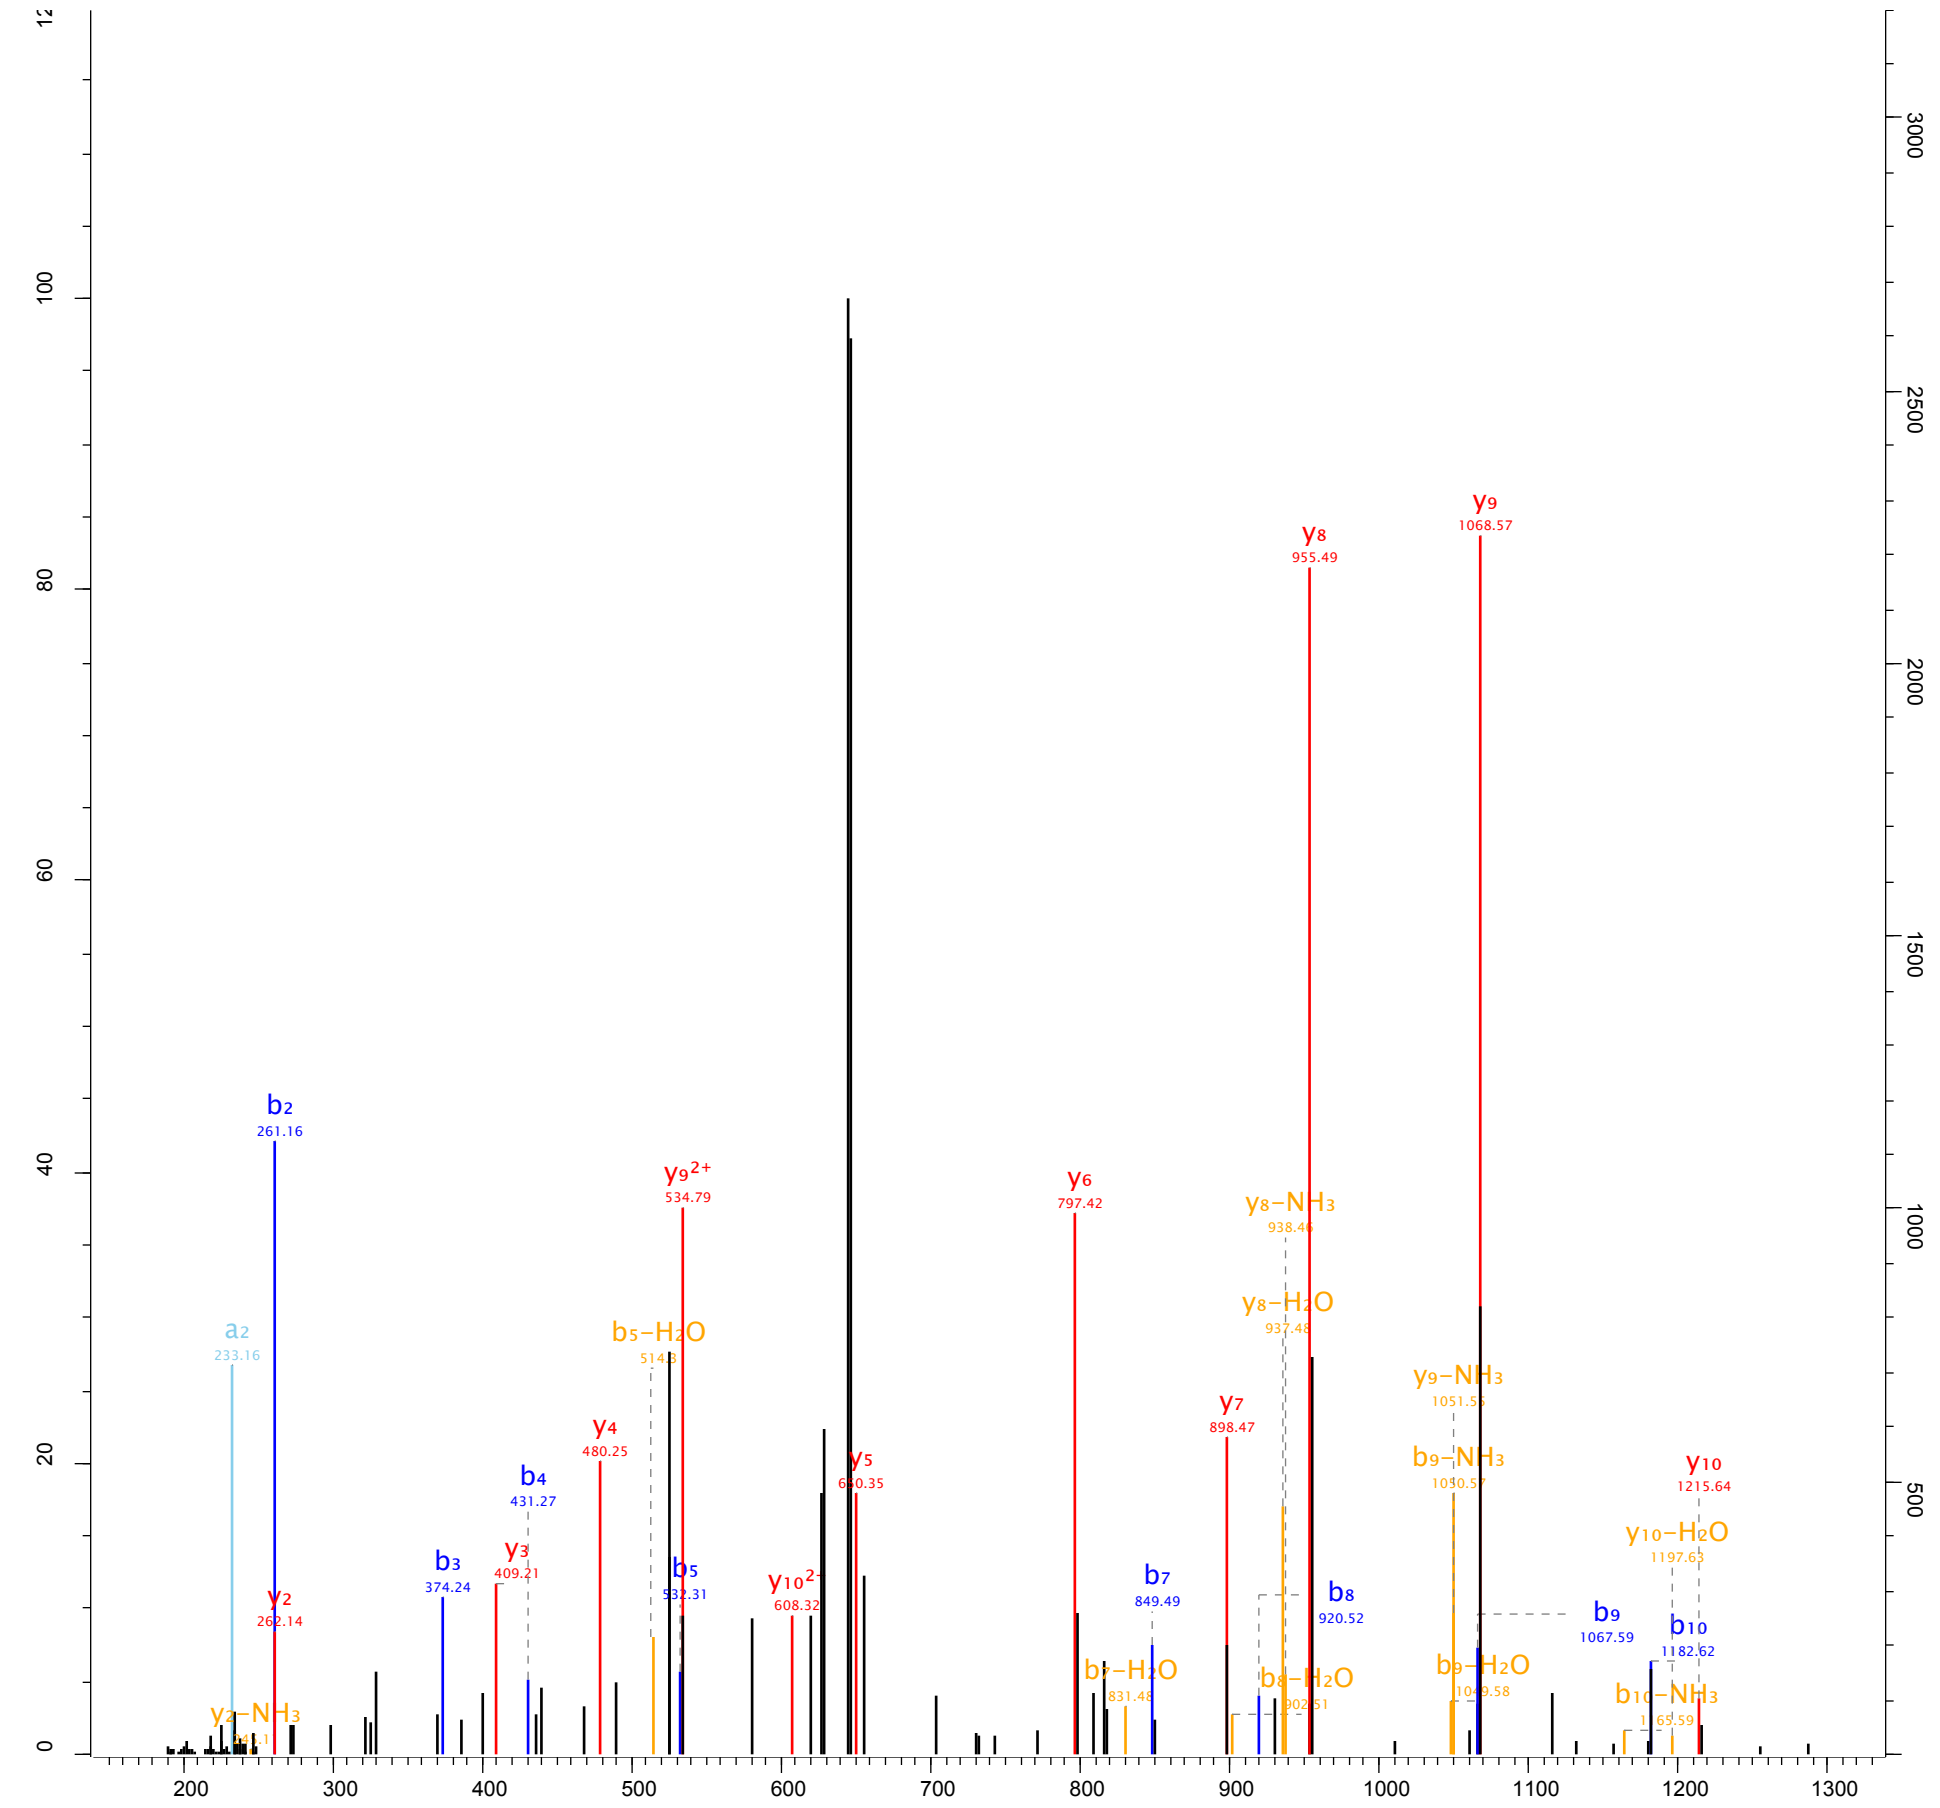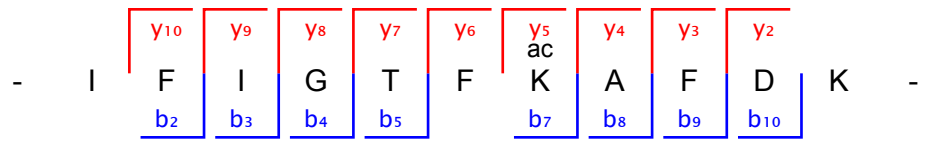

062513\_SCW\_II\_53\_4\_Vargas\_Enriched

23158 ITMS; CID 95.2 721.42 Gnao1

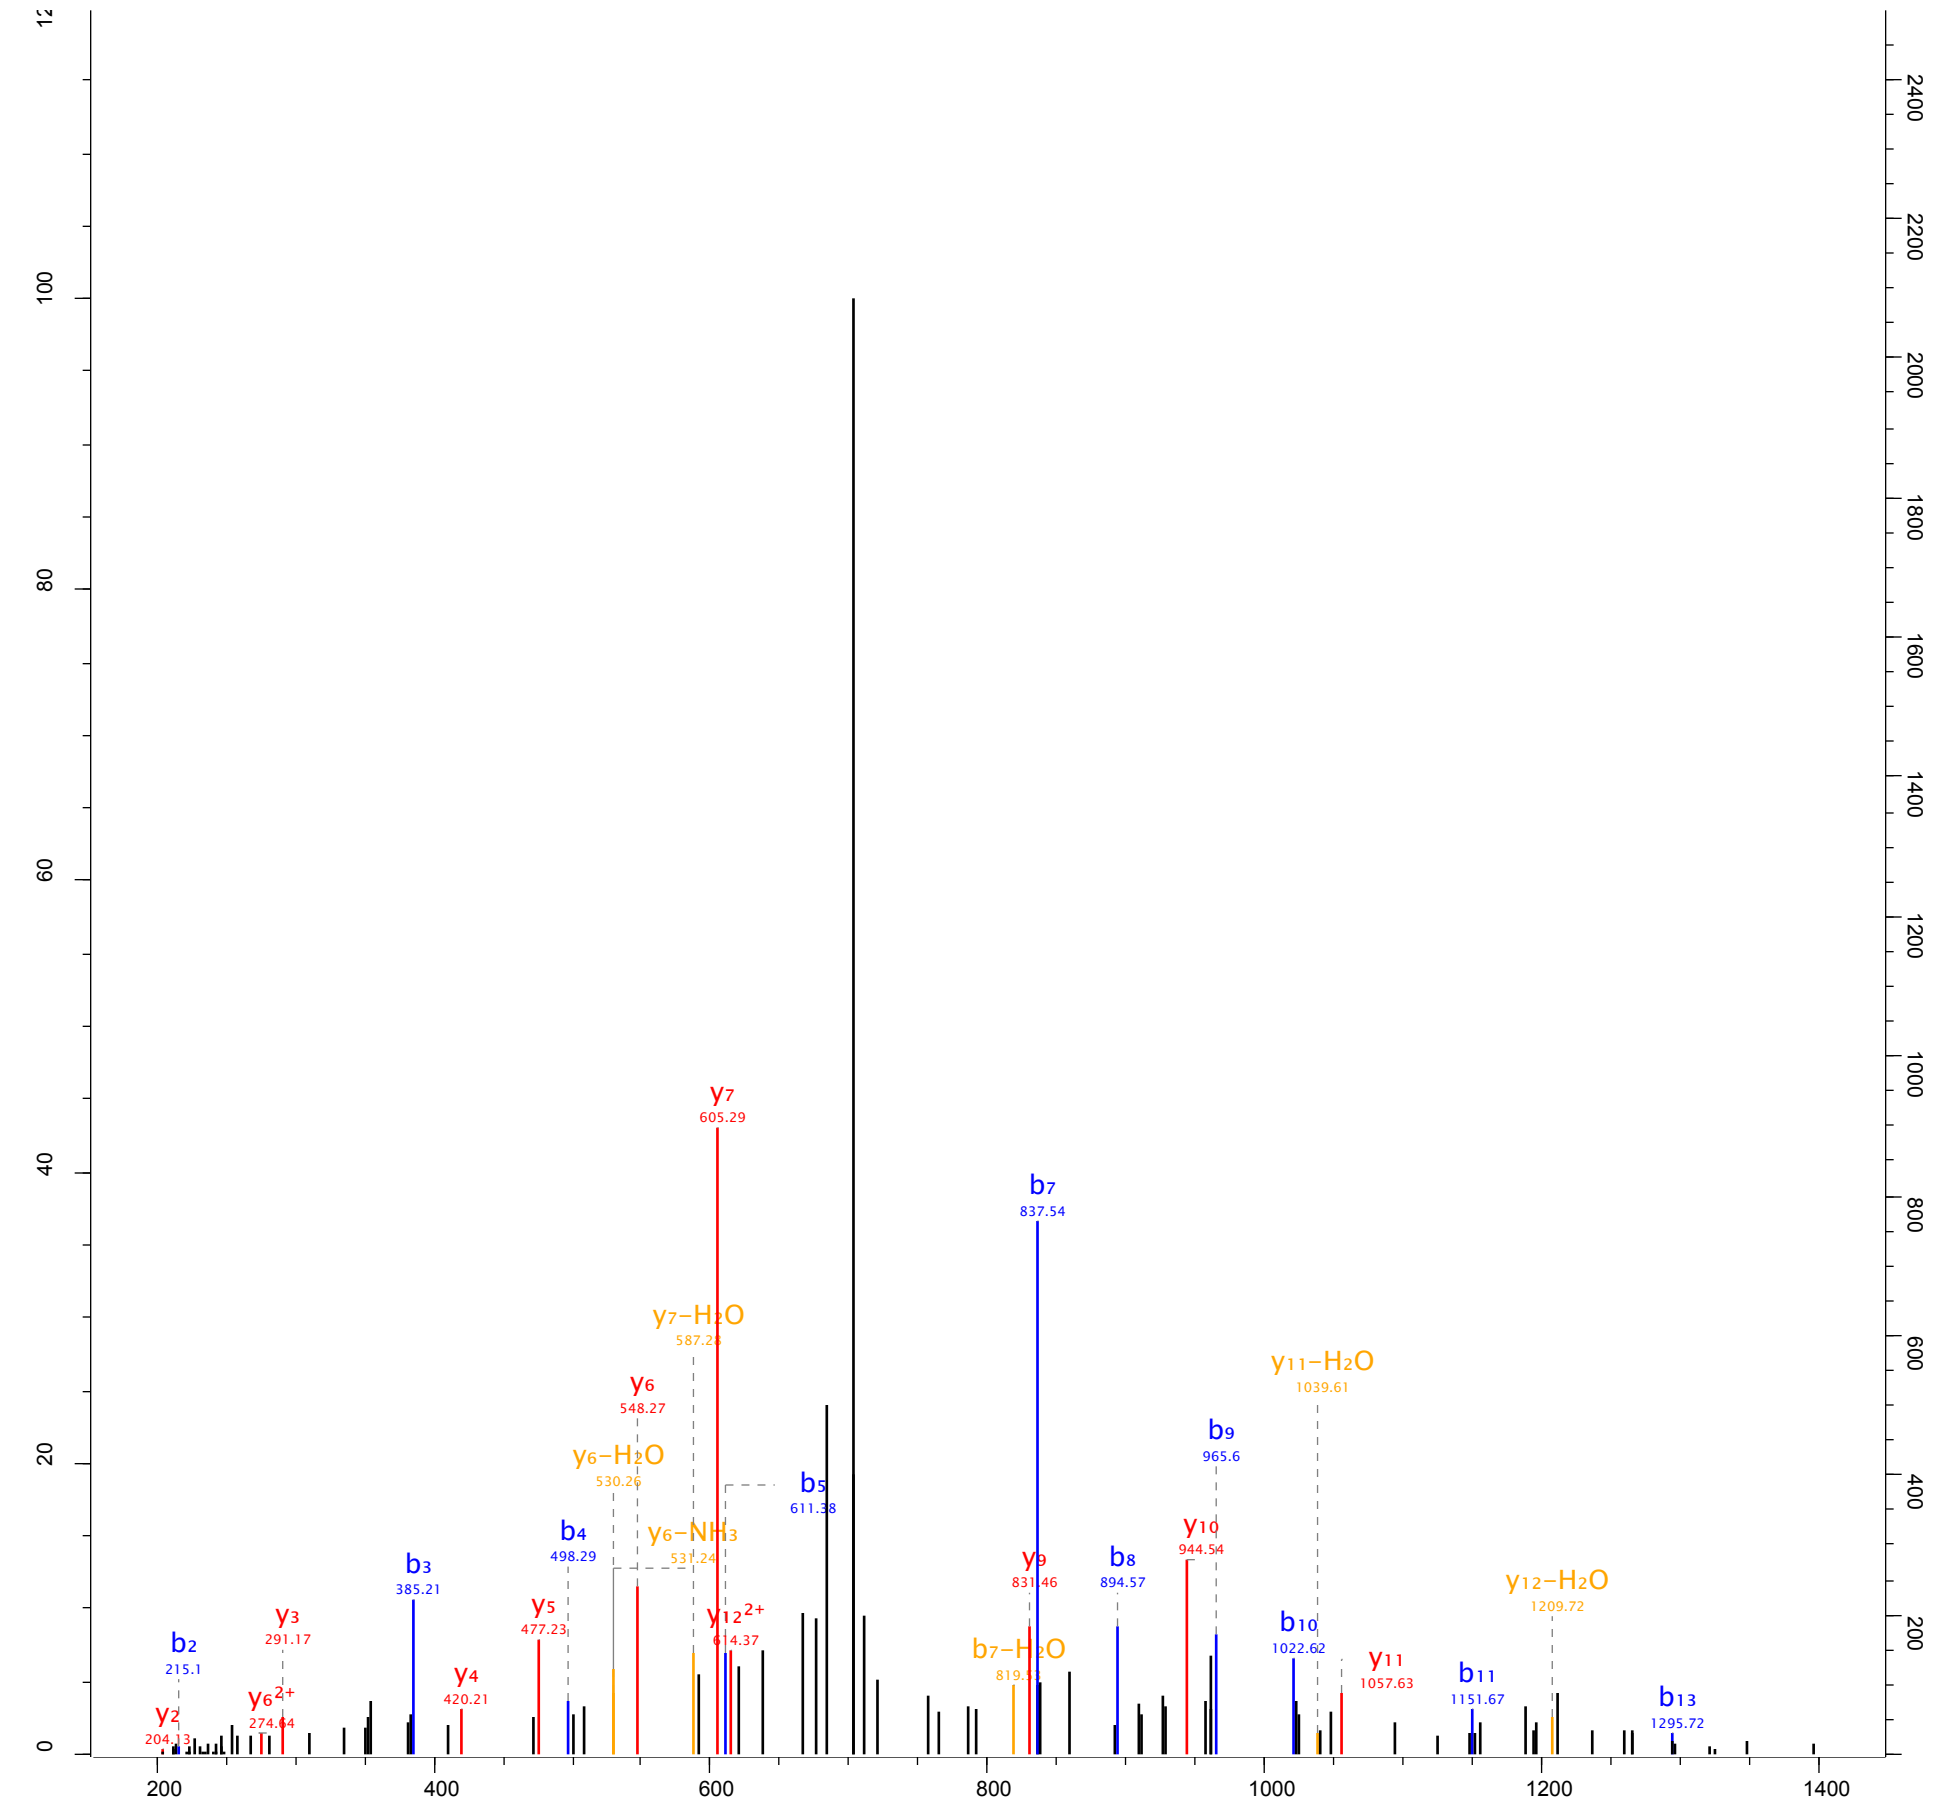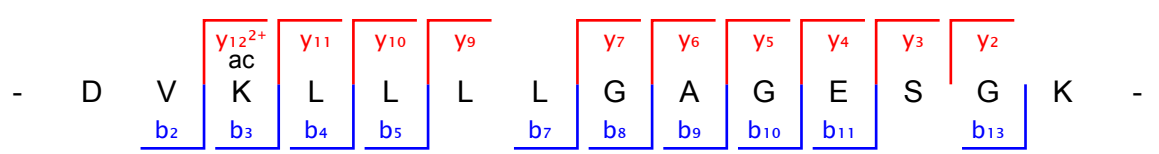

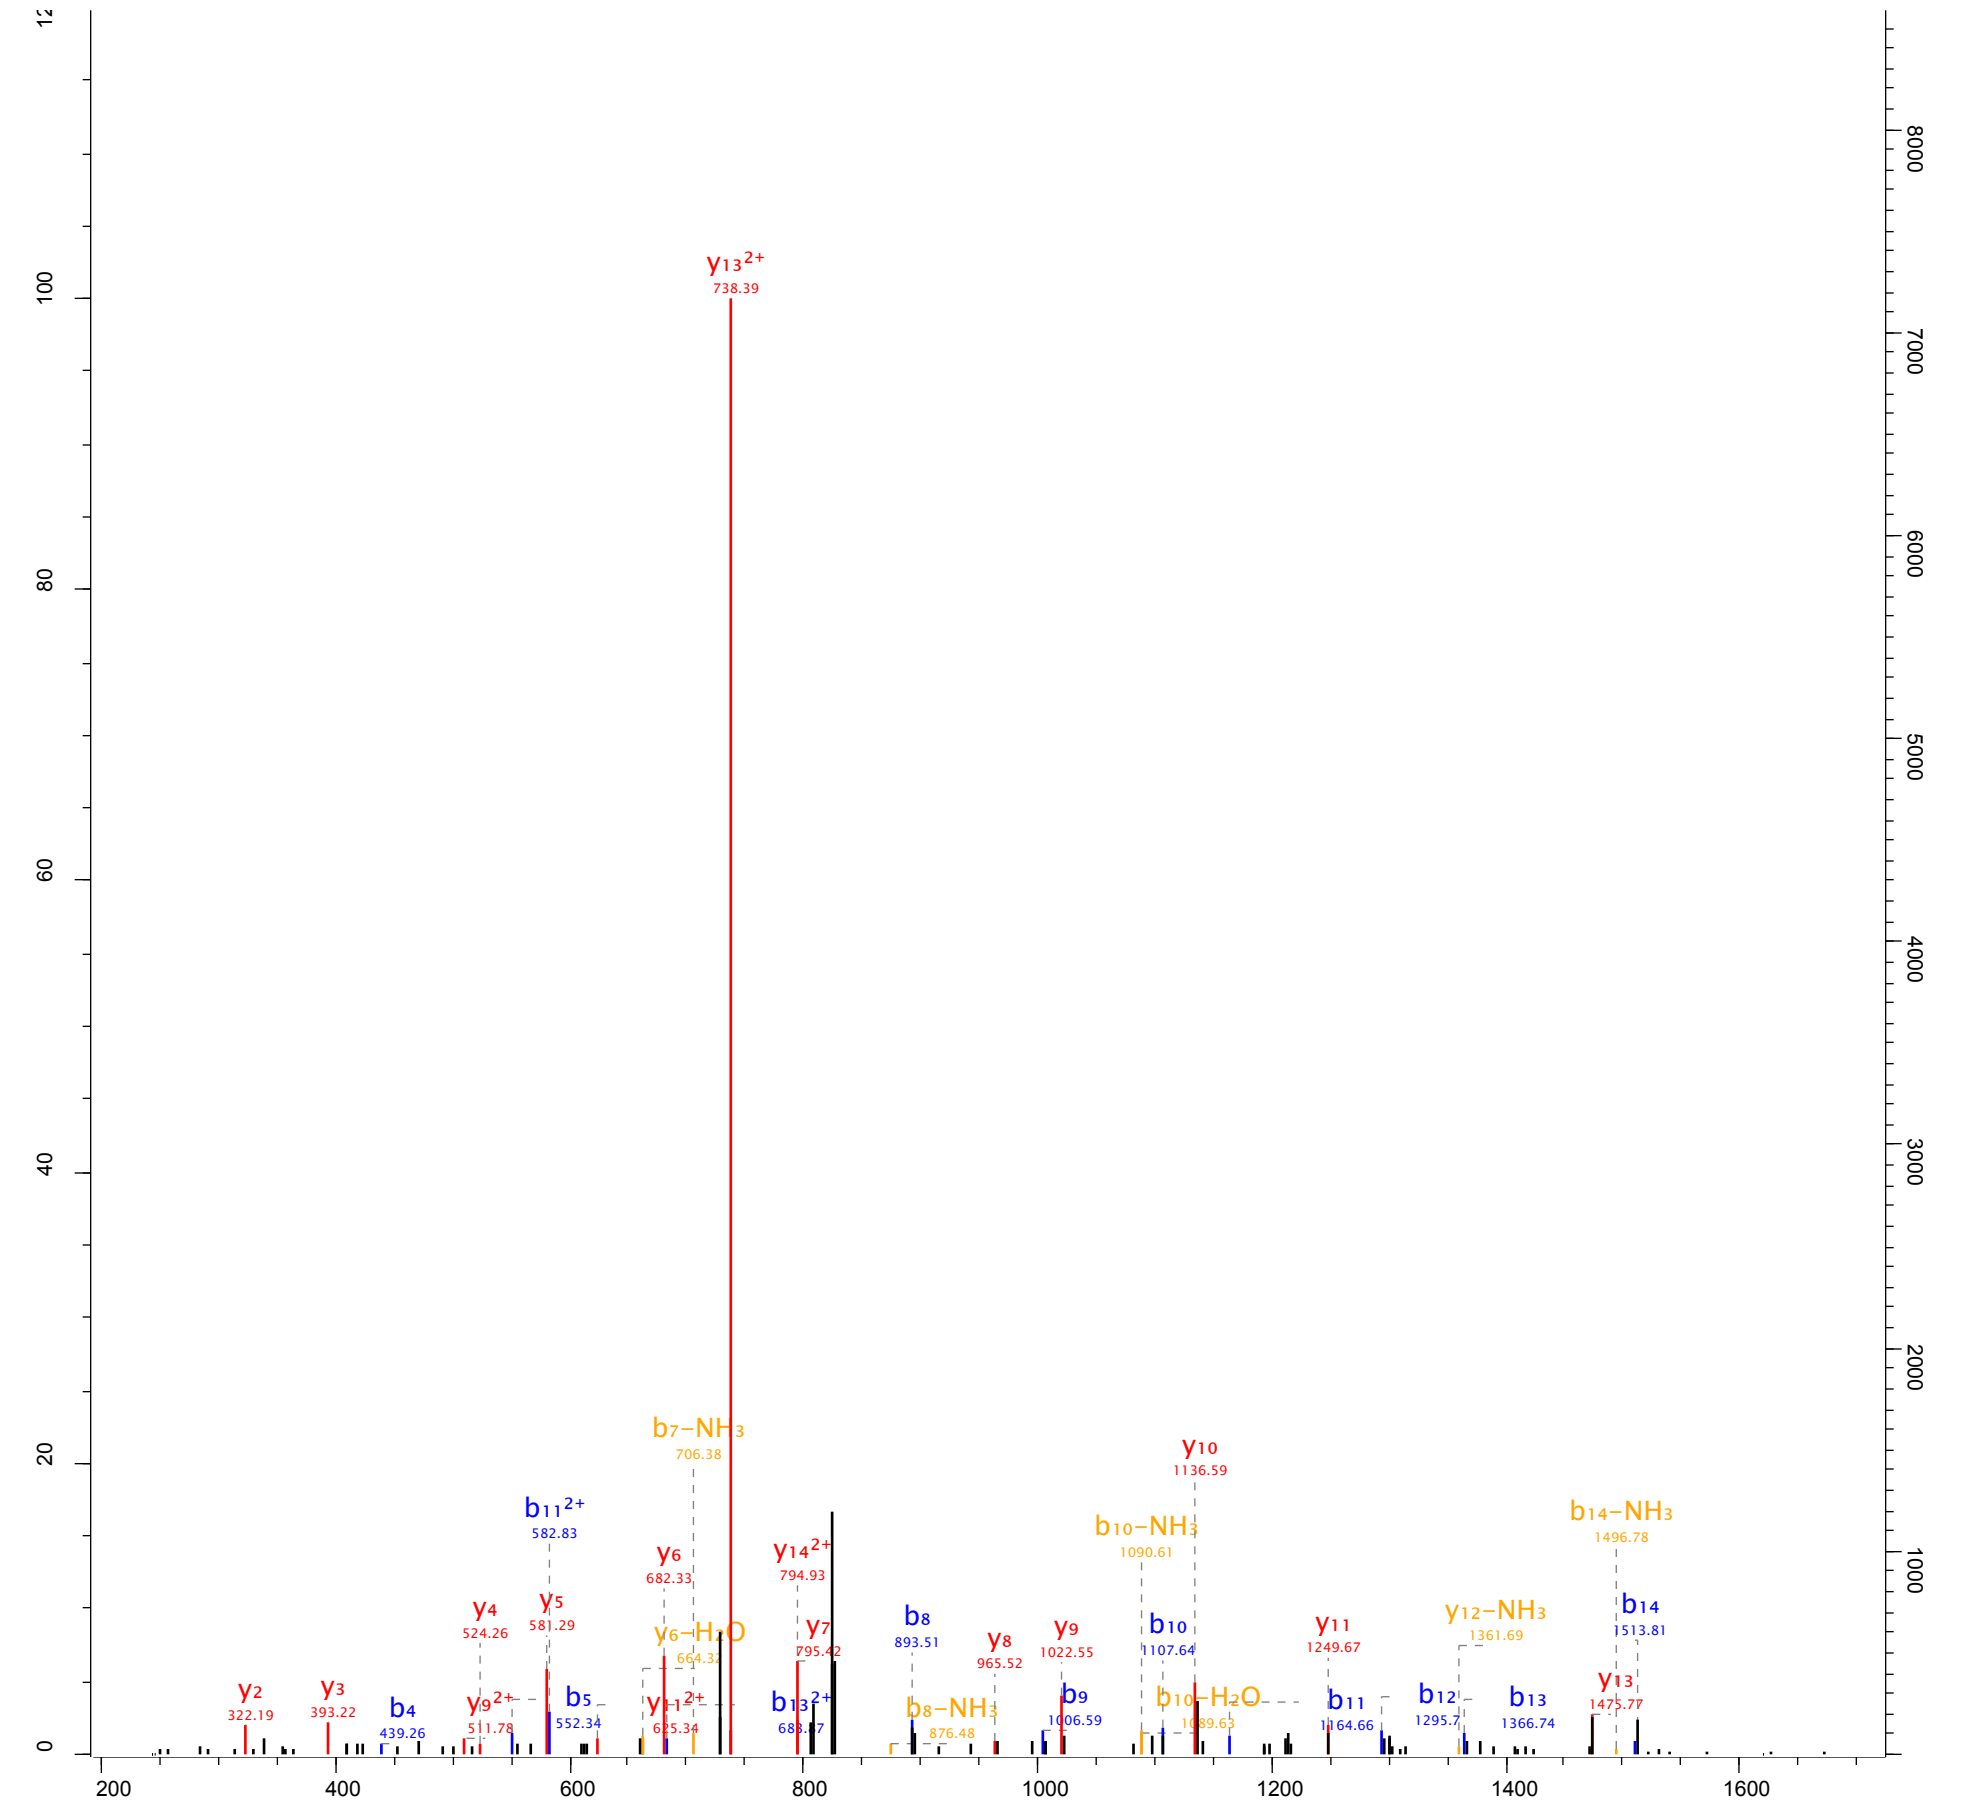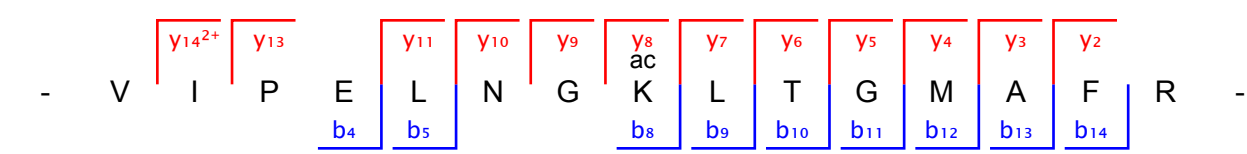

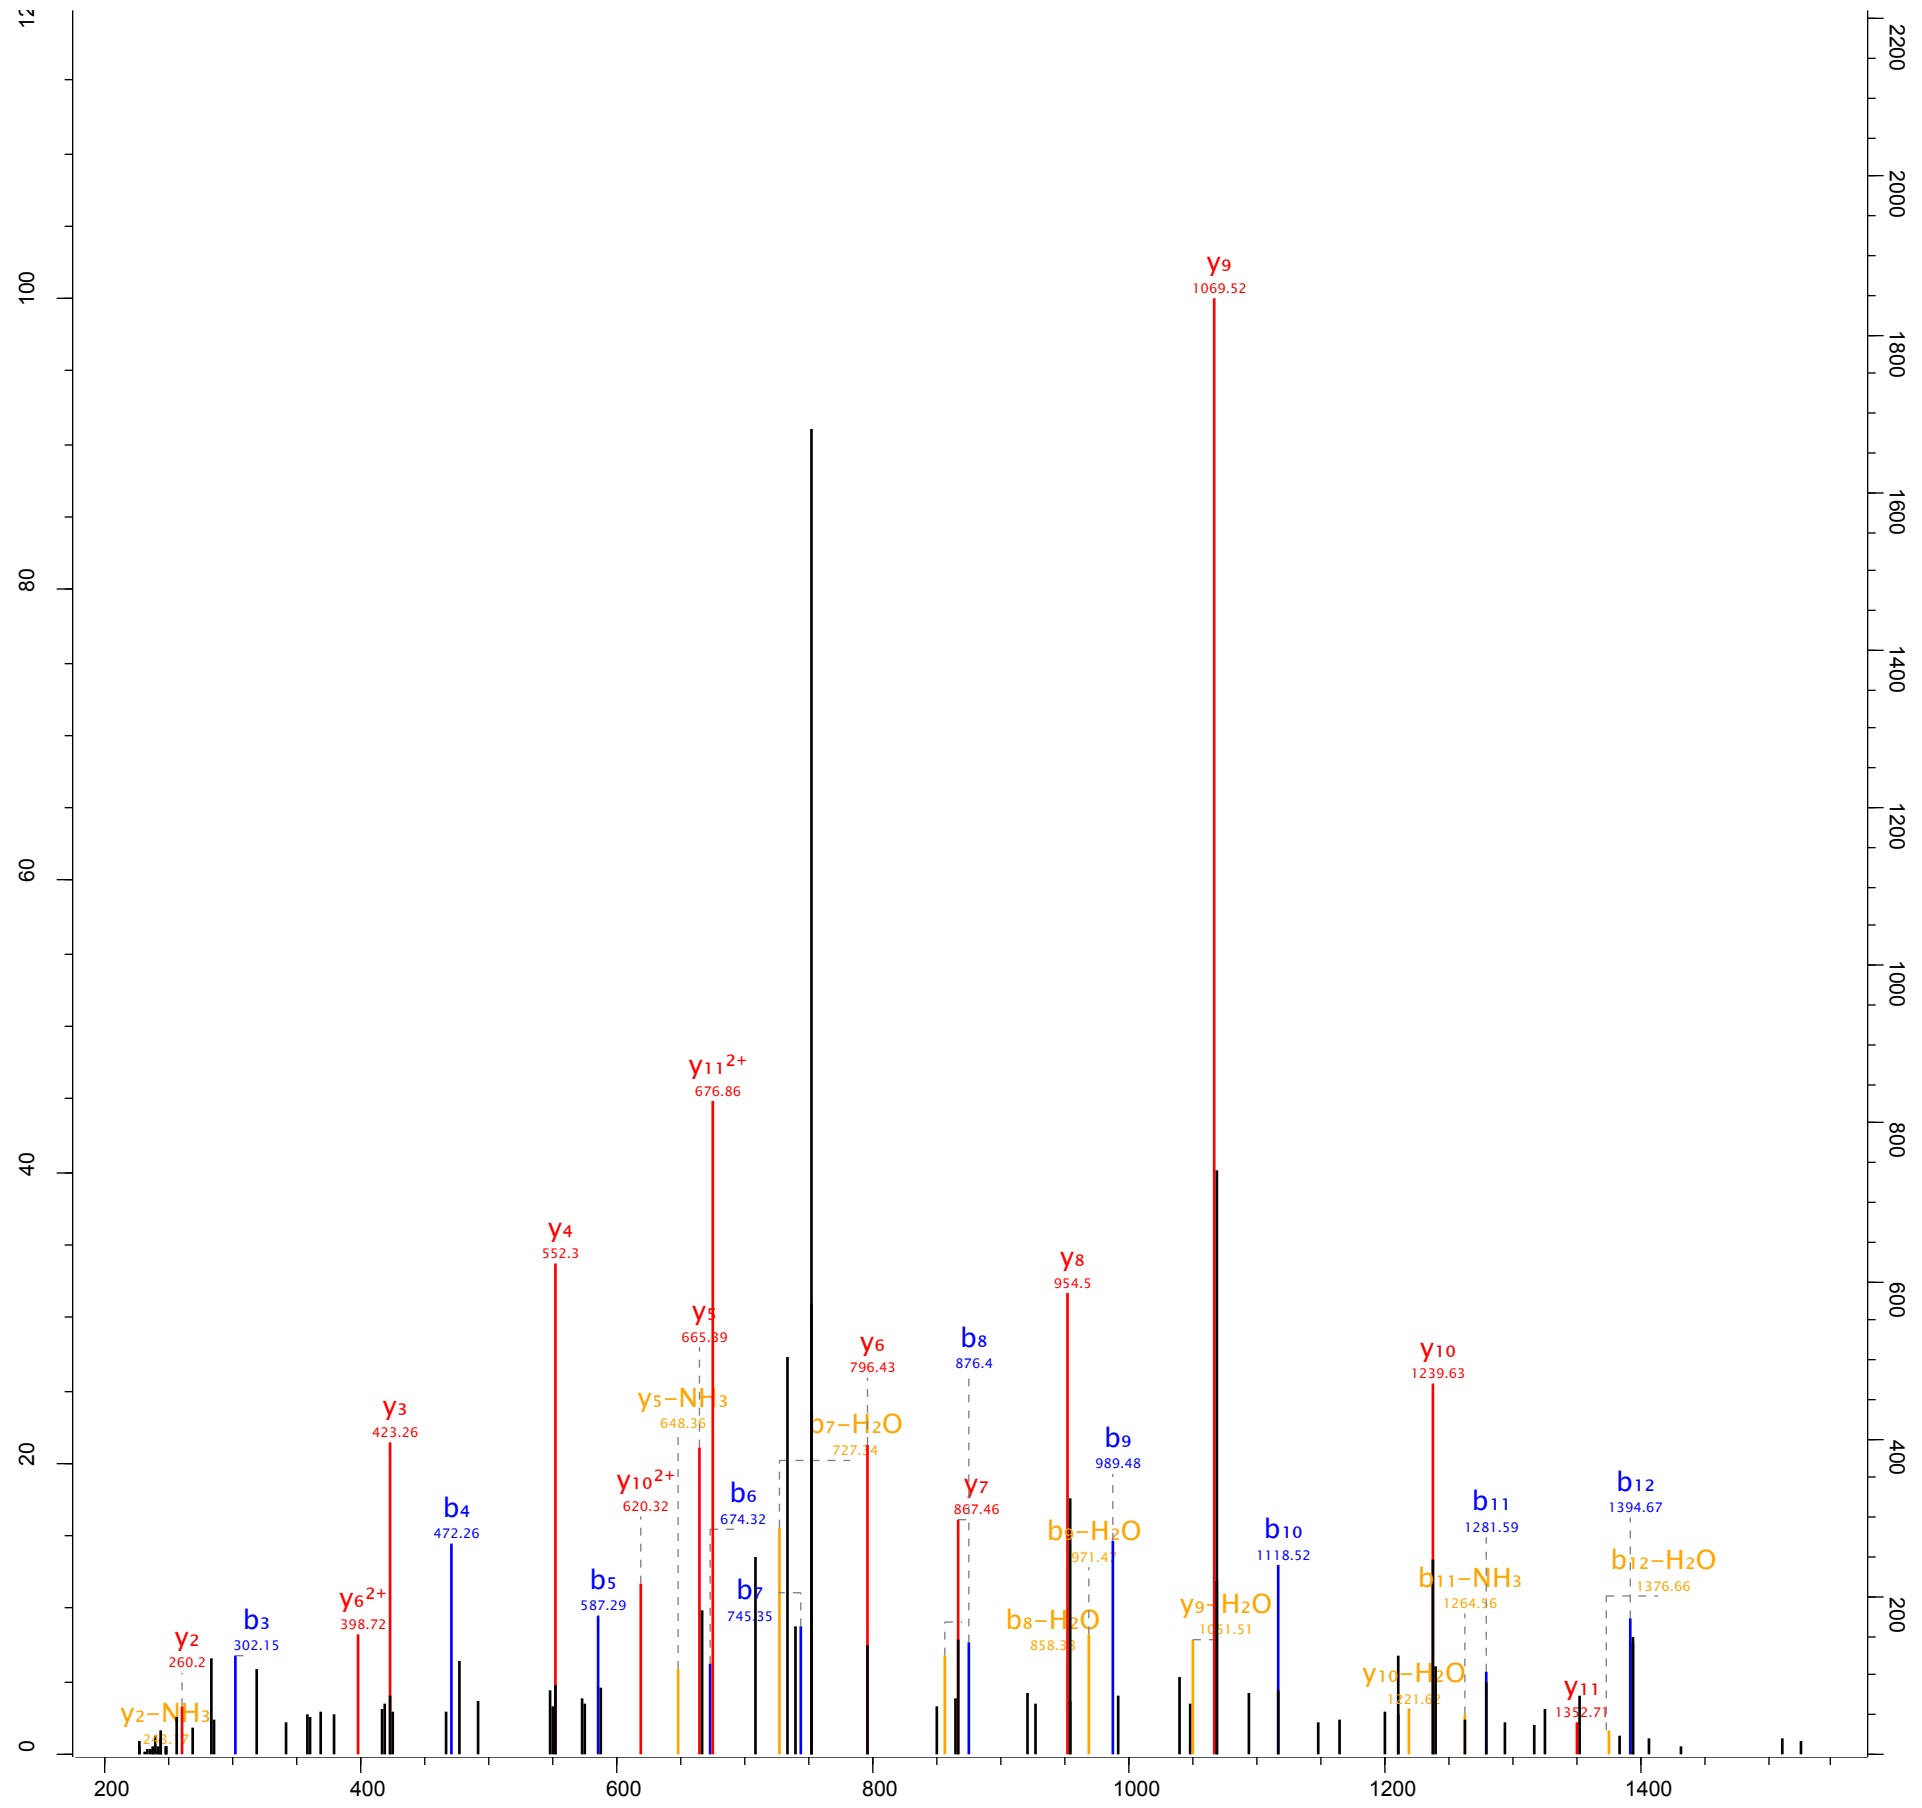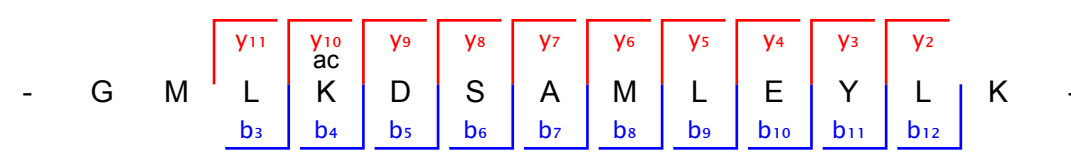

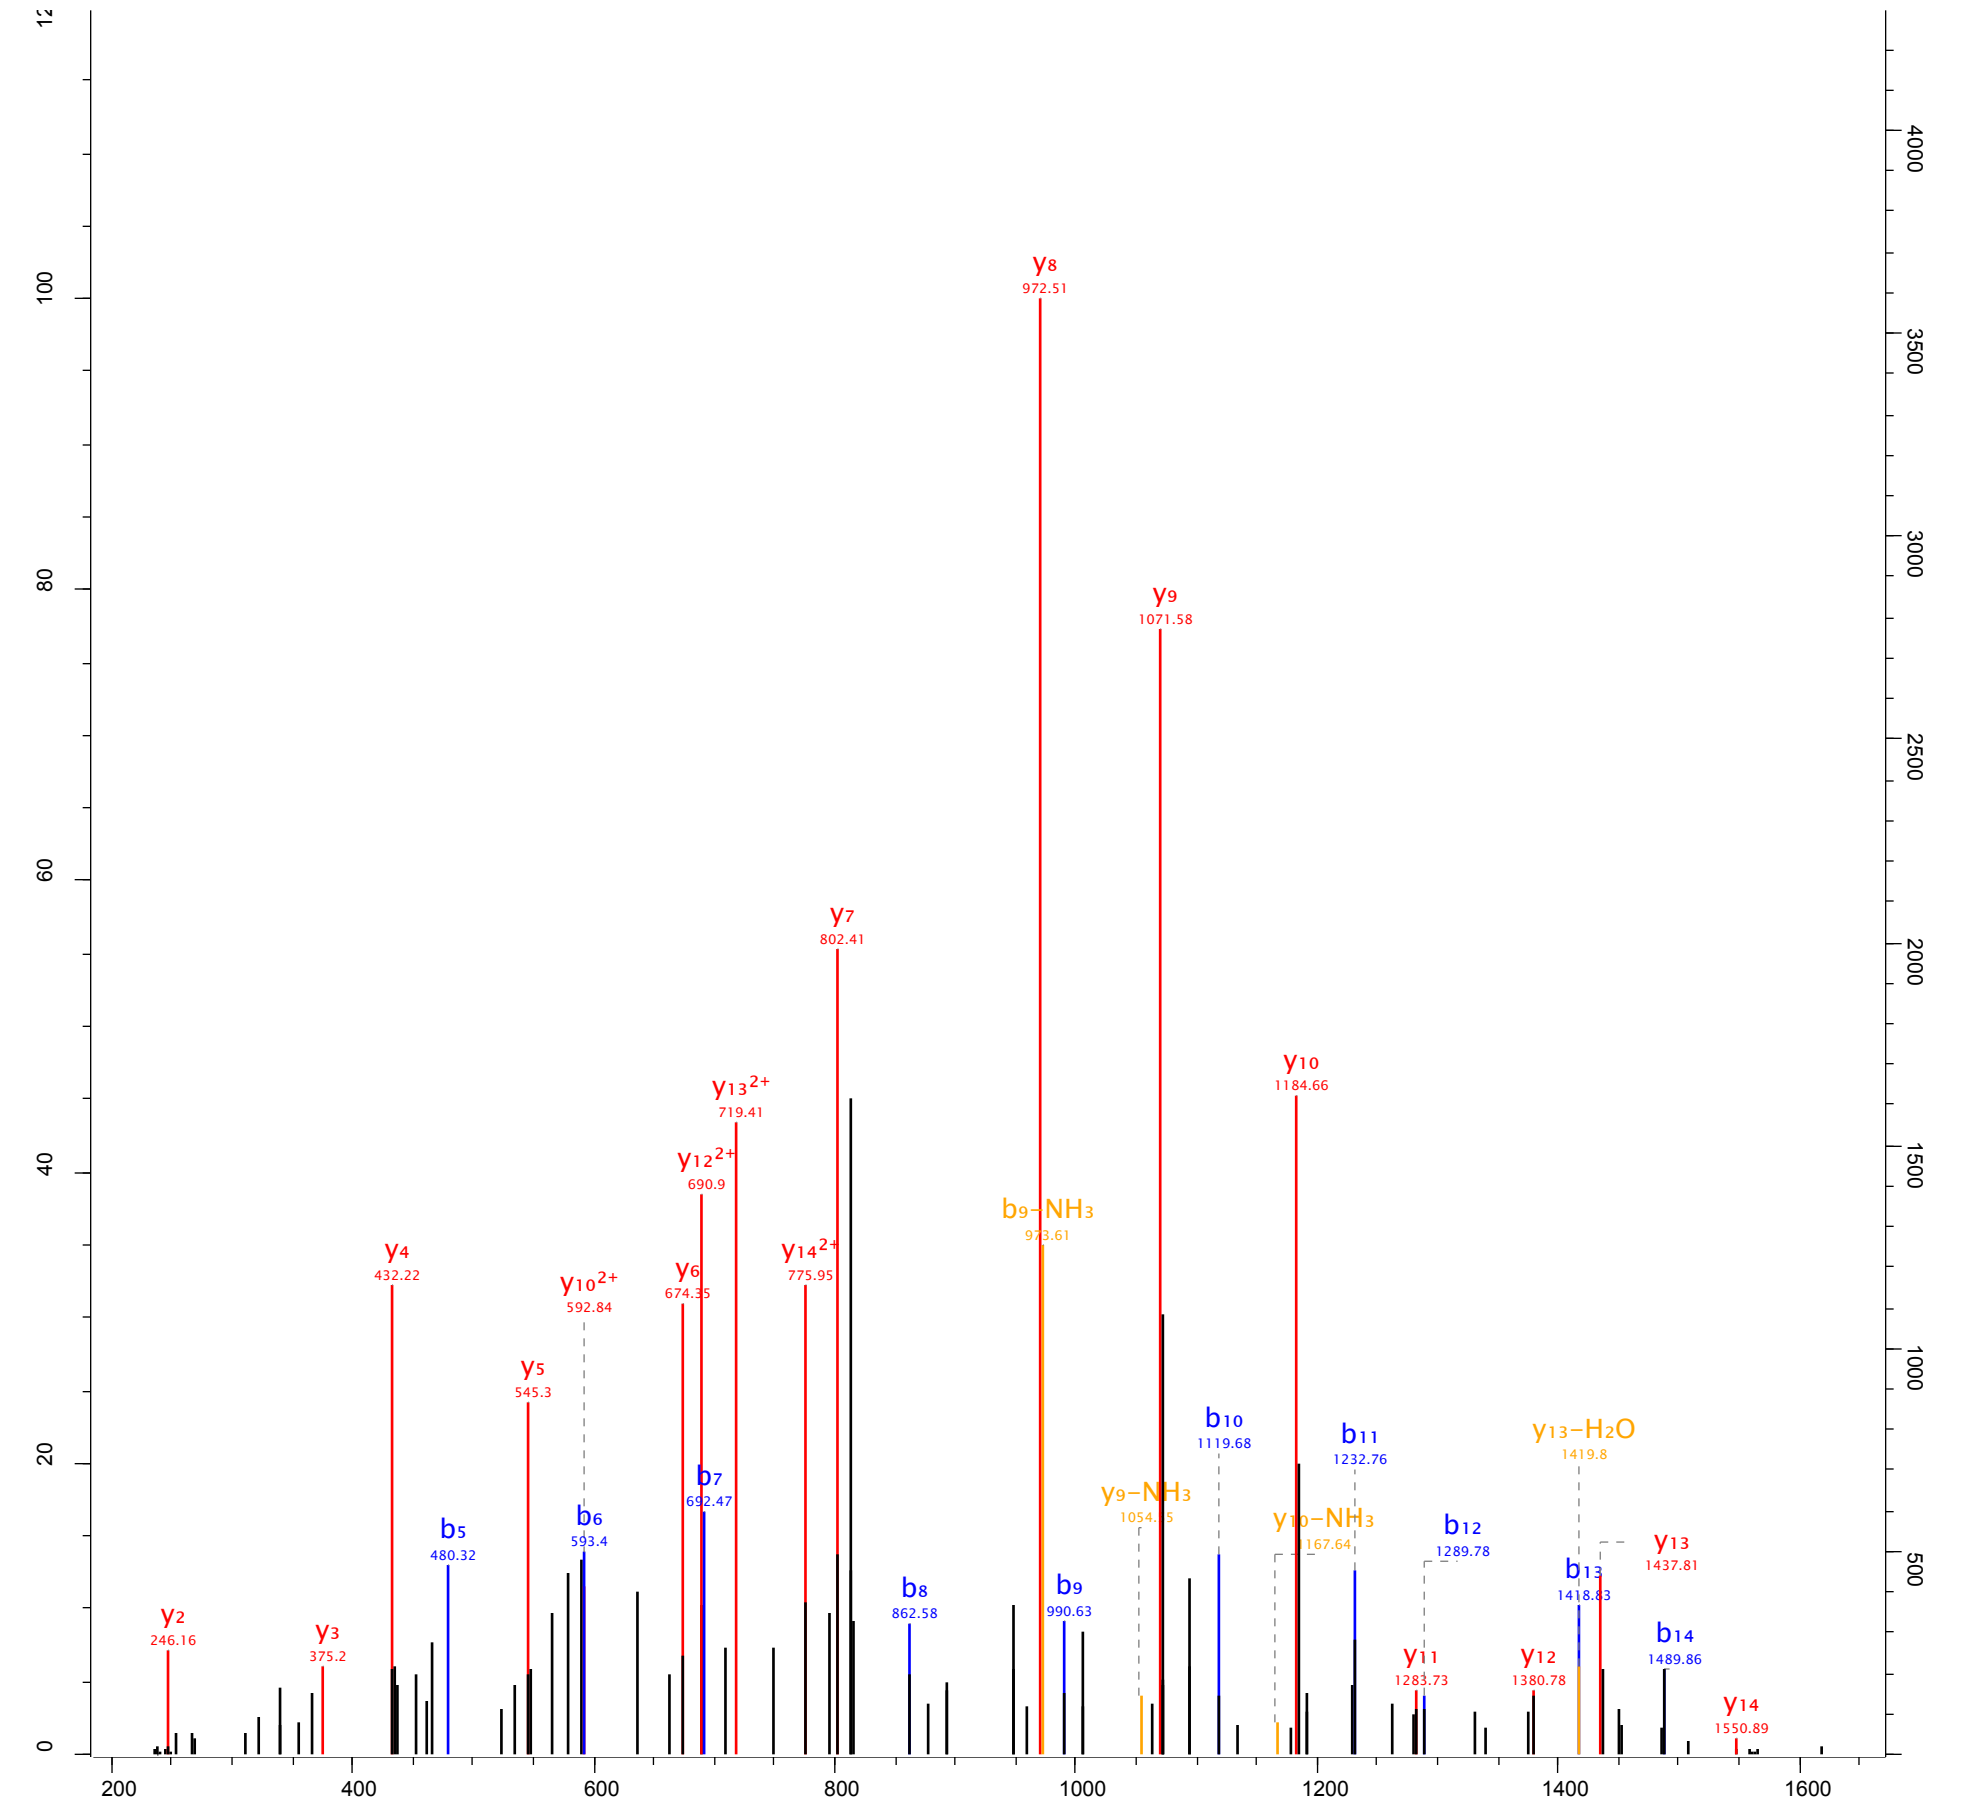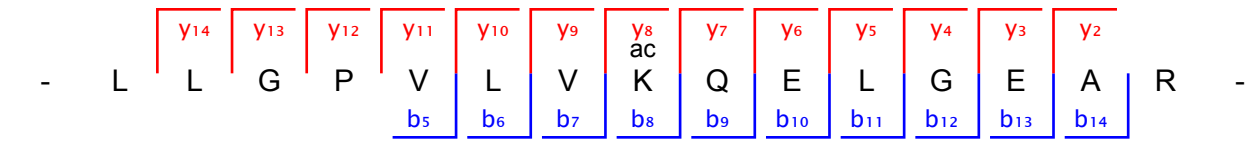

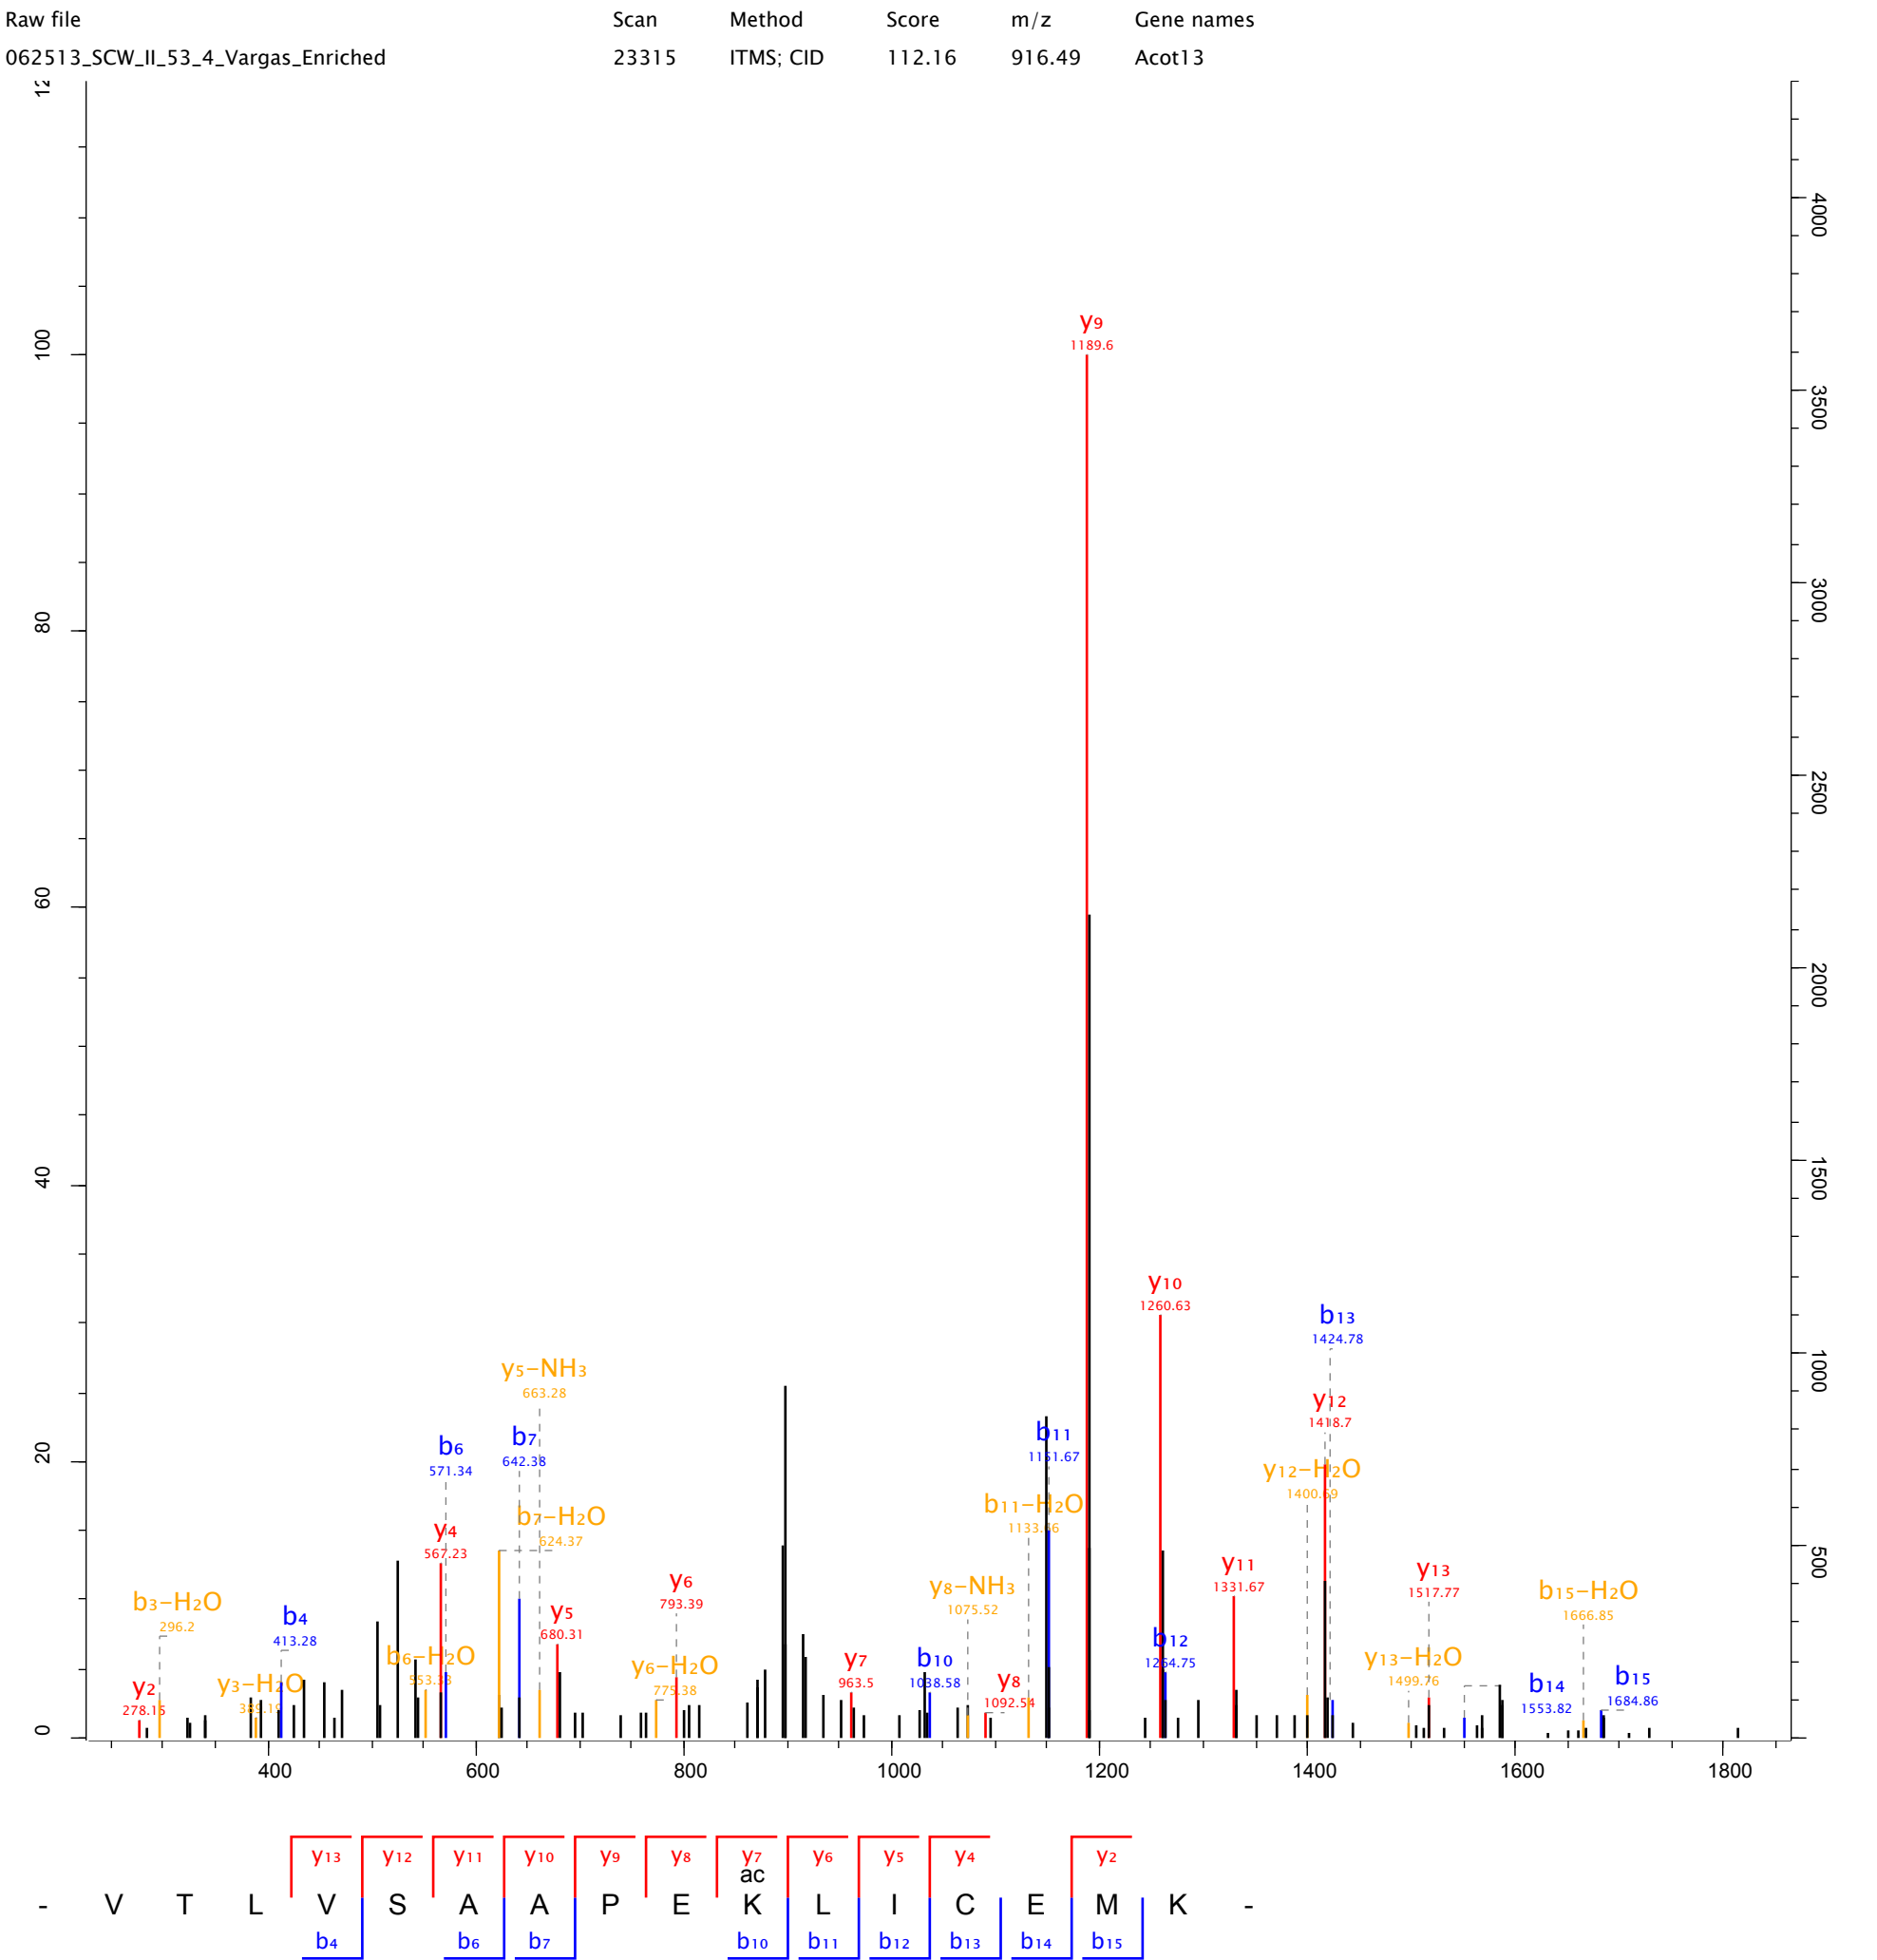



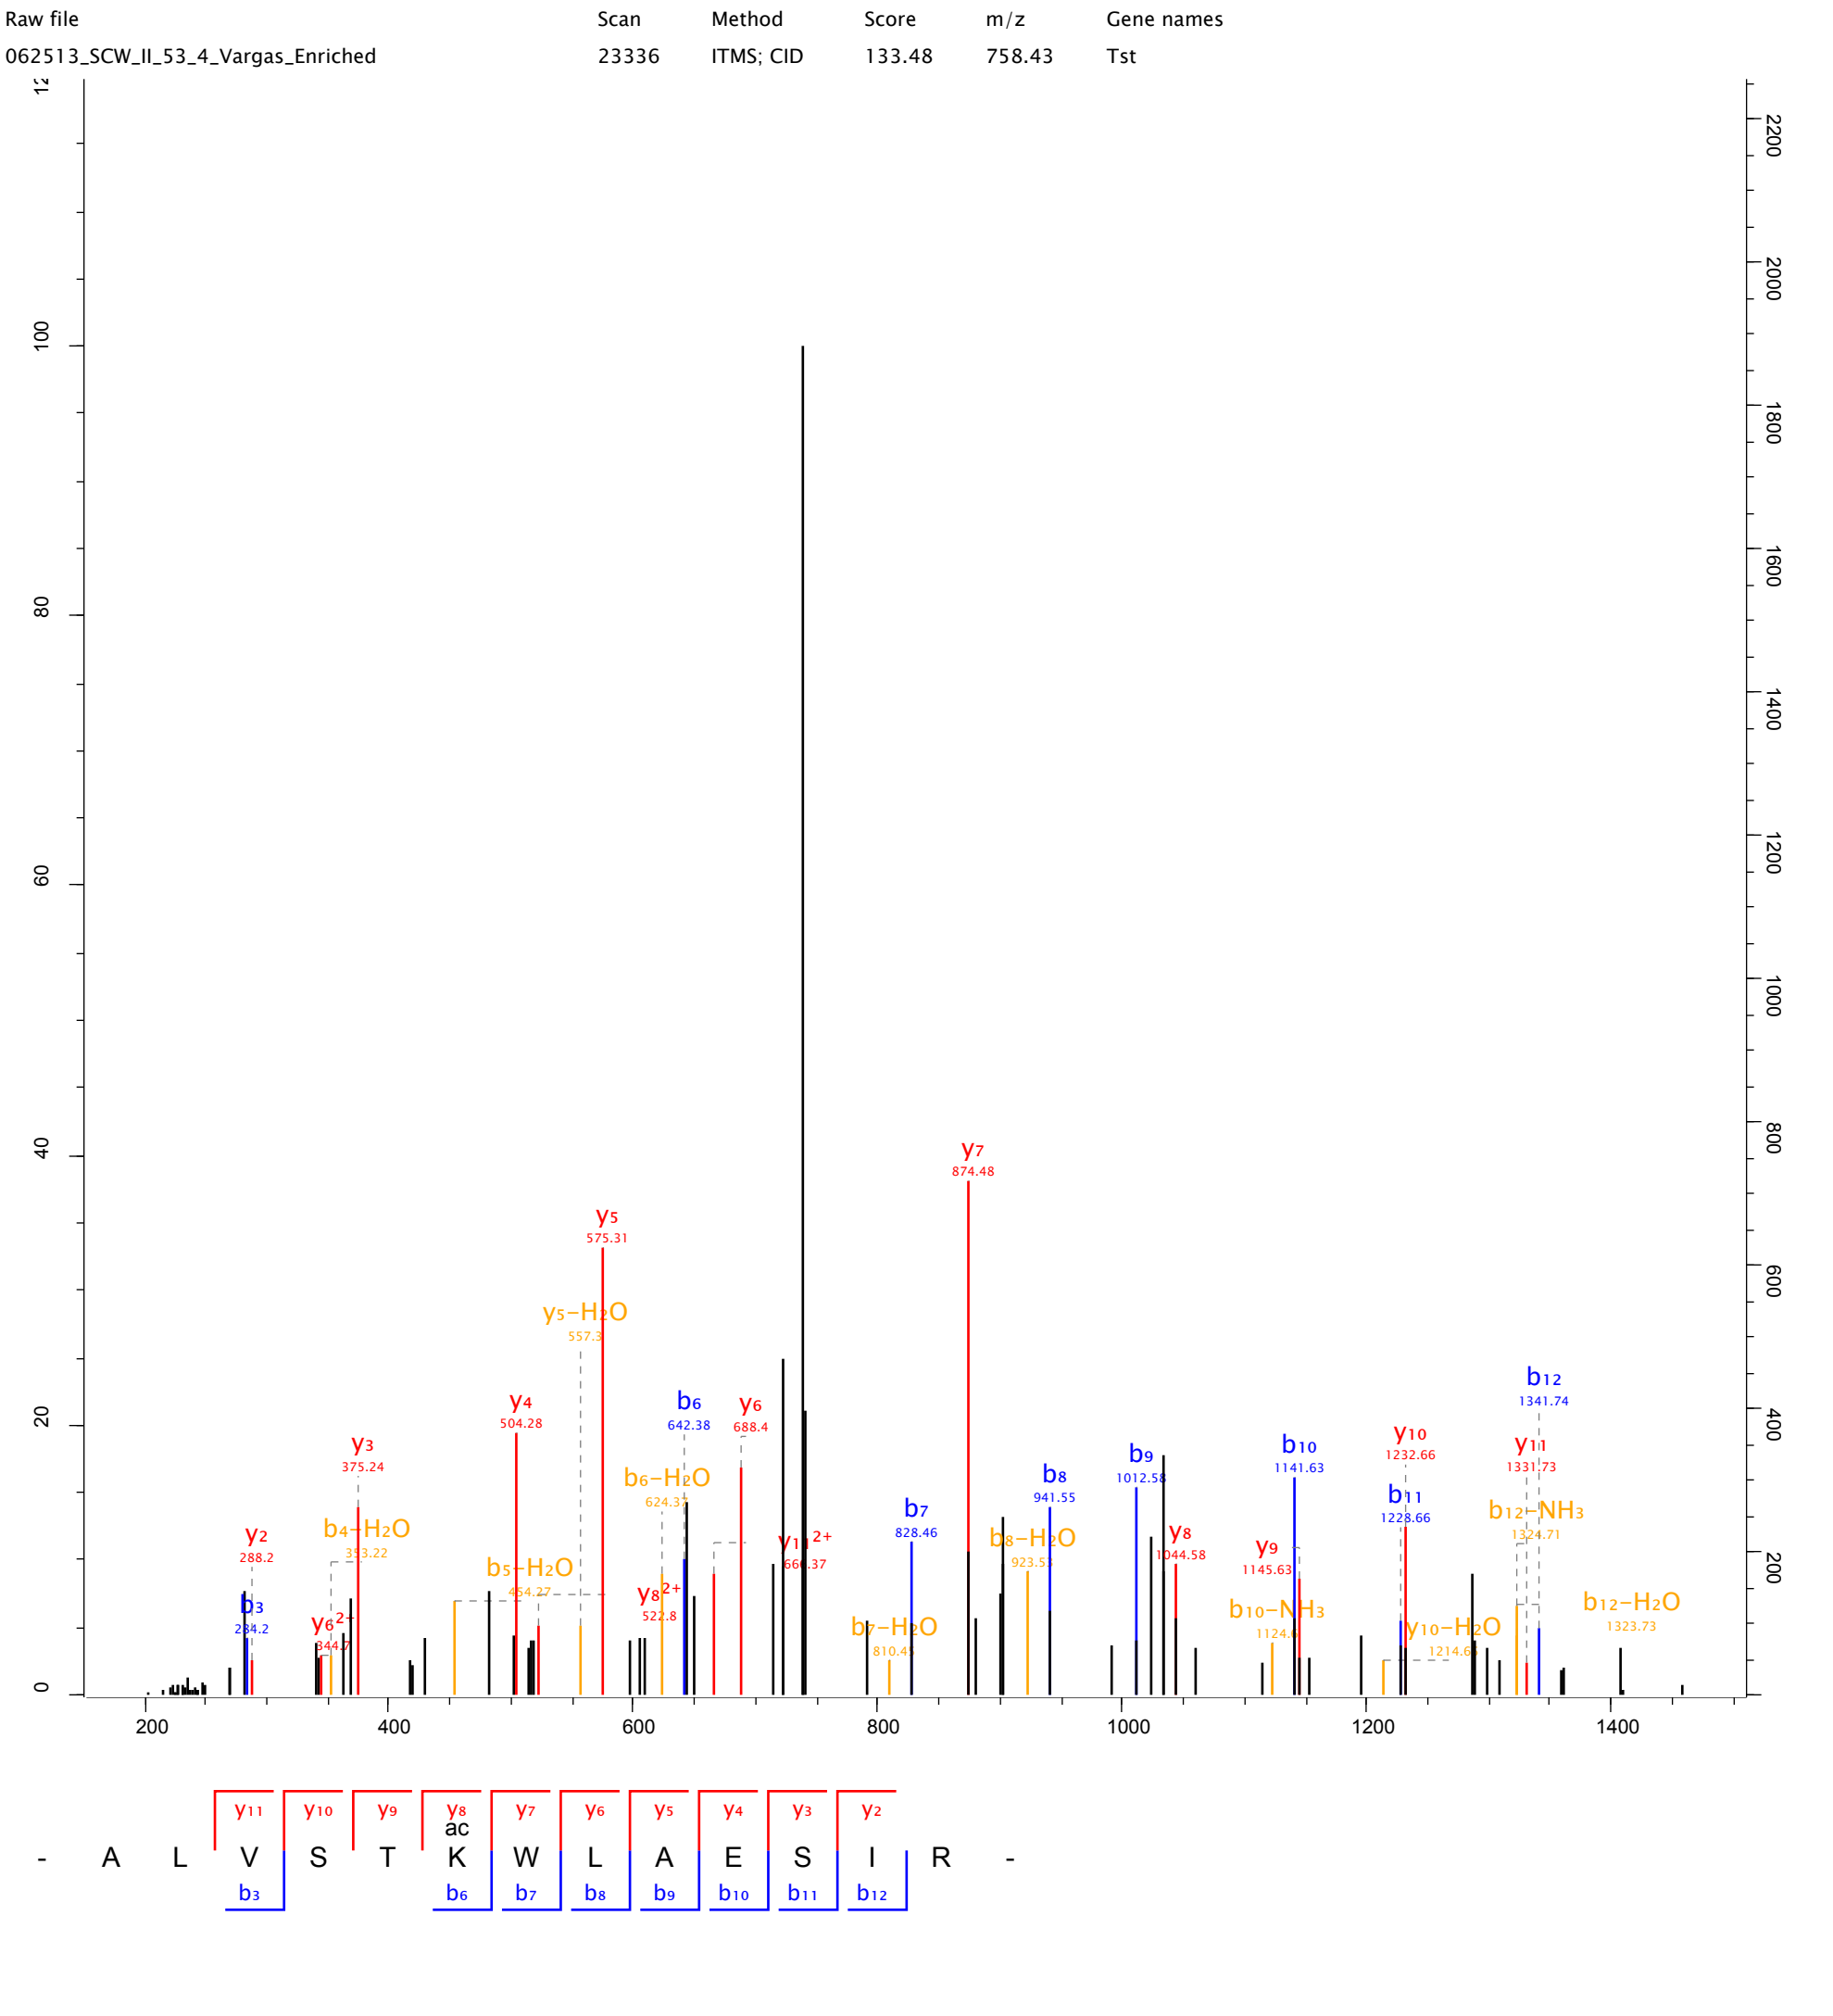

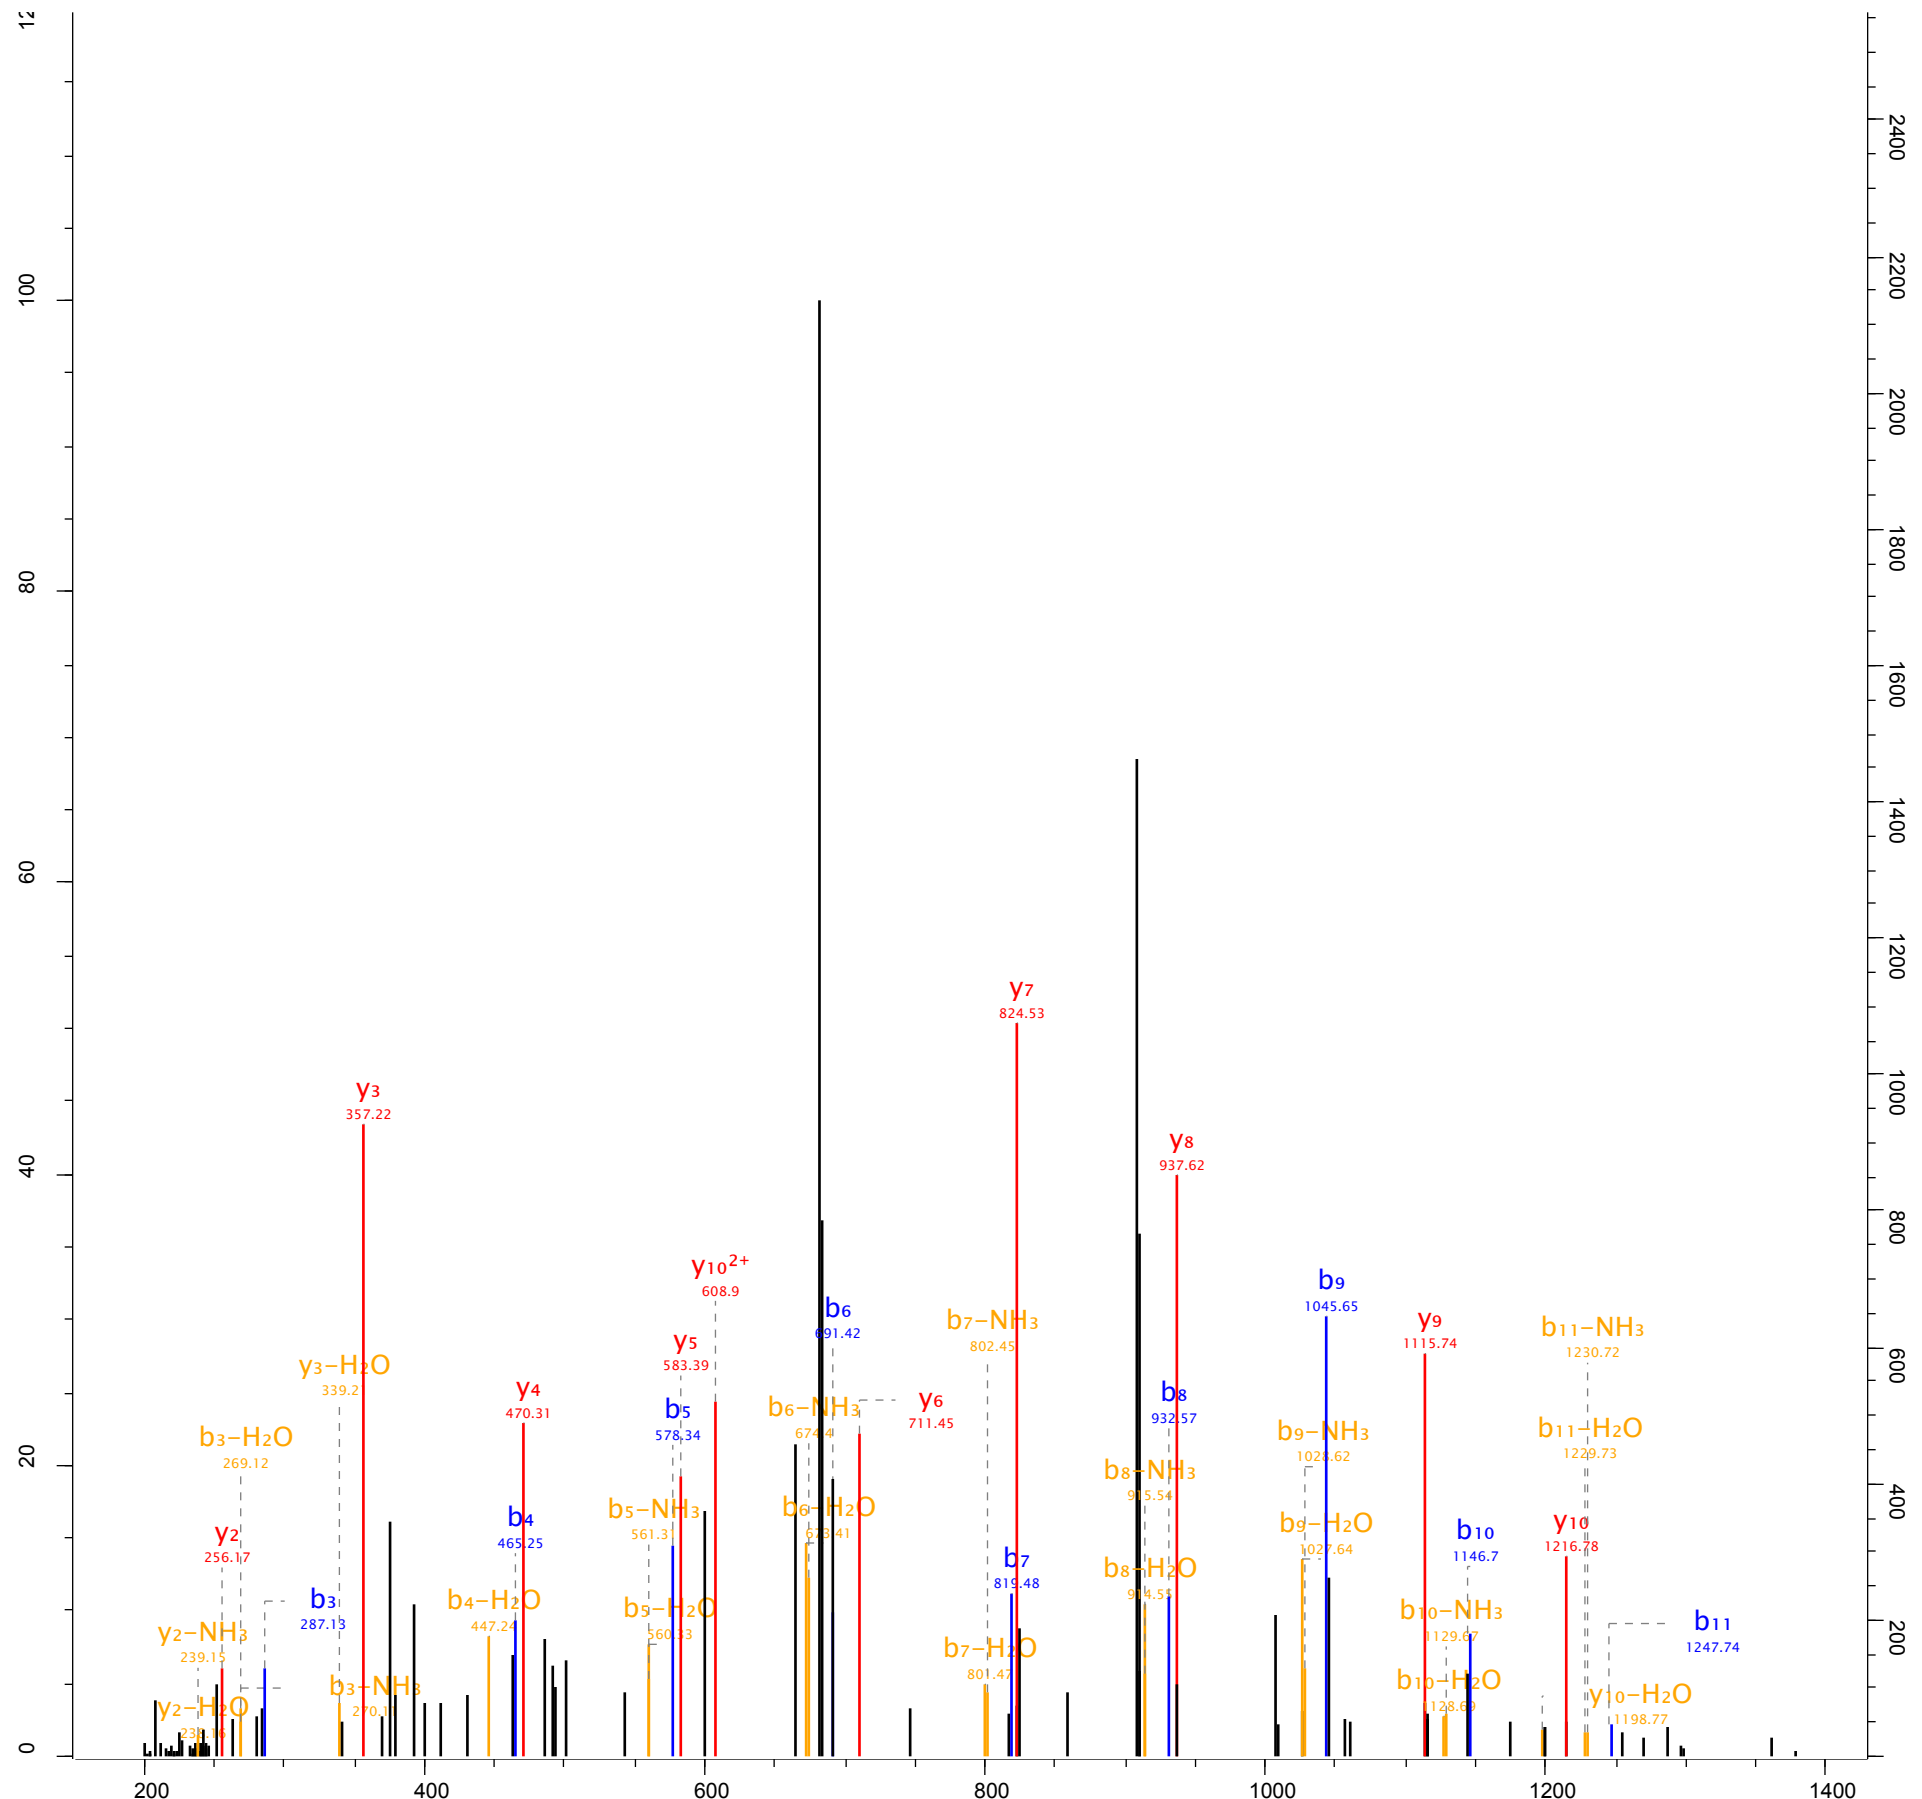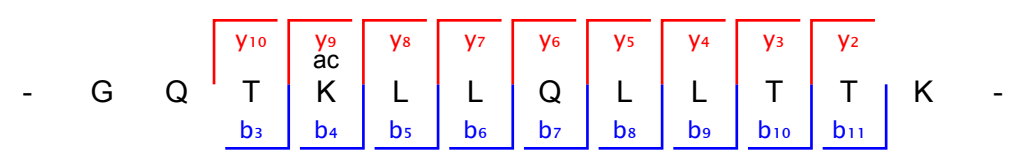

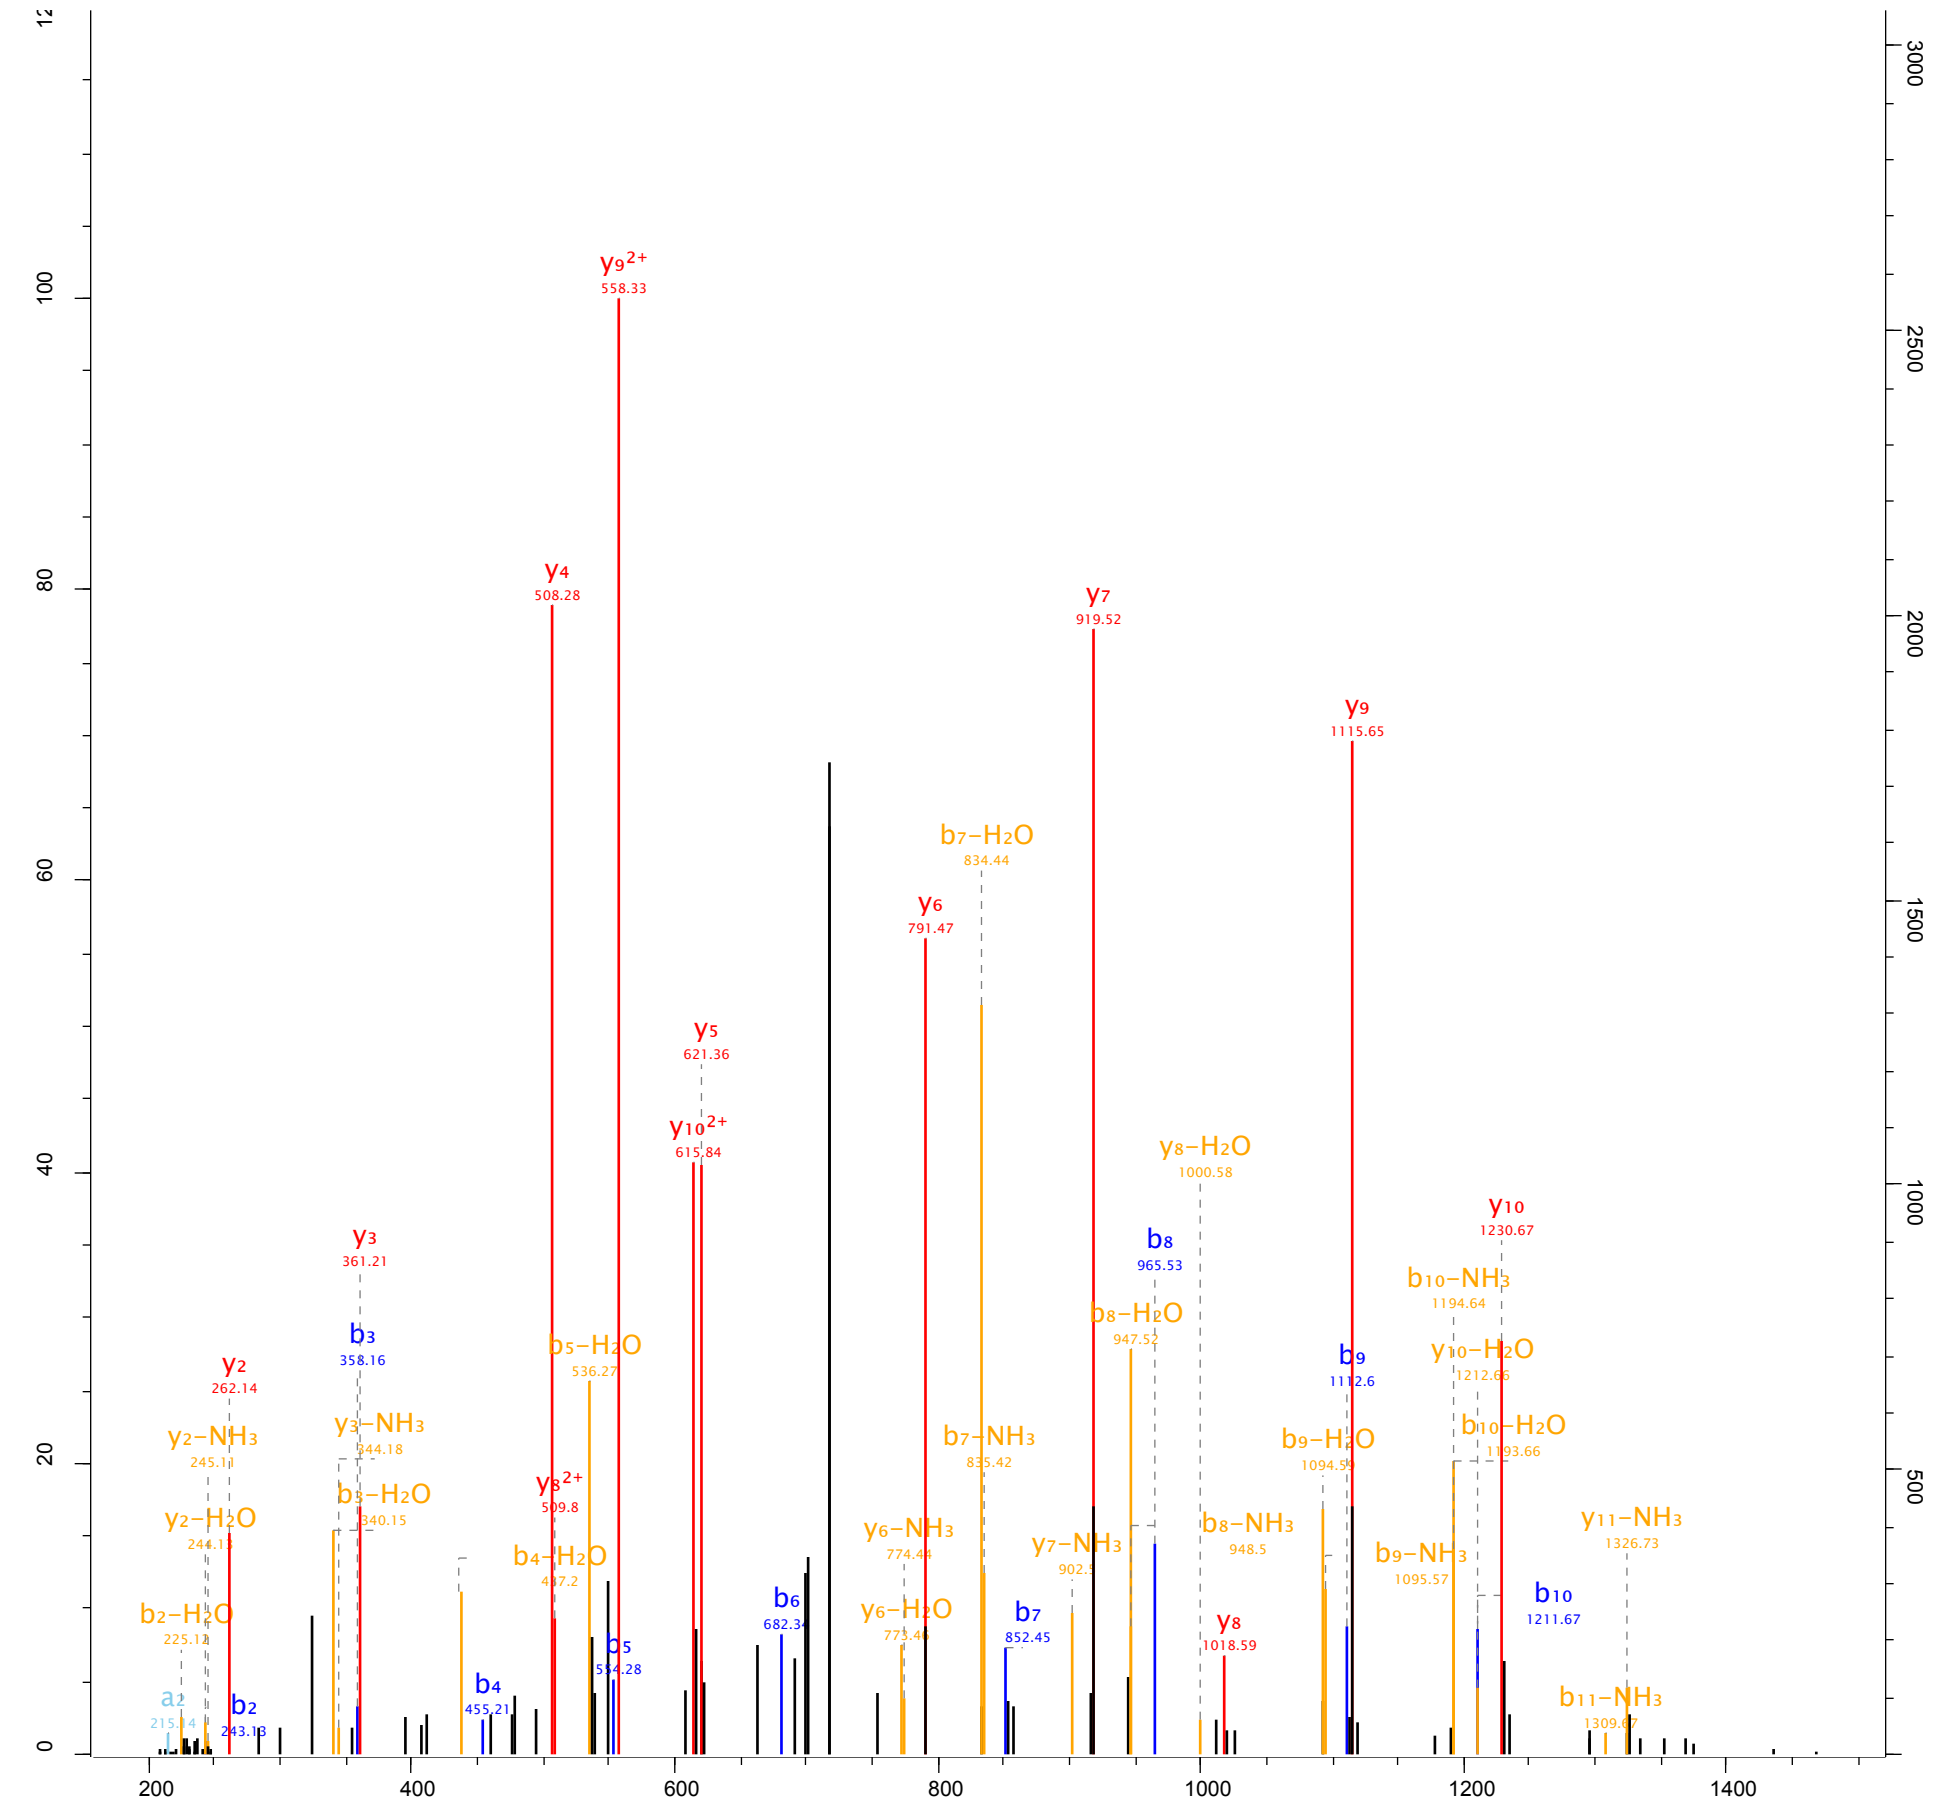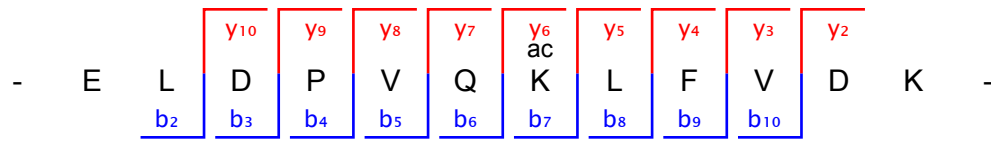

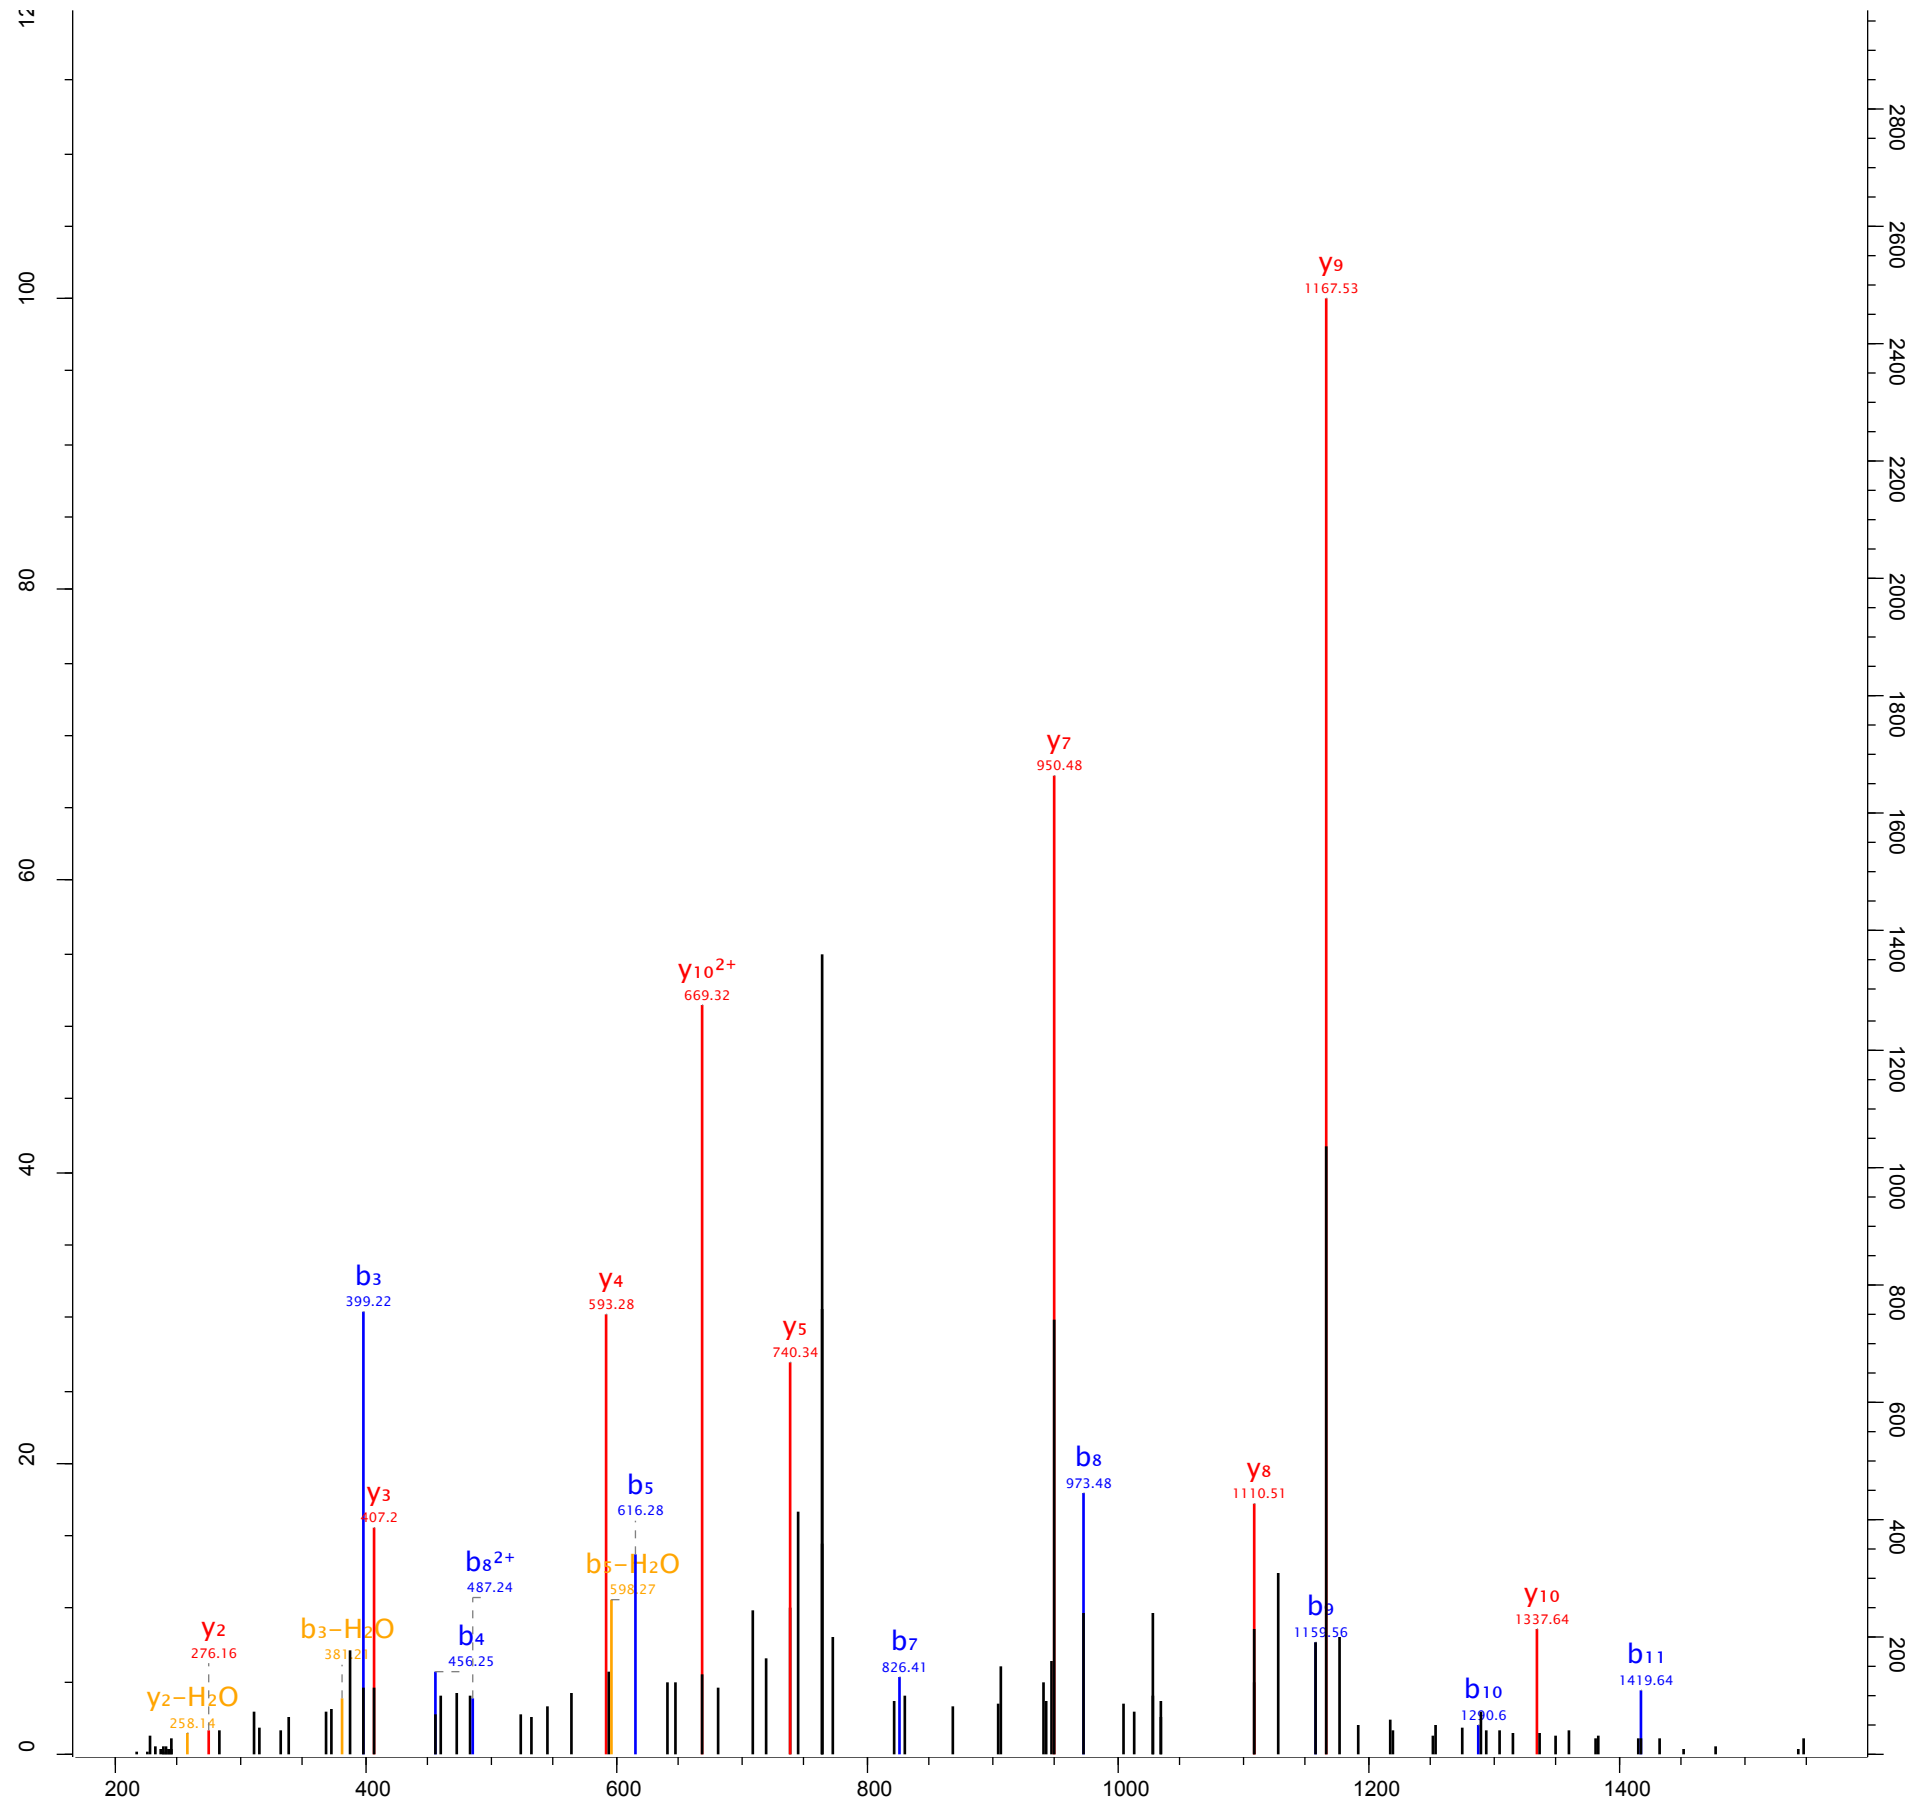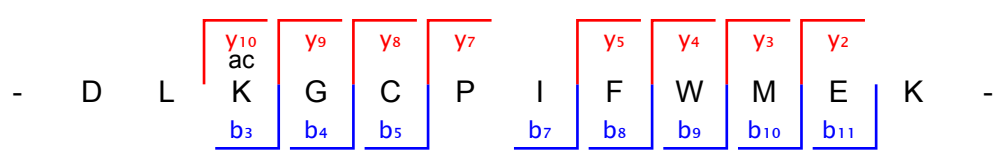

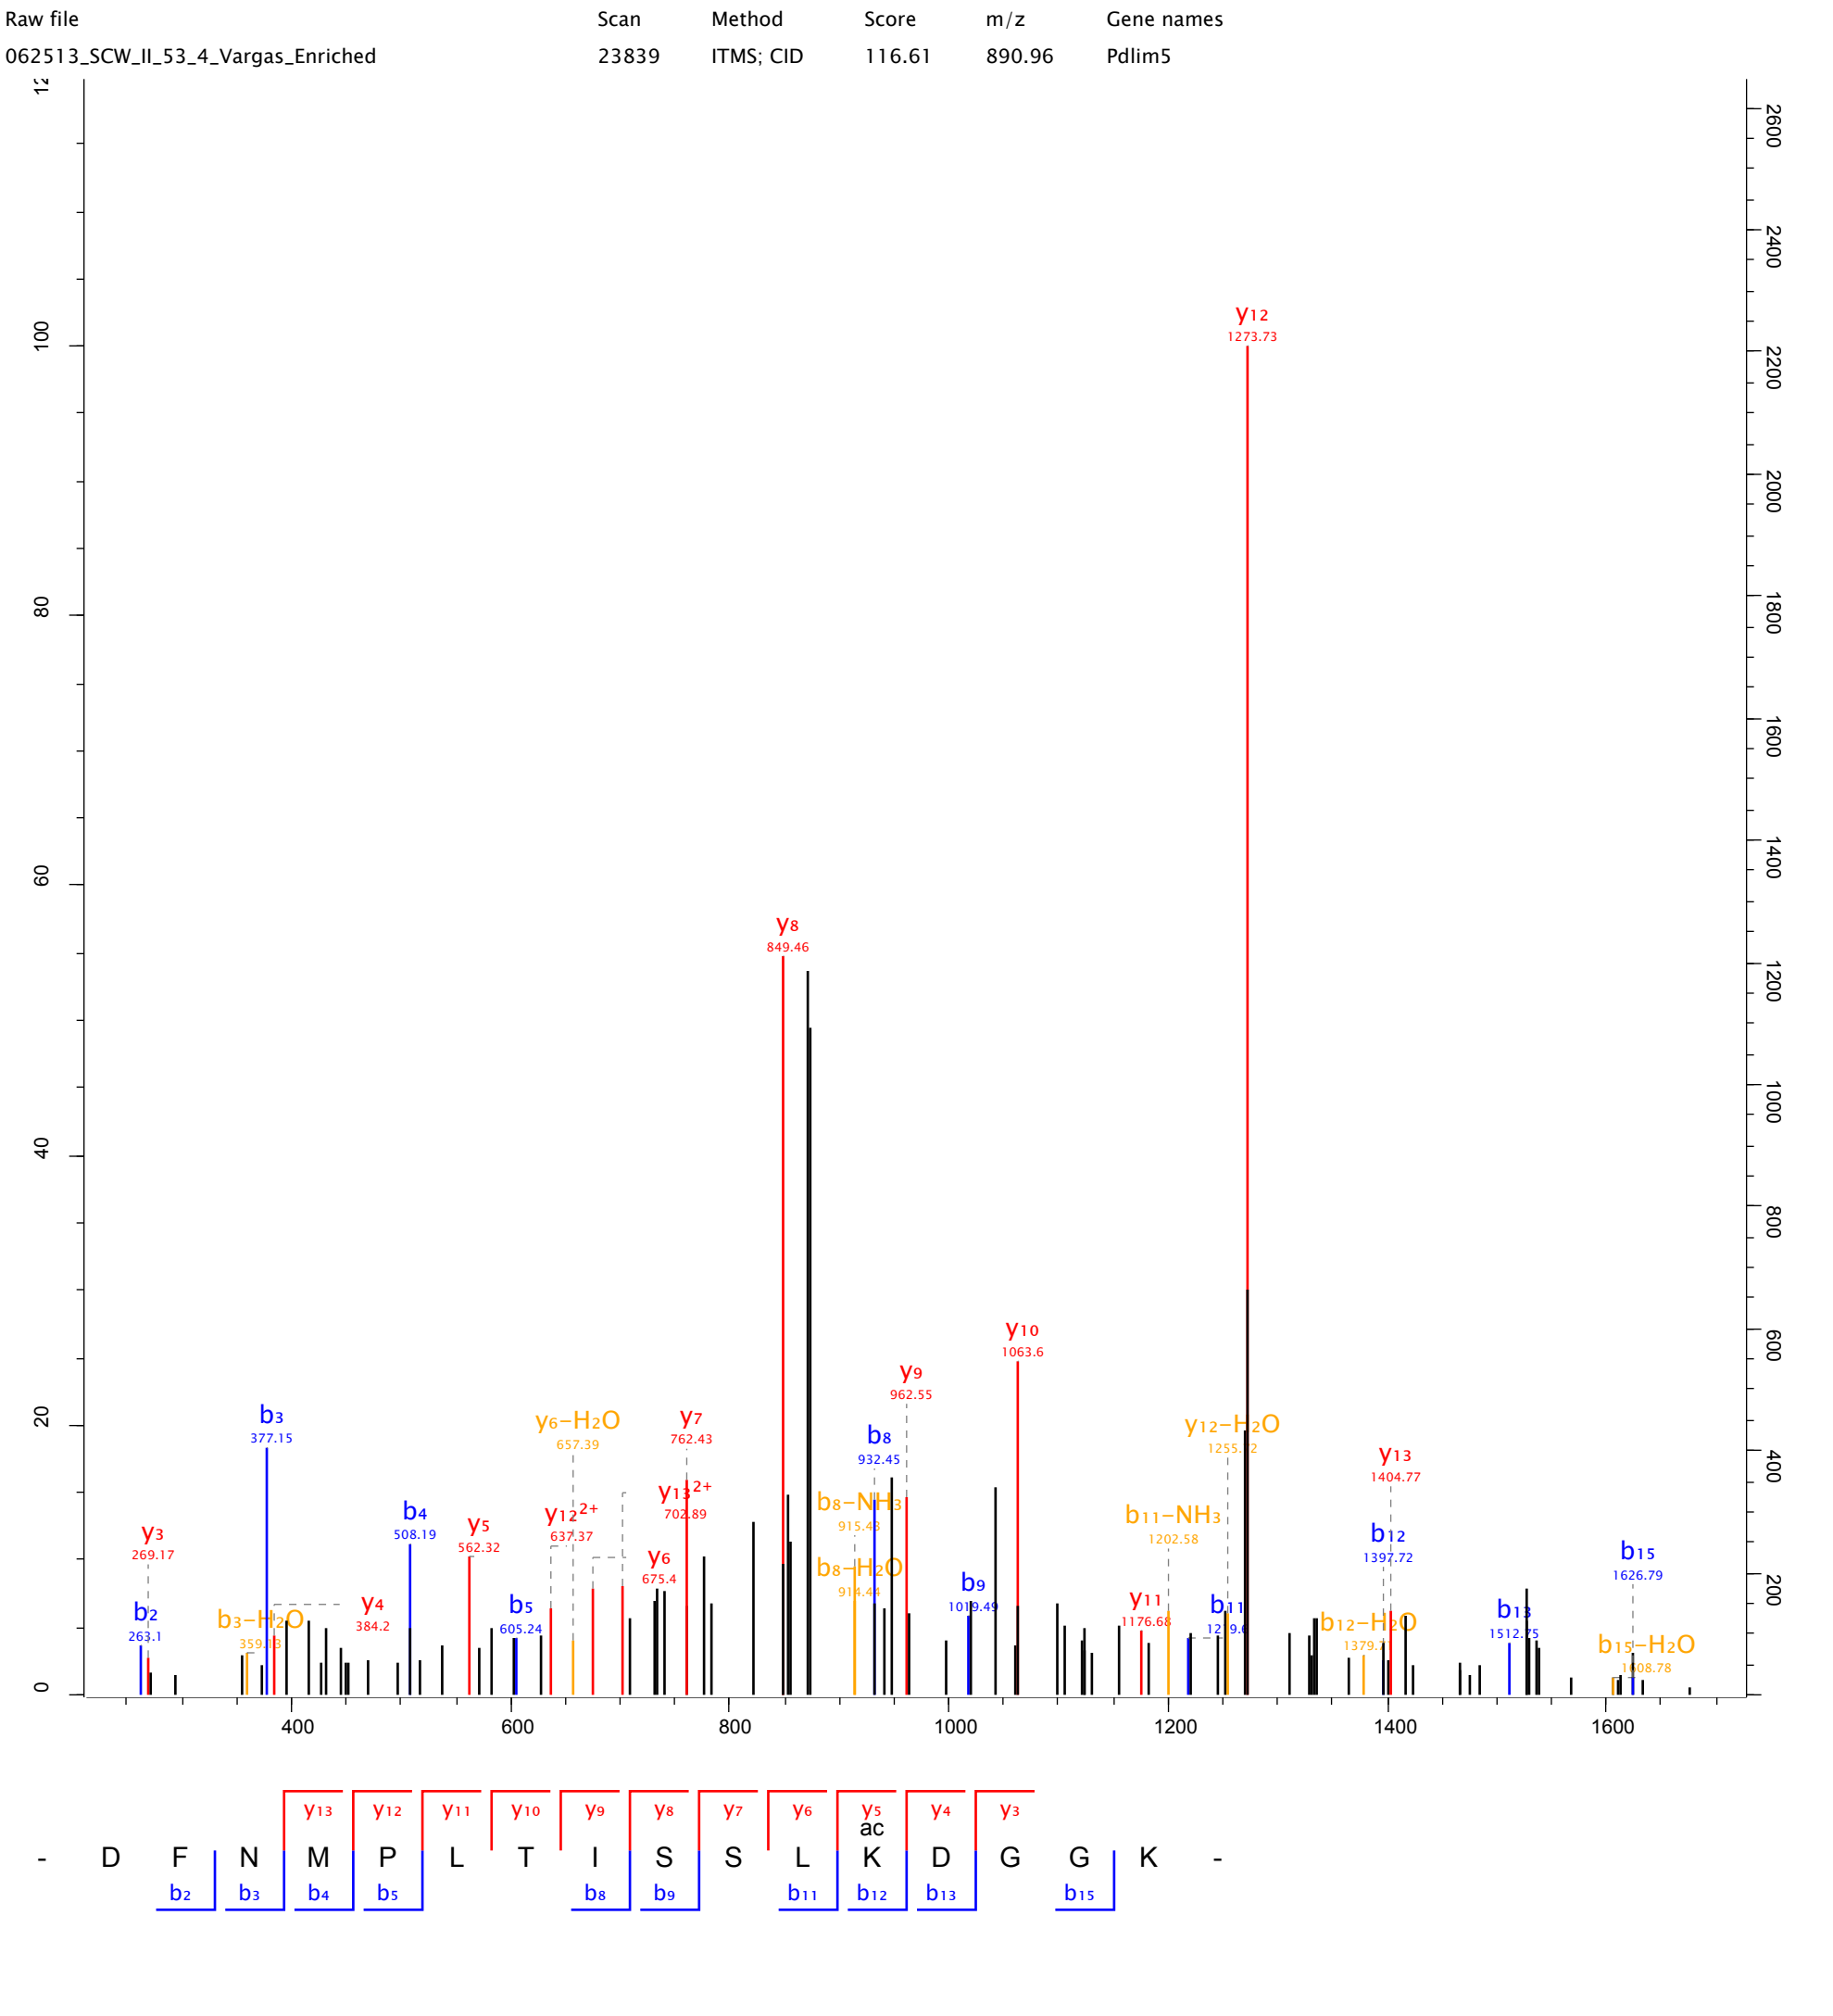

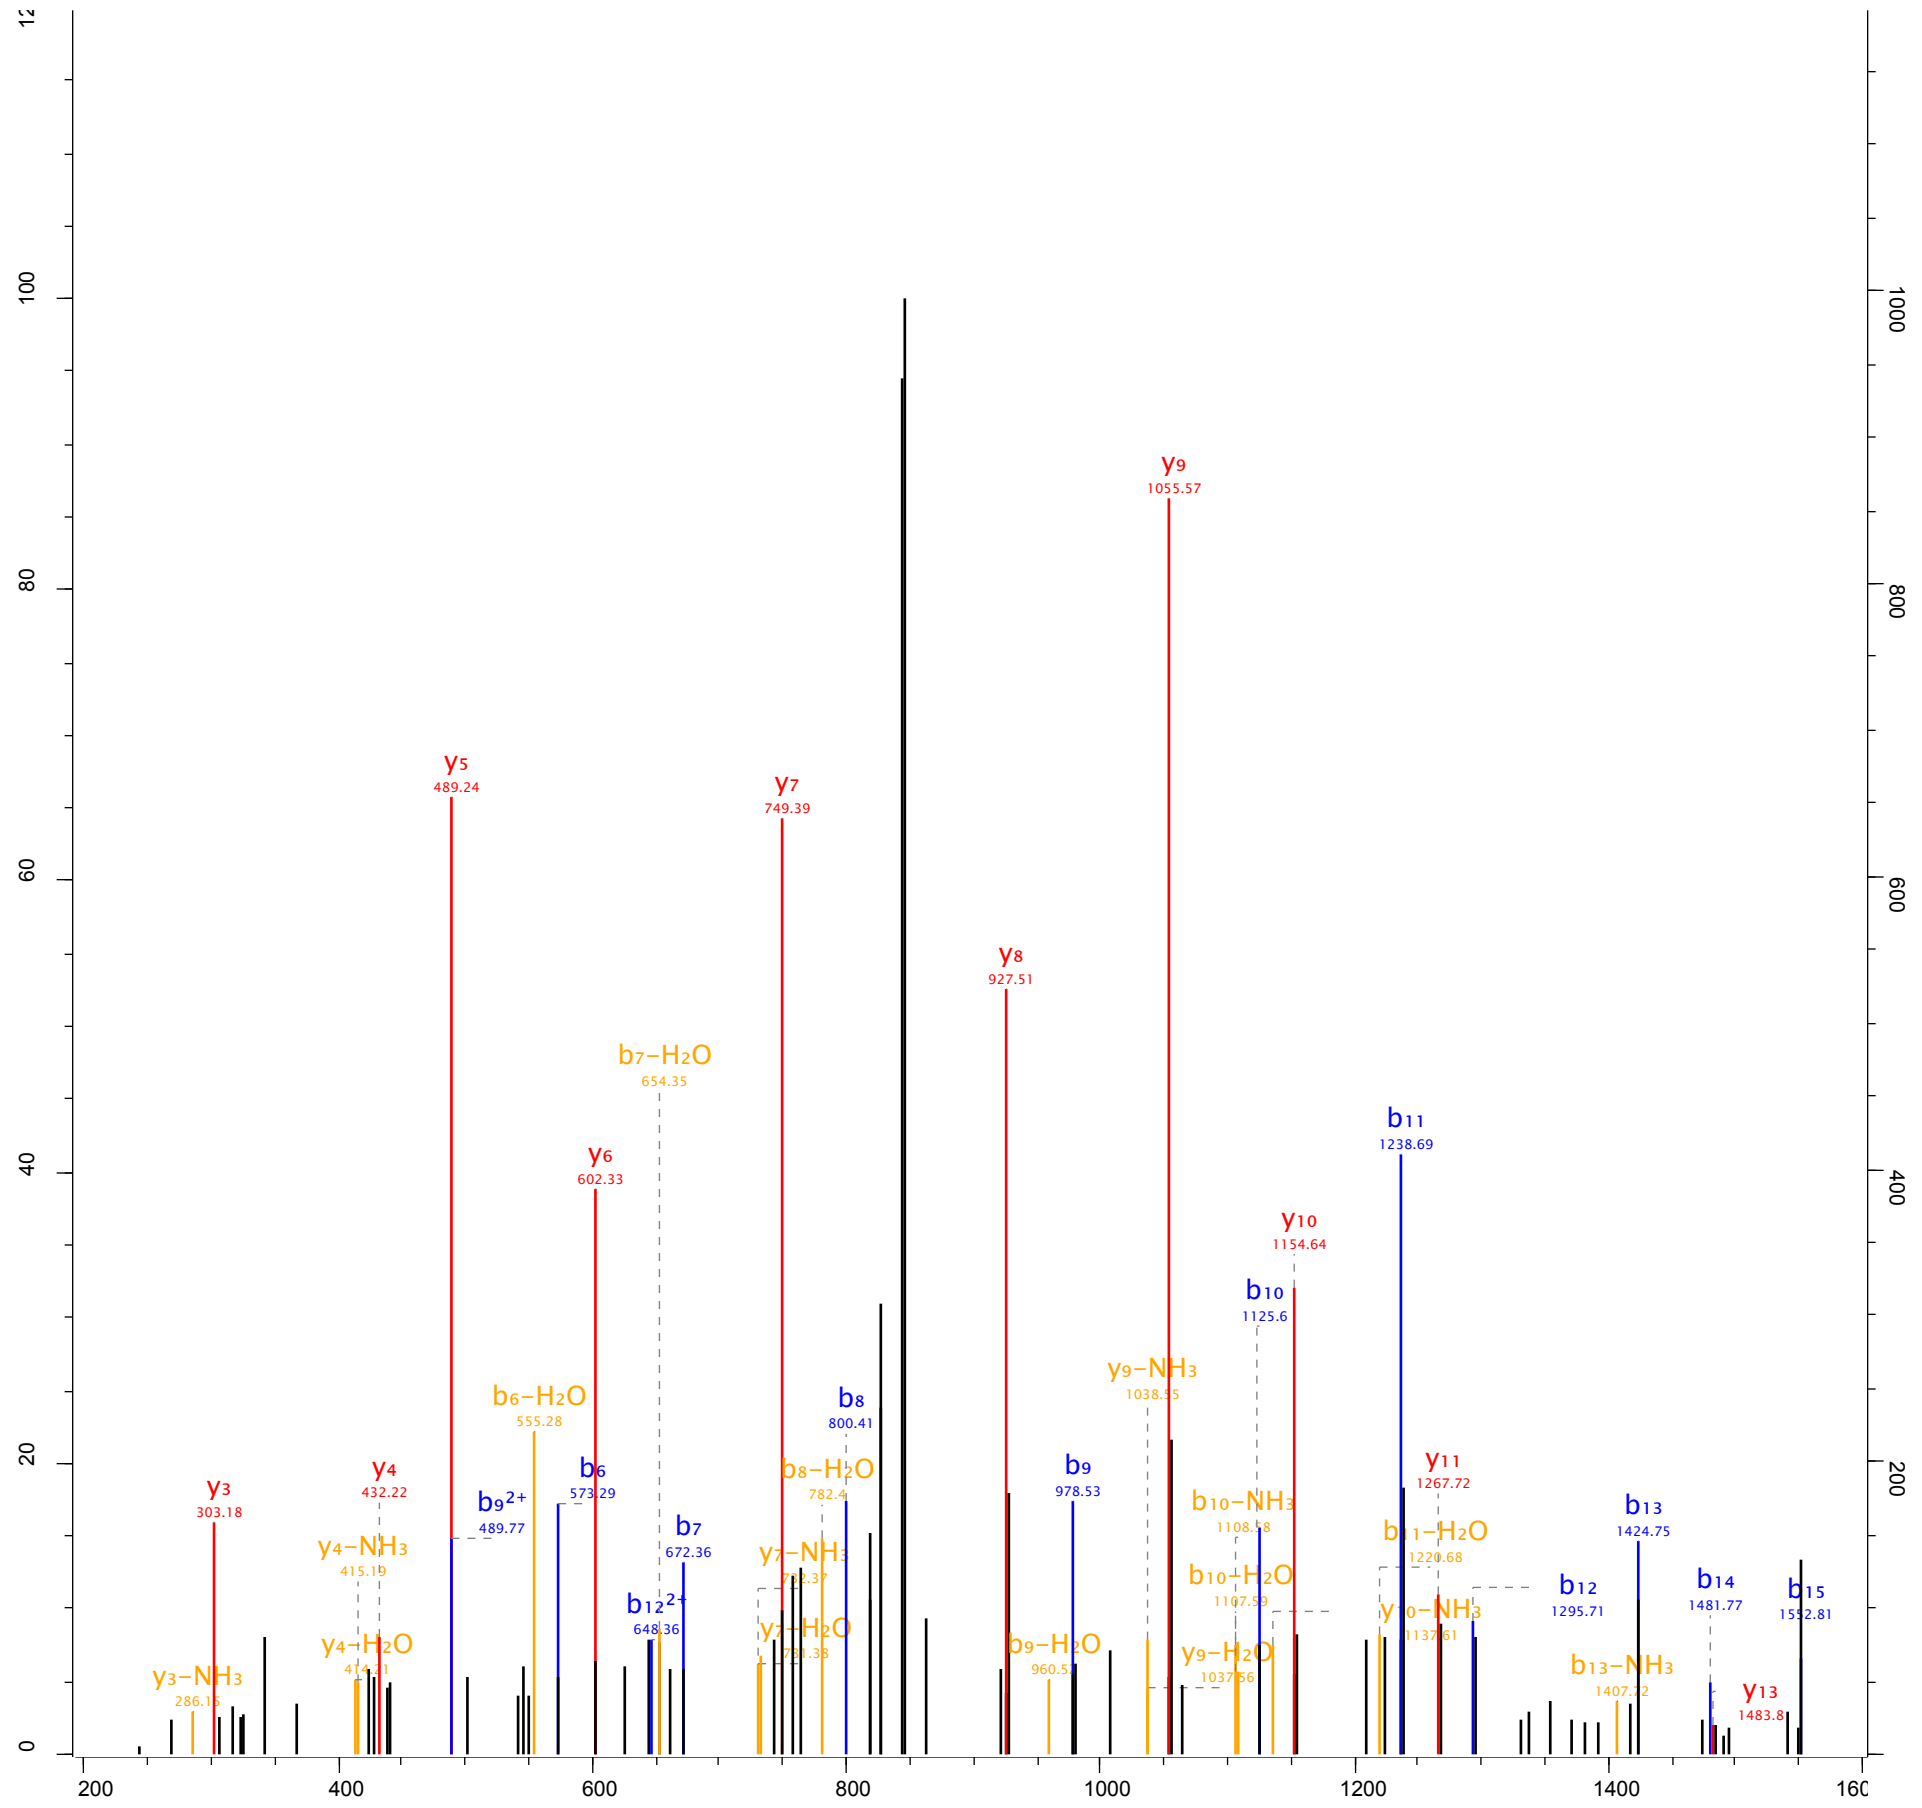

- V S G S E L V Q K F I G E G A R -

y13
y11
y10
y9
y8 ac
y7
y6
y5
y4
y3

b6
b7
b8
b9
b10
b11
b12
b13
b14
b15

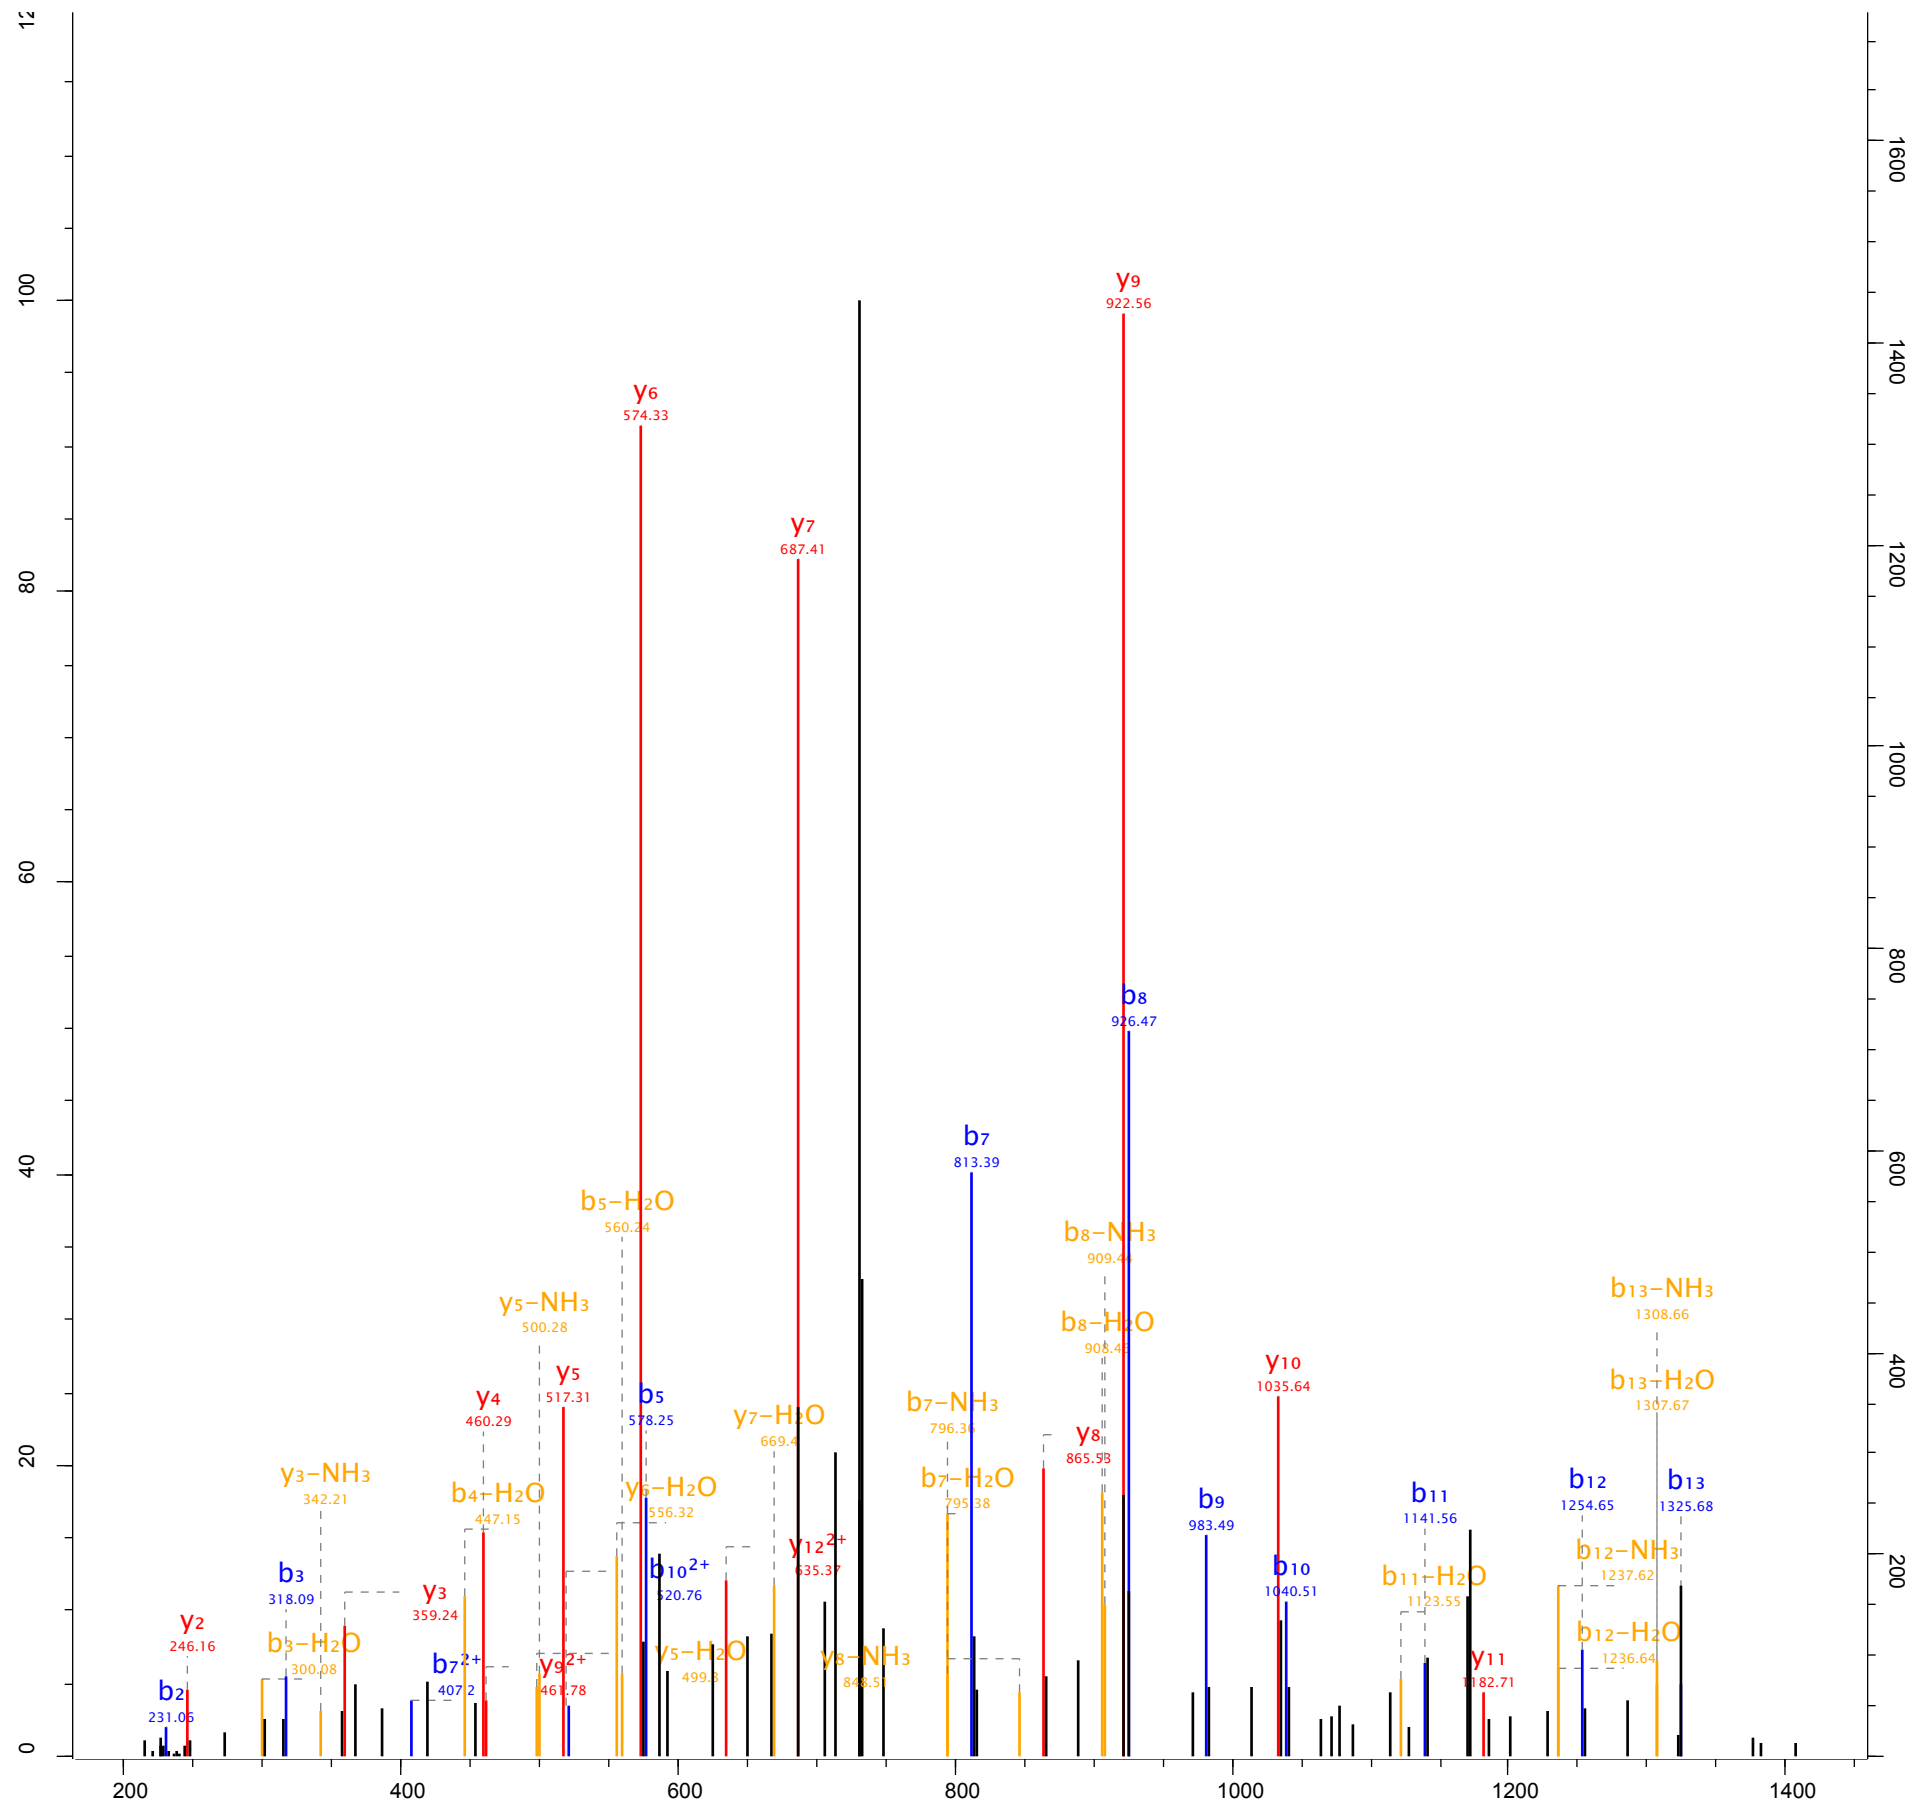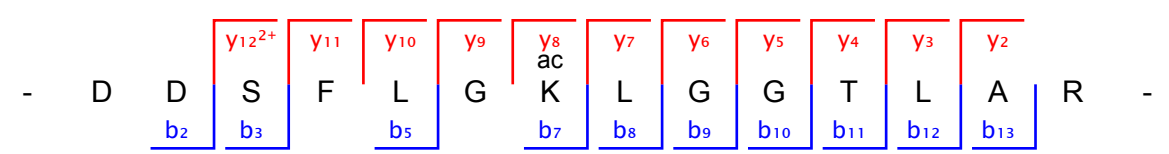

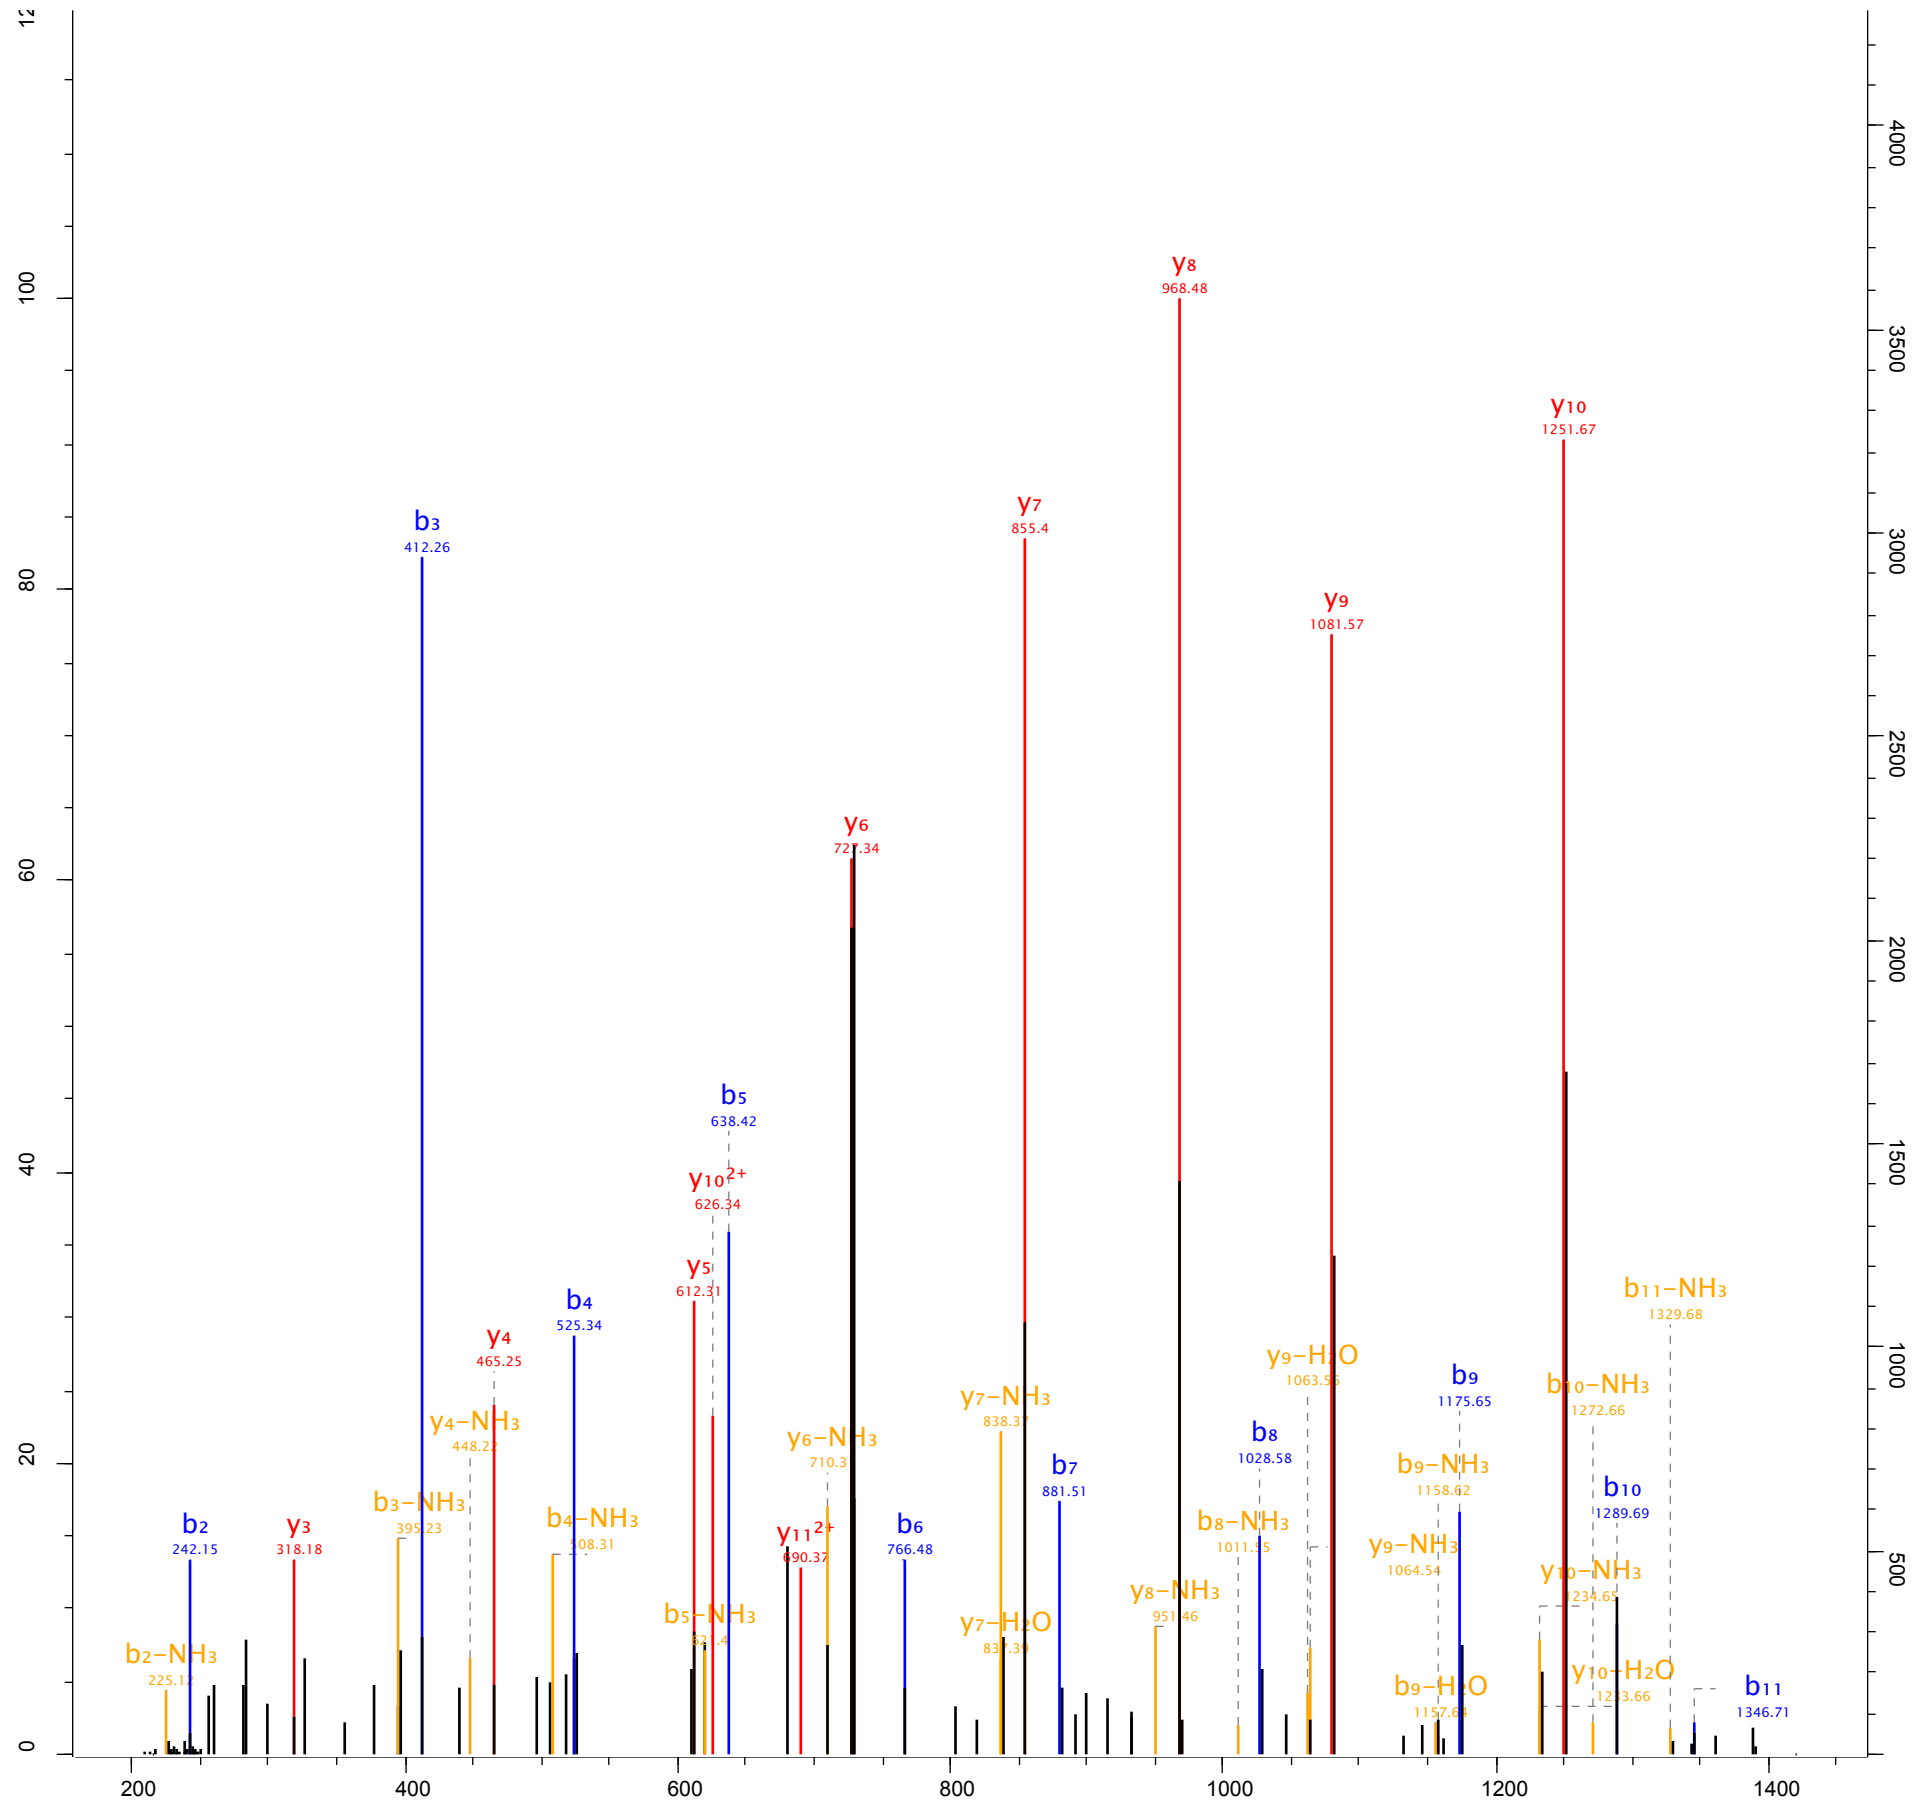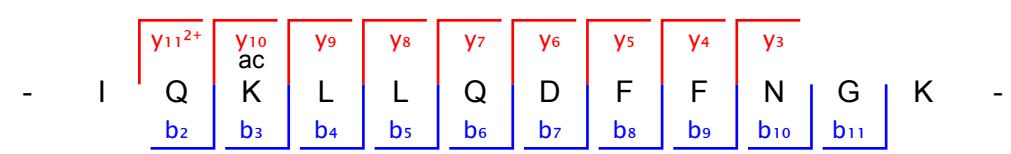



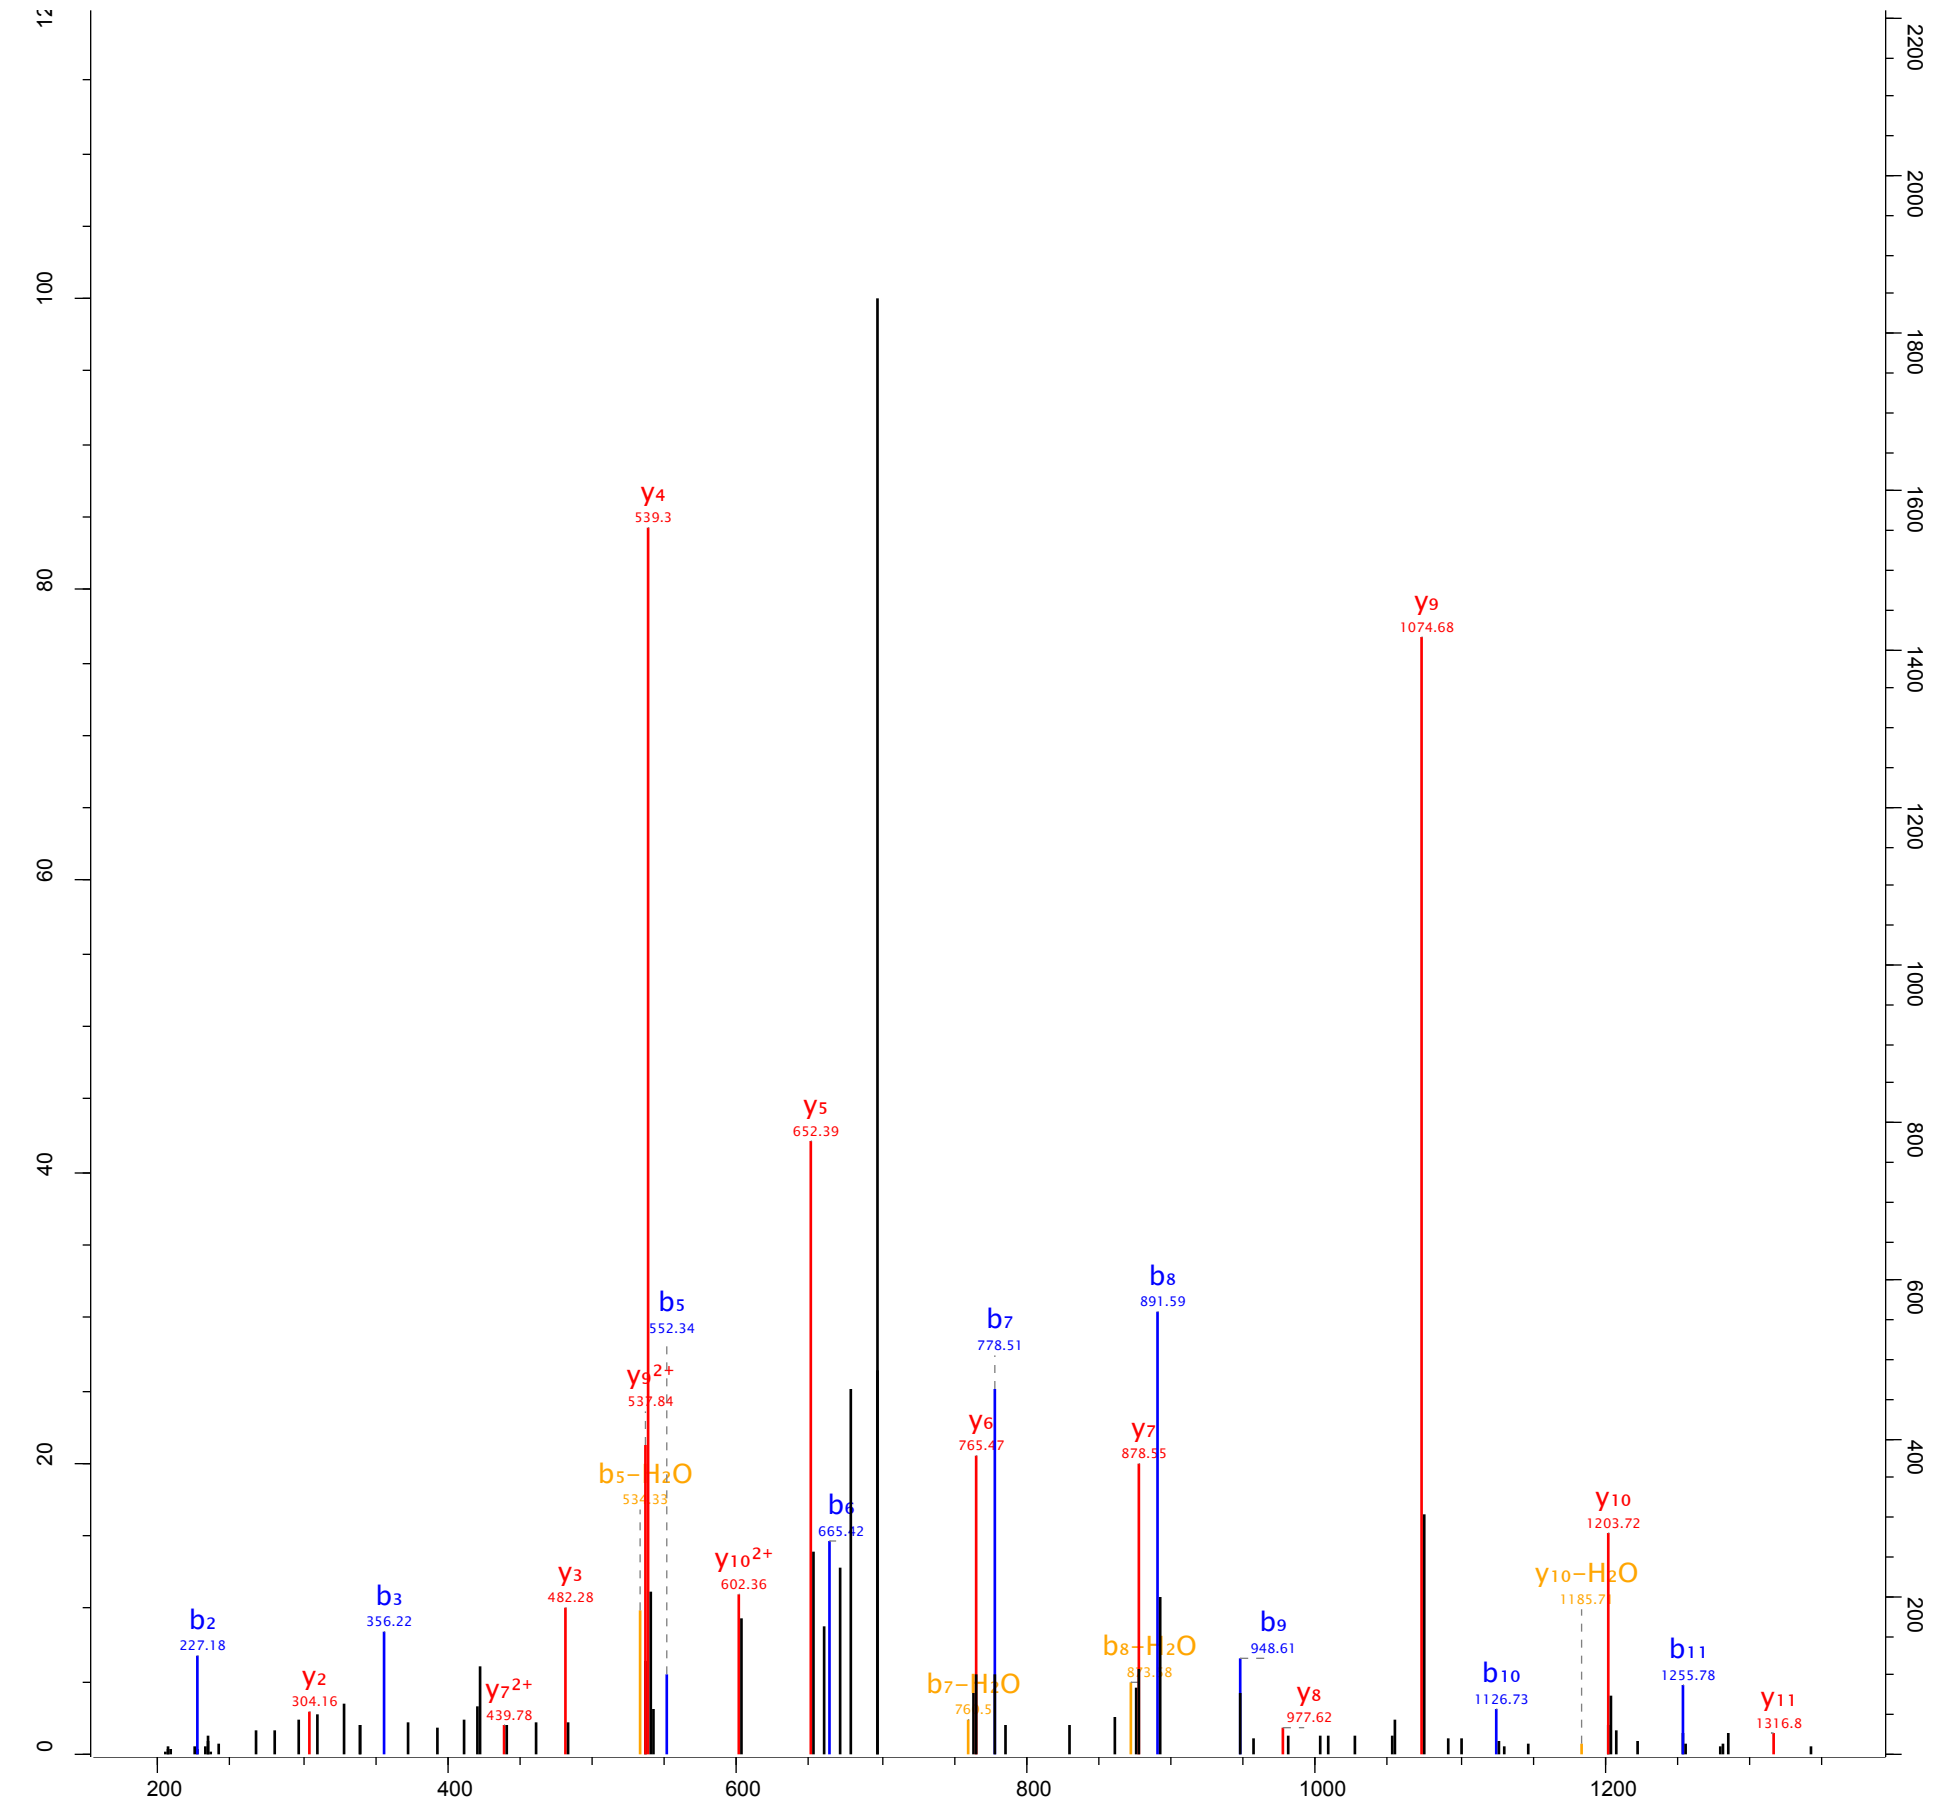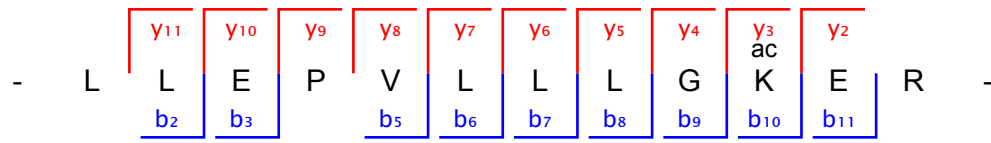

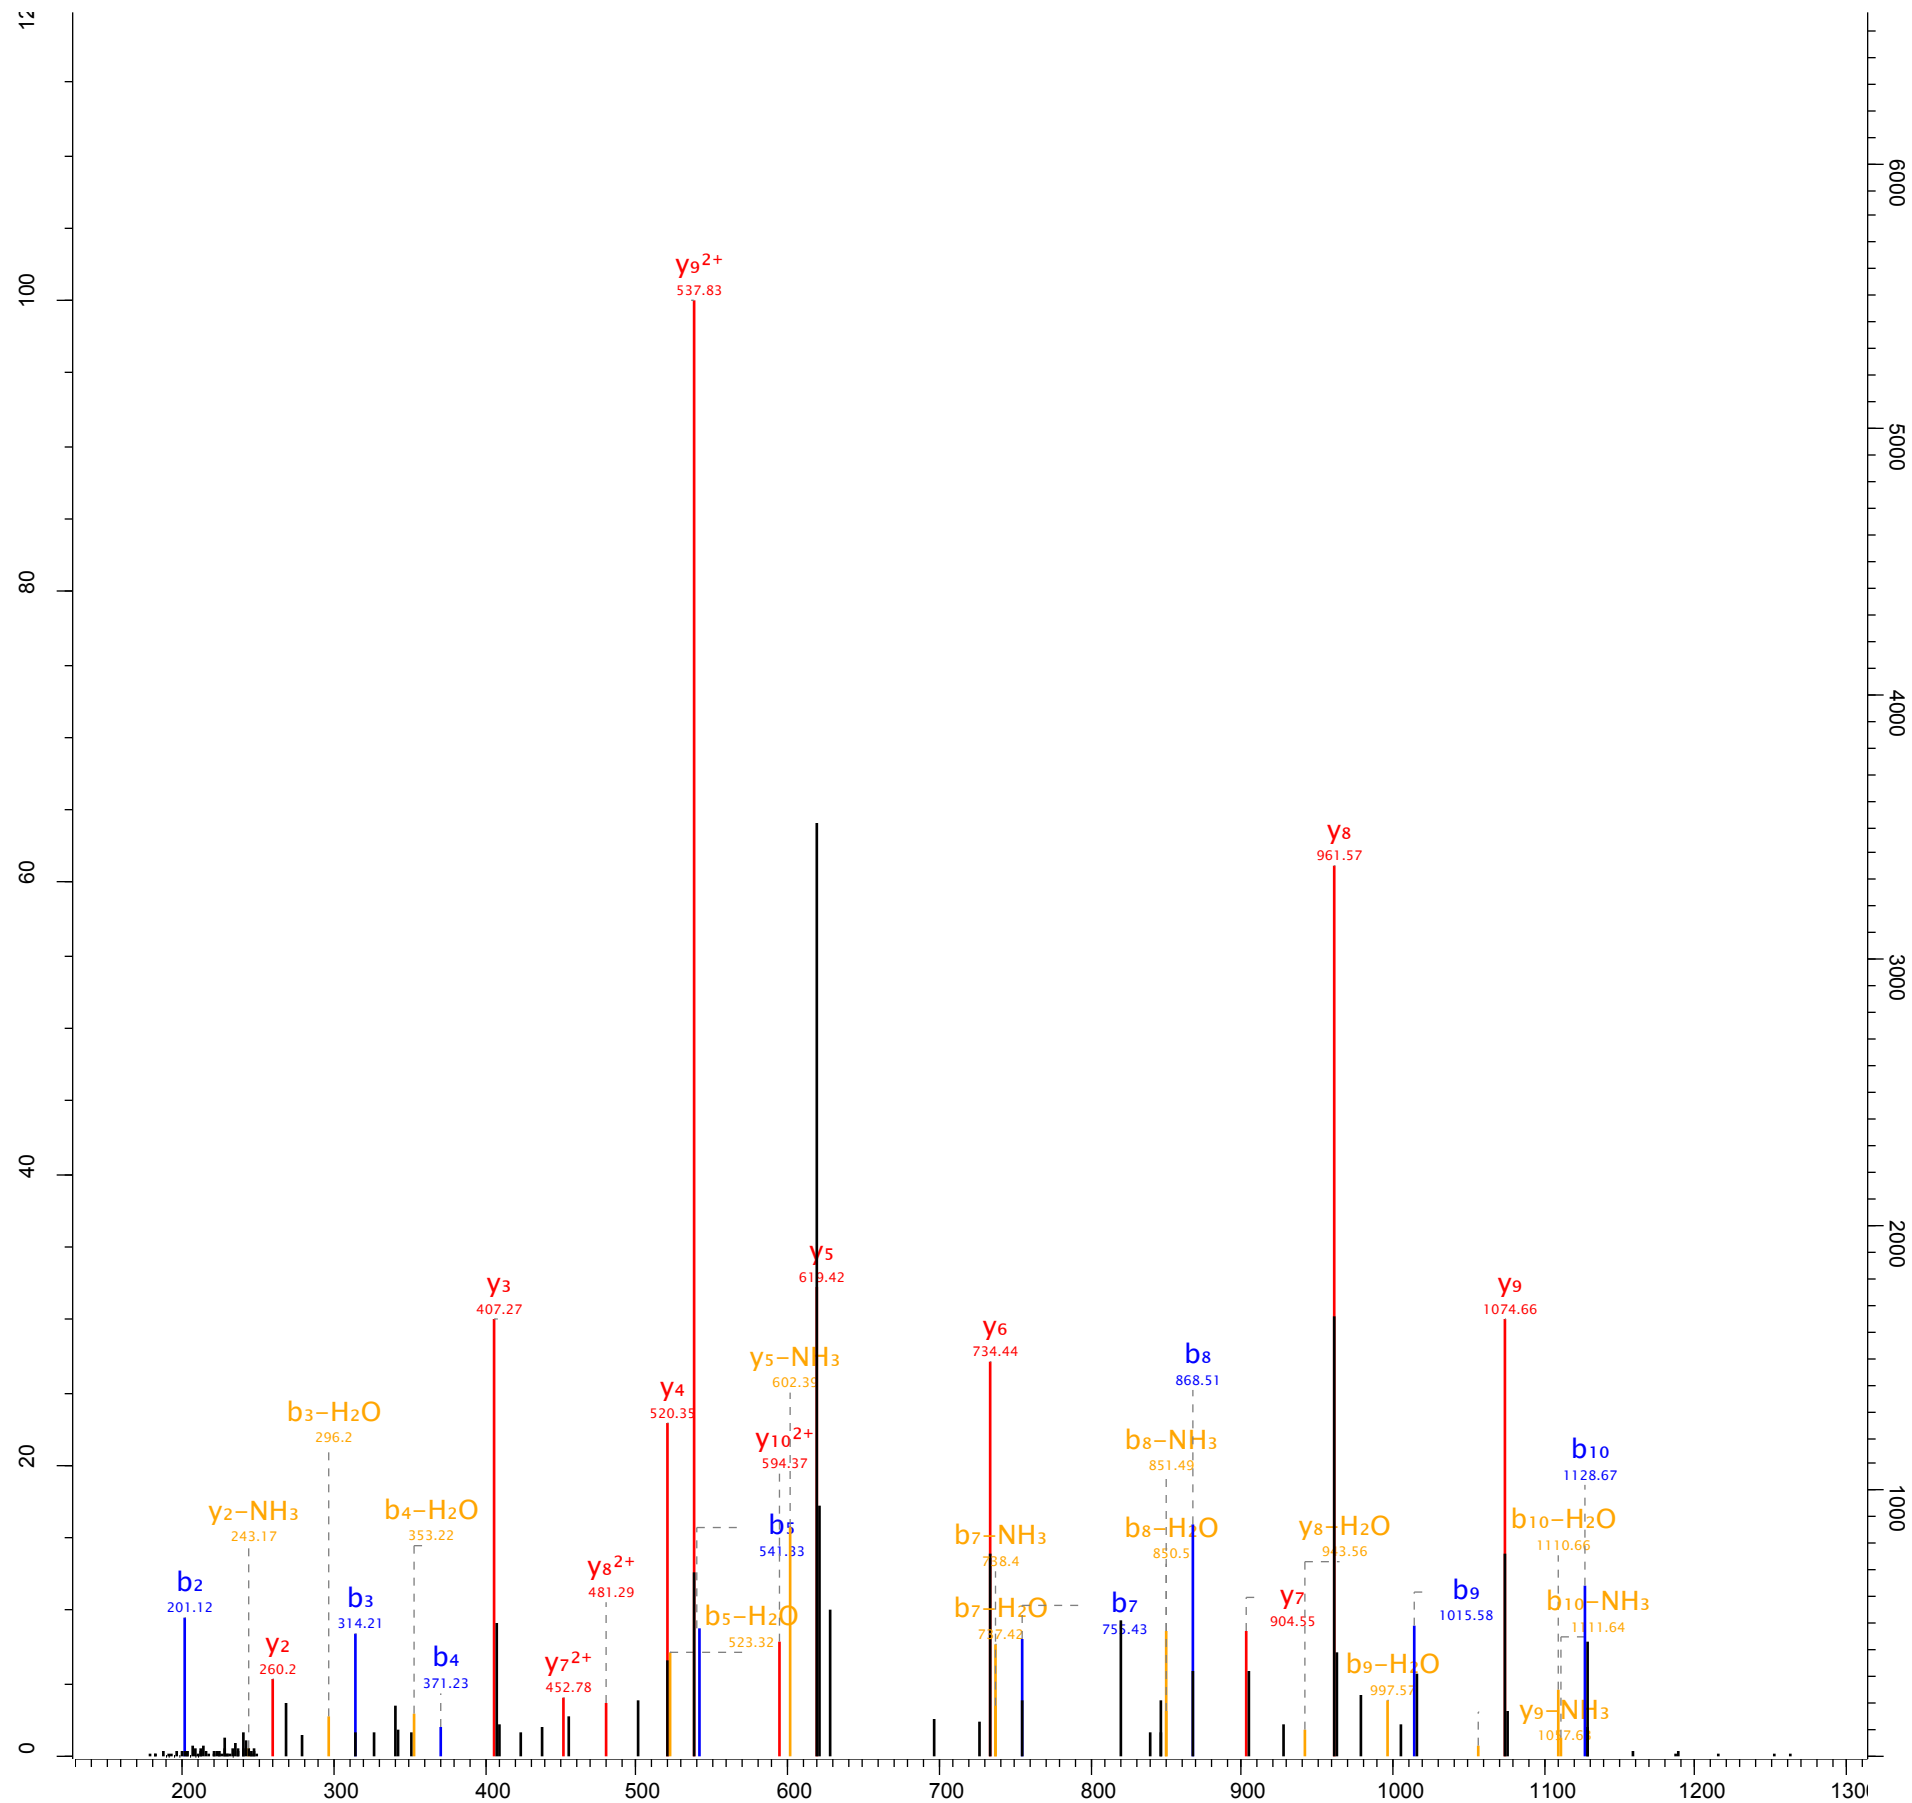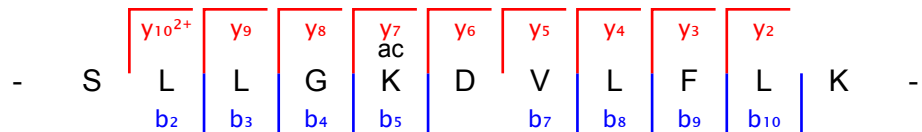

062513\_SCW\_II\_53\_4\_Vargas\_Enriched

24546

ITMS; CID

141.59

713.44

Rps25

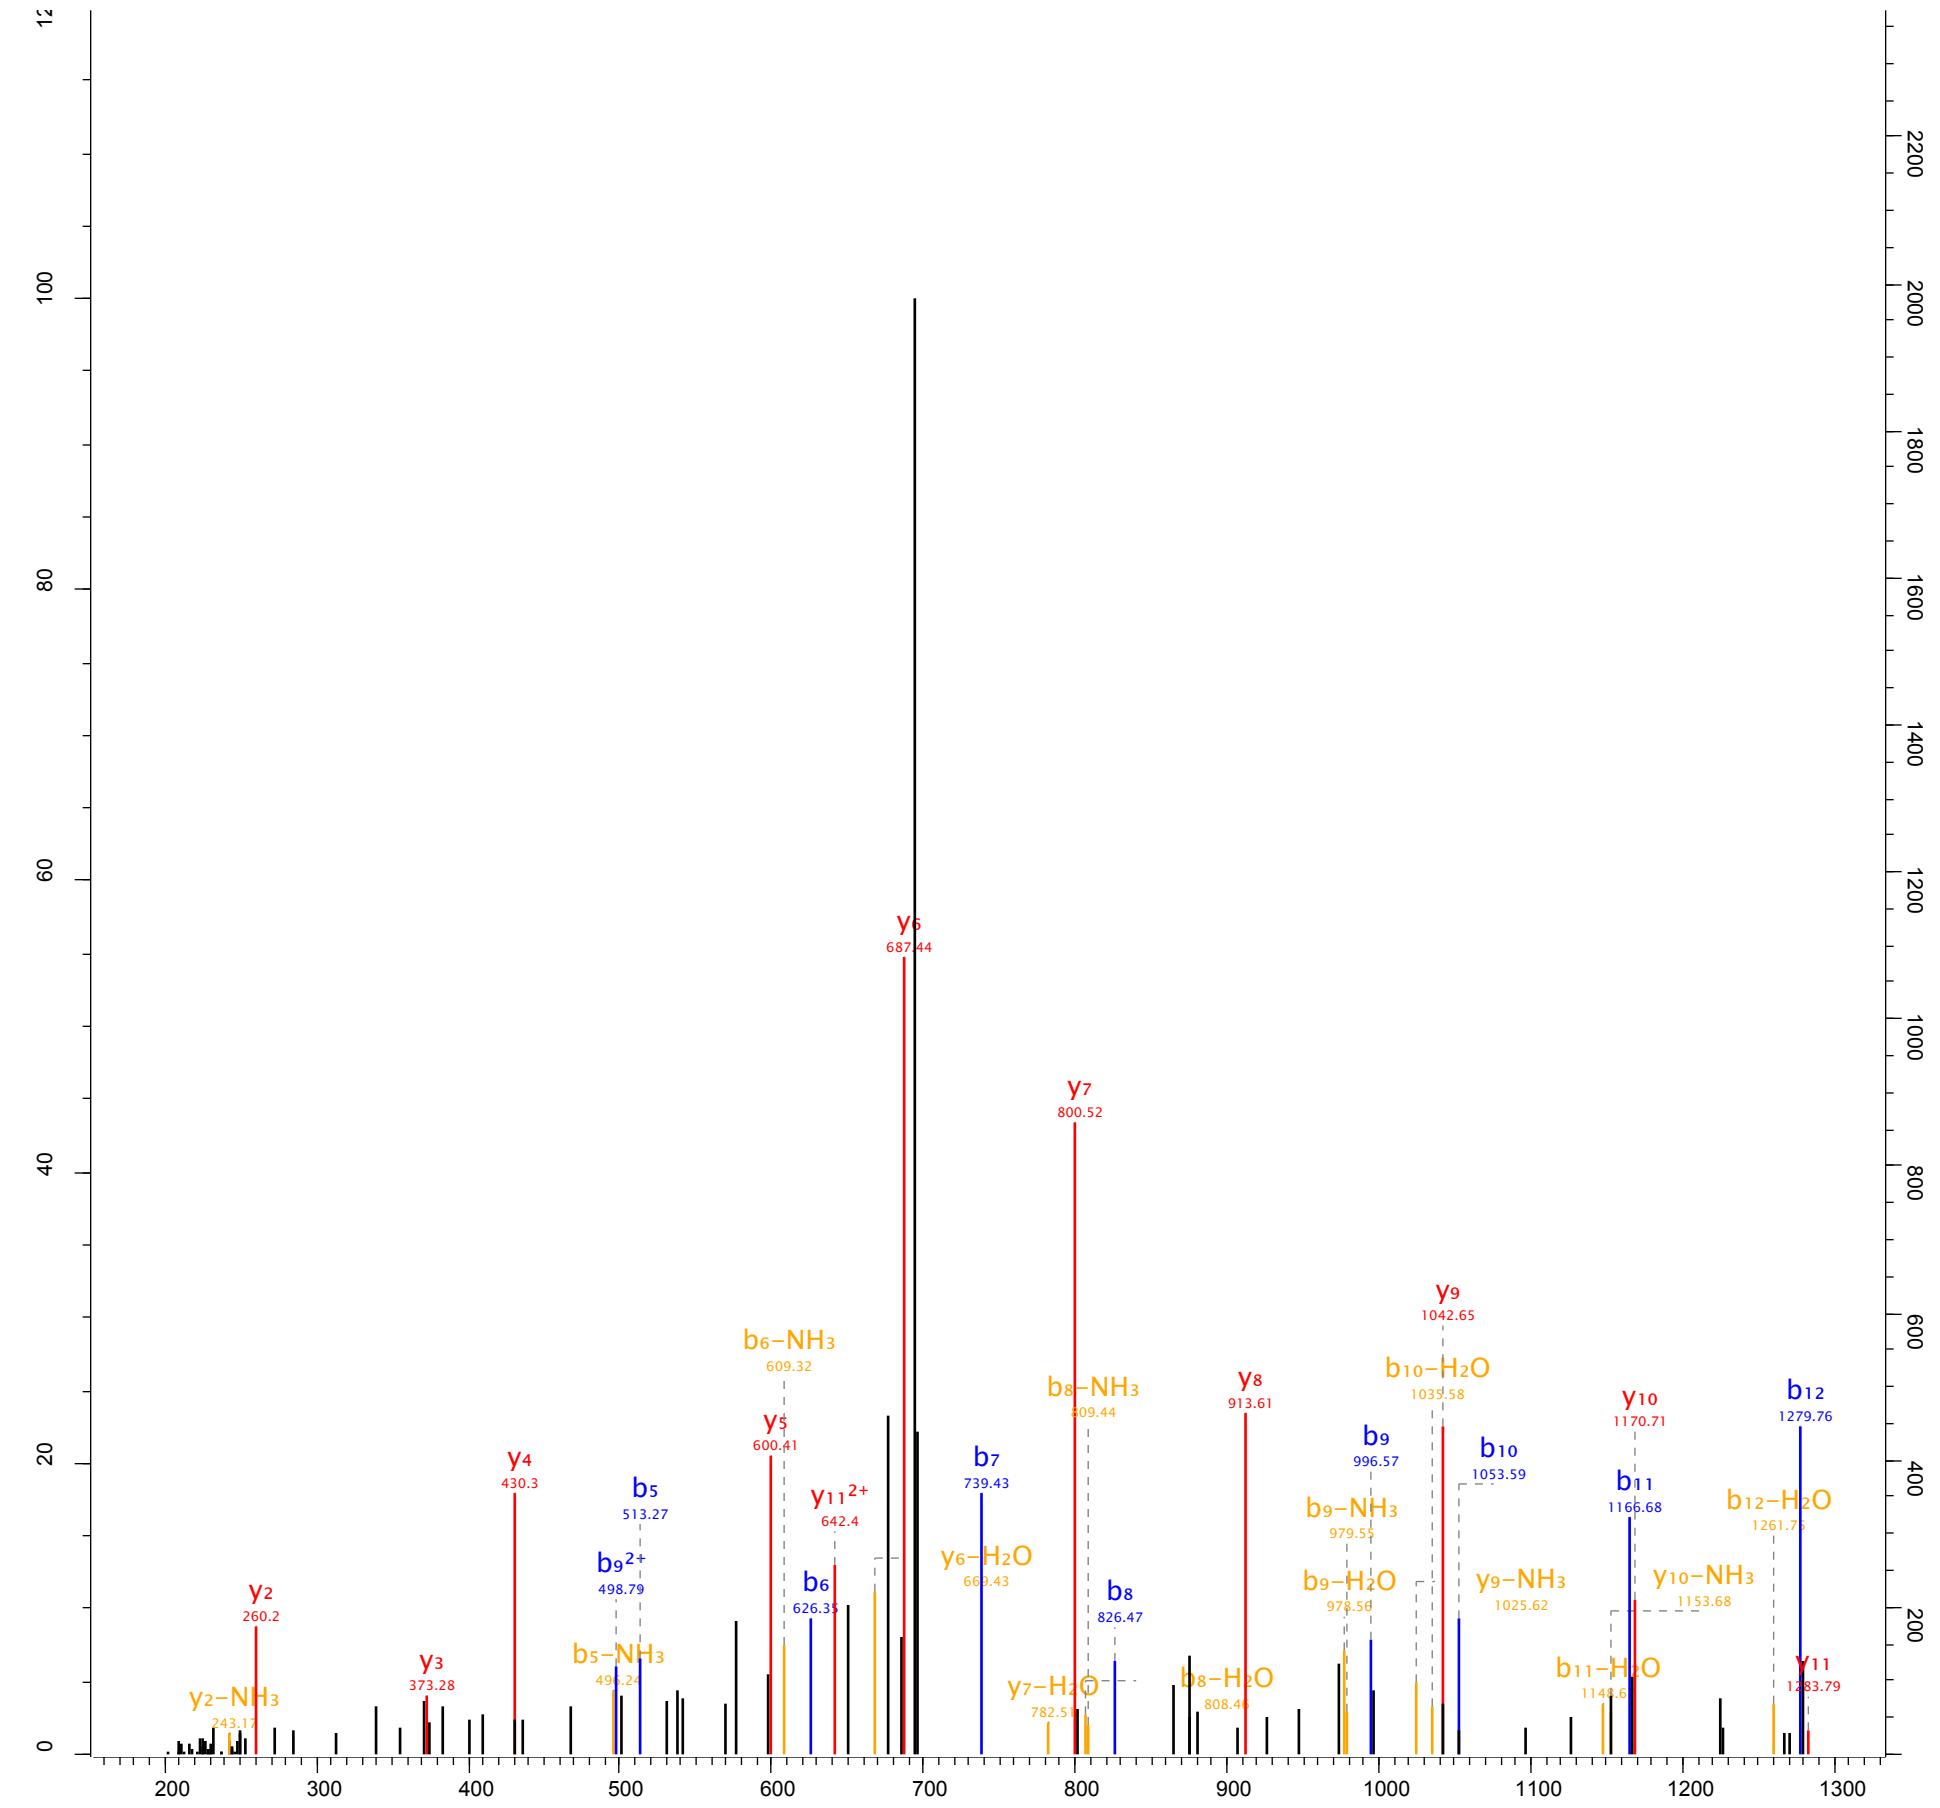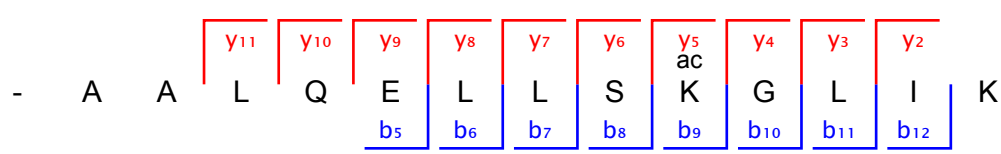

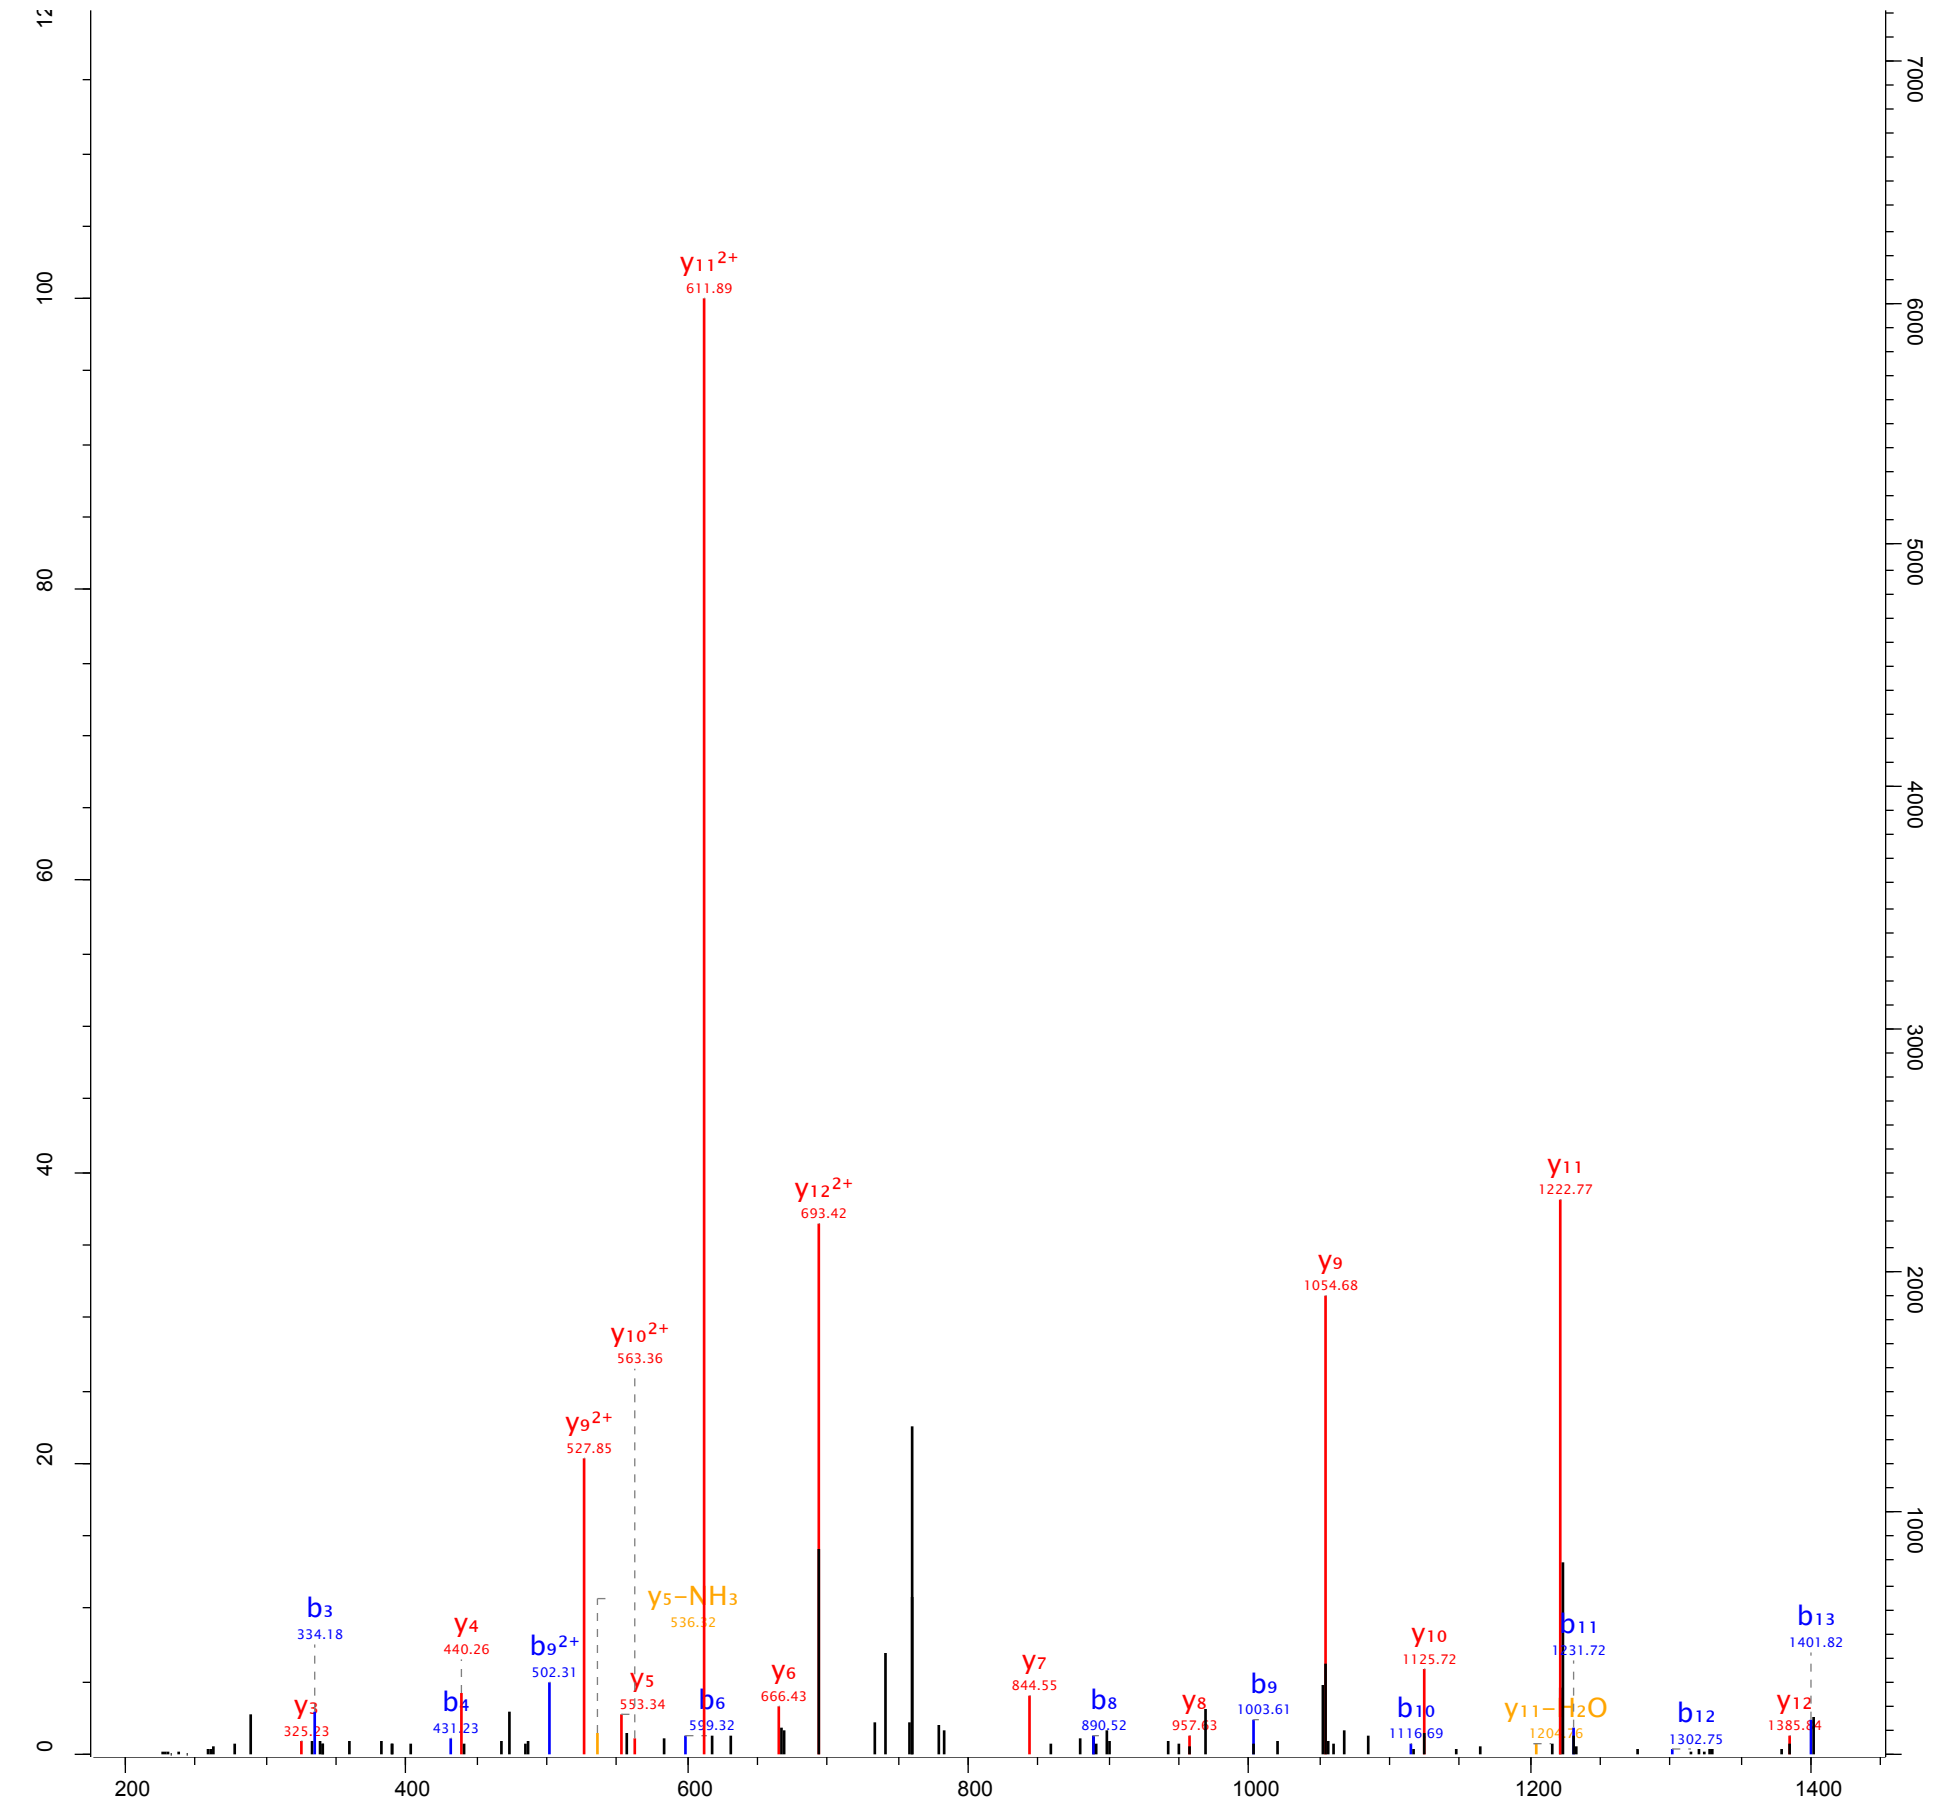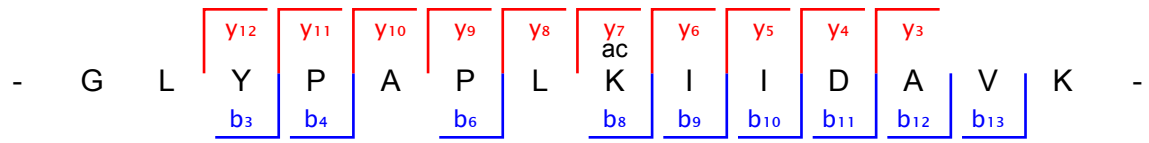

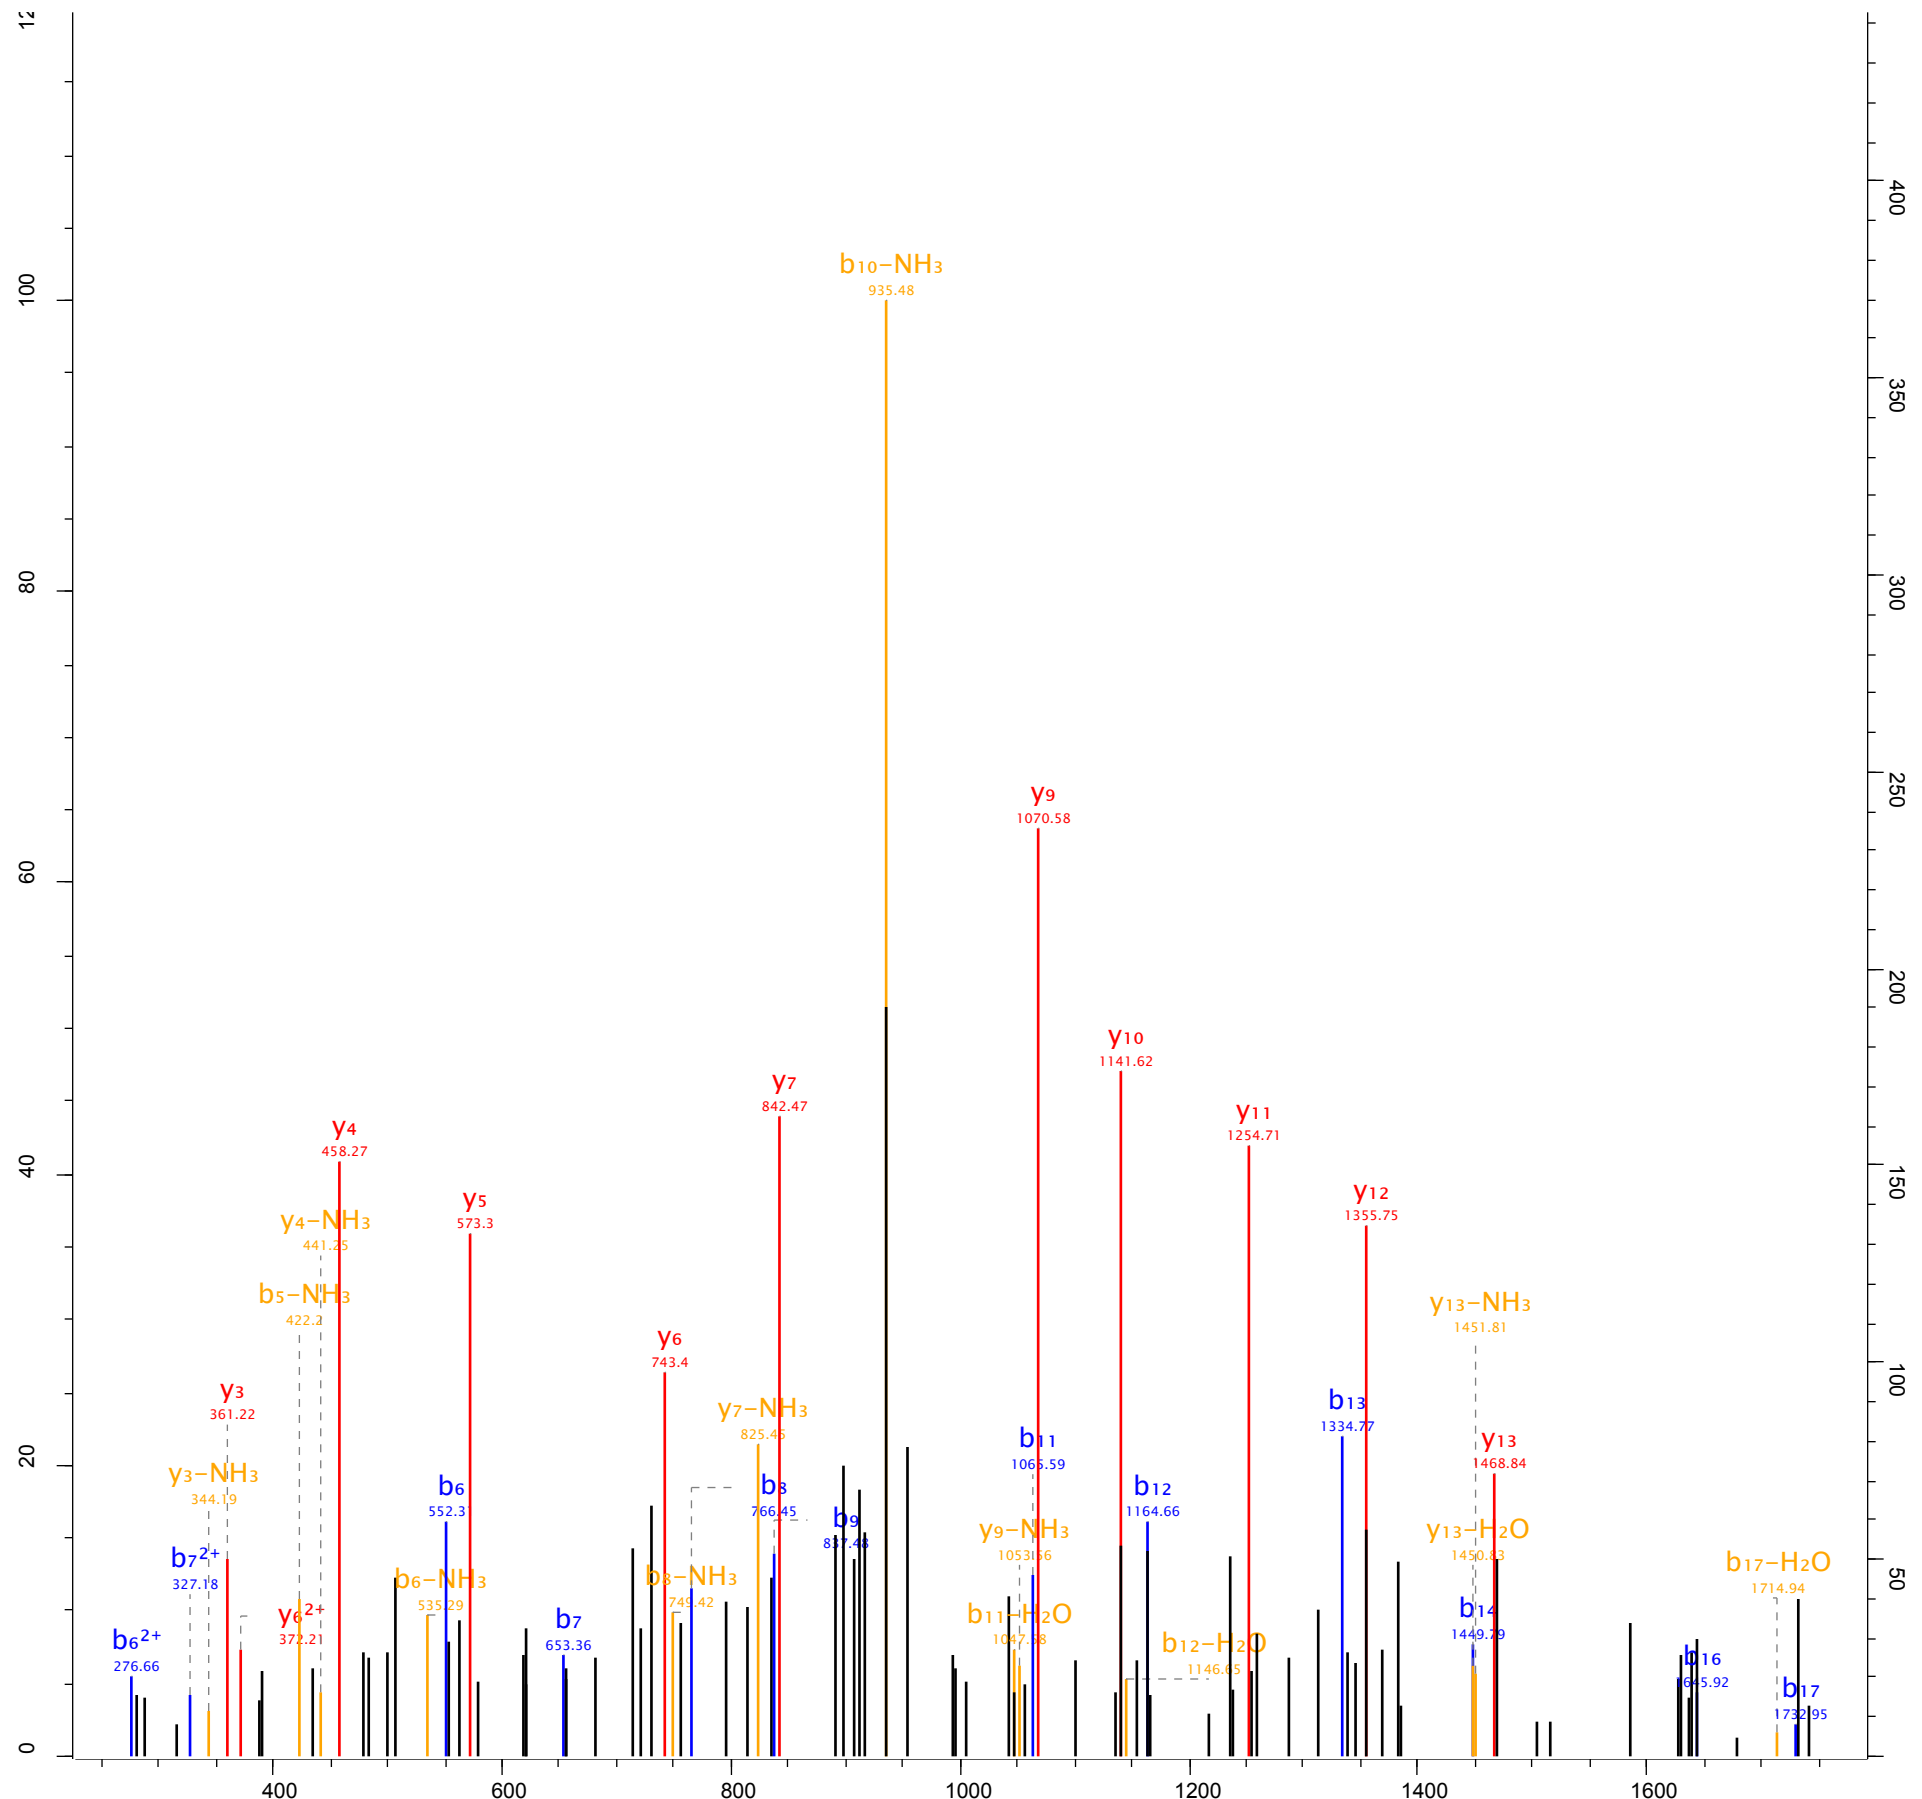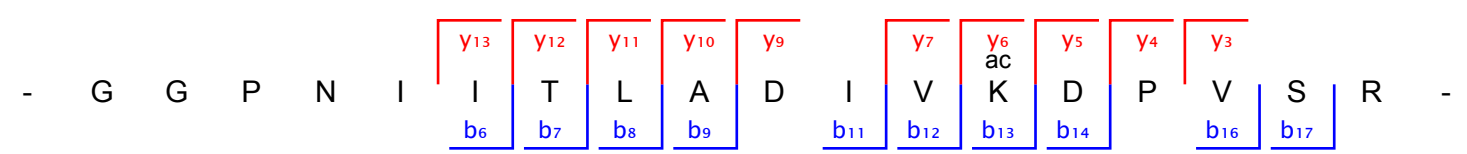

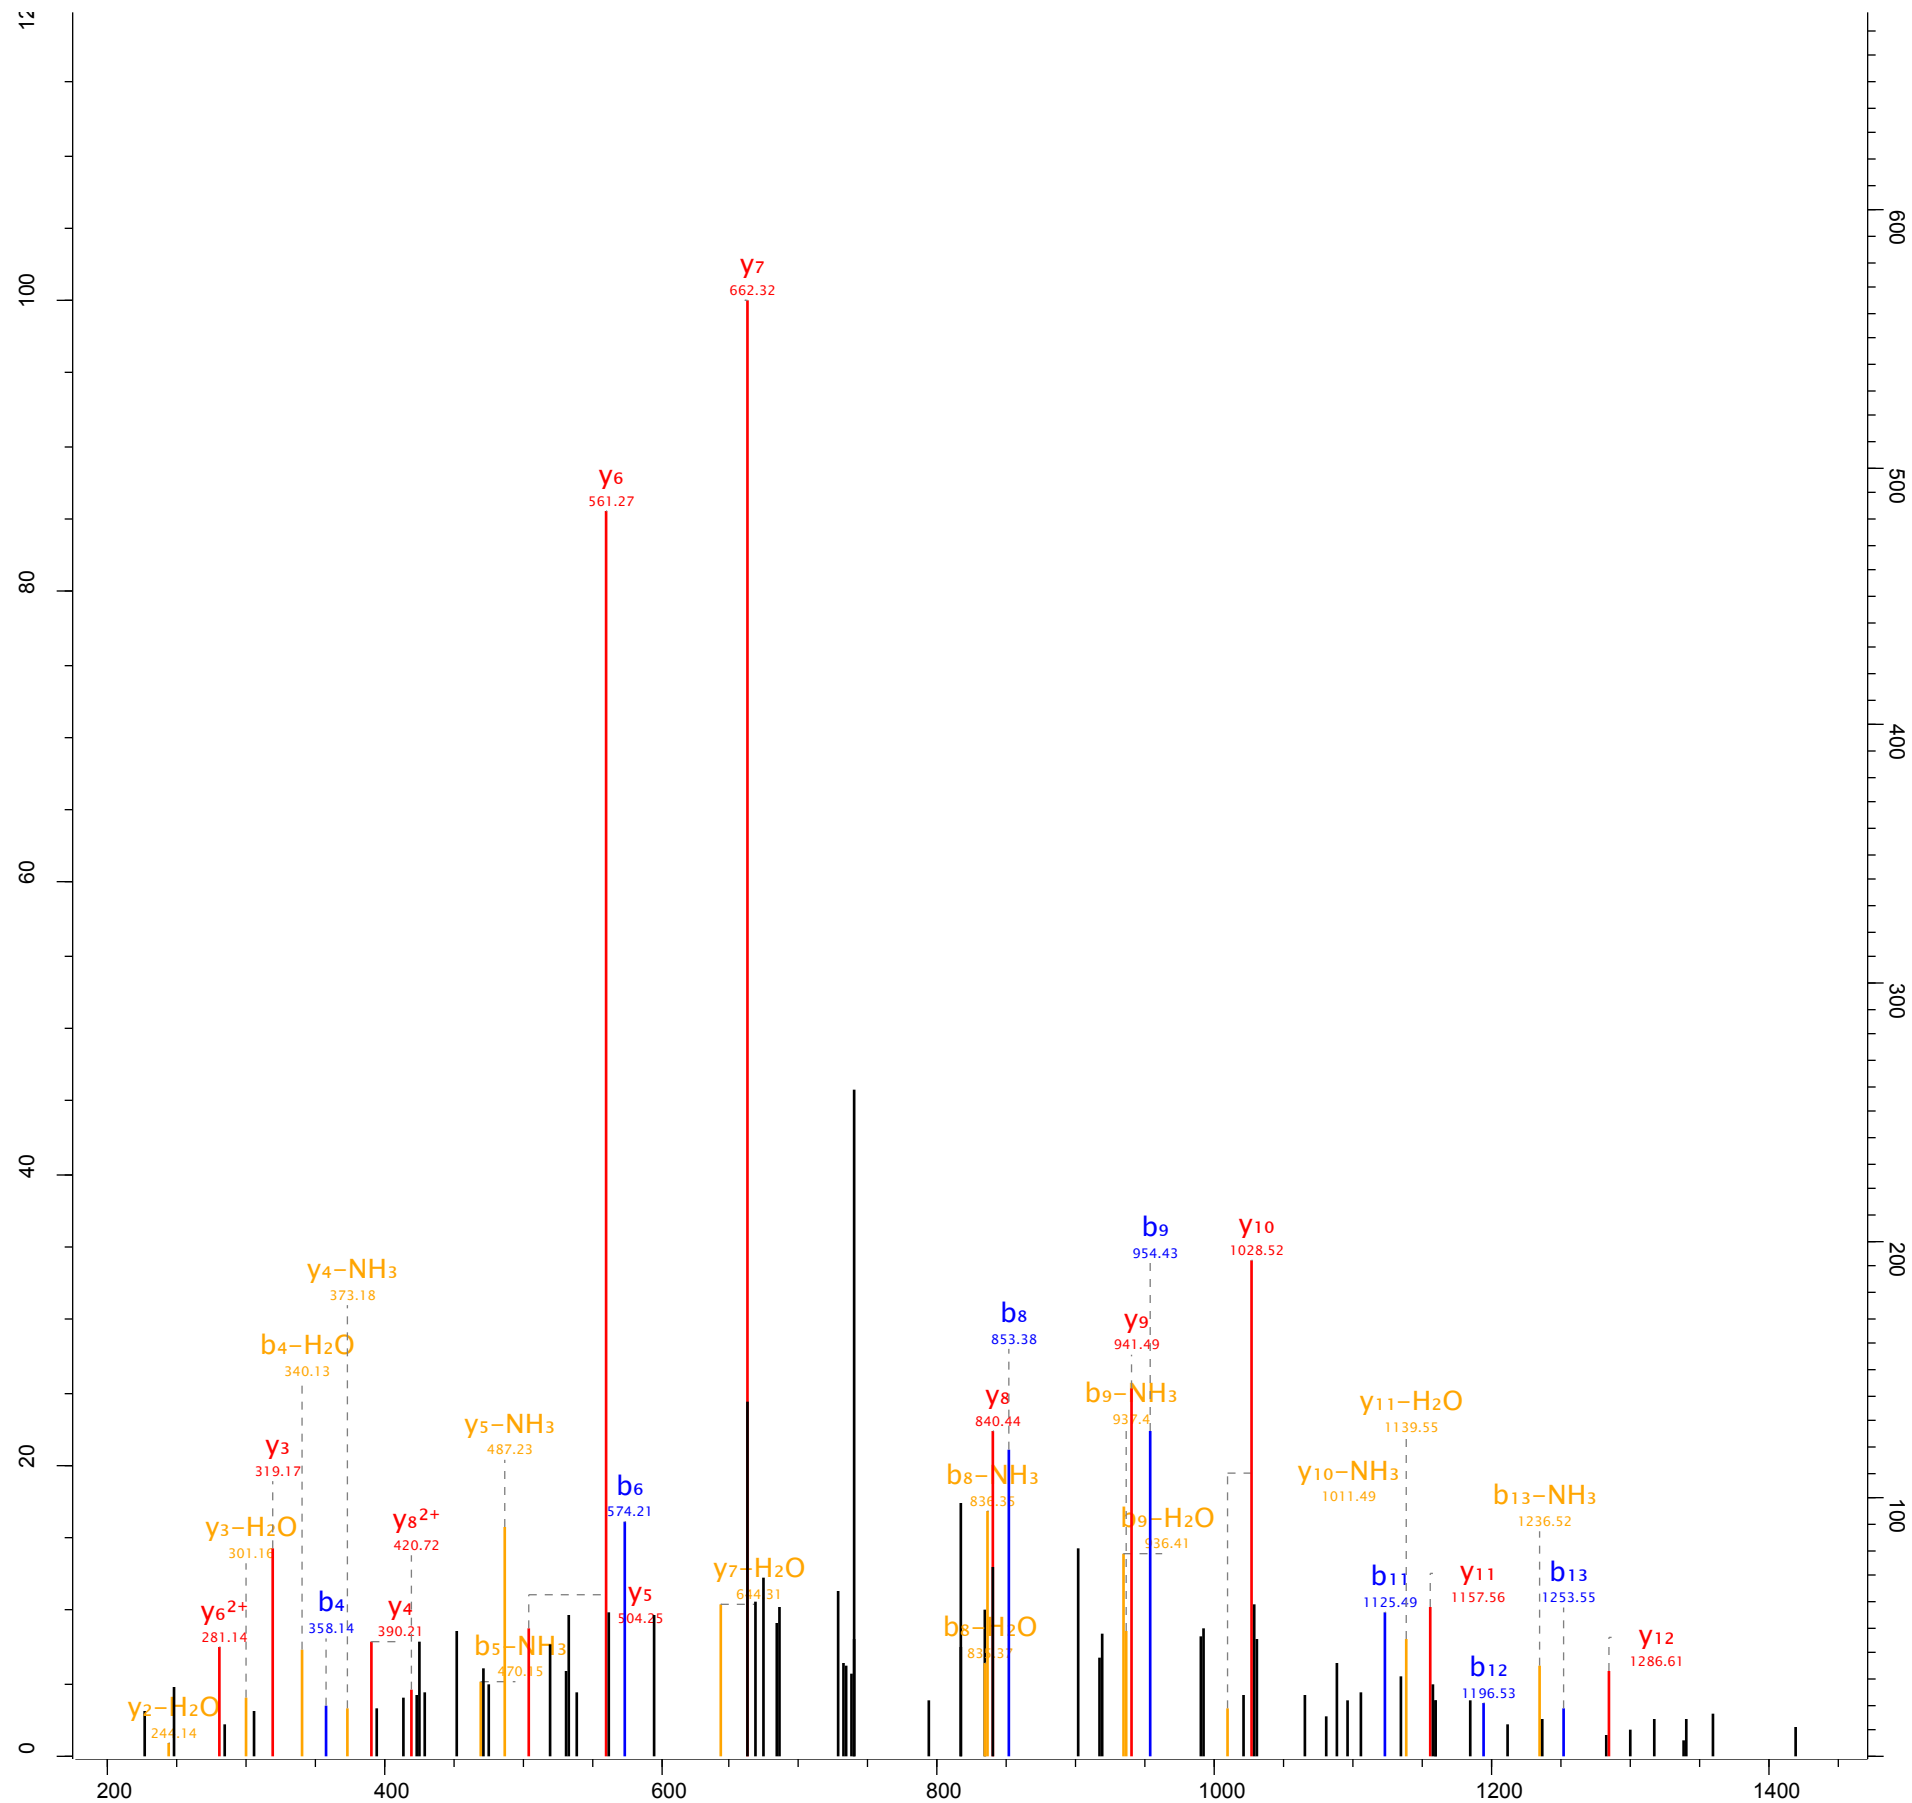

- G G N E E S T K T G N A G S R -

Fragmentation mapping: Red boxes above the sequence indicate y ions (y3 to y12) and blue boxes below indicate b ions (b4 to b13). Vertical dashed lines connect the b and y ions to their corresponding amino acid residues.

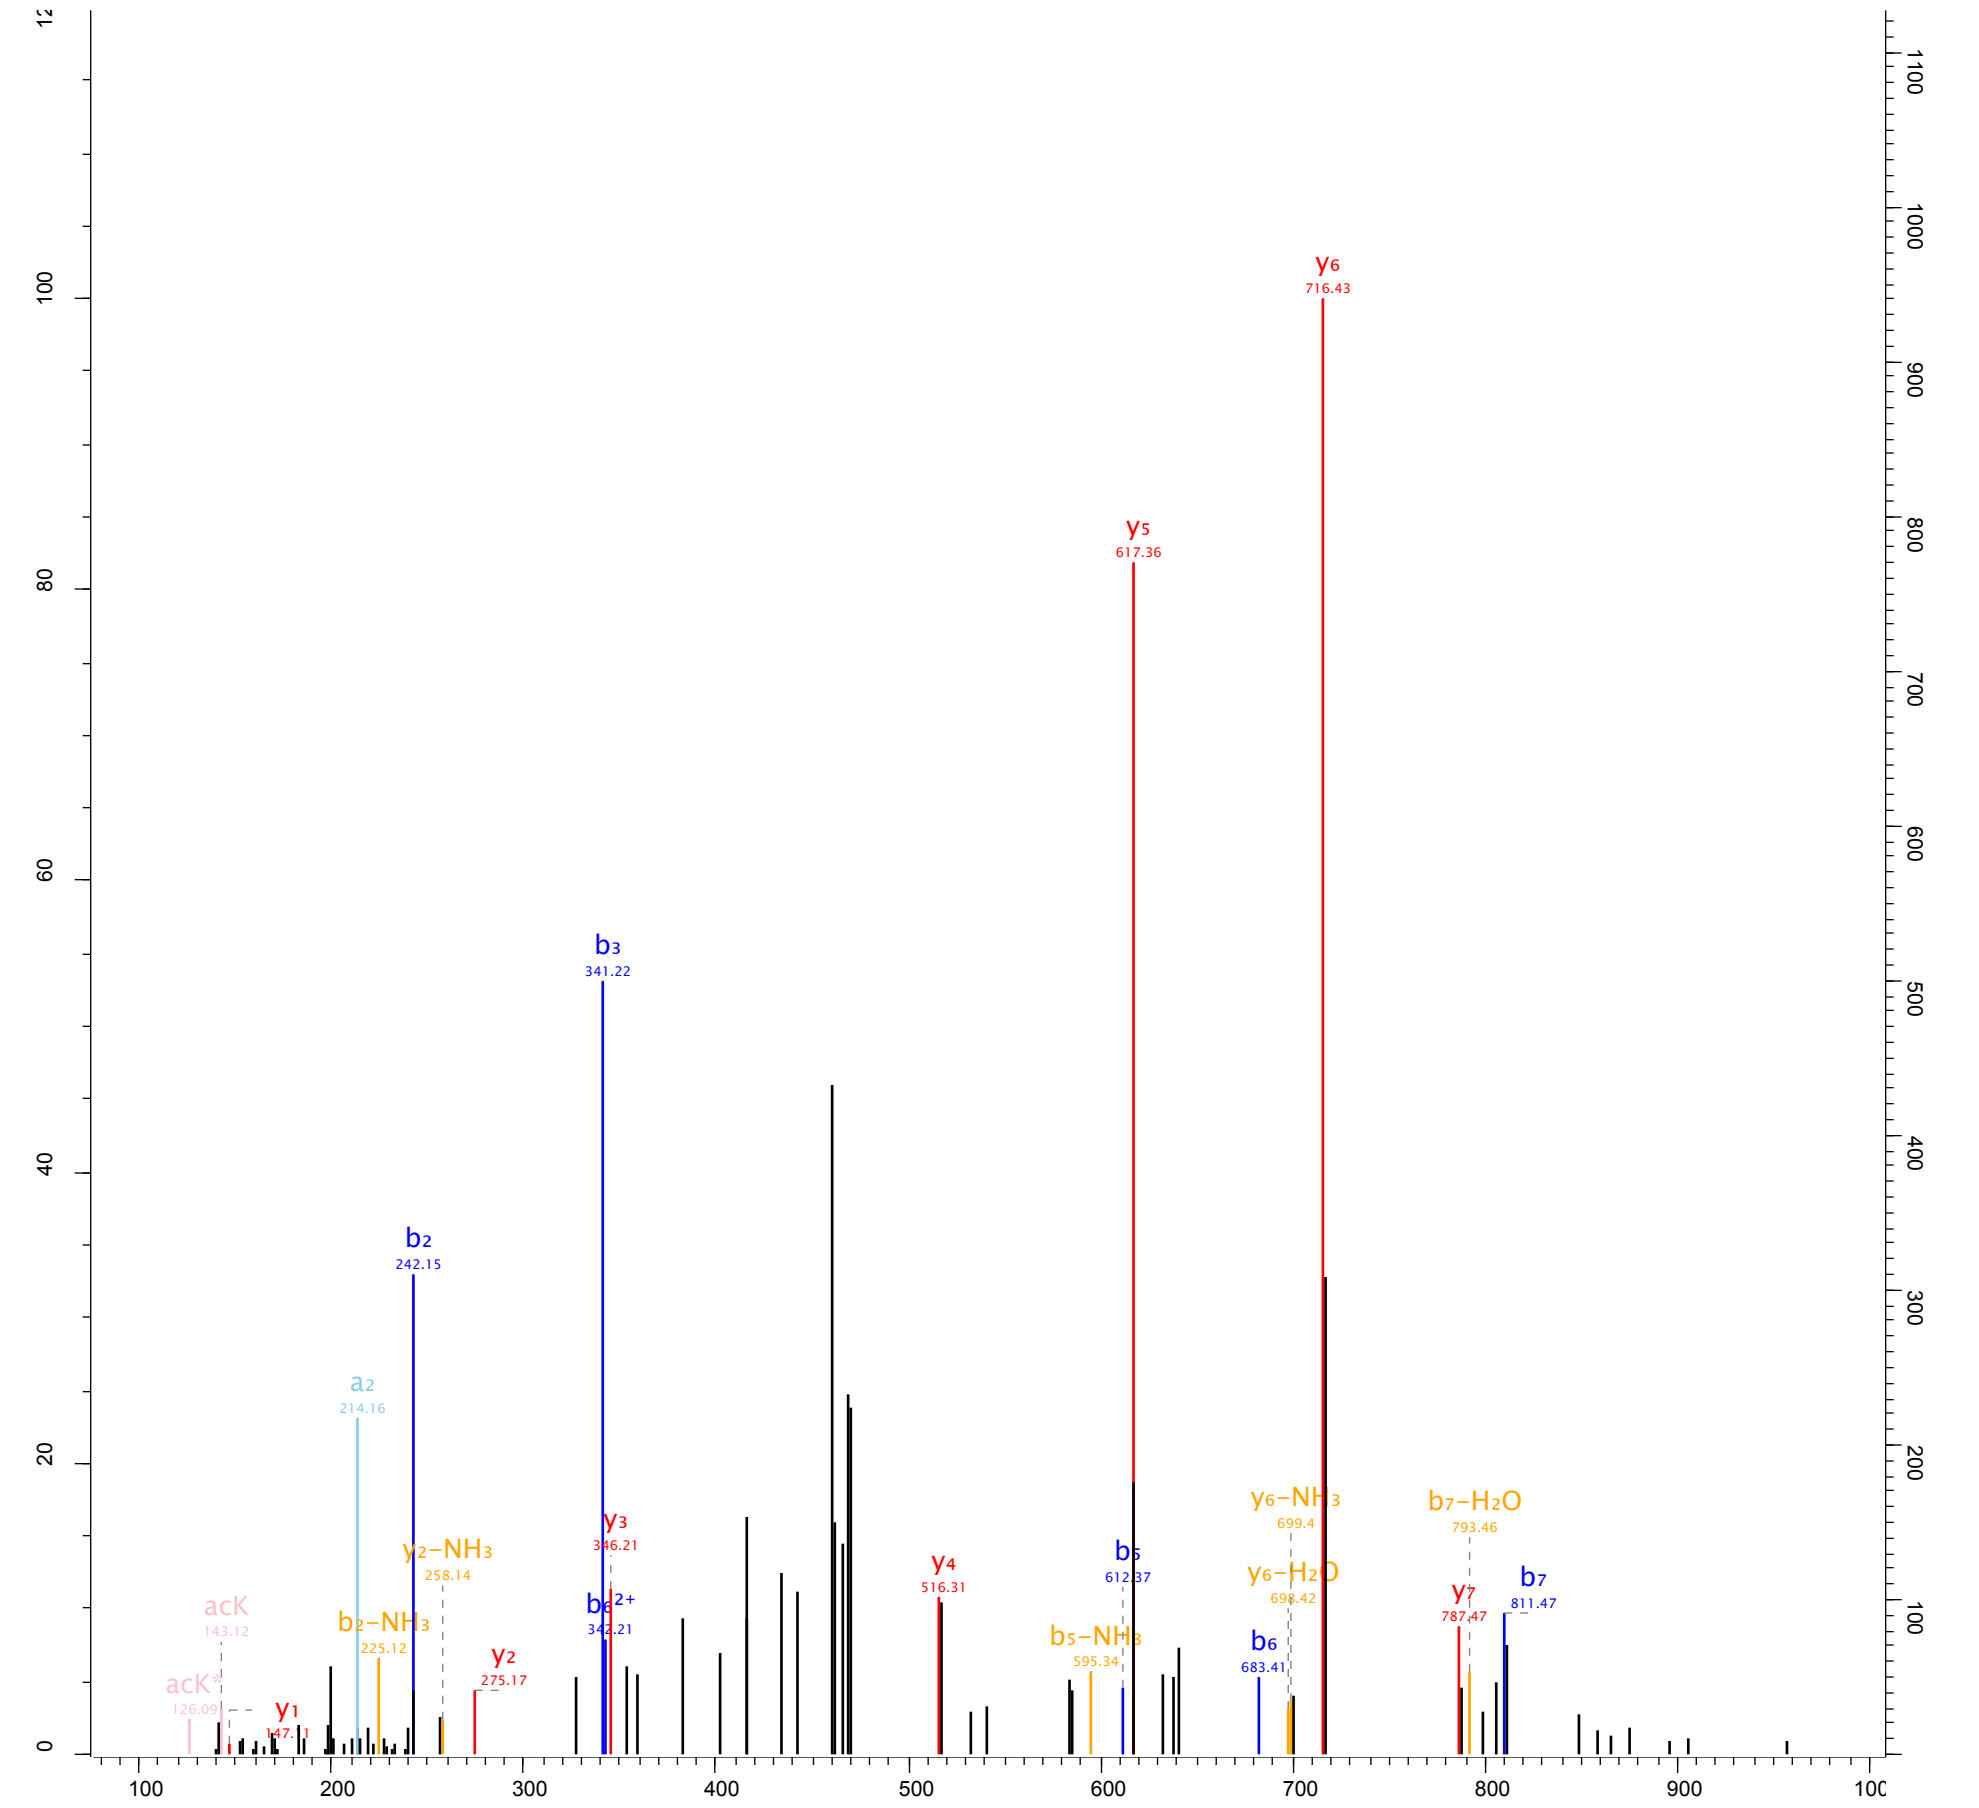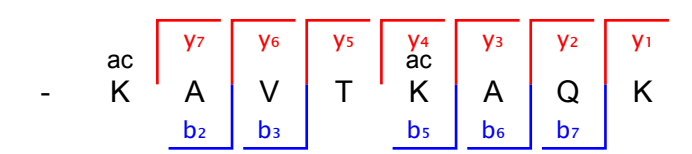

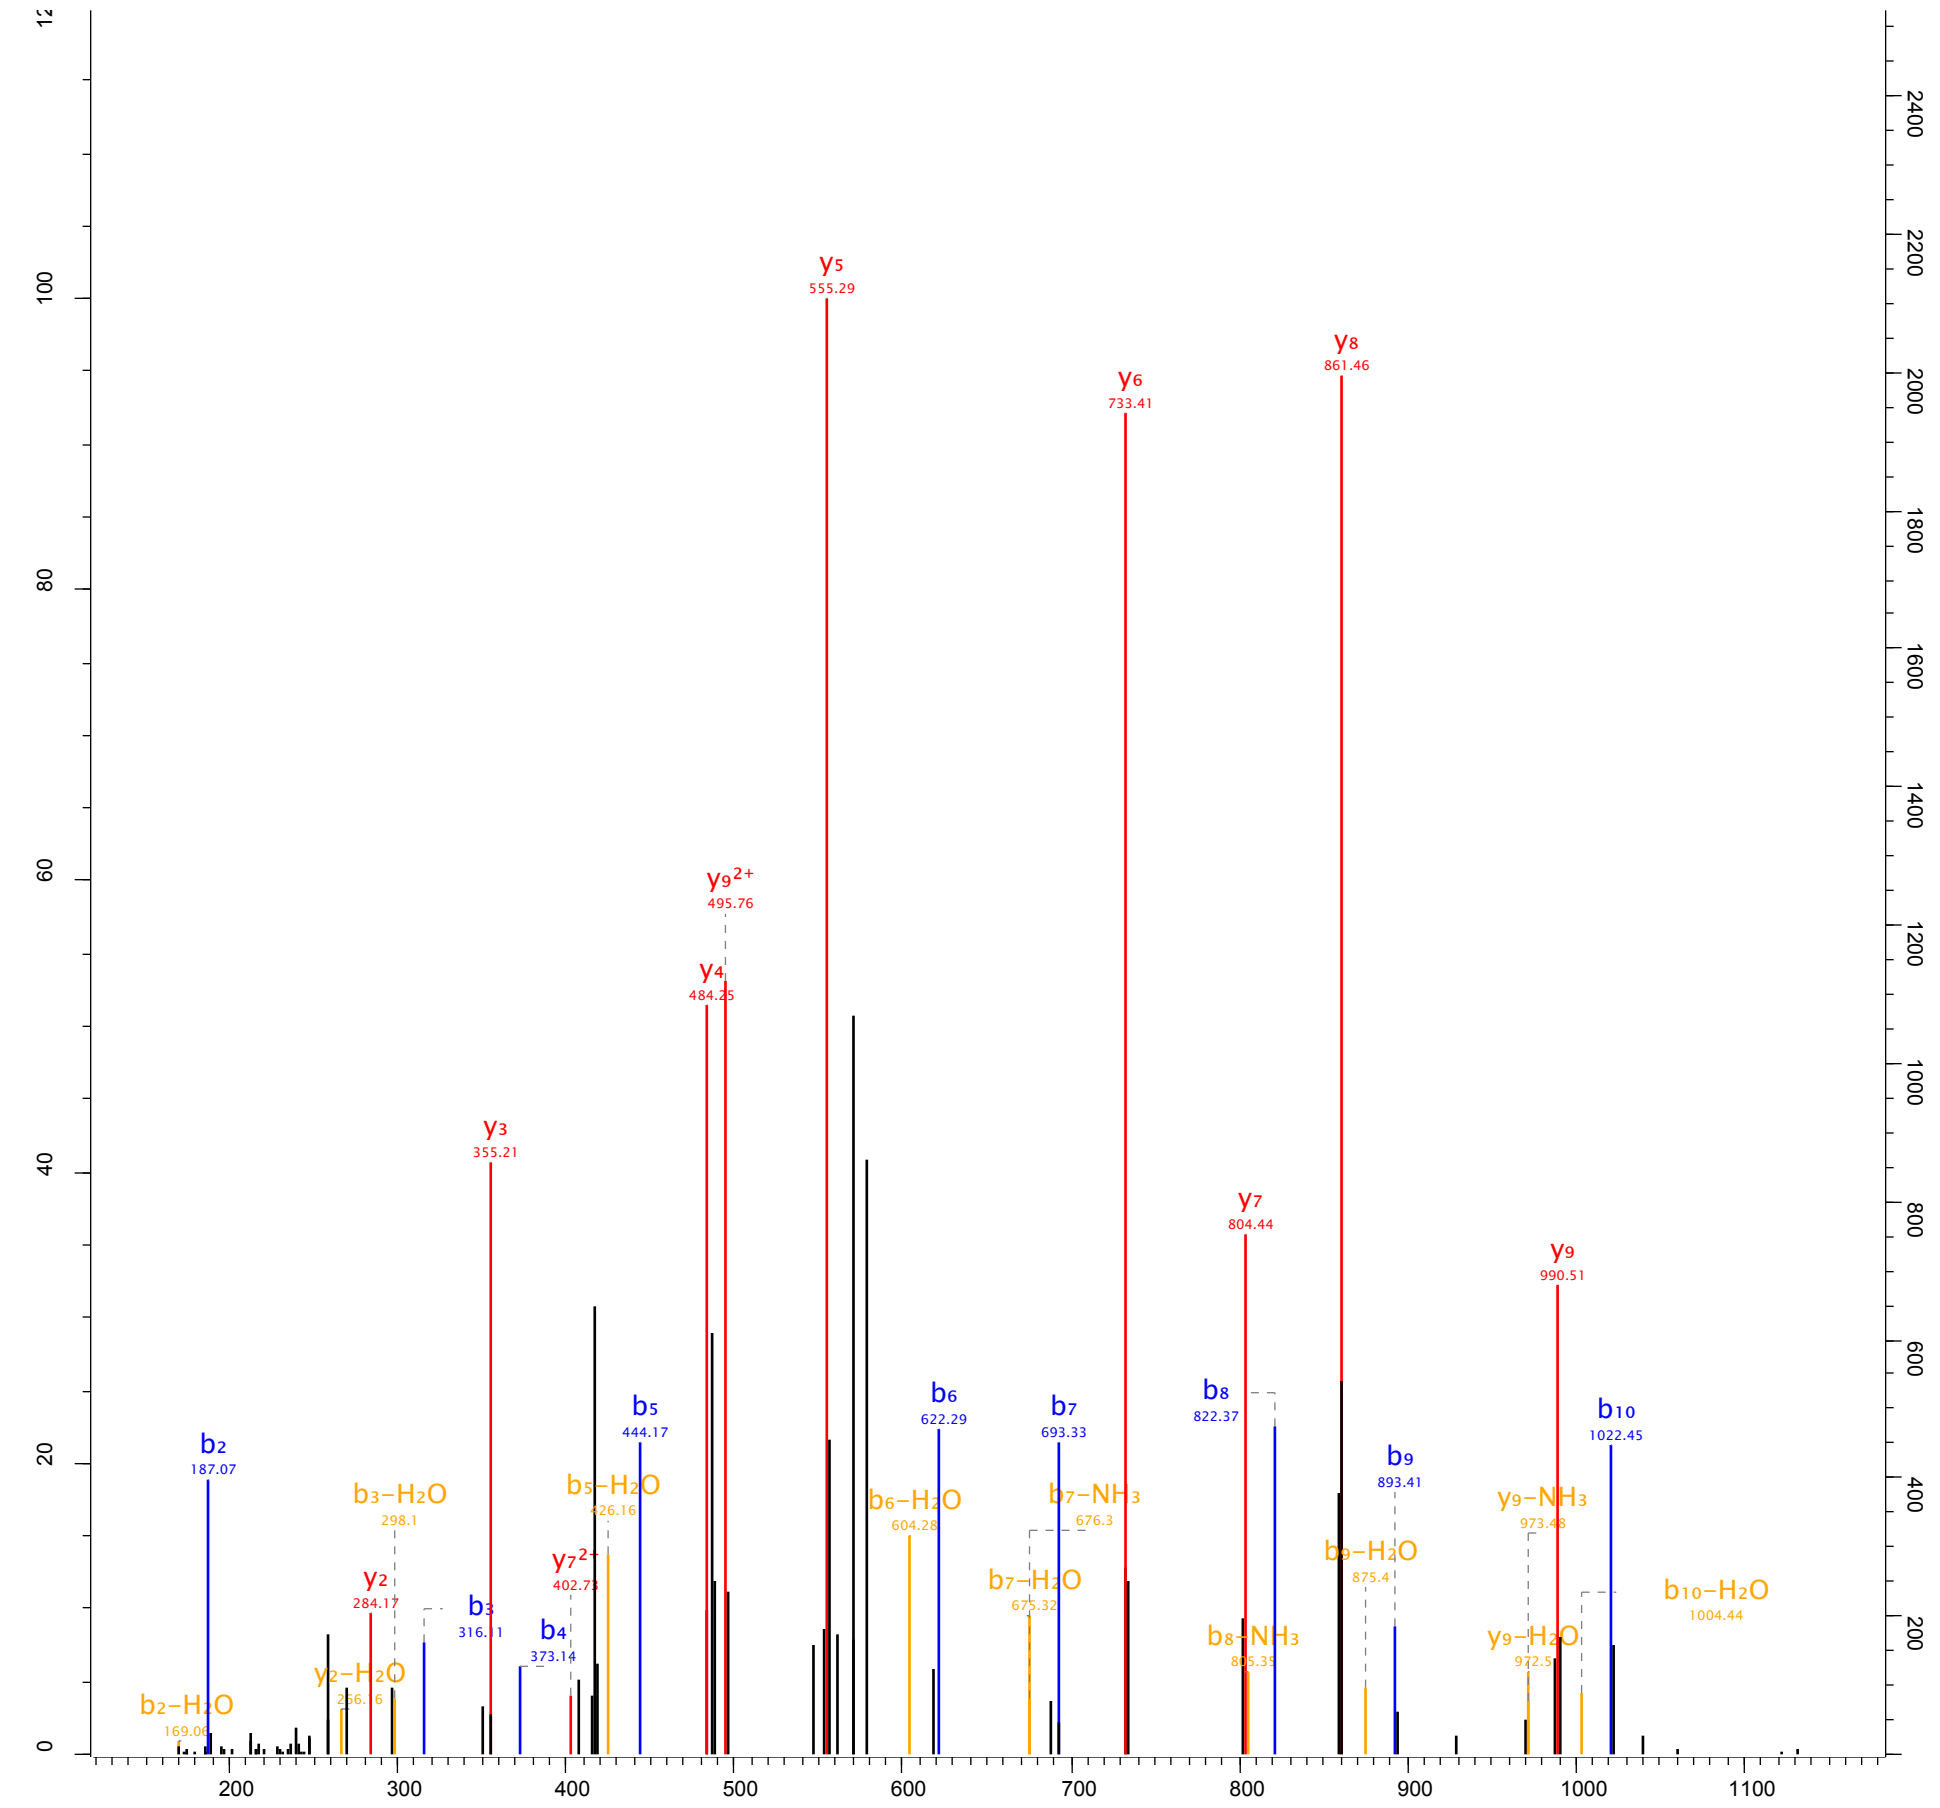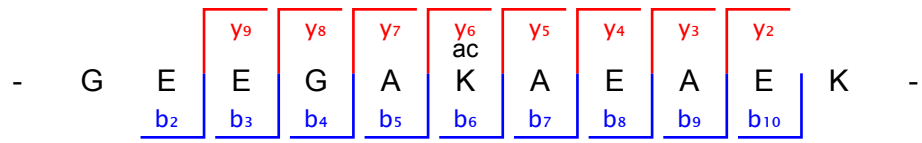



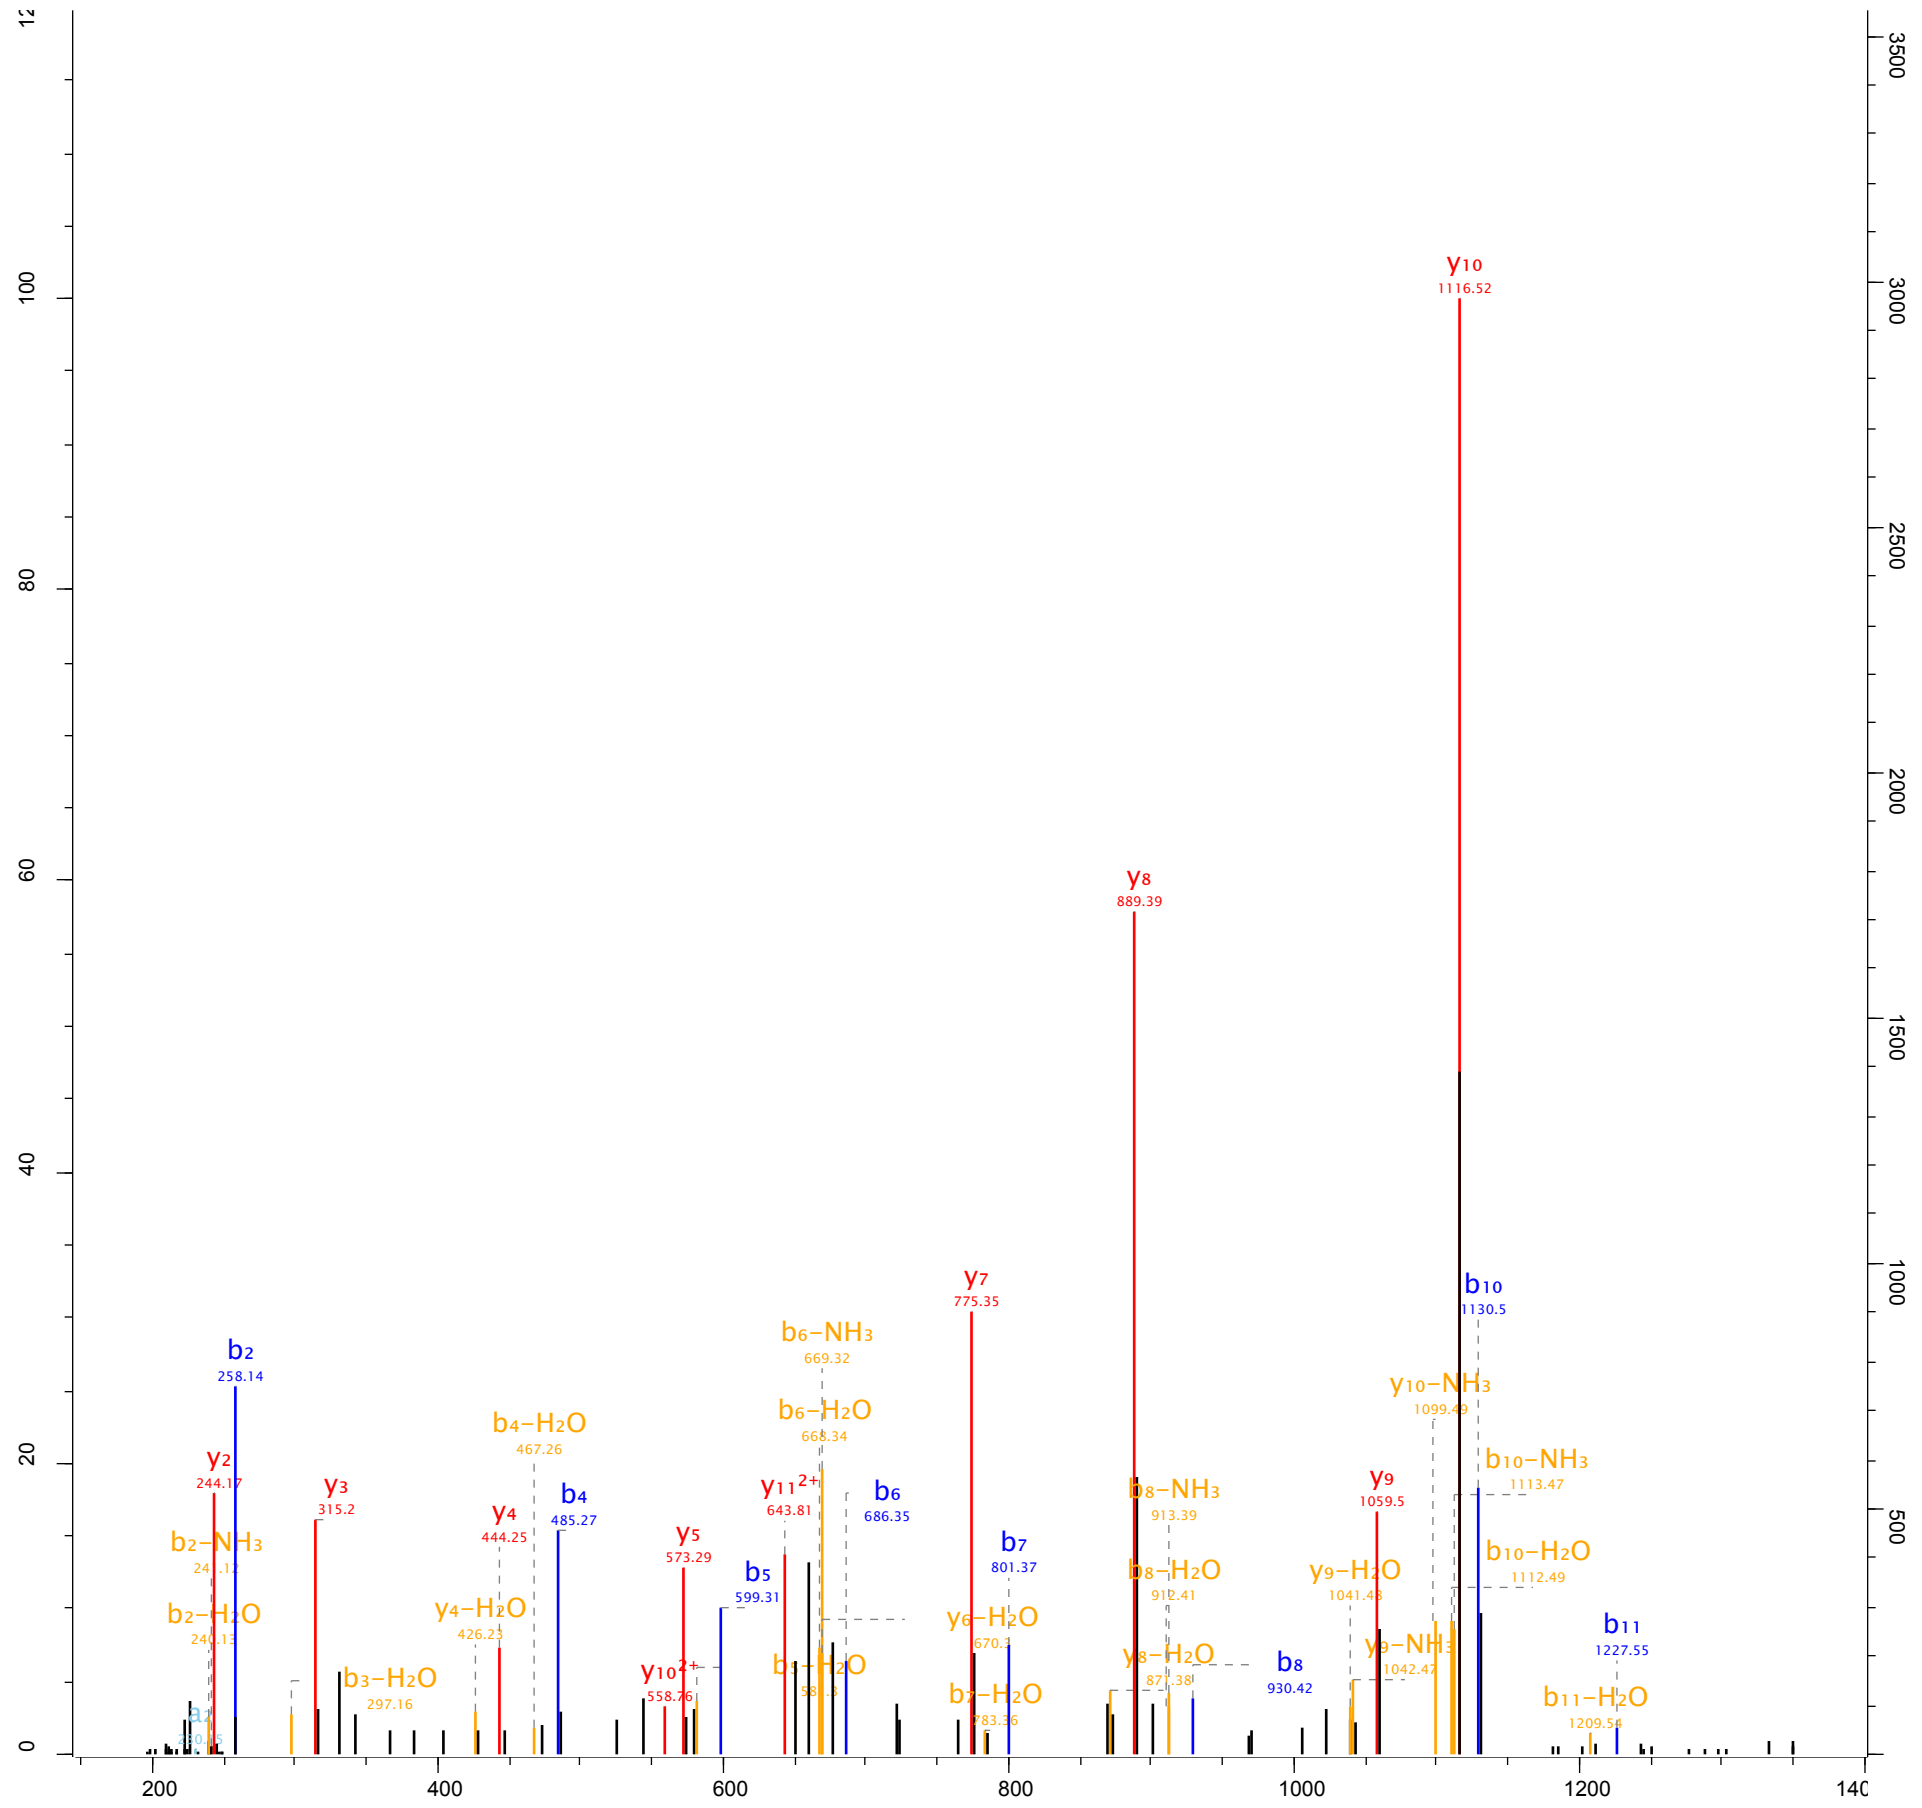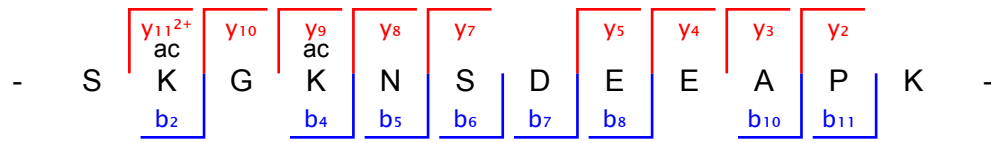

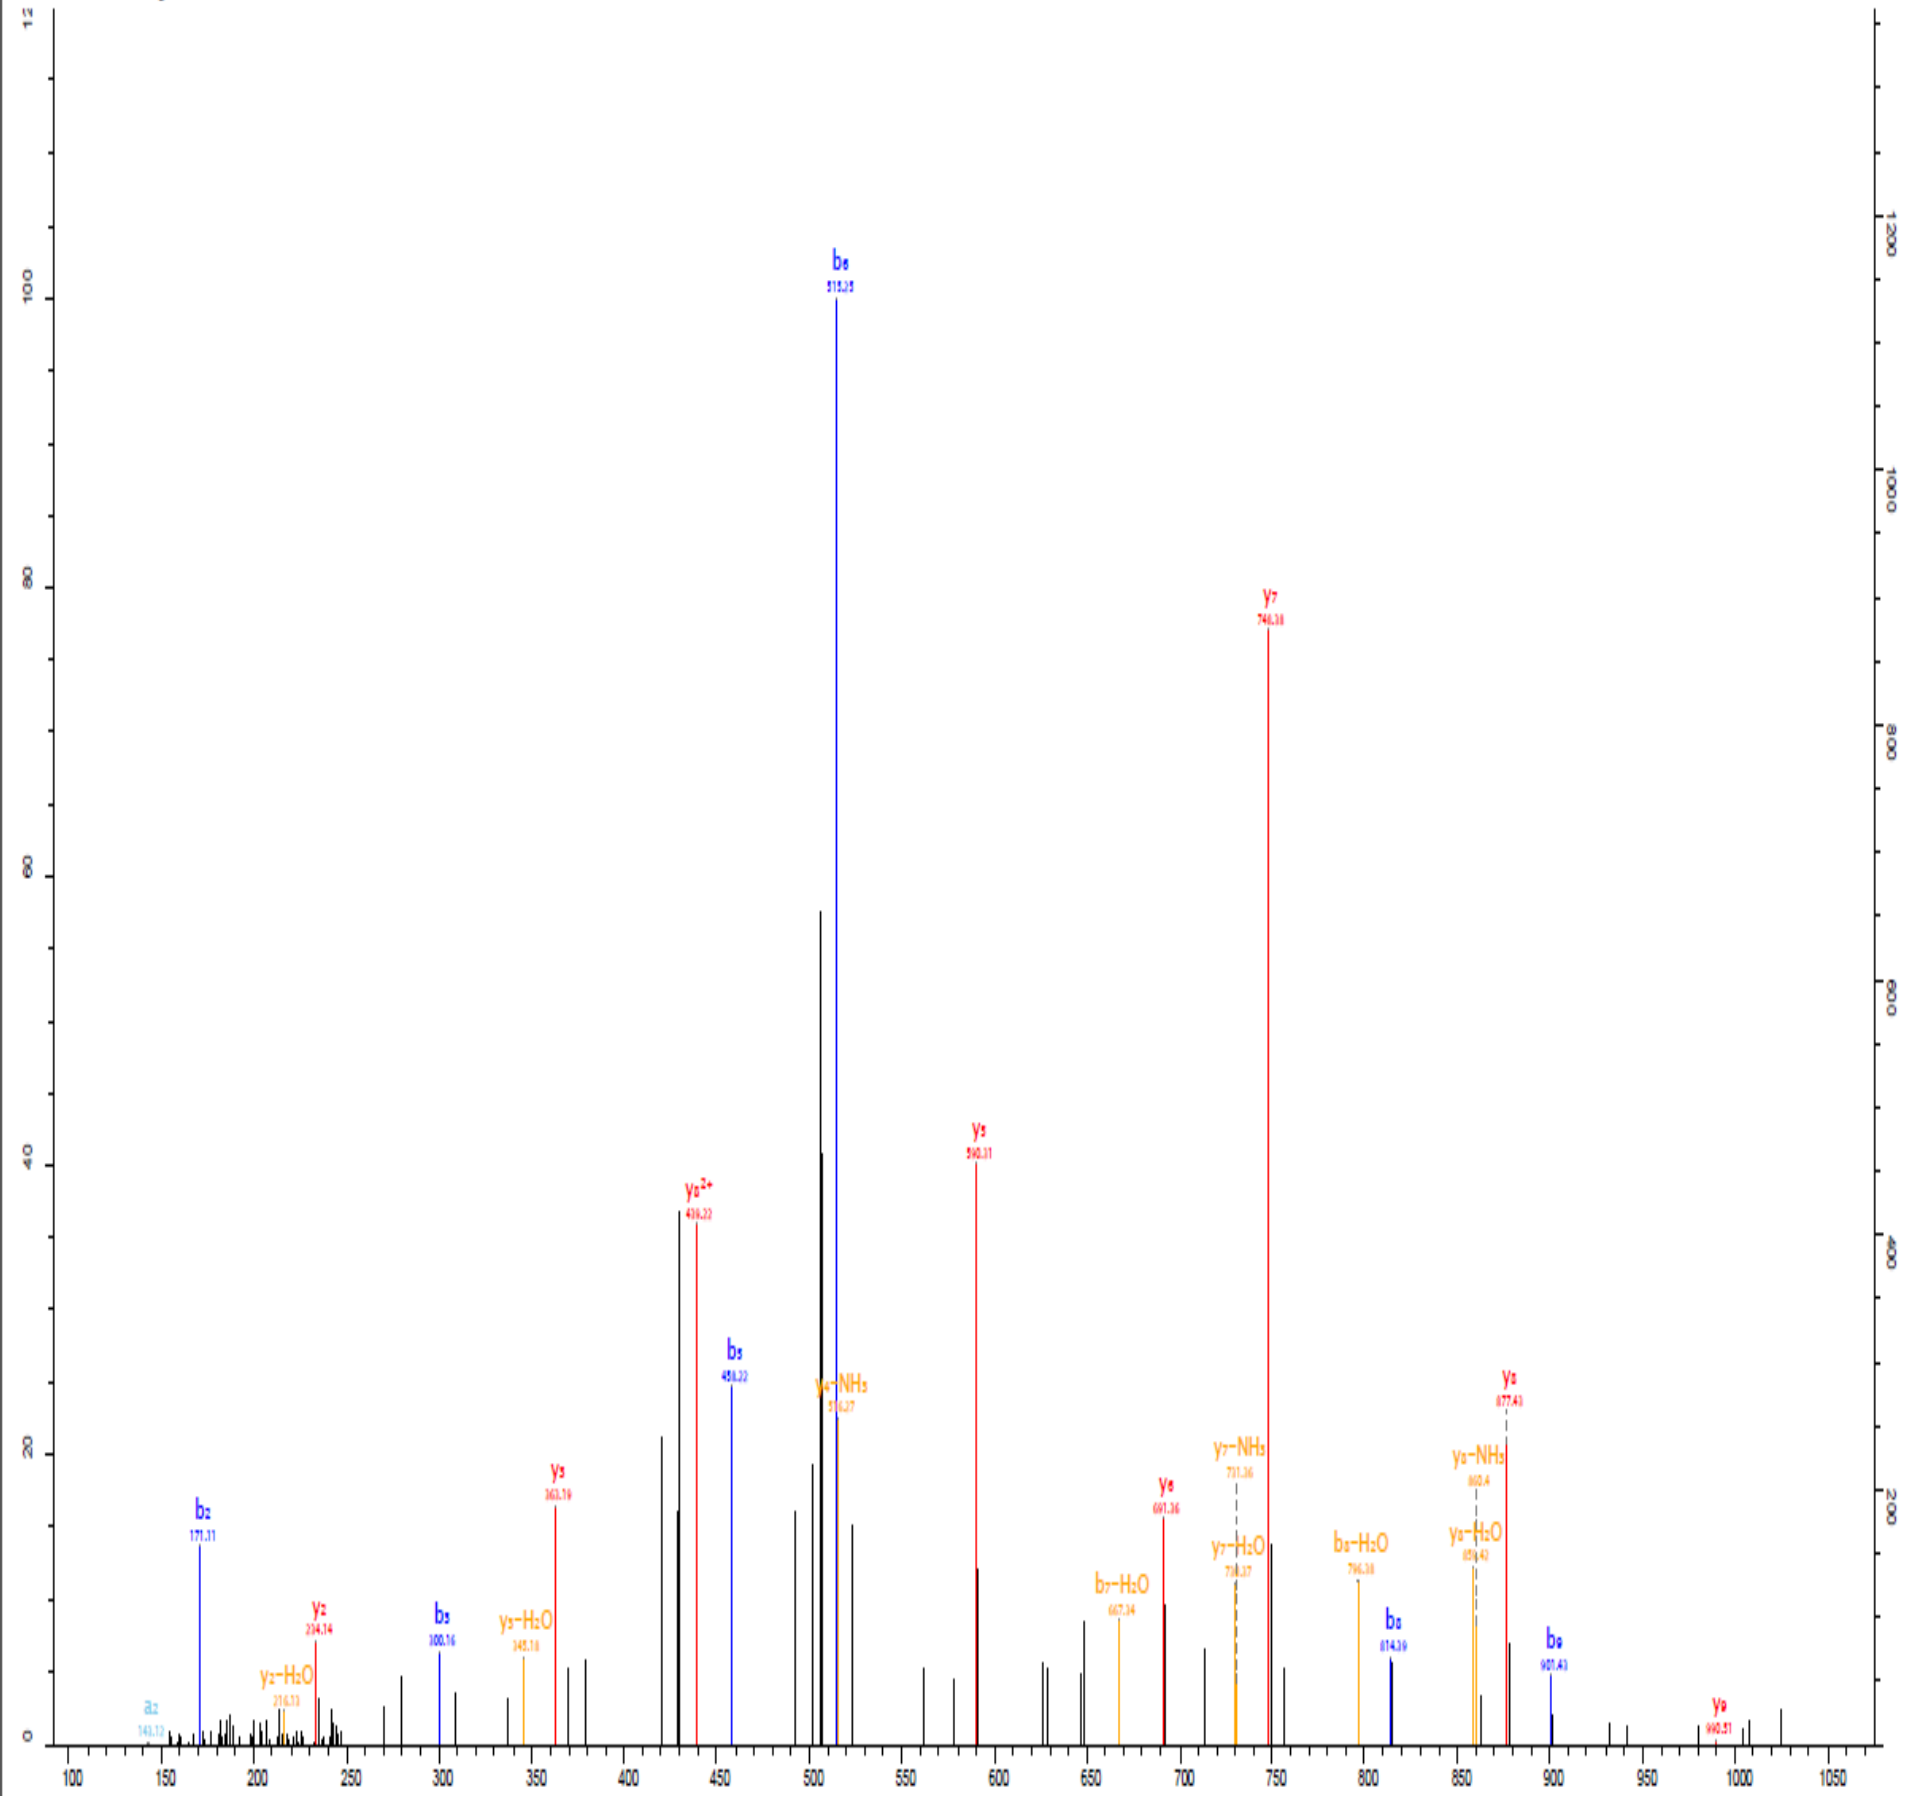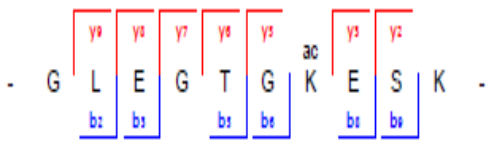

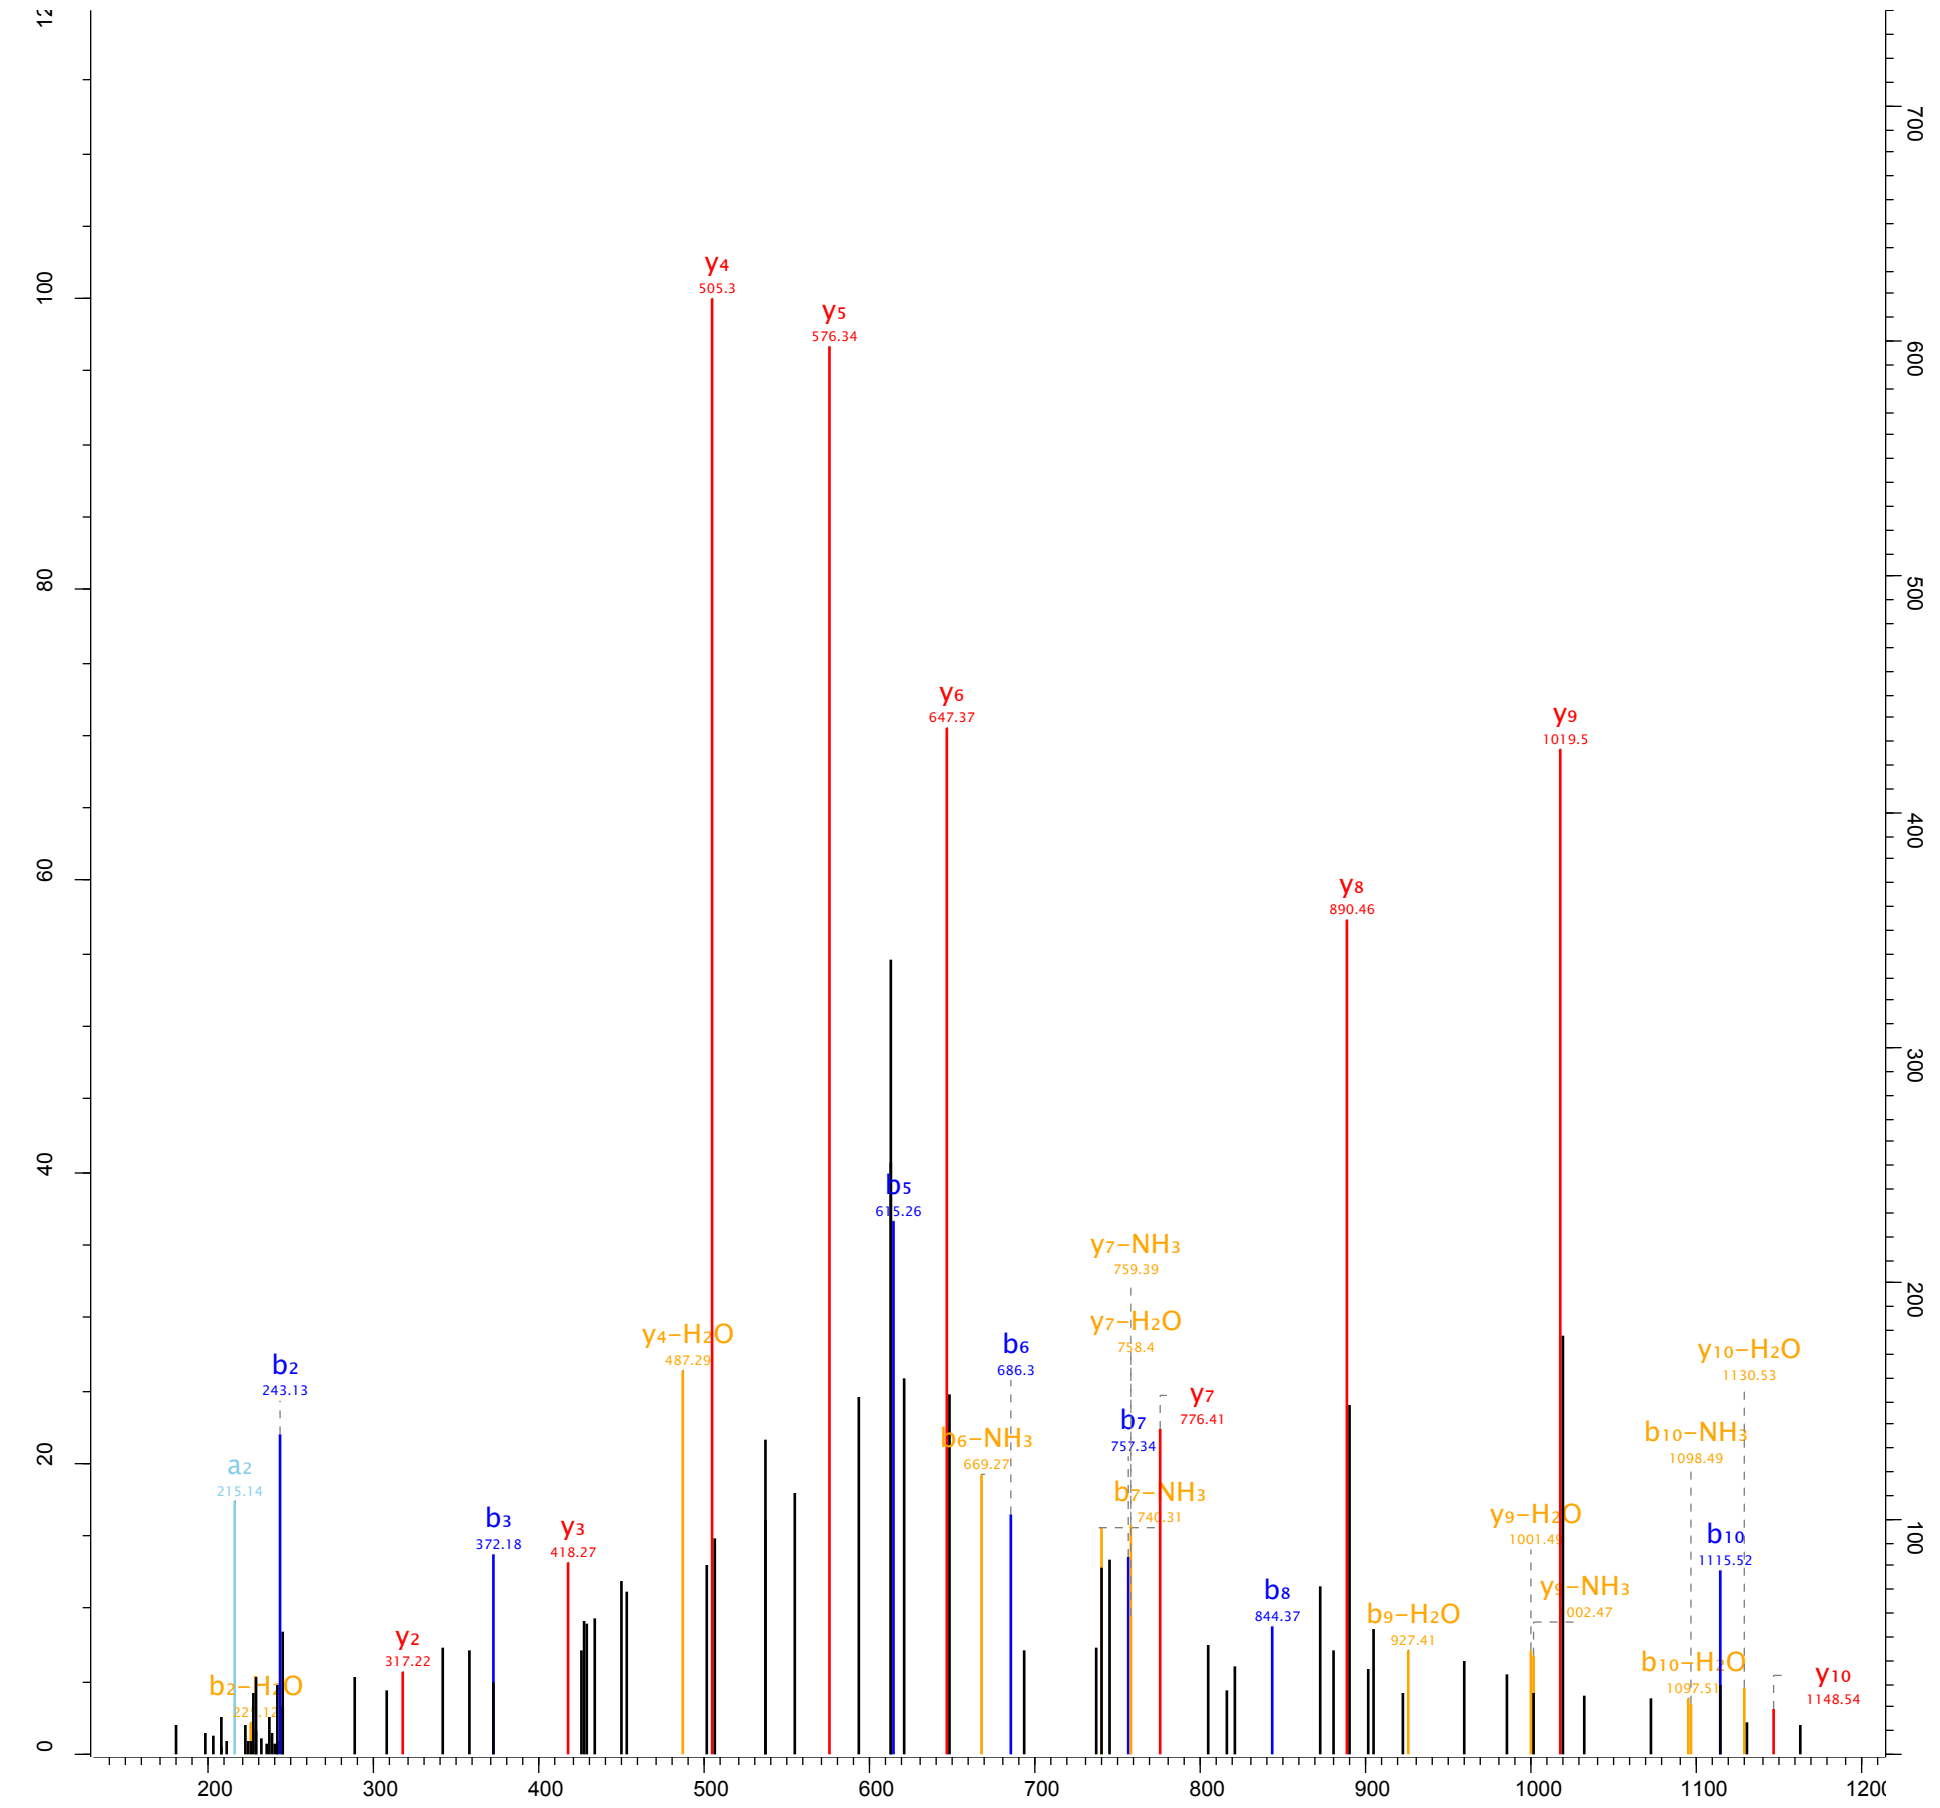

- L E E N E A A S T K -

y10 y9 y8 y7 y6 y5 y4 y3 y2  
b2 b3 b5 b6 b7 b8 b10

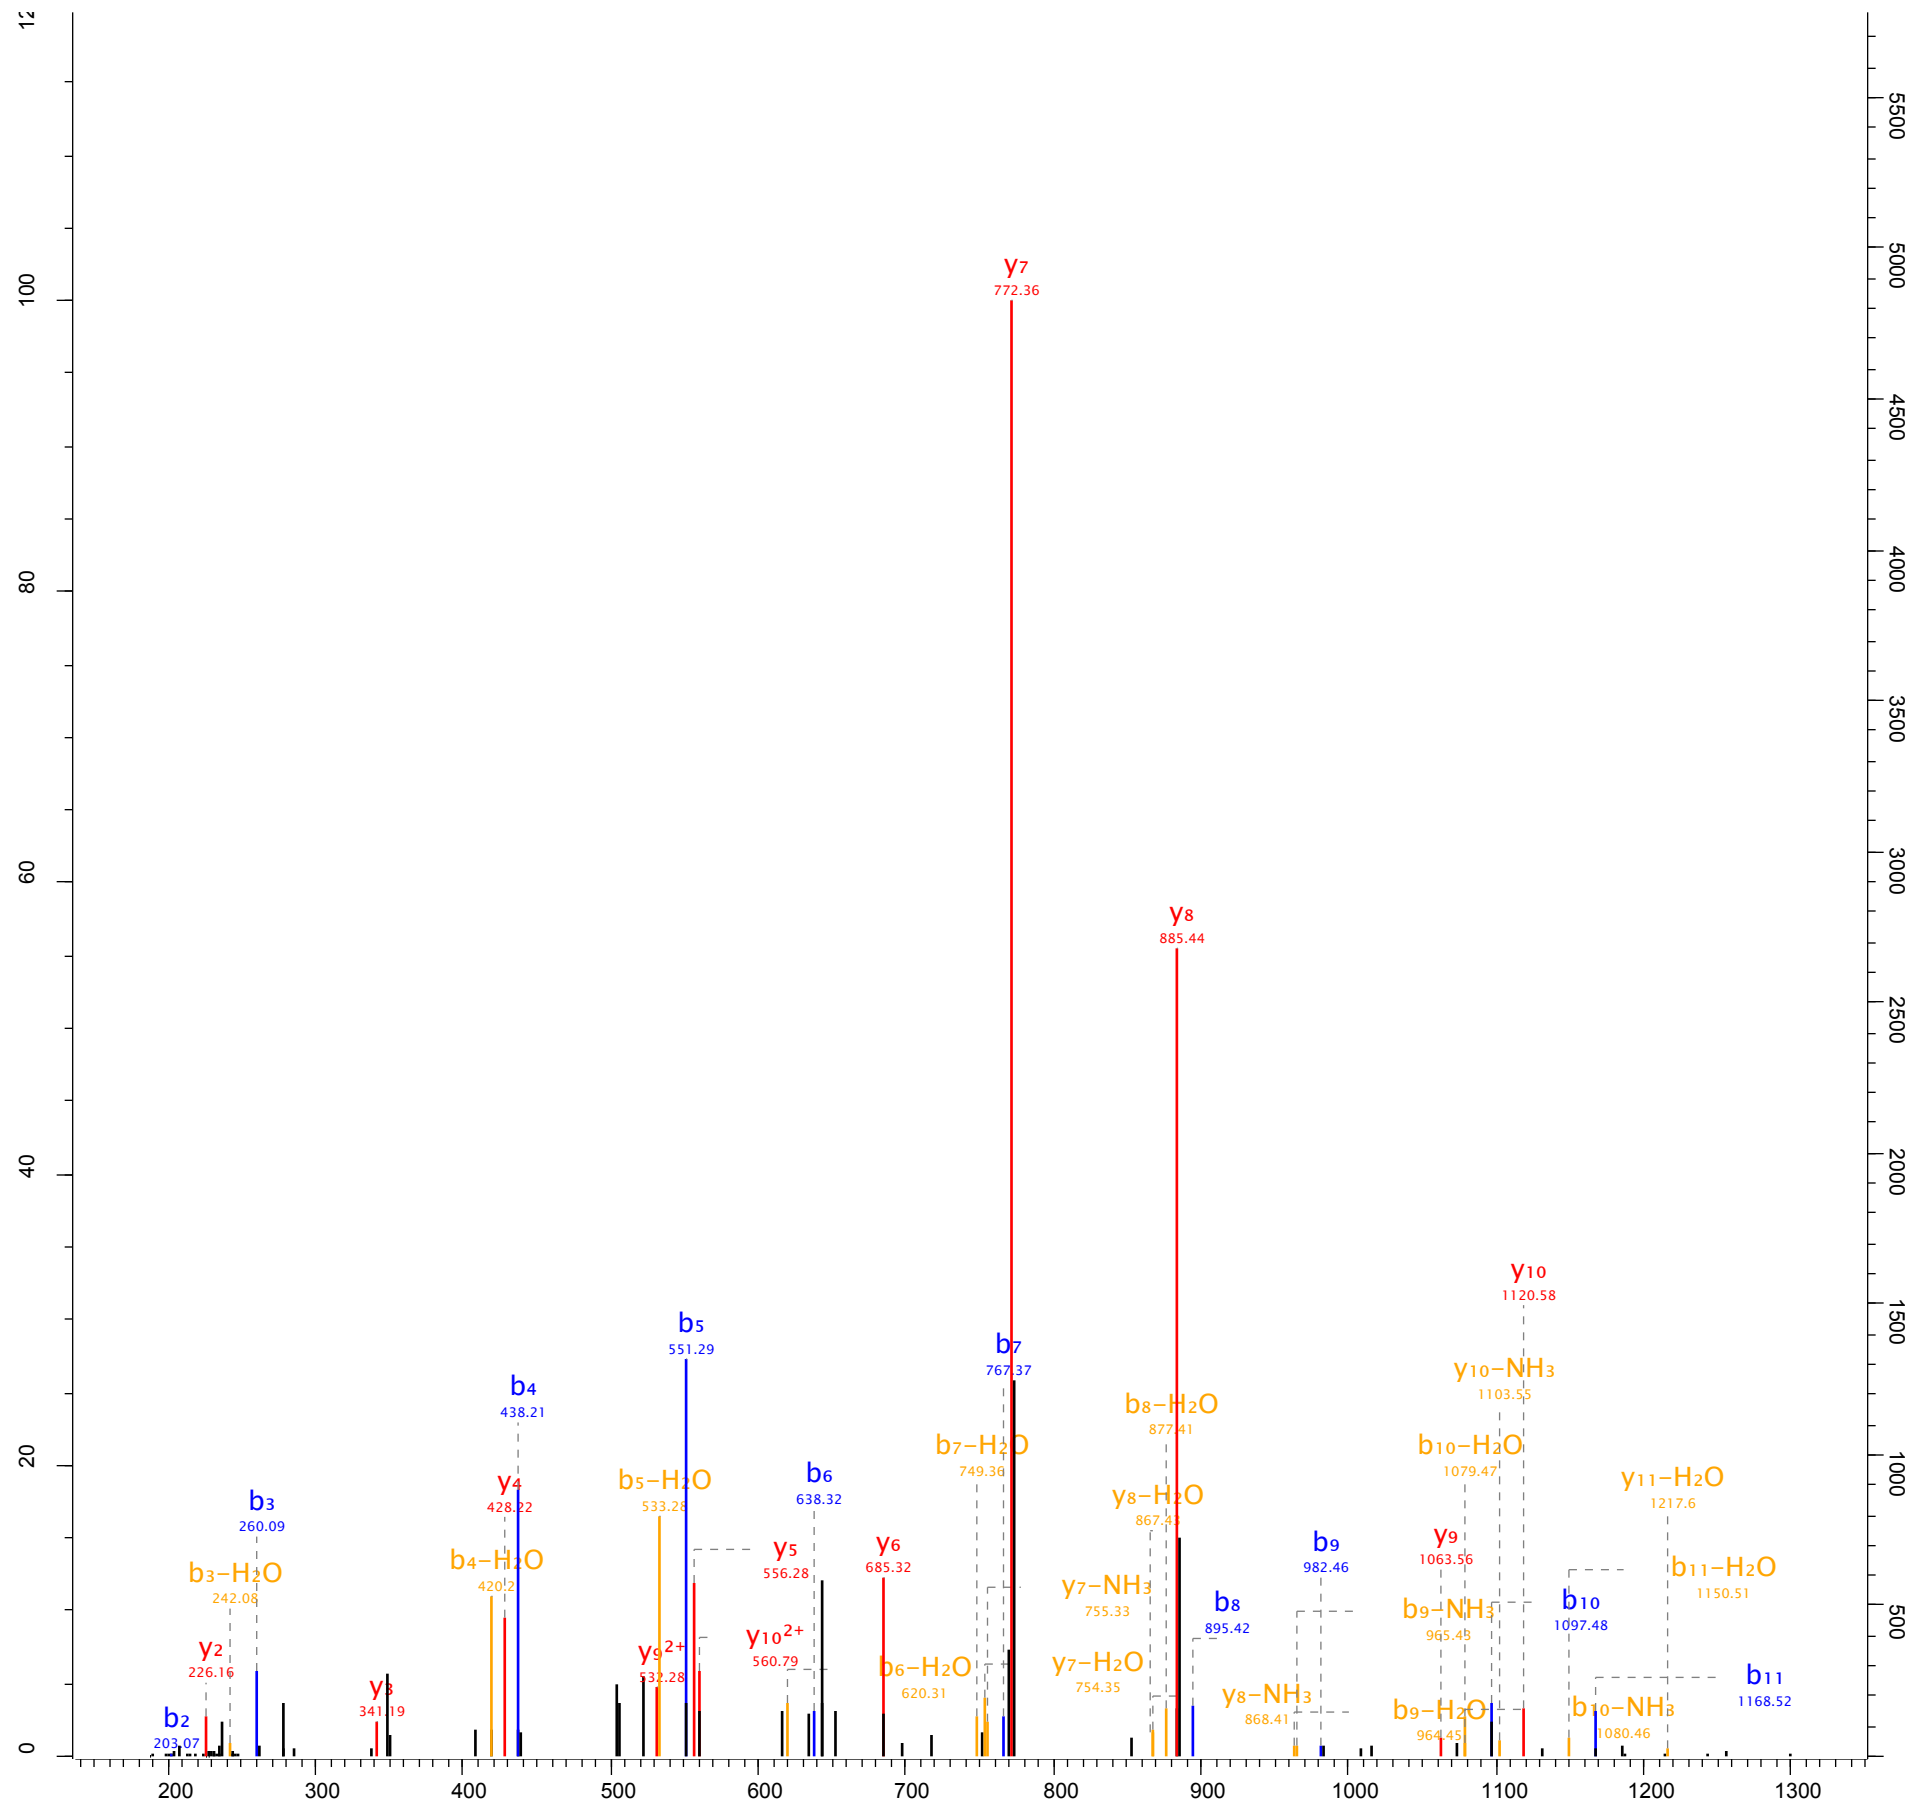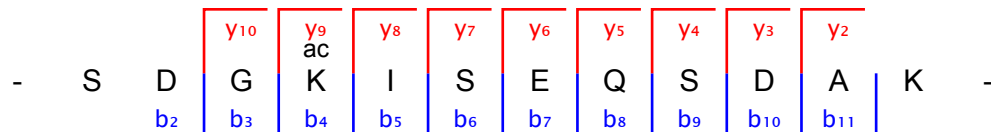

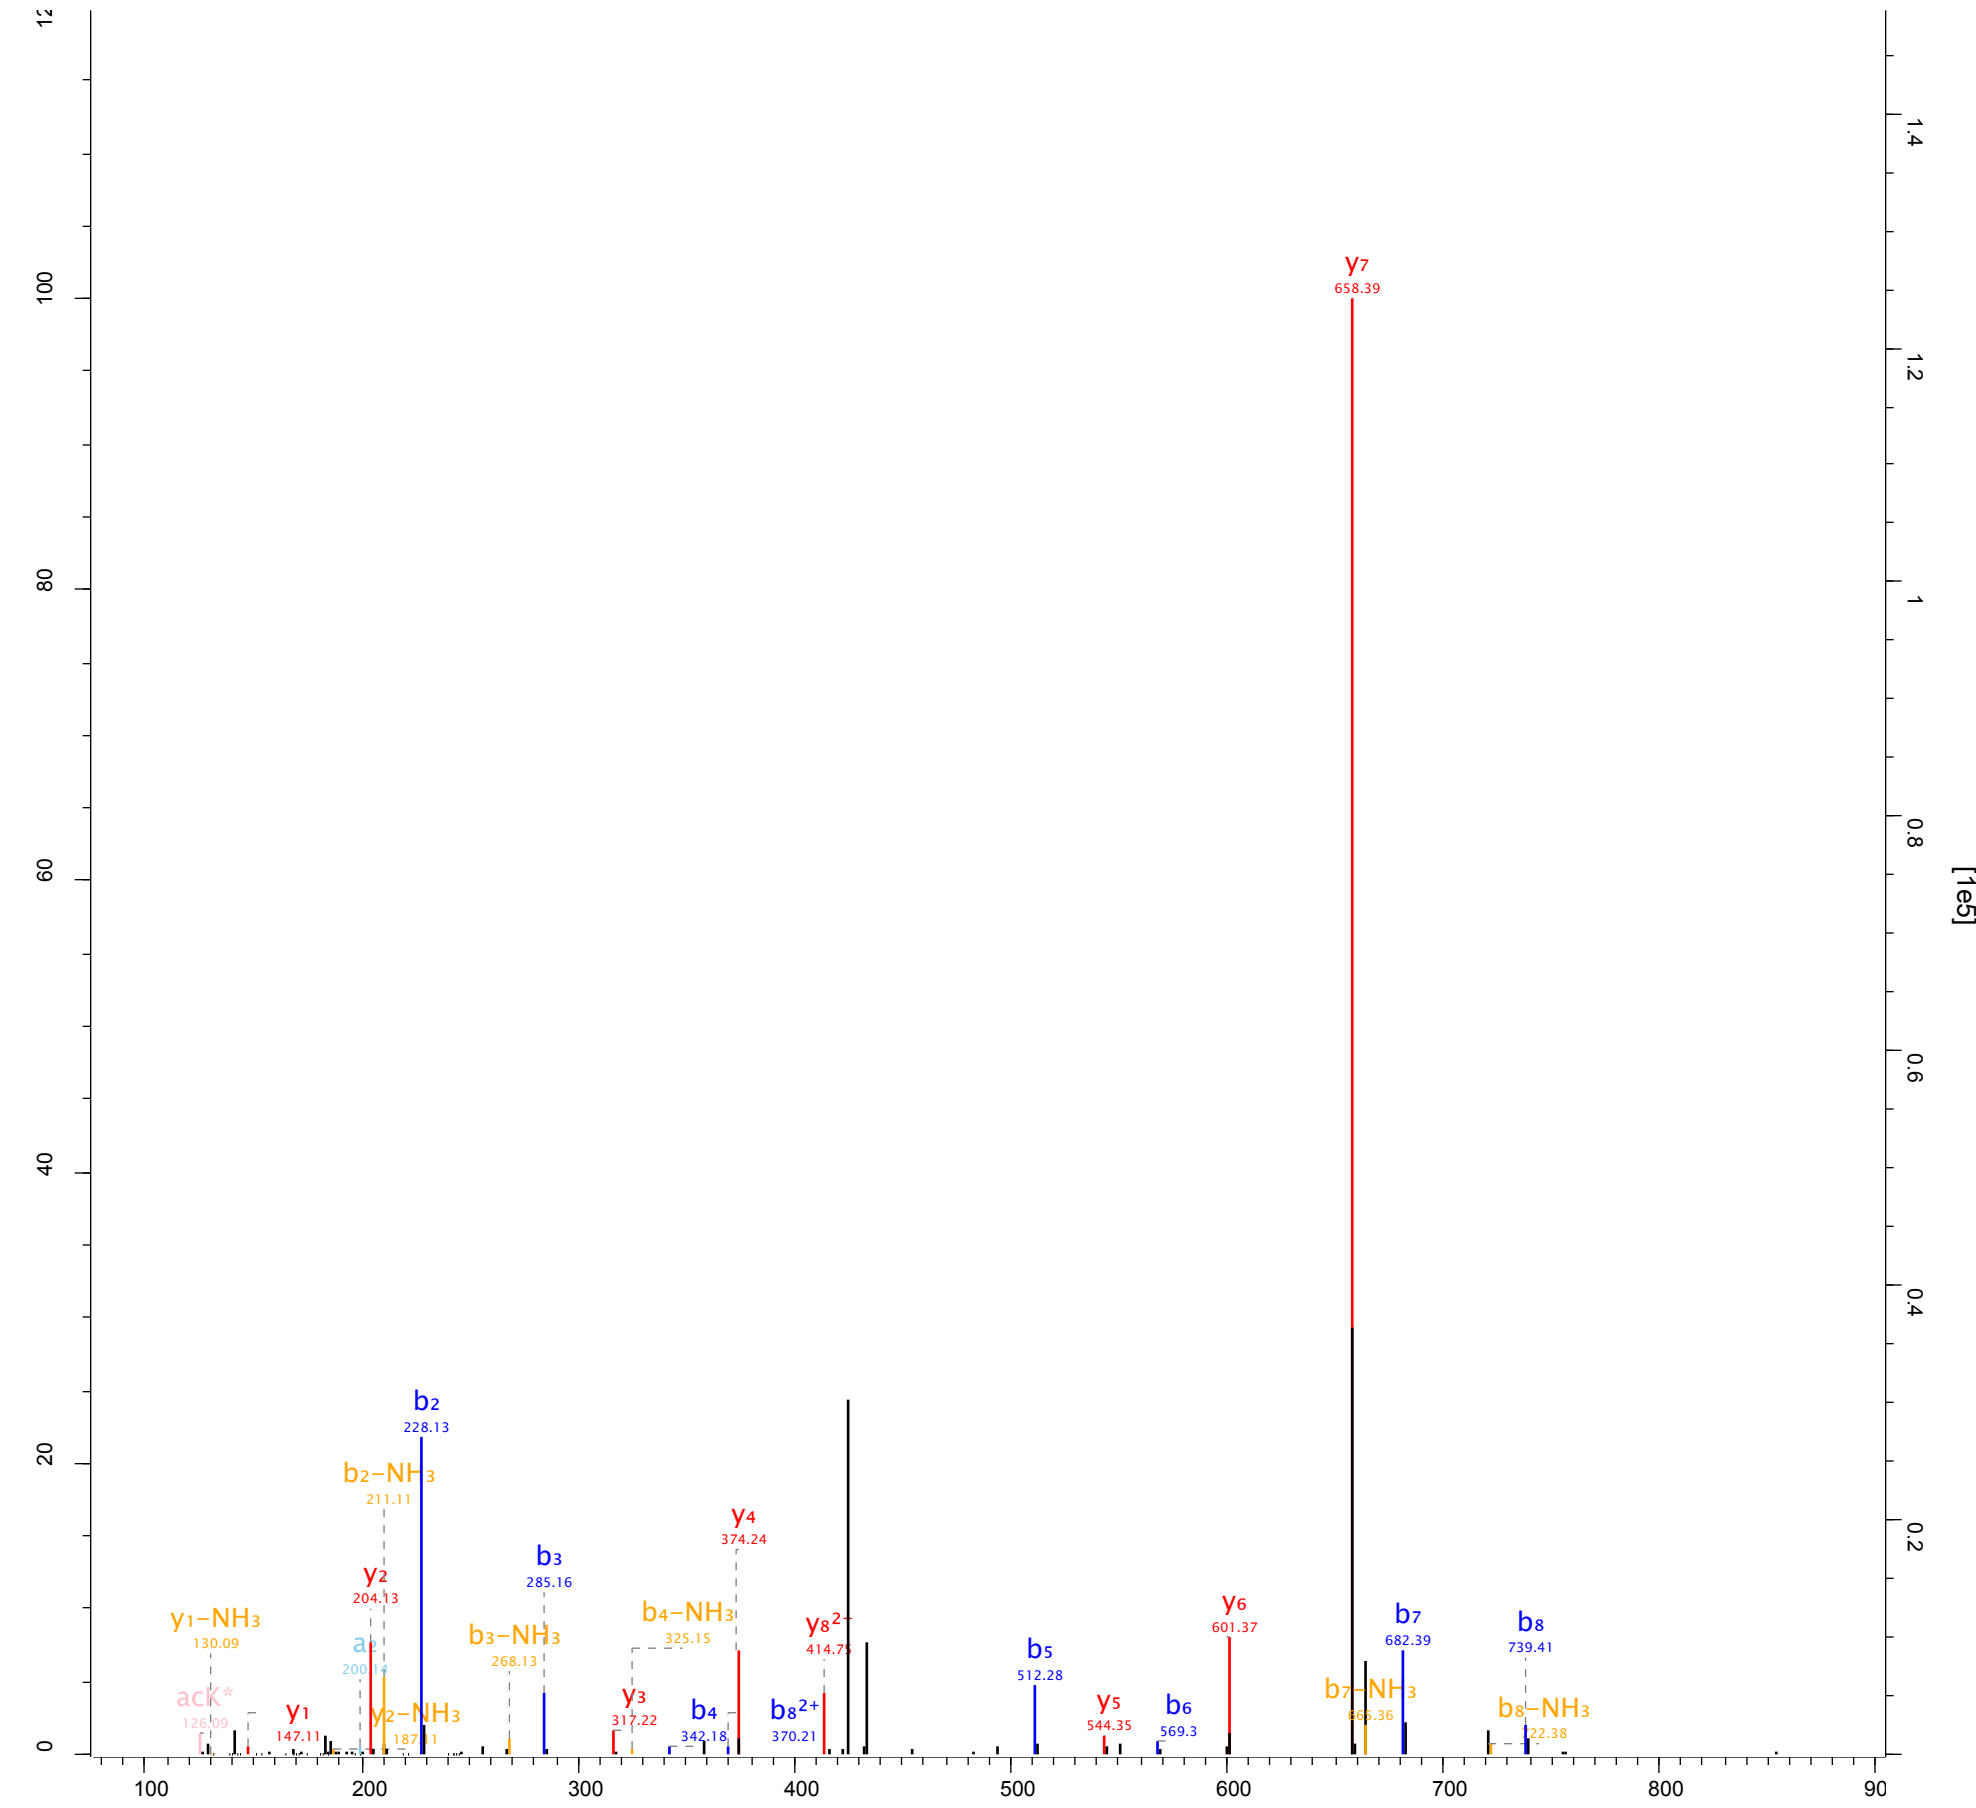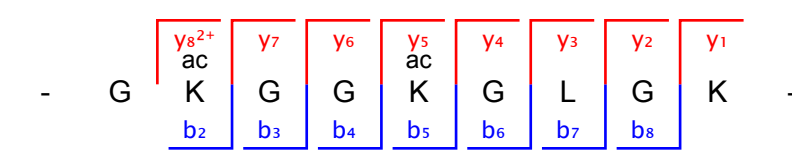

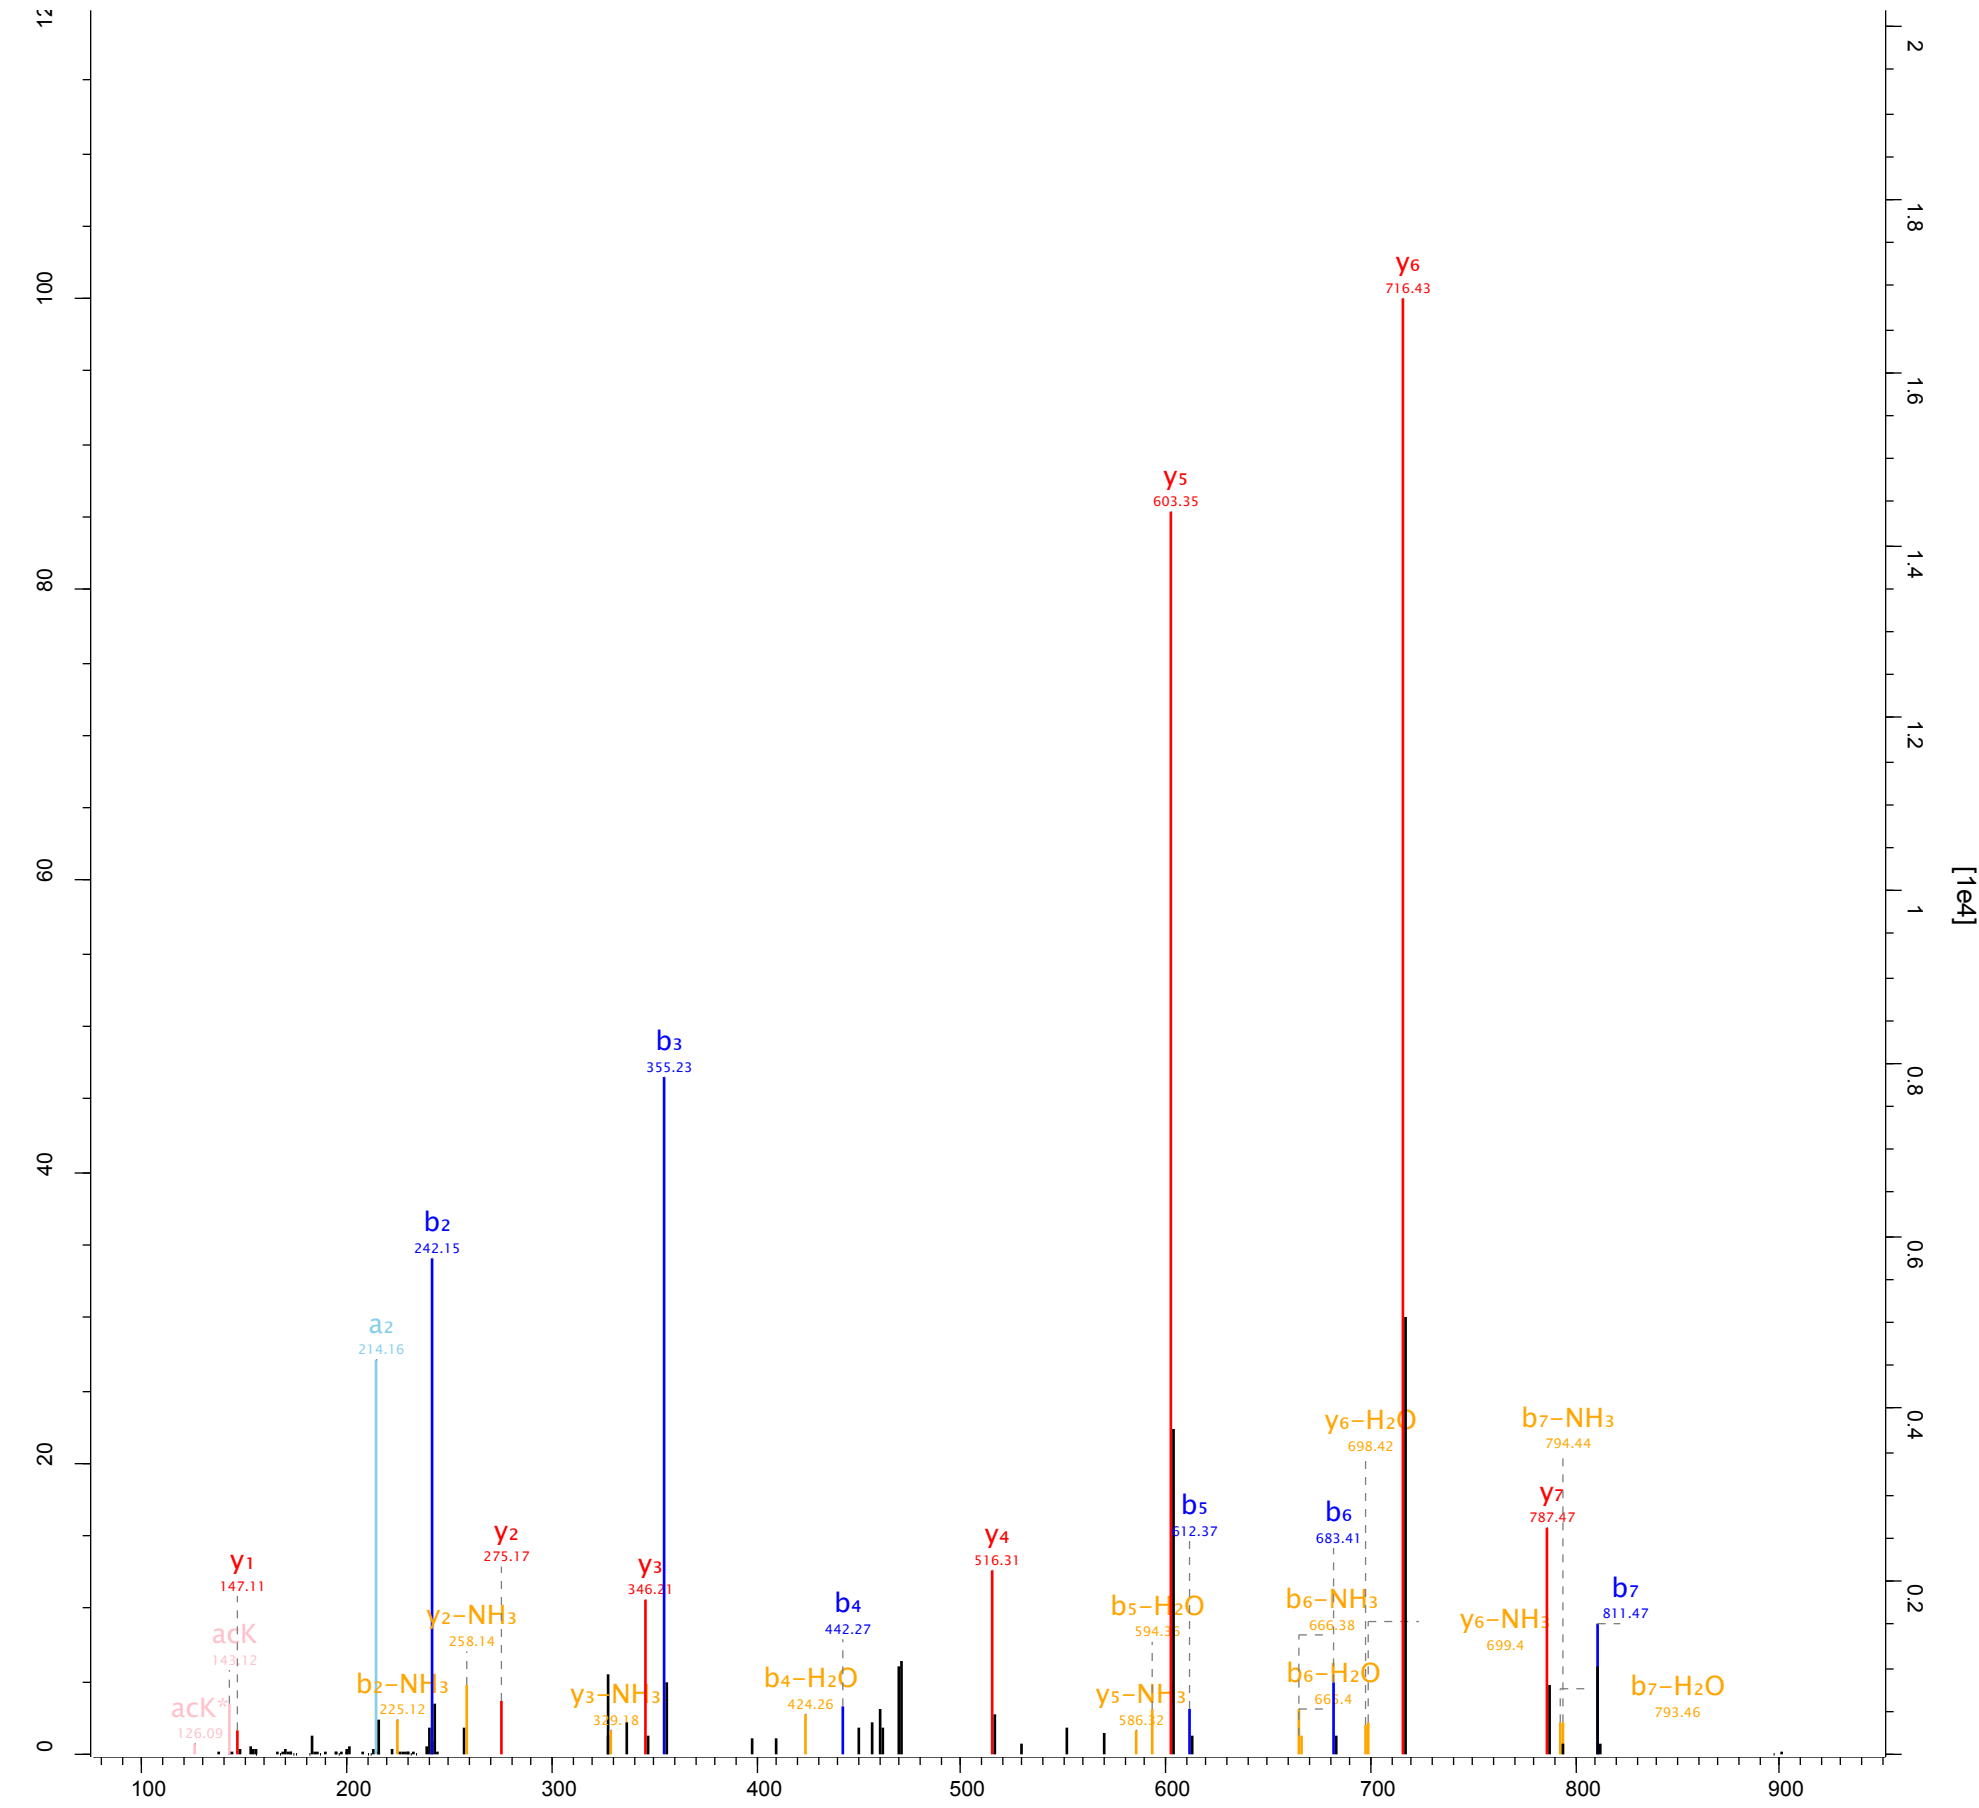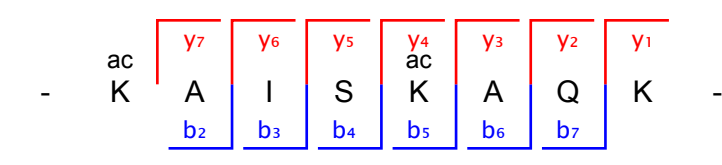

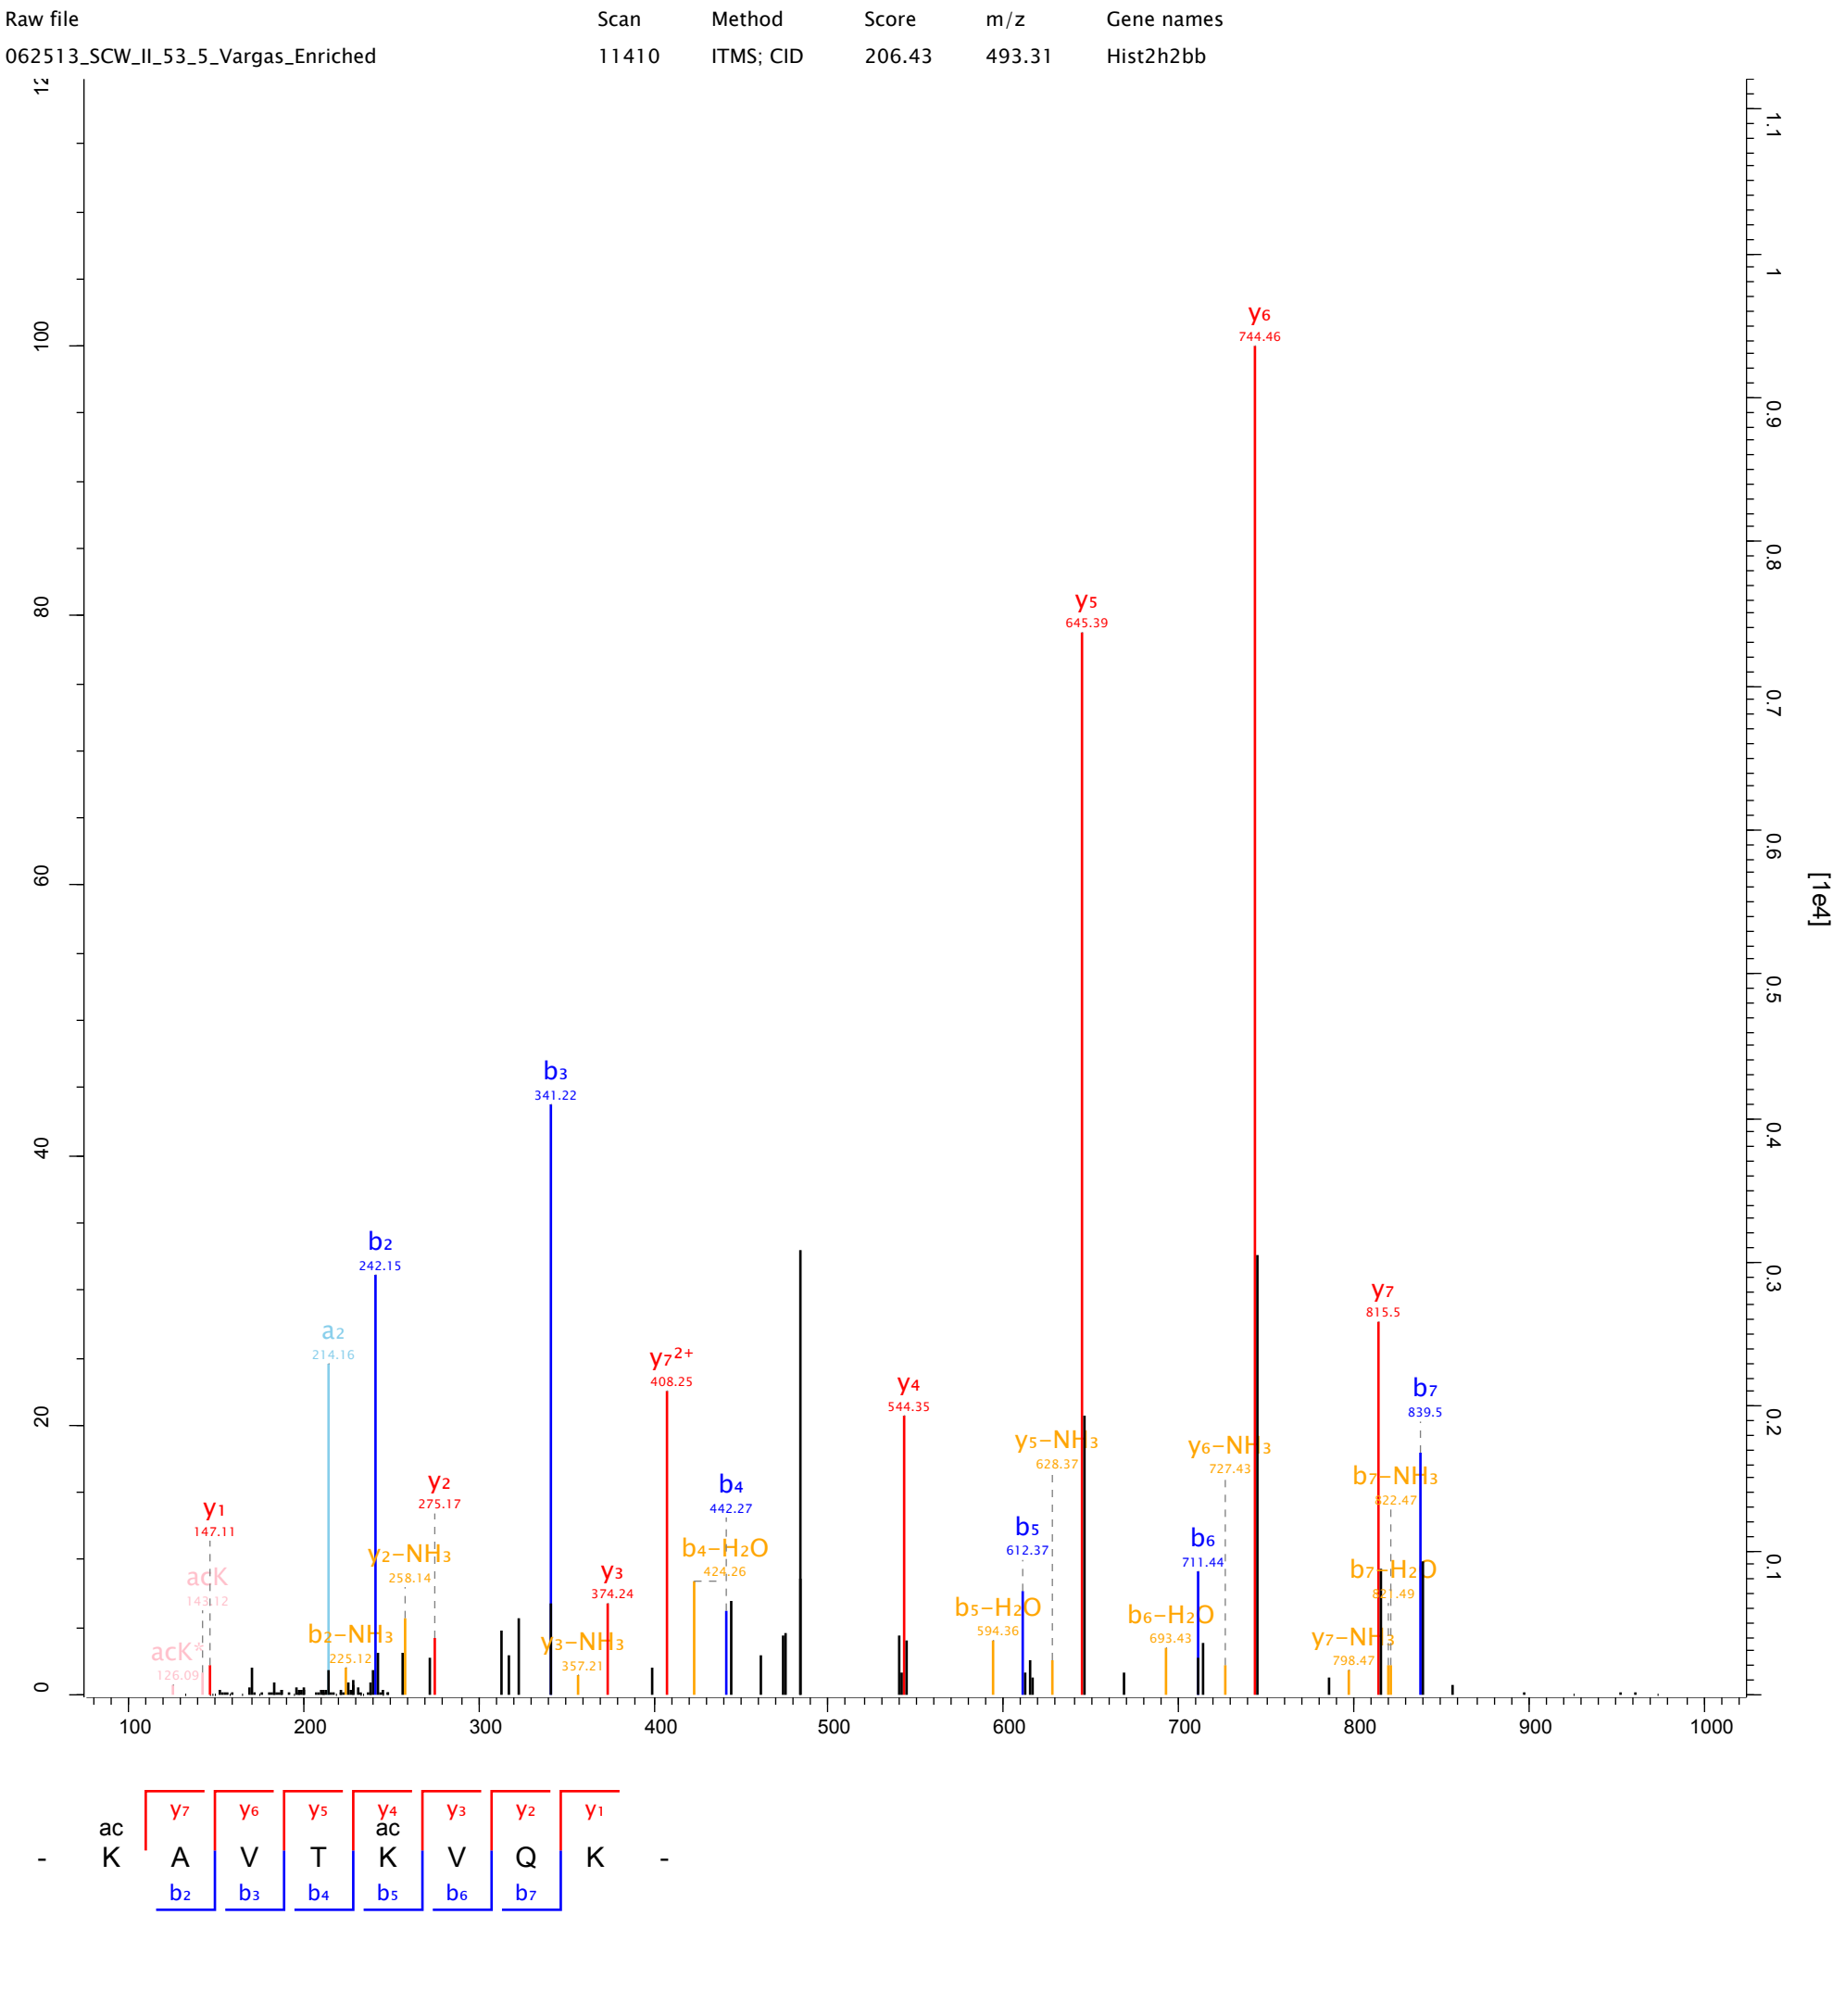

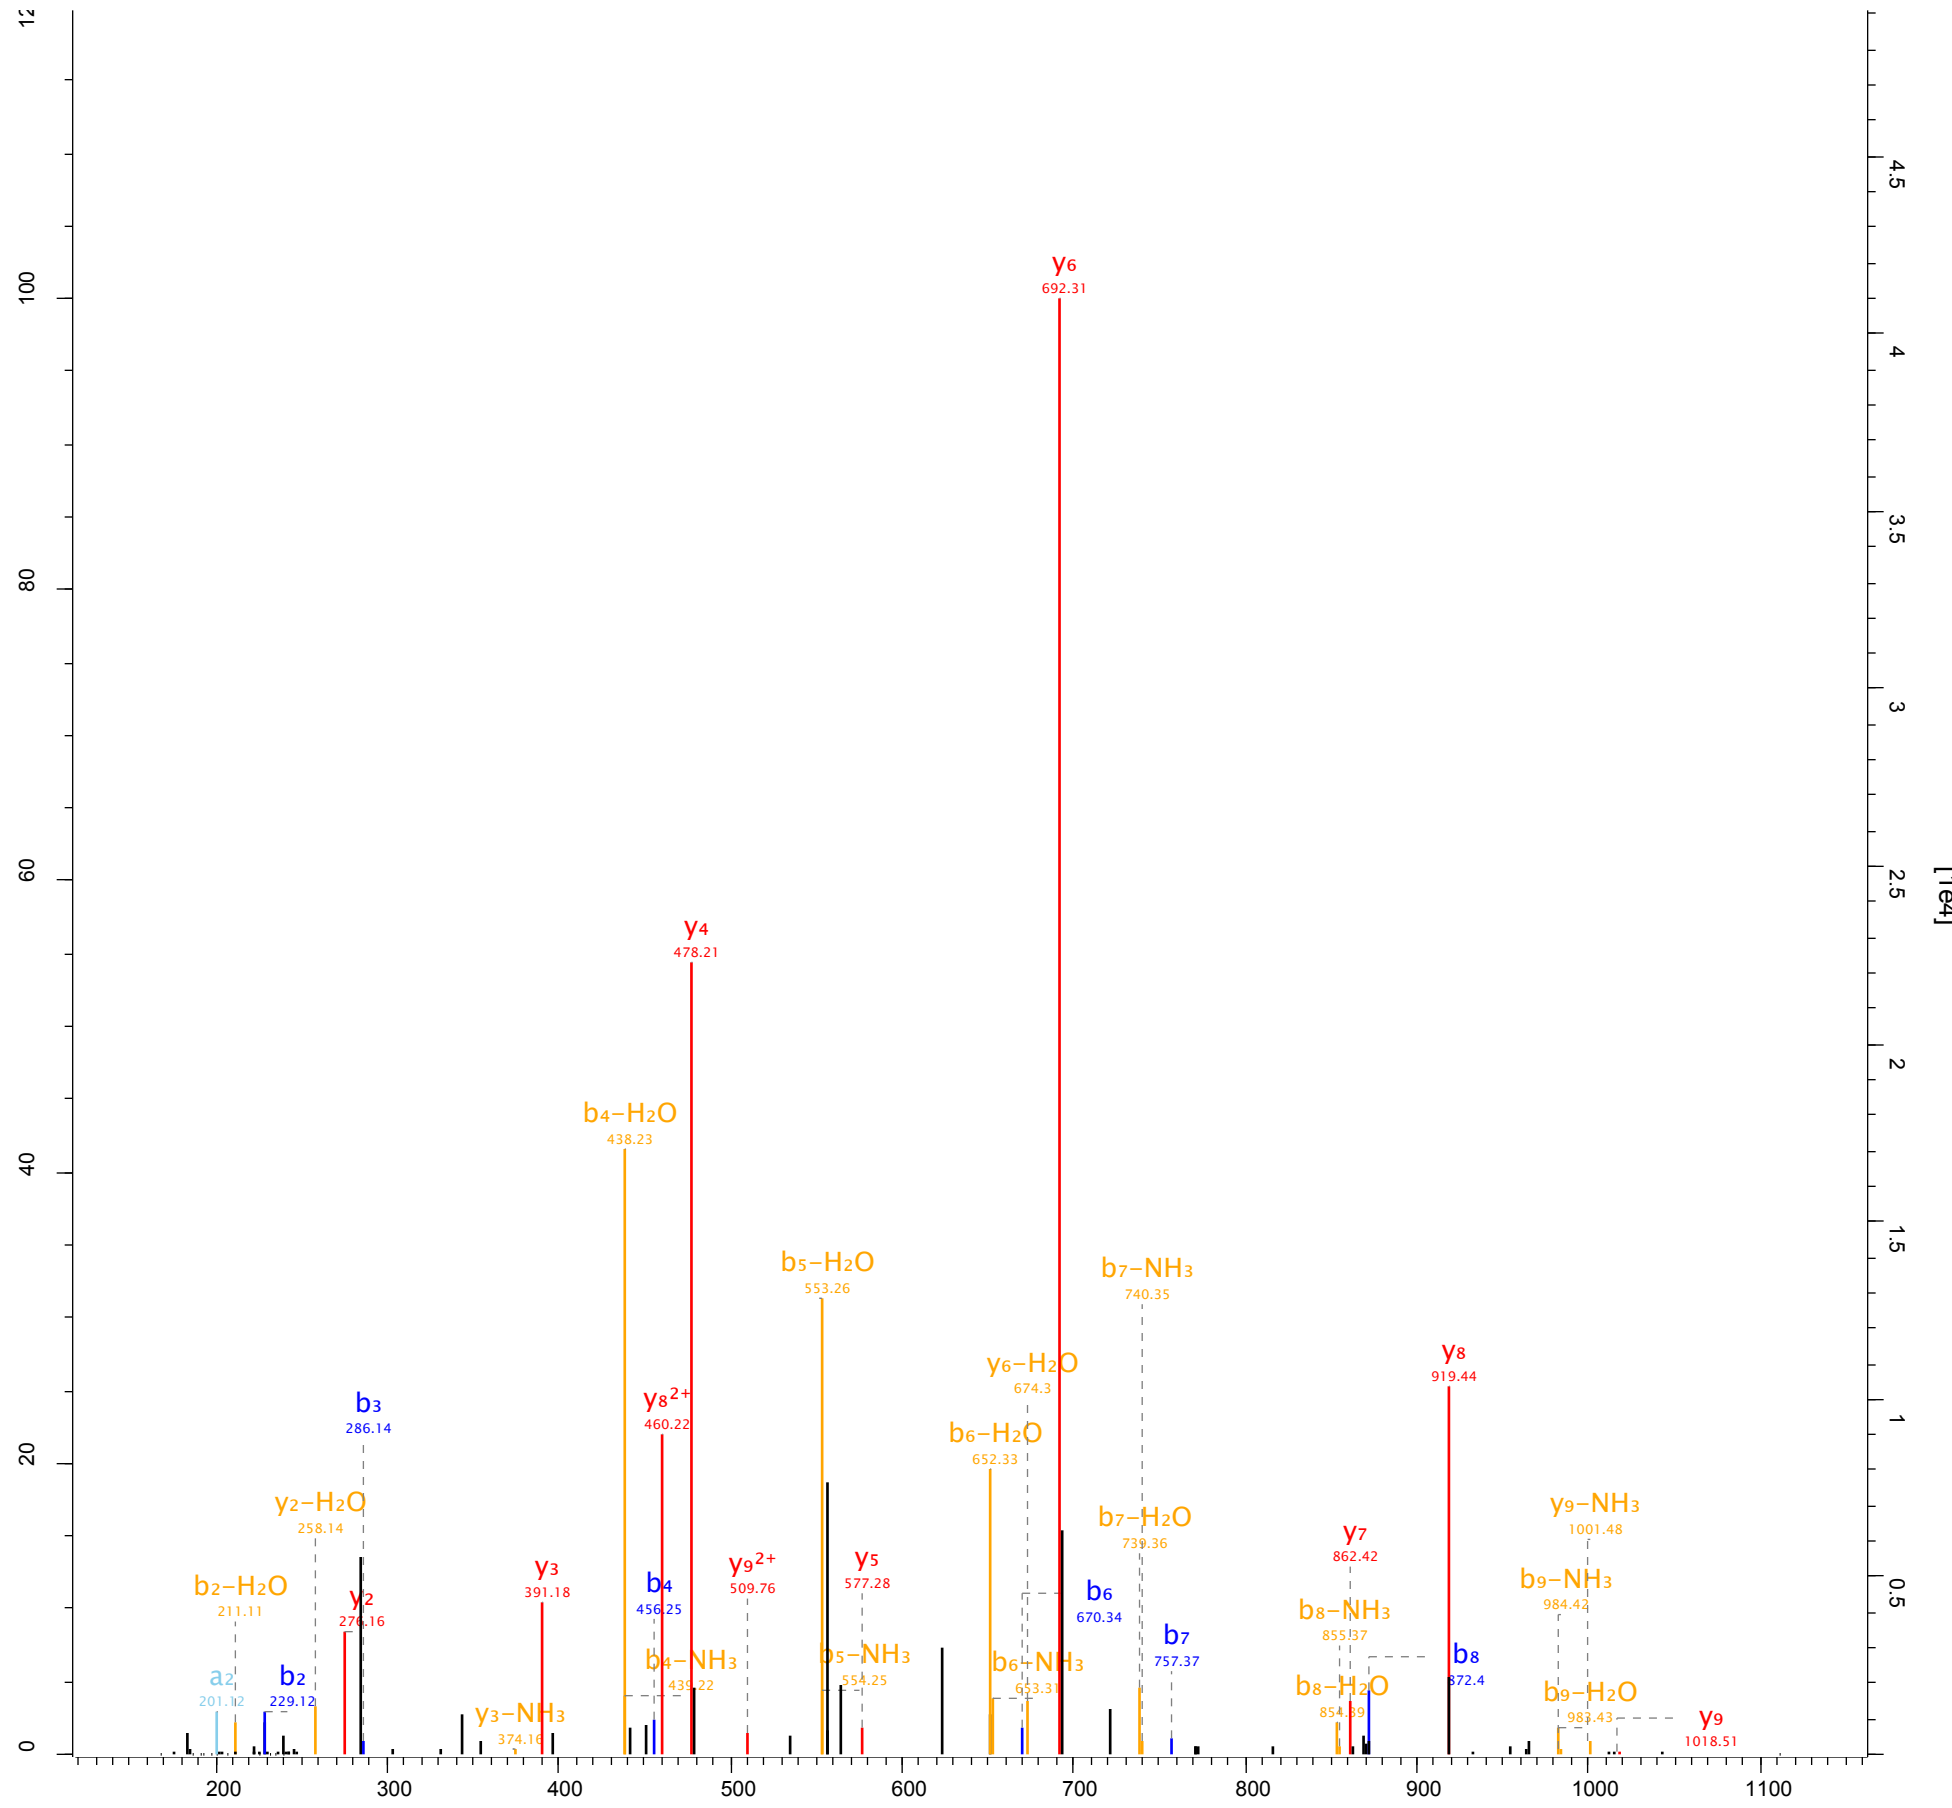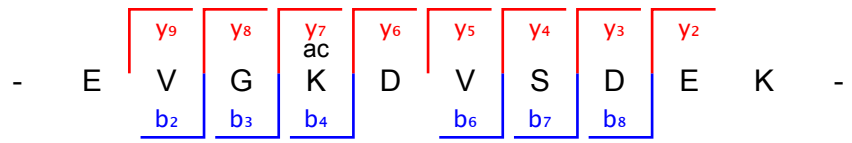



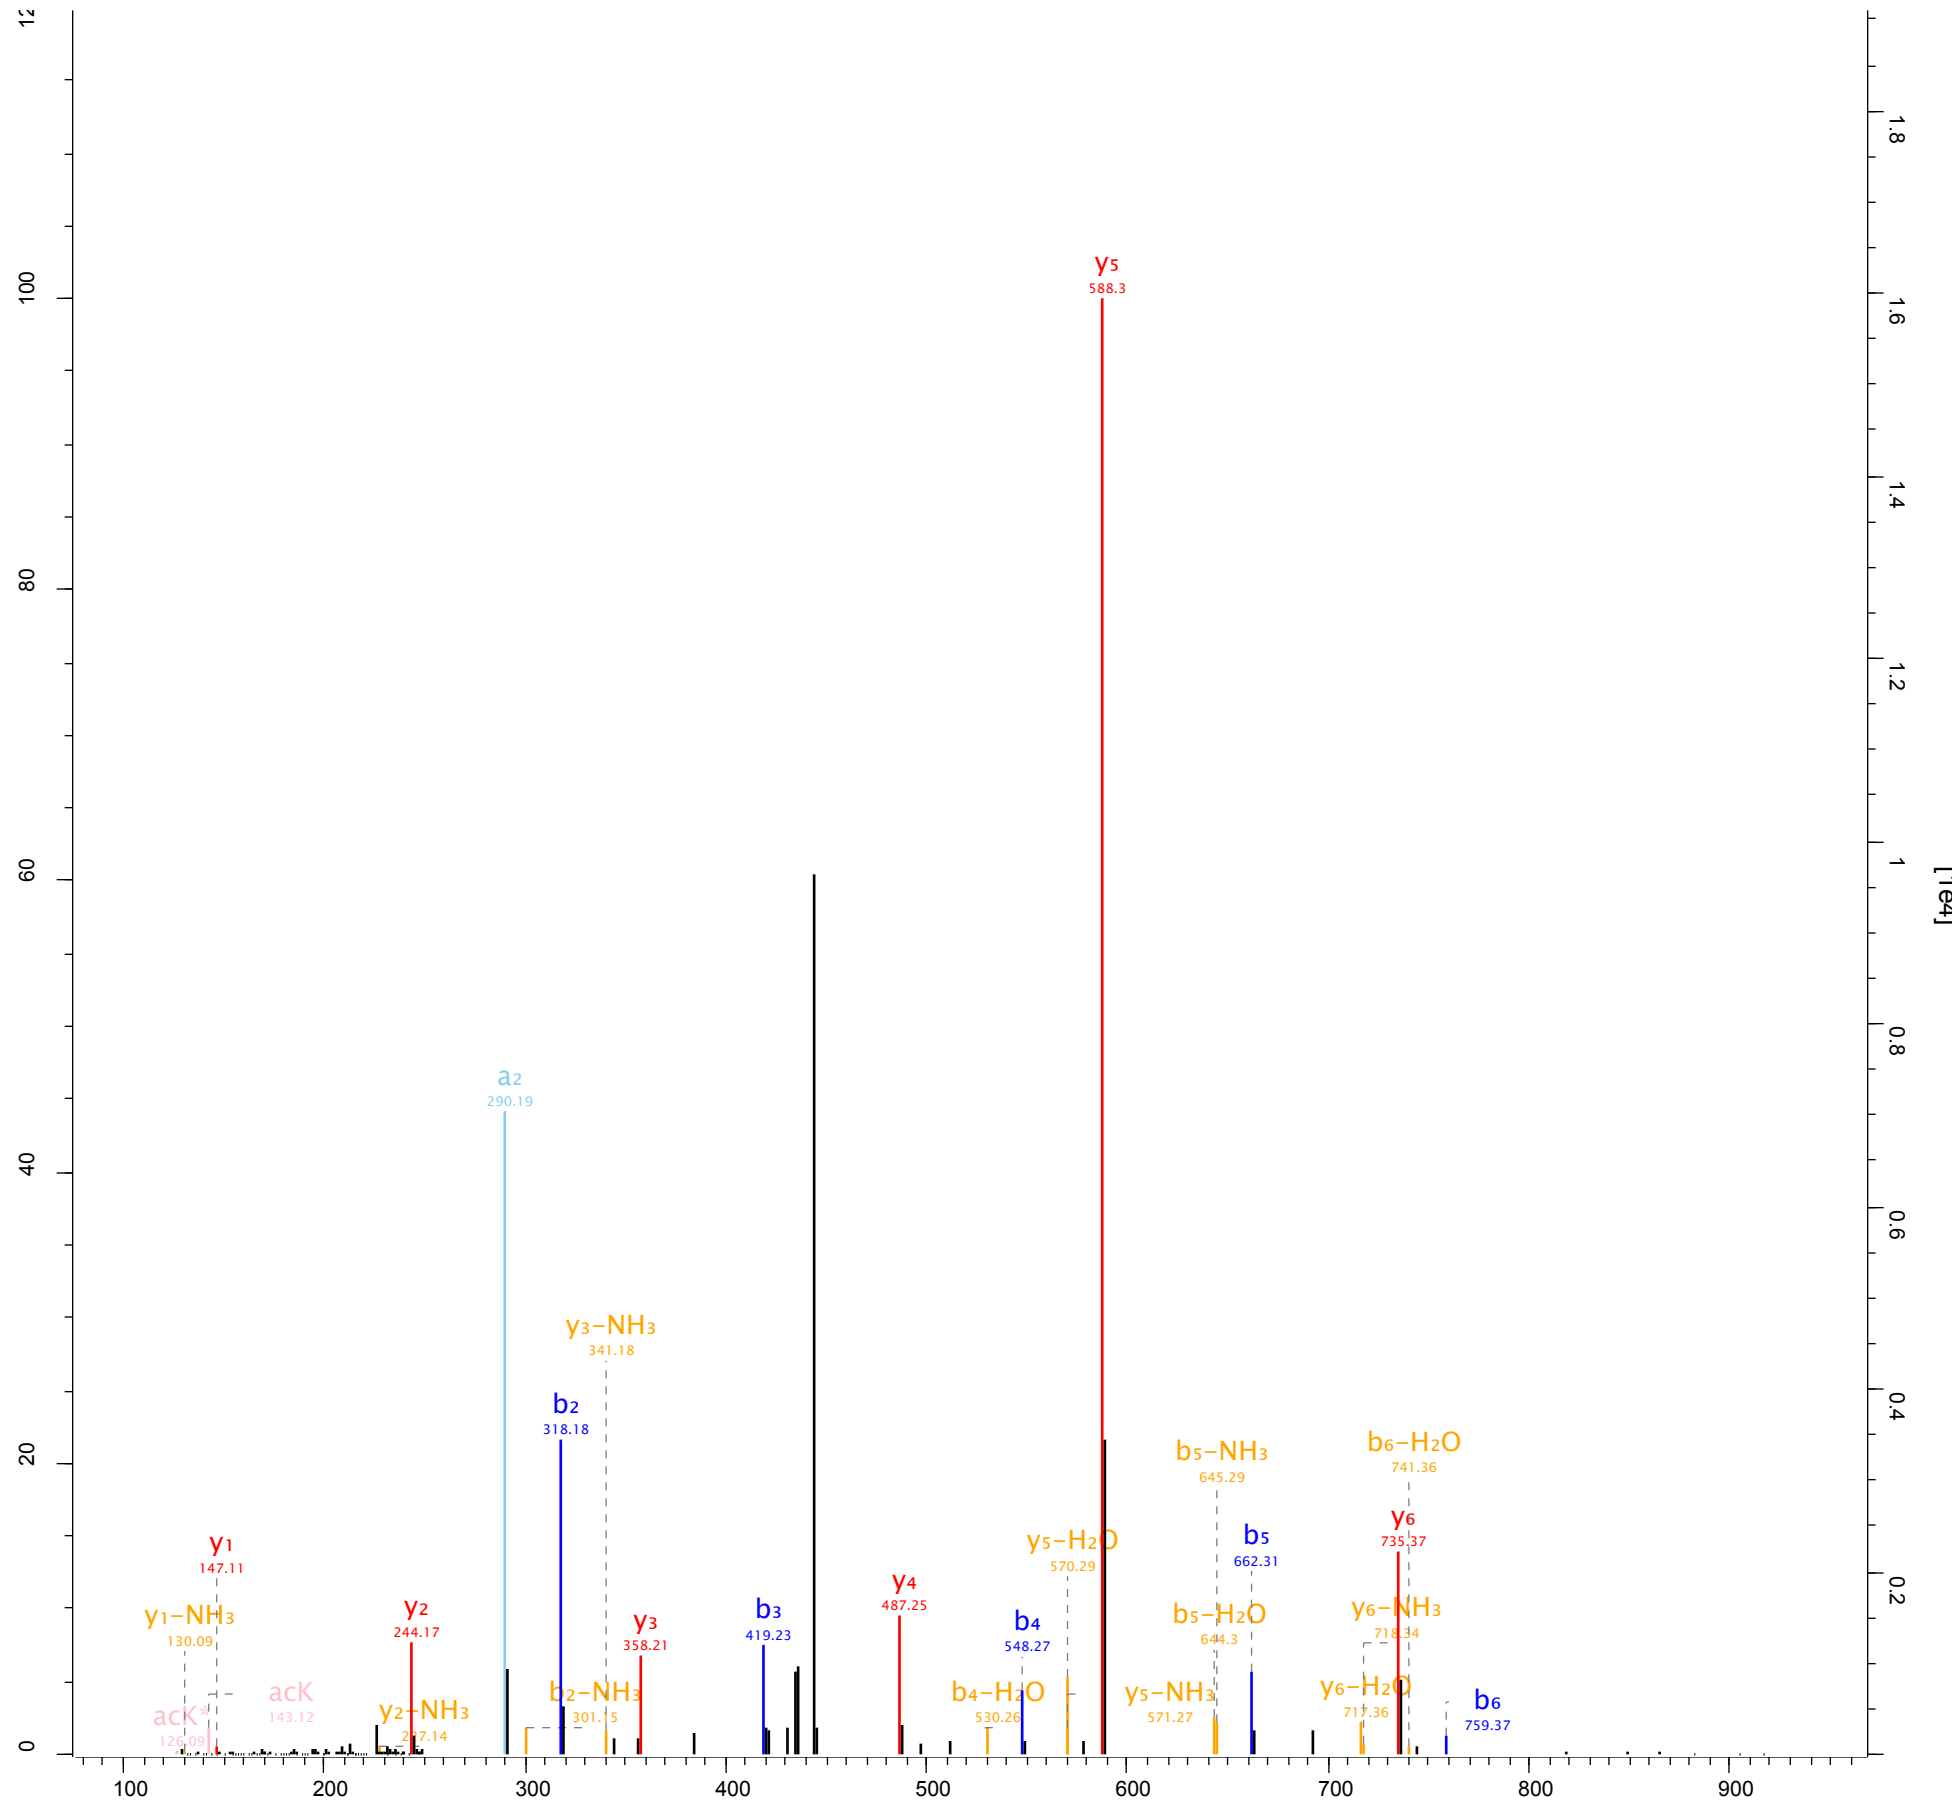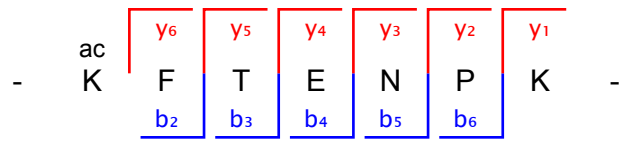

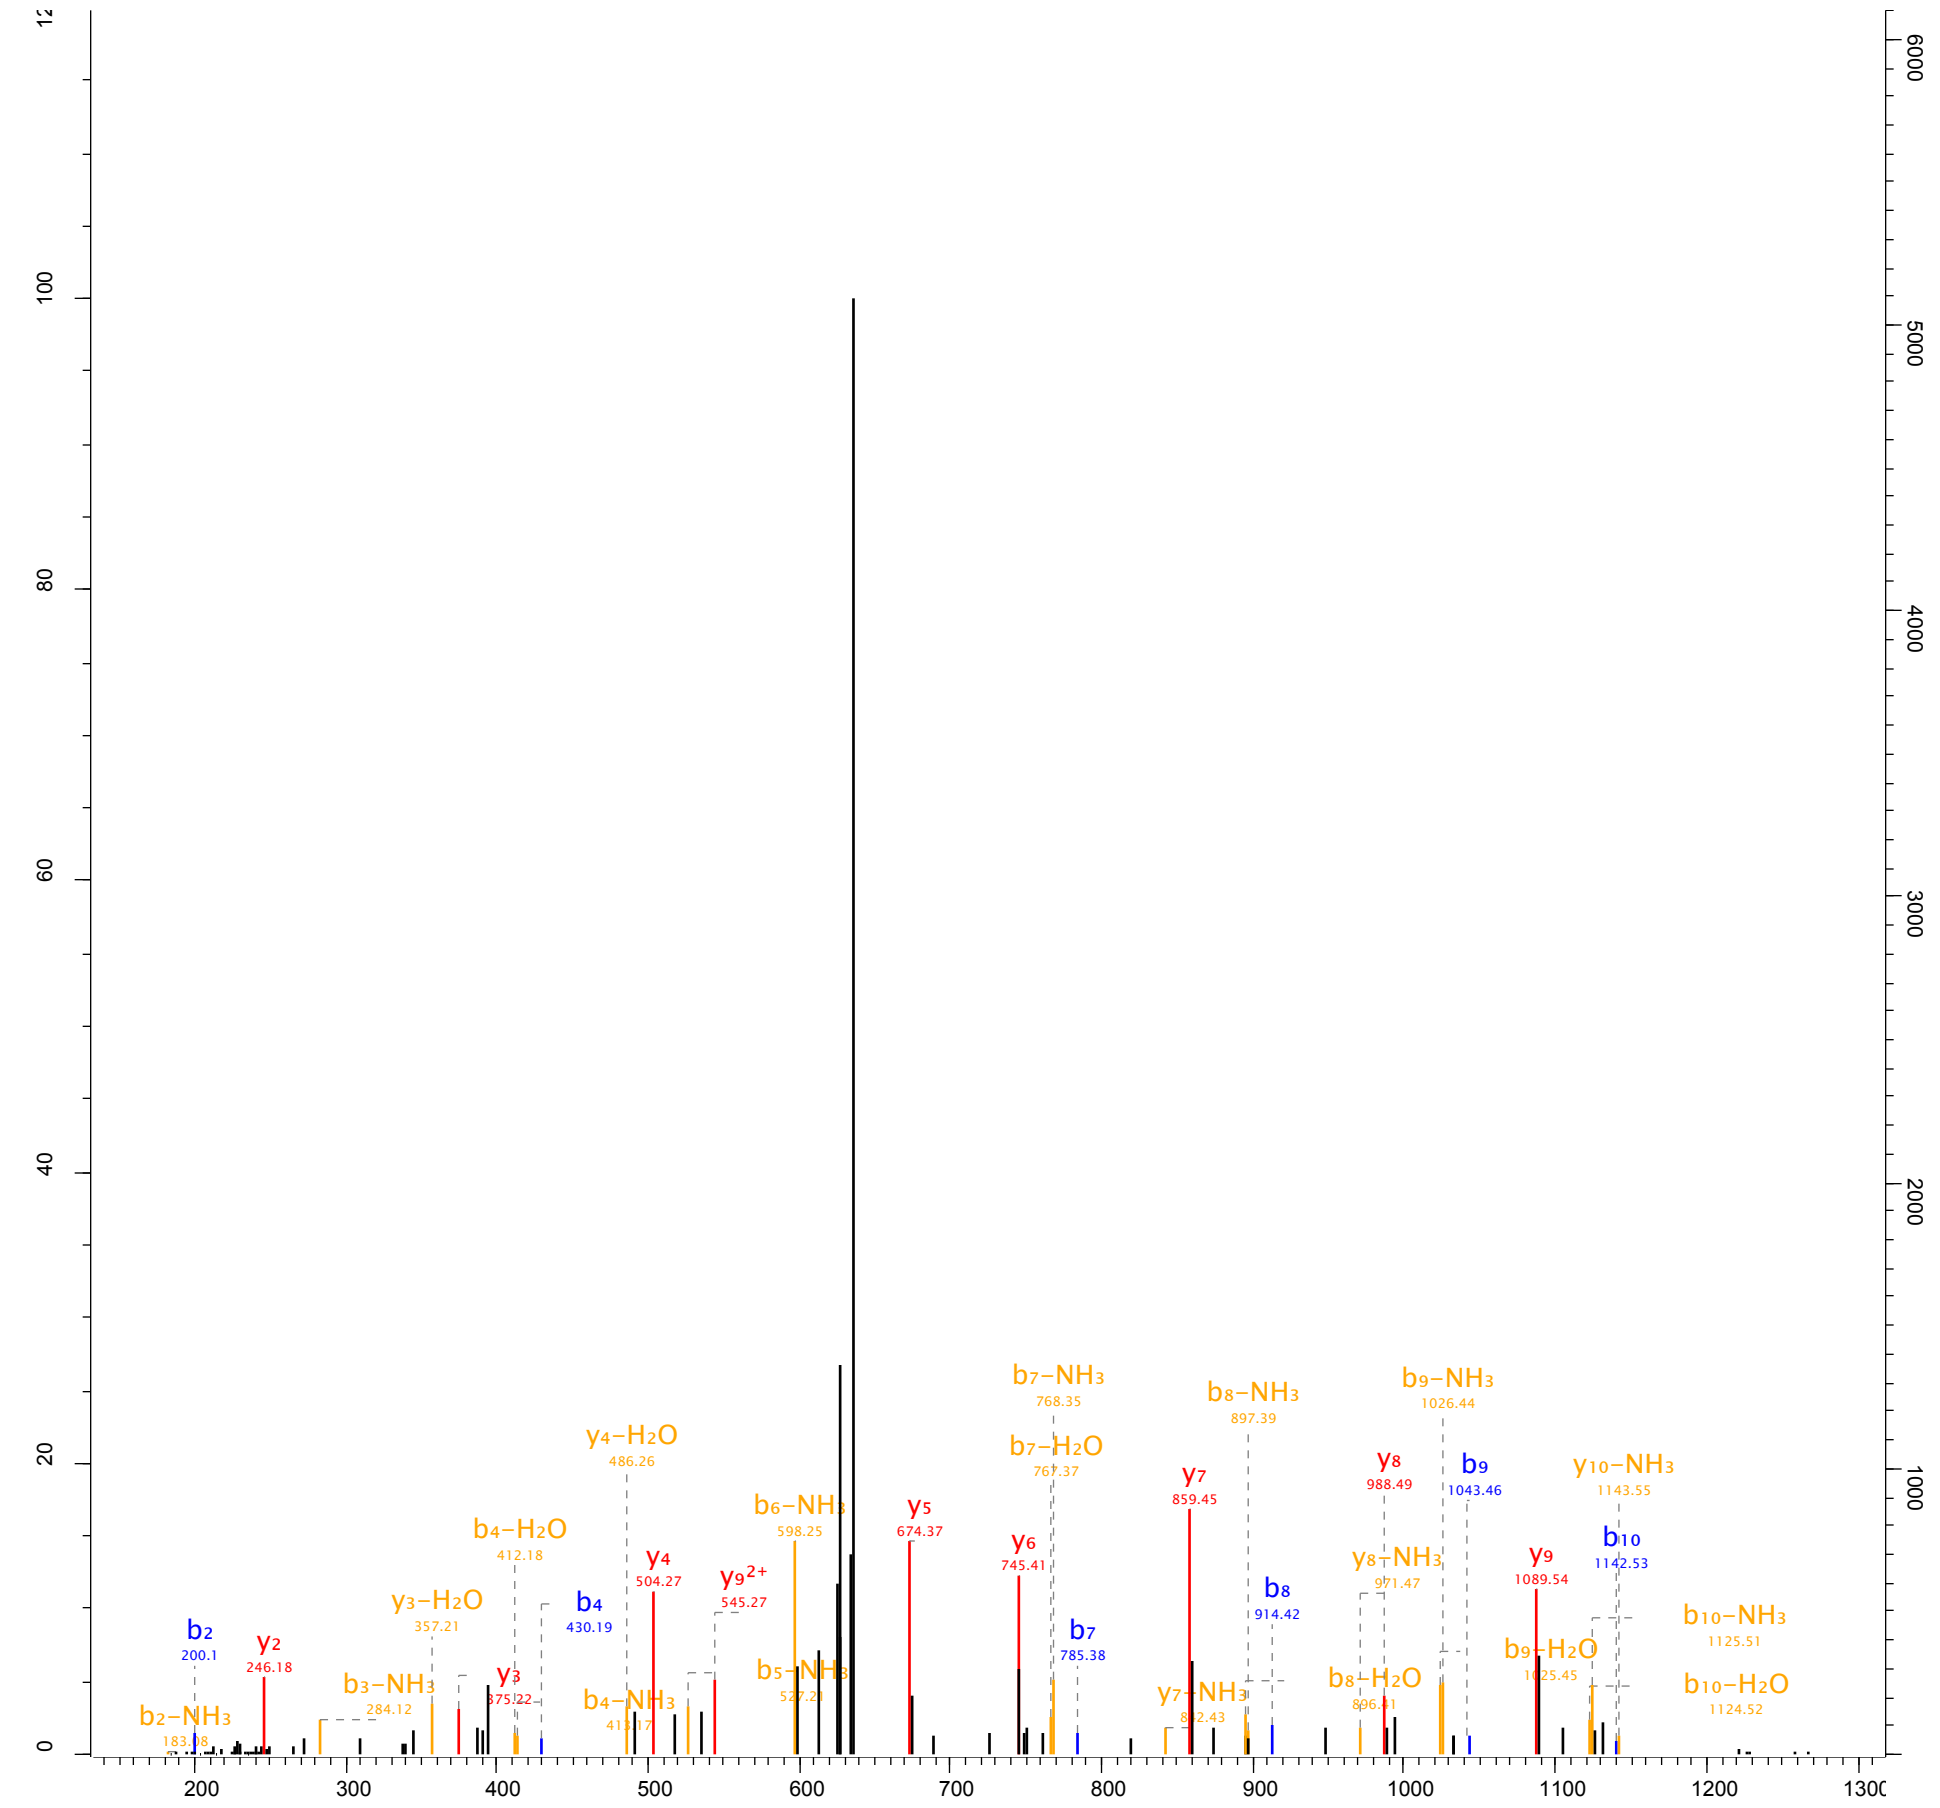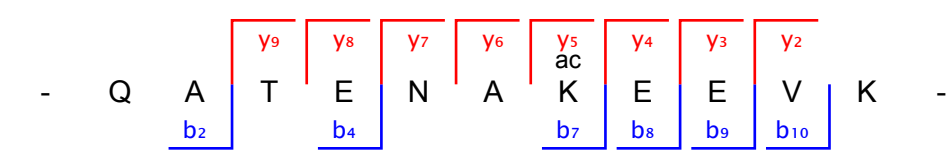

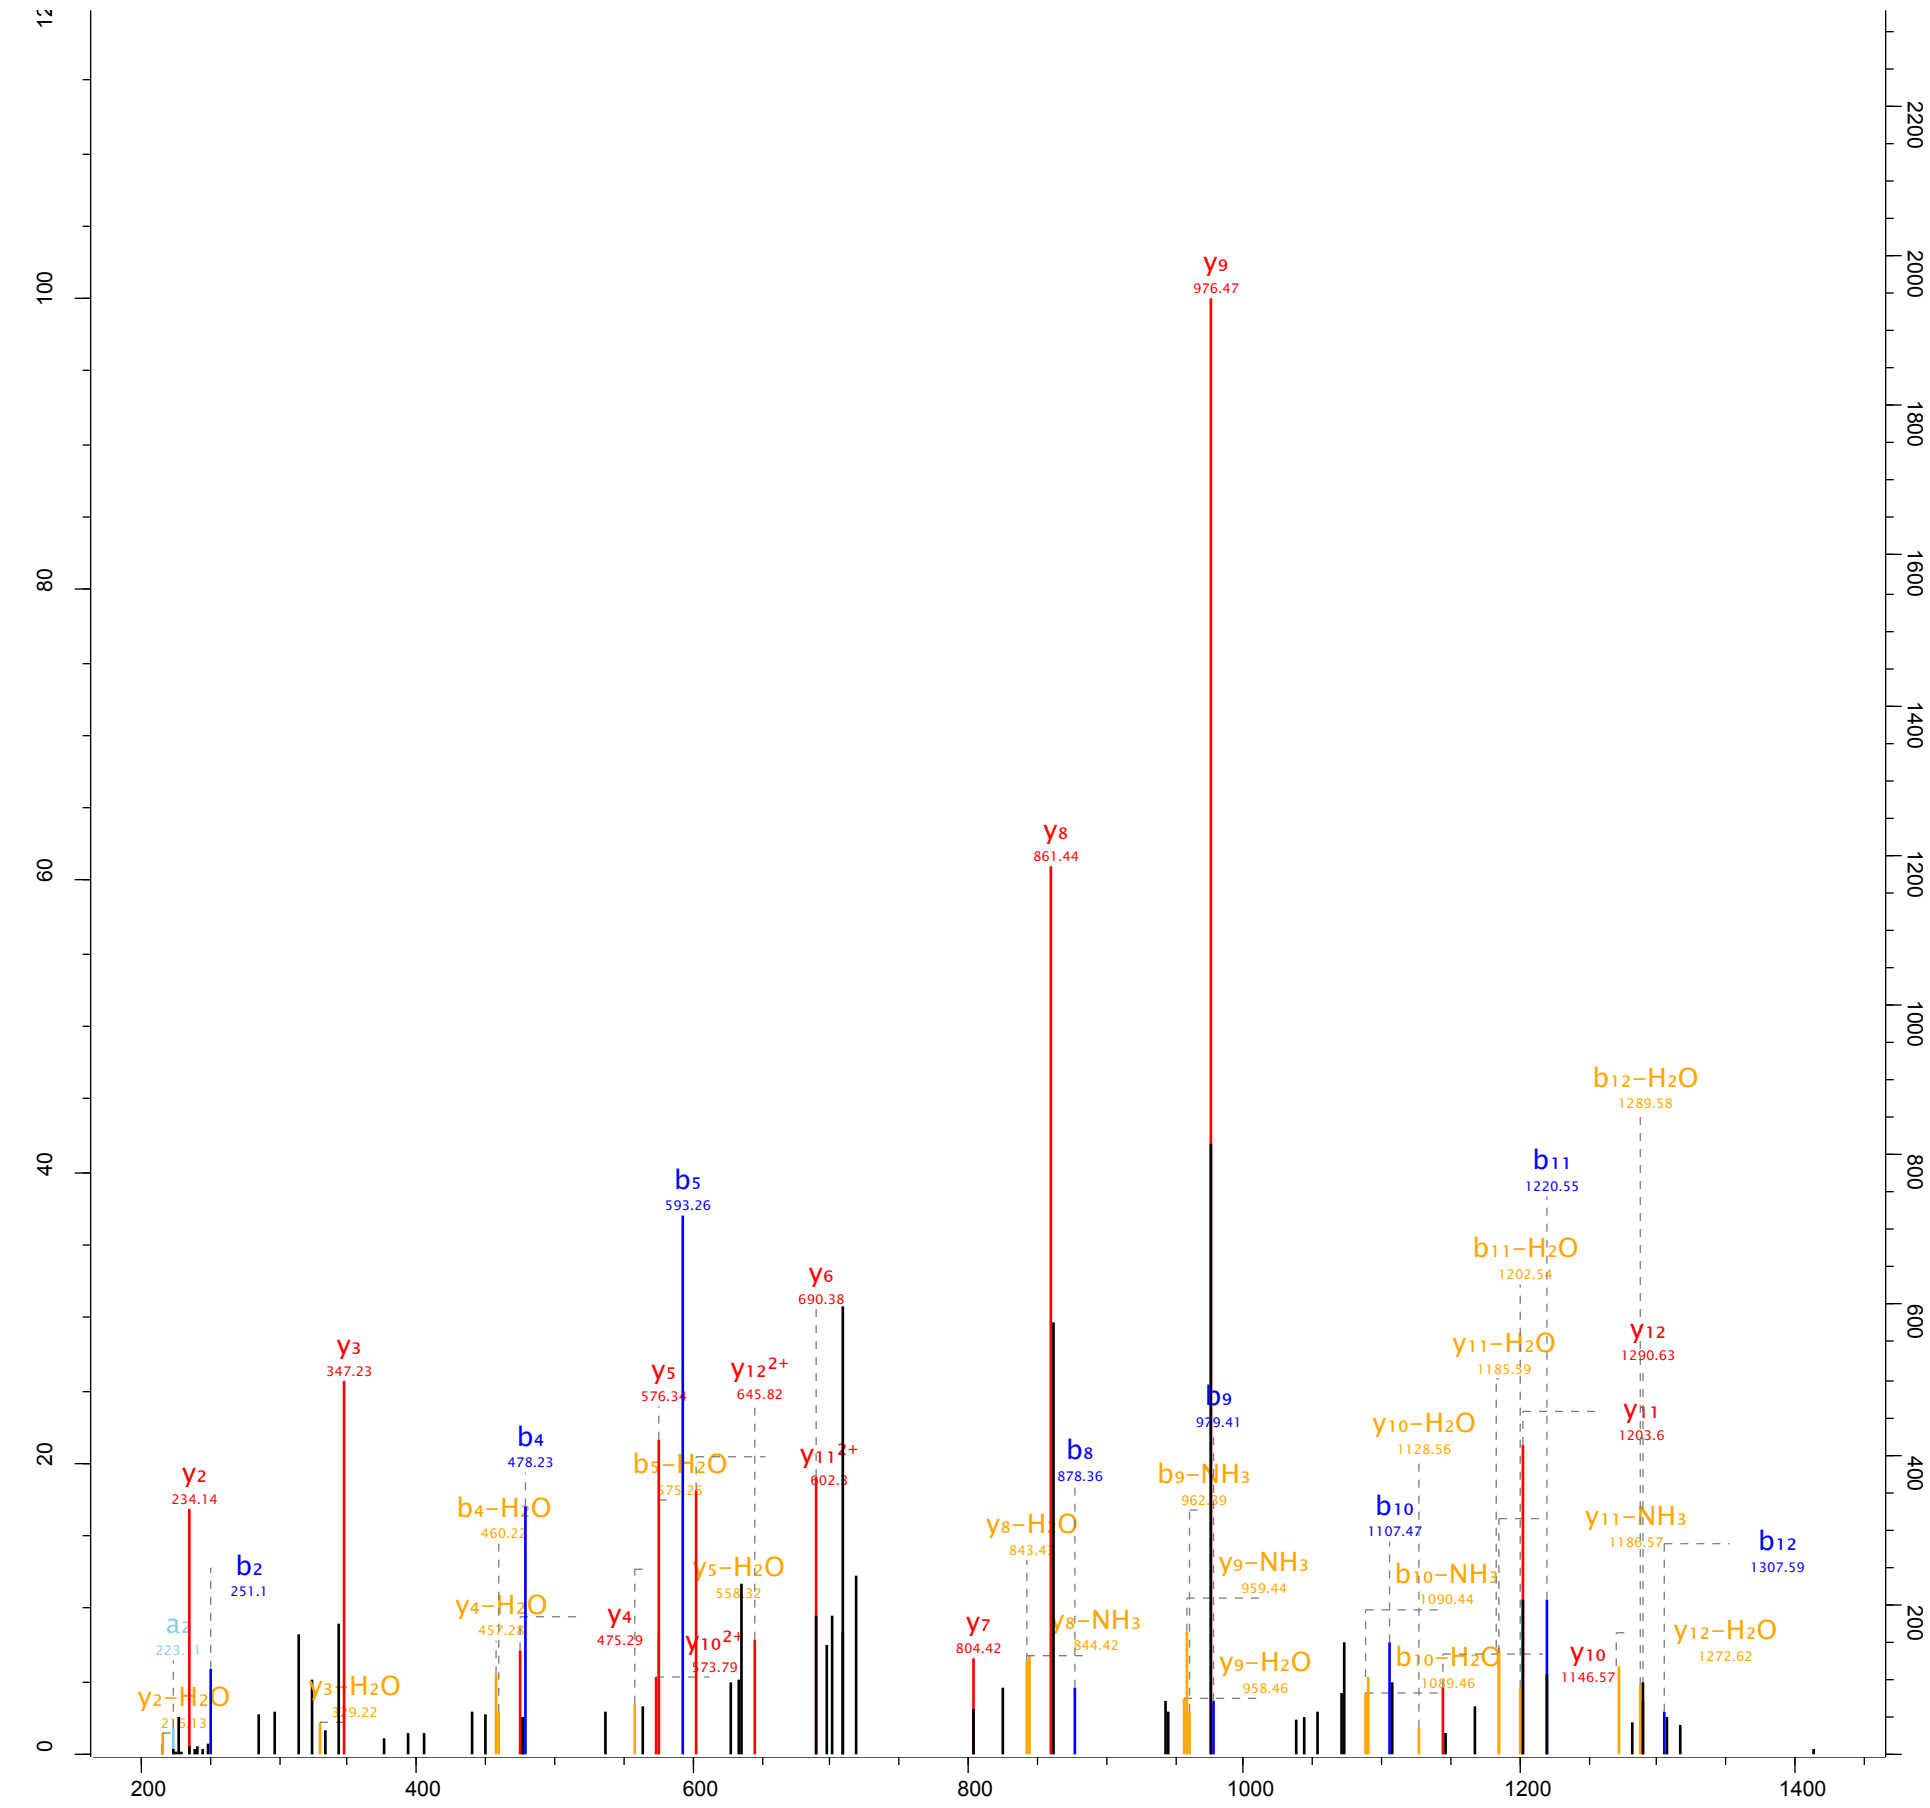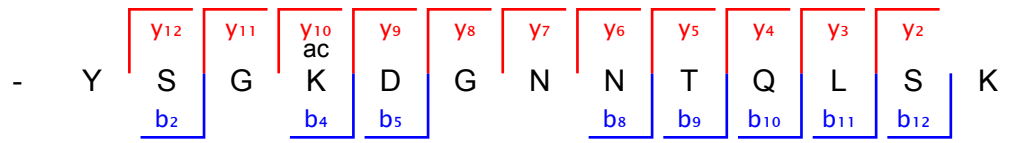

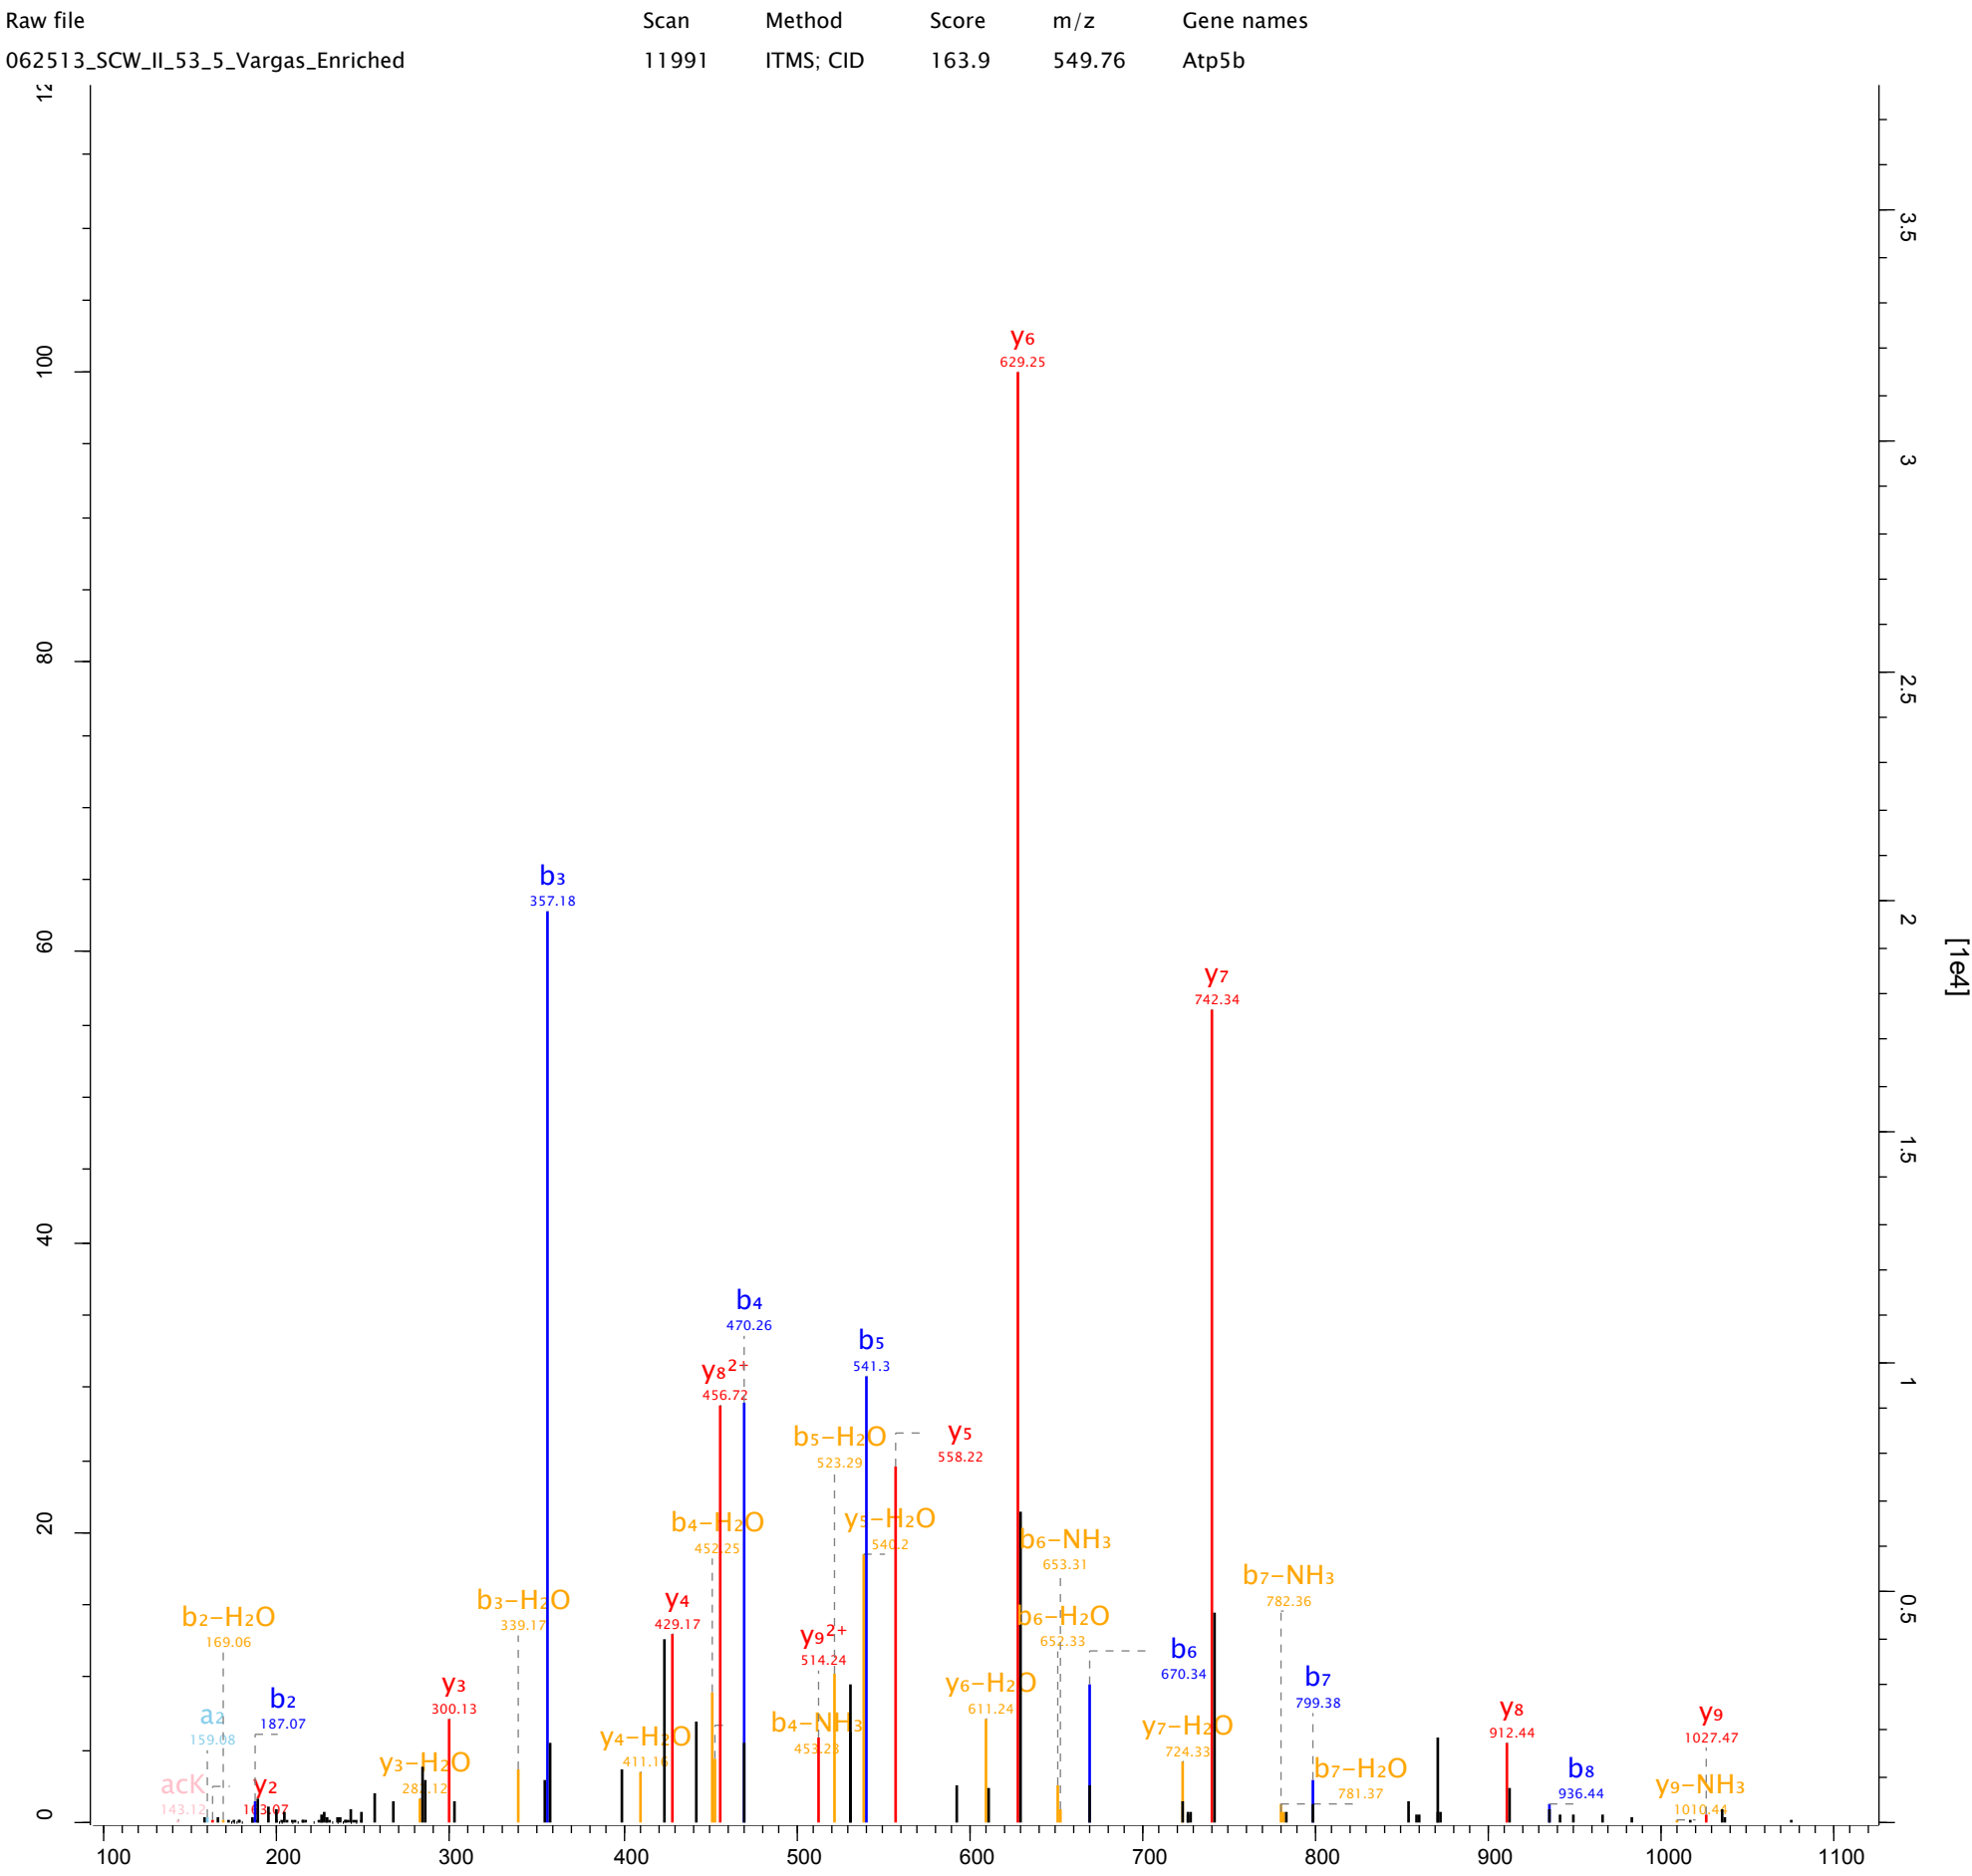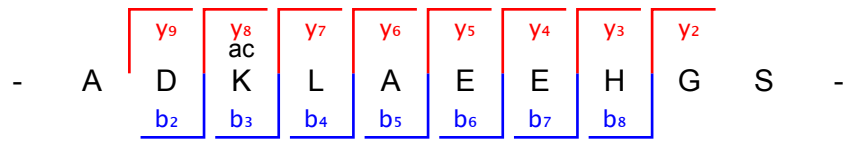

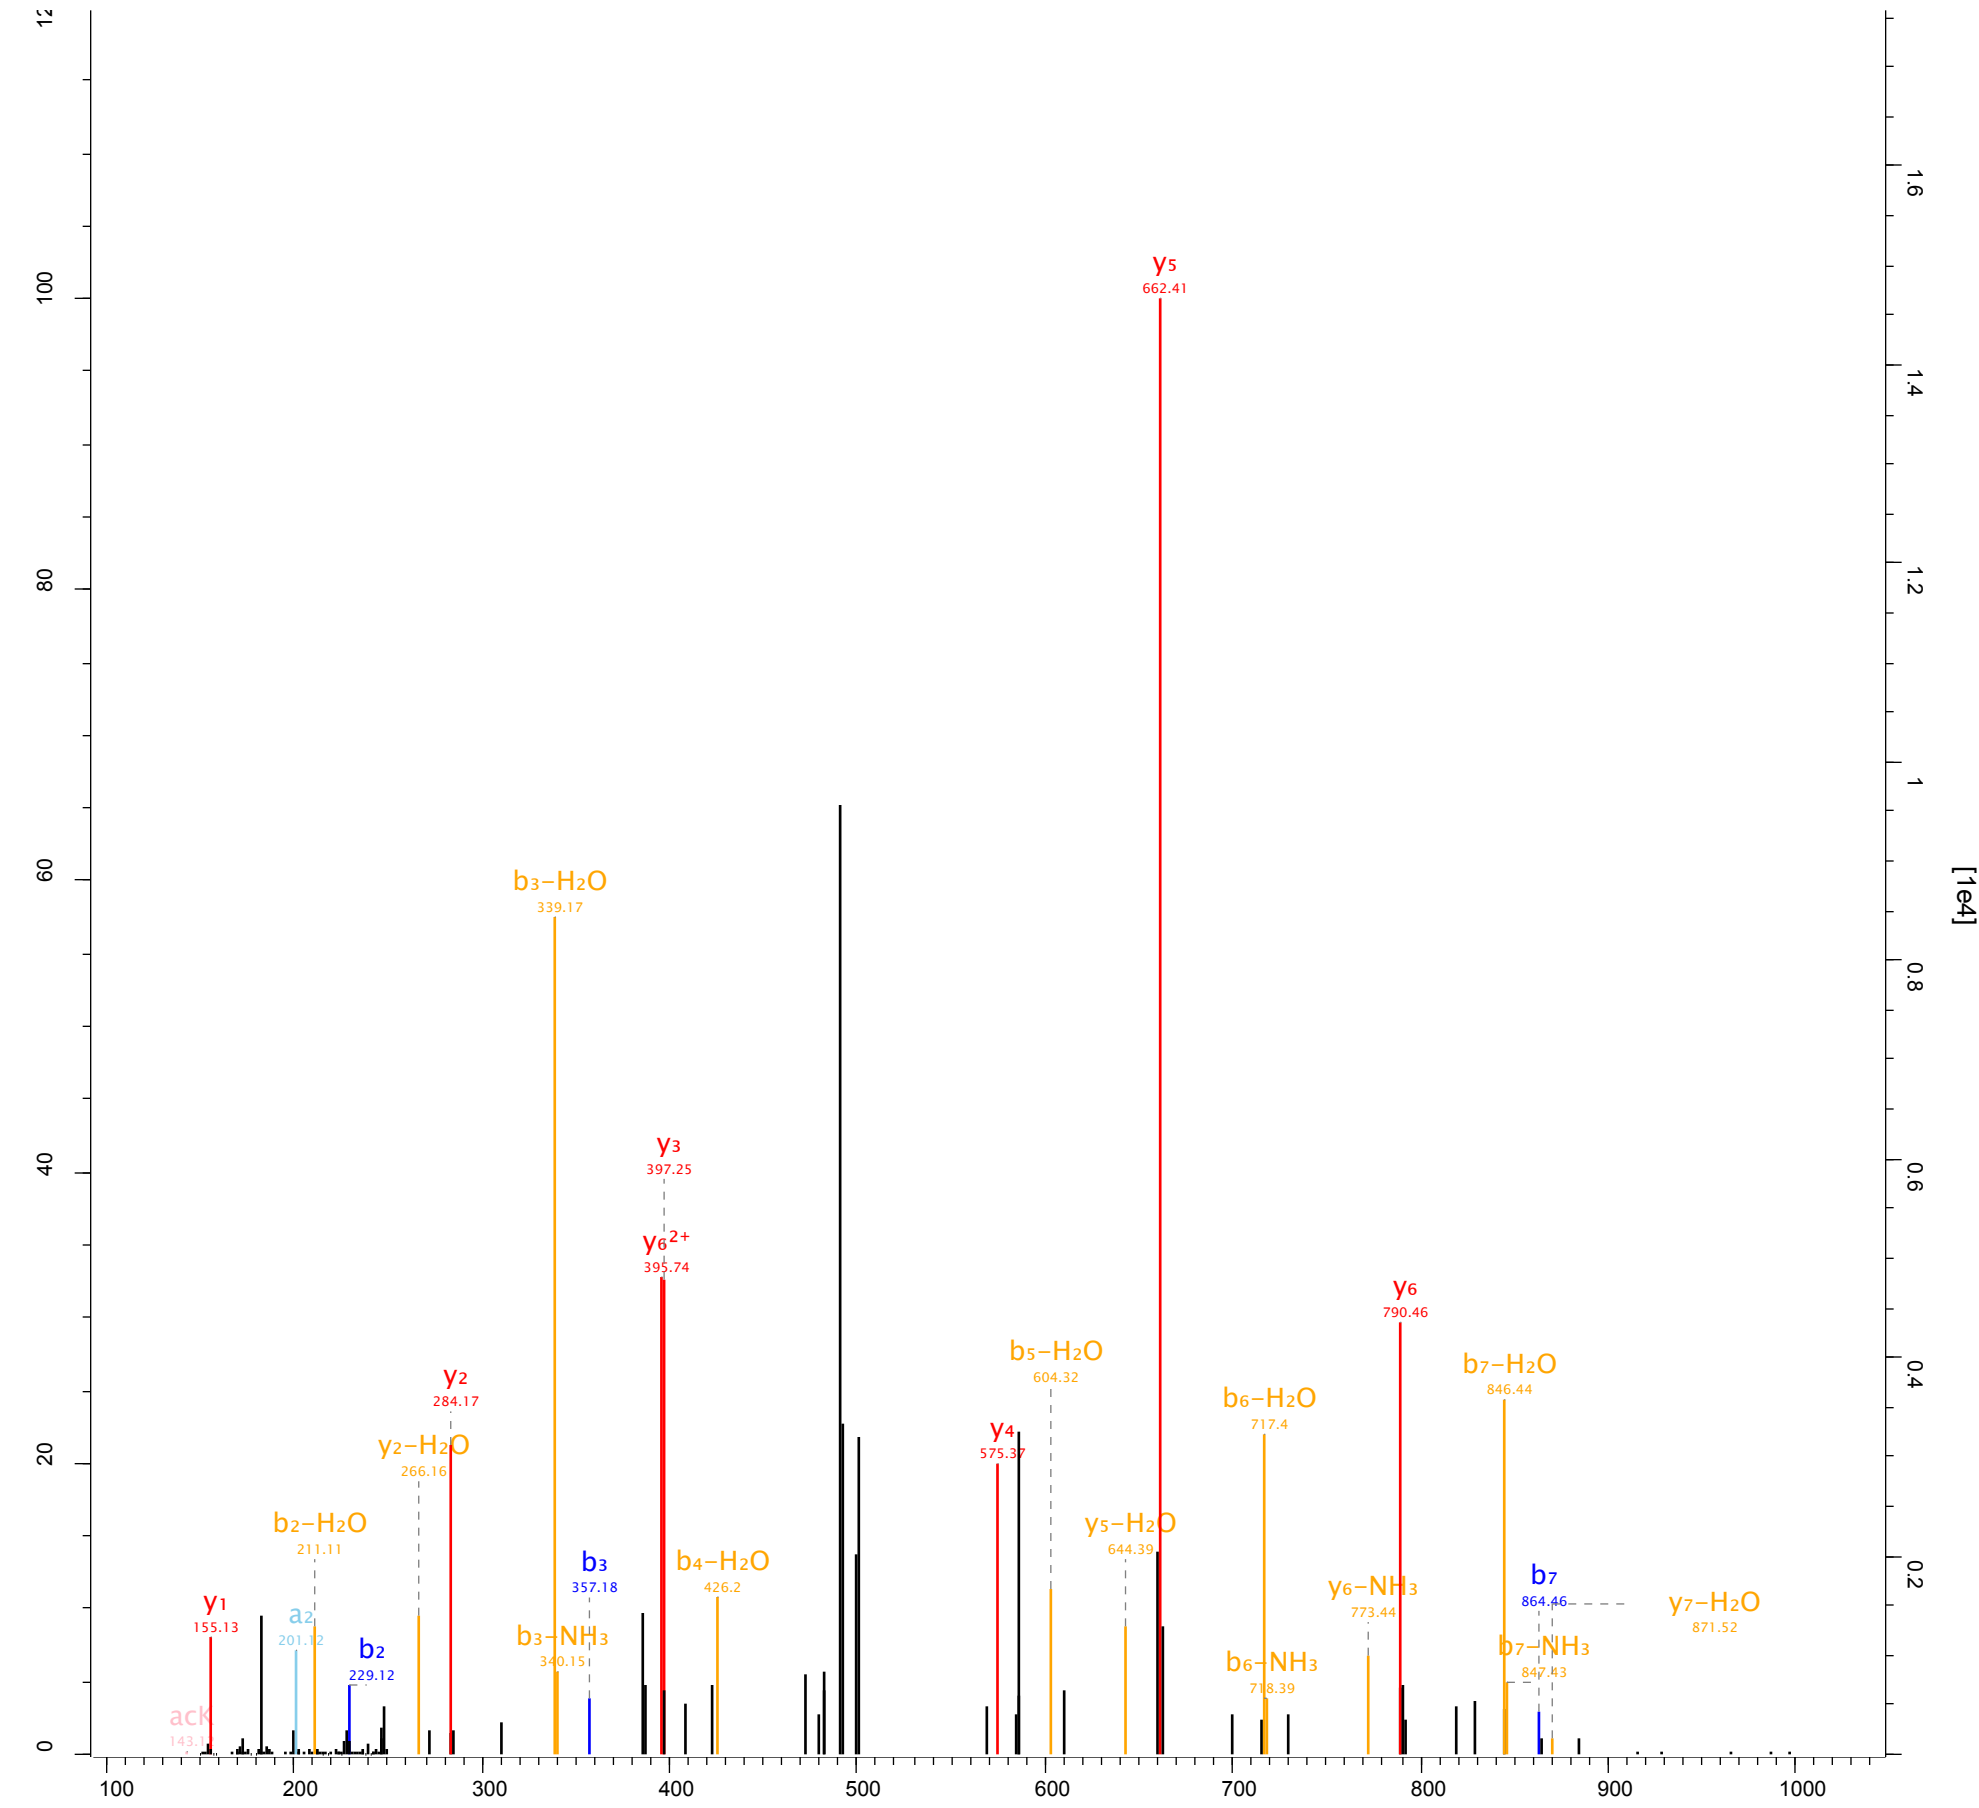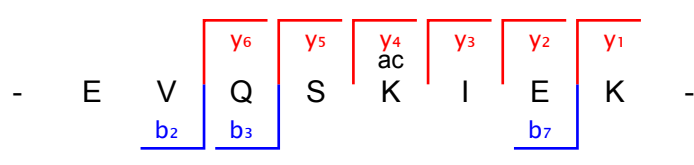

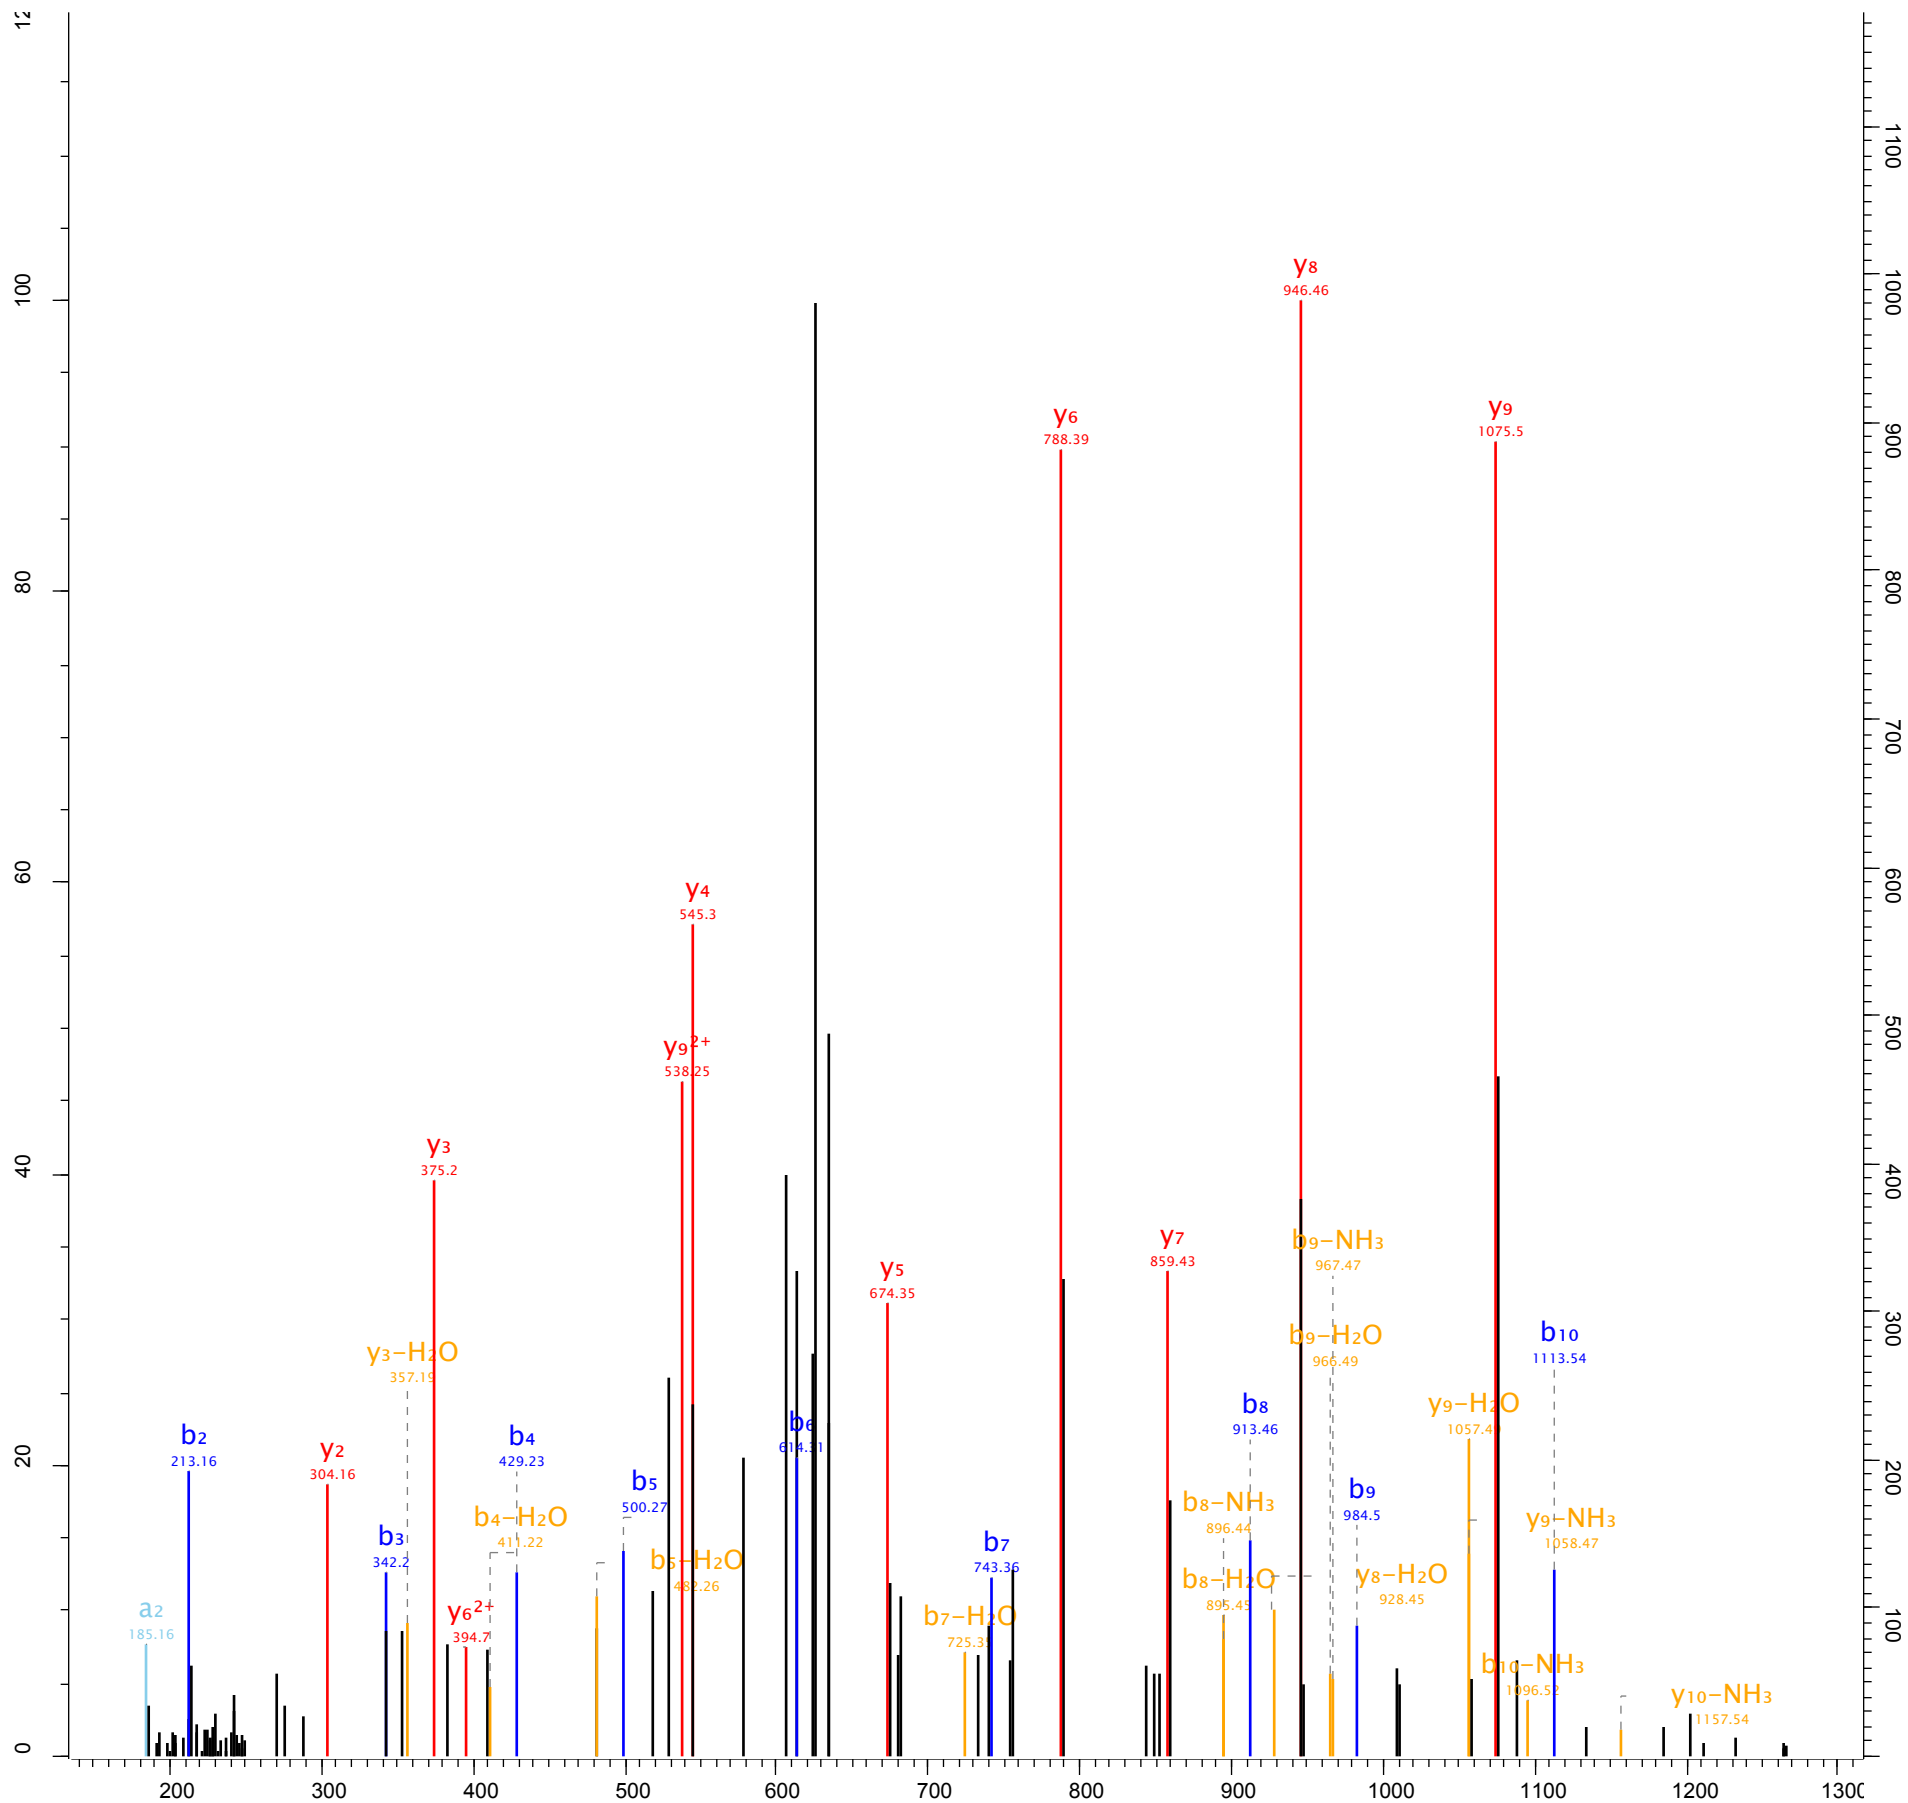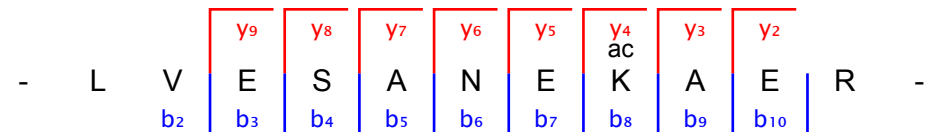

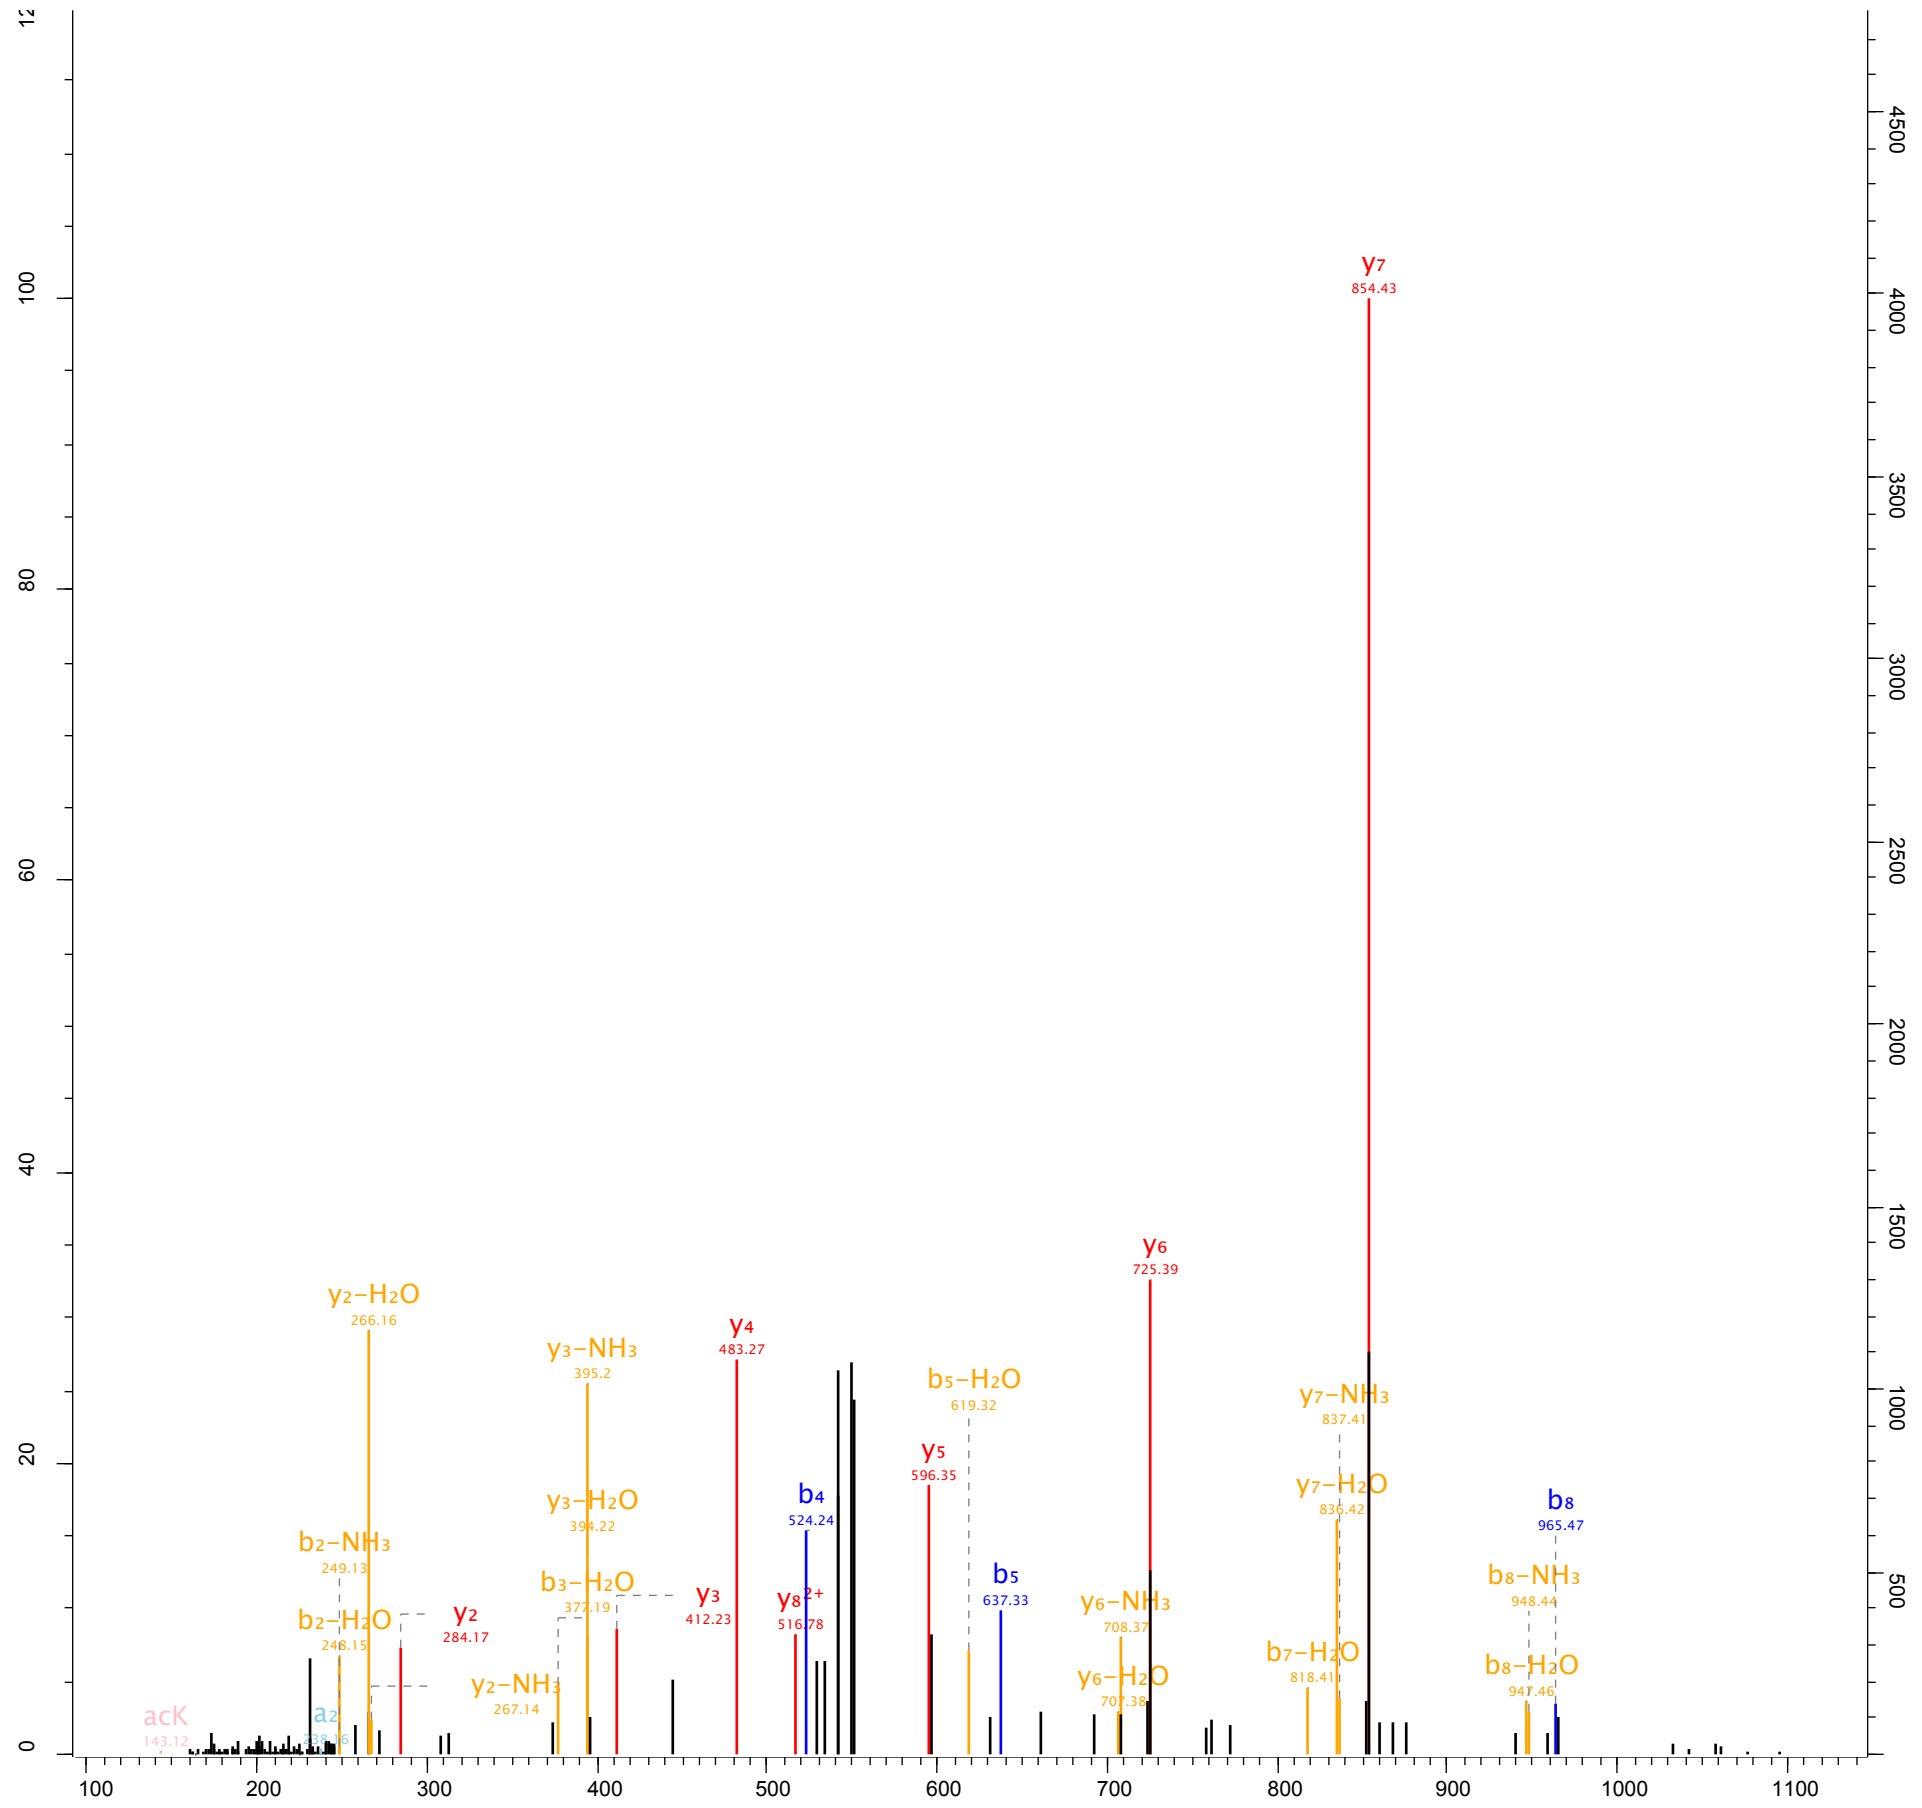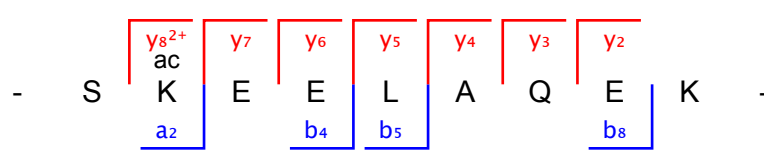

Raw file 062513\_SCW\_II\_53\_5\_Vargas\_Enriched Scan 12584 Method ITMS; CID Score 143.61 m/z 408.23 Gene names Hadha

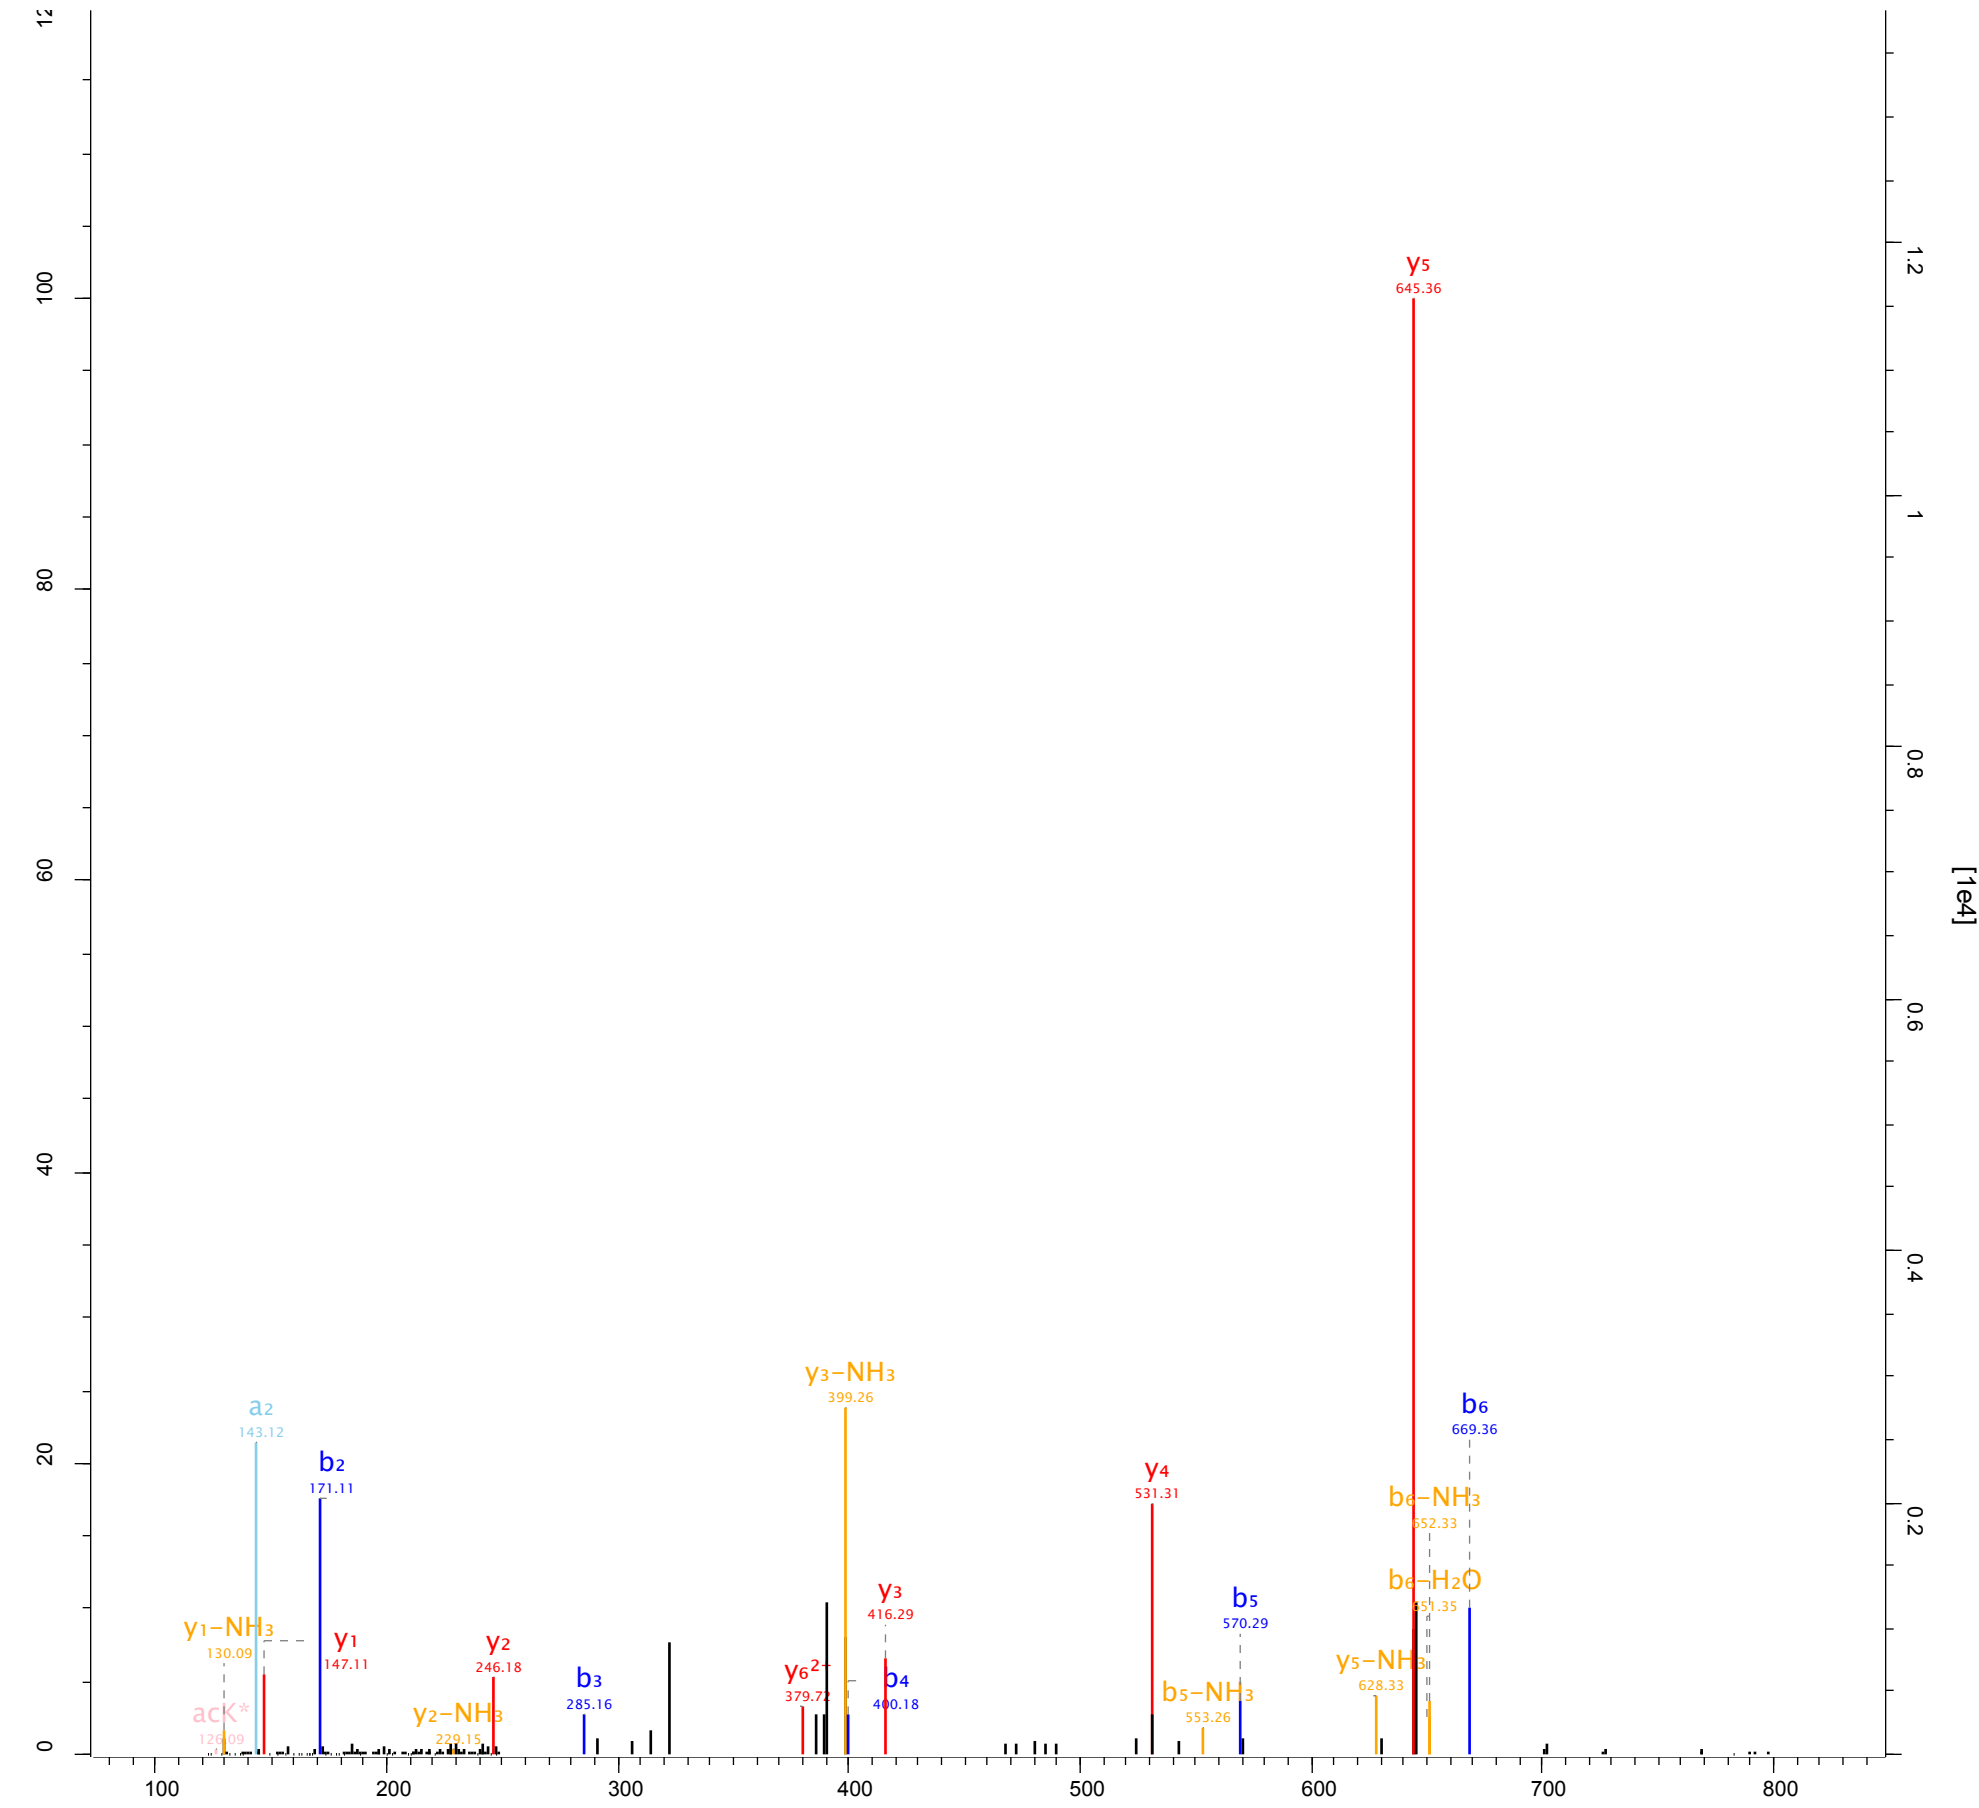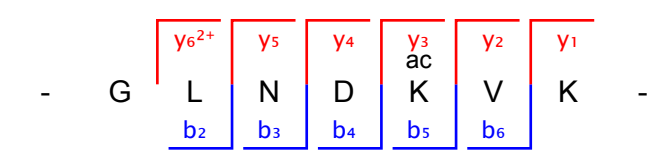



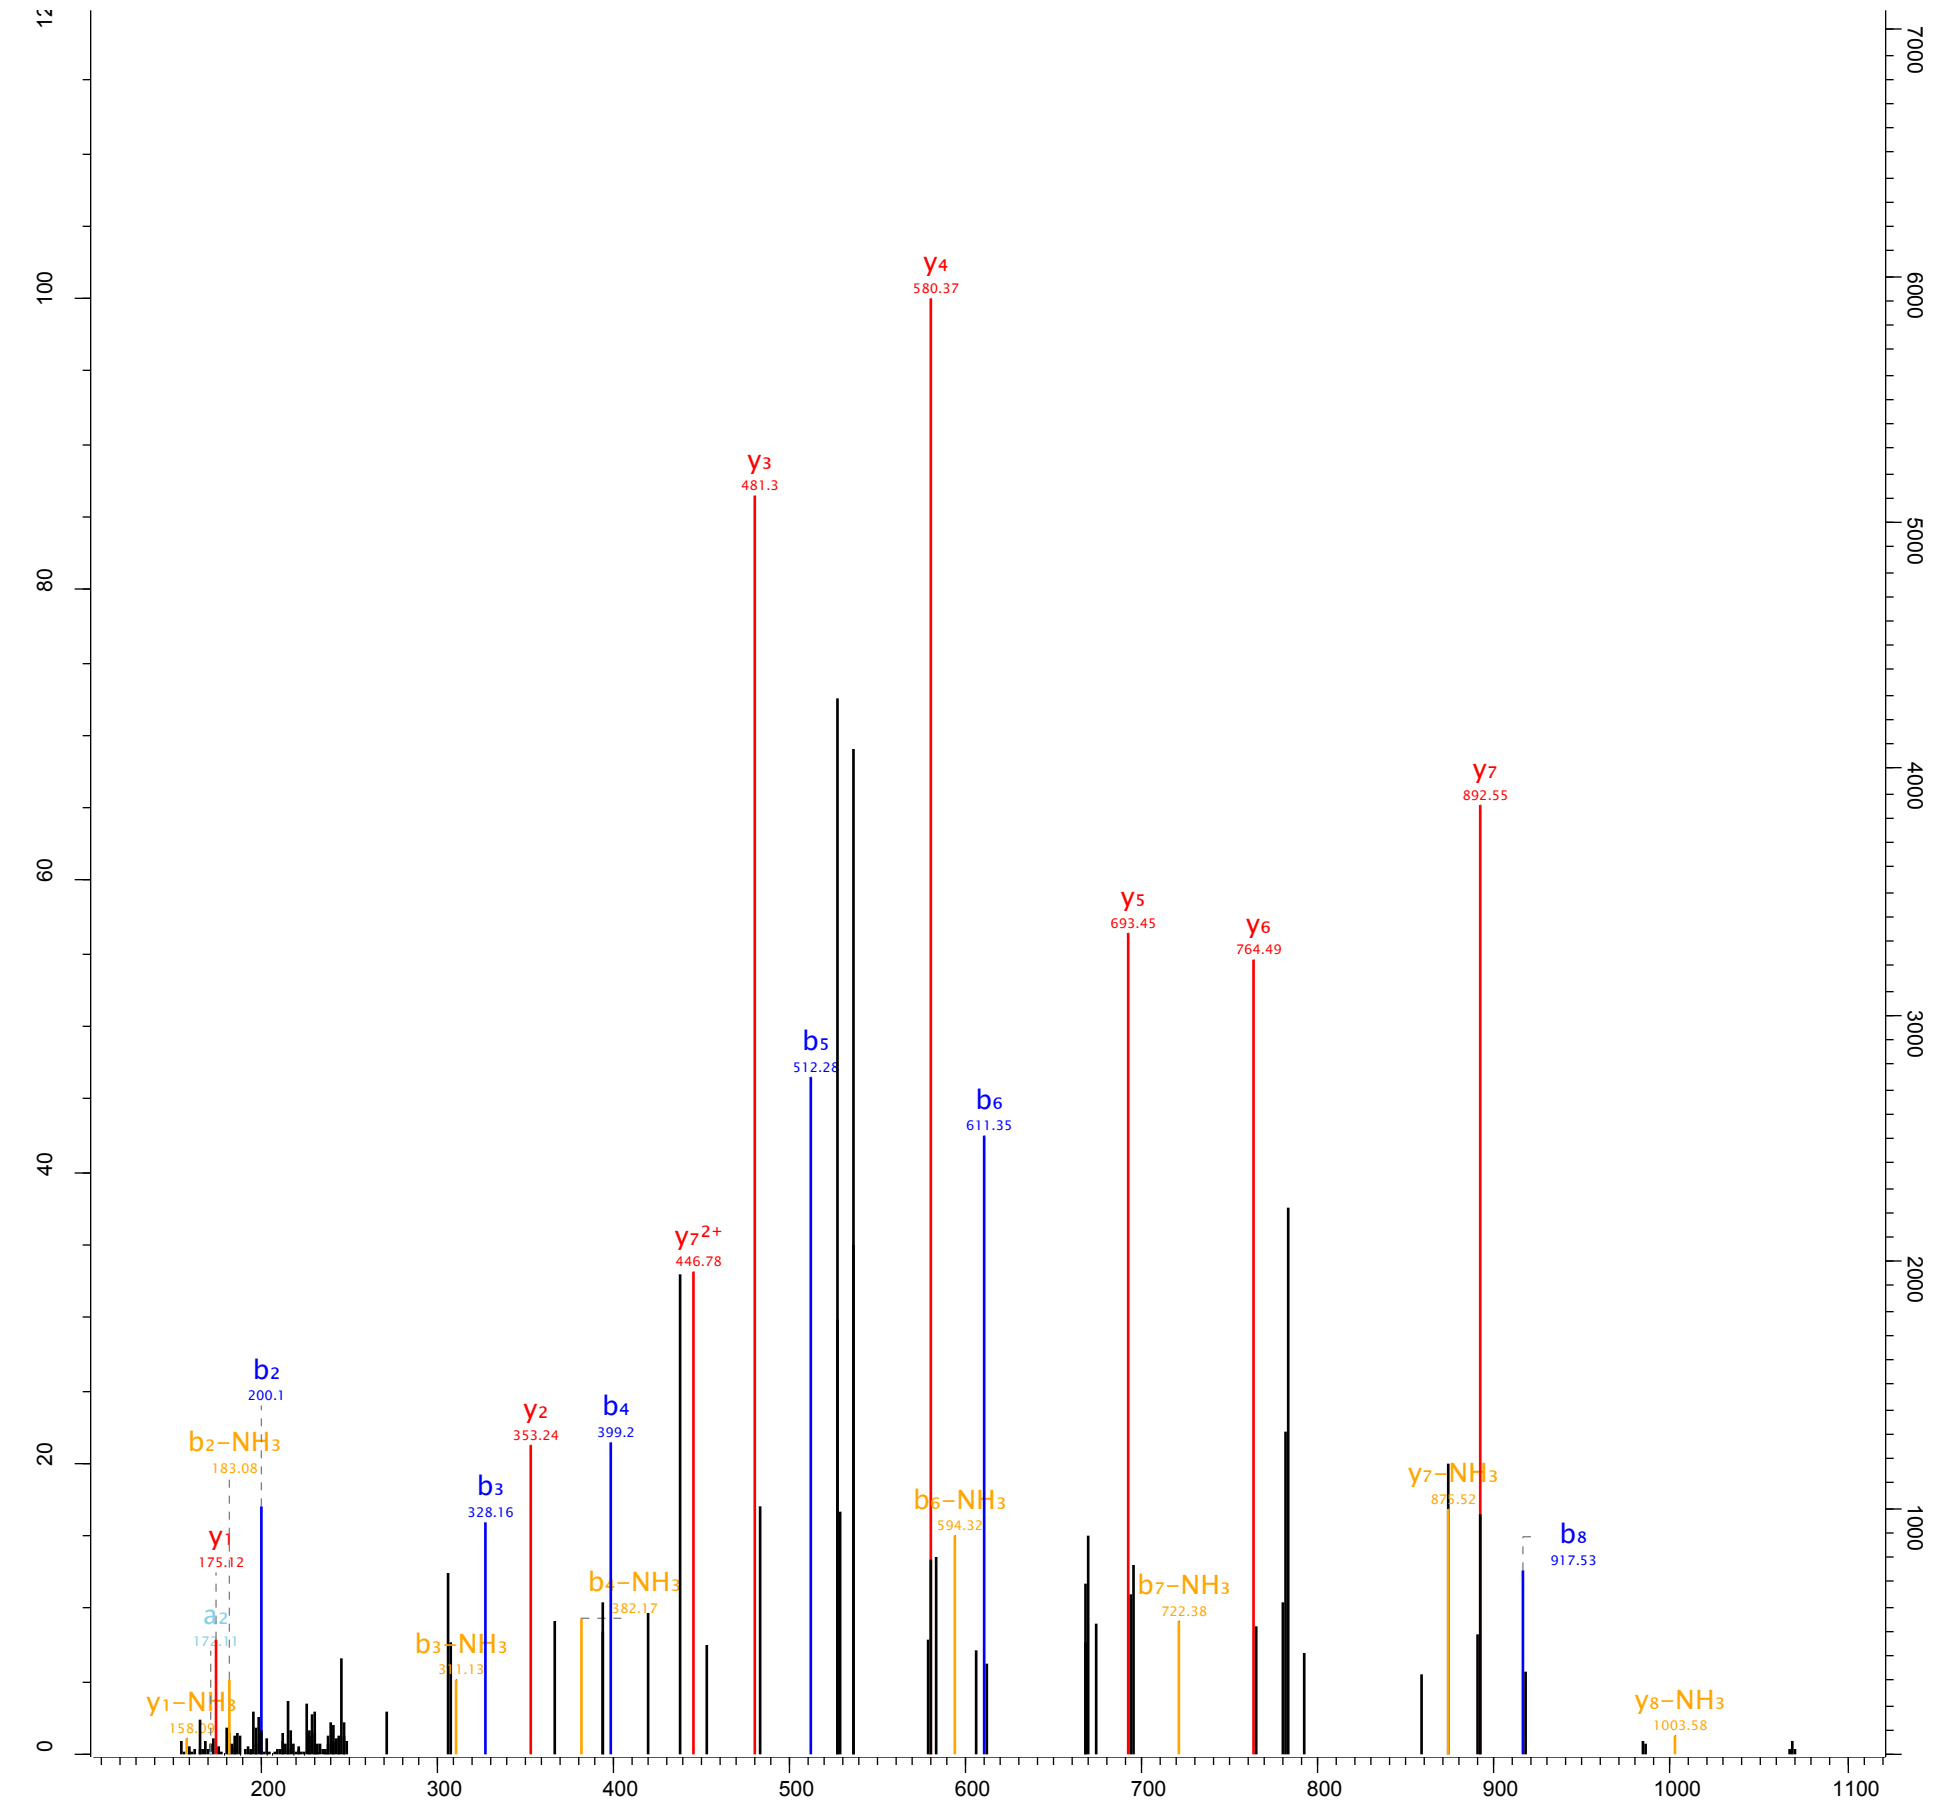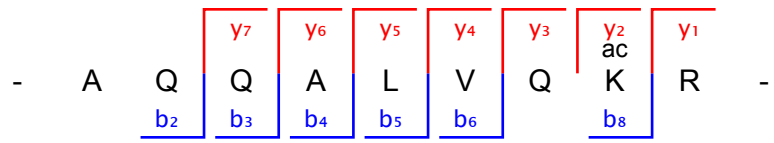

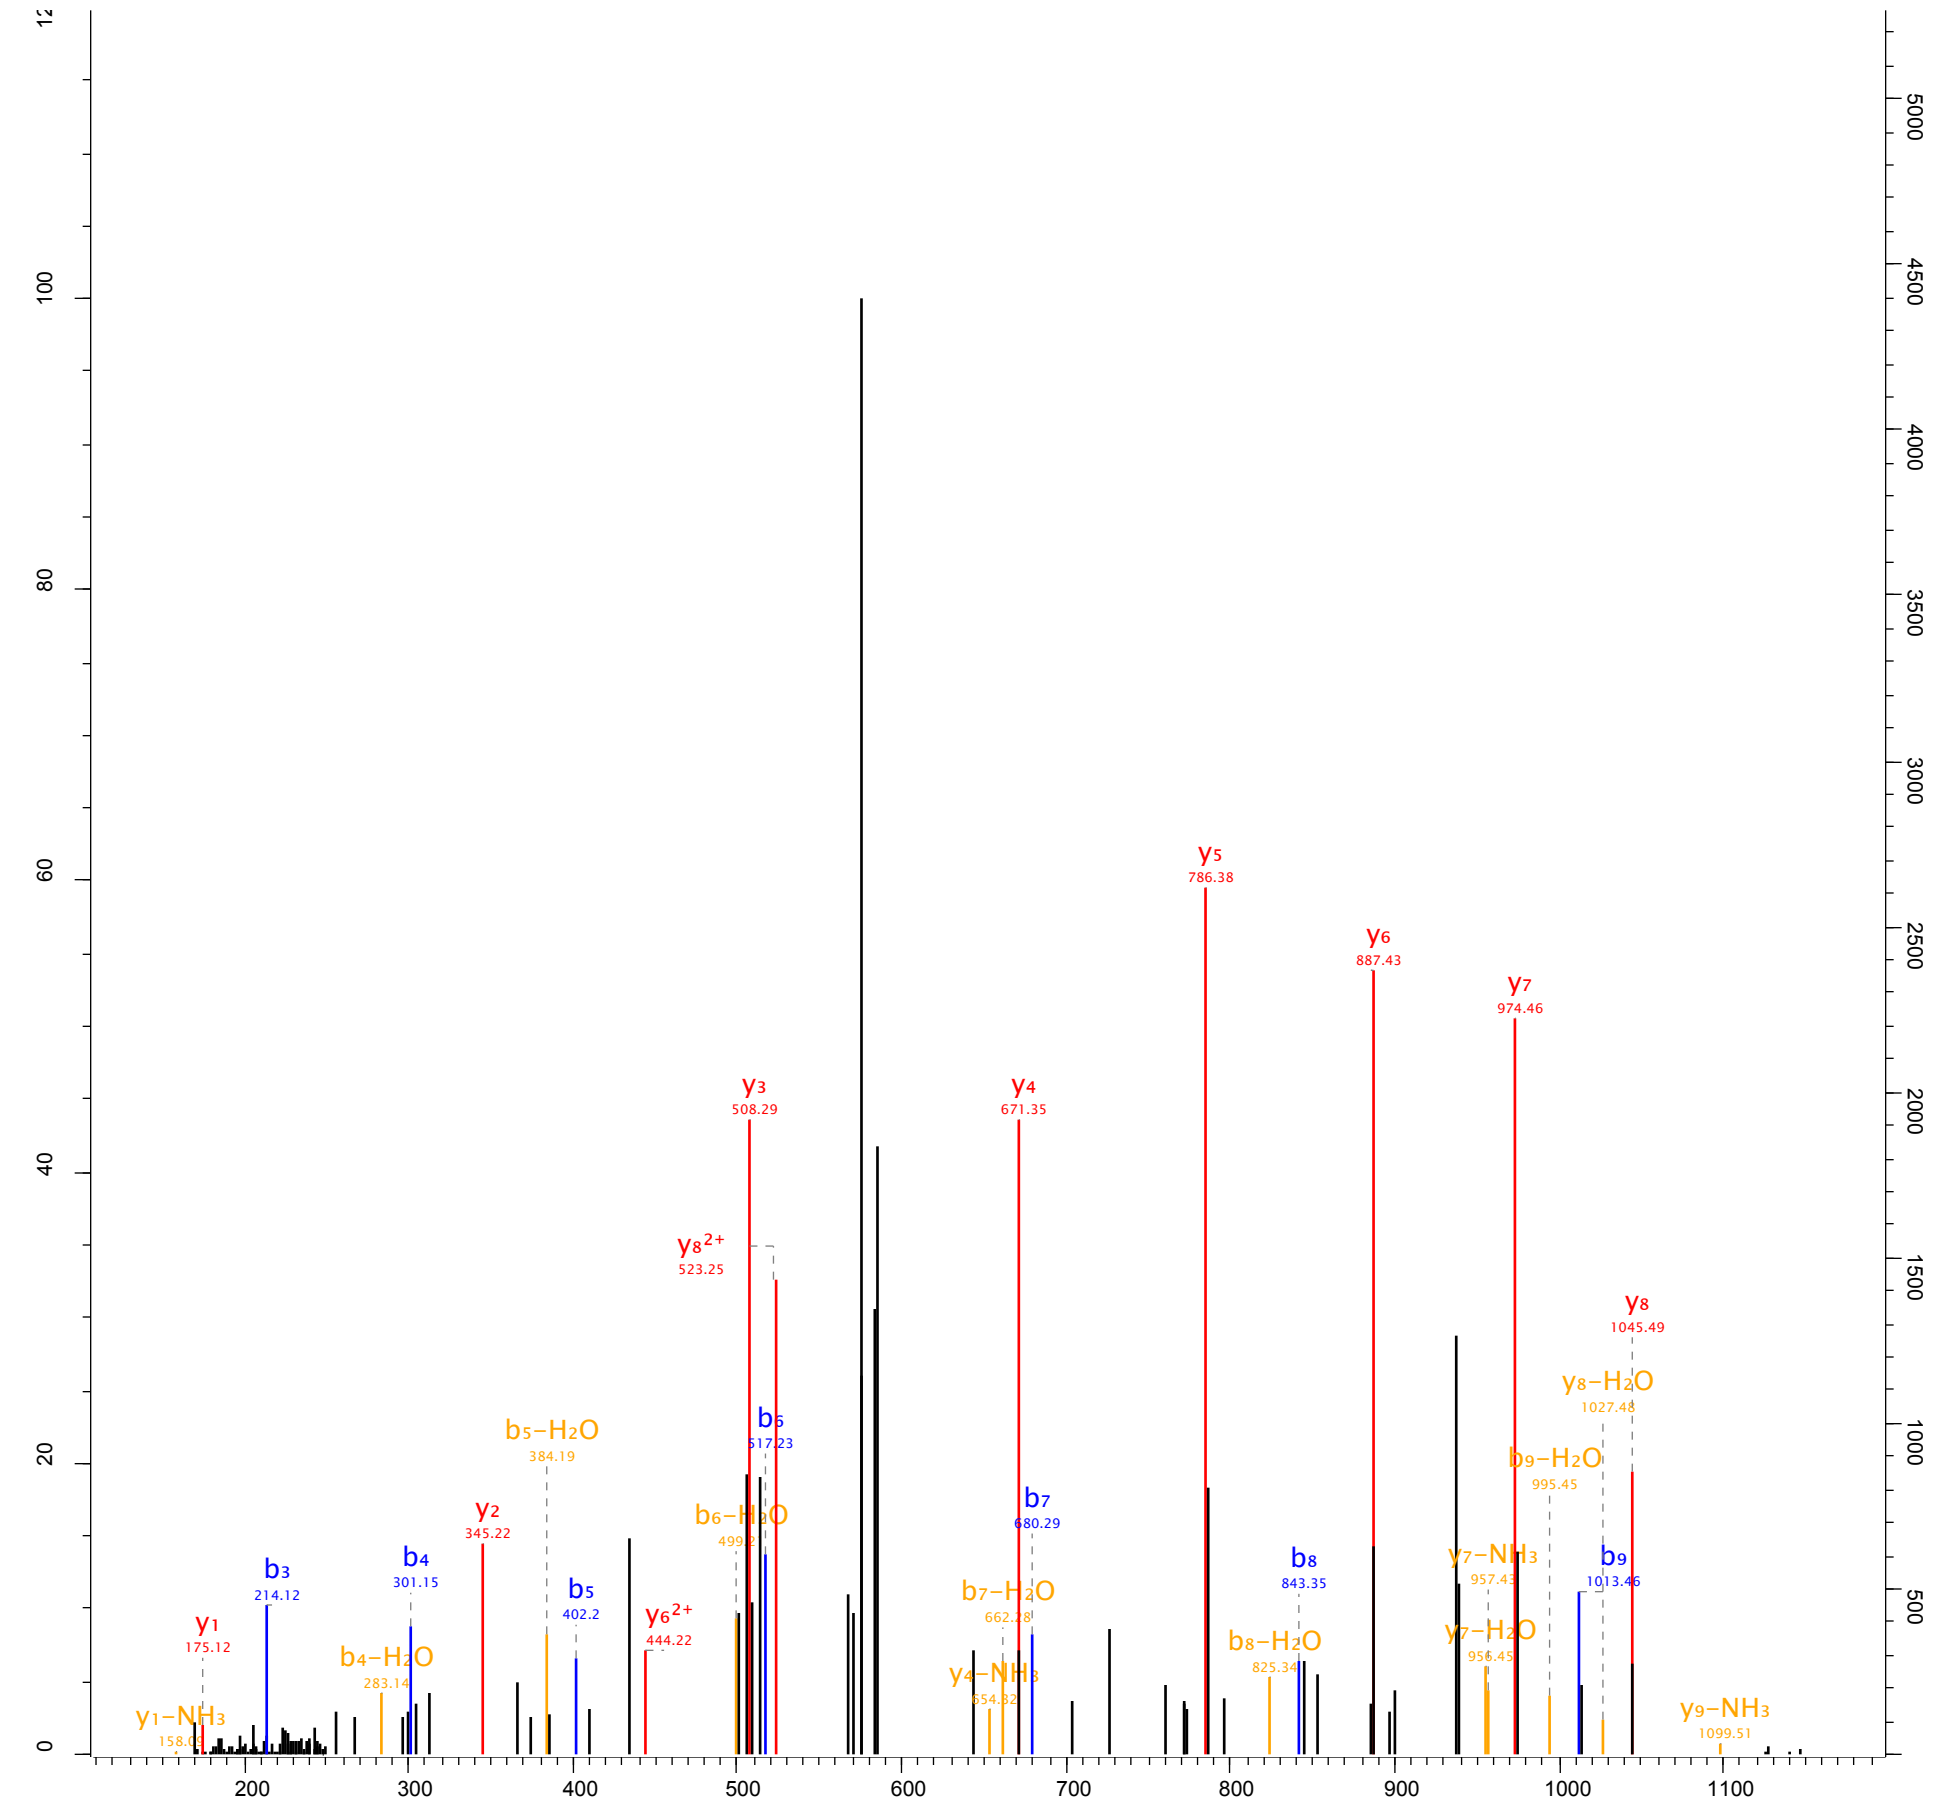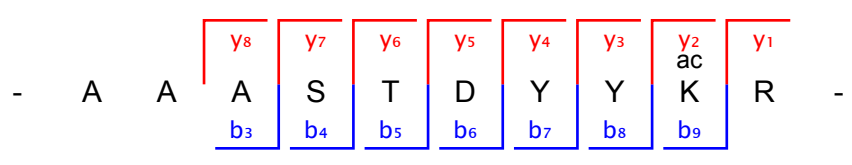

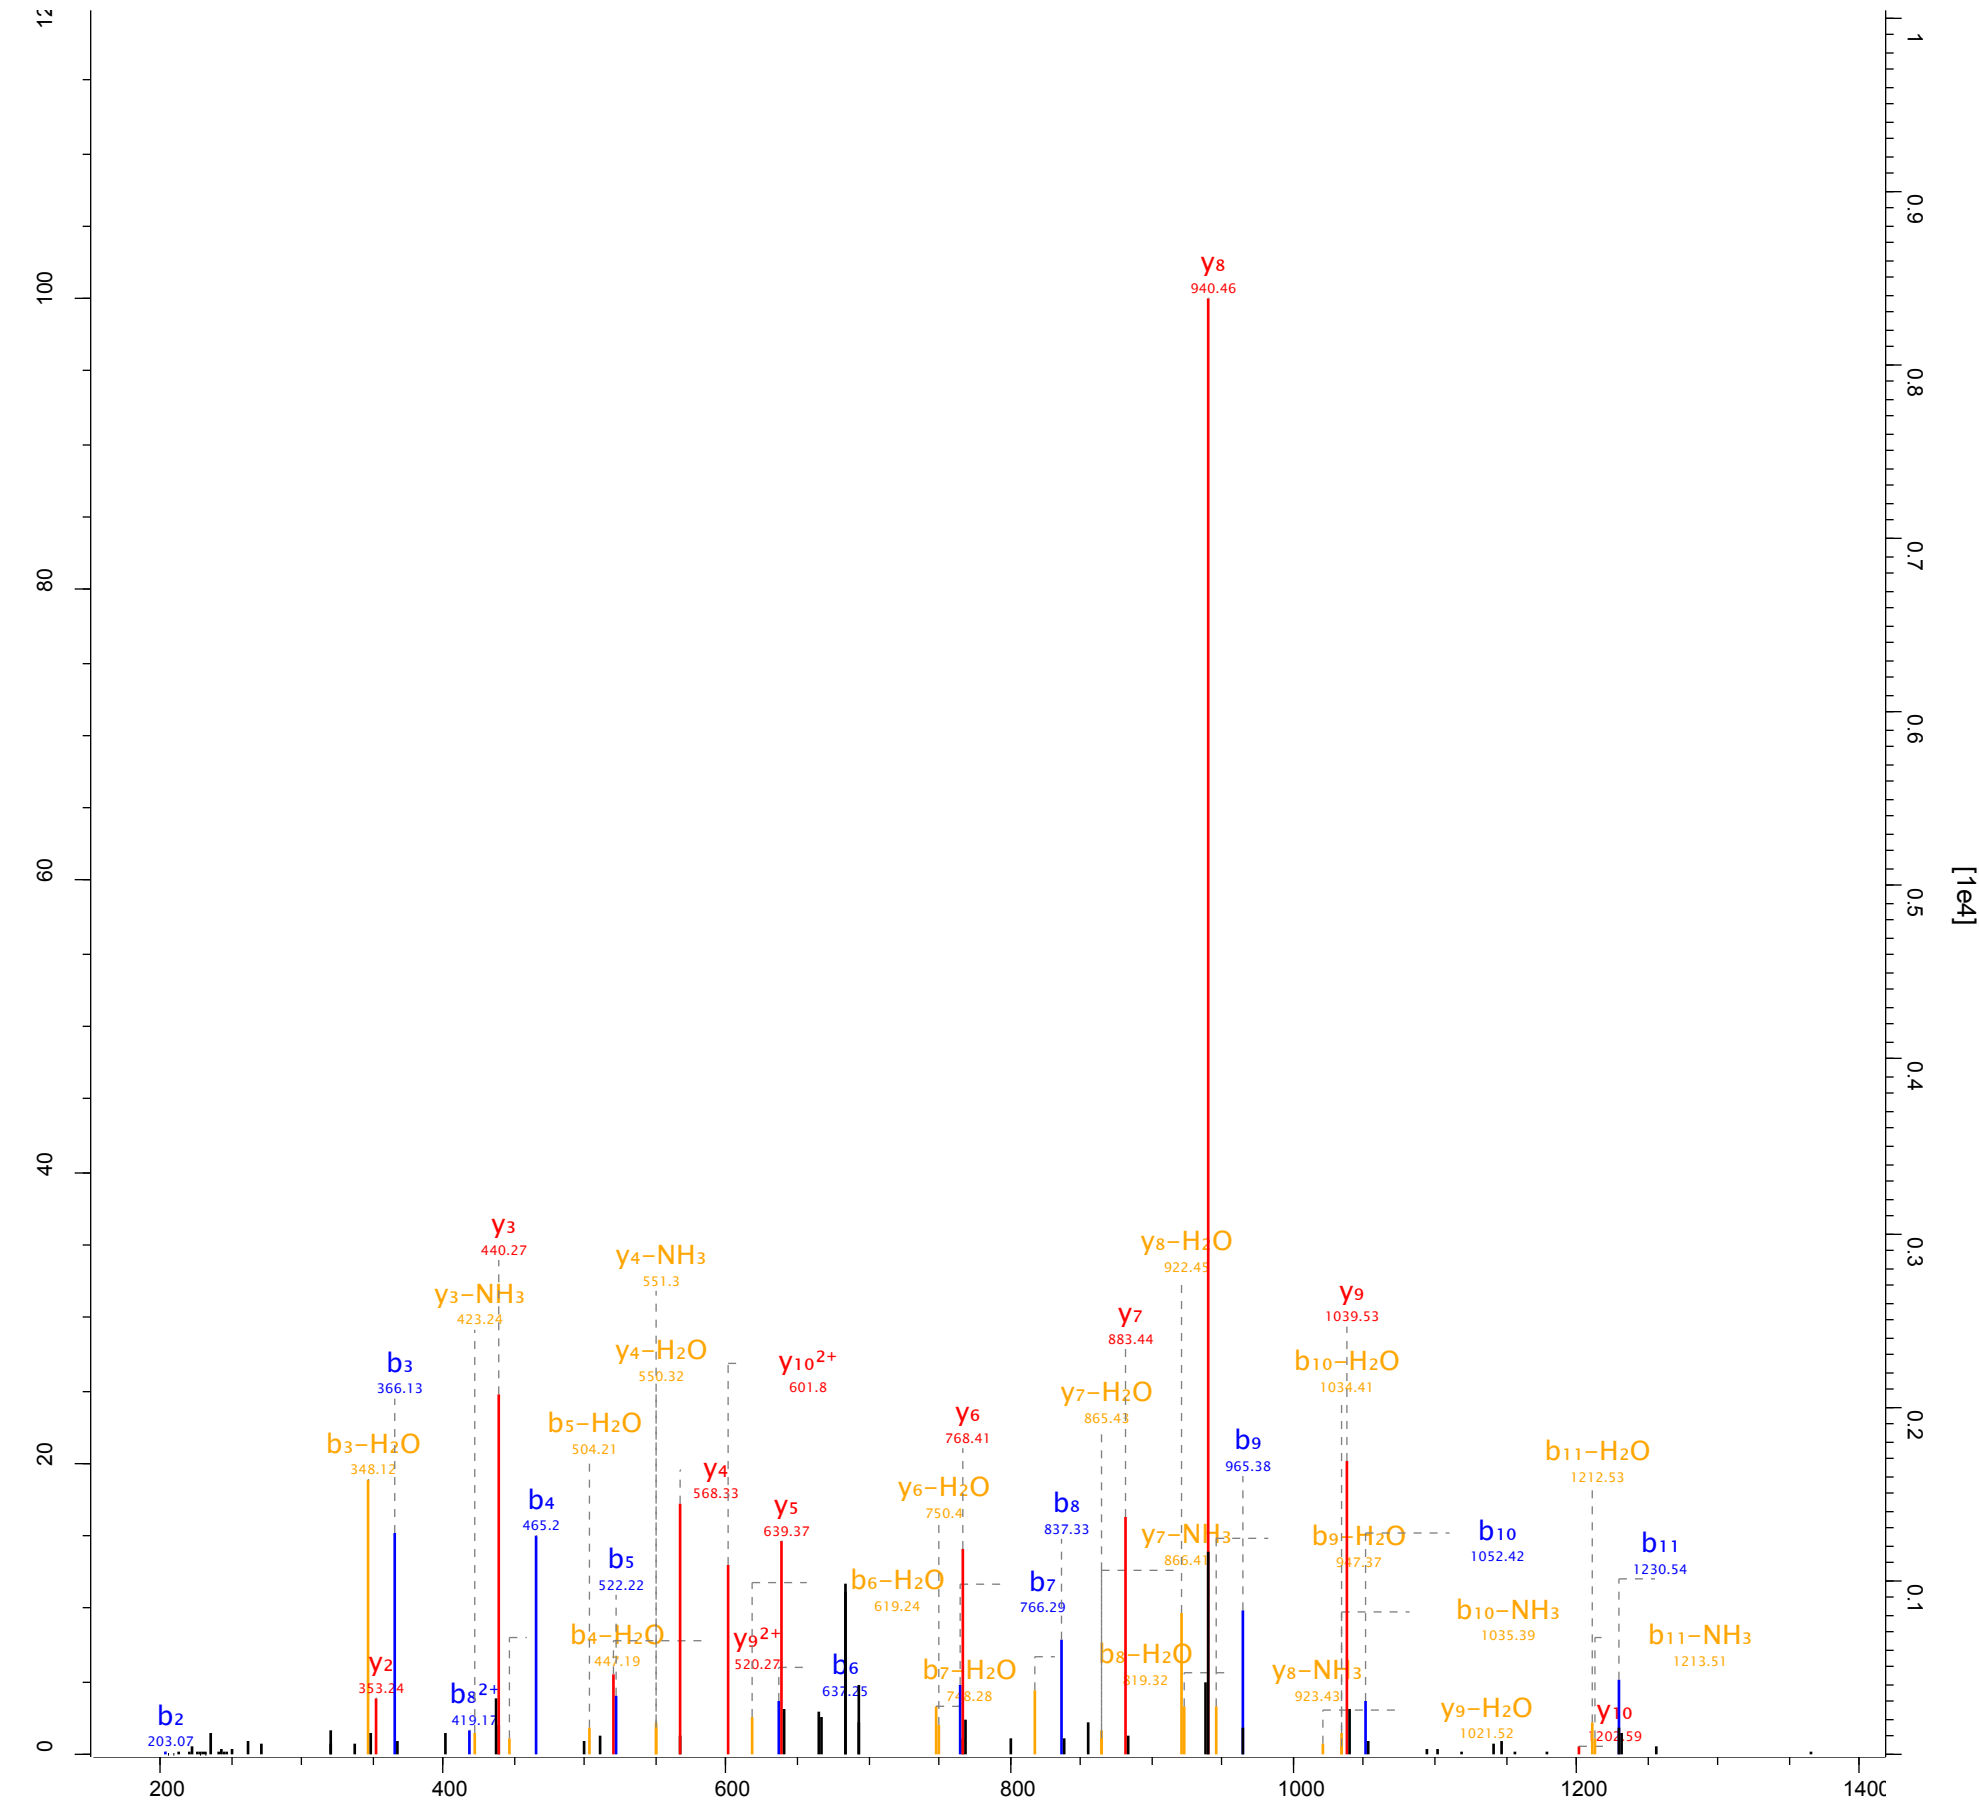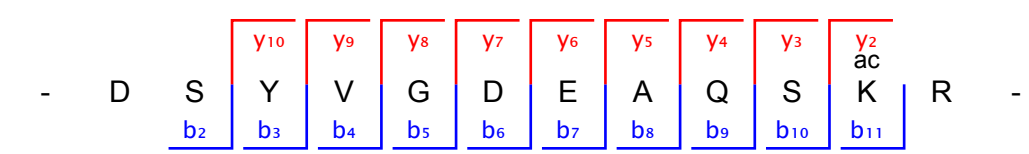

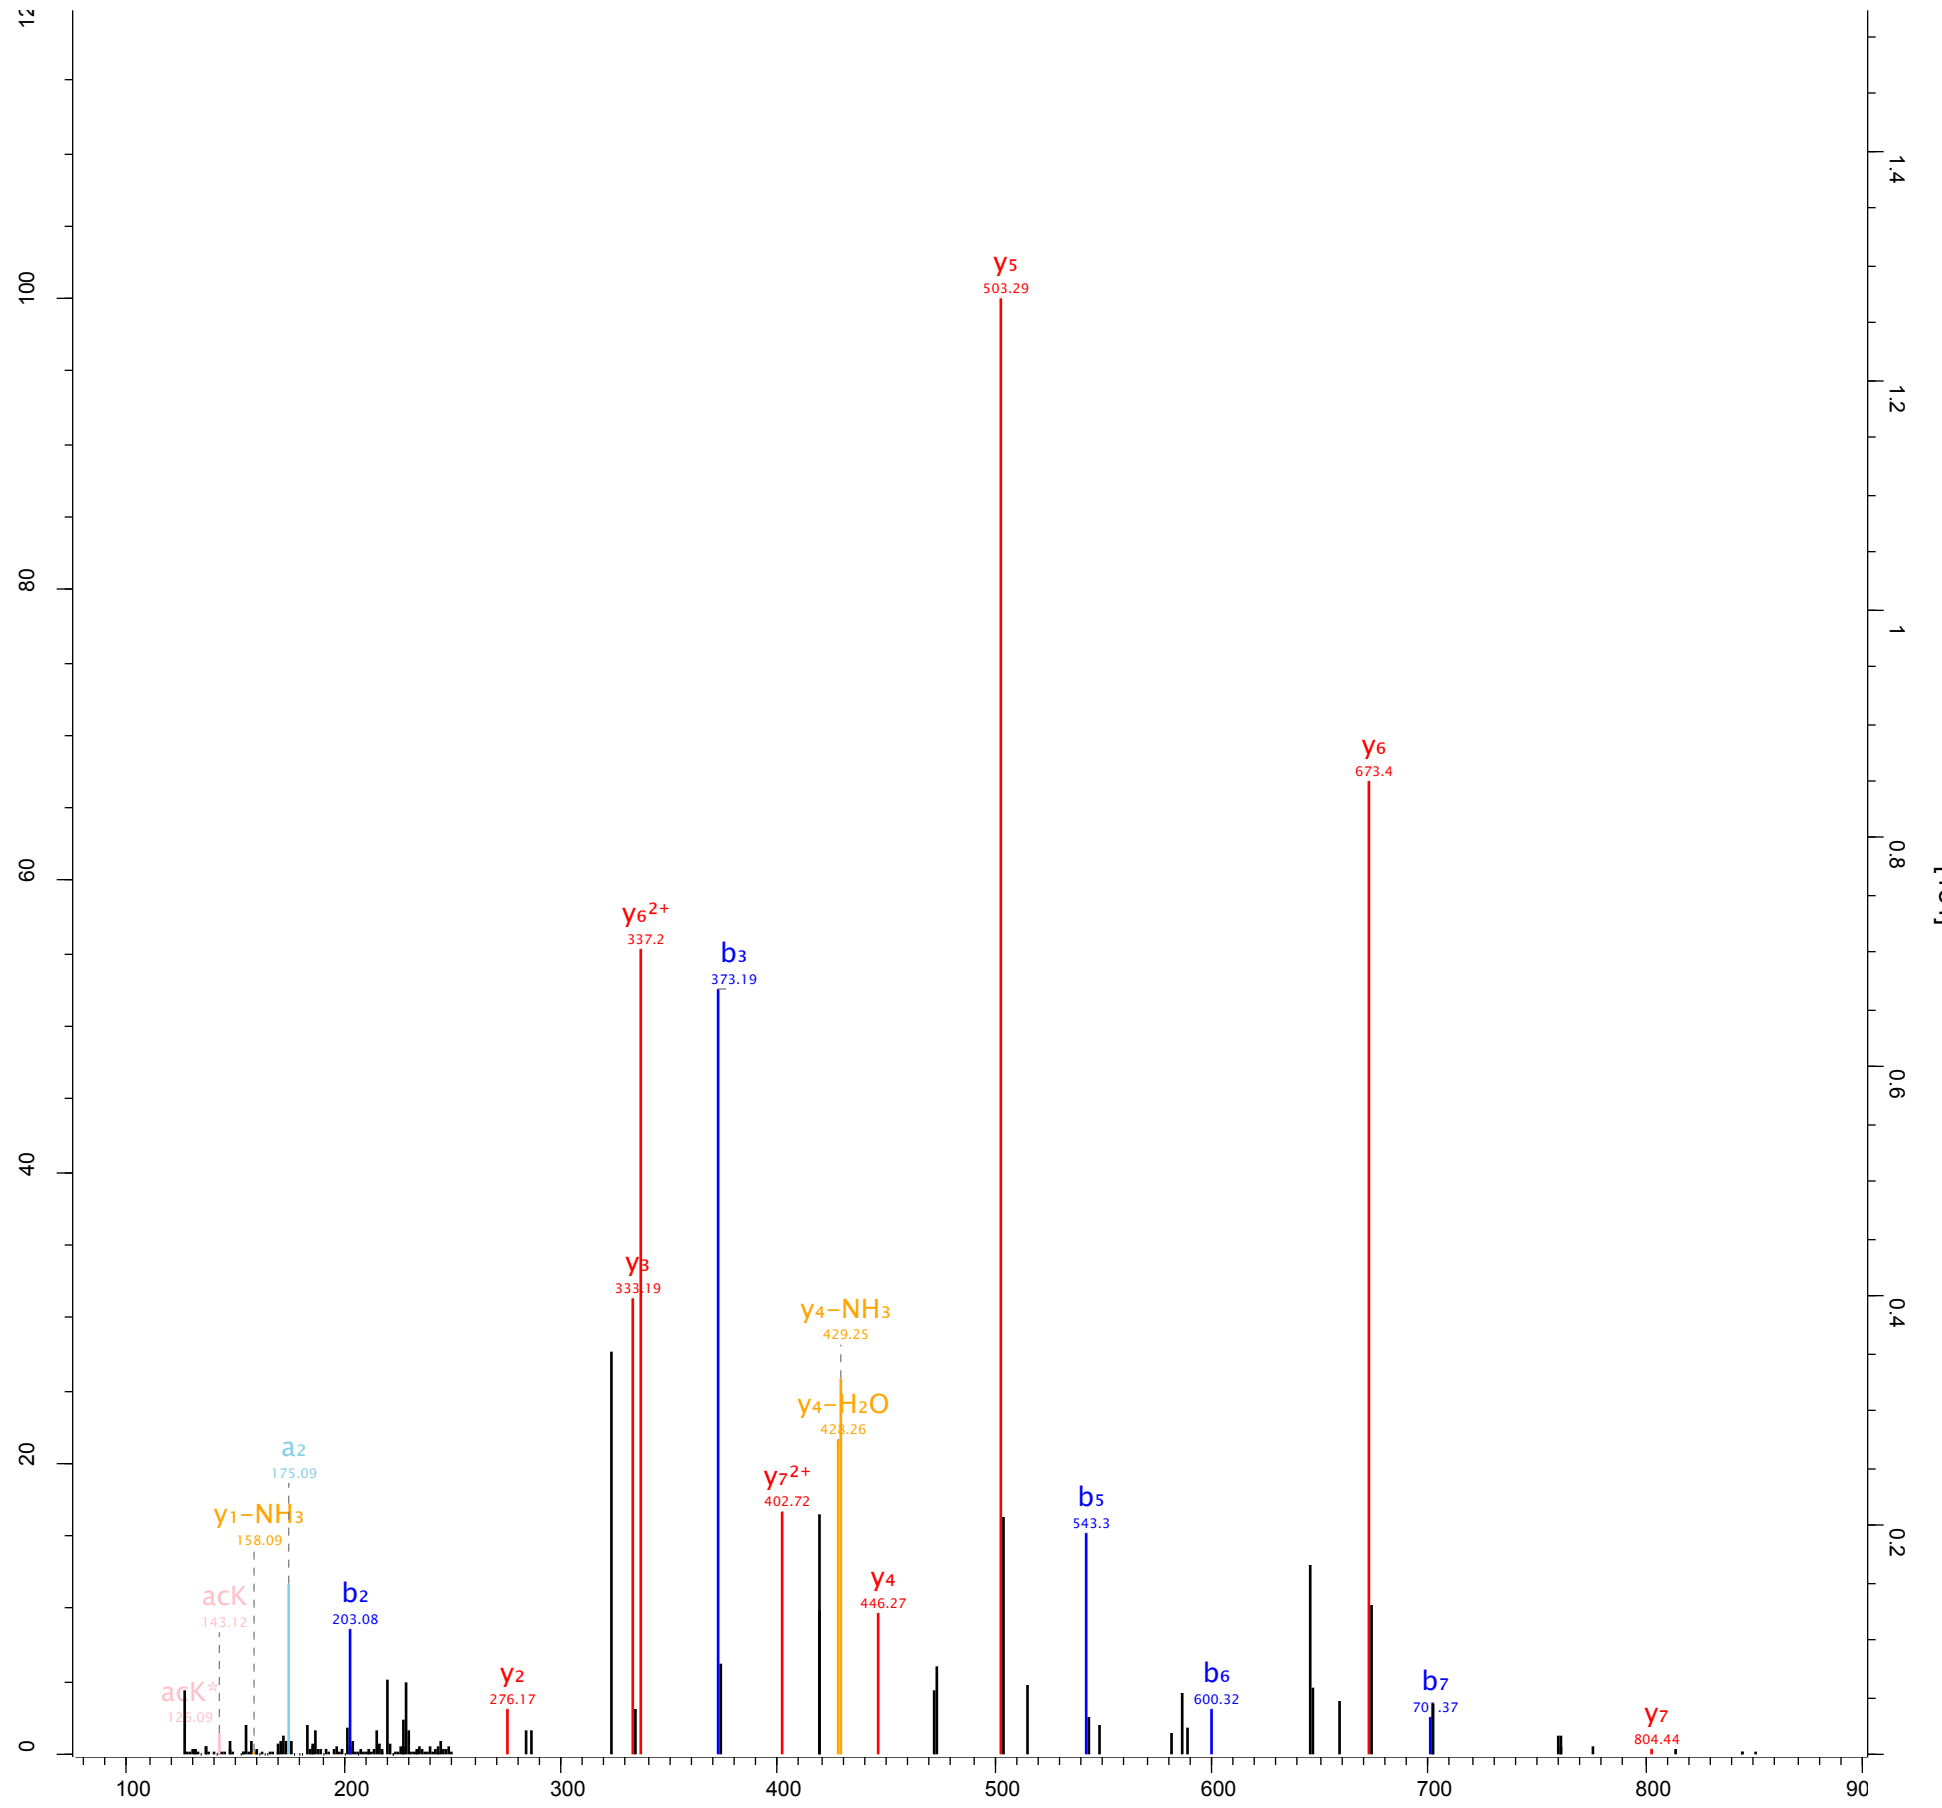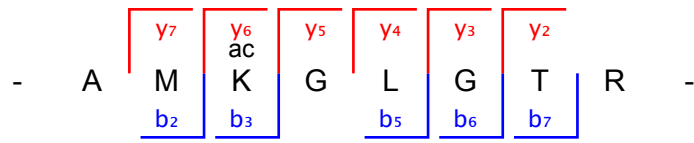

062513\_SCW\_II\_53\_5\_Vargas\_Enriched

13623

ITMS; CID

216.91

656.34

Ndufa5

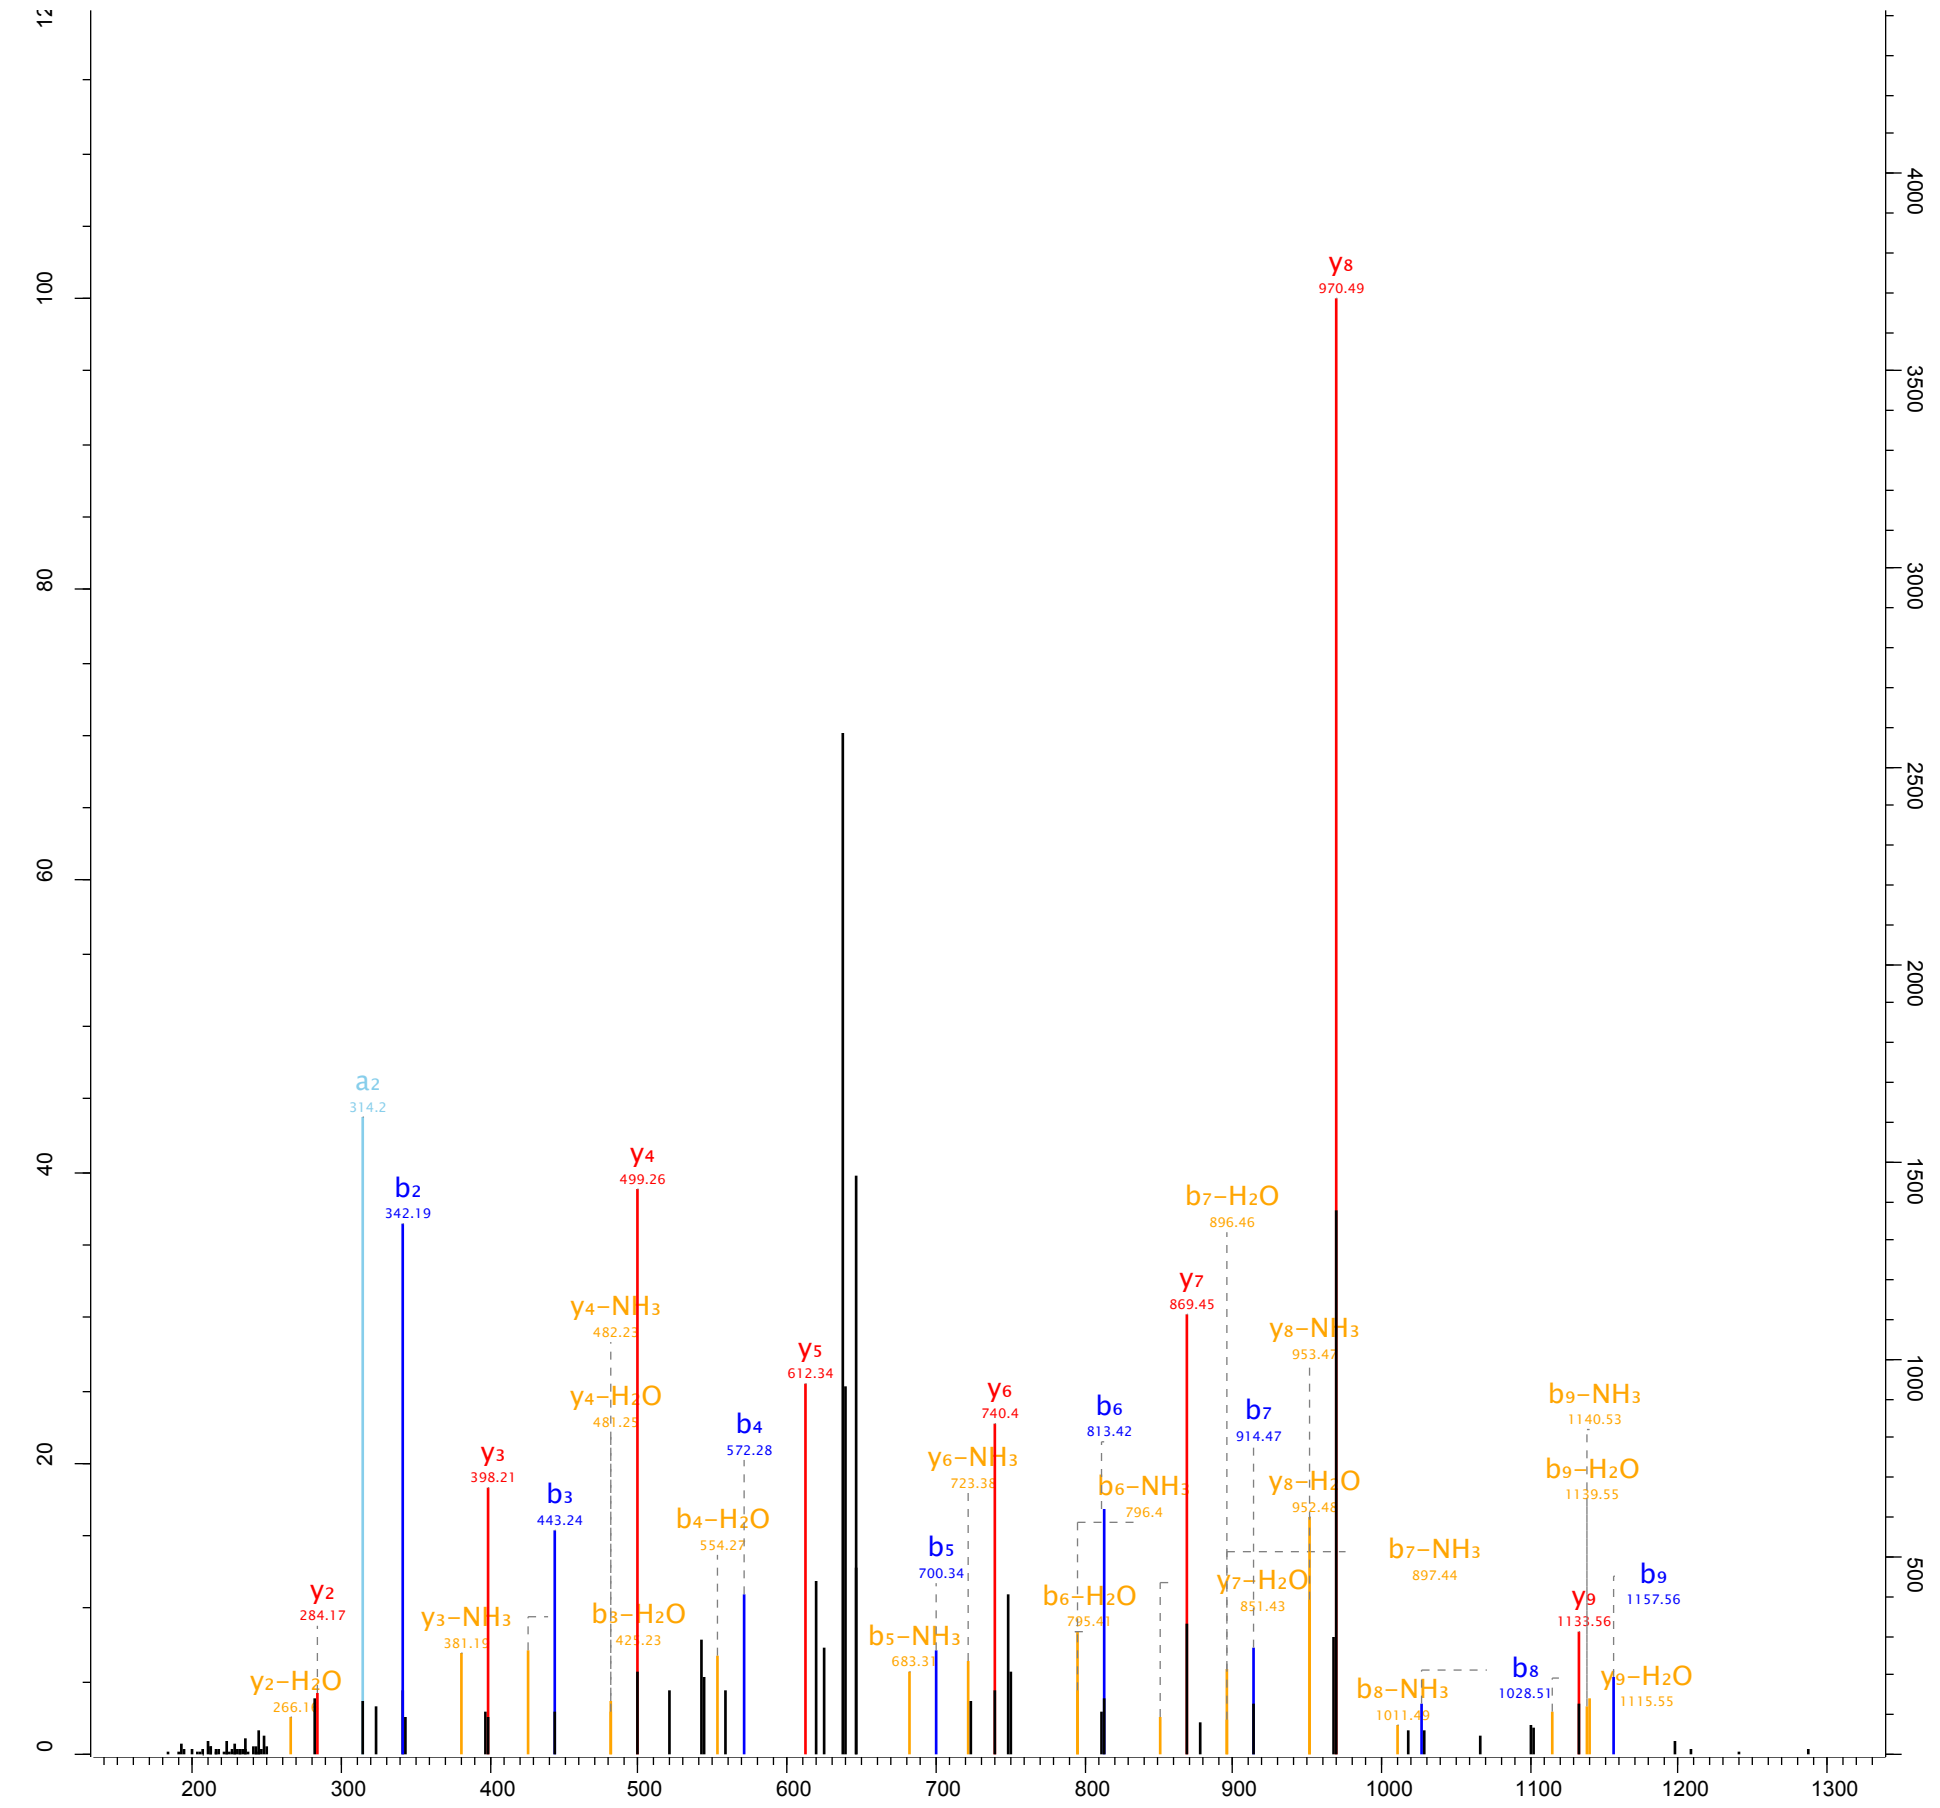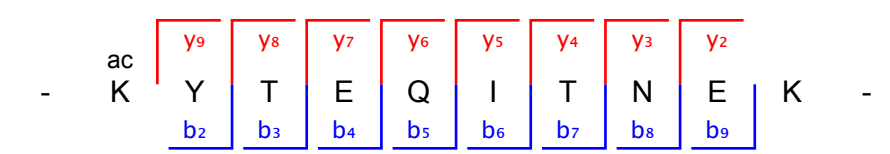

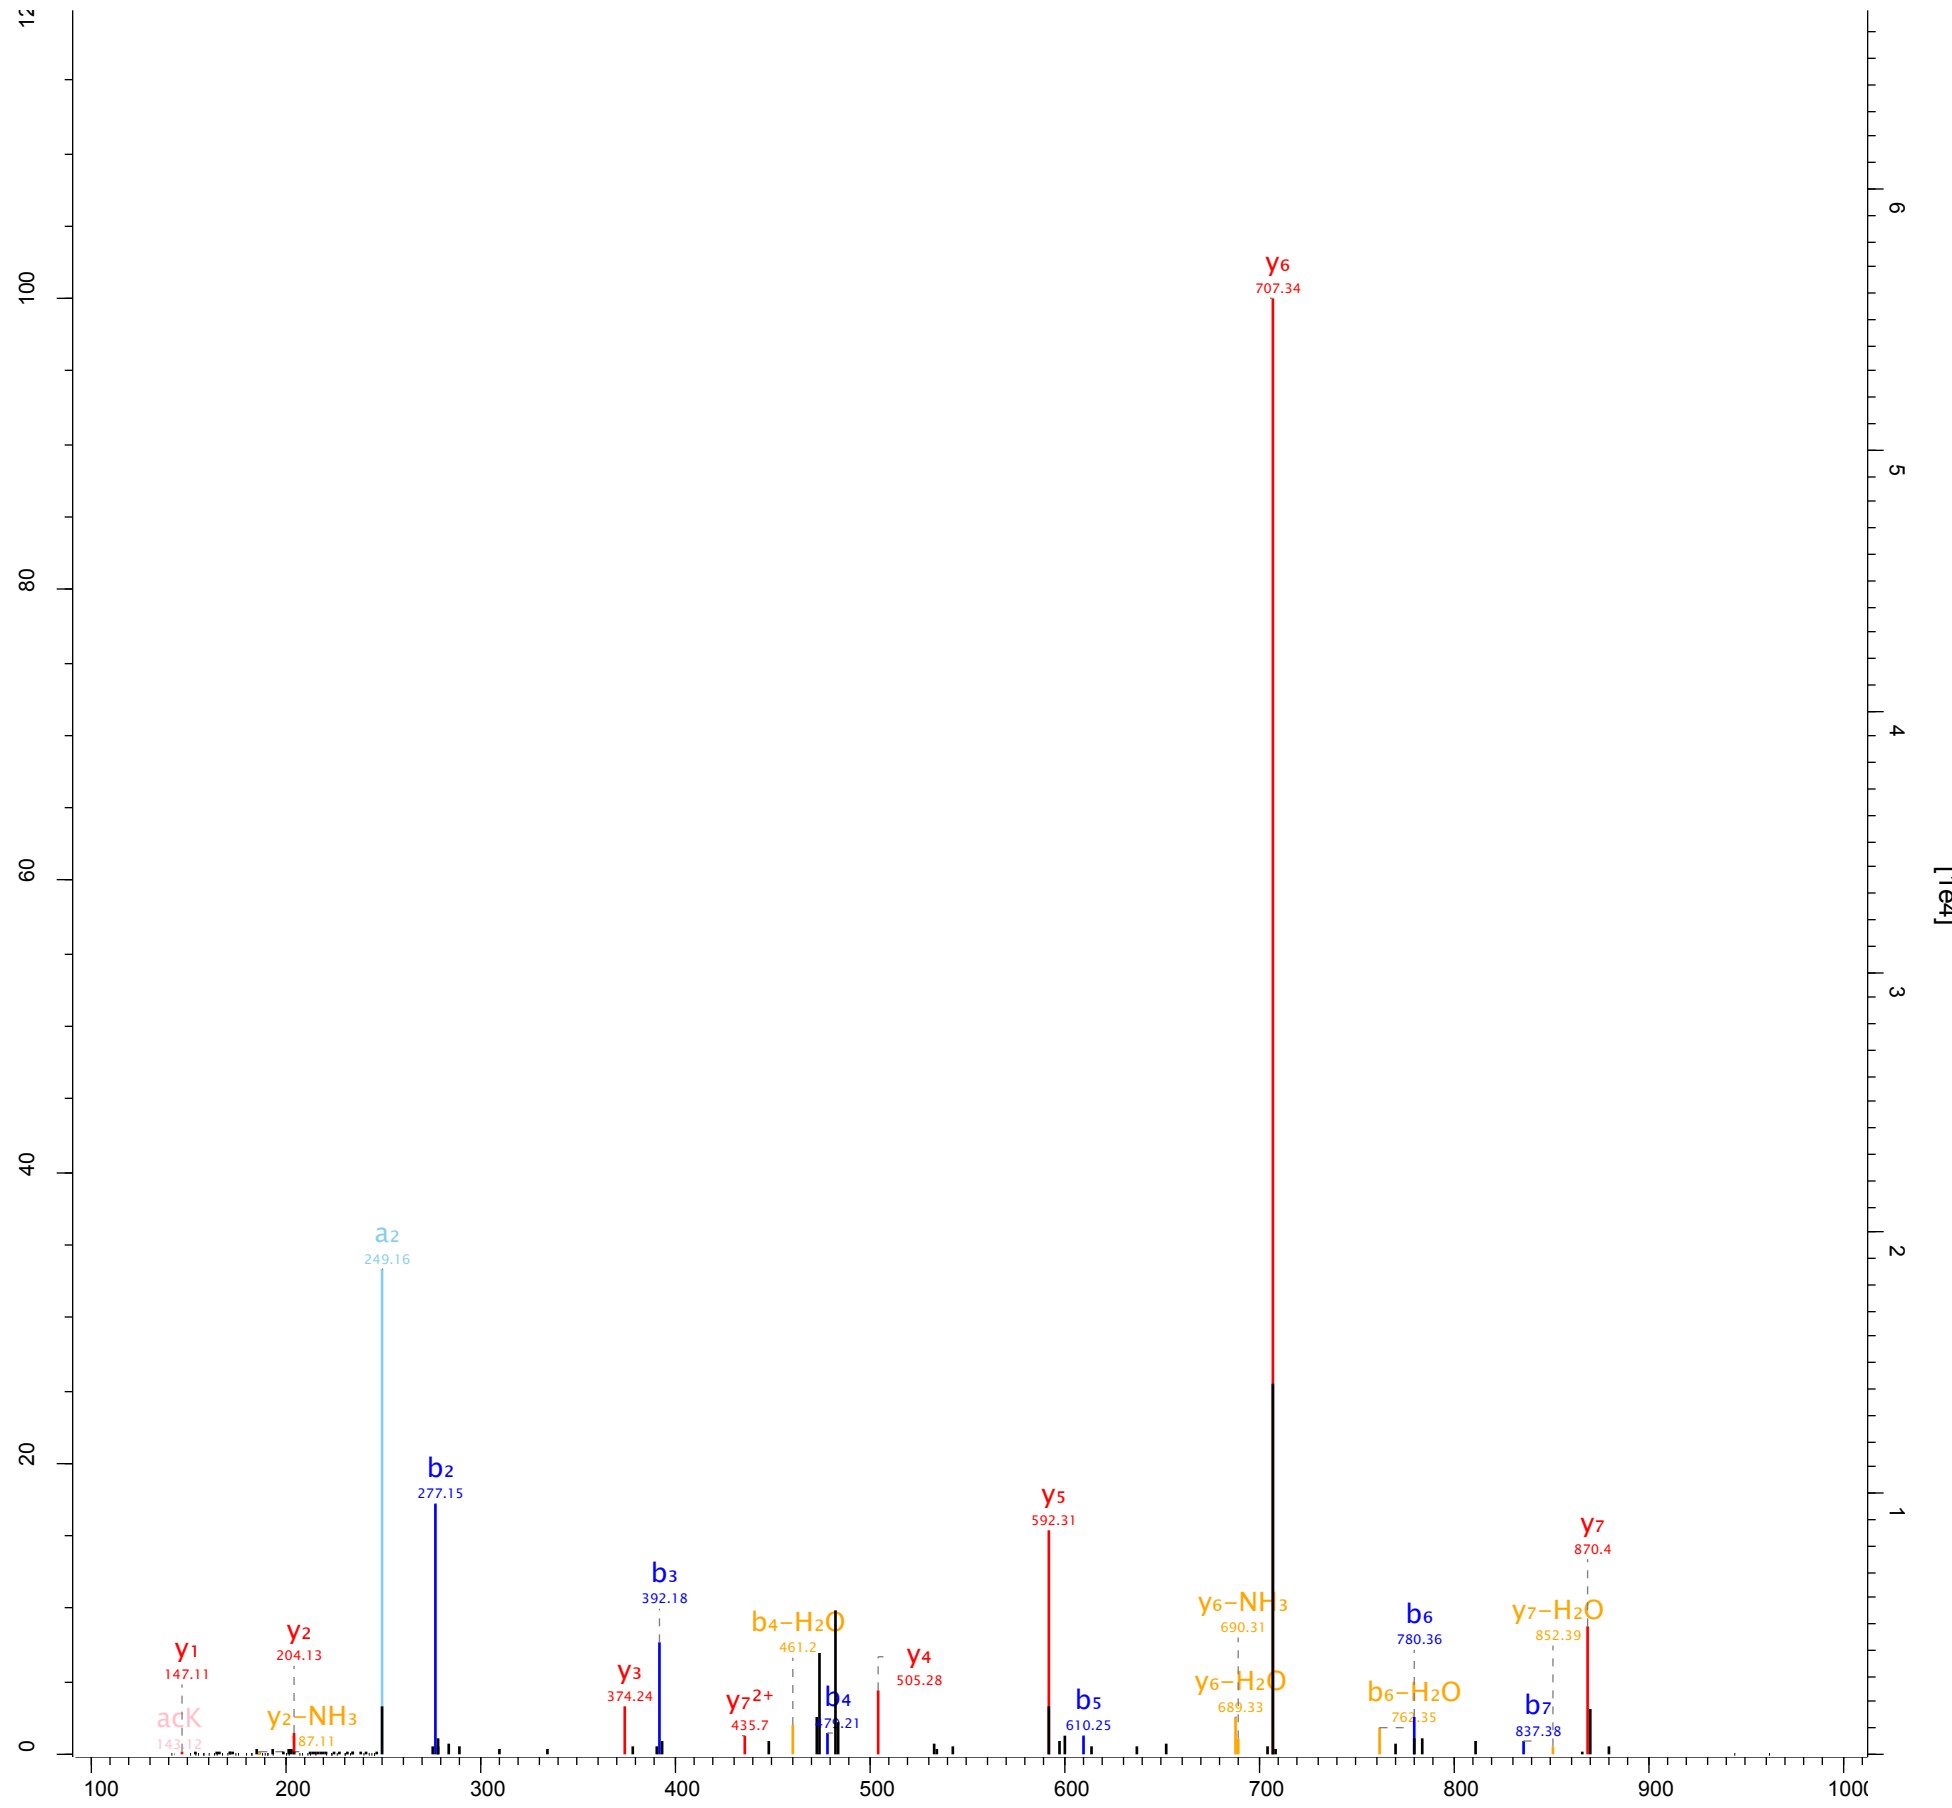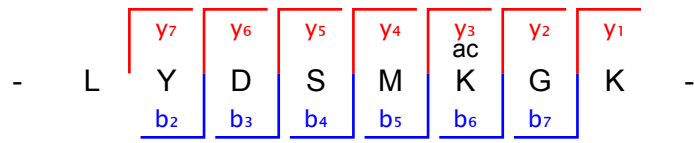

Raw file 062513\_SCW\_II\_53\_5\_Vargas\_Enriched Scan 13848 Method ITMS; CID Score 137.4 m/z 611.82 Gene names Hspa8

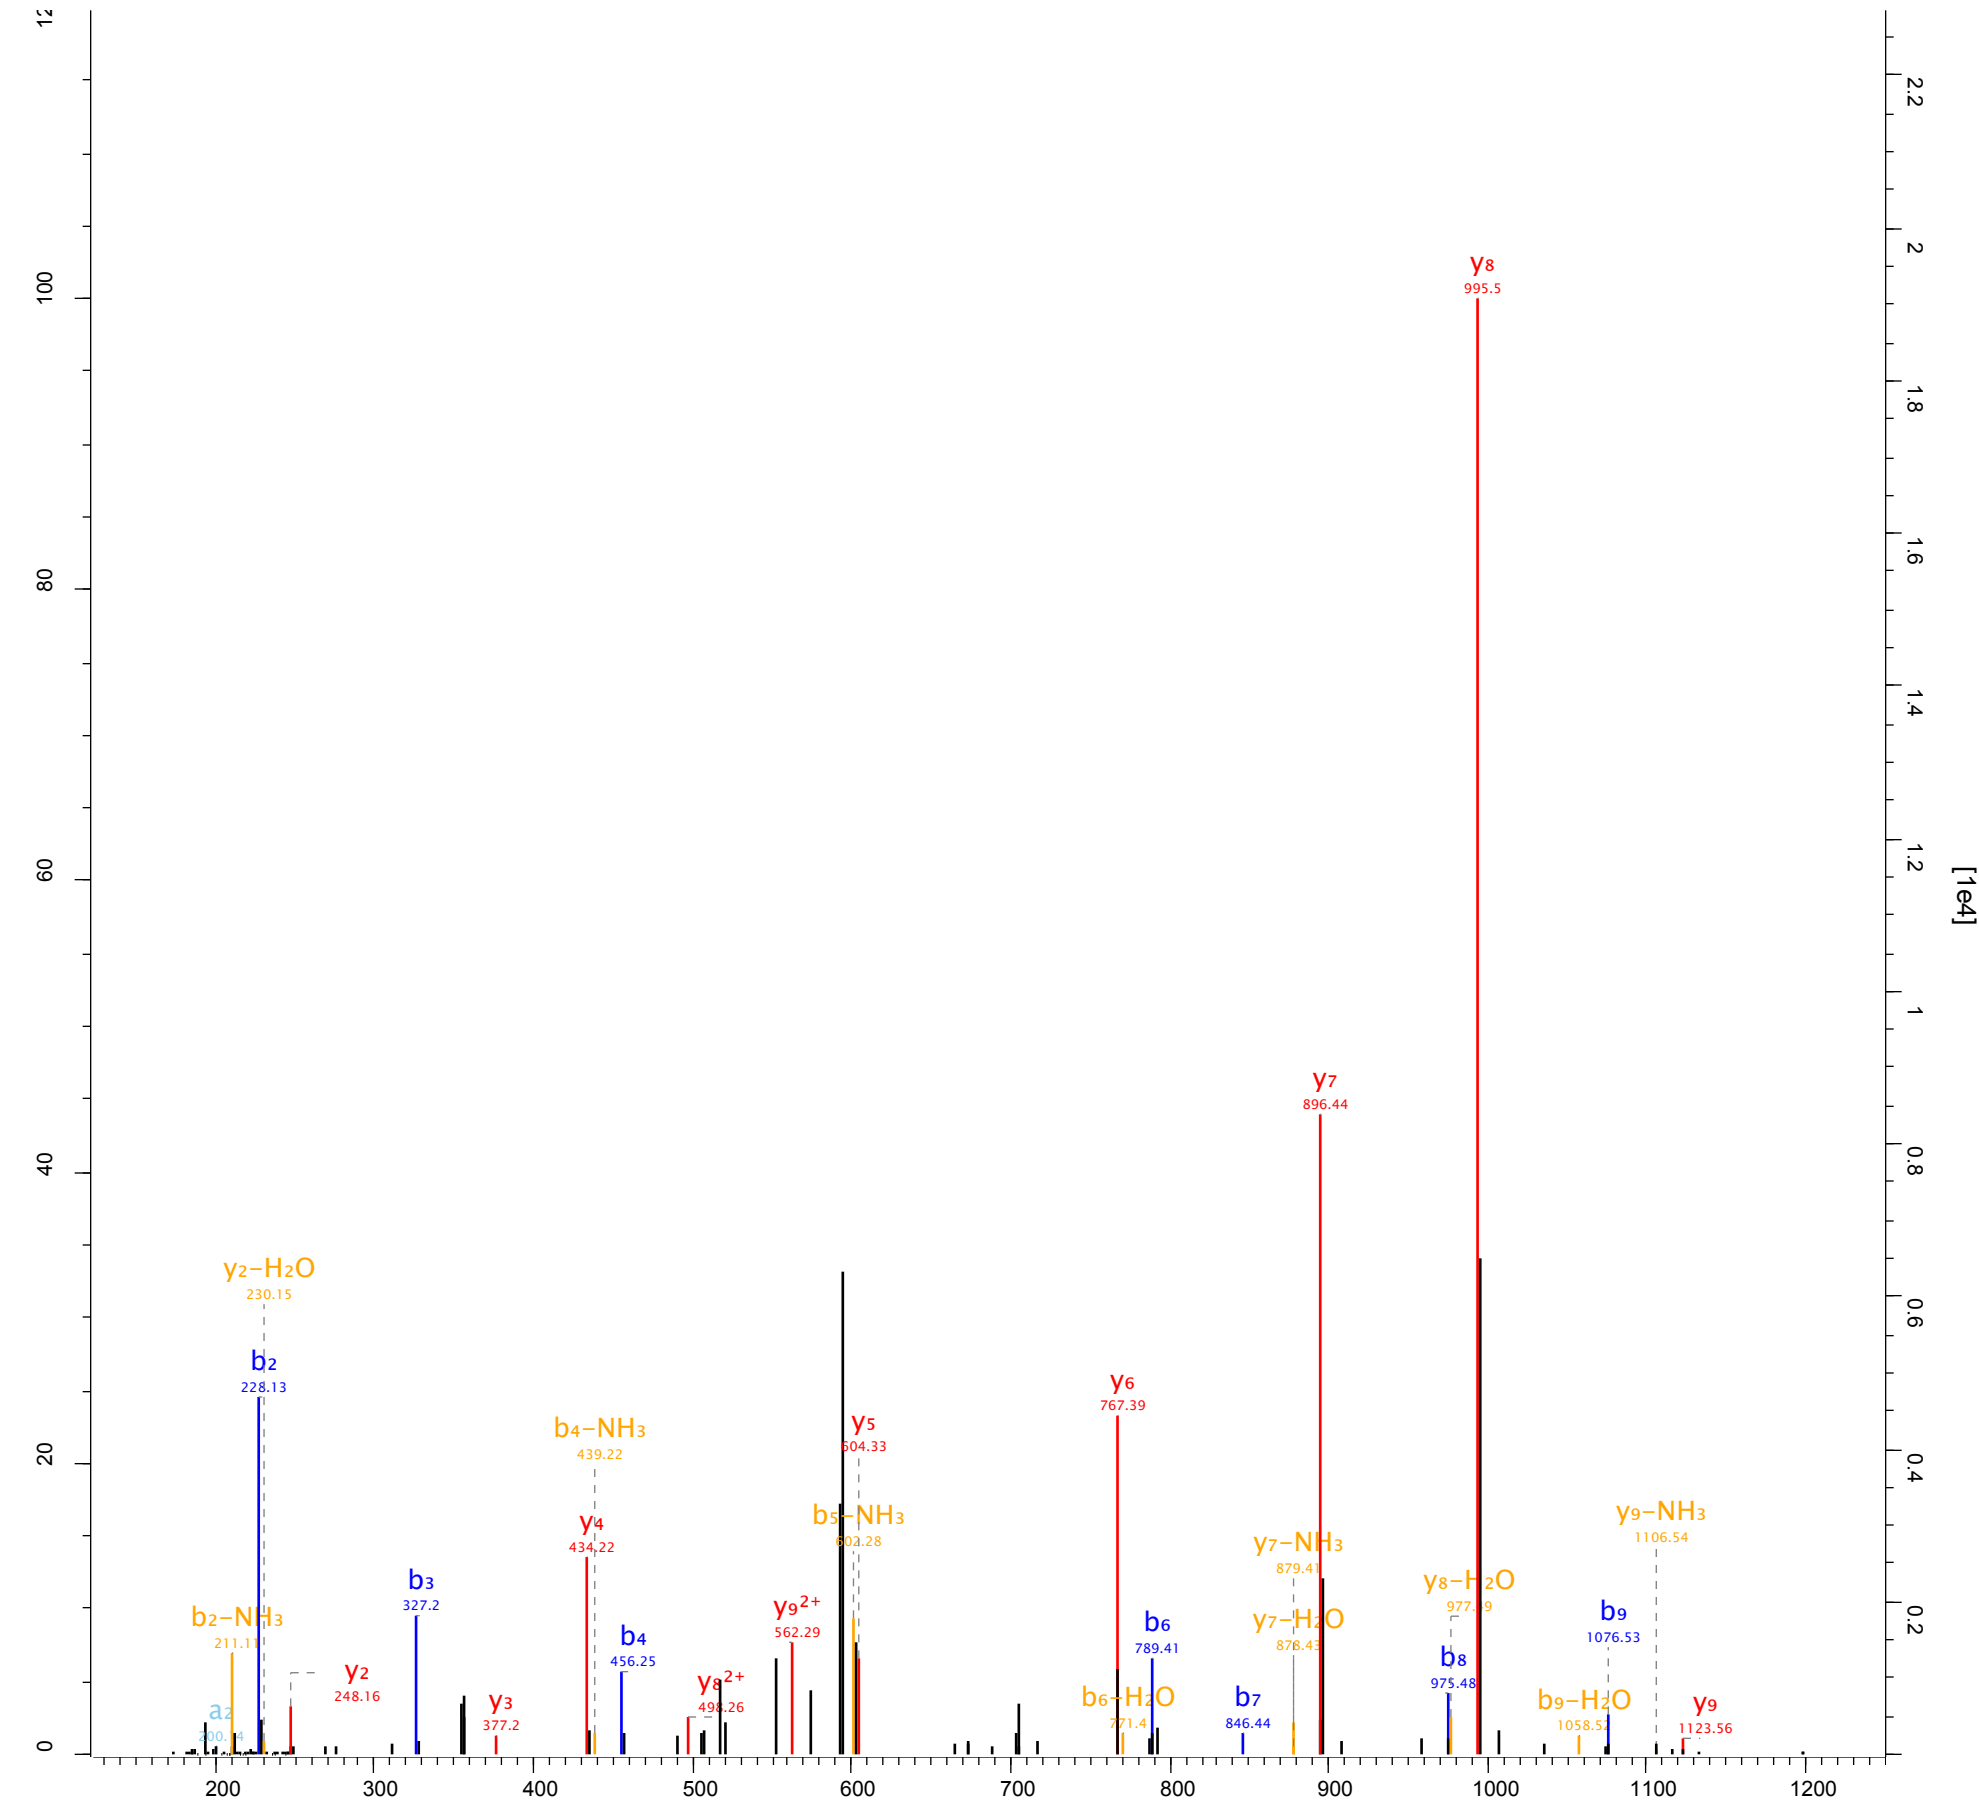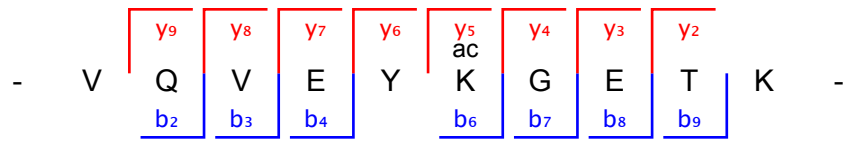

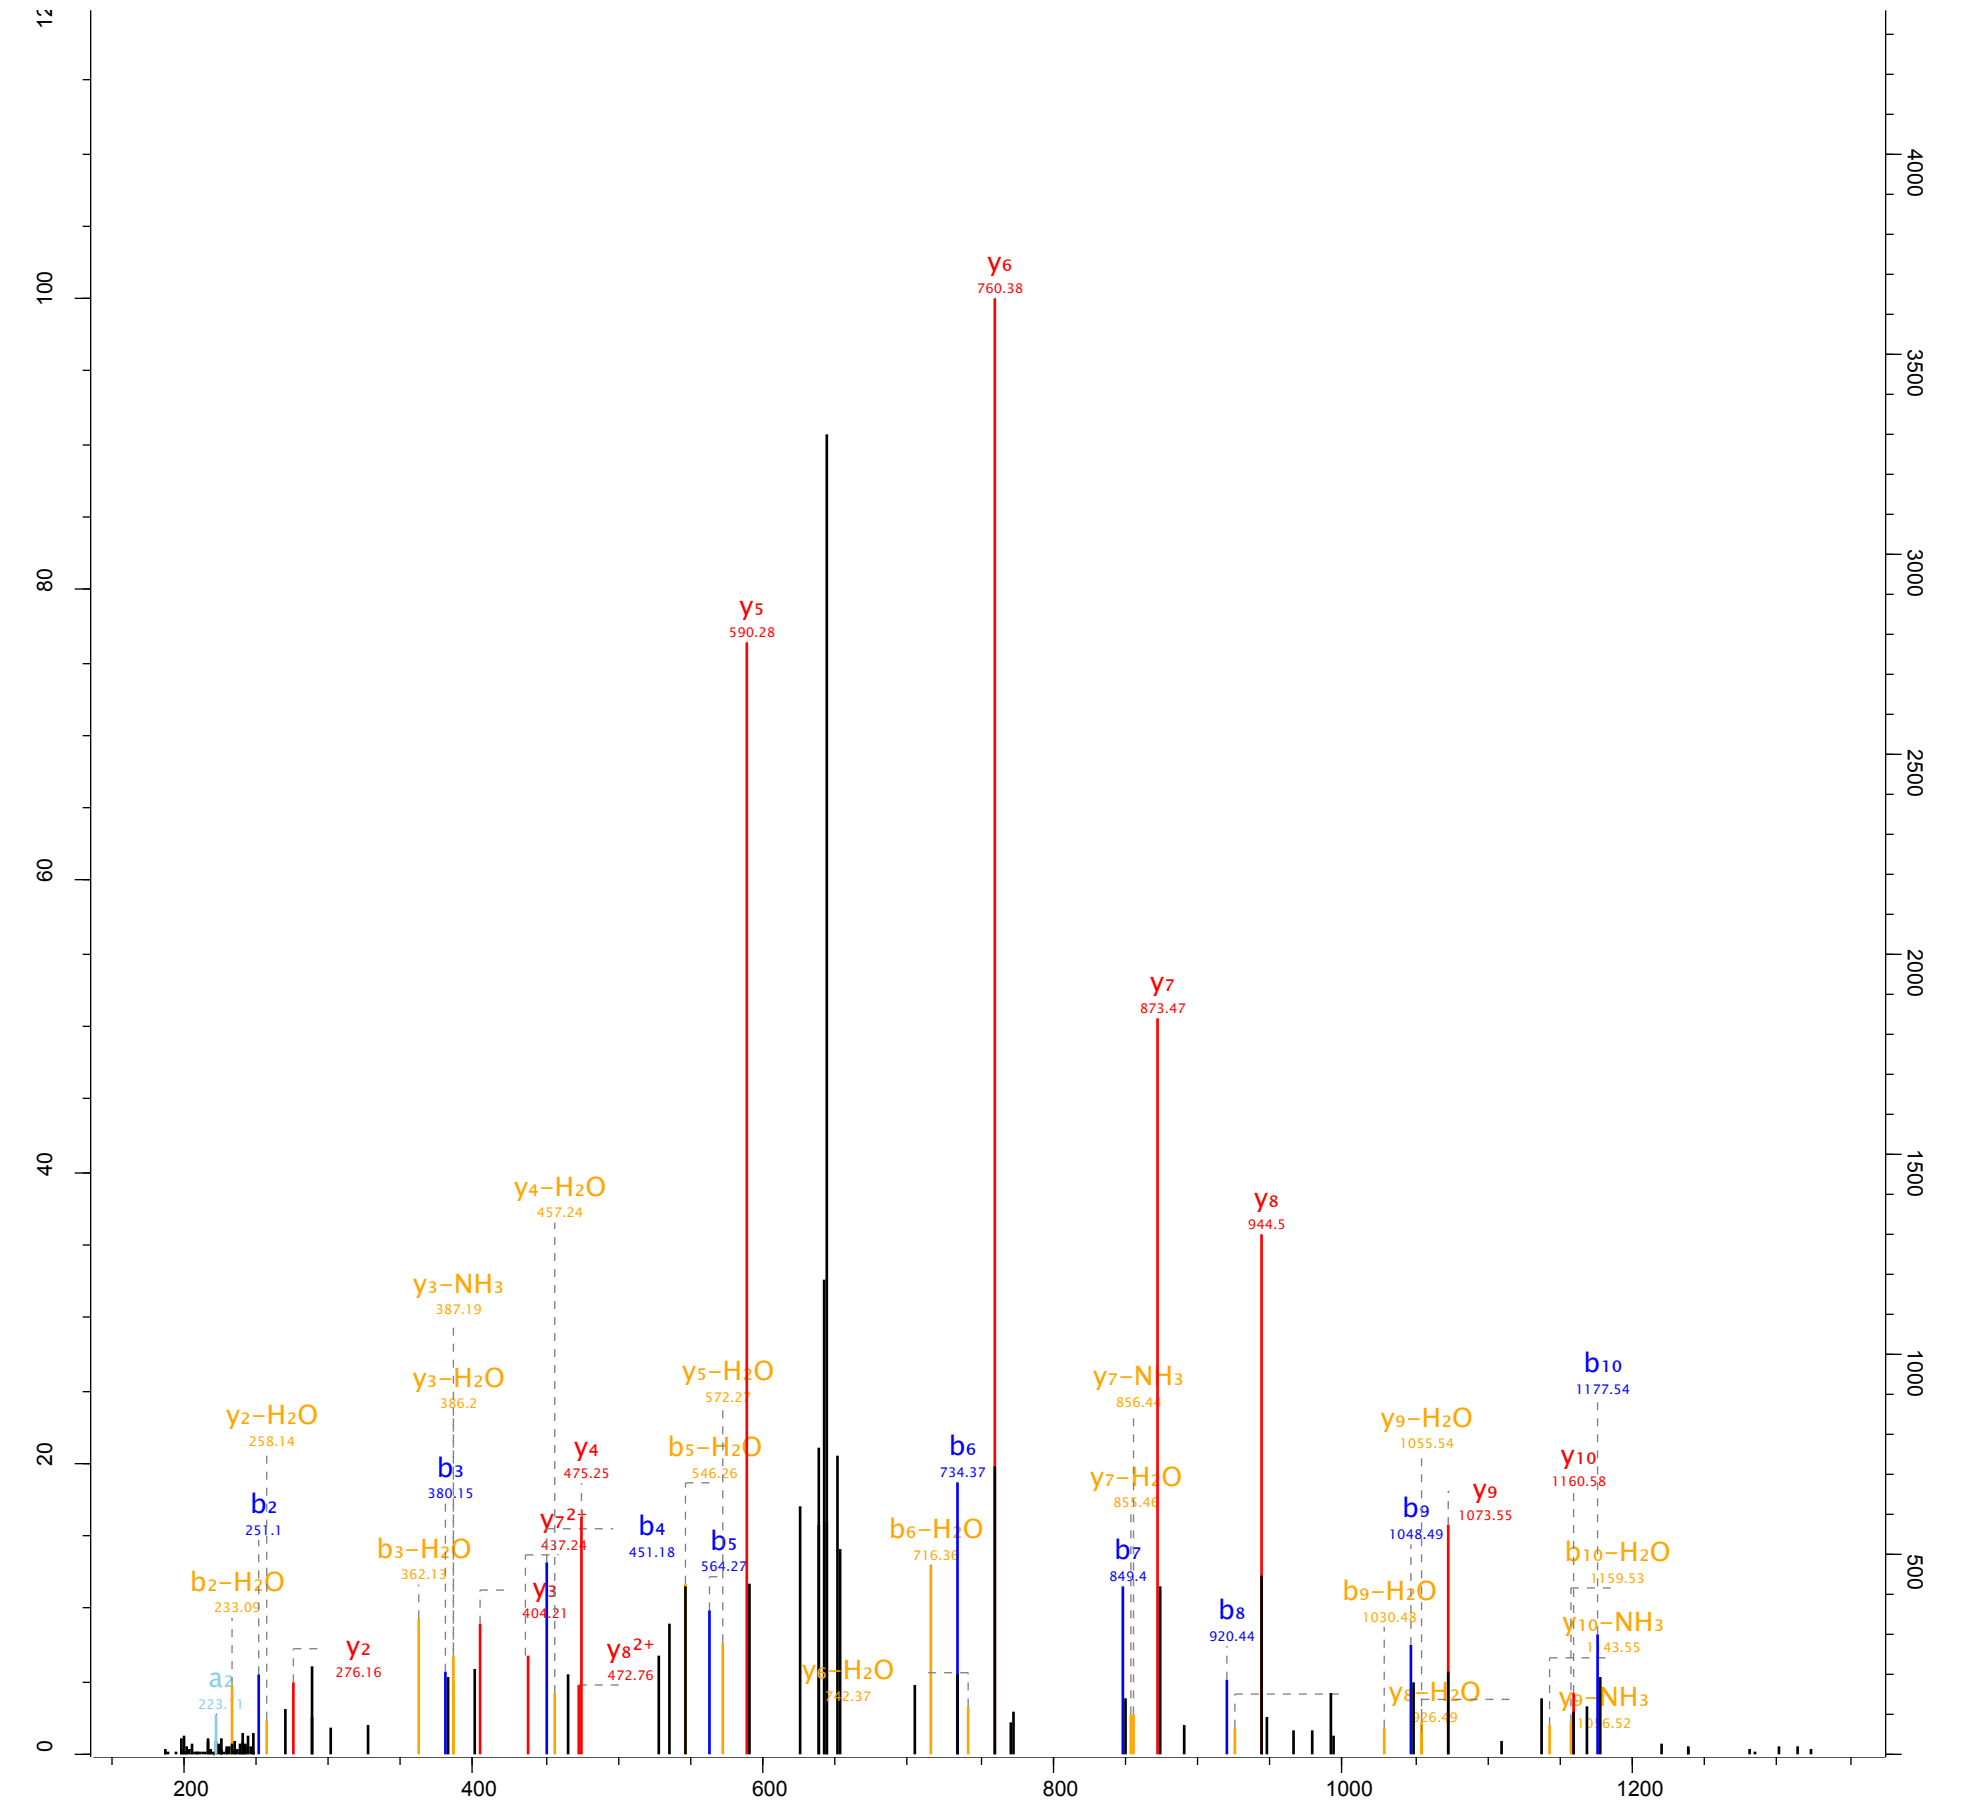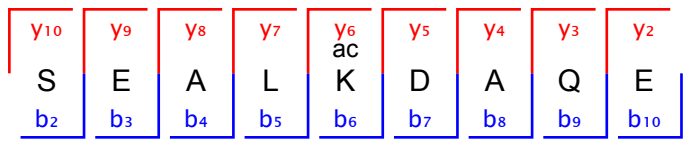



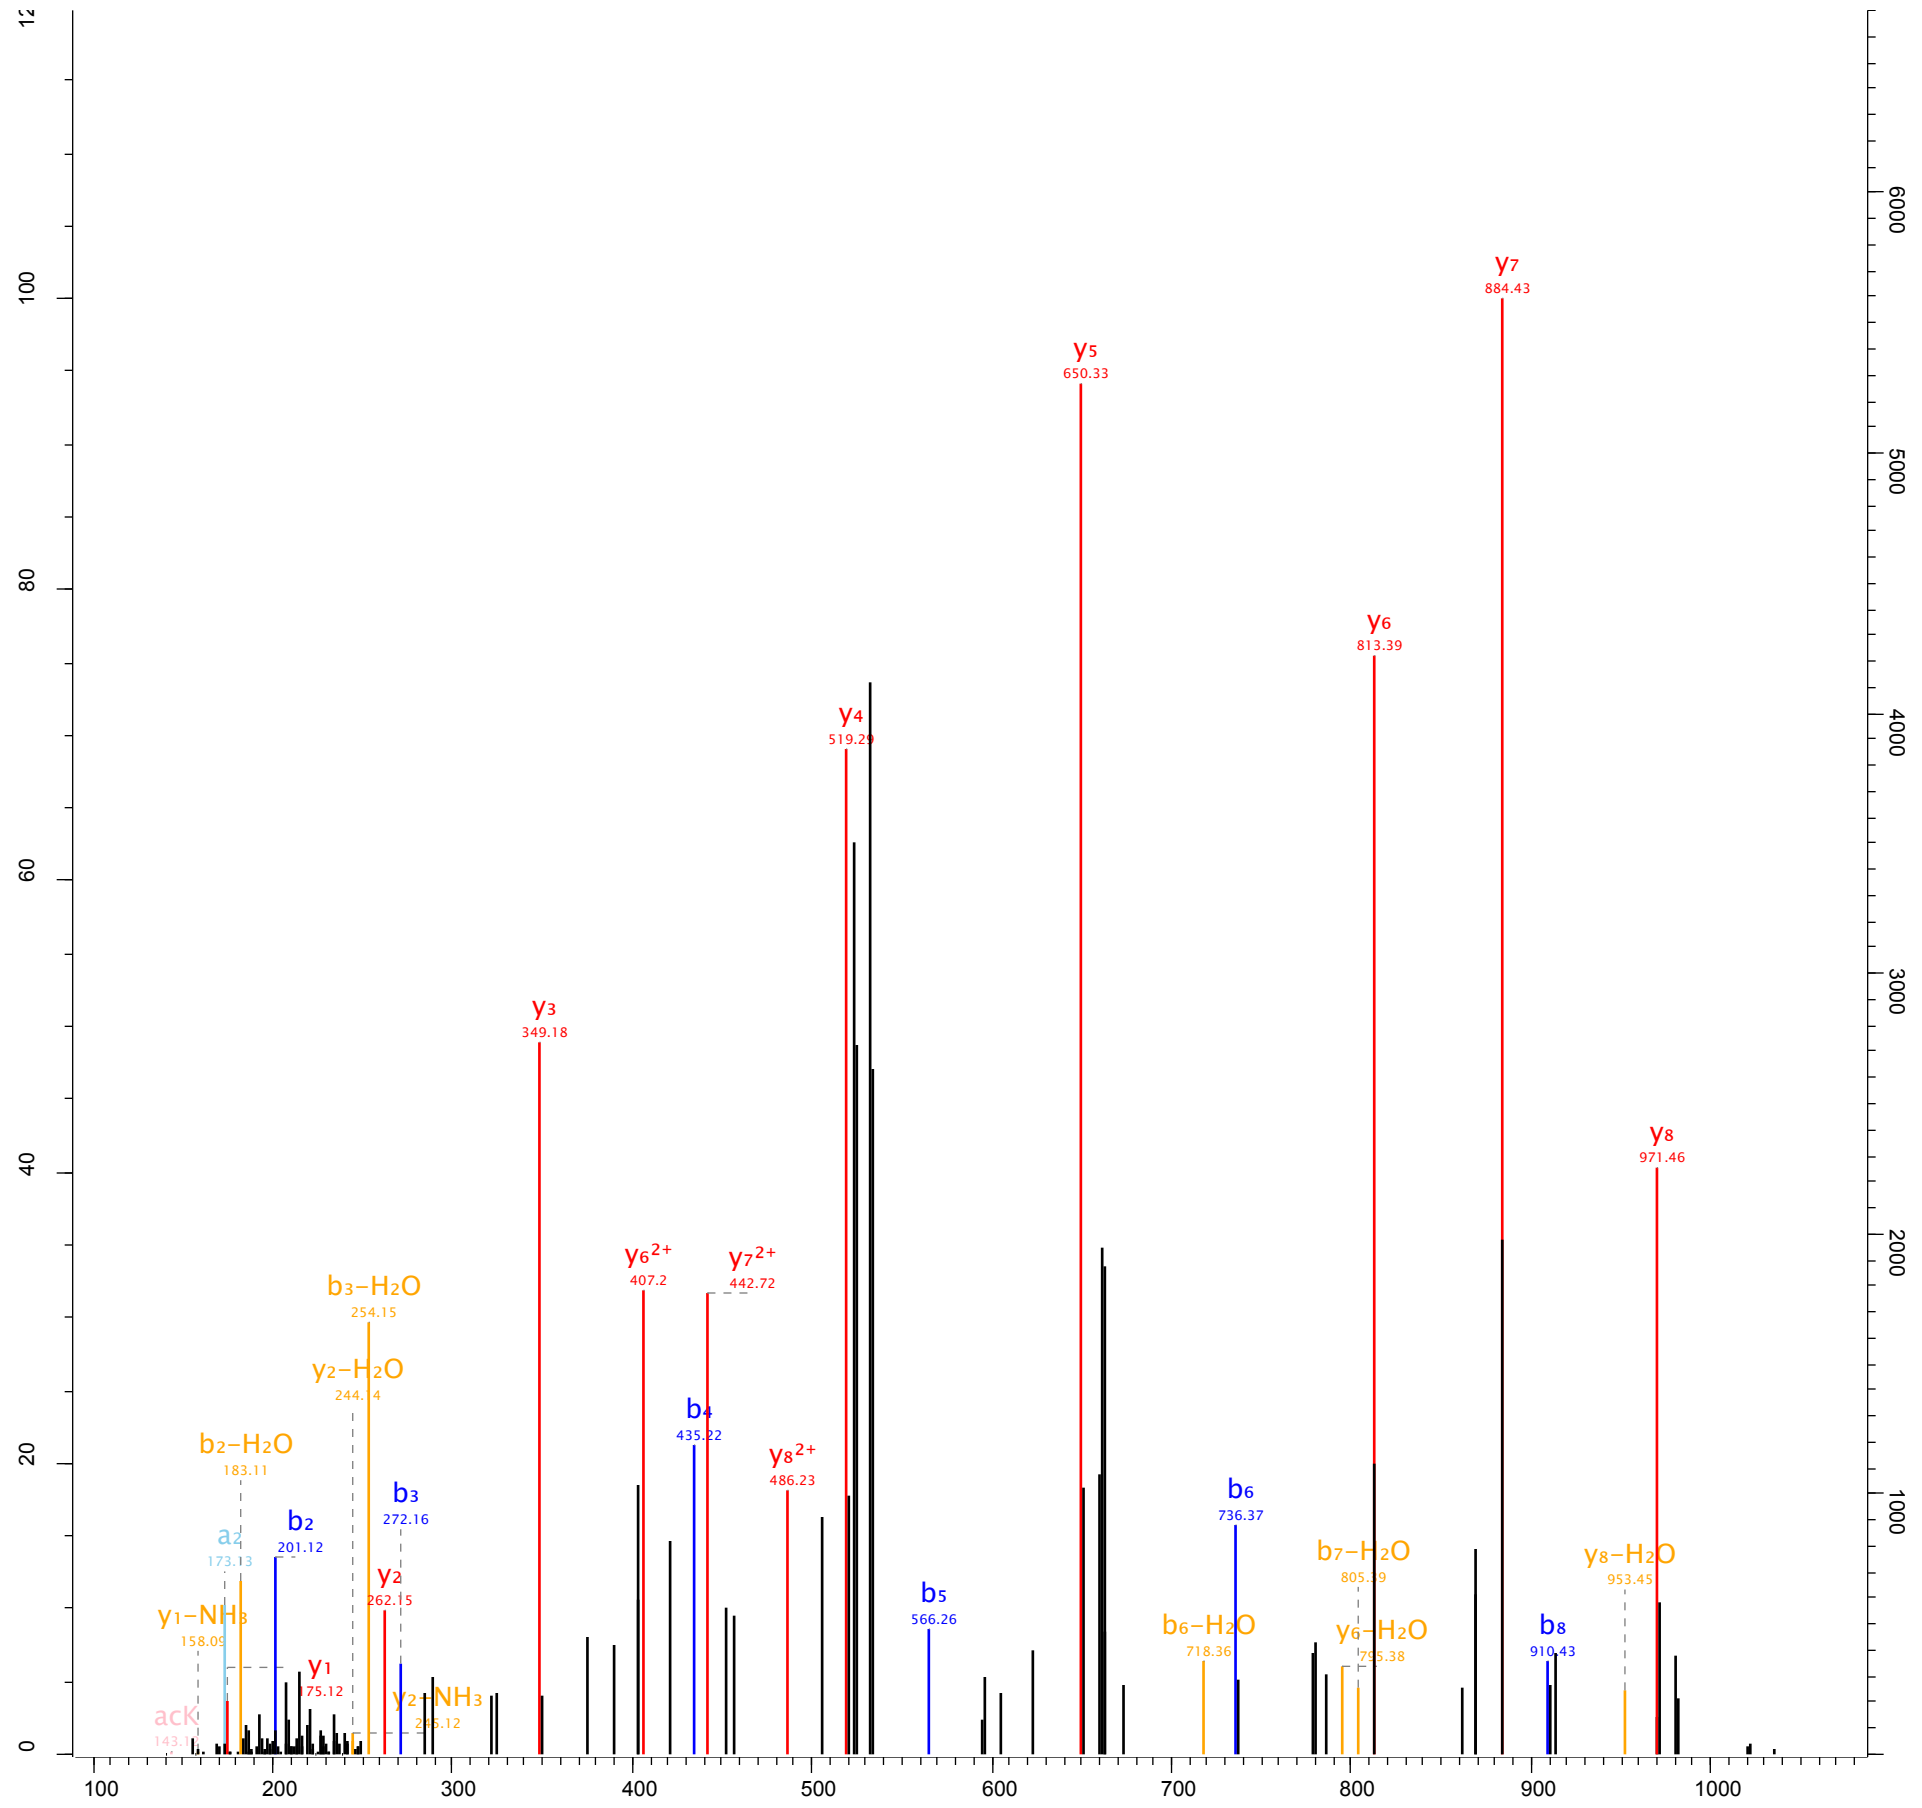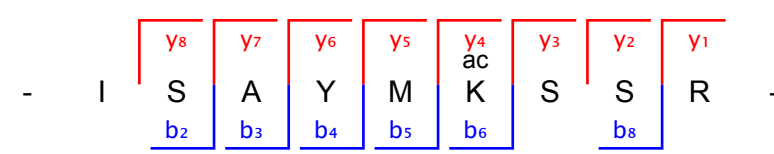

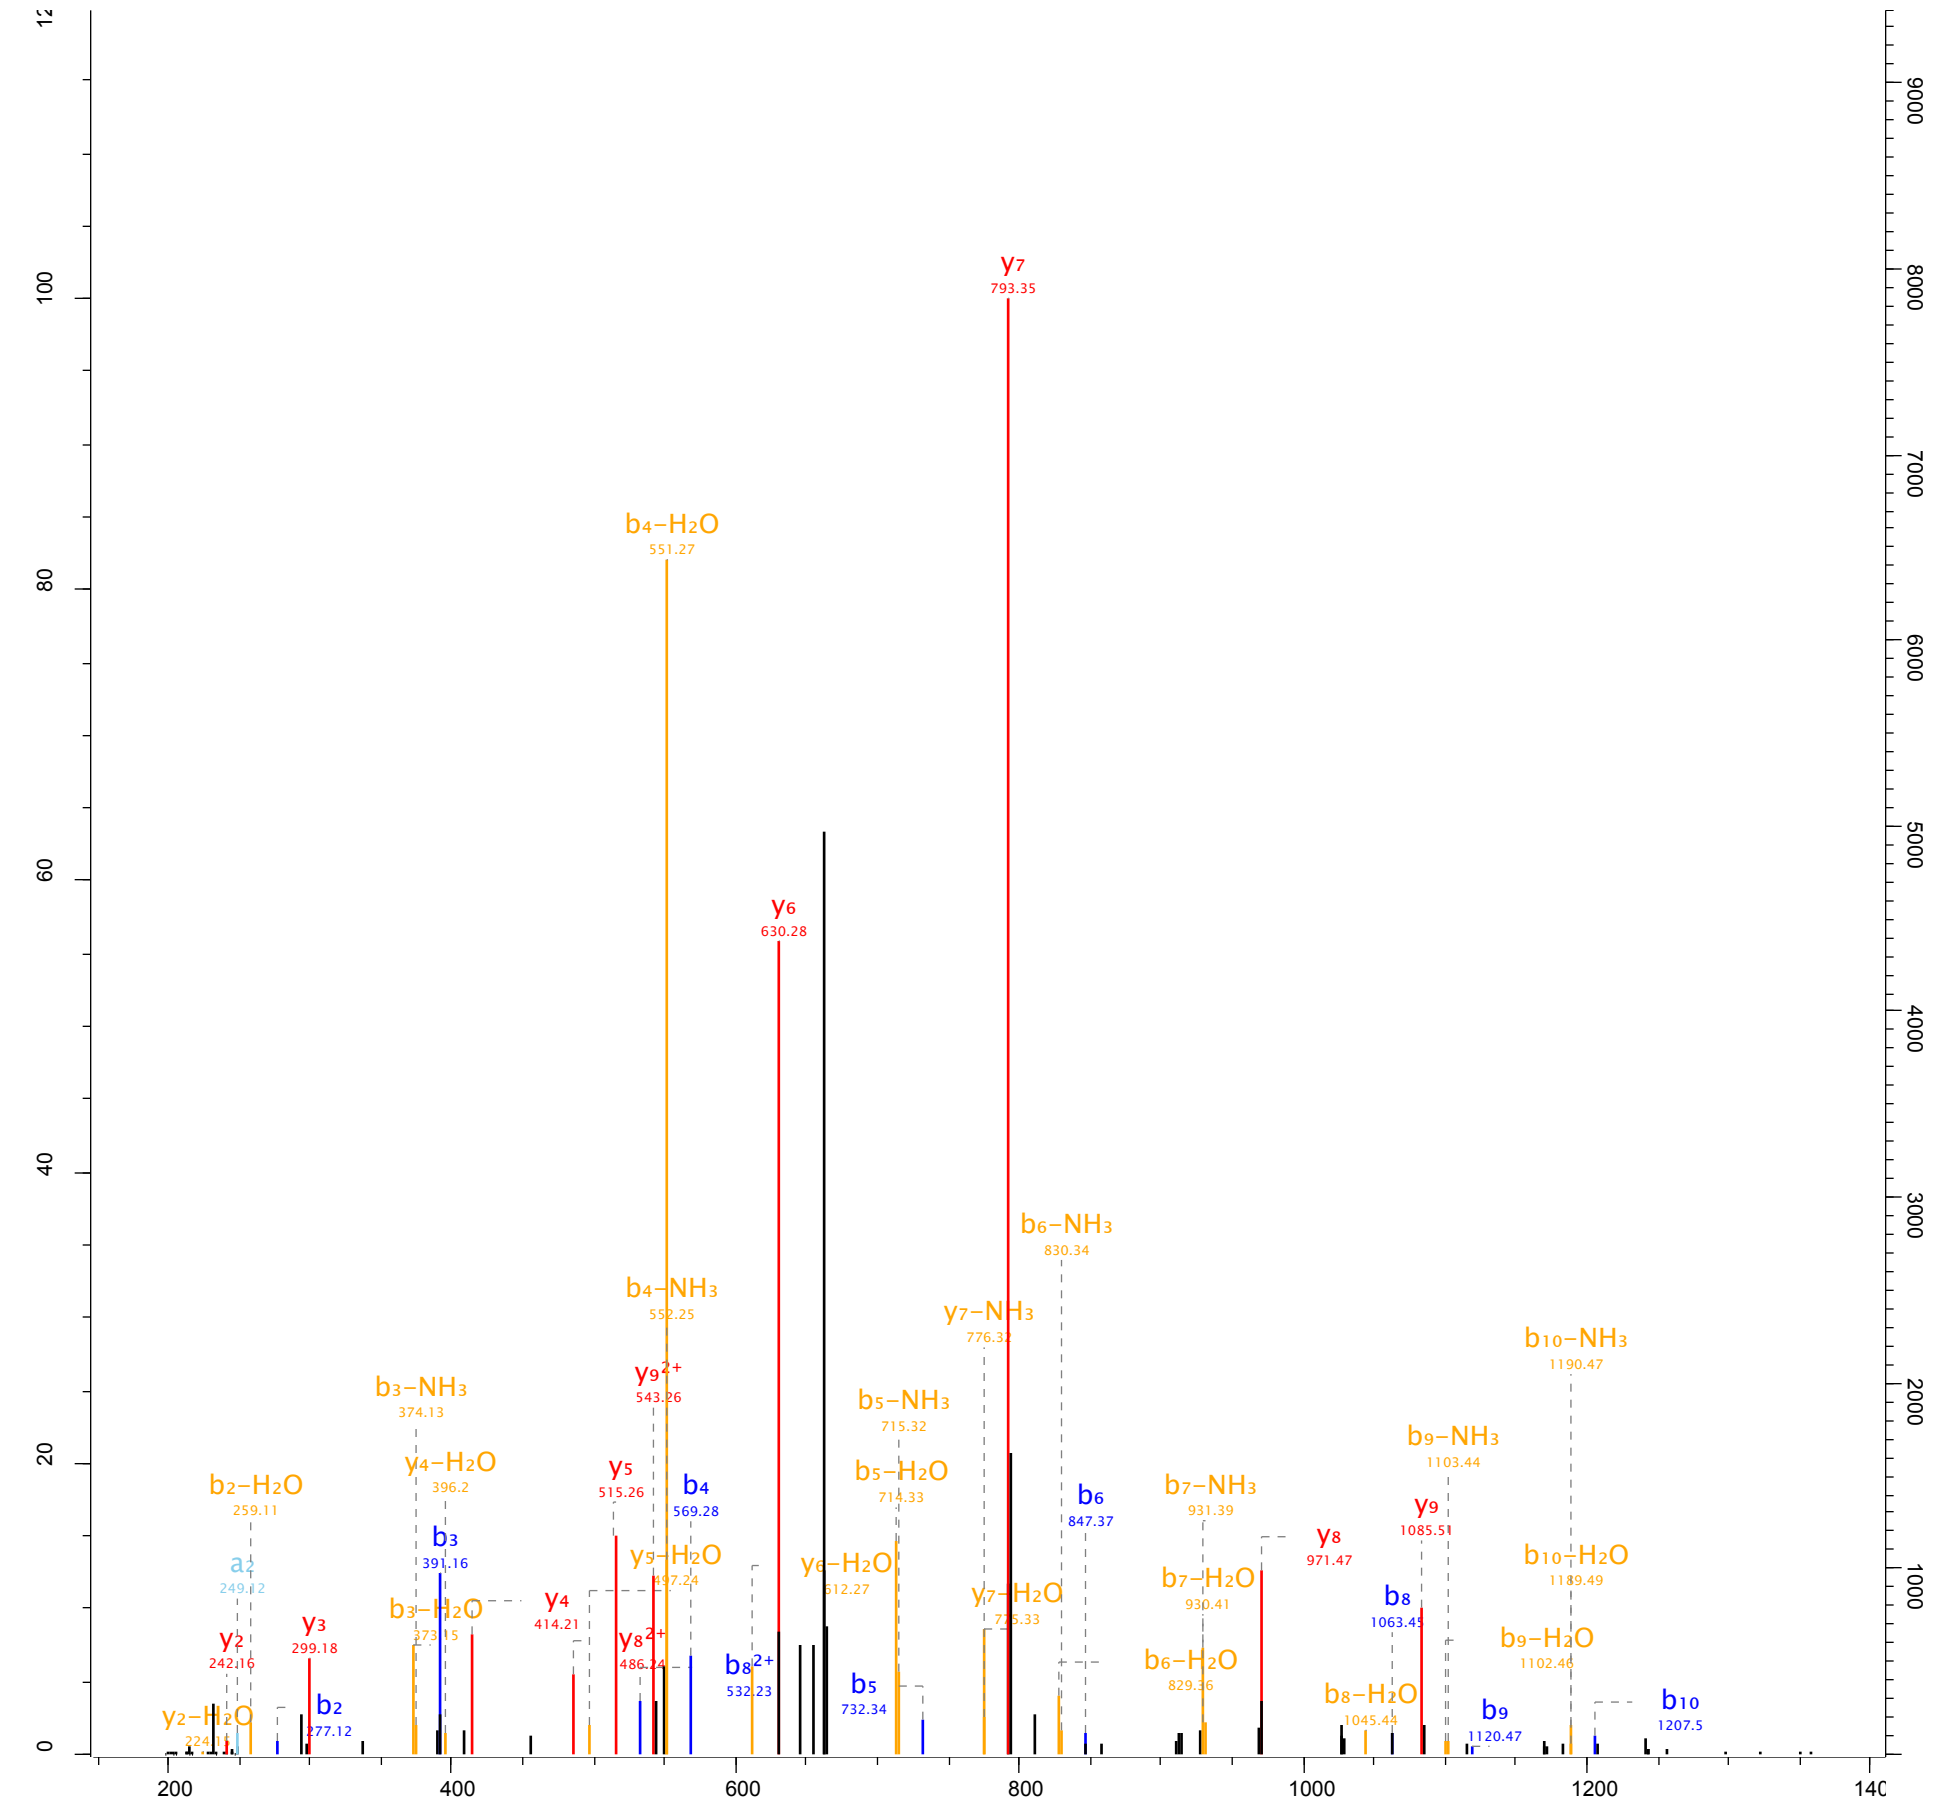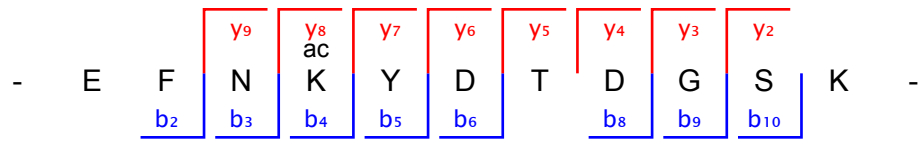

062513\_SCW\_II\_53\_5\_Vargas\_Enriched

14459

ITMS; CID

116.84

594.81

Lmna

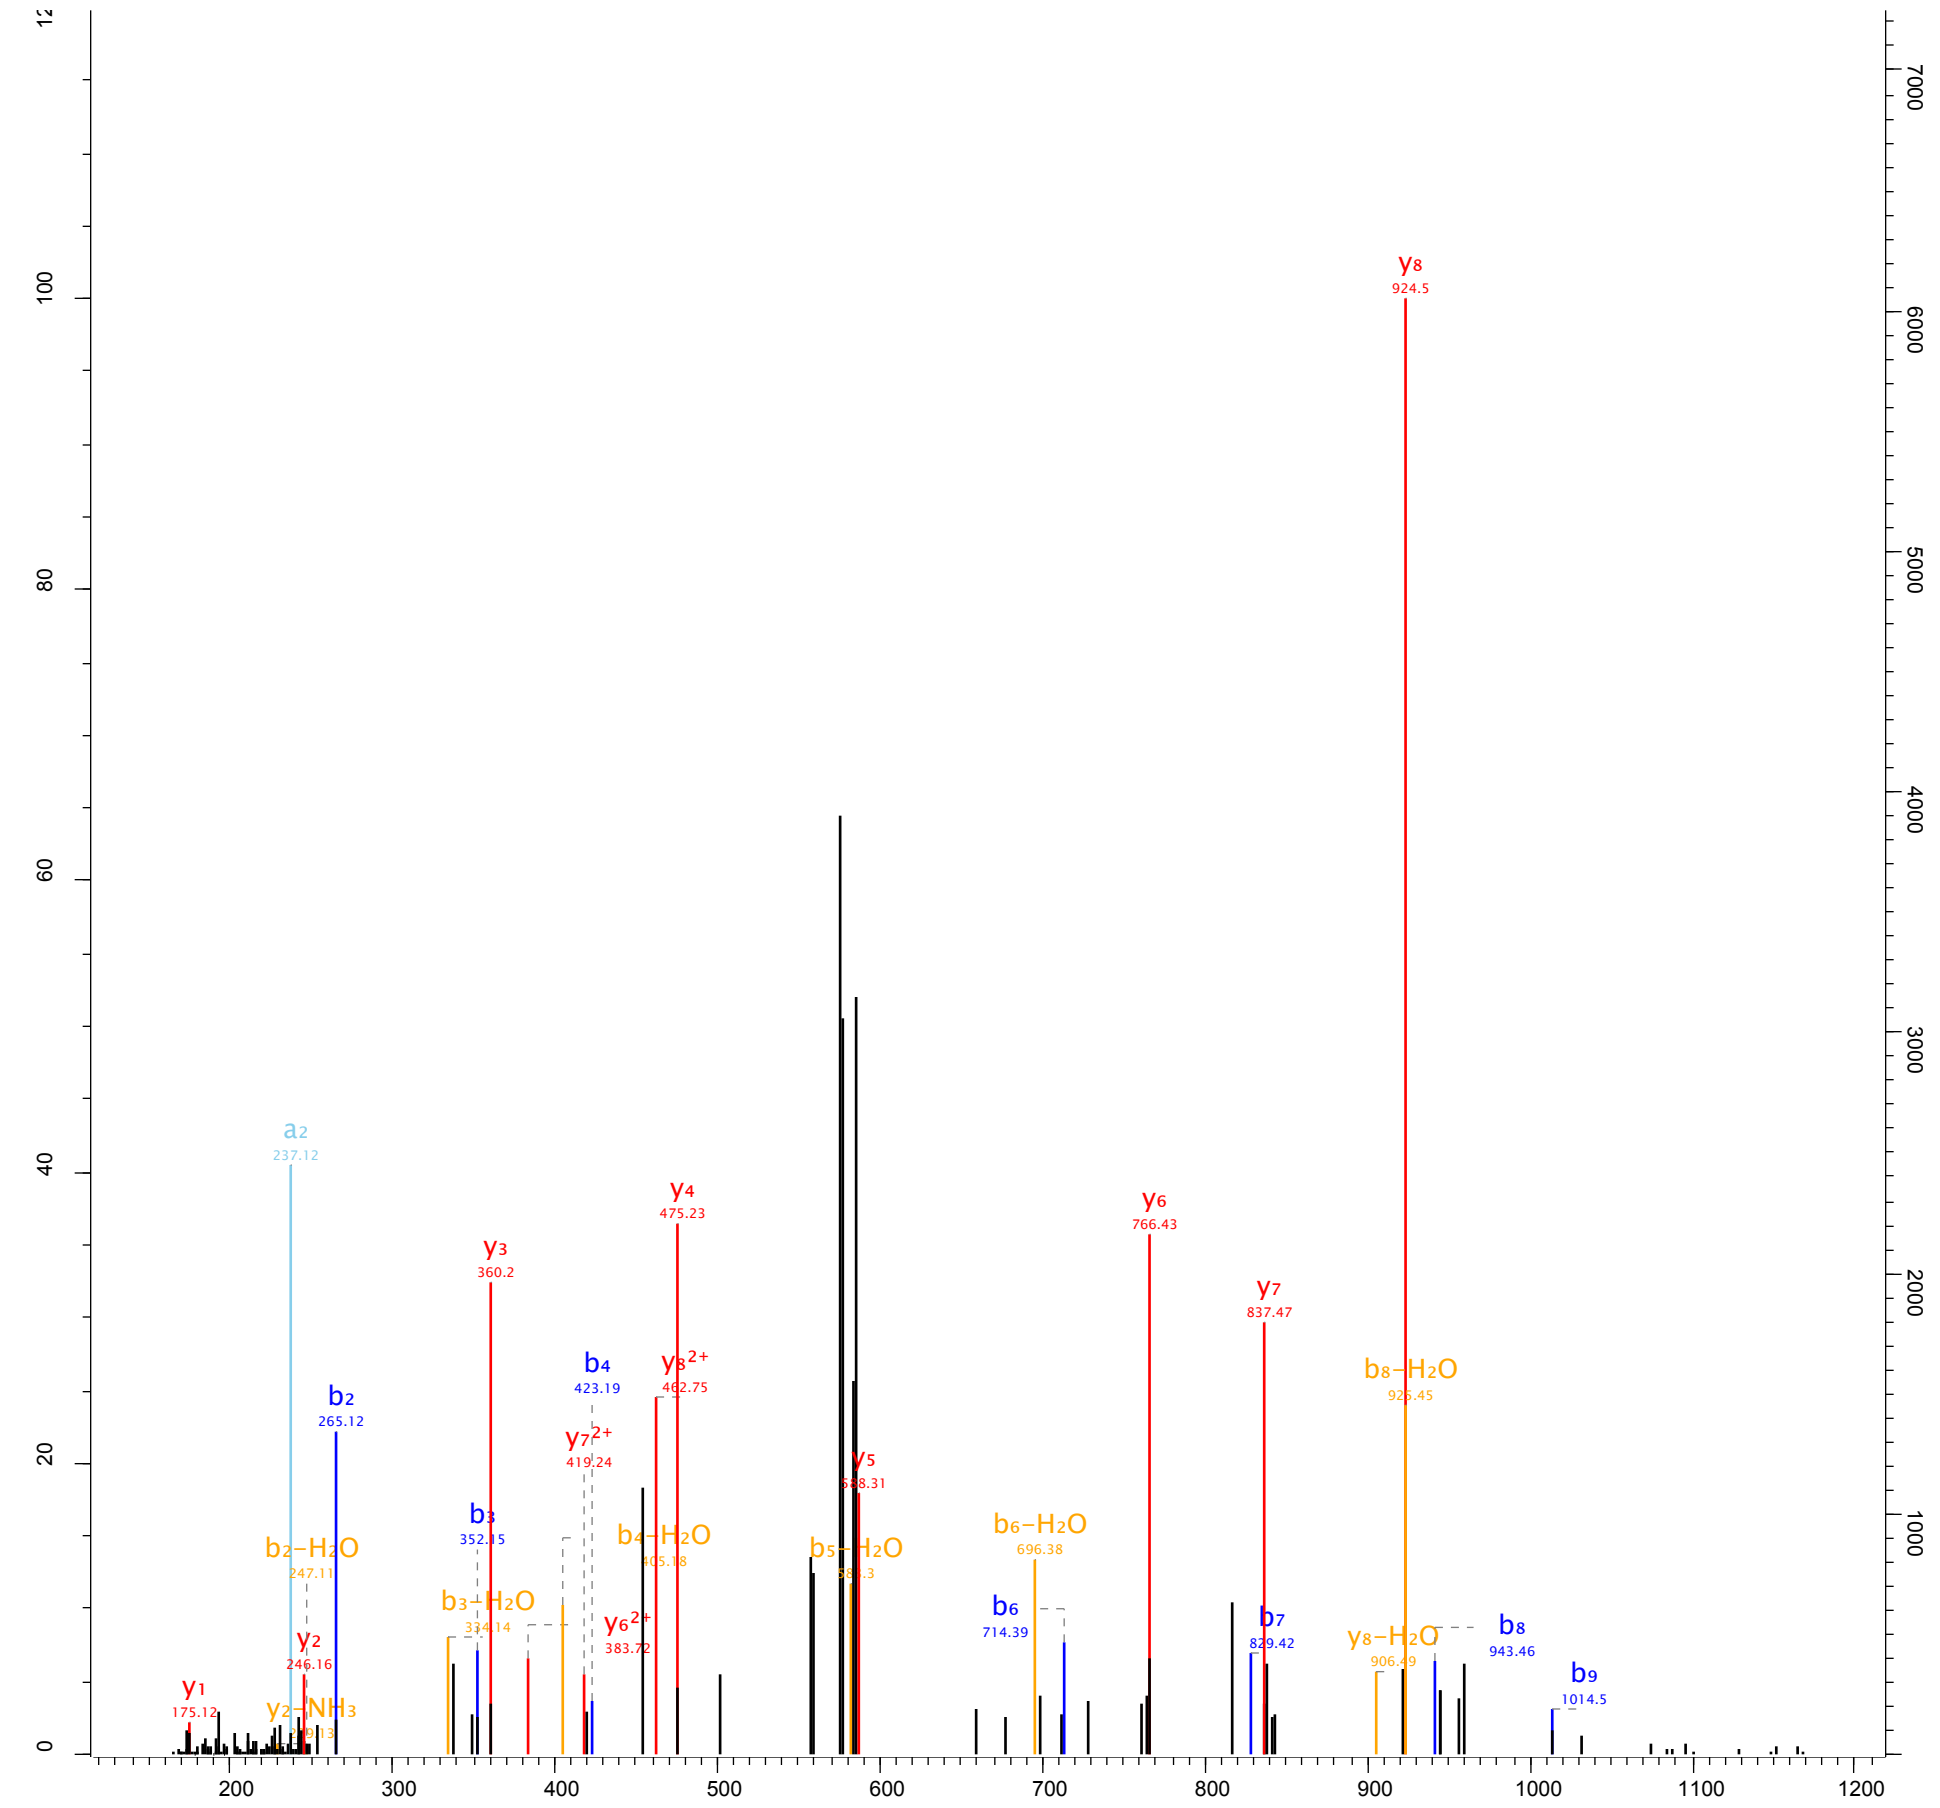

- T Y S A K L D N A R -

y8
y7
y6  
ac
y5
y4
y3
y2
y1

b2
b3
b4
b6
b7
b8
b9

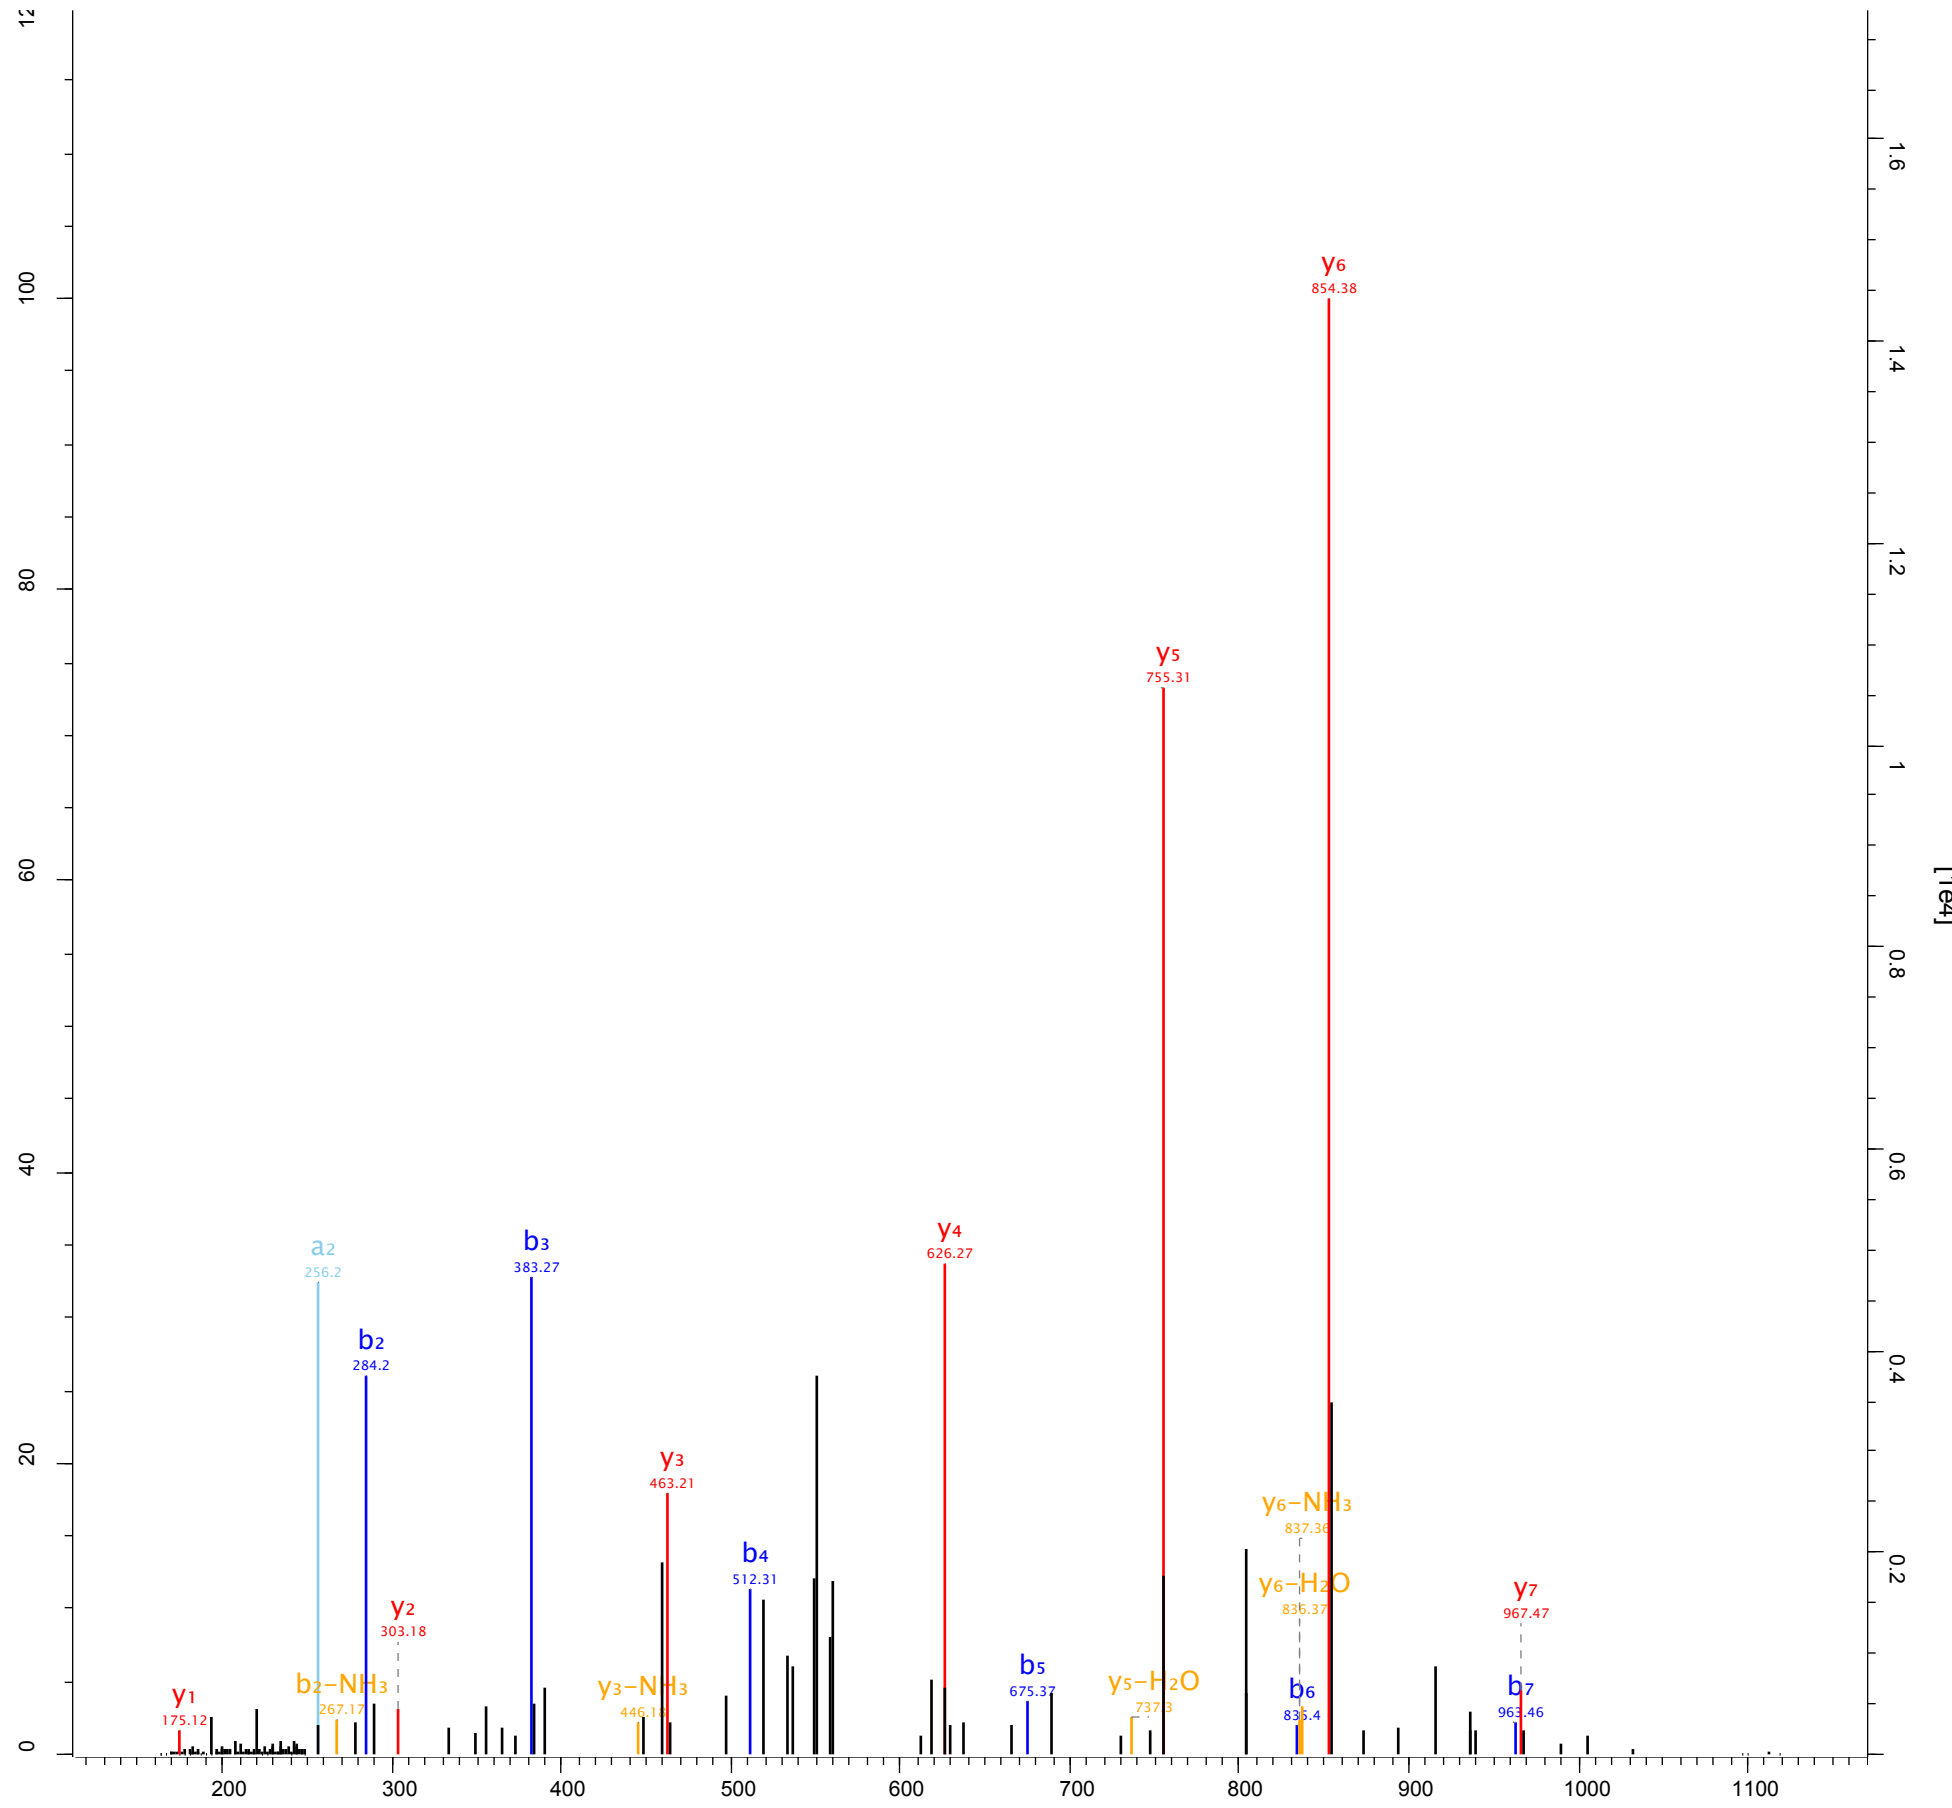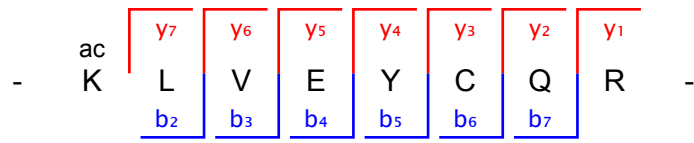

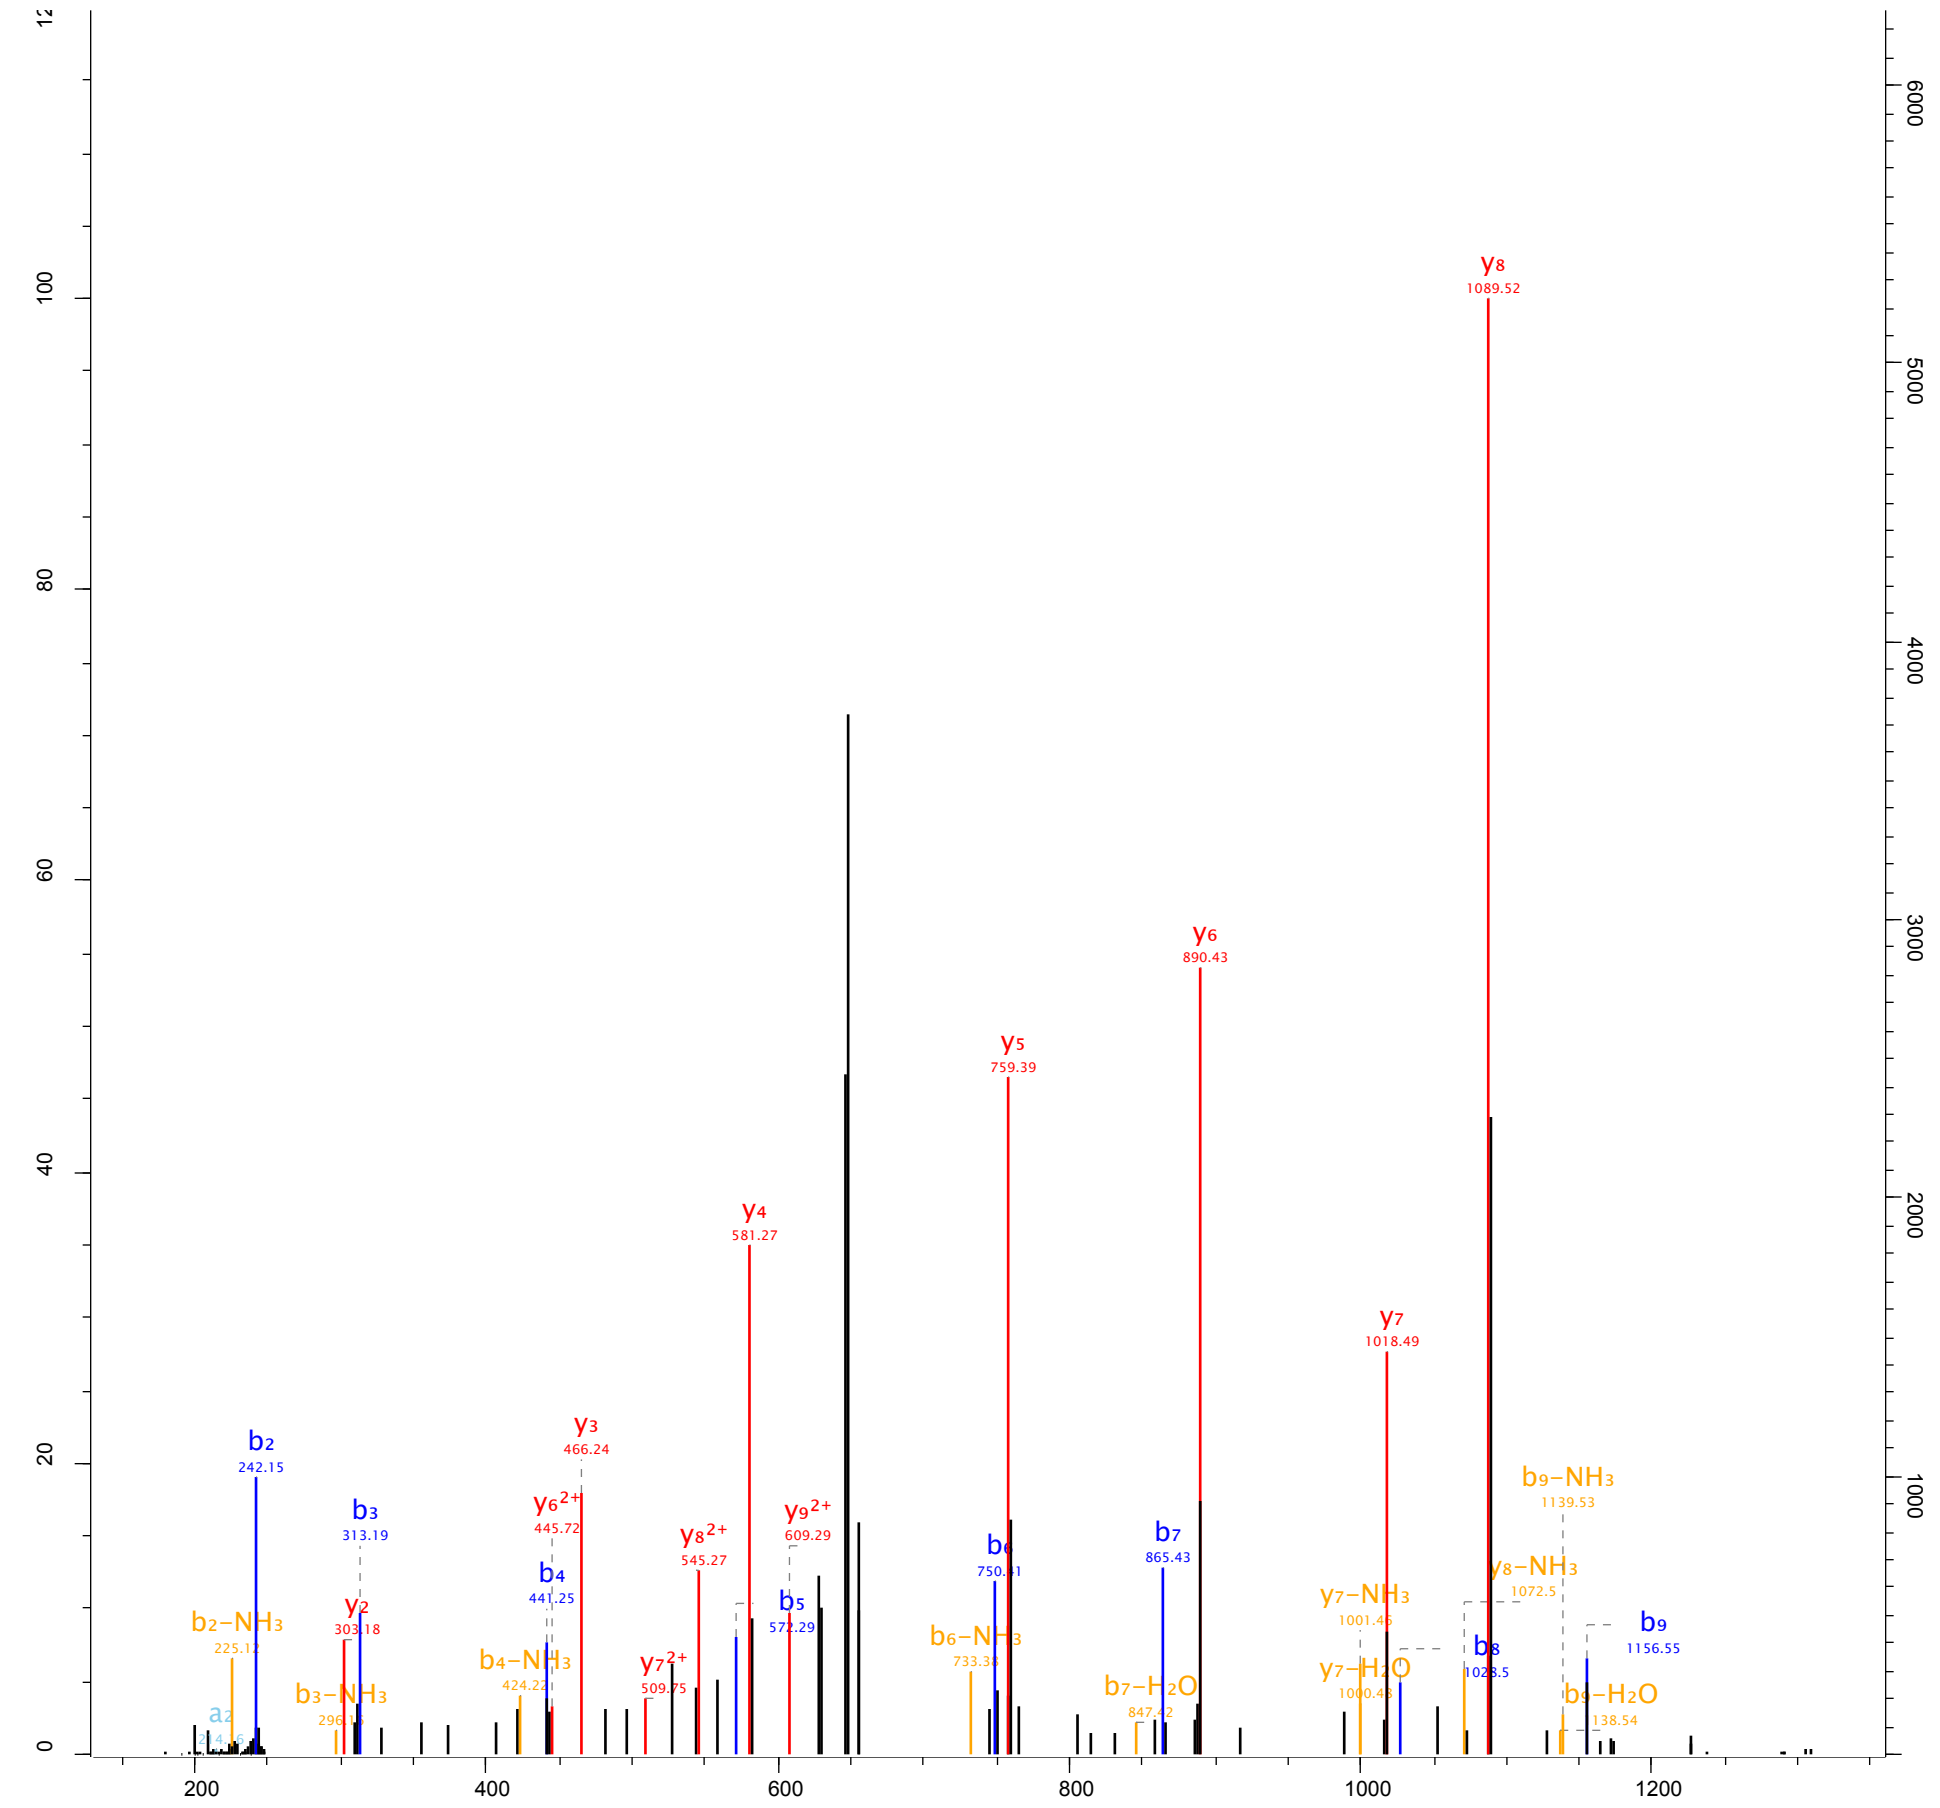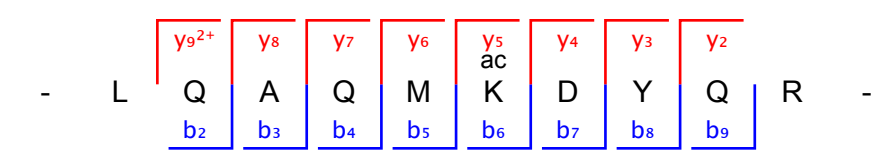

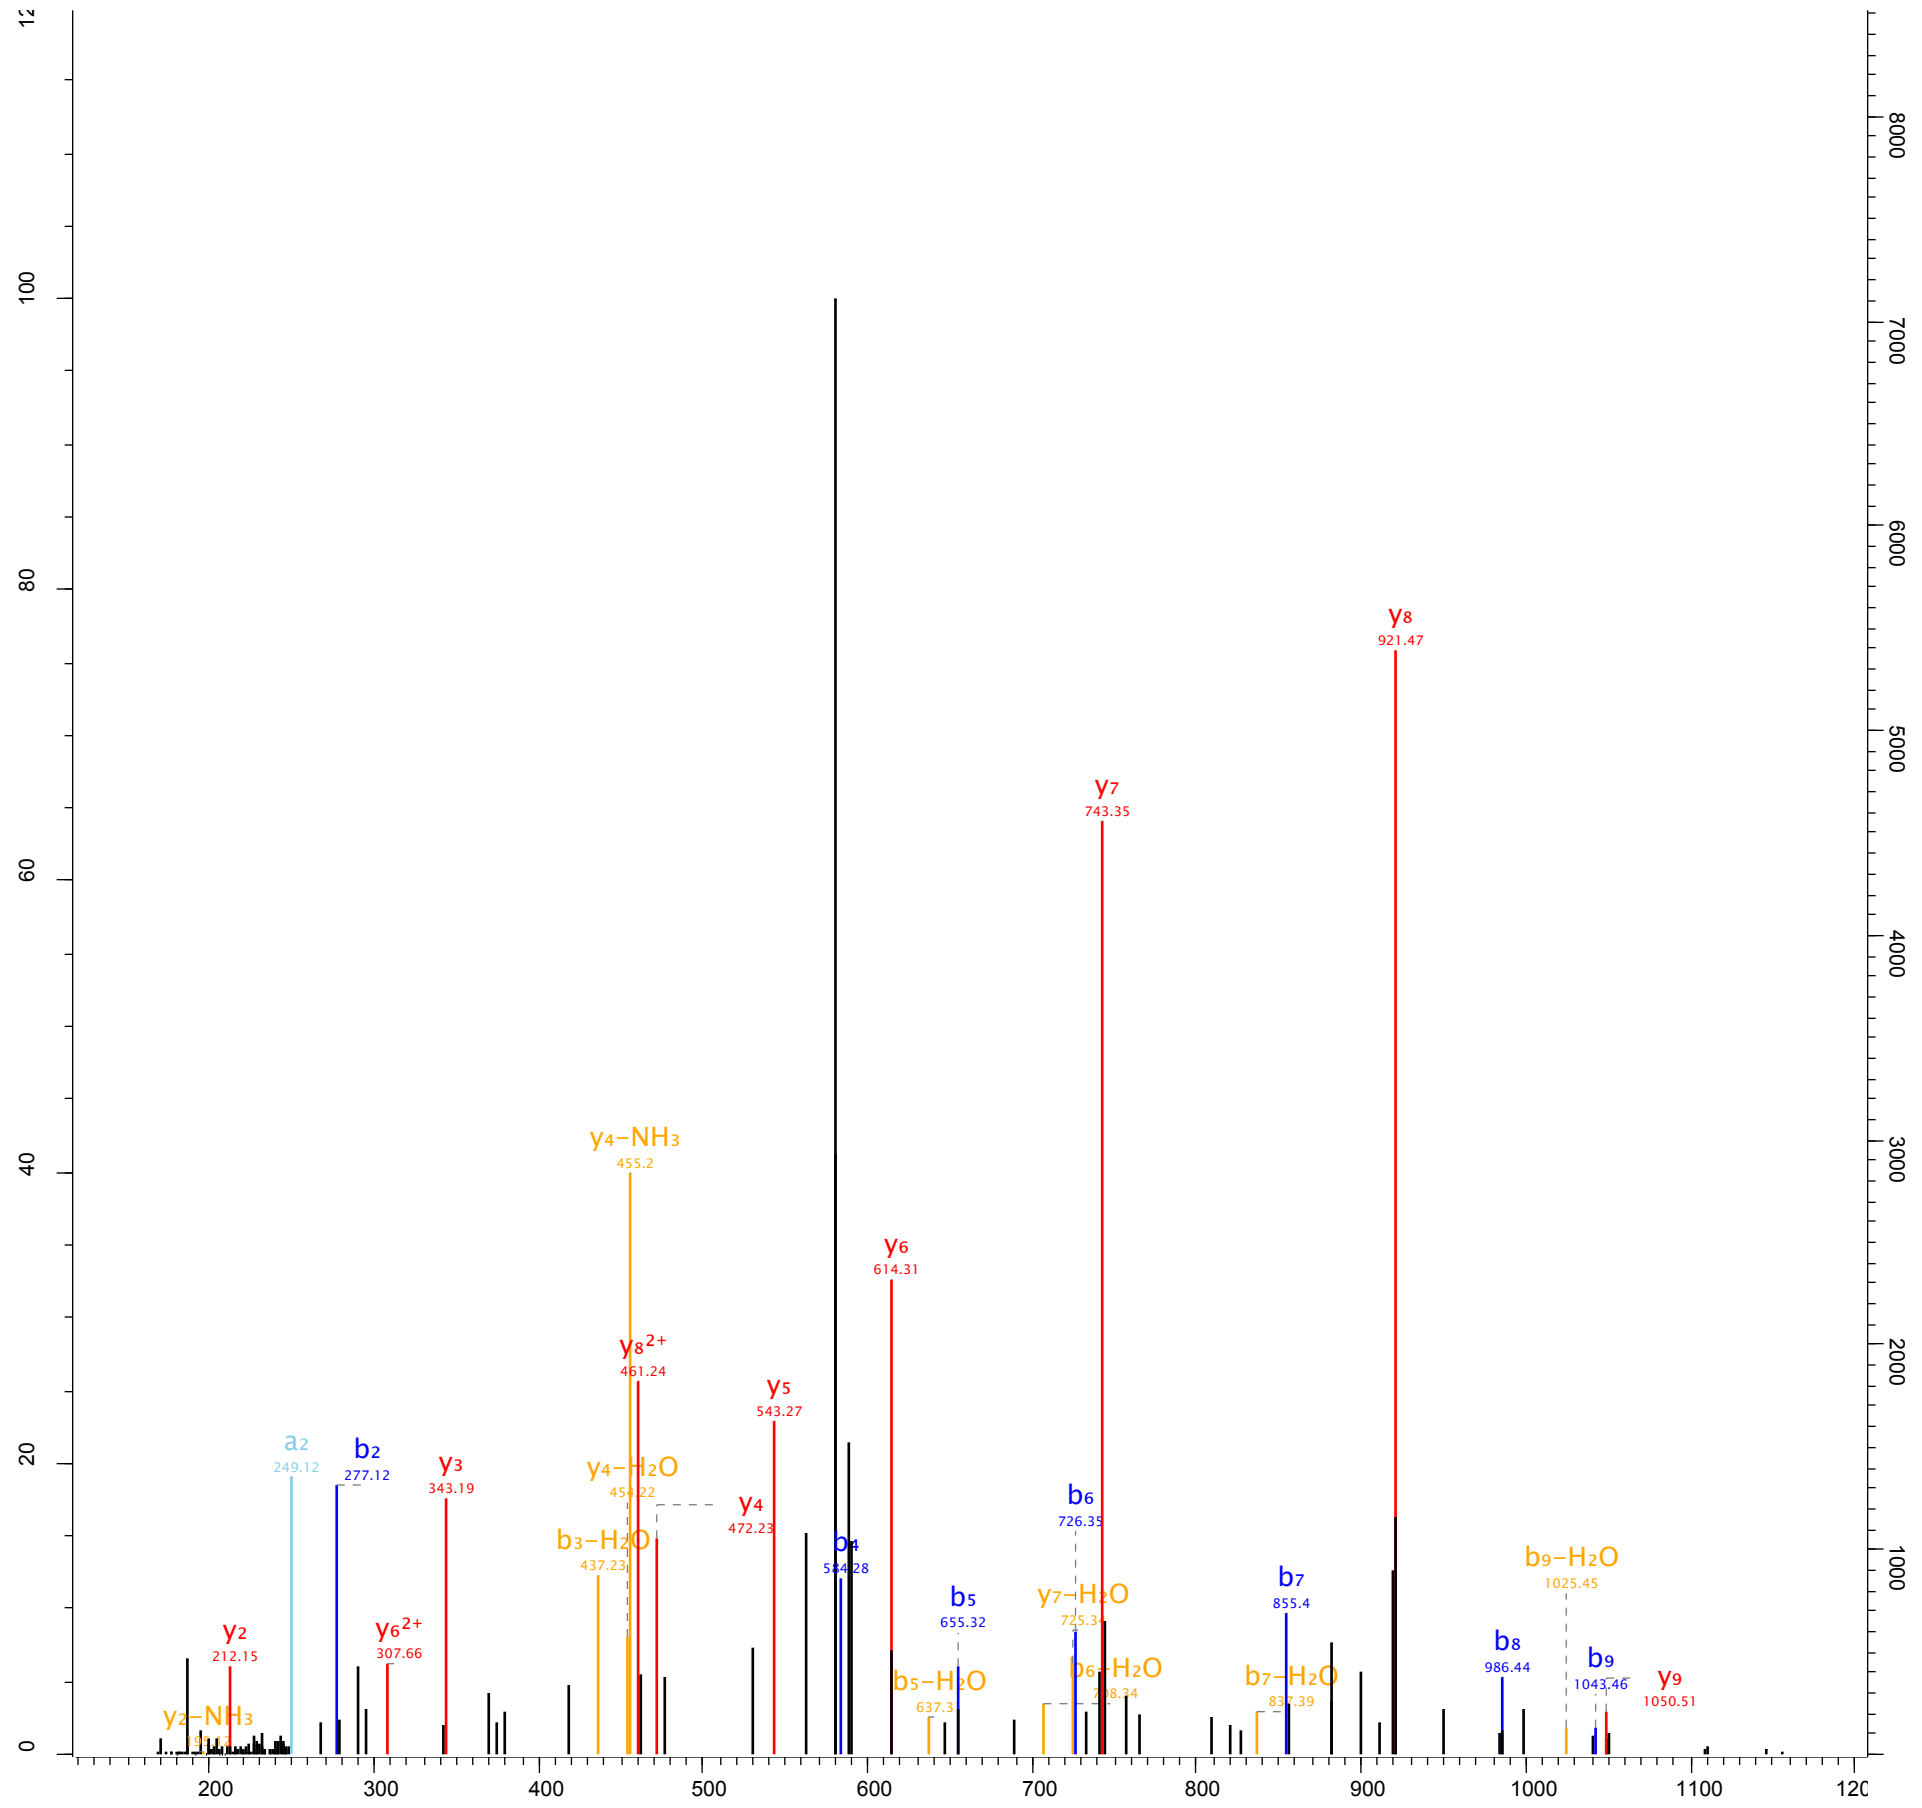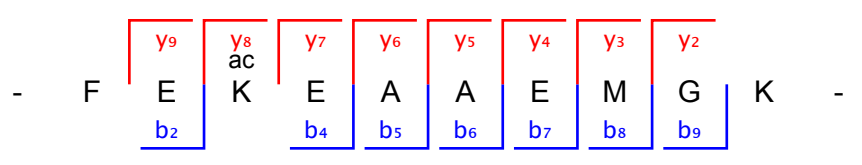

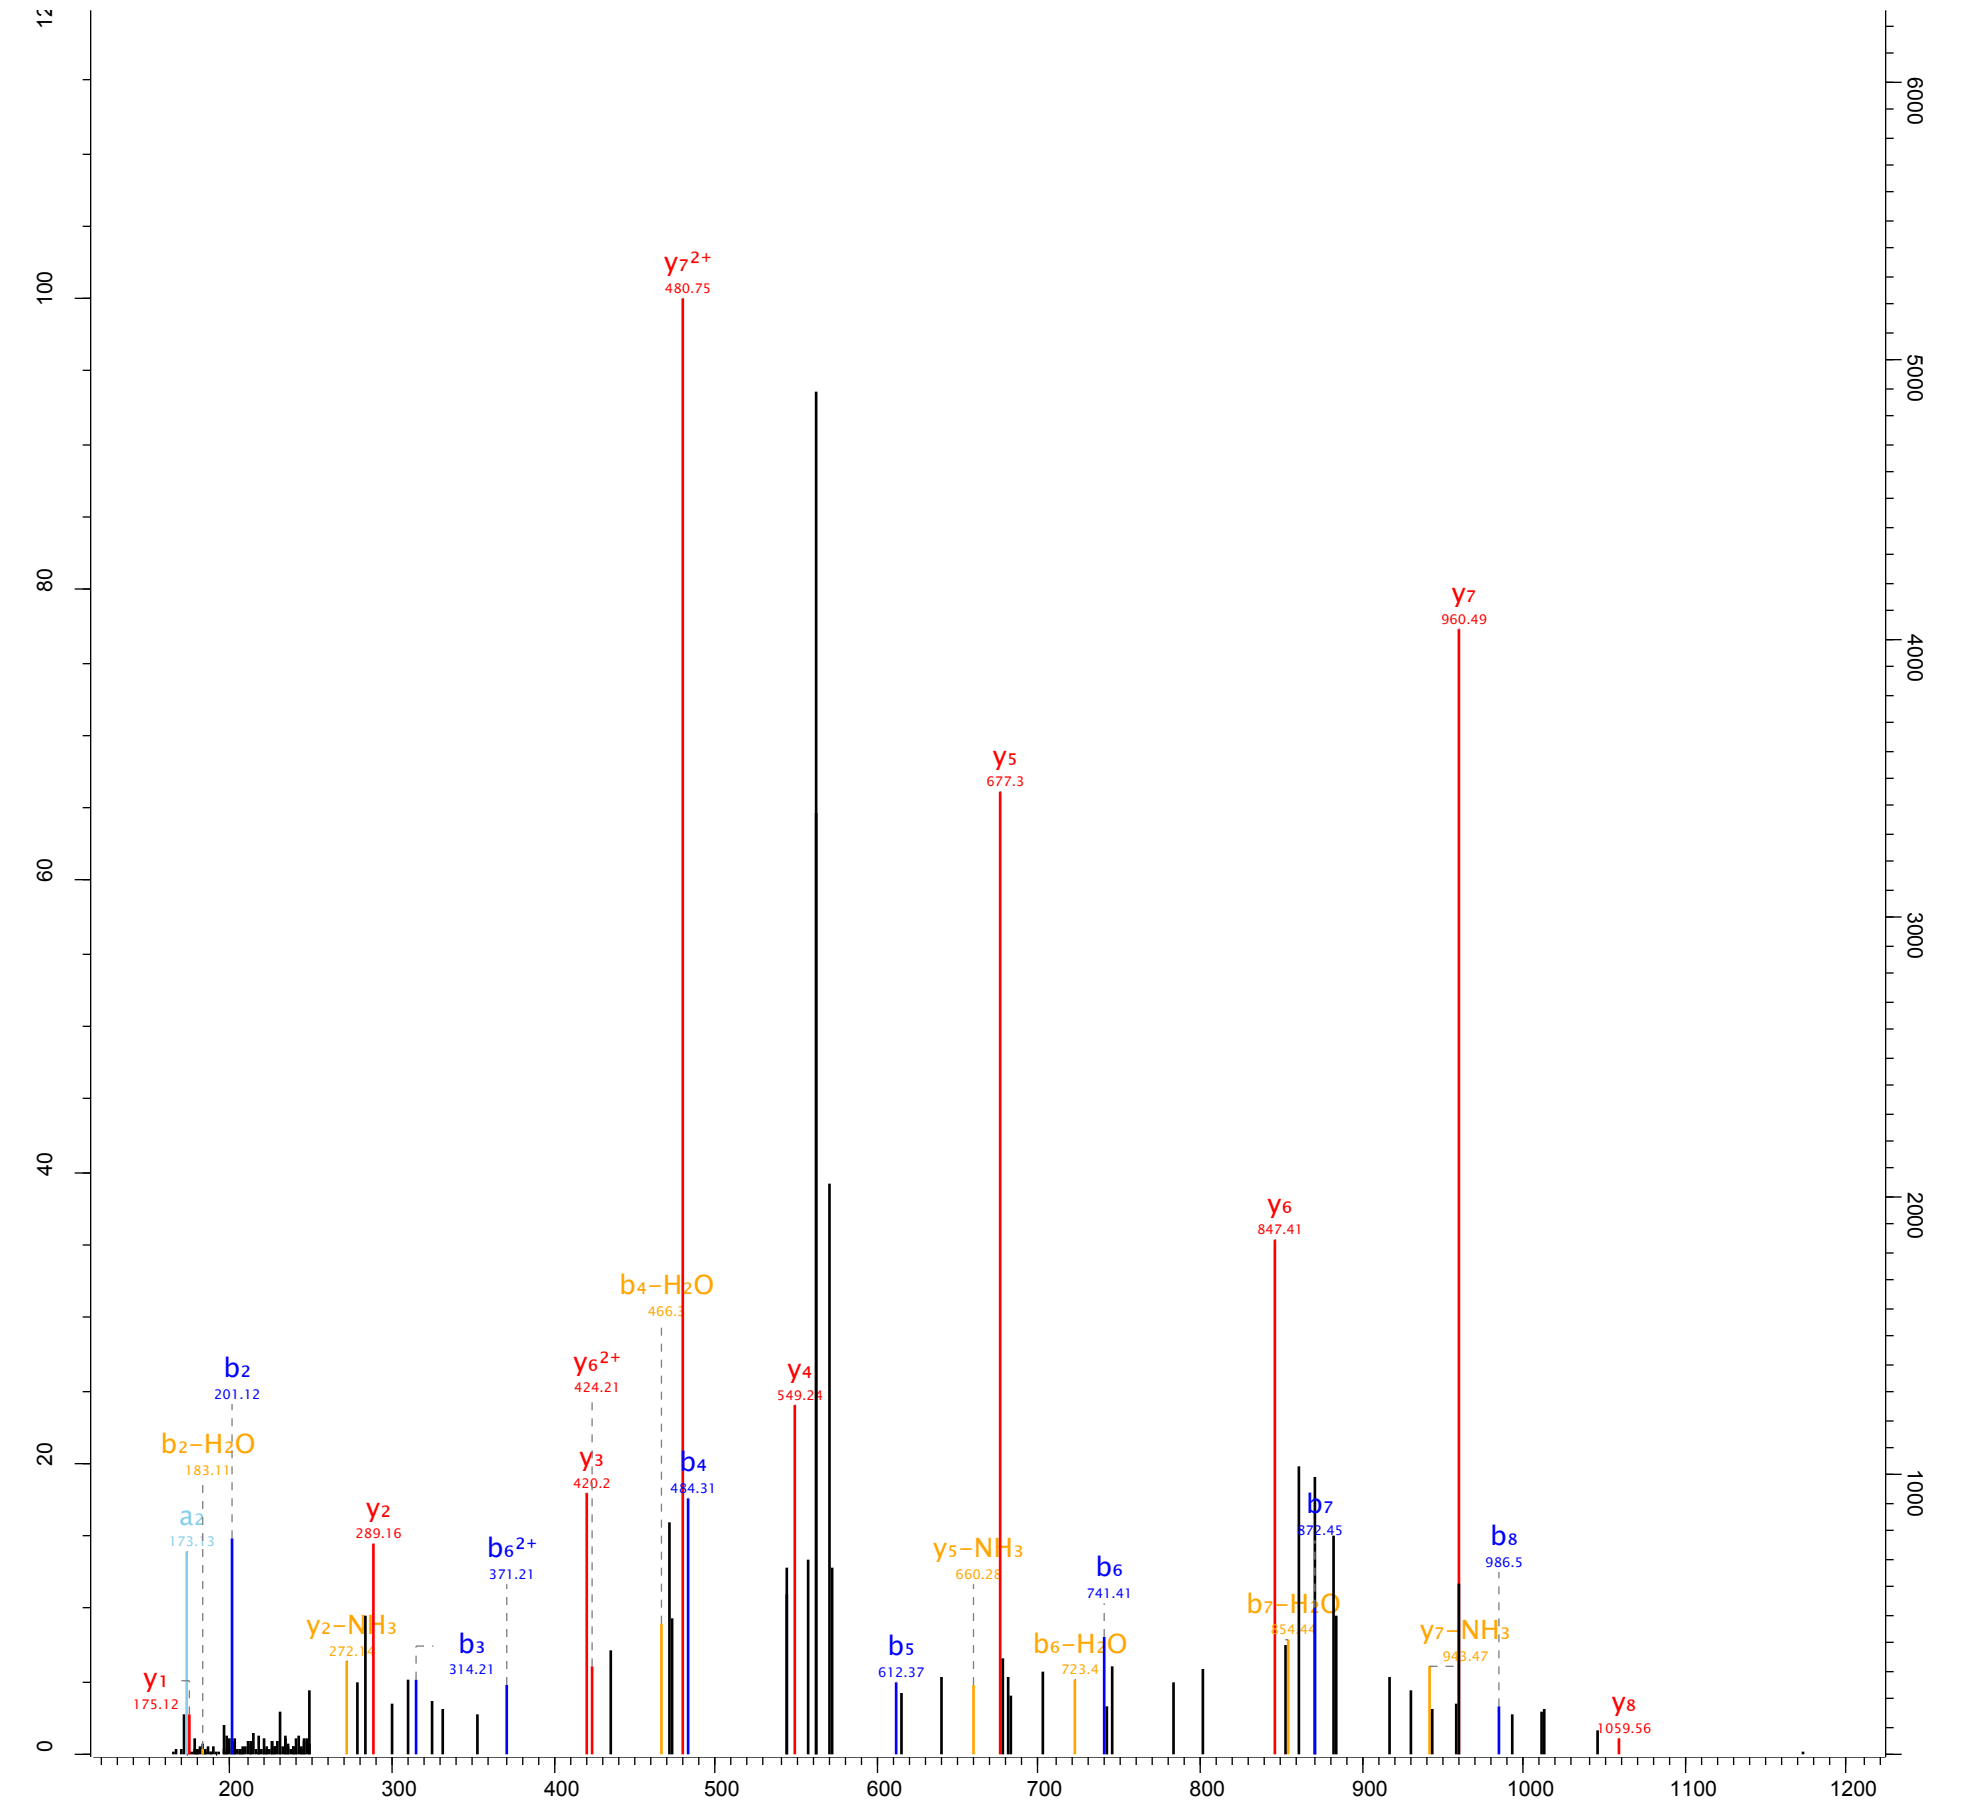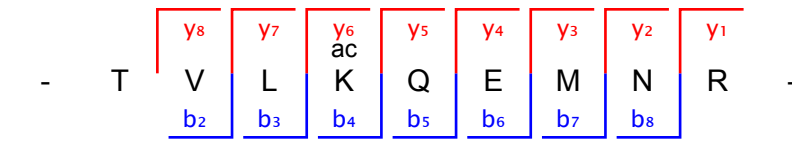

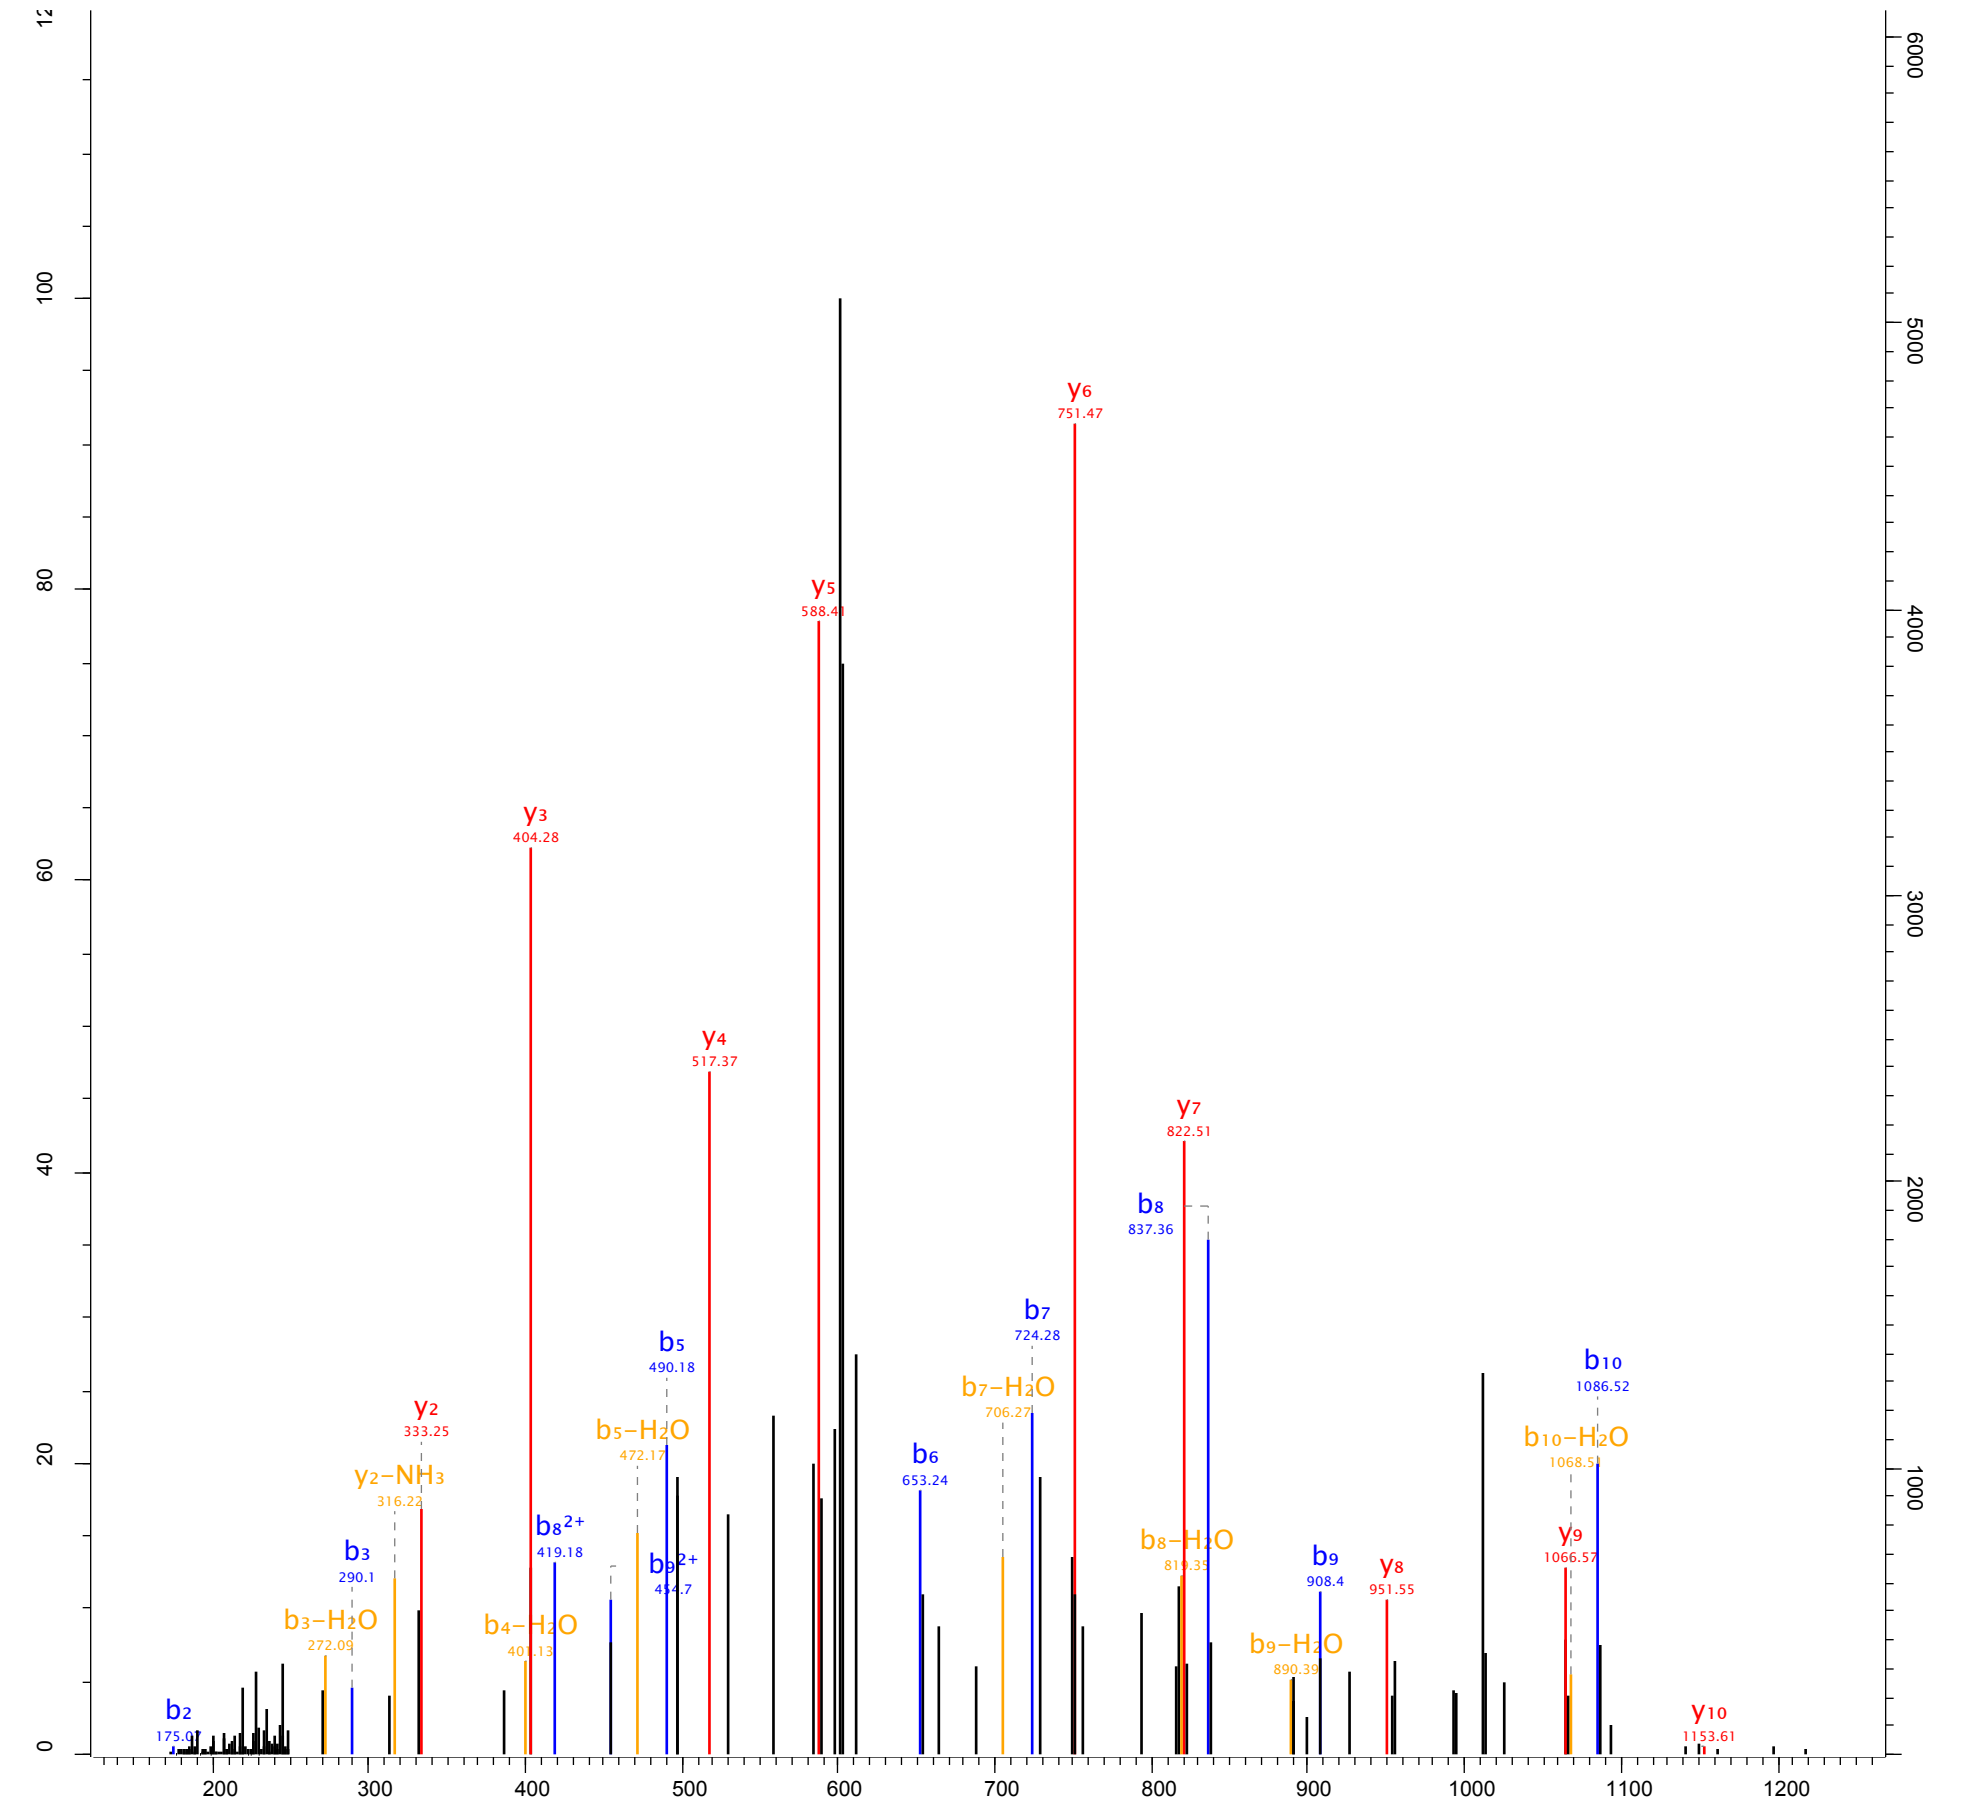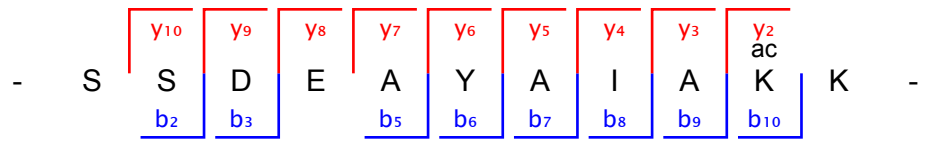



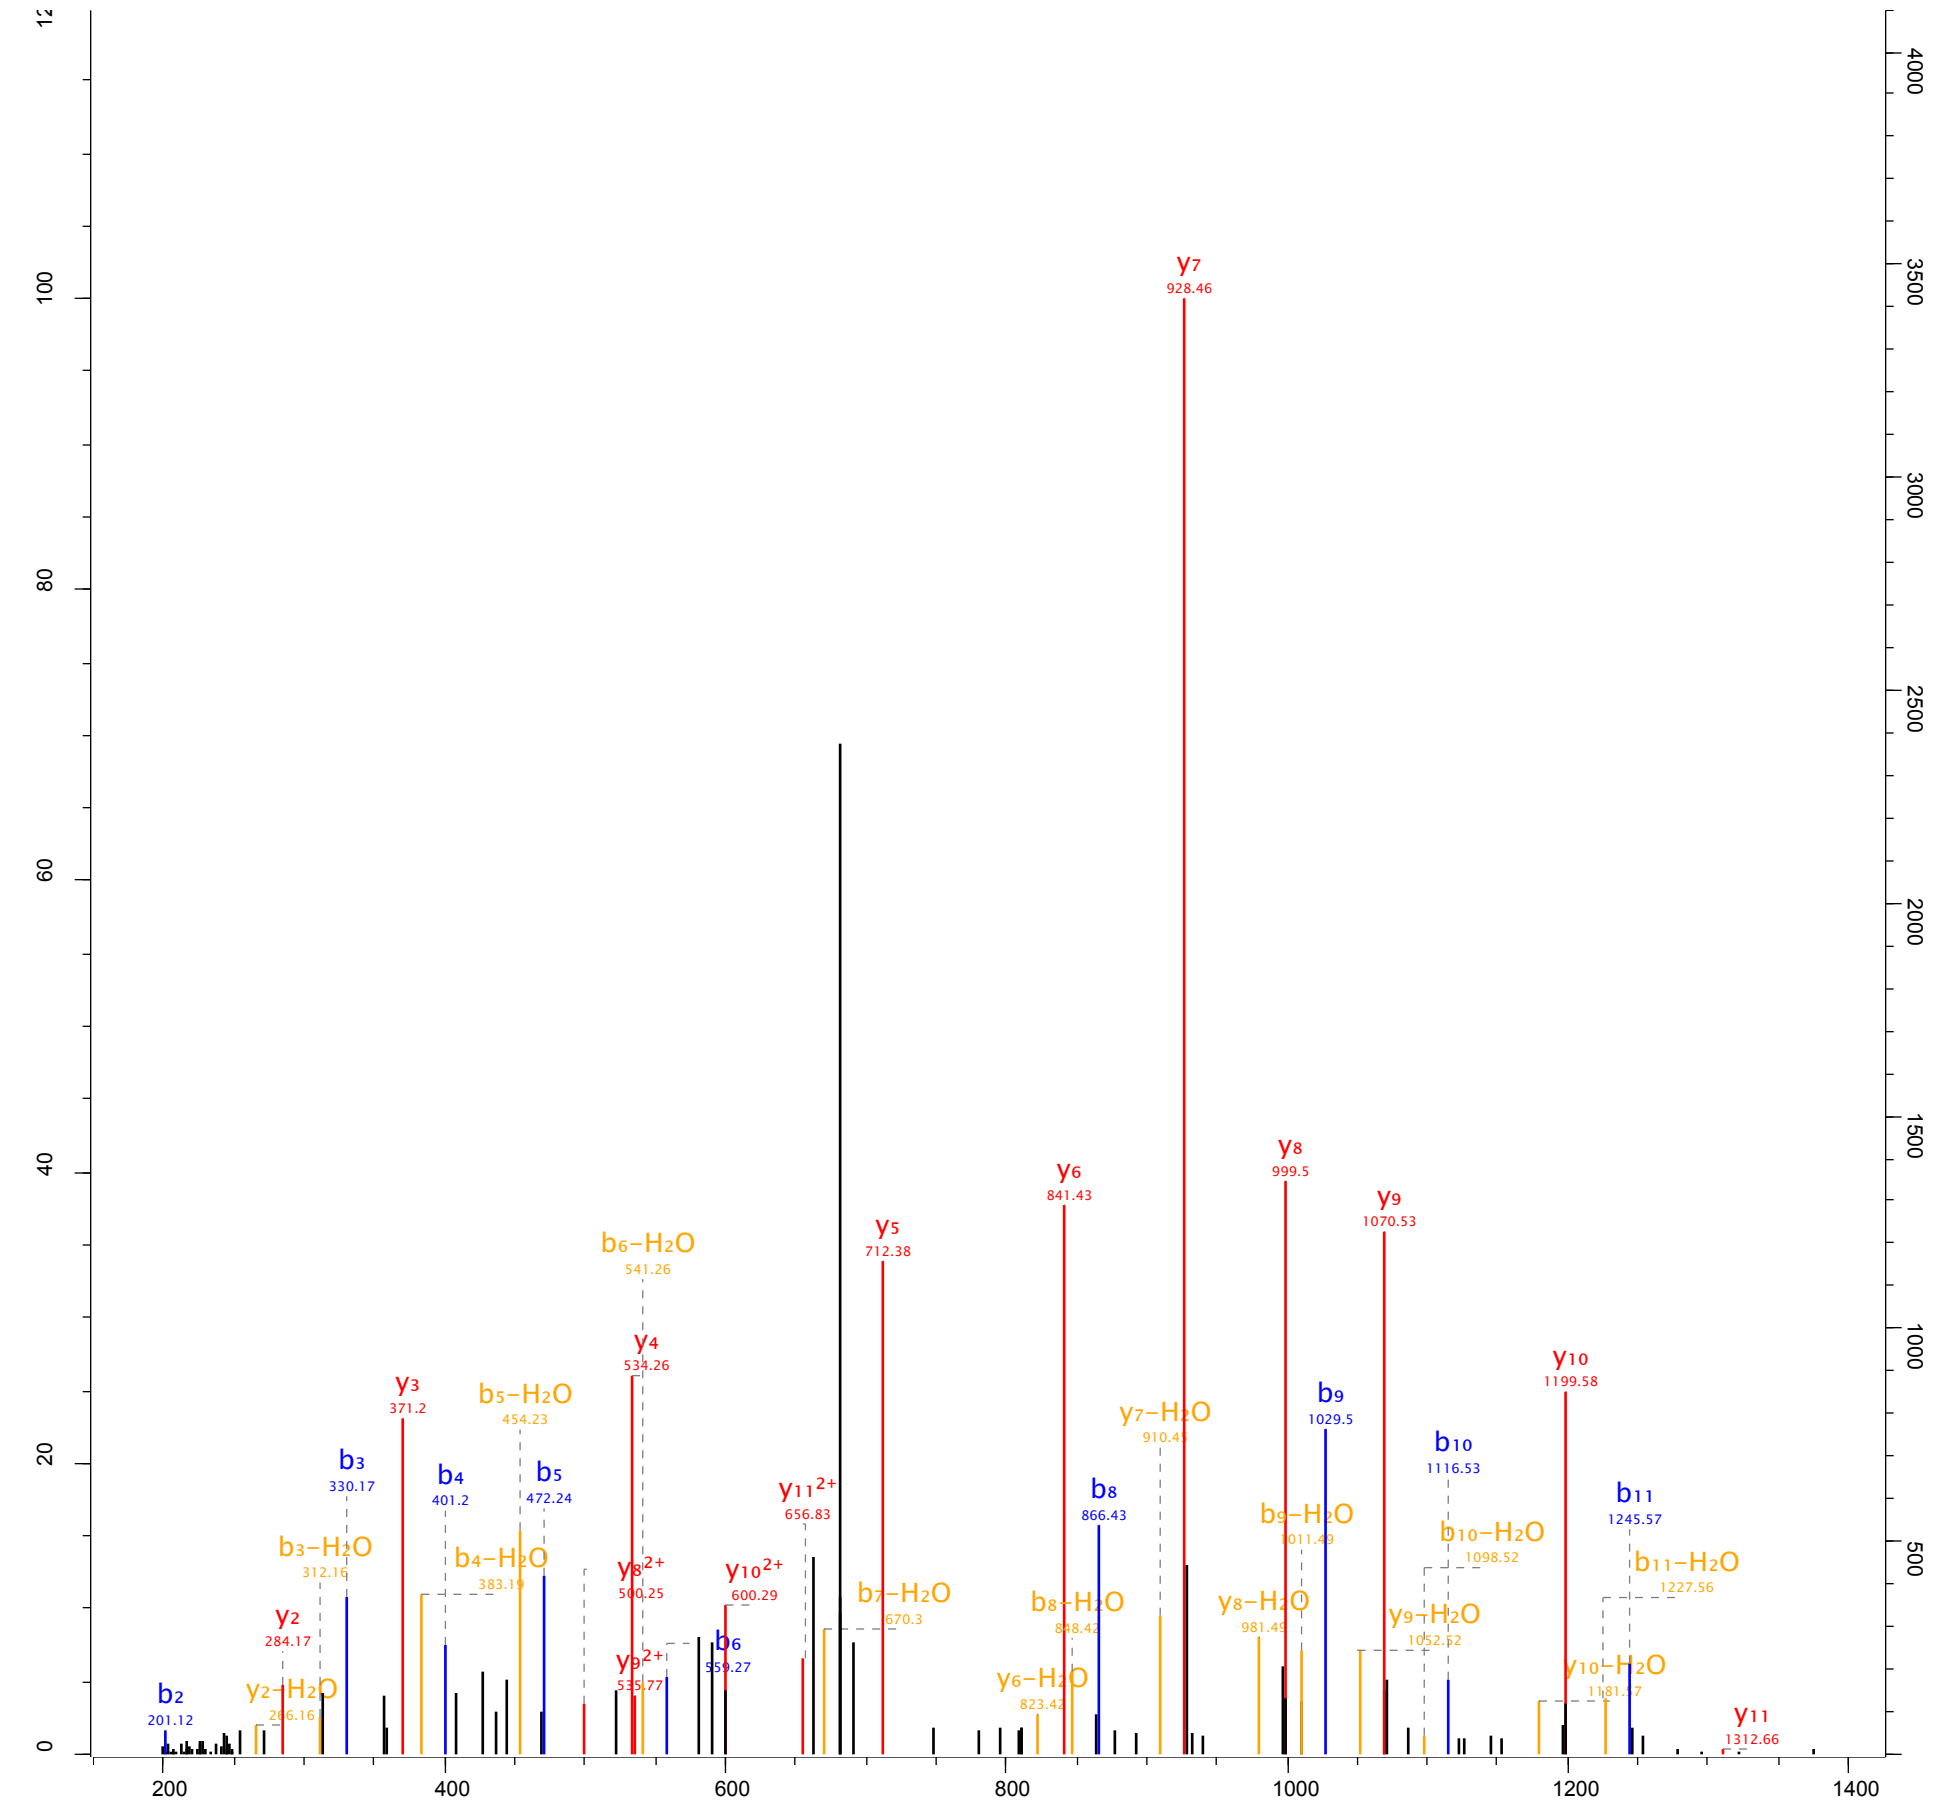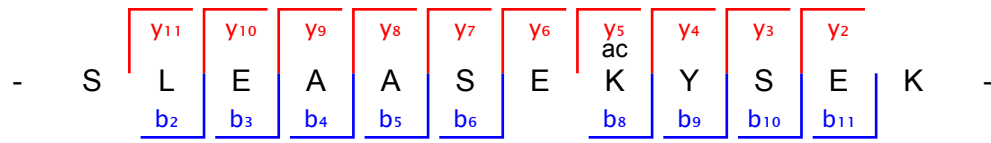

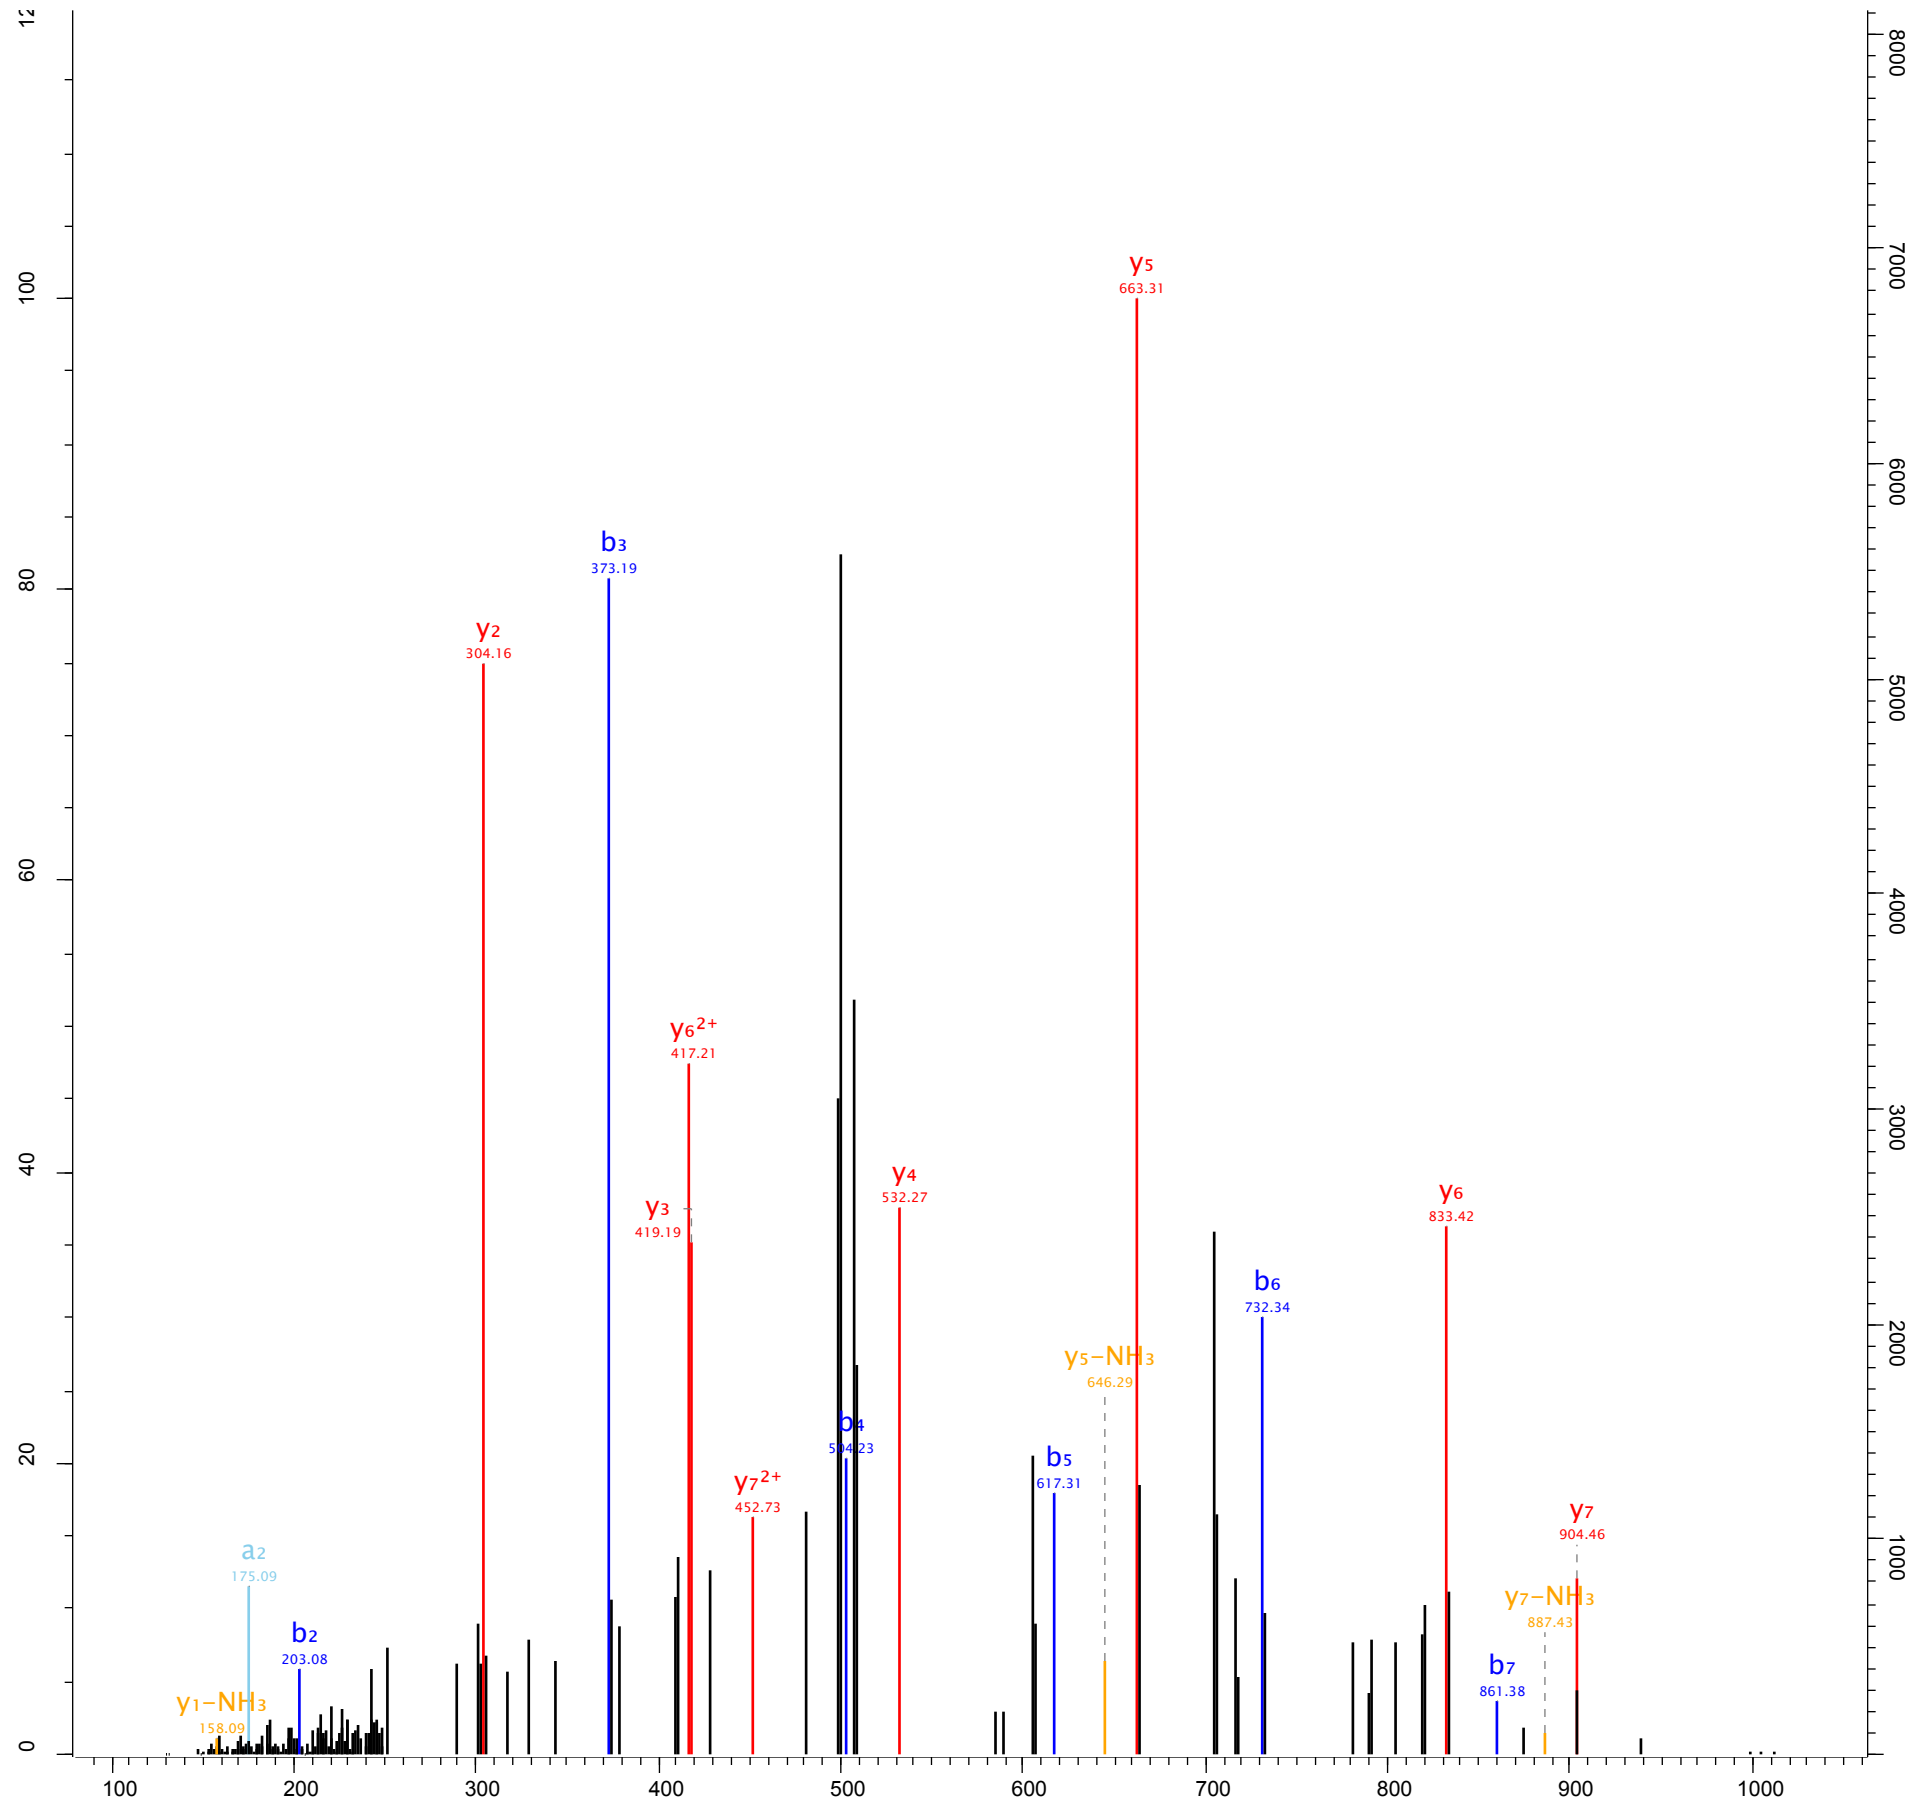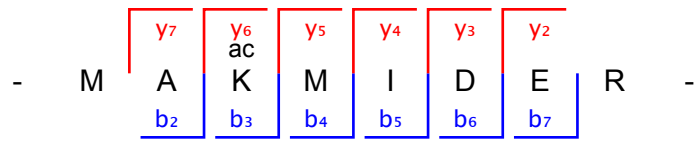

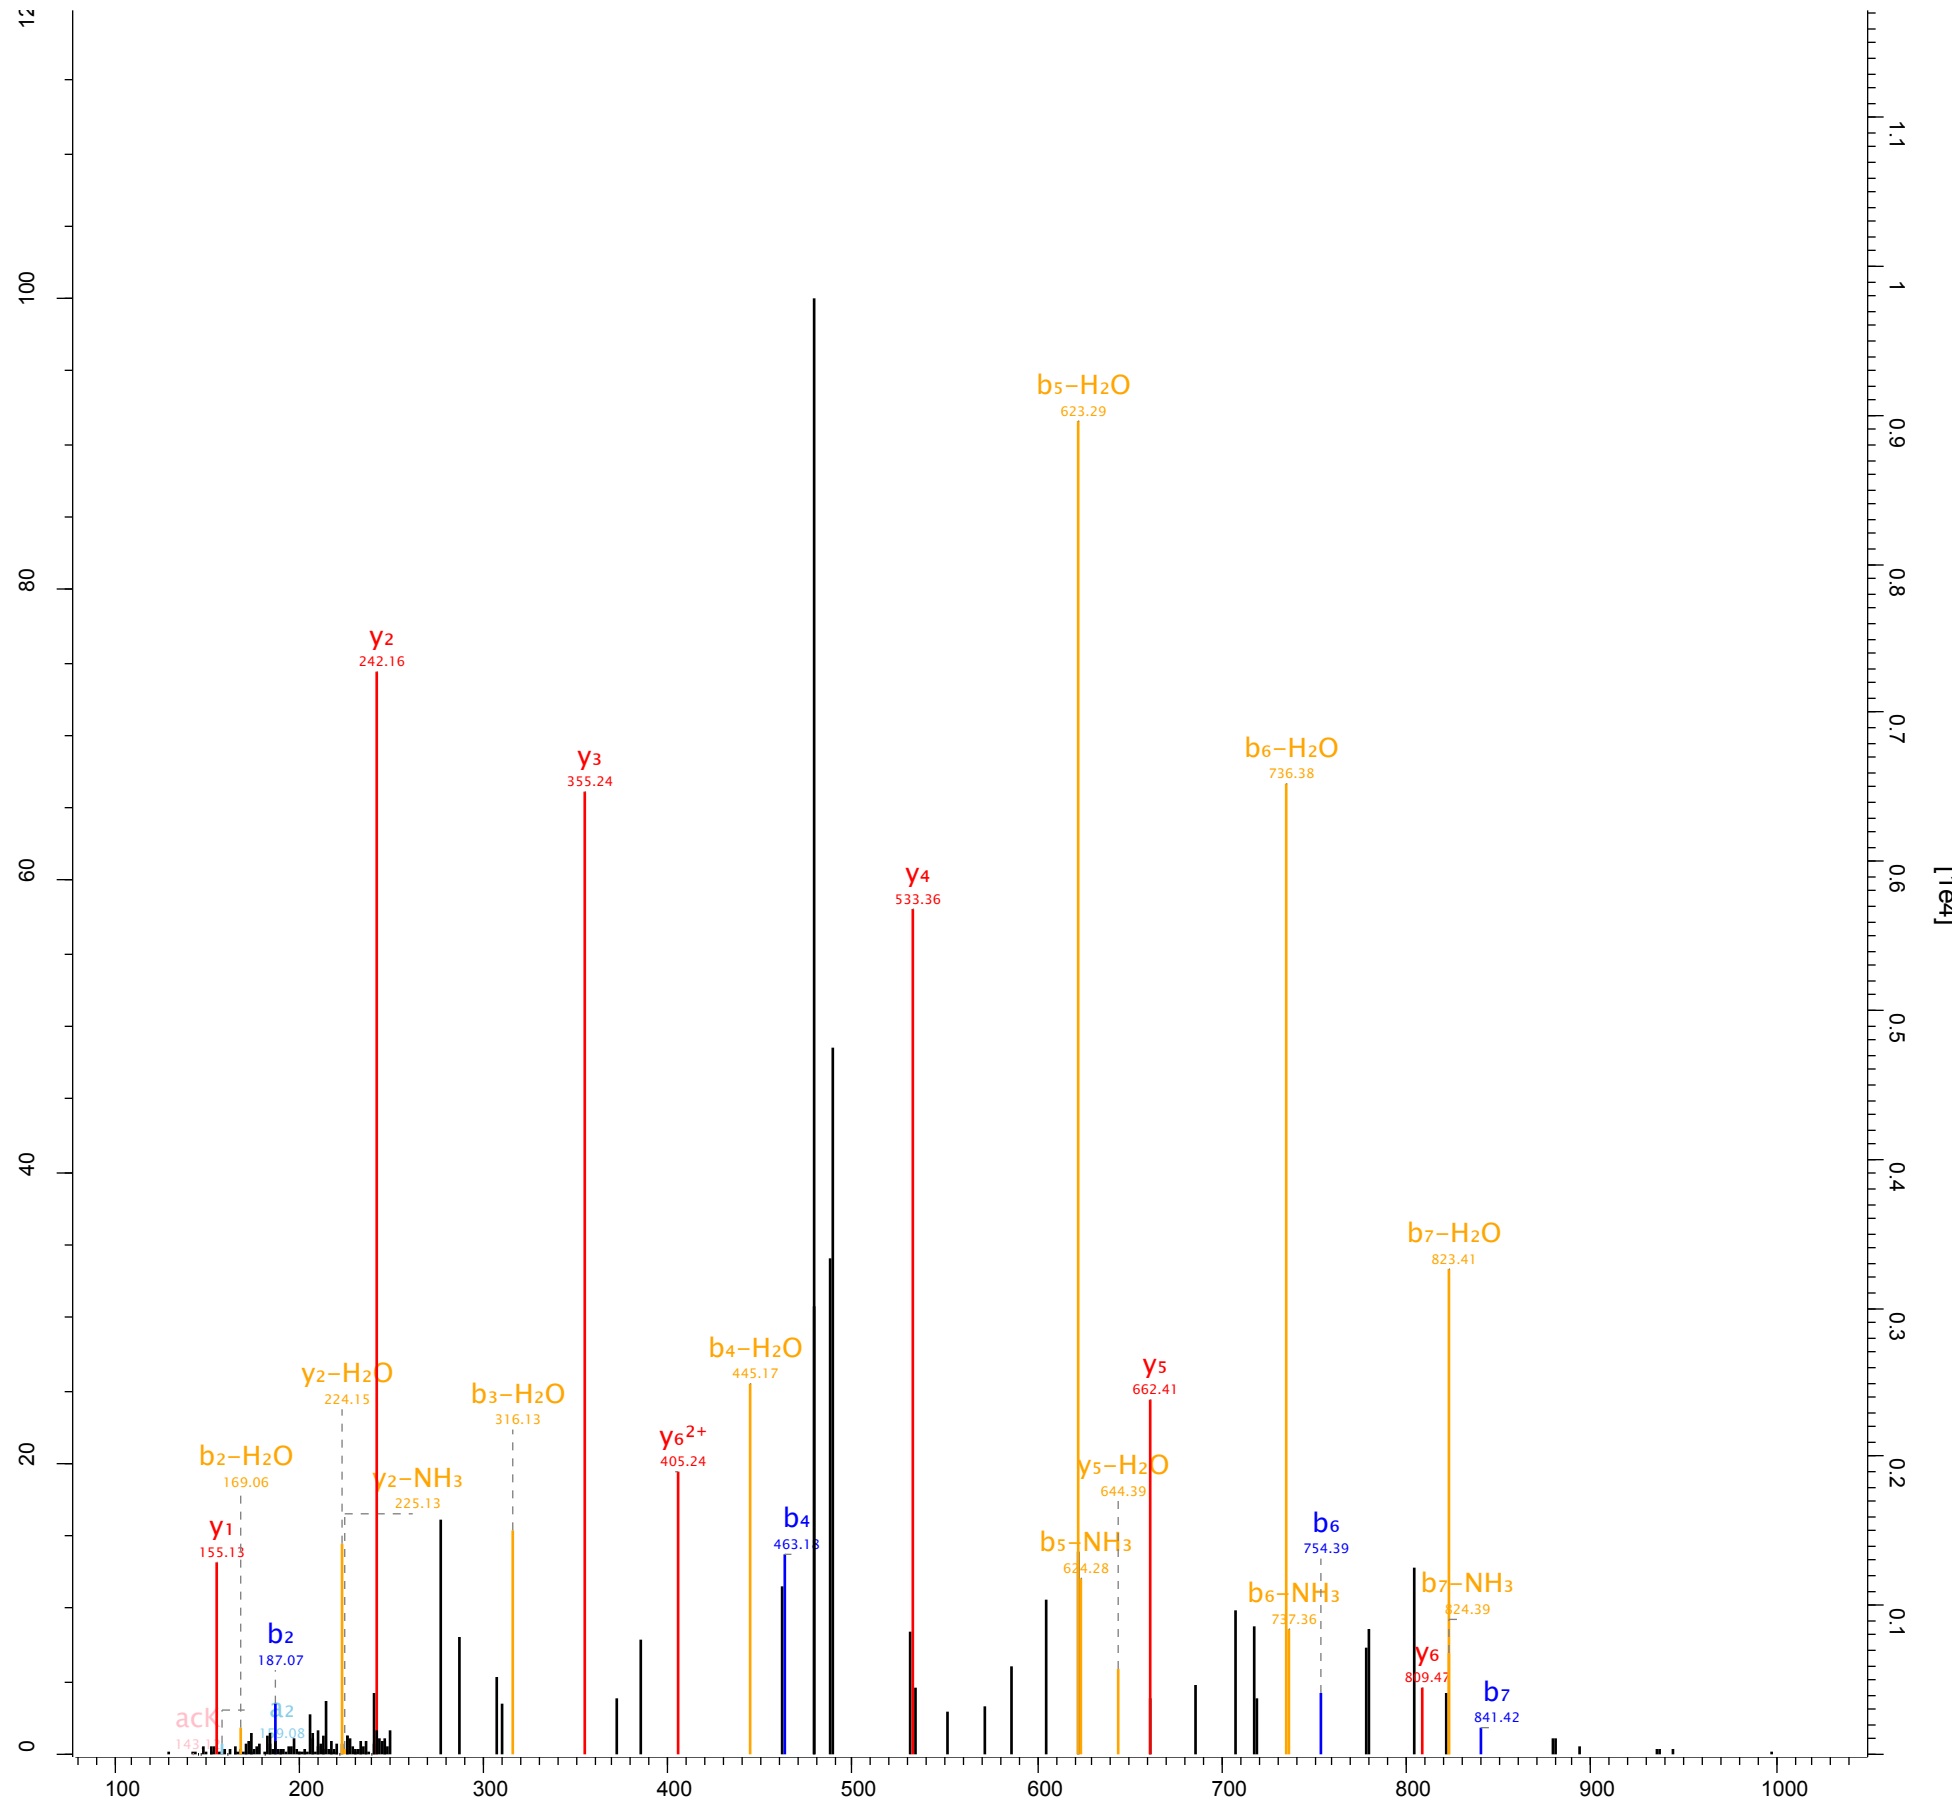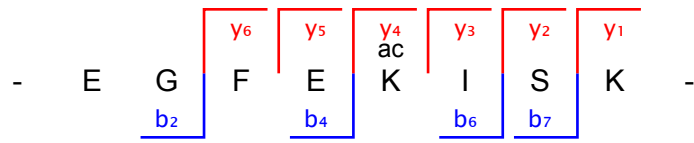

Raw file 062513\_SCW\_II\_53\_5\_Vargas\_Enriched Scan 15649 Method ITMS; CID Score 248.21 m/z 675.35 Gene names Gm10250;Atp5h

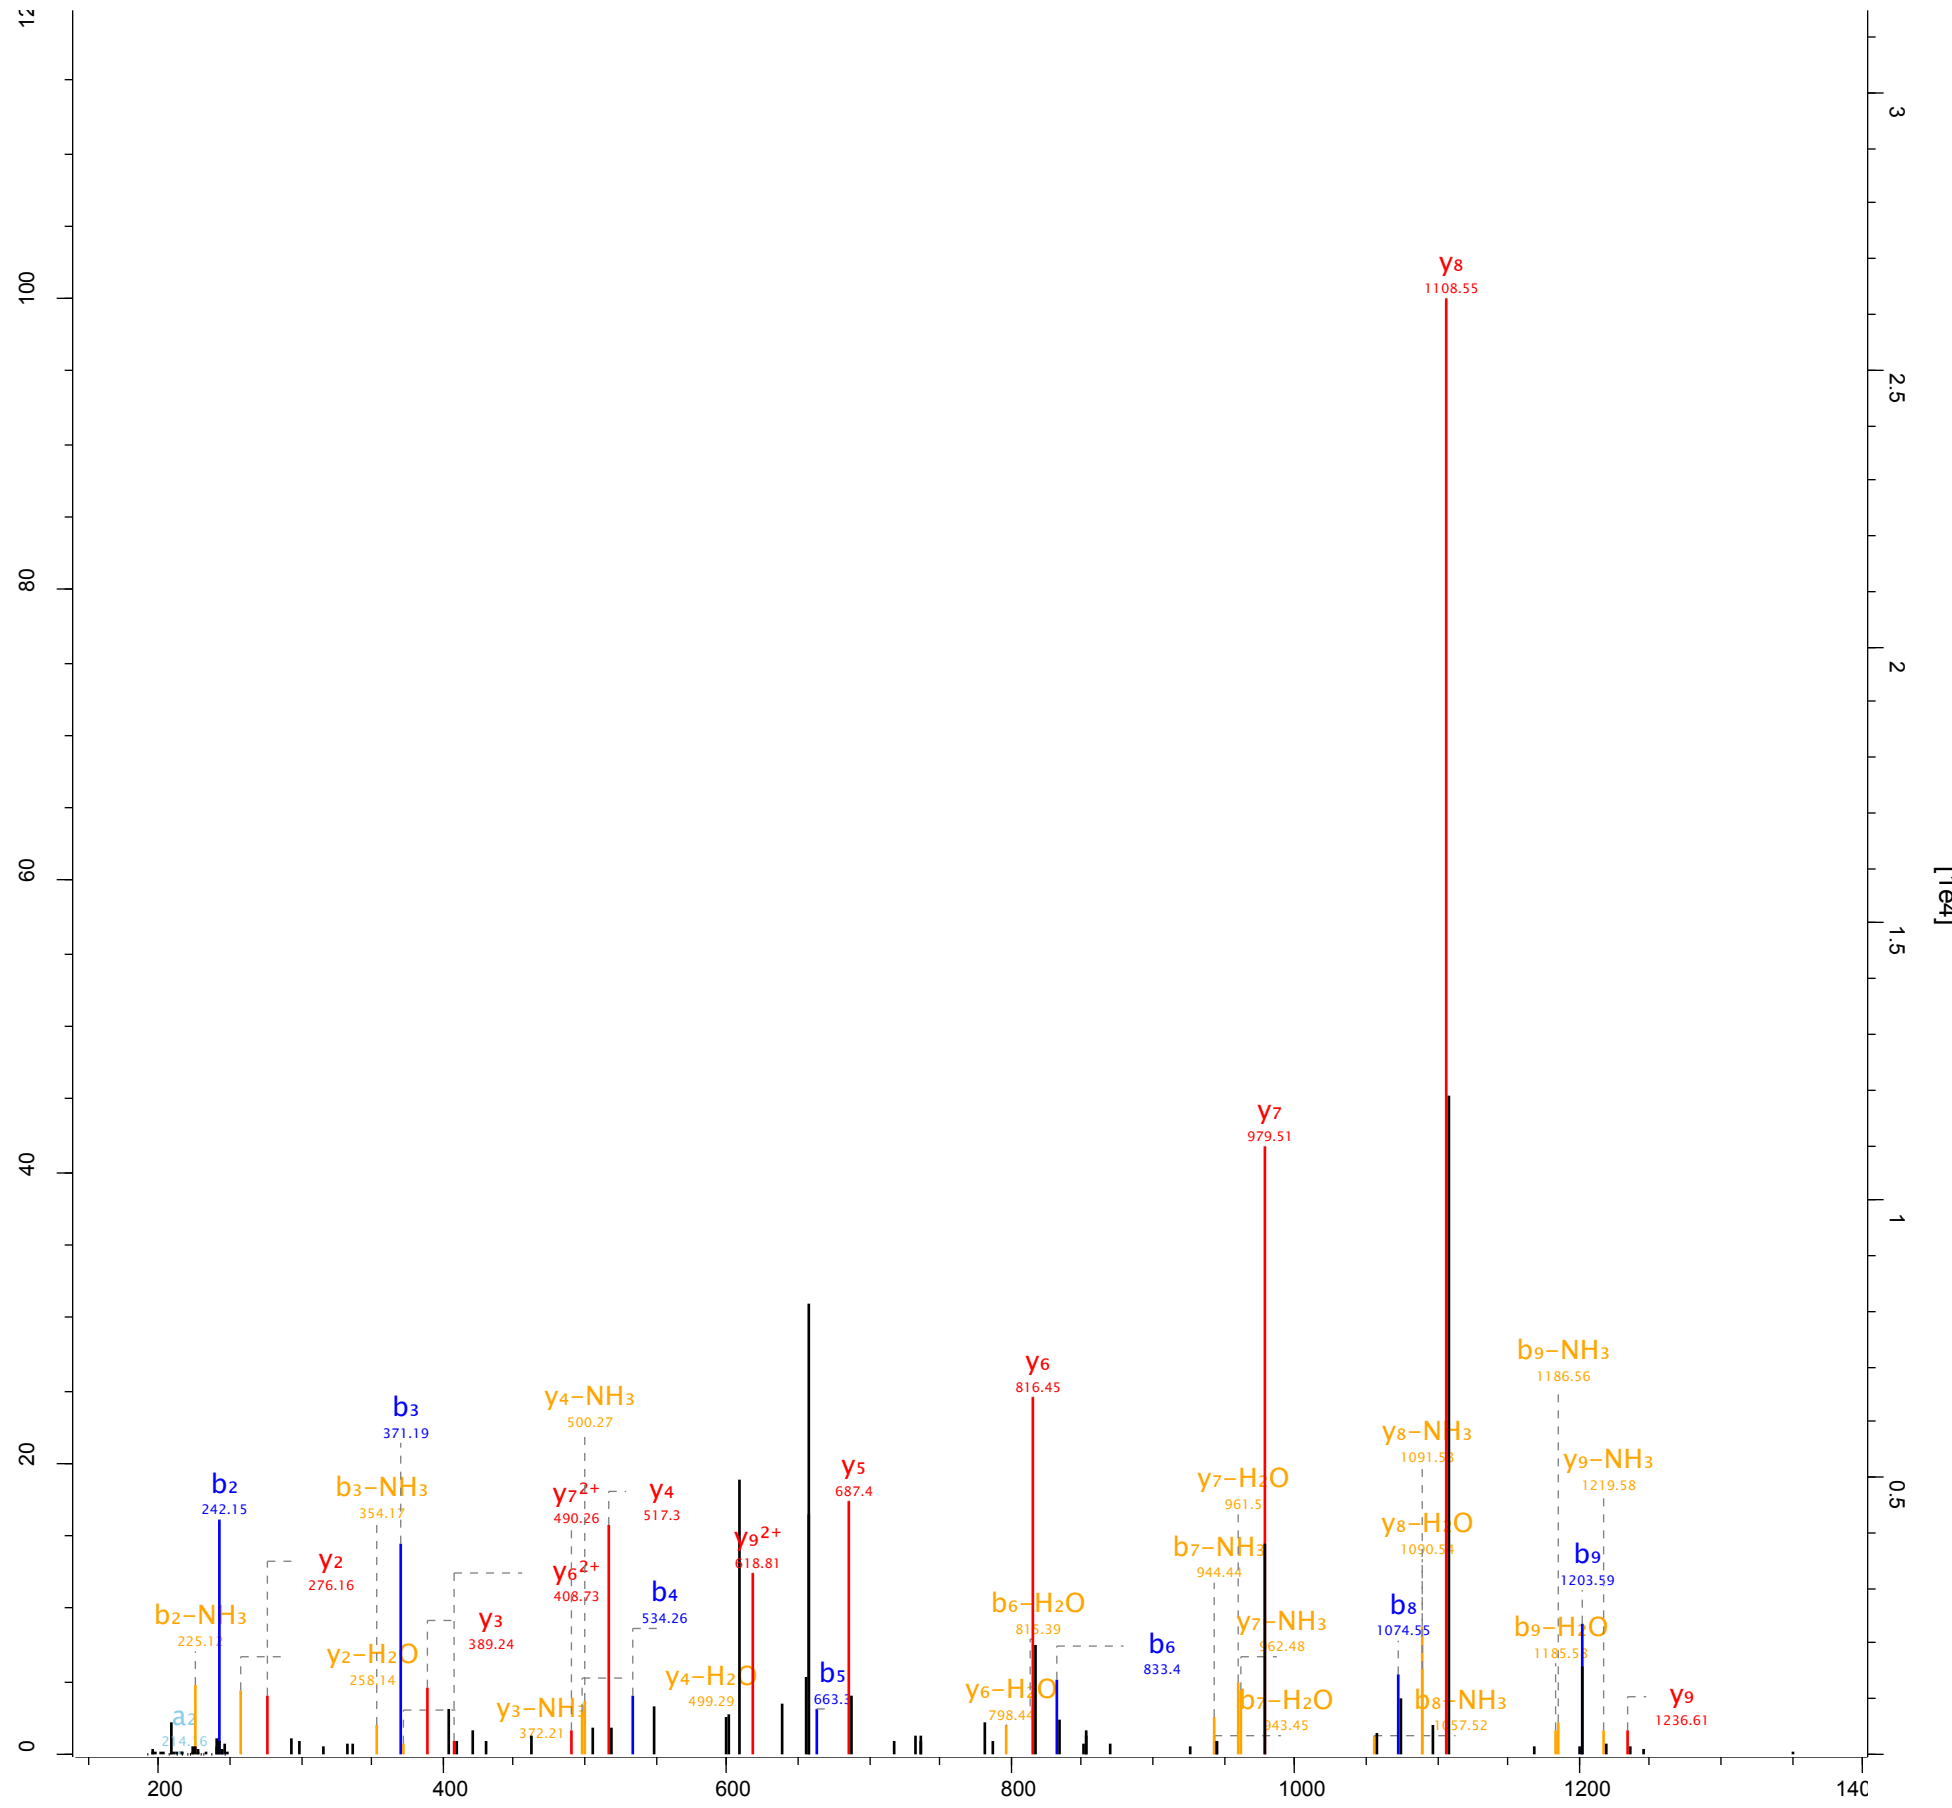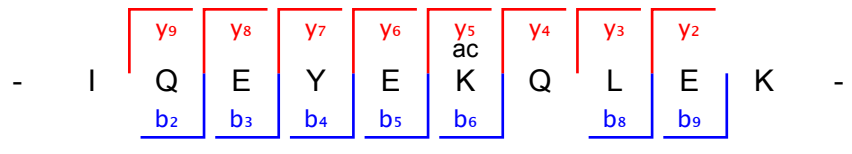

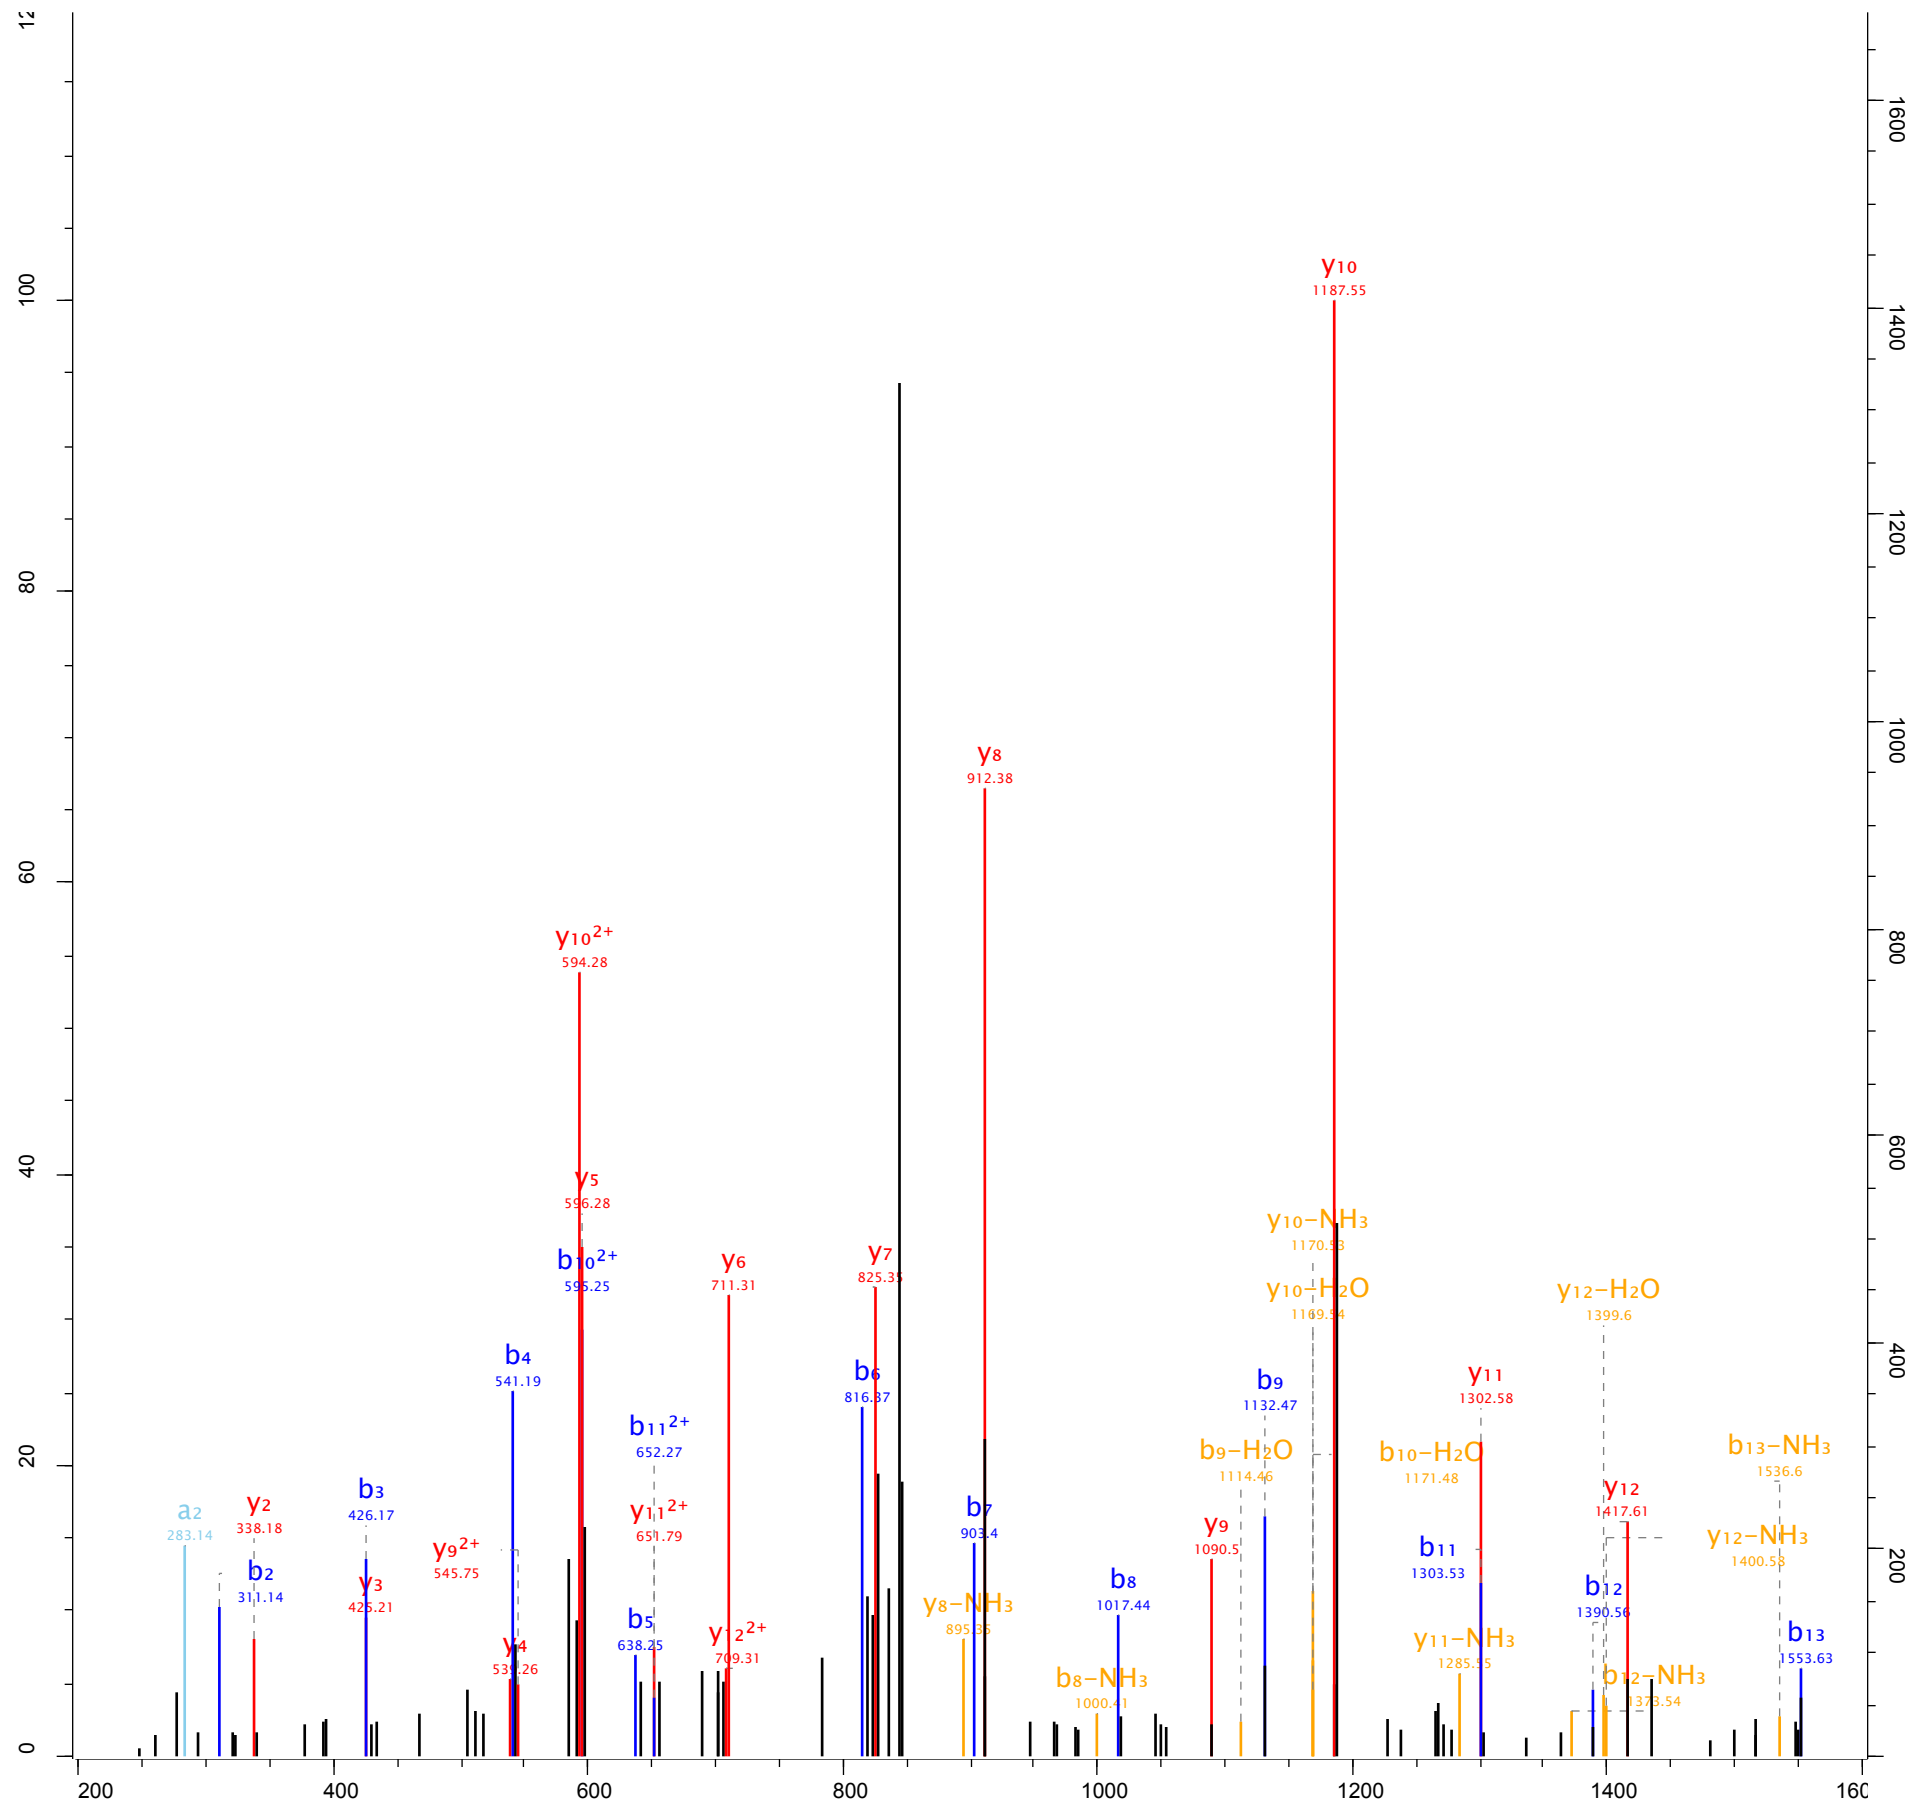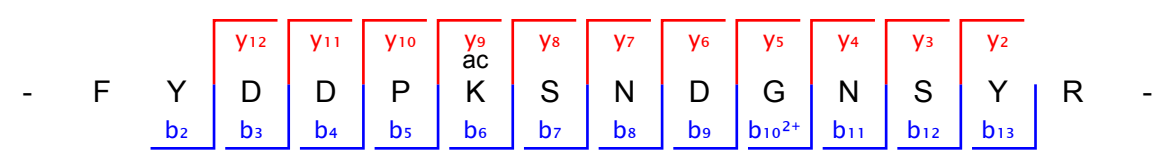

062513\_SCW\_II\_53\_5\_Vargas\_Enriched

16139

ITMS; CID

140.14

704.36

Adsl

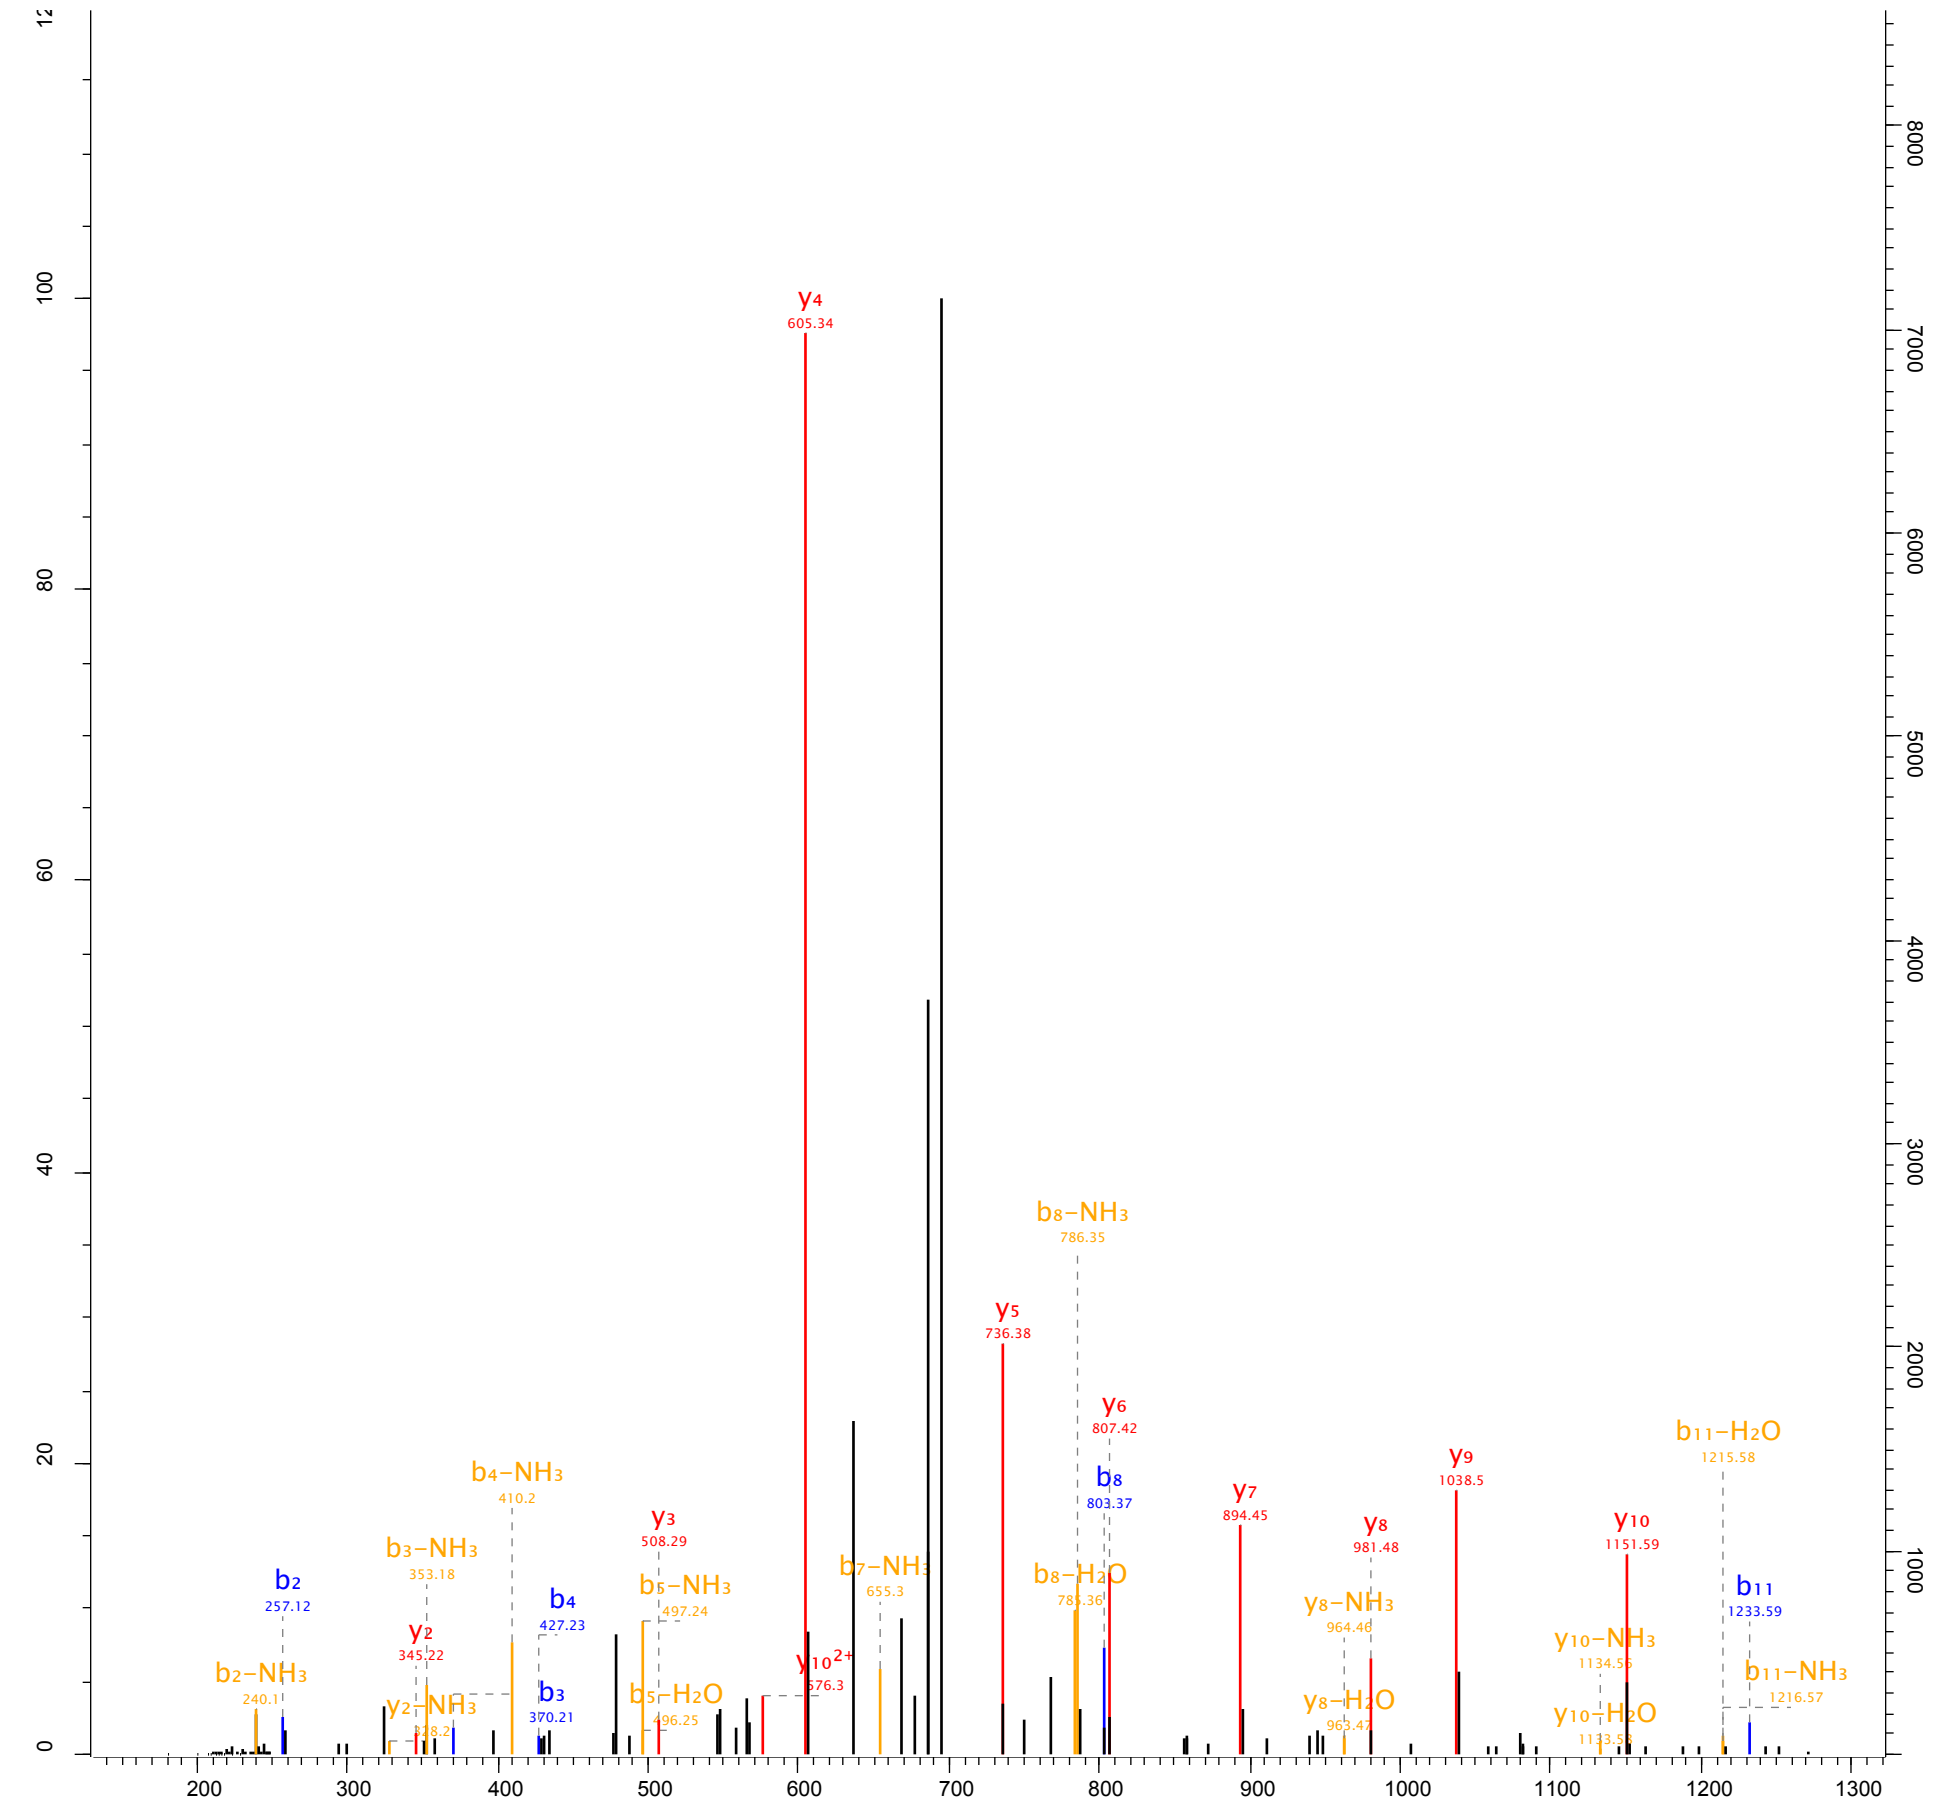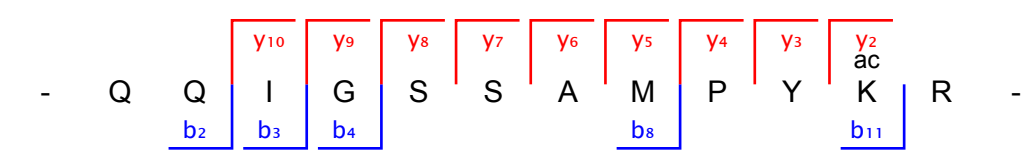

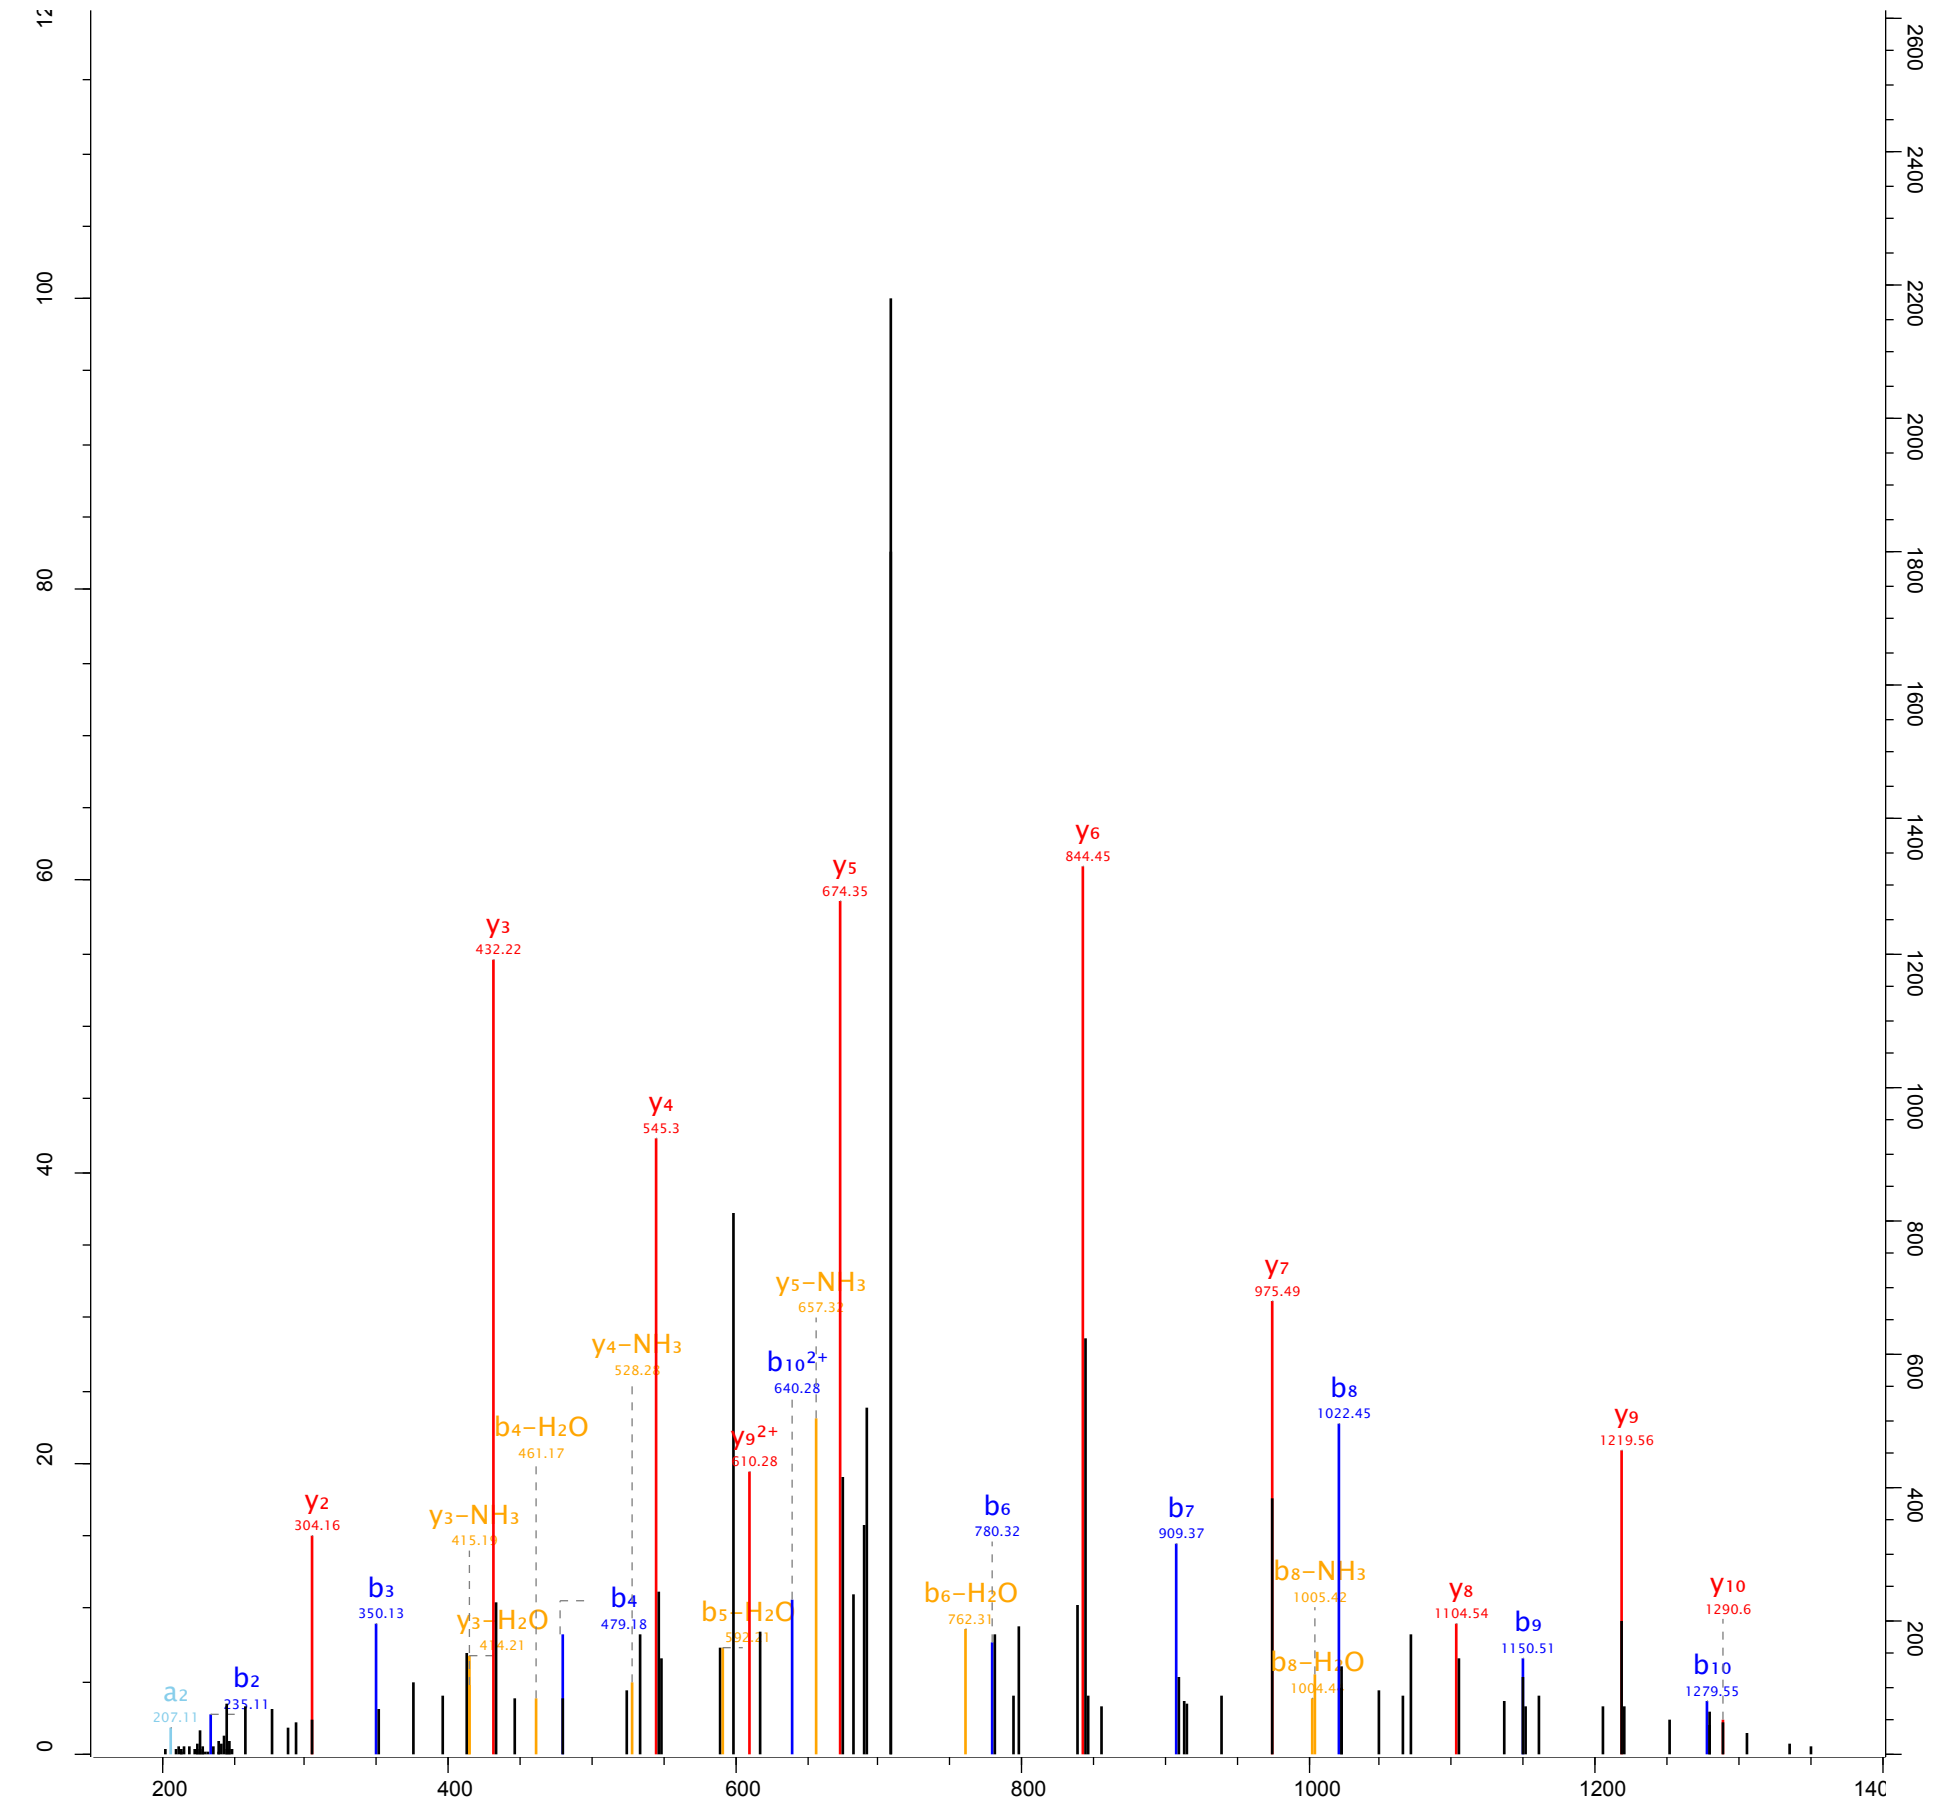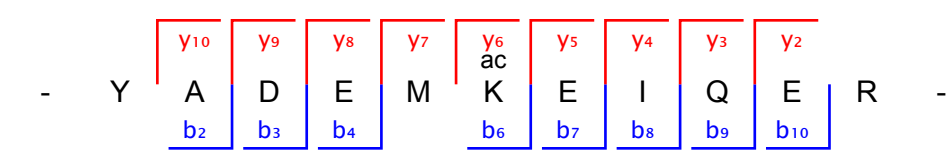

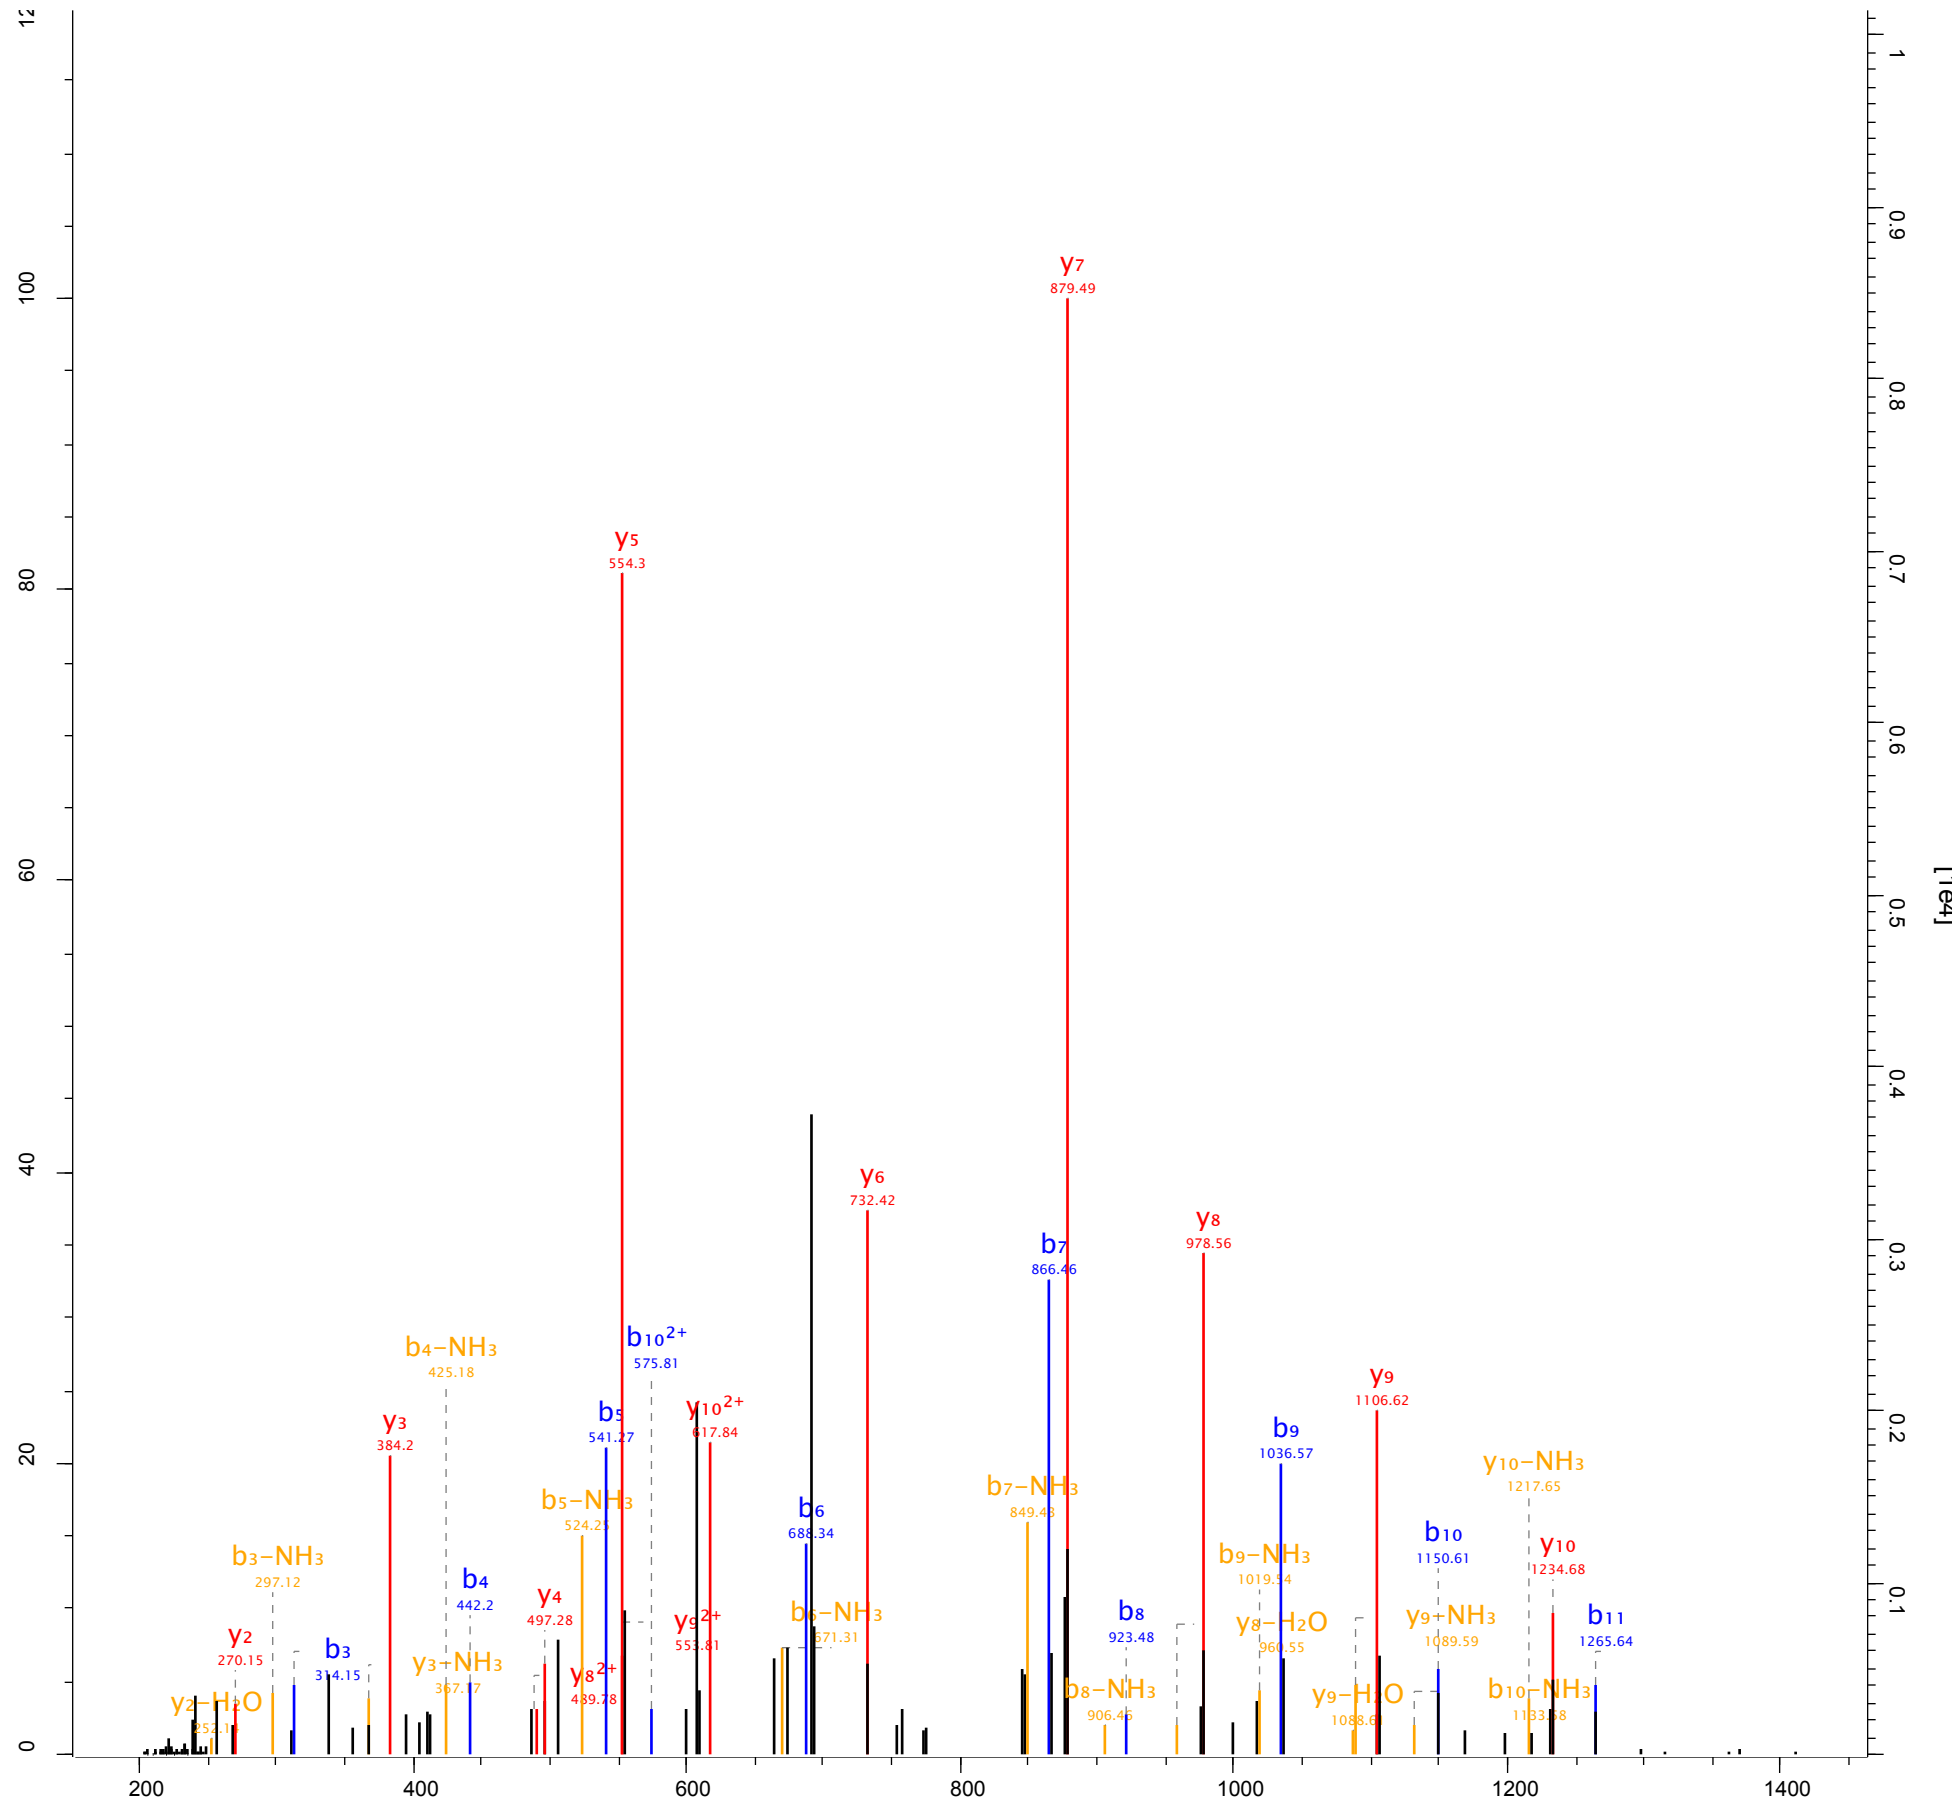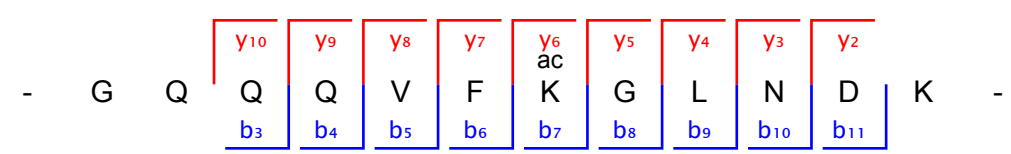



Raw file  
062513\_SCW\_II\_53\_5\_Vargas\_Enriched

Scan 17173 Method ITMS; CID Score 151.26 m/z 665.87 Gene names Ctdp1

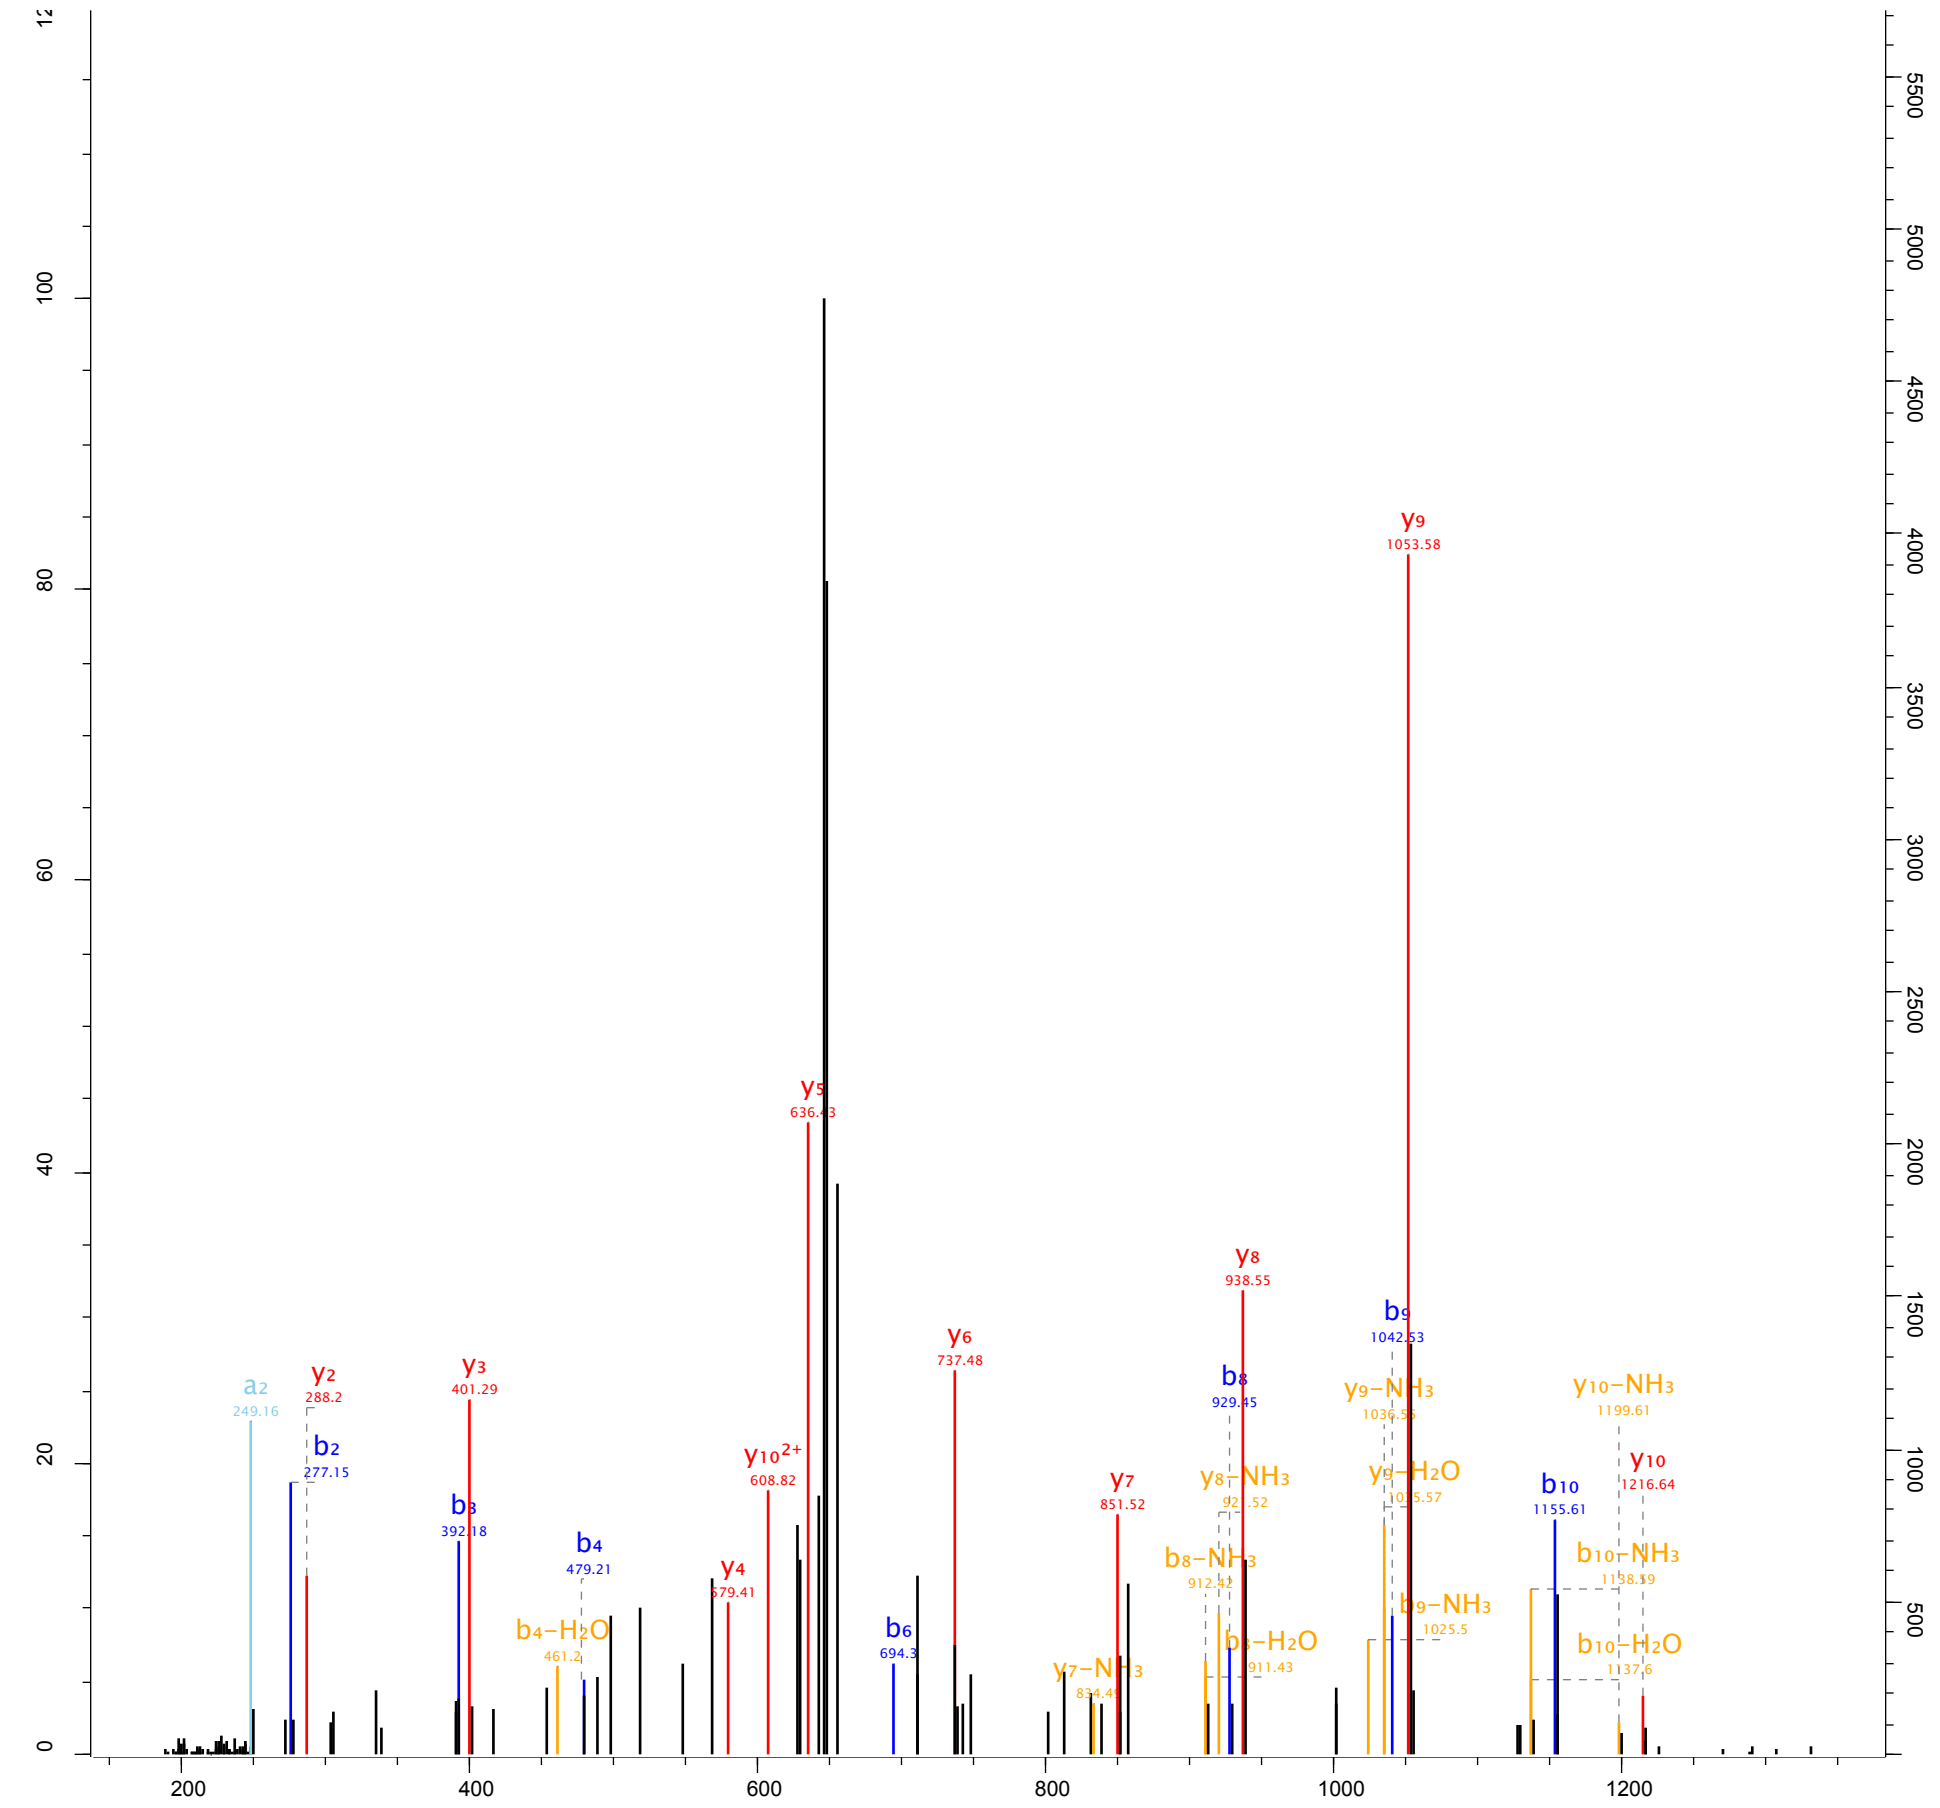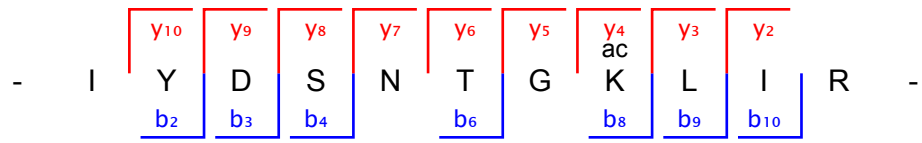

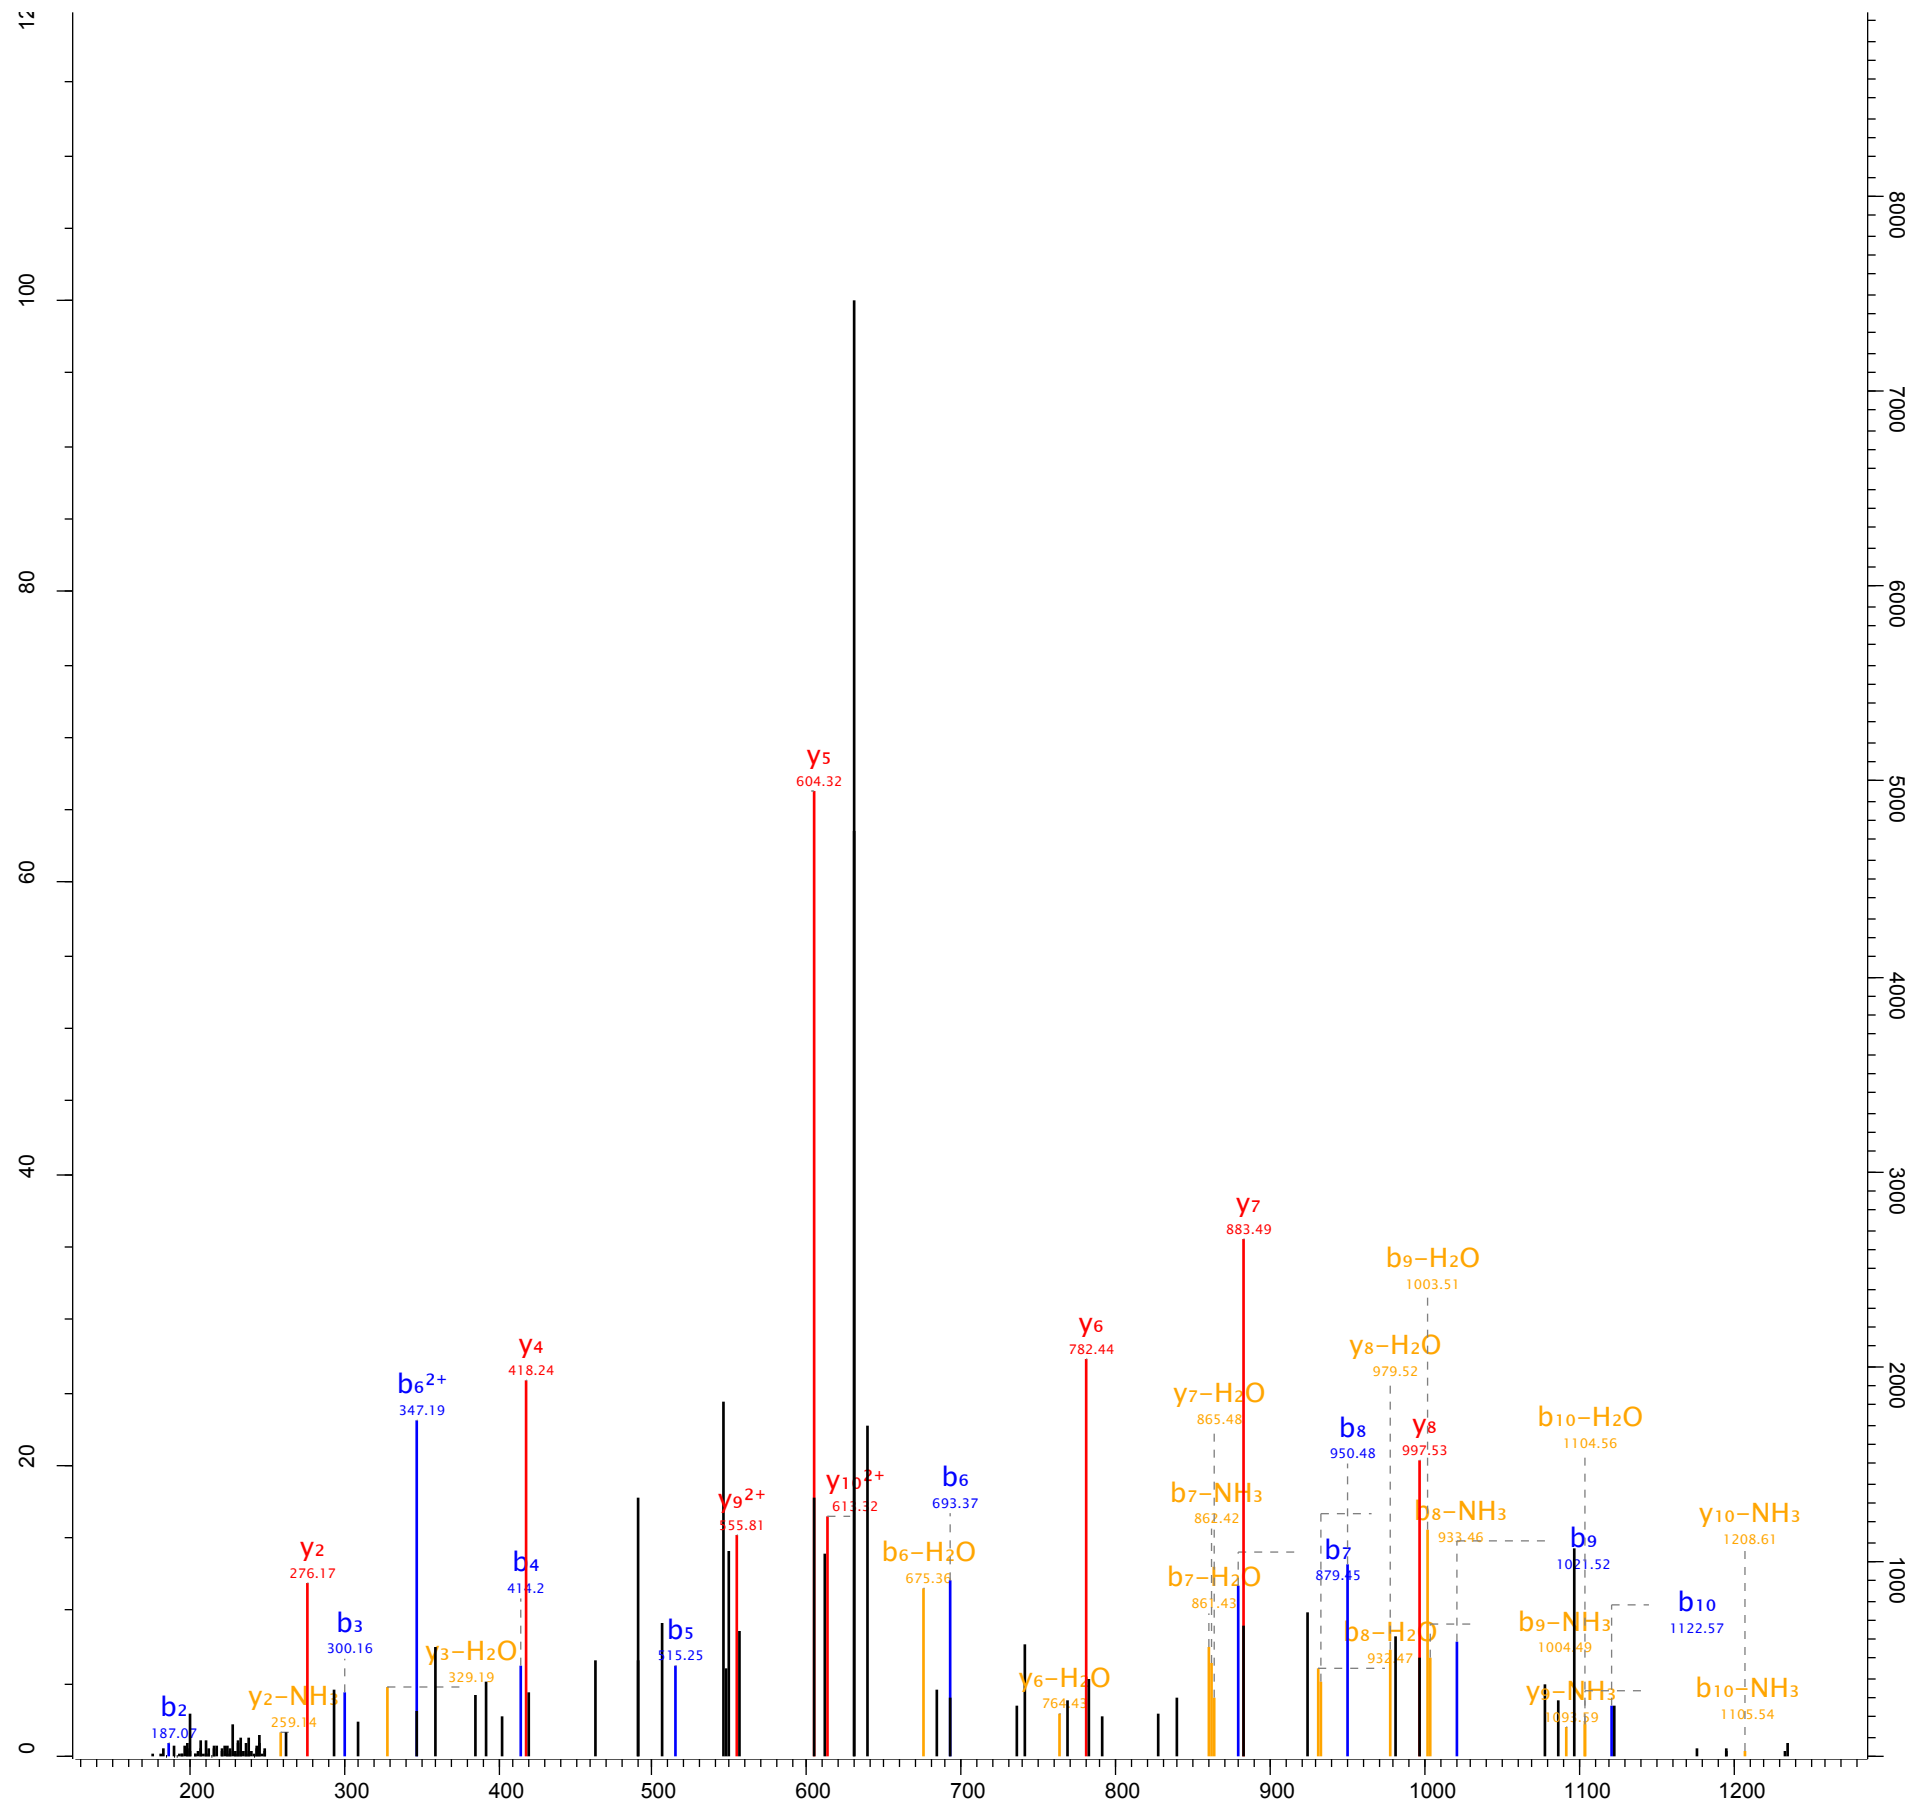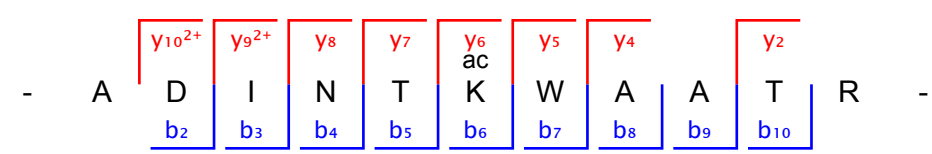

Raw file 062513\_SCW\_II\_53\_5\_Vargas\_Enriched Scan 18317 Method ITMS; CID Score 212.03 m/z 835.9 Gene names Hnrnpa1;Gm7729

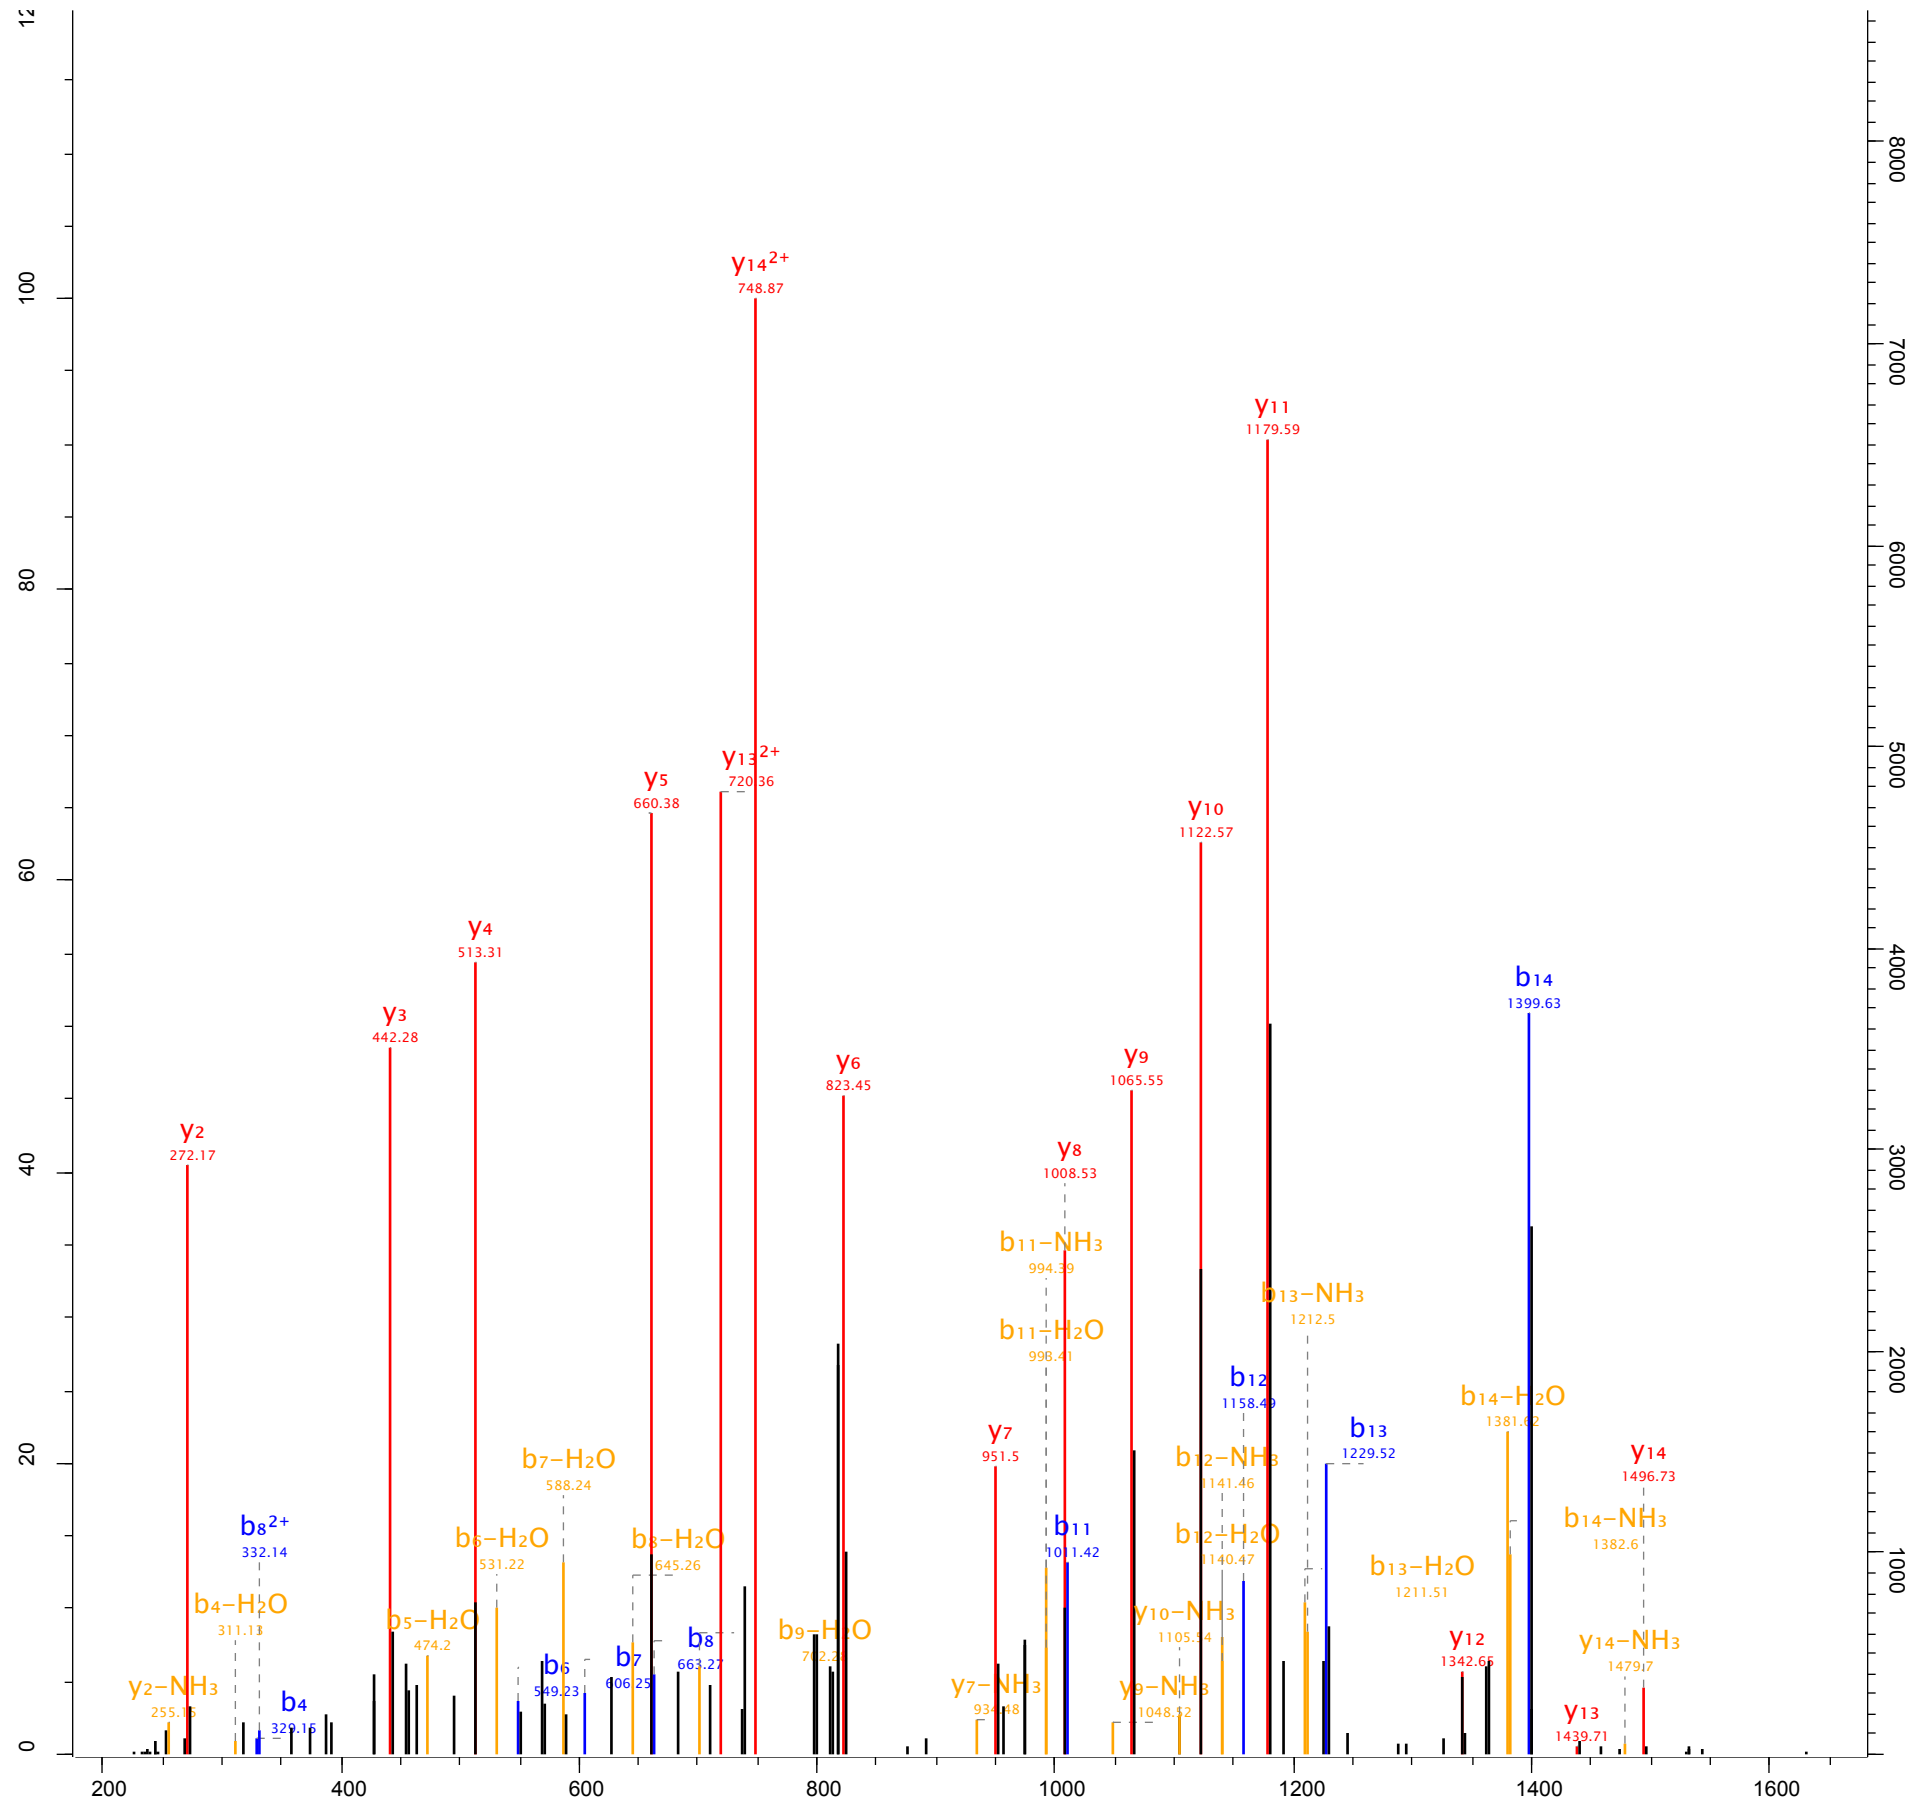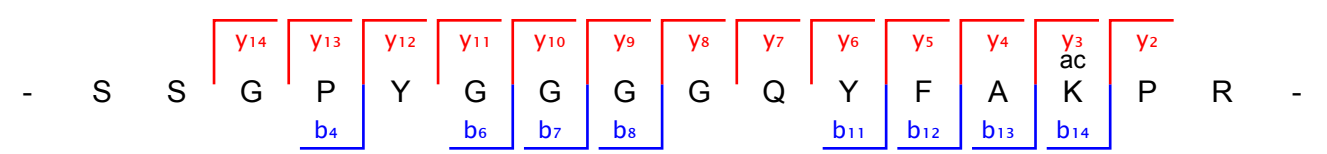

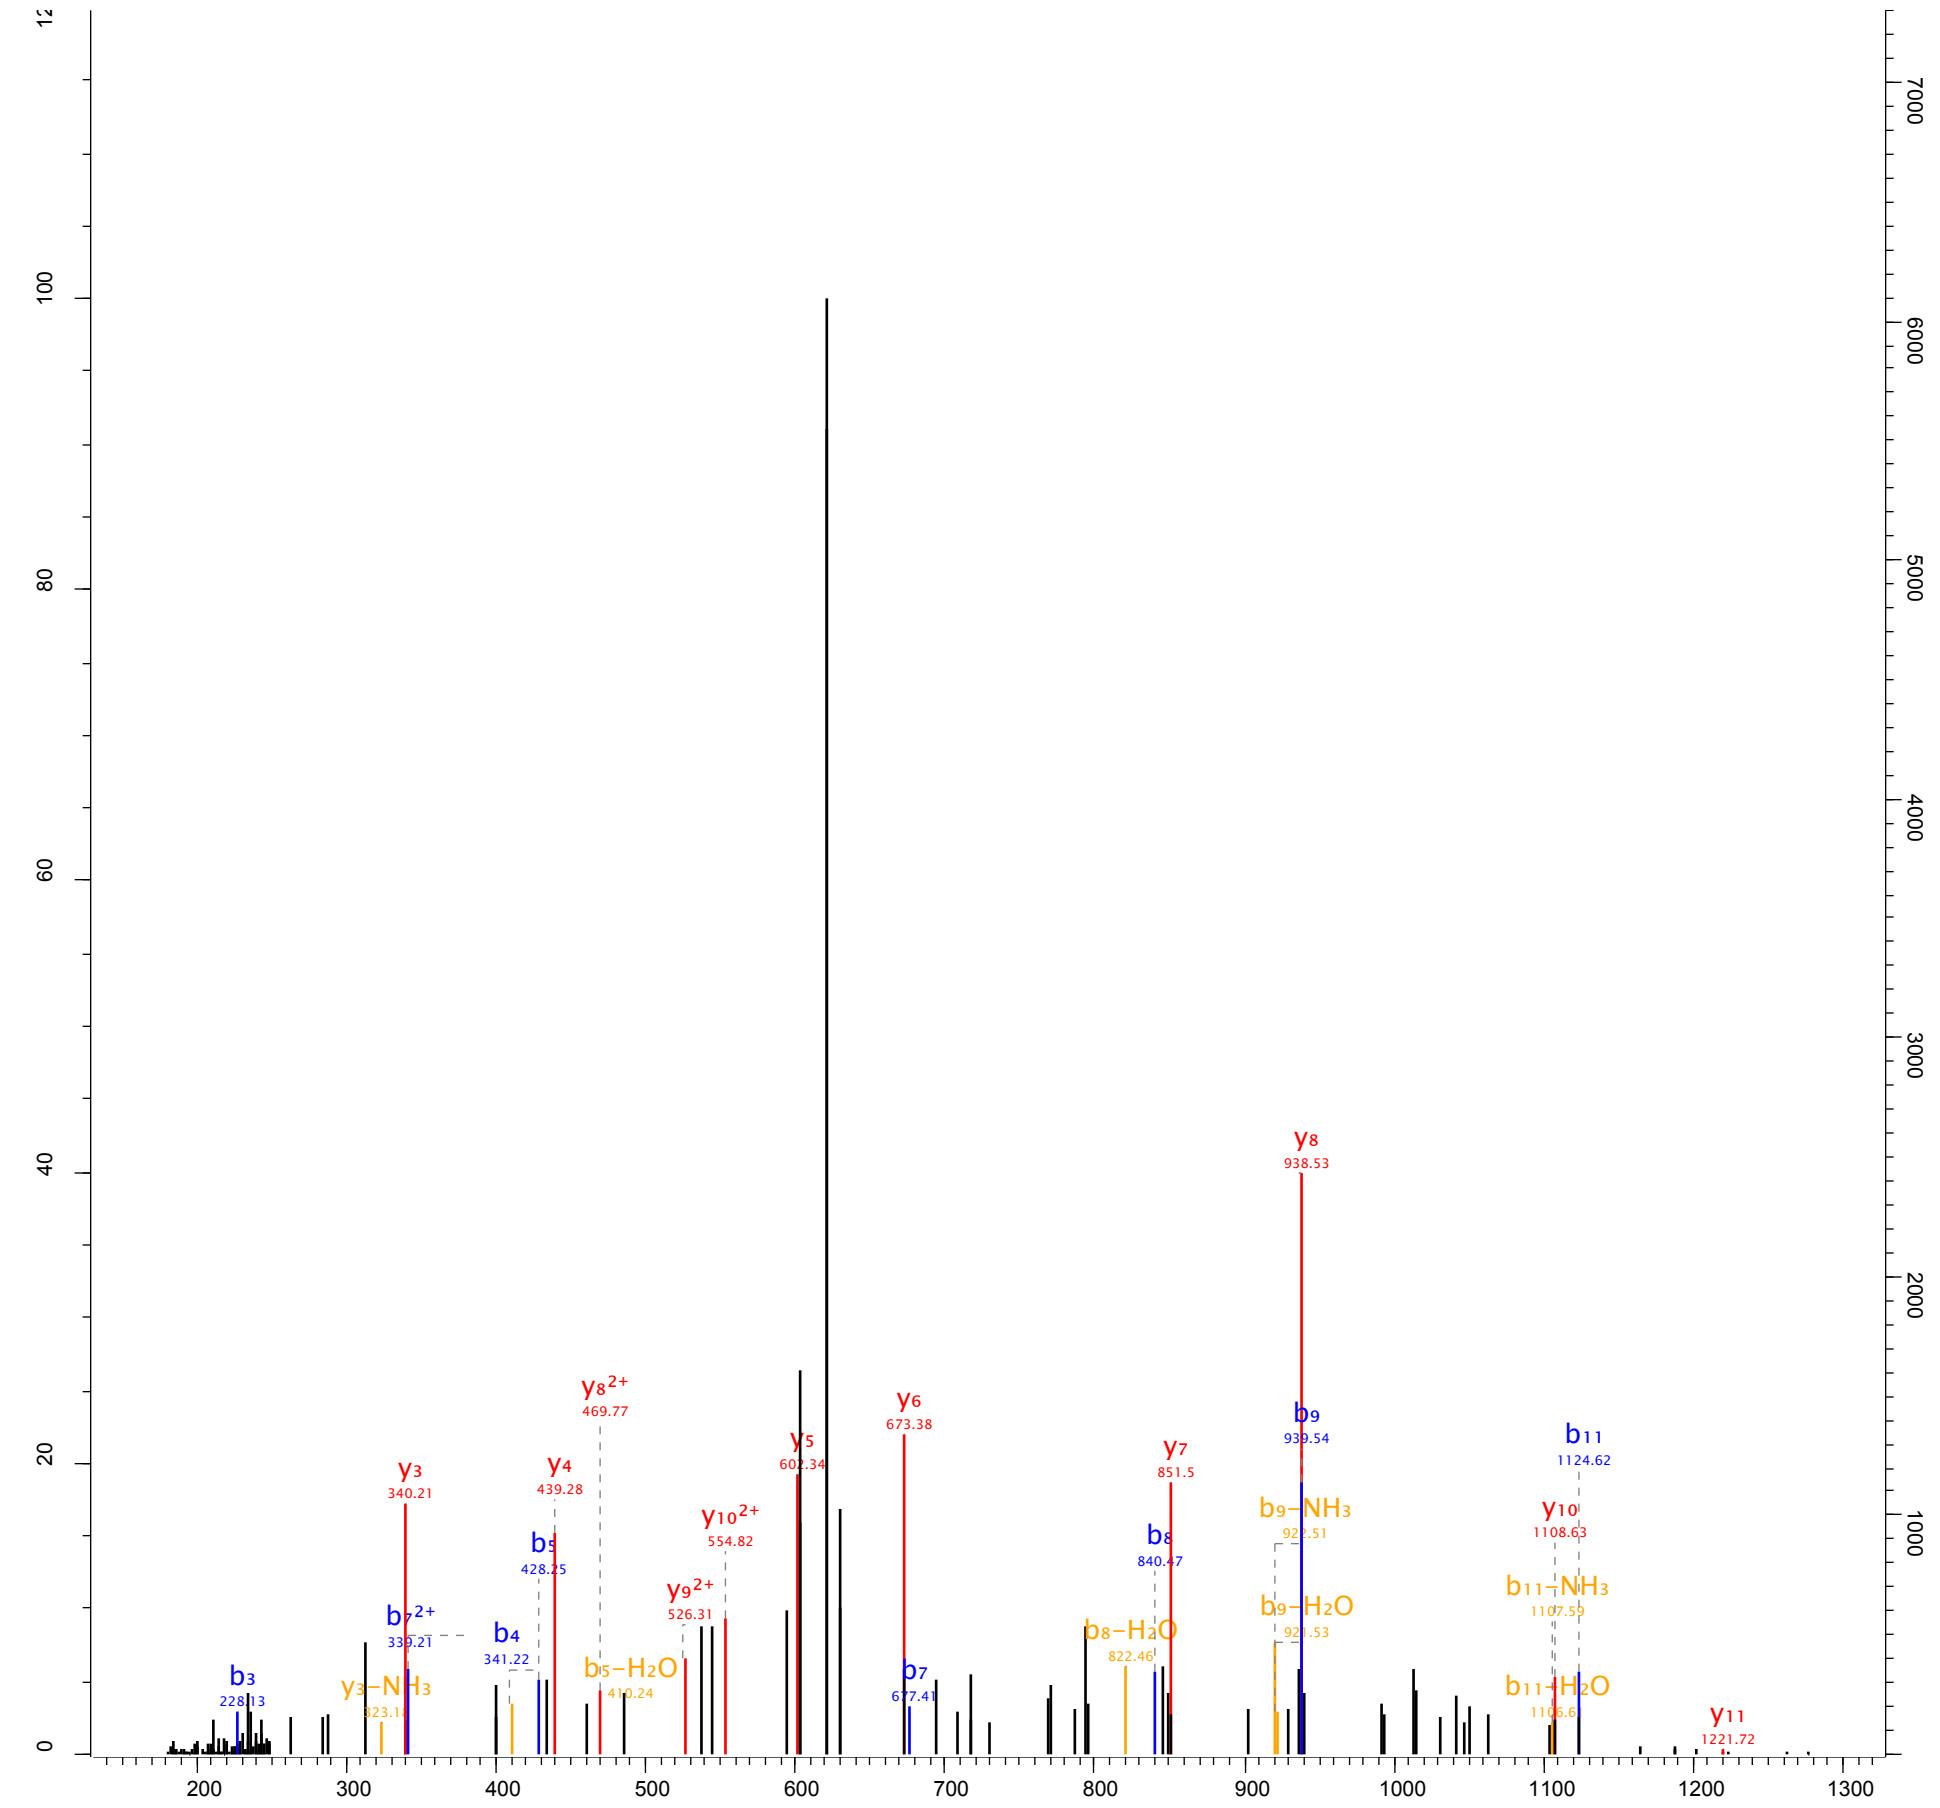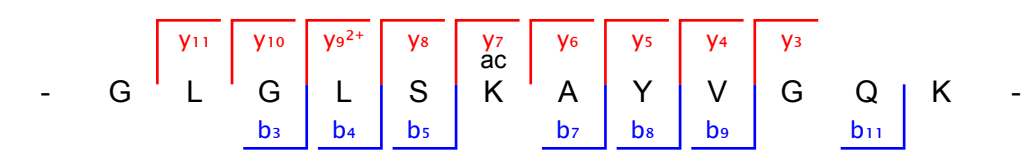

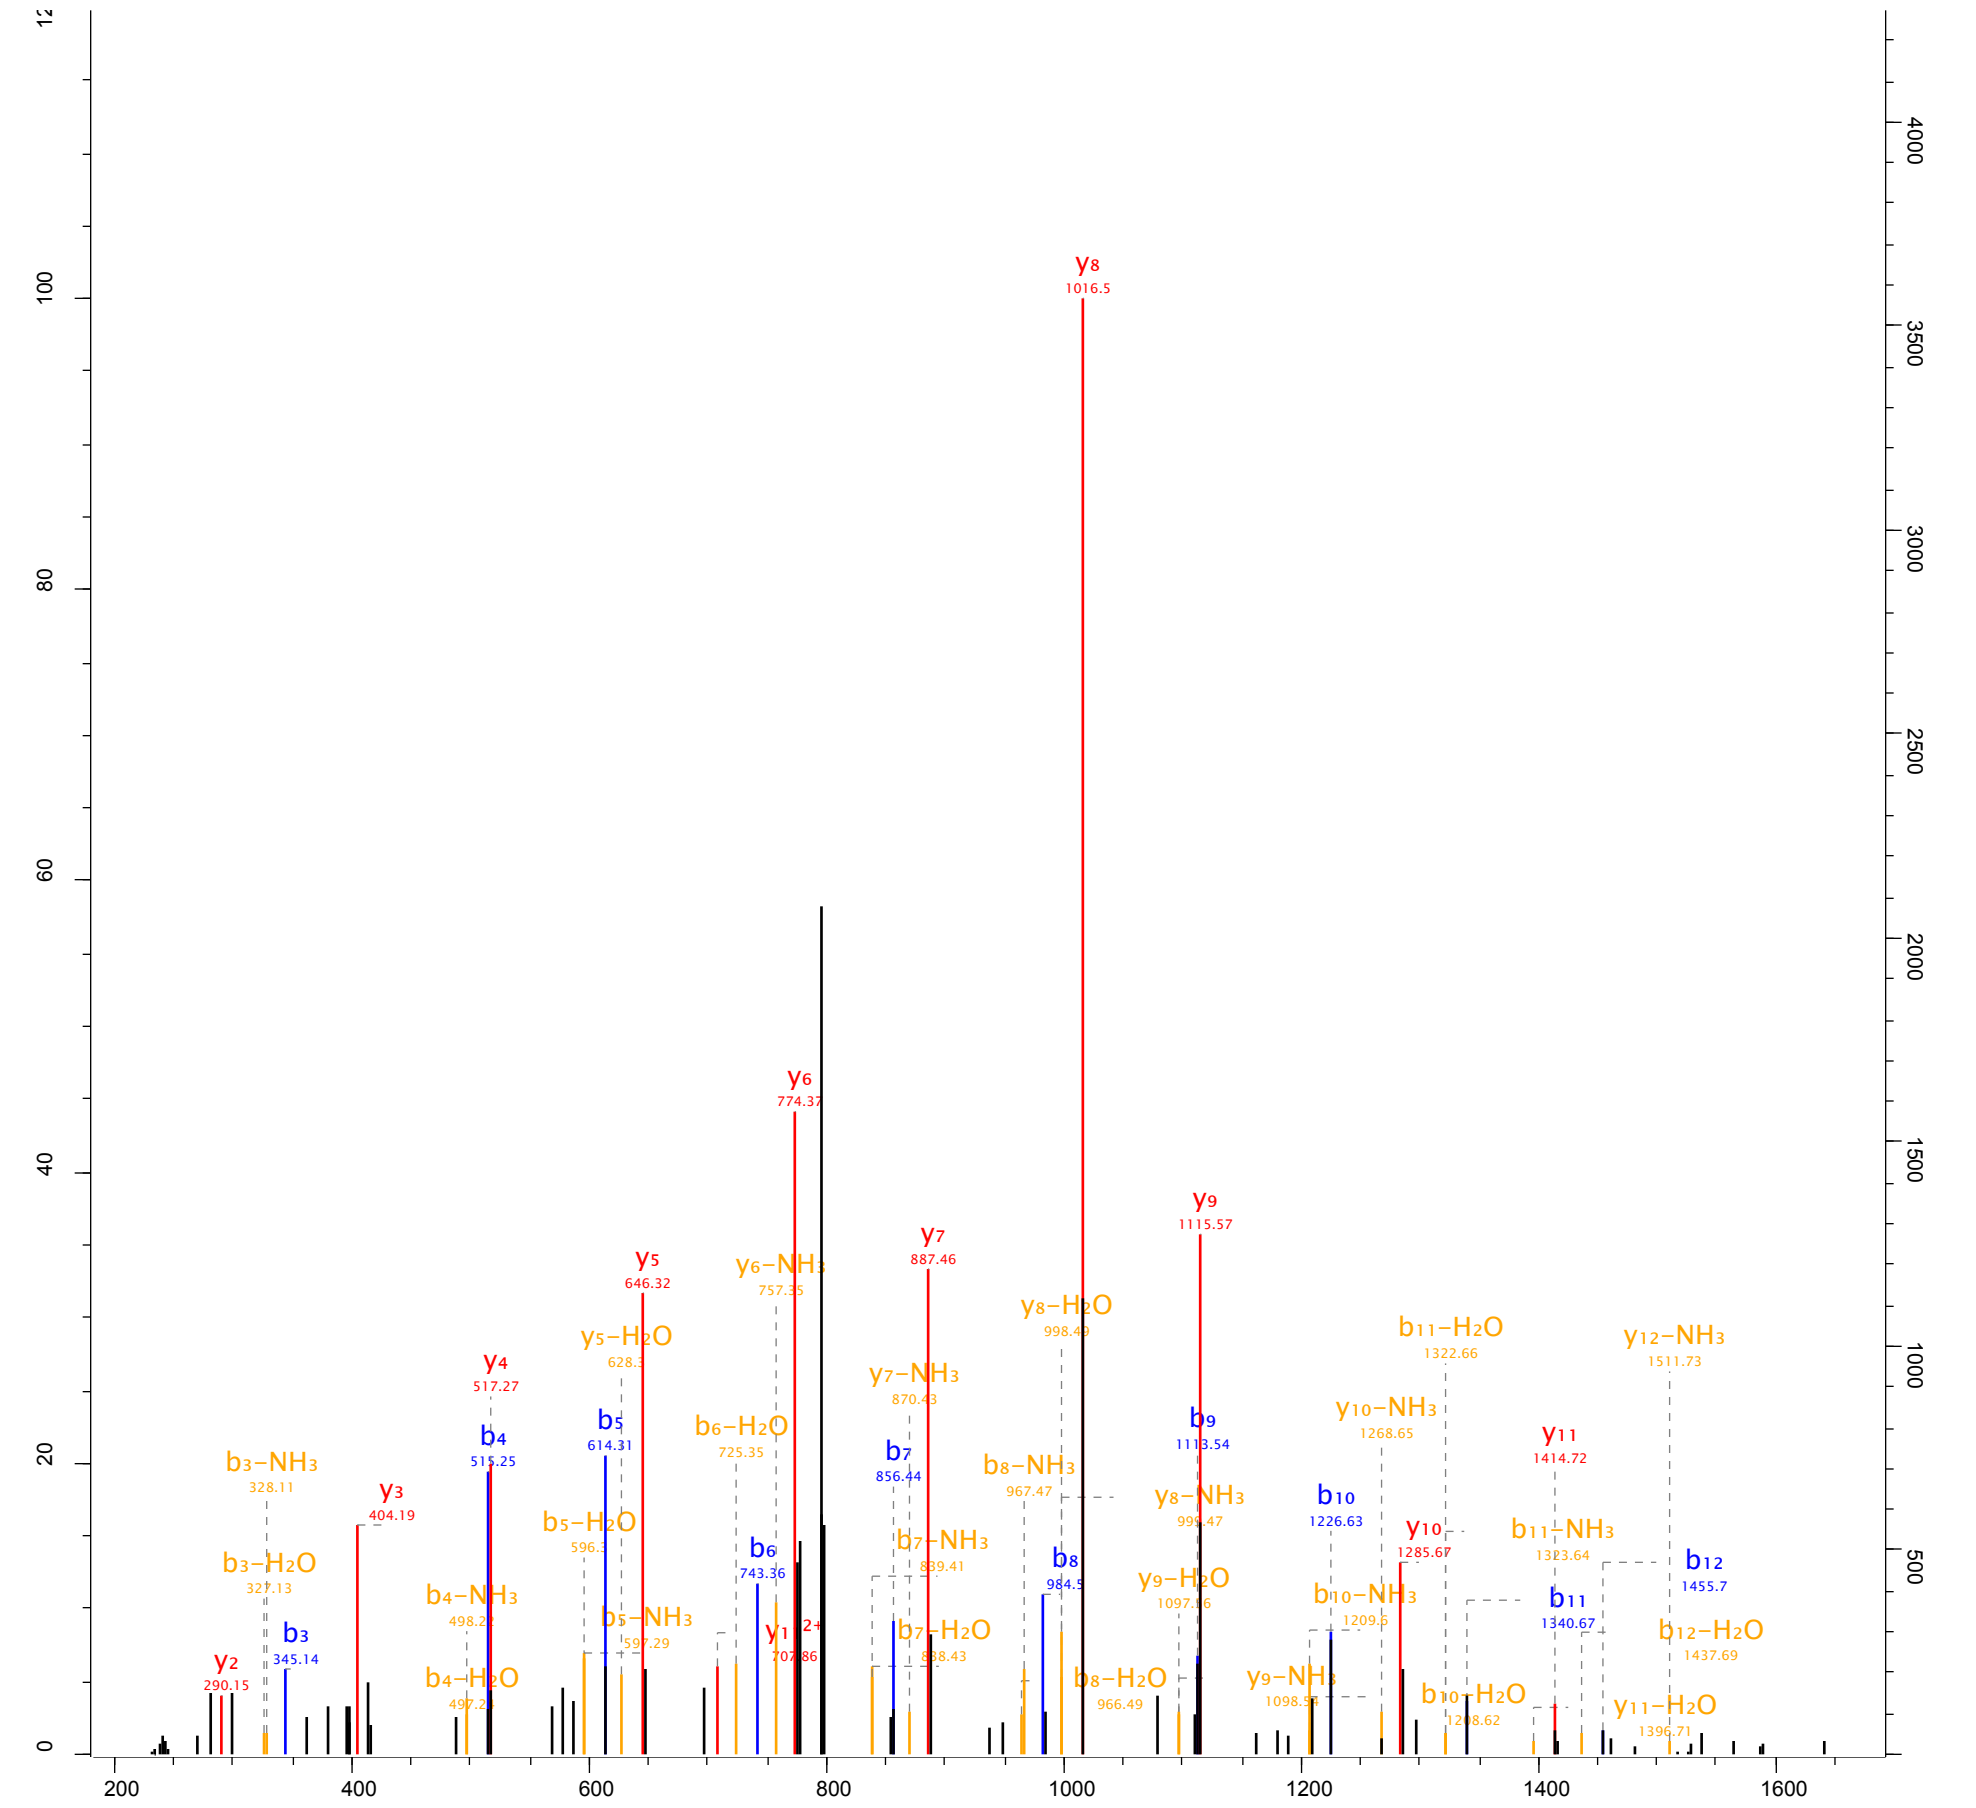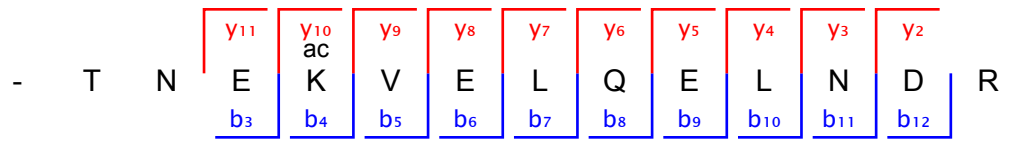

Raw file: 062513\_SCW\_II\_53\_5\_Vargas\_Enriched  
 Scan: 18674 Method: ITMS; CID Score: 122.94 m/z: 529.83 Gene names: Auh

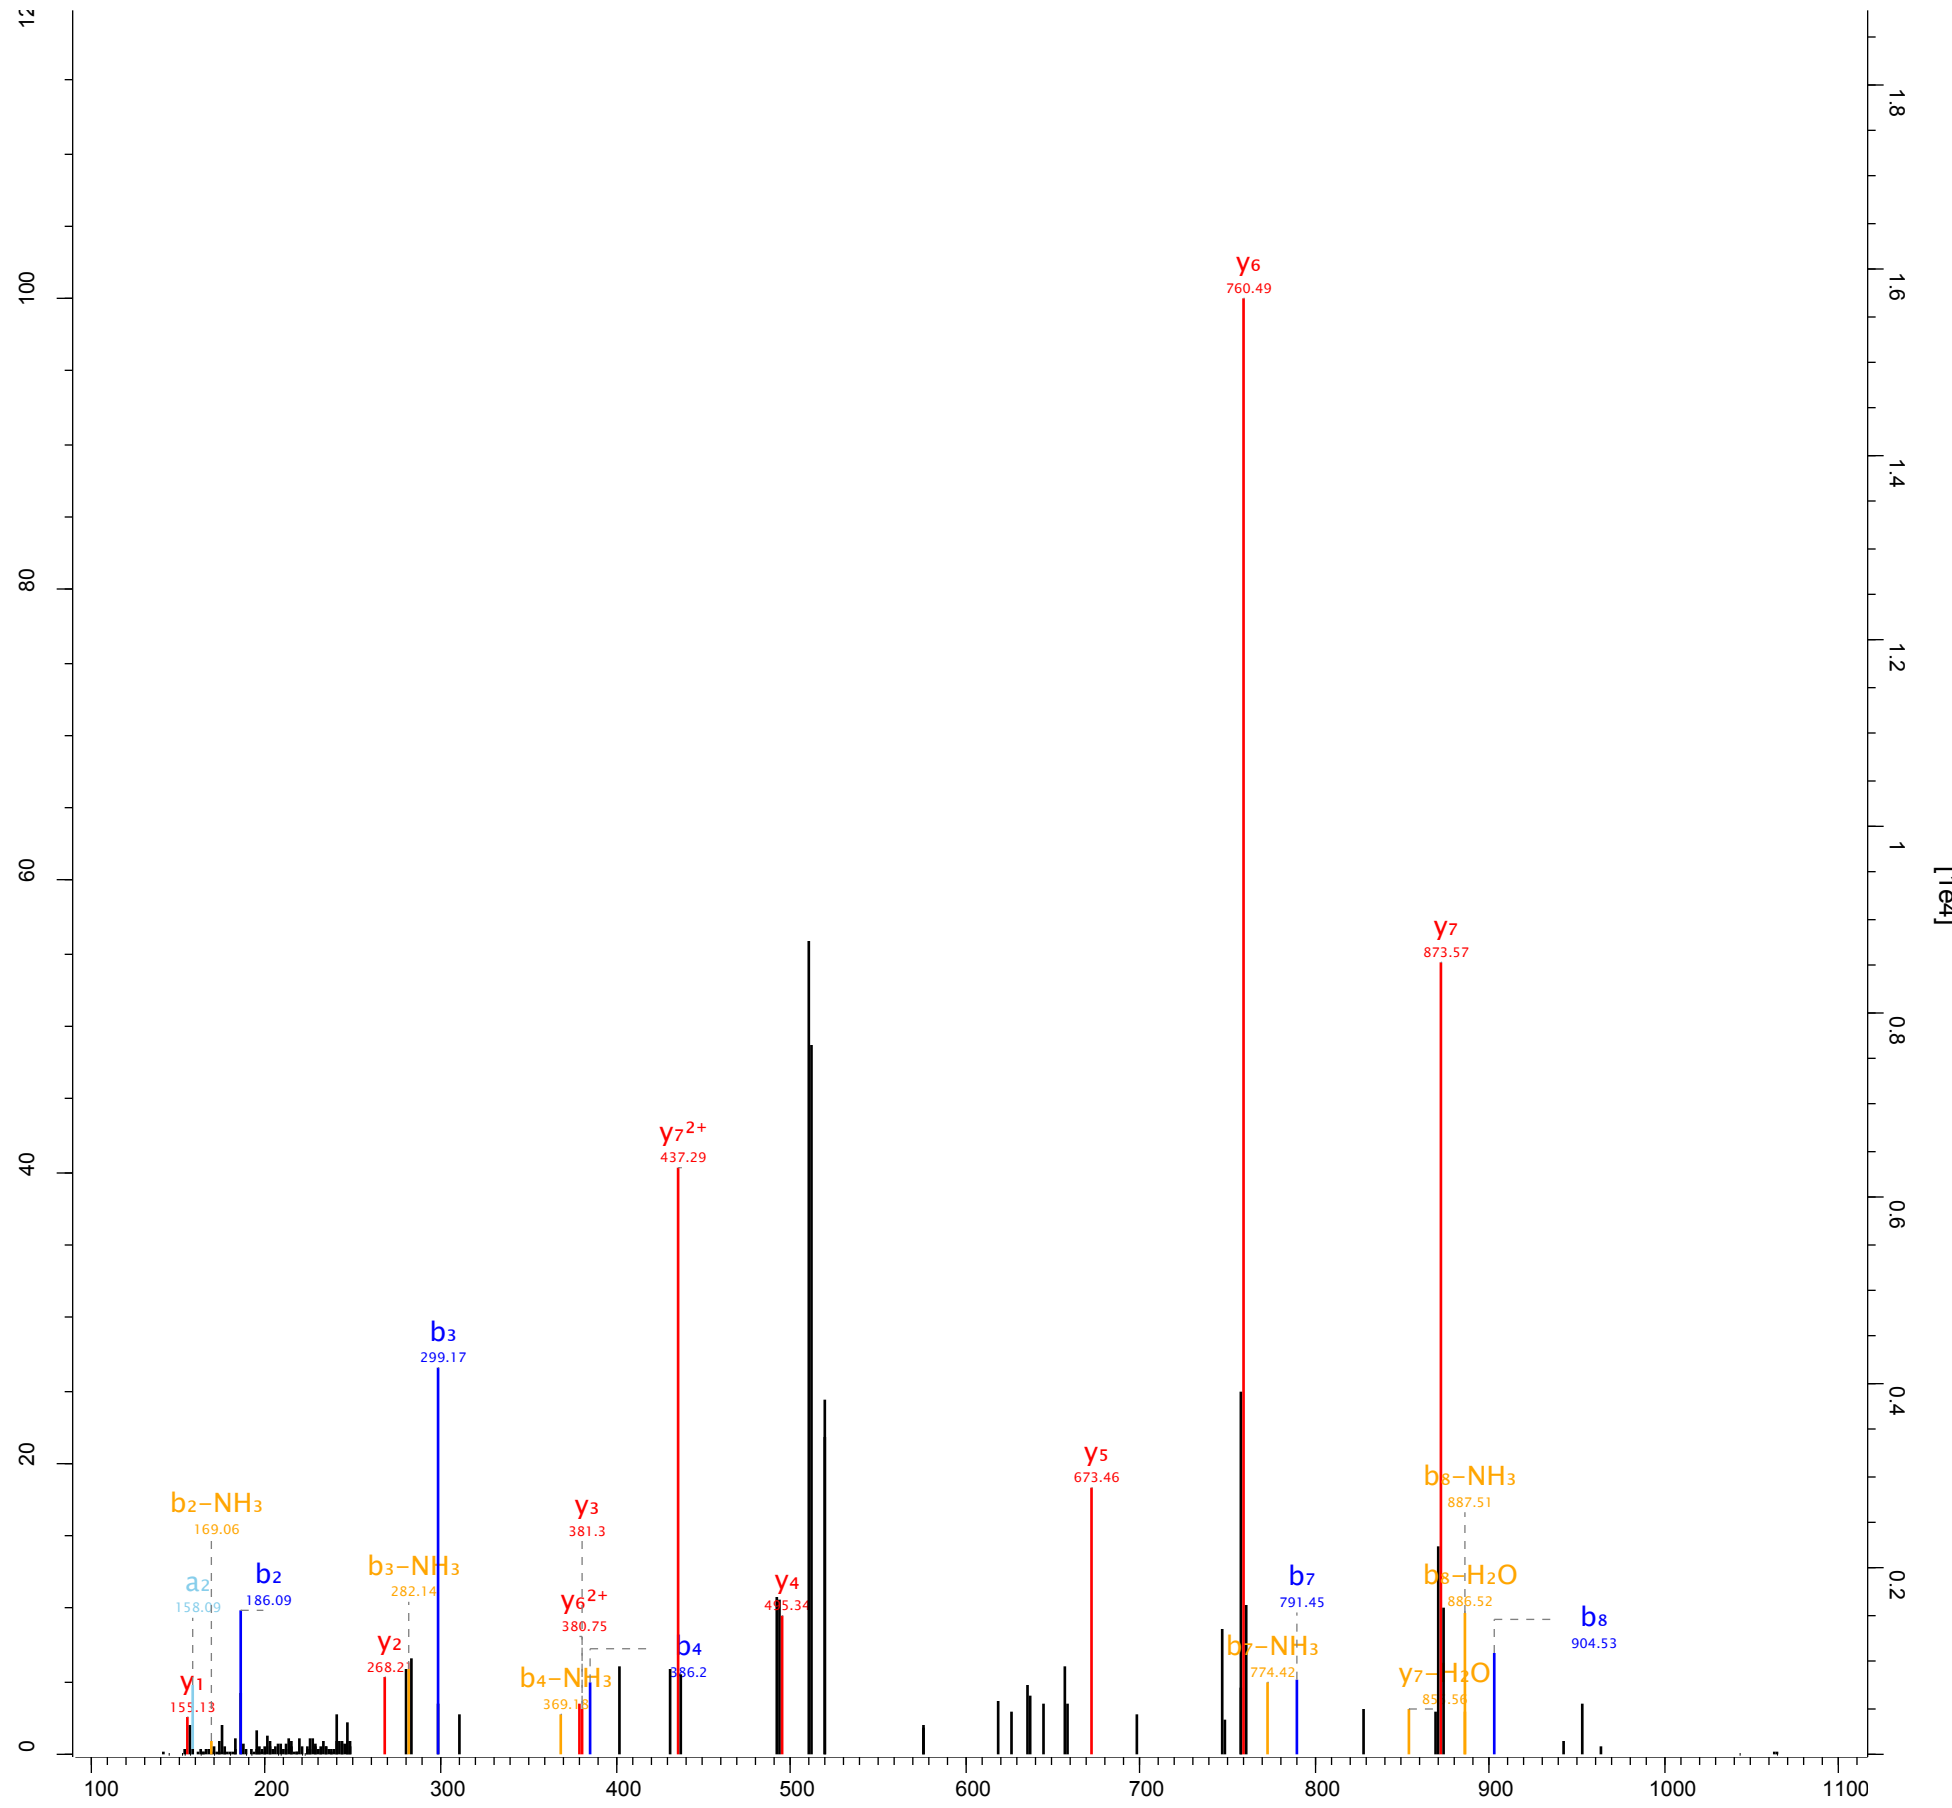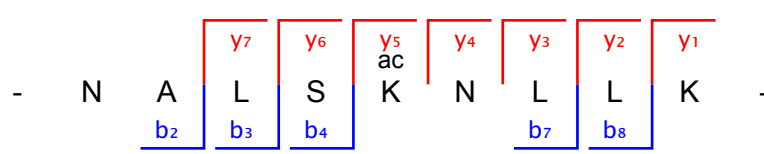

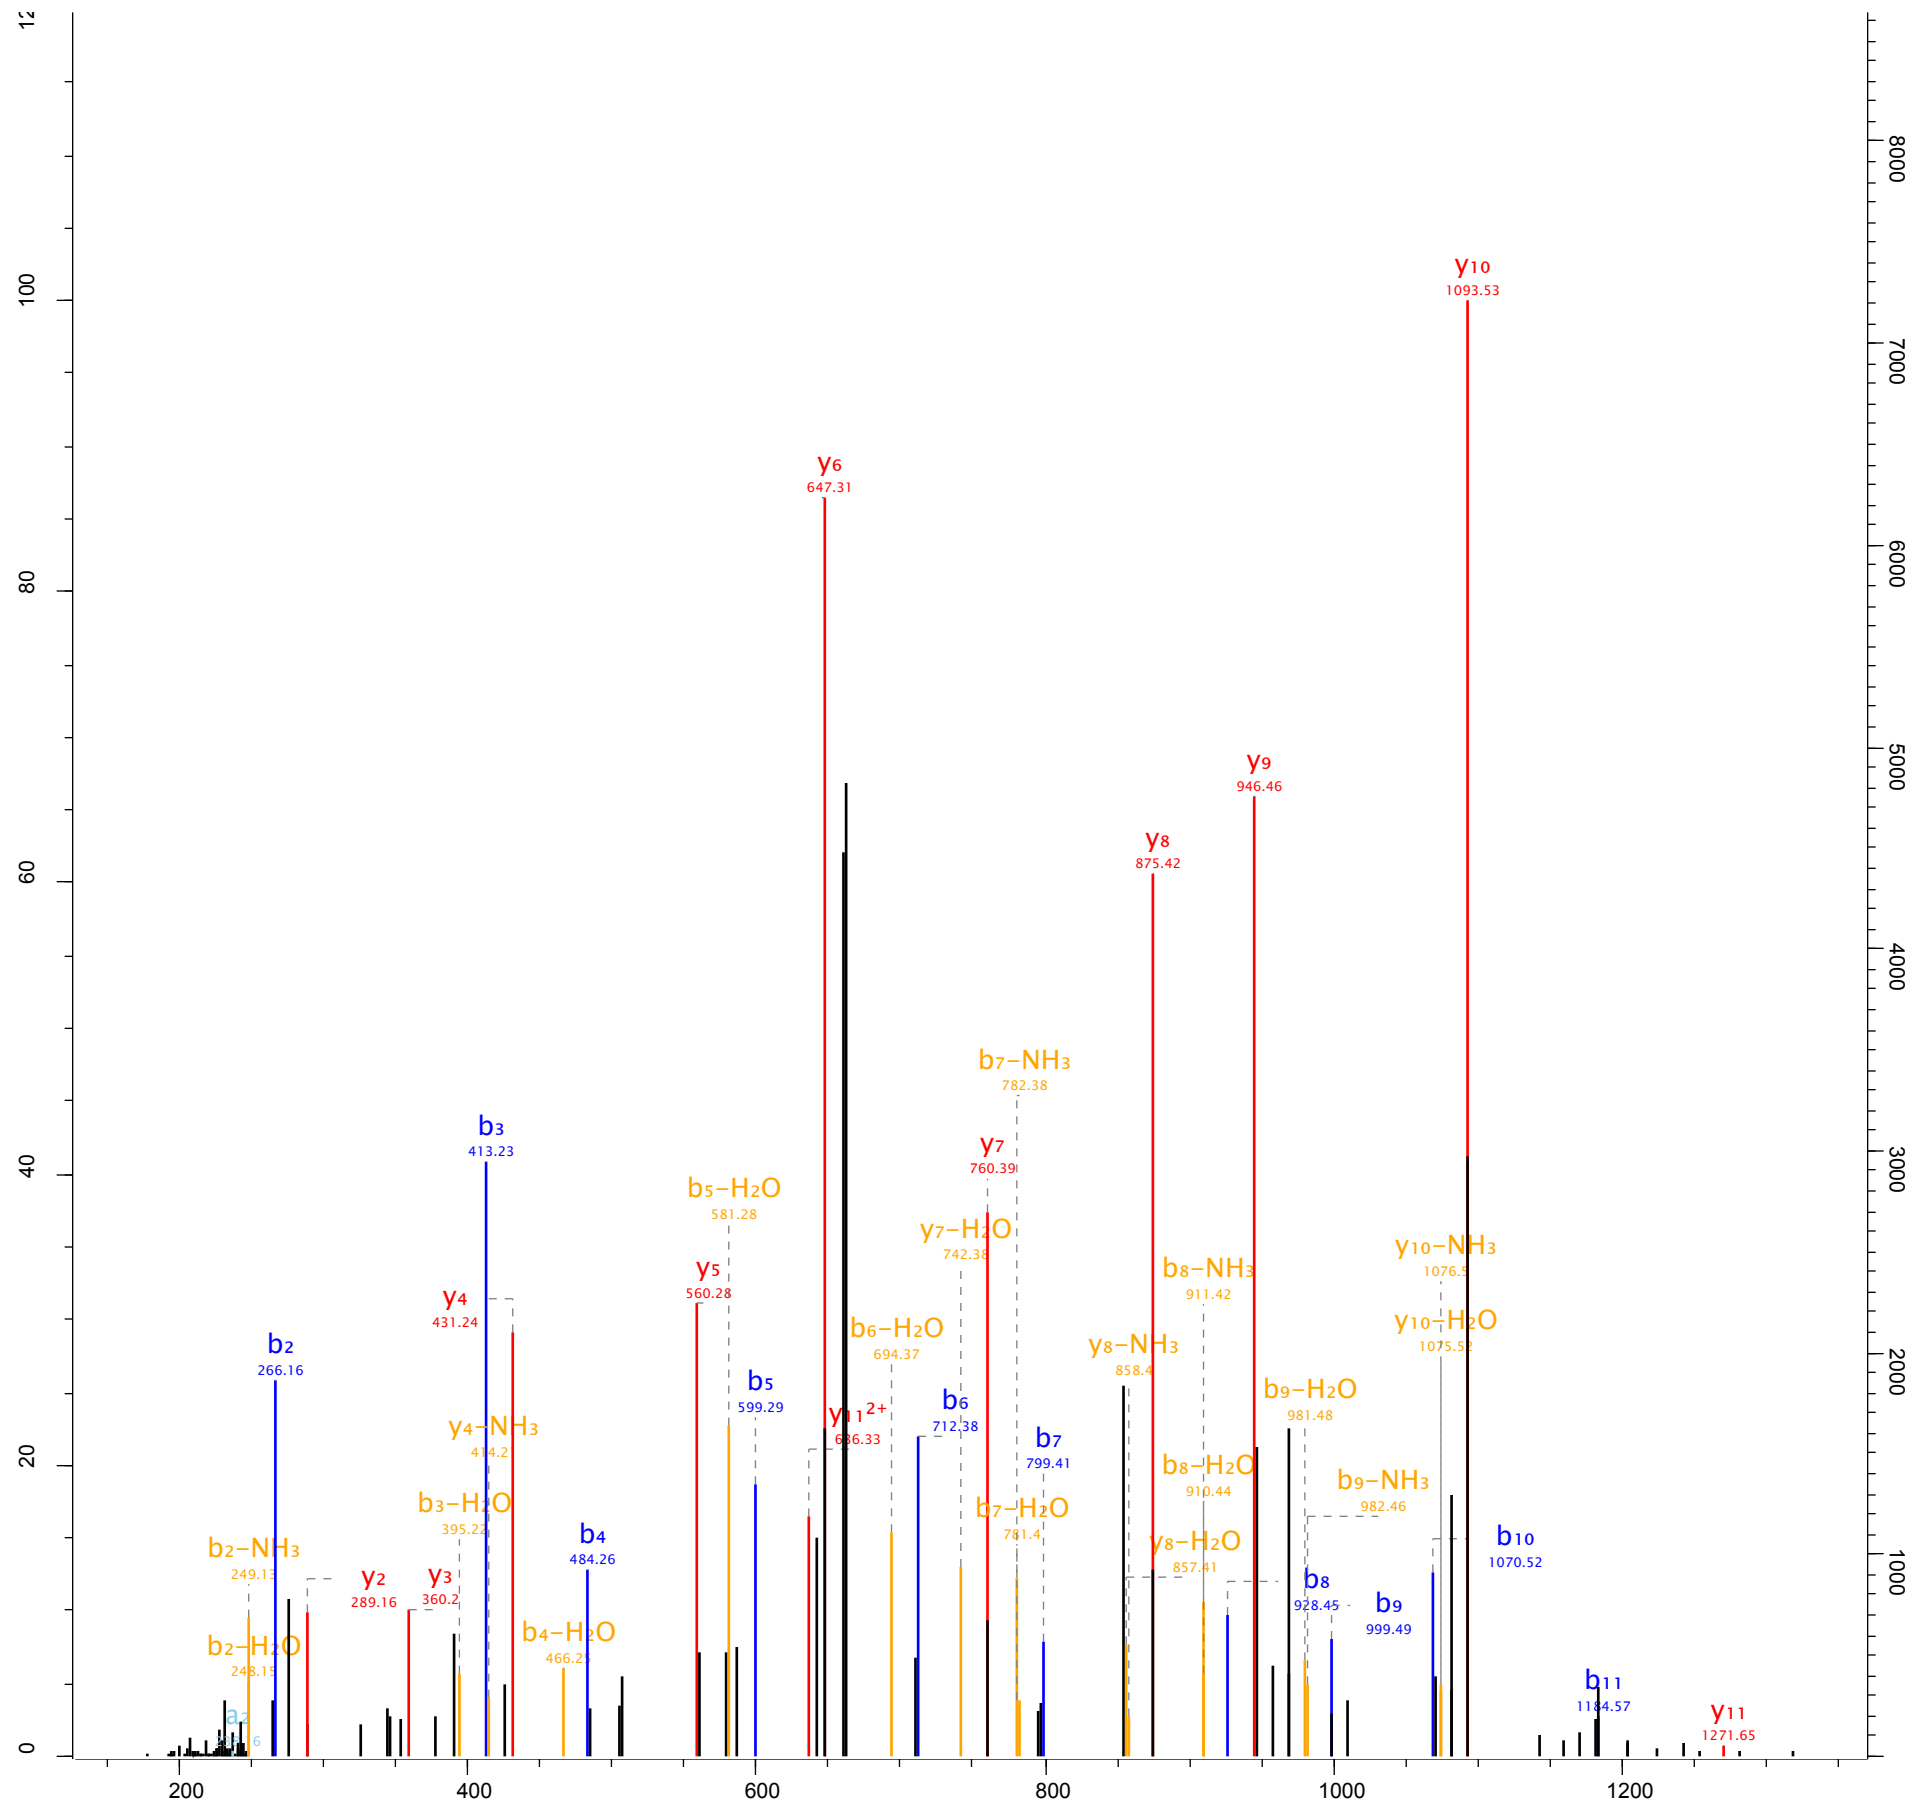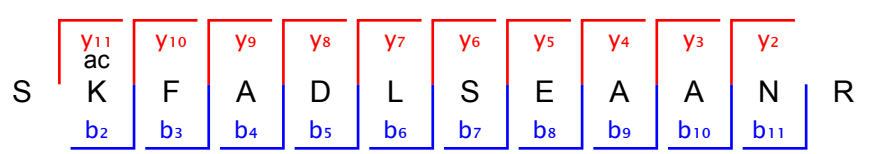

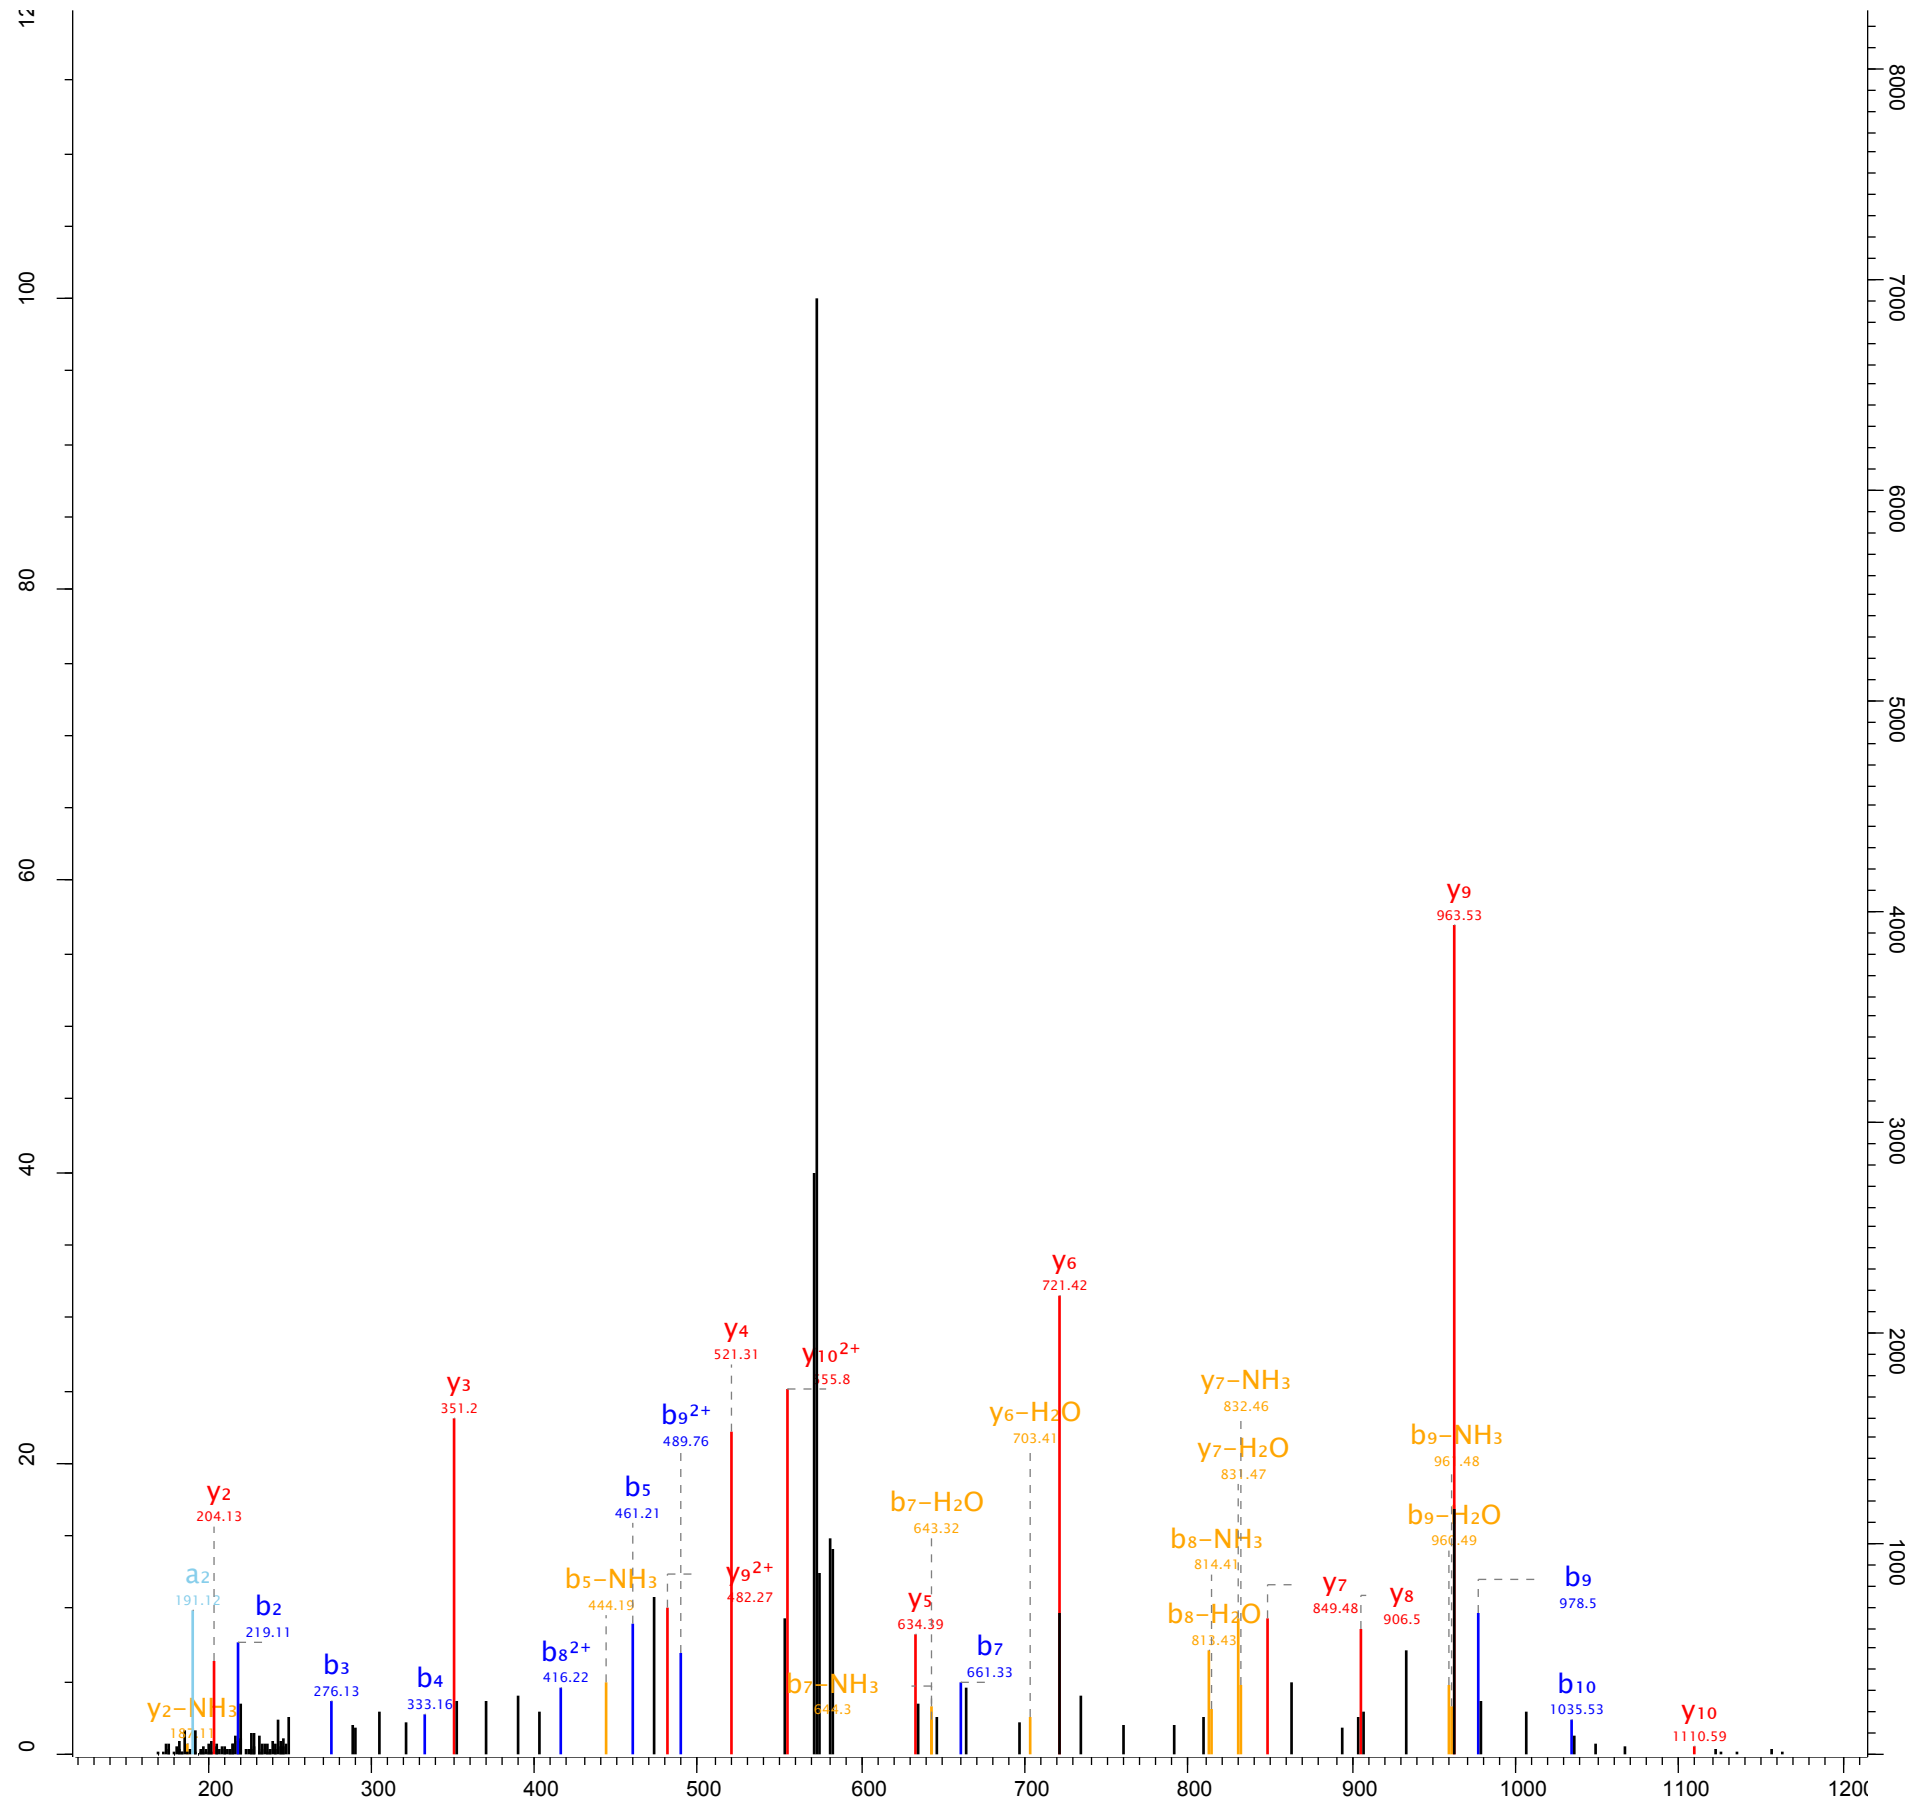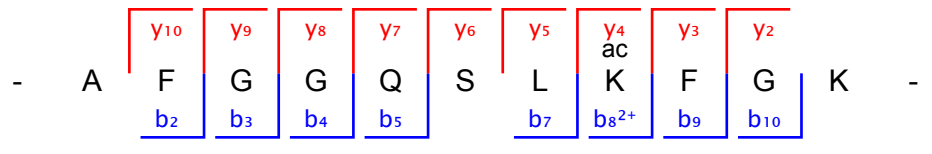



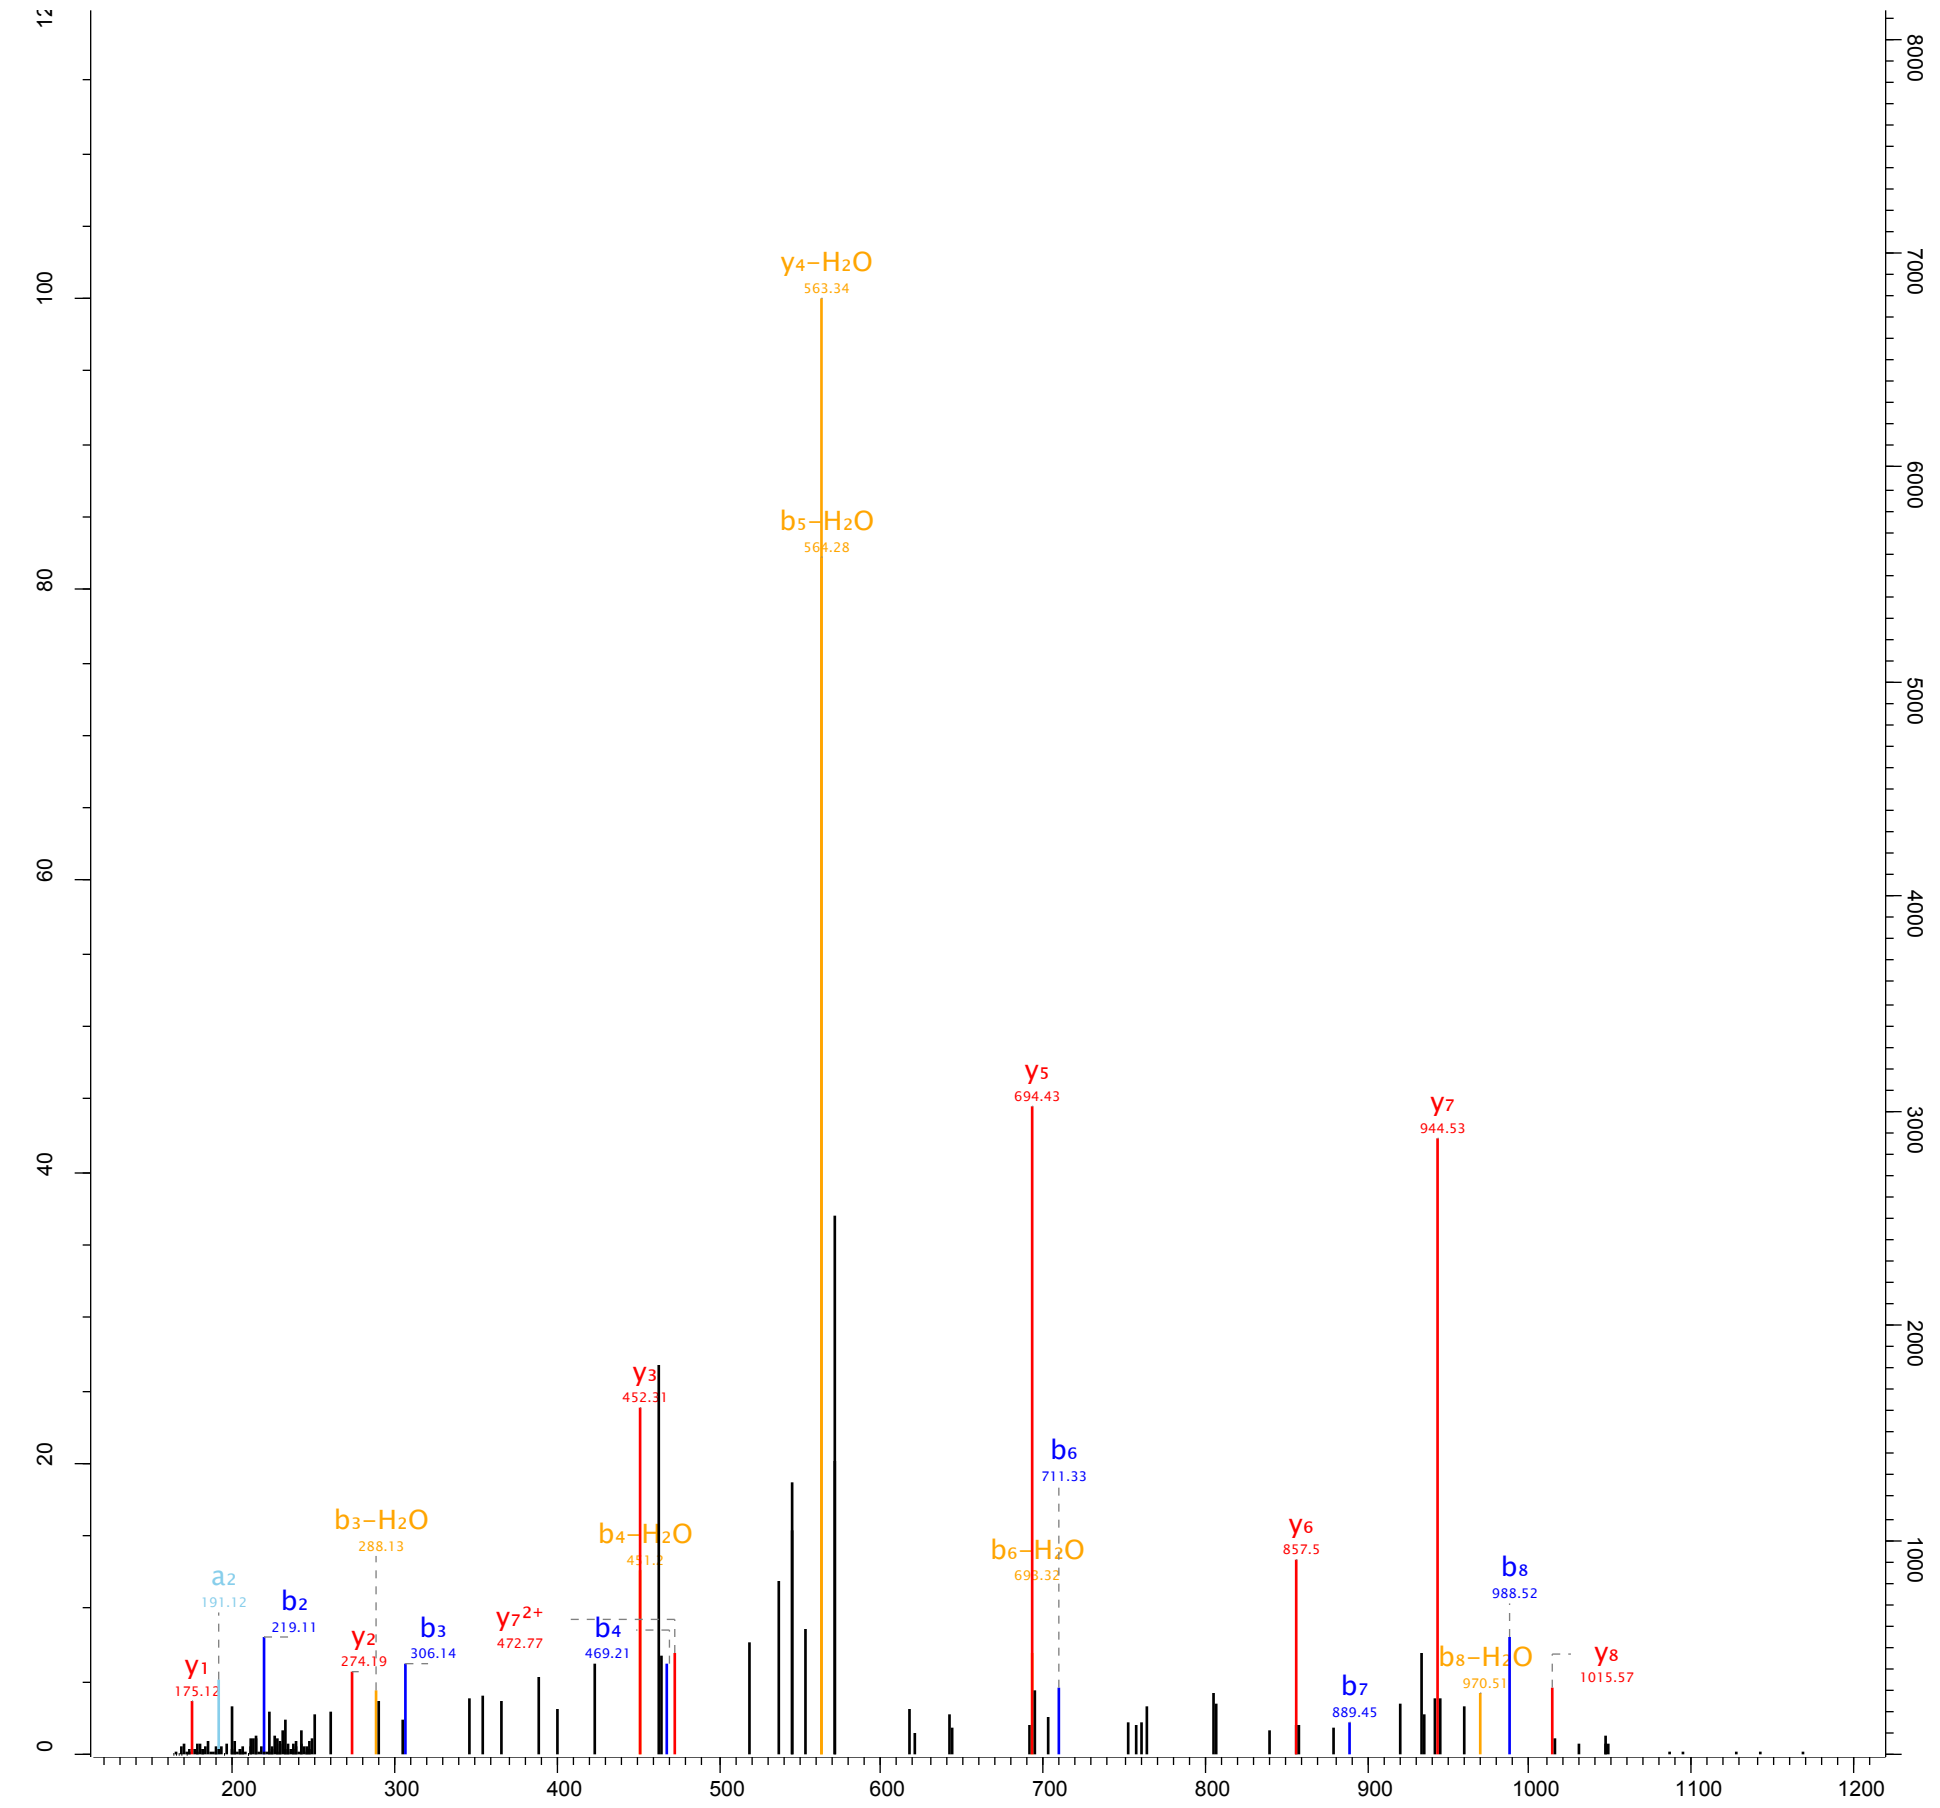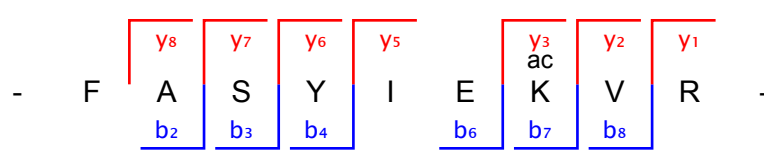

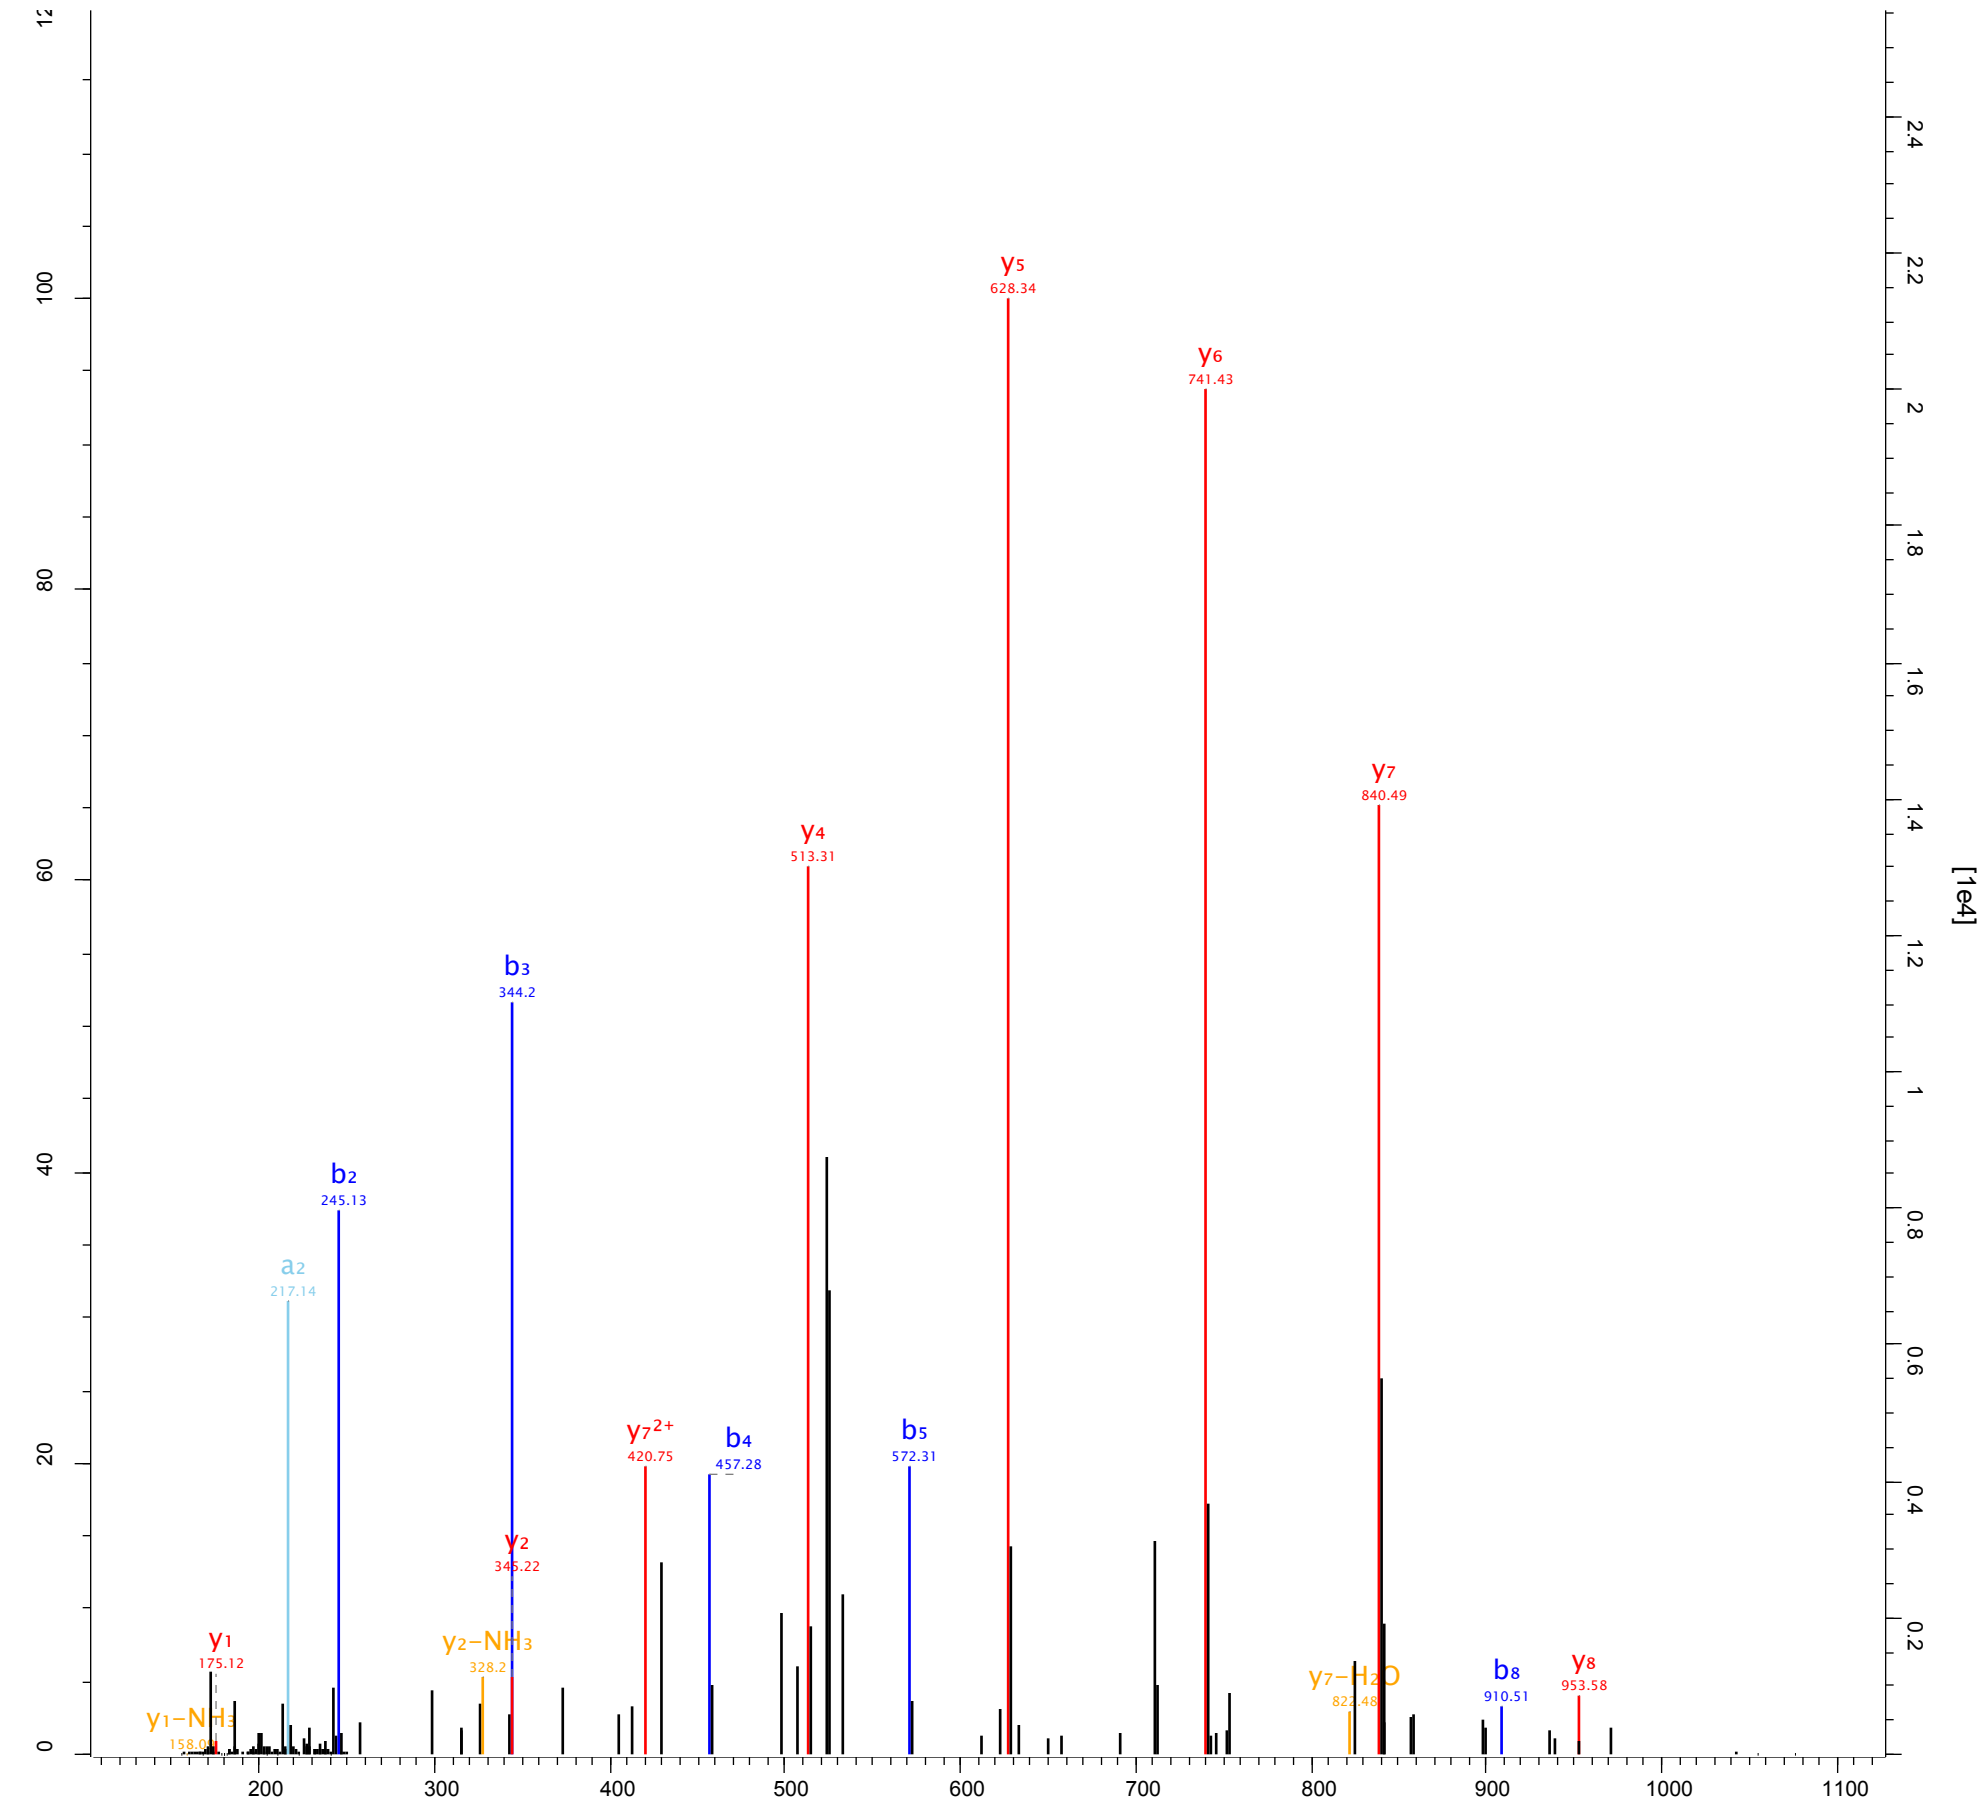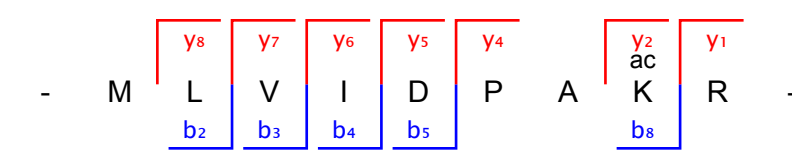

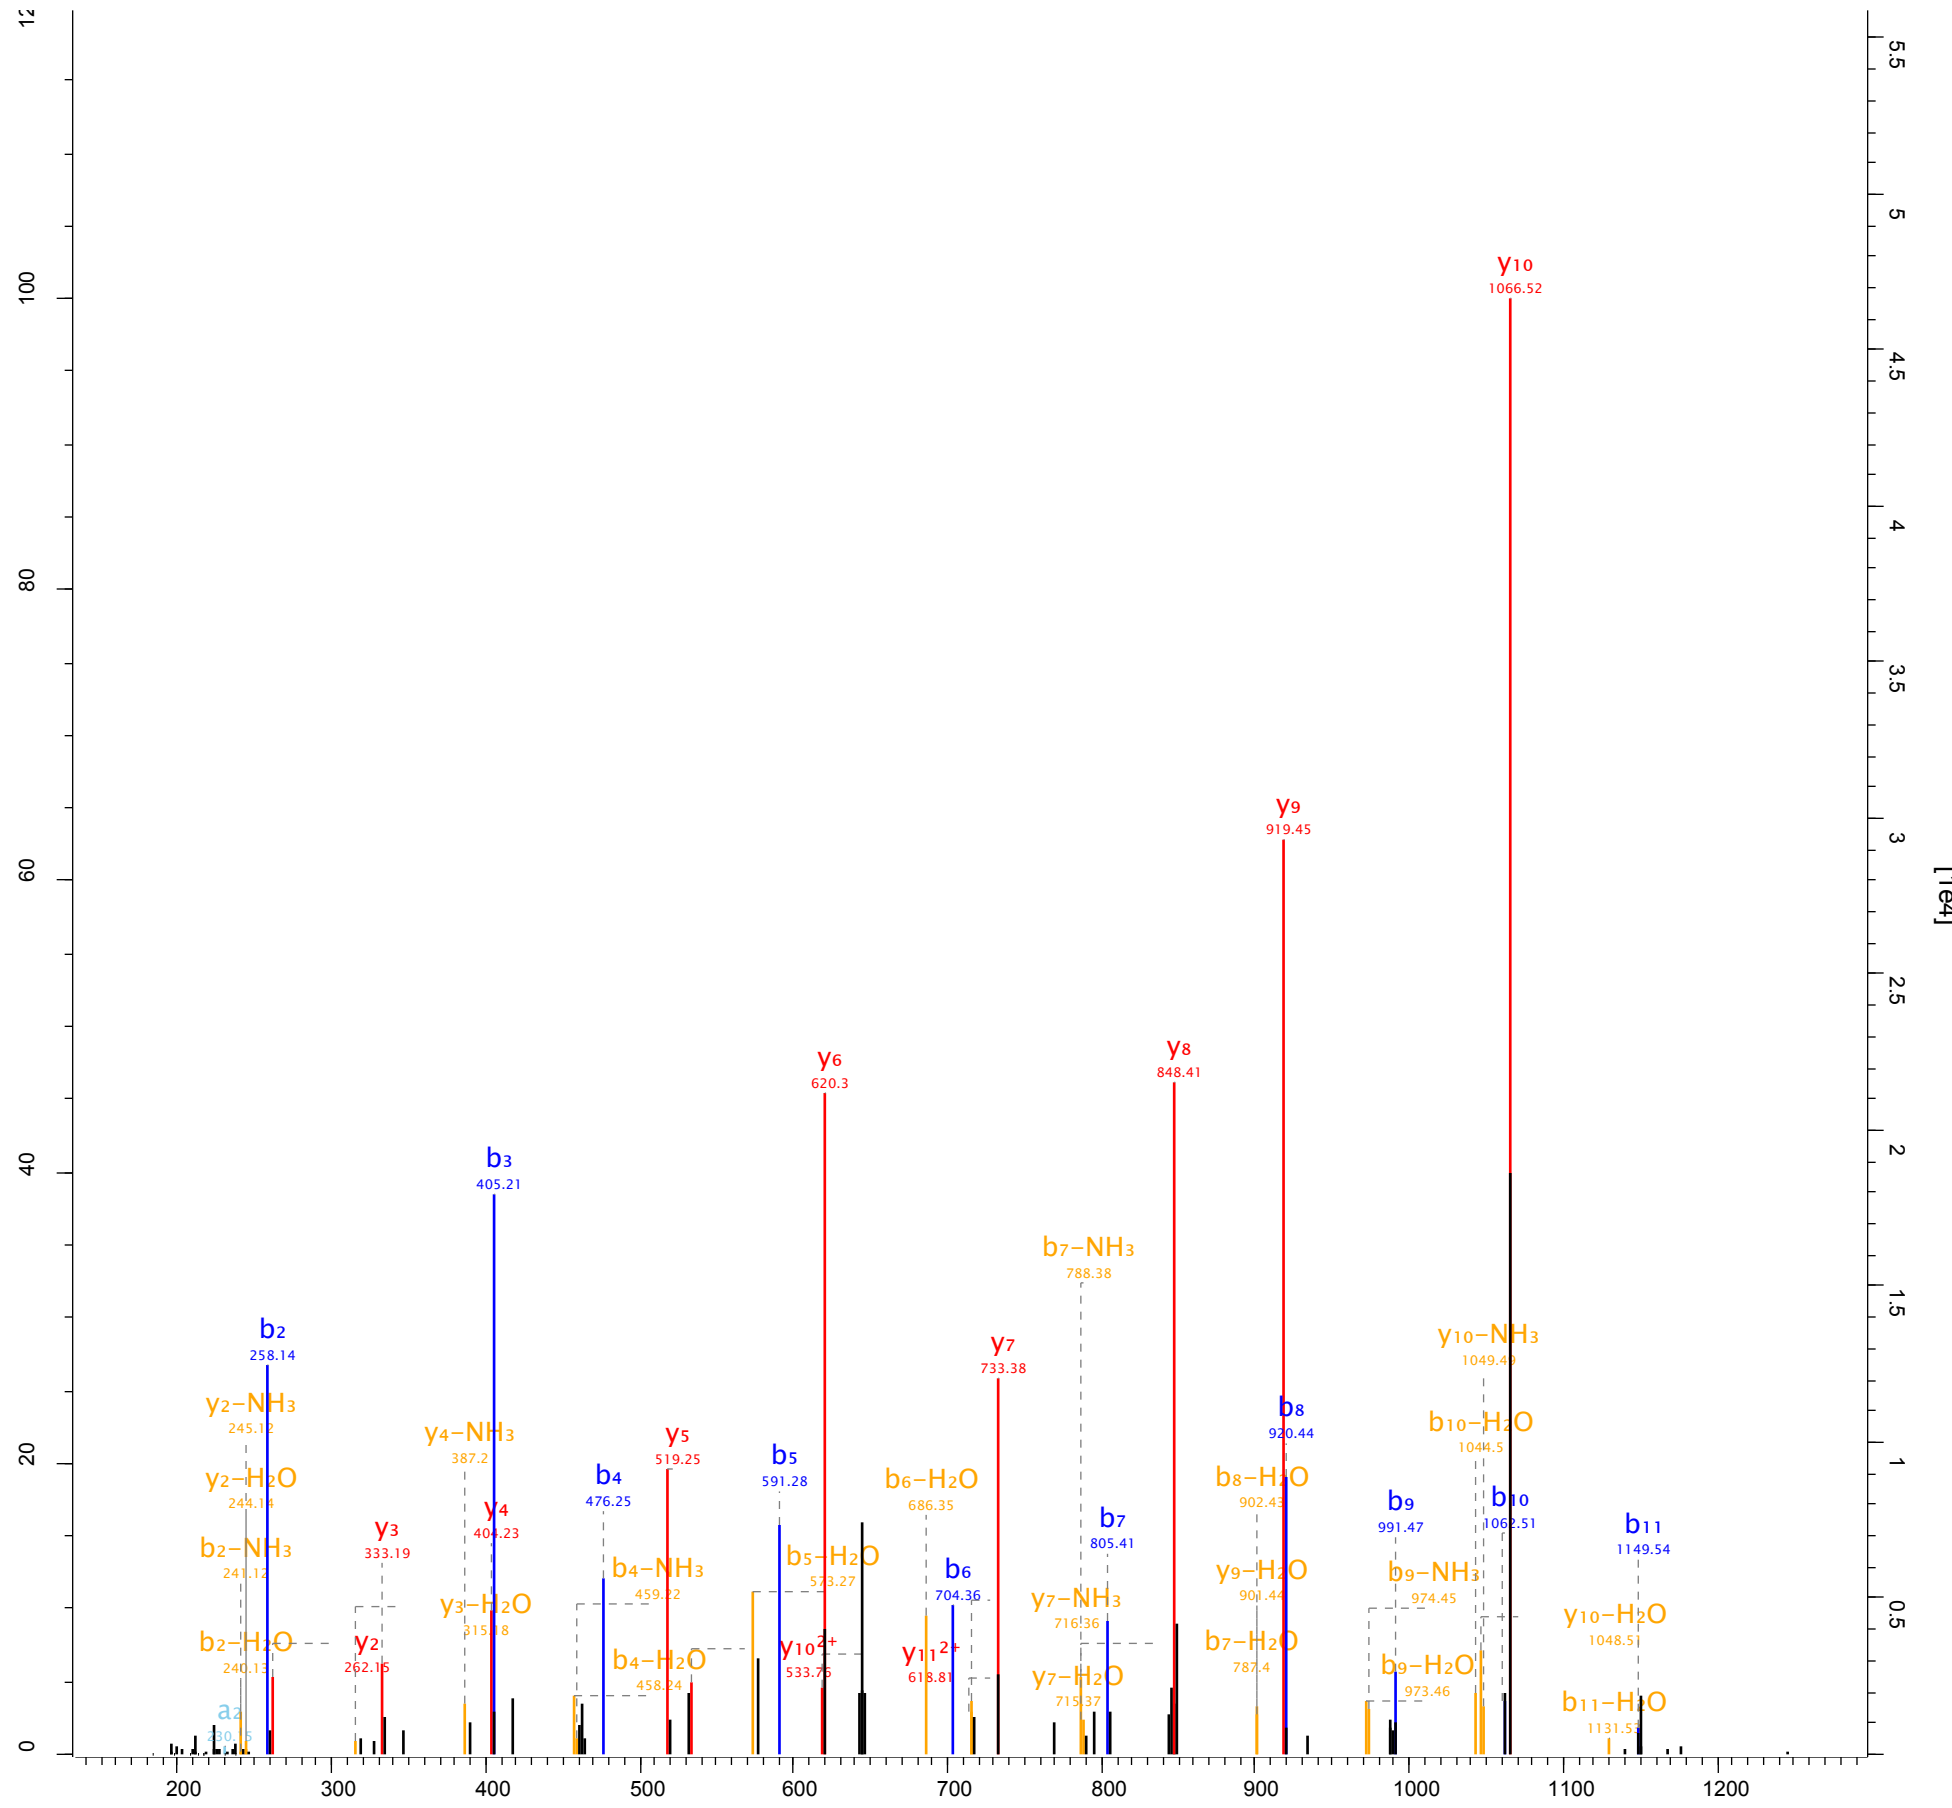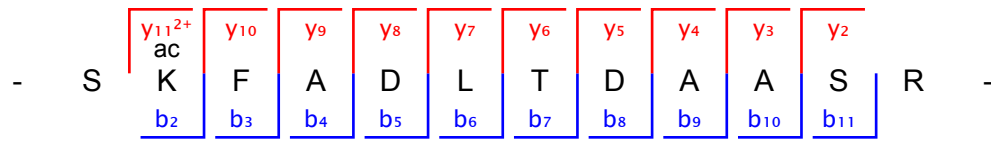

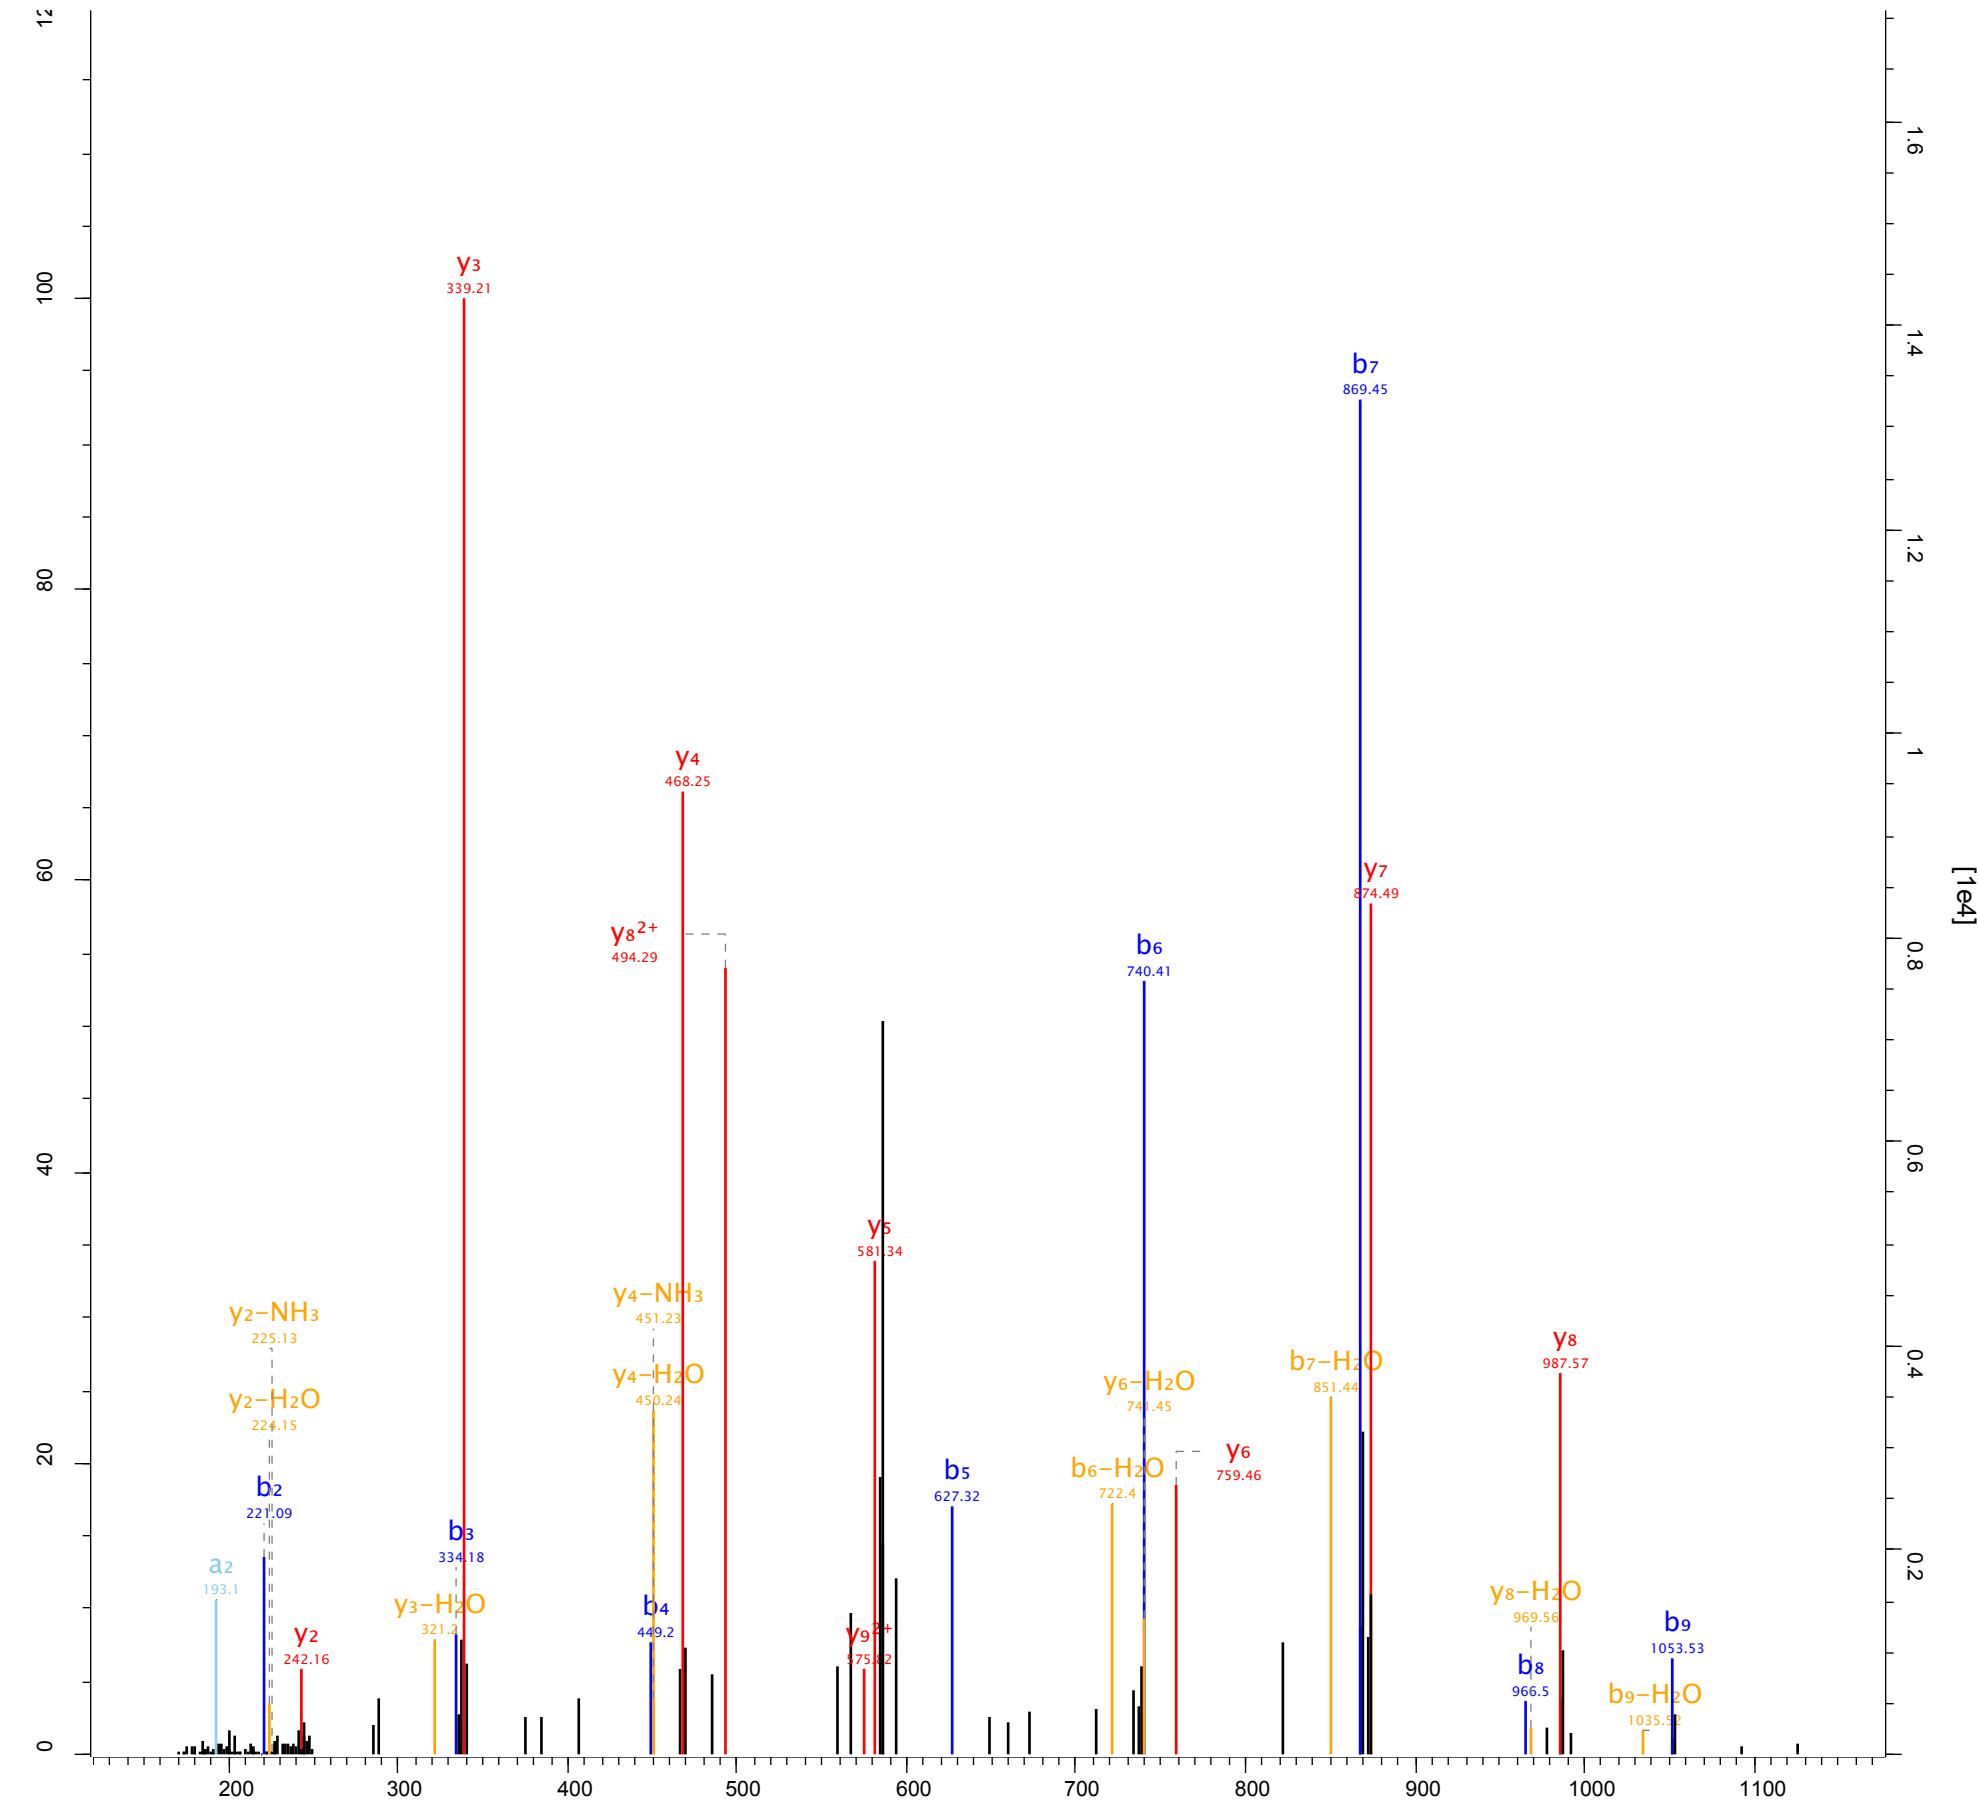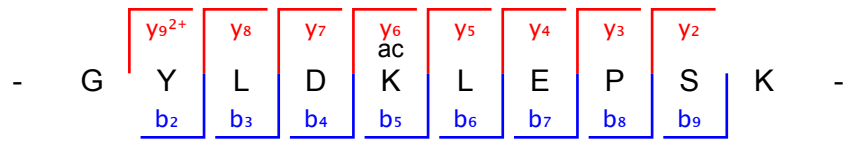

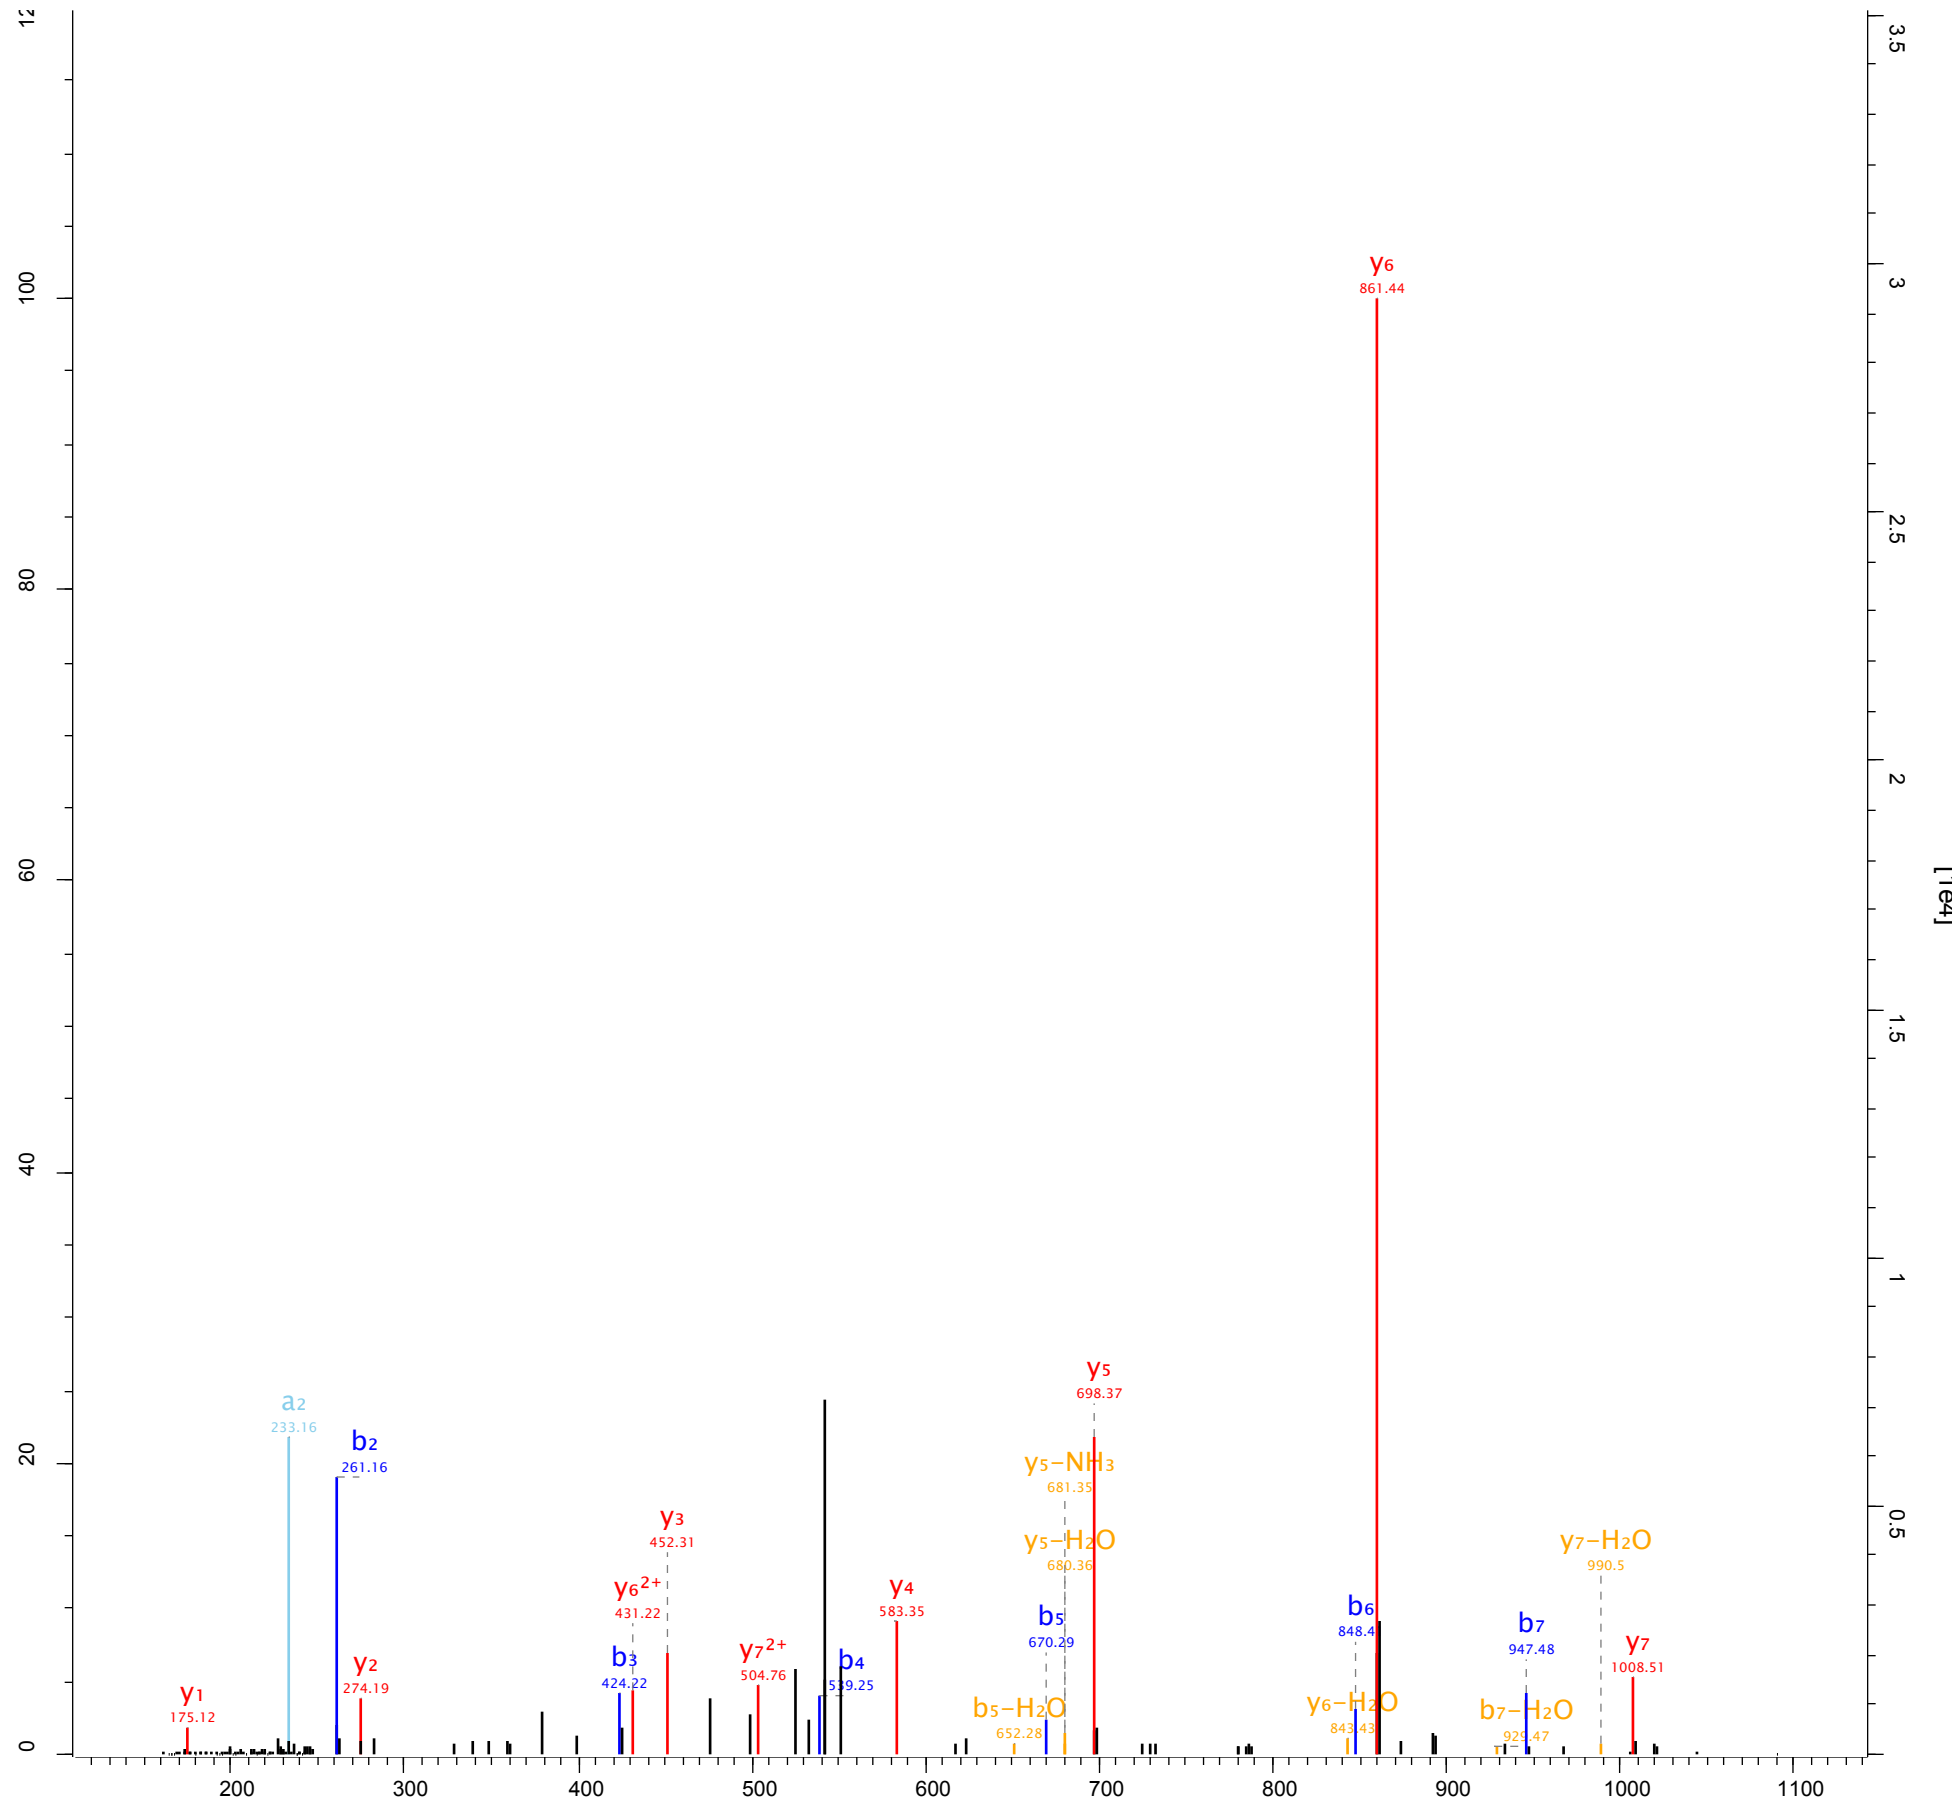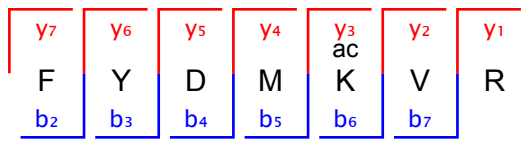

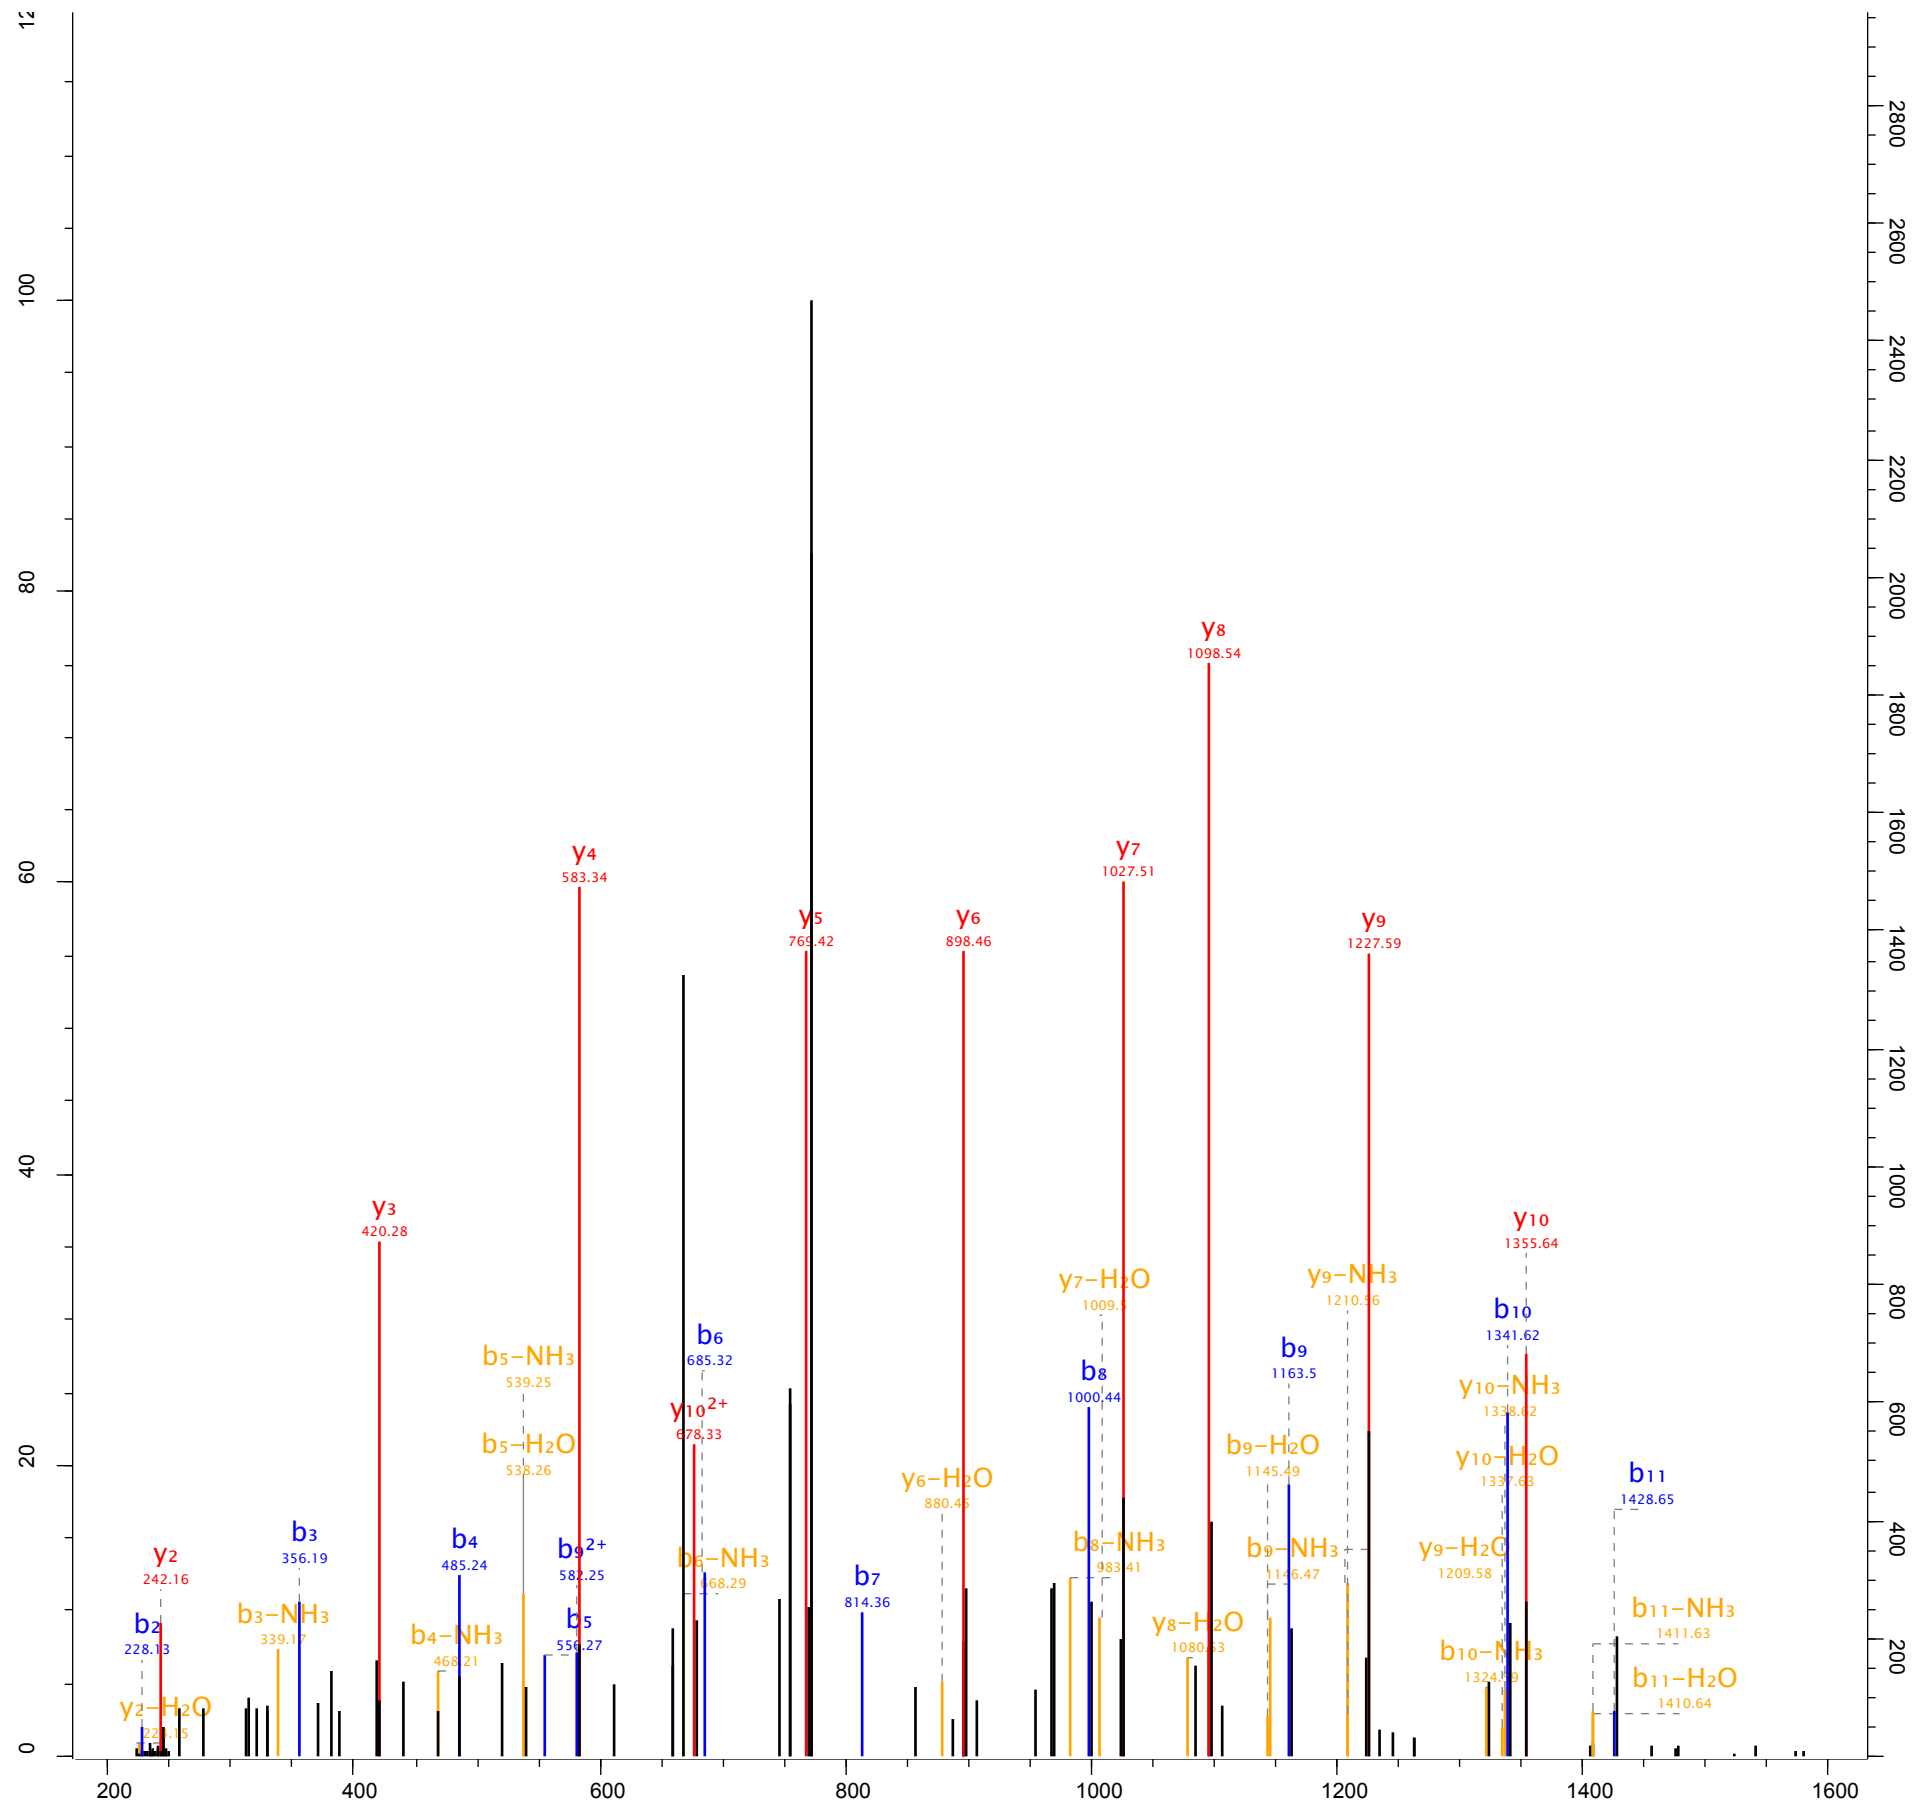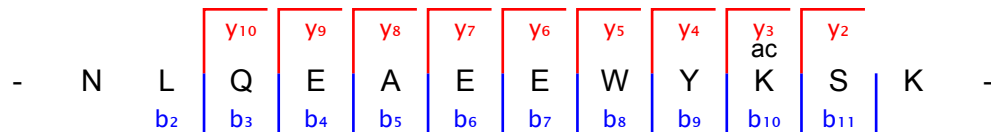

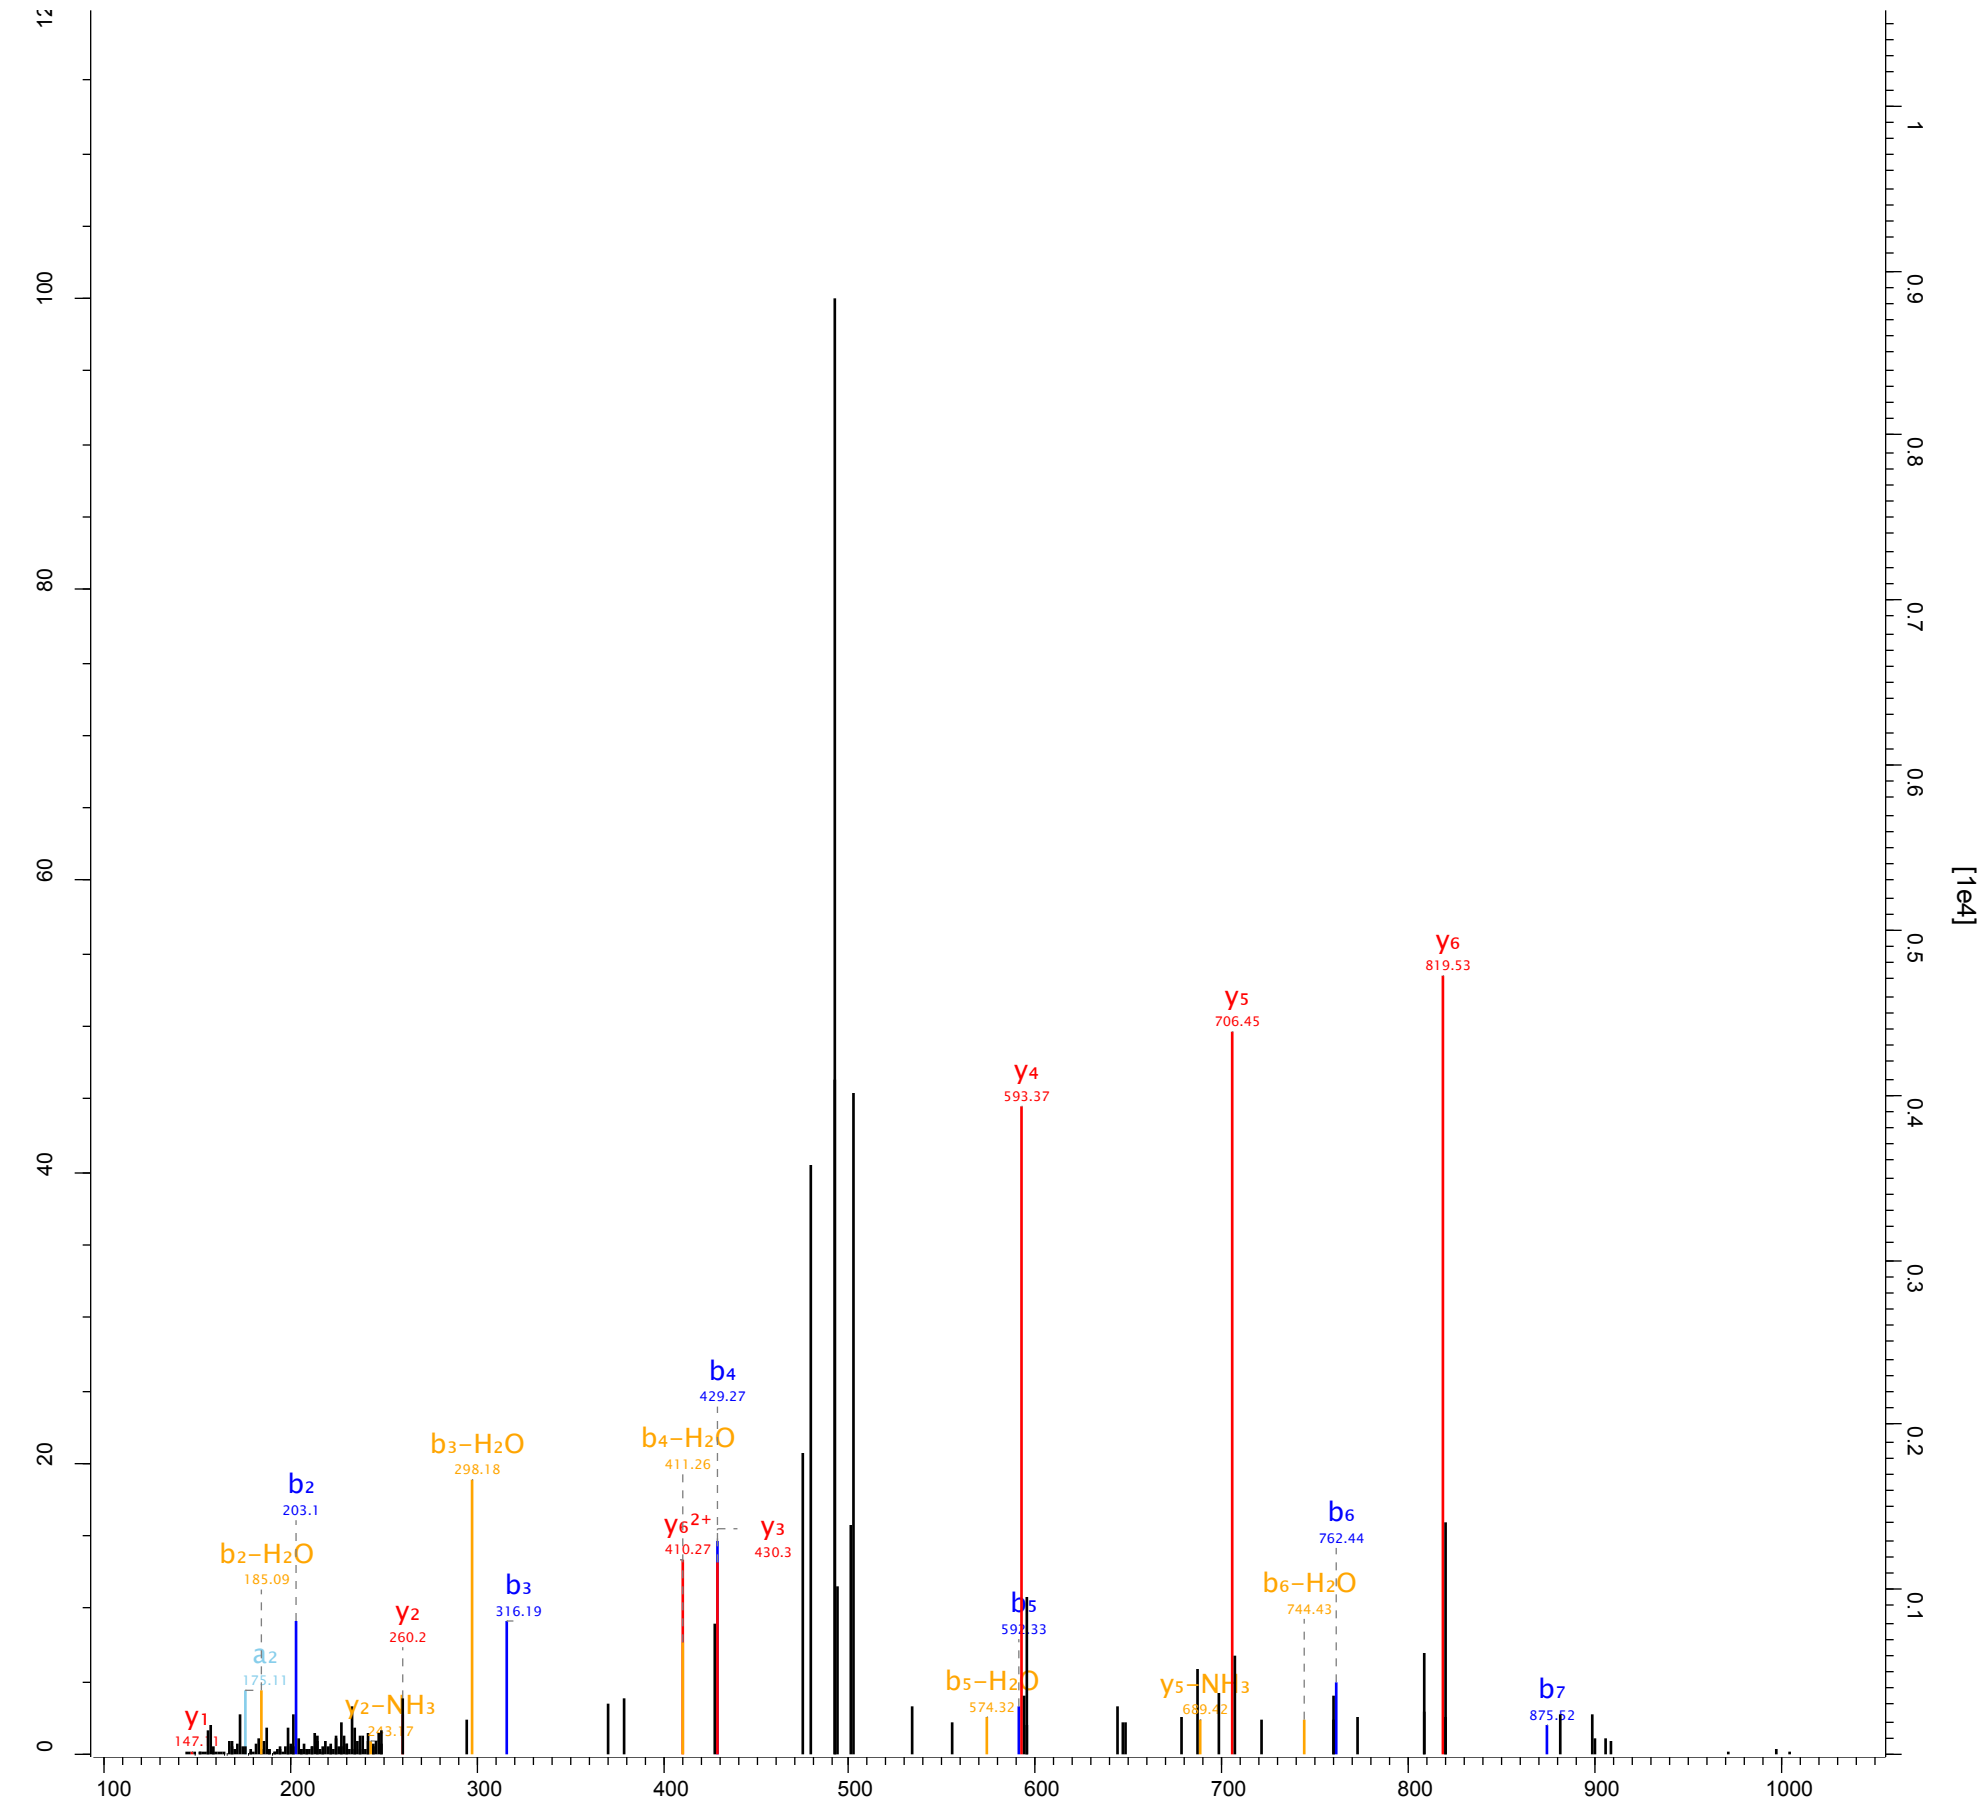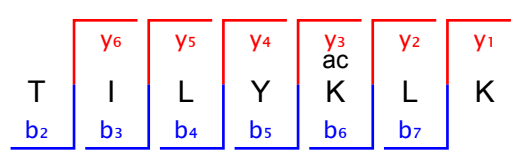

062513\_SCW\_II\_53\_5\_Vargas\_Enriched

20953

ITMS; CID

211.22

755.36

Lactb

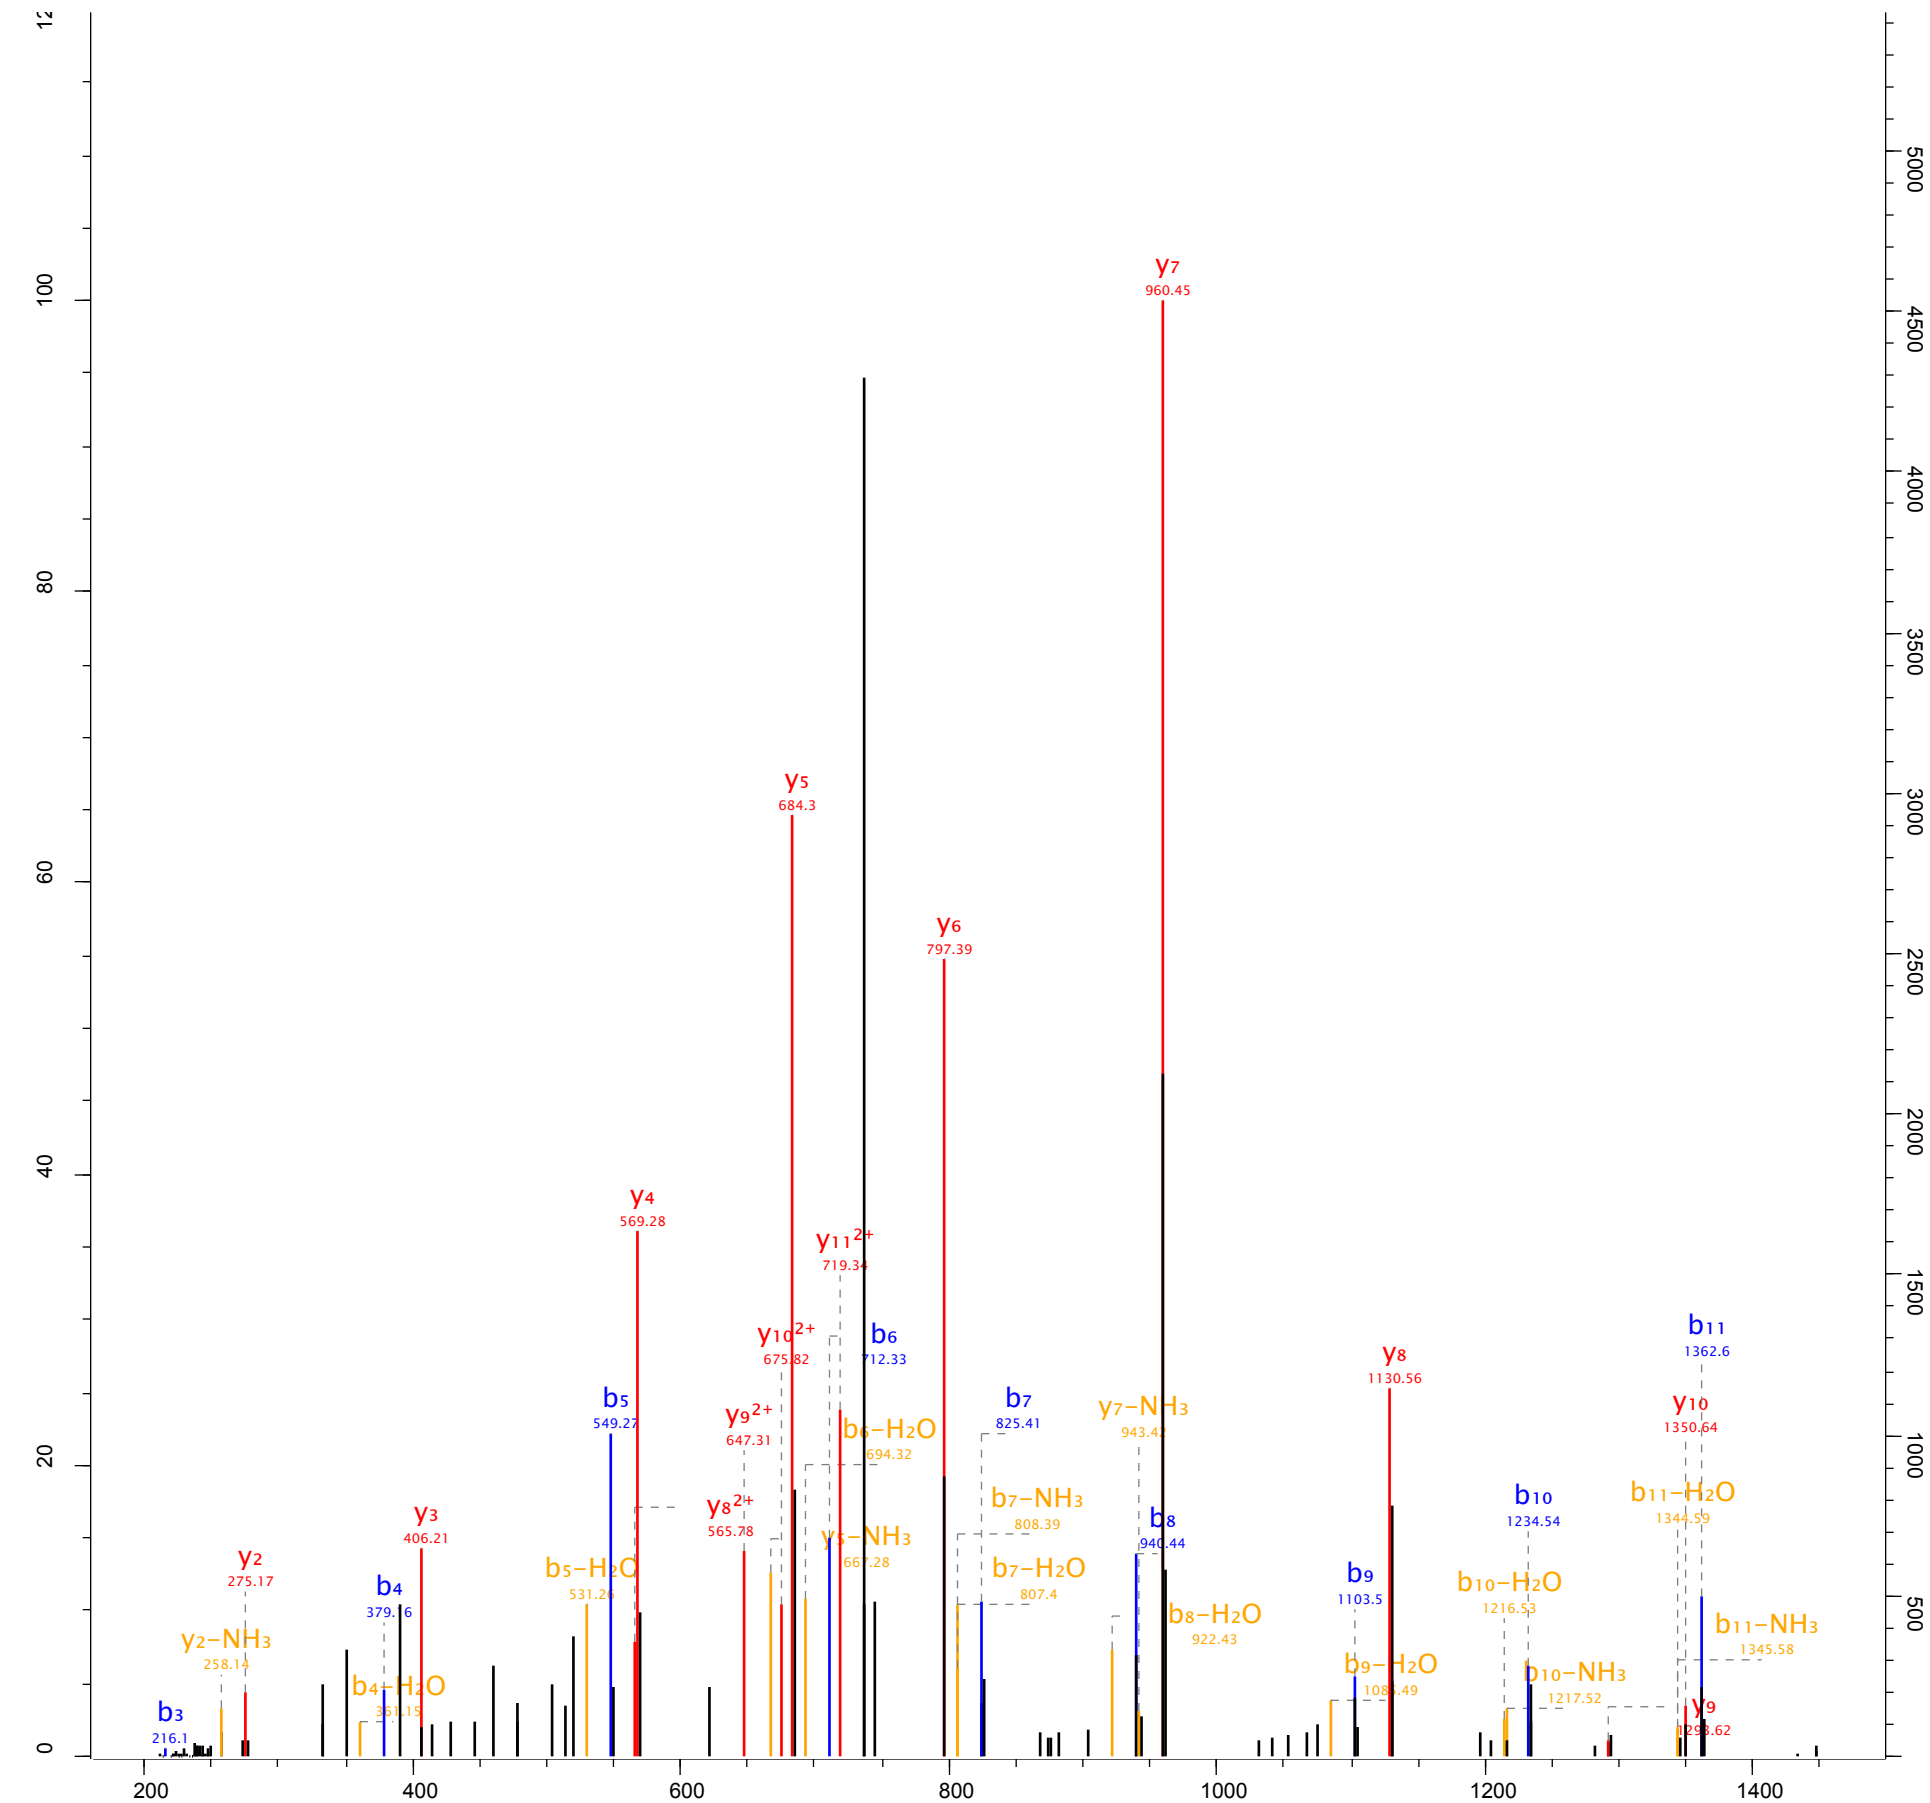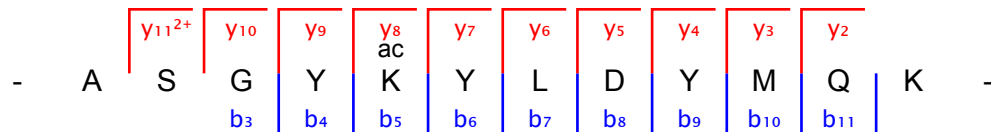



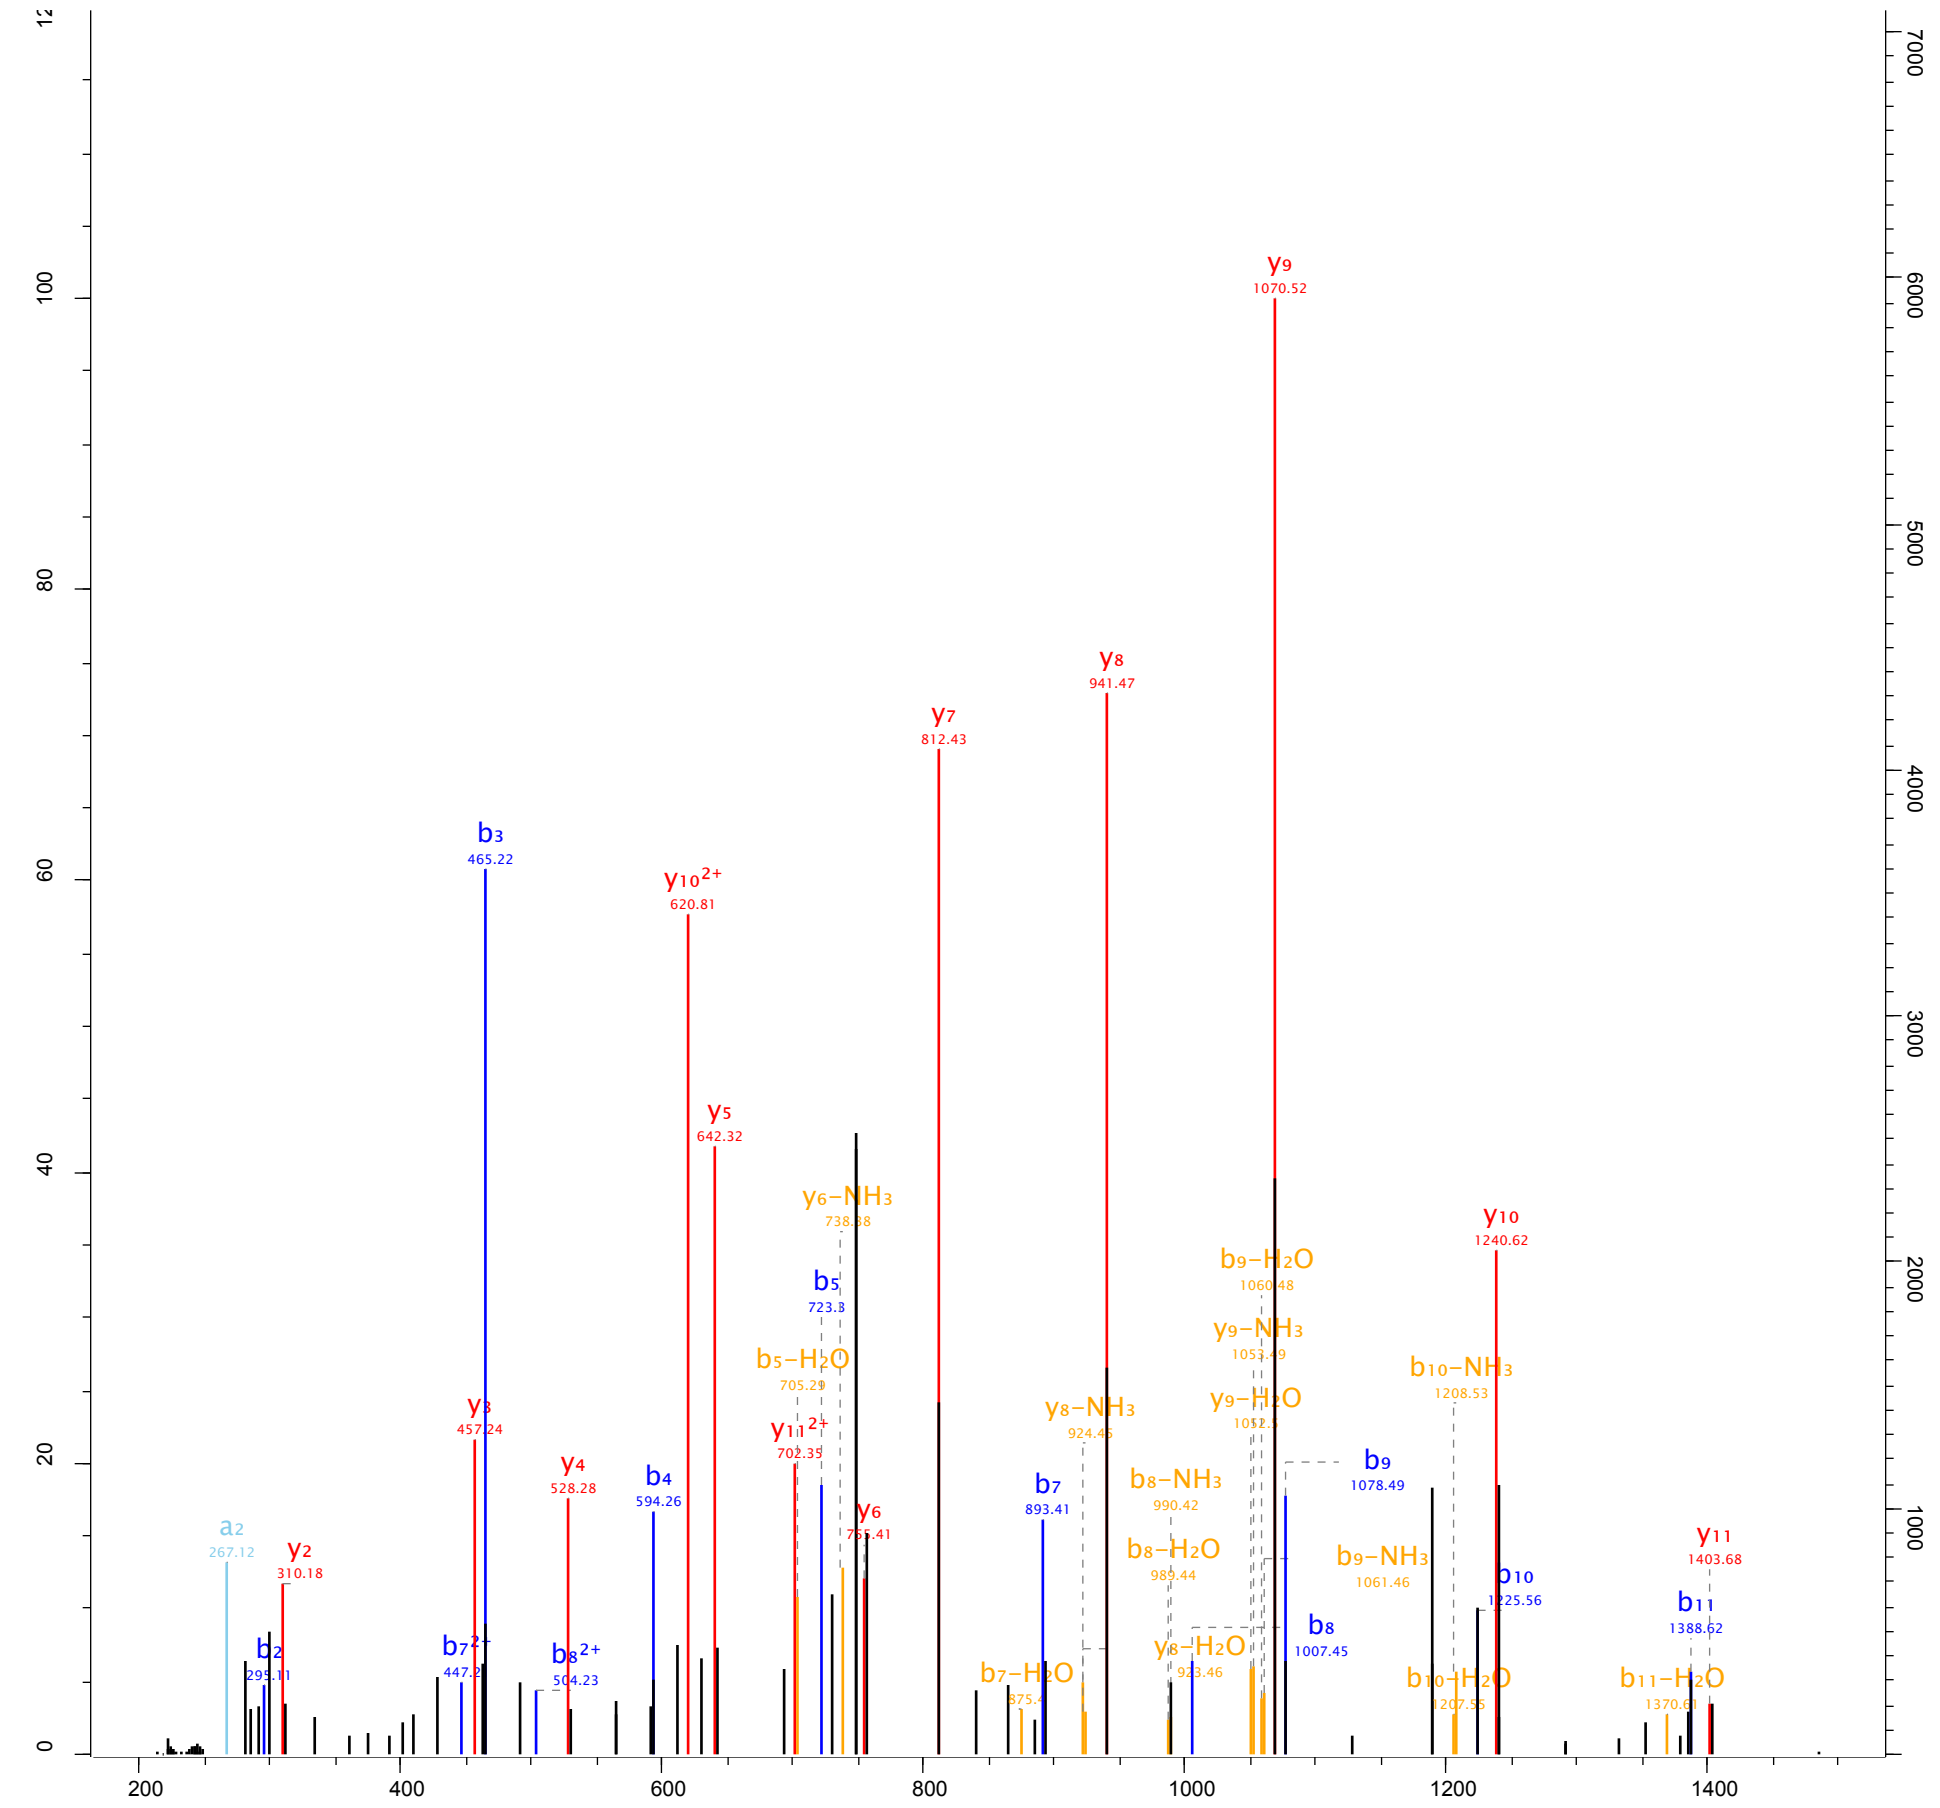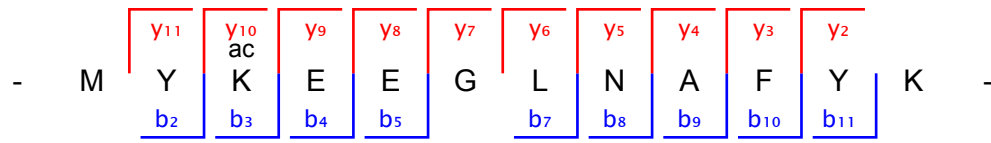

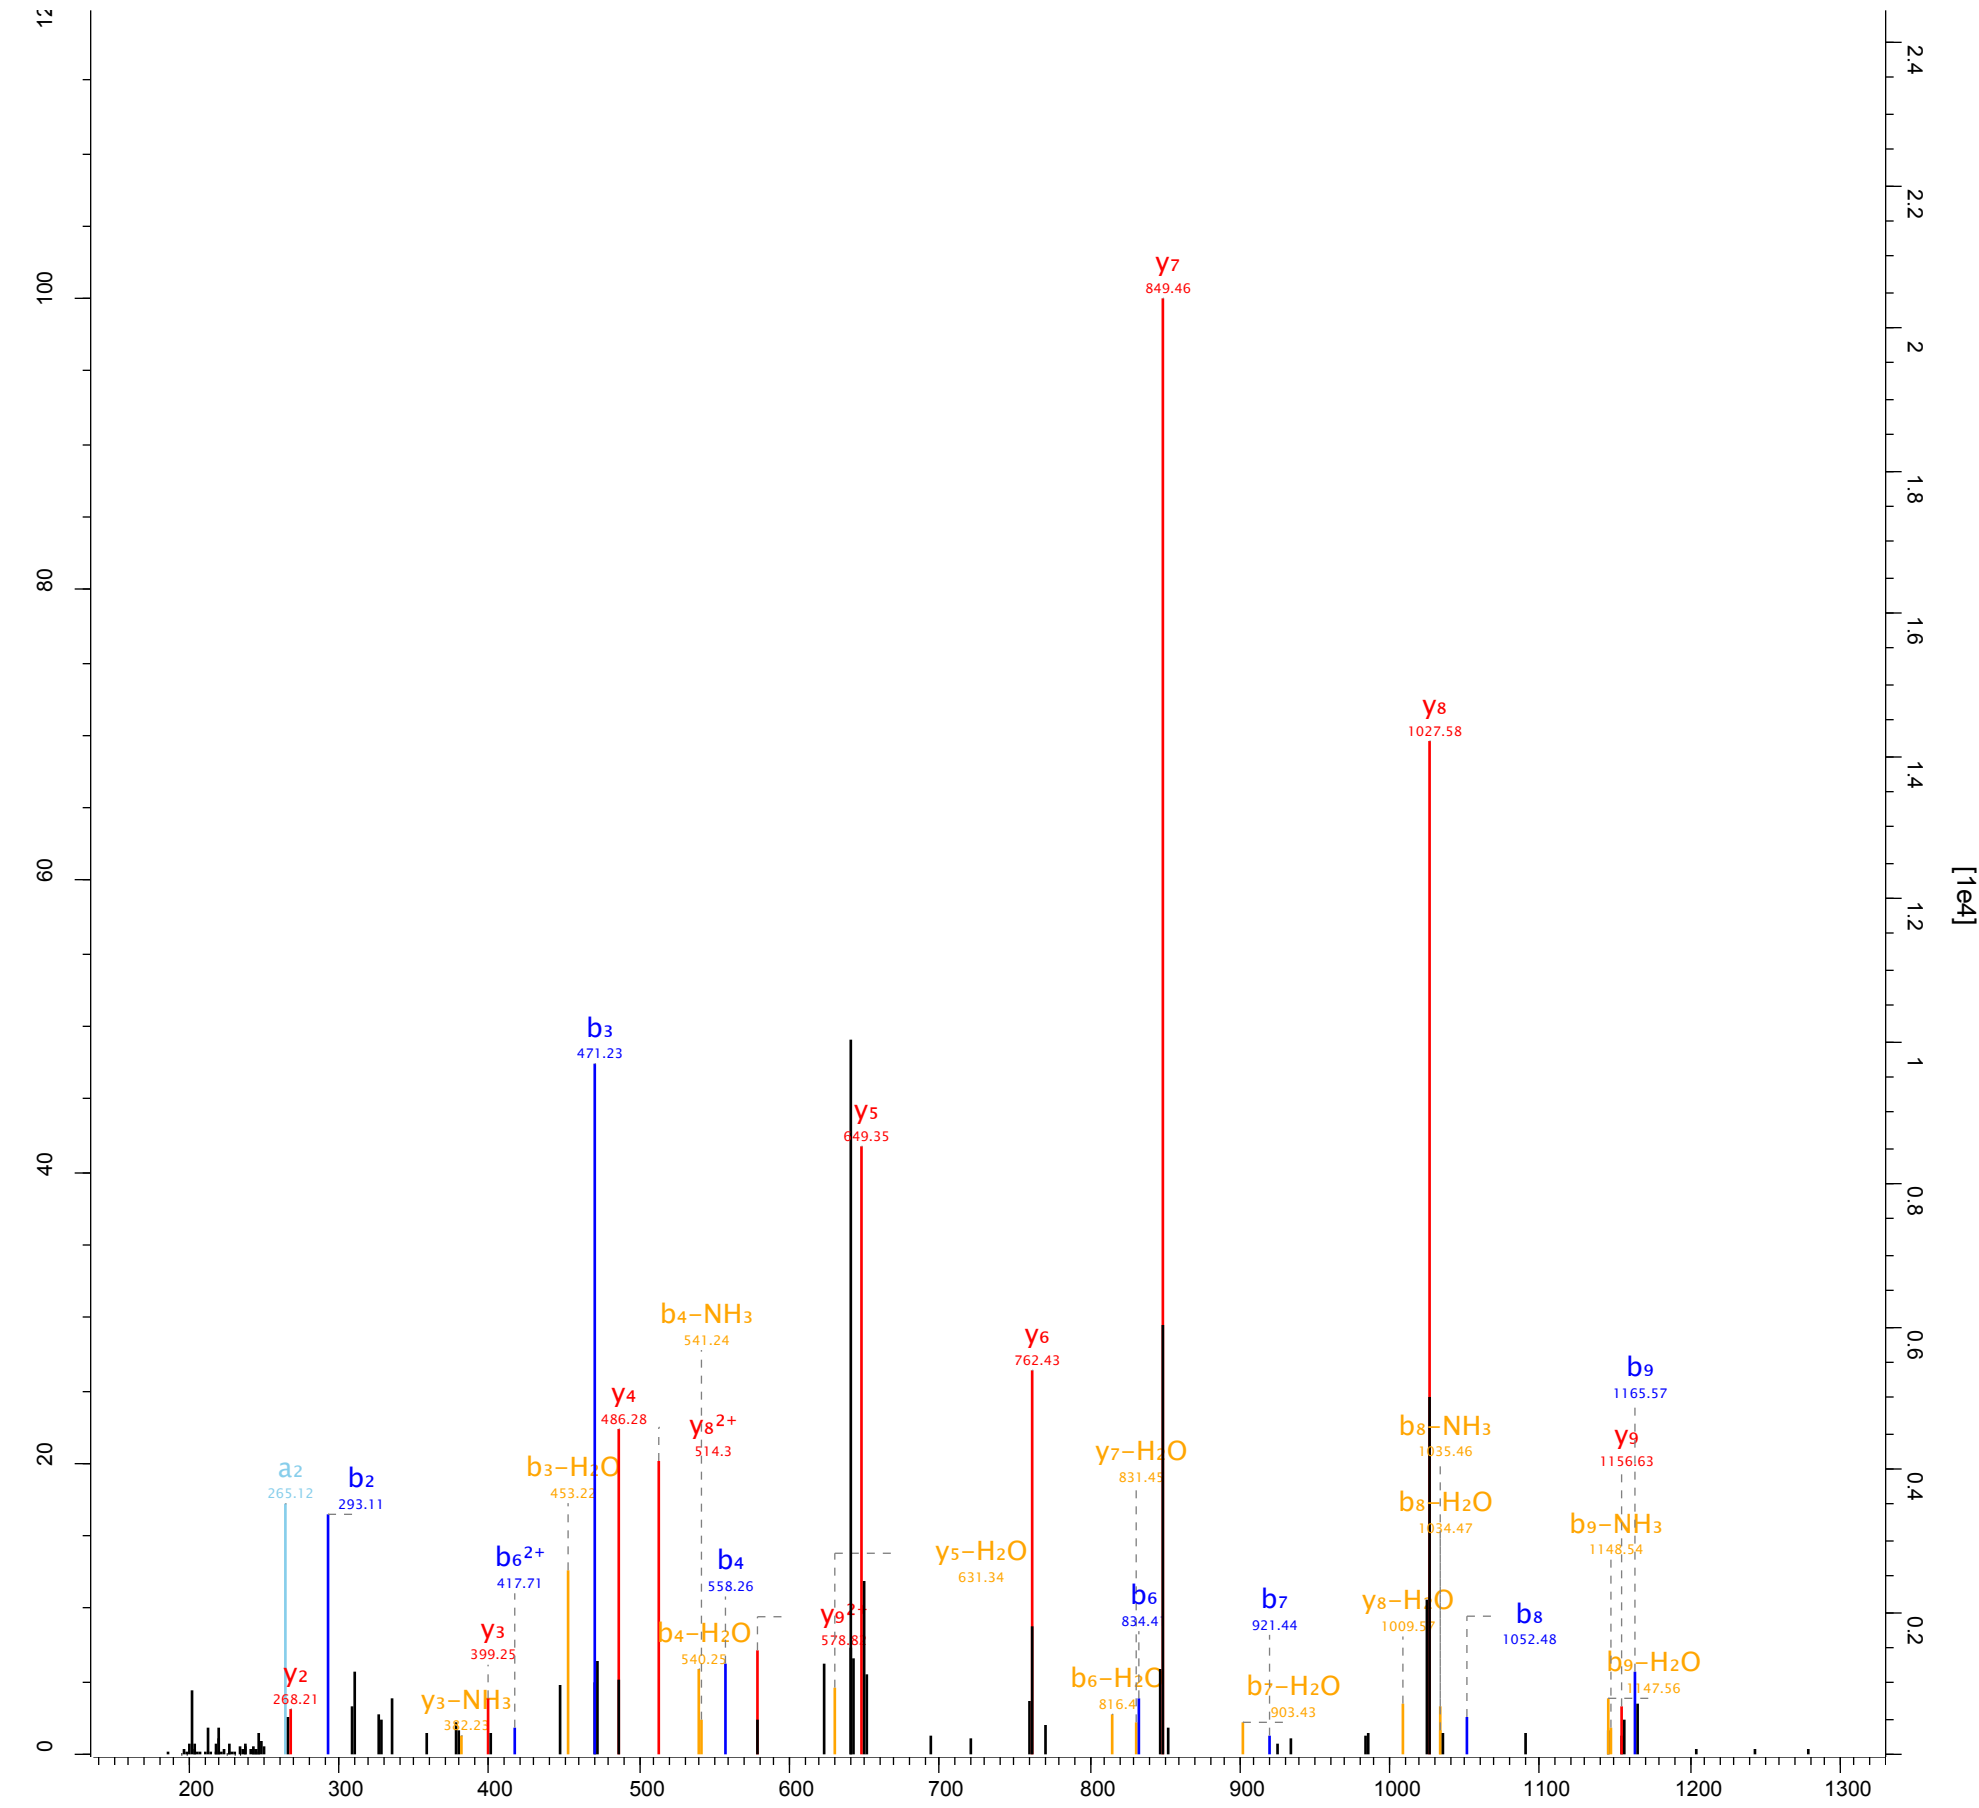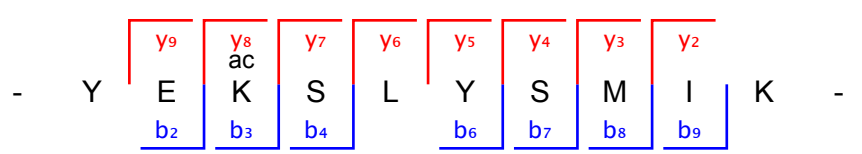

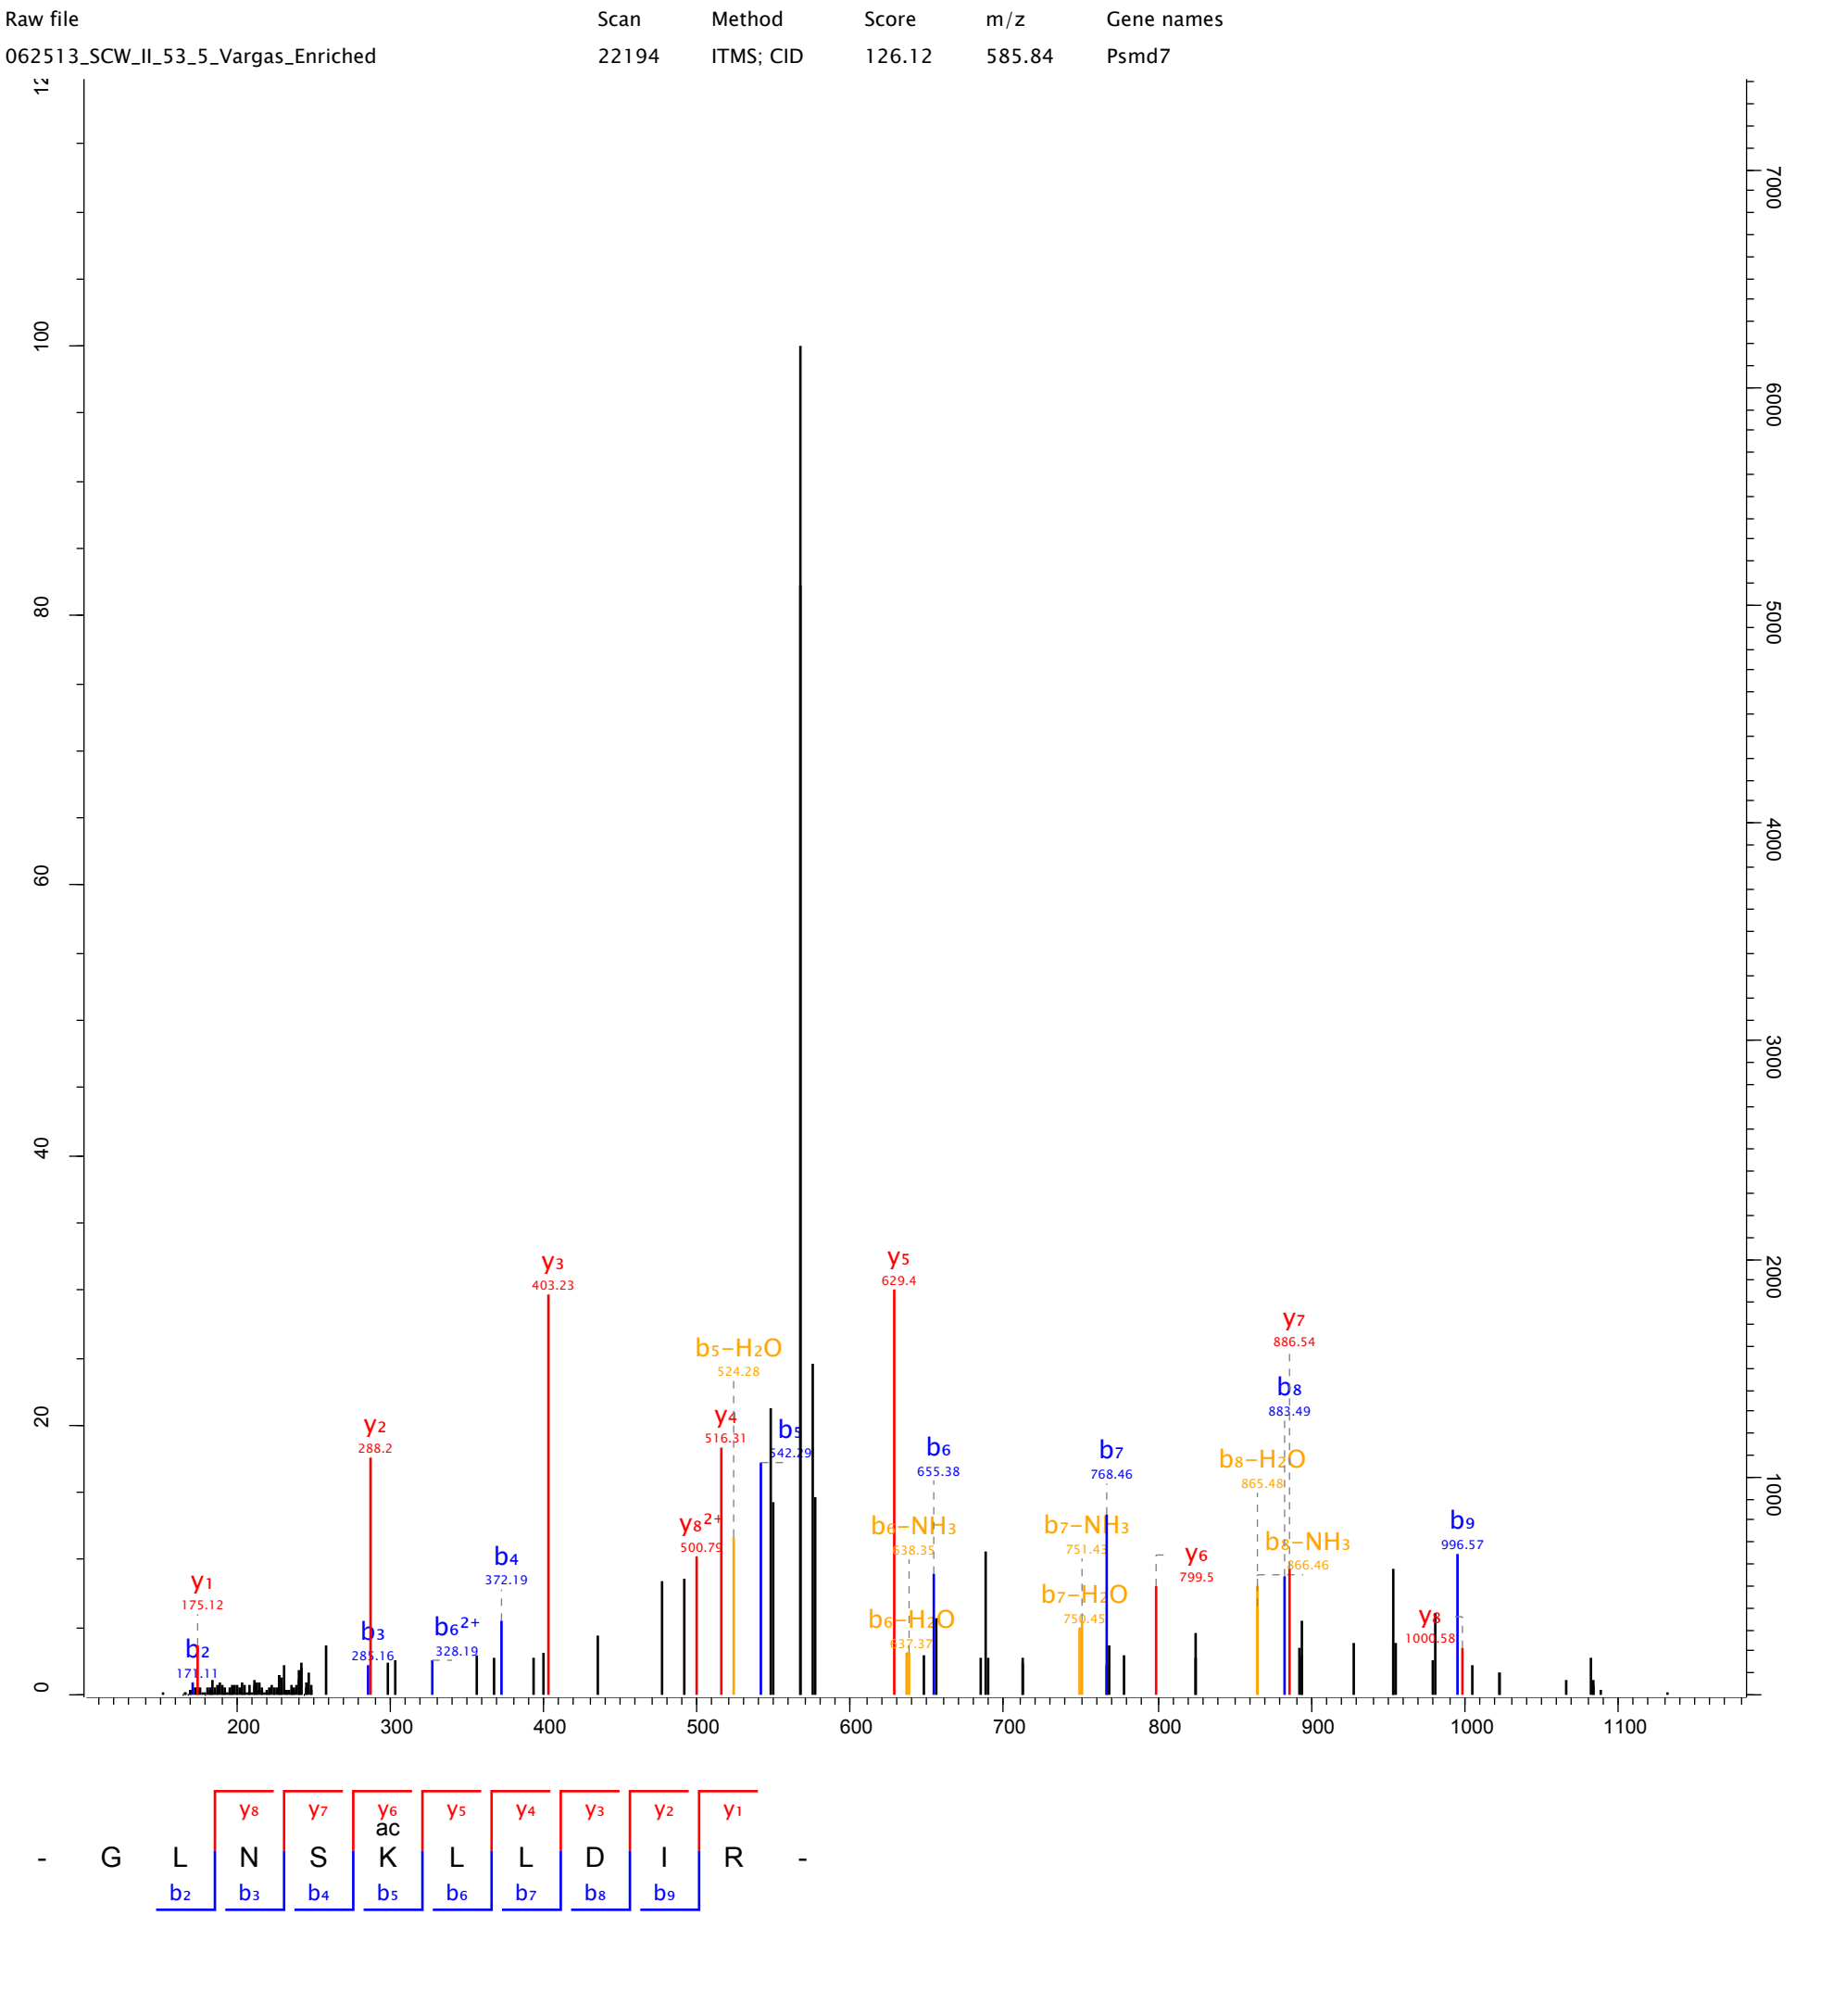

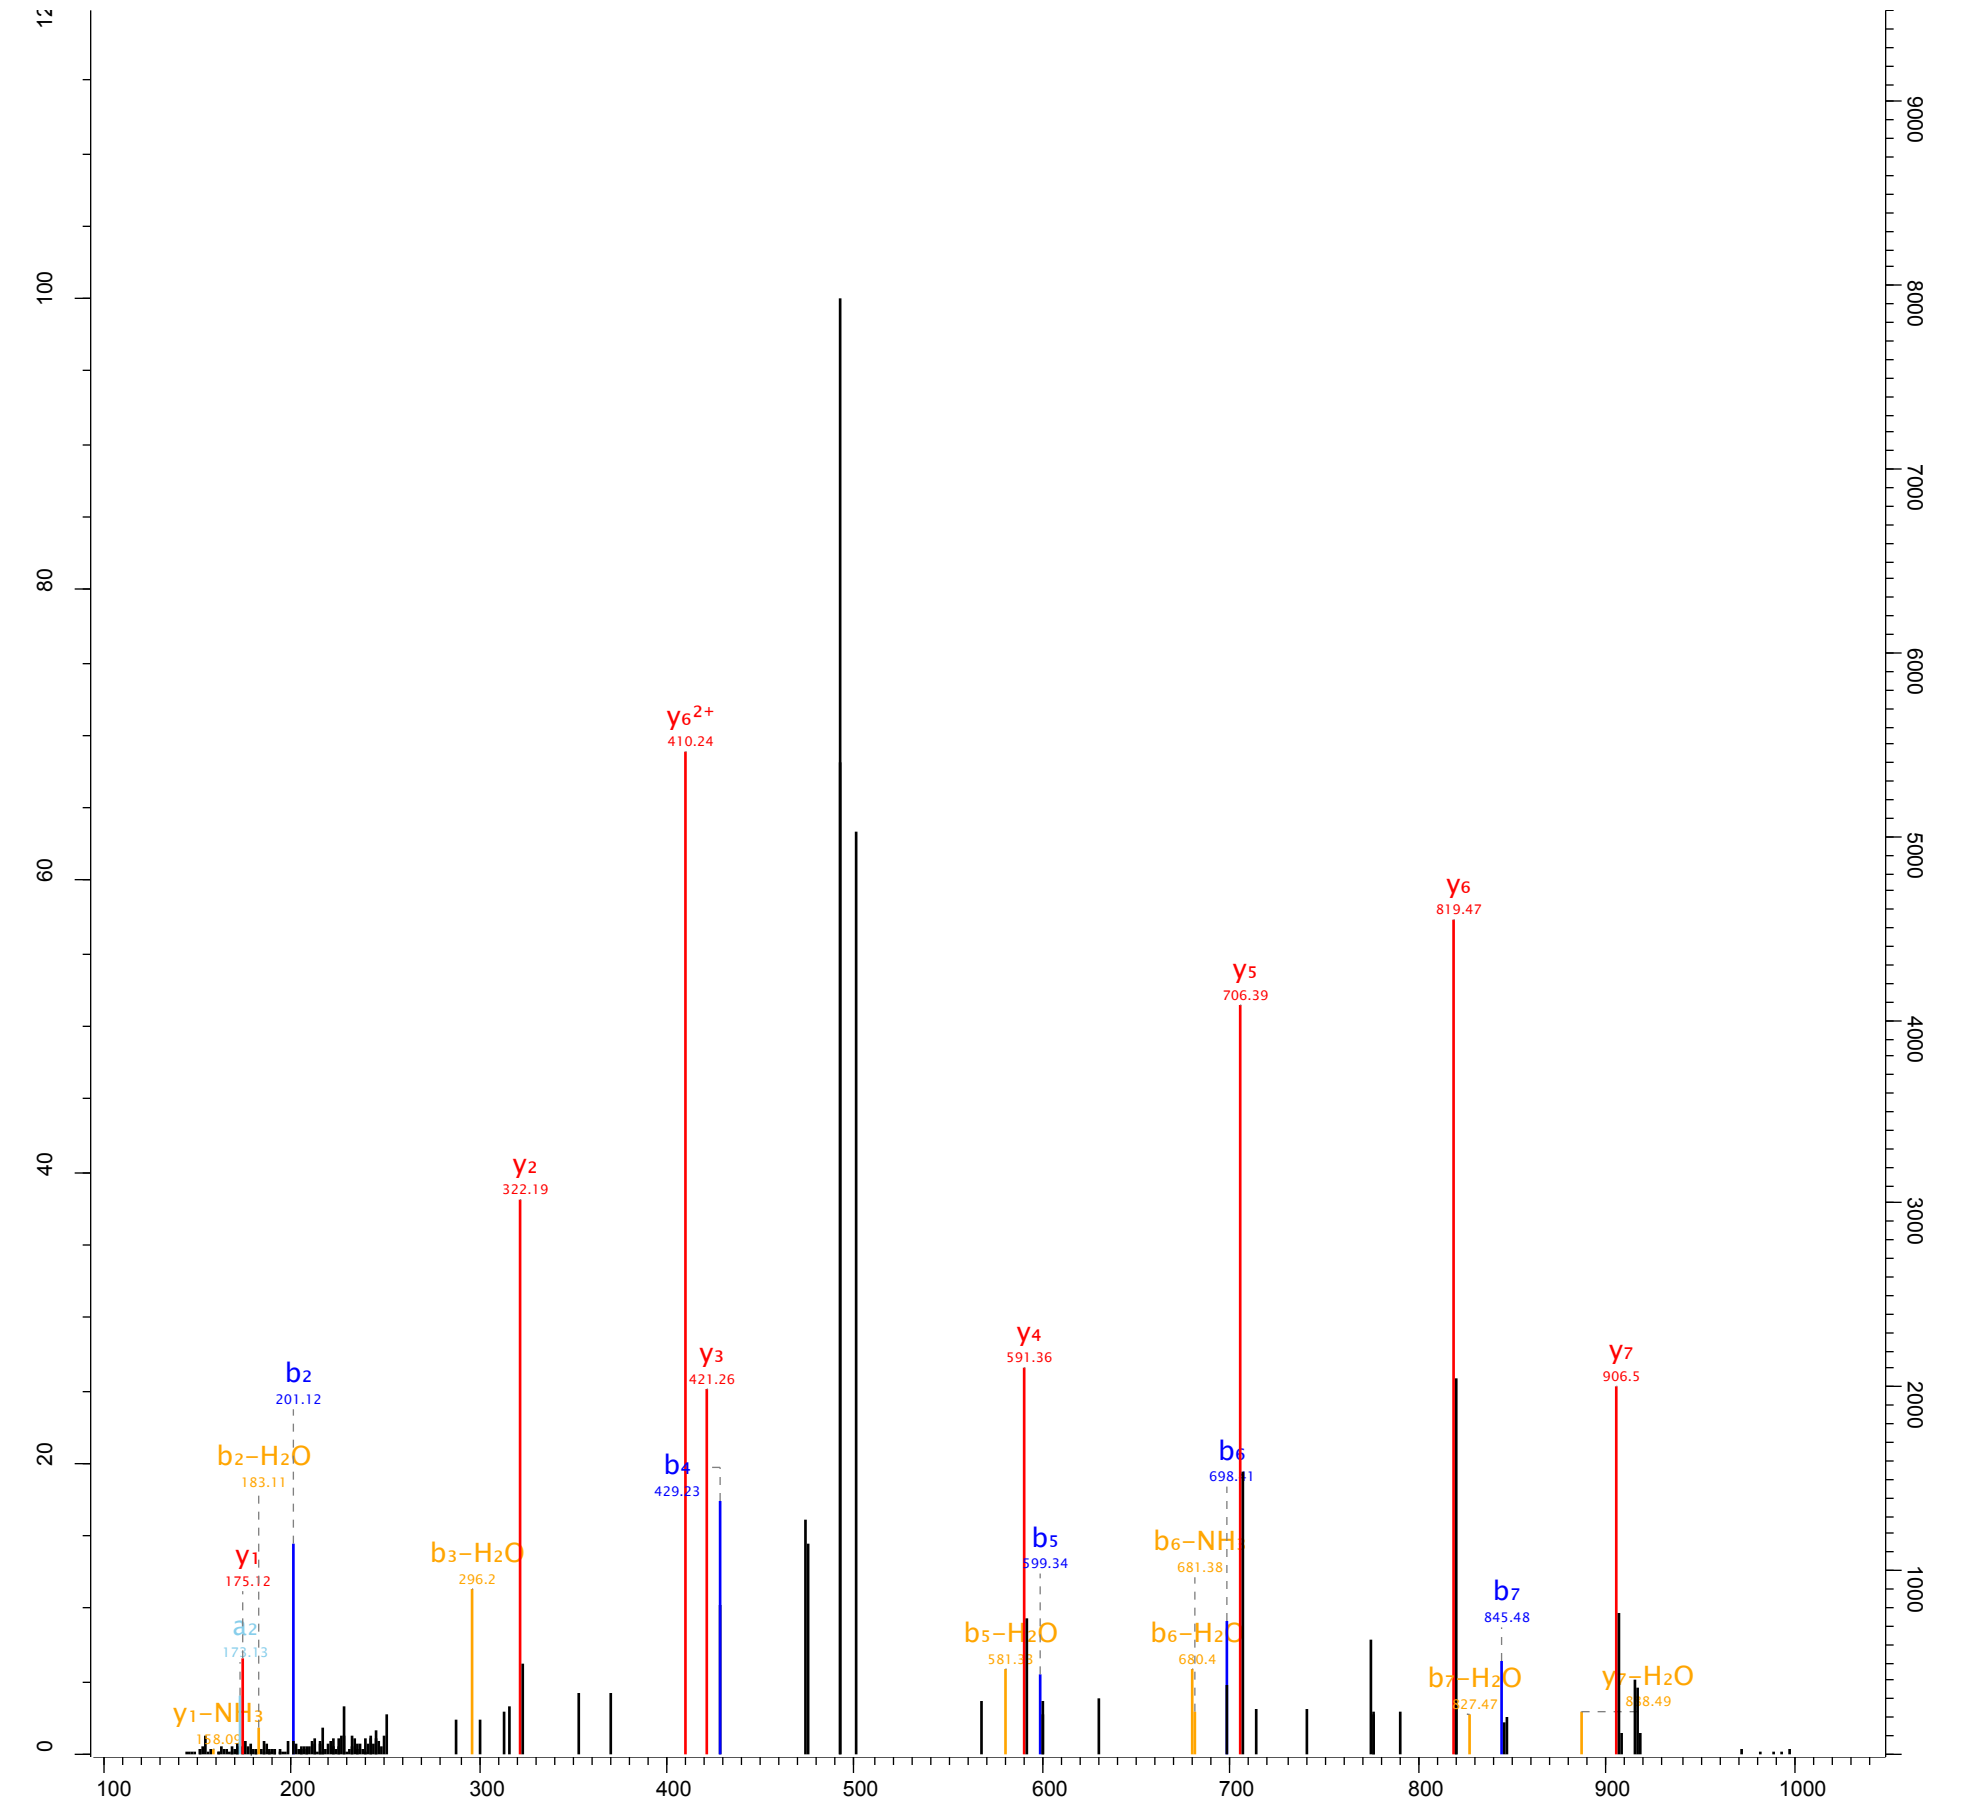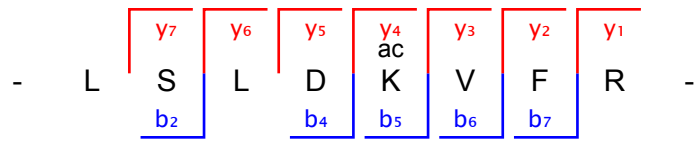

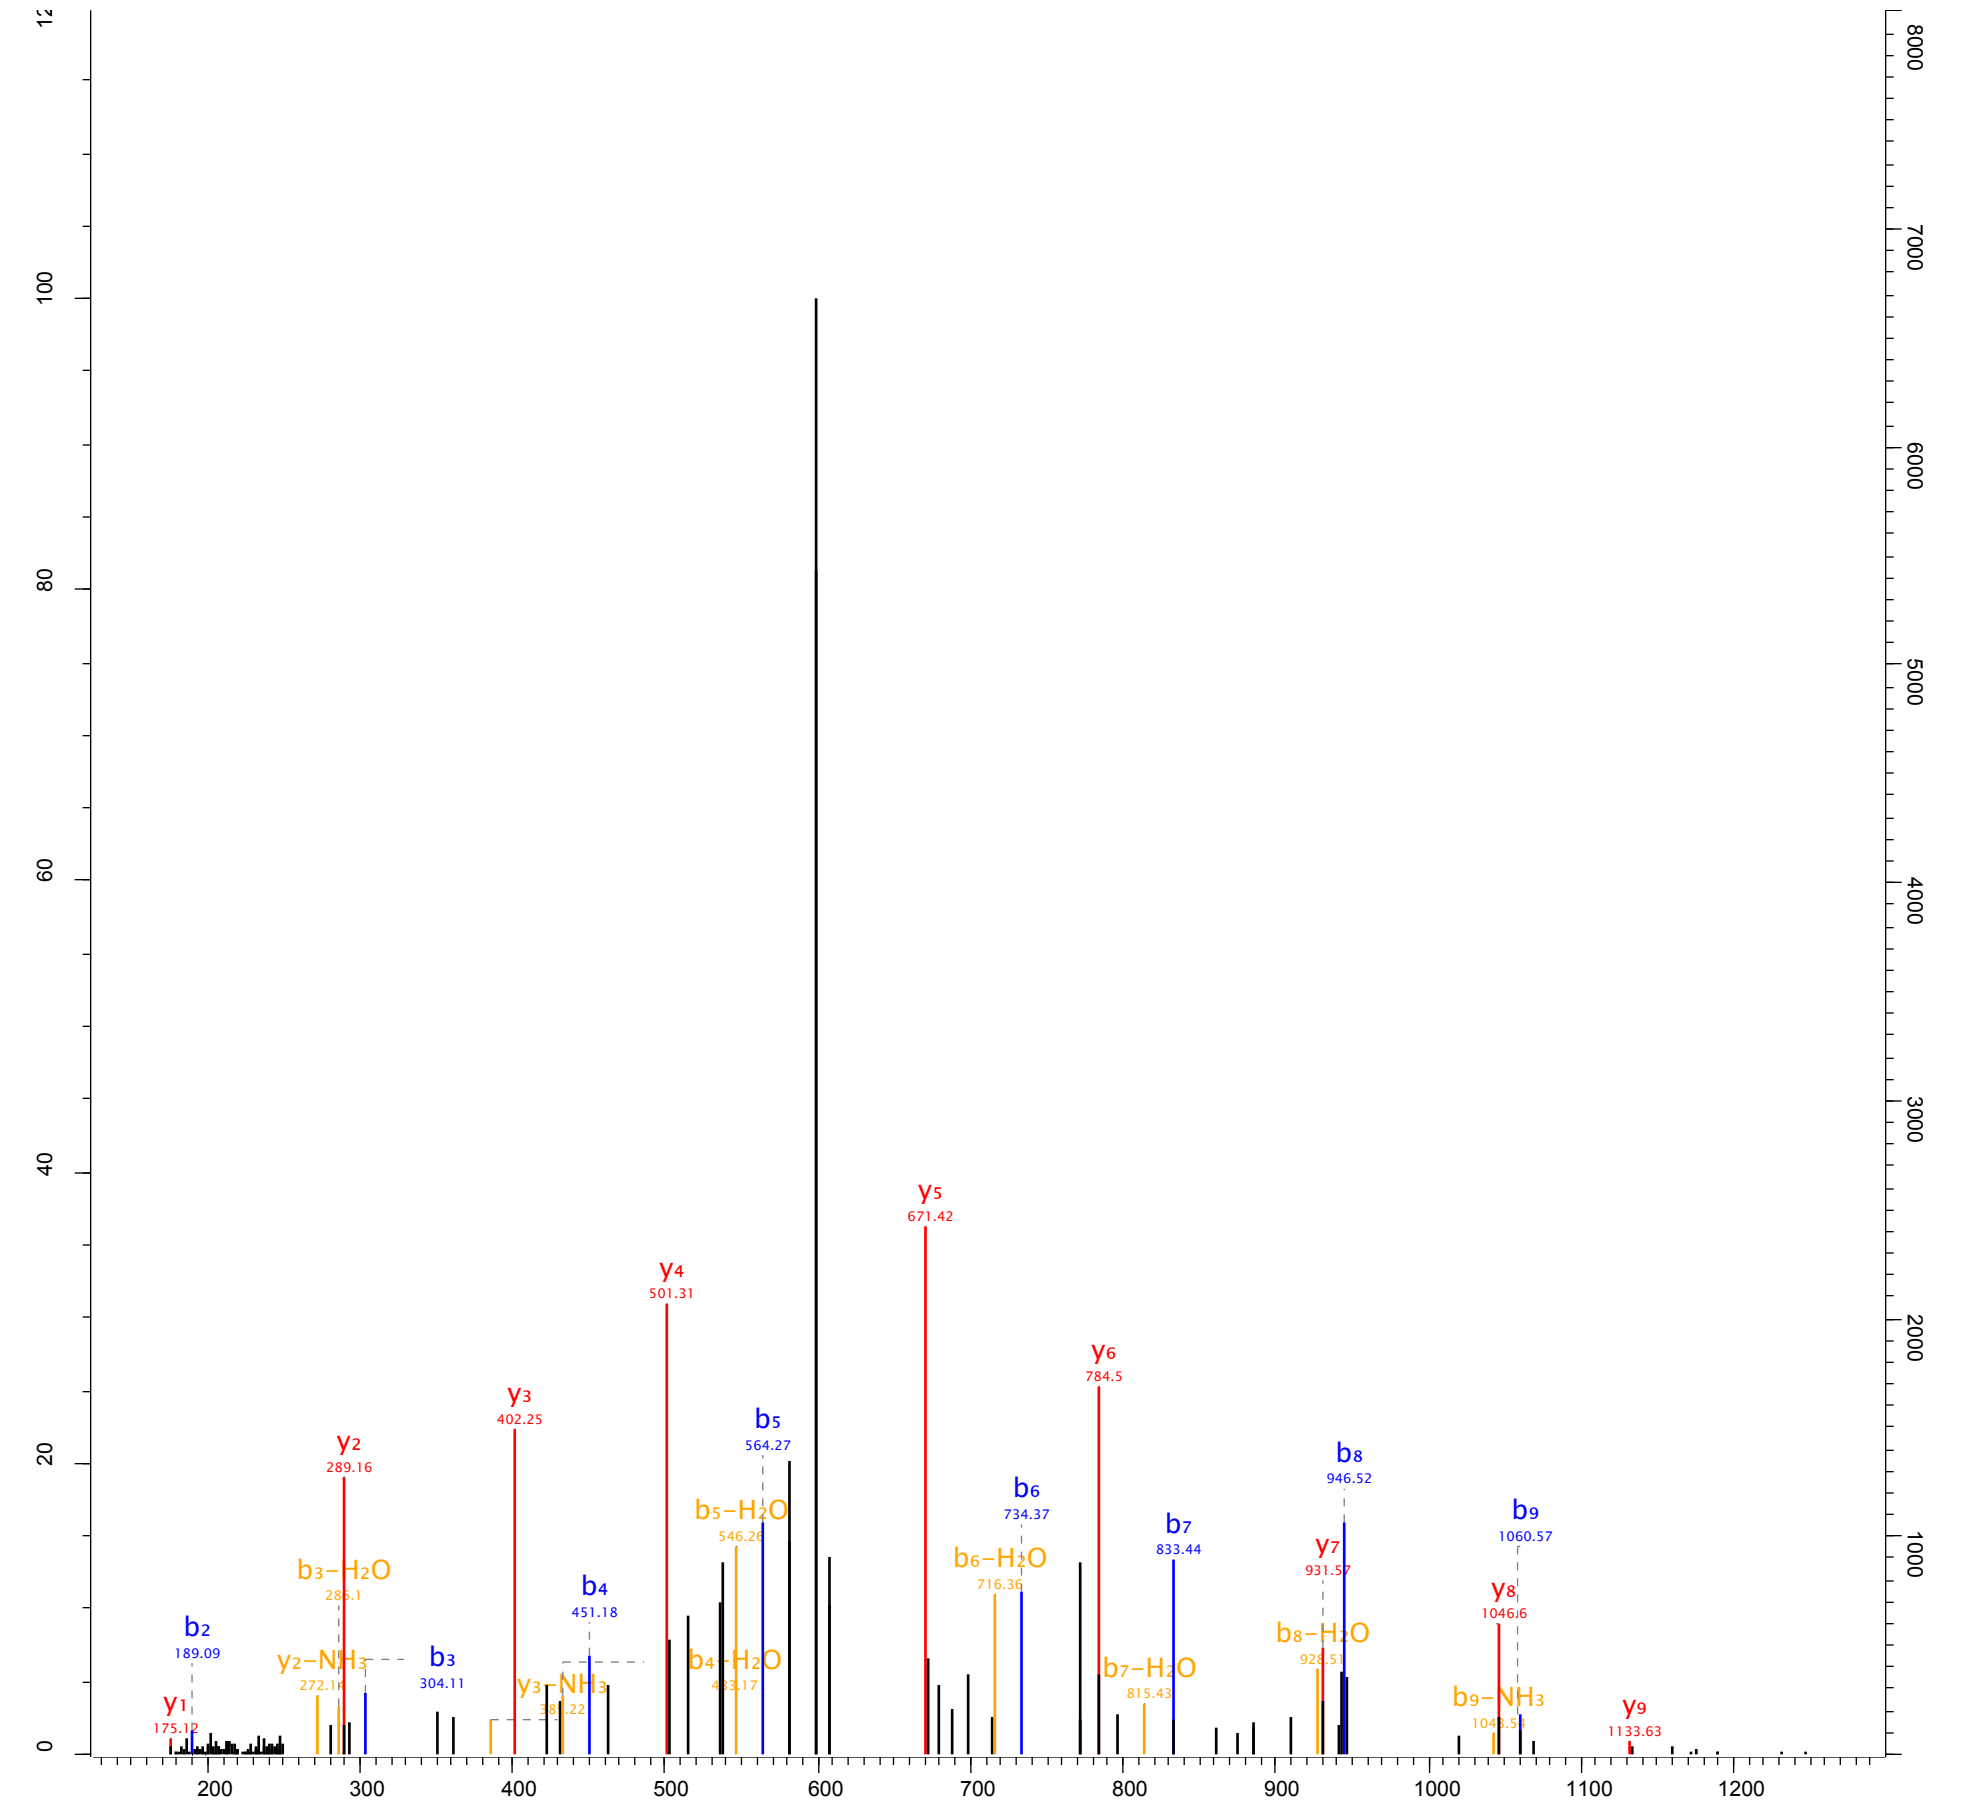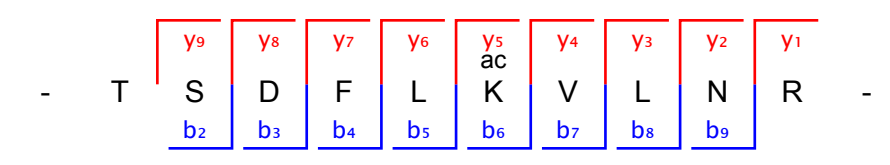

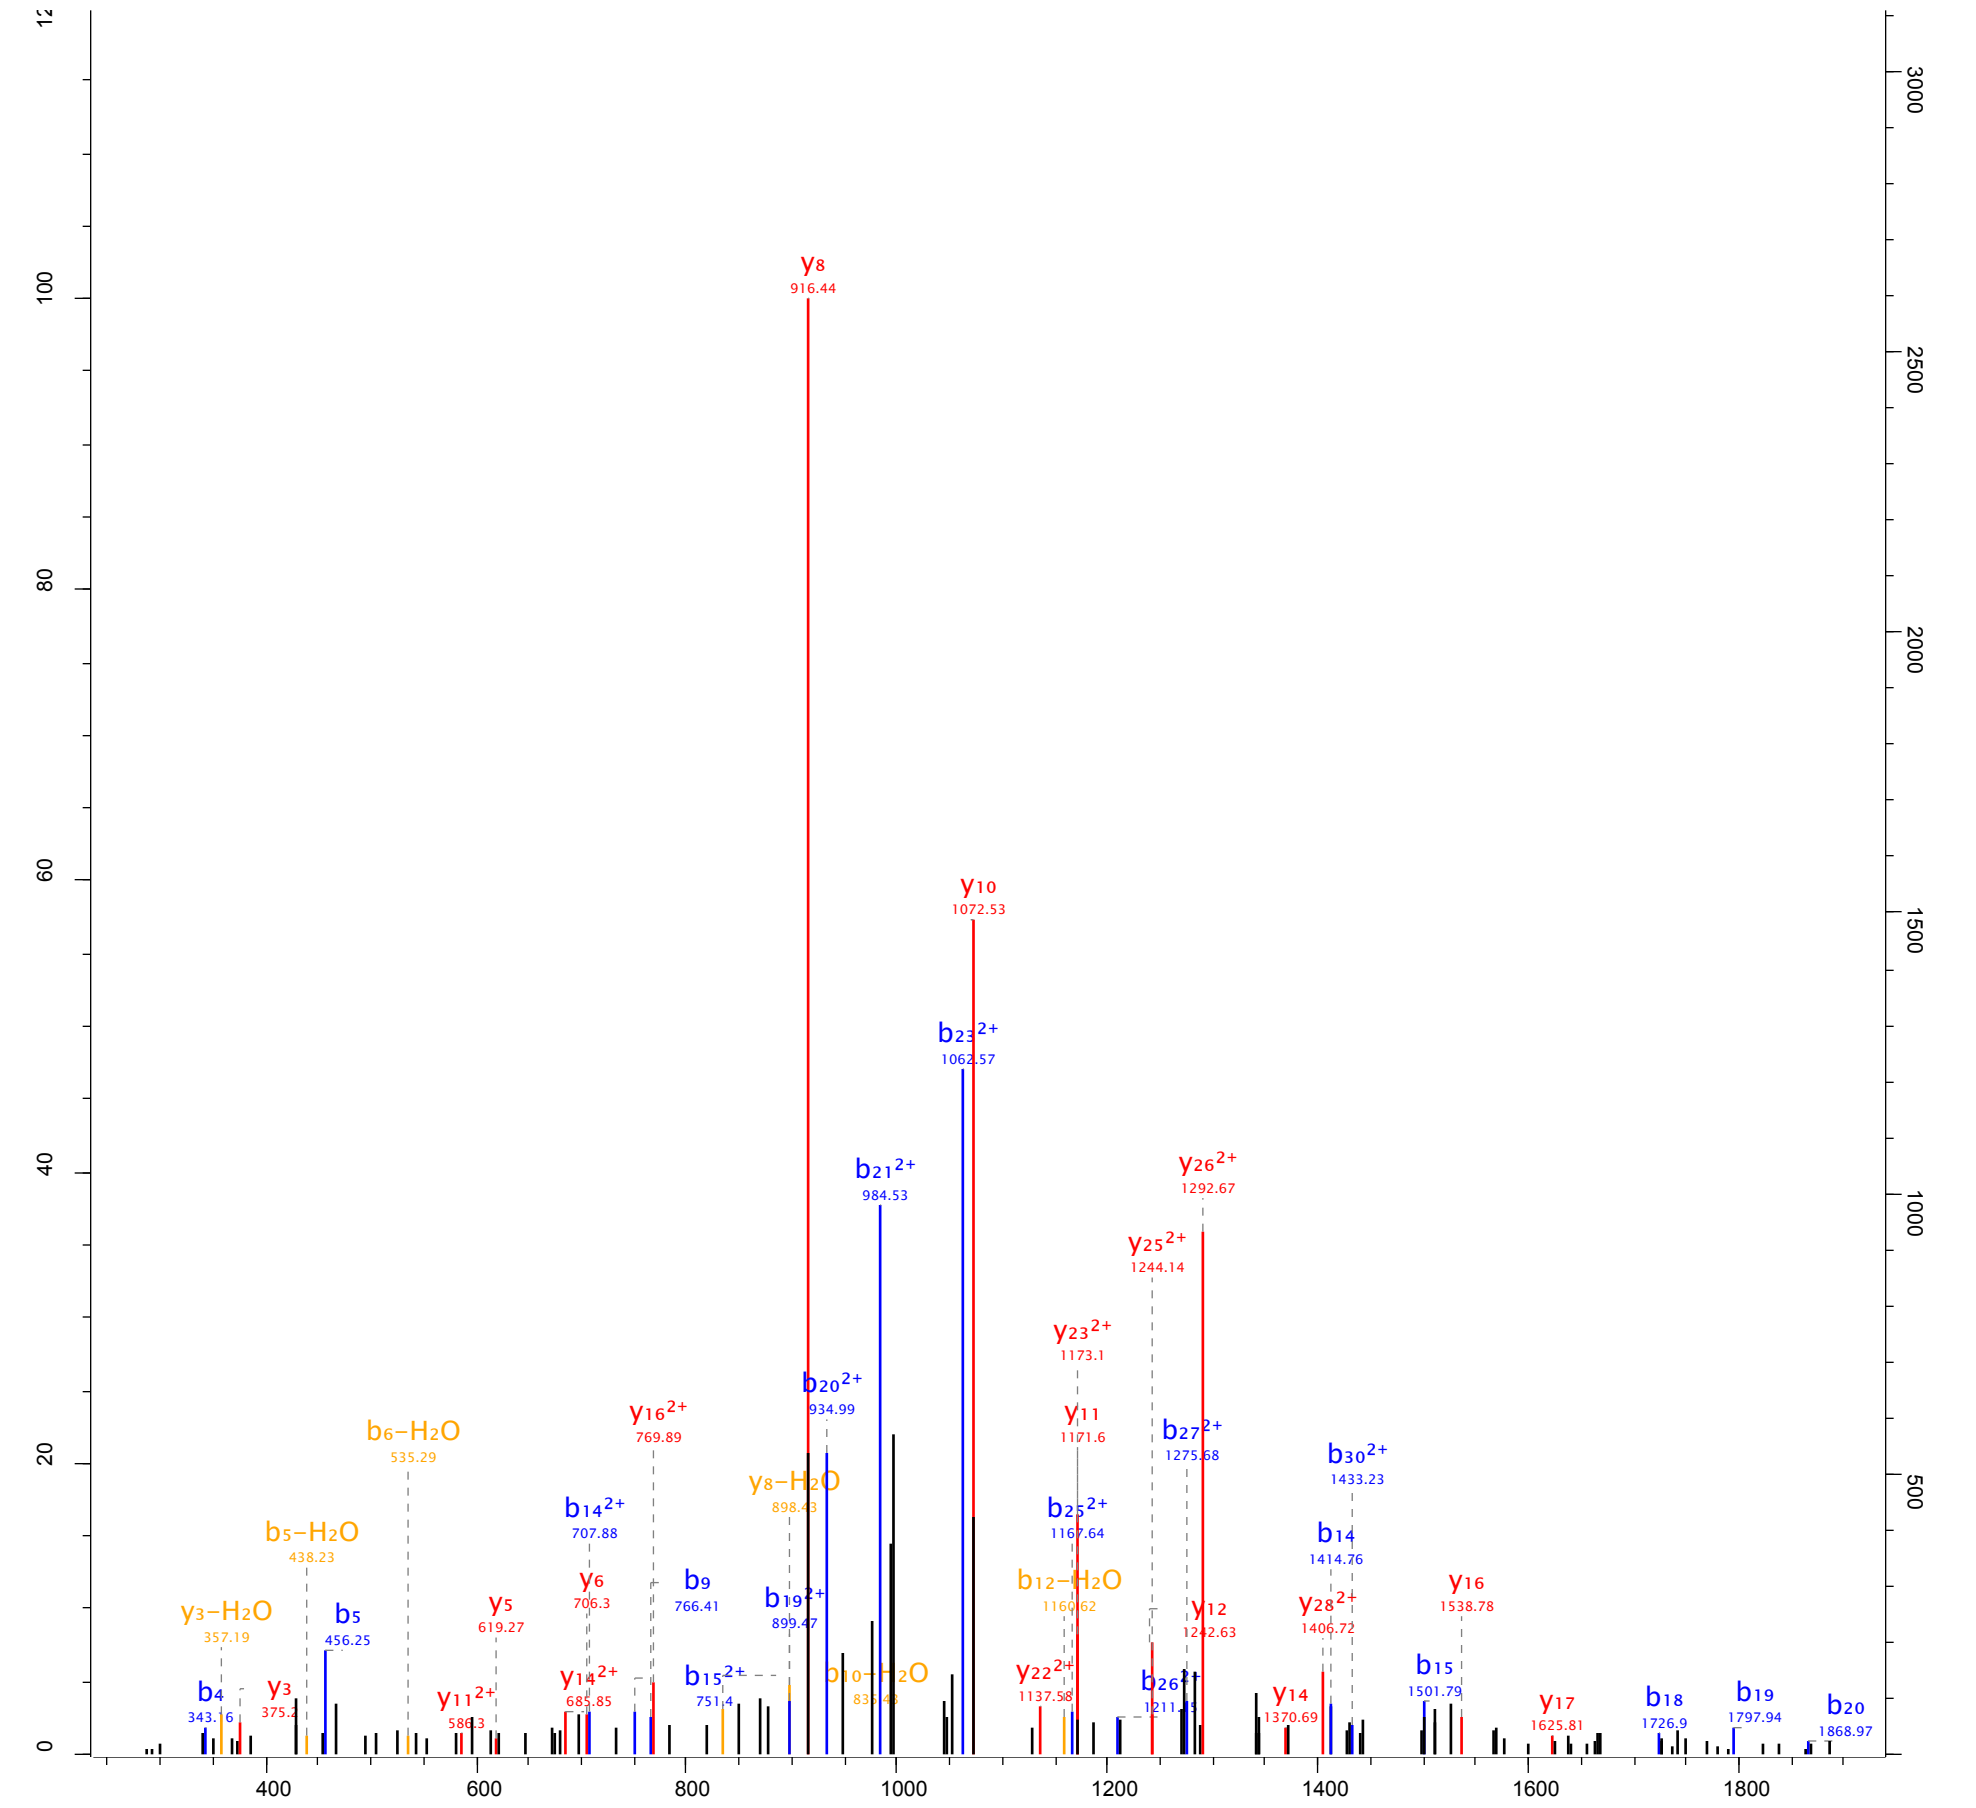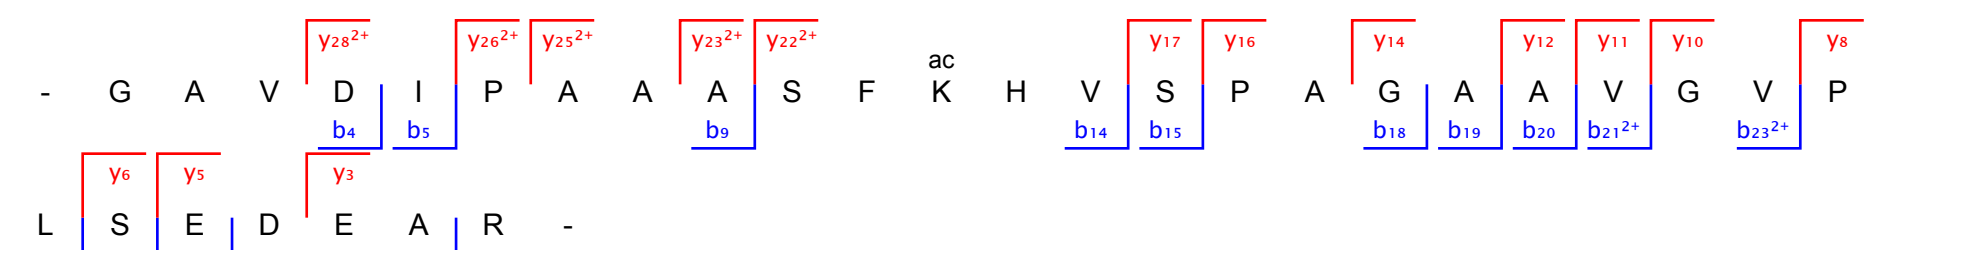

Raw file 062513\_SCW\_II\_53\_5\_Vargas\_Enriched Scan 23480 Method ITMS; CID Score 147.28 m/z 637.34 Gene names Gstm2;Gstm1

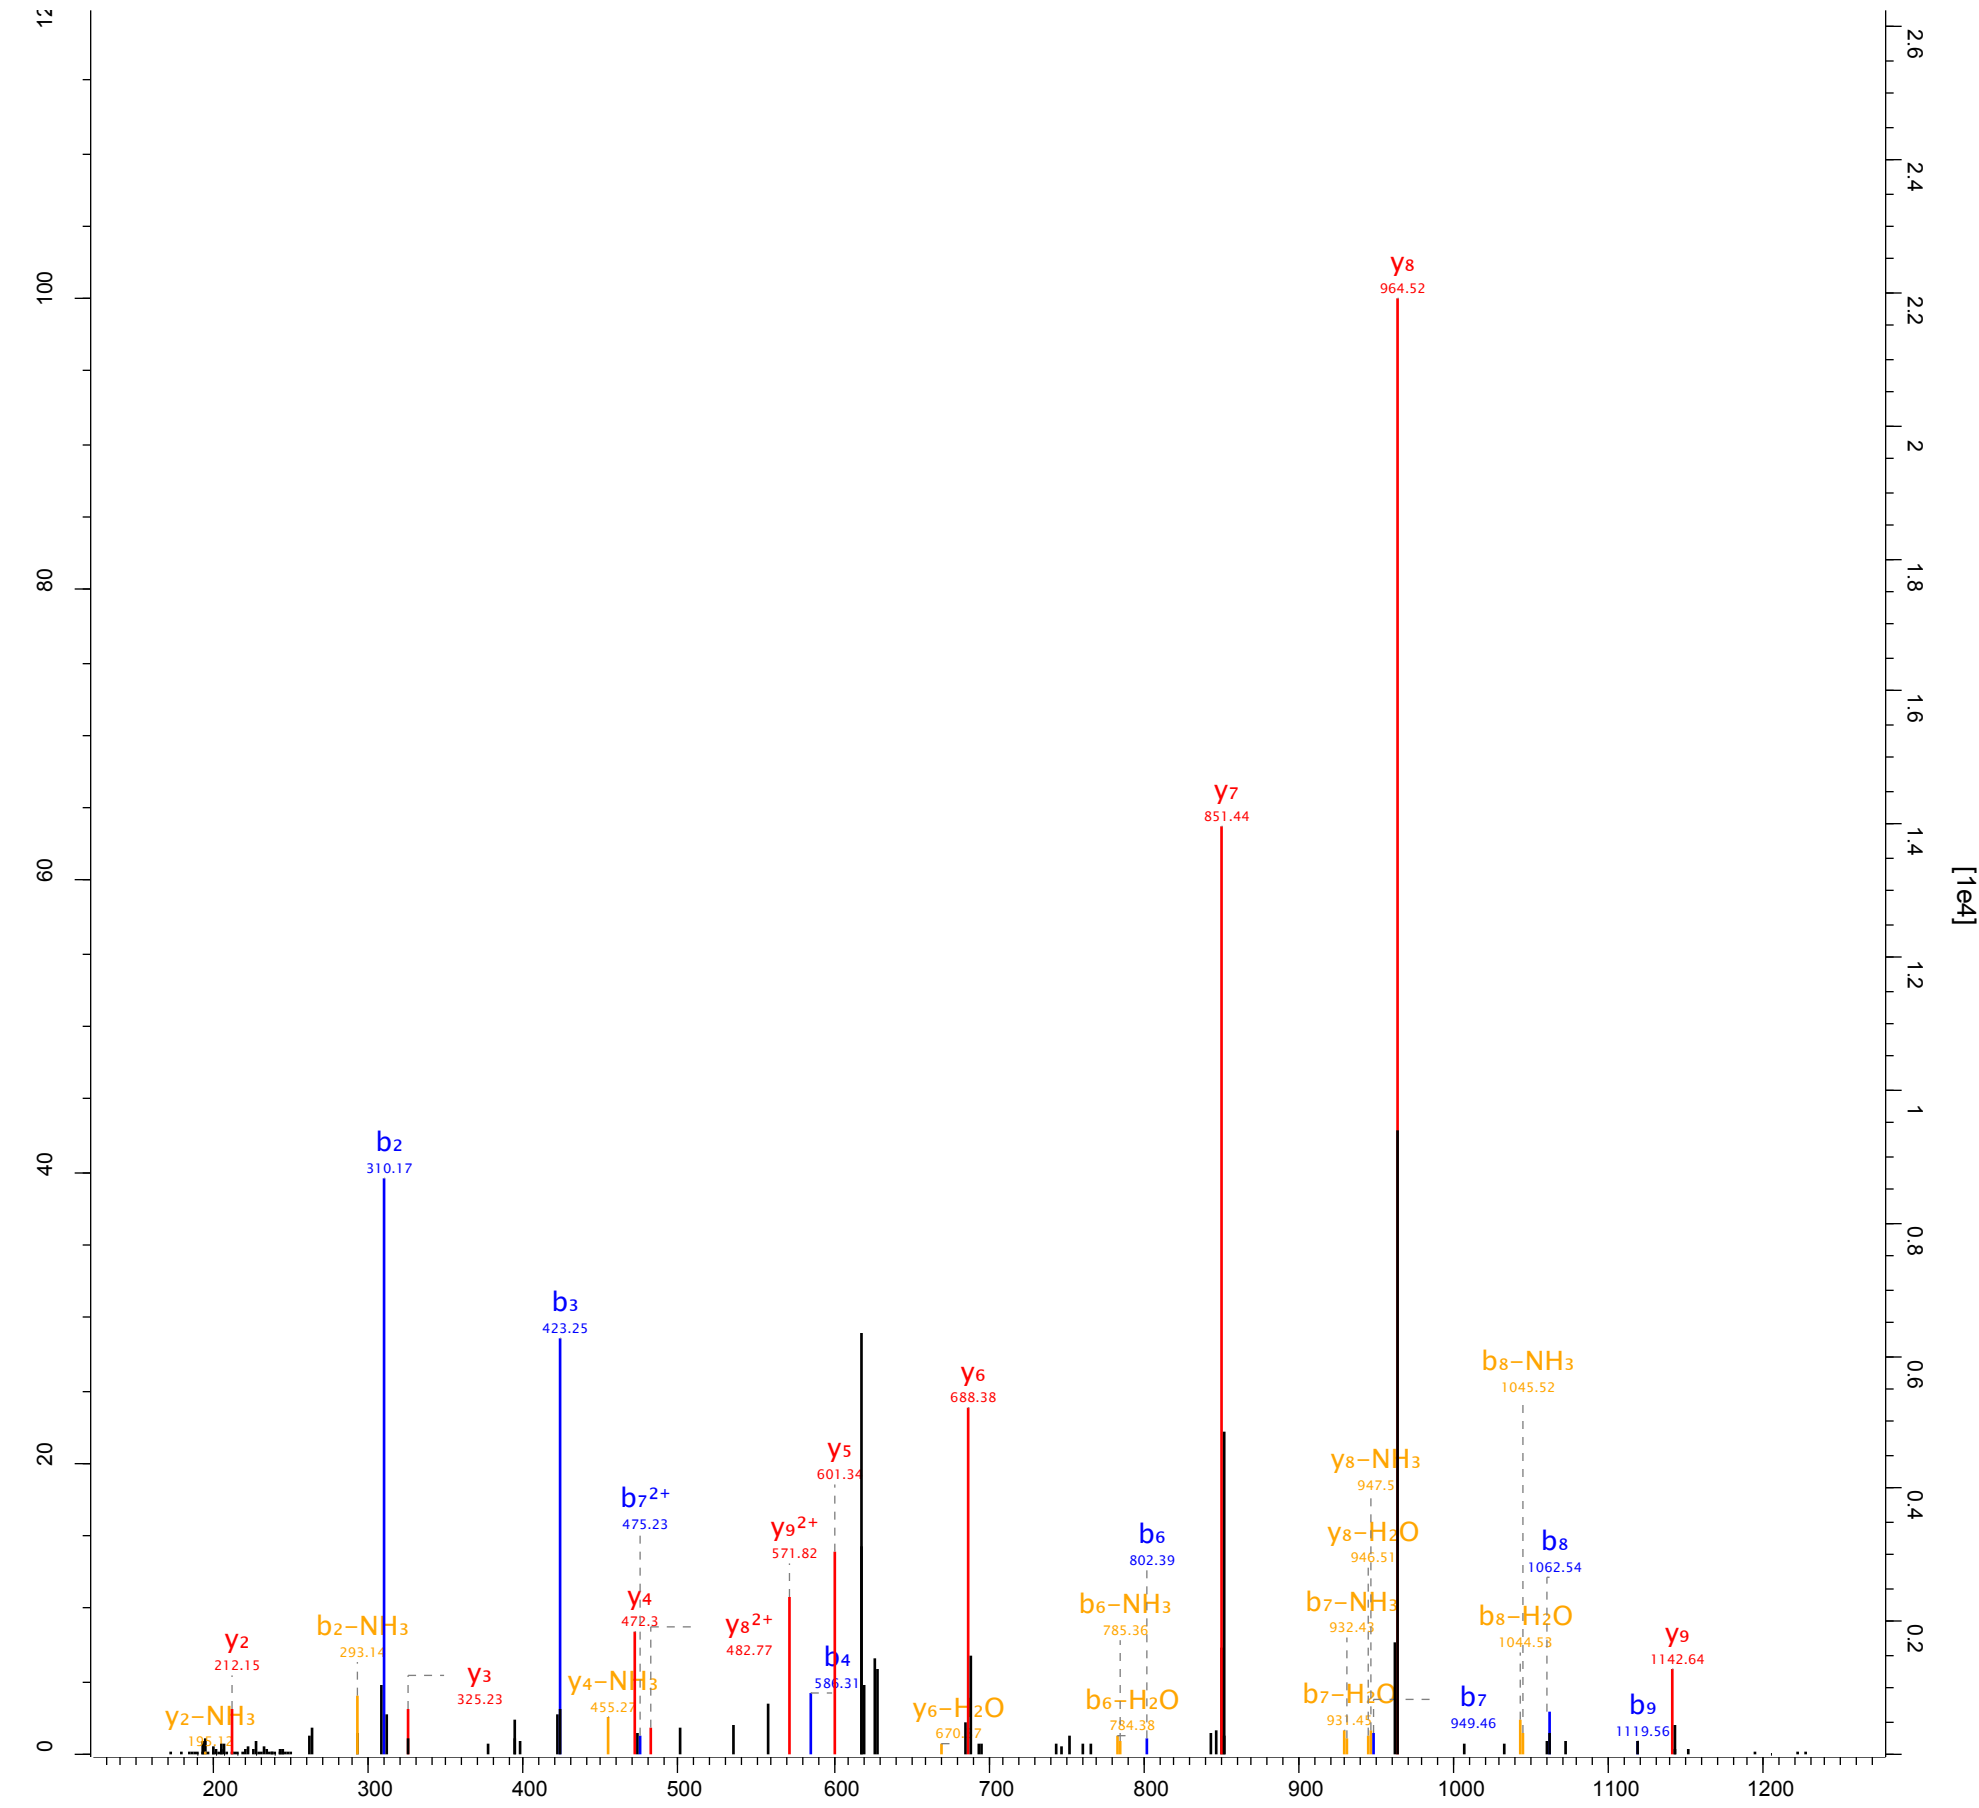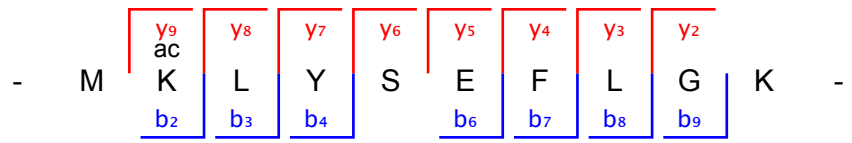

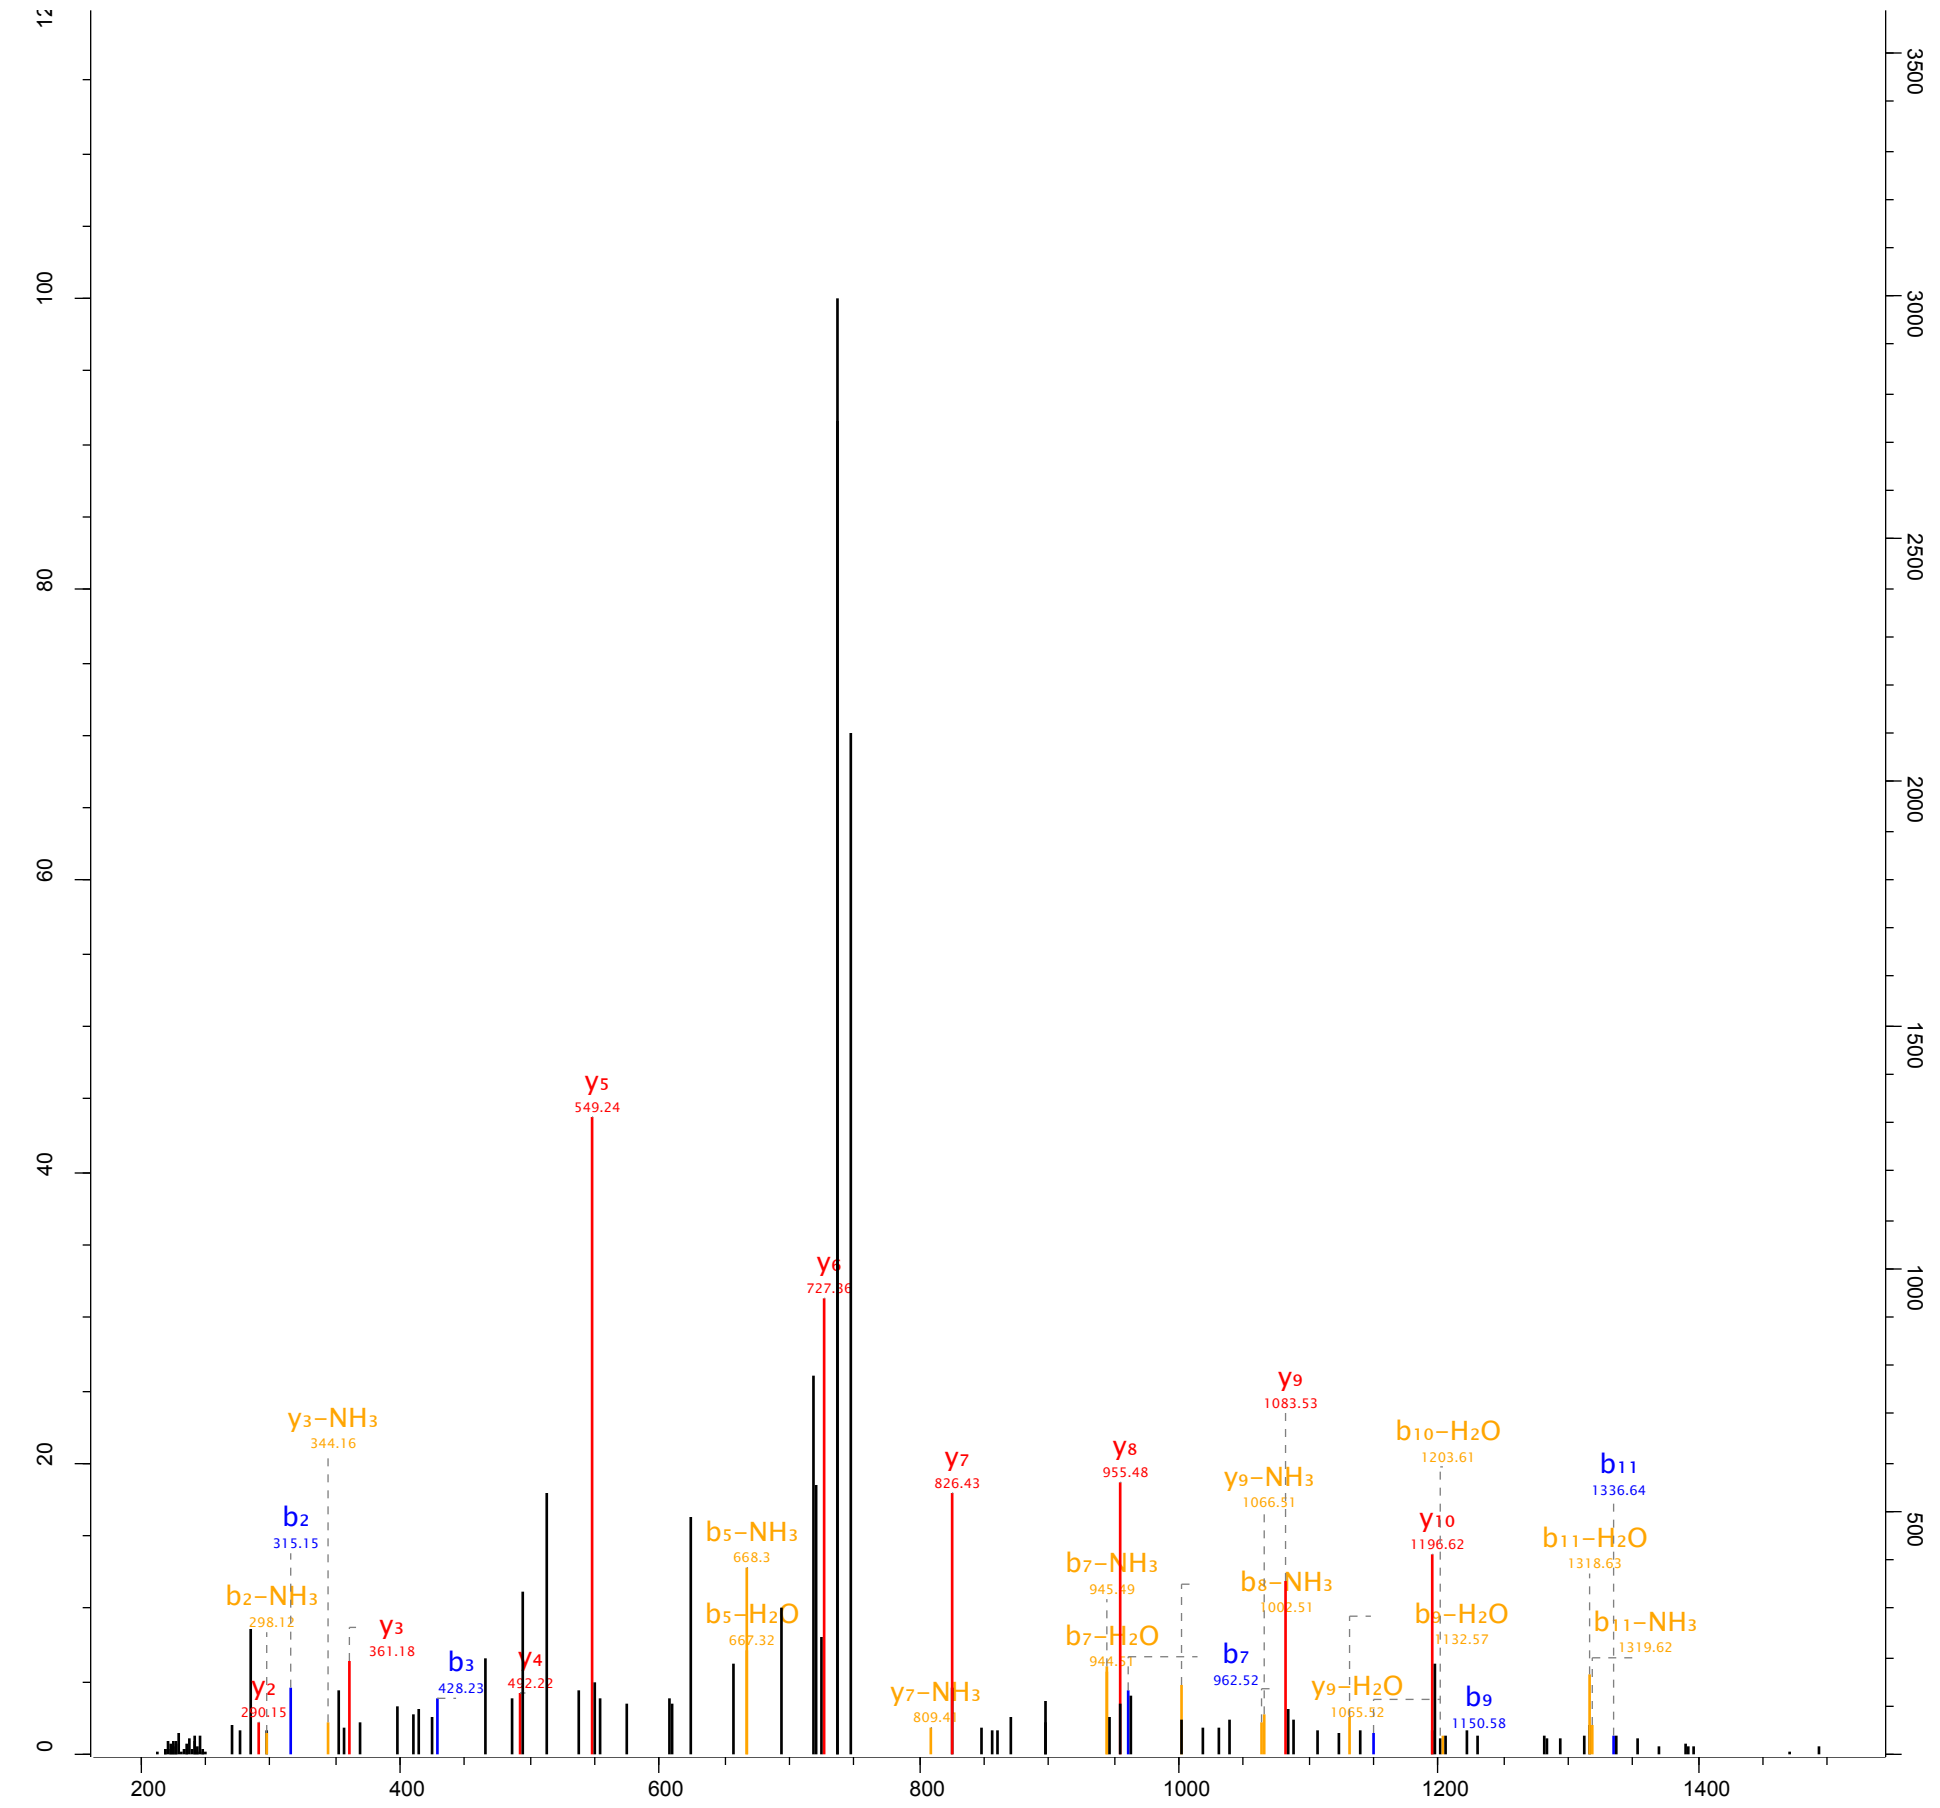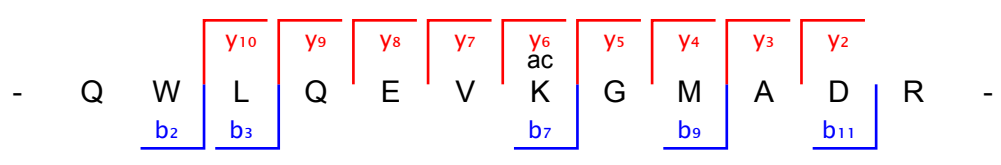



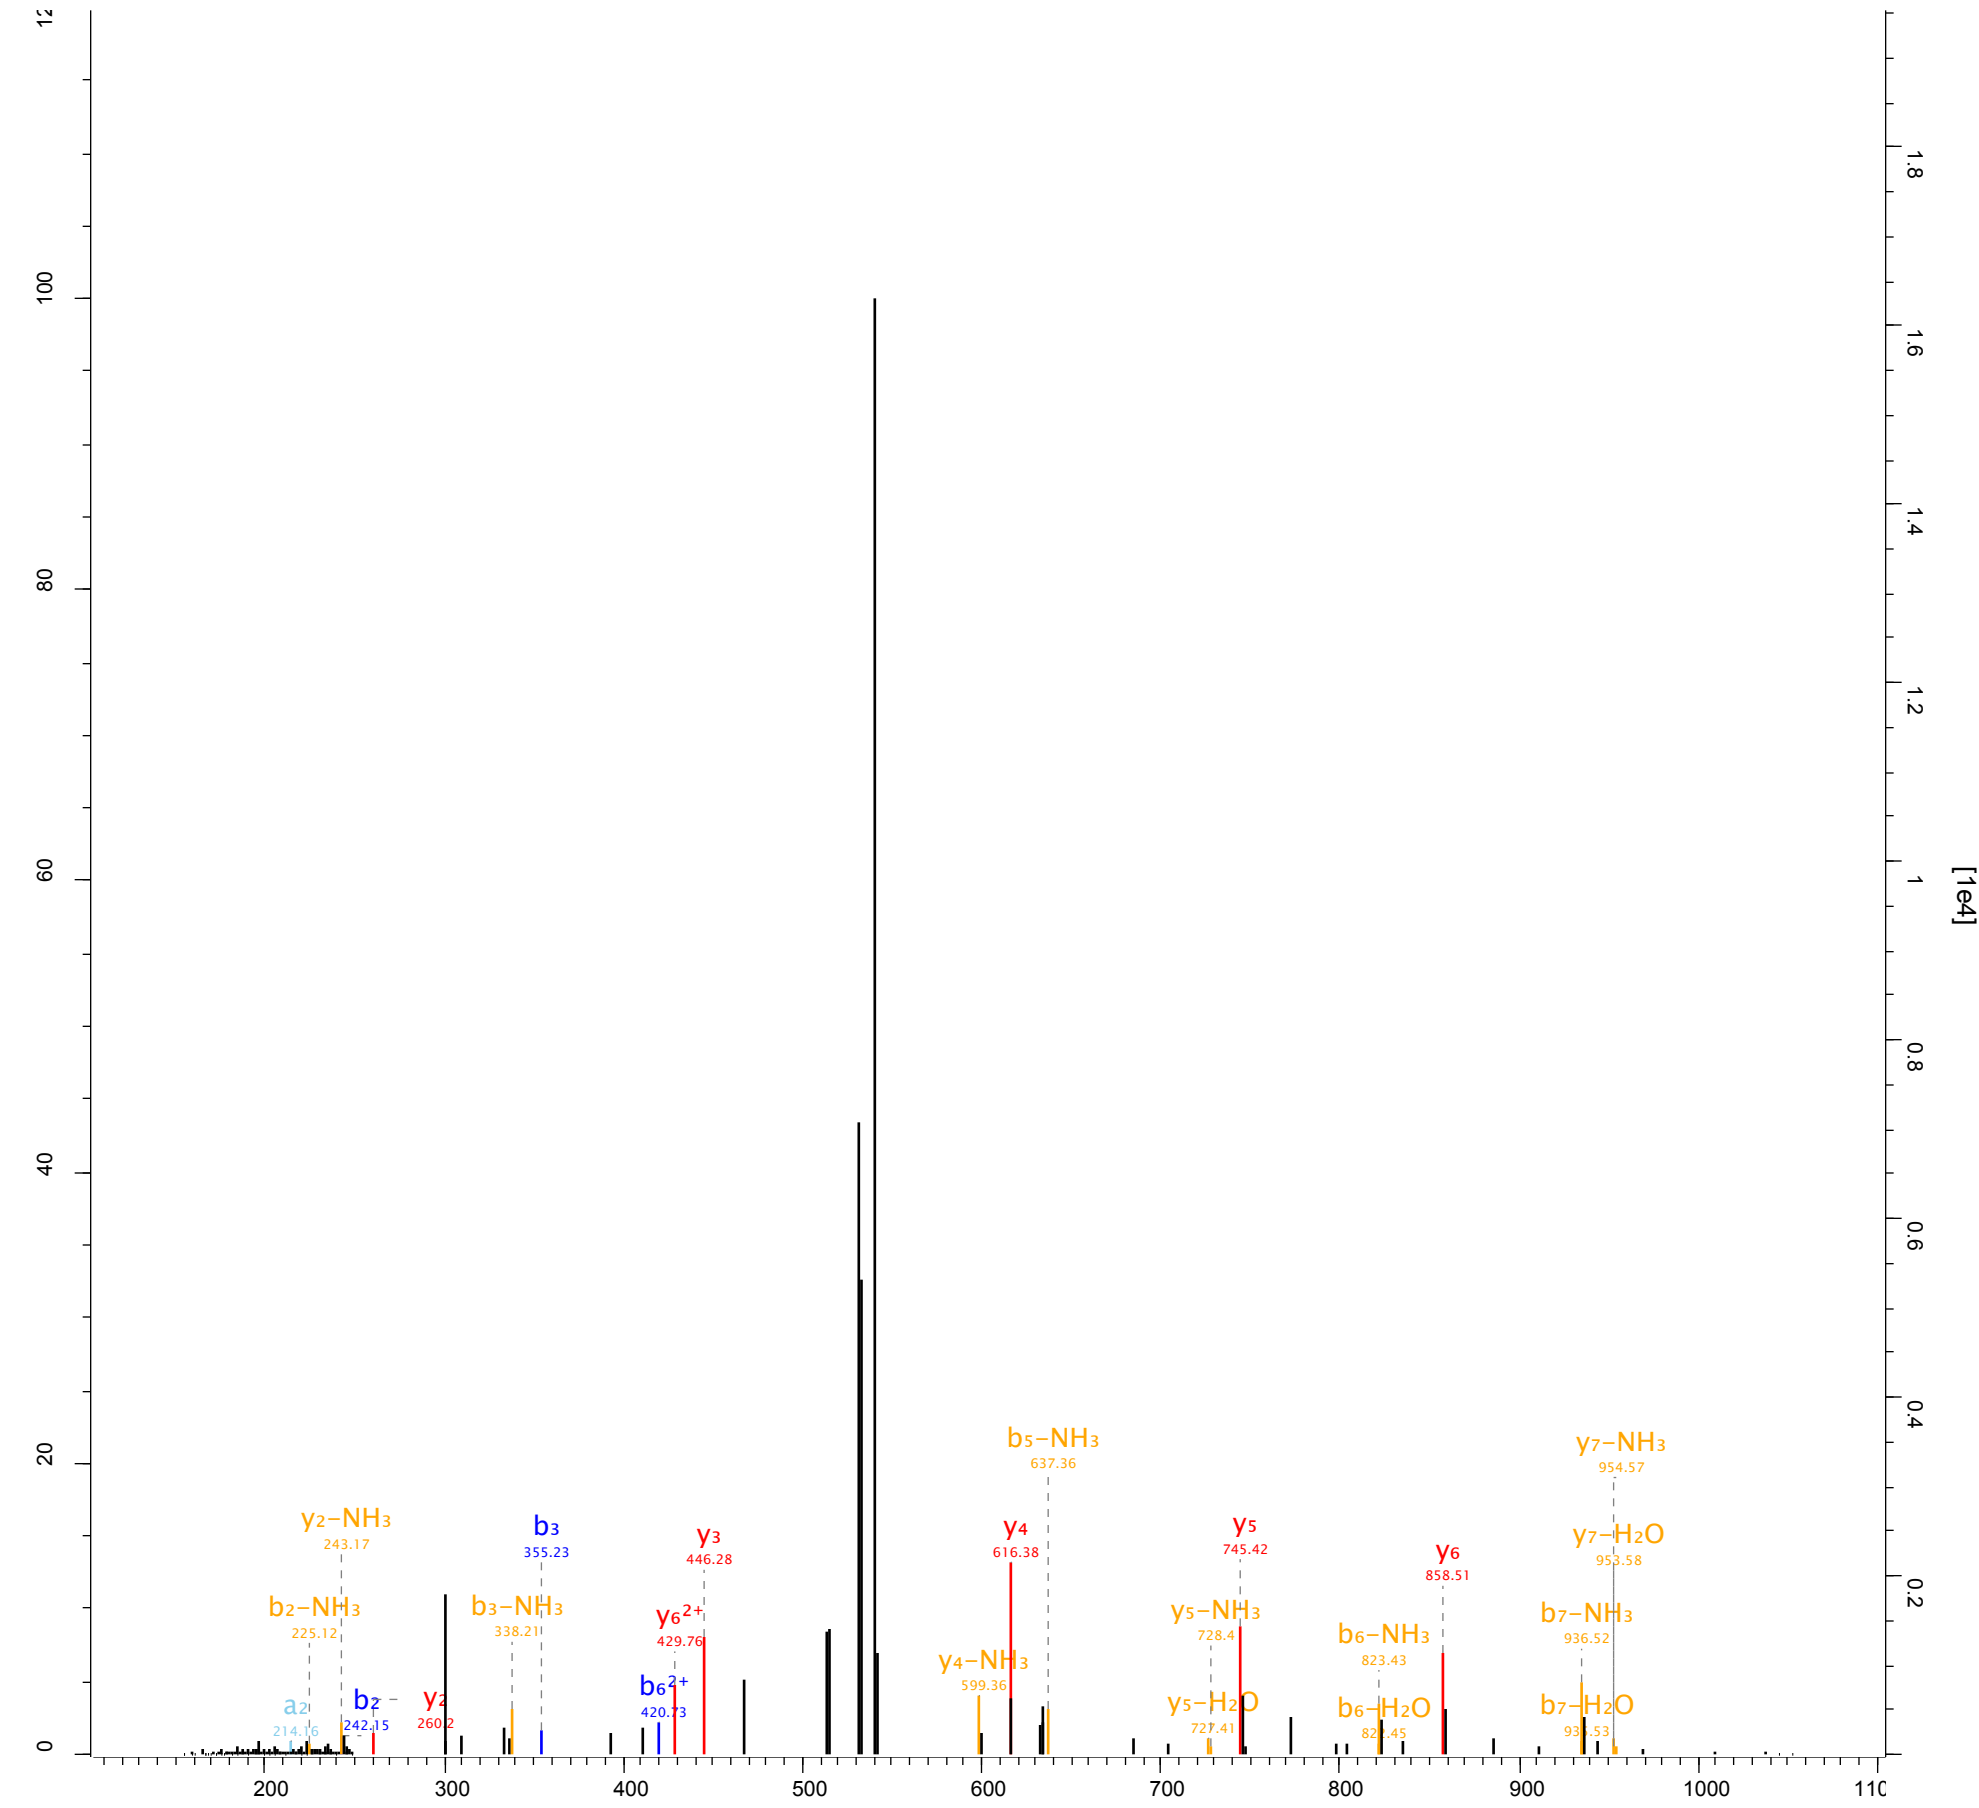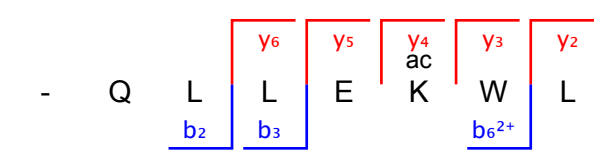

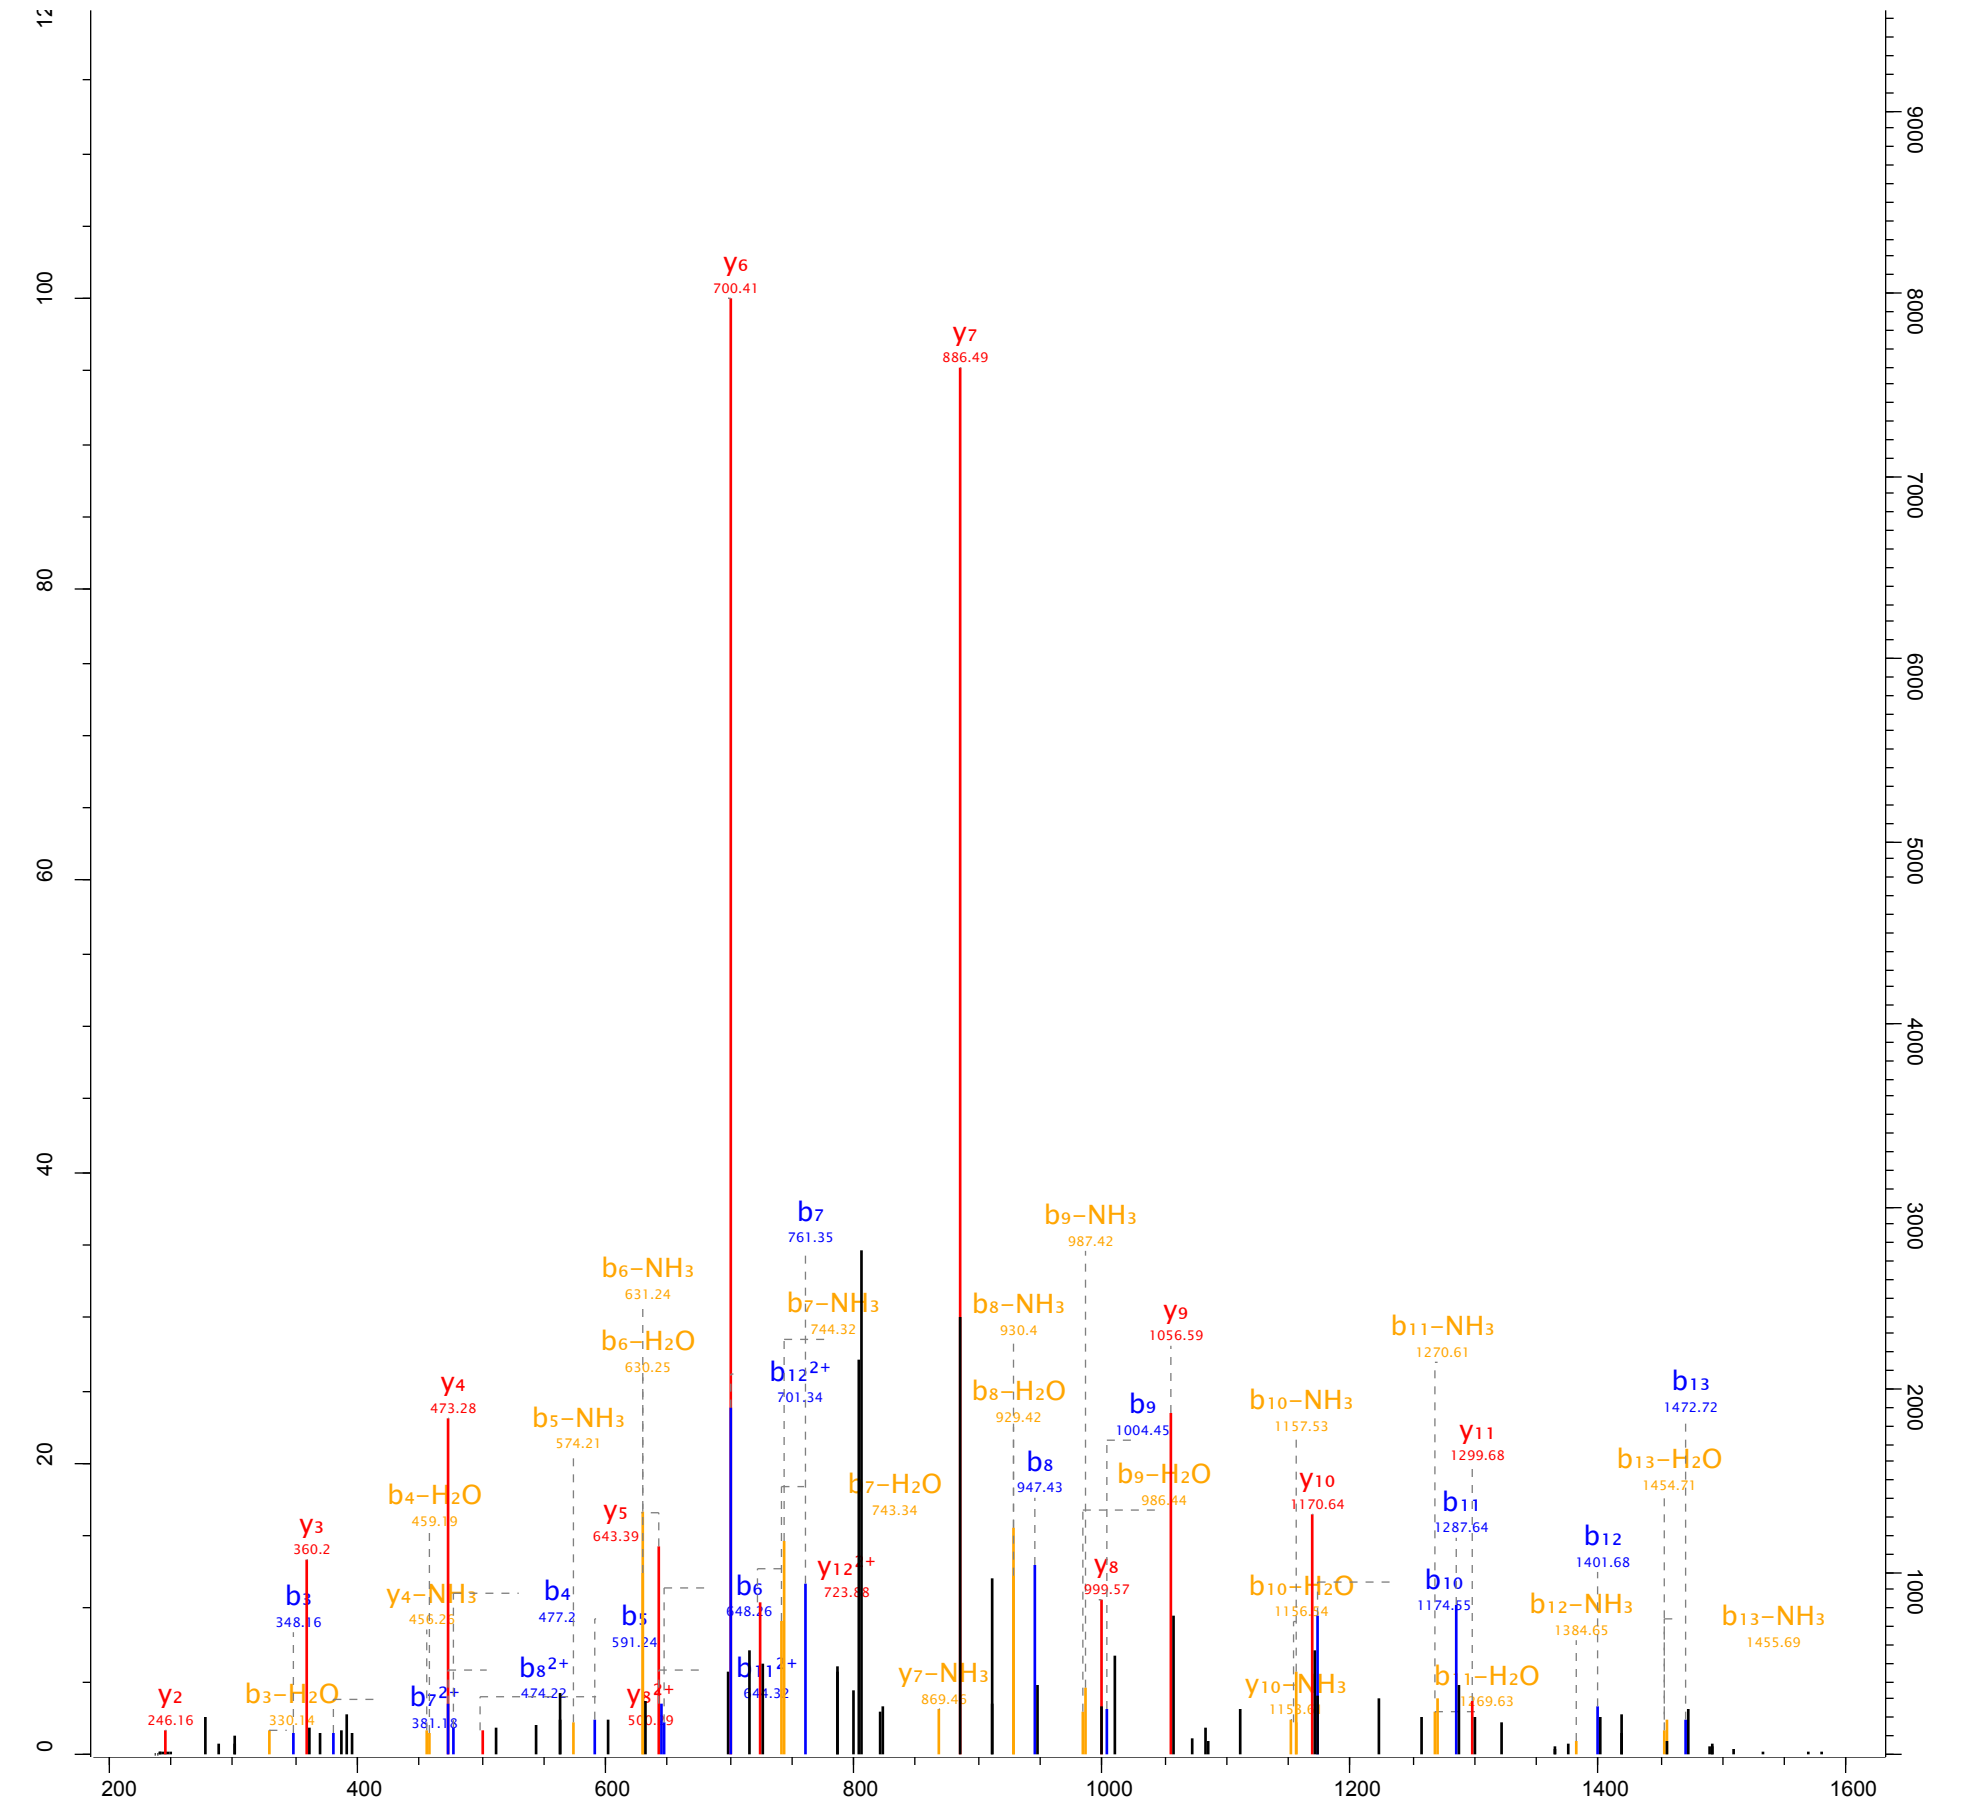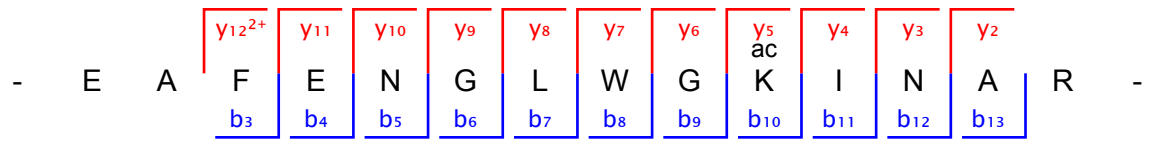

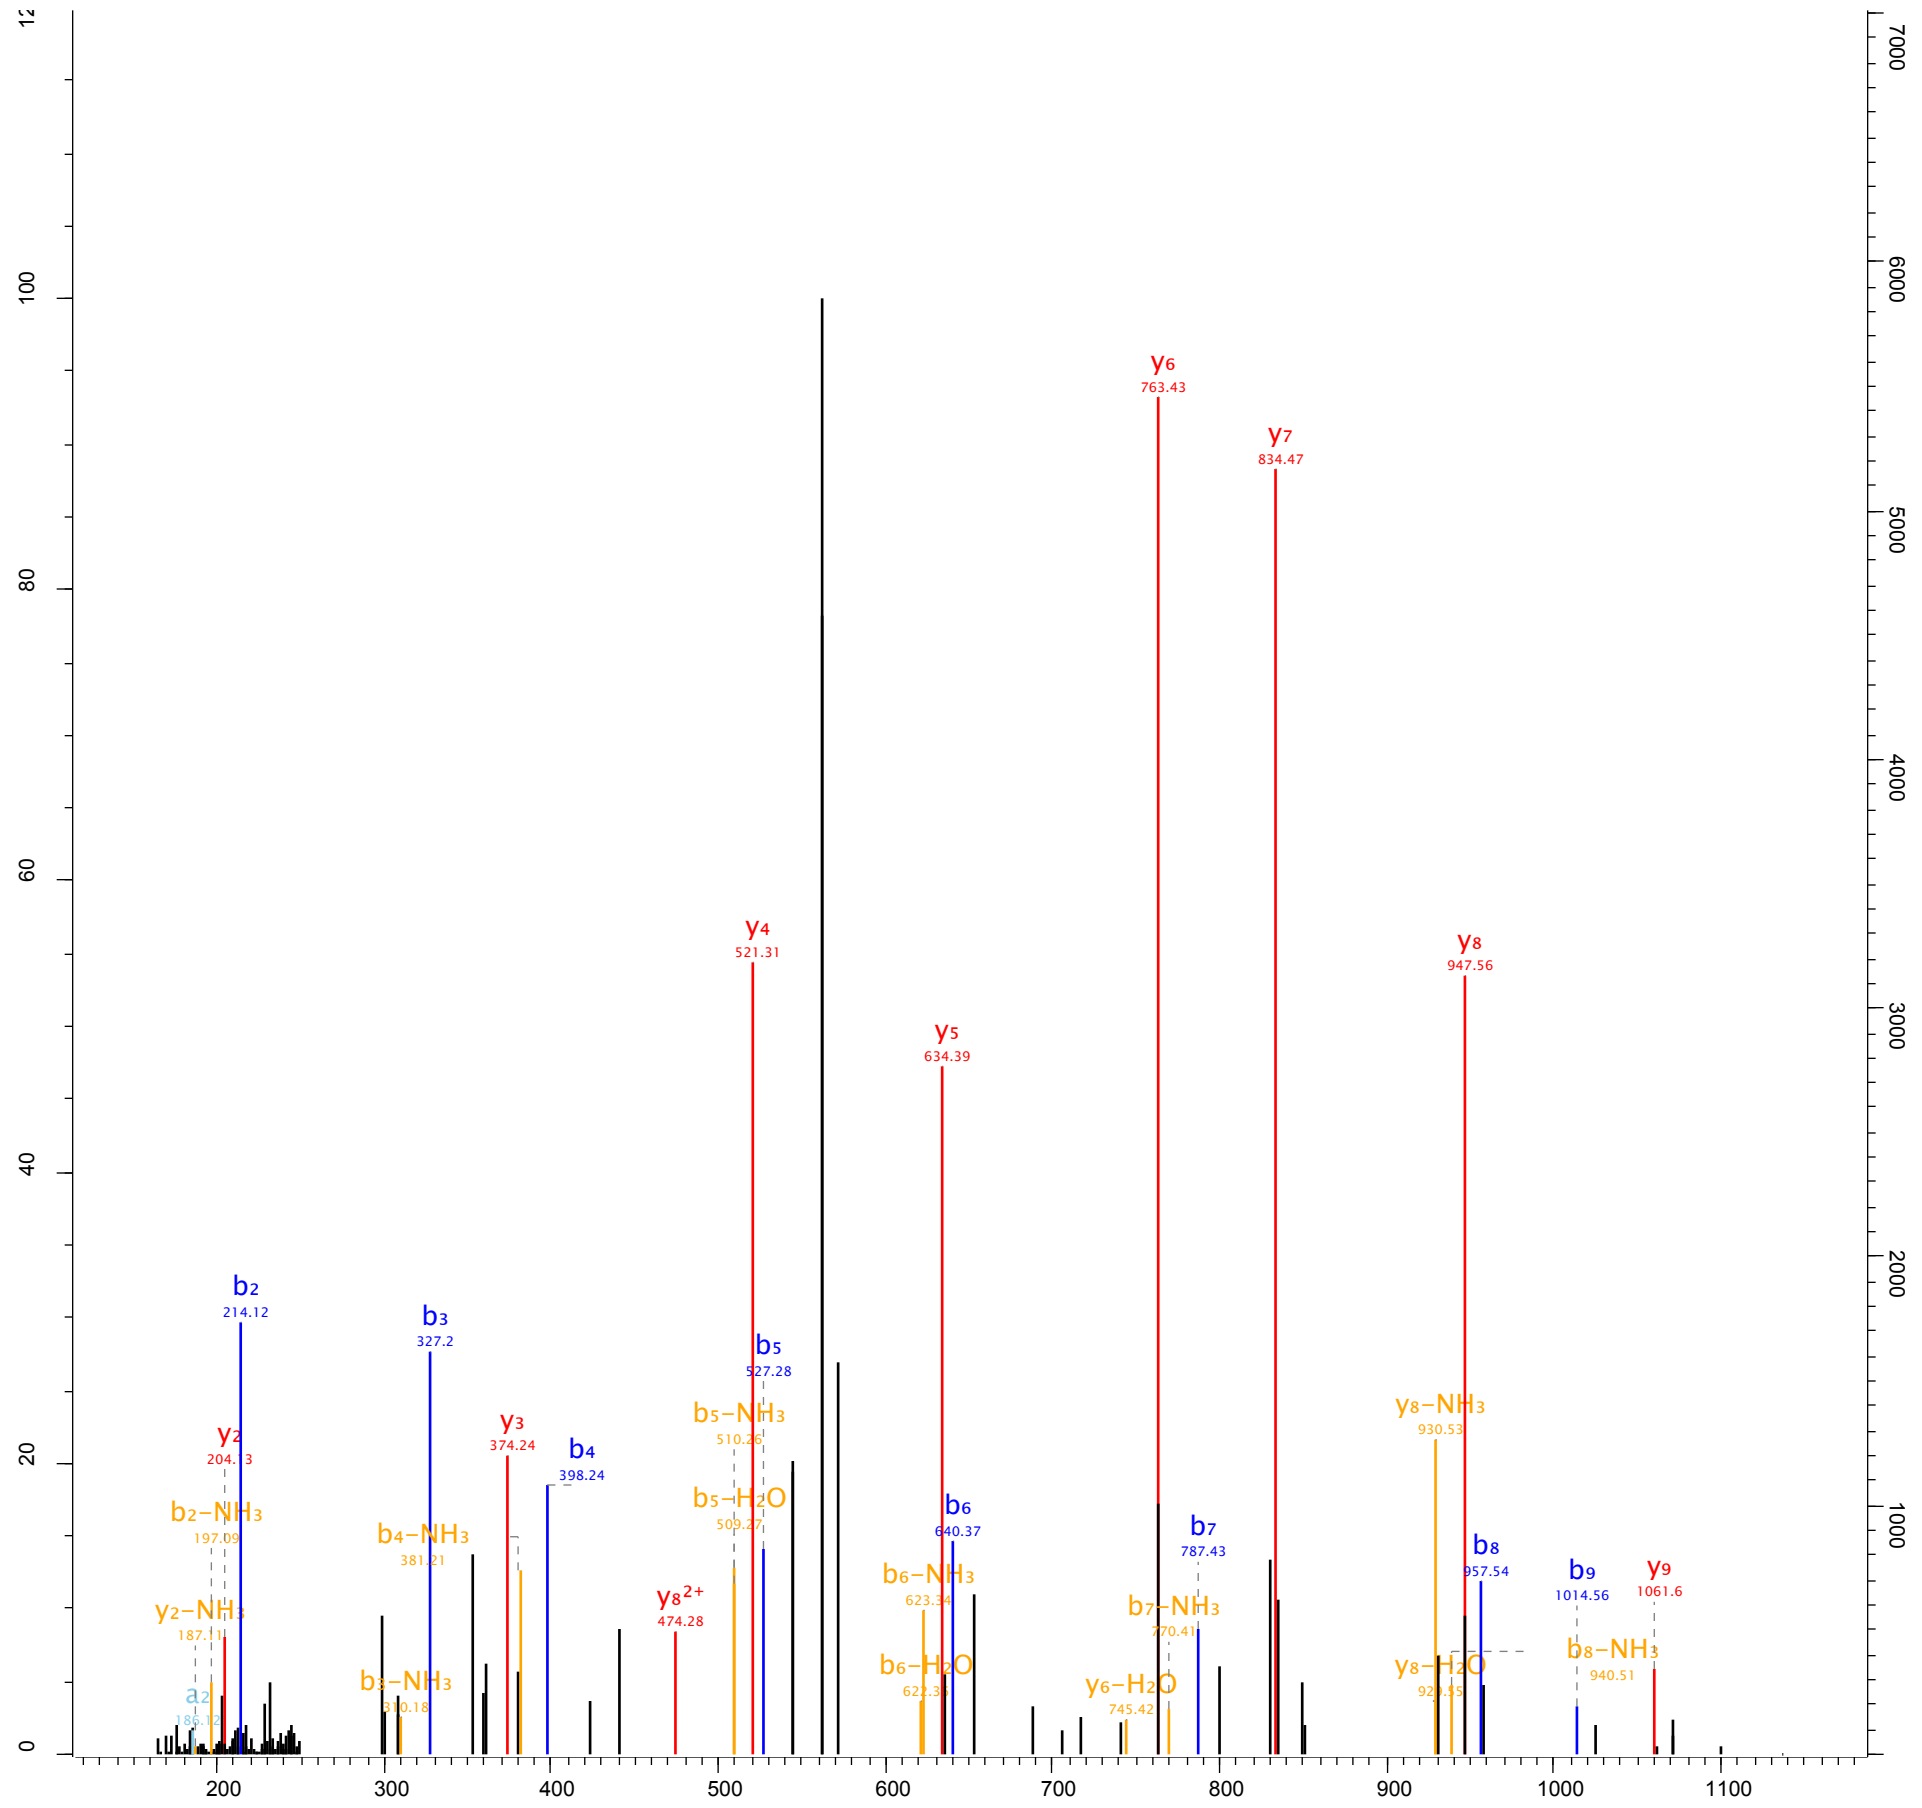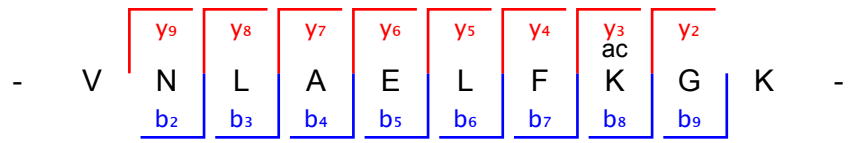

062513\_SCW\_II\_53\_5\_Vargas\_Enriched

26049

ITMS; CID

98.1

591.87

Rpl7a;Gm16477;Gm5619;Gm5459;Gm17415

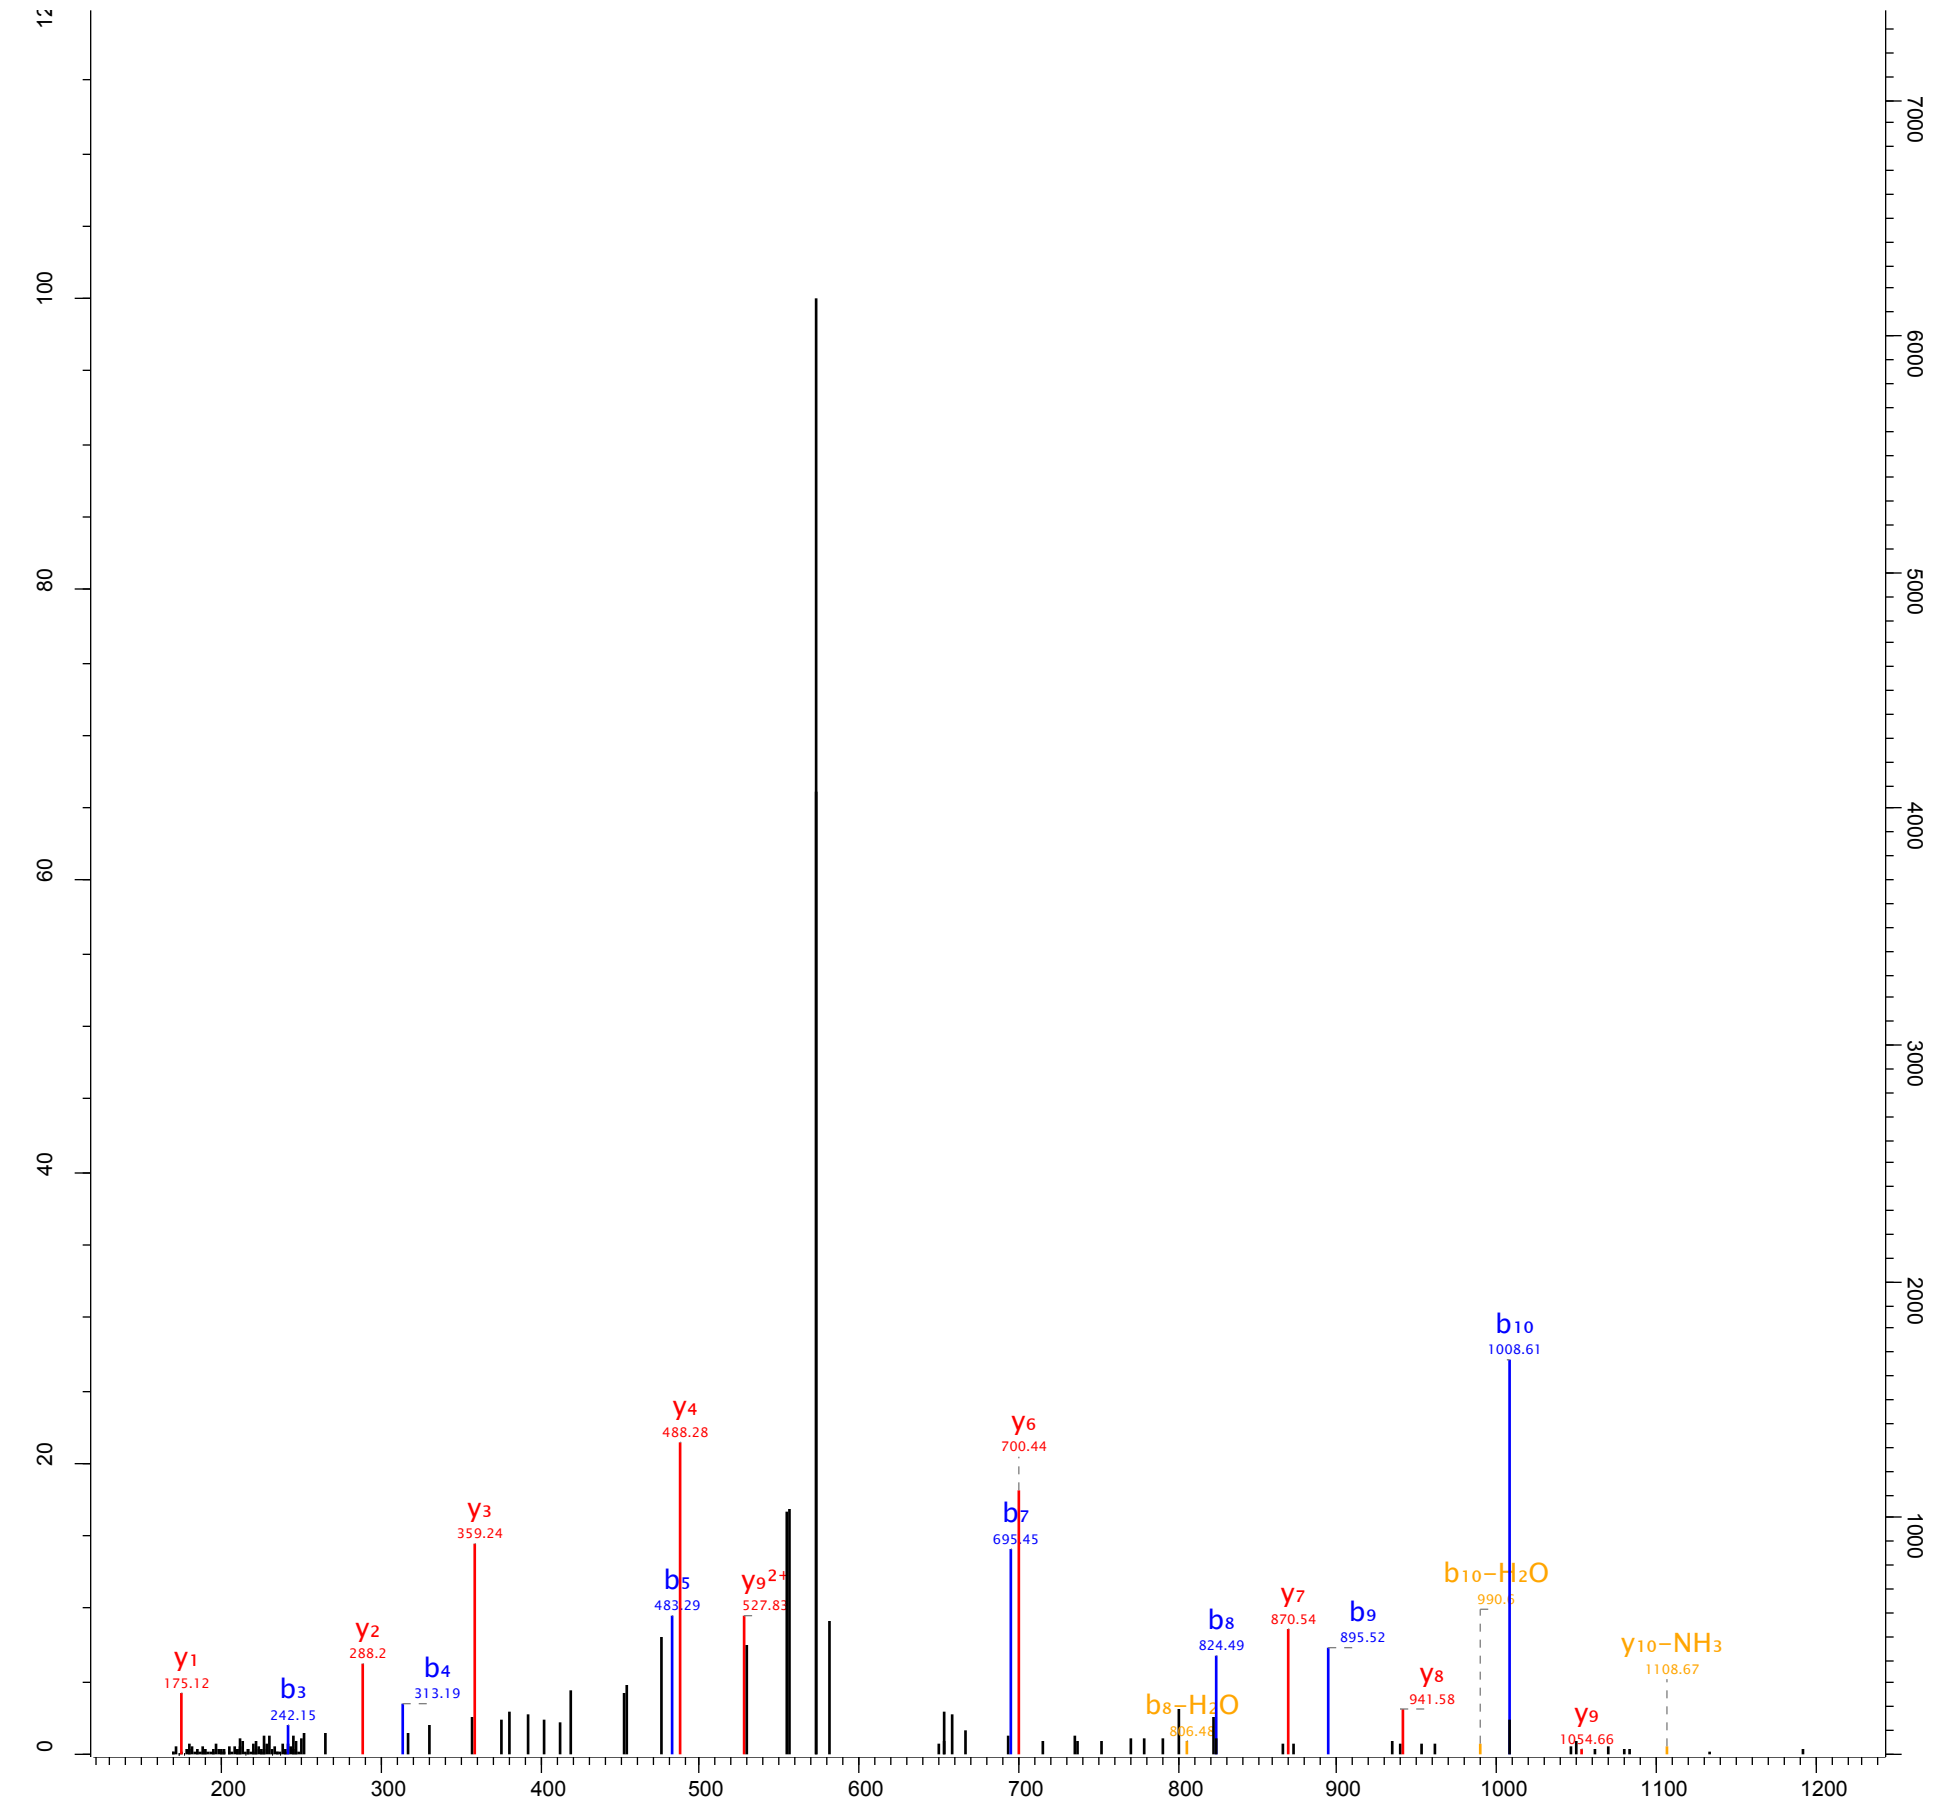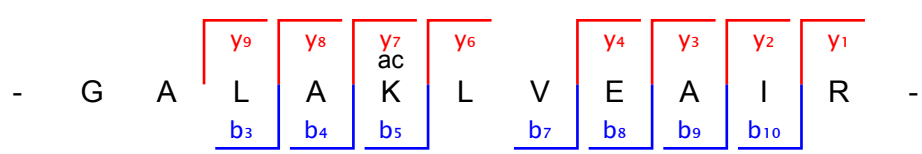

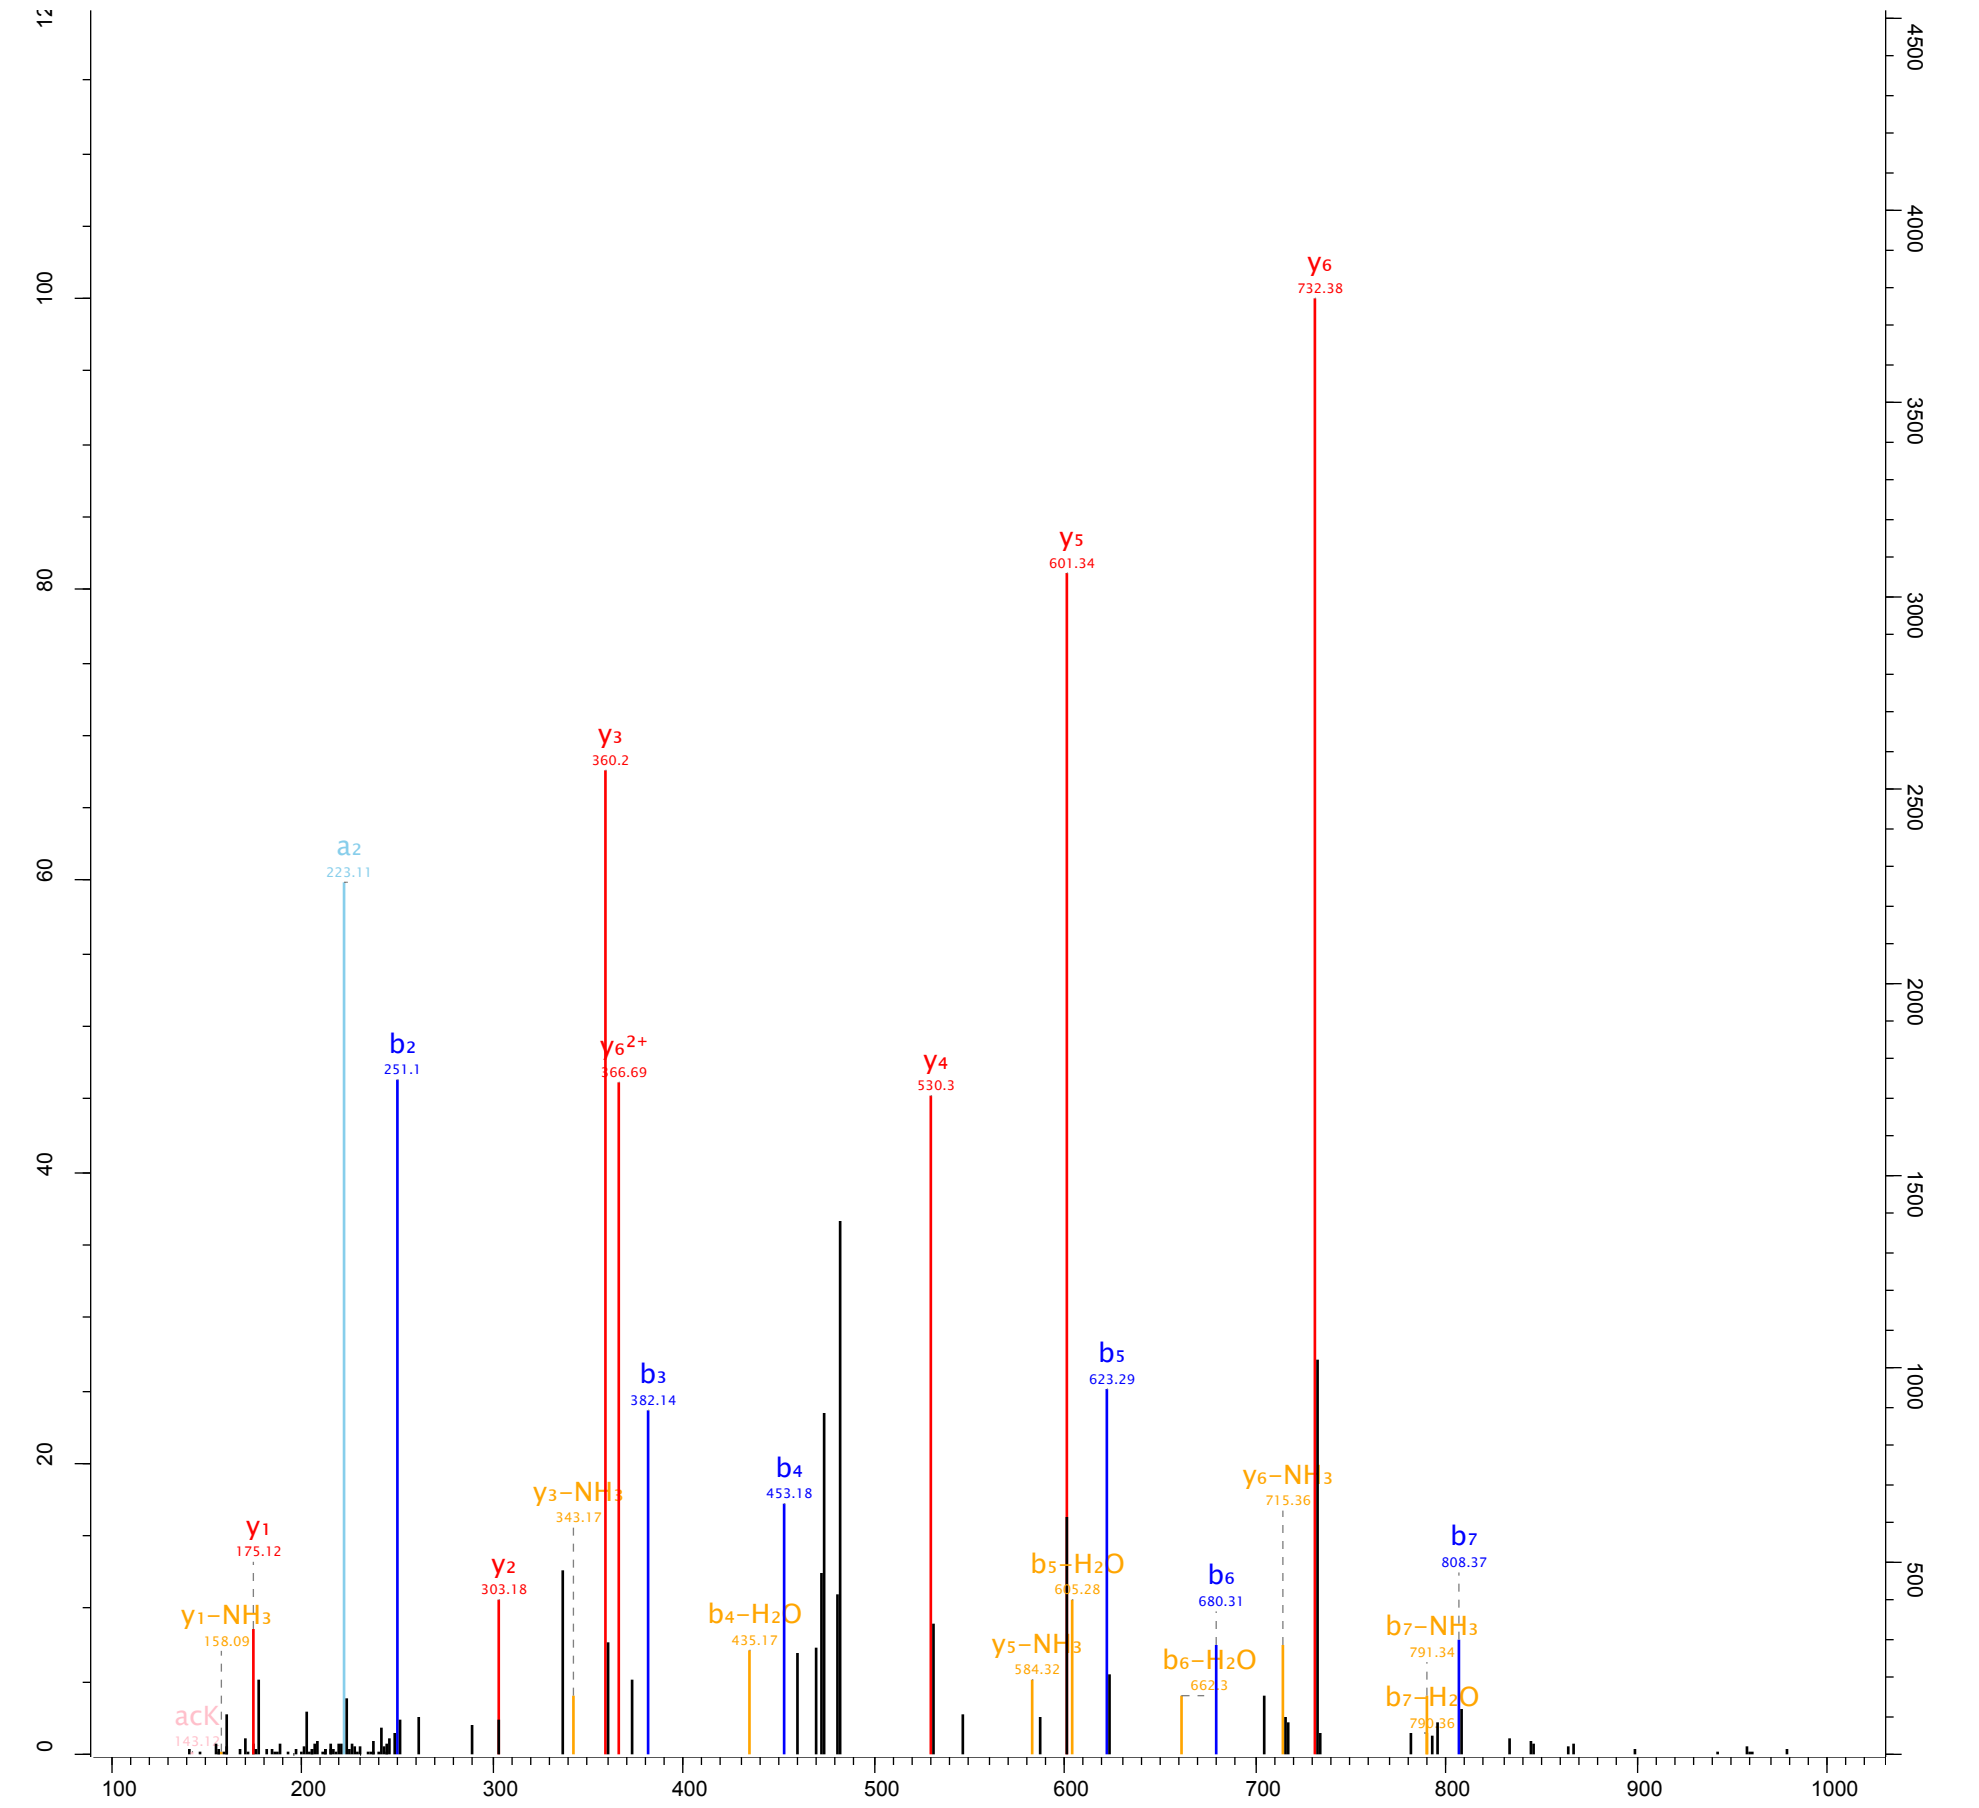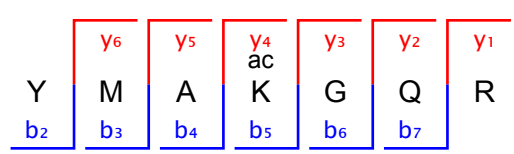

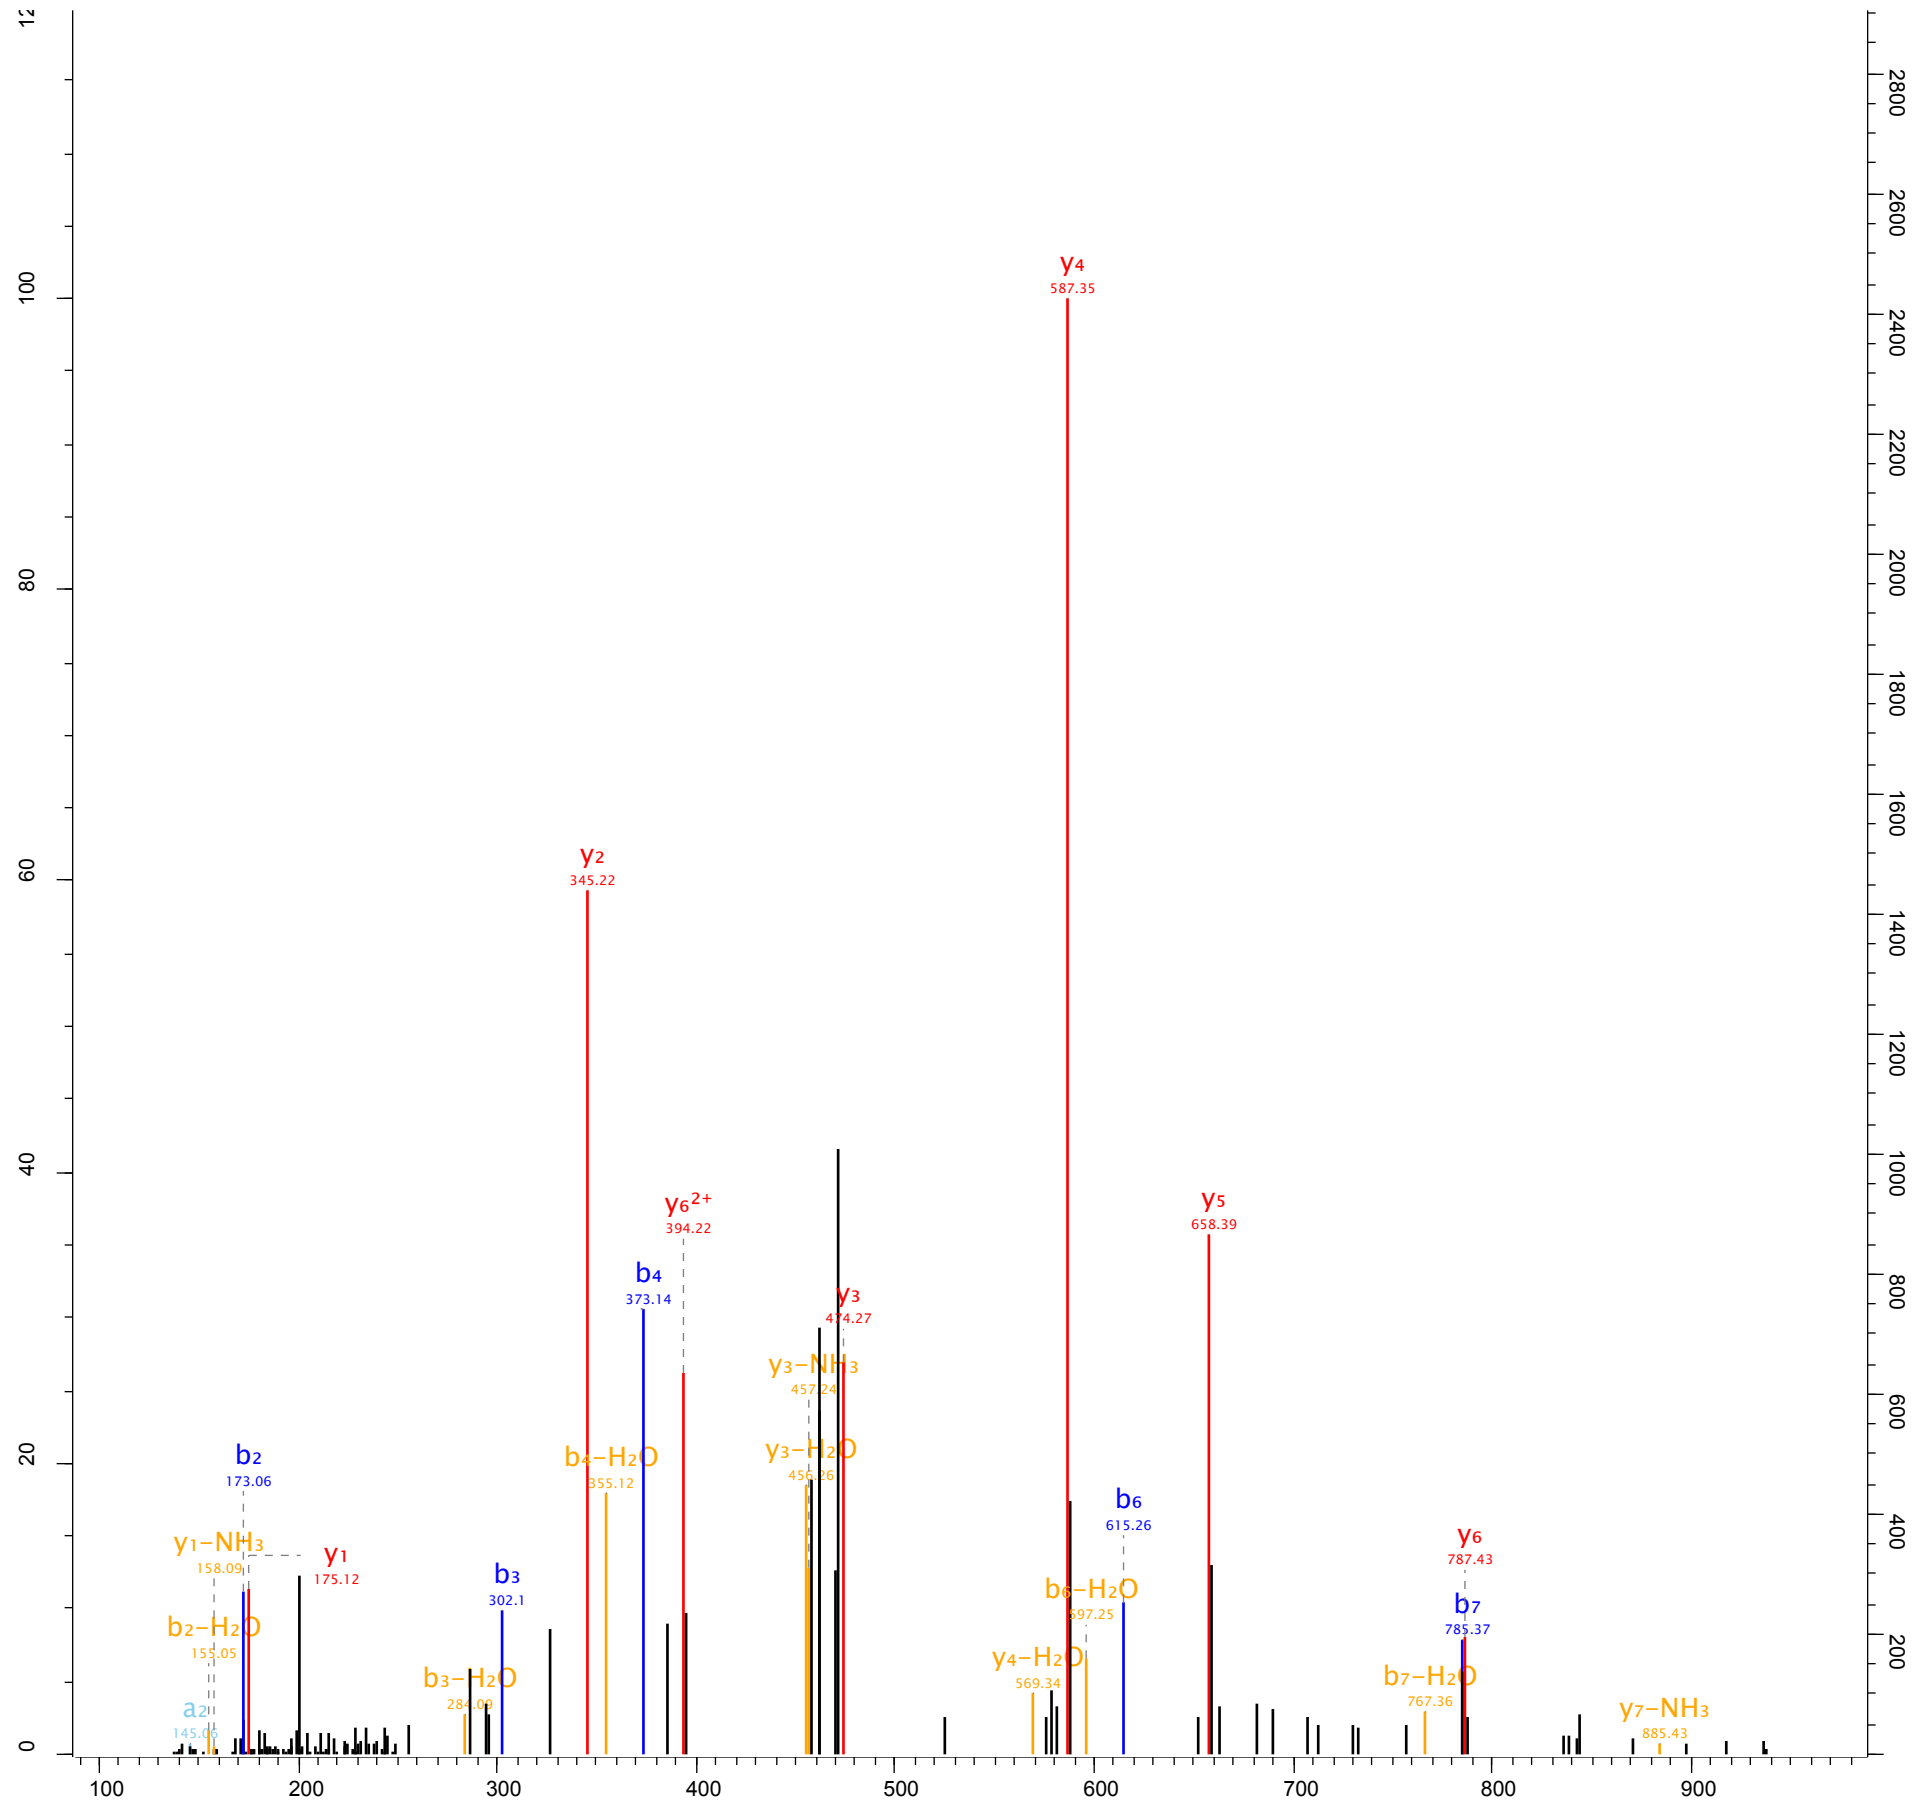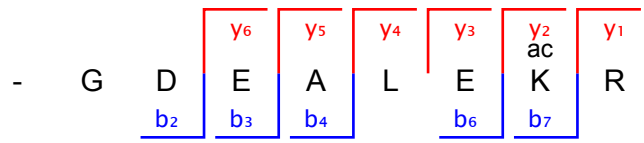

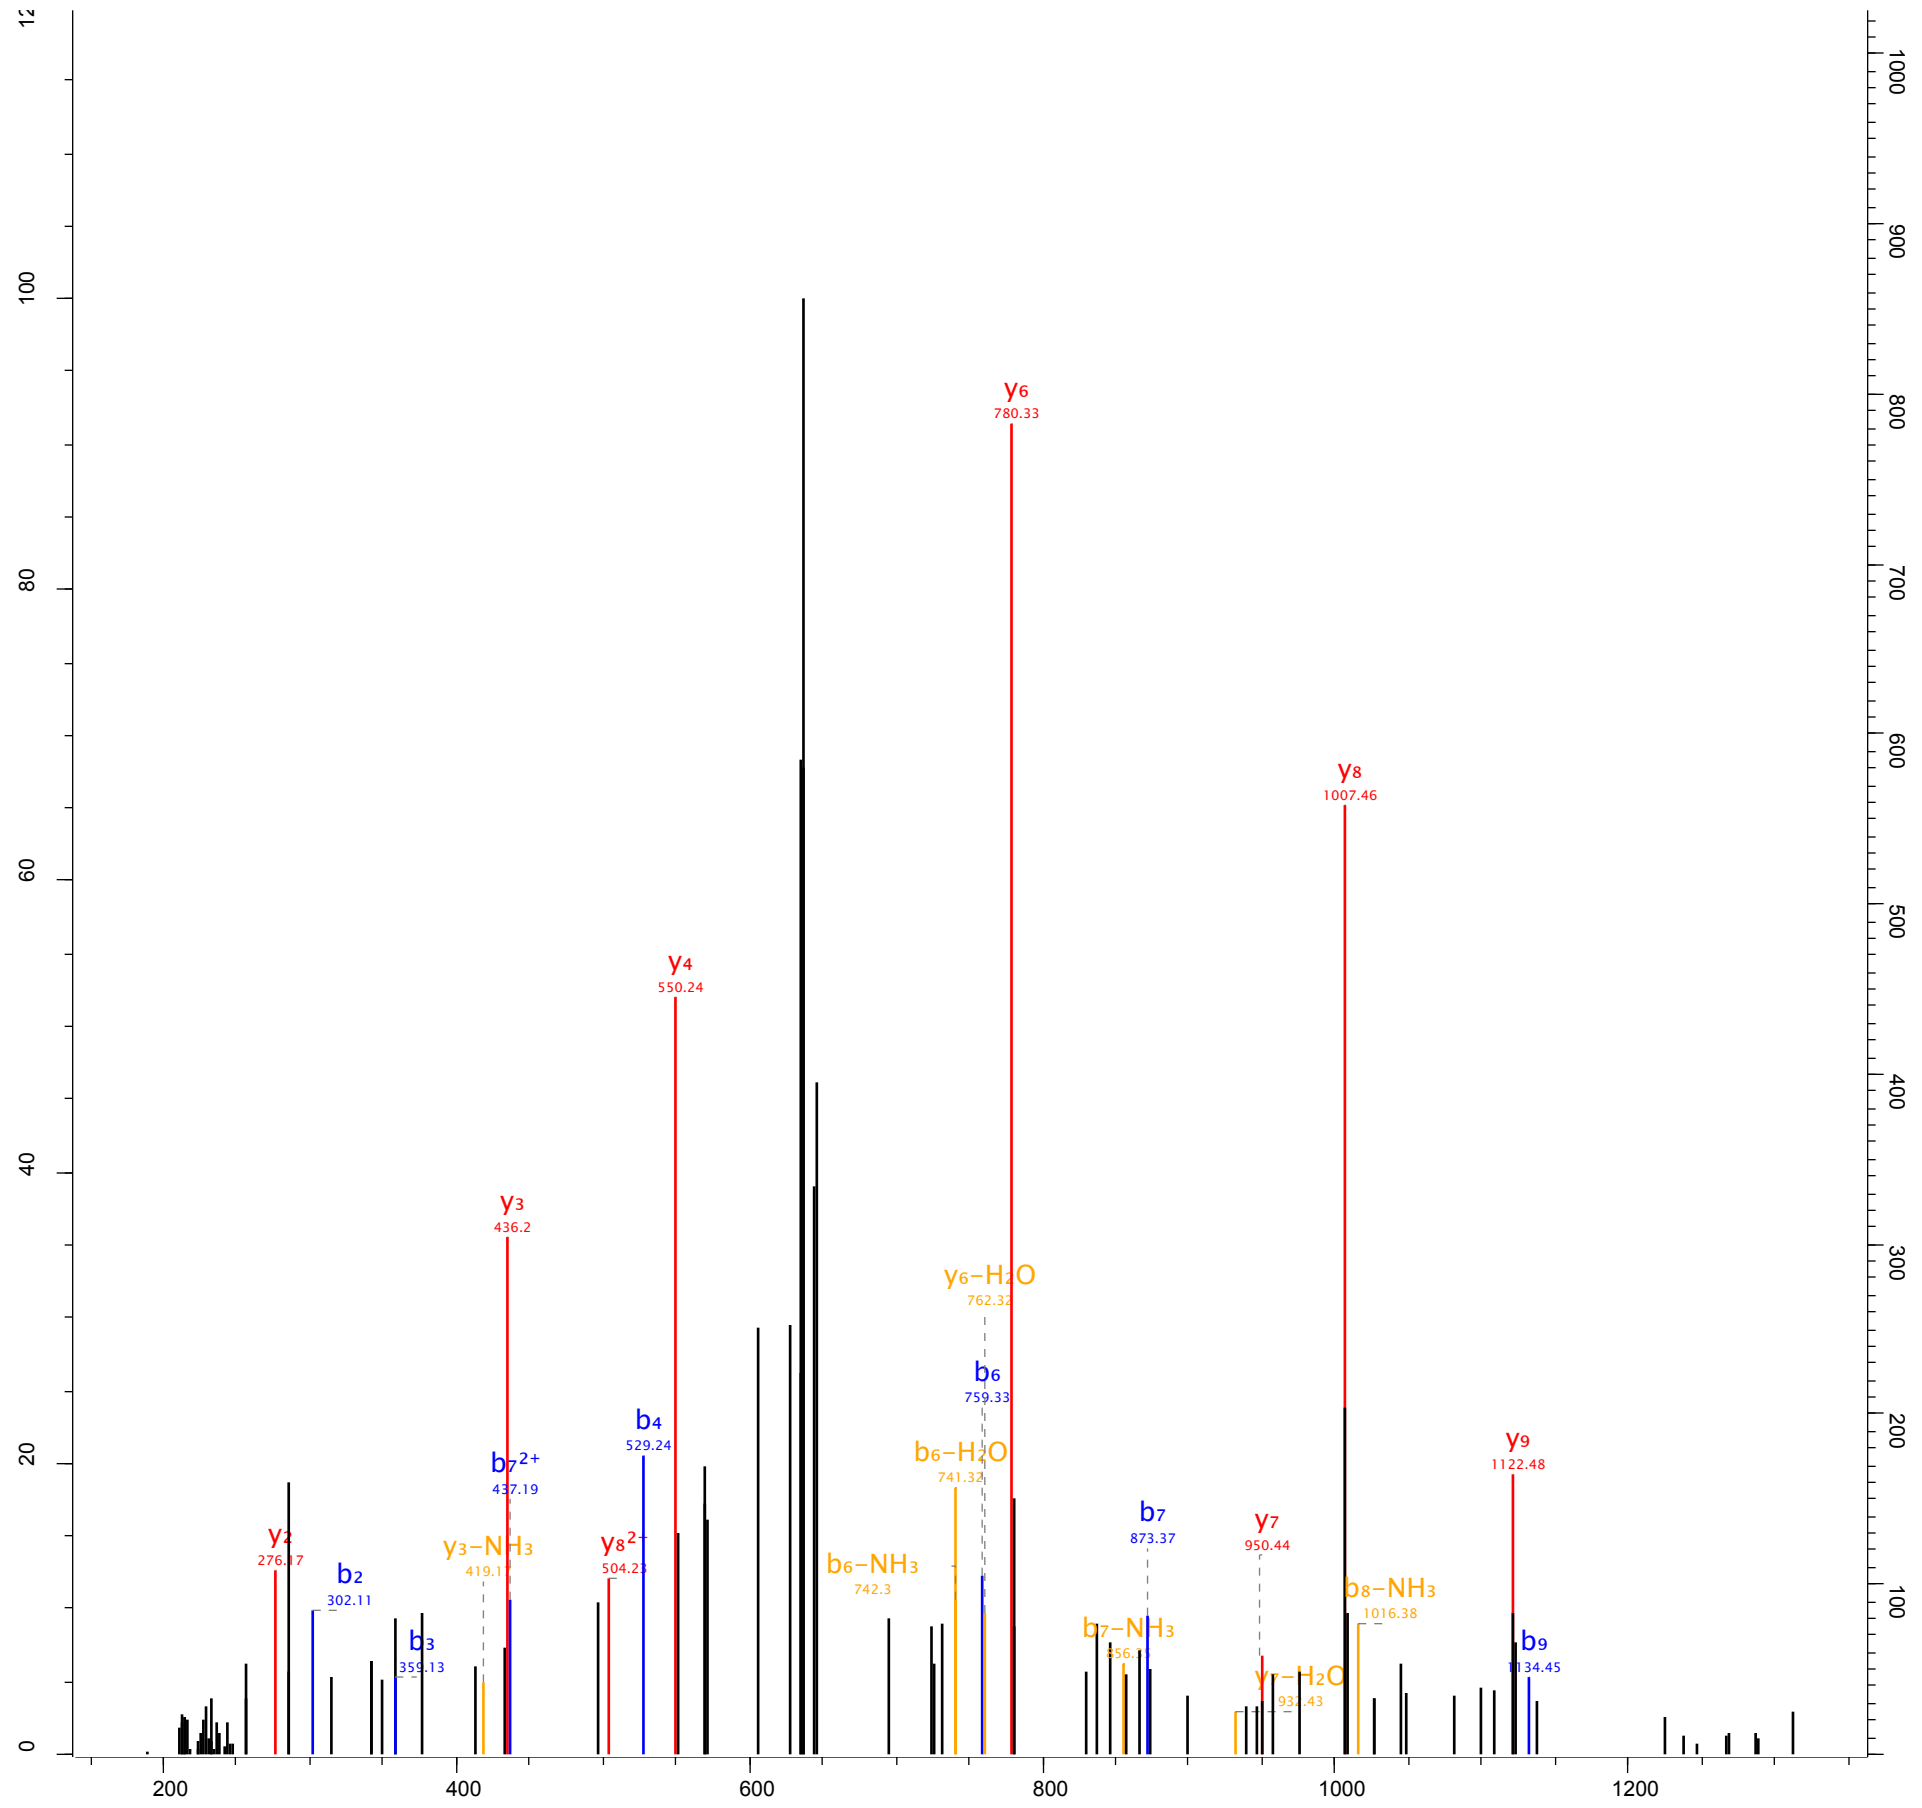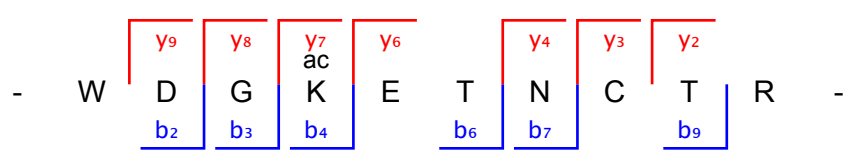

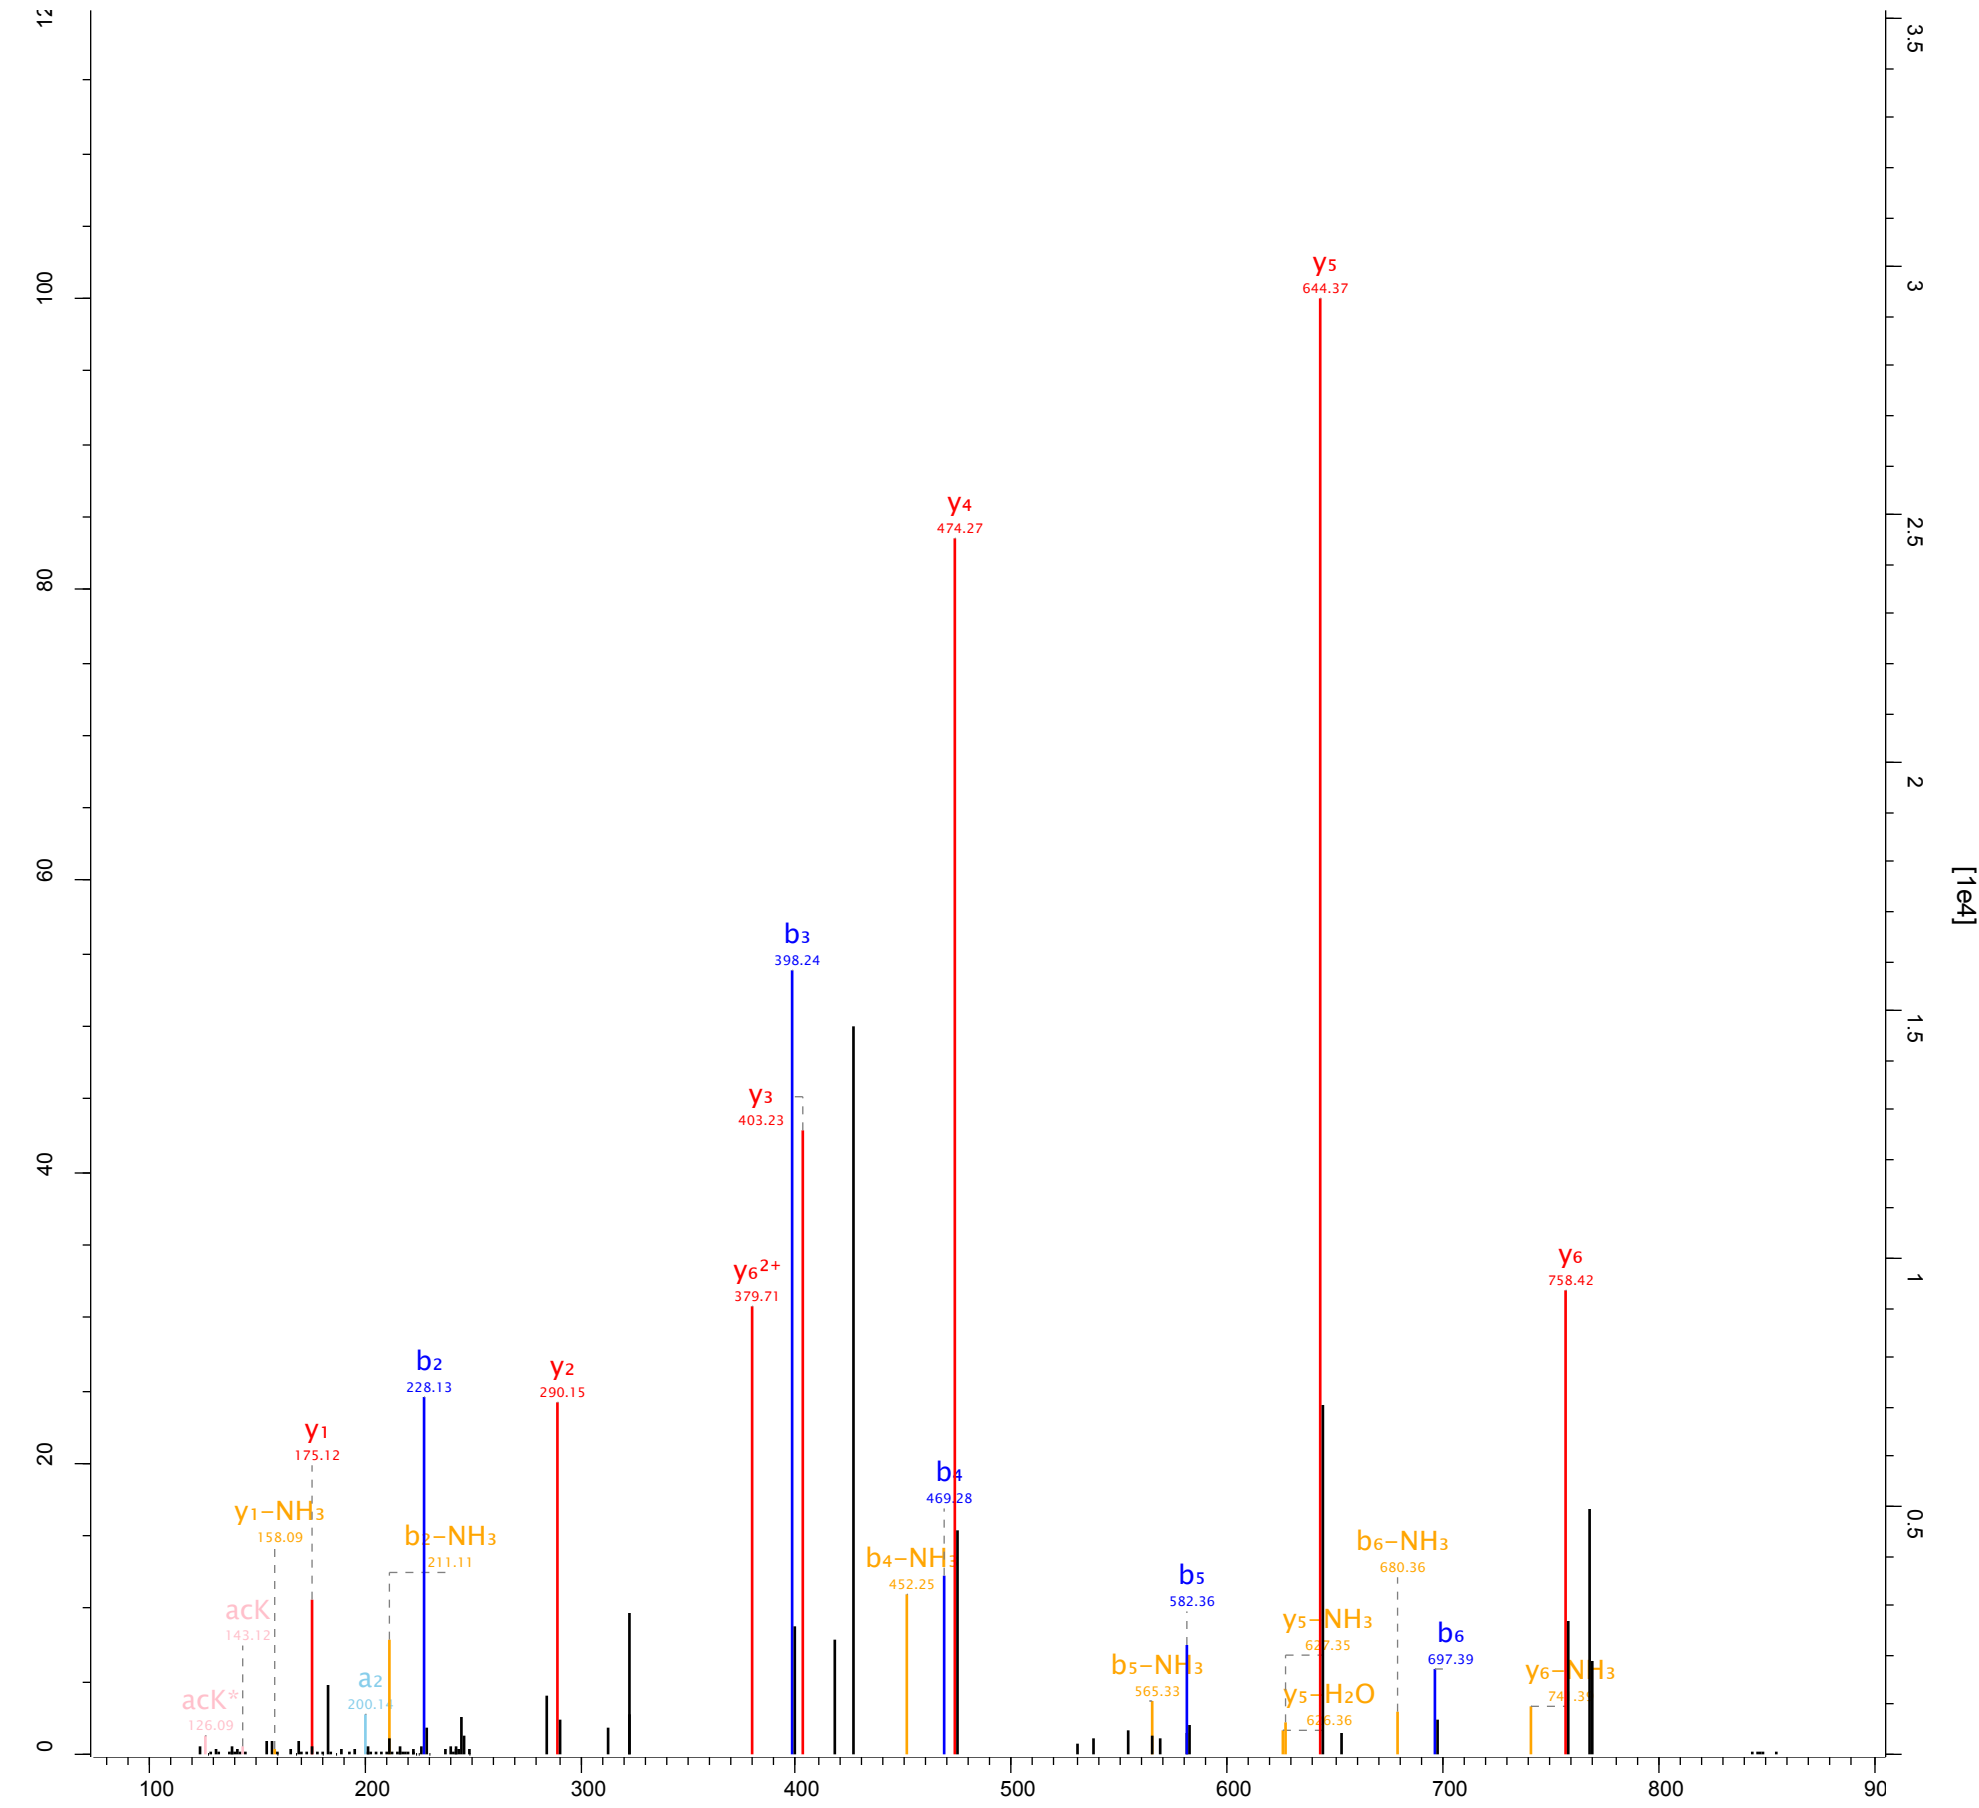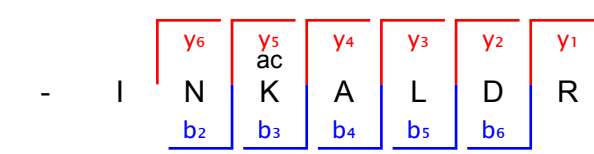



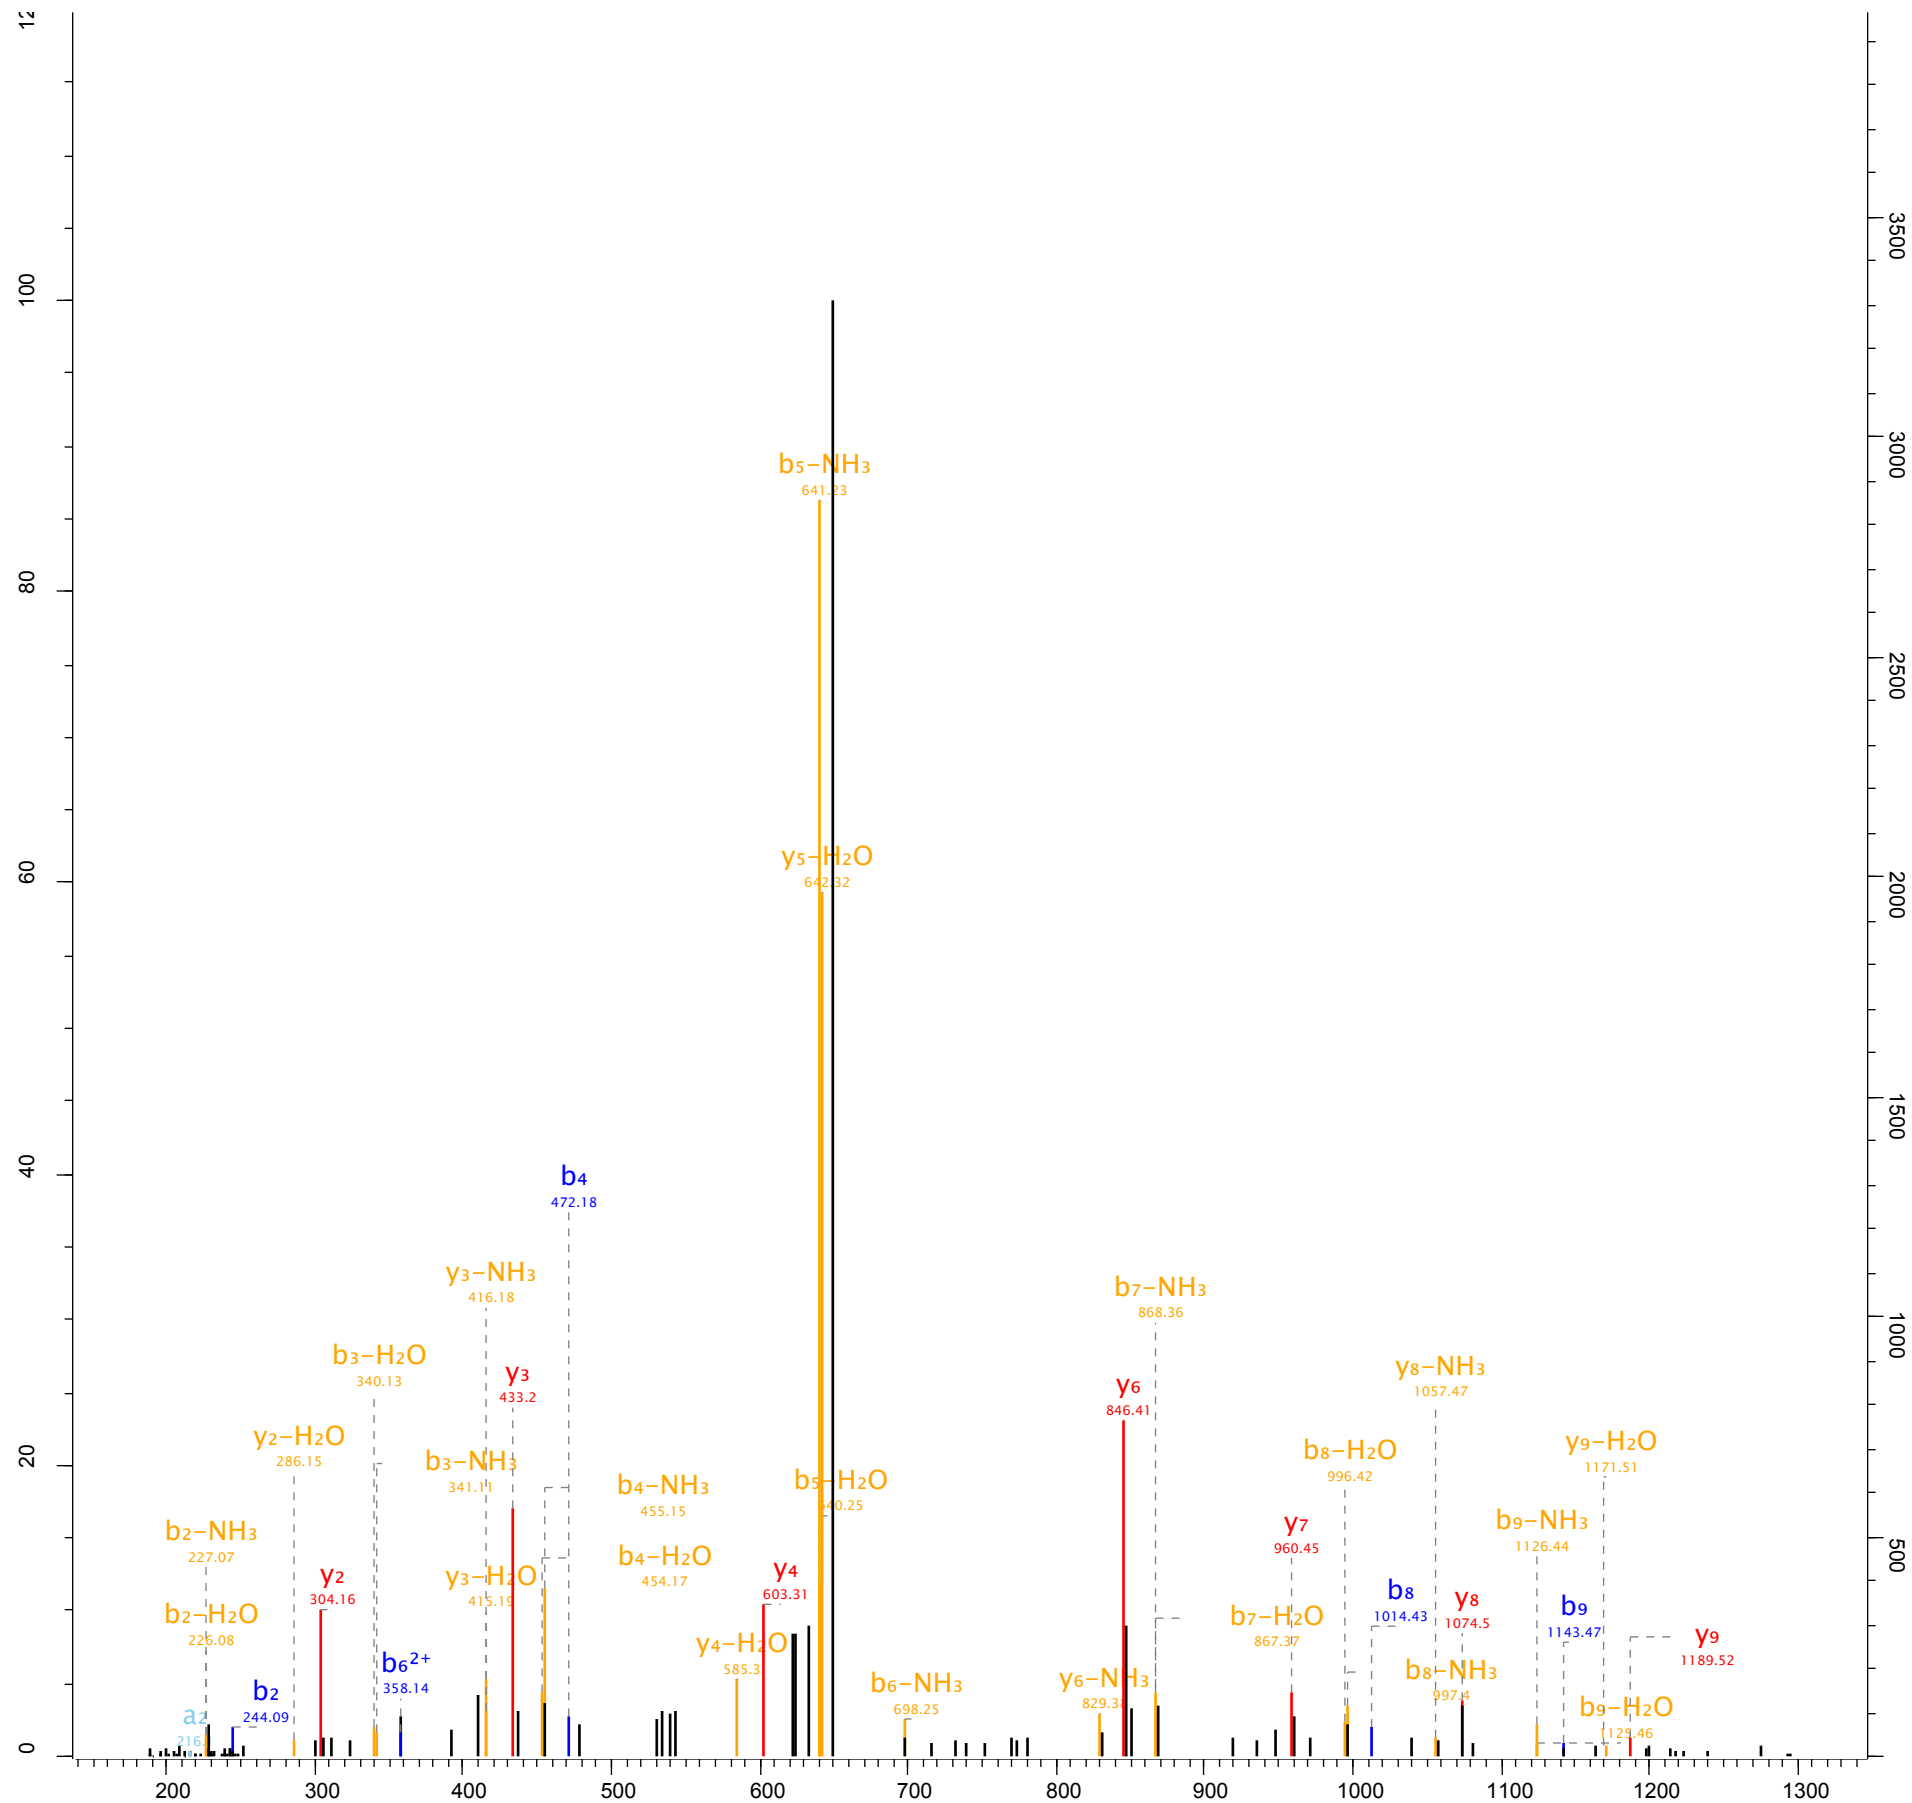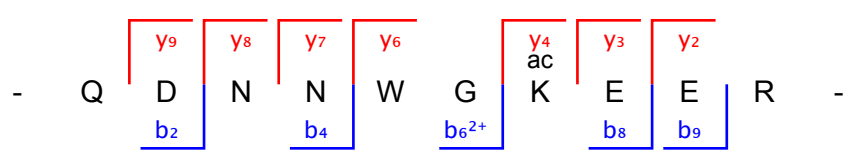

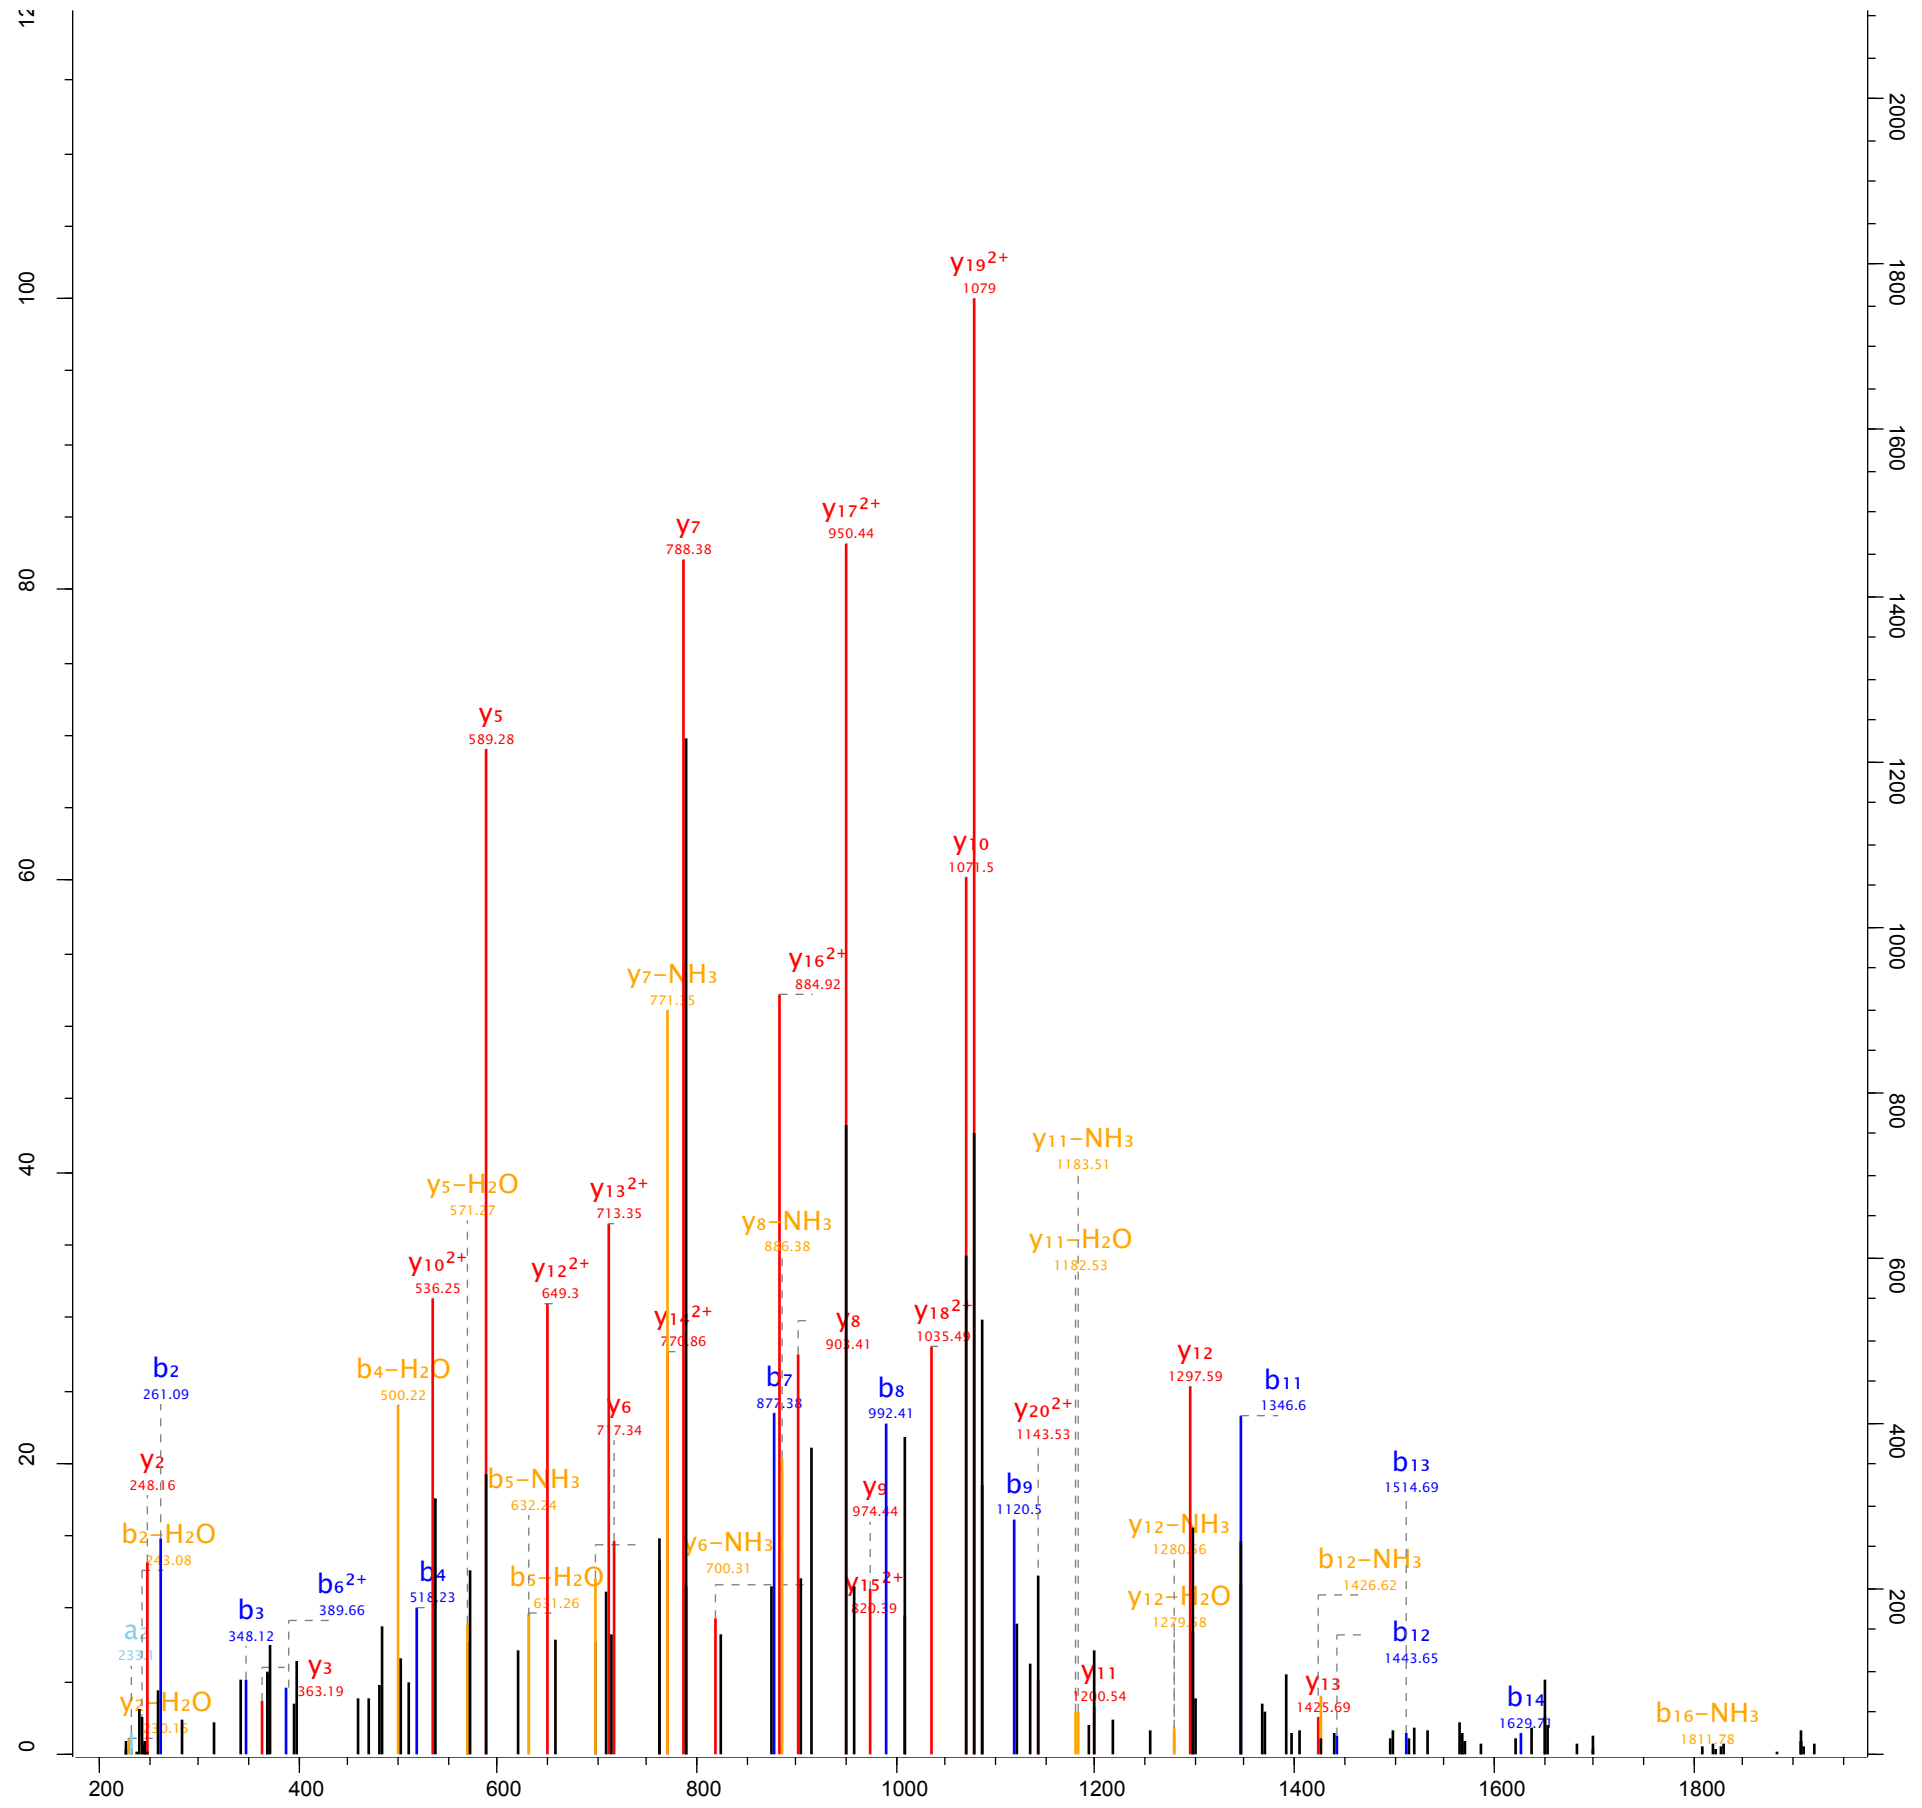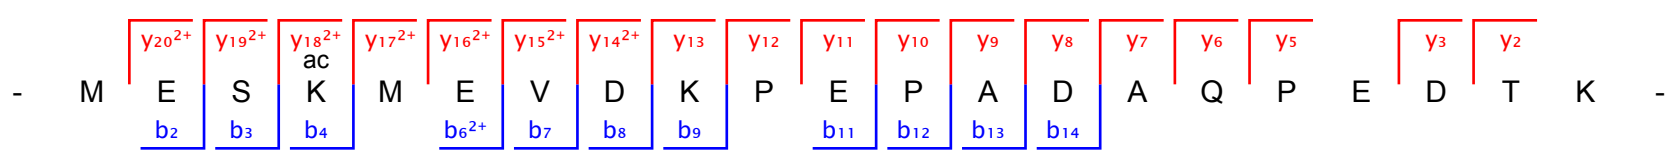

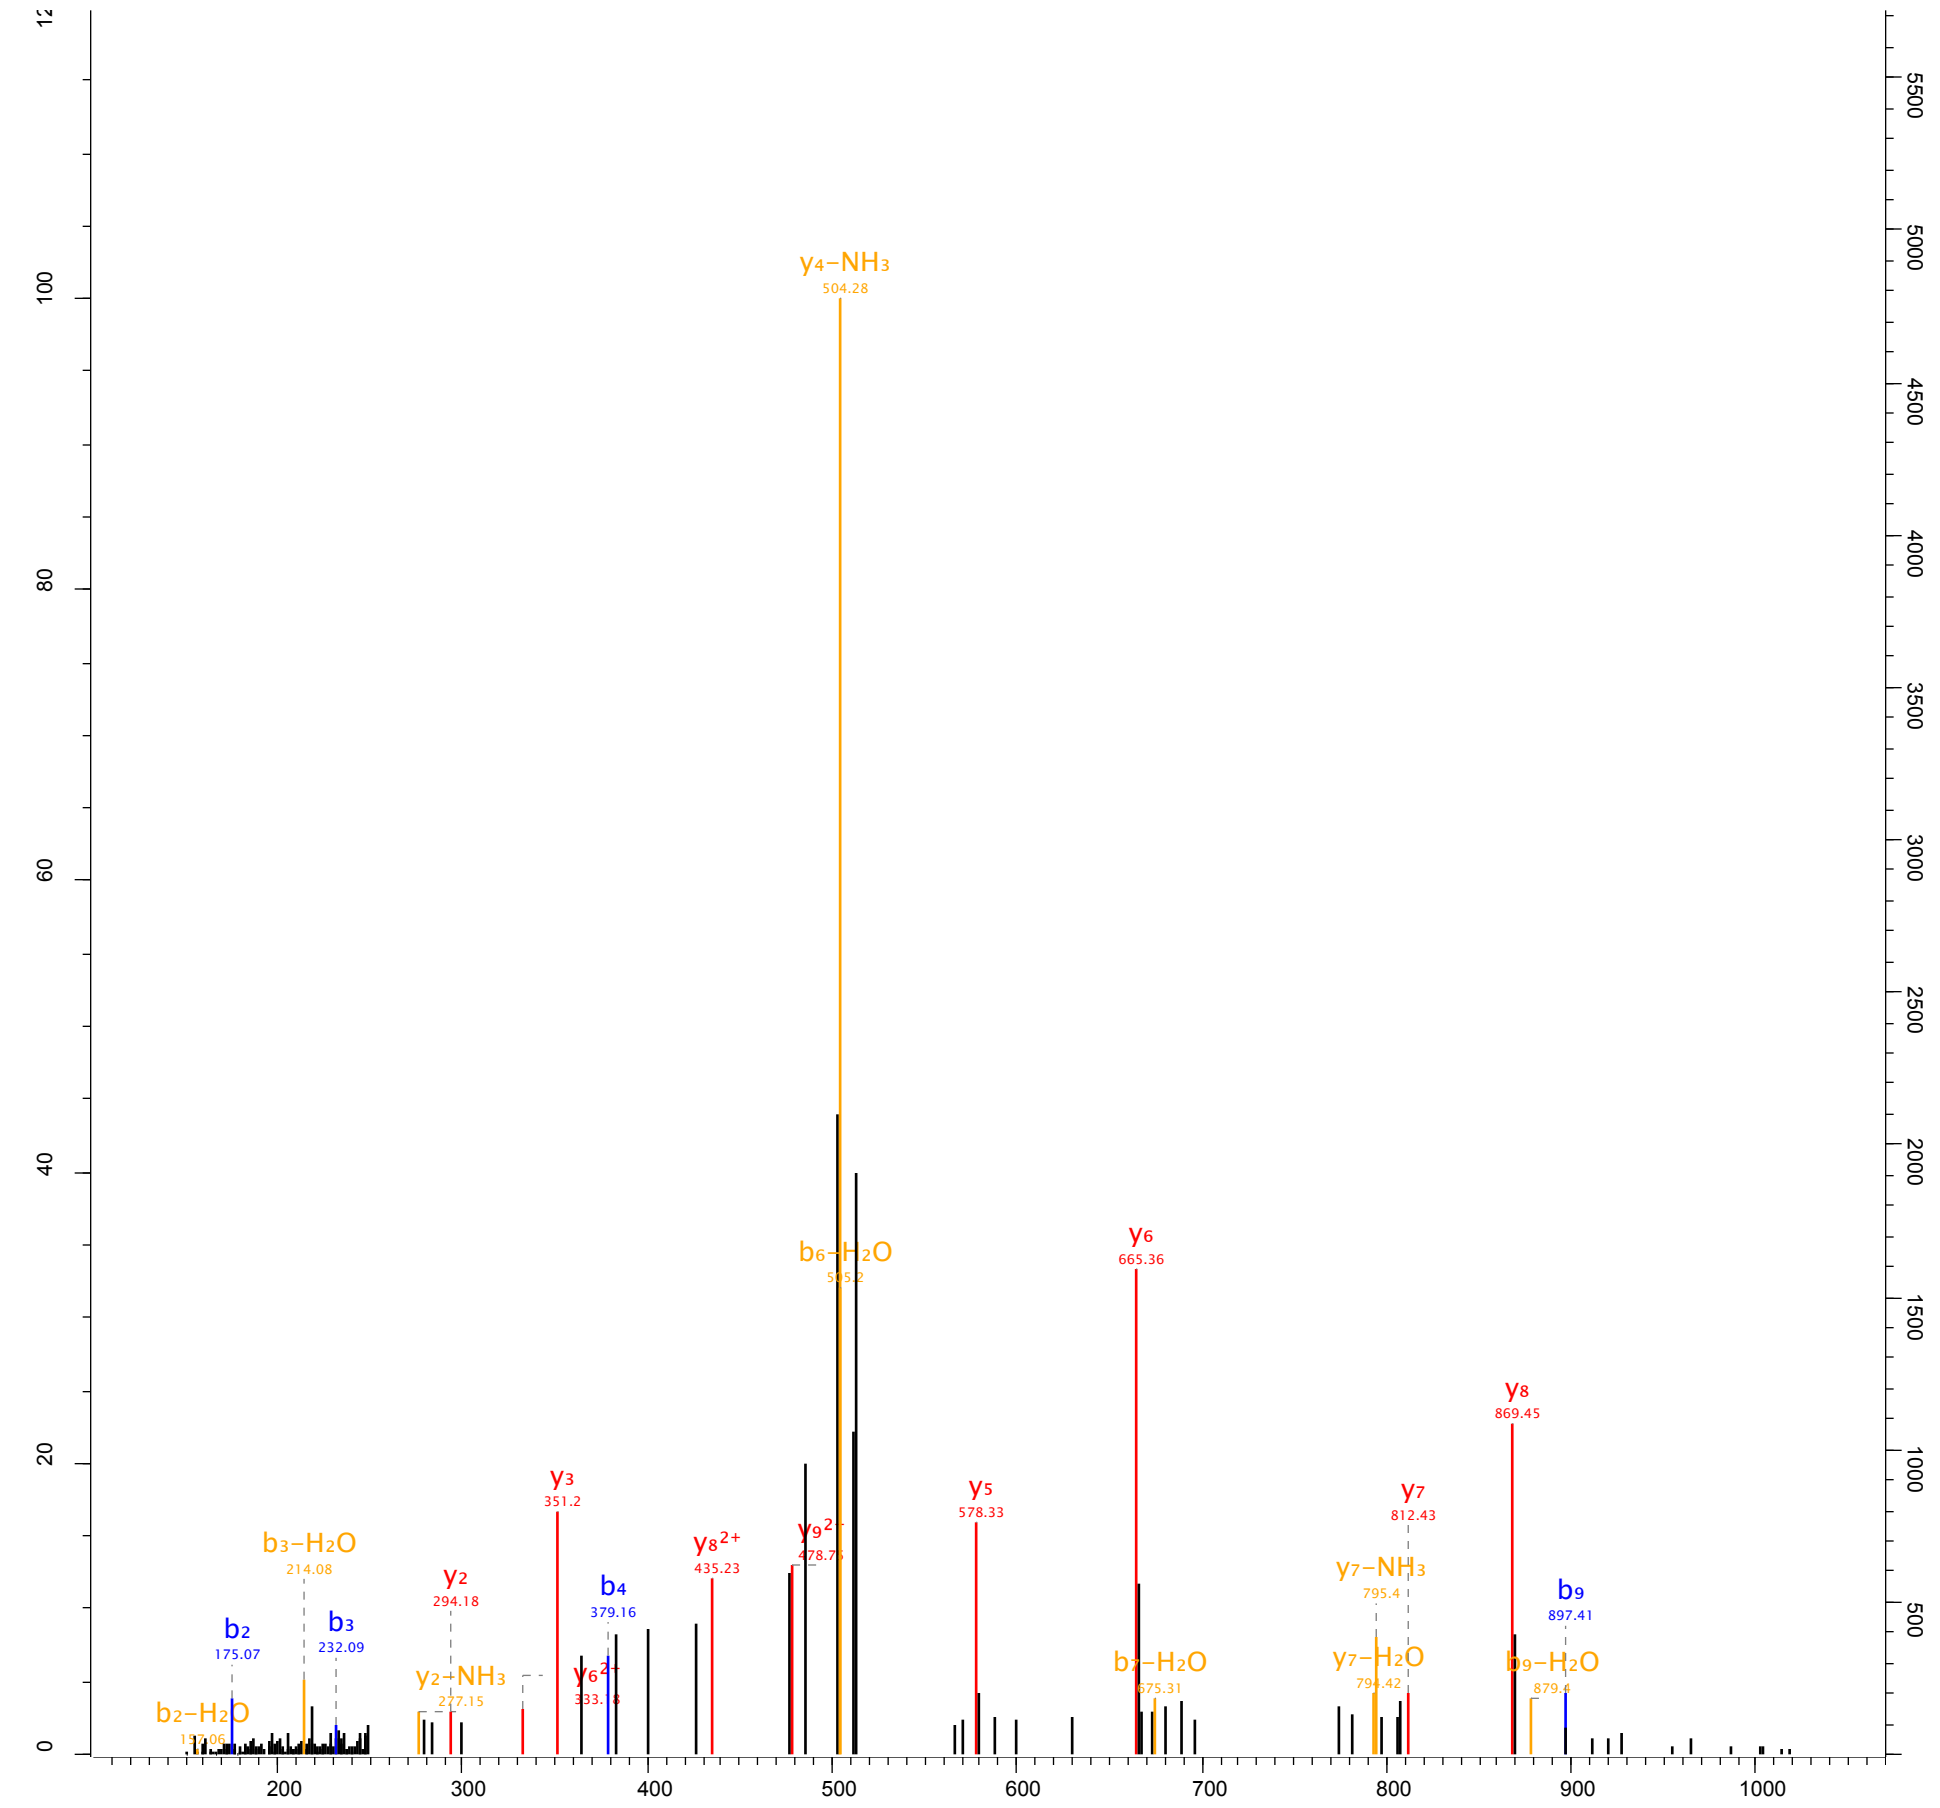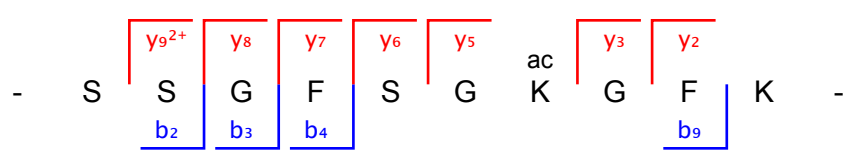

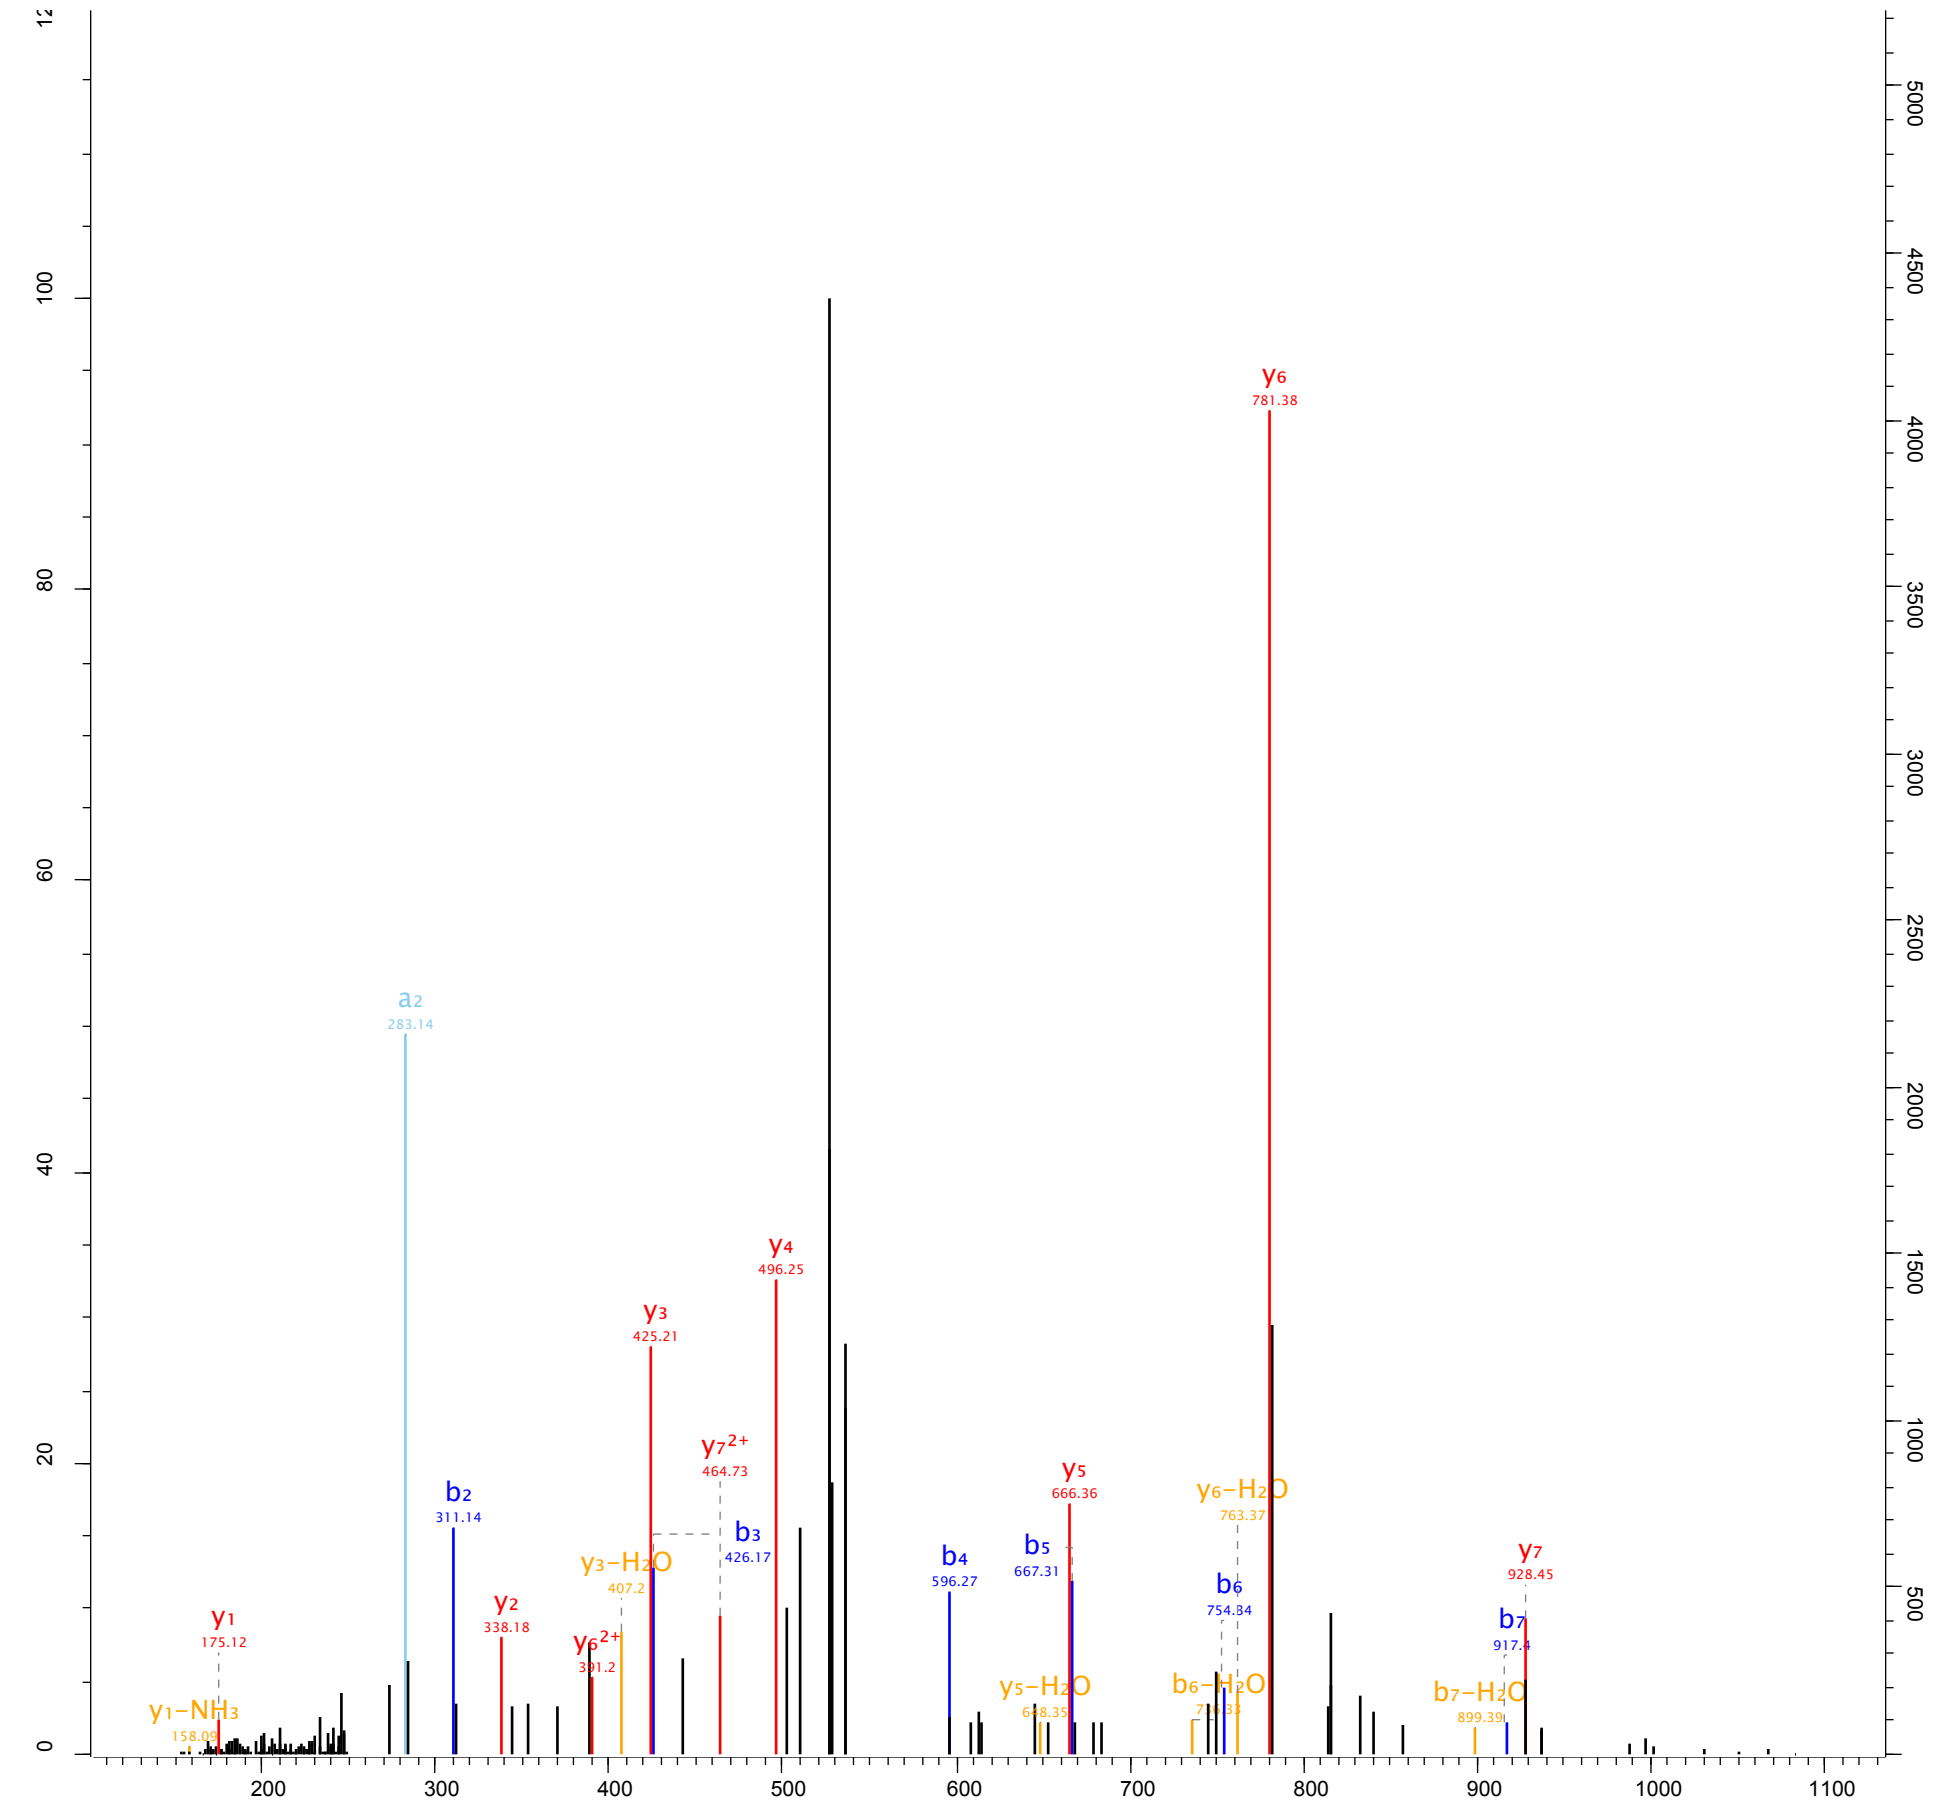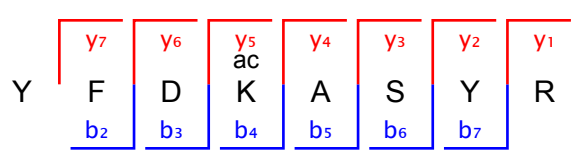

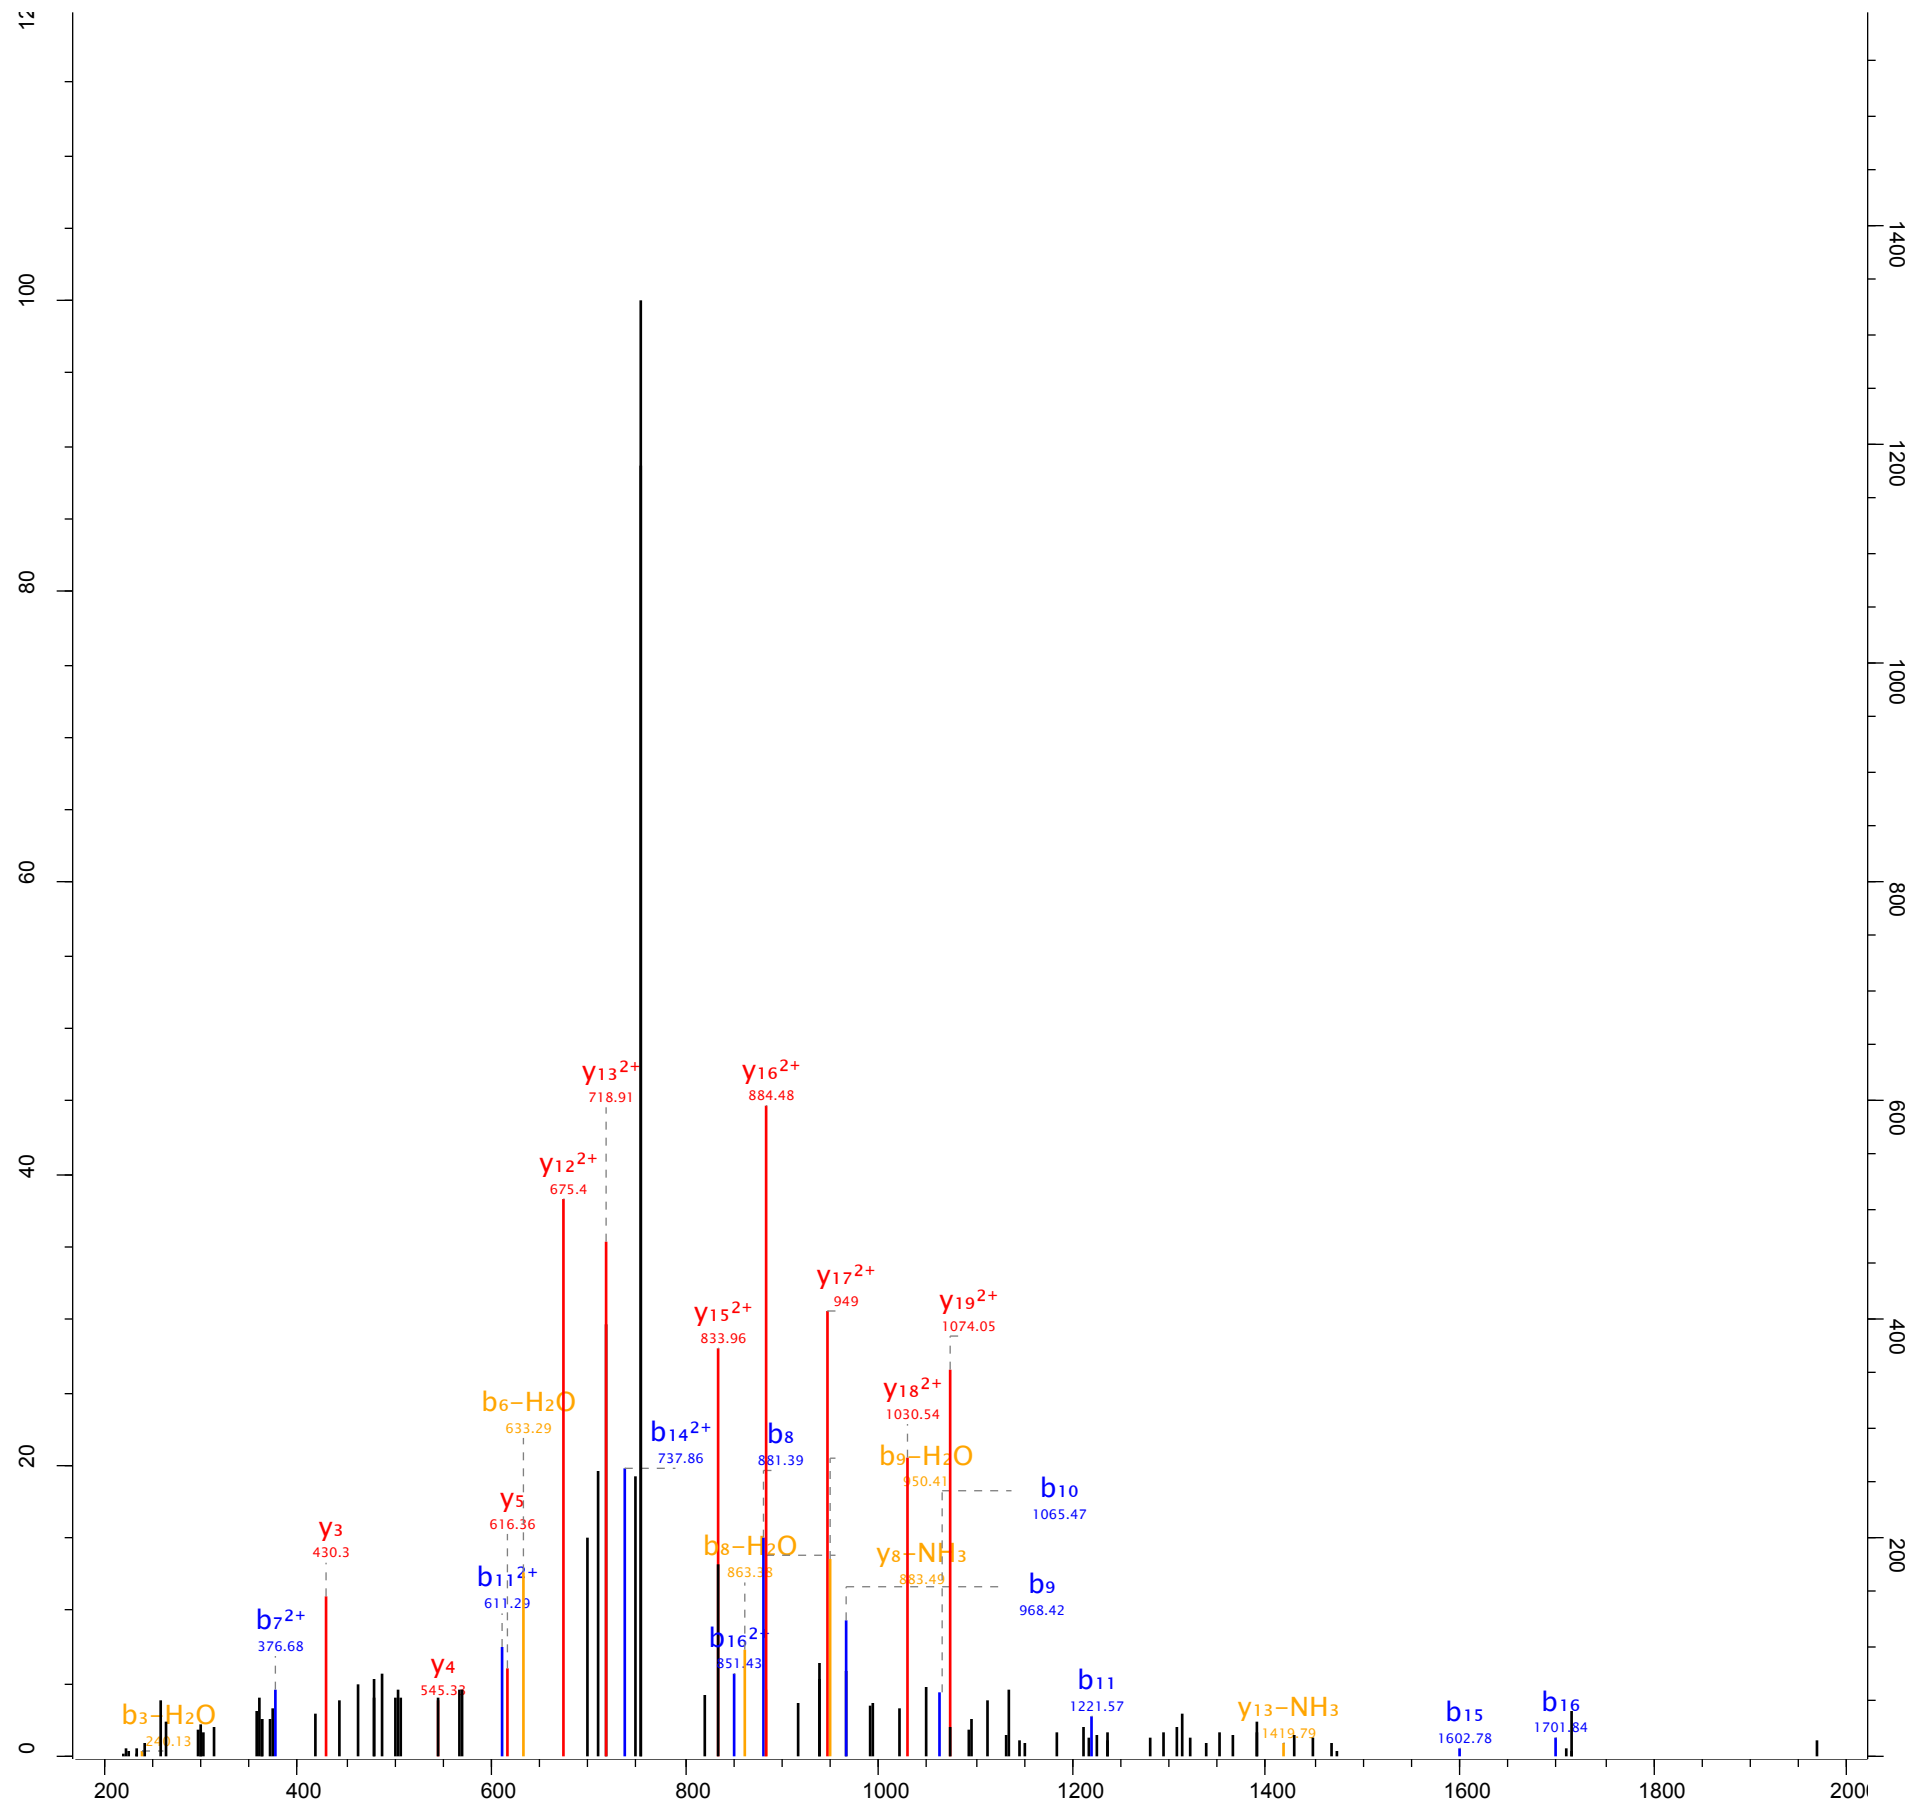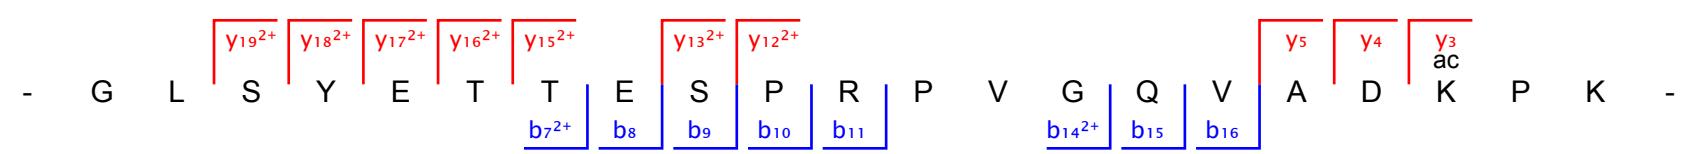

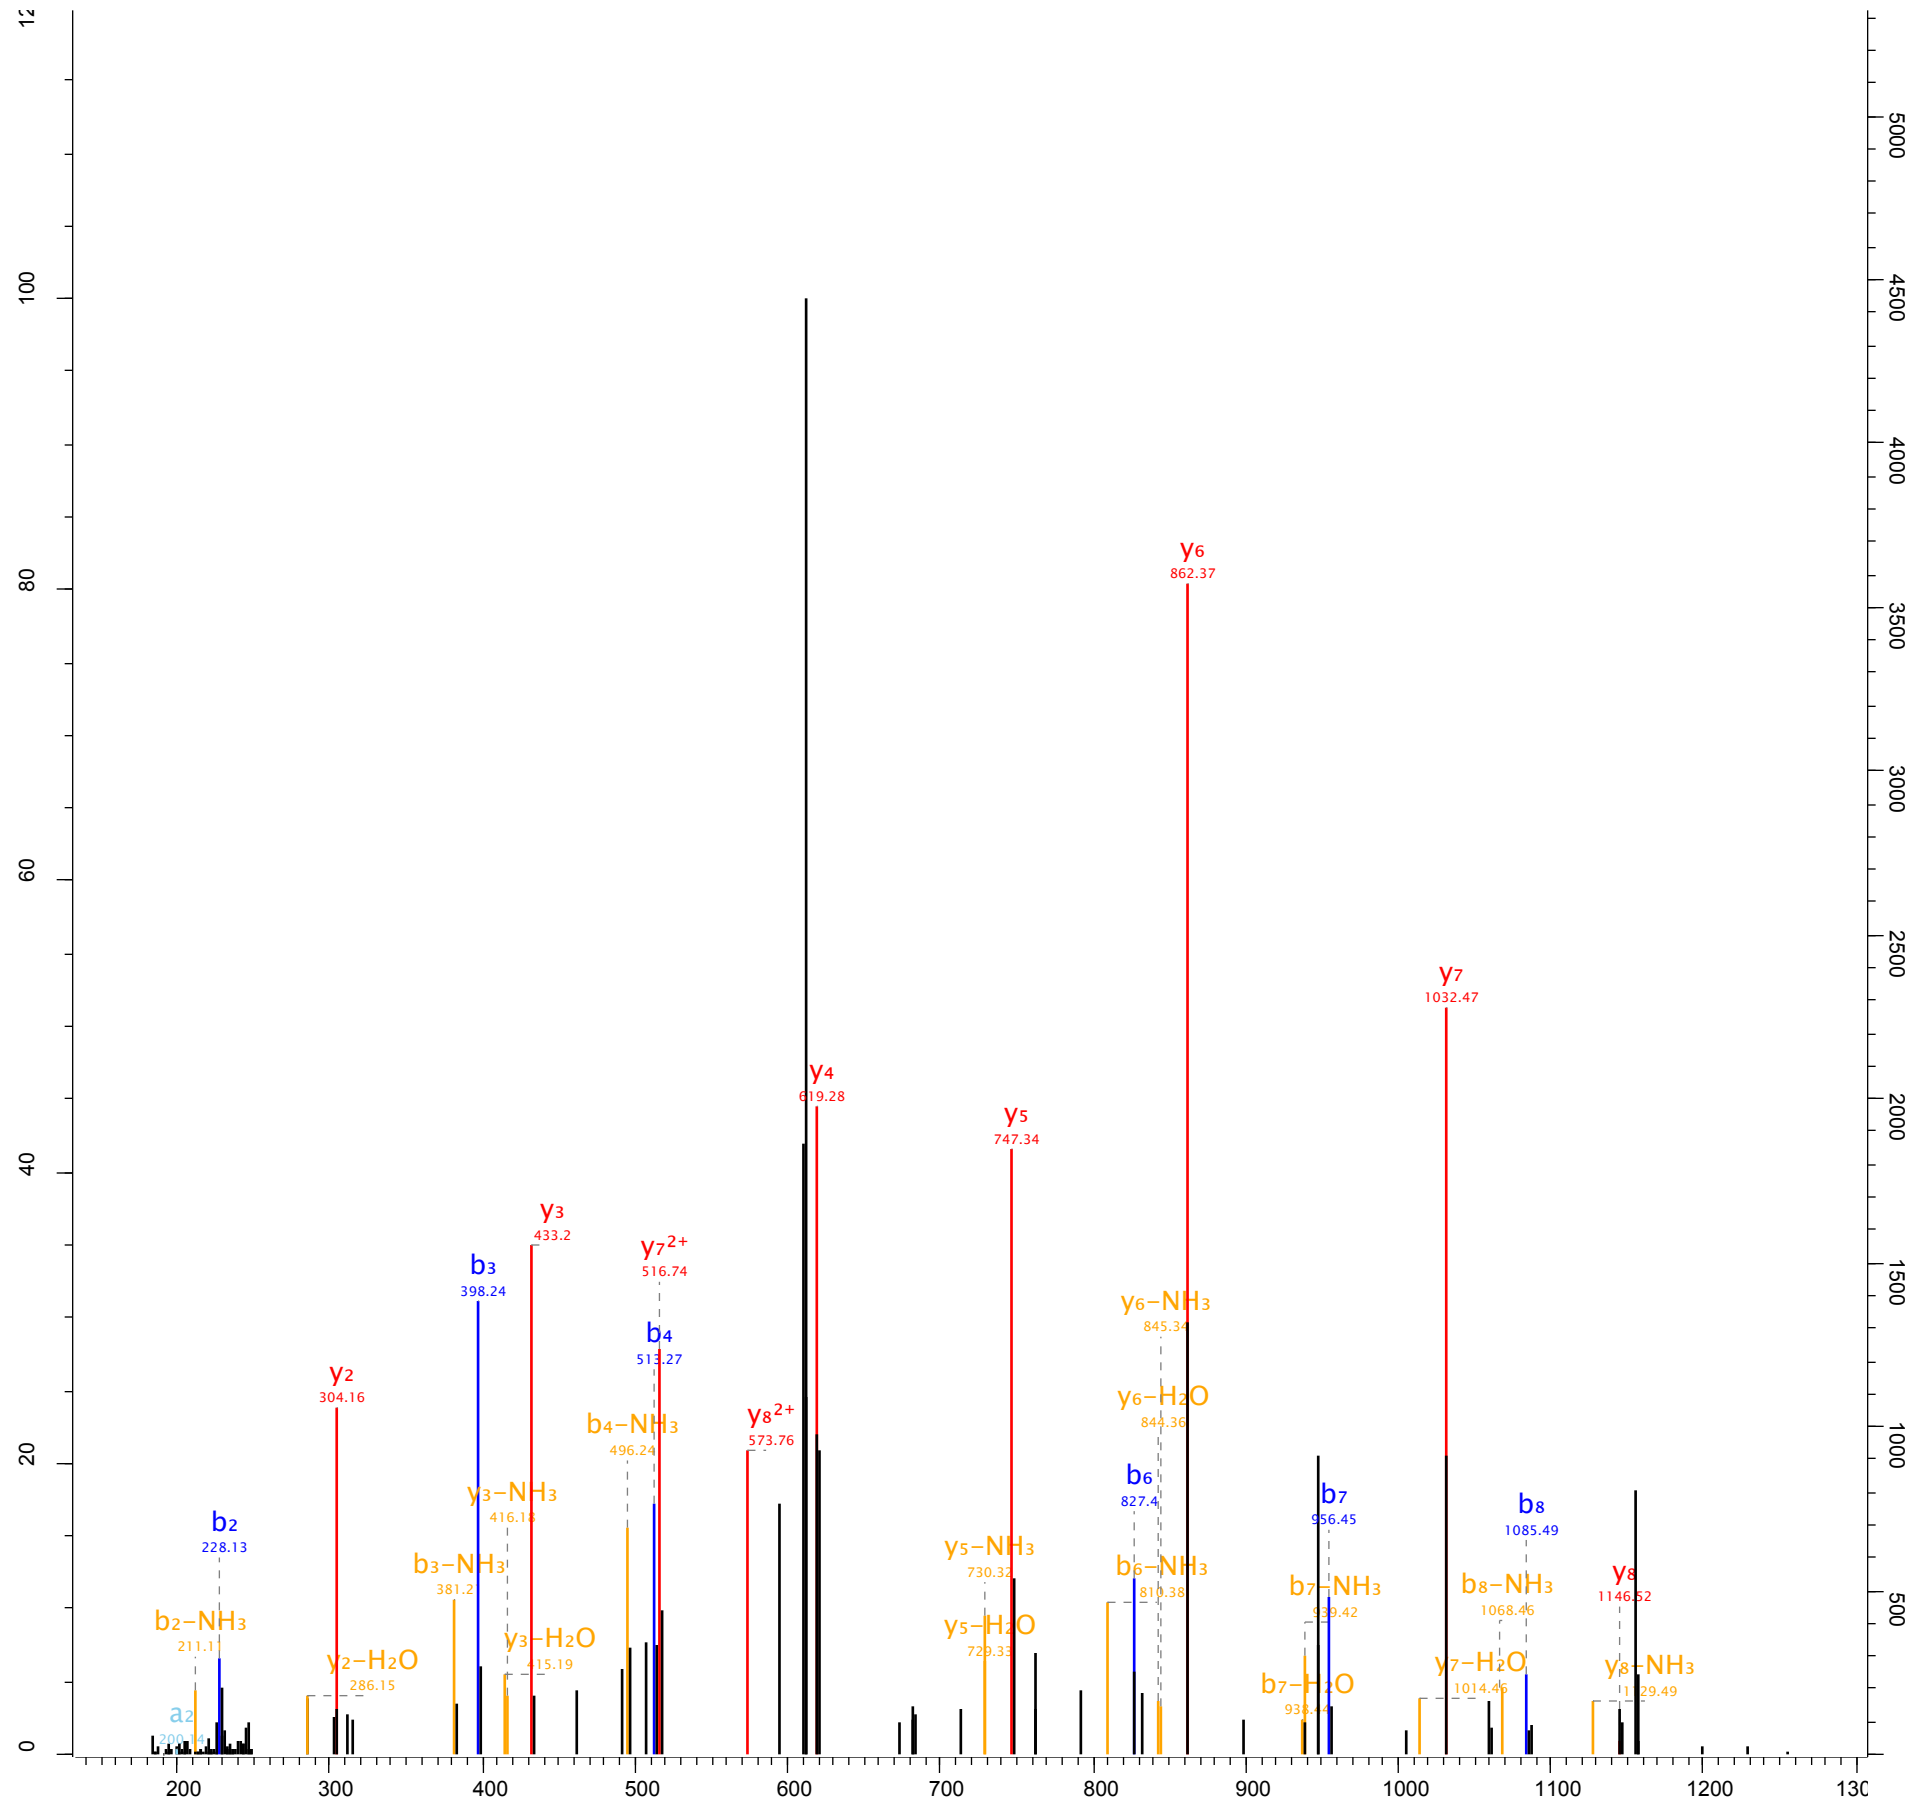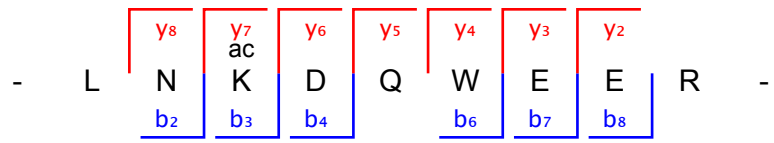

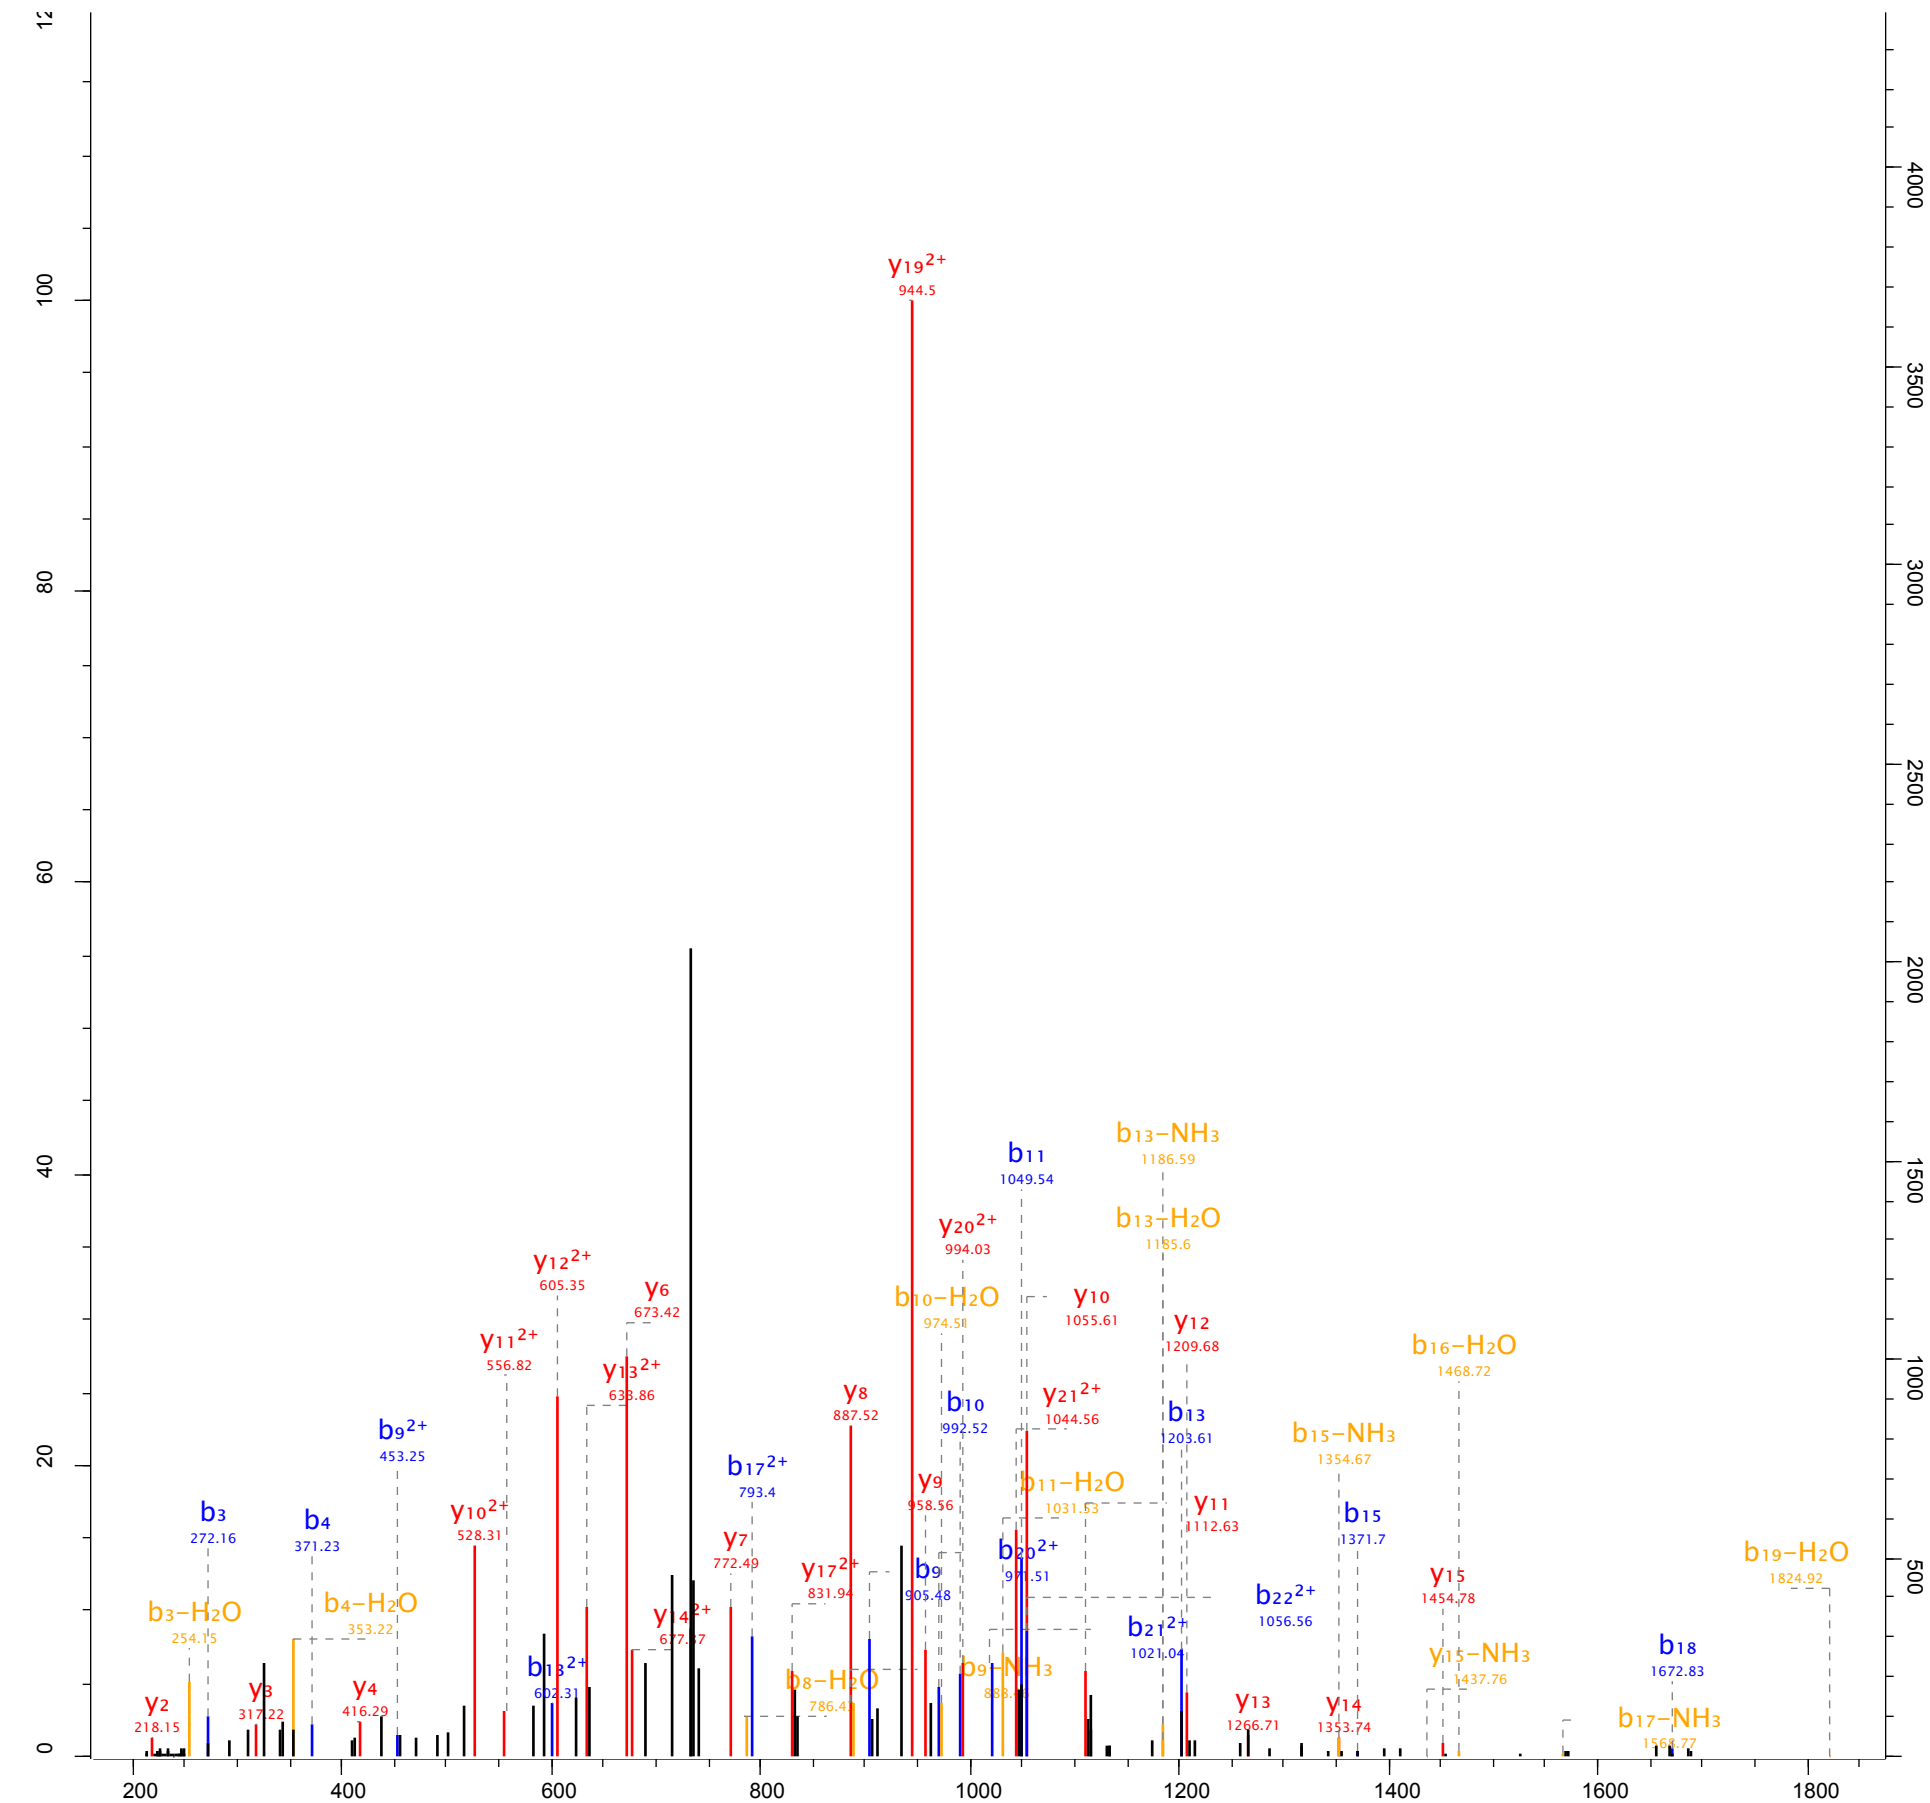

- V A T V P Q H A T S G P G P A D V S K V V A K -

b3 b4 b9 b10 b11 b13 b15 b17 2+ b18 b20 2+ b21 2+ b22 2+

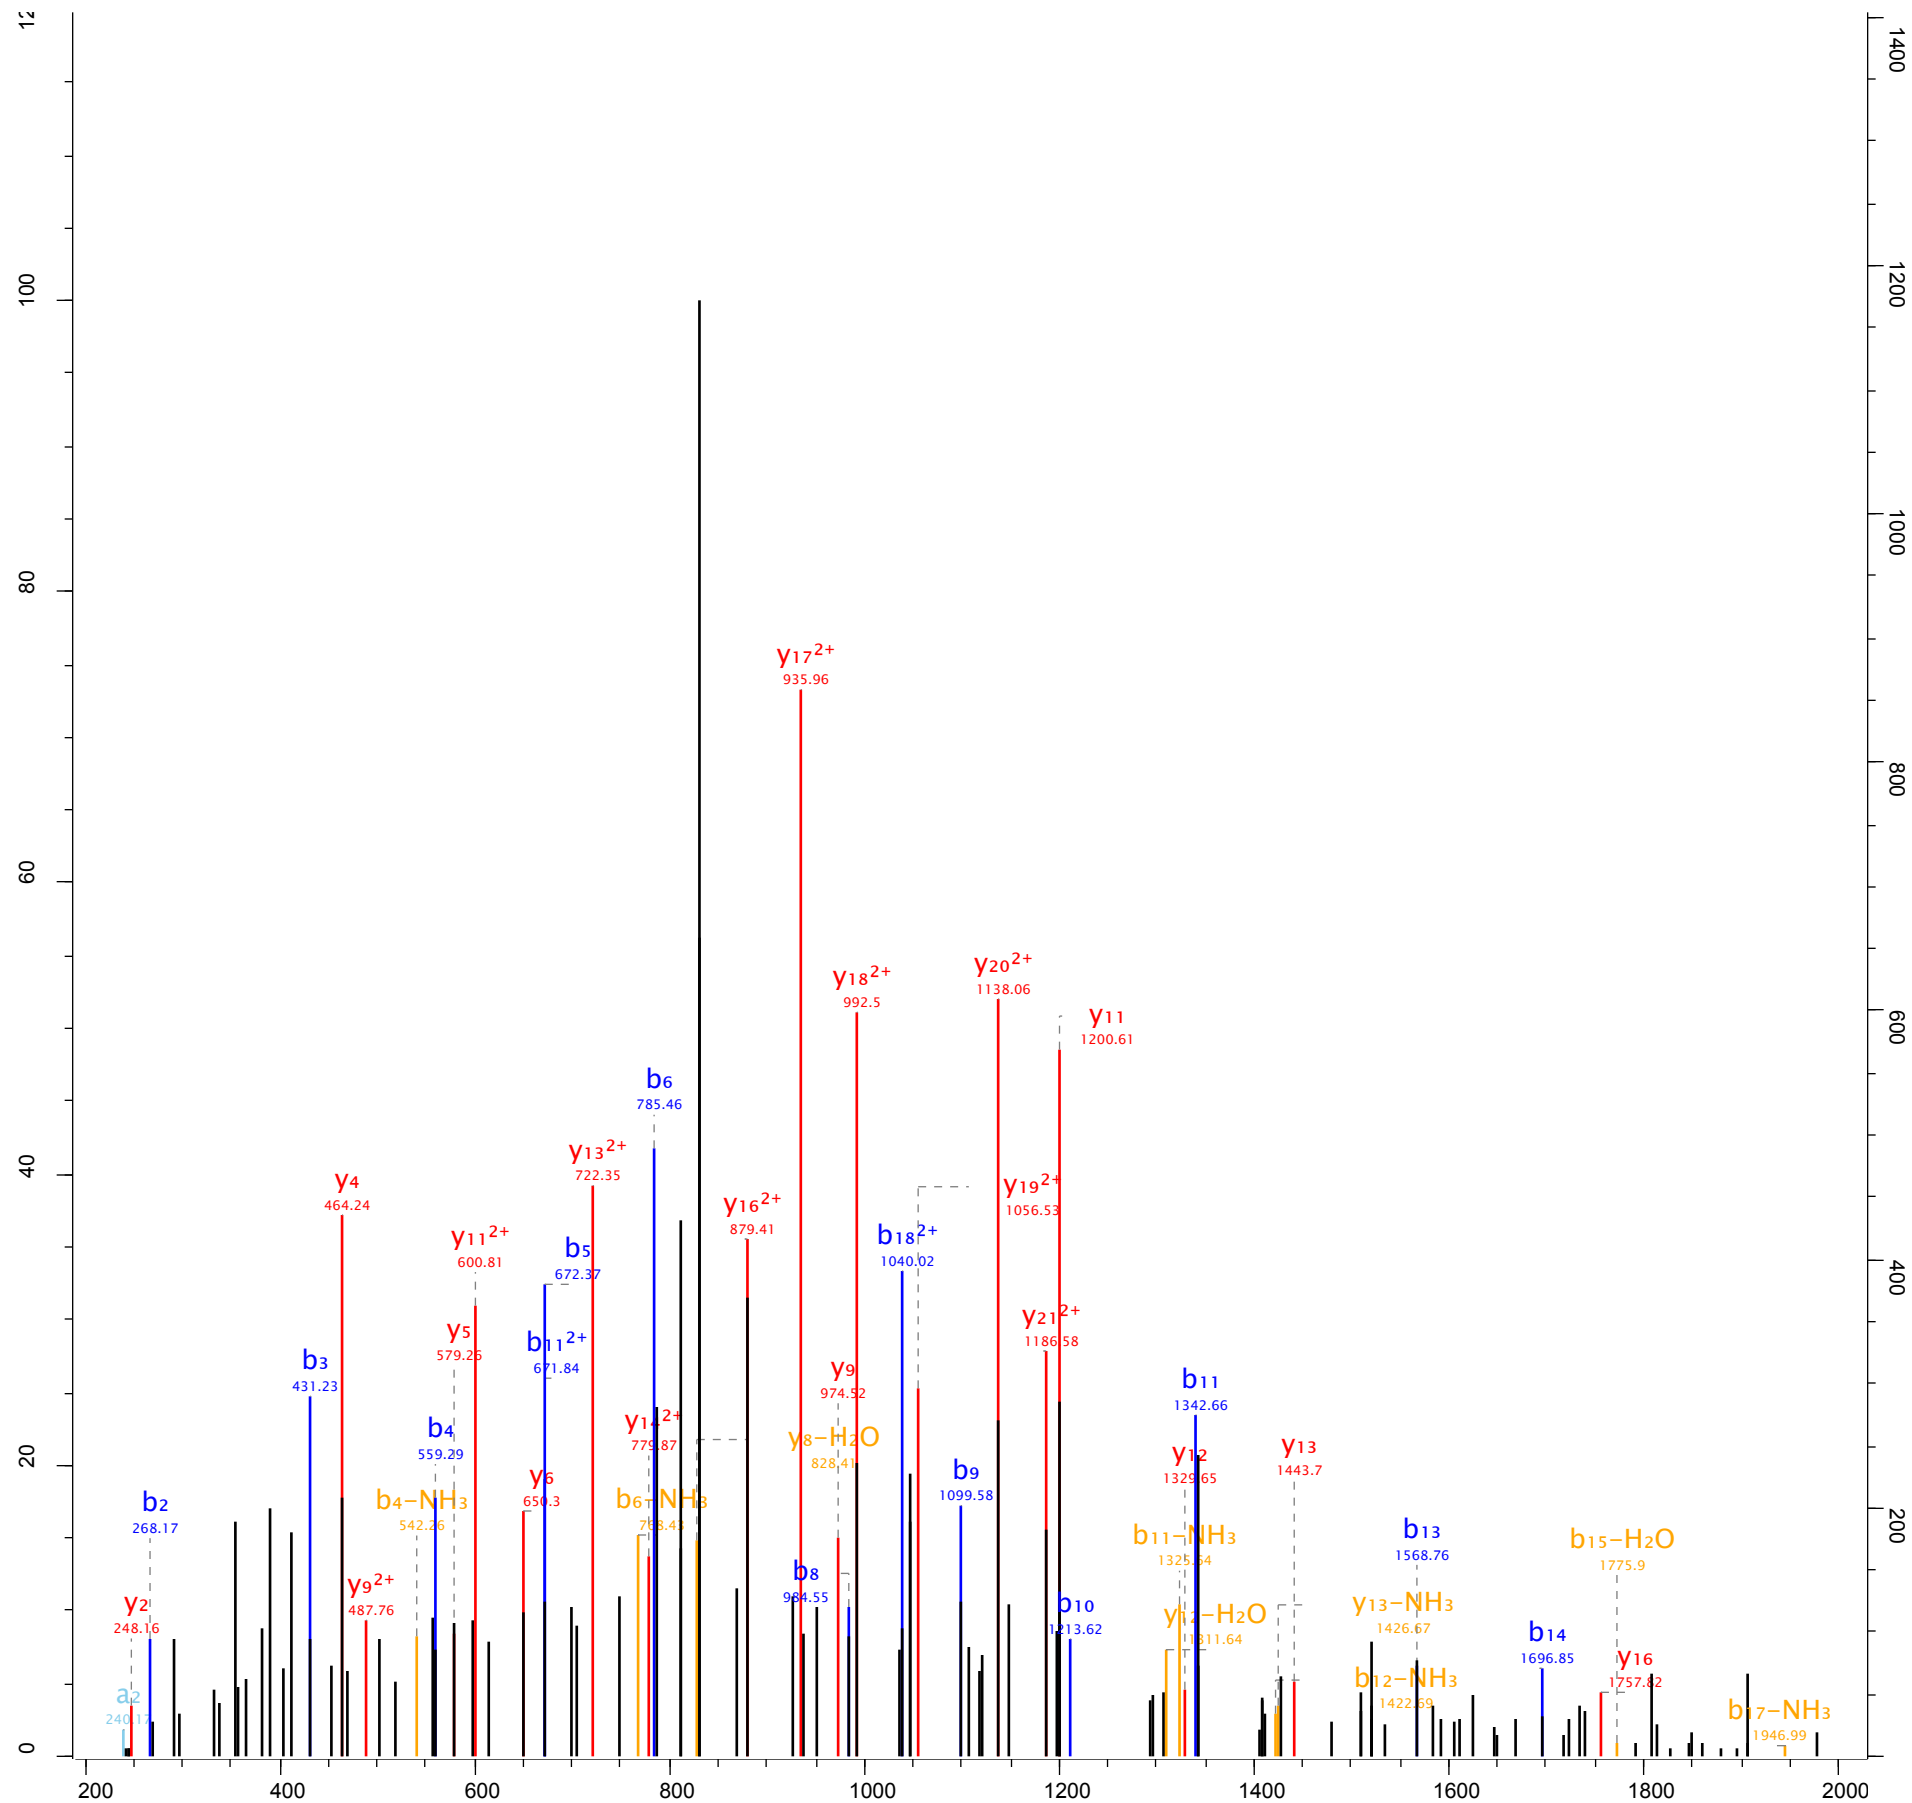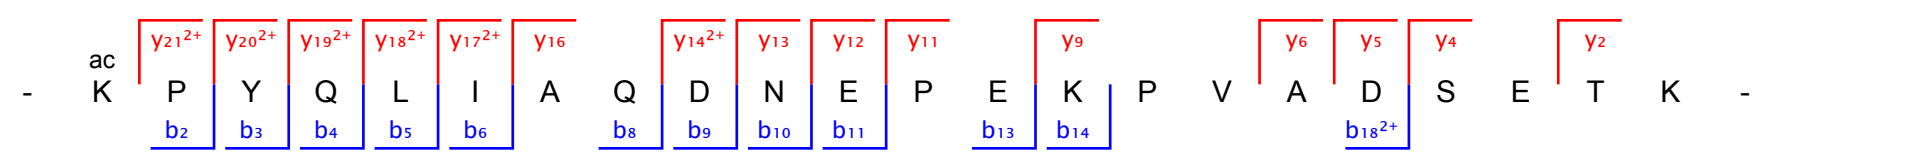



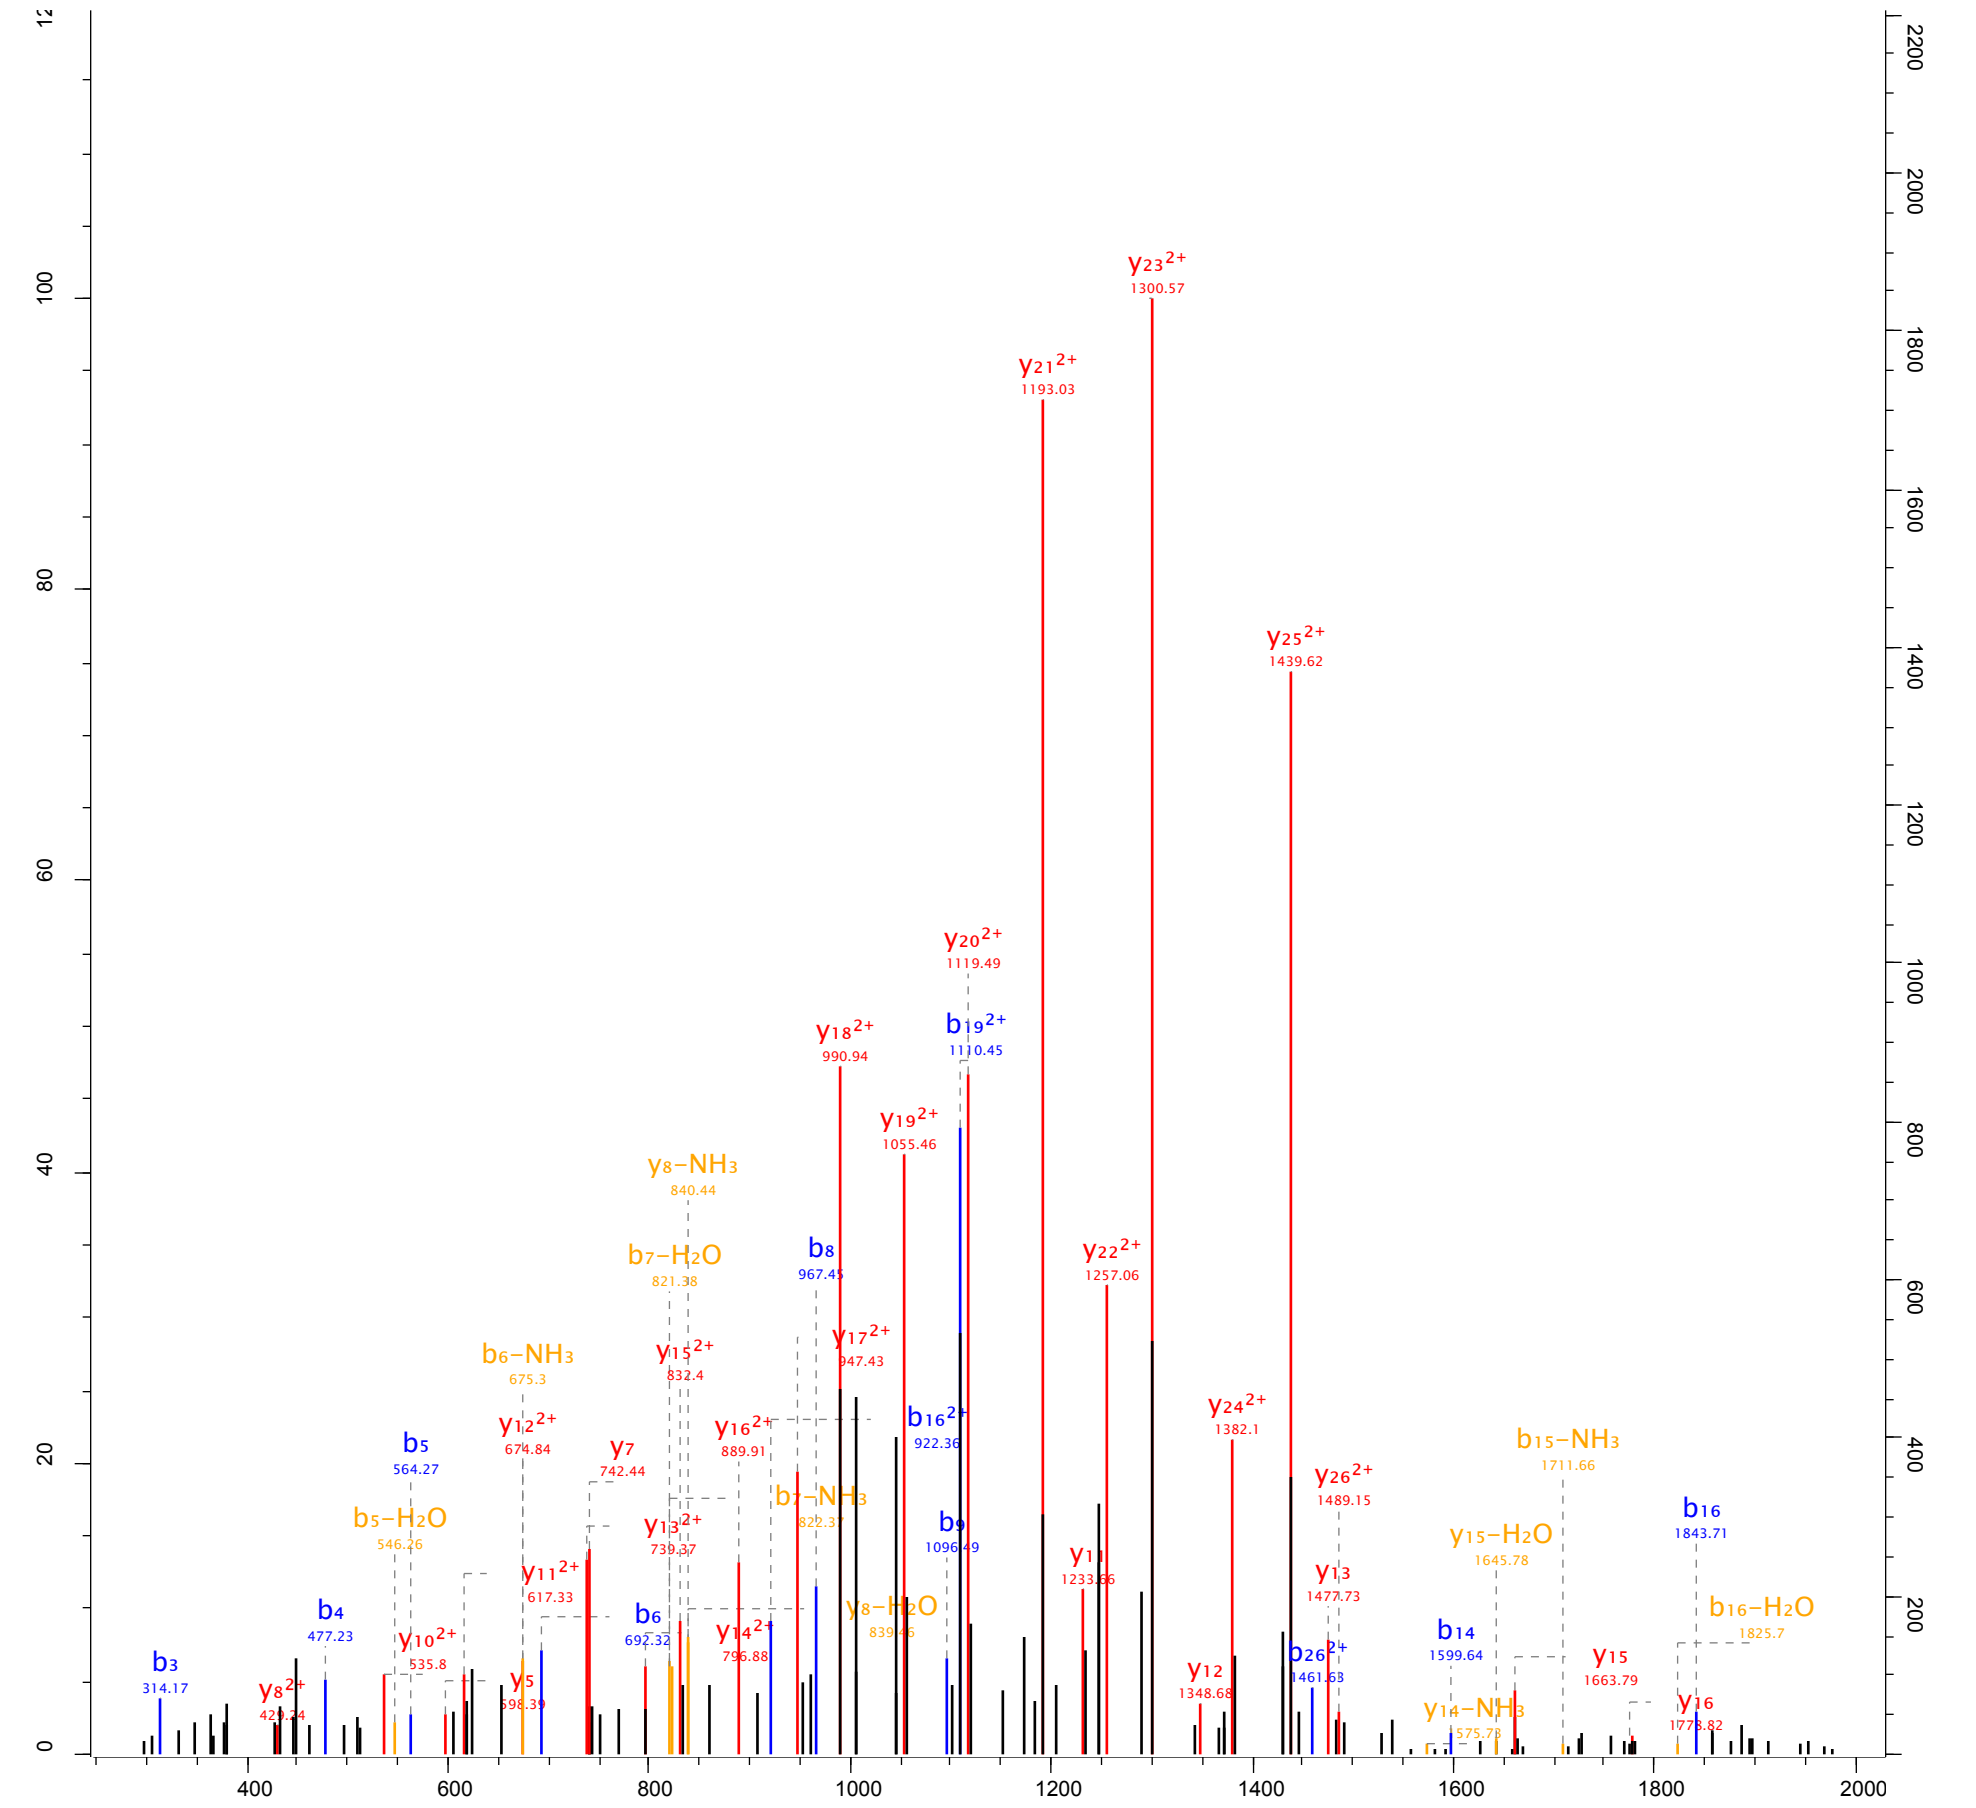

- V V D Y S Q F Q E S D D A D E D Y G R D S G P P

ac  
A K | K -

Fragmentation labels: b<sub>3</sub>, b<sub>4</sub>, b<sub>5</sub>, b<sub>6</sub>, b<sub>8</sub>, b<sub>9</sub>, b<sub>14</sub>, b<sub>16</sub>, b<sub>19</sub><sup>2+, y<sub>5</sub>, y<sub>7</sub>, y<sub>8</sub><sup>2+</sup>, y<sub>10</sub><sup>2+</sup>, y<sub>11</sub>, y<sub>12</sub>, y<sub>13</sub>, y<sub>14</sub><sup>2+</sup>, y<sub>15</sub>, y<sub>16</sub>, y<sub>17</sub><sup>2+</sup>, y<sub>18</sub><sup>2+</sup>, y<sub>19</sub><sup>2+</sup>, y<sub>20</sub><sup>2+</sup>, y<sub>21</sub><sup>2+</sup>, y<sub>22</sub><sup>2+</sup>, y<sub>23</sub><sup>2+</sup>, y<sub>24</sub><sup>2+</sup>, y<sub>25</sub><sup>2+</sup>, y<sub>26</sub><sup>2+</sup></sup>

062513\_SCW\_II\_53\_6\_Vargas\_Enriched

16265

ITMS; CID

168.26

532.27

Sptan1

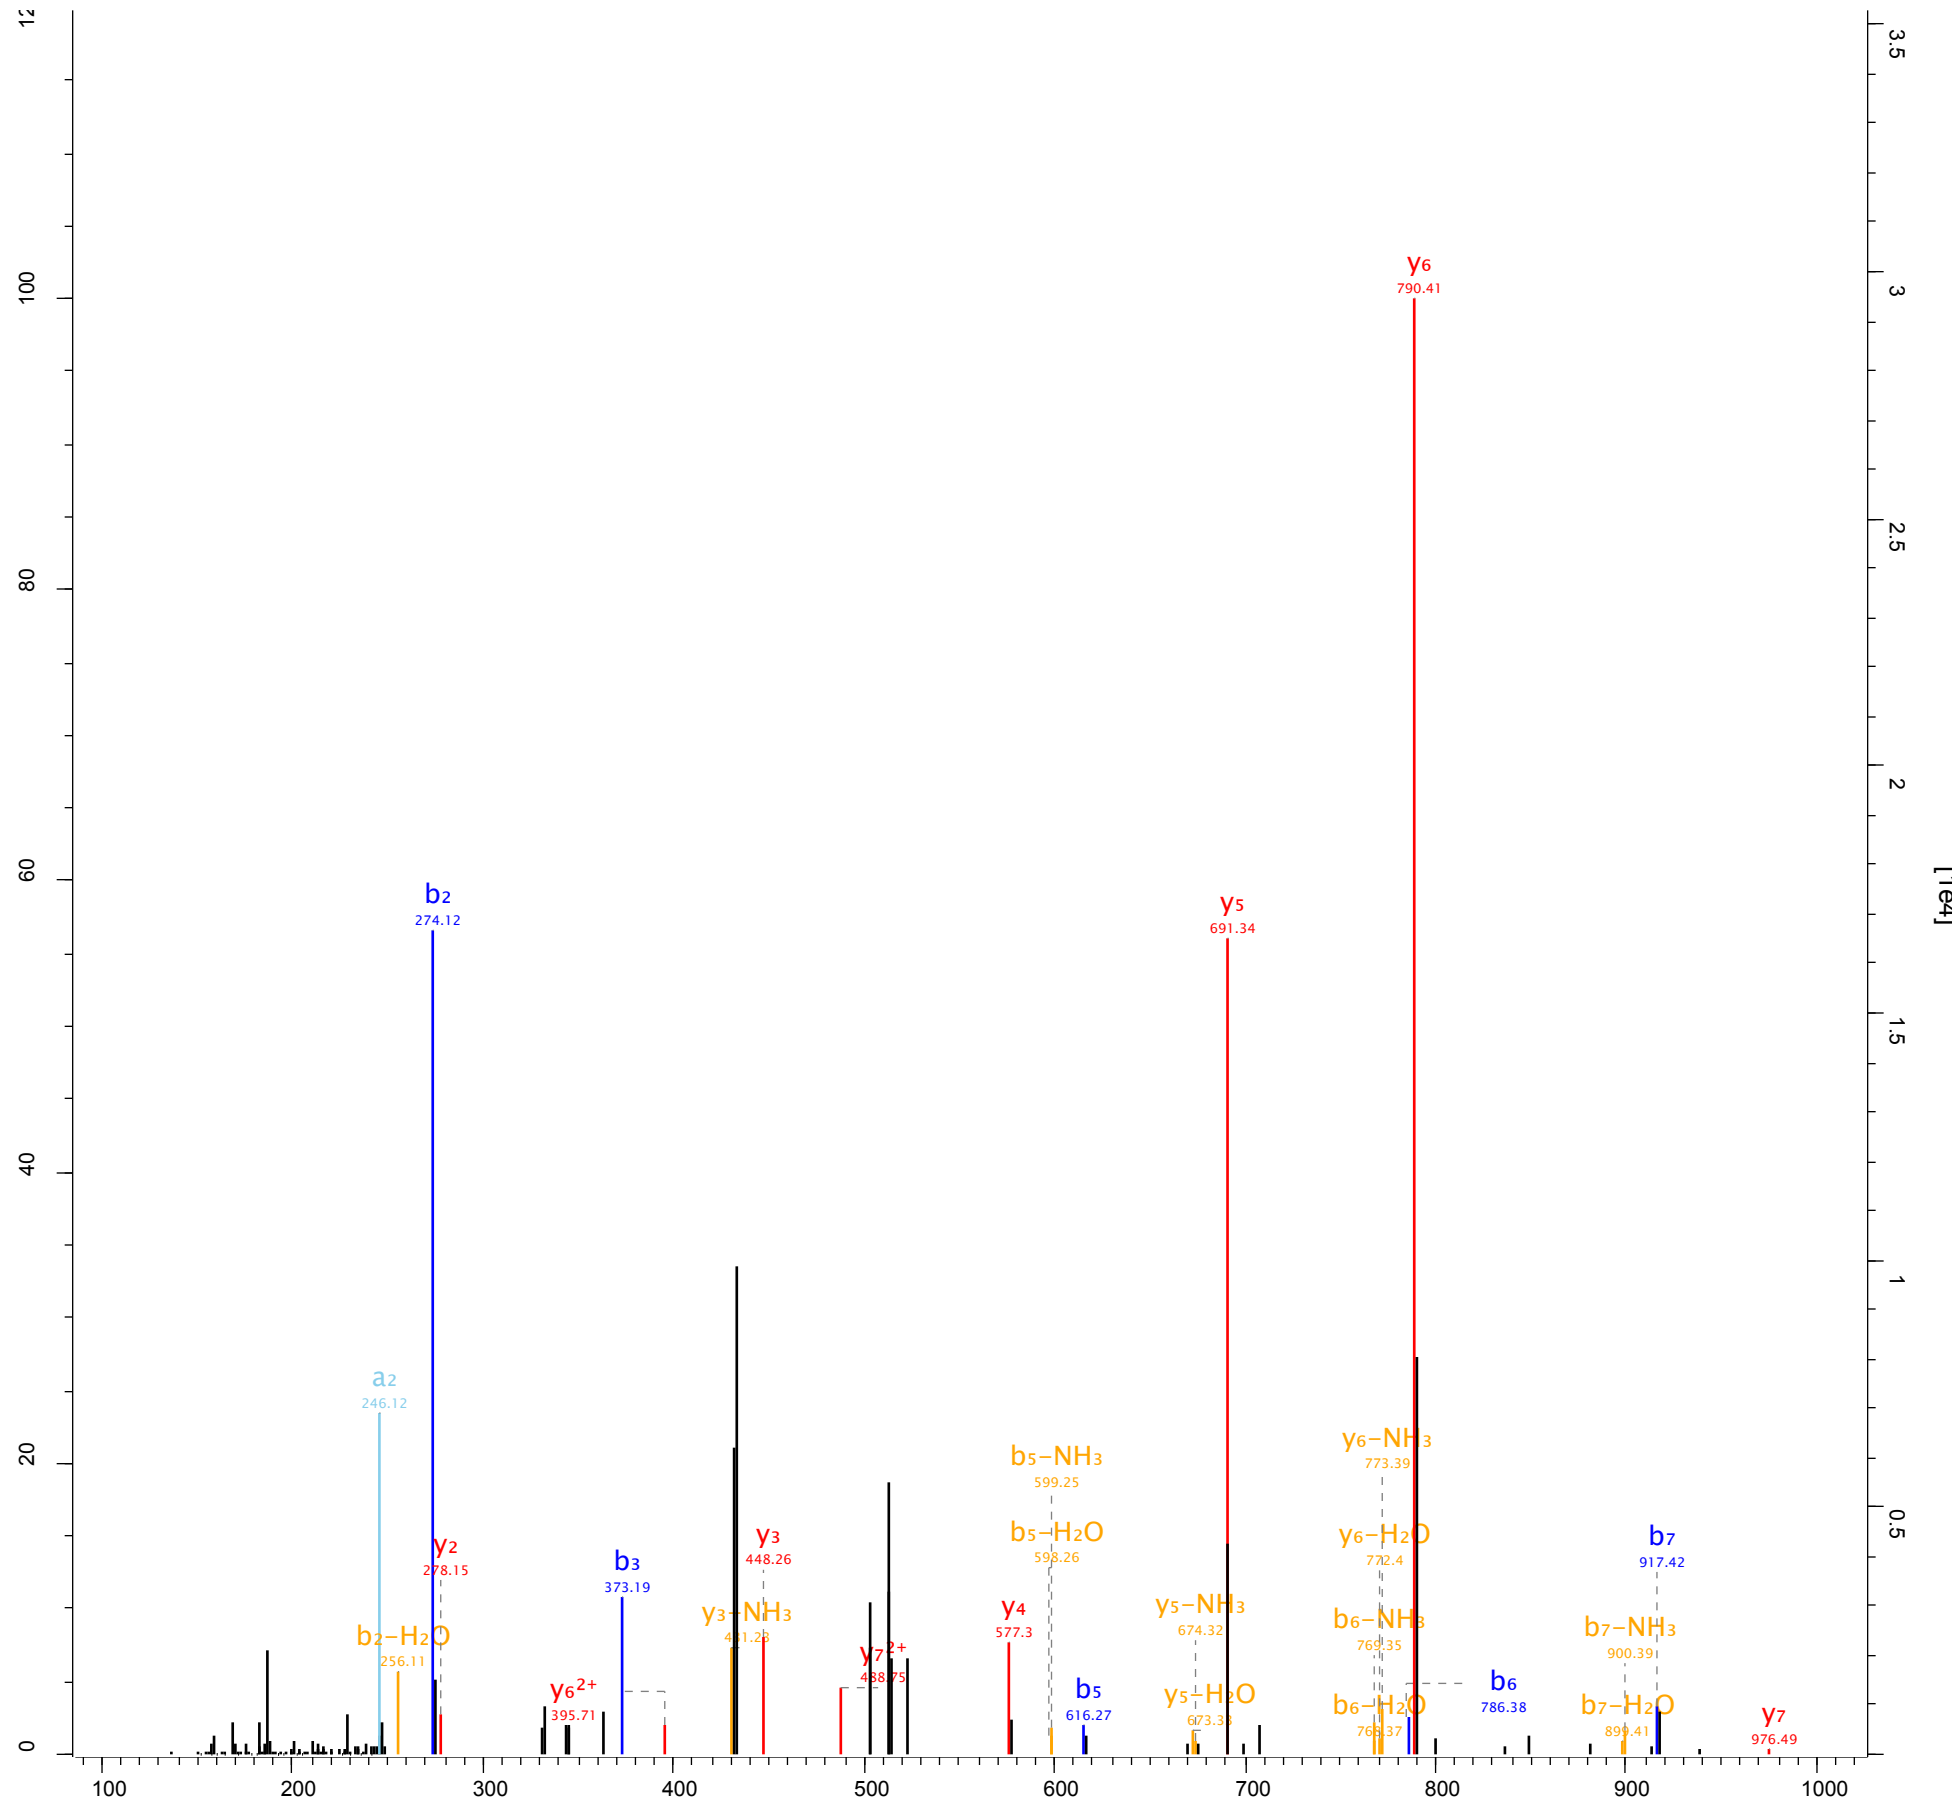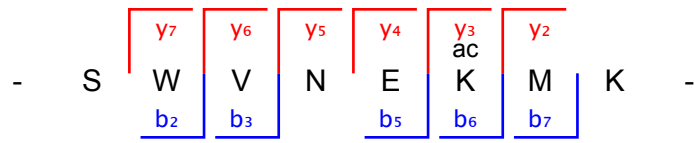

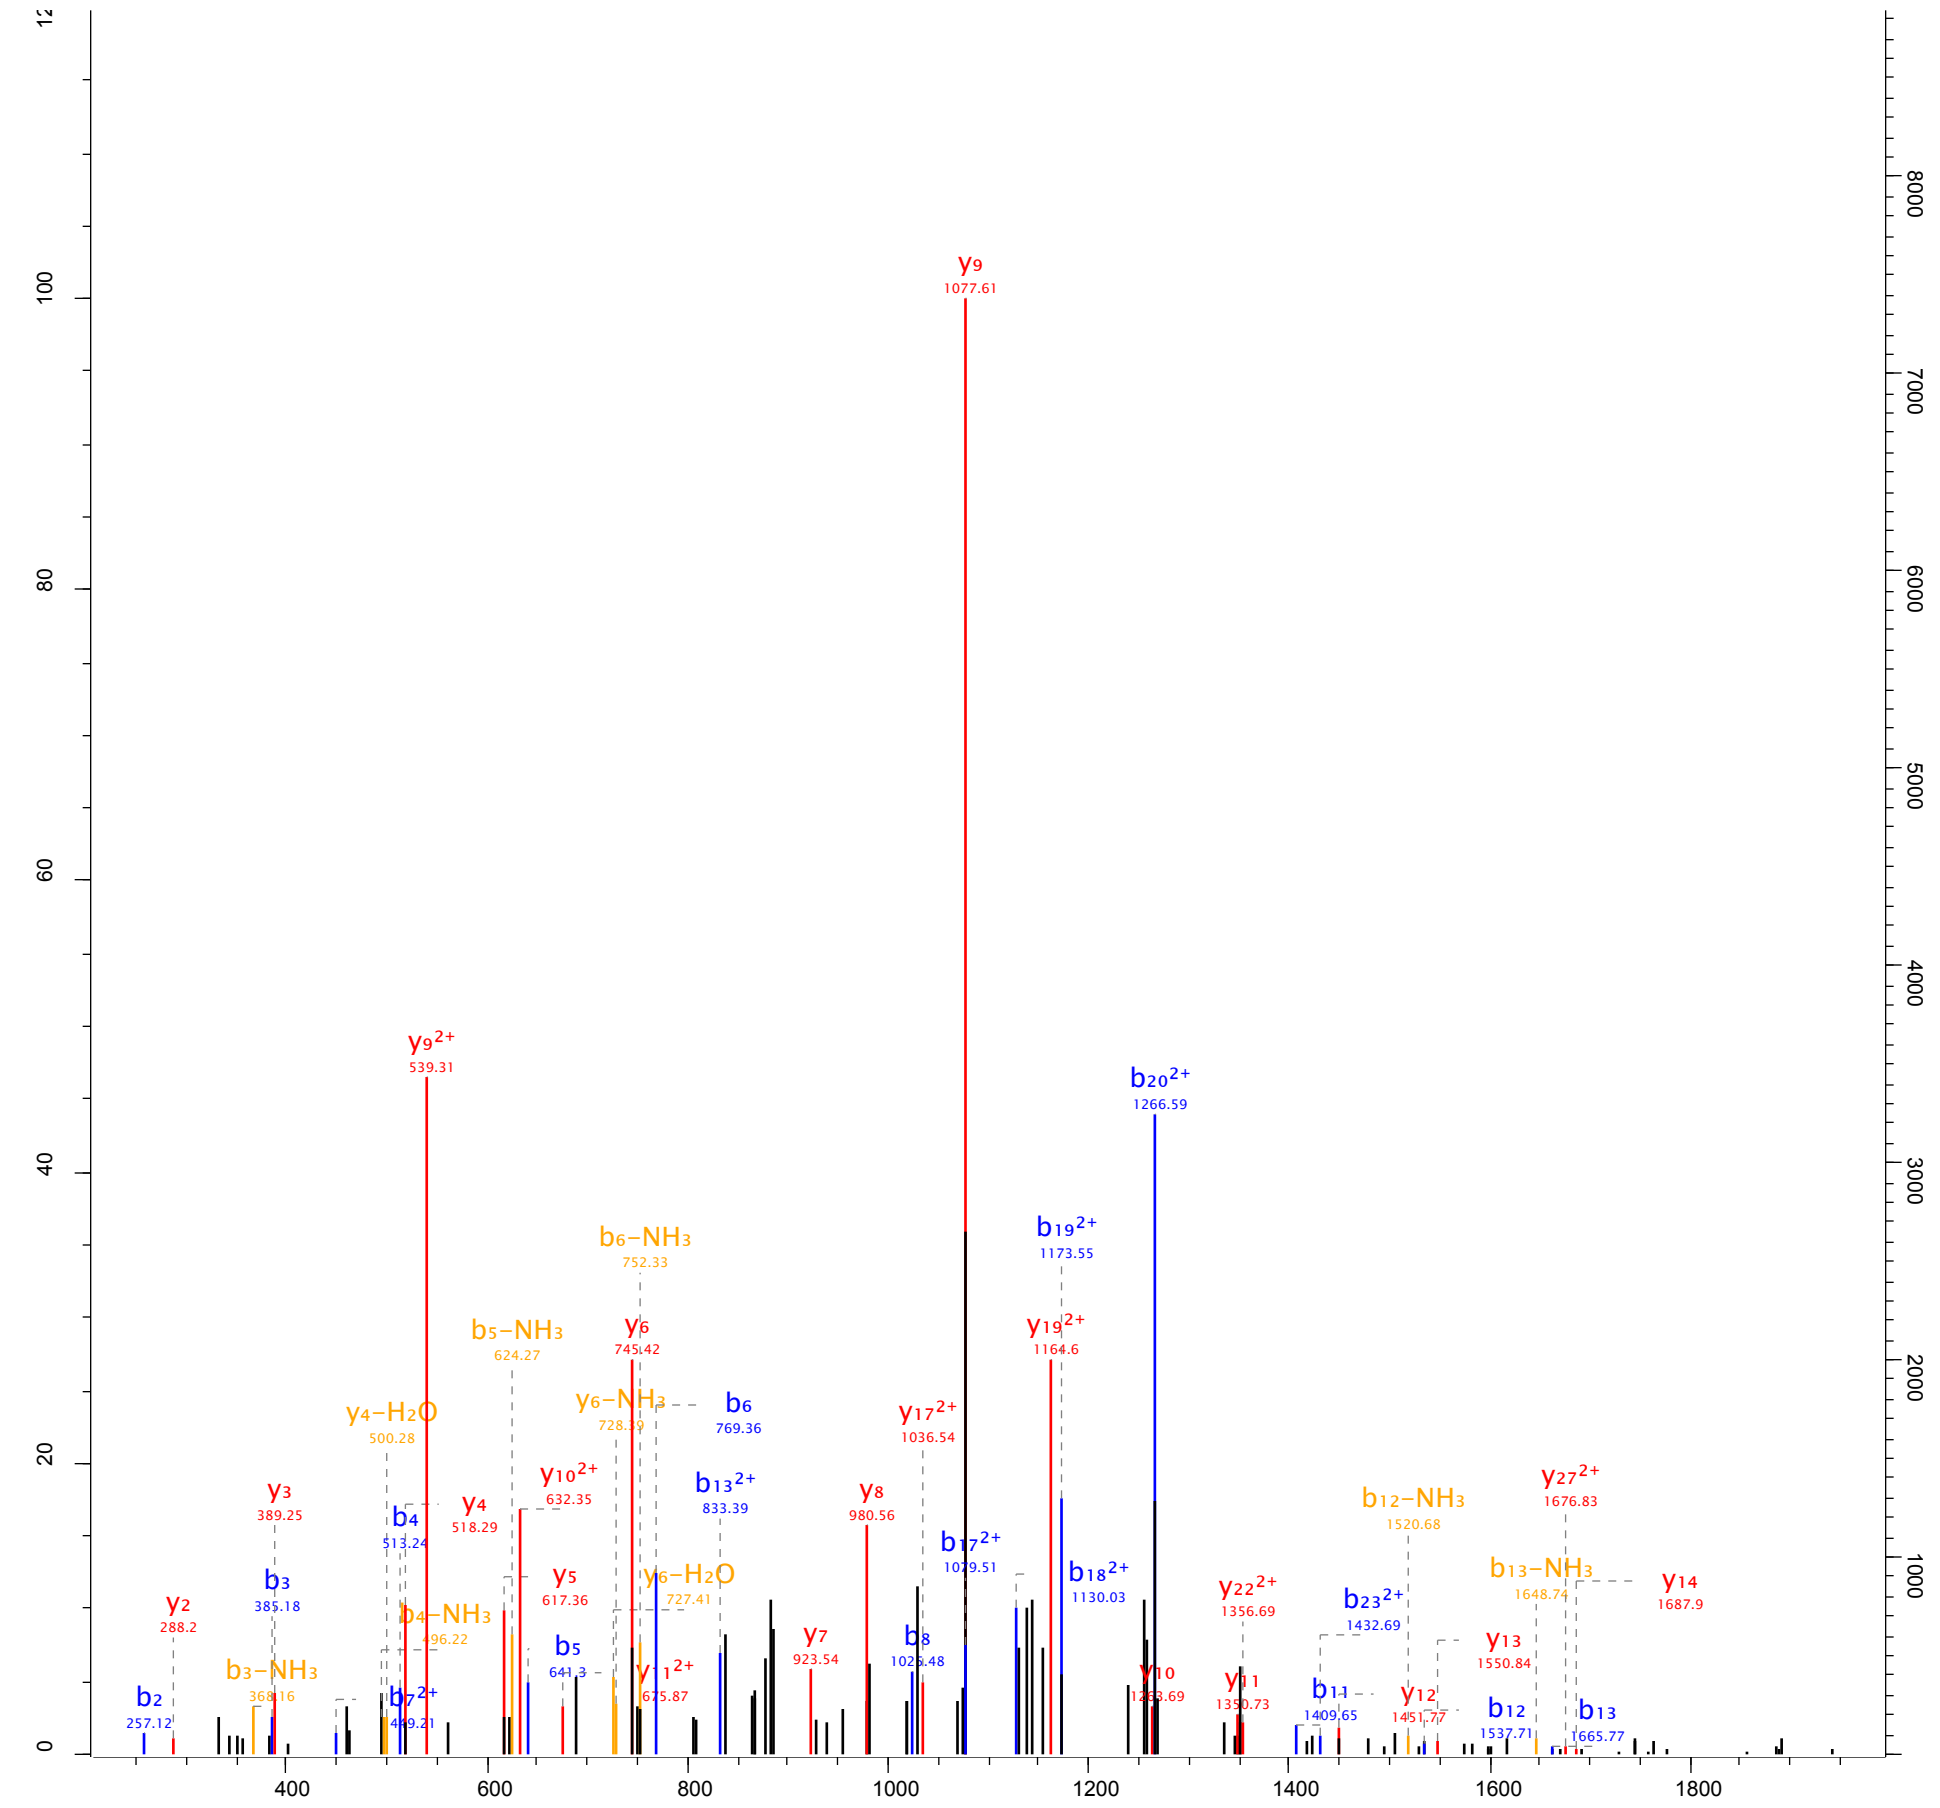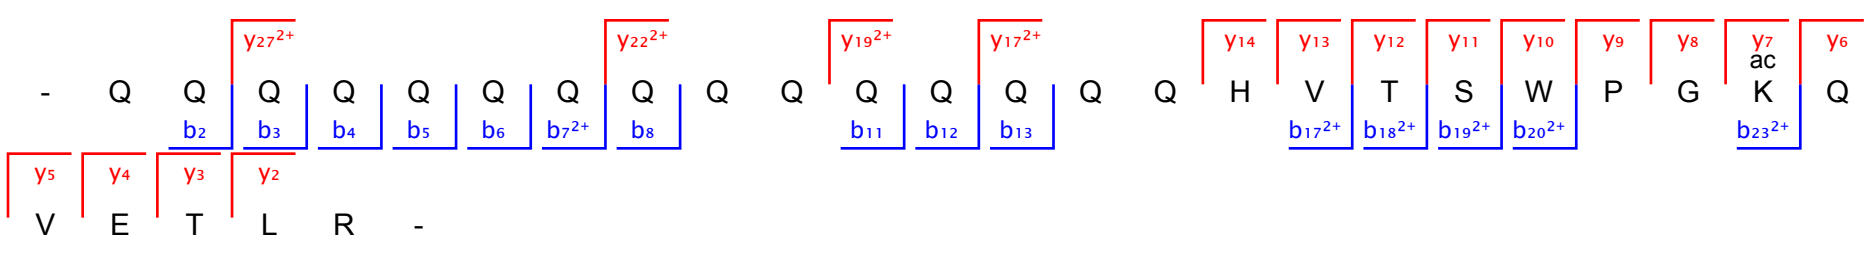

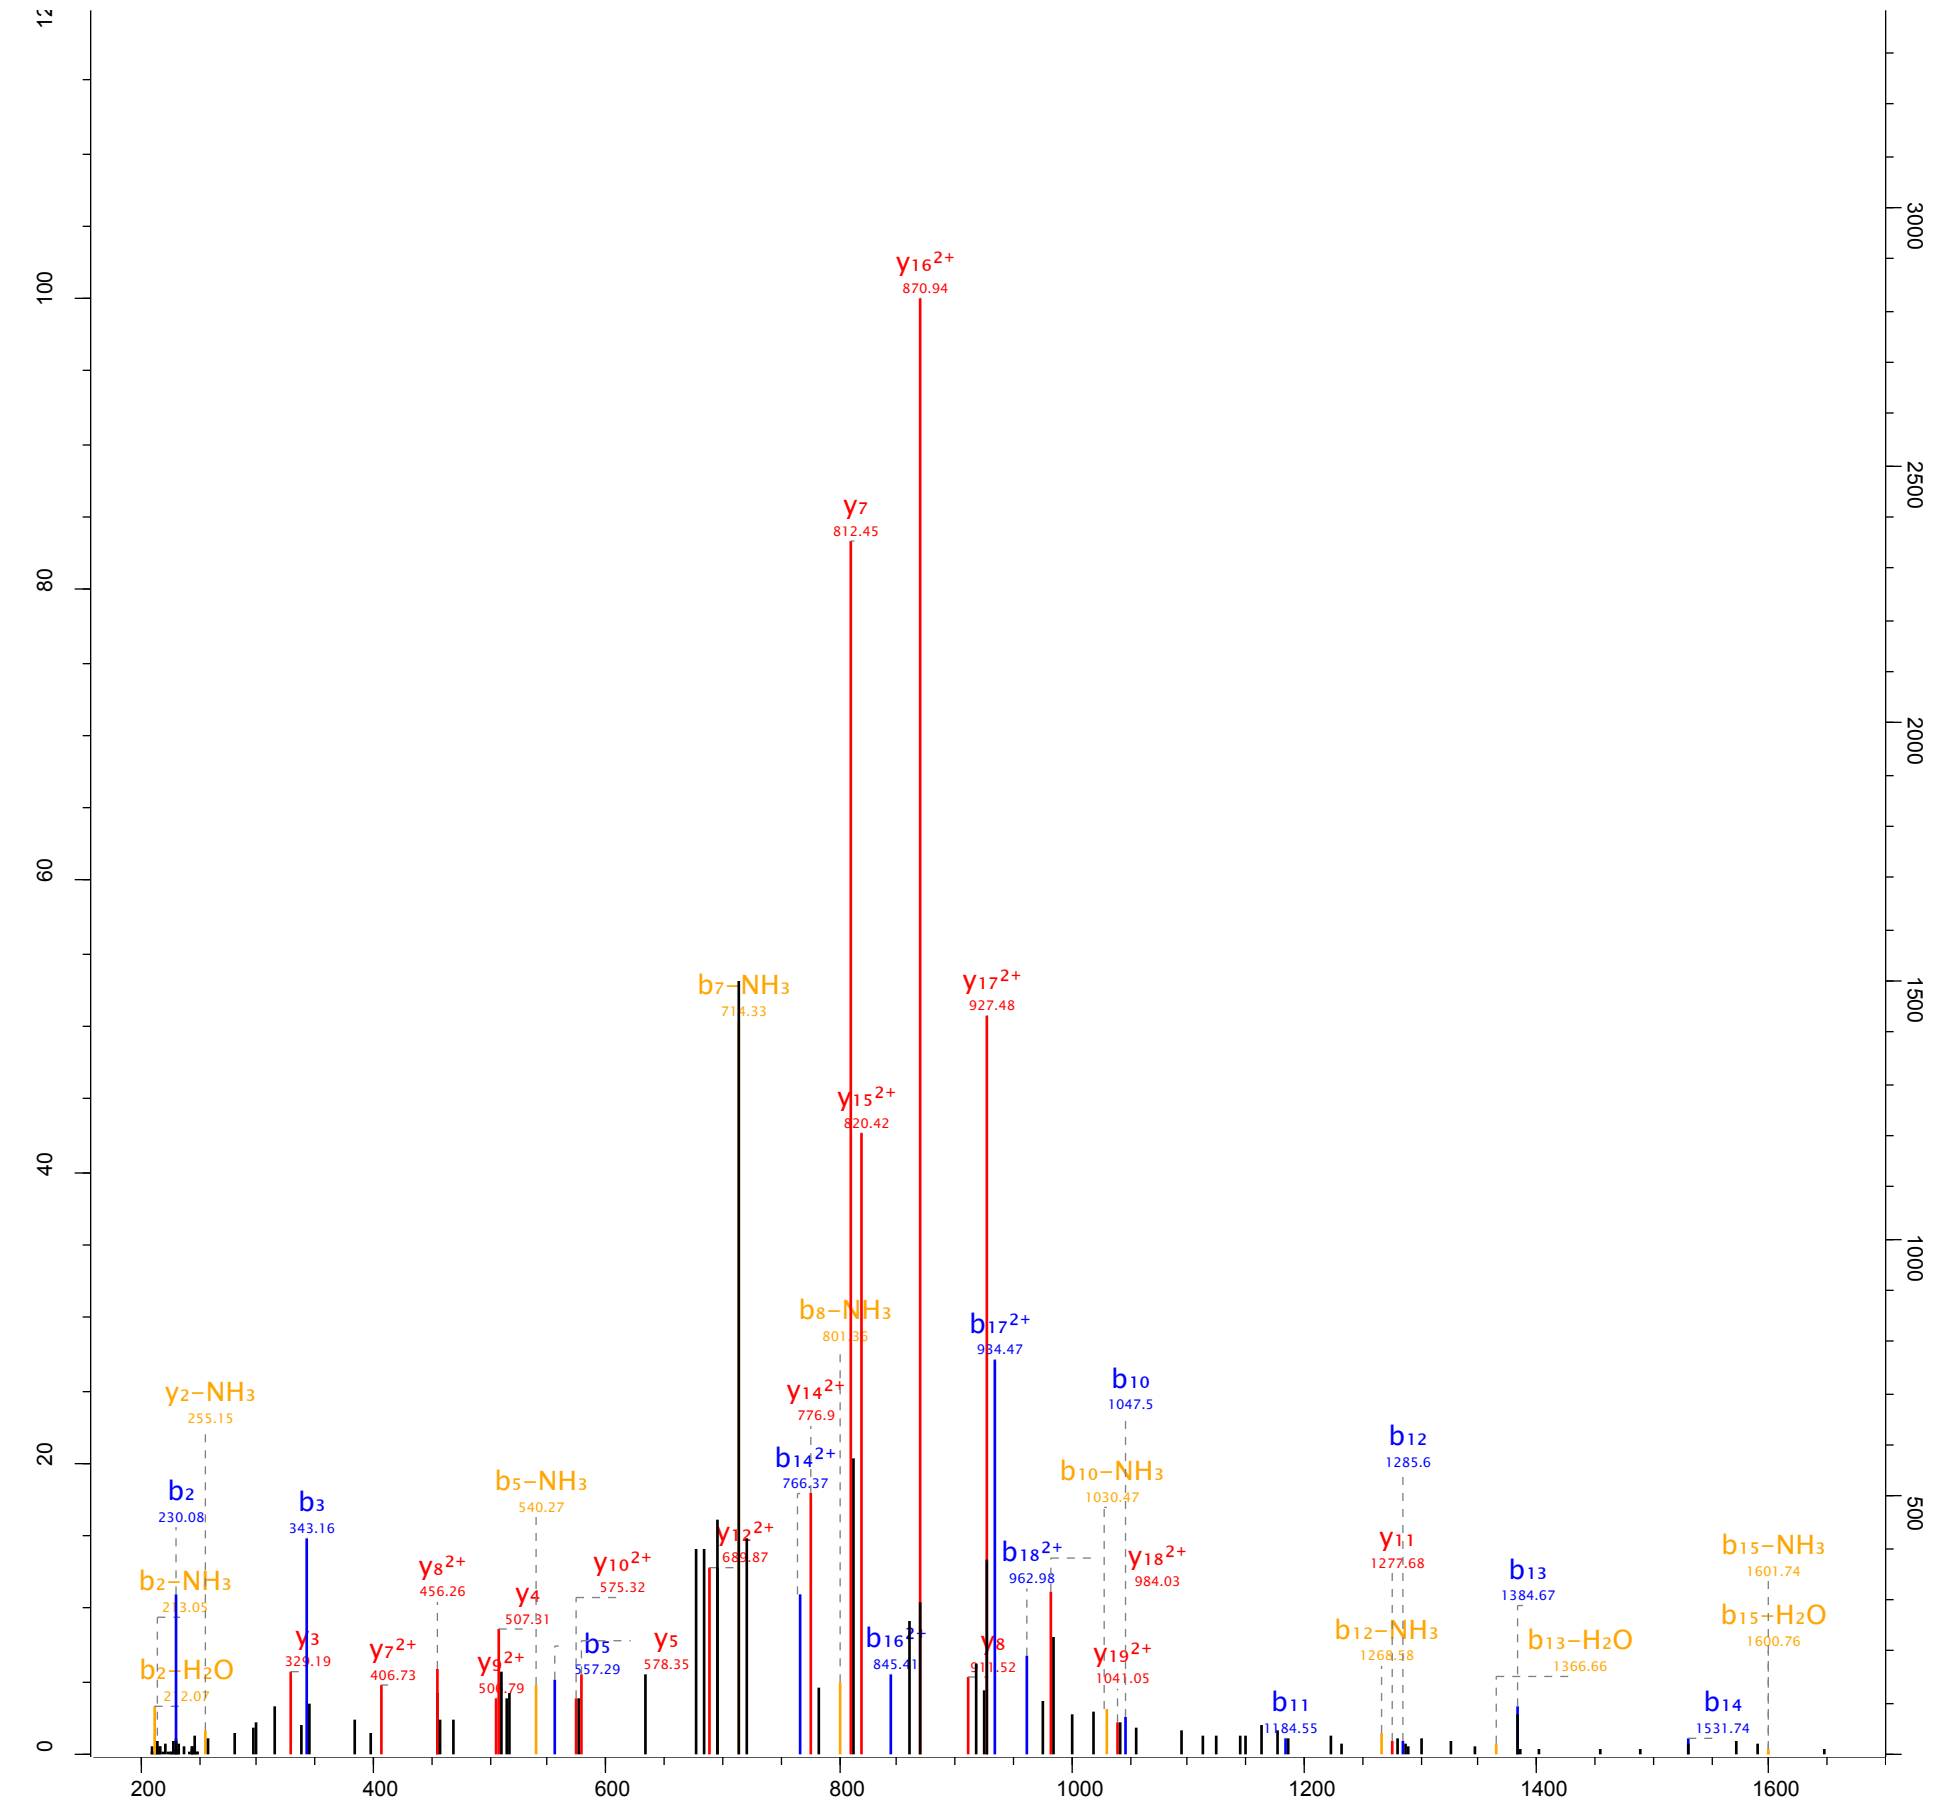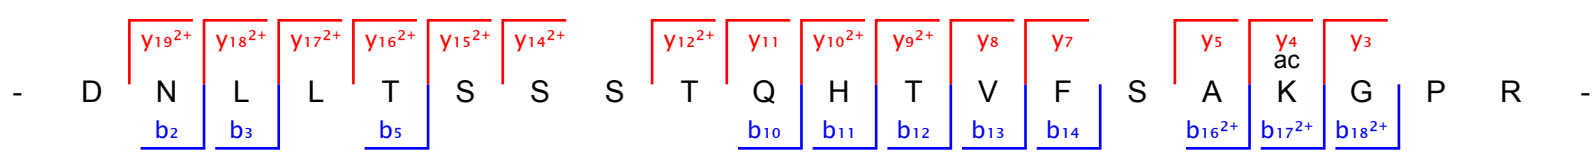

062513\_SCW\_II\_53\_6\_Vargas\_Enriched

18264

ITMS; CID

126.09

870.41

Suclg2

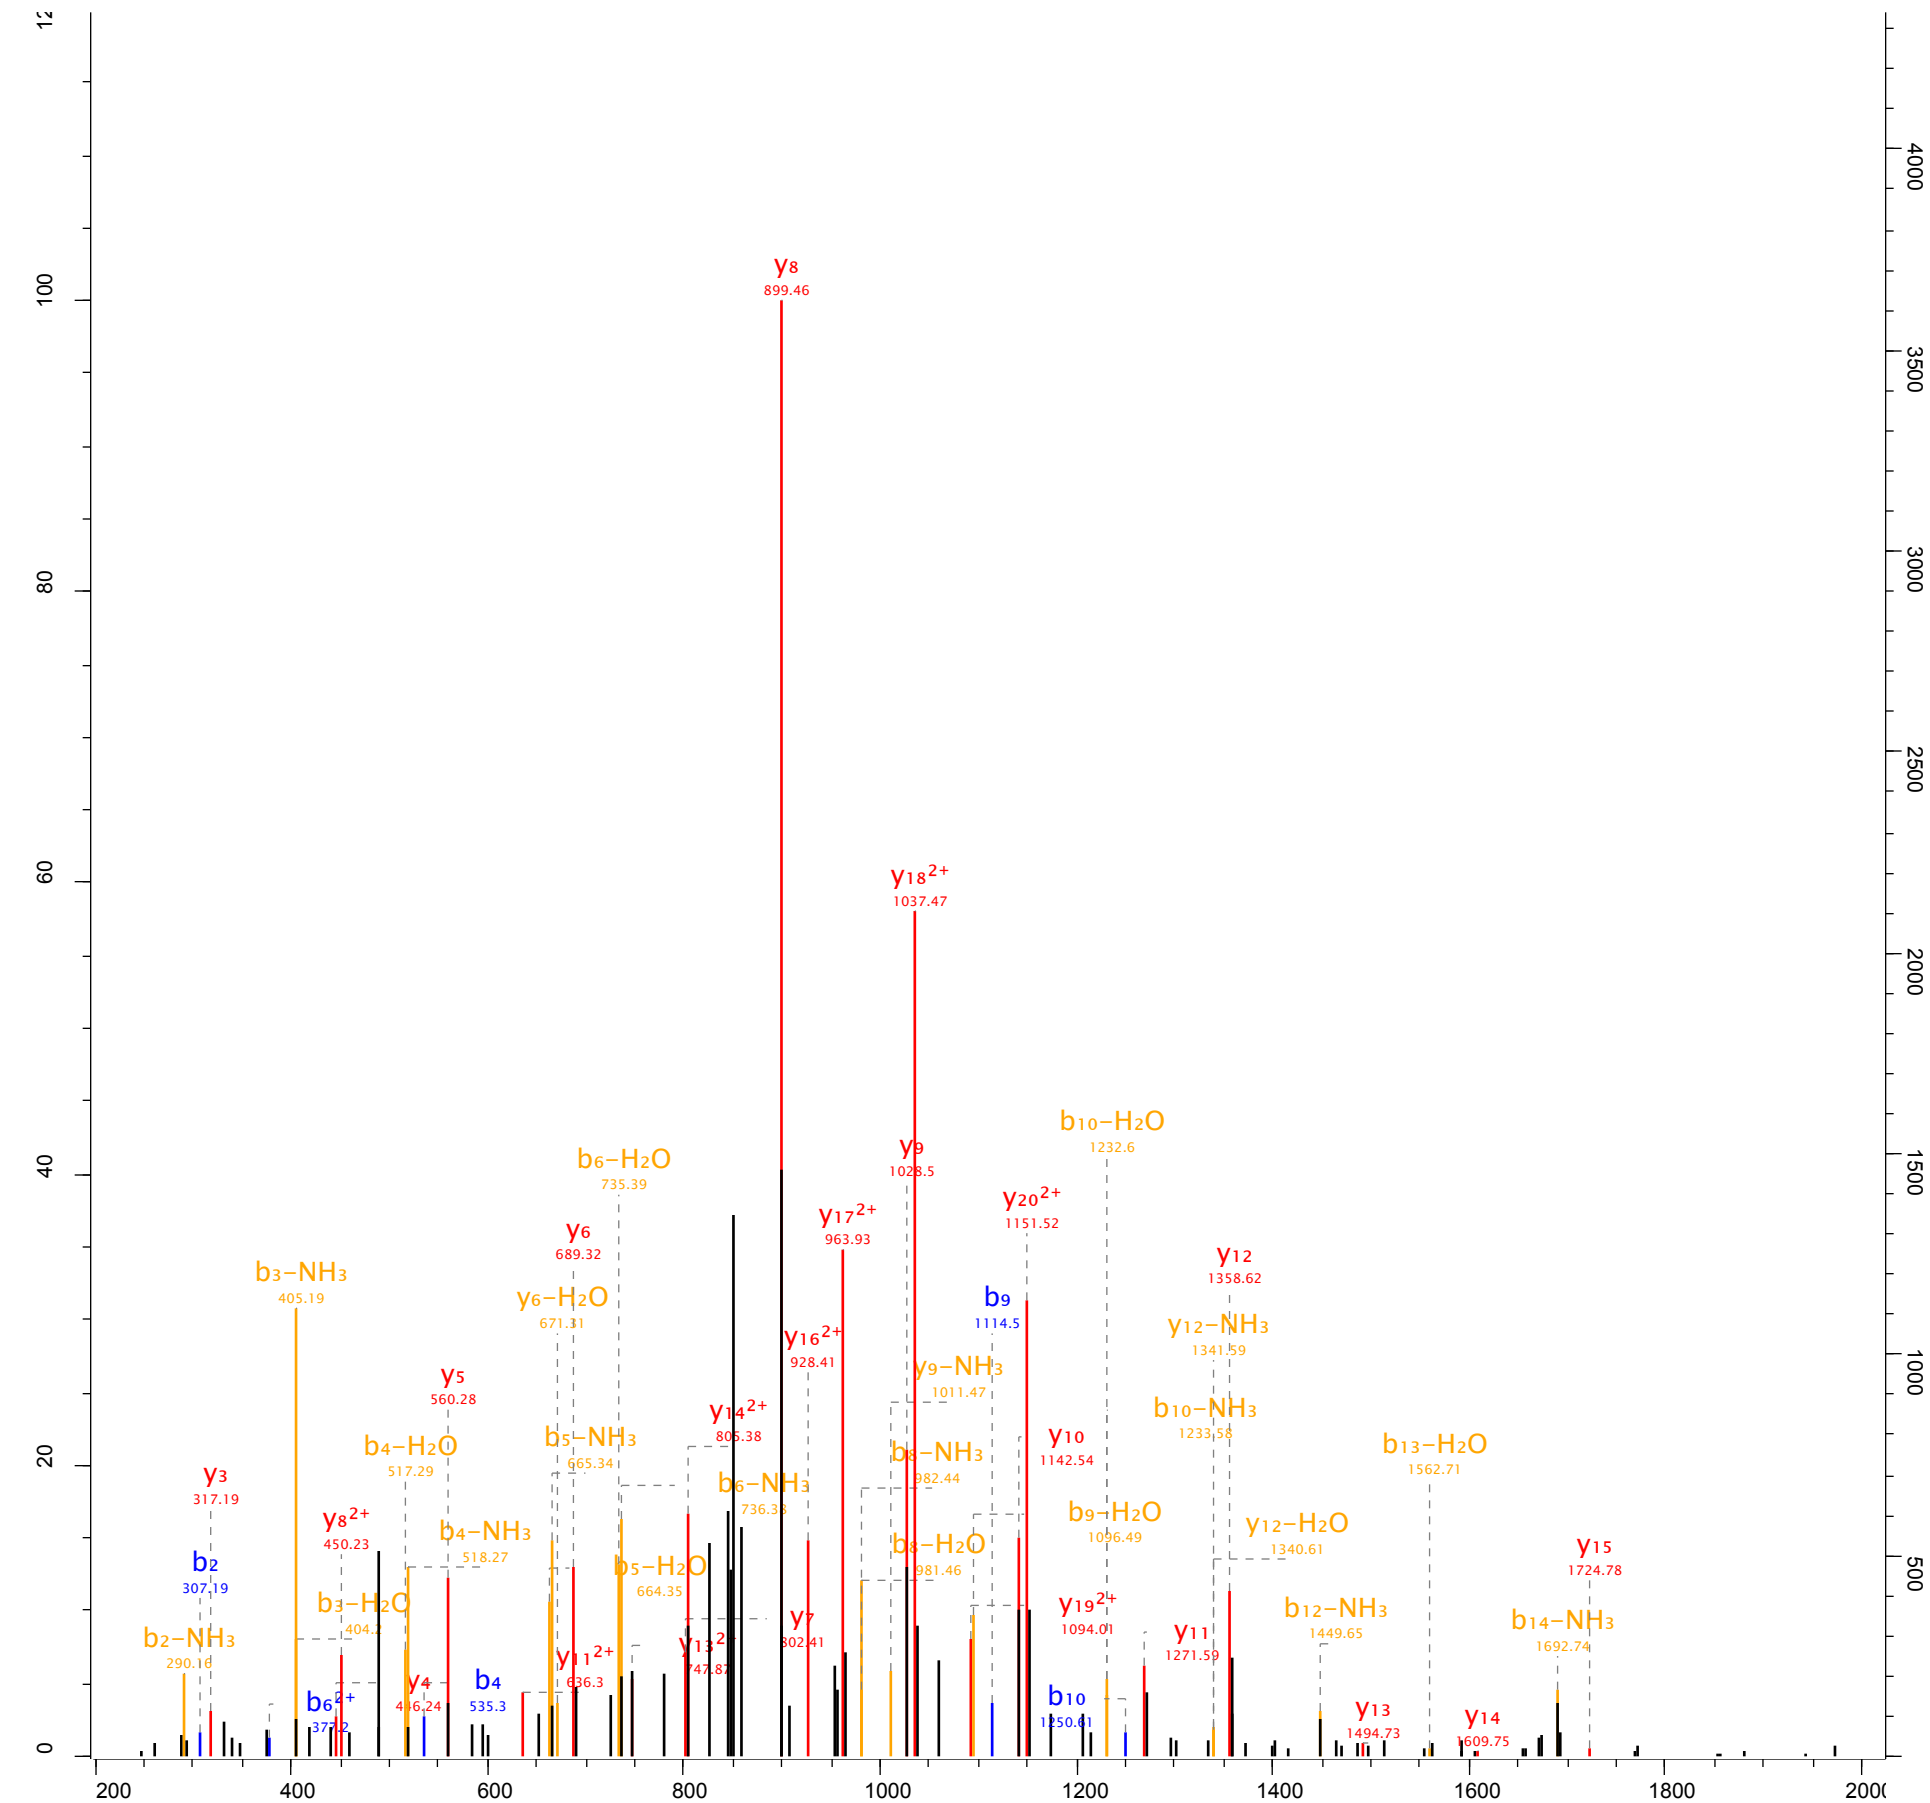

- Q ac K D I F A M D D K S E N E P I E N E A A R -

b<sub>2</sub>
y<sub>20</sub><sup>2+</sup>
y<sub>19</sub><sup>2+</sup>
y<sub>18</sub><sup>2+</sup>
y<sub>17</sub><sup>2+</sup>
y<sub>16</sub><sup>2+</sup>
y<sub>15</sub>
y<sub>14</sub>
y<sub>13</sub>
y<sub>12</sub>
y<sub>11</sub>
y<sub>10</sub>
y<sub>9</sub>
y<sub>8</sub>
y<sub>7</sub>
y<sub>6</sub>
y<sub>5</sub>
y<sub>4</sub>
y<sub>3</sub>
b<sub>4</sub>
b<sub>6</sub><sup>2+</sup>
b<sub>9</sub>
b<sub>10</sub>

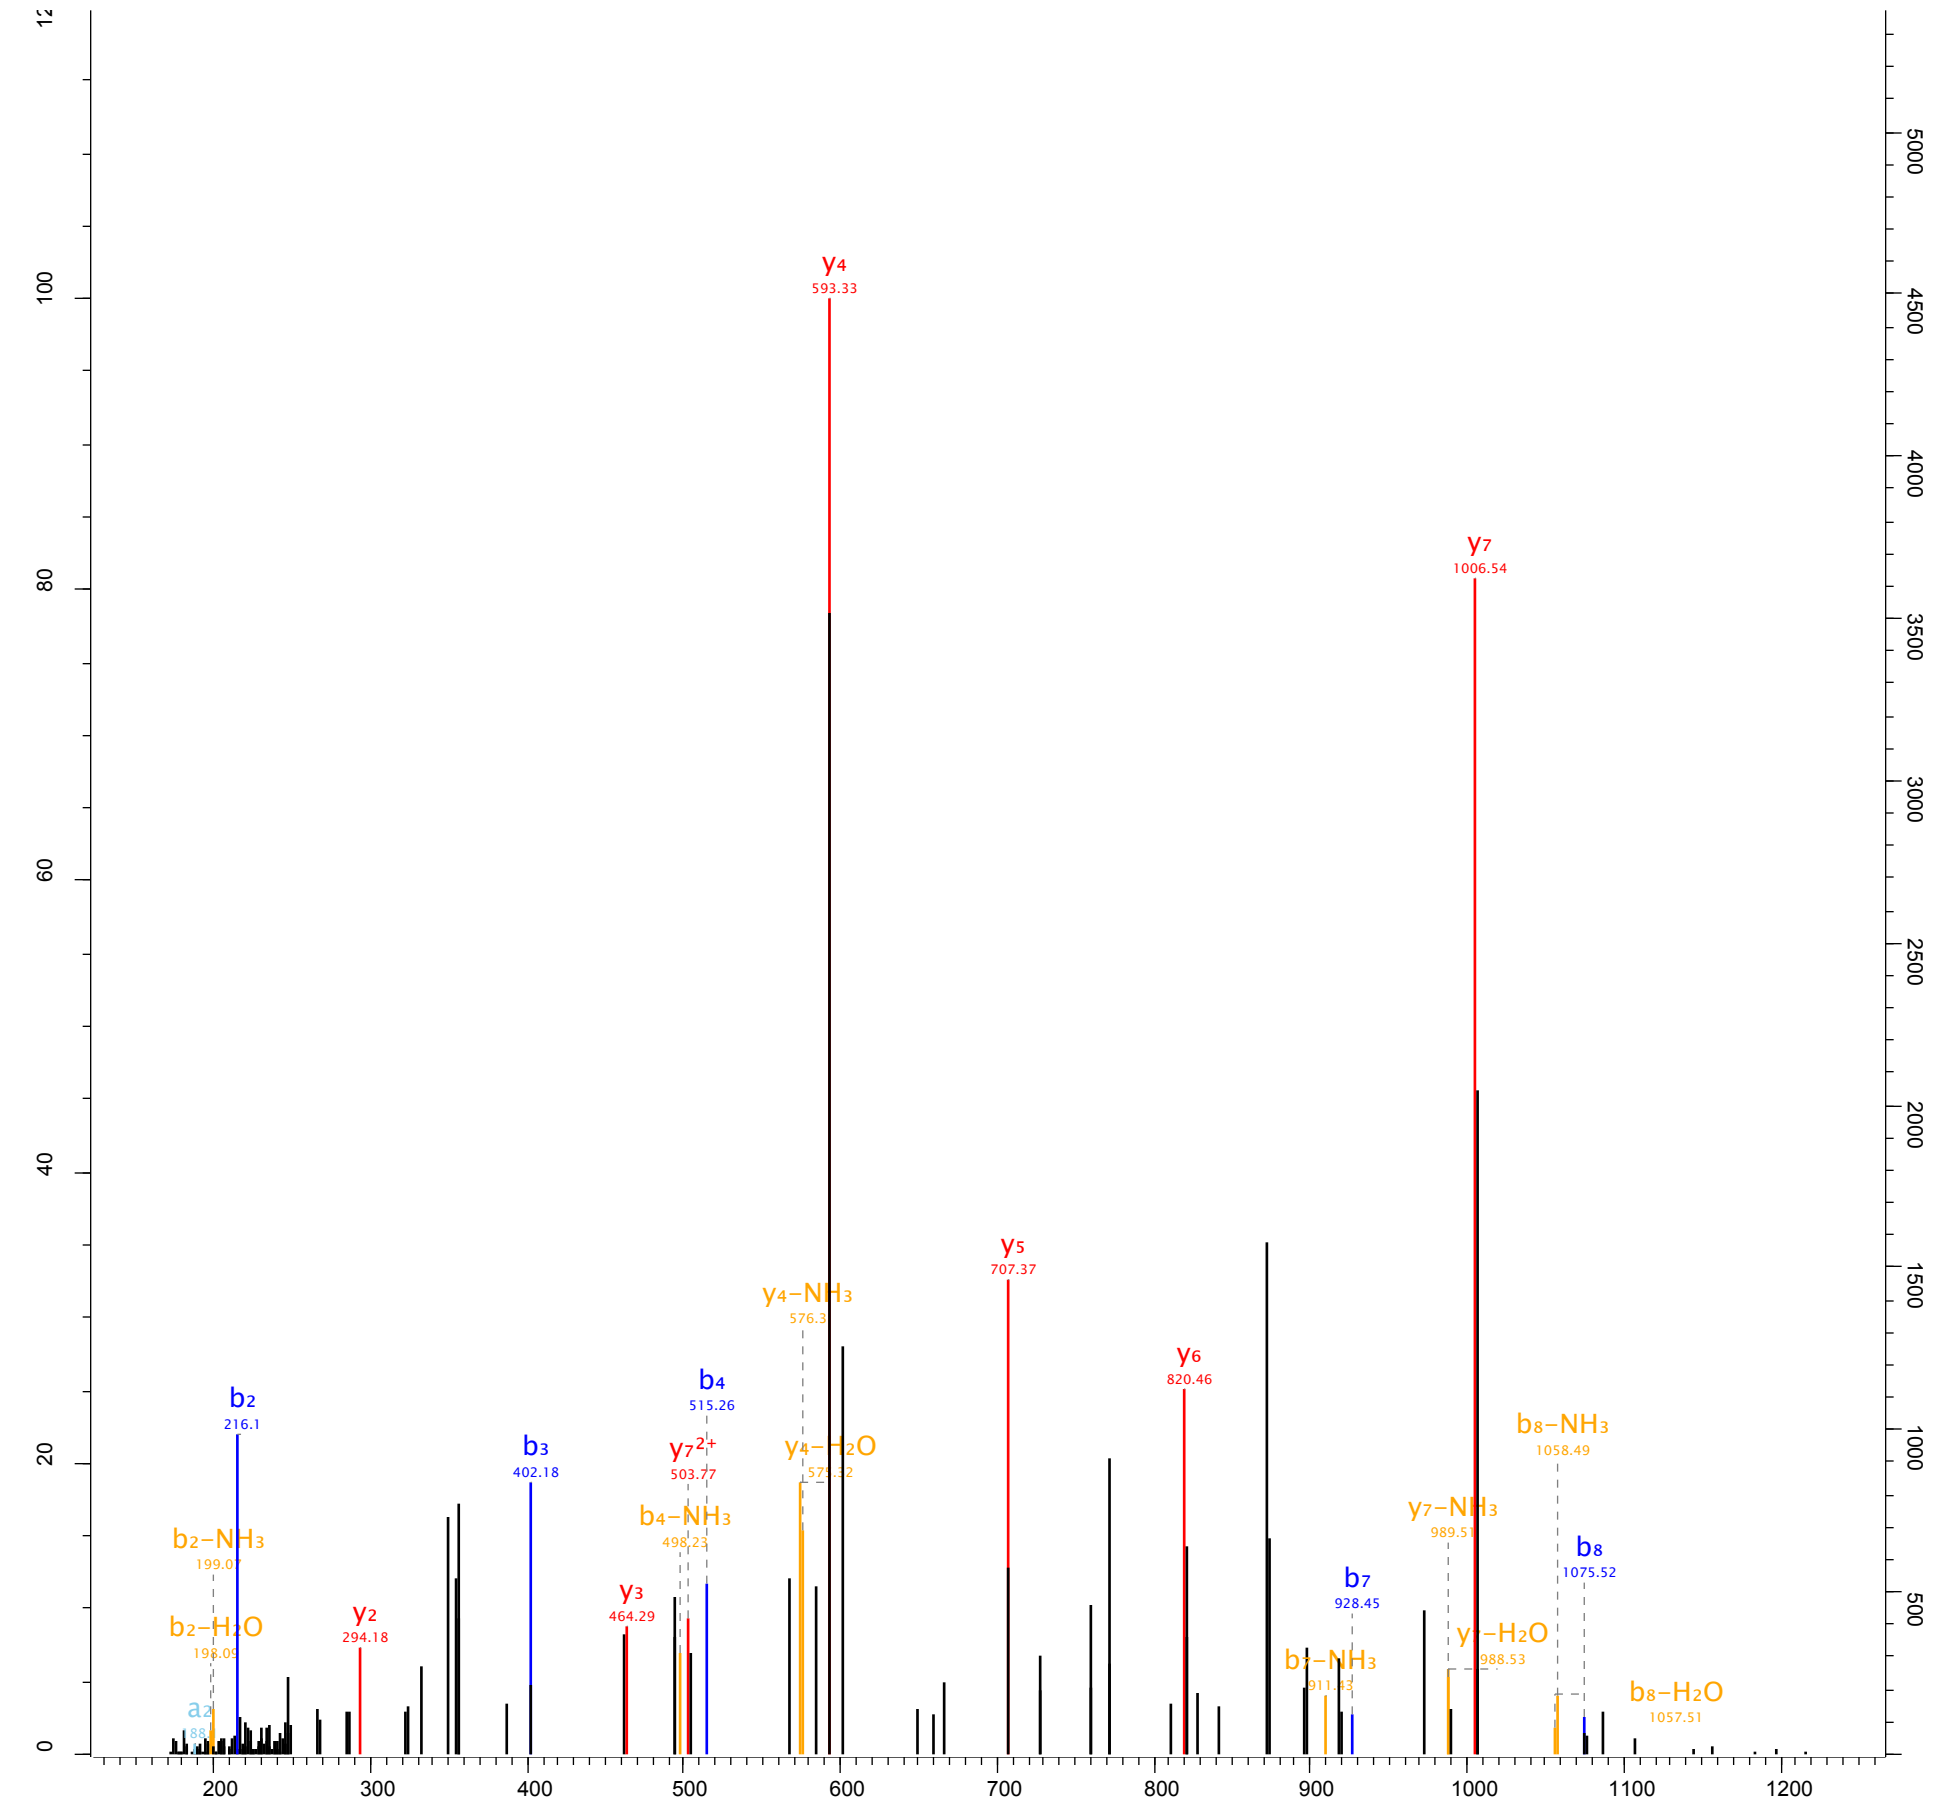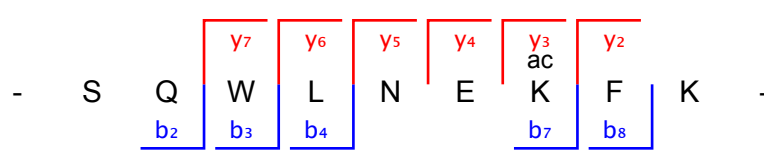

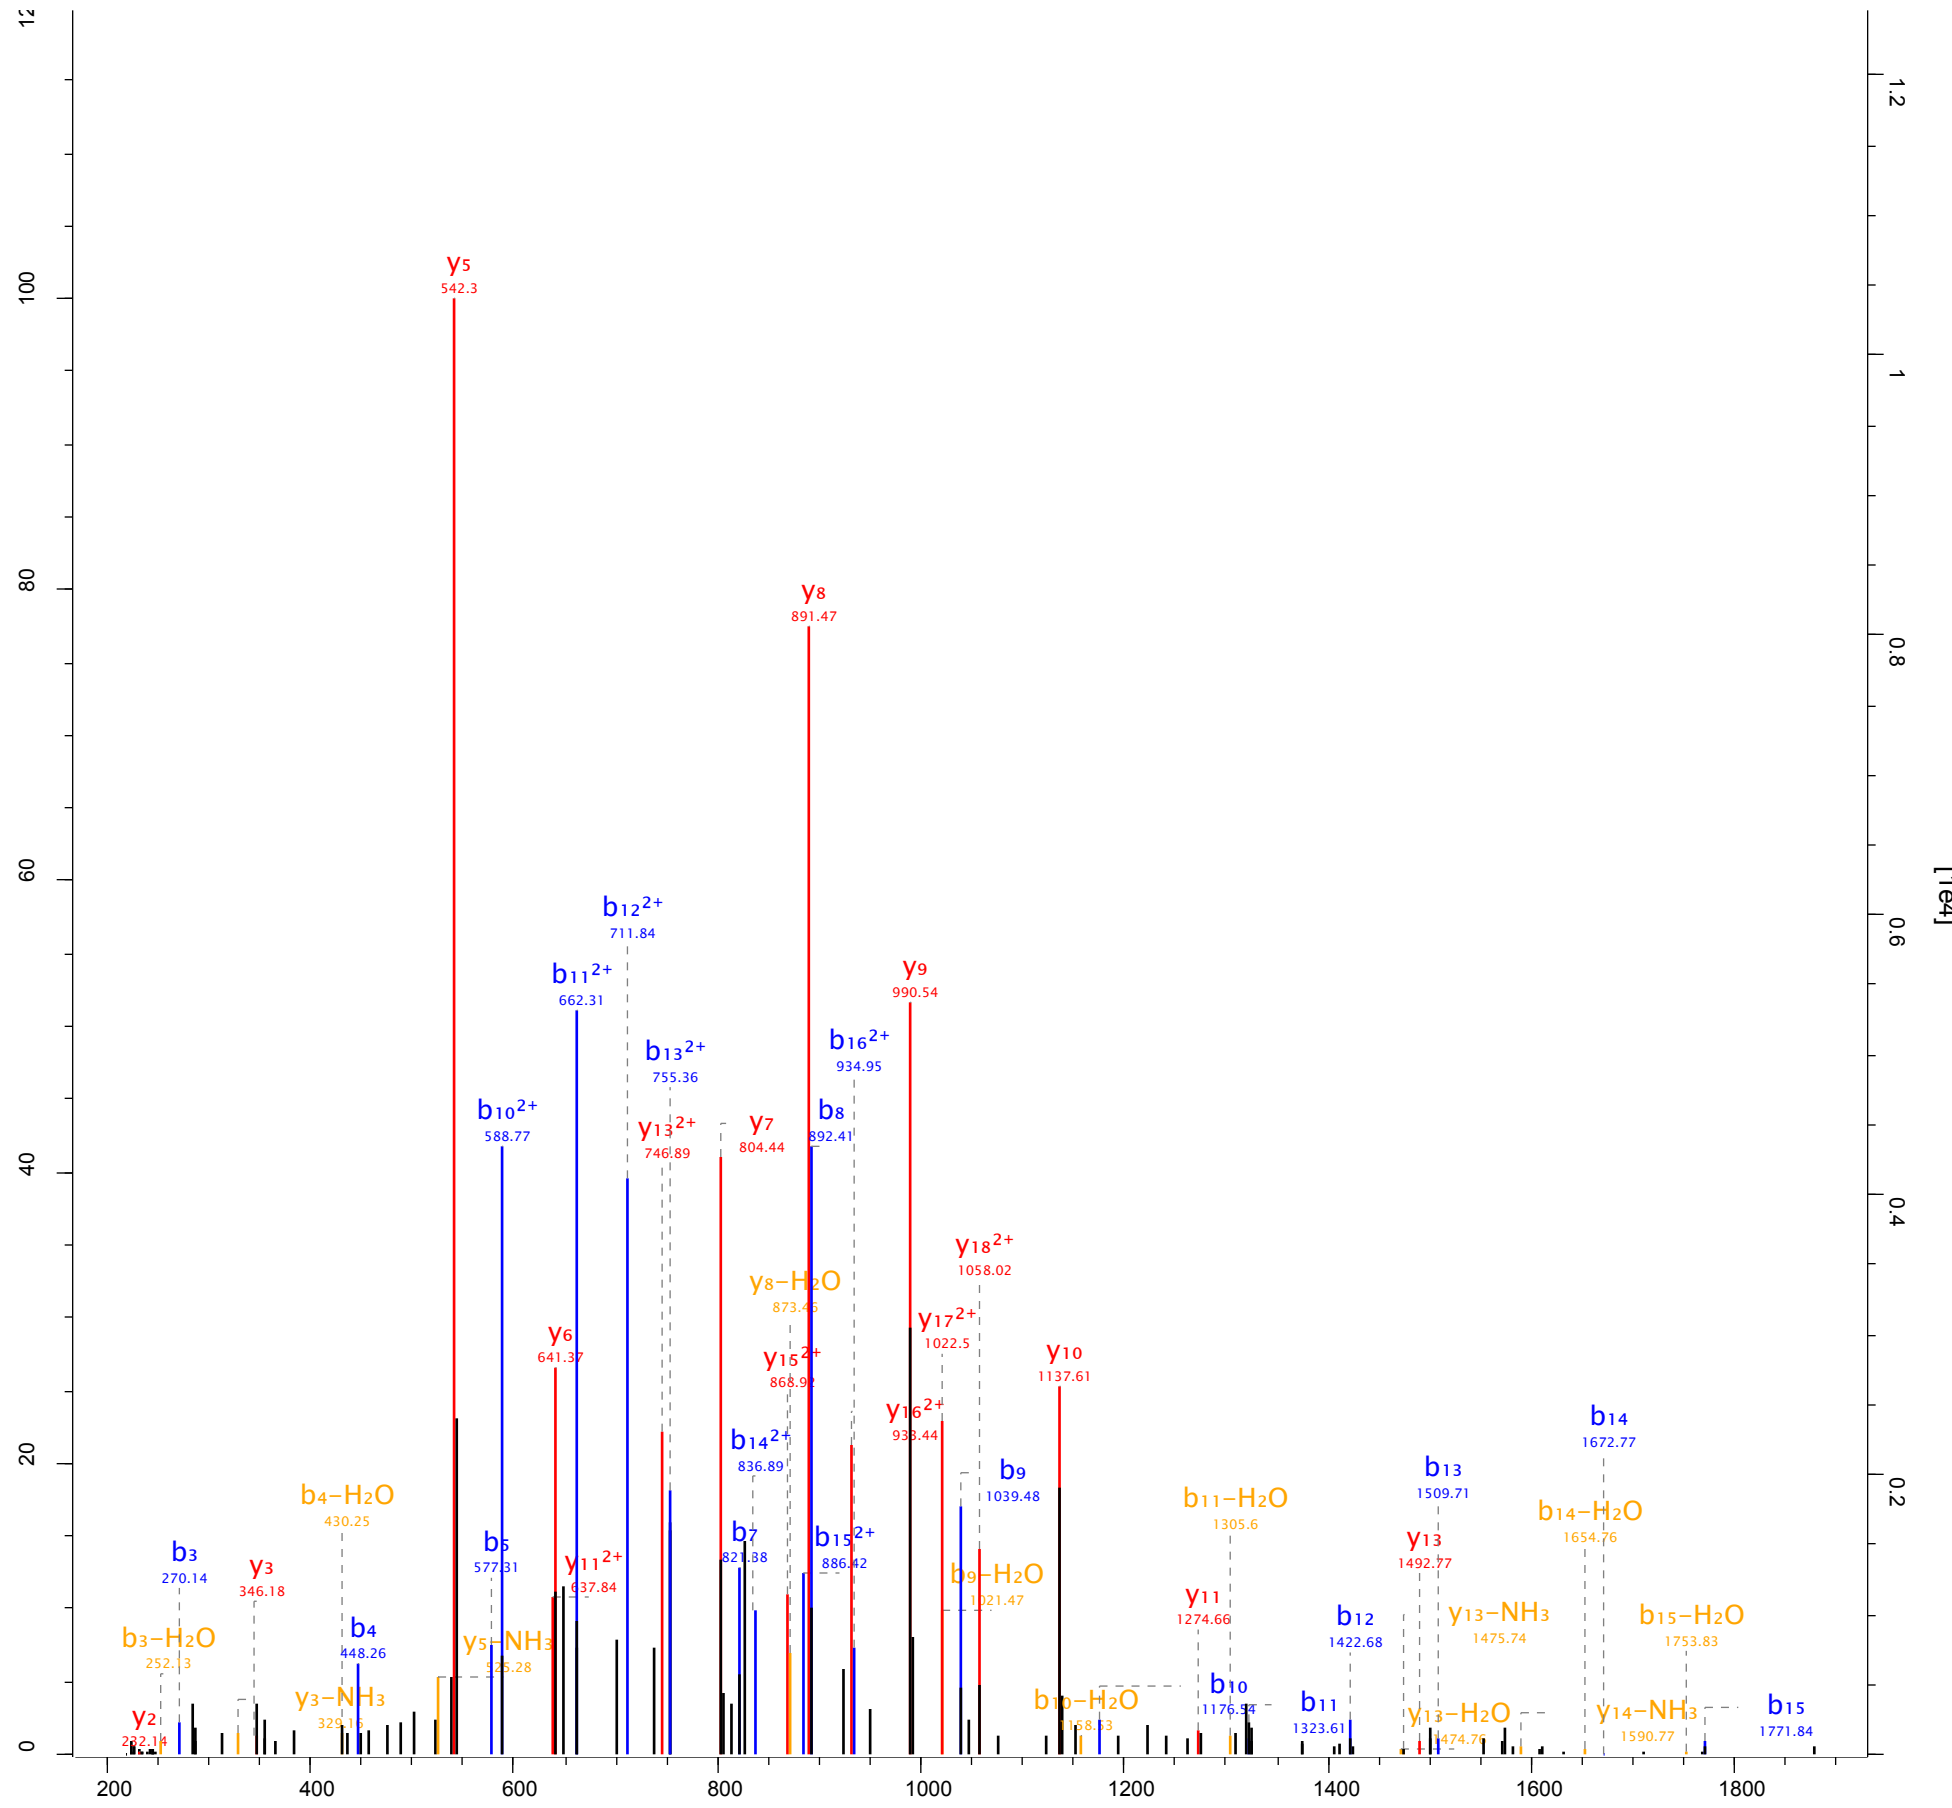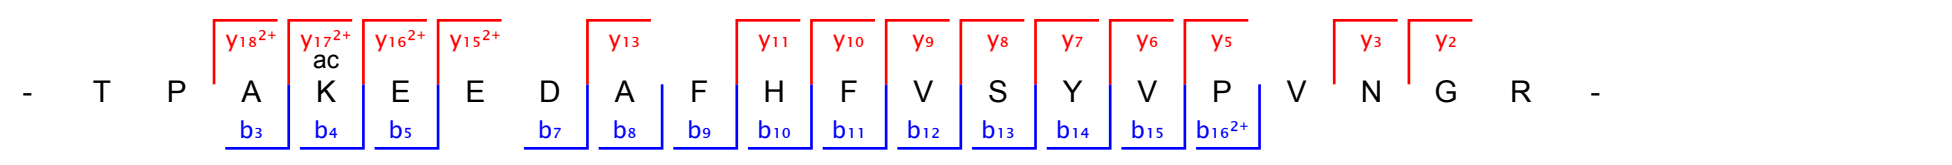

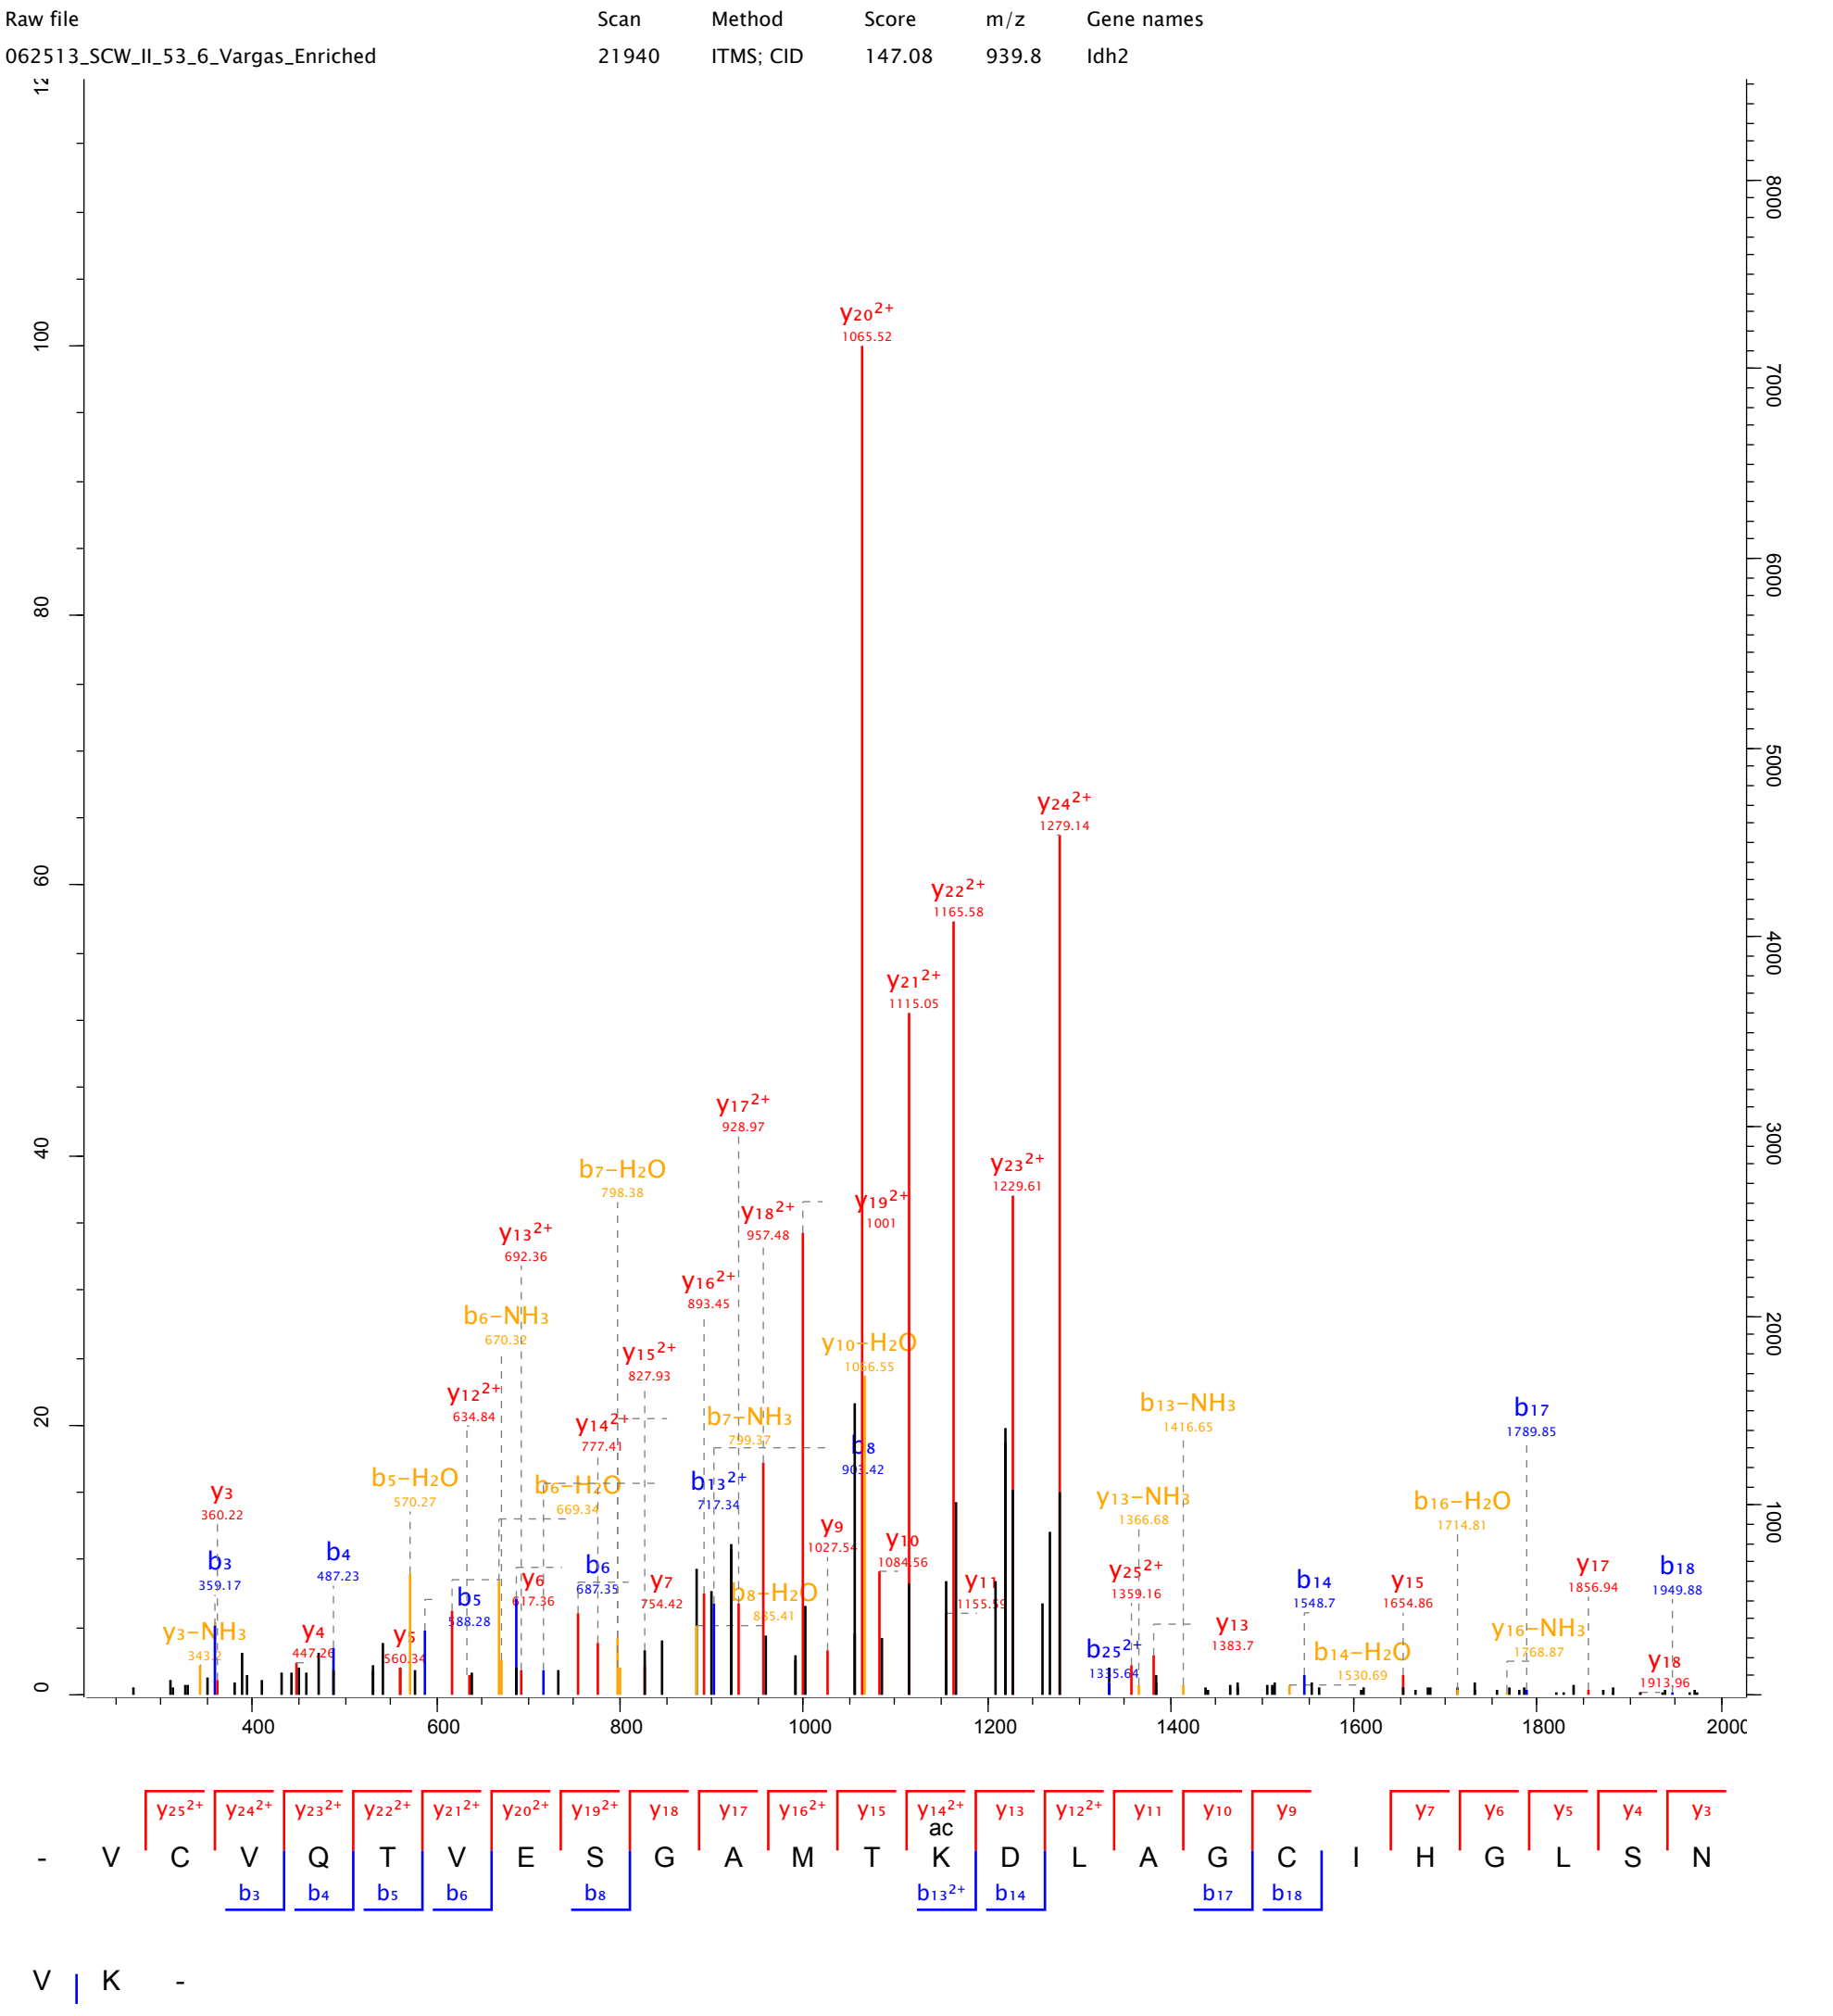



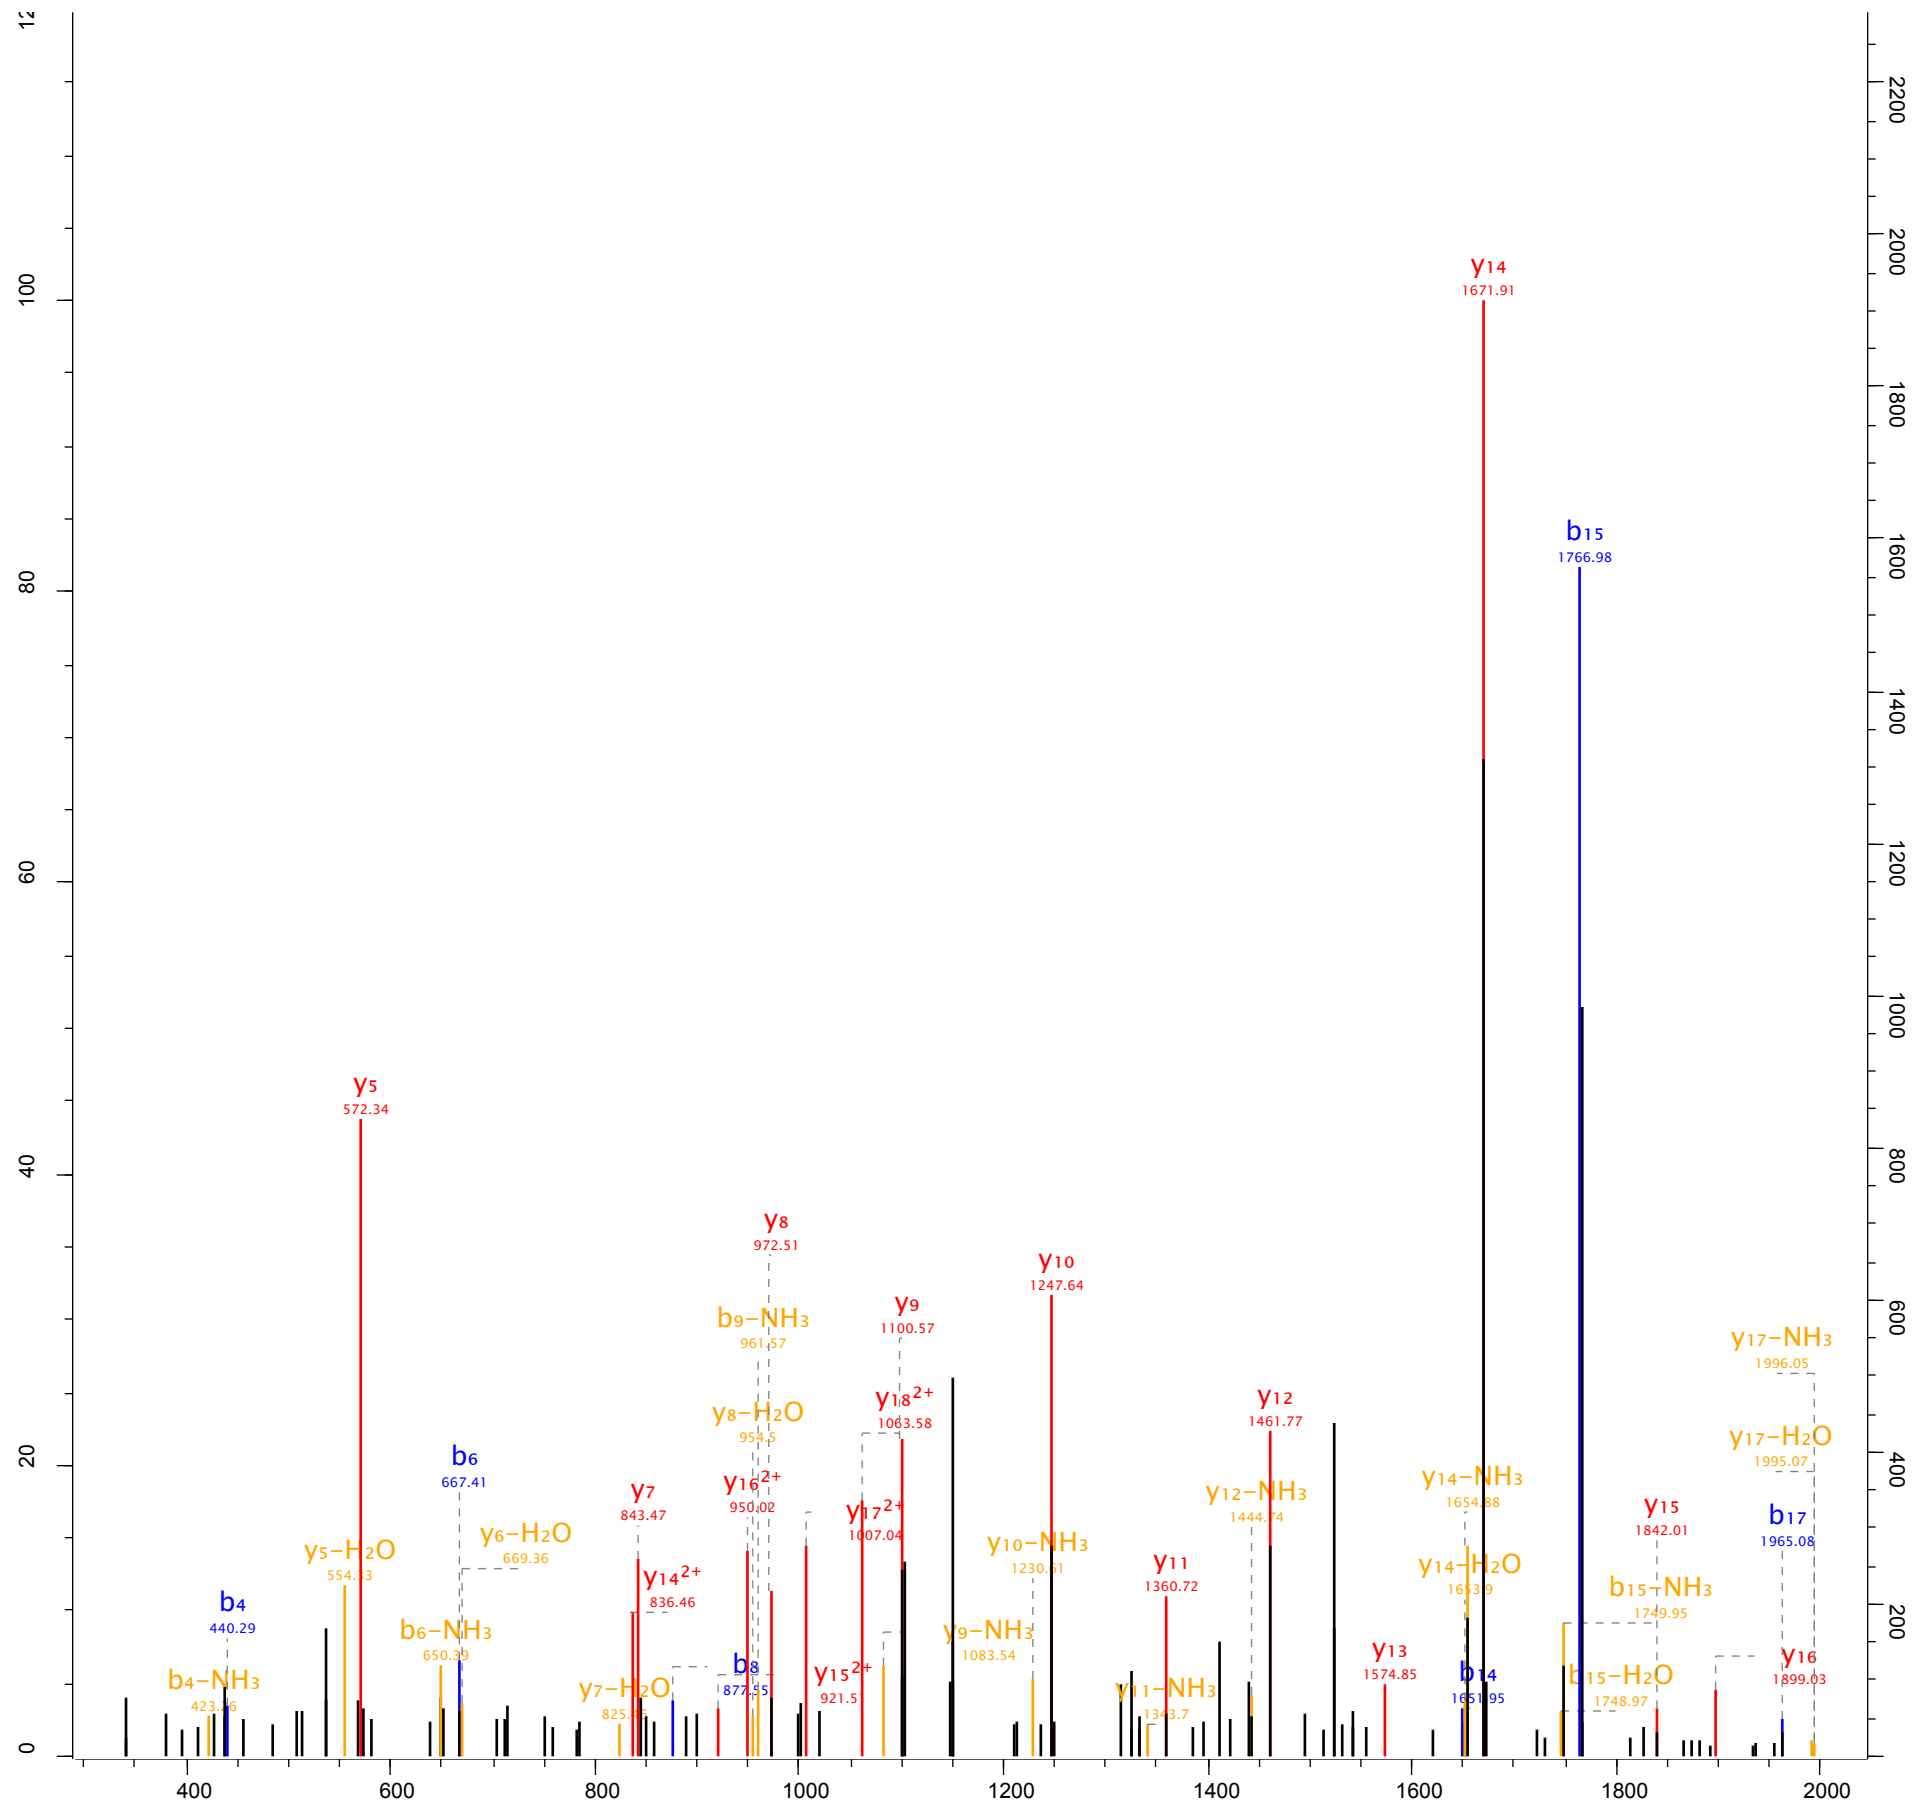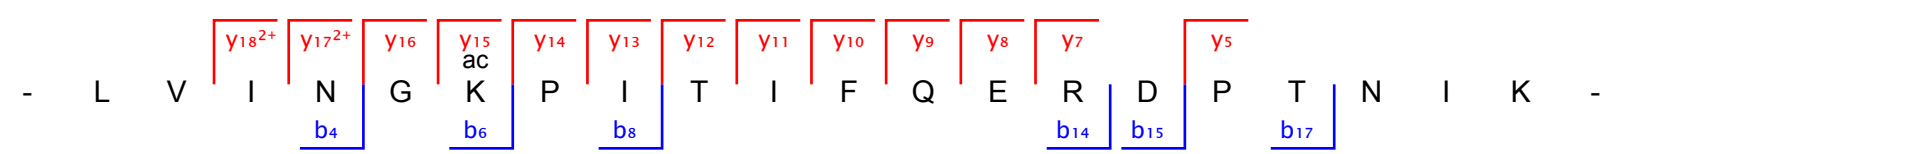

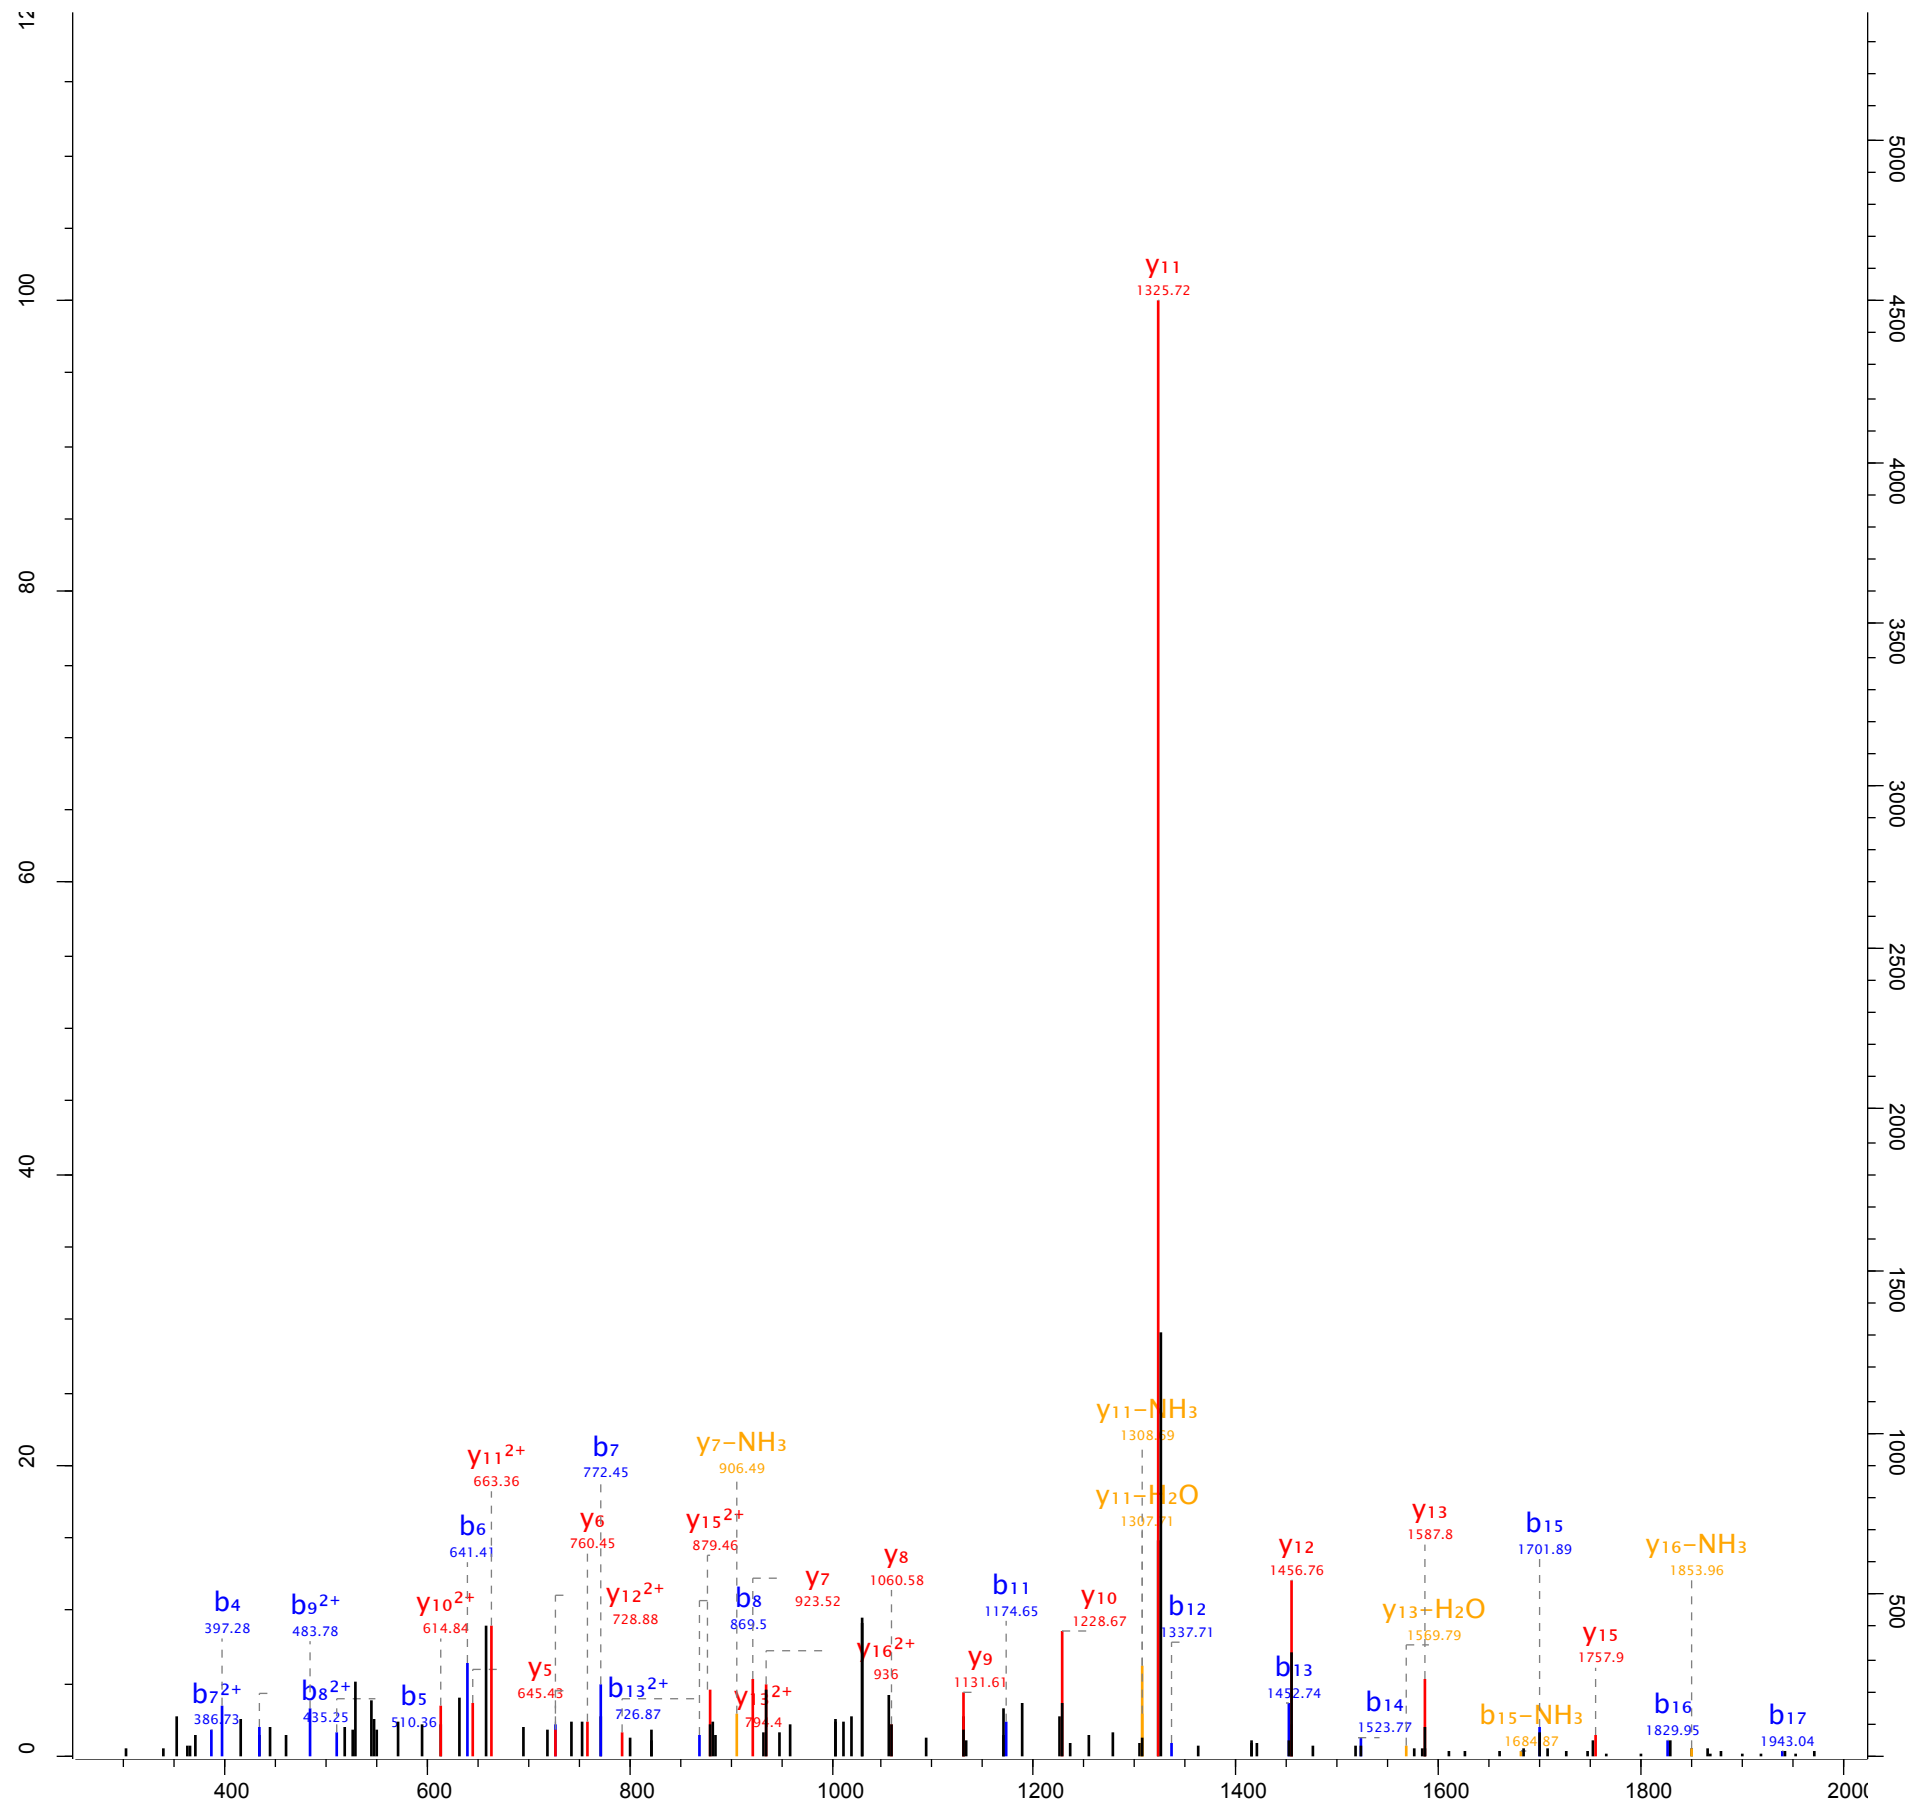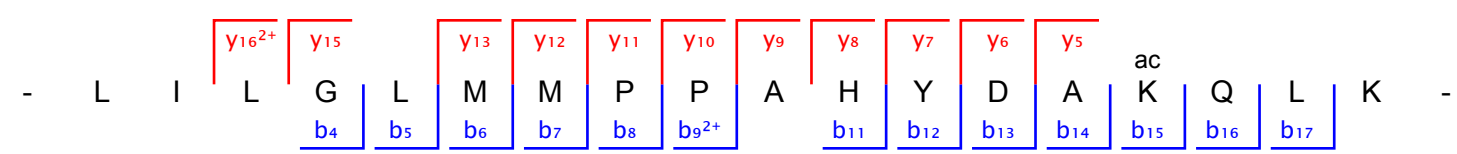

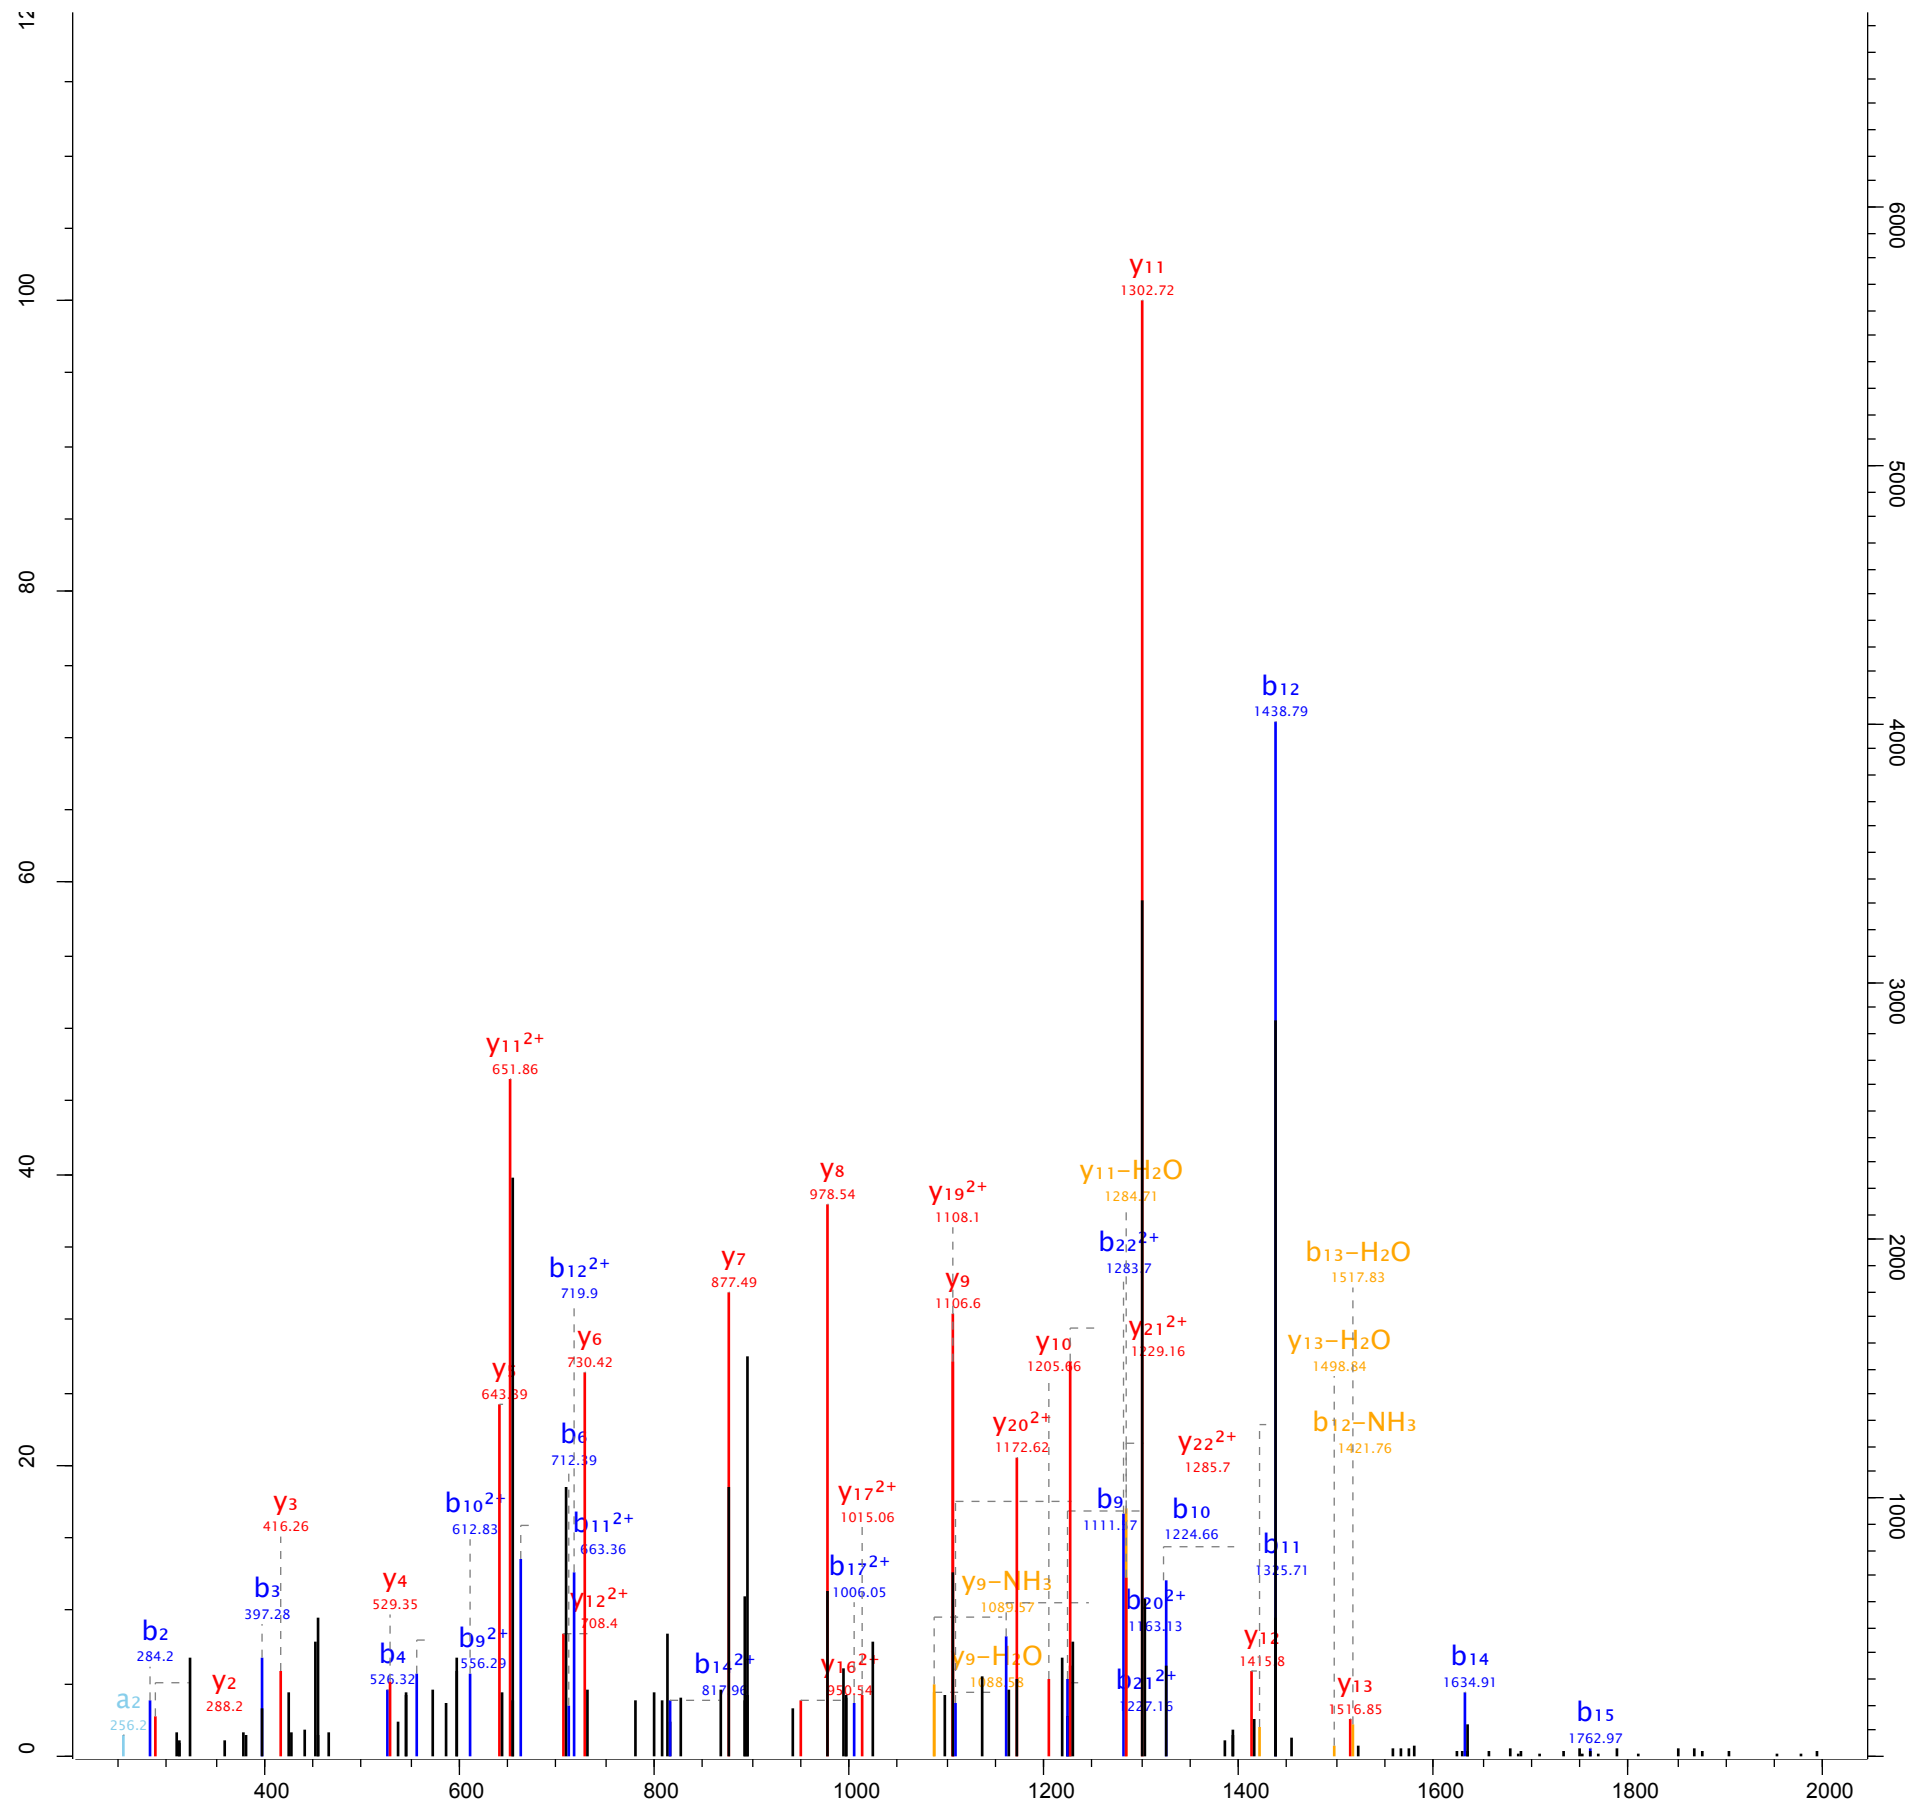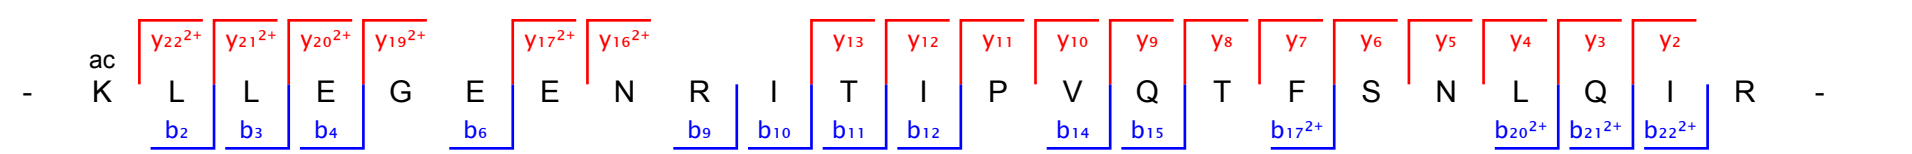

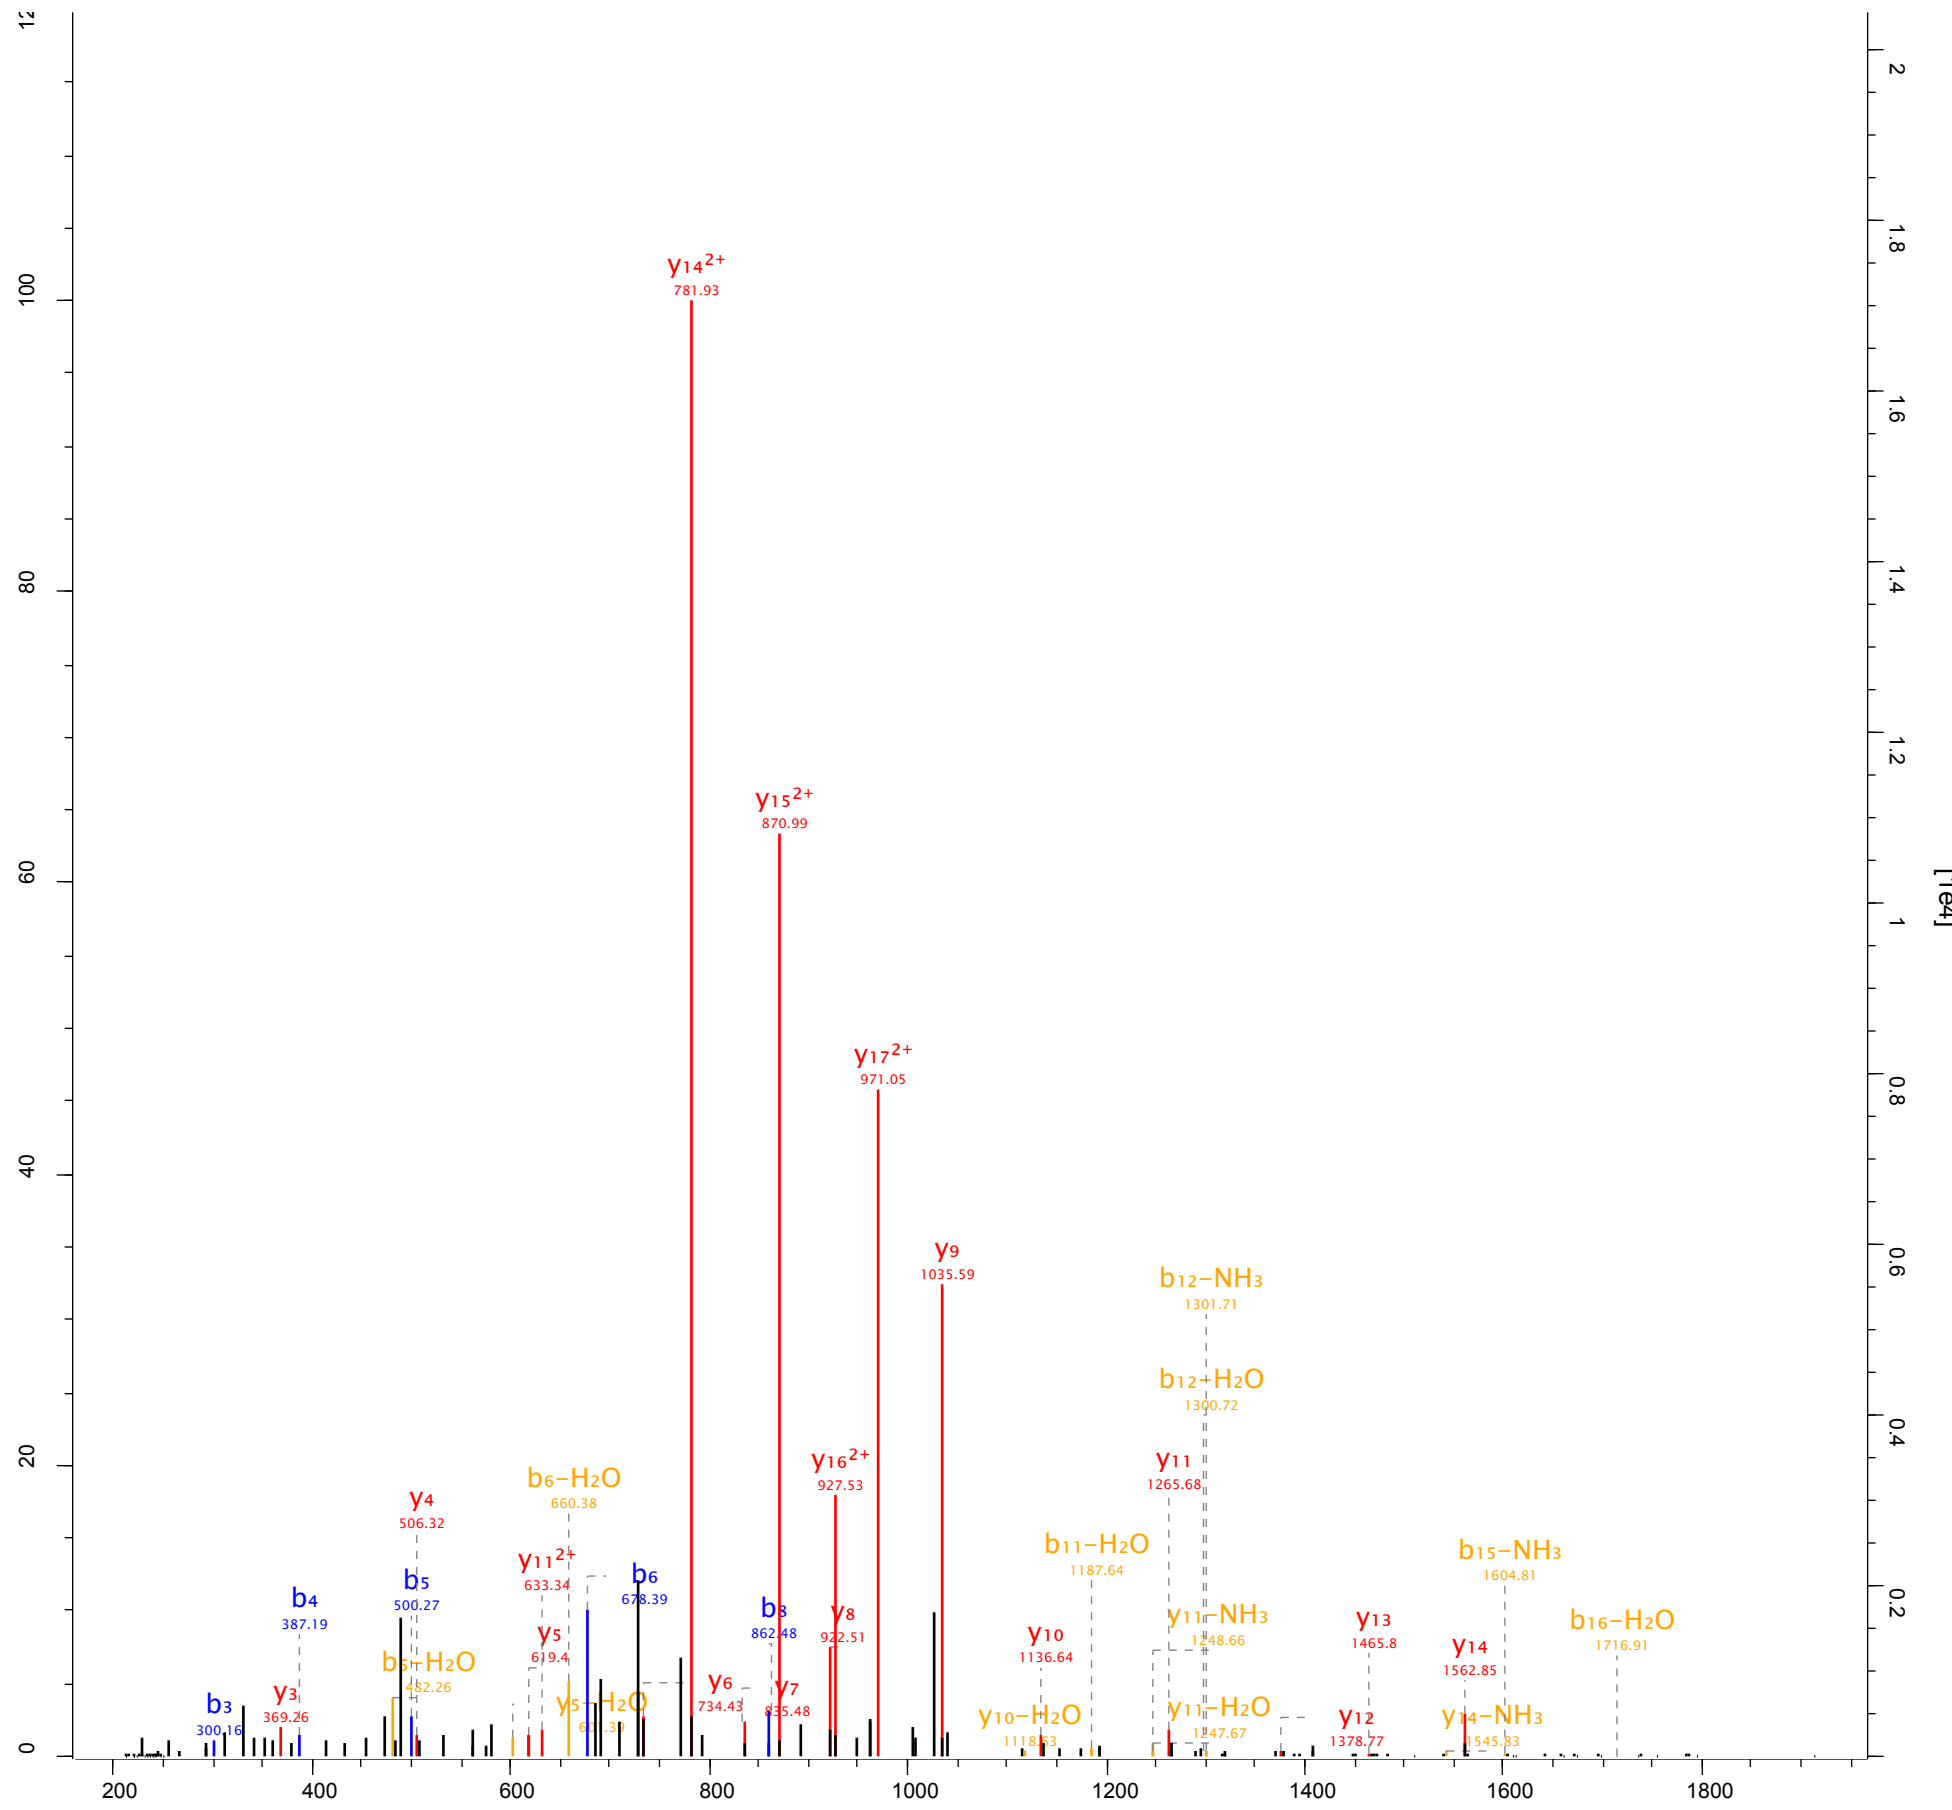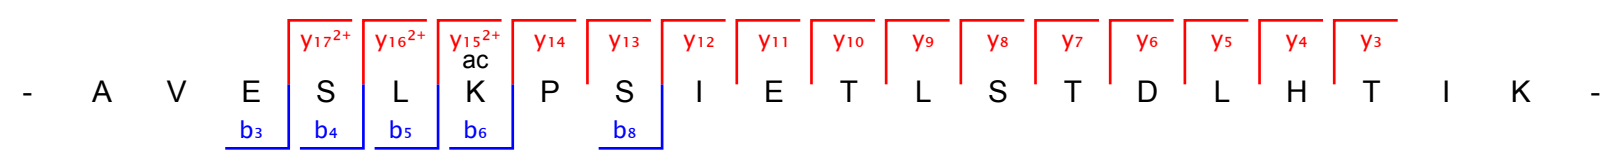

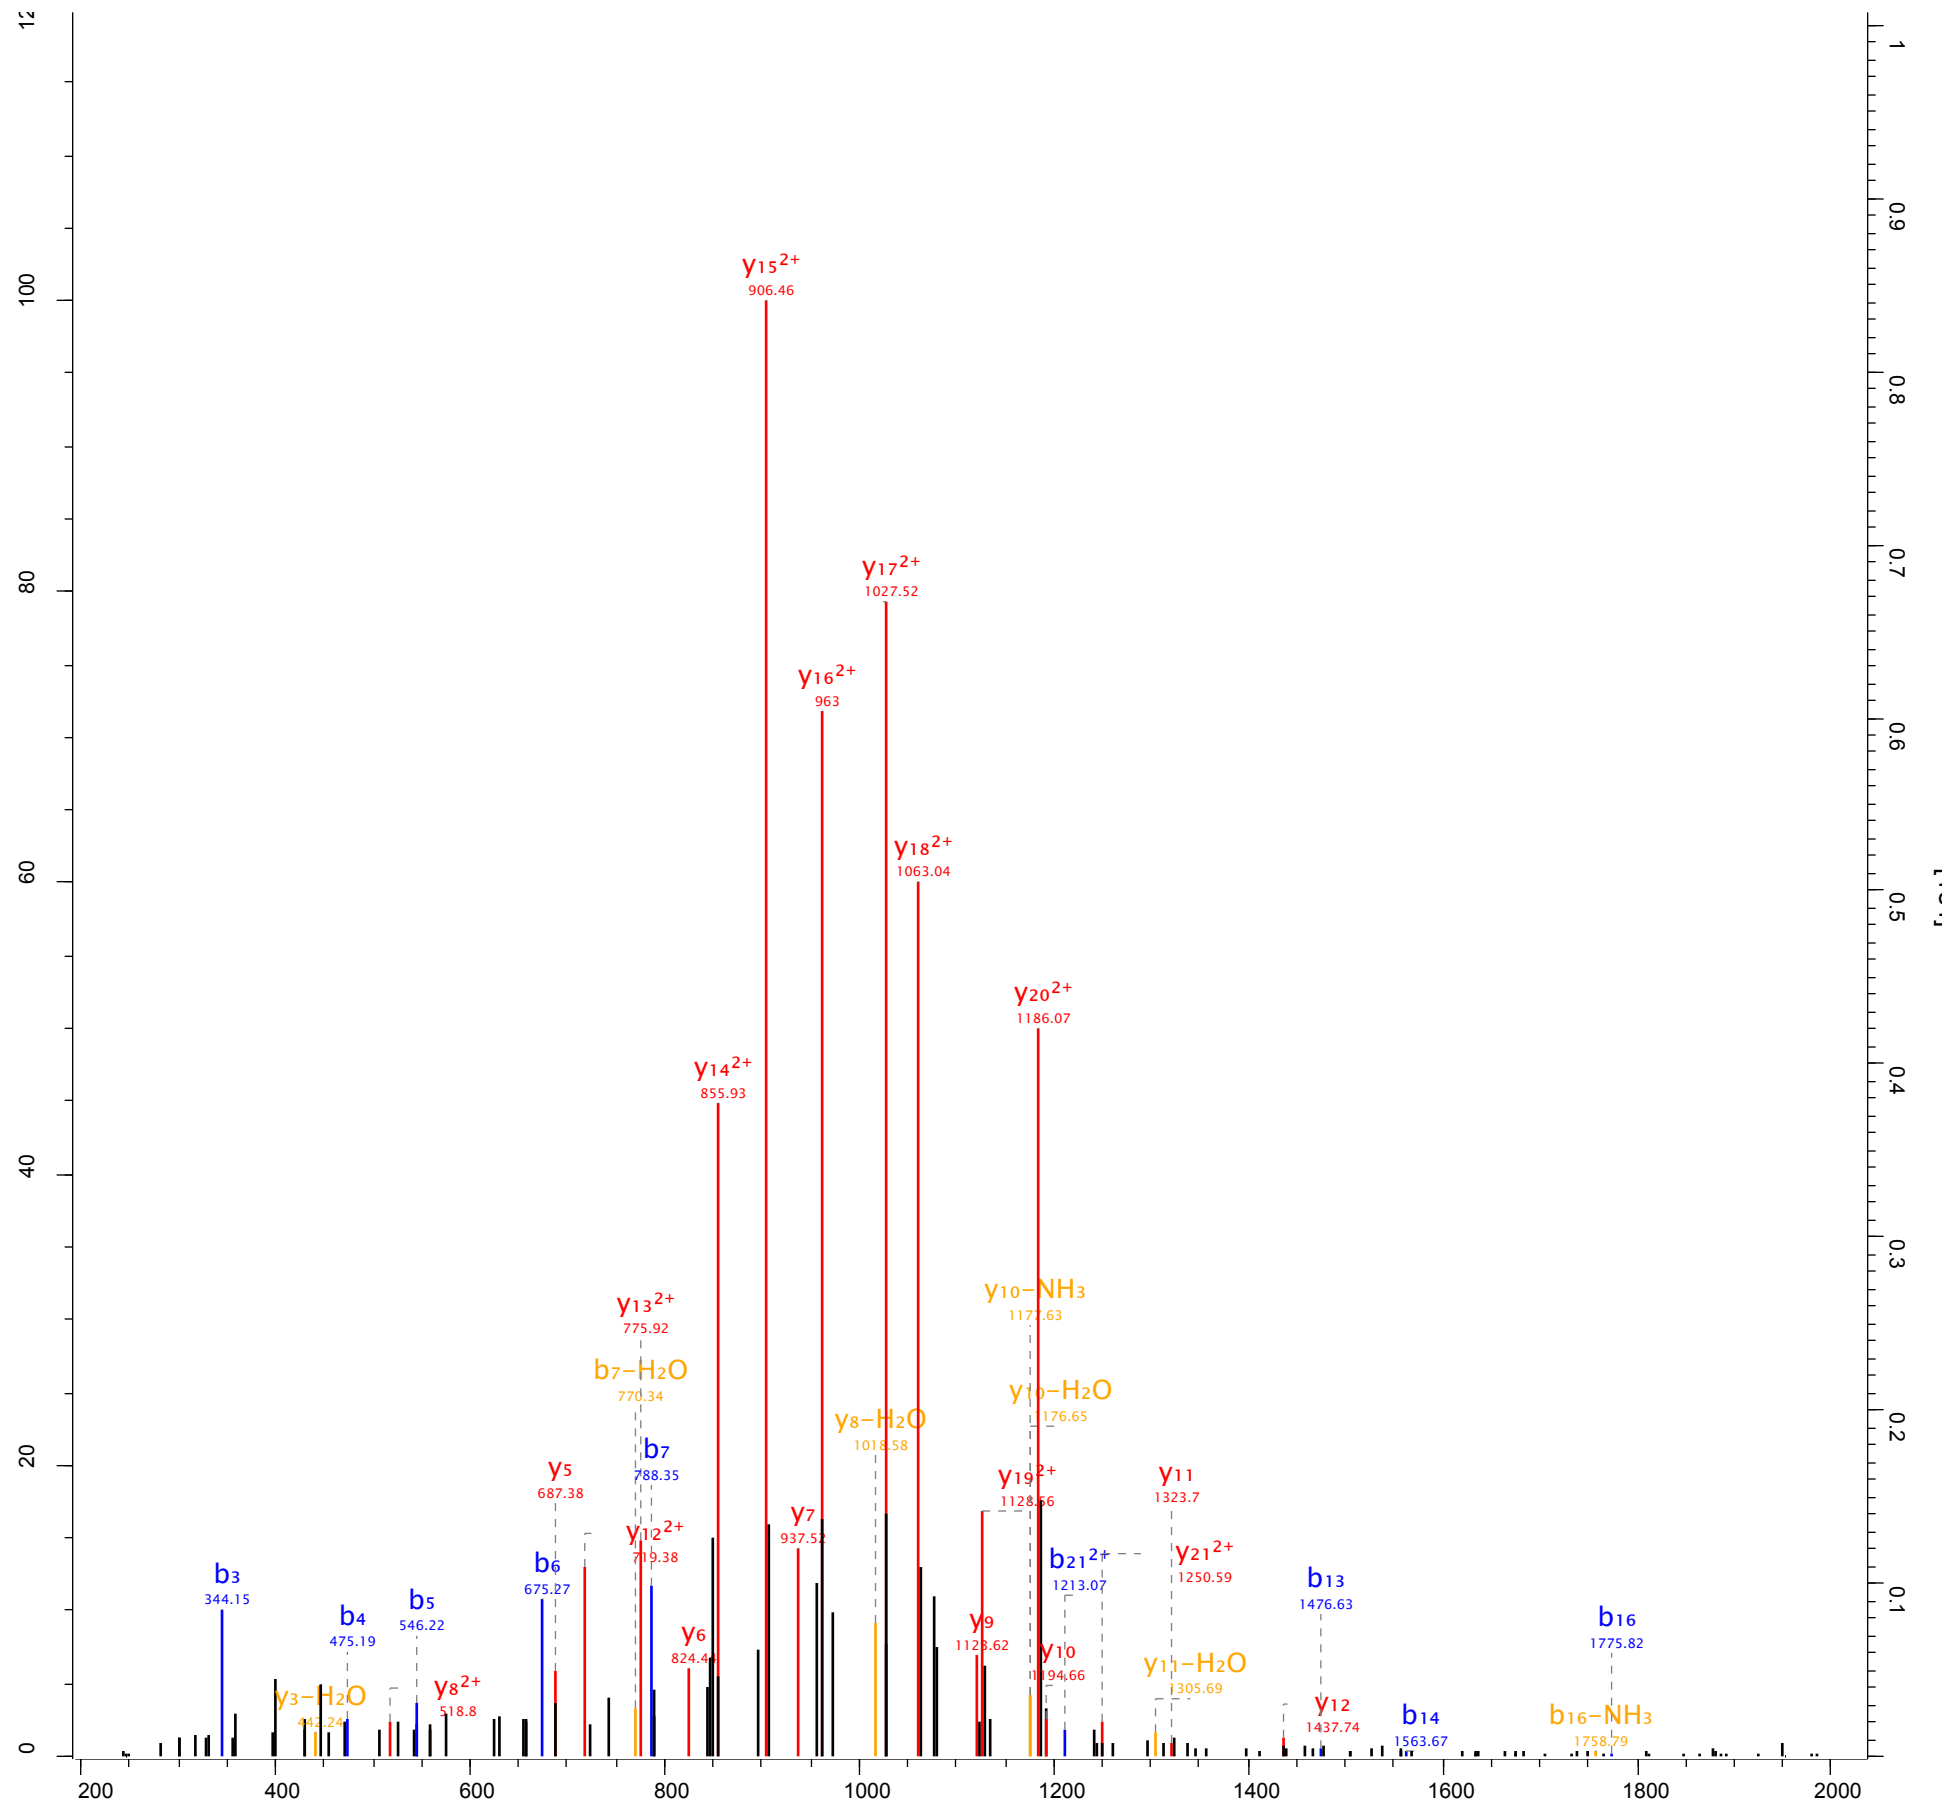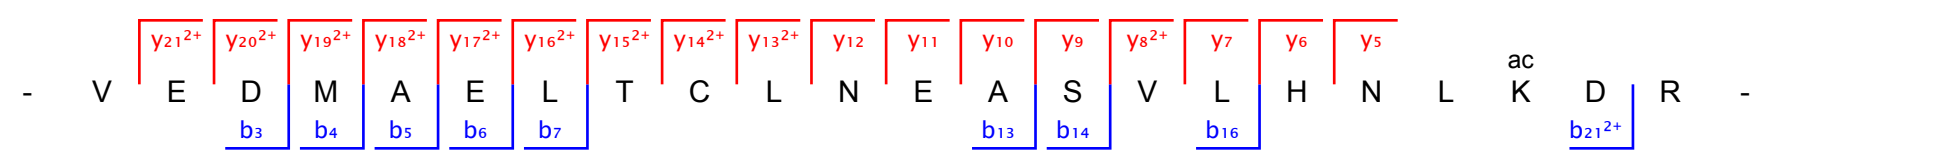

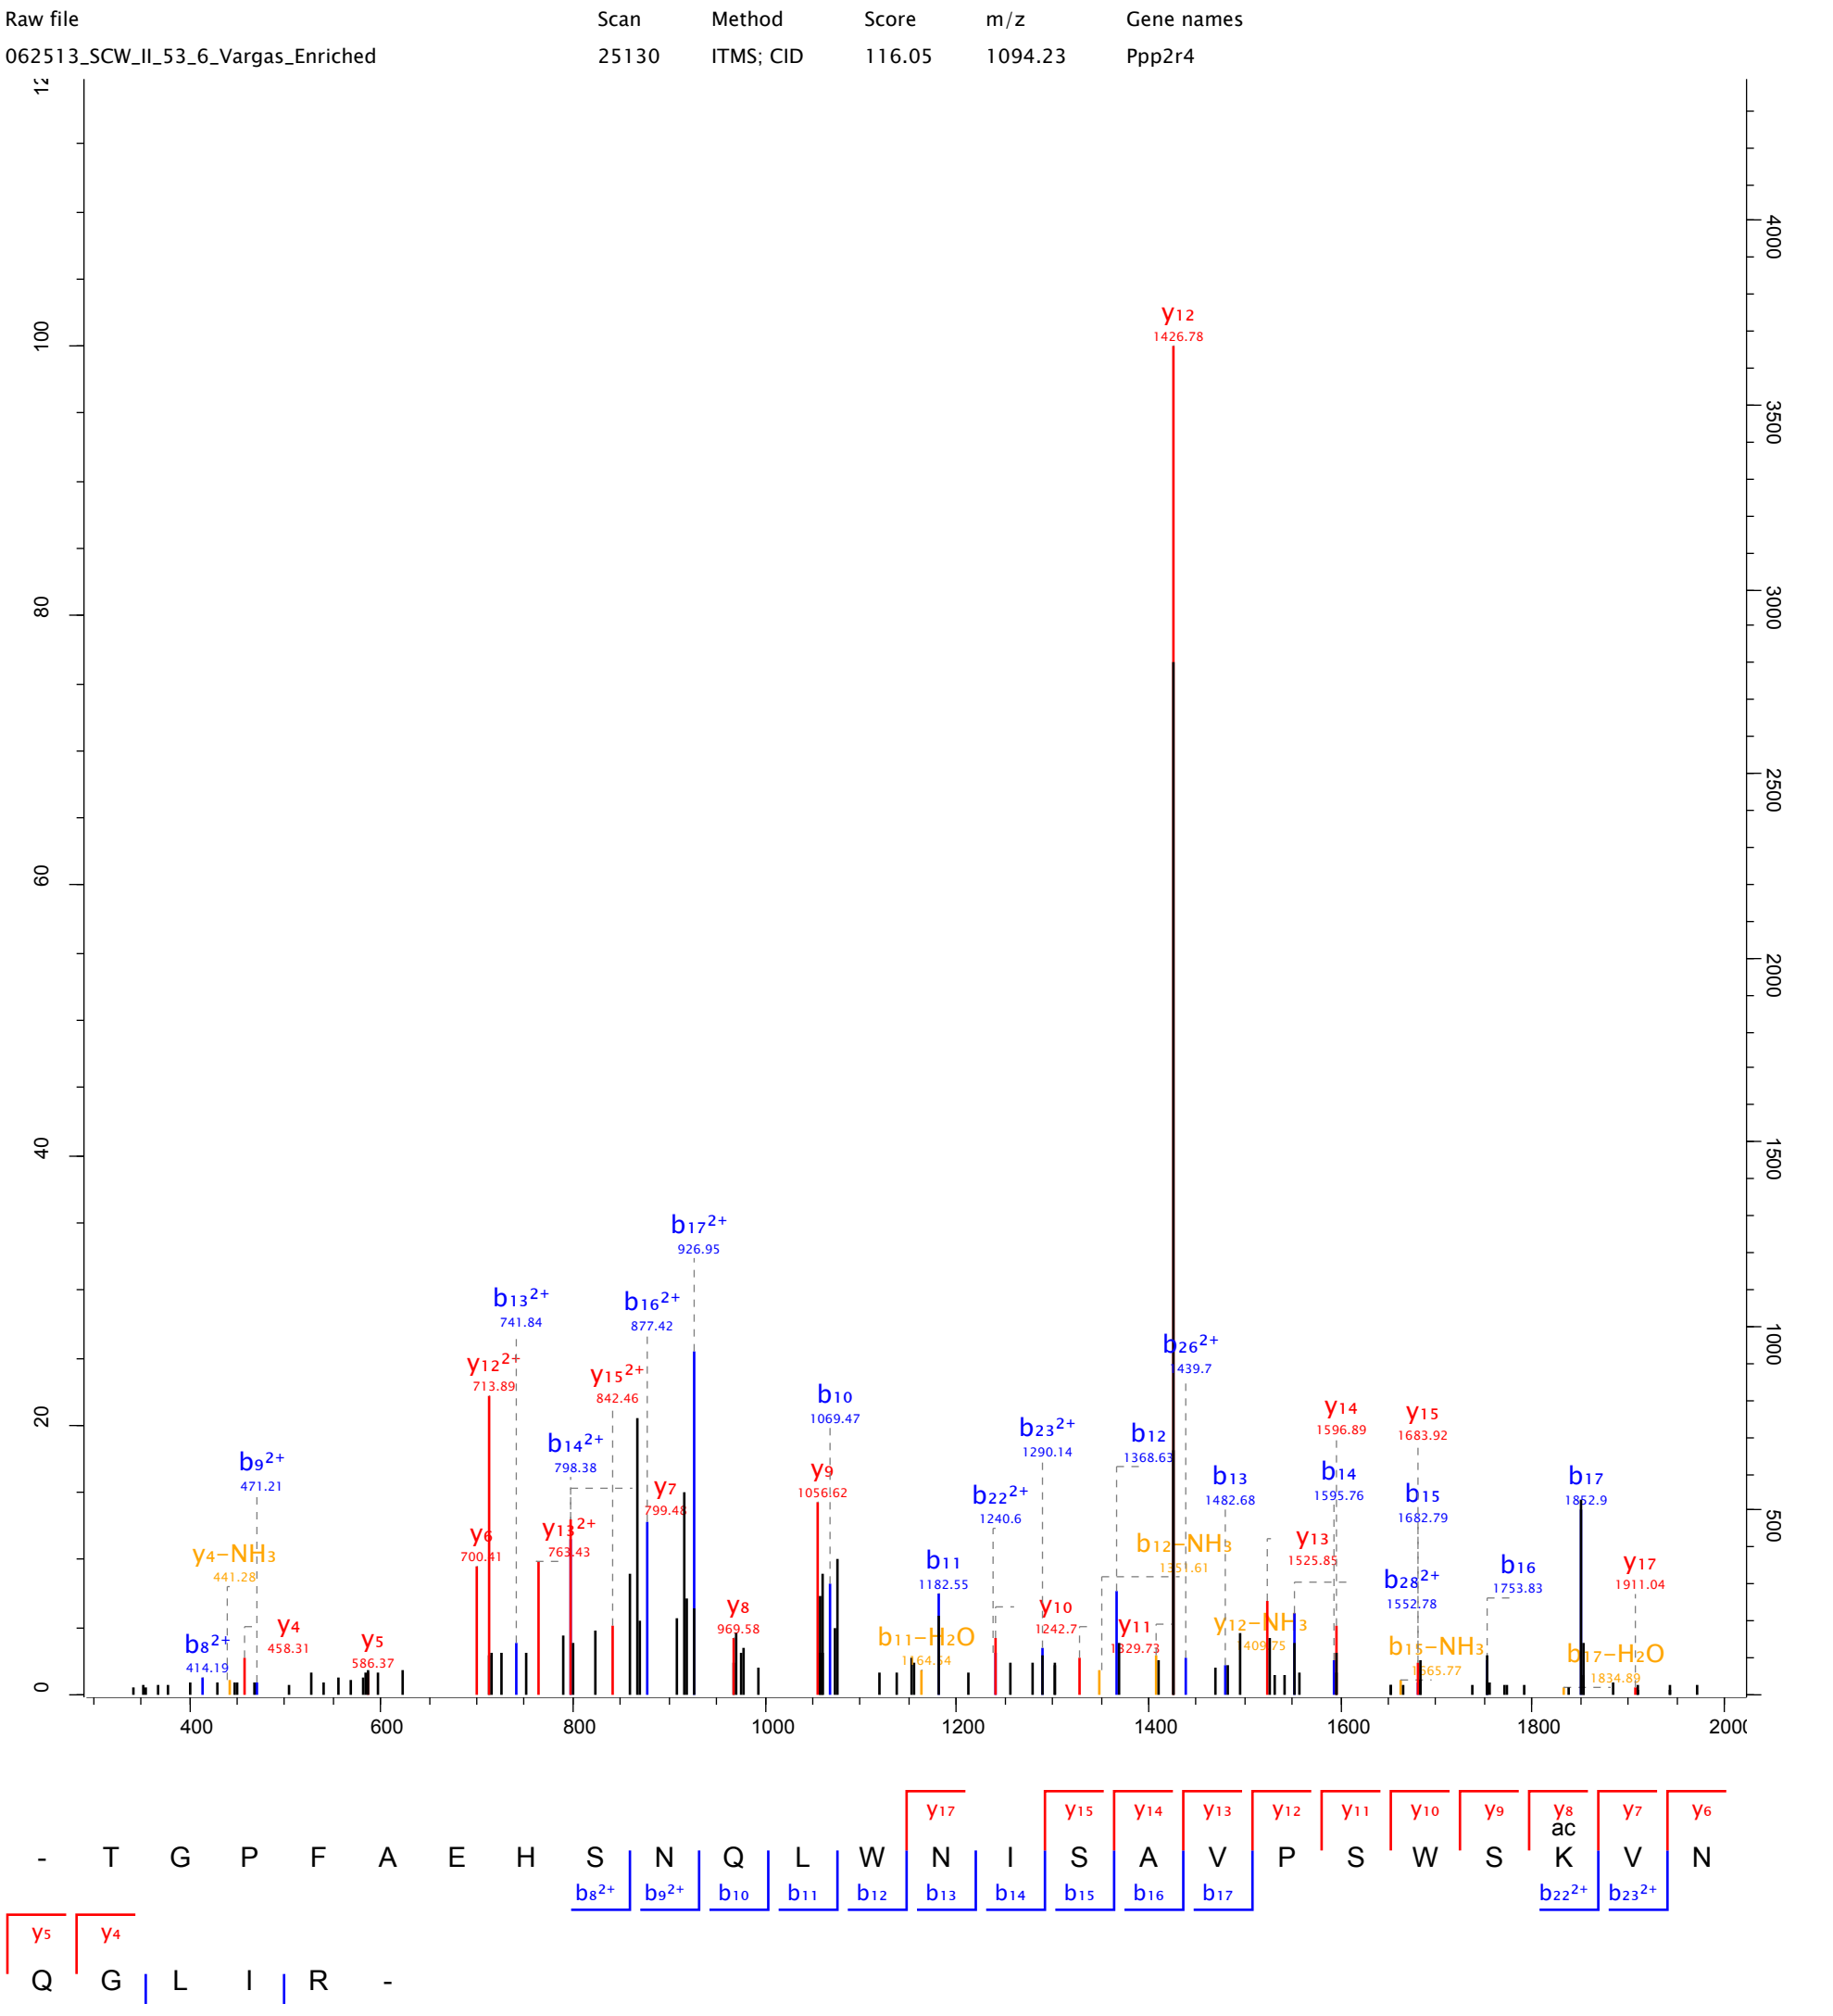

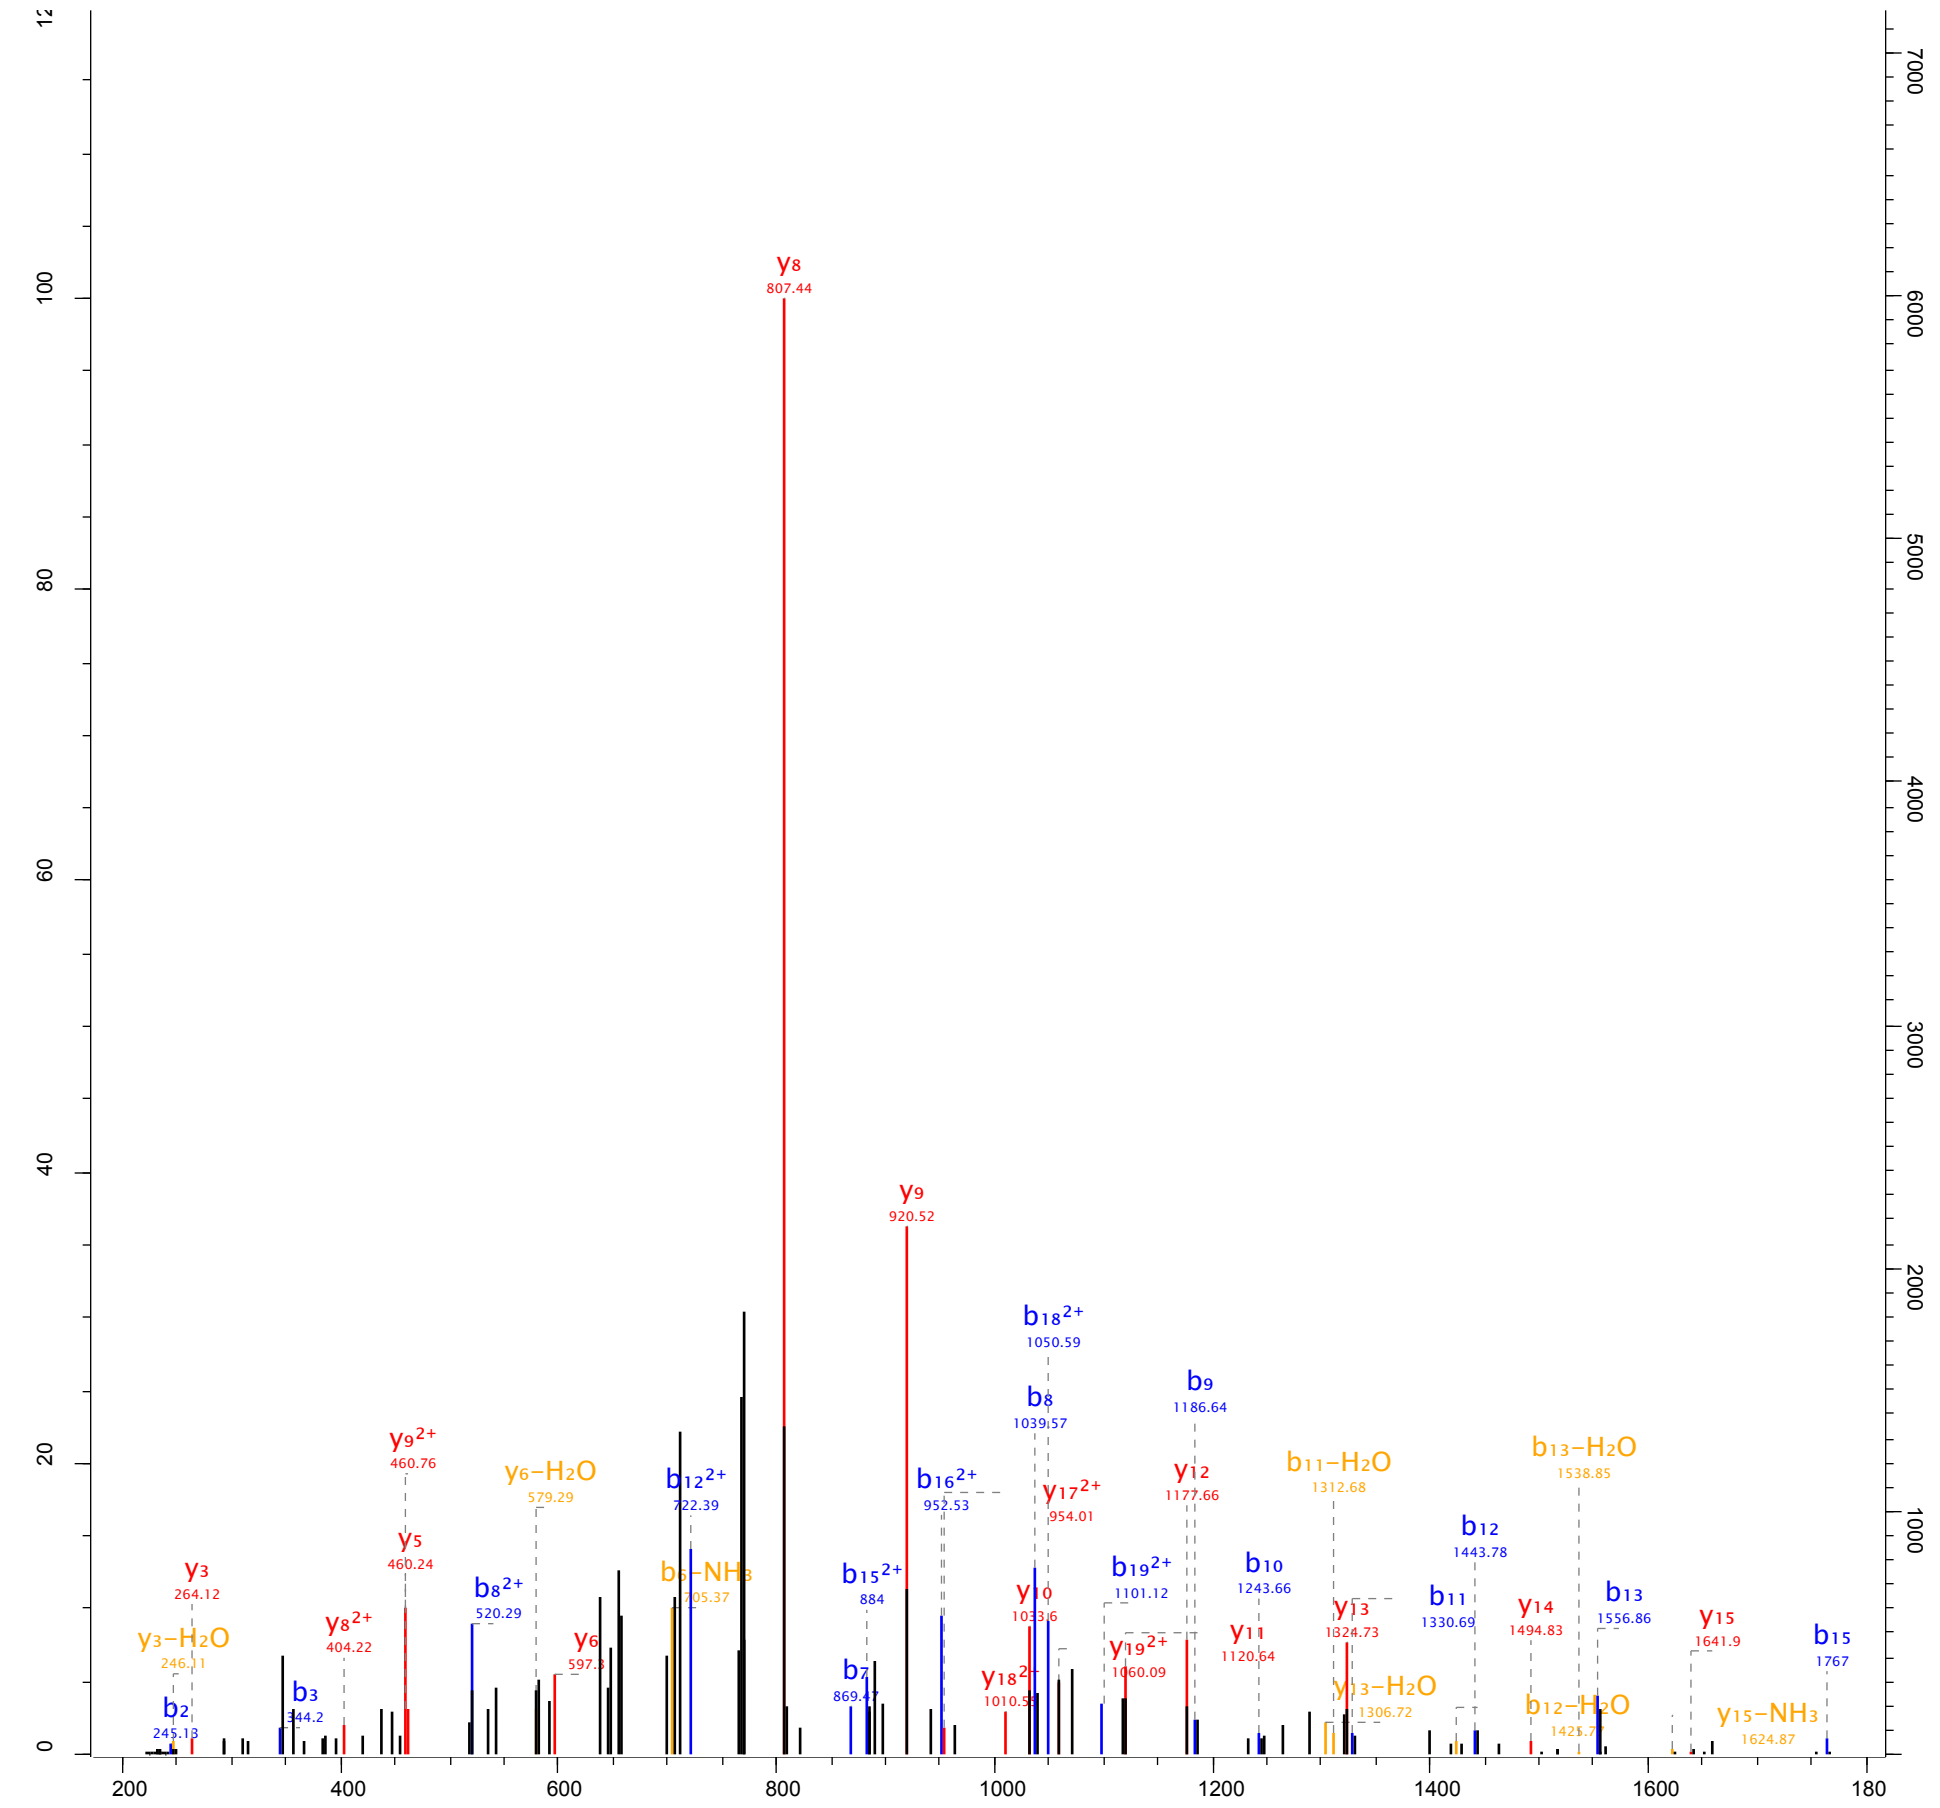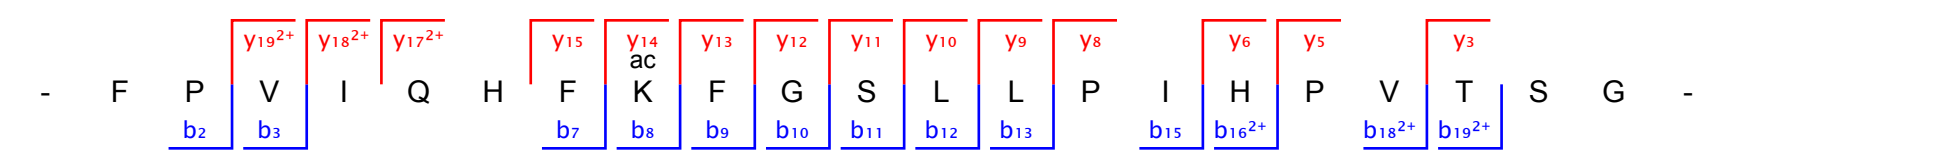

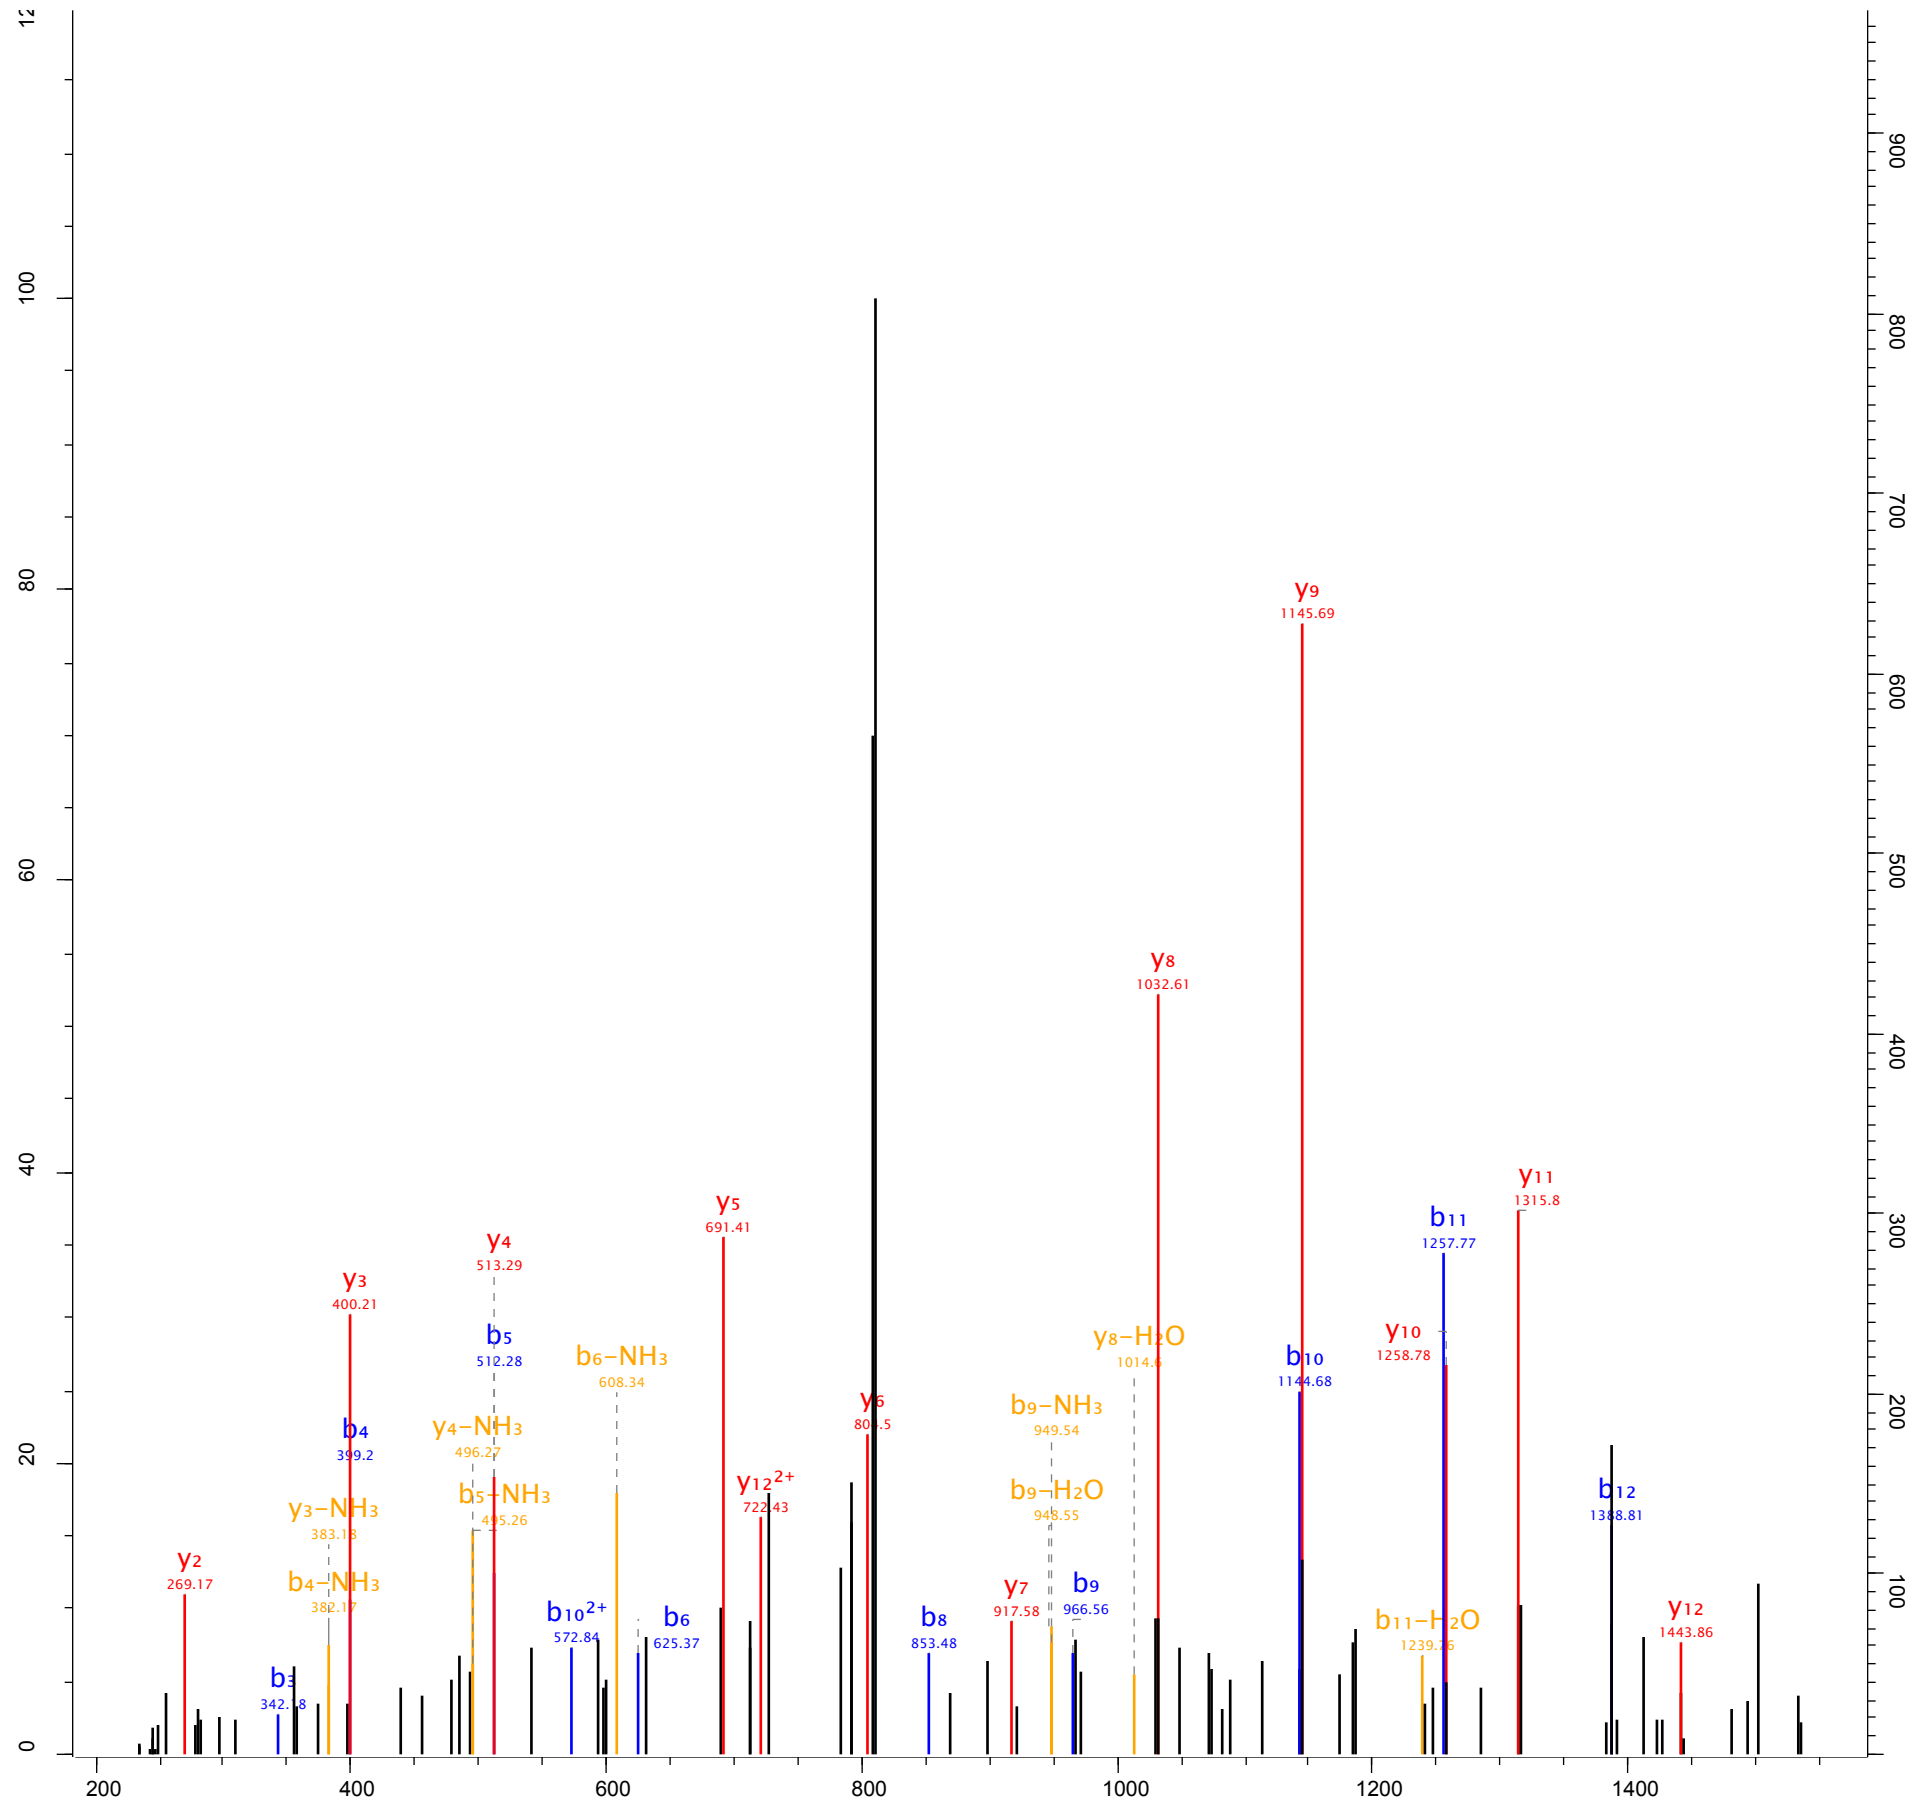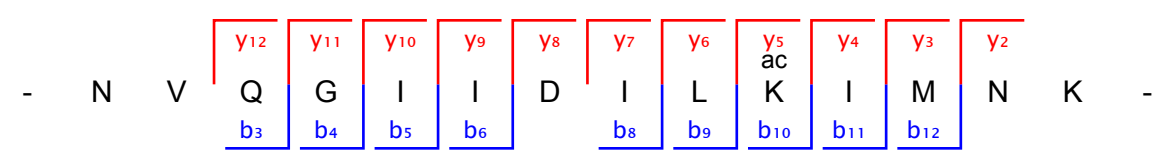



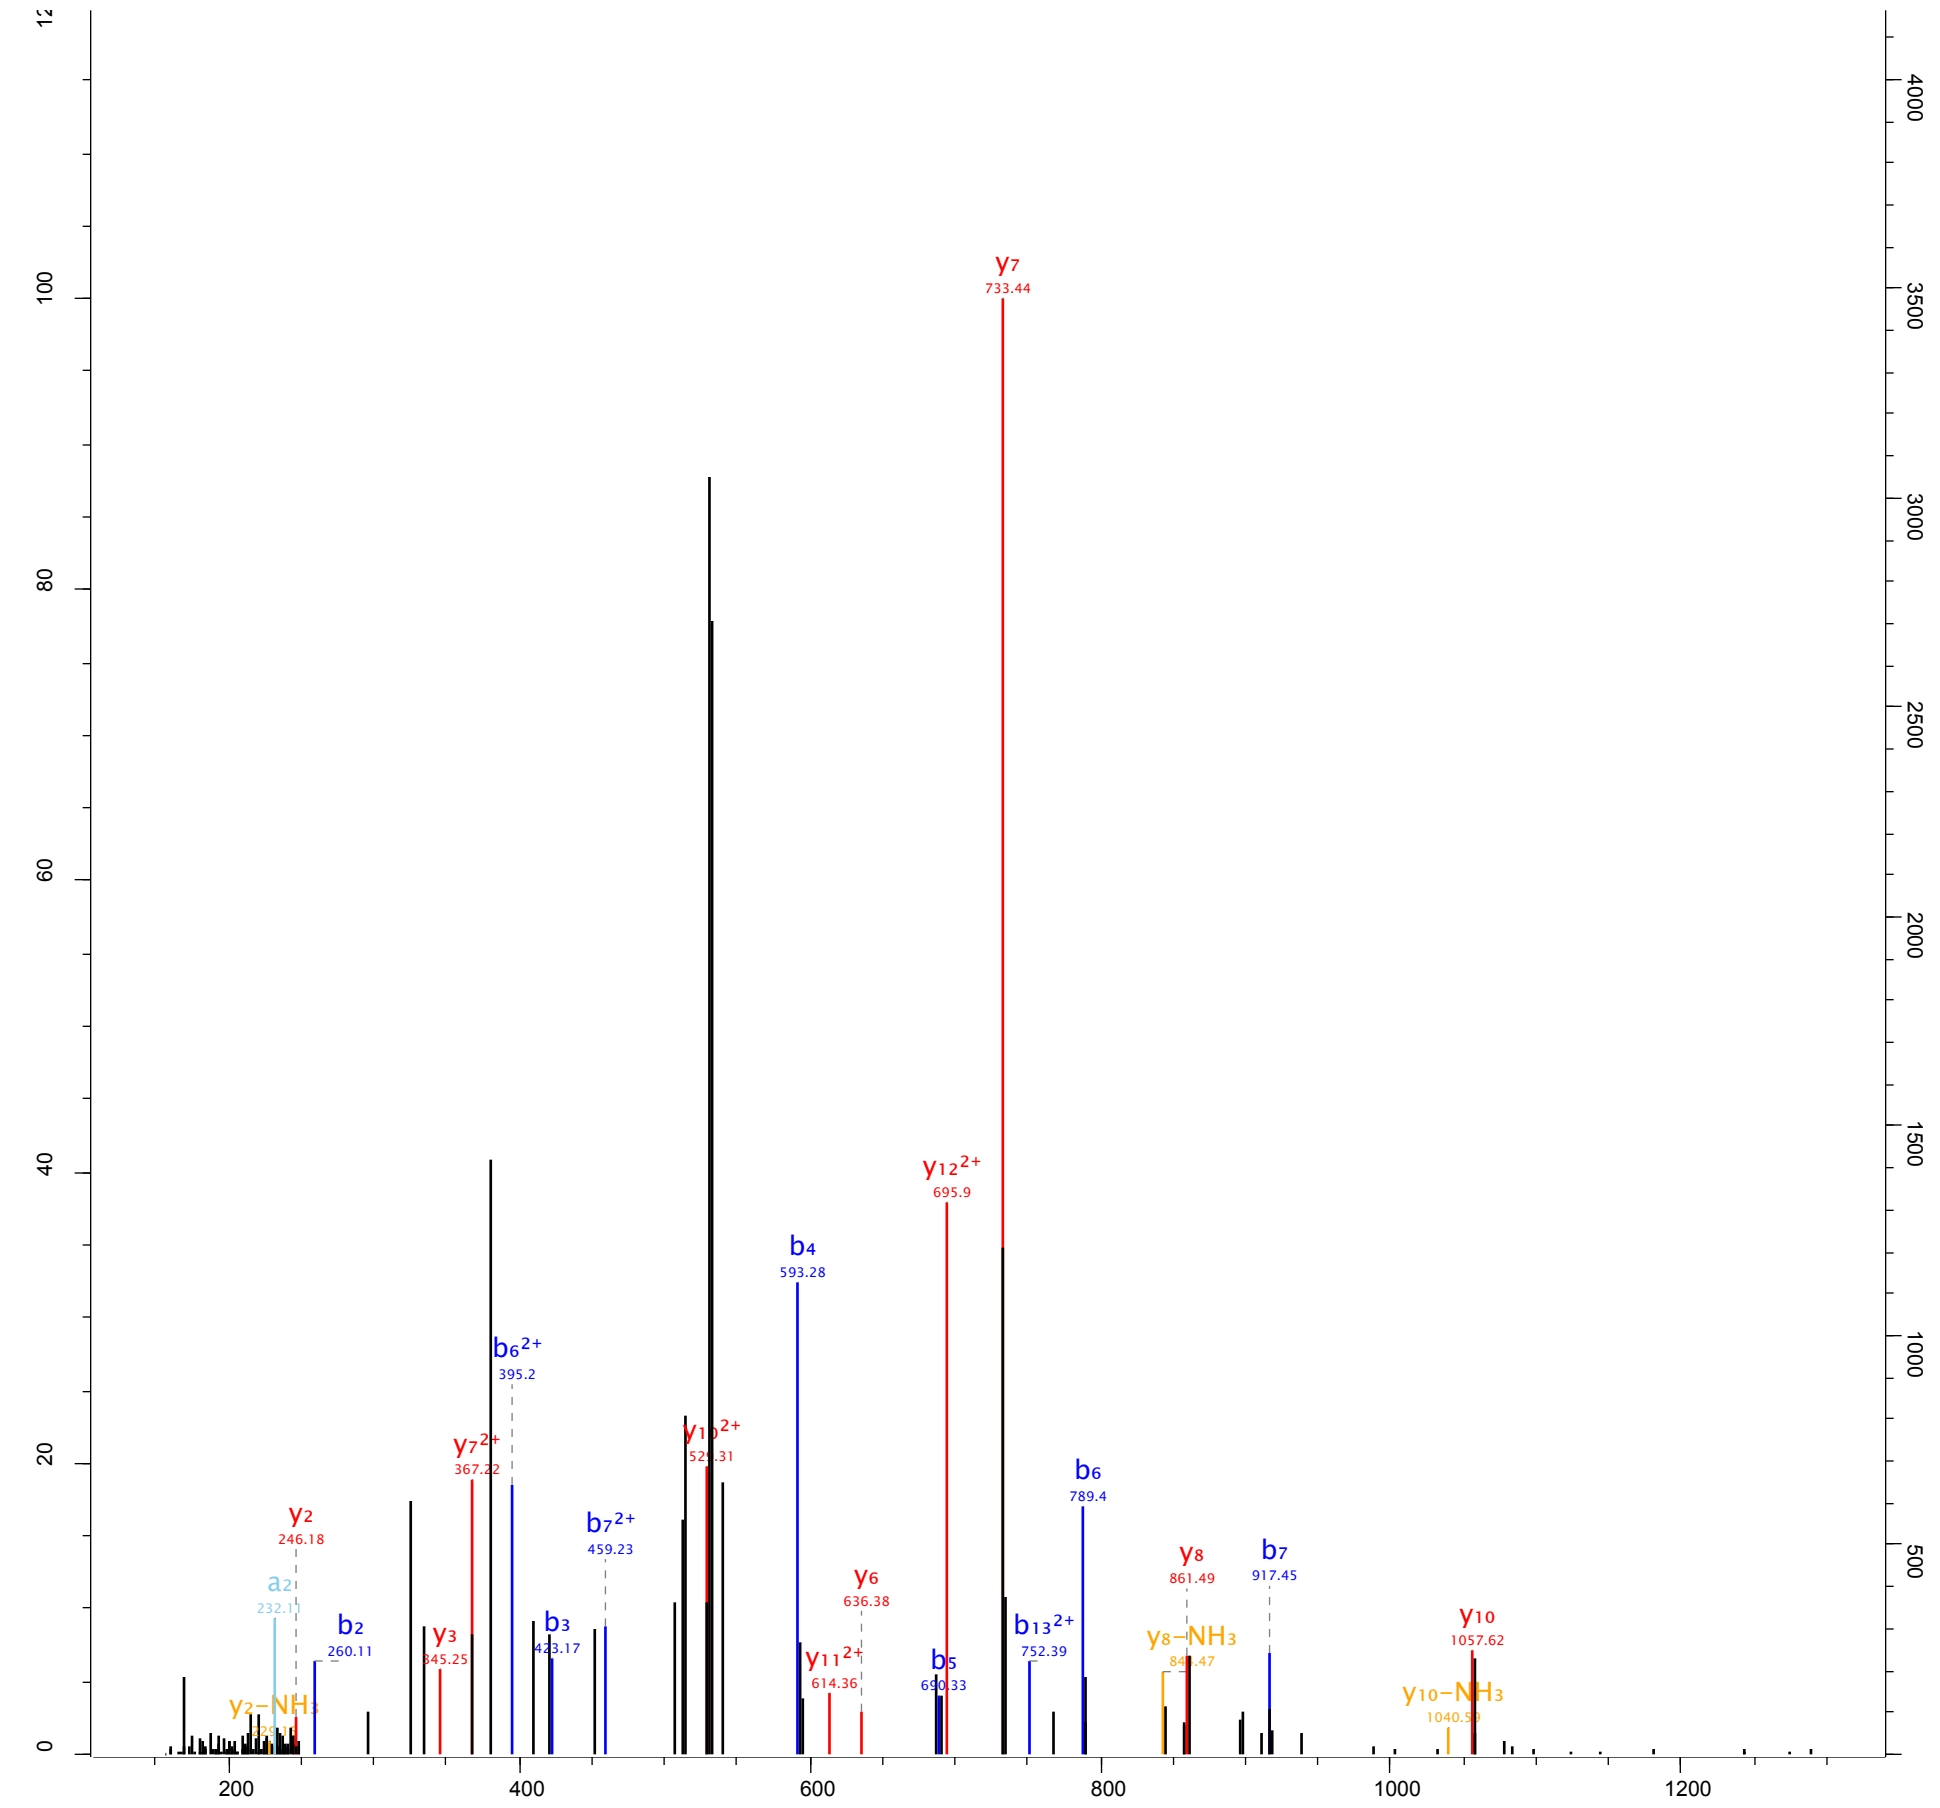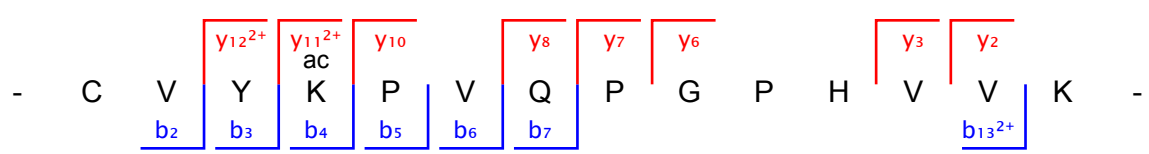

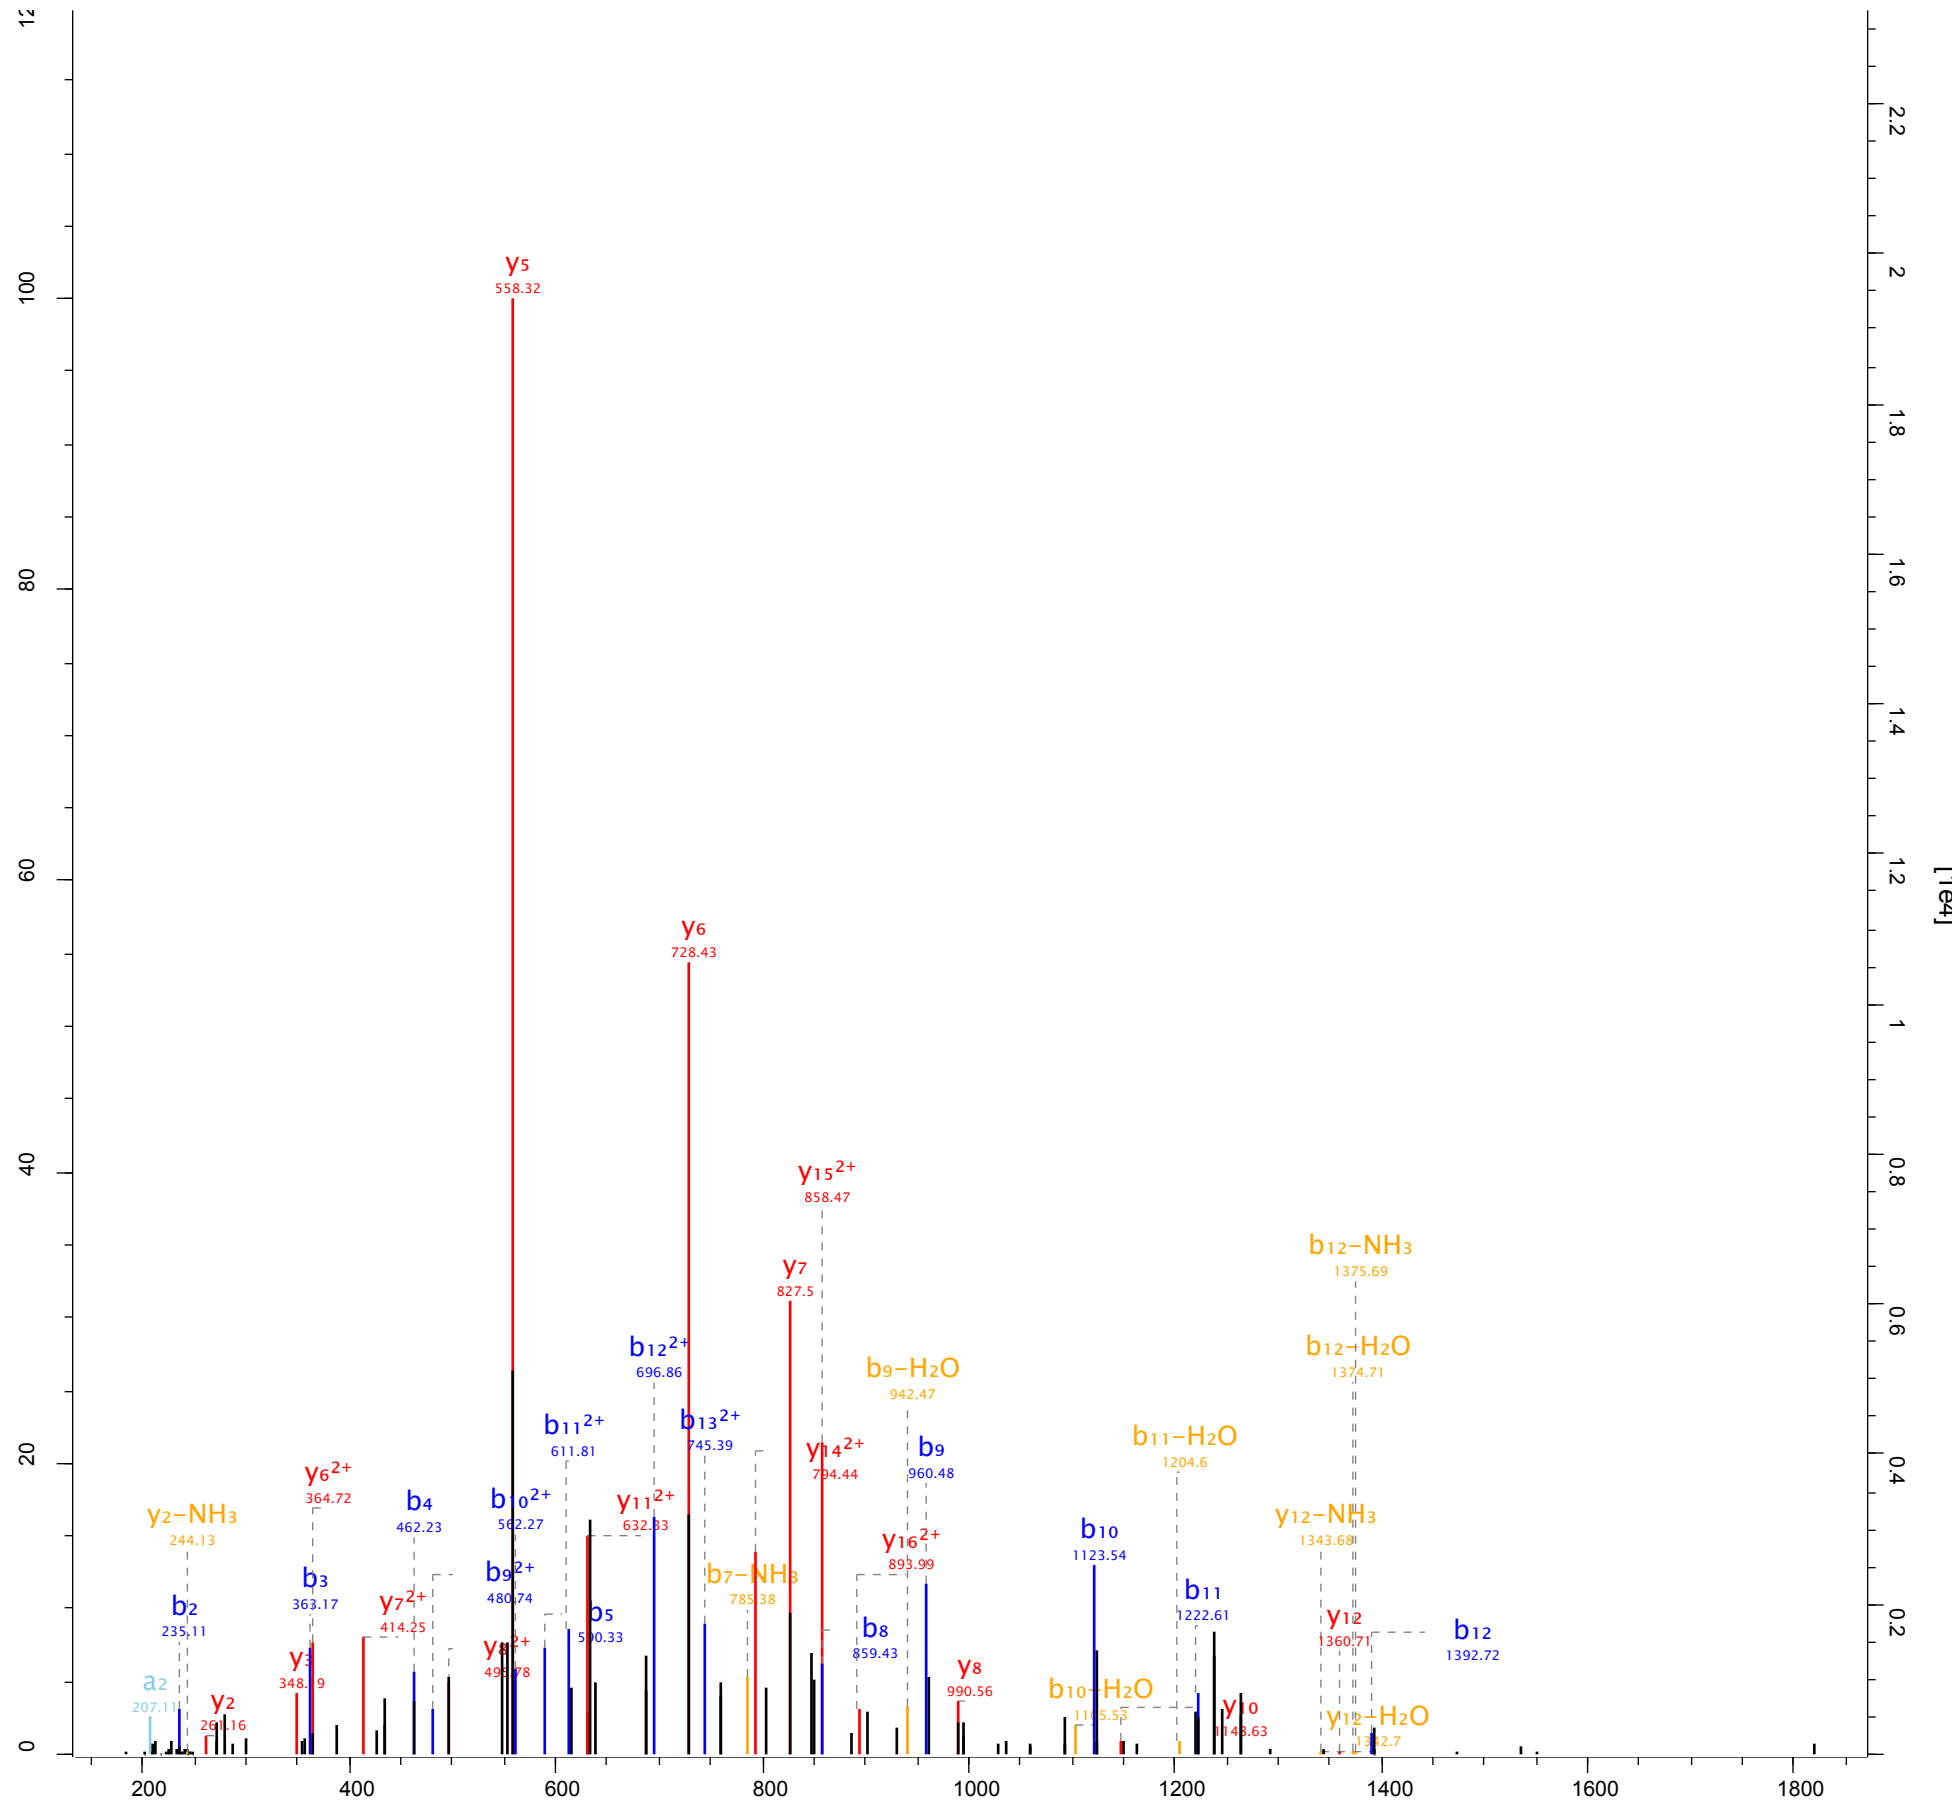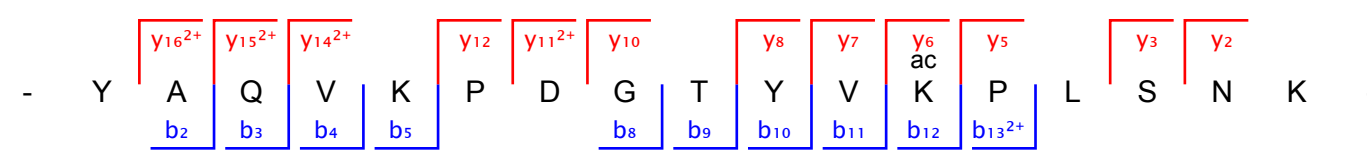

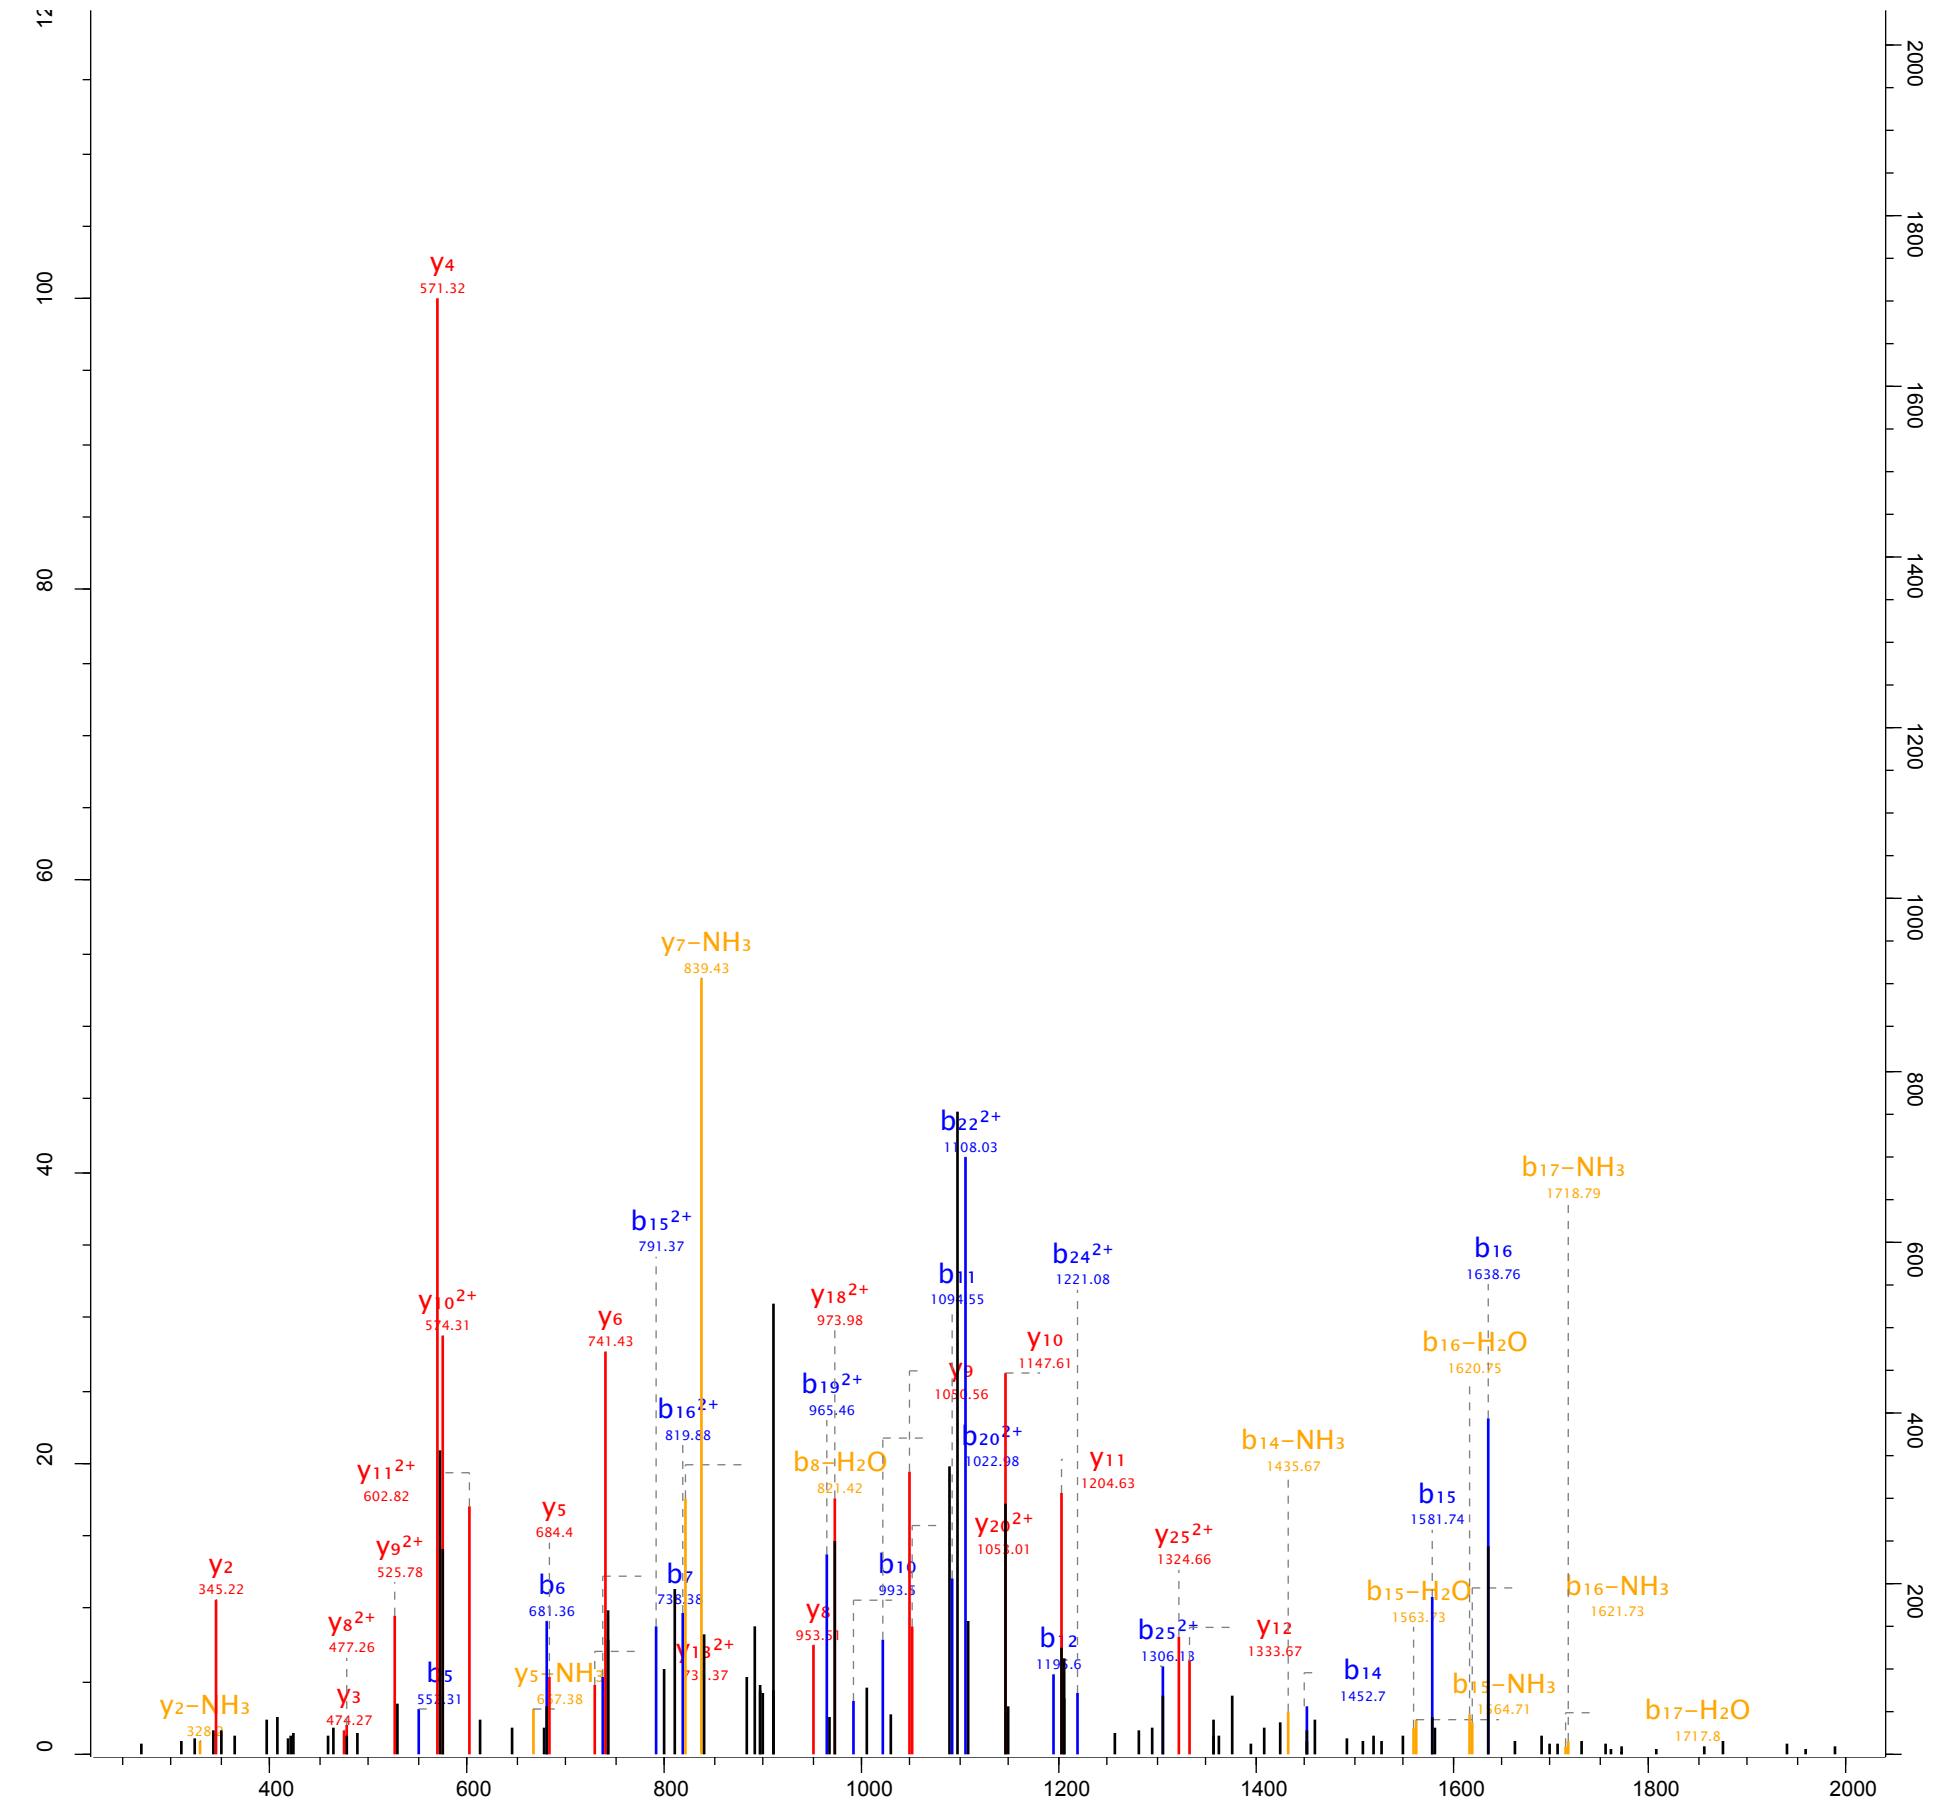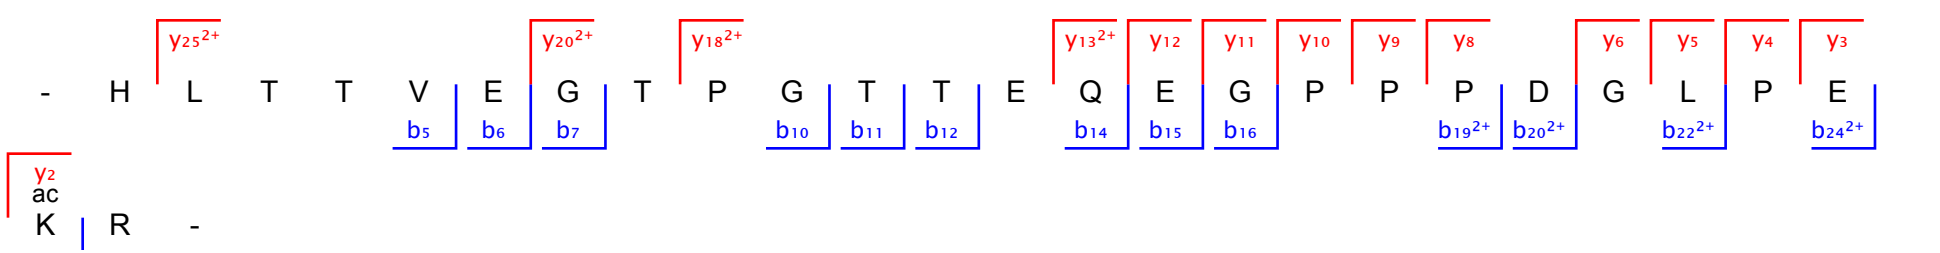

Raw file: 062513\_SCW\_II\_53\_7\_Vargas\_Enriched  
 Scan: 16253 Method: ITMS; CID Score: 118.71 m/z: 713.36 Gene names: Clic4

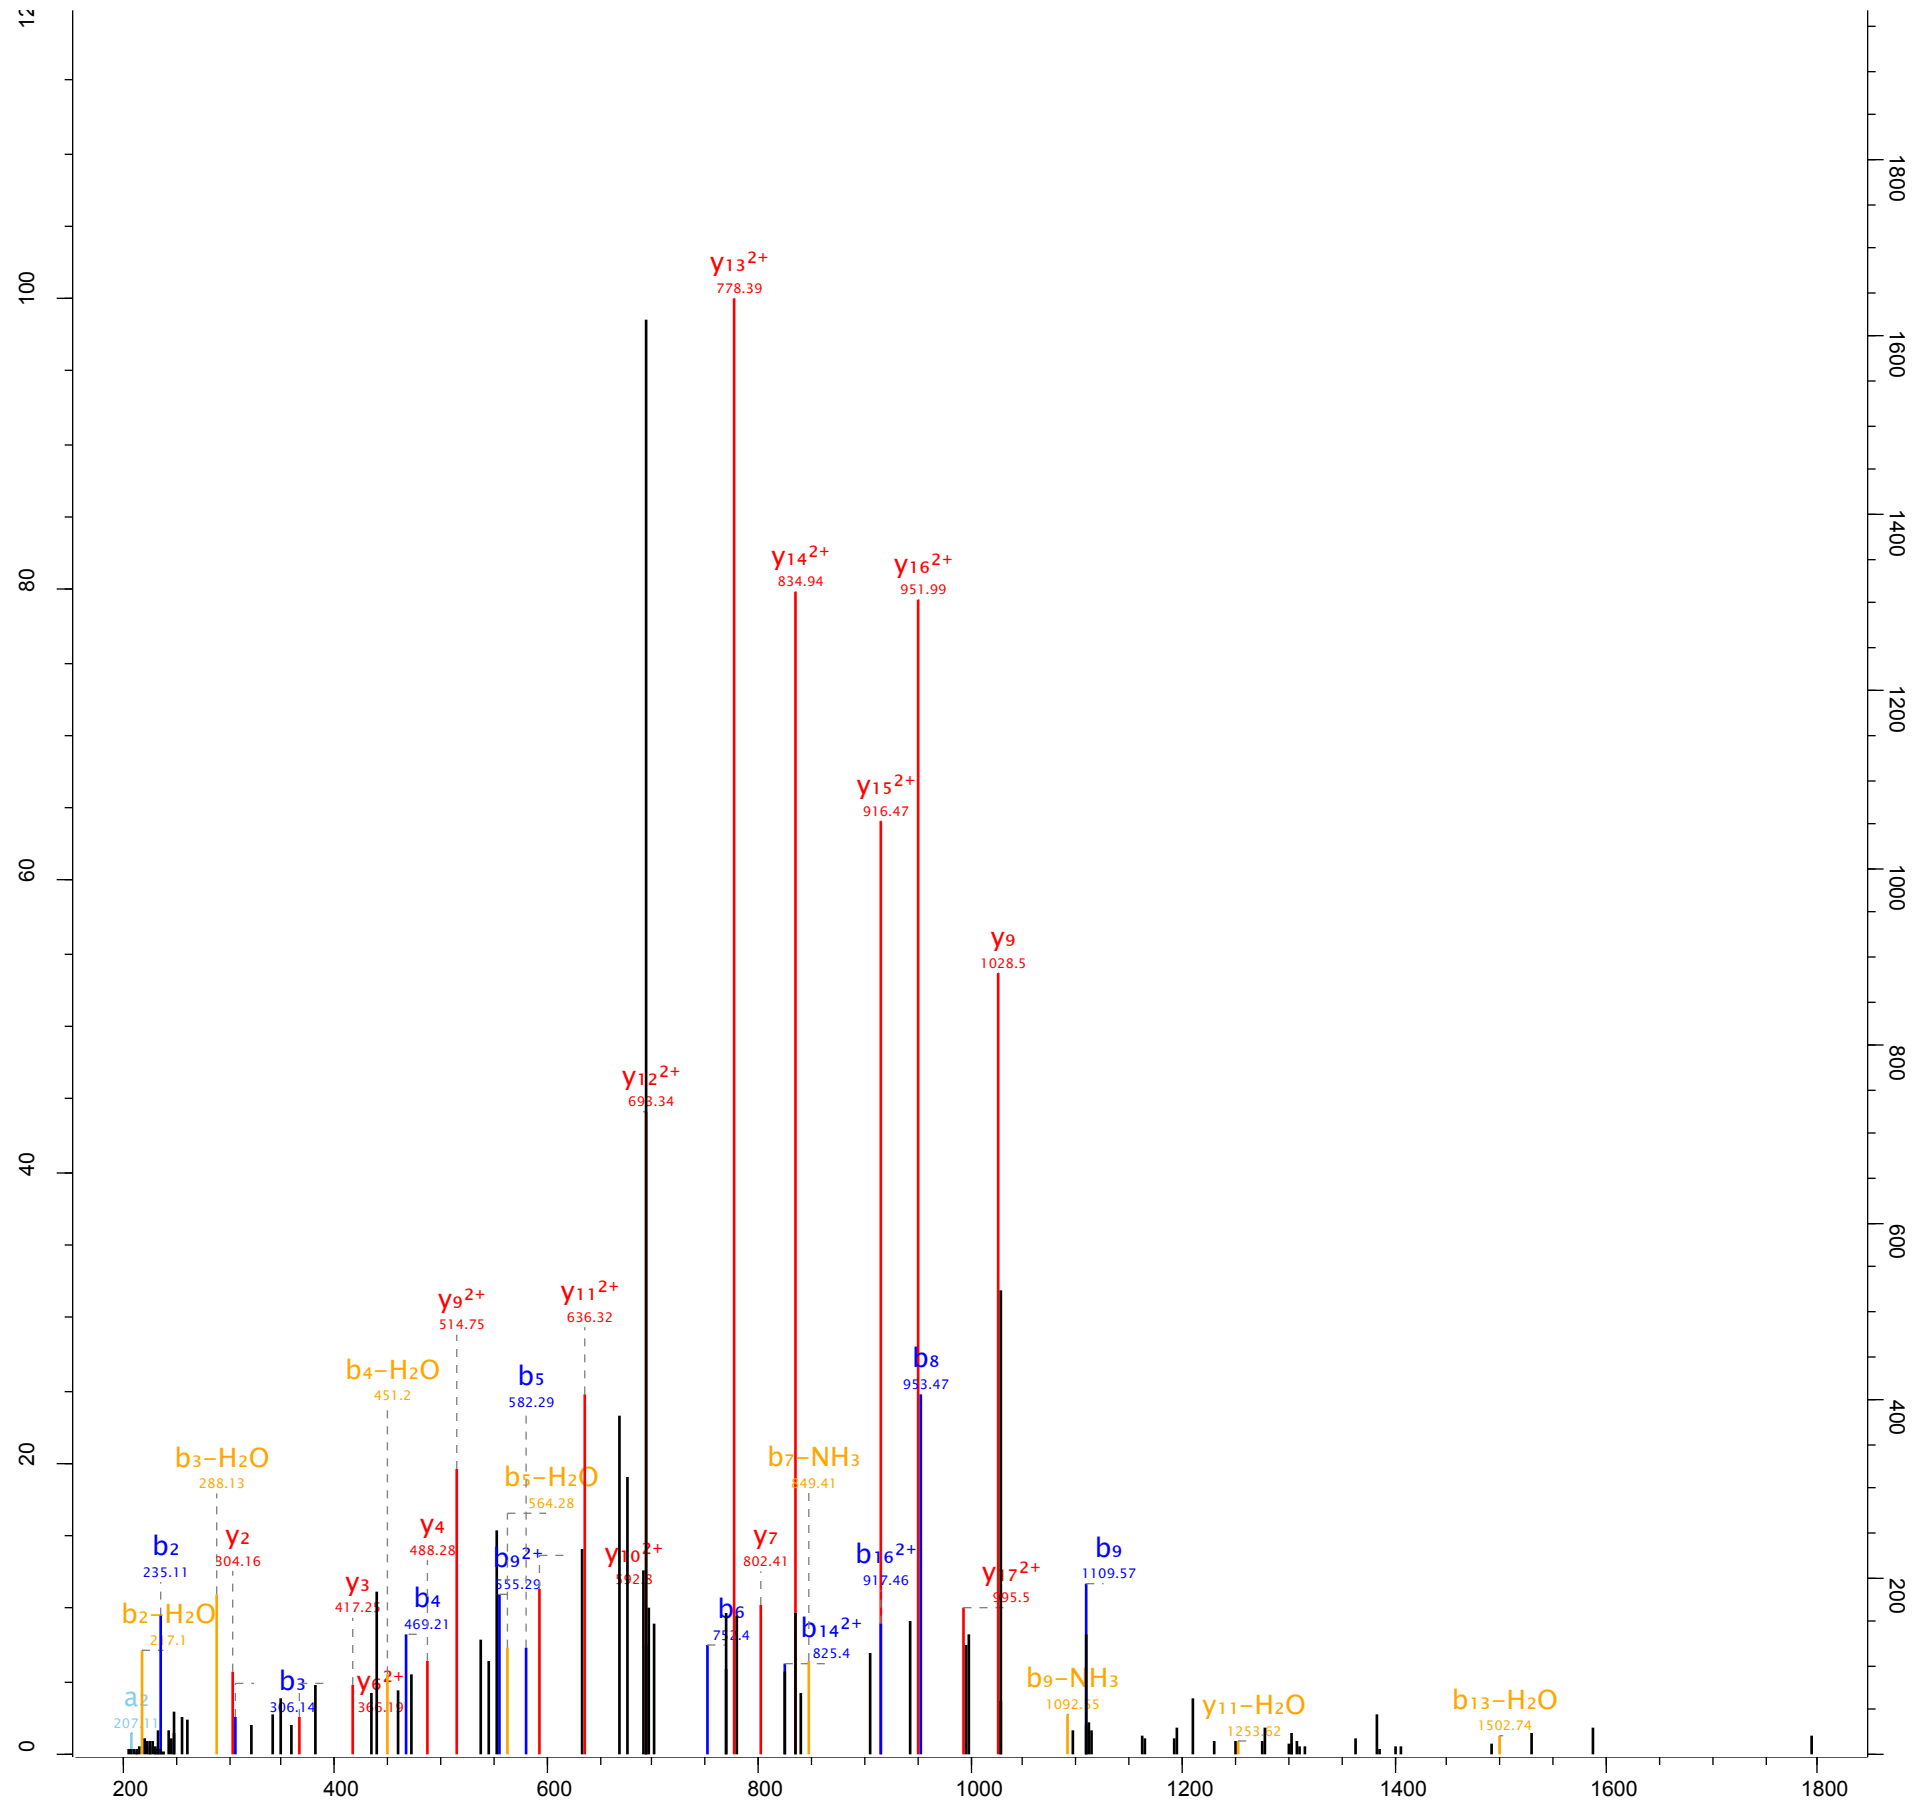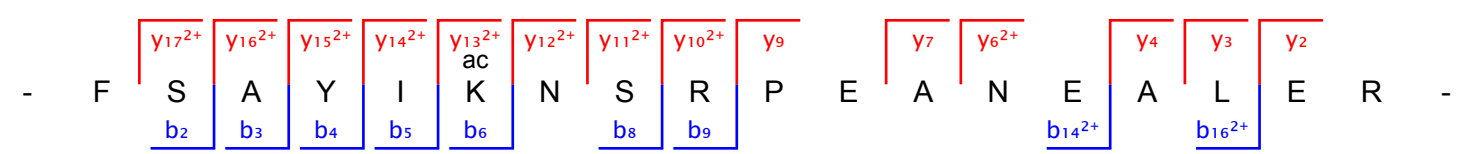

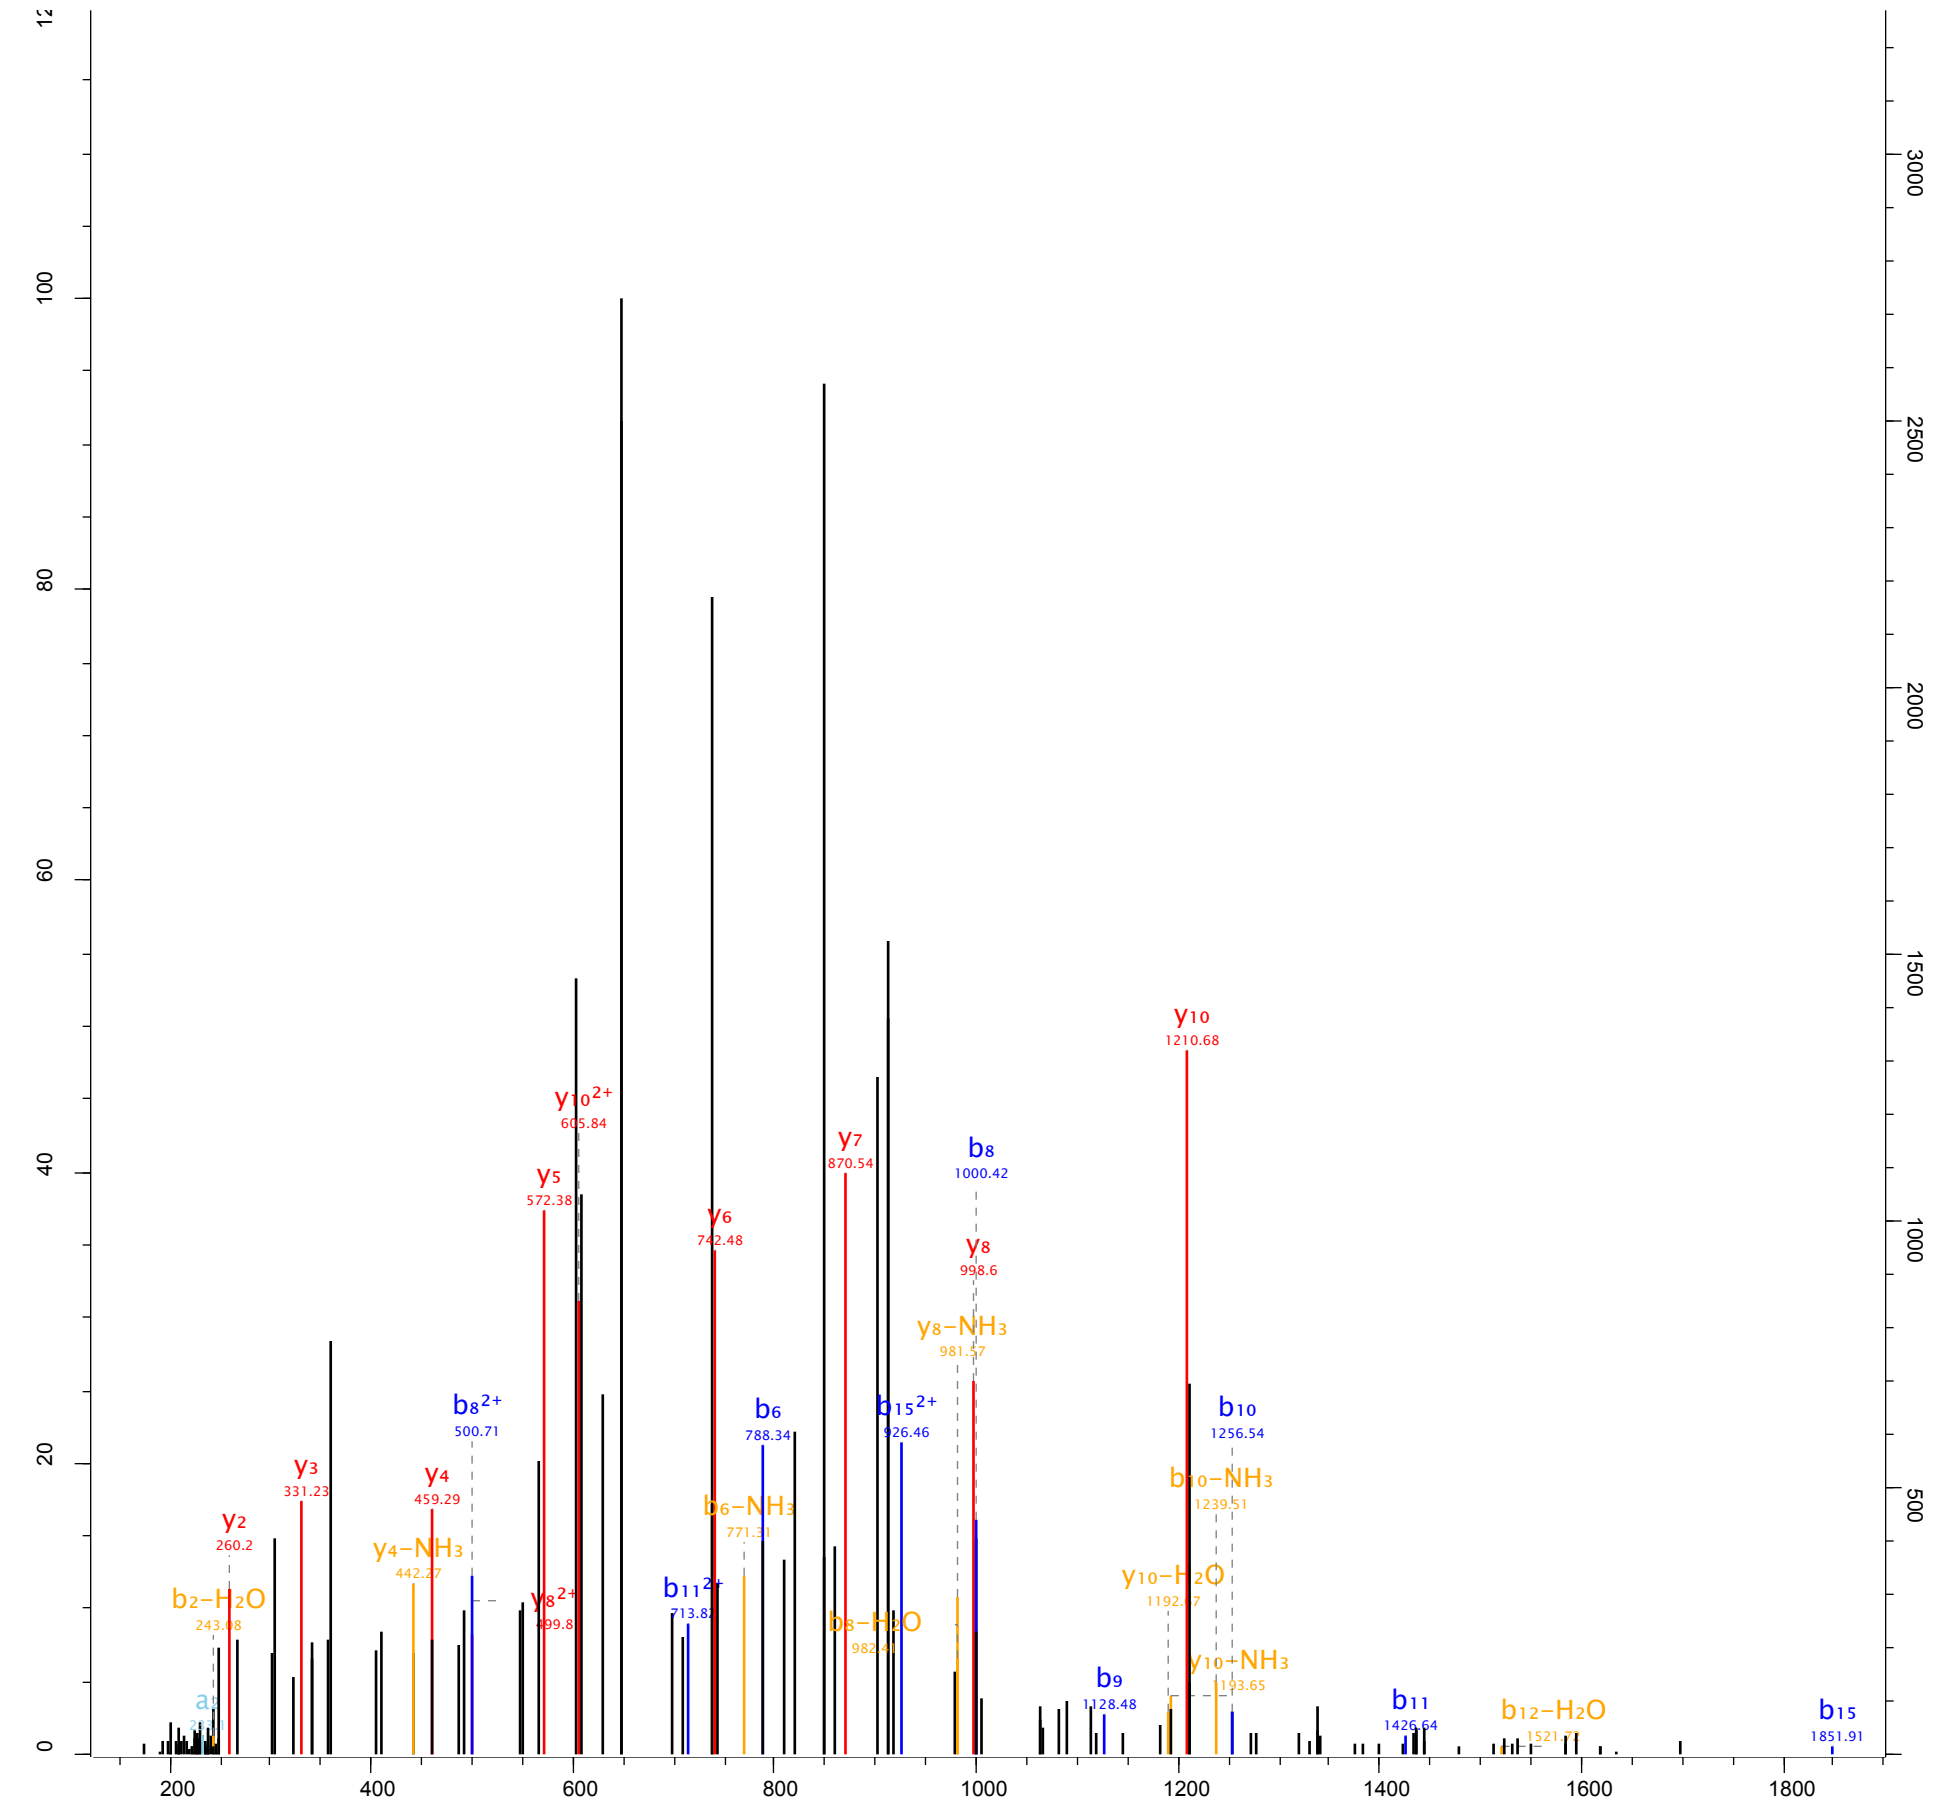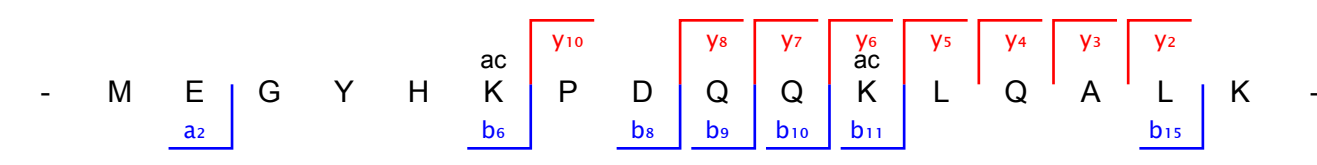

Raw file: 062513\_SCW\_II\_53\_7\_Vargas\_Enriched  
 Scan: 17032  
 Method: ITMS; CID  
 Score: 84.3  
 m/z: 639.36  
 Gene names: Erh

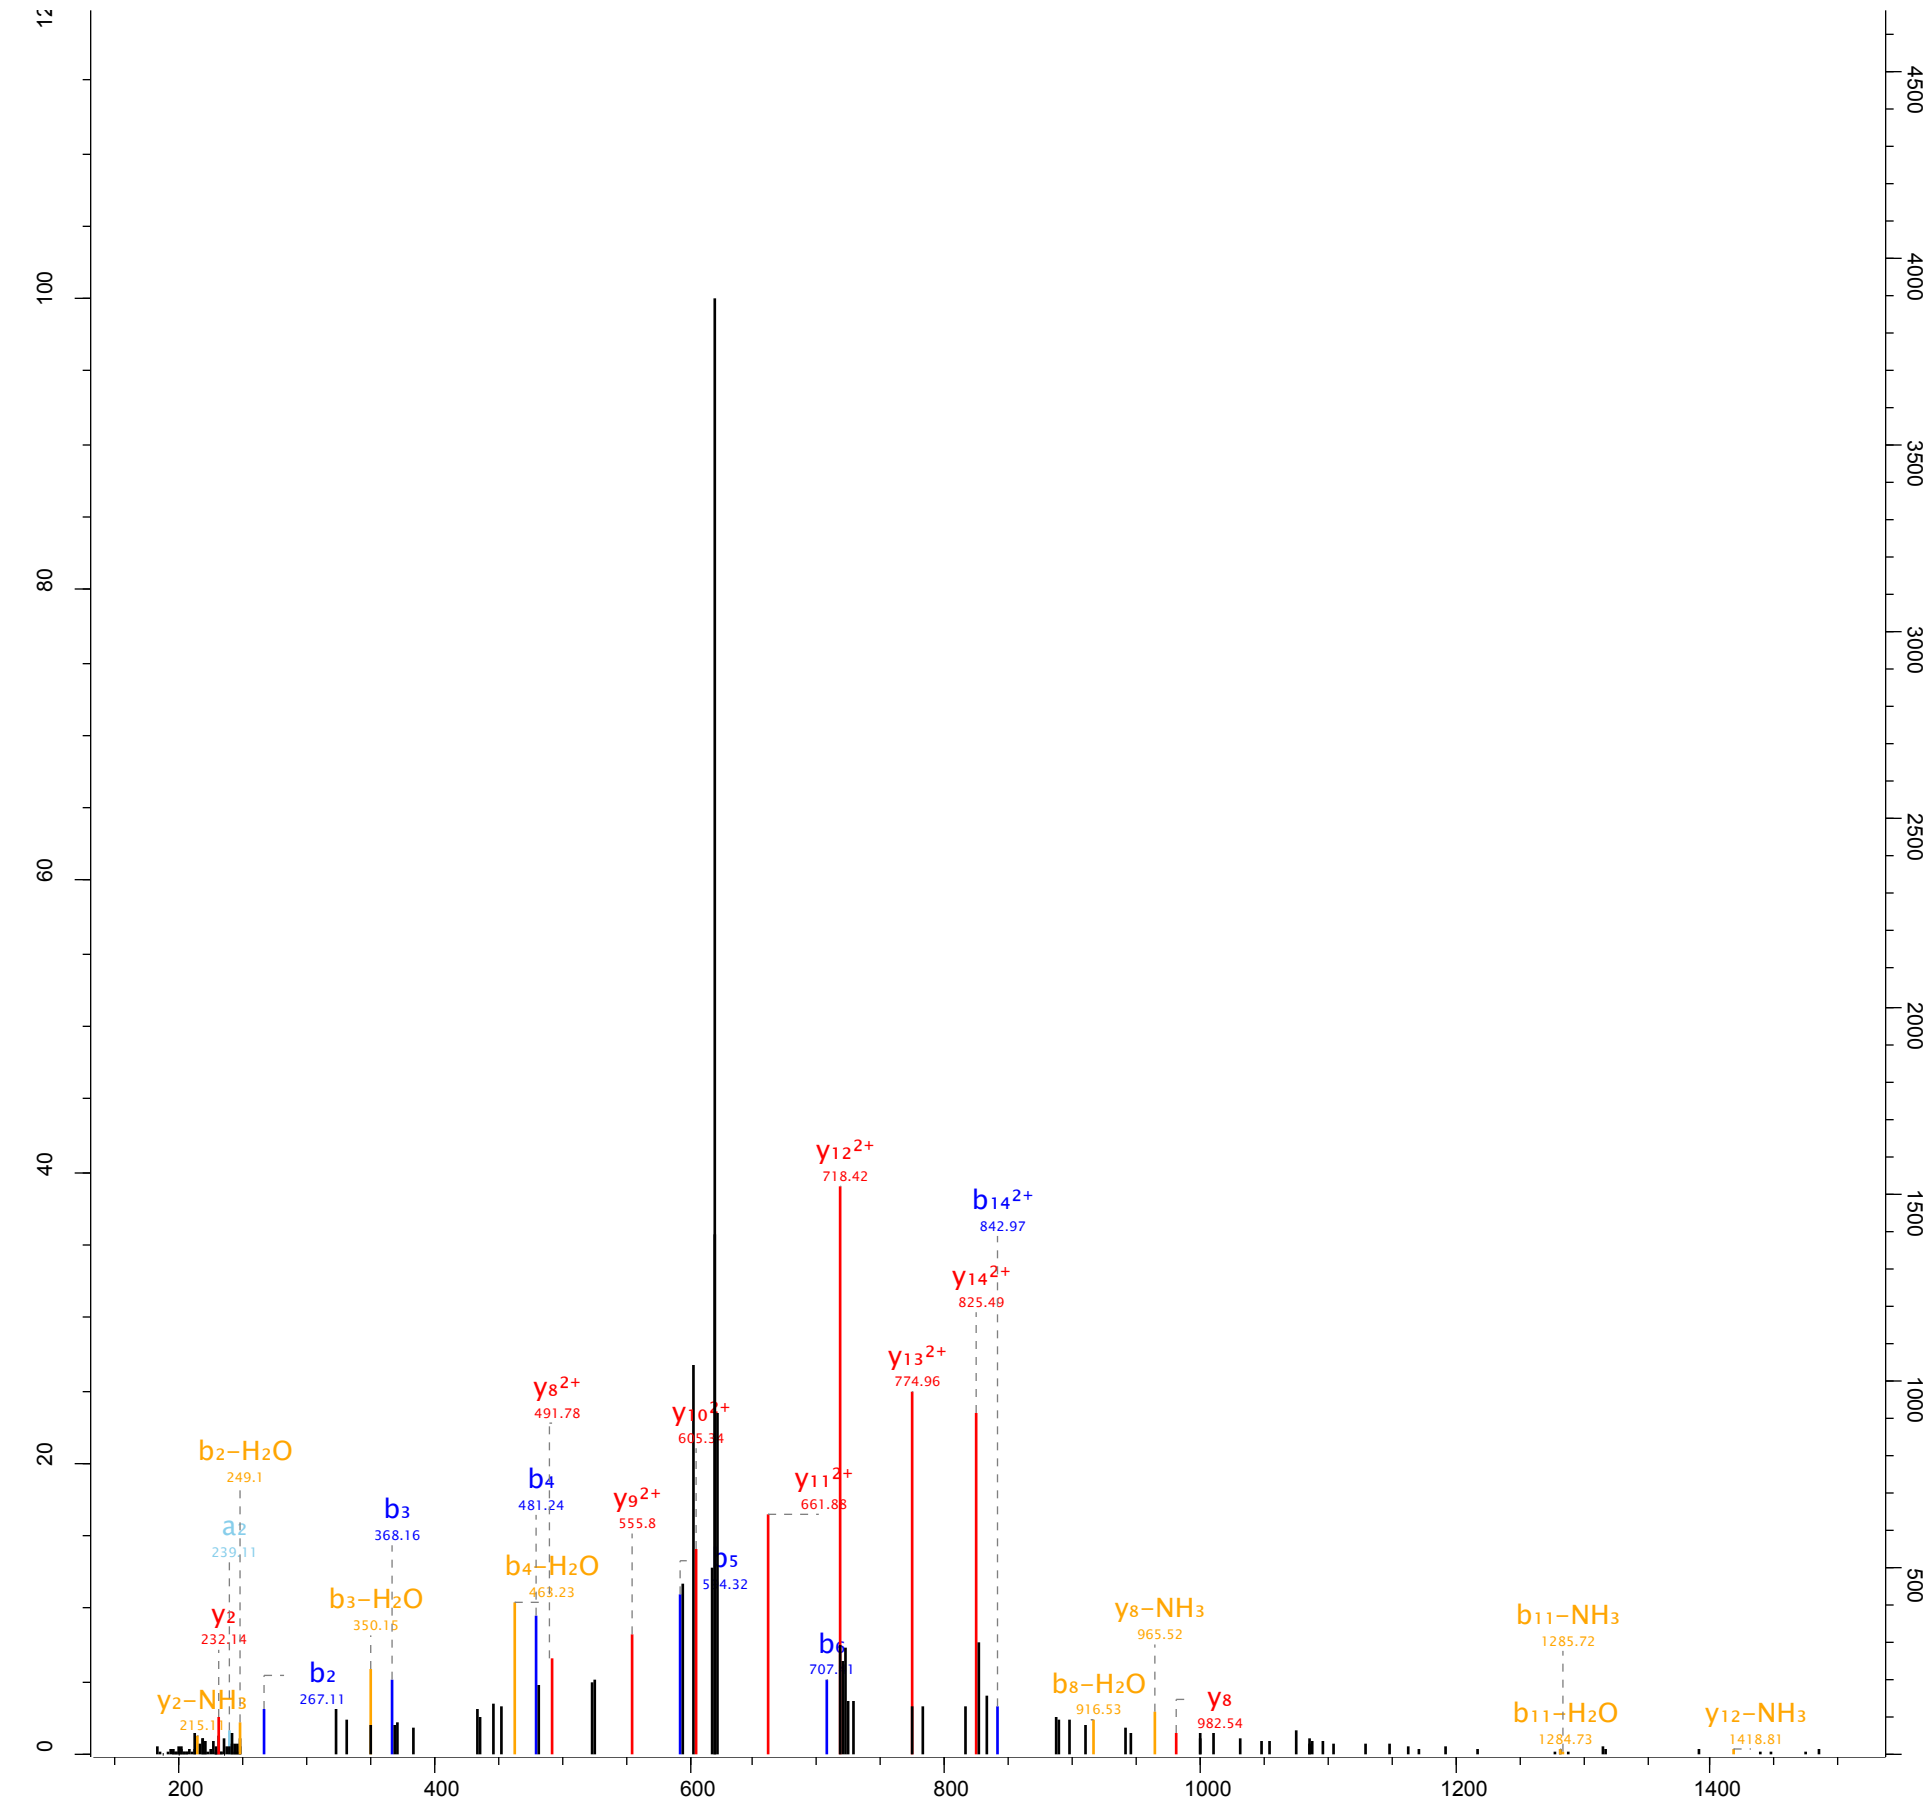

ac - S H T I L L V Q P T K R P E G R -

Fragmentation labels below the sequence:

- ac - S
- b<sub>2</sub> - H
- b<sub>3</sub> - T
- b<sub>4</sub> - I
- b<sub>5</sub> - L
- b<sub>6</sub> - L
- y<sub>14</sub><sup>2+</sup> - T
- y<sub>13</sub><sup>2+</sup> - I
- y<sub>12</sub><sup>2+</sup> - L
- y<sub>11</sub><sup>2+</sup> - L
- y<sub>10</sub><sup>2+</sup> - V
- y<sub>9</sub><sup>2+</sup> - Q
- y<sub>8</sub> - P
- ac - T
- b<sub>14</sub><sup>2+</sup> - E
- y<sub>2</sub> - G
- R -

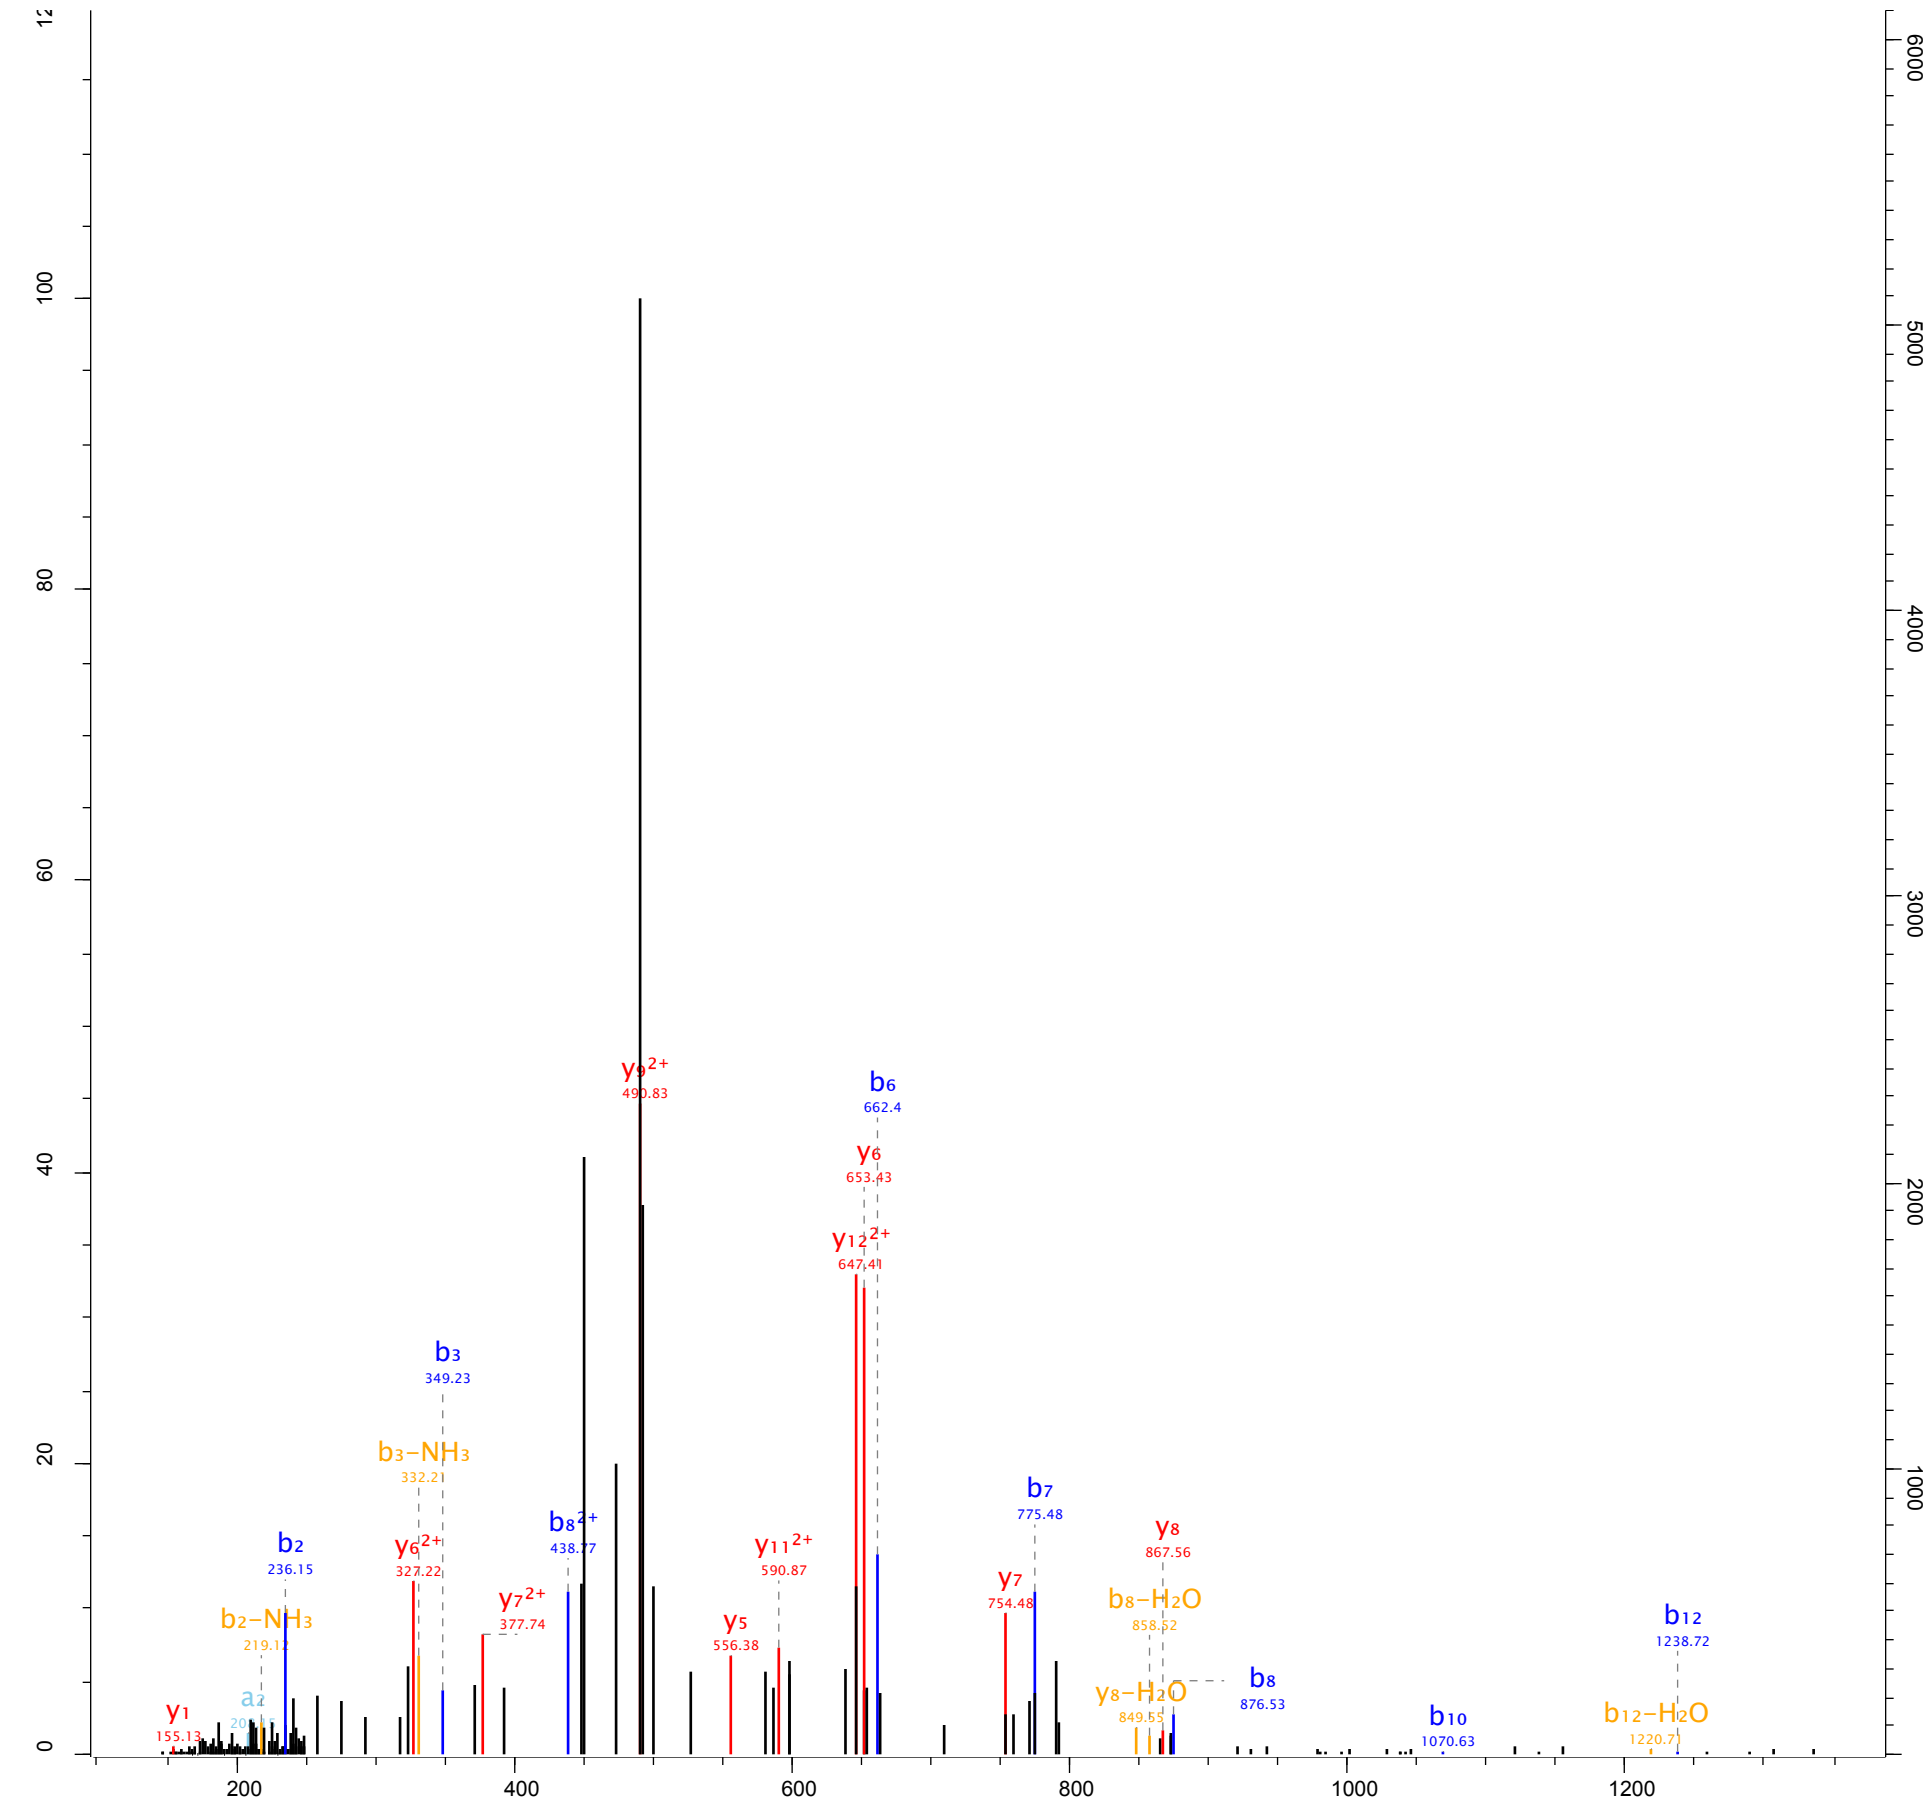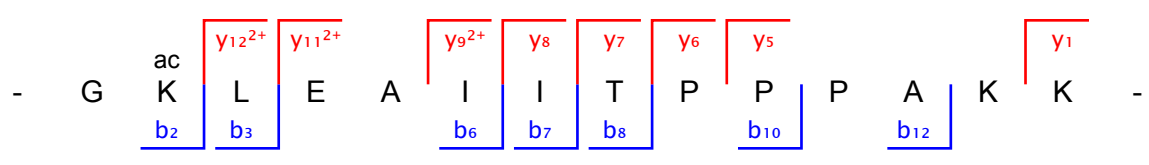

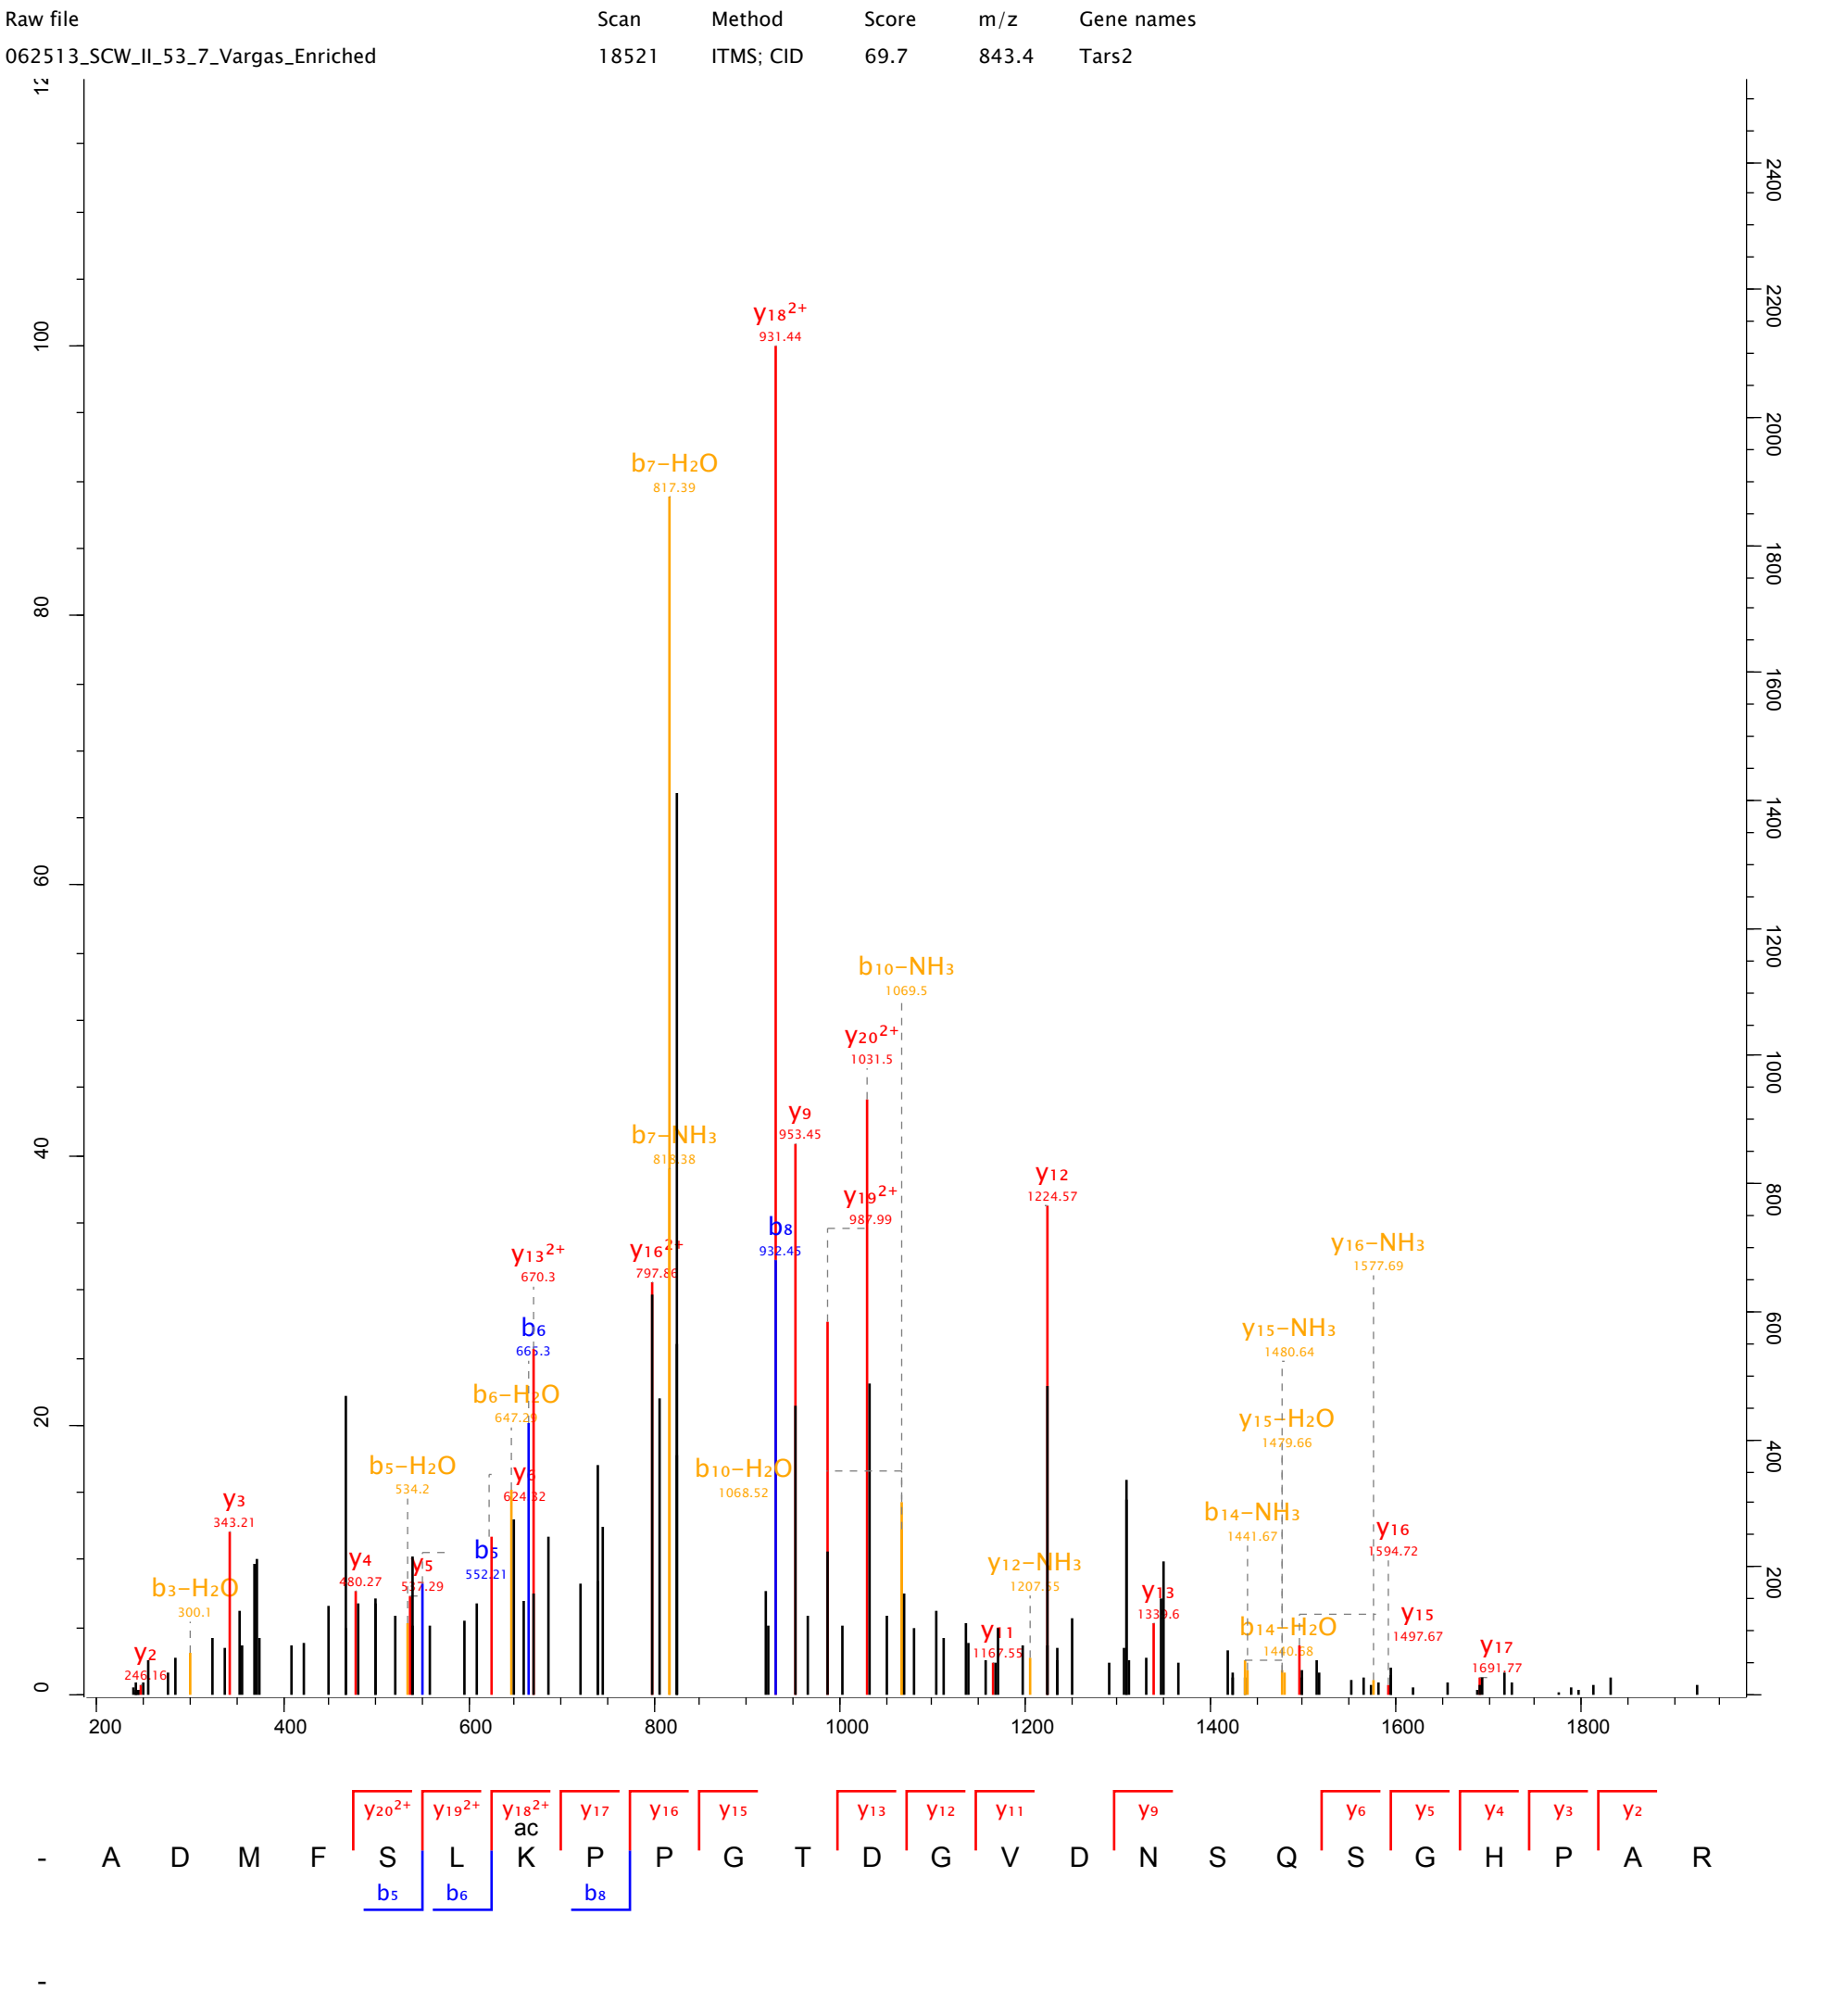



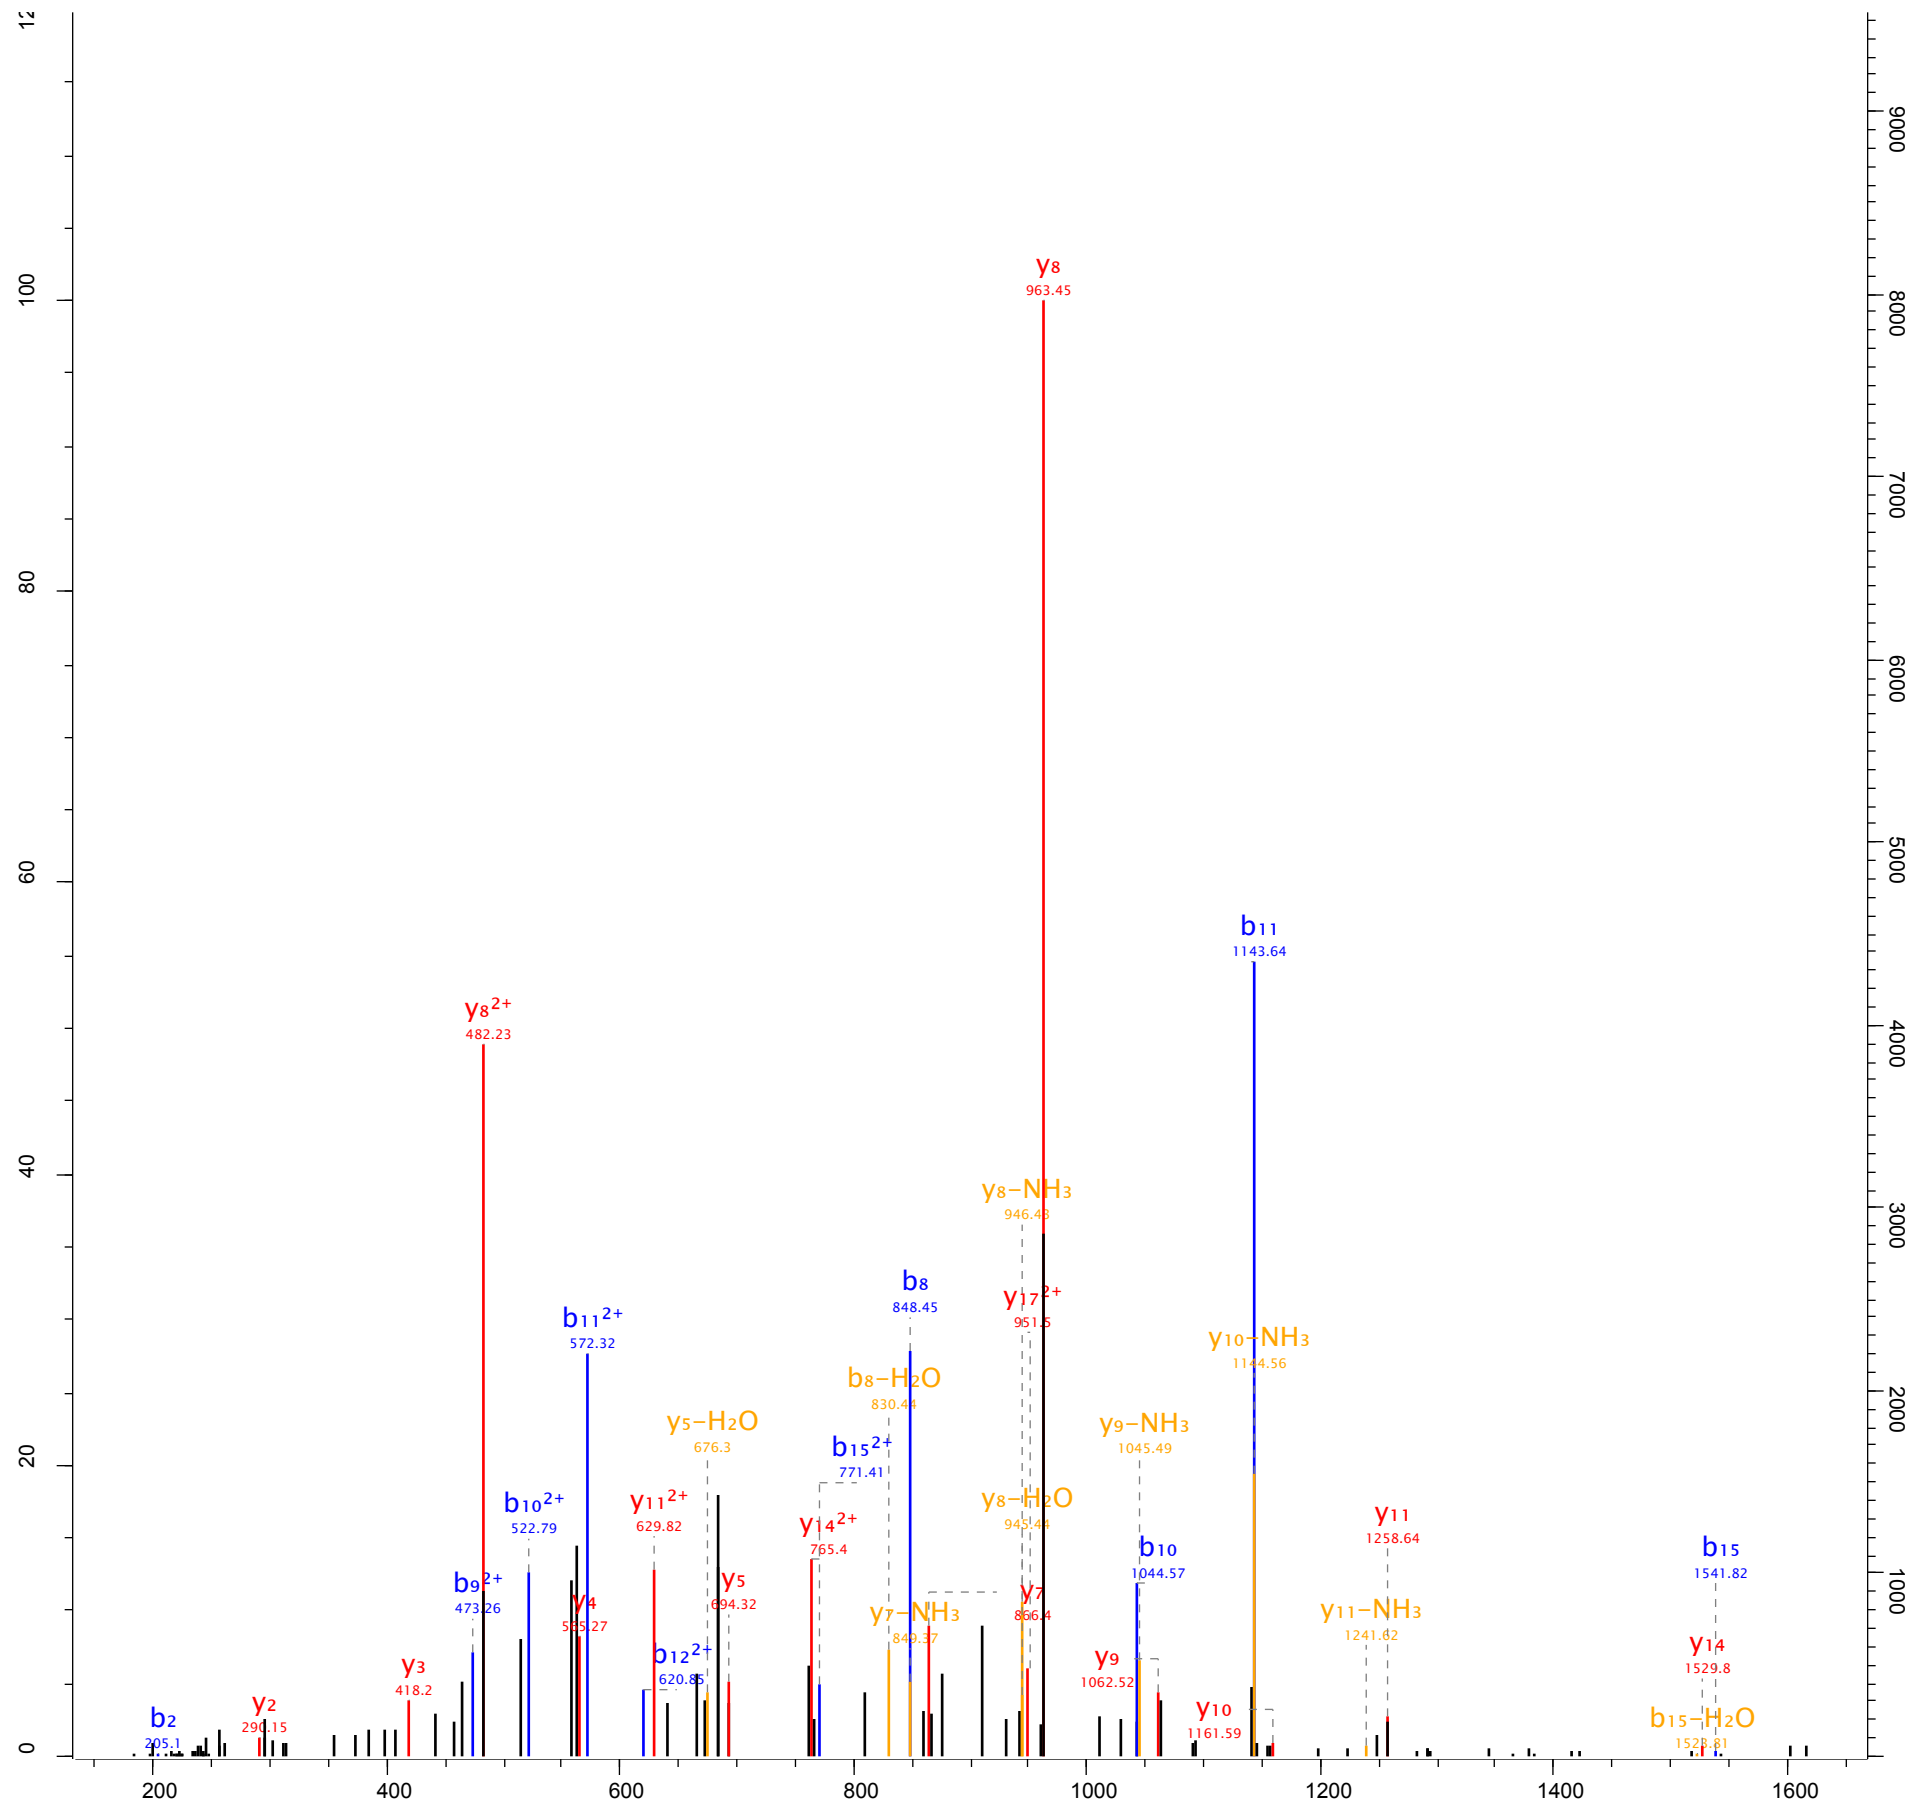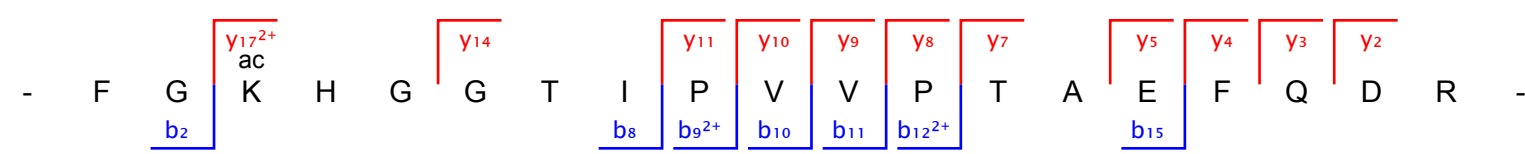

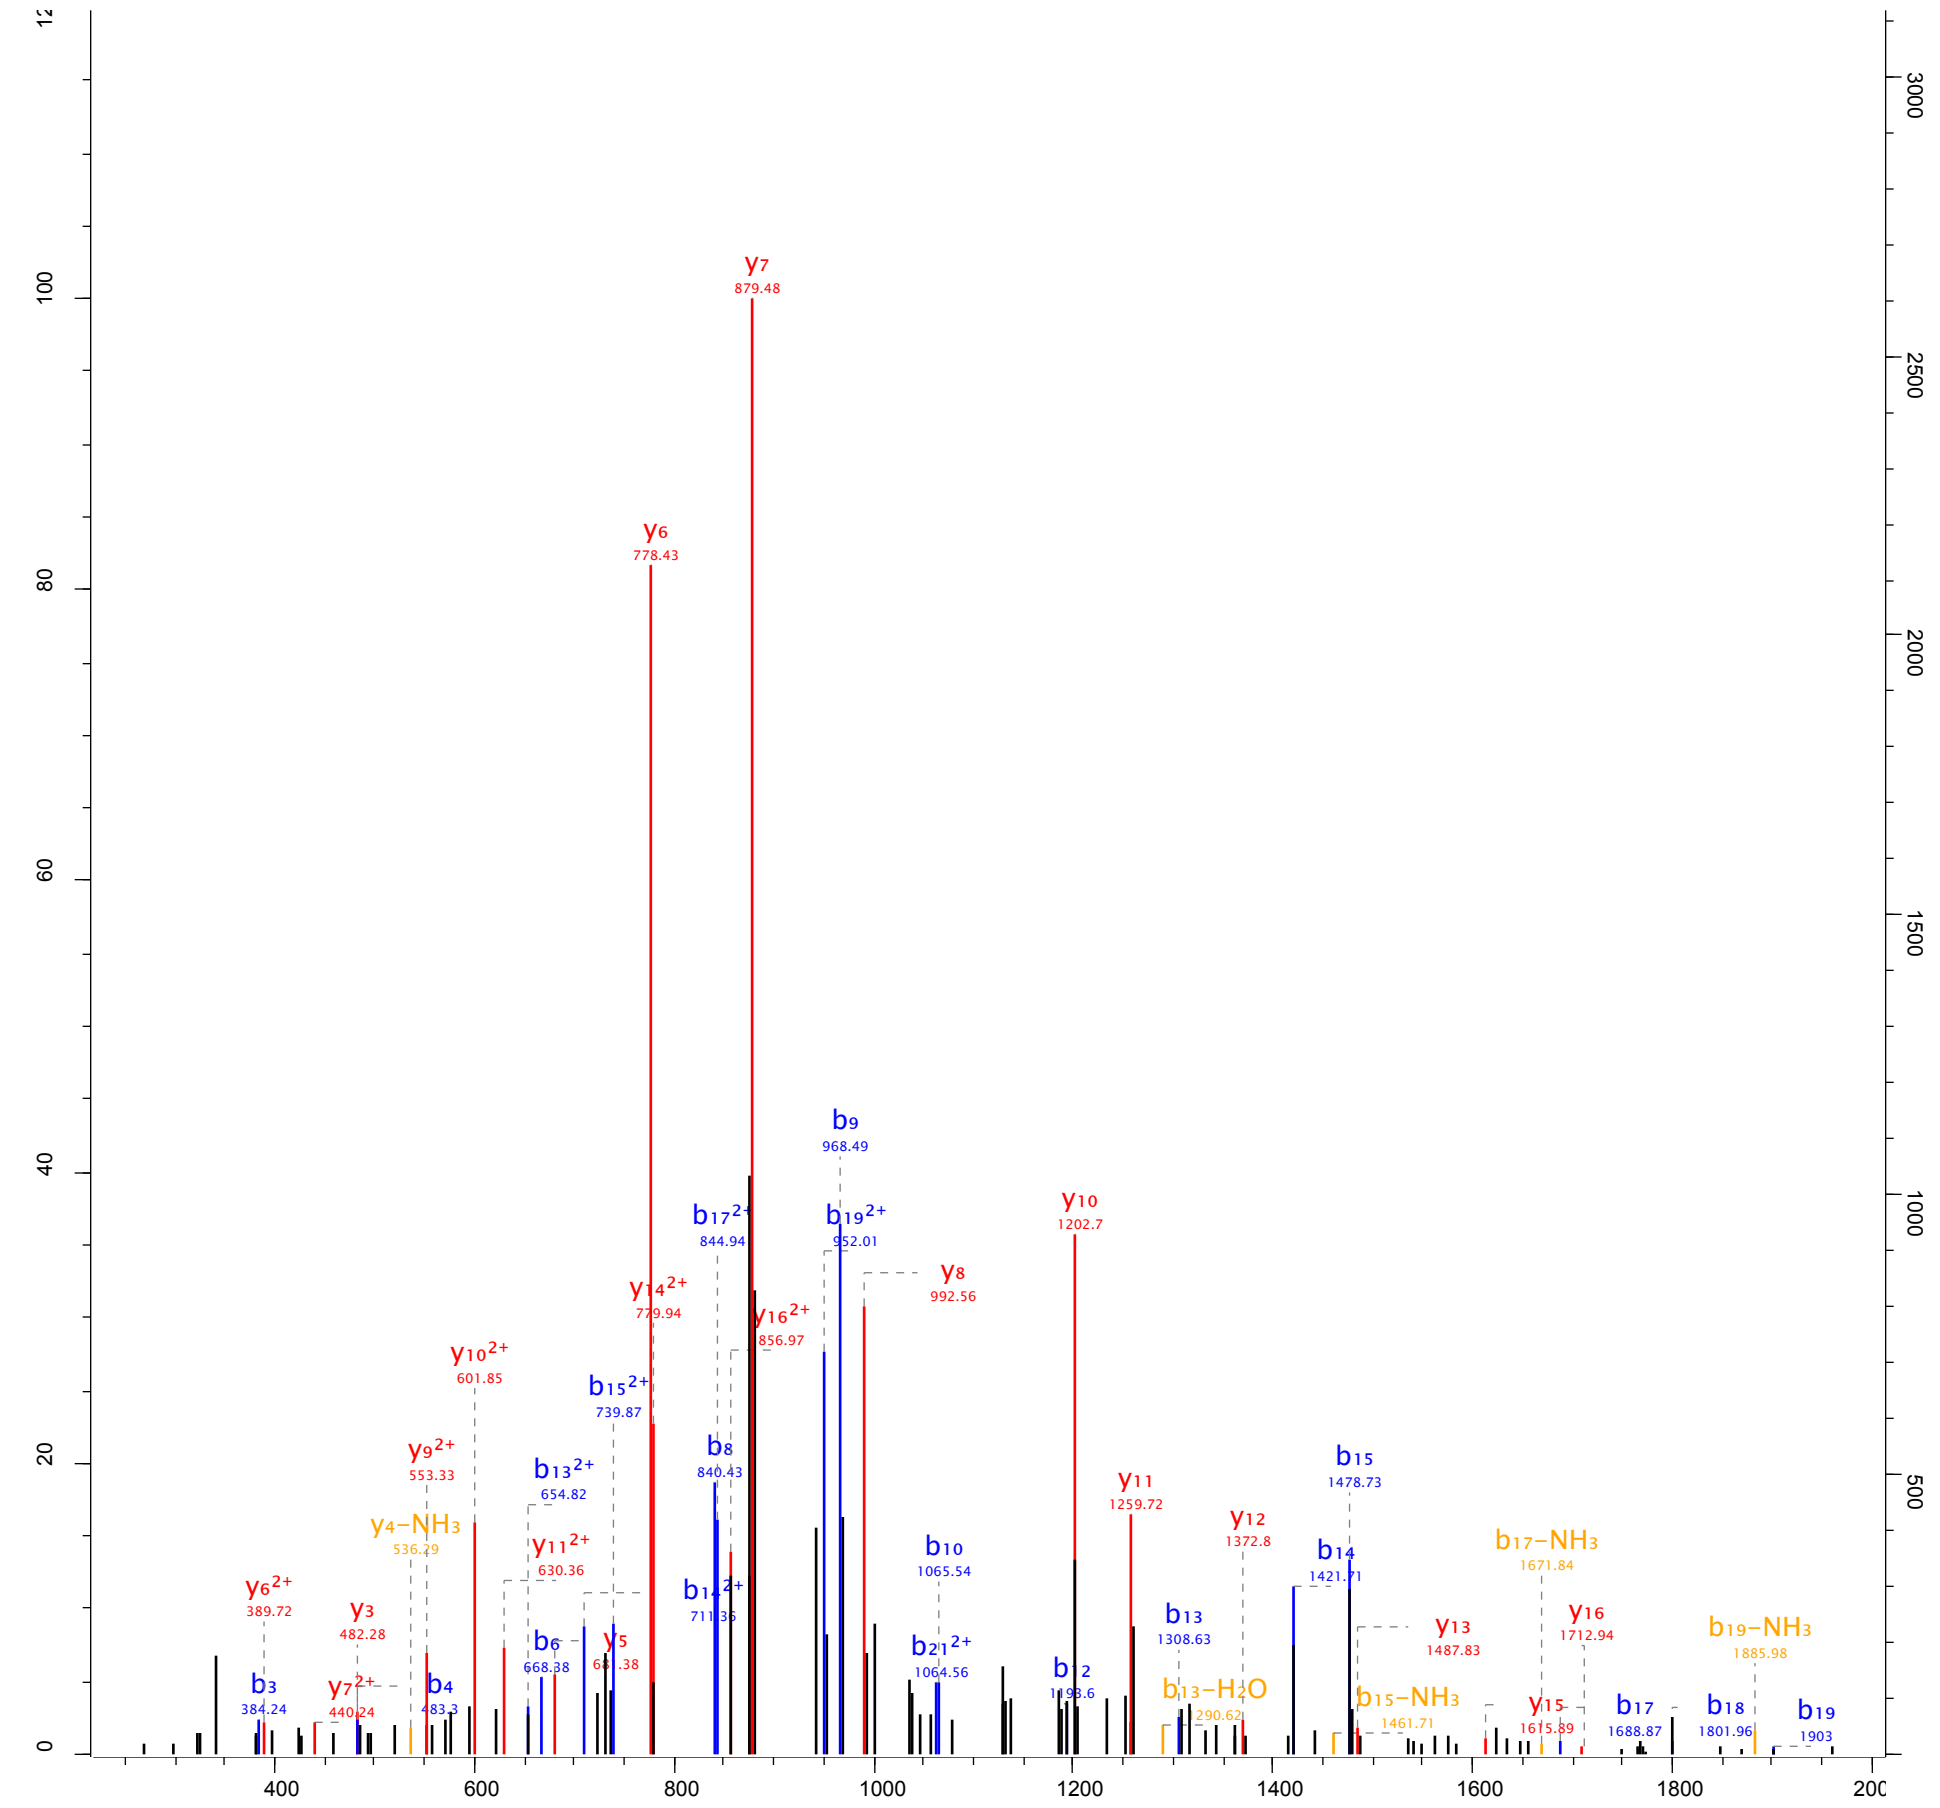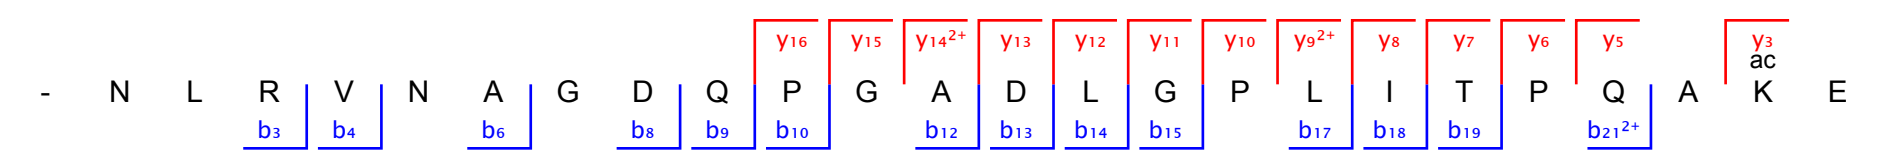

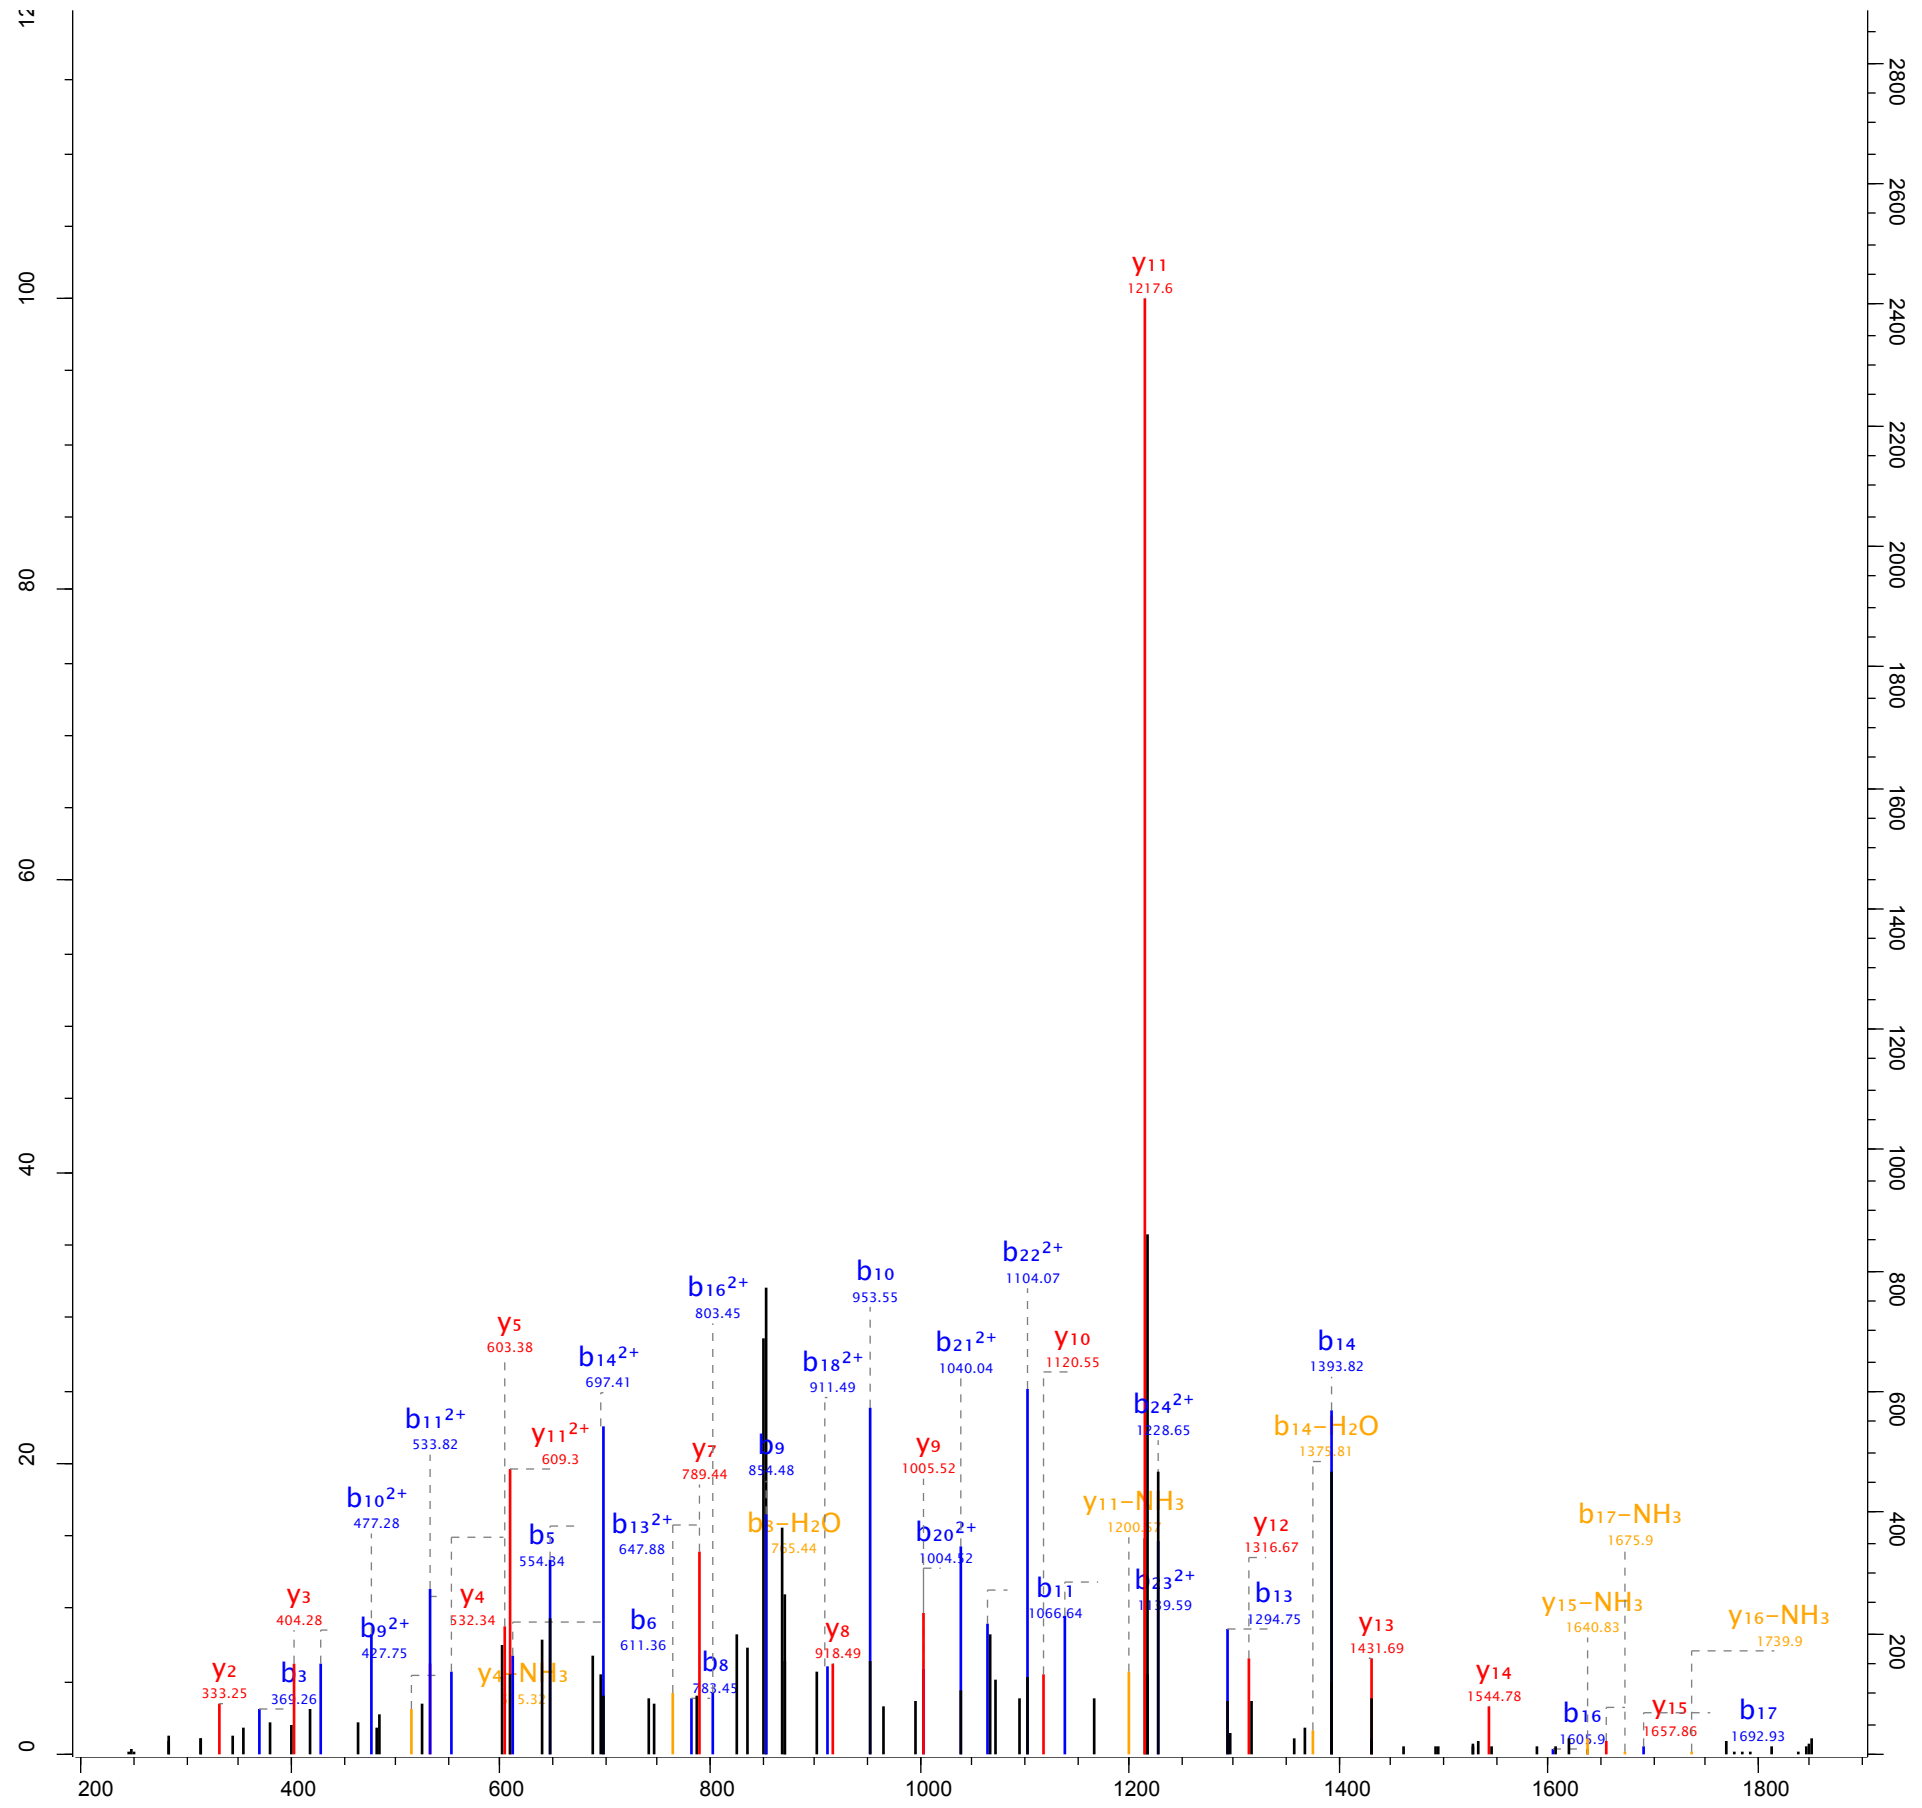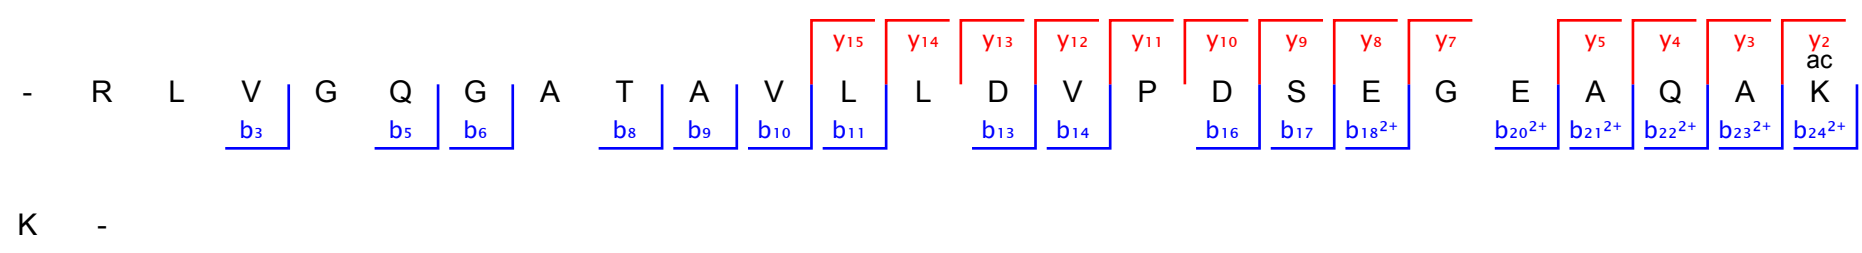

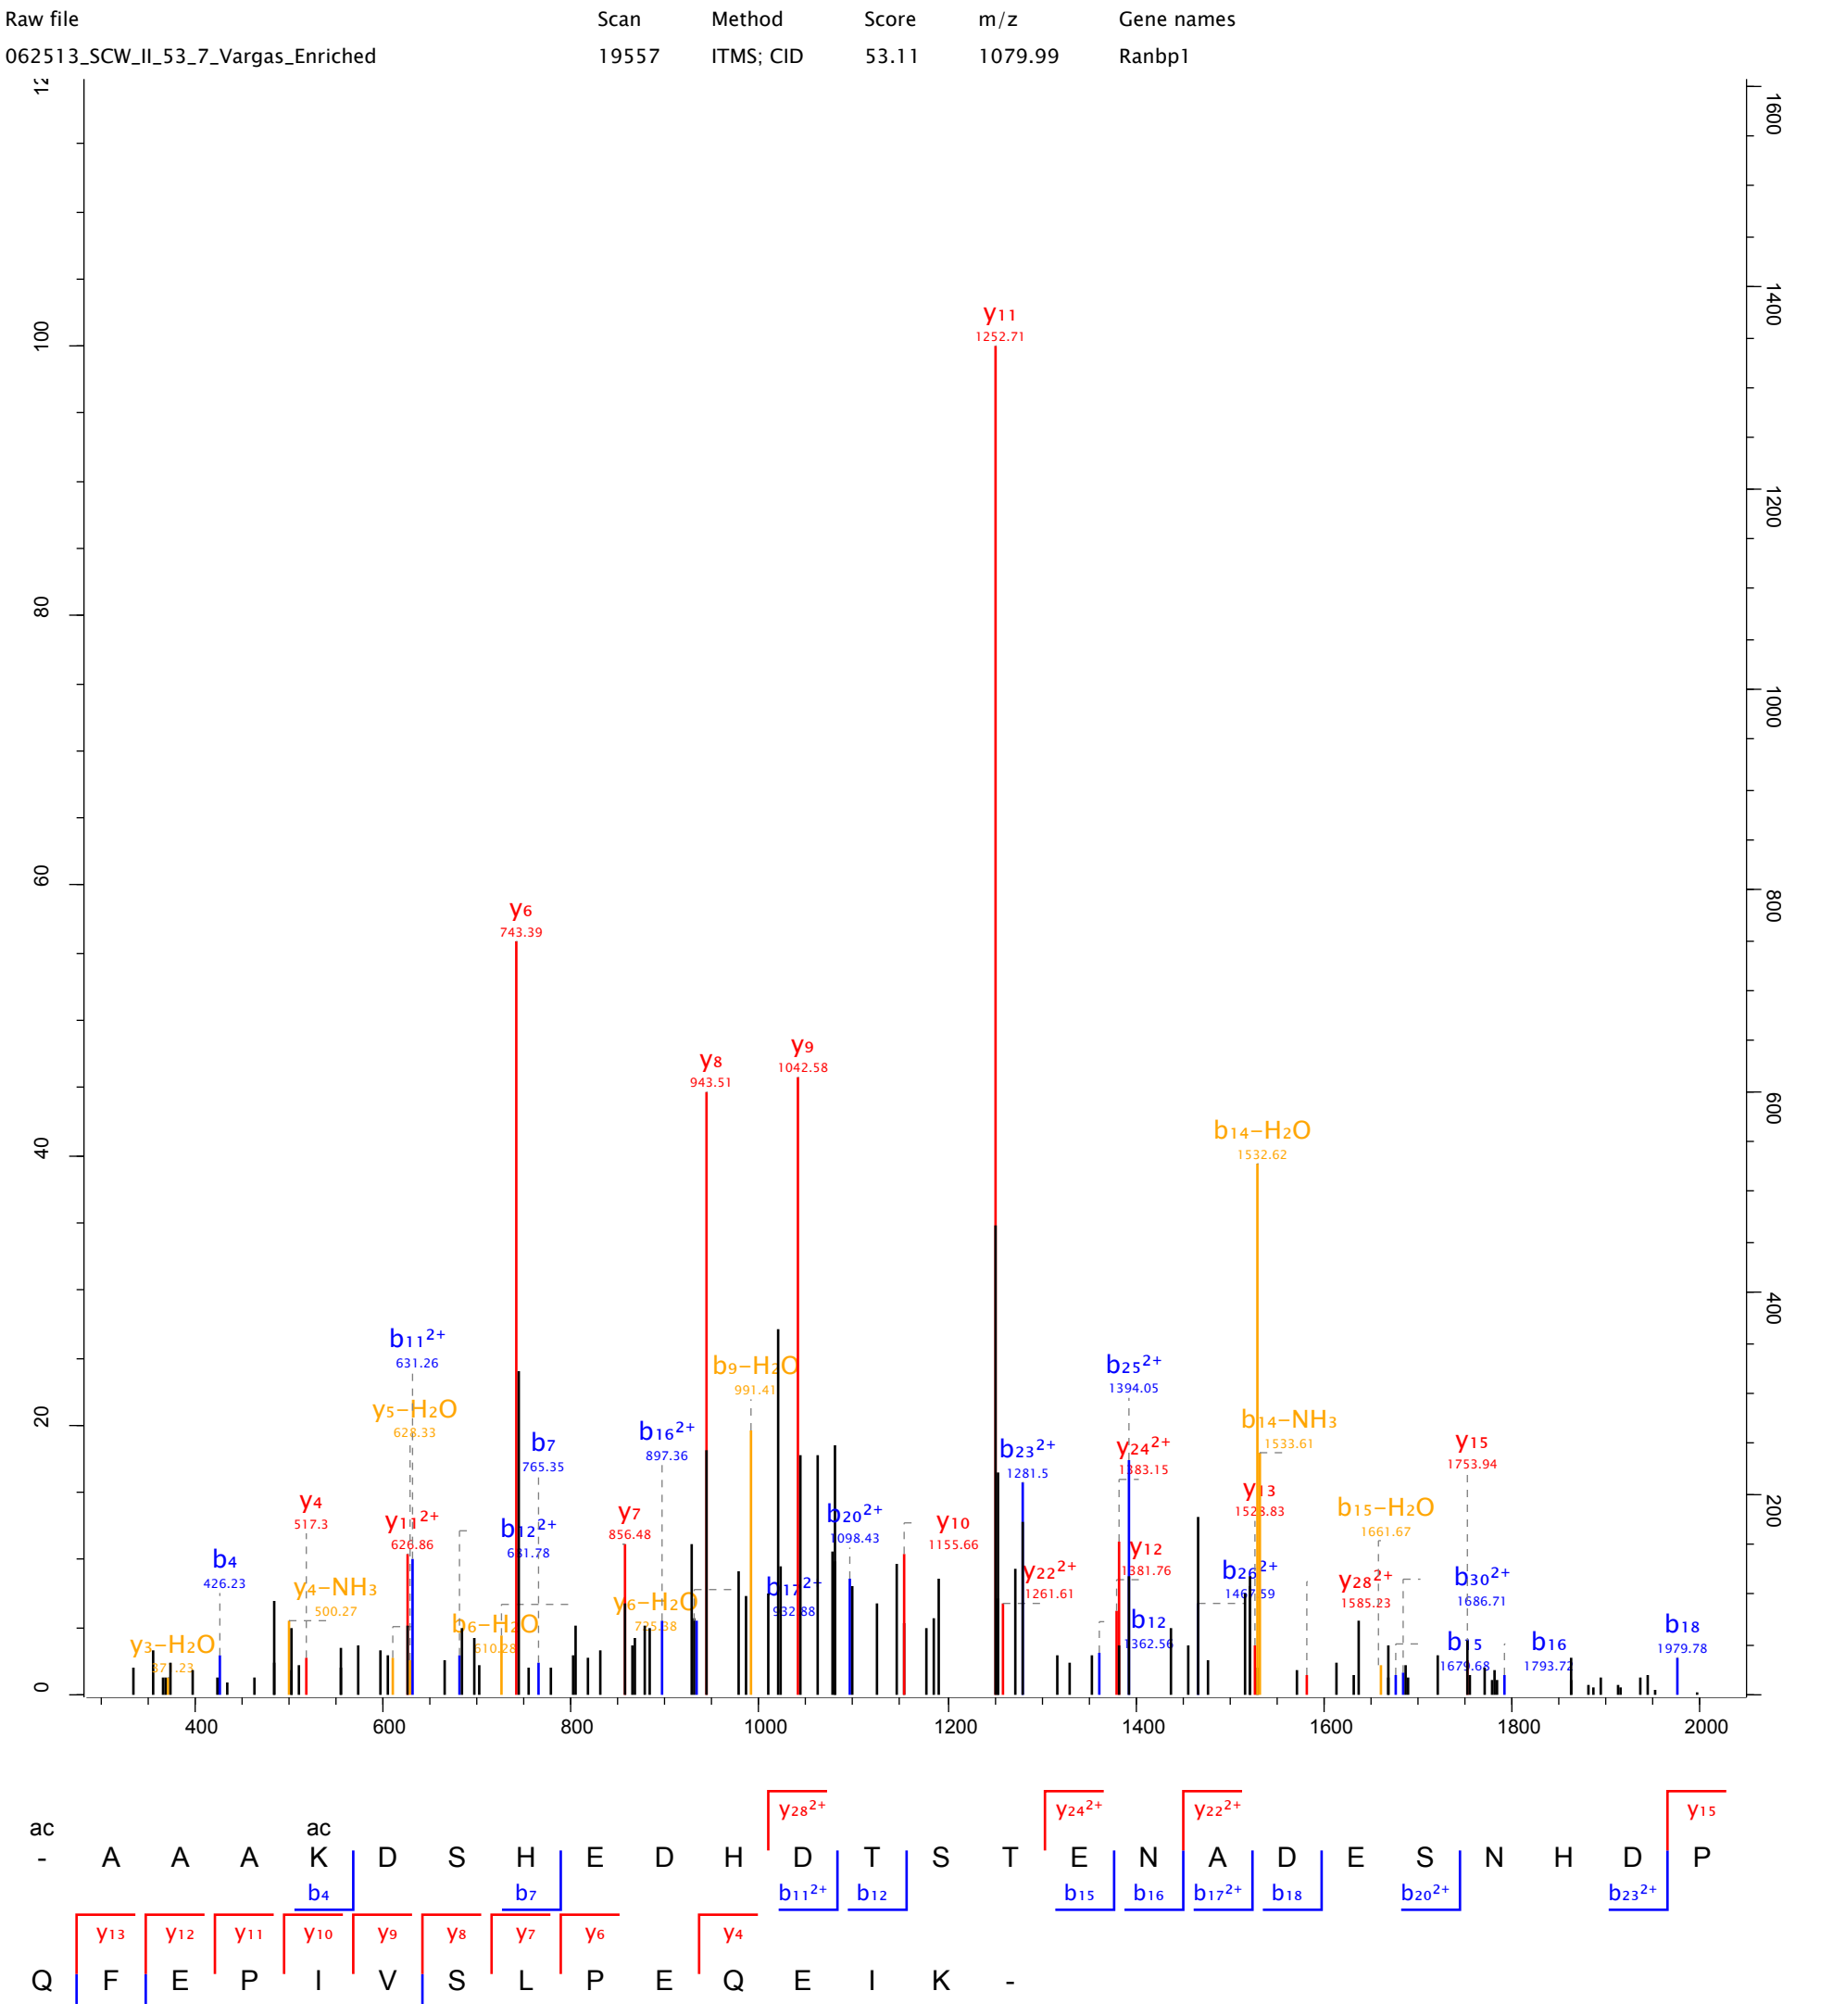

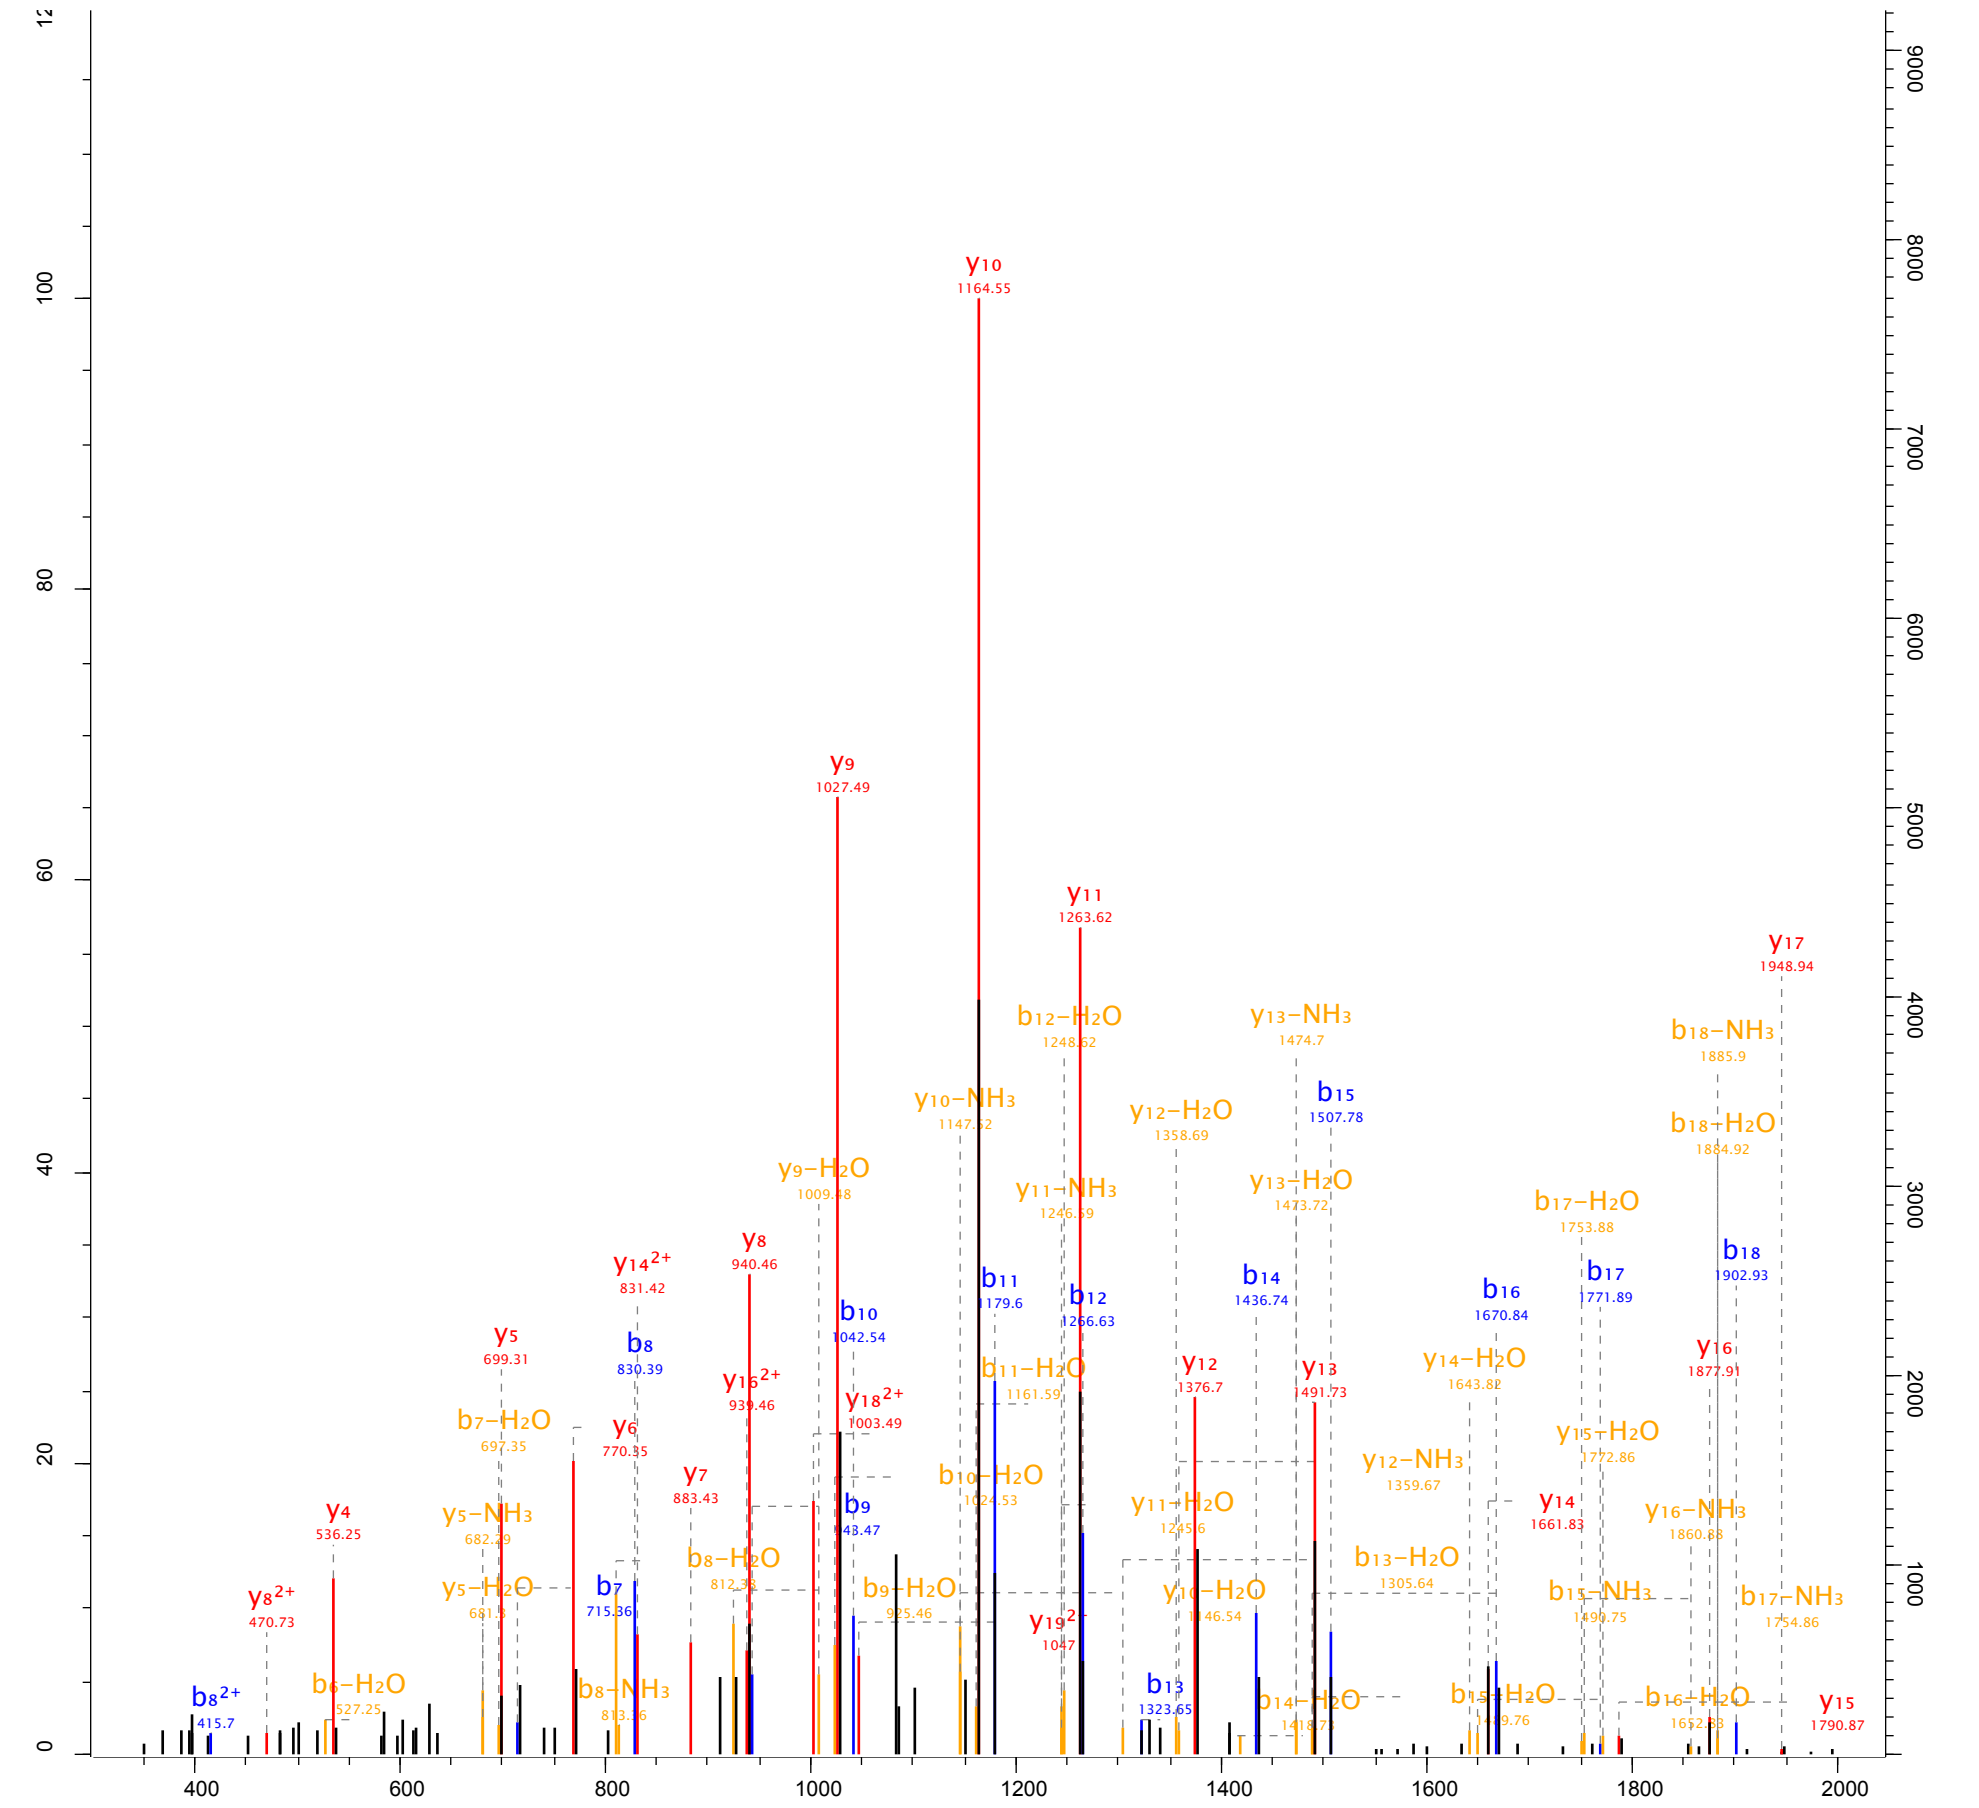

- I S G A S E K D I V H S G L A Y T M E R -

y19<sup>2+</sup>
y18<sup>2+</sup>
y17
y16
y15
y14
y13
y12
y11
y10
y9
y8
y7
y6
y5
y4

b7
b8
b9
b10
b11
b12
b13
b14
b15
b16
b17
b18

Raw file  
062513\_SCW\_II\_53\_7\_Vargas\_Enriched

Scan Method Score m/z Gene names  
19717 ITMS; CID 146.13 893.76 Sptbn1

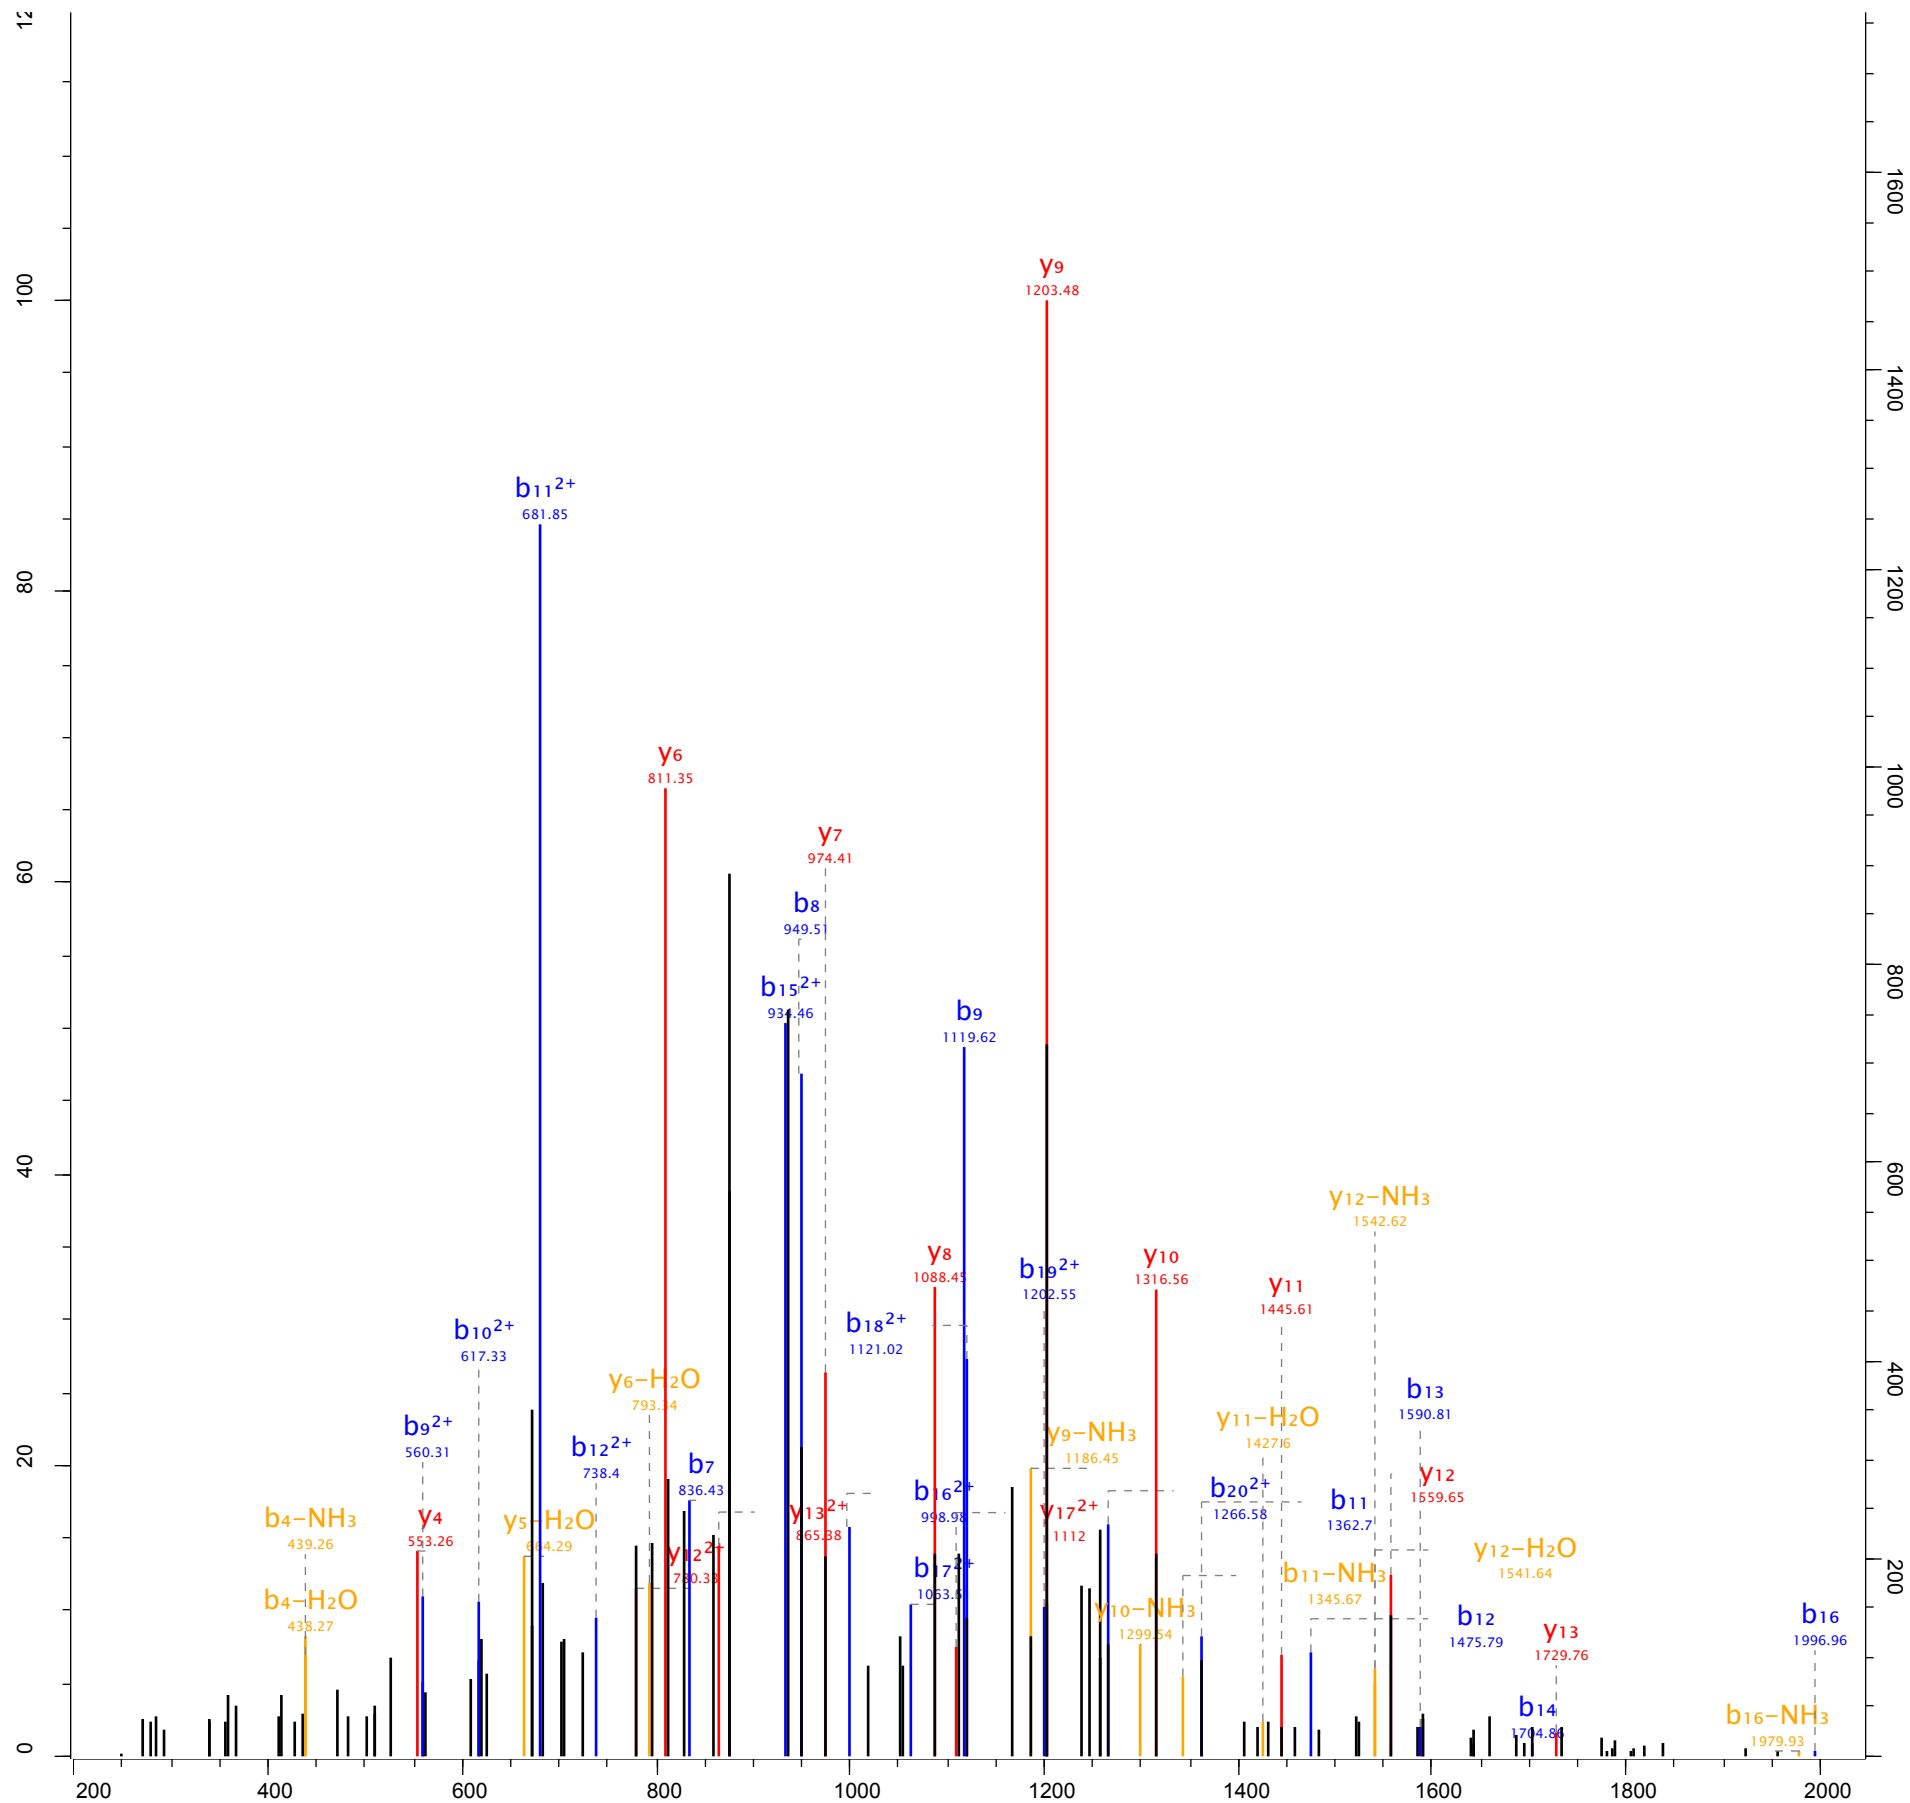

- L L T Q H E N I K N E I D N Y E E D Y Q K -

Fragmentation labels below the sequence:  
- b7 b8 b9 b10<sup>2+</sup> b11 b12 b13 b14 b15<sup>2+</sup> b16 b17<sup>2+</sup> b18<sup>2+</sup> b19<sup>2+</sup> b20<sup>2+</sup> -

Fragmentation labels above the sequence:  
- y17<sup>2+</sup> y13 ac y12 y11 y10 y9 y8 y7 y6 y4 -

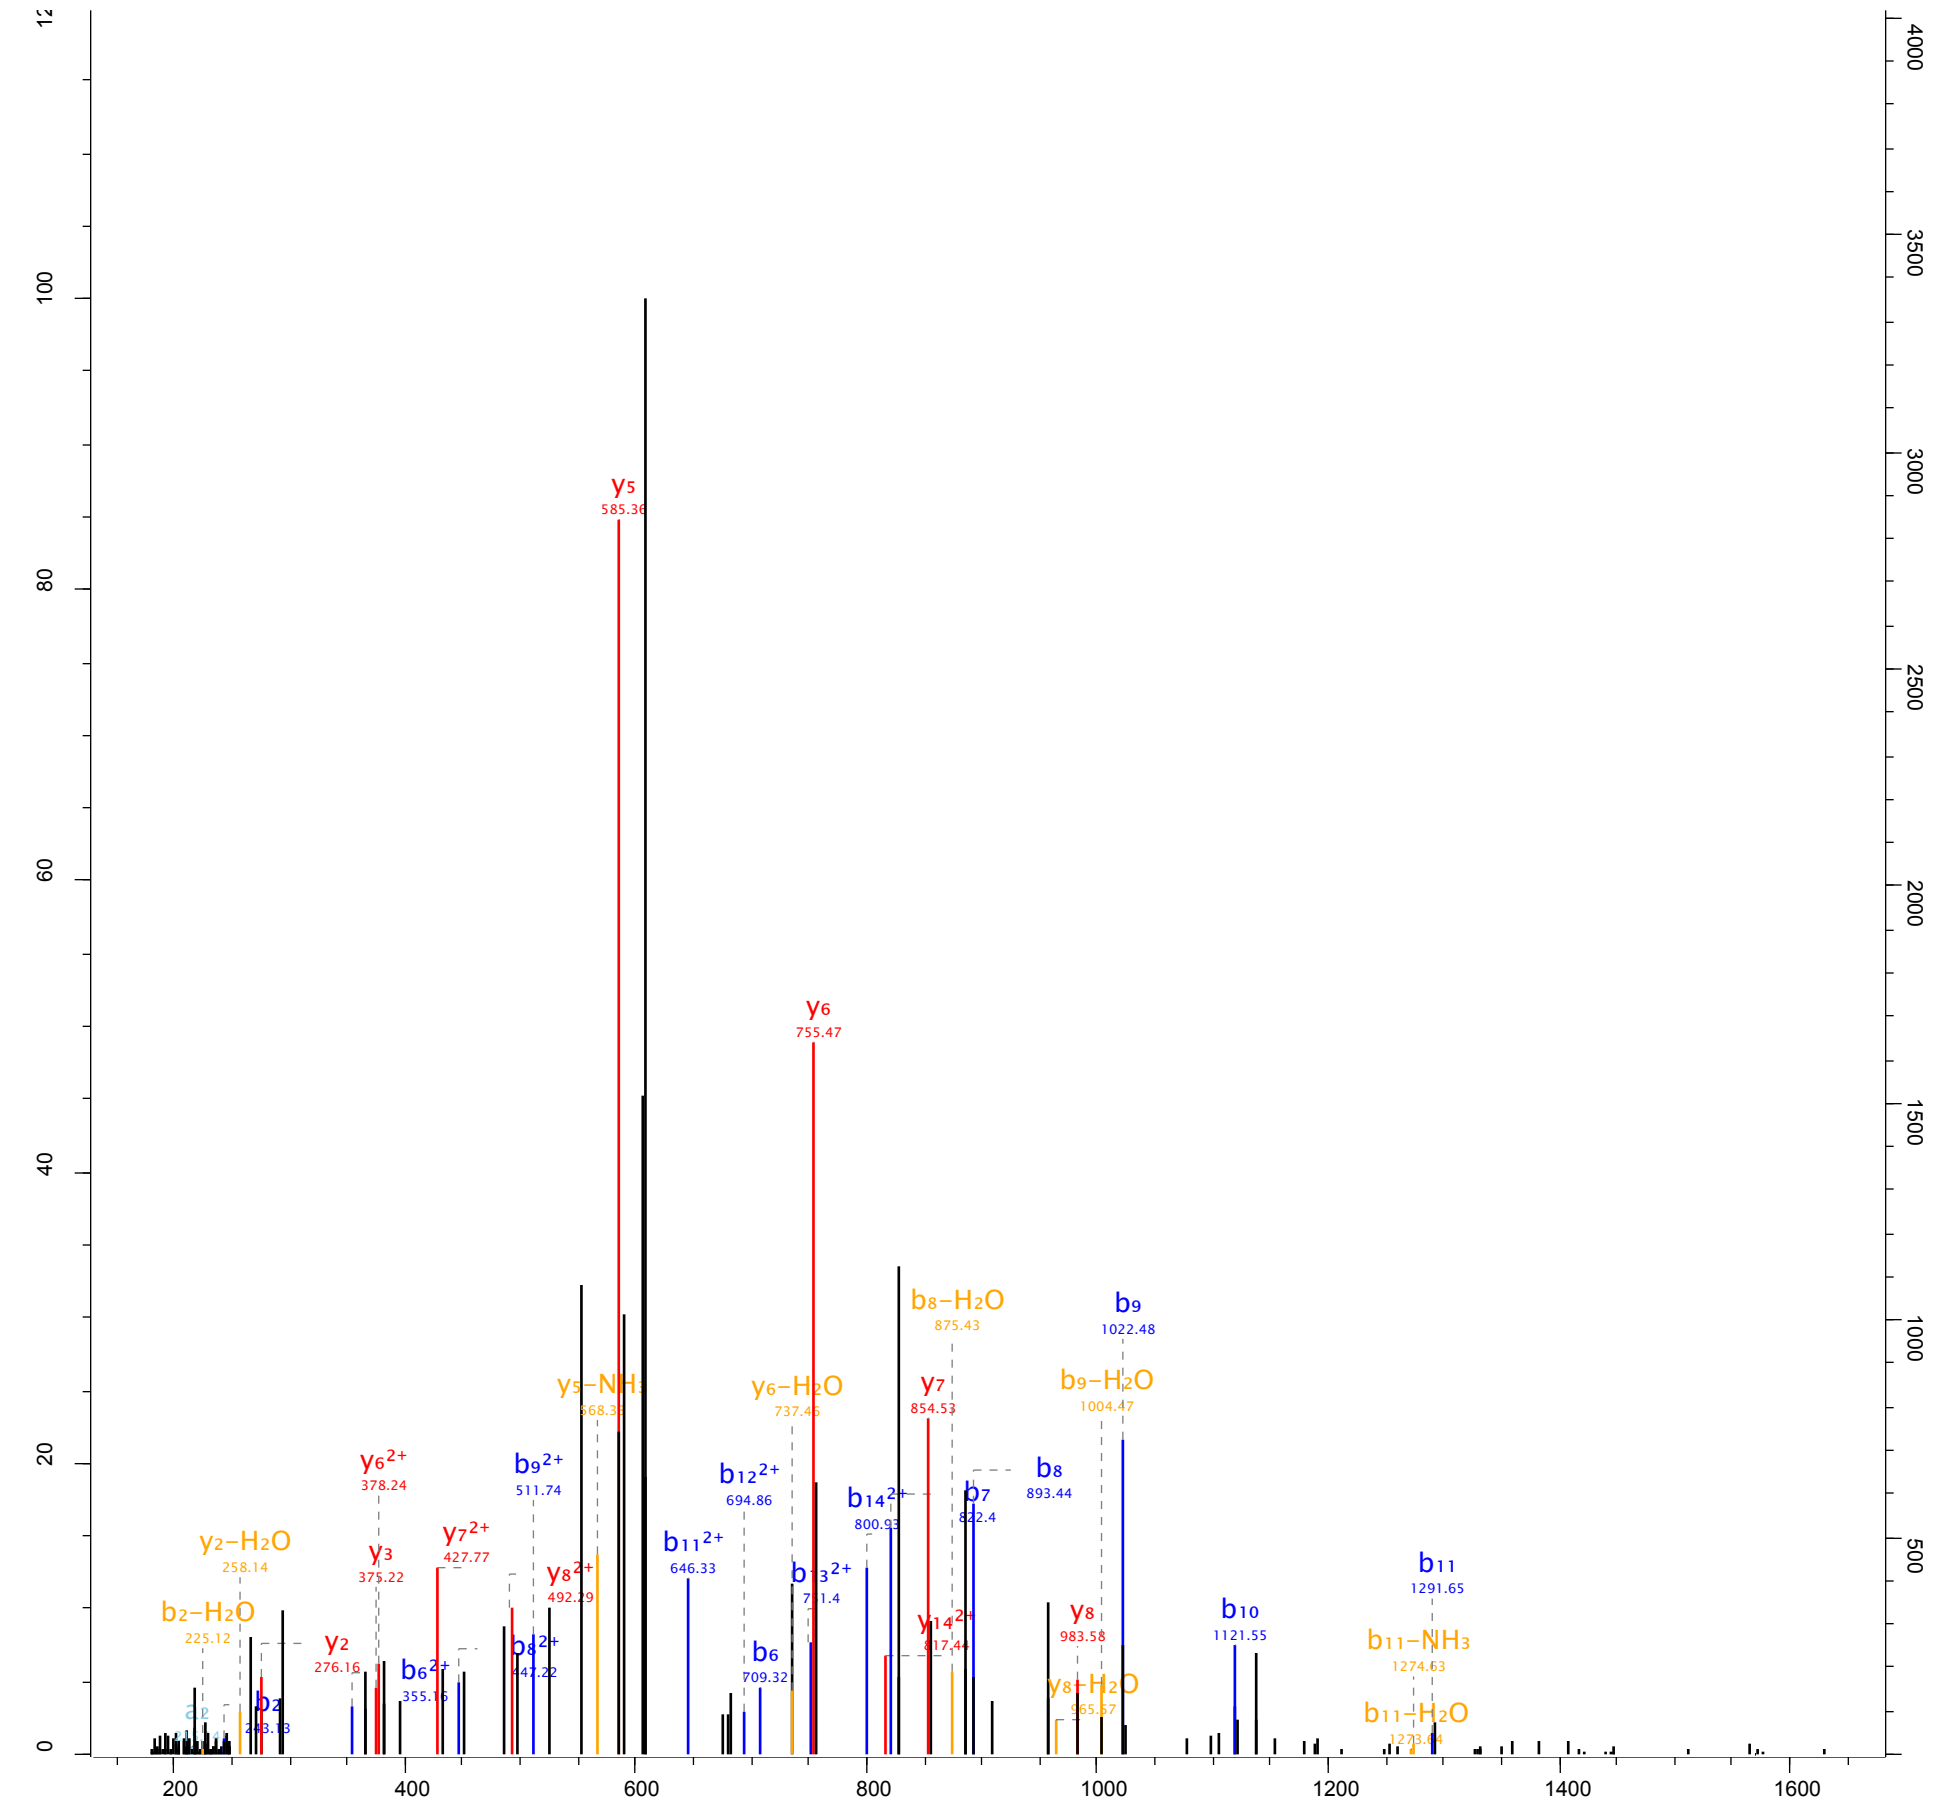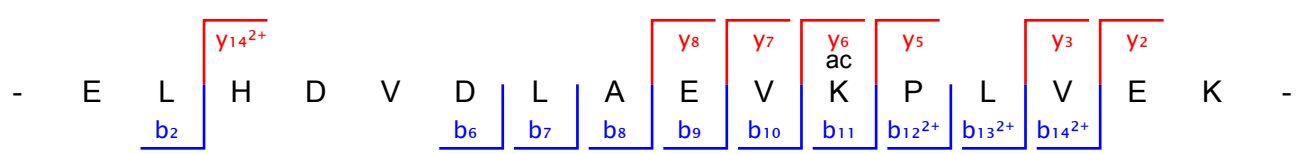

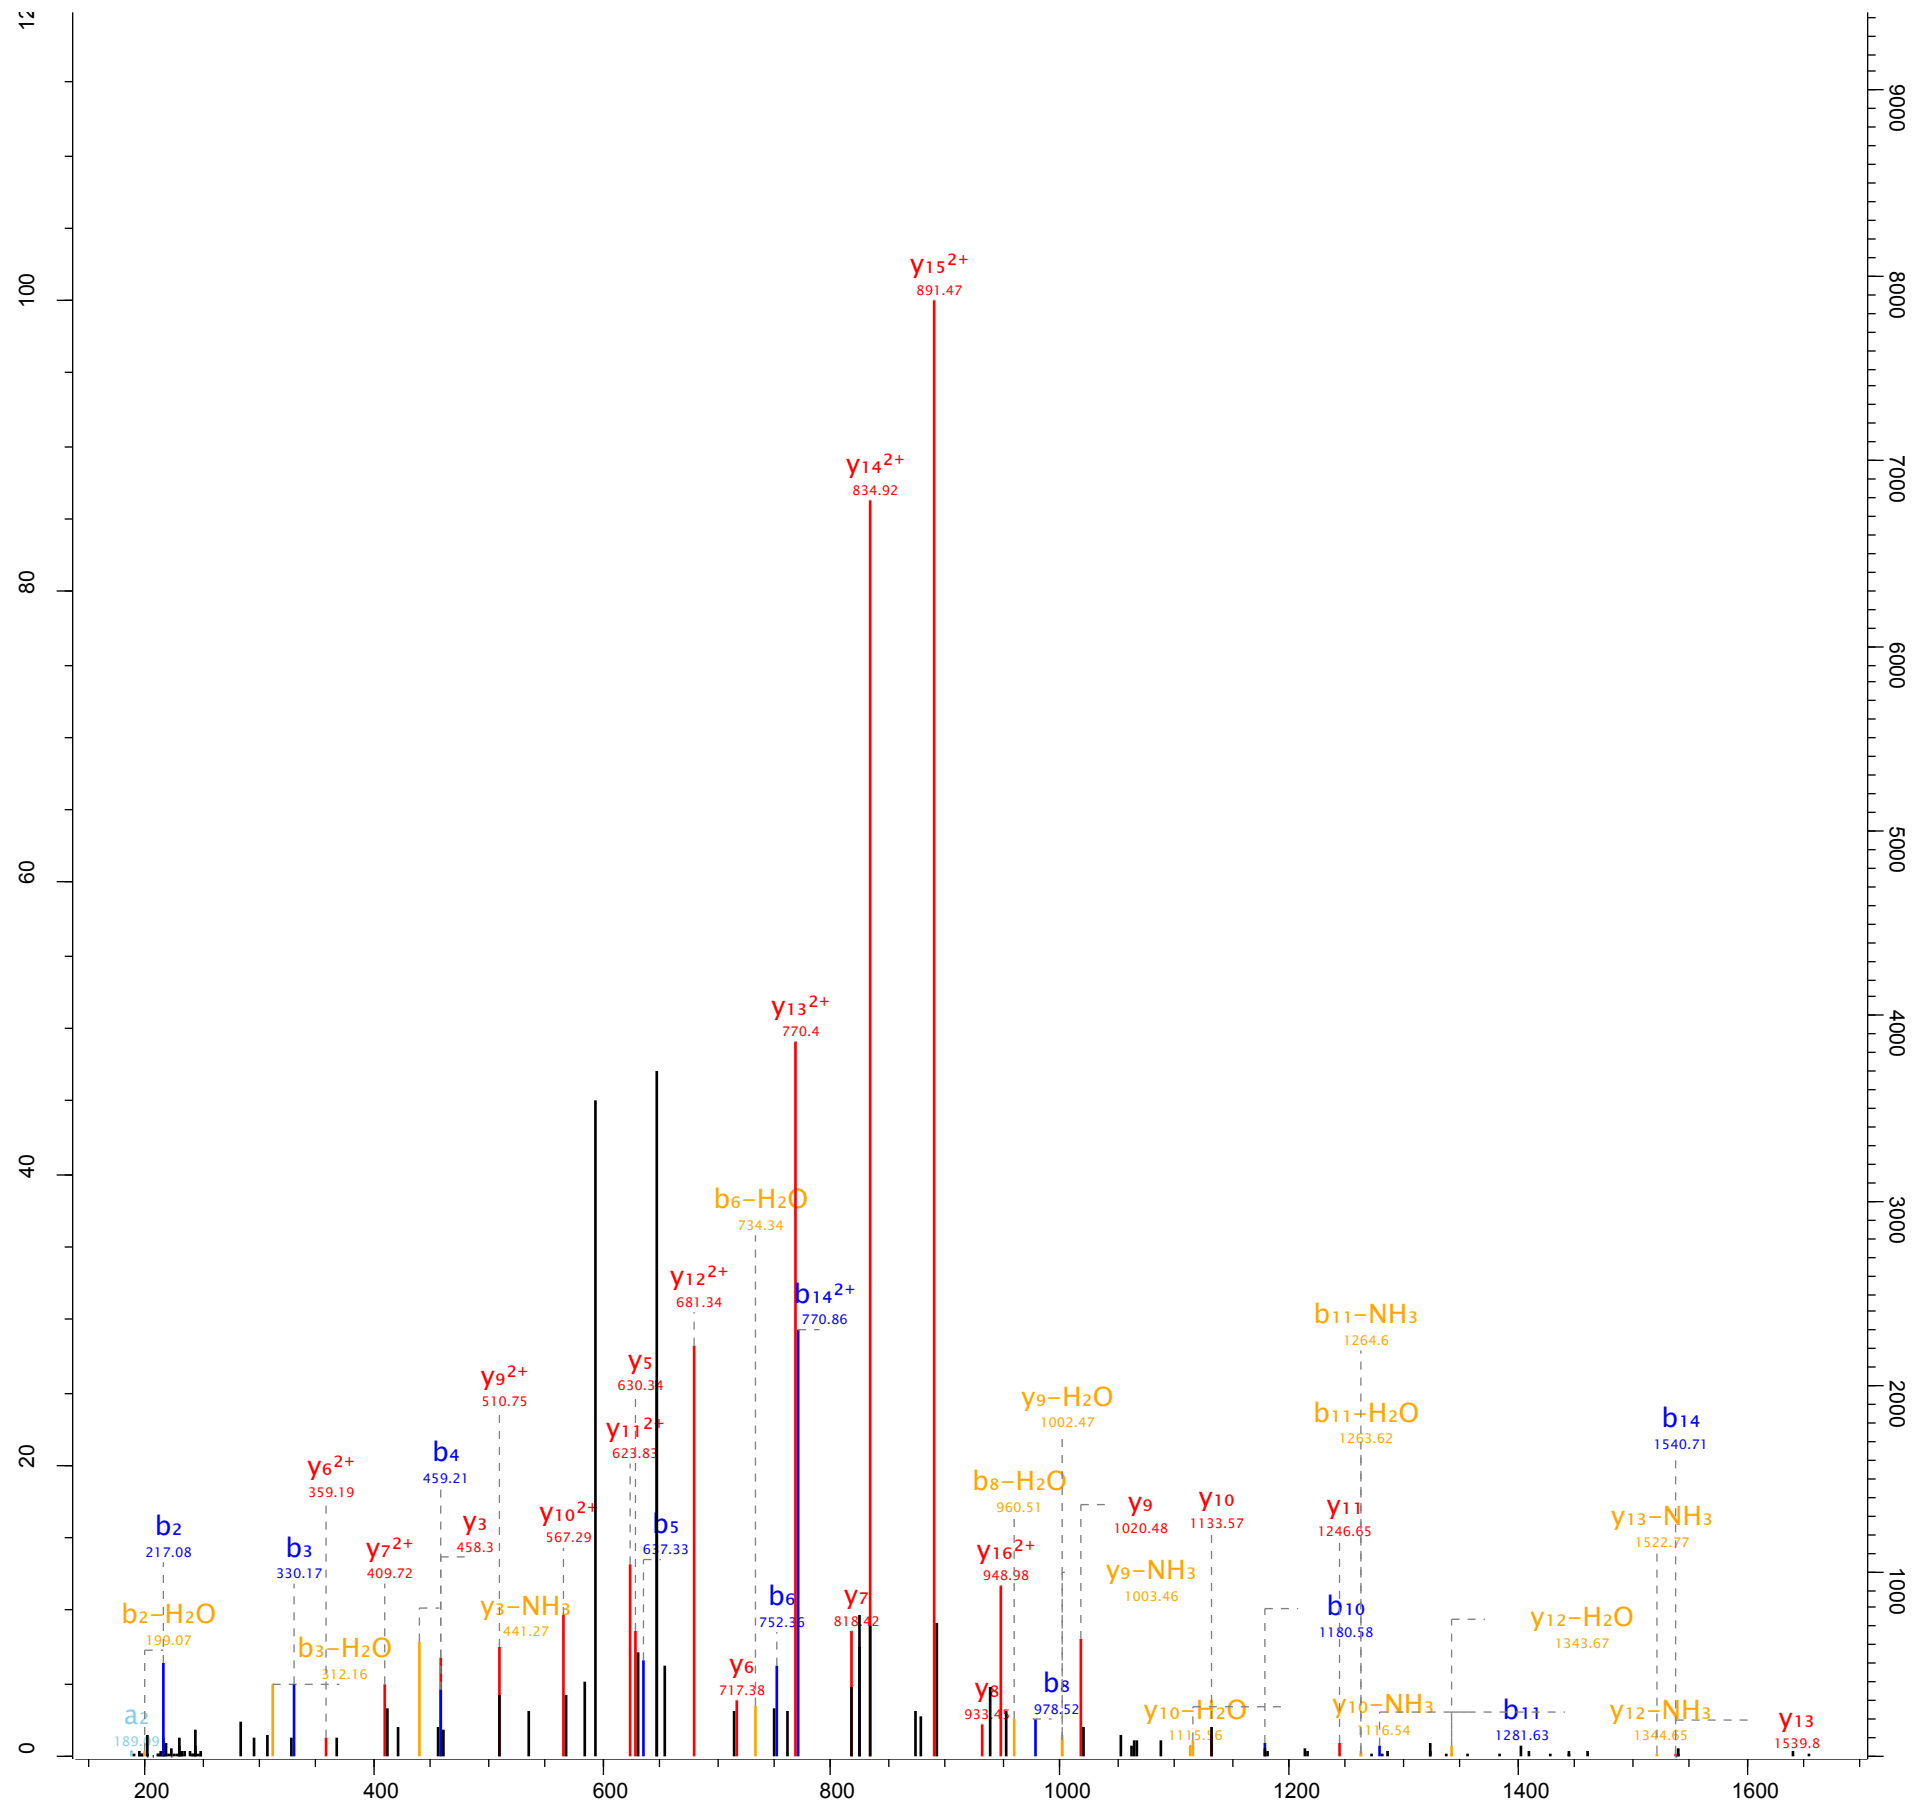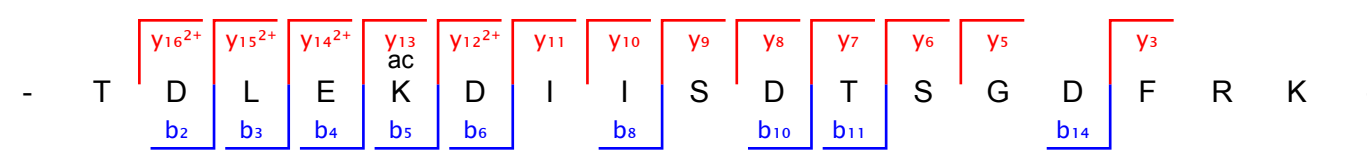



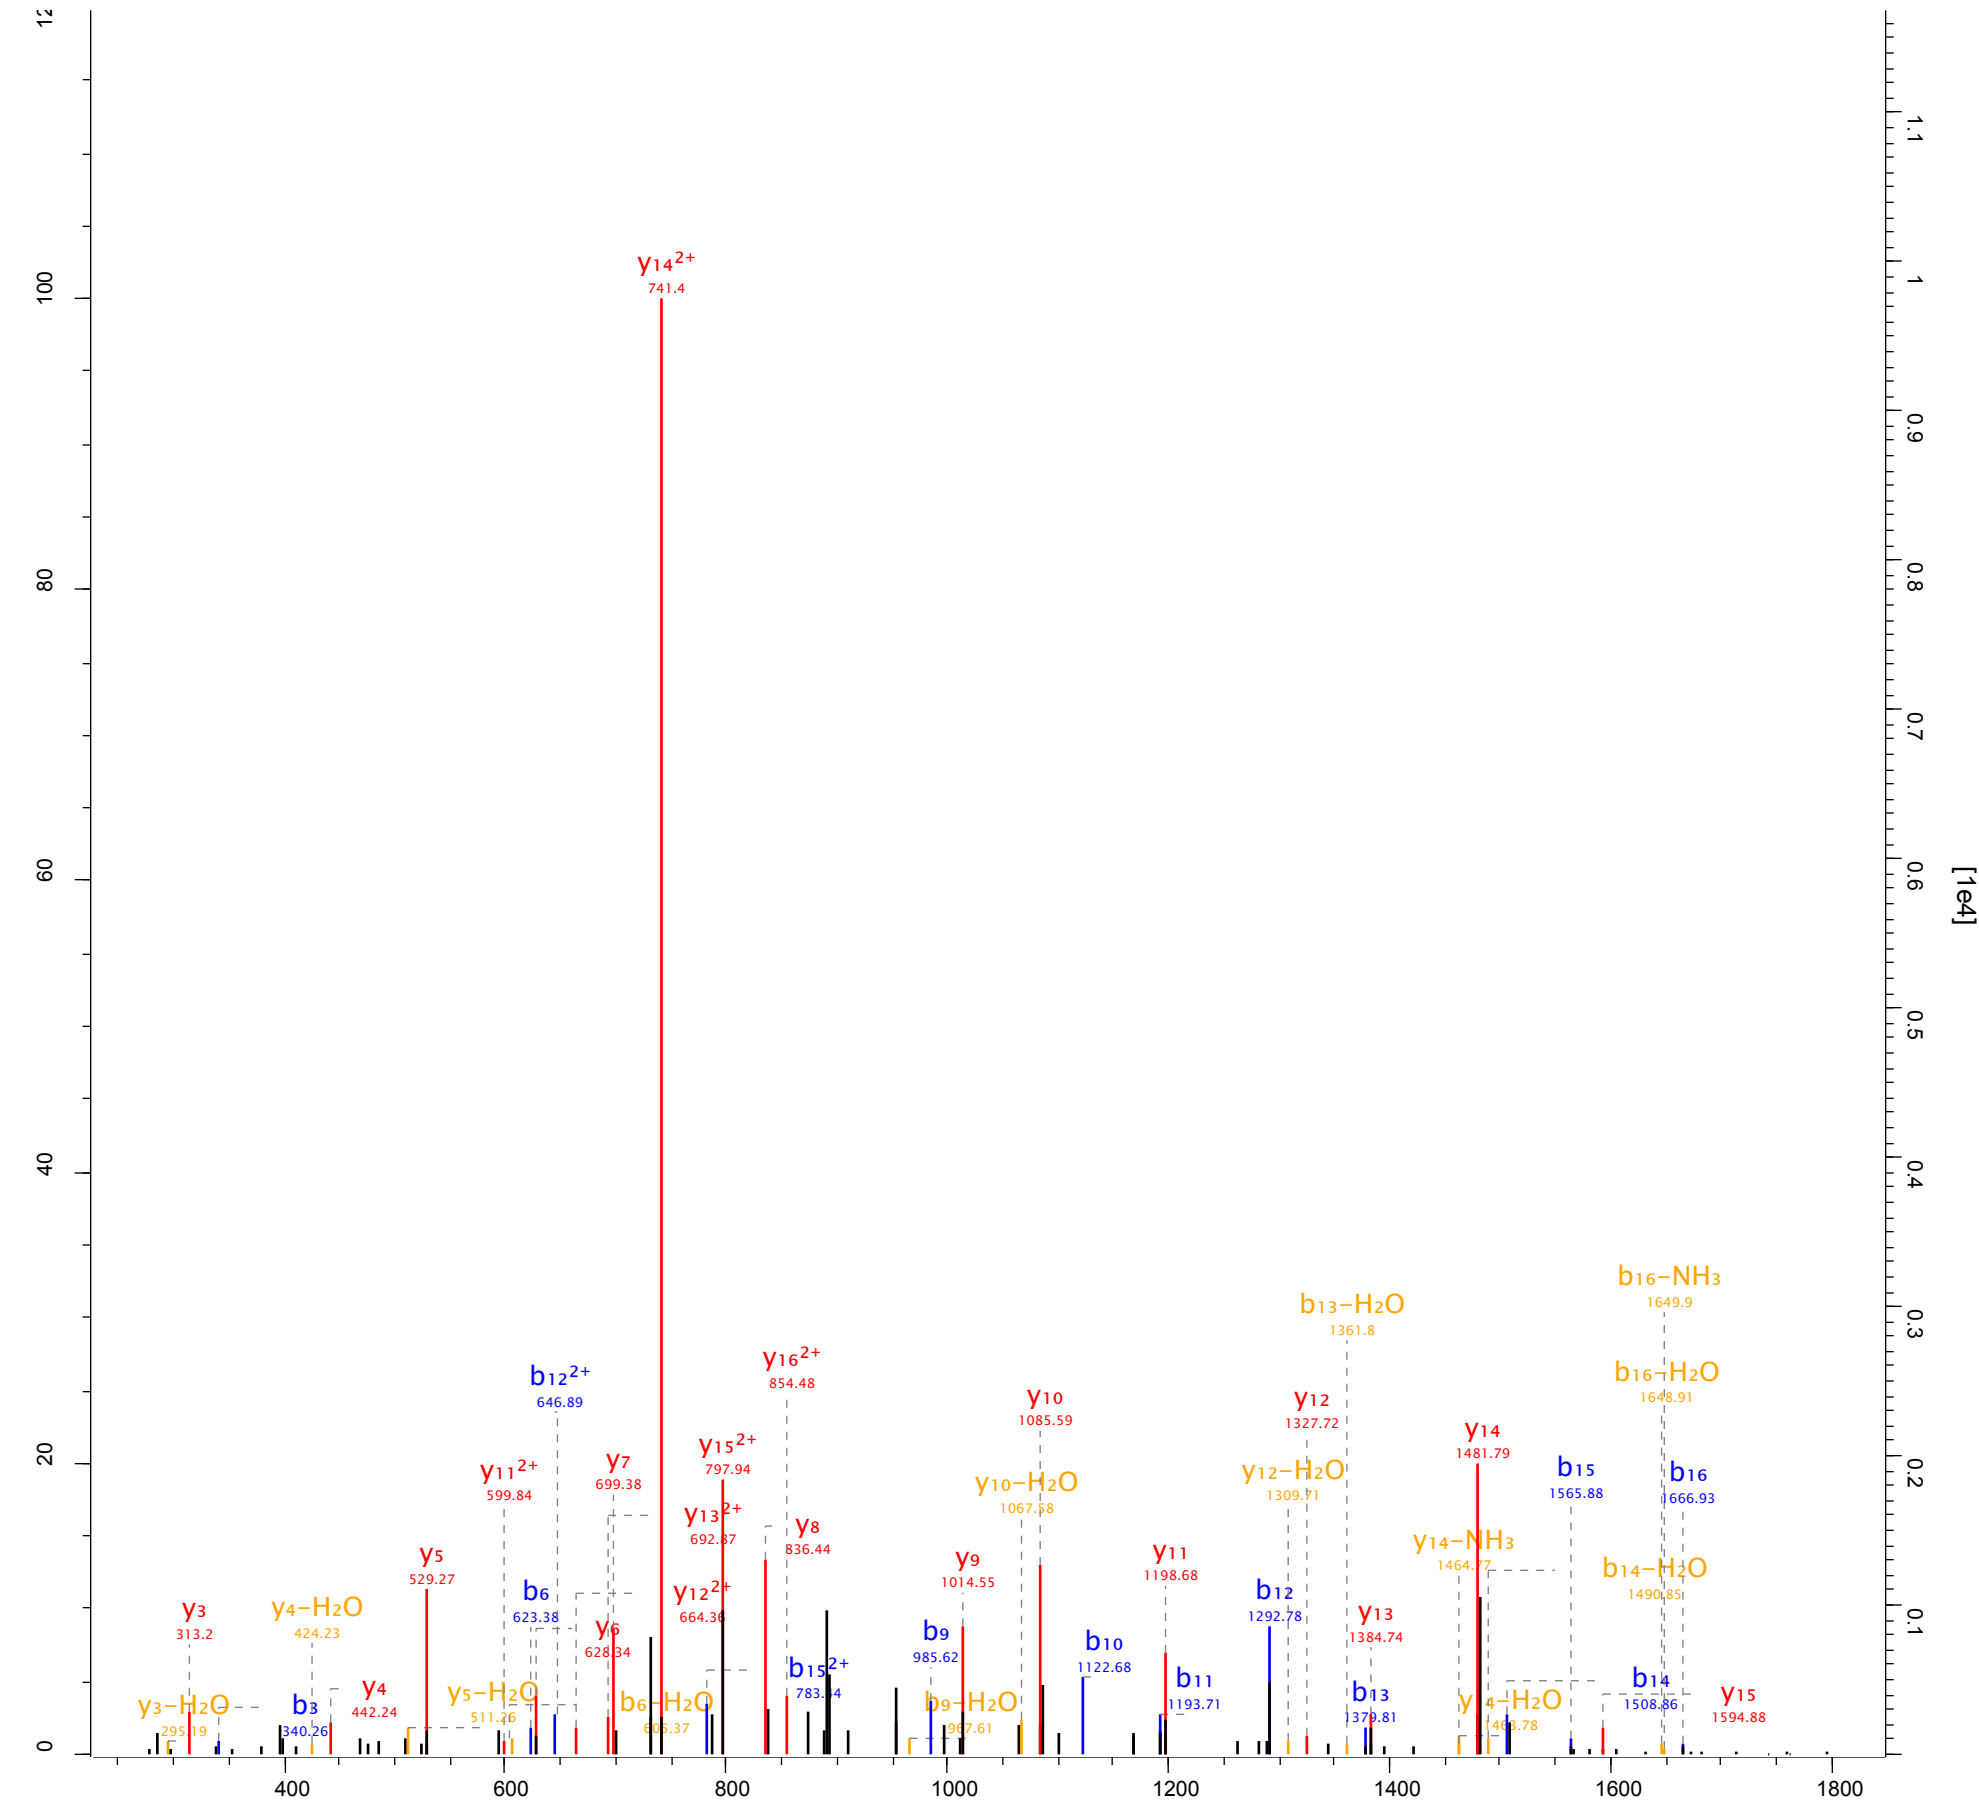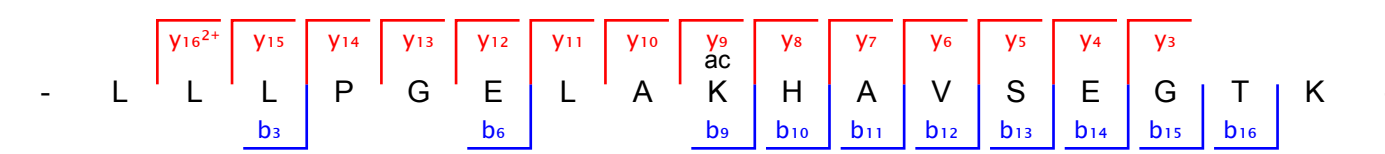

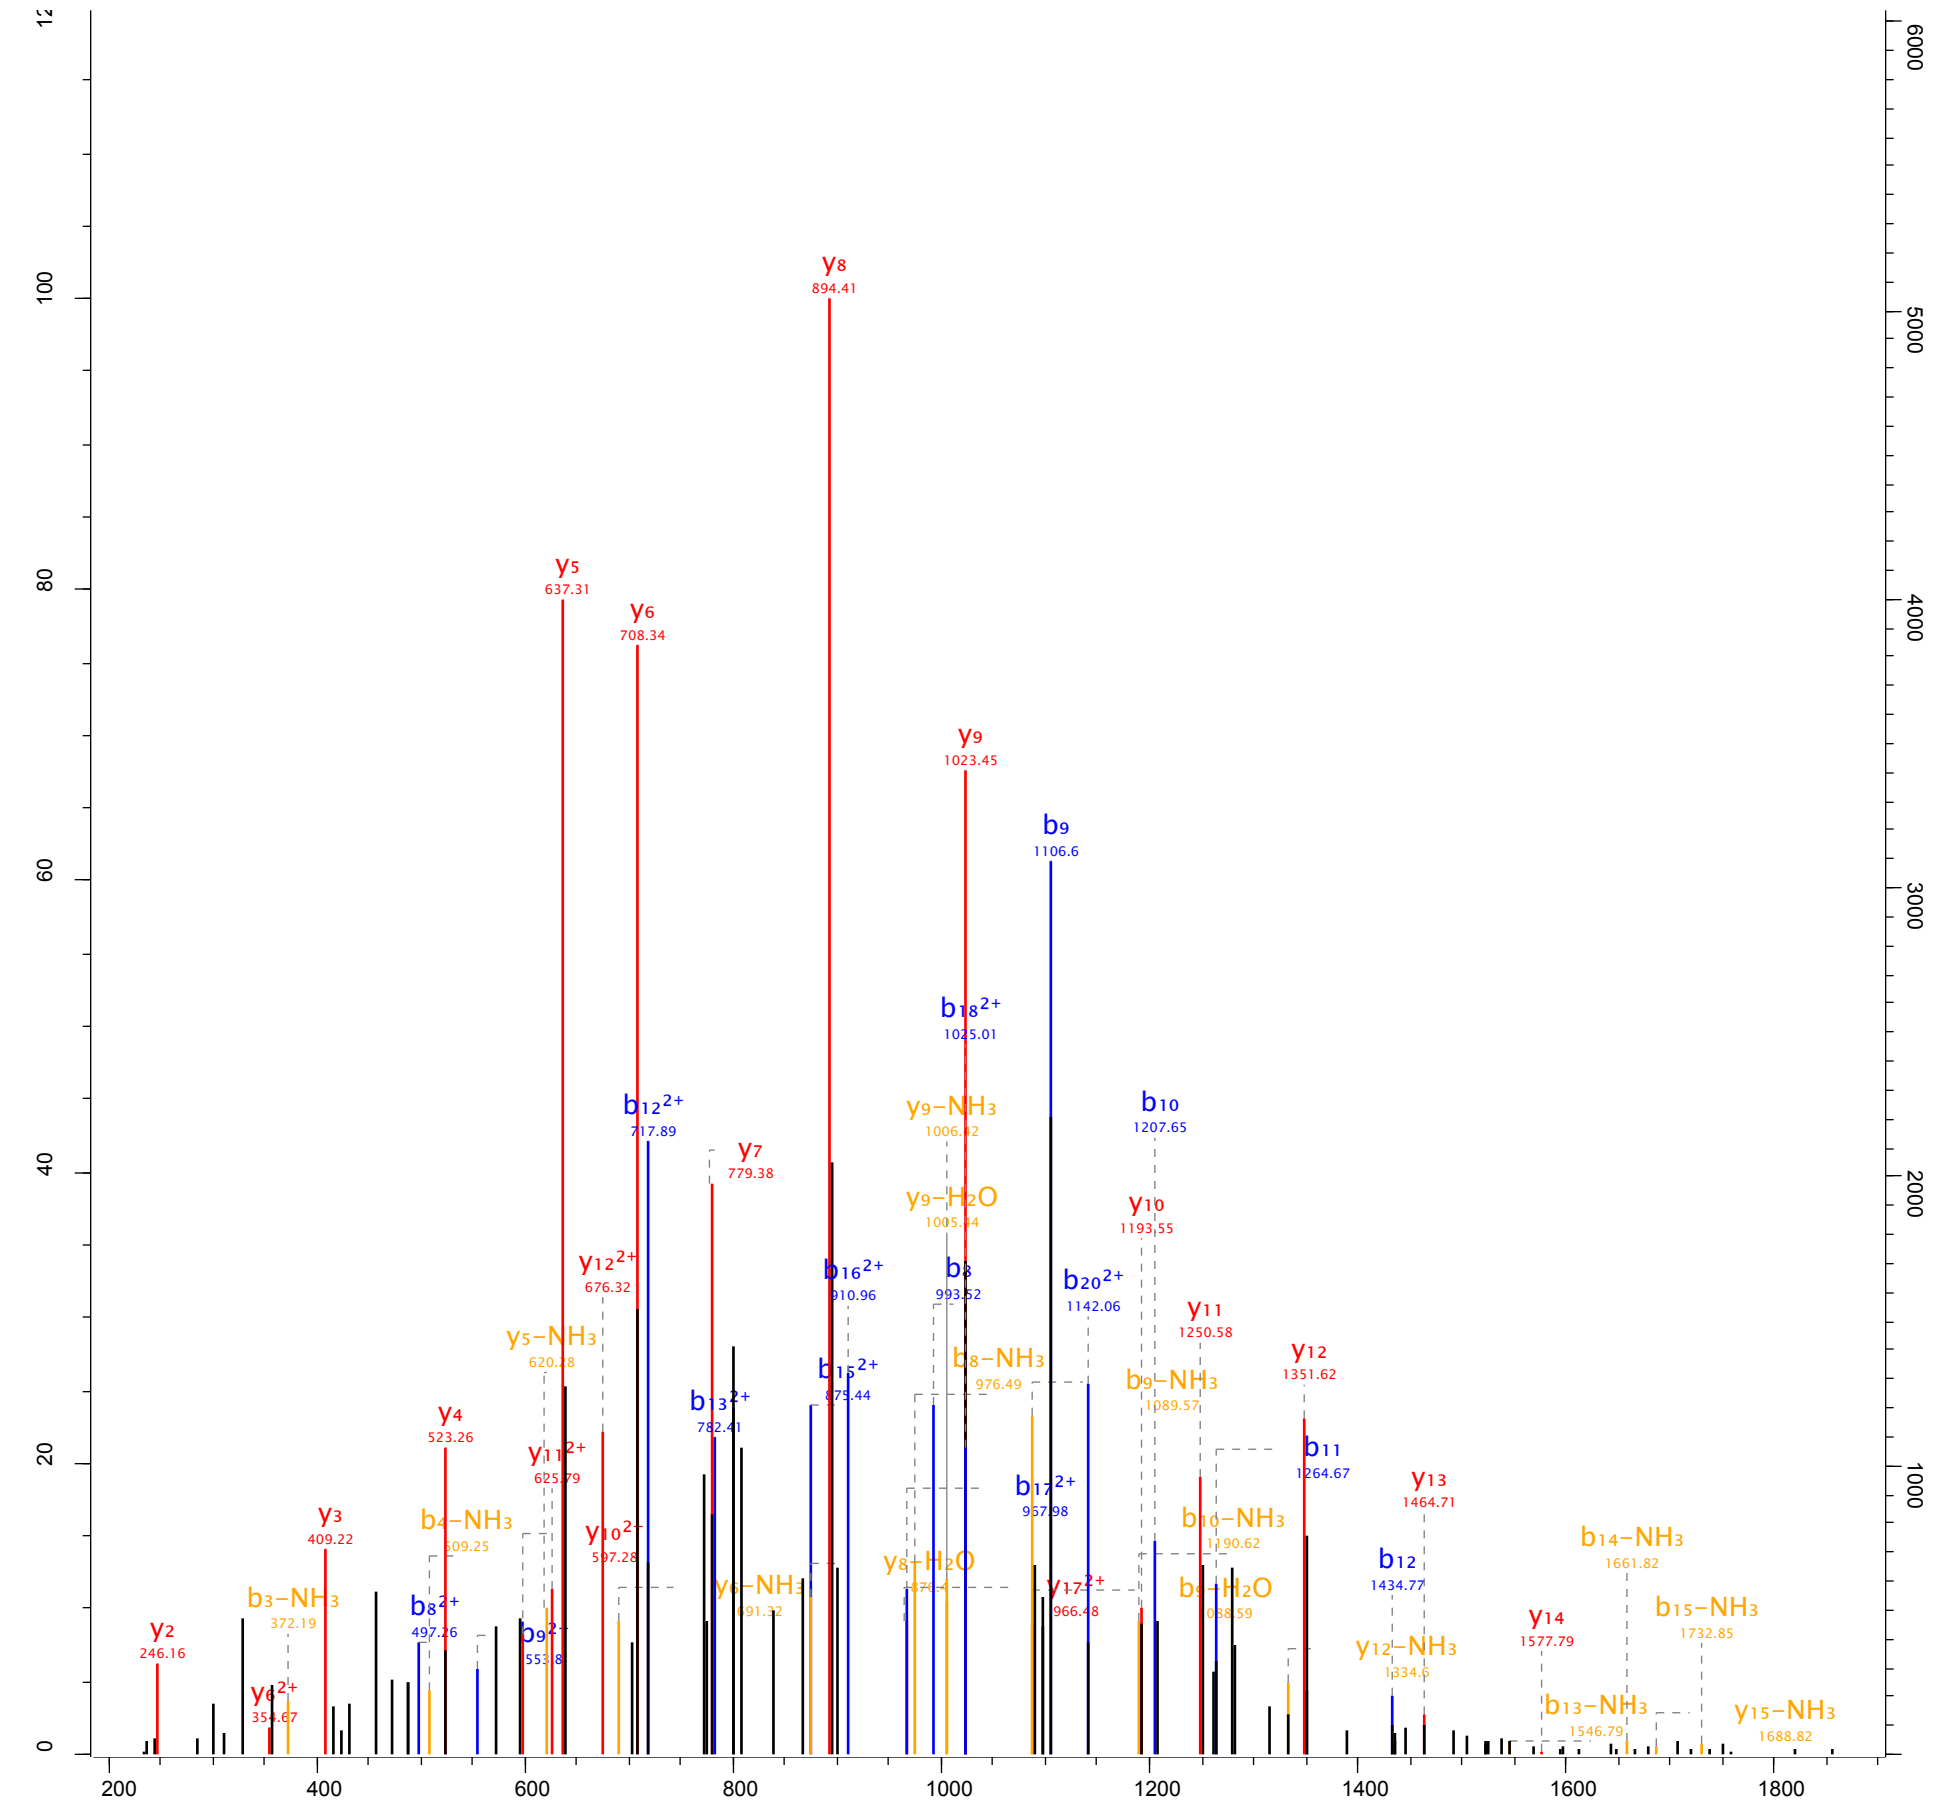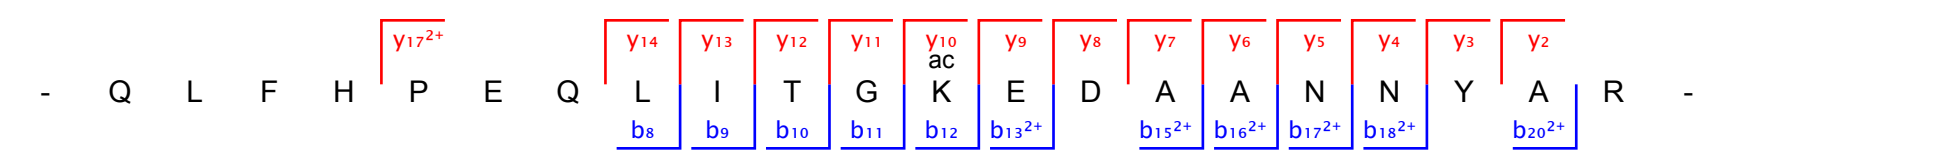

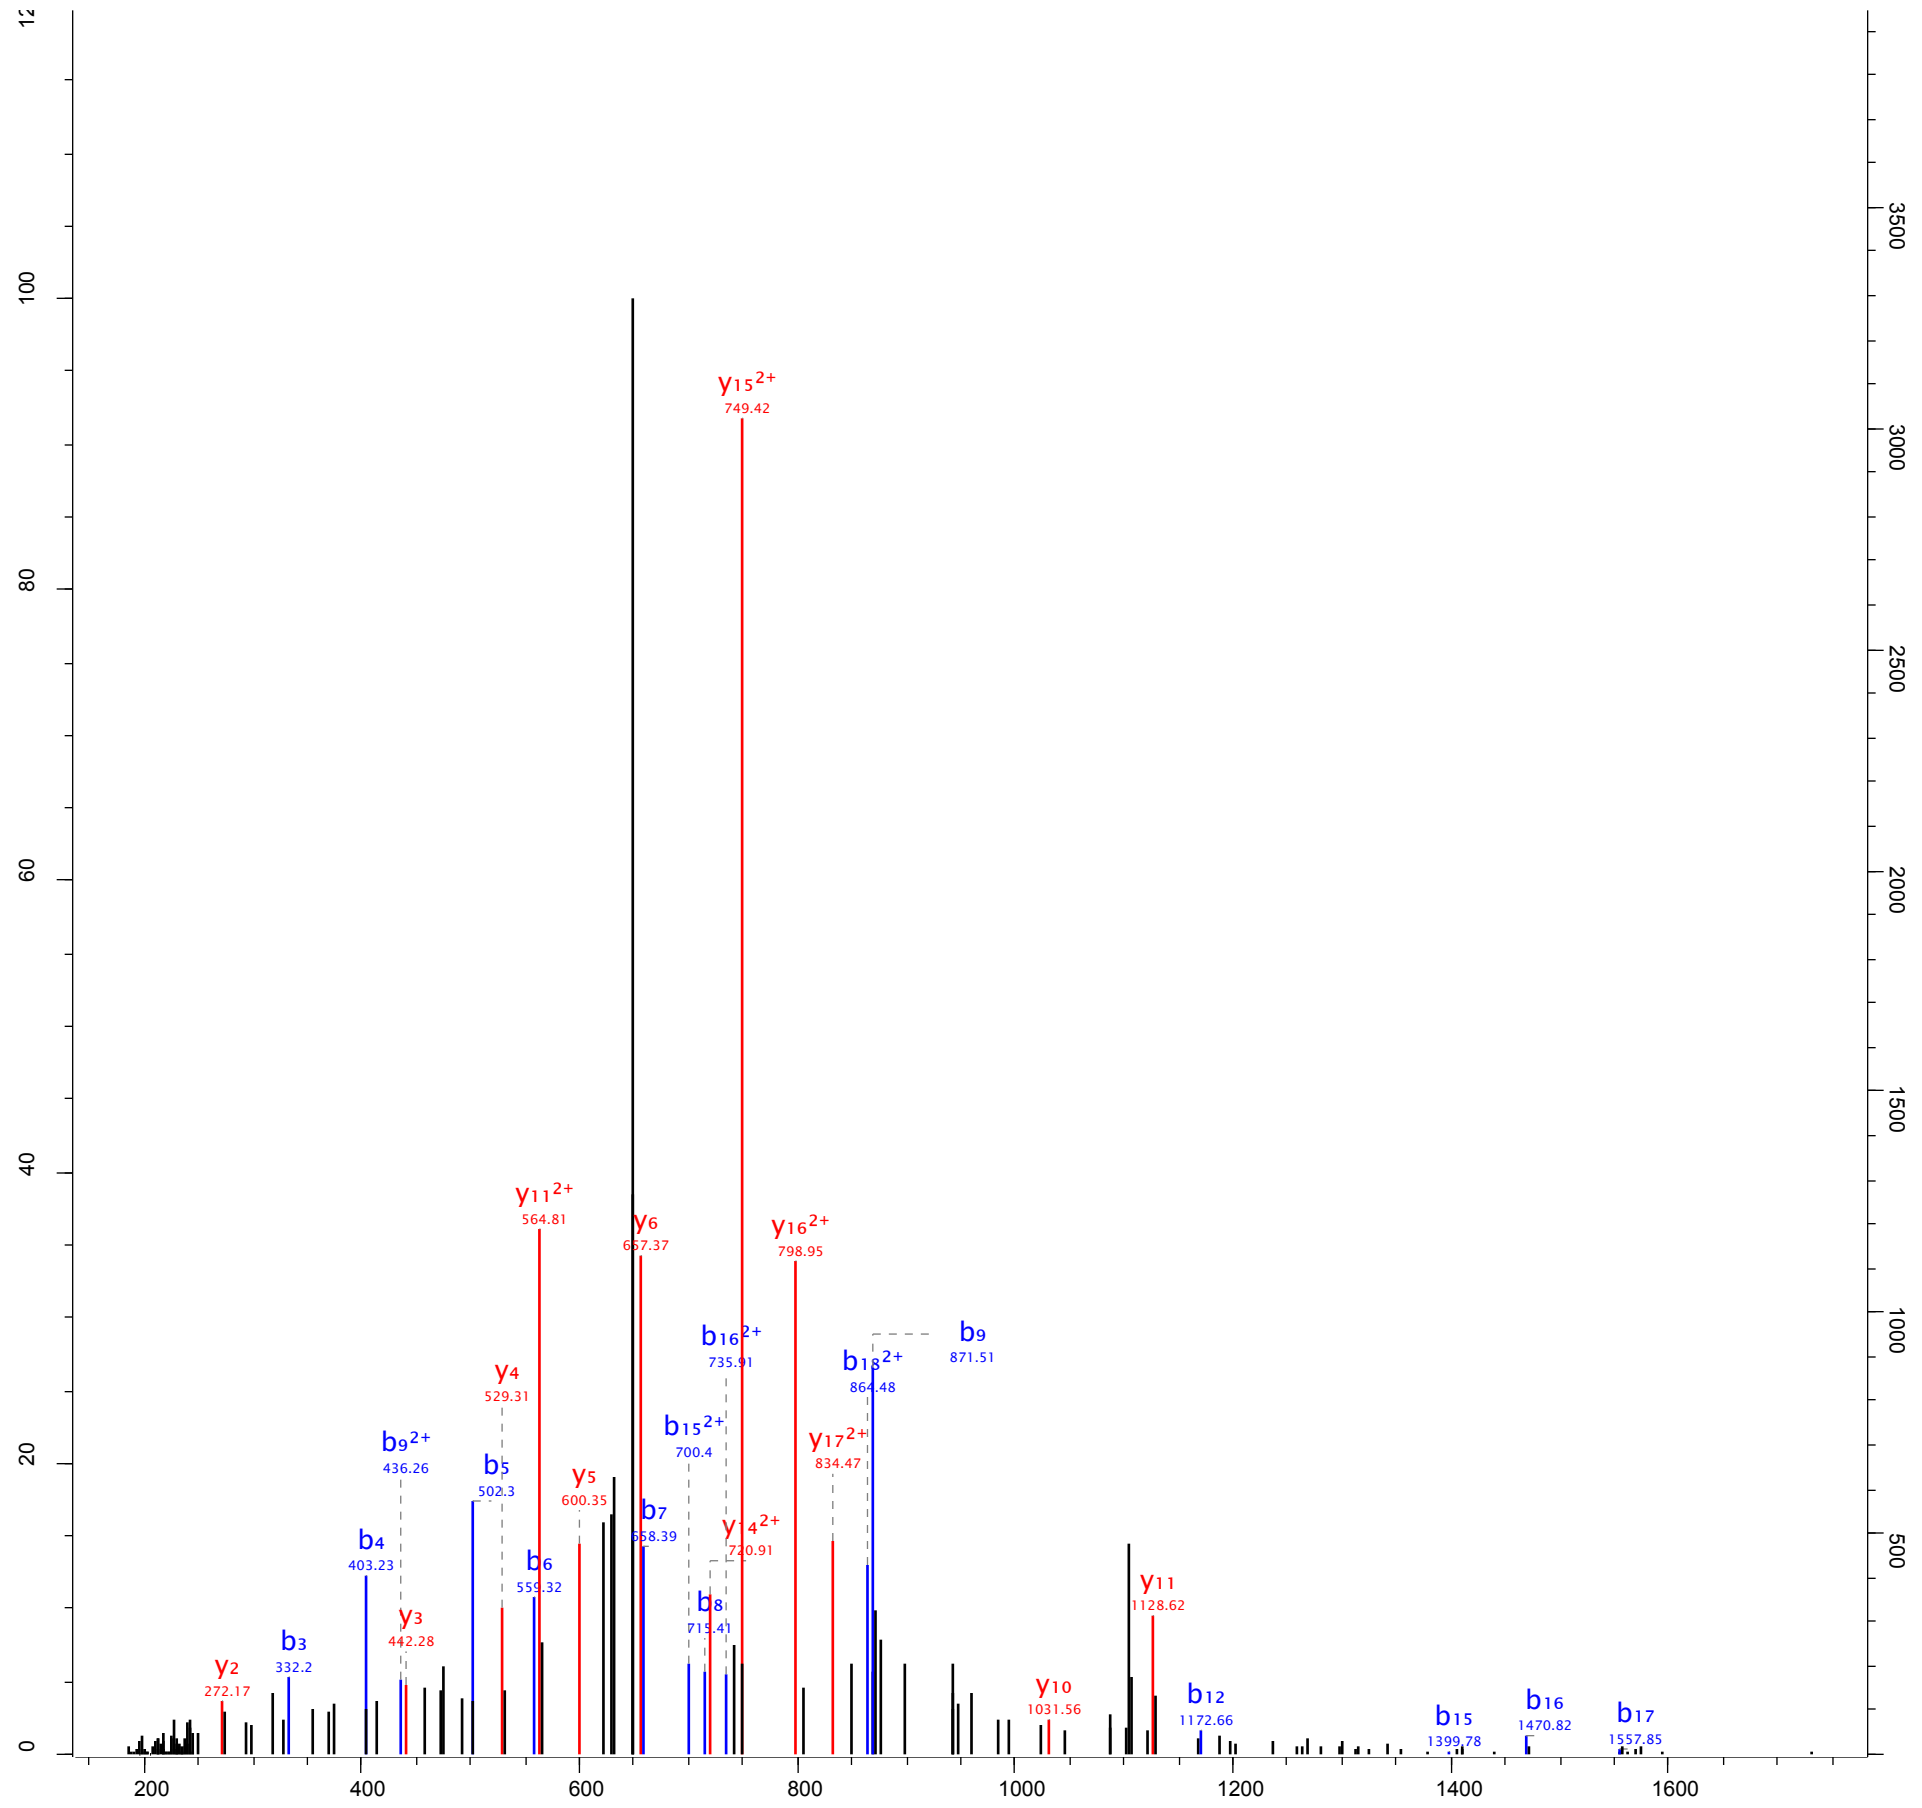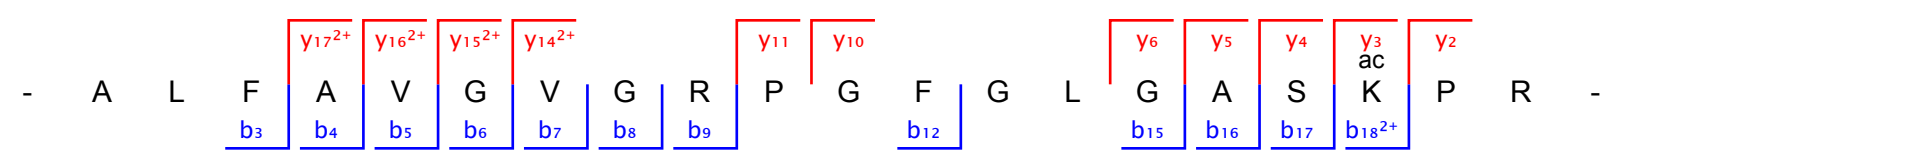

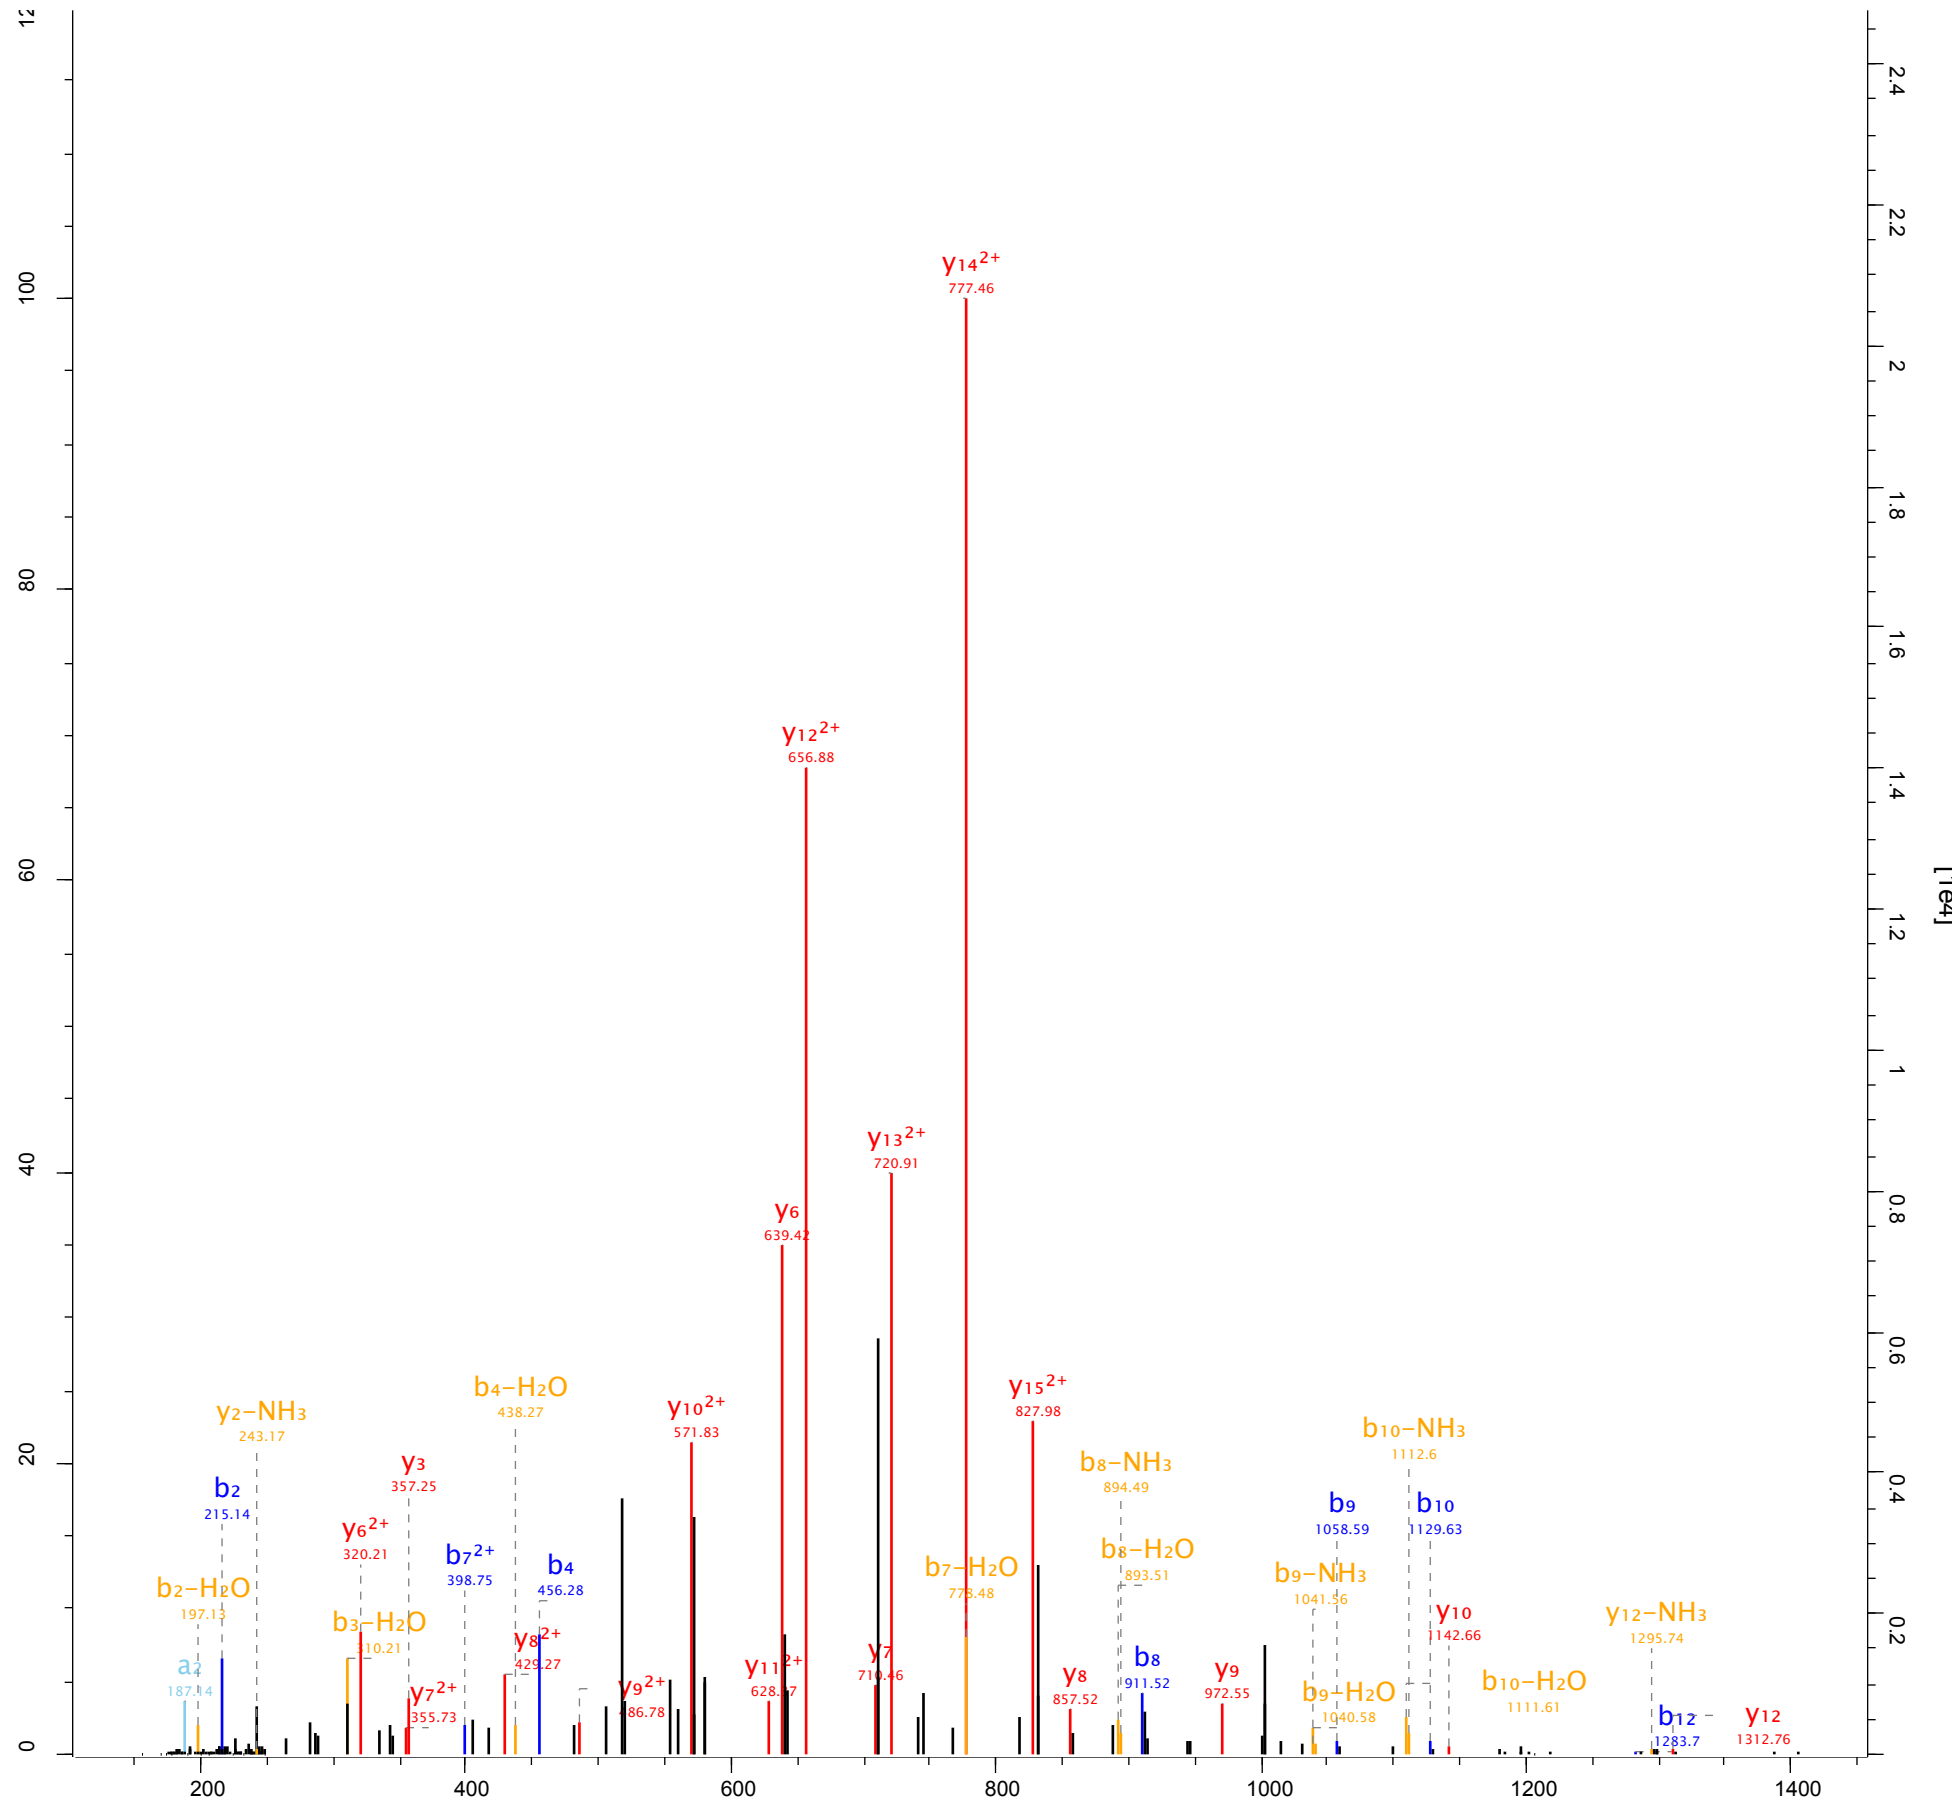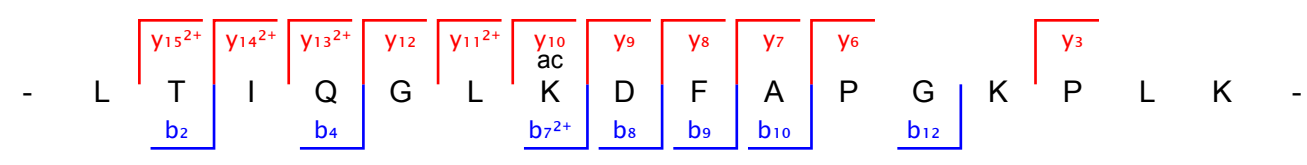

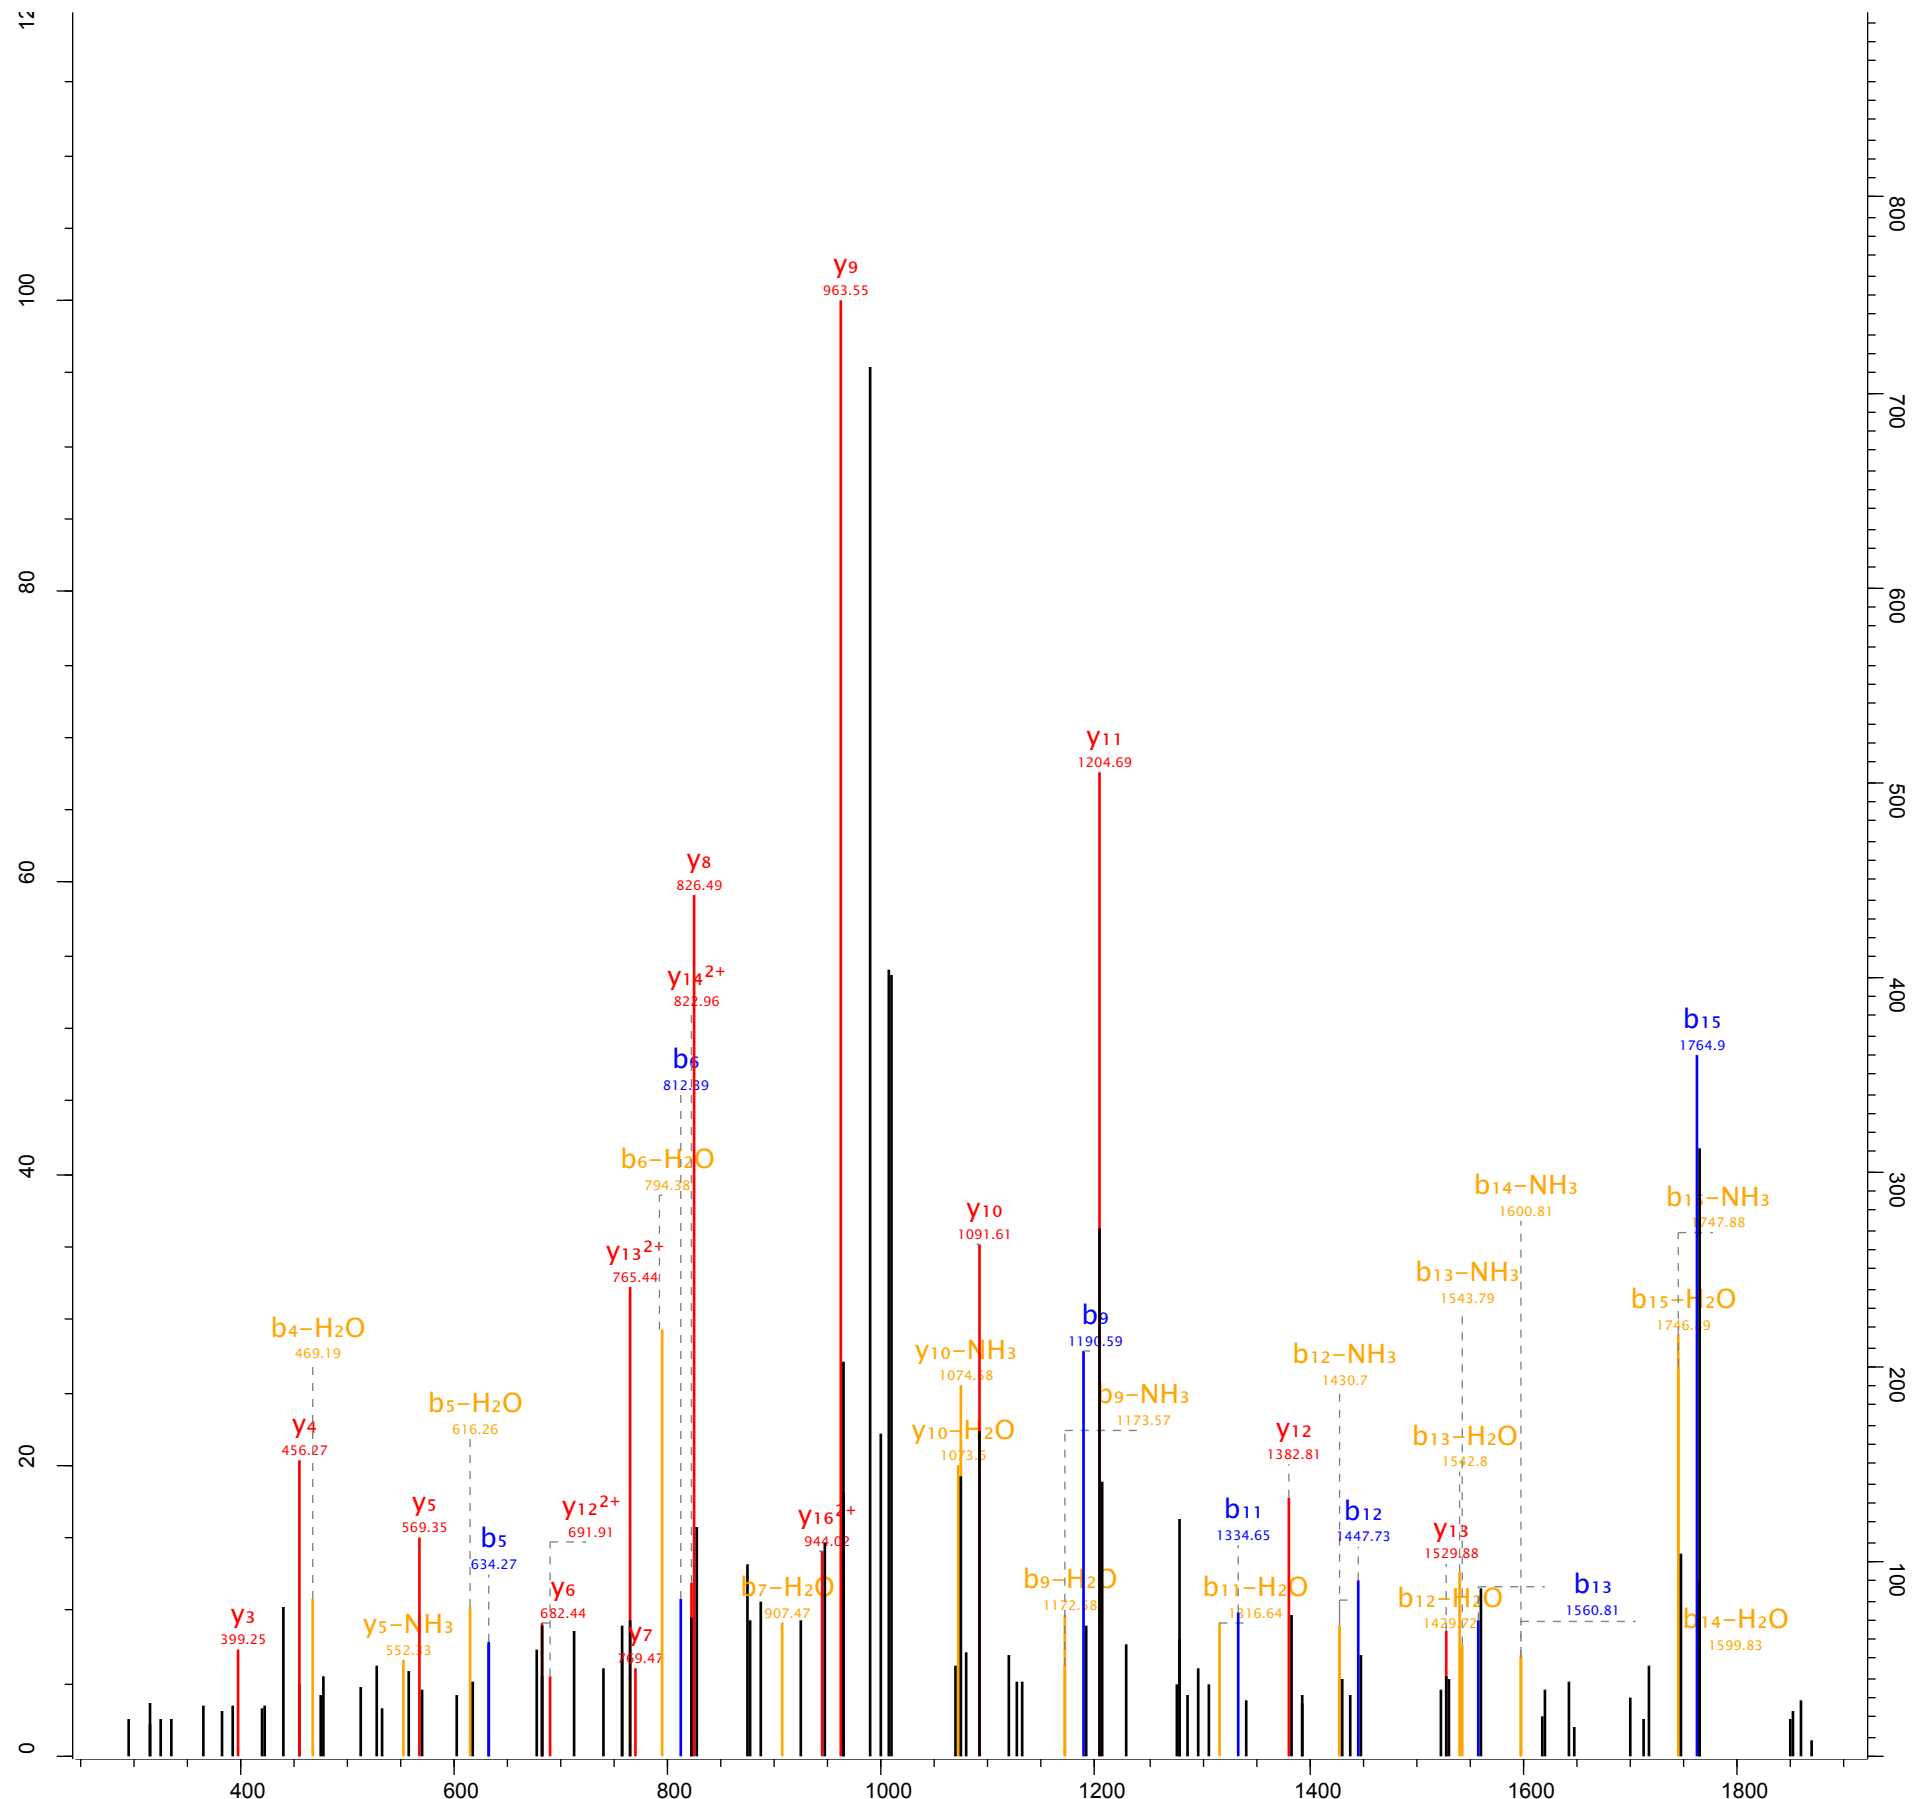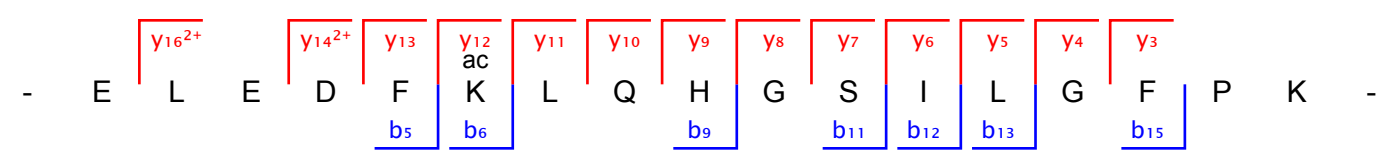

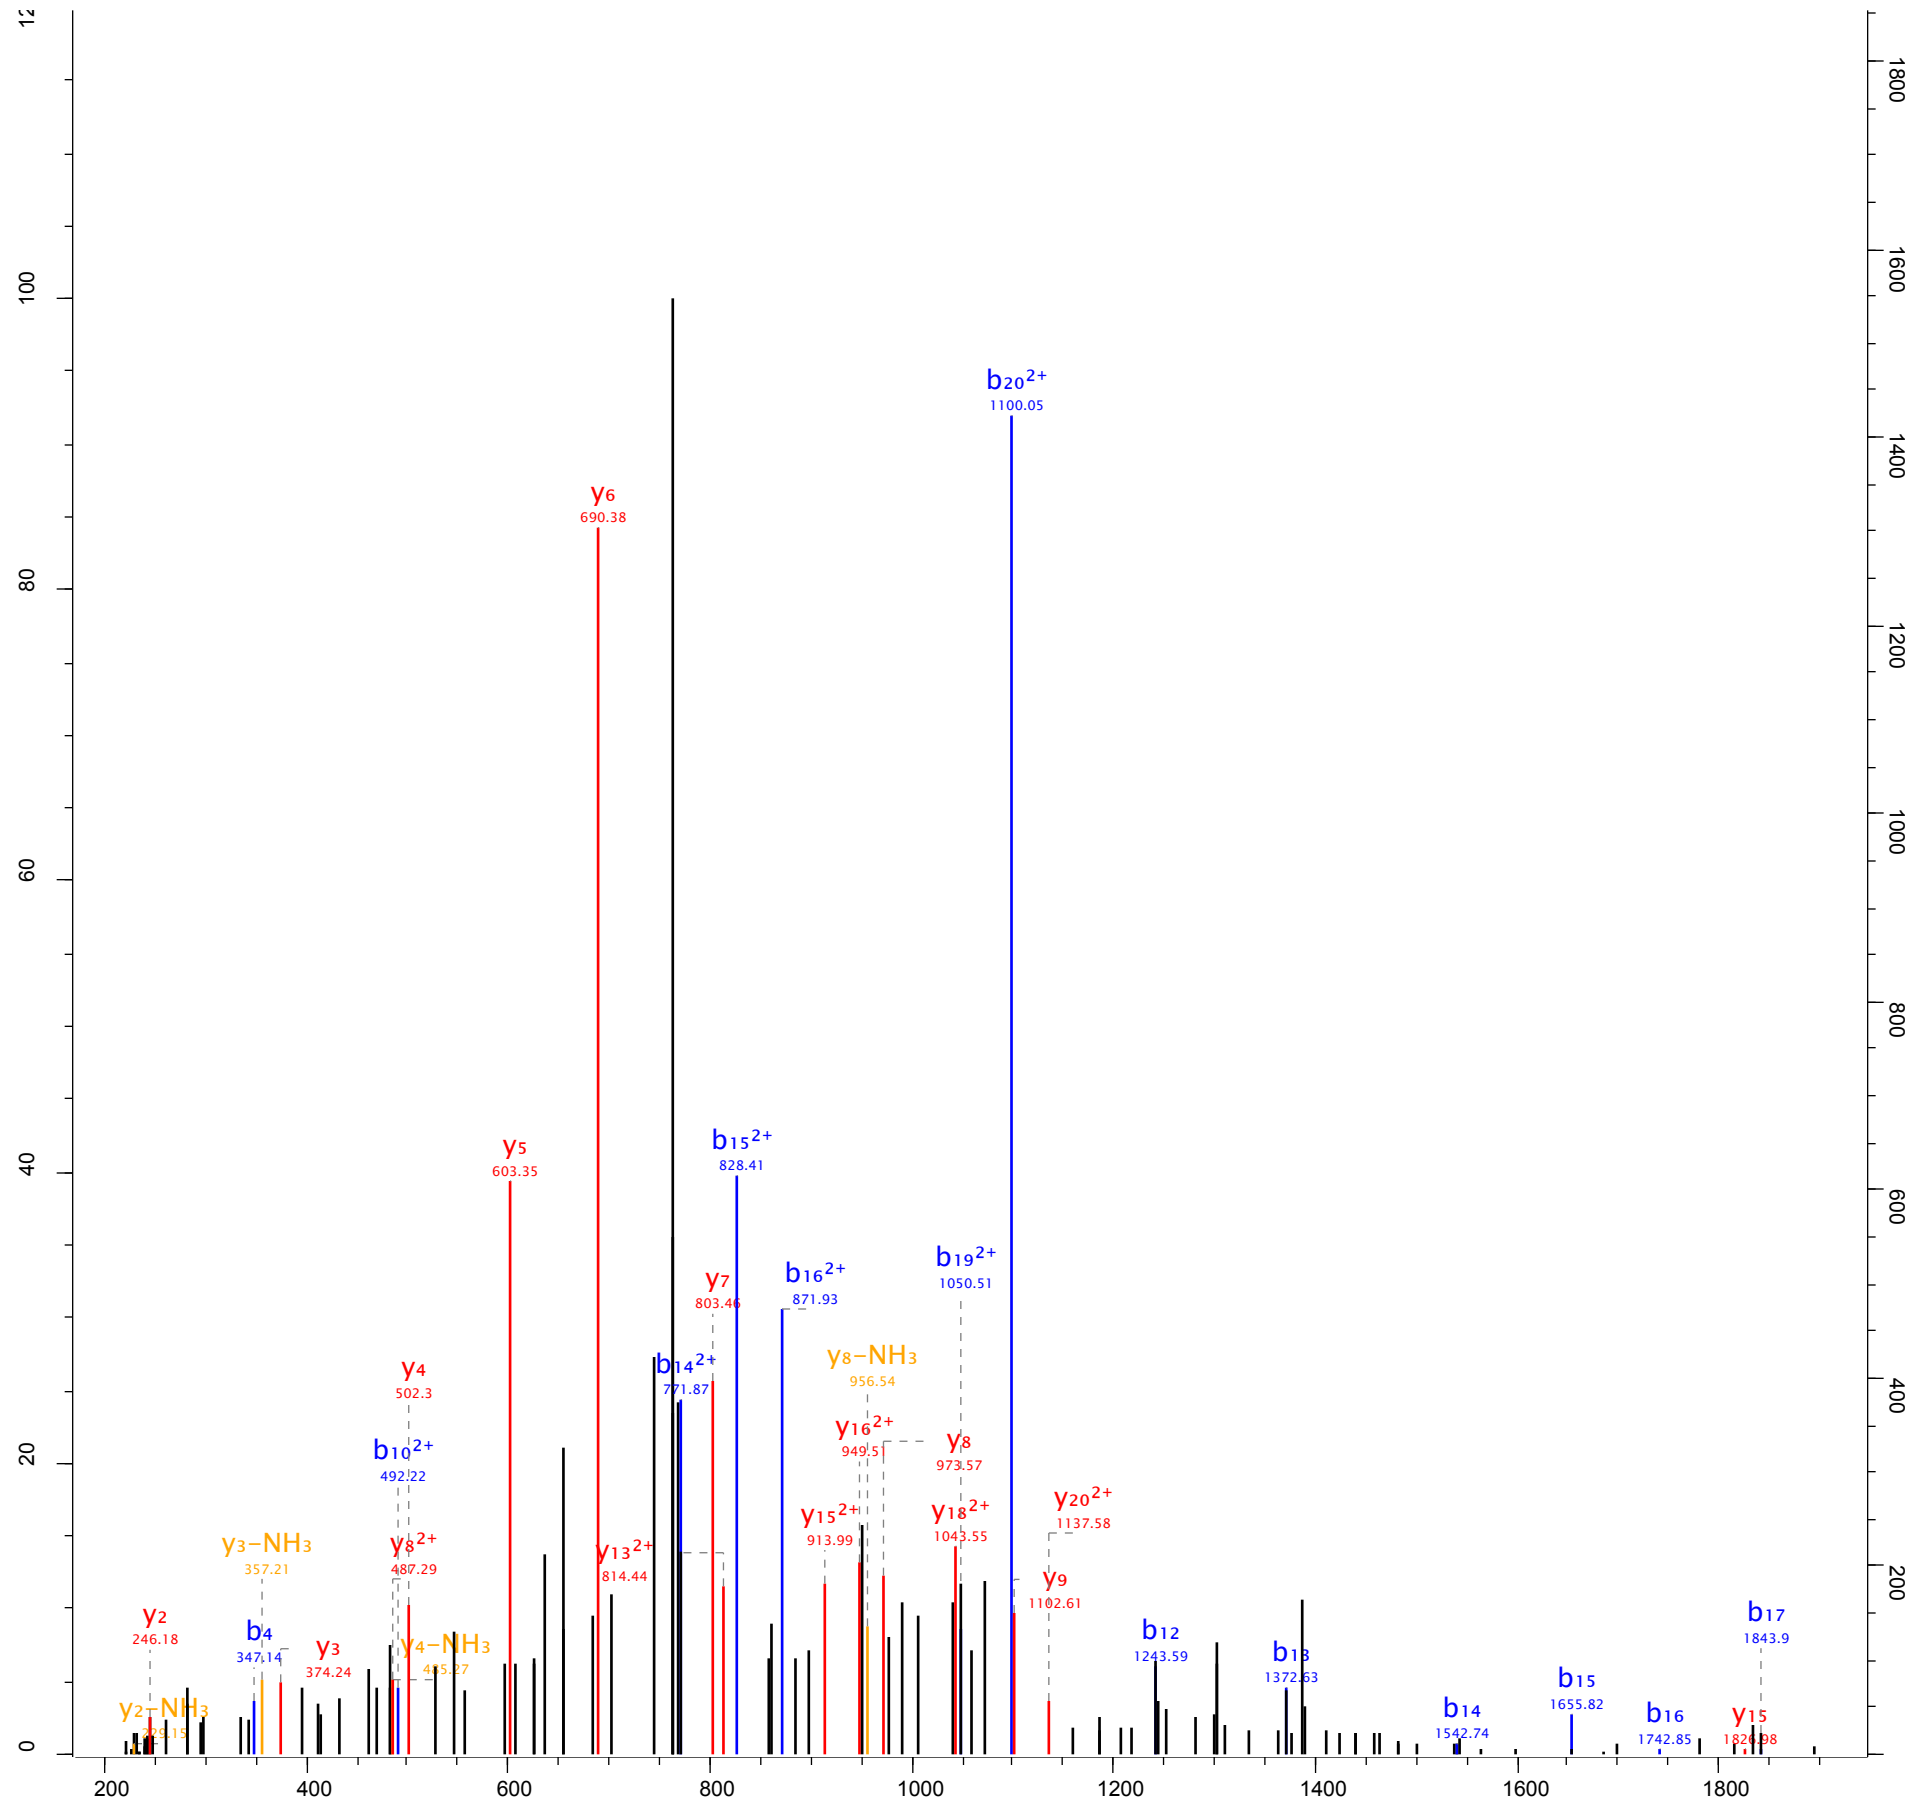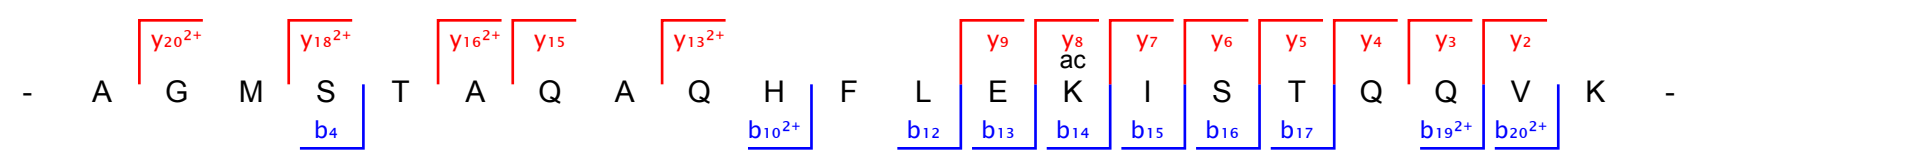

Raw file: 062513\_SCW\_II\_53\_7\_Vargas\_Enriched  
 Scan: 22030 Method: ITMS; CID Score: 142.57 m/z: 759.4 Gene names: Rps18;Gm10260

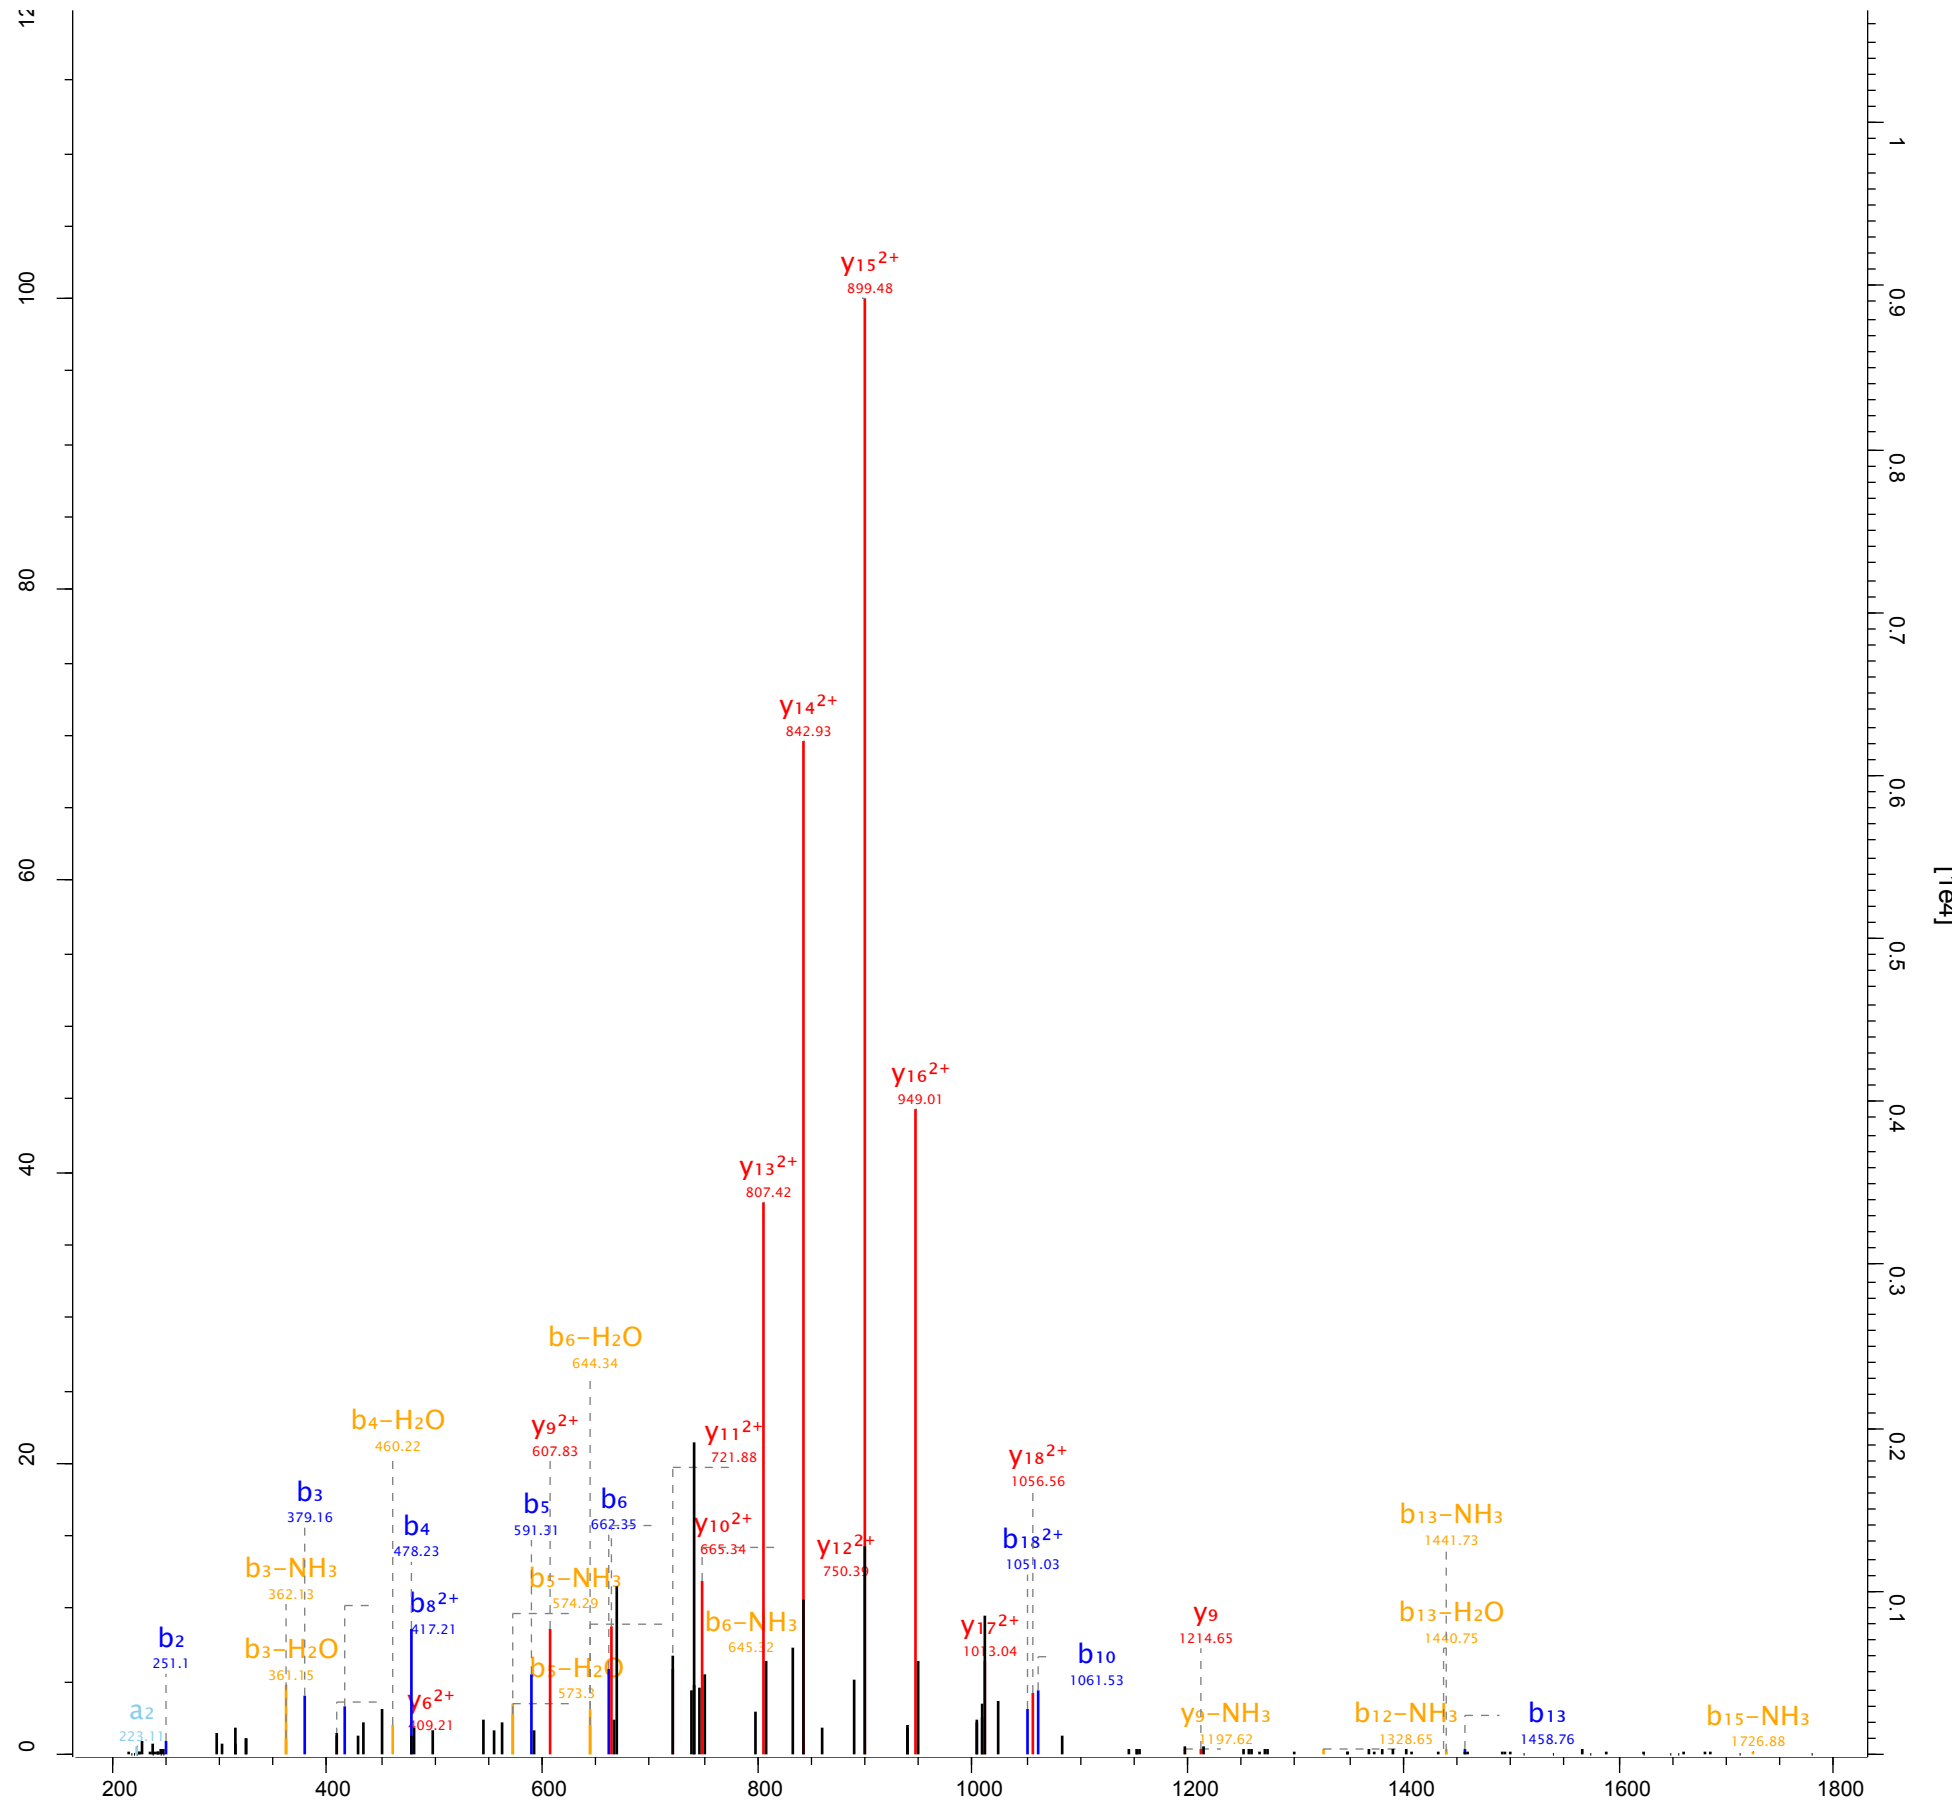

Sequence: - Y S Q V L A N G L D N ac K L R E D L E R -

Fragmentation sites (b and y ions) are indicated by boxes below the sequence:

- Red boxes above:  $y_{18}^{2+}$ ,  $y_{17}^{2+}$ ,  $y_{16}^{2+}$ ,  $y_{15}^{2+}$ ,  $y_{14}^{2+}$ ,  $y_{13}^{2+}$ ,  $y_{12}^{2+}$ ,  $y_{11}^{2+}$ ,  $y_{10}^{2+}$ ,  $y_9$
- Blue boxes below: b<sub>2</sub>, b<sub>3</sub>, b<sub>4</sub>, b<sub>5</sub>, b<sub>6</sub>, b<sub>8</sub><sup>2+</sup>, b<sub>10</sub>, b<sub>13</sub>, b<sub>18</sub><sup>2+</sup>

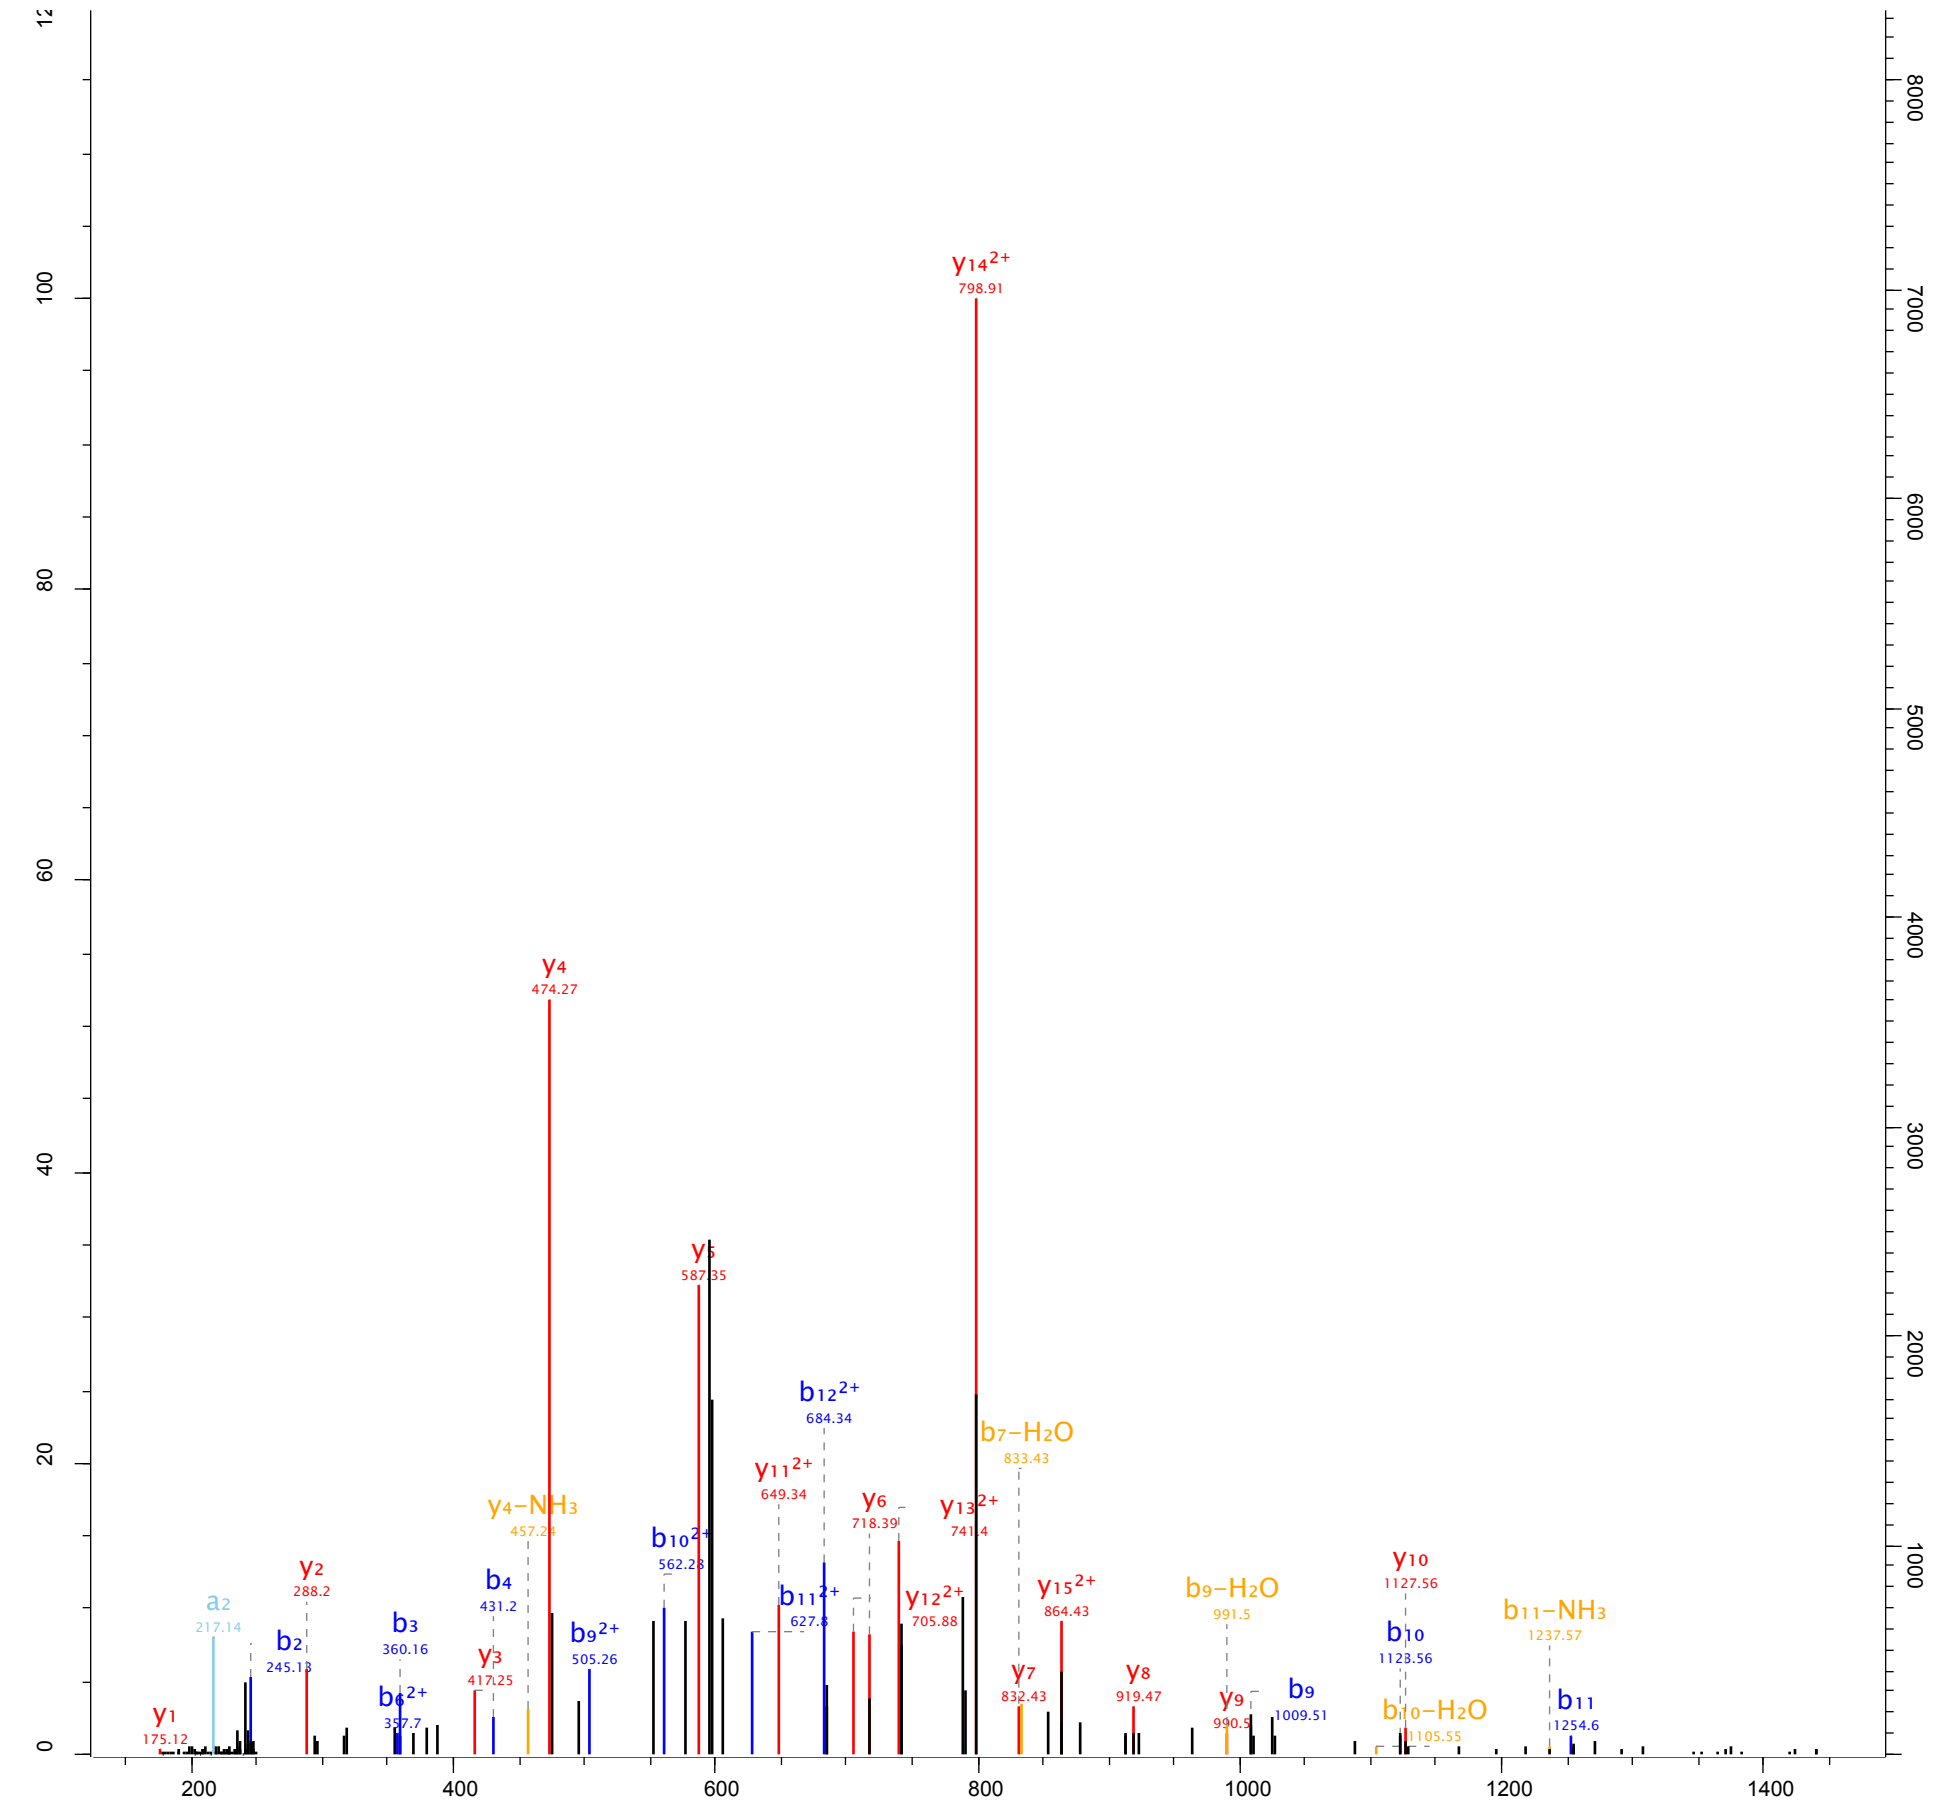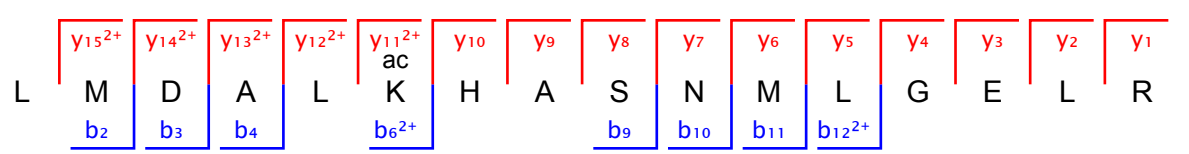



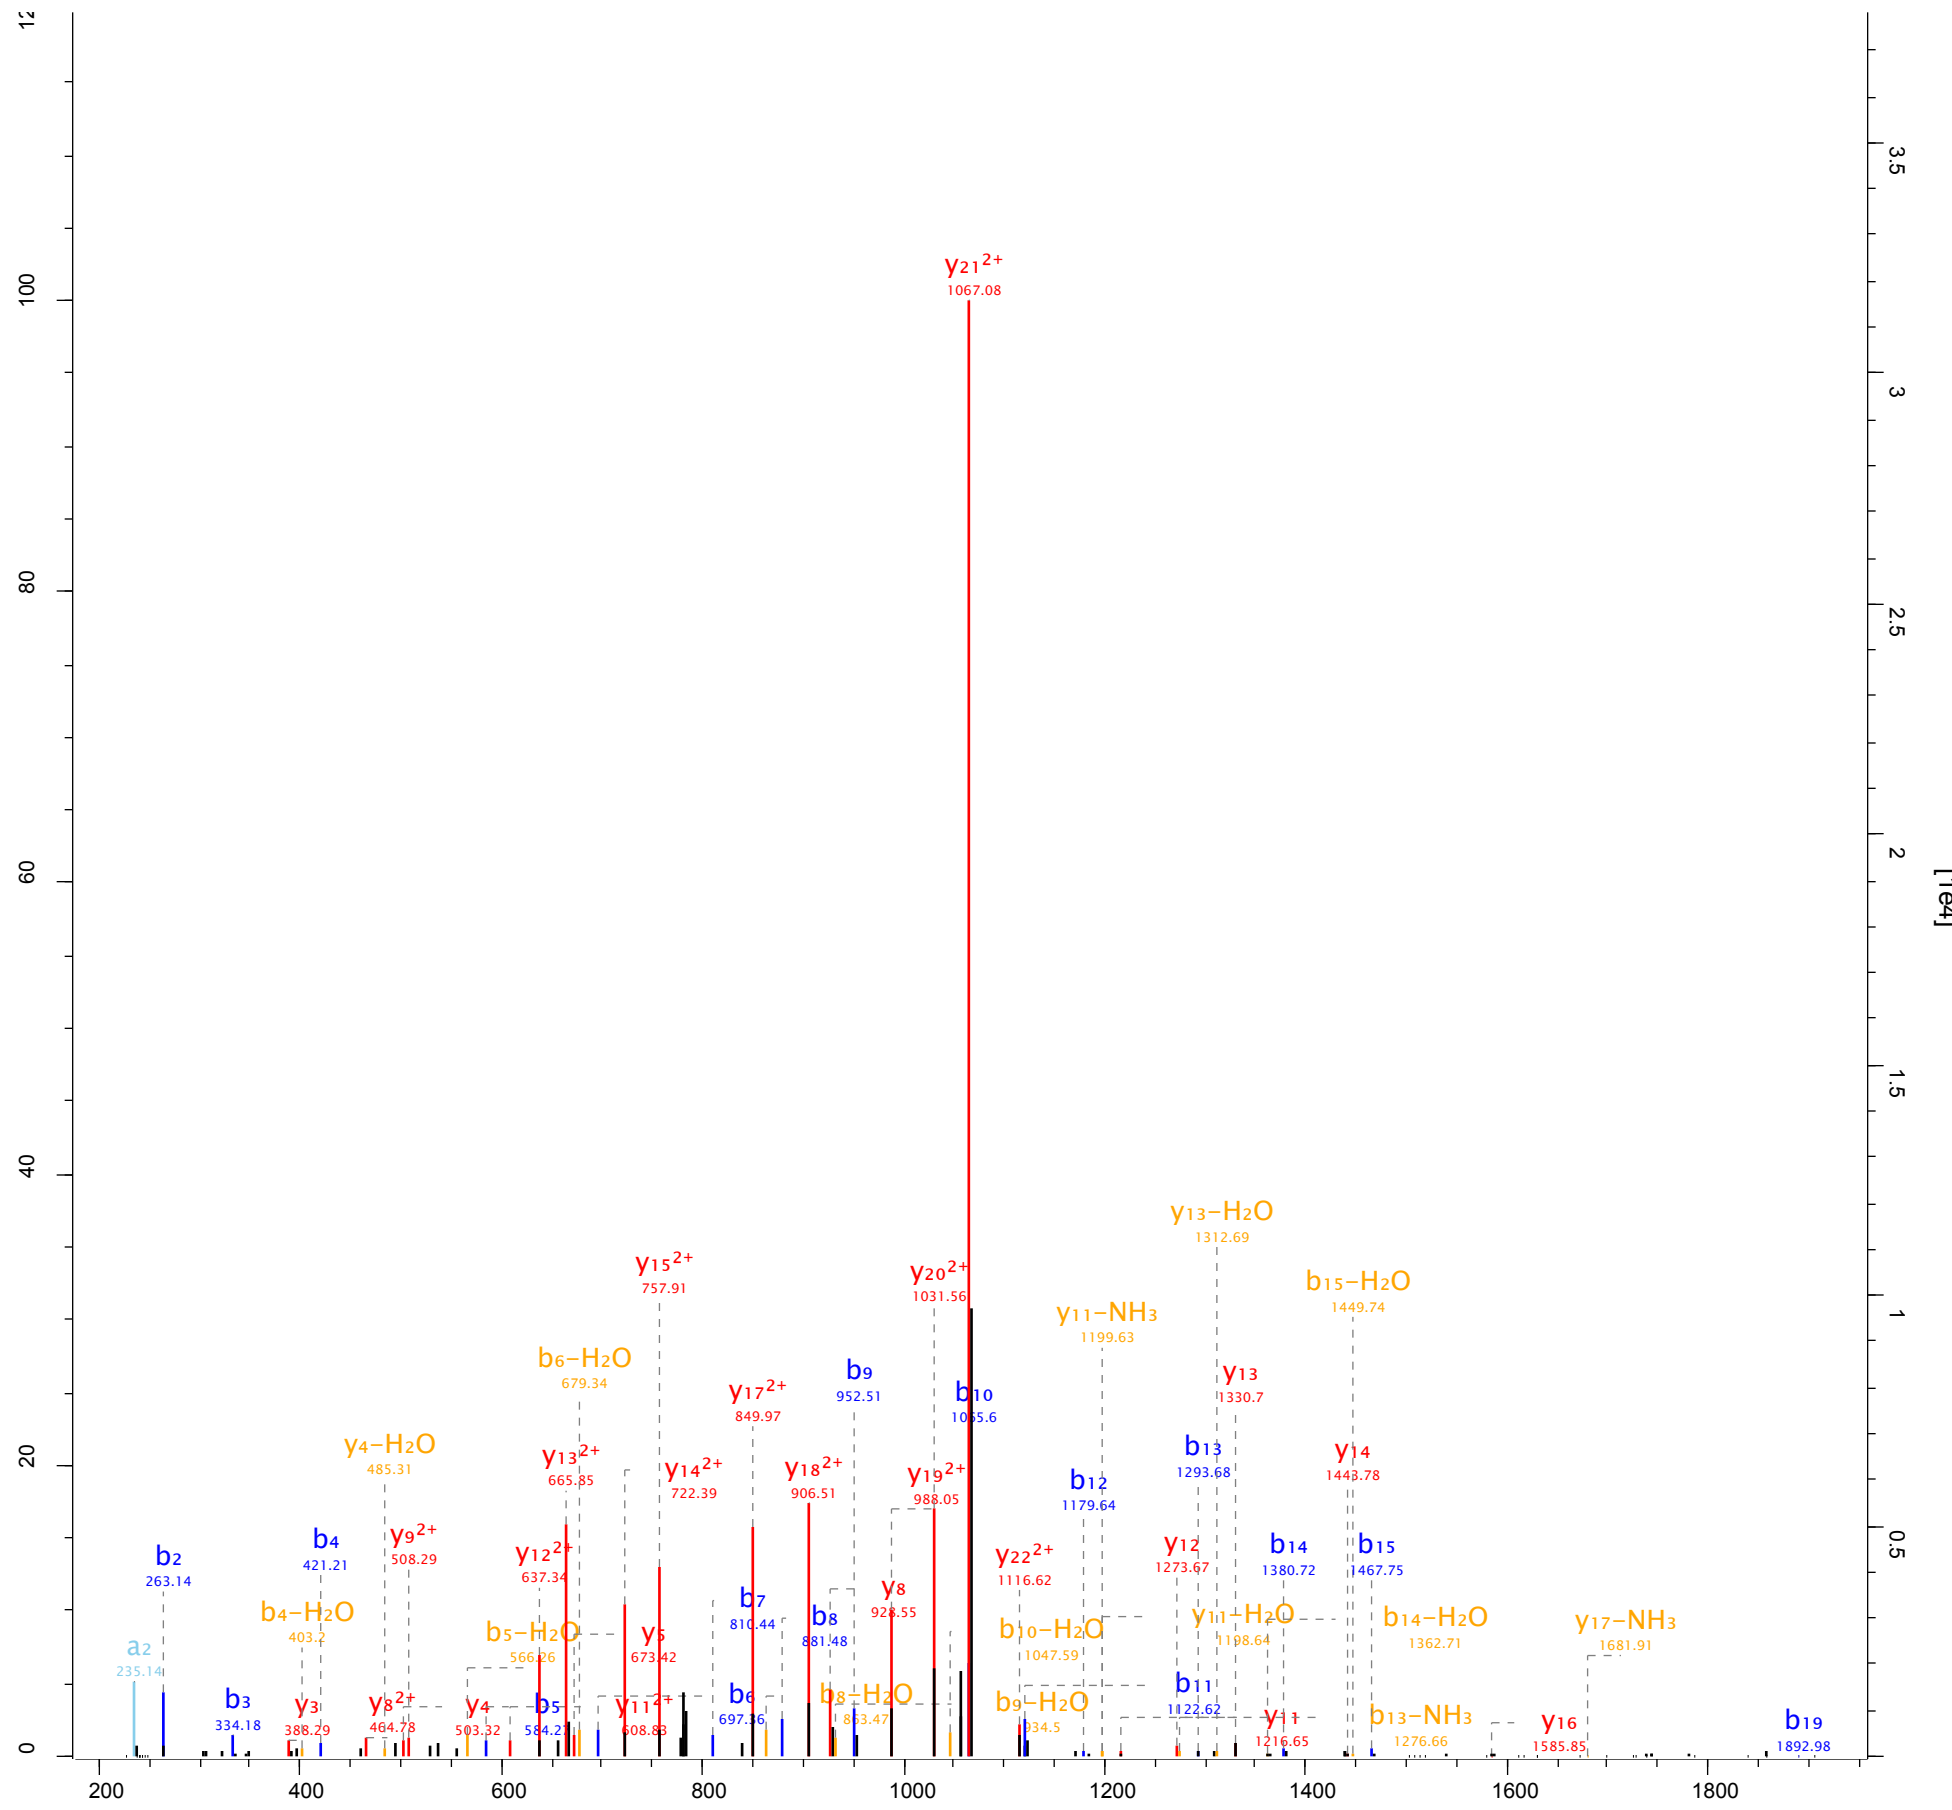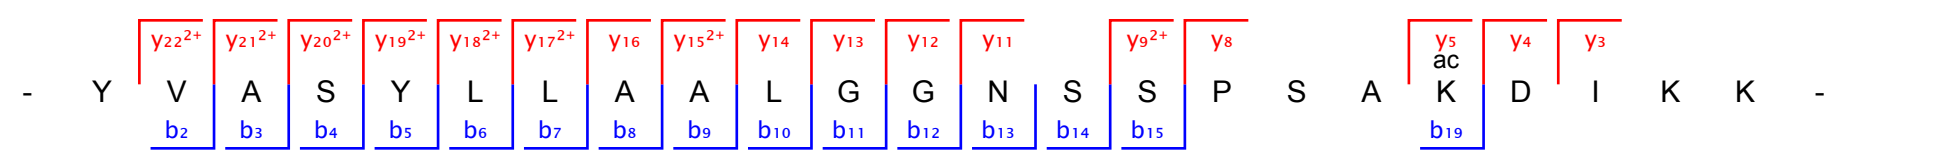

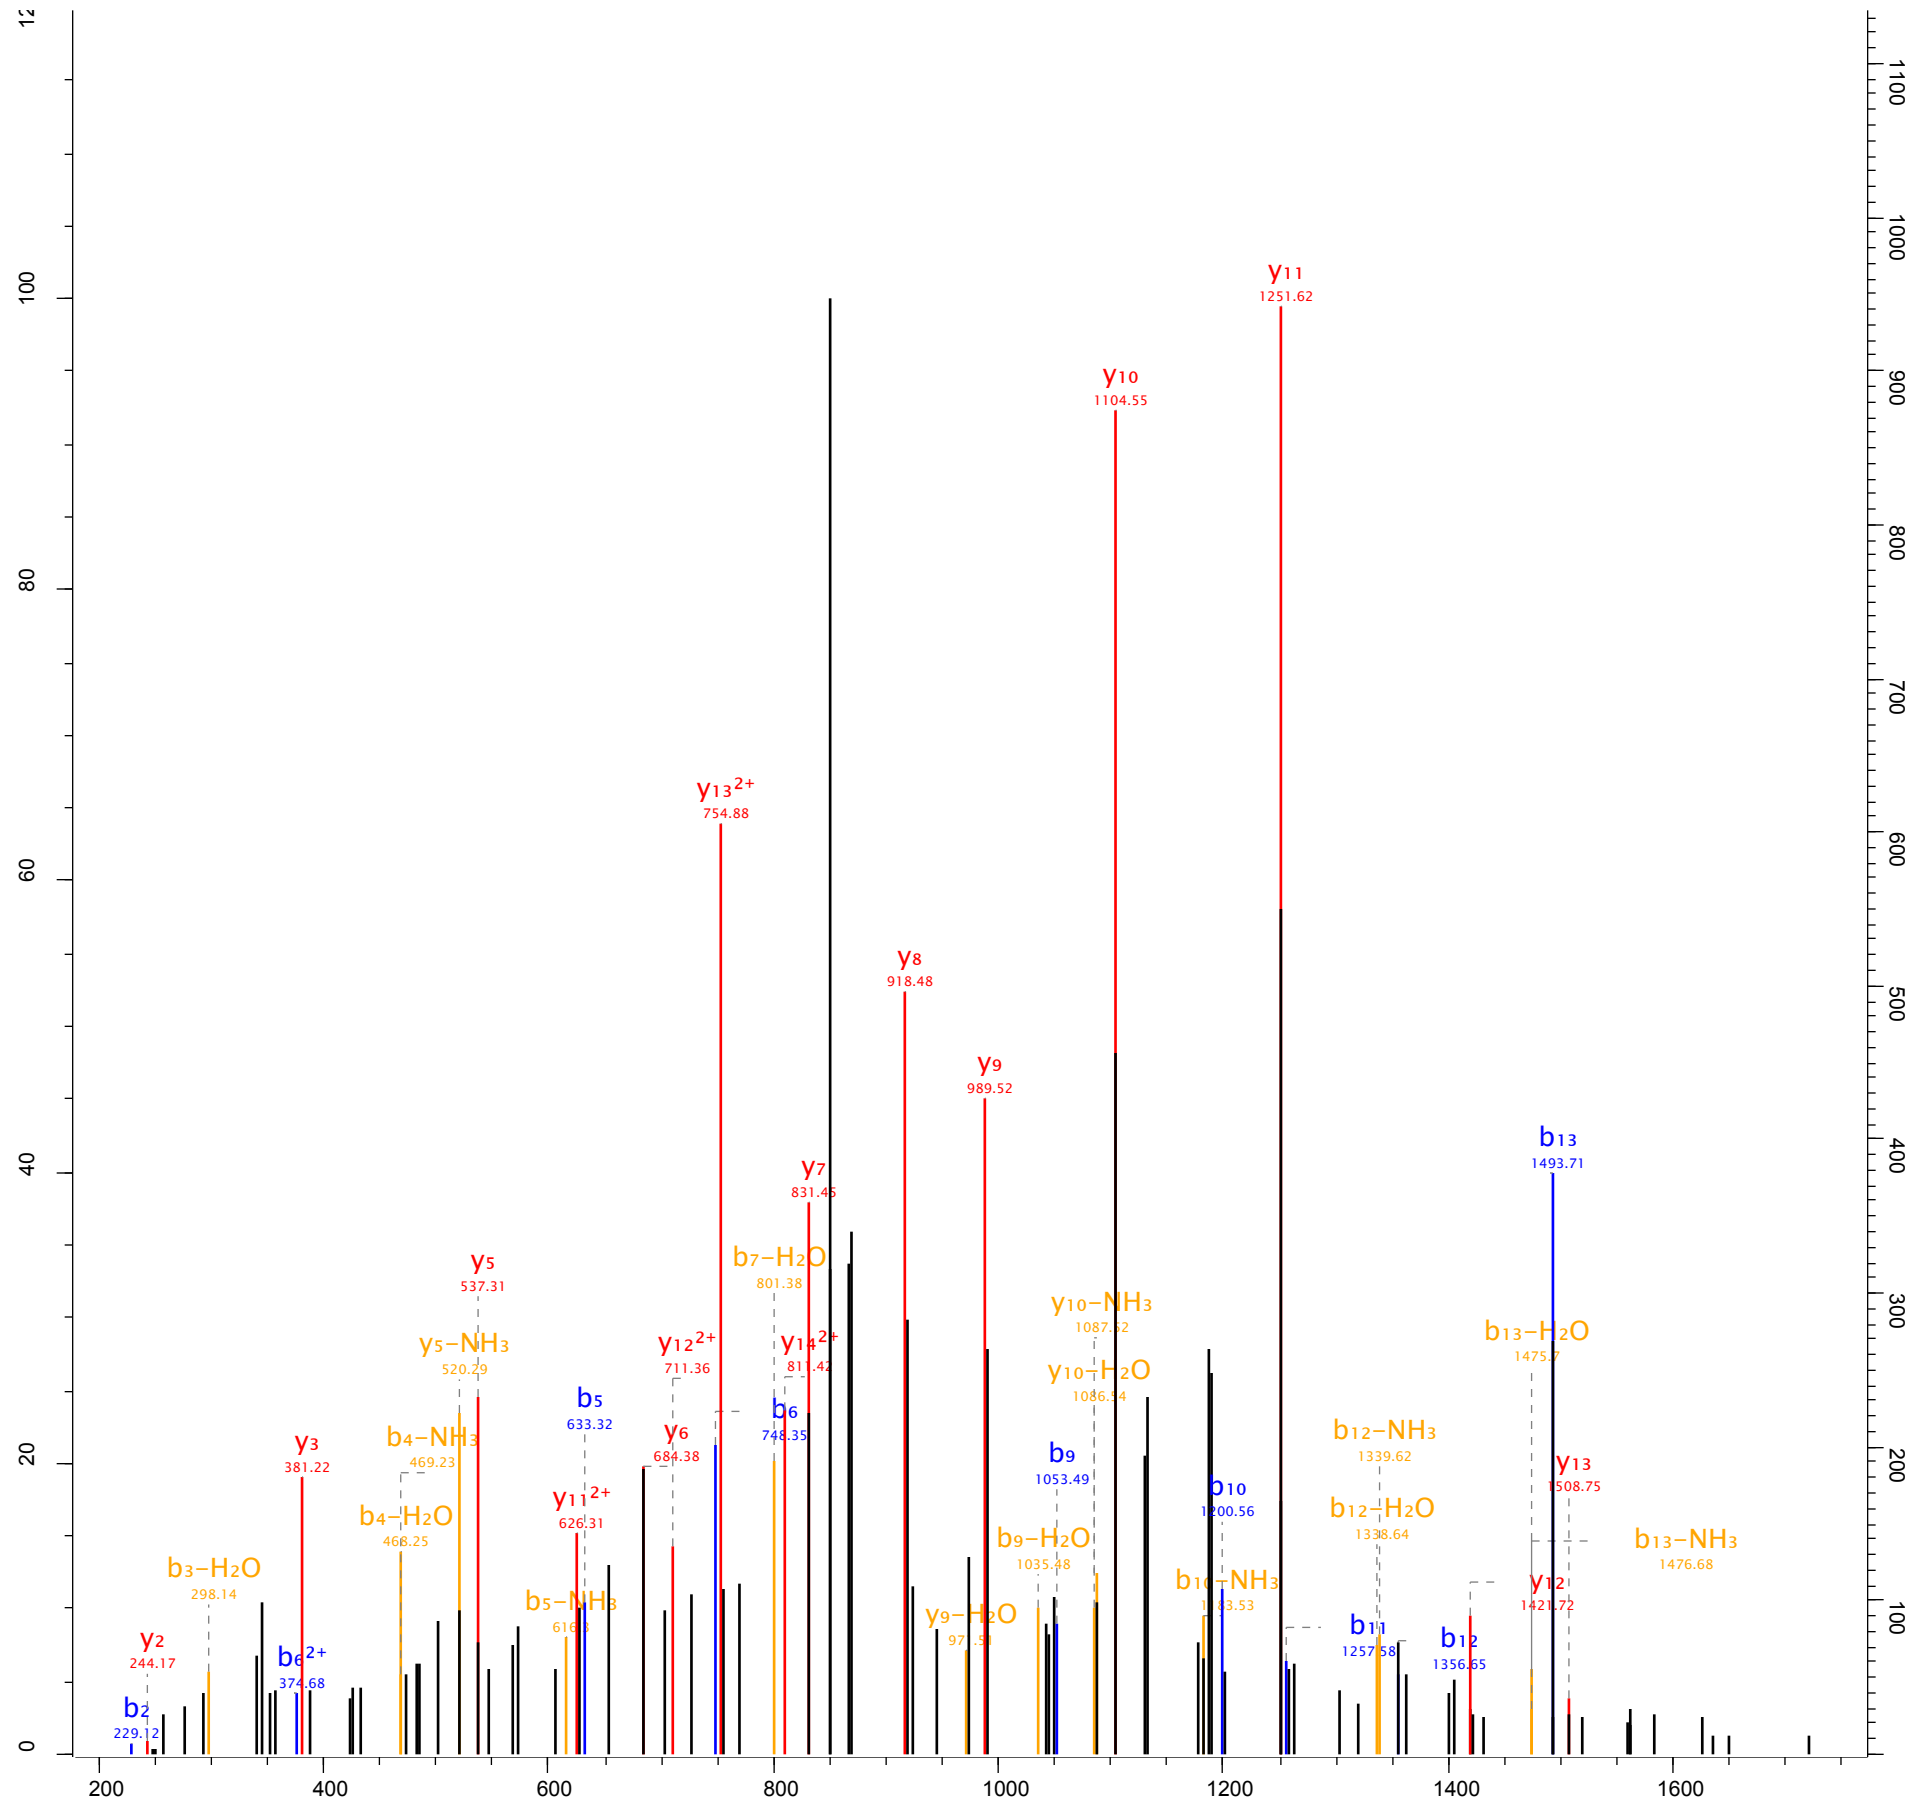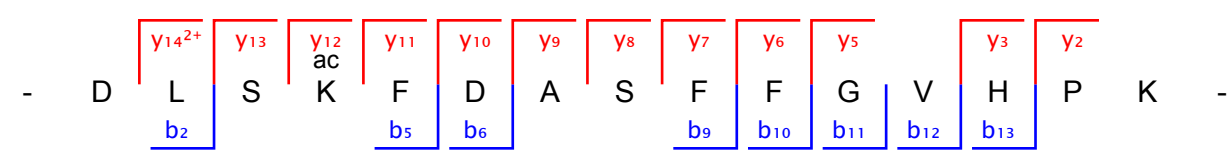

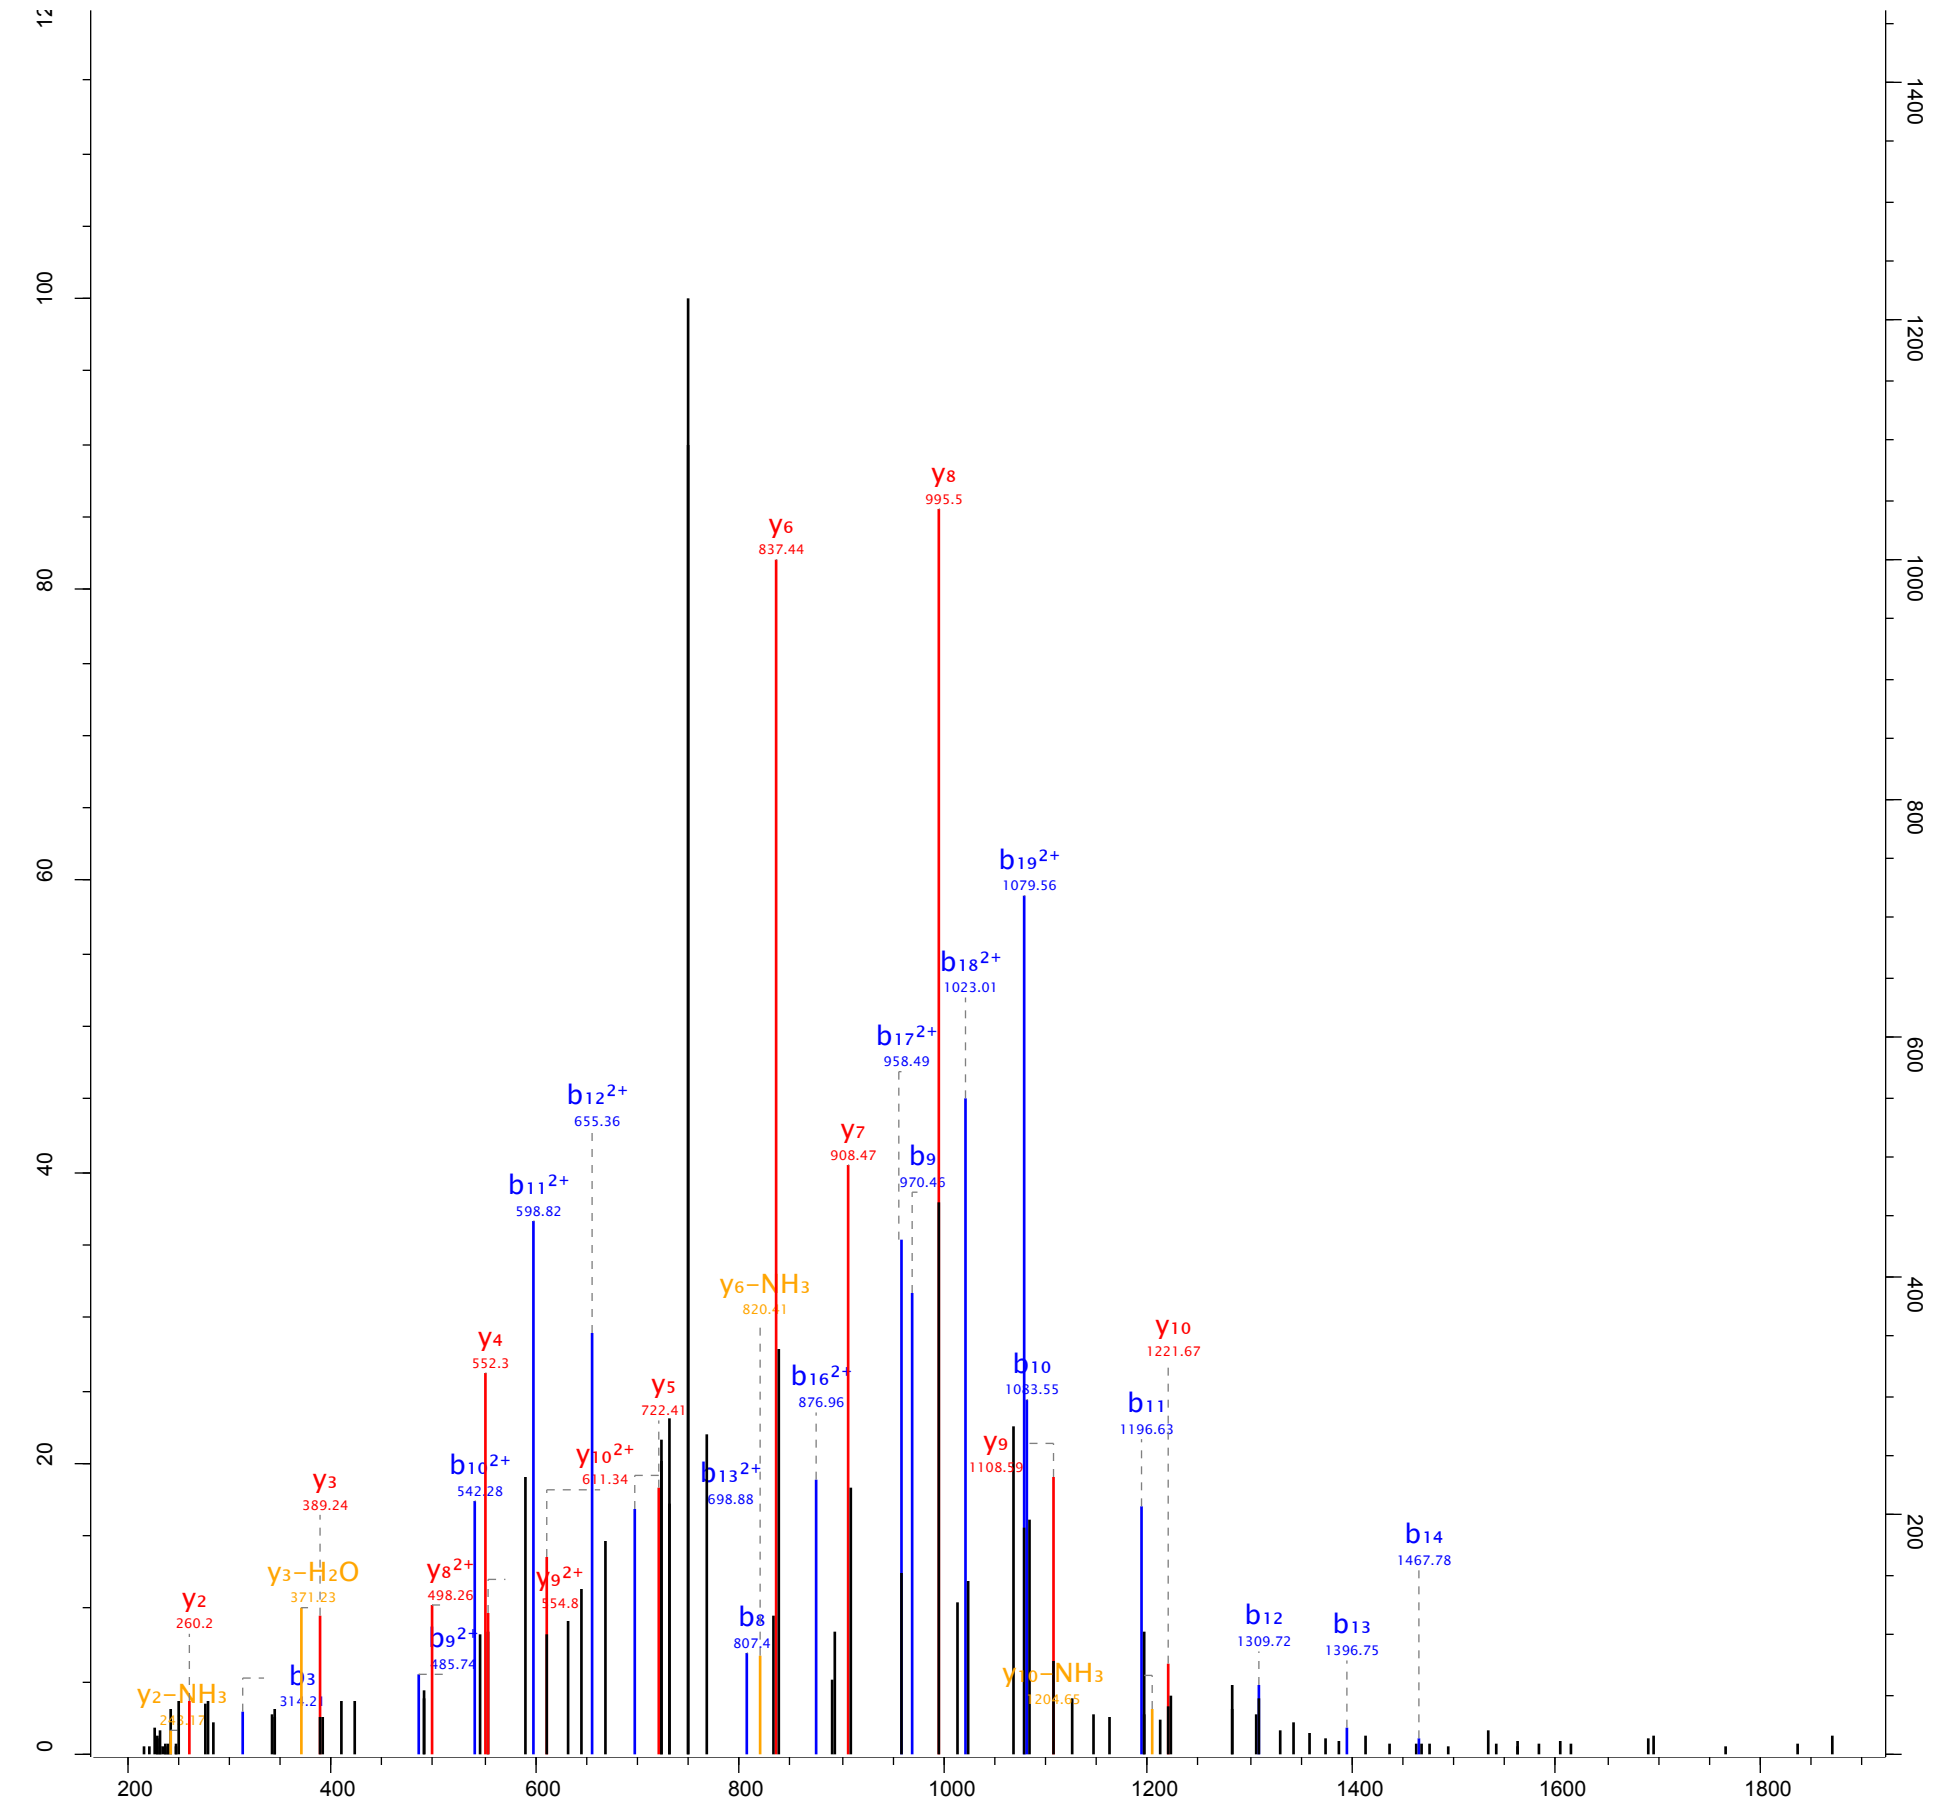

- S L L H S P G D Y I L L S A D K Y E I K -

b3 b8 b9 b10 b11 b12 b13 b14 b16<sup>2+</sup> b17<sup>2+</sup> b18<sup>2+</sup> b19<sup>2+</sup> y10 y9 y8 y7 y6 y5 ac y4 y3 y2

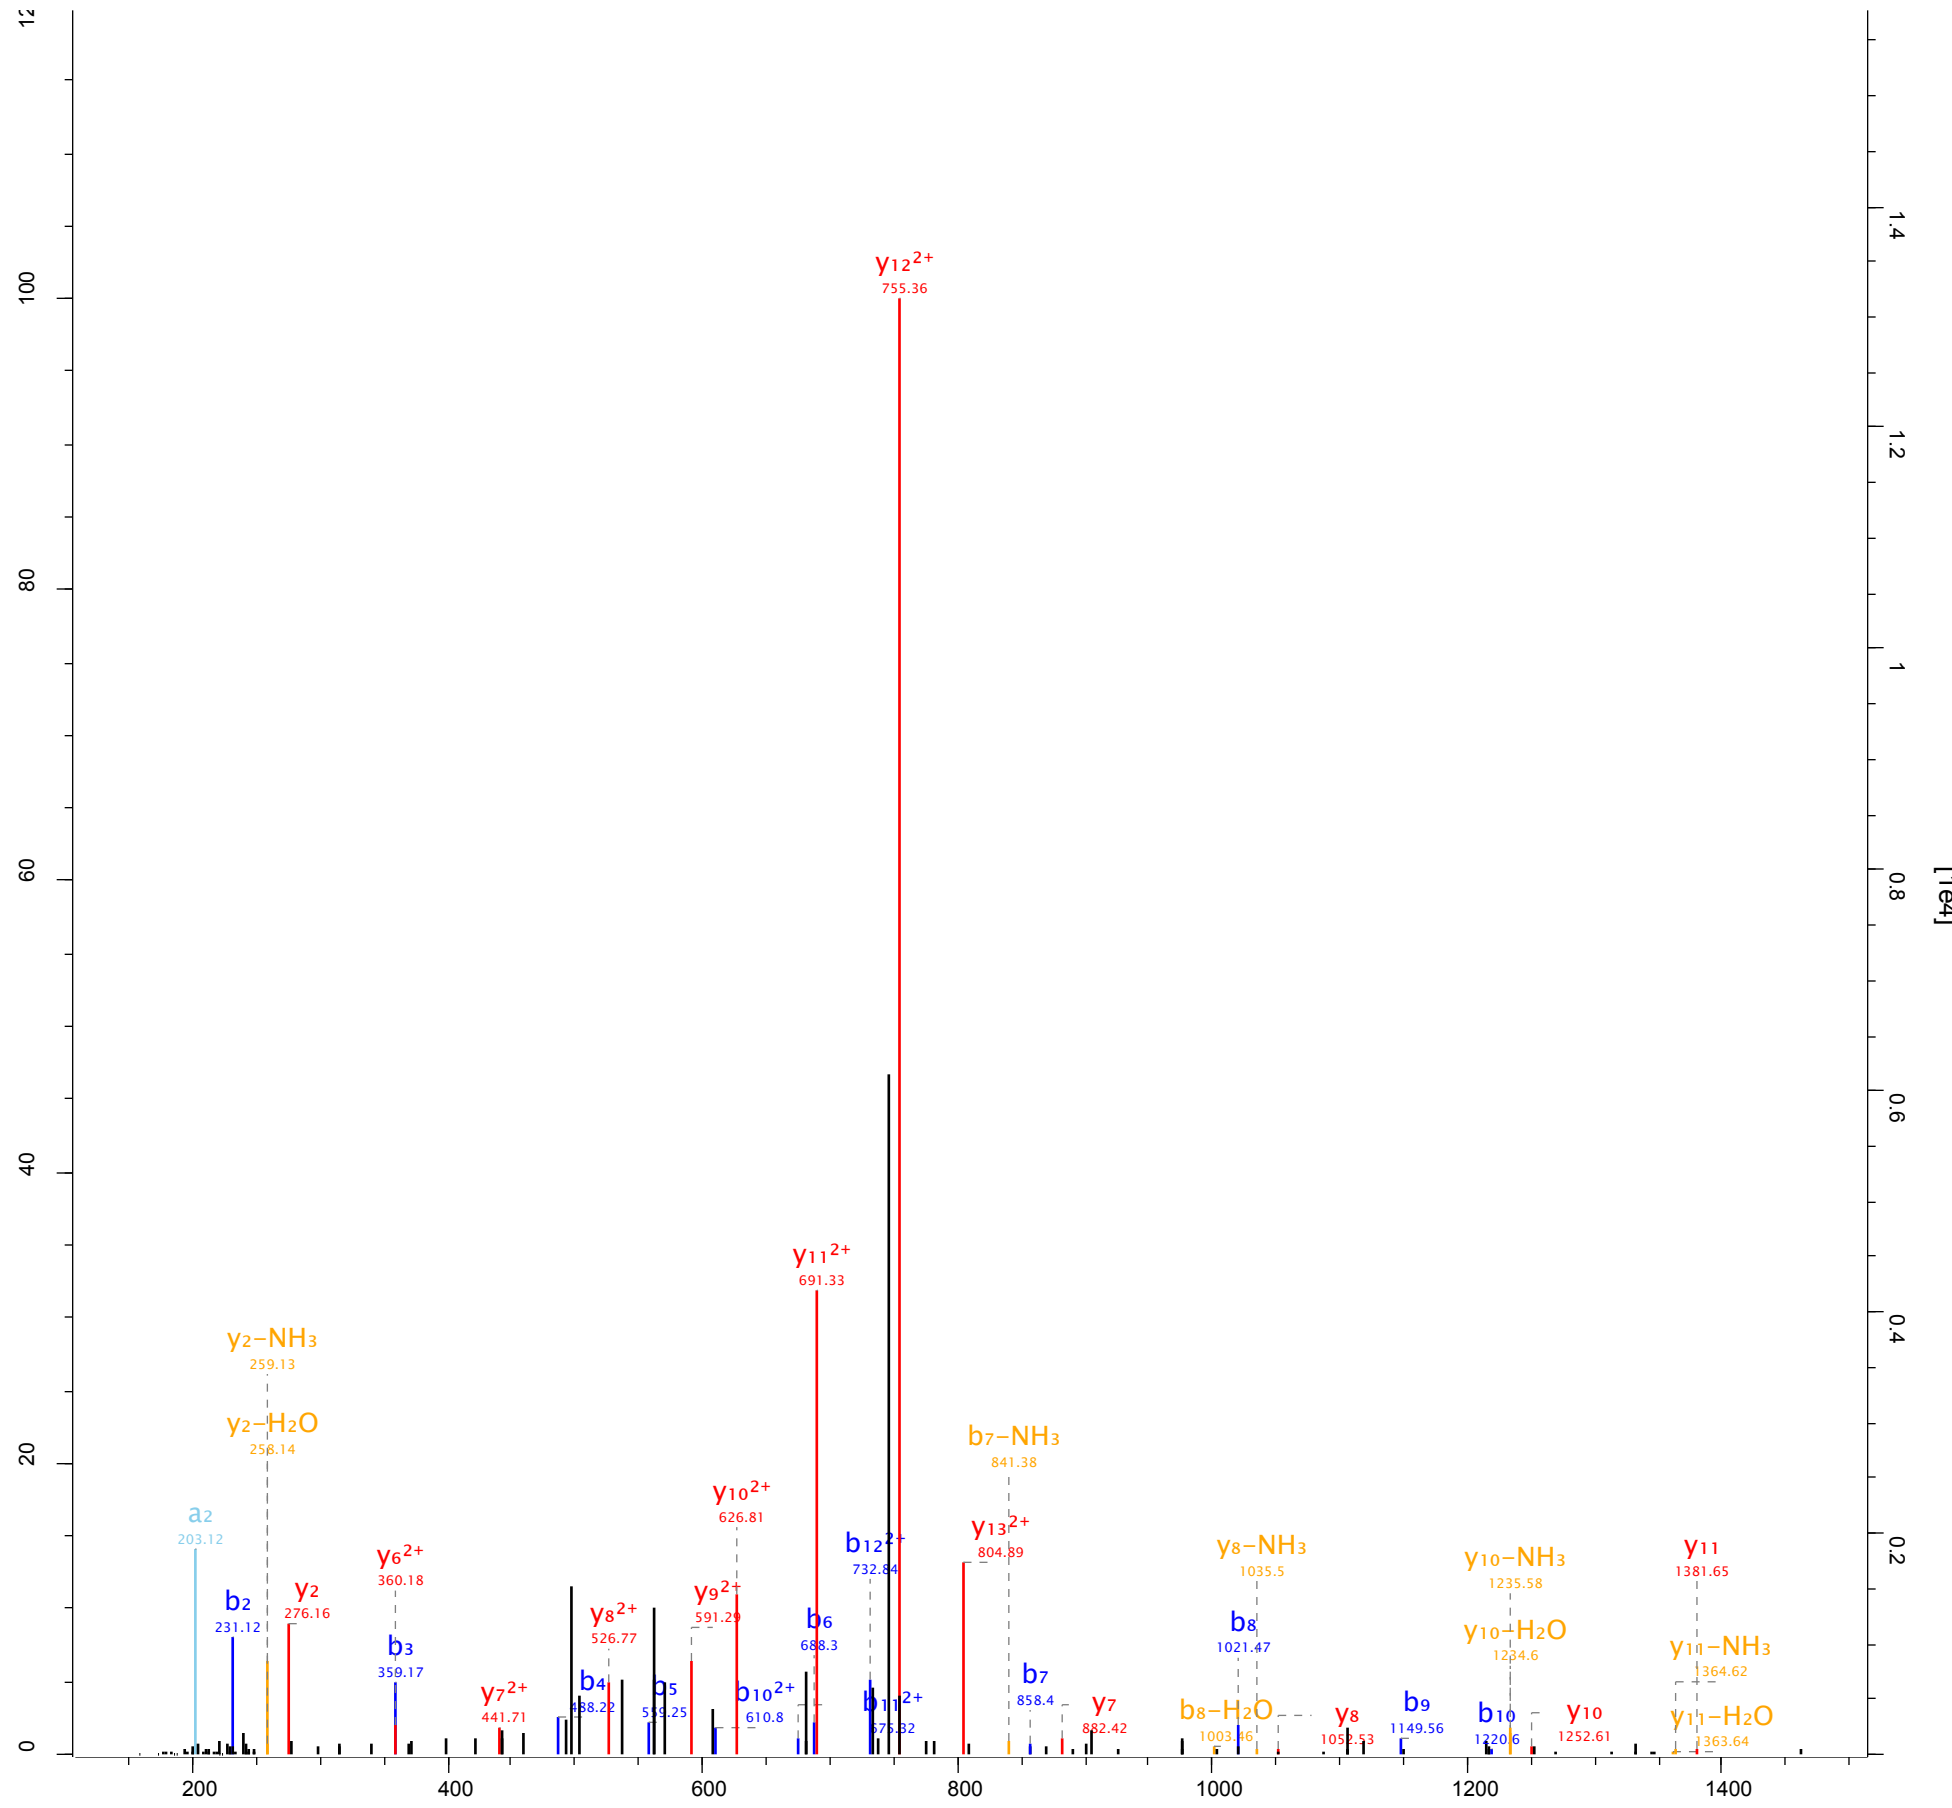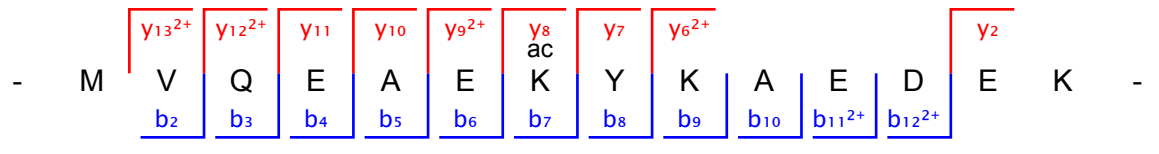

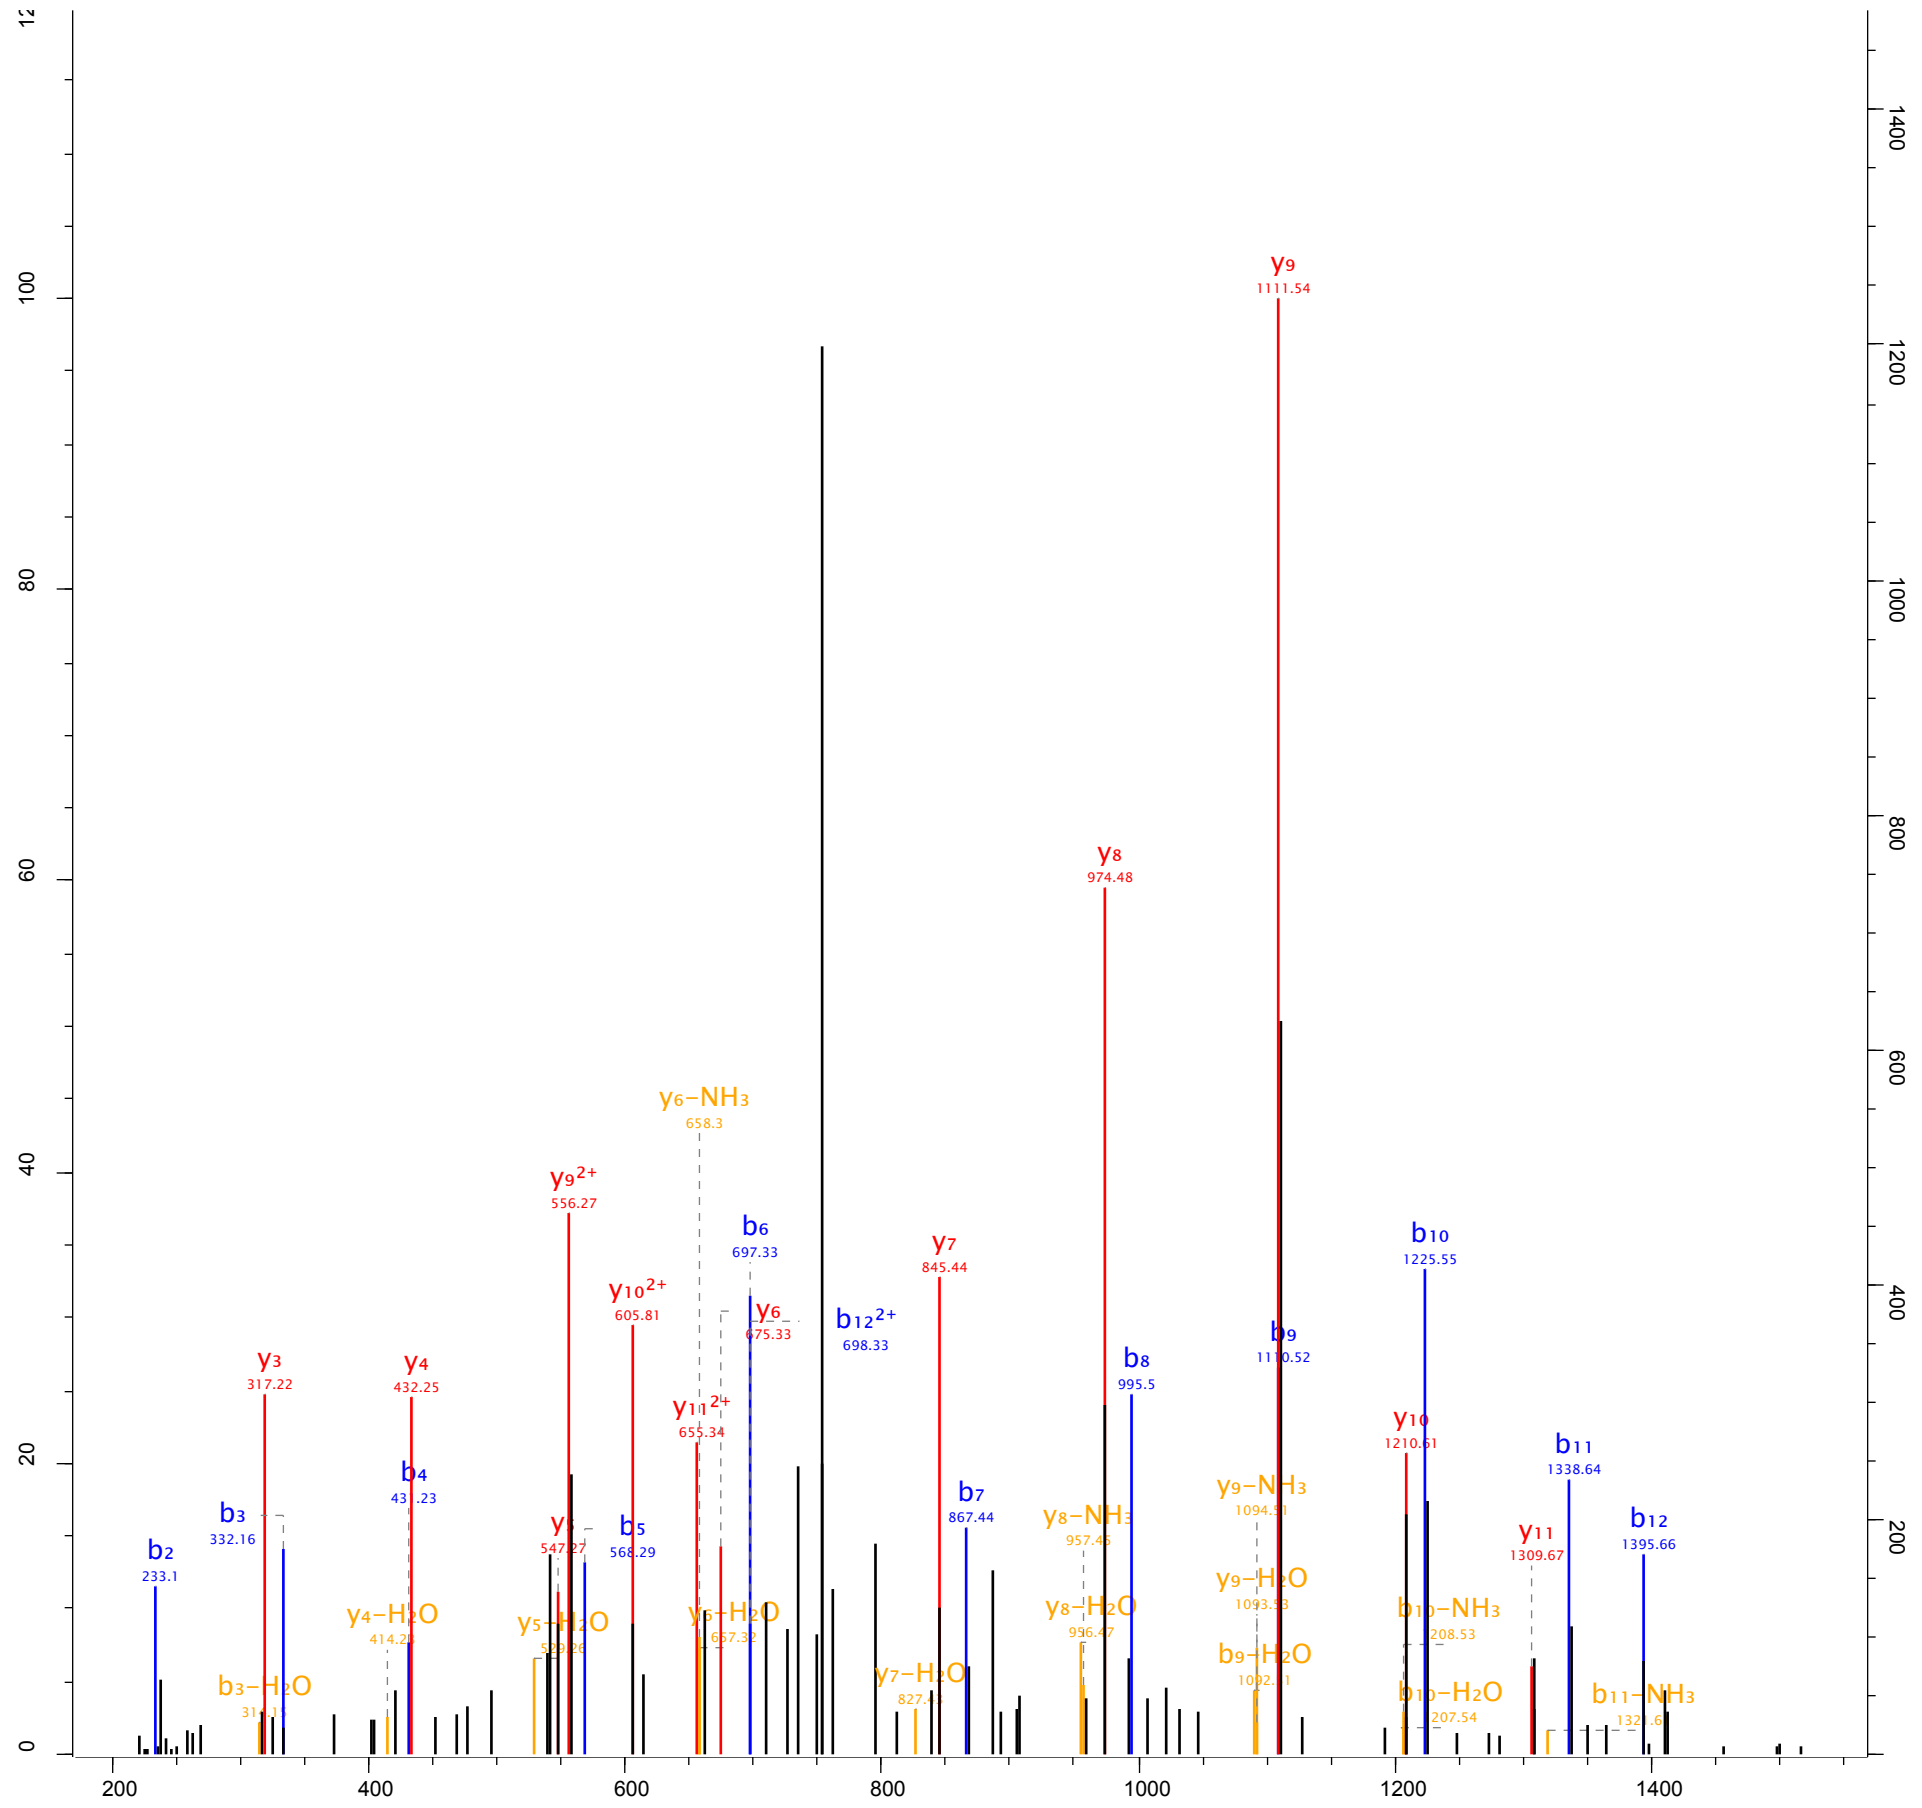

- T M V V H E K Q D D L G K -

y<sub>11</sub>
y<sub>10</sub>
y<sub>9</sub>
y<sub>8</sub>
y<sub>7</sub>  
ac
y<sub>6</sub>
y<sub>5</sub>
y<sub>4</sub>
y<sub>3</sub>

b<sub>2</sub>
b<sub>3</sub>
b<sub>4</sub>
b<sub>5</sub>
b<sub>6</sub>
b<sub>7</sub>
b<sub>8</sub>
b<sub>9</sub>
b<sub>10</sub>
b<sub>11</sub>
b<sub>12</sub>

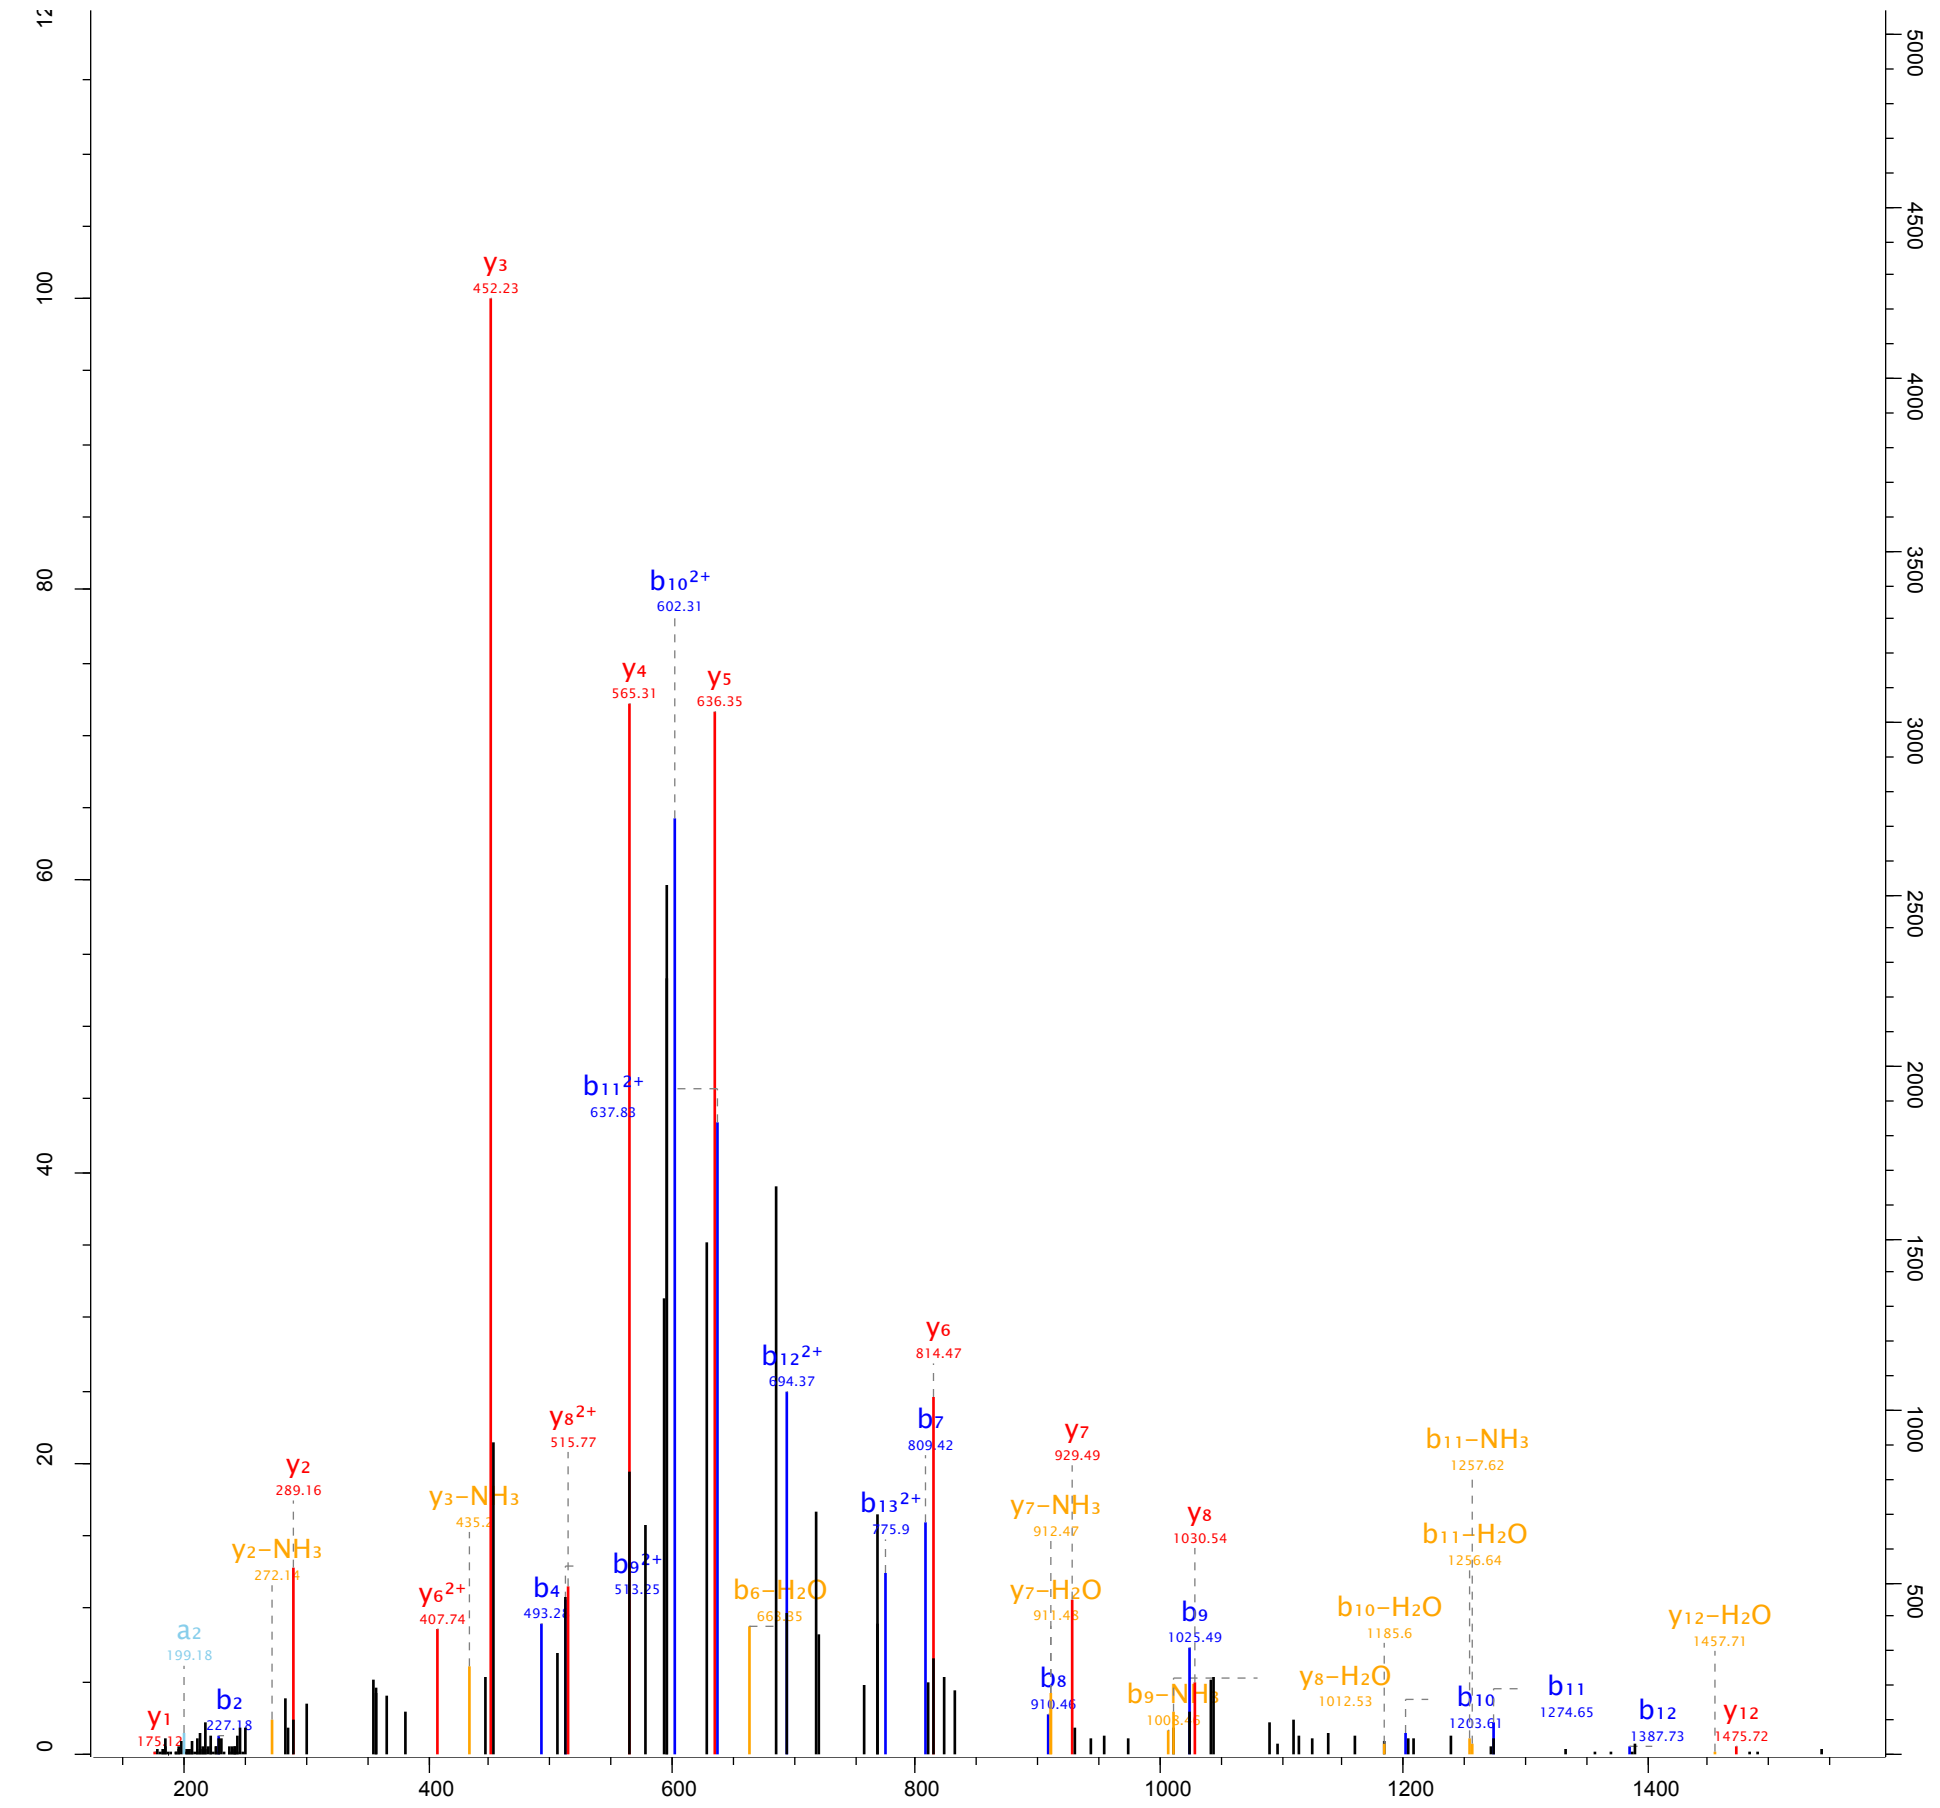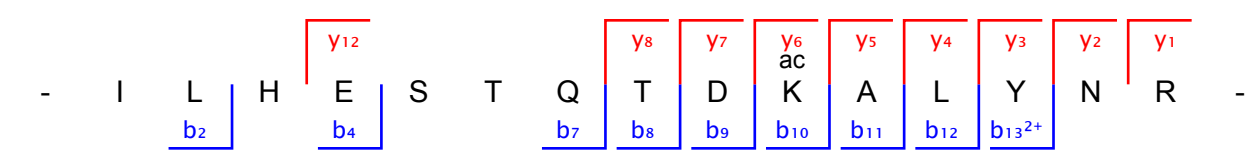

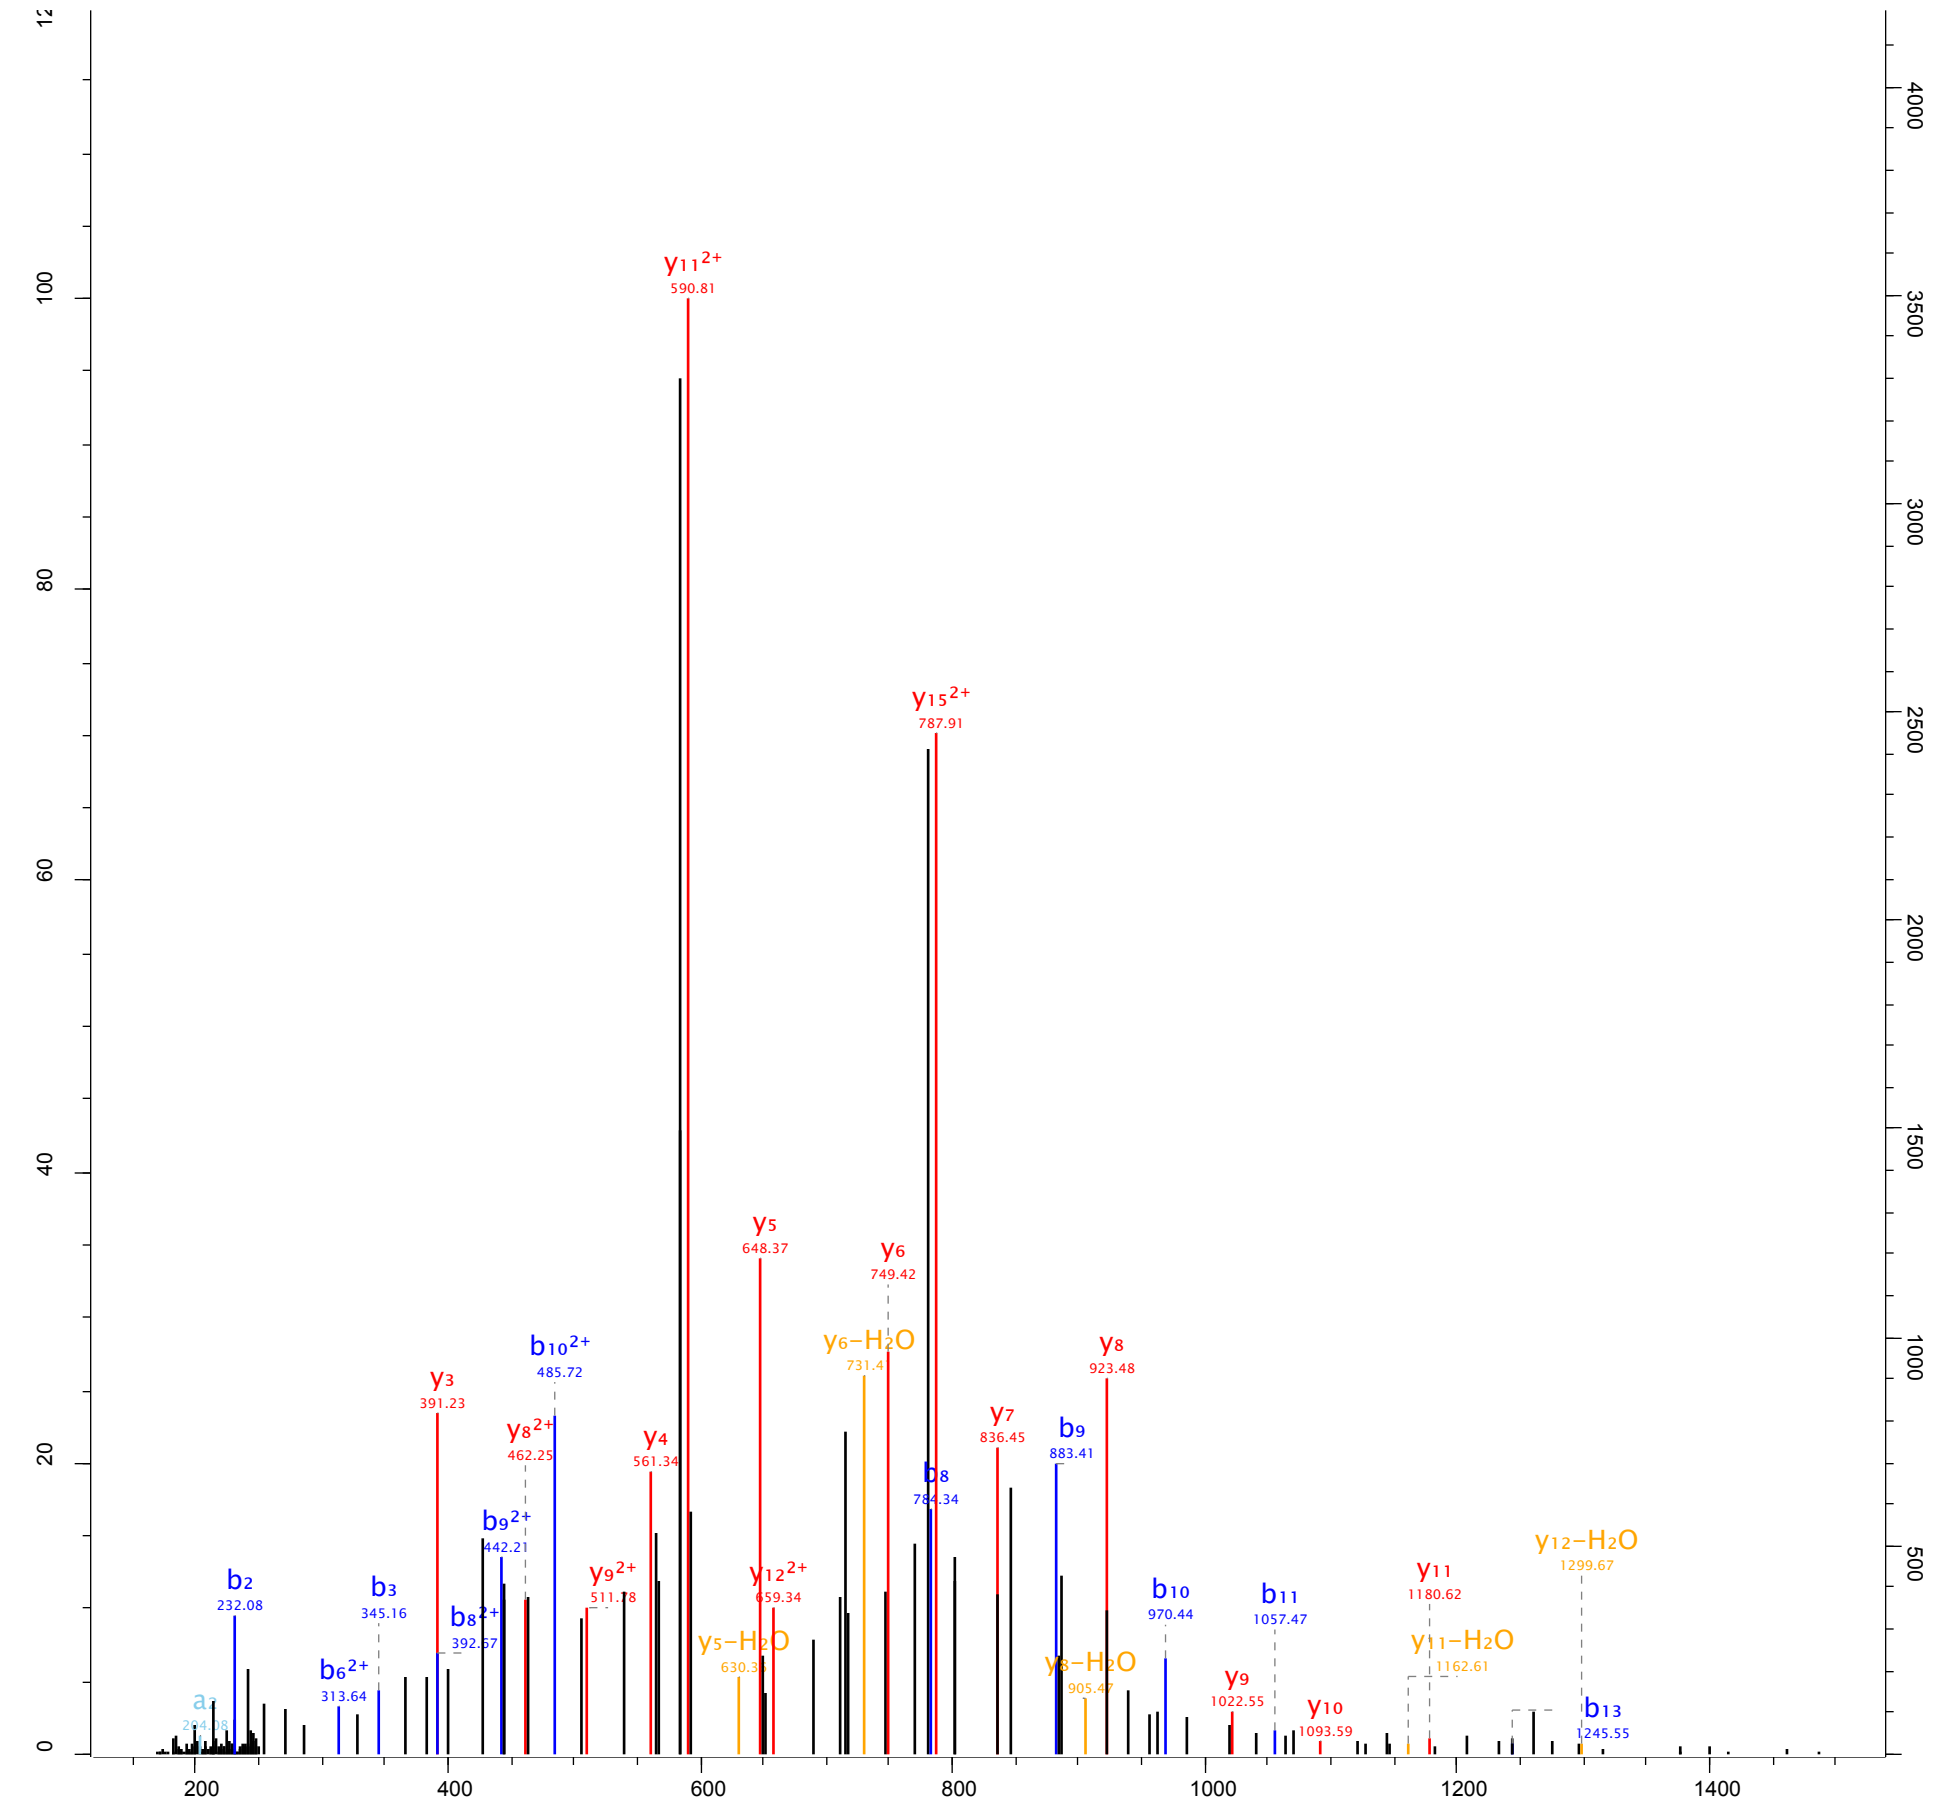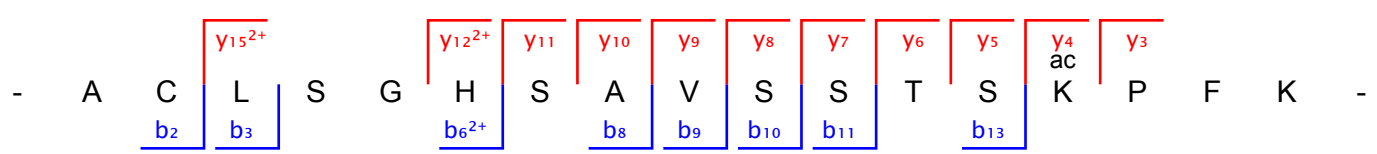

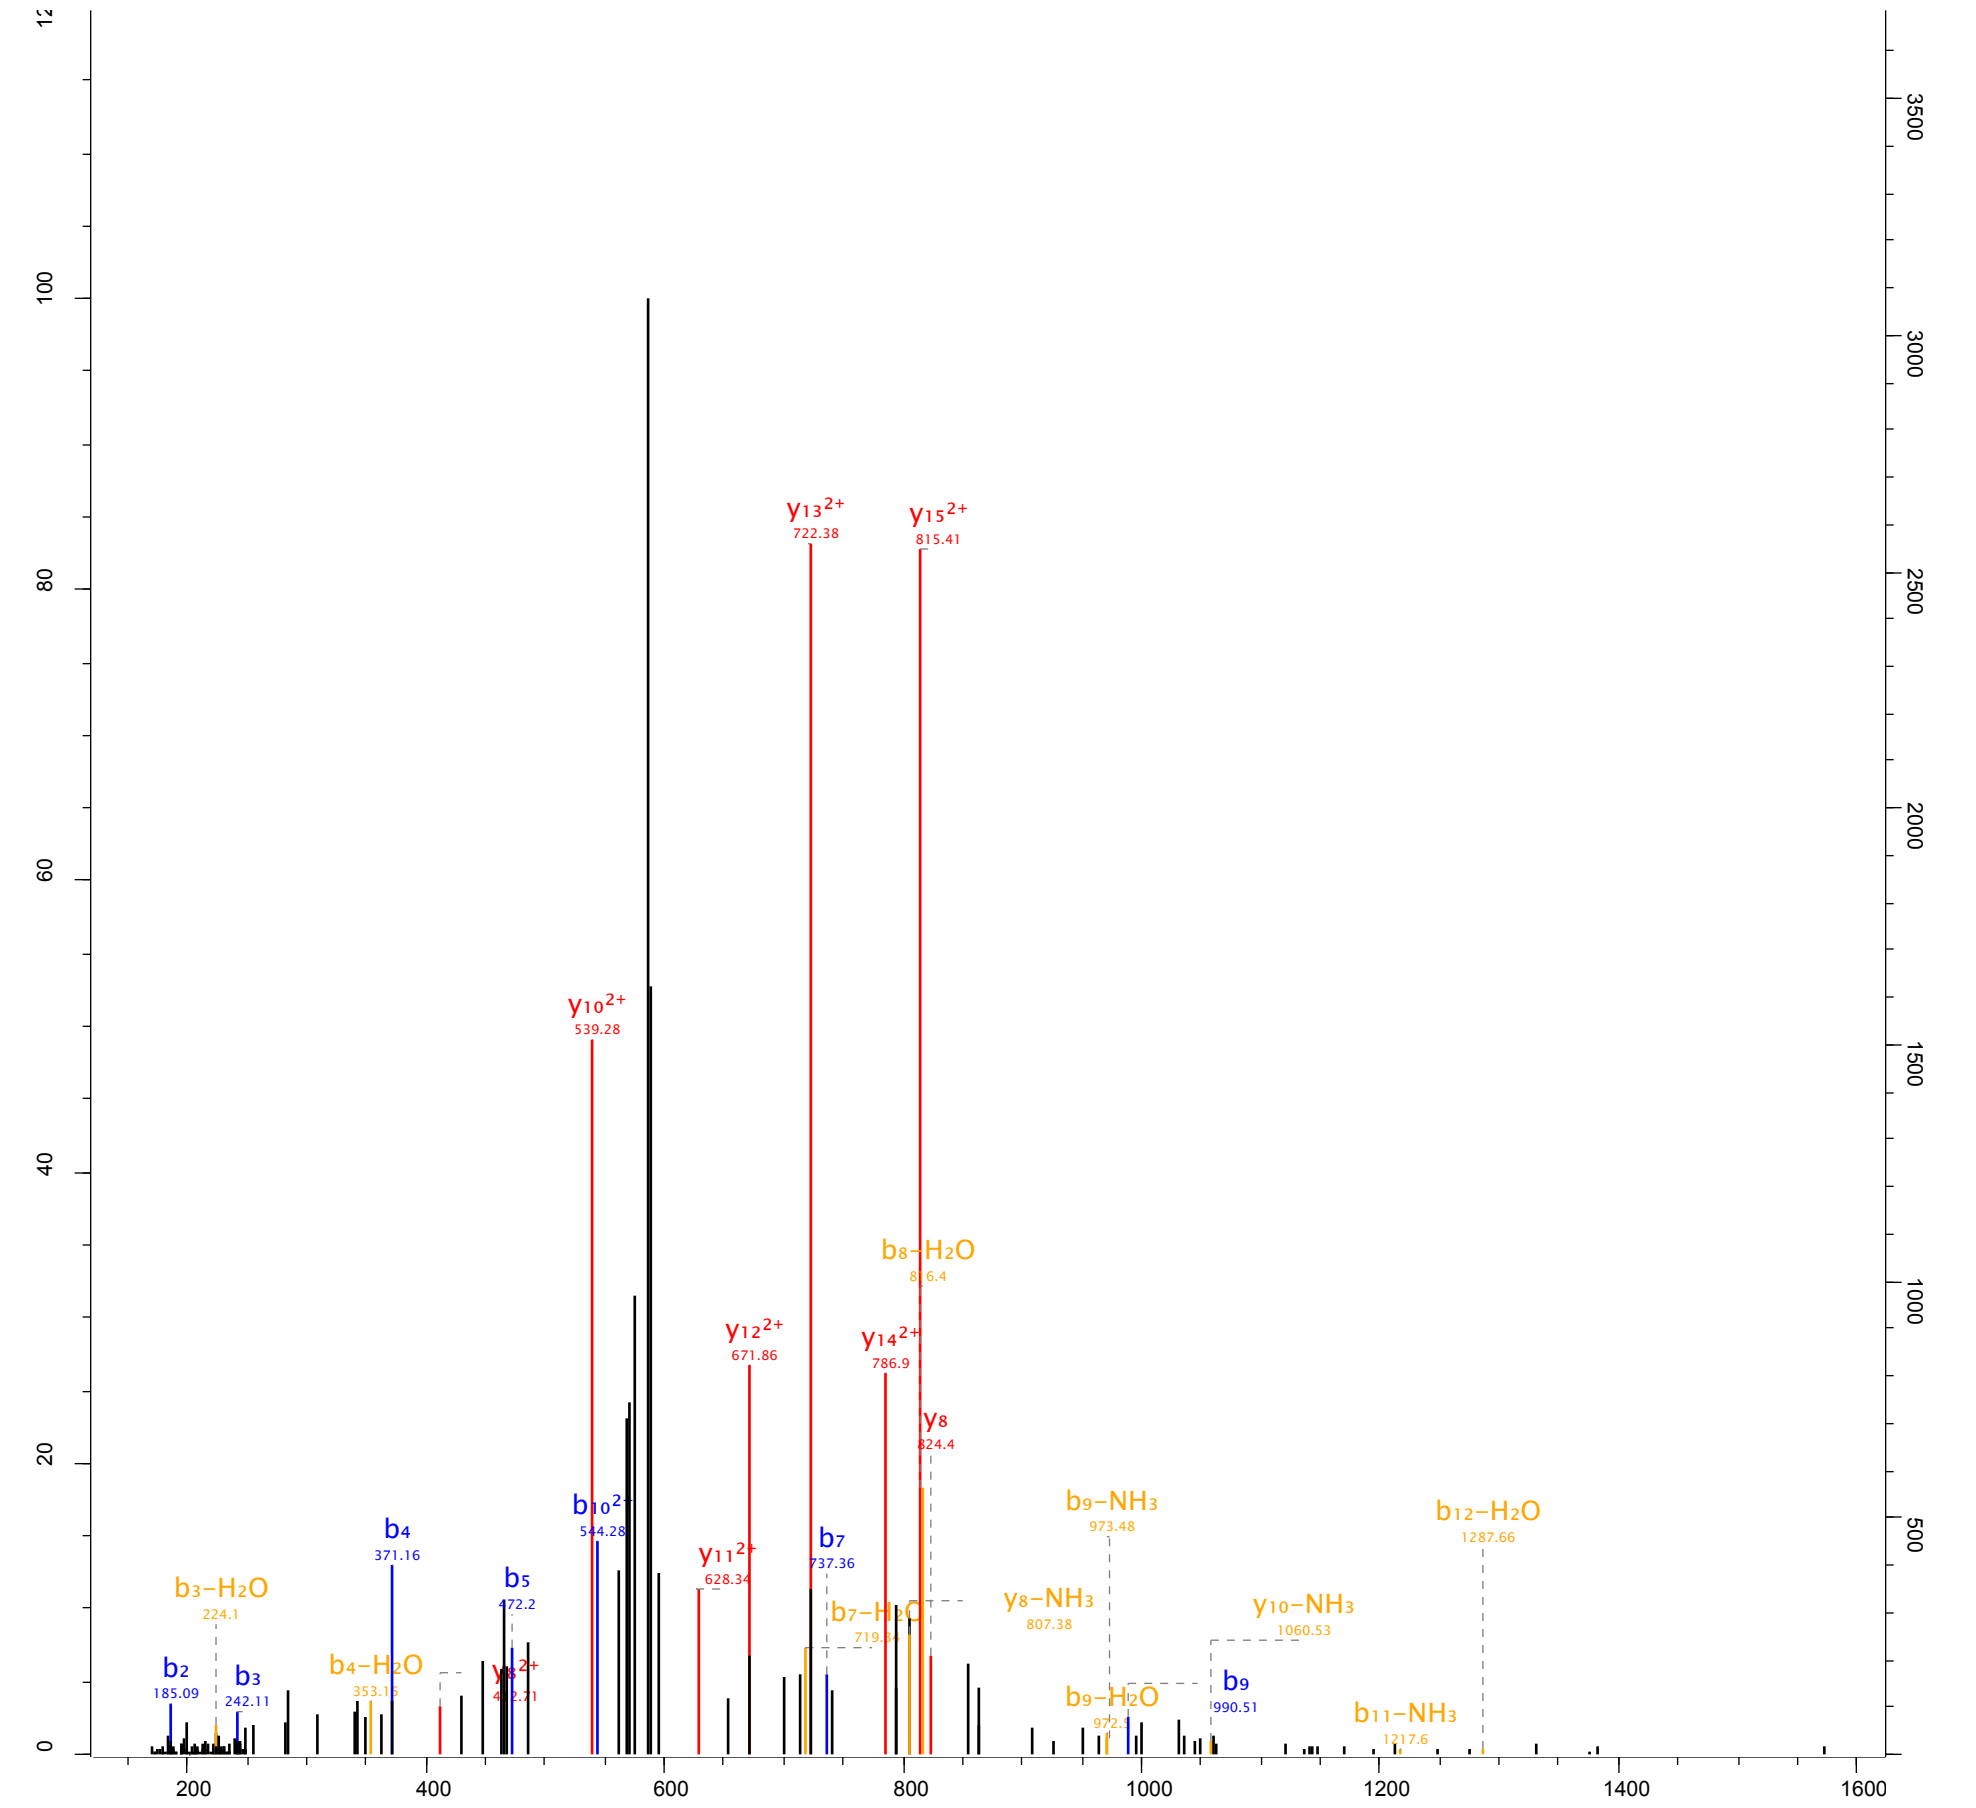

- S P G E T S K P R P F A G G G Y R -

b<sub>2</sub>
b<sub>3</sub>
b<sub>4</sub>
b<sub>5</sub>
b<sub>7</sub>
b<sub>9</sub>
b<sub>10</sub><sup>2+</sup>
y<sub>15</sub><sup>2+</sup>
y<sub>14</sub><sup>2+</sup>
y<sub>13</sub><sup>2+</sup>
y<sub>12</sub><sup>2+</sup>
y<sub>11</sub><sup>2+</sup>
ac
y<sub>10</sub><sup>2+</sup>
y<sub>8</sub>



062513\_SCW\_II\_53\_8\_Vargas\_Enriched

14287

ITMS; CID

140.45

668.85

MIIt3

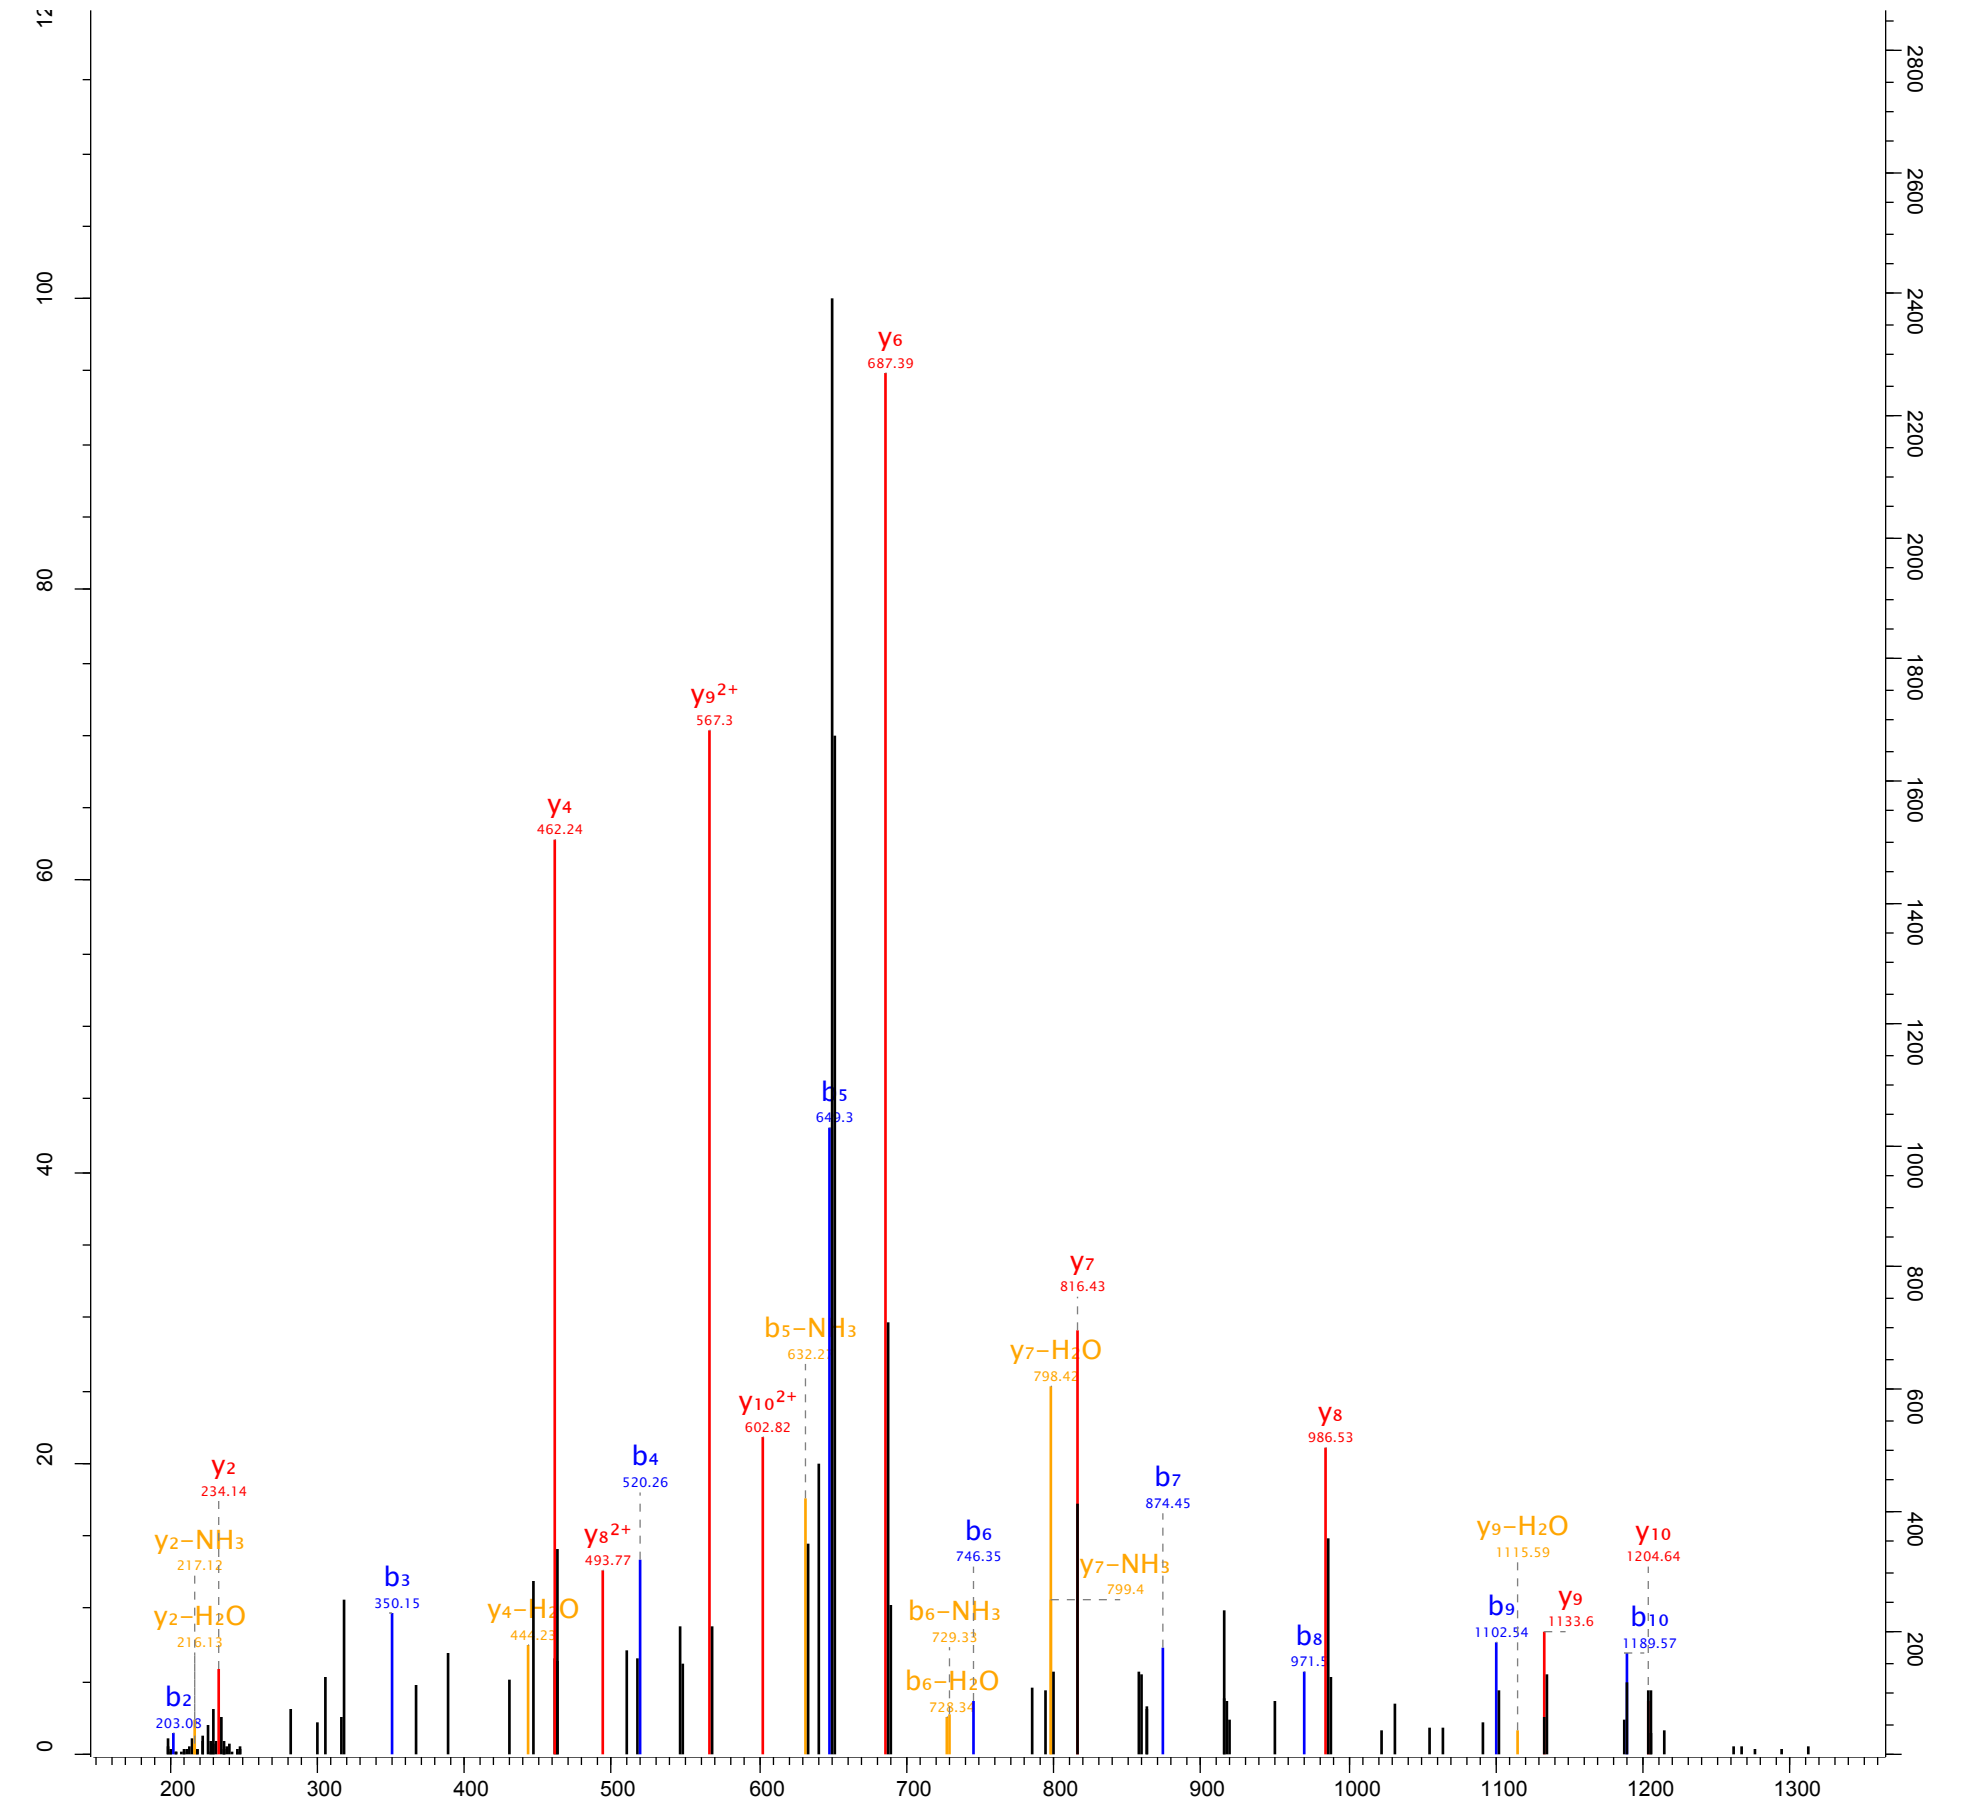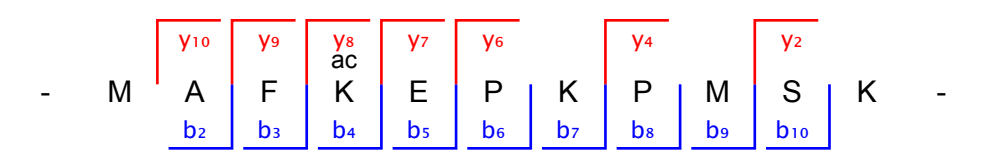

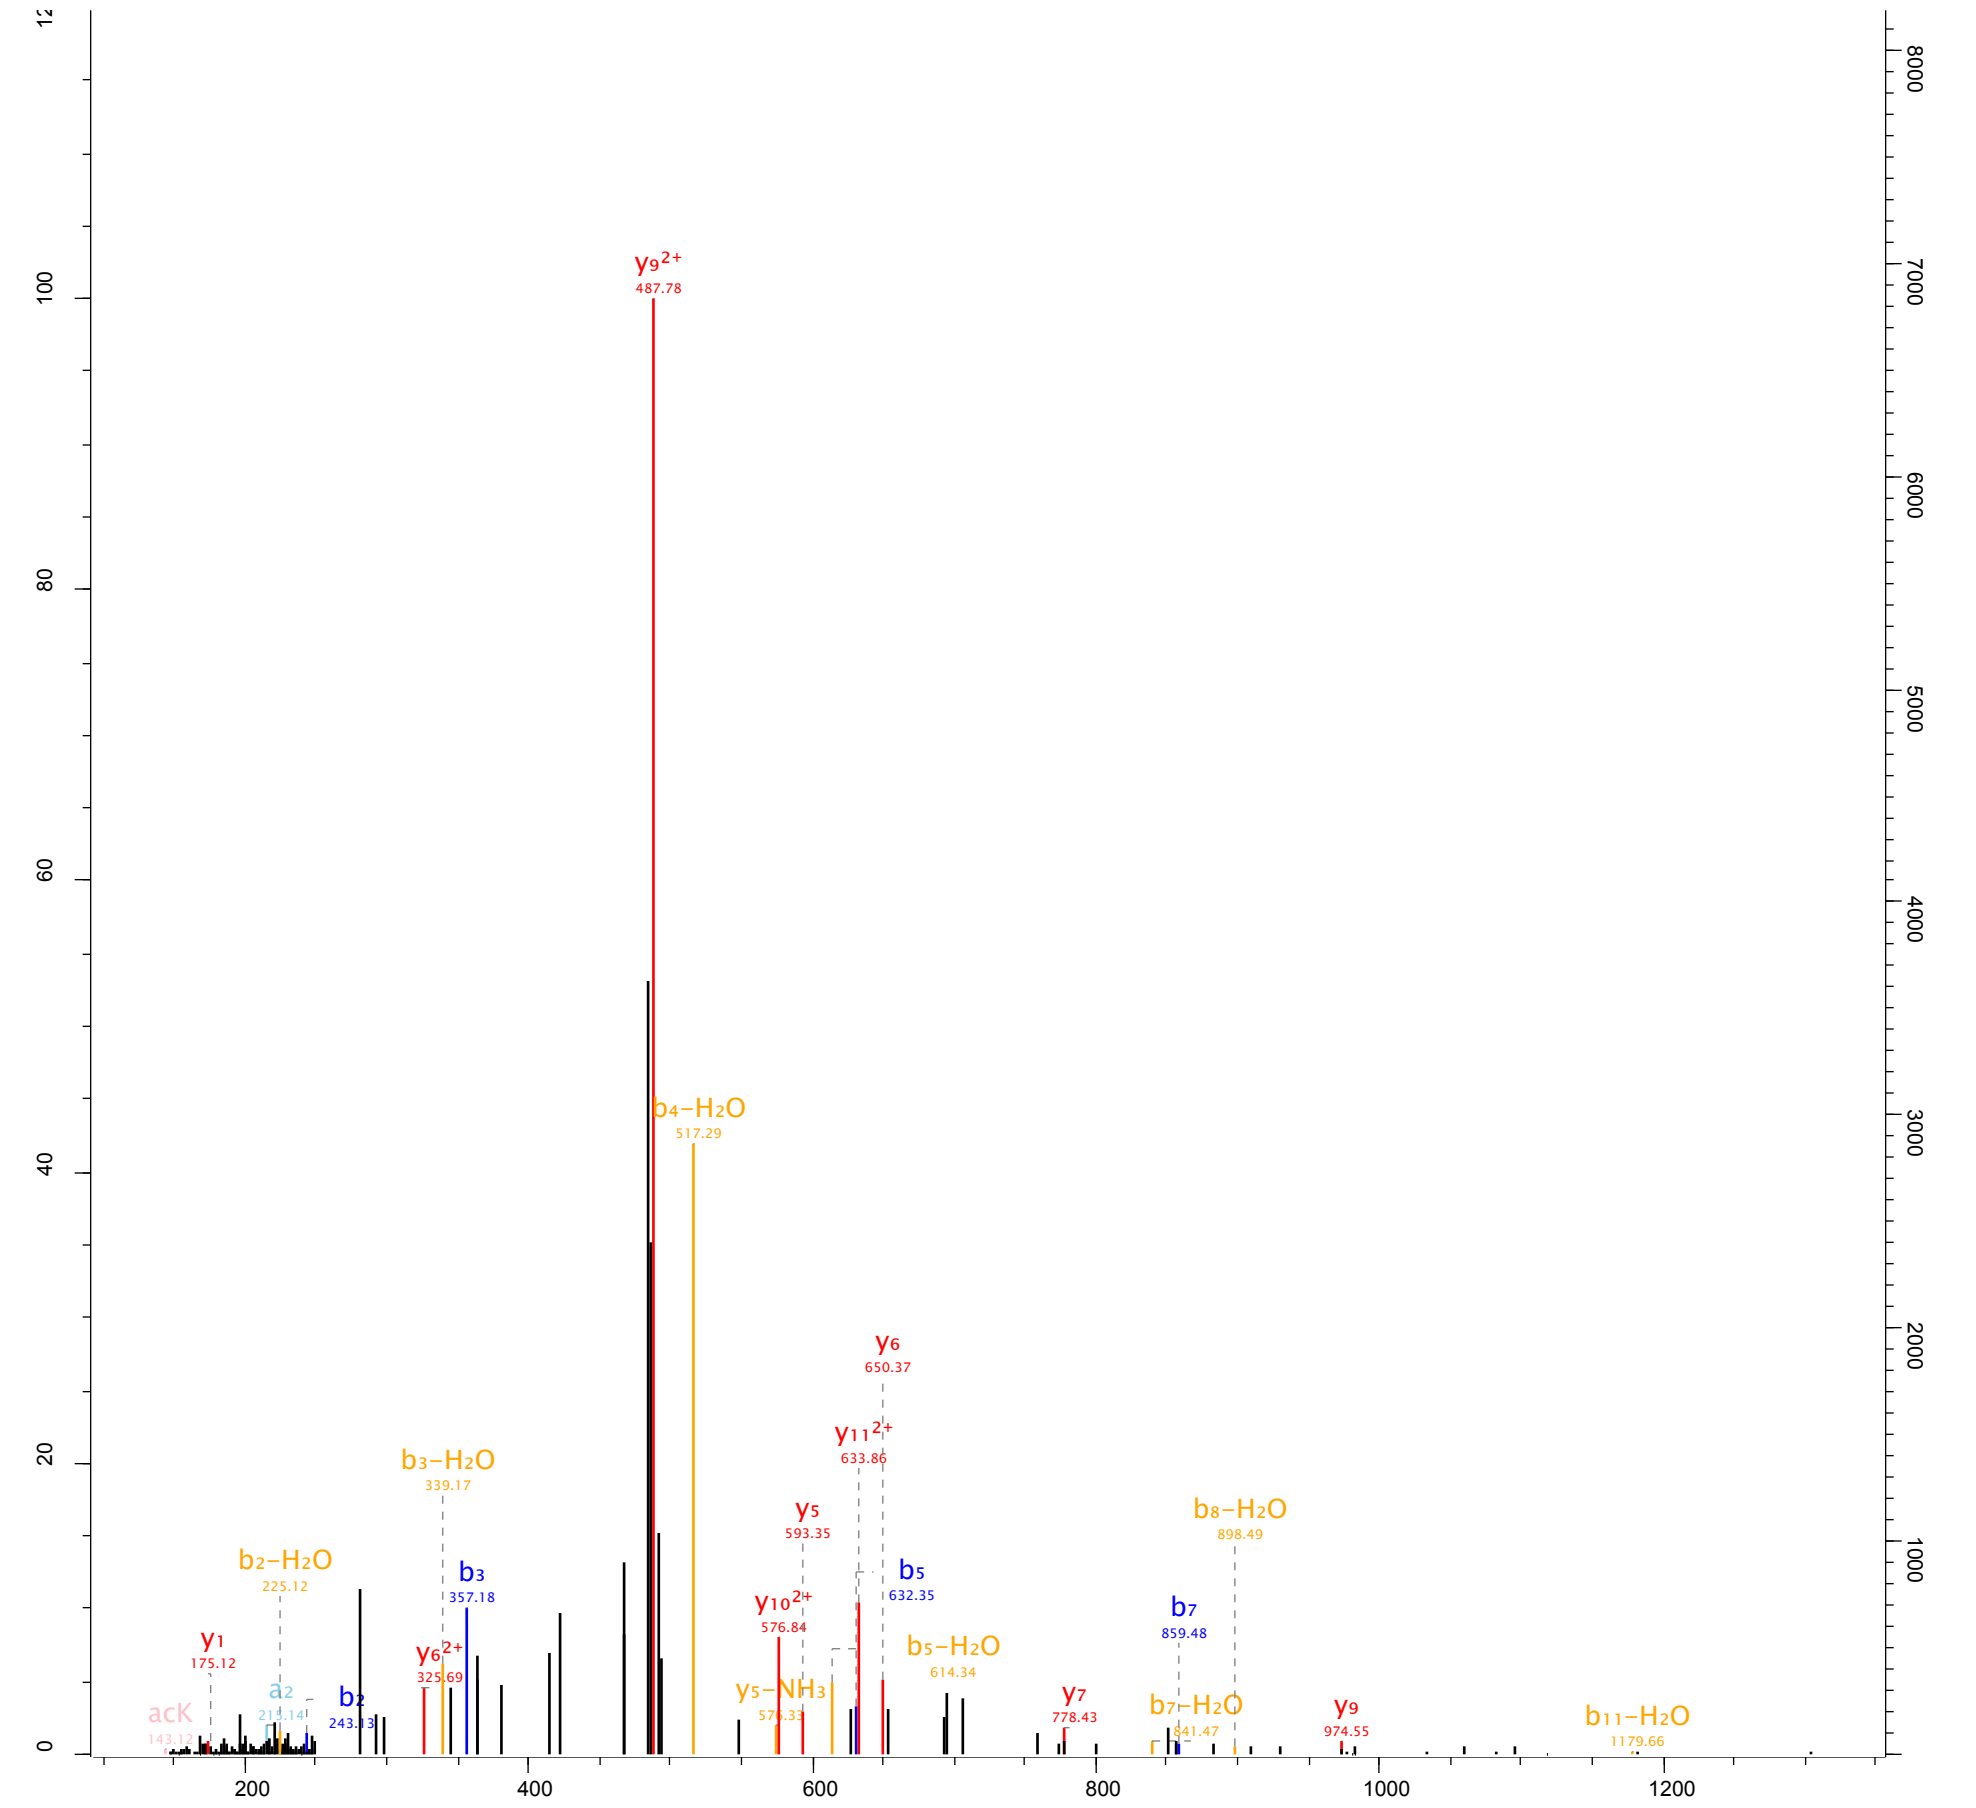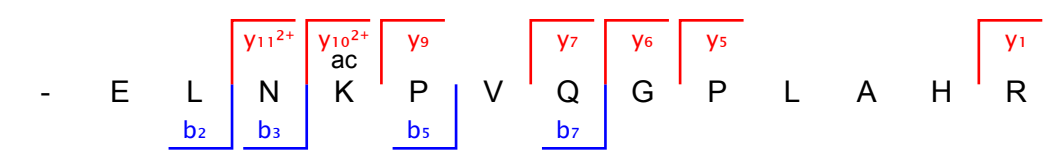

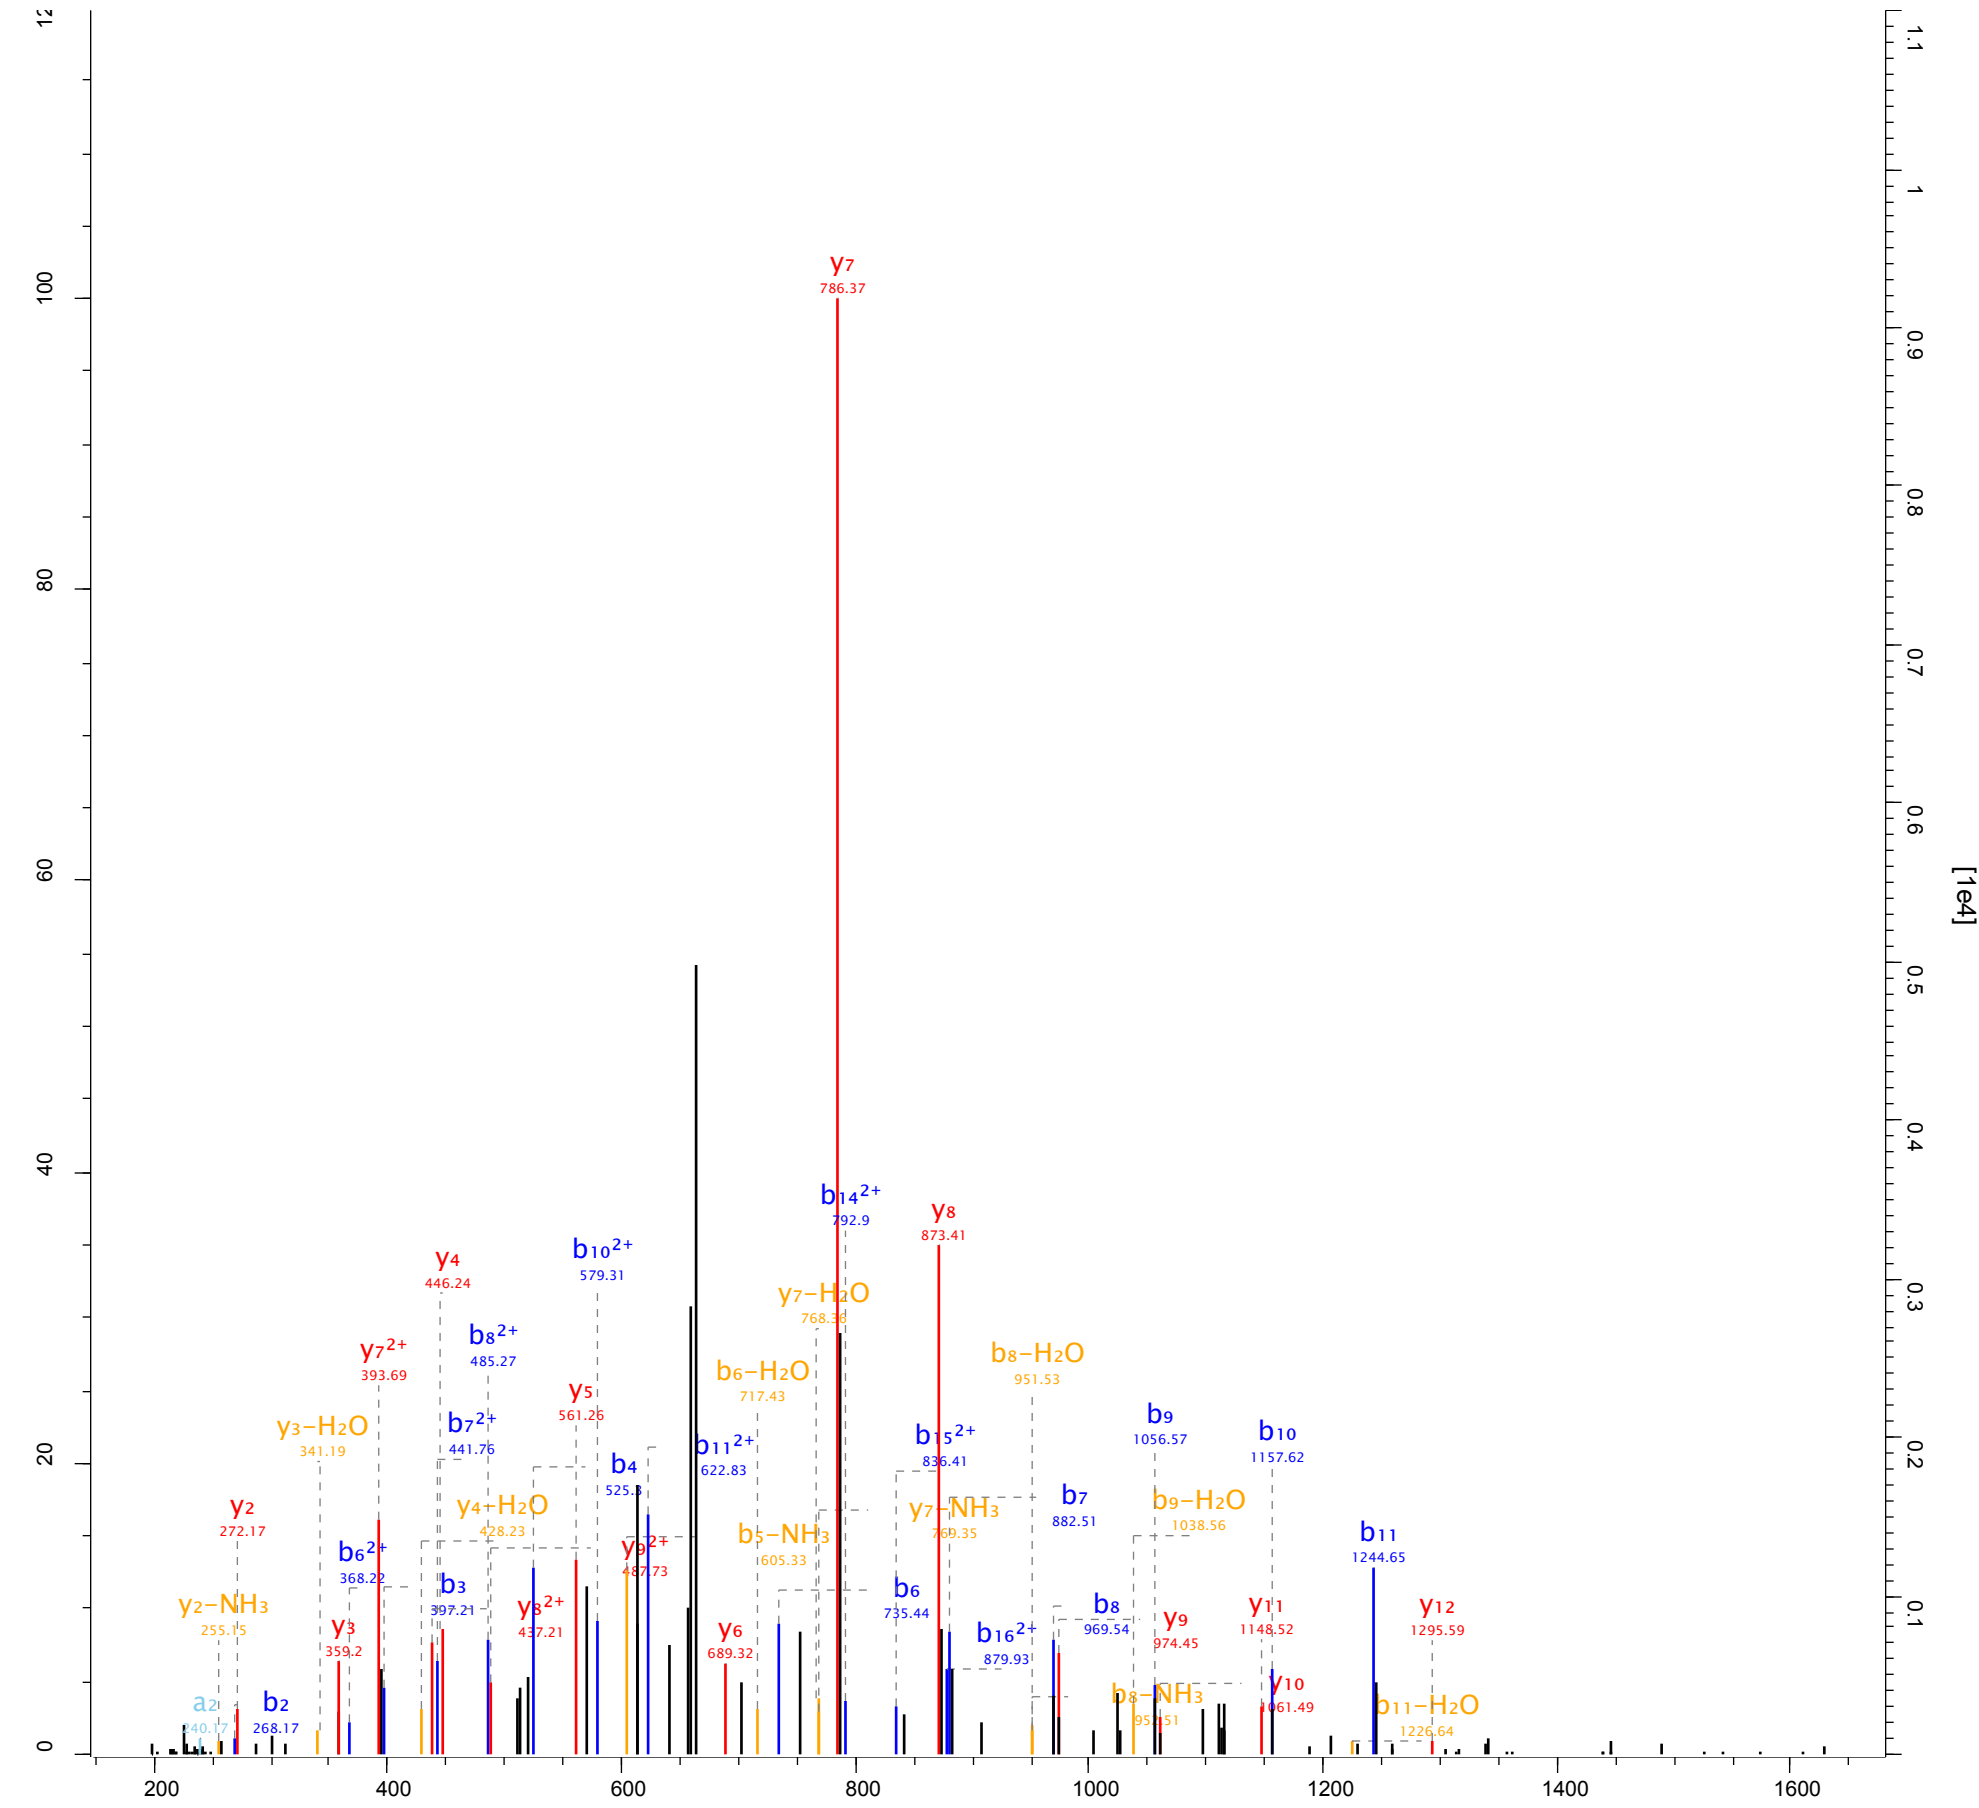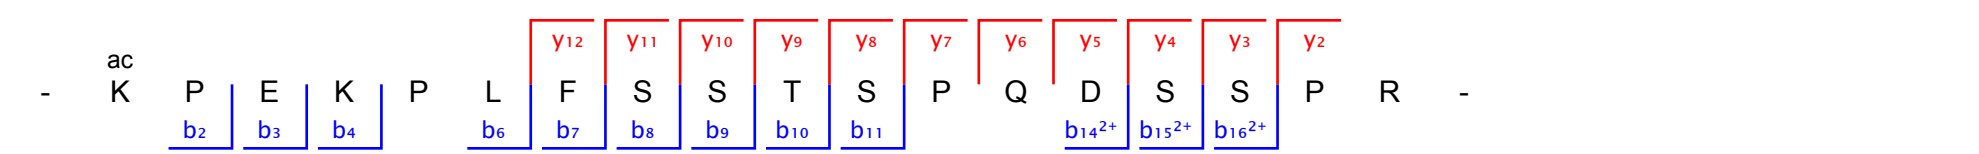

Raw file: 062513\_SCW\_II\_53\_8\_Vargas\_Enriched  
 Scan: 14731 Method: ITMS; CID Score: 94.34 m/z: 633.31 Gene names: Hsp90aa1

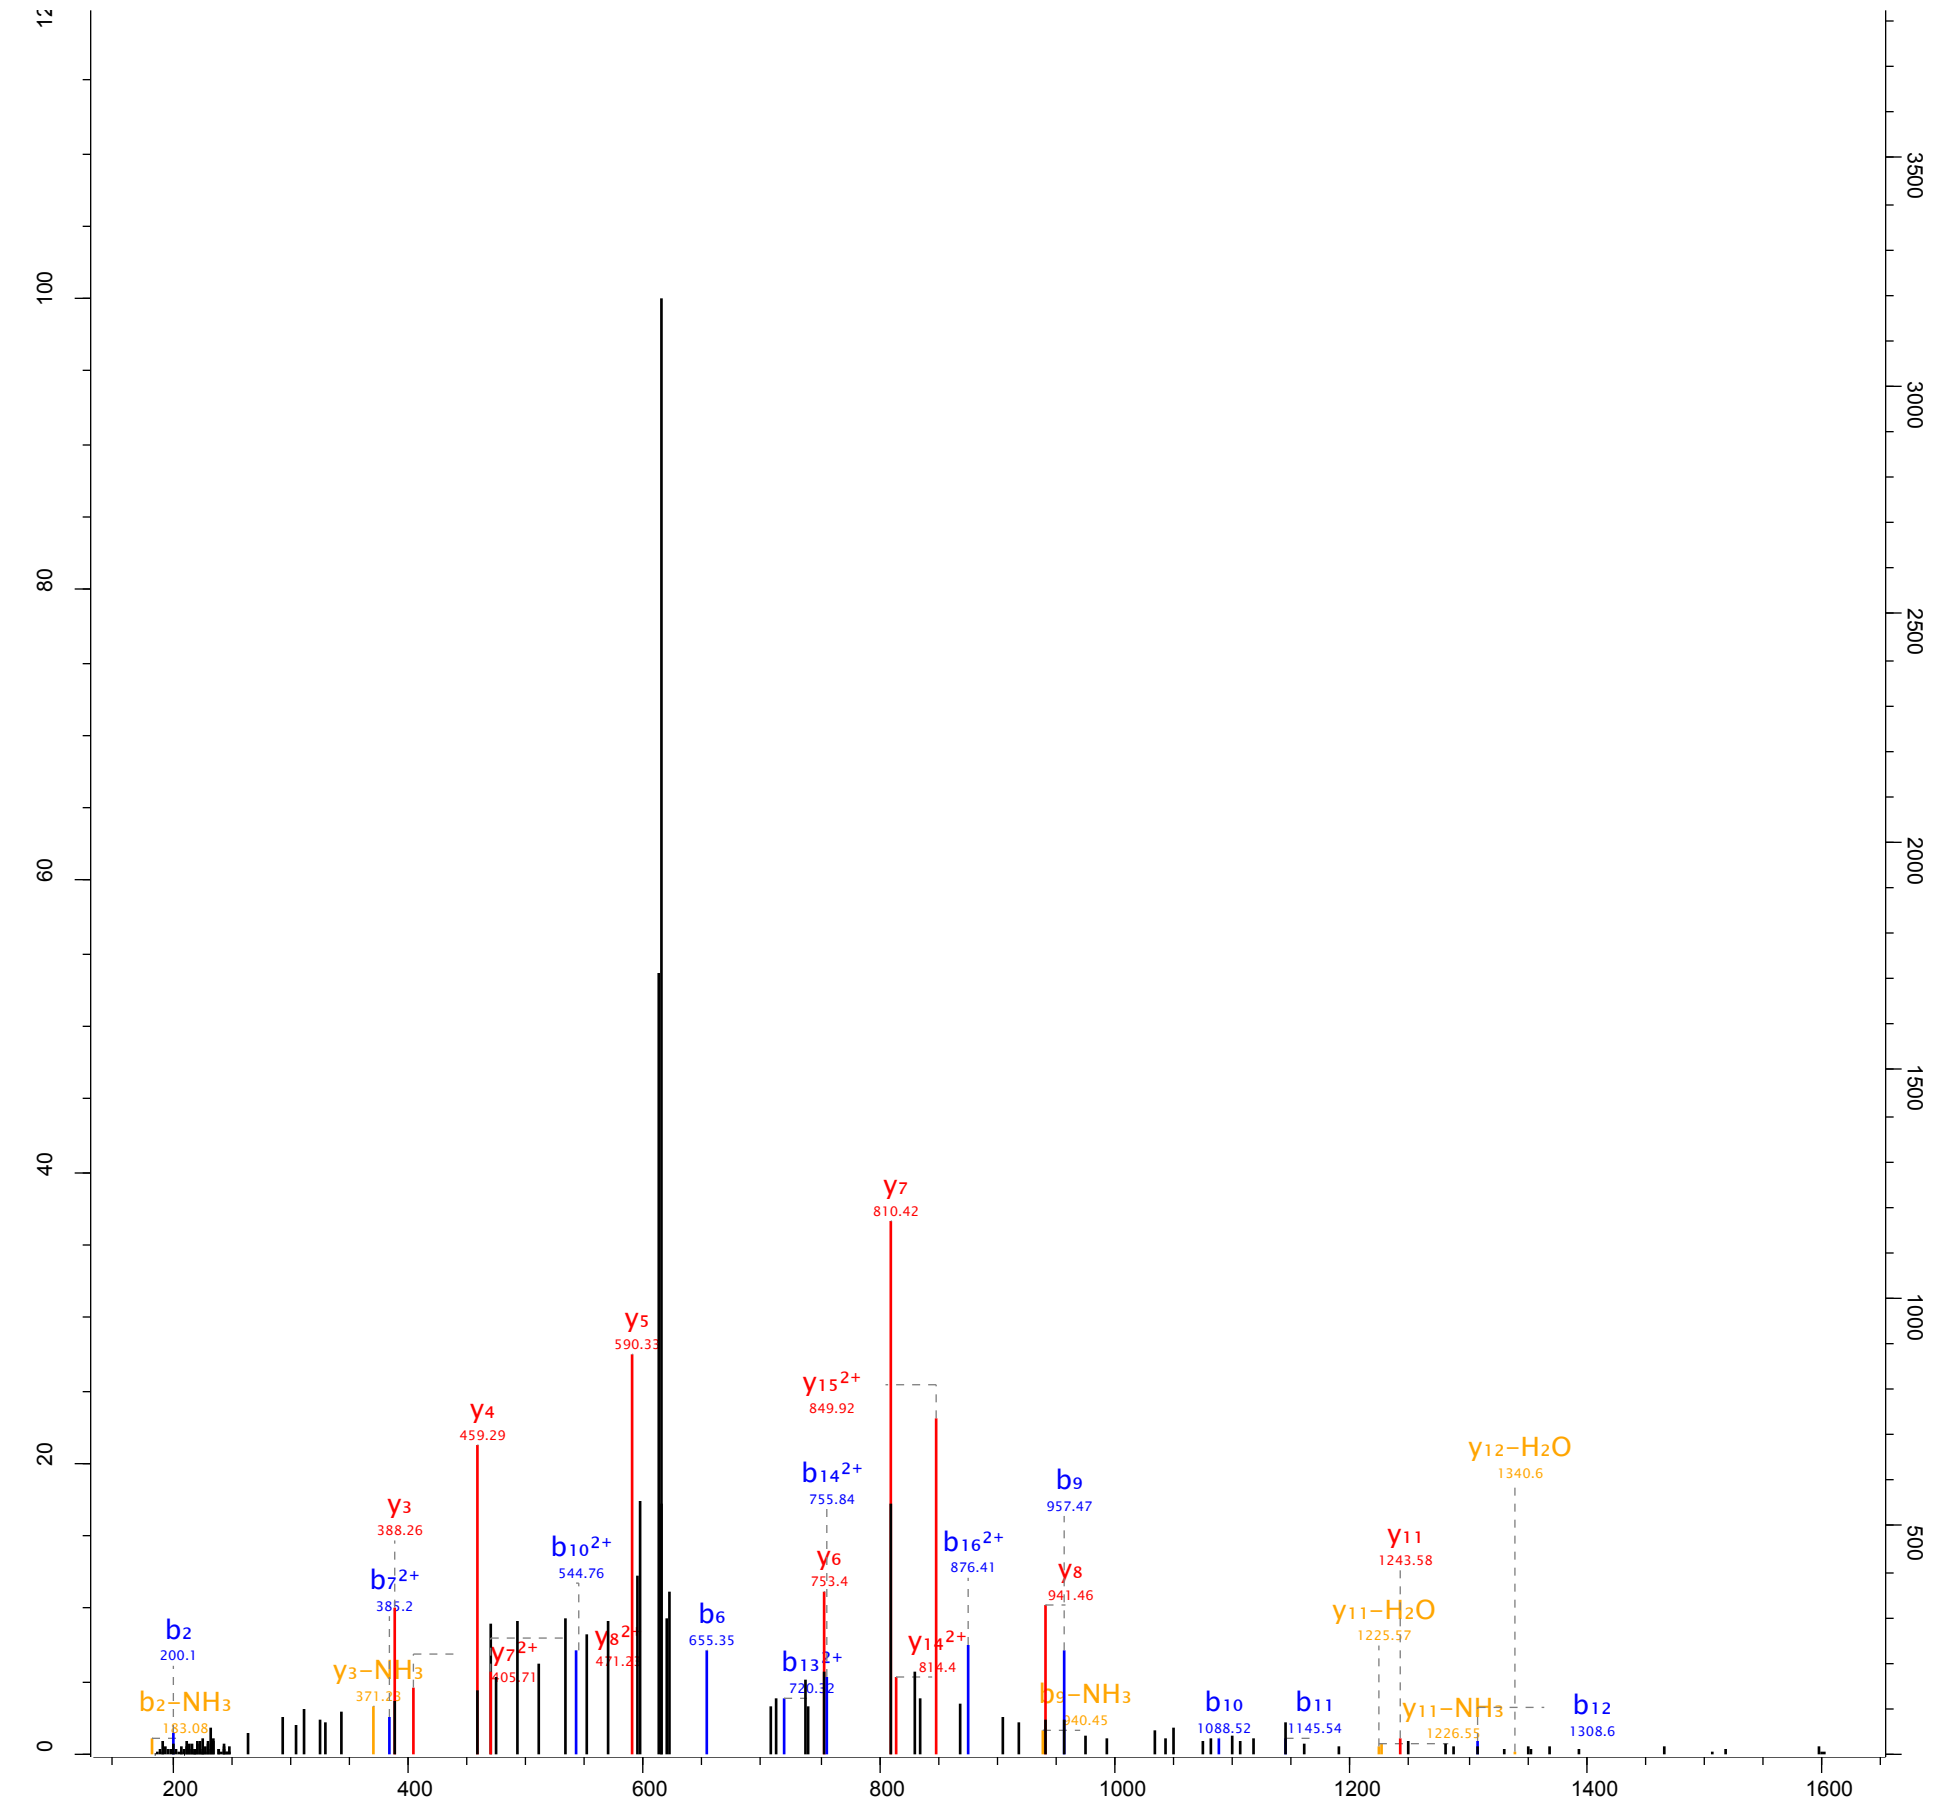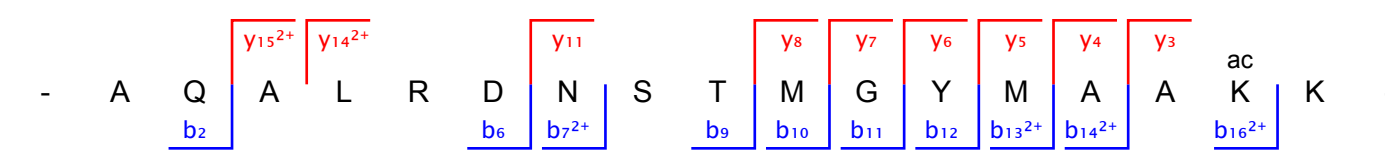

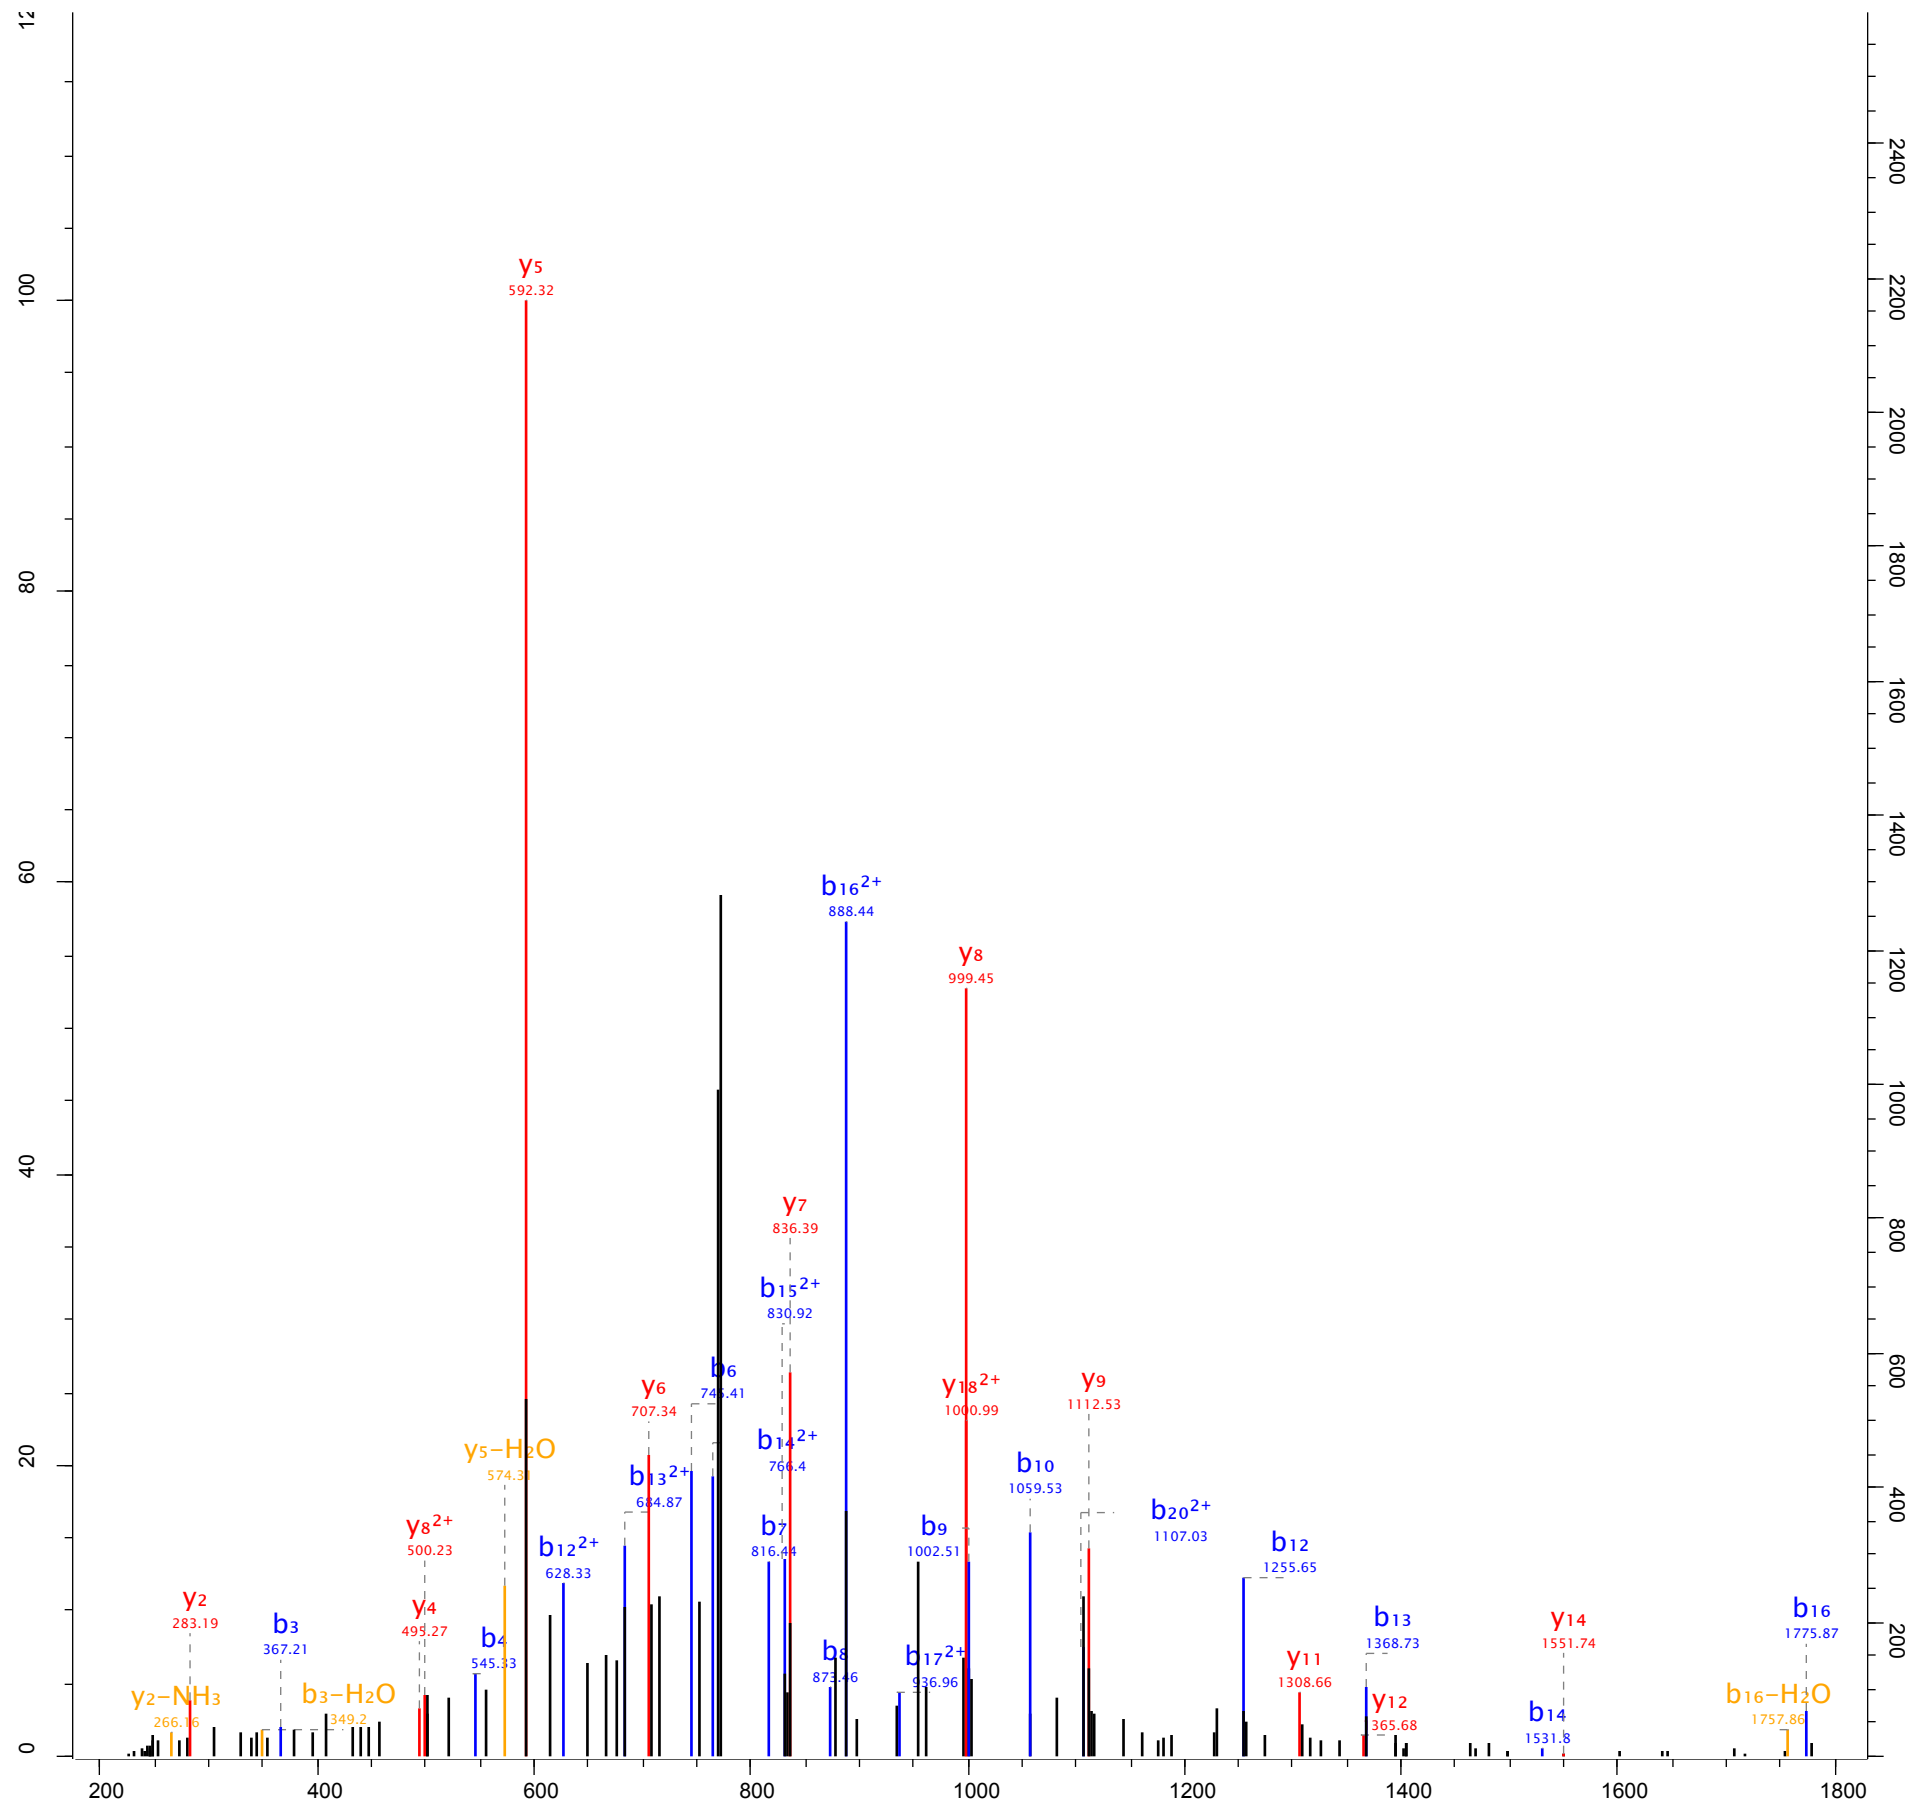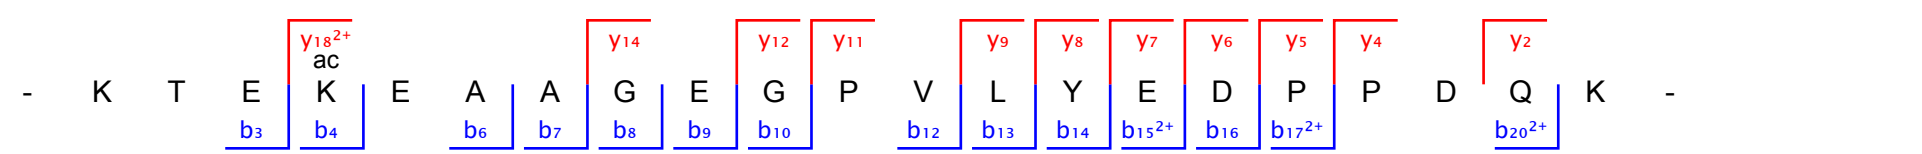

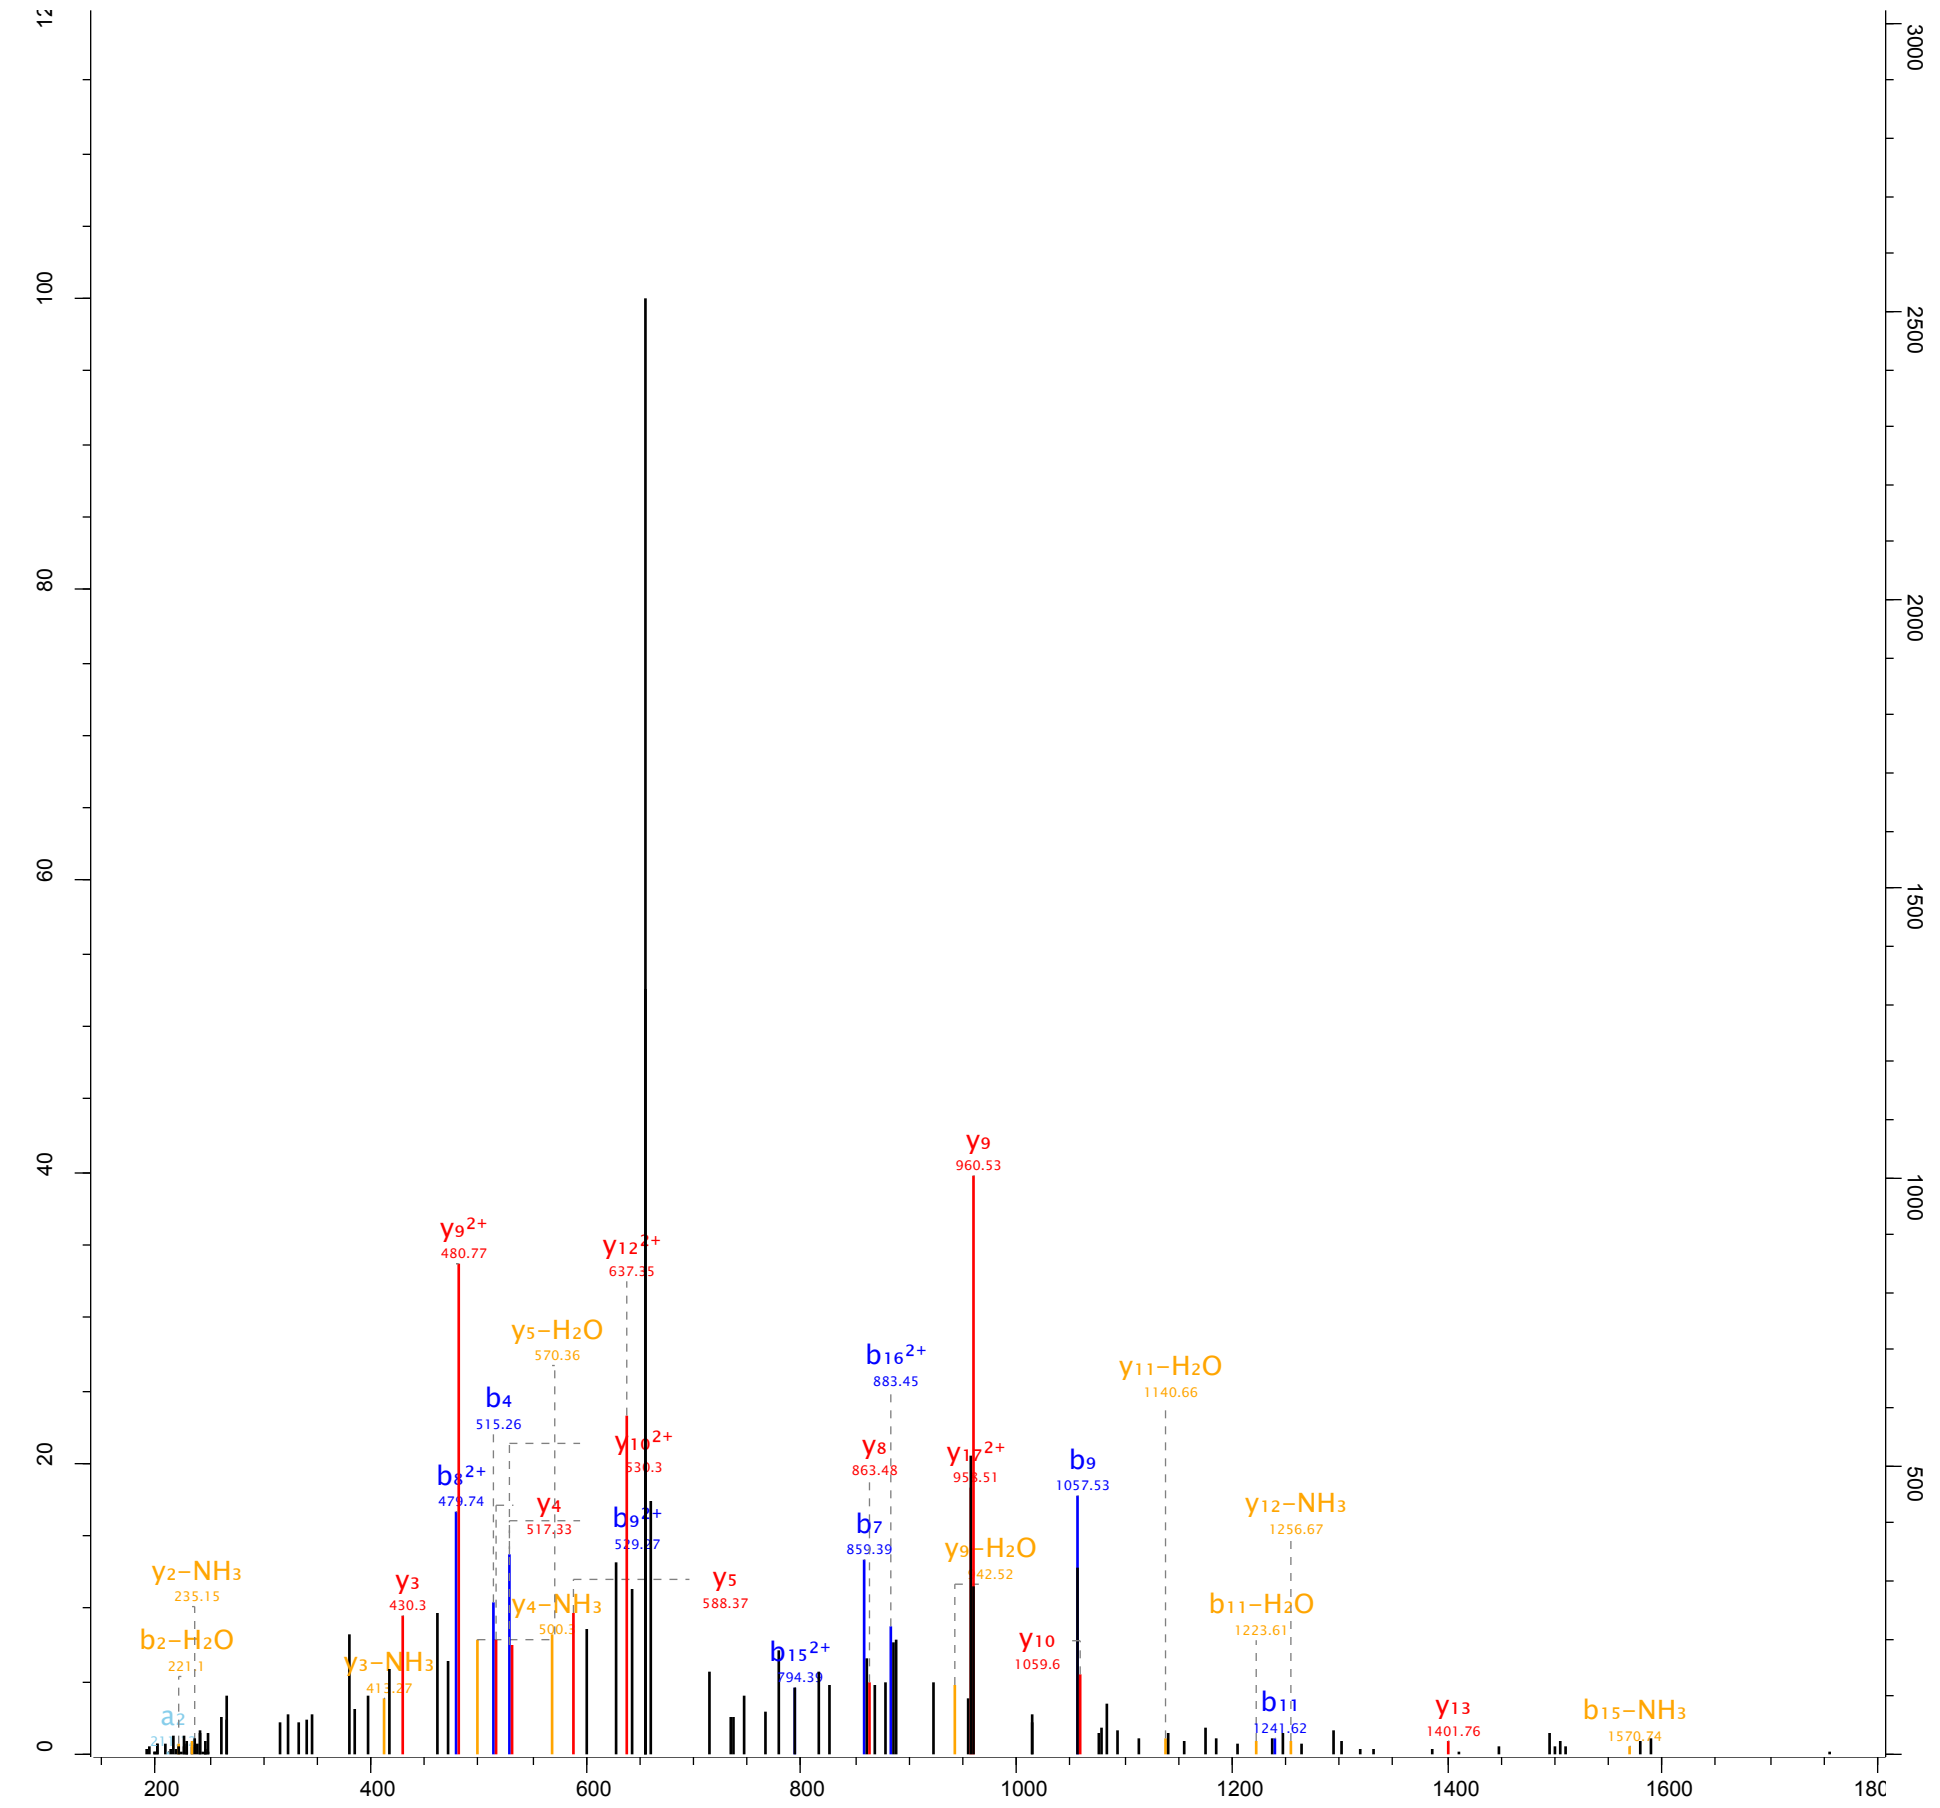

- T y<sub>17</sub><sup>2+</sup> H a<sub>2</sub> Y L b<sub>4</sub> T y<sub>13</sub> Q y<sub>12</sub><sup>2+</sup> D b<sub>7</sub> V y<sub>10</sub> V y<sub>9</sub> P y<sub>8</sub> S b<sub>11</sub> T S y<sub>5</sub> A y<sub>4</sub> S b<sub>15</sub><sup>2+</sup> y<sub>3</sub>  
ac K b<sub>16</sub><sup>2+</sup> P K -

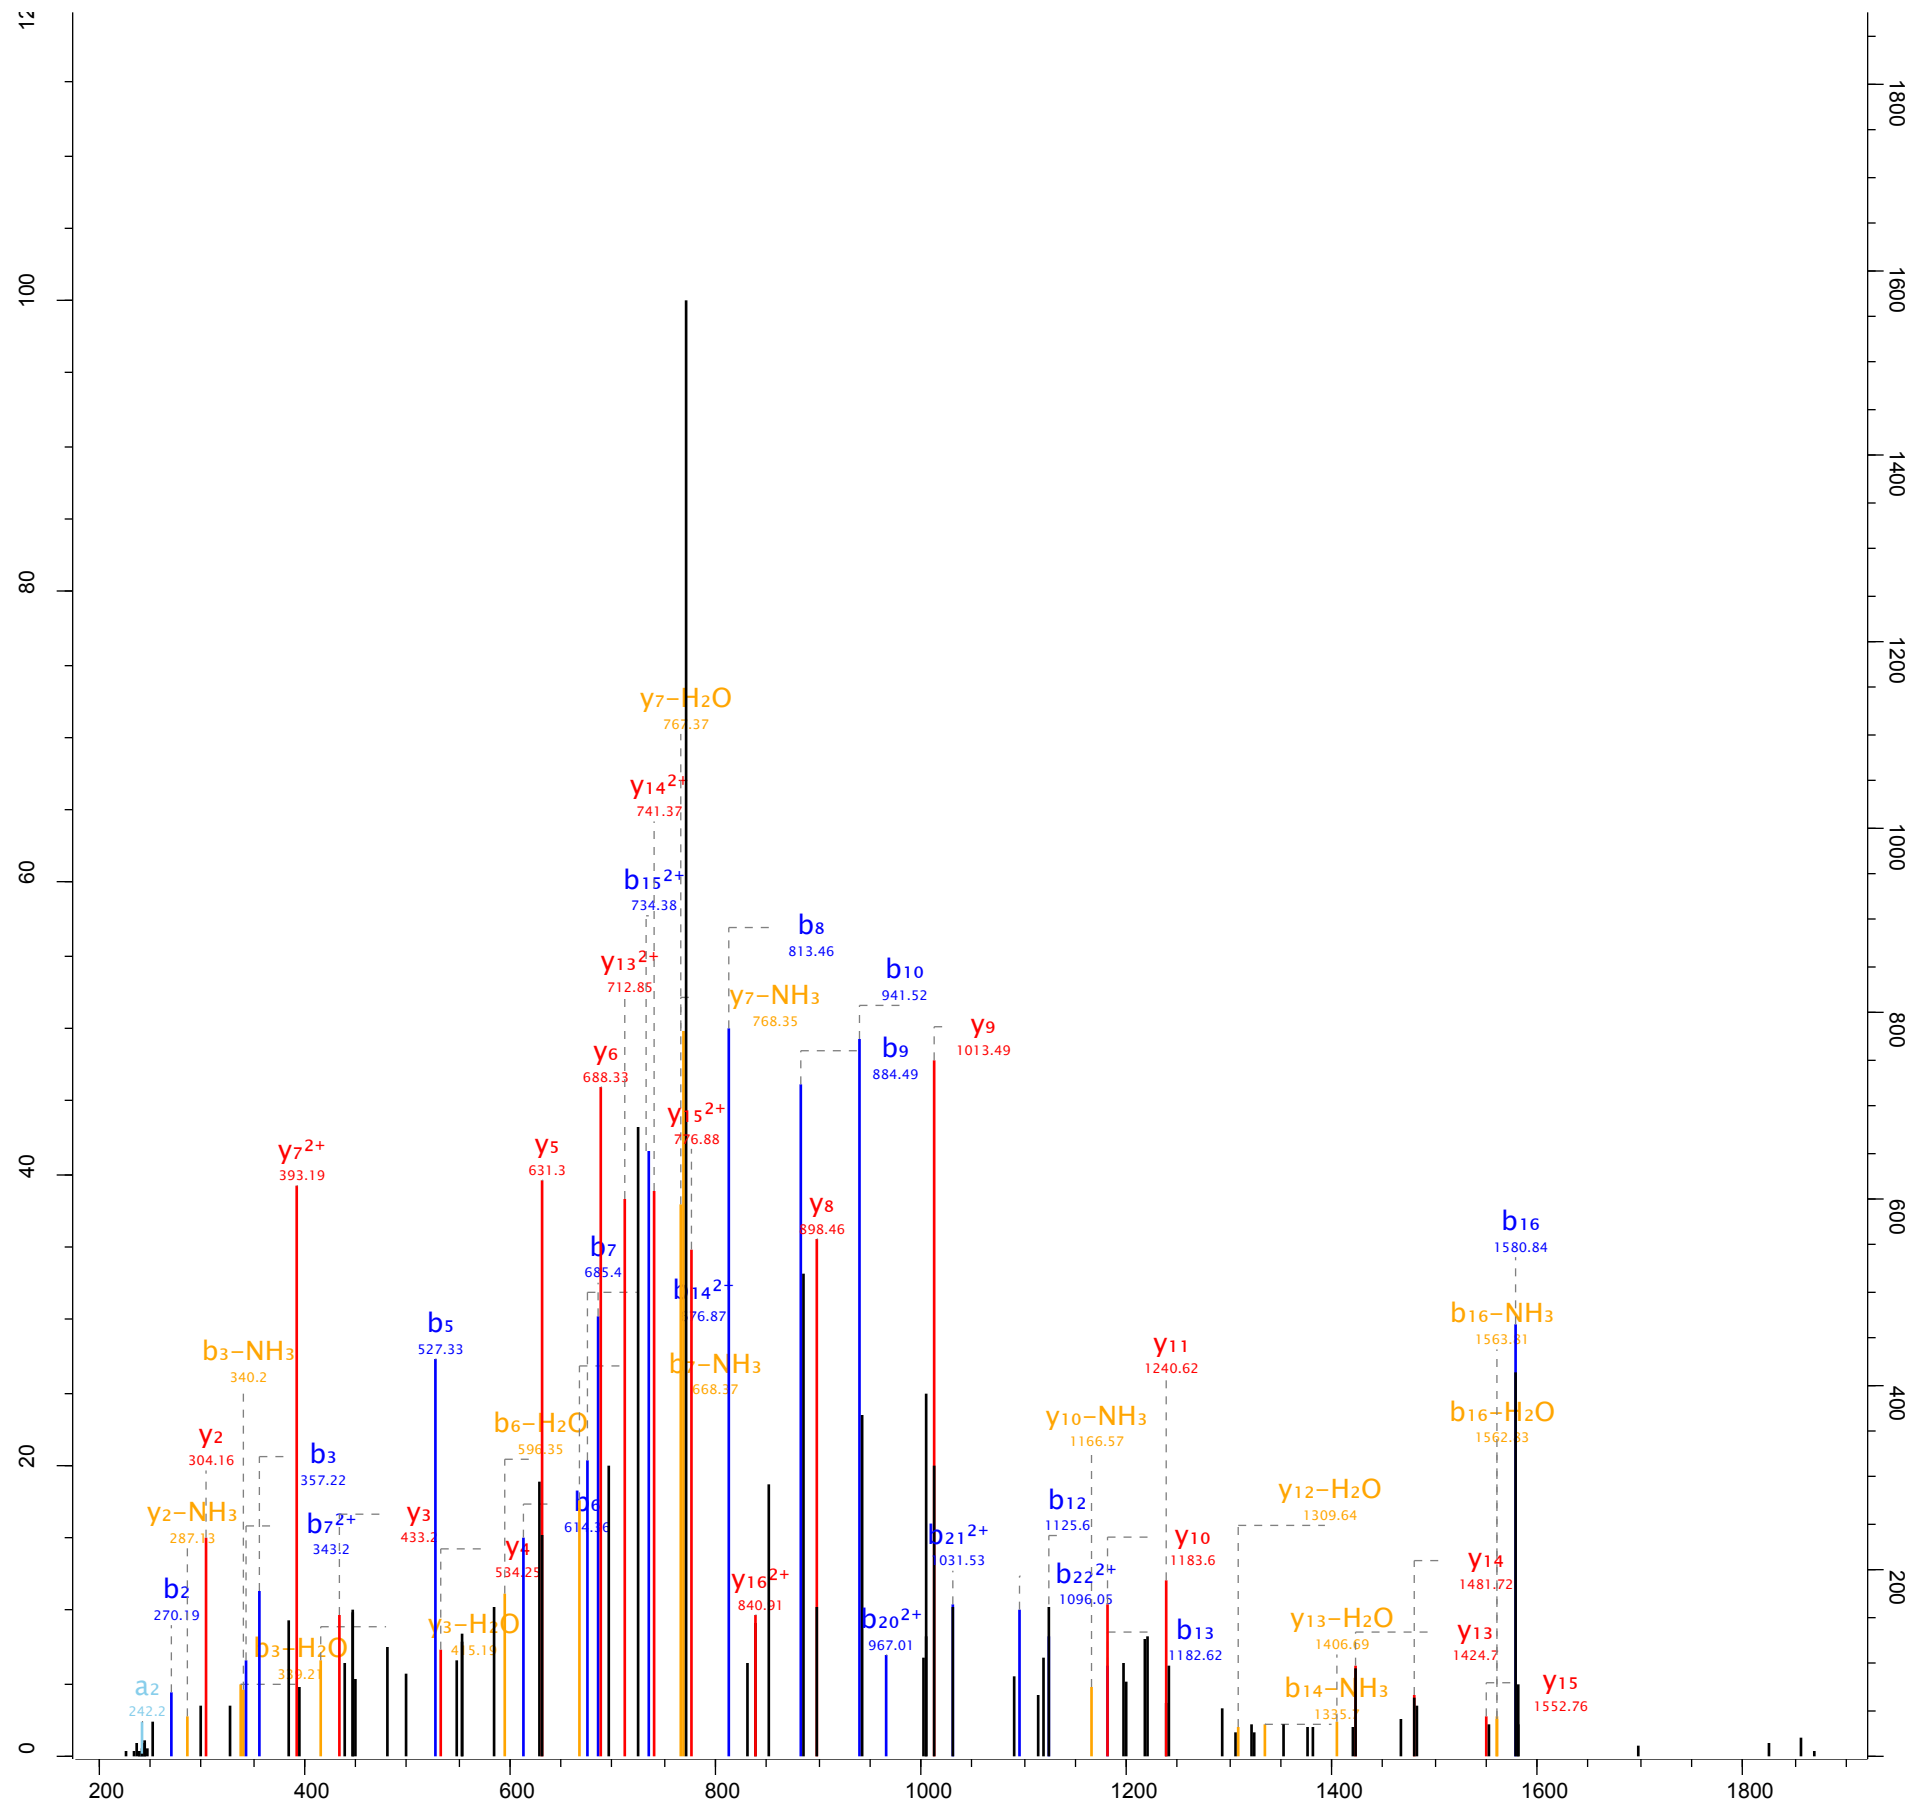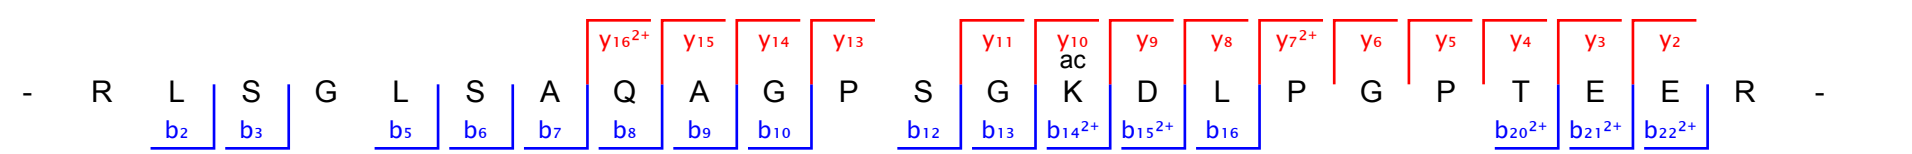

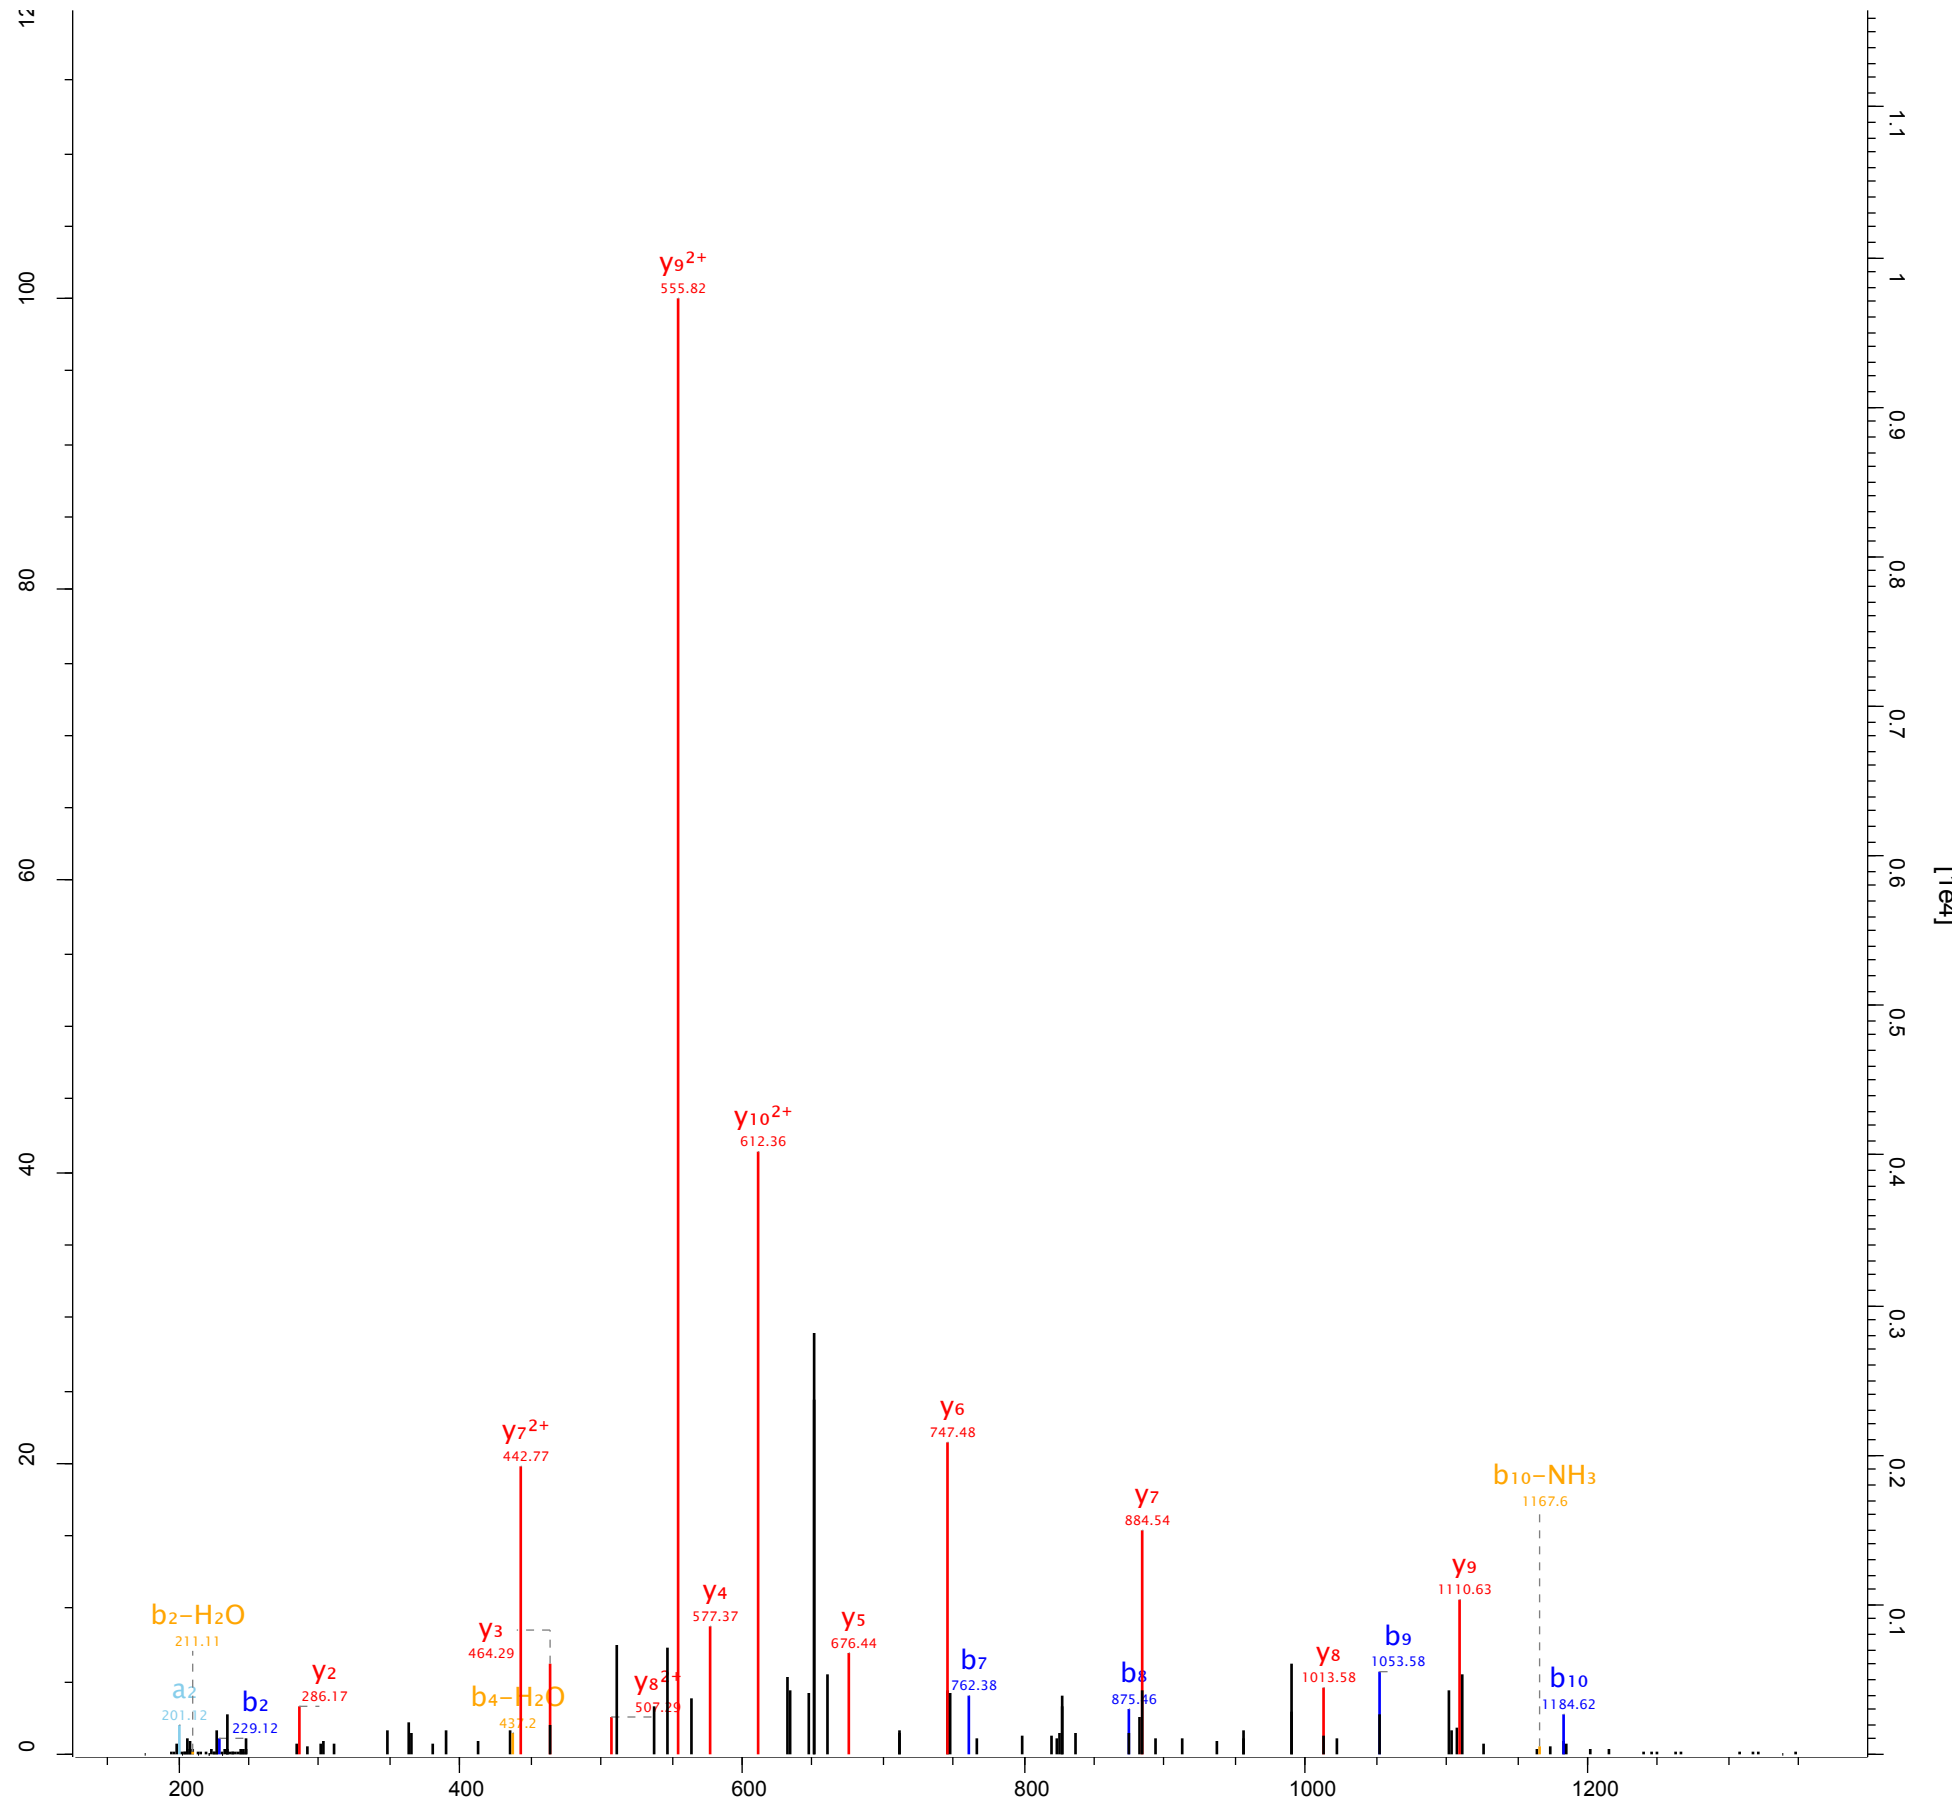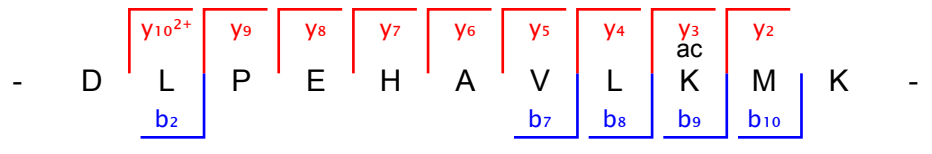



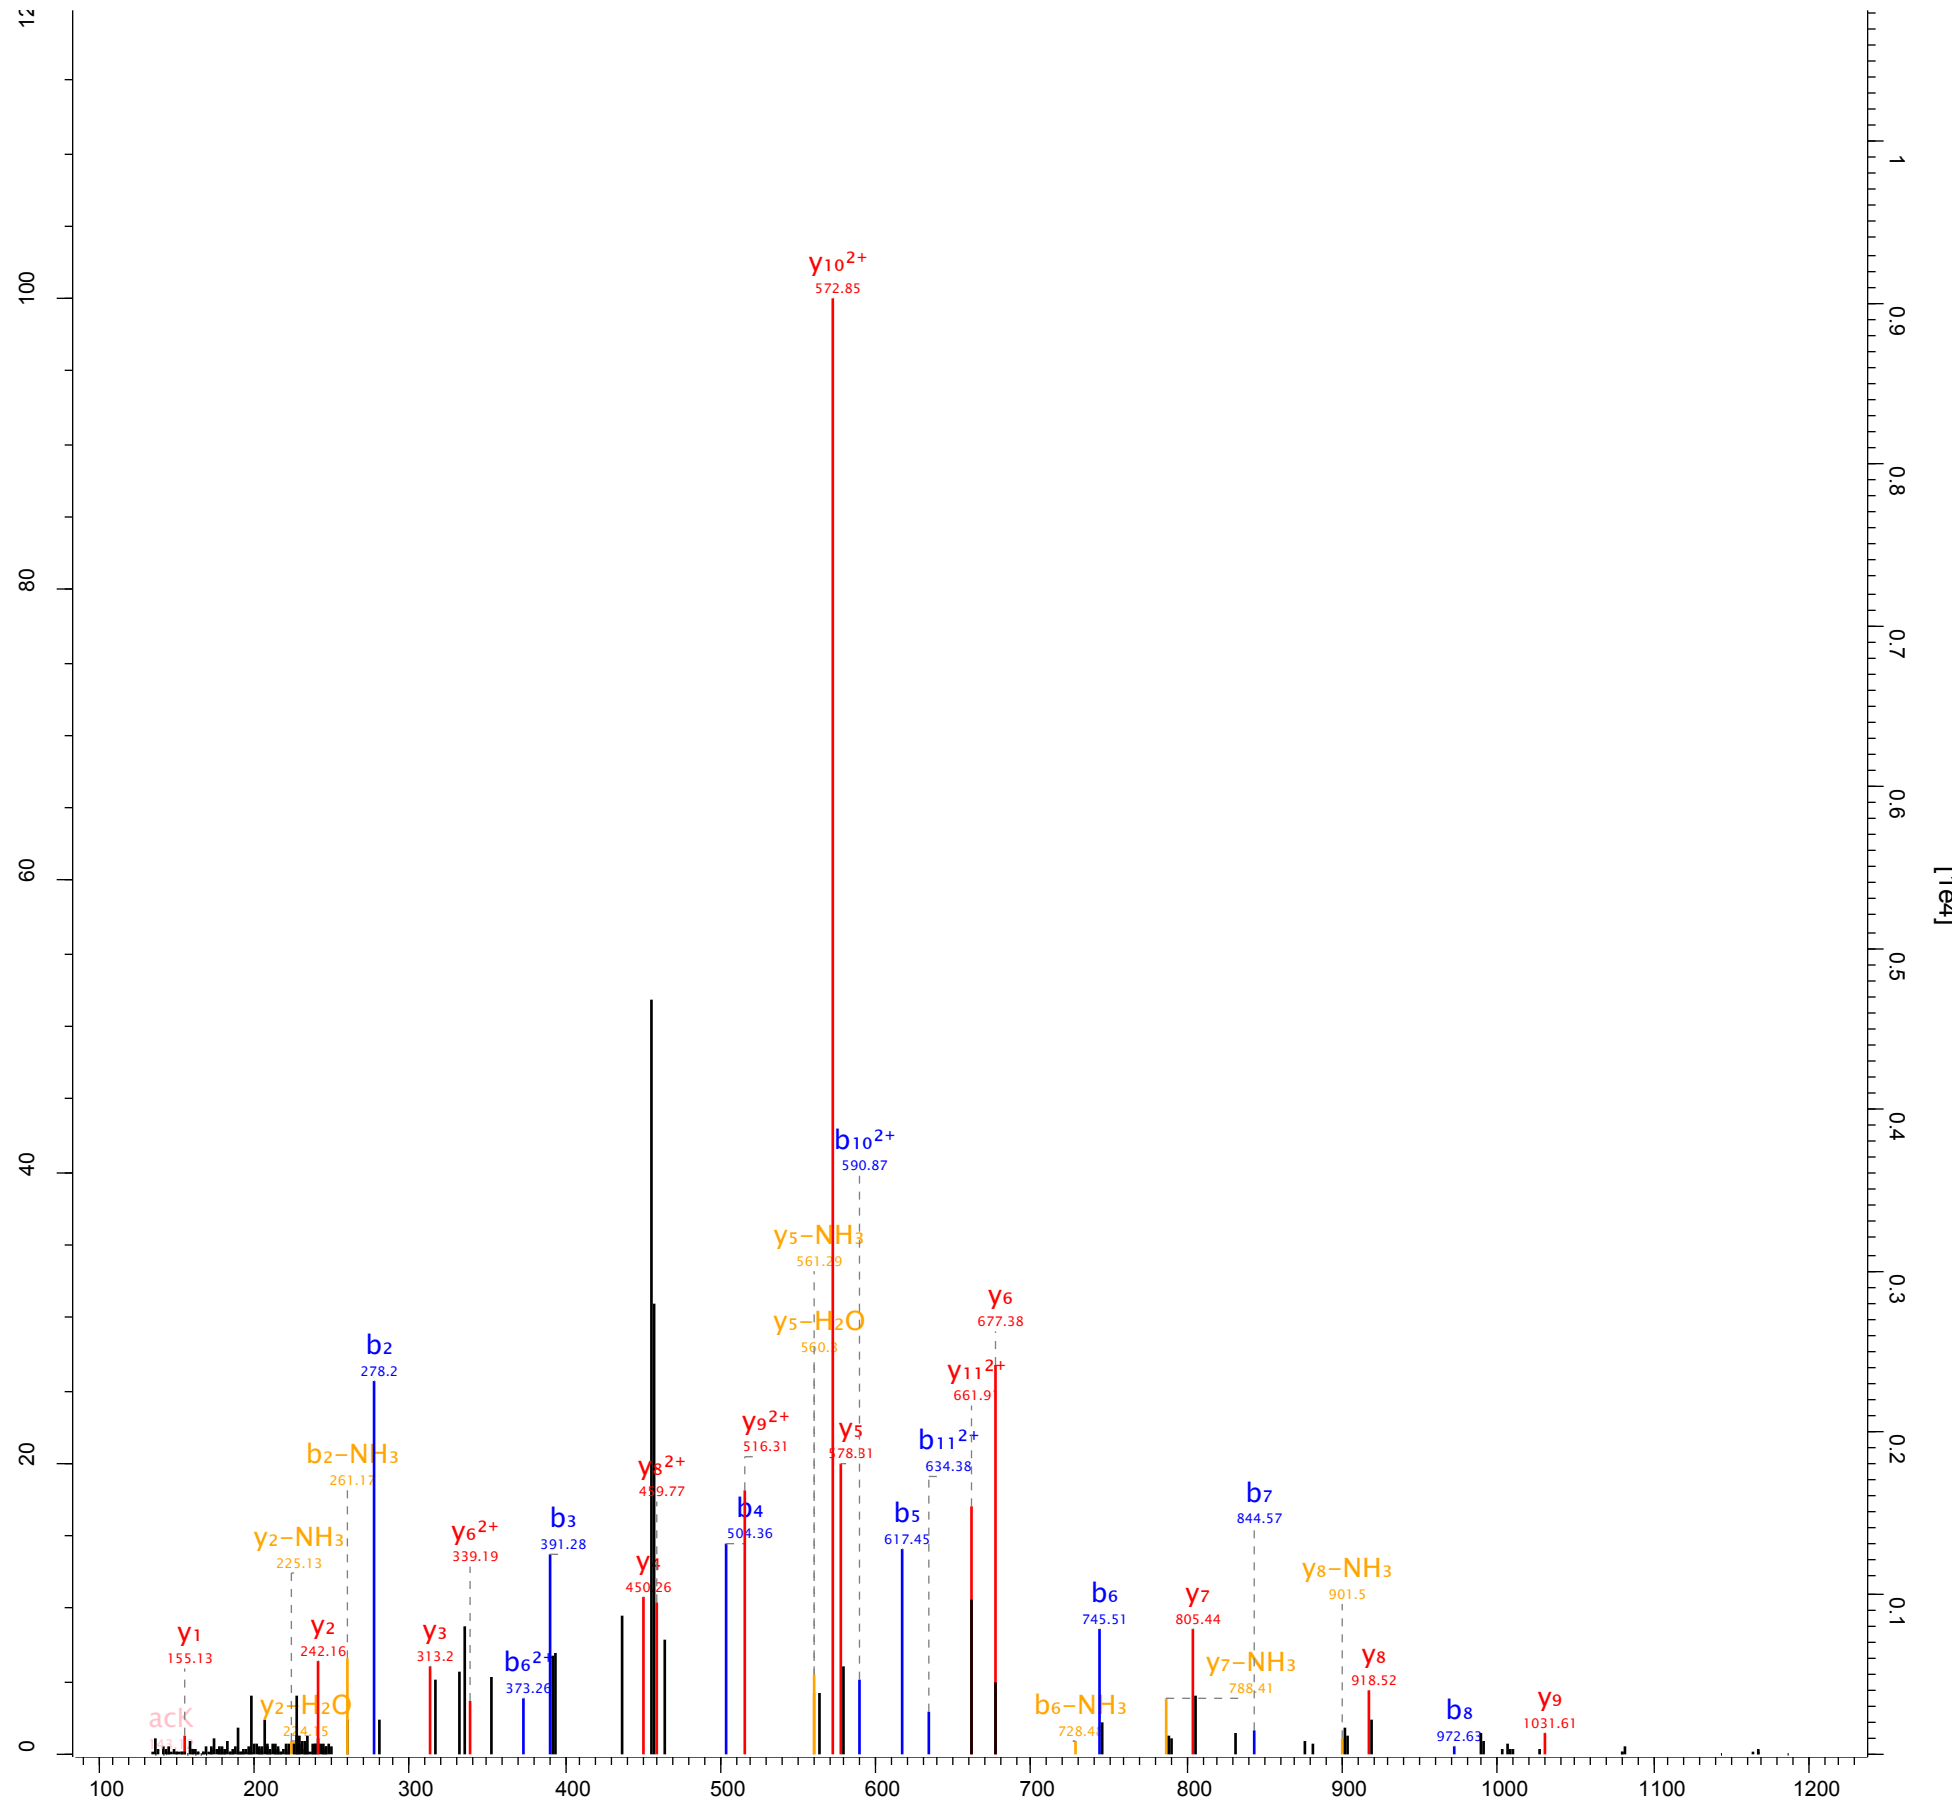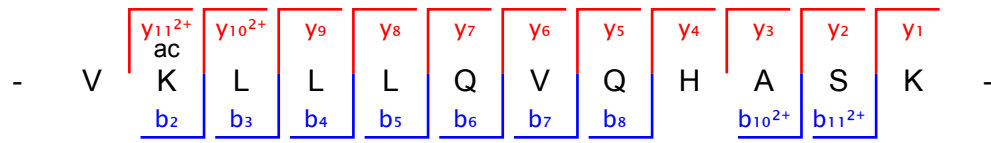

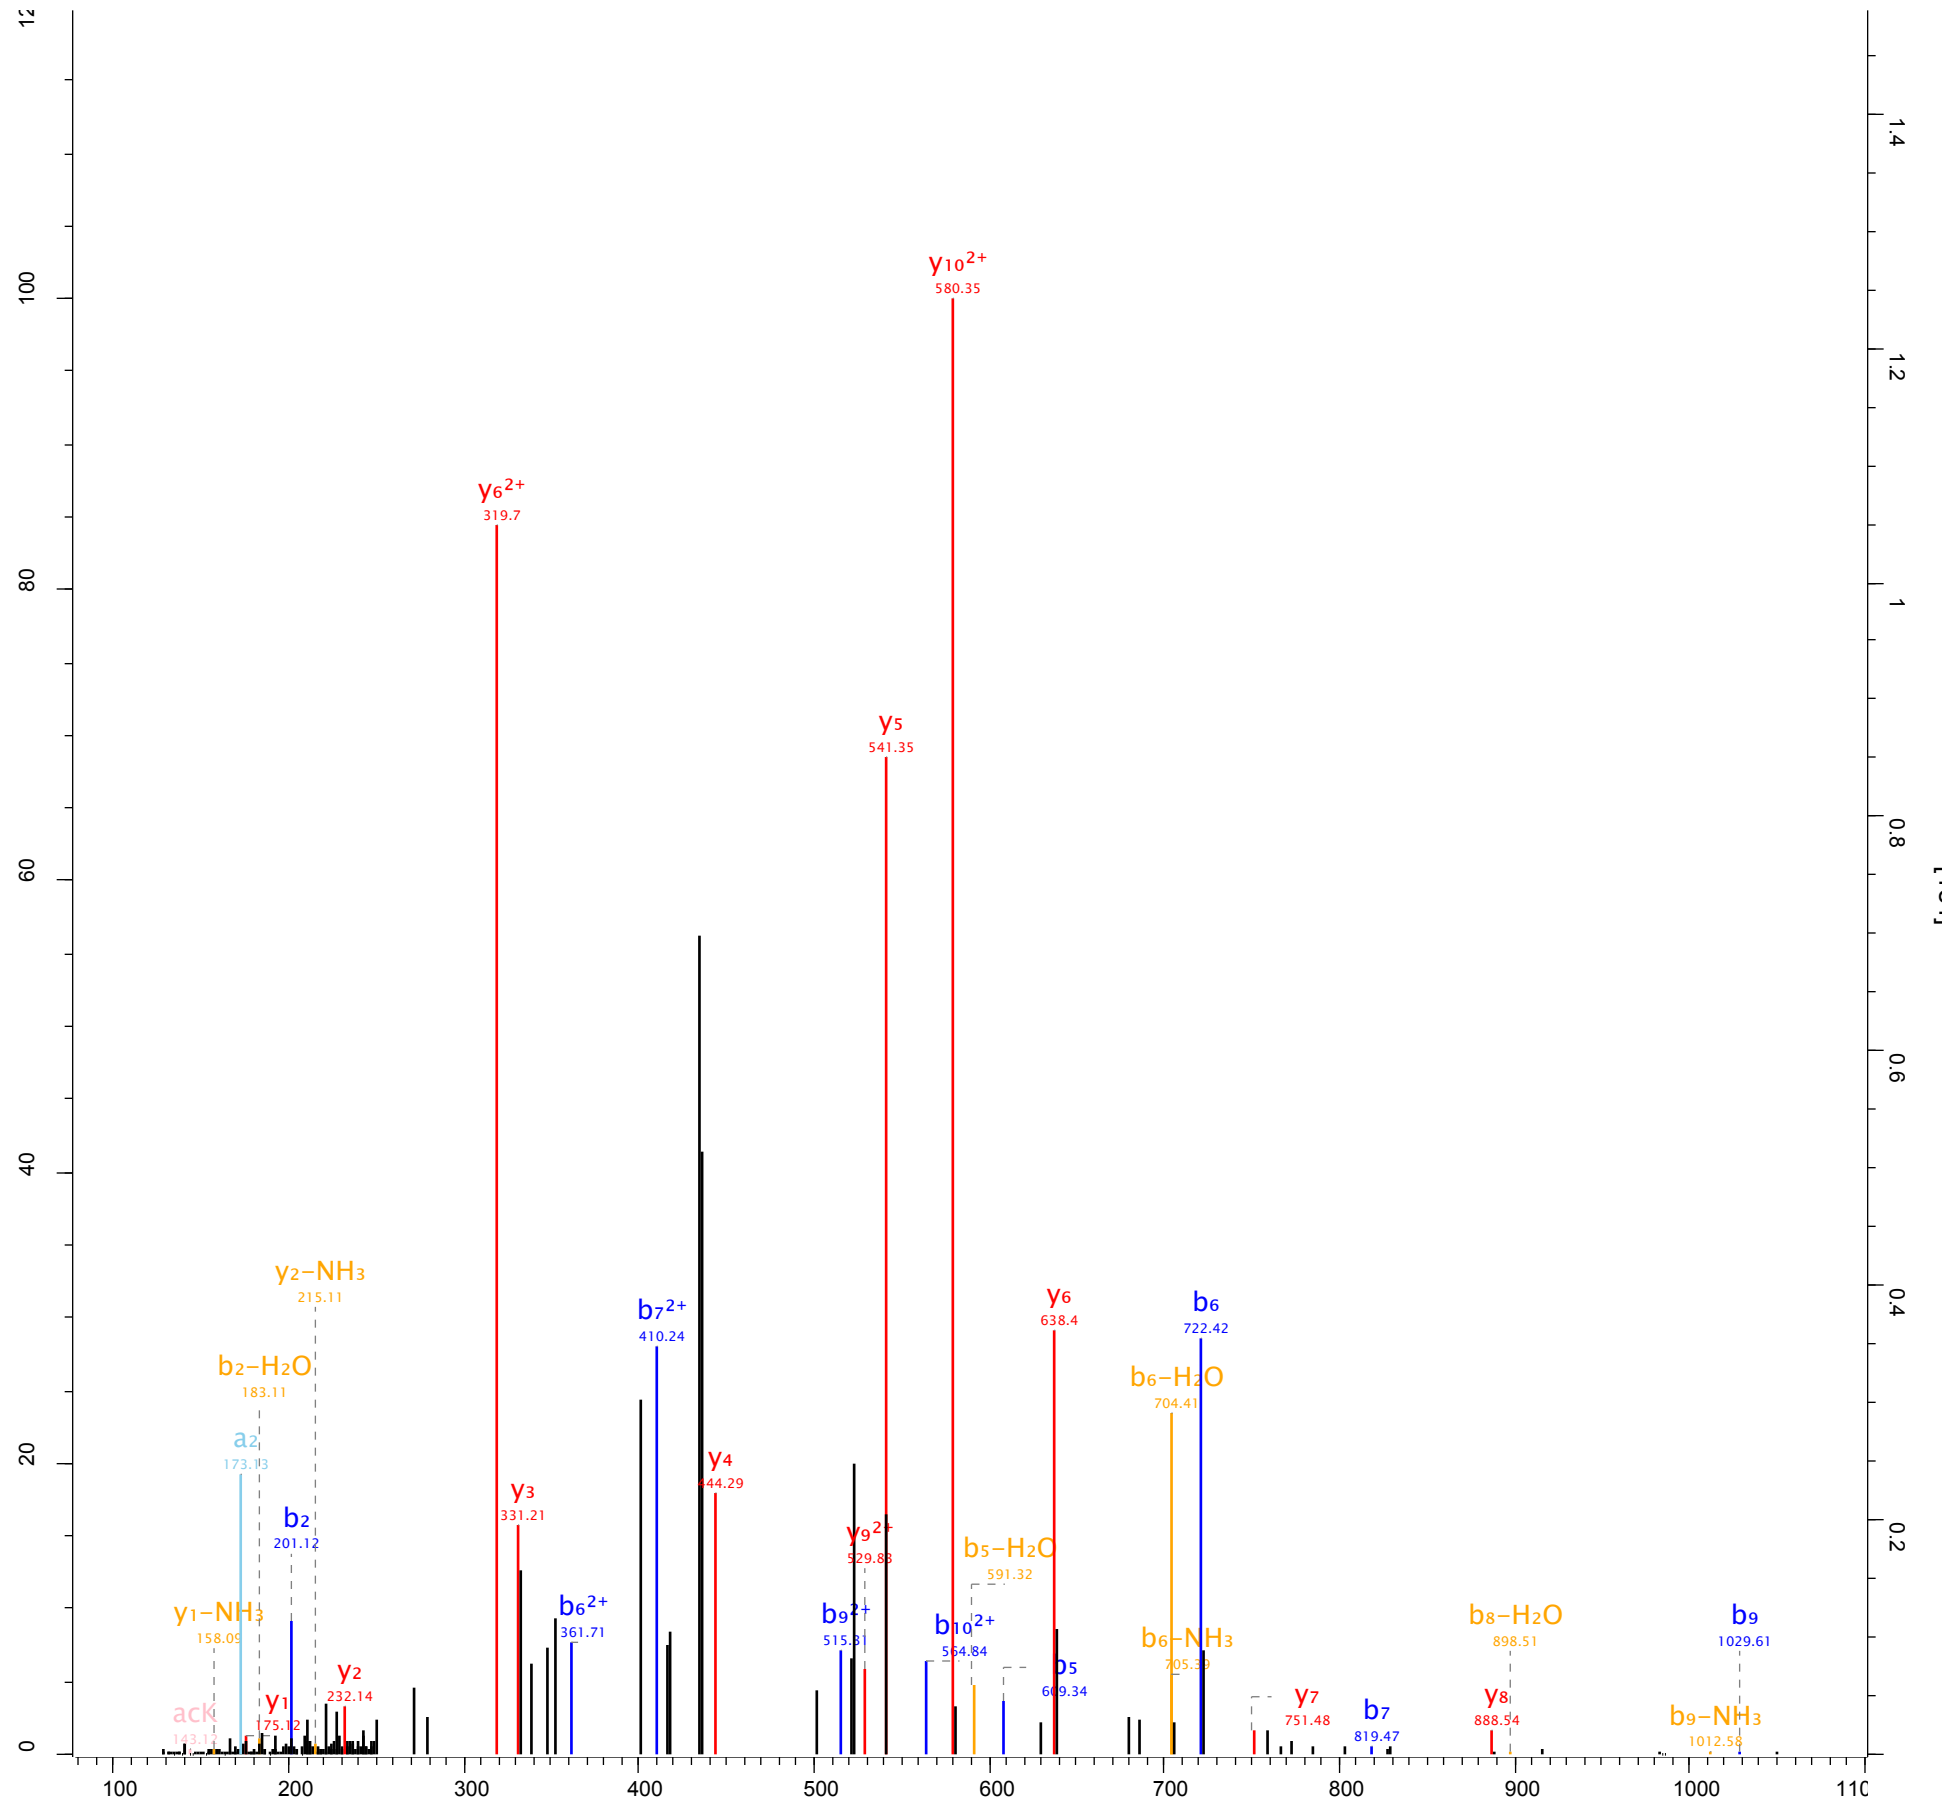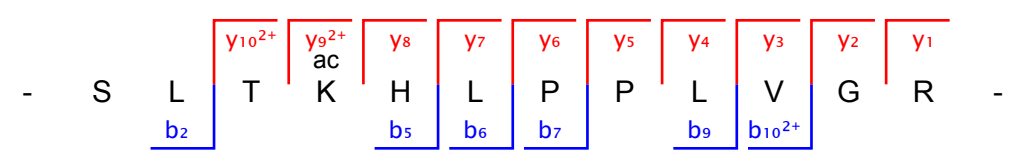

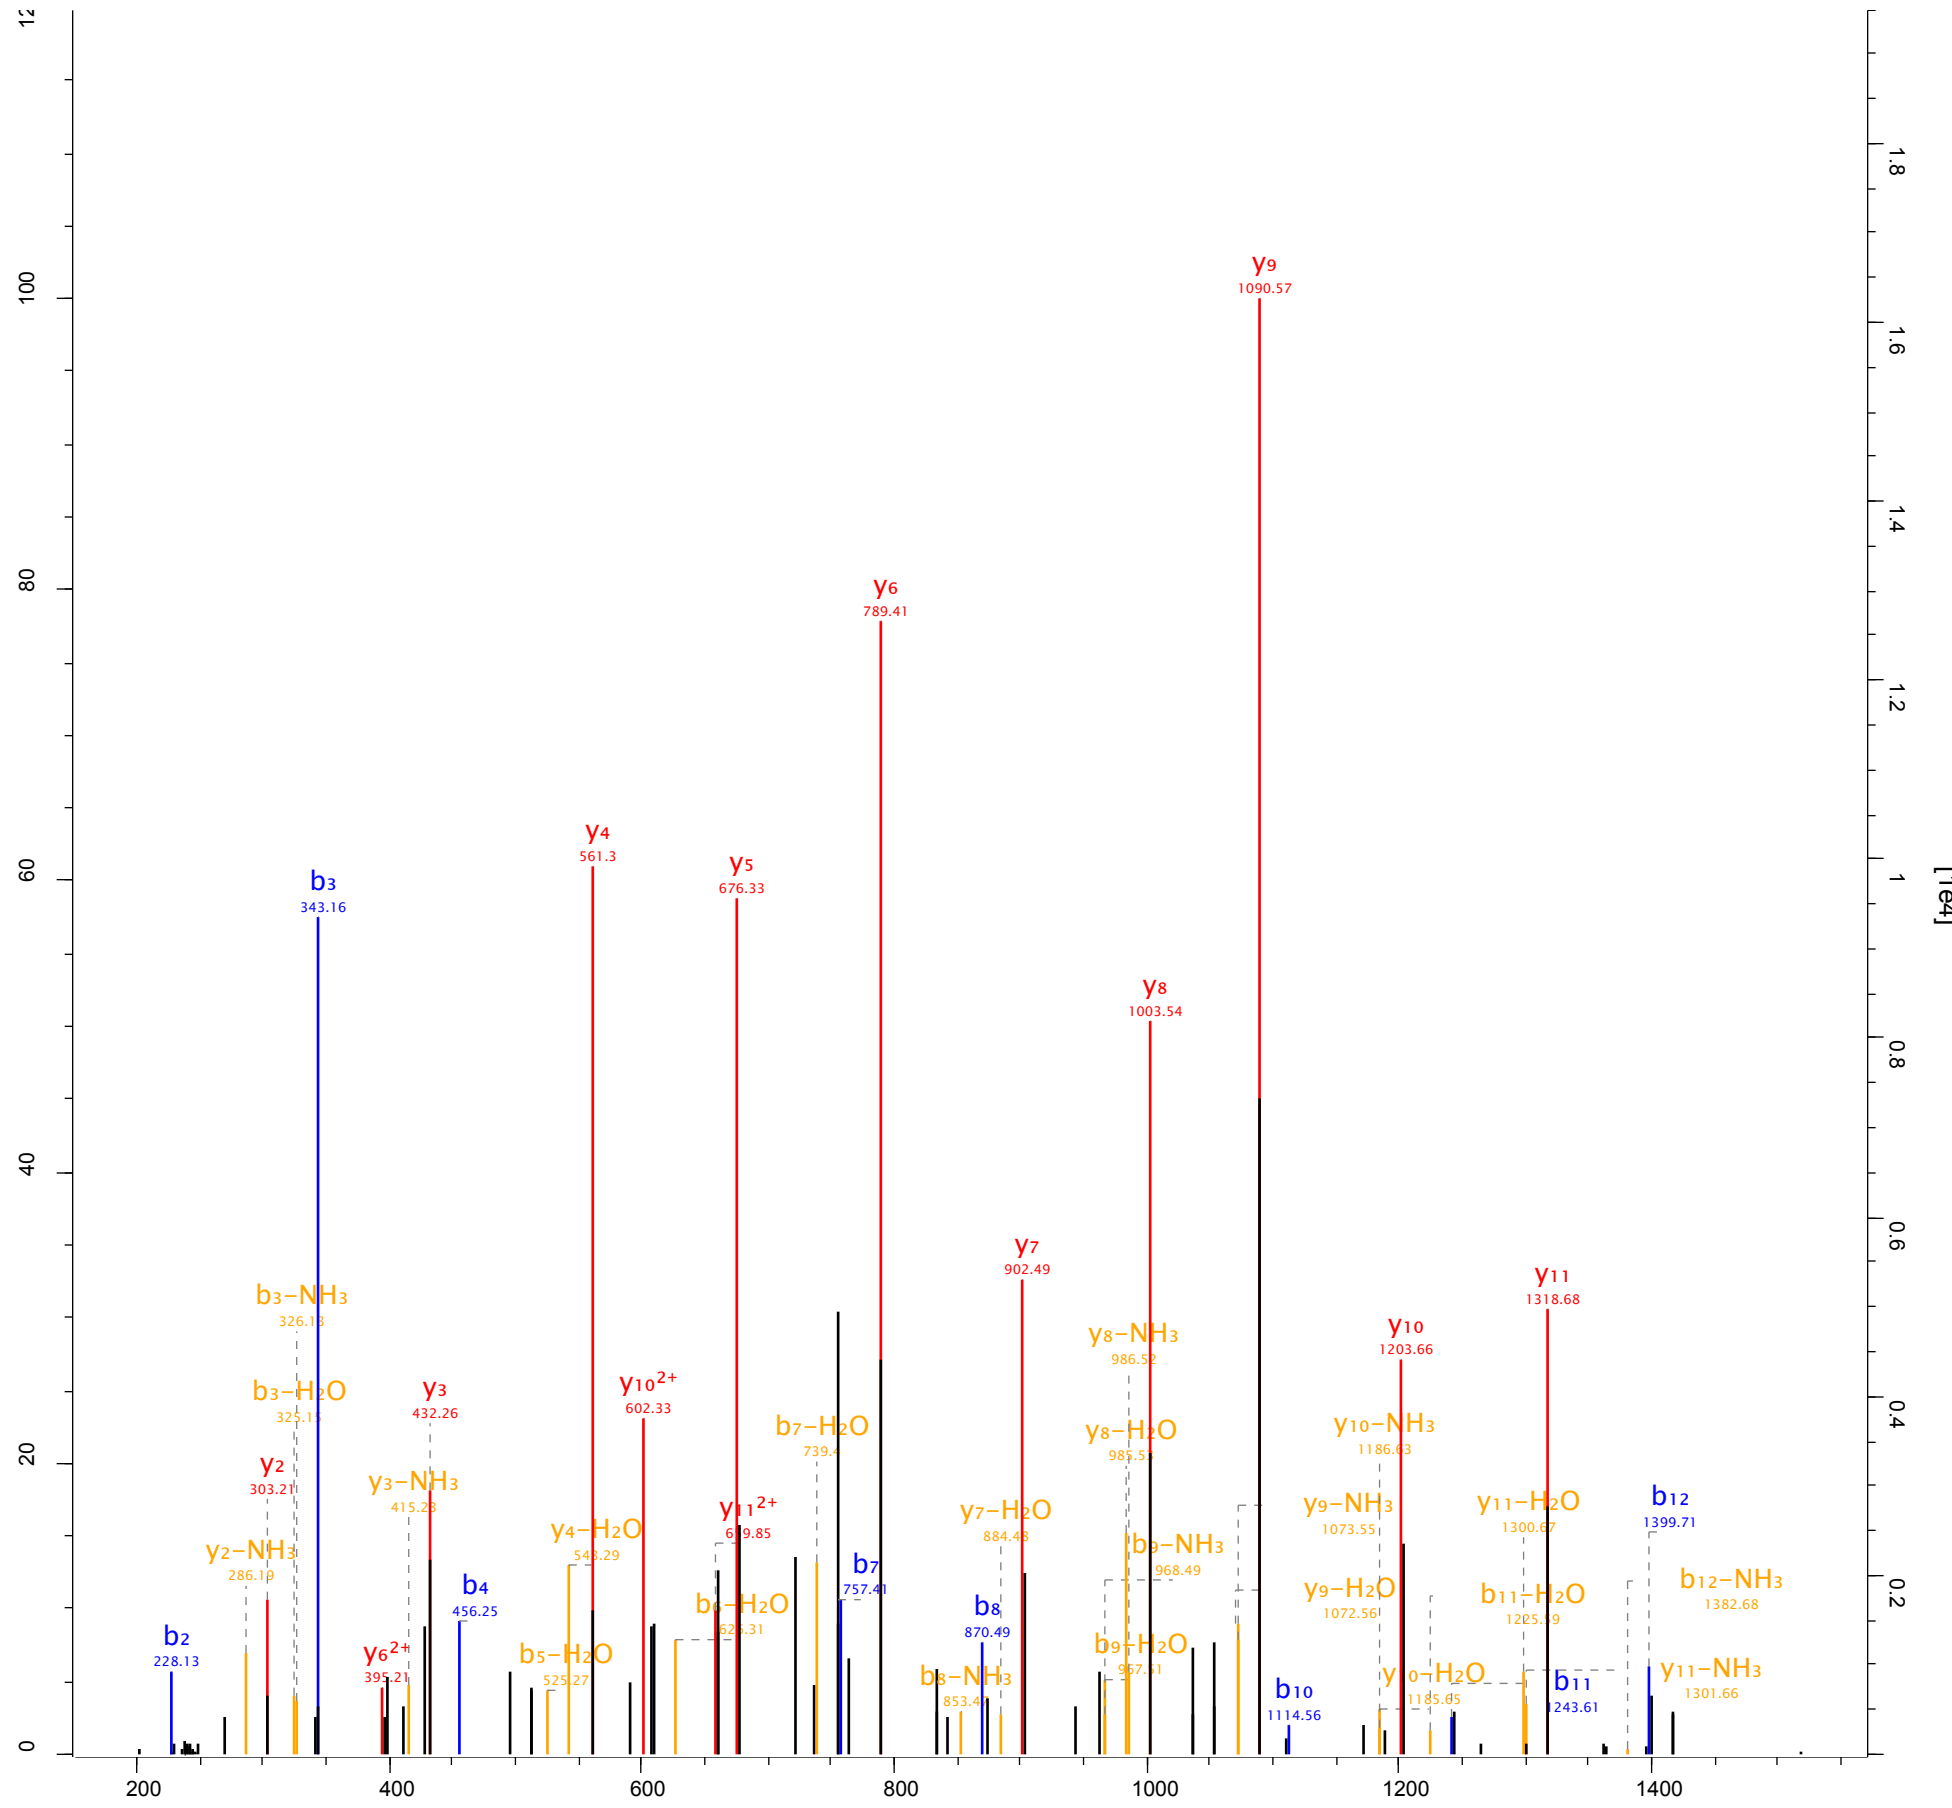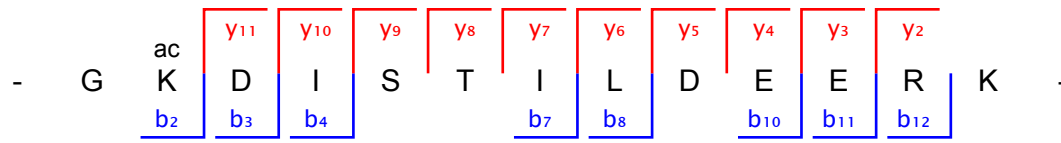

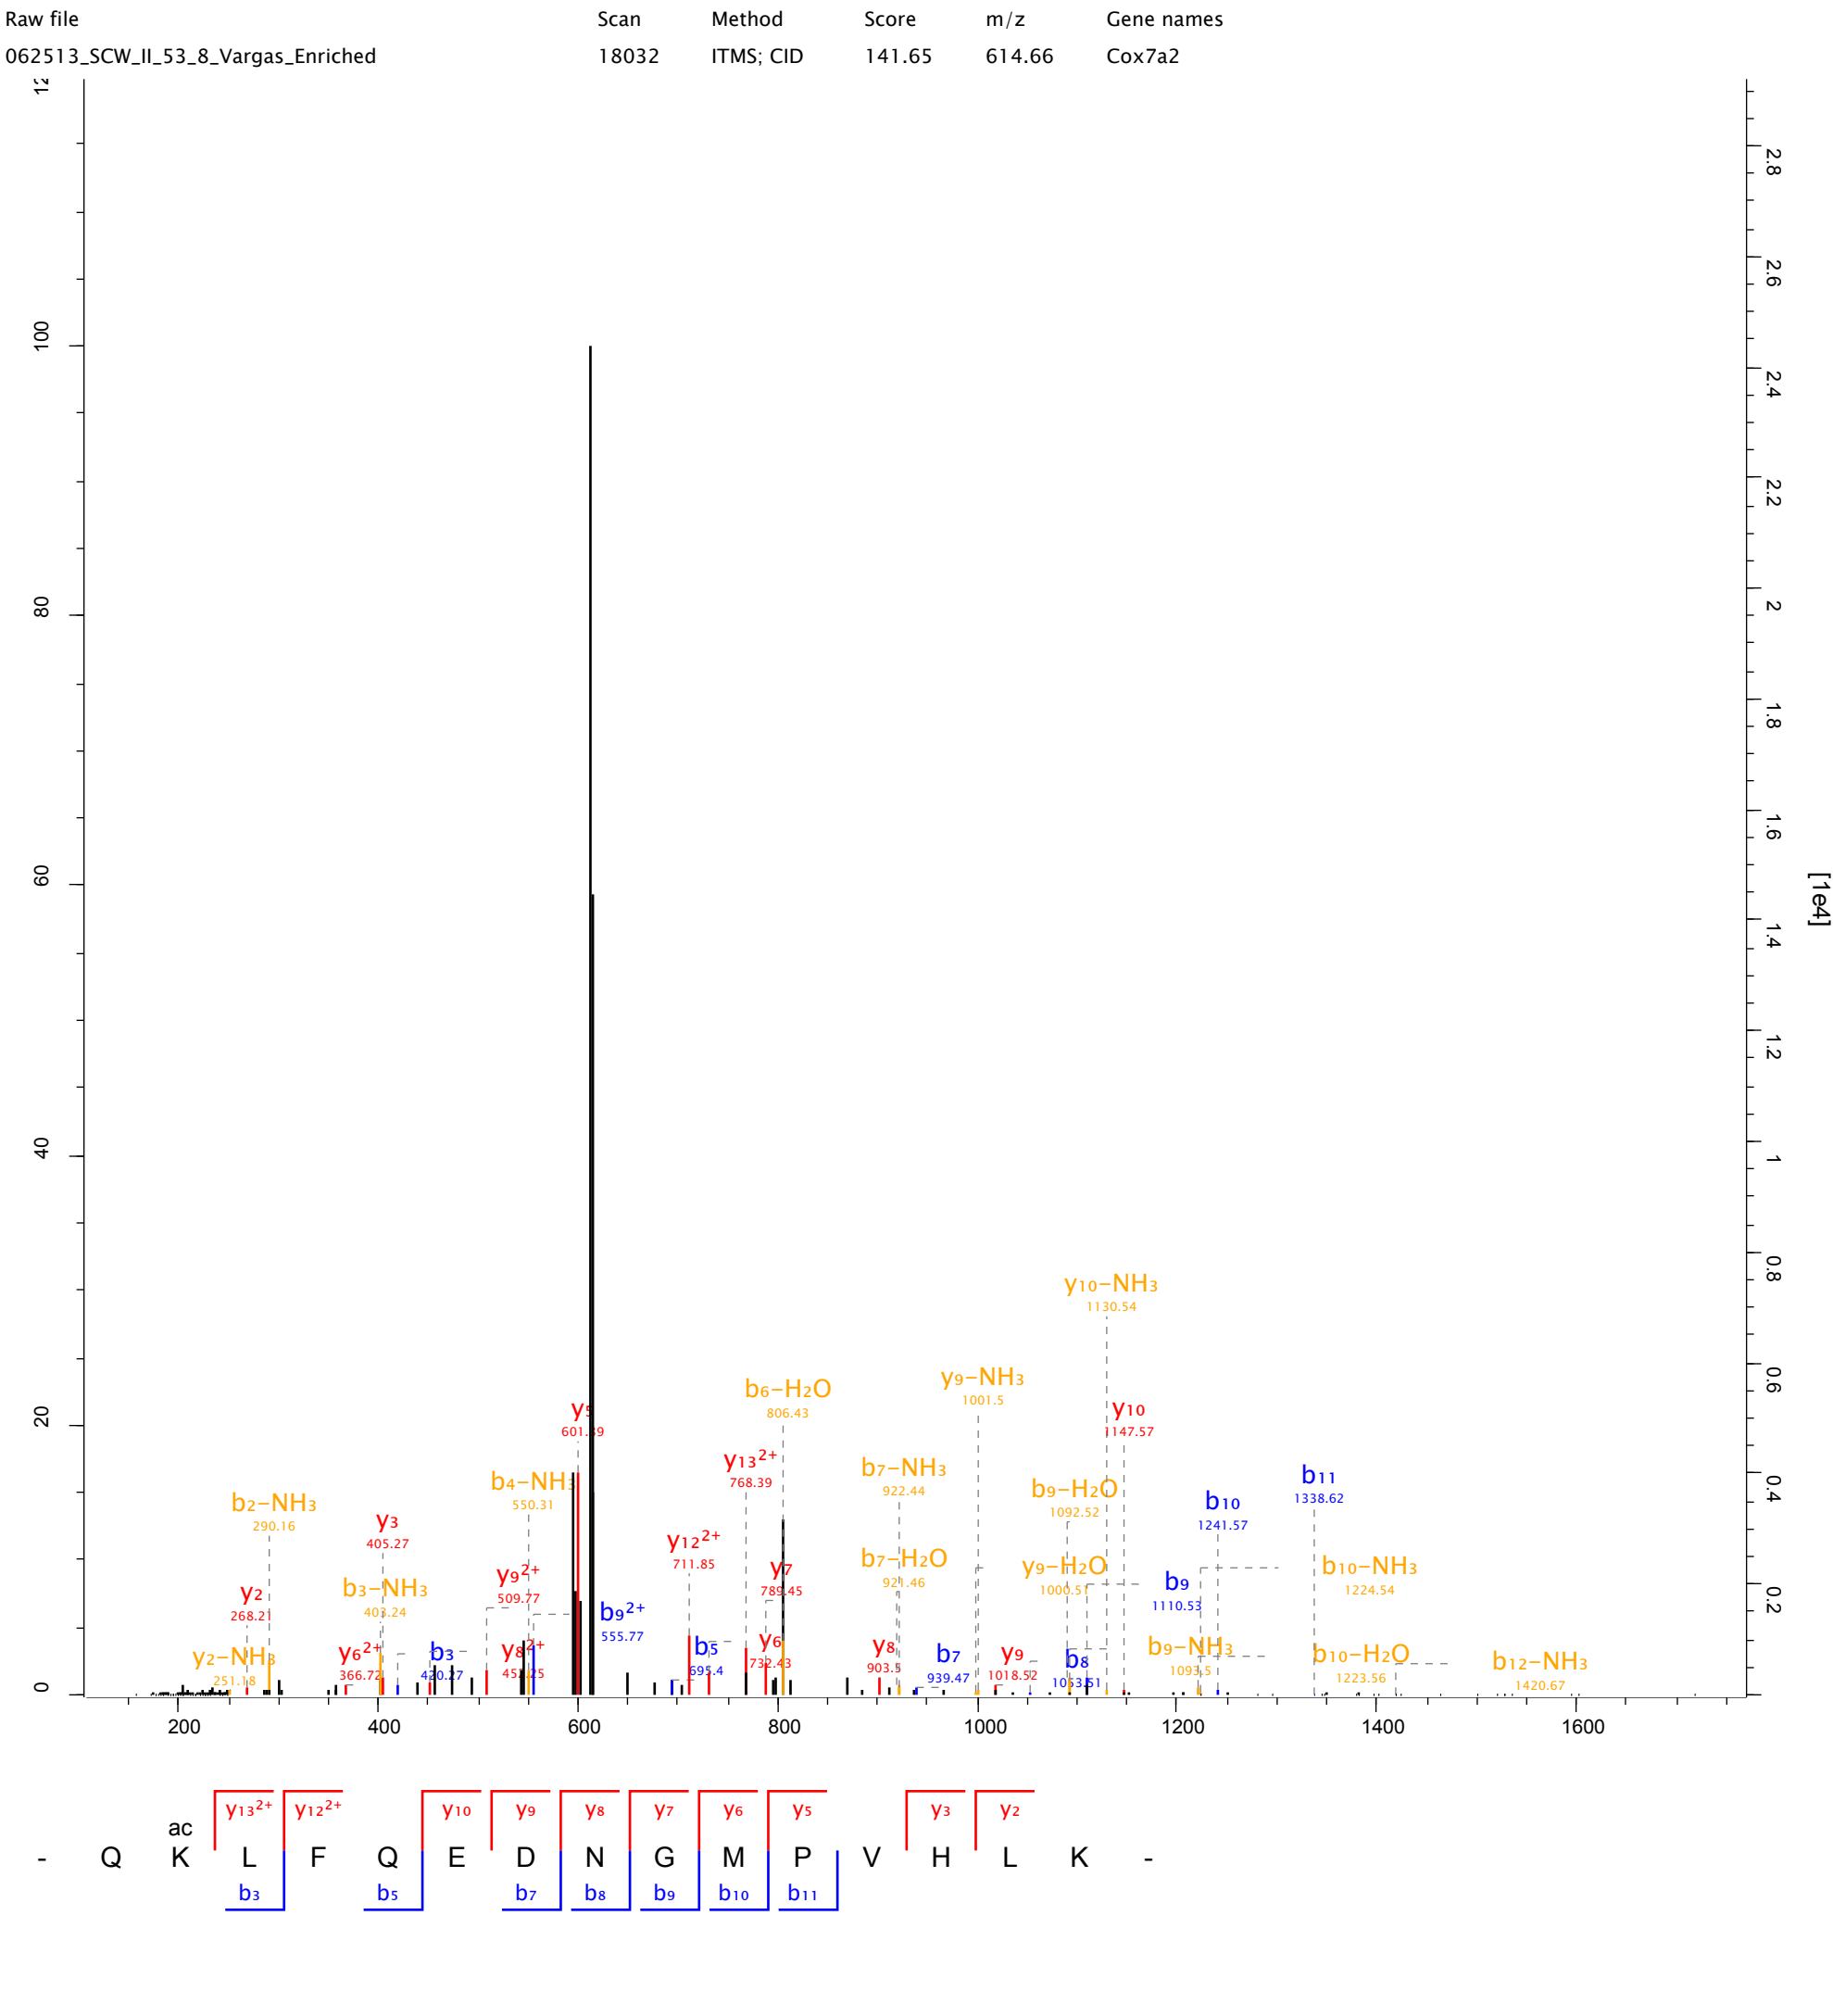

Raw file 062513\_SCW\_II\_53\_8\_Vargas\_Enriched Scan 18540 Method ITMS; CID Score 157.5 m/z 800.42 Gene names Sat2

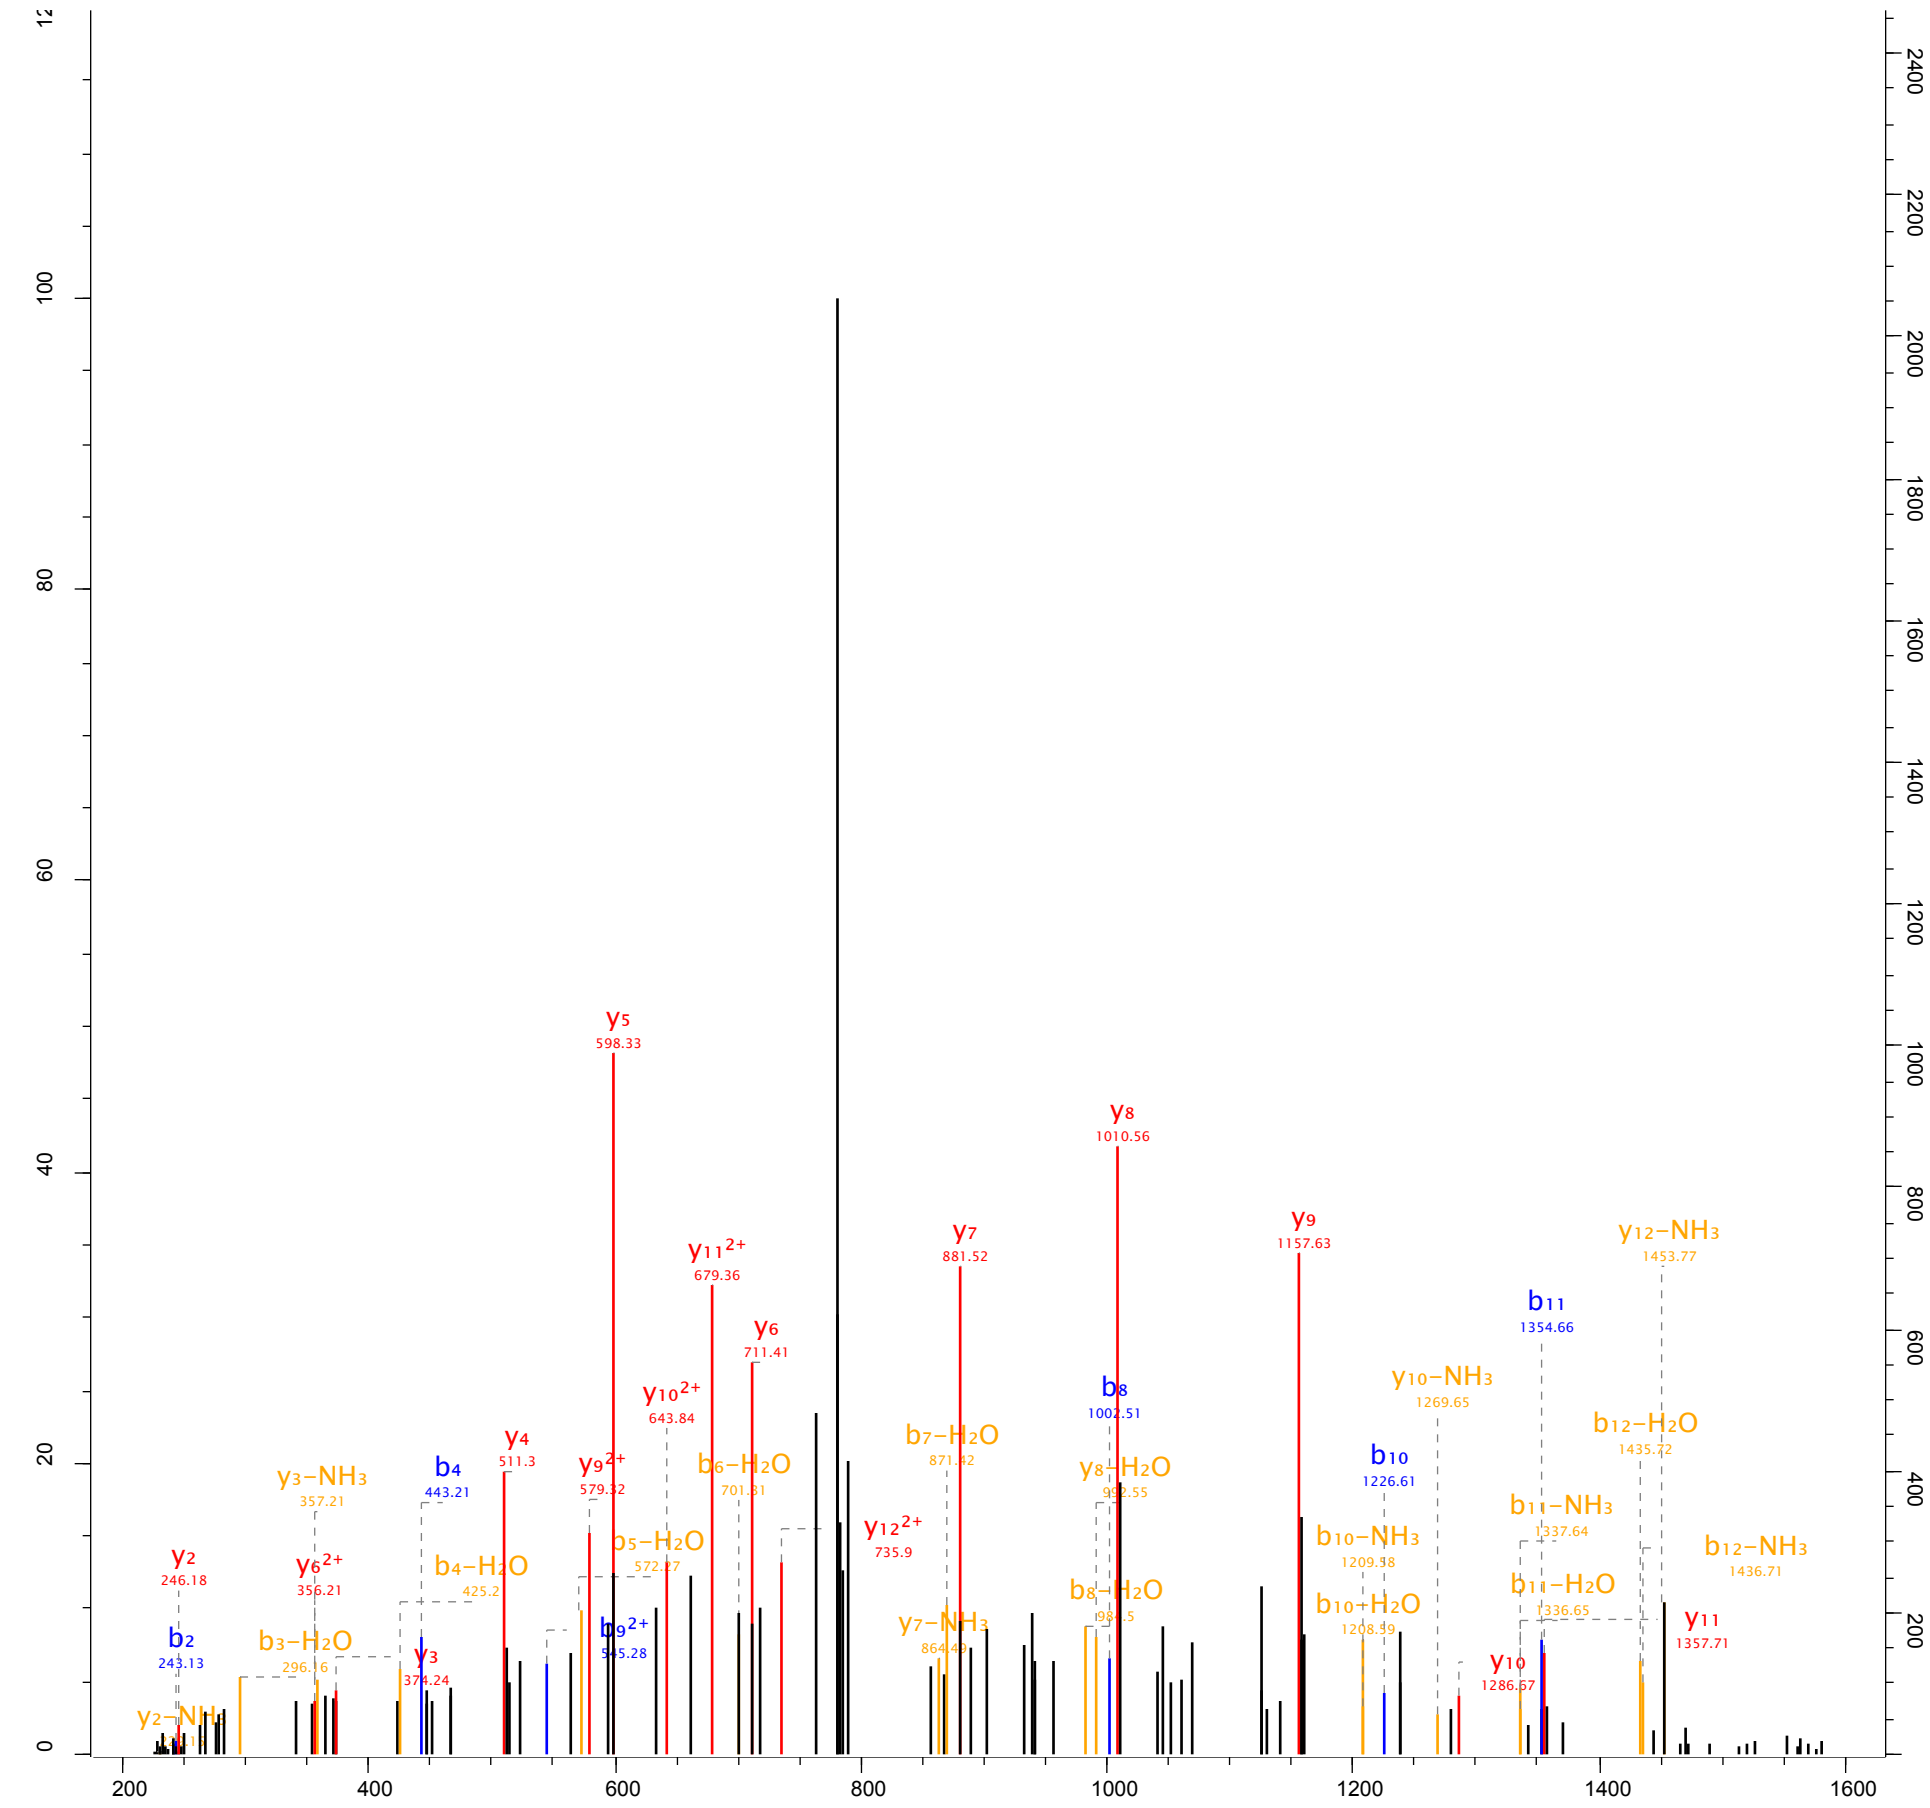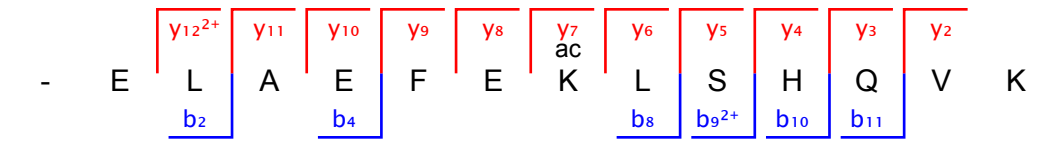

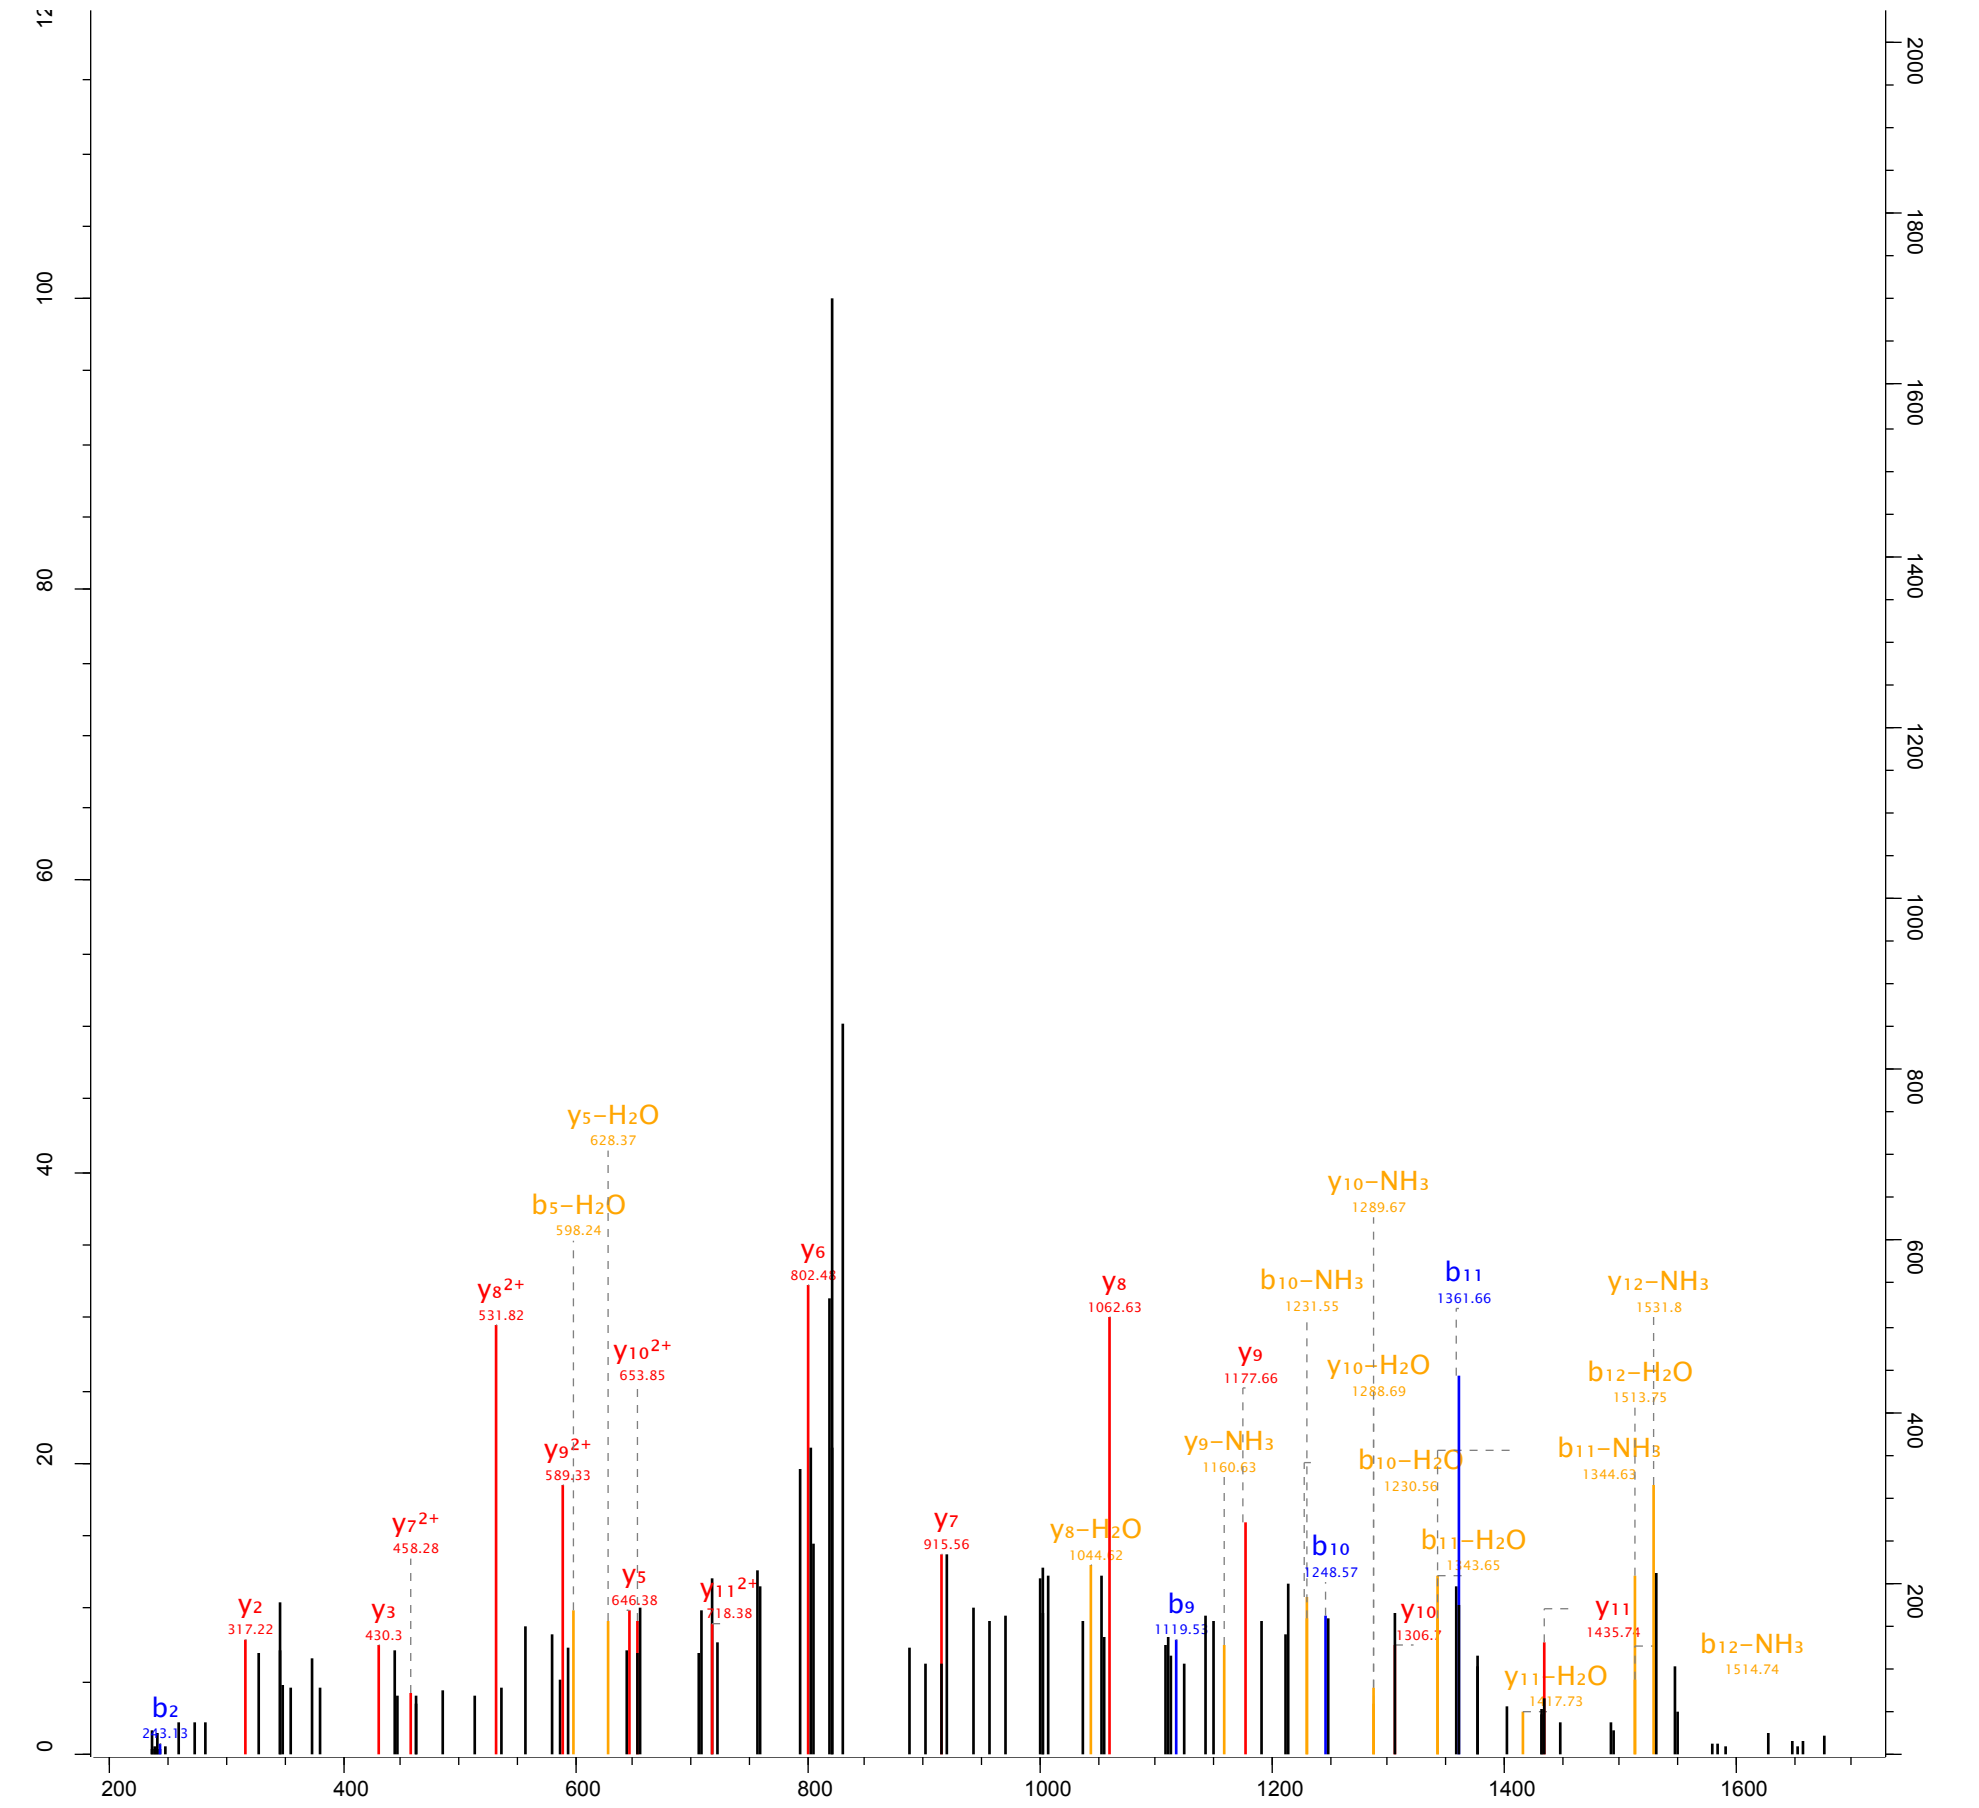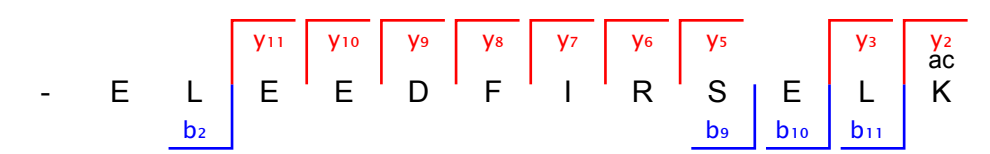

Raw file: 062513\_SCW\_II\_53\_8\_Vargas\_Enriched  
 Scan: 19469 Method: ITMS; CID Score: 163.46 m/z: 483.6 Gene names: Gpi;Gm1840

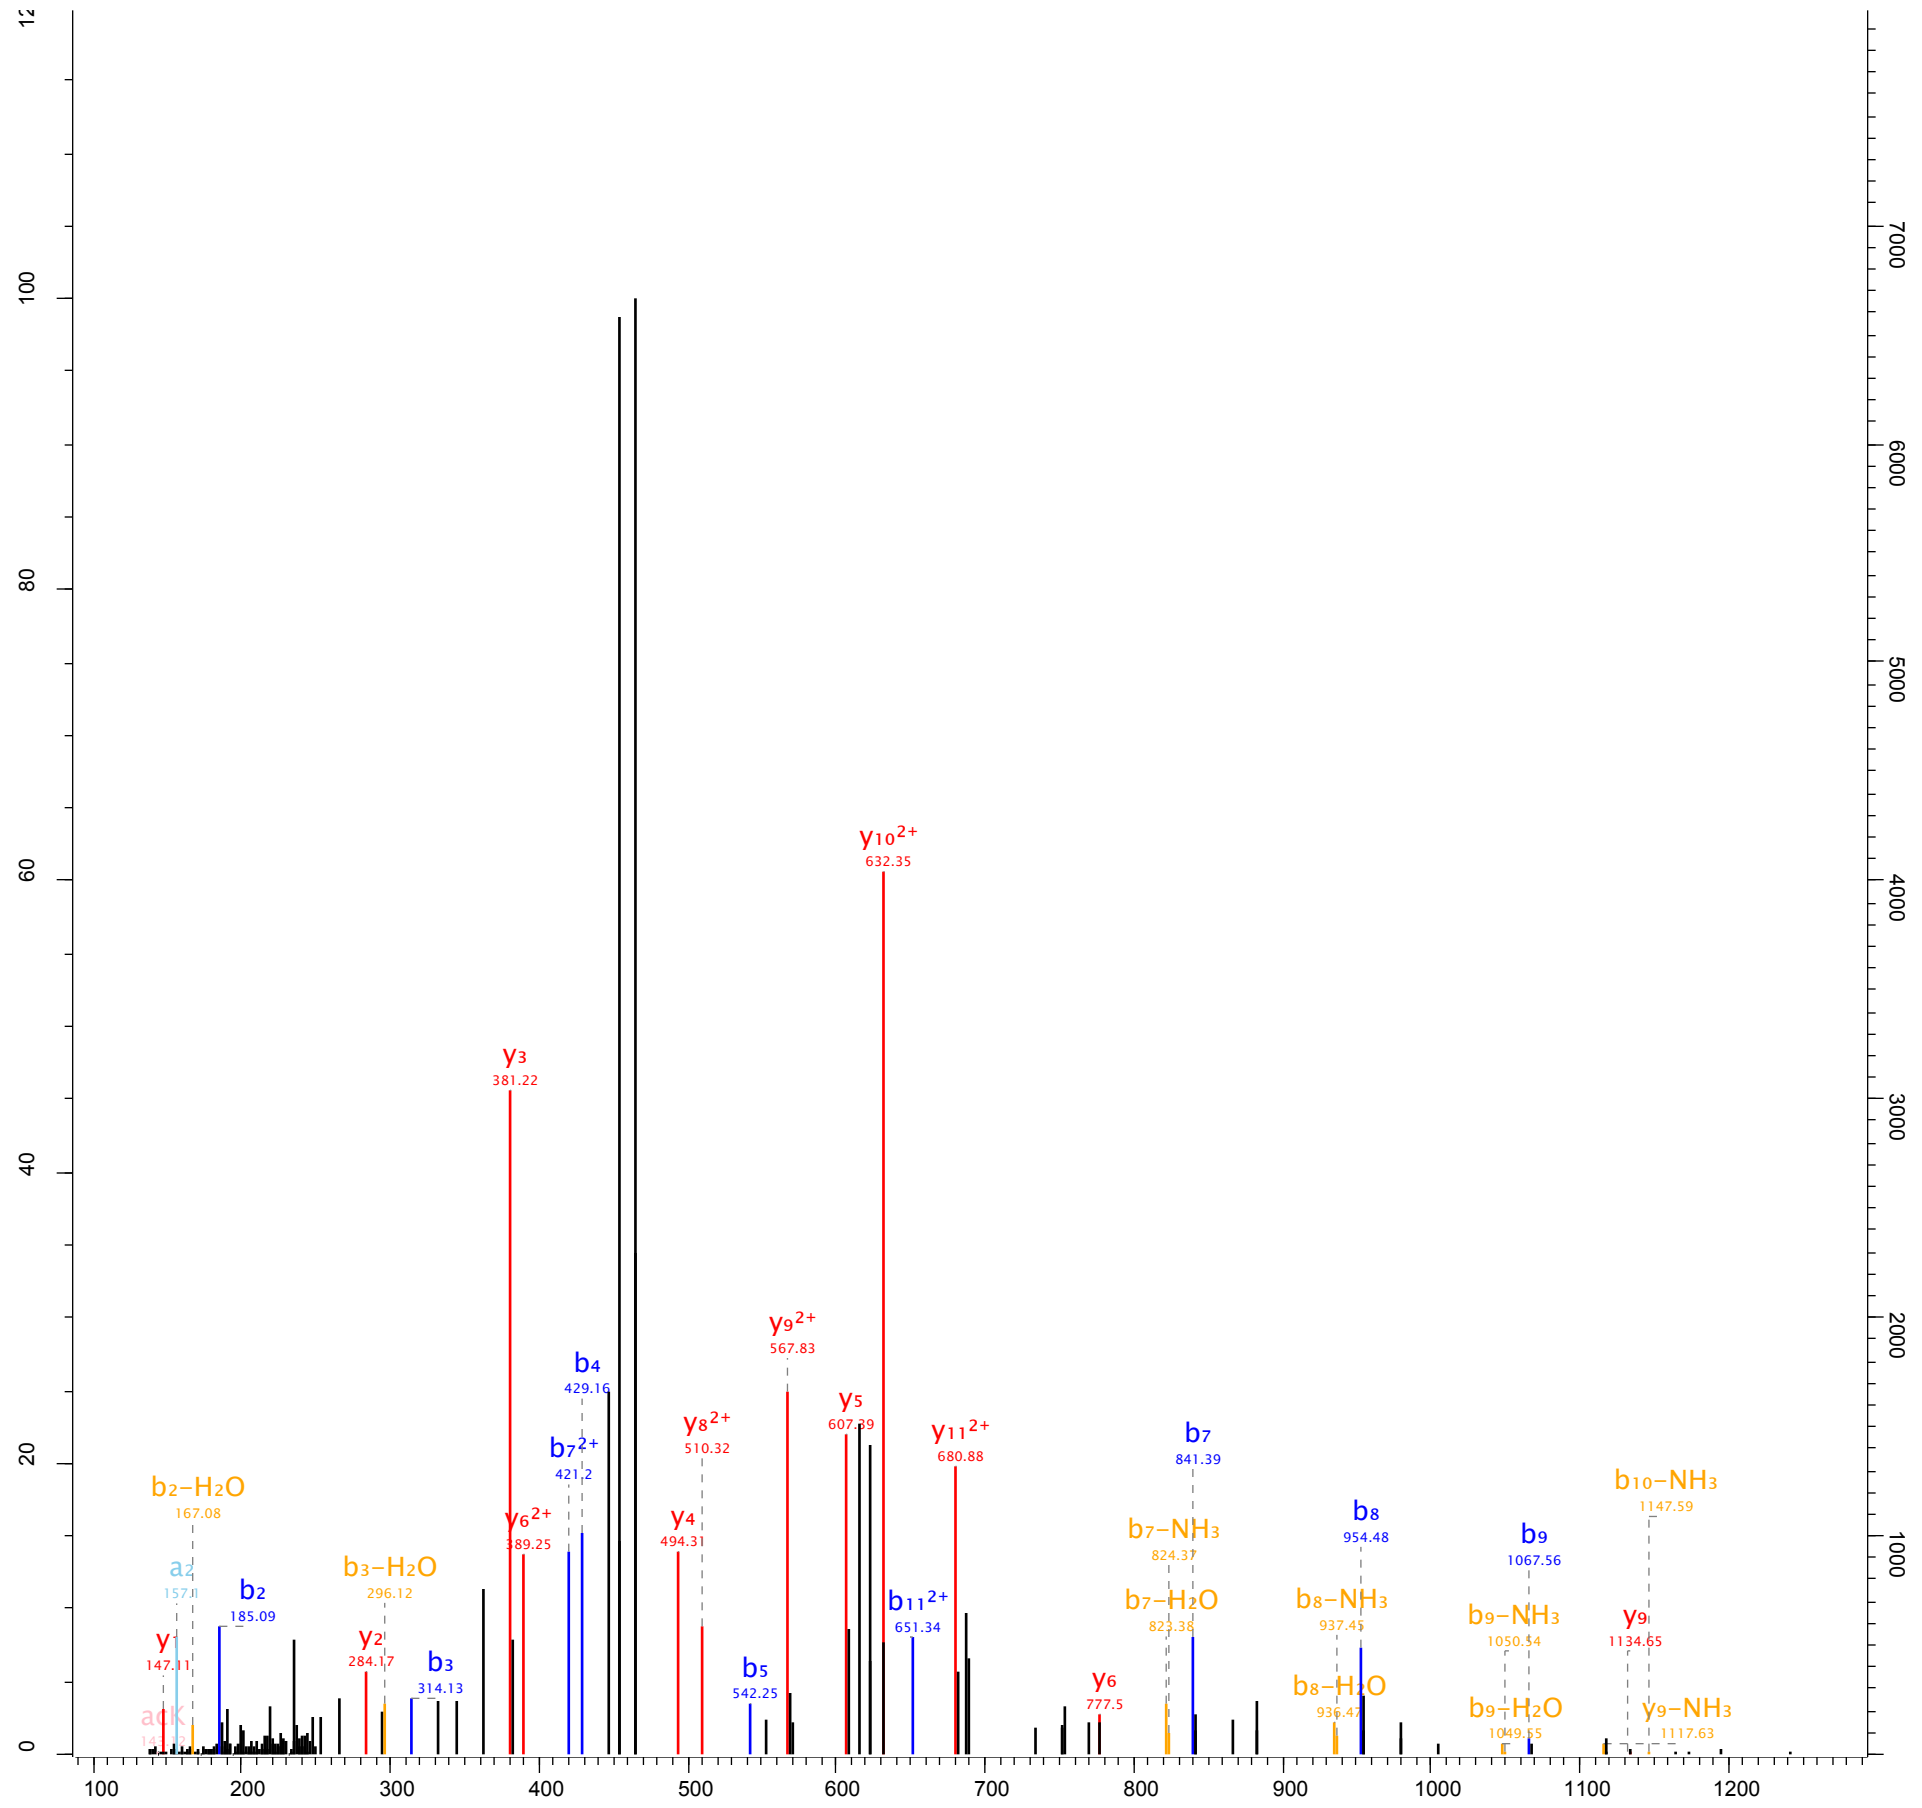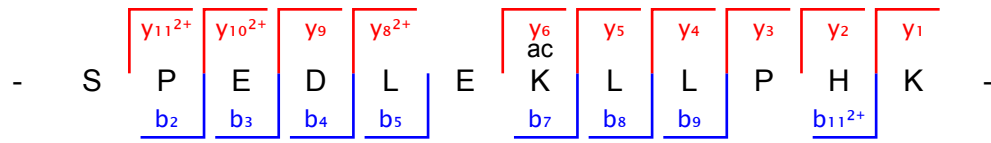

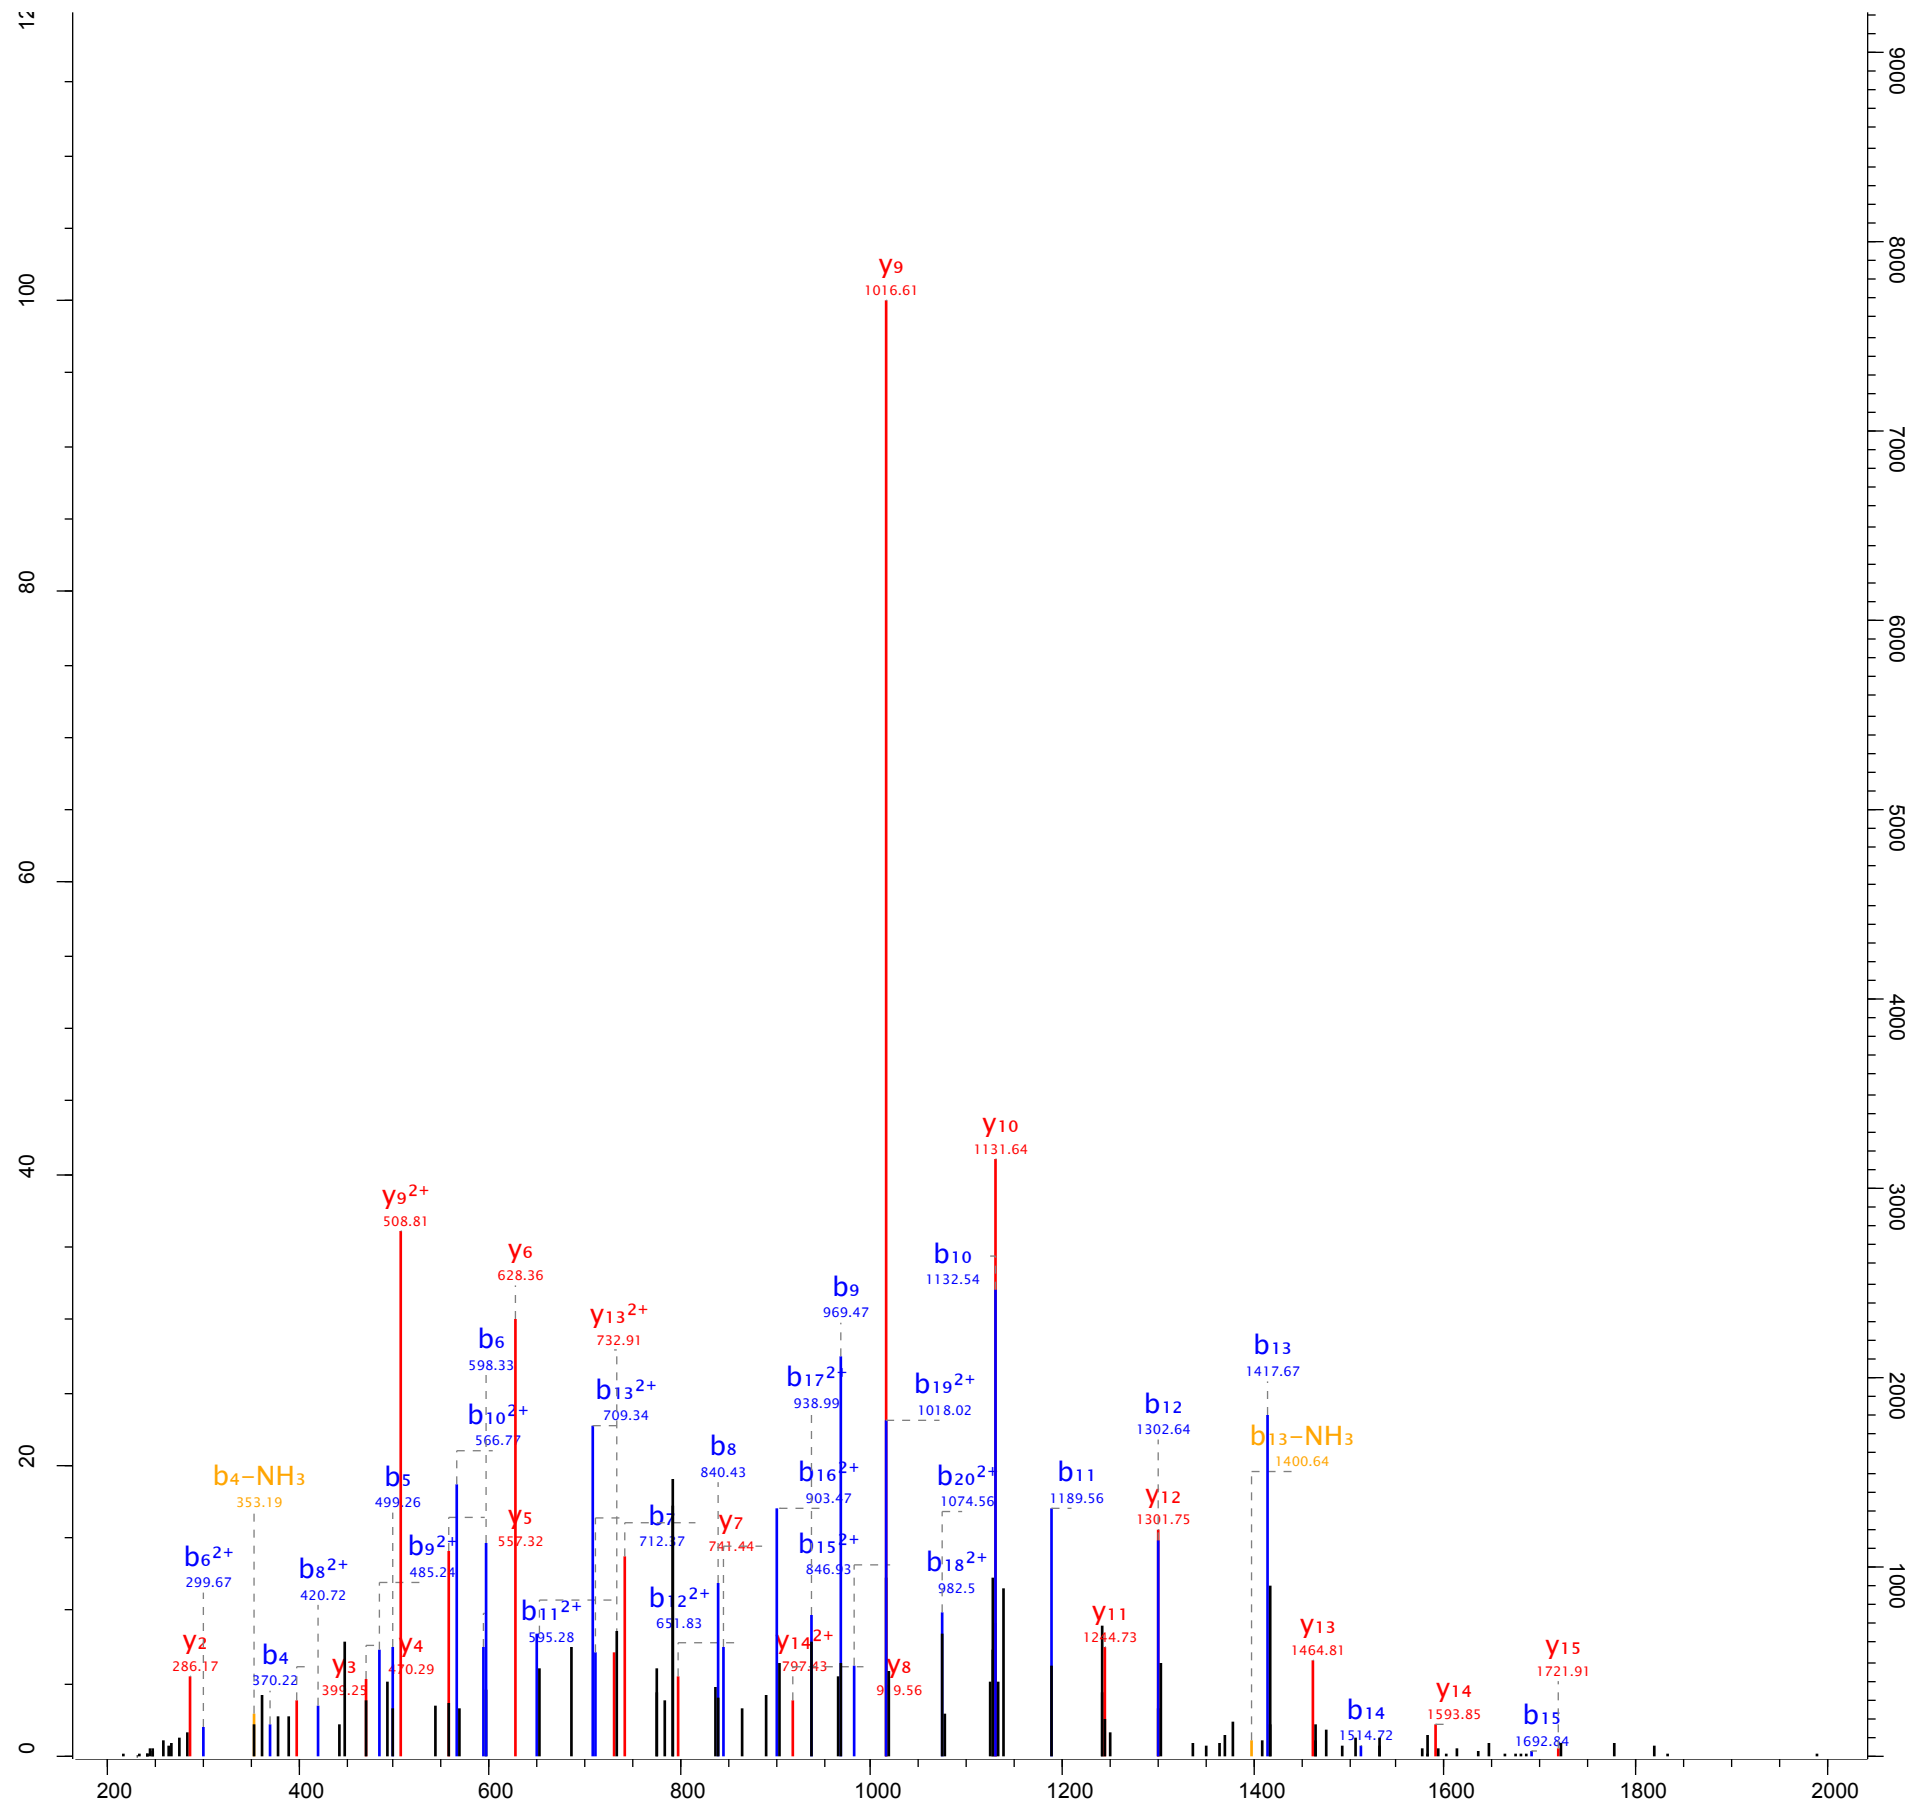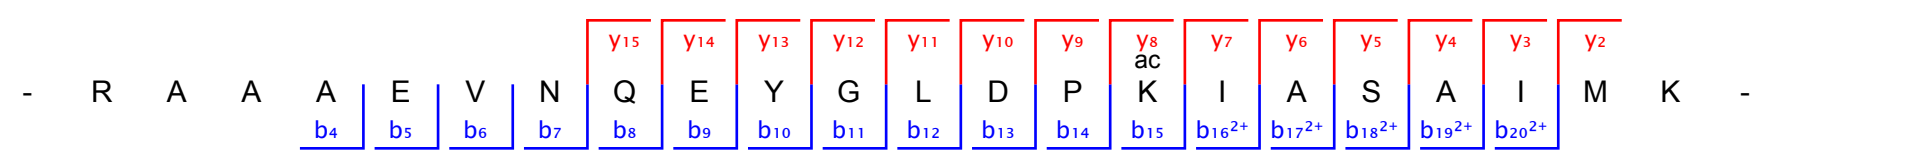



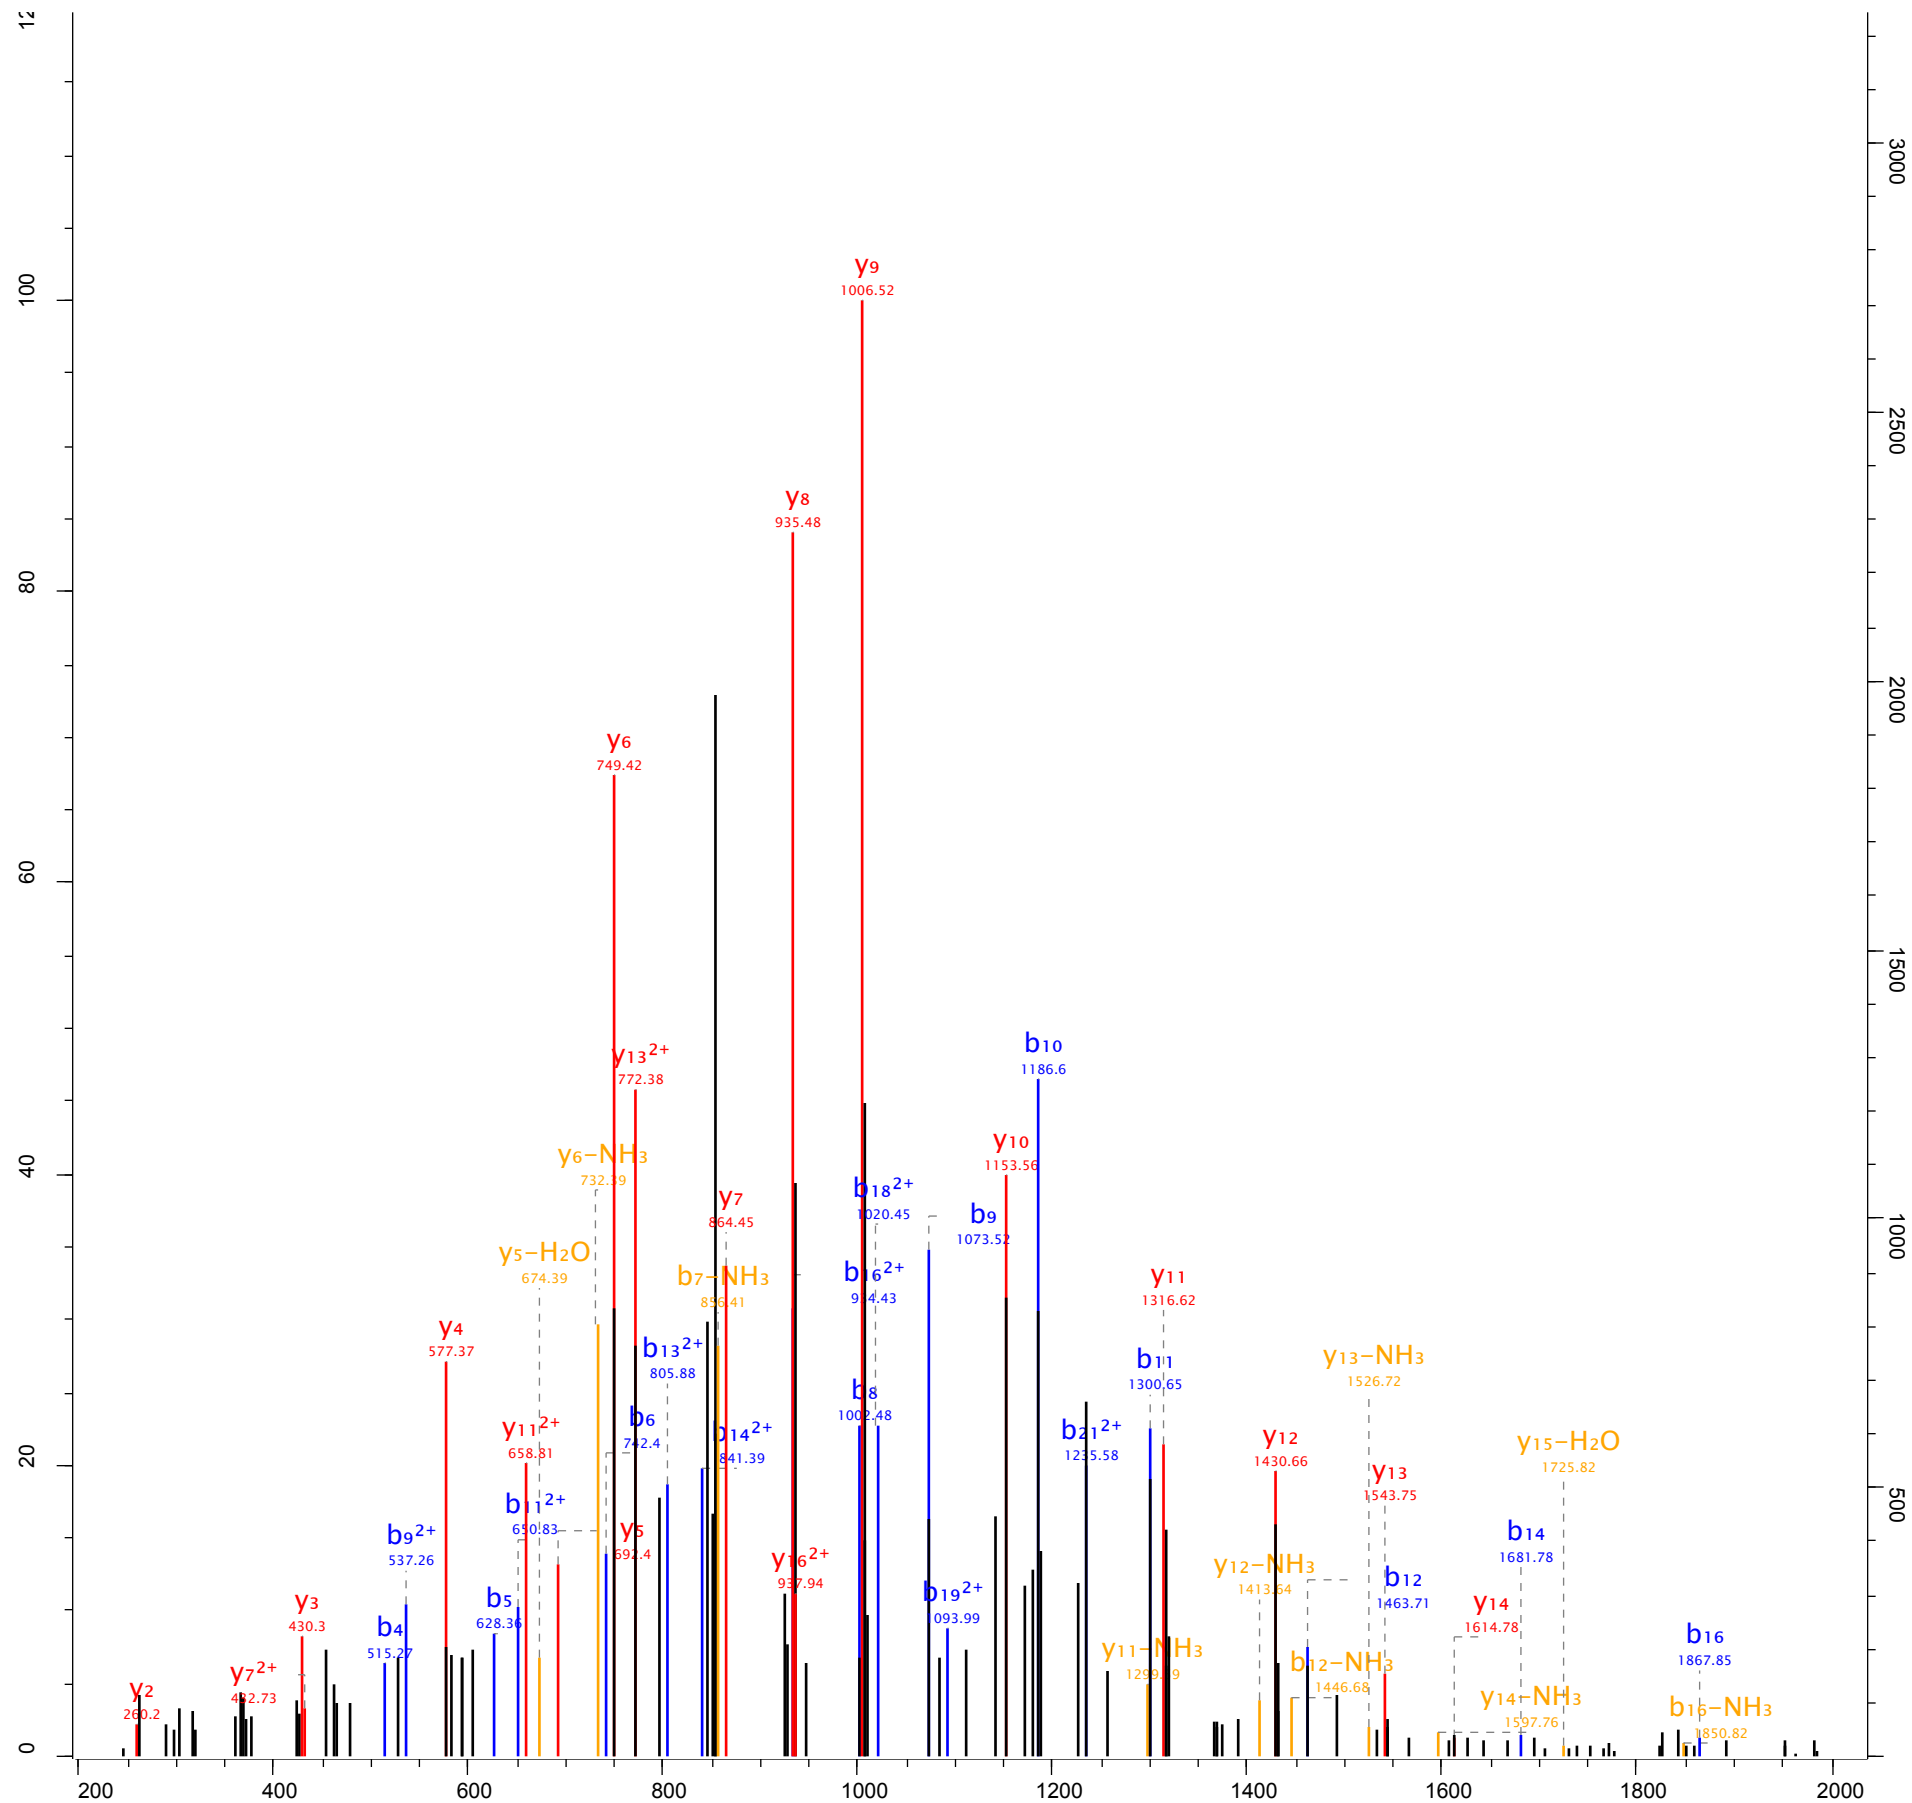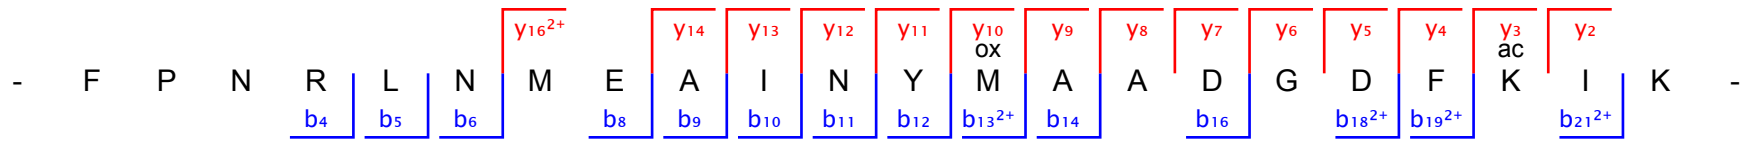

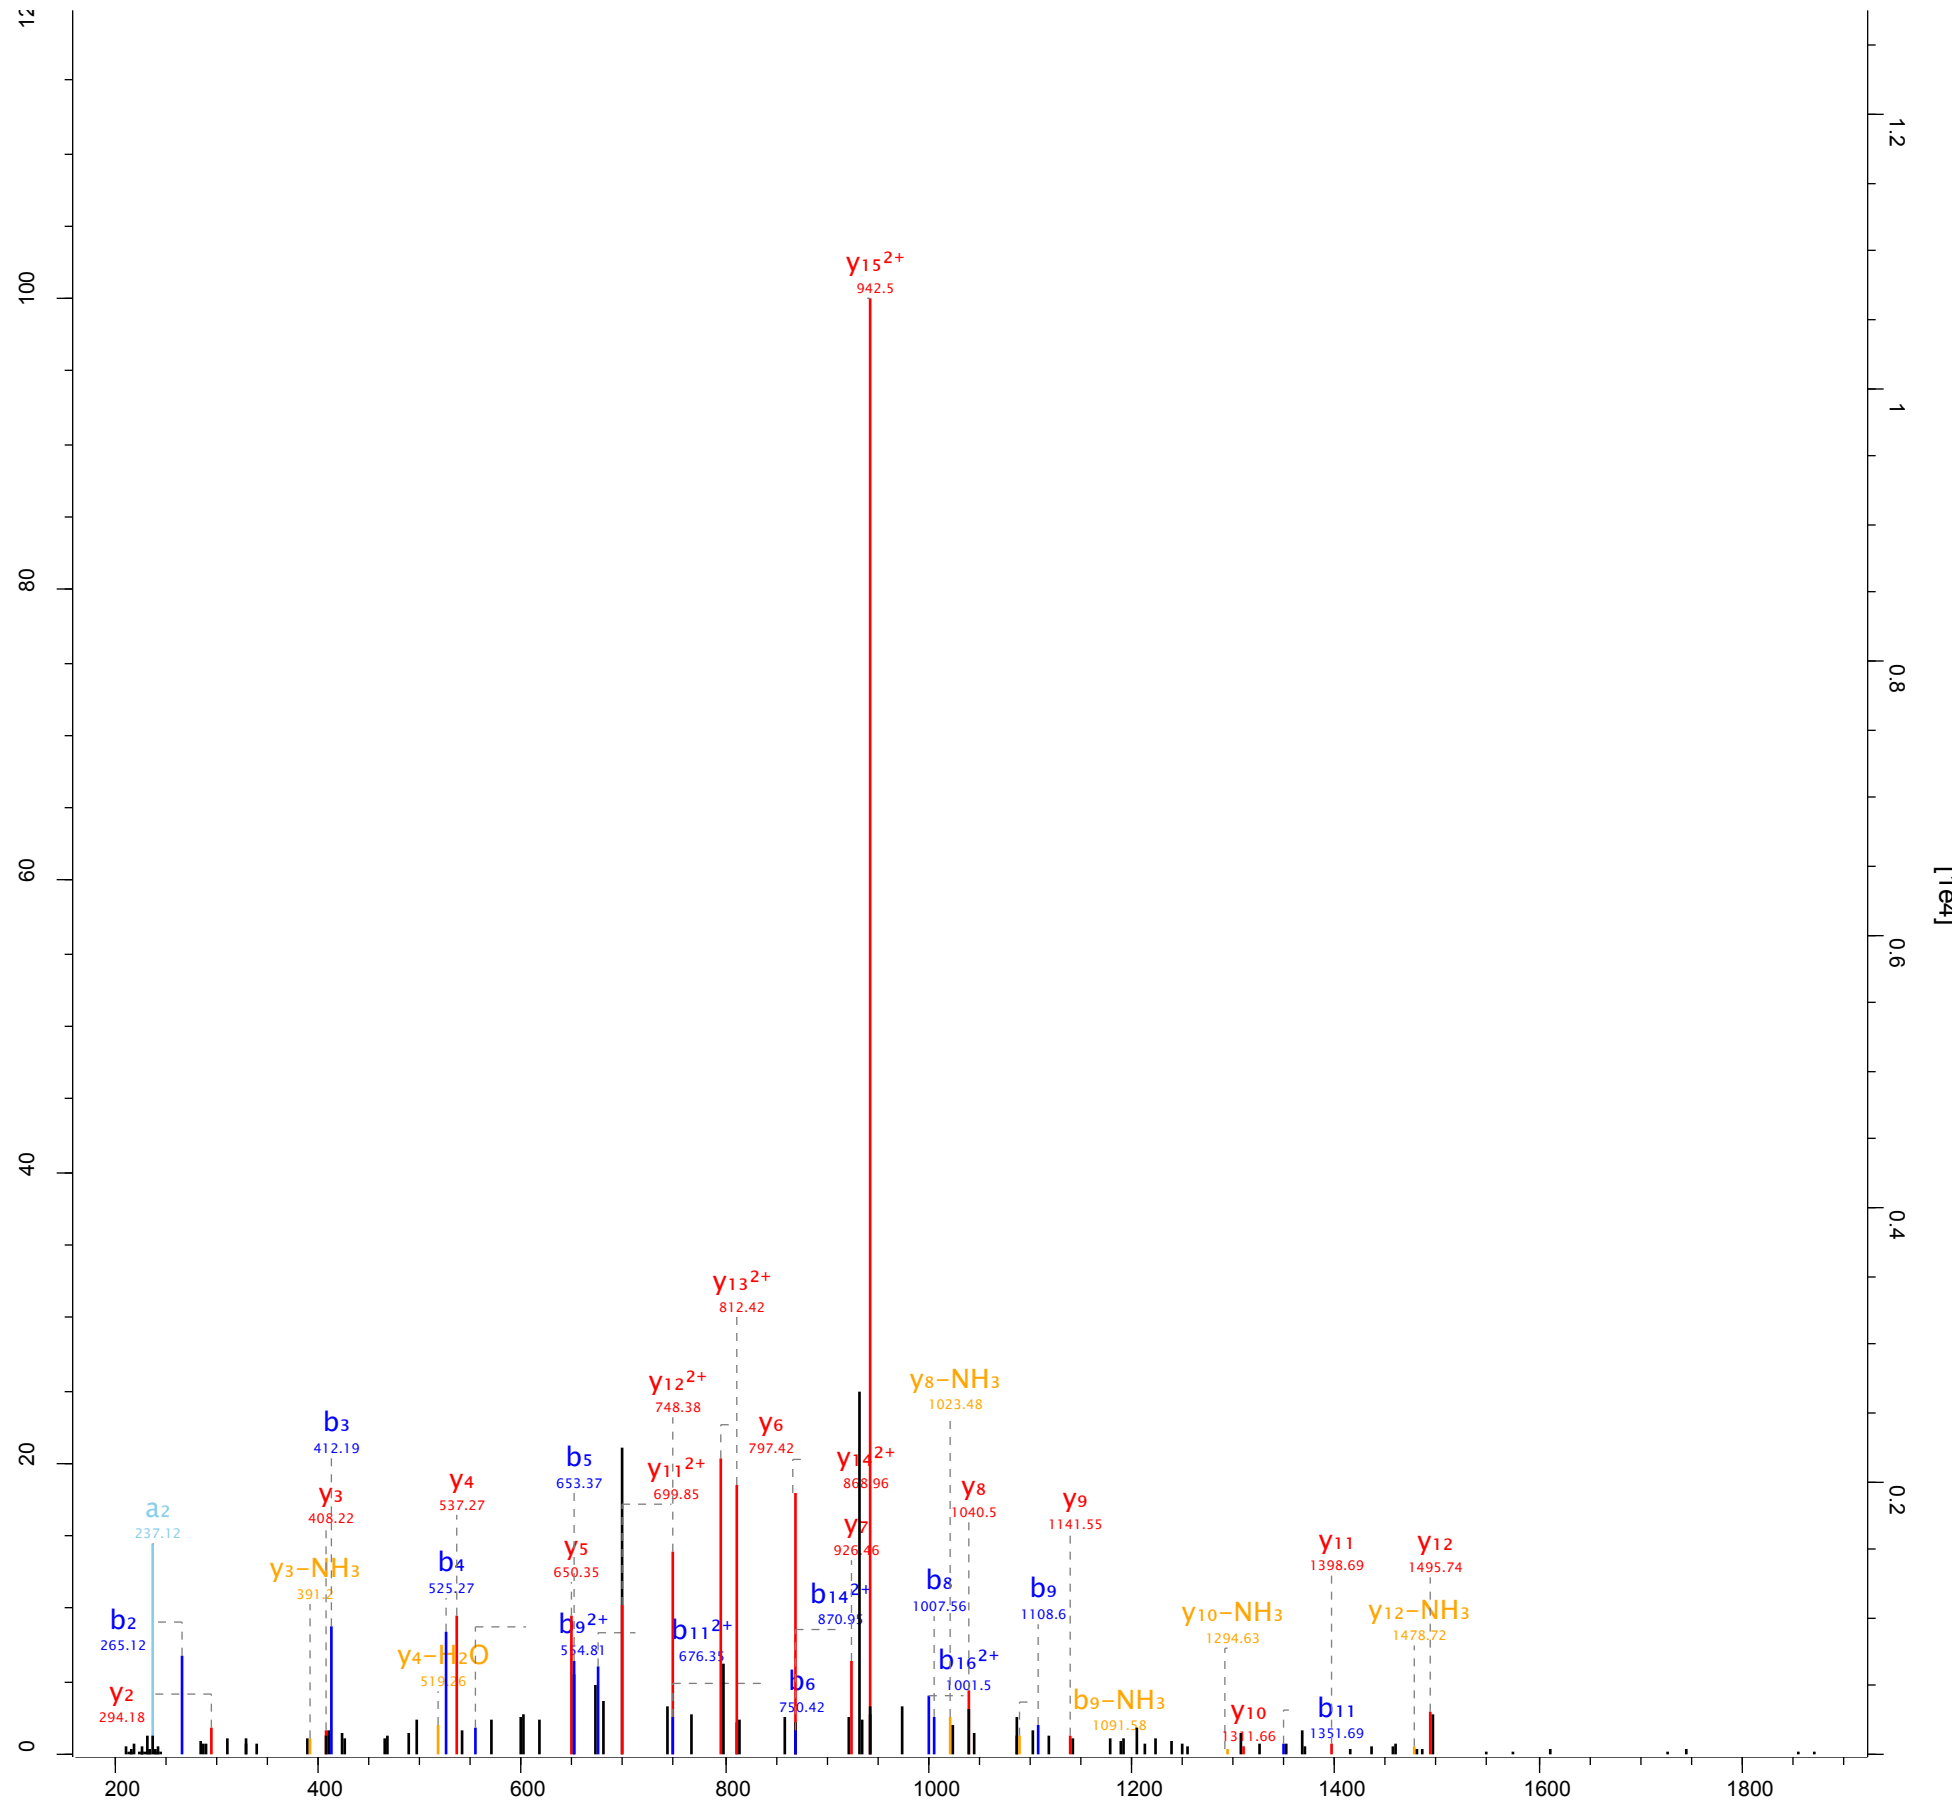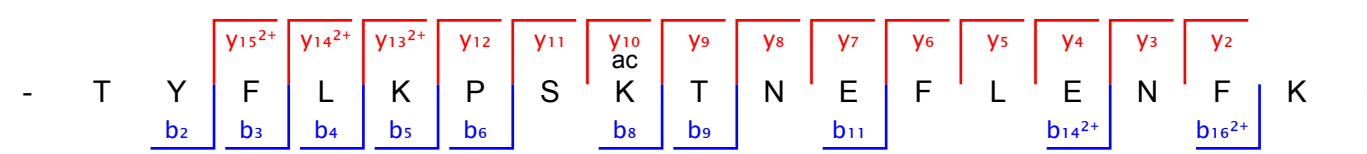

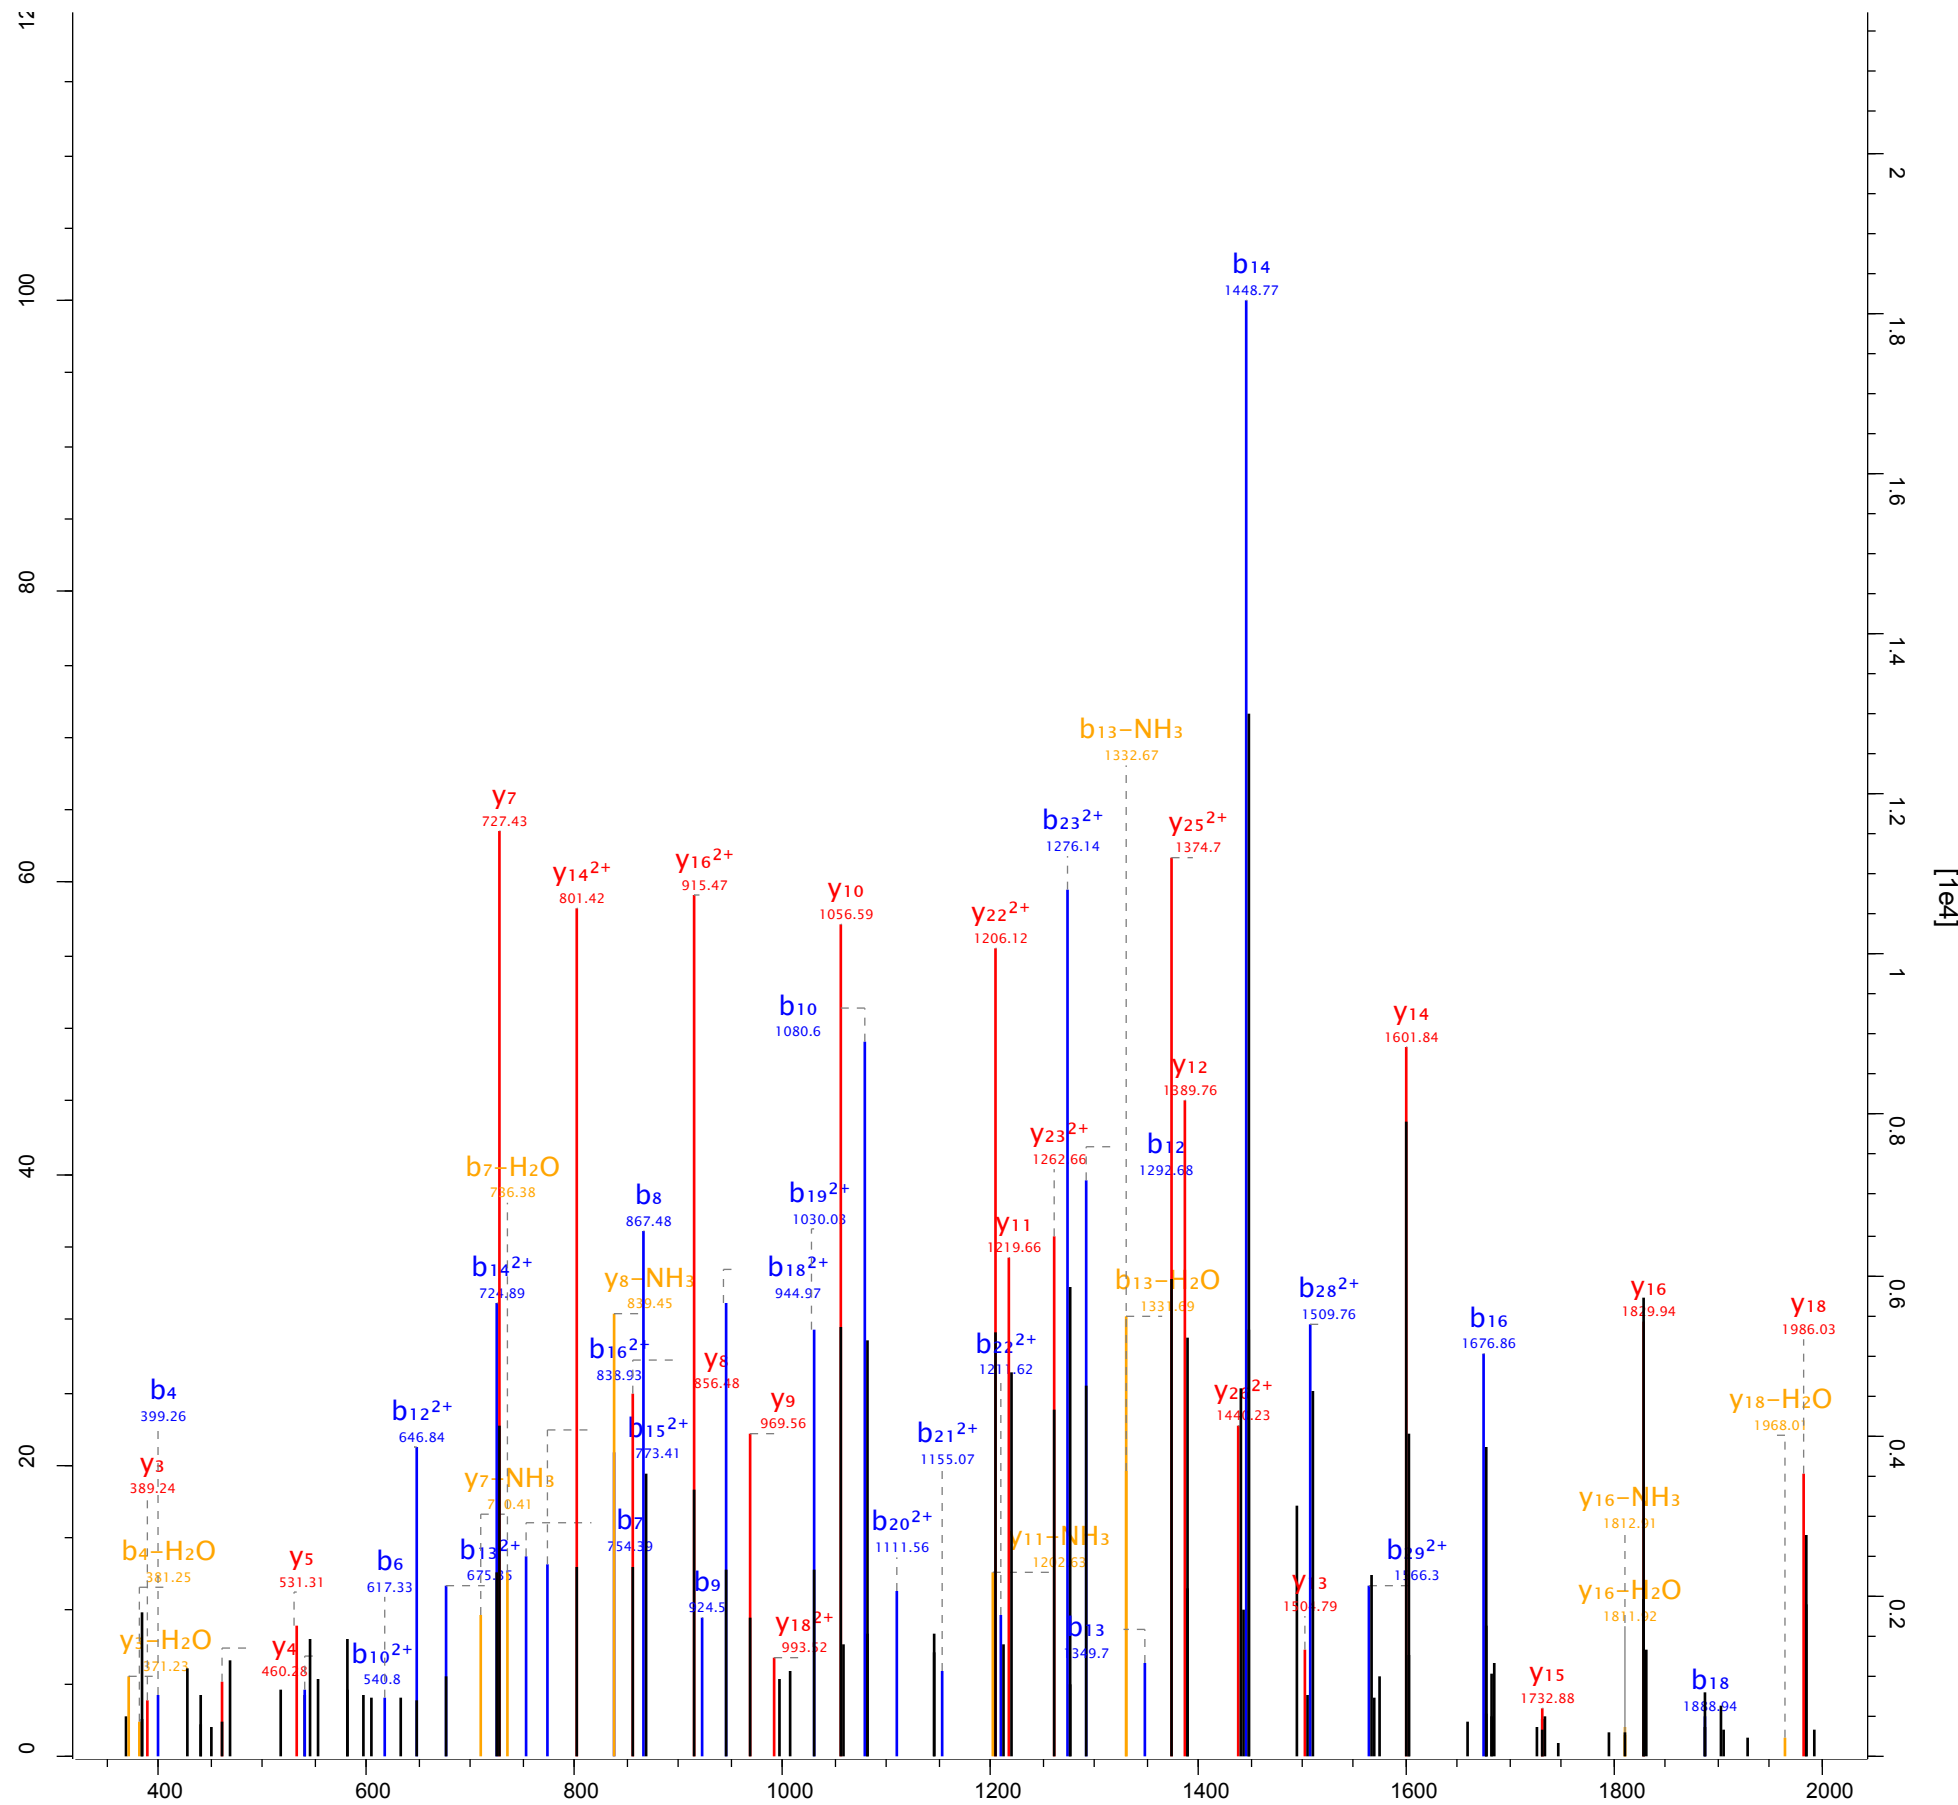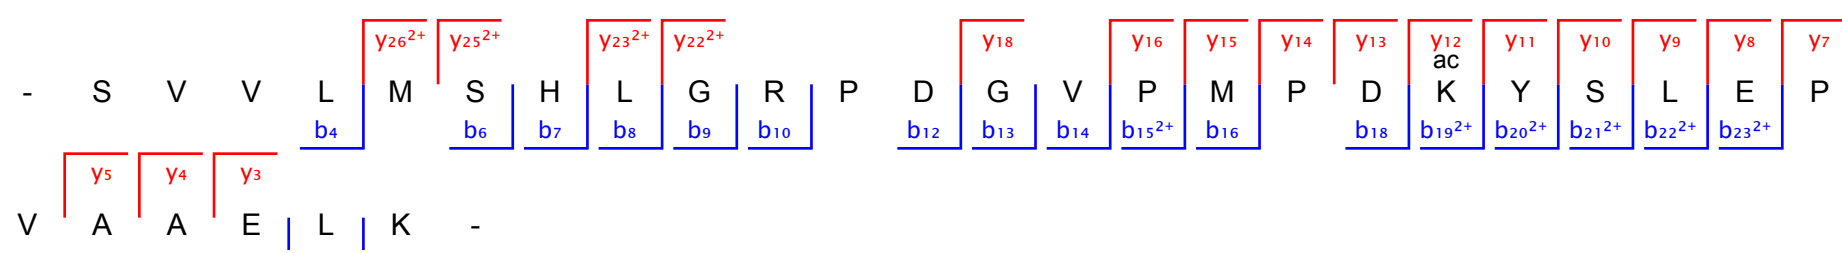

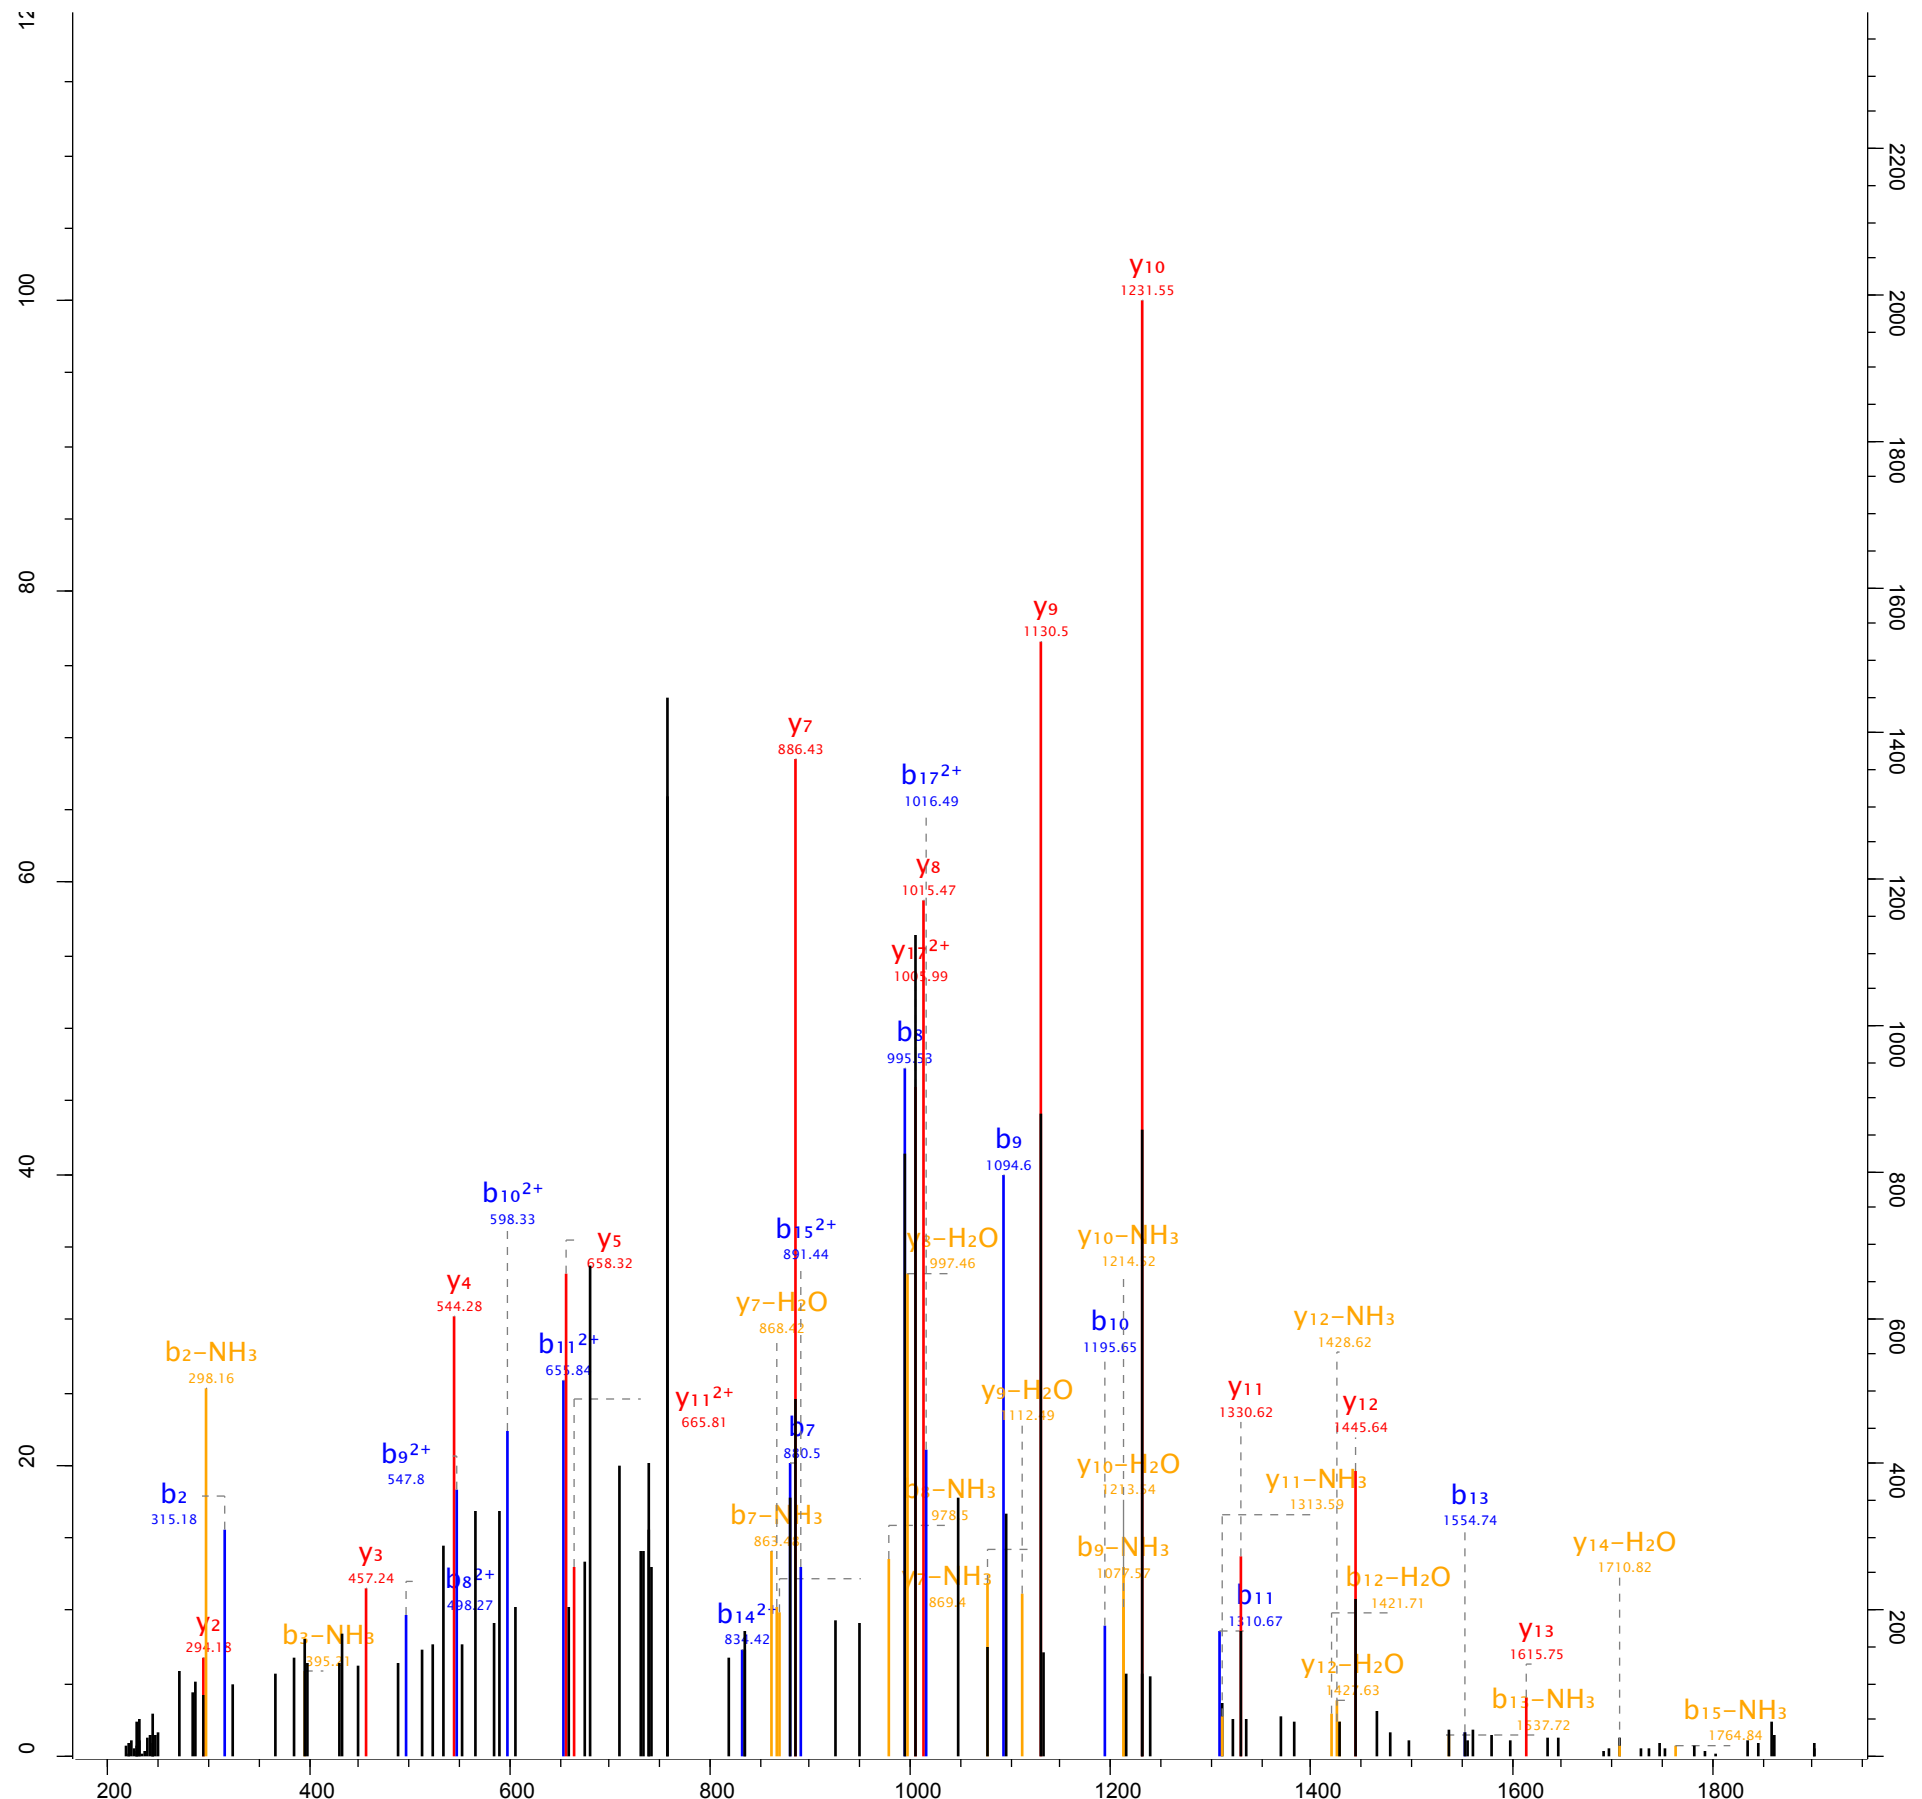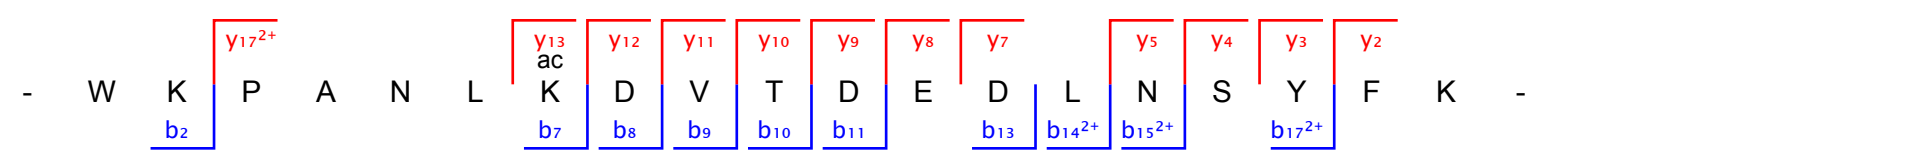

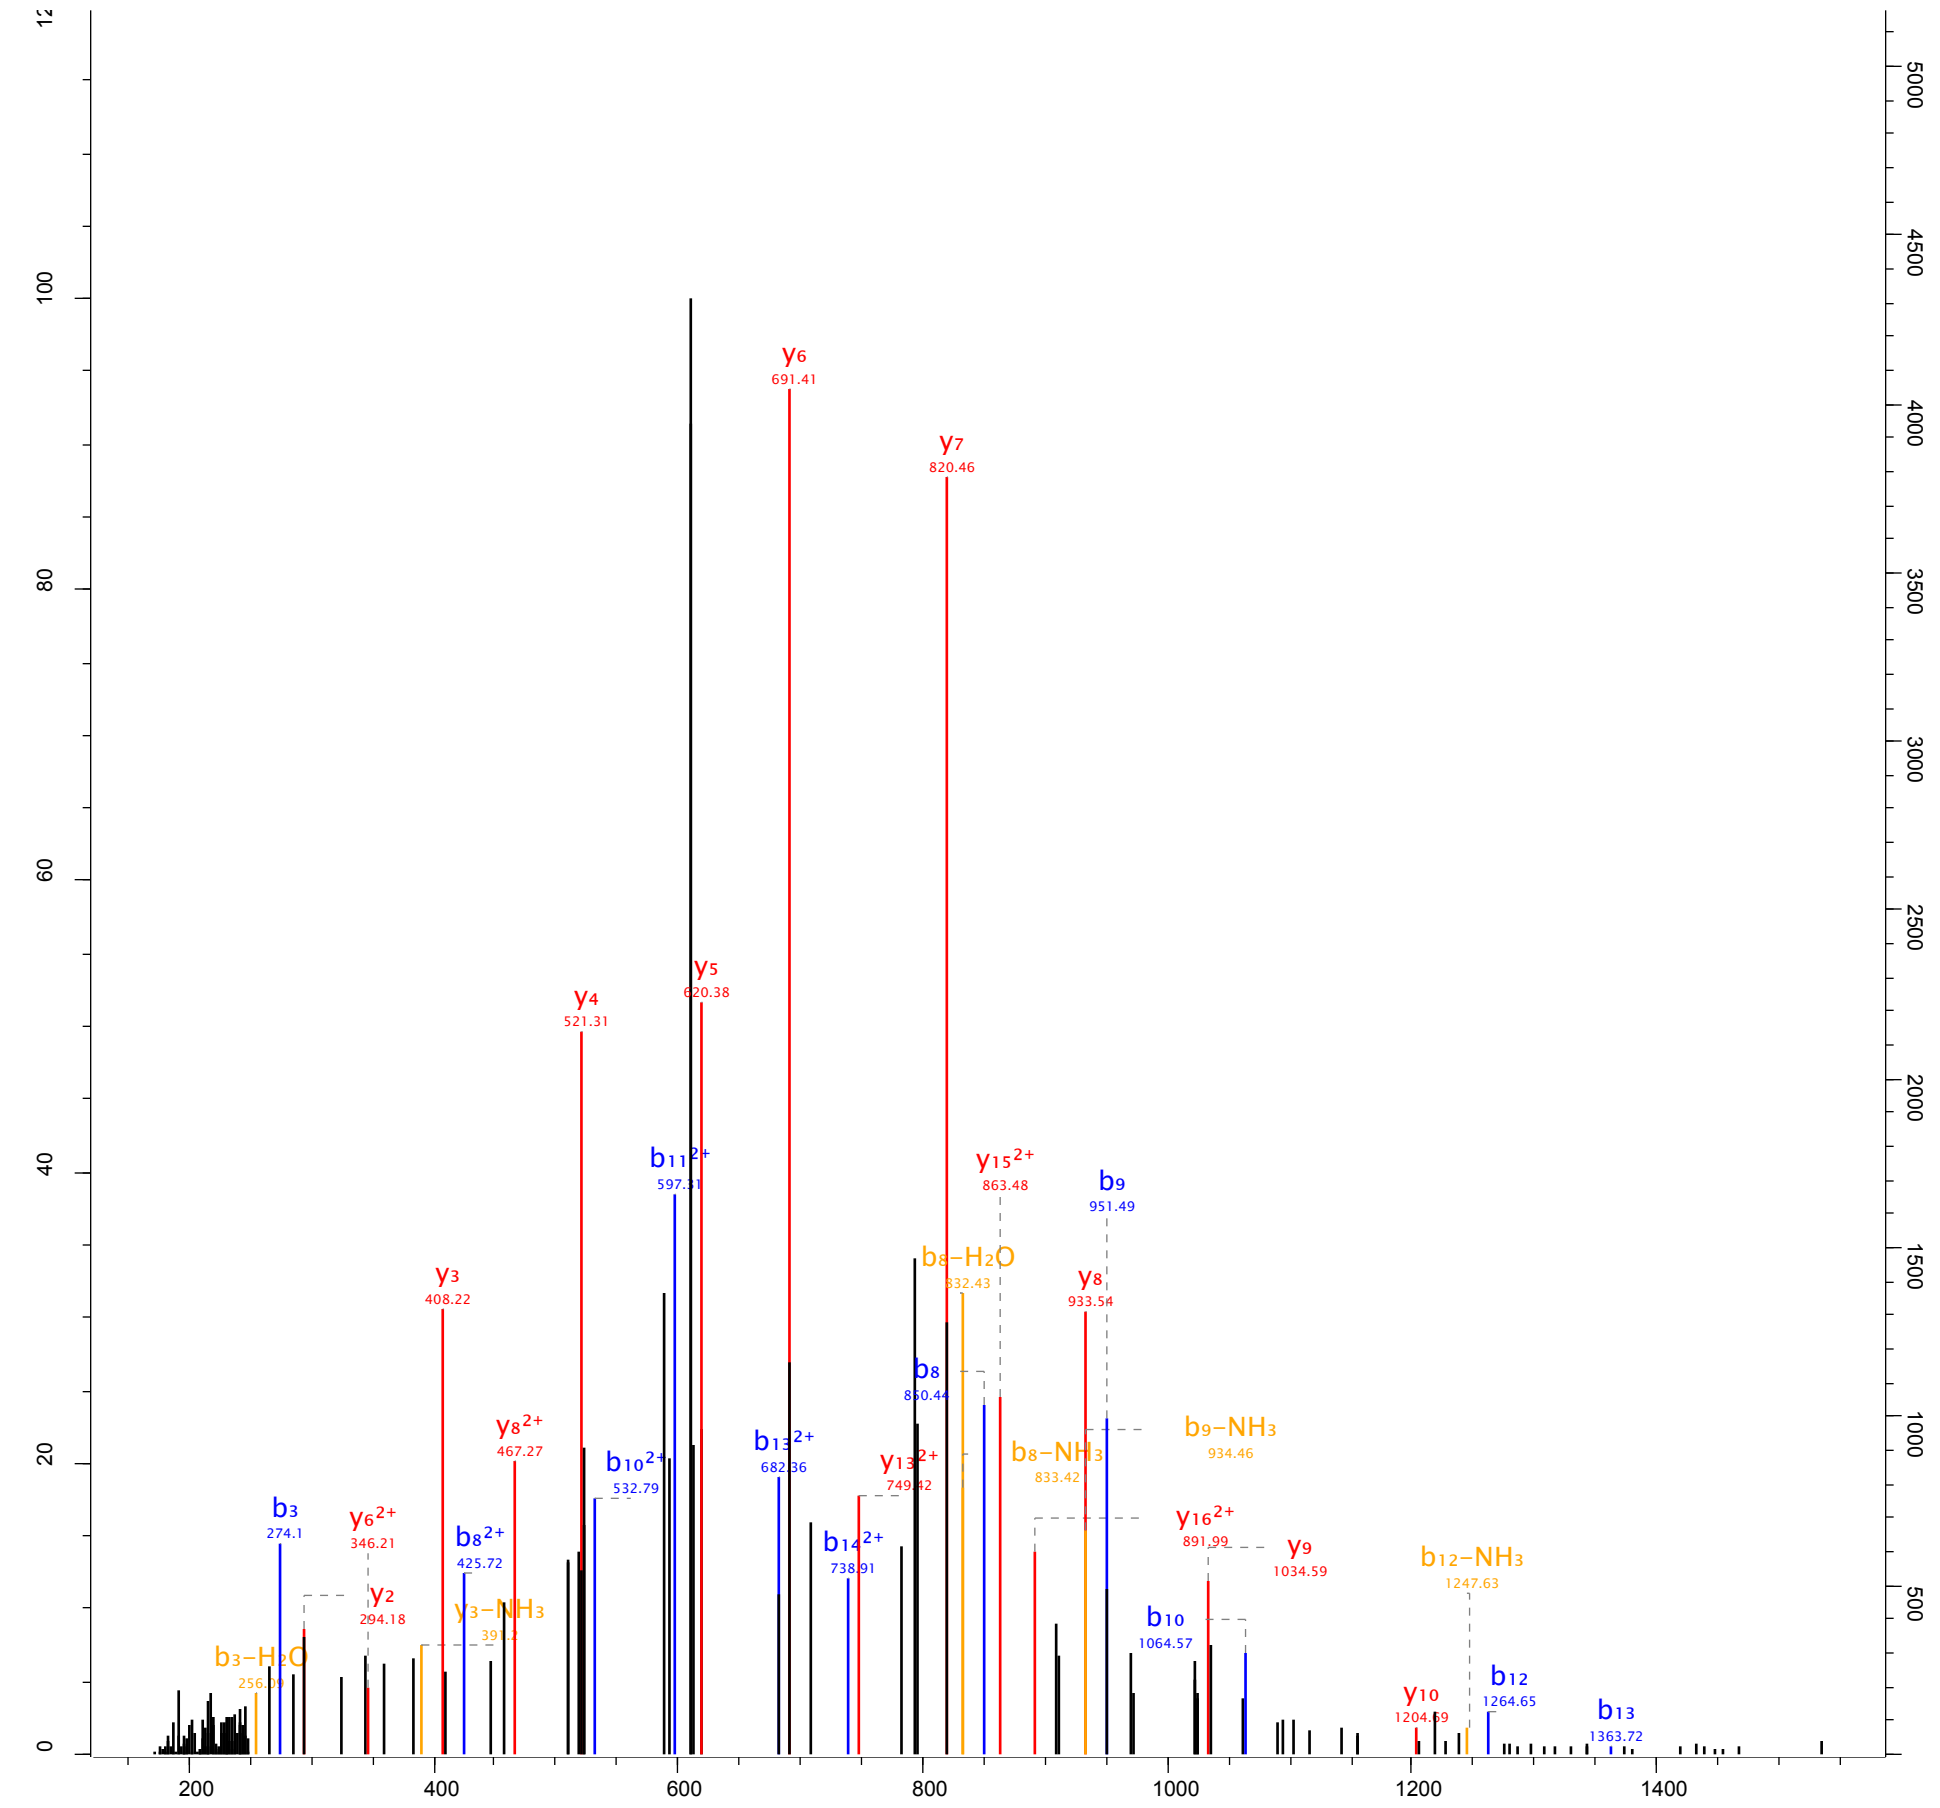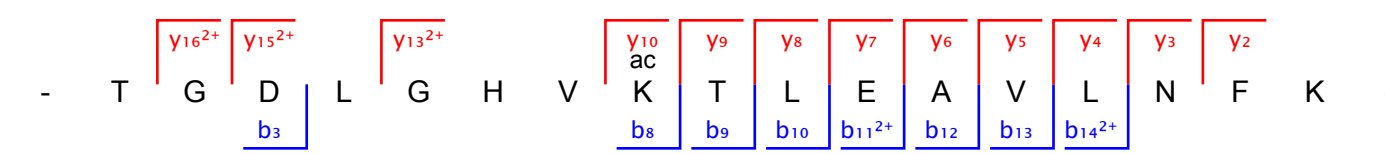

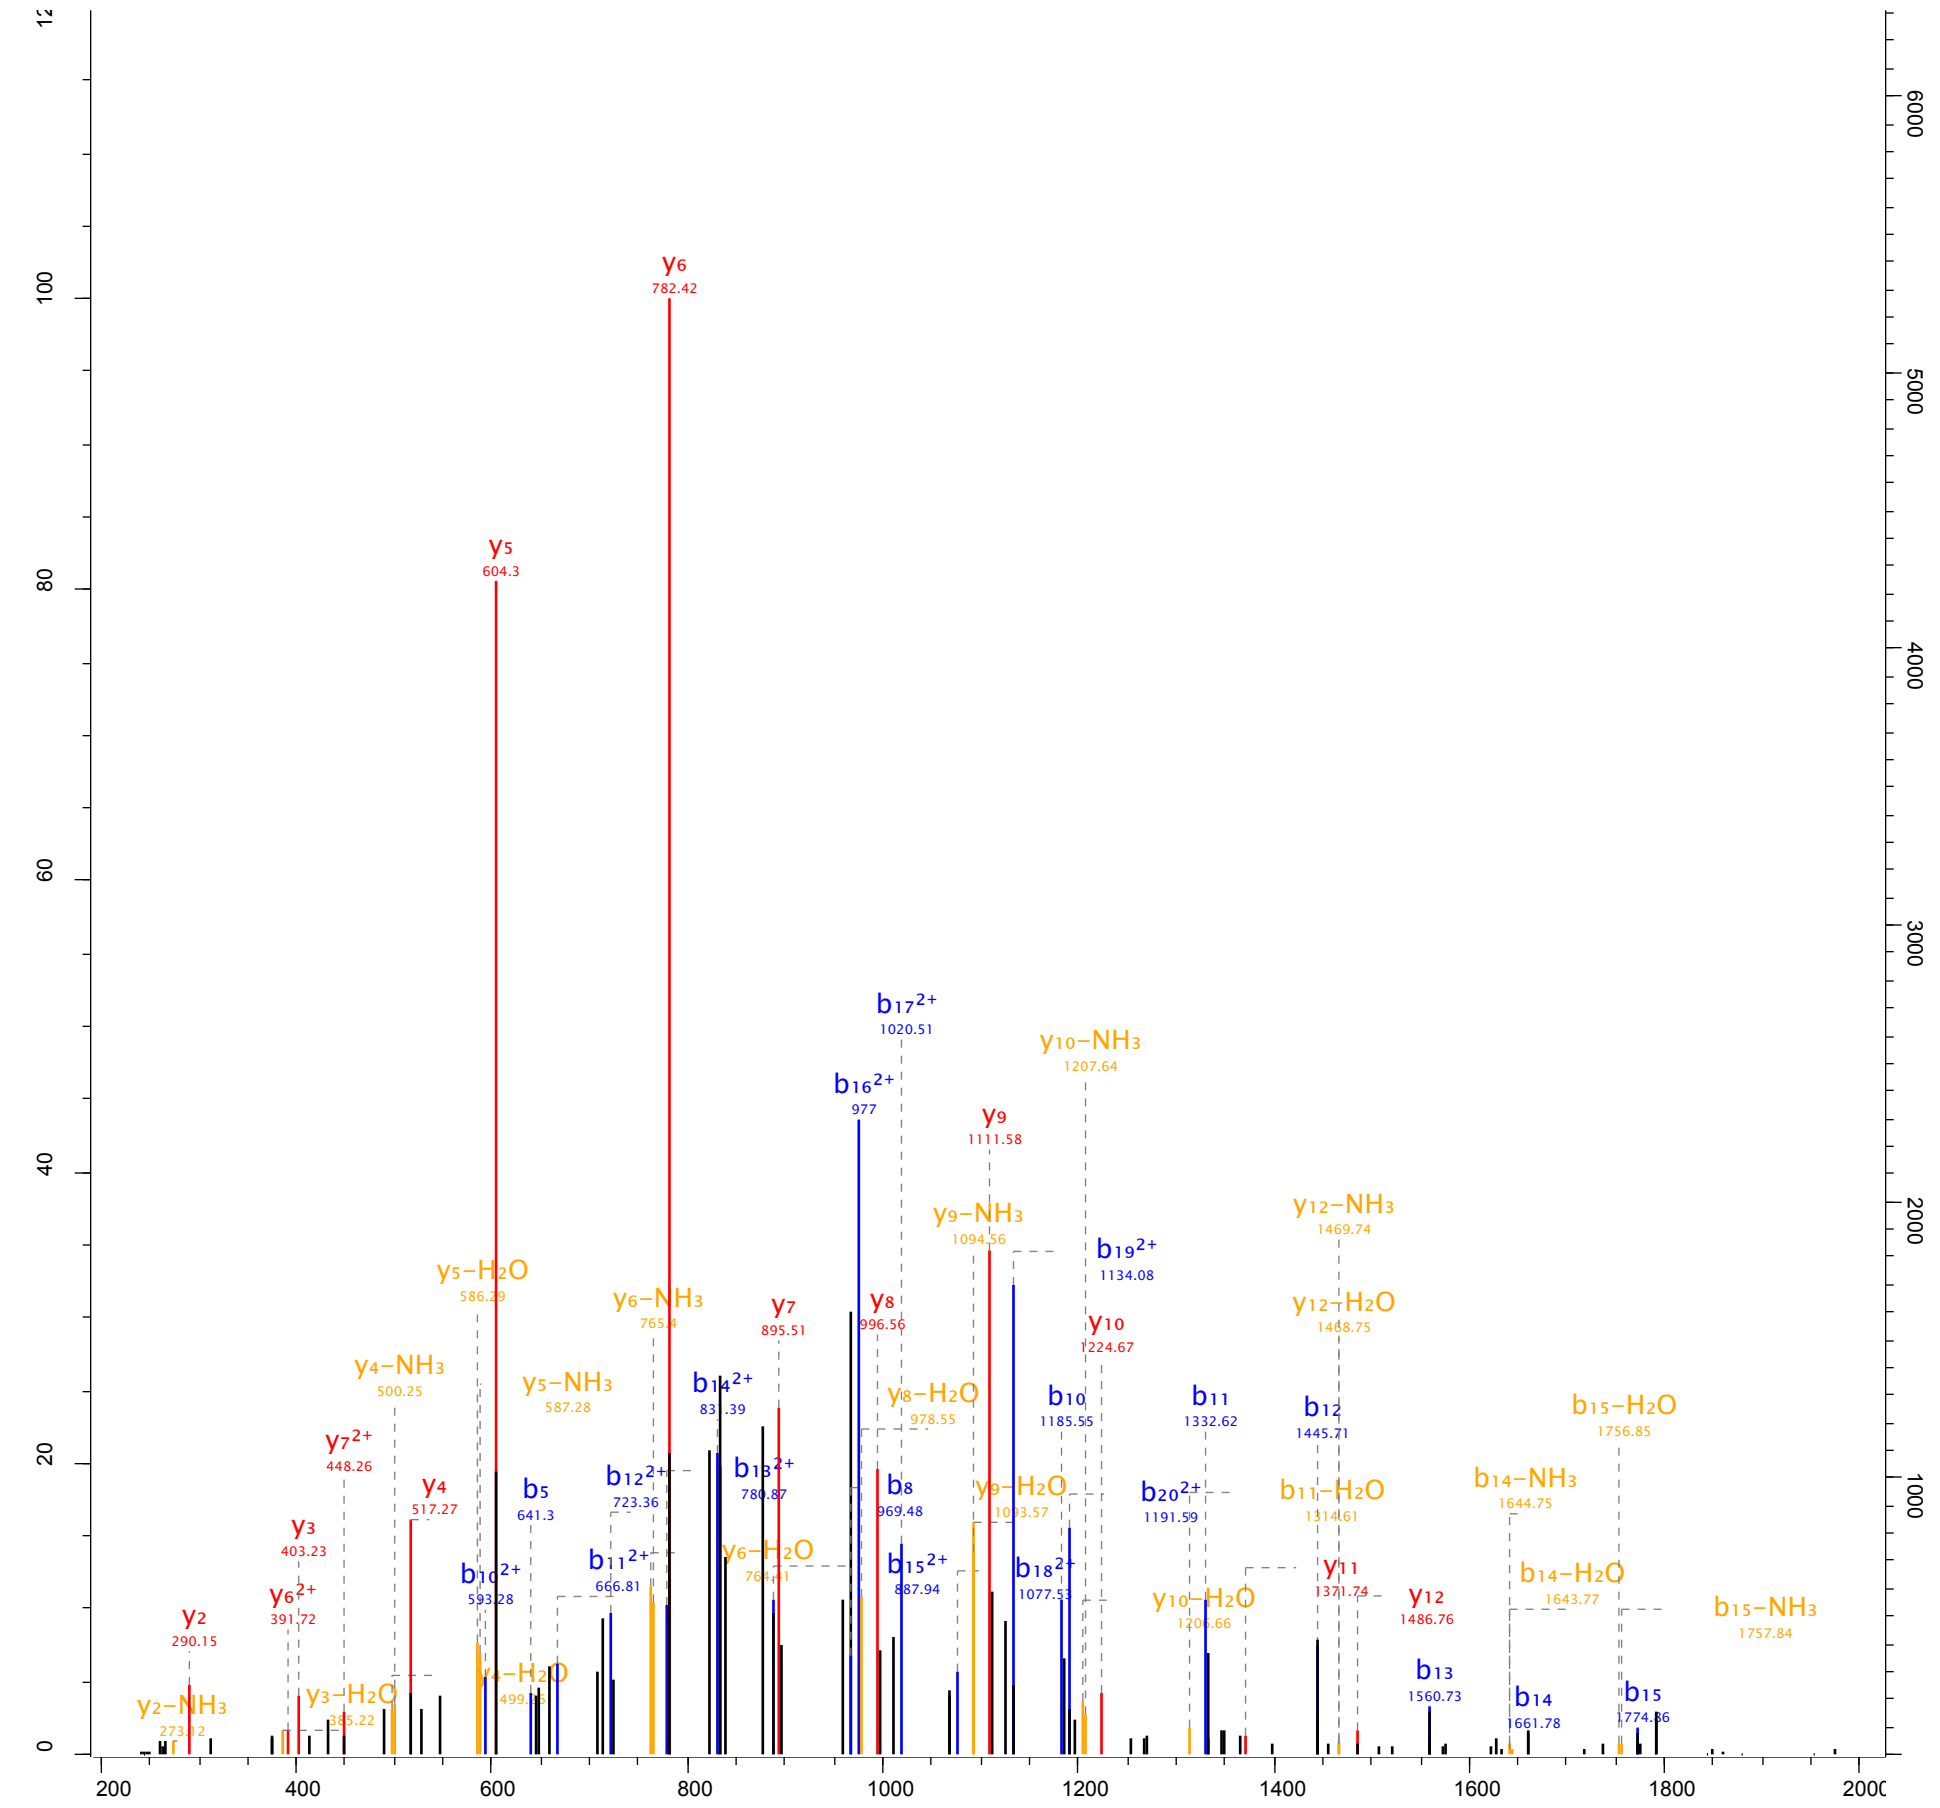

- L N E H F L N T T D F L D T I K S N L D R -

b<sub>5</sub> b<sub>8</sub> b<sub>10</sub> b<sub>11</sub> b<sub>12</sub> b<sub>13</sub> b<sub>14</sub> b<sub>15</sub> b<sub>16</sub><sup>2+</sup> b<sub>17</sub><sup>2+</sup> b<sub>18</sub><sup>2+</sup> b<sub>19</sub><sup>2+</sup> b<sub>20</sub><sup>2+</sup>

y<sub>12</sub> y<sub>11</sub> y<sub>10</sub> y<sub>9</sub> y<sub>8</sub> y<sub>7</sub> y<sub>6</sub> ac y<sub>5</sub> y<sub>4</sub> y<sub>3</sub> y<sub>2</sub>

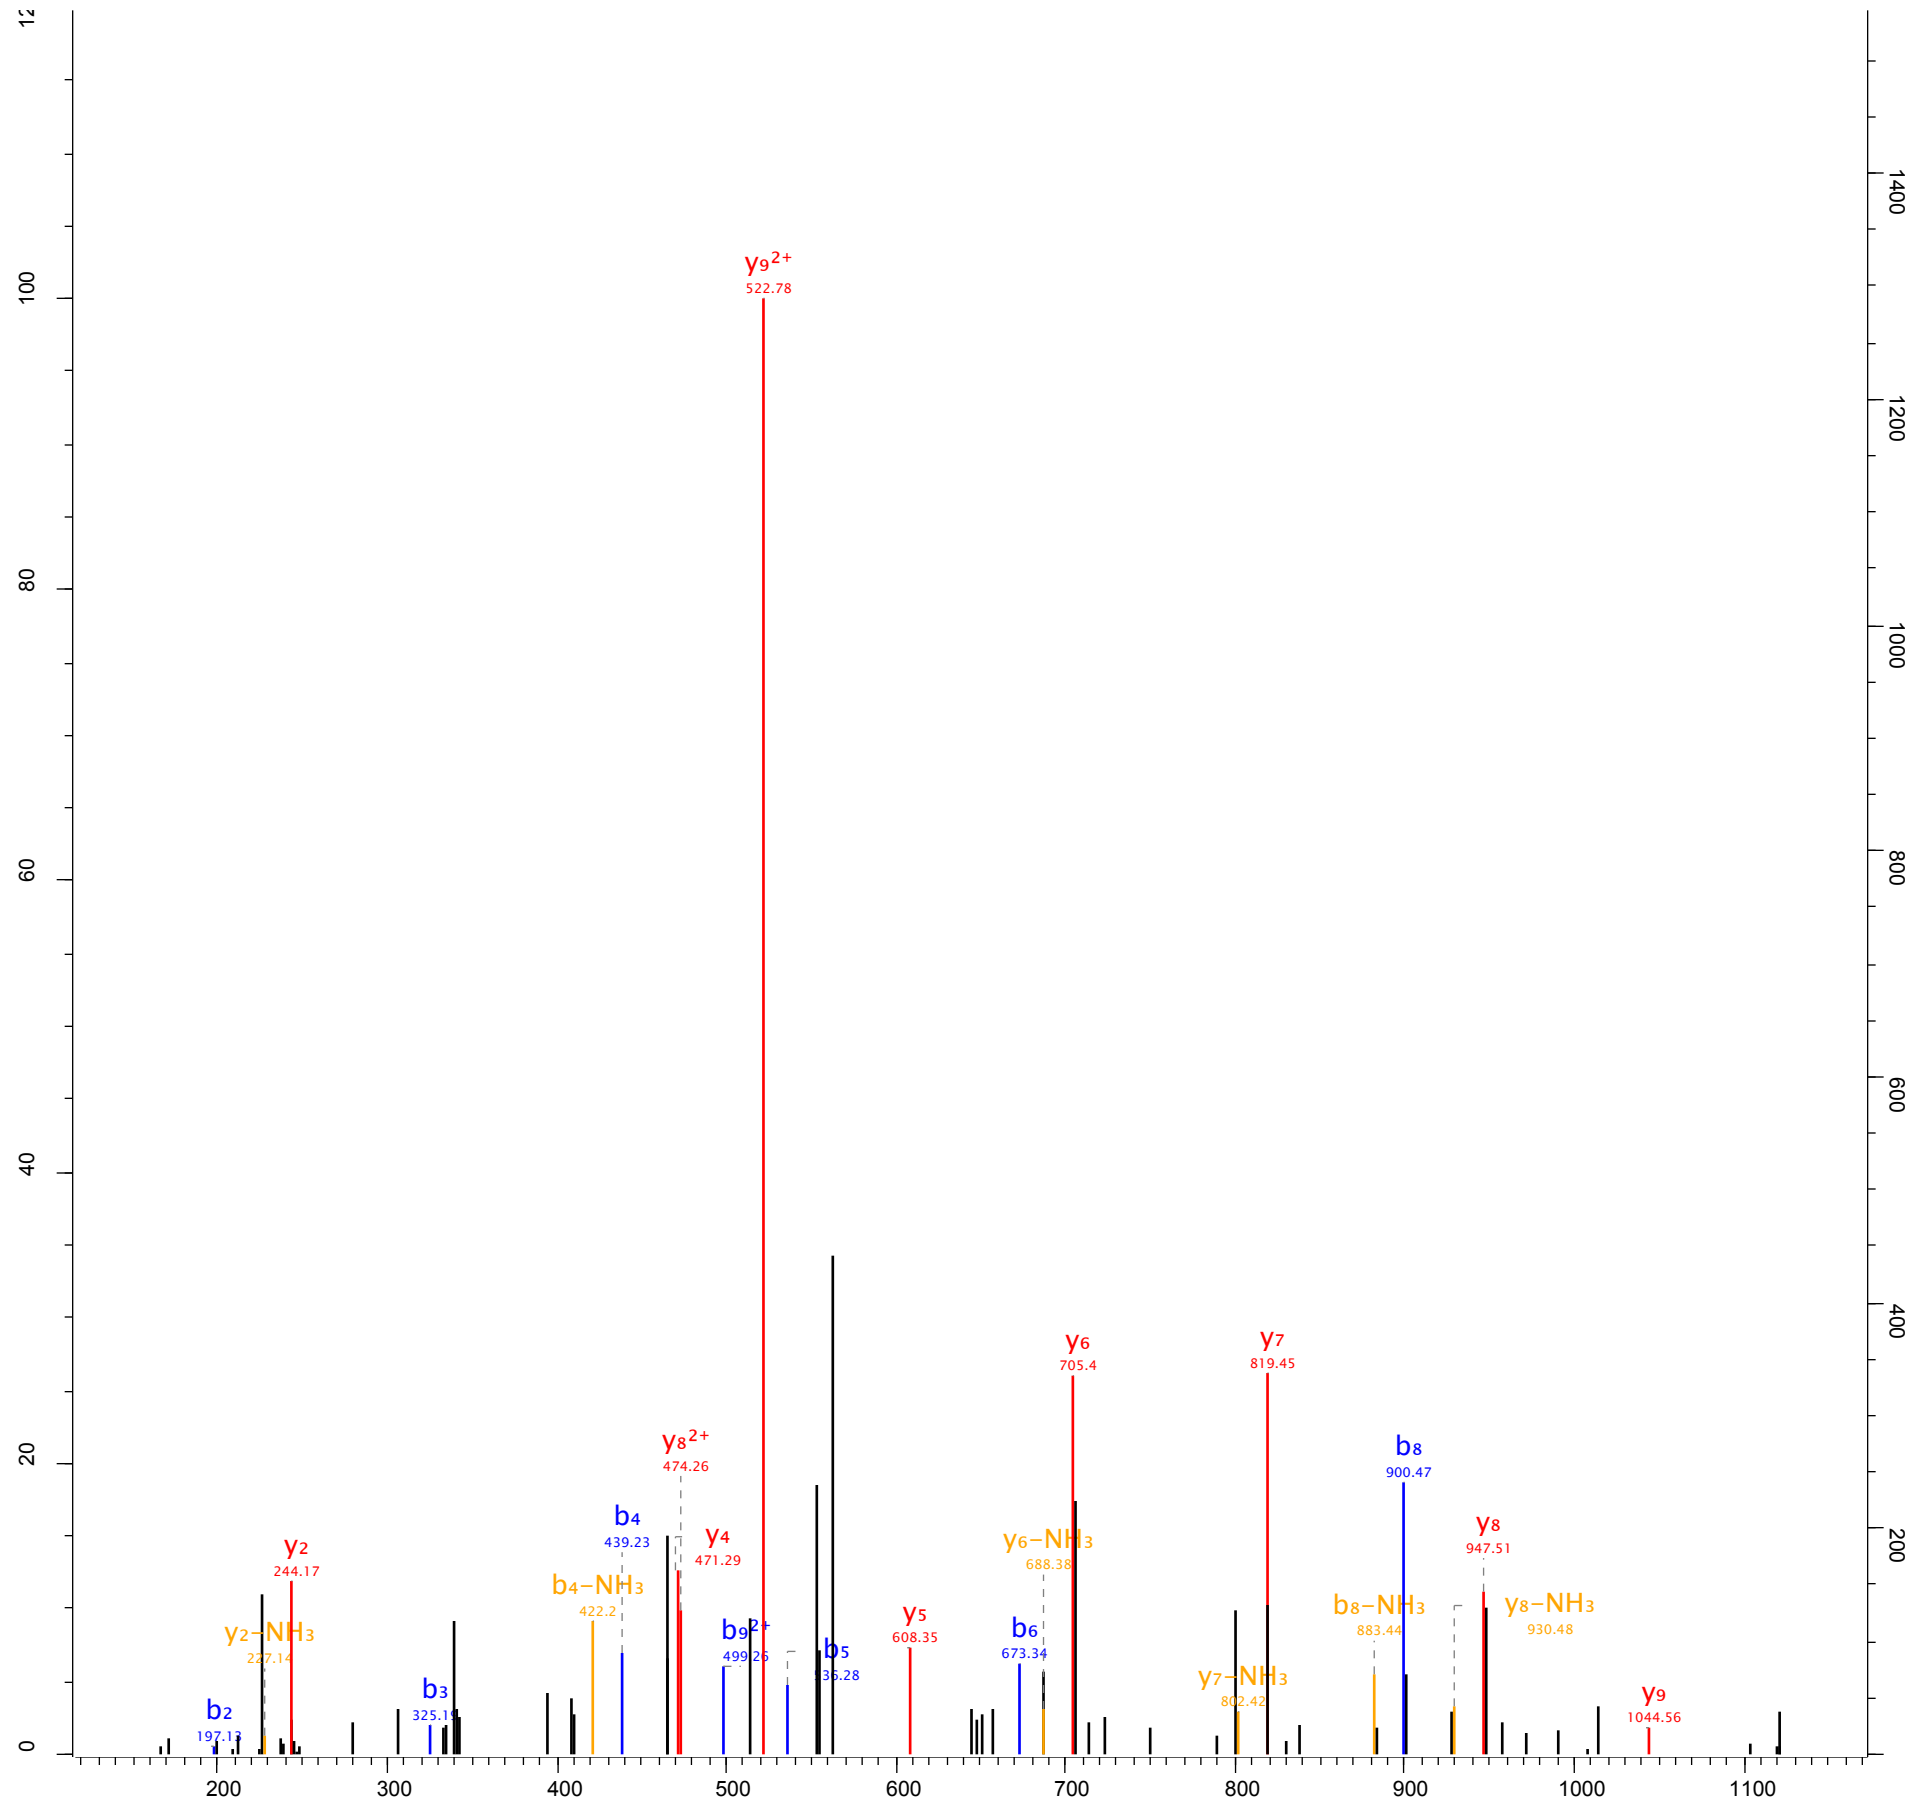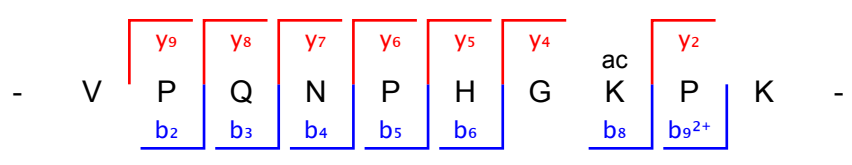

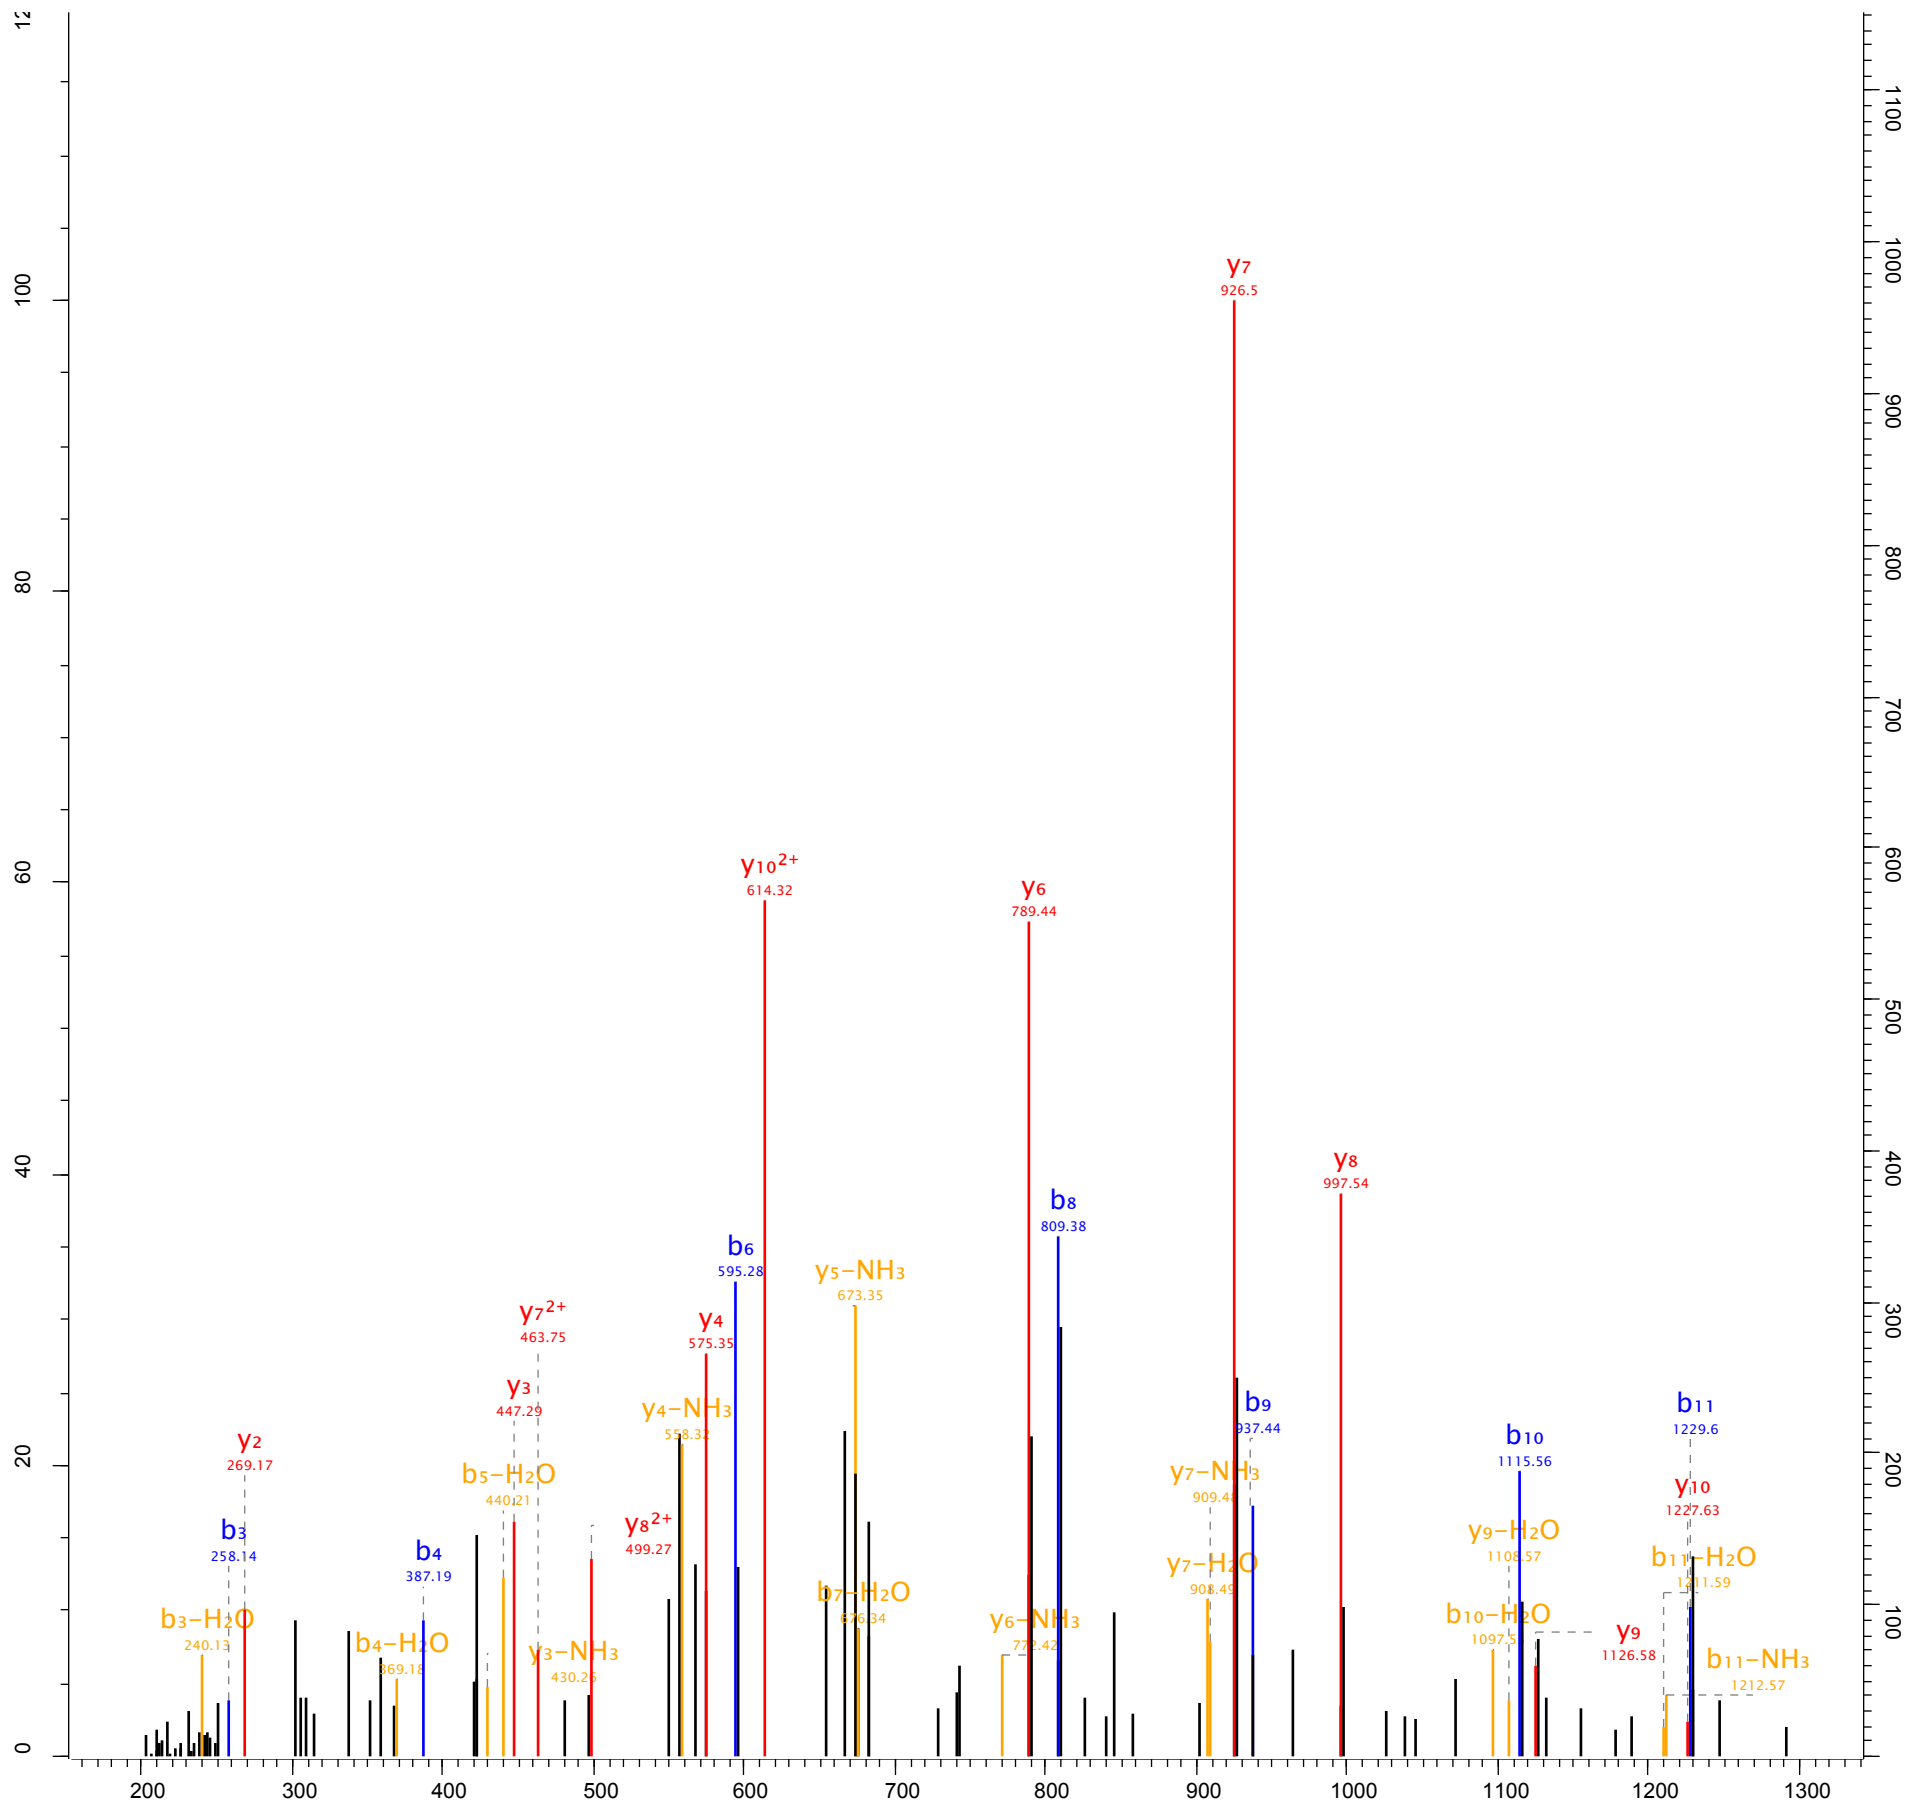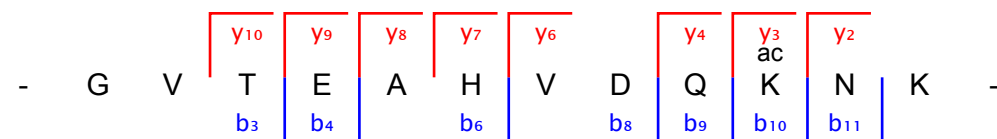



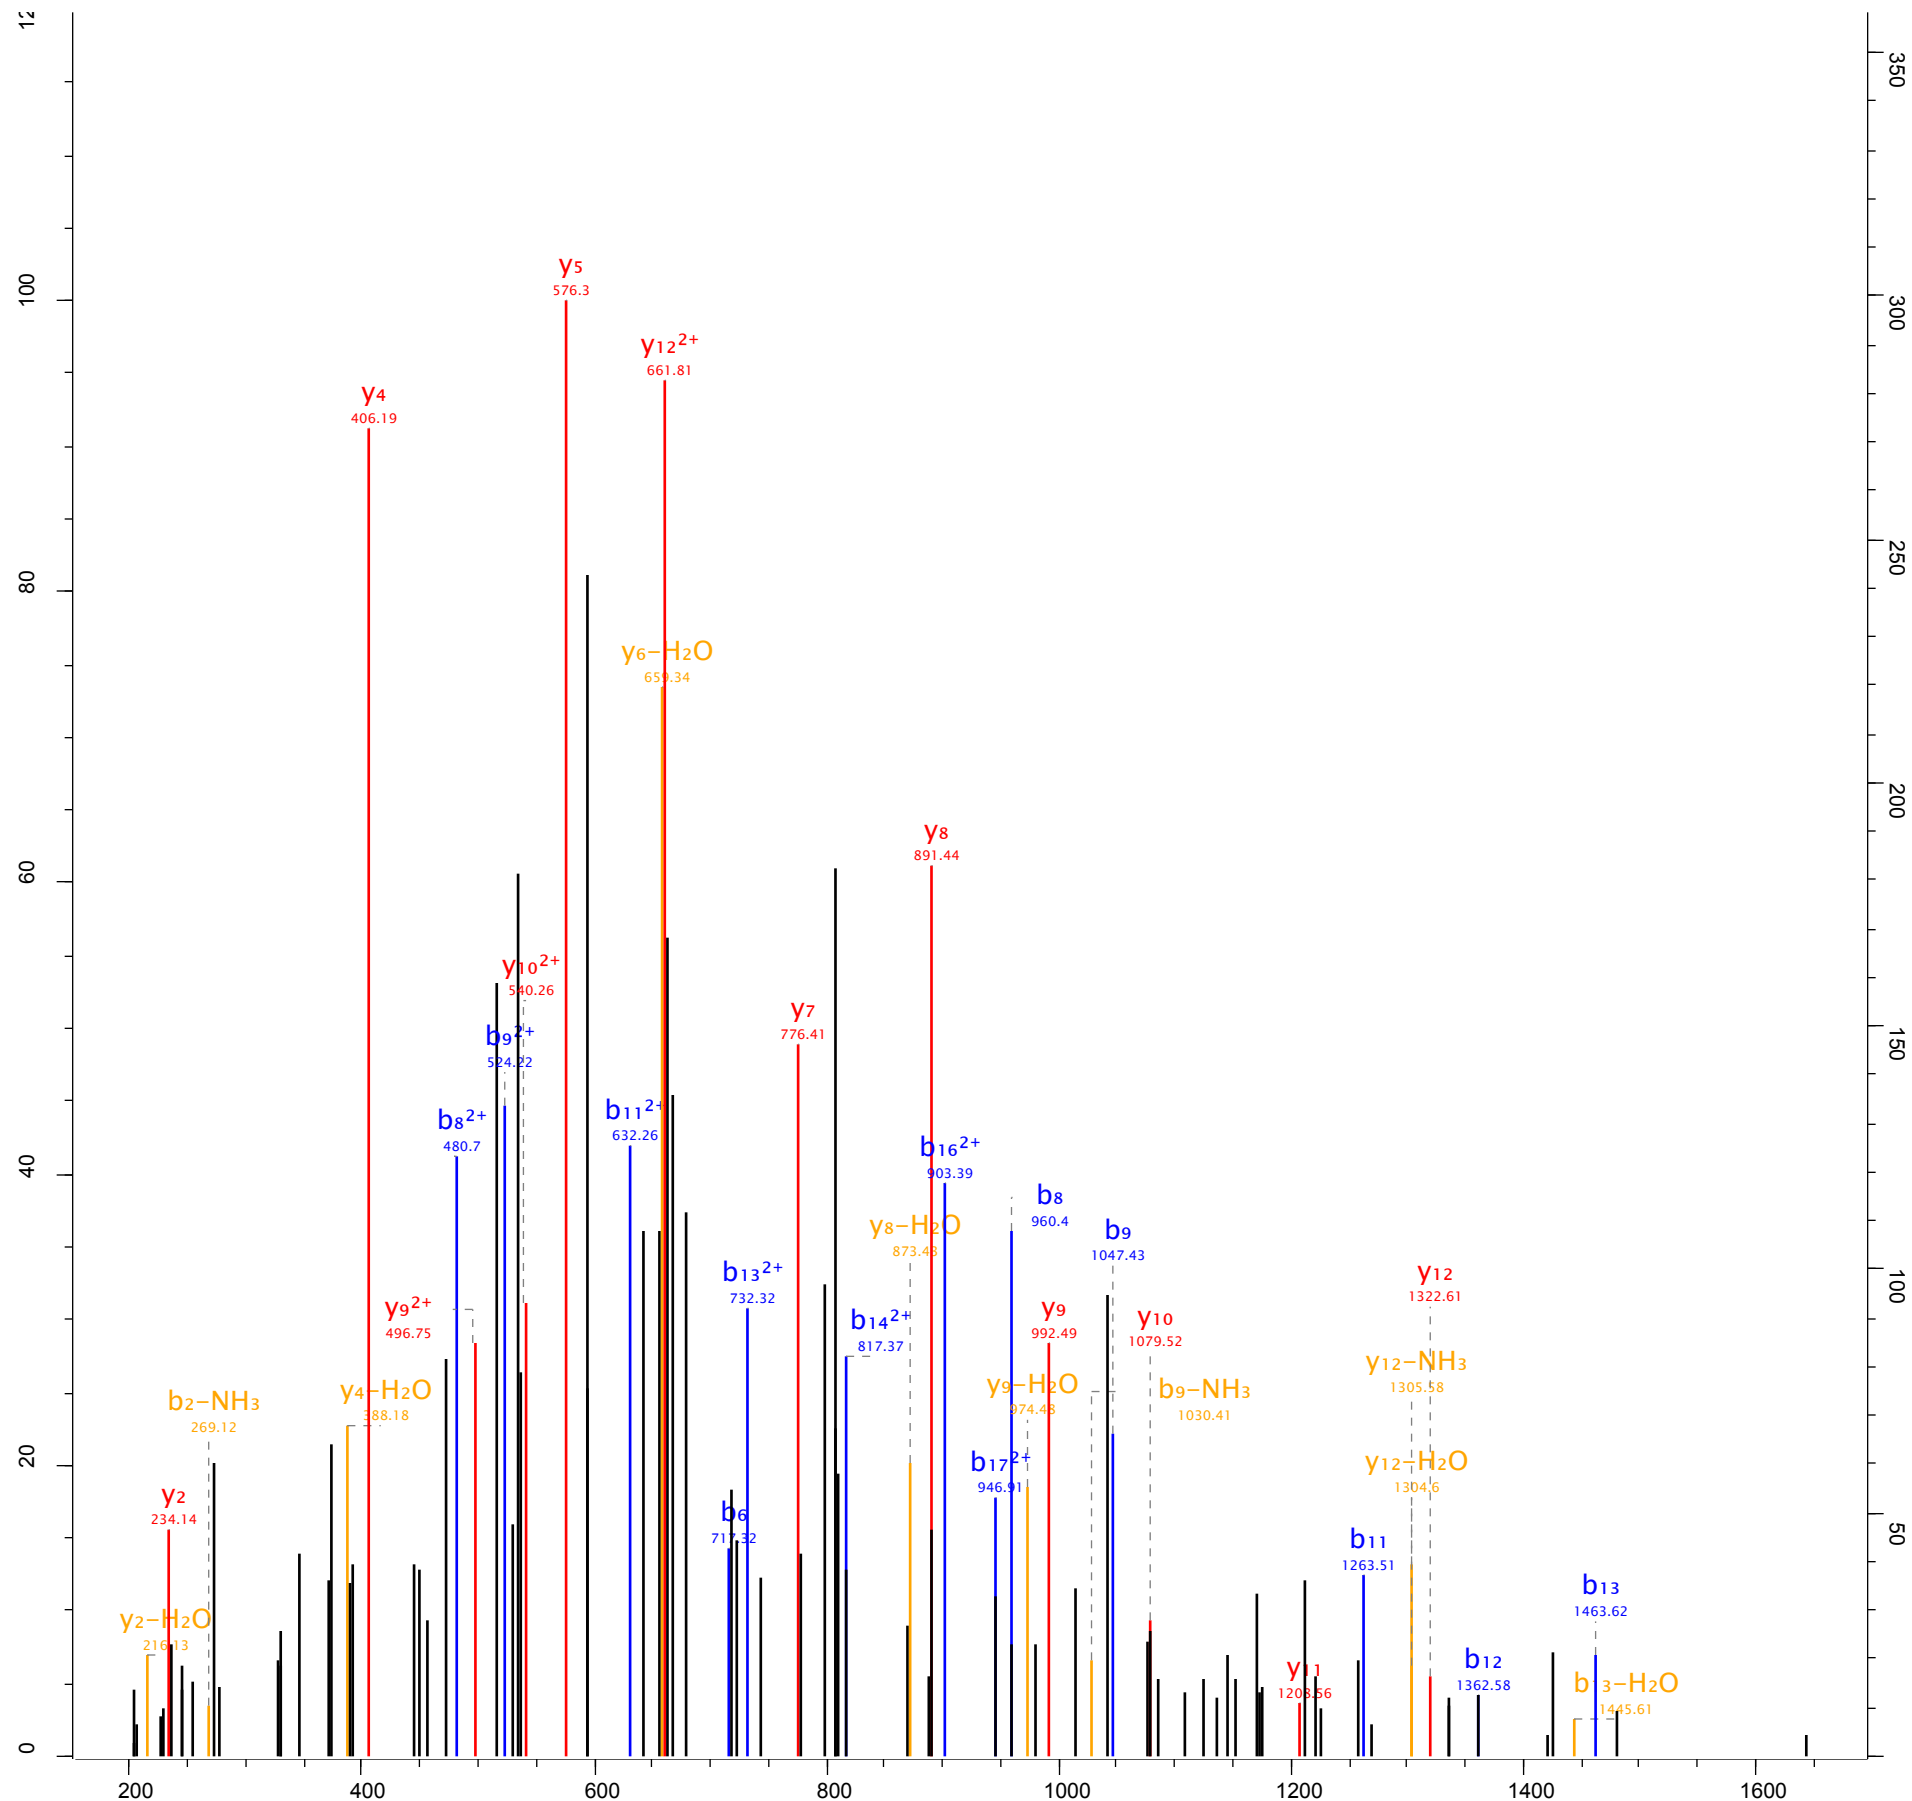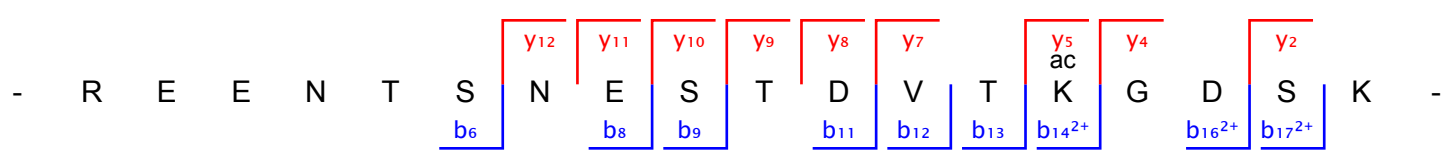

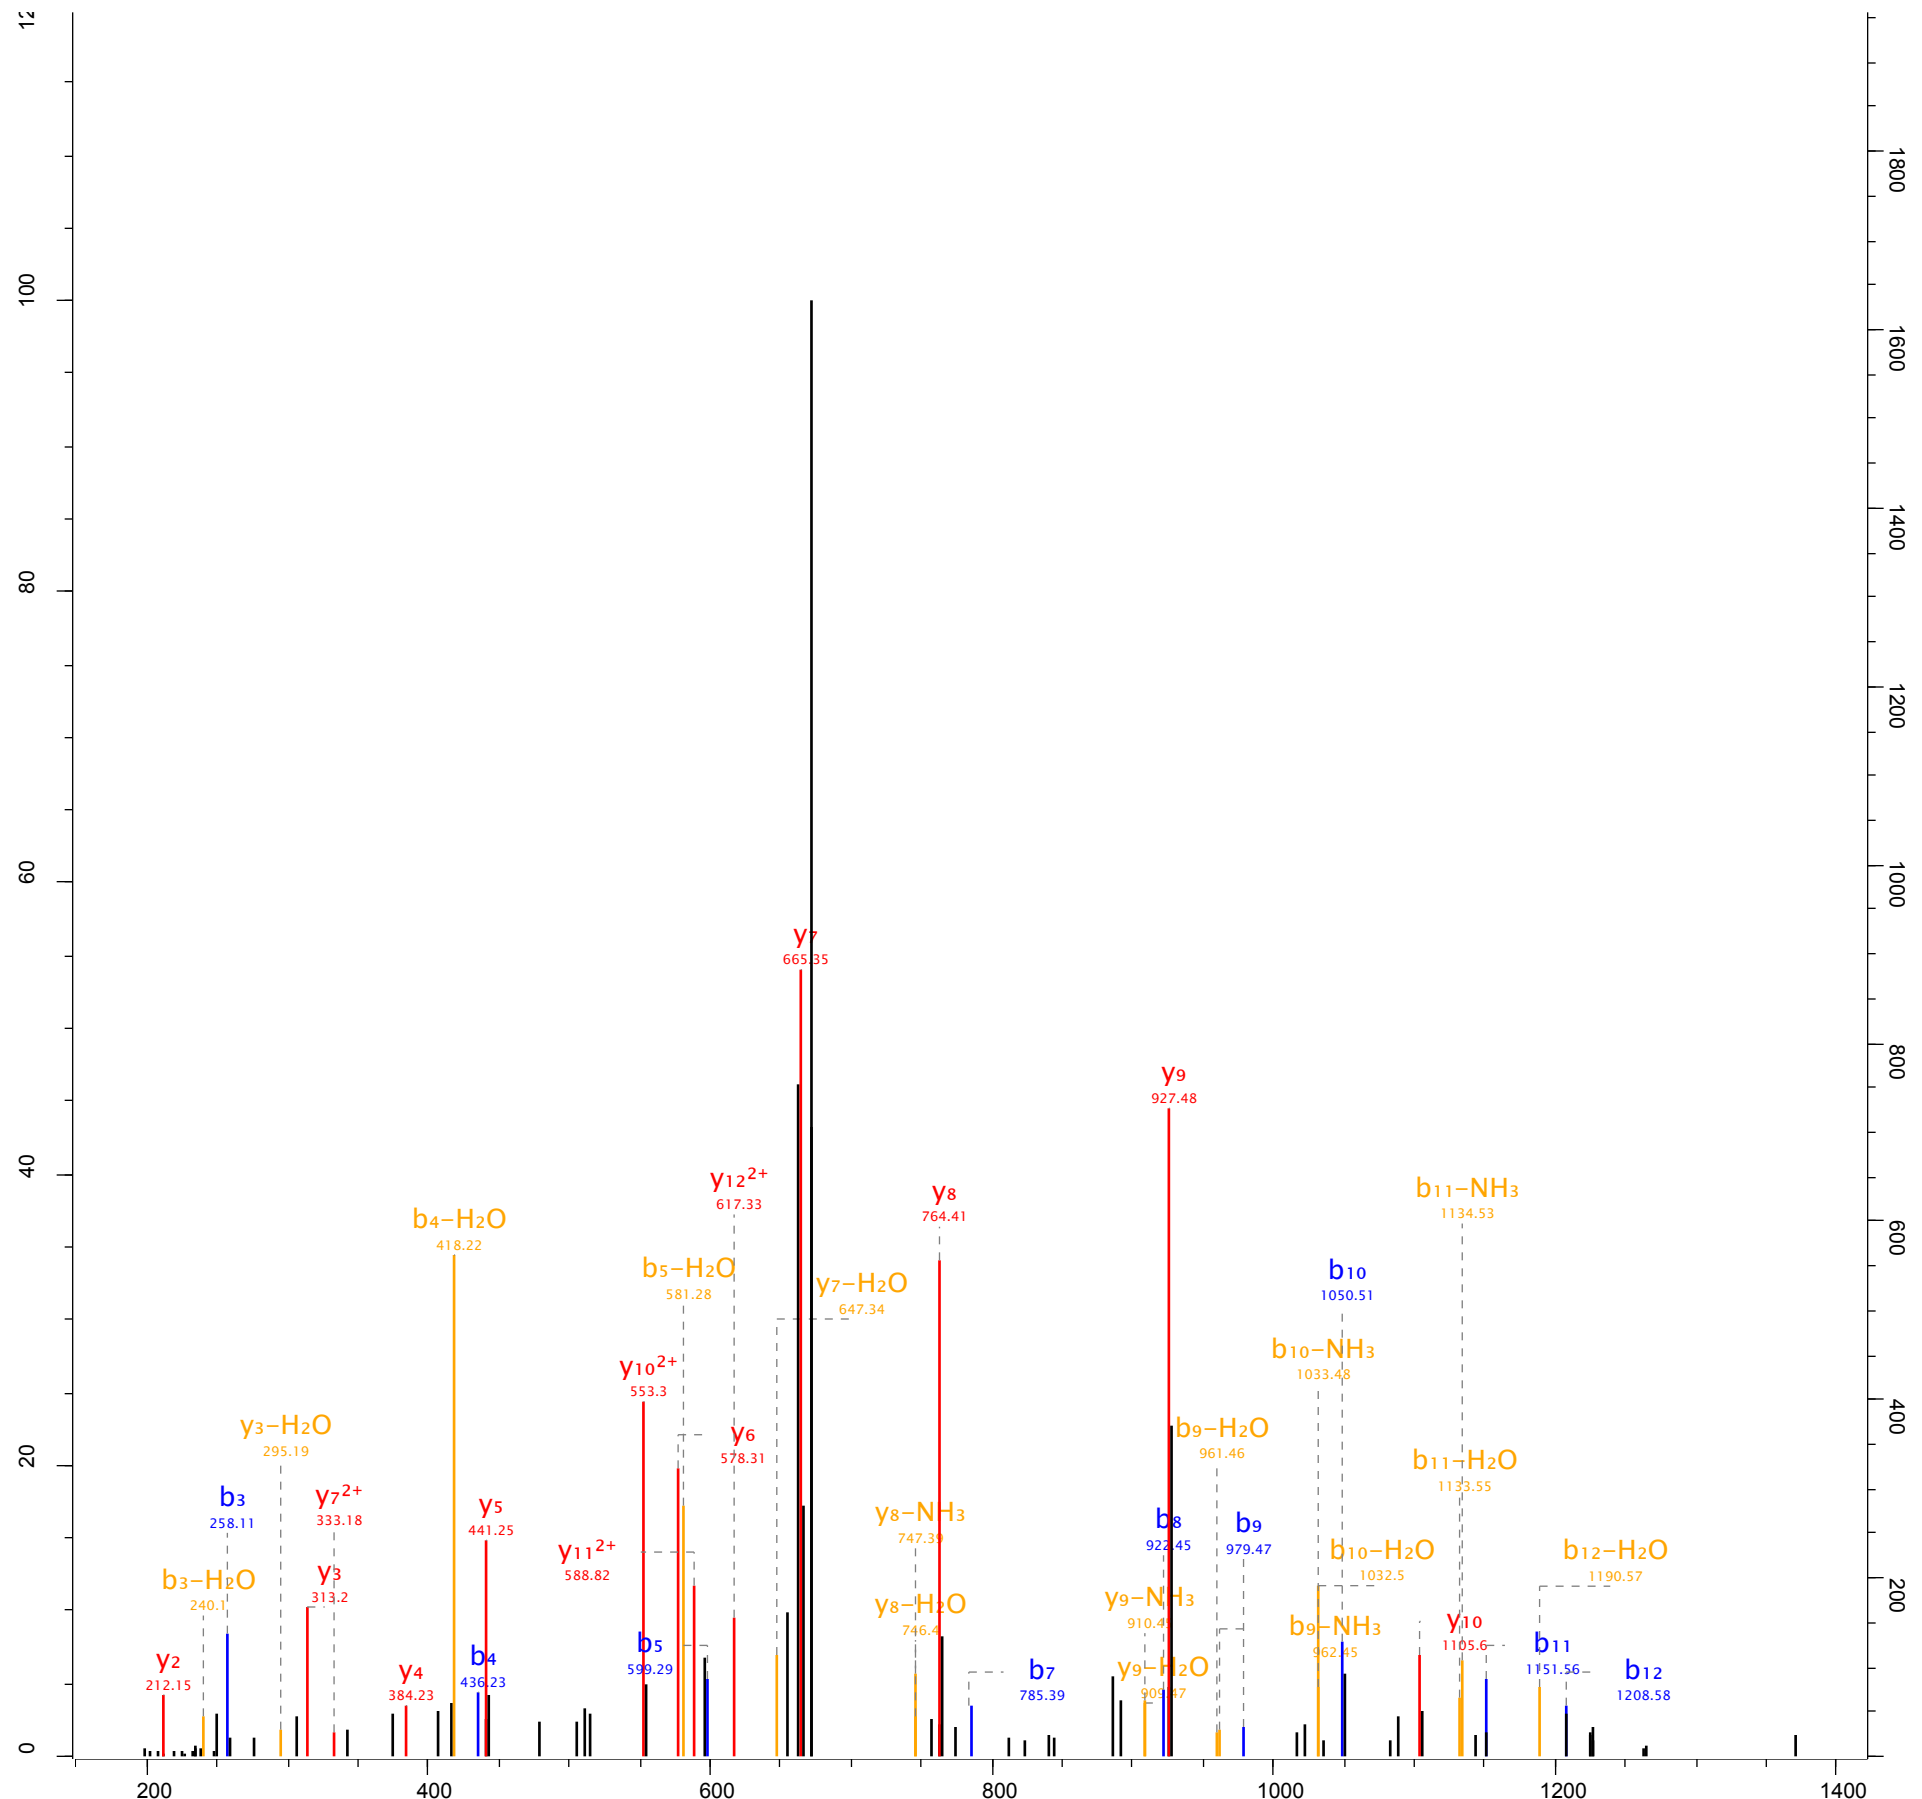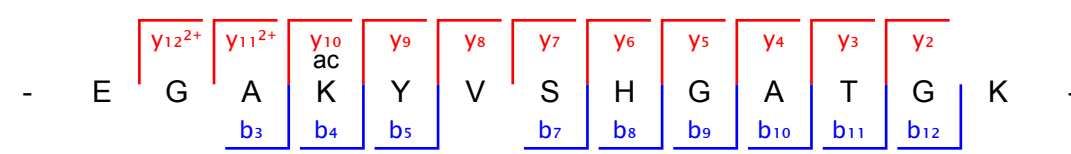

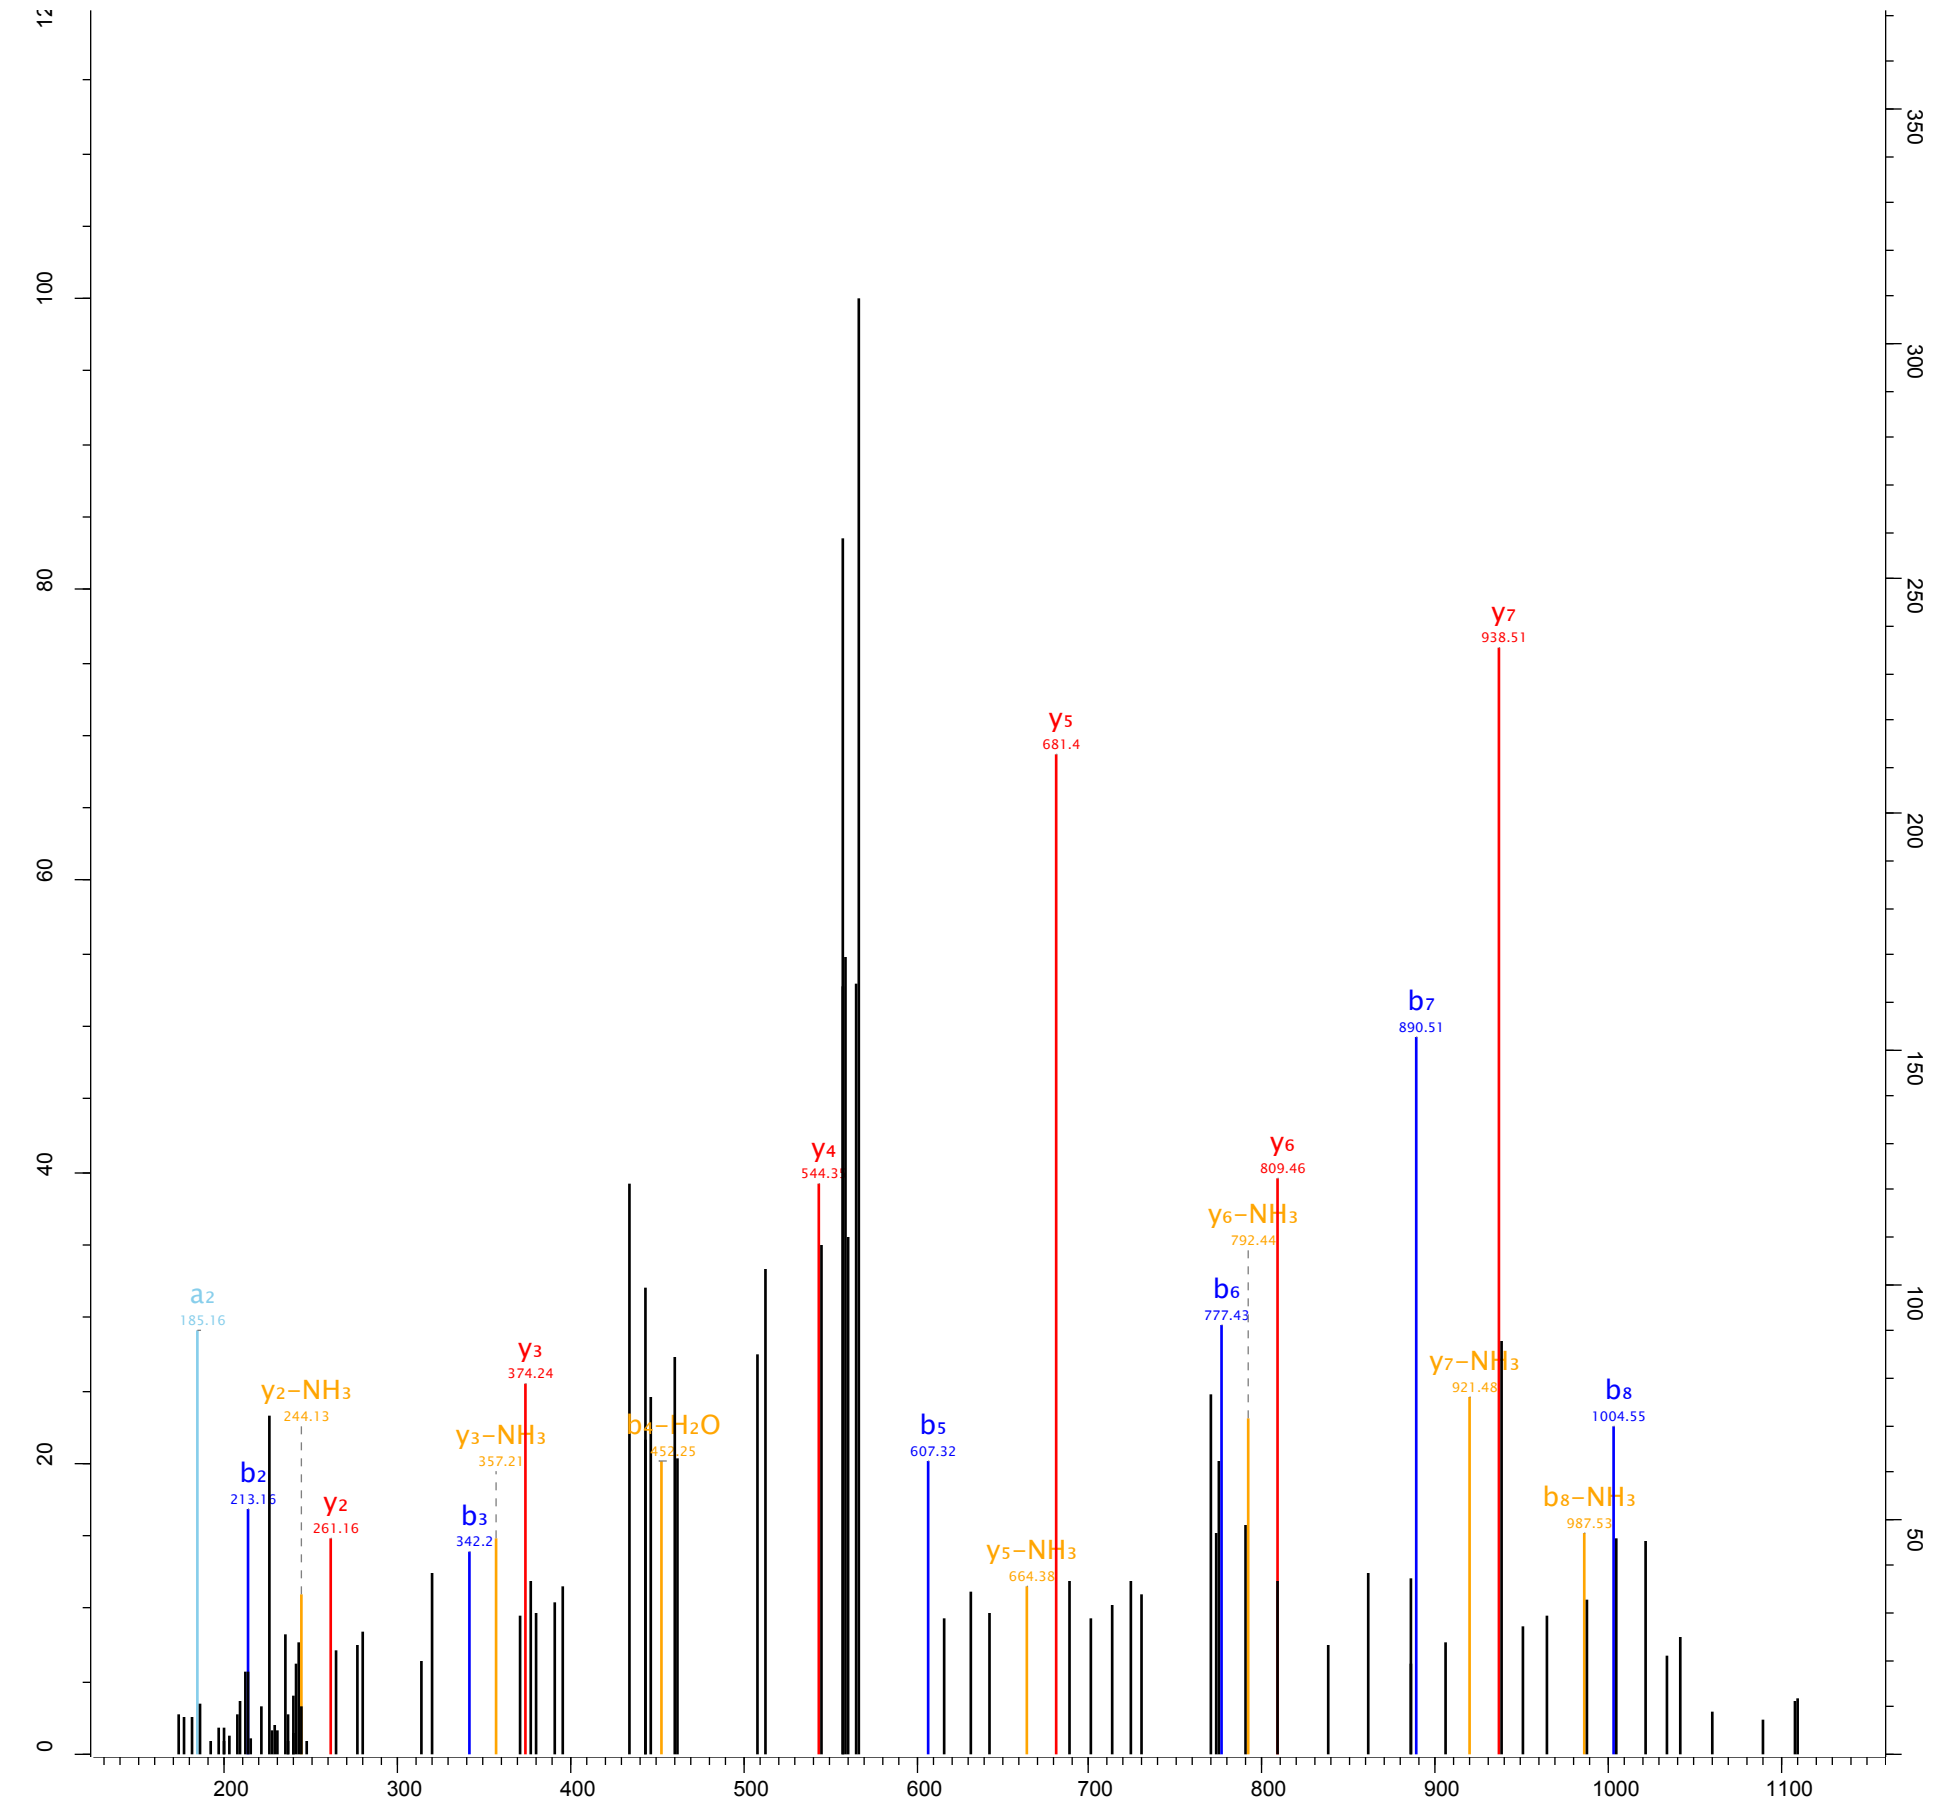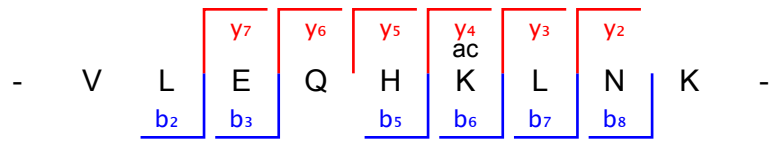

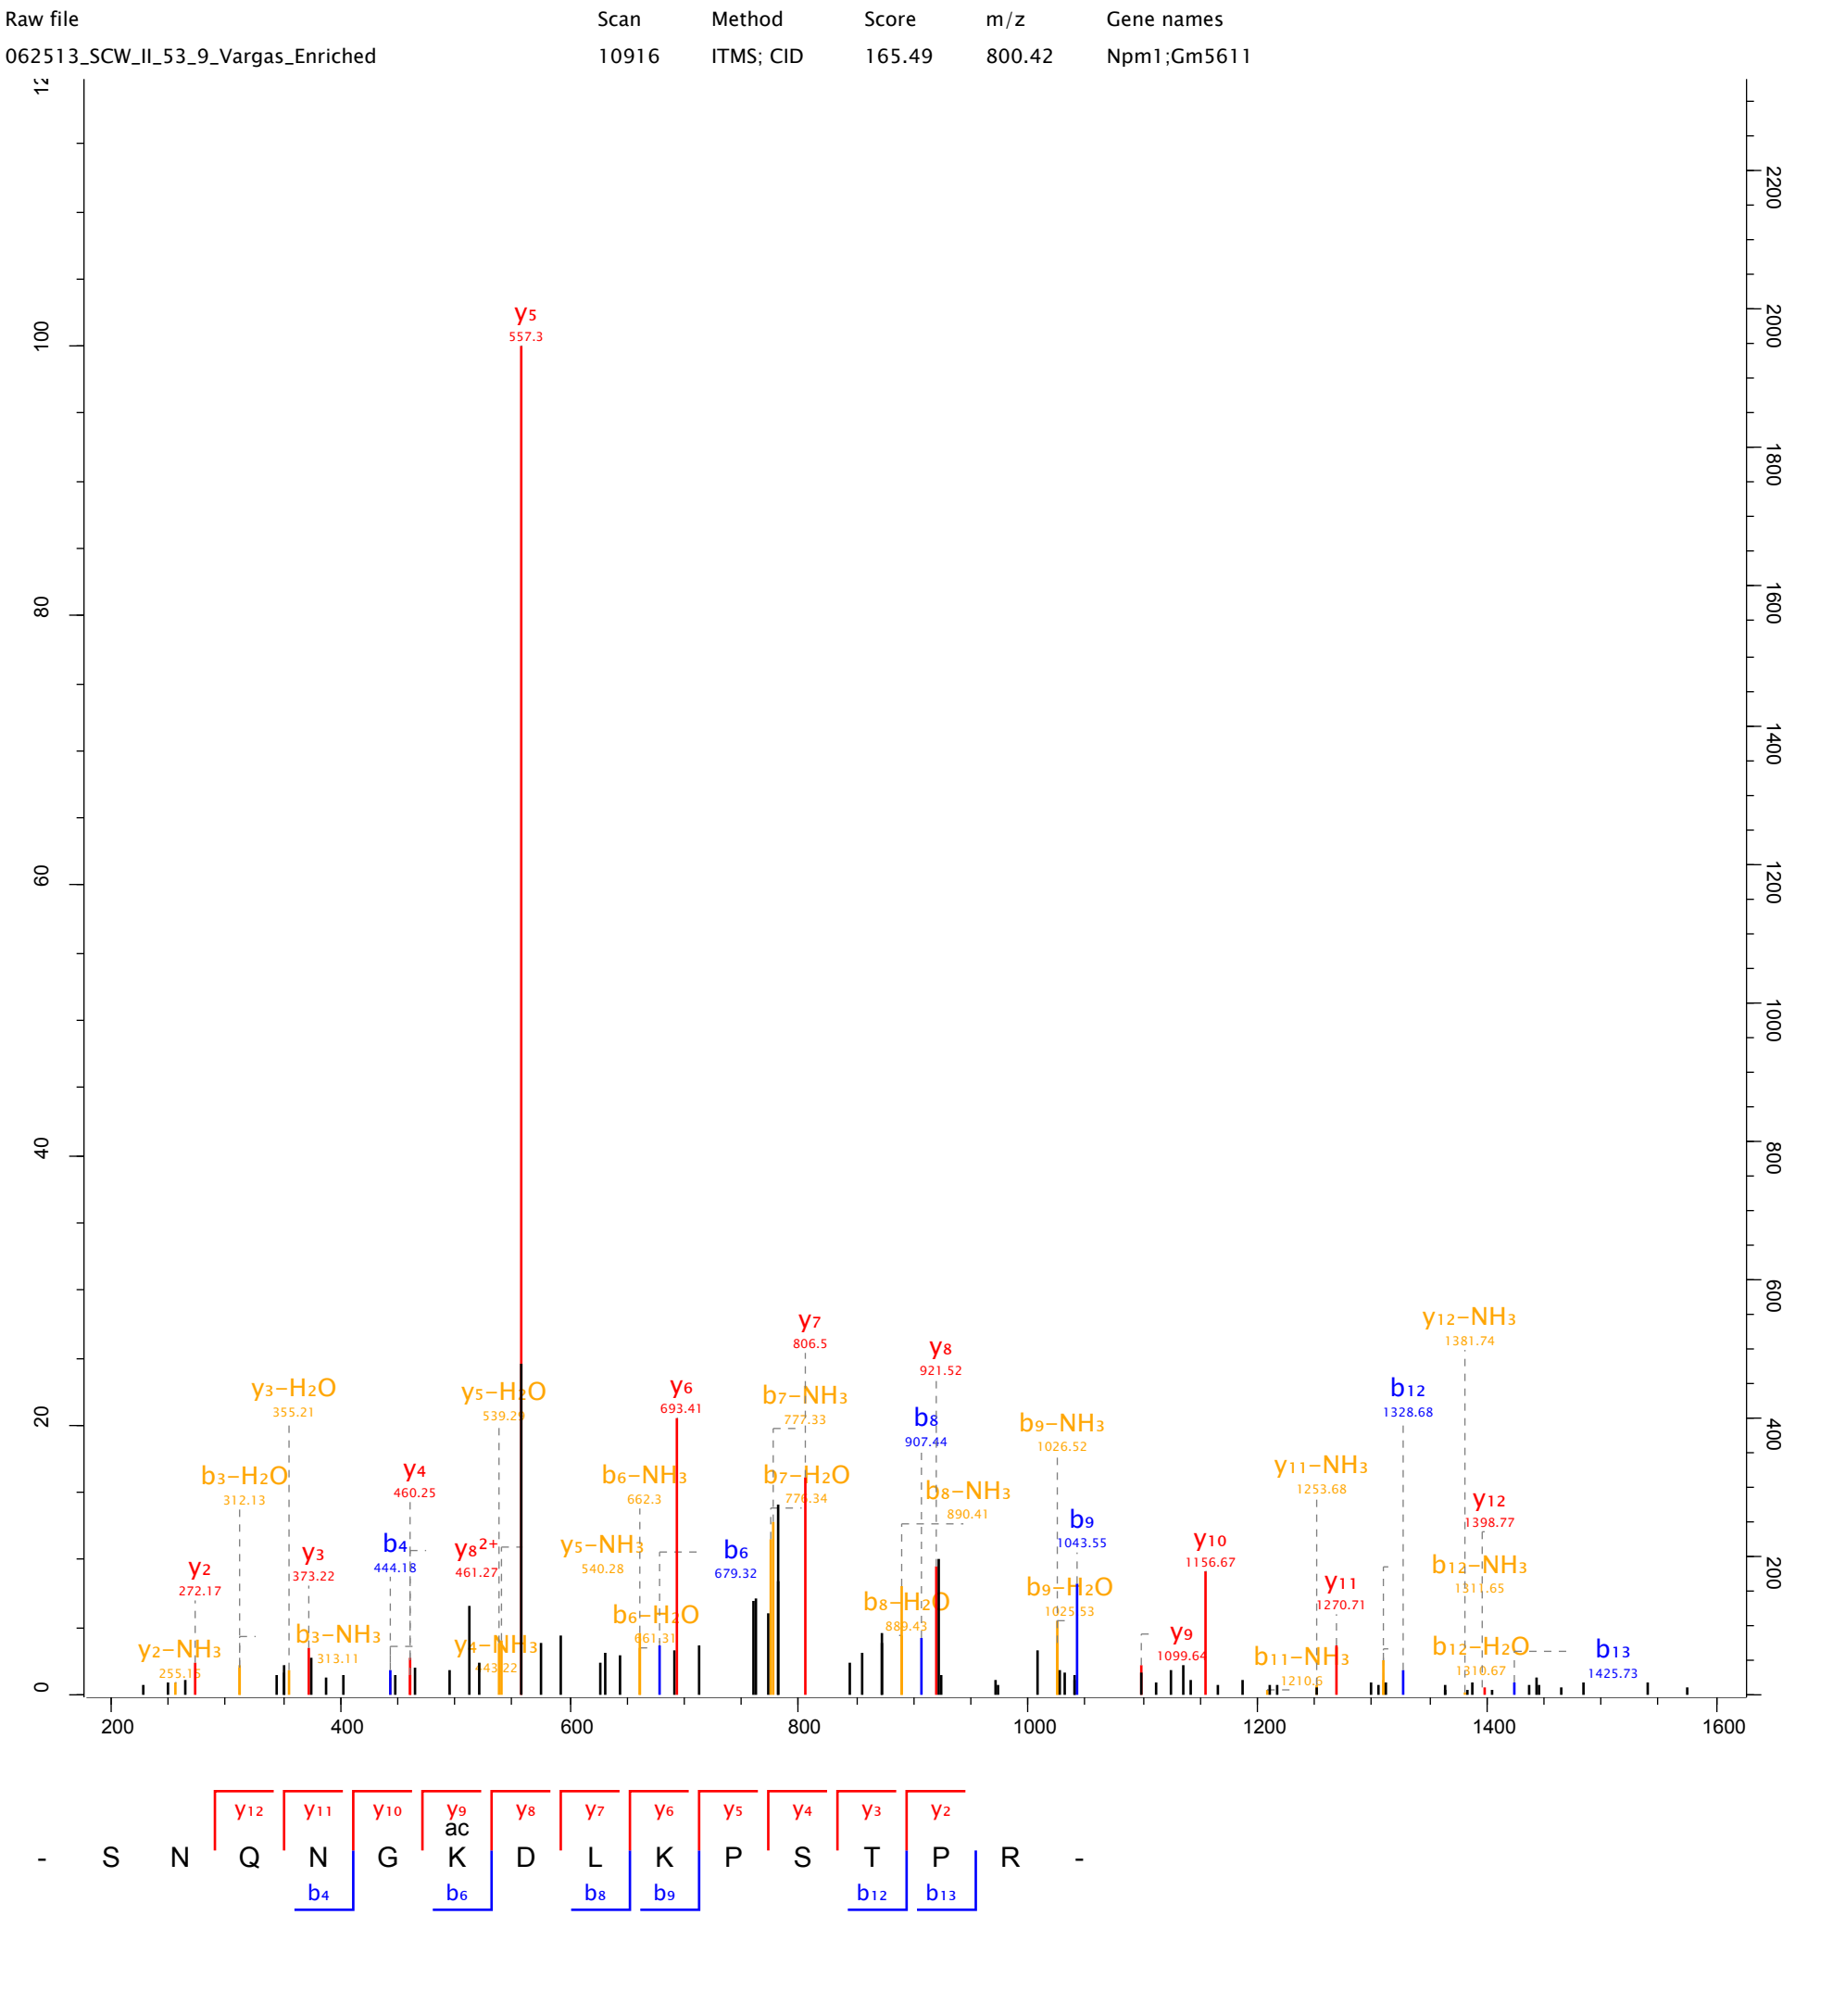

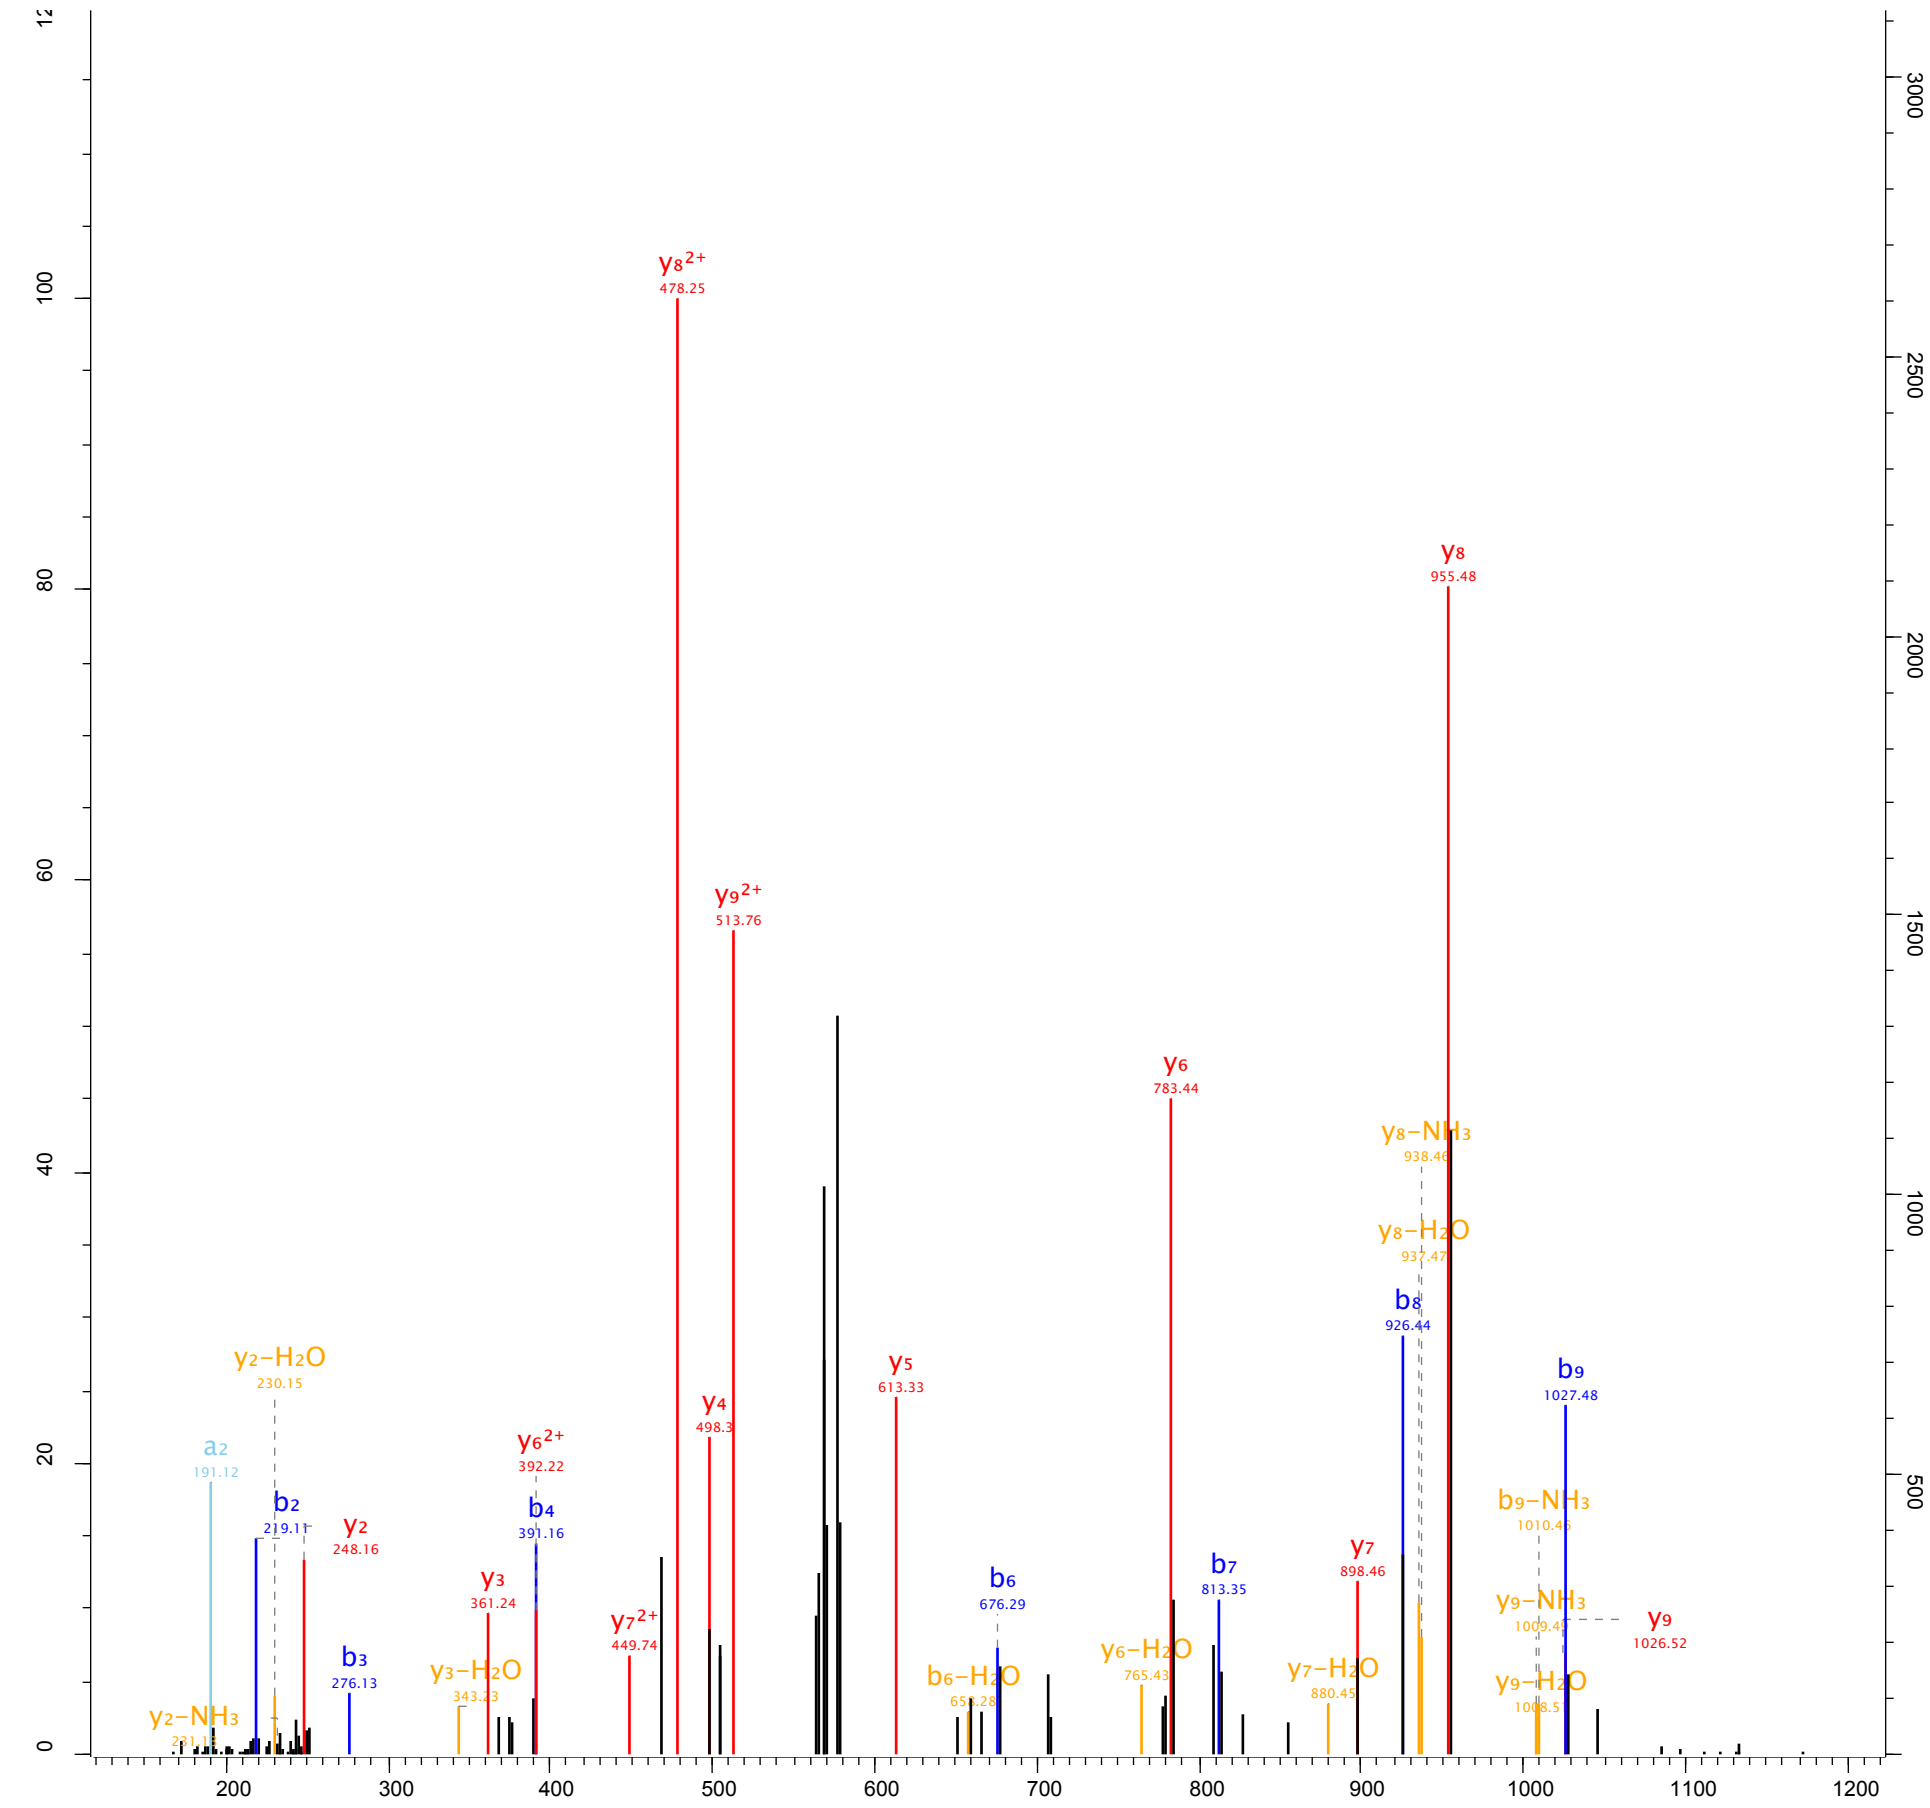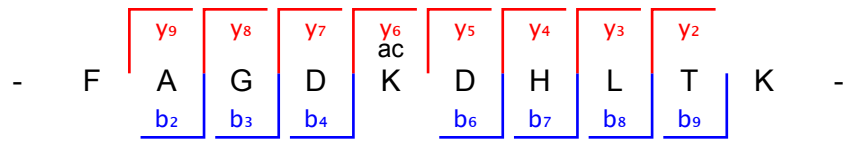

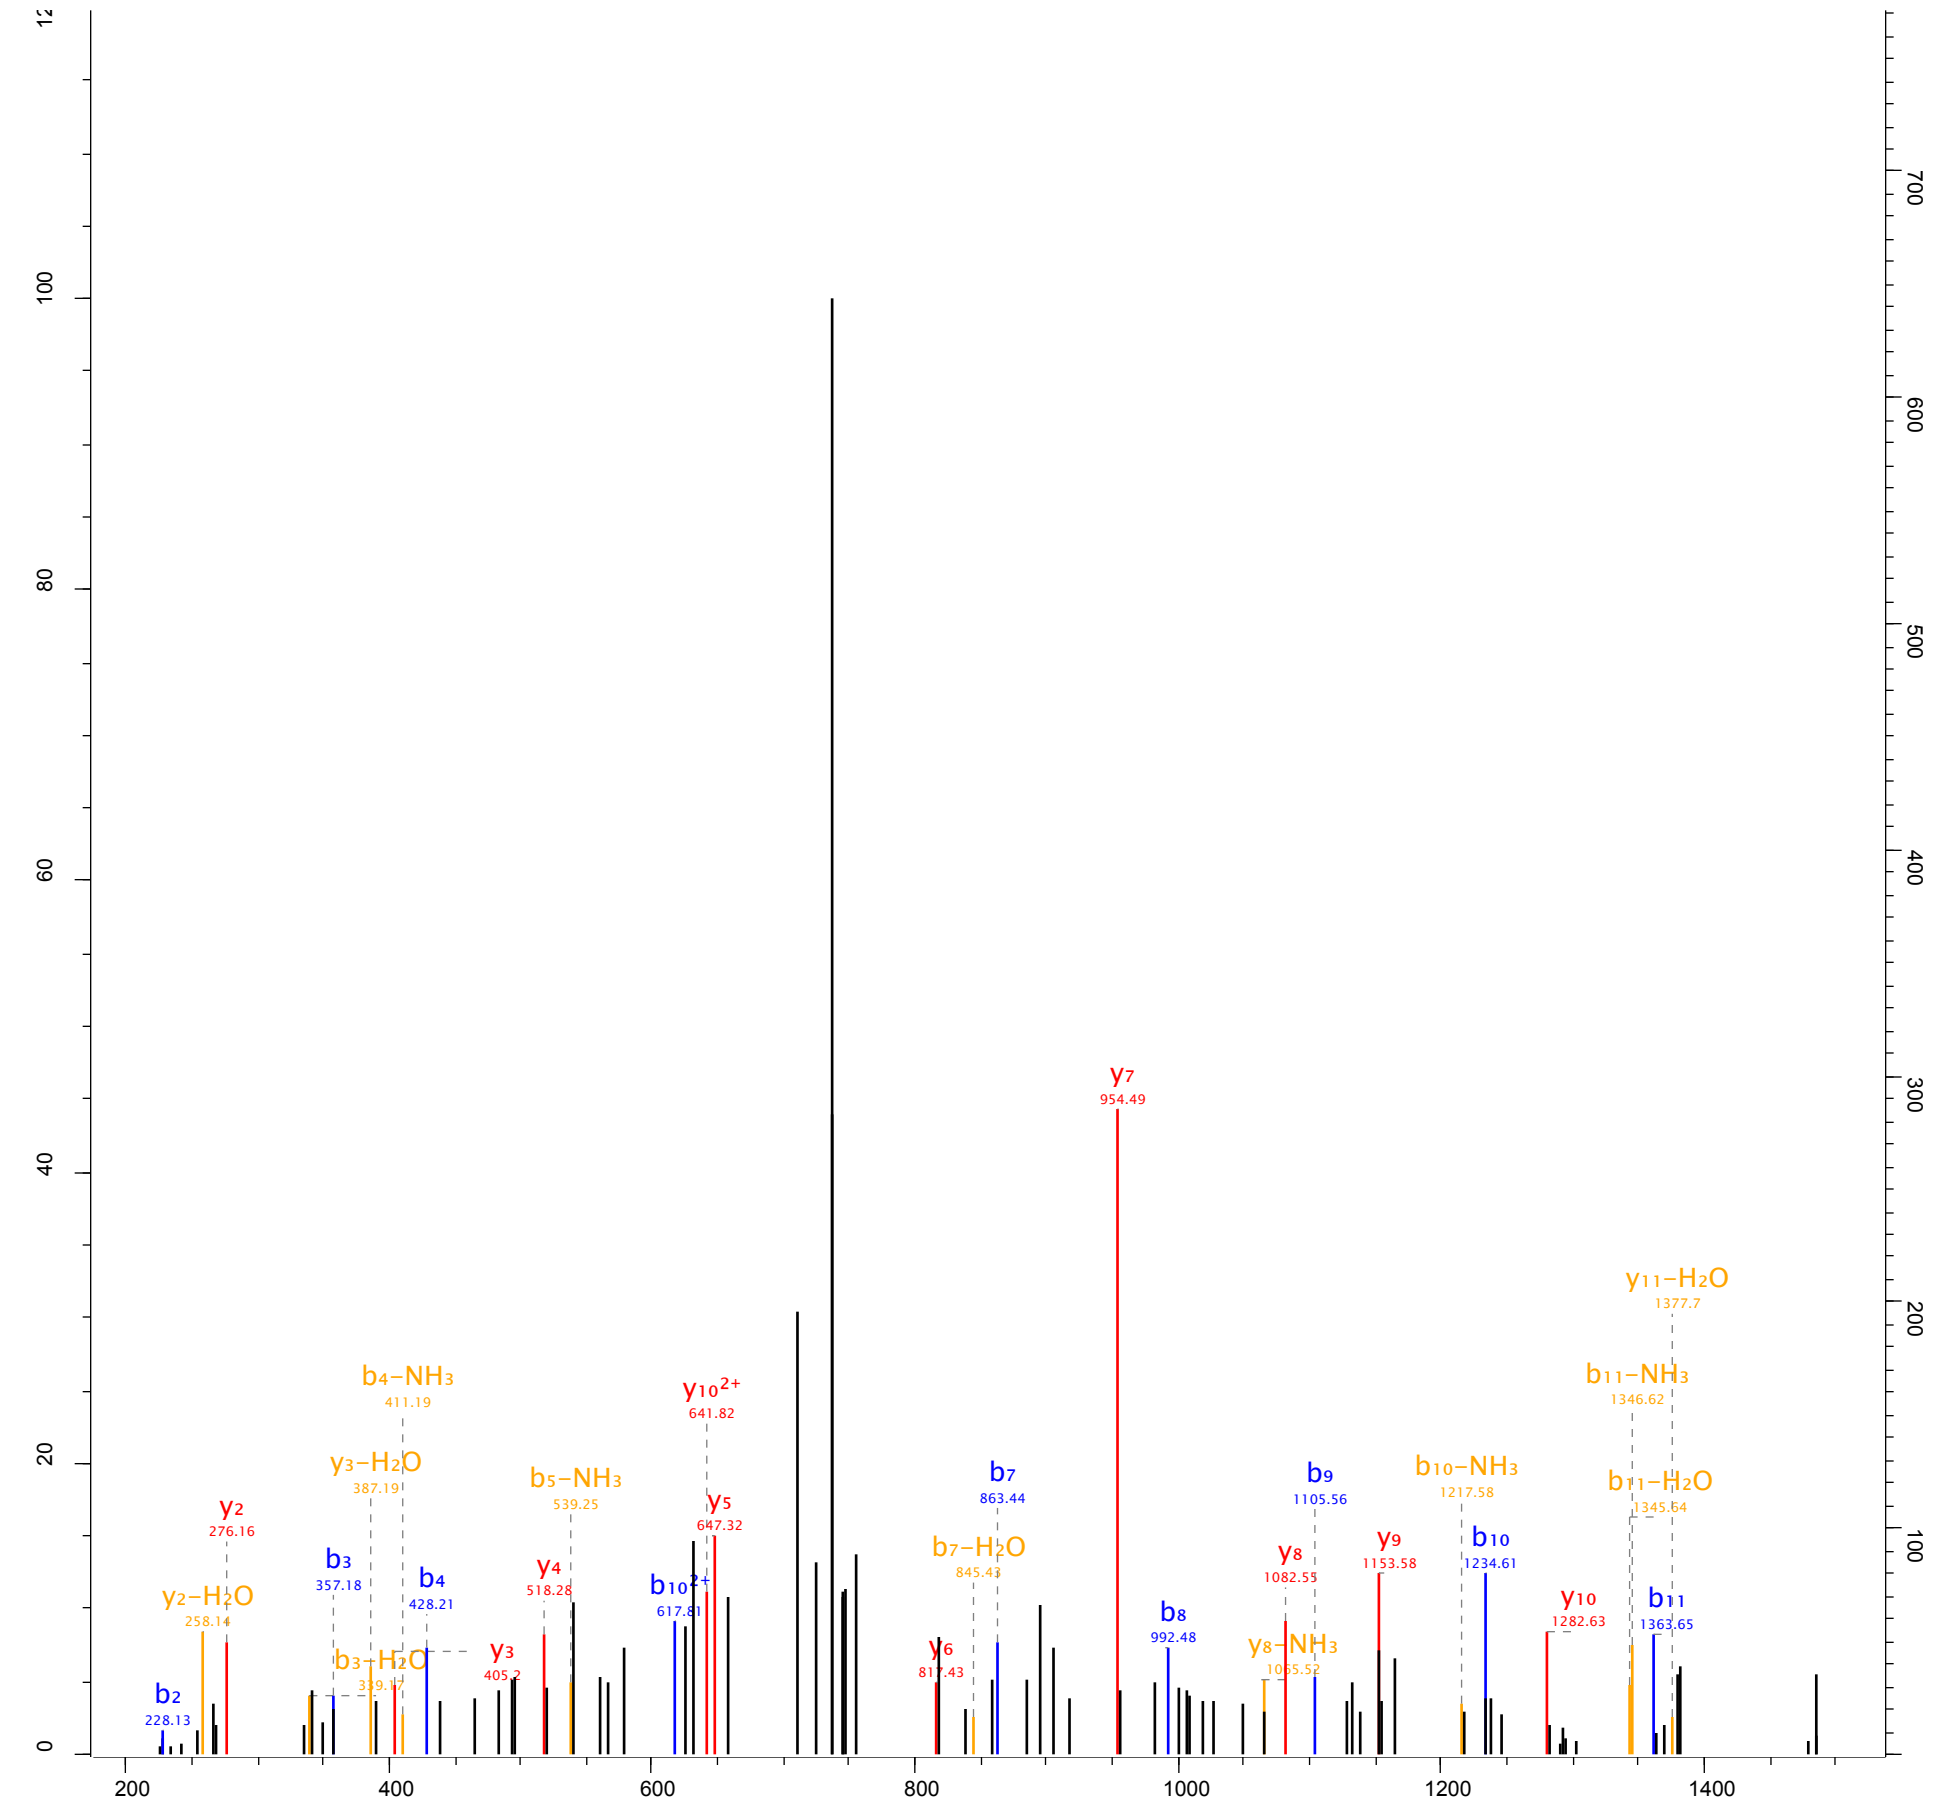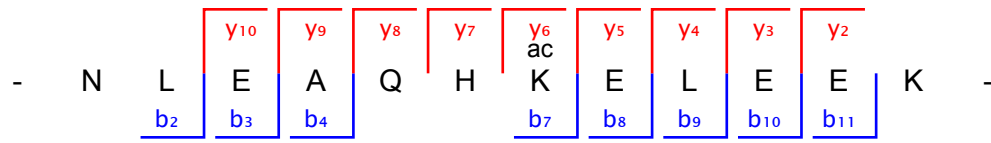

Raw file: 062513\_SCW\_II\_53\_9\_Vargas\_Enriched  
 Scan: 12528 Method: ITMS; CID Score: 103.26 m/z: 535.8 Gene names: D10Jhu81e

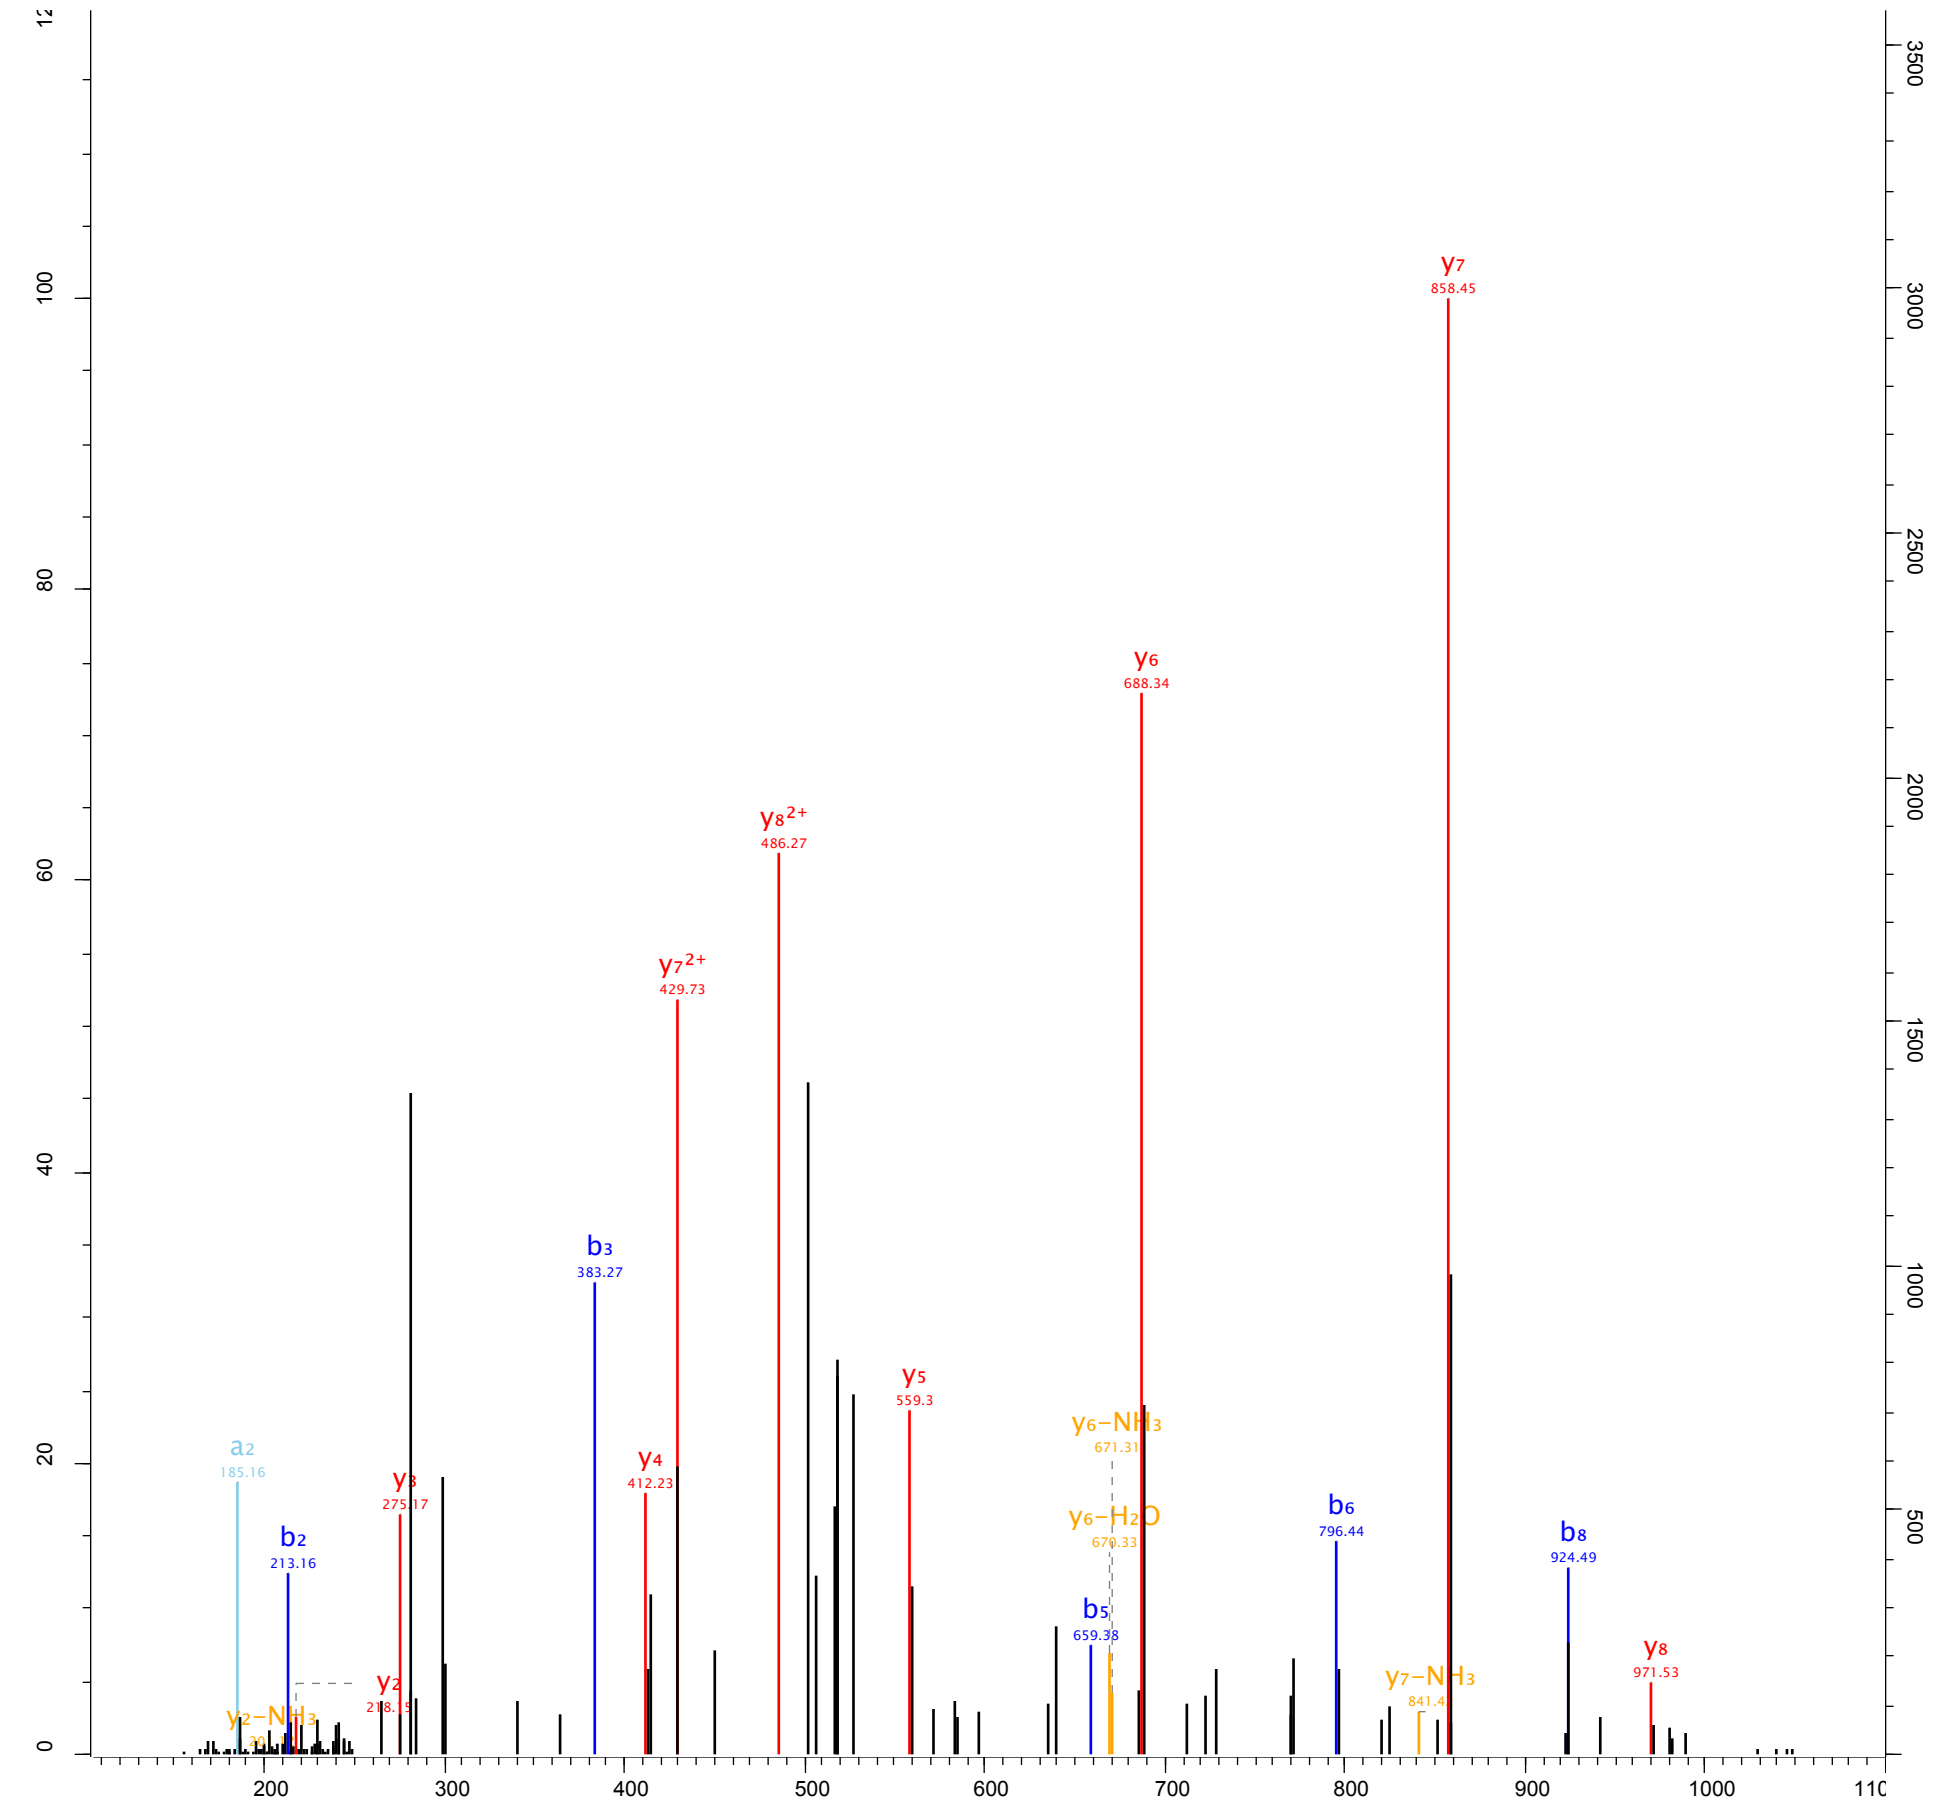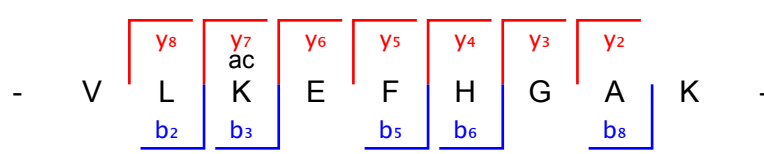

062513\_SCW\_II\_53\_9\_Vargas\_Enriched

12760

ITMS; CID

163.66

586.34

Actb;Actg1;Actc1;Acta1;Acta2;Actg2

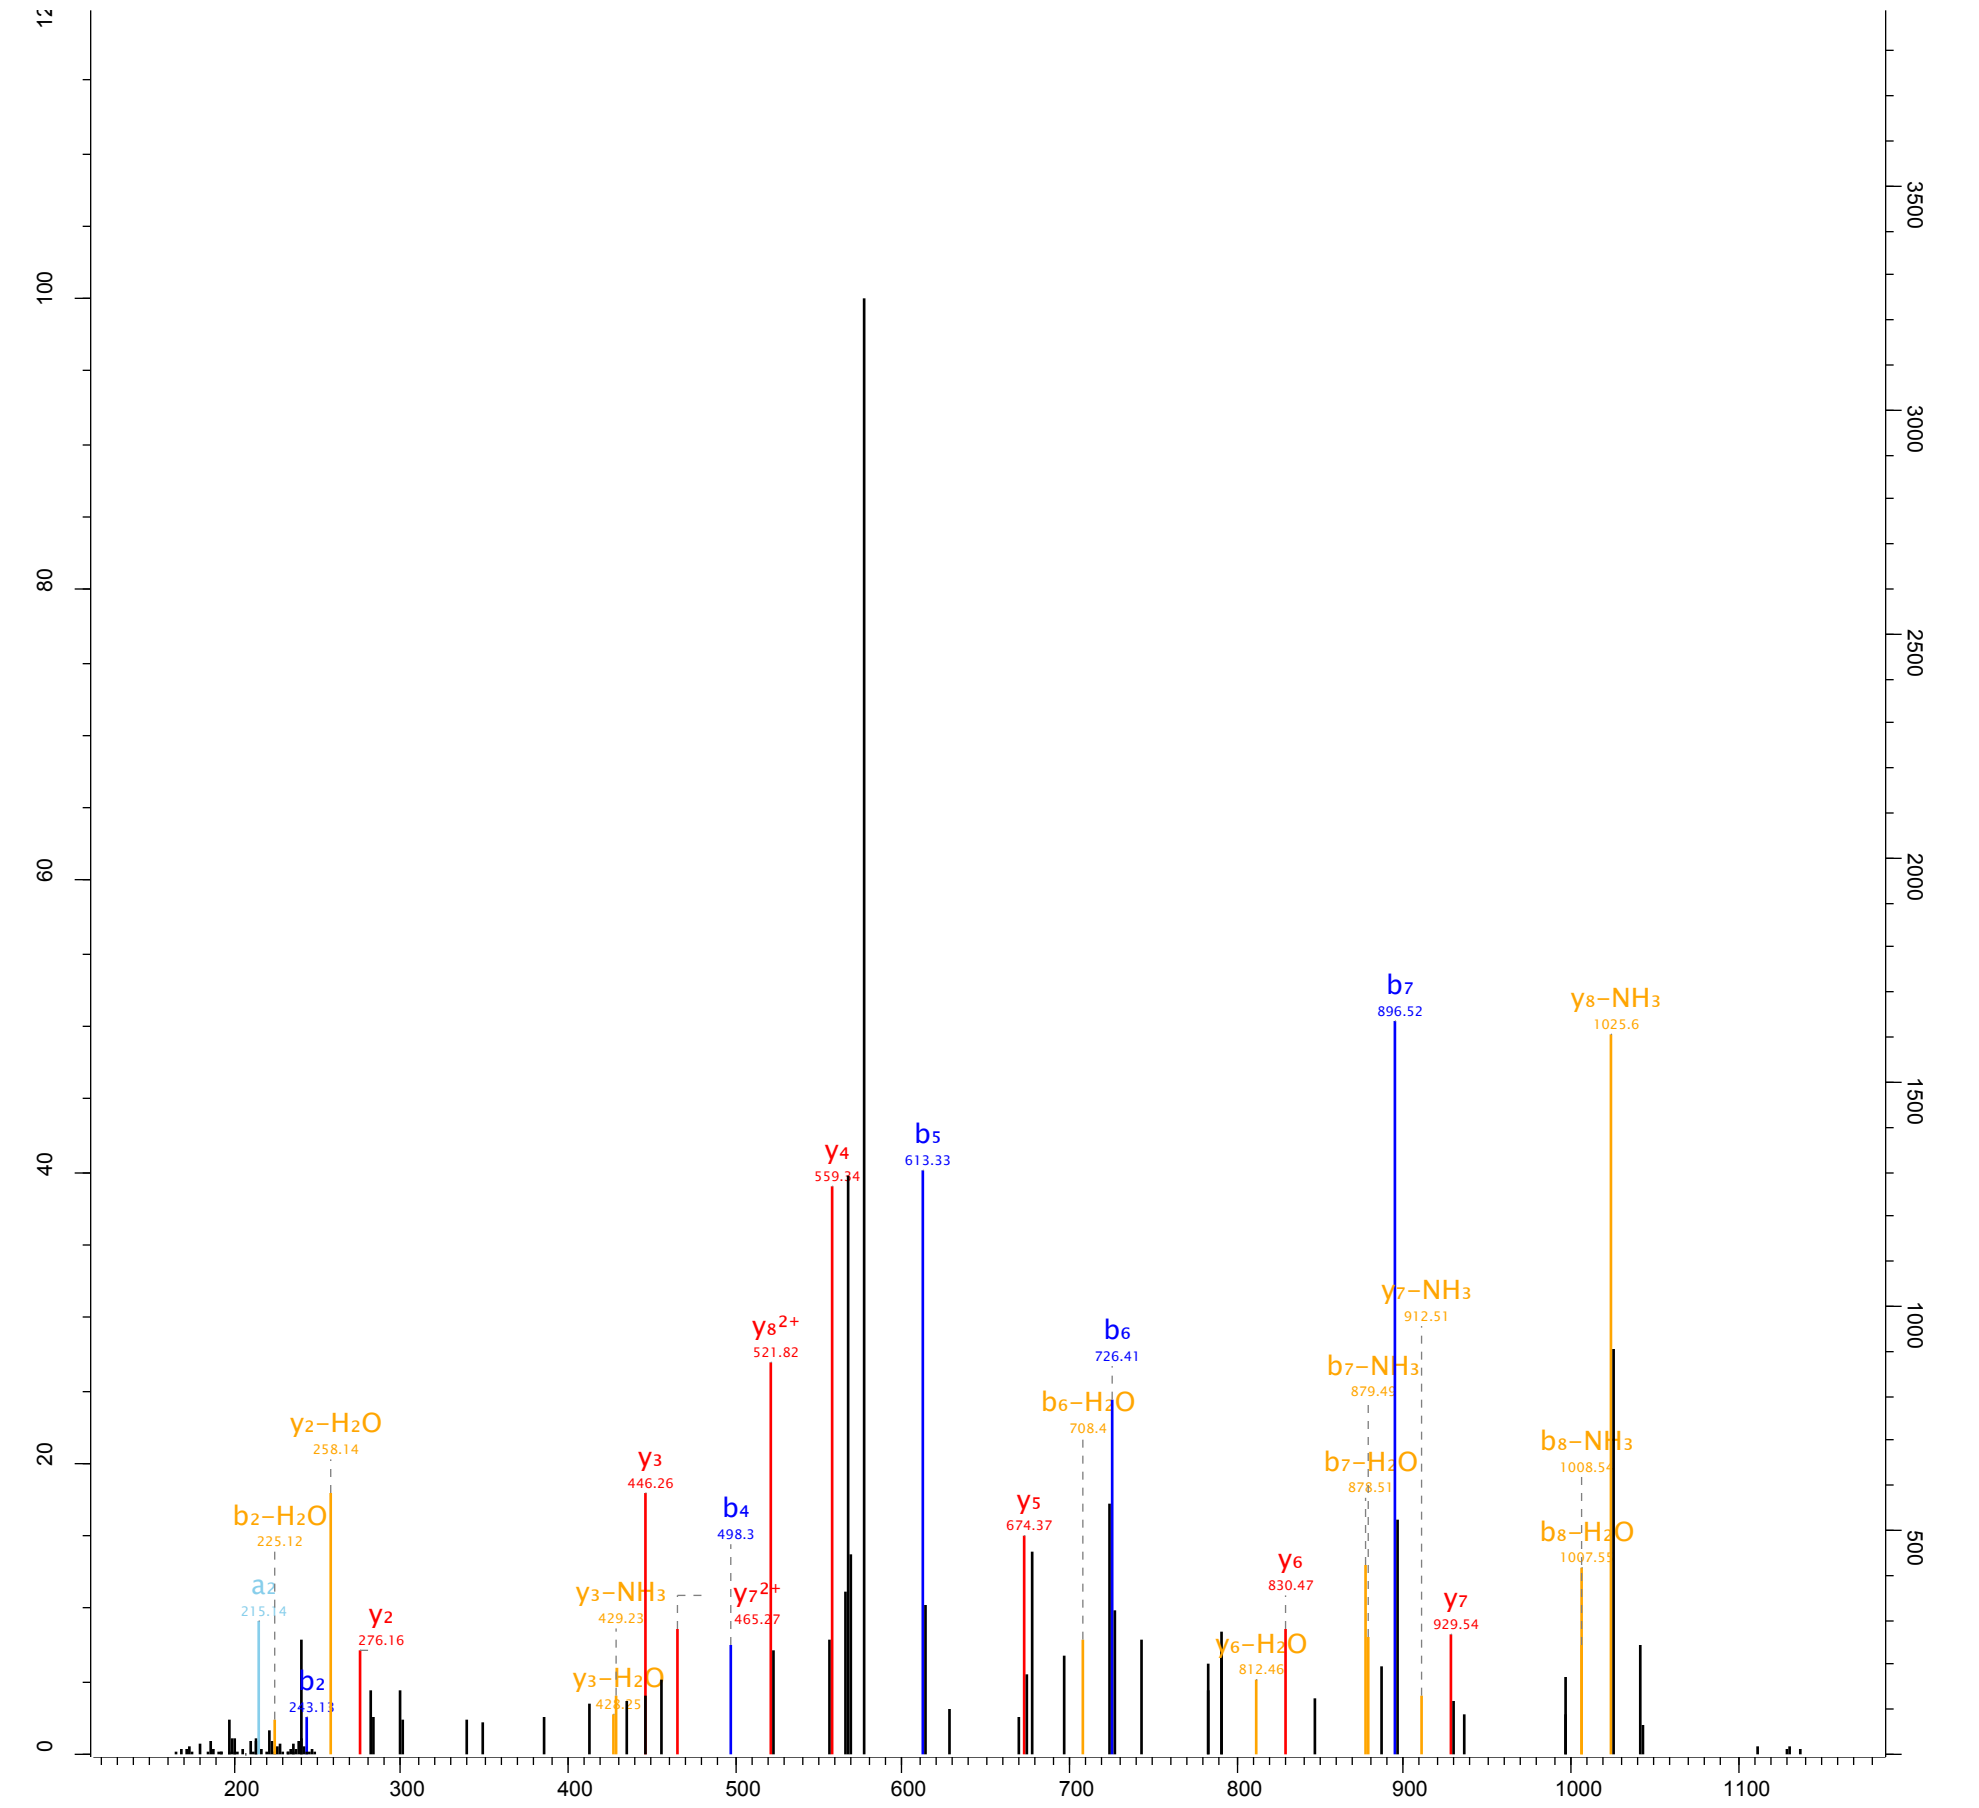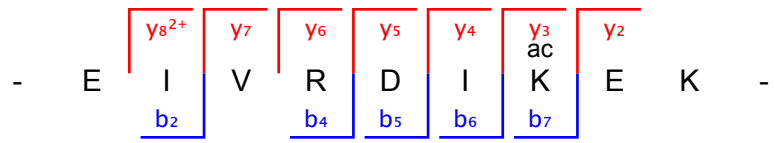



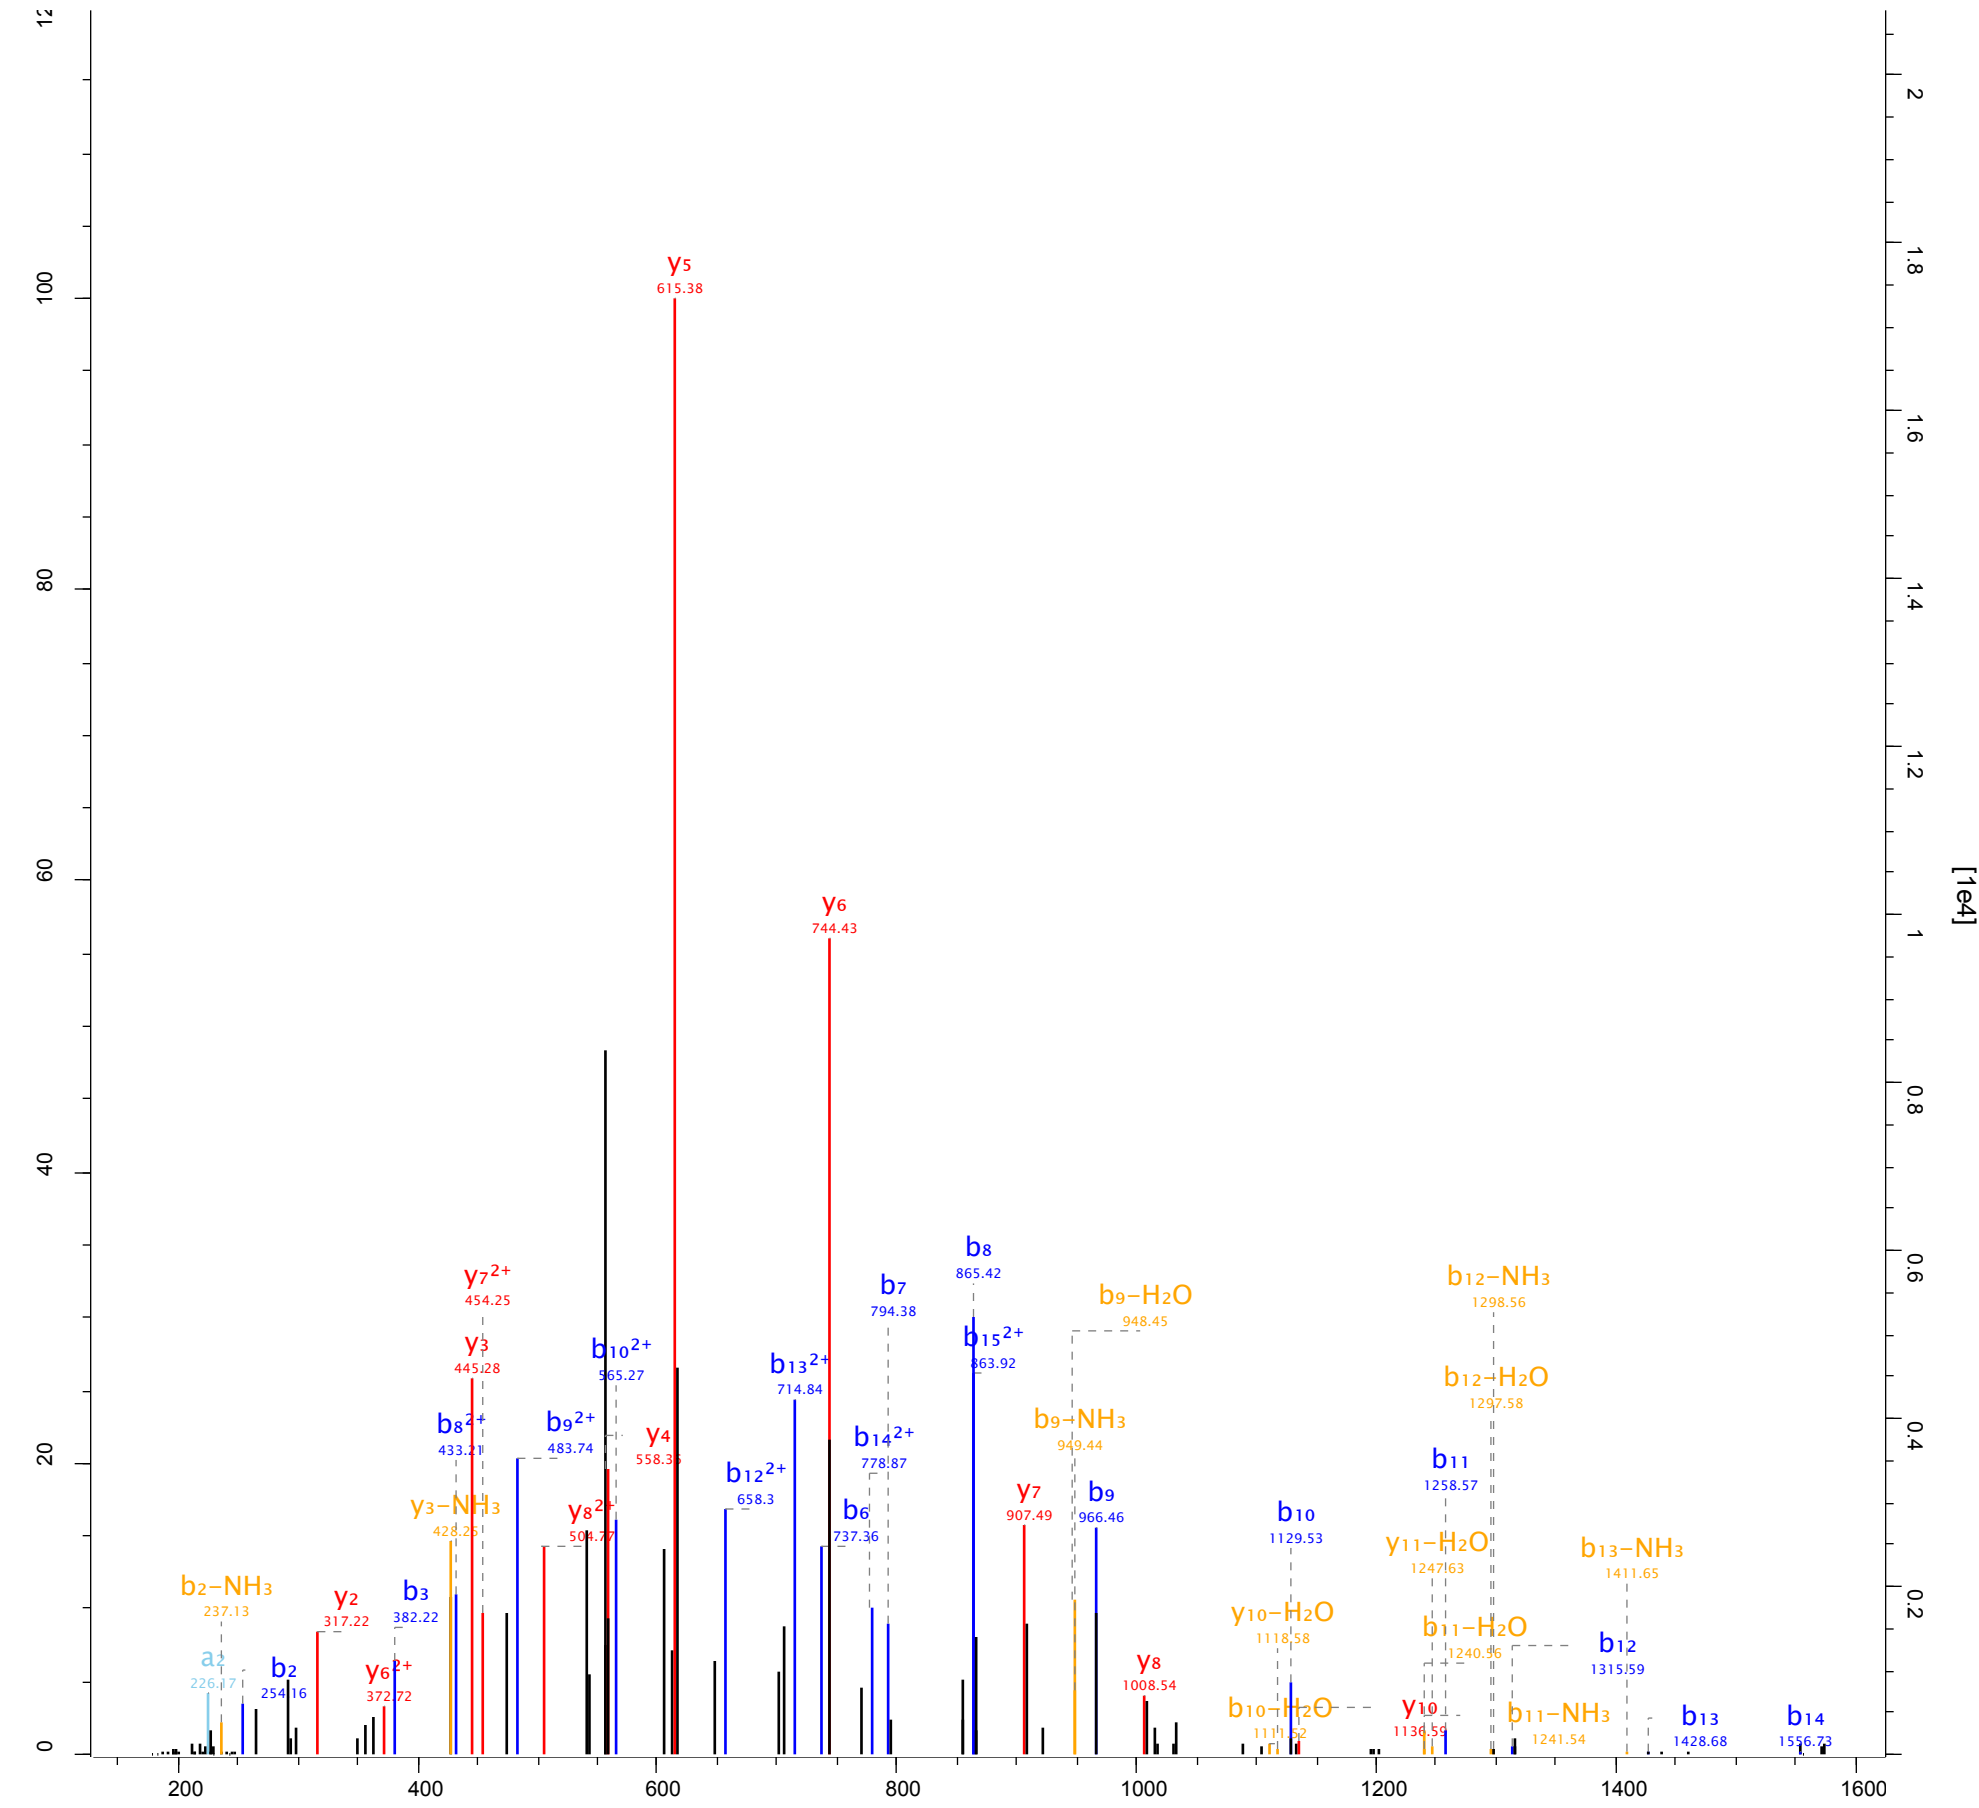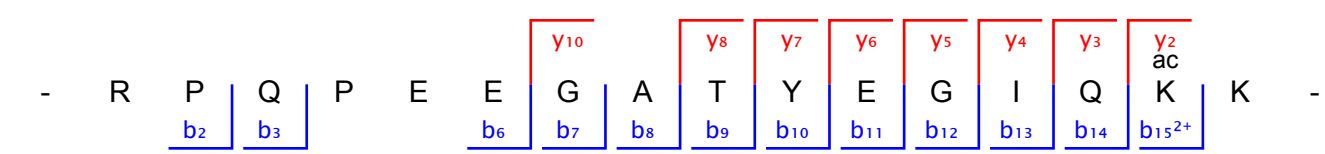

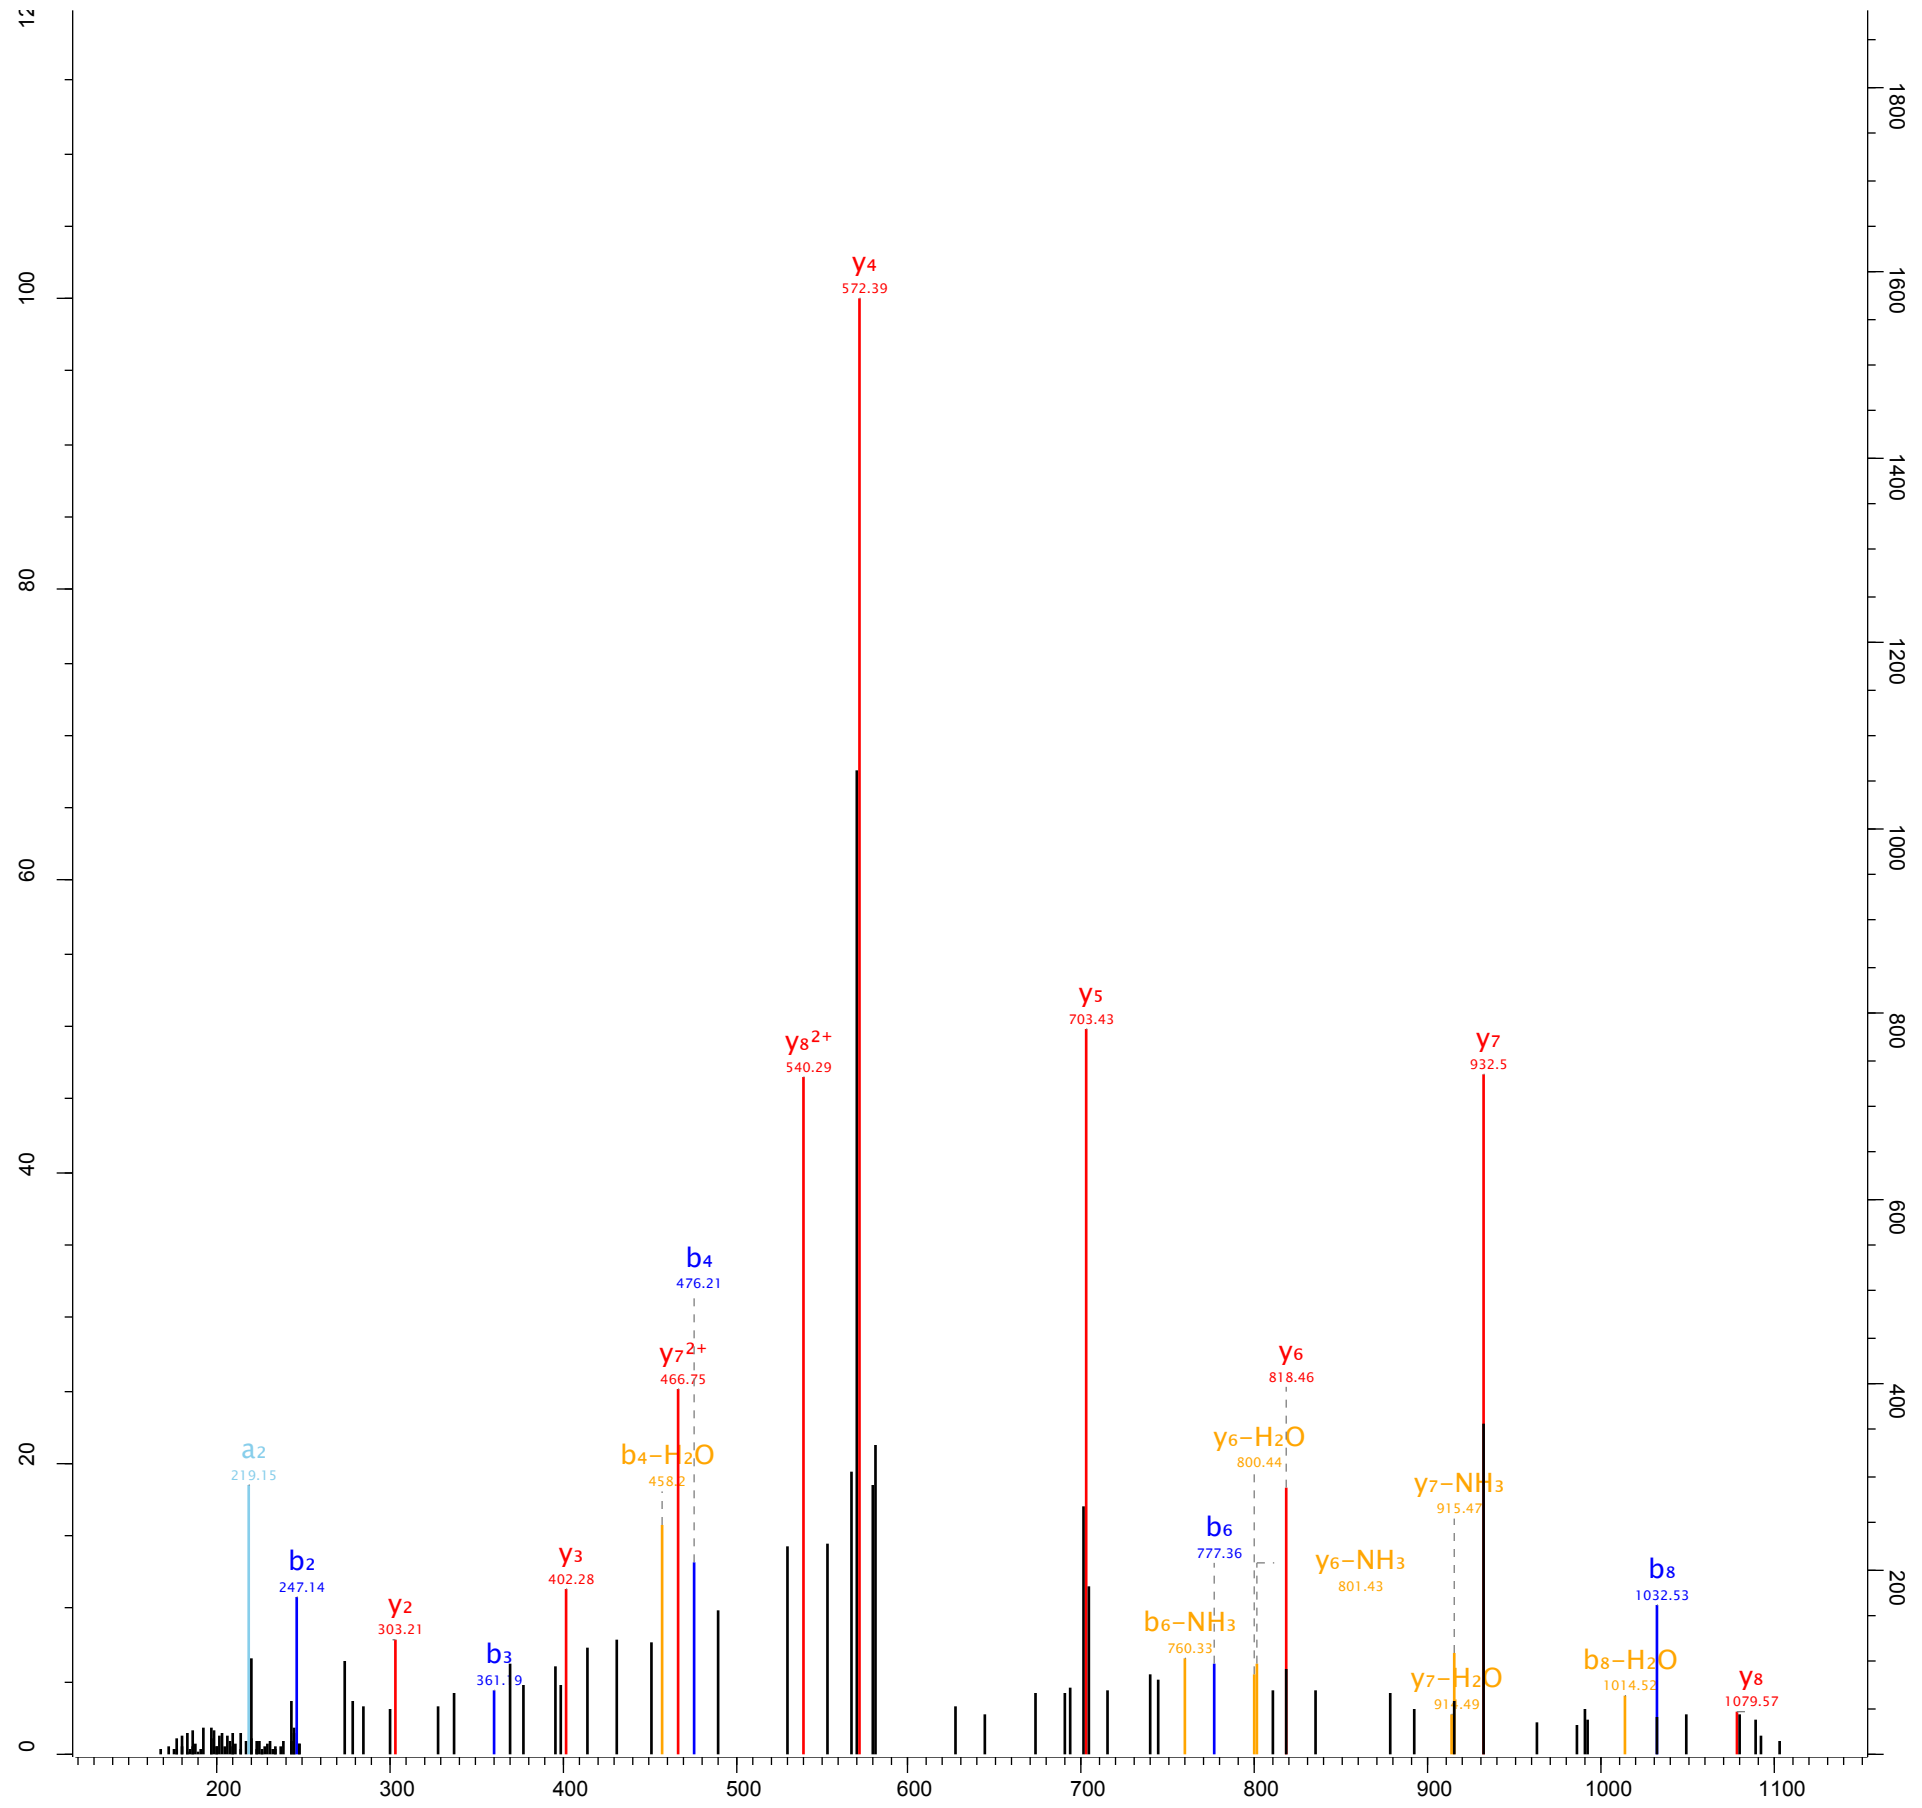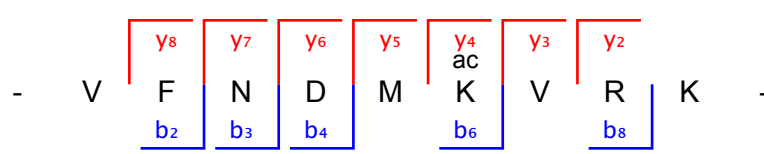

062513\_SCW\_II\_53\_9\_Vargas\_Enriched

13221

ITMS; CID

132.86

447.9

Dync1h1

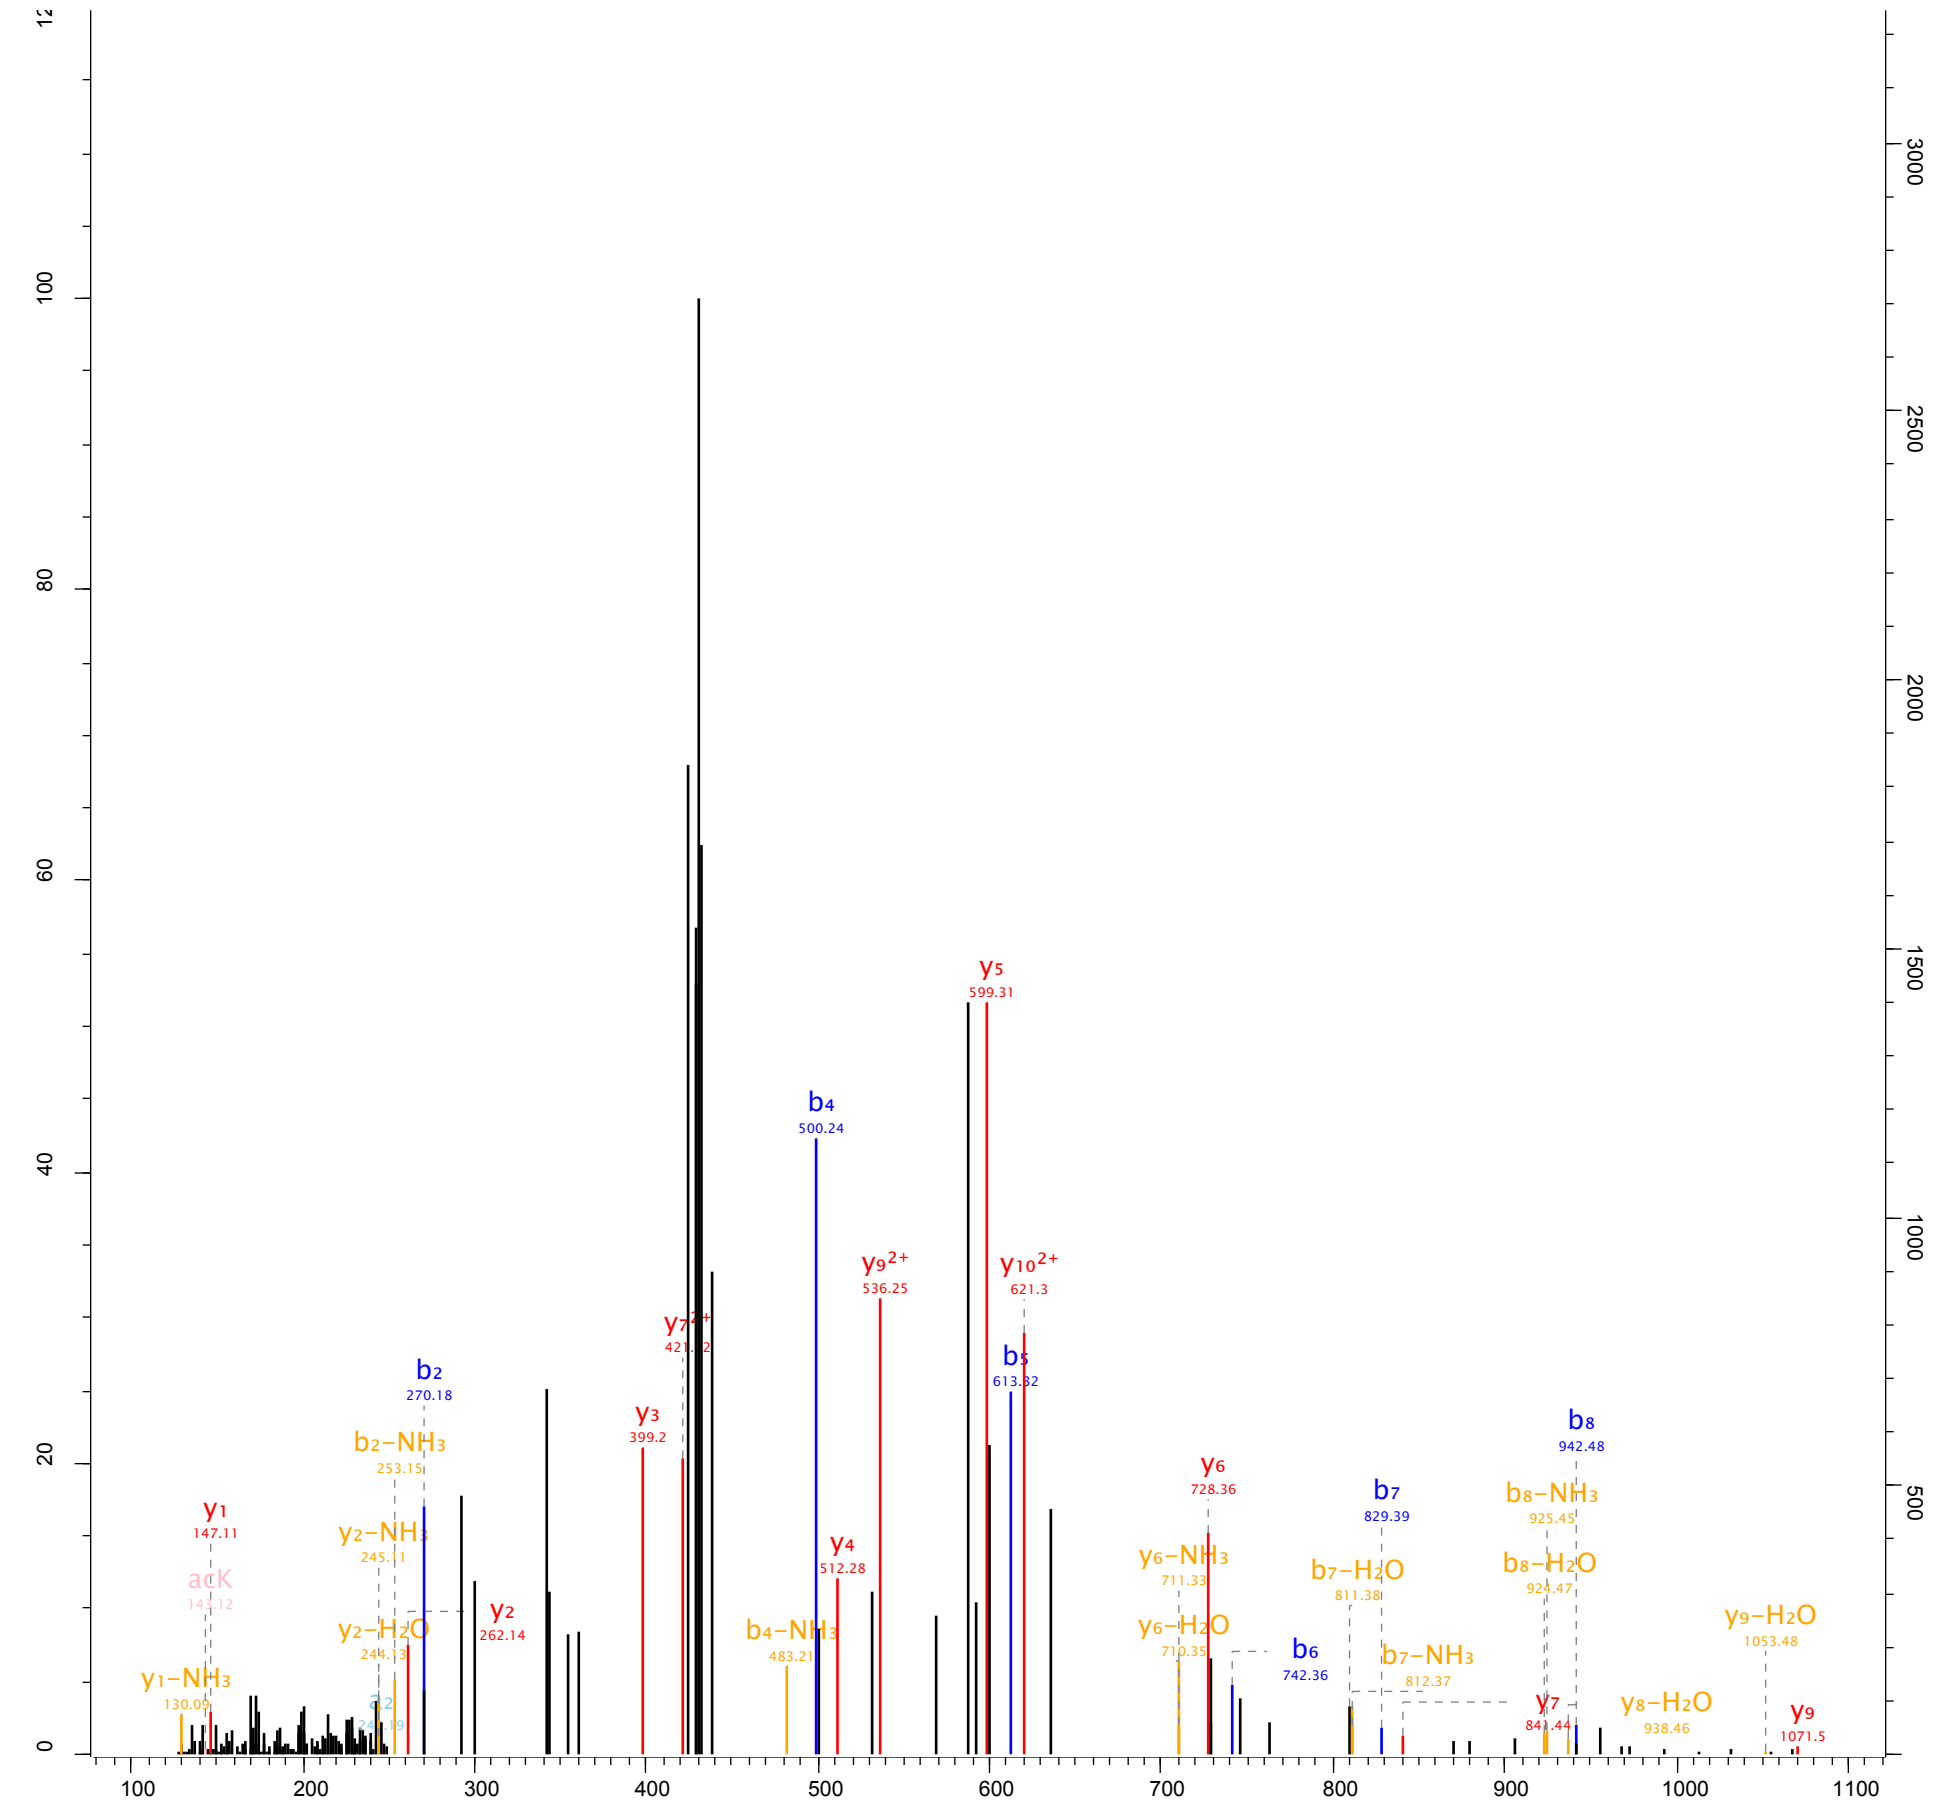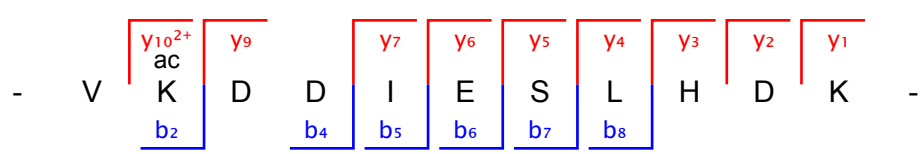

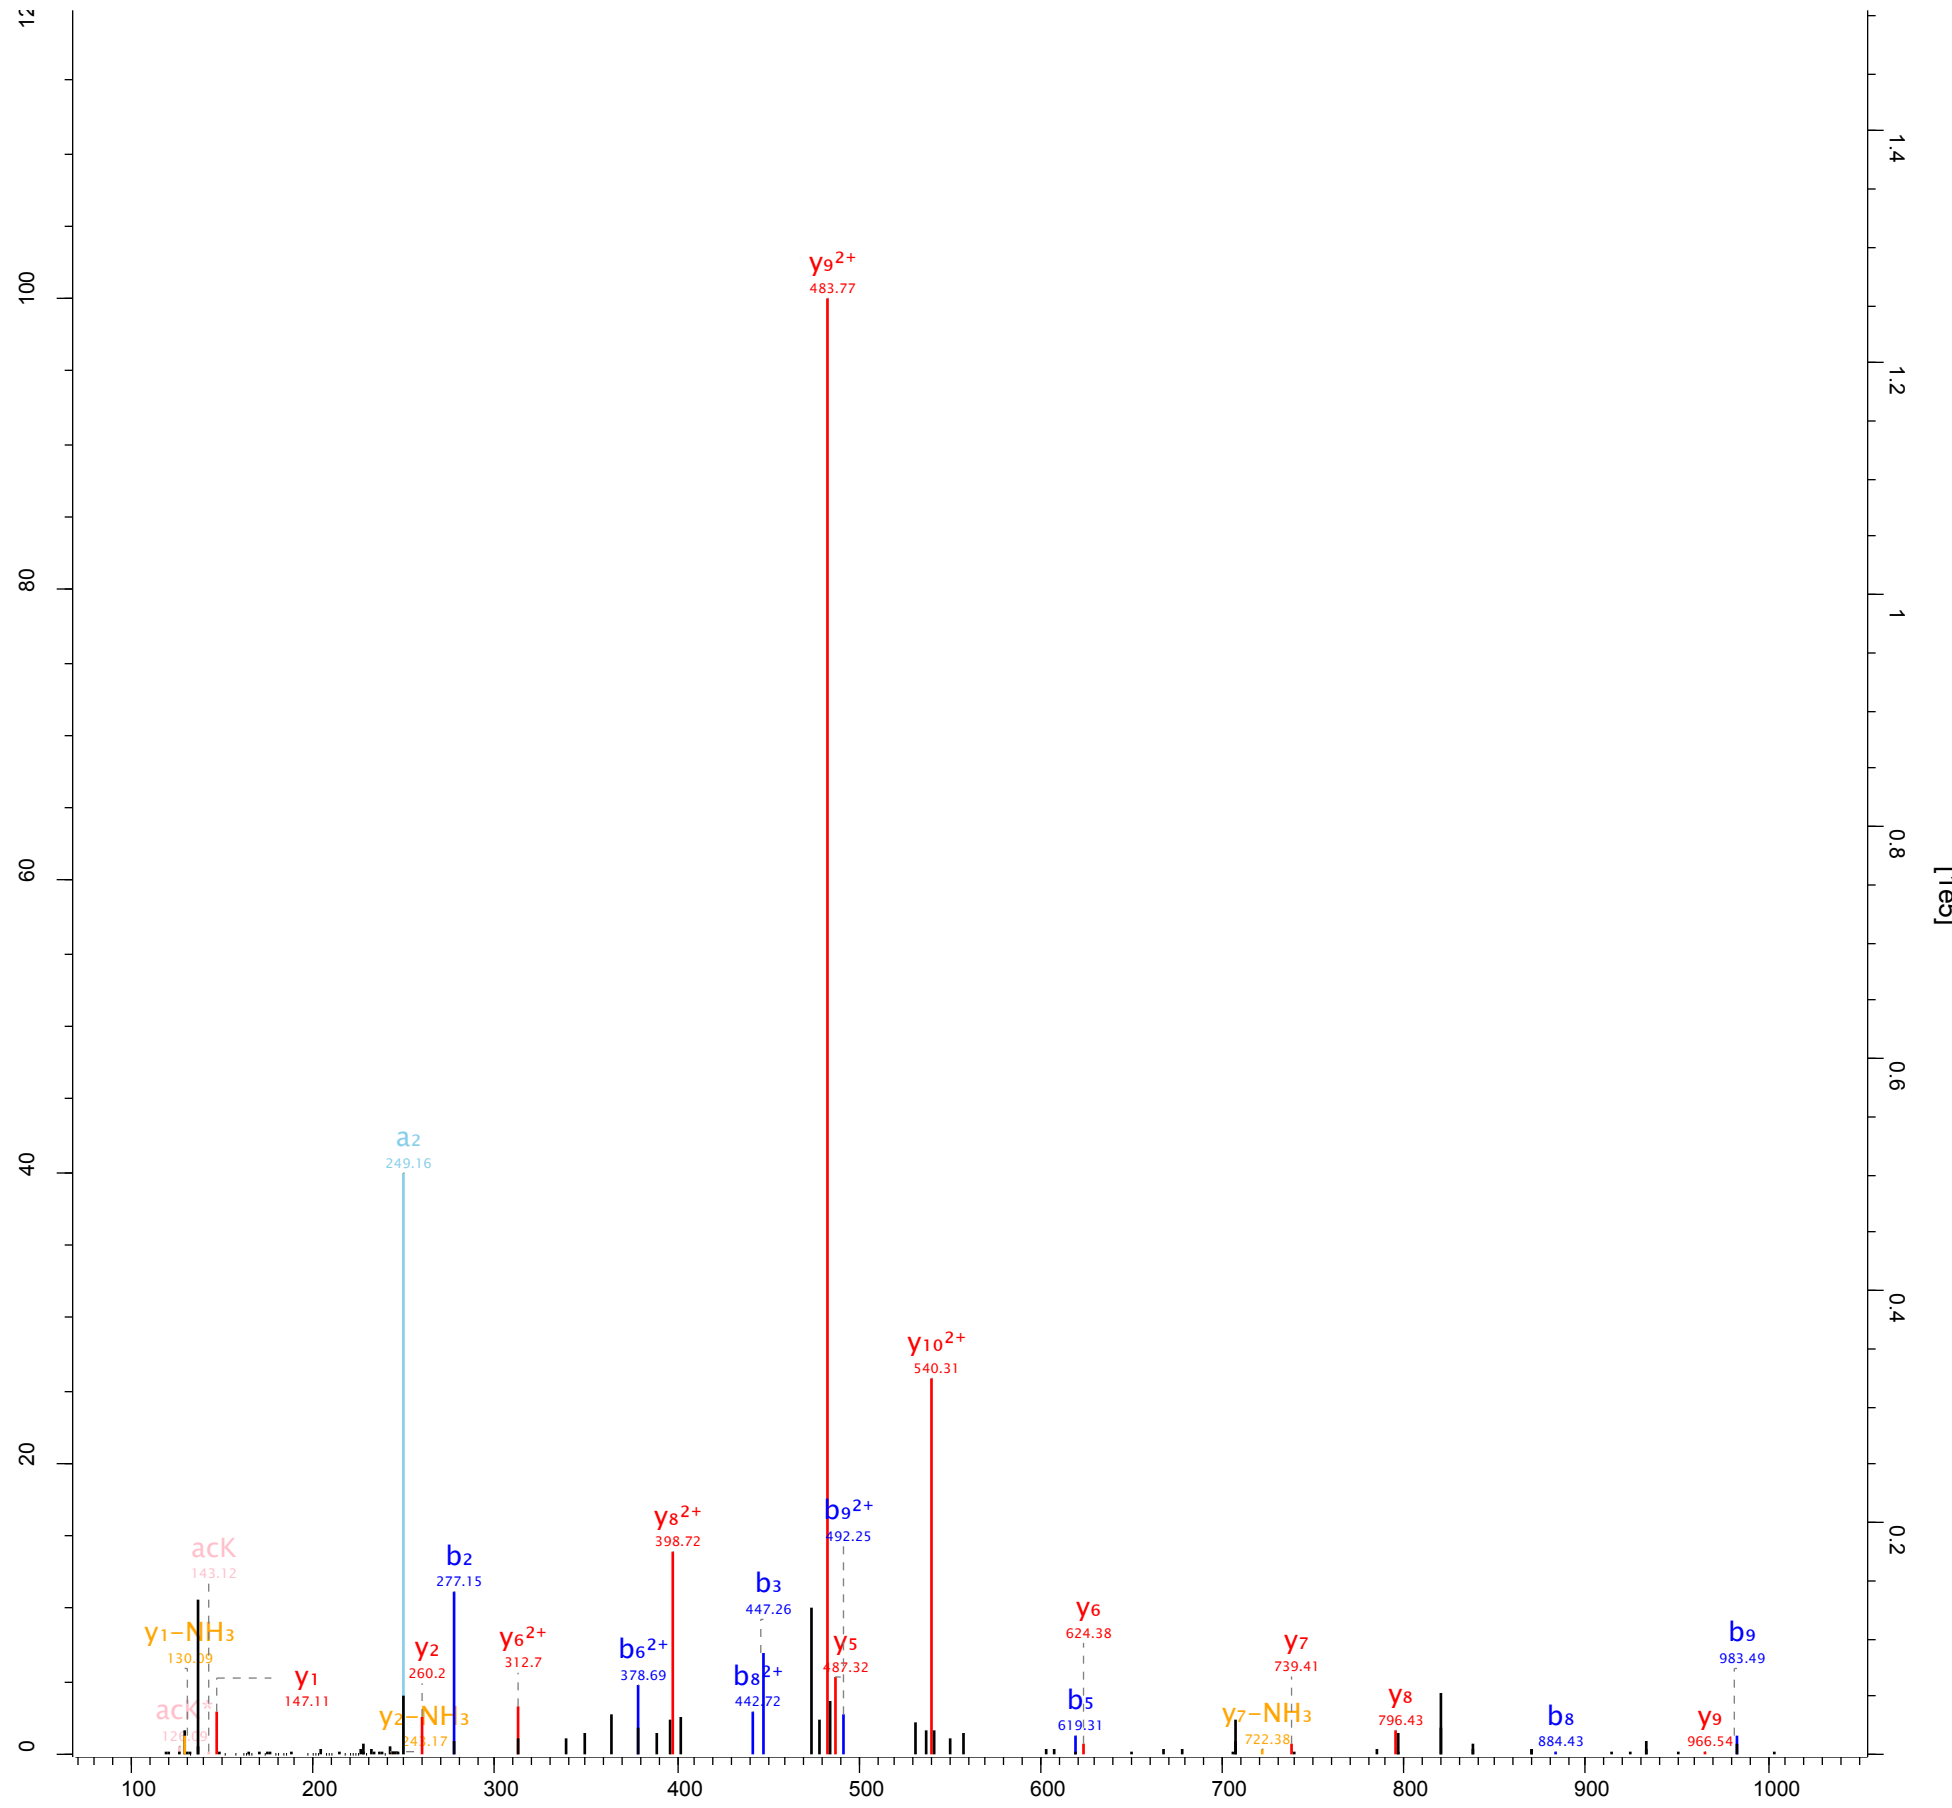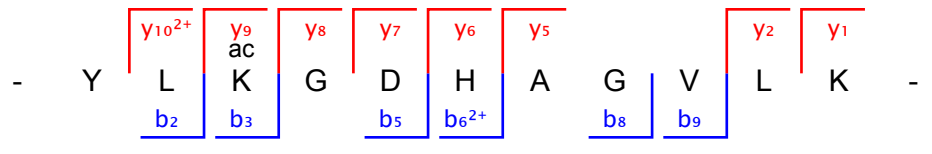

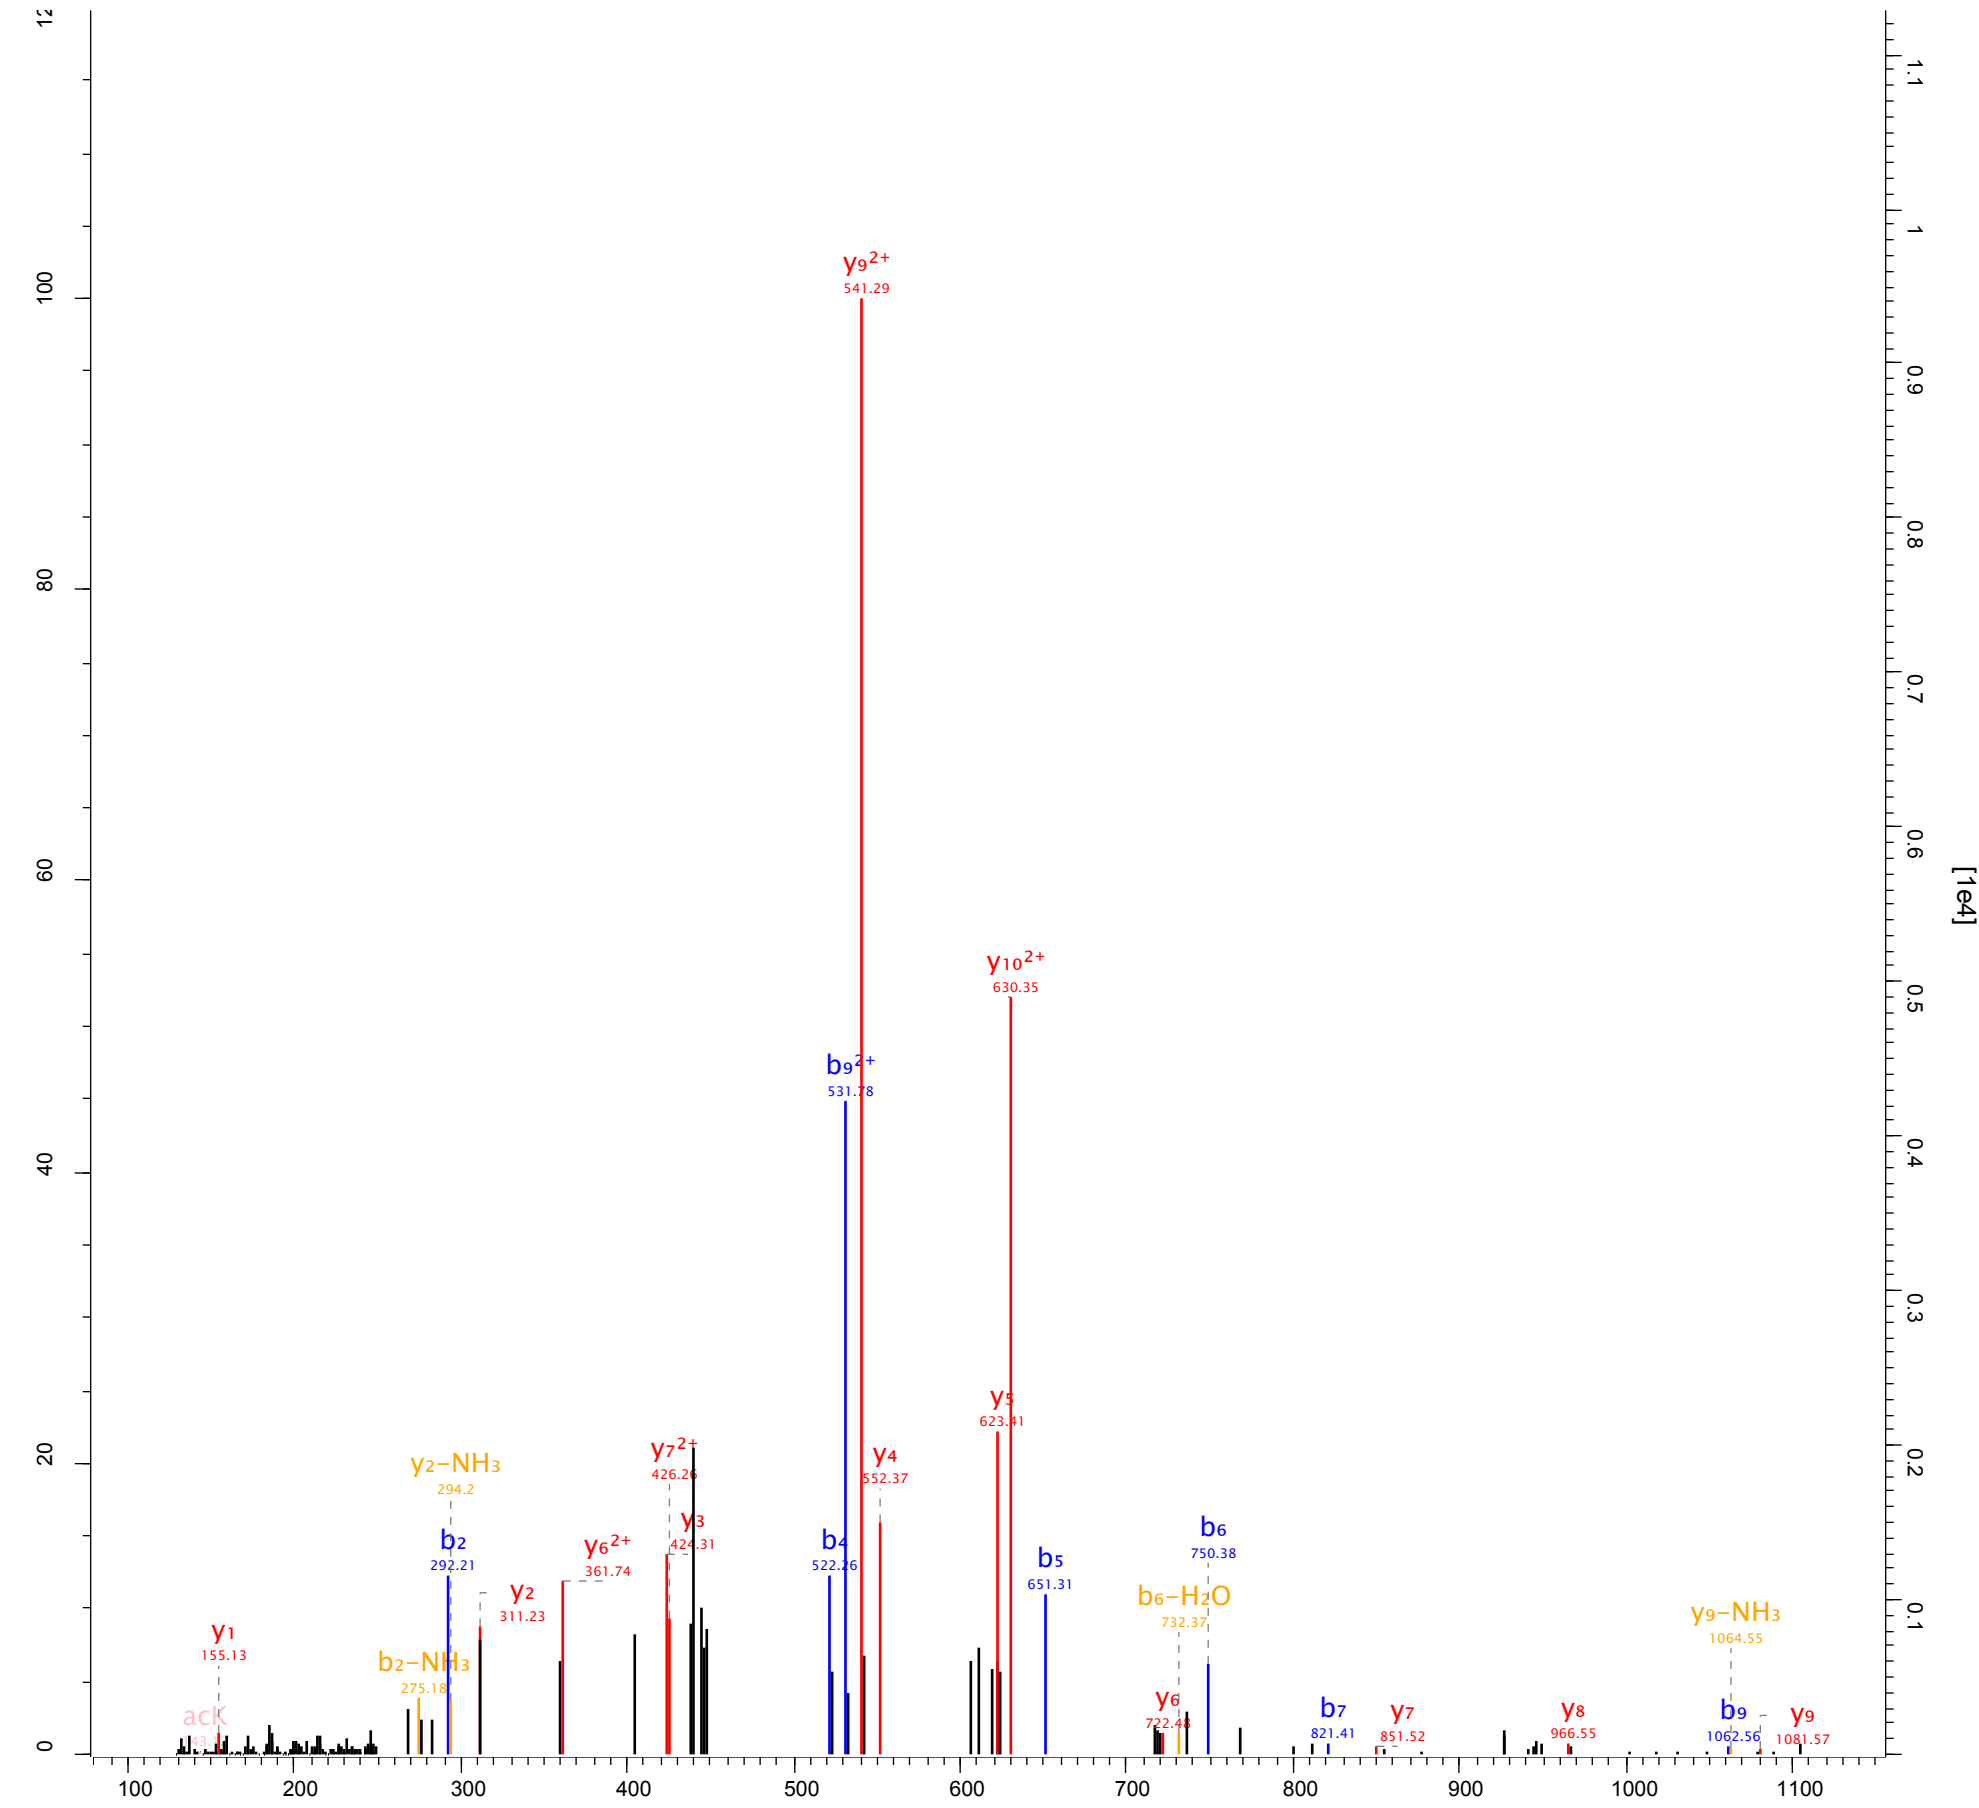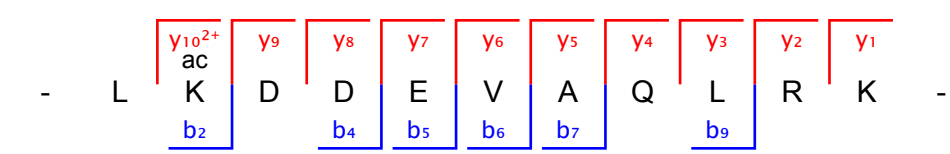

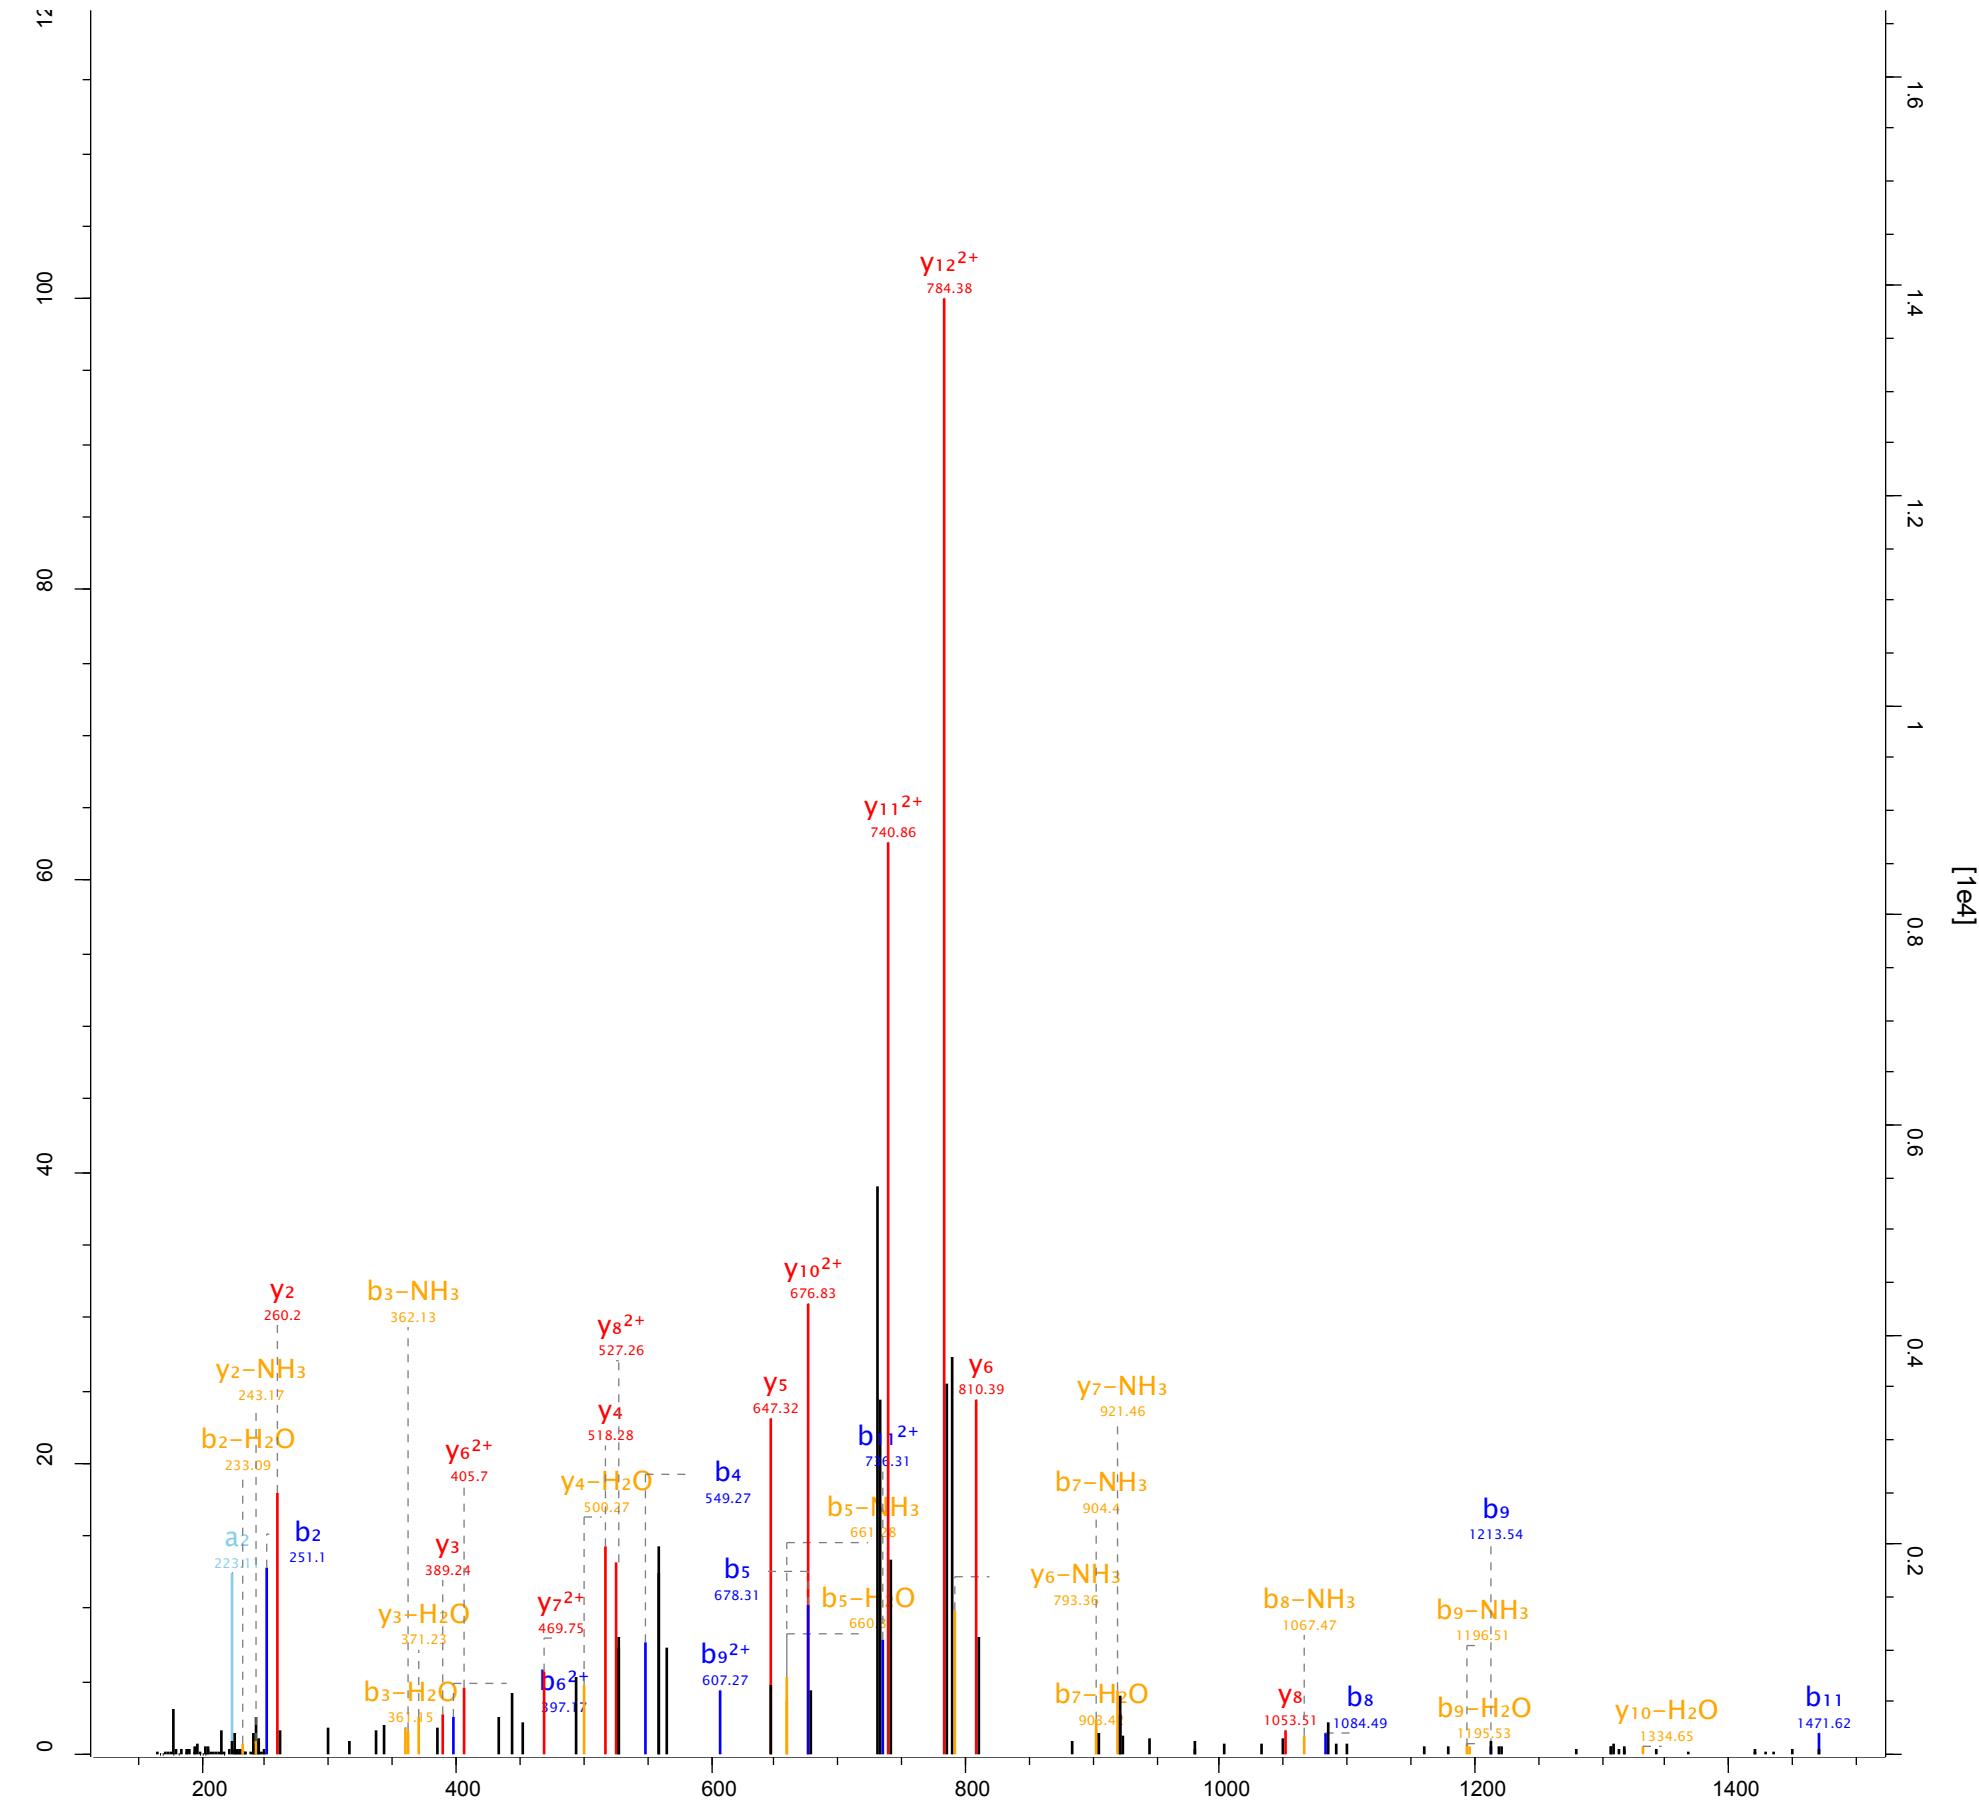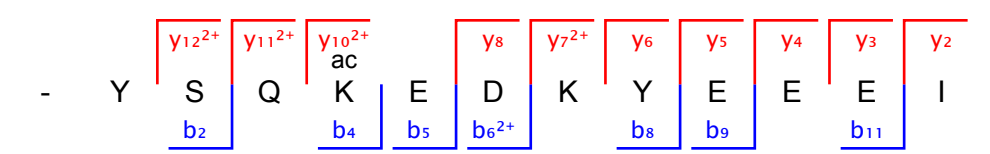

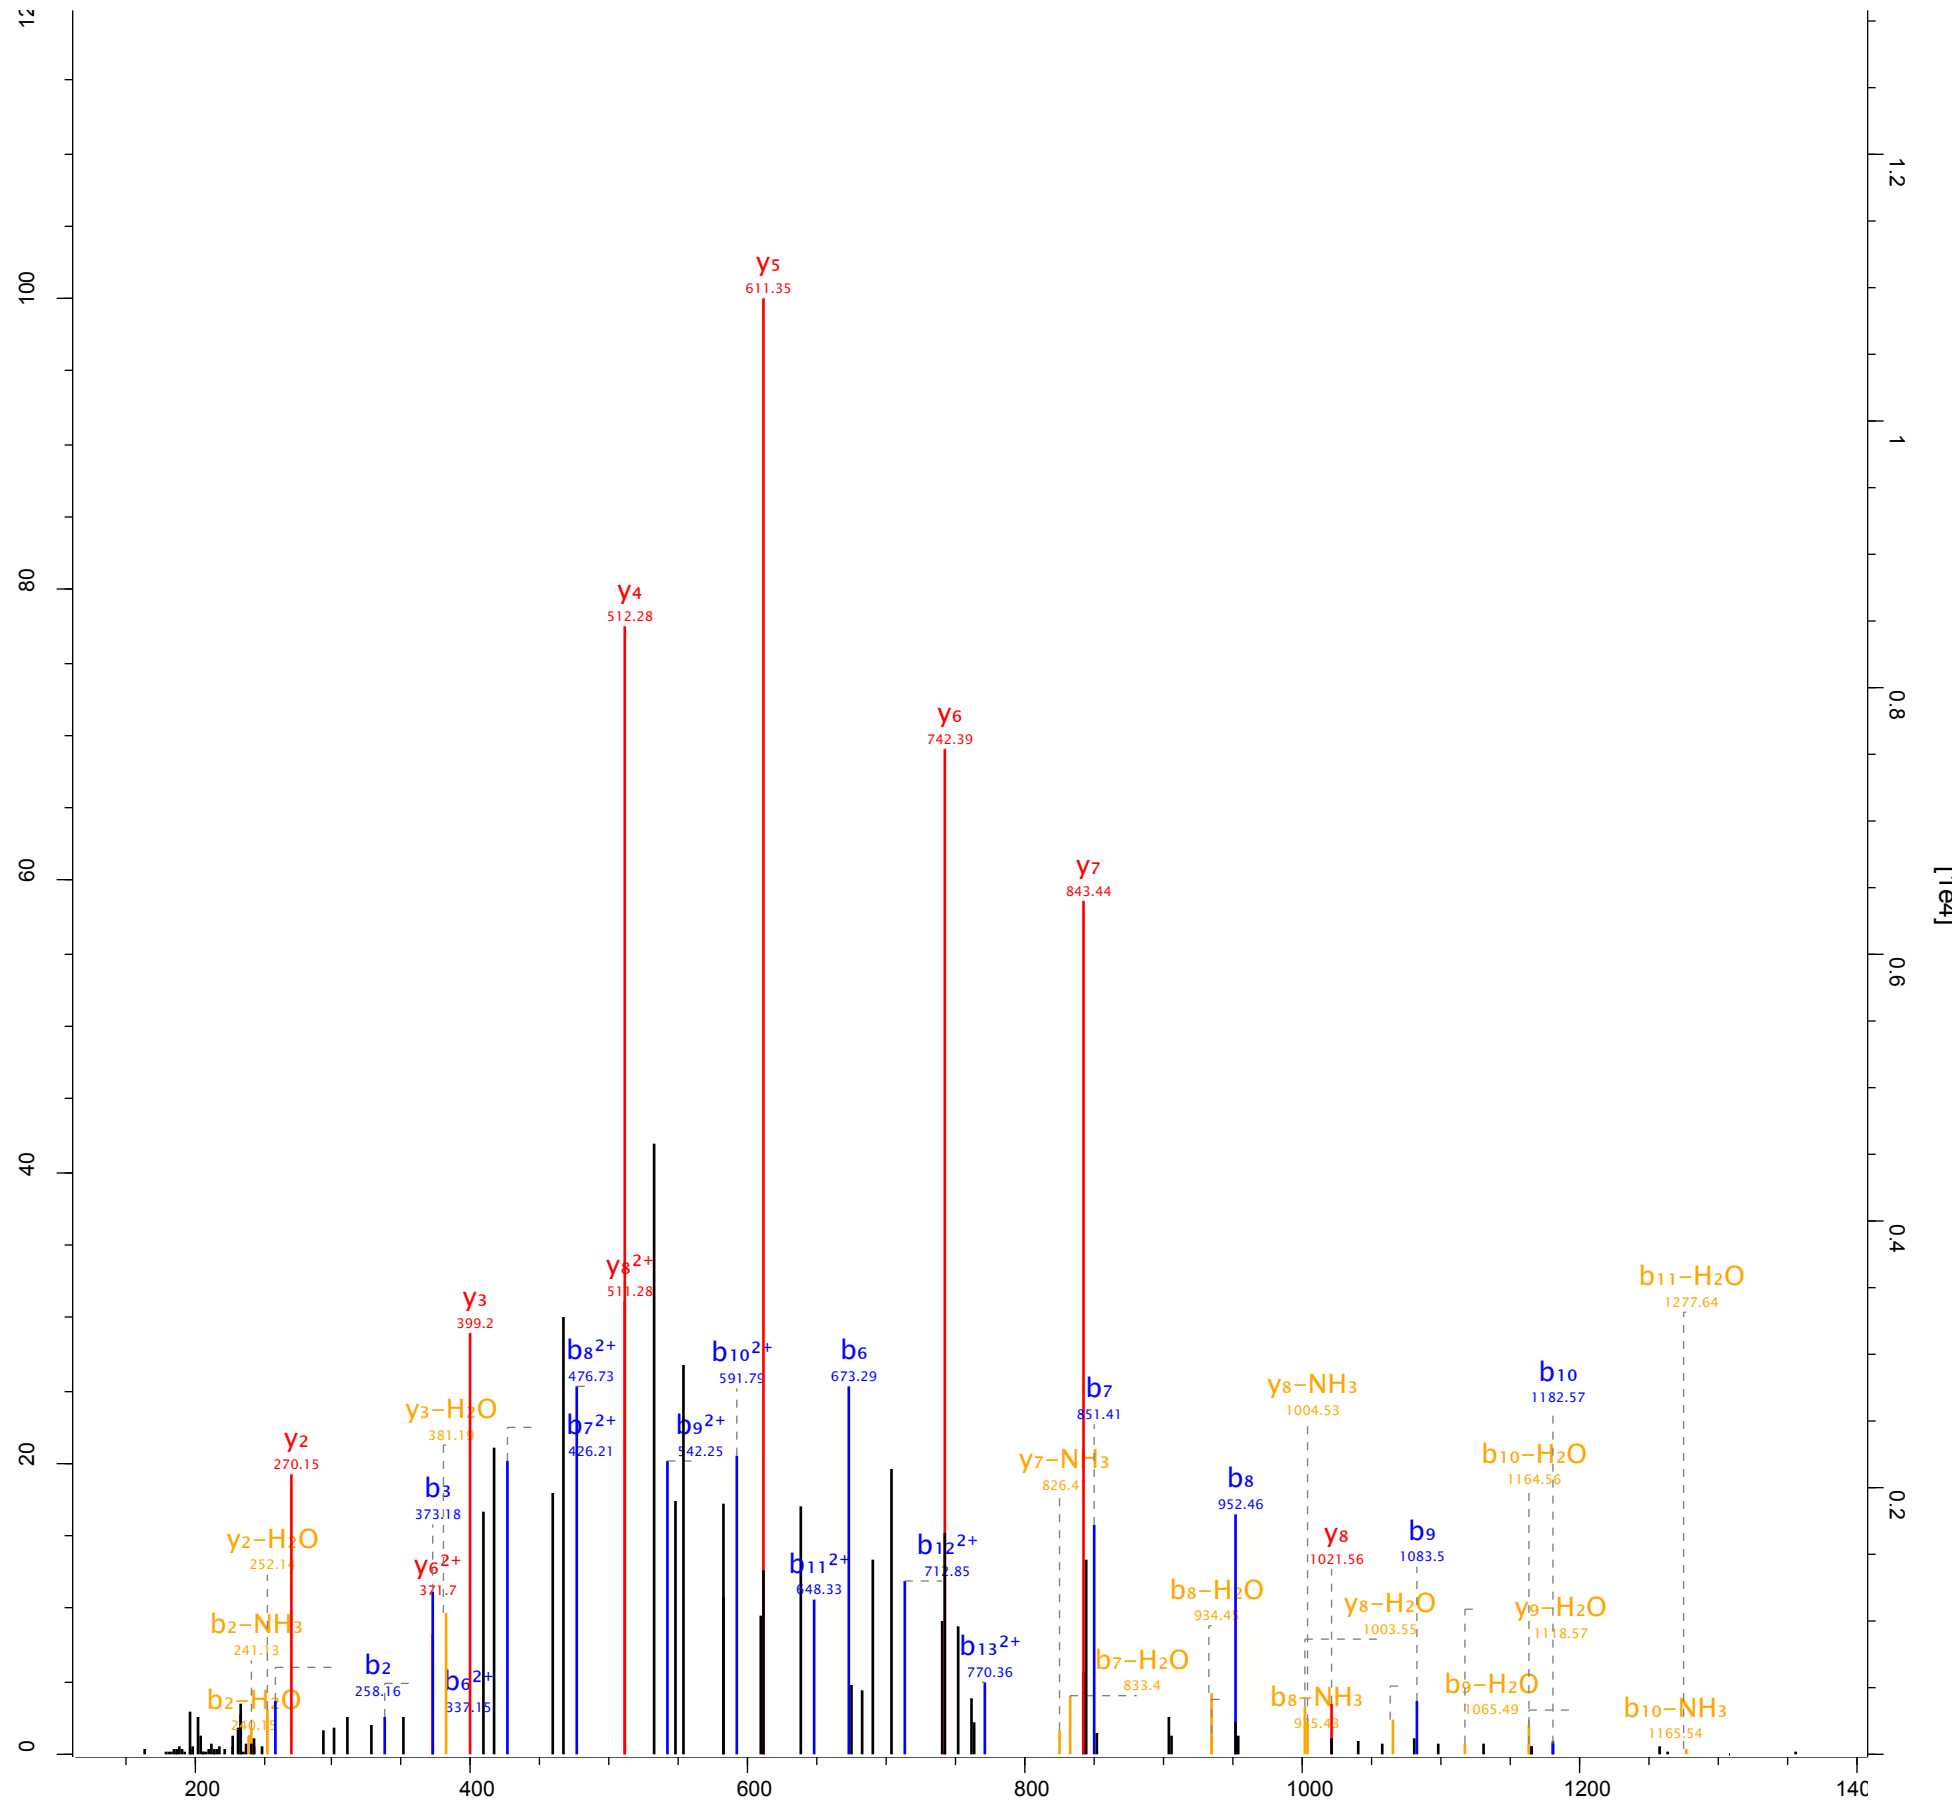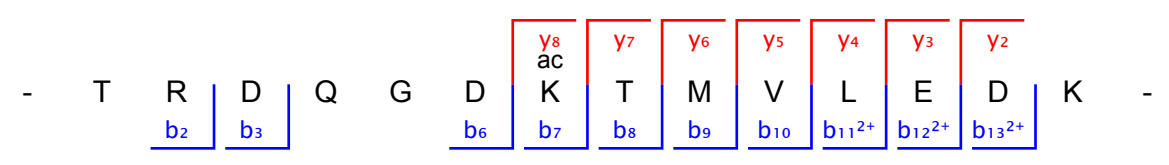

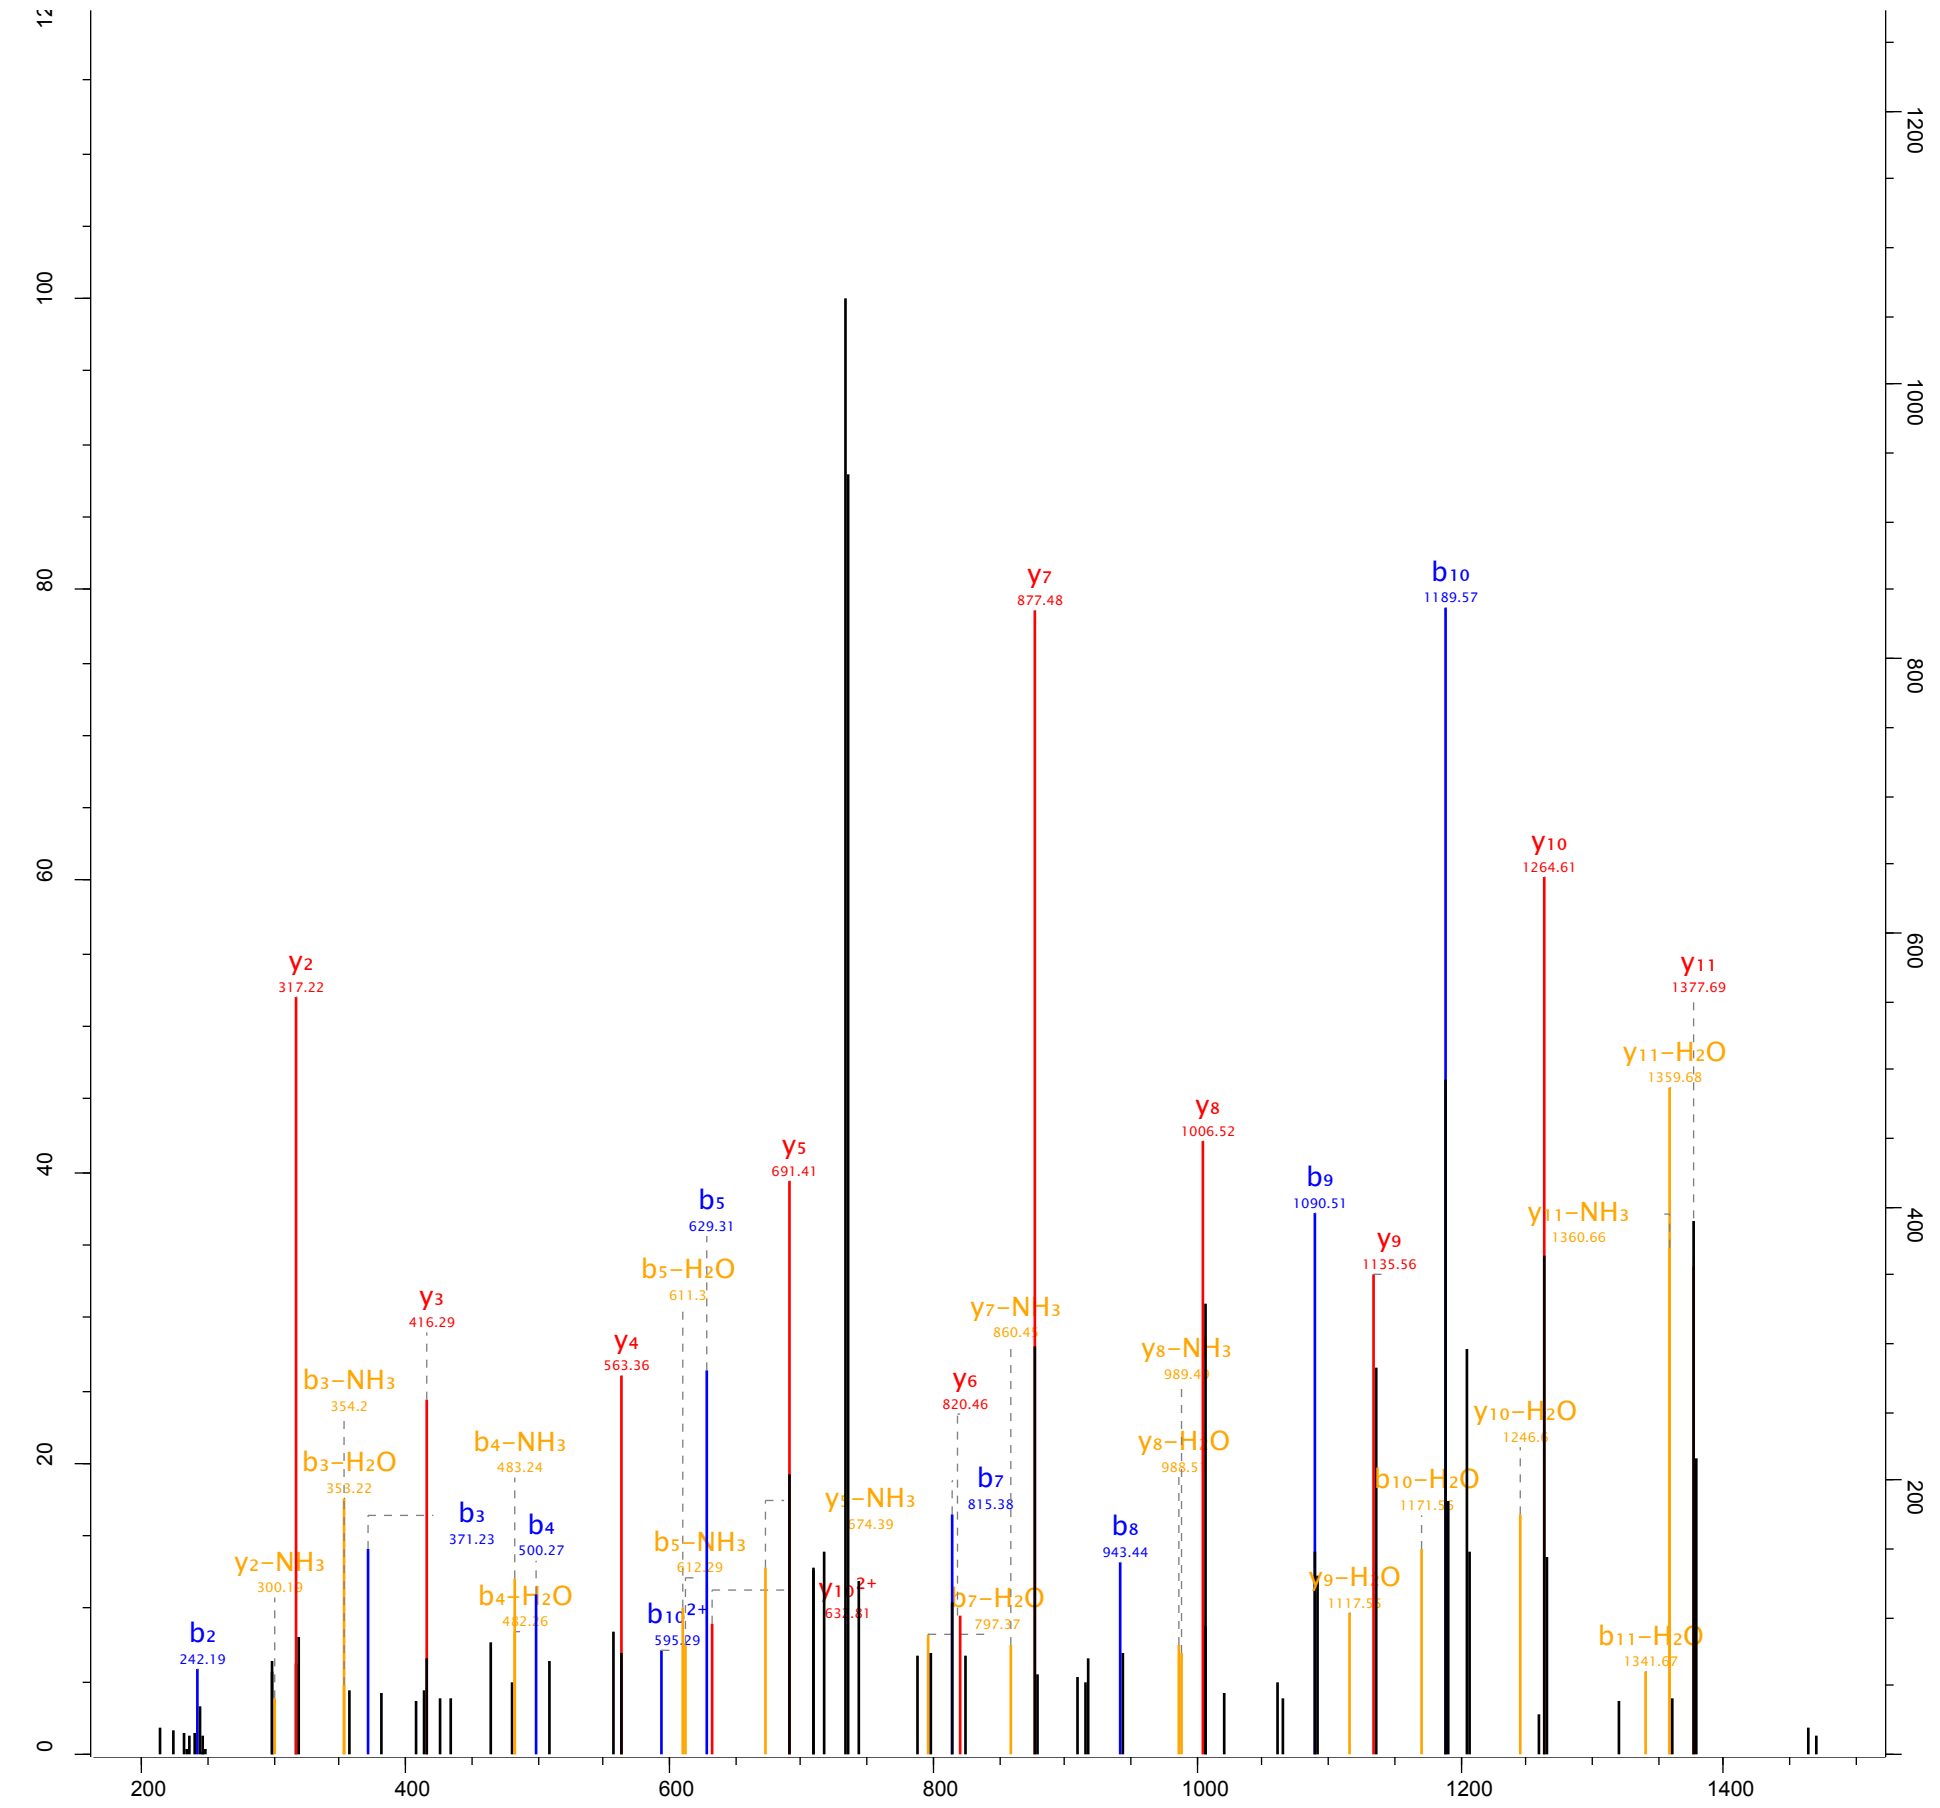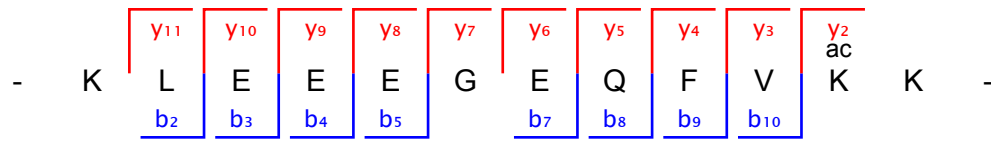



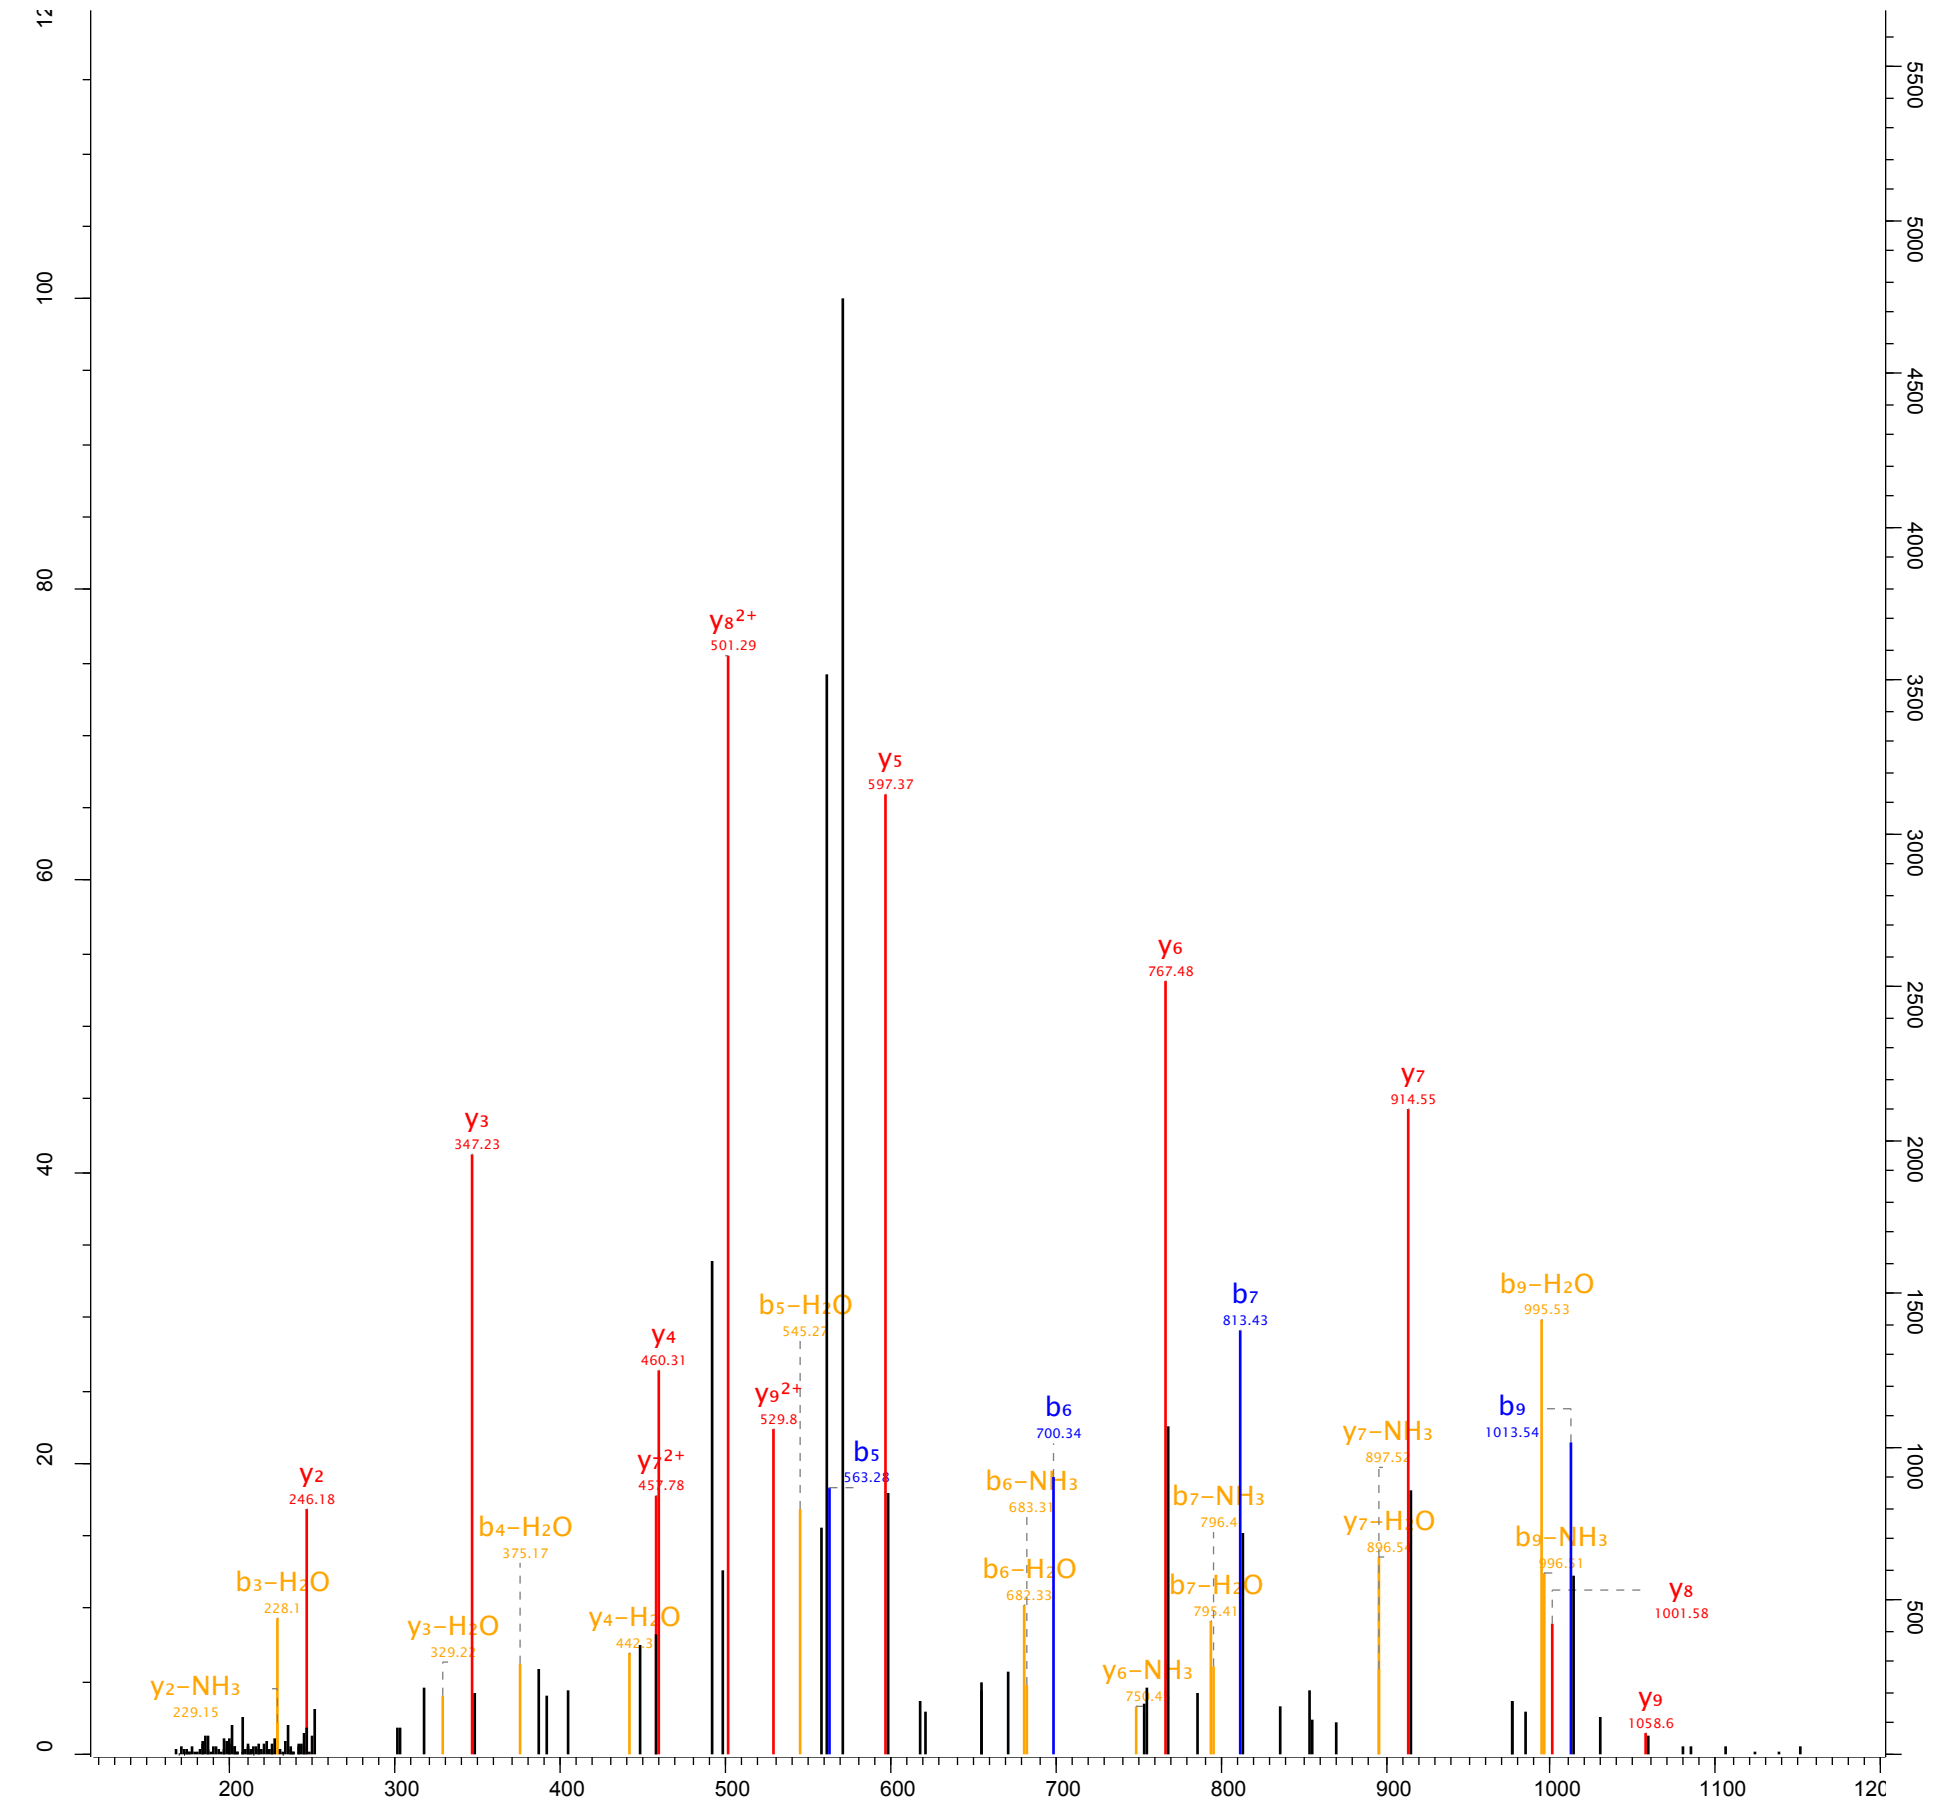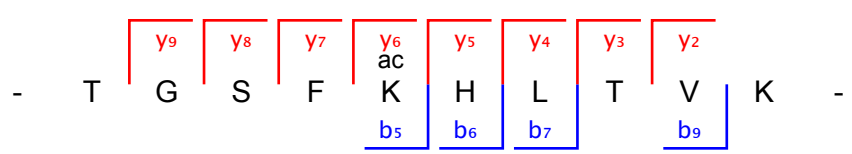

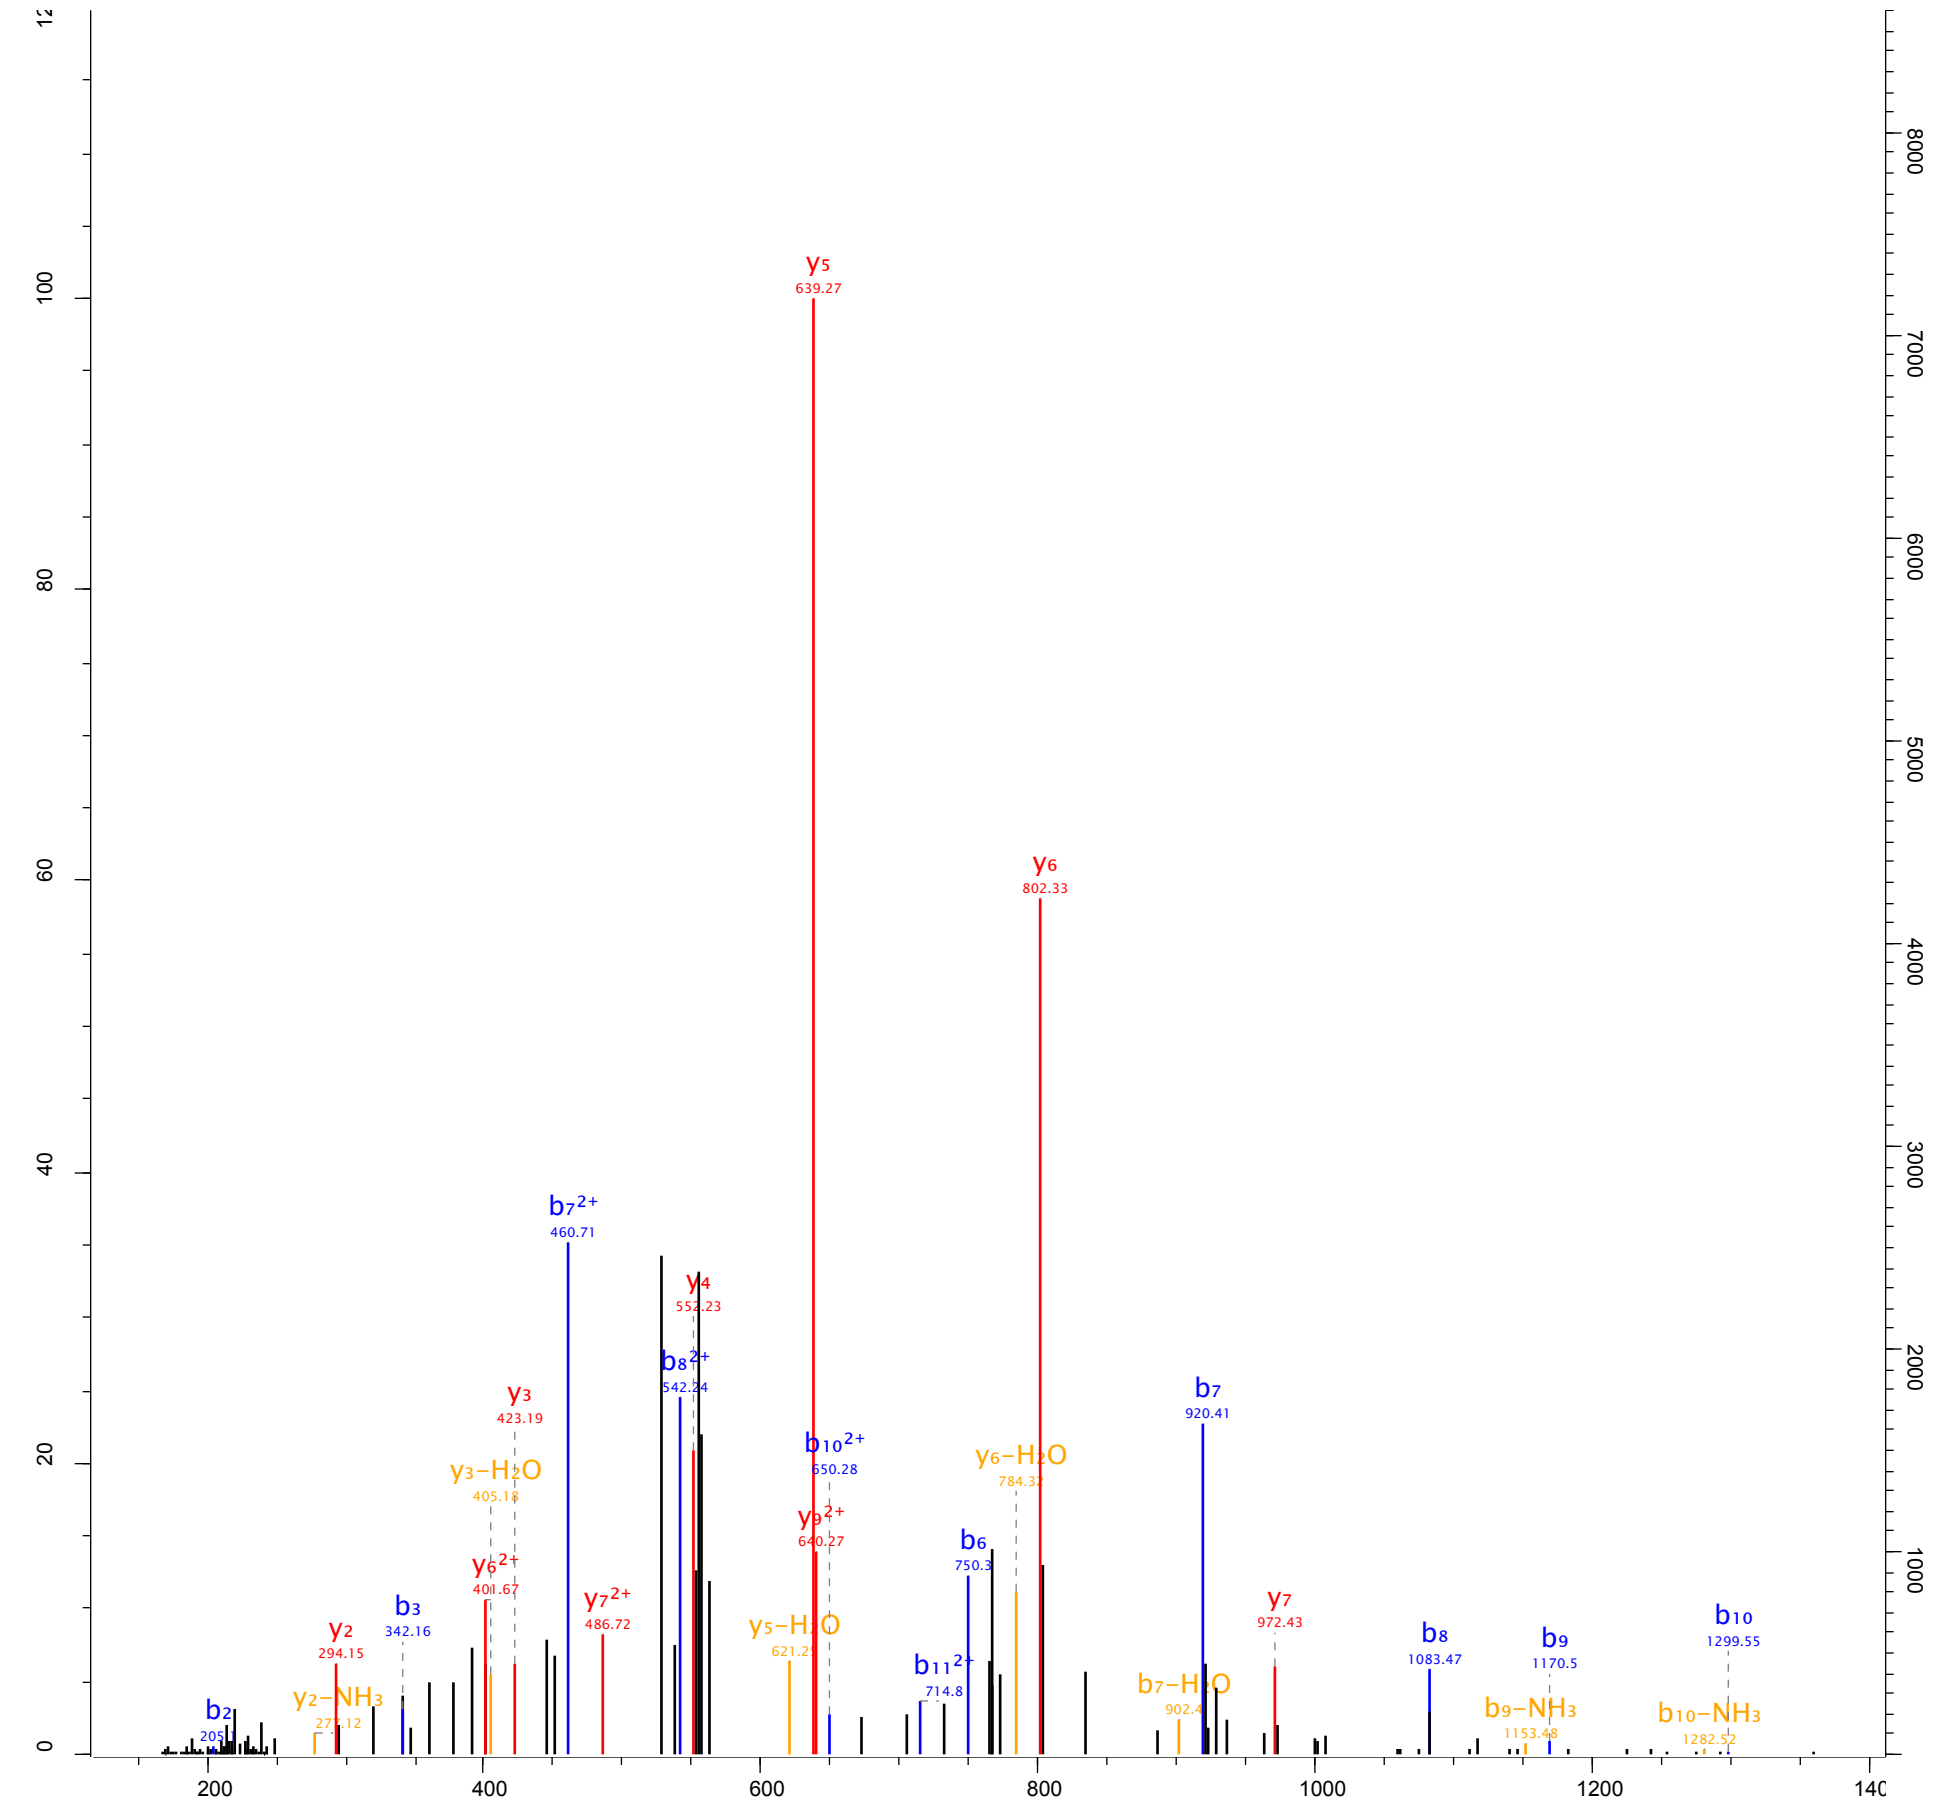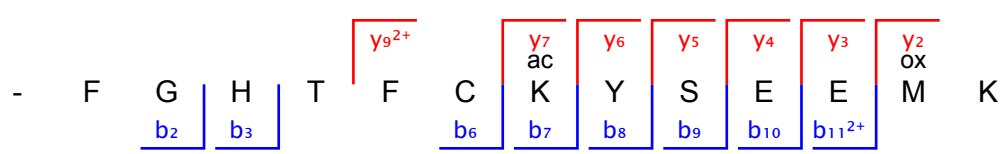

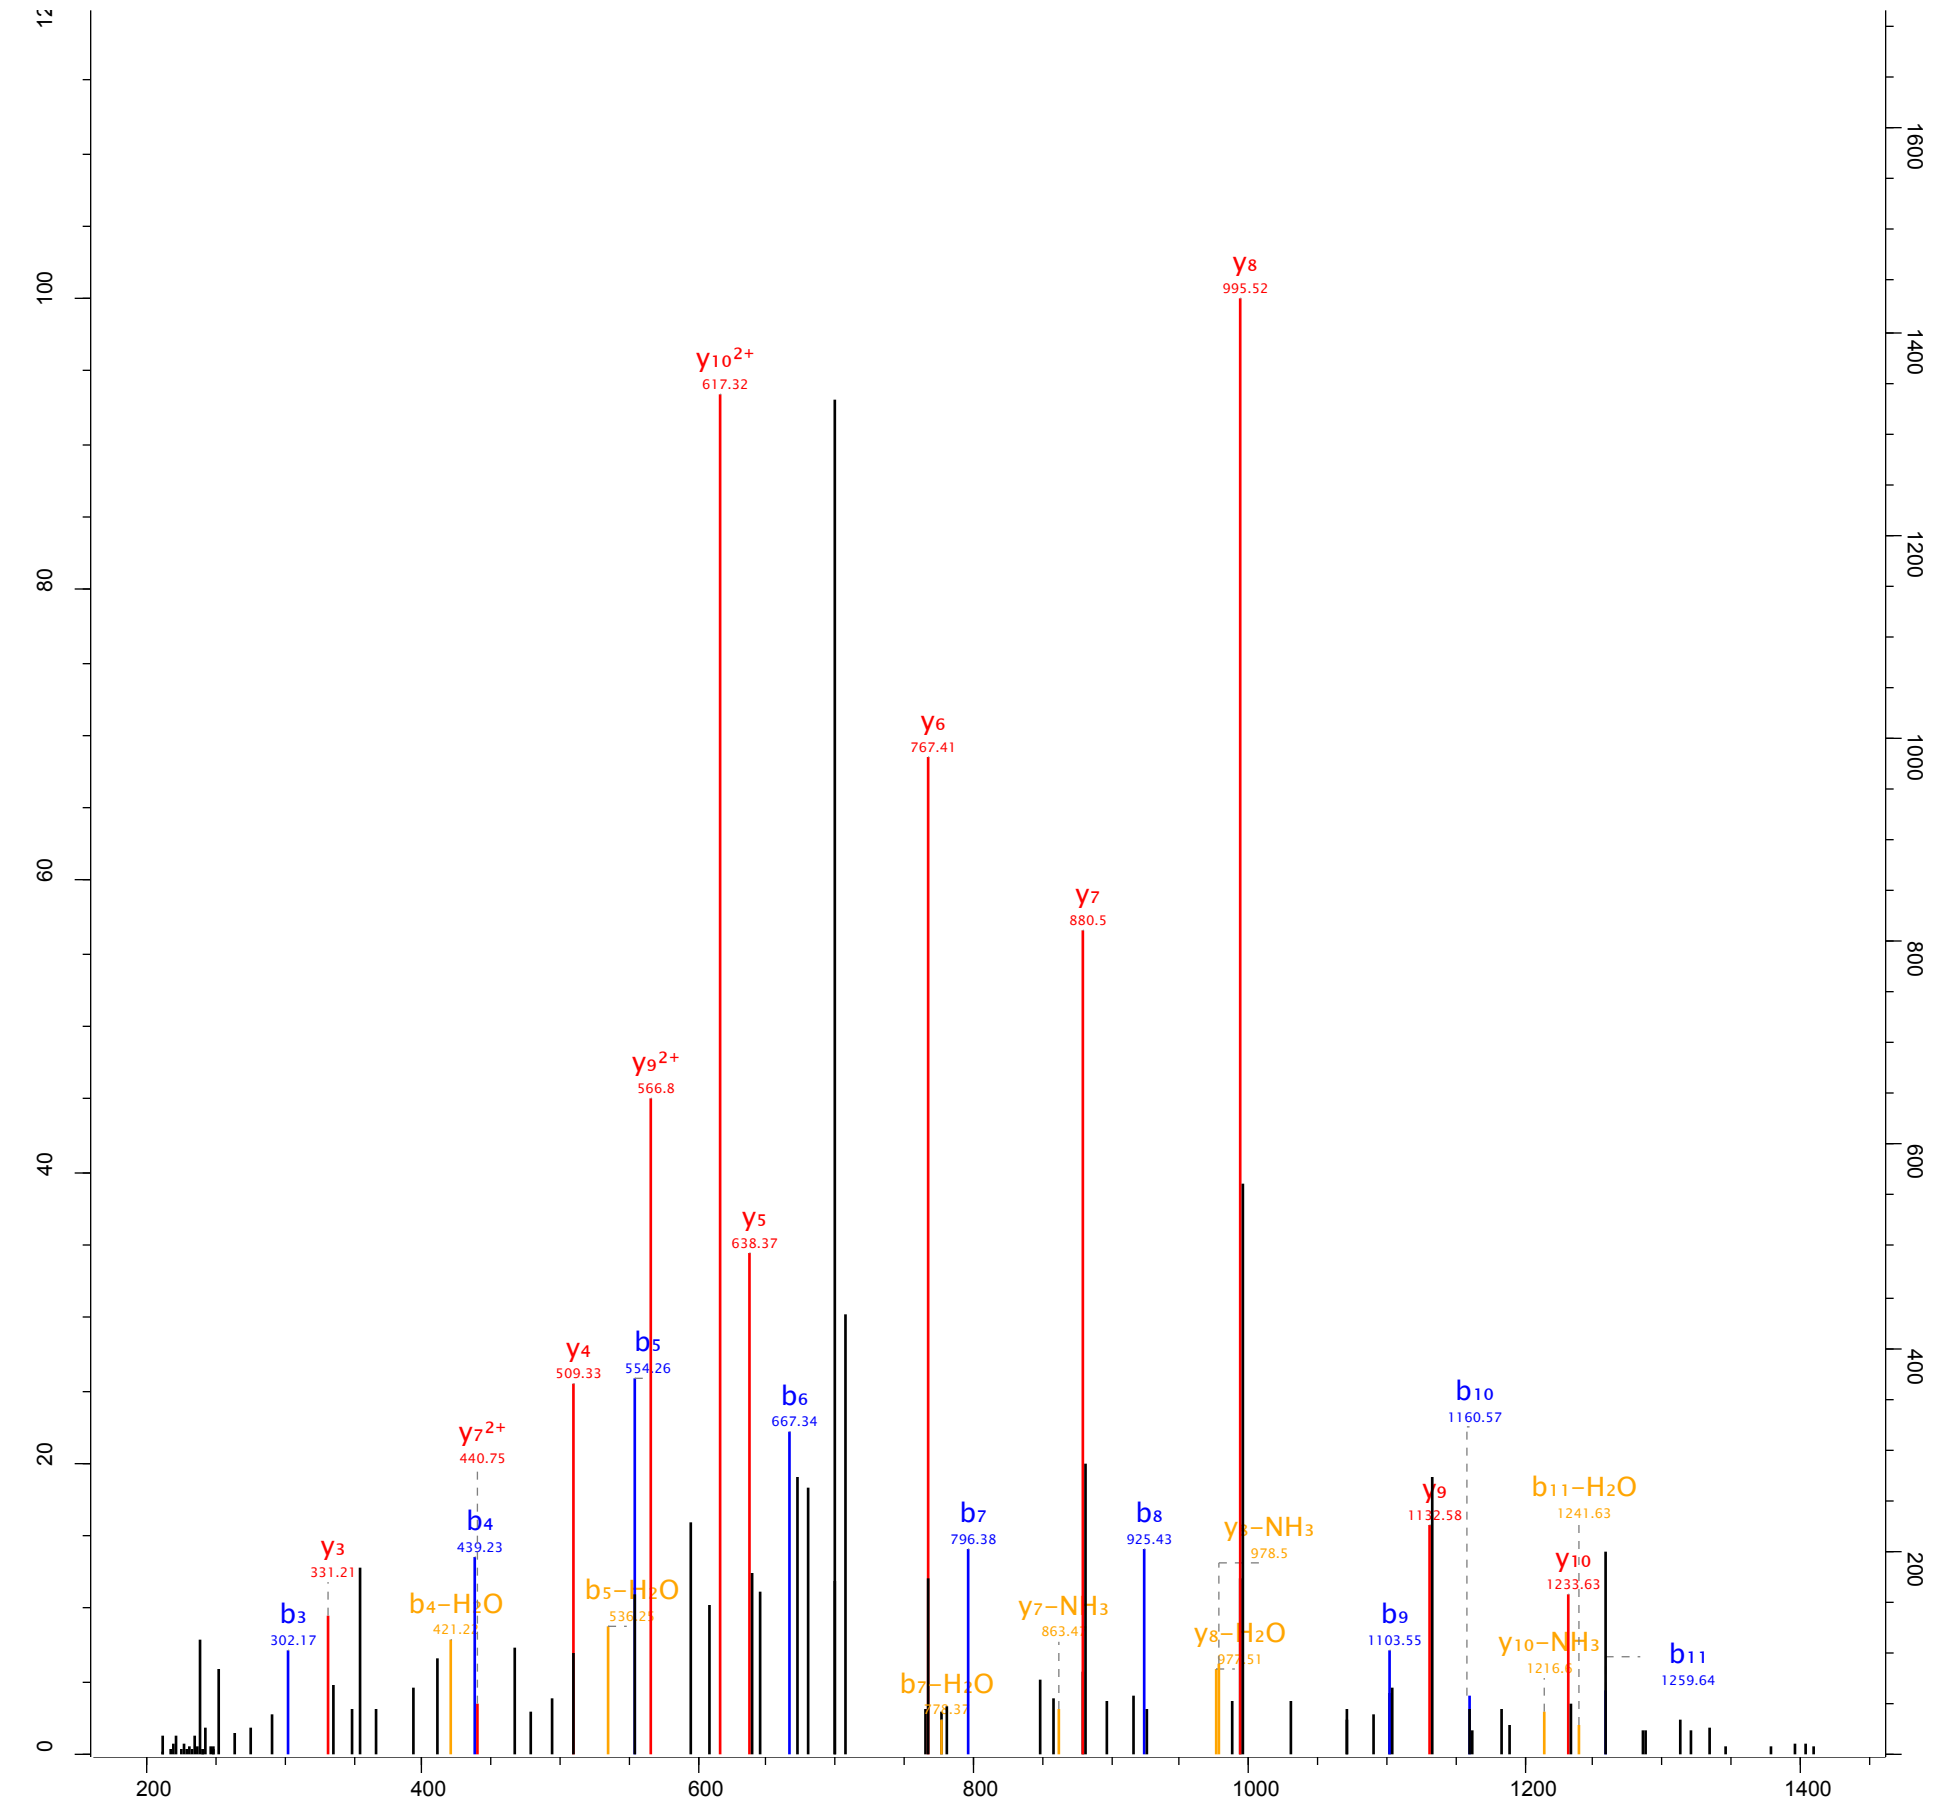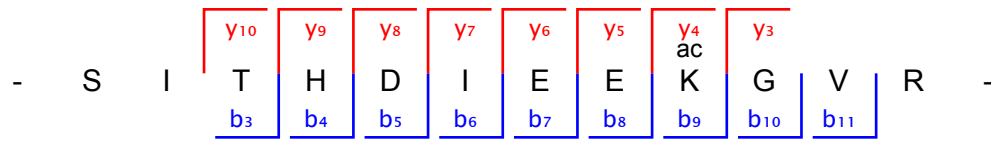

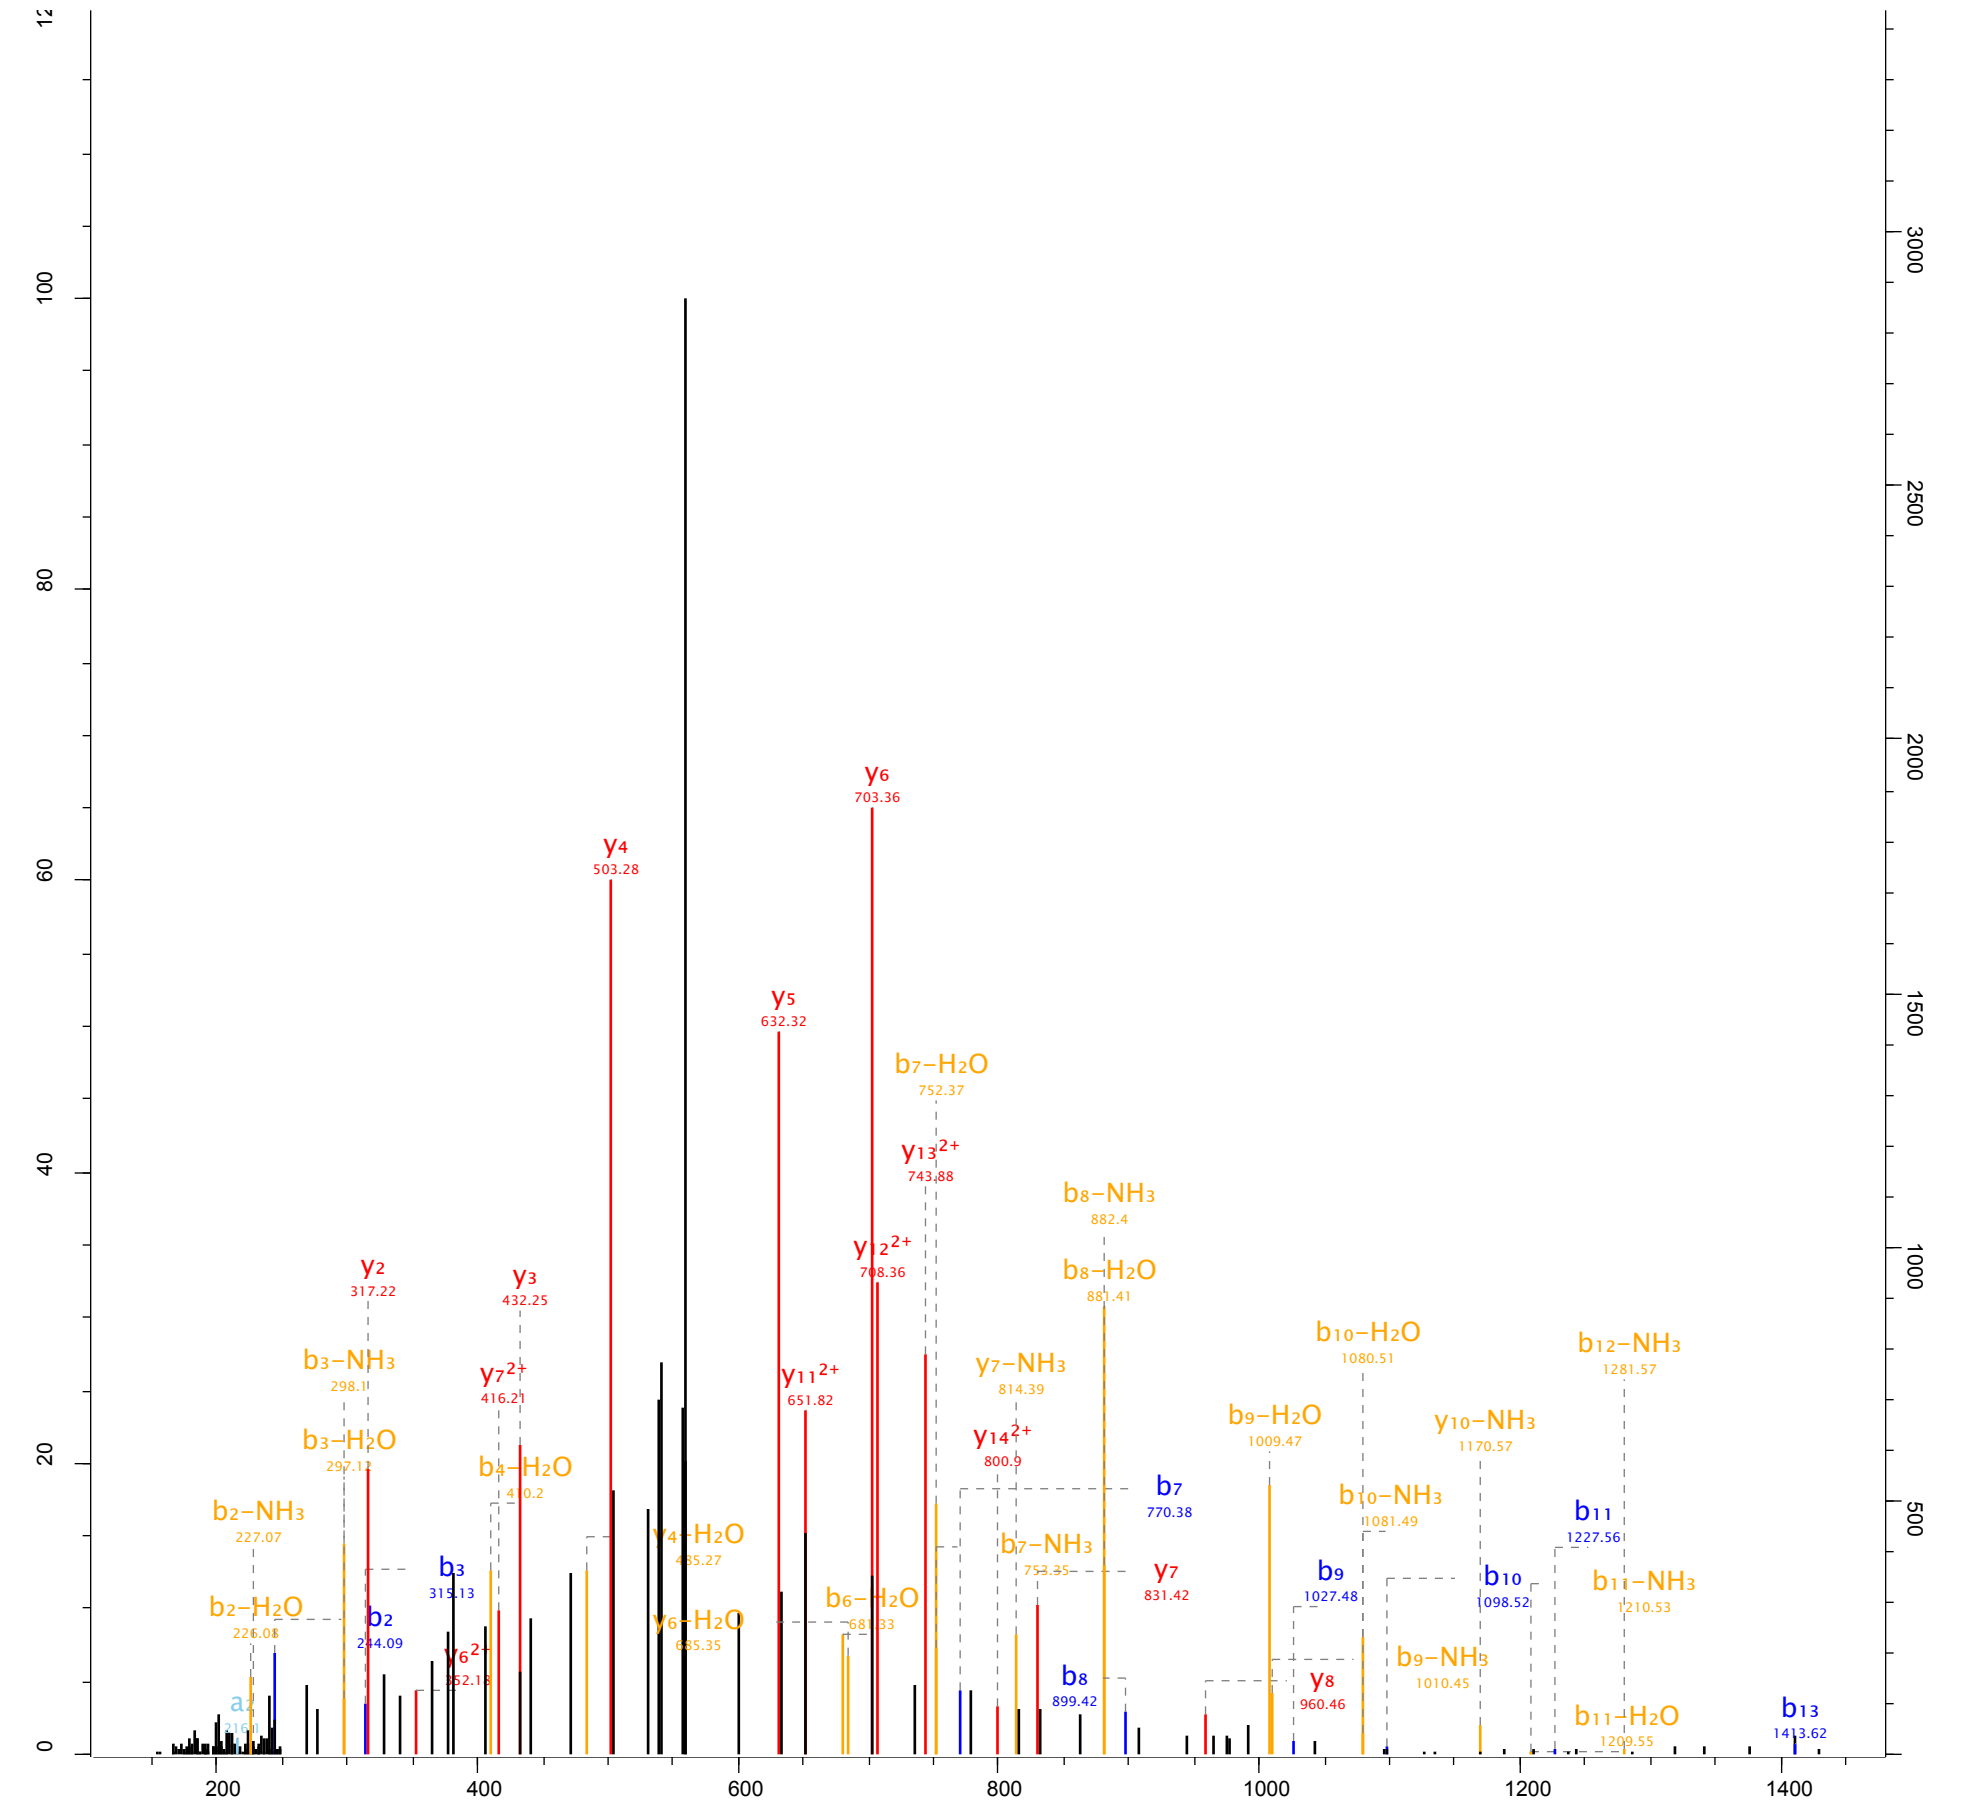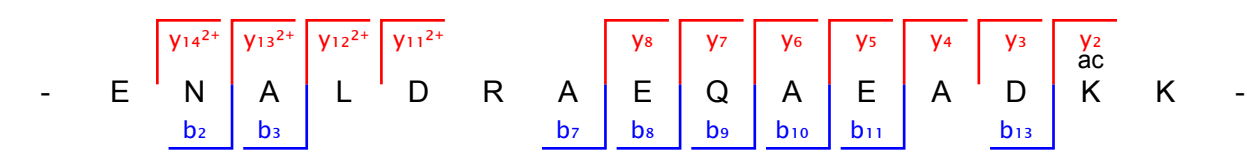

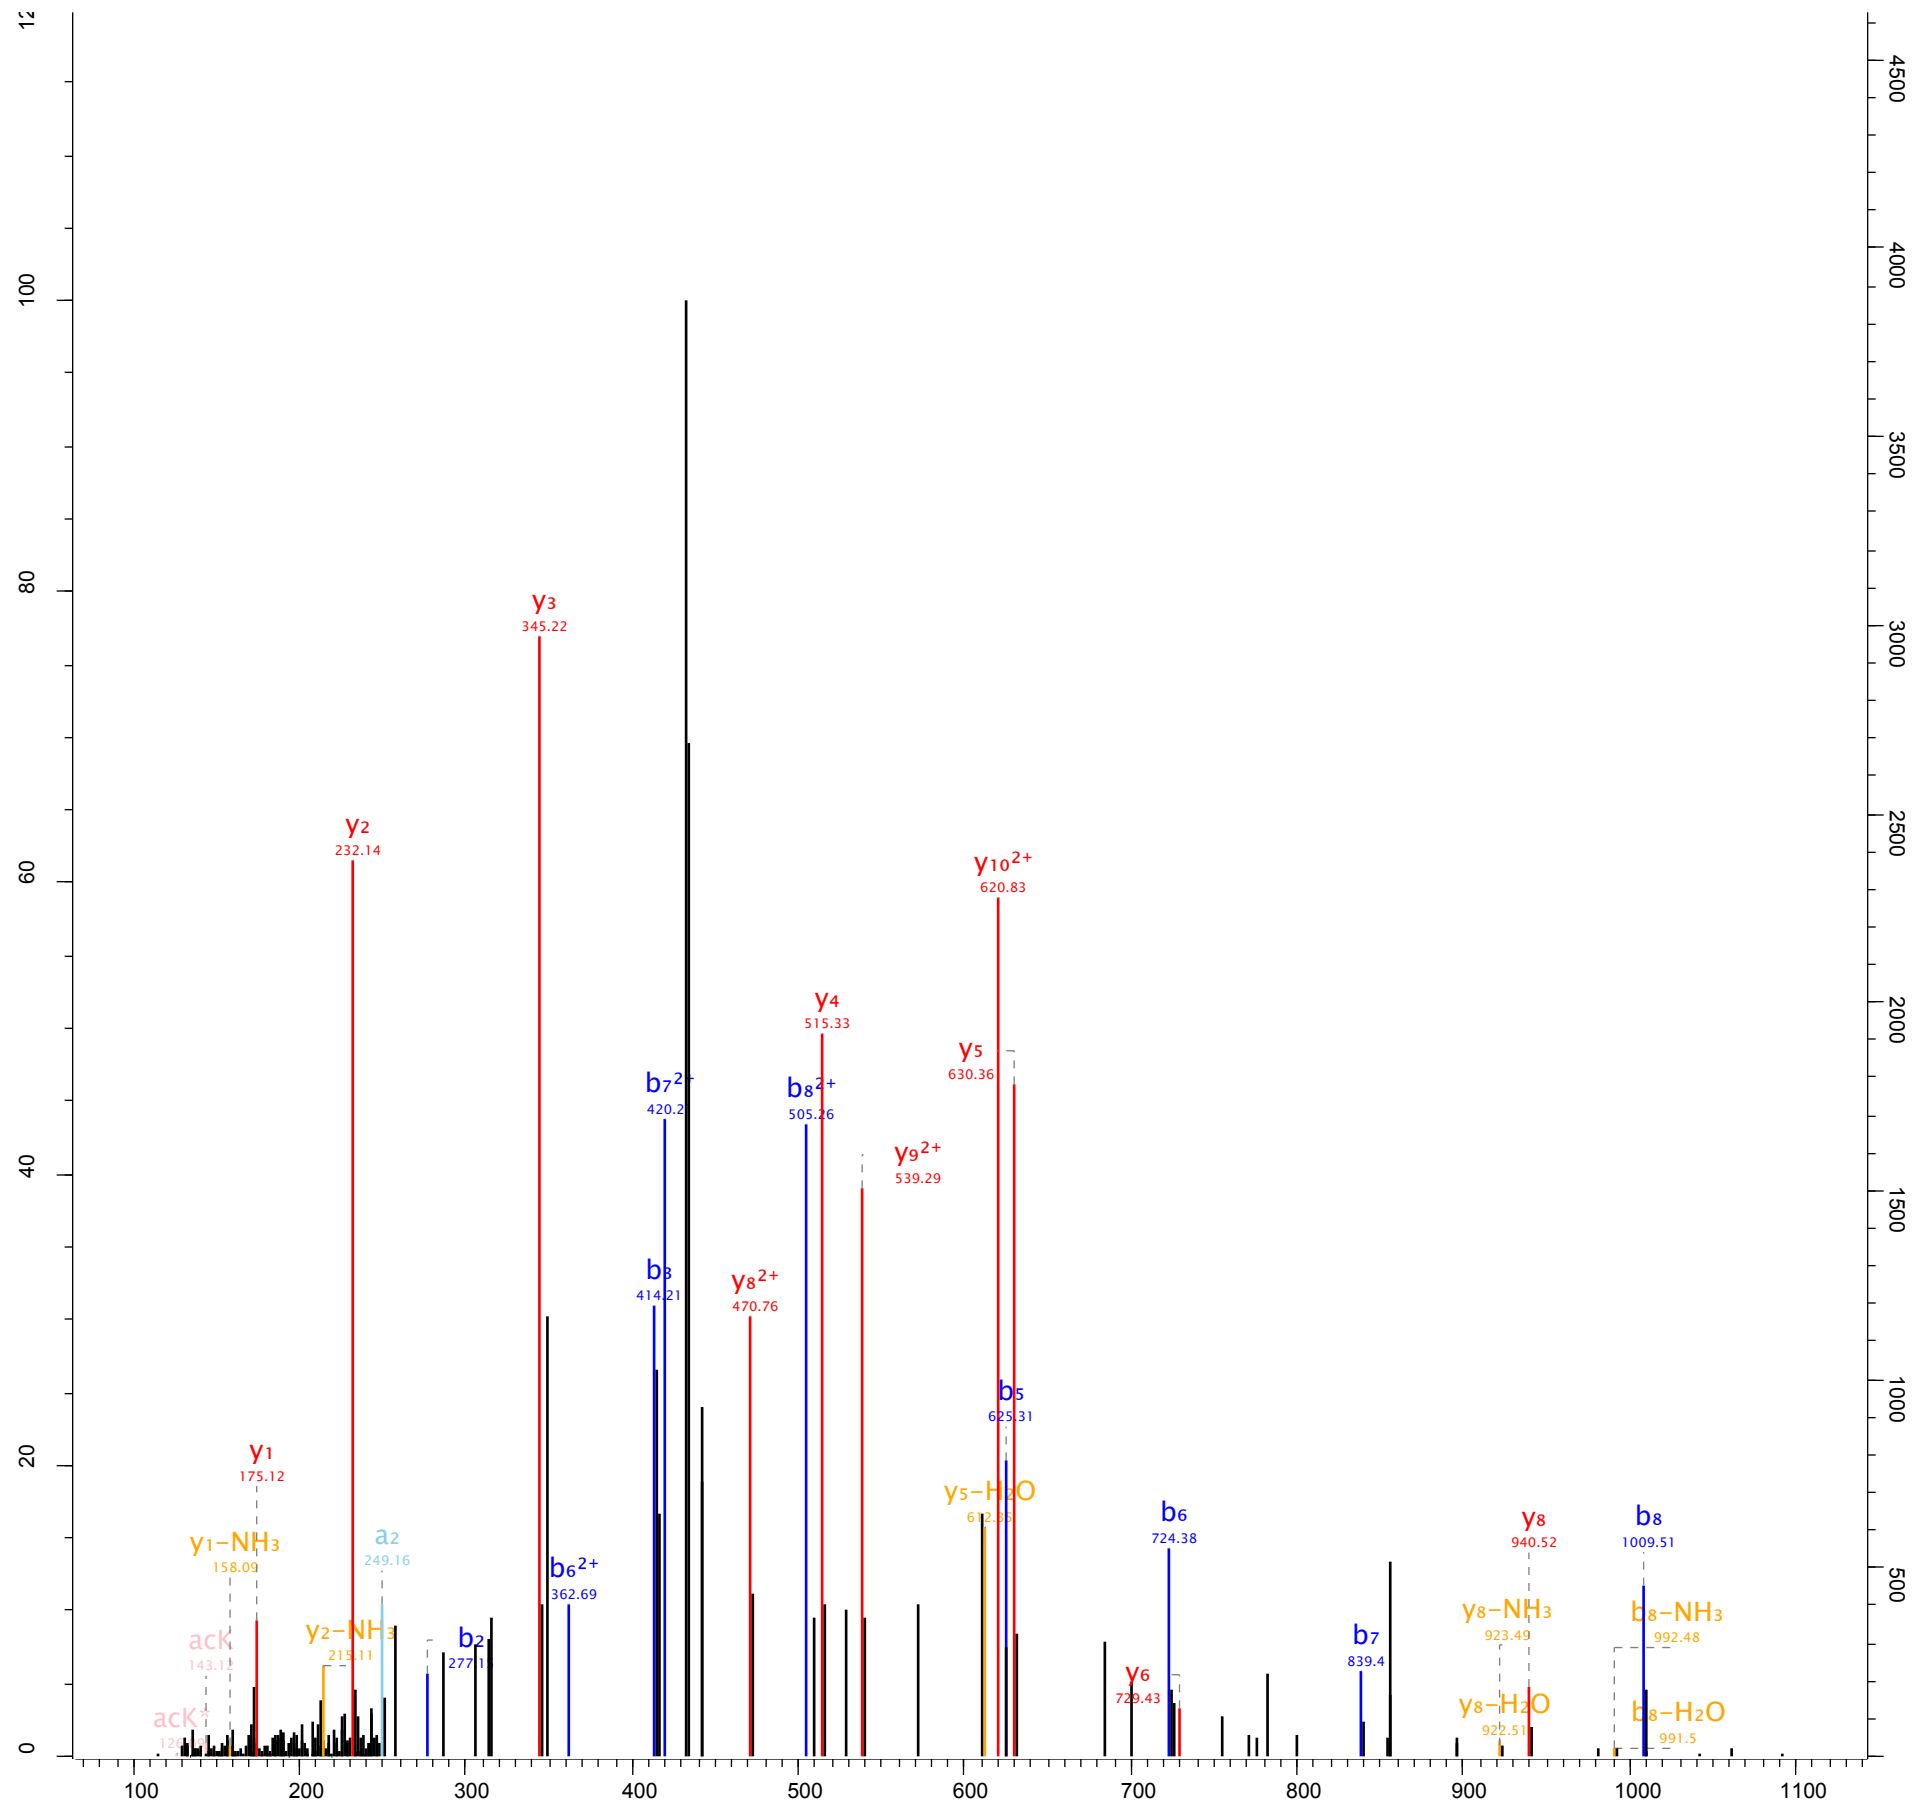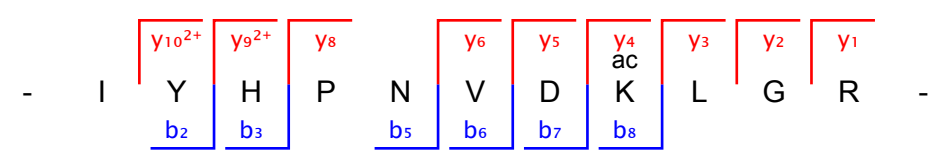

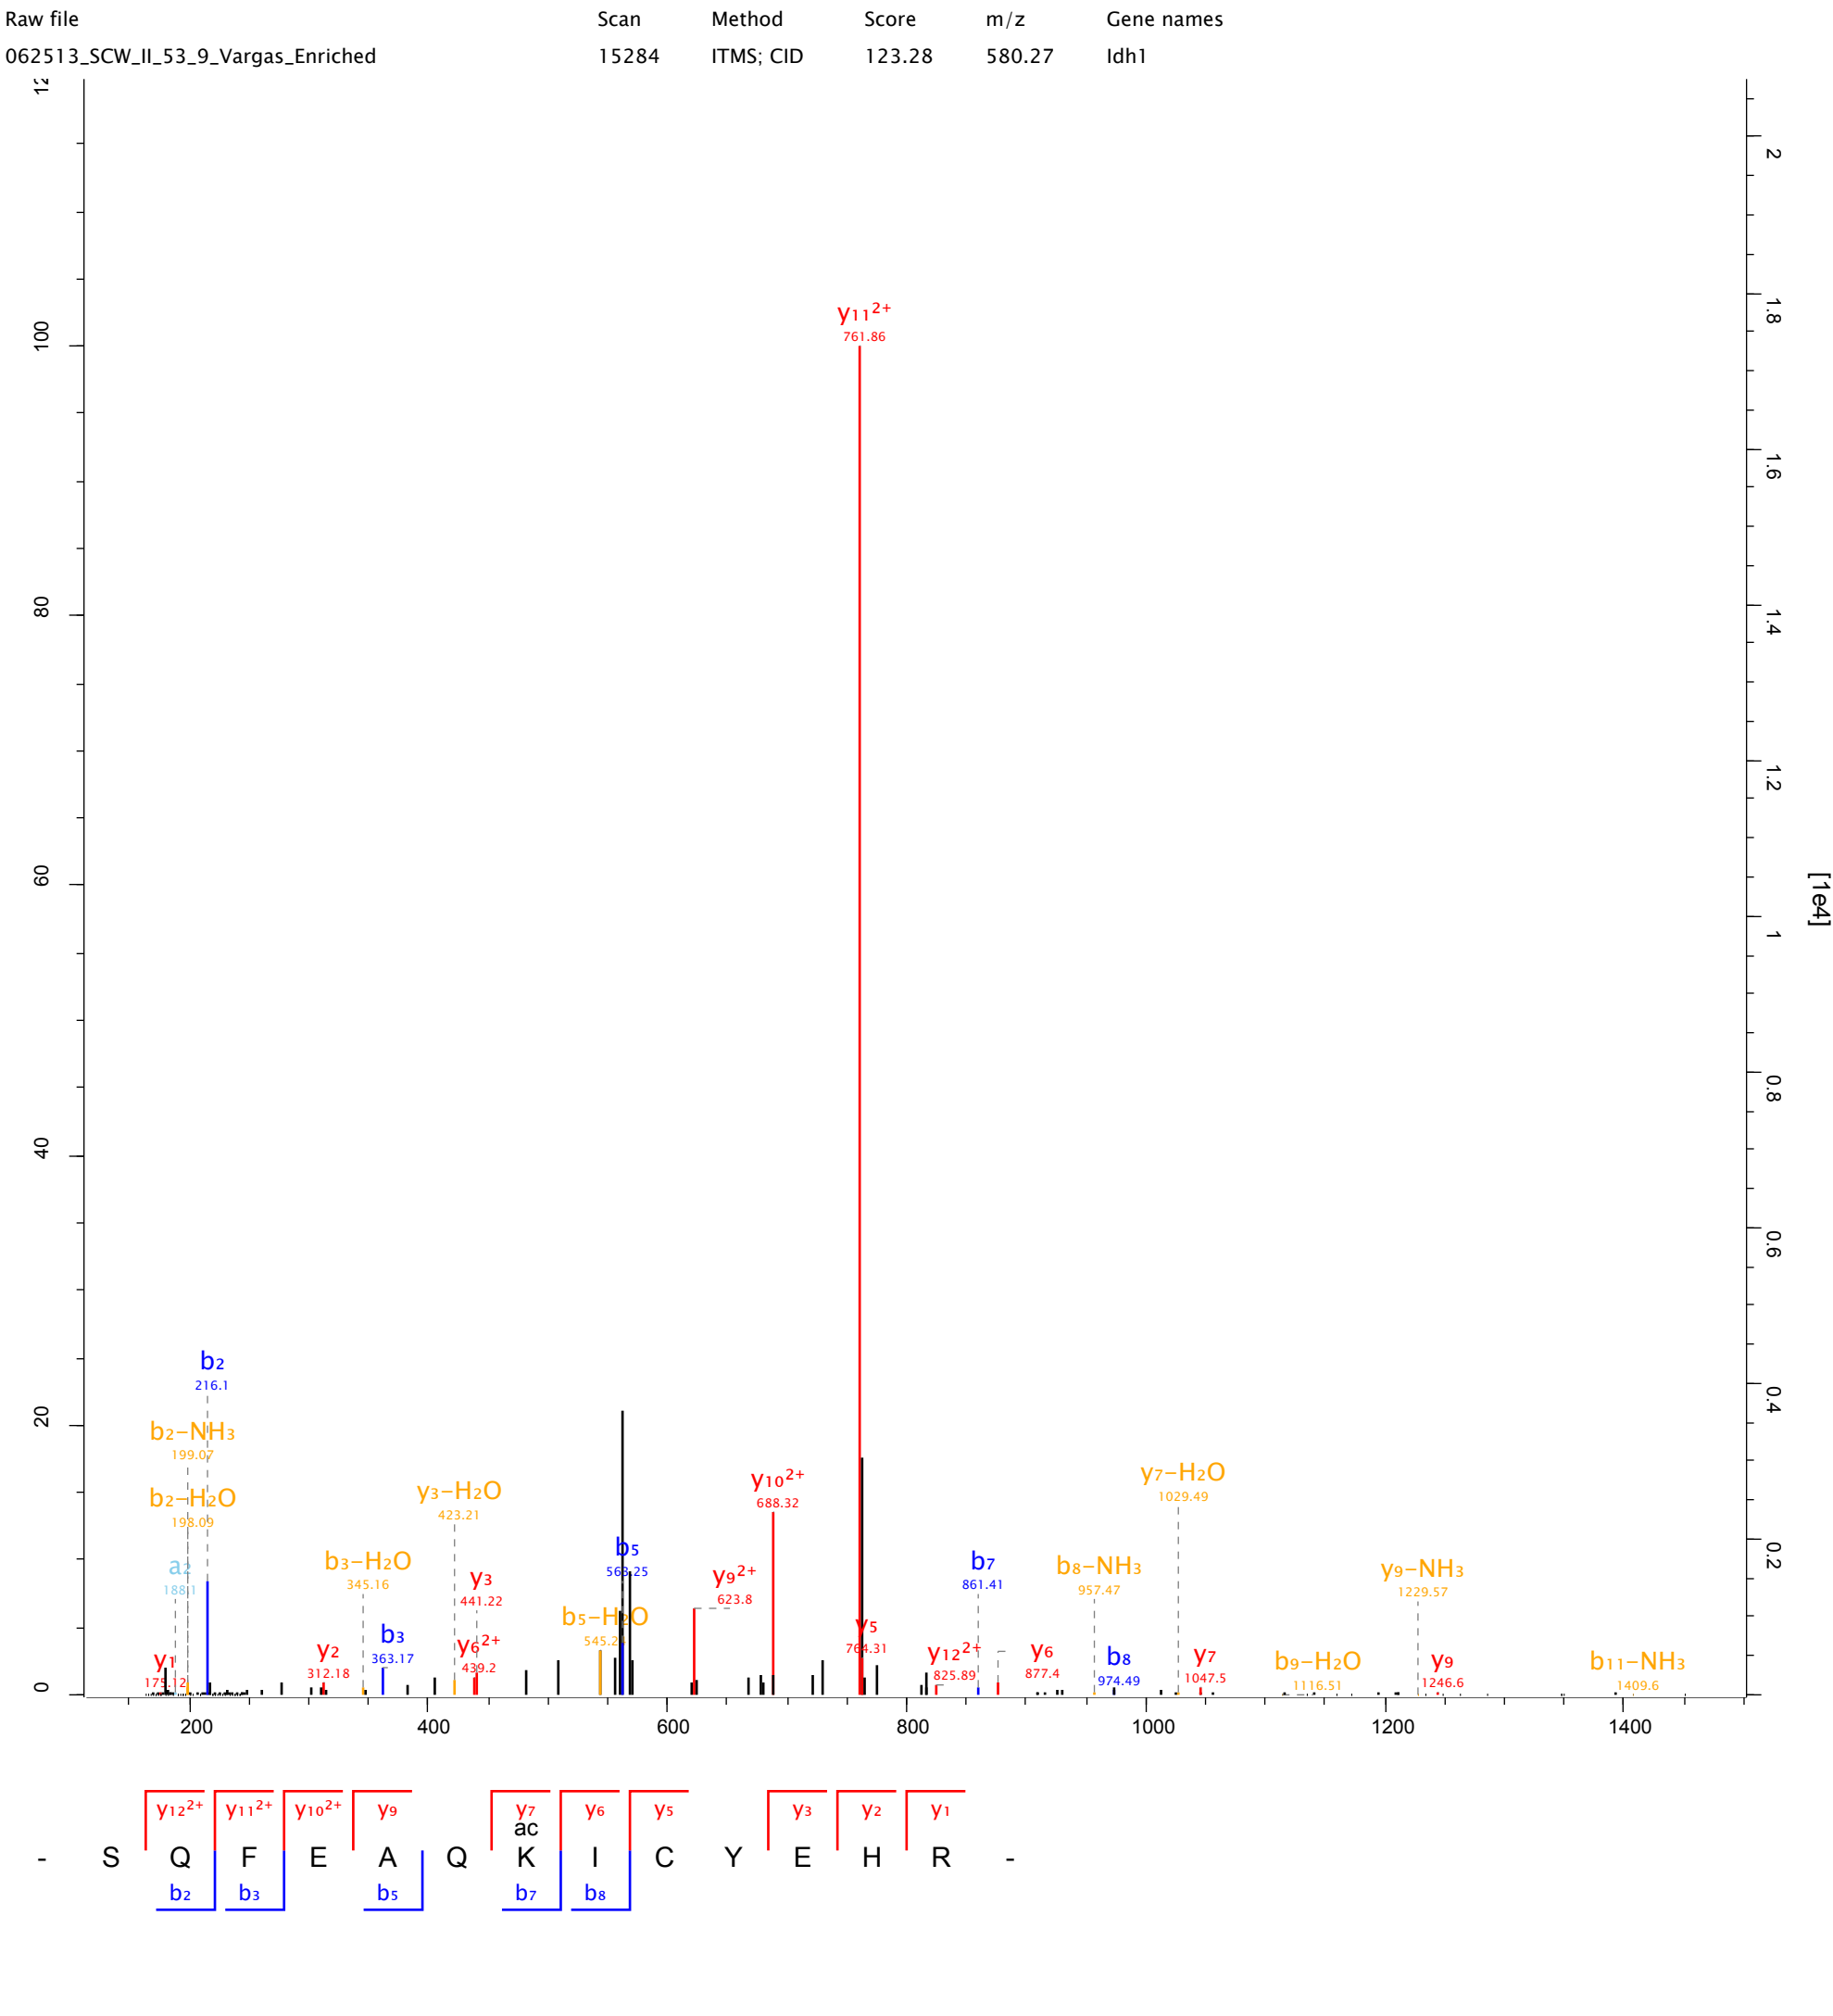

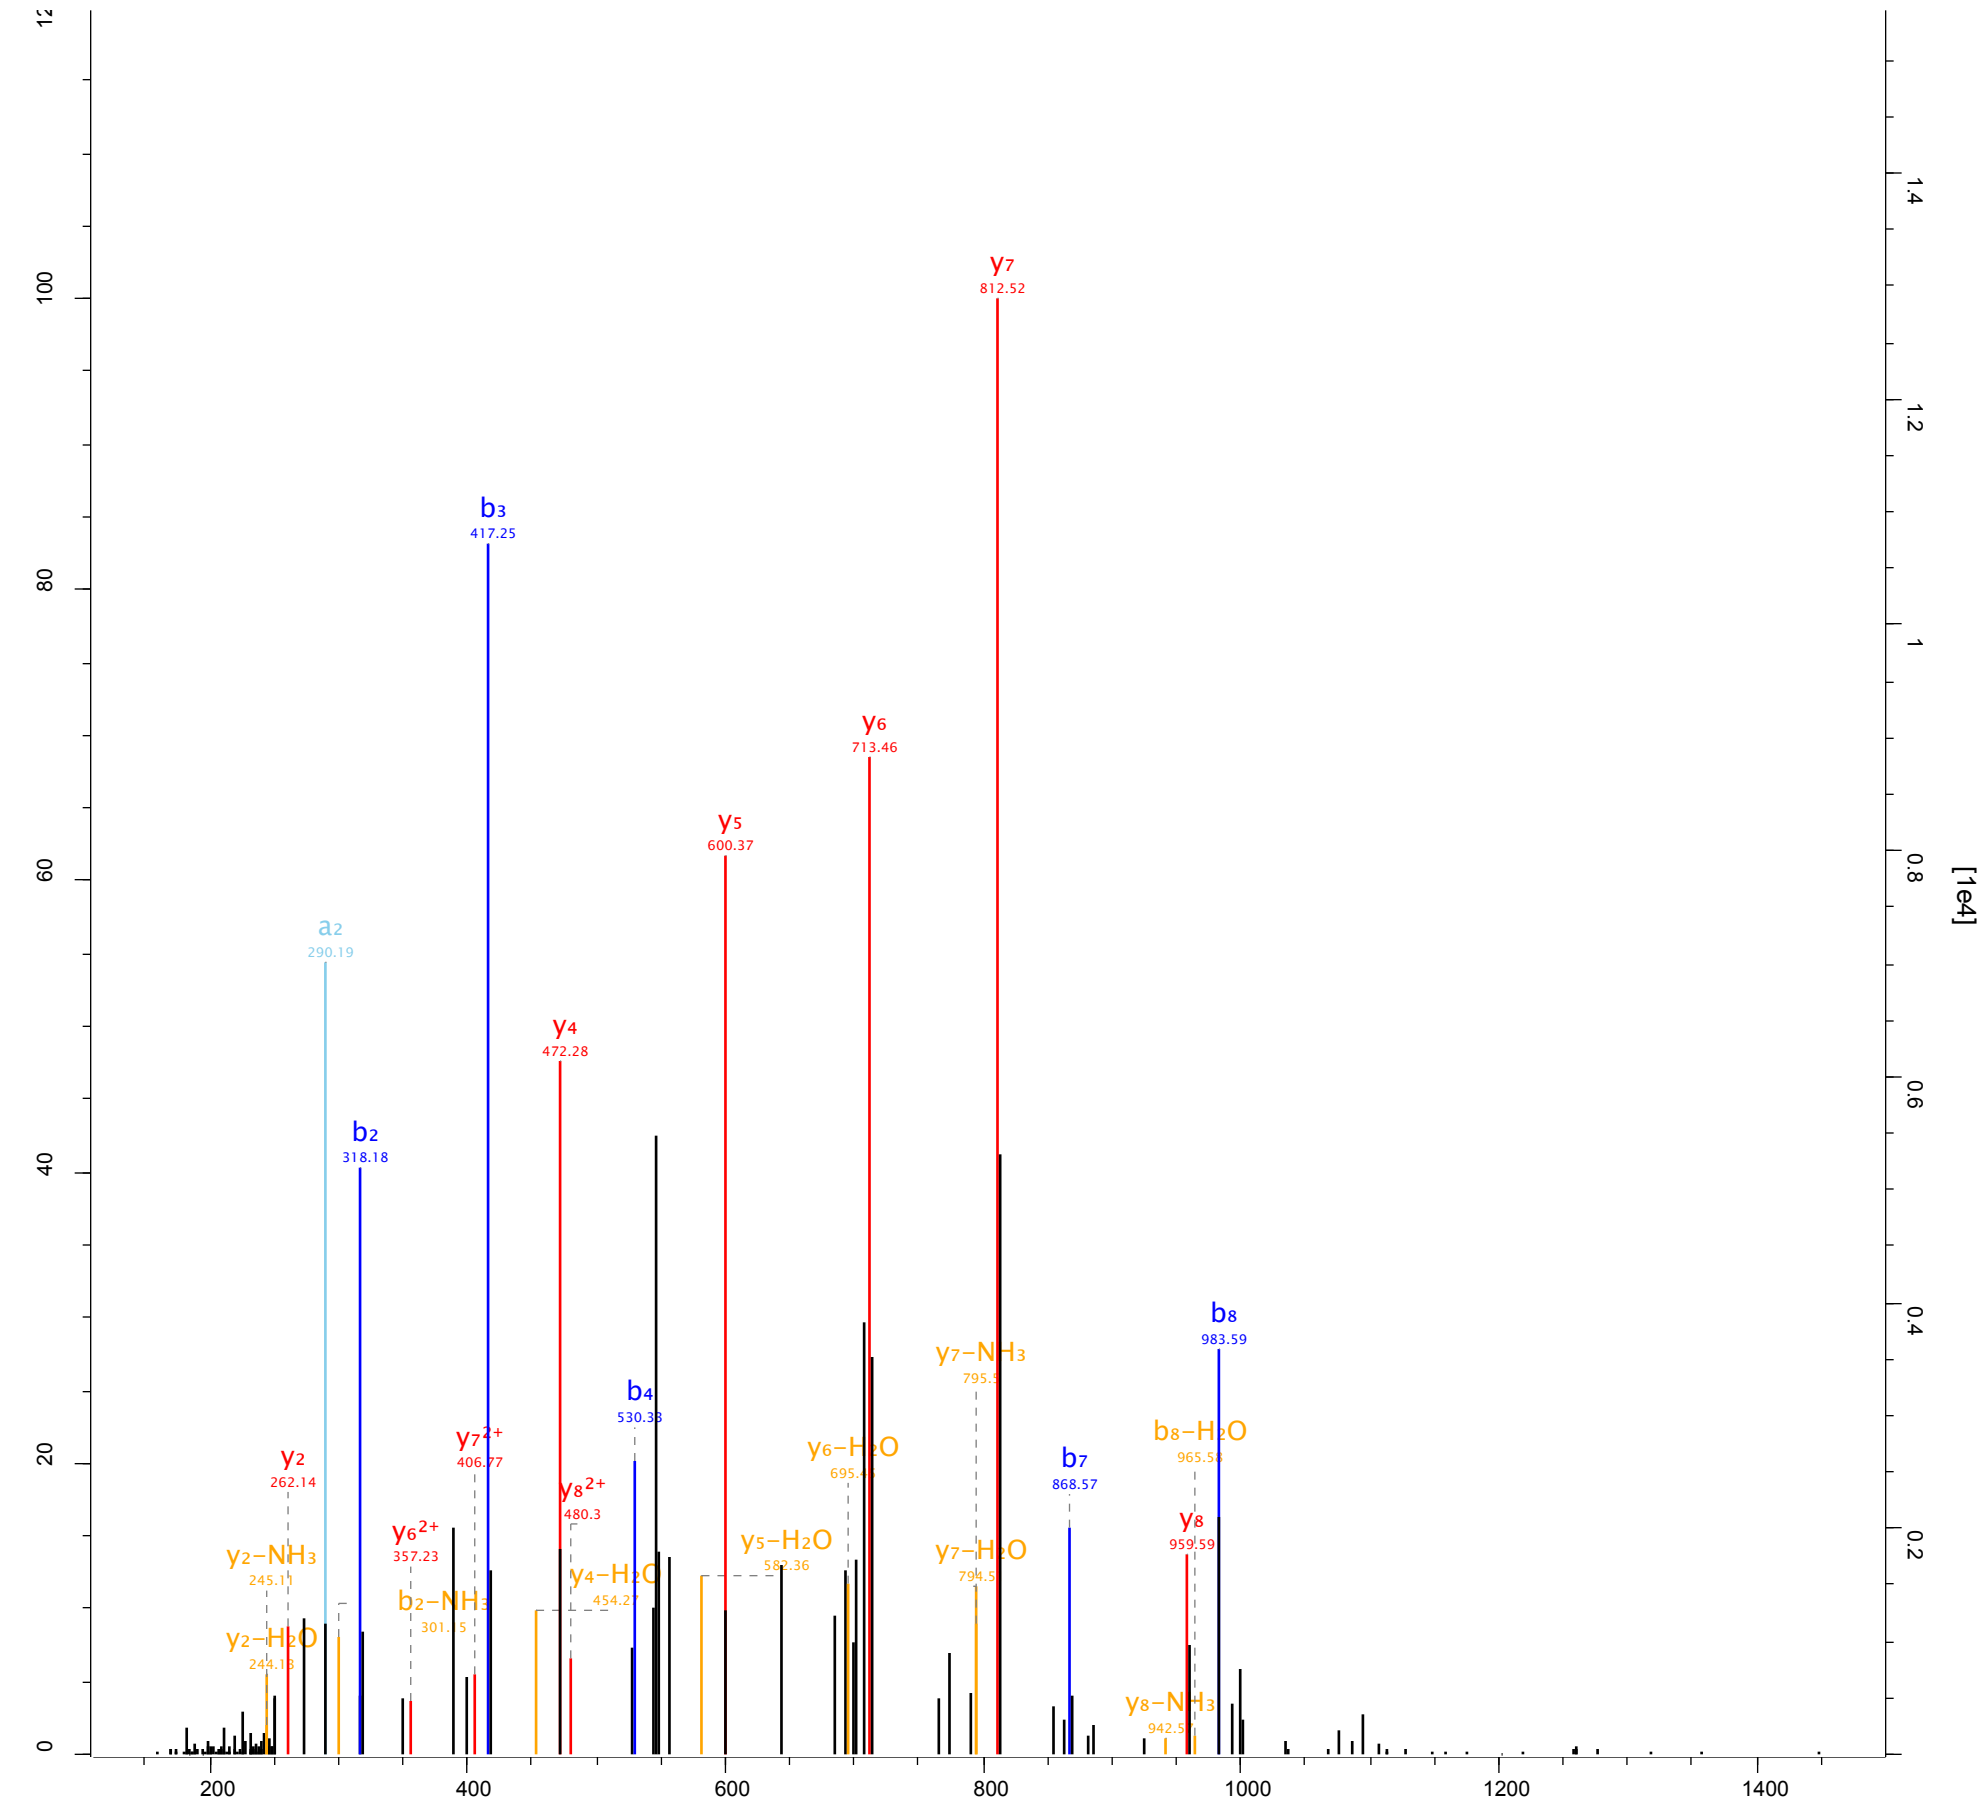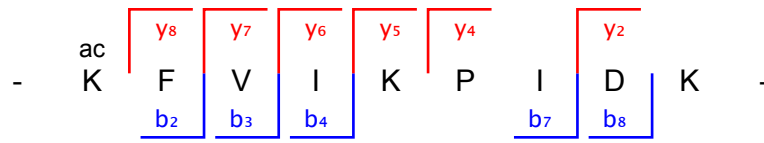

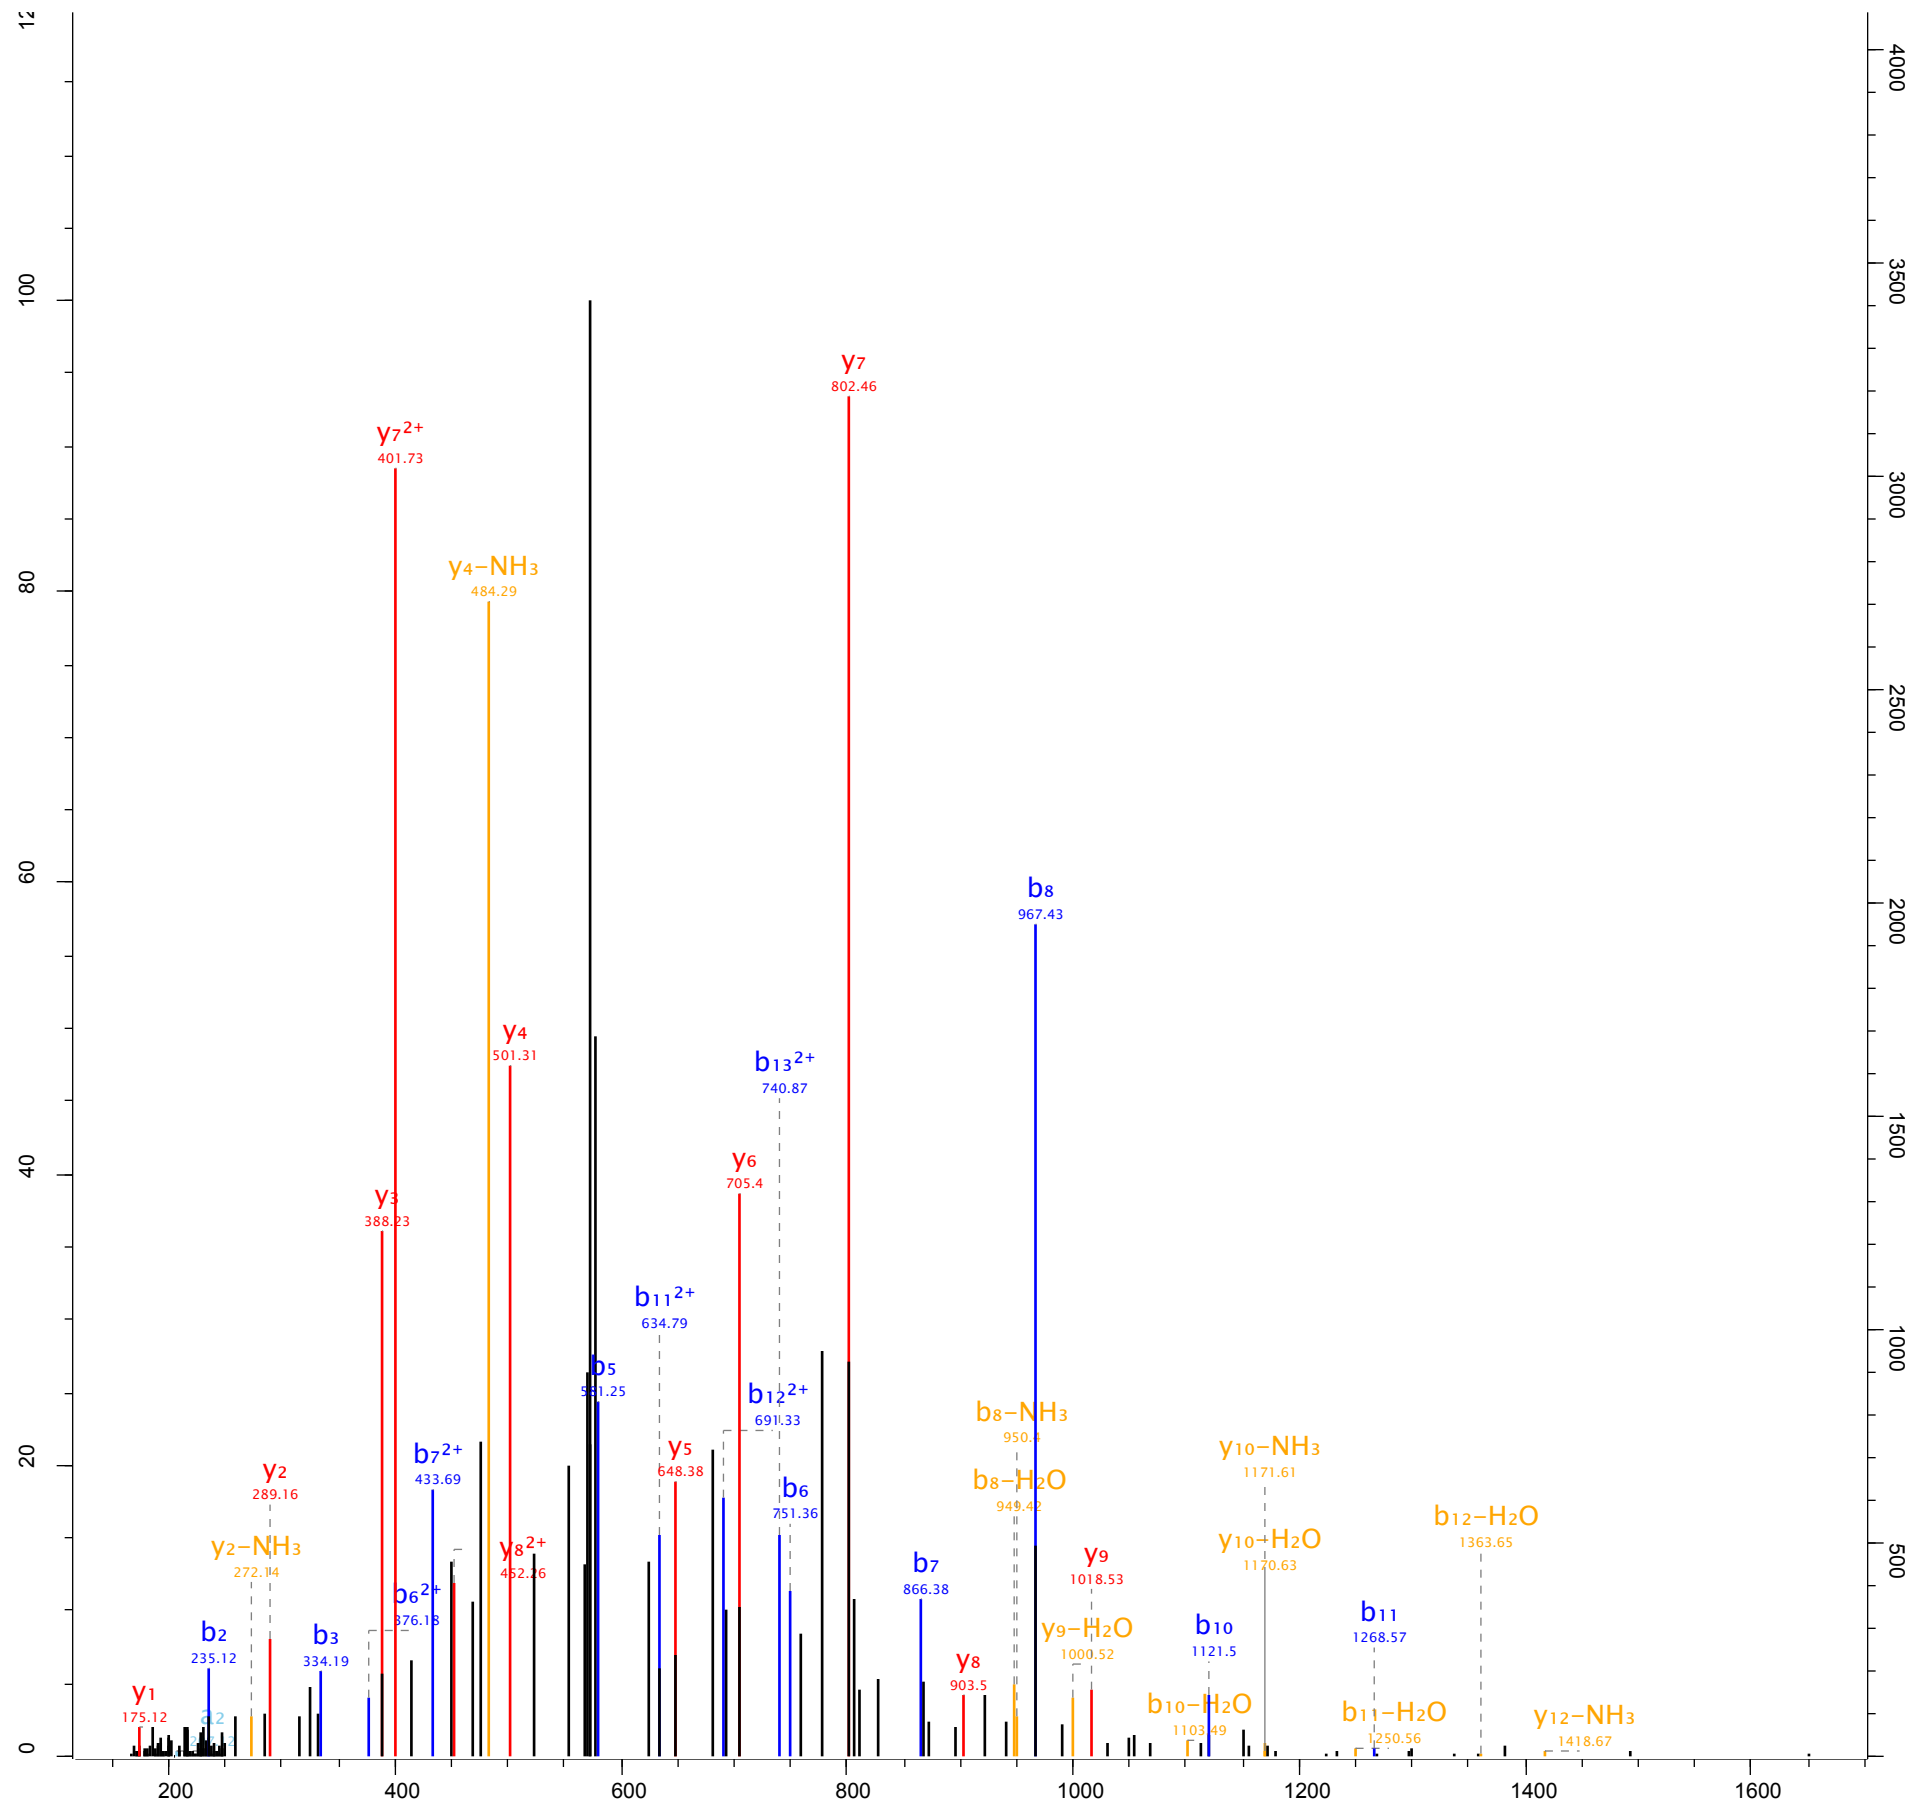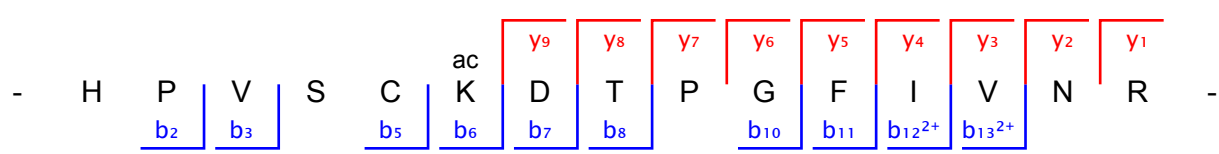

- H P V S C K ac D T P G F I V N R -



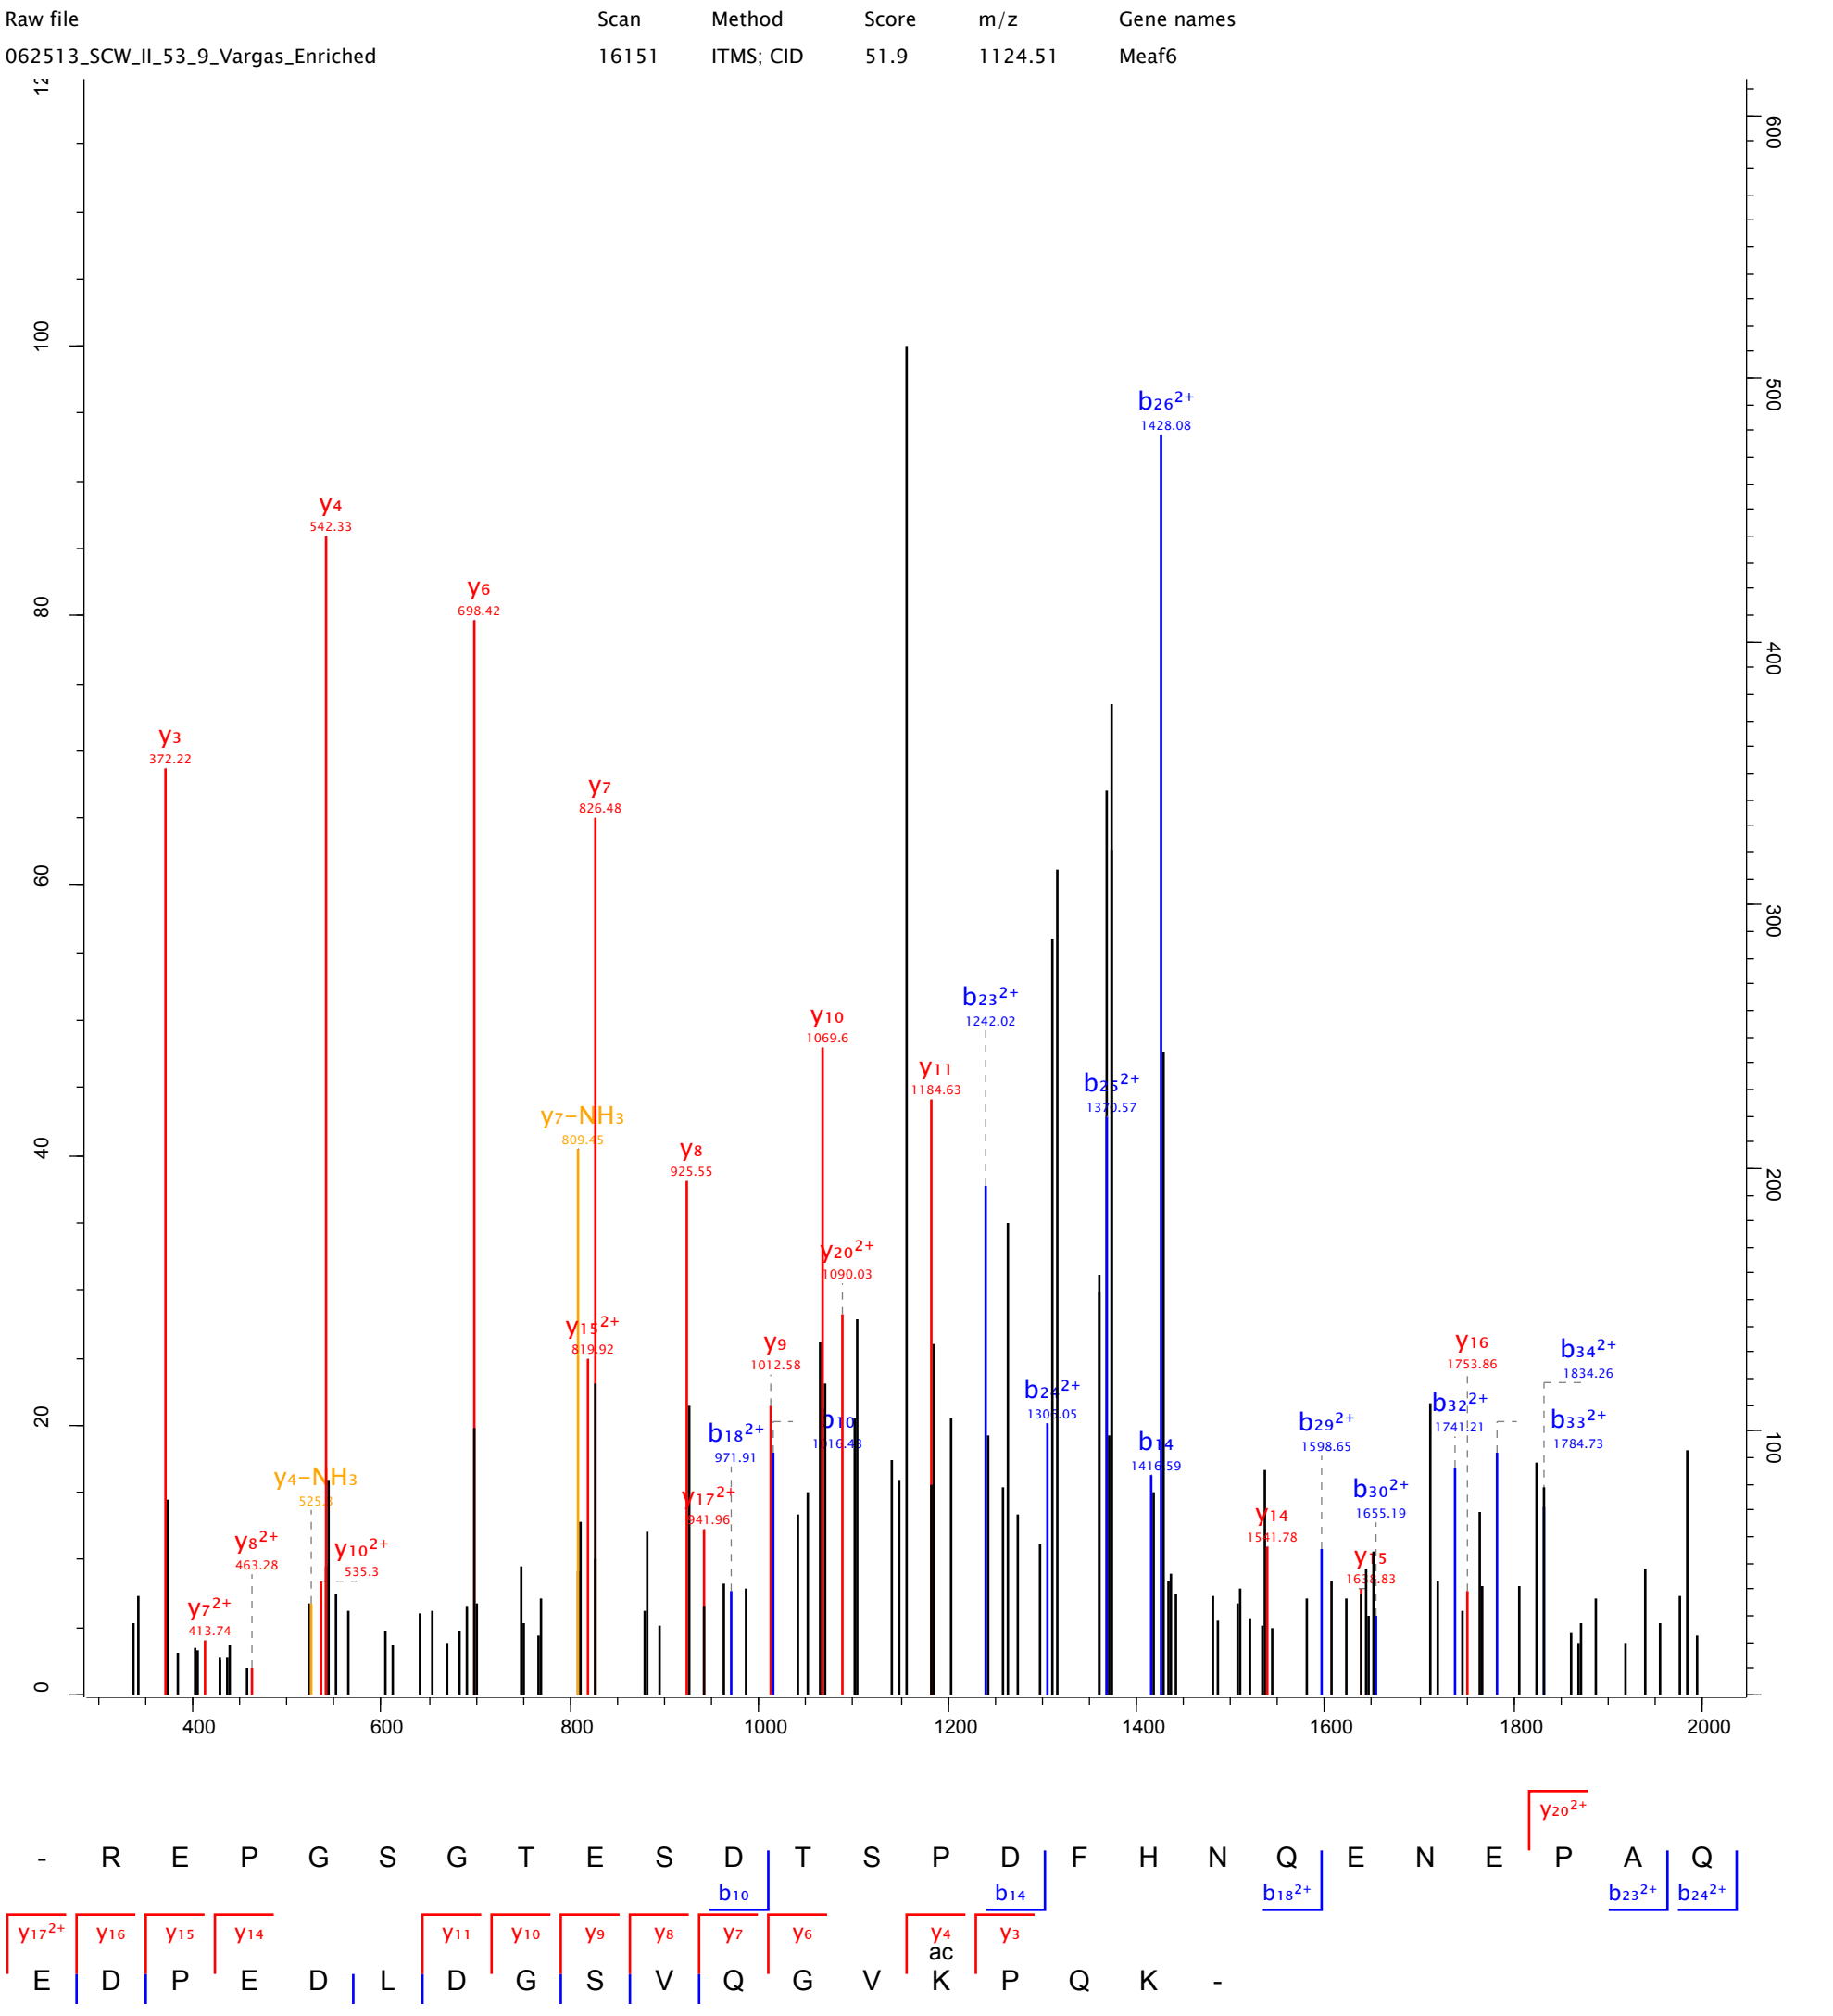

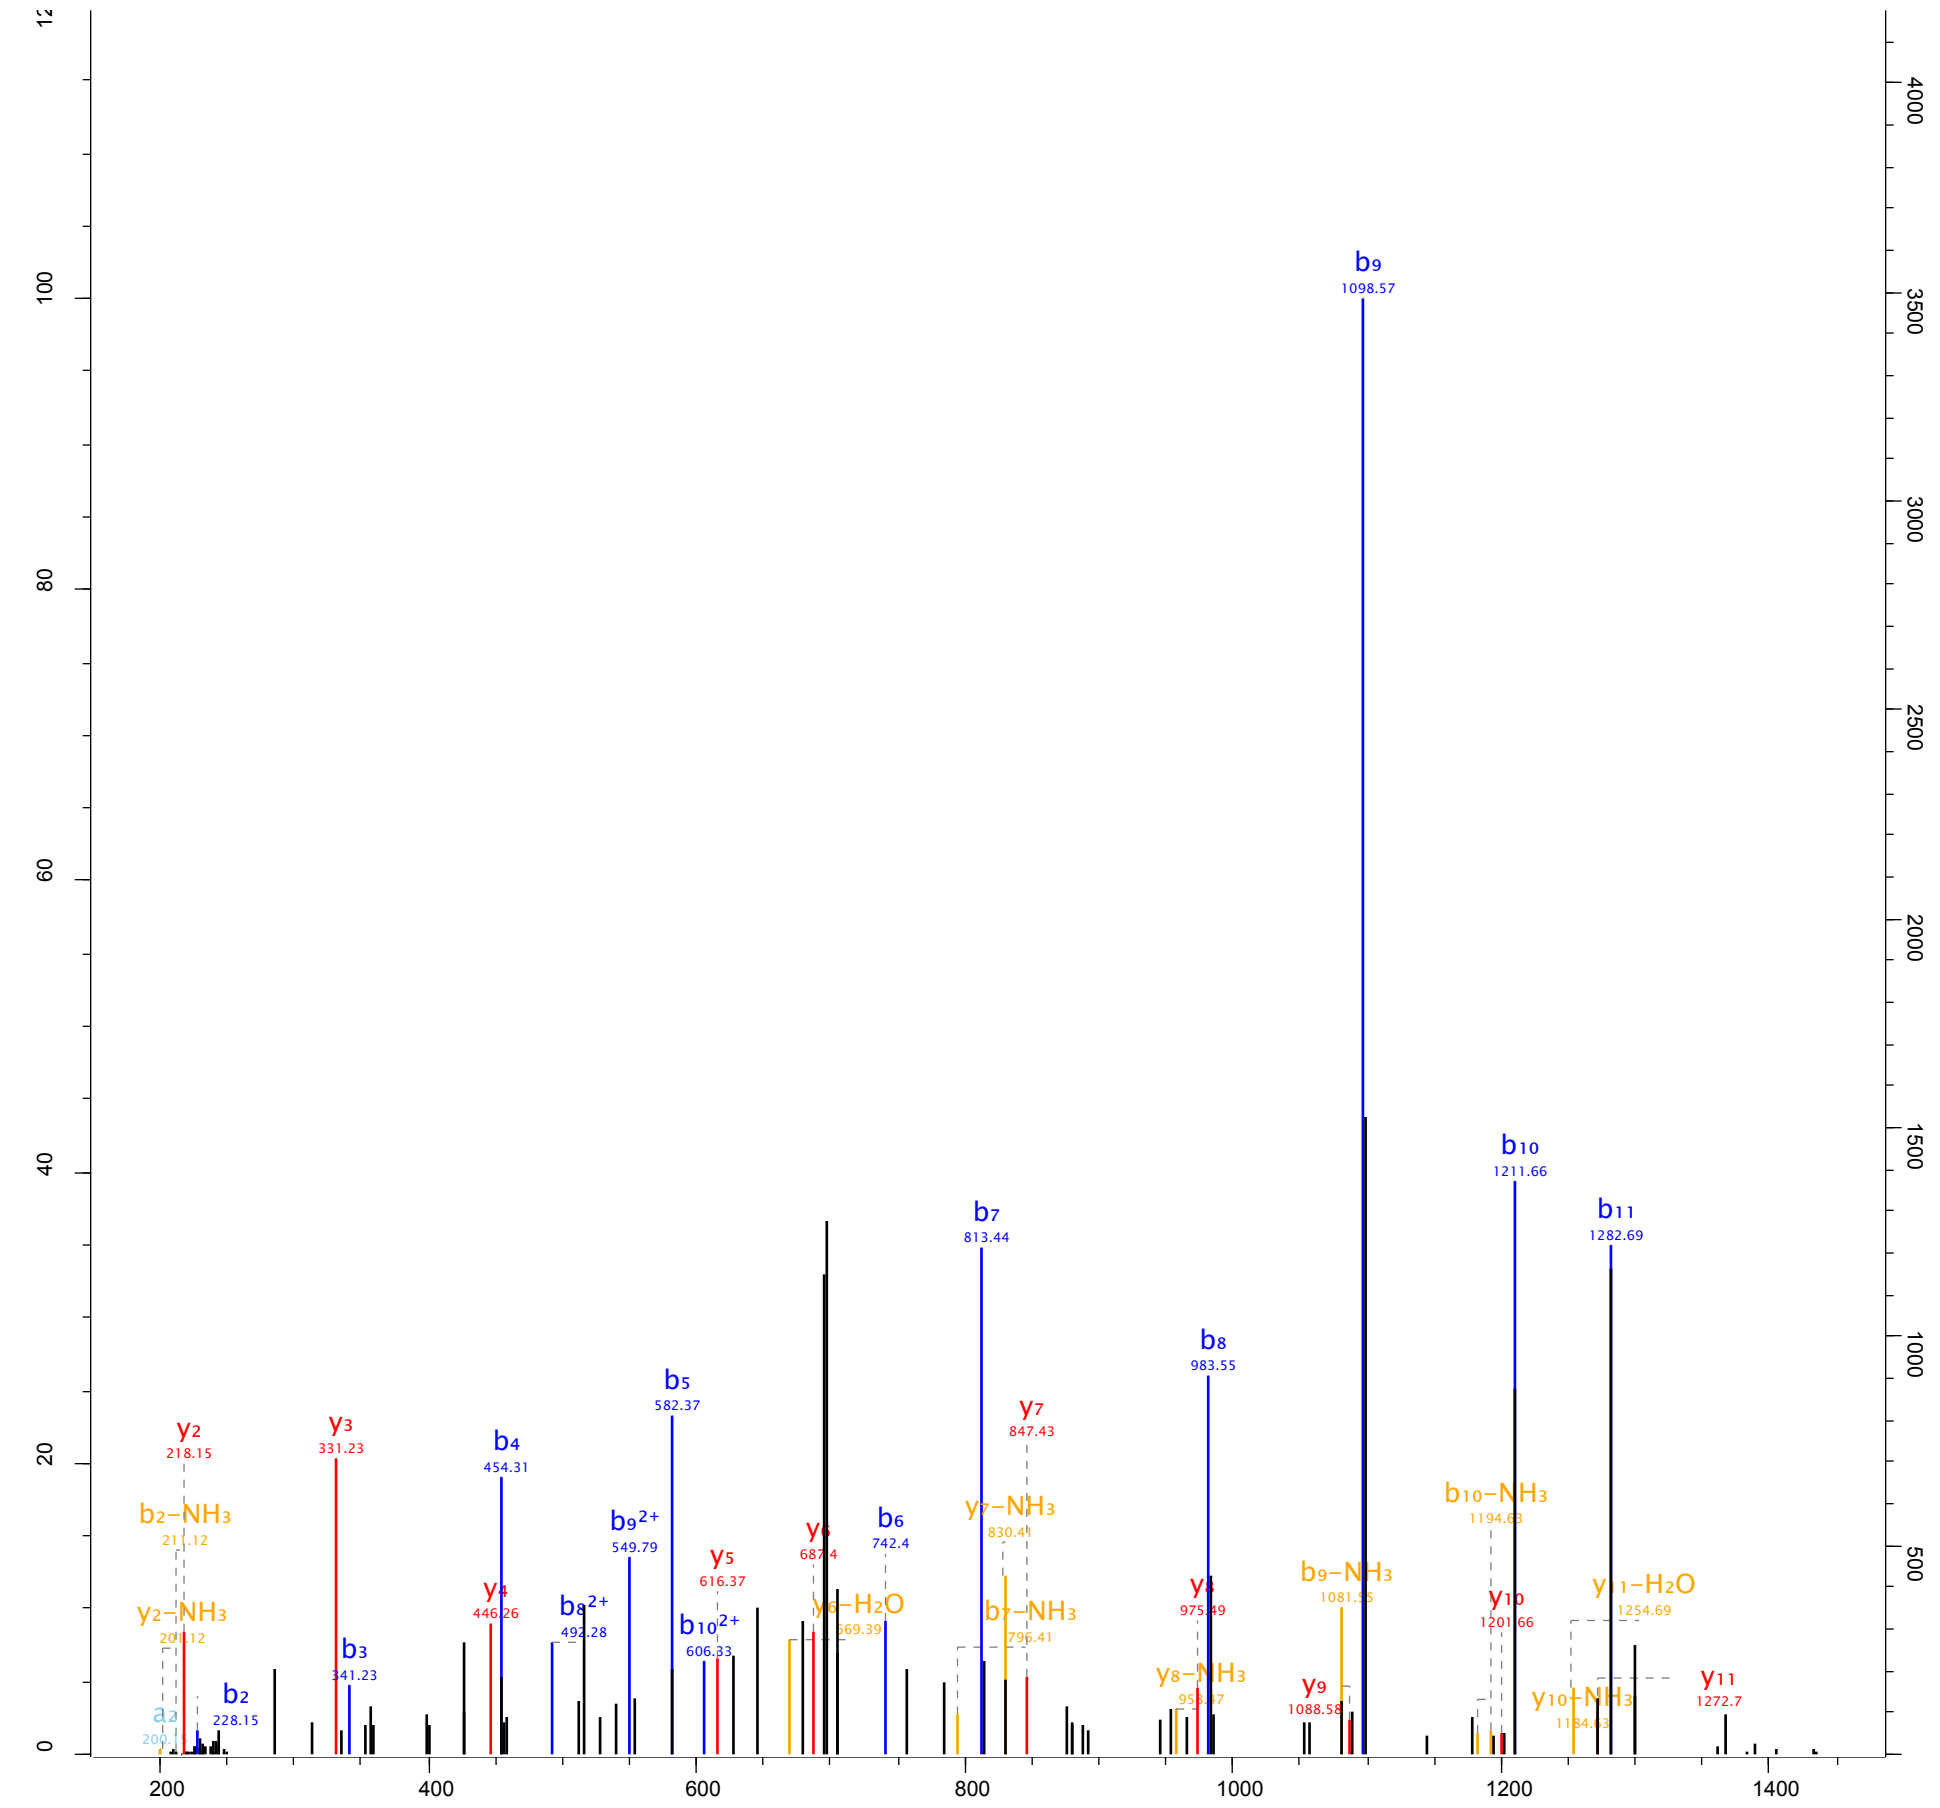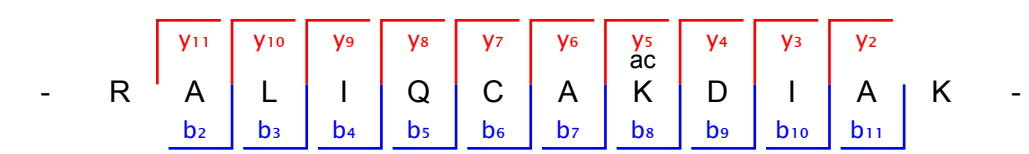

062513\_SCW\_II\_53\_9\_Vargas\_Enriched

16250

ITMS; CID

139.48

709.38

Acot9;Acot10

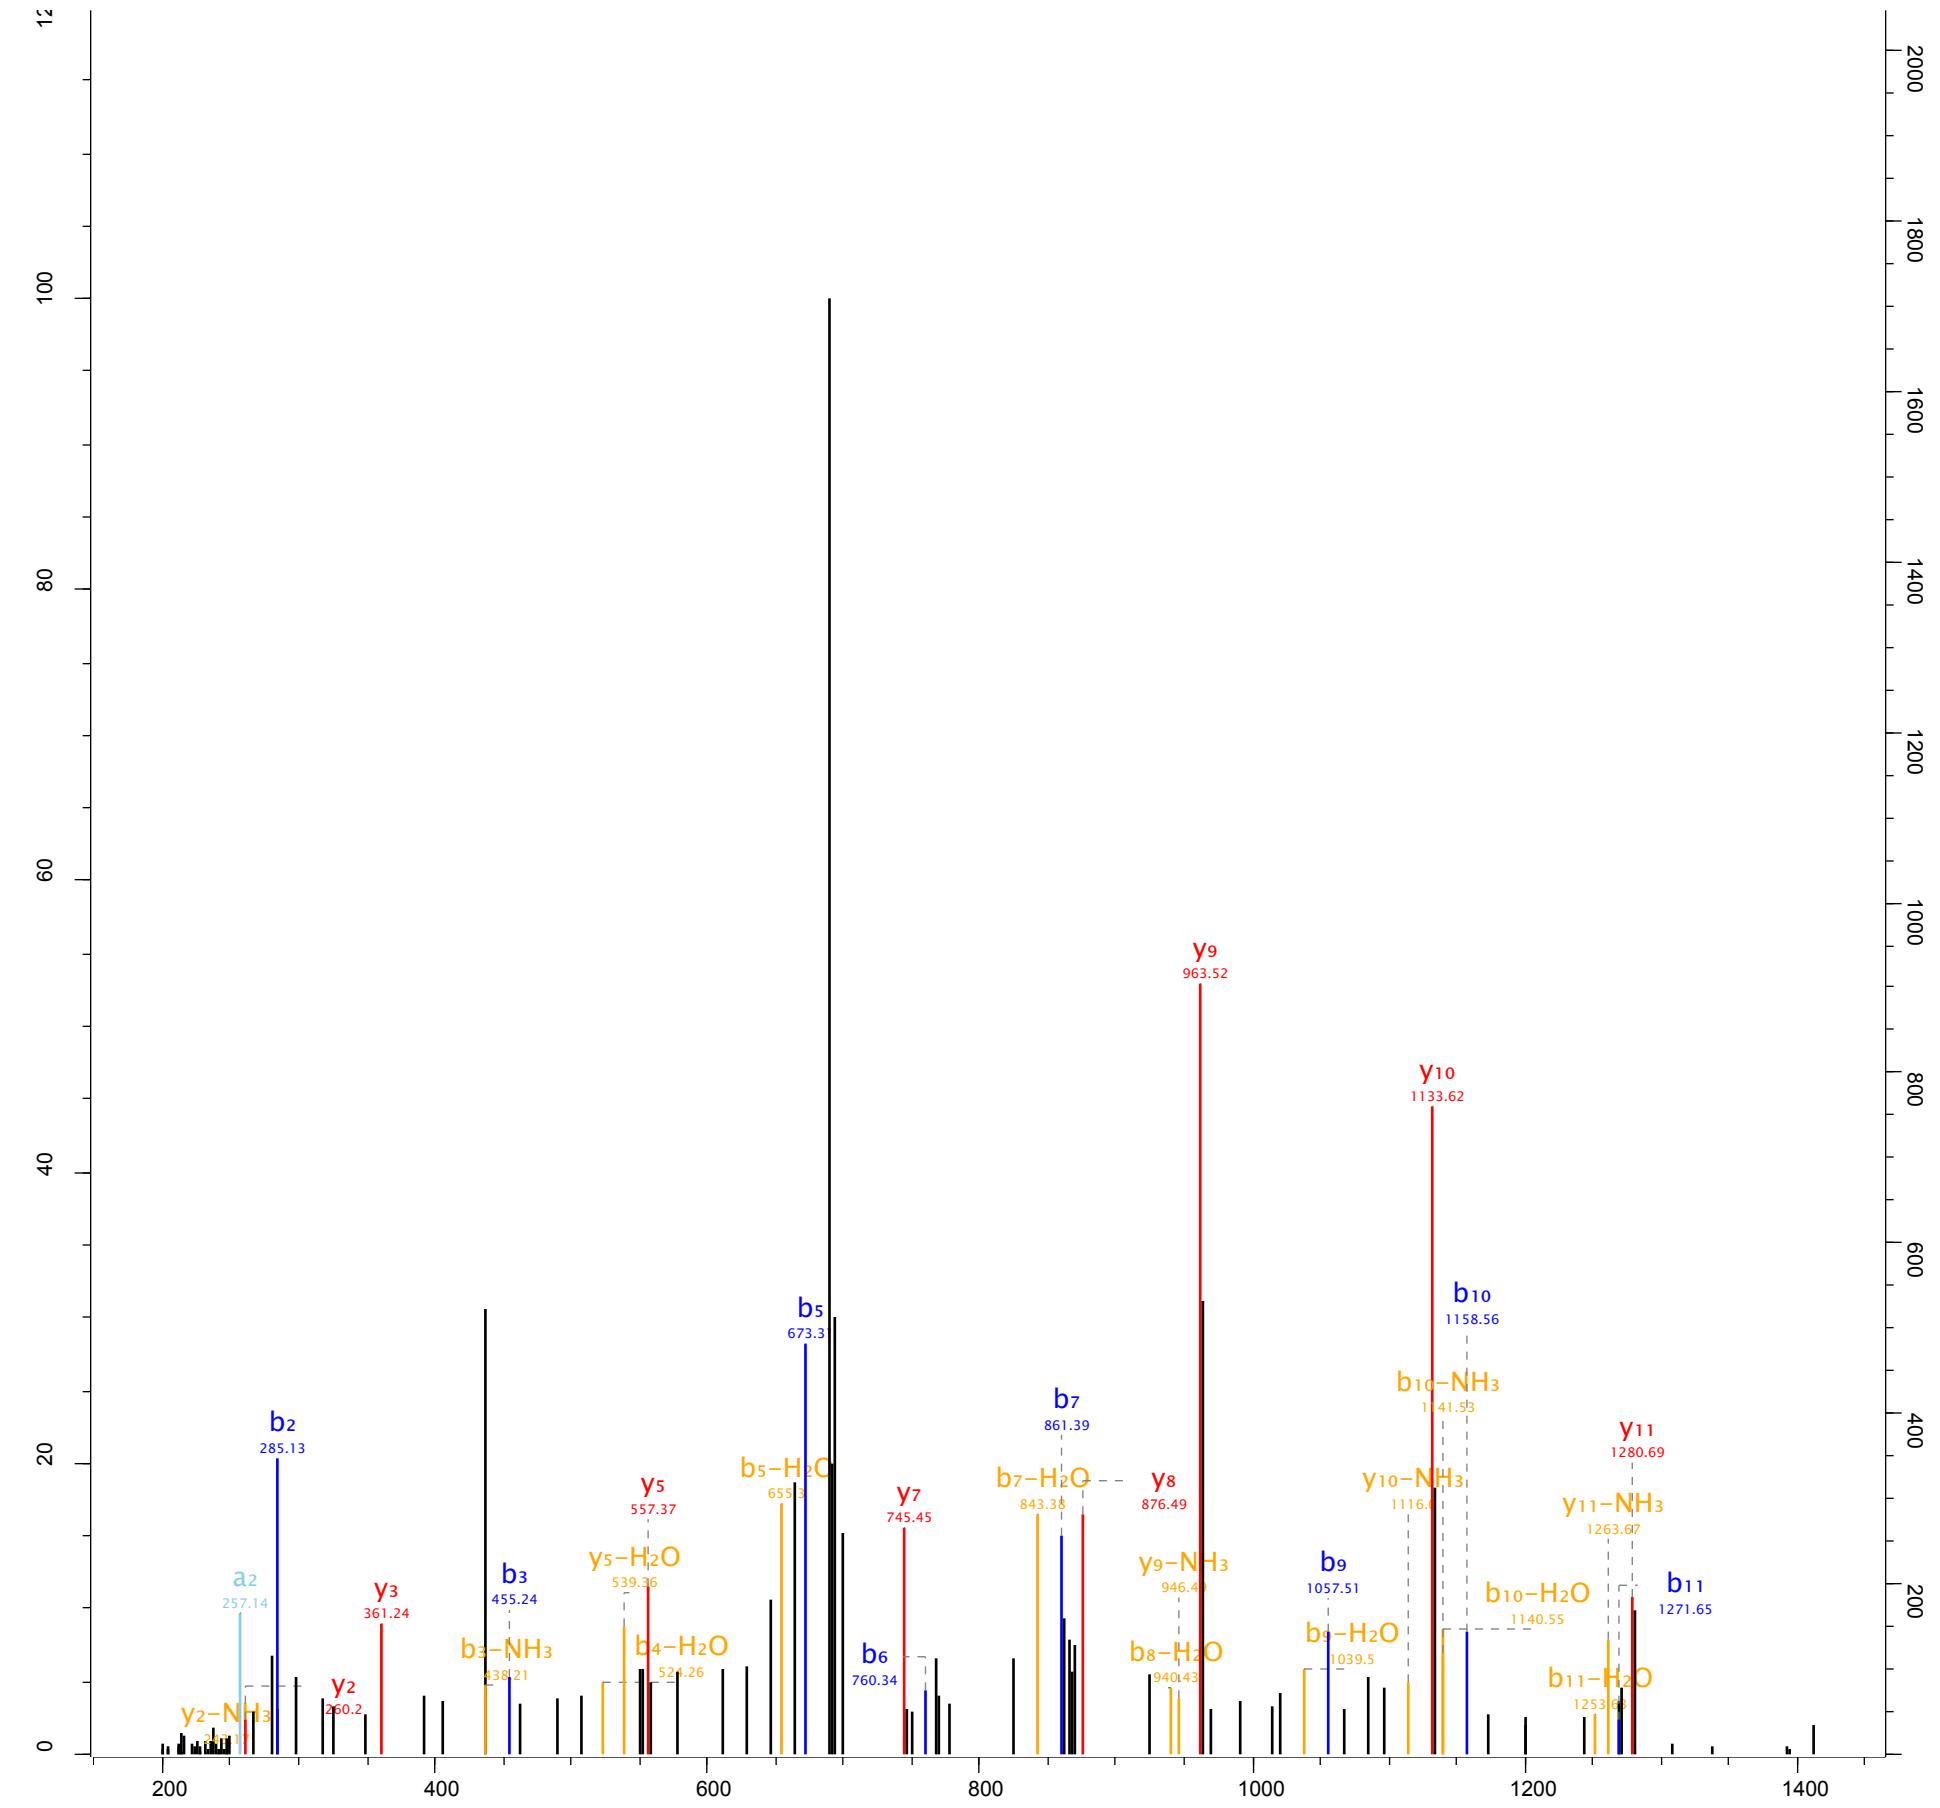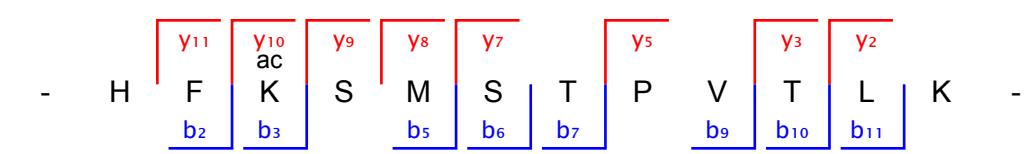

Raw file 062513\_SCW\_II\_53\_9\_Vargas\_Enriched Scan 16259 Method ITMS; CID Score 138.2 m/z 531.95 Gene names Gbas

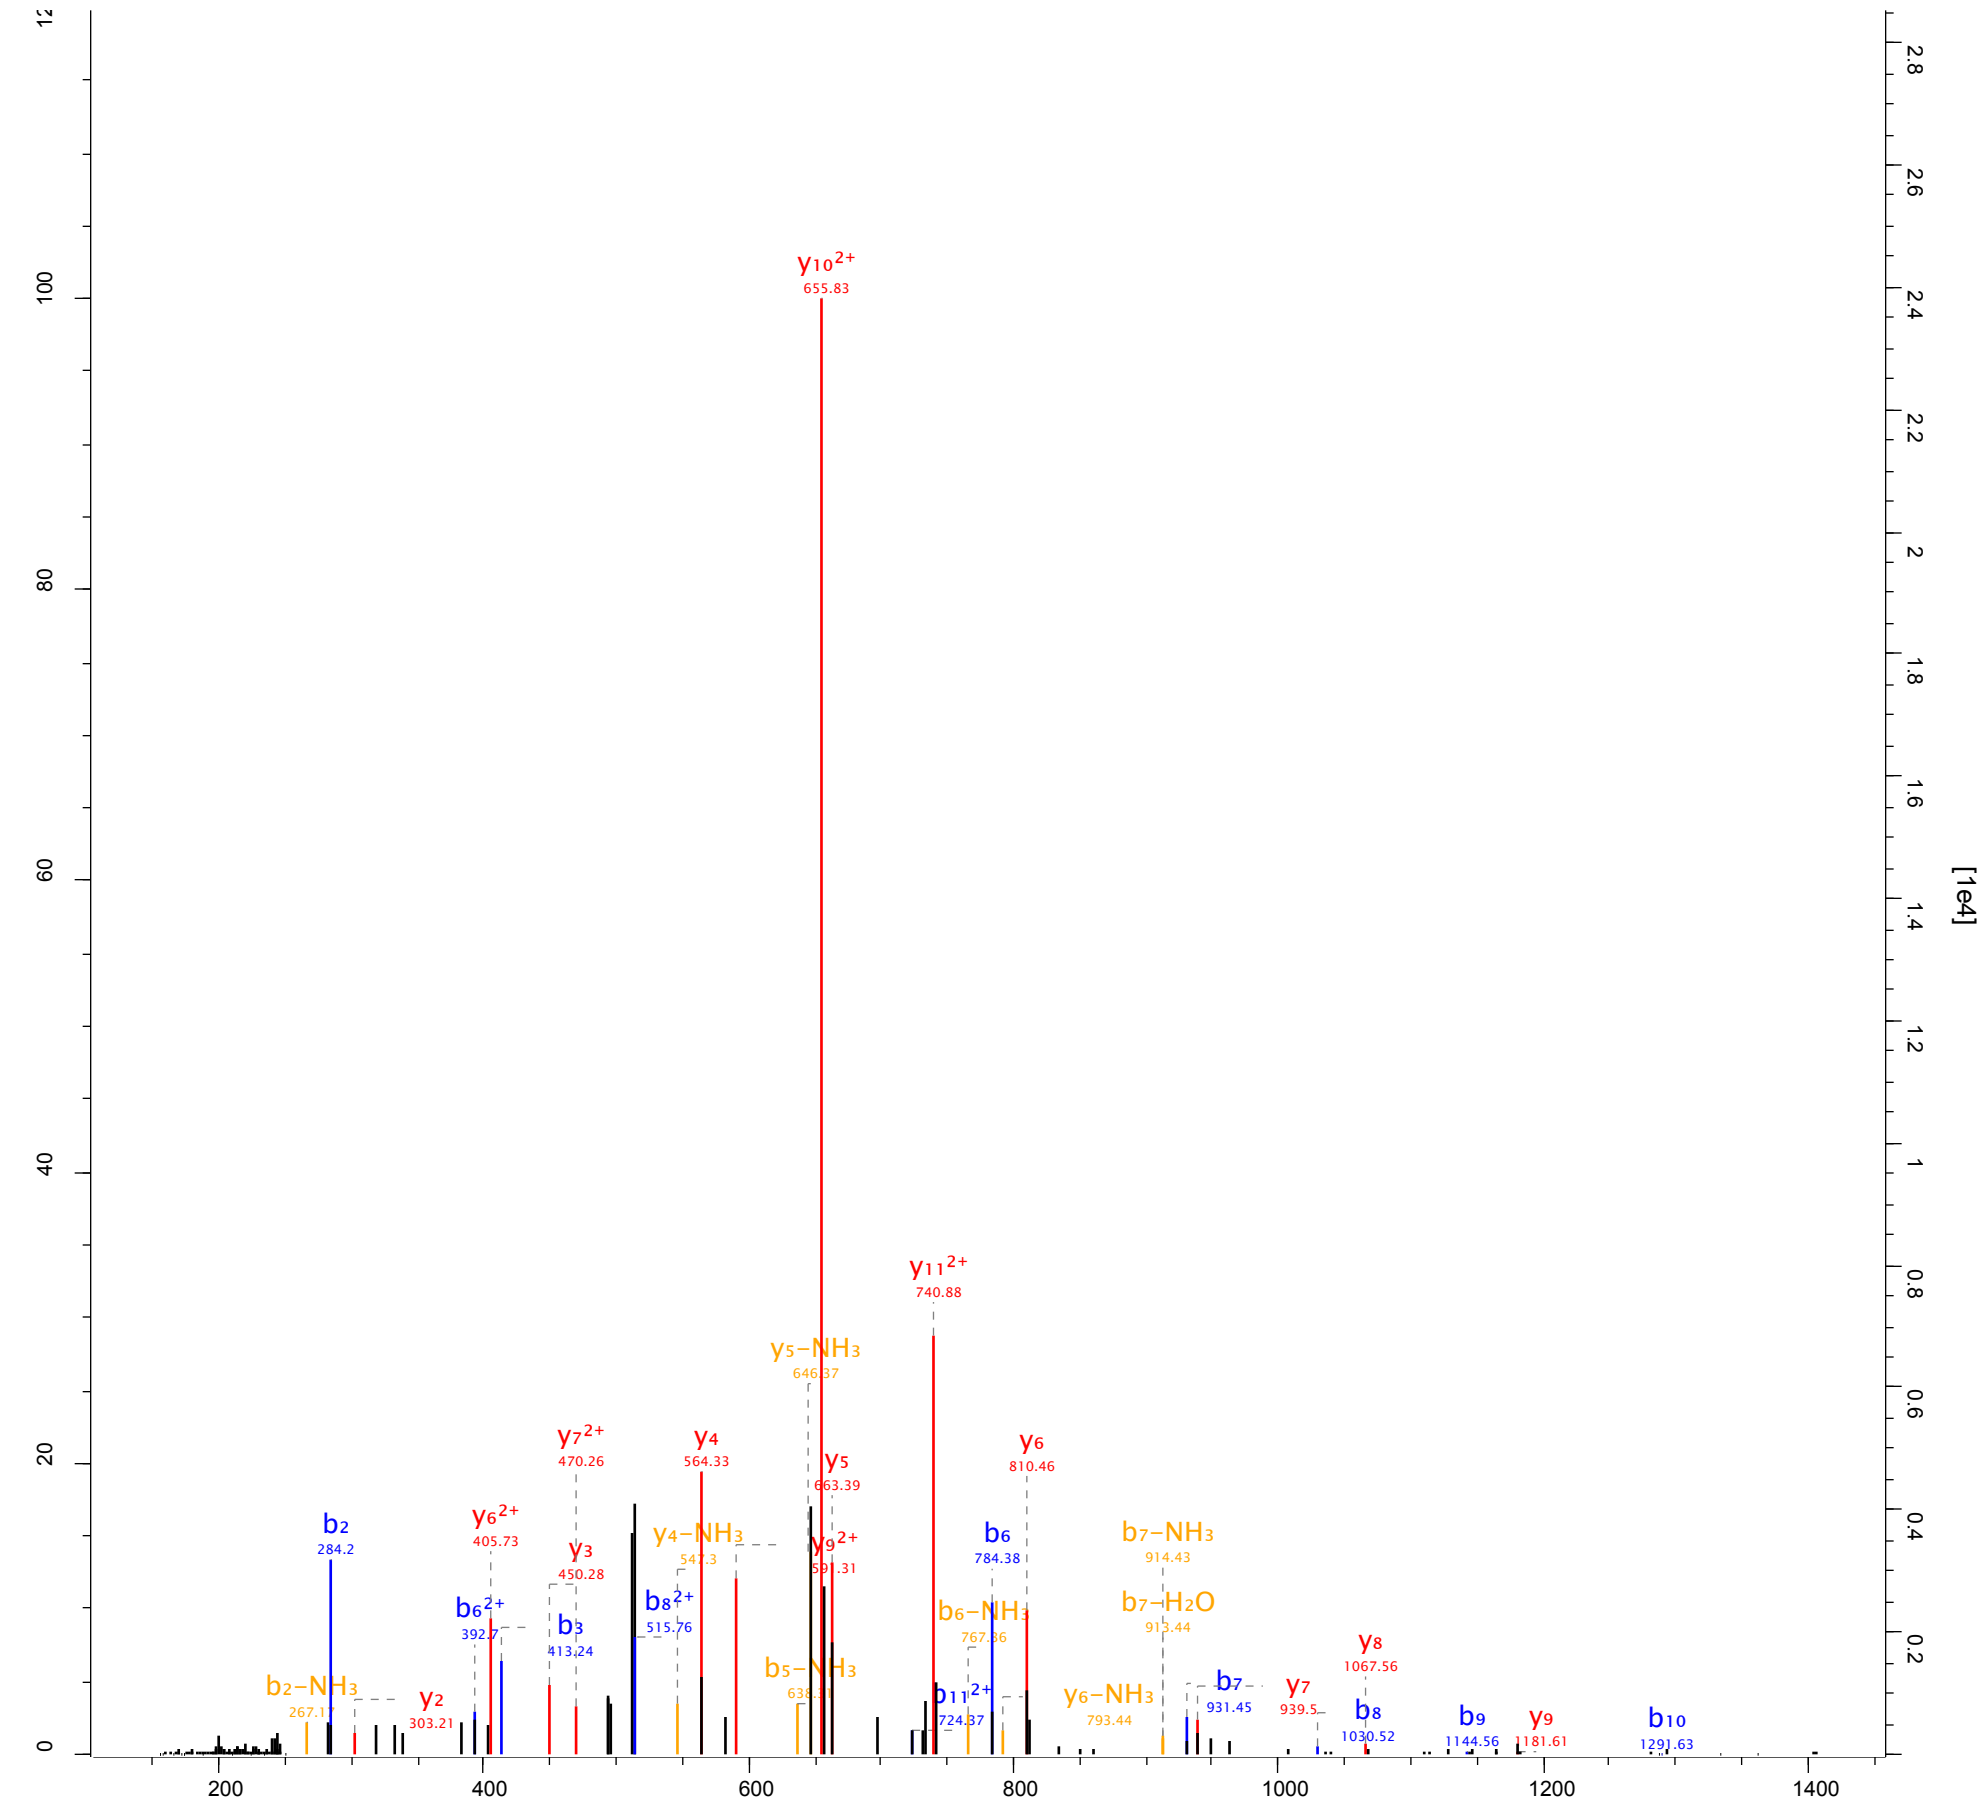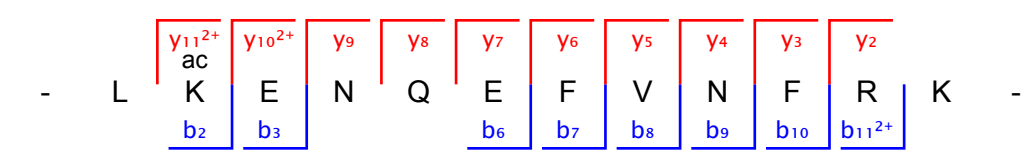

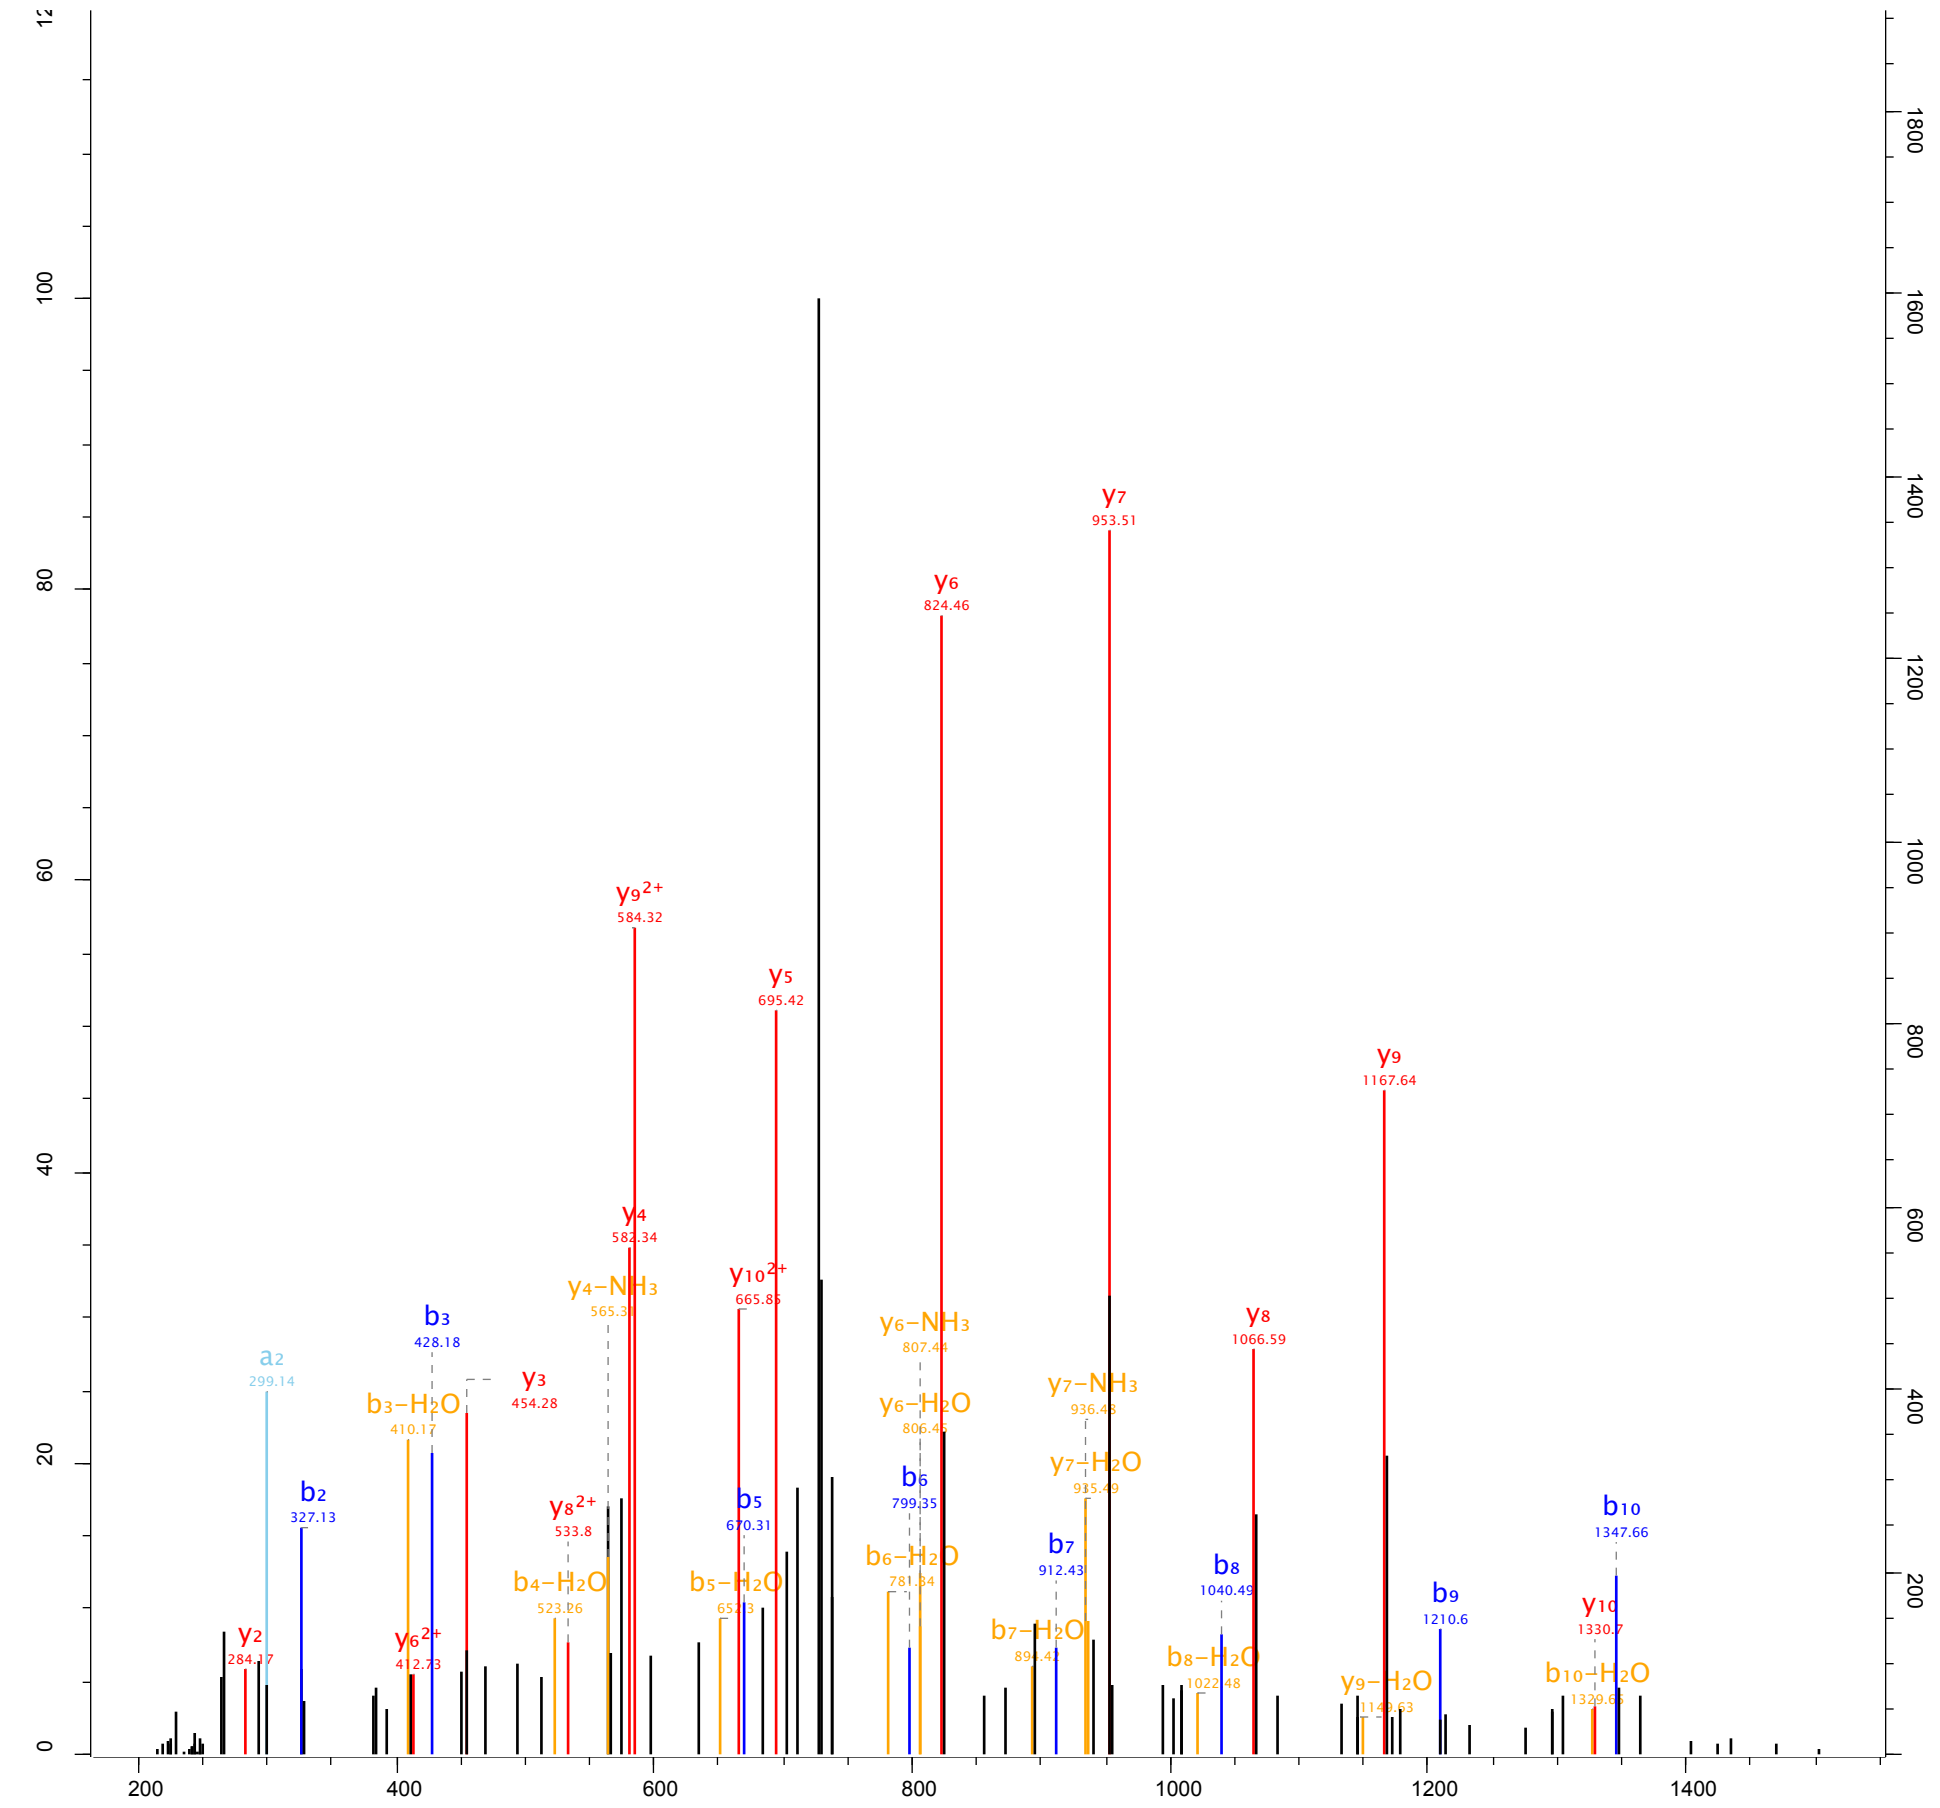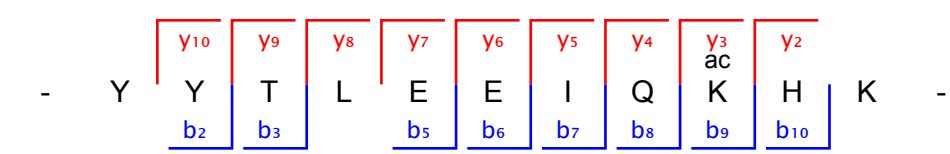

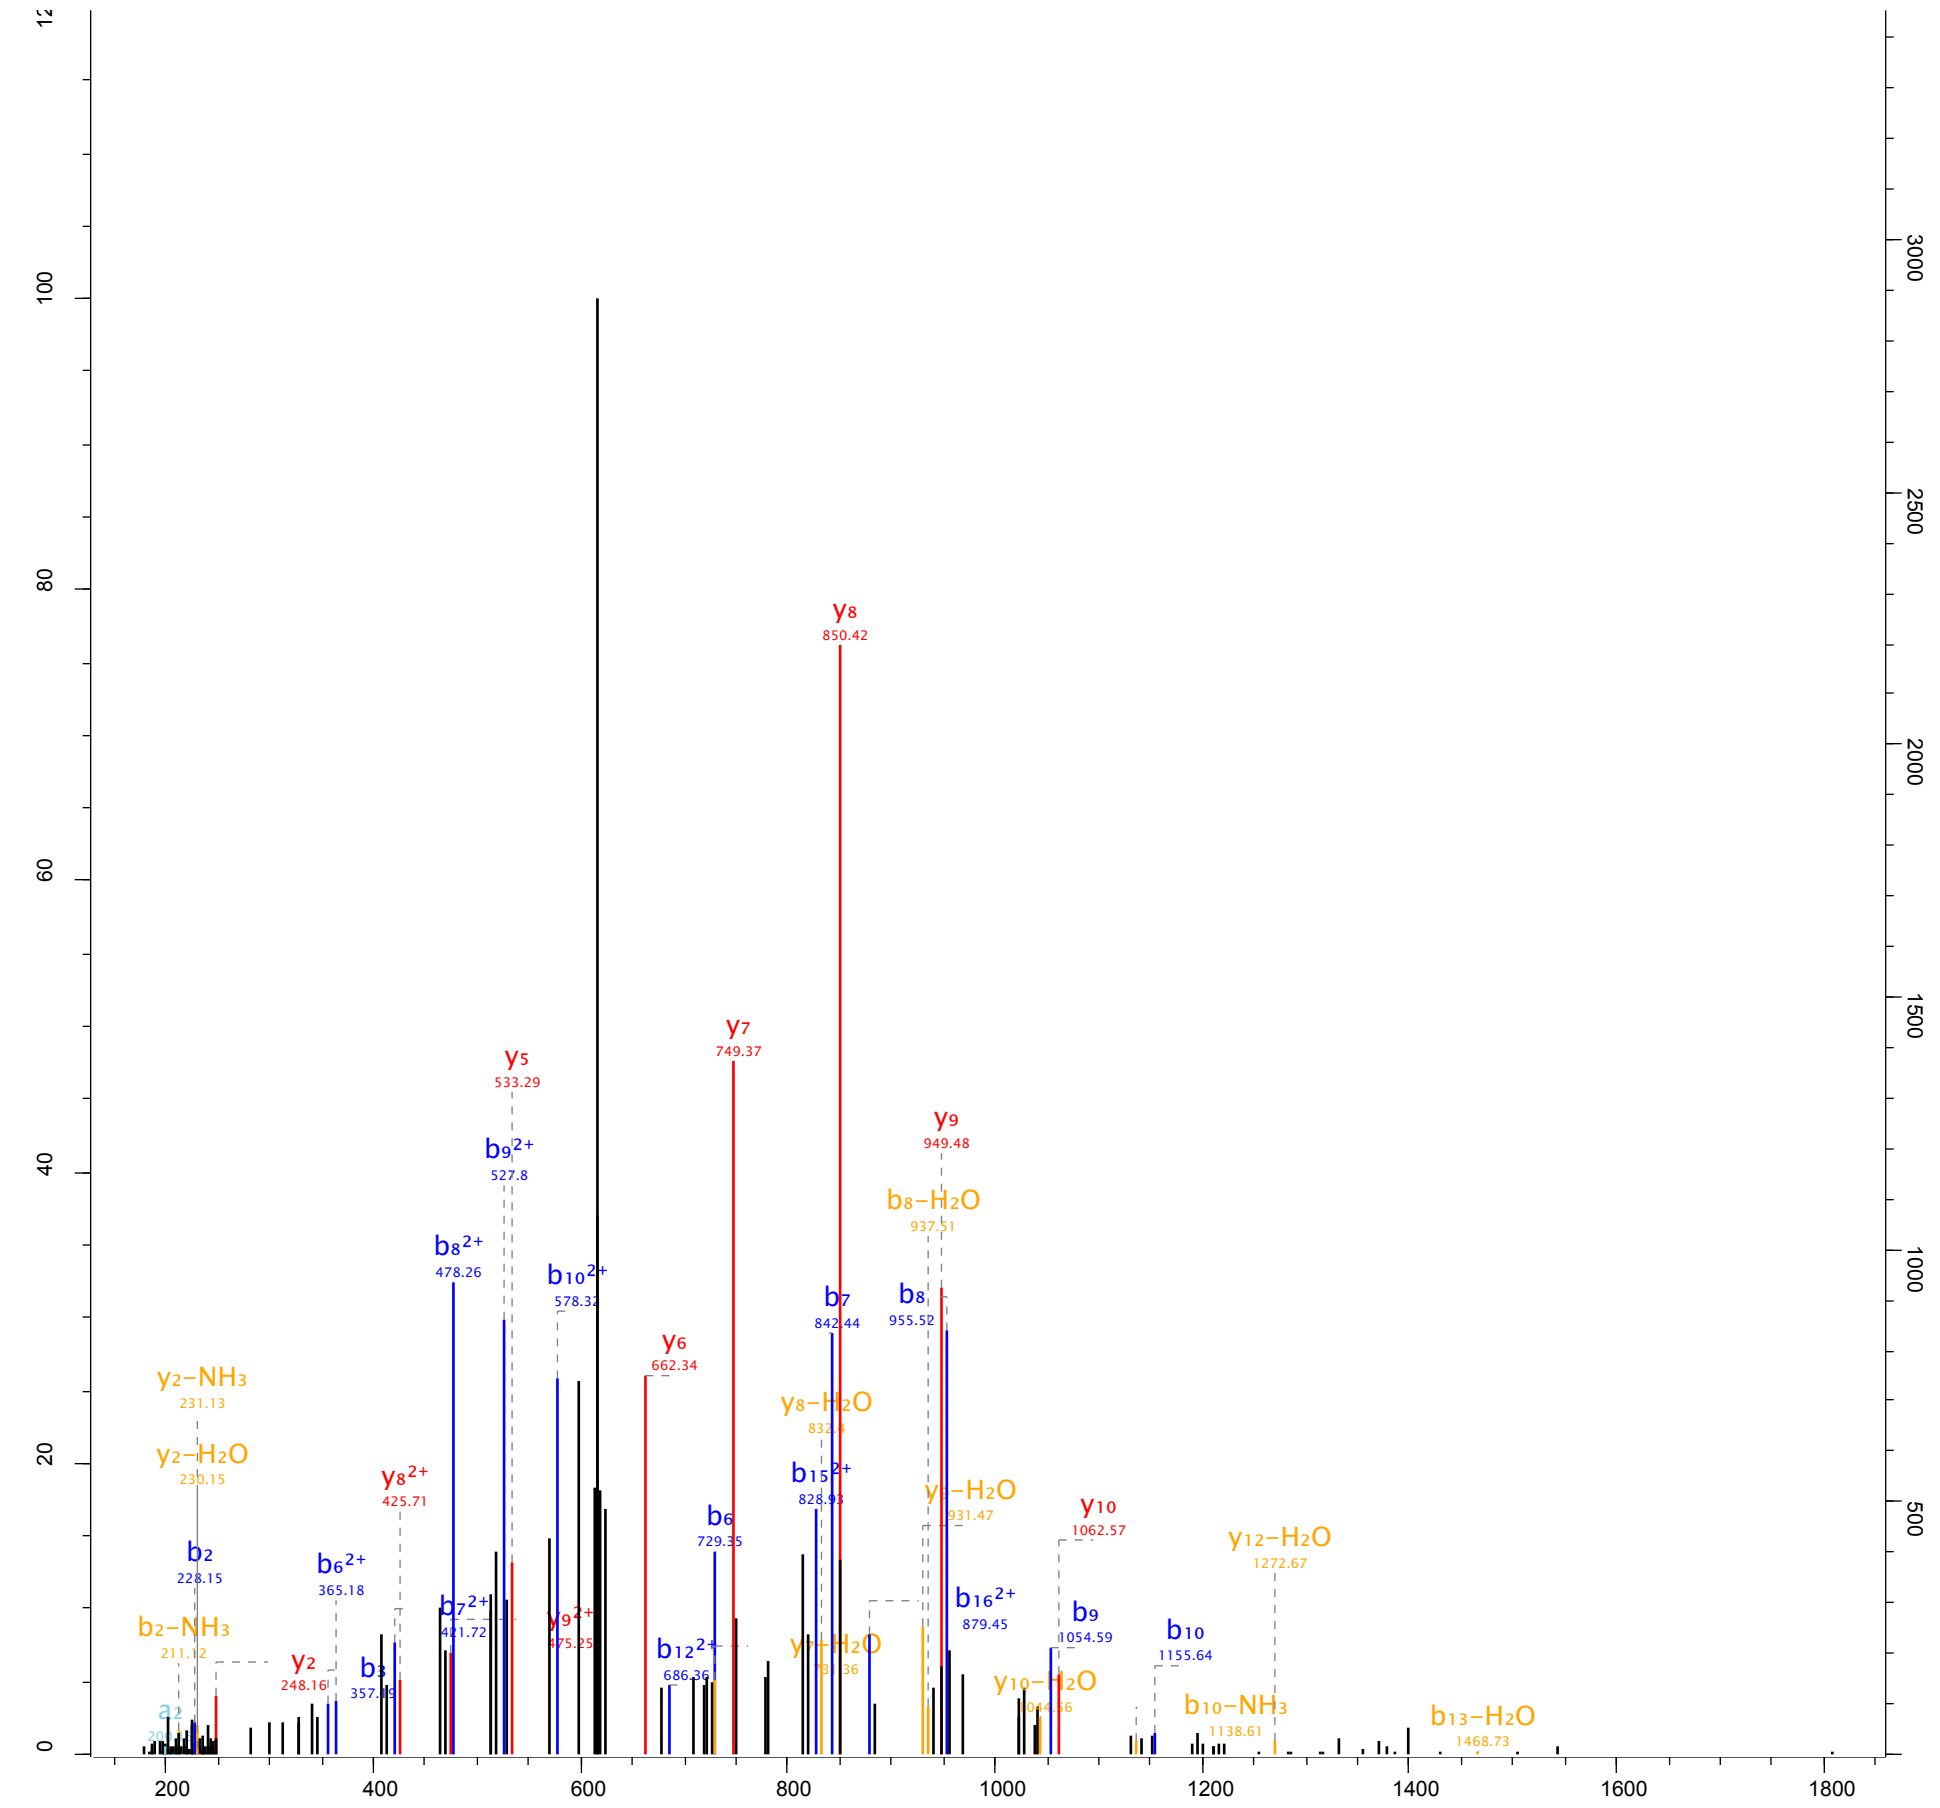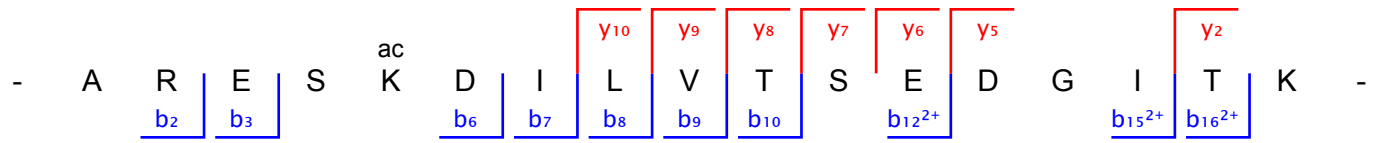

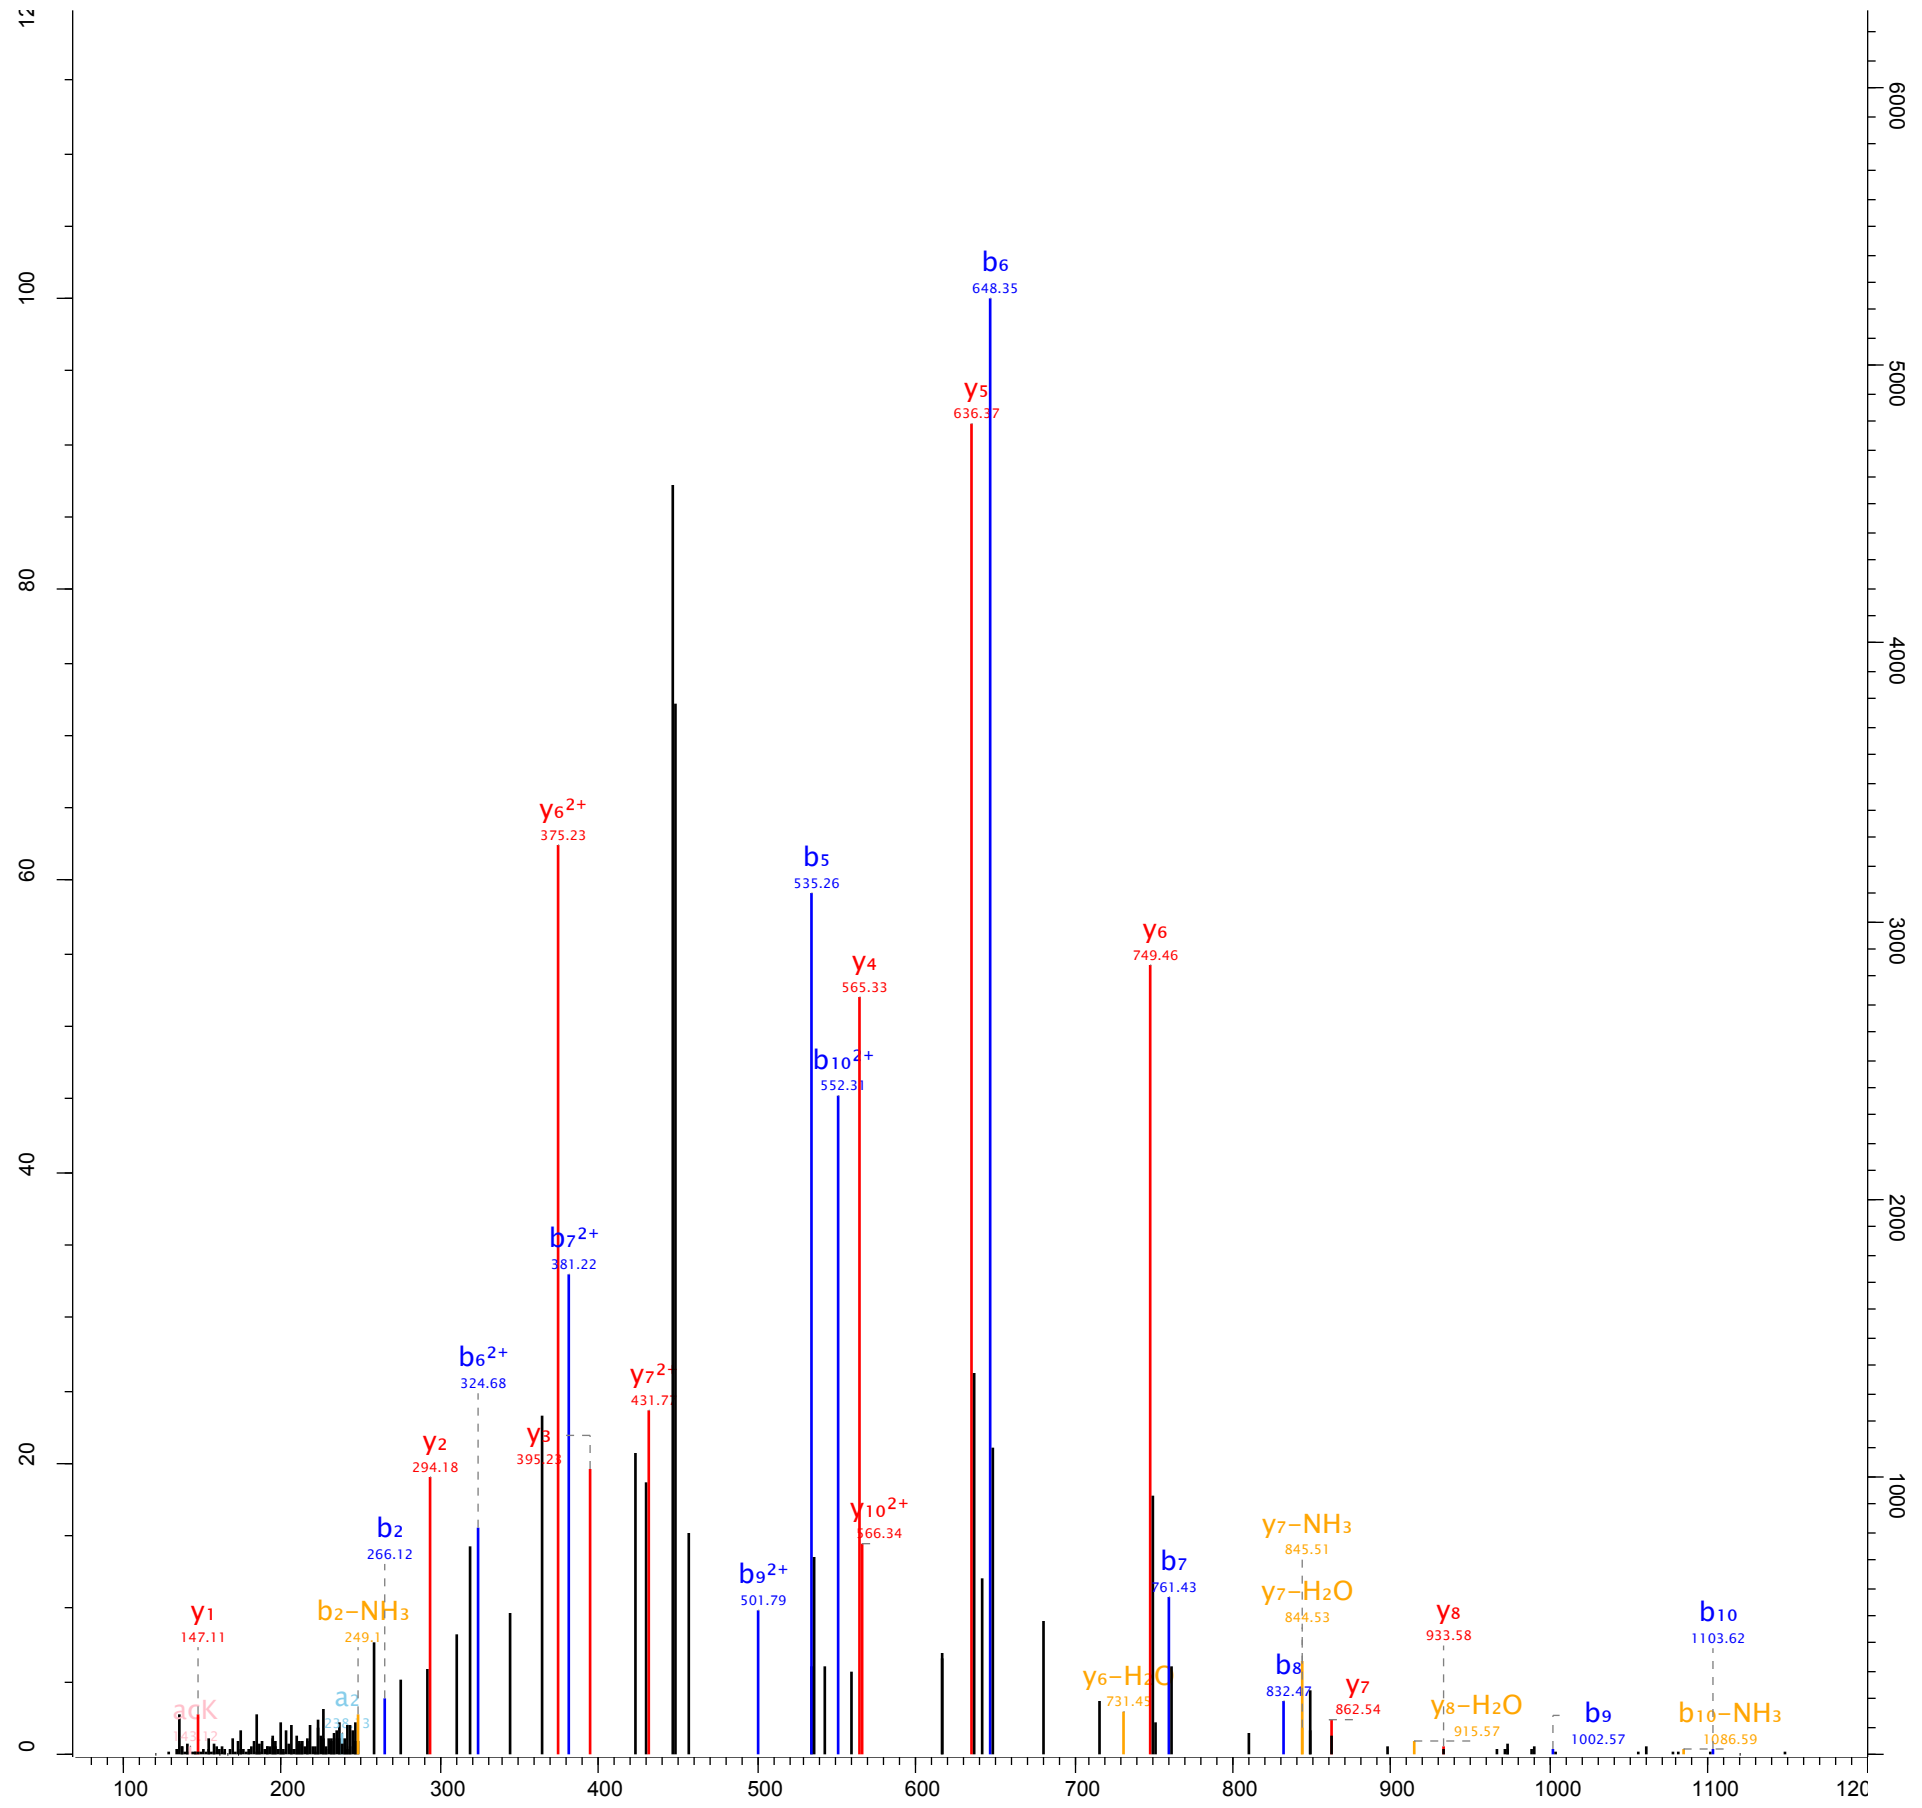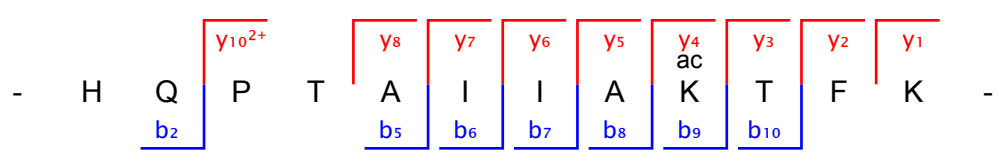

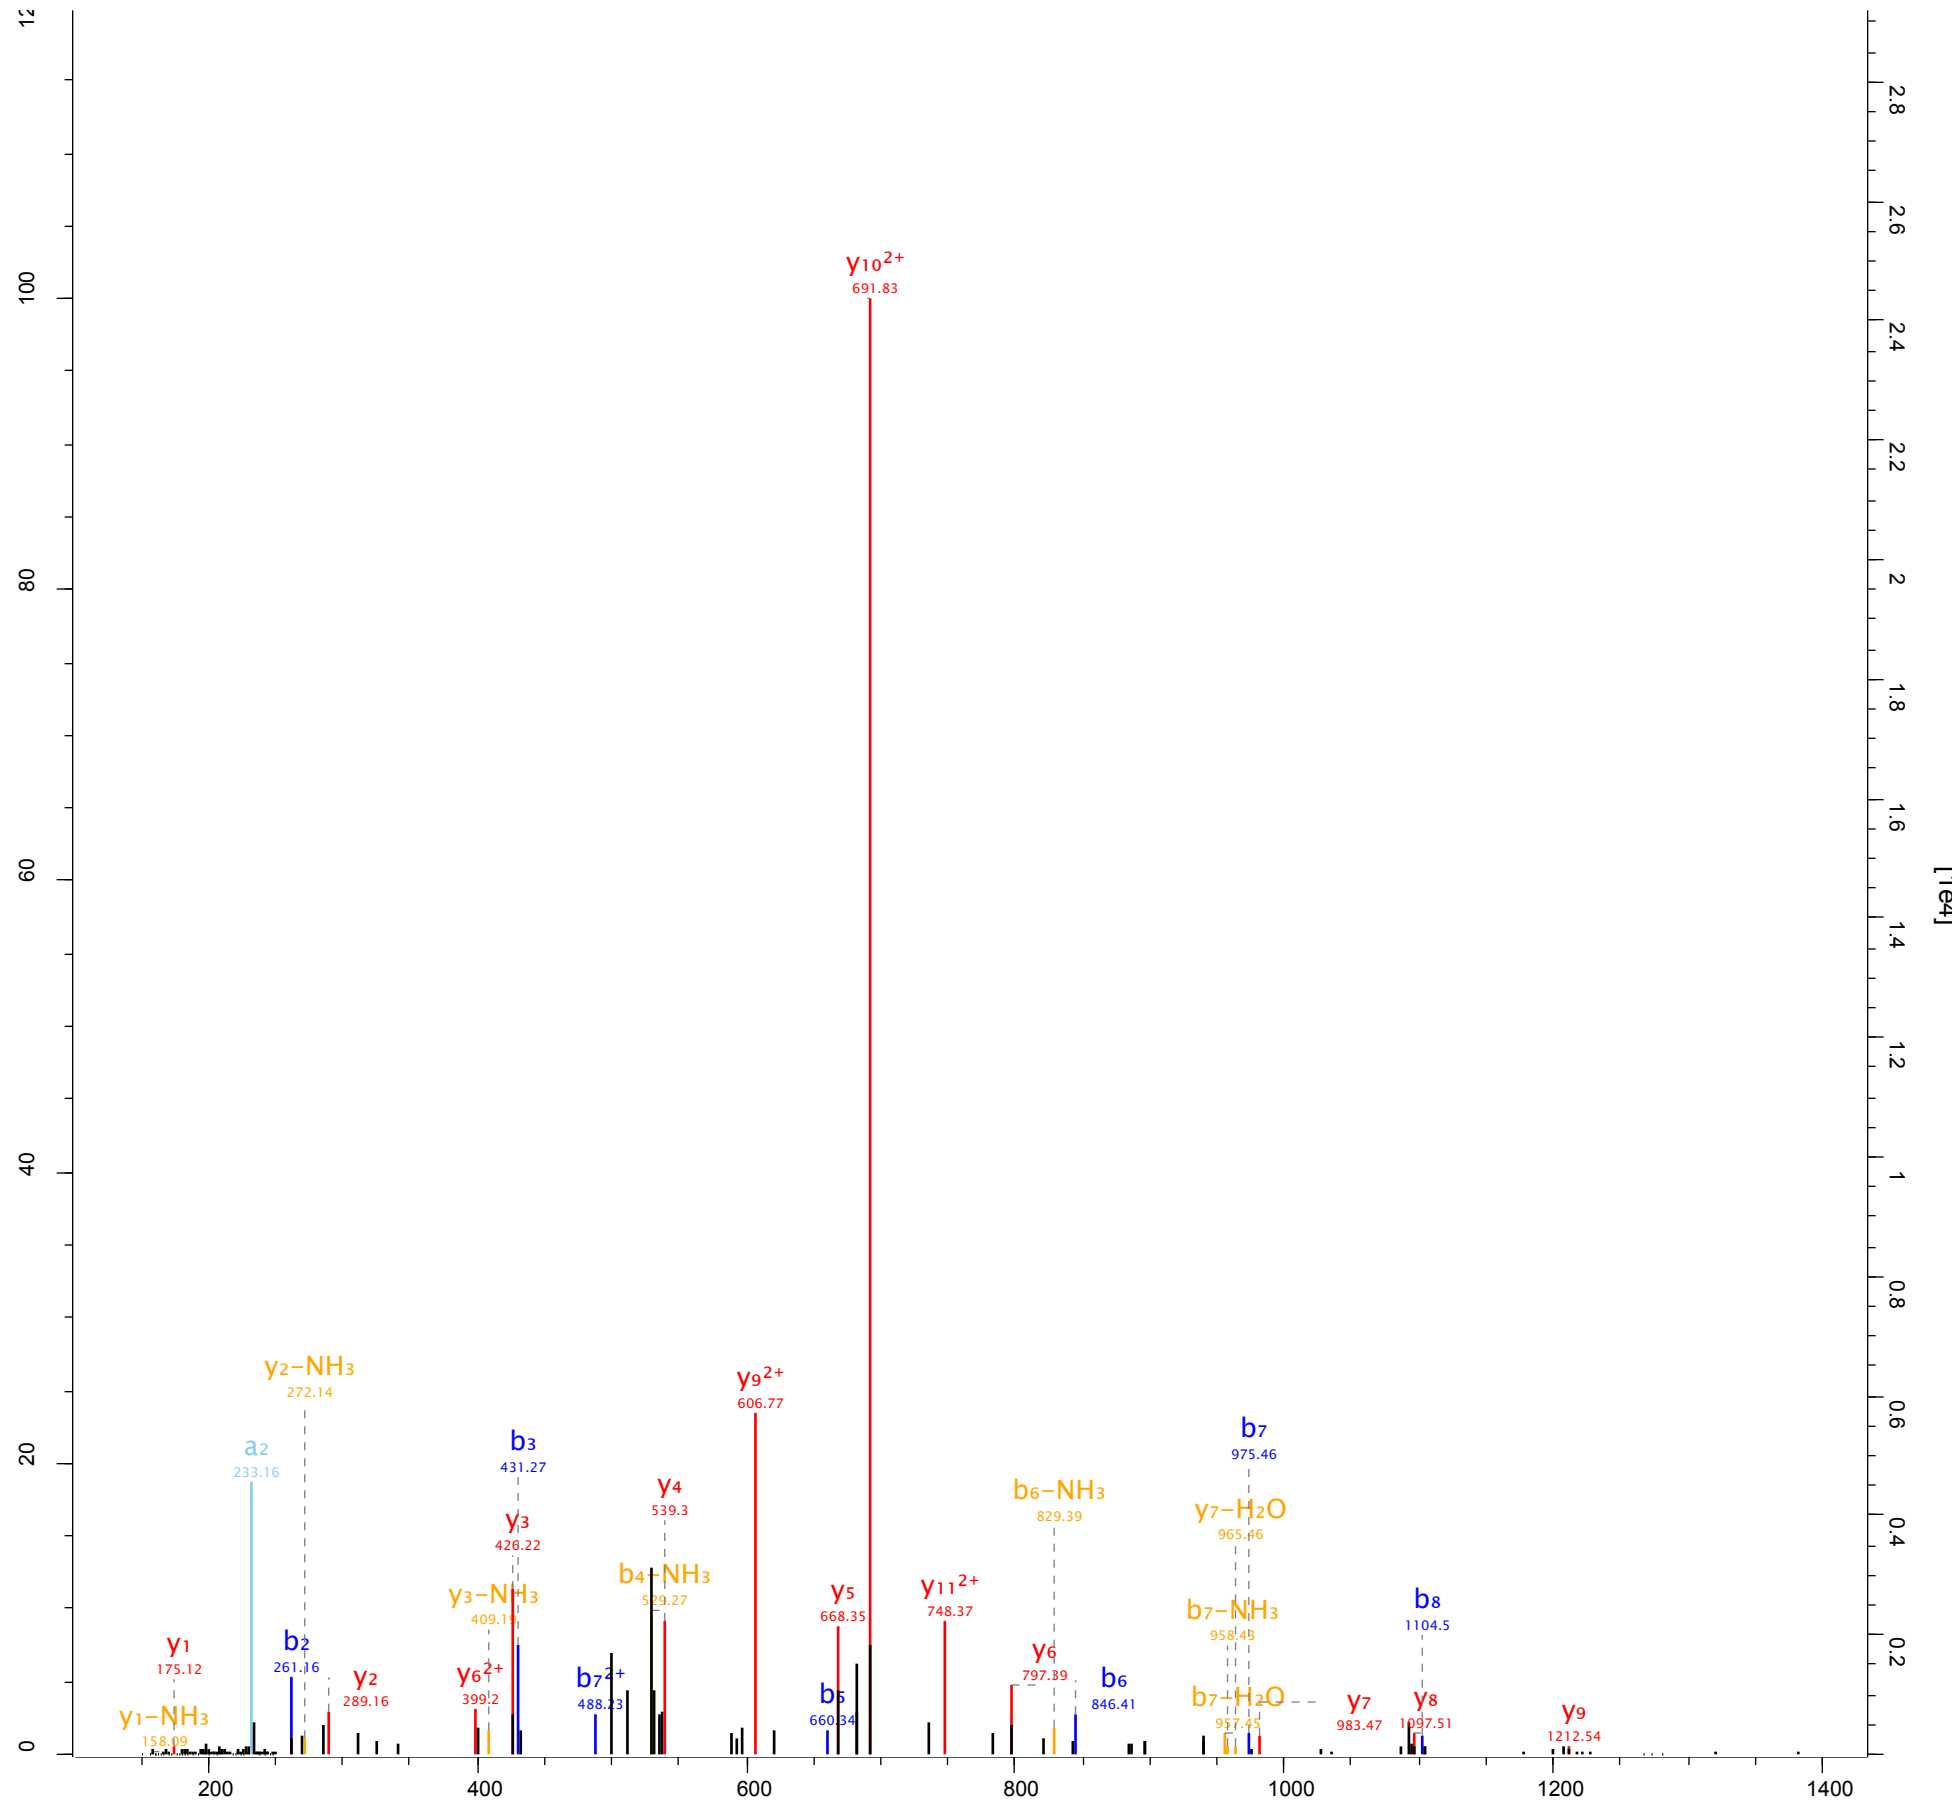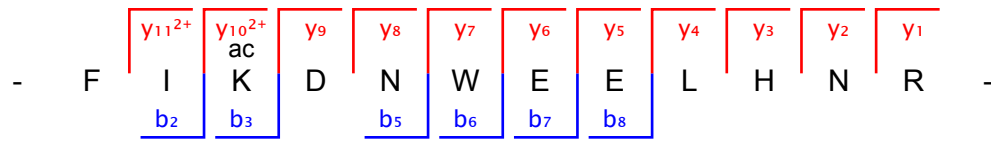



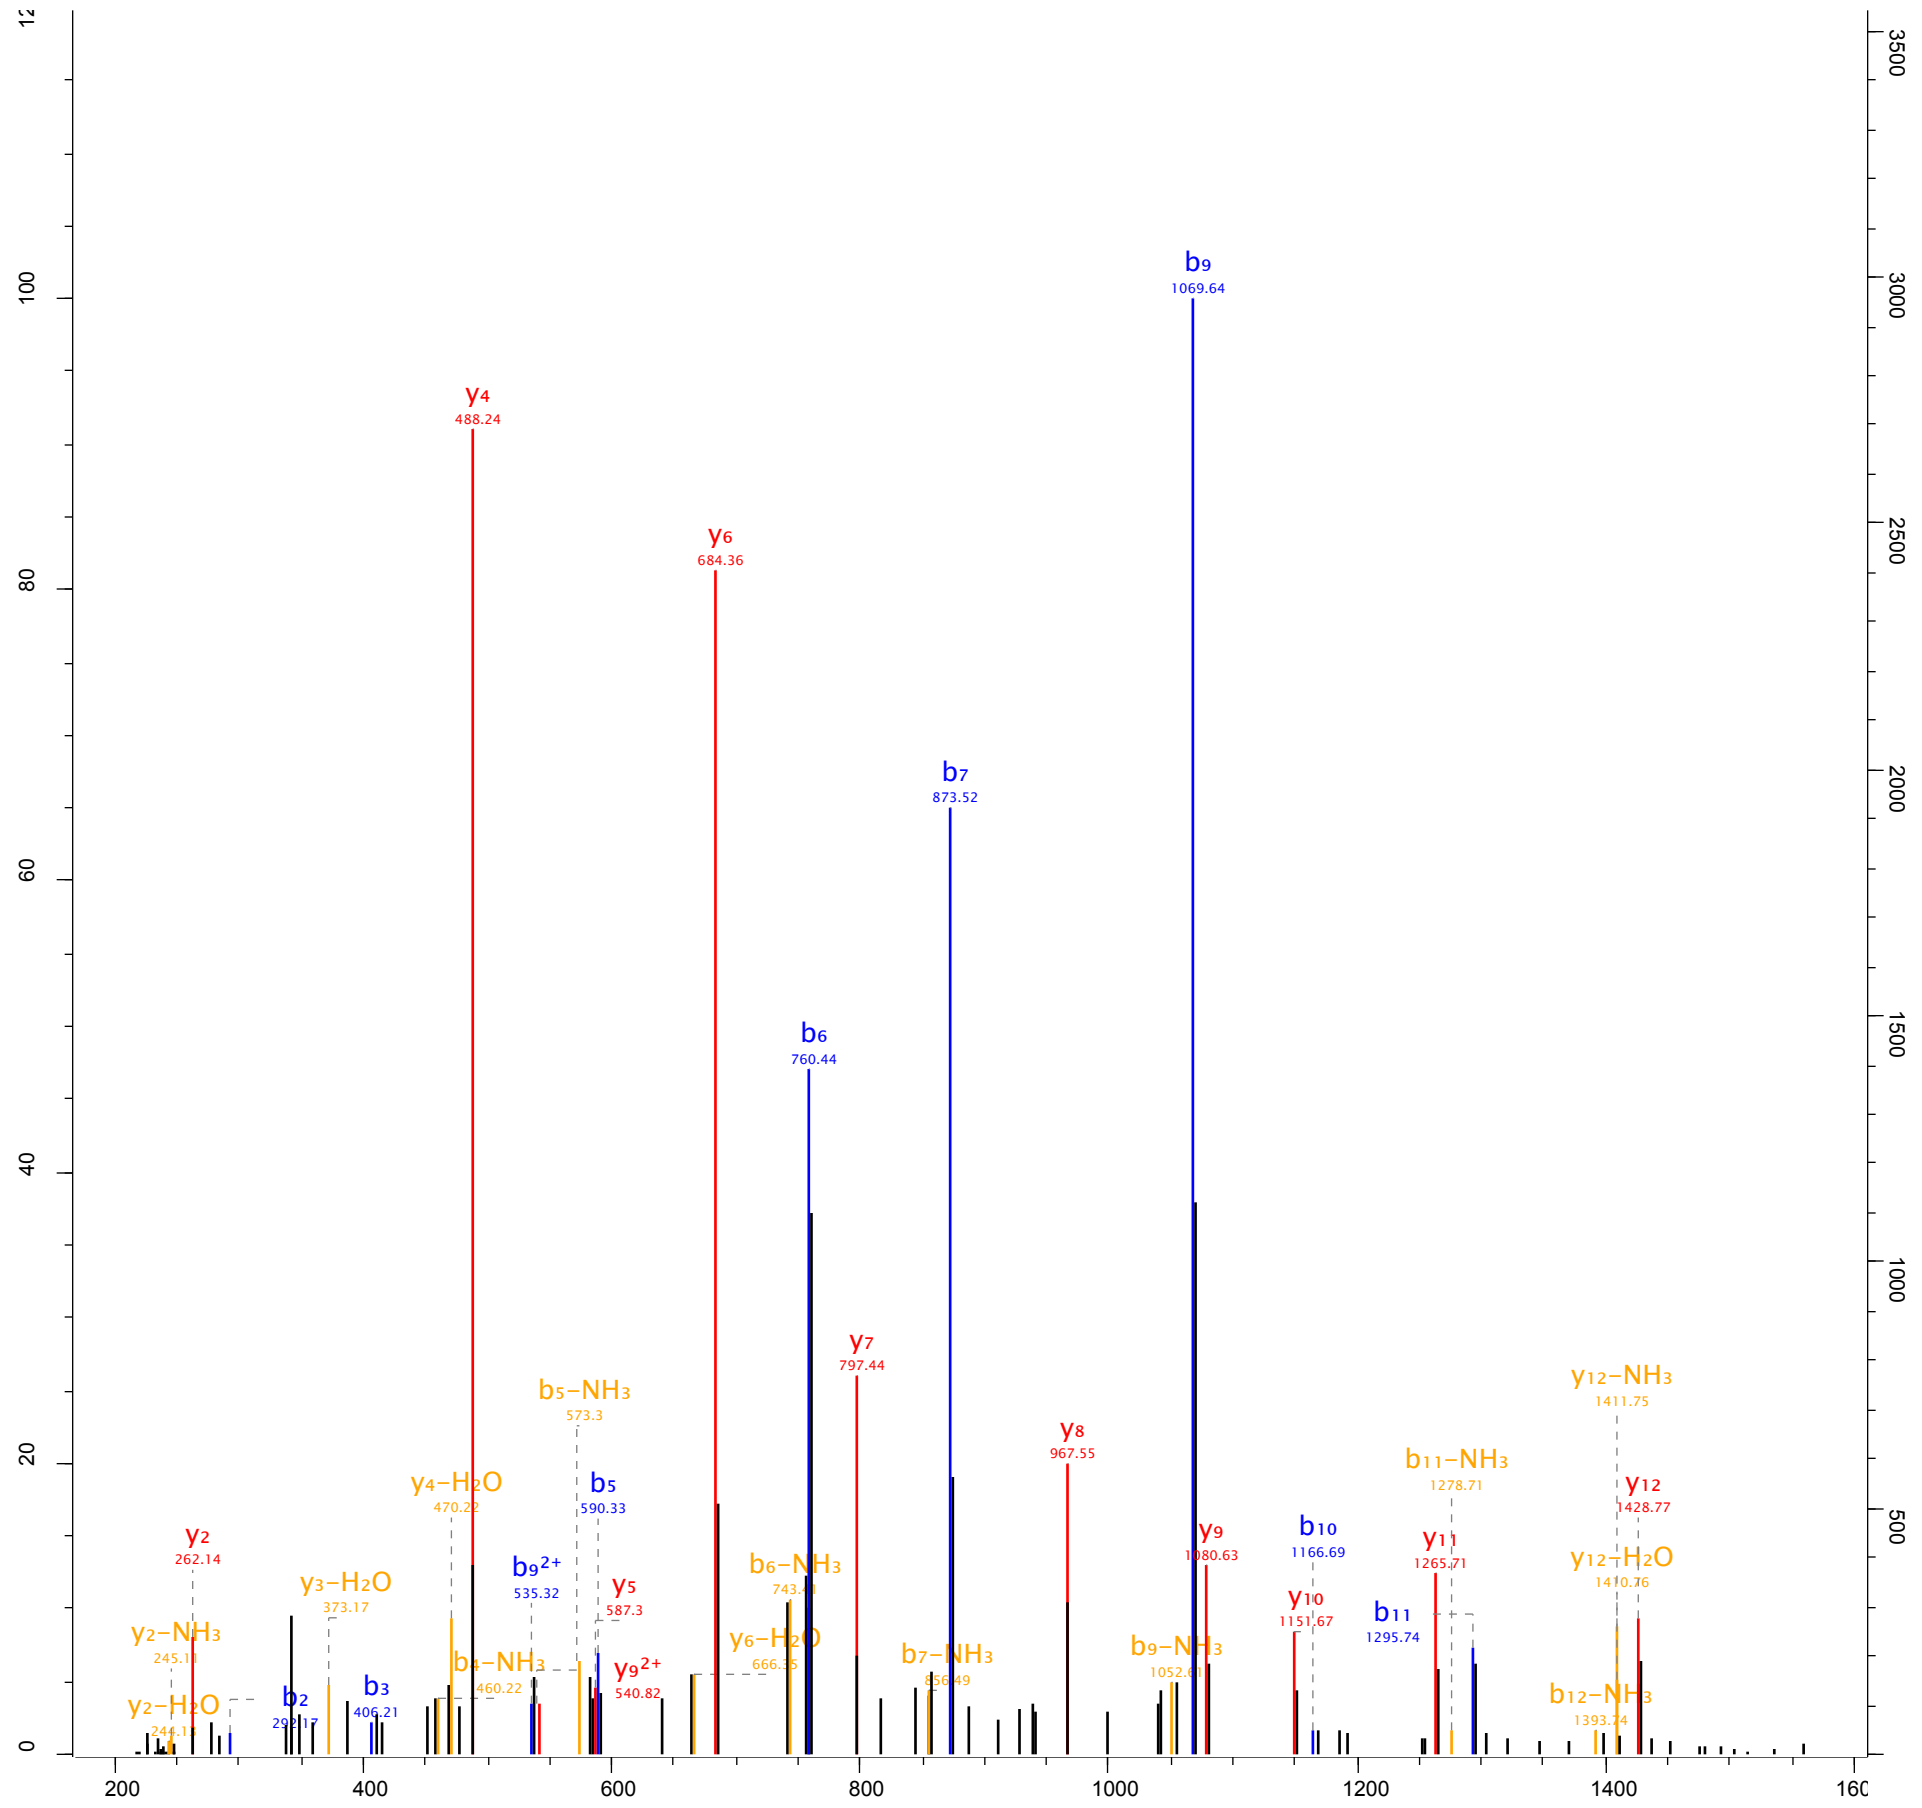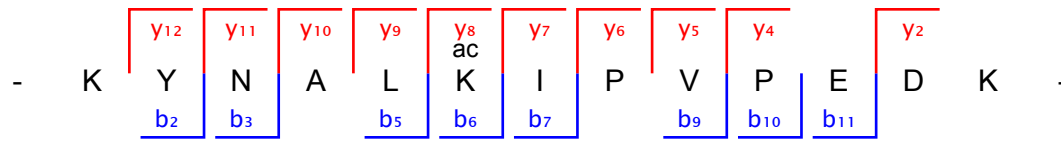

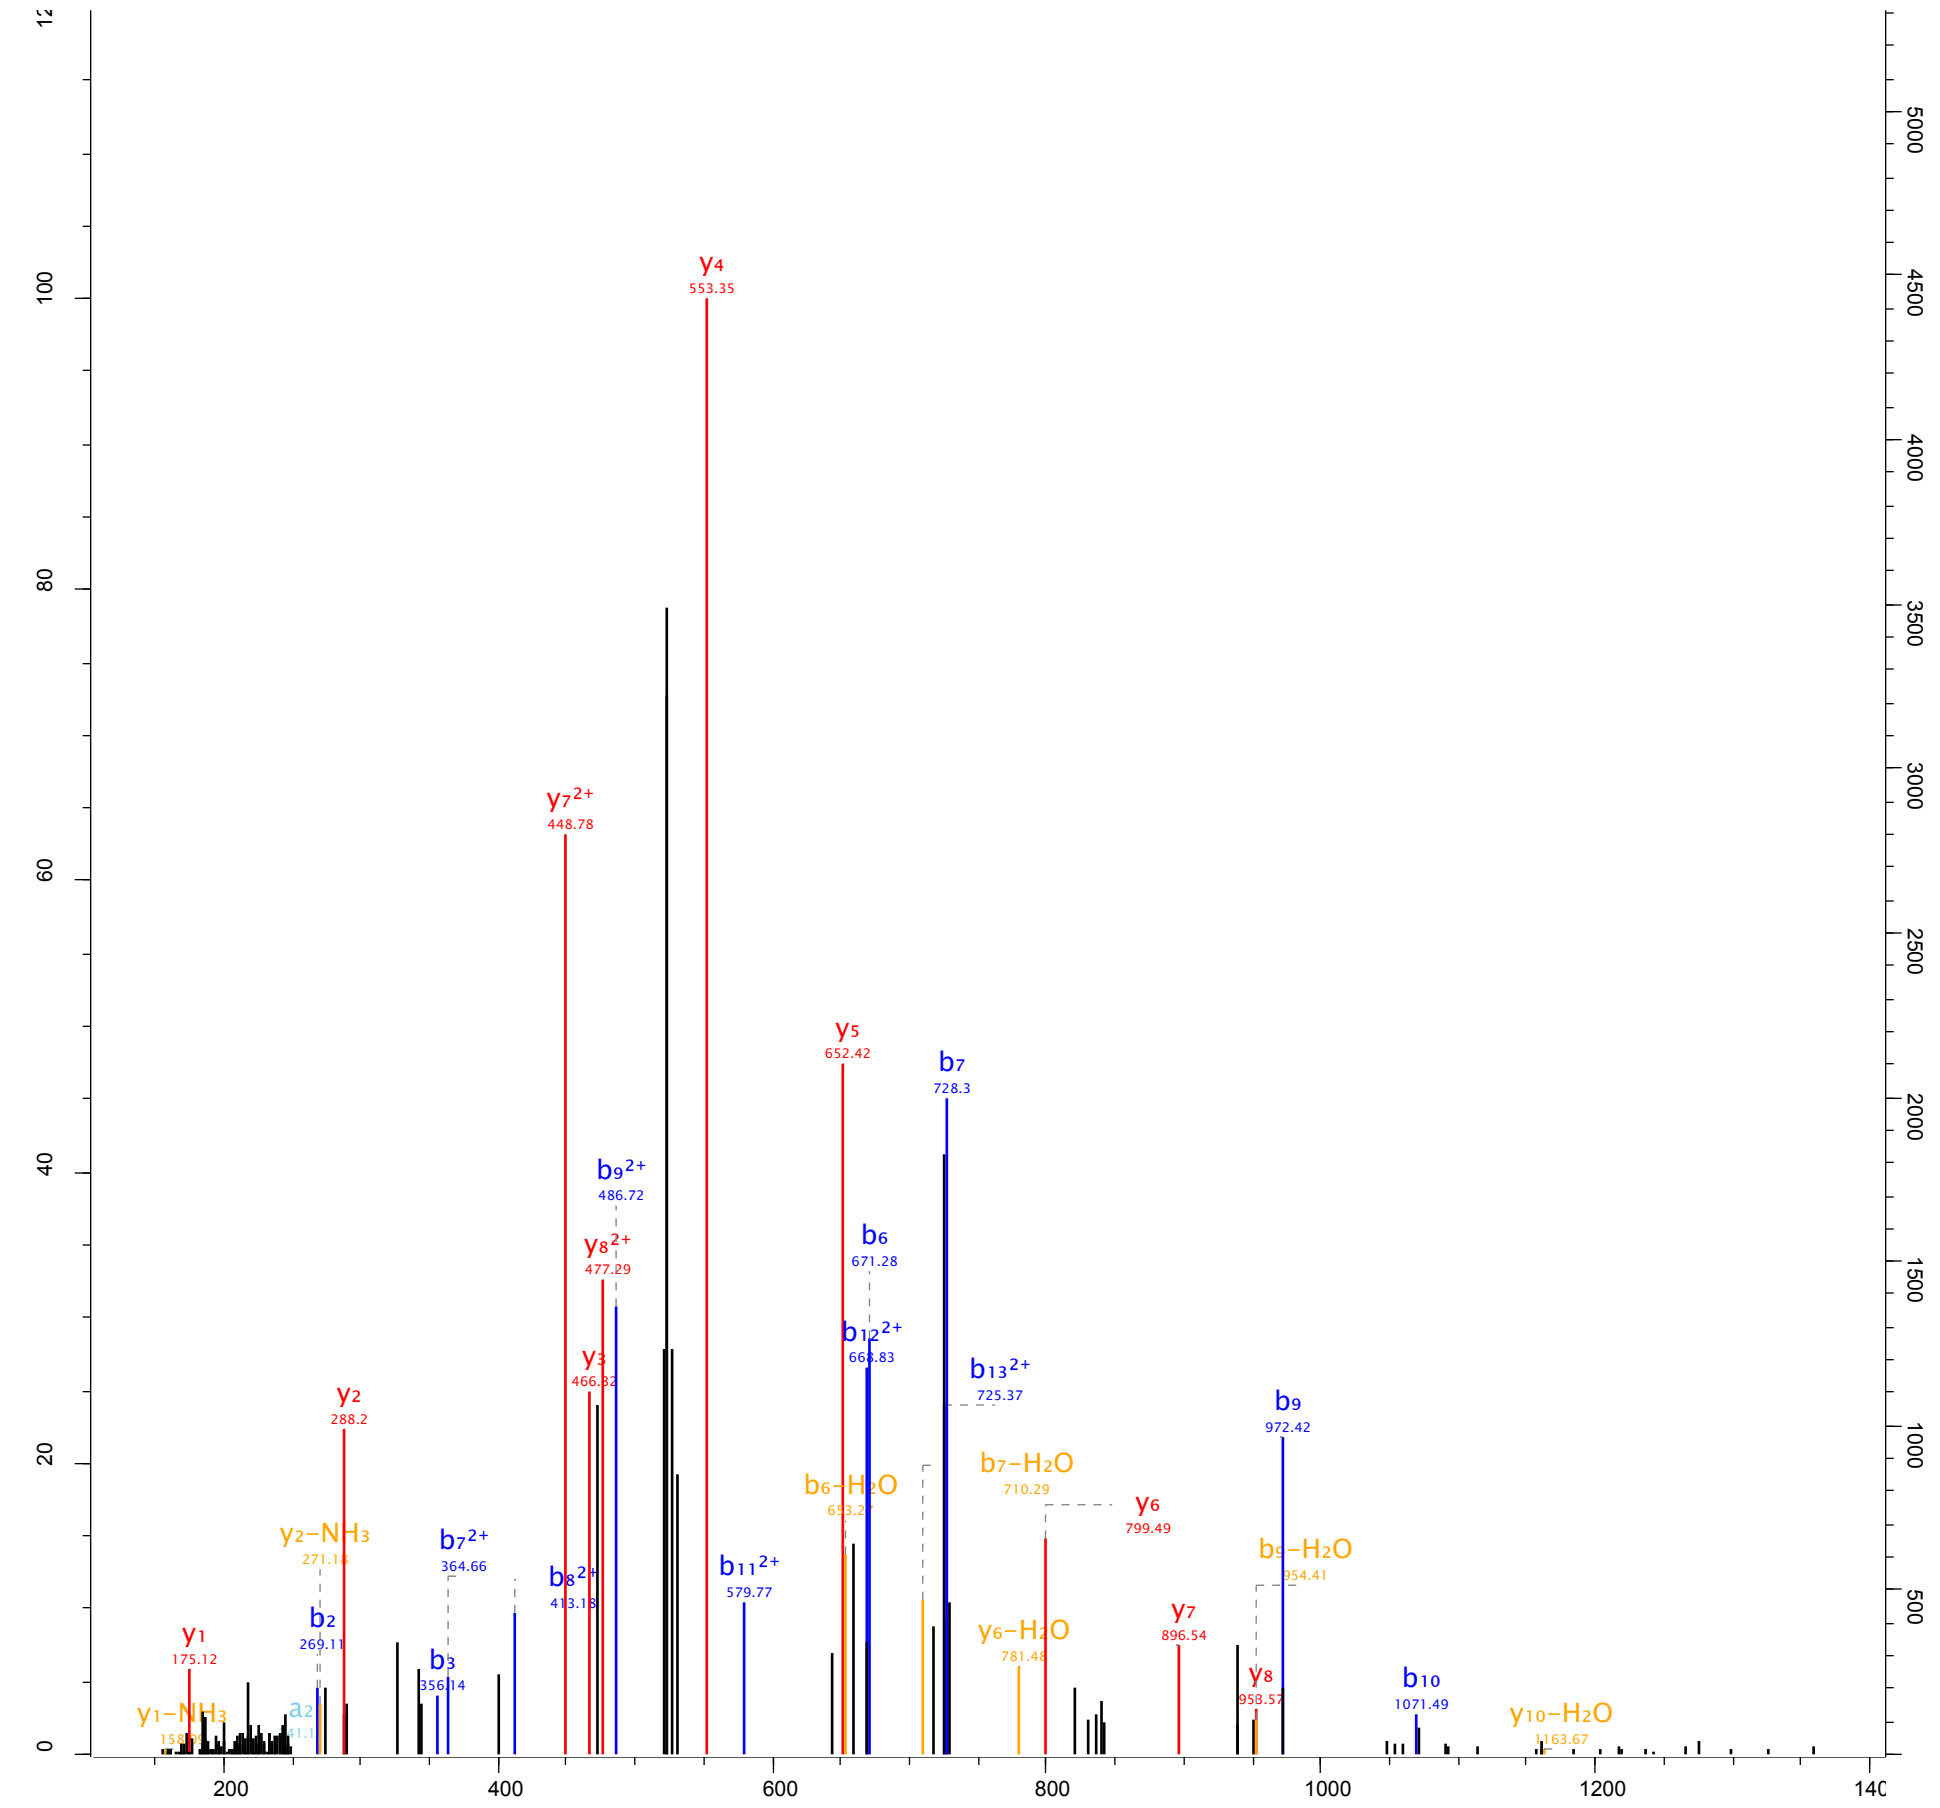

- M H S S E V G P F V S K I R -

b<sub>2</sub>
b<sub>3</sub>
b<sub>6</sub>
b<sub>7</sub>
b<sub>8</sub><sup>2+</sup>
b<sub>9</sub>
b<sub>10</sub>
b<sub>11</sub><sup>2+</sup>
b<sub>12</sub><sup>2+</sup>
b<sub>13</sub><sup>2+</sup>
y<sub>8</sub>
y<sub>7</sub>
y<sub>6</sub>
y<sub>5</sub>
y<sub>4</sub>
y<sub>3</sub>
y<sub>2</sub>
y<sub>1</sub>

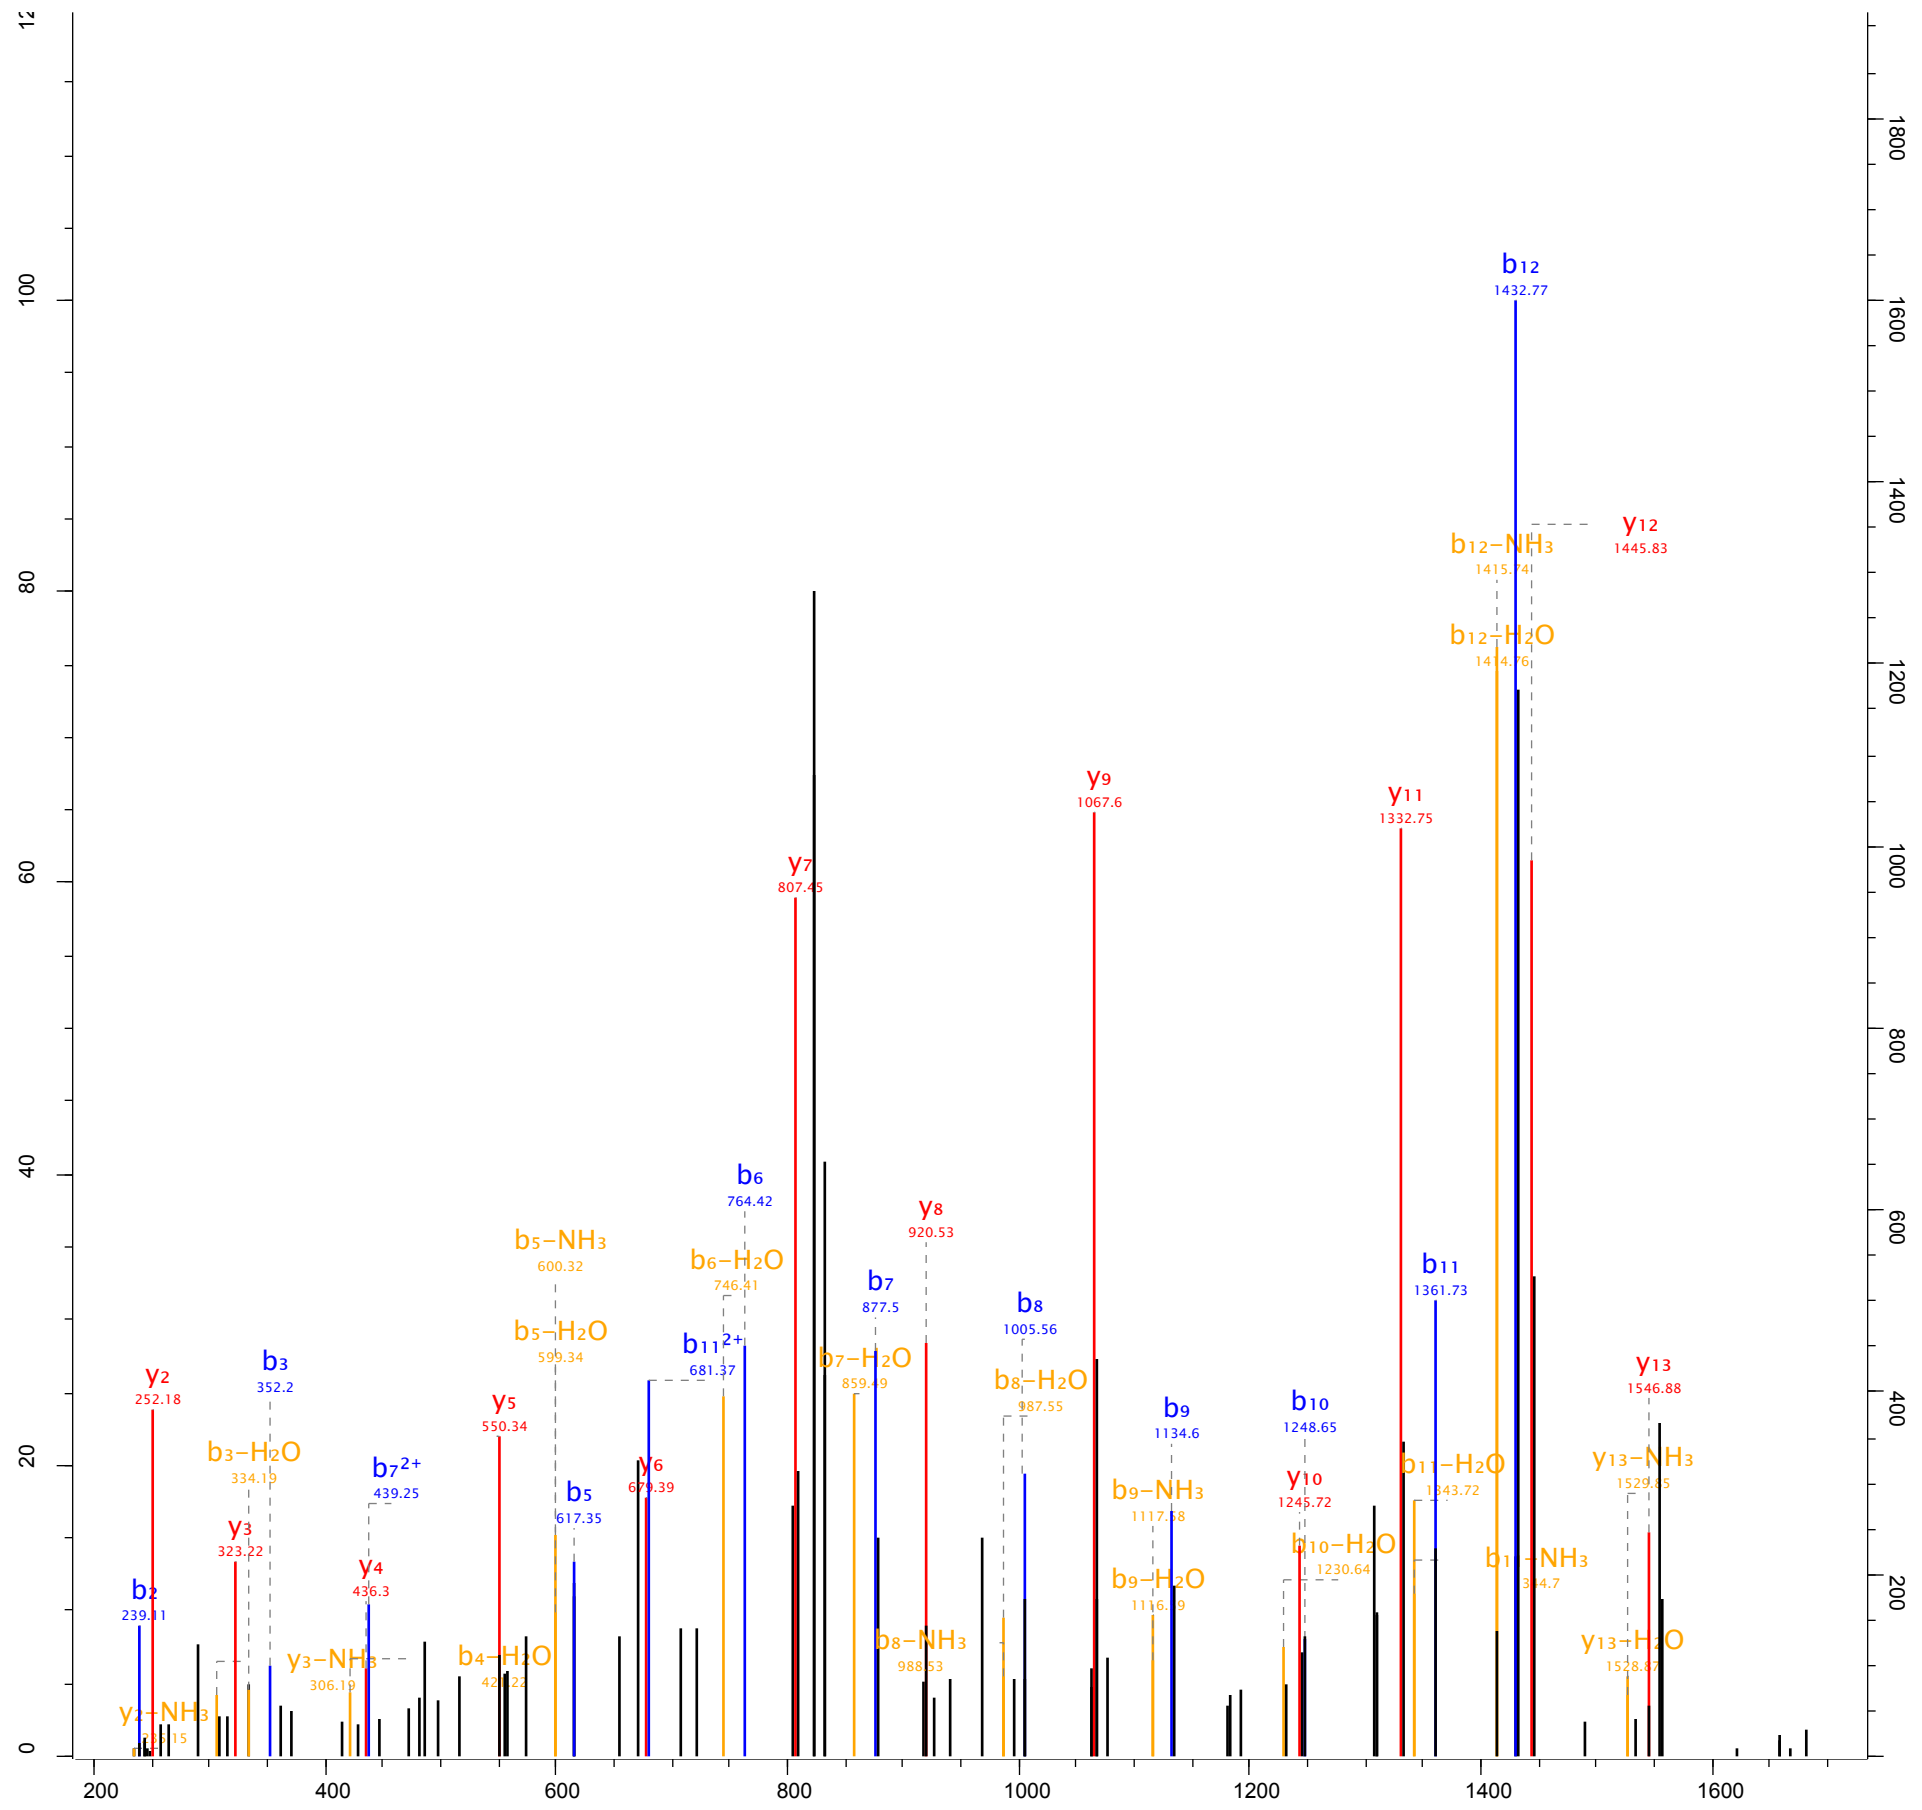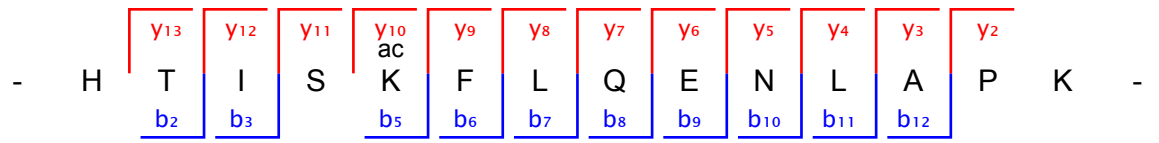

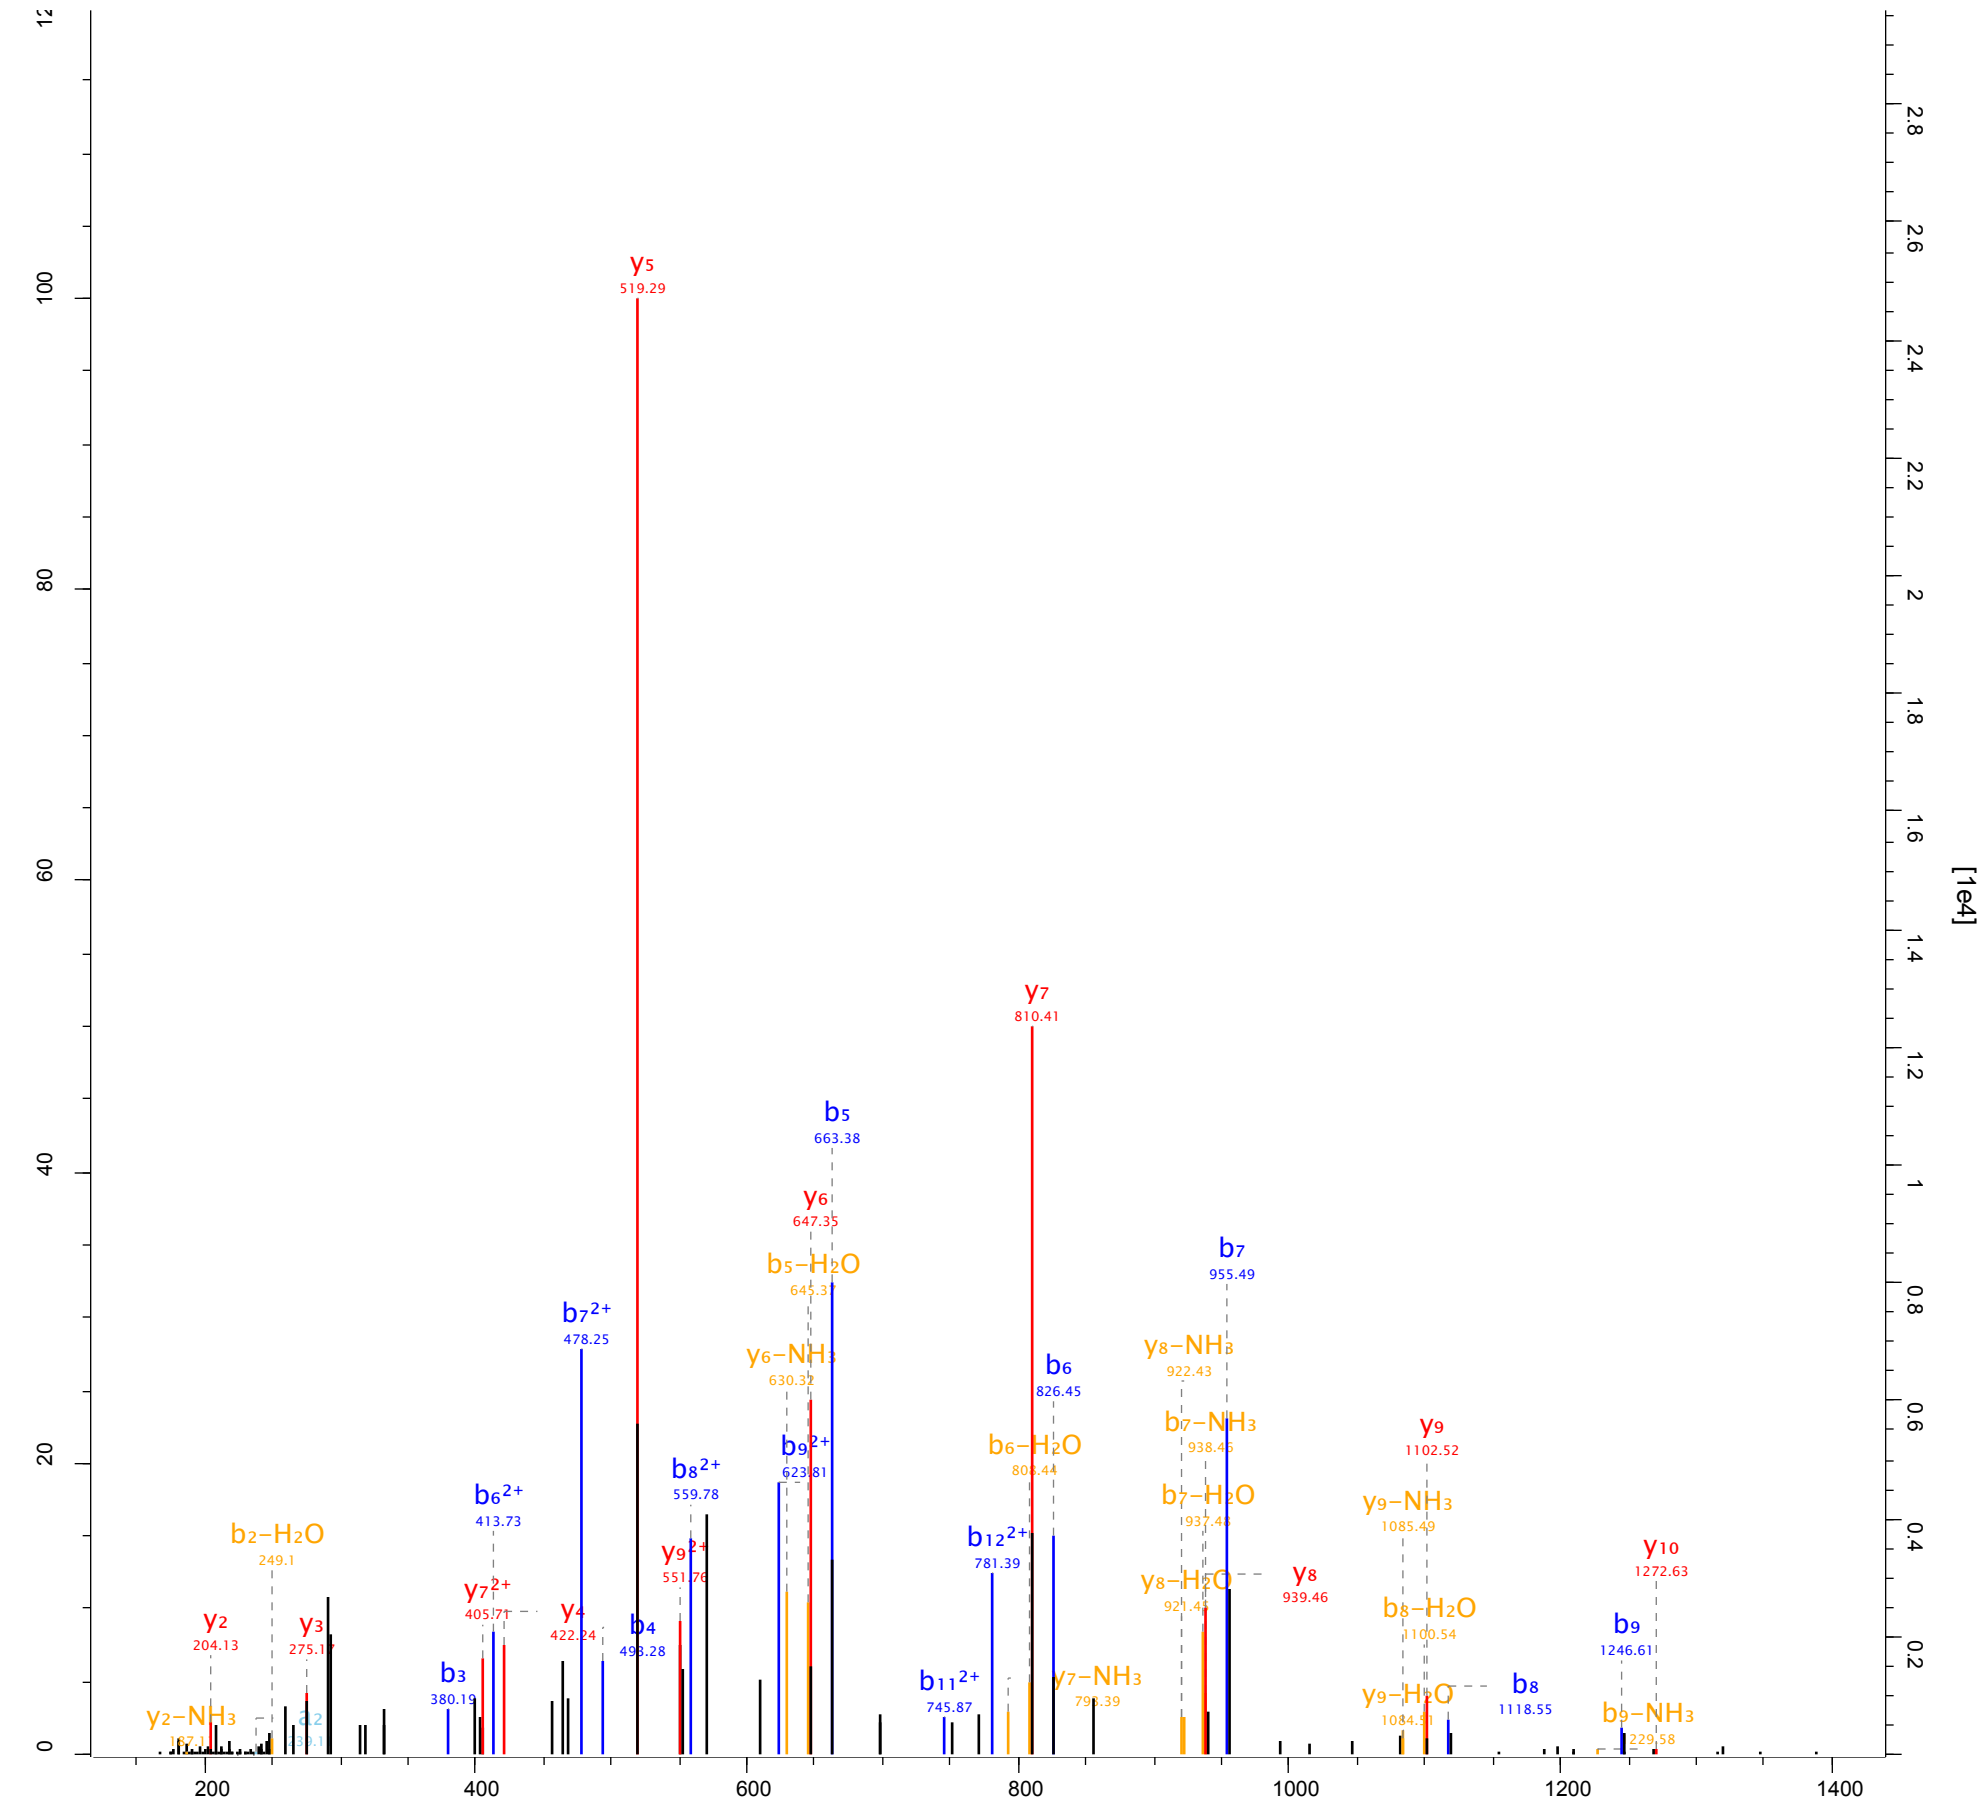

- E H L L K Y E Y Q P F A G K -

a<sub>2</sub>
b<sub>3</sub>
b<sub>4</sub>
b<sub>5</sub>
b<sub>6</sub>
b<sub>7</sub>
b<sub>8</sub>
b<sub>9</sub>
b<sub>11</sub><sup>2+</sup>
b<sub>12</sub><sup>2+</sup>

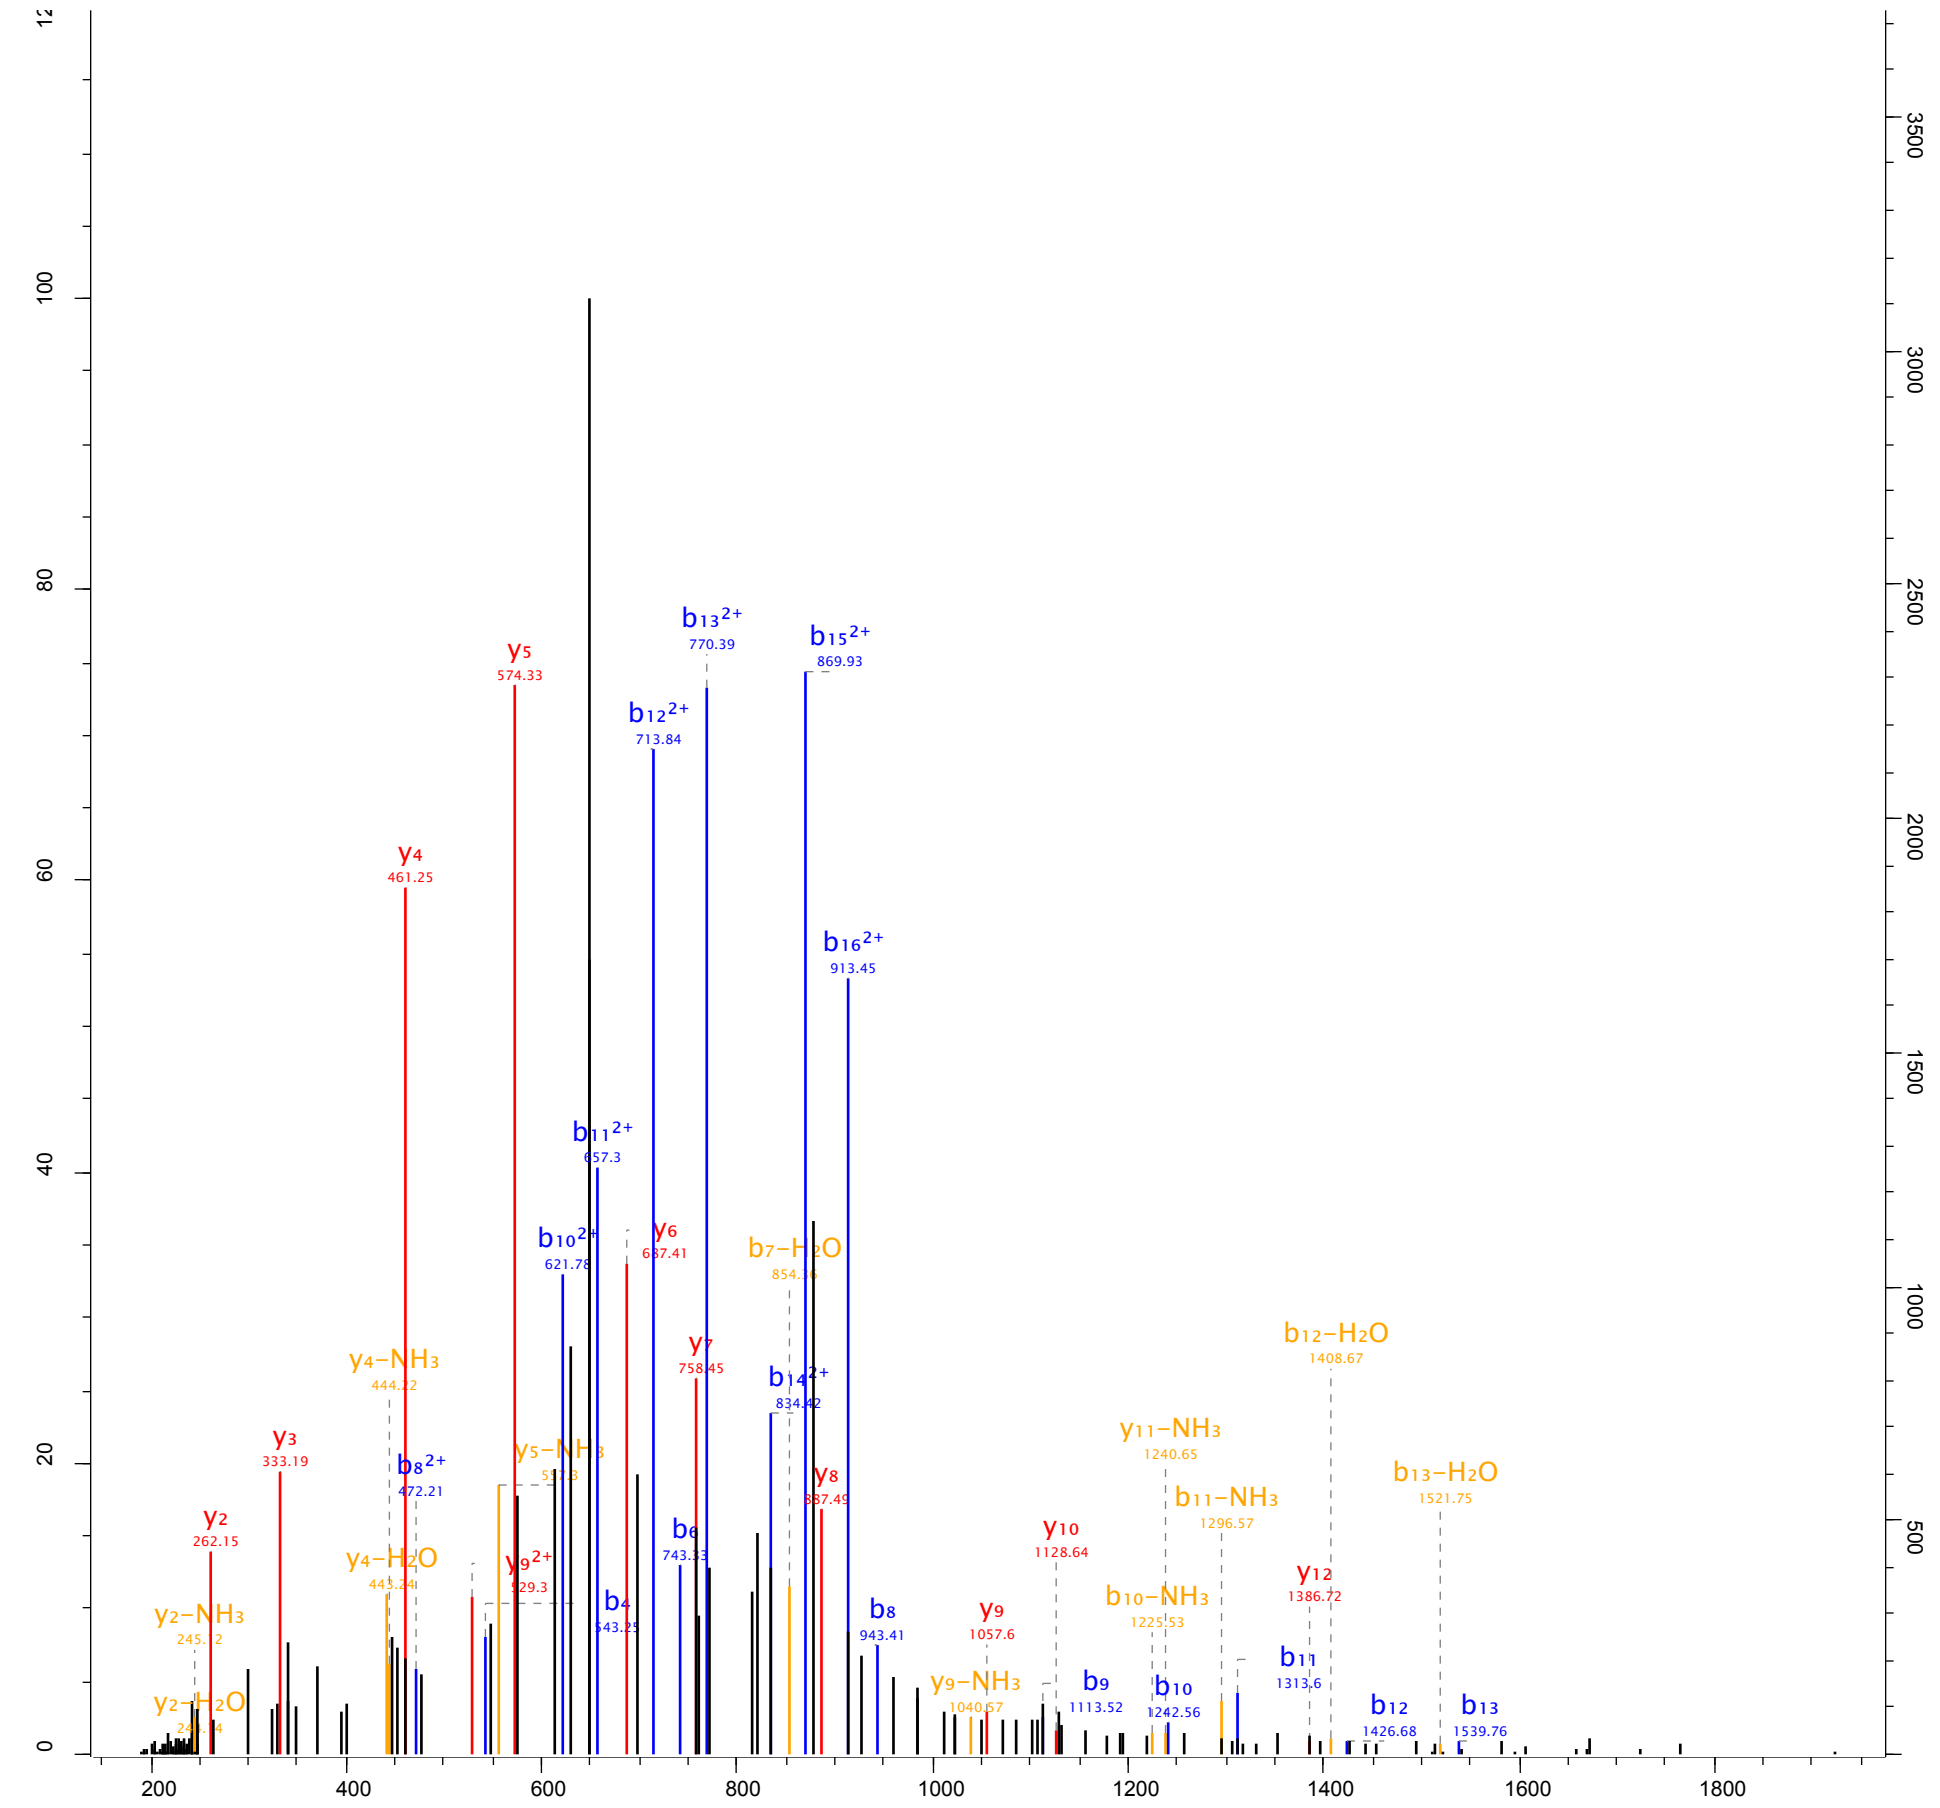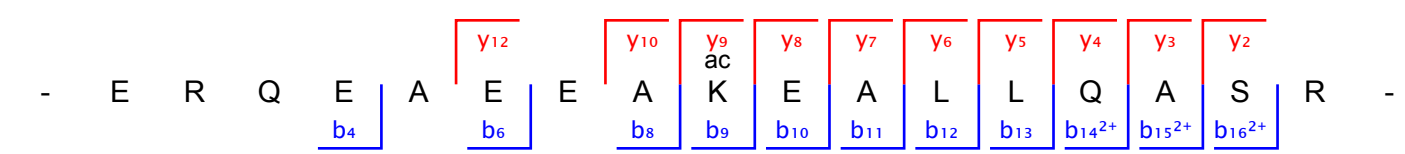

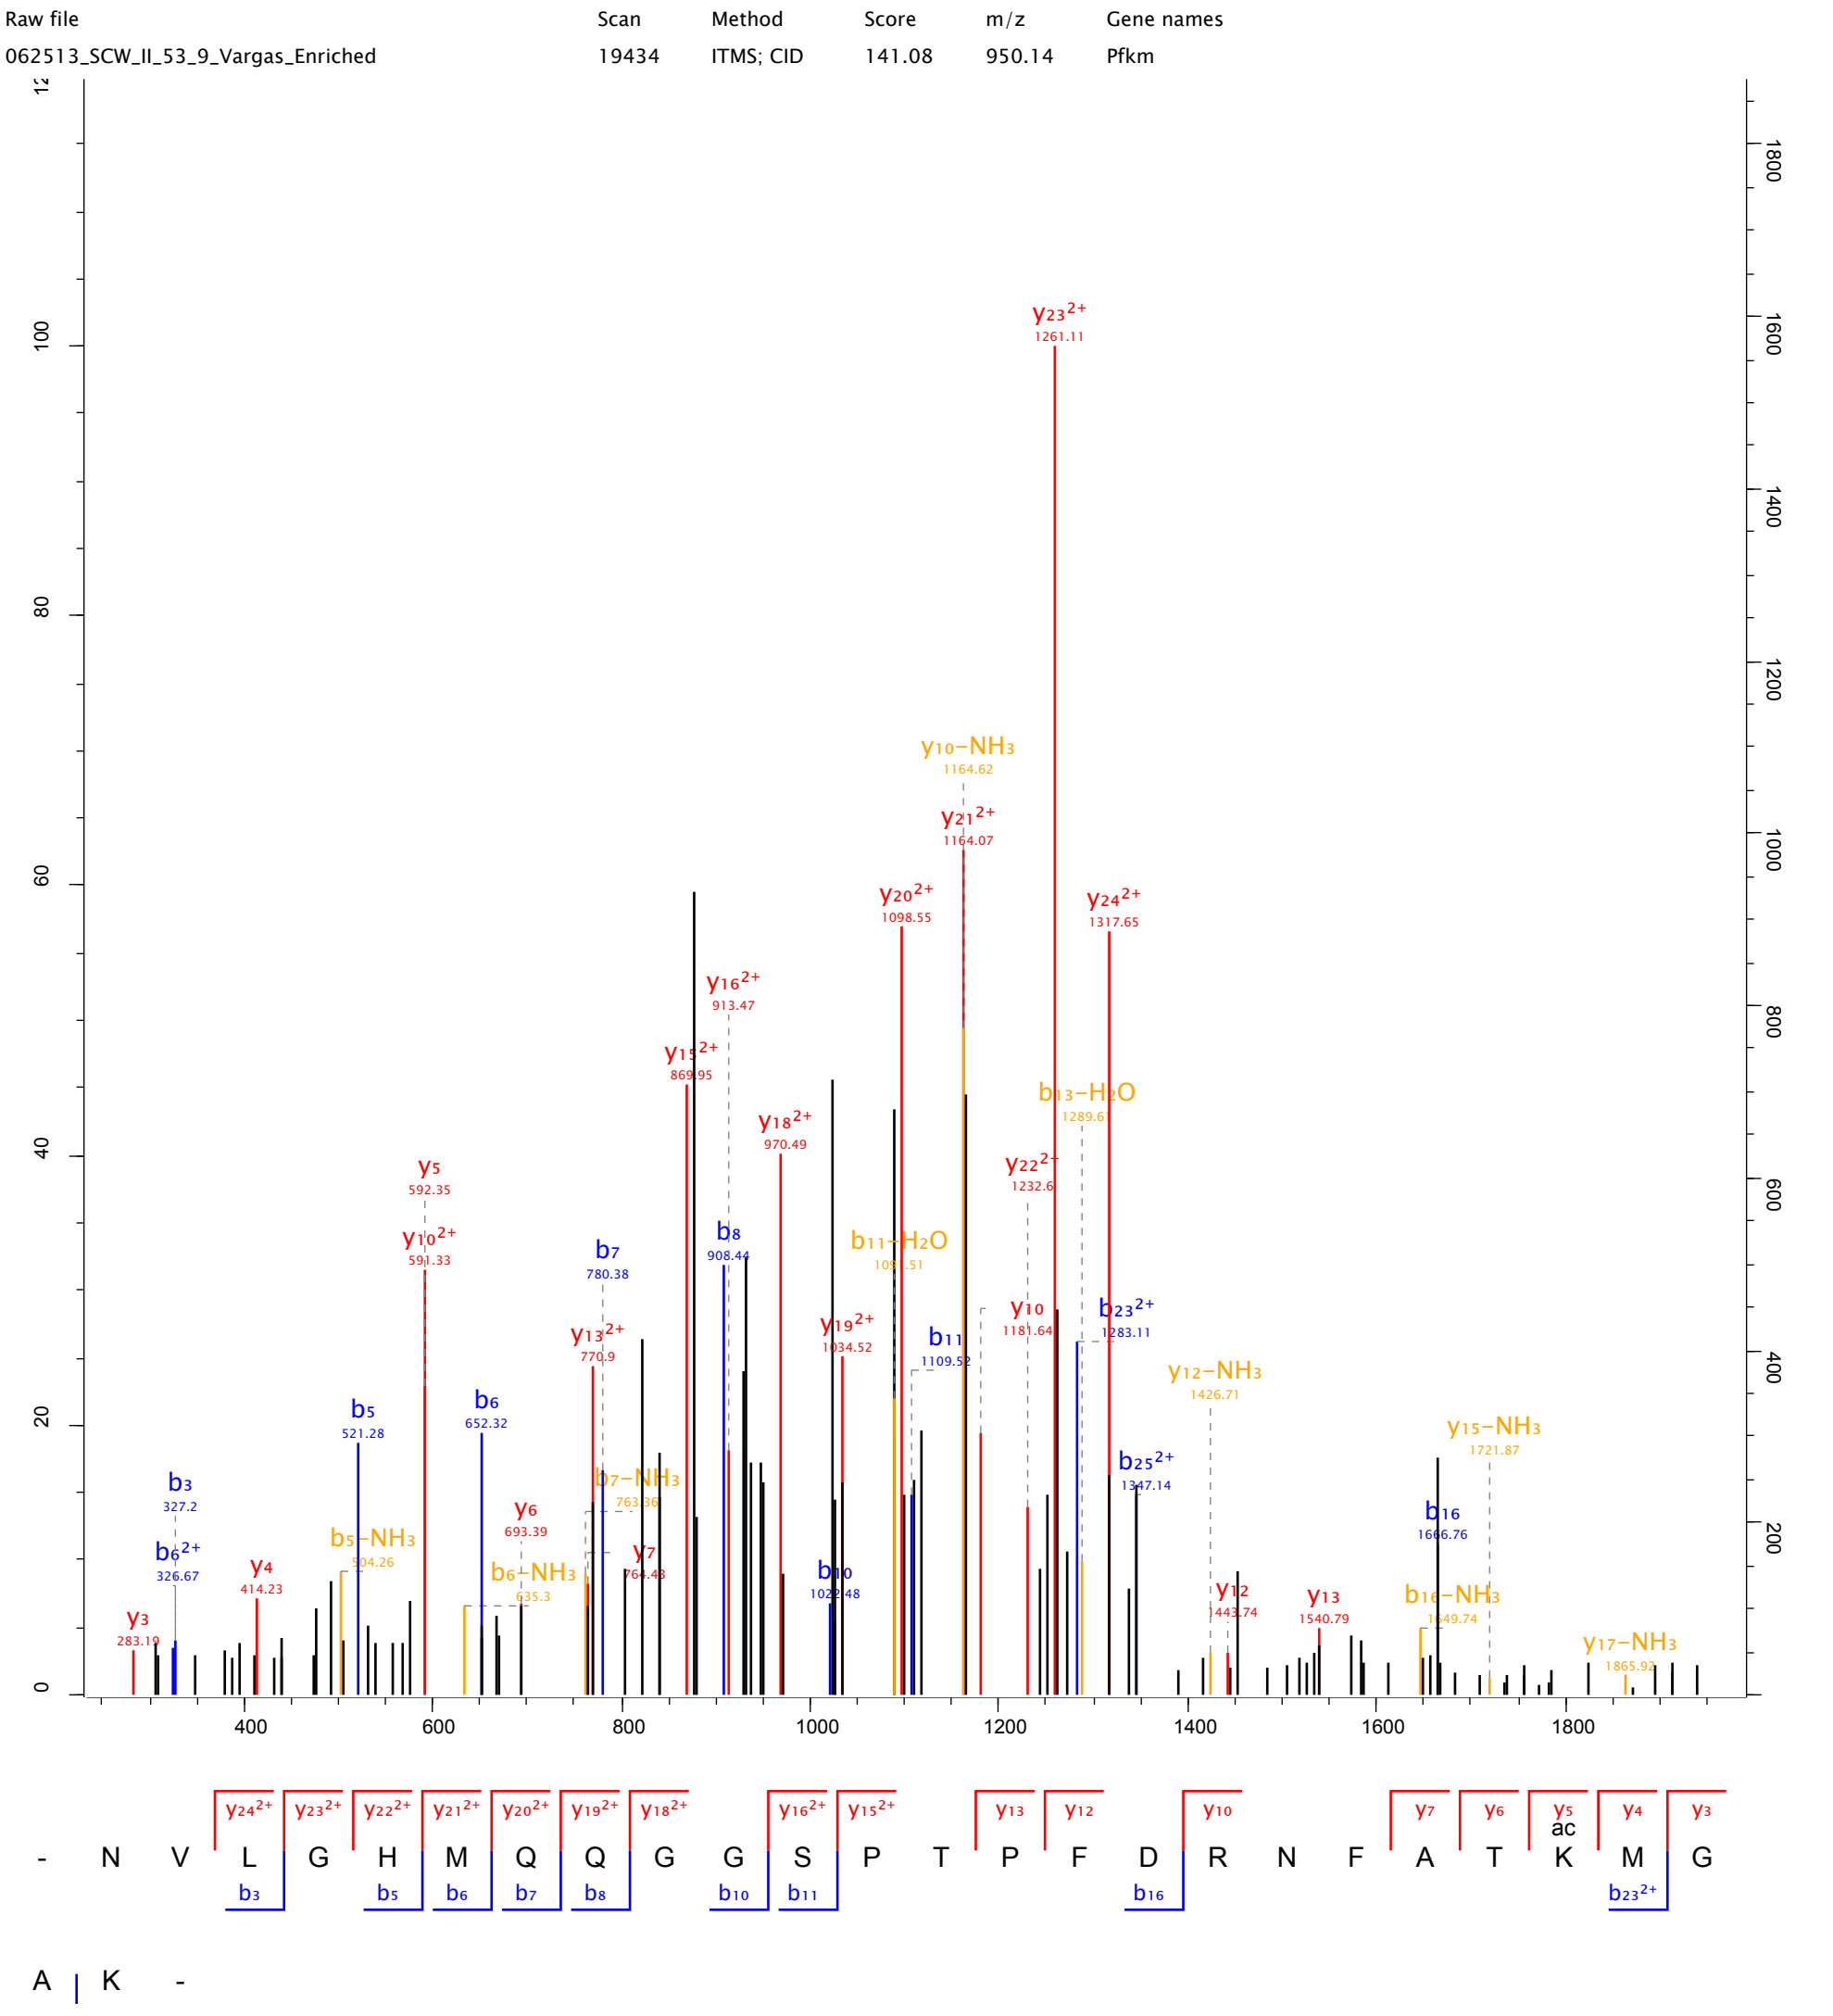

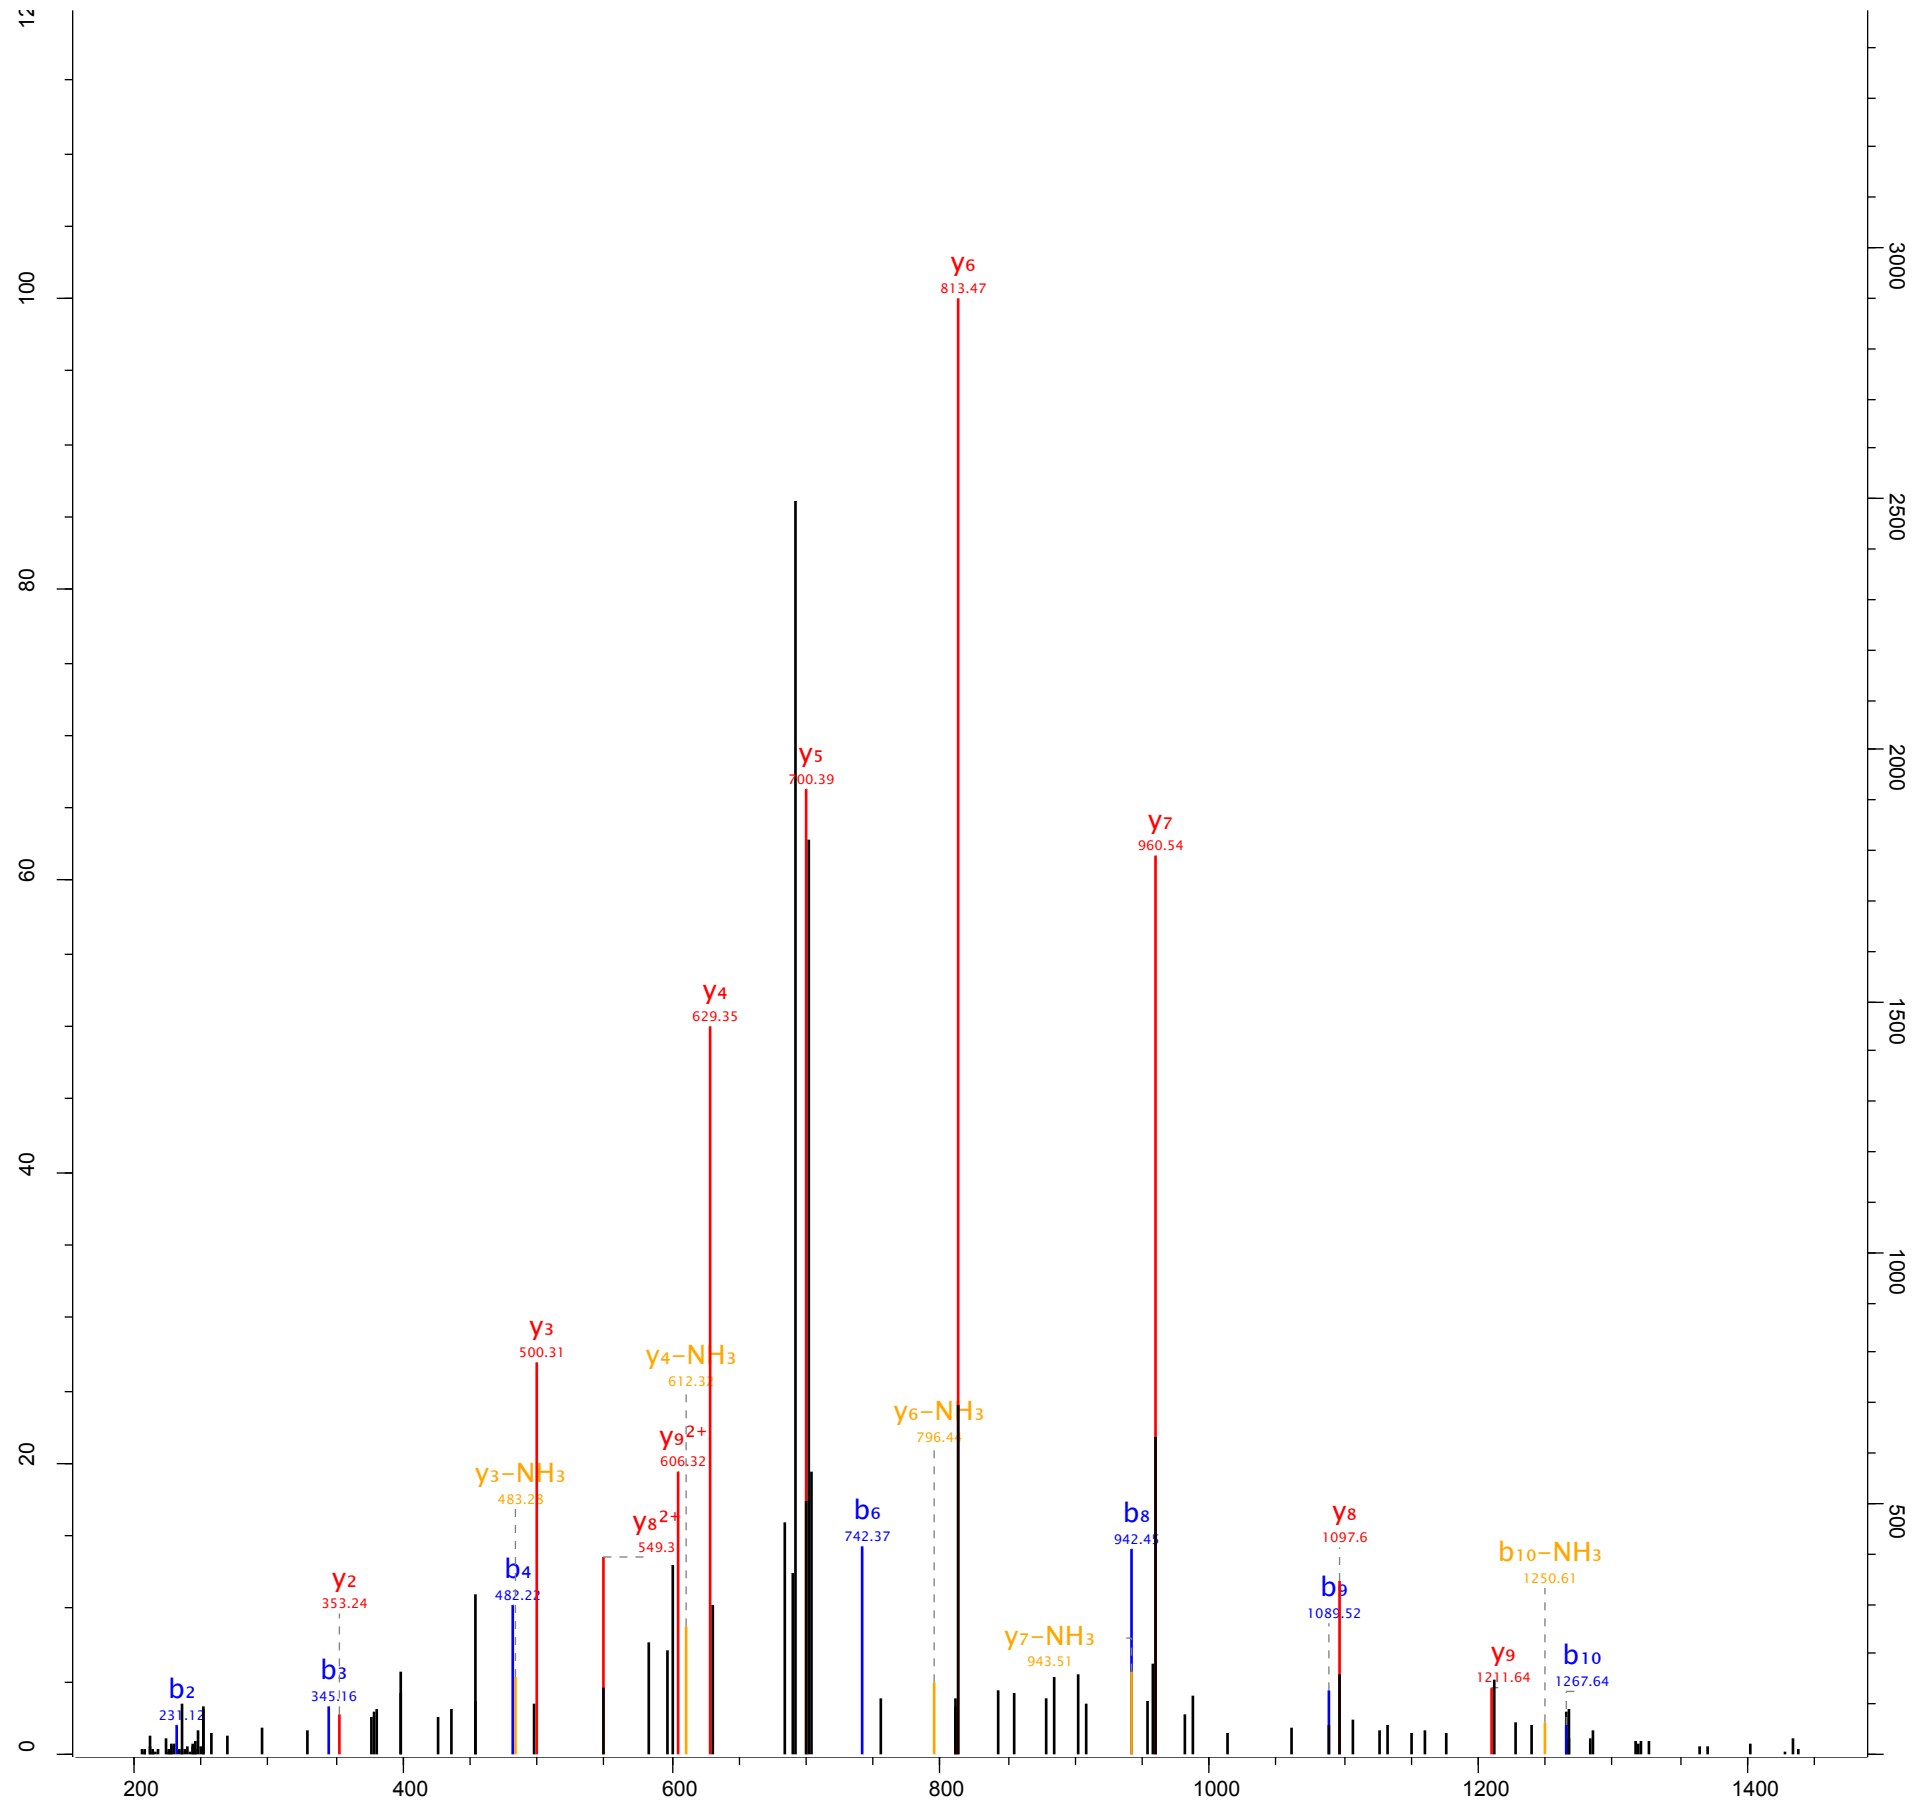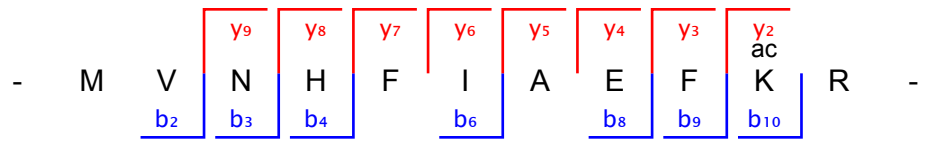

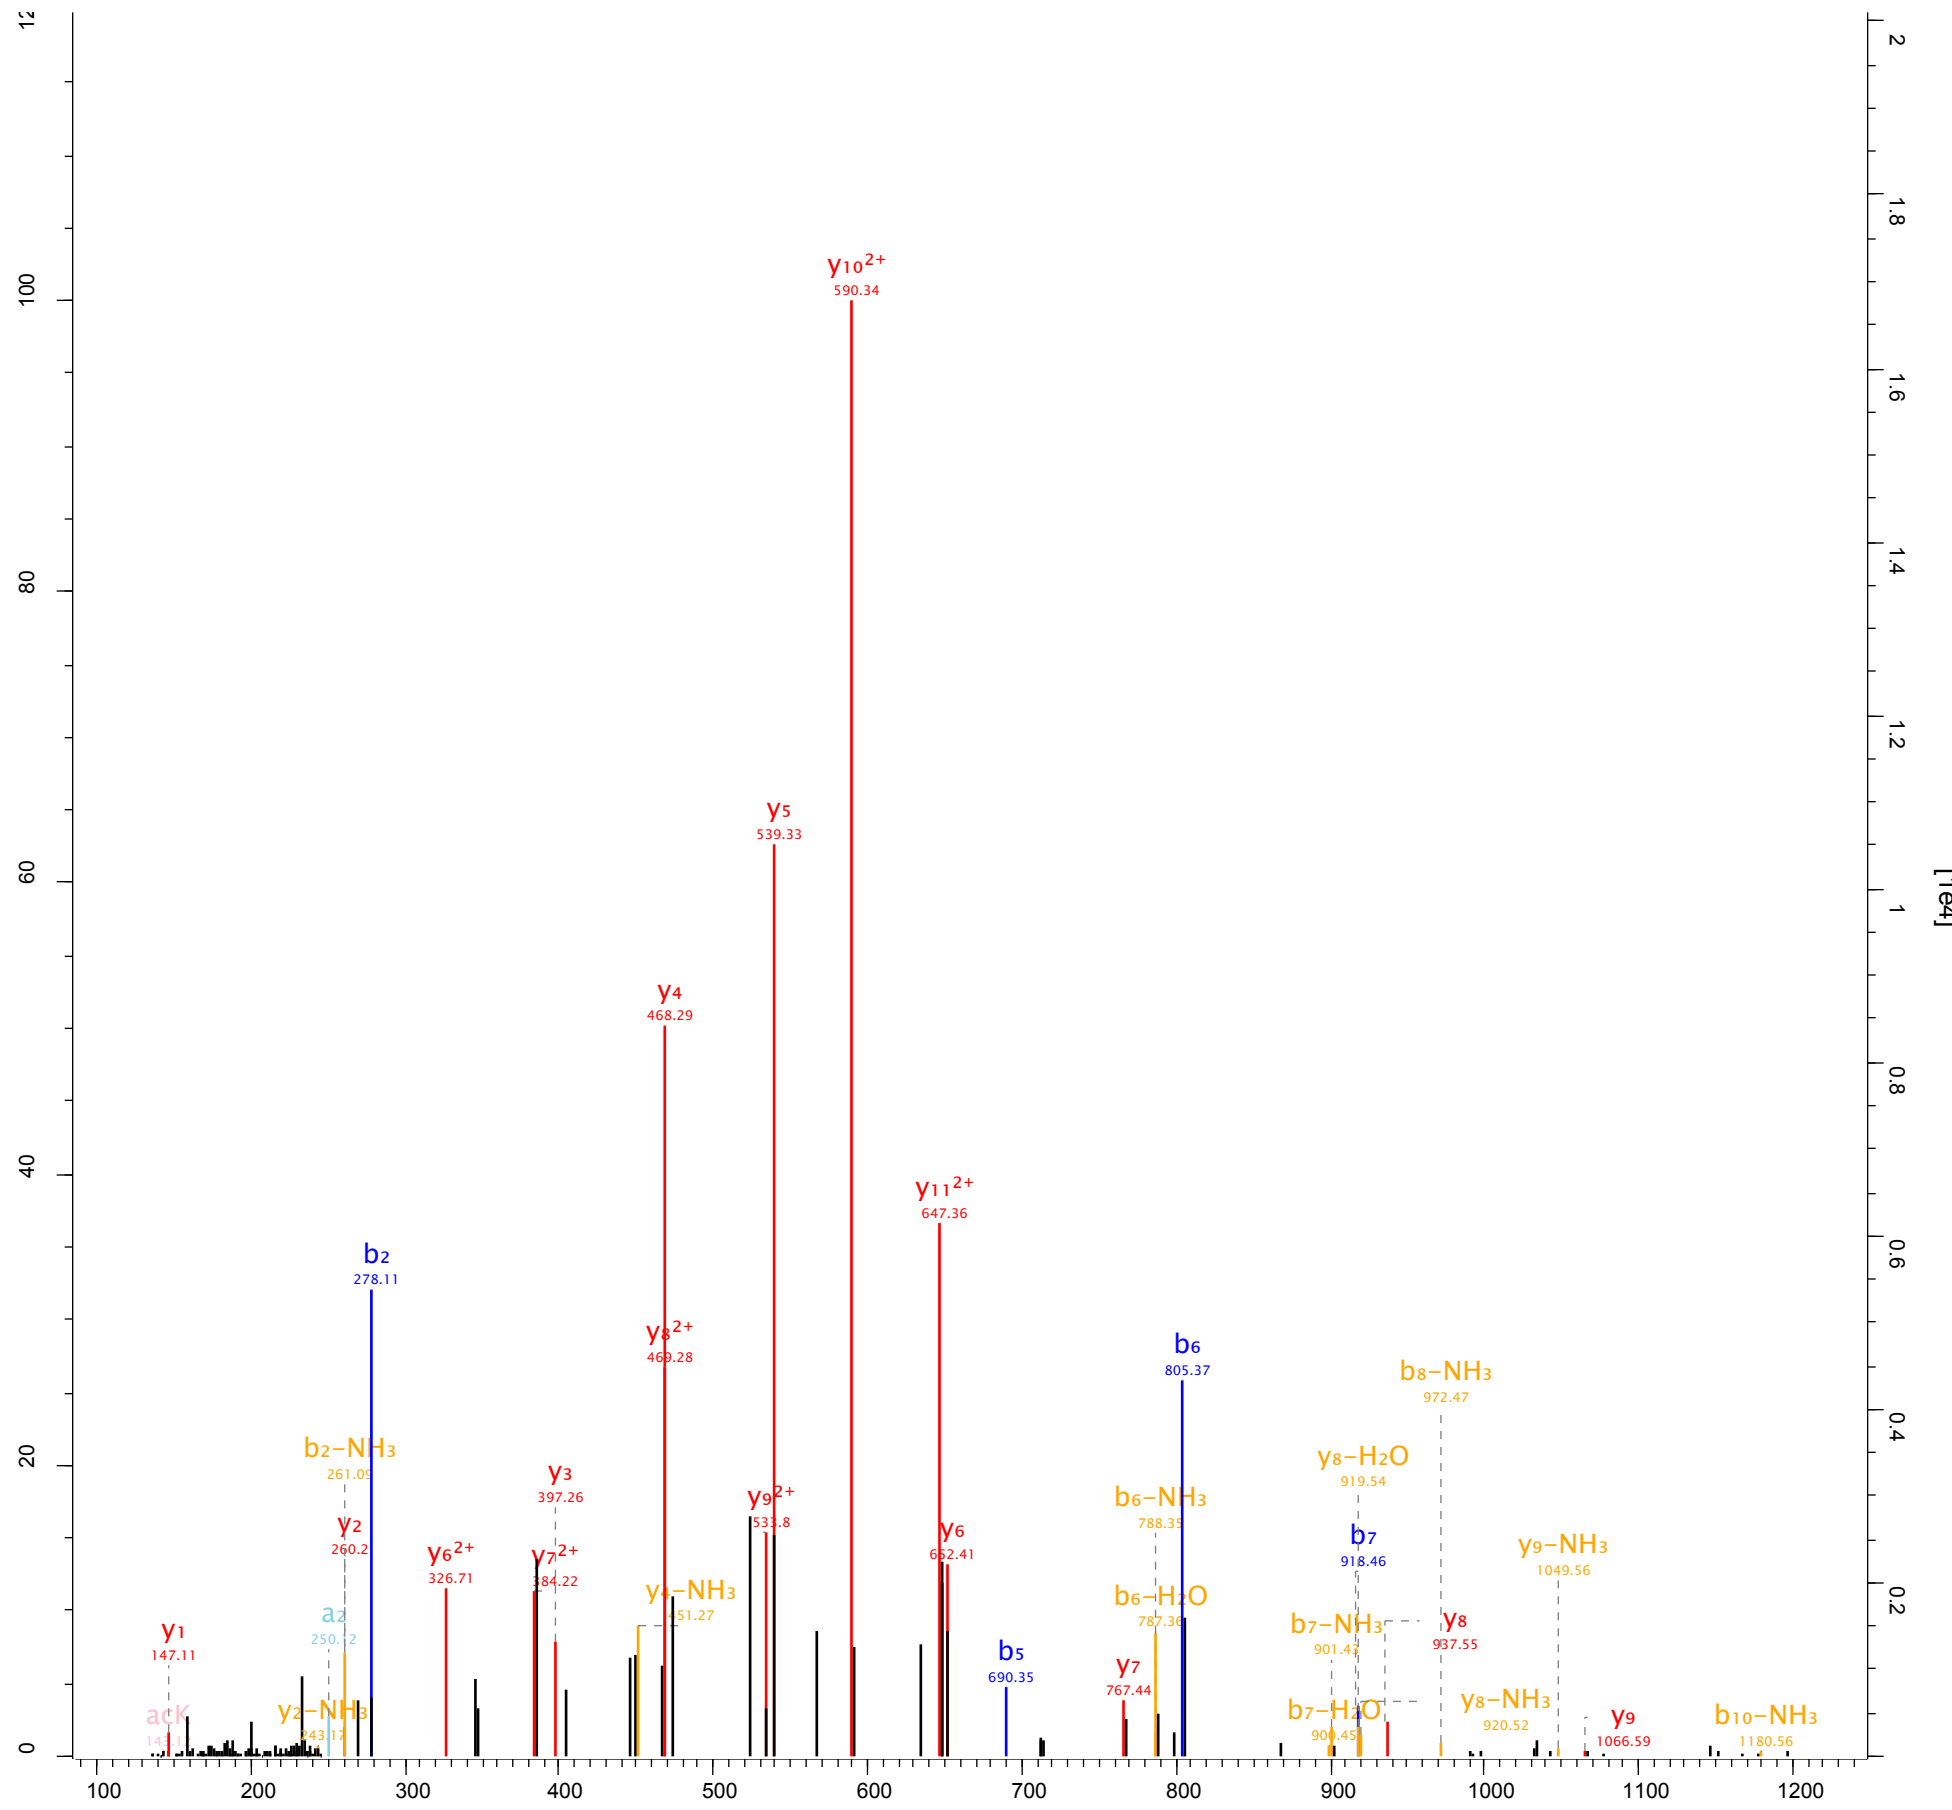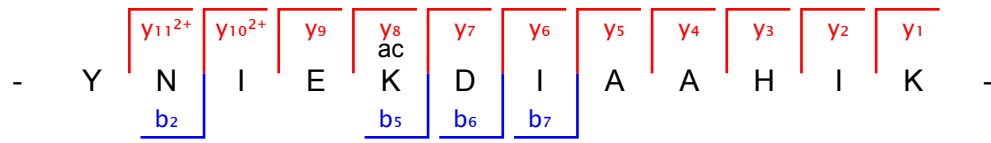



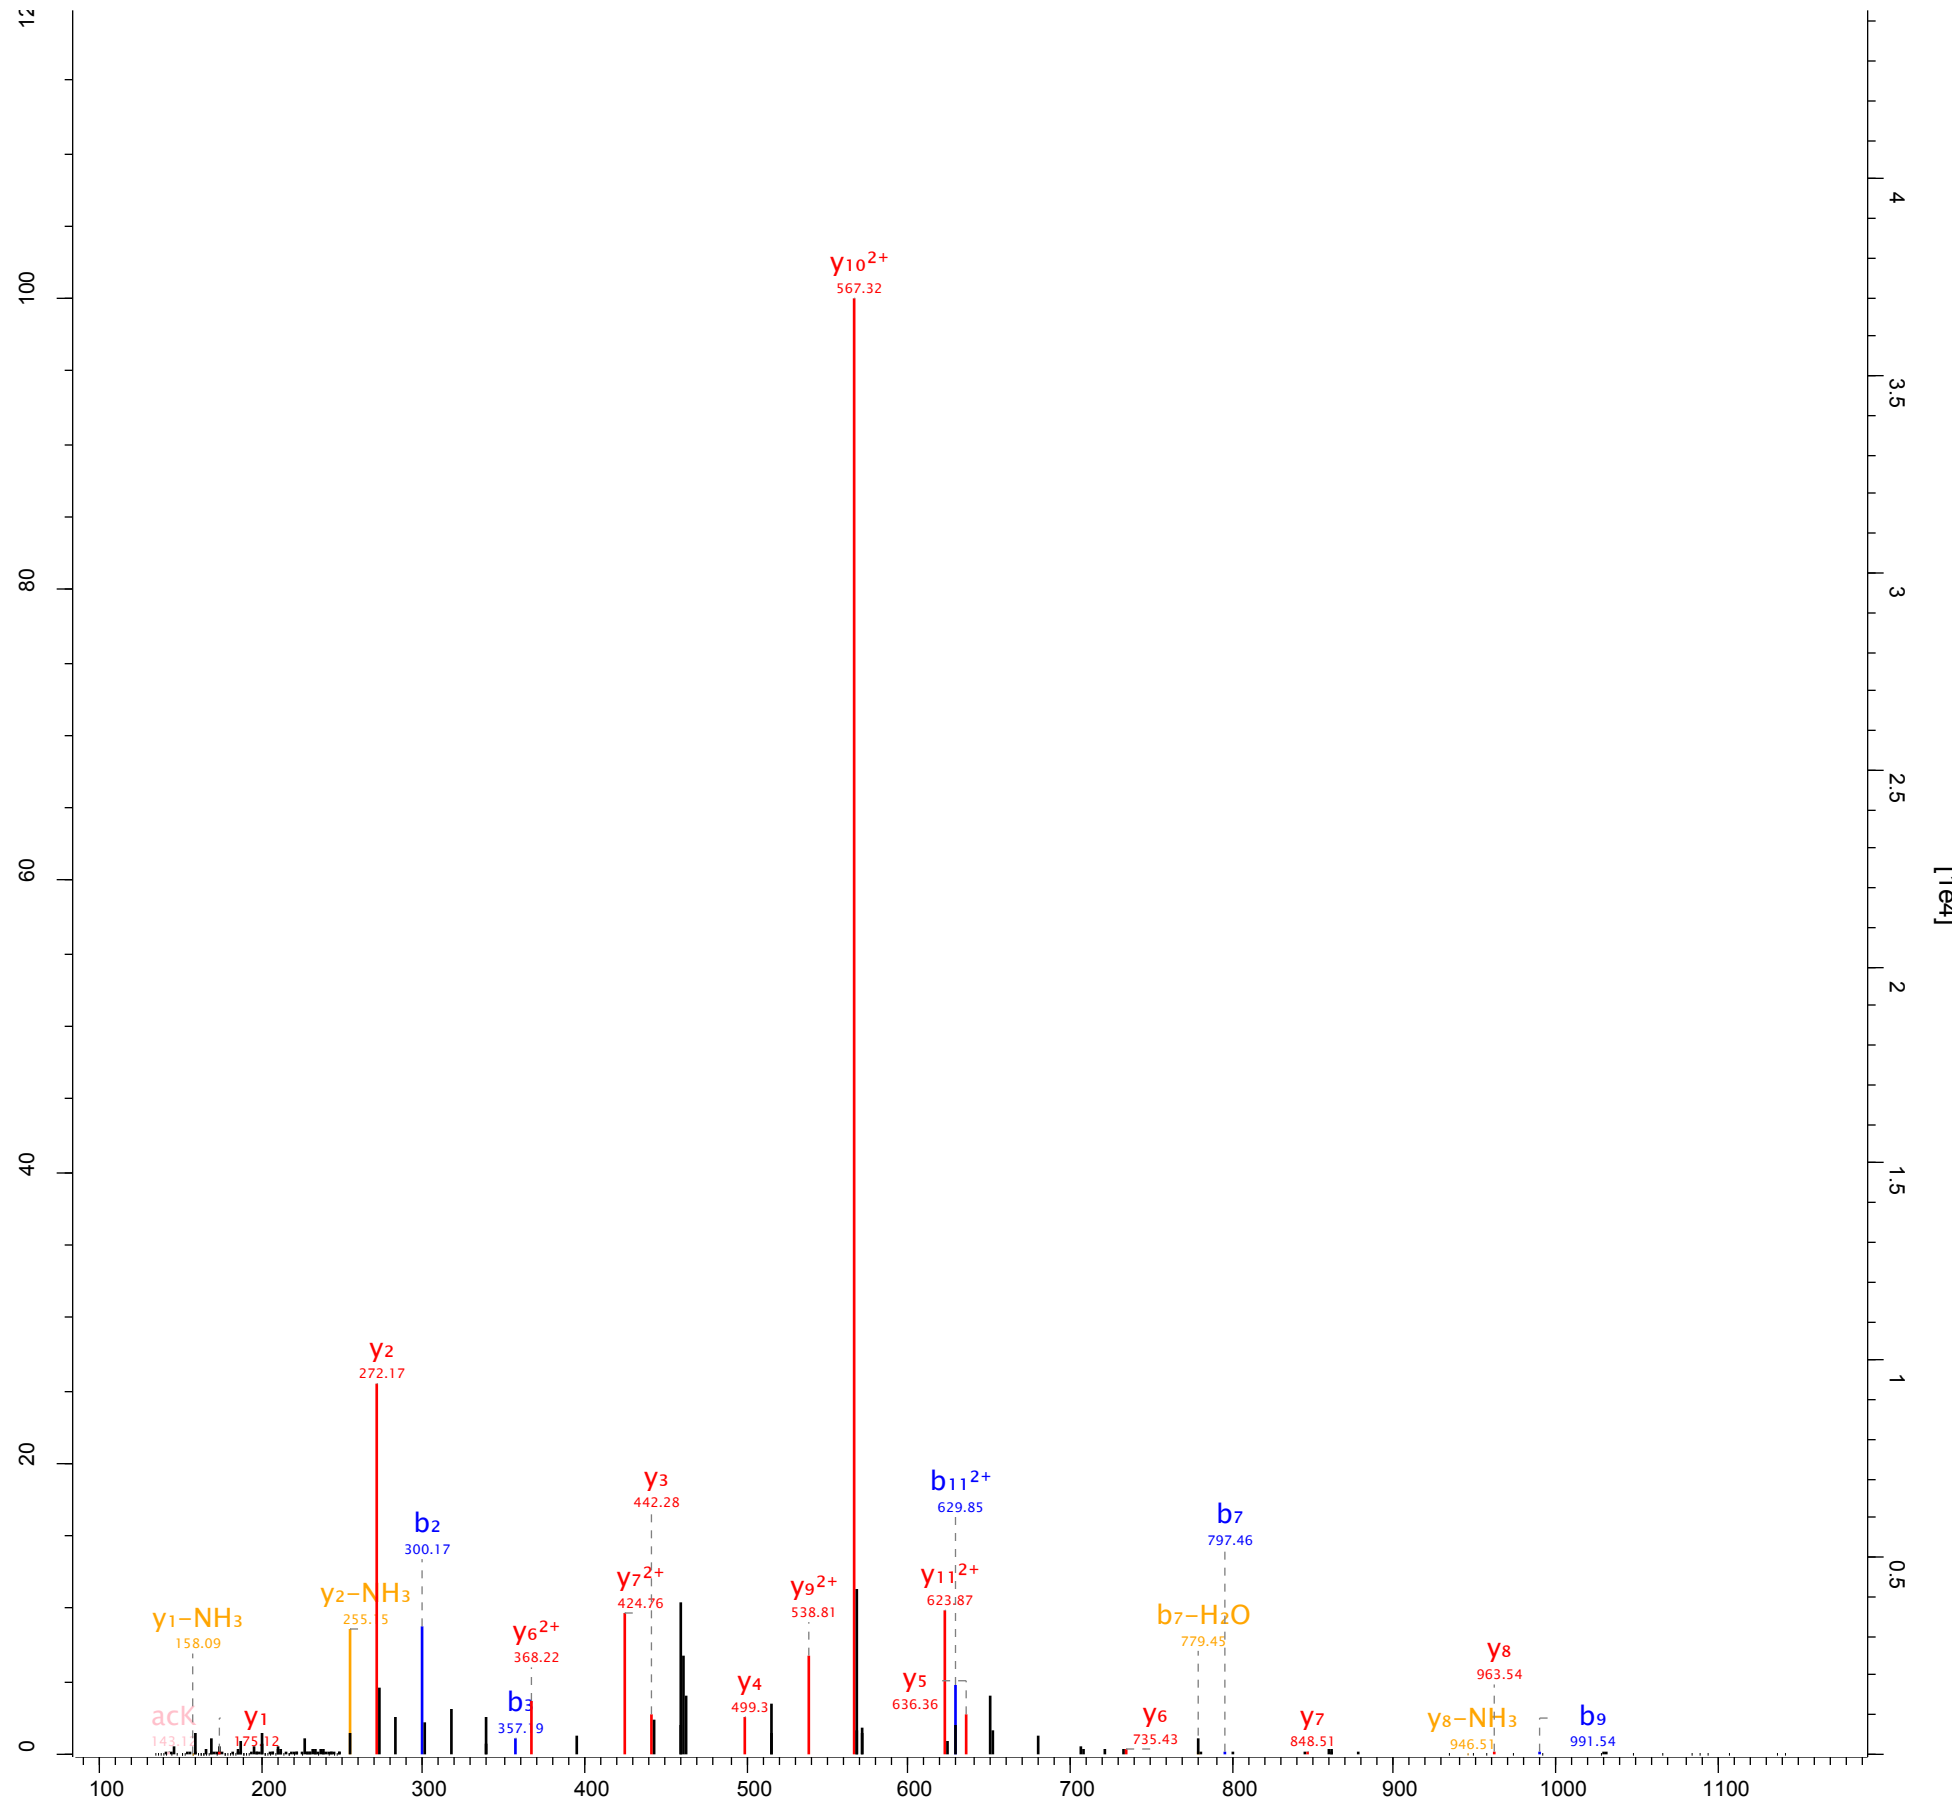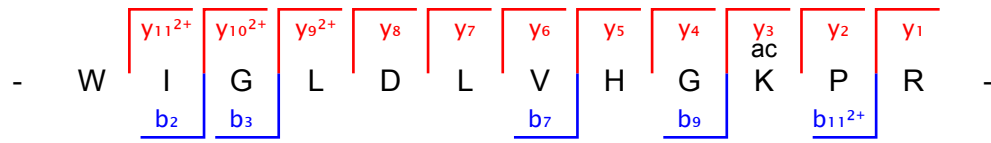

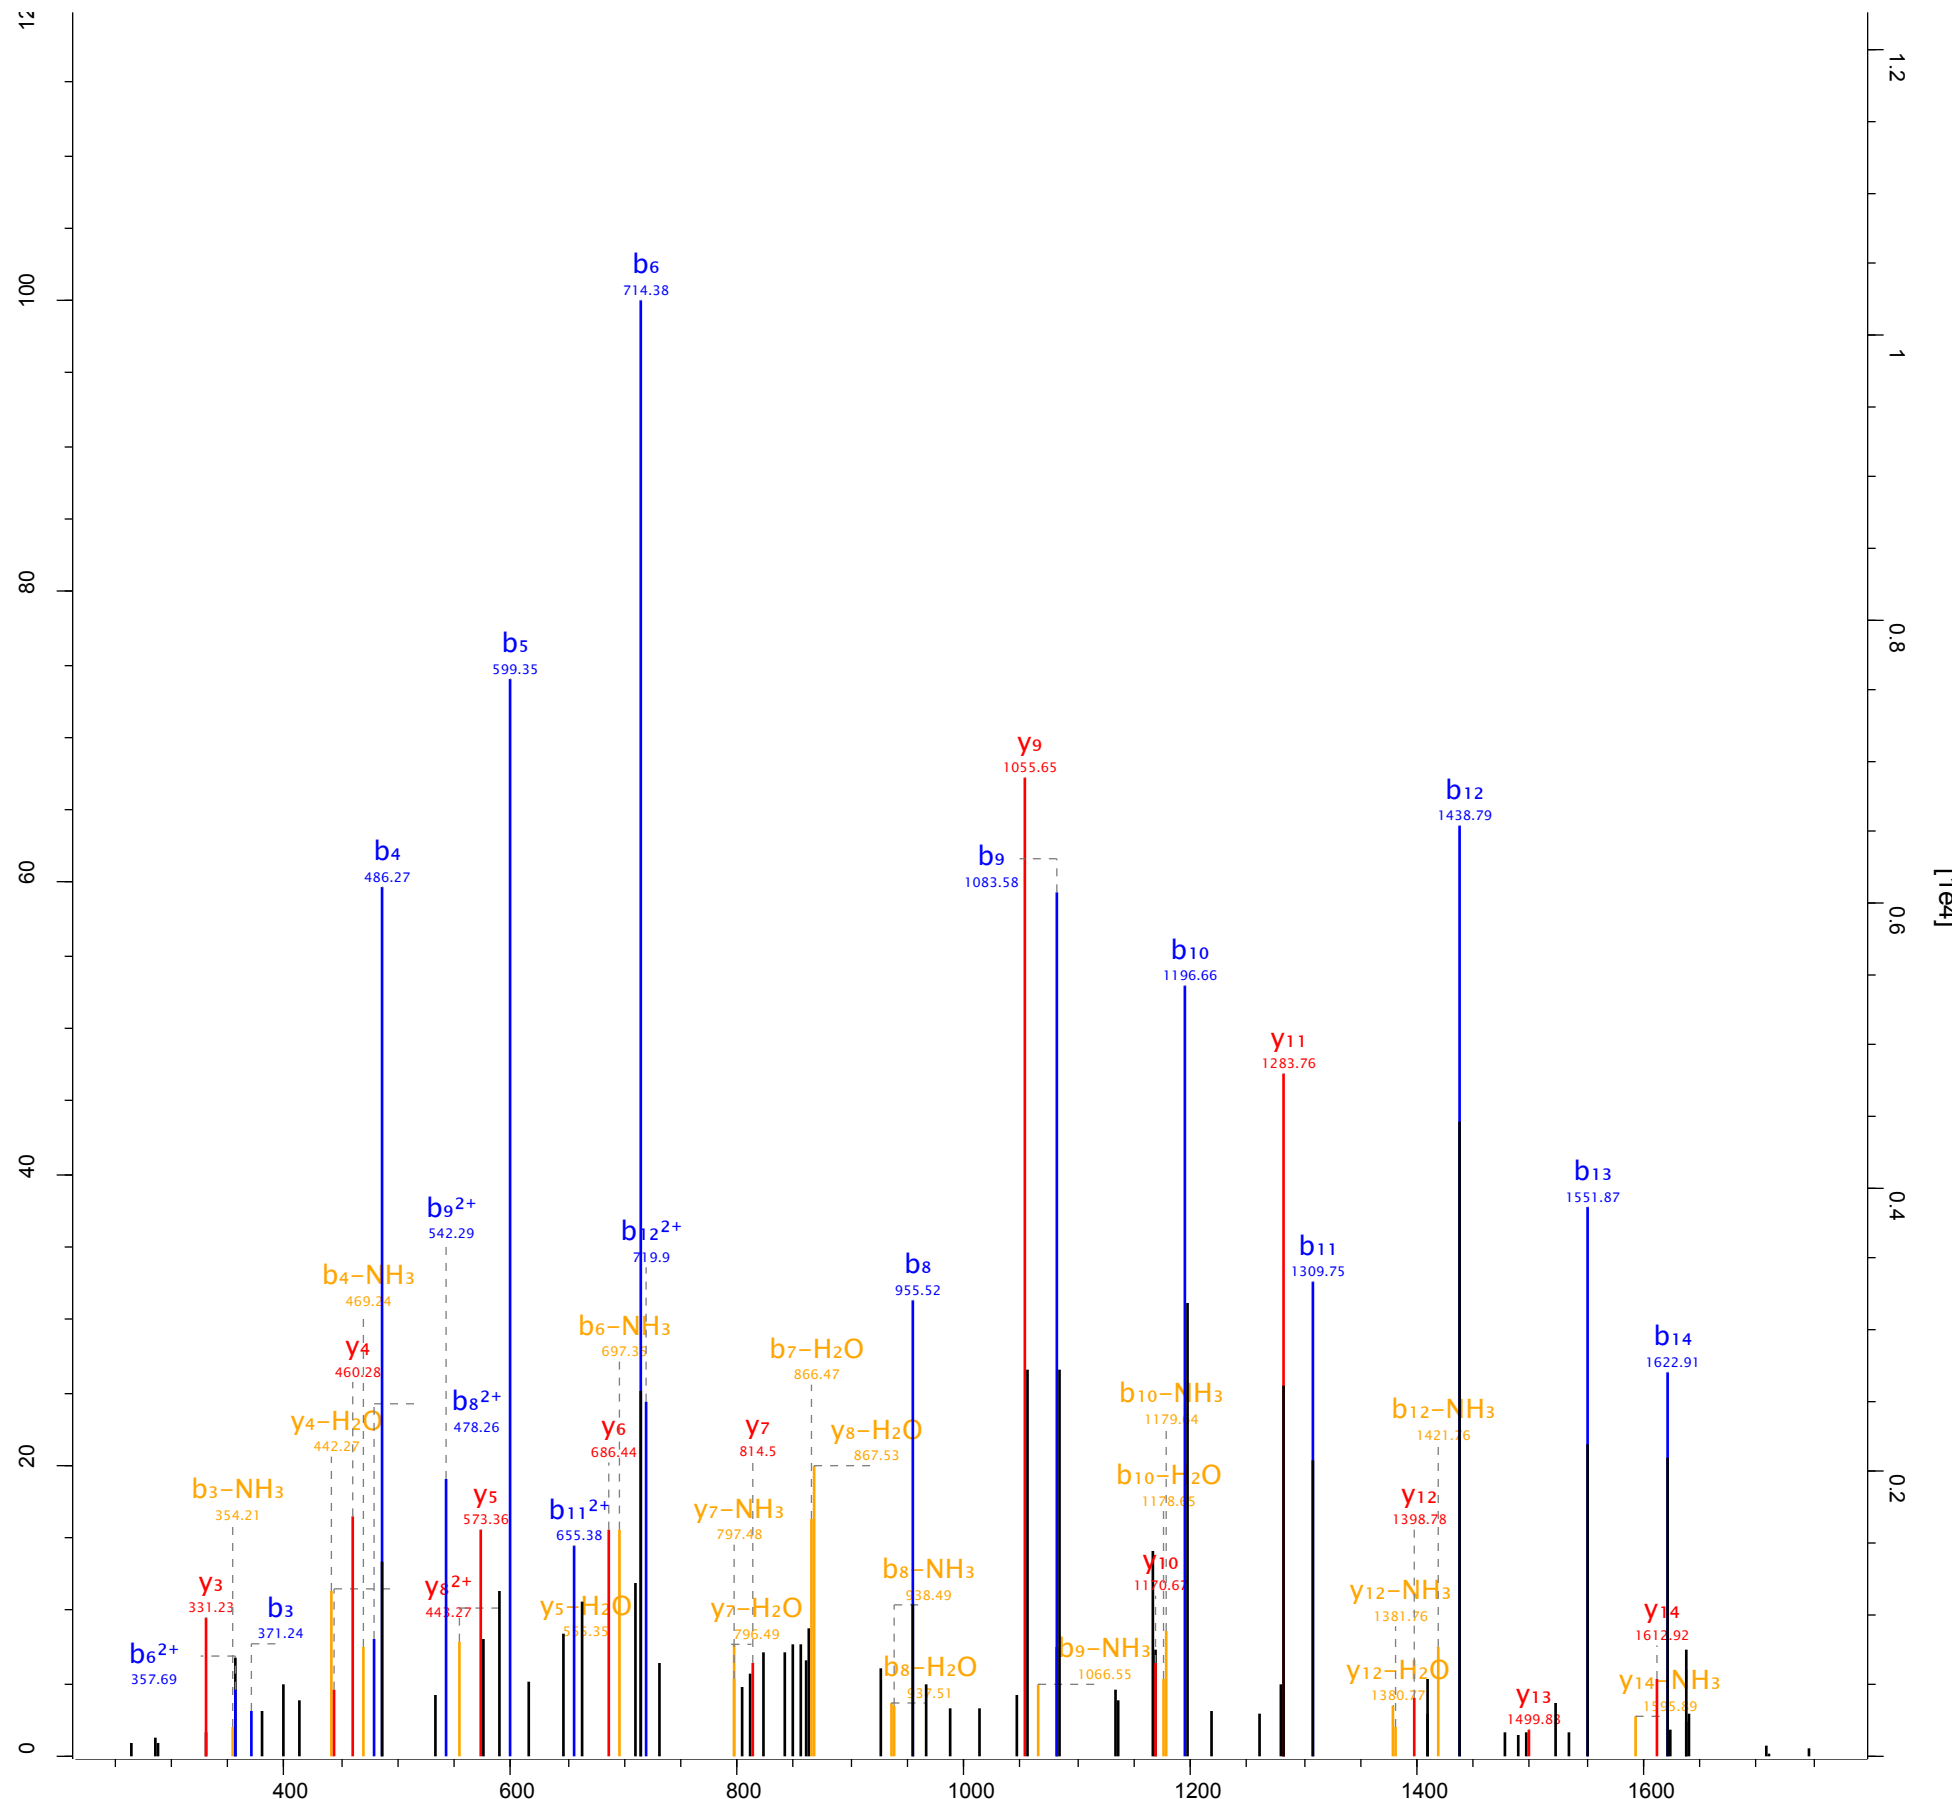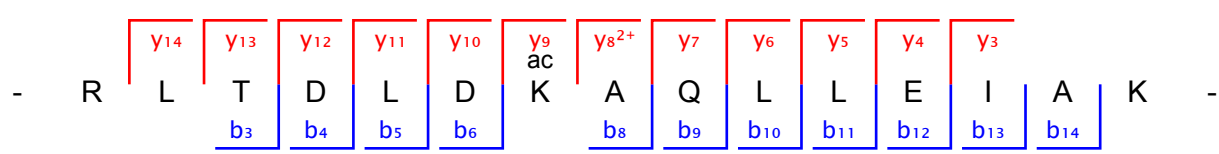

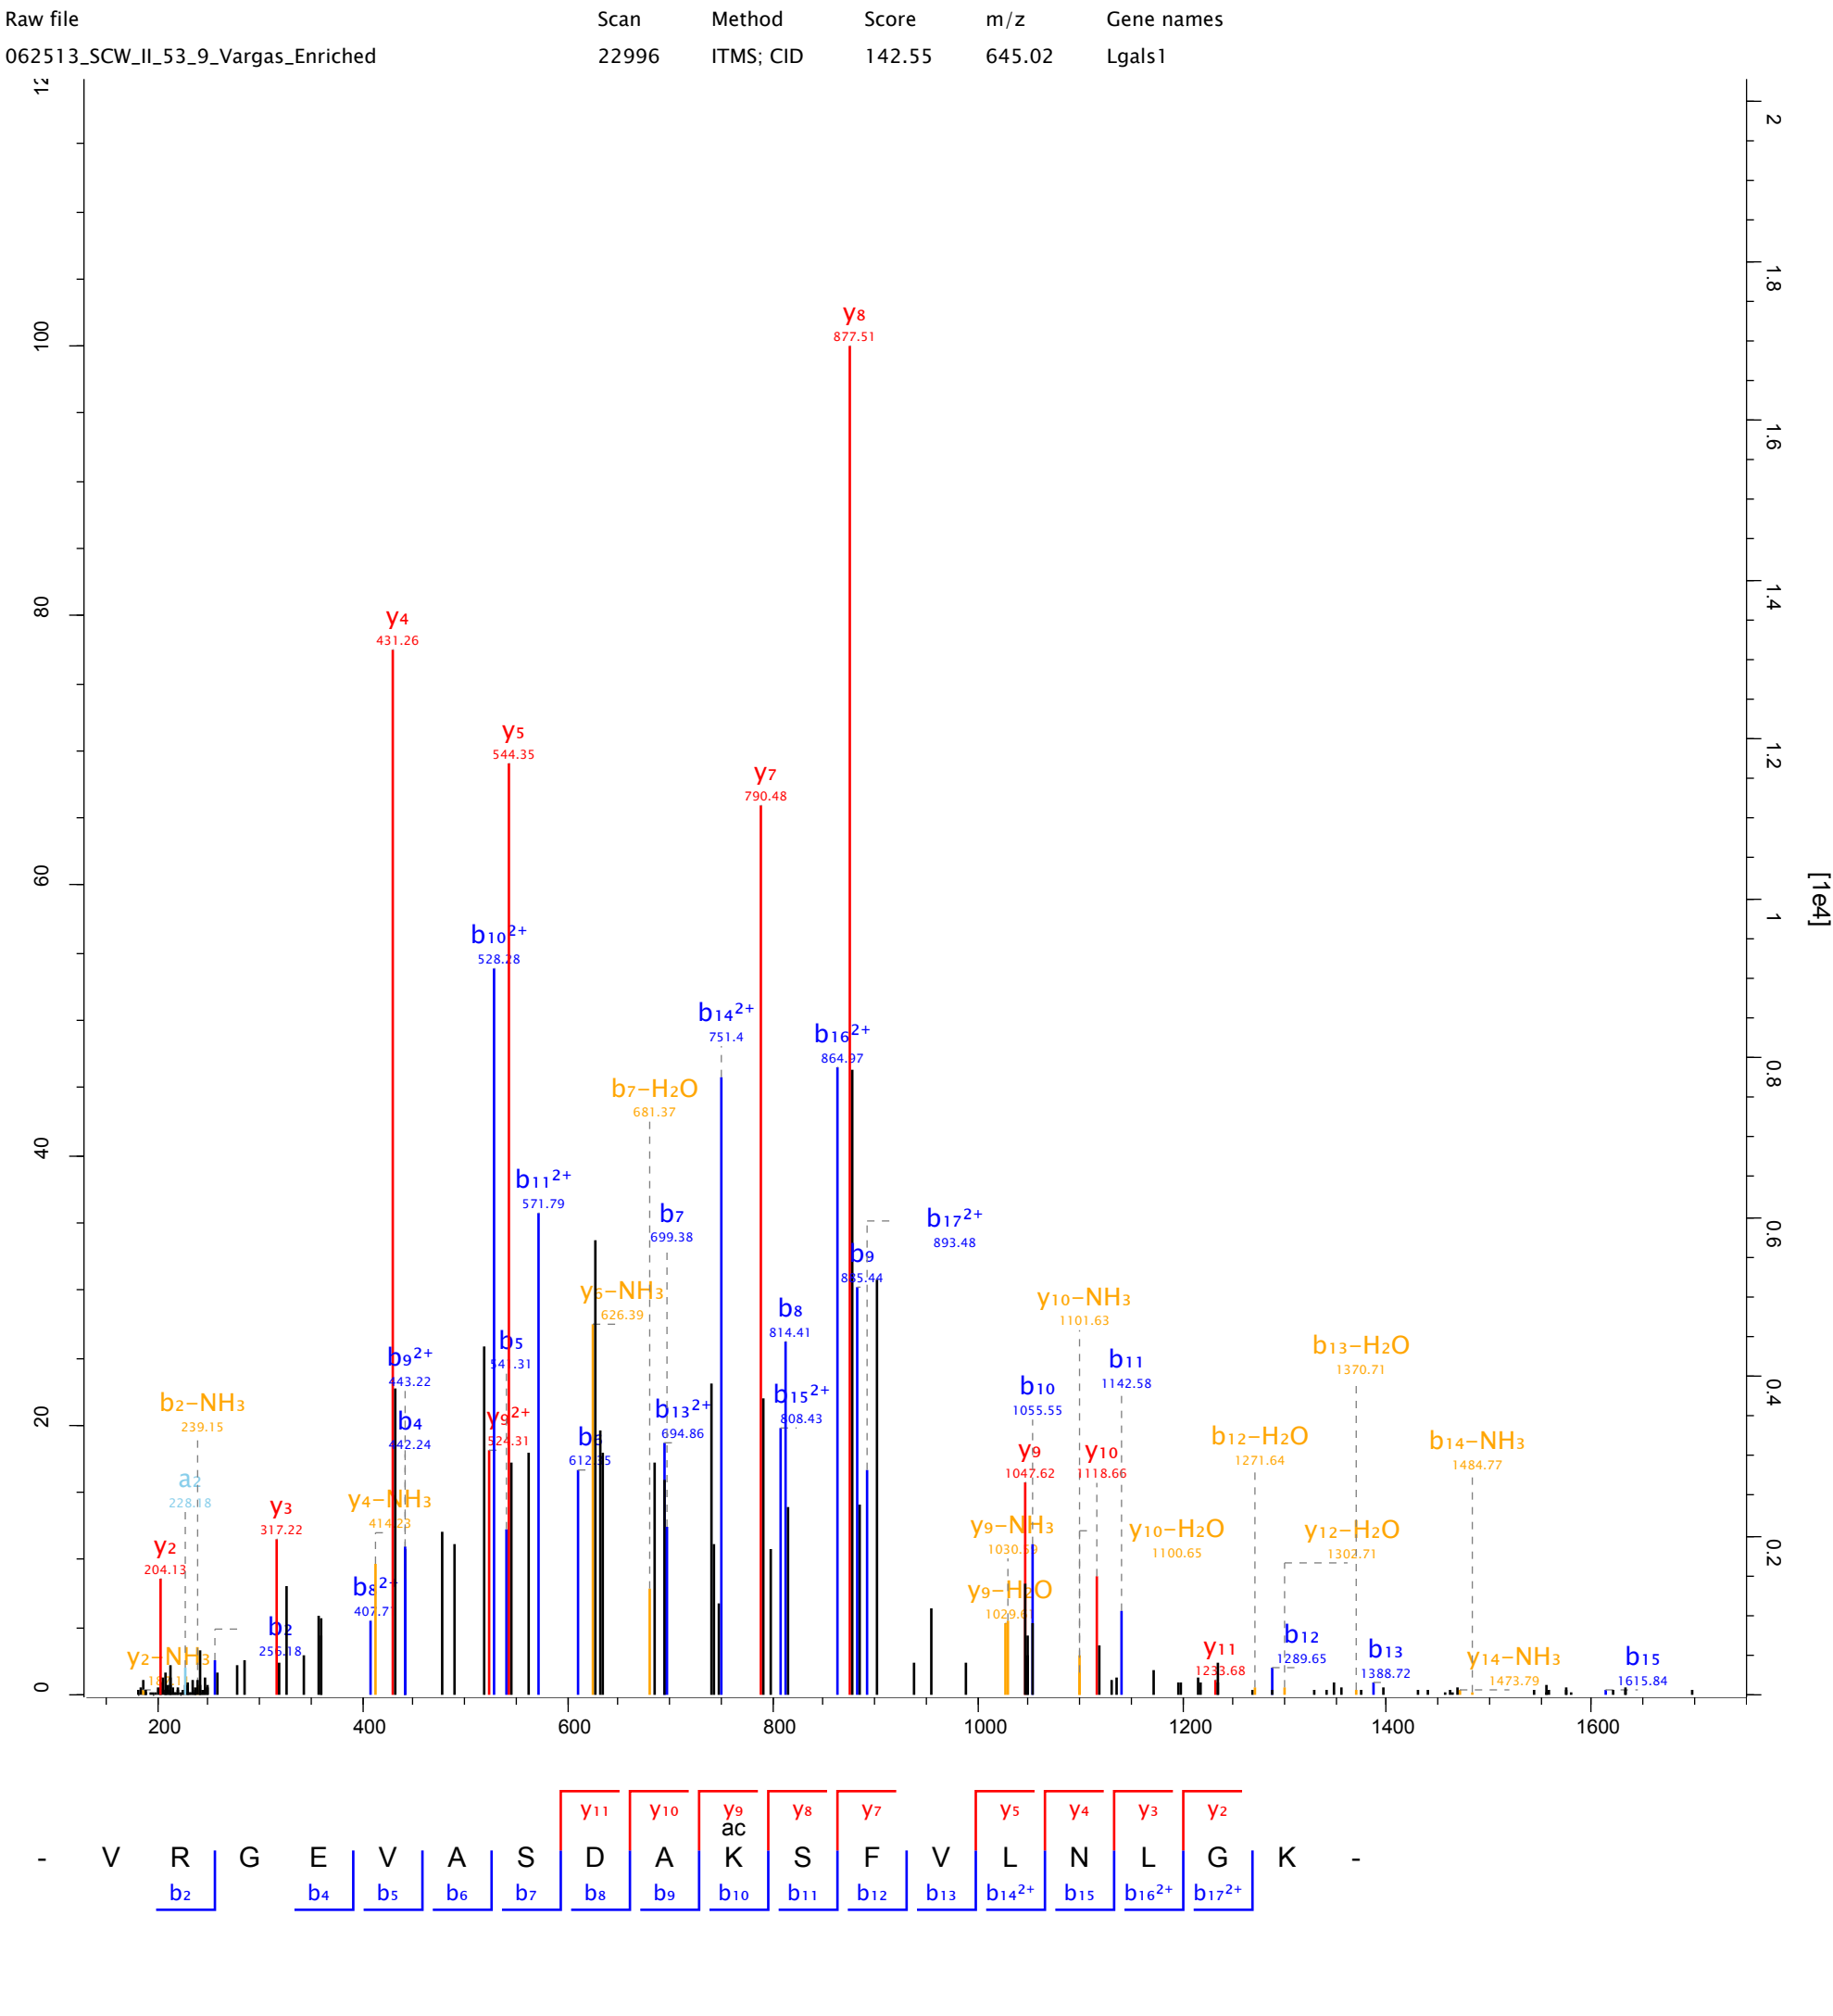

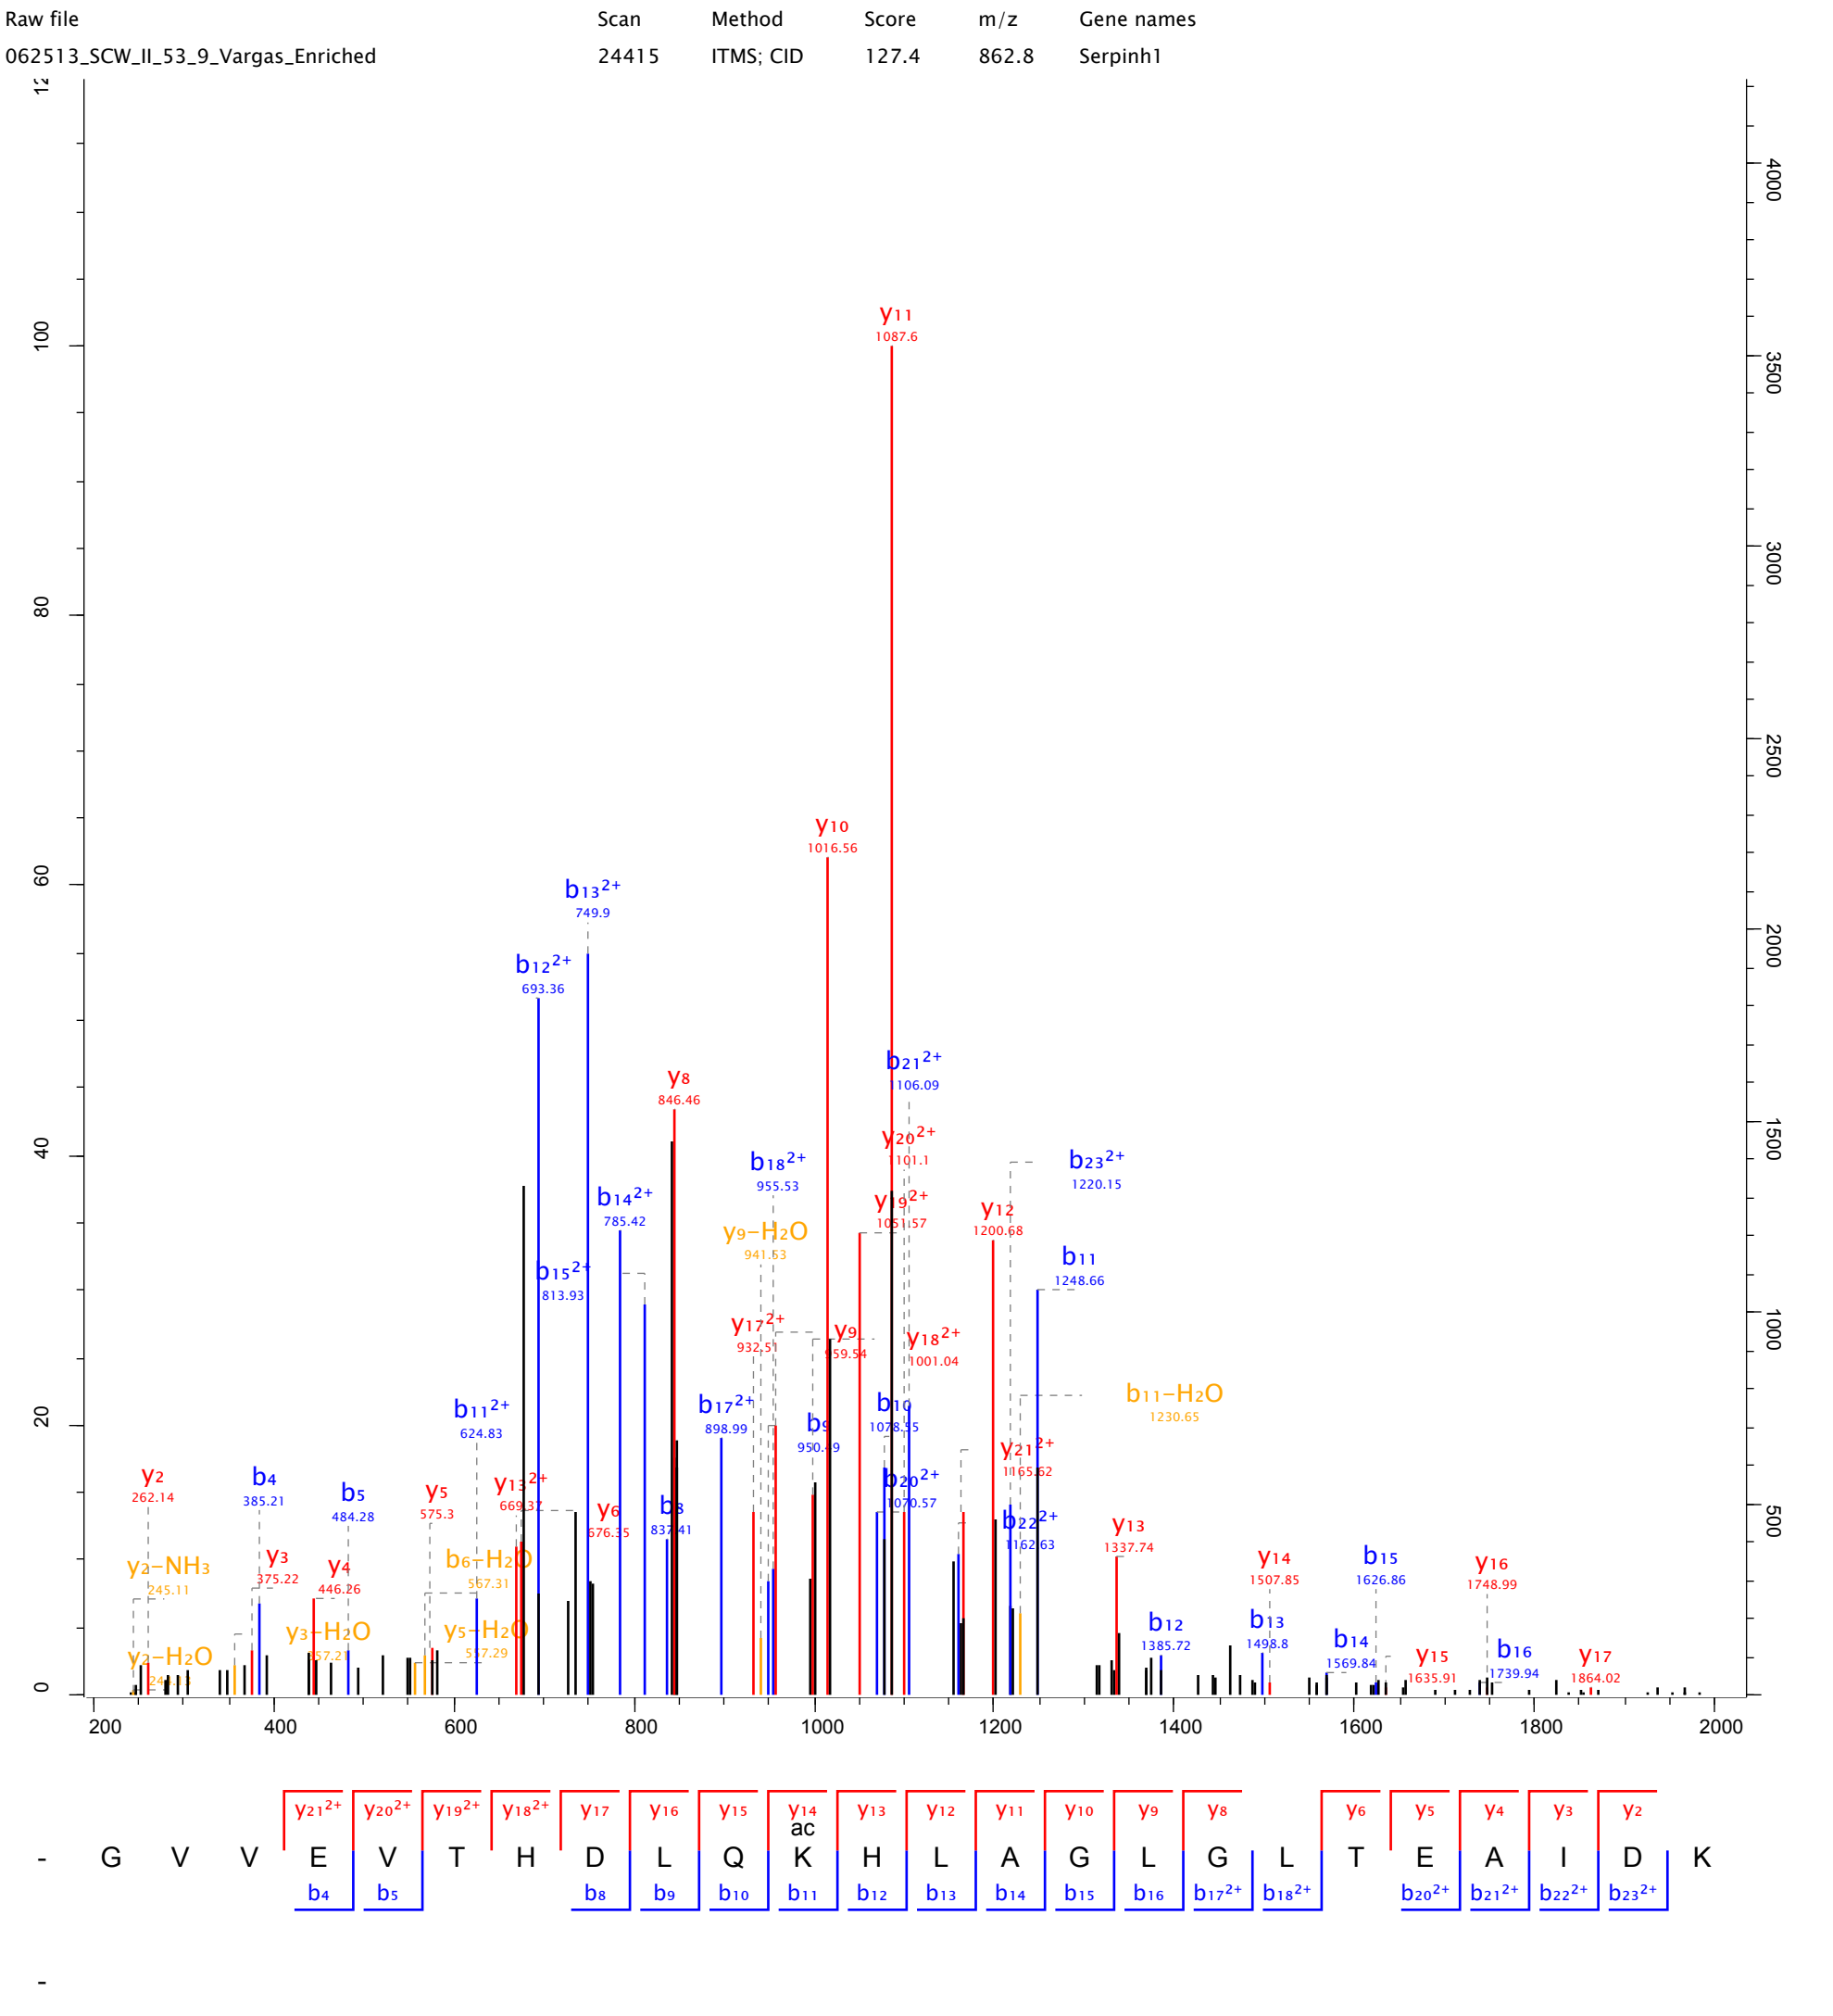

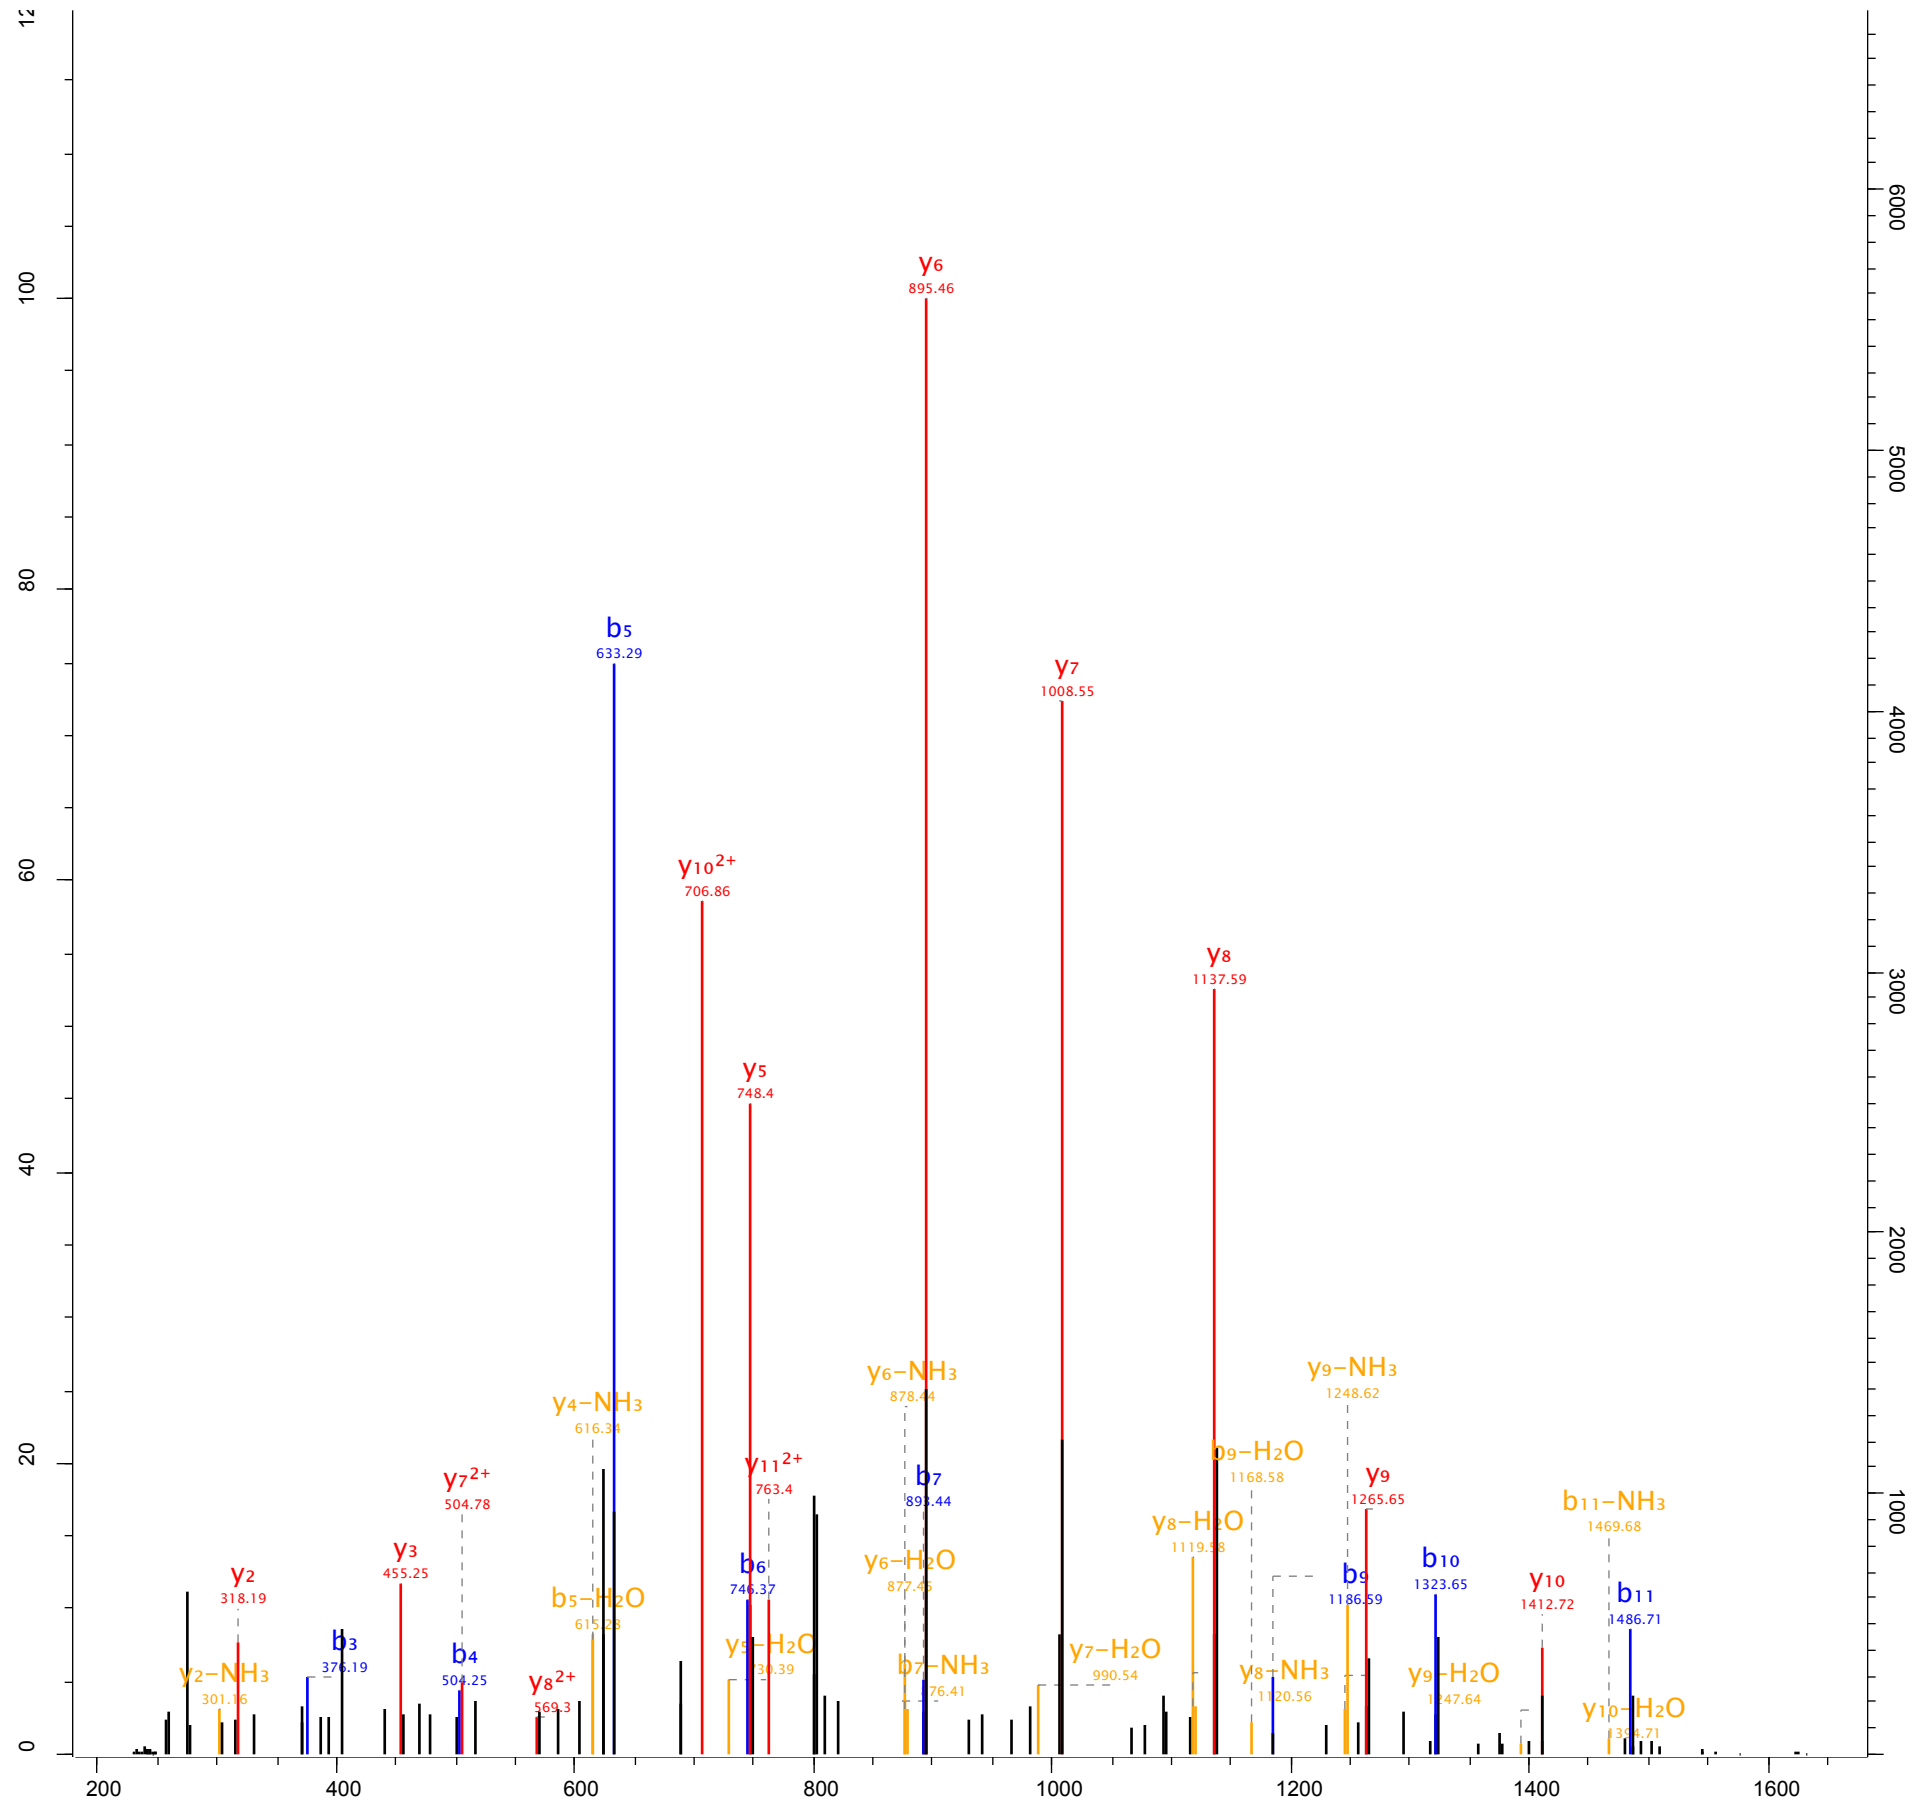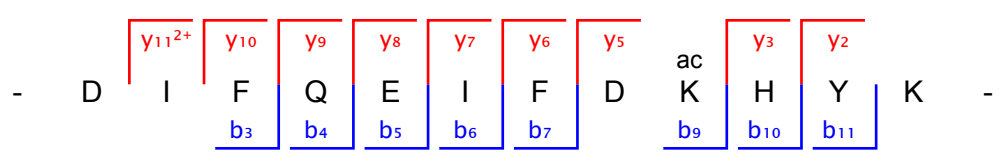

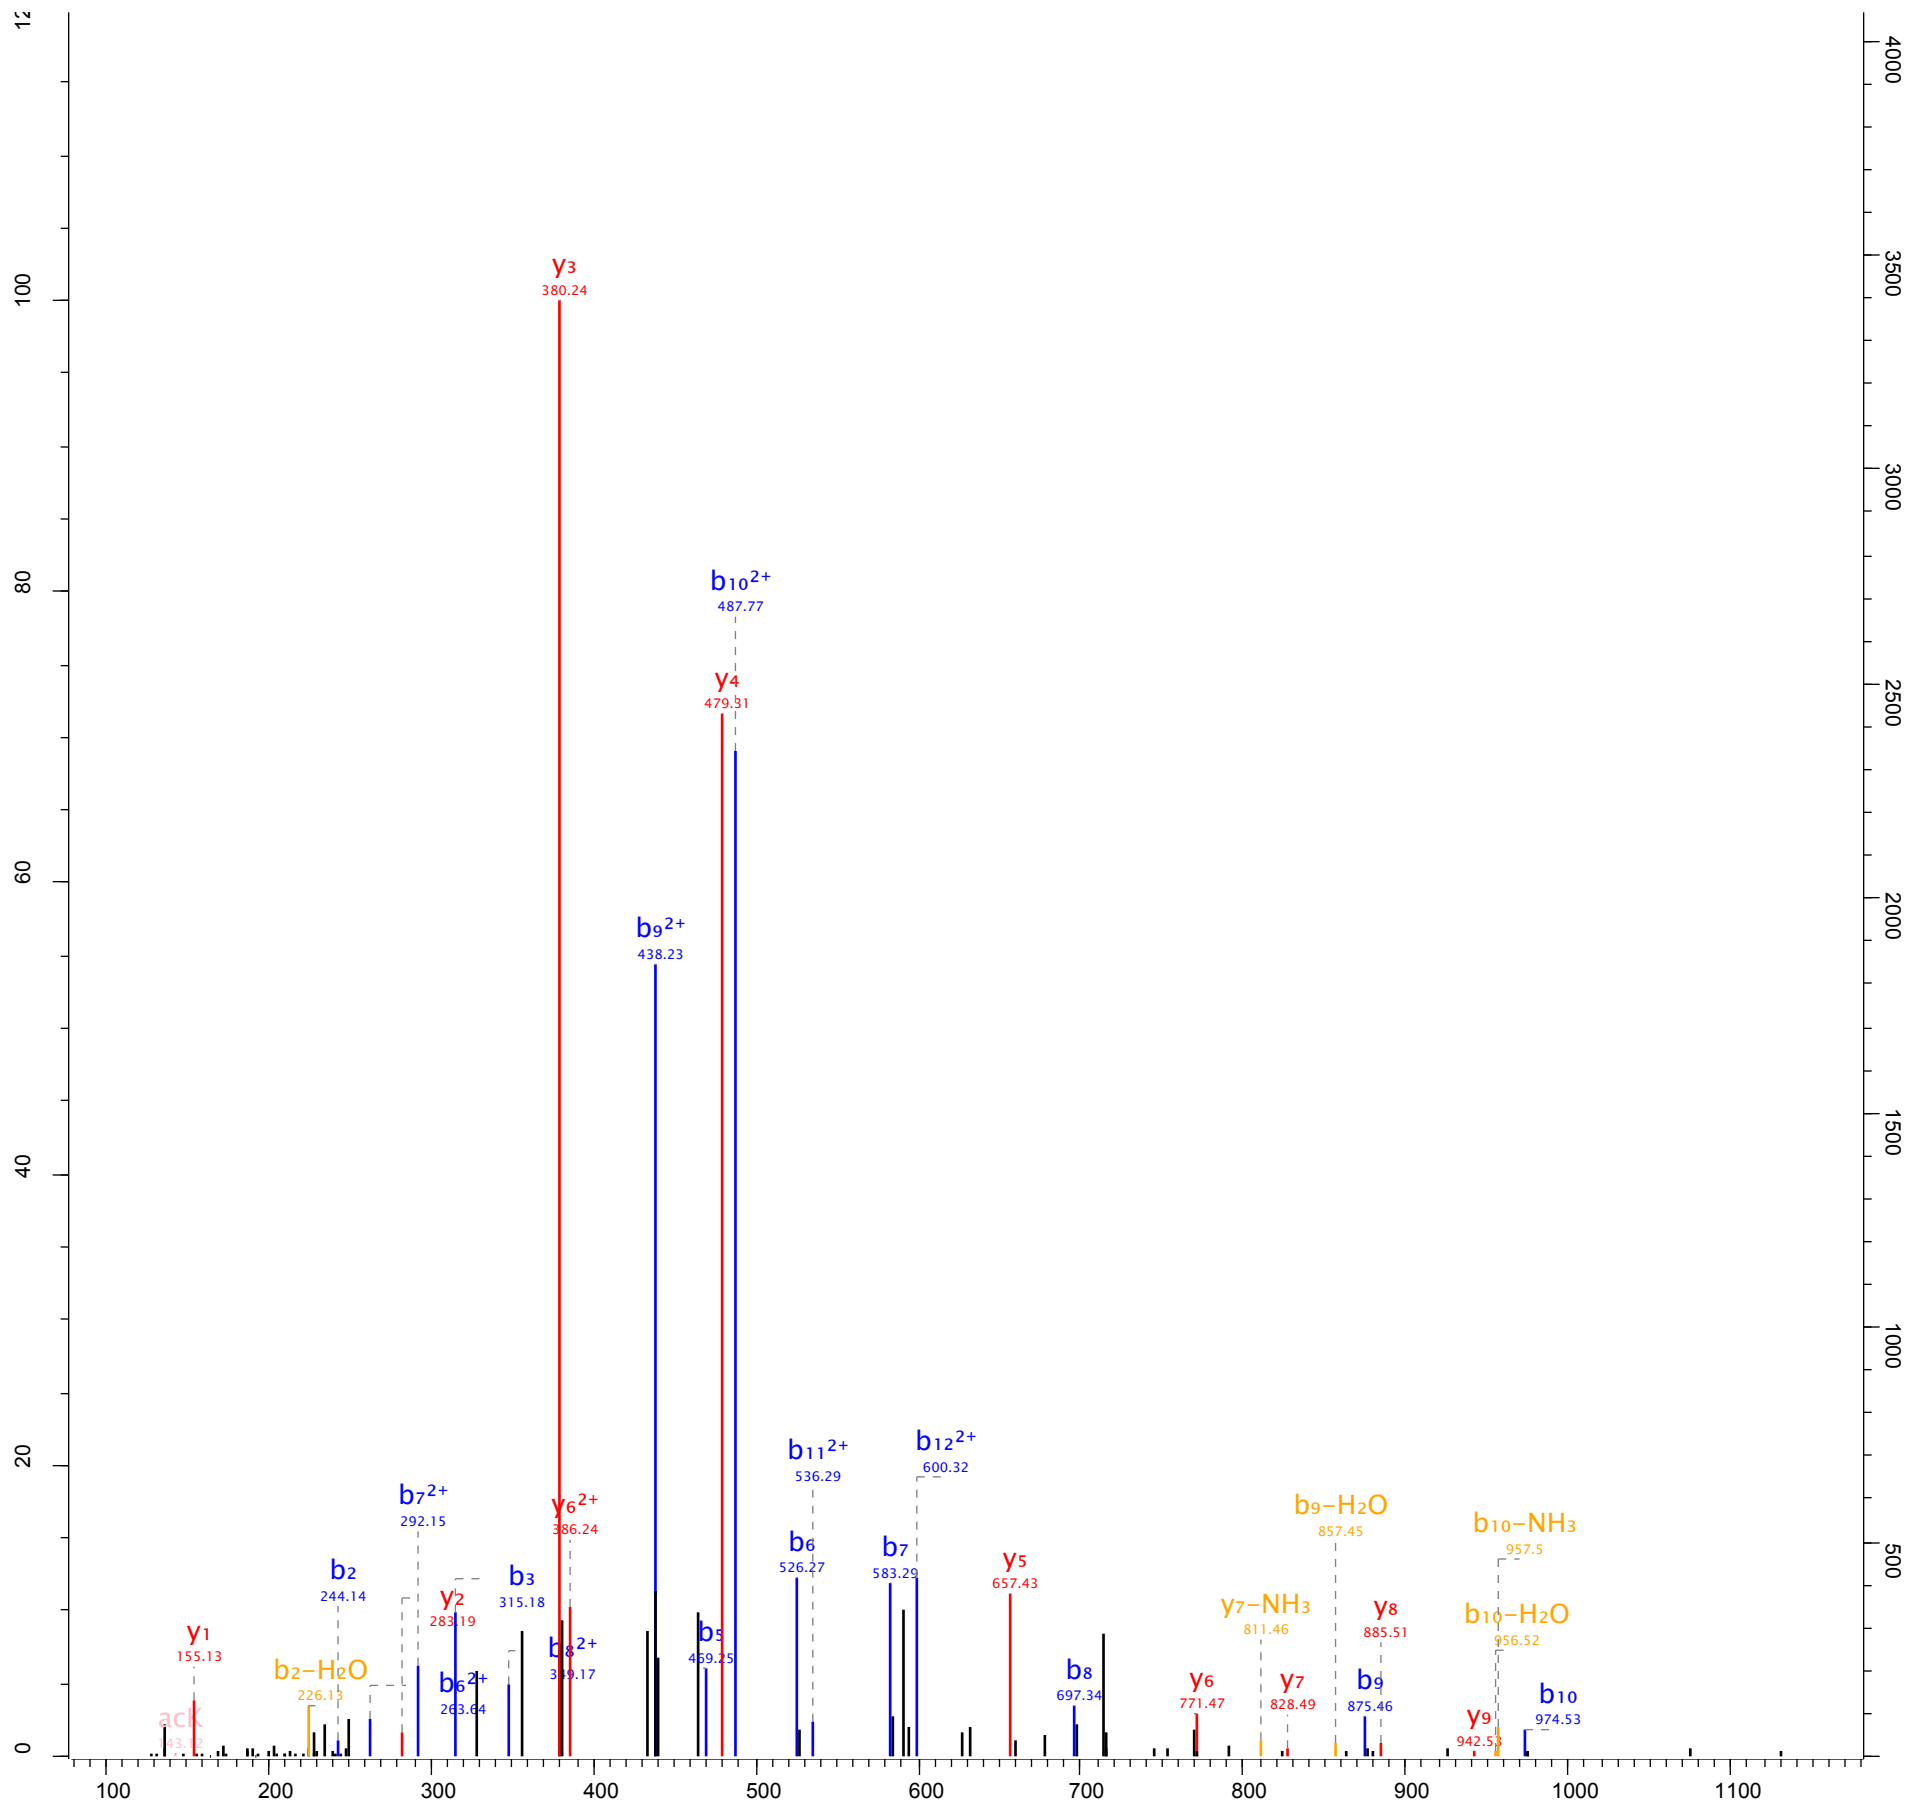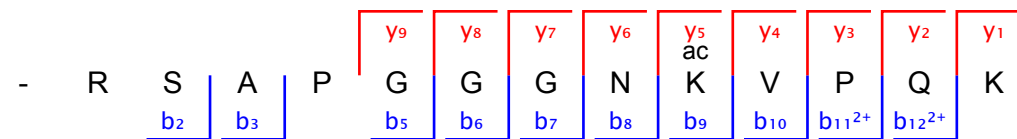

062513\_SCW\_II\_53\_10\_Vargas\_Enriched

9552

ITMS; CID

144.51

635.34

Hist1h2bb;Hist1h2ba;Hist1h2bm;Hist1h2bj;Hist1h2bp;Hist2h2bb;Hist1h2bh;Hist1h2b

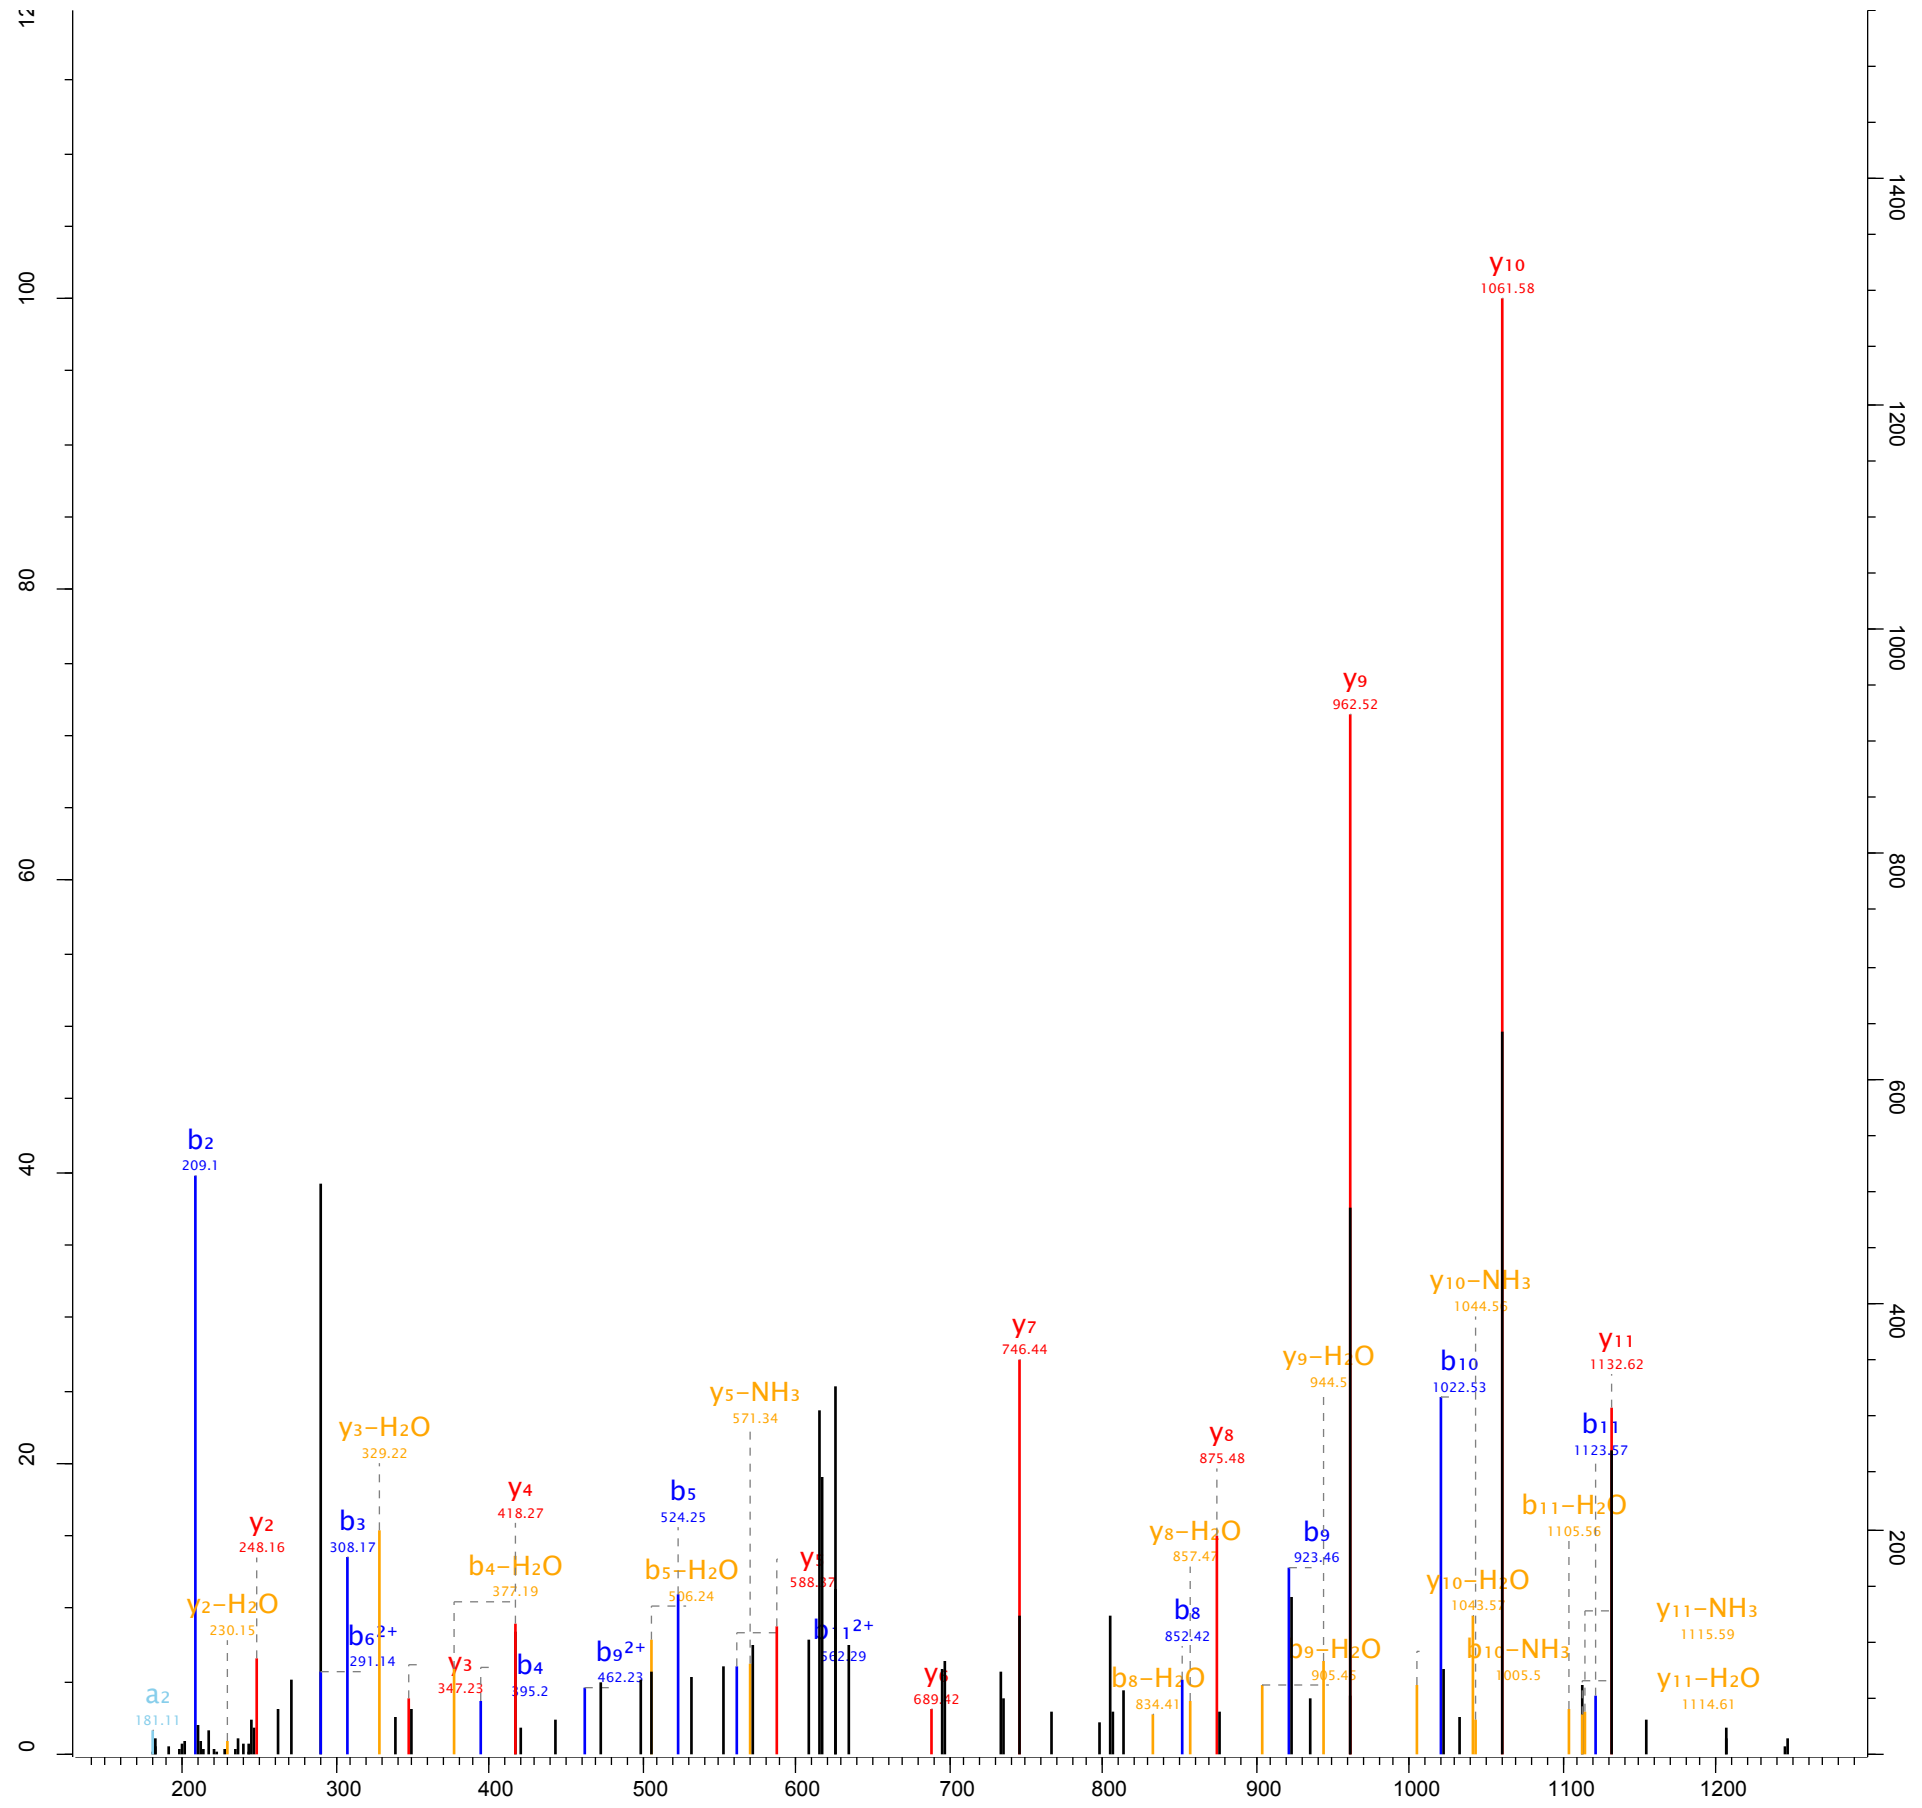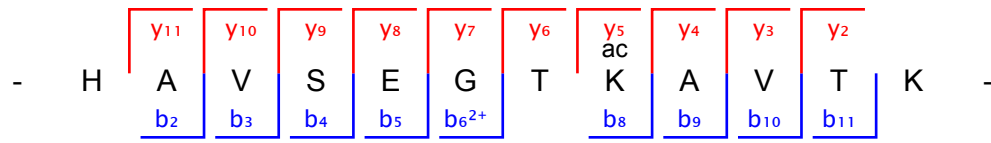

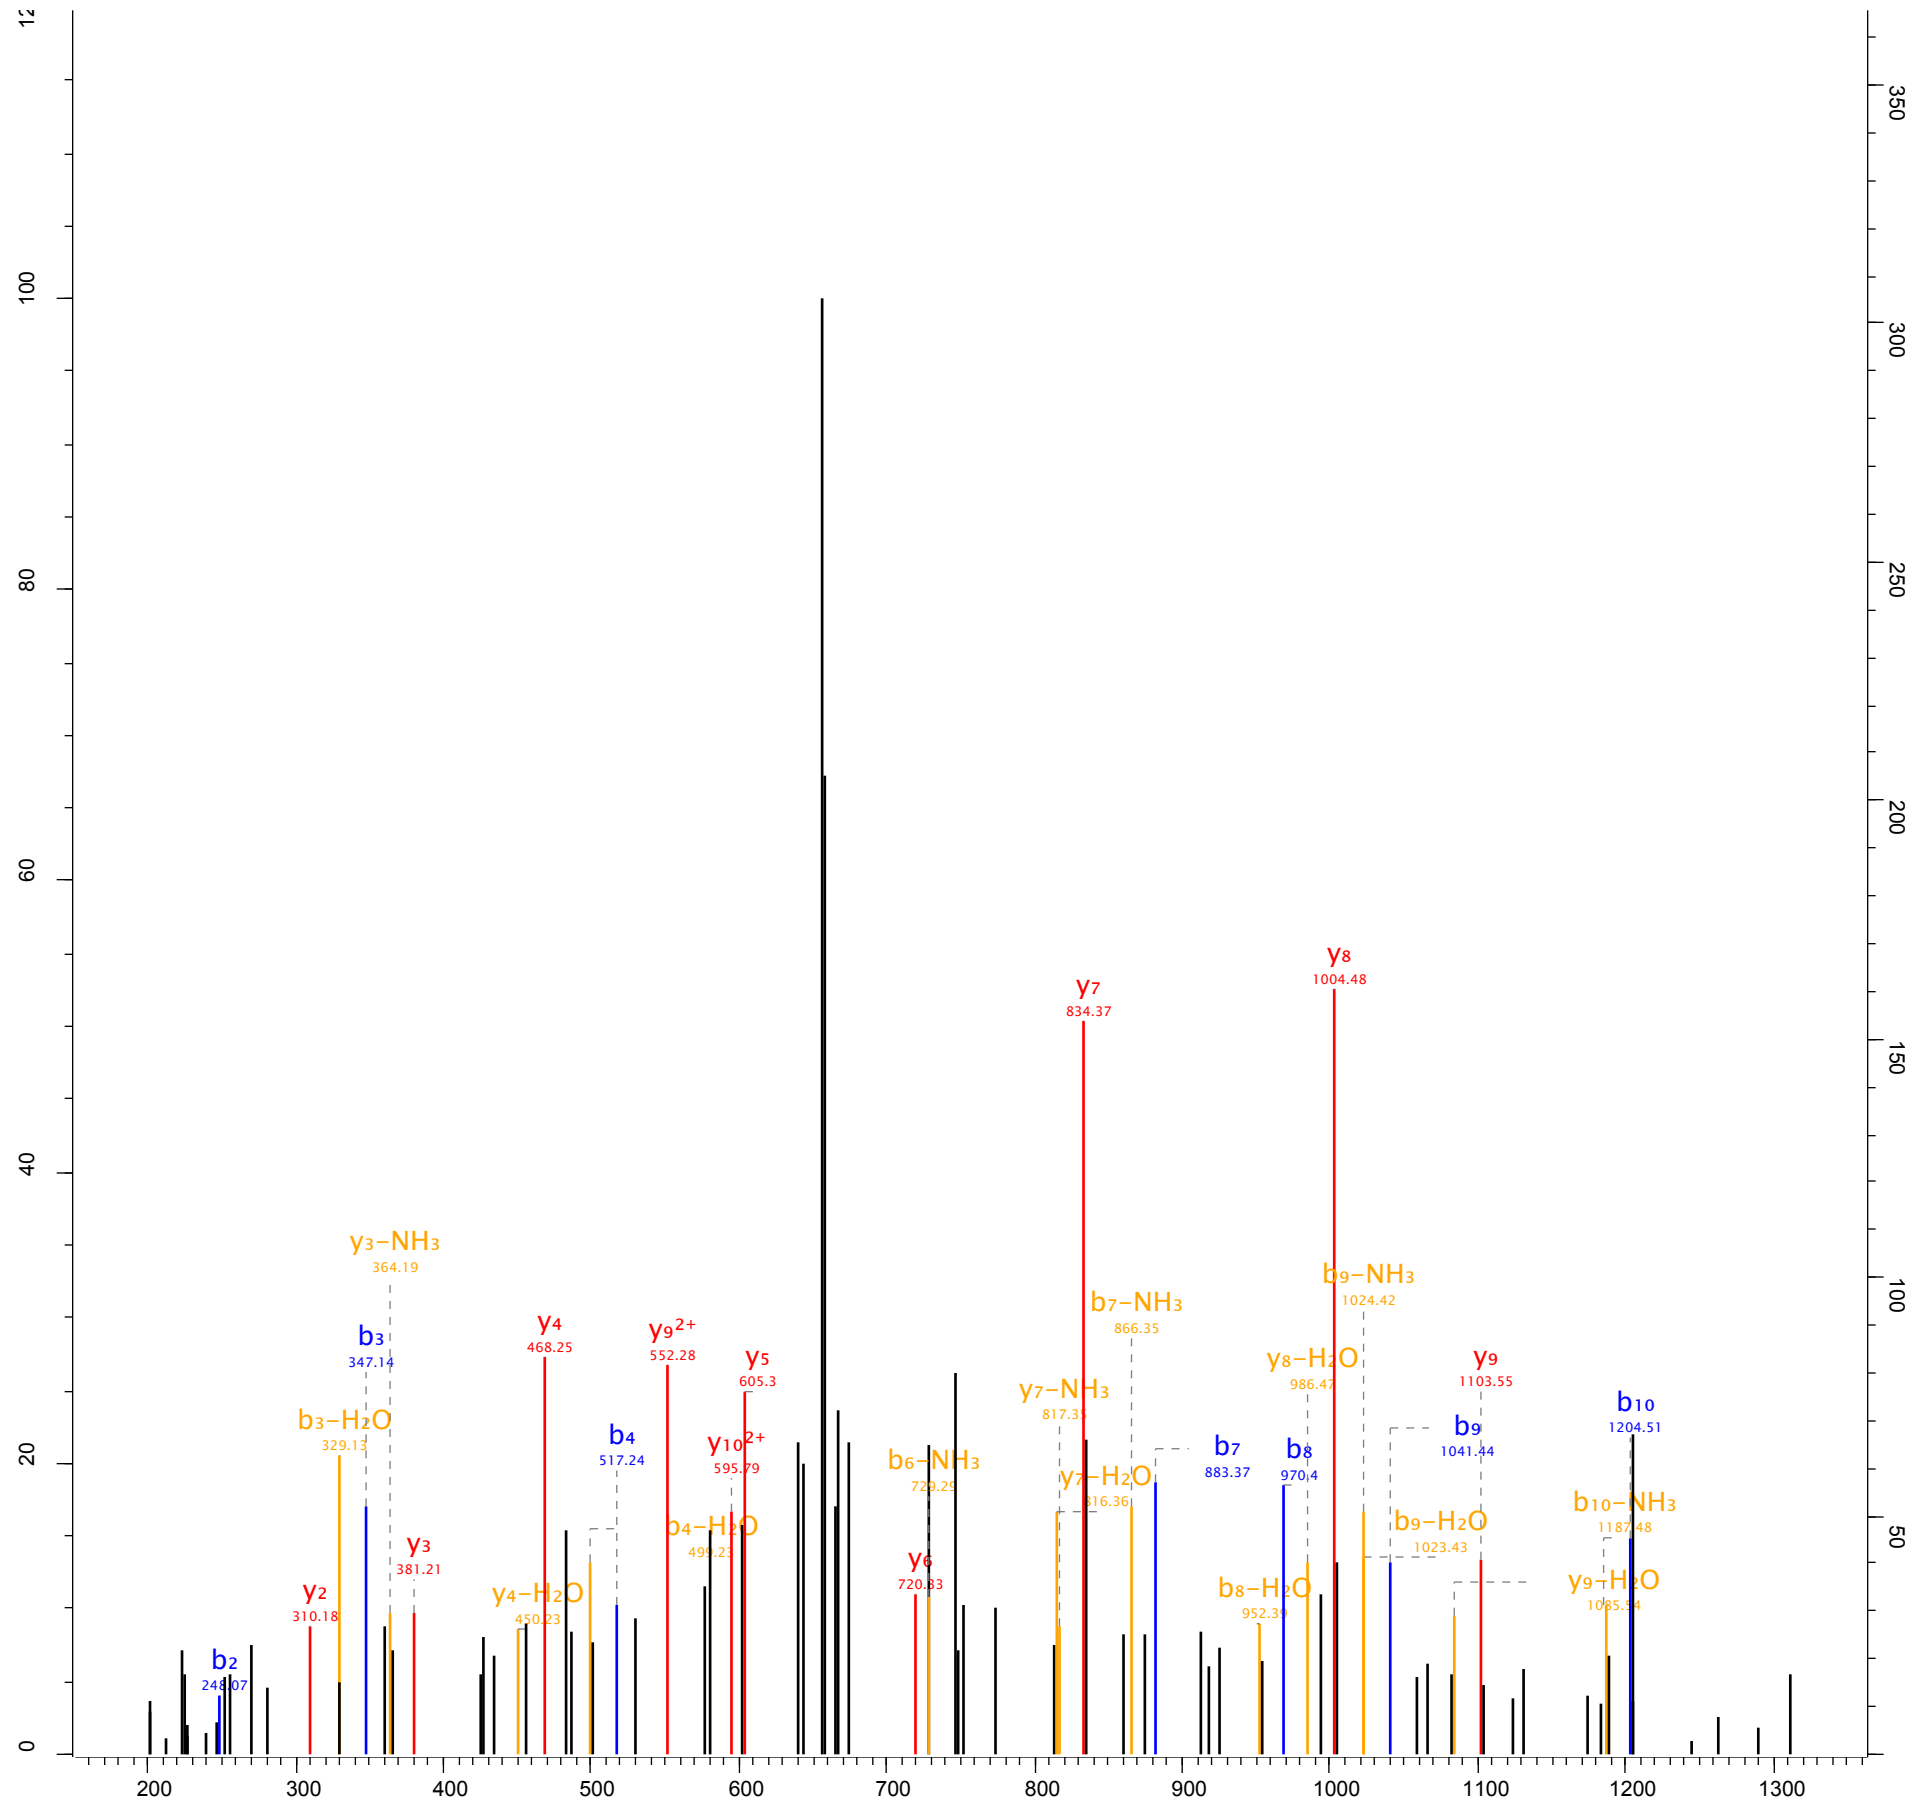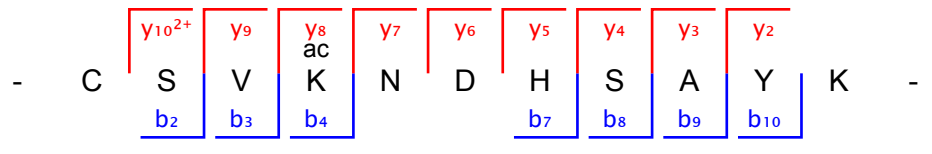



Raw file: 062513\_SCW\_II\_53\_10\_Vargas\_Enriched  
 Scan: 10143 Method: ITMS; CID Score: 105.4 m/z: 549.79 Gene names: Myh9

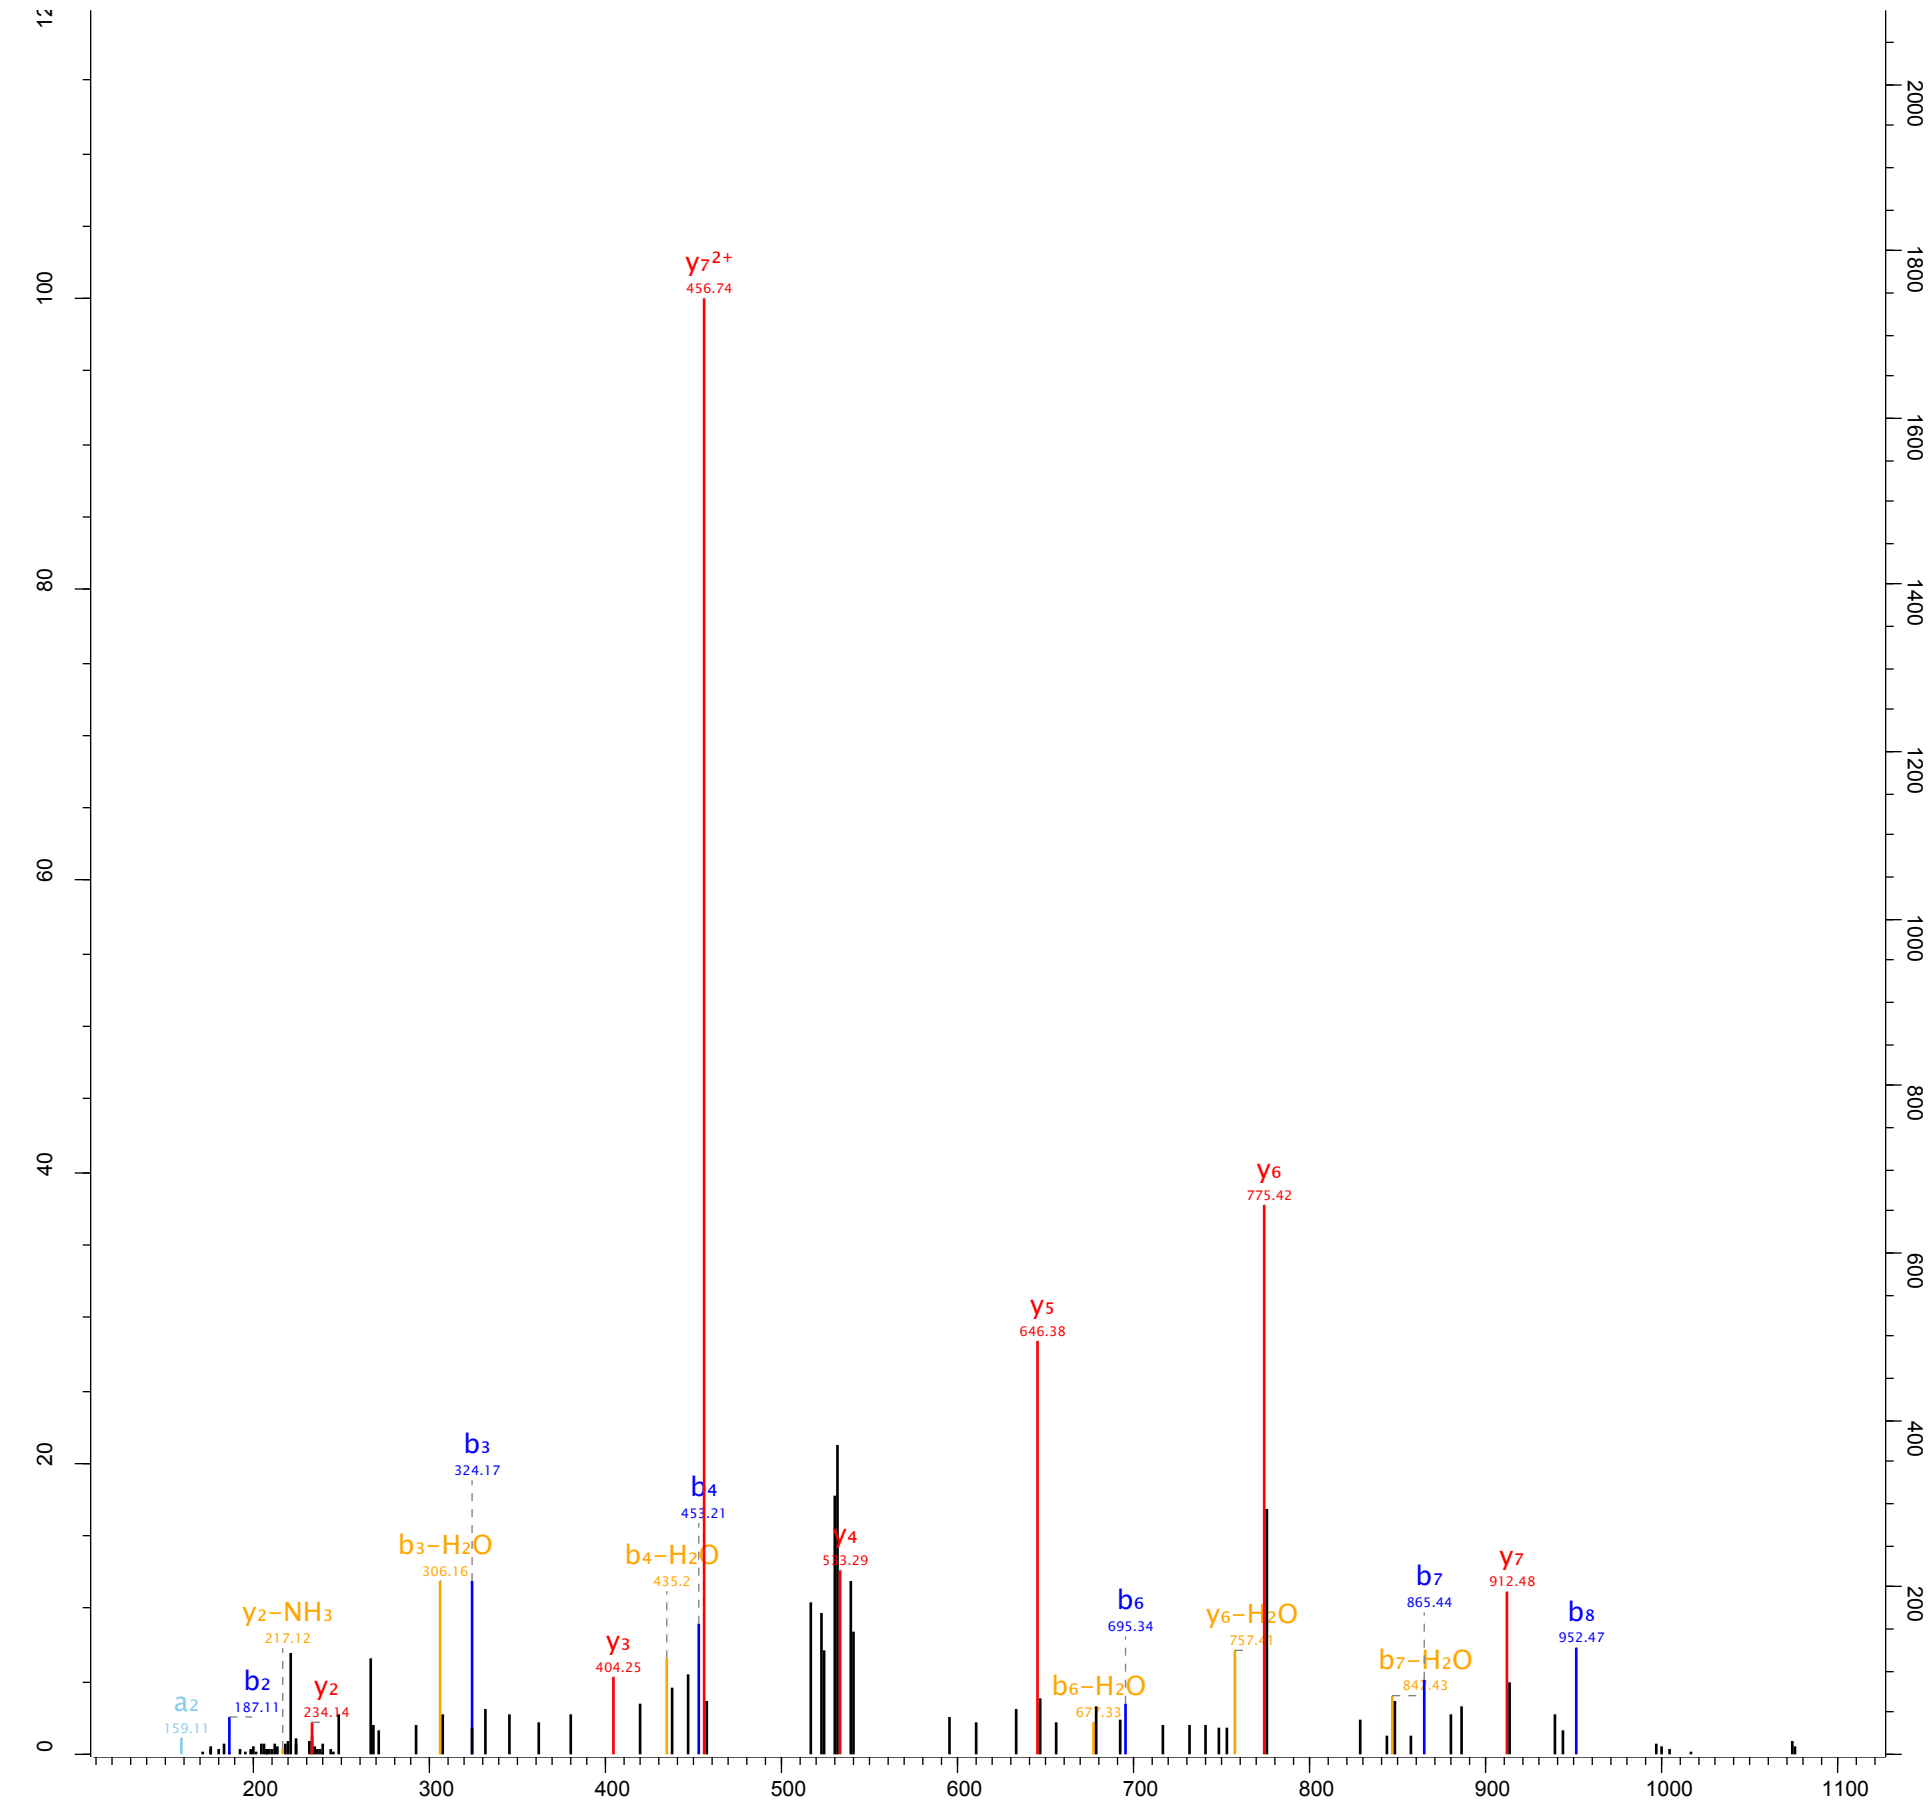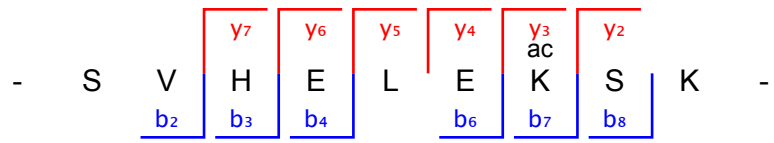

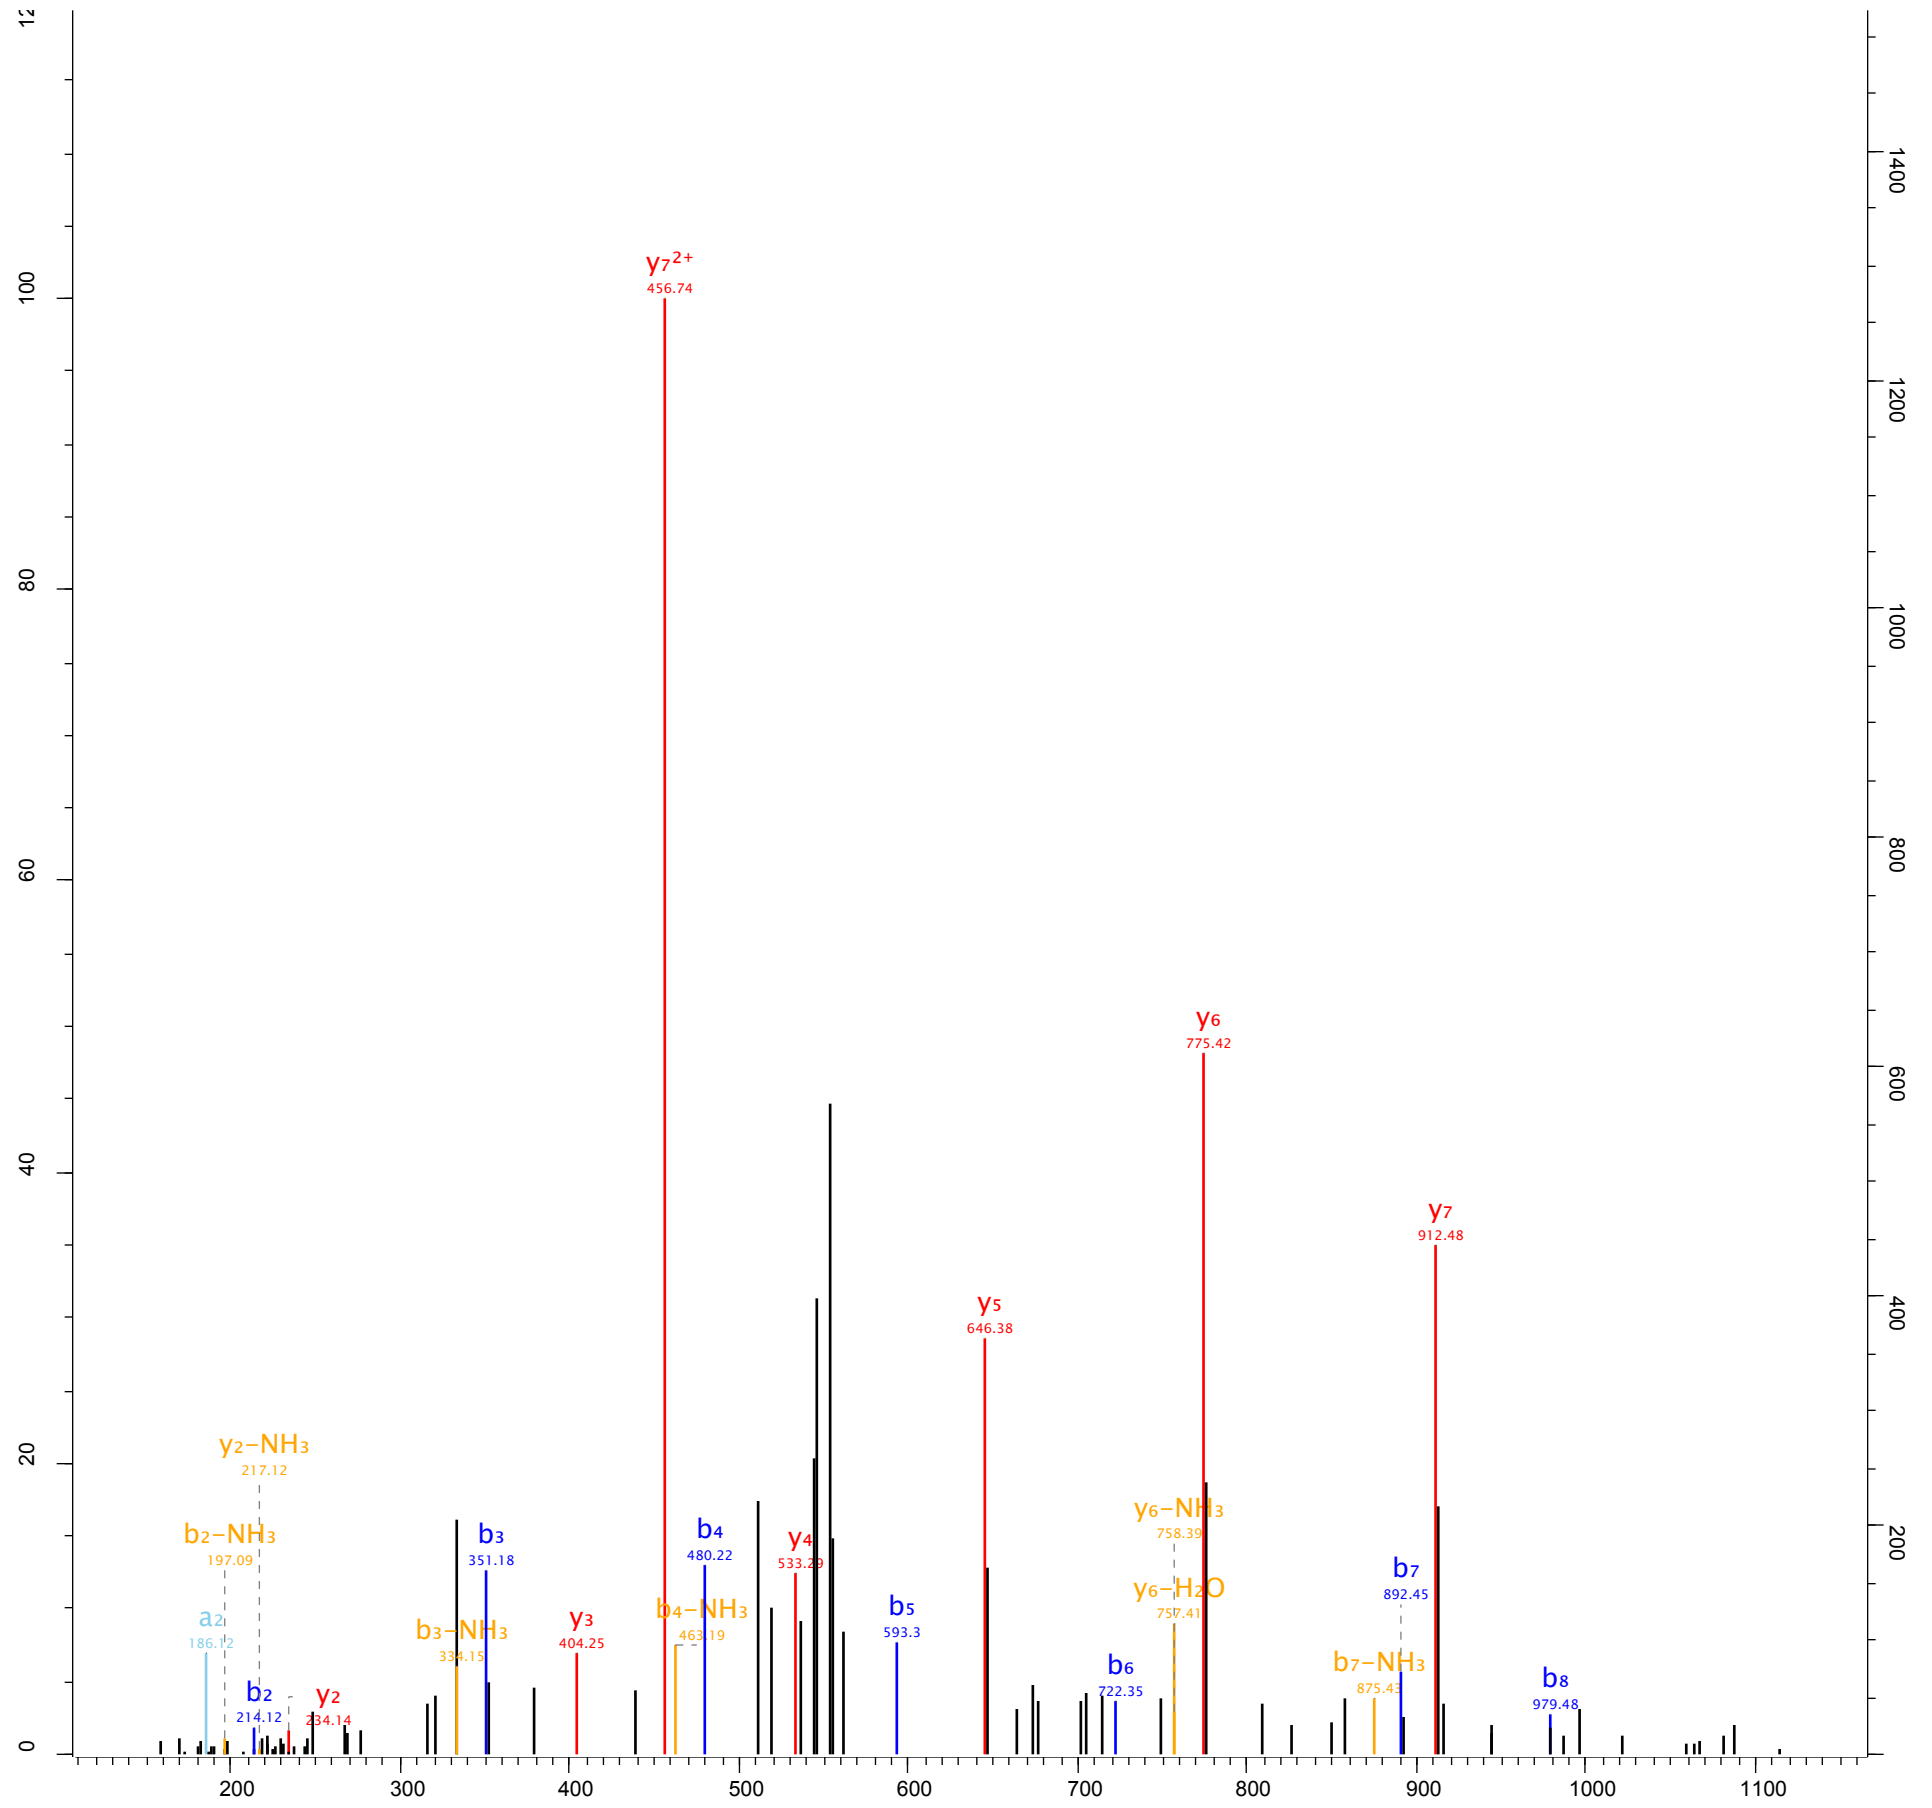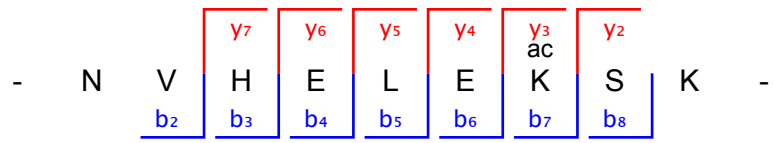

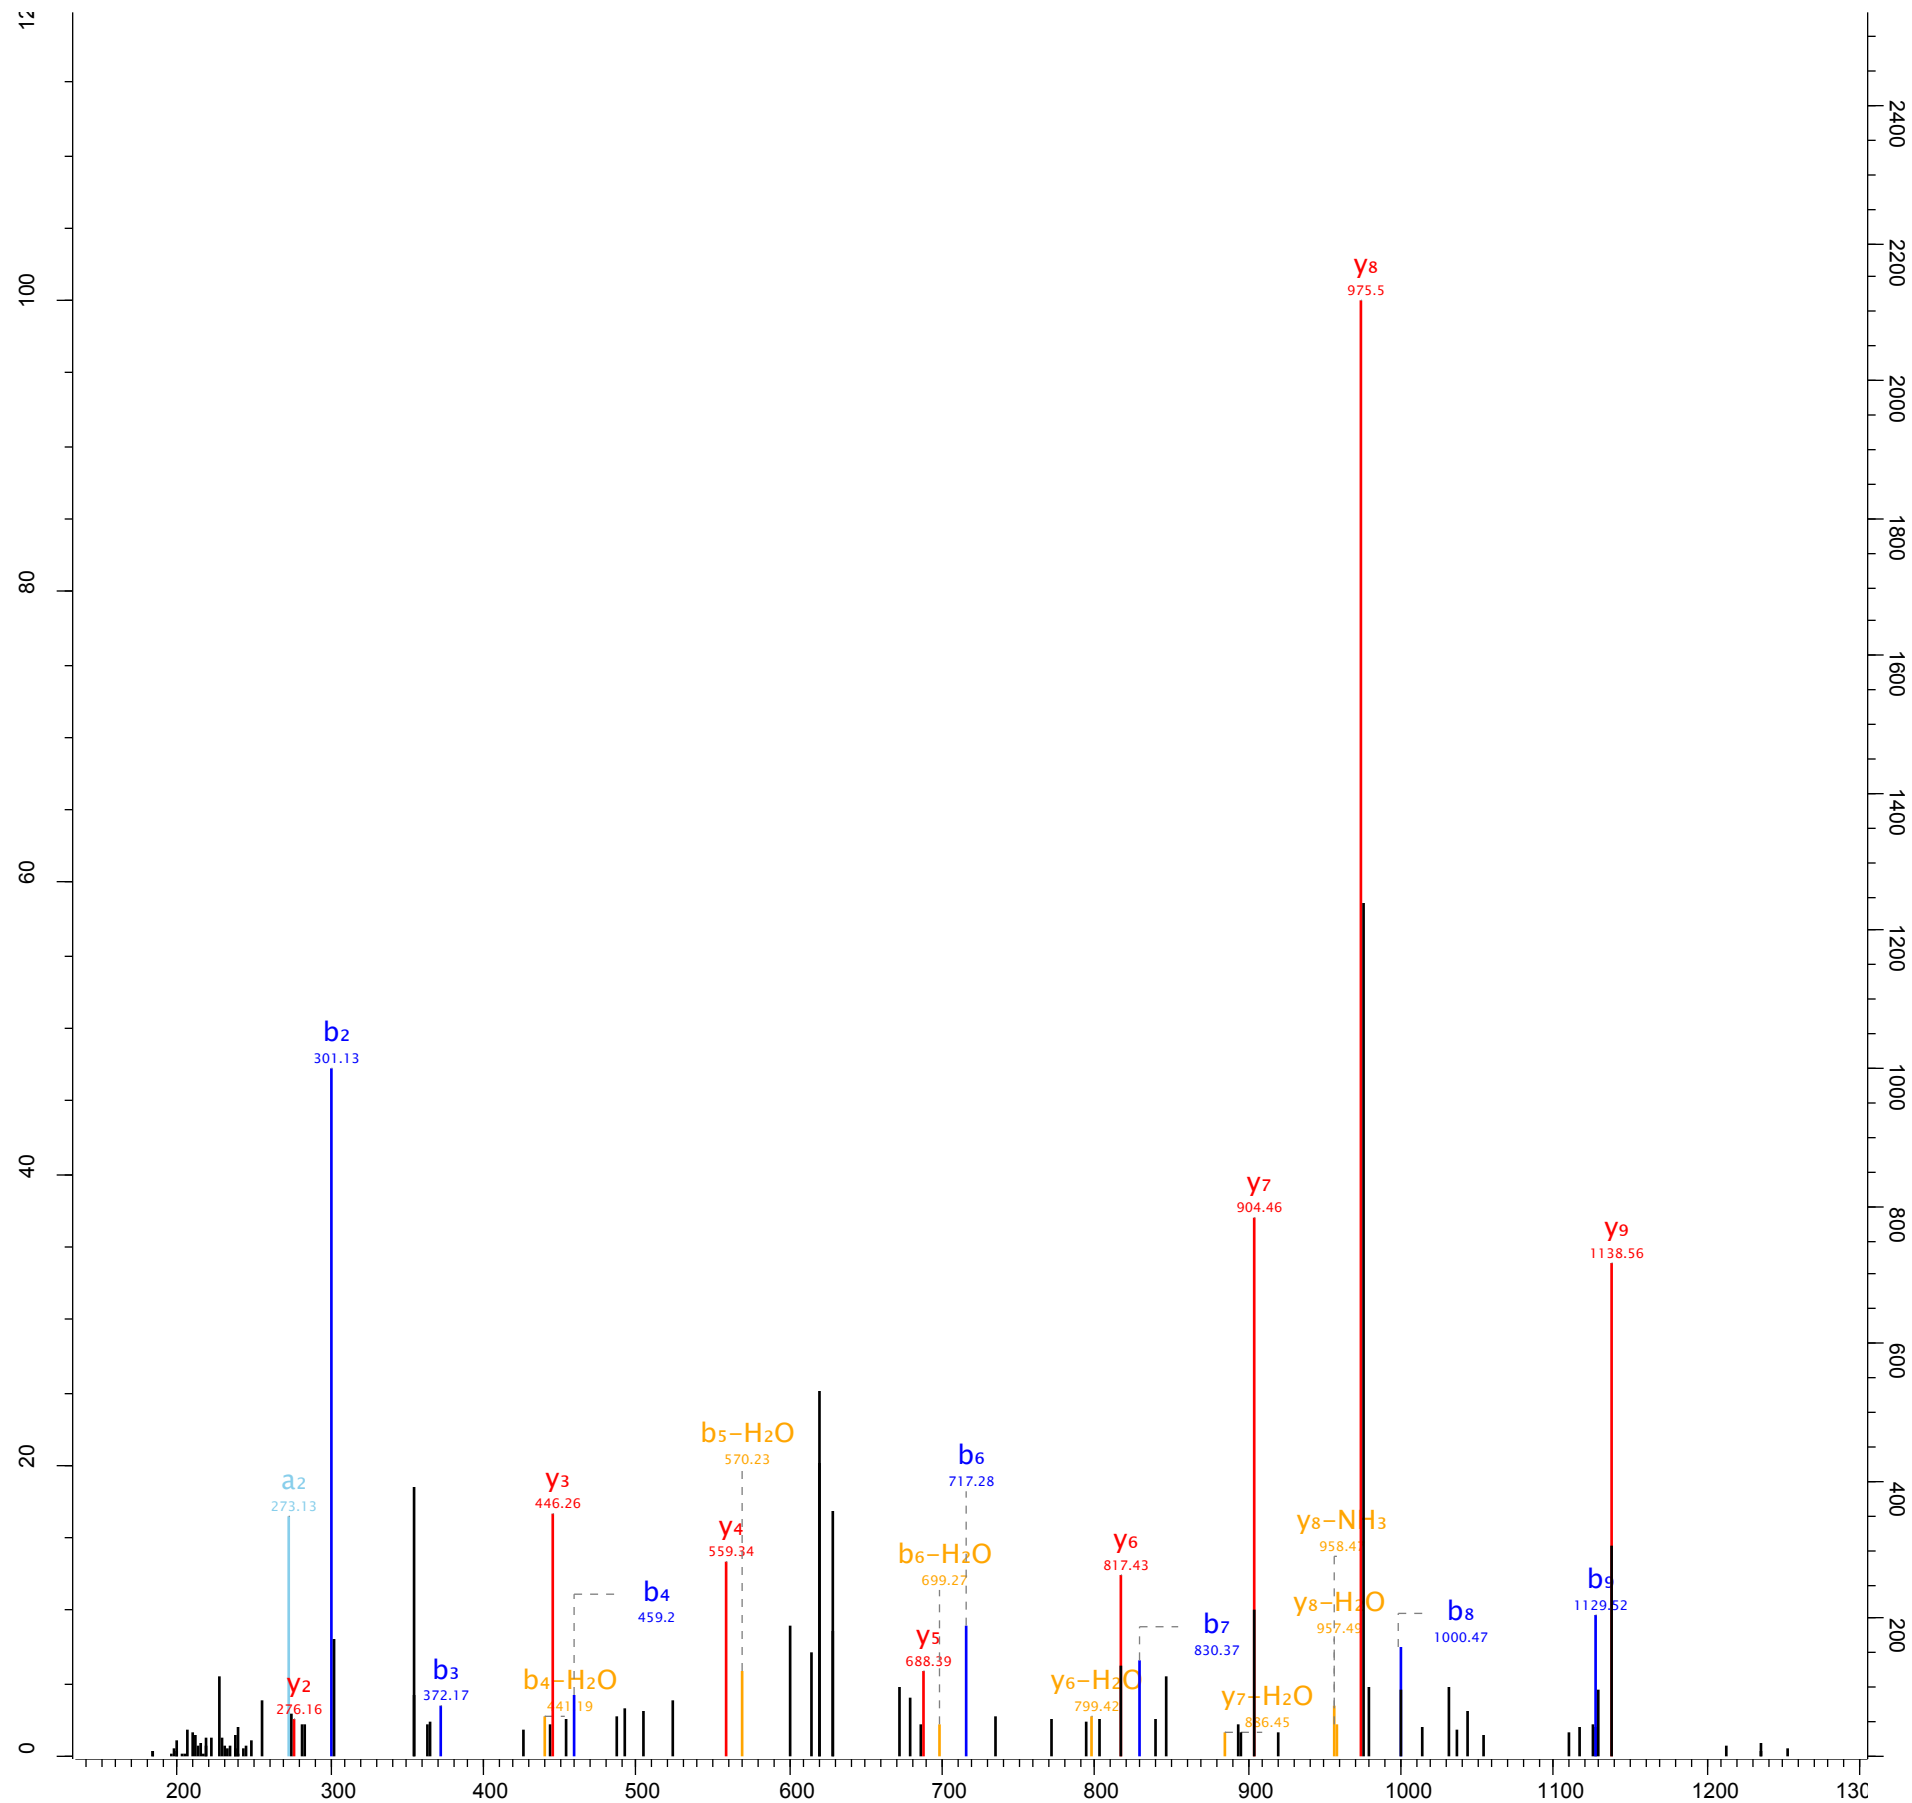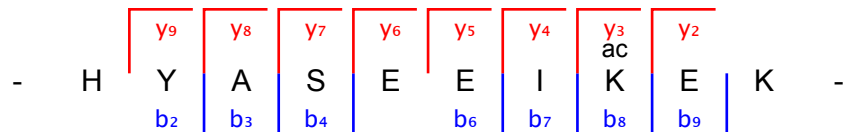

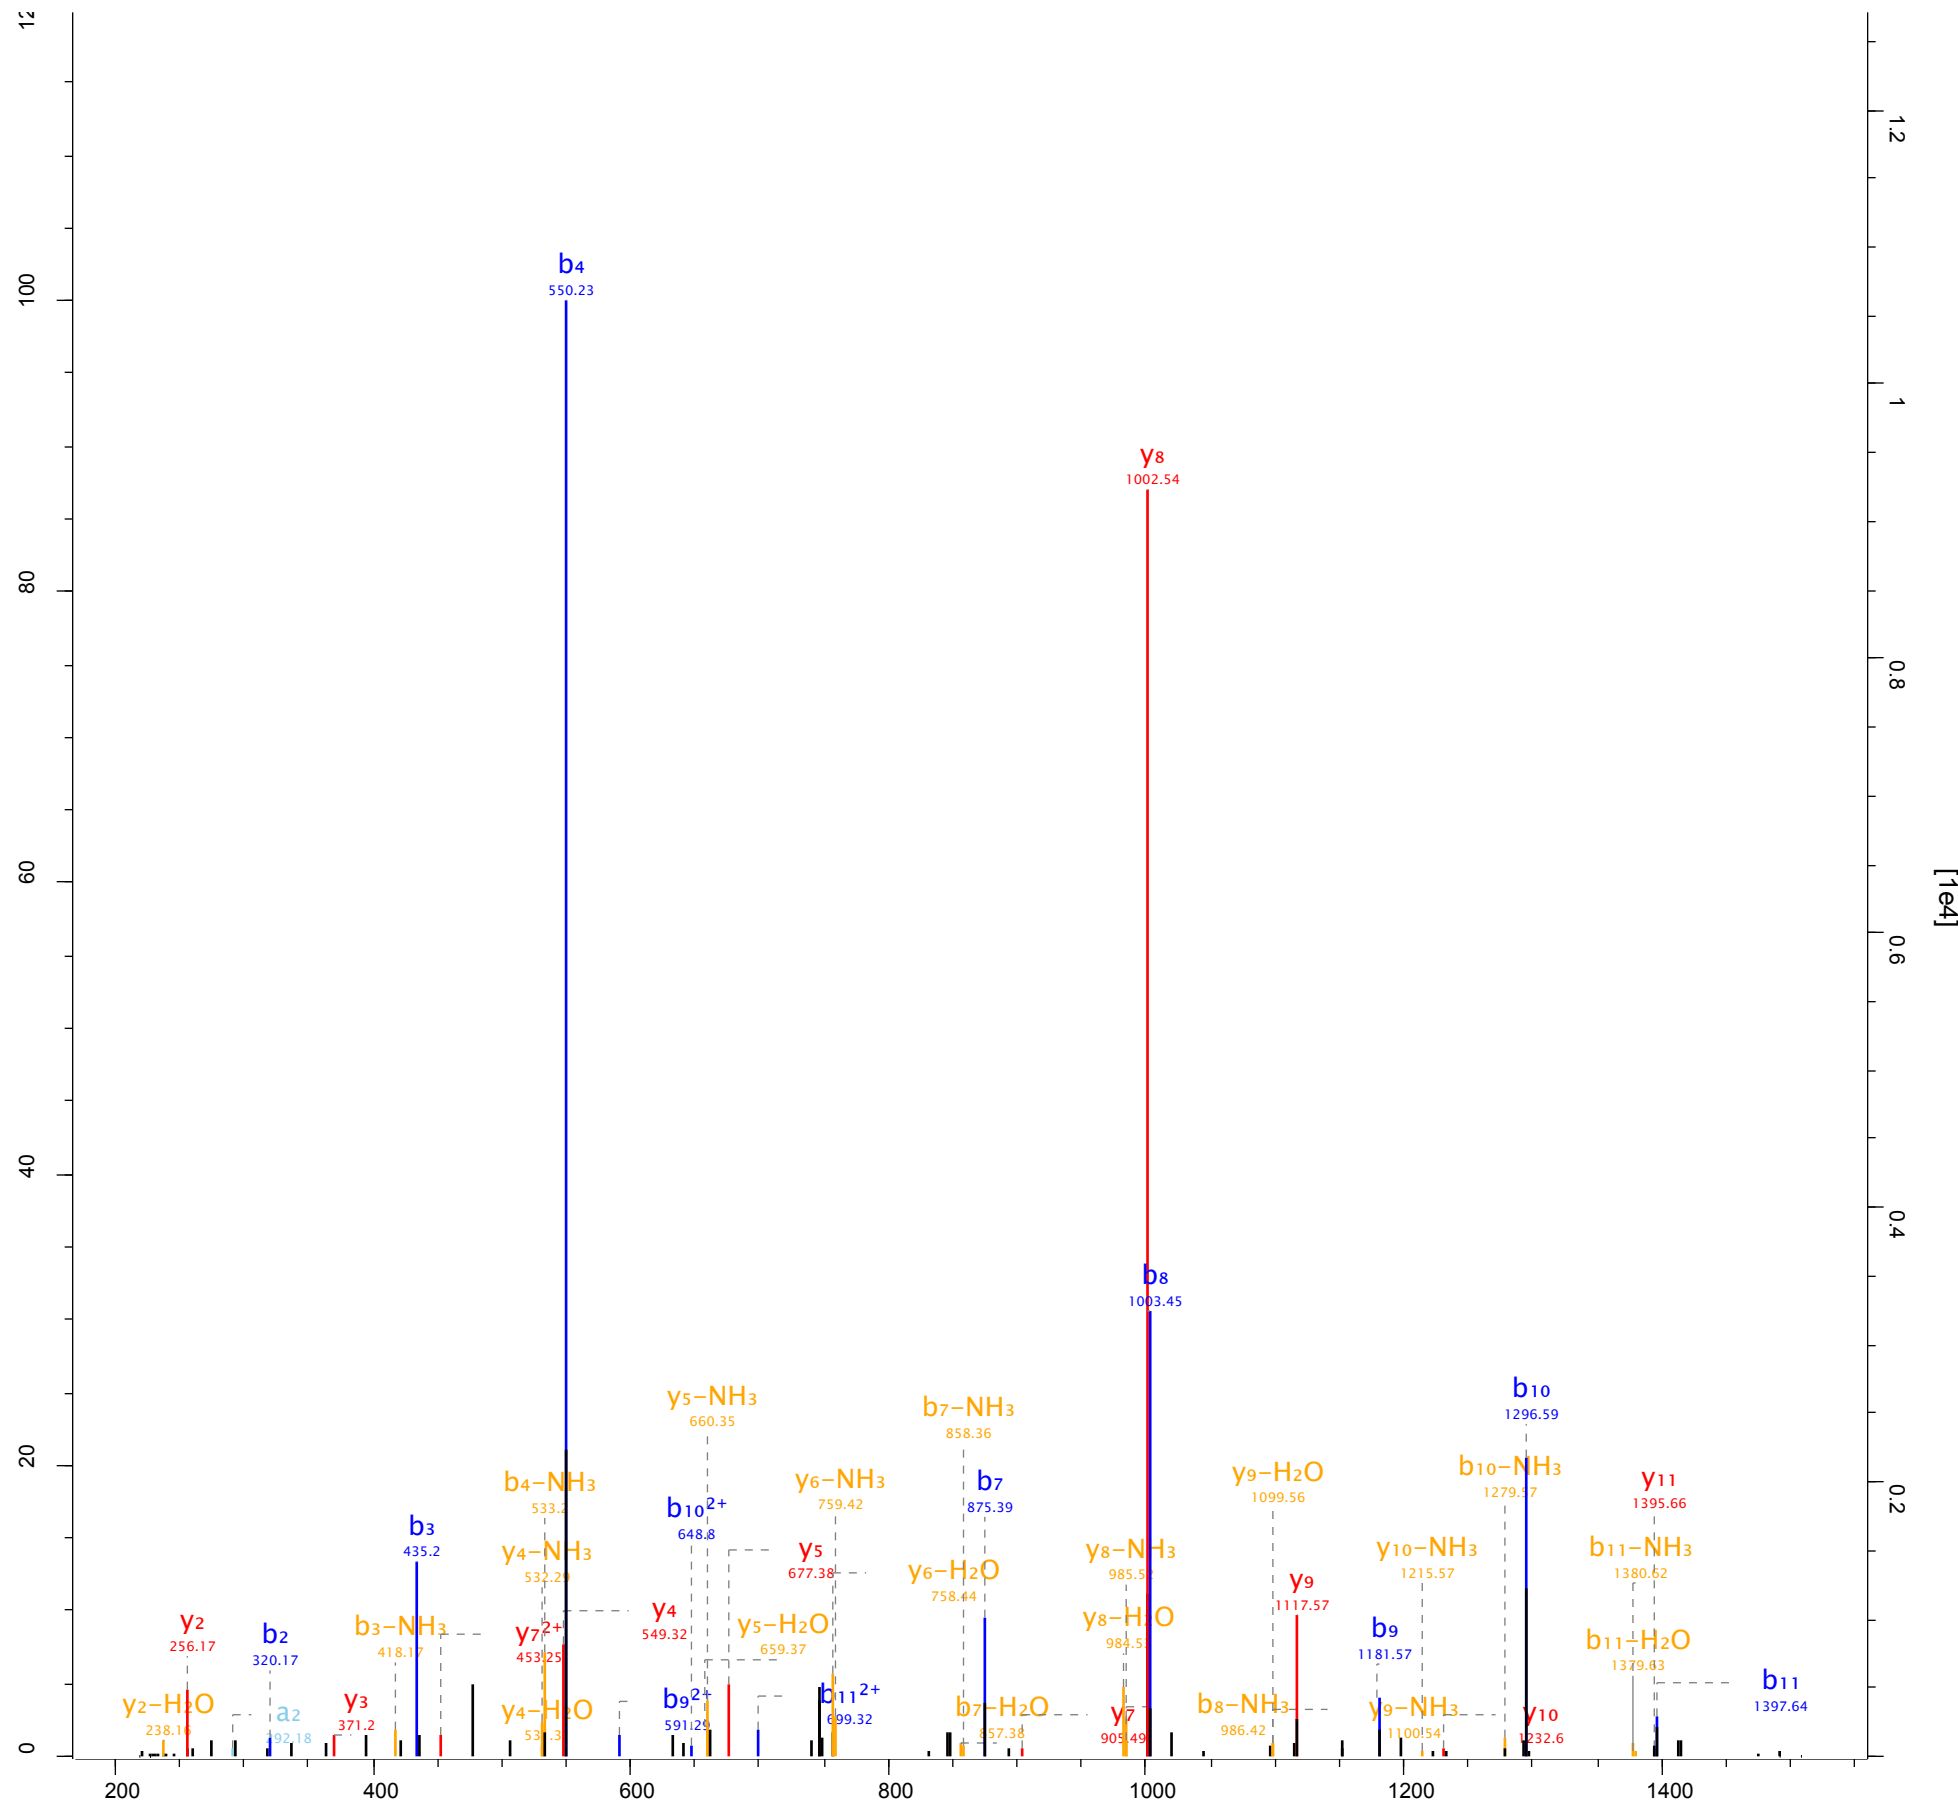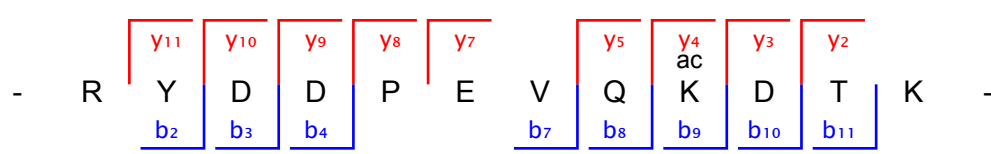

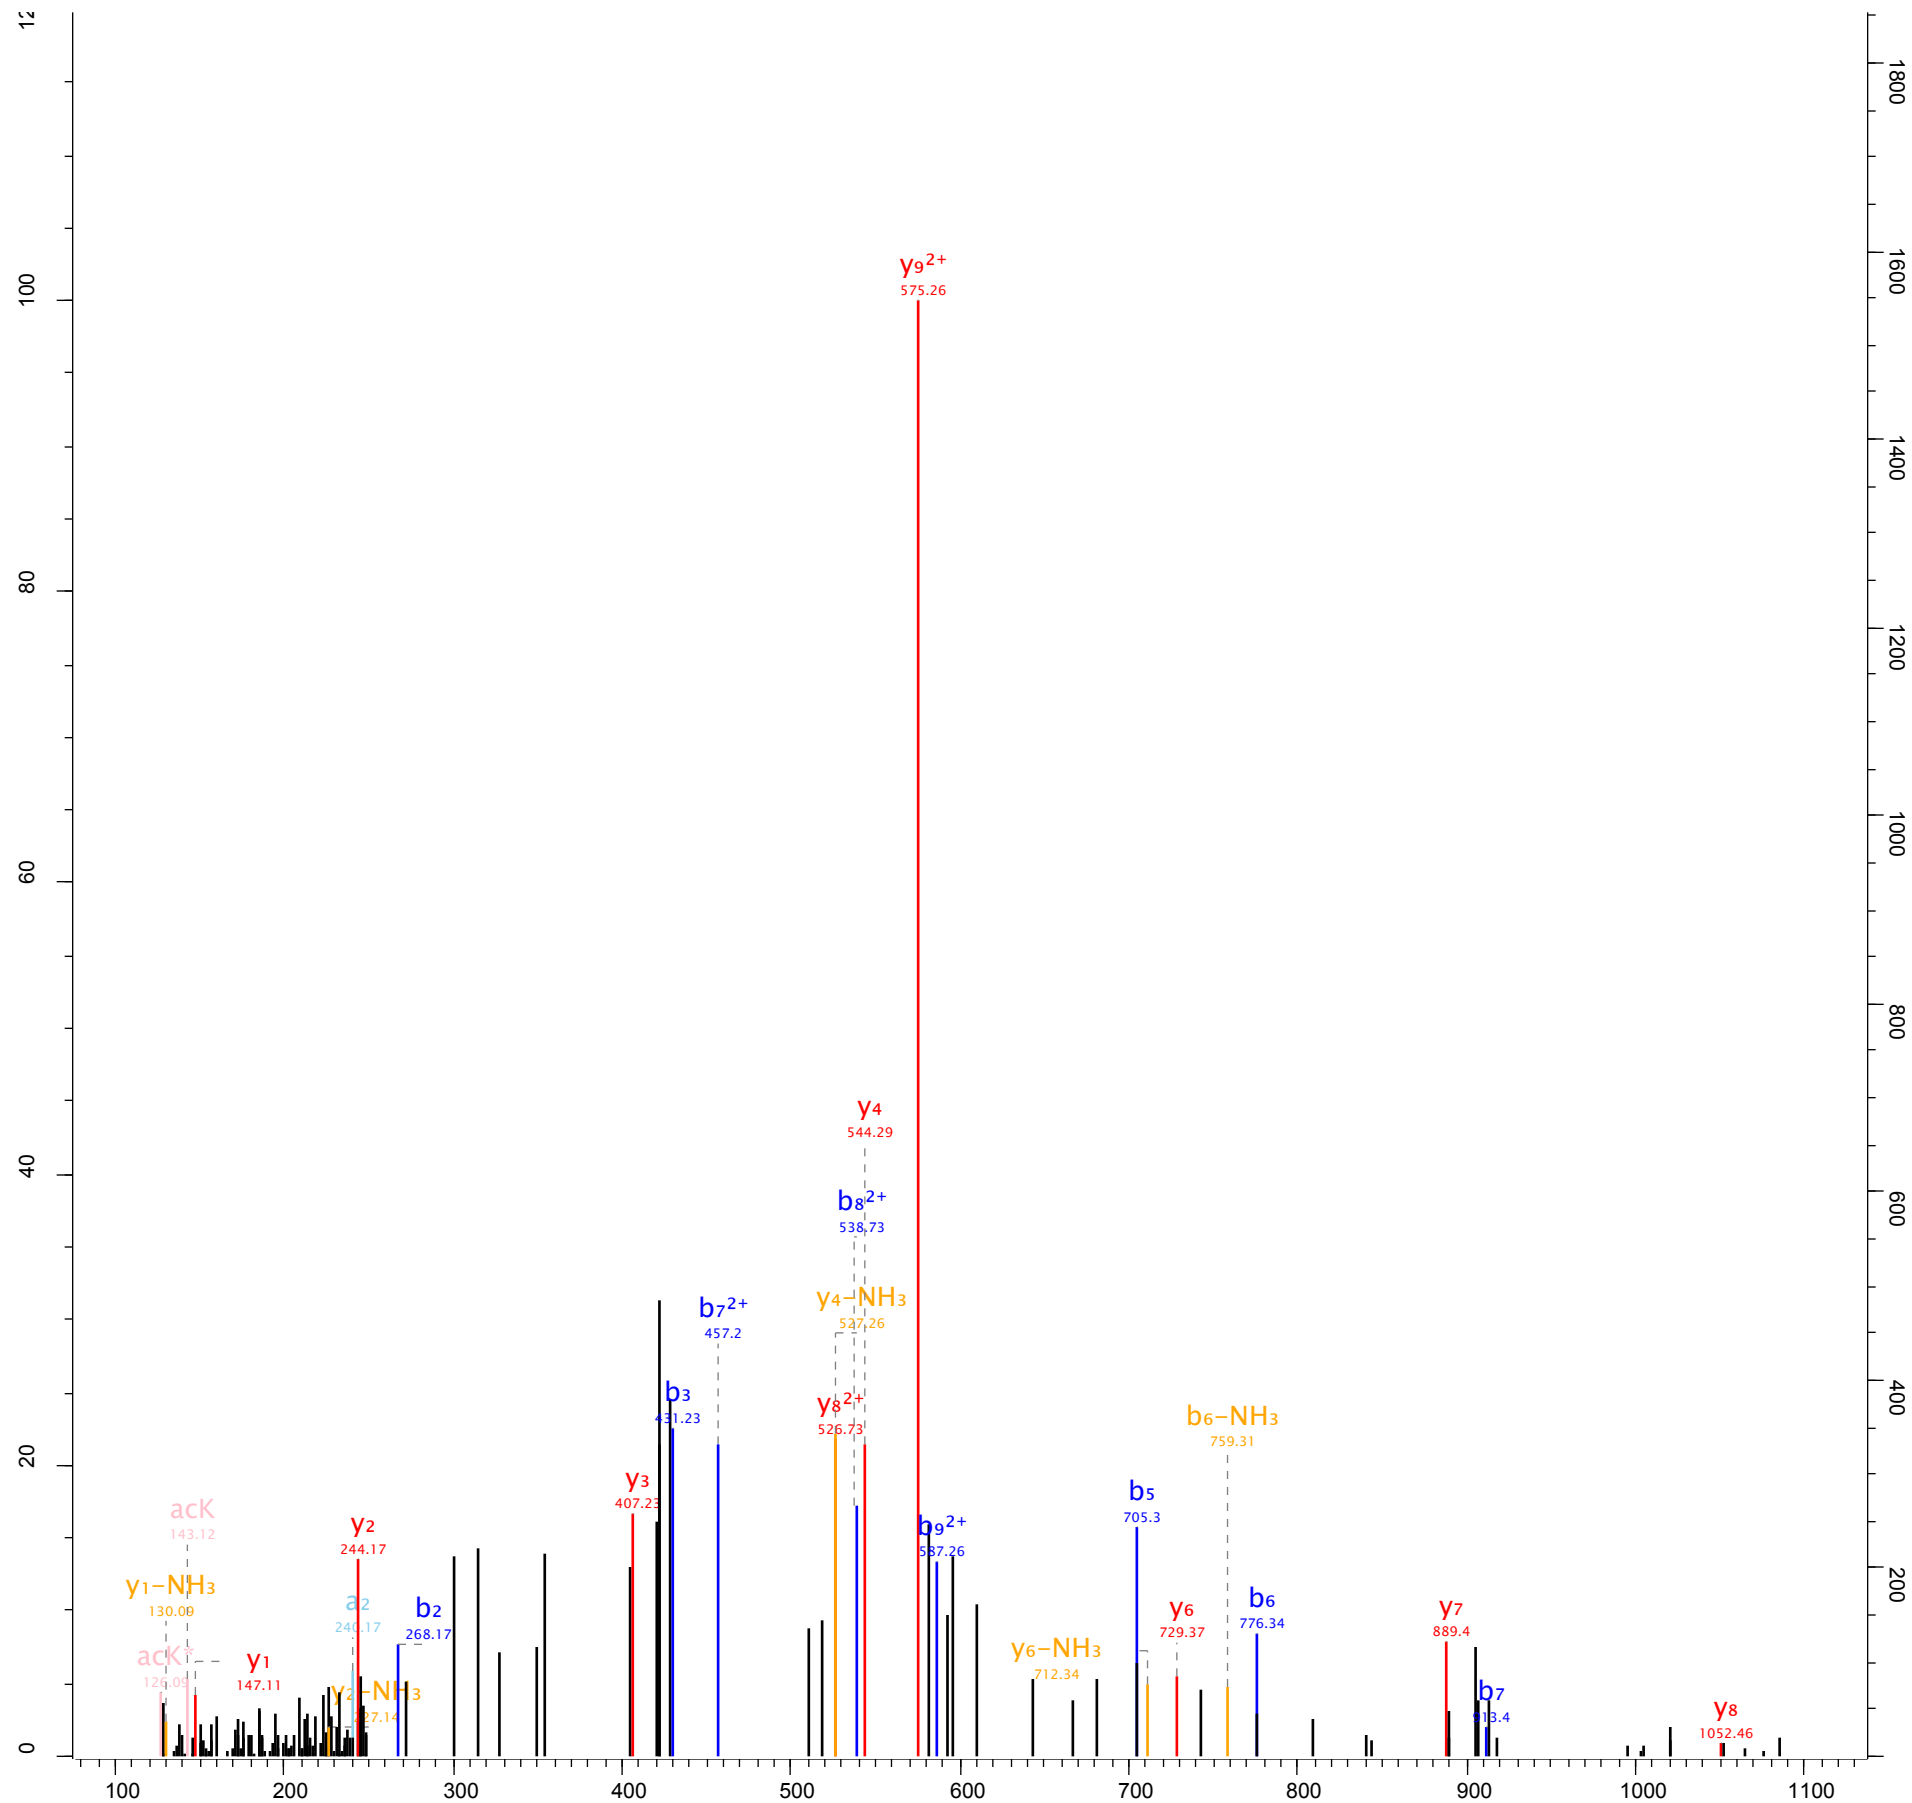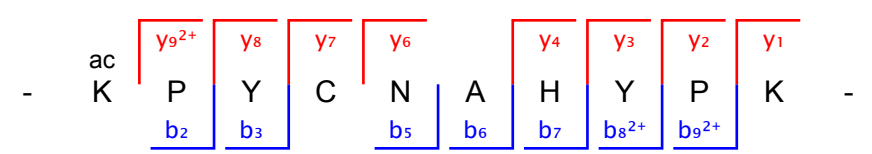

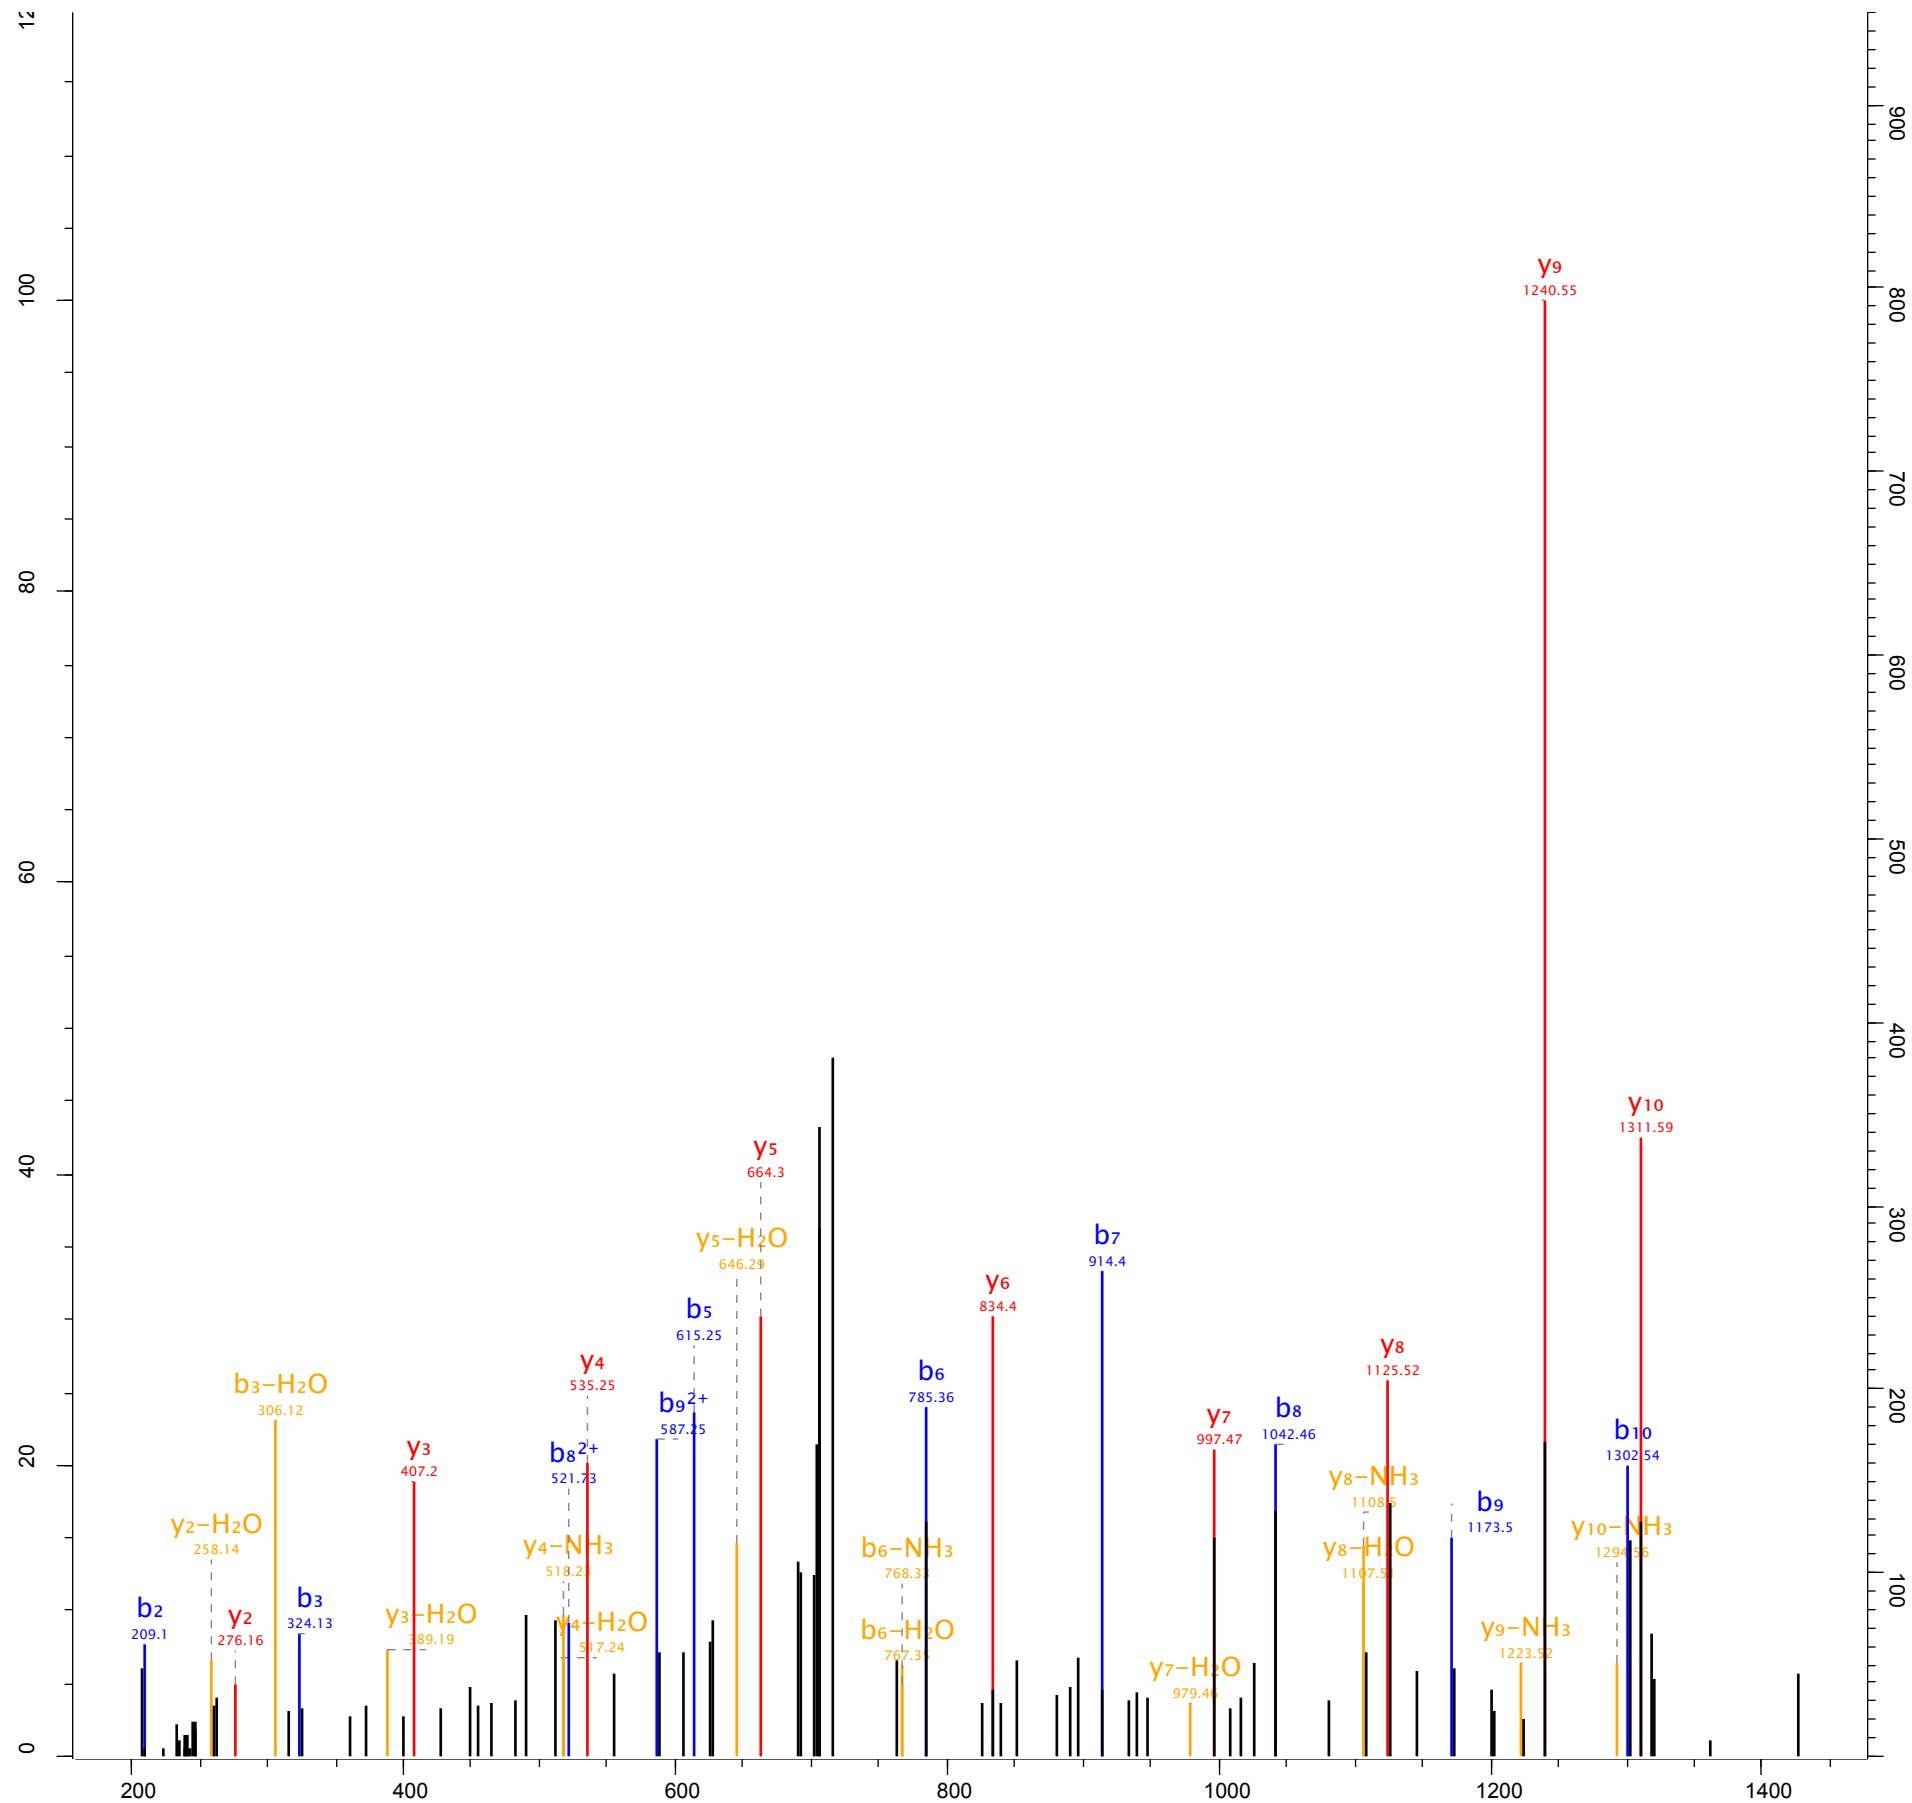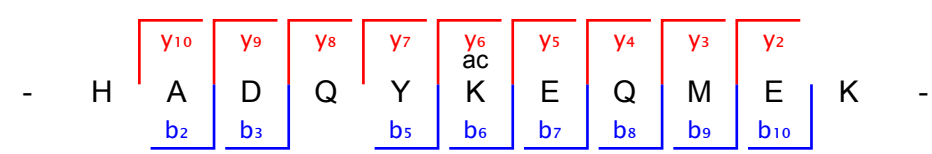

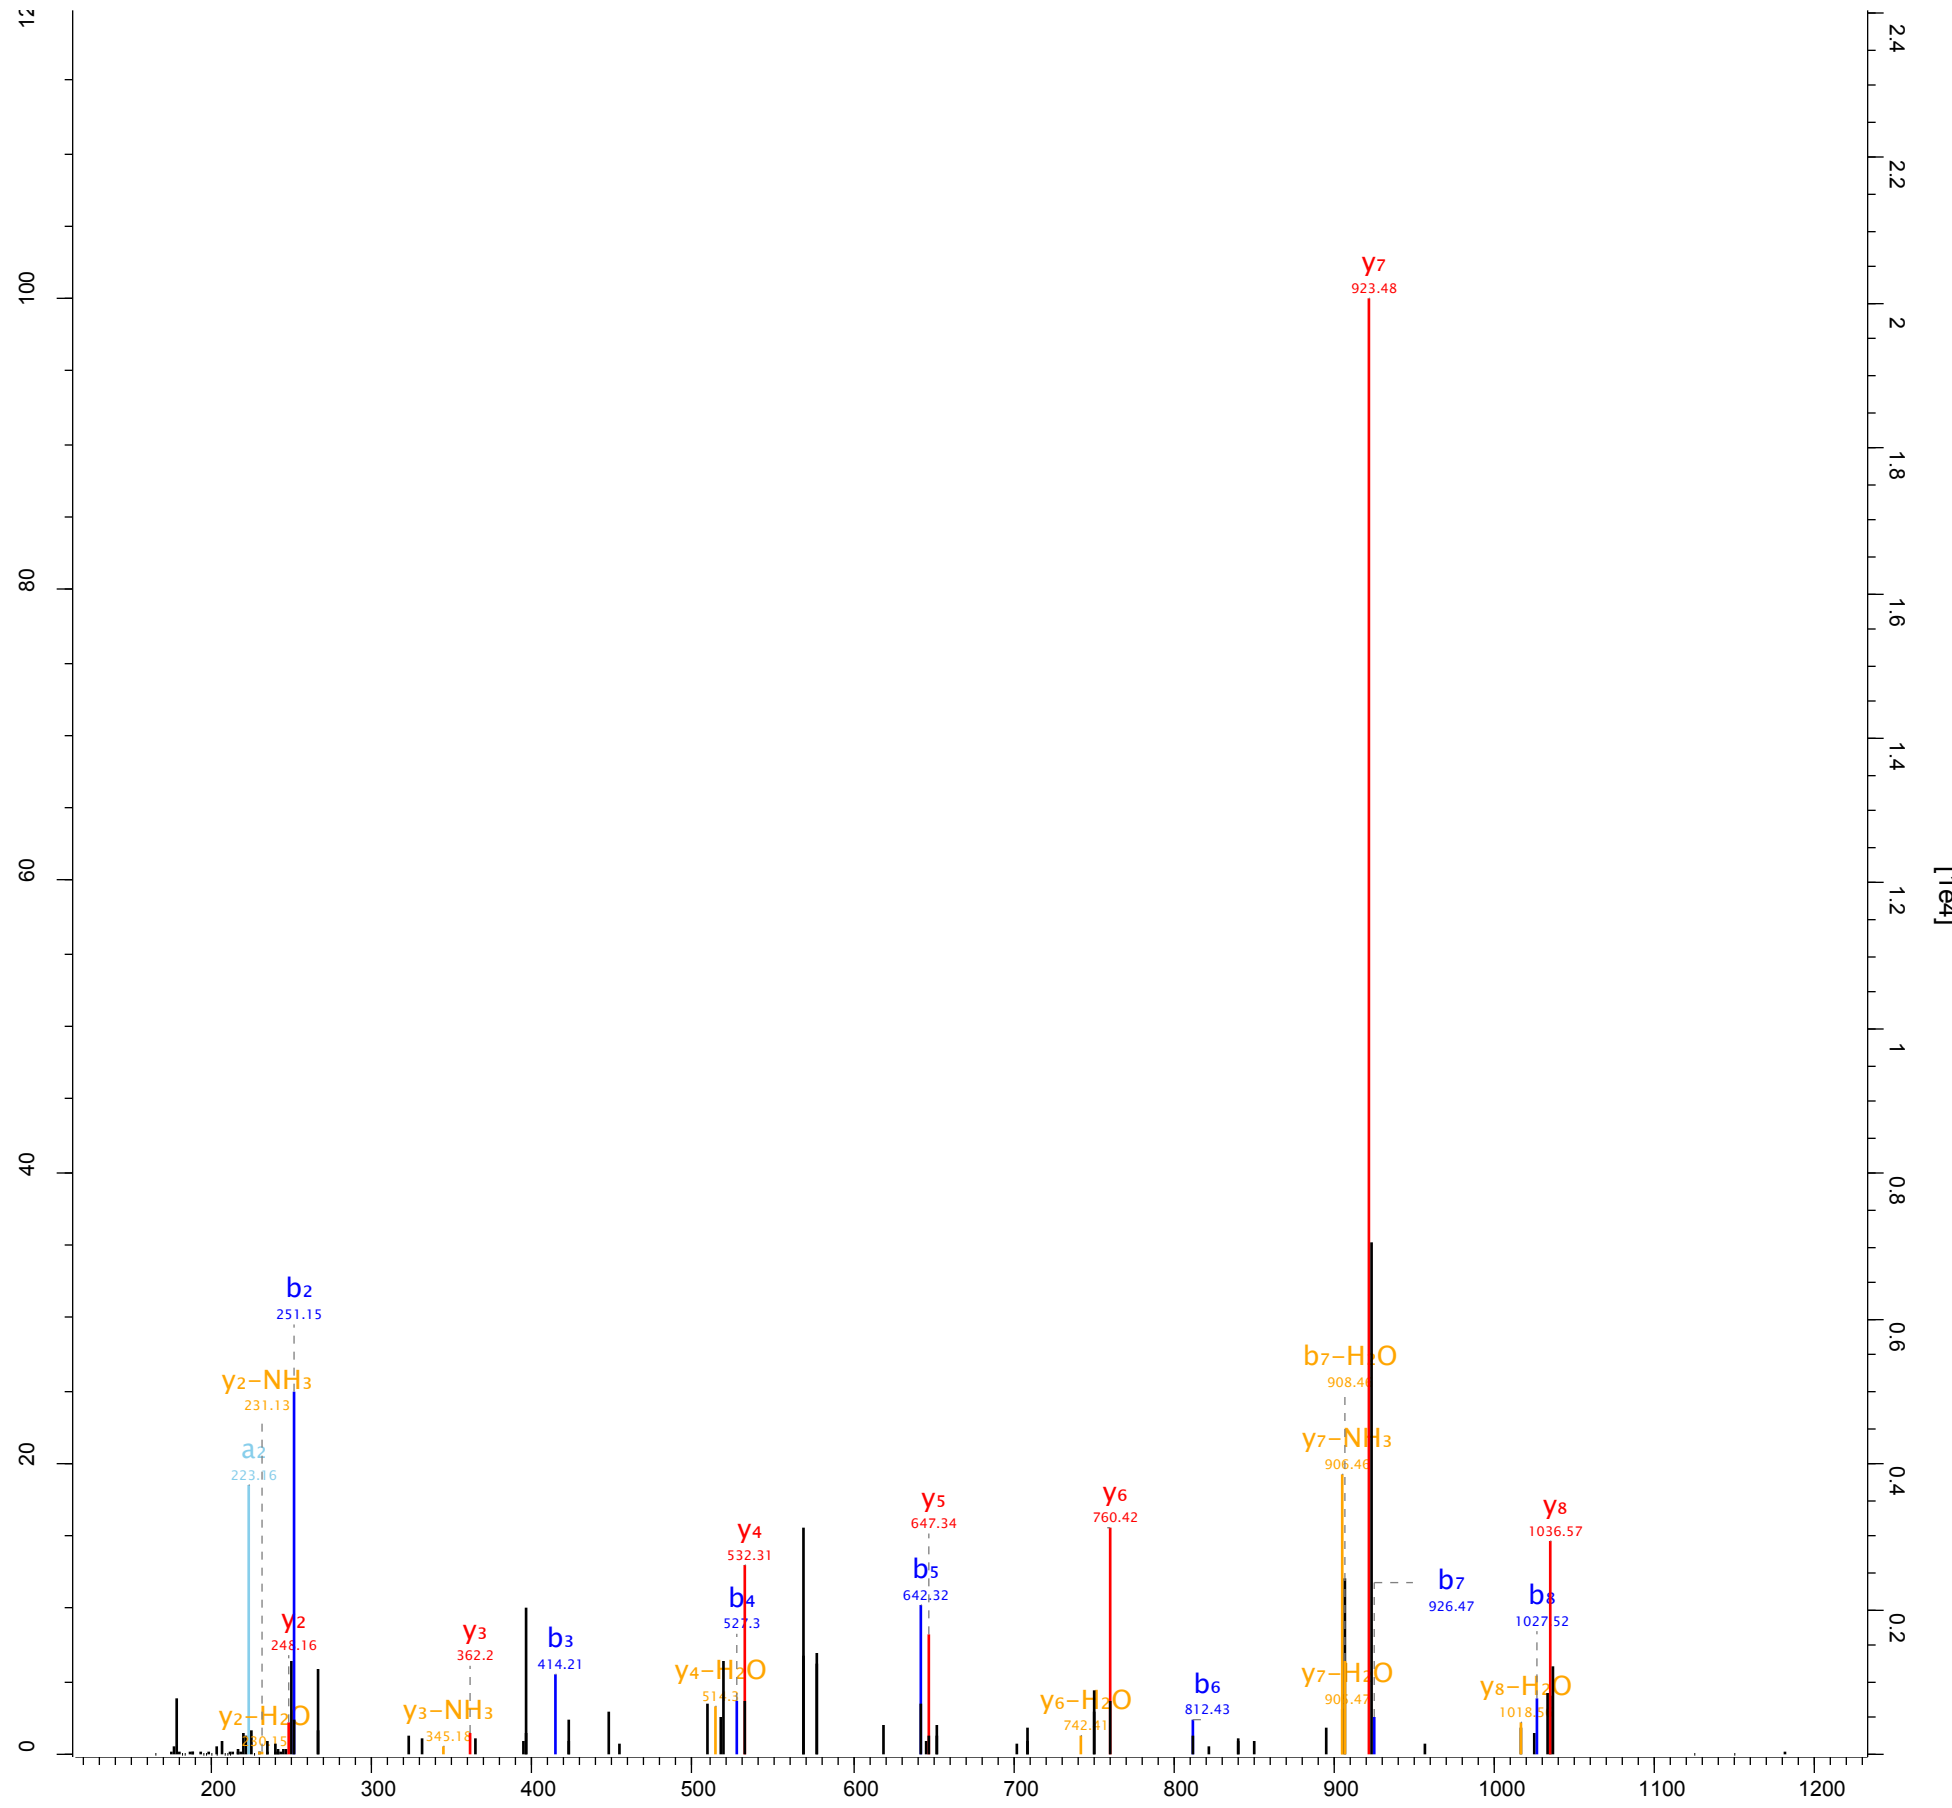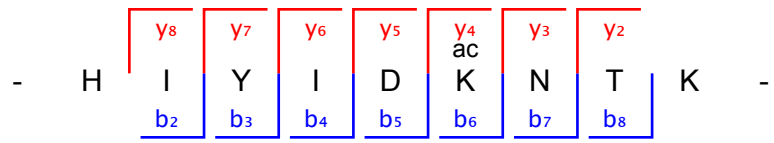

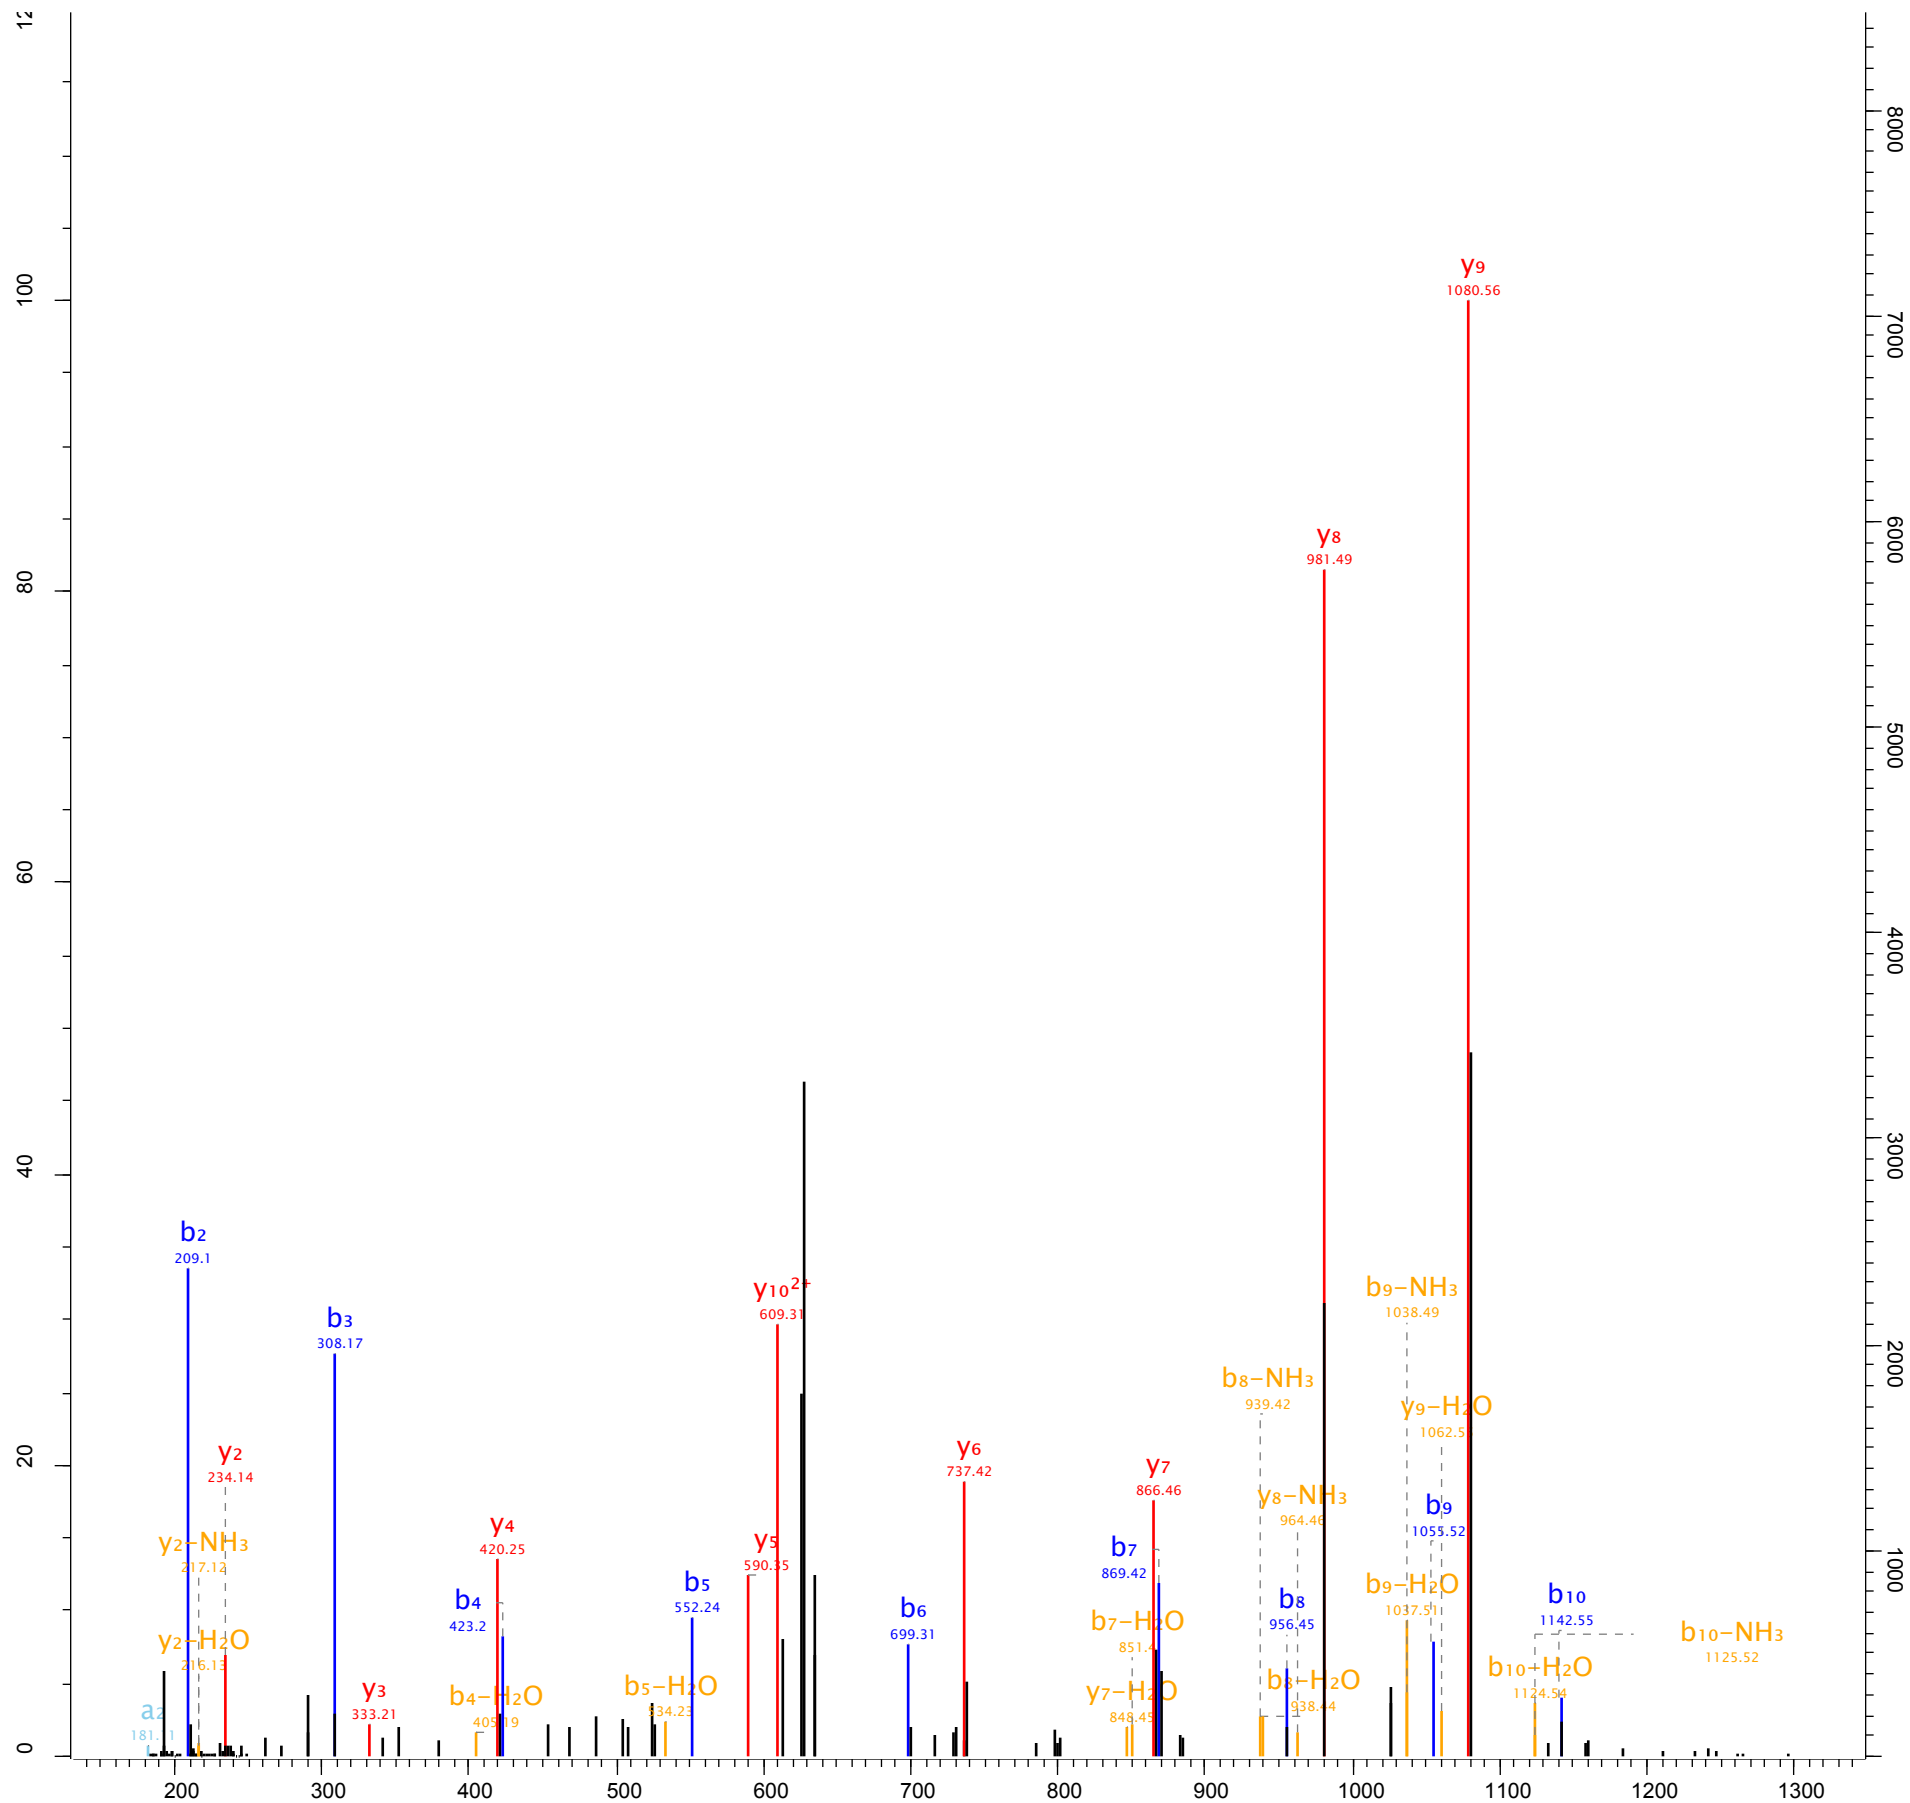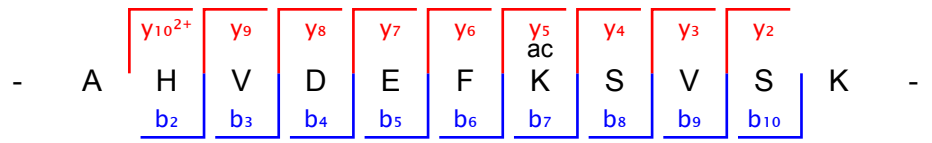



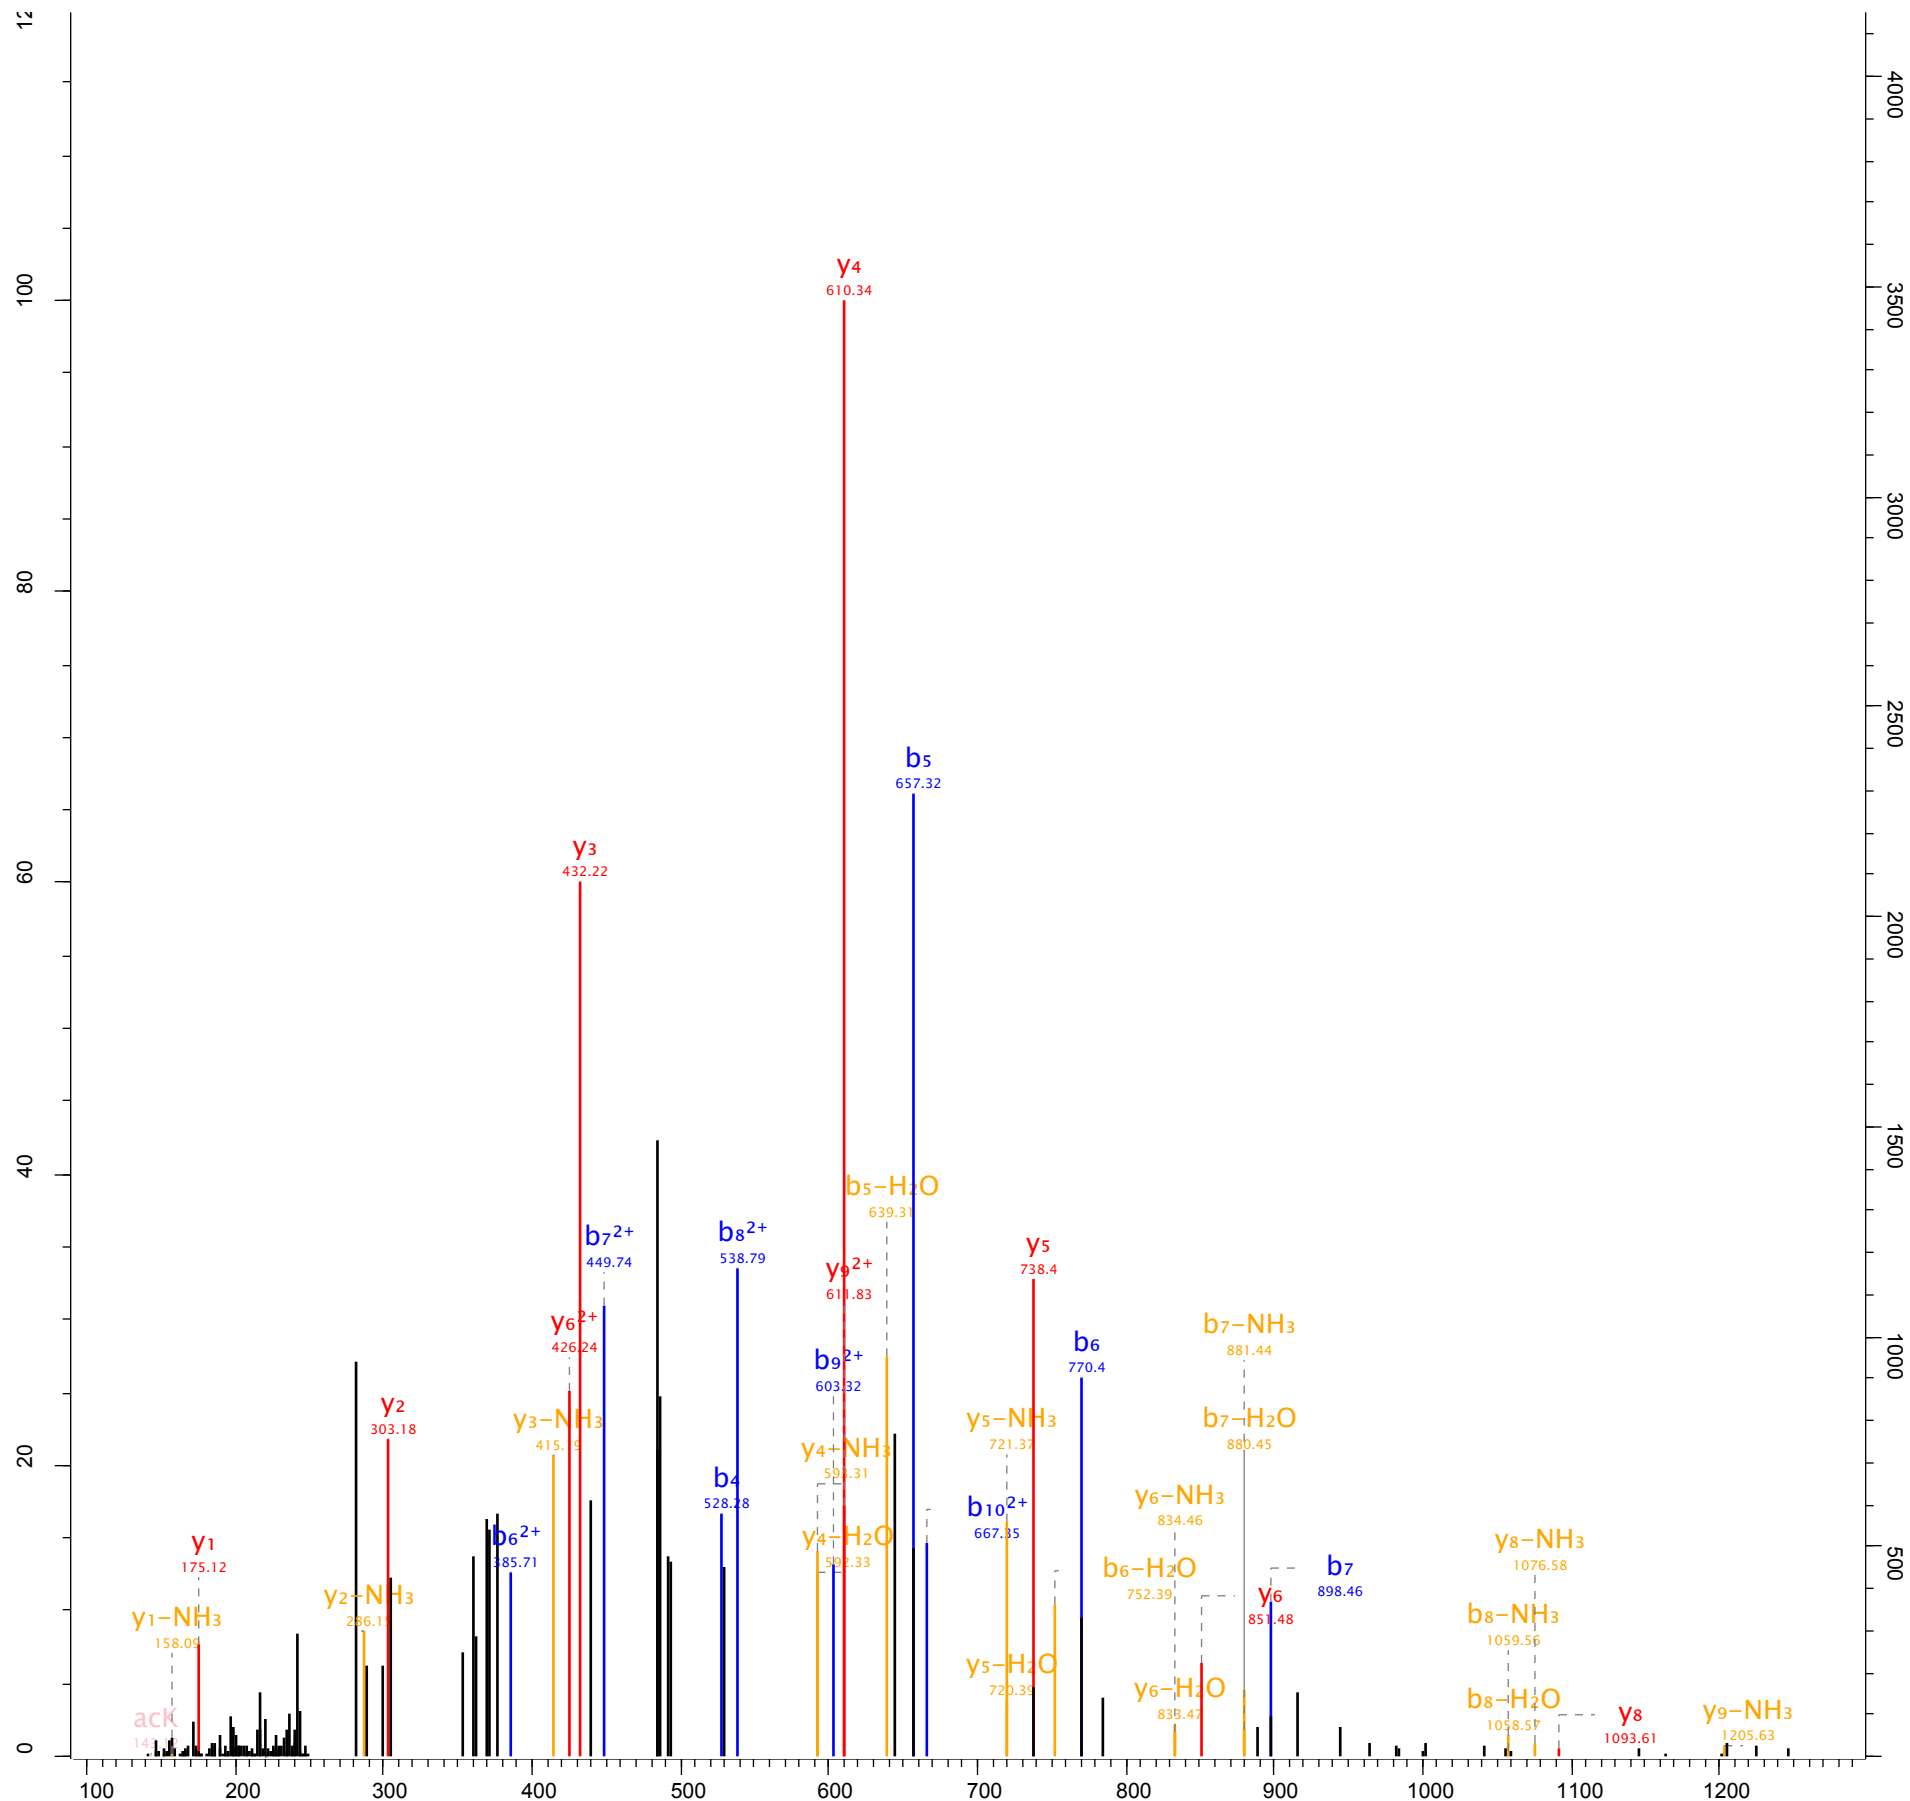

- E R E L E L Q K E Q R -

y<sub>9</sub><sup>2+</sup>
y<sub>8</sub>
y<sub>6</sub>
y<sub>5</sub>
y<sub>4</sub>  
ac
y<sub>3</sub>
y<sub>2</sub>
y<sub>1</sub>

b<sub>4</sub>
b<sub>5</sub>
b<sub>6</sub>
b<sub>7</sub>
b<sub>8</sub><sup>2+</sup>
b<sub>9</sub><sup>2+</sup>
b<sub>10</sub><sup>2+</sup>

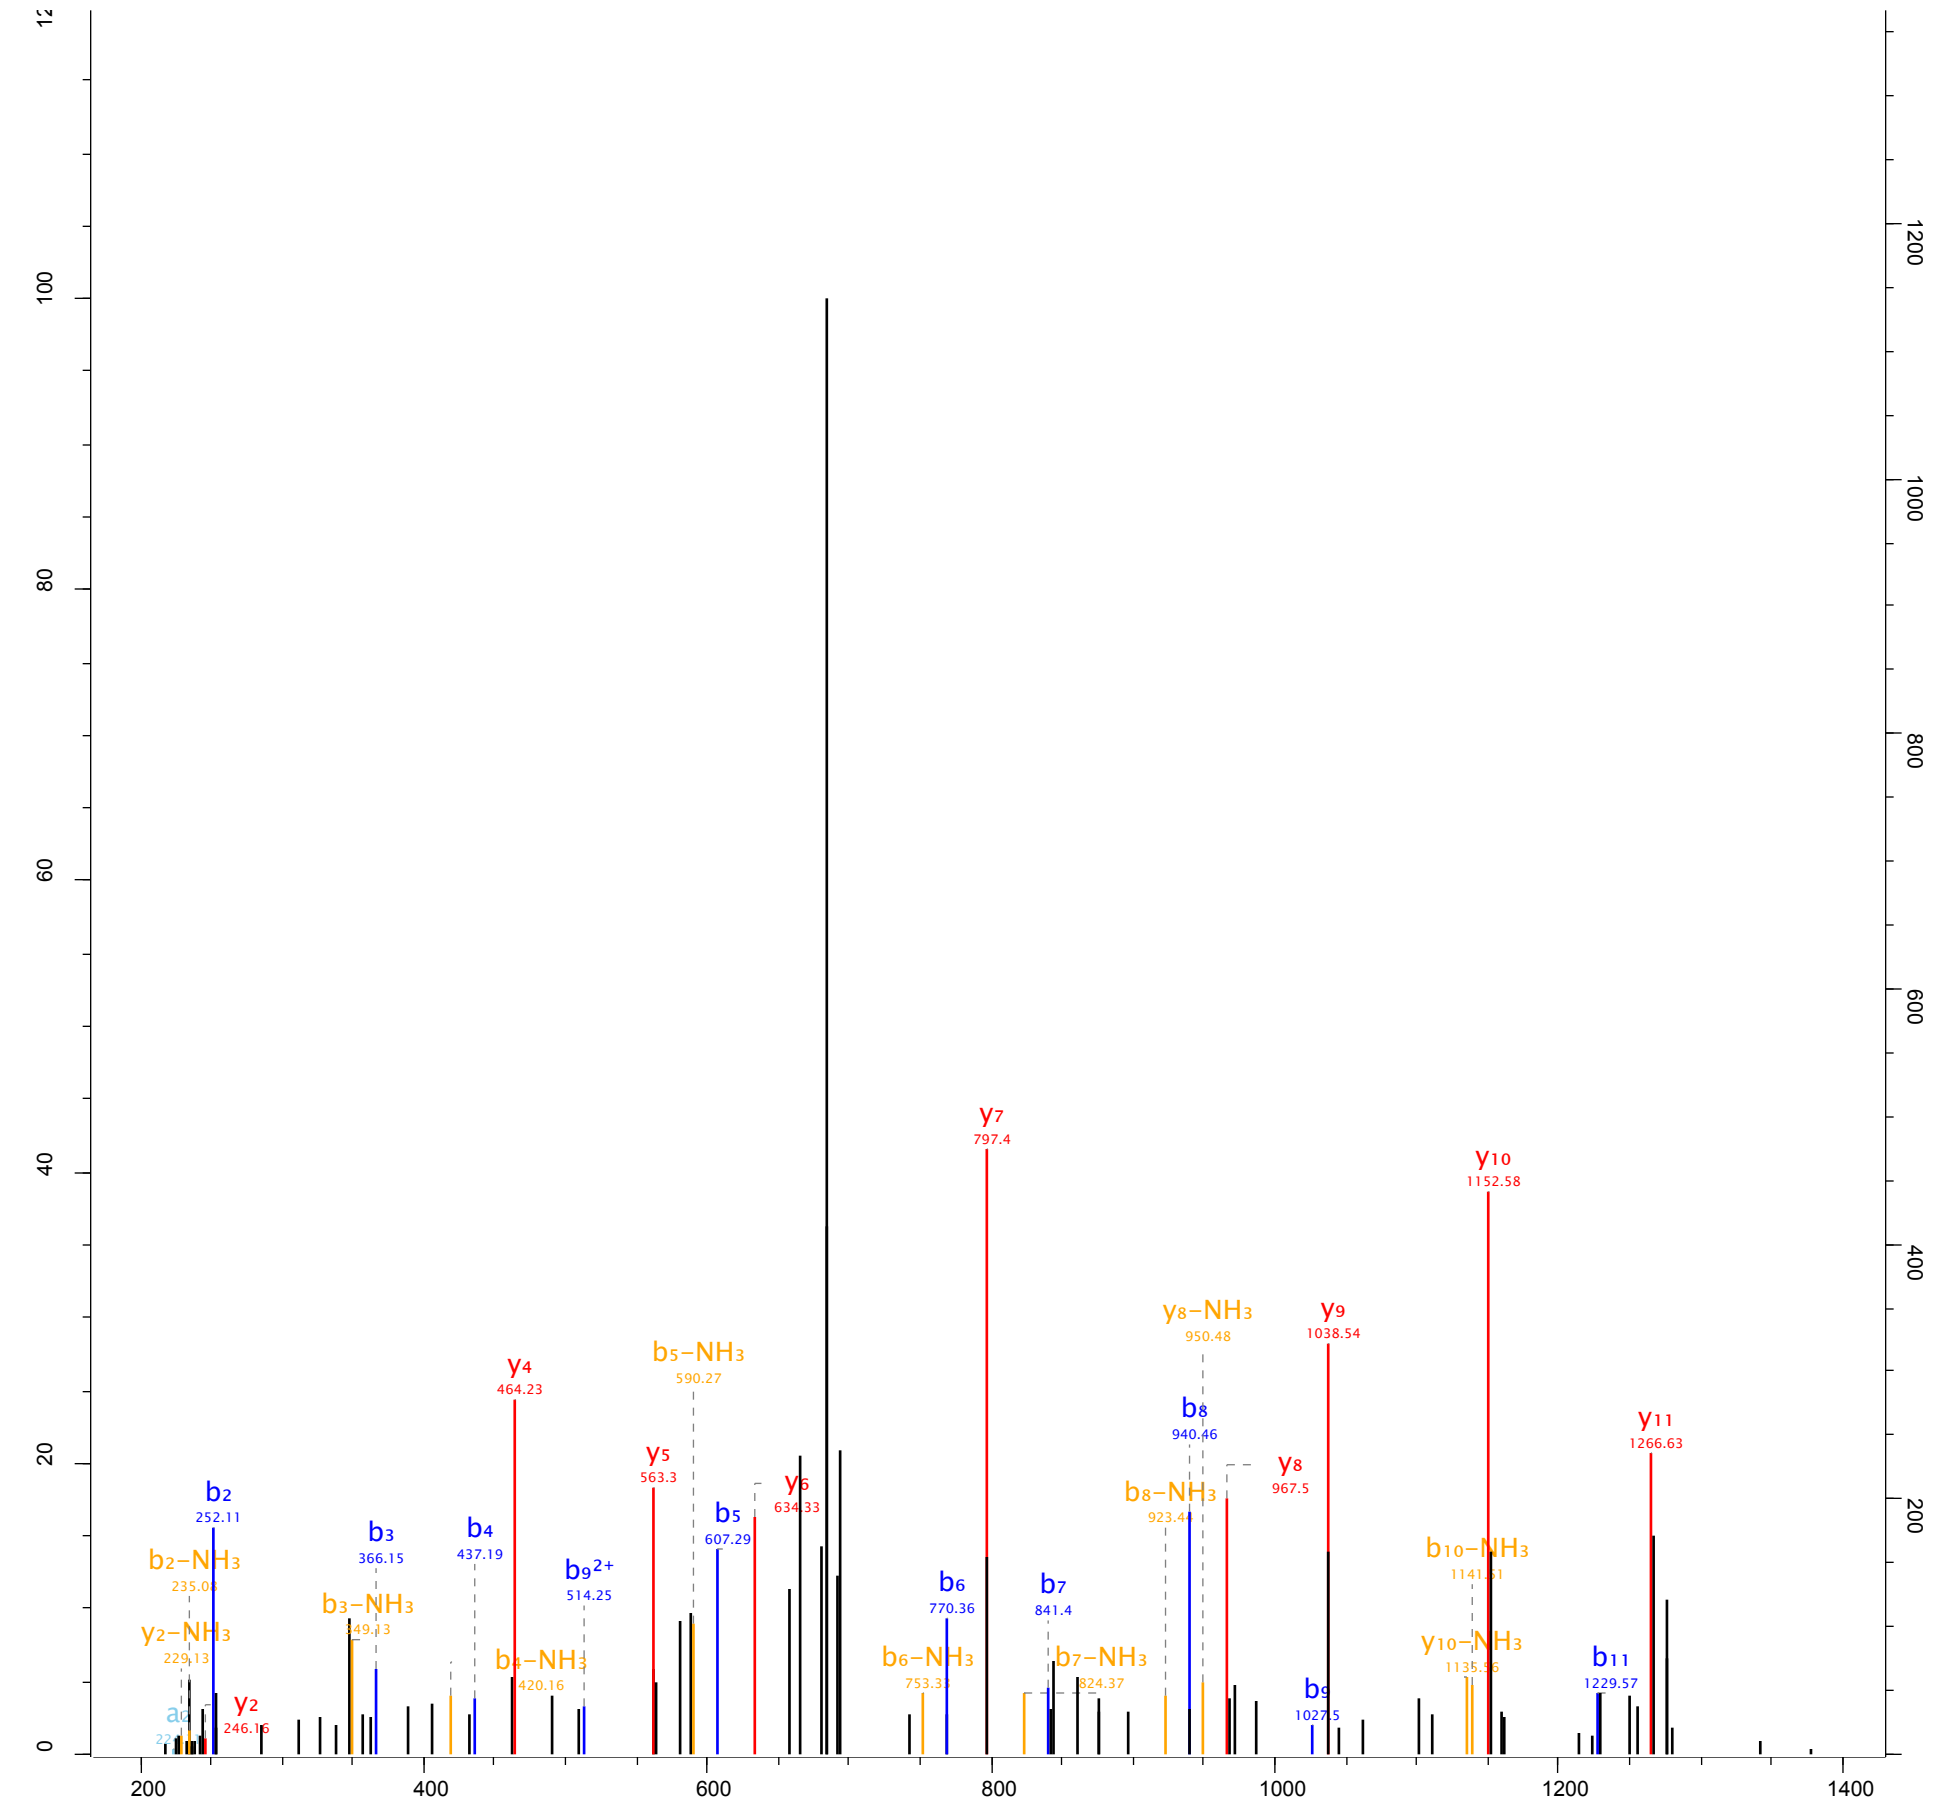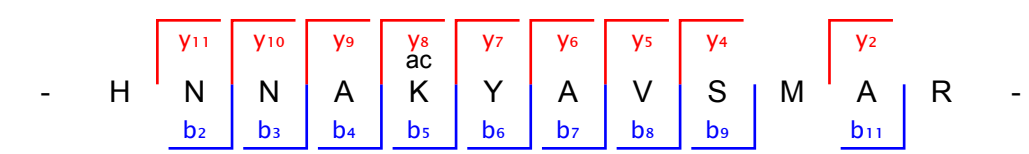

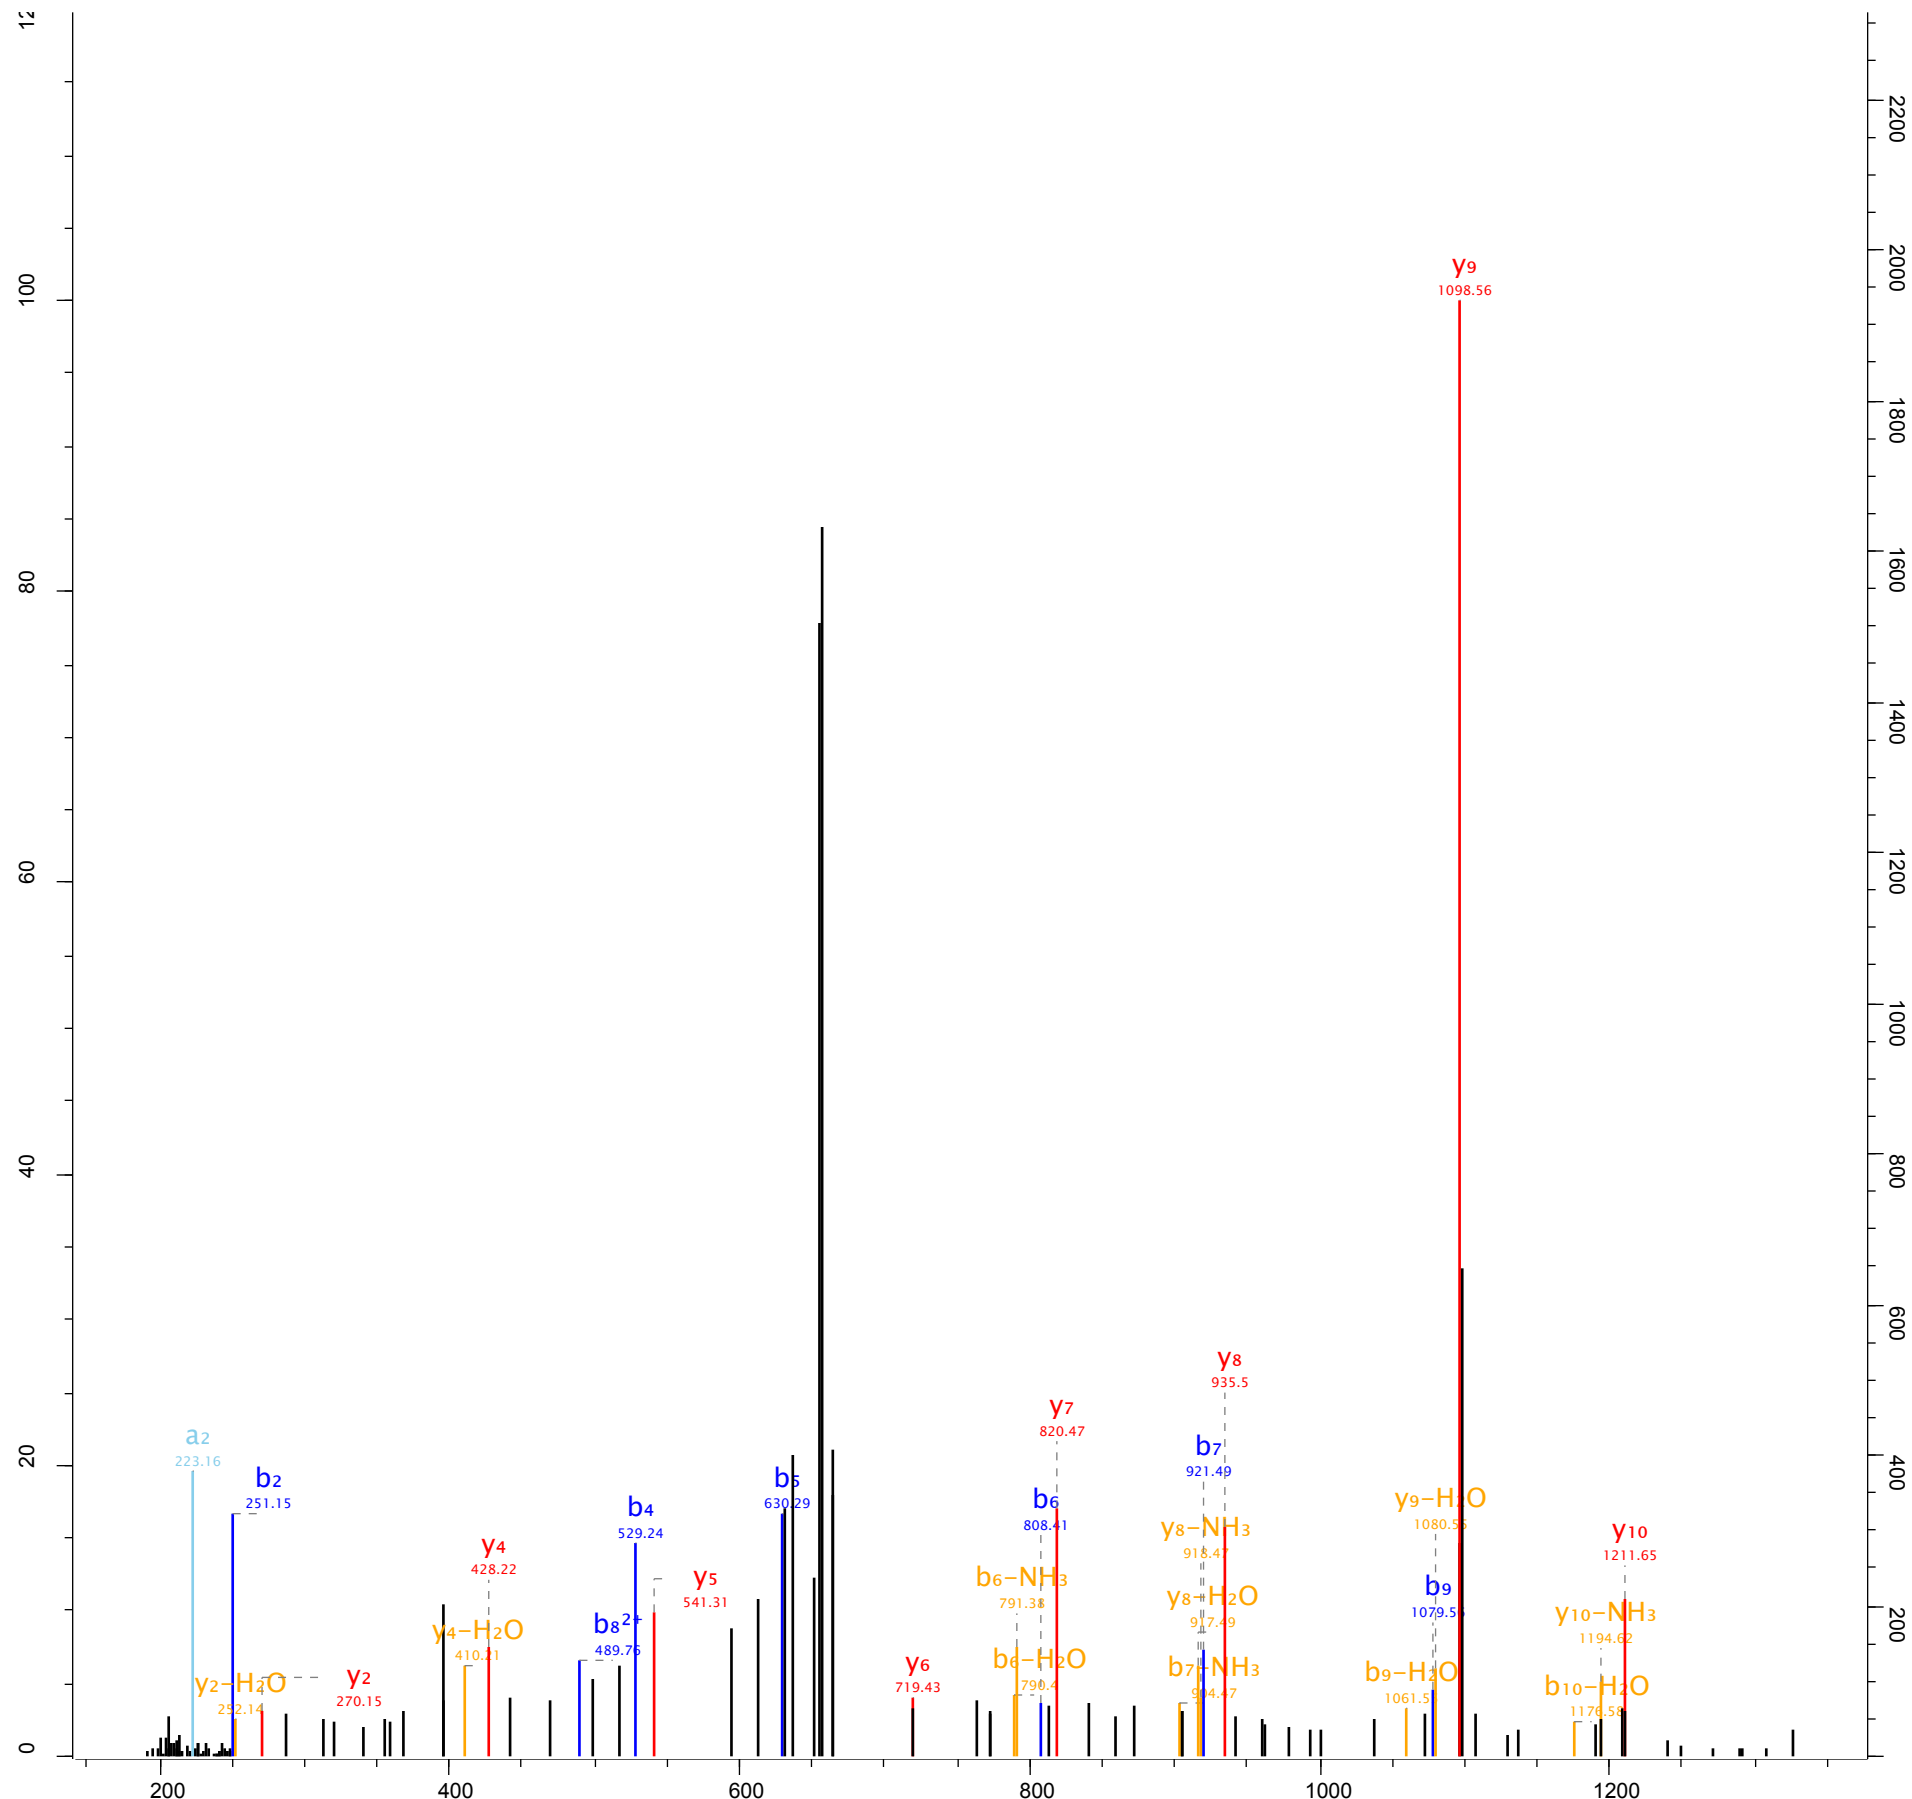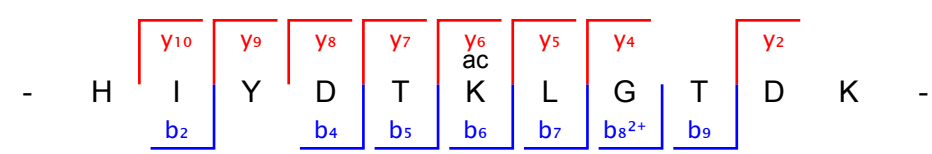

062513\_SCW\_II\_53\_10\_Vargas\_Enriched

14139

ITMS; CID

156.01

631.34

Mdh2

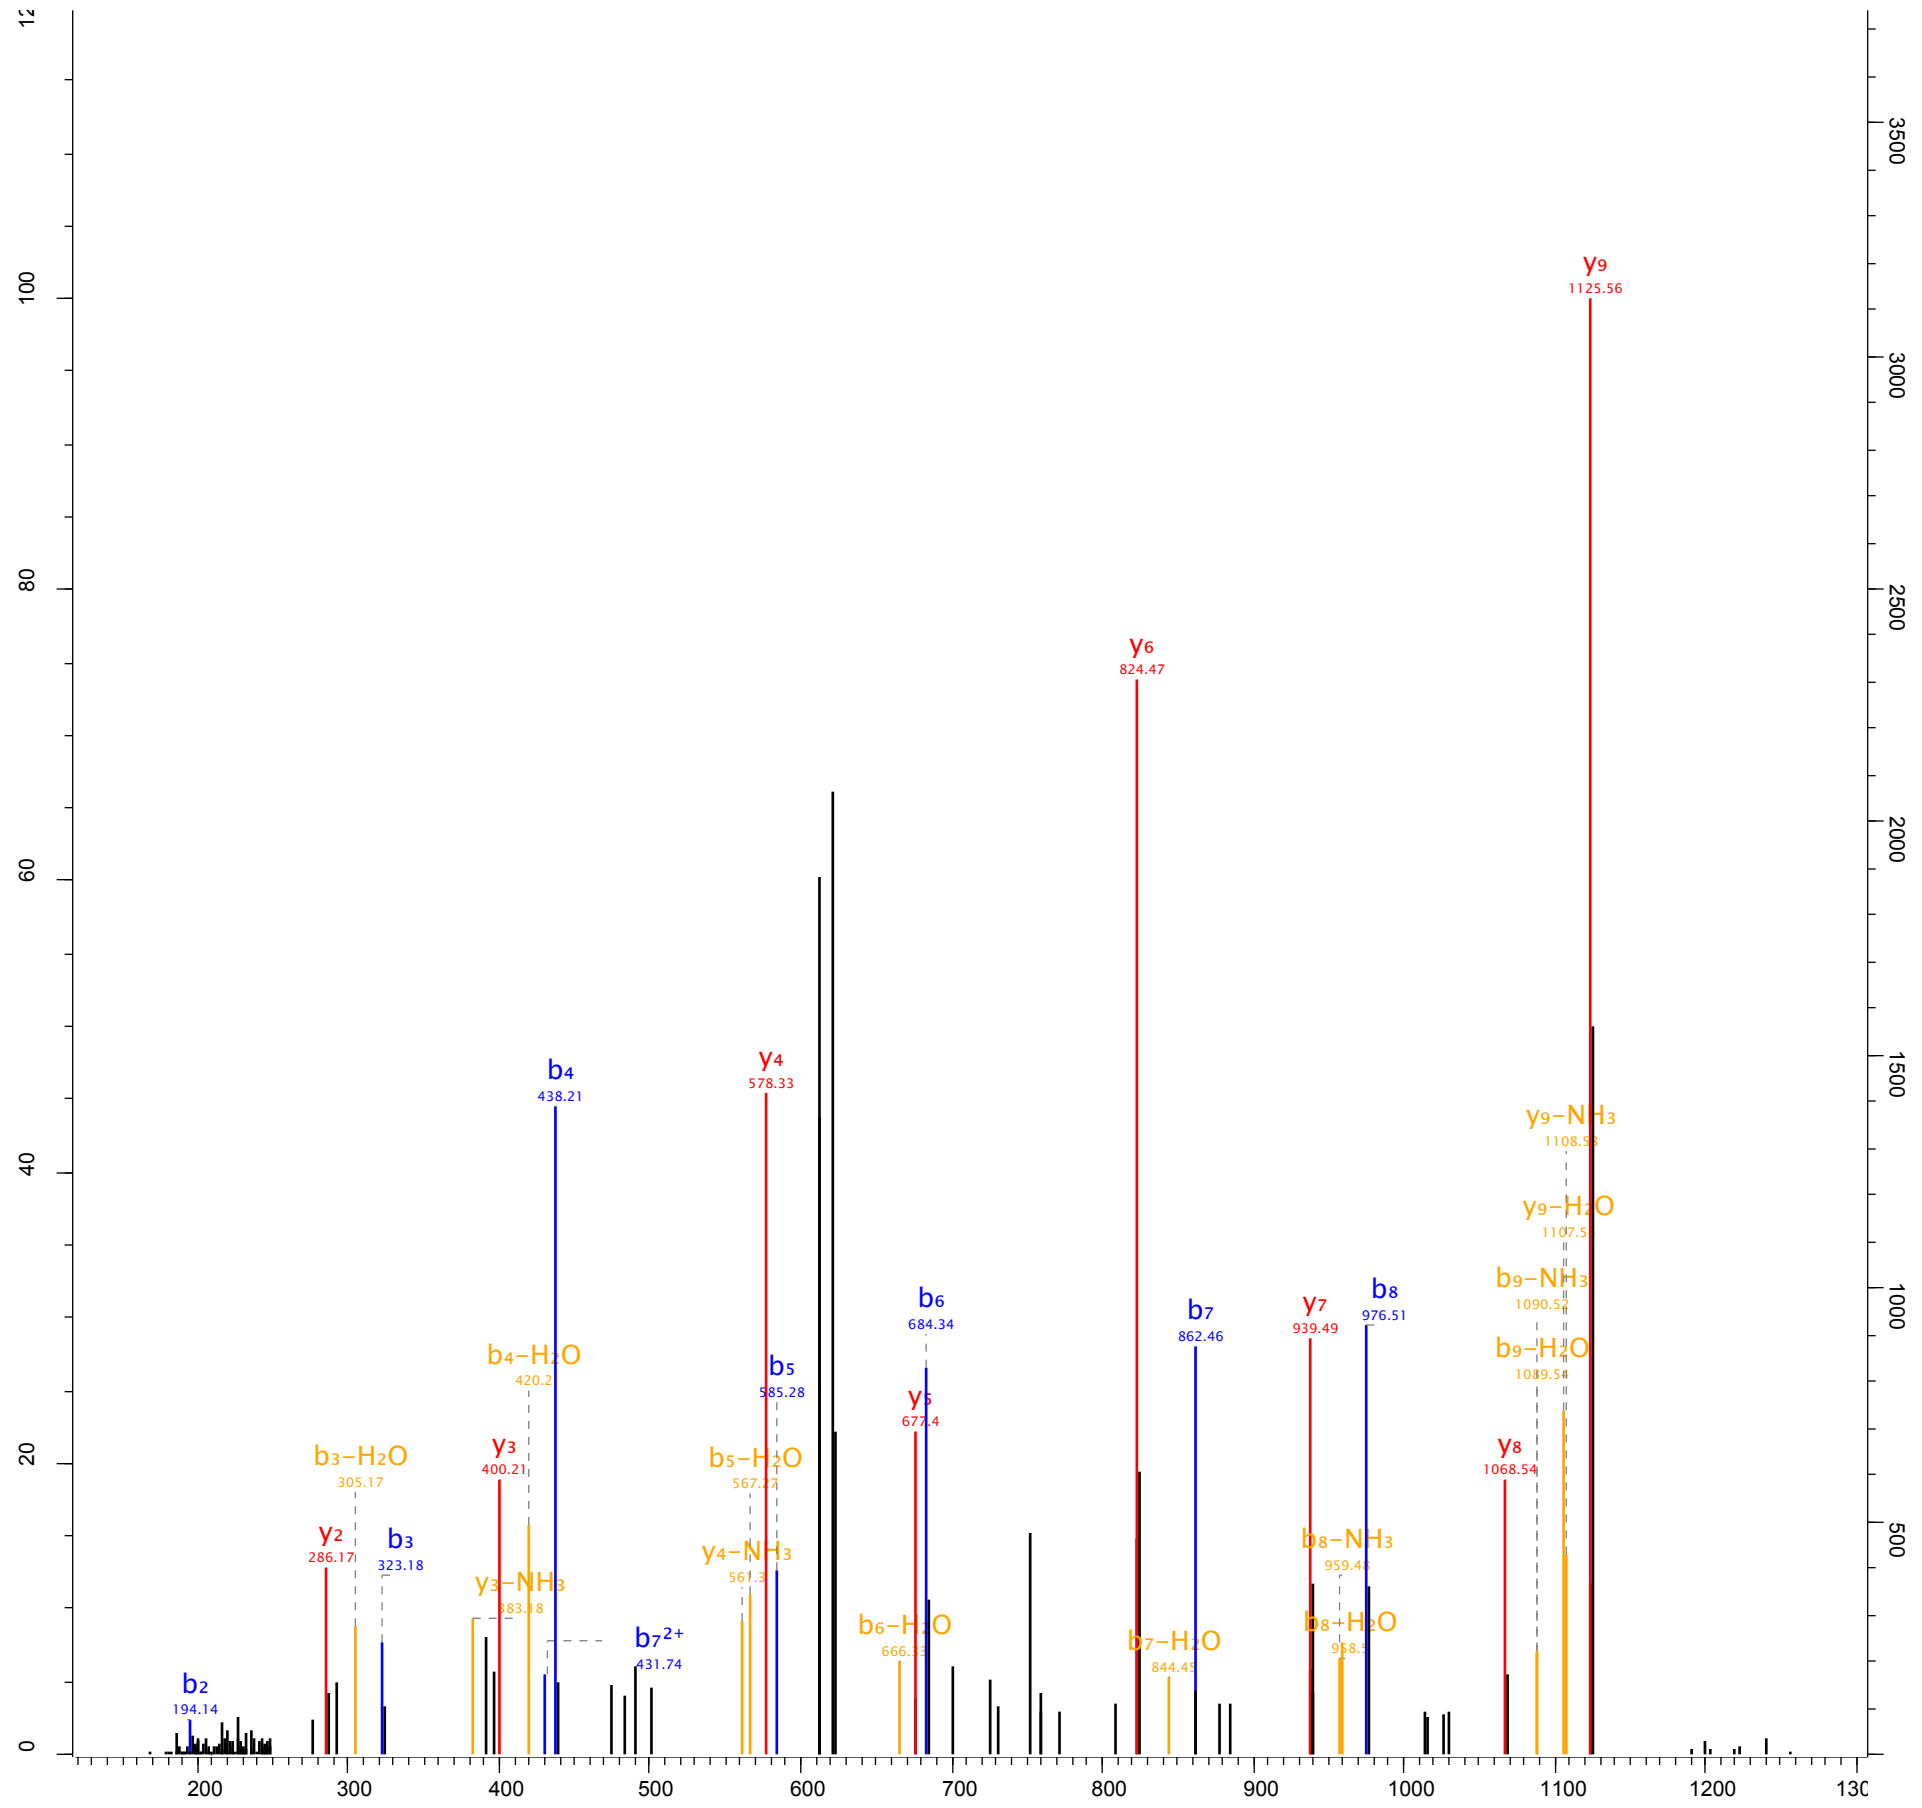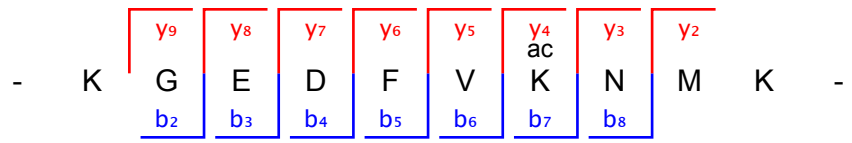

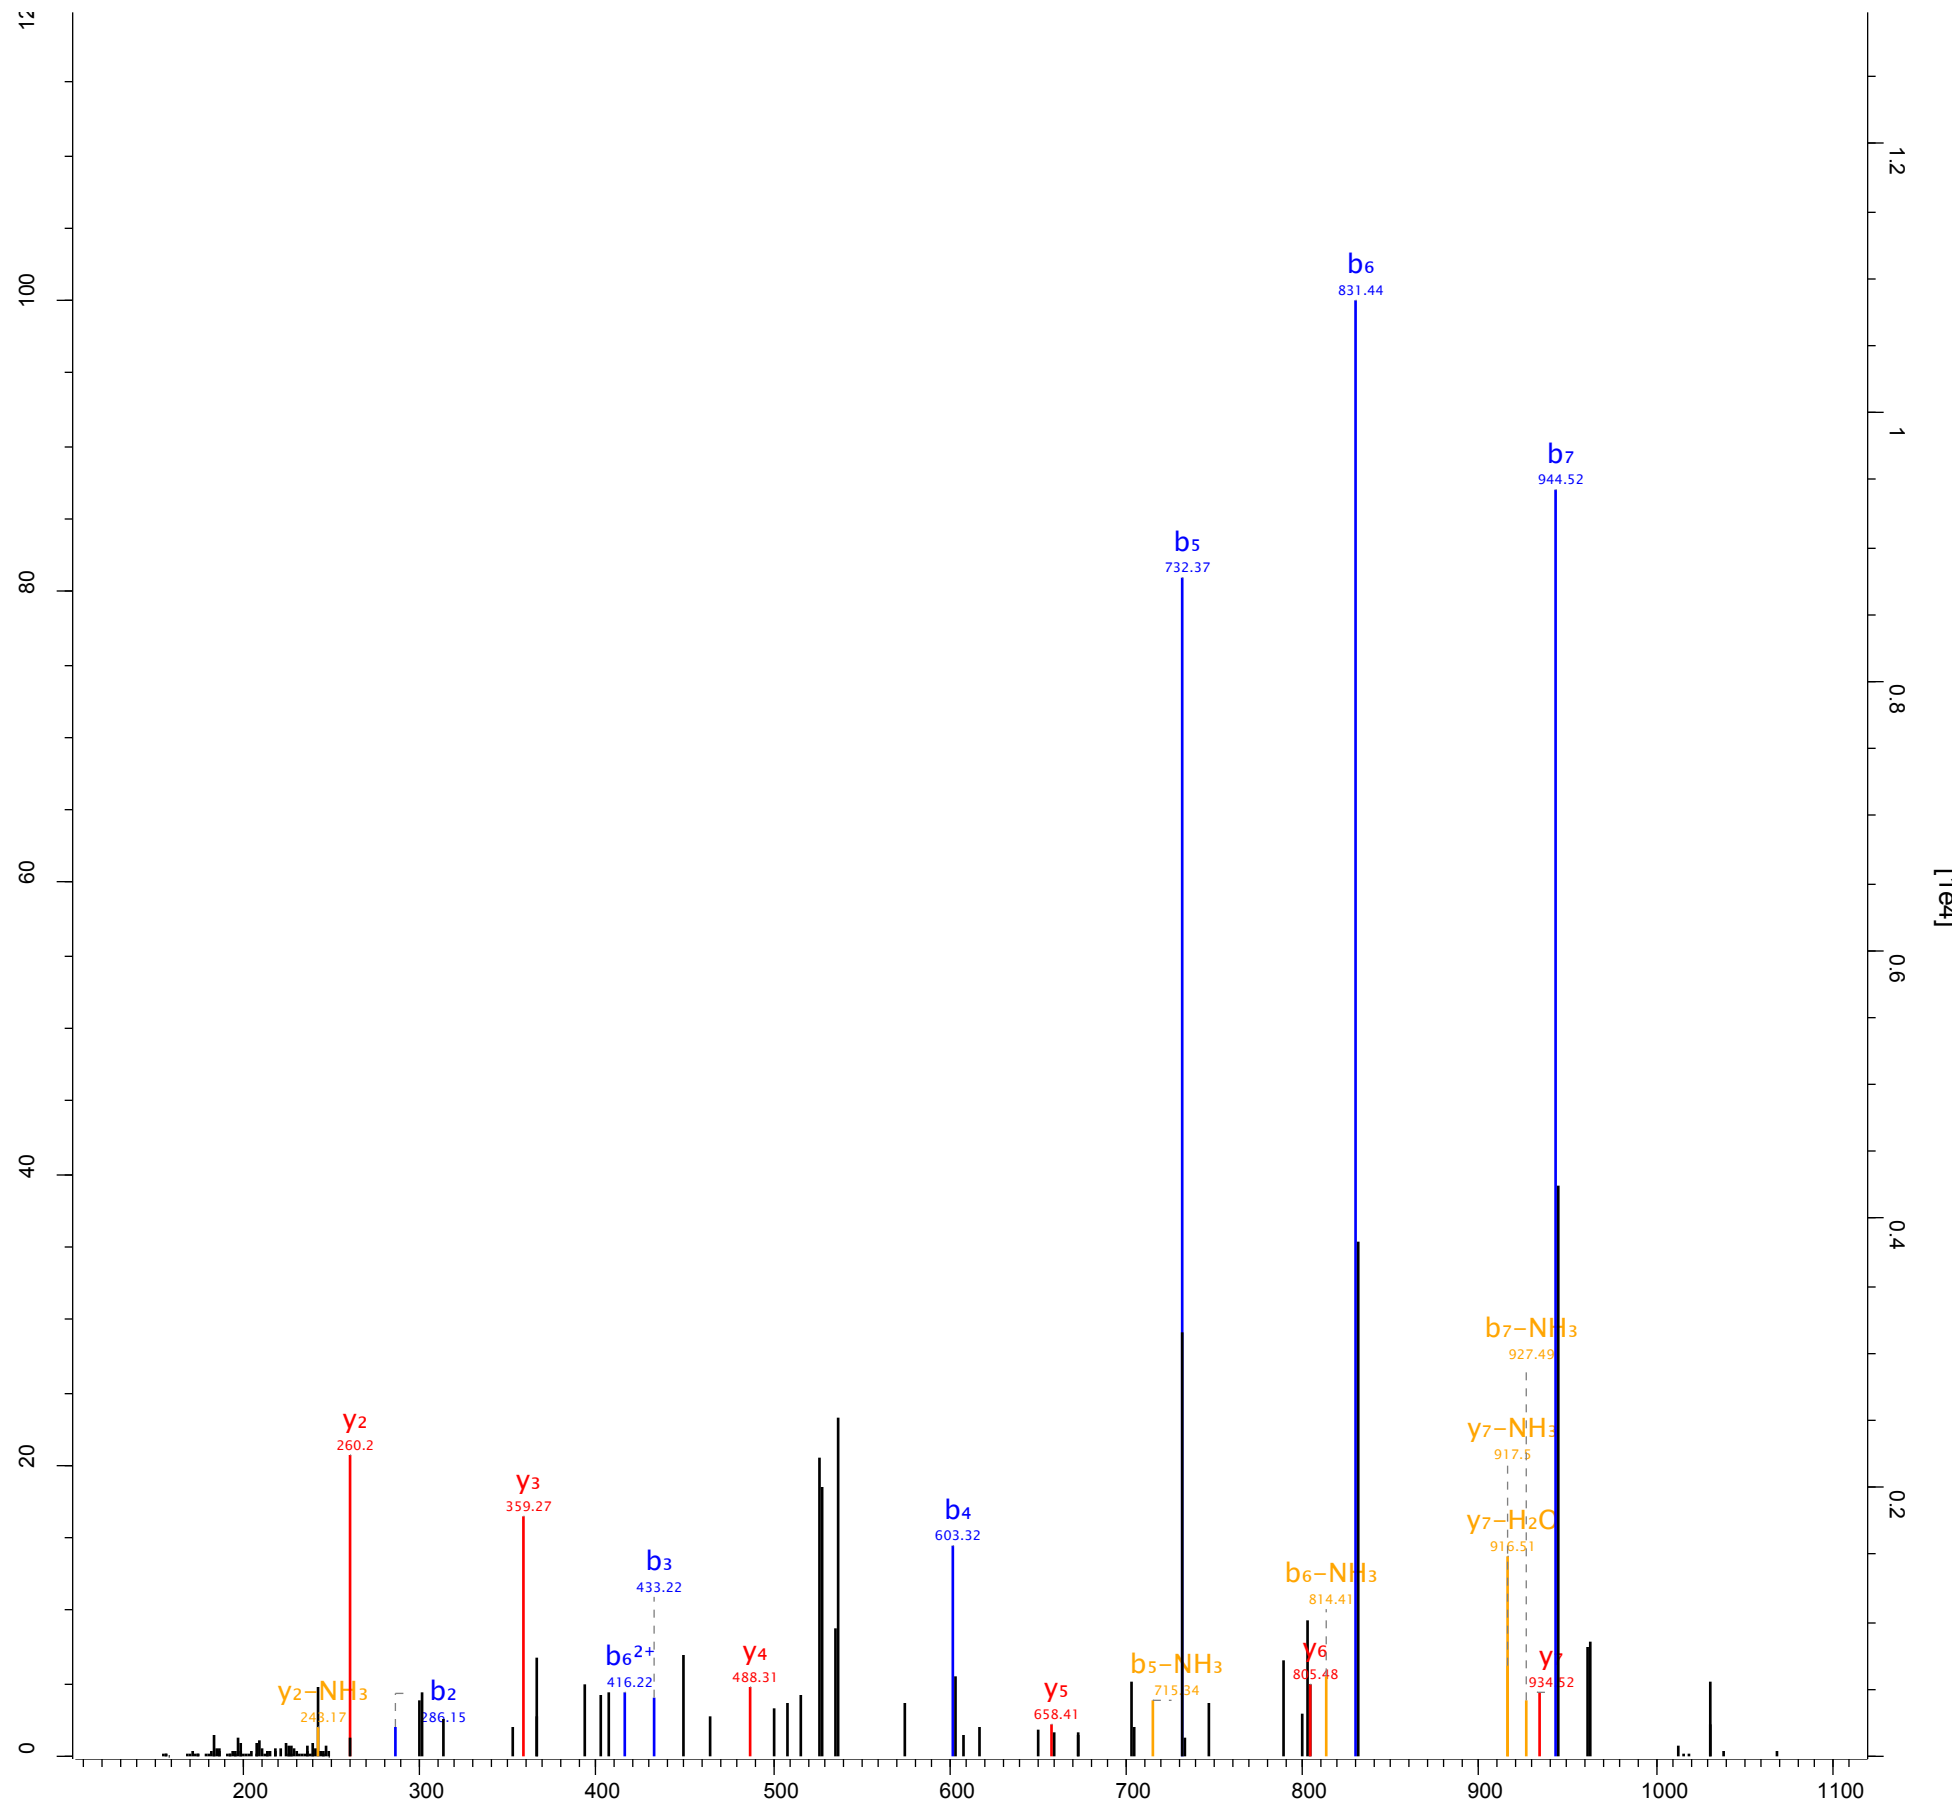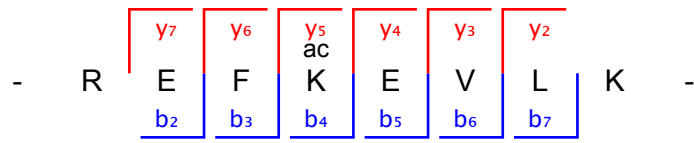

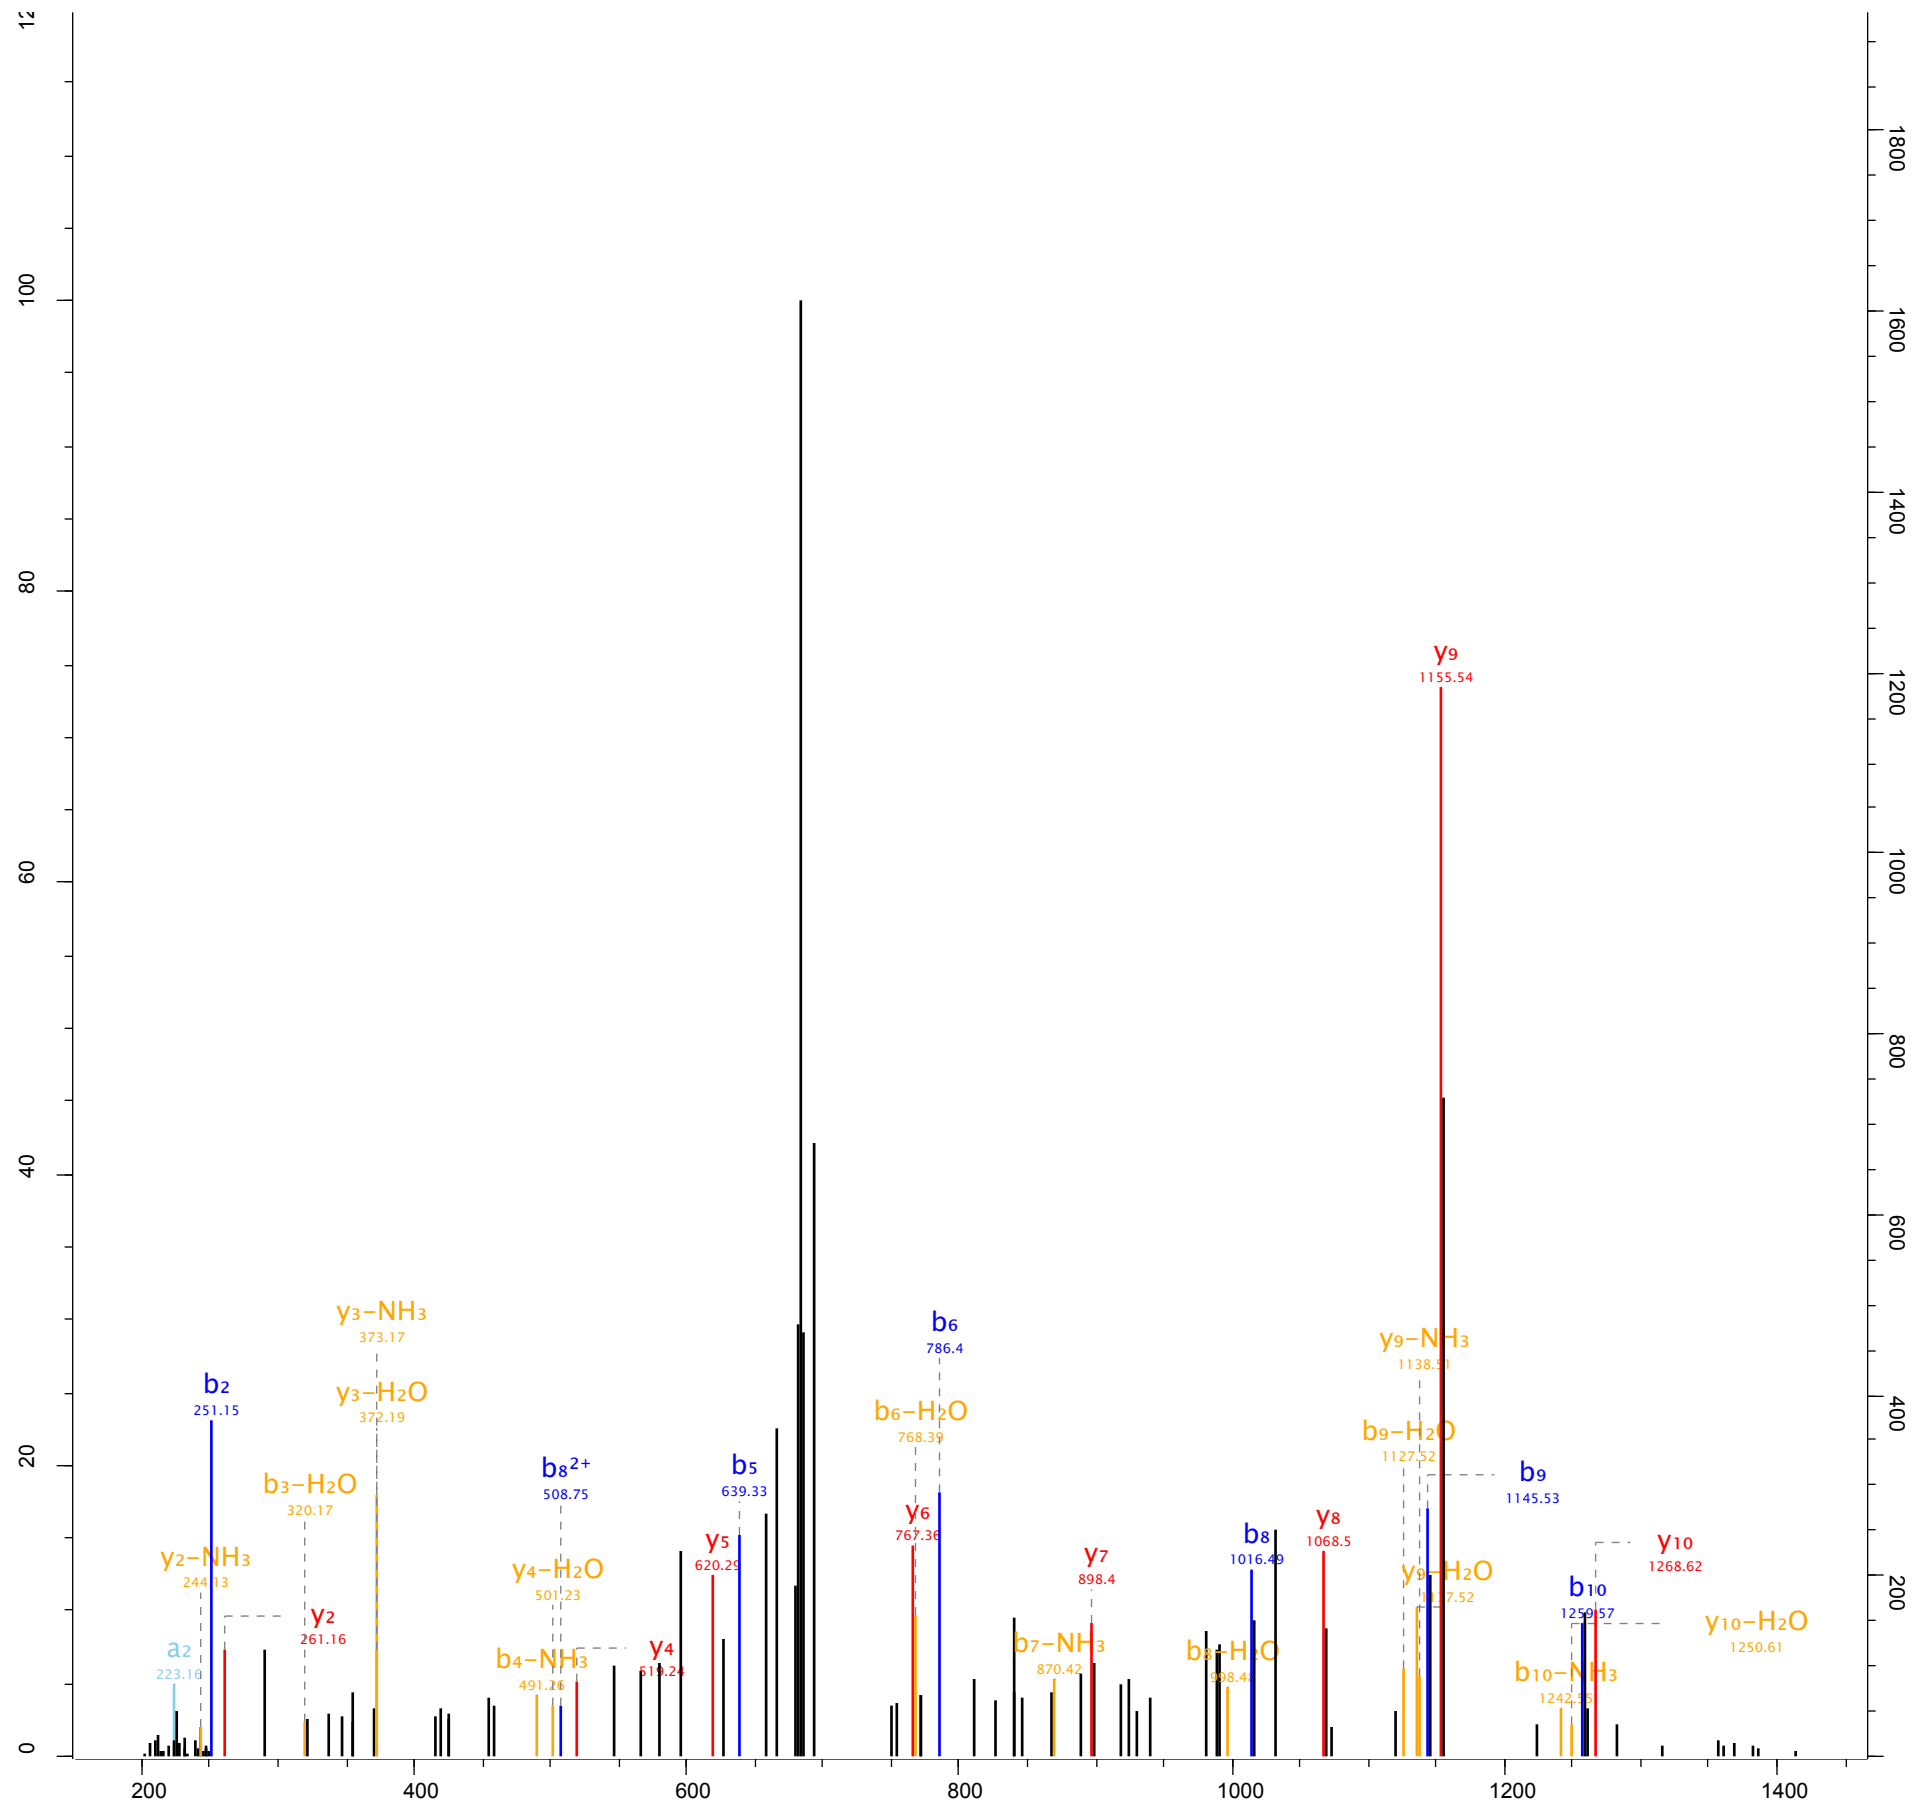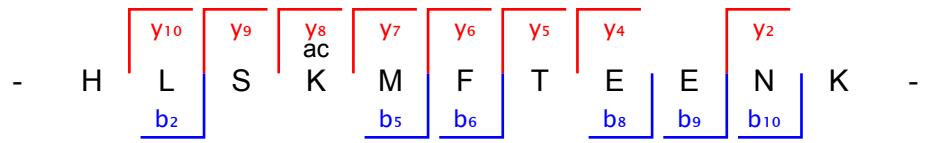

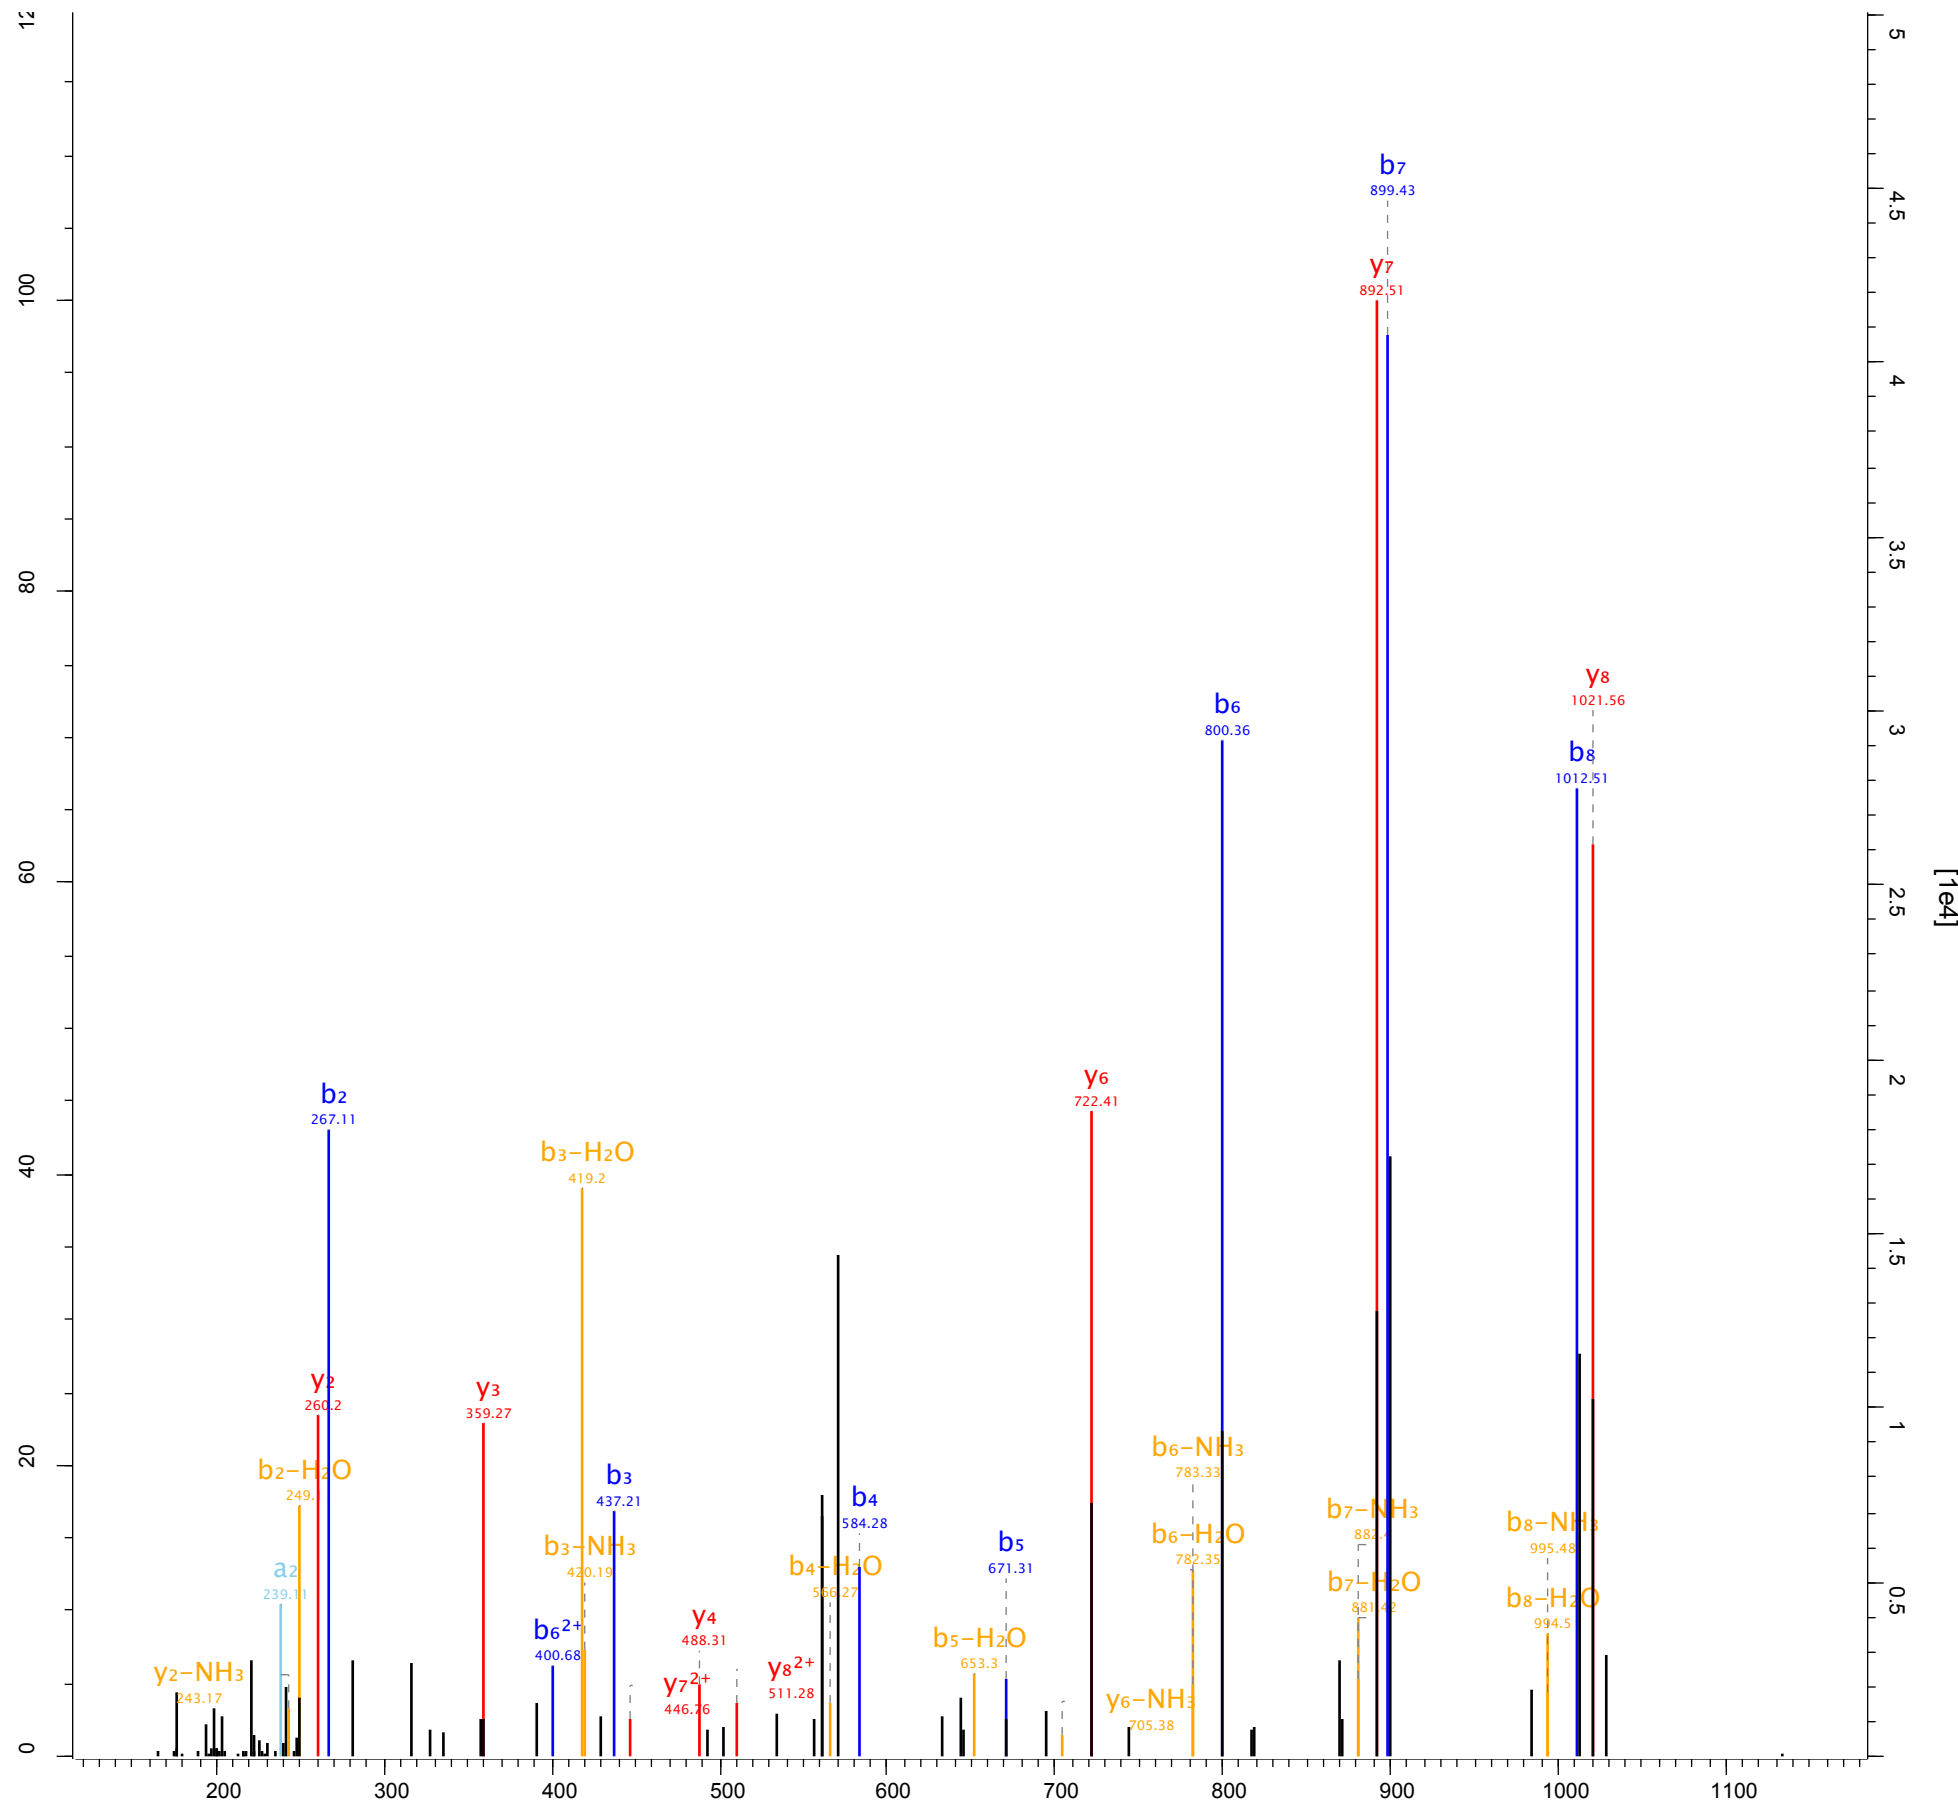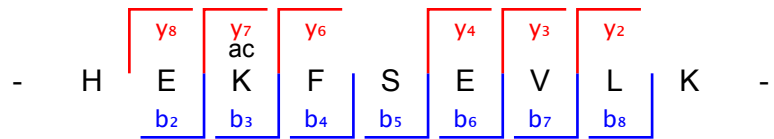

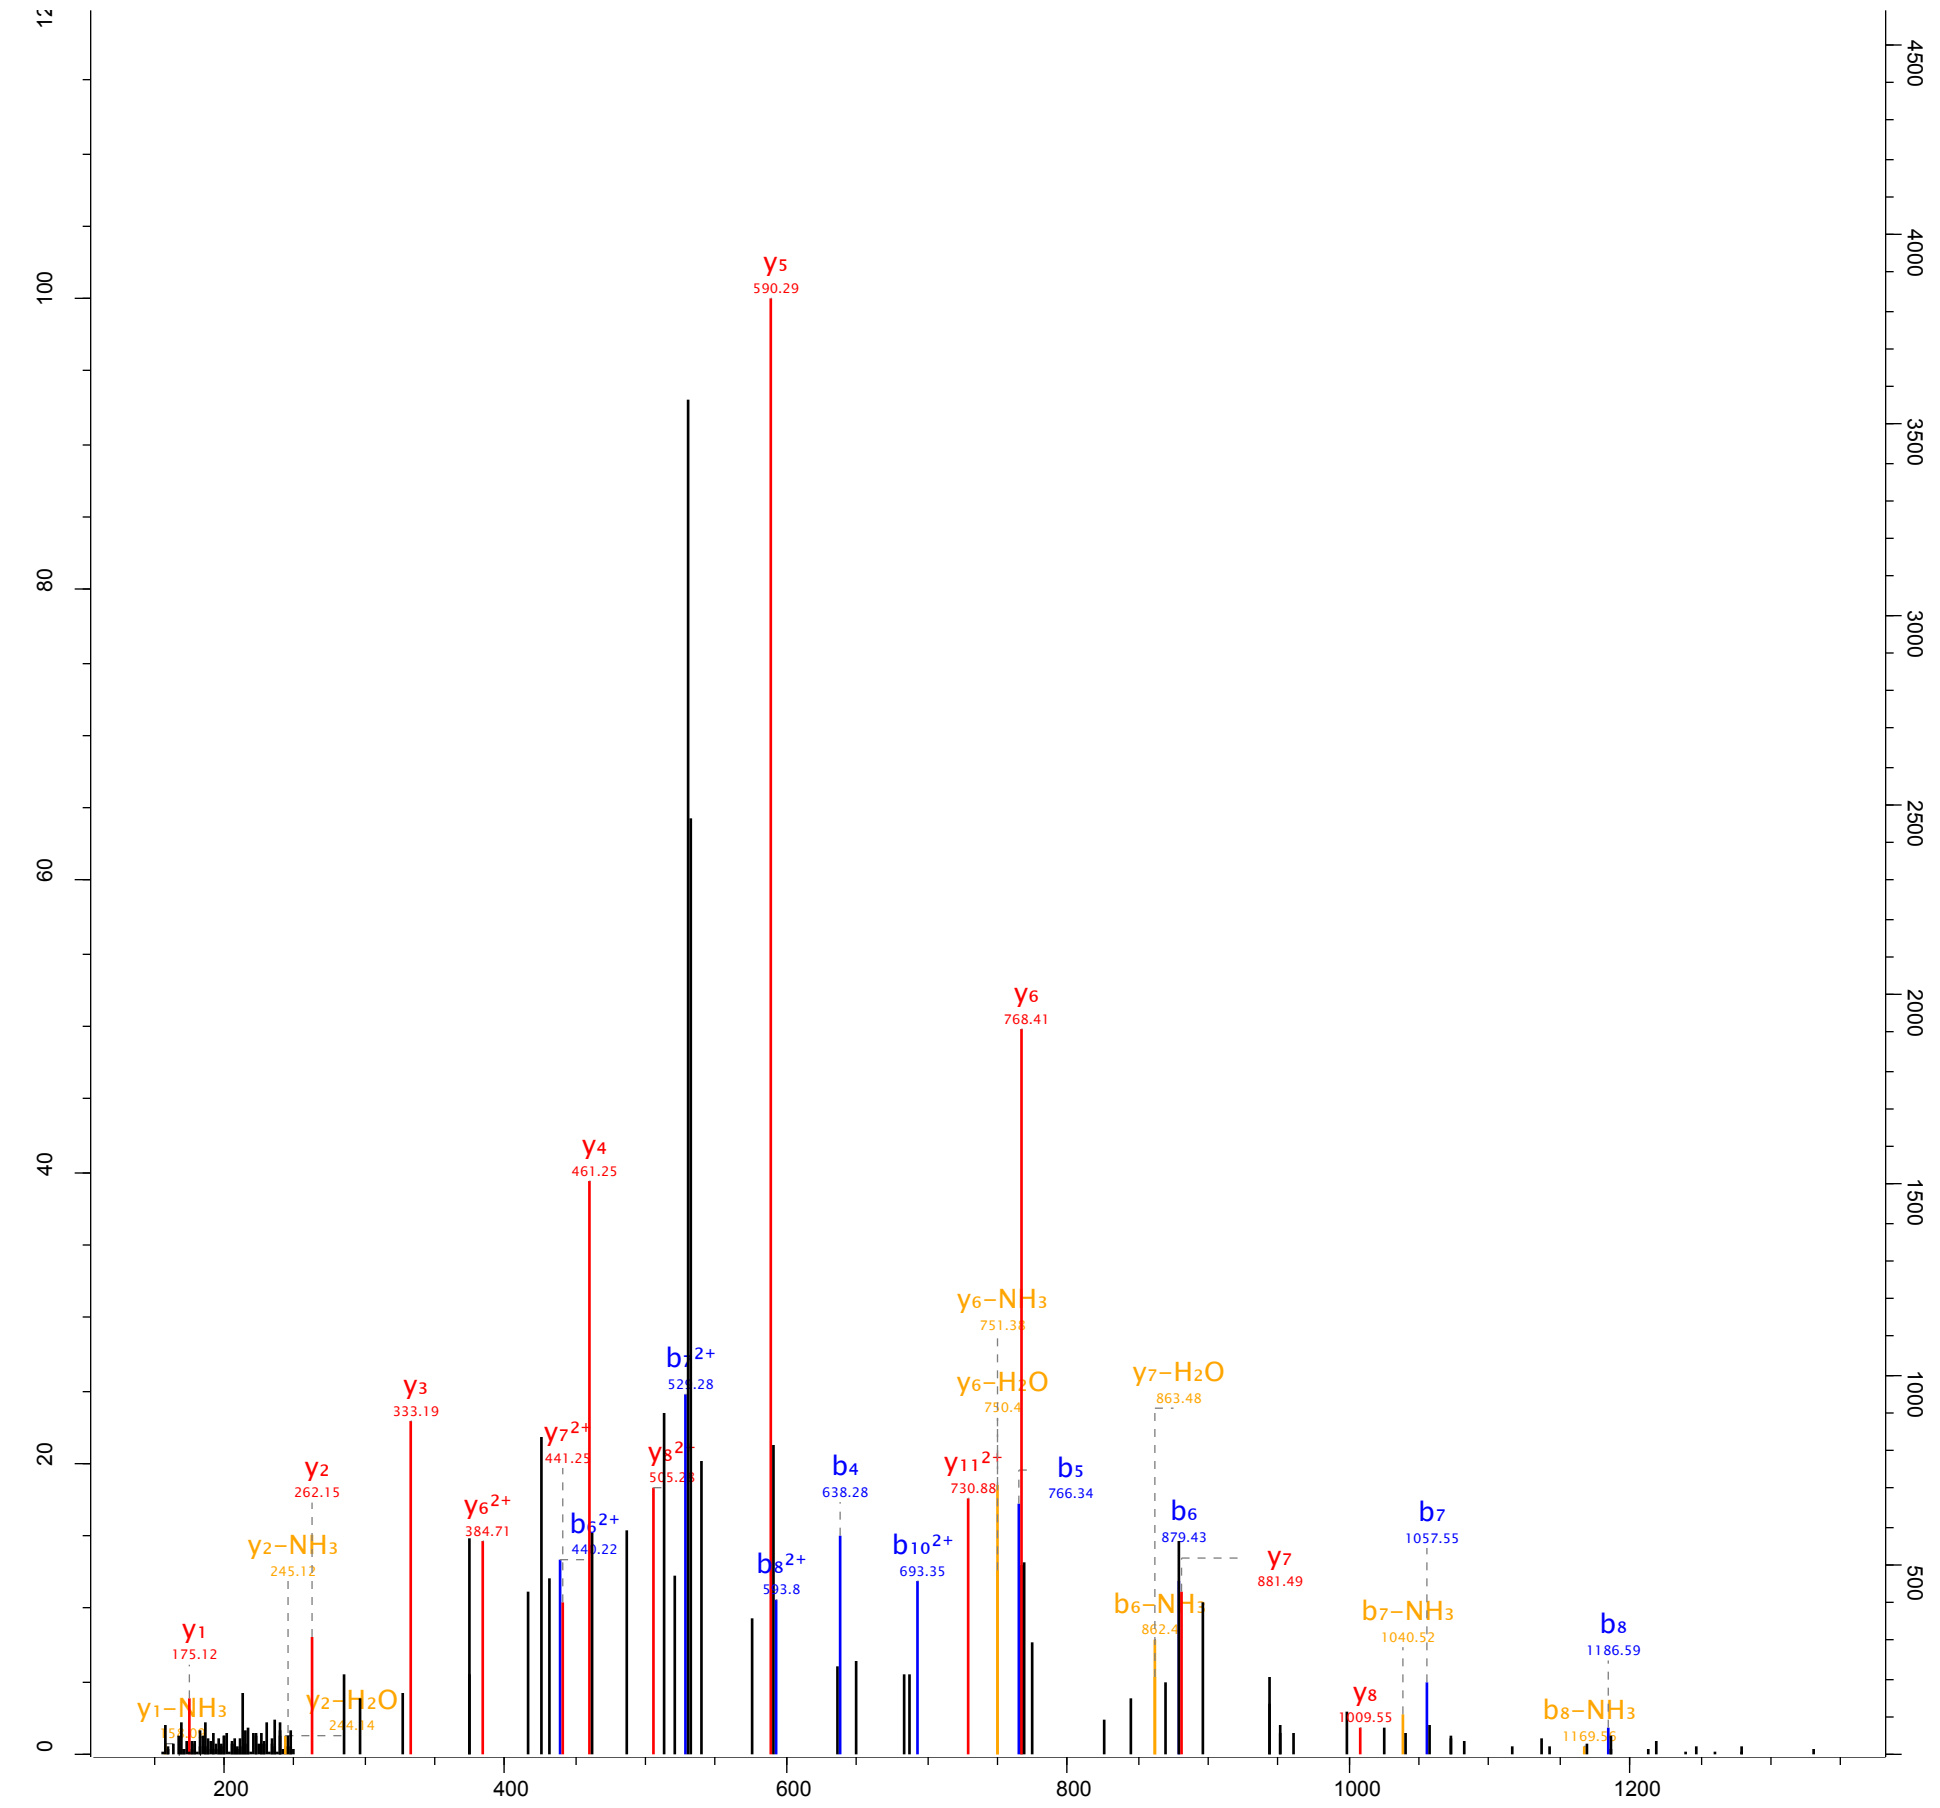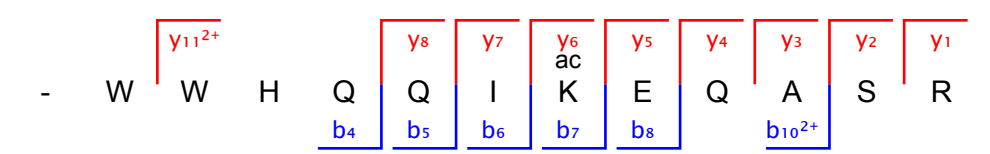



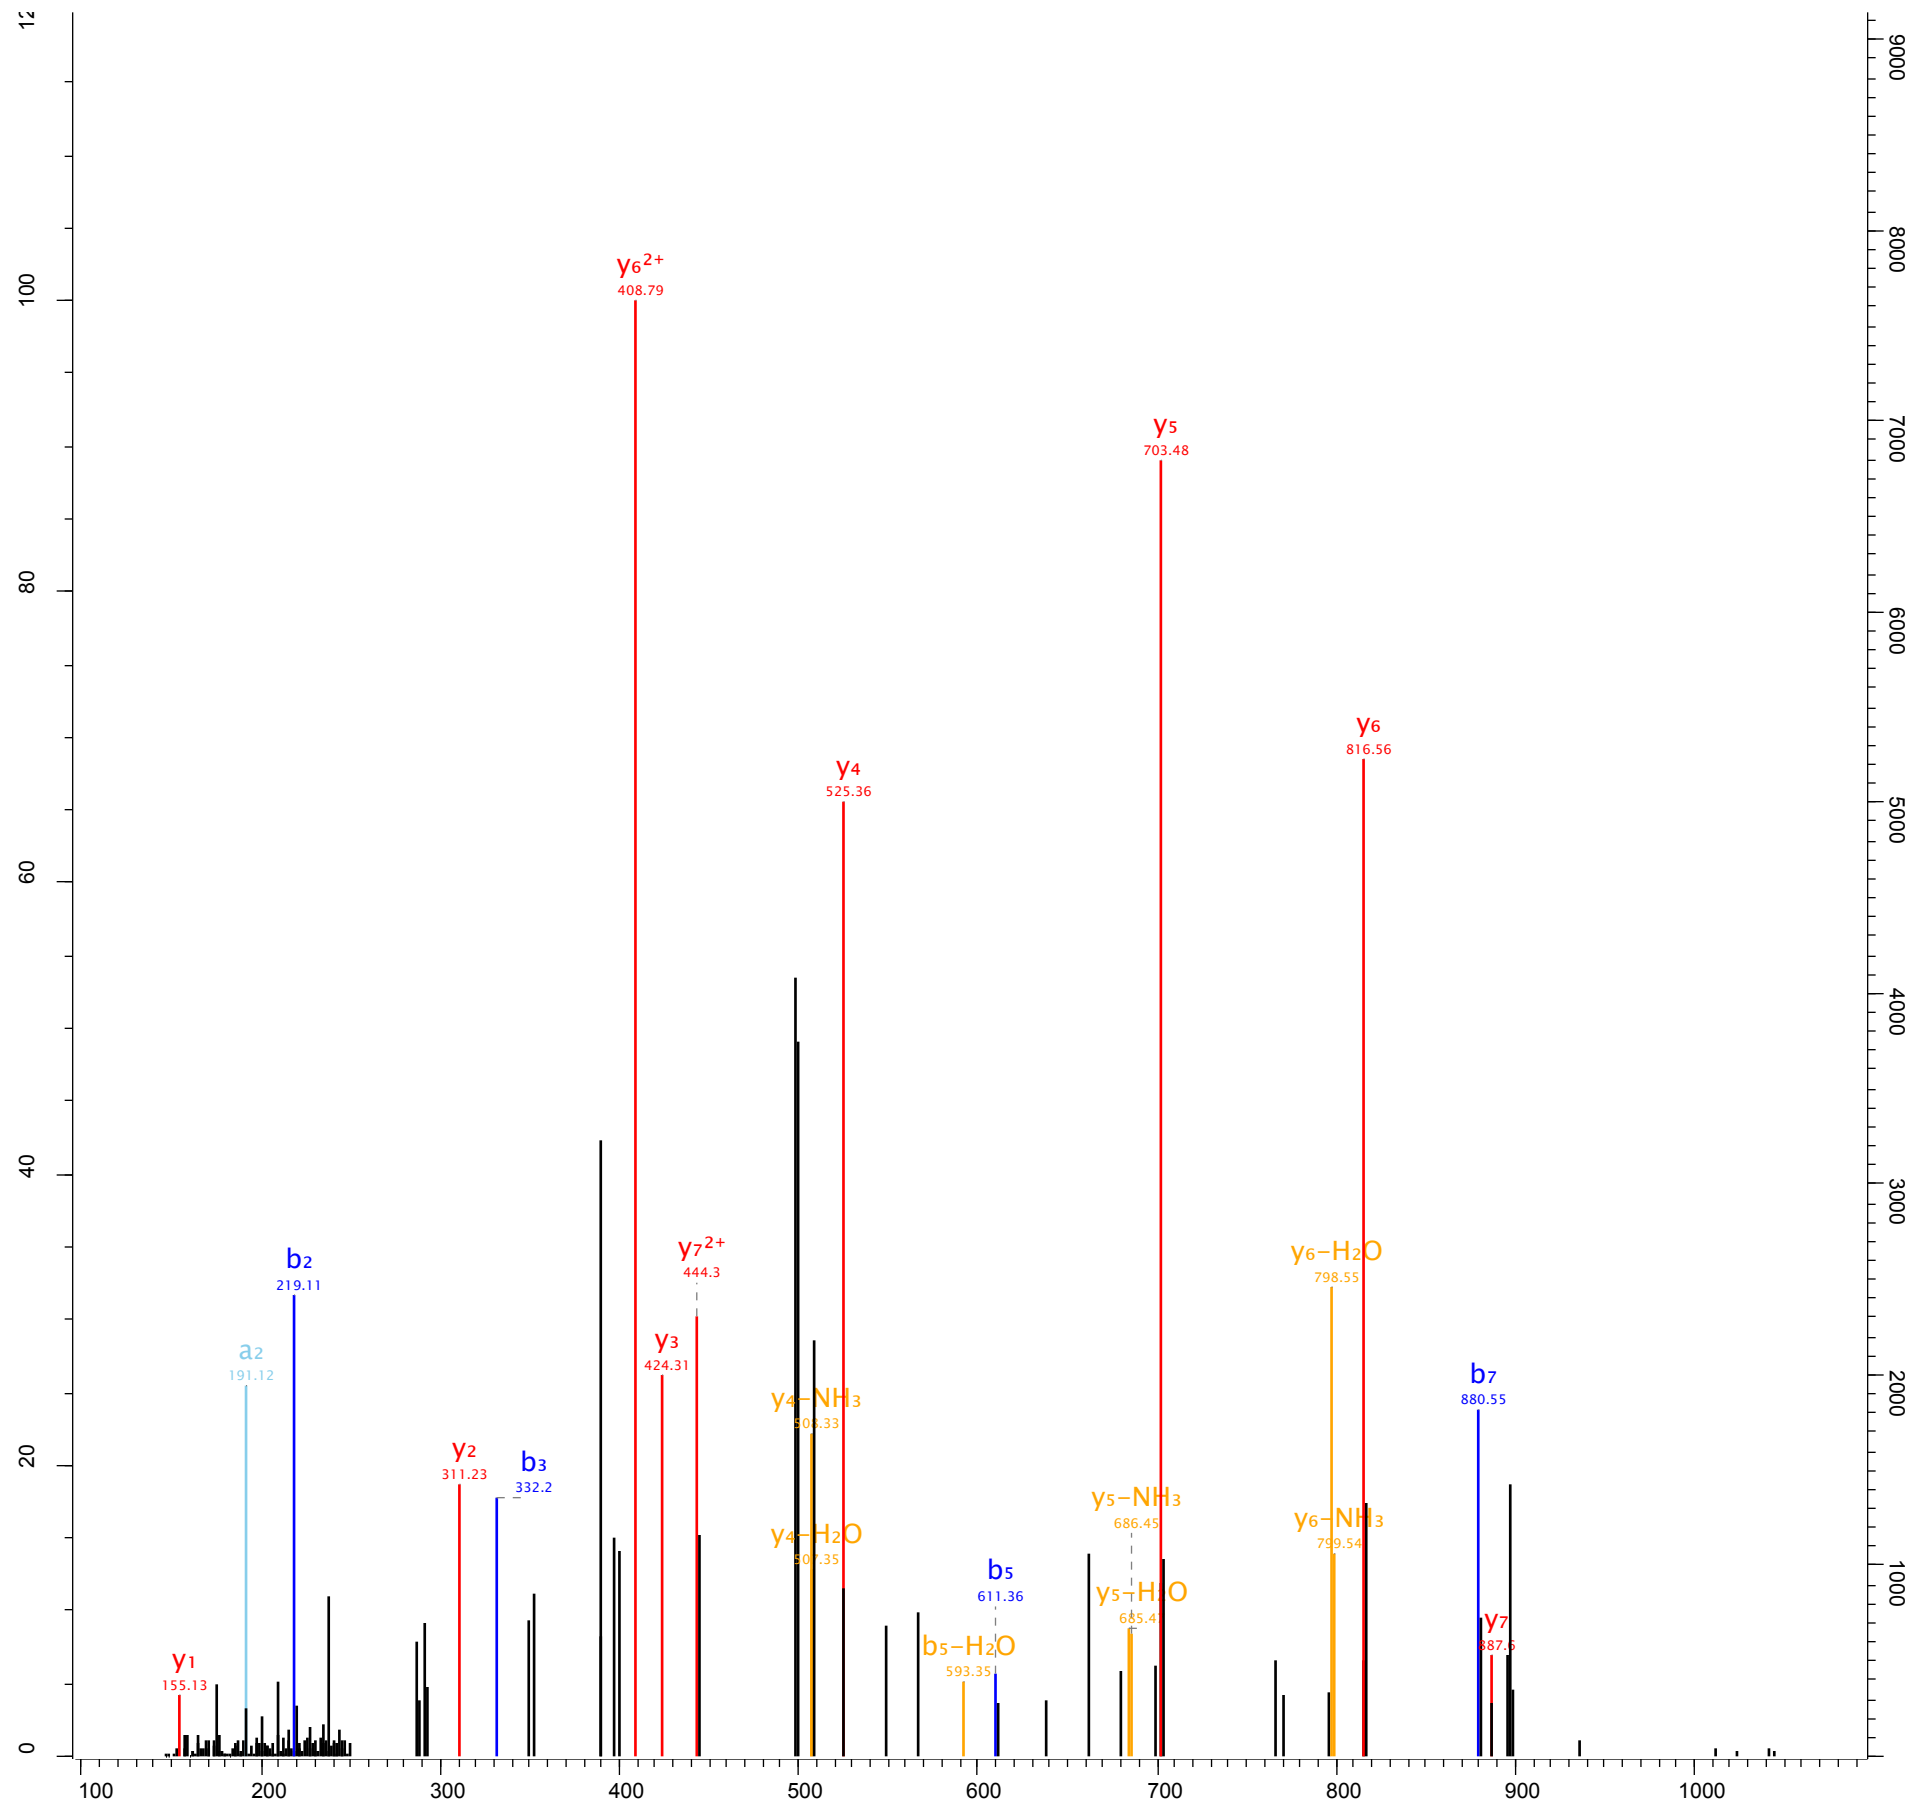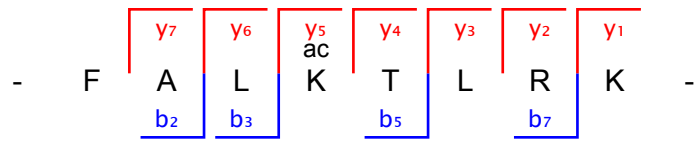

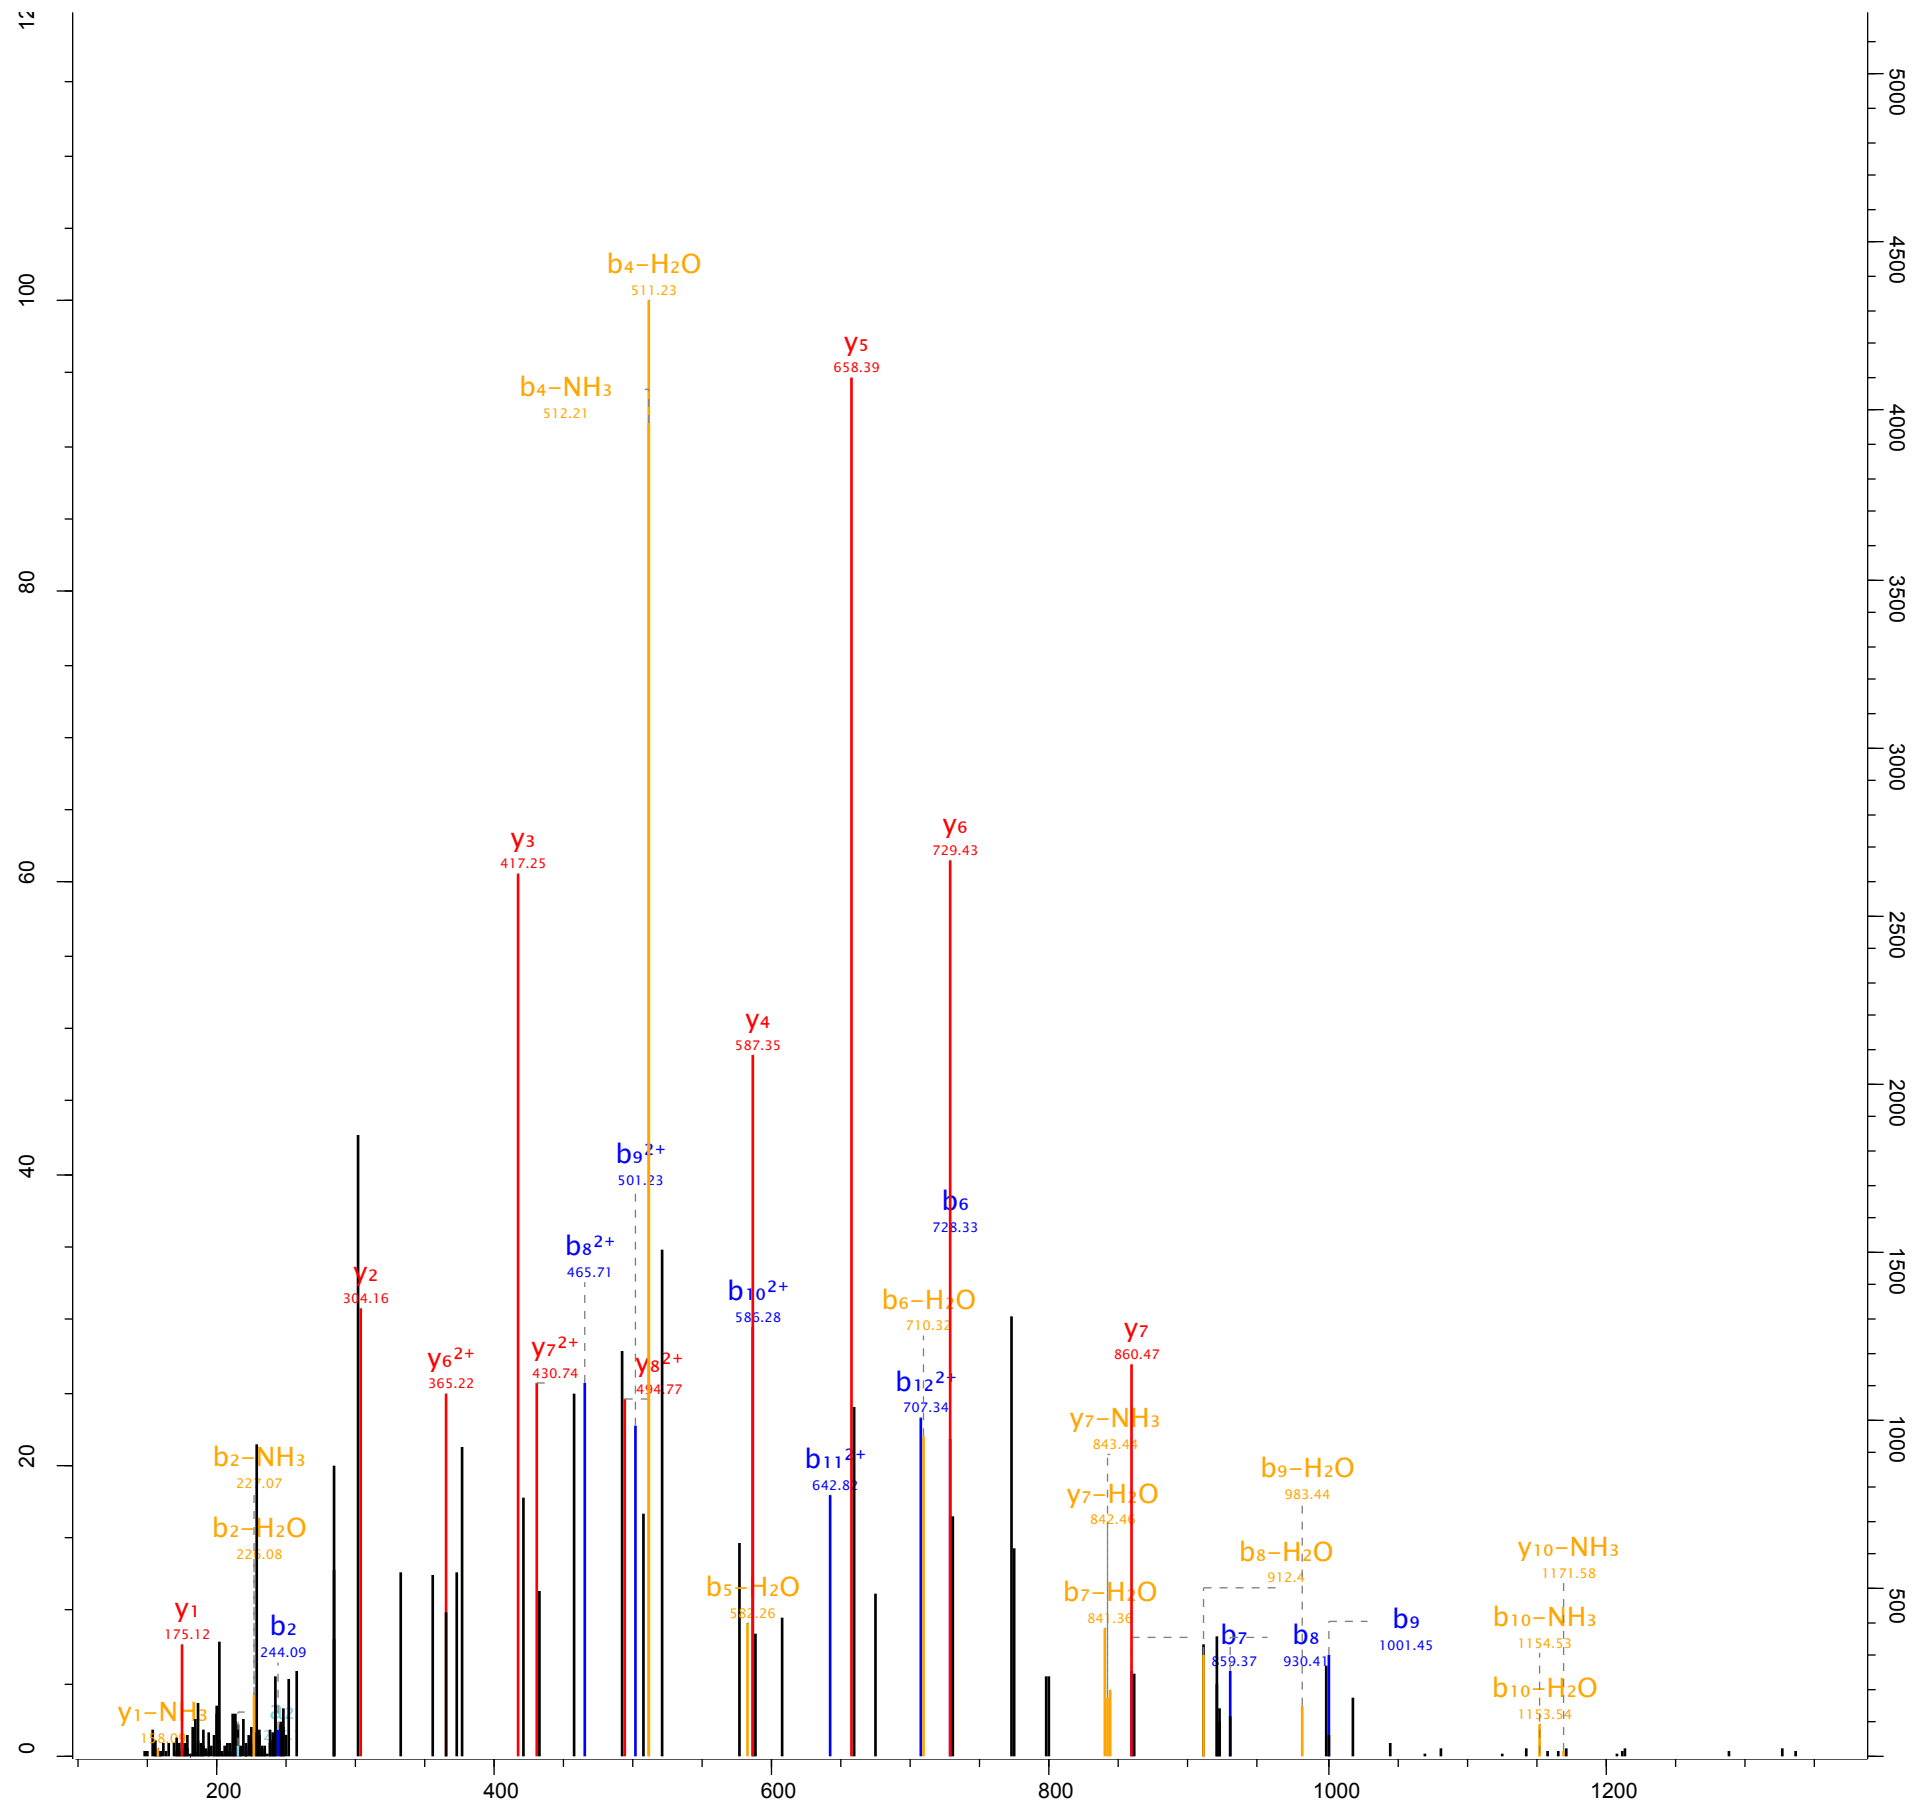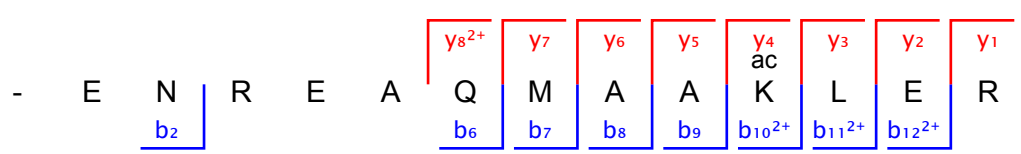

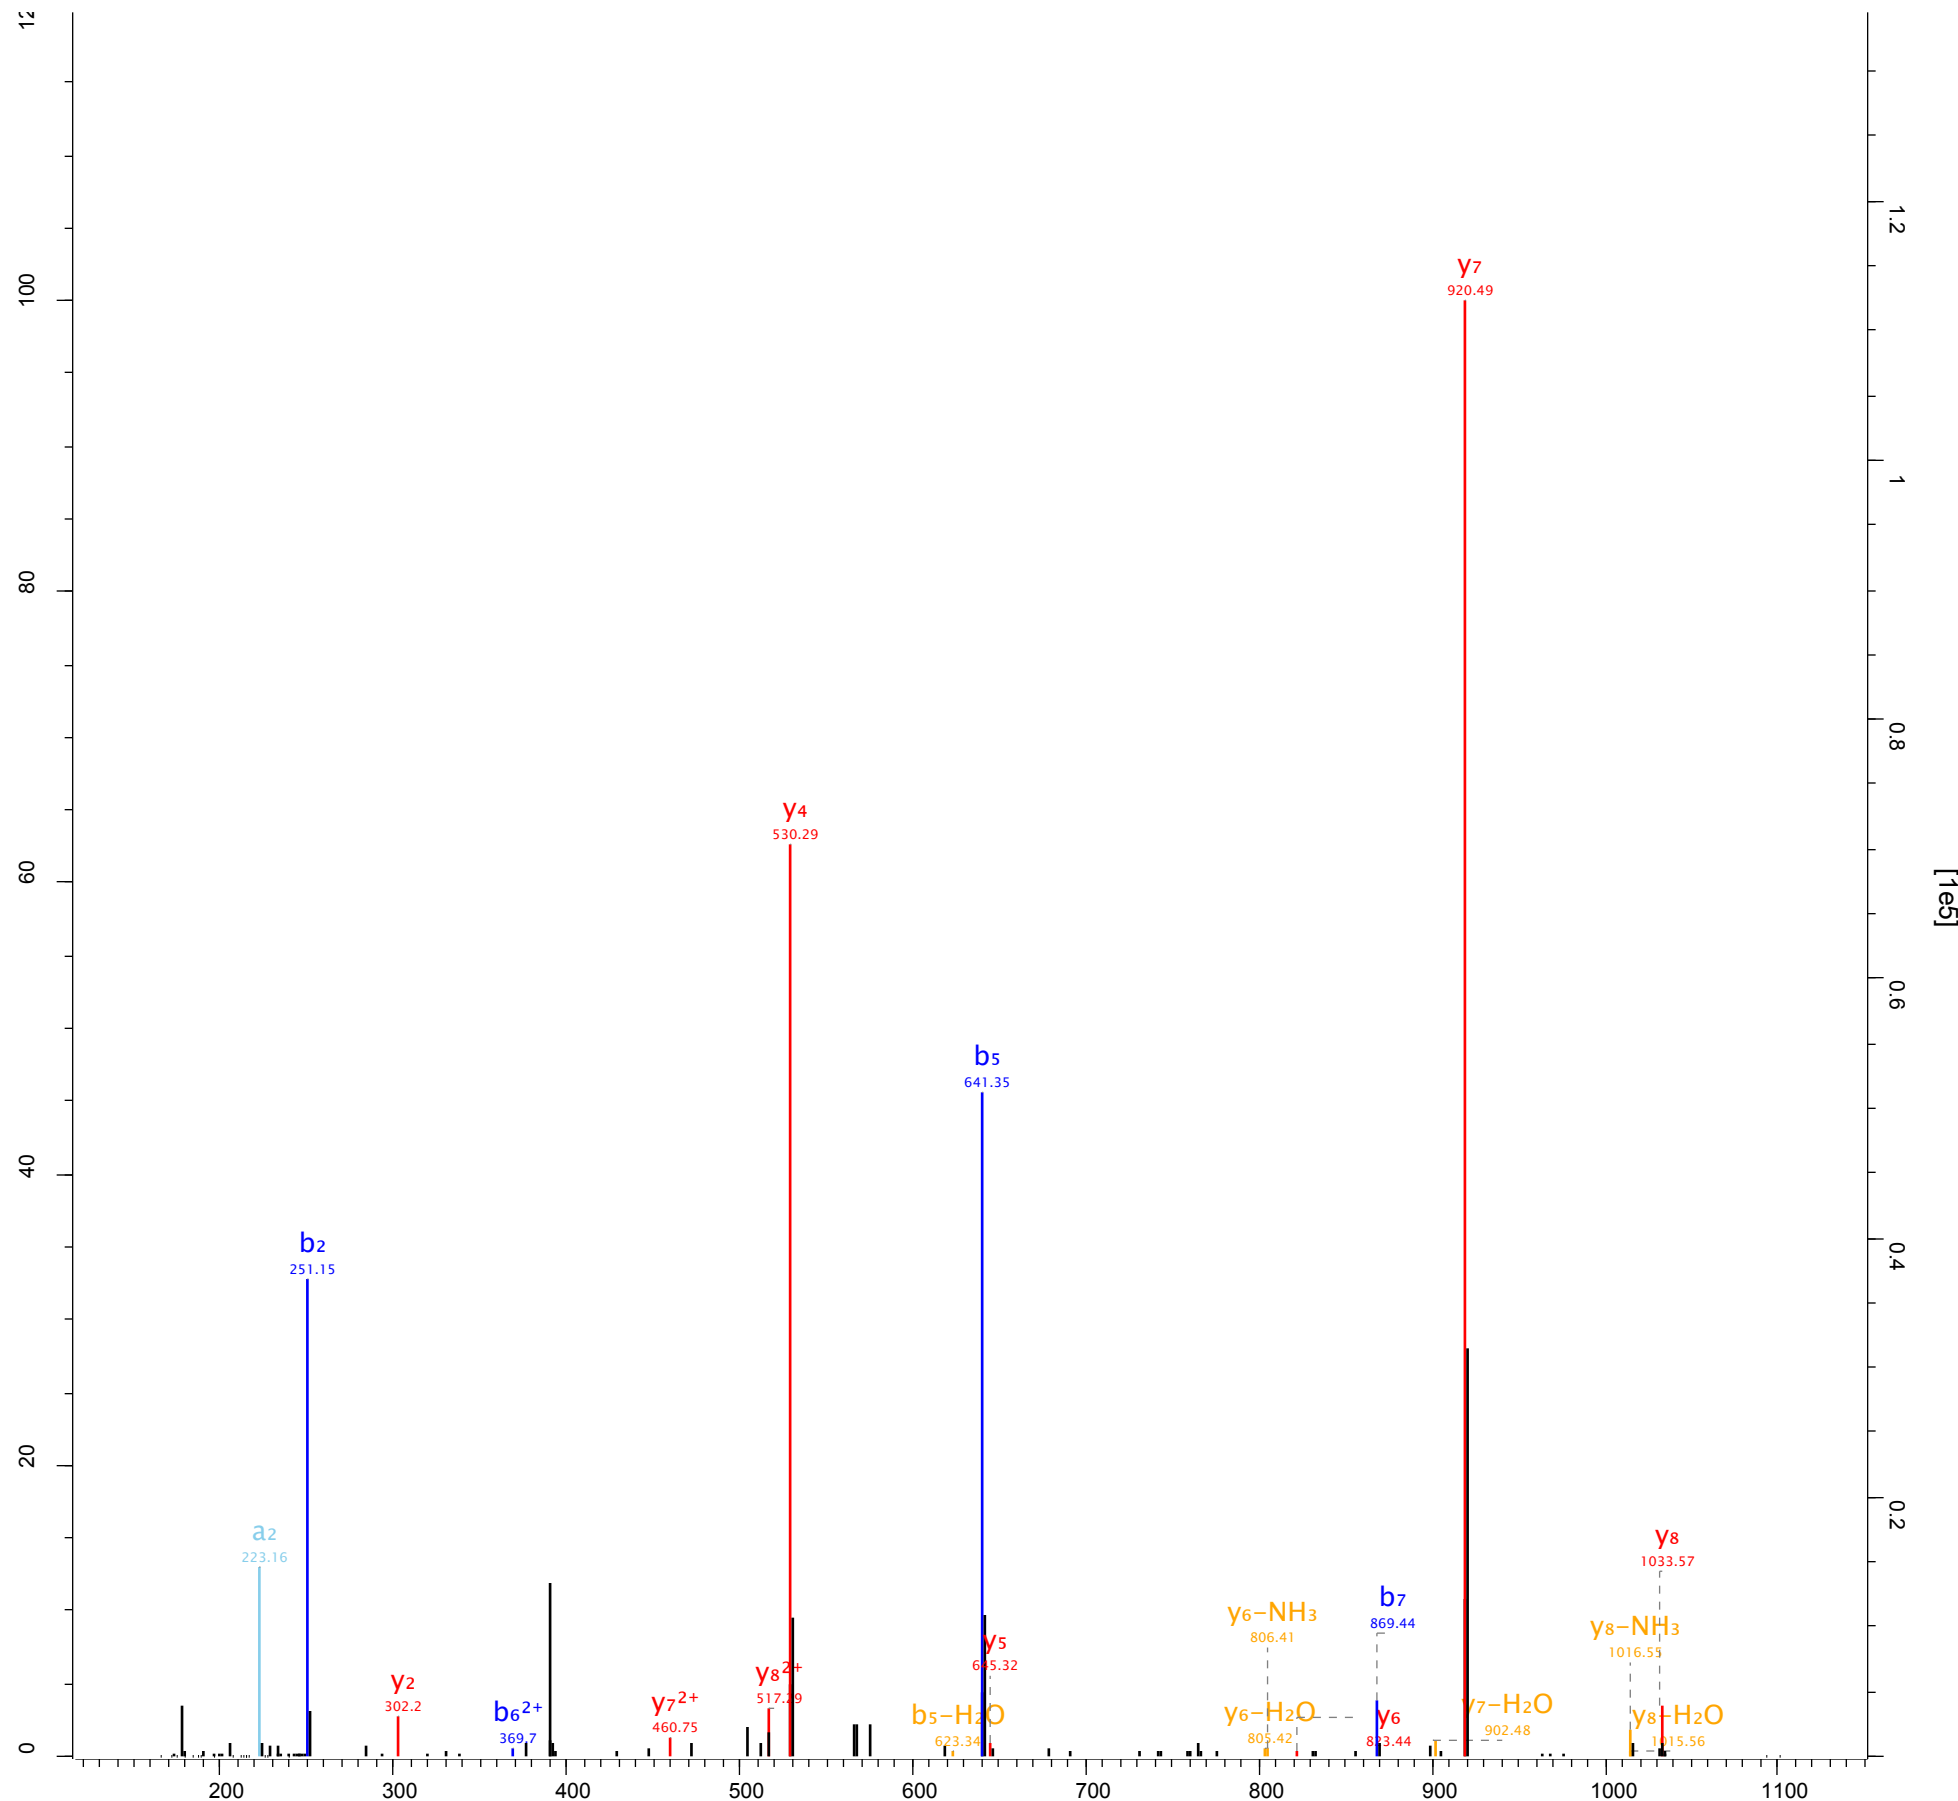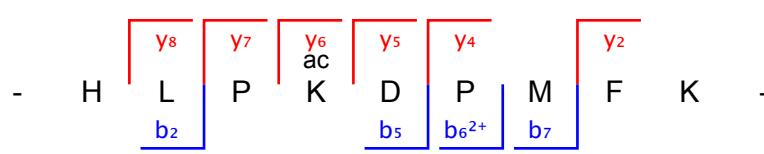

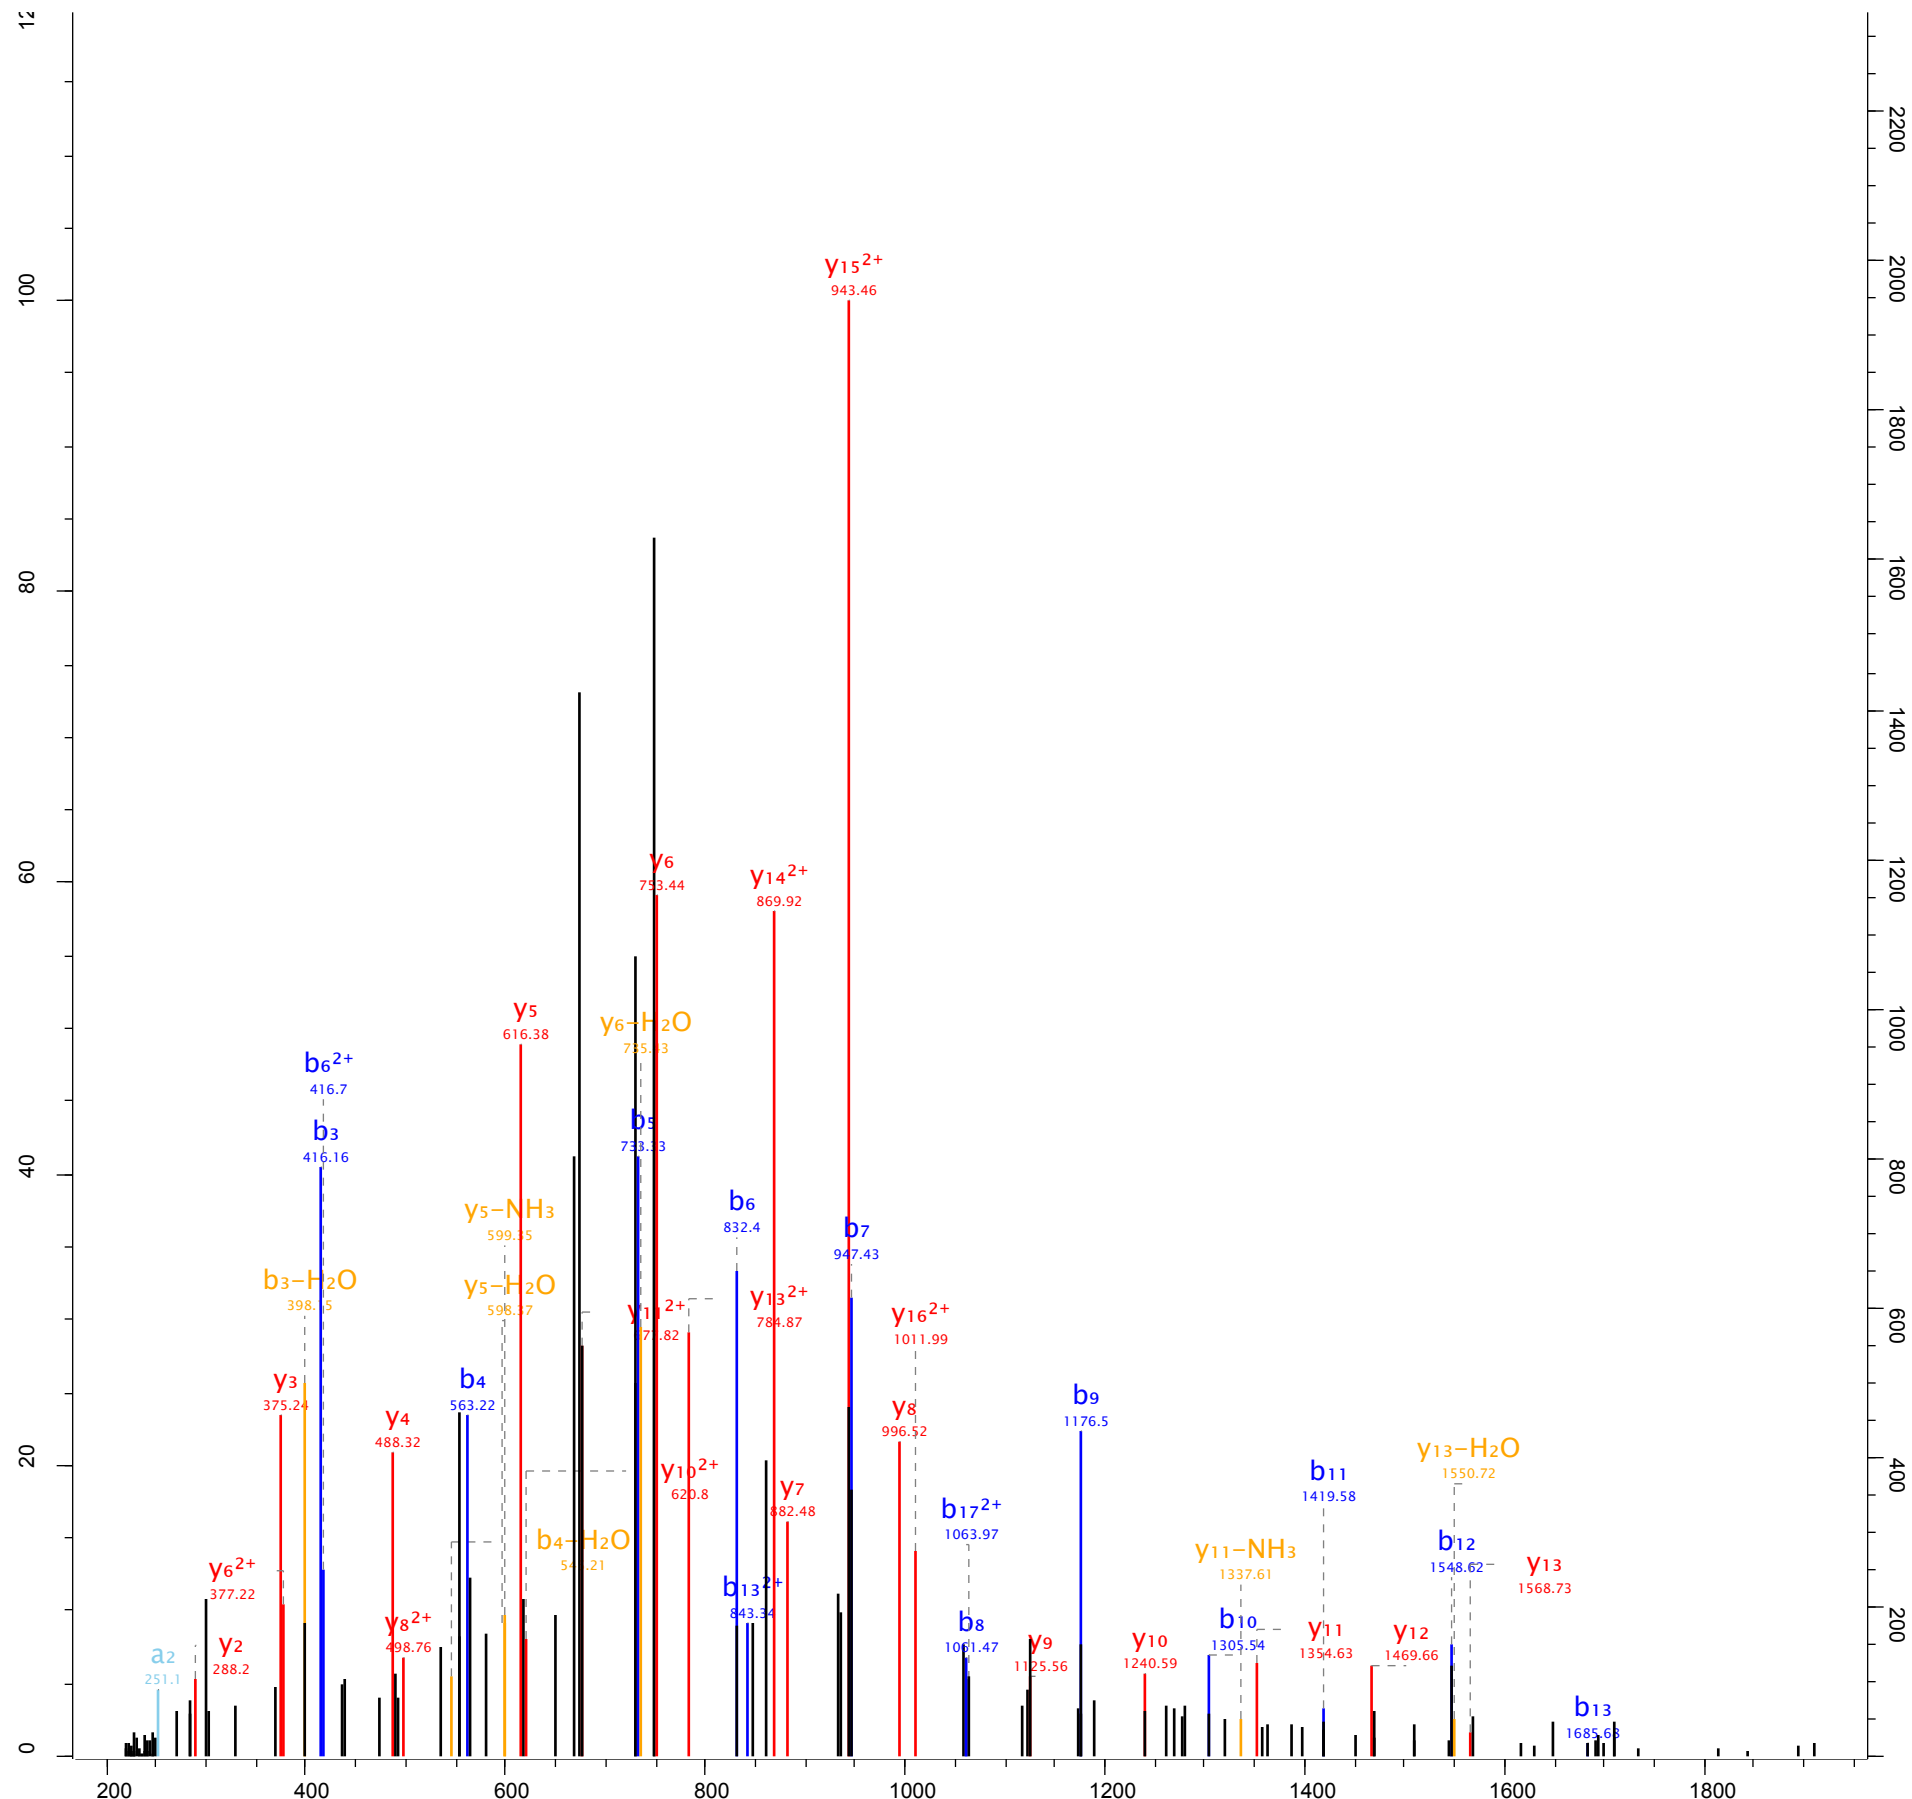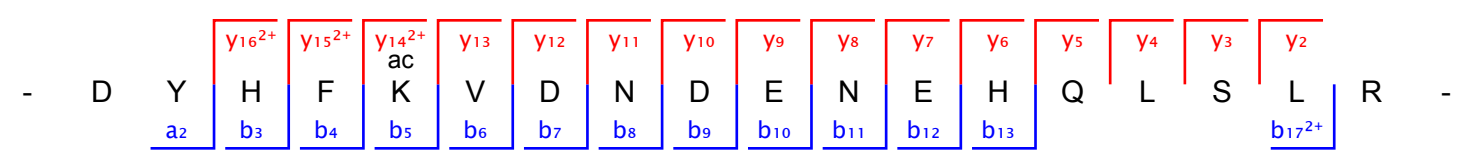

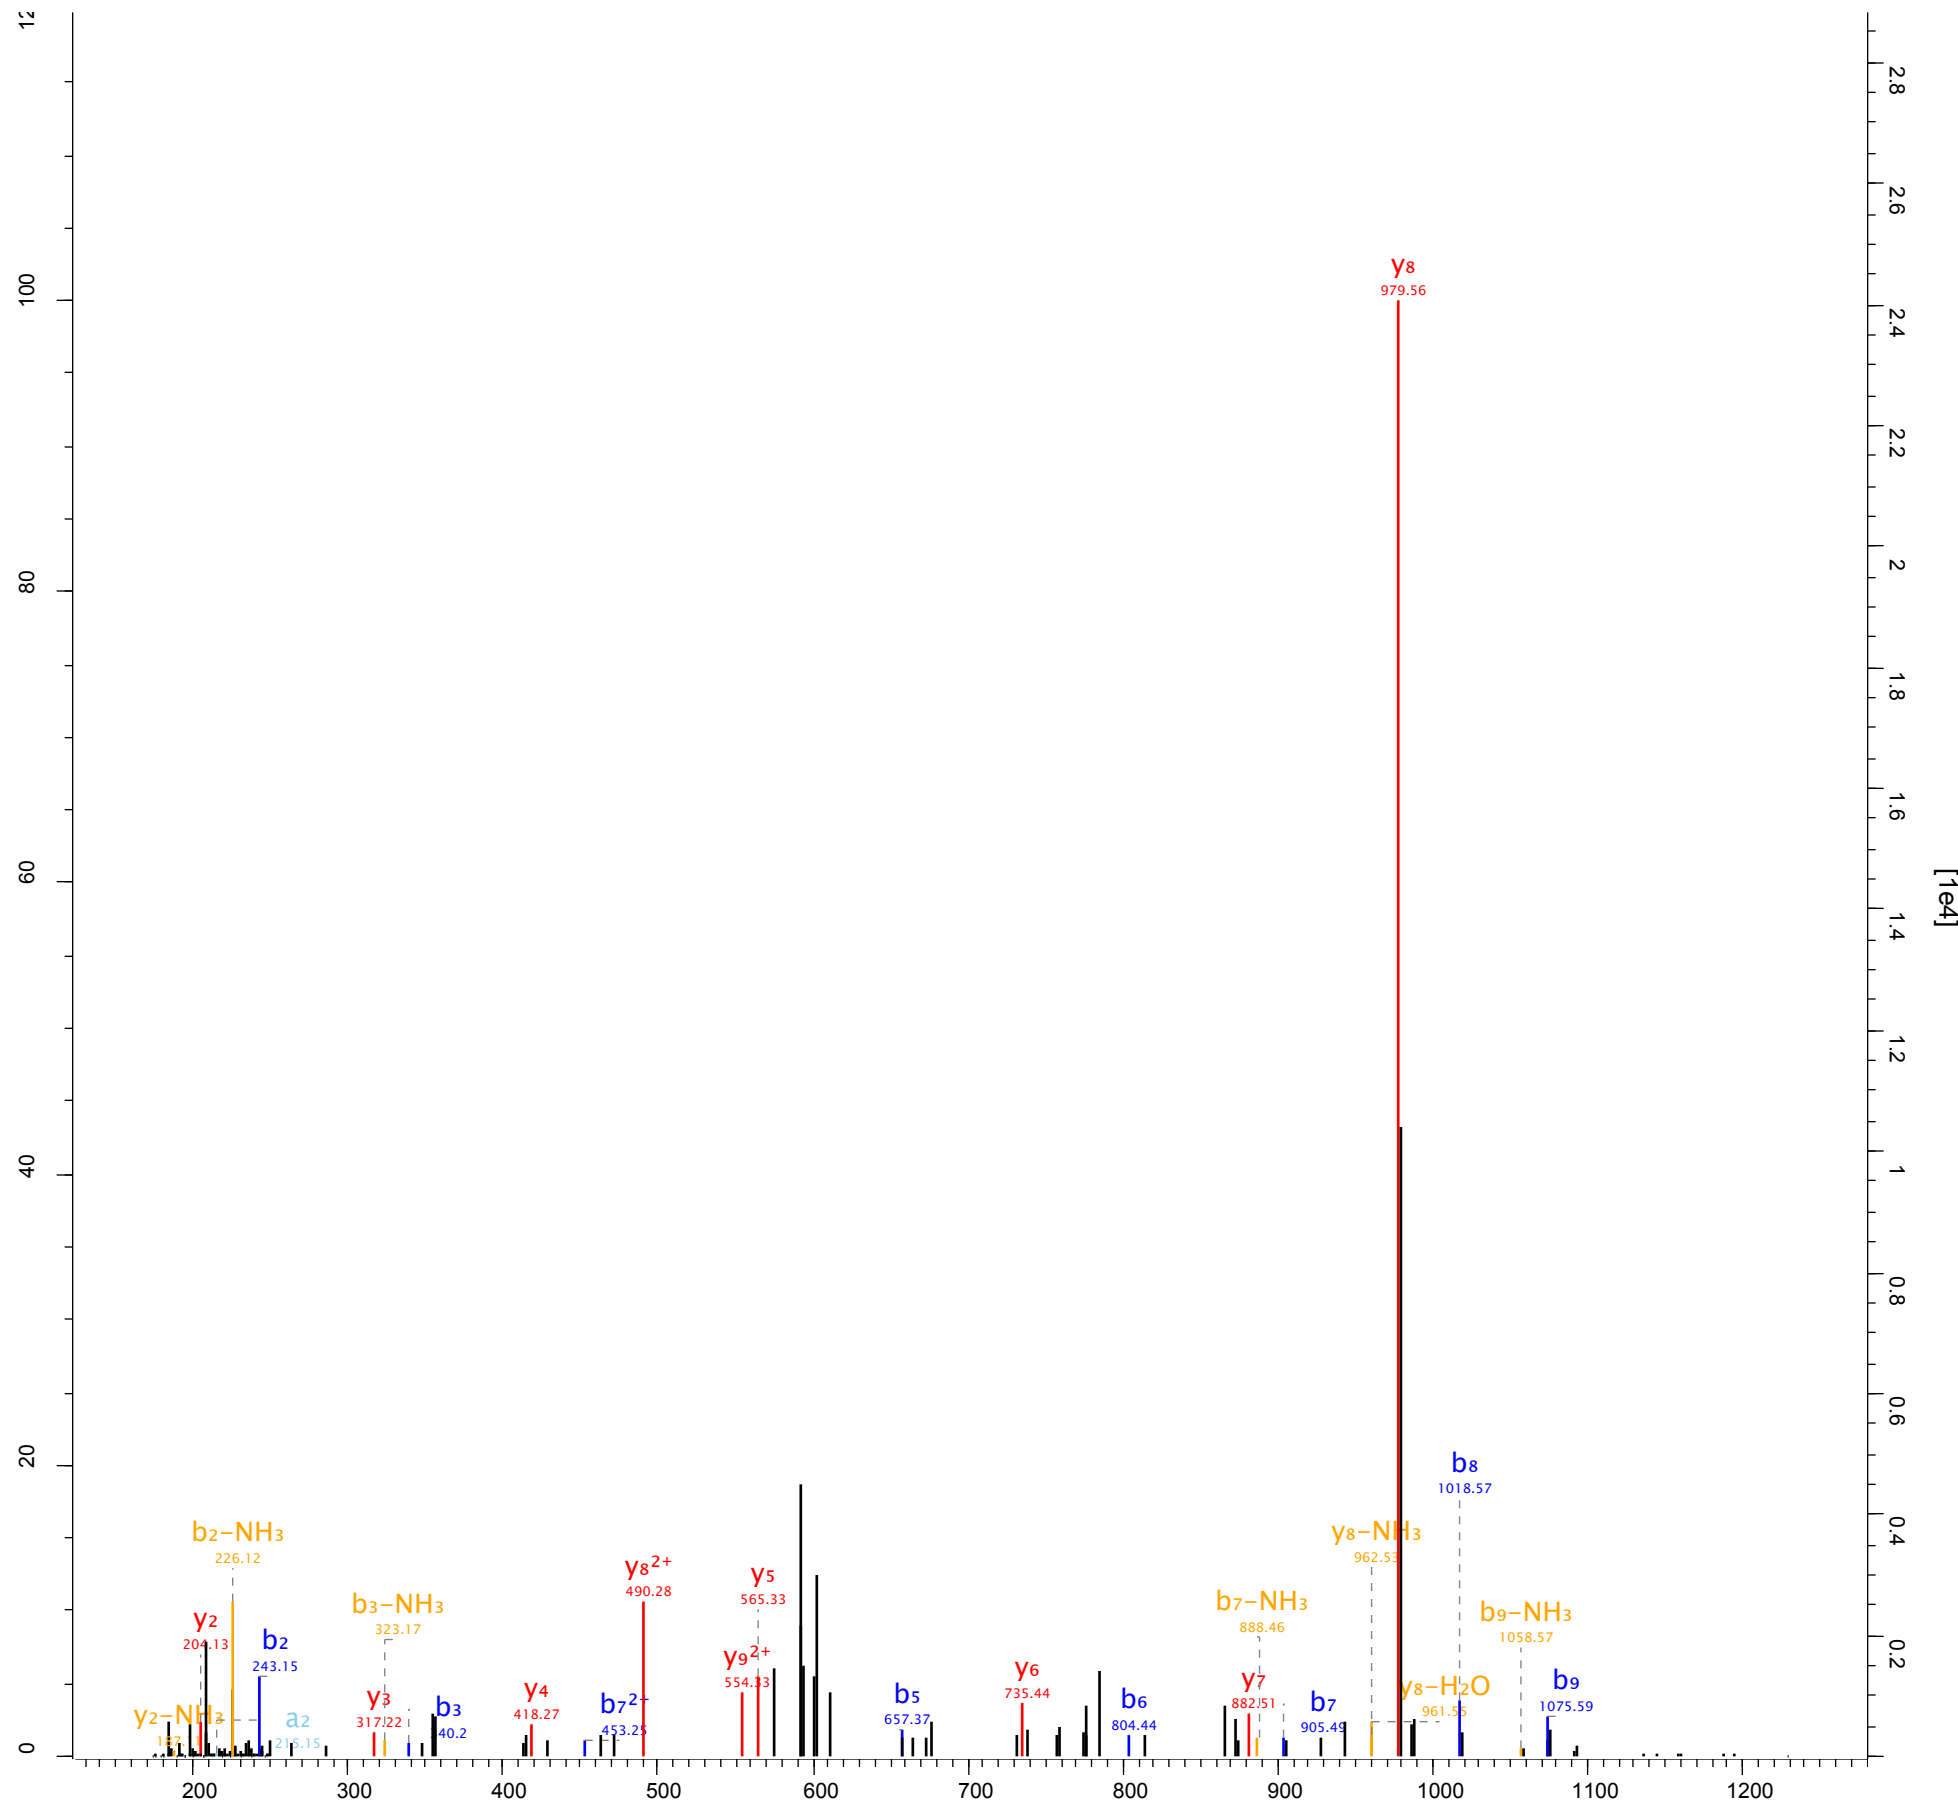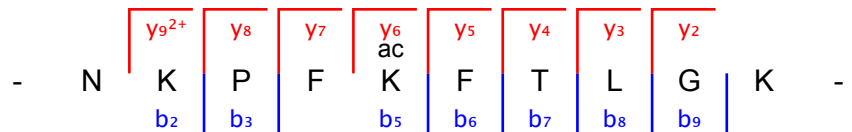

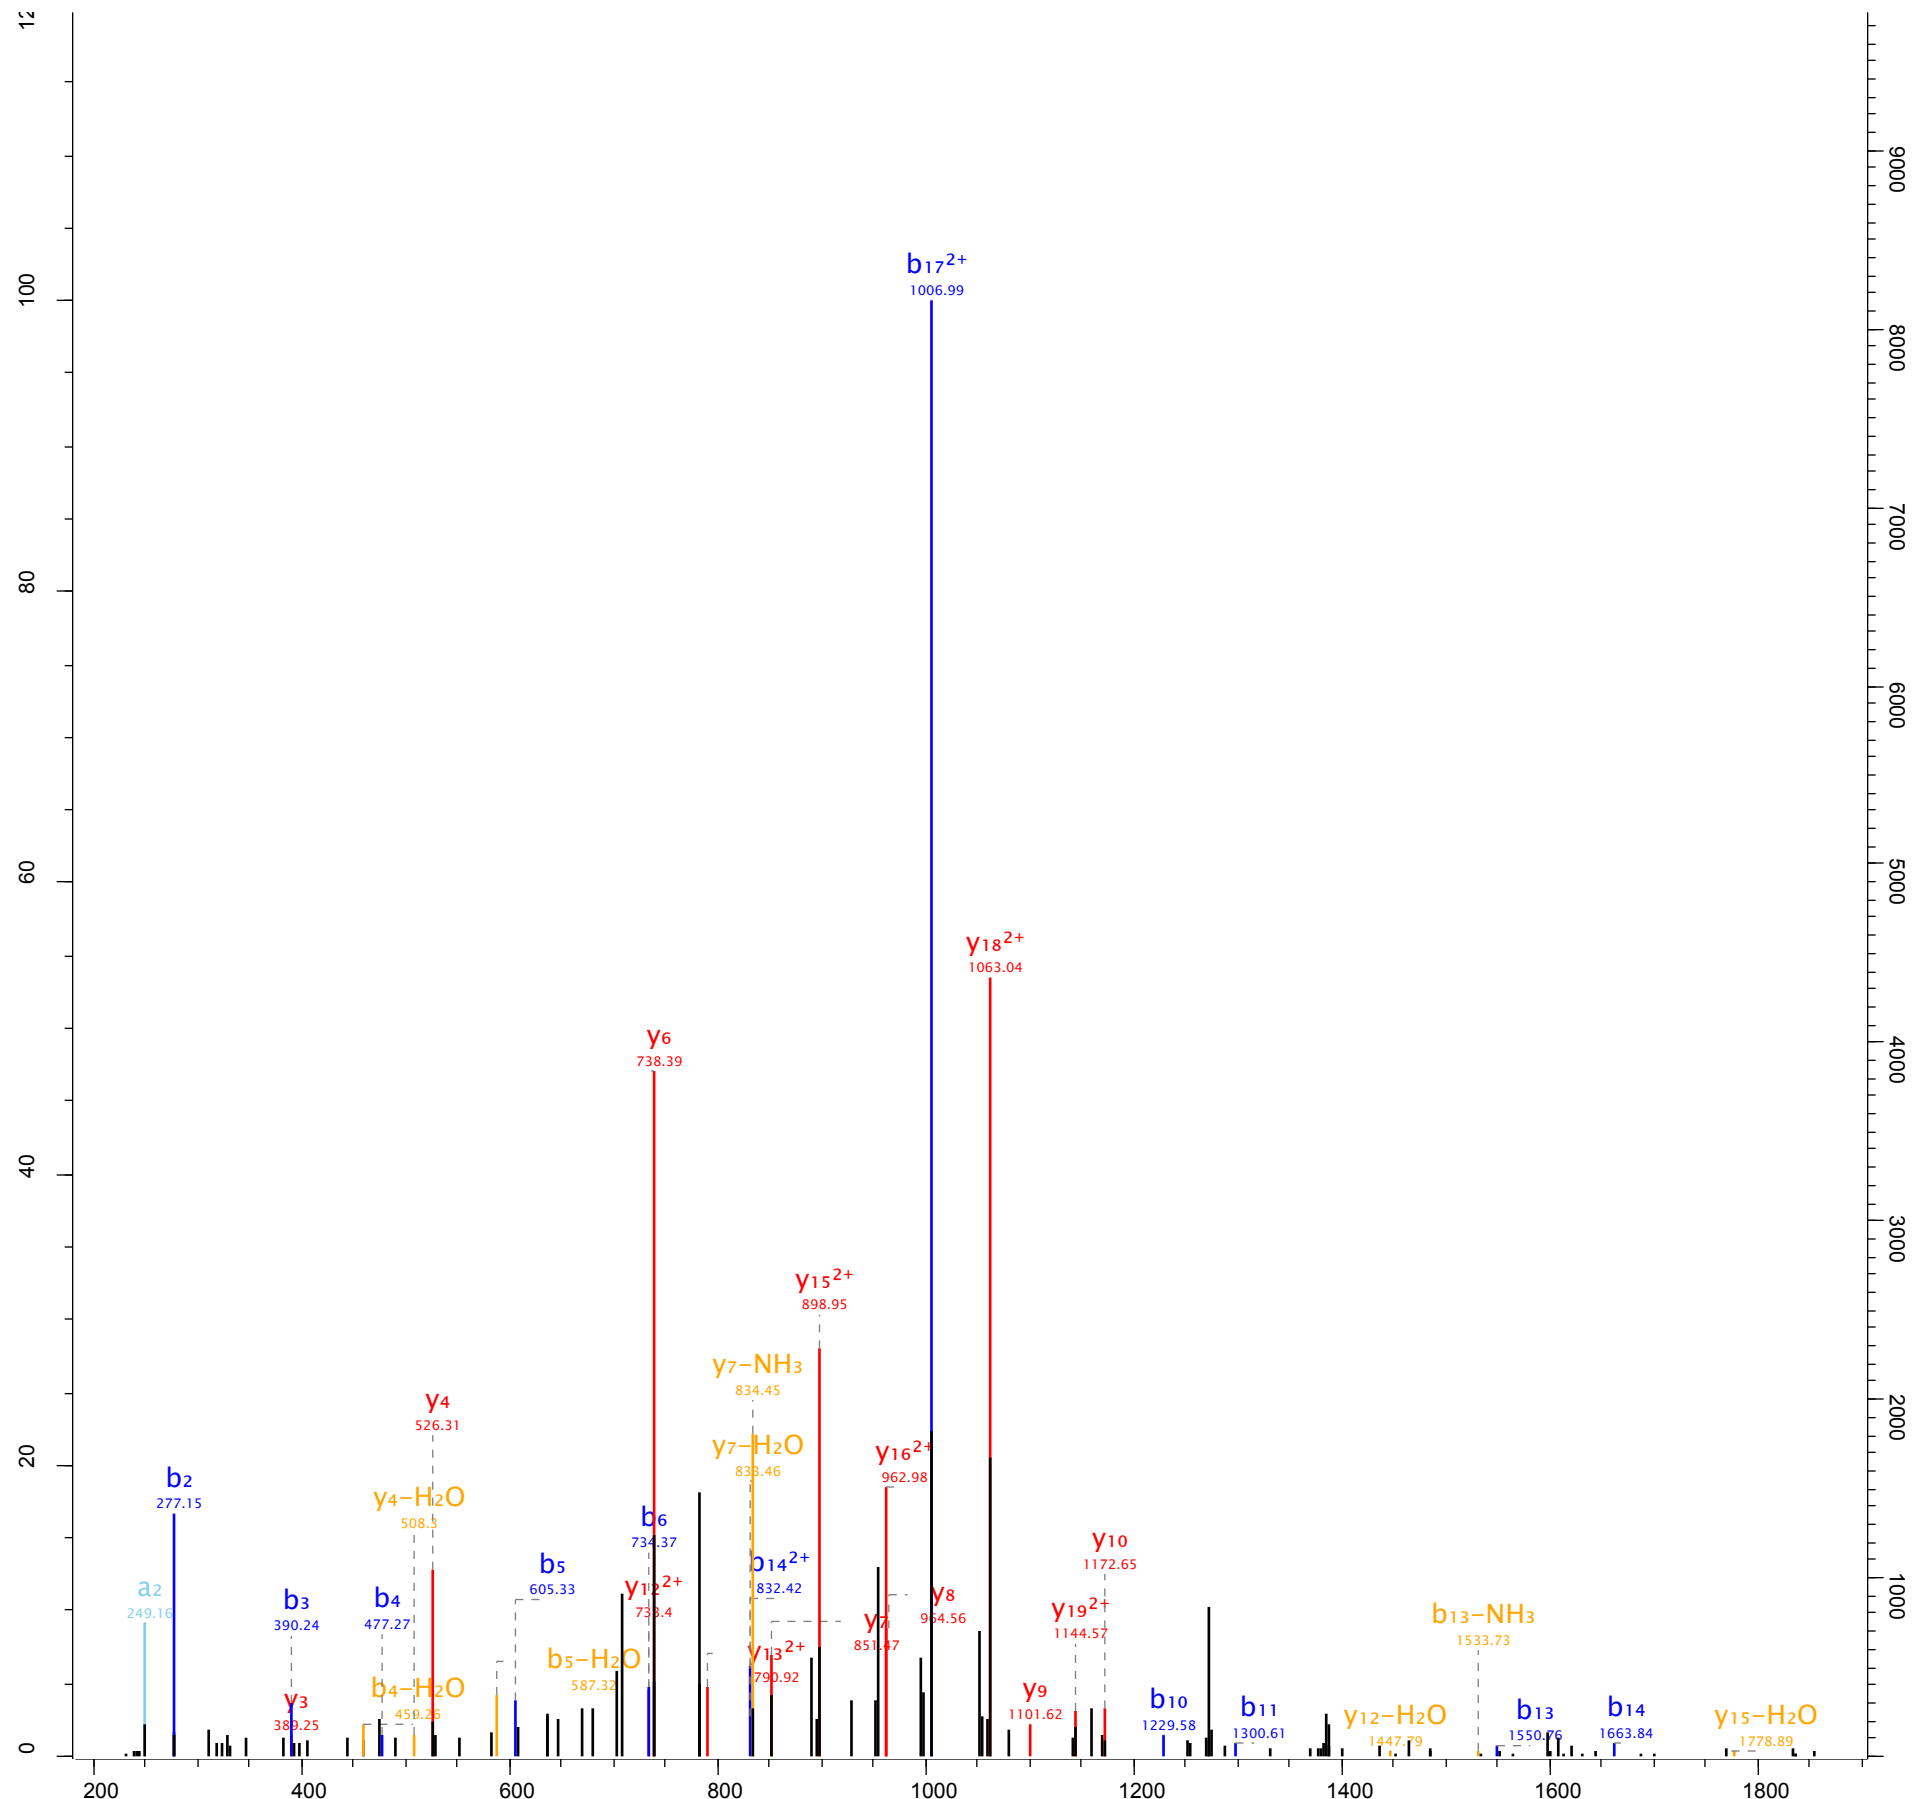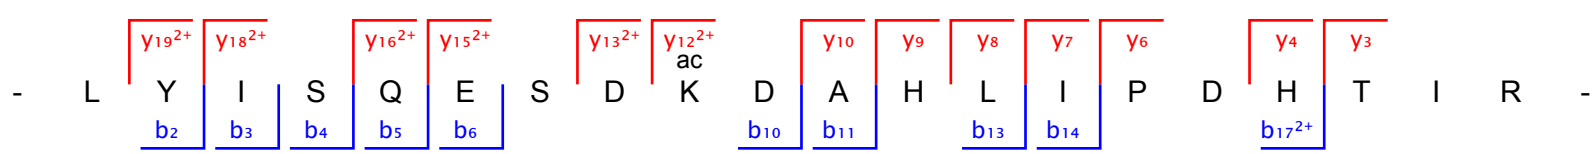

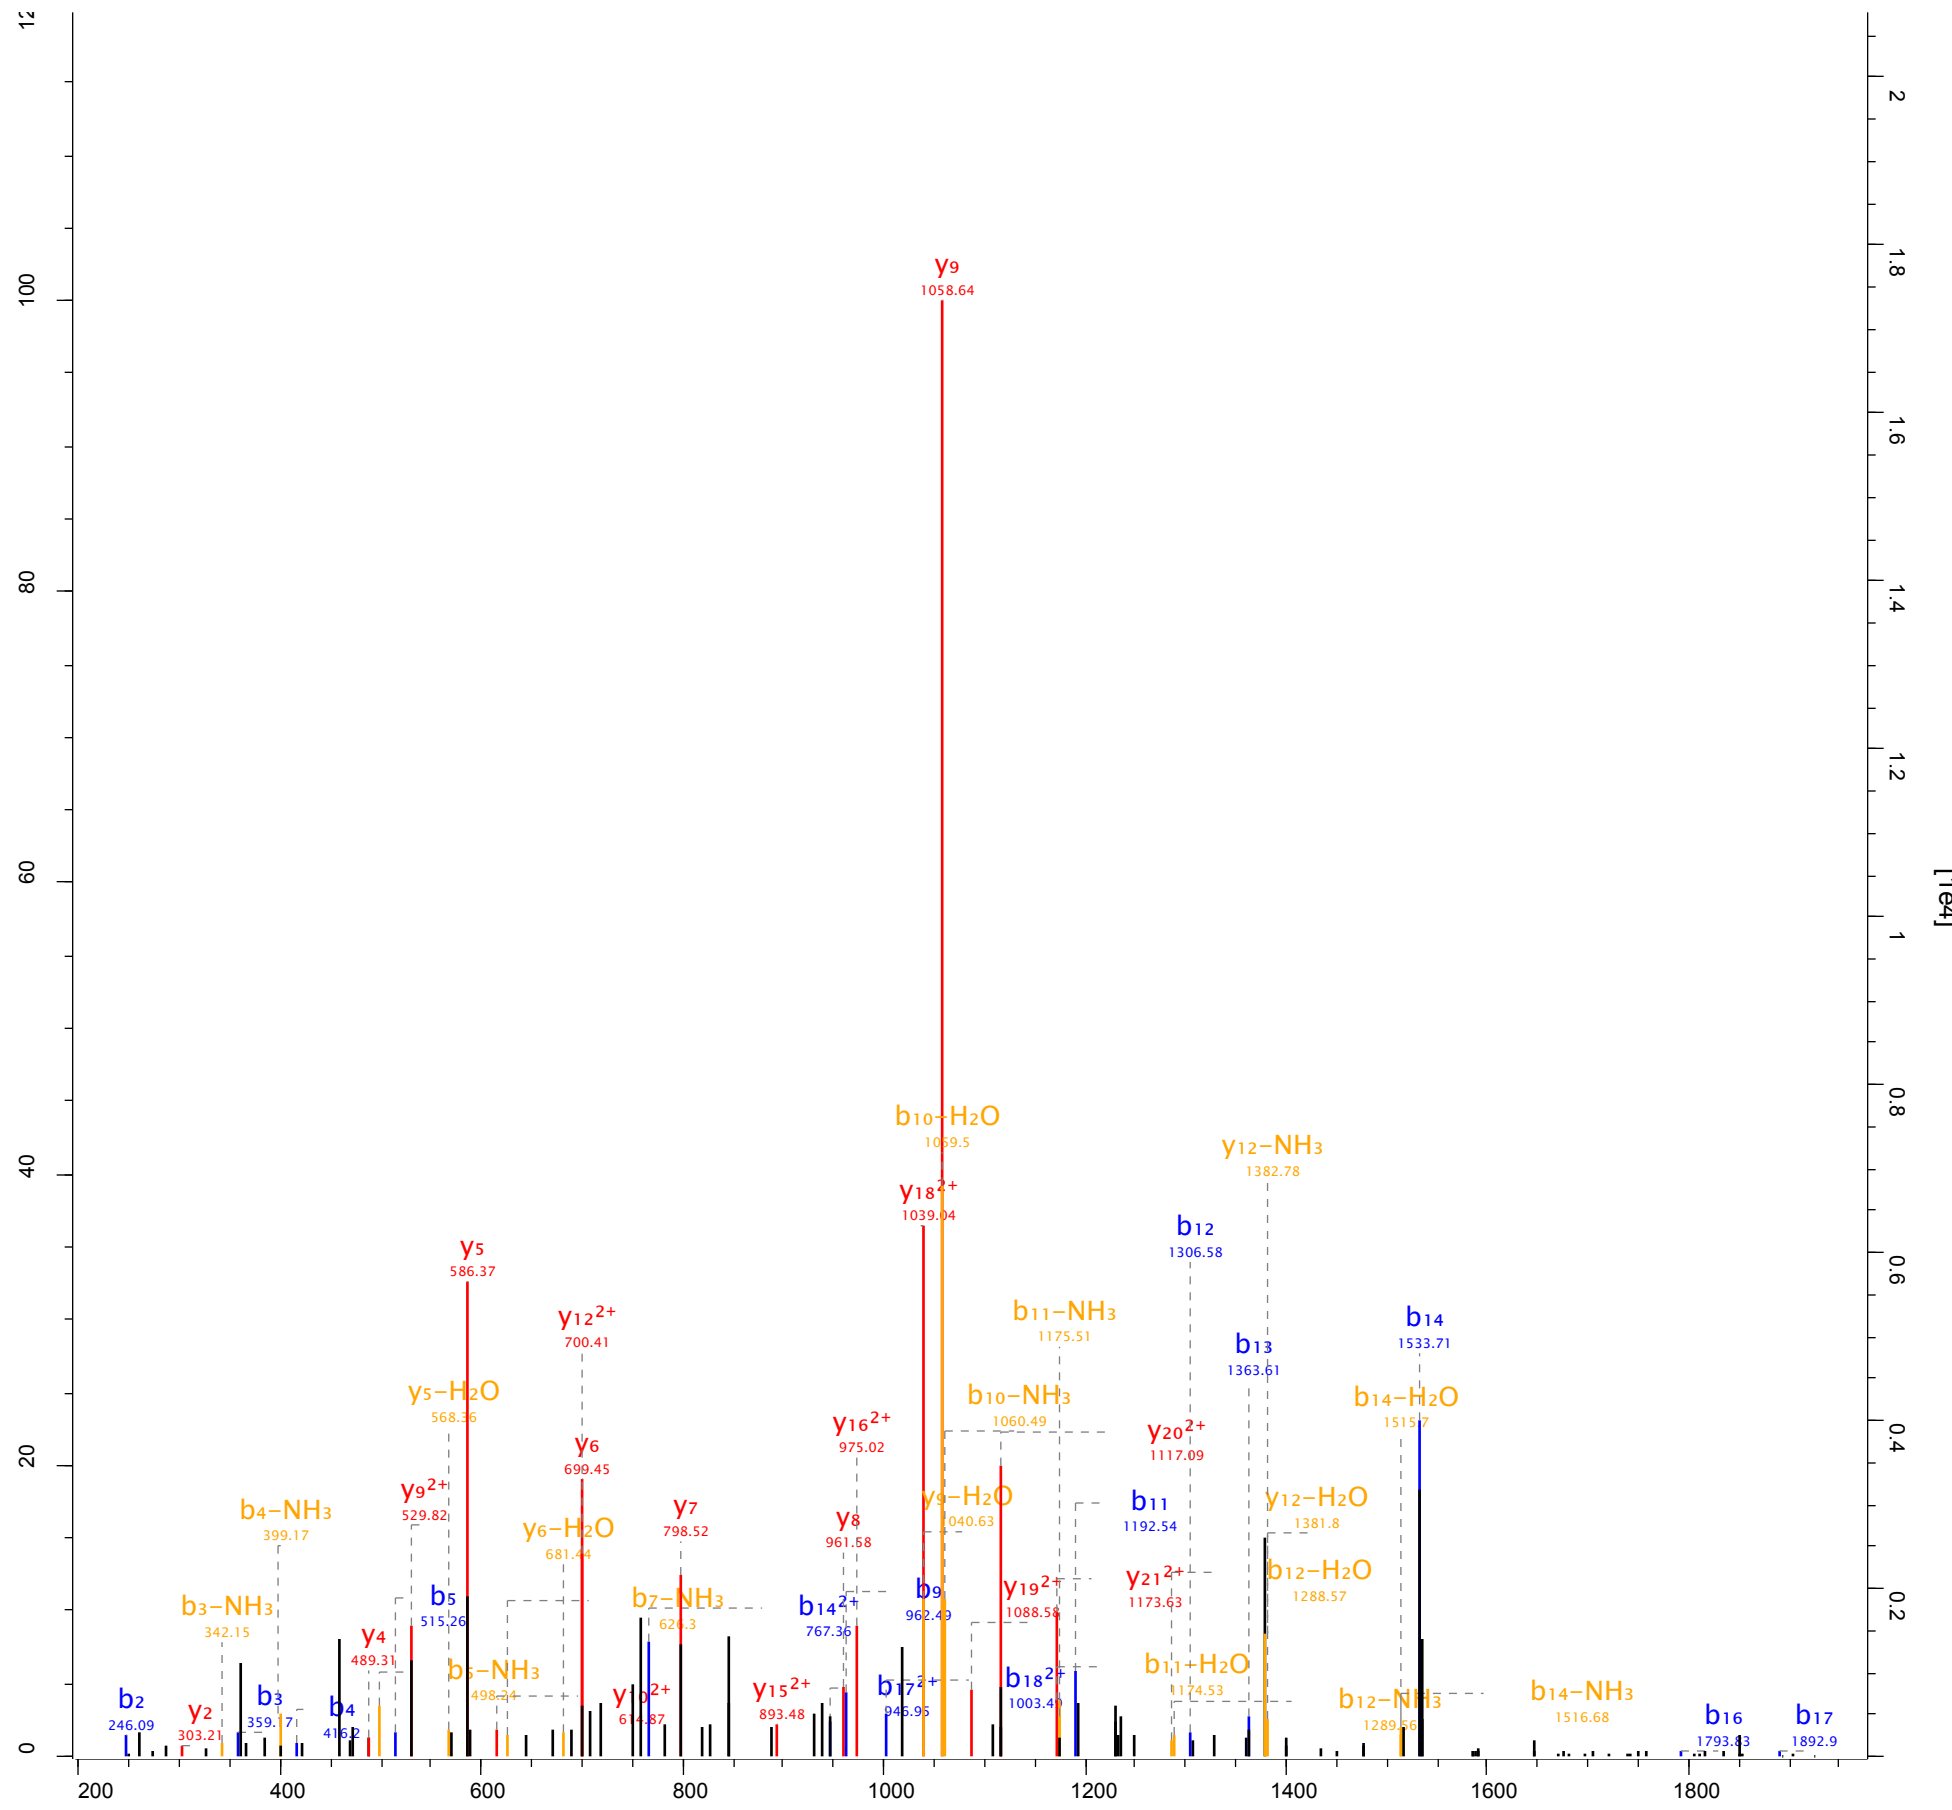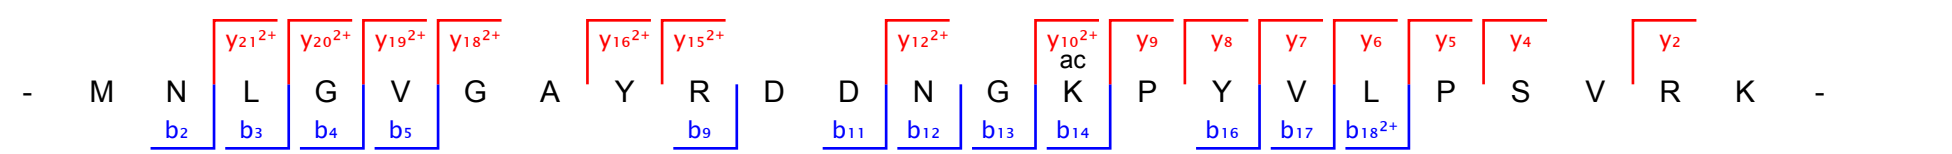

062513\_SCW\_II\_53\_10\_Vargas\_Enriched

21419

ITMS; CID

168.12

946.17

Clic4

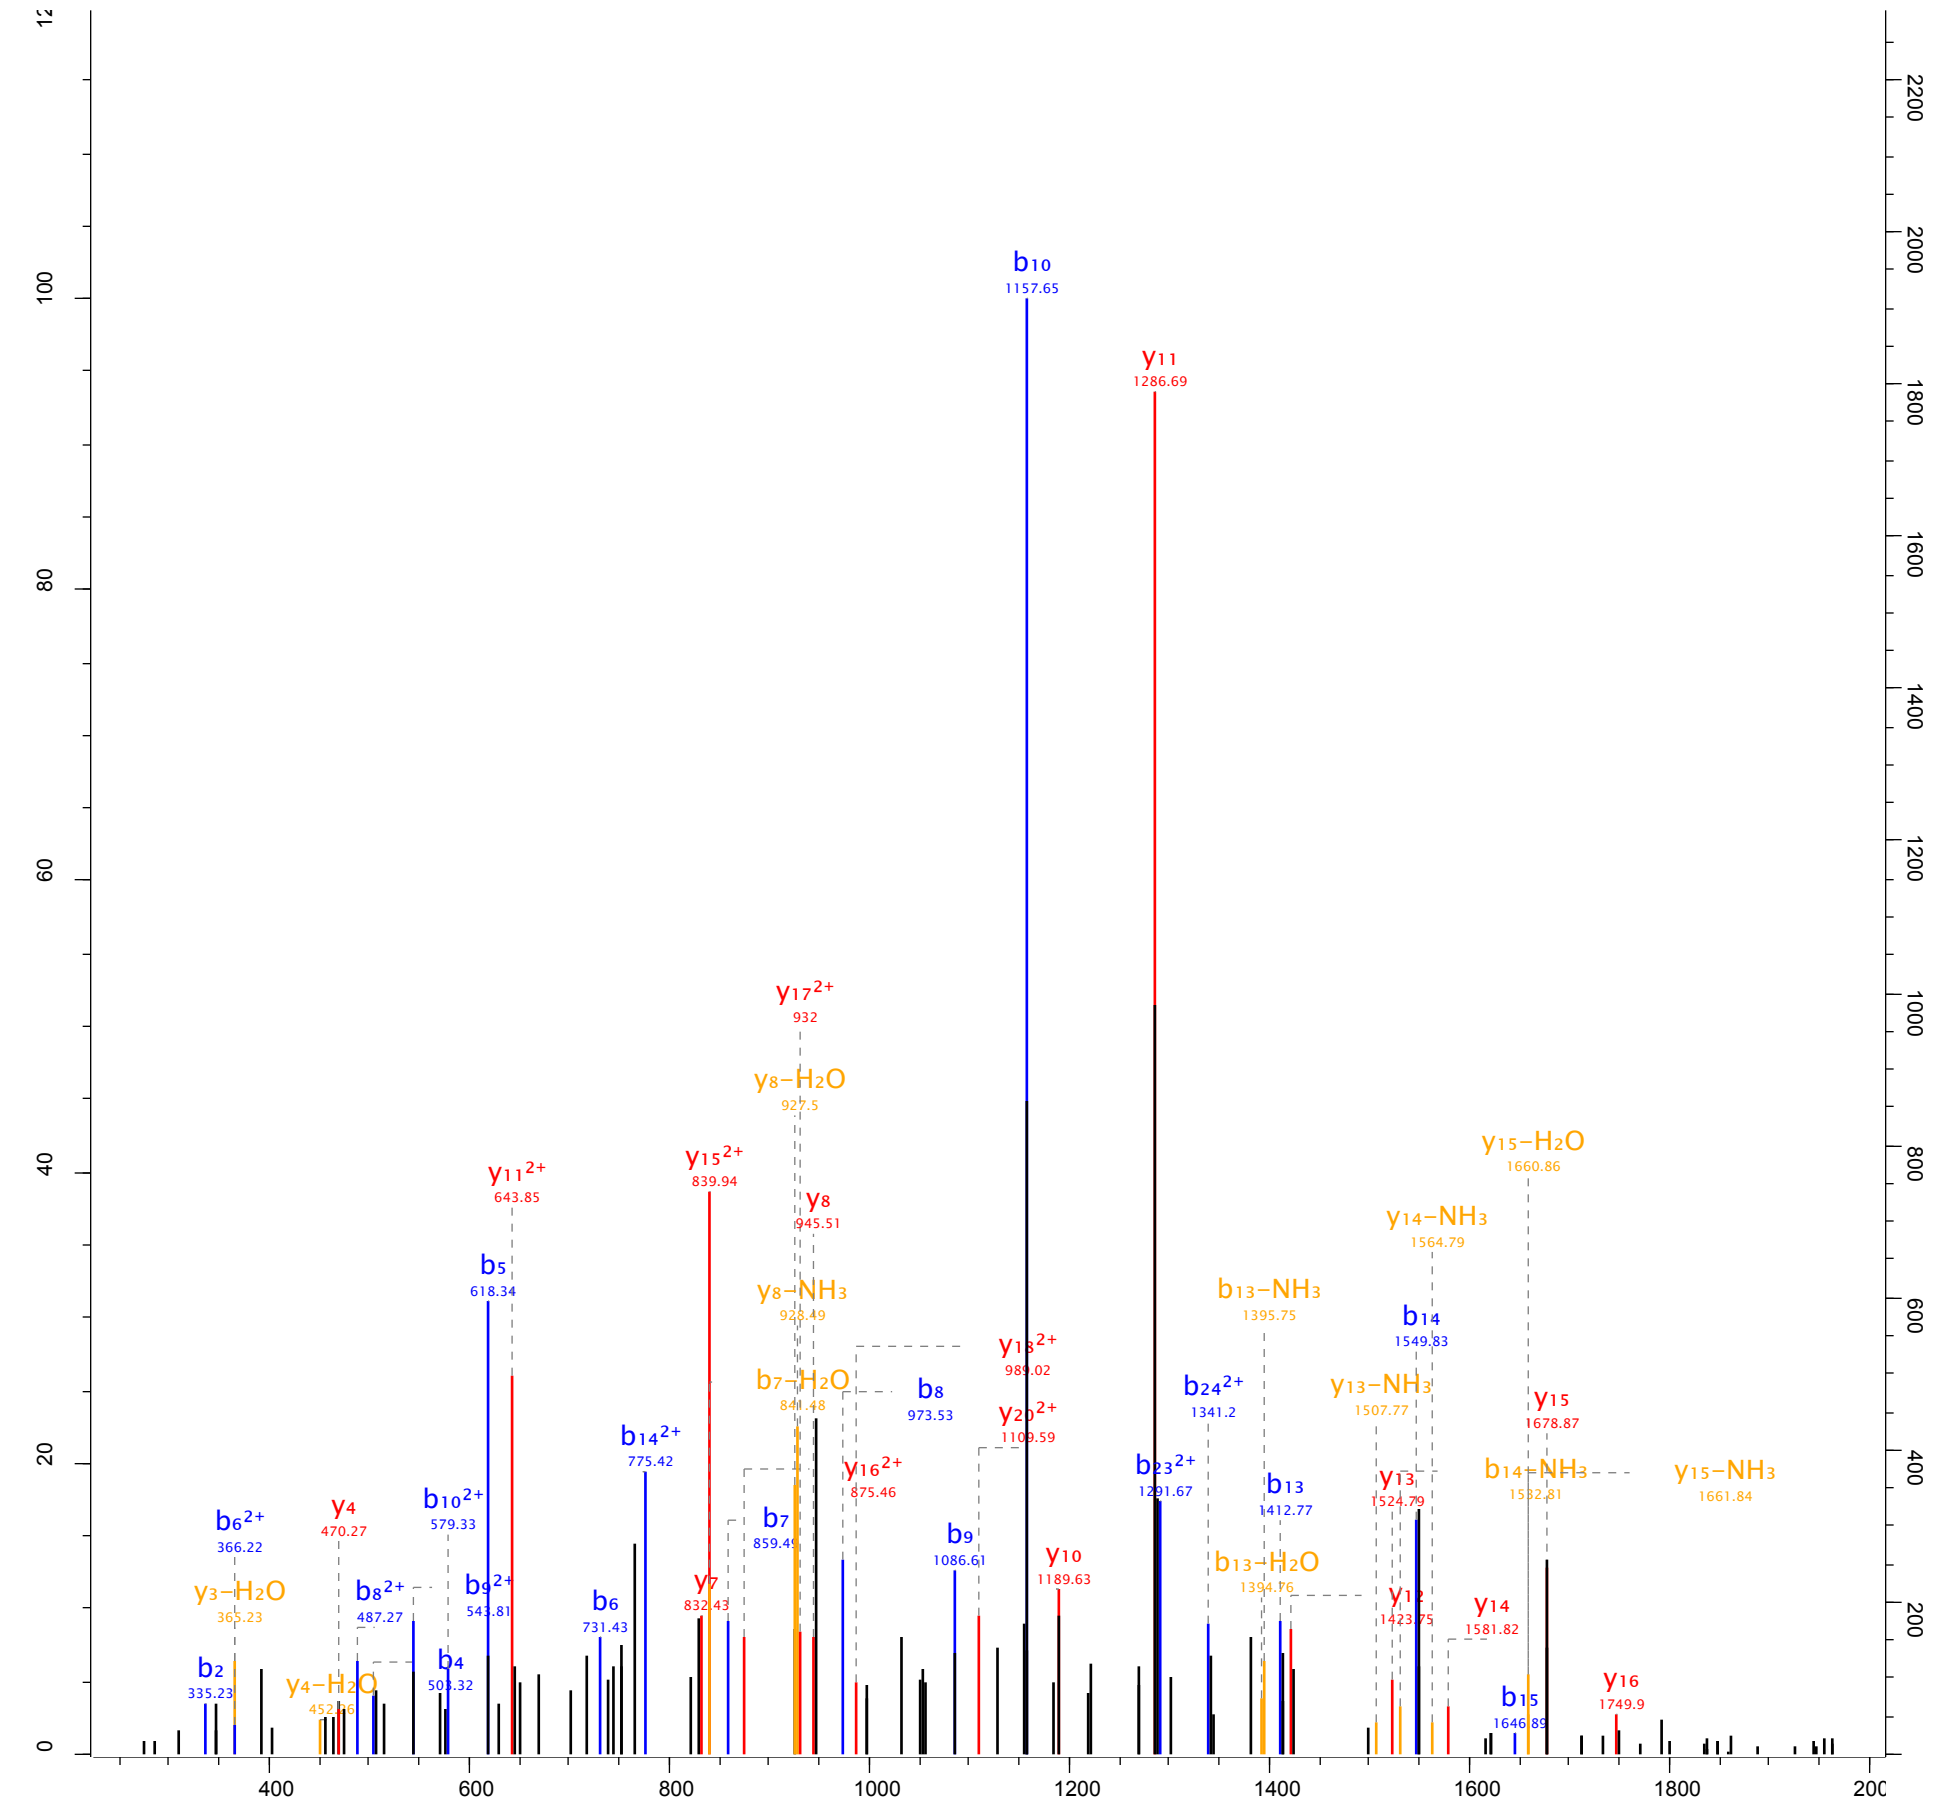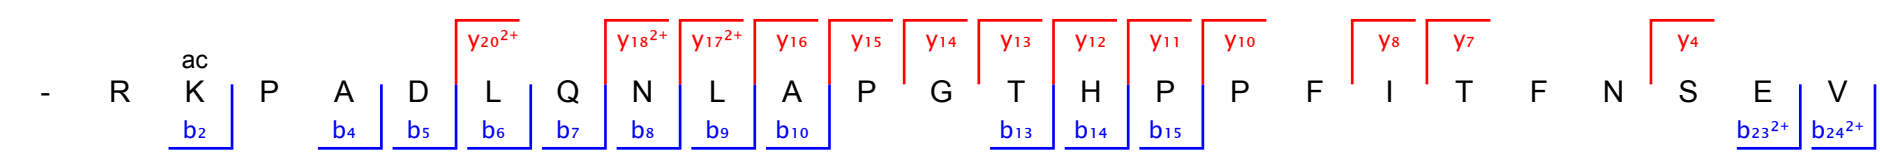

K -



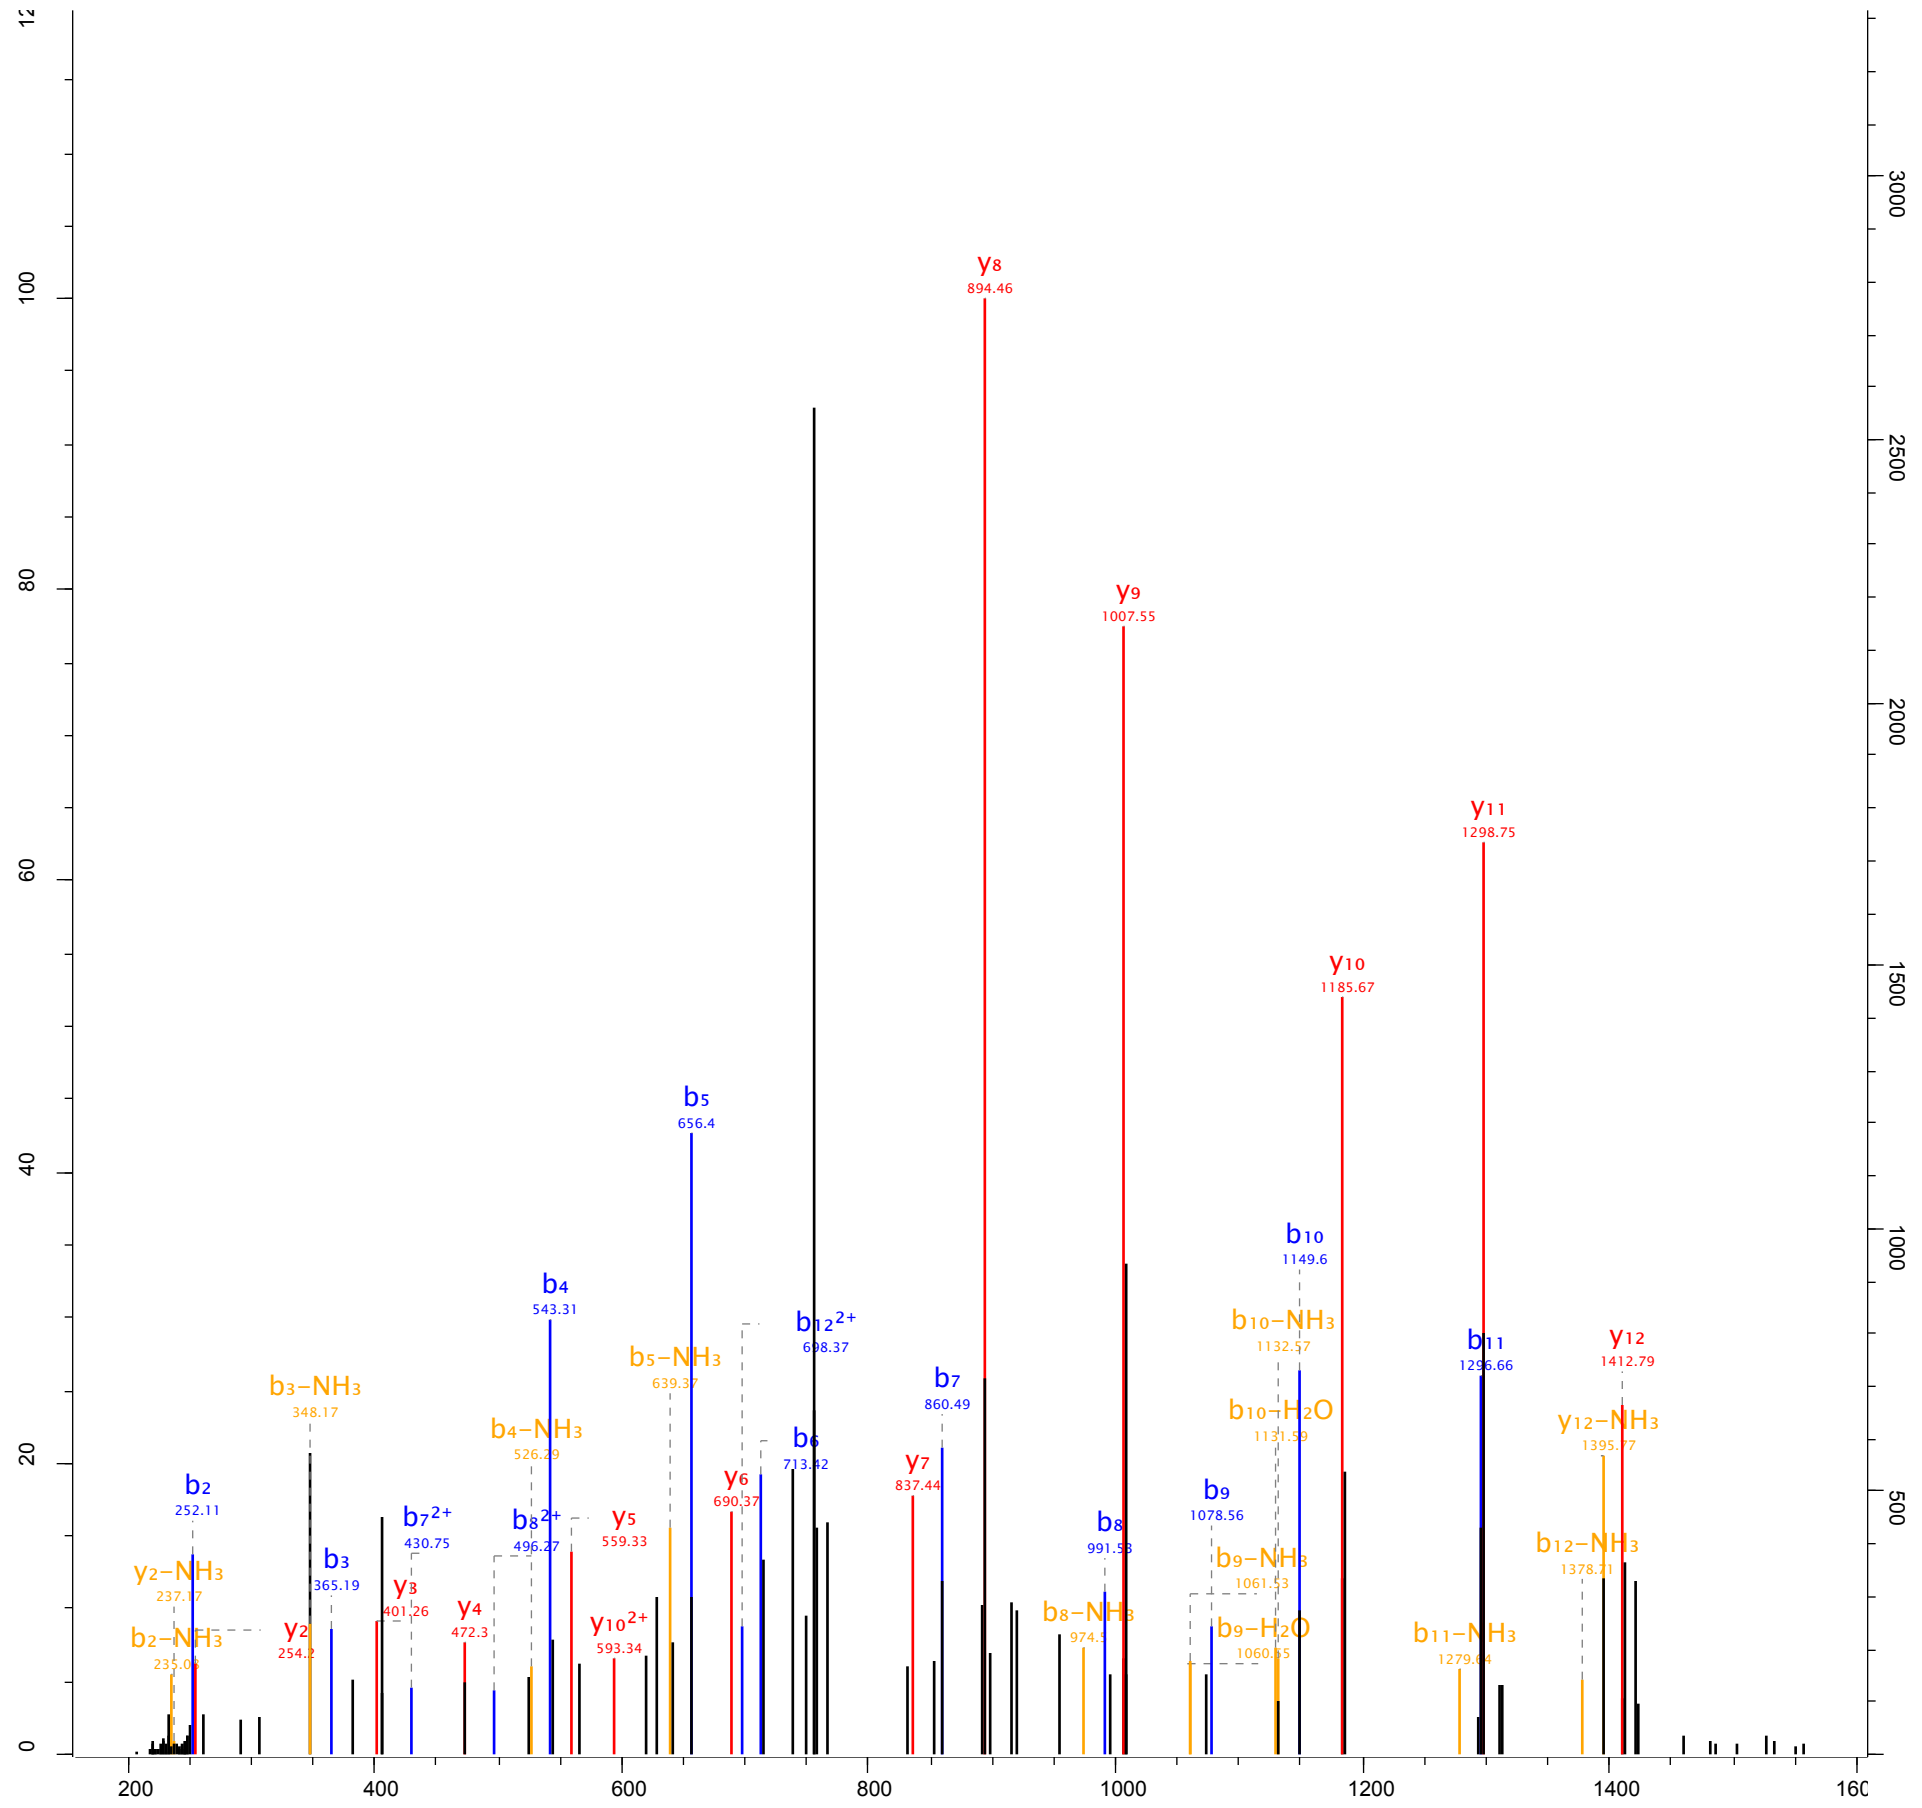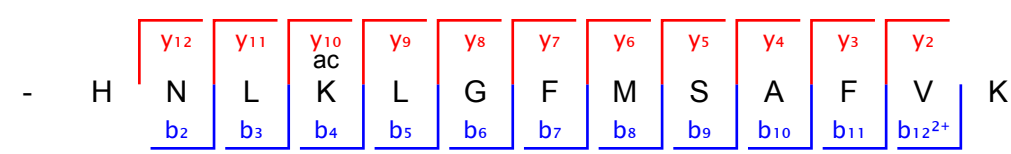

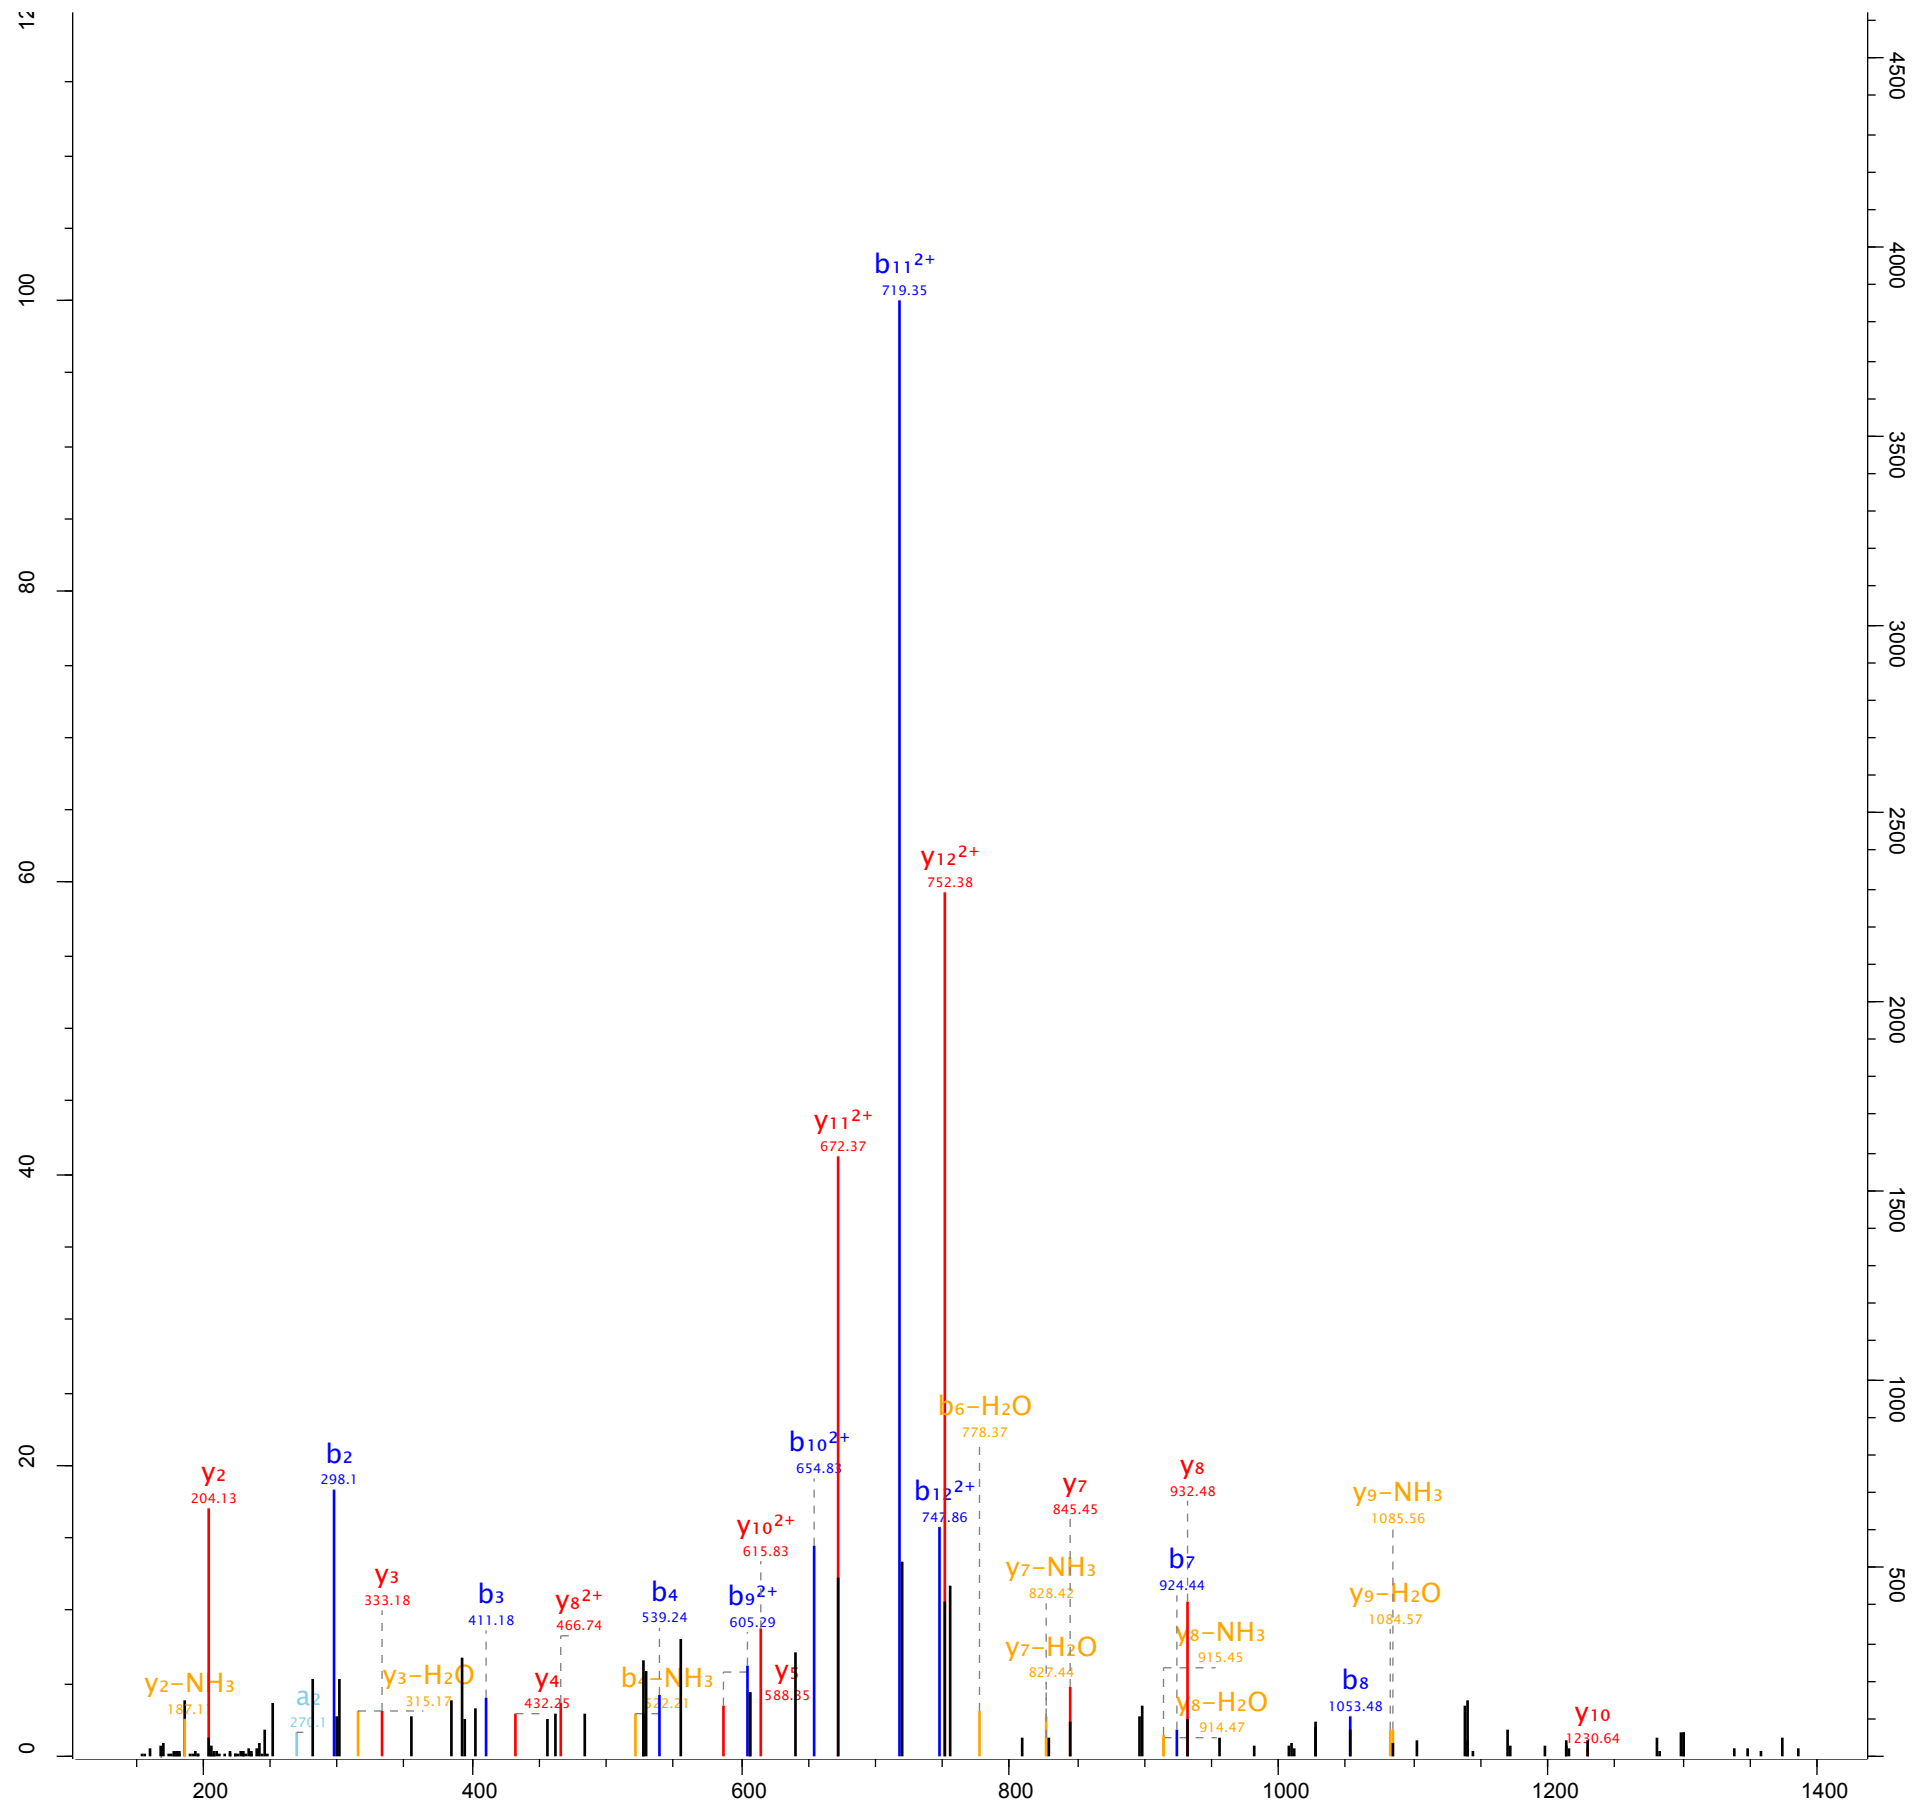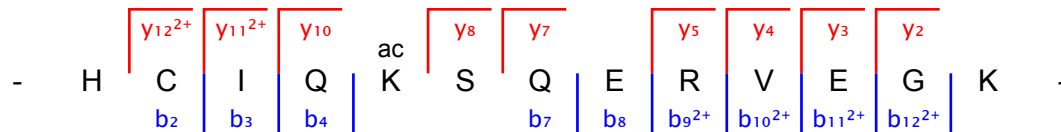

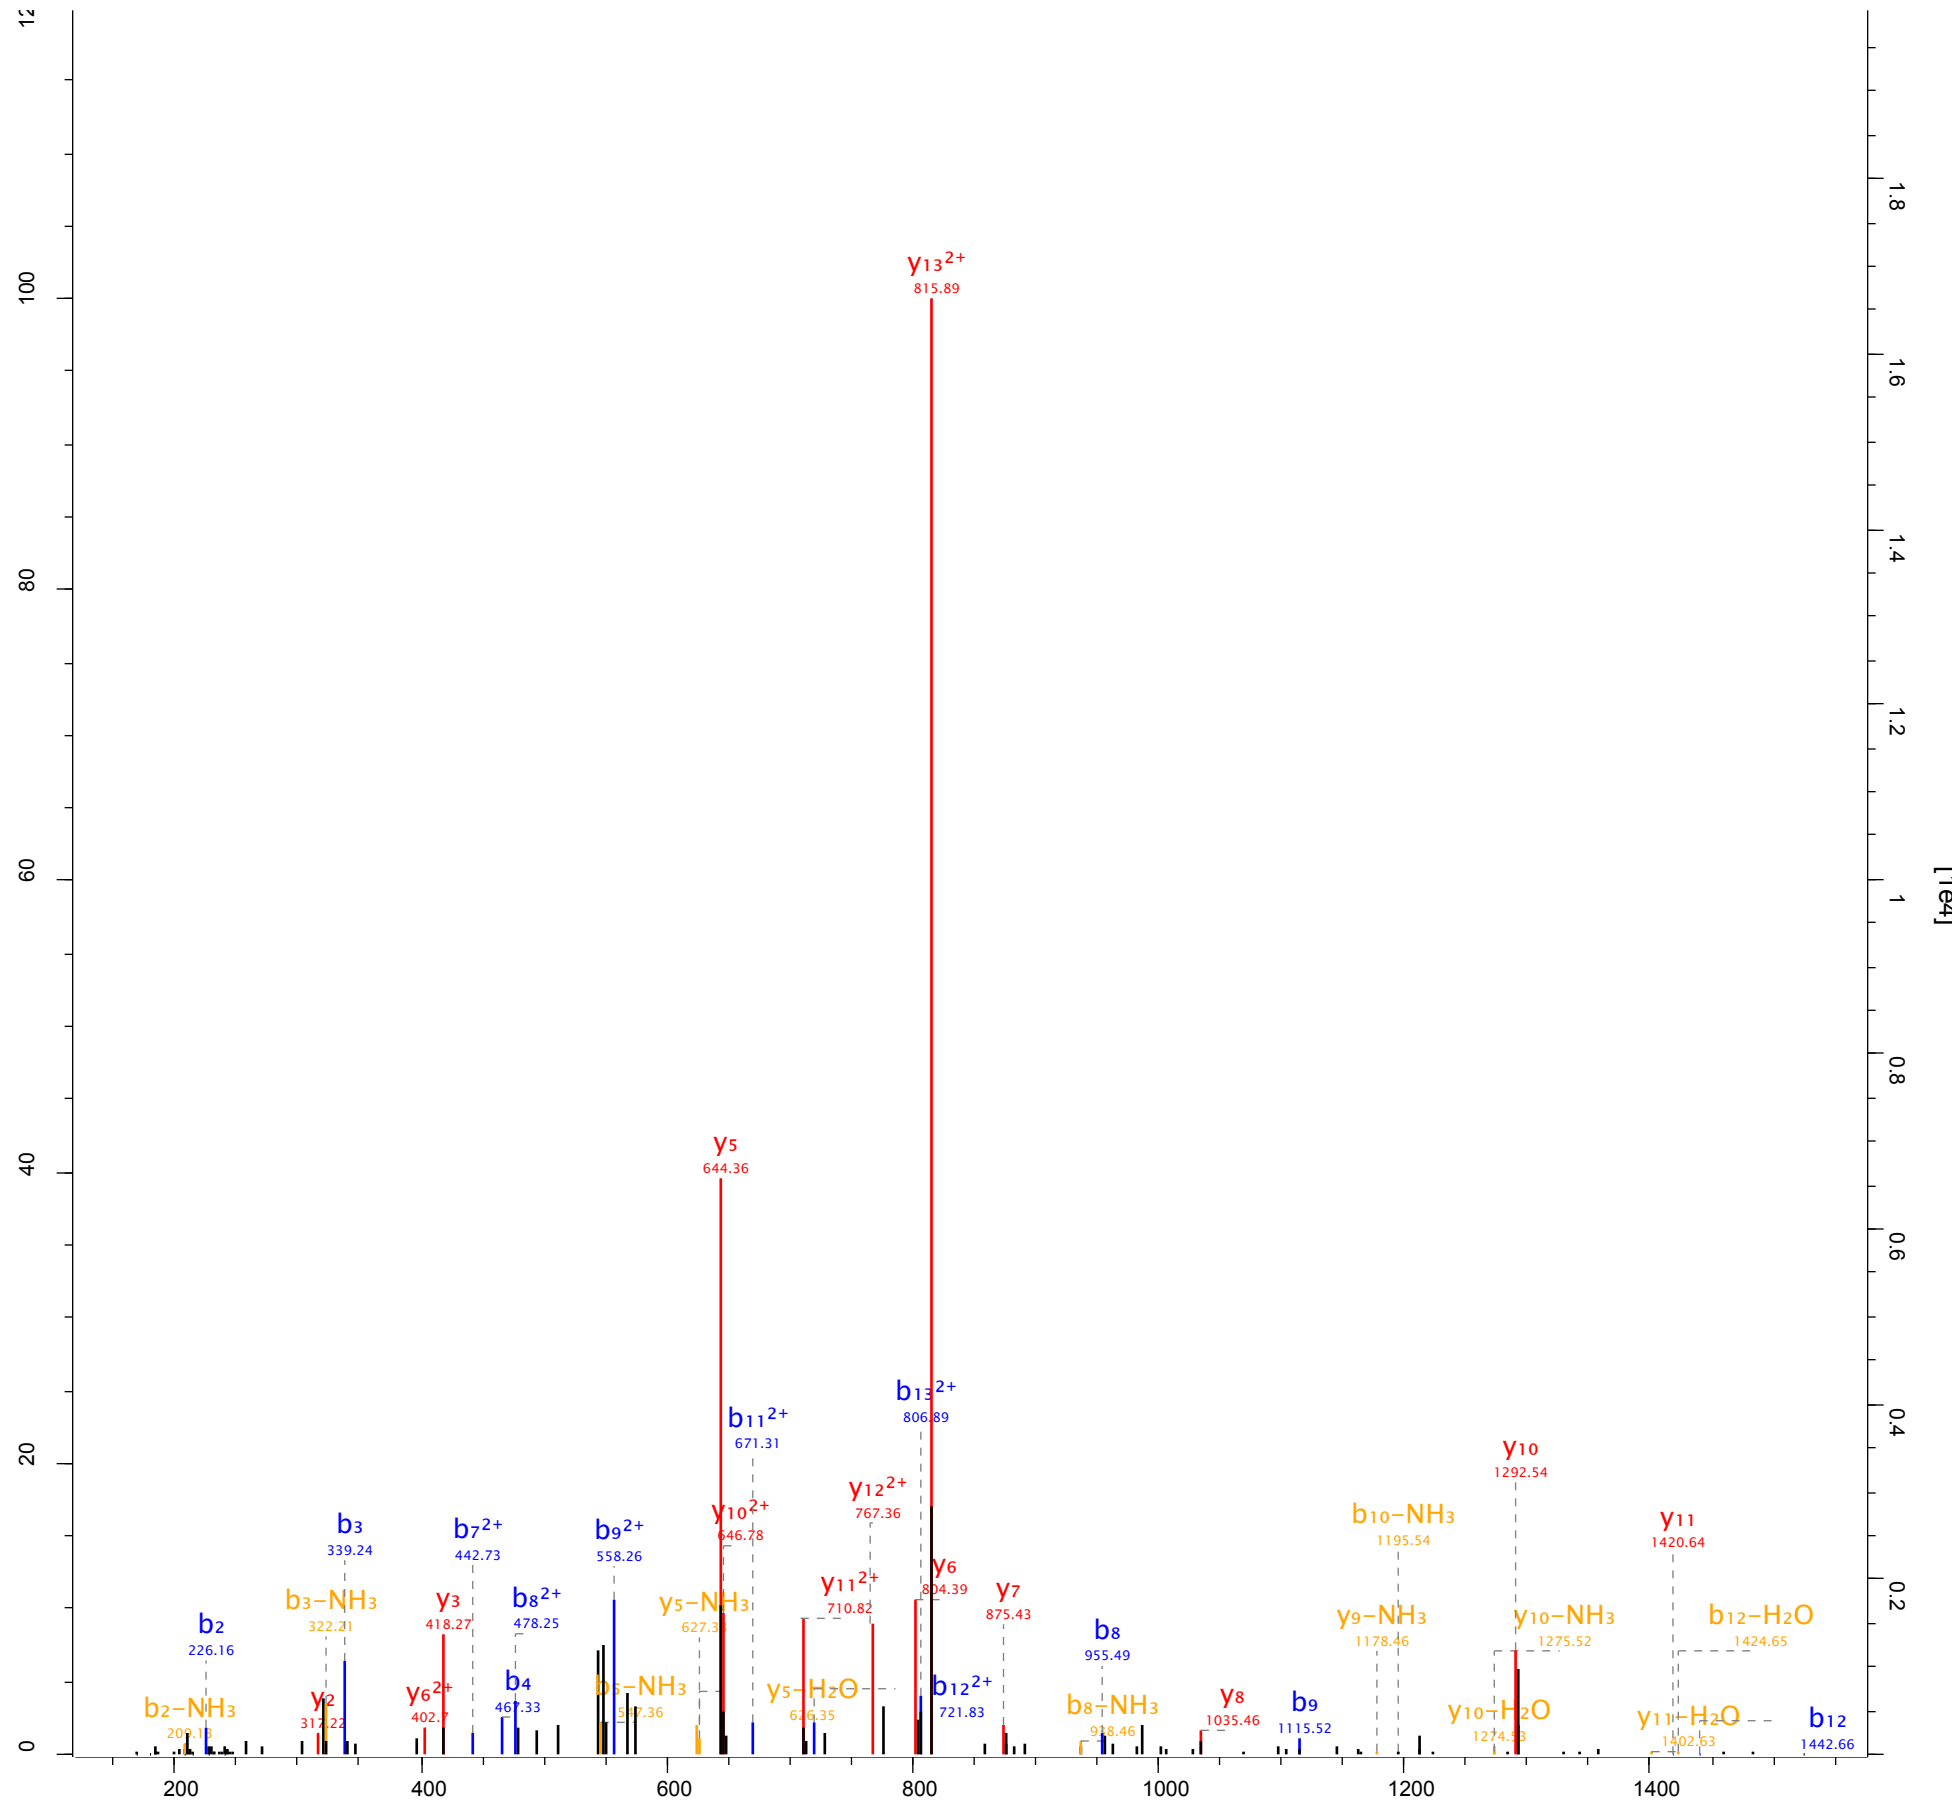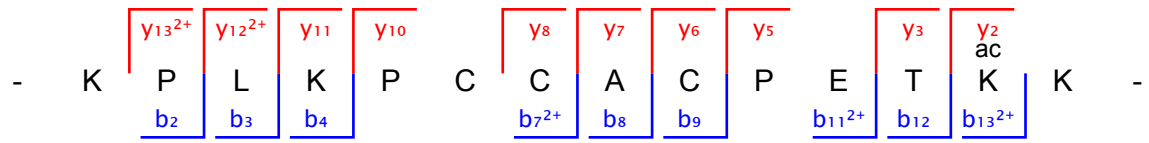

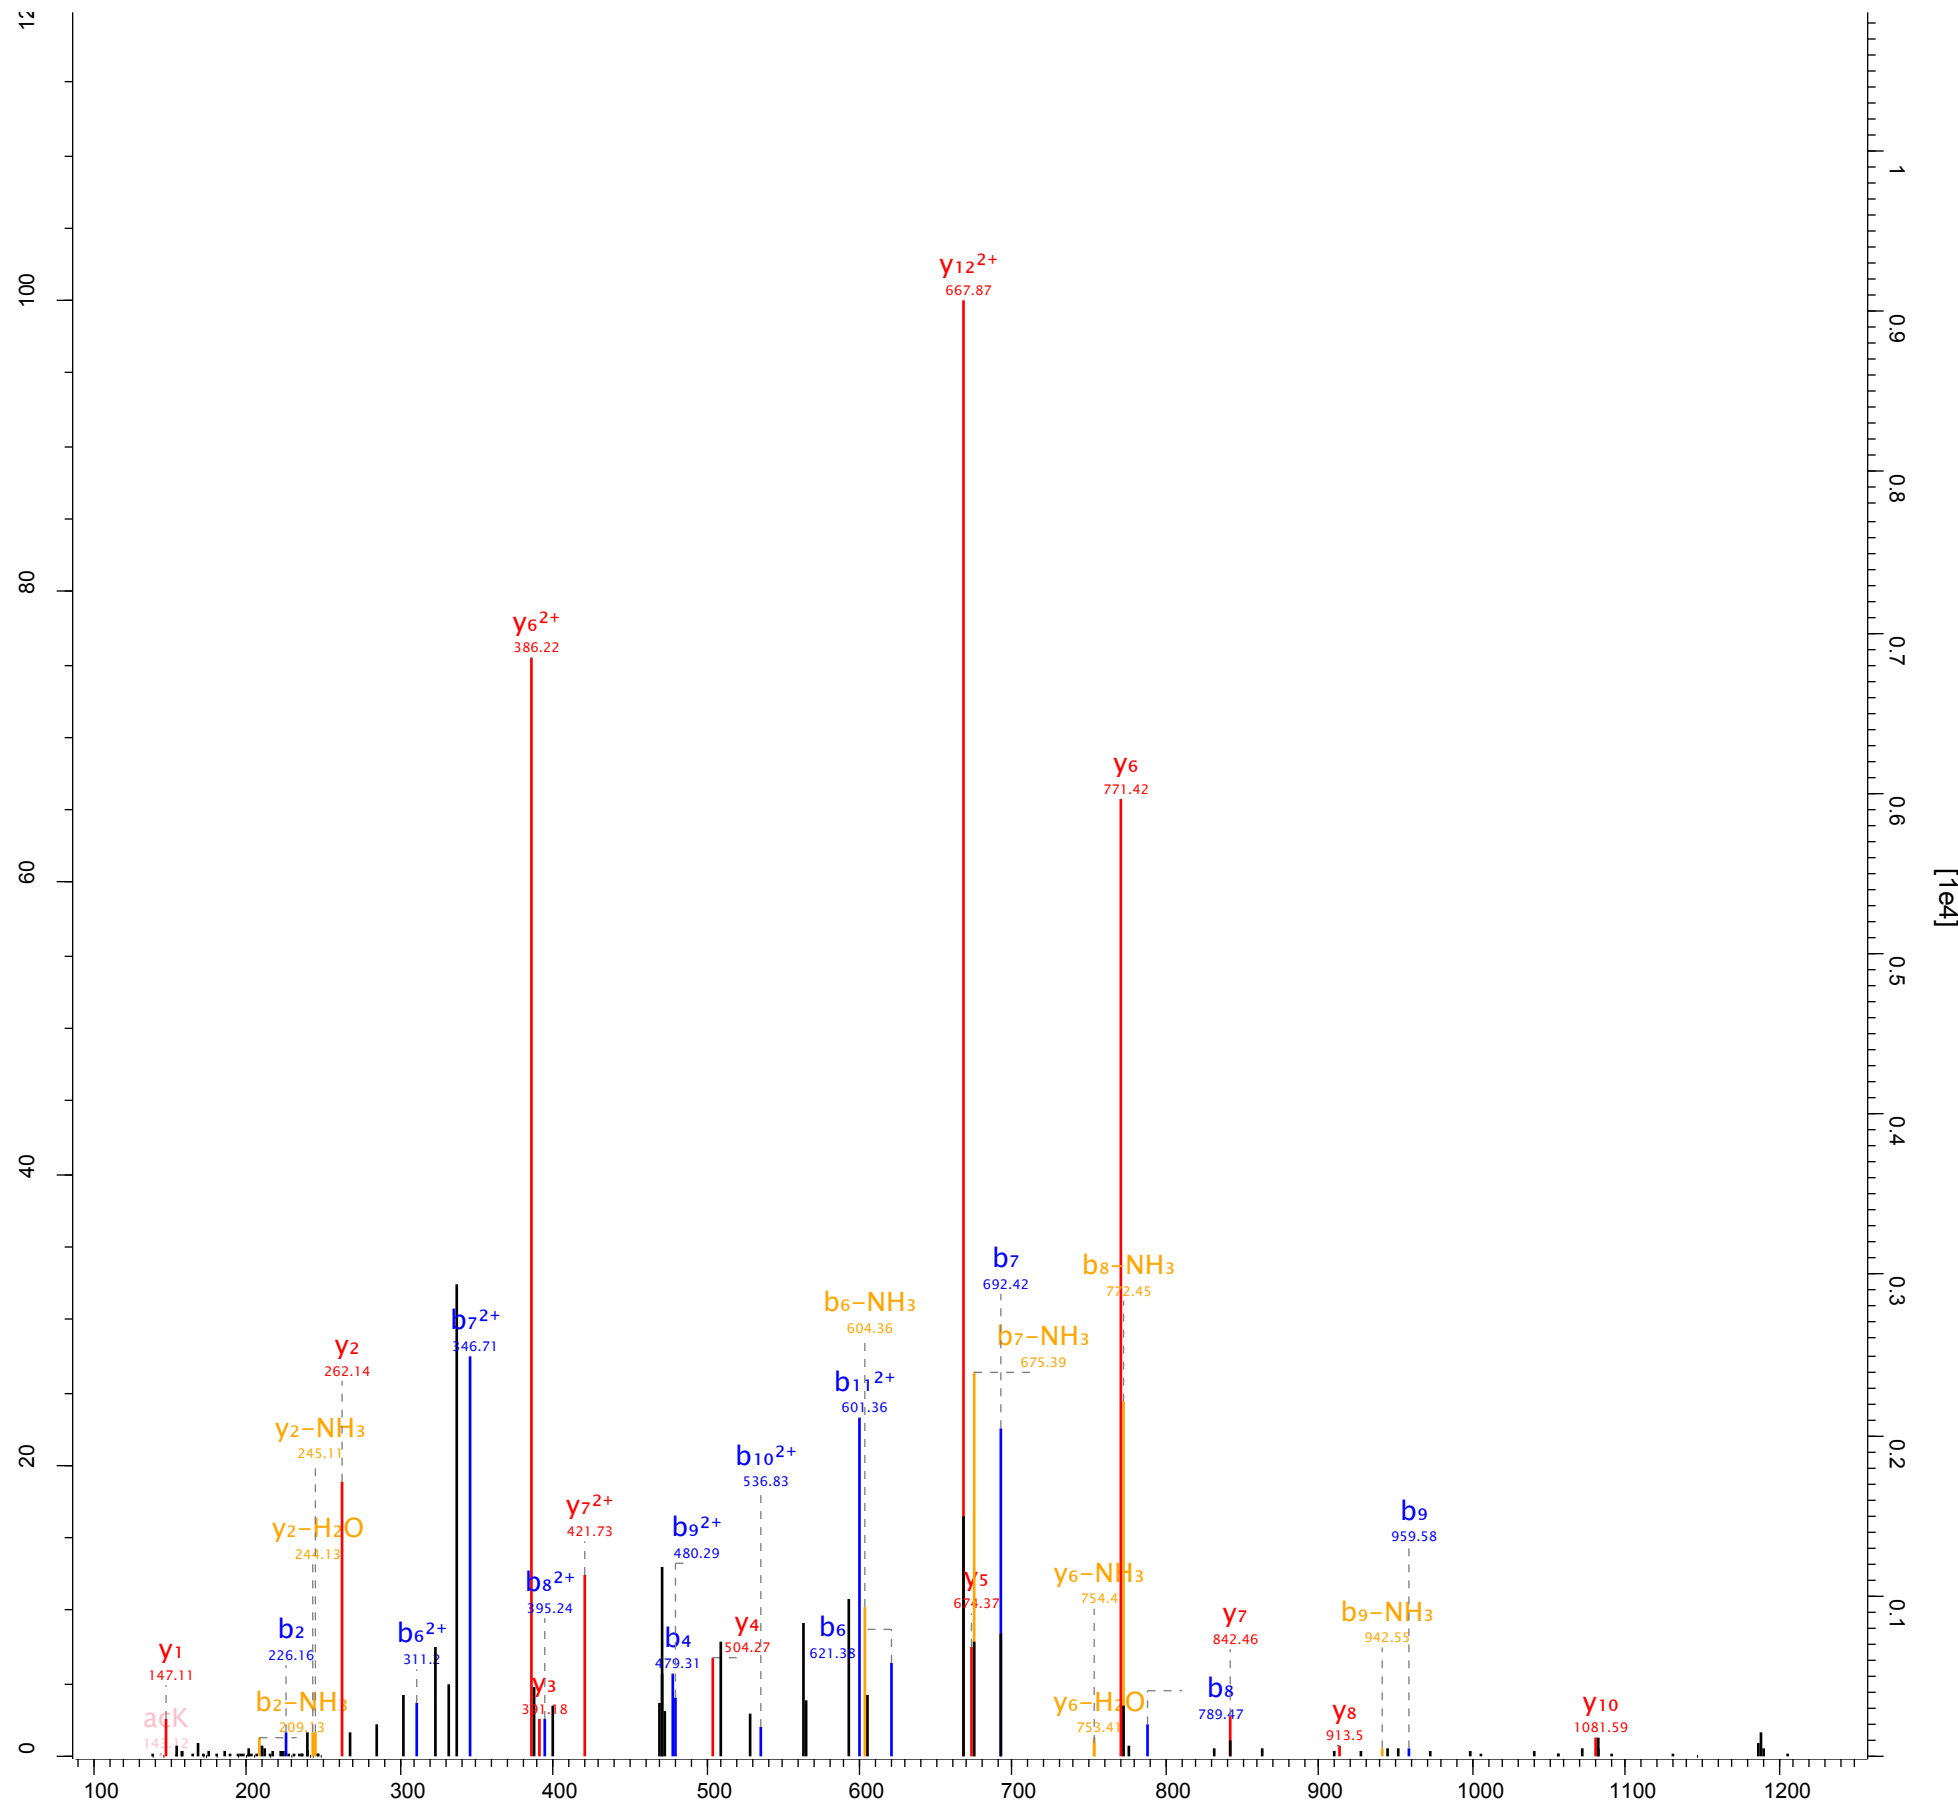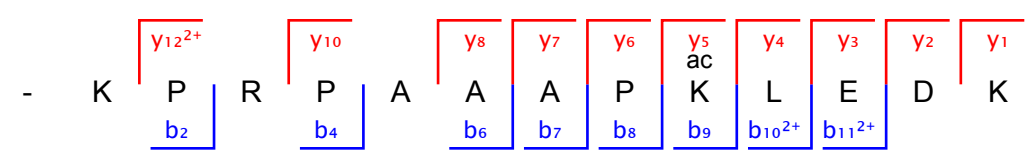

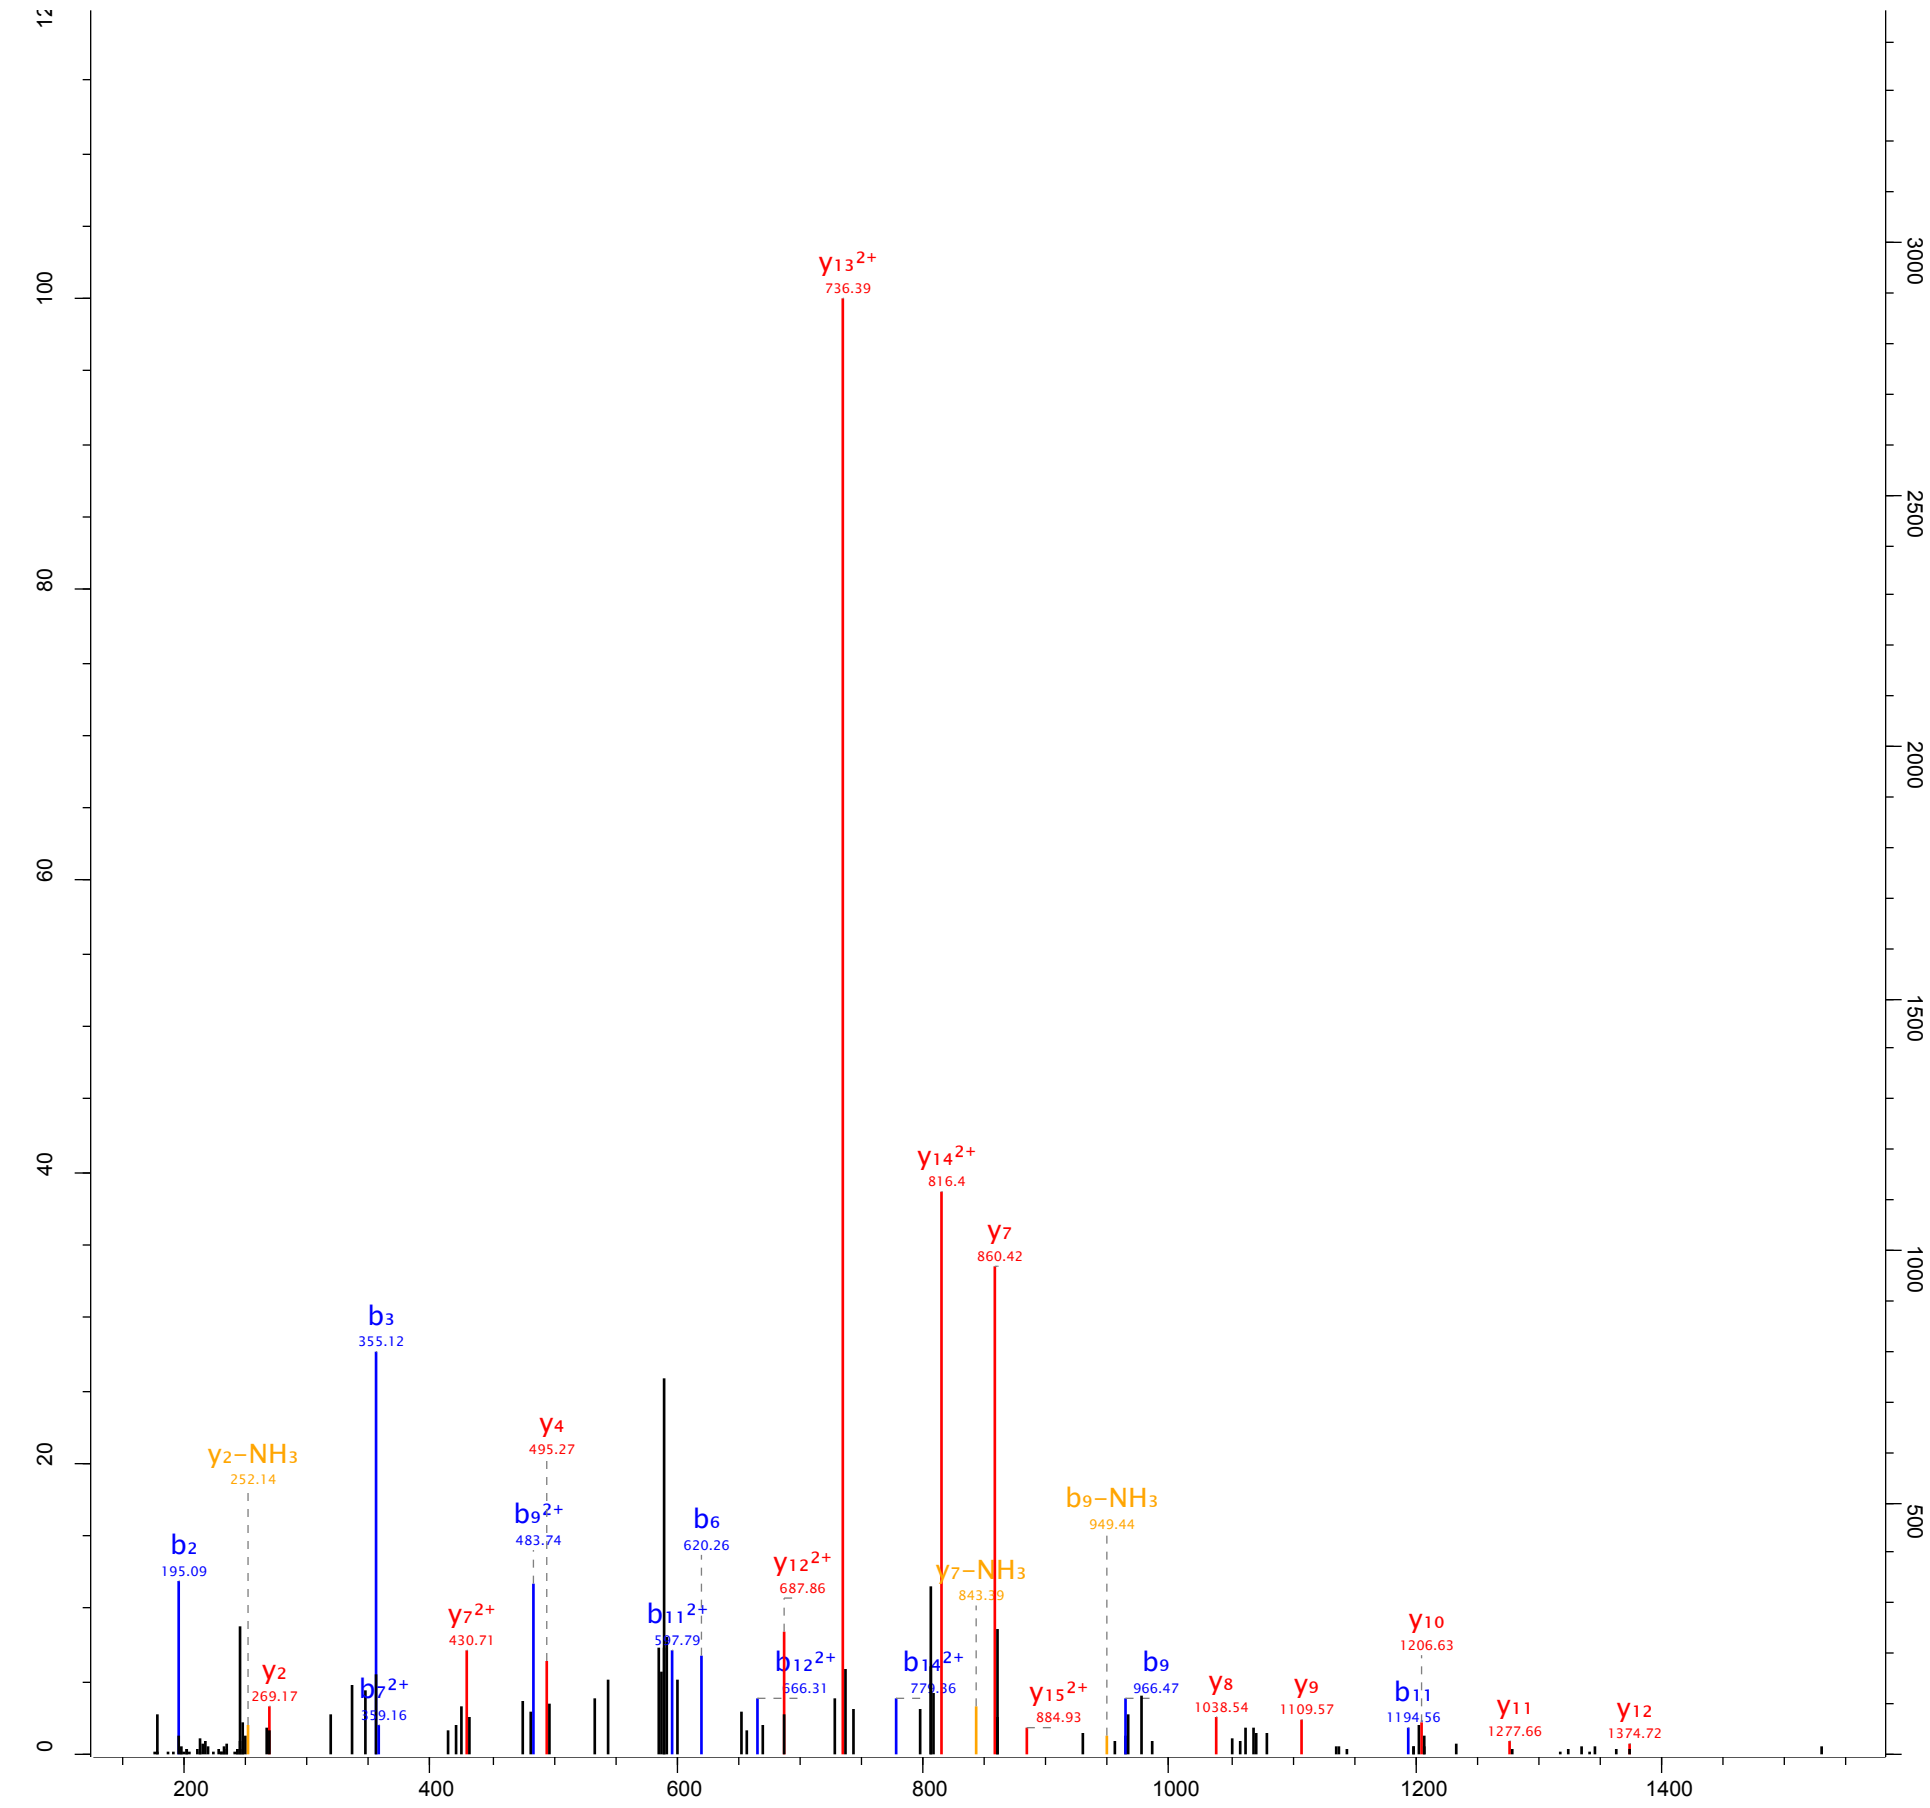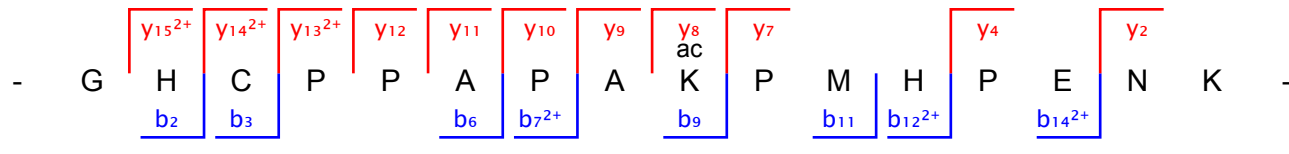

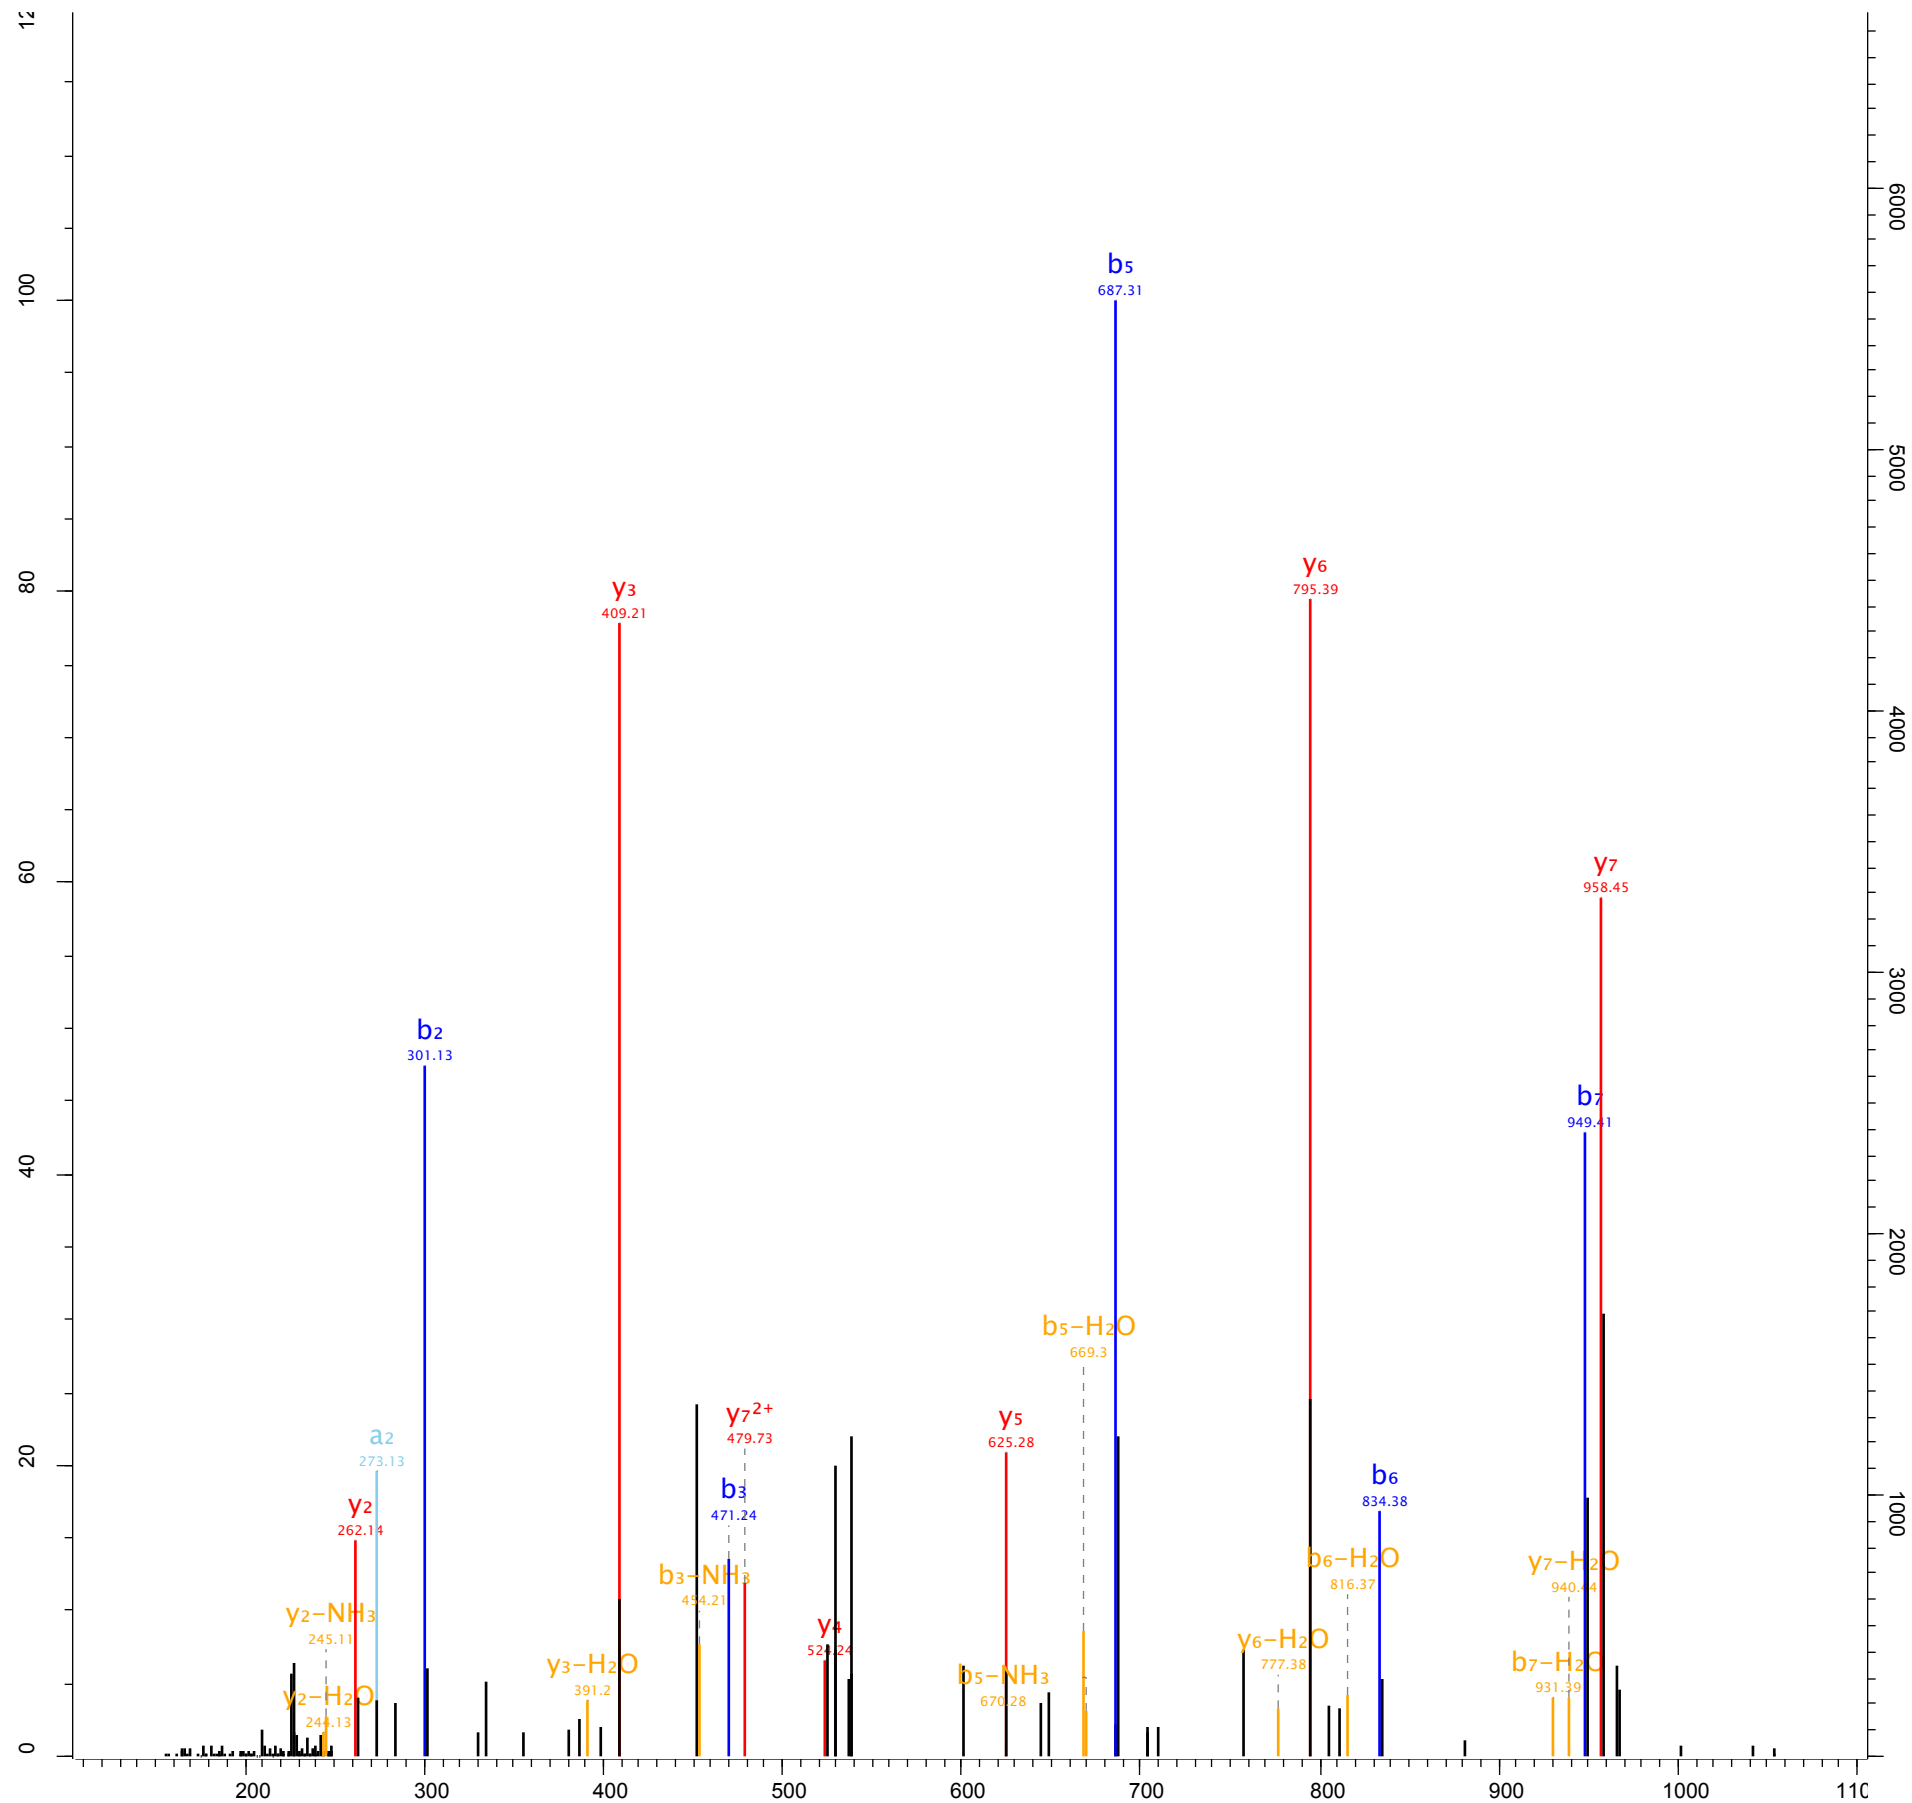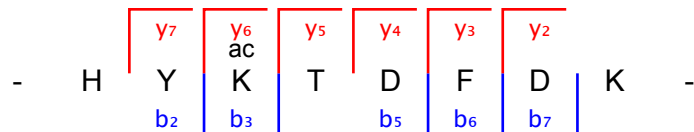

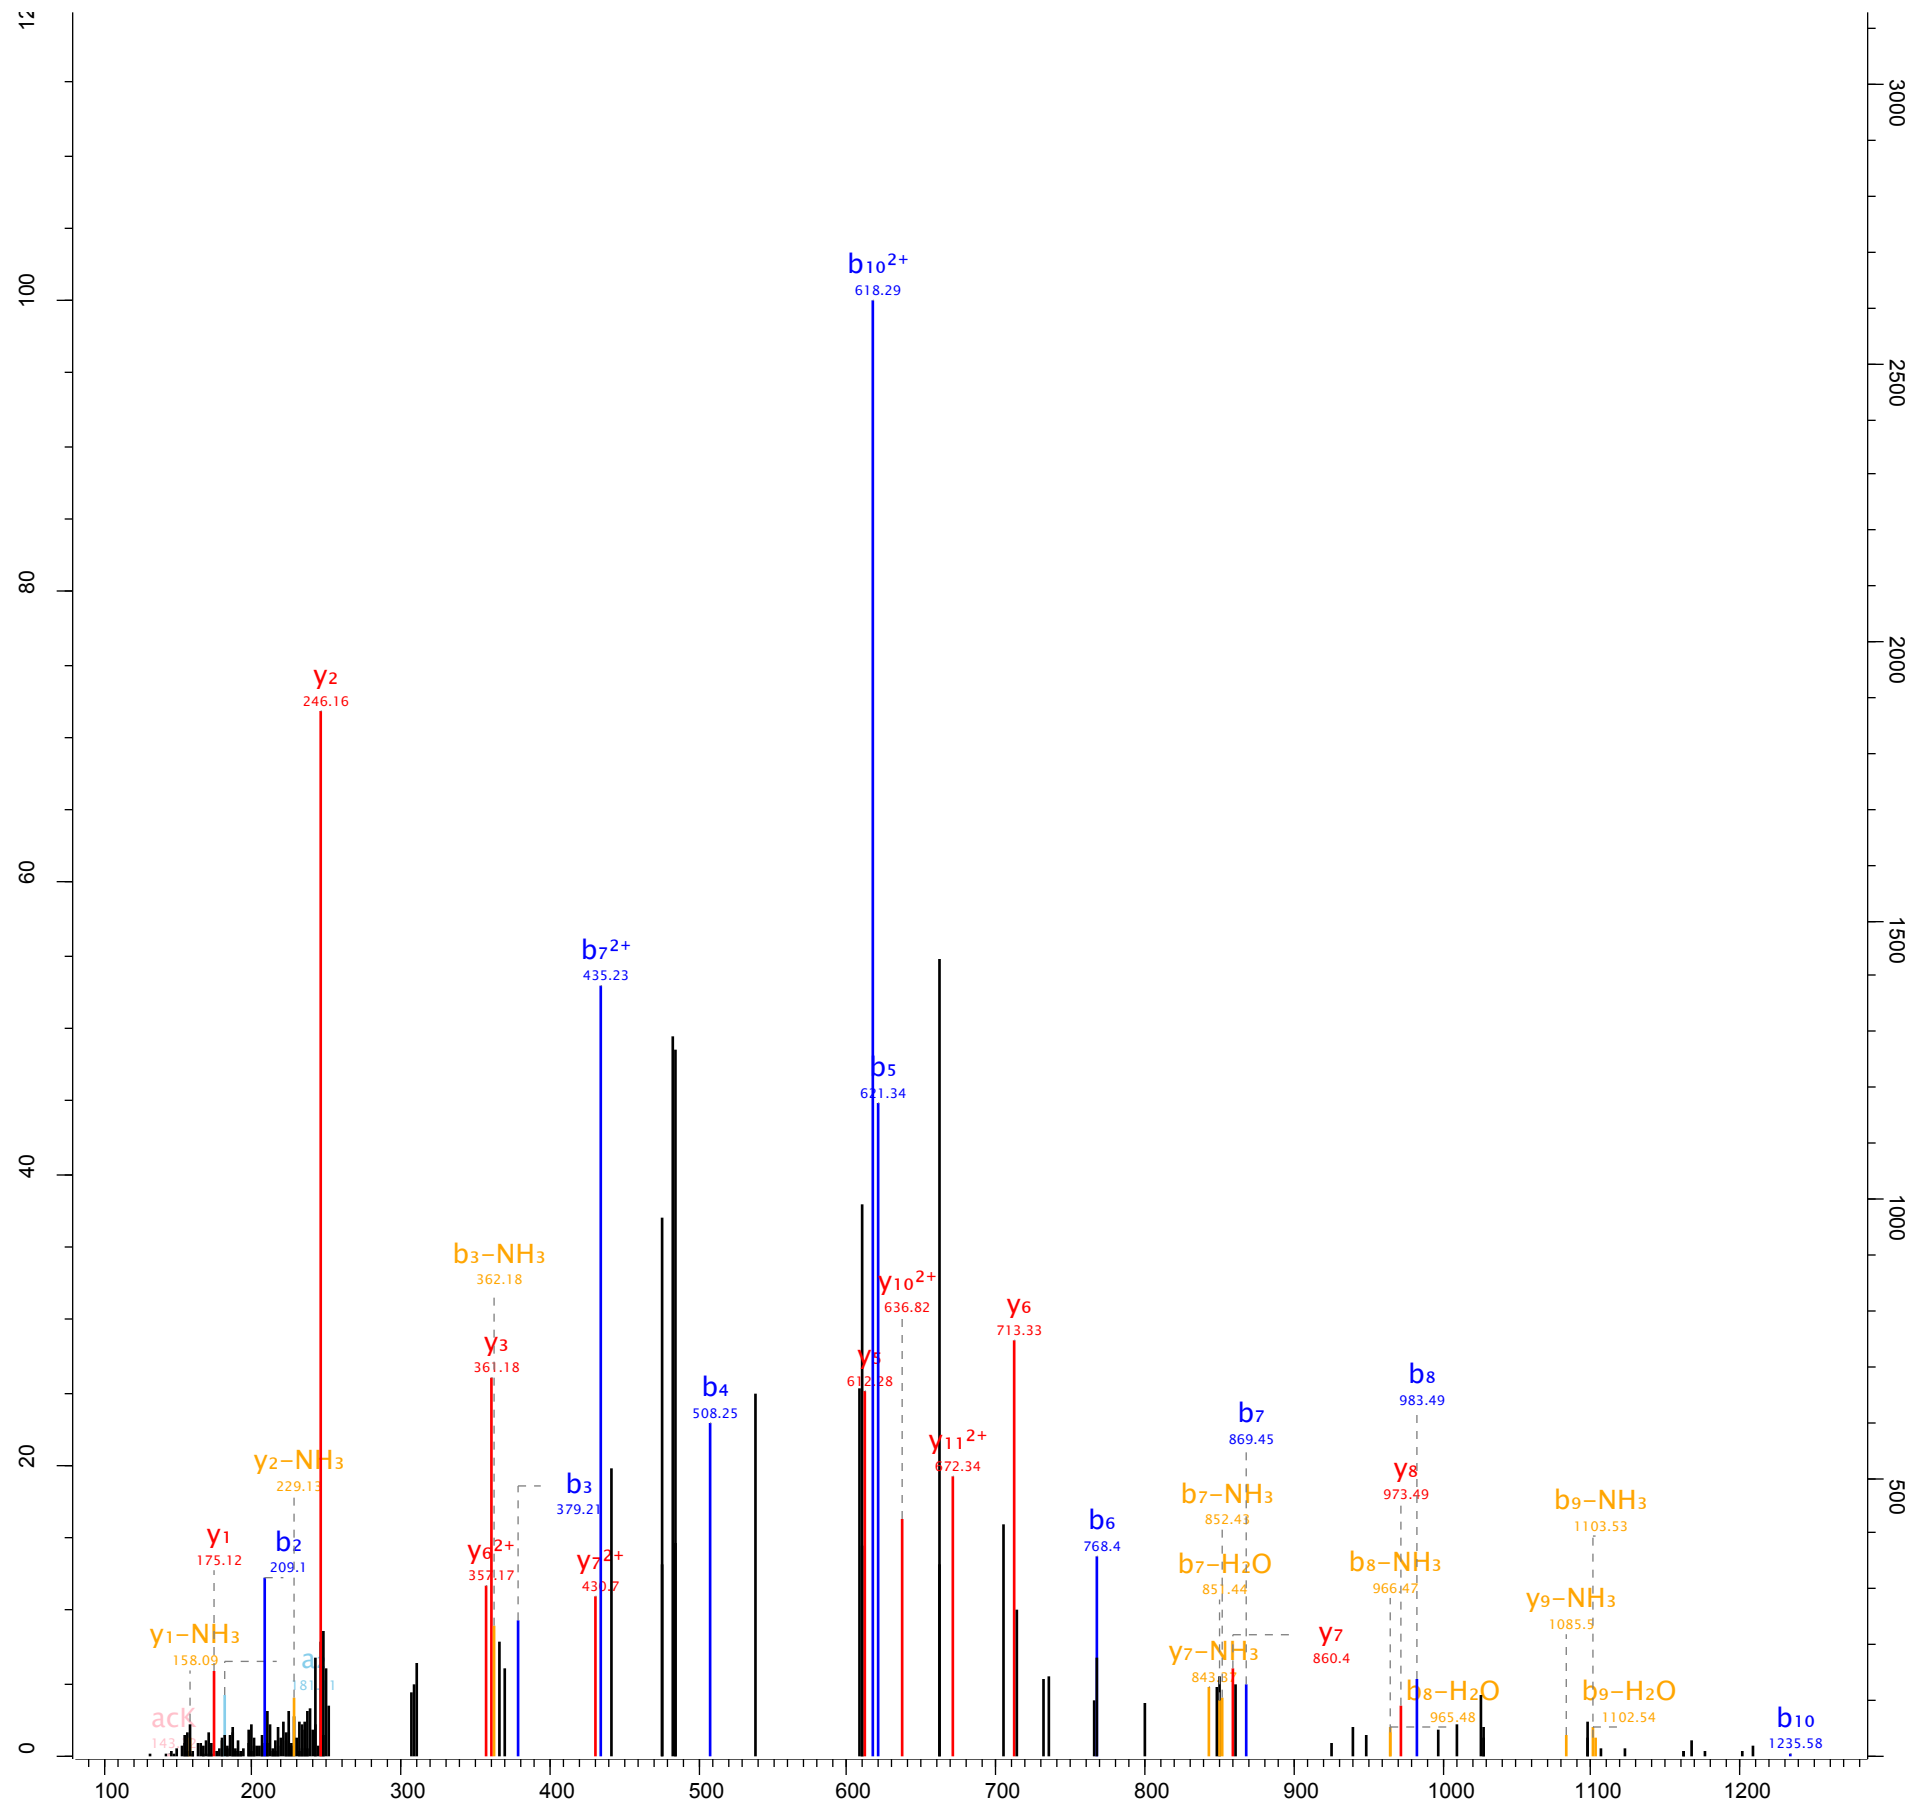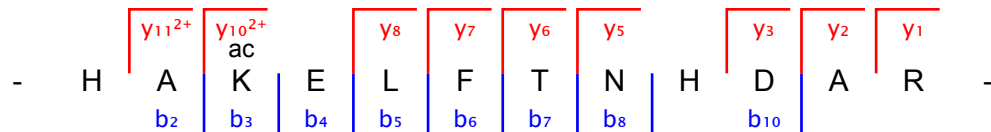

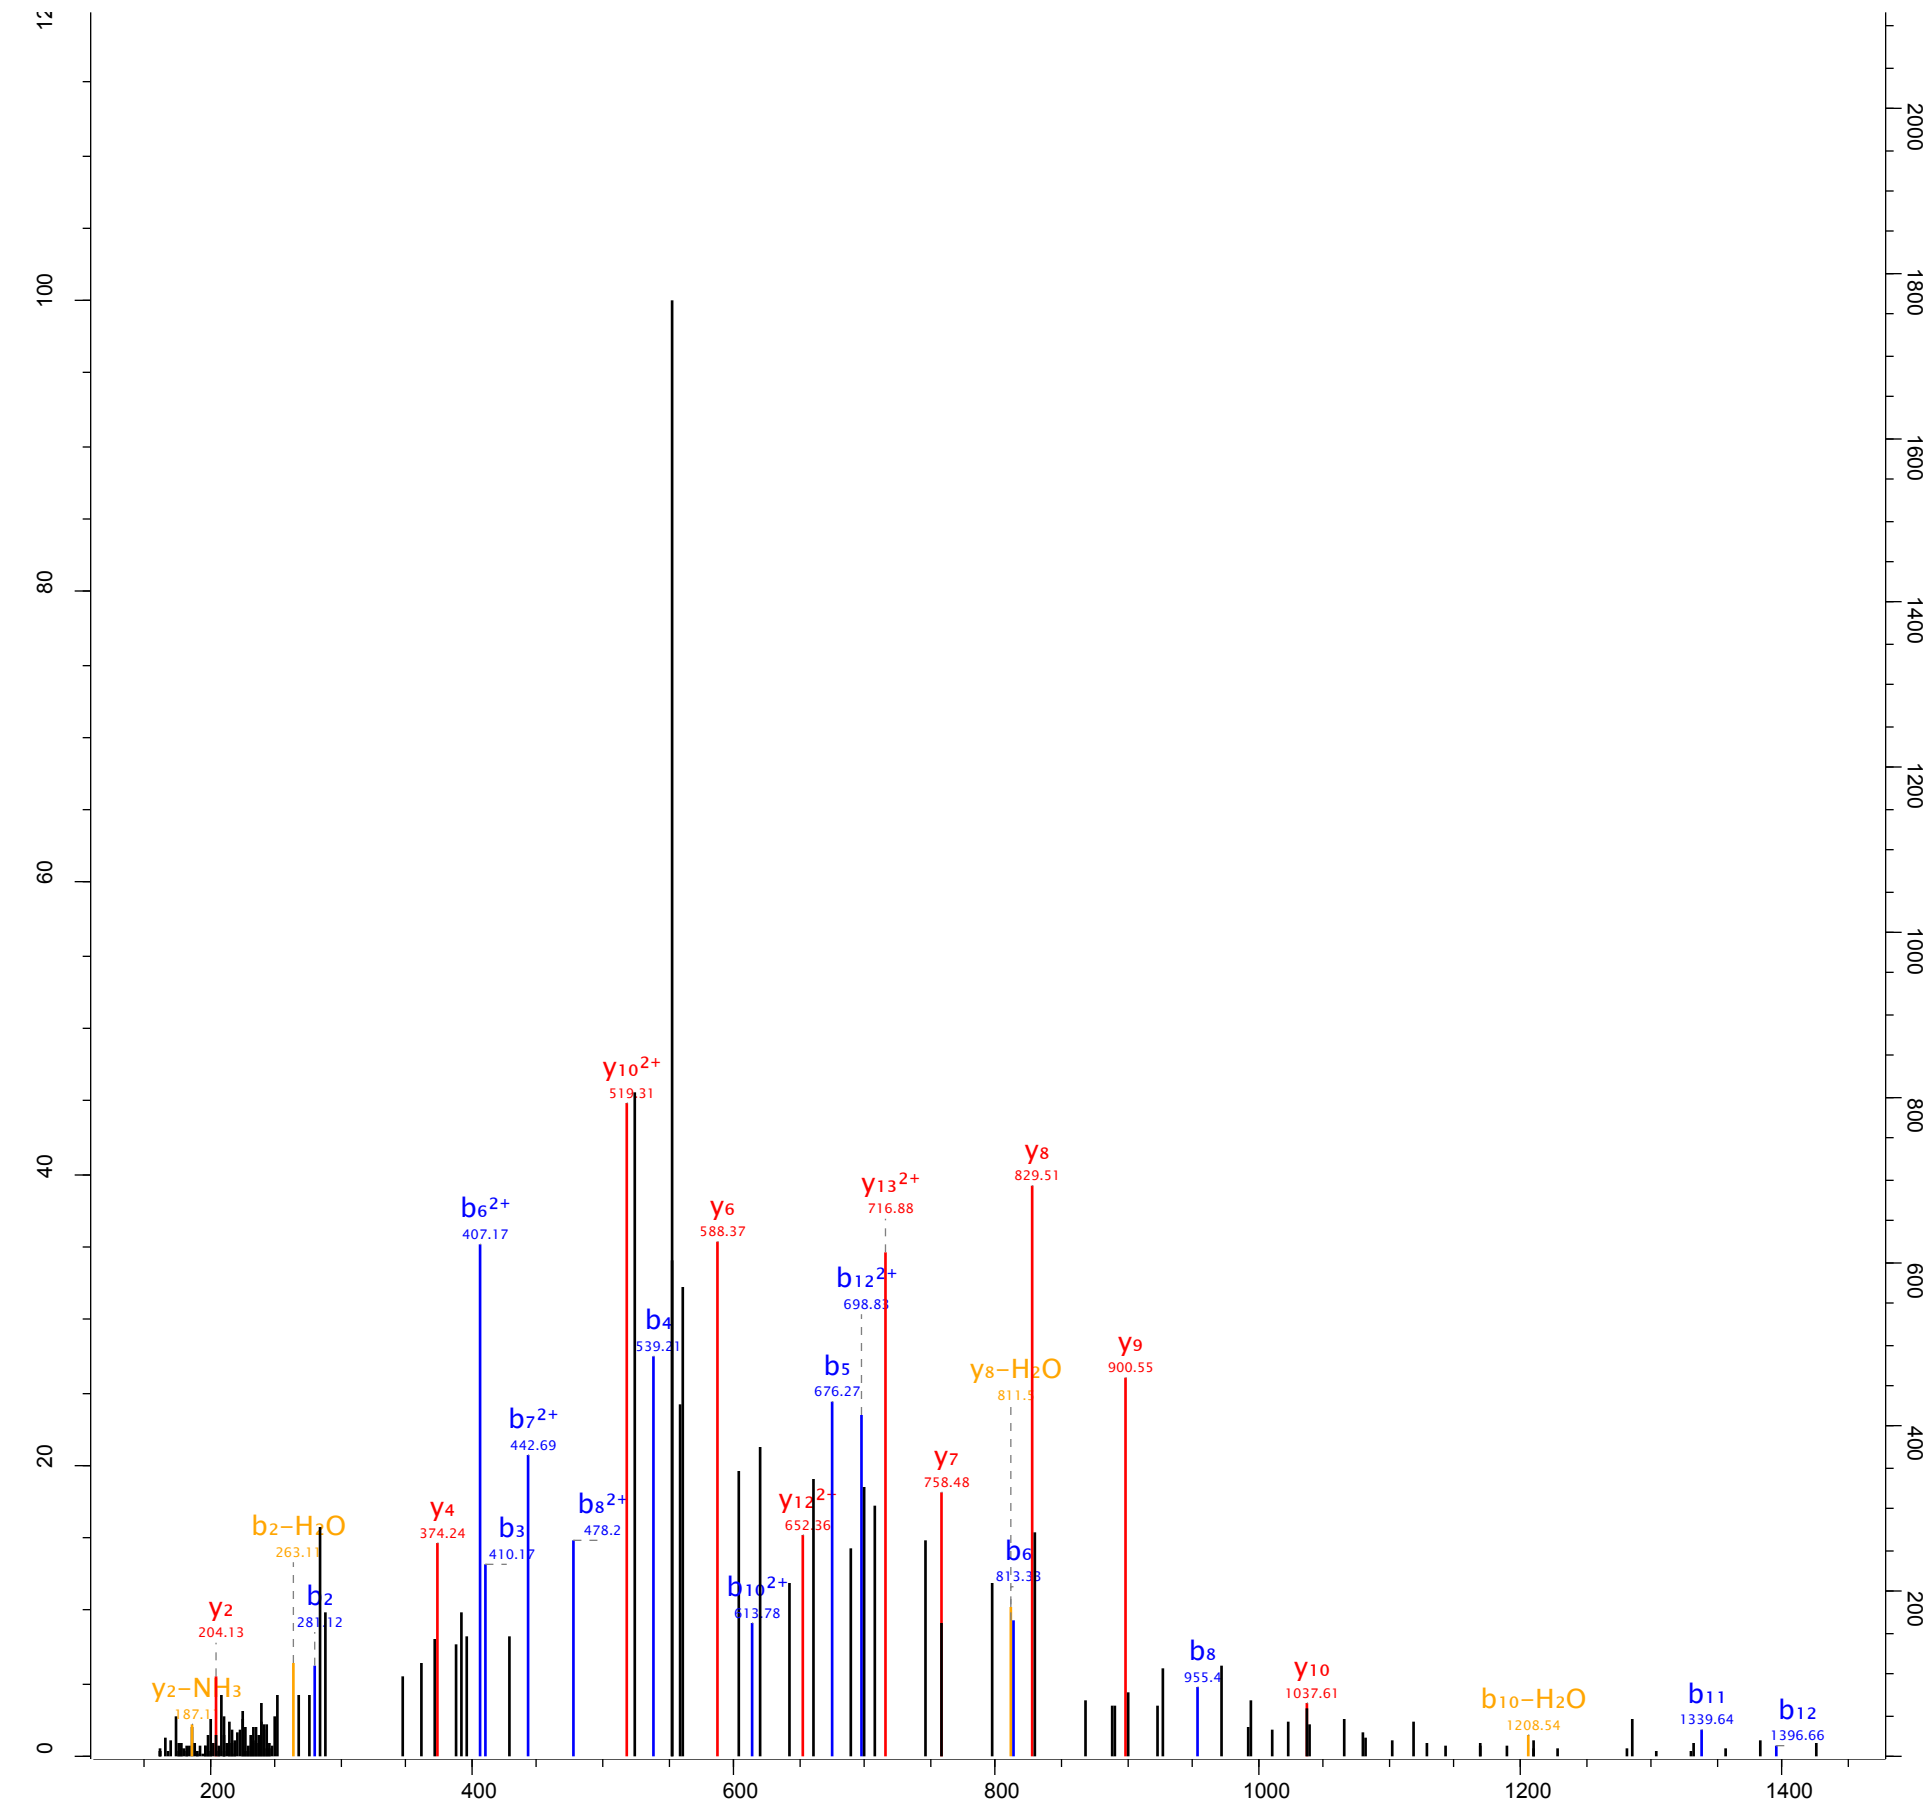

ac  
- T H E E H H A A K T L G I G K -

Fragmentation mapping (b and y ions):

- b<sub>2</sub> (under H)
- b<sub>3</sub> (under E)
- b<sub>4</sub> (under E)
- b<sub>5</sub> (under H)
- b<sub>6</sub> (under H)
- b<sub>7</sub><sup>2+</sup> (under A)
- b<sub>8</sub> (under A)
- b<sub>10</sub><sup>2+</sup> (under T)
- b<sub>11</sub> (under L)
- b<sub>12</sub> (under G)
- y<sub>2</sub> (above G)
- y<sub>4</sub> (above I)
- y<sub>6</sub> (above T)
- y<sub>7</sub> (above K)
- y<sub>8</sub> (above A)
- y<sub>9</sub> (above A)
- y<sub>10</sub> (above H)
- y<sub>12</sub><sup>2+</sup> (above E)
- y<sub>13</sub><sup>2+</sup> (above E)



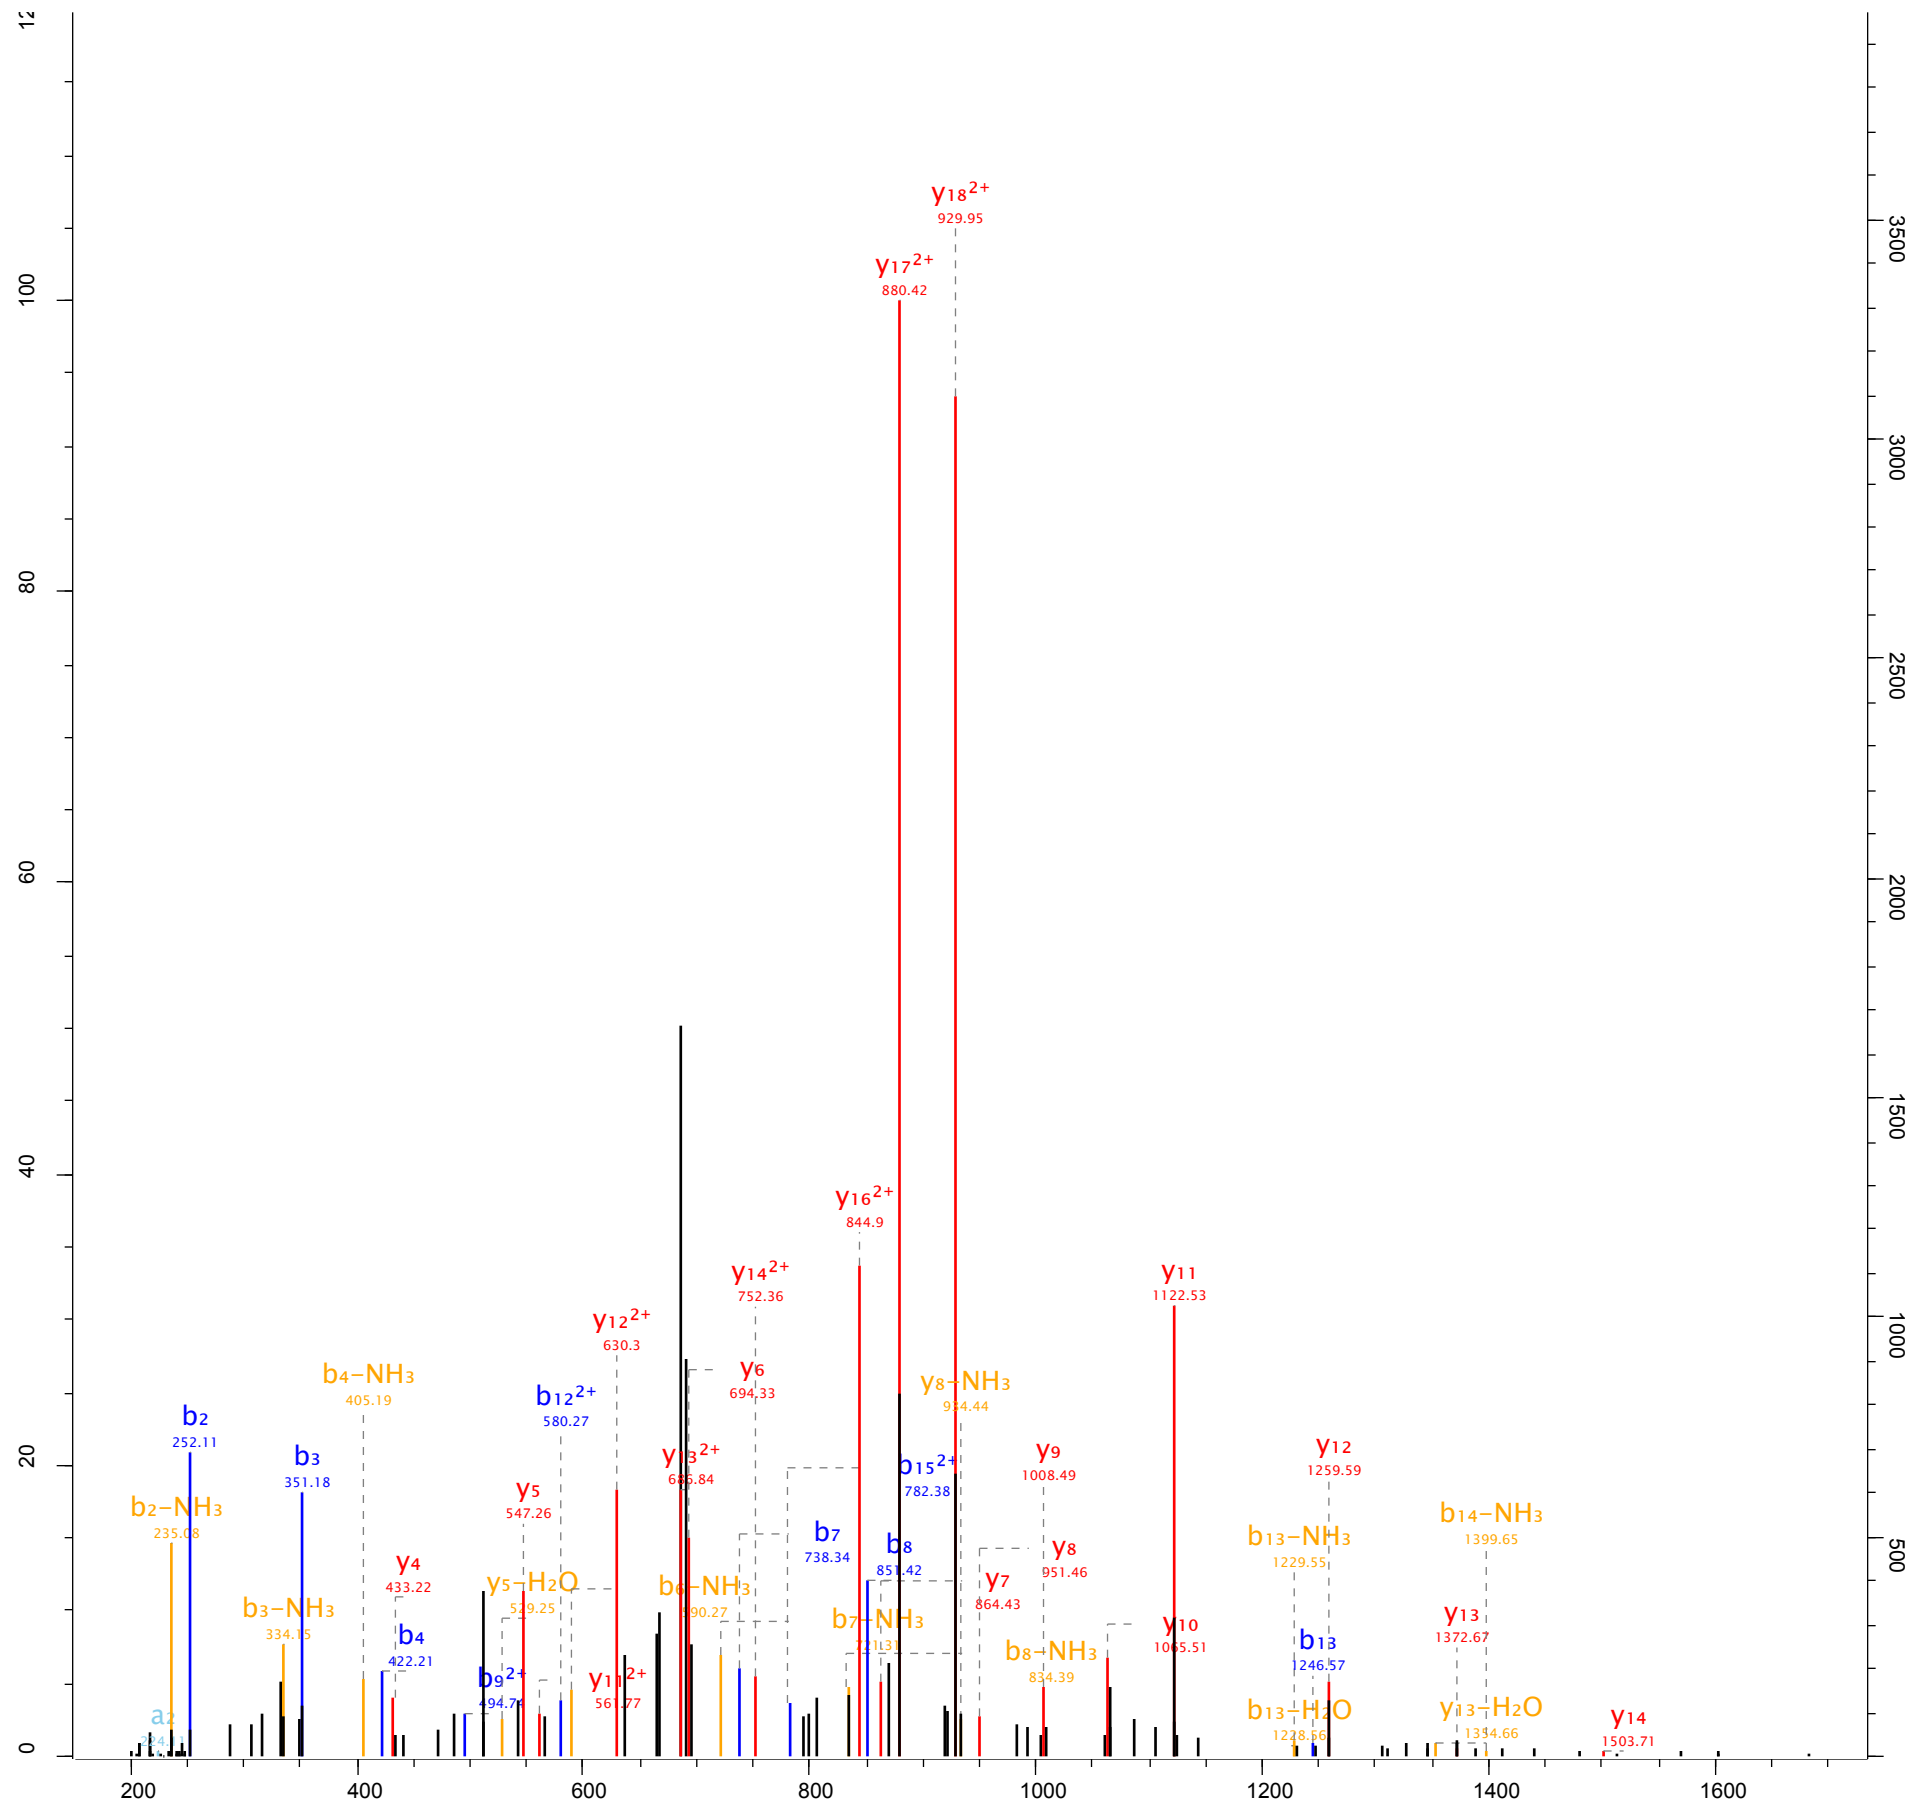

- N H V A G Q M L H G G S K F N S G N R -

b<sub>2</sub>
b<sub>3</sub>
b<sub>4</sub>
b<sub>7</sub>
b<sub>8</sub>
b<sub>9</sub><sup>2+</sup>
b<sub>12</sub><sup>2+</sup>
b<sub>13</sub>
b<sub>15</sub><sup>2+</sup>
y<sub>4</sub>
y<sub>5</sub>
y<sub>6</sub>
y<sub>7</sub>
y<sub>8</sub>
y<sub>9</sub>
y<sub>10</sub>
y<sub>11</sub>
y<sub>12</sub>
y<sub>13</sub>
y<sub>14</sub>
y<sub>16</sub><sup>2+</sup>
y<sub>17</sub><sup>2+</sup>
y<sub>18</sub><sup>2+</sup>

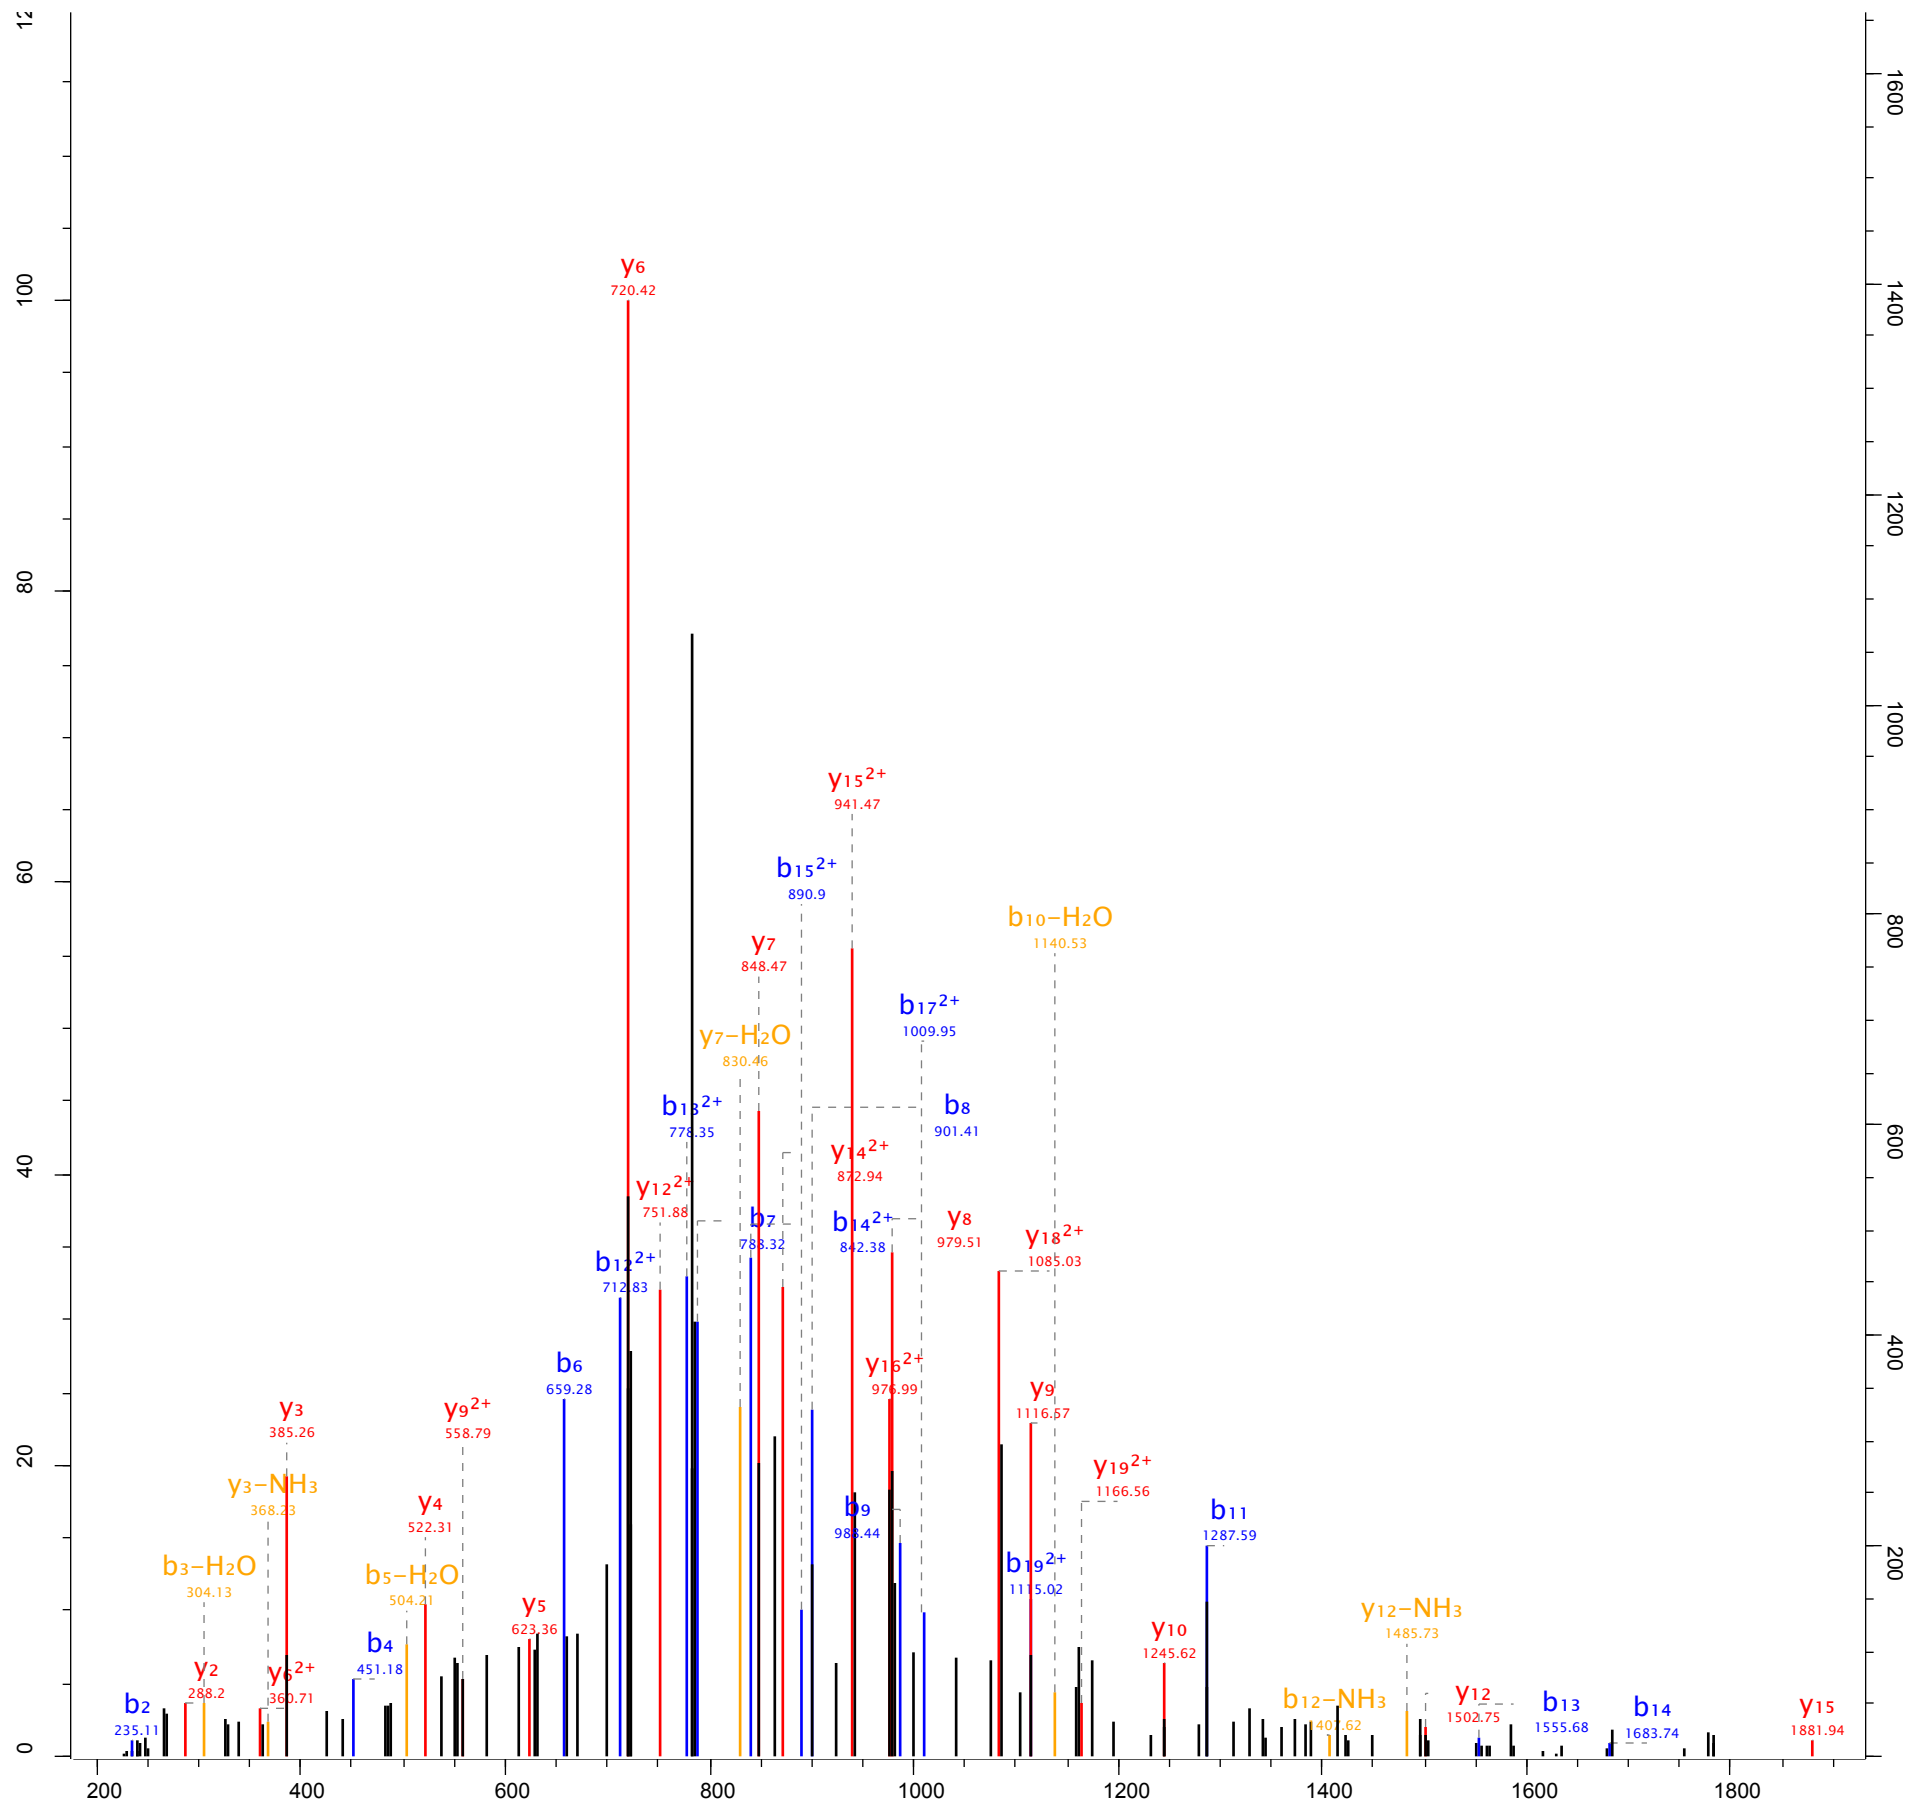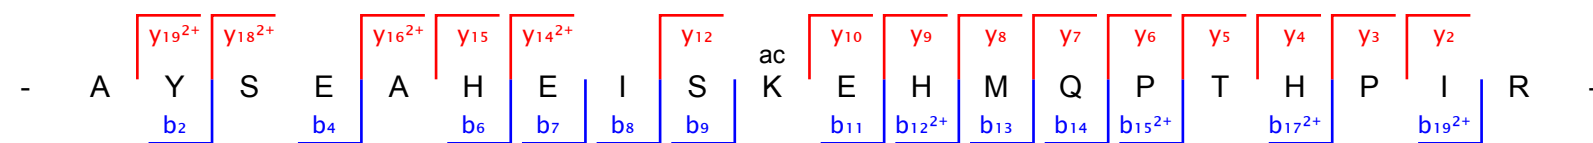

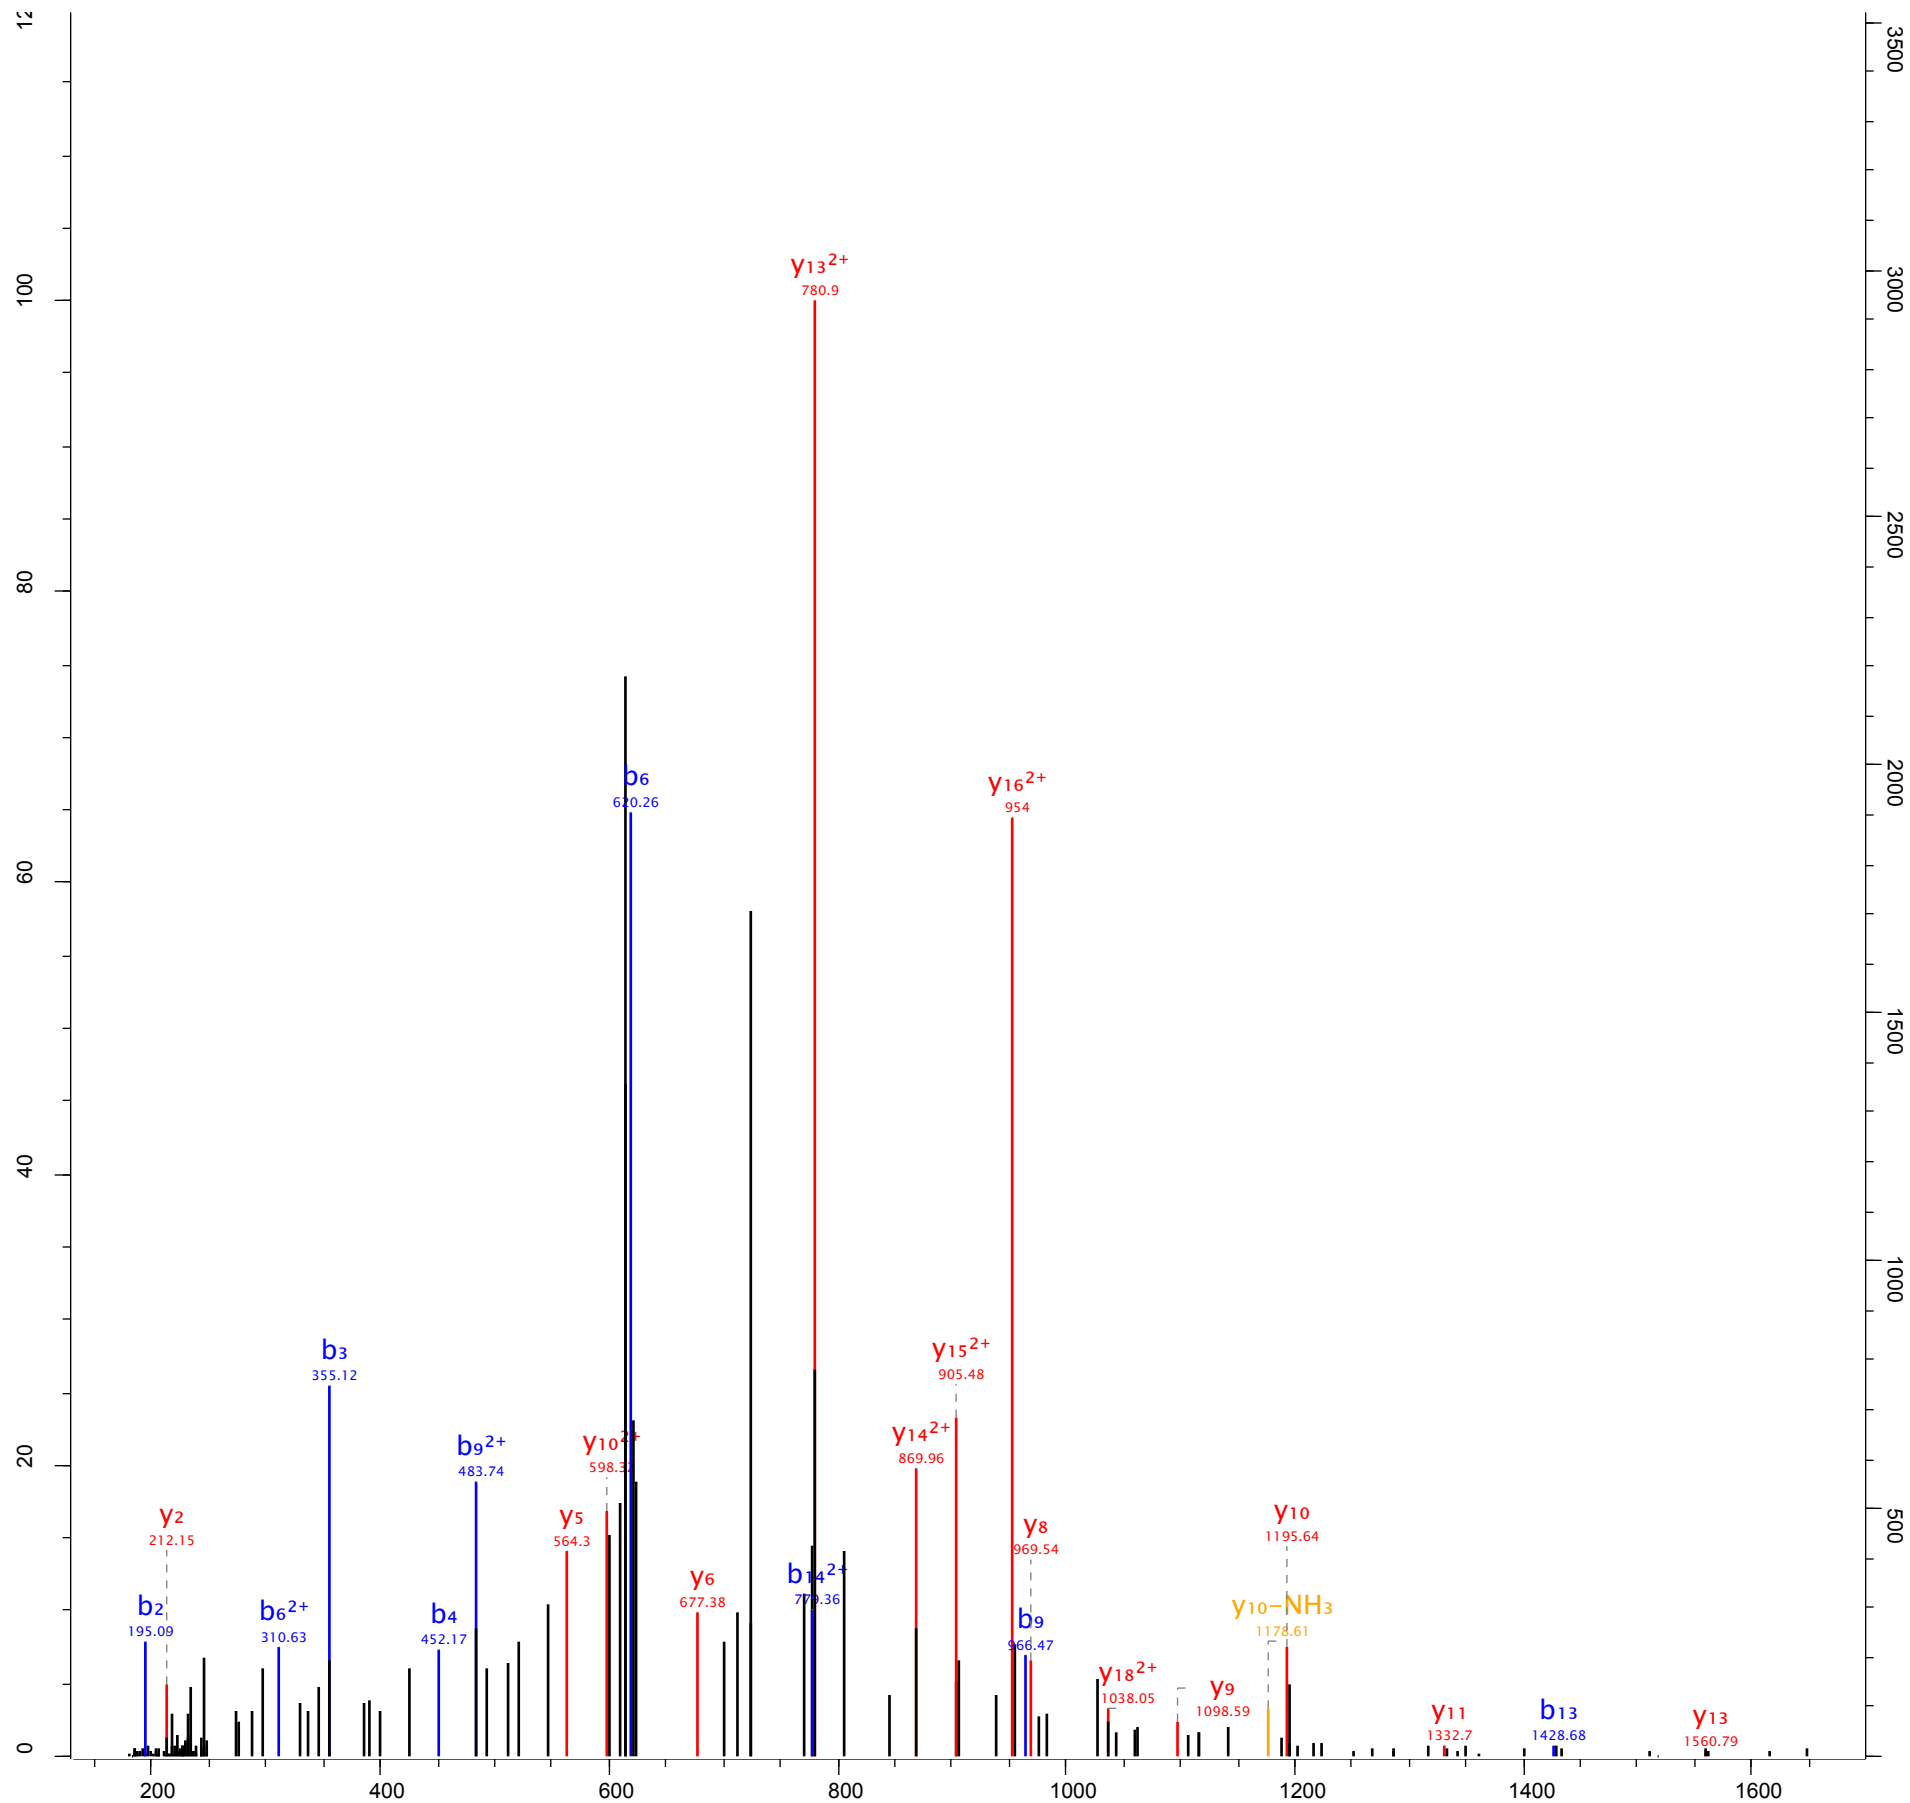

- G H C P P A P A K P M H P E N ac K L T N H G K -

Fragmentation mapping (b and y ions):

- $b_2$  (H),  $b_3$  (C),  $b_4$  (P),  $b_6$  (A),  $b_9$  (K),  $b_{13}$  (P),  $b_{14}^{2+}$  (E)
- $y_2$  (G),  $y_5$  (T),  $y_6$  (L),  $y_8$  (N),  $y_9$  (E),  $y_{10}$  (P),  $y_{11}$  (H),  $y_{13}$  (P),  $y_{14}^{2+}$  (K),  $y_{15}^{2+}$  (A),  $y_{16}^{2+}$  (P),  $y_{18}^{2+}$  (P)

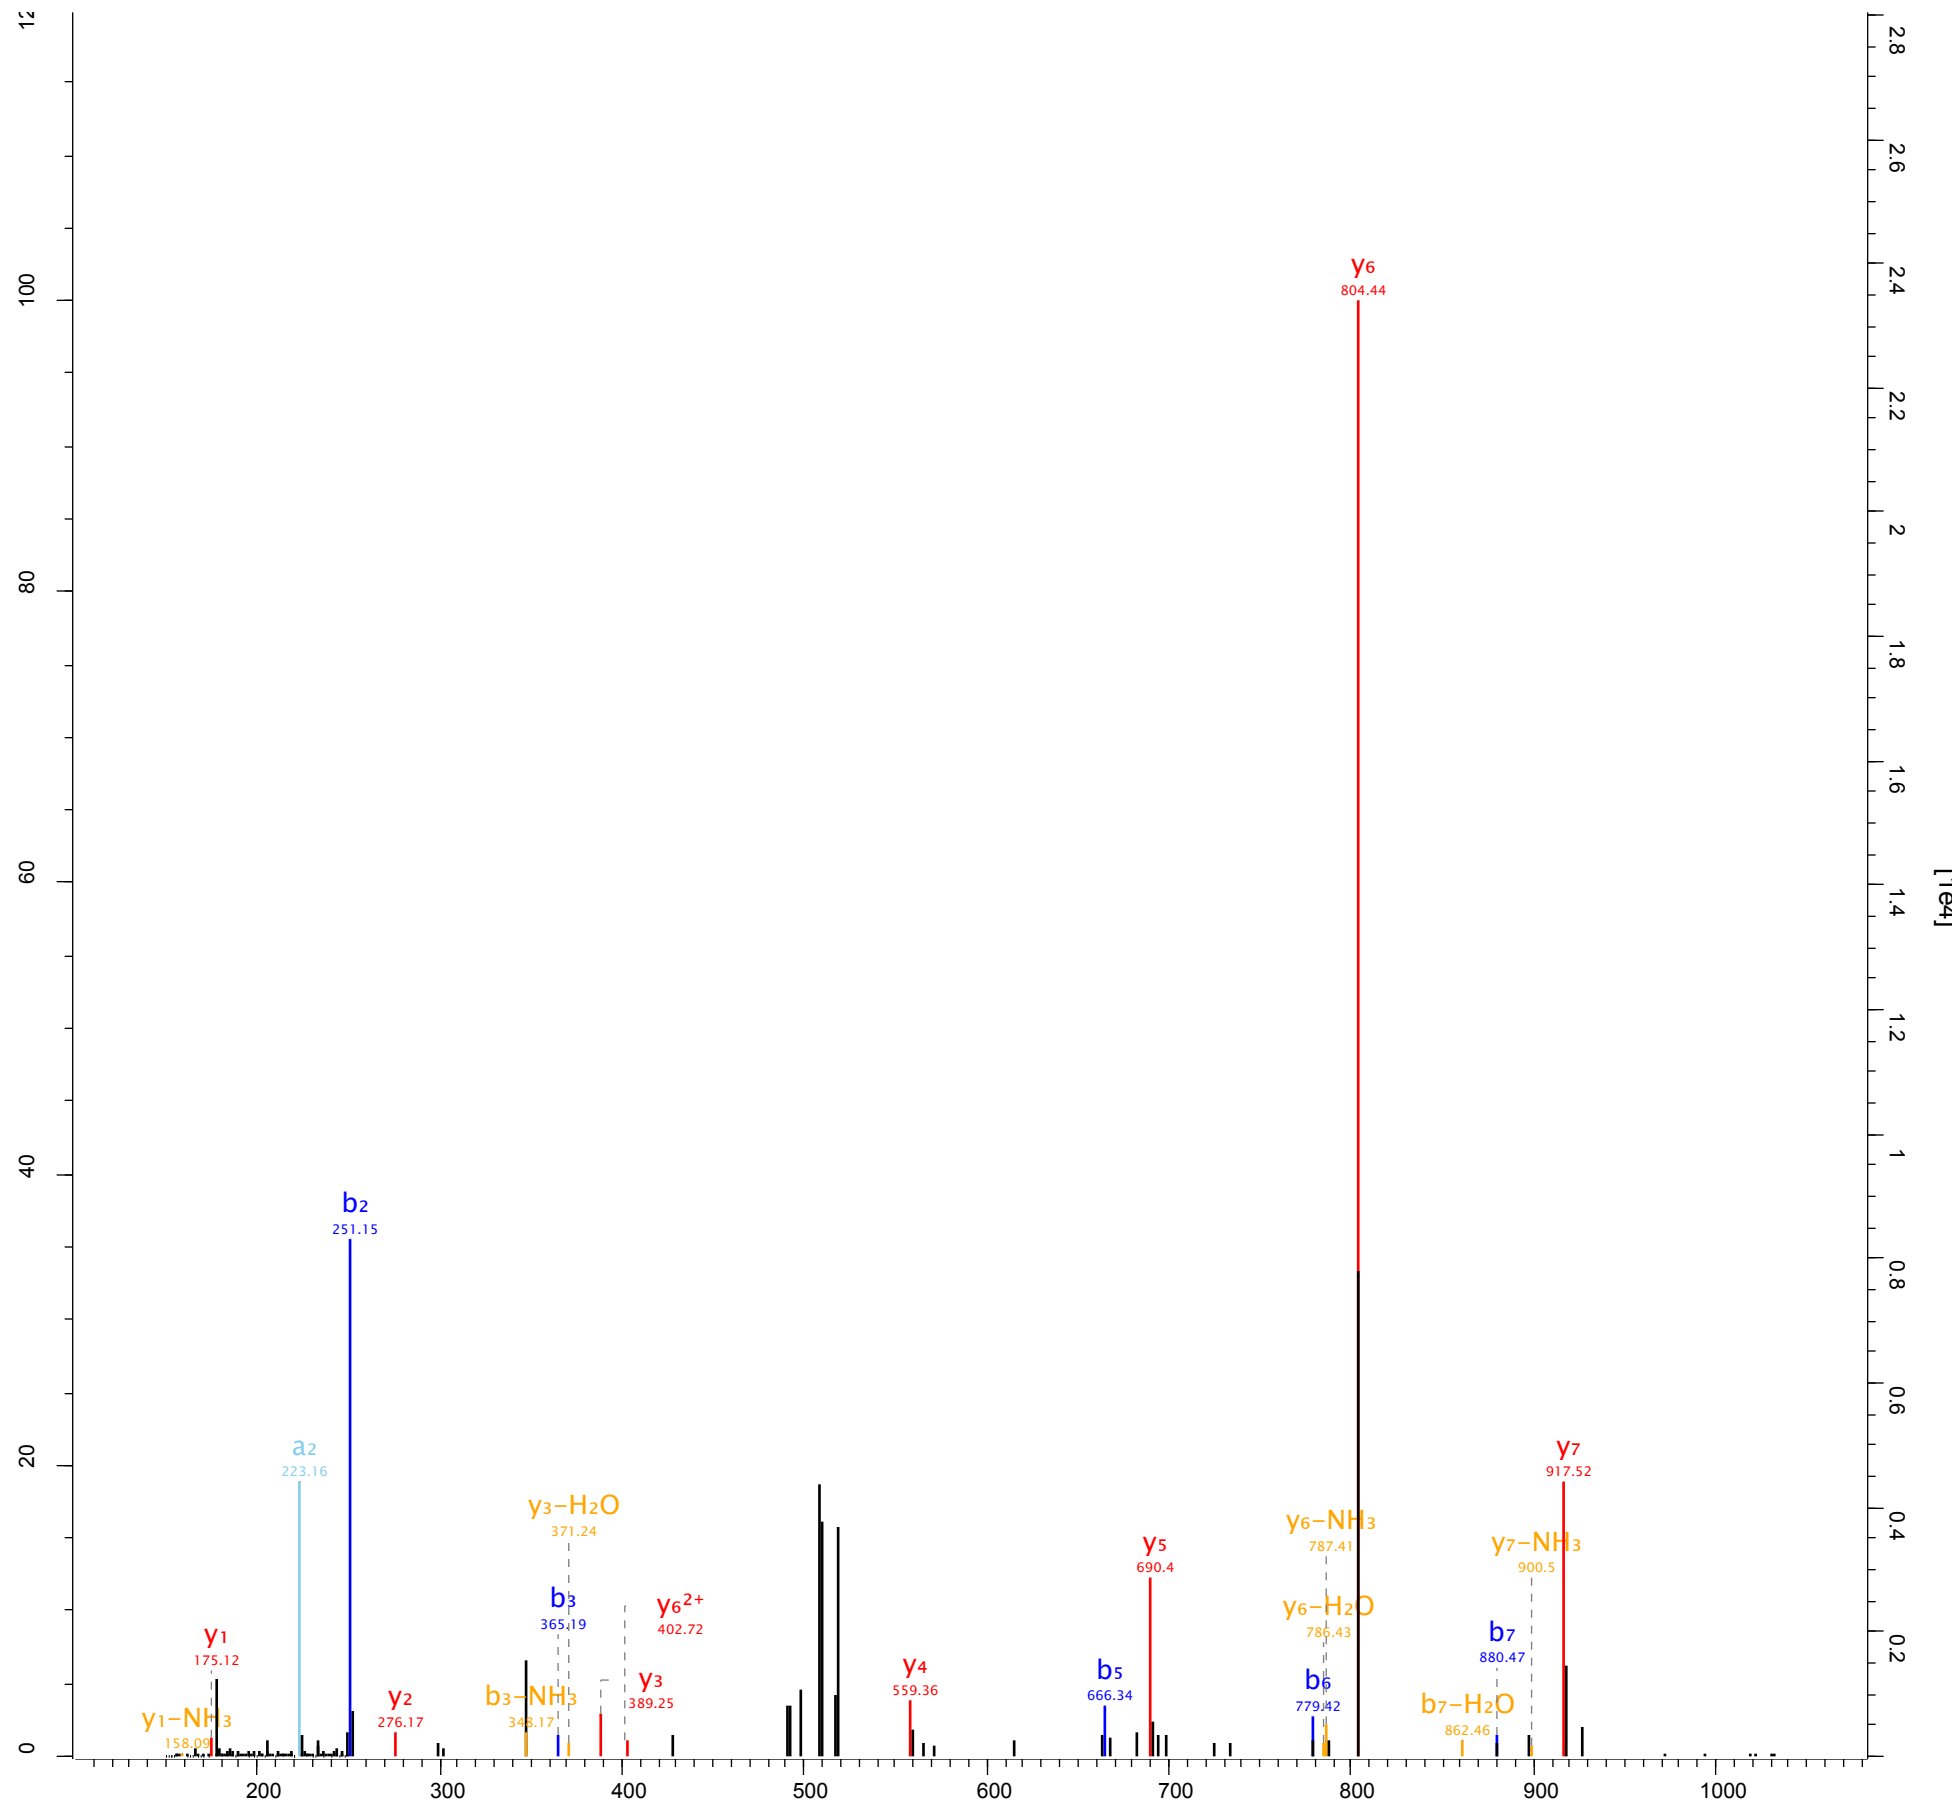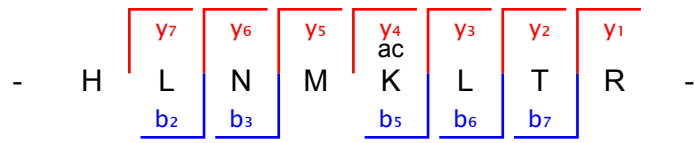

062513\_SCW\_II\_53\_11\_Vargas\_Enriched

14200

ITMS; CID

109.44

562.82

Cnn1

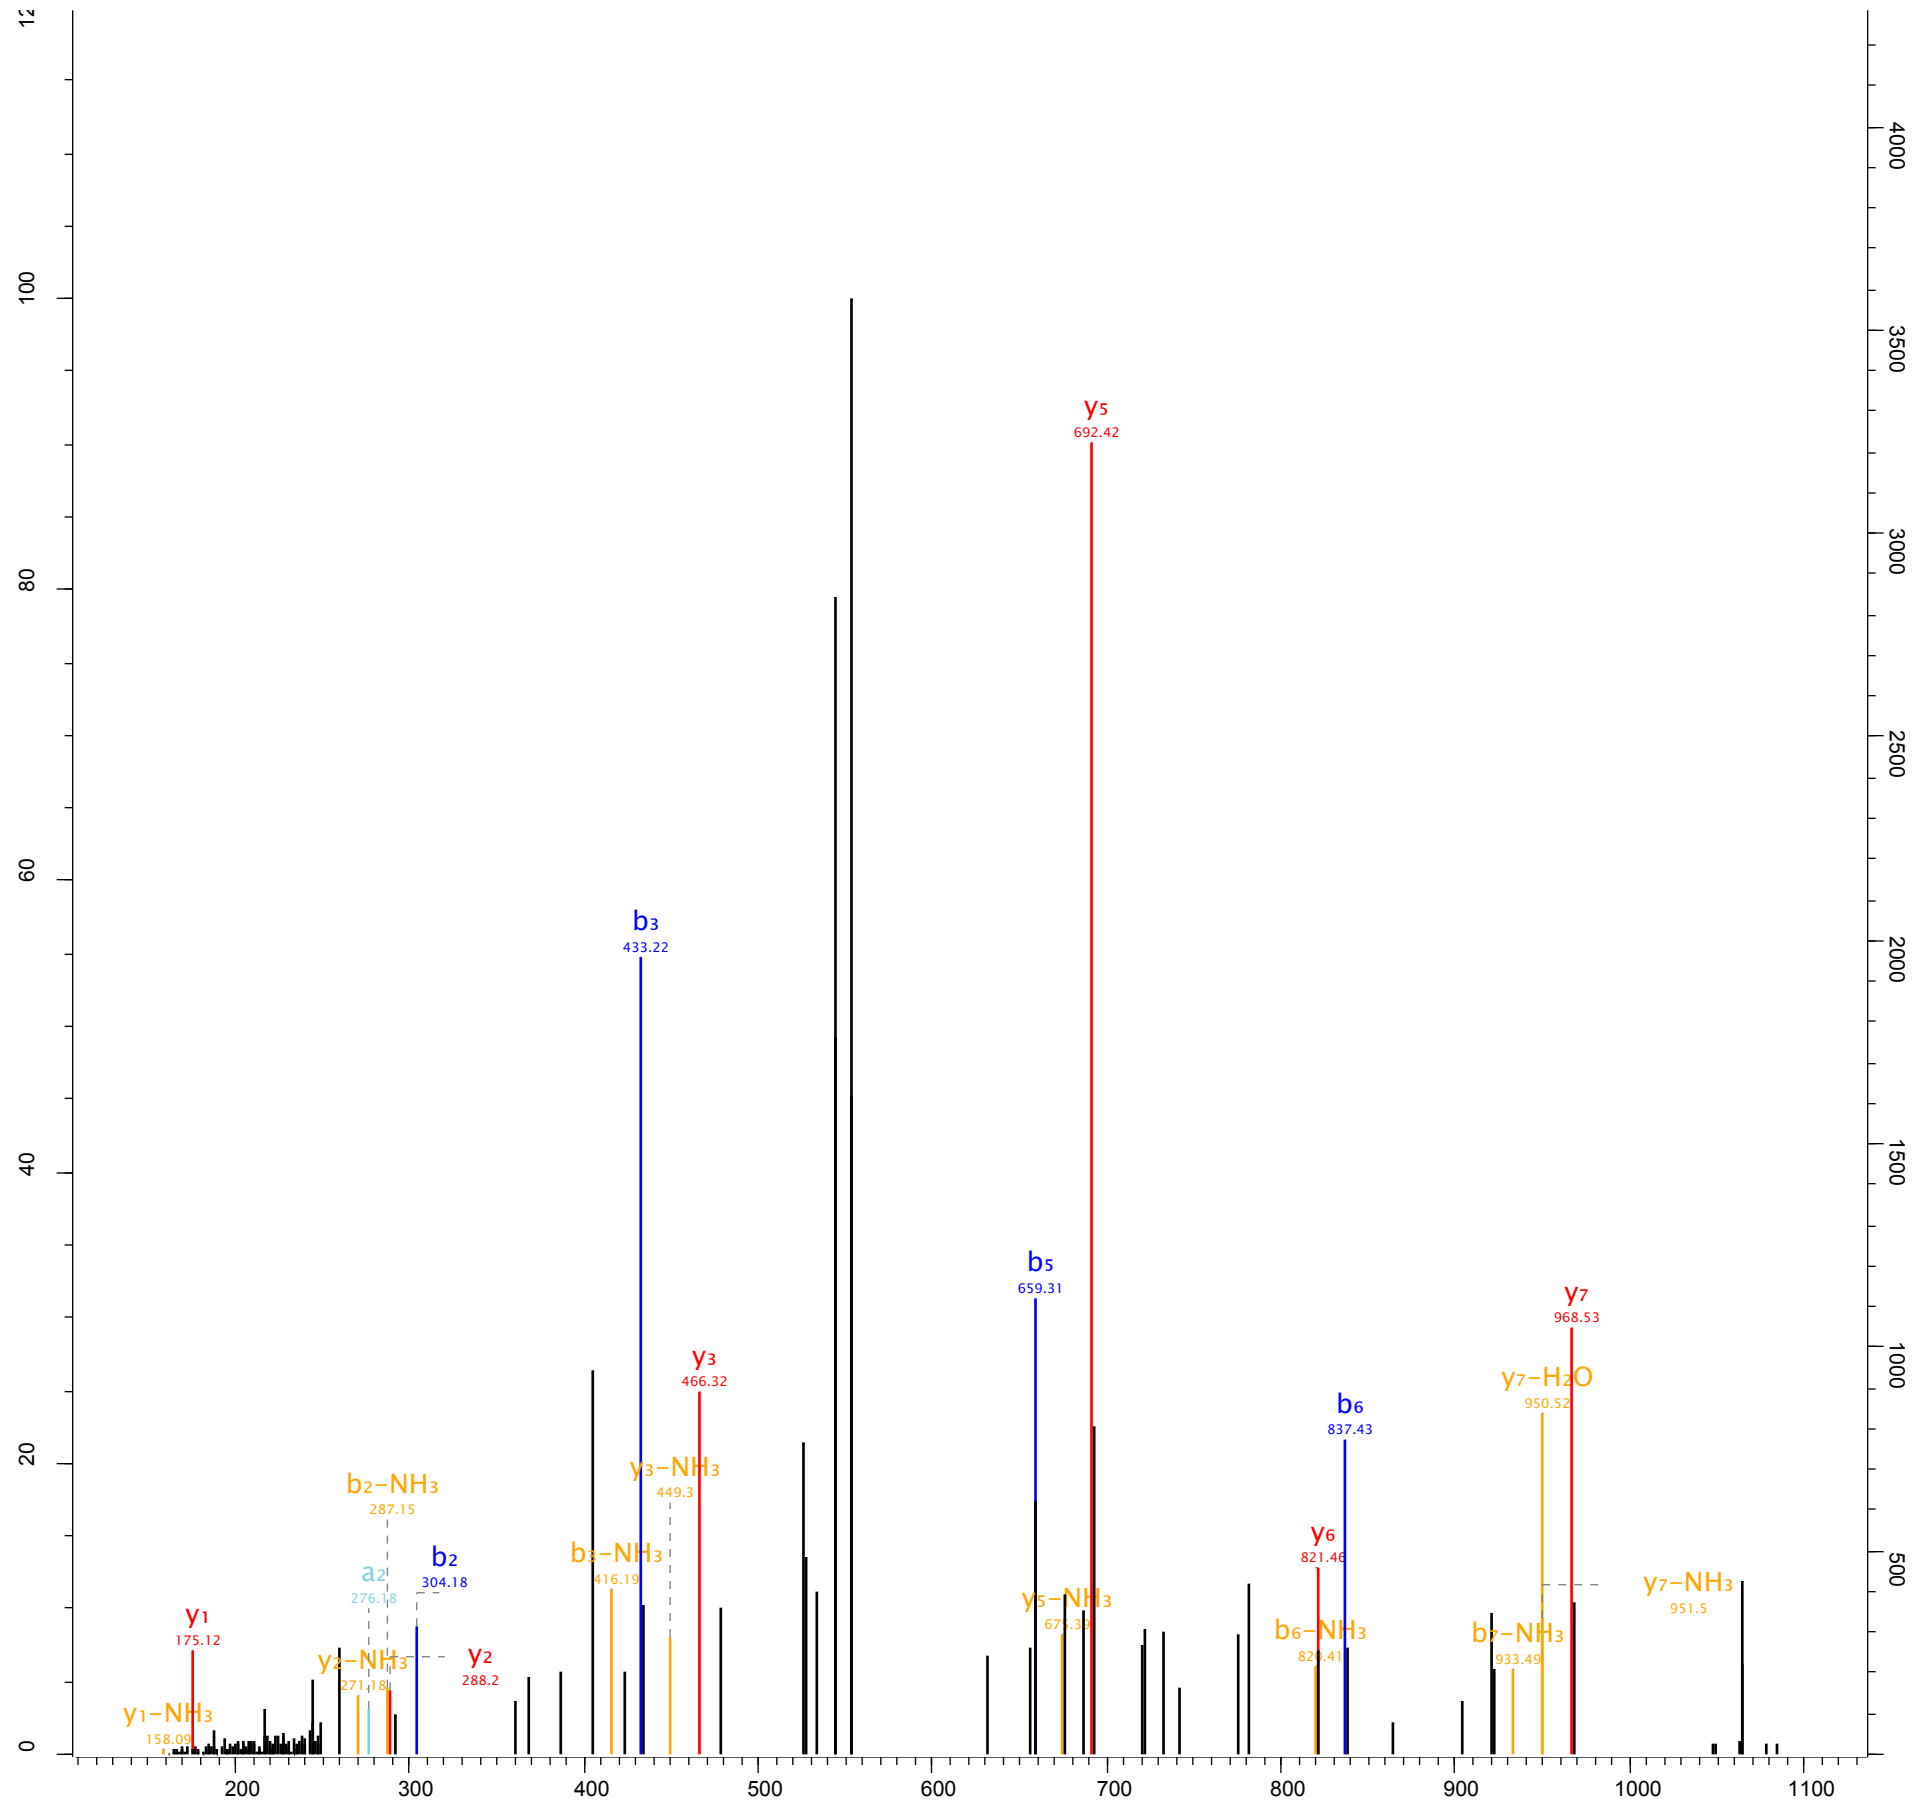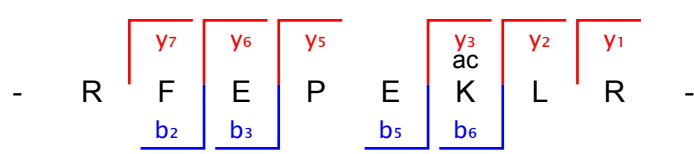

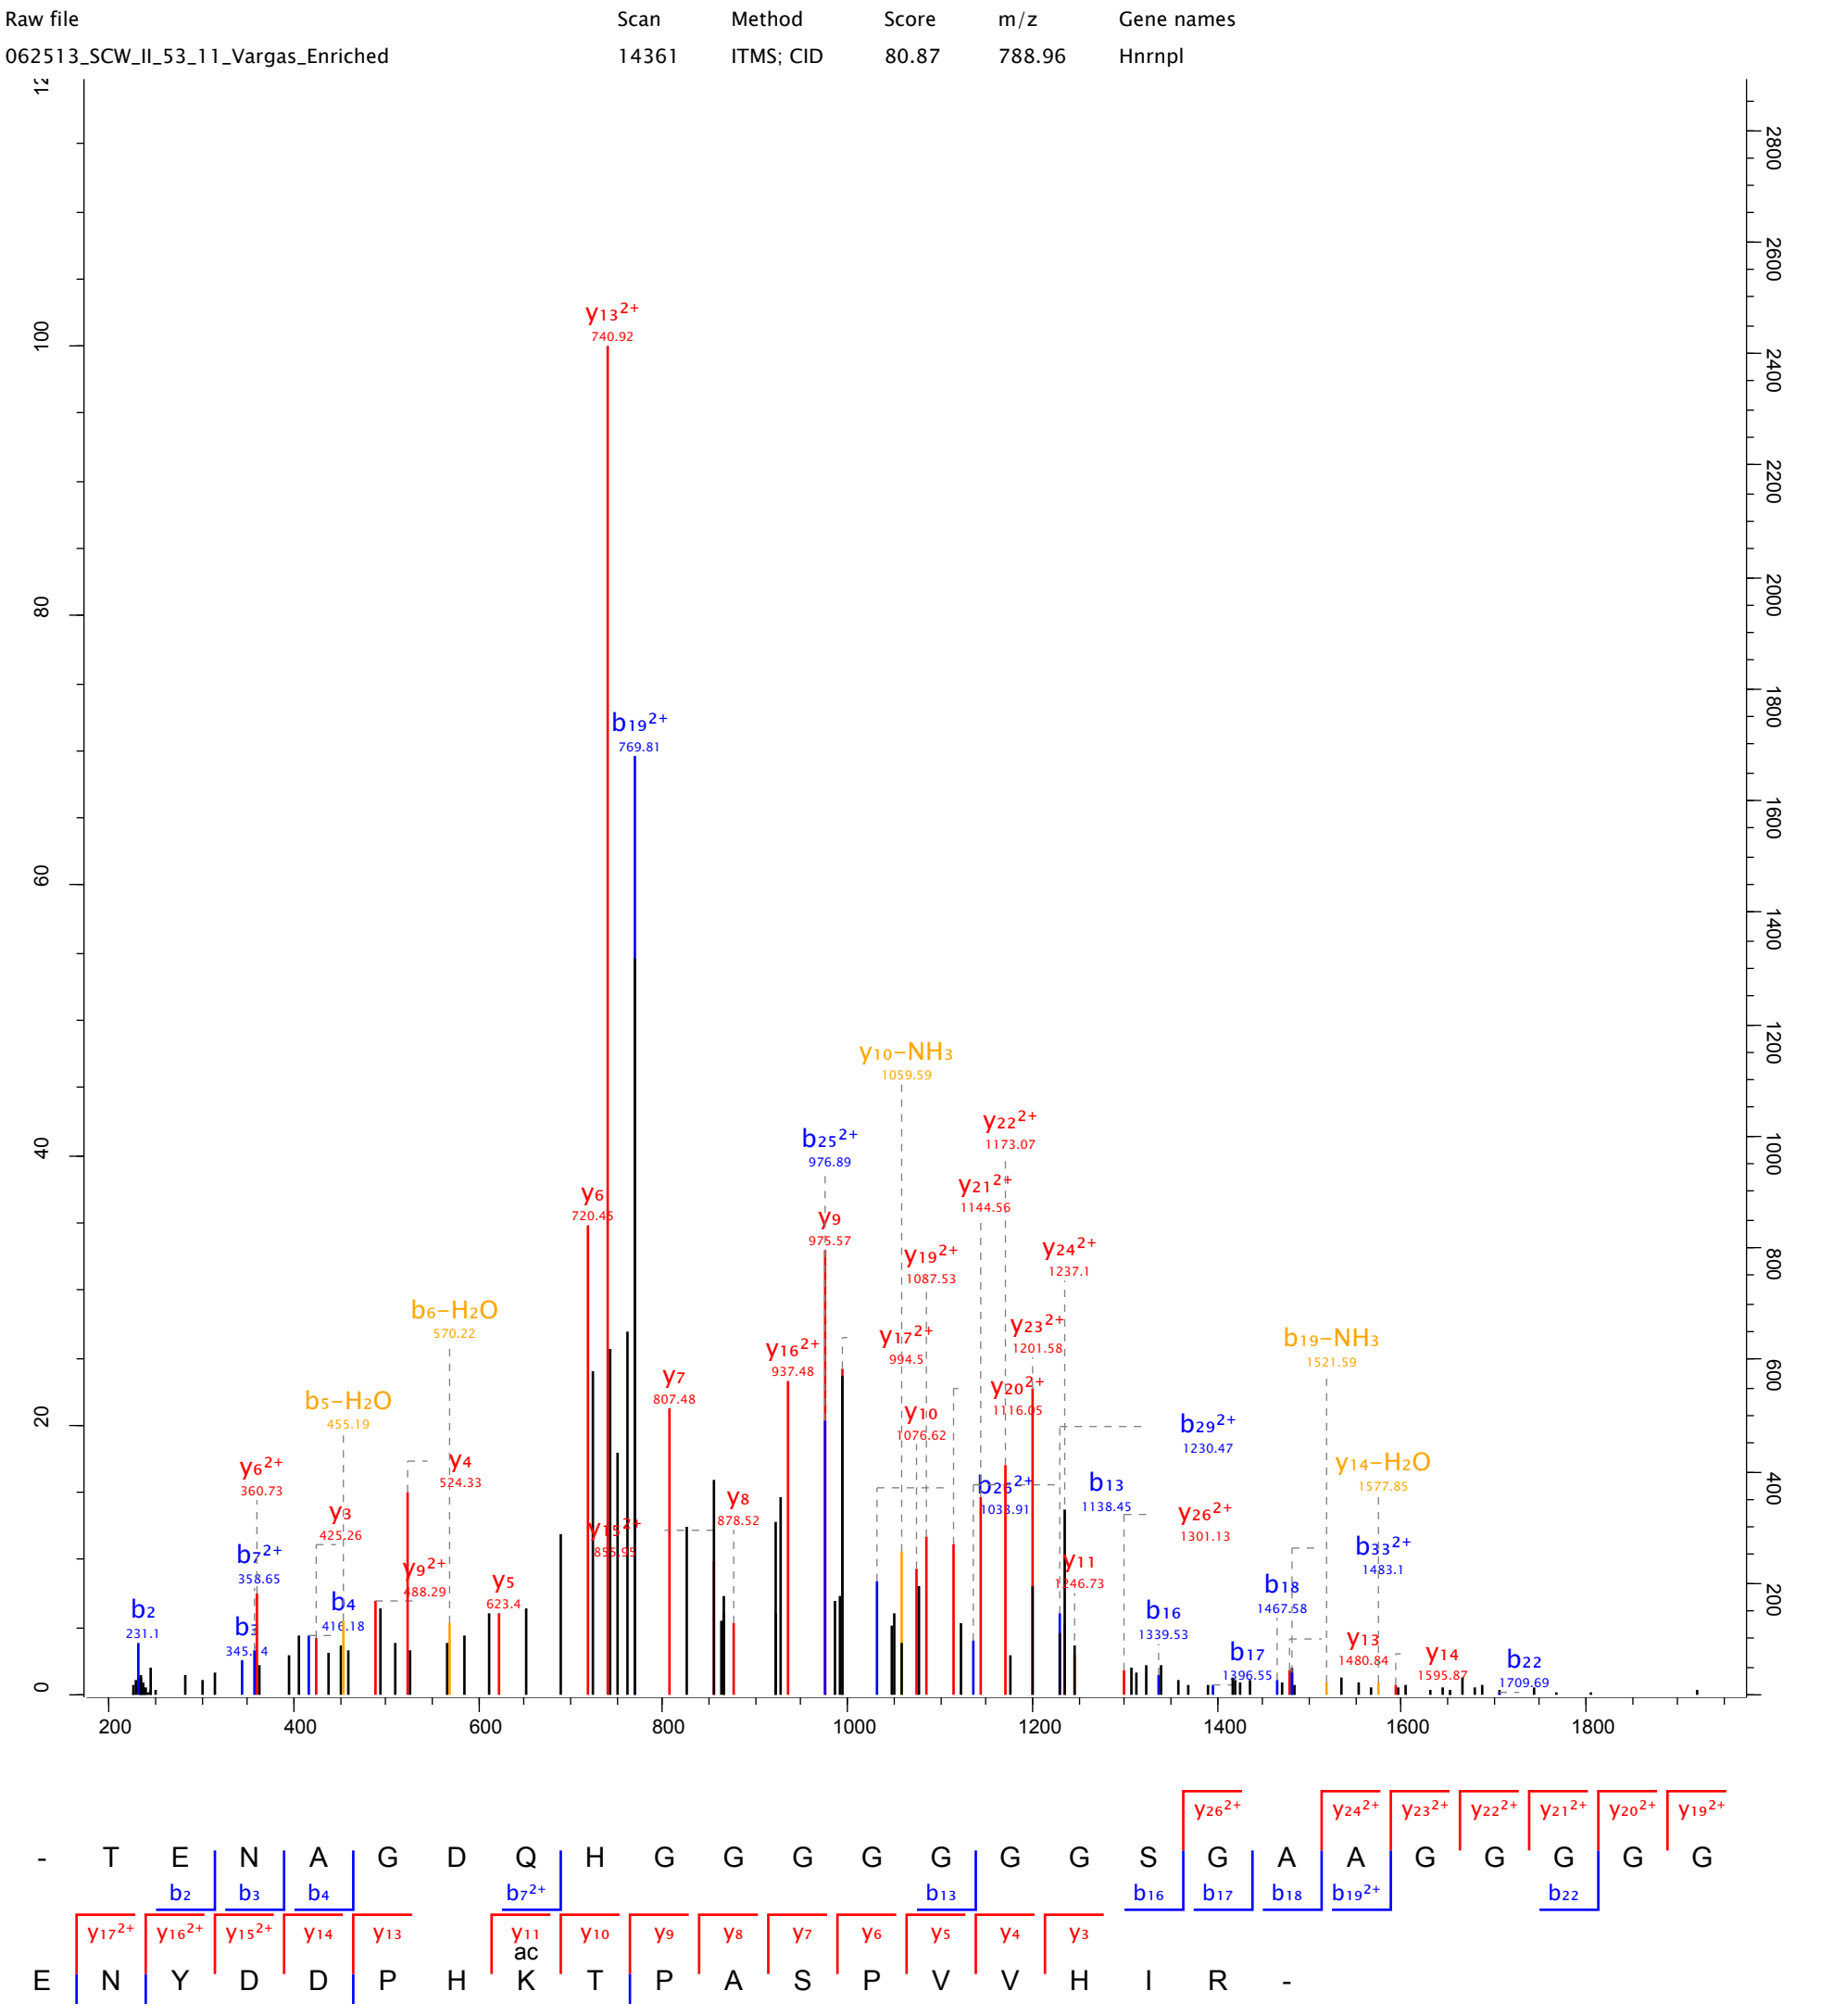

Raw file  
062513\_SCW\_II\_53\_11\_Vargas\_Enriched

Scan Method Score m/z Gene names  
14706 ITMS; CID 109.29 577.82 Tpt1

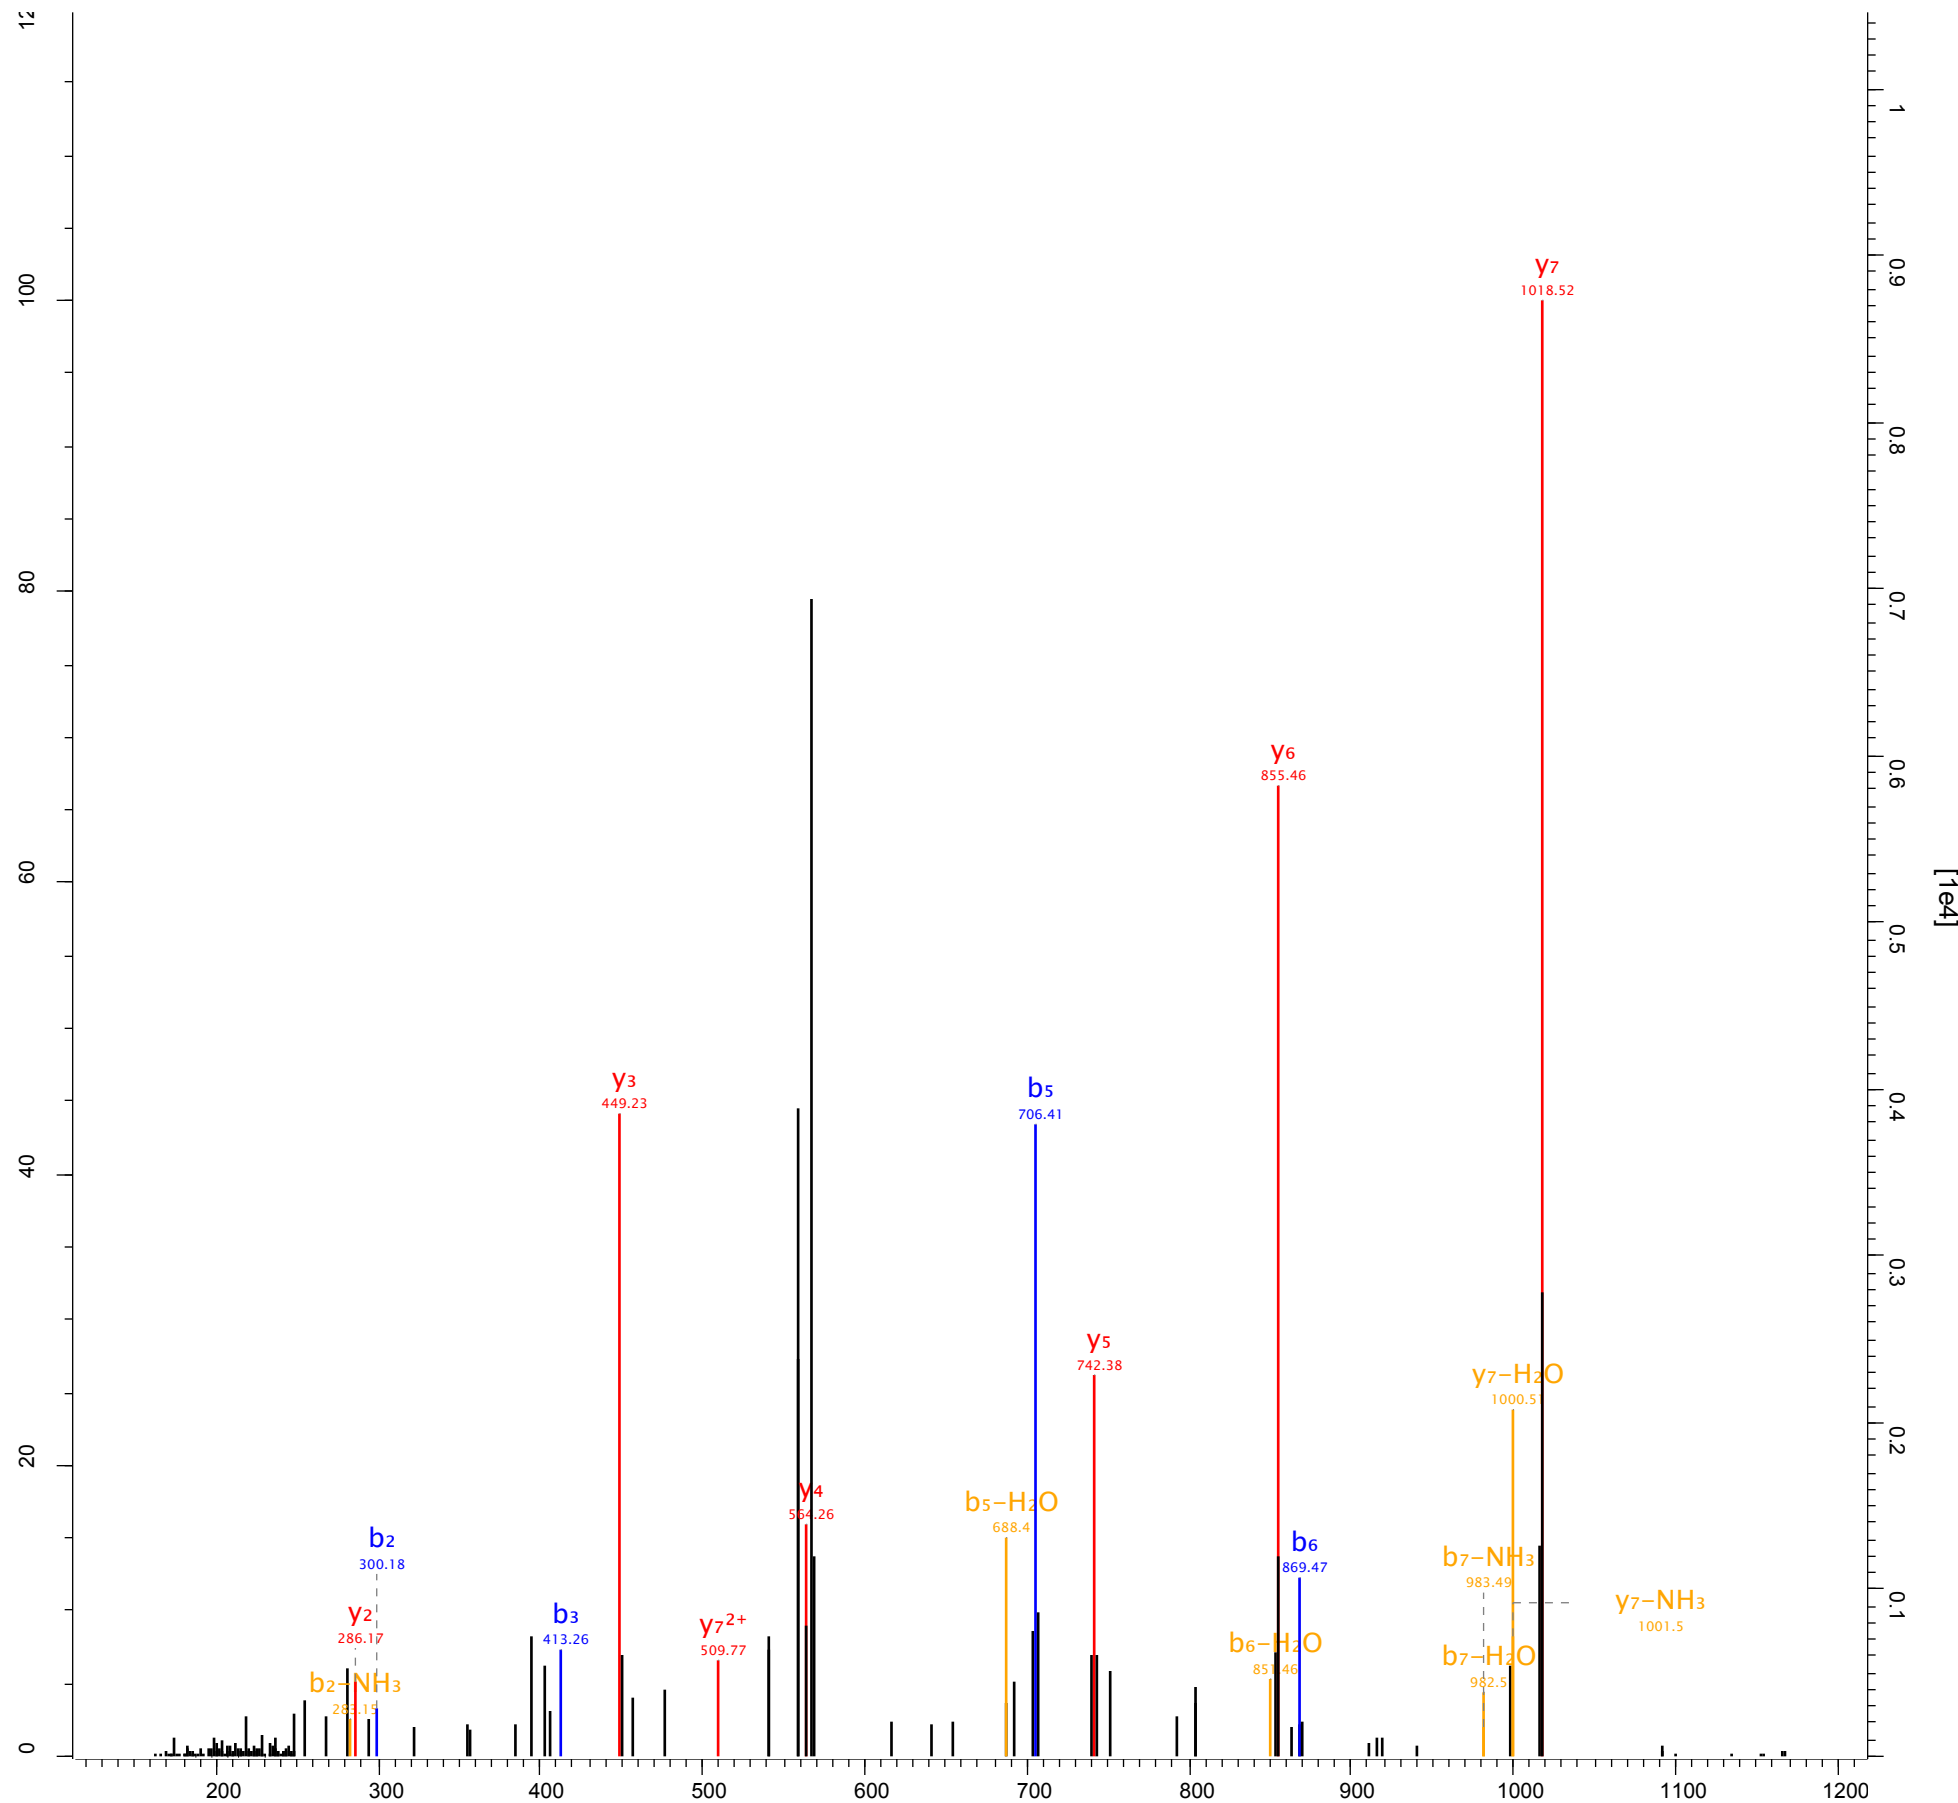

- K Y I K D Y M K -

b2 b3 b5 b6

y7 y6 y5 ac y4 y3 y2

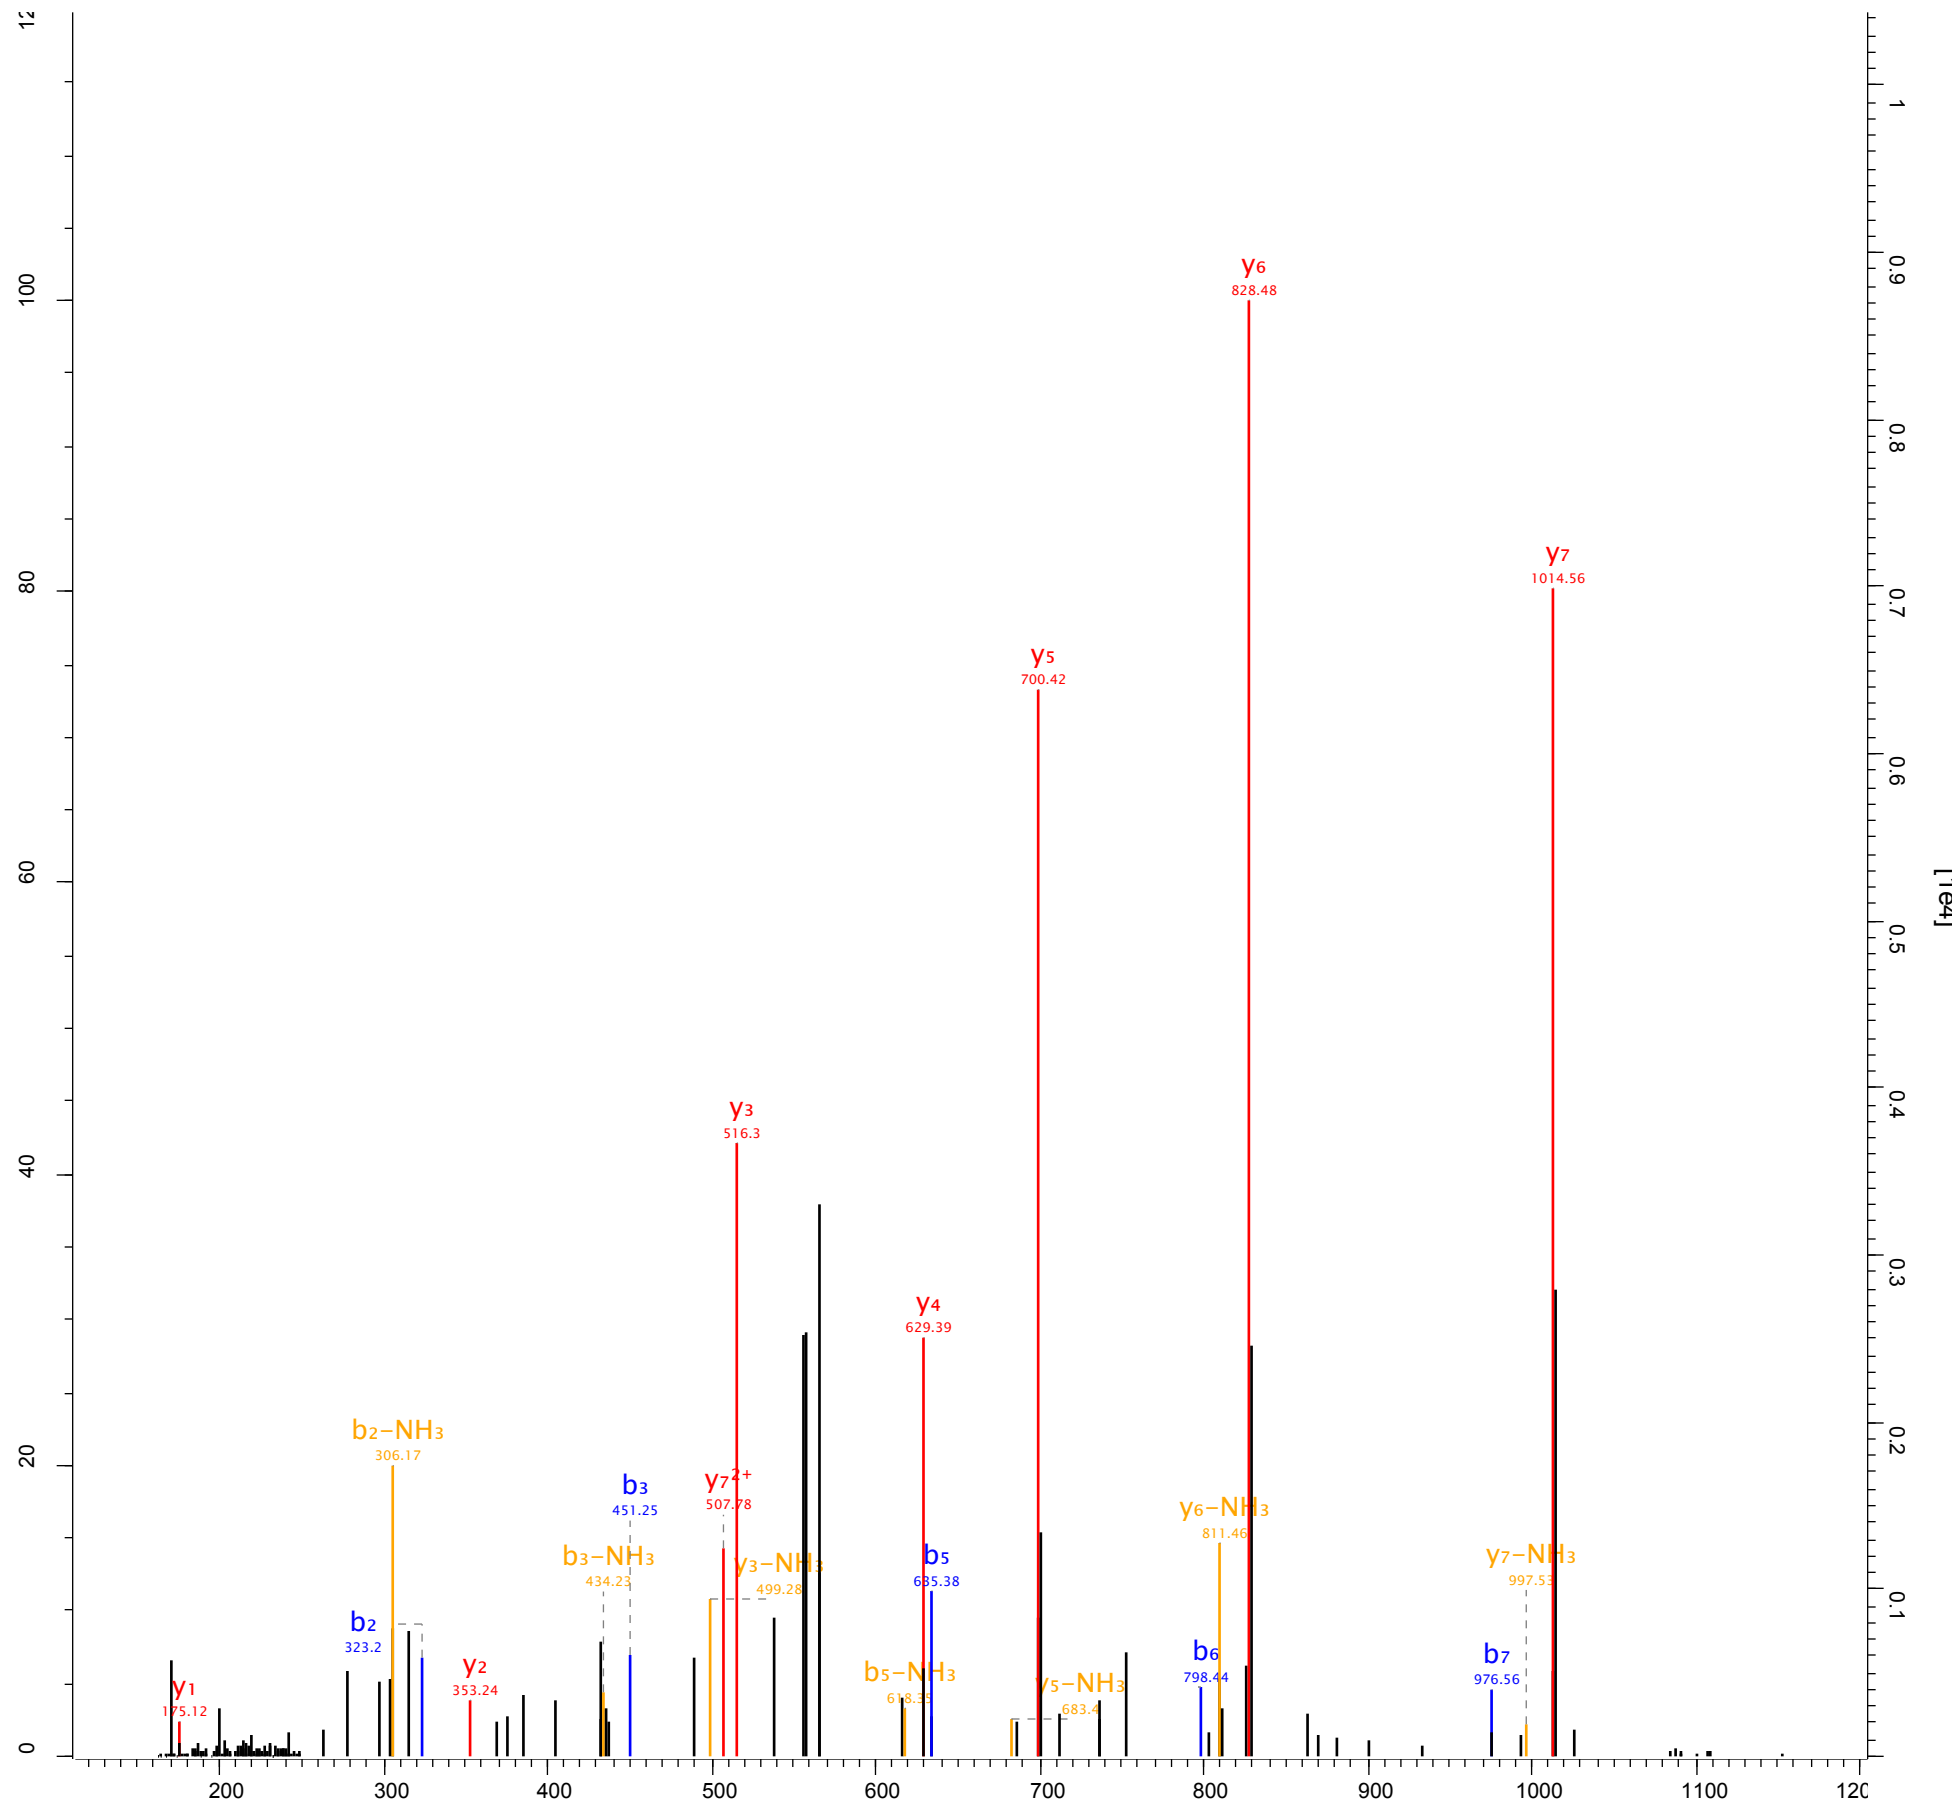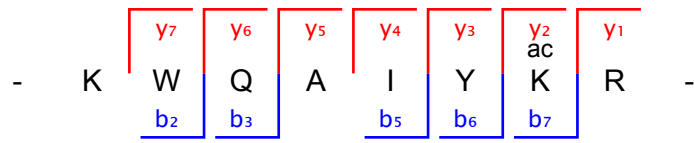



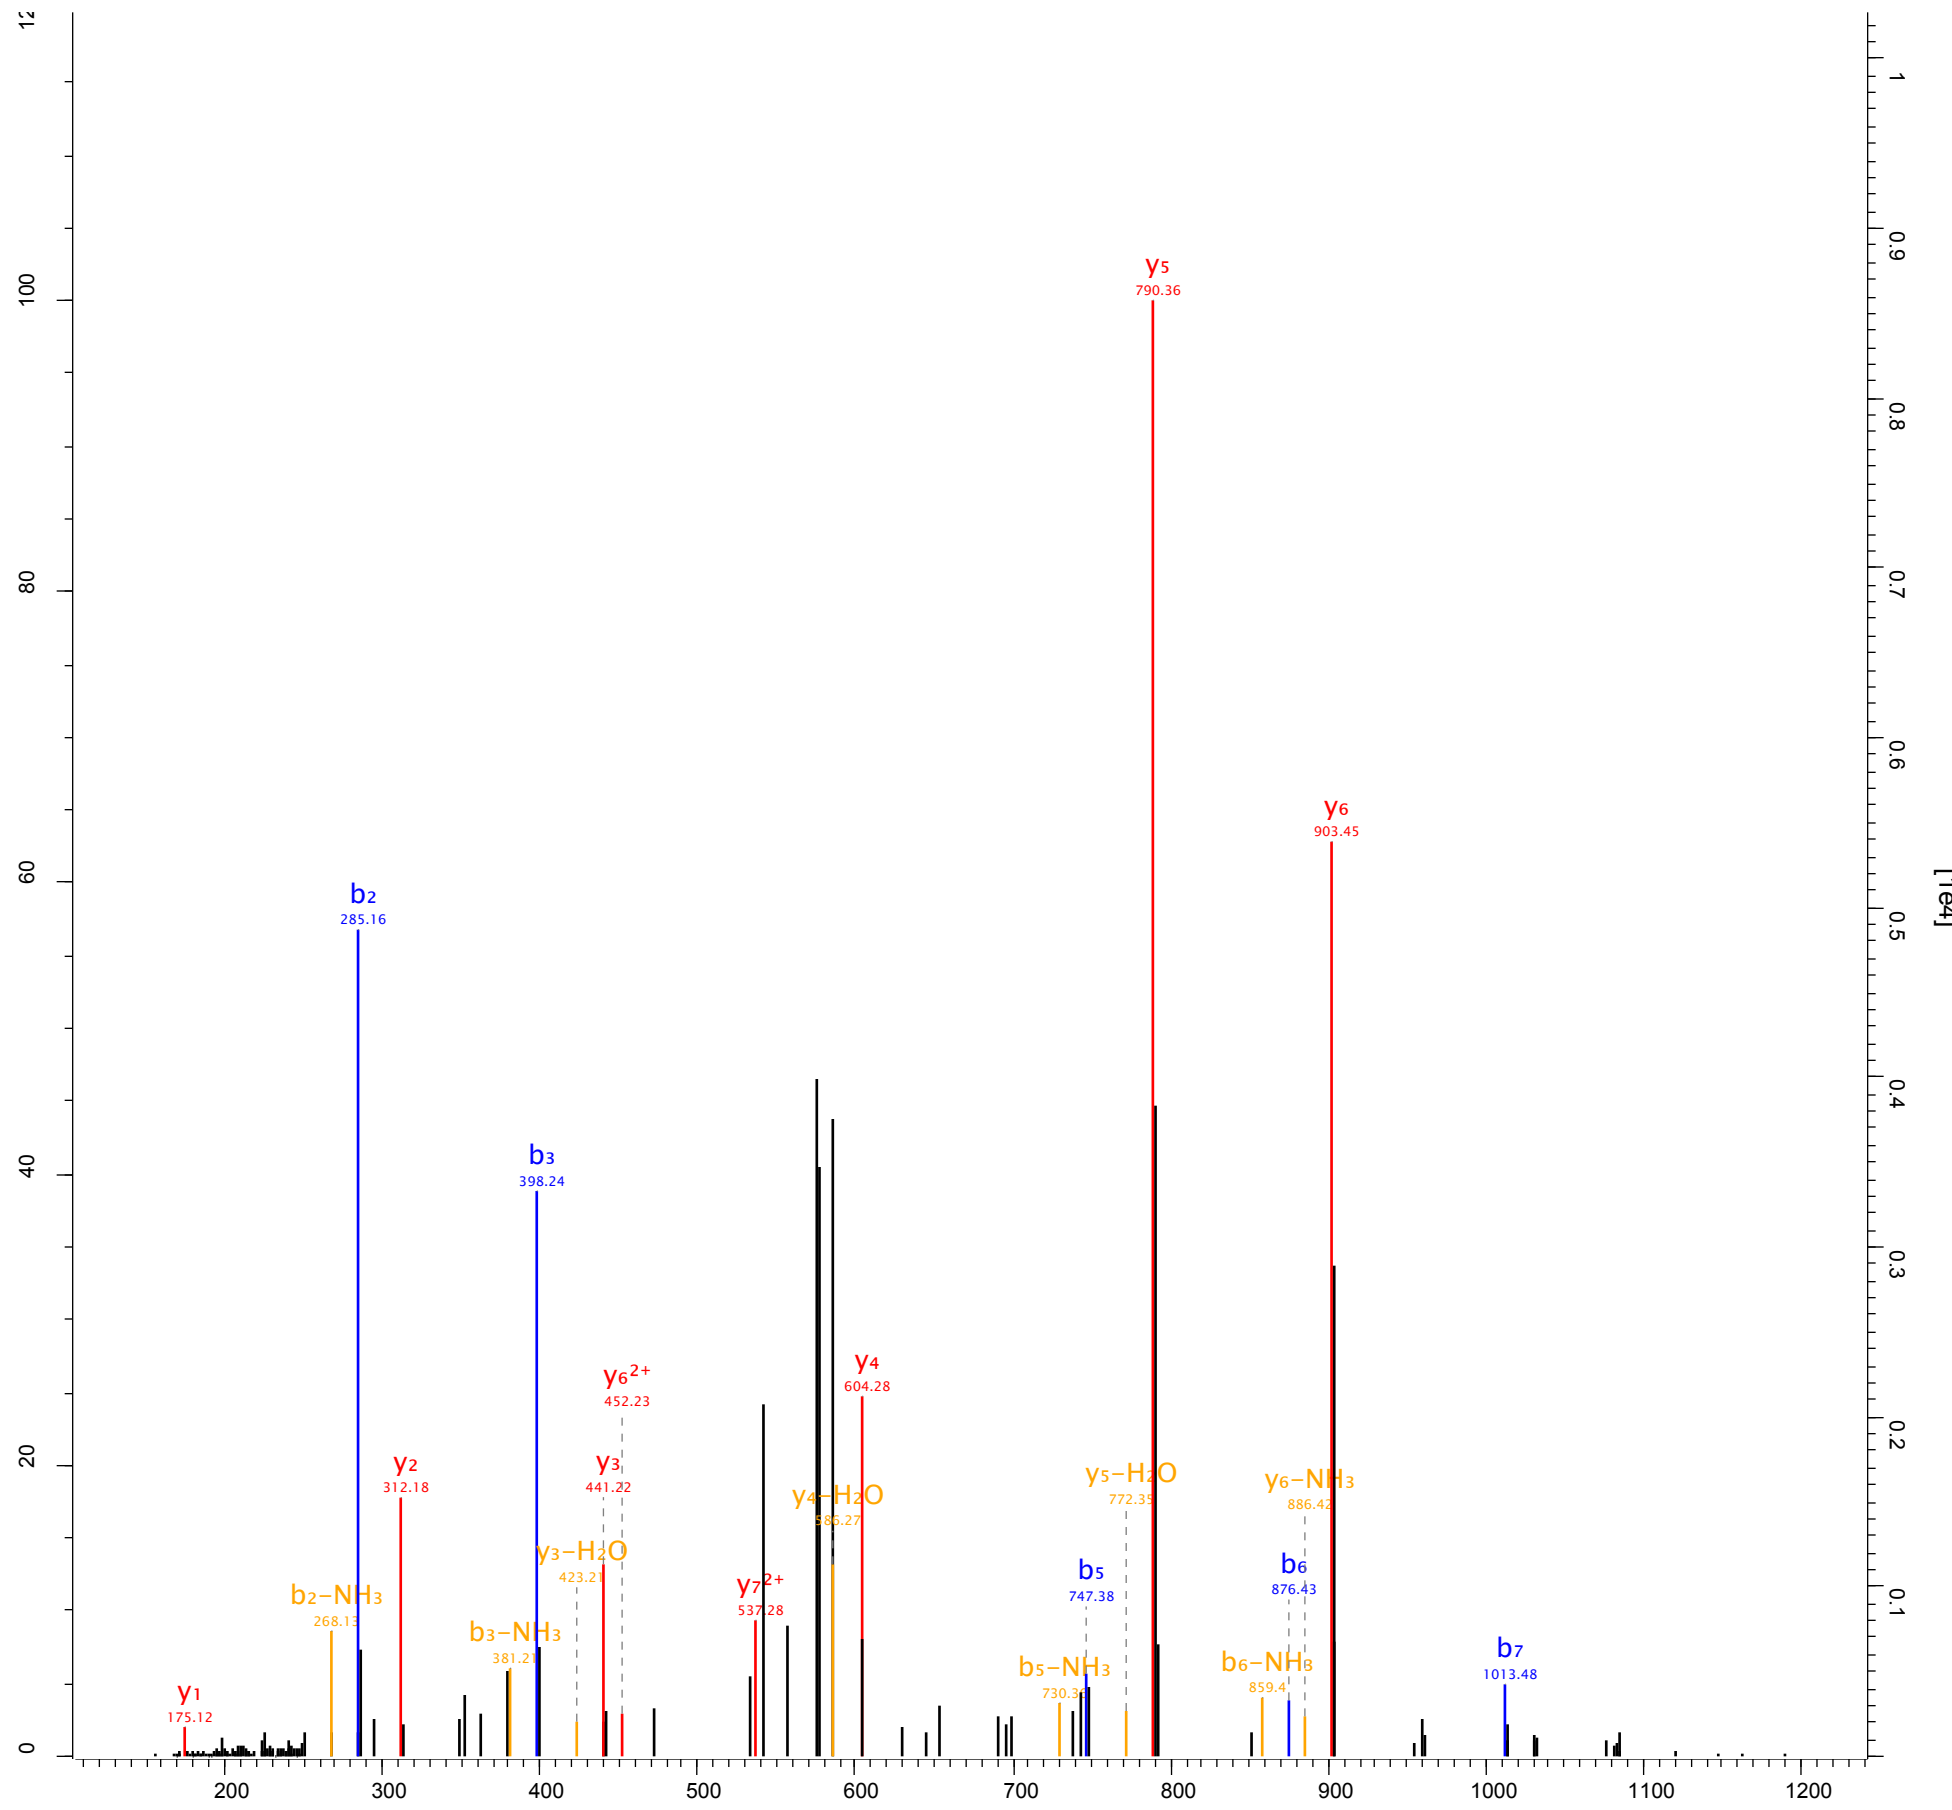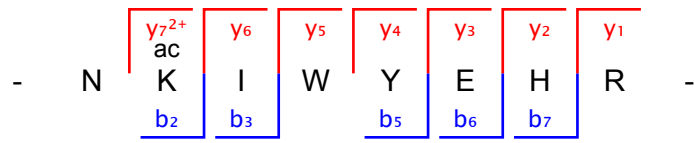

062513\_SCW\_II\_53\_11\_Vargas\_Enriched

15456

ITMS; CID

100.69

614.32

Spcs2

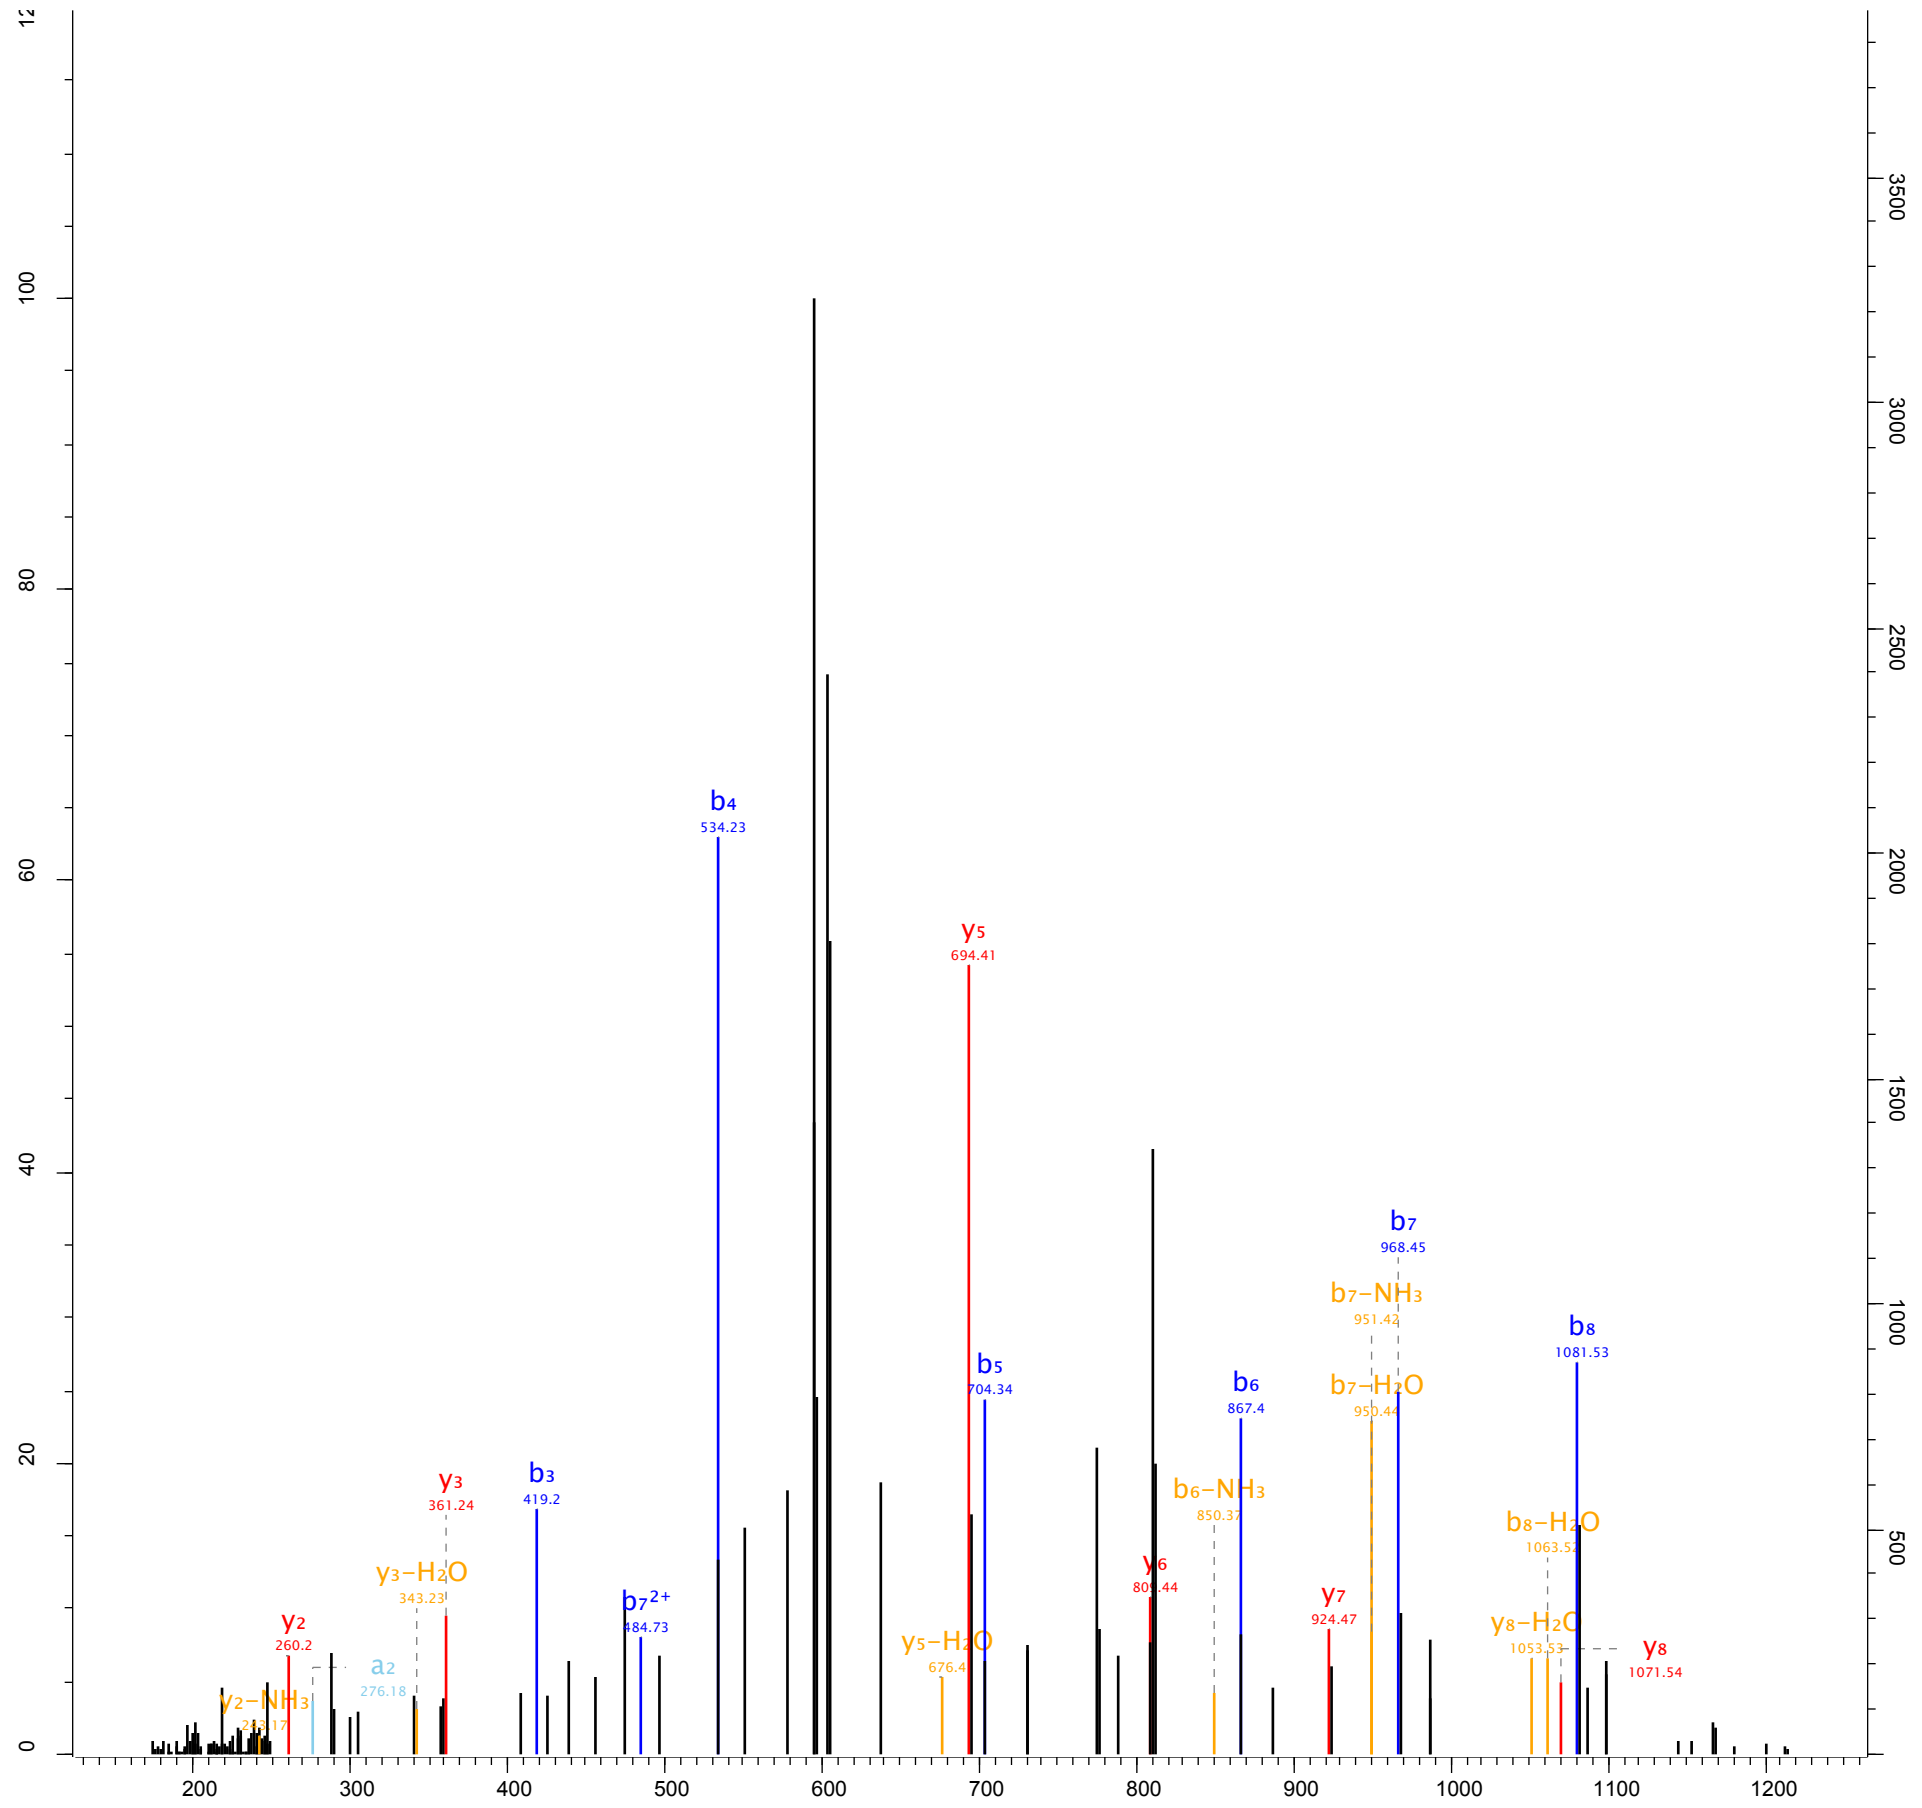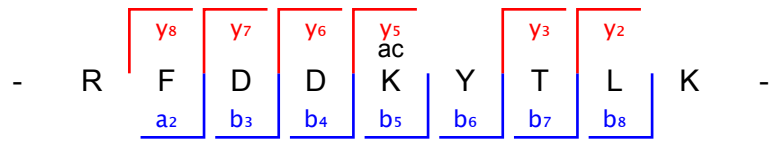

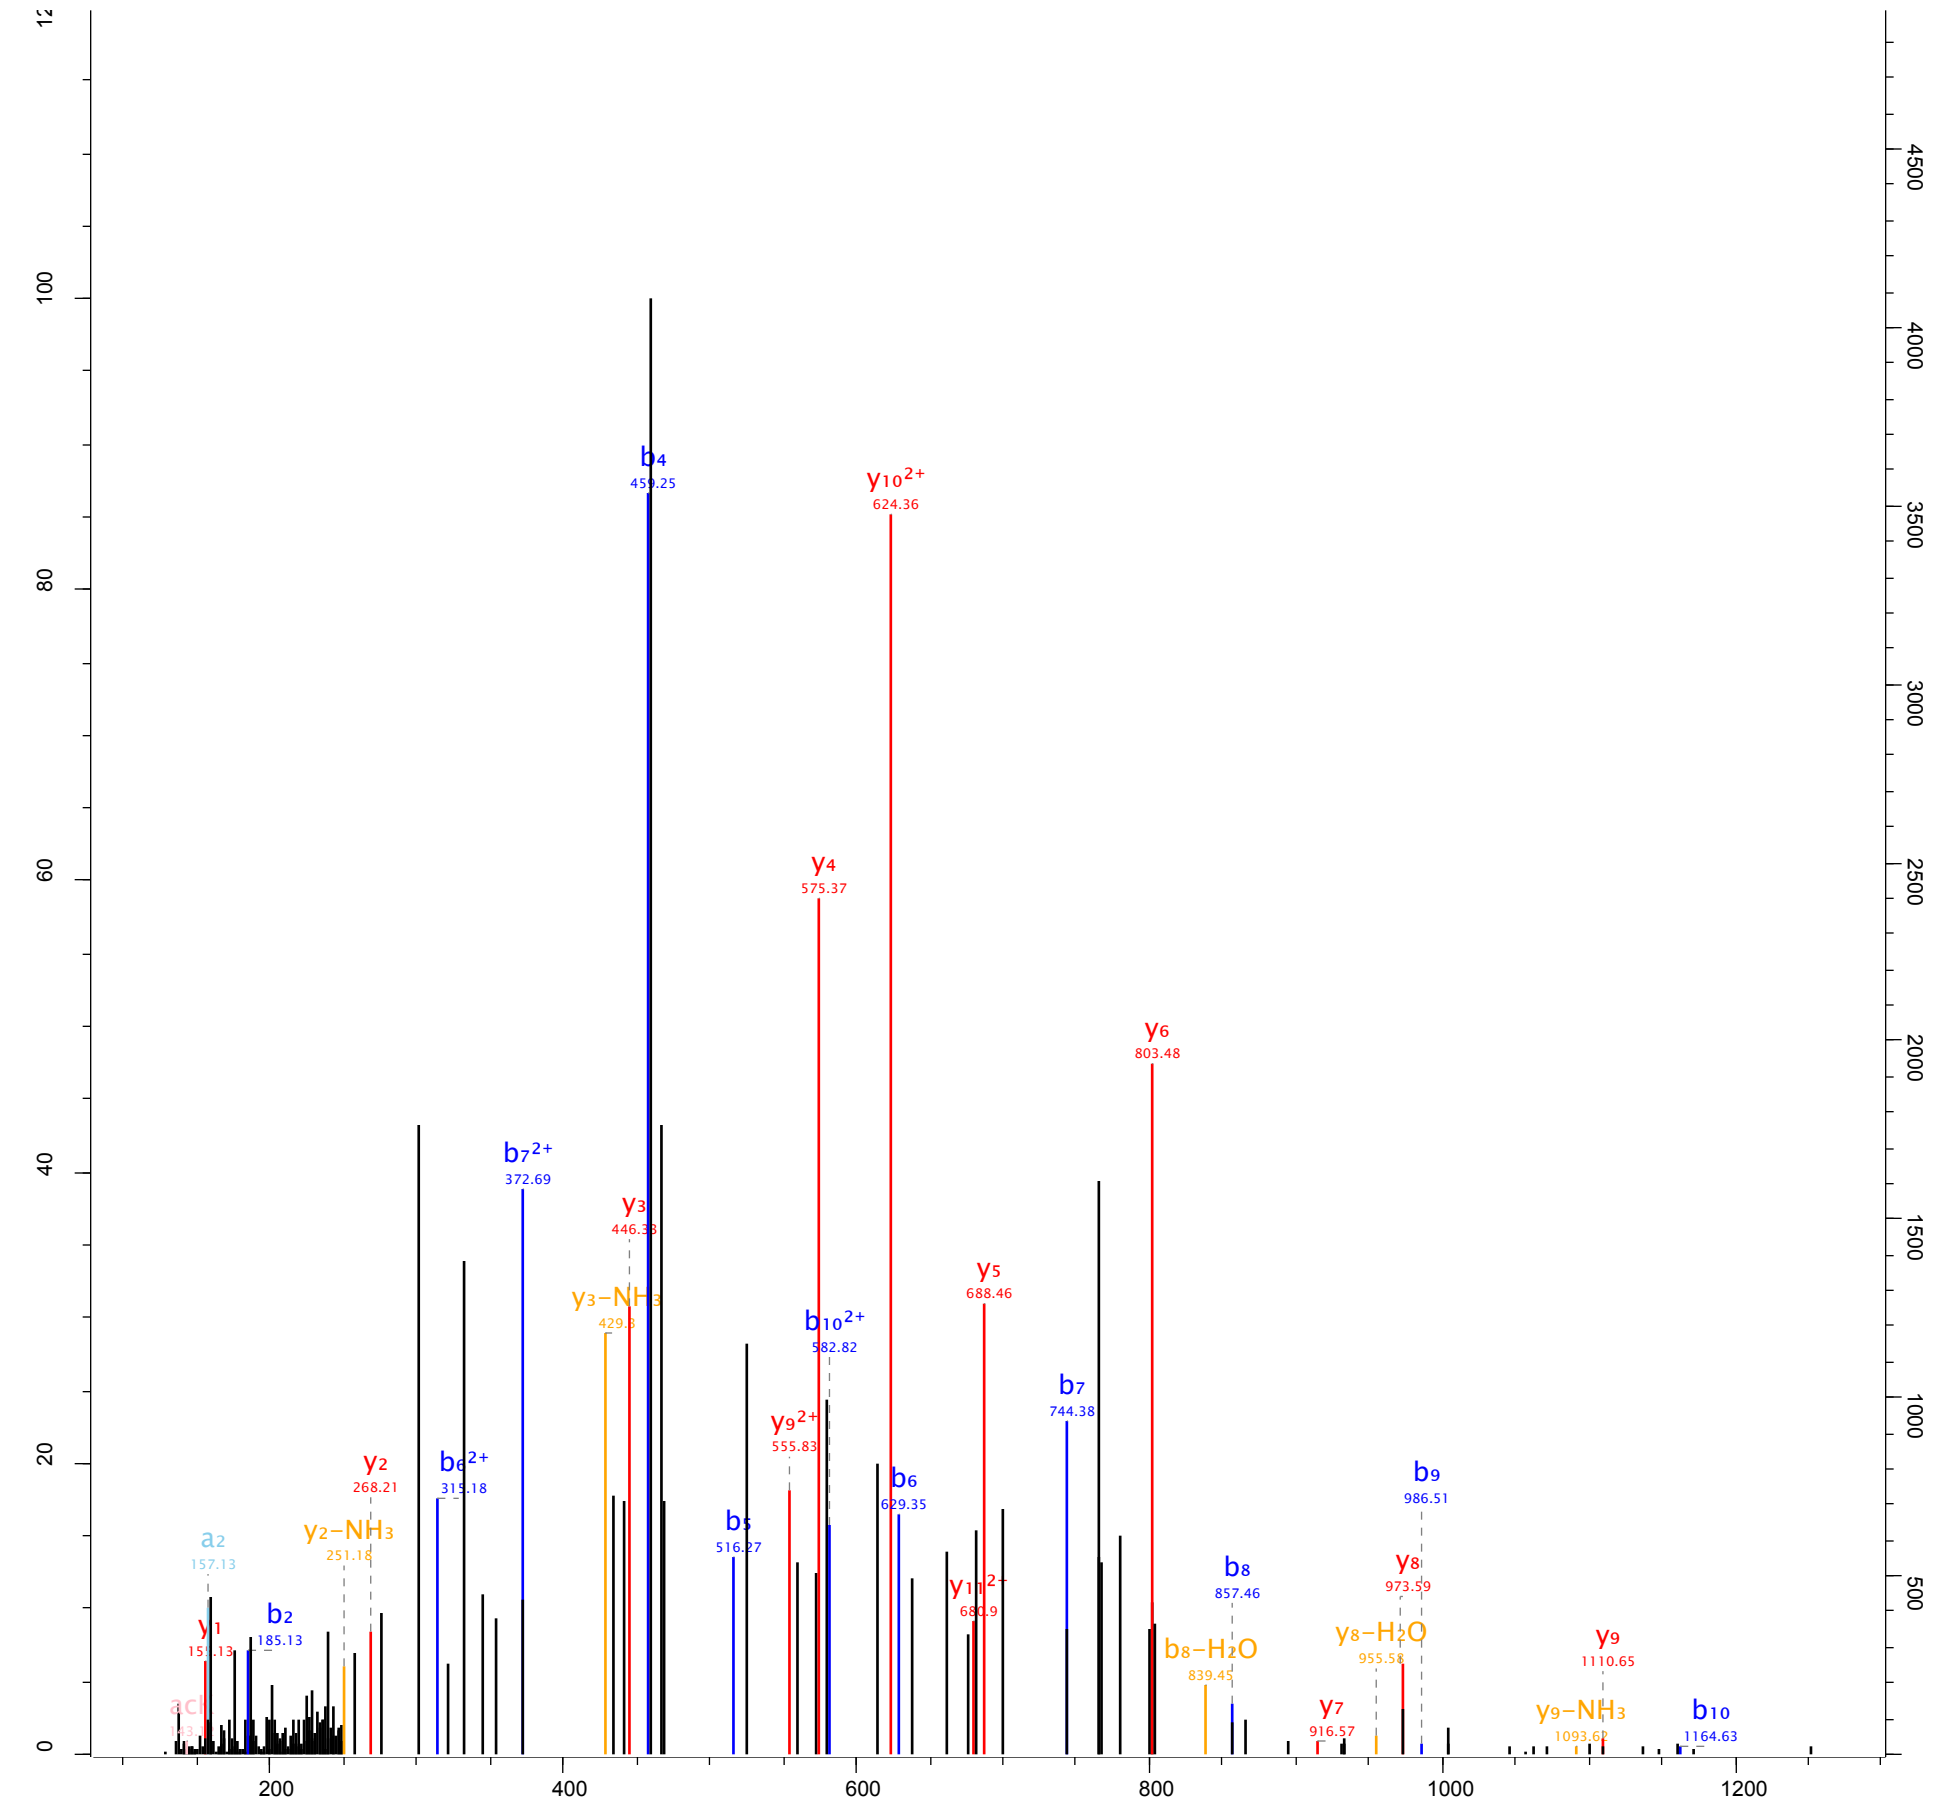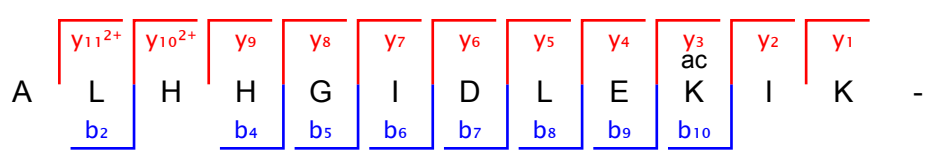

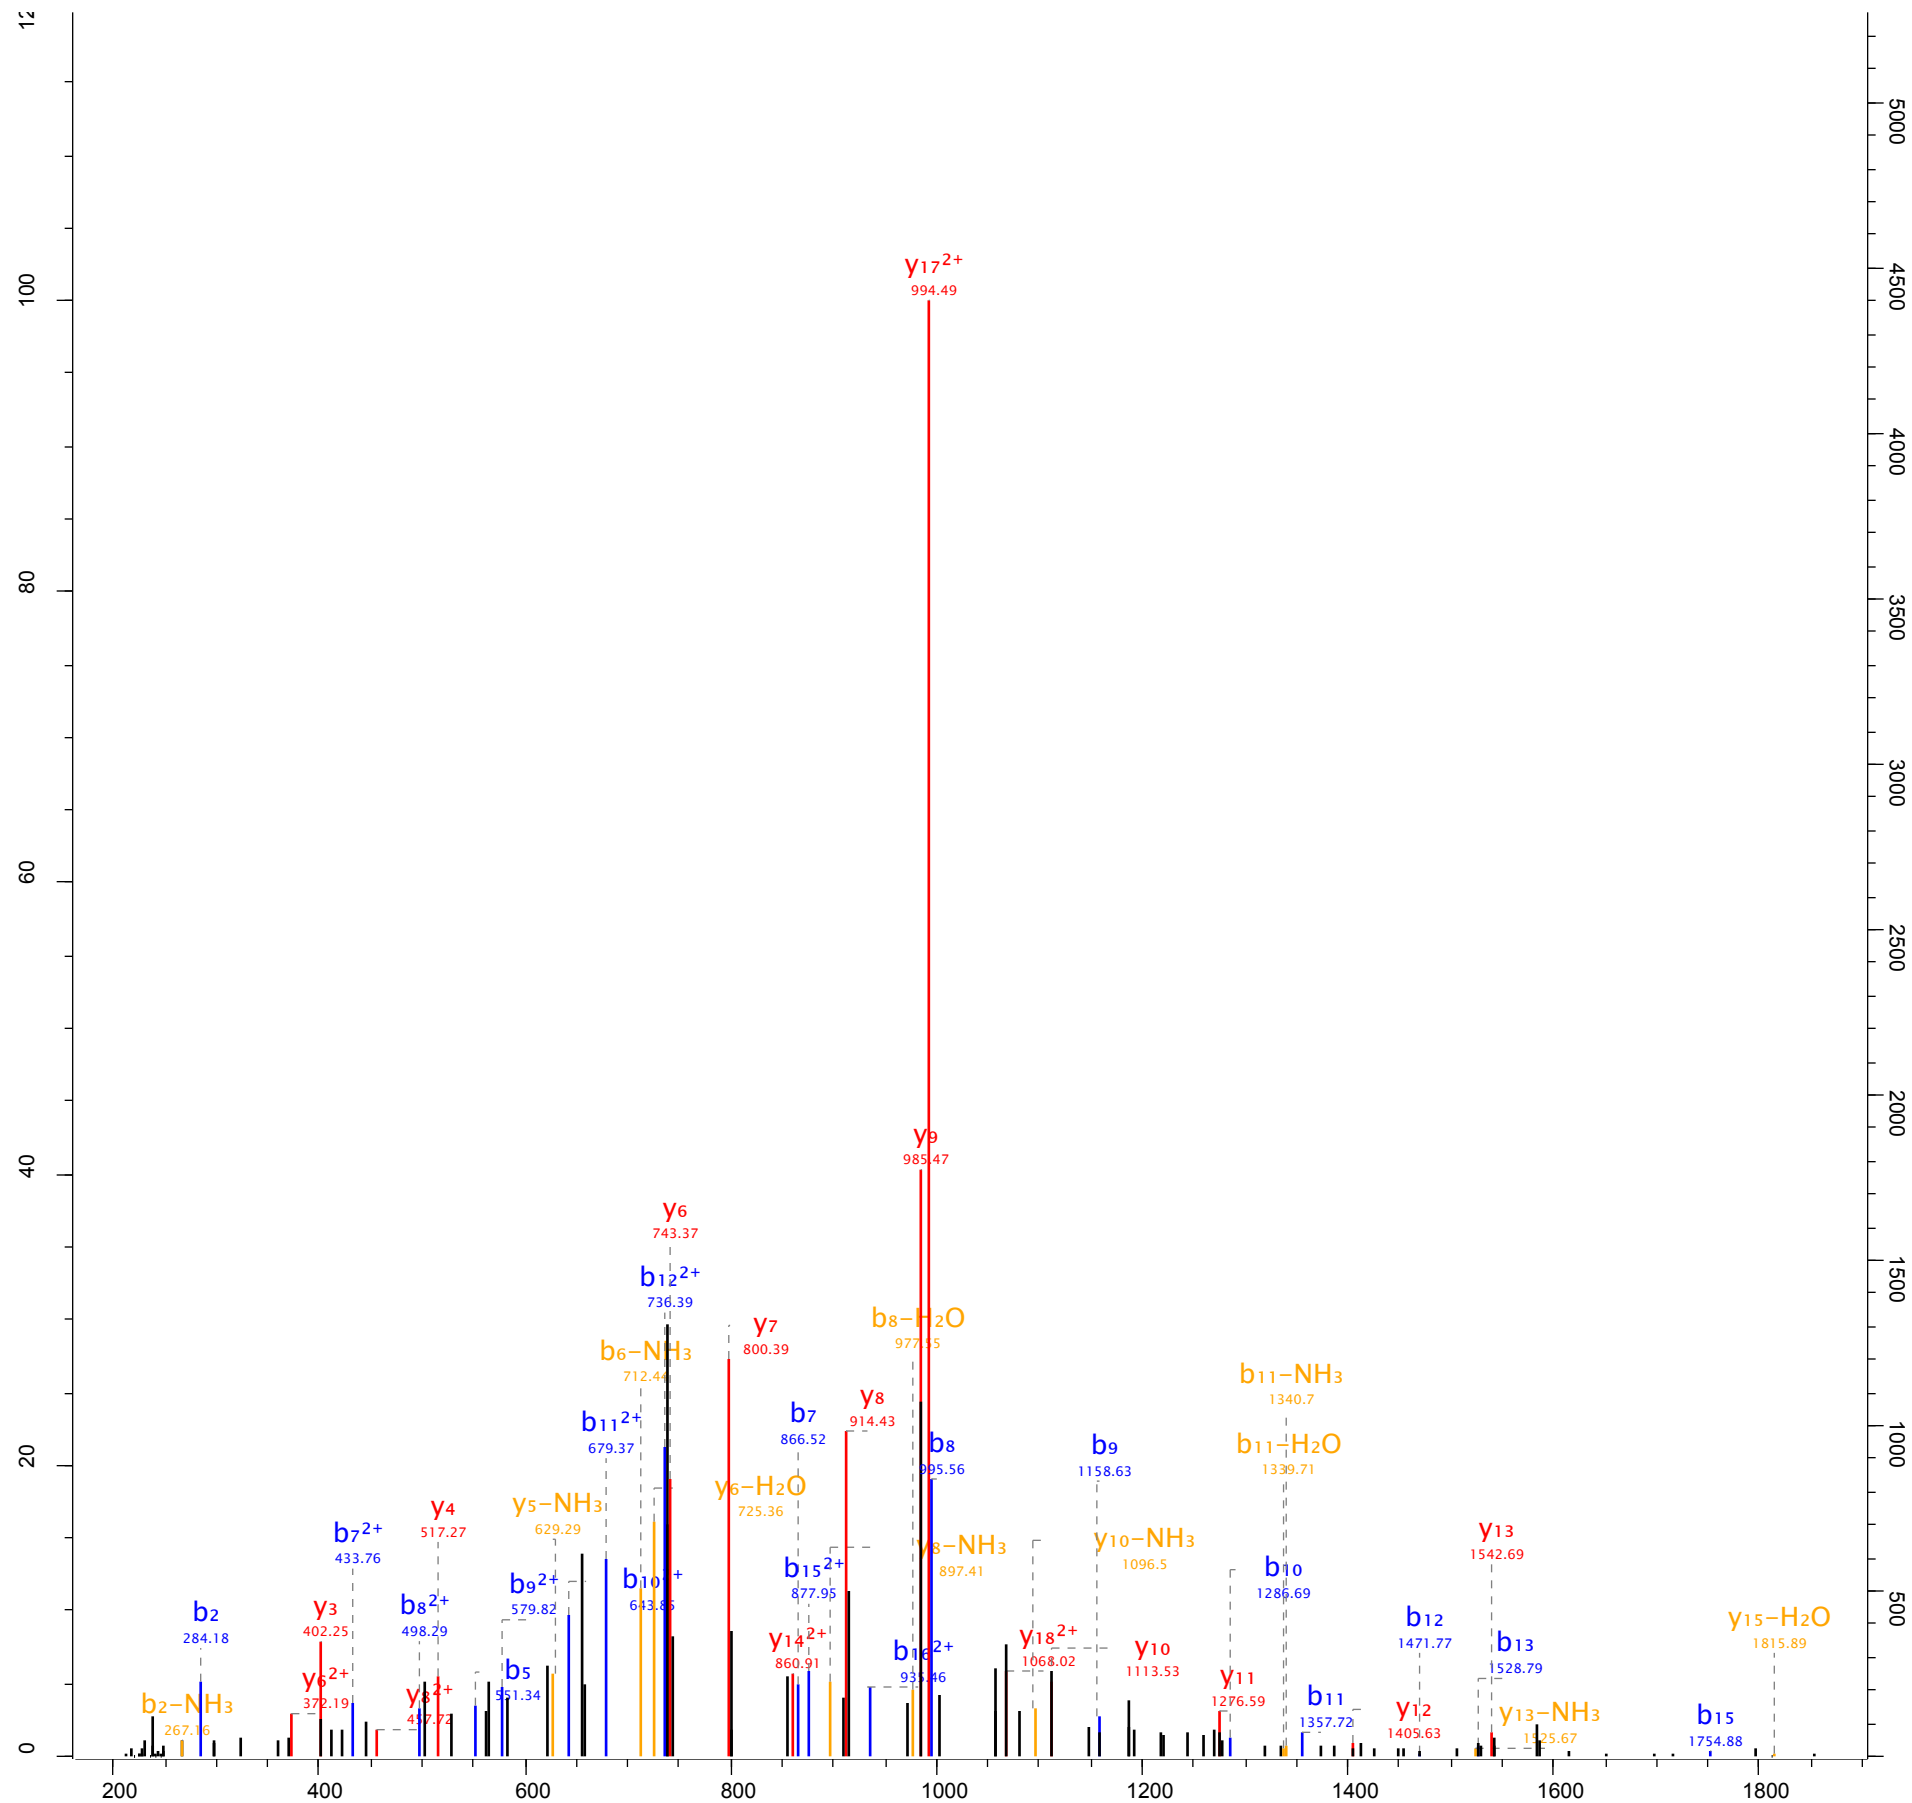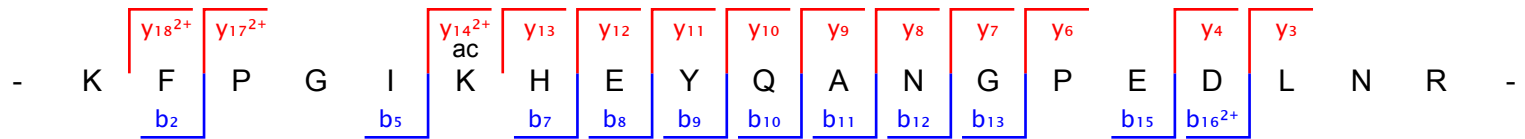

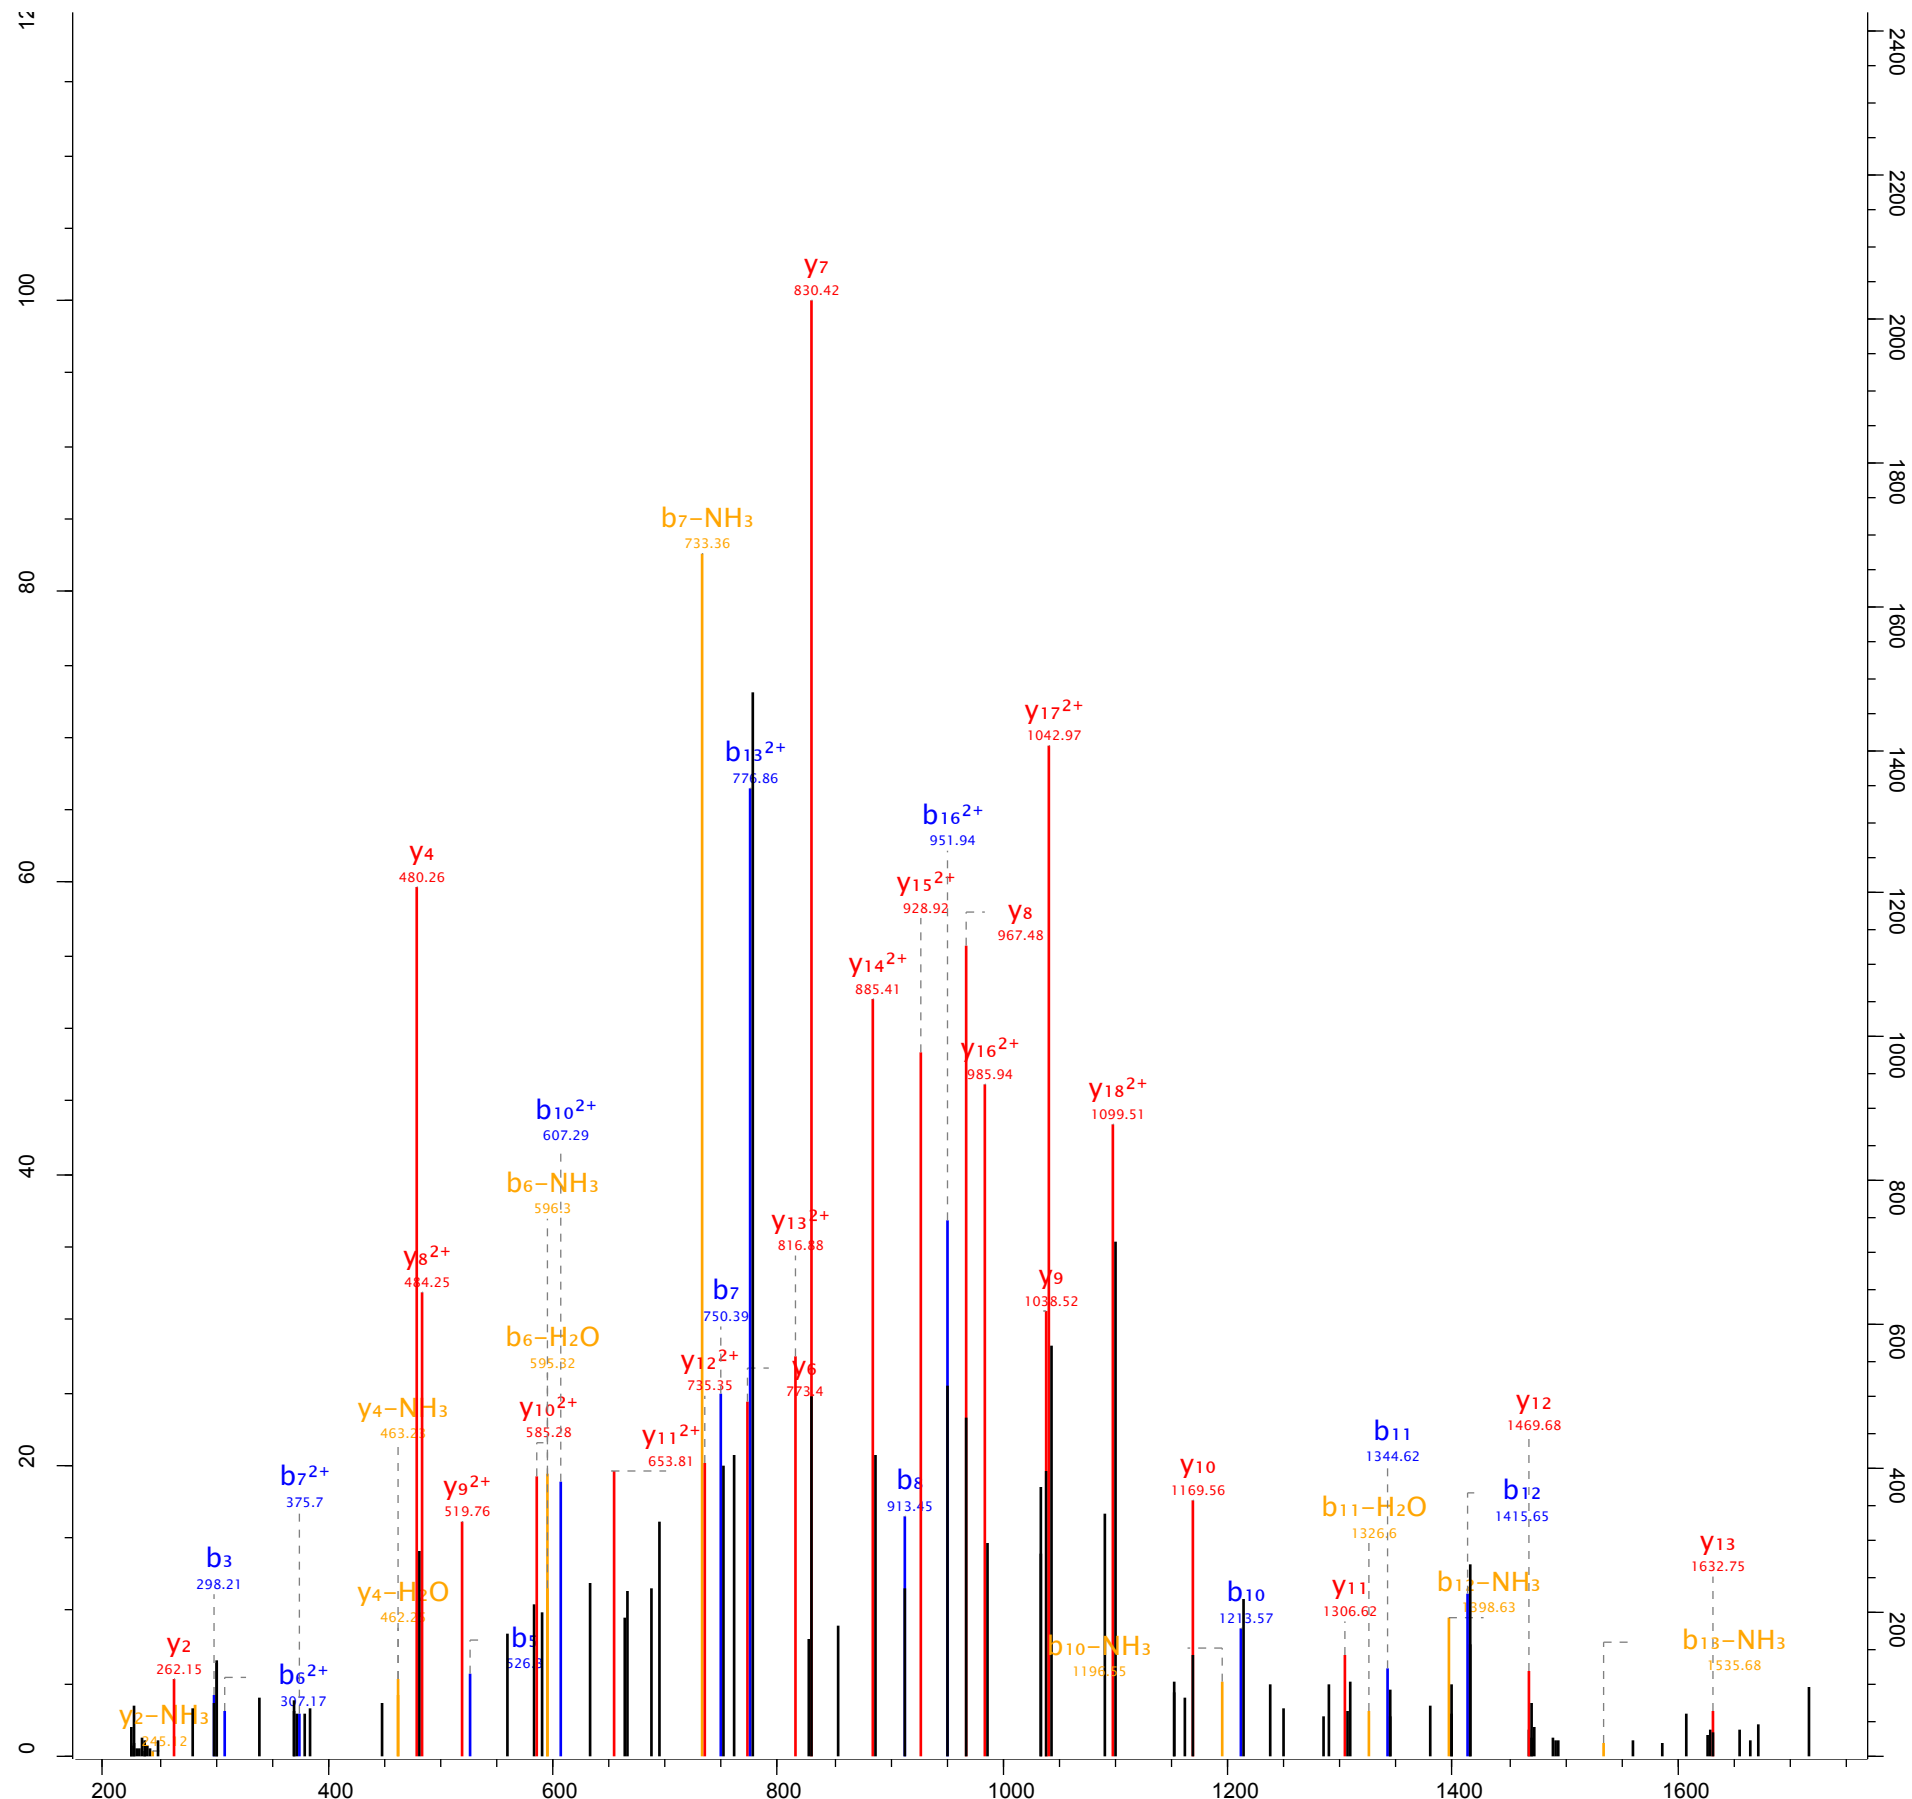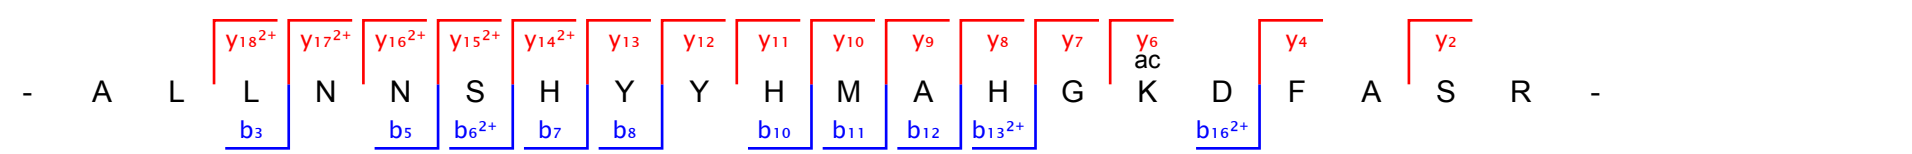

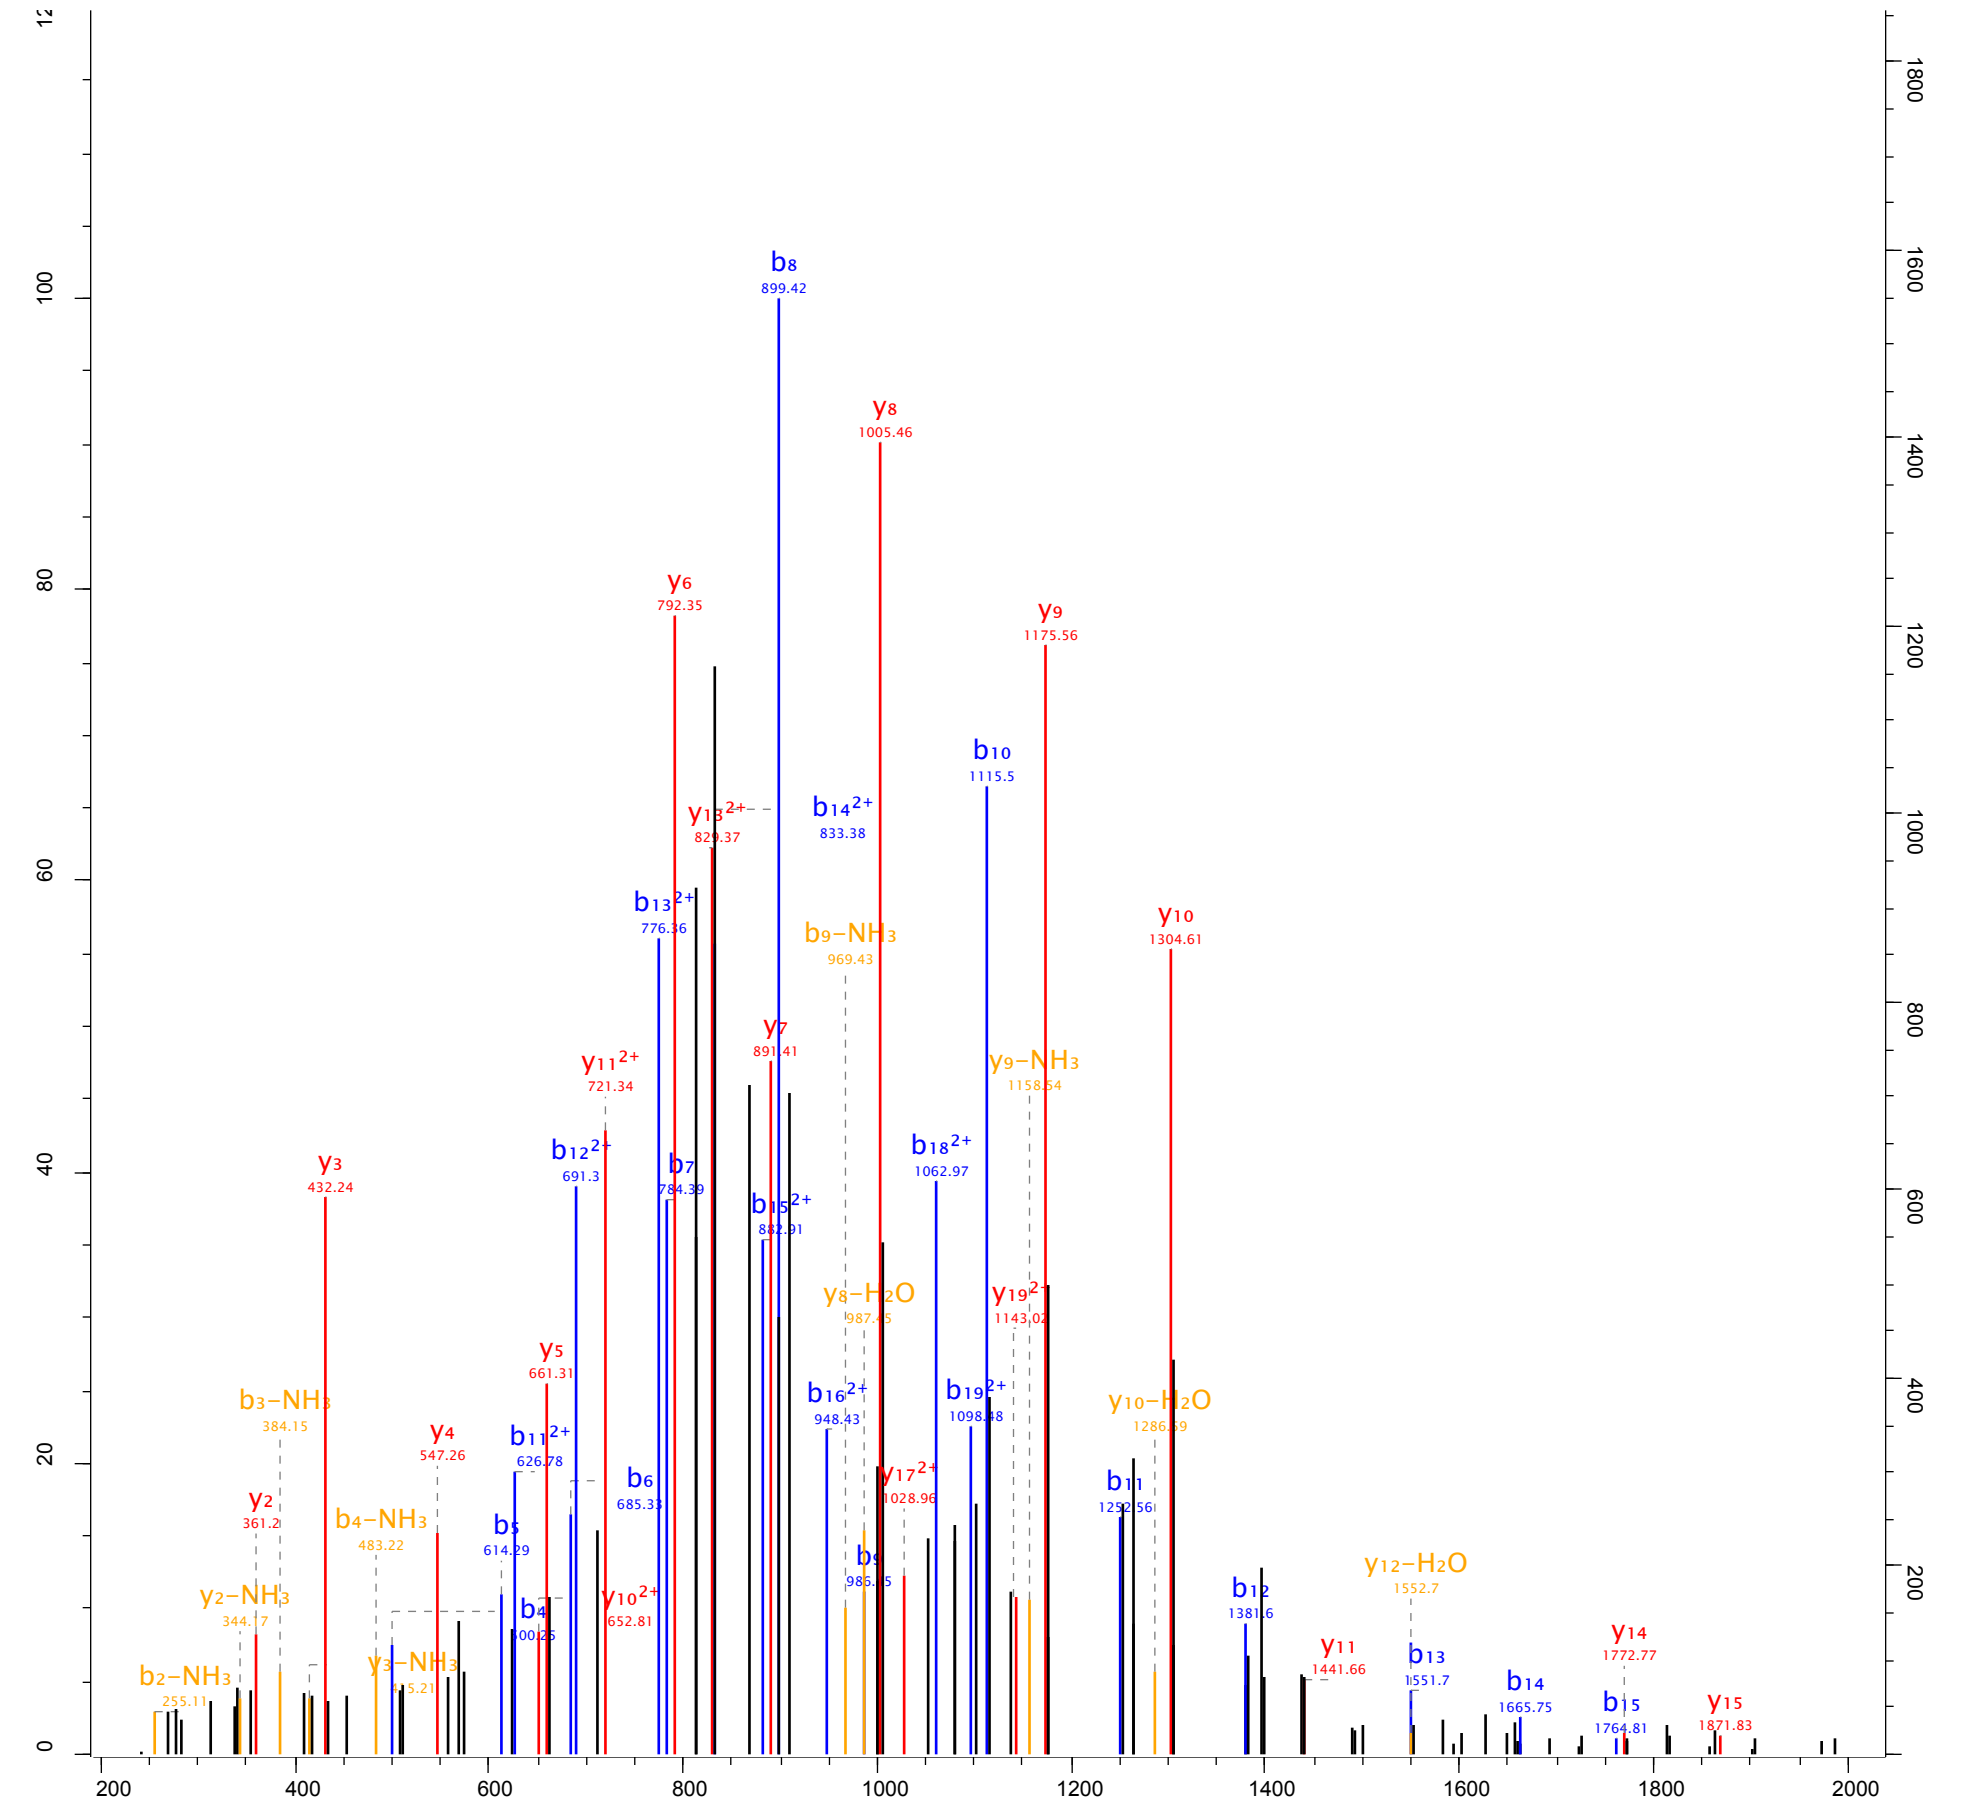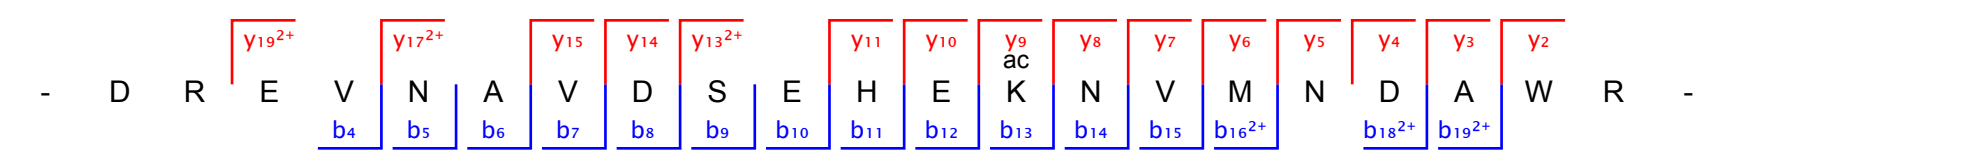

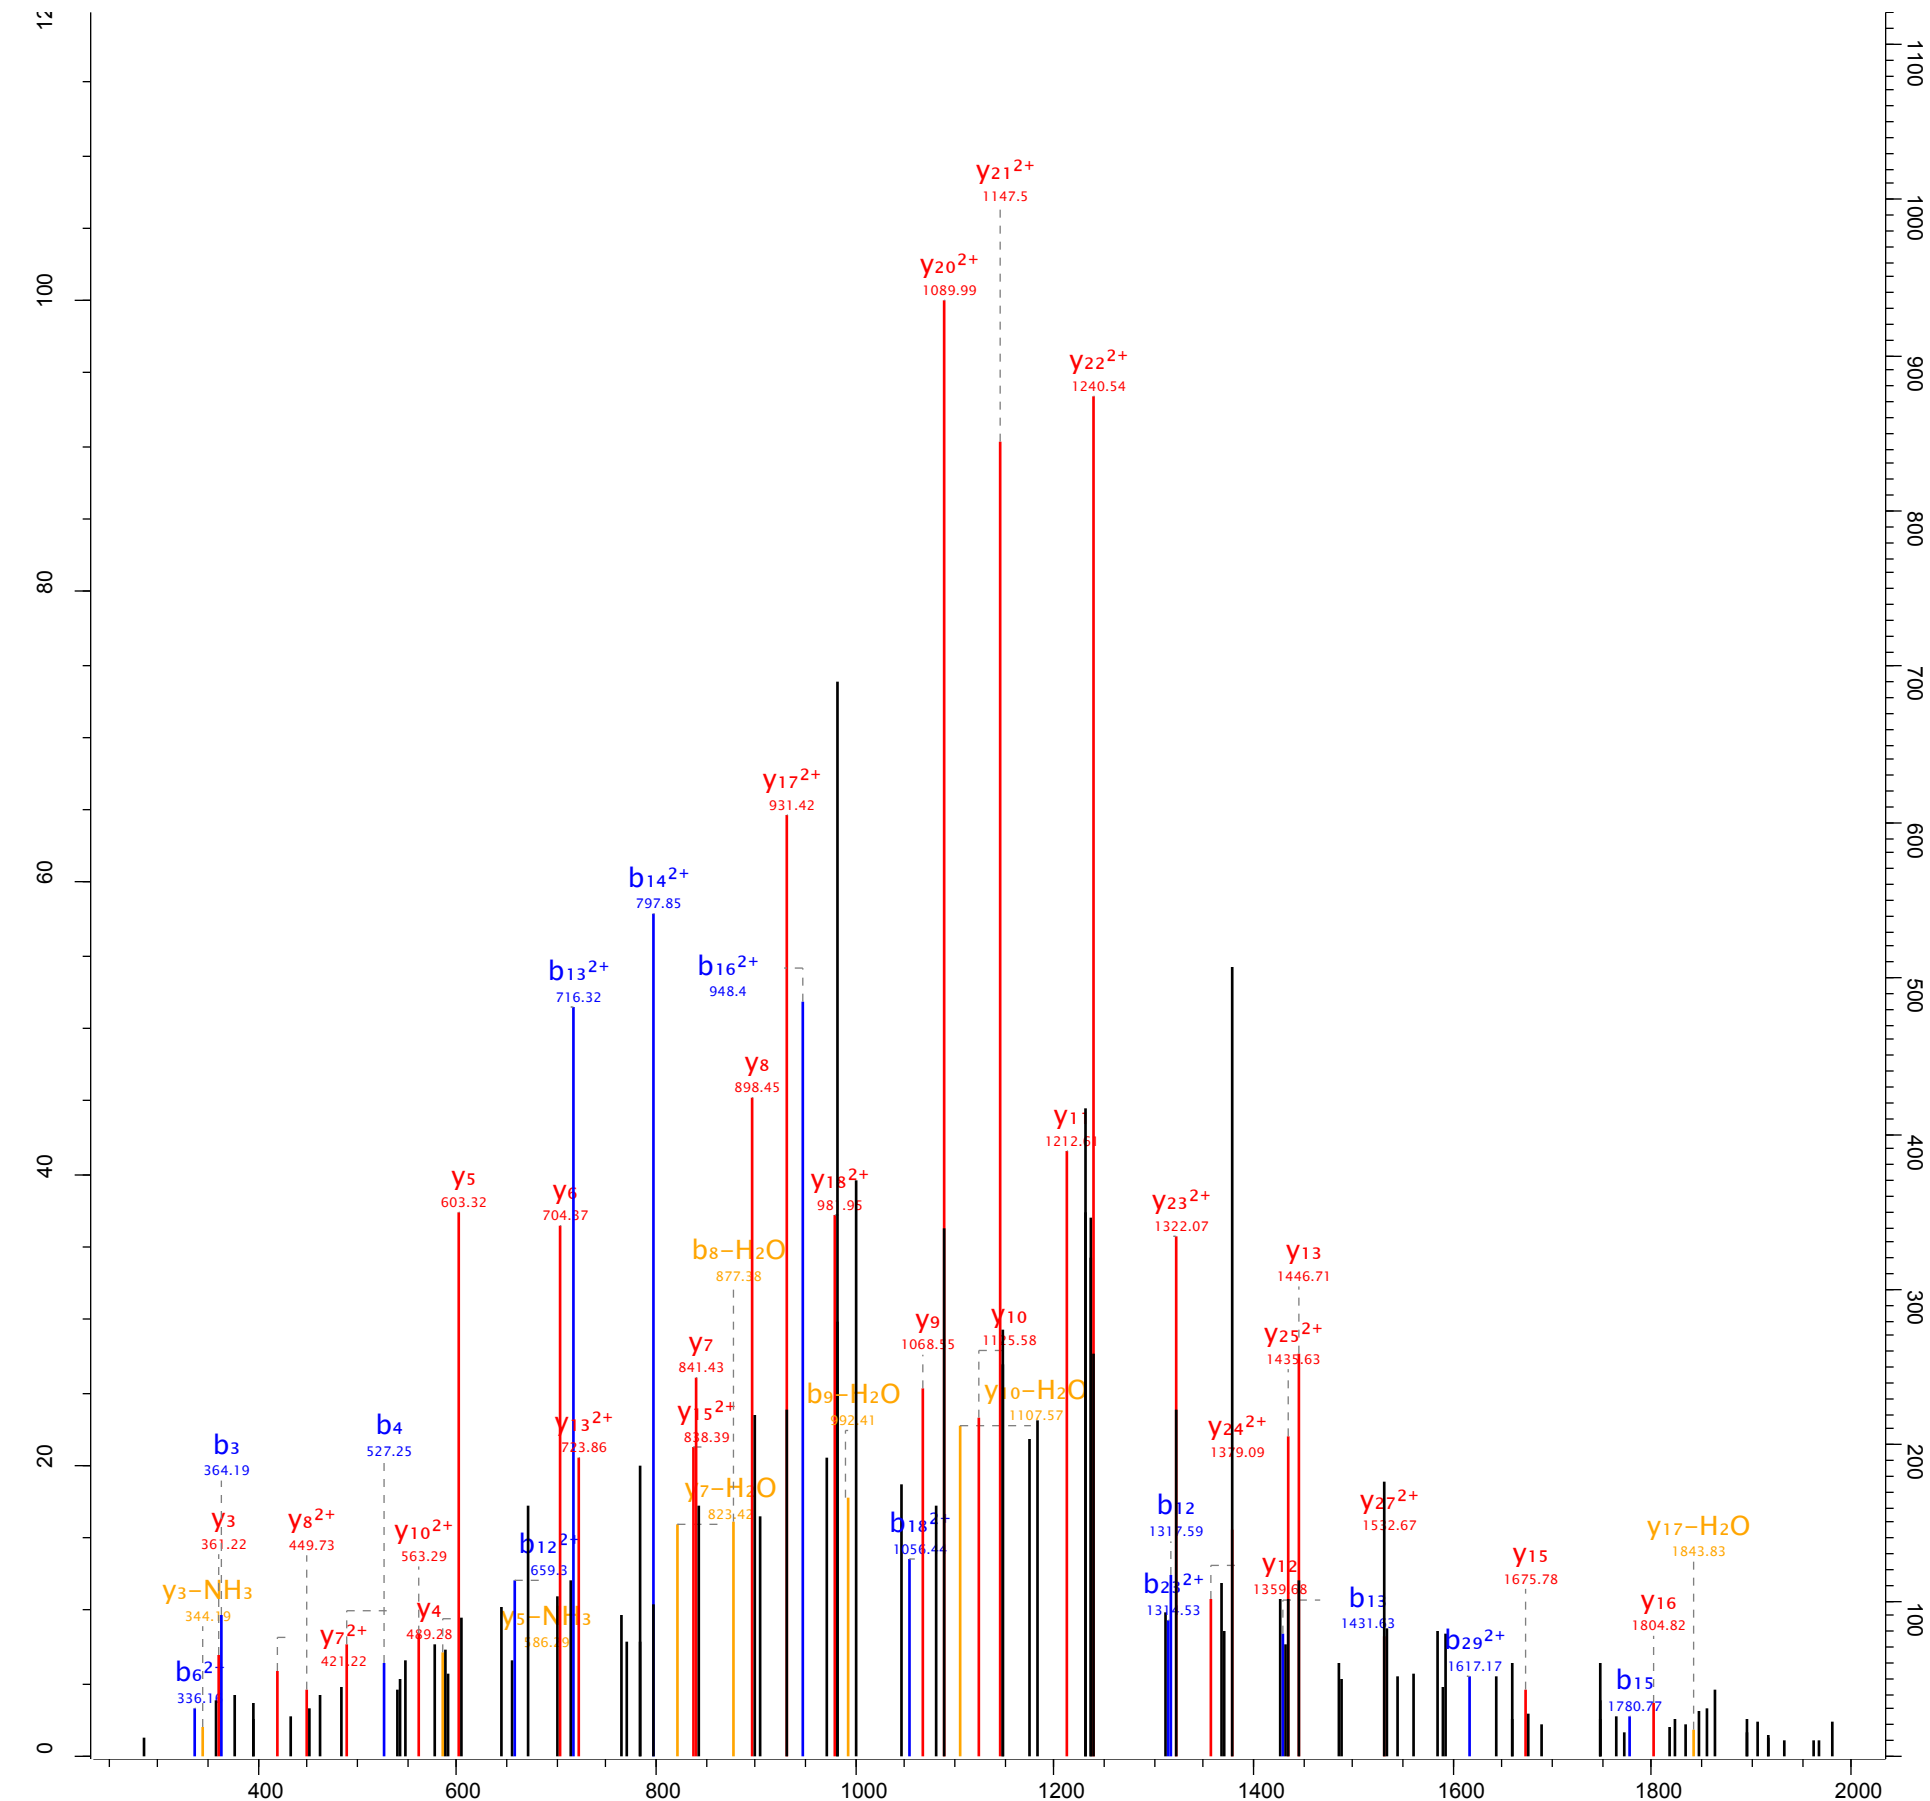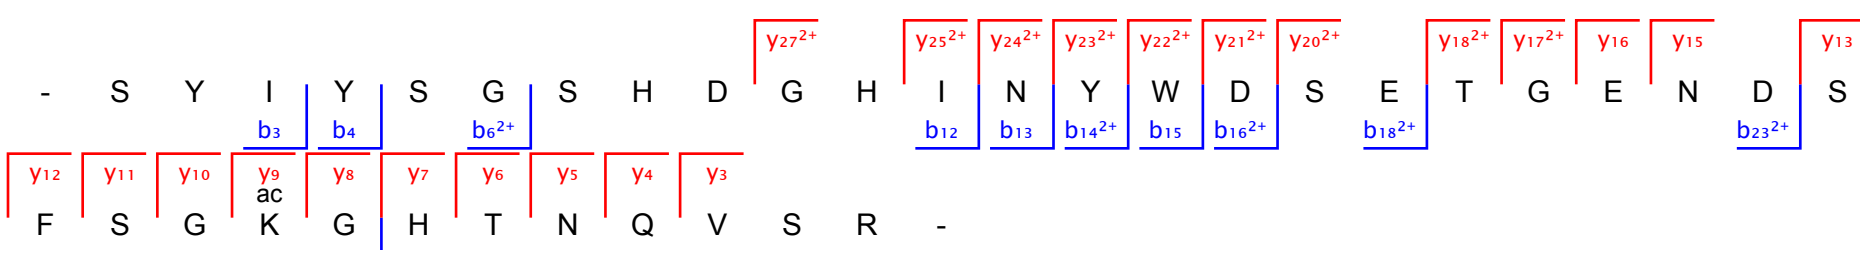

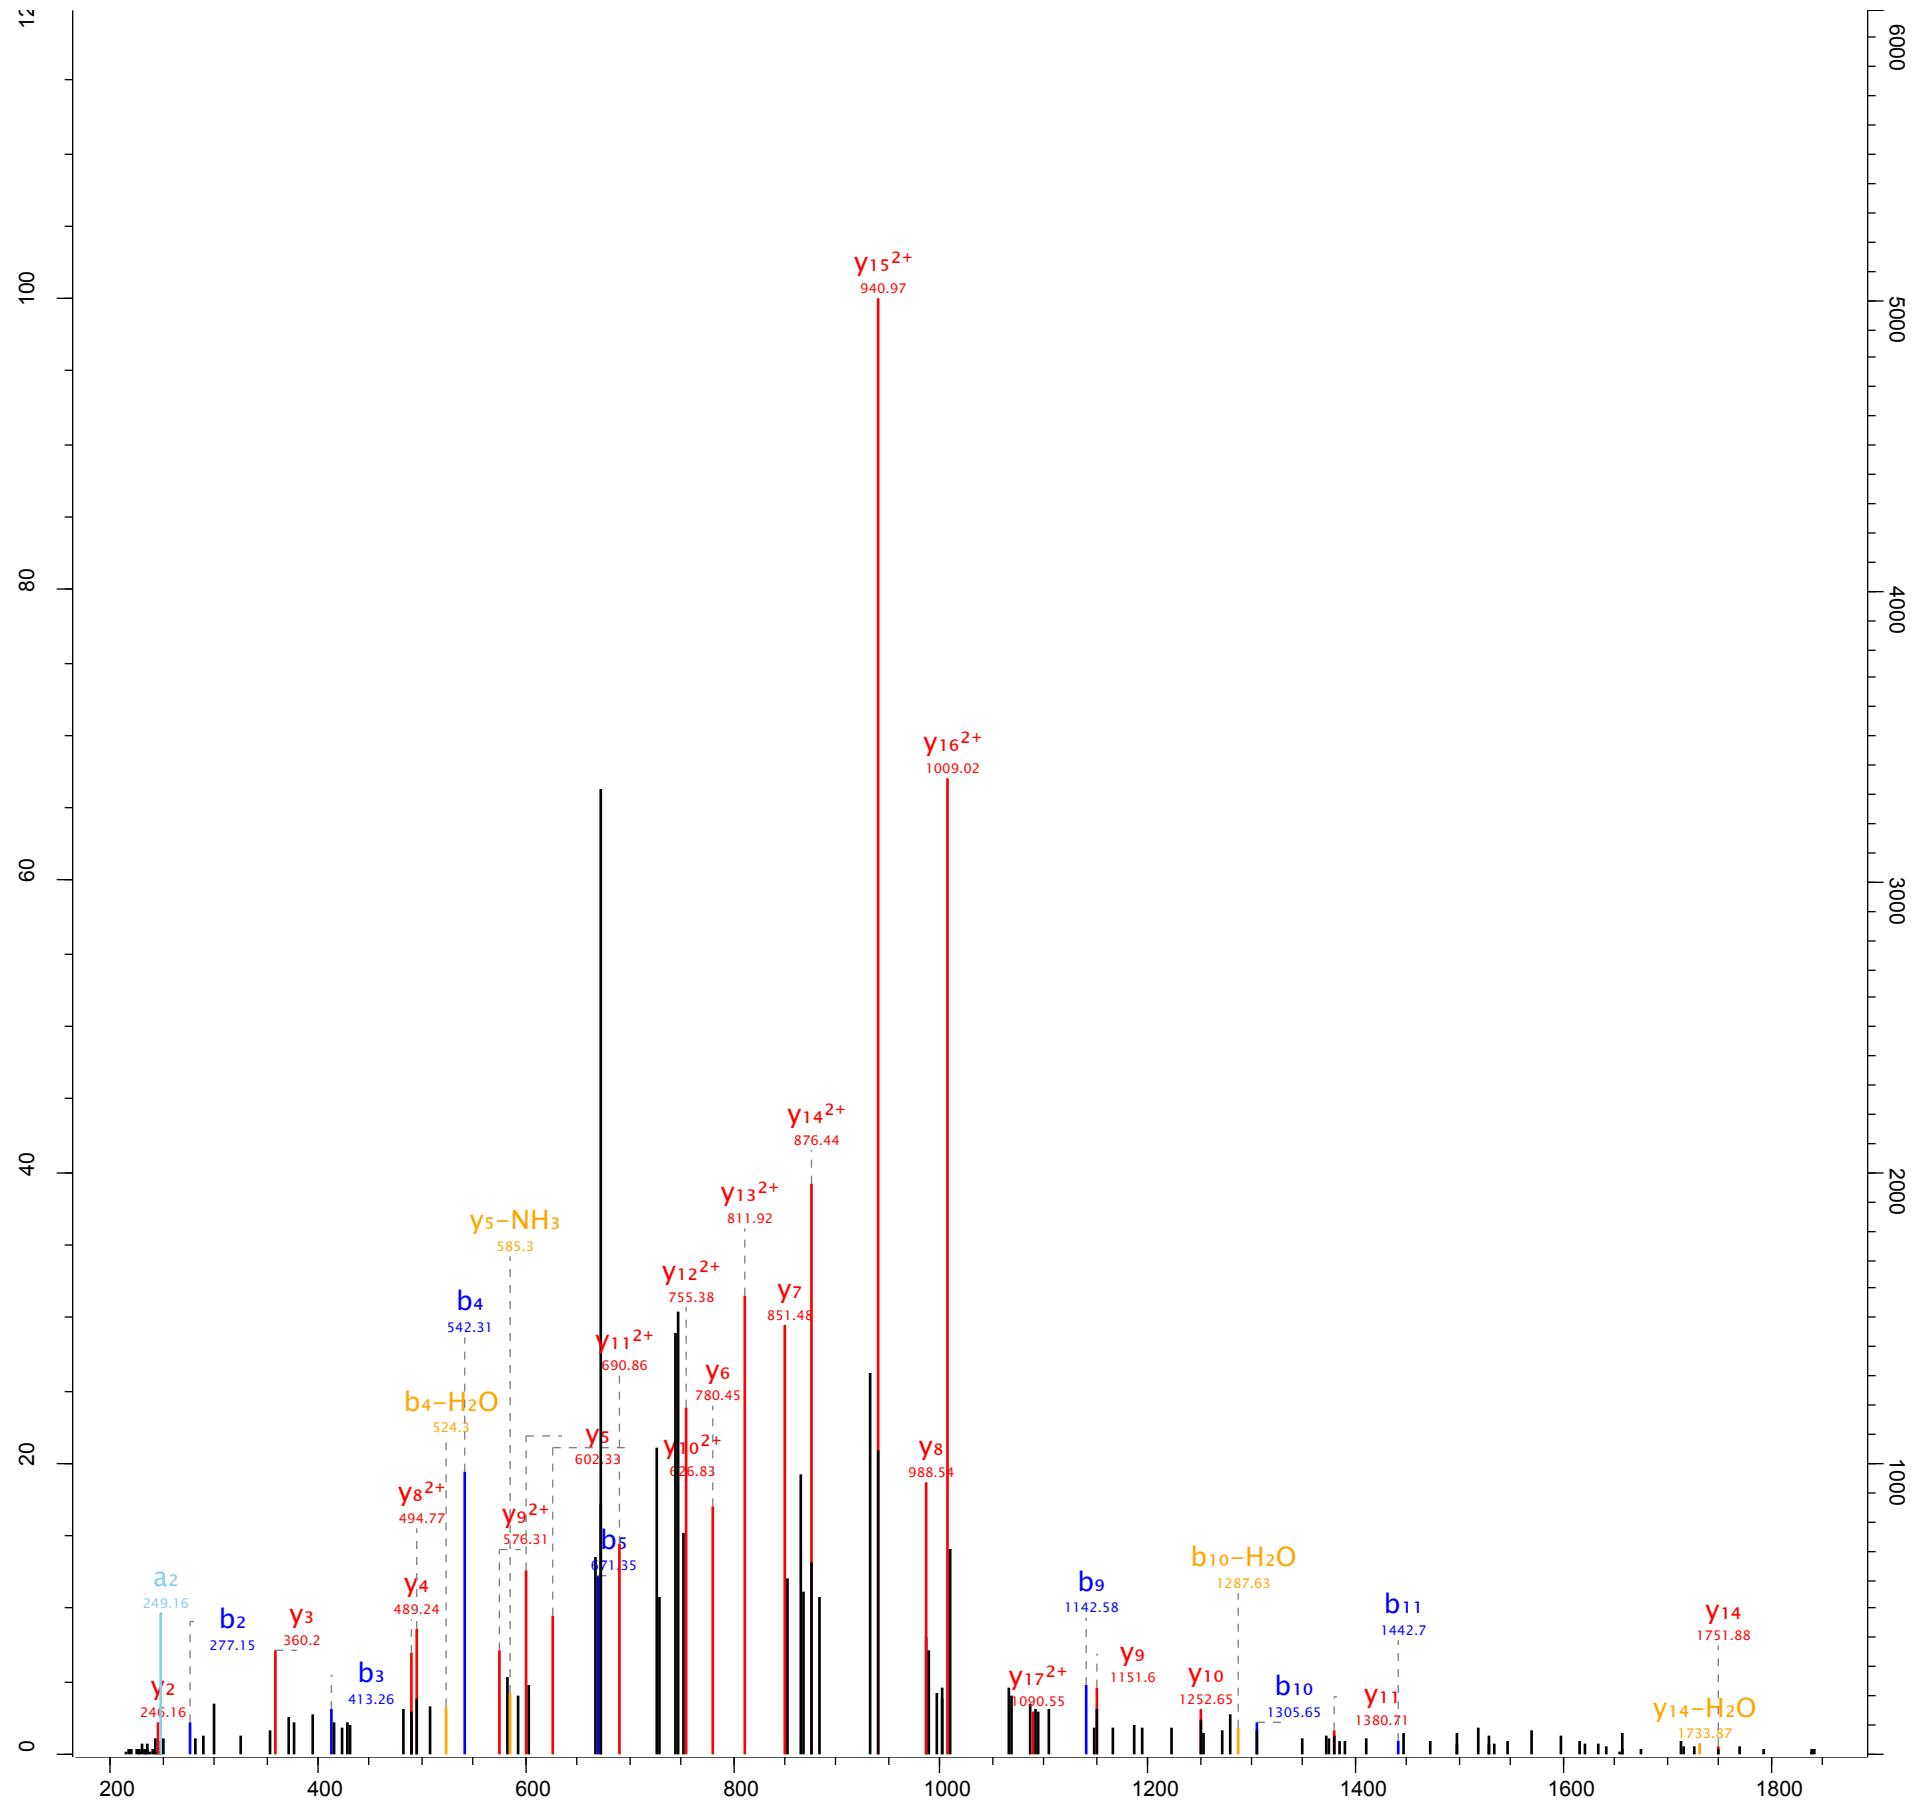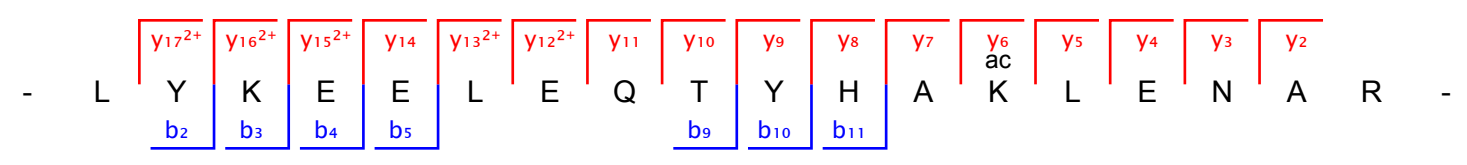



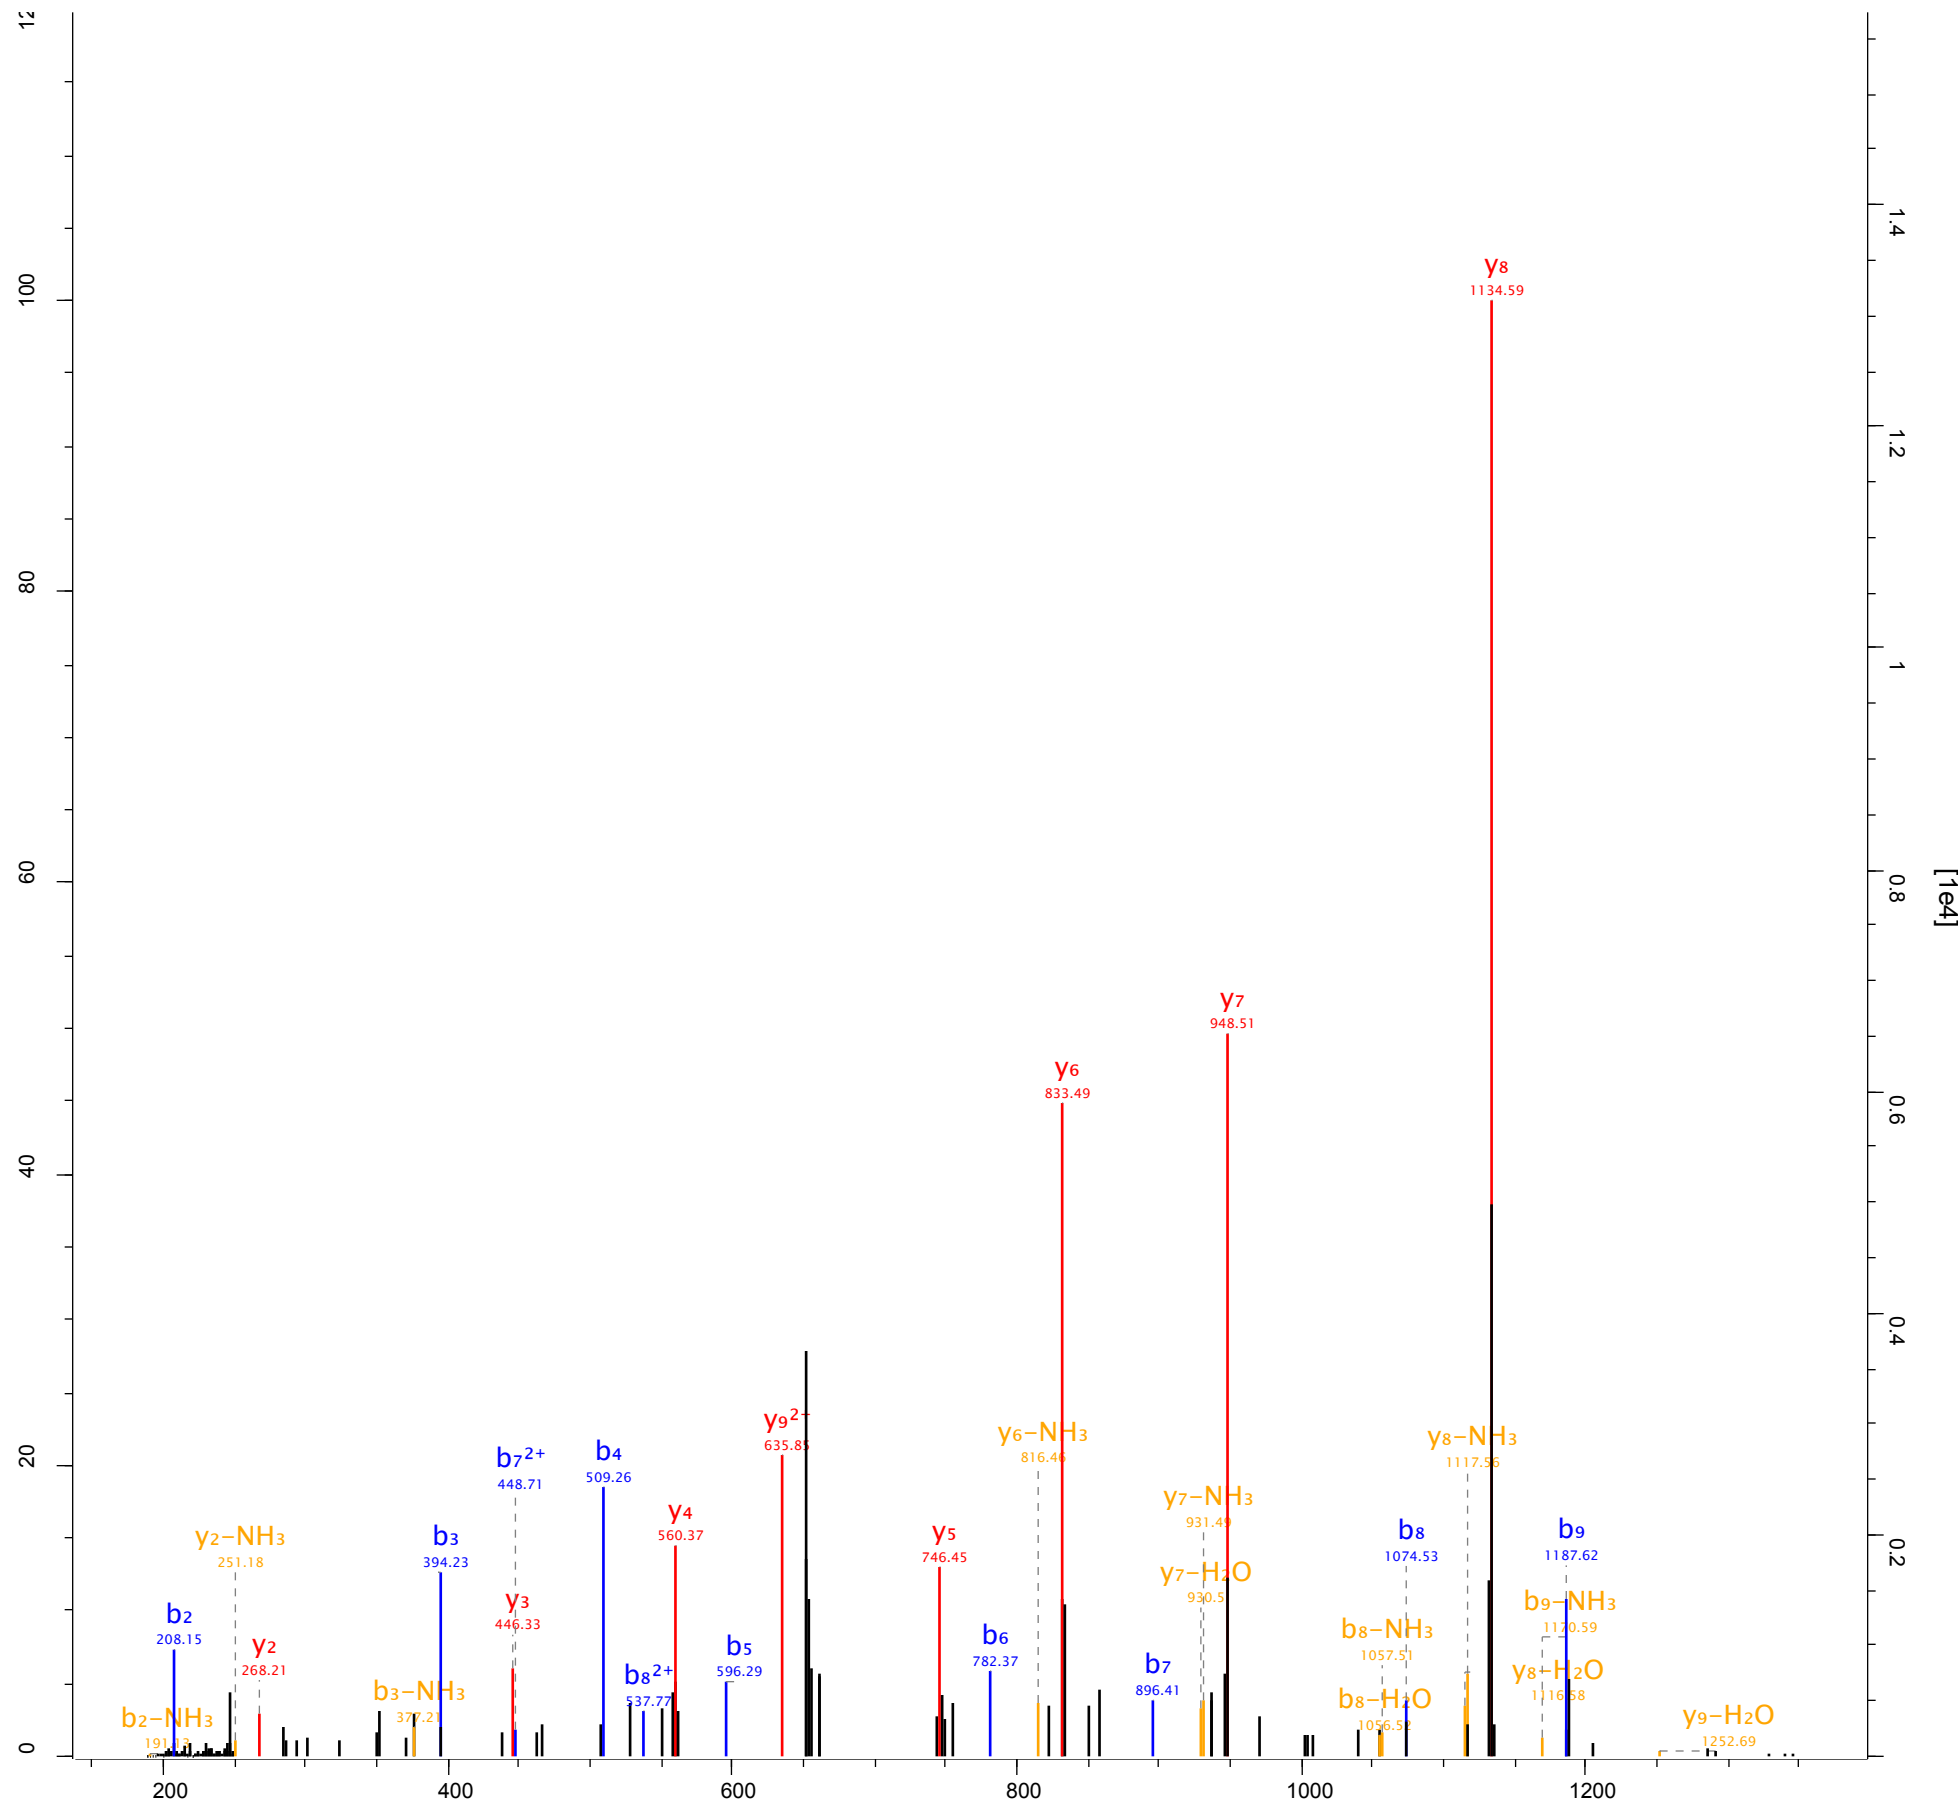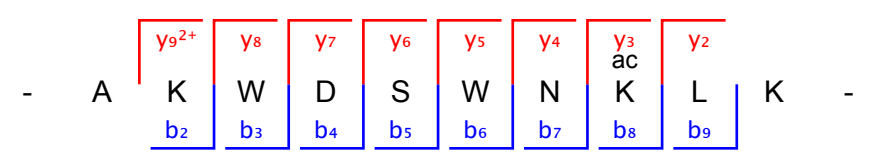

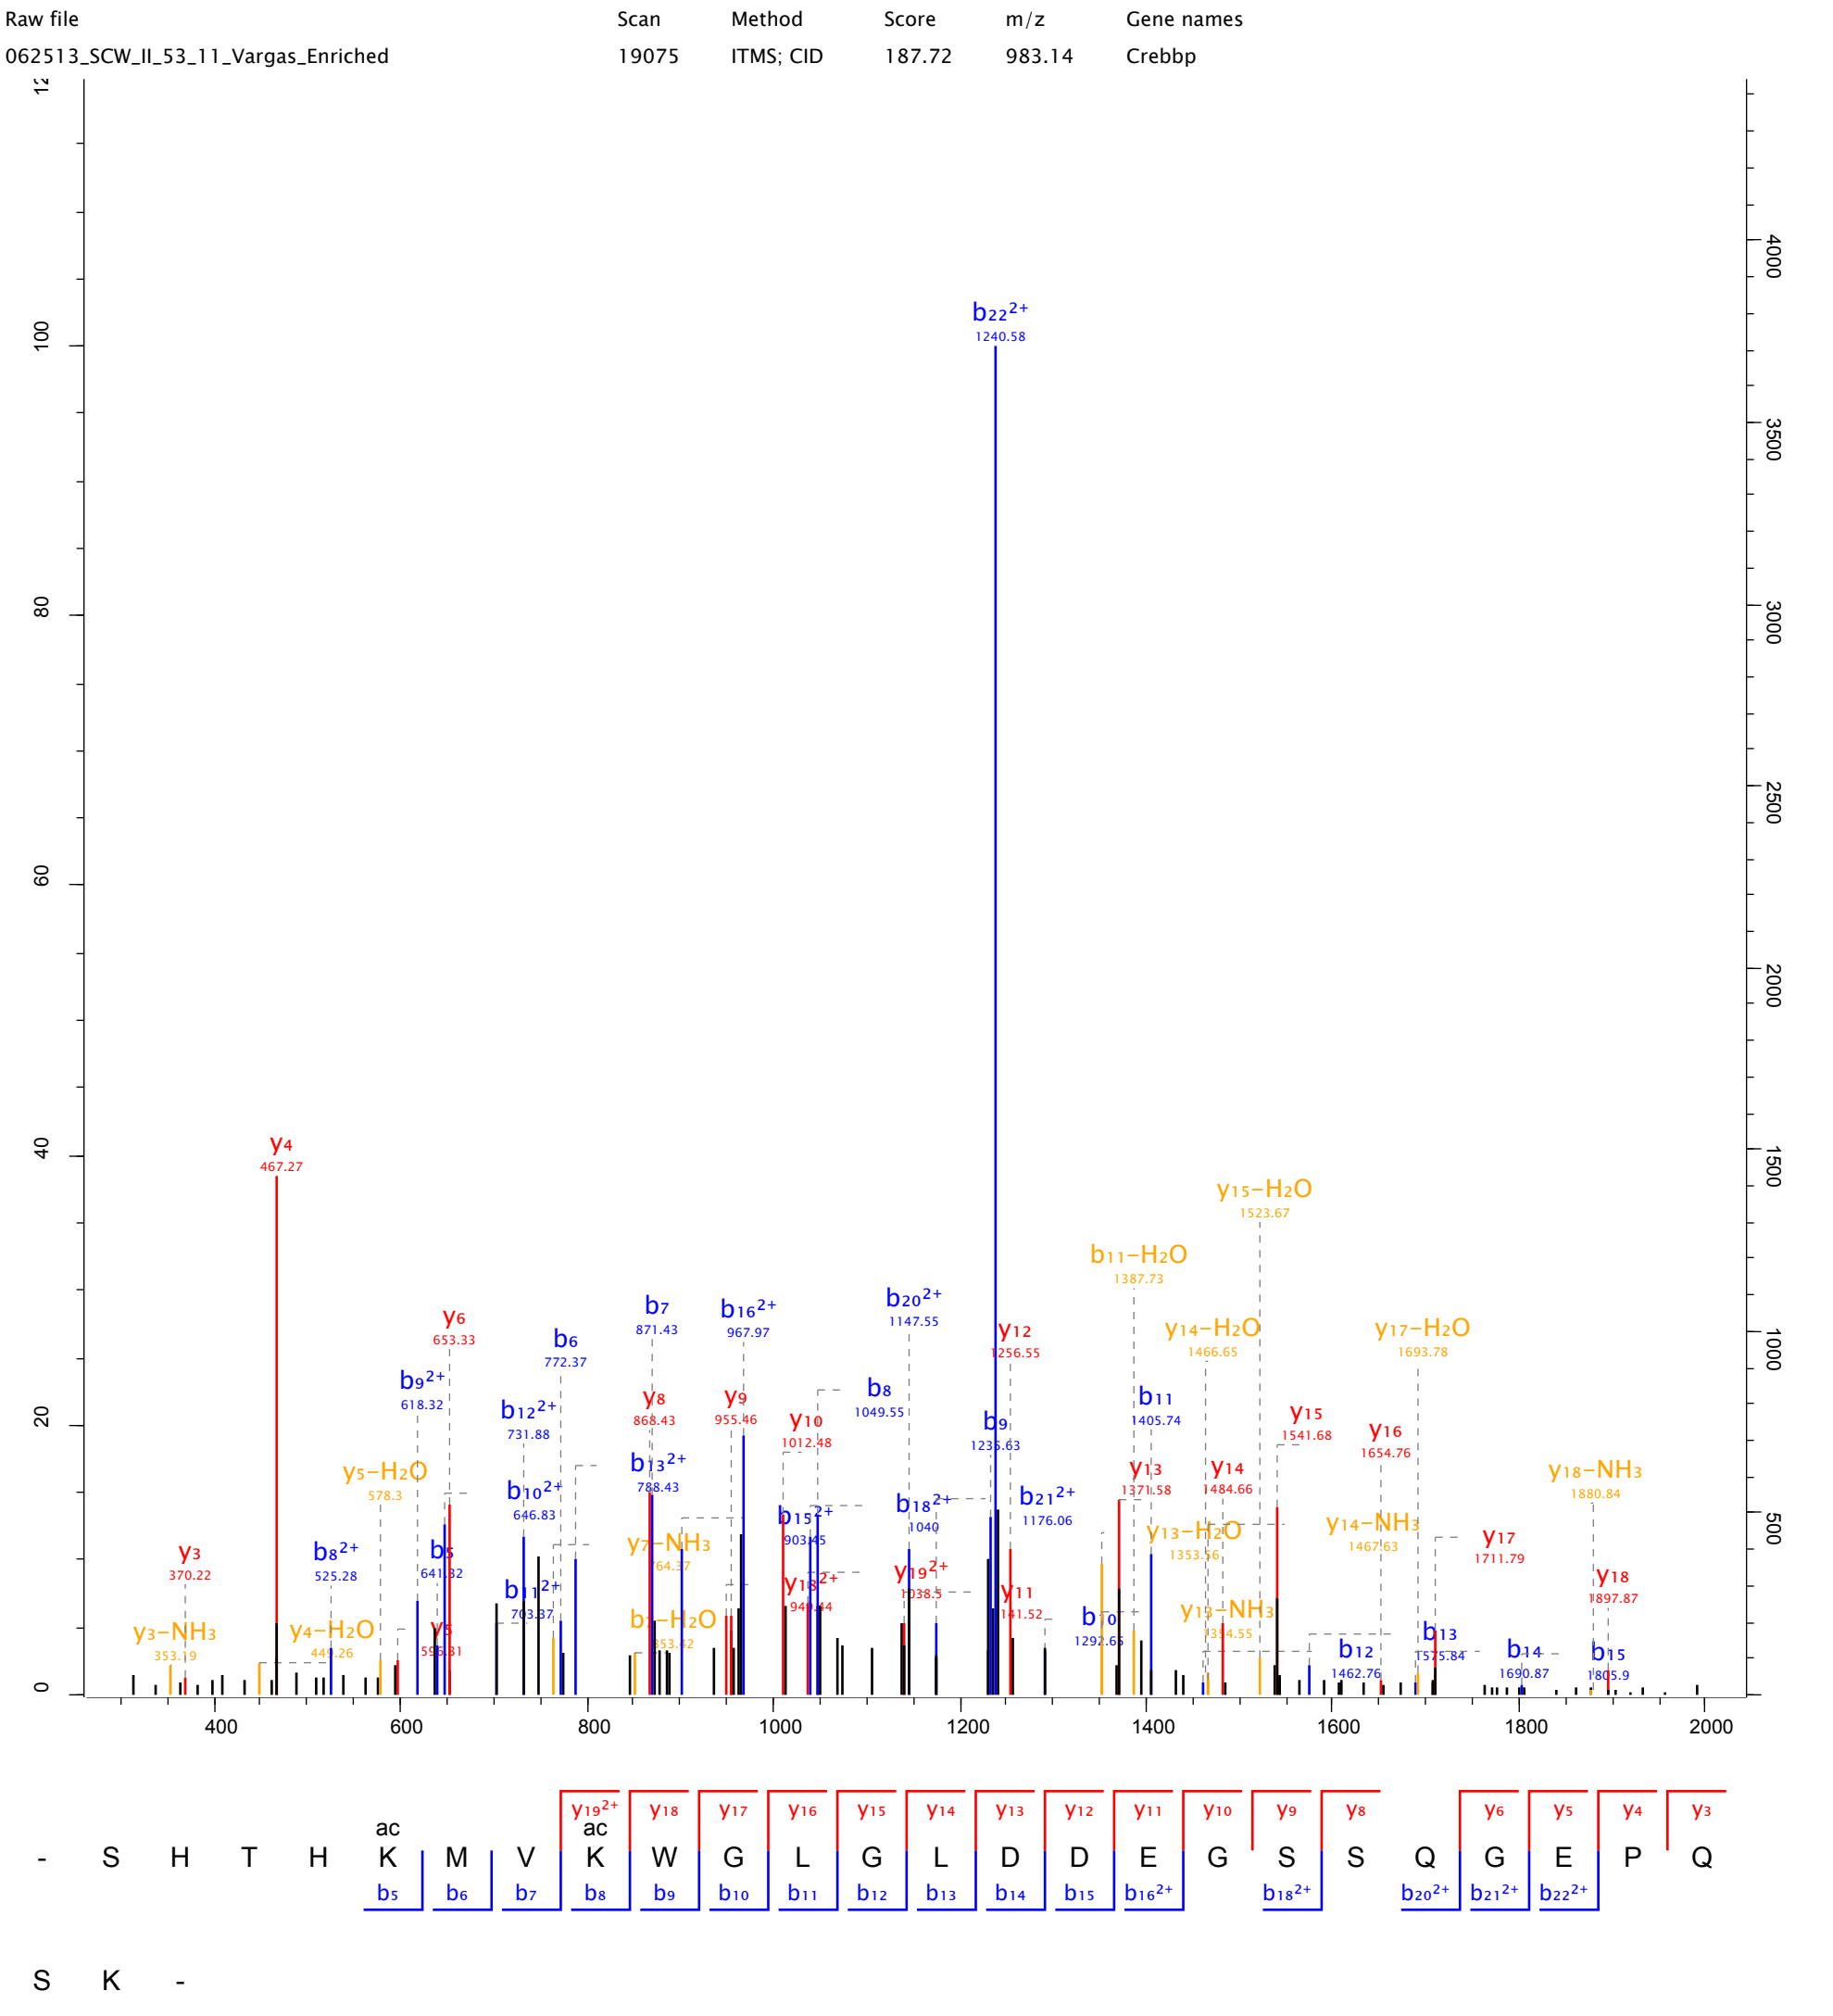

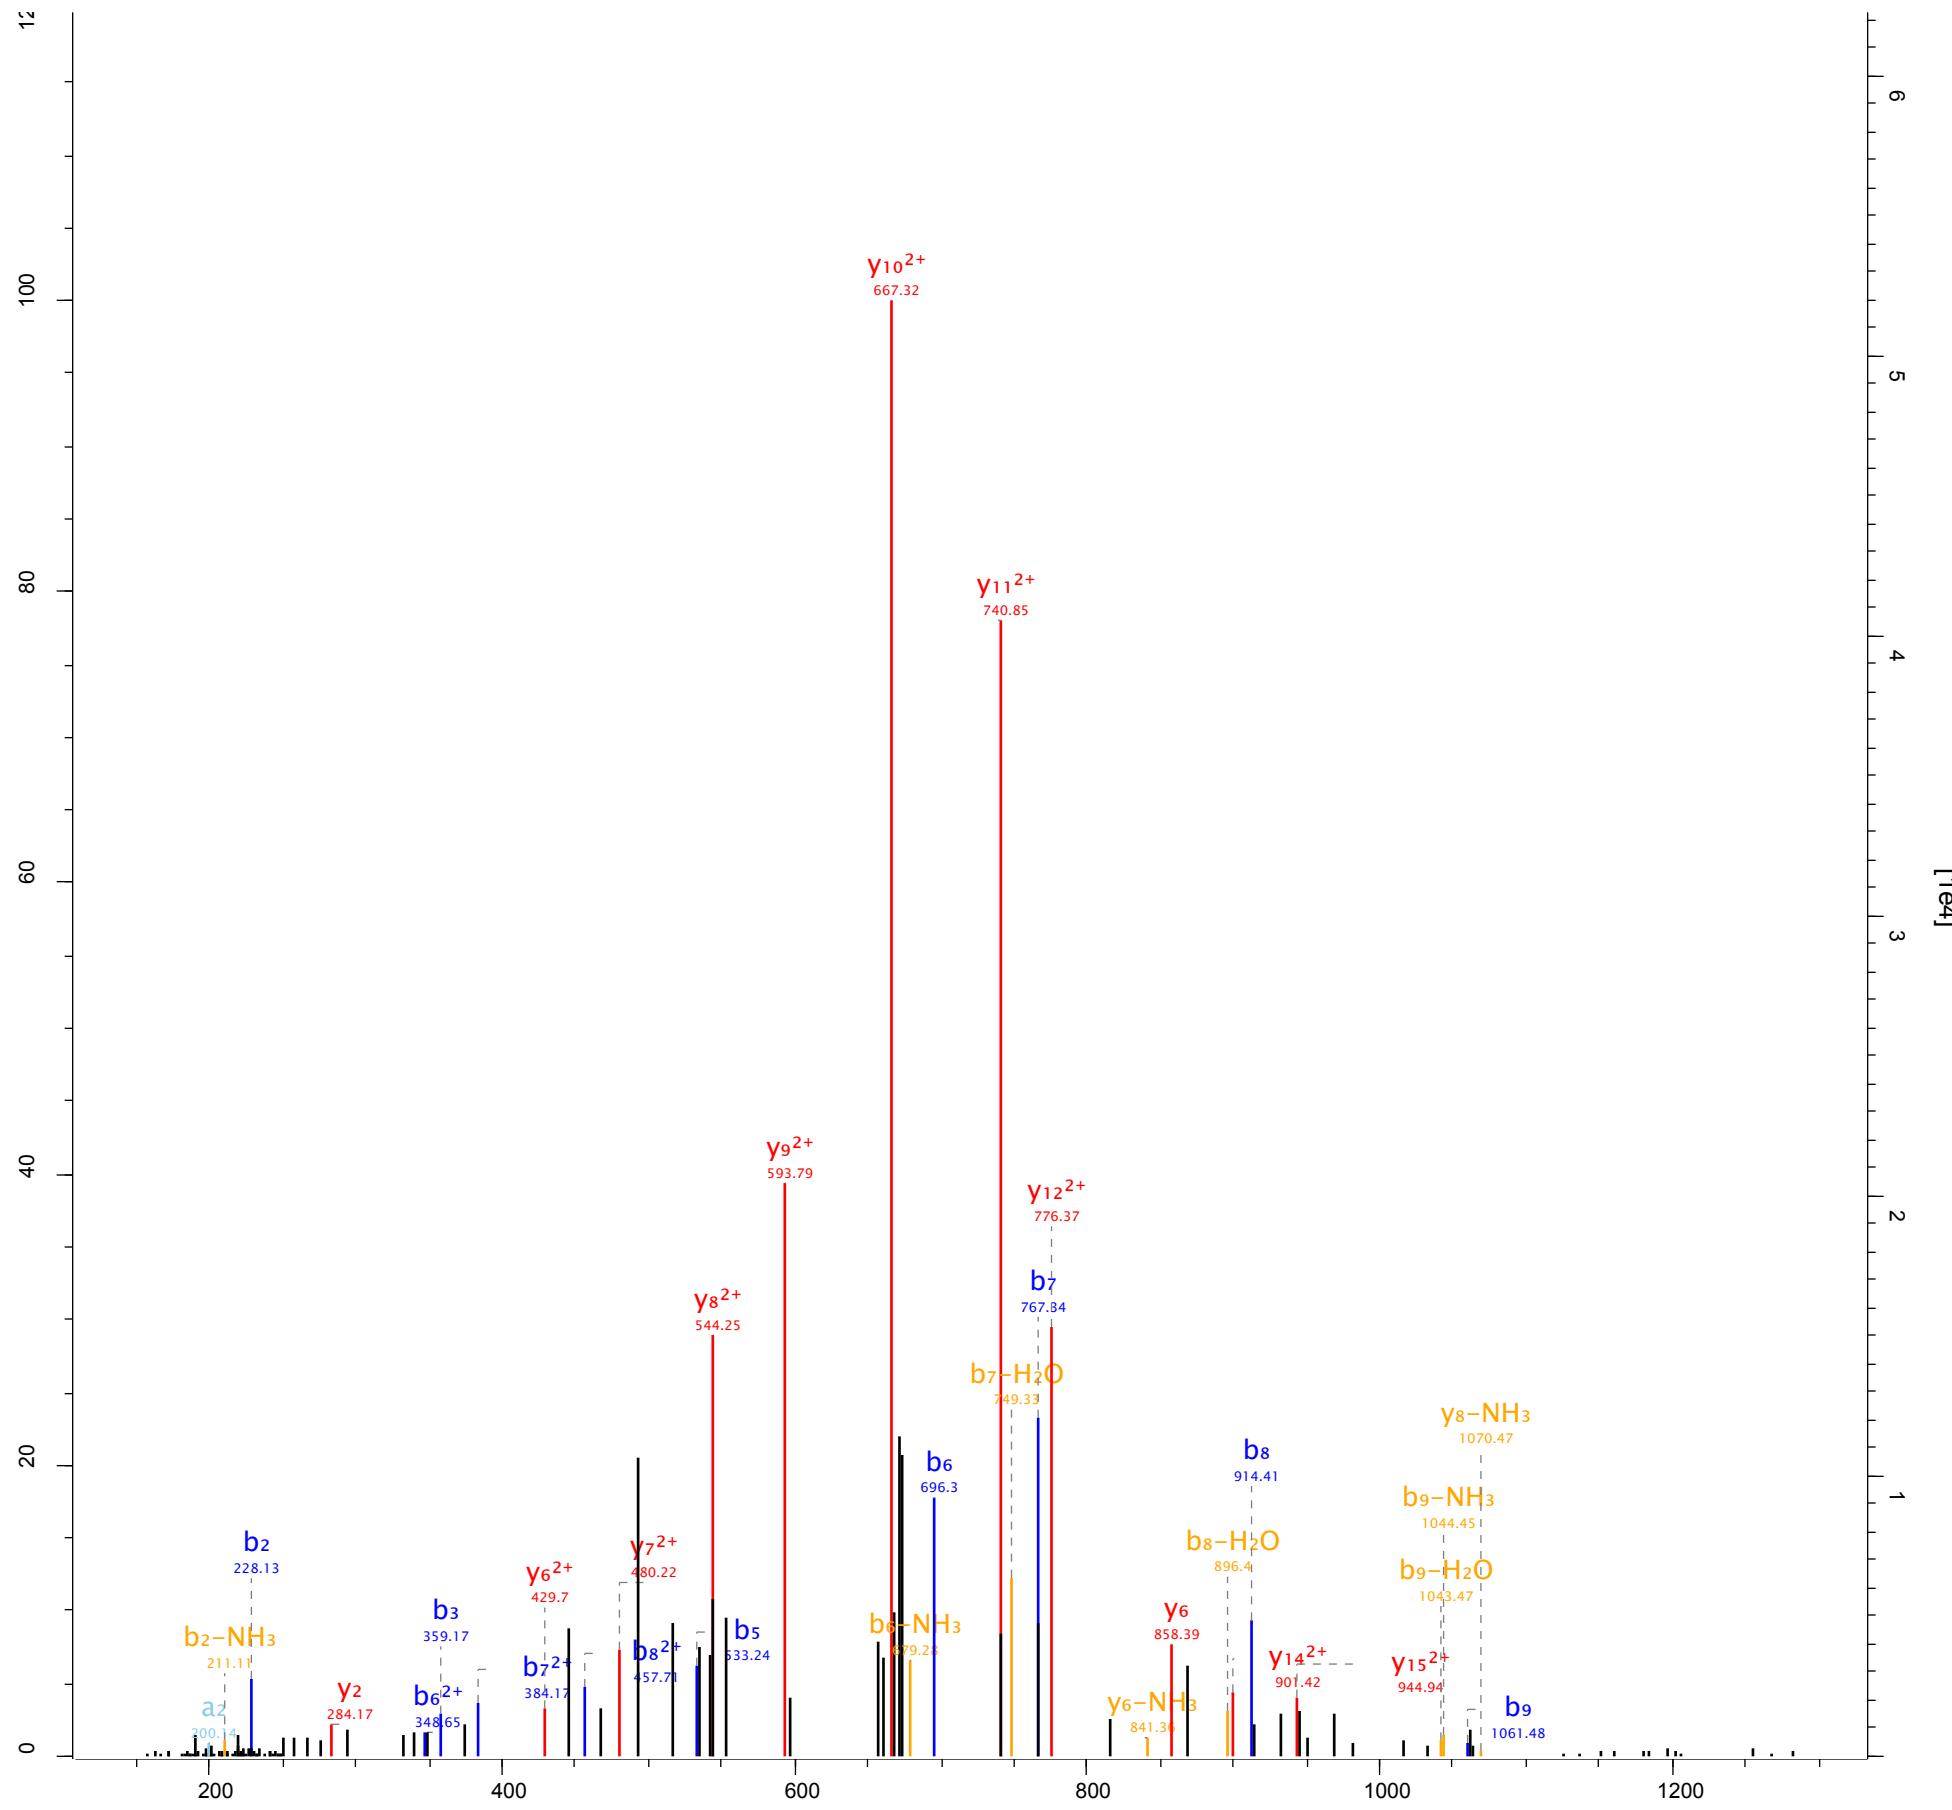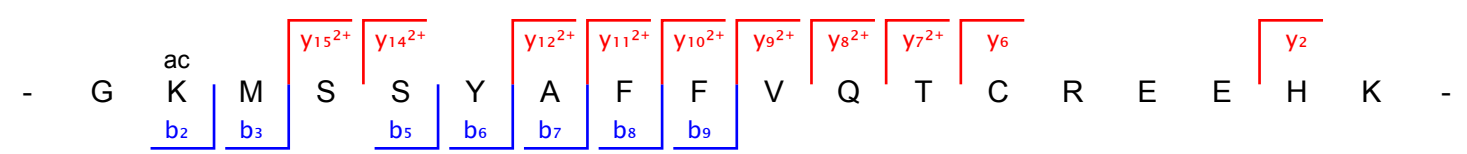

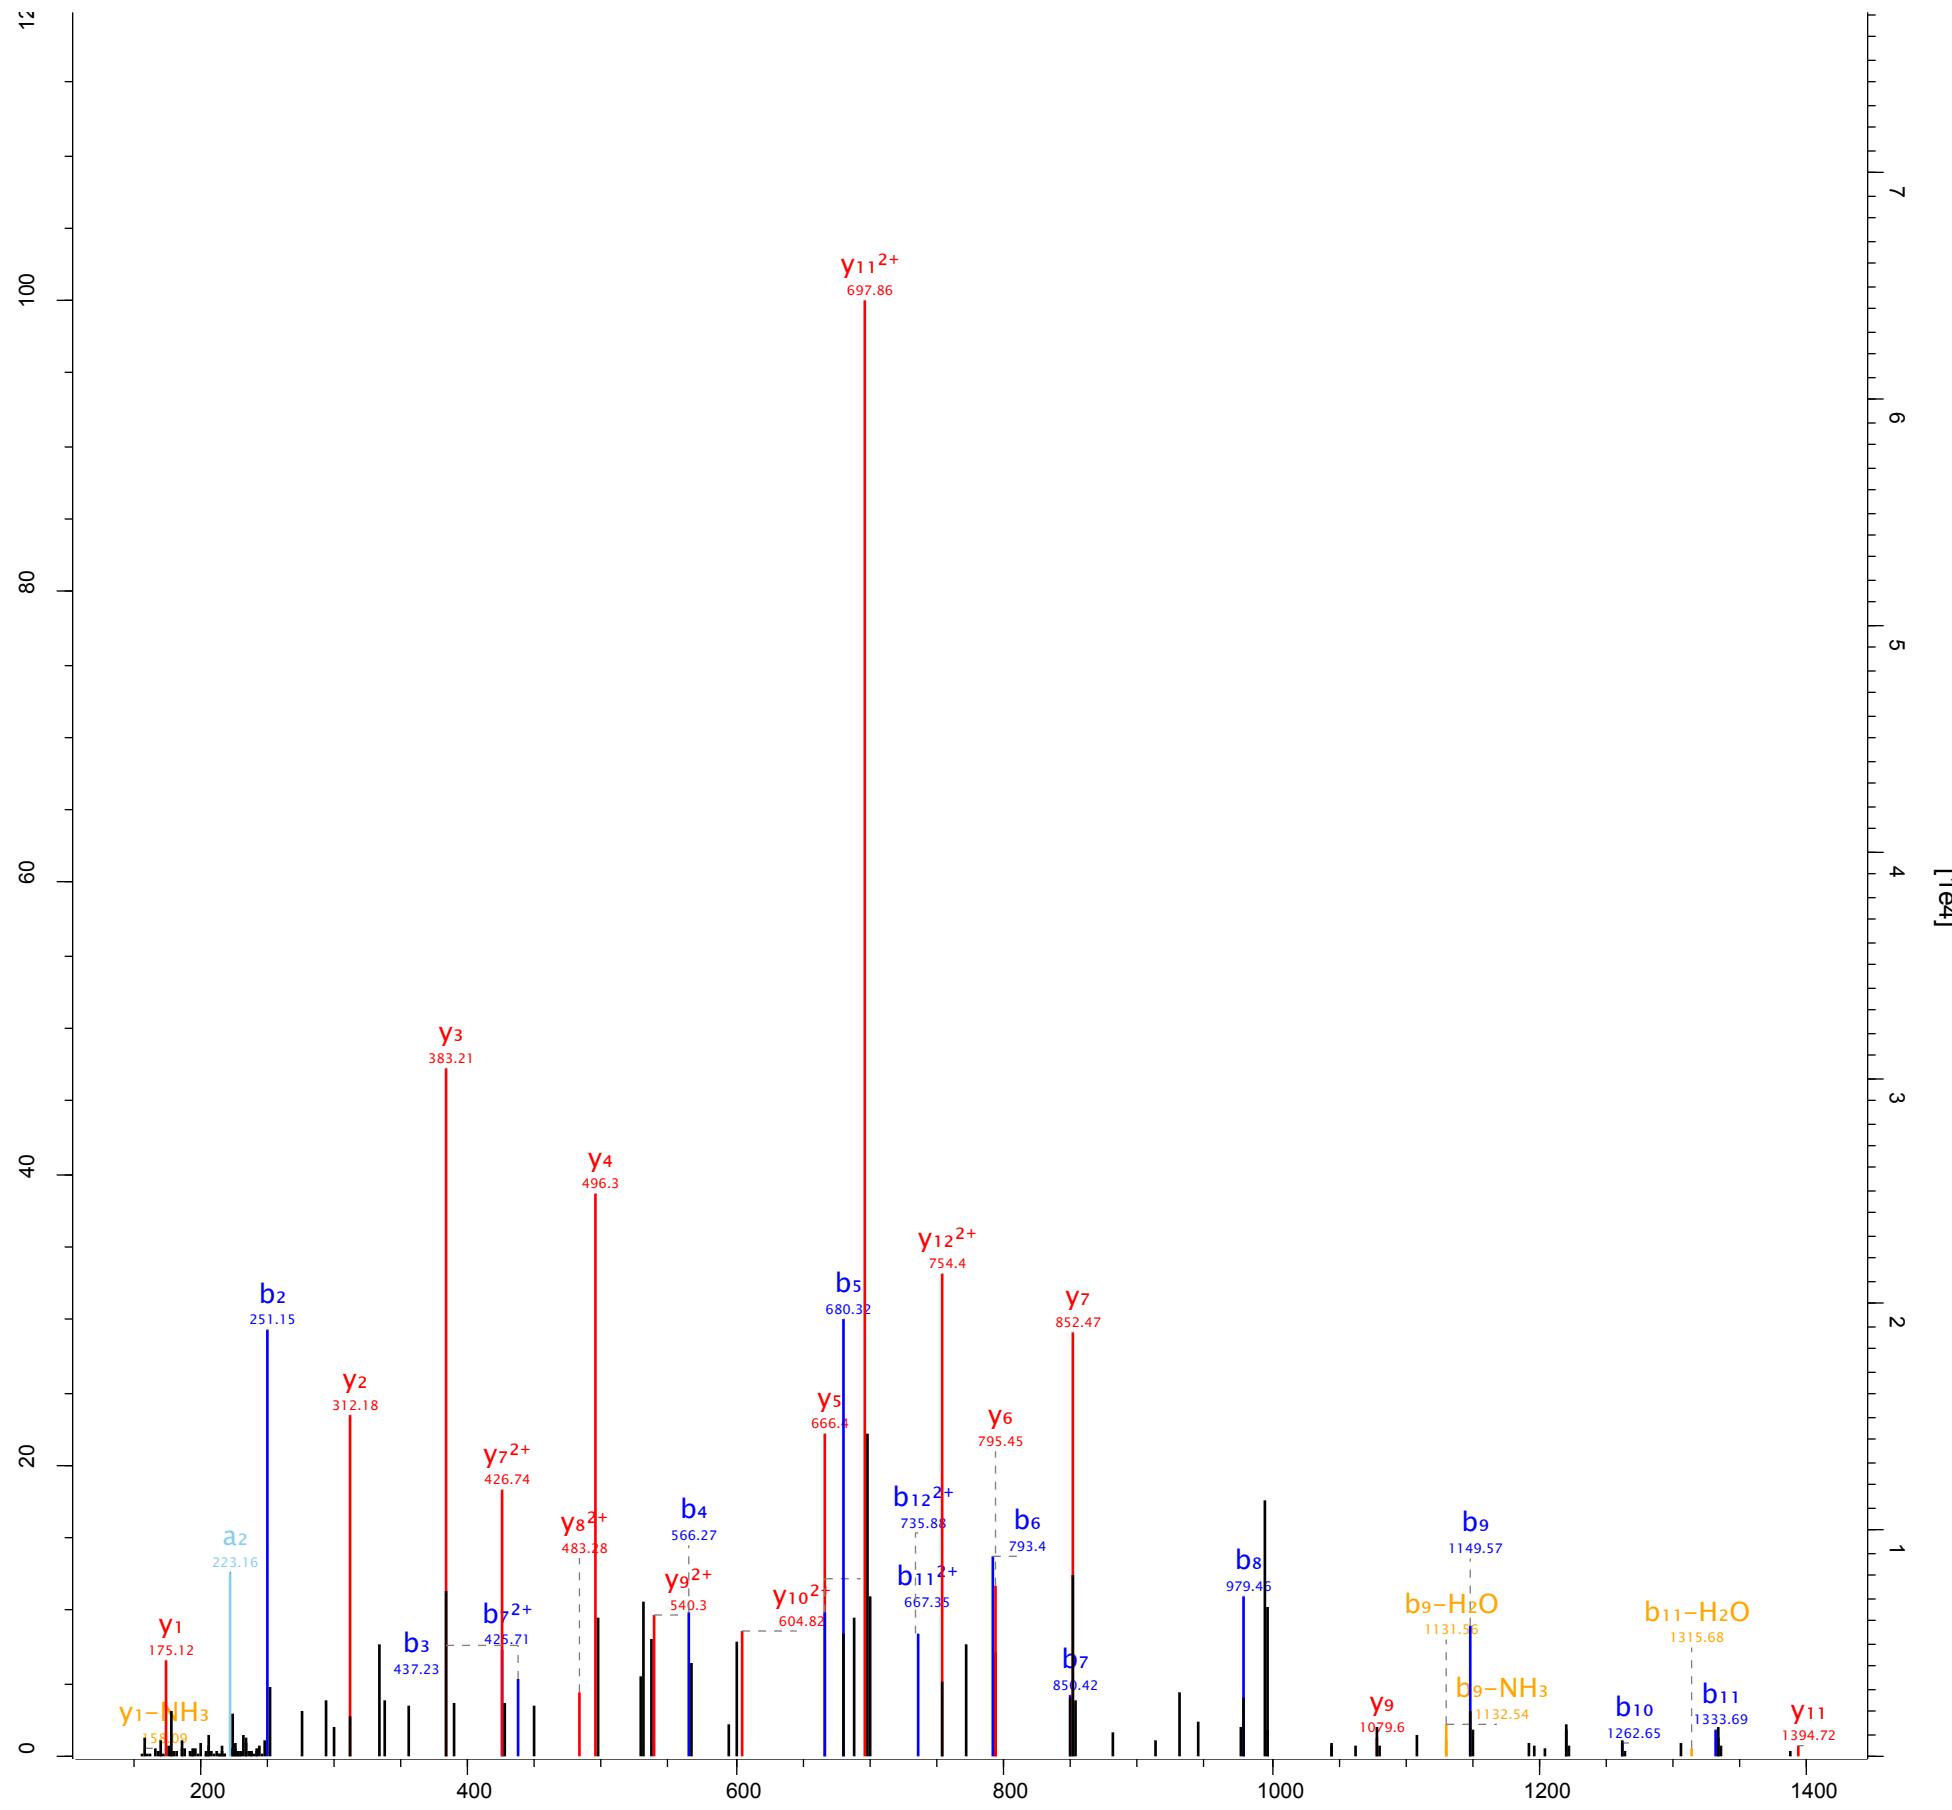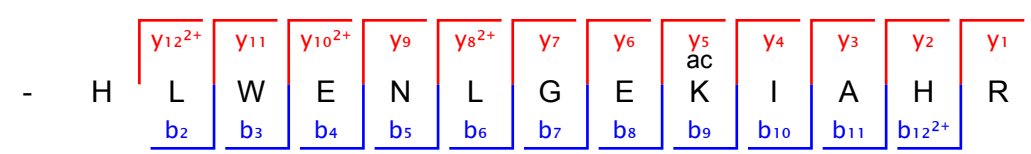

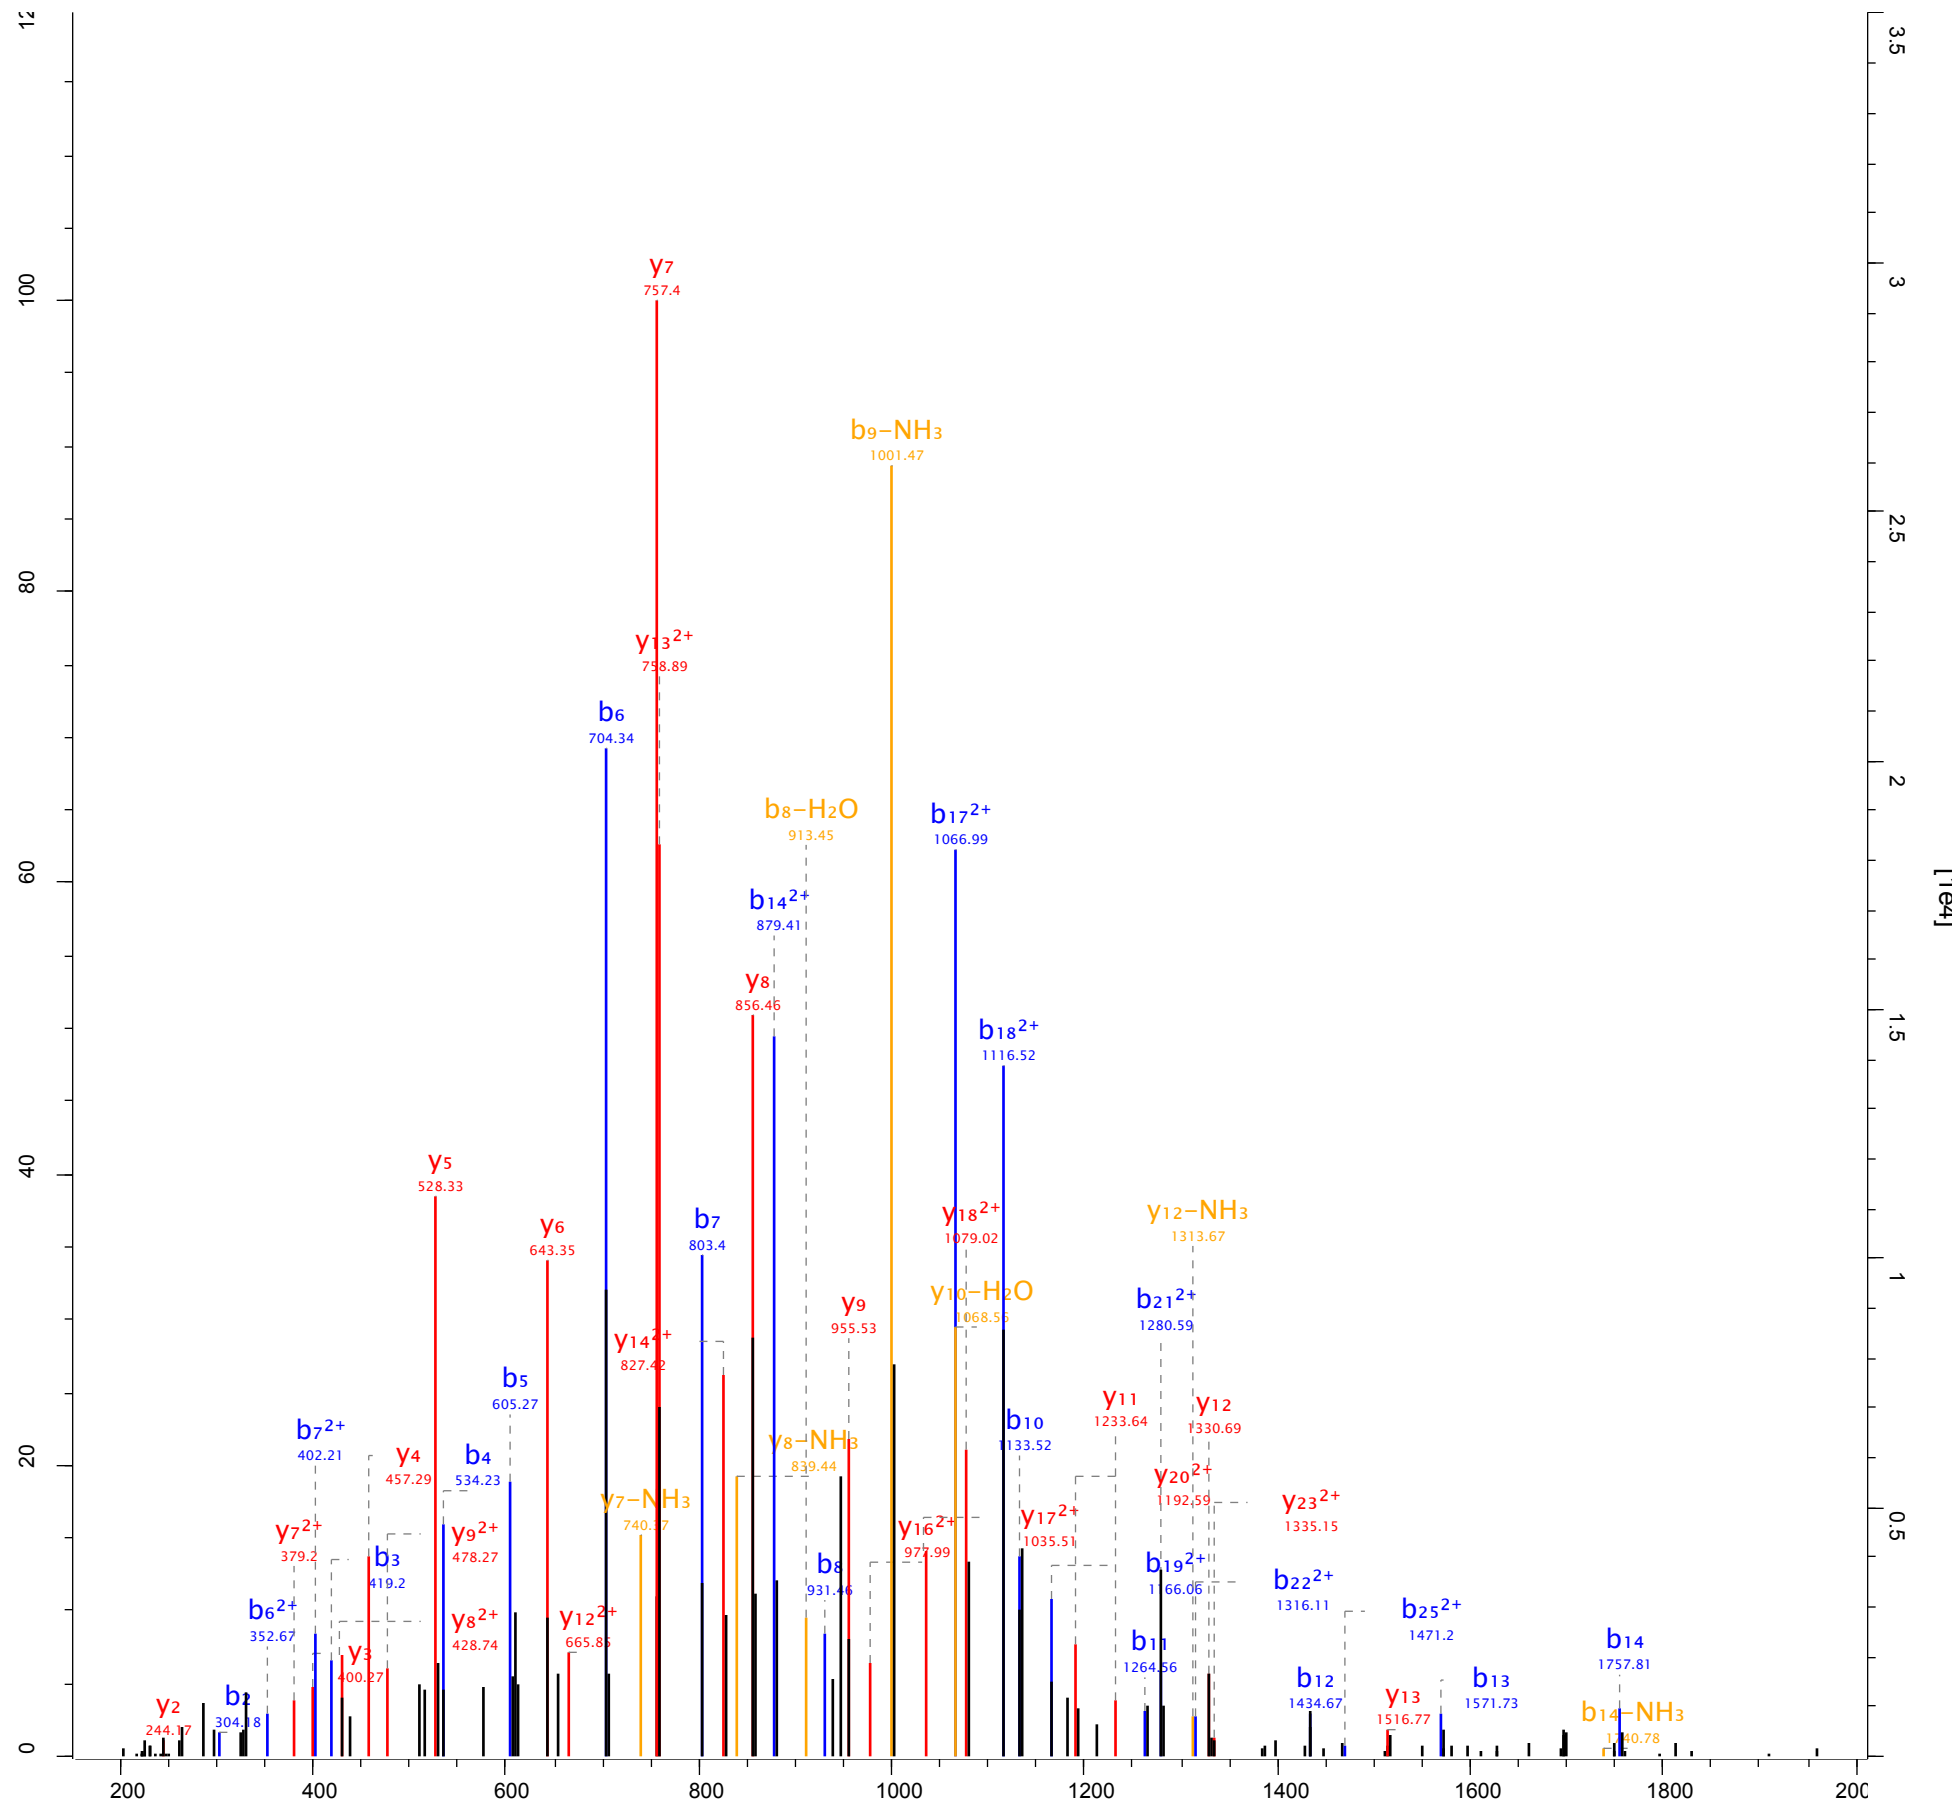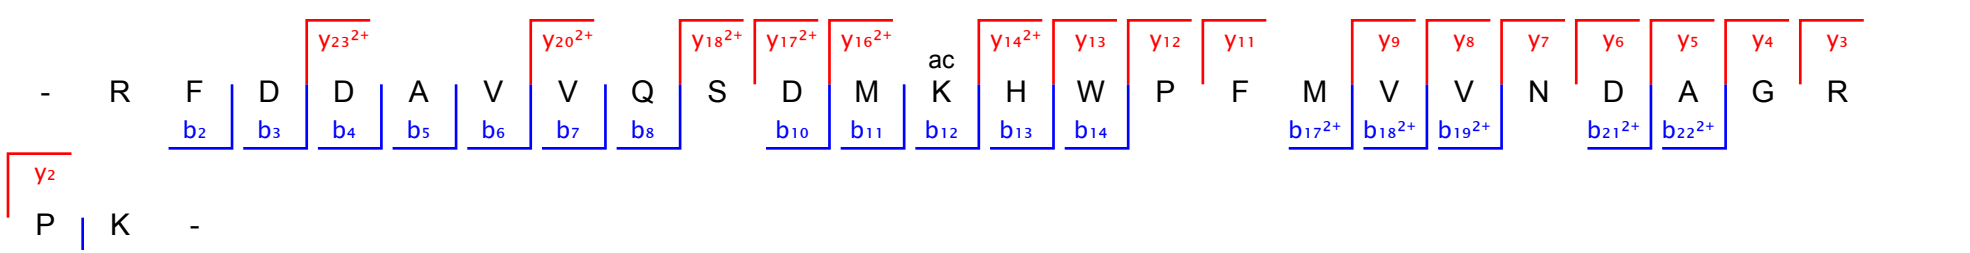

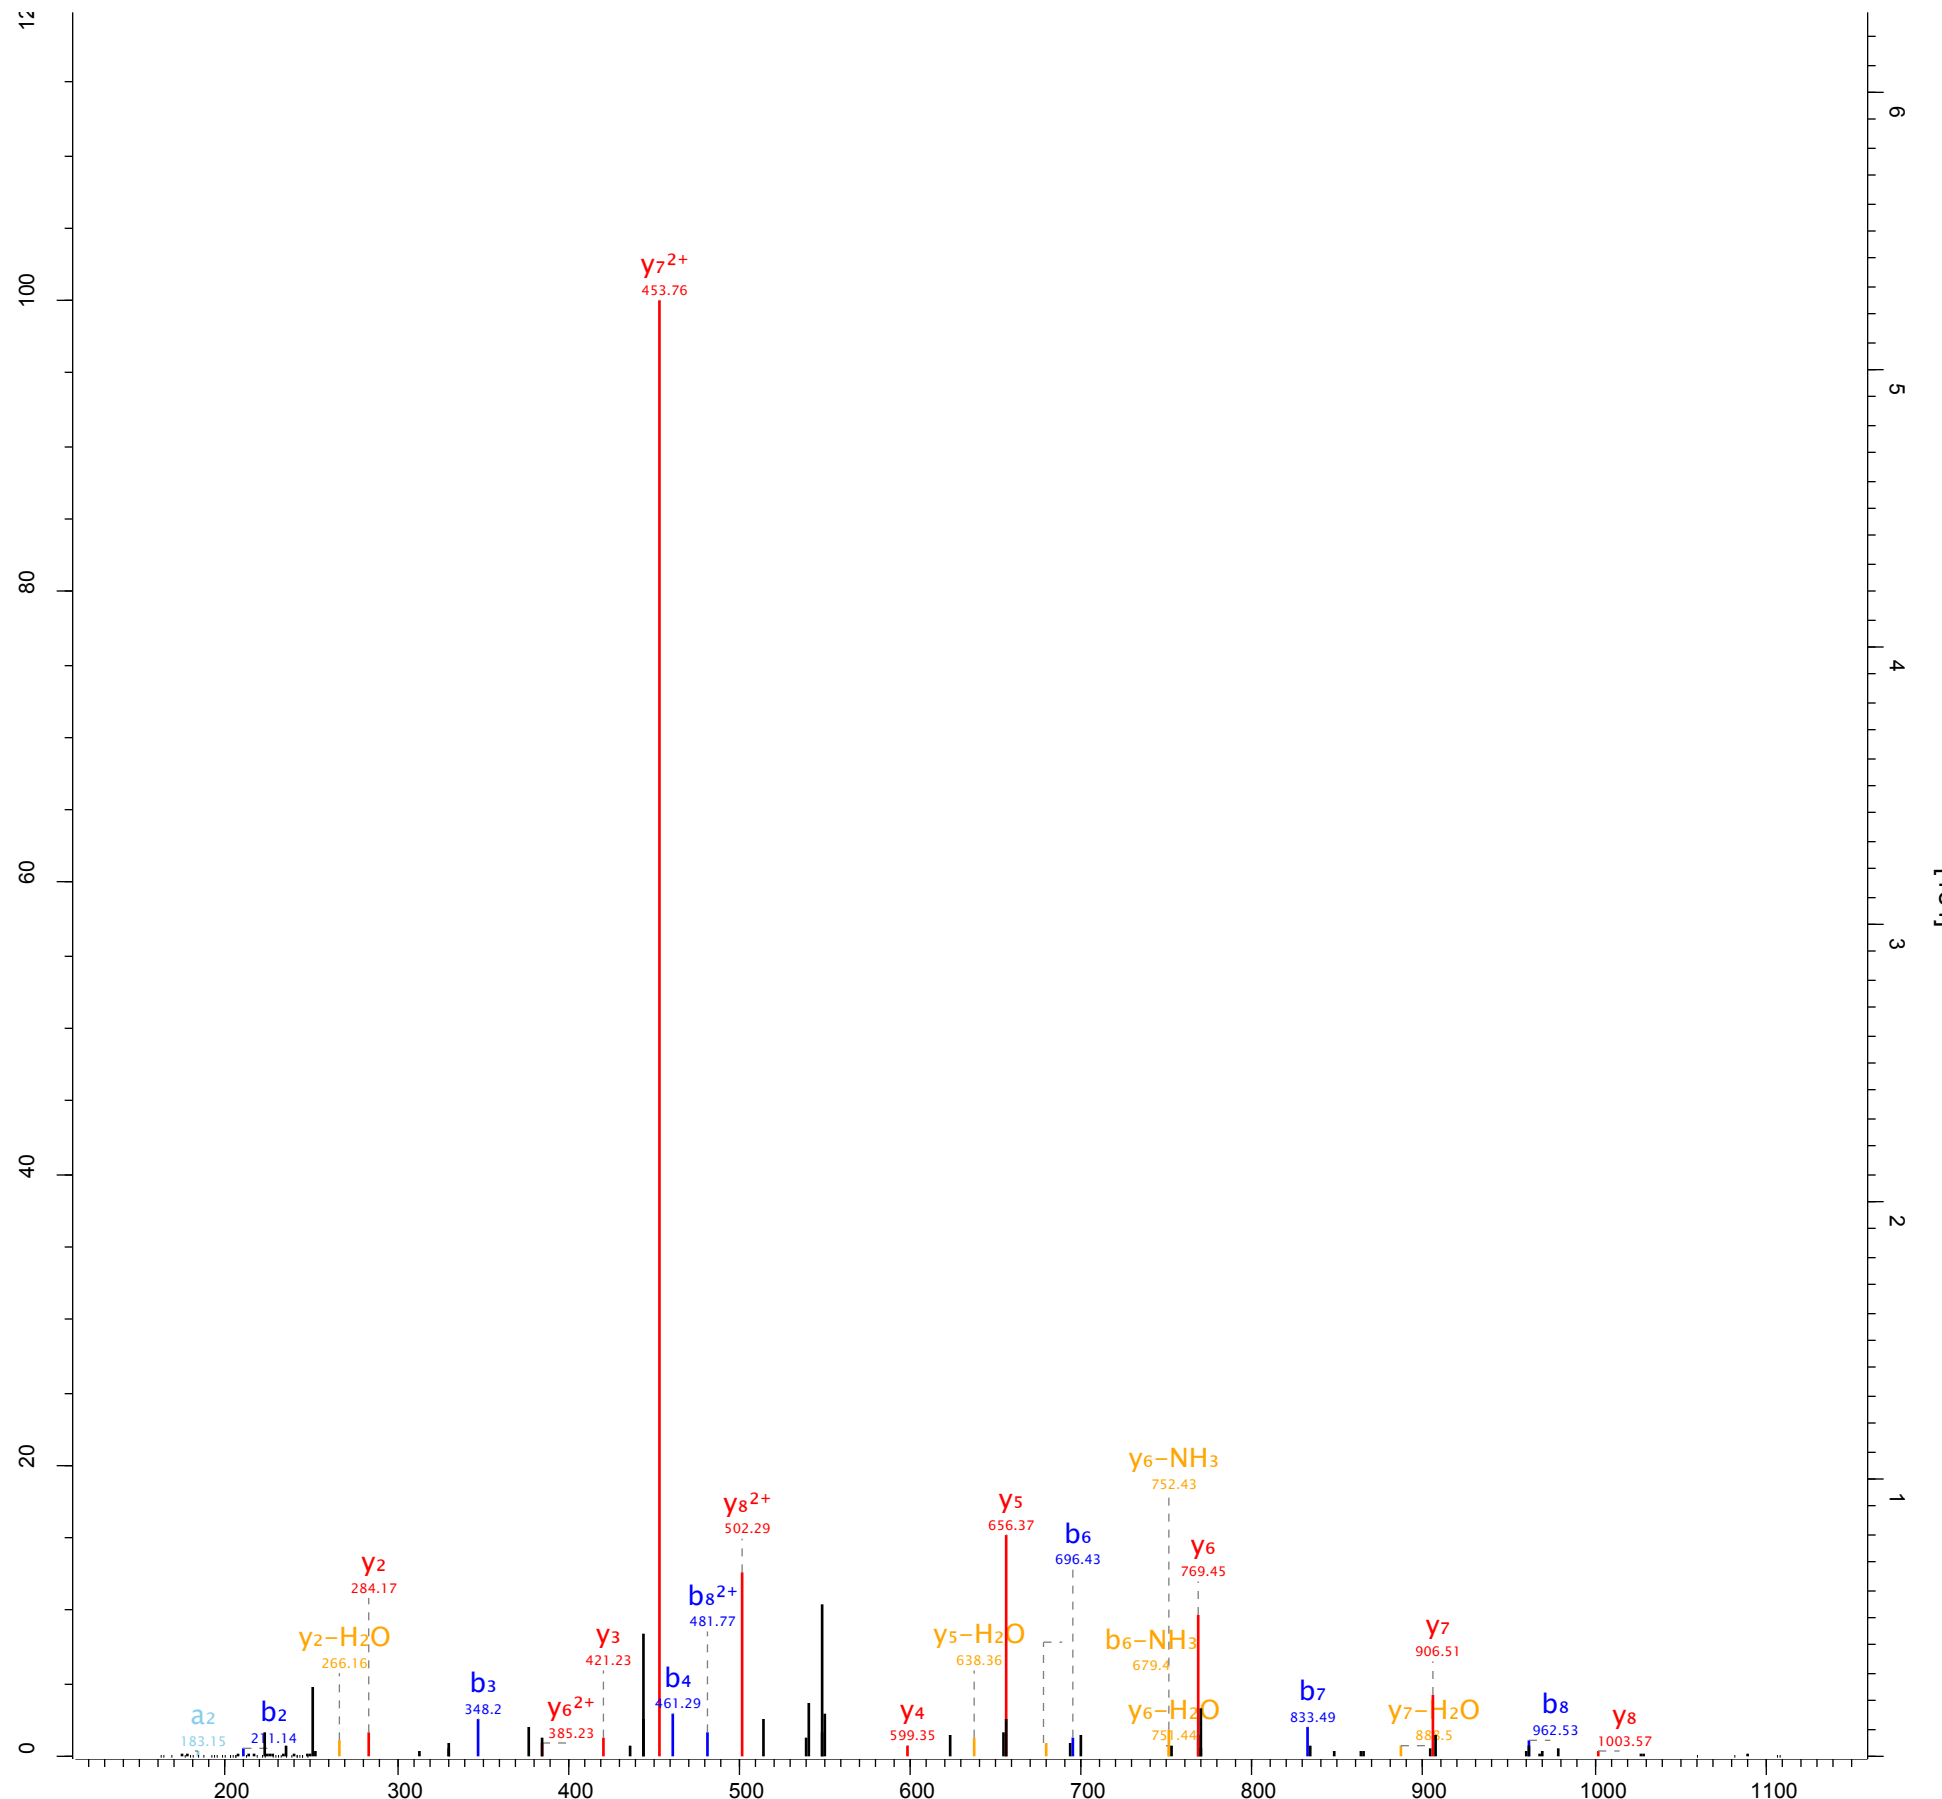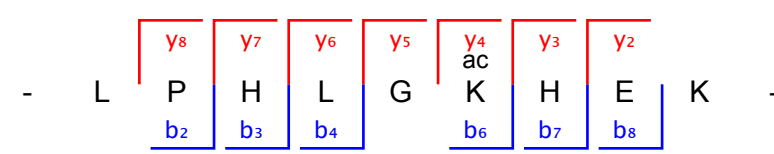

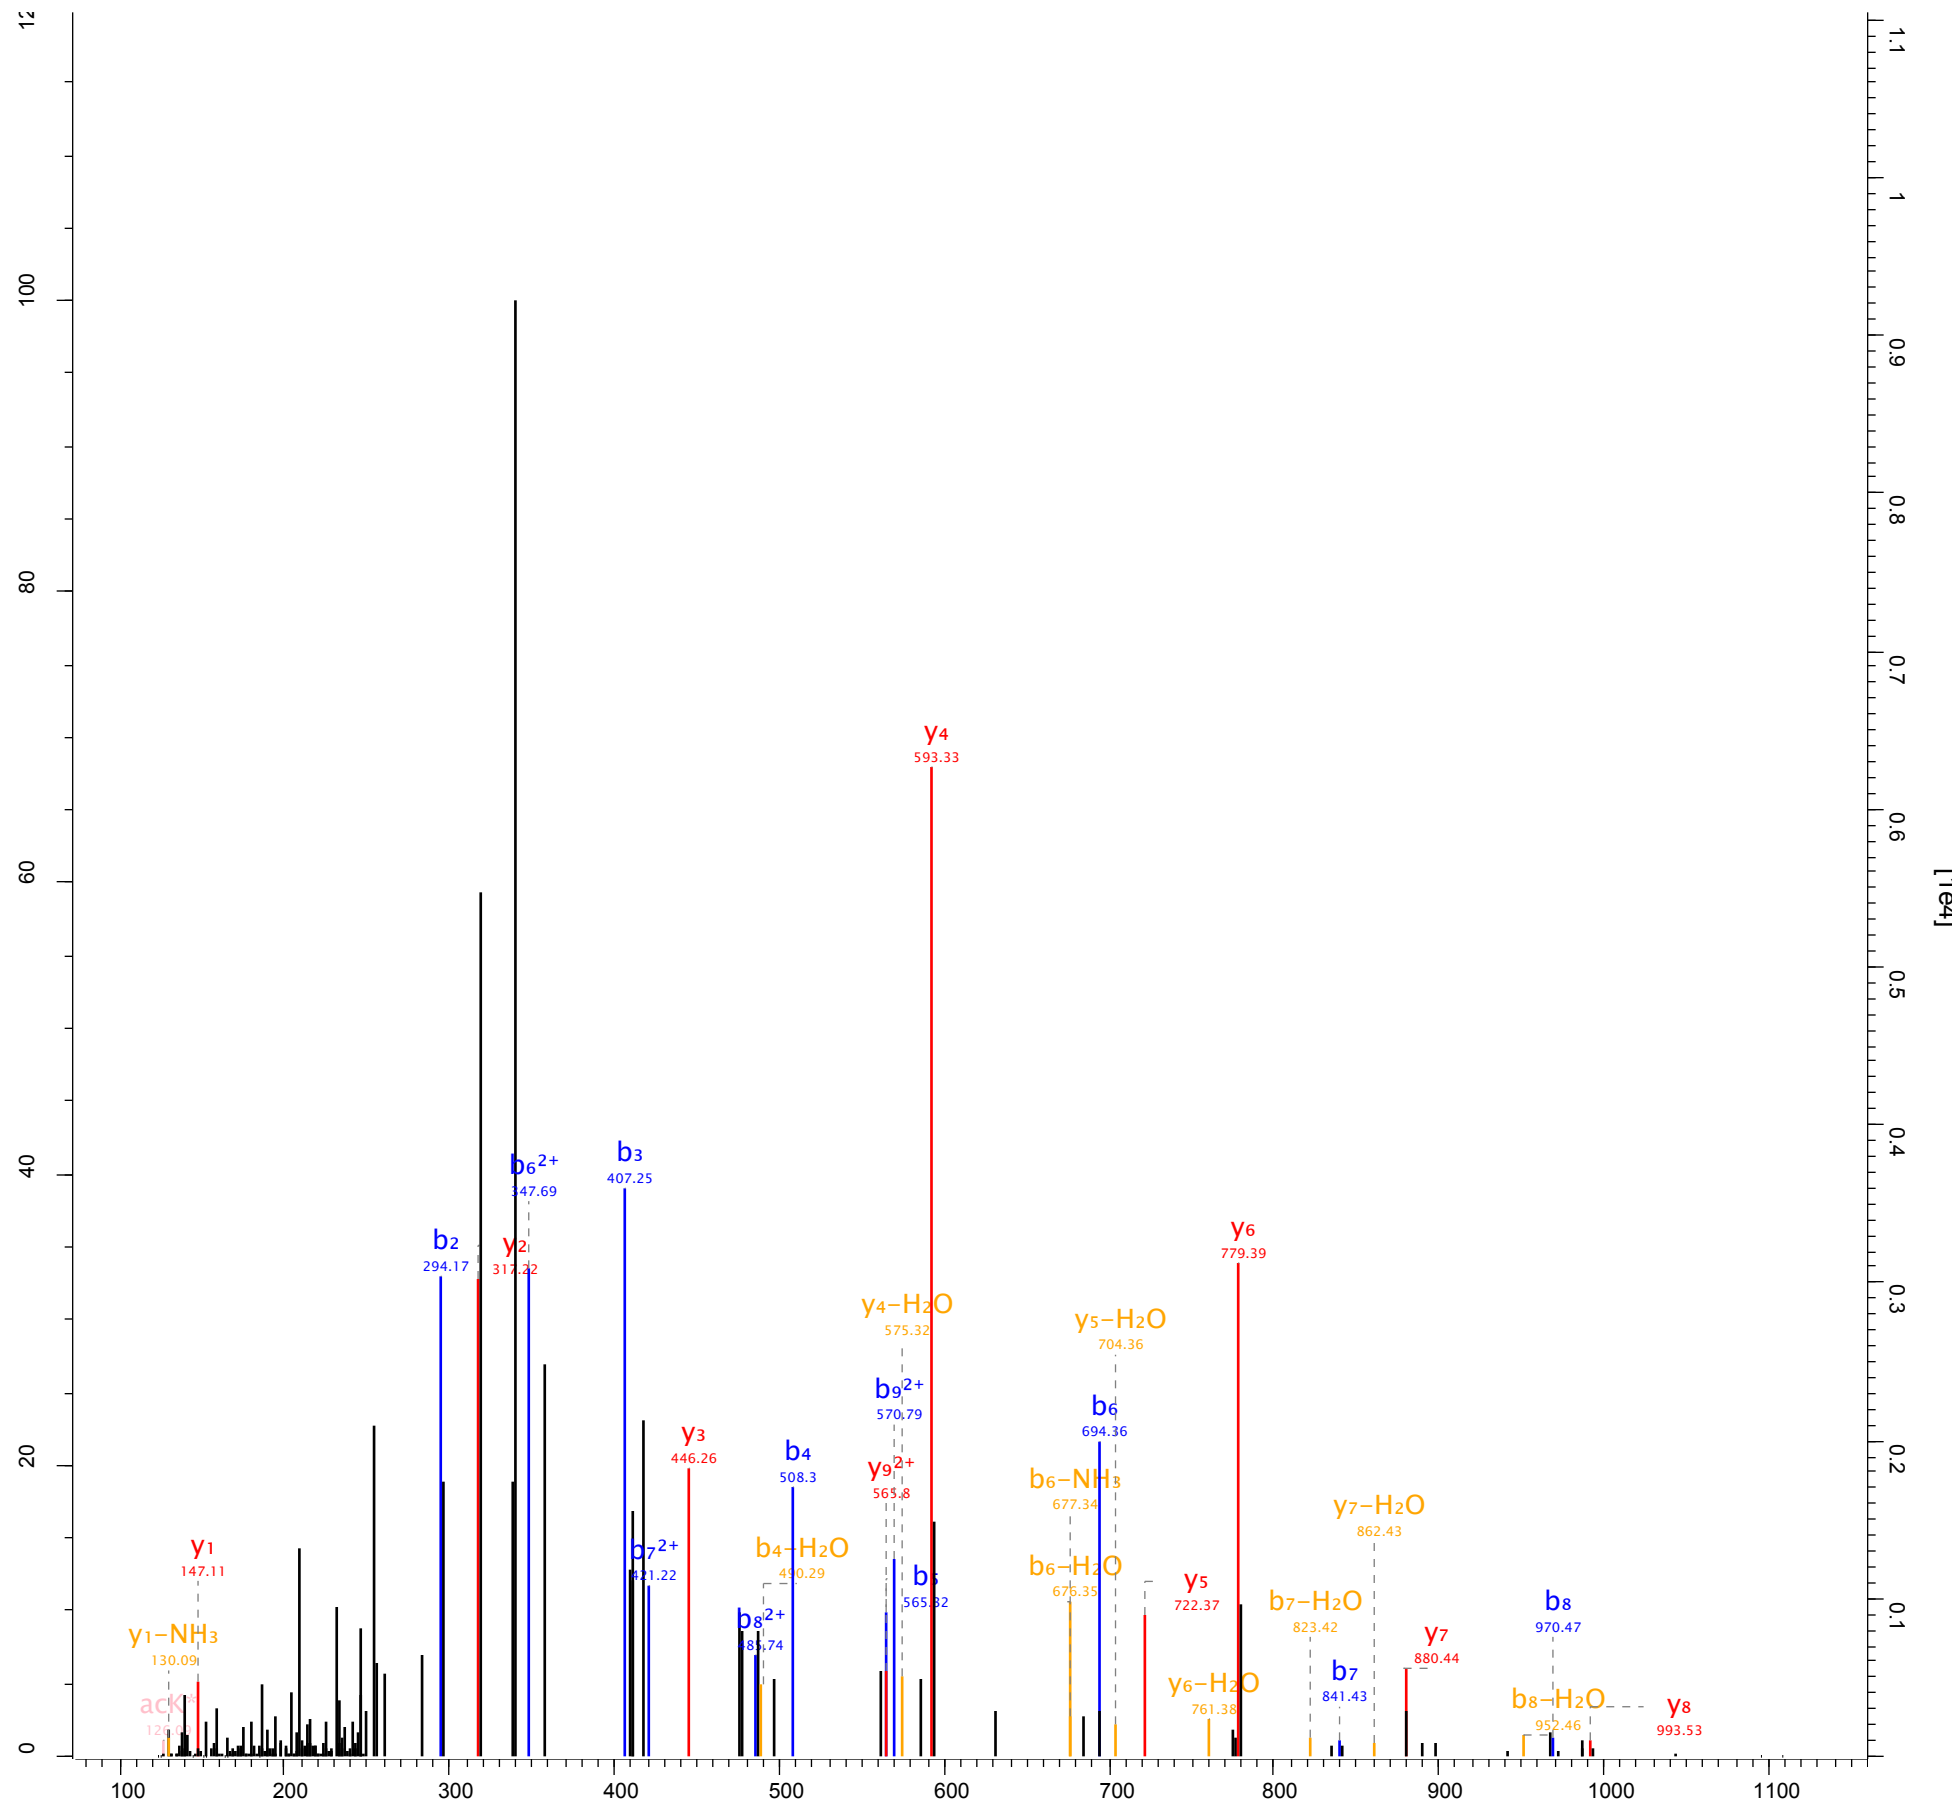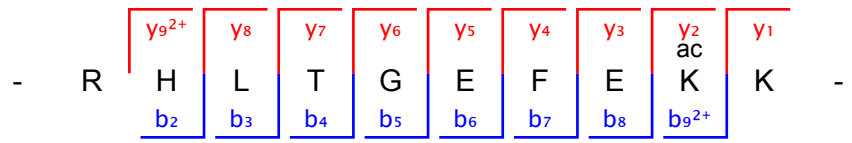

Raw file  
062513\_SCW\_II\_53\_12\_Vargas\_Enriched

Scan Method Score m/z Gene names  
28310 ITMS; CID 194.97 971.14 Gapdh

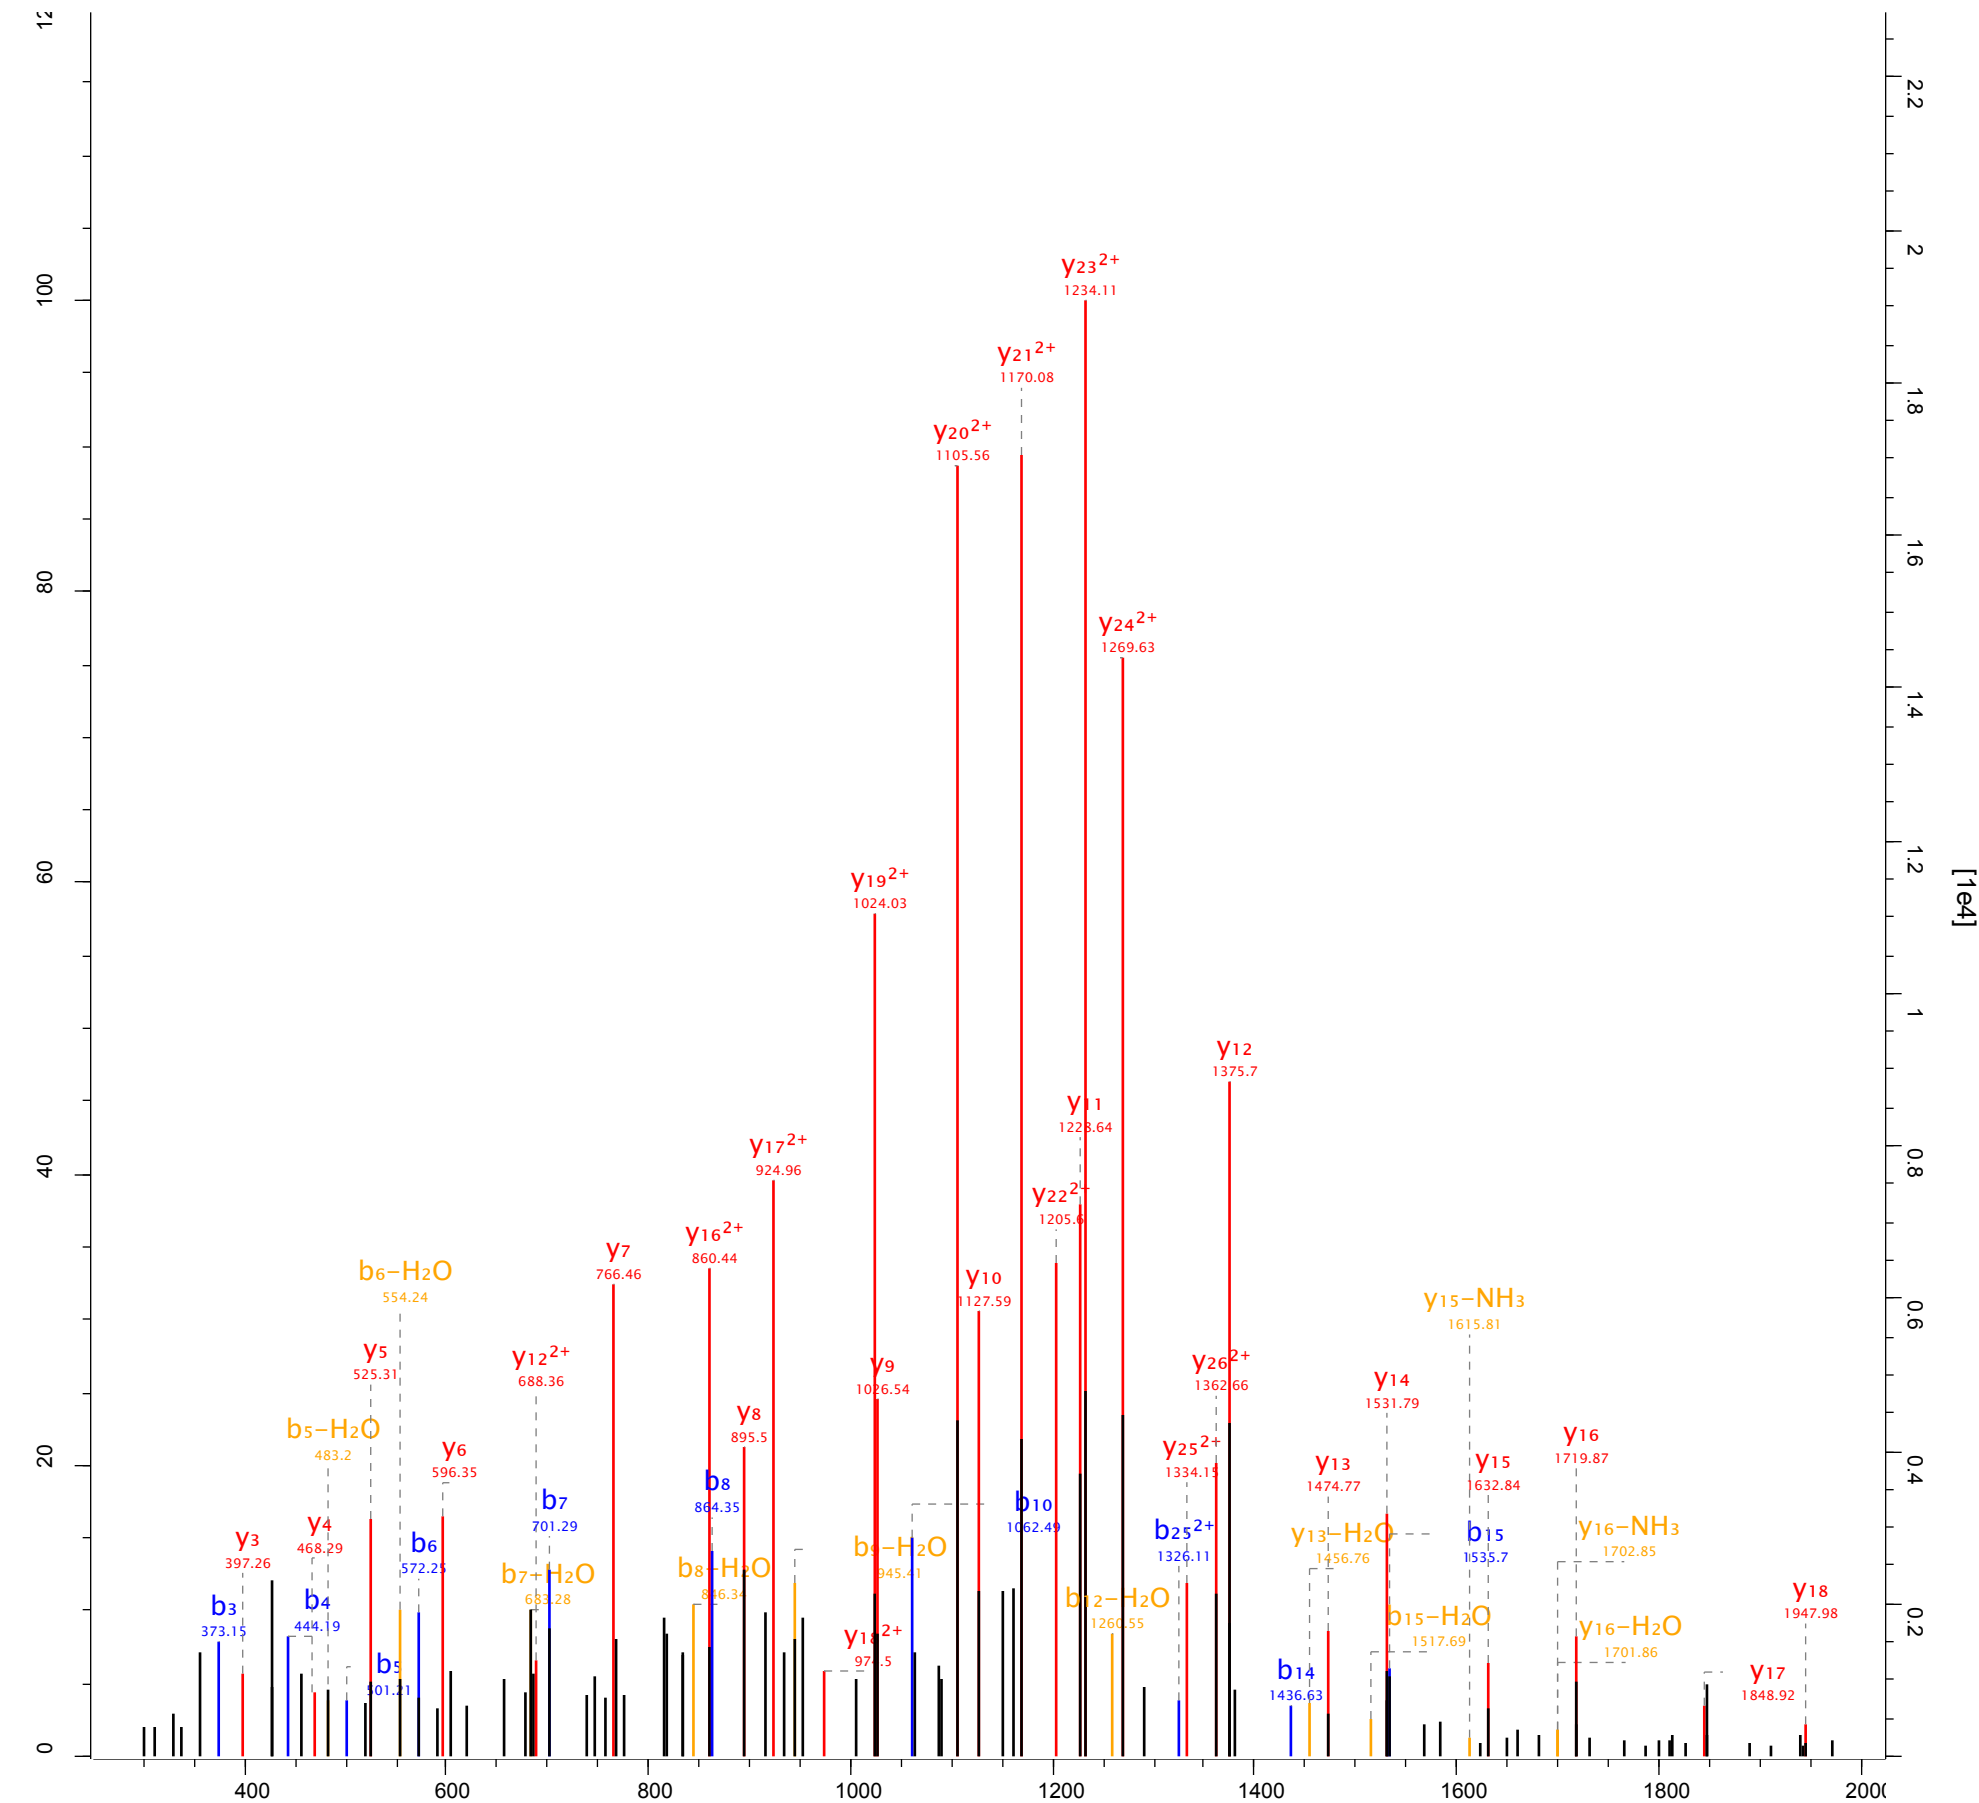

- W G E A G A E Y V V E S T G V F T T M E K A G A

          y<sub>26</sub><sup>2+</sup> y<sub>25</sub><sup>2+</sup> y<sub>24</sub><sup>2+</sup> y<sub>23</sub><sup>2+</sup> y<sub>22</sub><sup>2+</sup> y<sub>21</sub><sup>2+</sup> y<sub>20</sub><sup>2+</sup> y<sub>19</sub><sup>2+</sup> y<sub>18</sub> y<sub>17</sub> y<sub>16</sub> y<sub>15</sub> y<sub>14</sub> y<sub>13</sub> y<sub>12</sub> y<sub>11</sub> y<sub>10</sub> y<sub>9</sub> y<sub>8</sub> y<sub>7</sub> y<sub>6</sub> y<sub>5</sub> y<sub>4</sub>

          b<sub>3</sub> b<sub>4</sub> b<sub>5</sub> b<sub>6</sub> b<sub>7</sub> b<sub>8</sub> b<sub>10</sub> b<sub>14</sub> b<sub>15</sub>

          y<sub>3</sub>

H | L K -



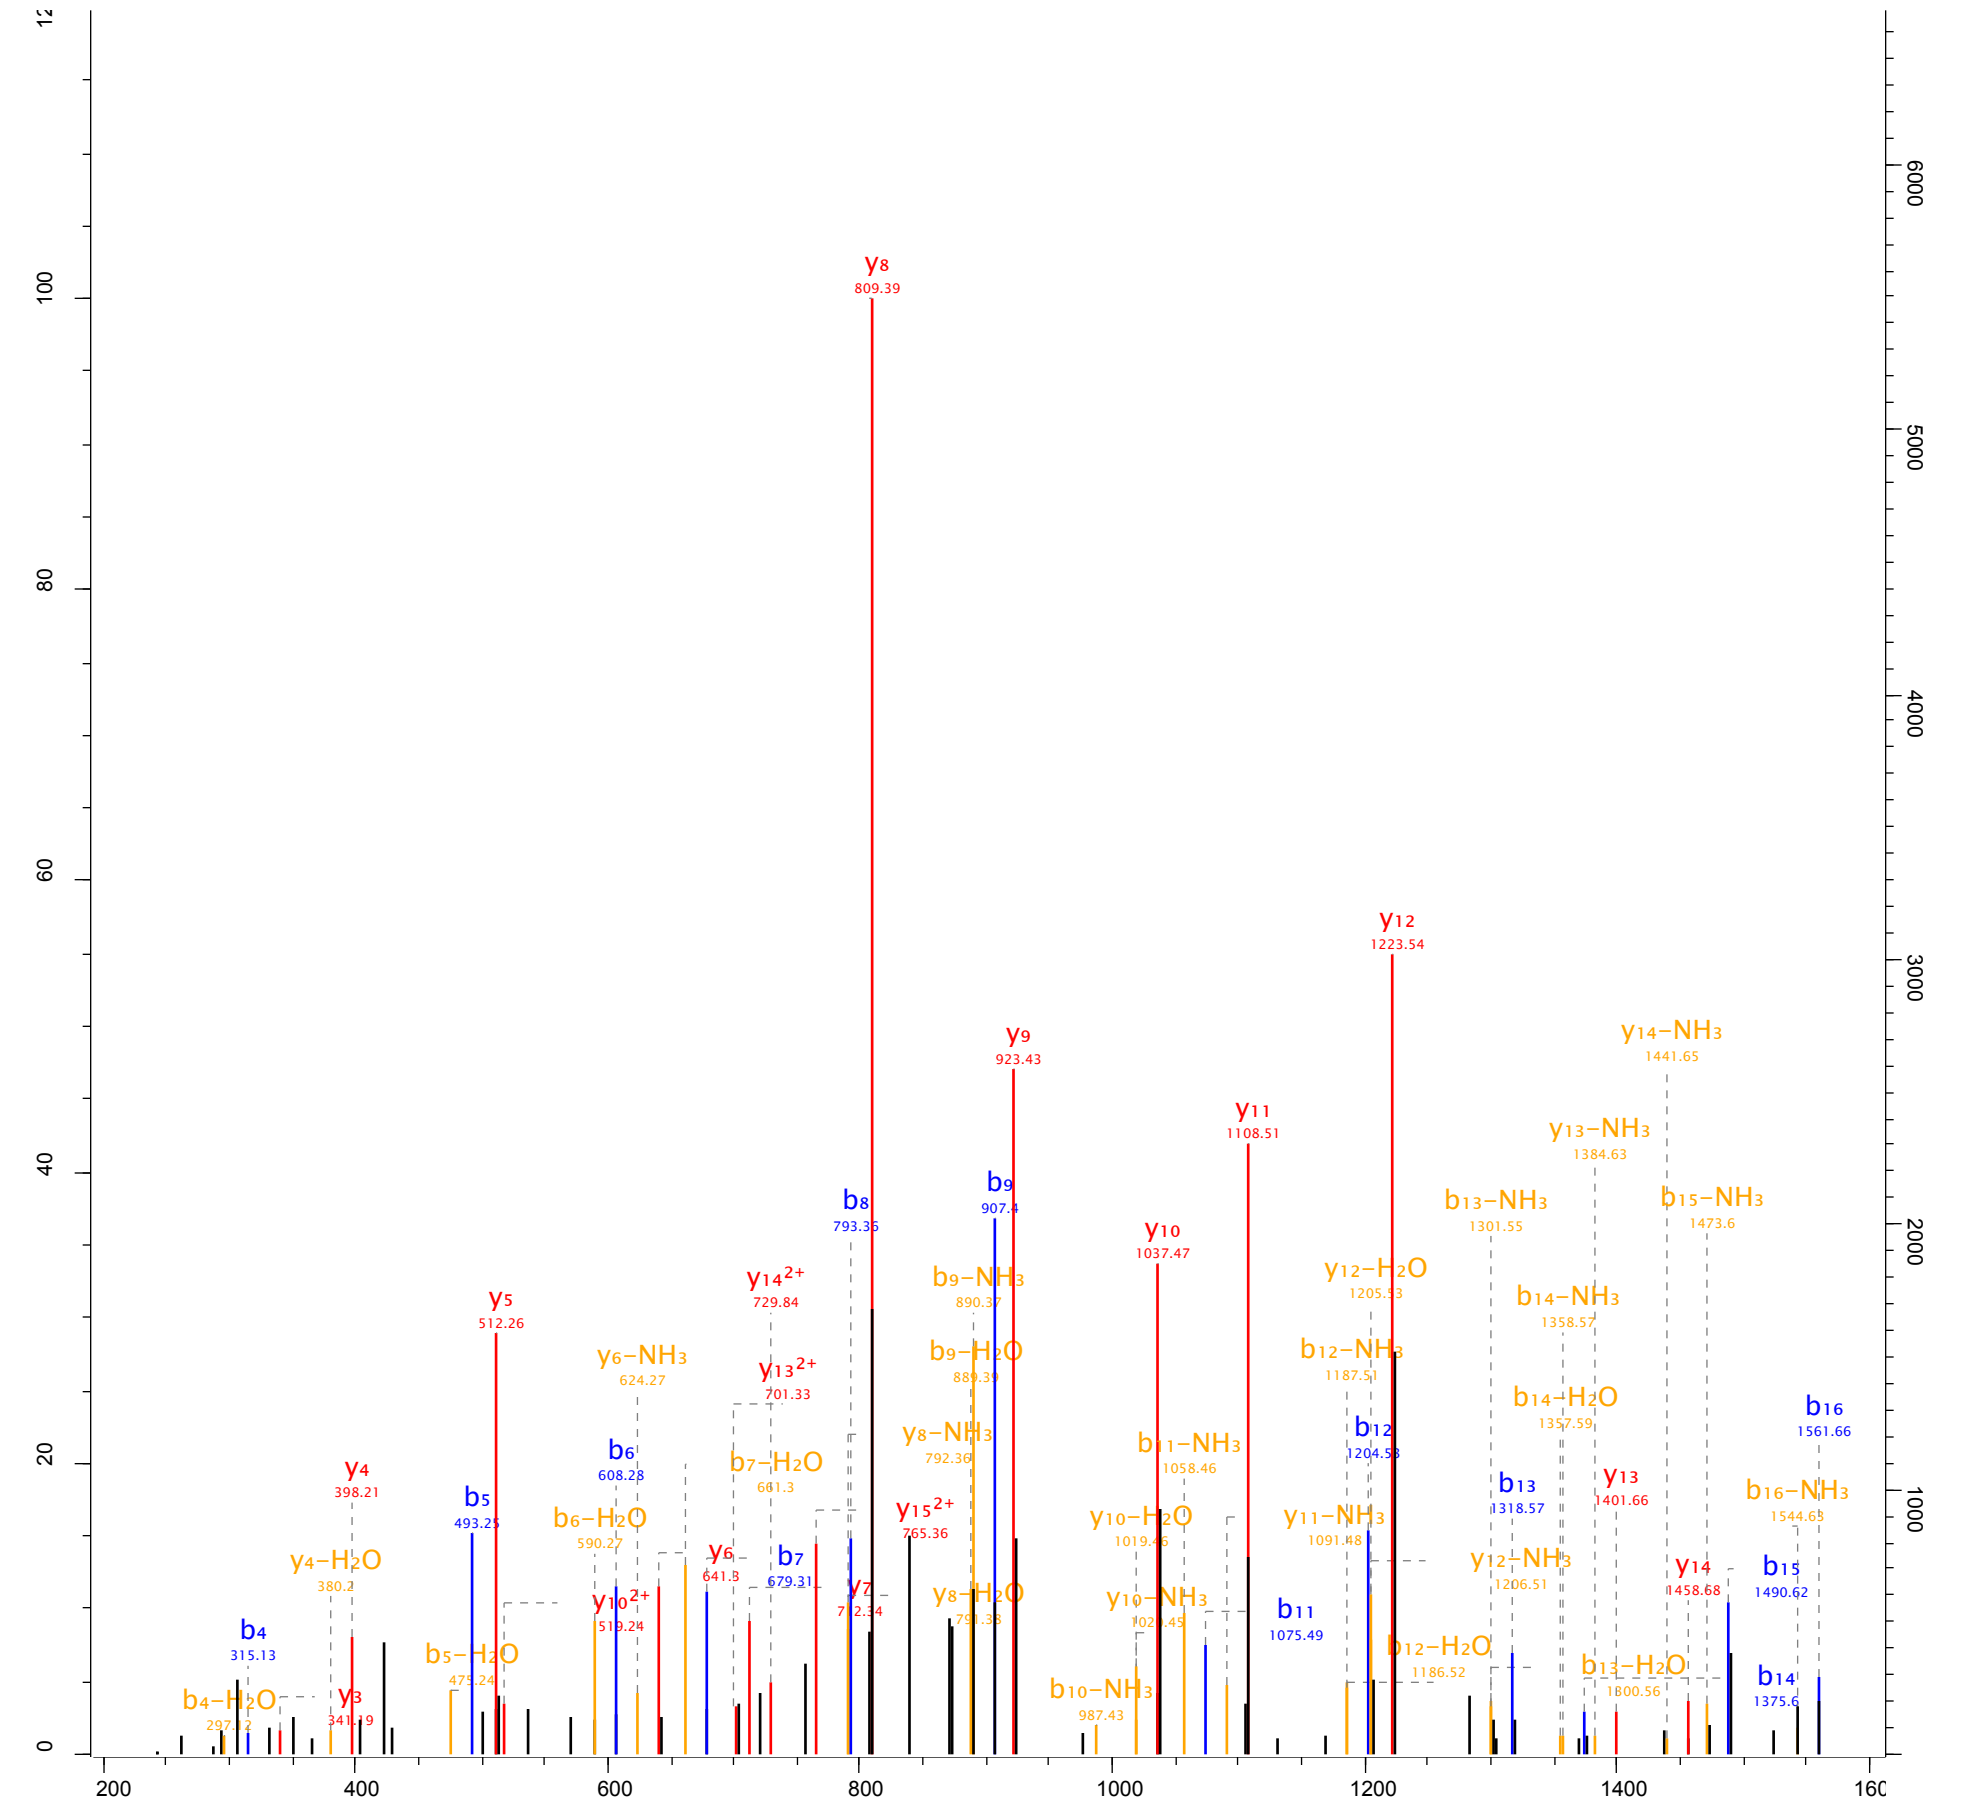

- A D A G K D A N N P A E N G D A K -

y15<sup>2+</sup>
y14
y13 ac
y12
y11
y10
y9
y8
y7
y6
y5
y4
y3

b4
b5
b6
b7
b8
b9
b11
b12
b13
b14
b15
b16

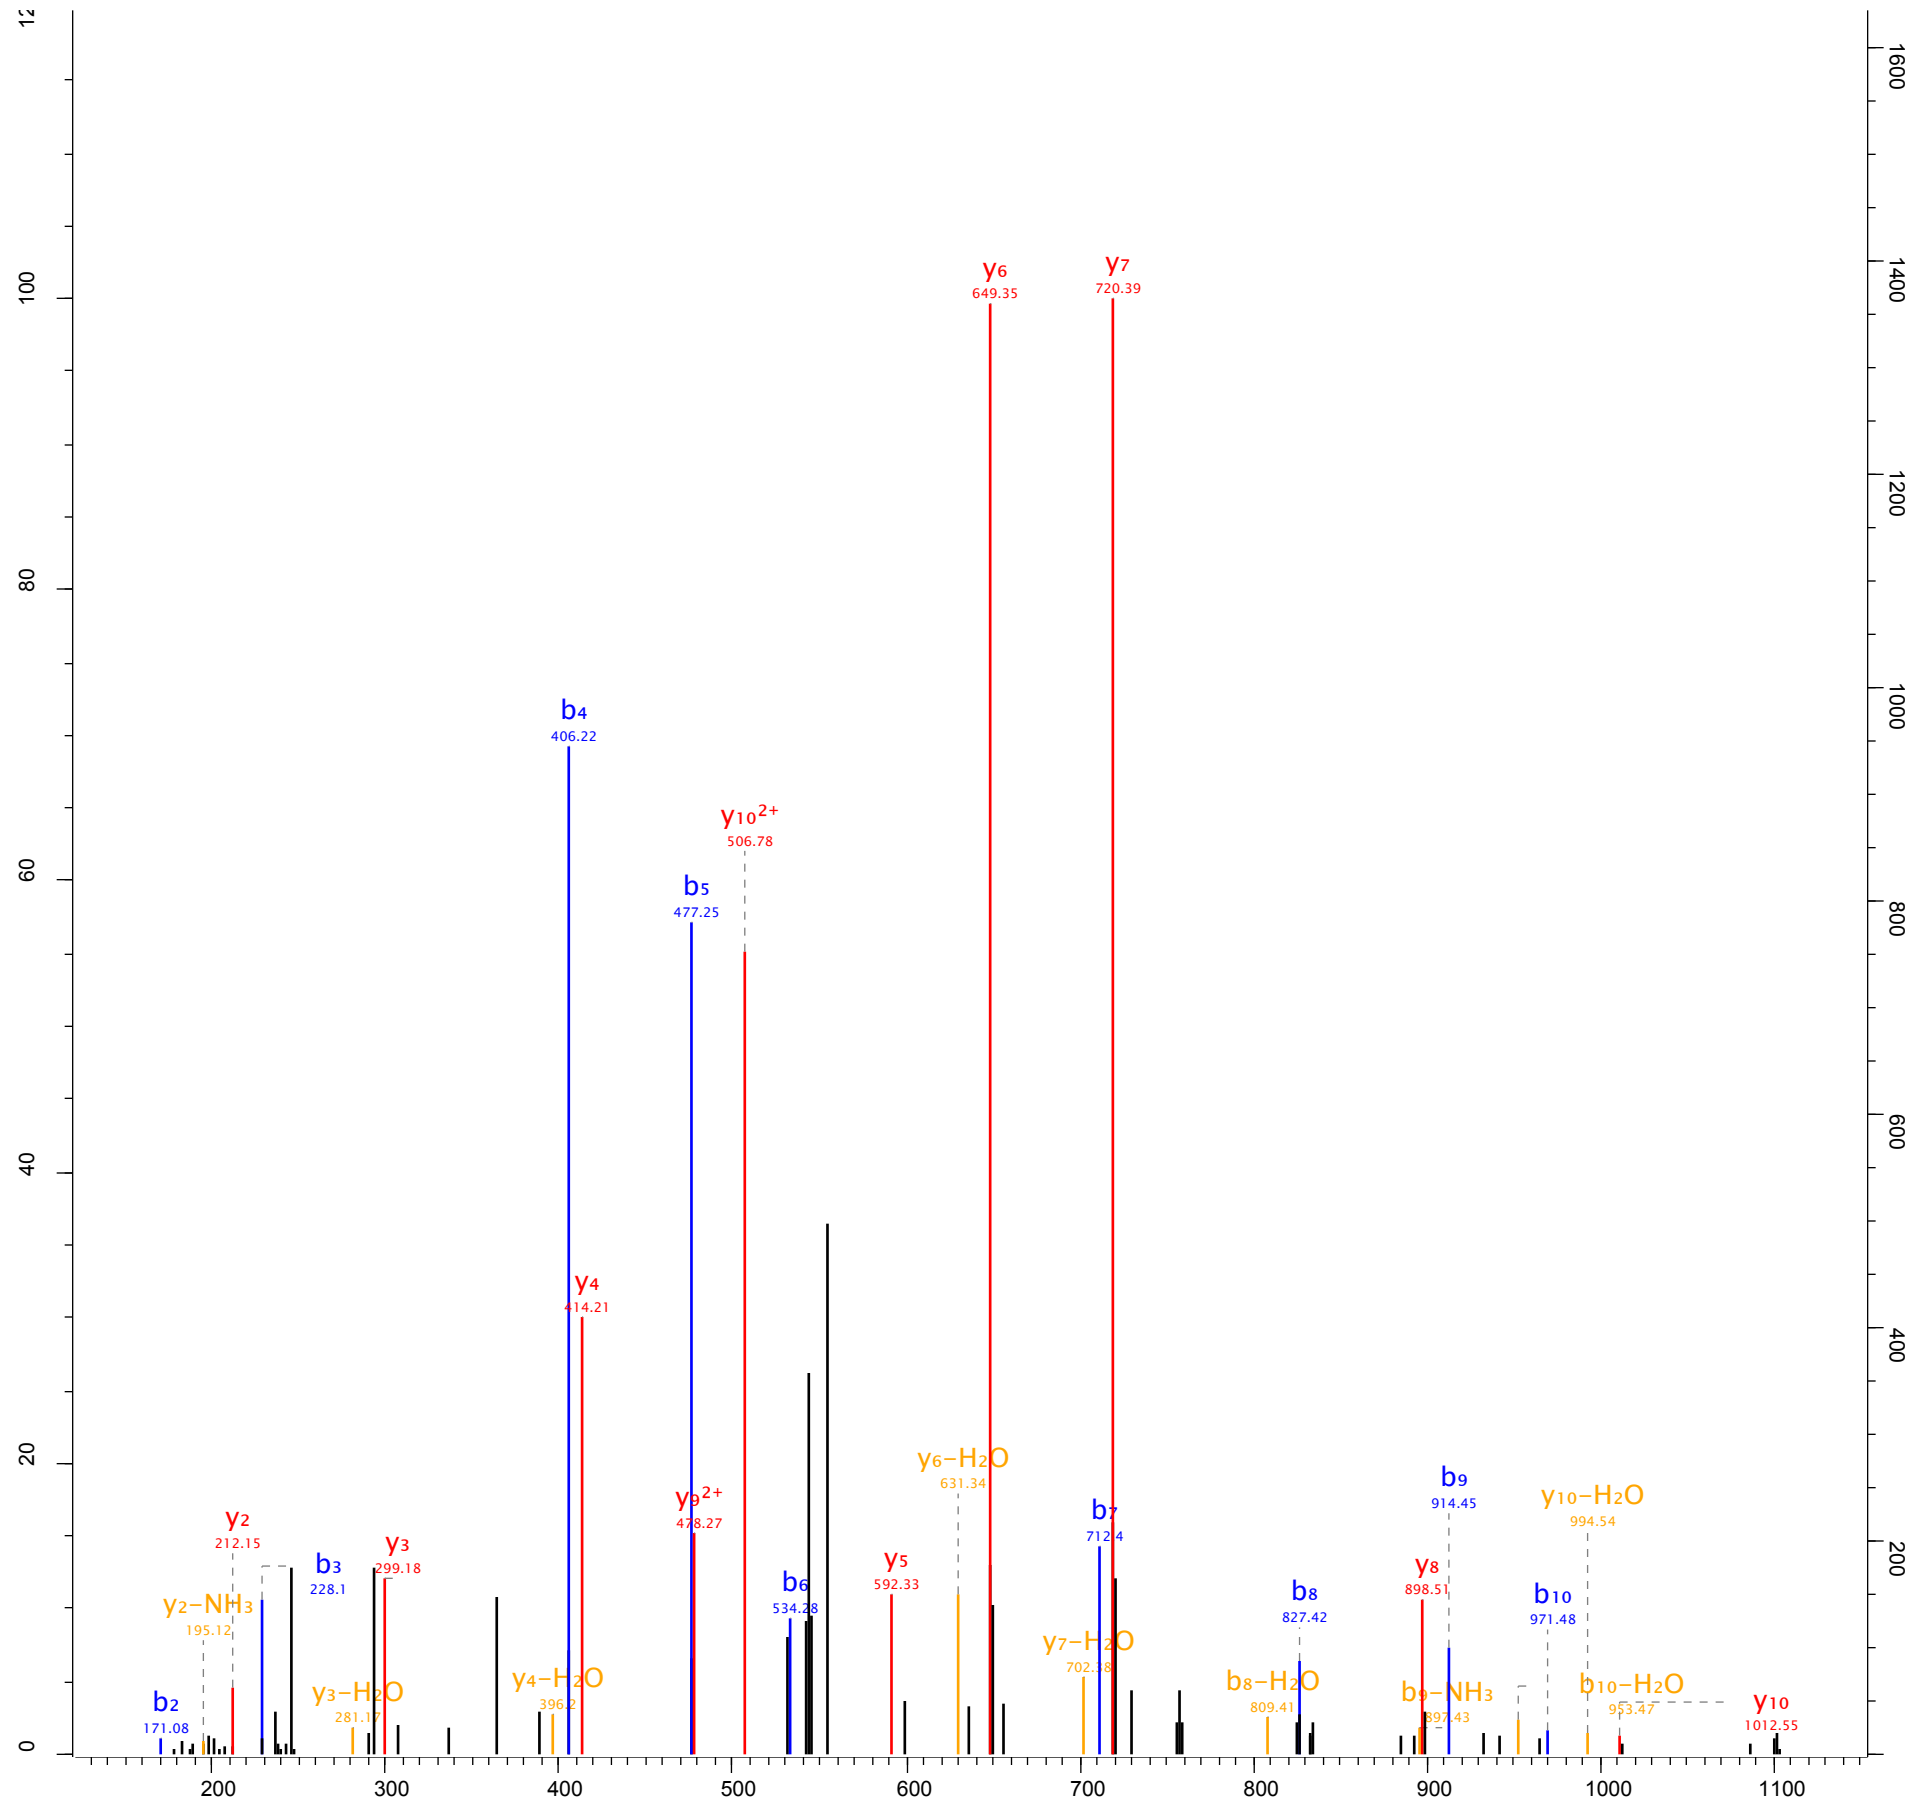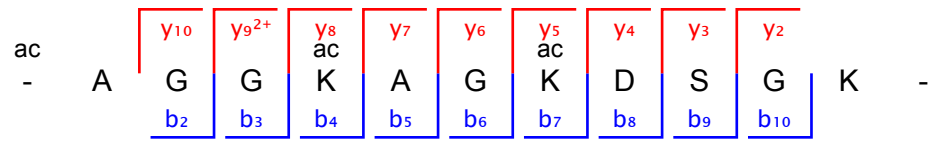

072613\_SCW\_II\_68\_Enriched\_1

18365

ITMS; CID

93.37

1016.55

Hist1h1d

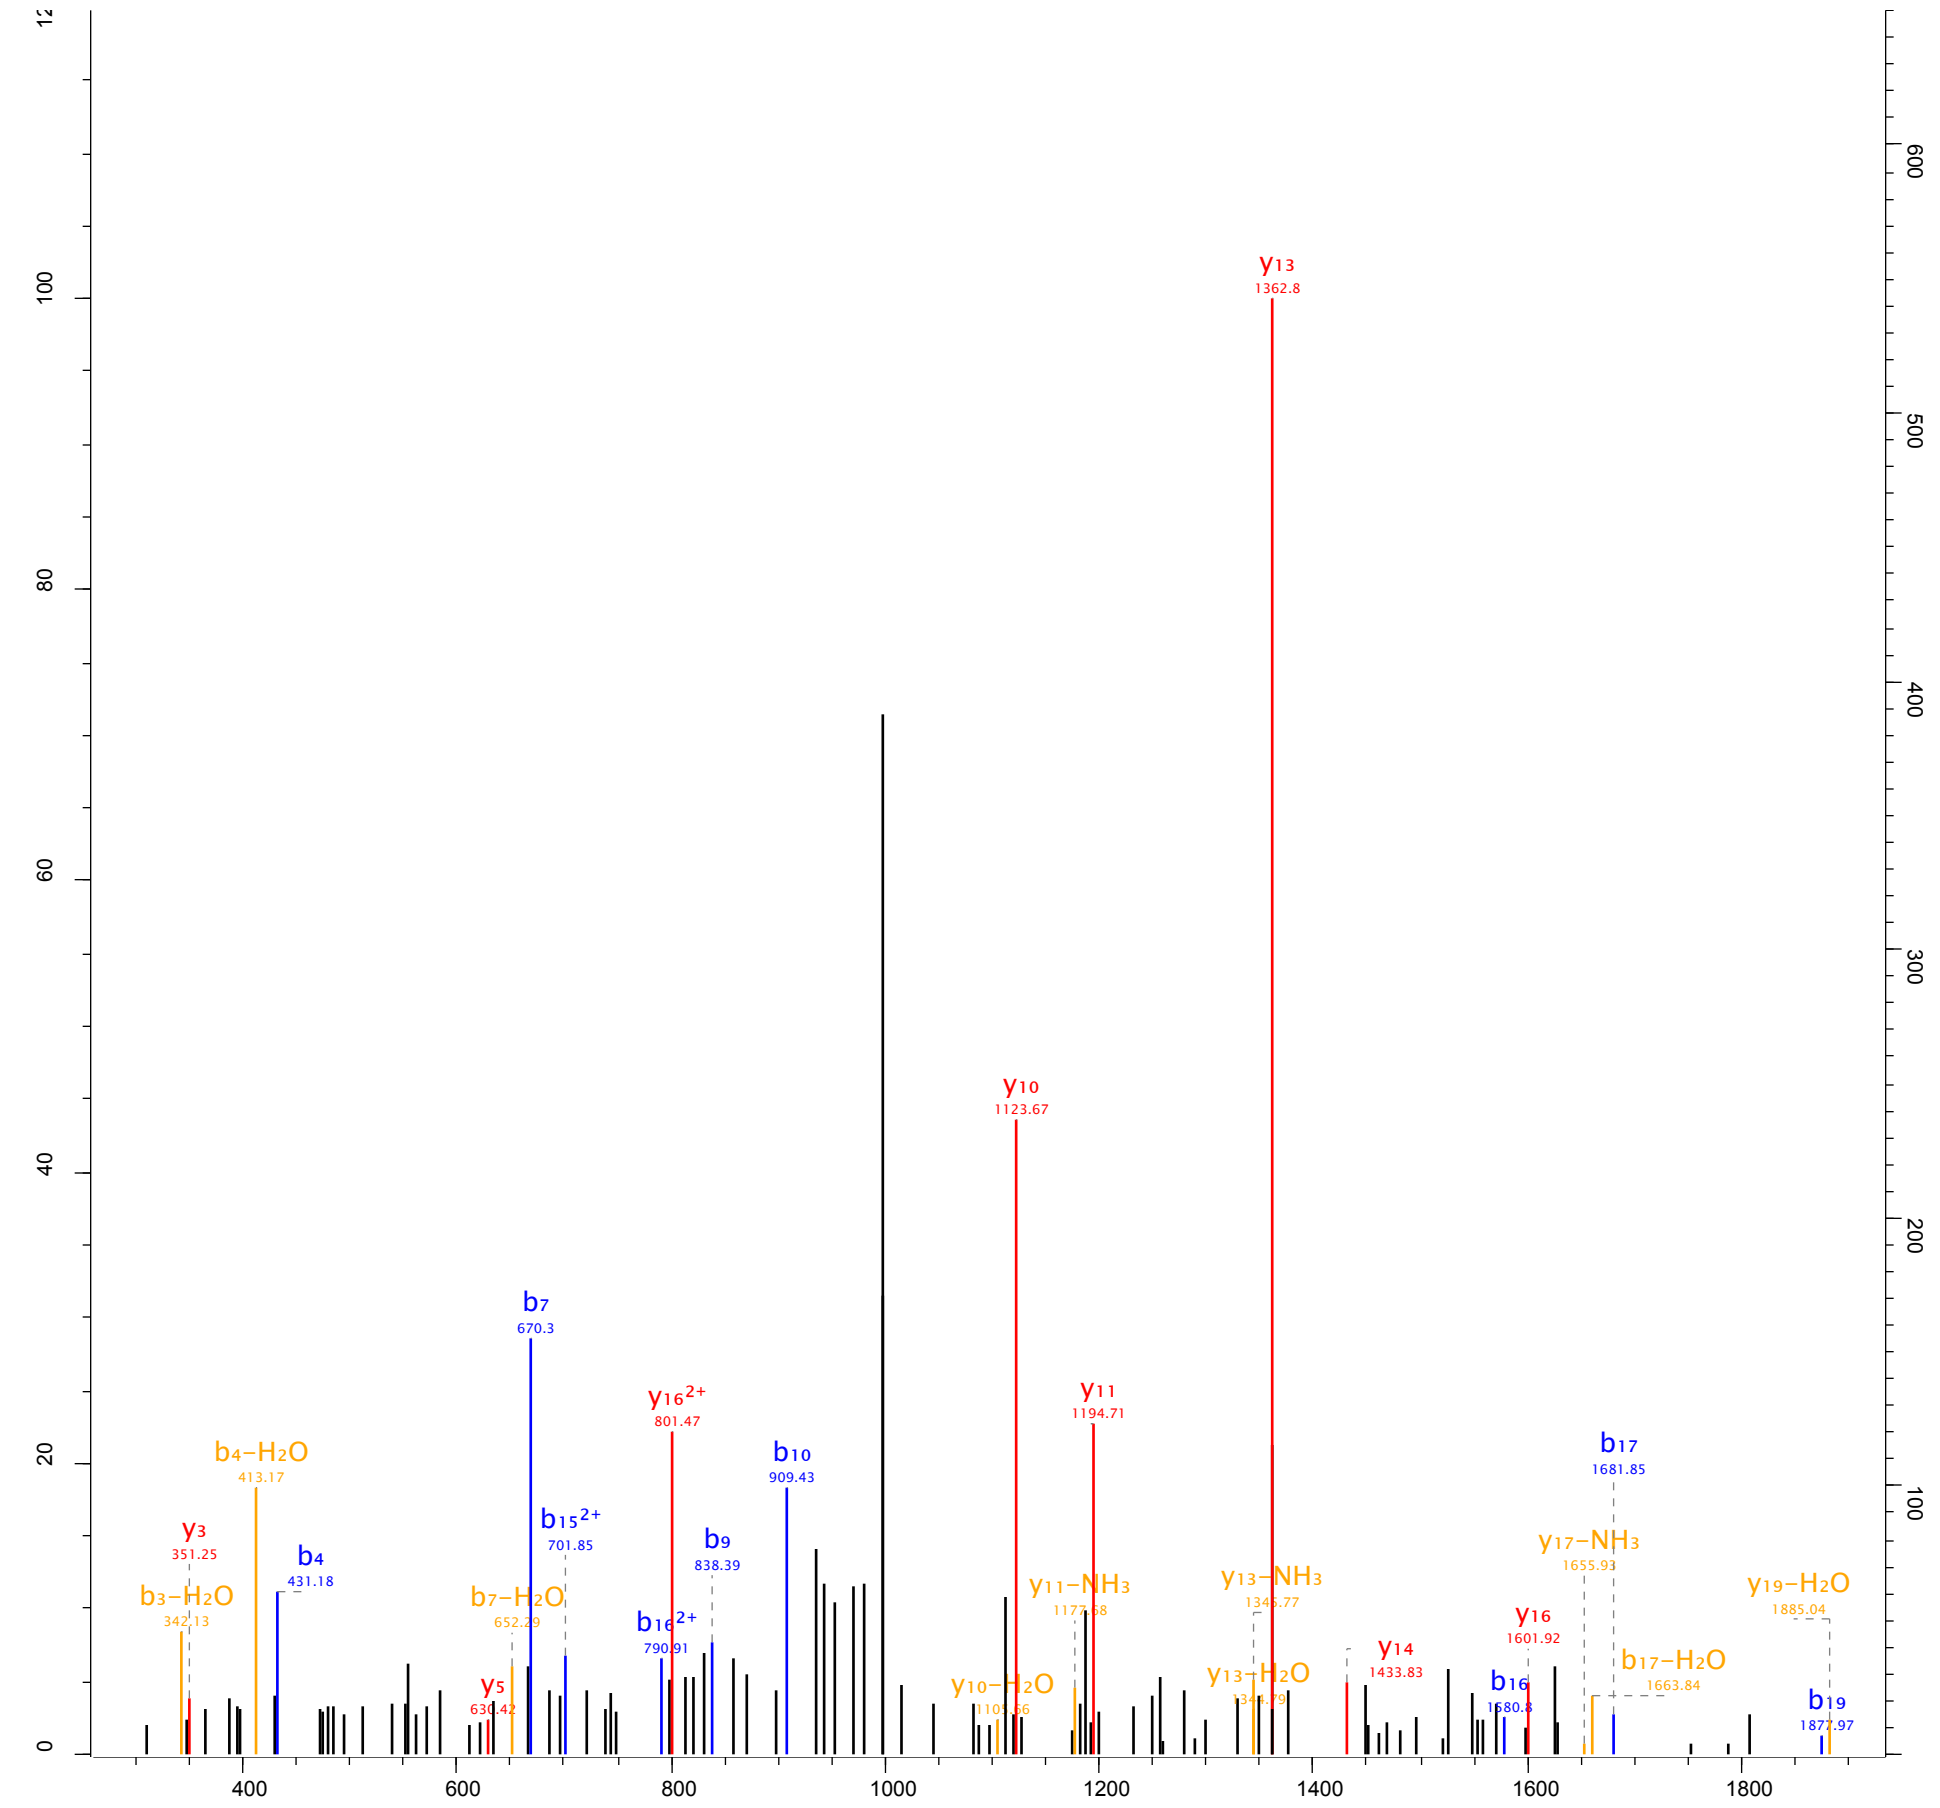

ac - S E T A P A A P A A P A P V E K T P V K -

Fragmentation mapping (b and y ions):

- b4: A
- y16: P
- b7: A
- y14: A
- y13: P
- b9: A
- y11: A
- y10: P
- b15<sup>2+</sup>: V
- b16: K
- y5: ac
- b17: T
- y3: P
- b19: V

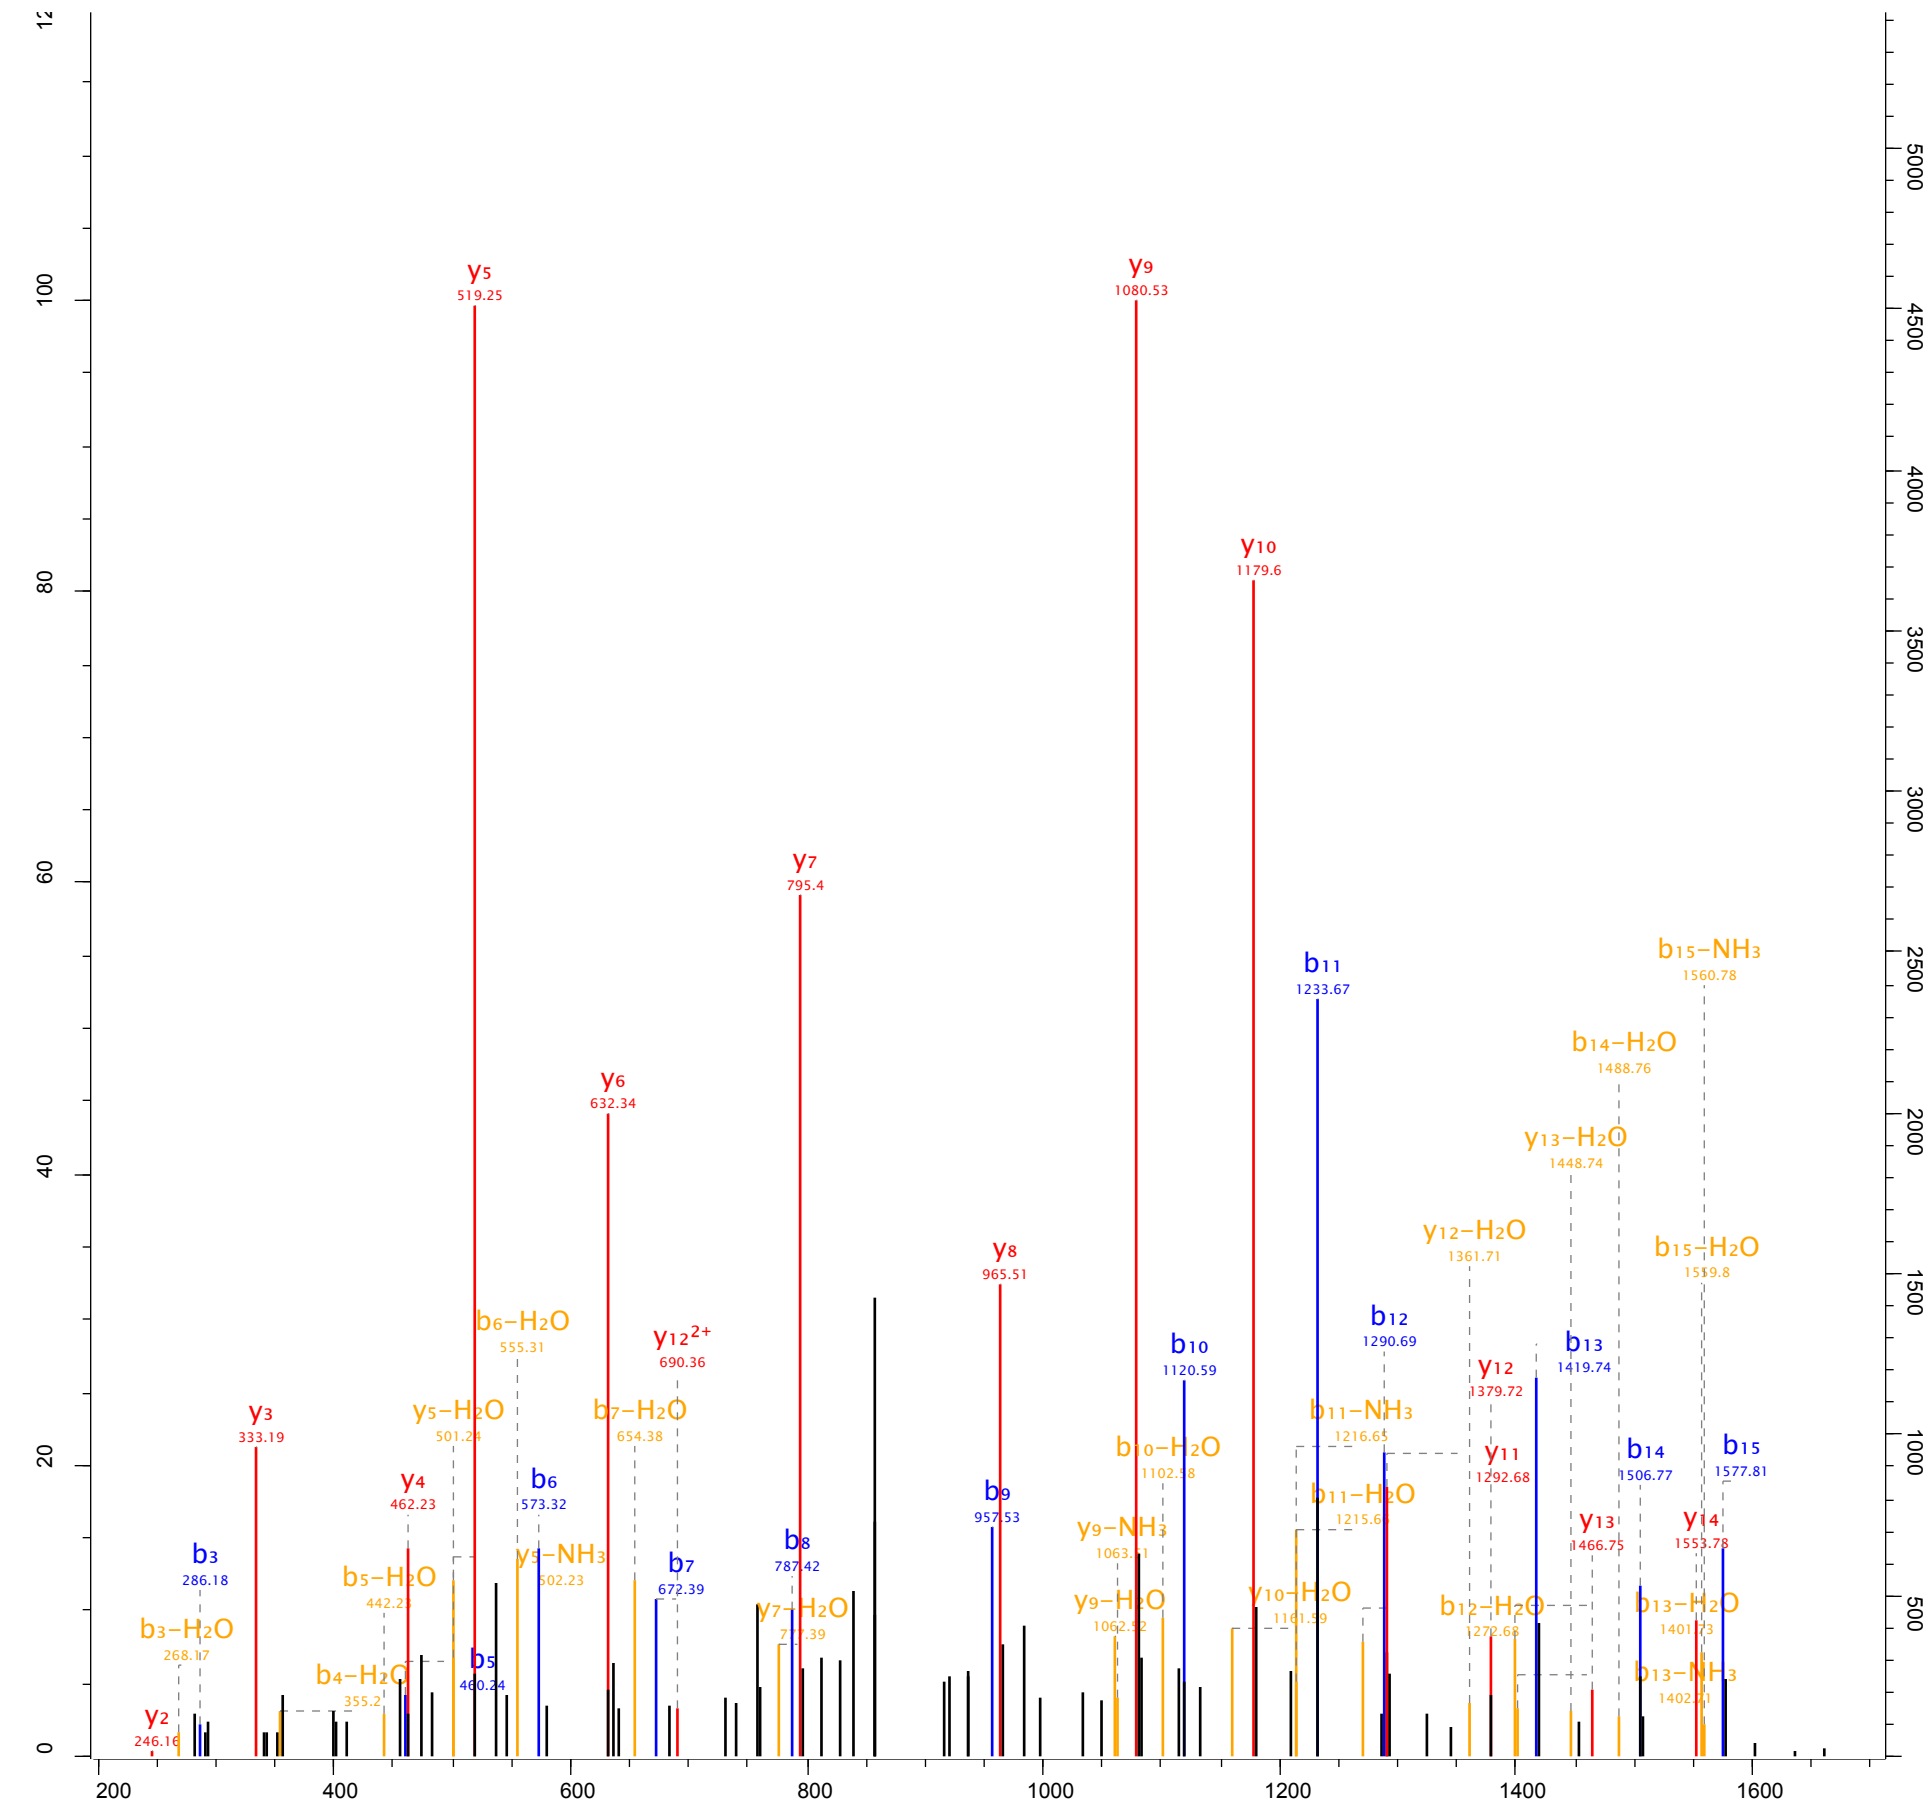

- V V S<sup>y<sub>14</sub></sup> S<sup>y<sub>13</sub></sup> S<sup>y<sub>12</sub></sup> I<sup>y<sub>11</sub></sup> V<sup>y<sub>10</sub></sup> D<sup>y<sub>9</sub></sup> K<sup>y<sub>8</sub> ac</sup> Y<sup>y<sub>7</sub></sup> I<sup>y<sub>6</sub></sup> G<sup>y<sub>5</sub></sup> E<sup>y<sub>4</sub></sup> S<sup>y<sub>3</sub></sup> A<sup>y<sub>2</sub></sup> R -

b<sub>3</sub> b<sub>5</sub> b<sub>6</sub> b<sub>7</sub> b<sub>8</sub> b<sub>9</sub> b<sub>10</sub> b<sub>11</sub> b<sub>12</sub> b<sub>13</sub> b<sub>14</sub> b<sub>15</sub>

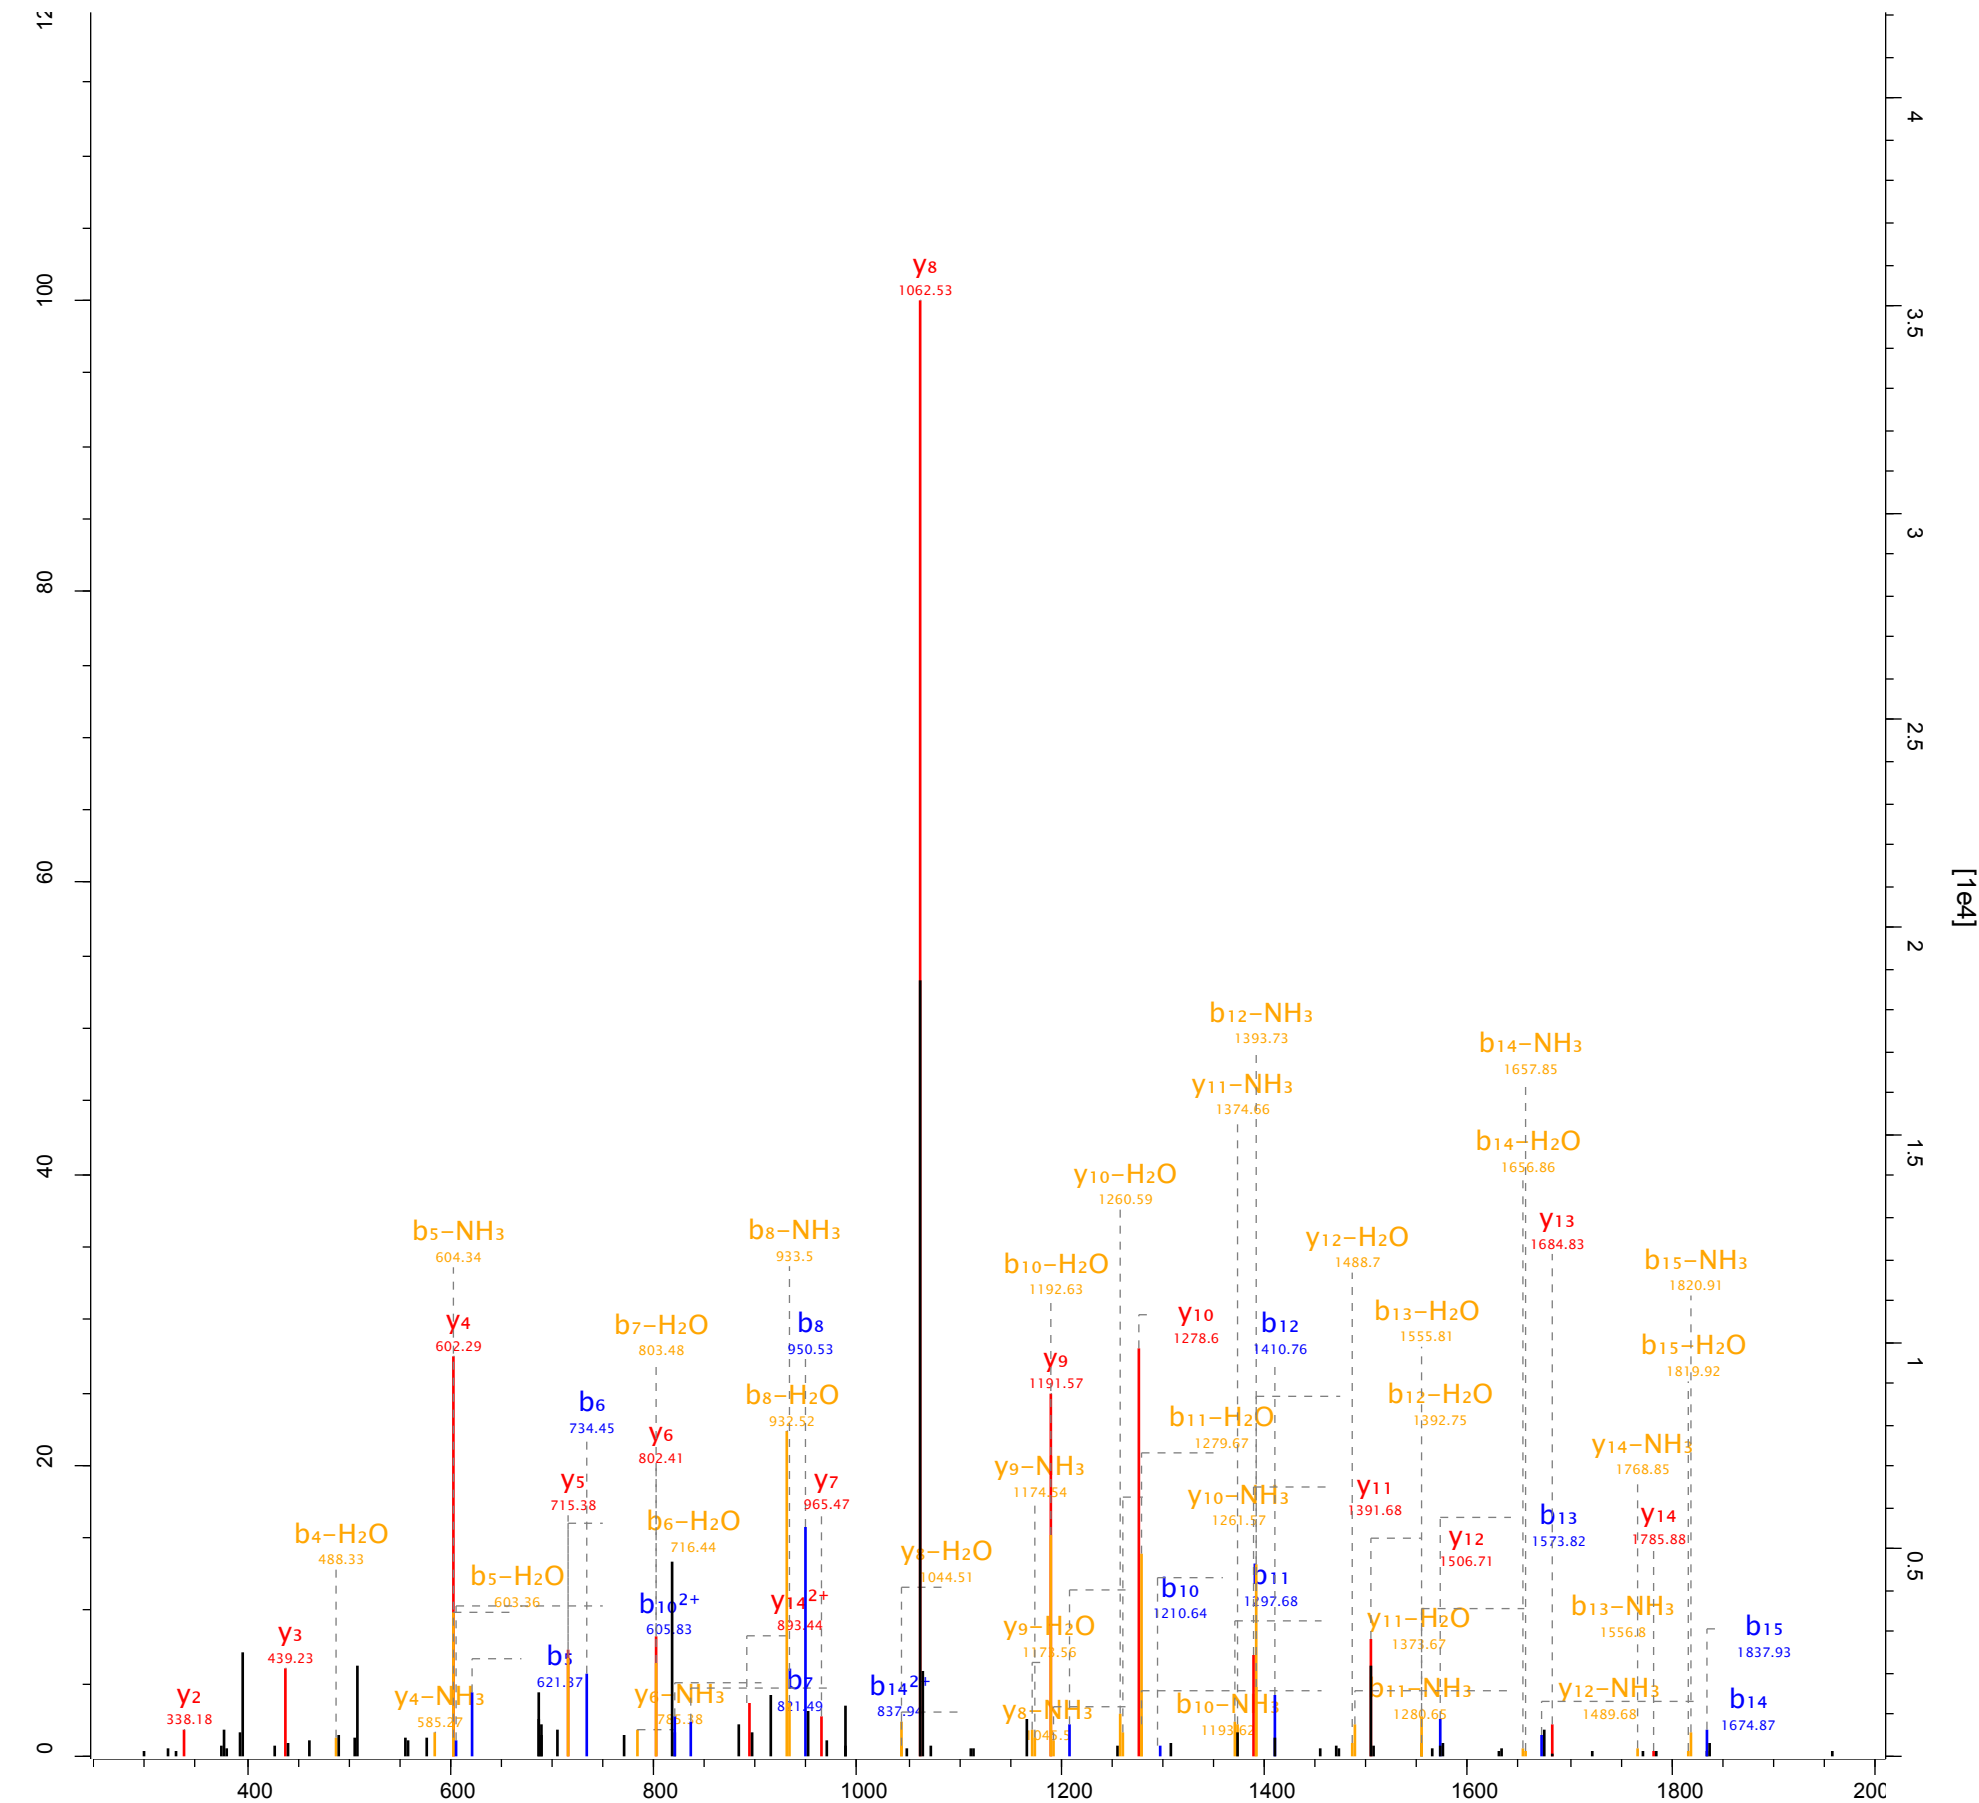

Y14
Y13 ac
Y12
Y11
Y10
Y9
Y8
Y7
Y6
Y5
Y4
Y3
Y2

b5
b6
b7
b8
b10
b11
b12
b13
b14
b15

- L I T K D L S E P Y S I Y T Y R -

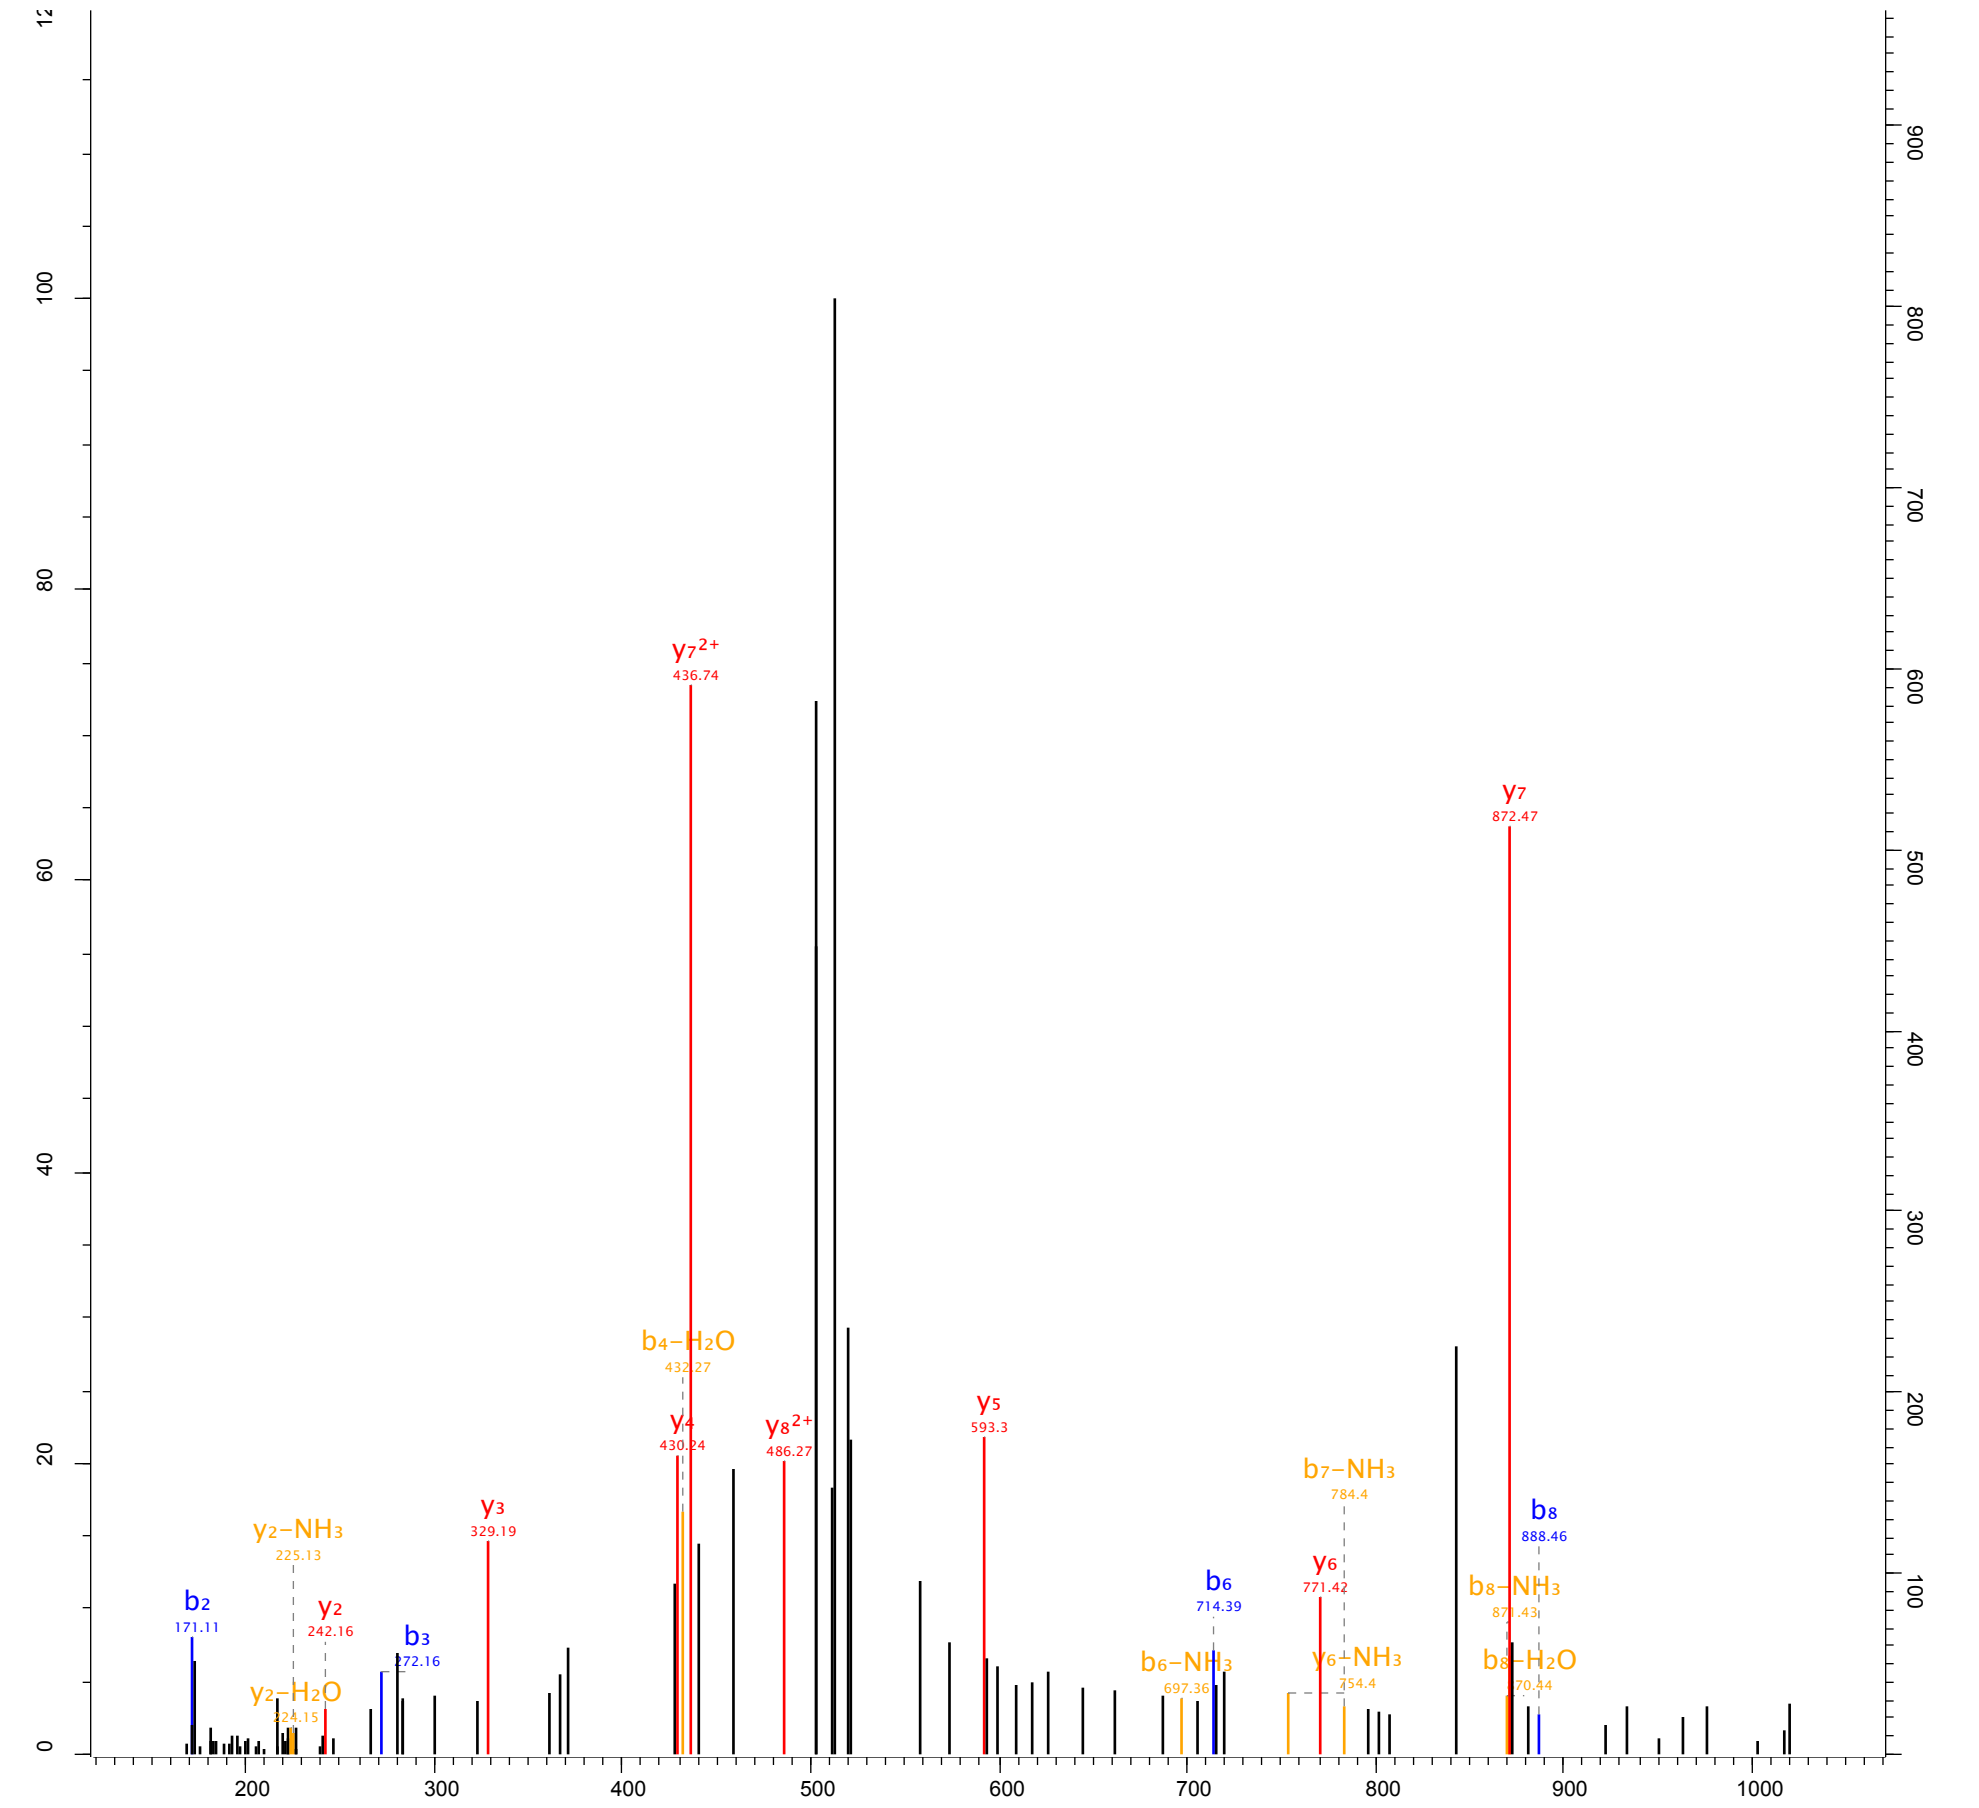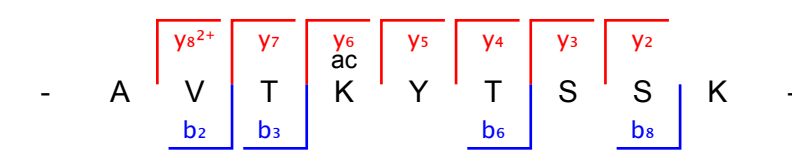

Raw file 072613\_SCW\_II\_68\_Enriched\_4 Scan 12385 Method ITMS; CID 204.56 m/z 595.84 Gene names Tpr

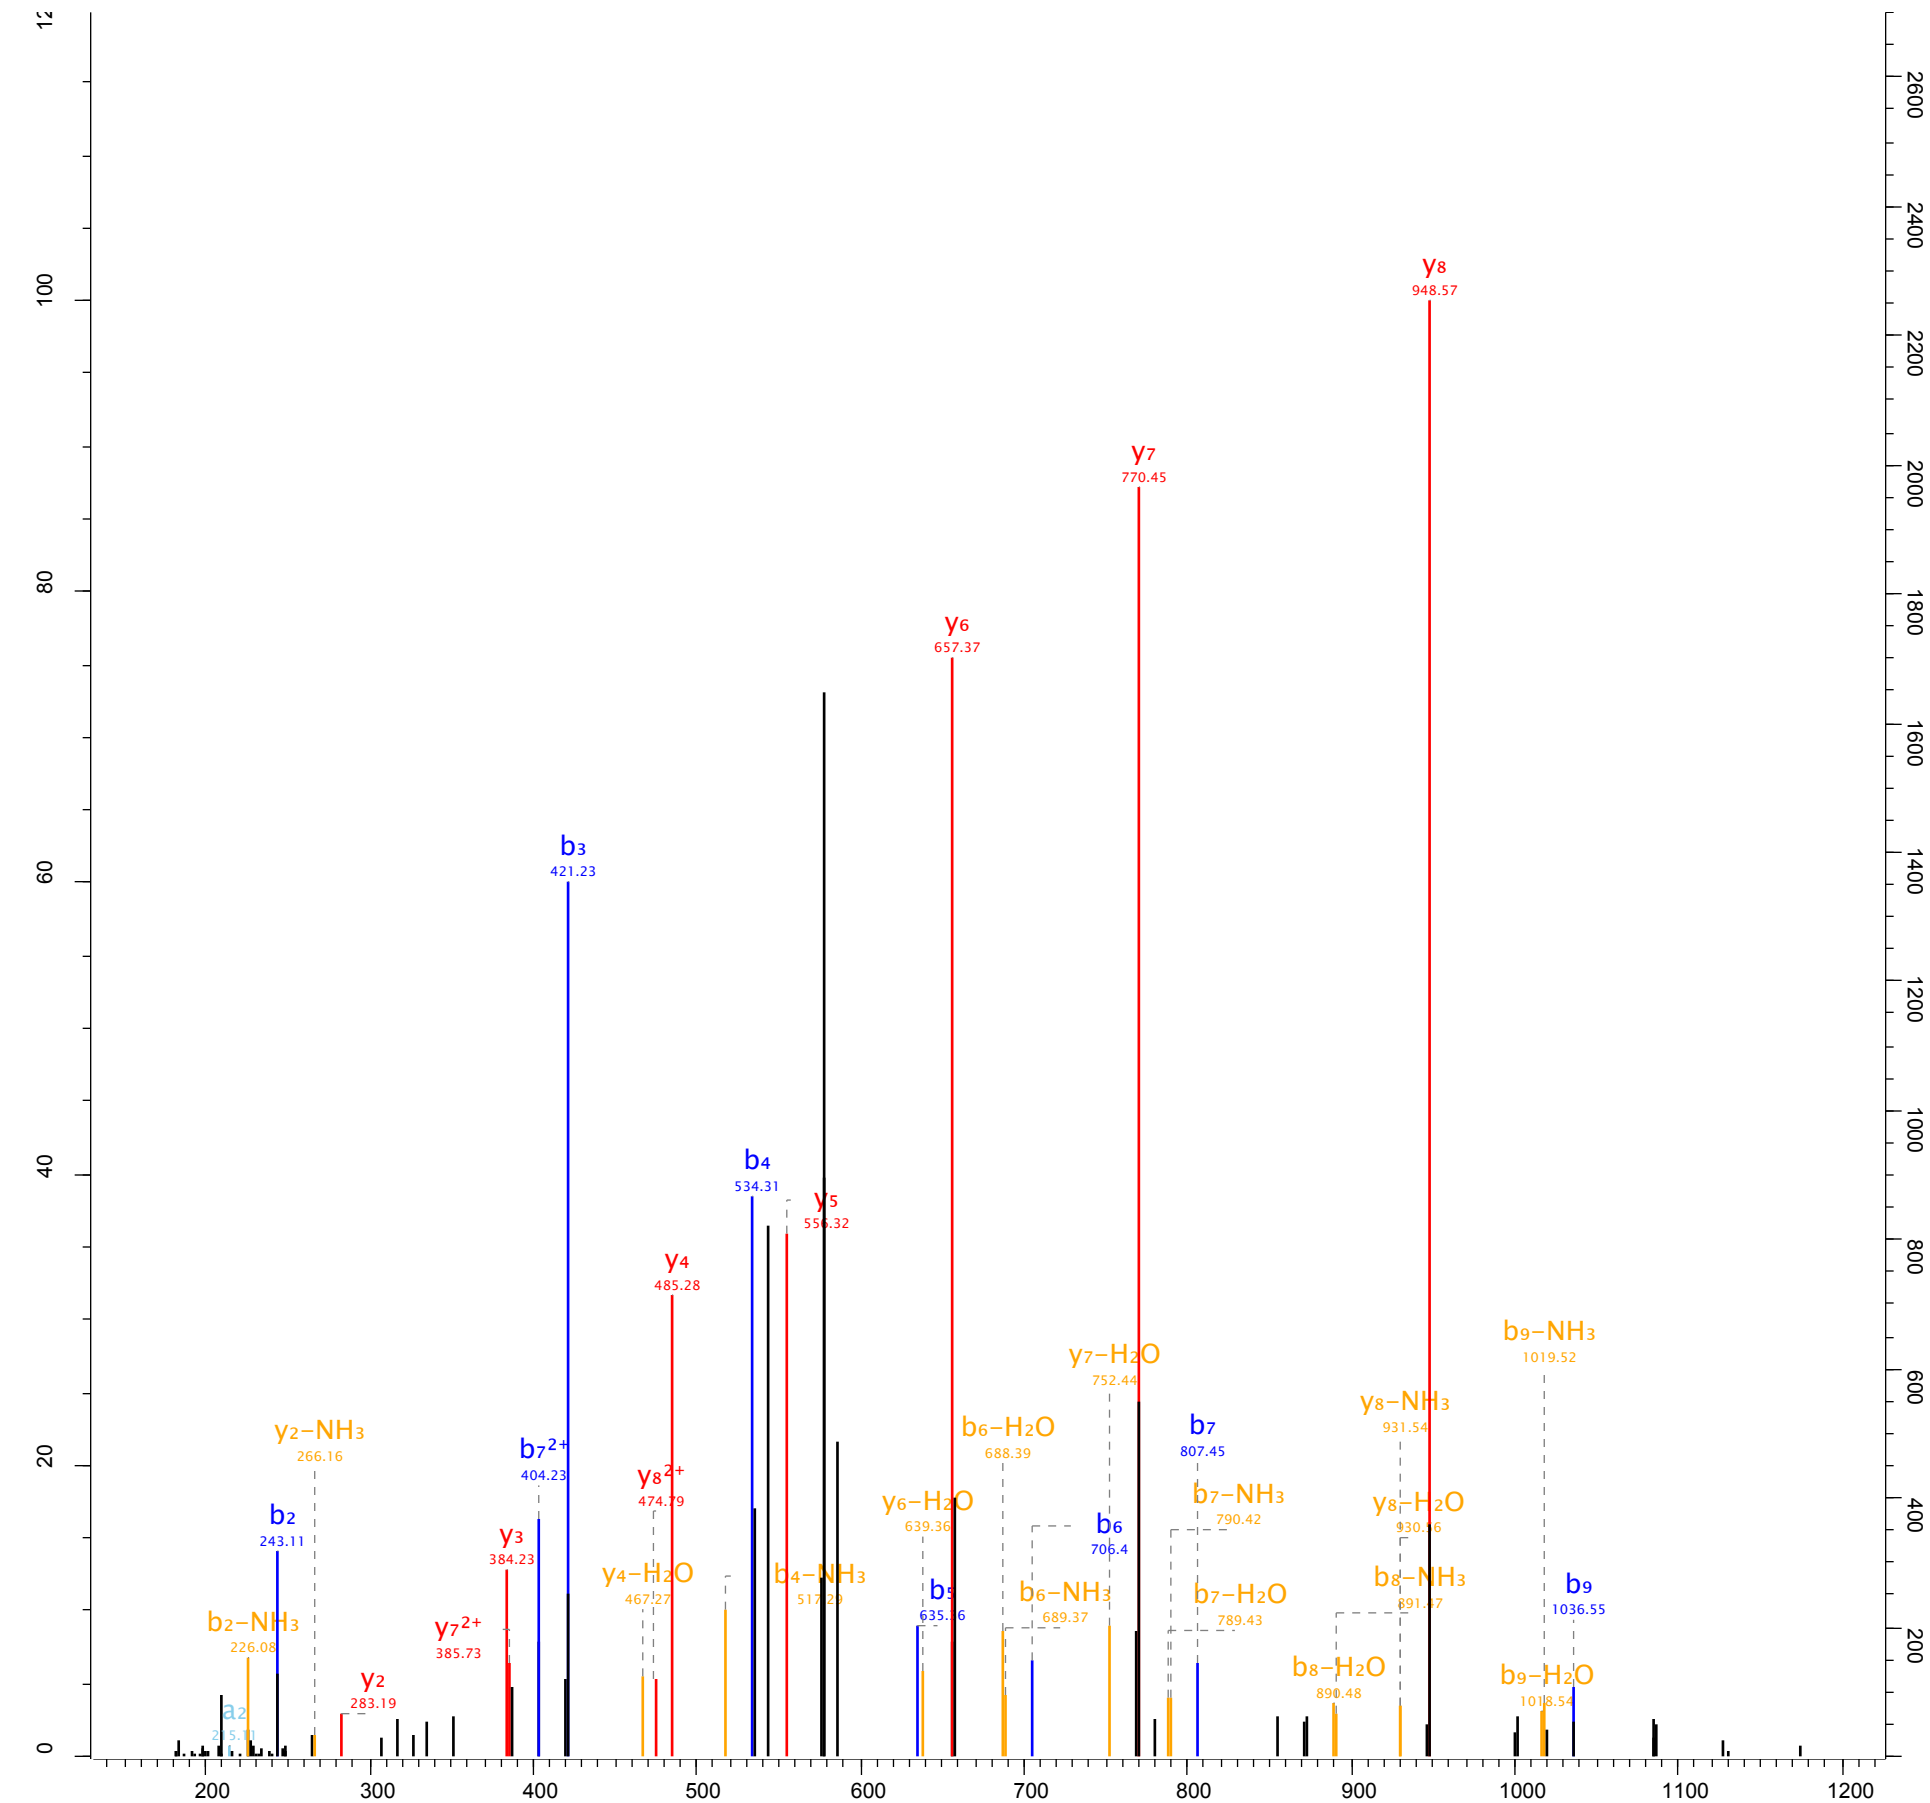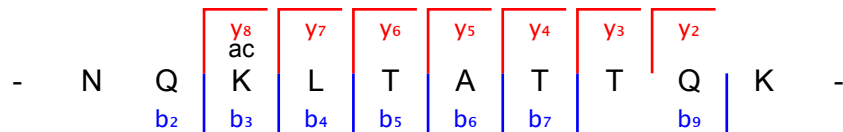

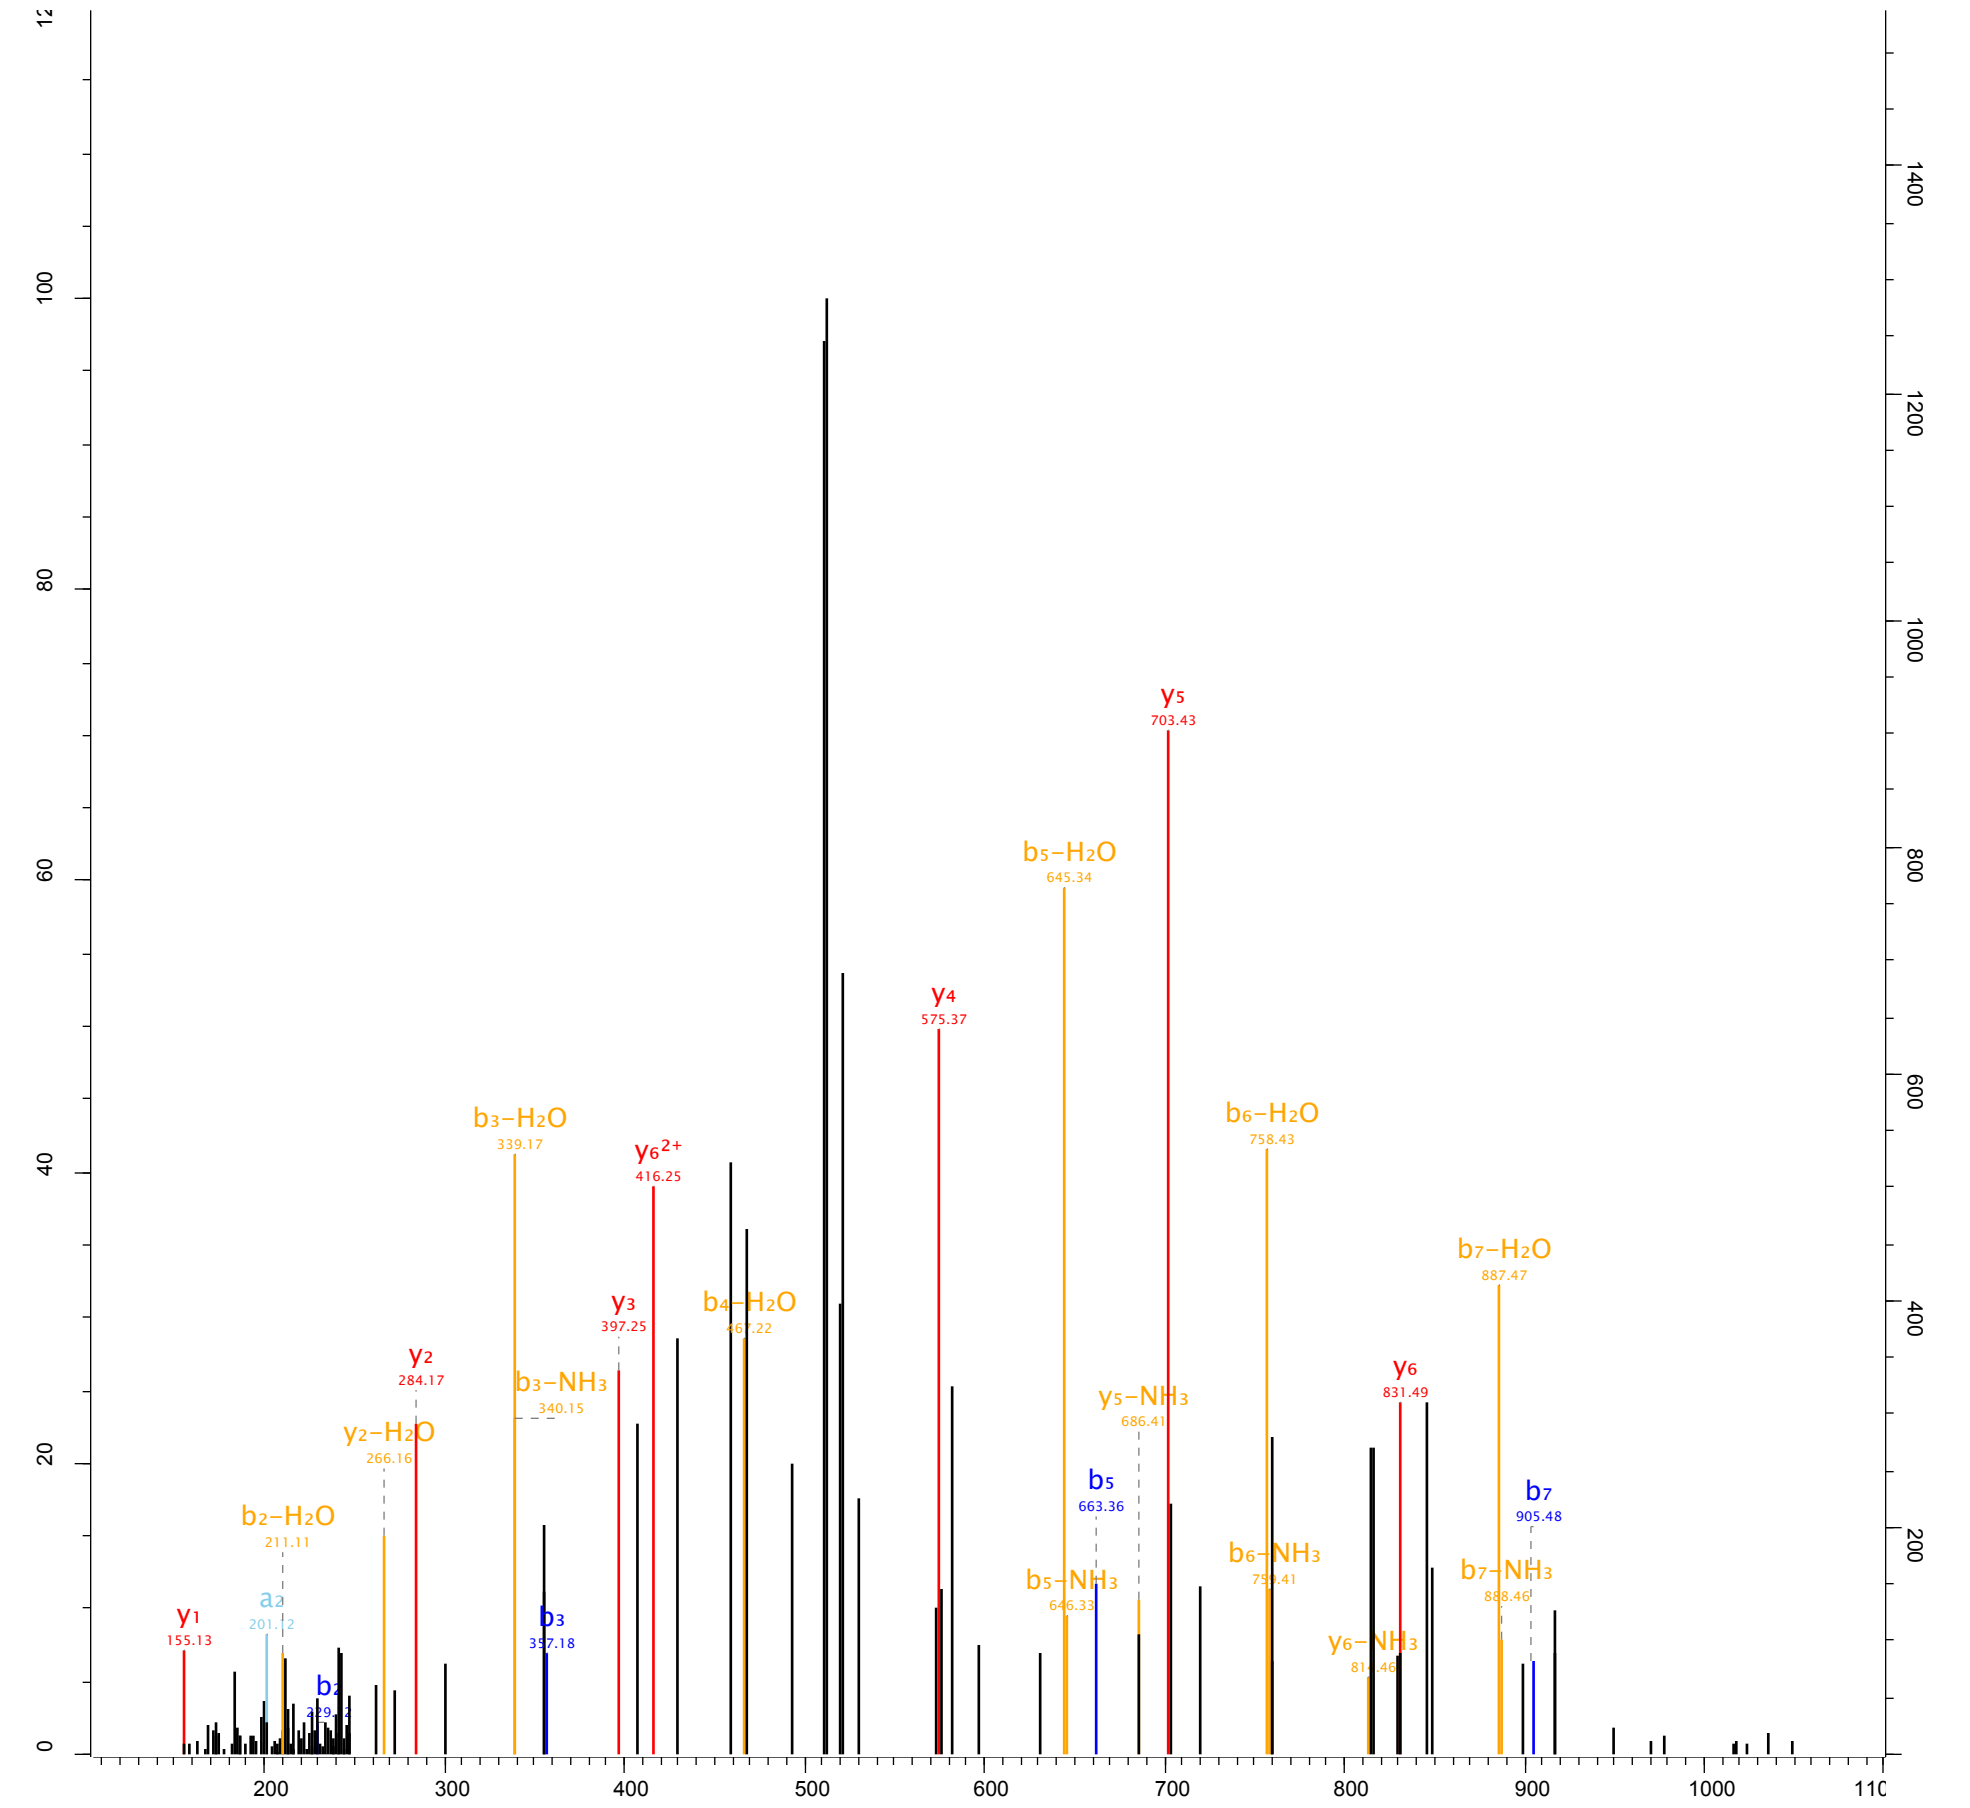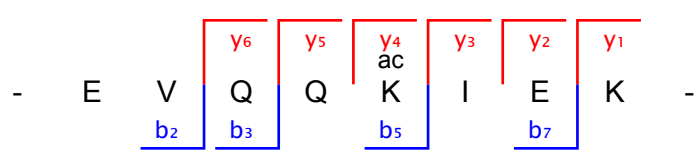



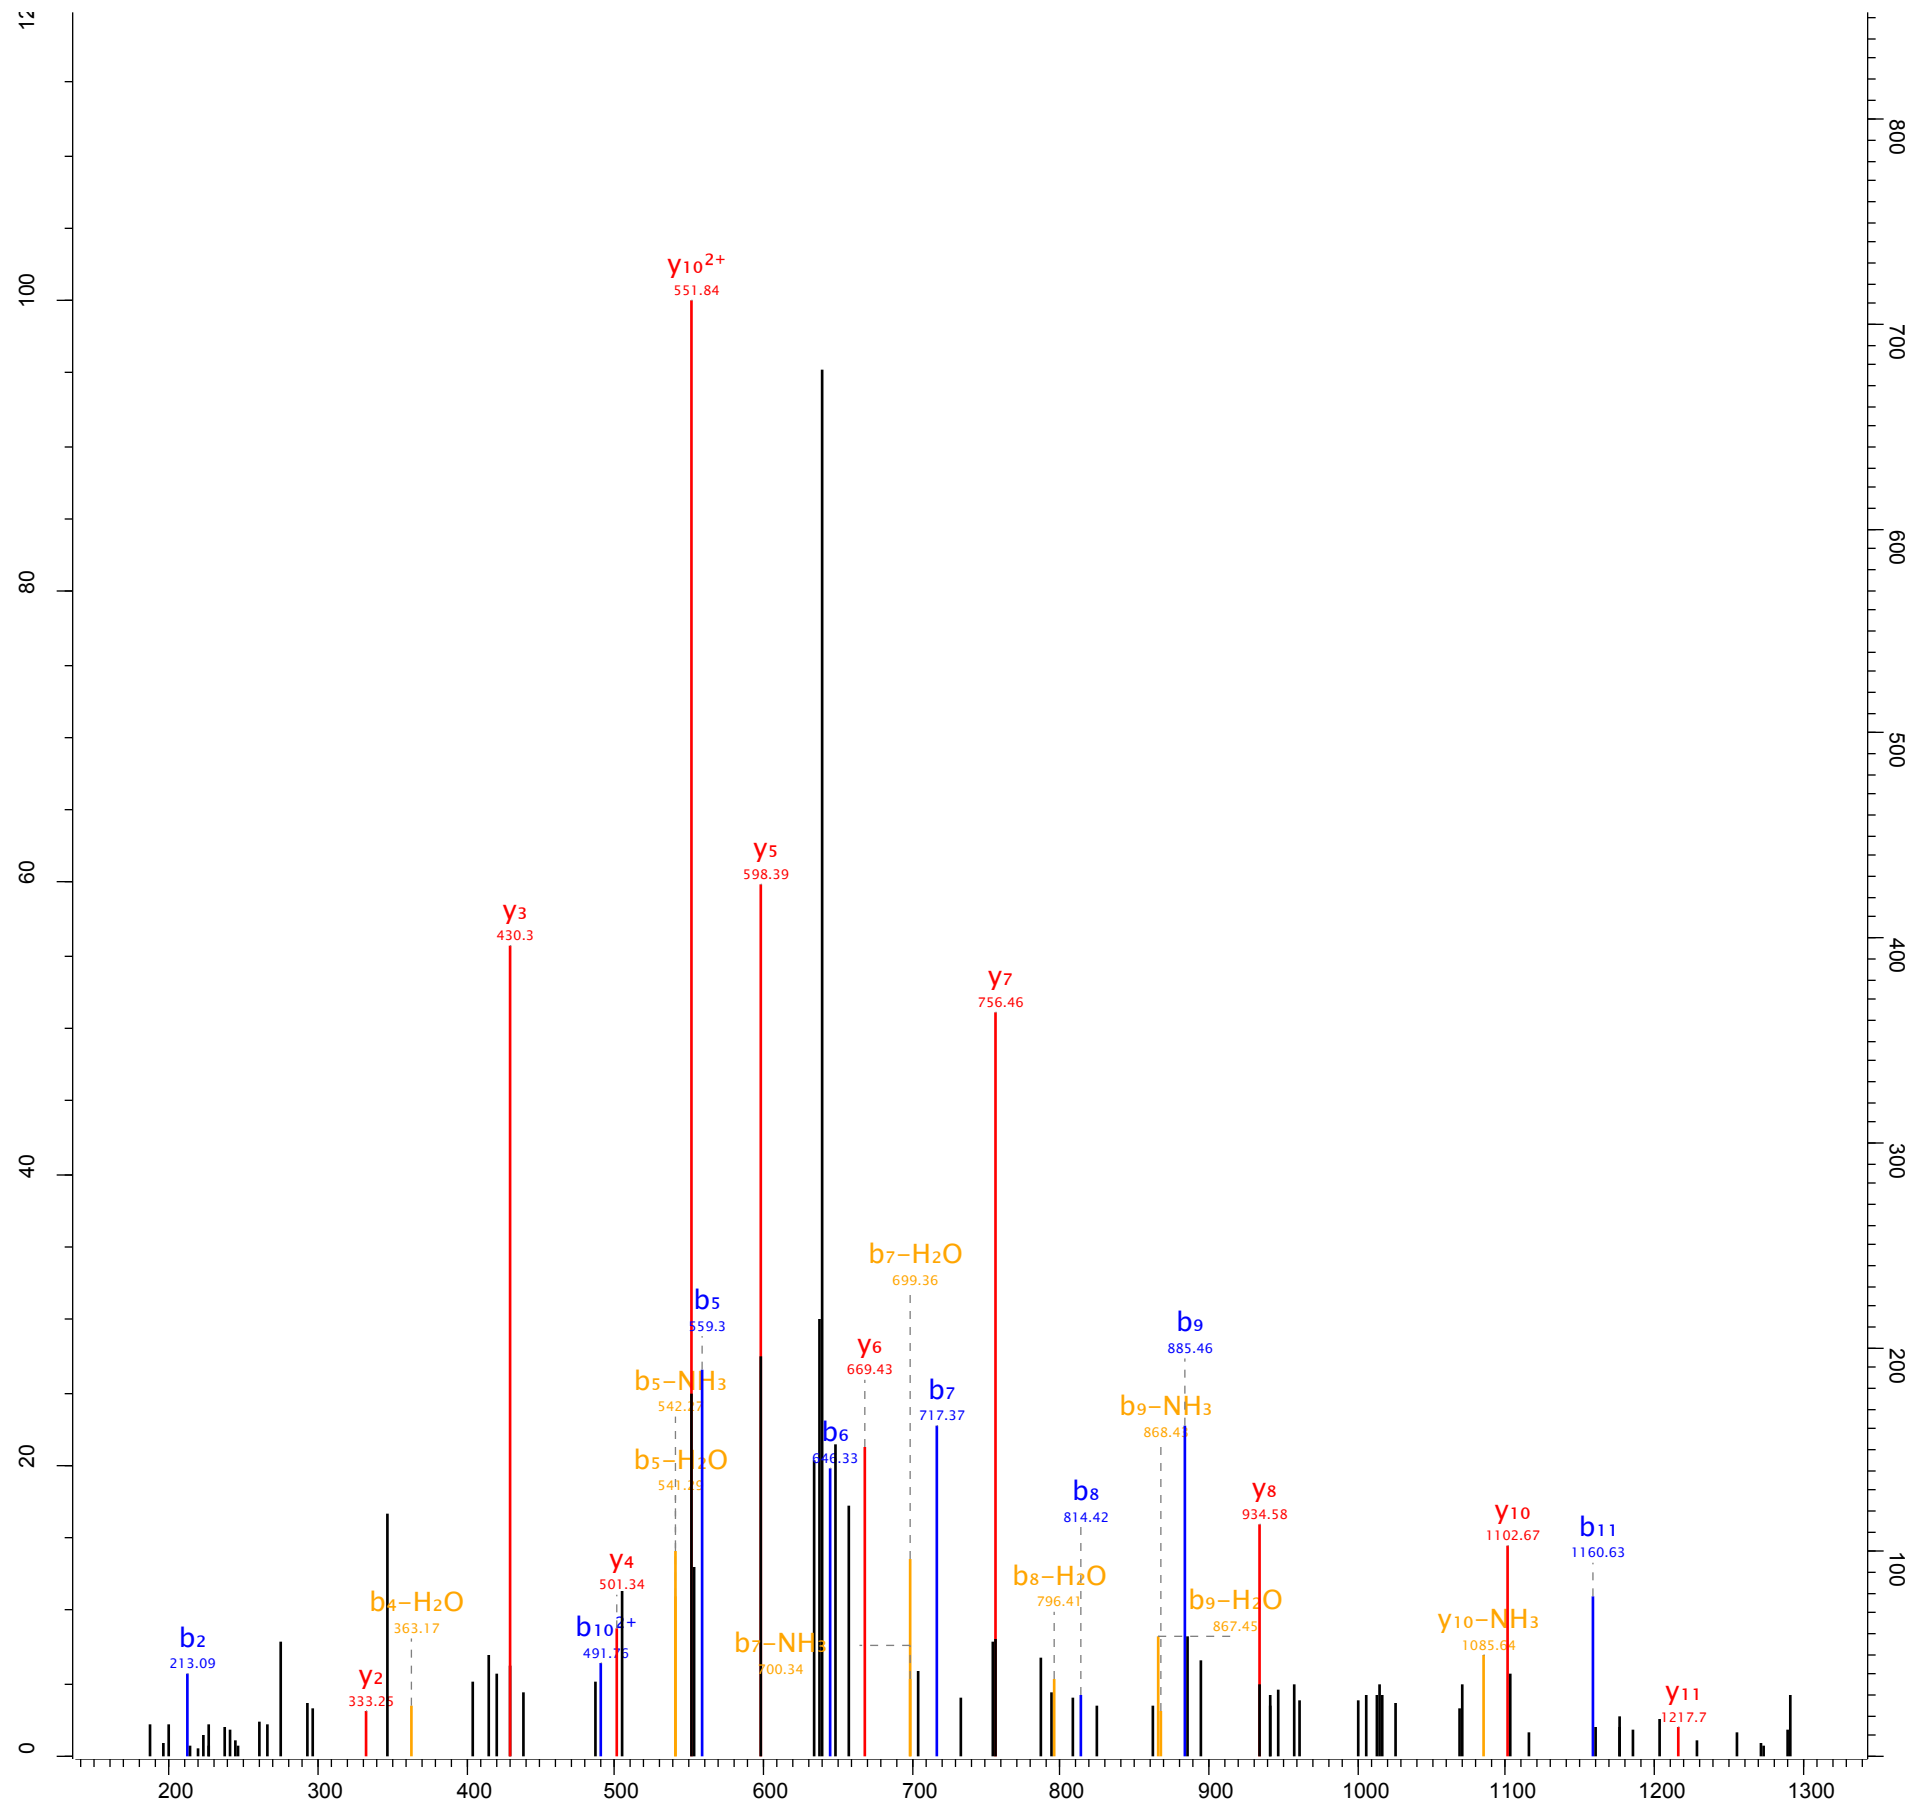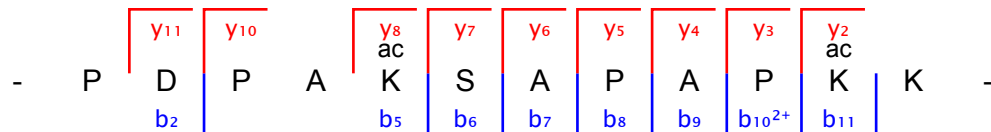

Raw file 072613\_SCW\_II\_68\_Enriched\_4 Scan 13880 Method ITMS; CID Score 243.91 m/z 580.81 Gene names Atp5a1

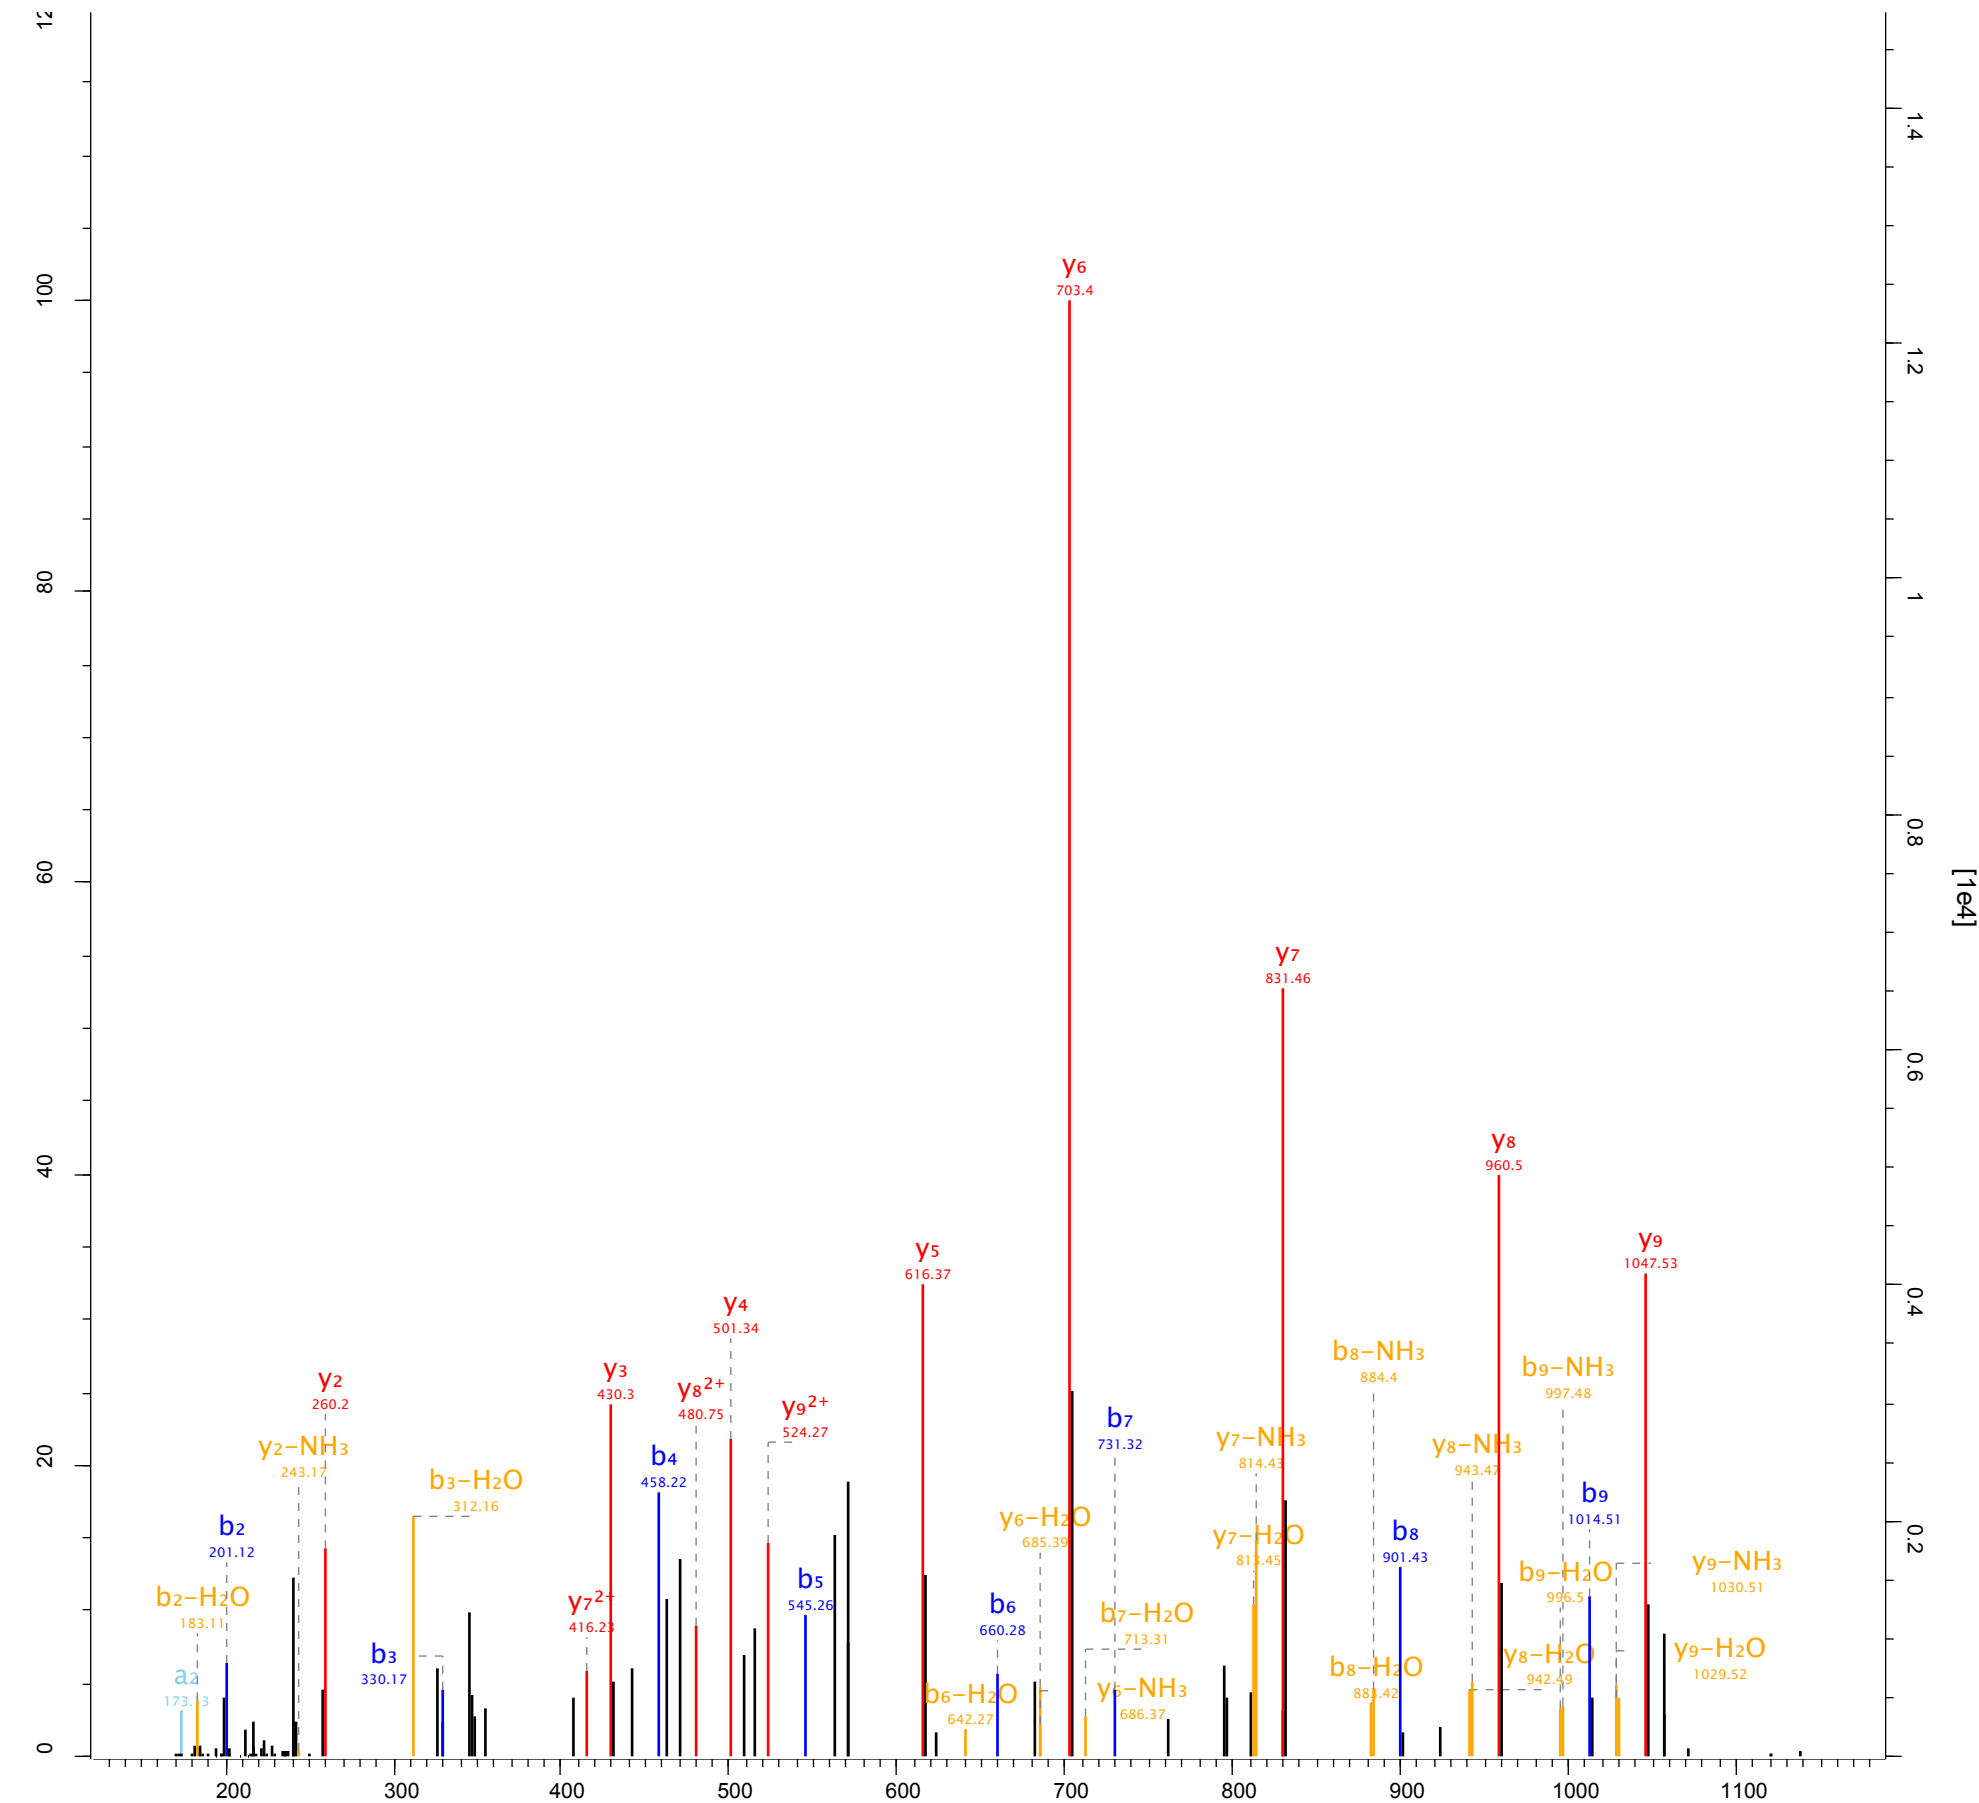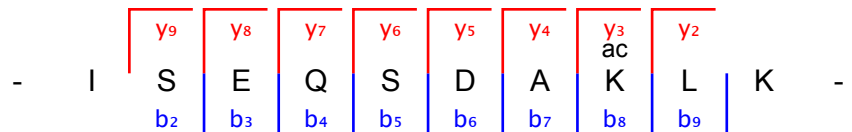

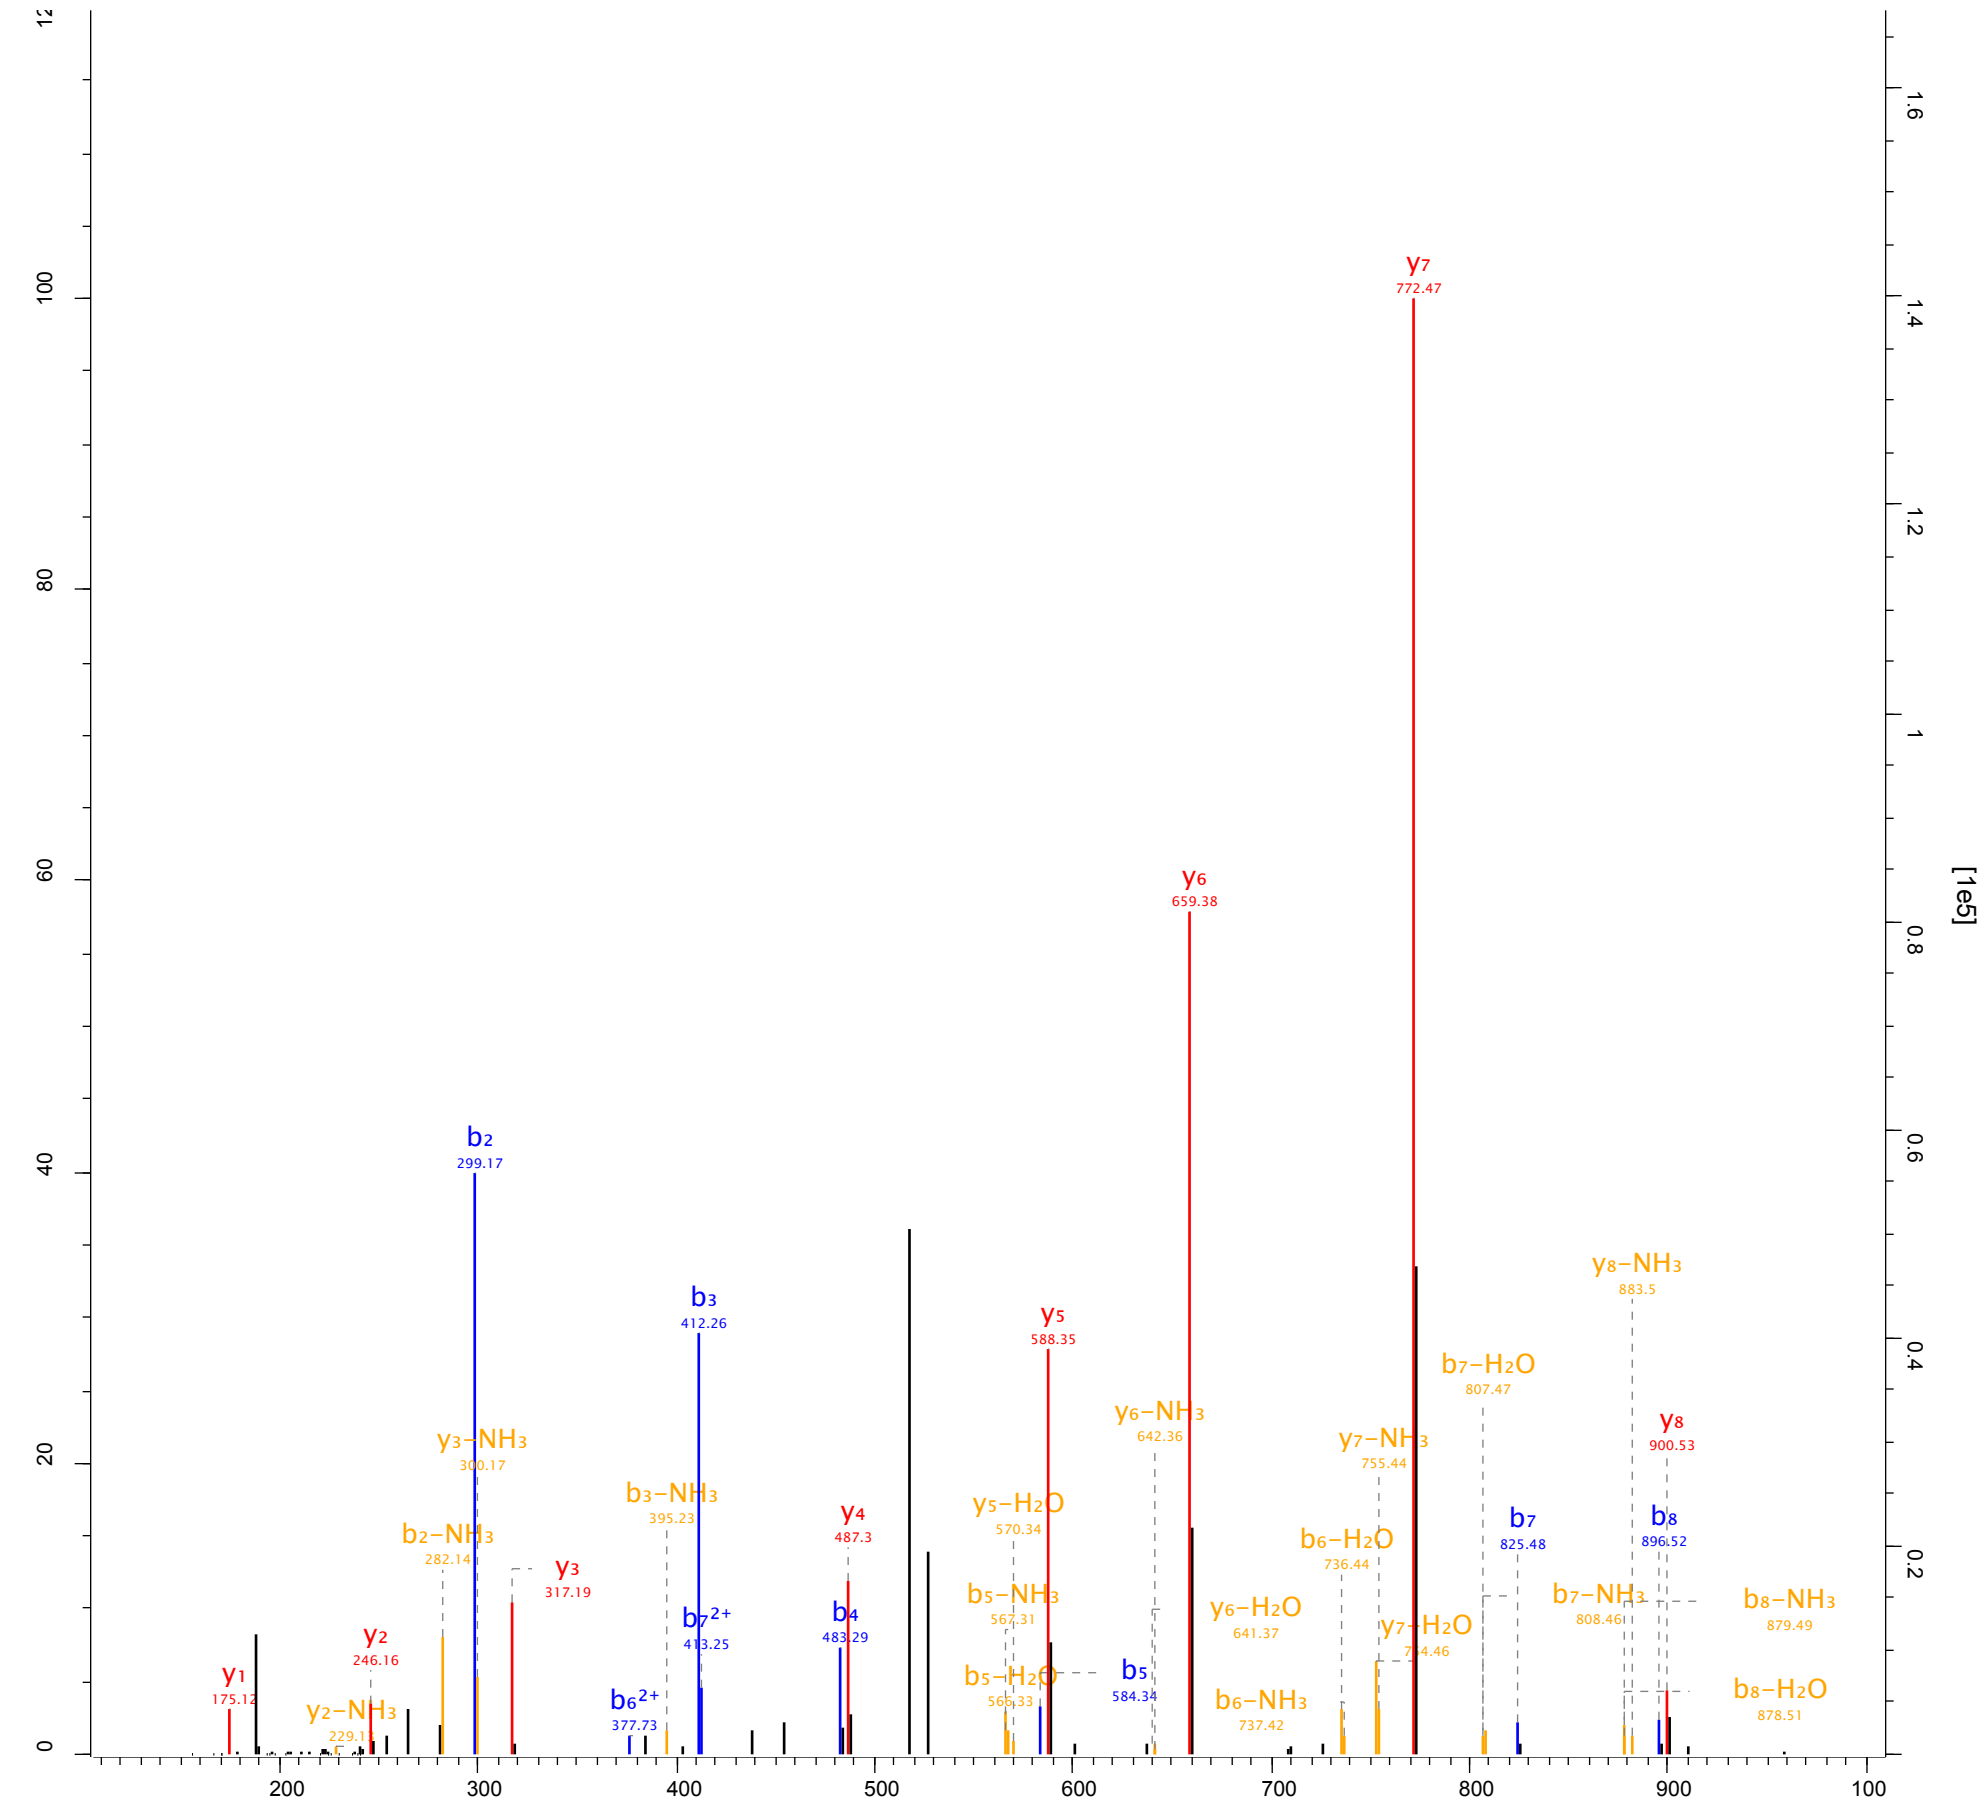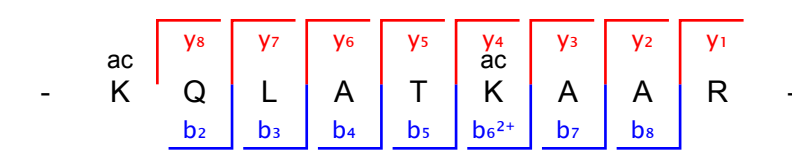

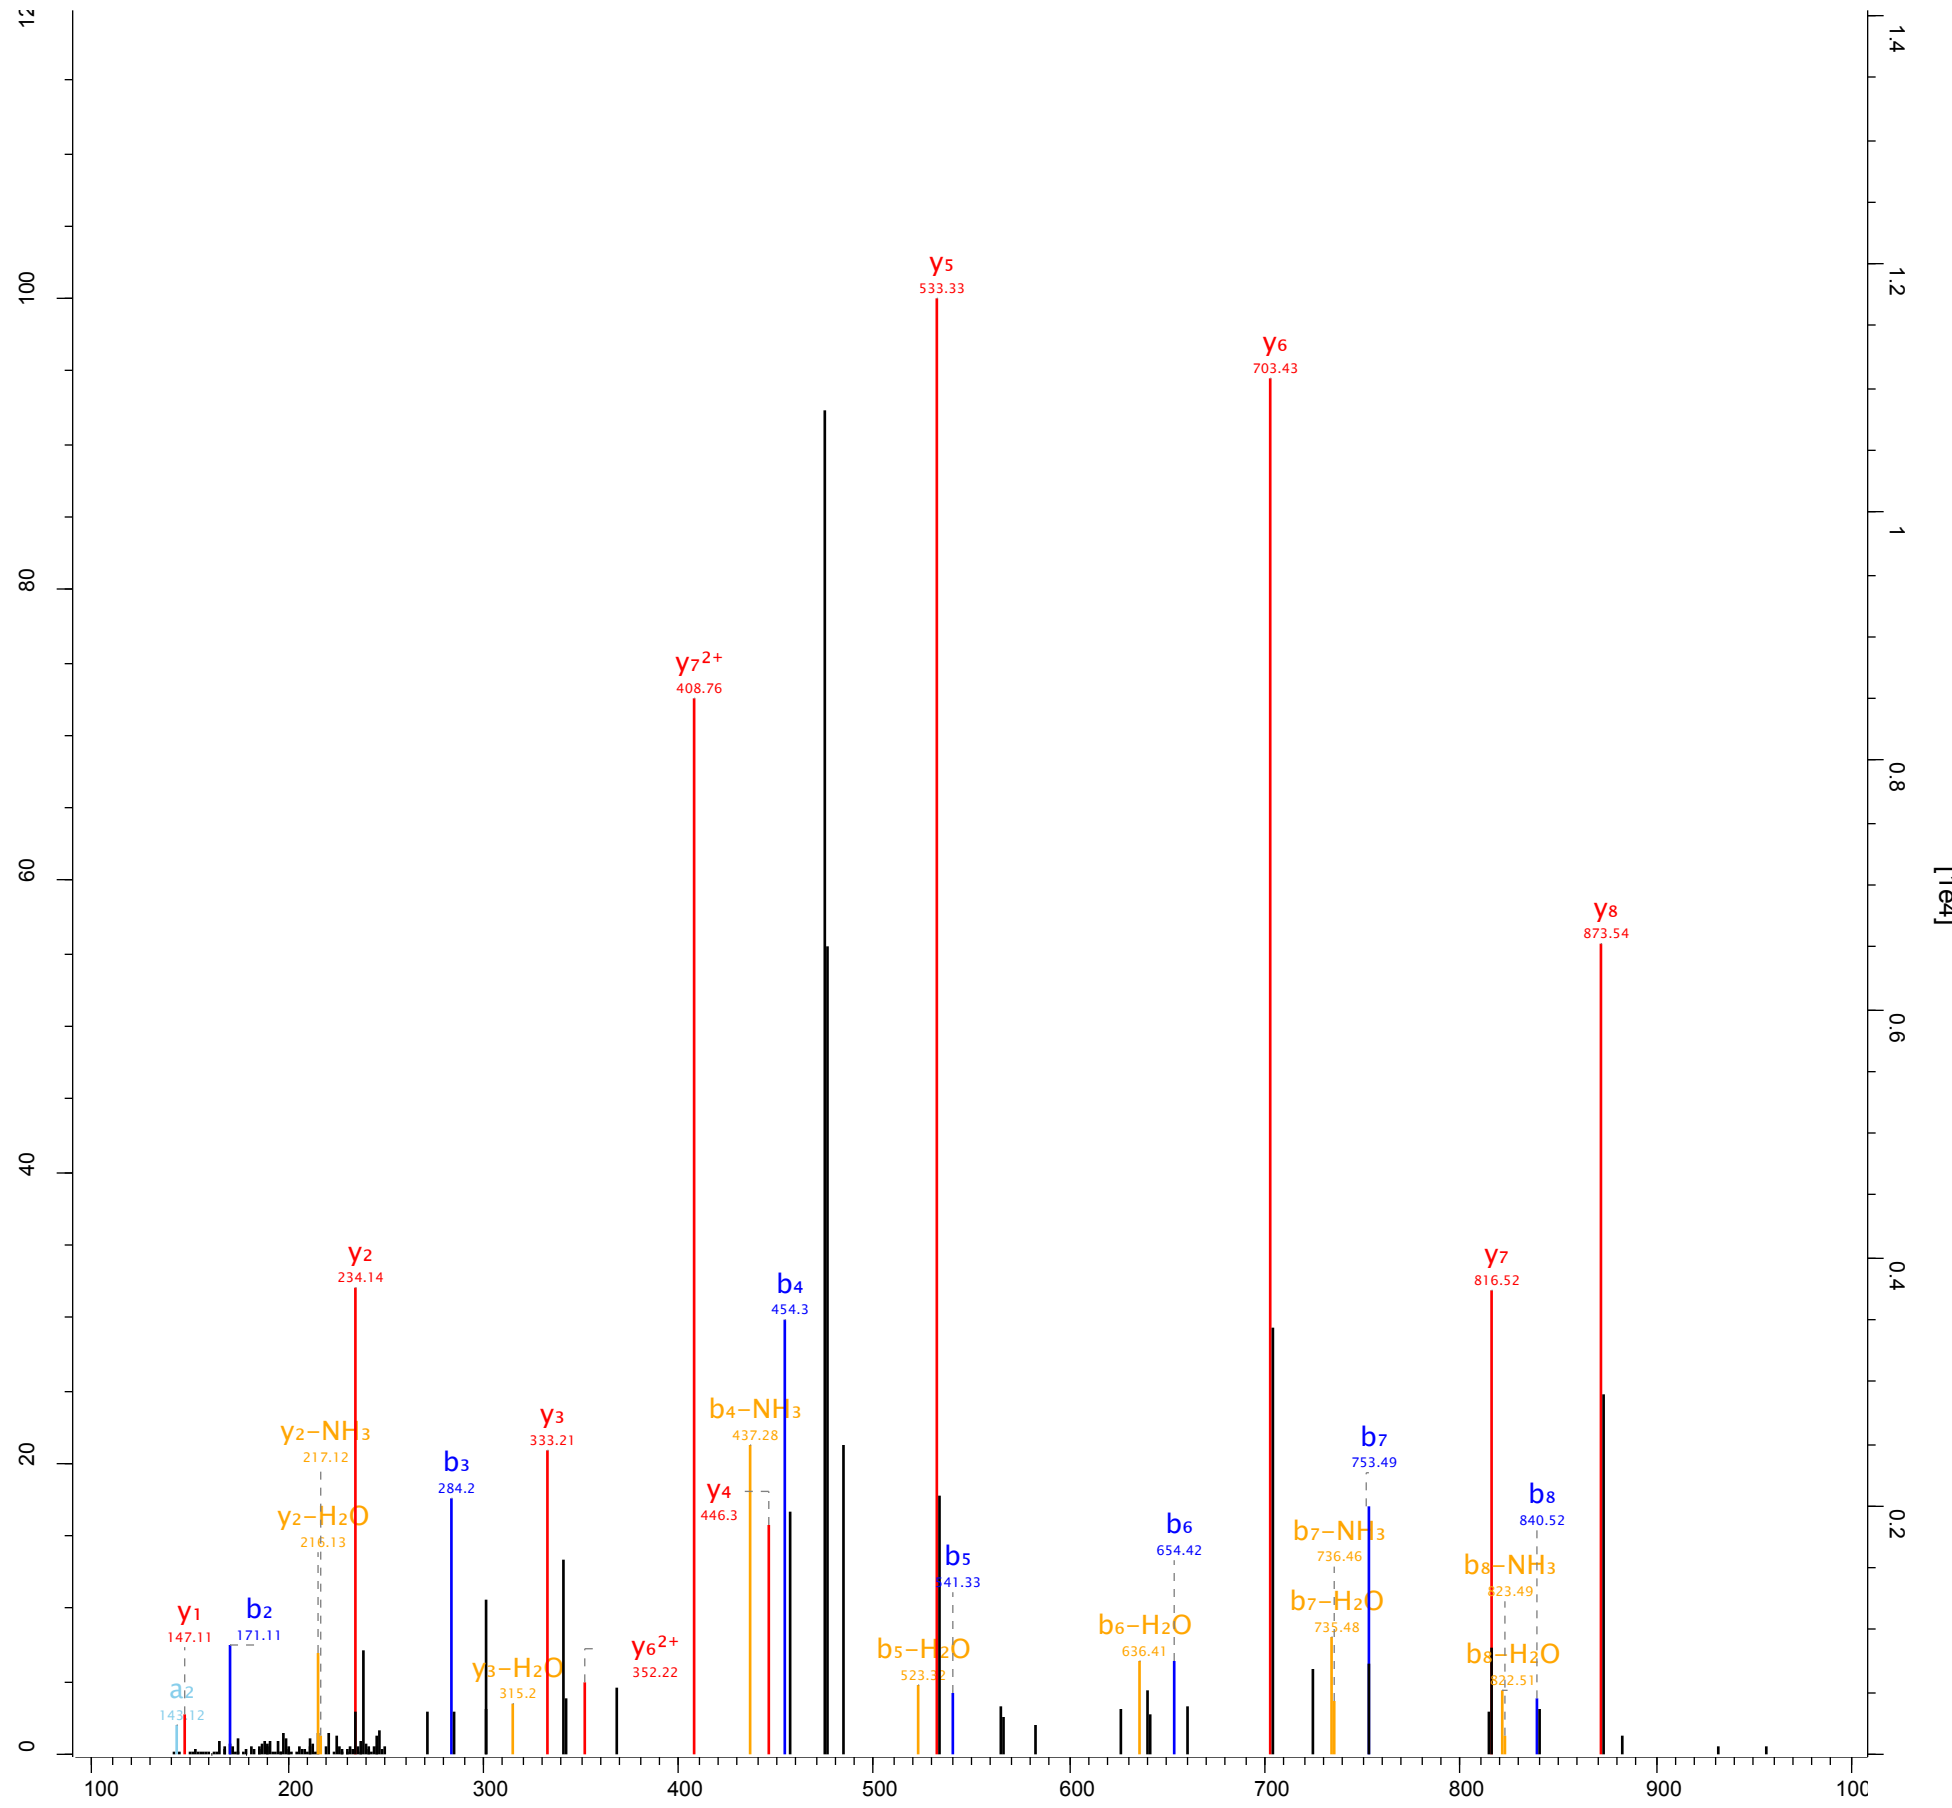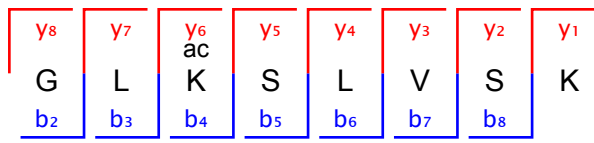

Raw file  
072613\_SCW\_II\_68\_Enriched\_4

Scan 31183 Method ITMS; CID Score 124.47 m/z 851.51 Gene names Ldha

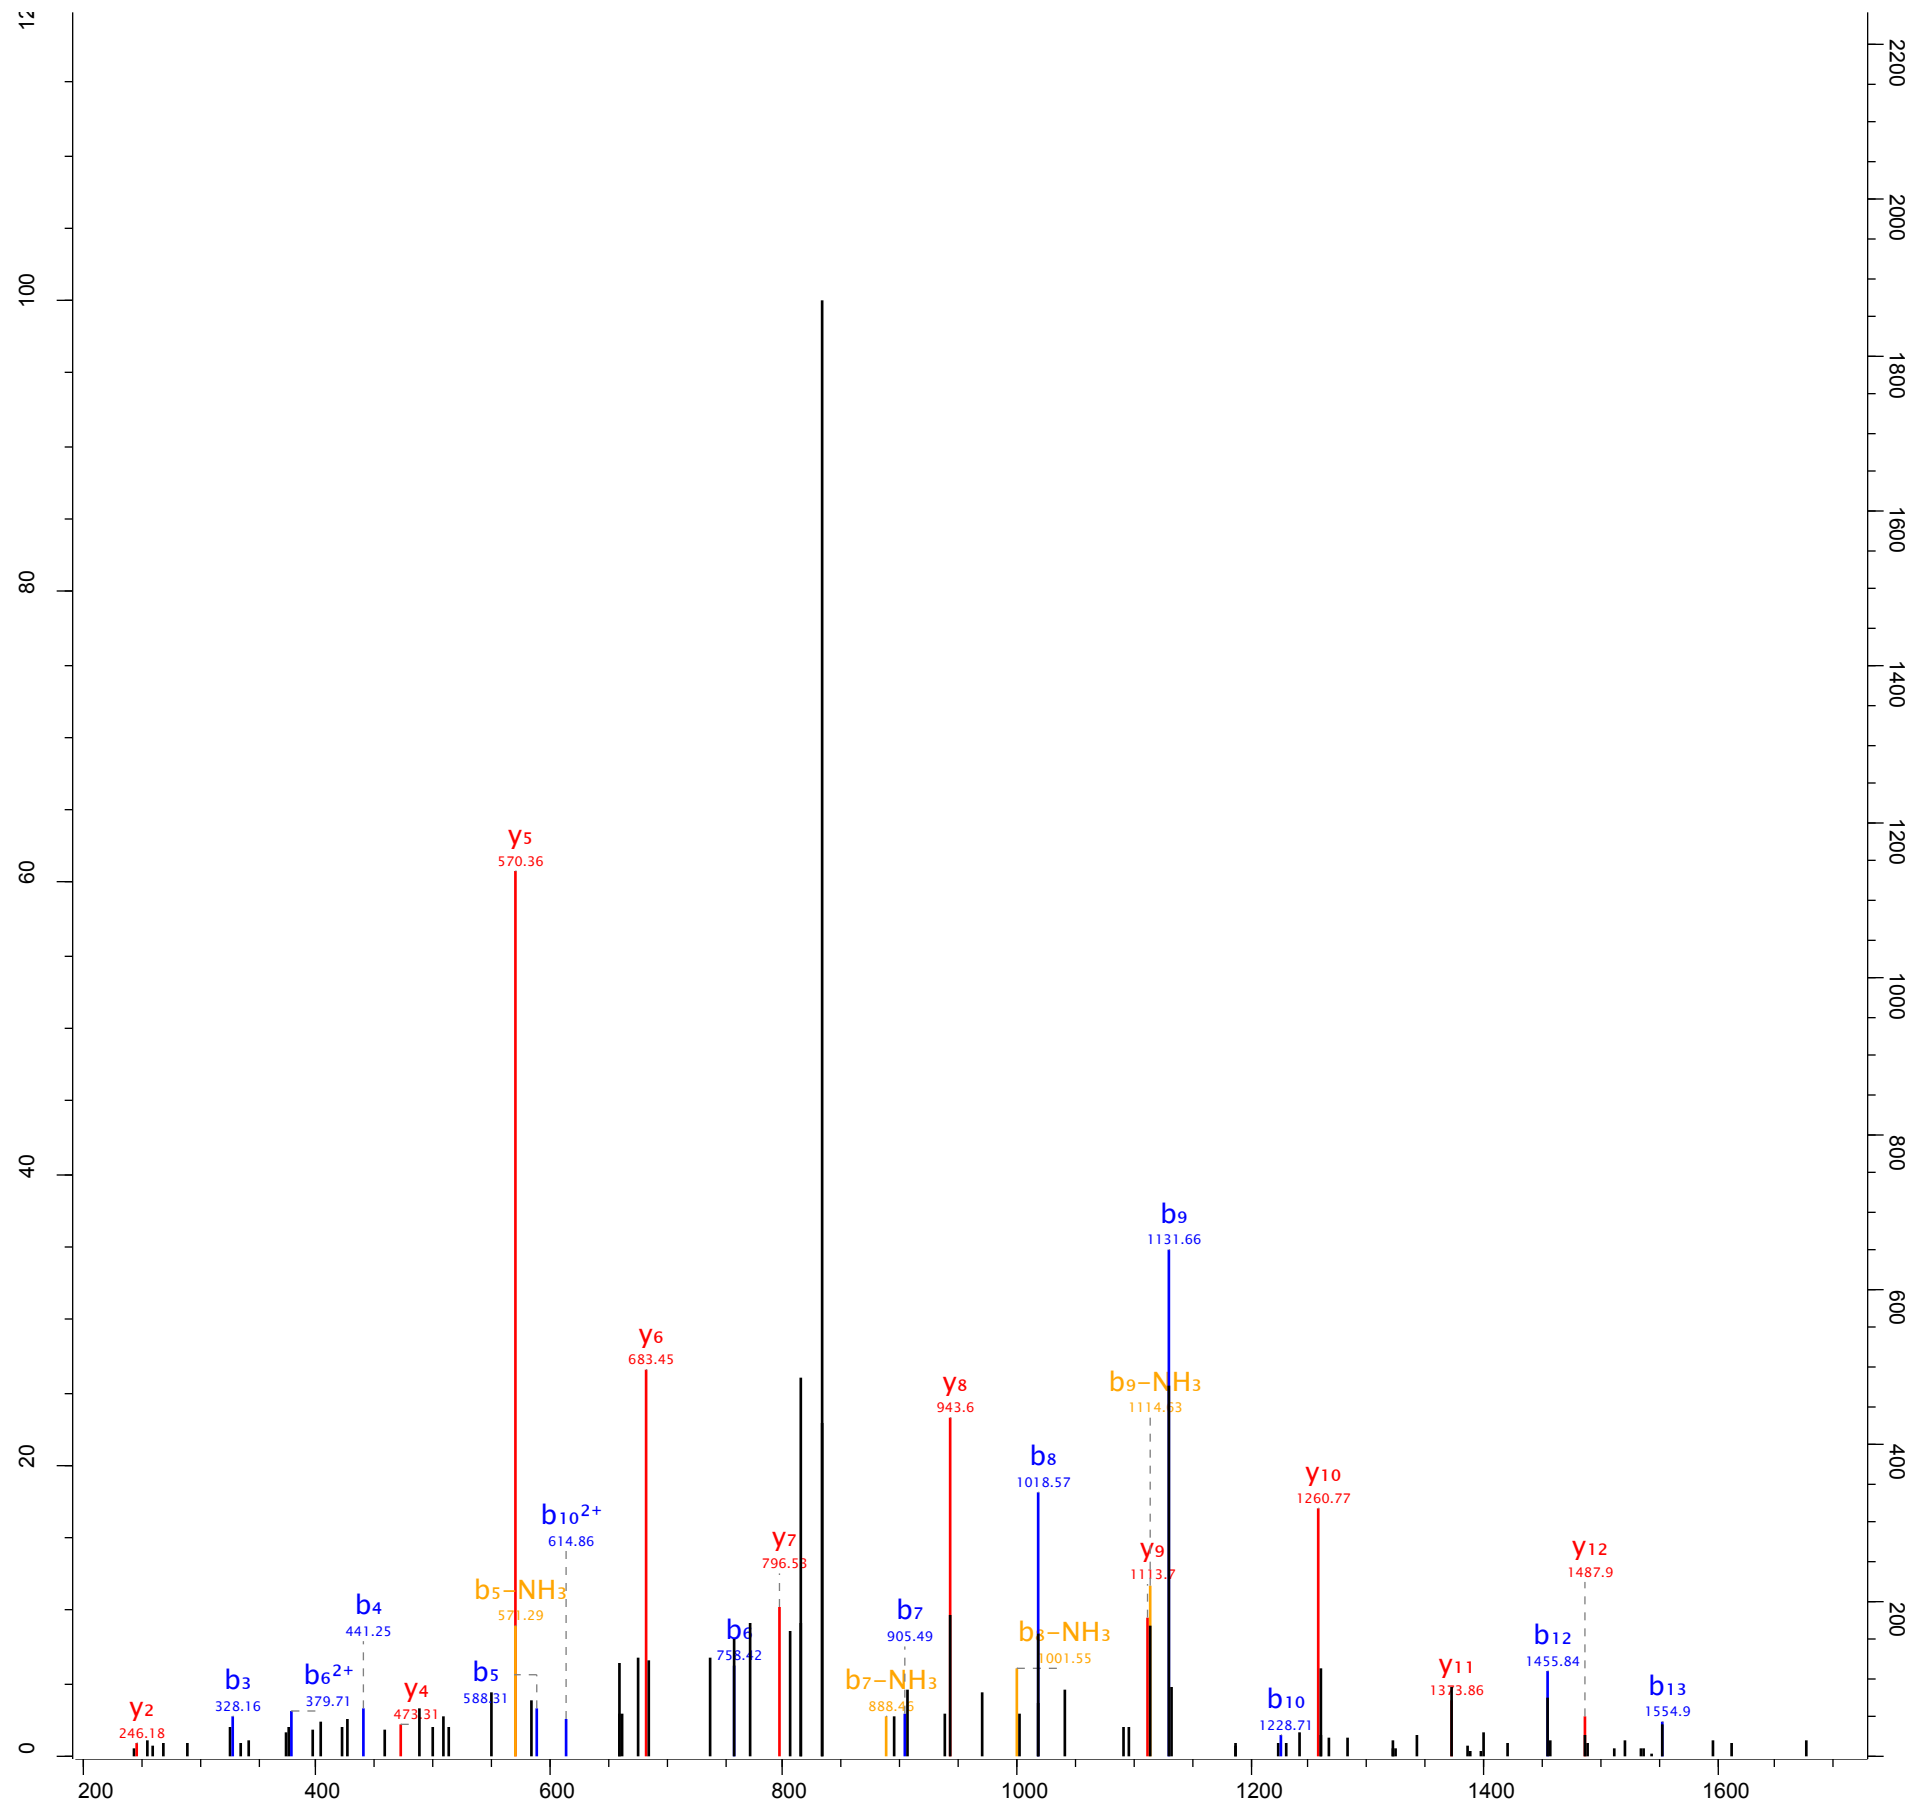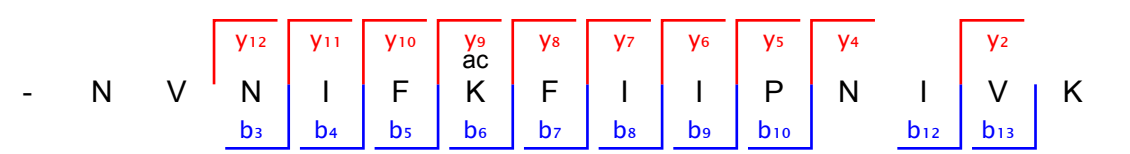

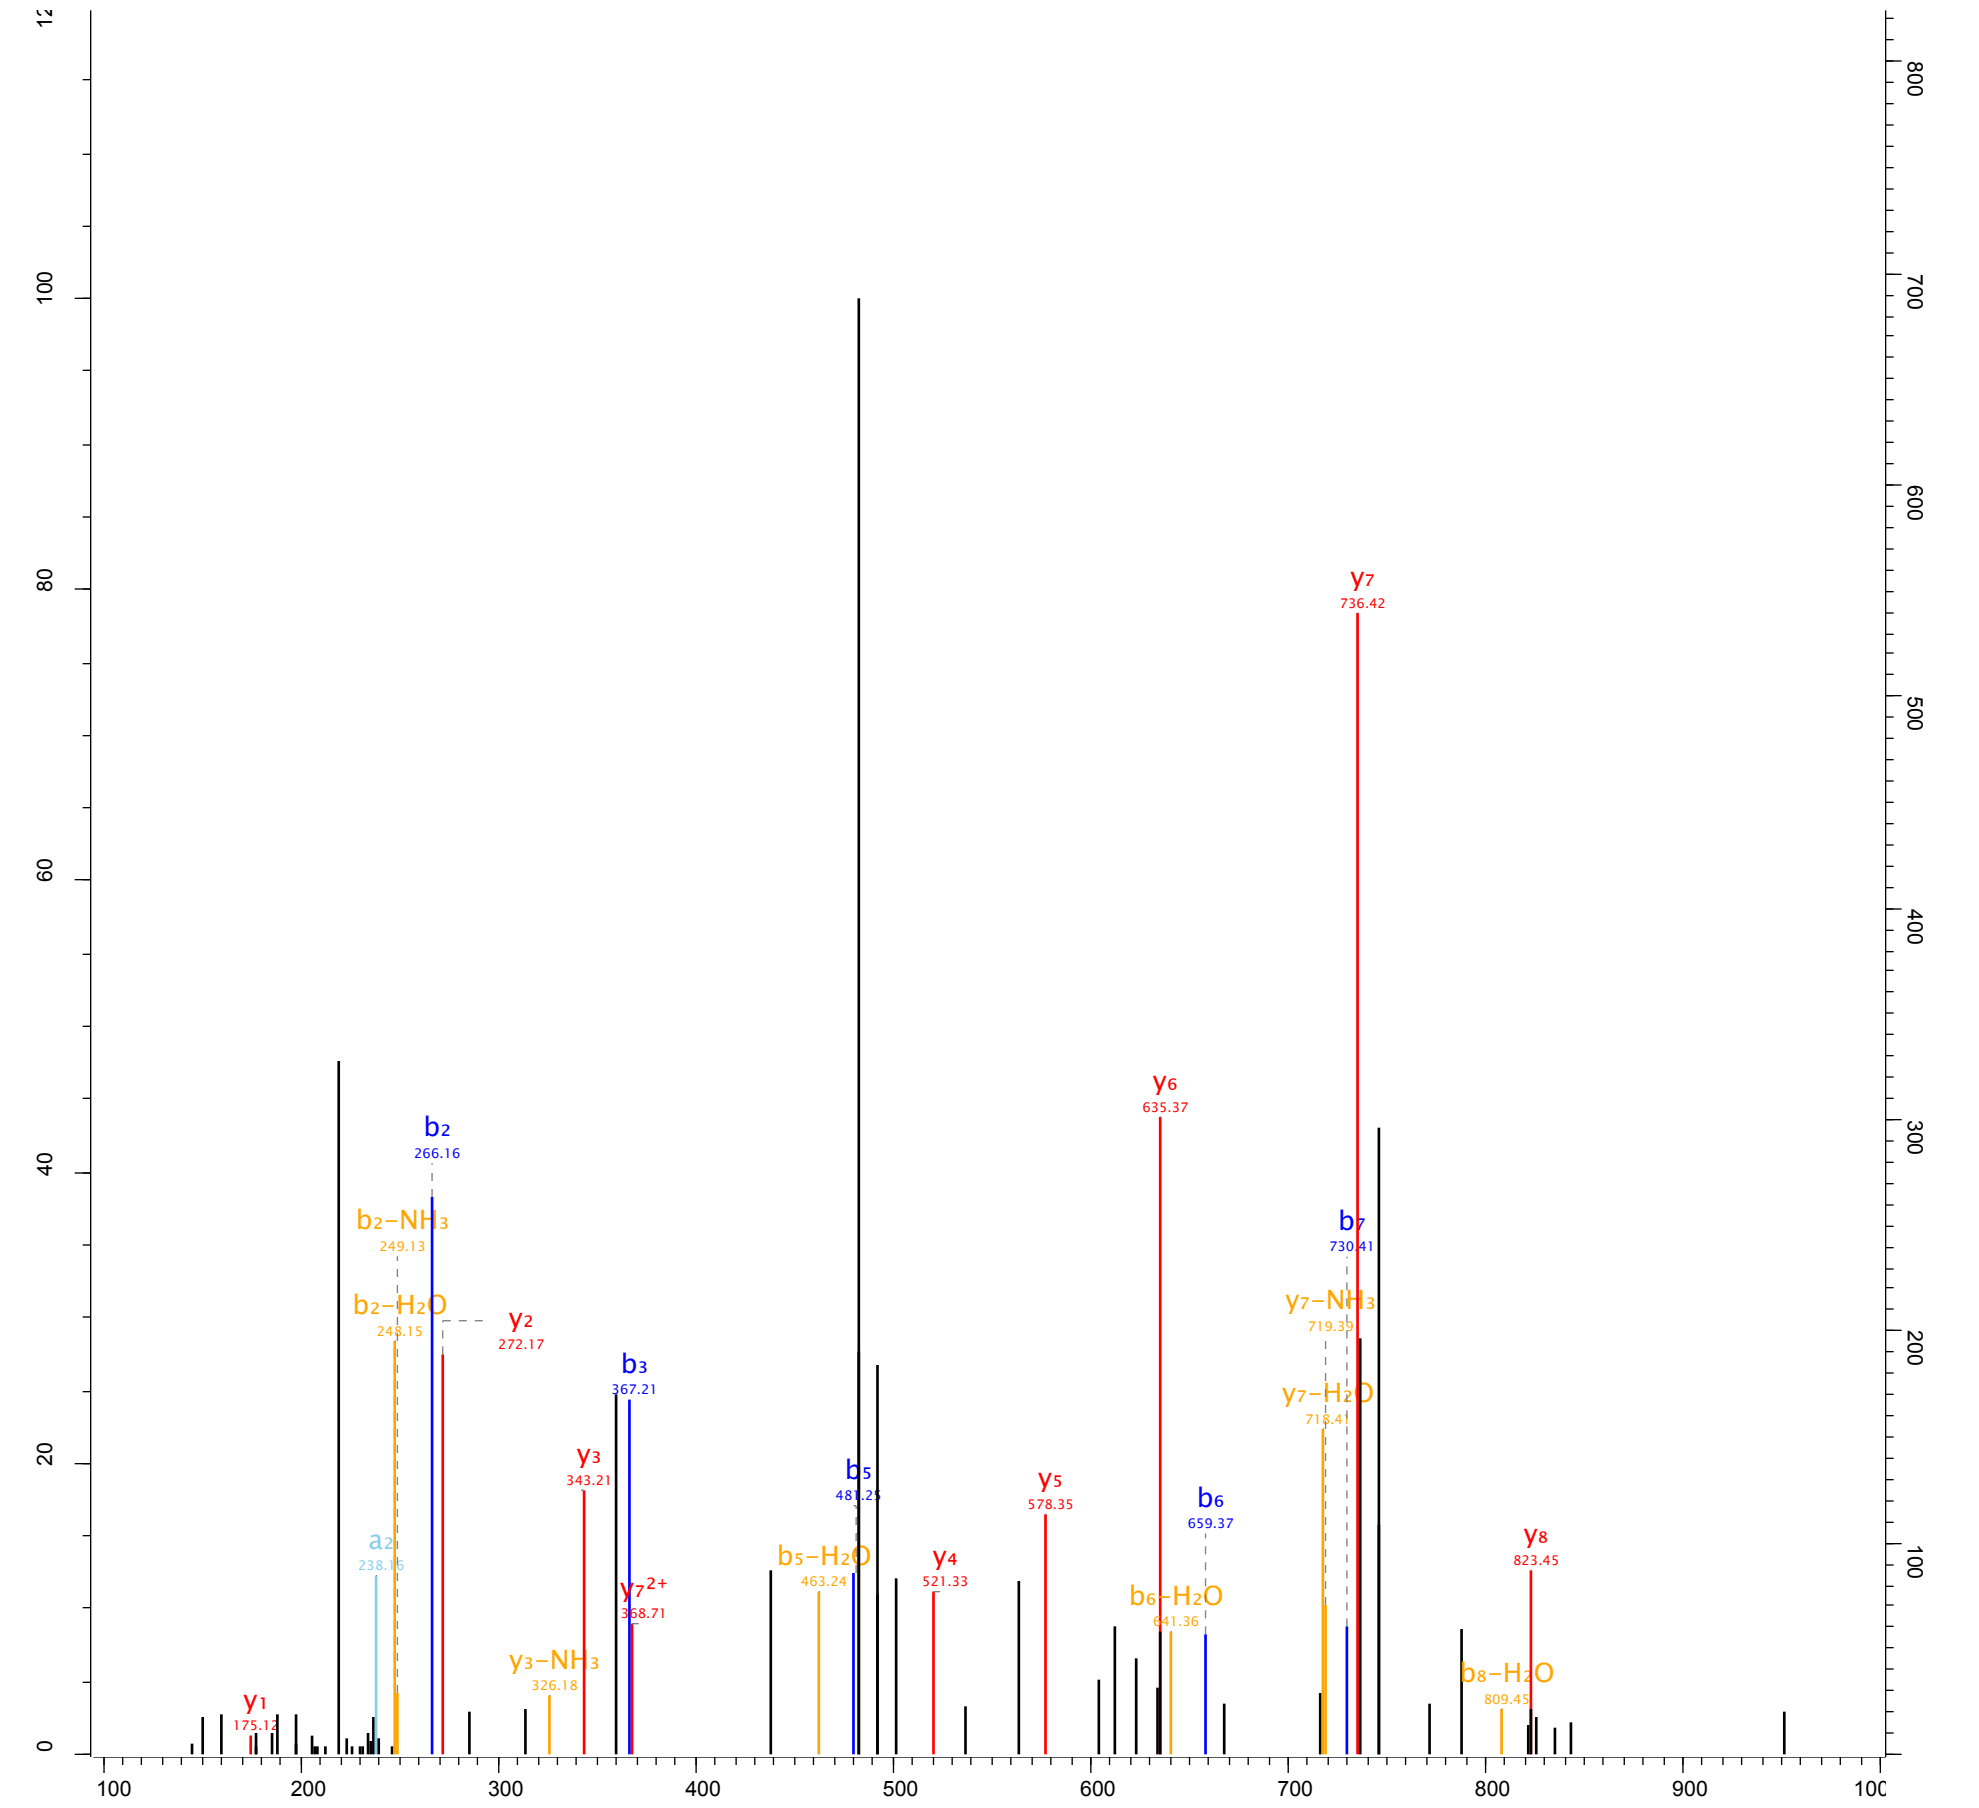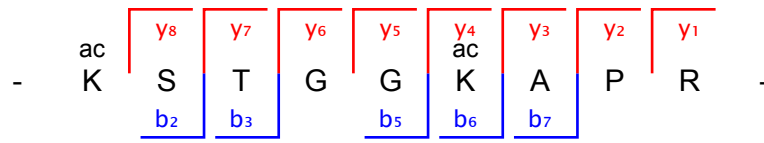

Raw file 072613\_SCW\_II\_68\_Enriched\_5 Scan 12950 Method ITMS; CID Score 125.71 m/z 468.25 Gene names Pgk1

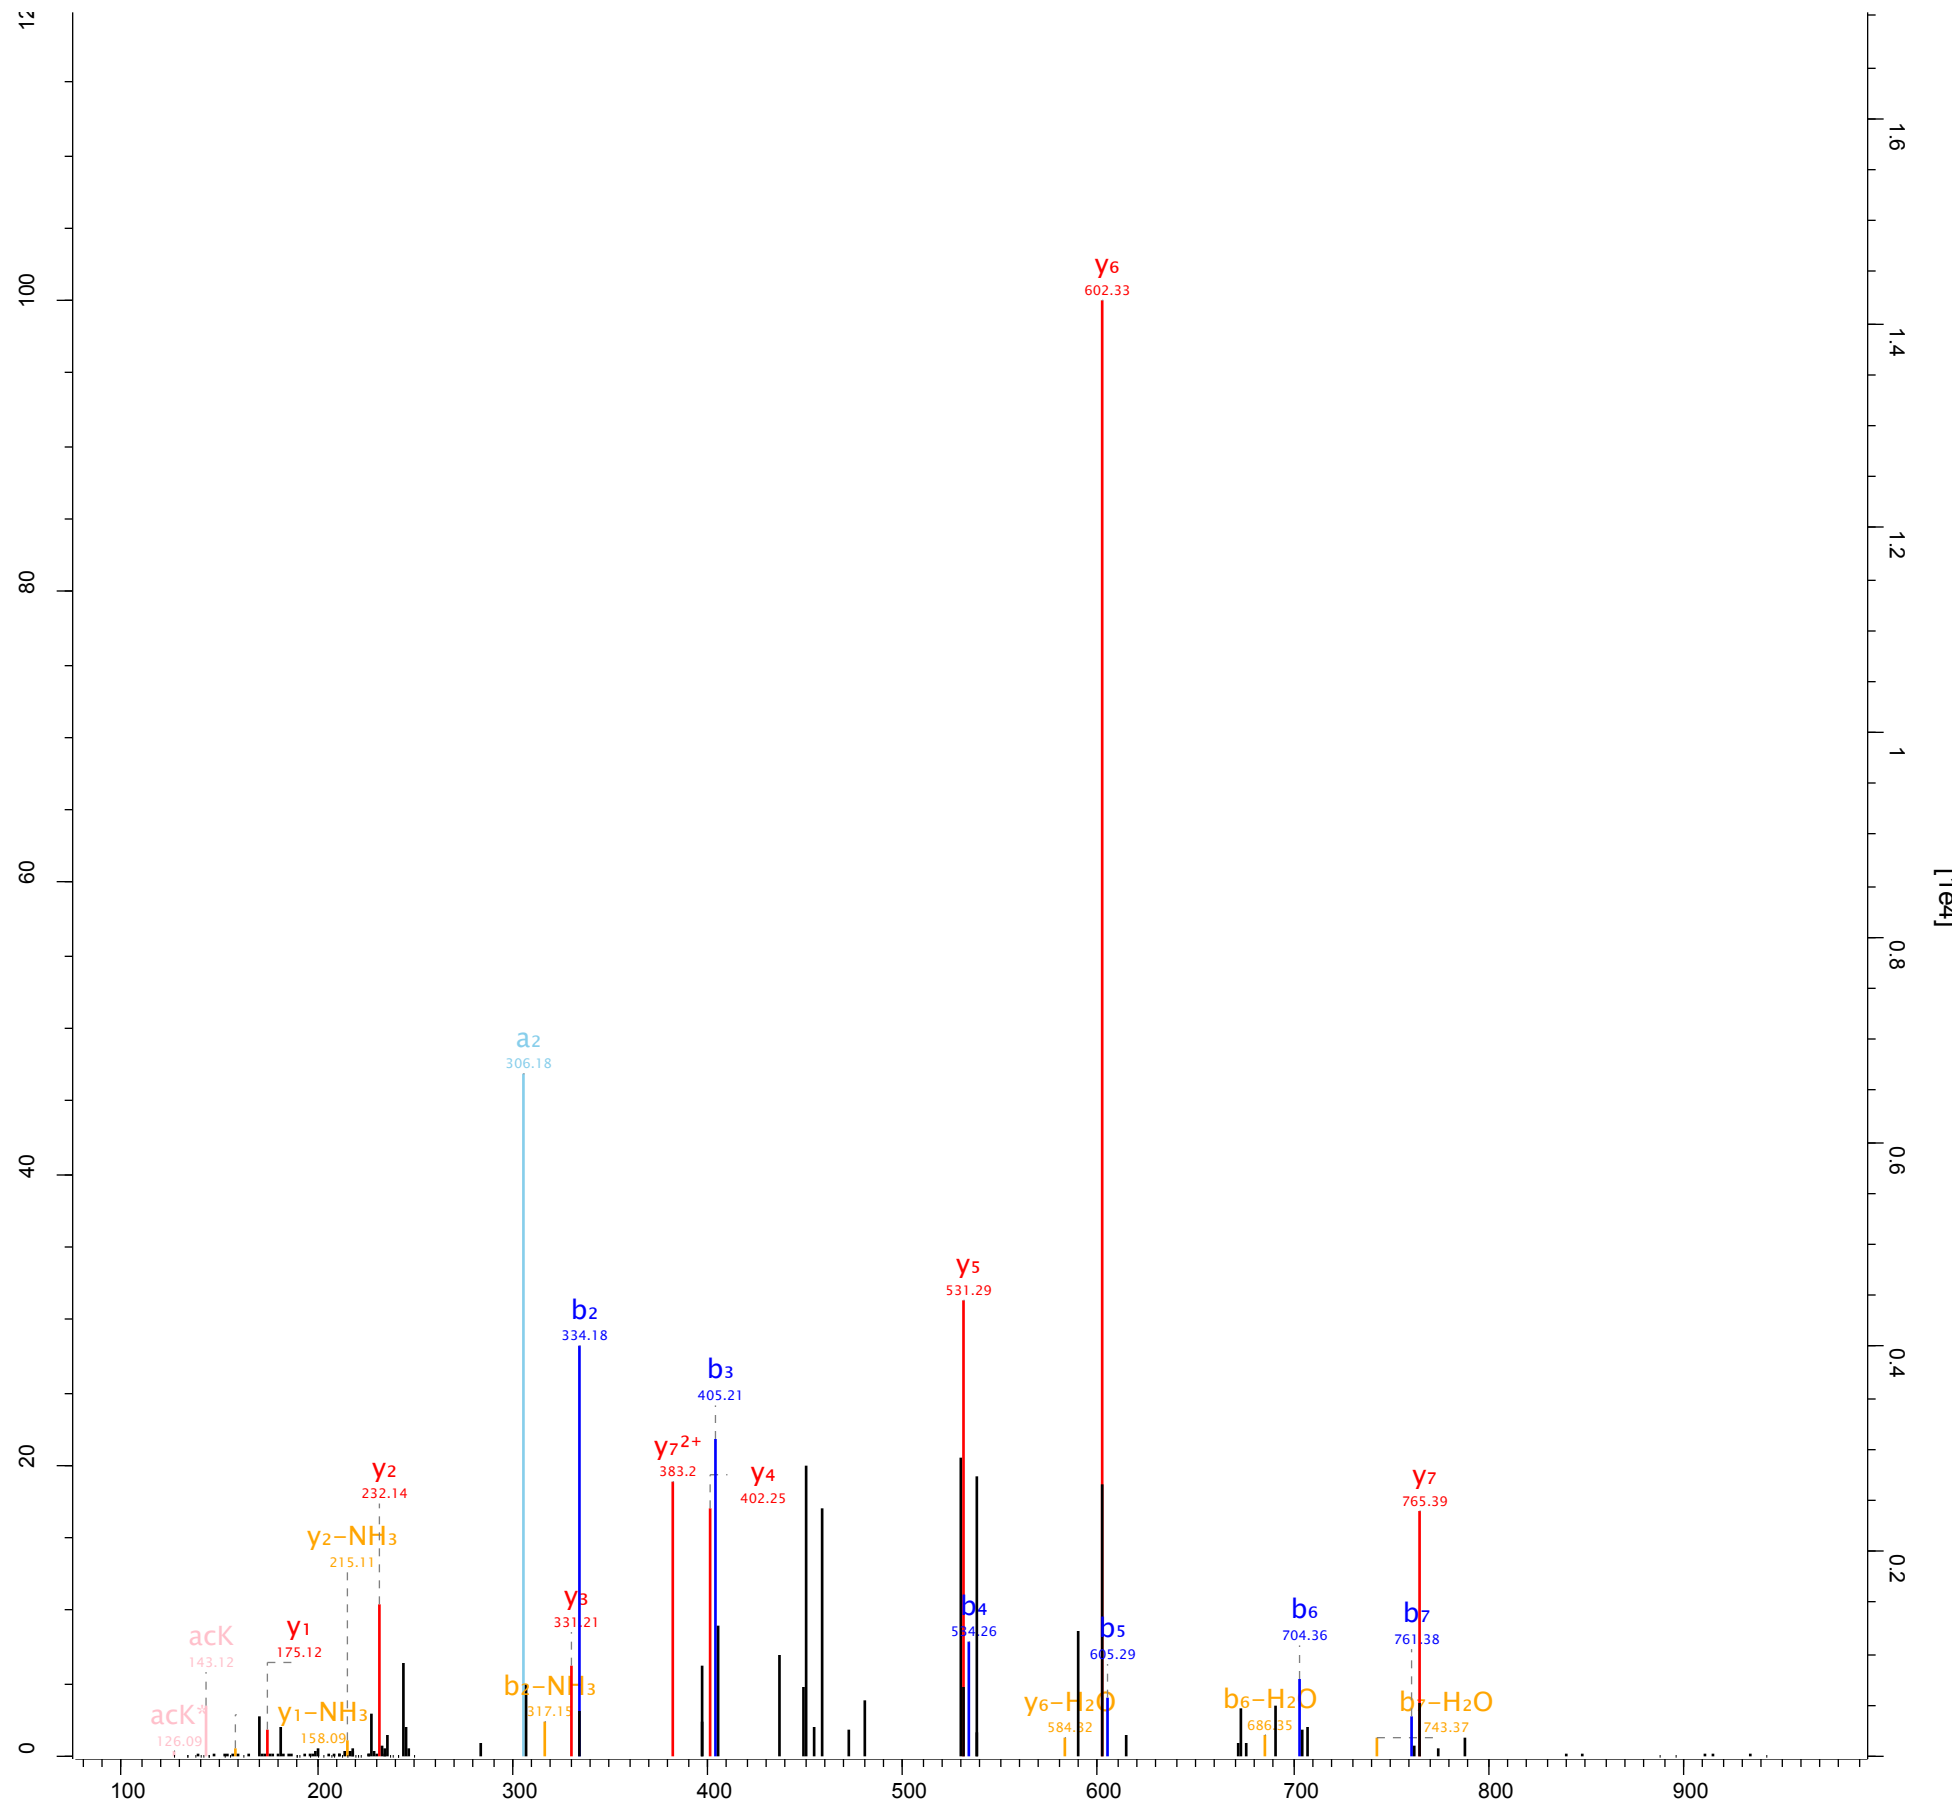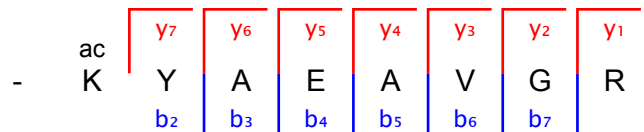

Raw file 072613\_SCW\_II\_68\_Enriched\_5 Scan 13861 Method ITMS; CID Score 107.29 m/z 466.26 Gene names Hadha

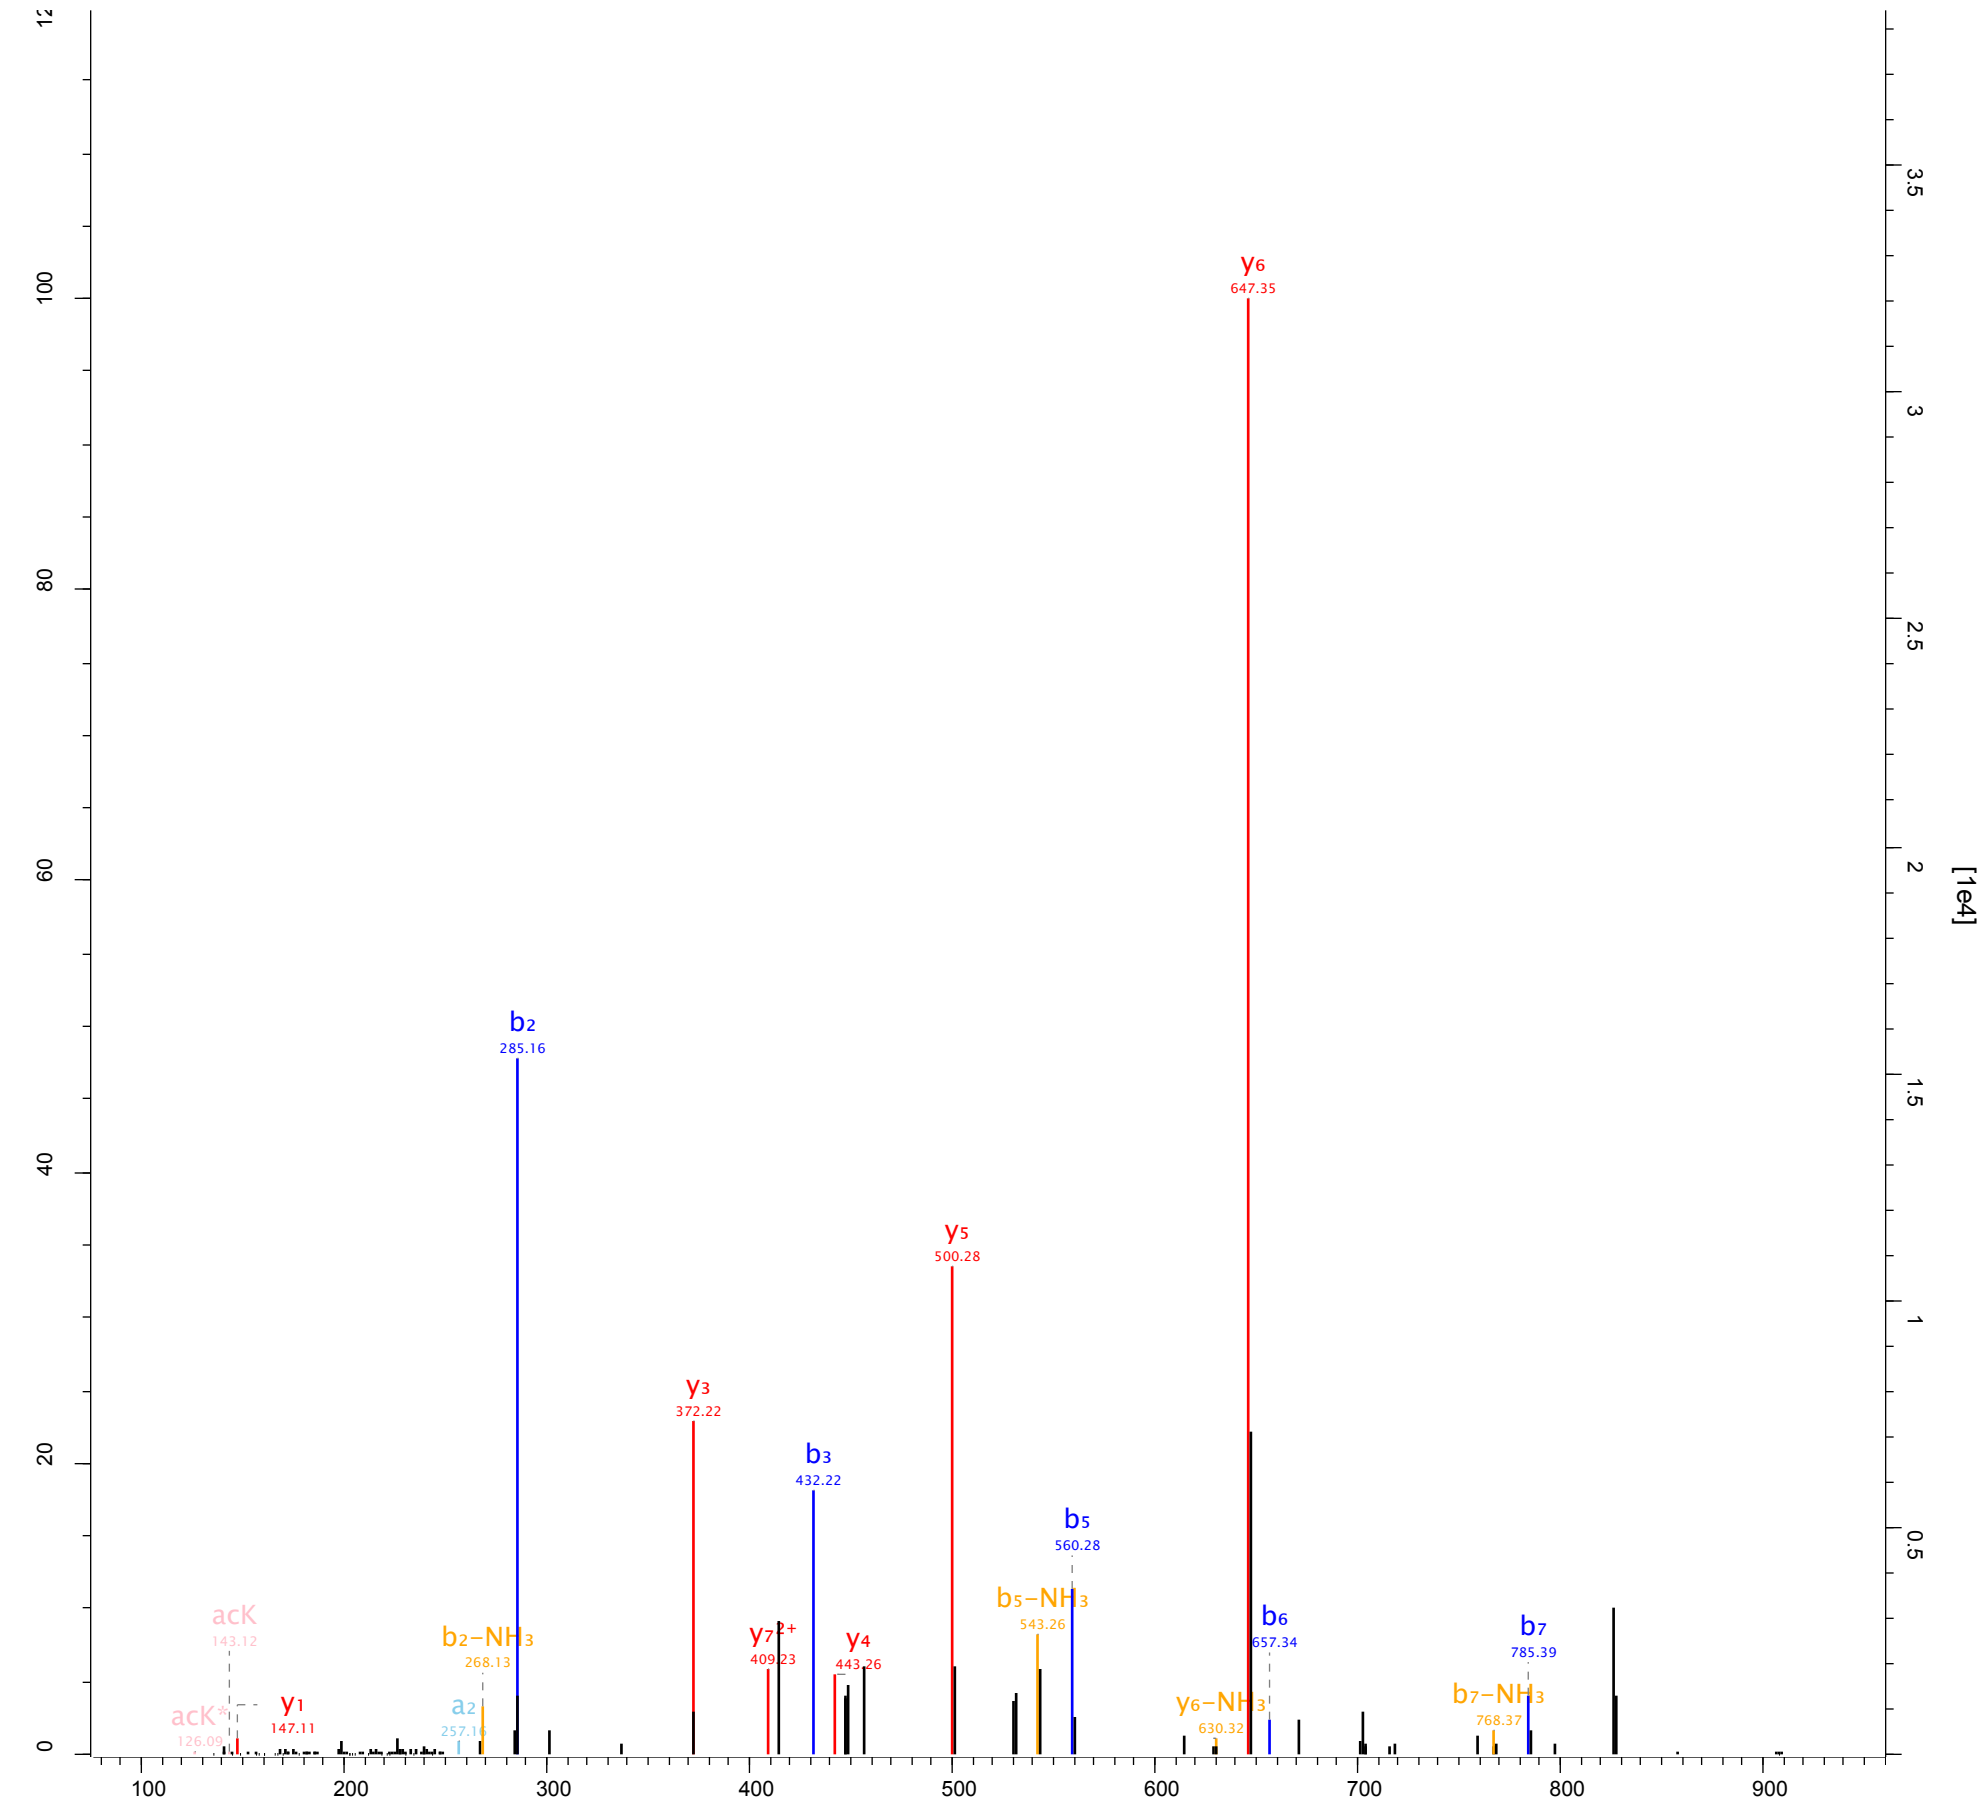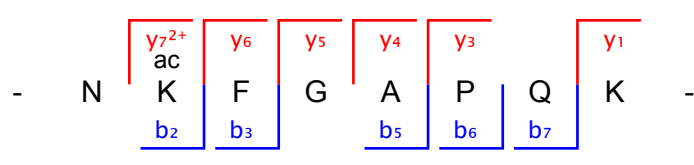



Raw file 072613\_SCW\_II\_68\_Enriched\_5 Scan 18536 Method ITMS; CID Score 120.46 m/z 470.27 Gene names Vdac3

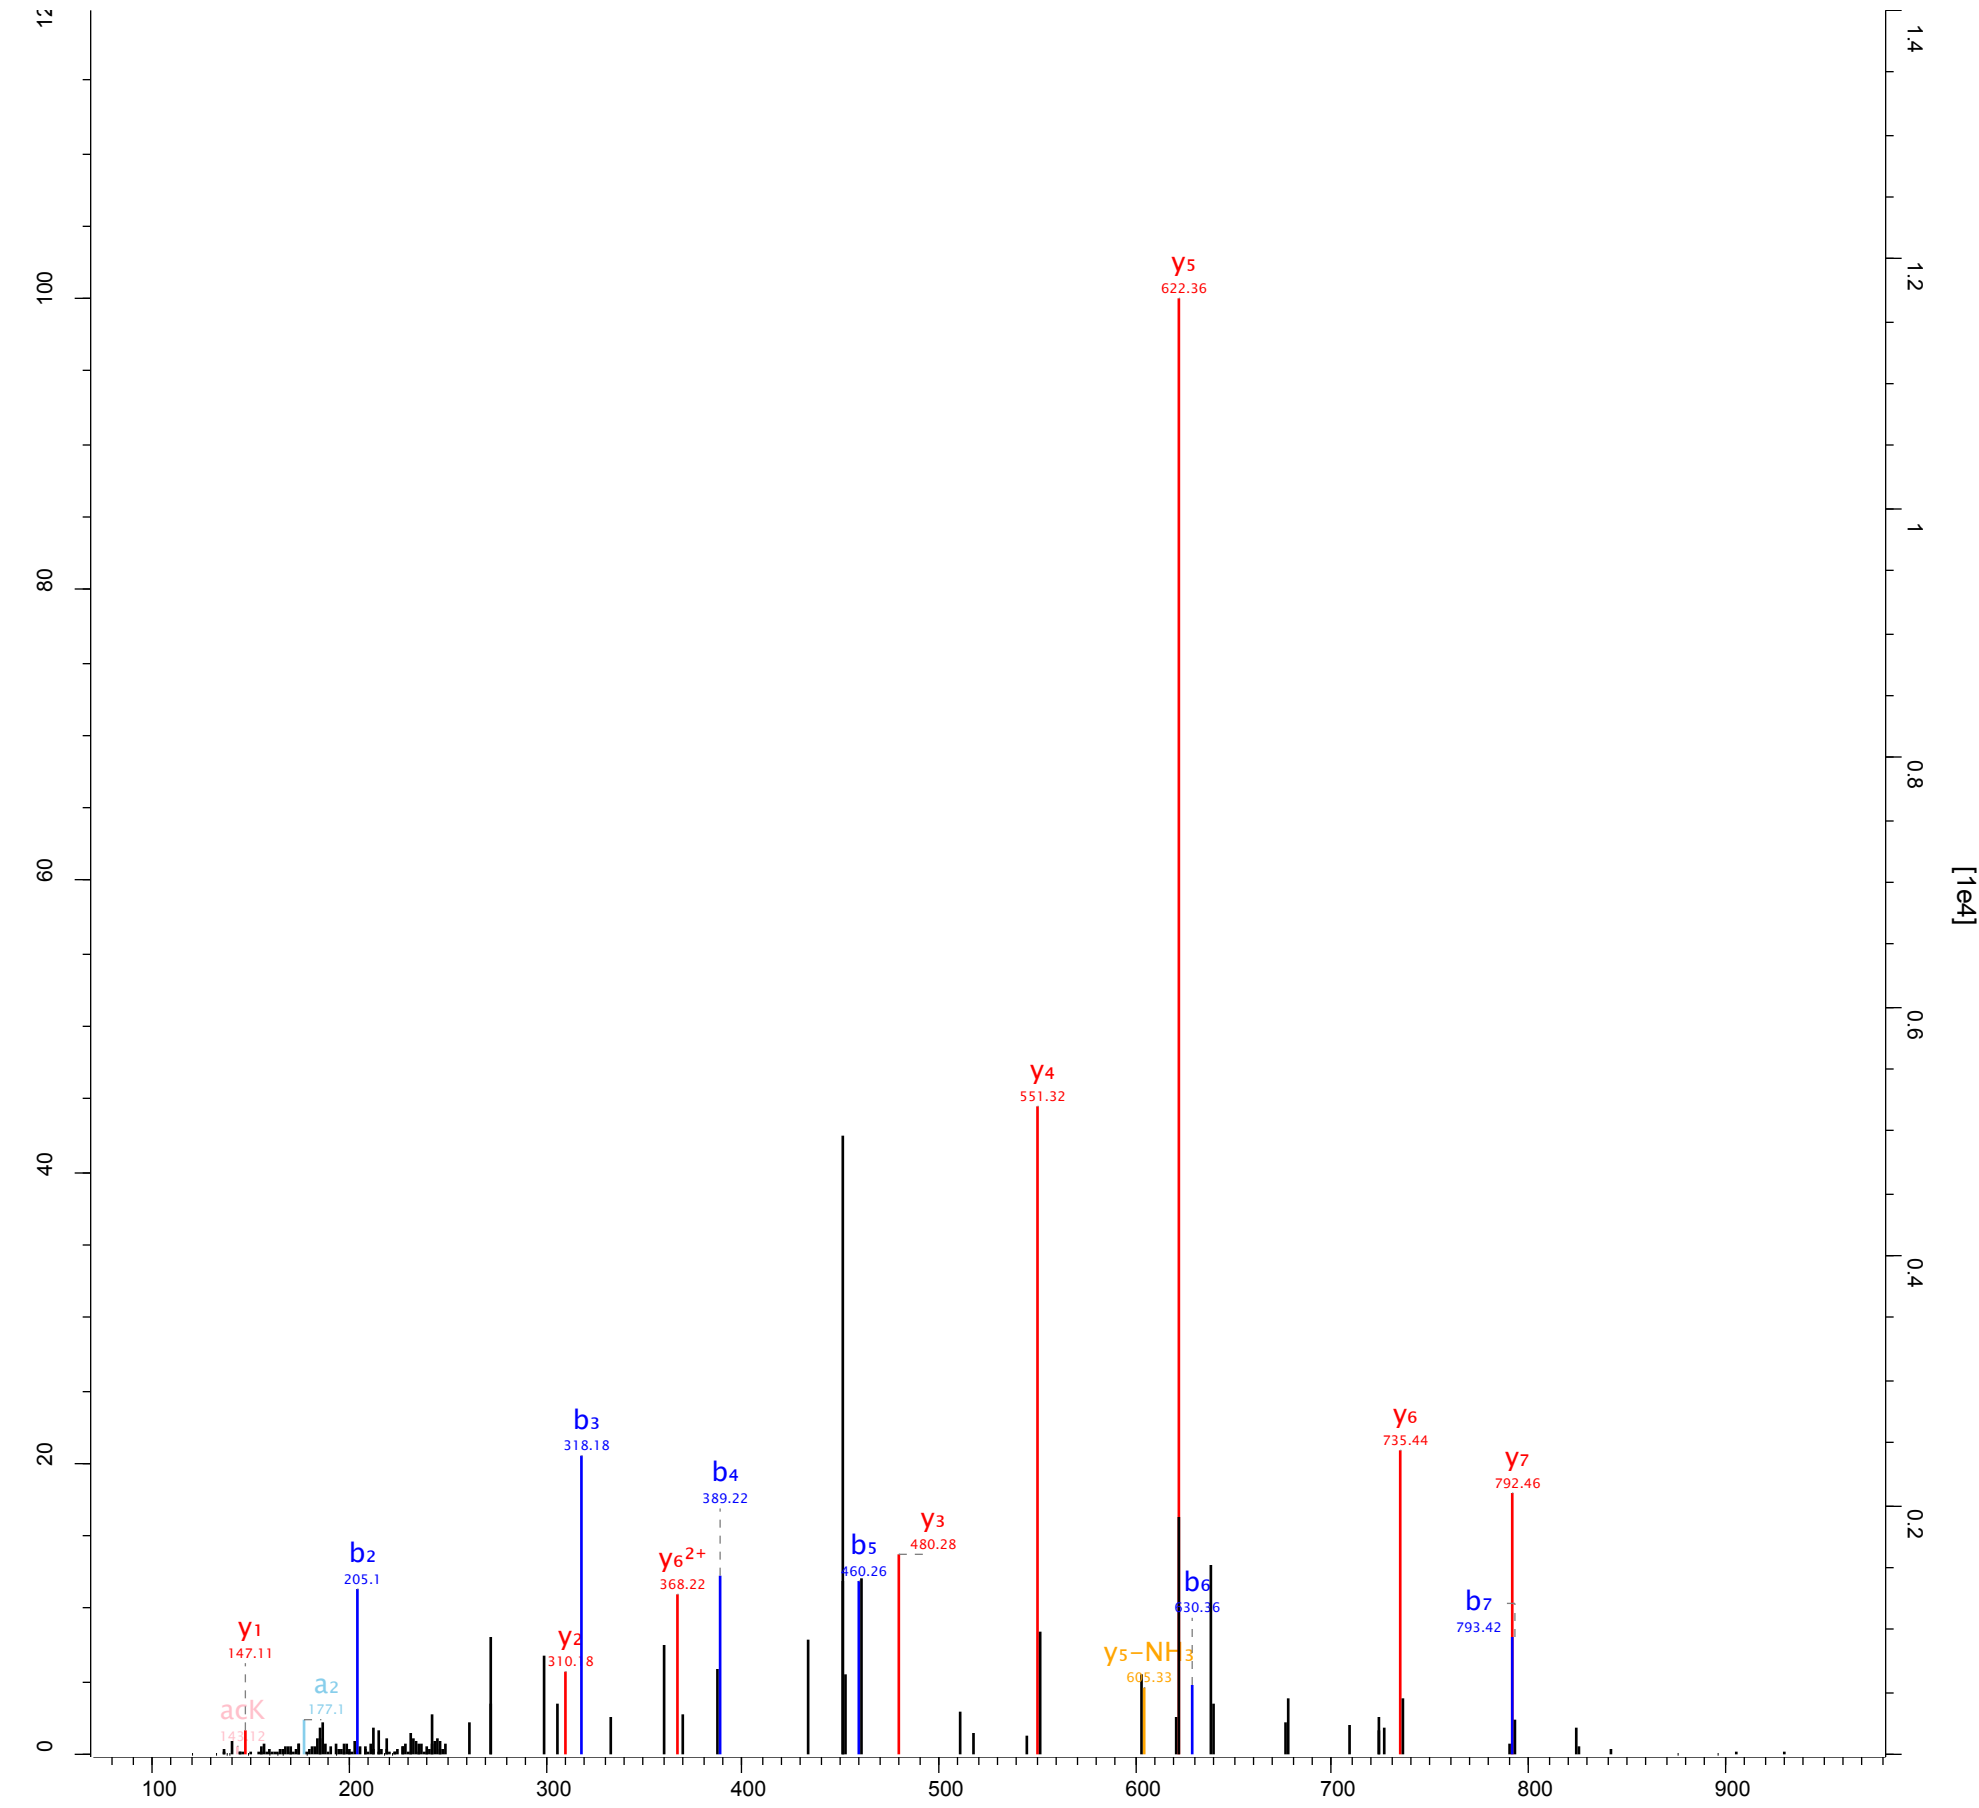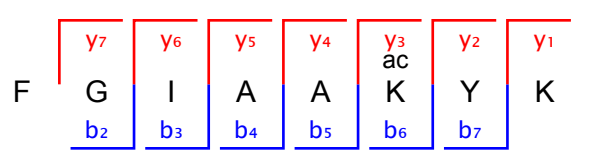

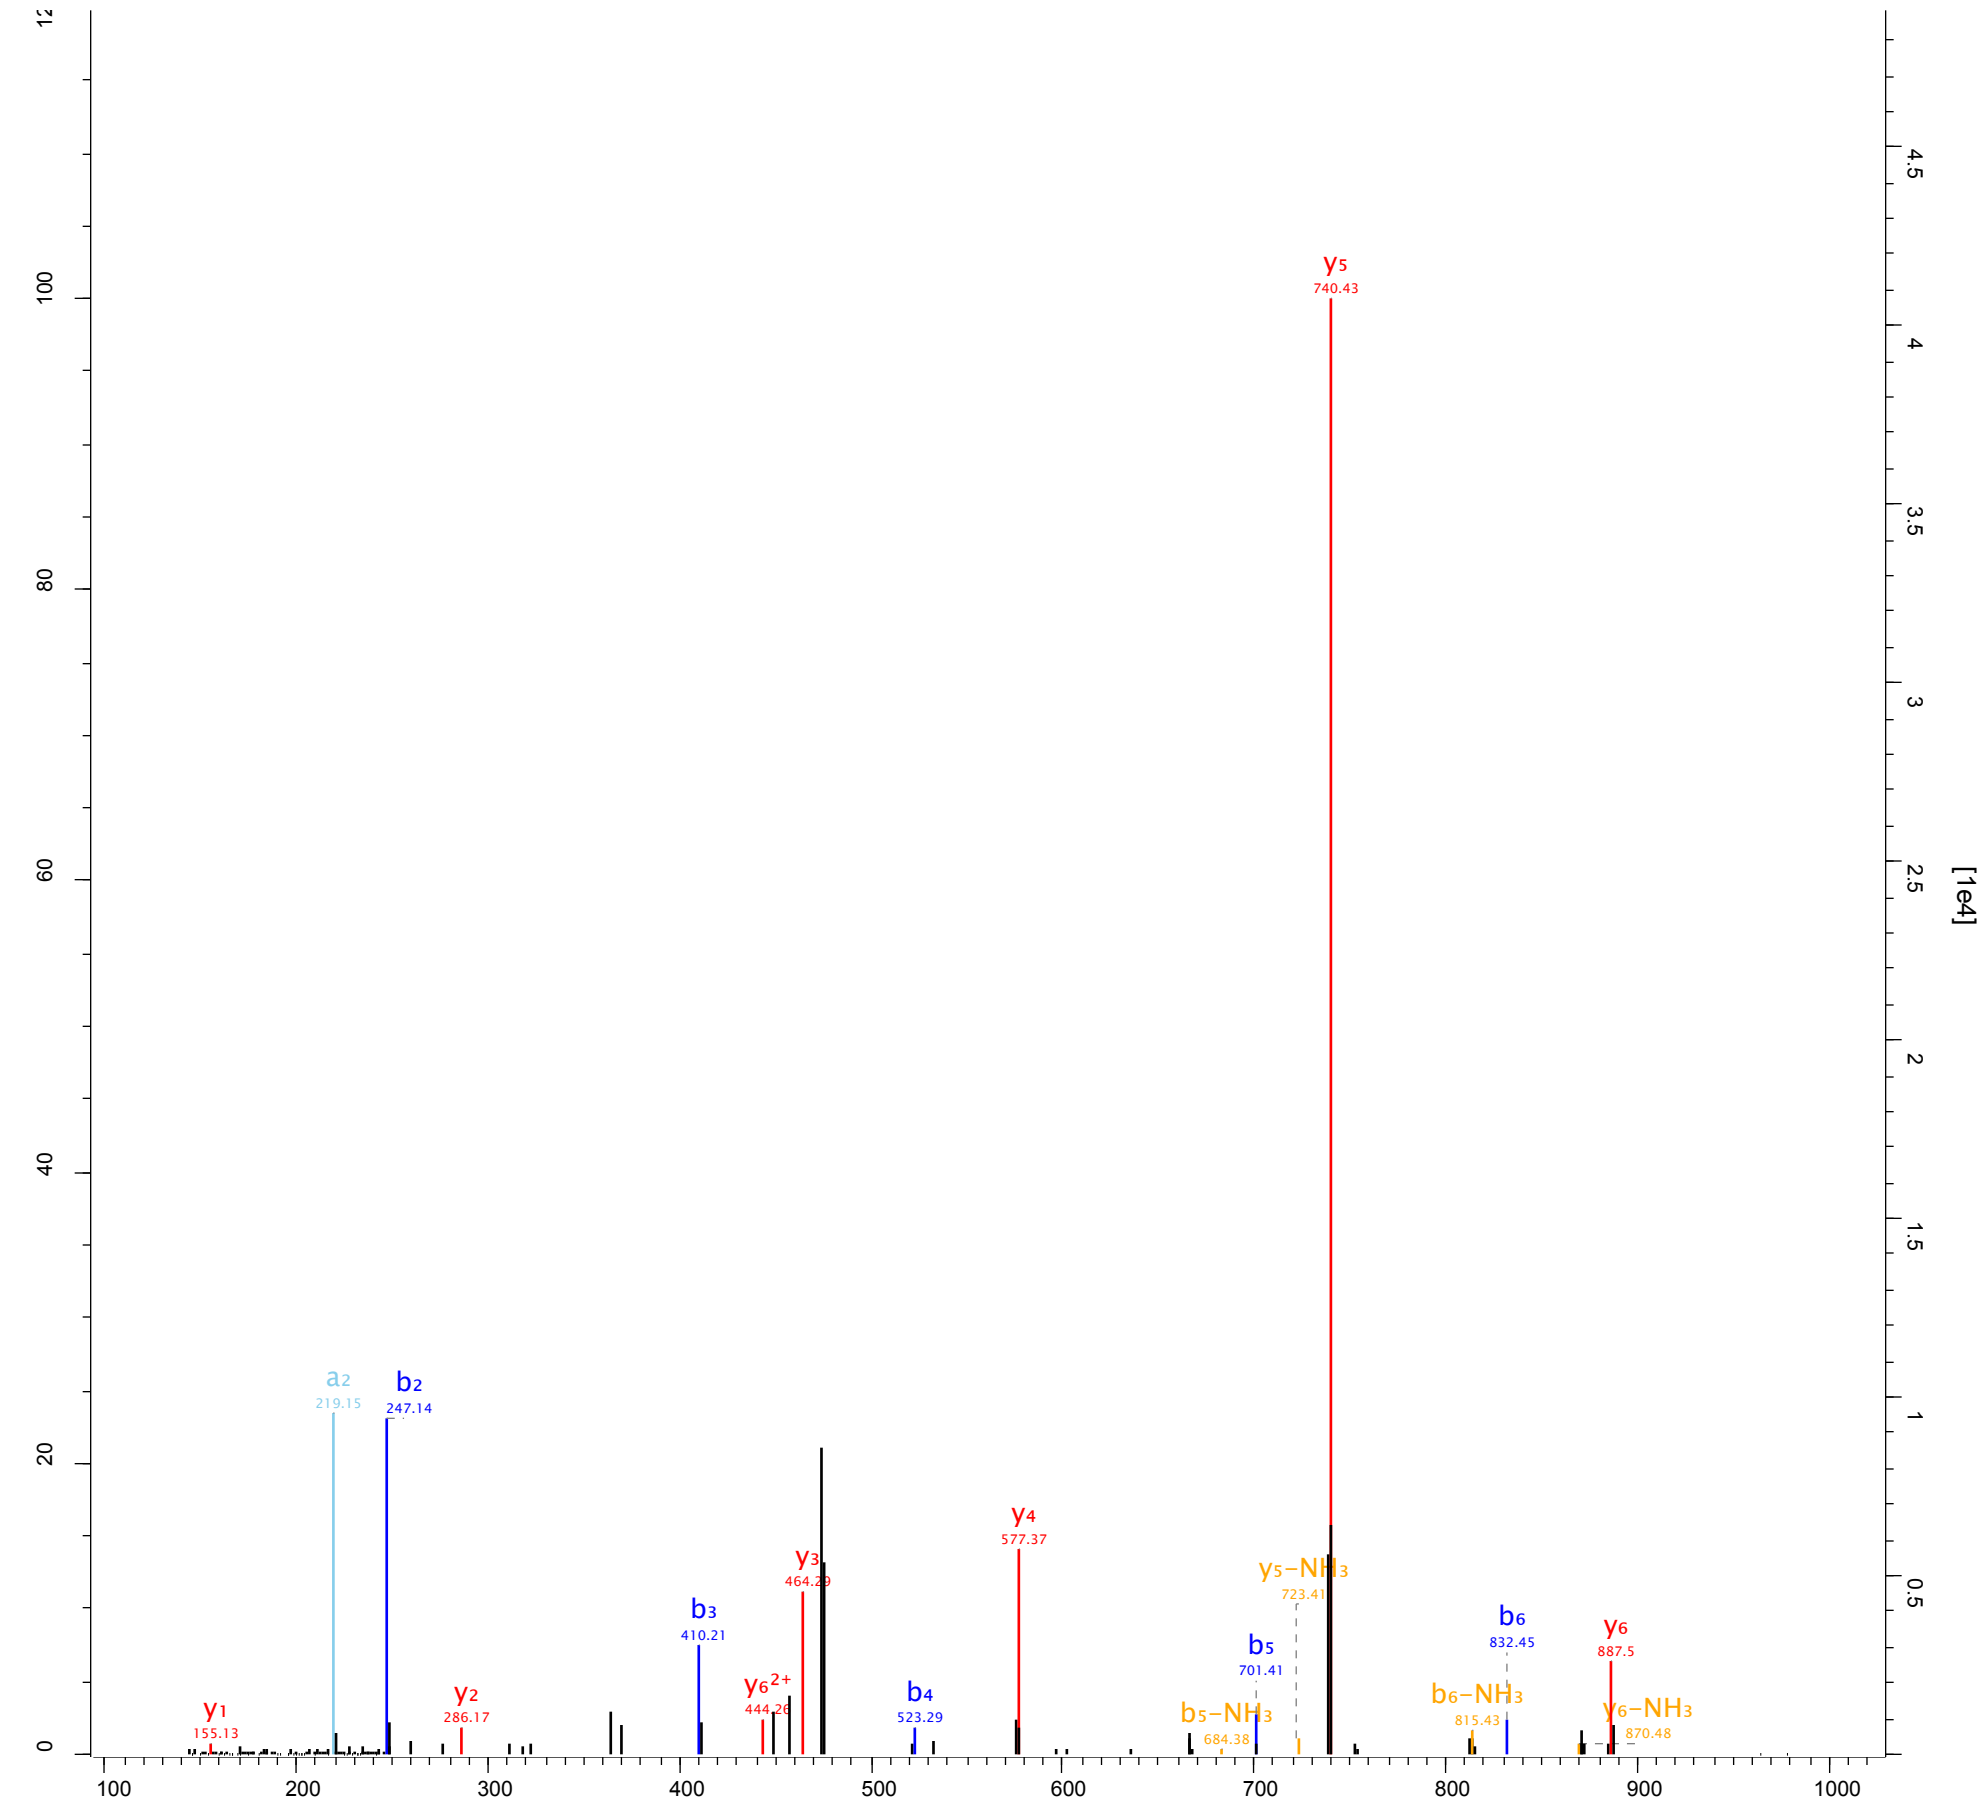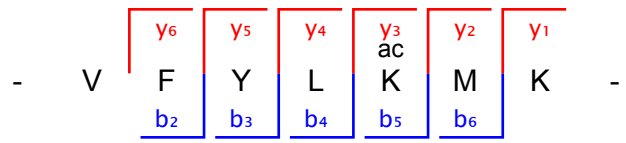

Raw file 072613\_SCW\_II\_68\_Enriched\_6 Scan 22130 Method ITMS; CID Score 122.94 m/z 805.75 Gene names Me2

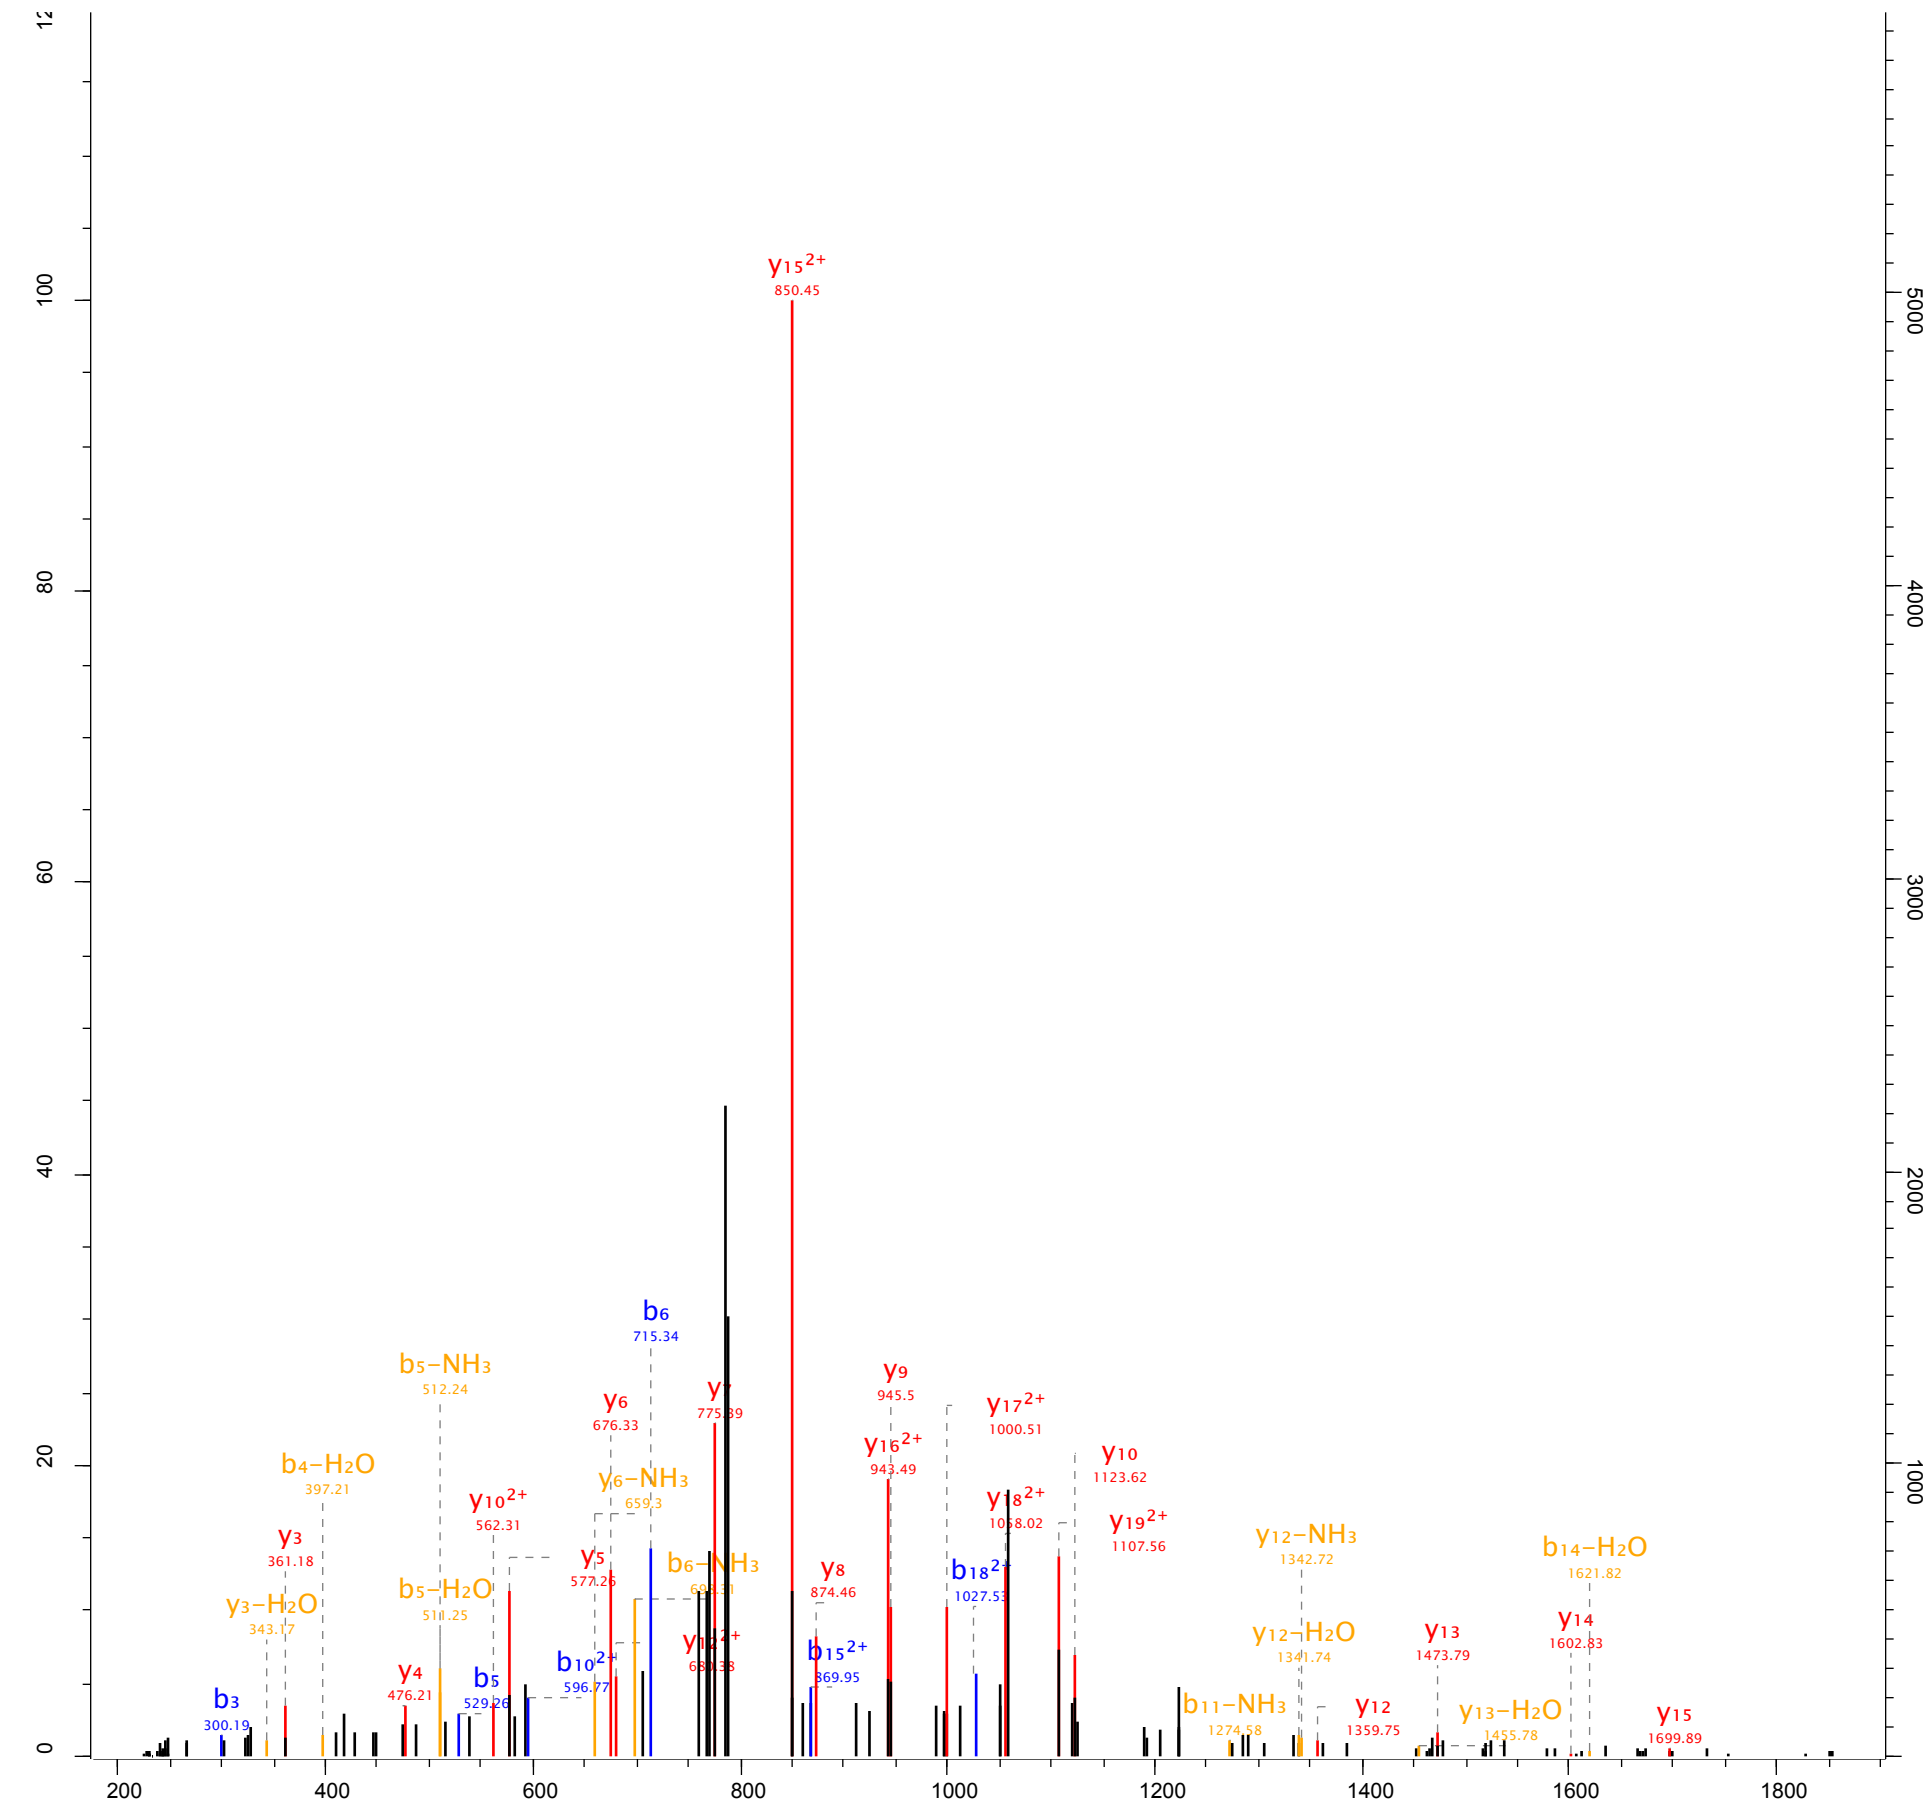

- S I V D N W P E N H V K A V V V T D G E R -

b<sub>3</sub> b<sub>5</sub> b<sub>6</sub> b<sub>10</sub><sup>2+</sup> b<sub>15</sub><sup>2+</sup> b<sub>18</sub><sup>2+</sup> y<sub>19</sub><sup>2+</sup> y<sub>18</sub><sup>2+</sup> y<sub>17</sub><sup>2+</sup> y<sub>16</sub><sup>2+</sup> y<sub>15</sub> y<sub>14</sub> y<sub>13</sub> y<sub>12</sub> y<sub>10</sub> ac y<sub>9</sub> y<sub>8</sub> y<sub>7</sub> y<sub>6</sub> y<sub>5</sub> y<sub>4</sub> y<sub>3</sub>

072613\_SCW\_II\_68\_Enriched\_6

28190

ITMS; CID

69.02

1009.54

Huwe1

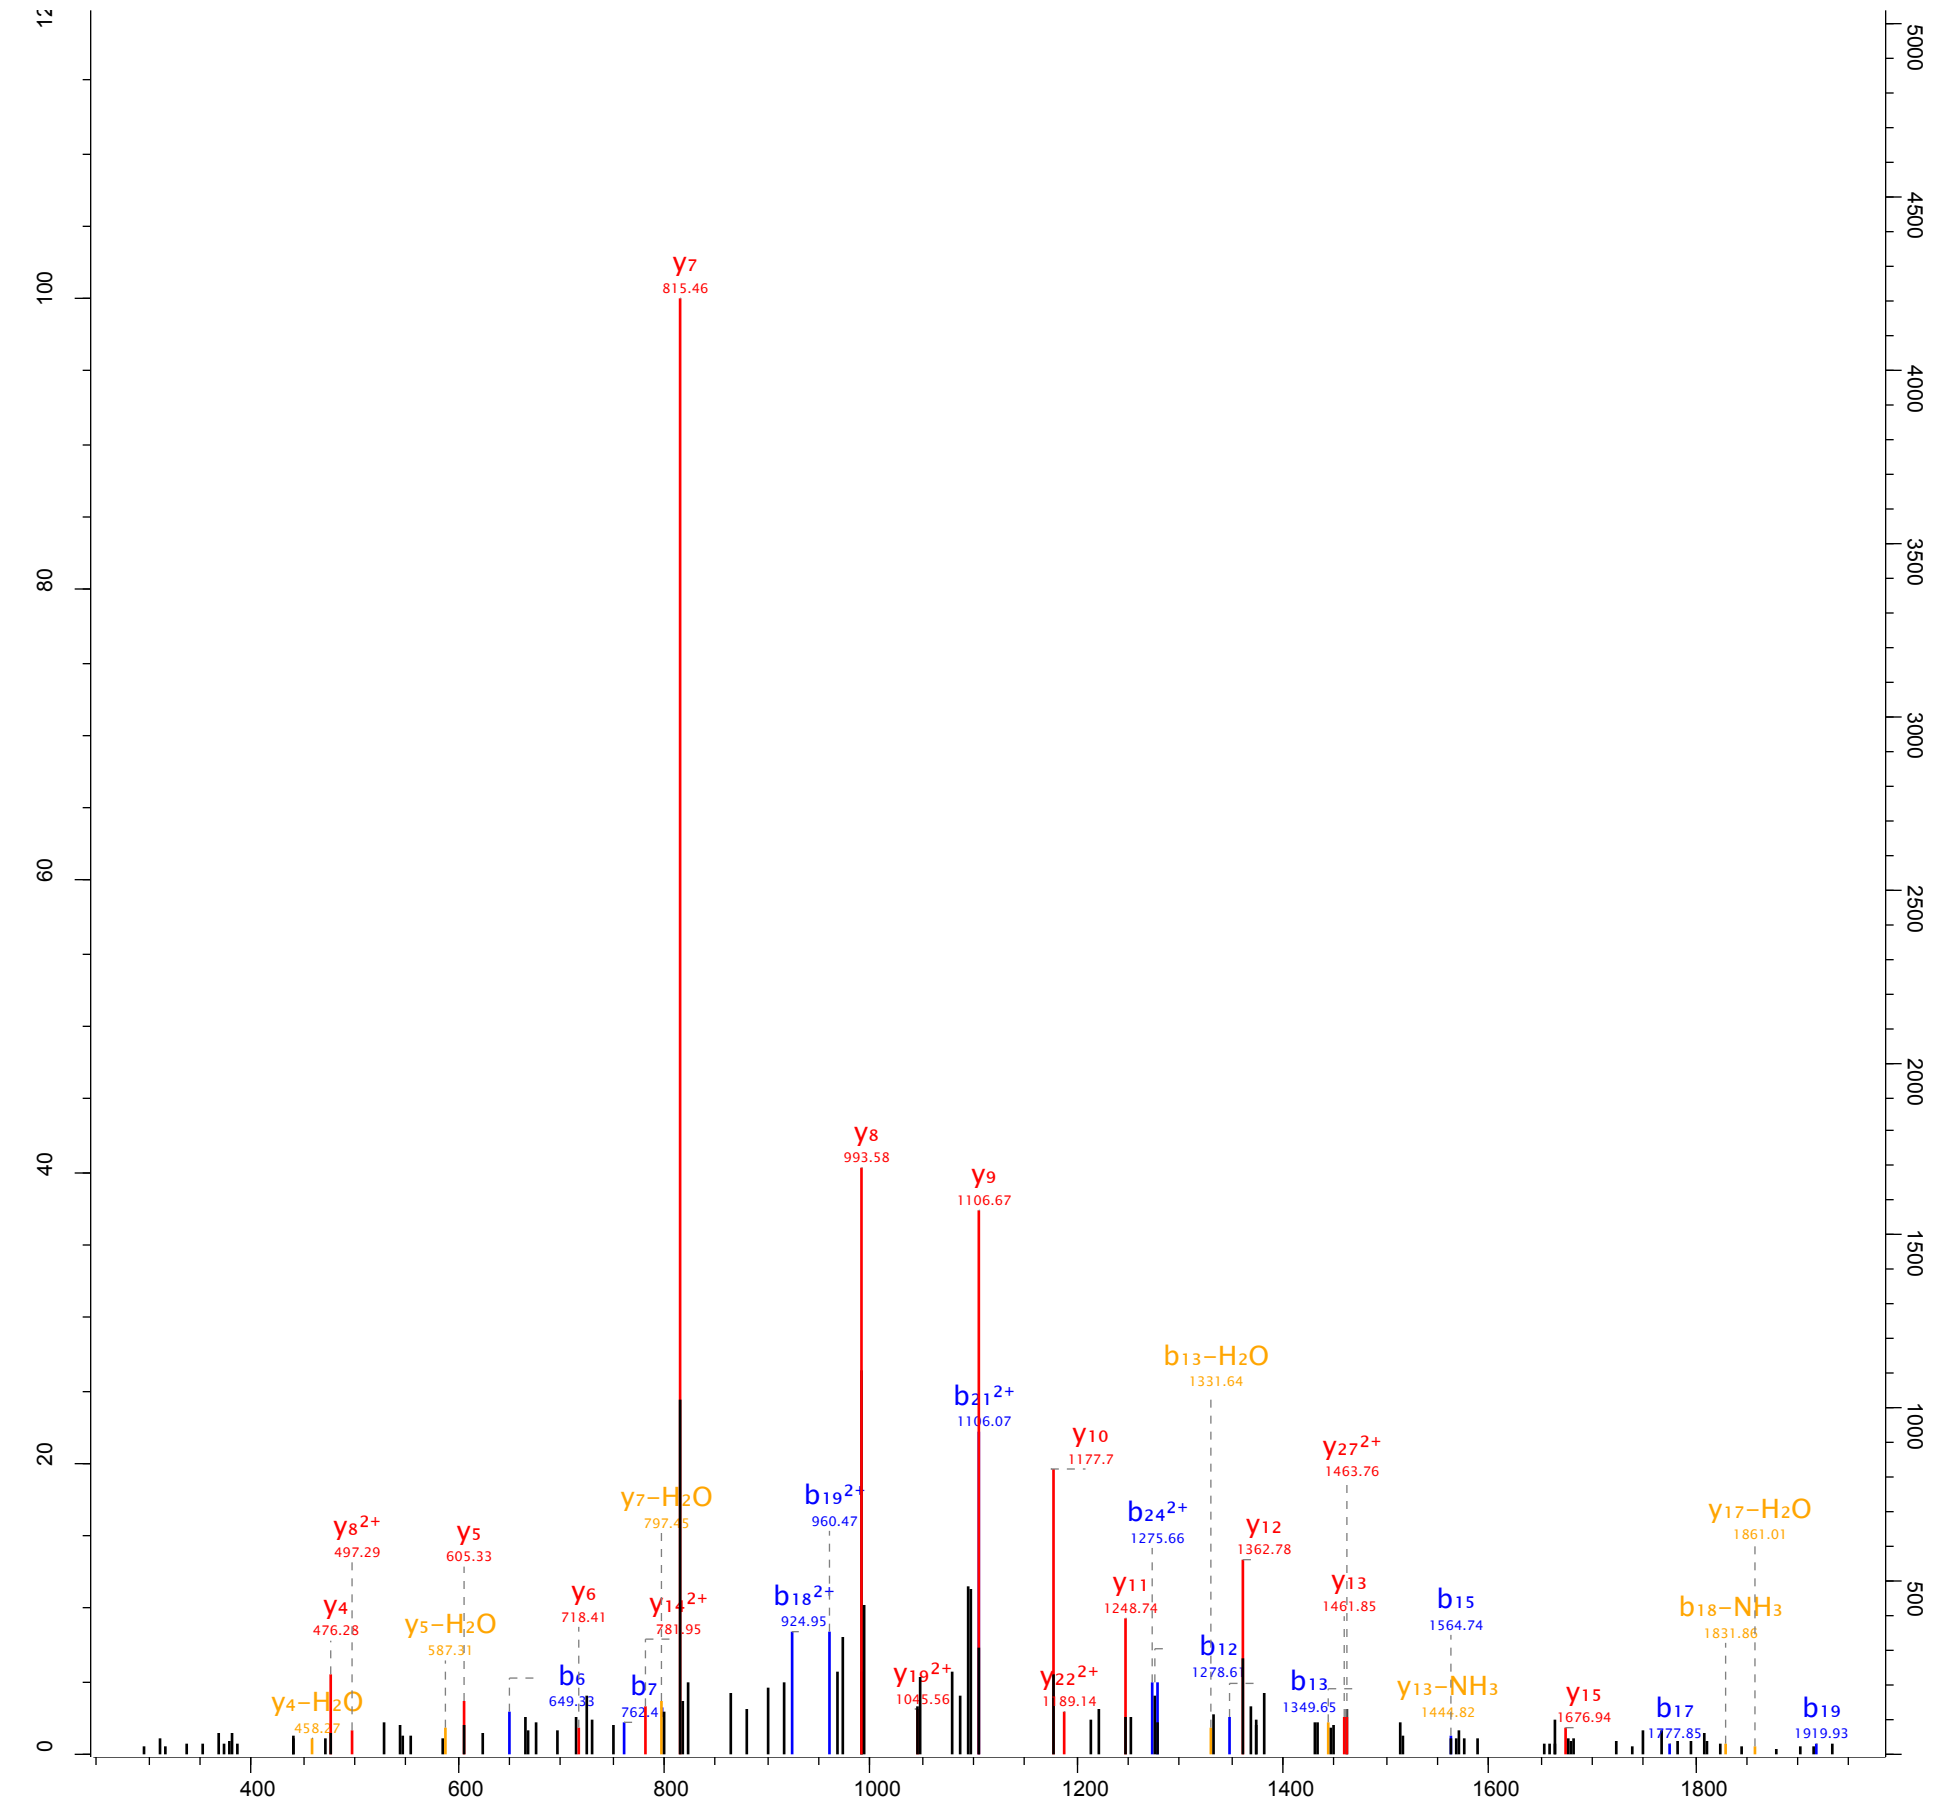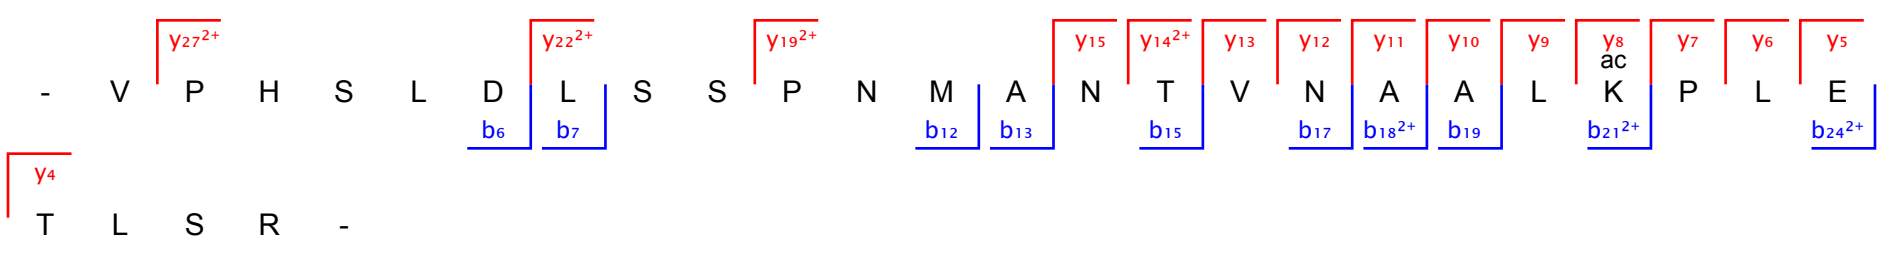

Raw file: 072613\_SCW\_II\_68\_Enriched\_7  
 Scan: 14544 Method: ITMS; CID Score: 121.32 m/z: 657.68 Gene names: Ywhae

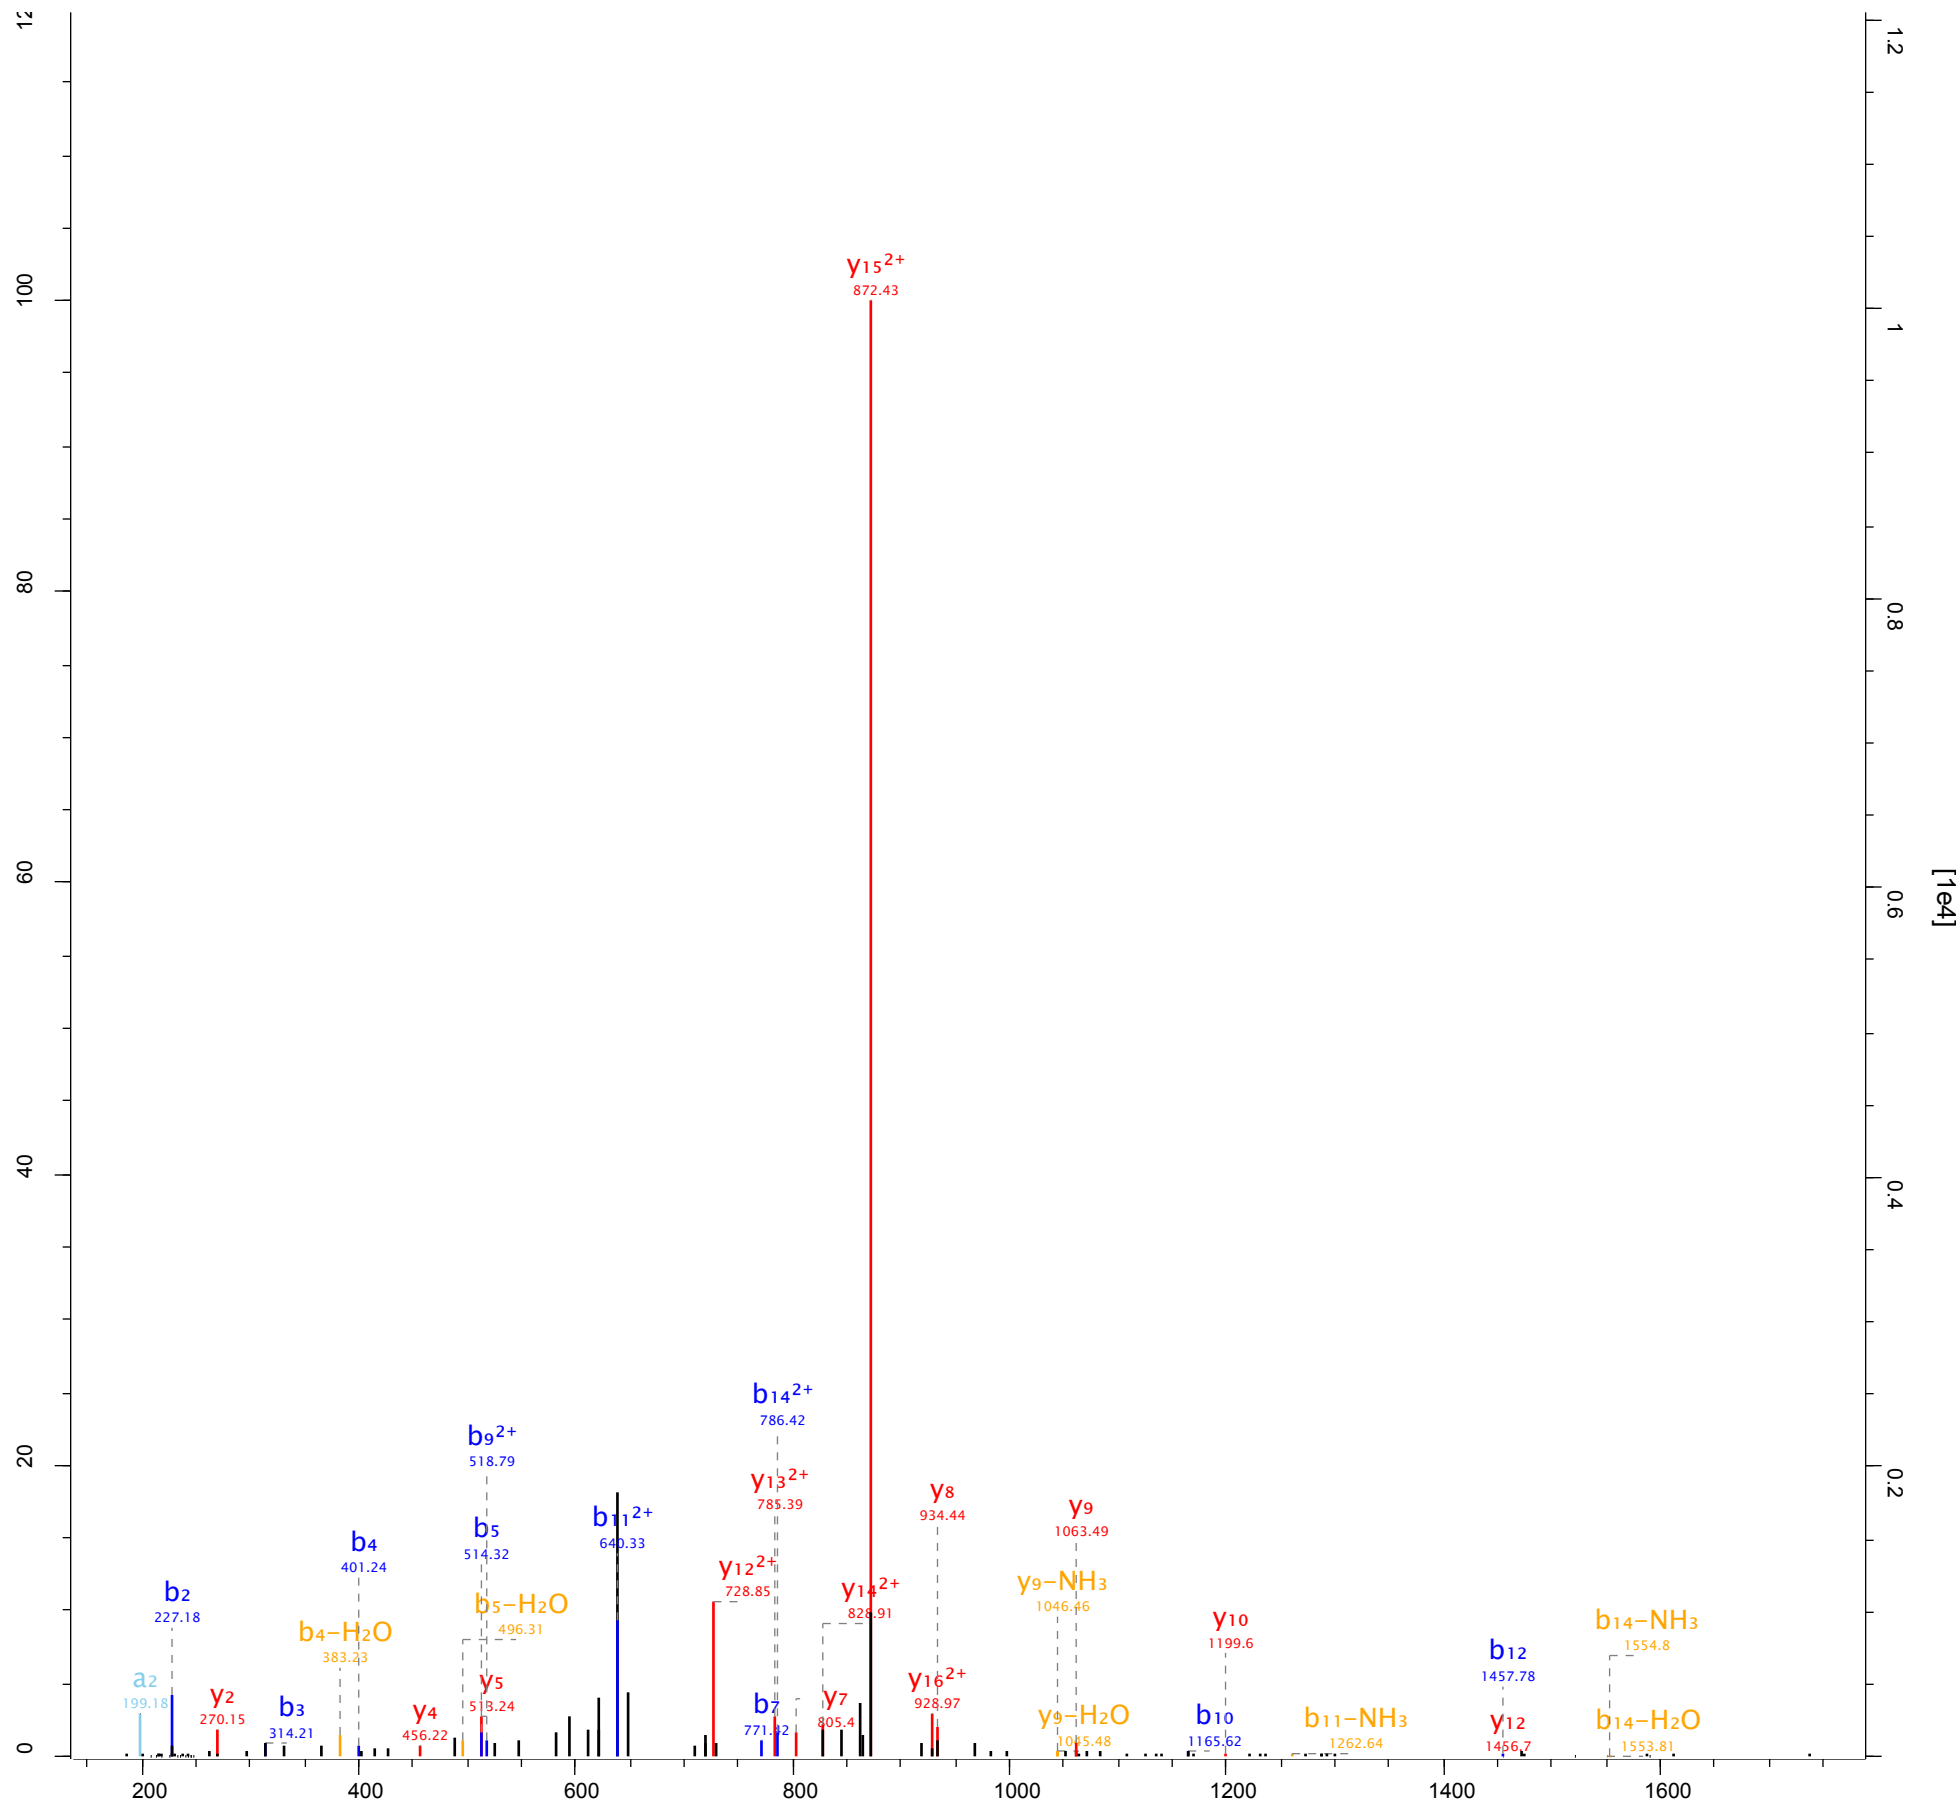

- I y16<sup>2+</sup> y15<sup>2+</sup> y14<sup>2+</sup> y13<sup>2+</sup> y12 Q y10 y9 y8 y7 ac y5 y4 y2 -  
b2 b3 b4 b5 b7 K b9<sup>2+</sup> b10 b11<sup>2+</sup> b12 b14<sup>2+</sup> E D K -

072613\_SCW\_II\_68\_Enriched\_7

16355

ITMS; CID

102.5

639.67

Meaf6

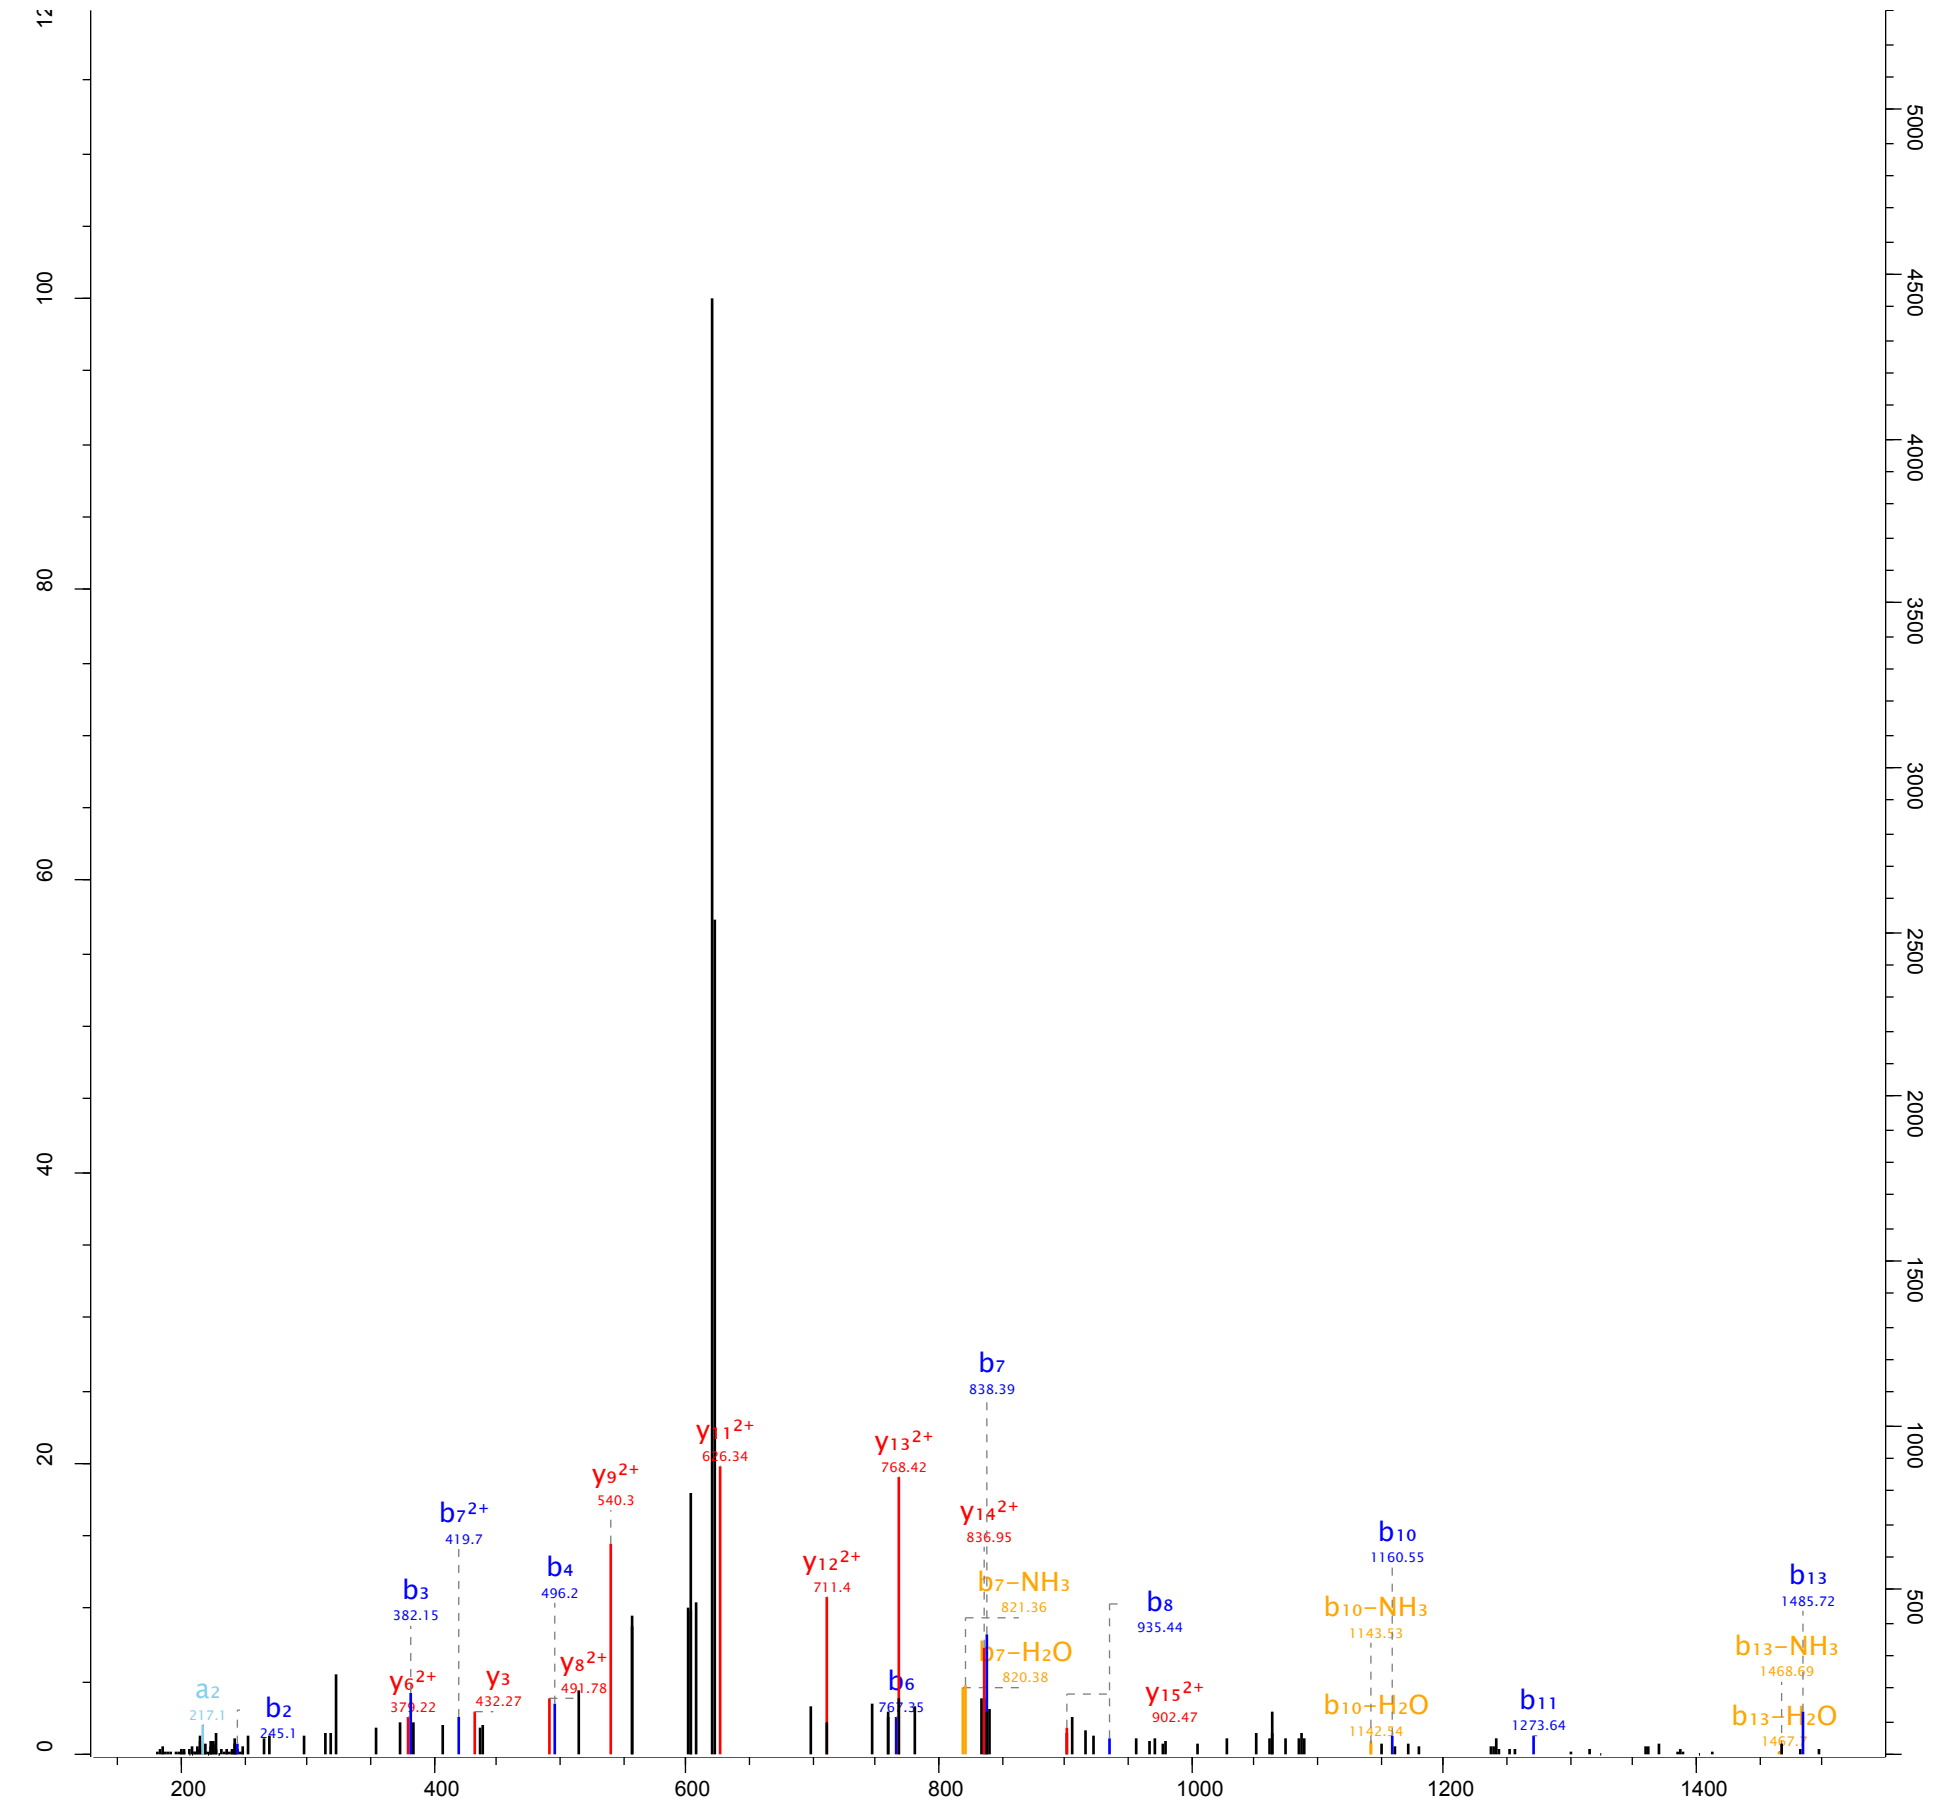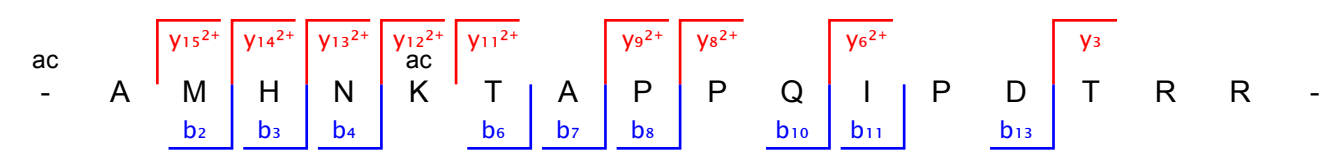

Raw file  
072613\_SCW\_II\_68\_Enriched\_7

Scan 16803 Method ITMS; CID Score 95.07 m/z 614.65 Gene names Kmt2c

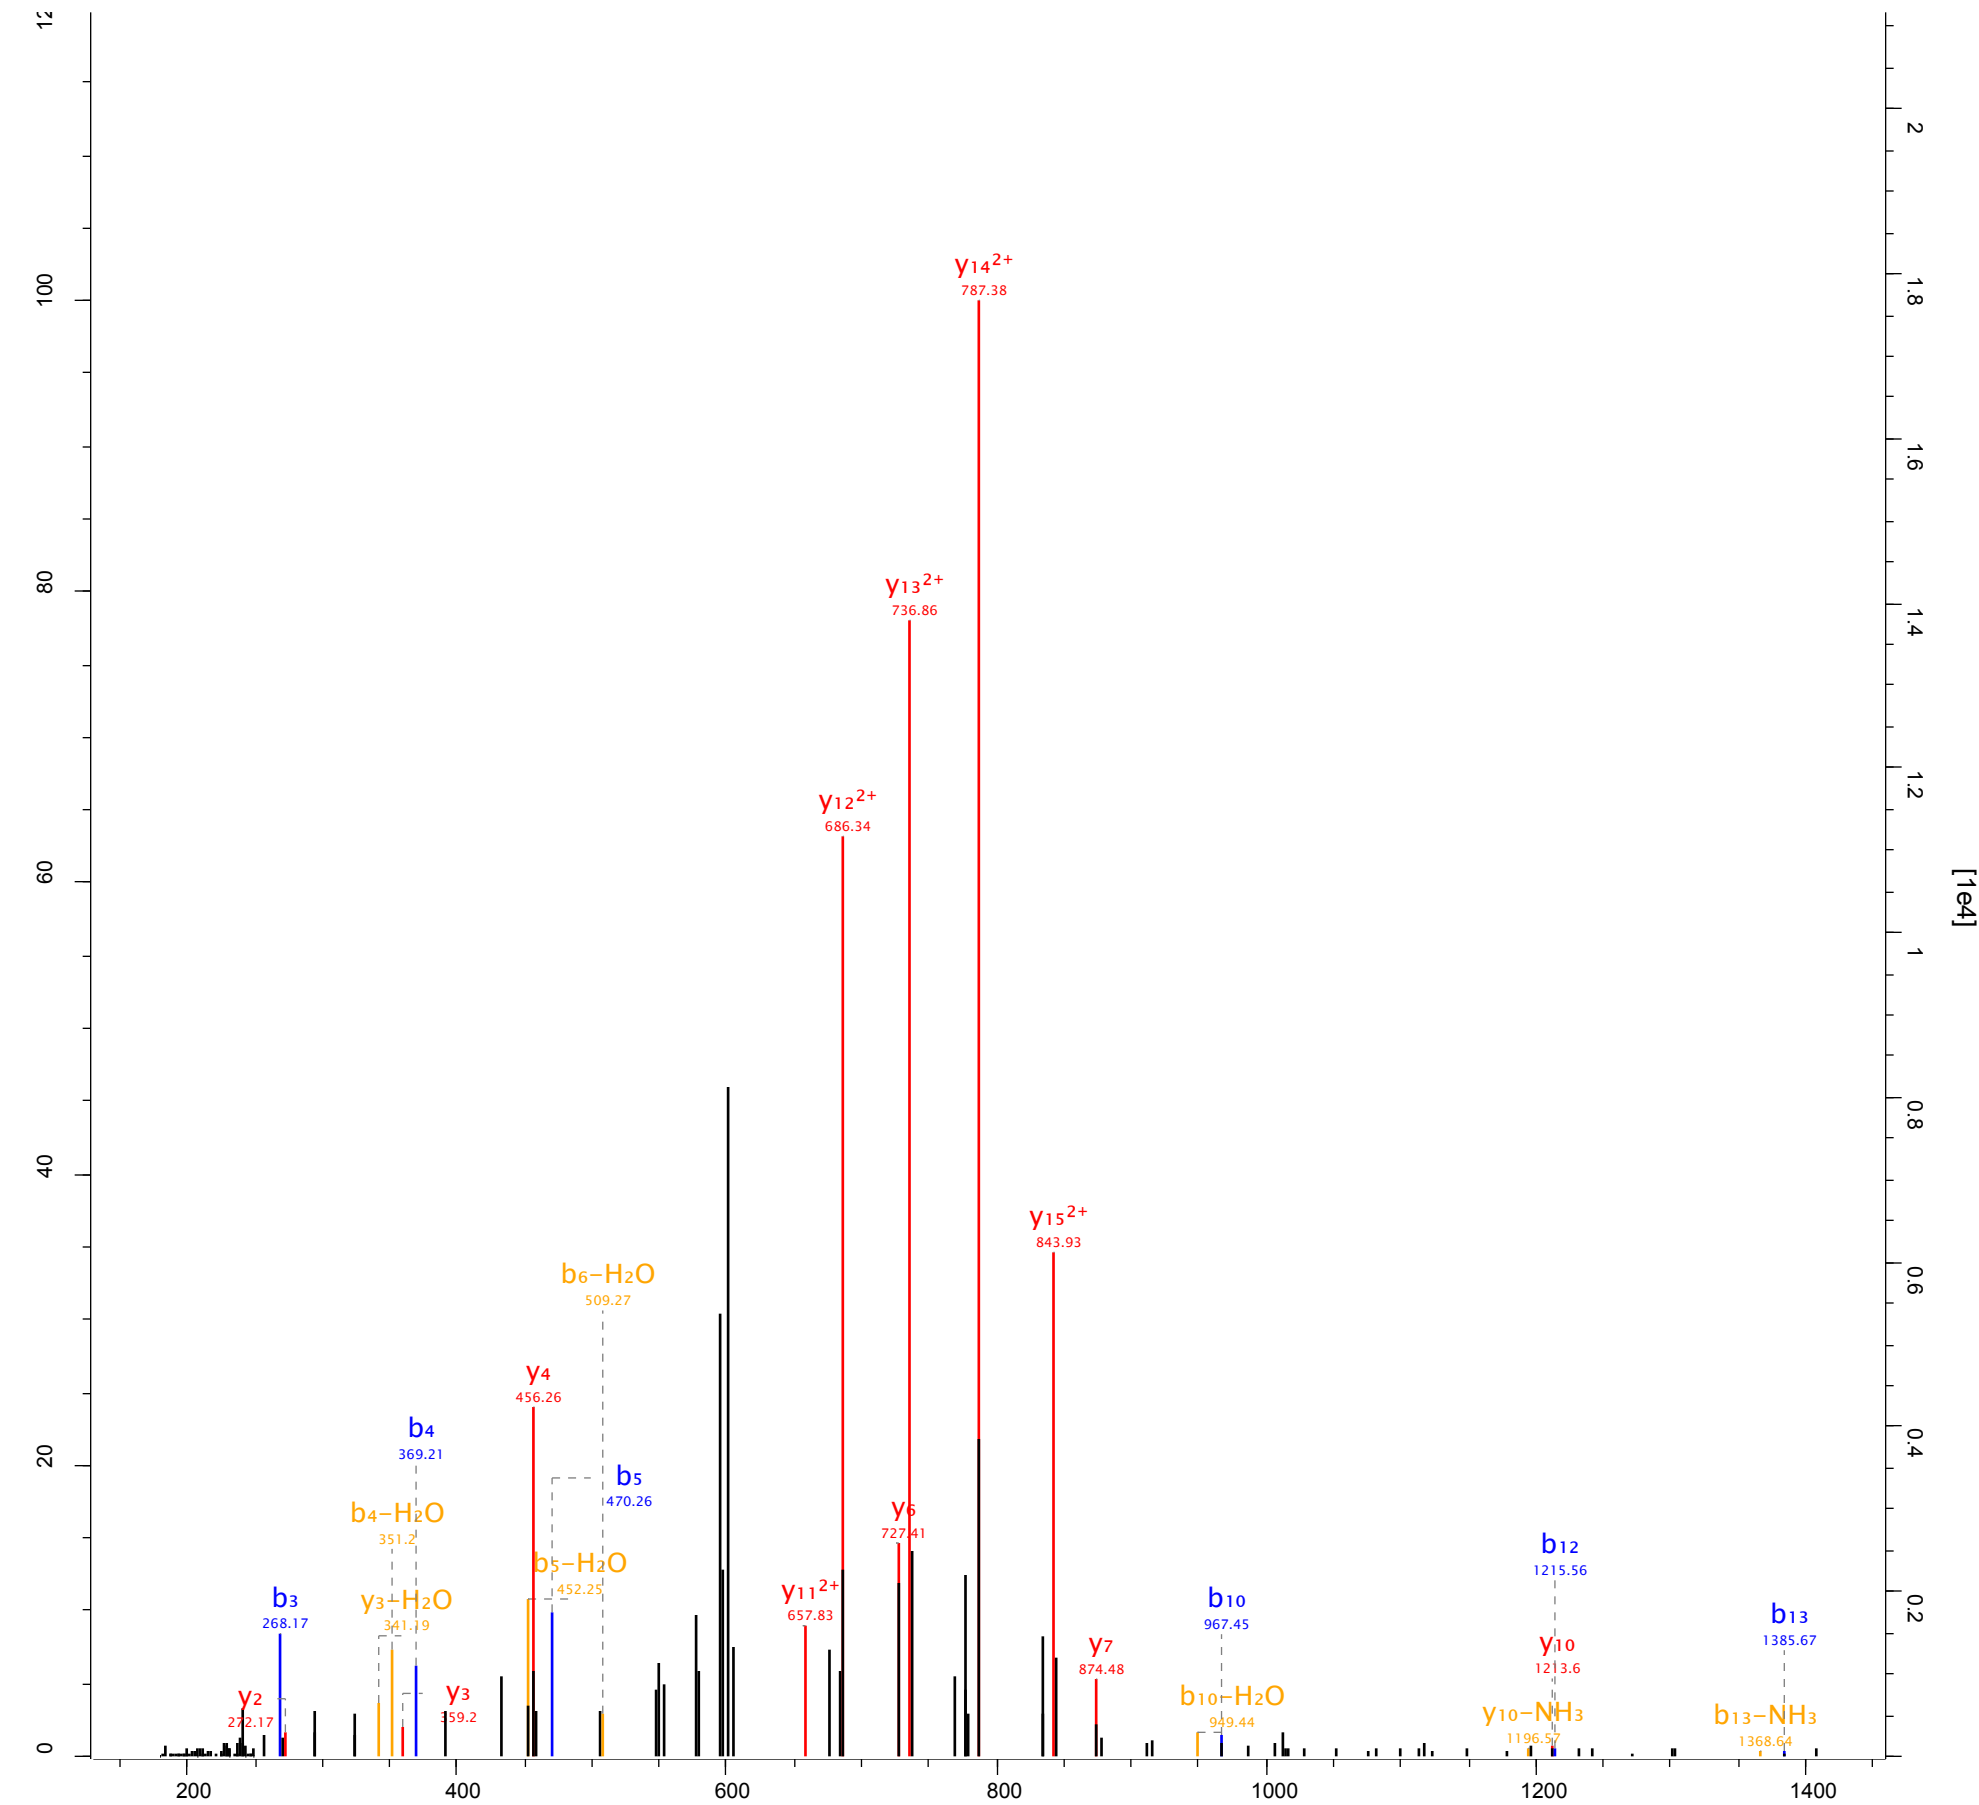

- G P L T T G T S D H F T ac K P S P R -  
b3 b4 b5 b10 b12 b13

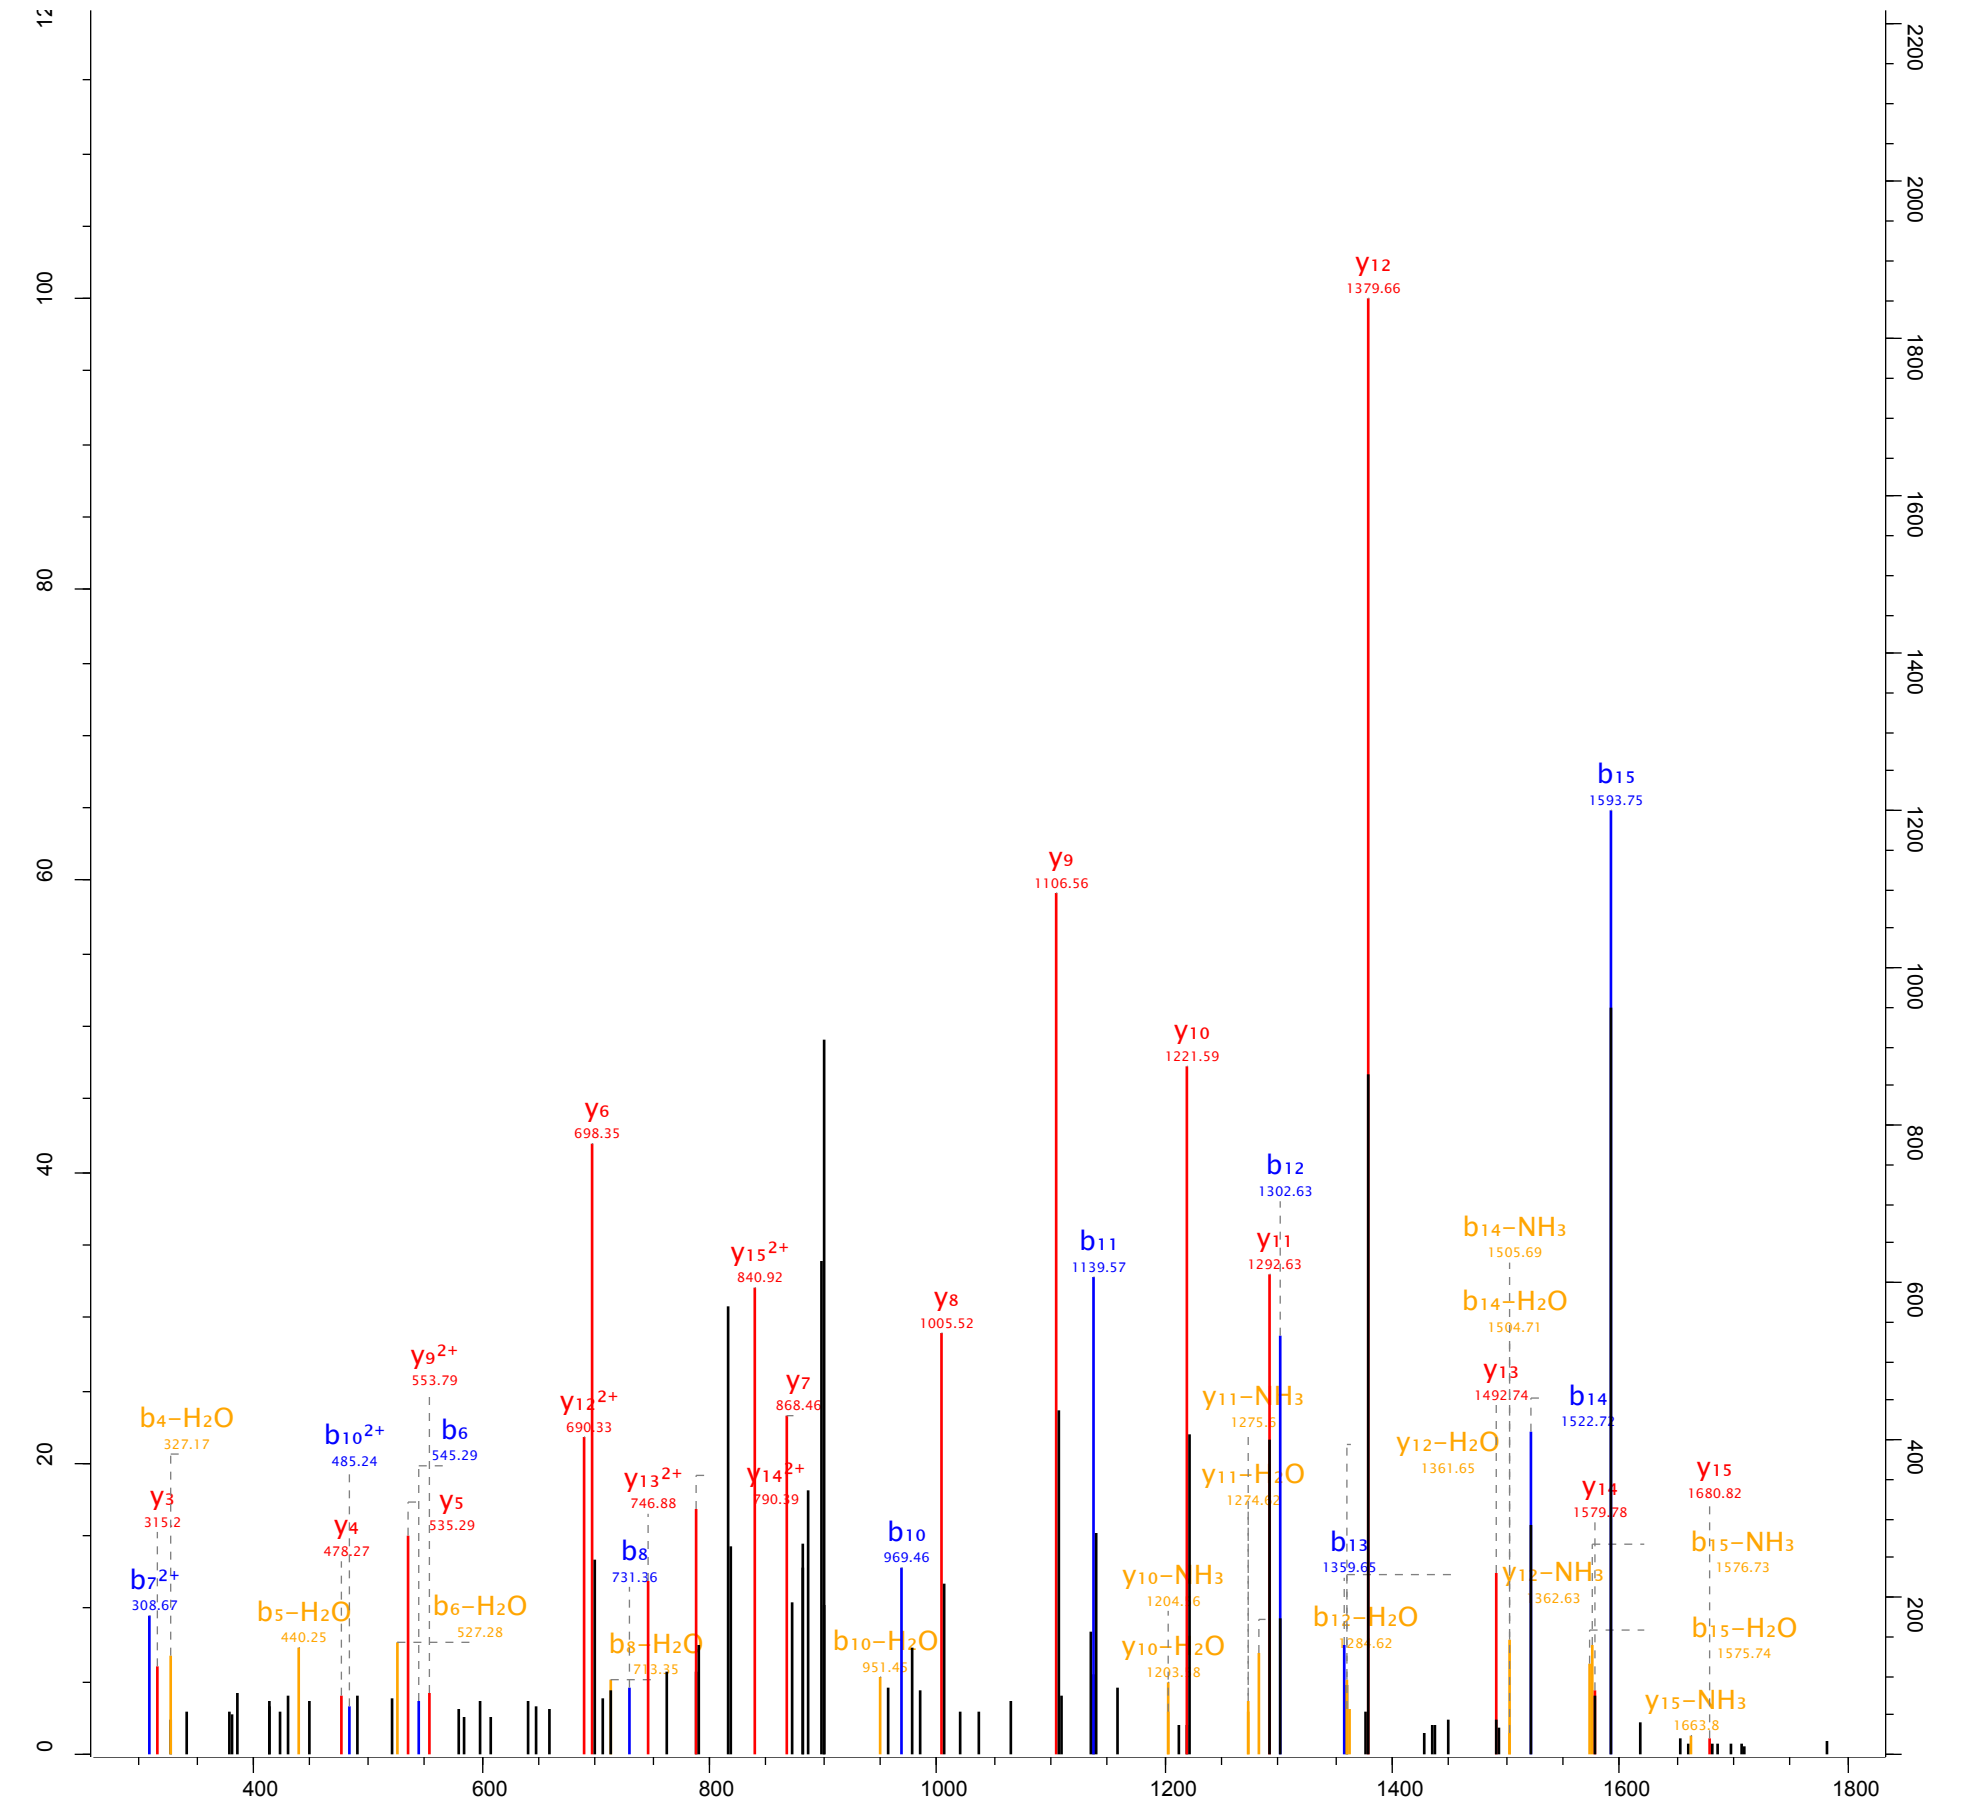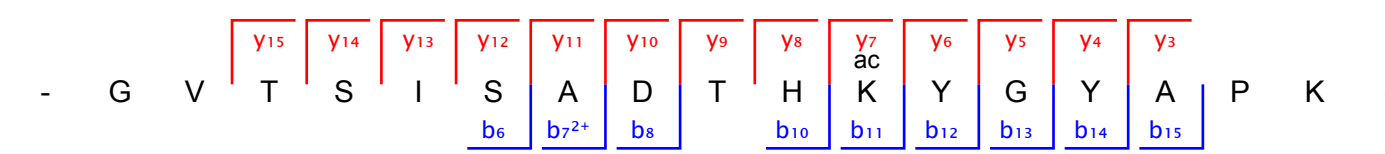



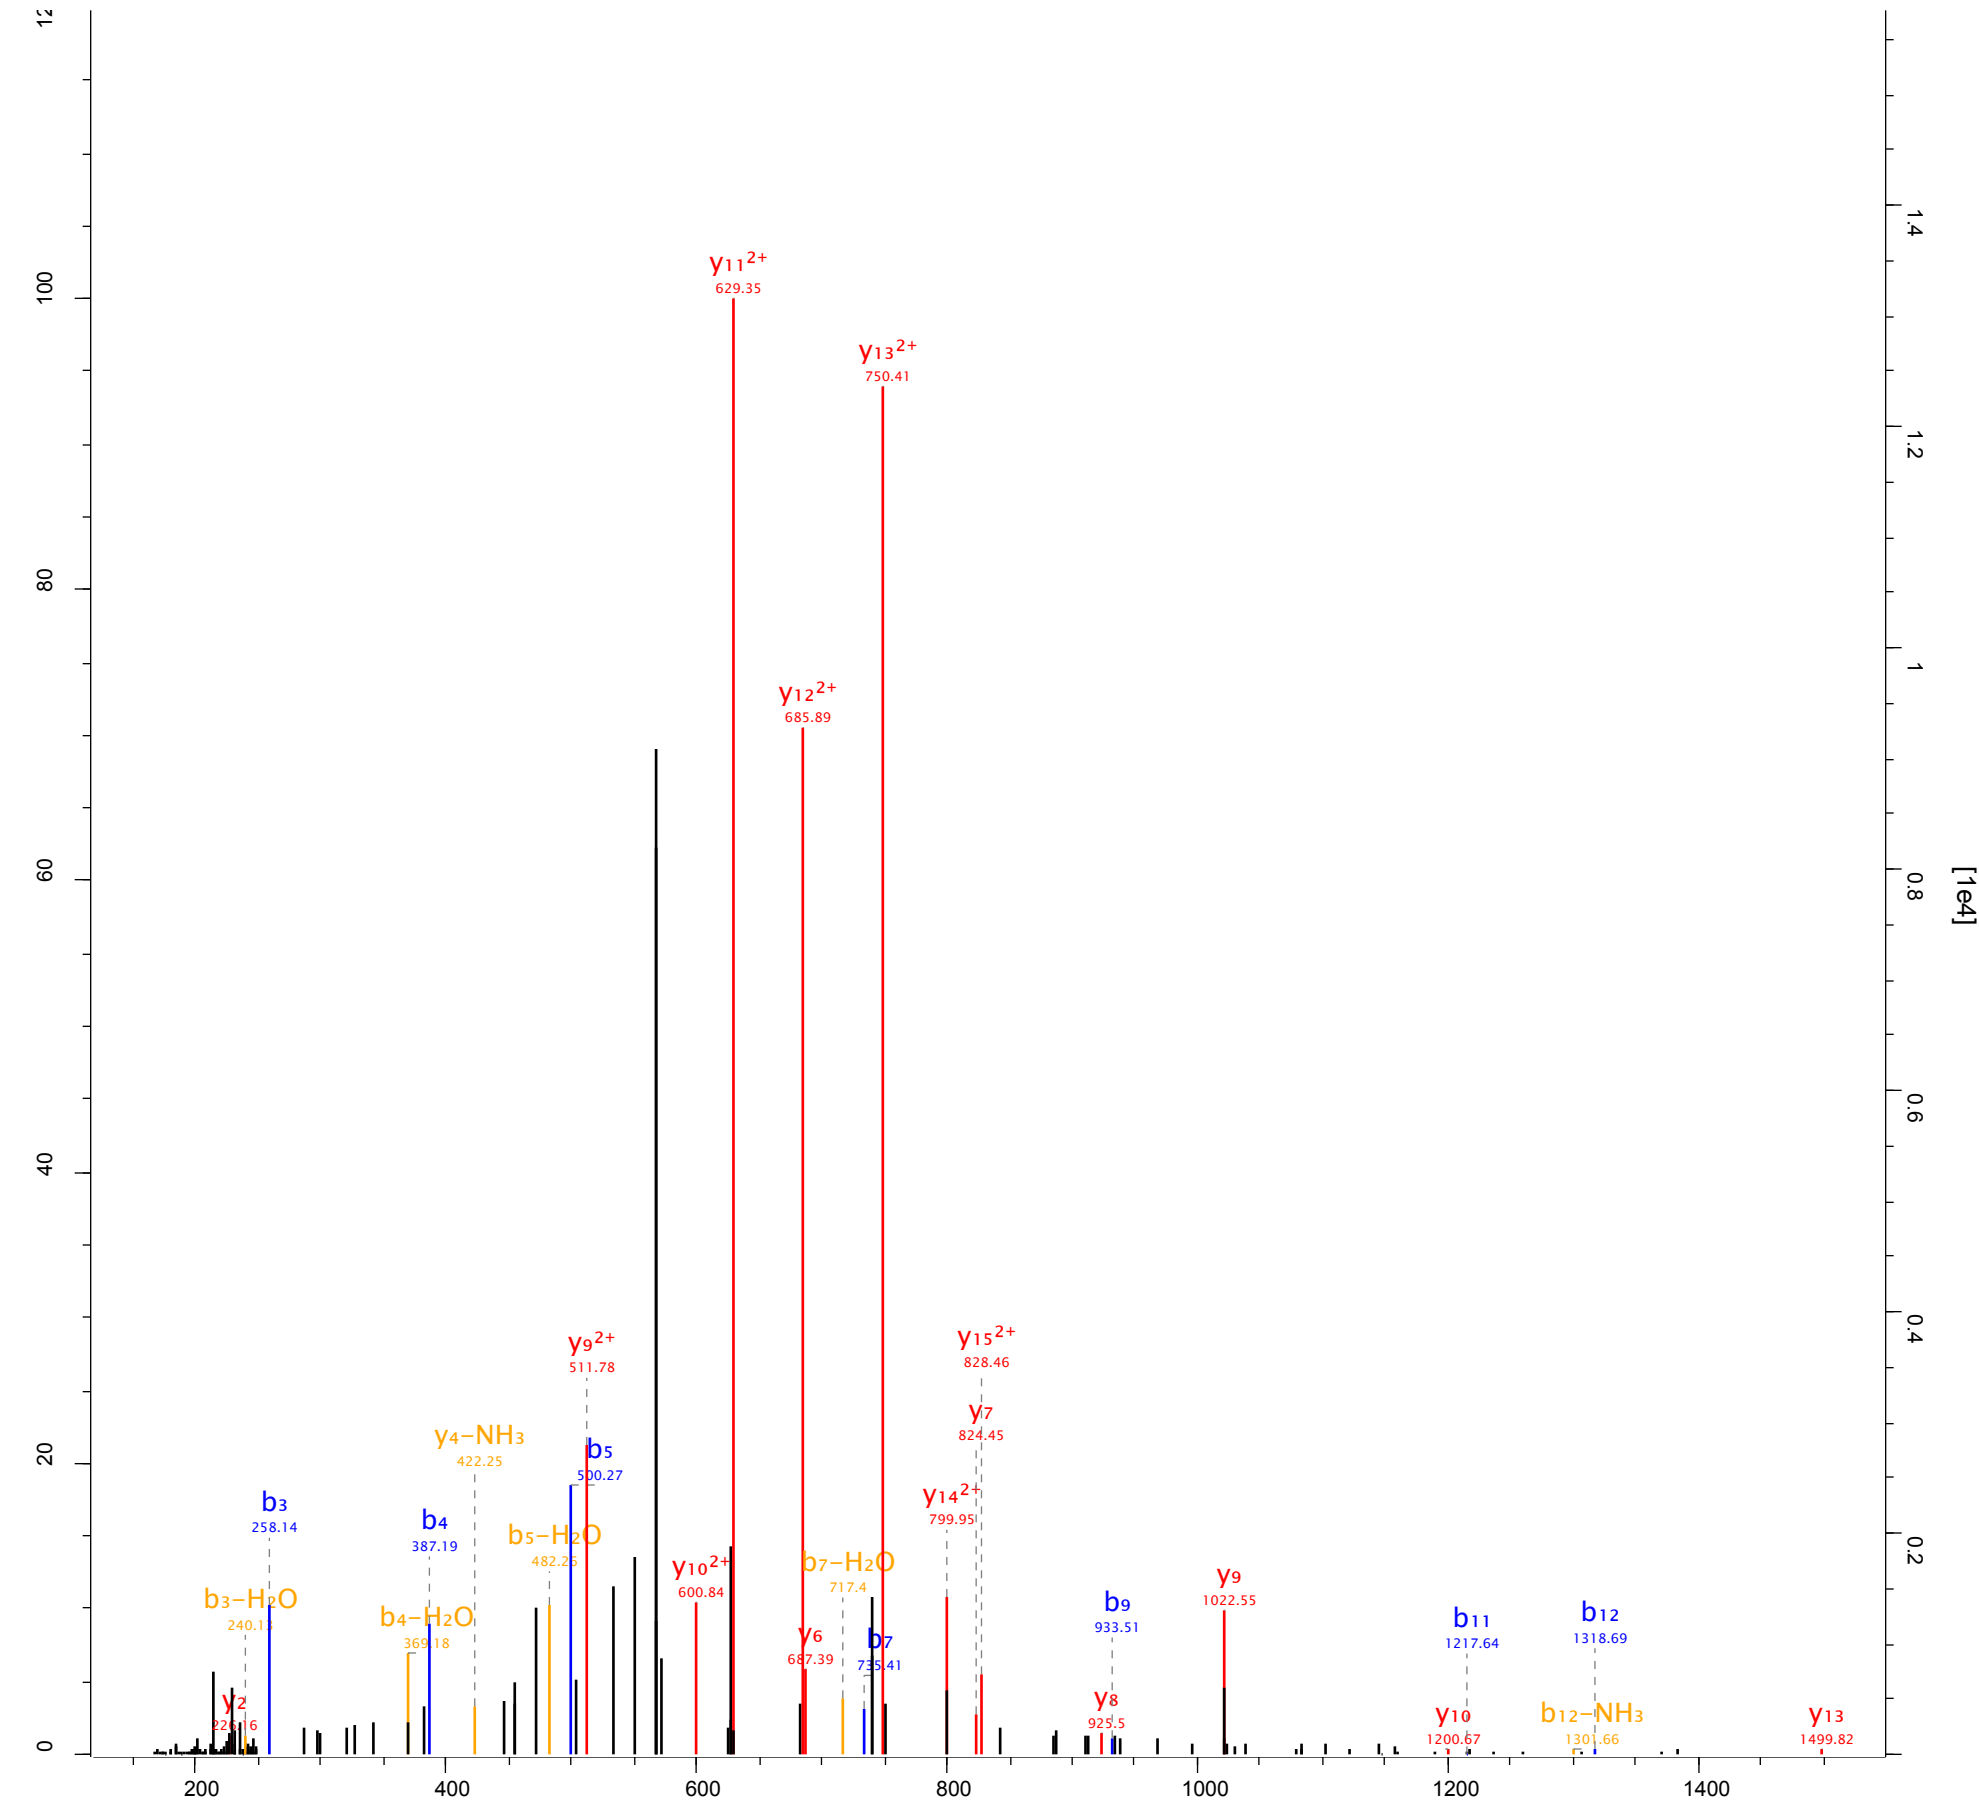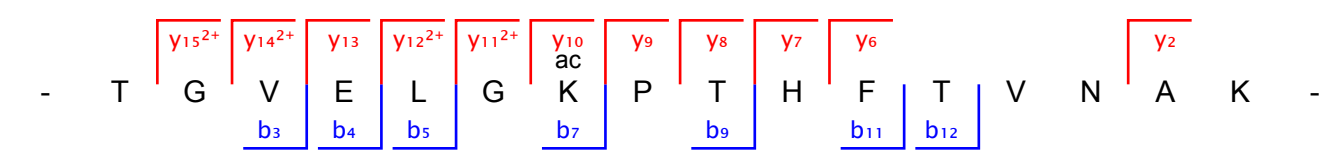

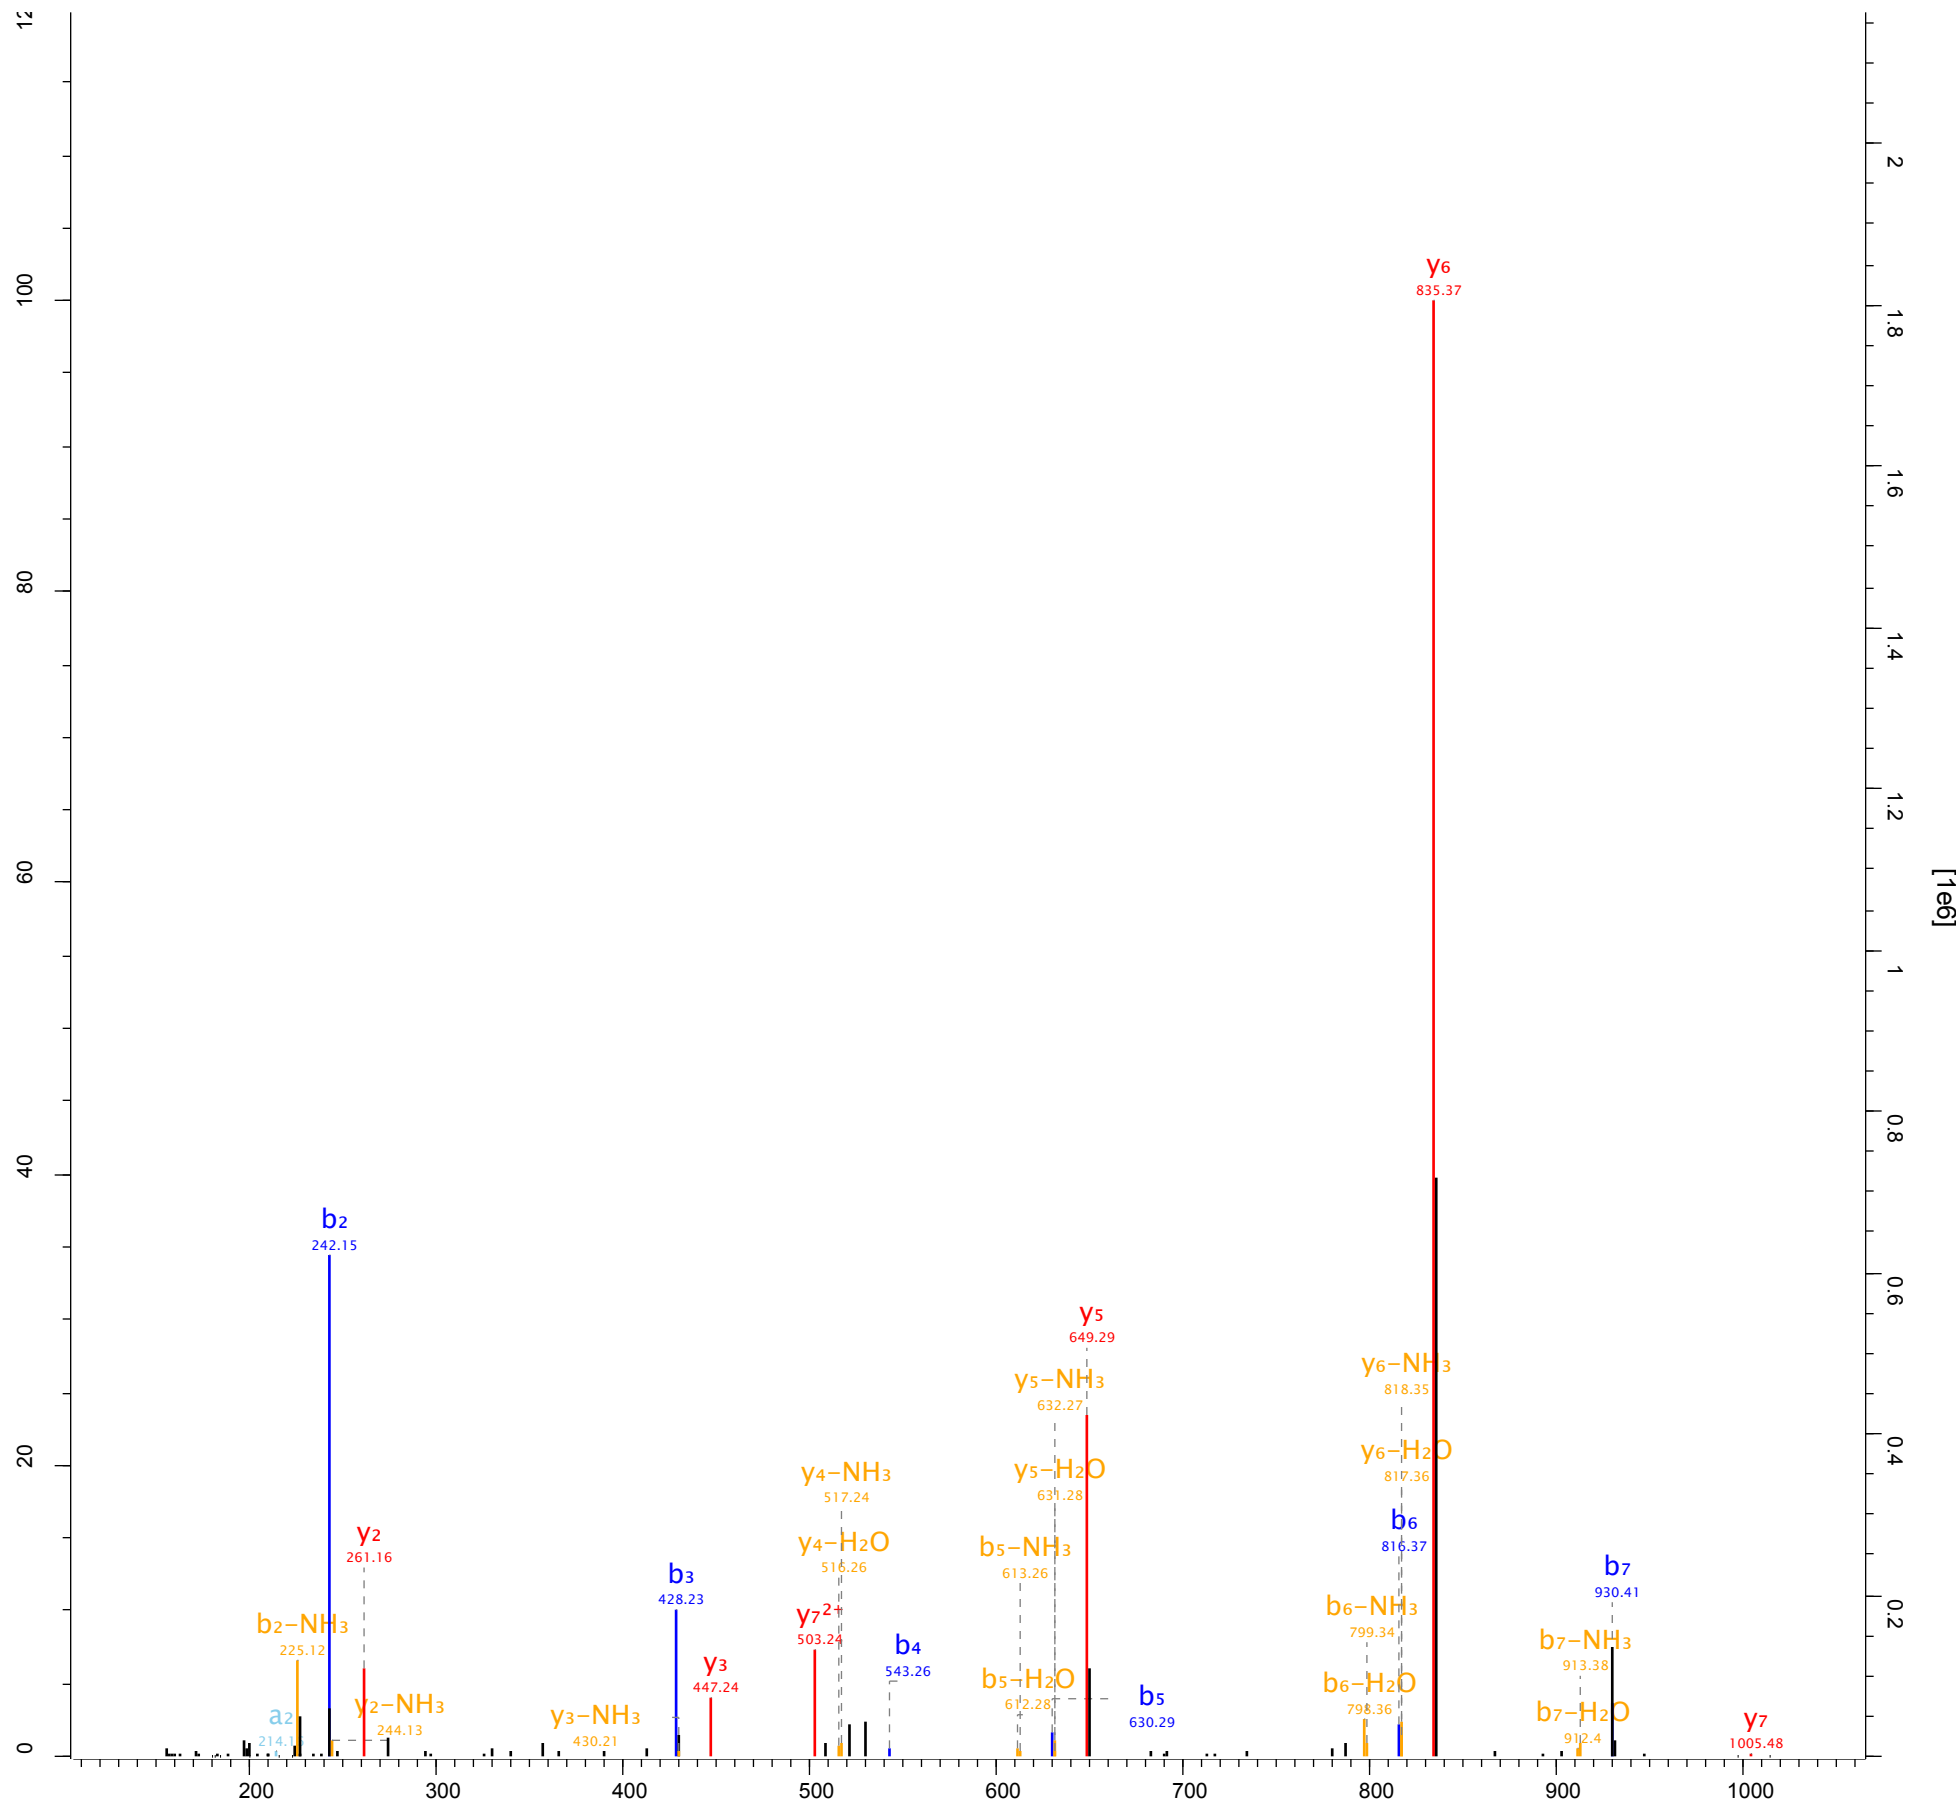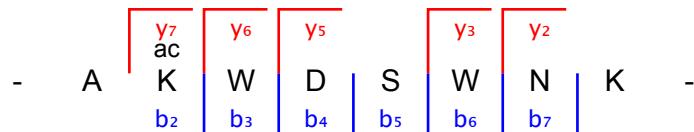

Raw file 072613\_SCW\_II\_68\_Enriched\_7 Scan 20843 Method ITMS; CID Score 121.13 m/z 633.03 Gene names Hspd1

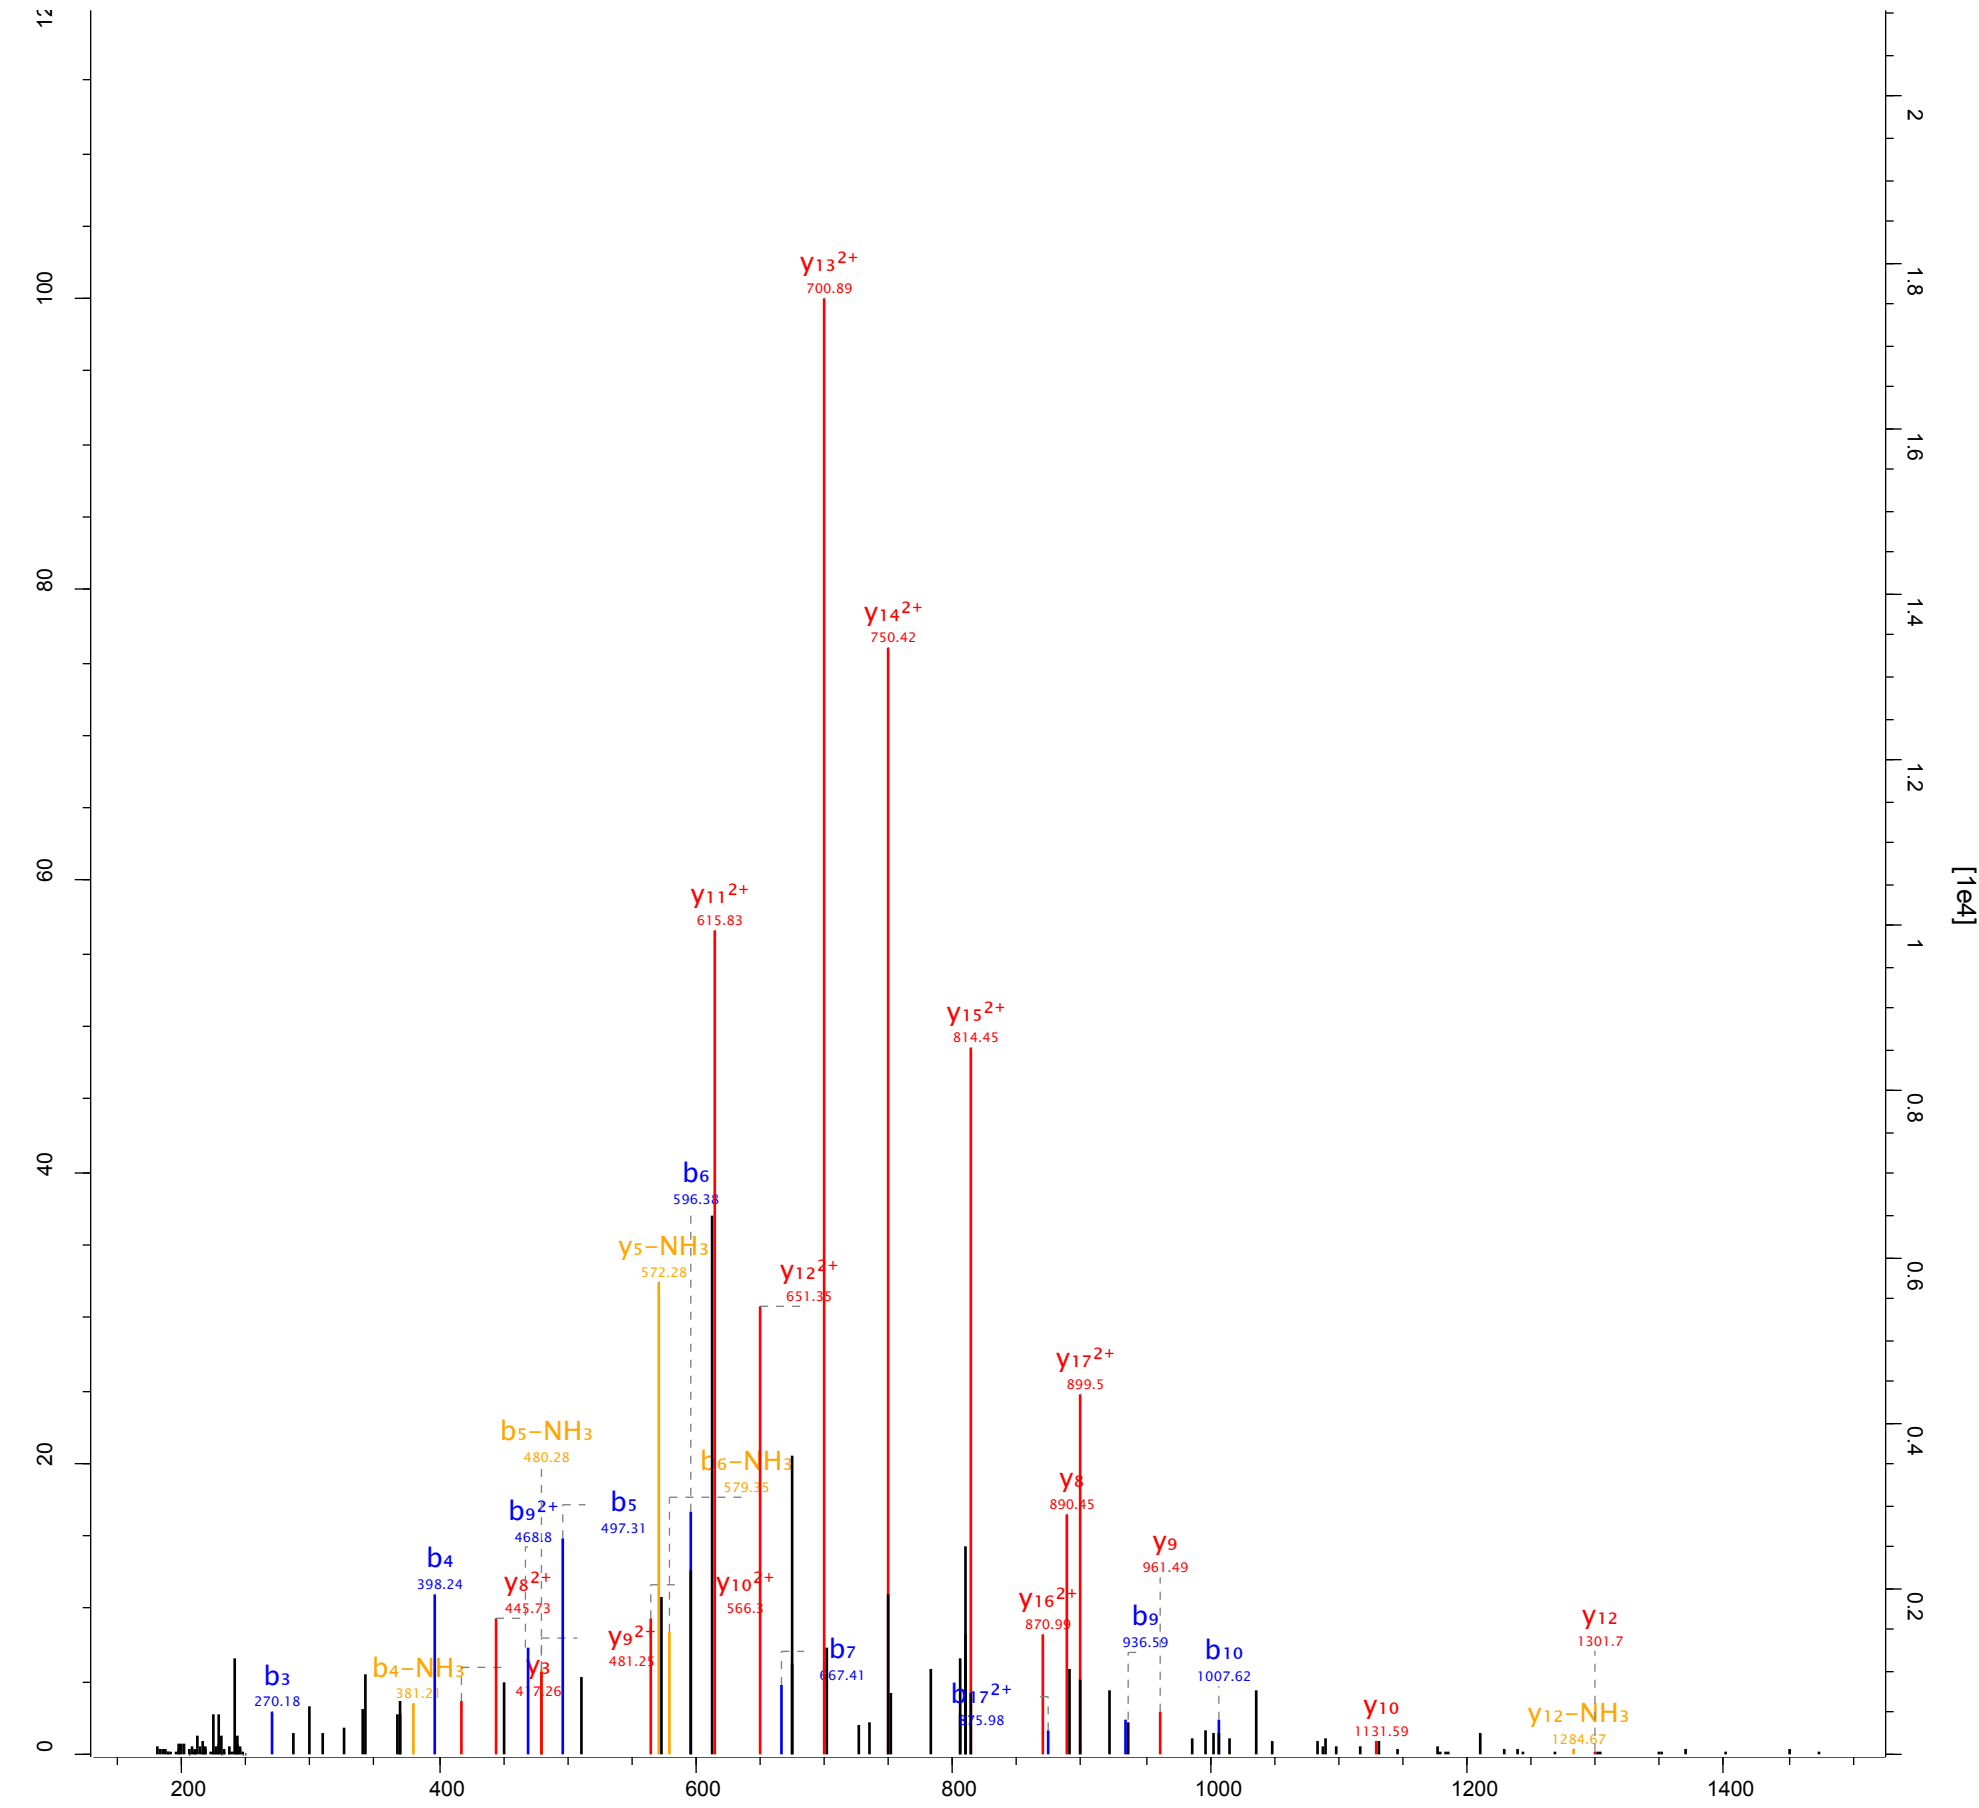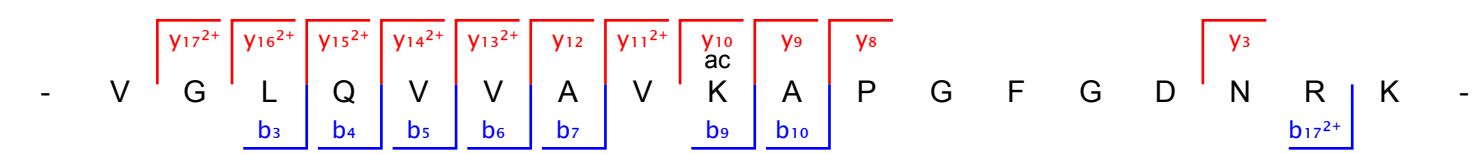

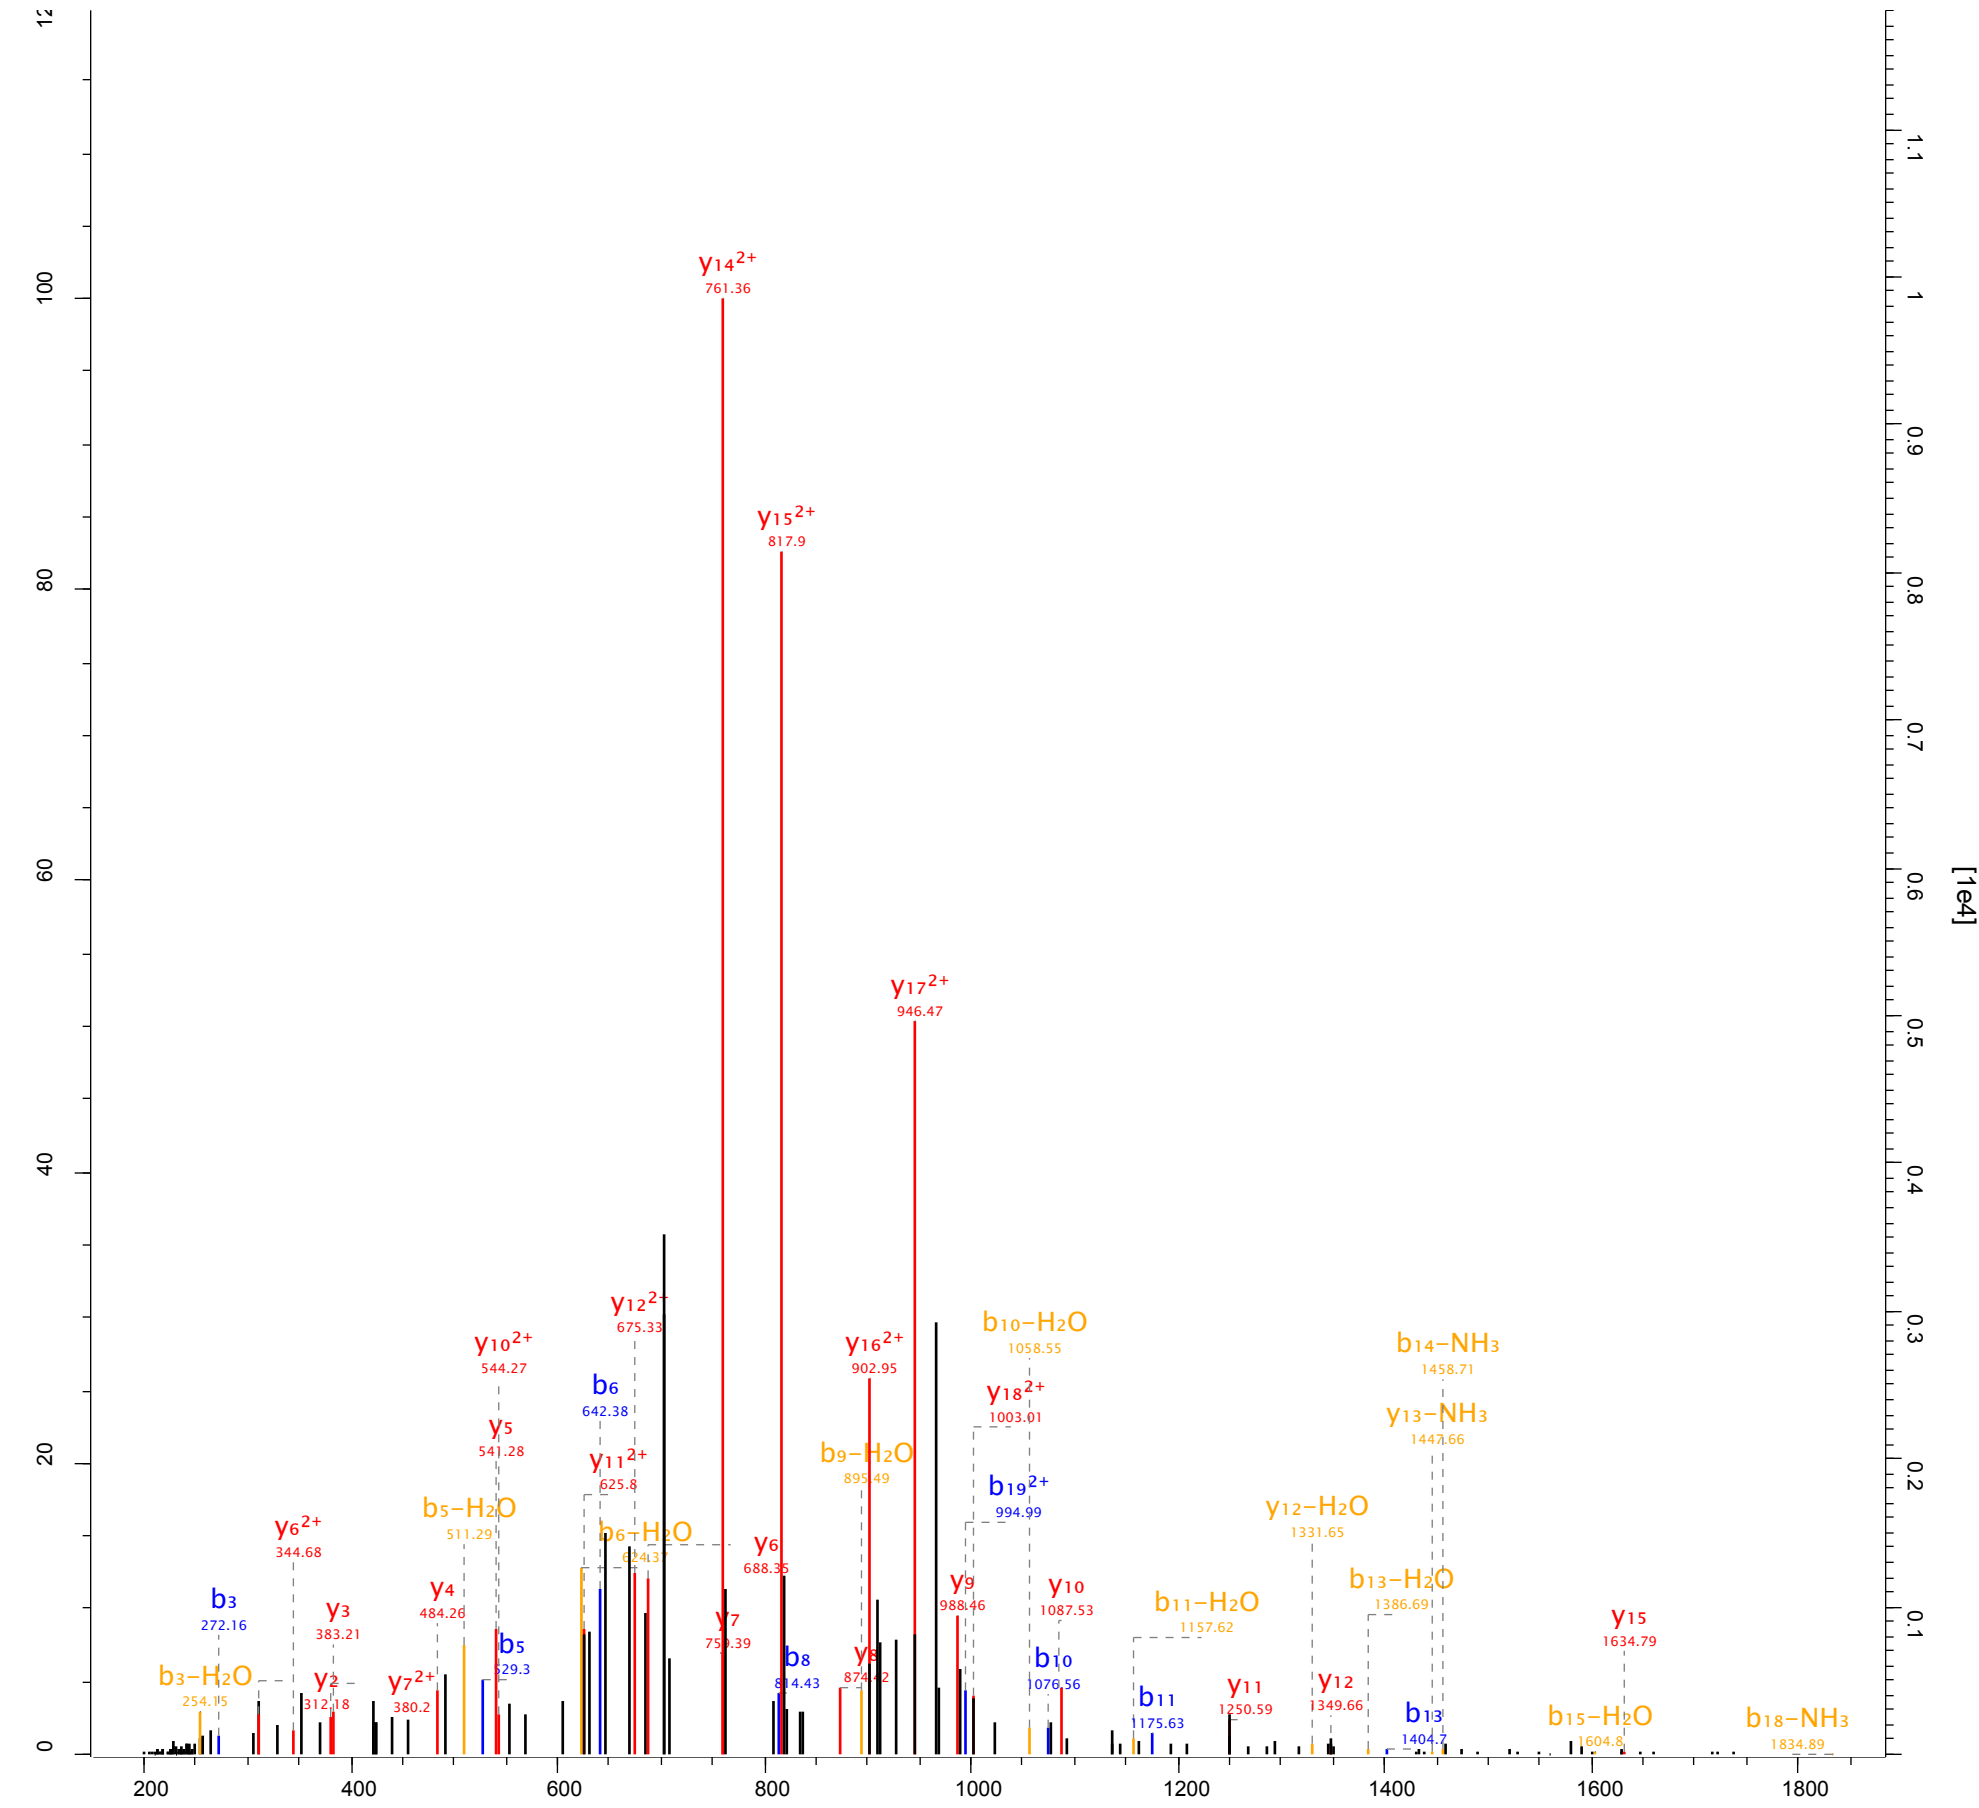

- A S L S K L G D V Y V N D A F G T A H R -

y<sub>18</sub><sup>2+</sup>
y<sub>17</sub><sup>2+</sup>
y<sub>16</sub><sup>2+</sup>
y<sub>15</sub>
y<sub>14</sub><sup>2+</sup>
y<sub>12</sub>
y<sub>11</sub>
y<sub>10</sub>
y<sub>9</sub>
y<sub>8</sub>
y<sub>7</sub>
y<sub>6</sub>
y<sub>5</sub>
y<sub>4</sub>
y<sub>3</sub>
y<sub>2</sub>

b<sub>3</sub>
b<sub>5</sub>
b<sub>6</sub>
b<sub>8</sub>
b<sub>10</sub>
b<sub>11</sub>
b<sub>13</sub>
b<sub>19</sub><sup>2+</sup>

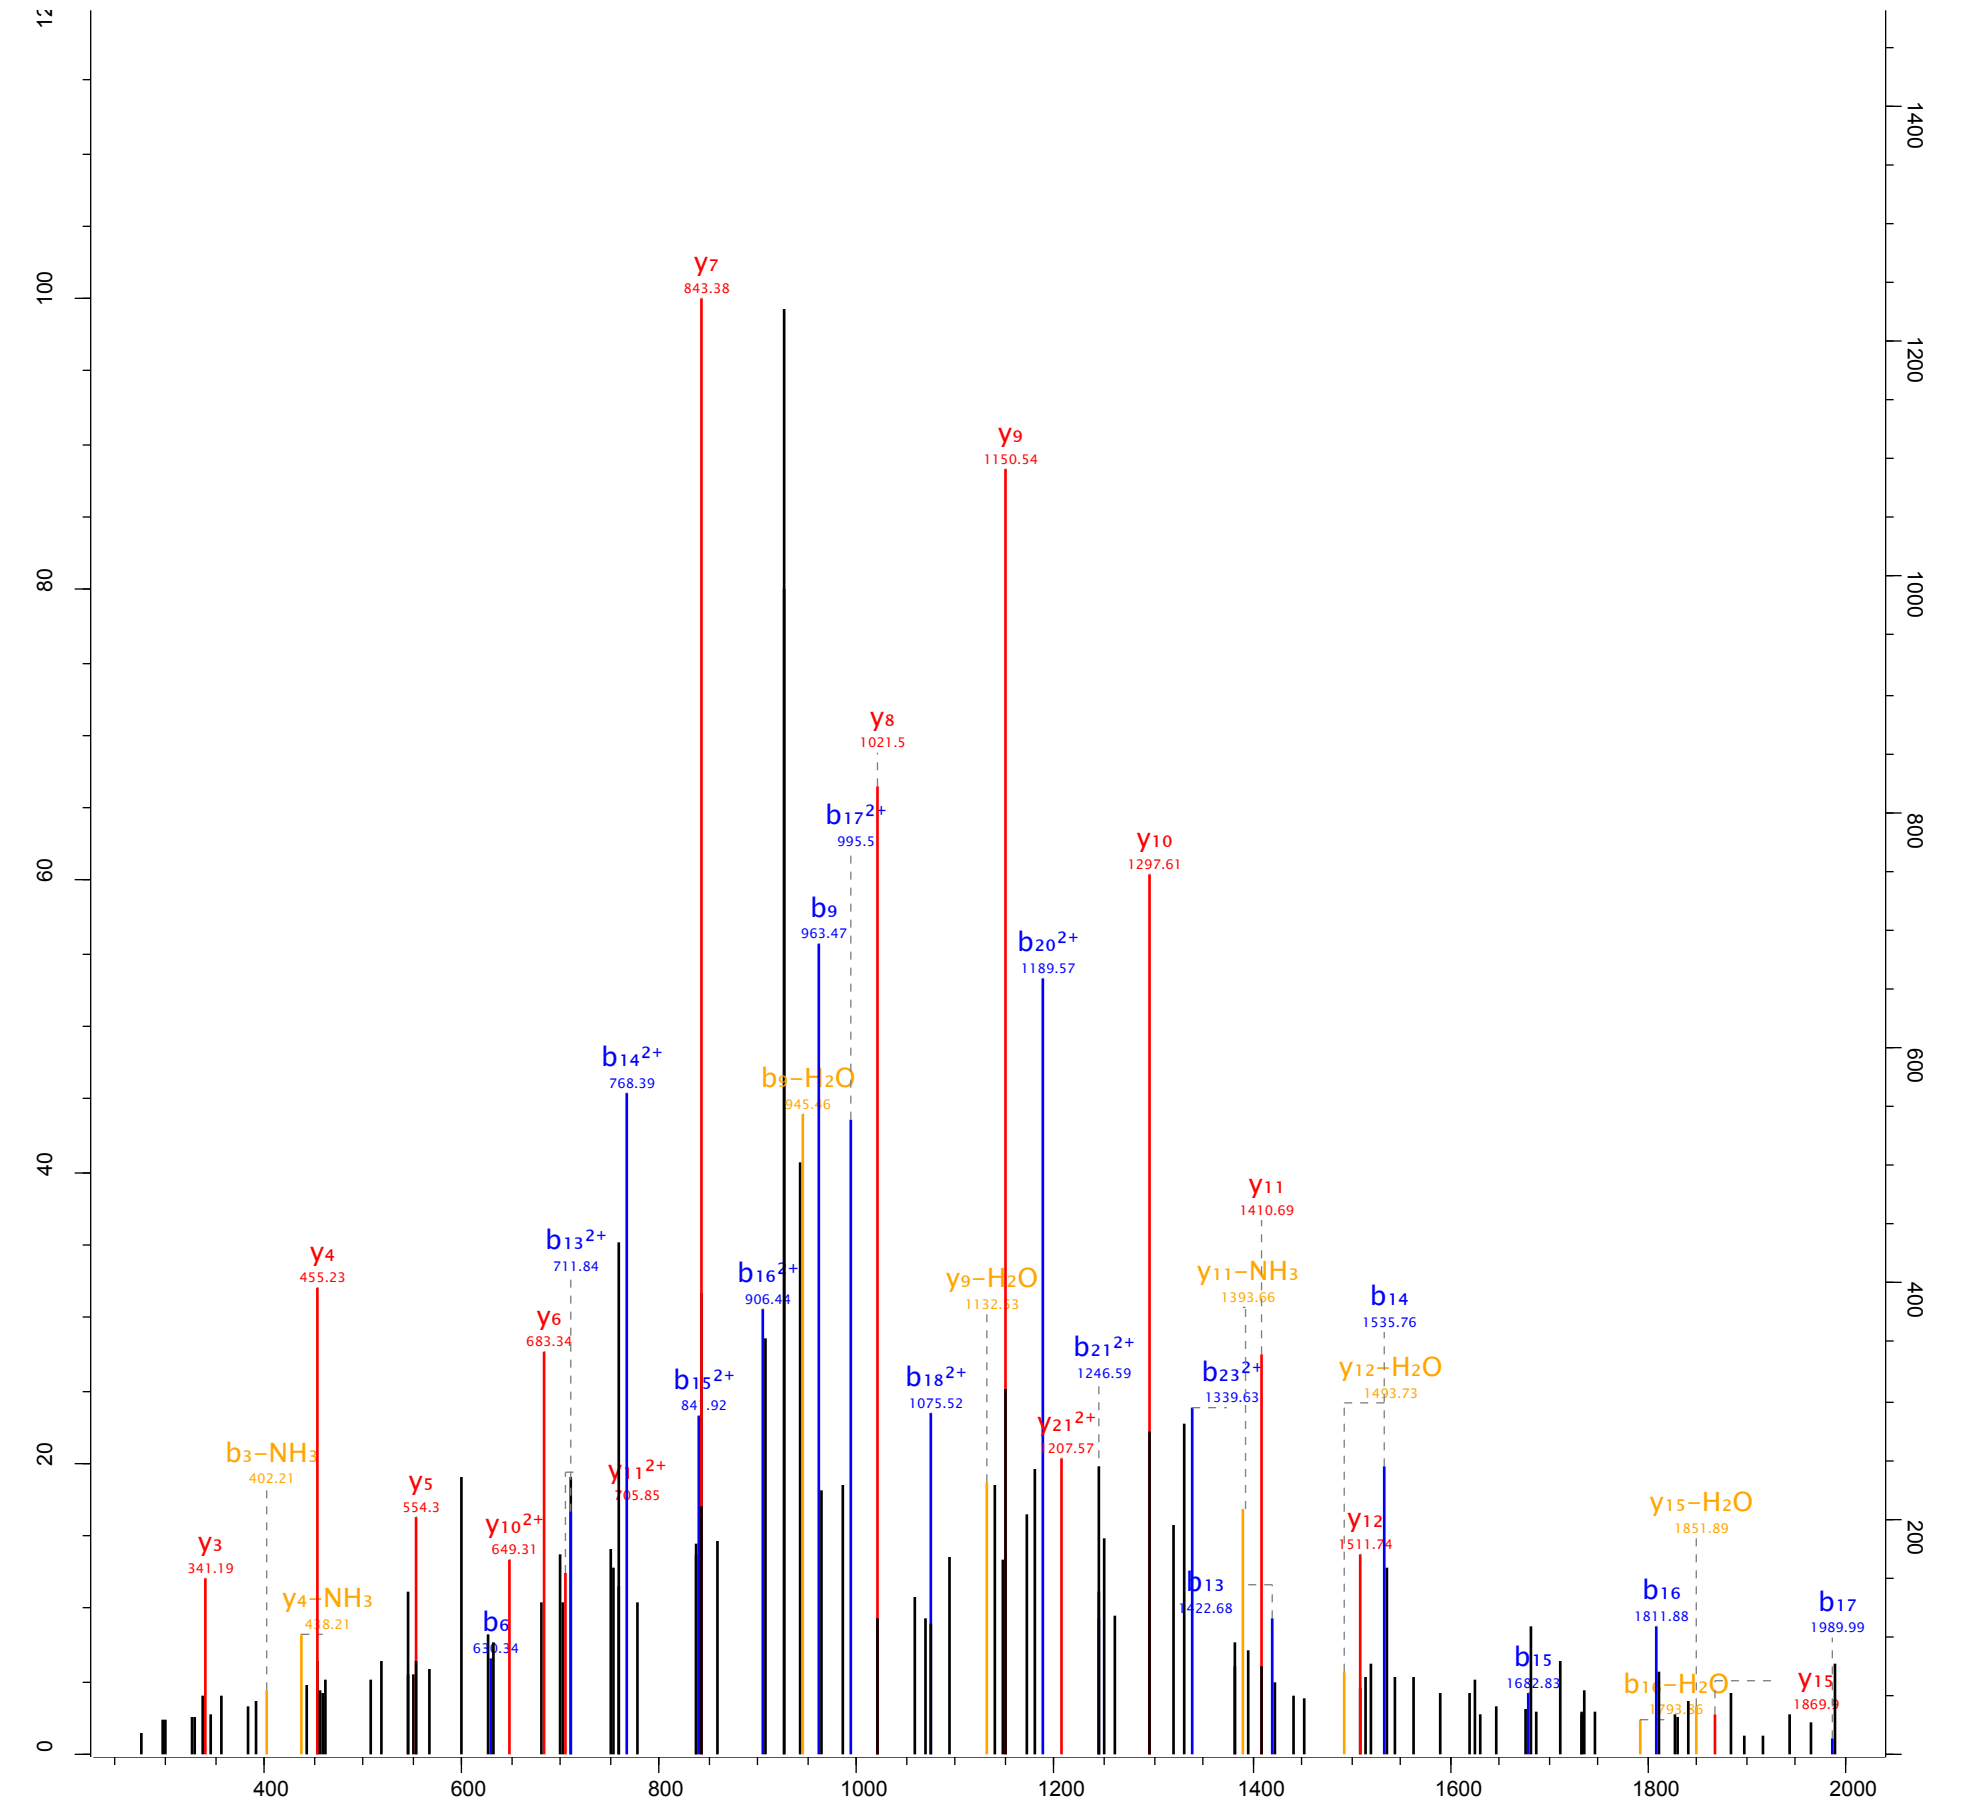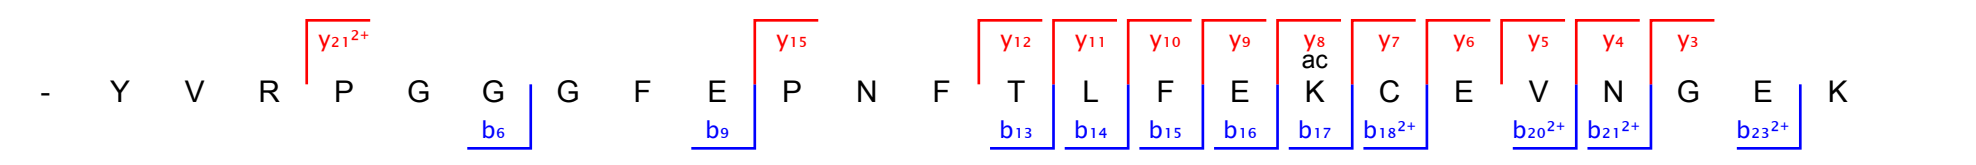

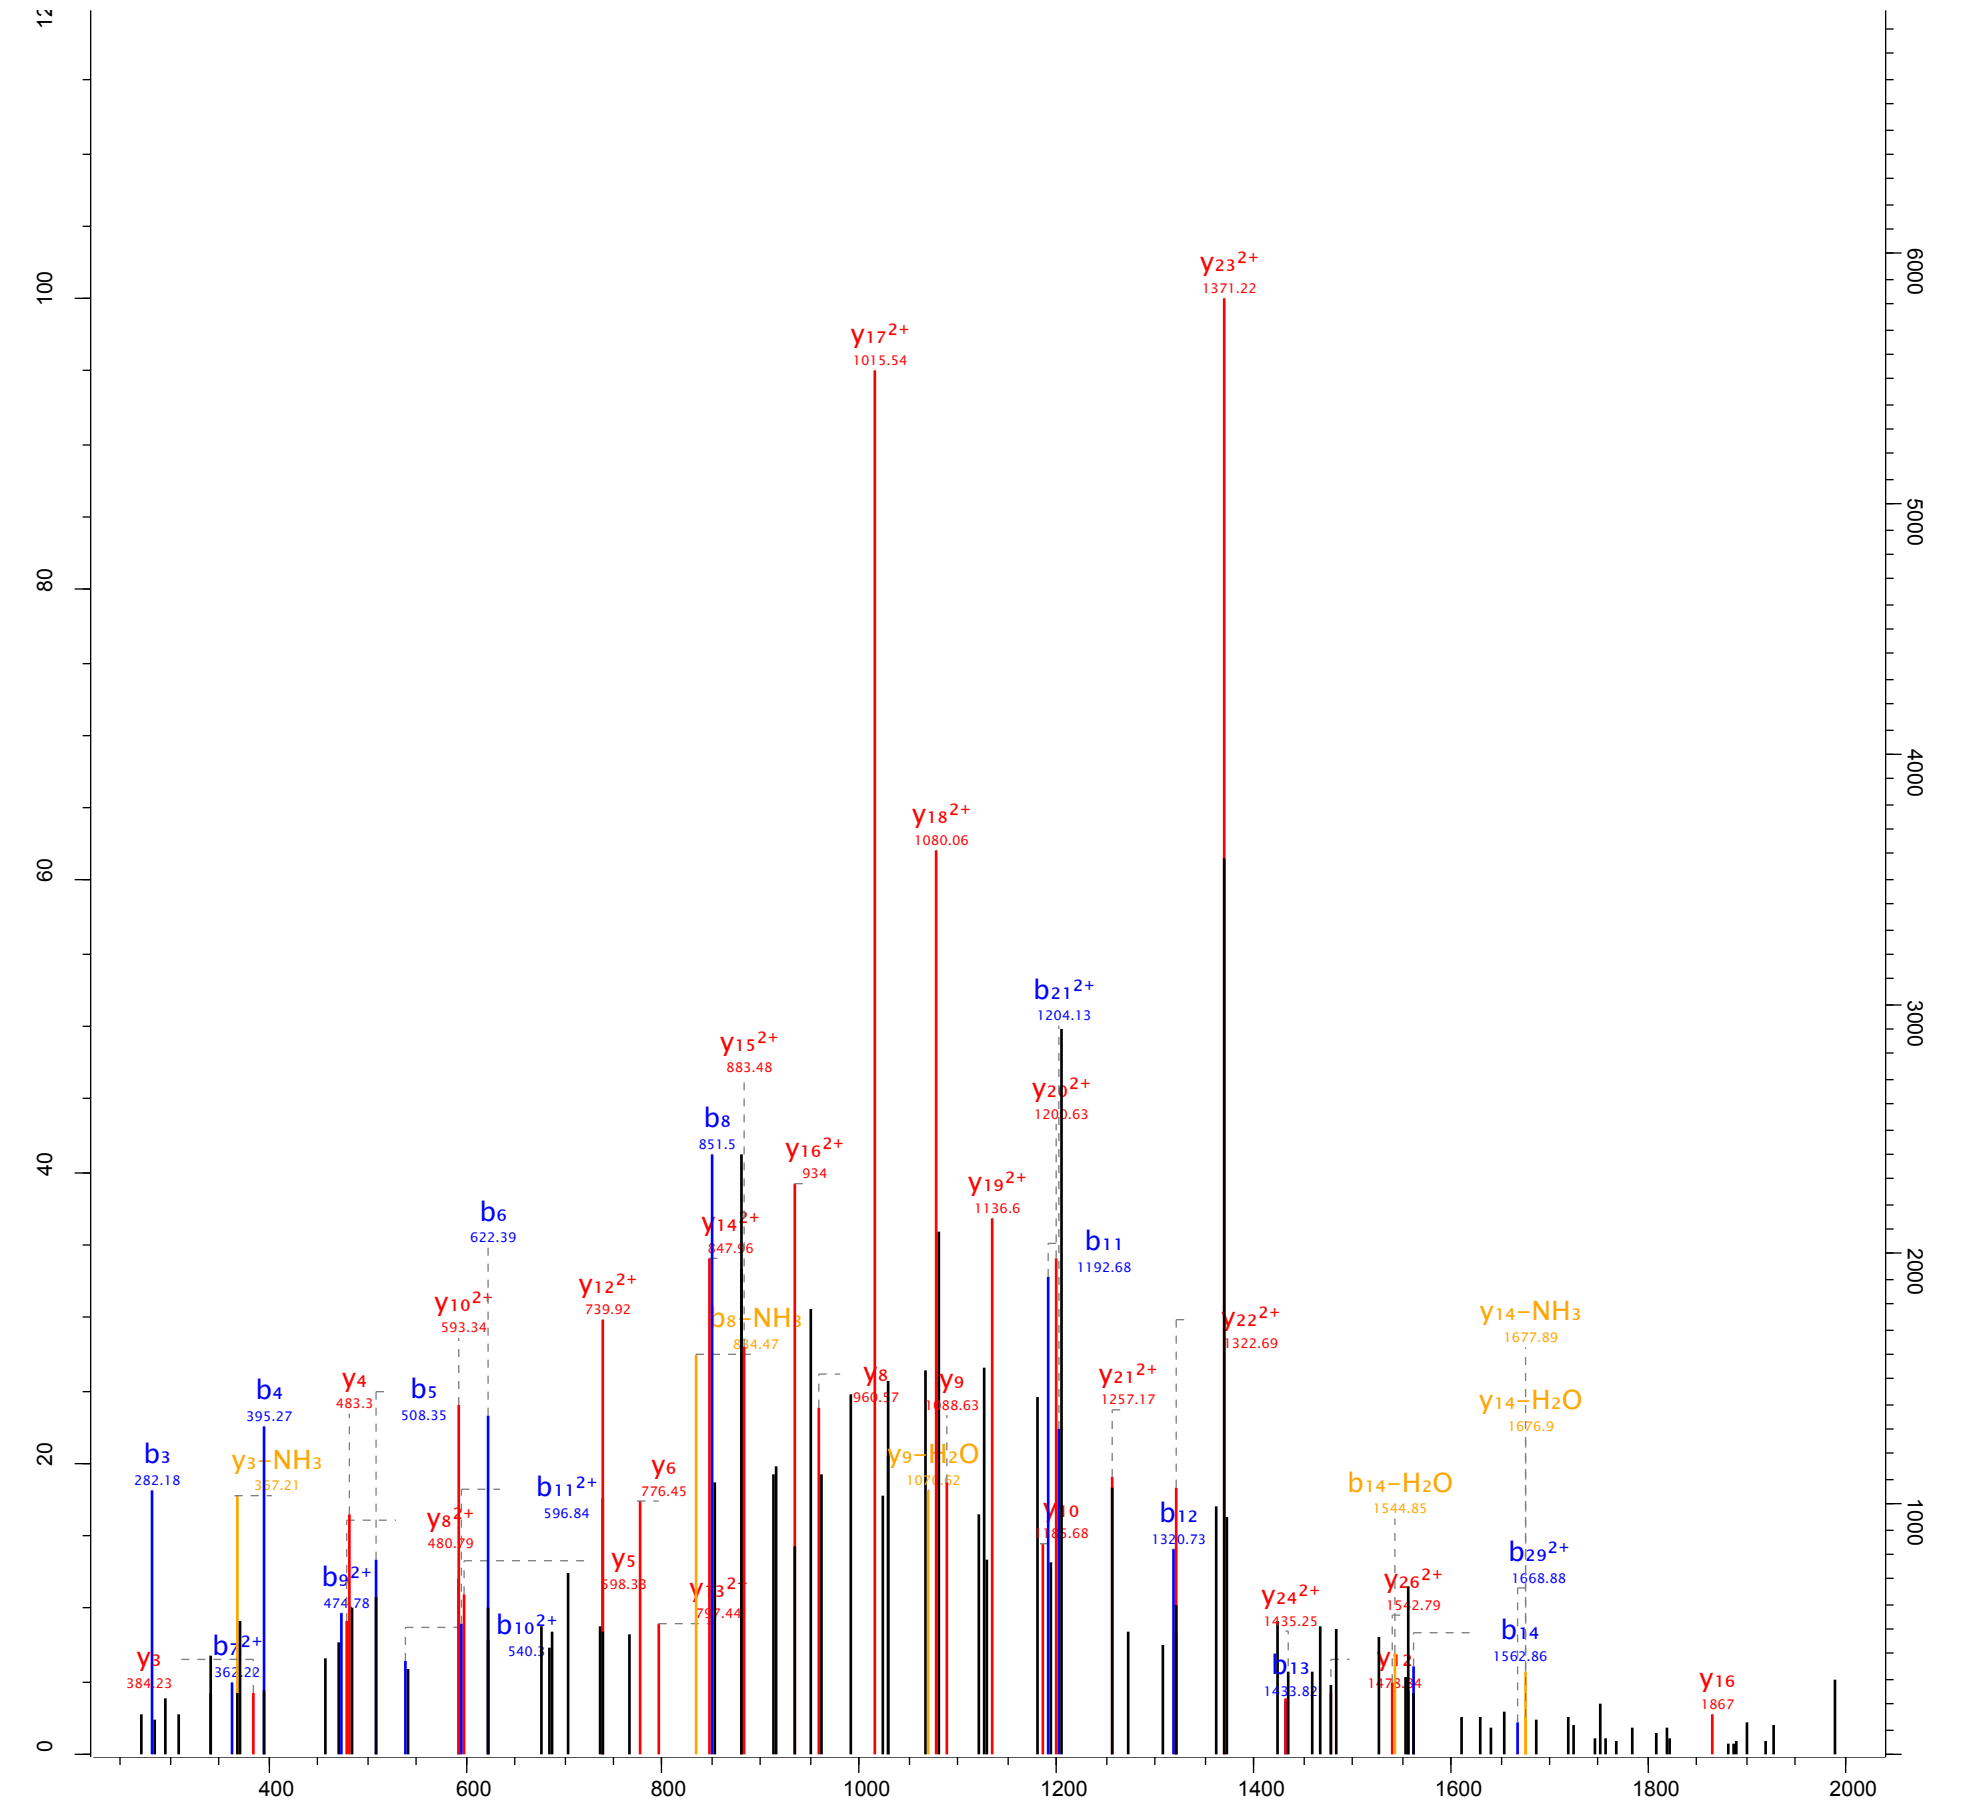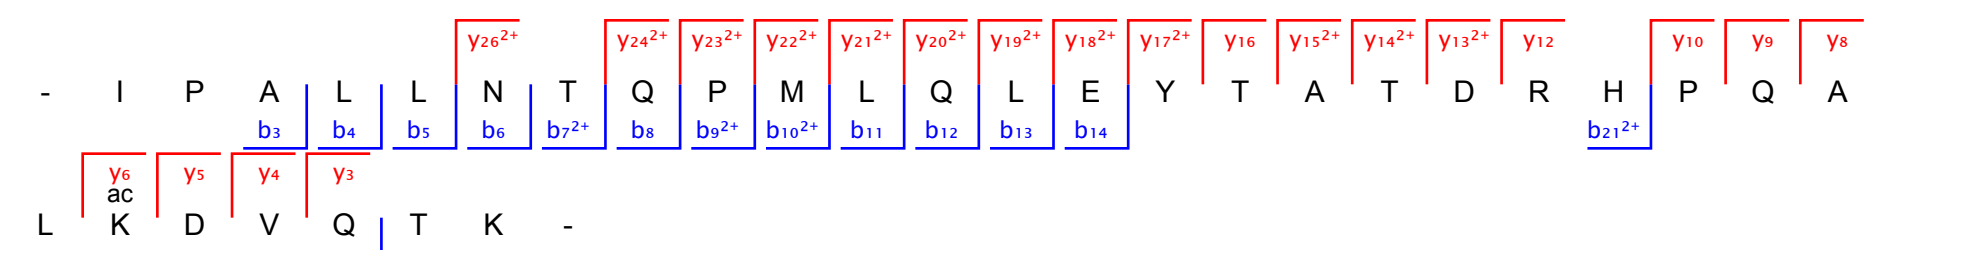

Raw file  
072613\_SCW\_II\_68\_Enriched\_7

Scan 28685 Method ITMS; CID Score 110.03 m/z 1008.17 Gene names Aldh6a1

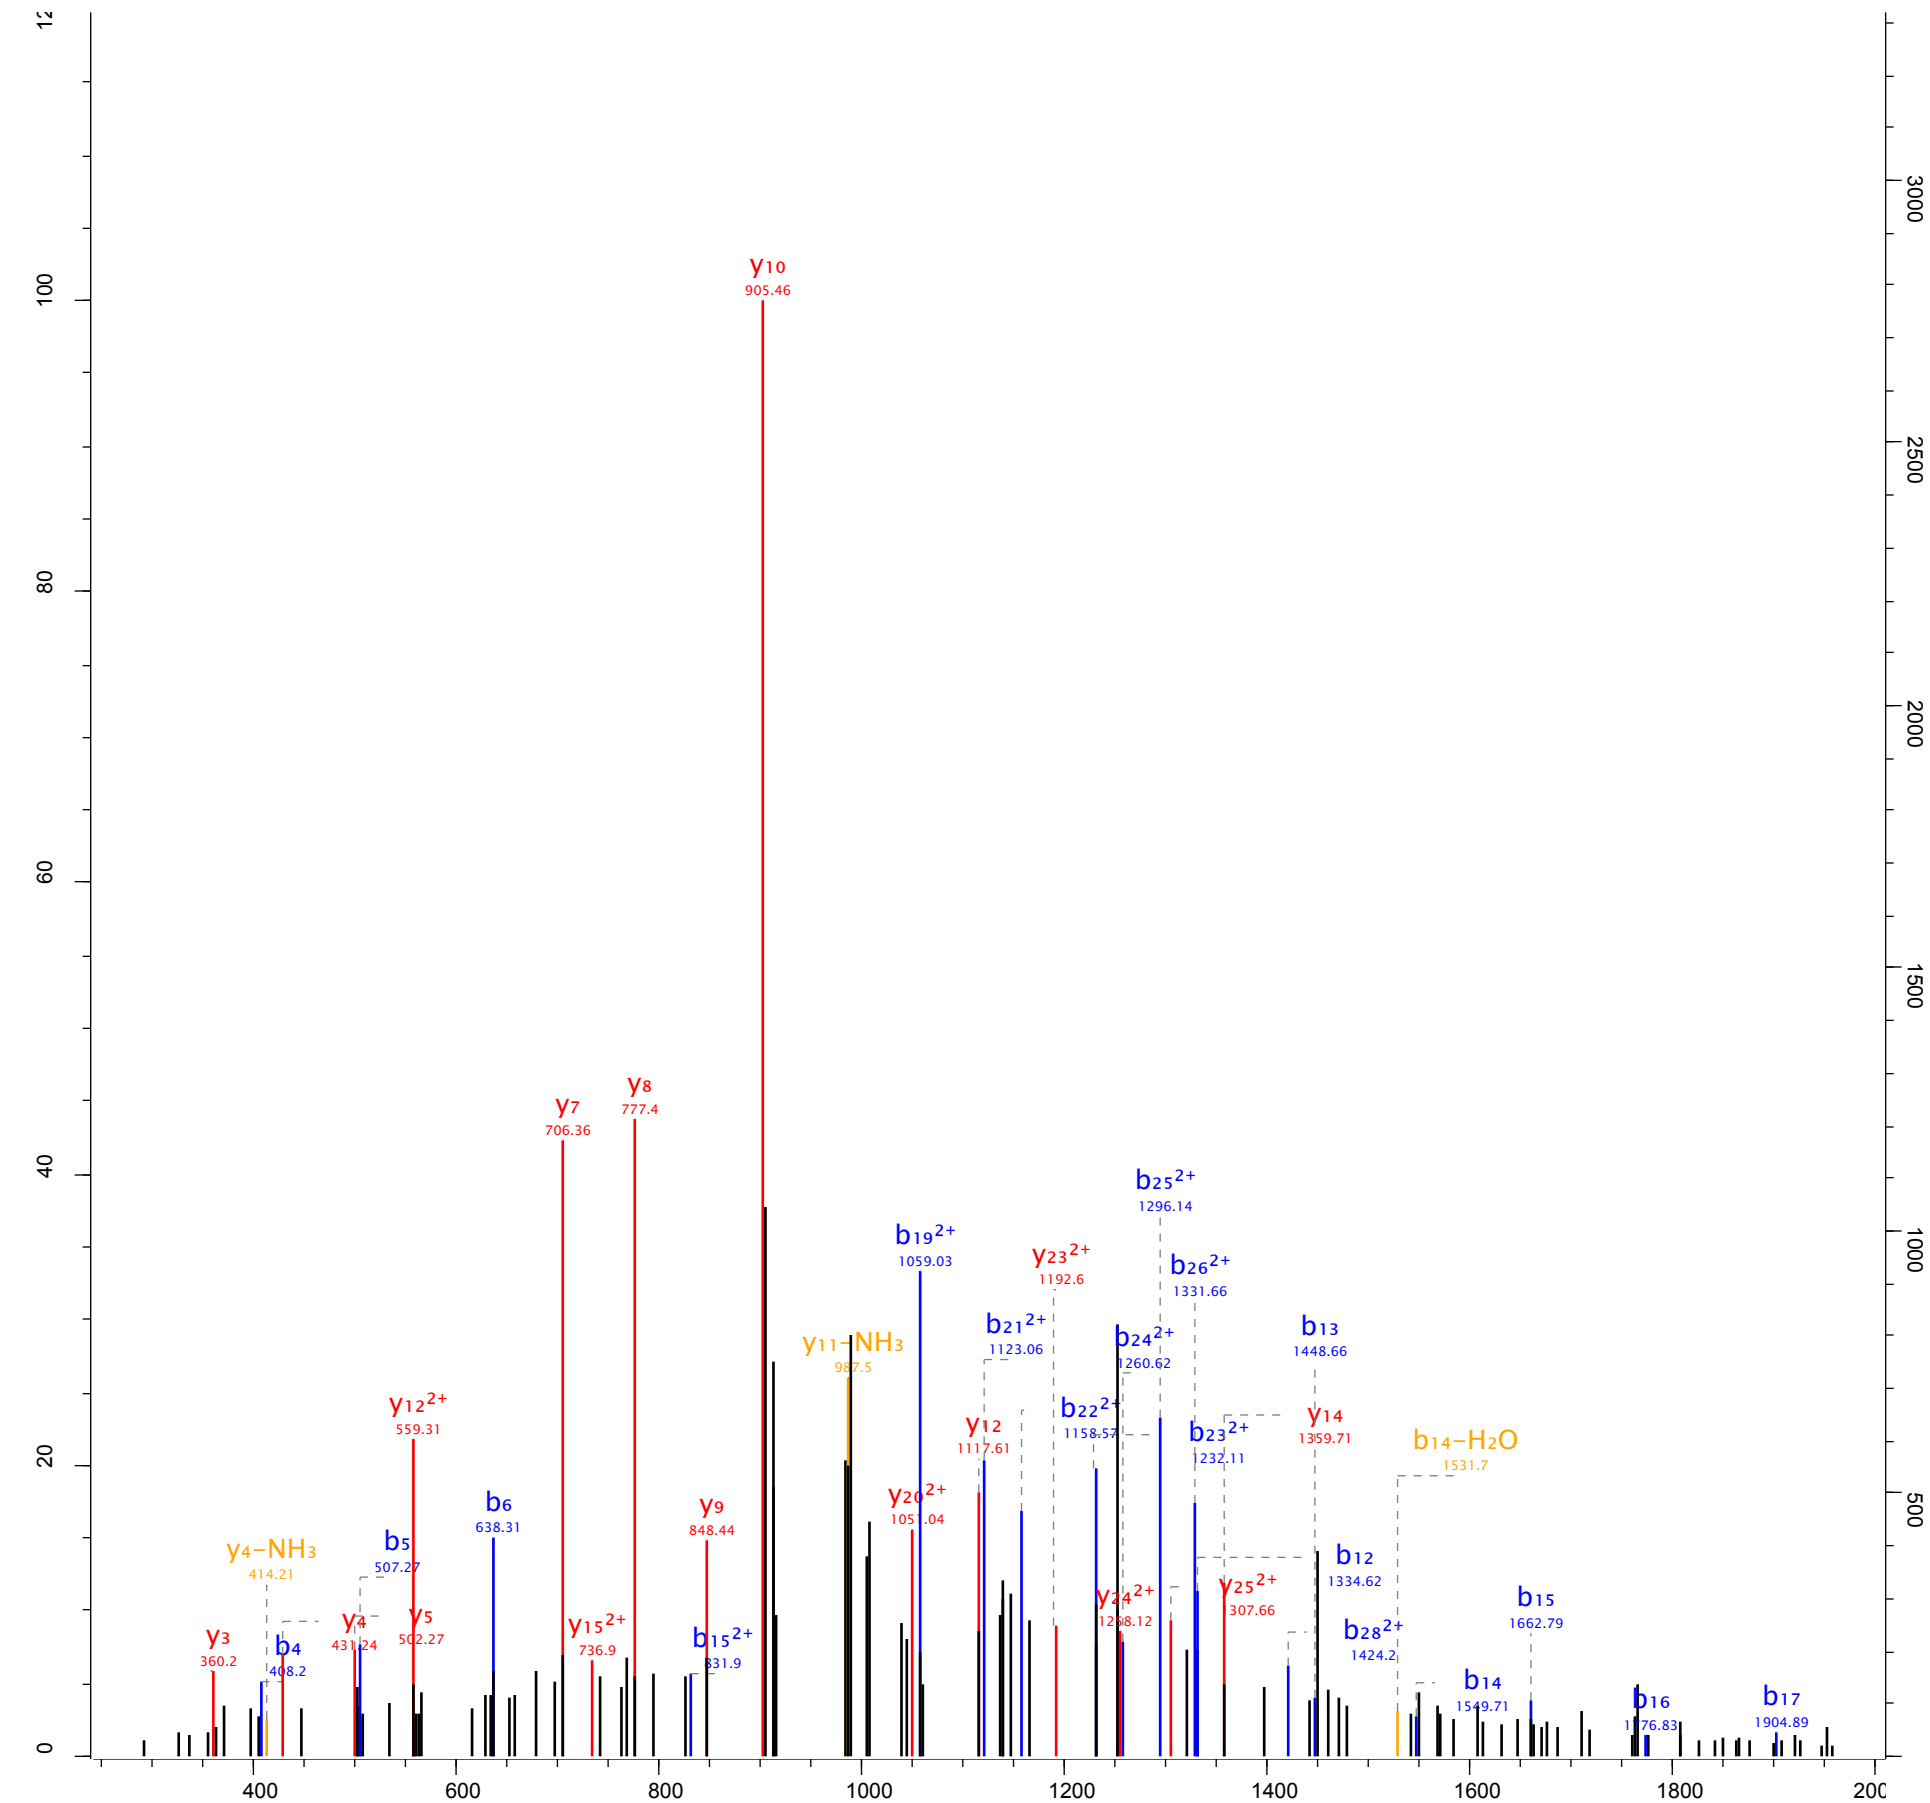

- N H G V V M P D A N K E N T L N Q L V G A A F G  
b4 b5 b6 b12 b13 b14 b15 b16 b17 b19<sup>2+</sup> b21<sup>2+</sup> b22<sup>2+</sup> b23<sup>2+</sup> b24<sup>2+</sup>  
y5 y4 y3 y25<sup>2+</sup> y24<sup>2+</sup> y23<sup>2+</sup> y20<sup>2+</sup> y15<sup>2+</sup> y14 y12 y10 y9 y8 y7  
A A G Q R -

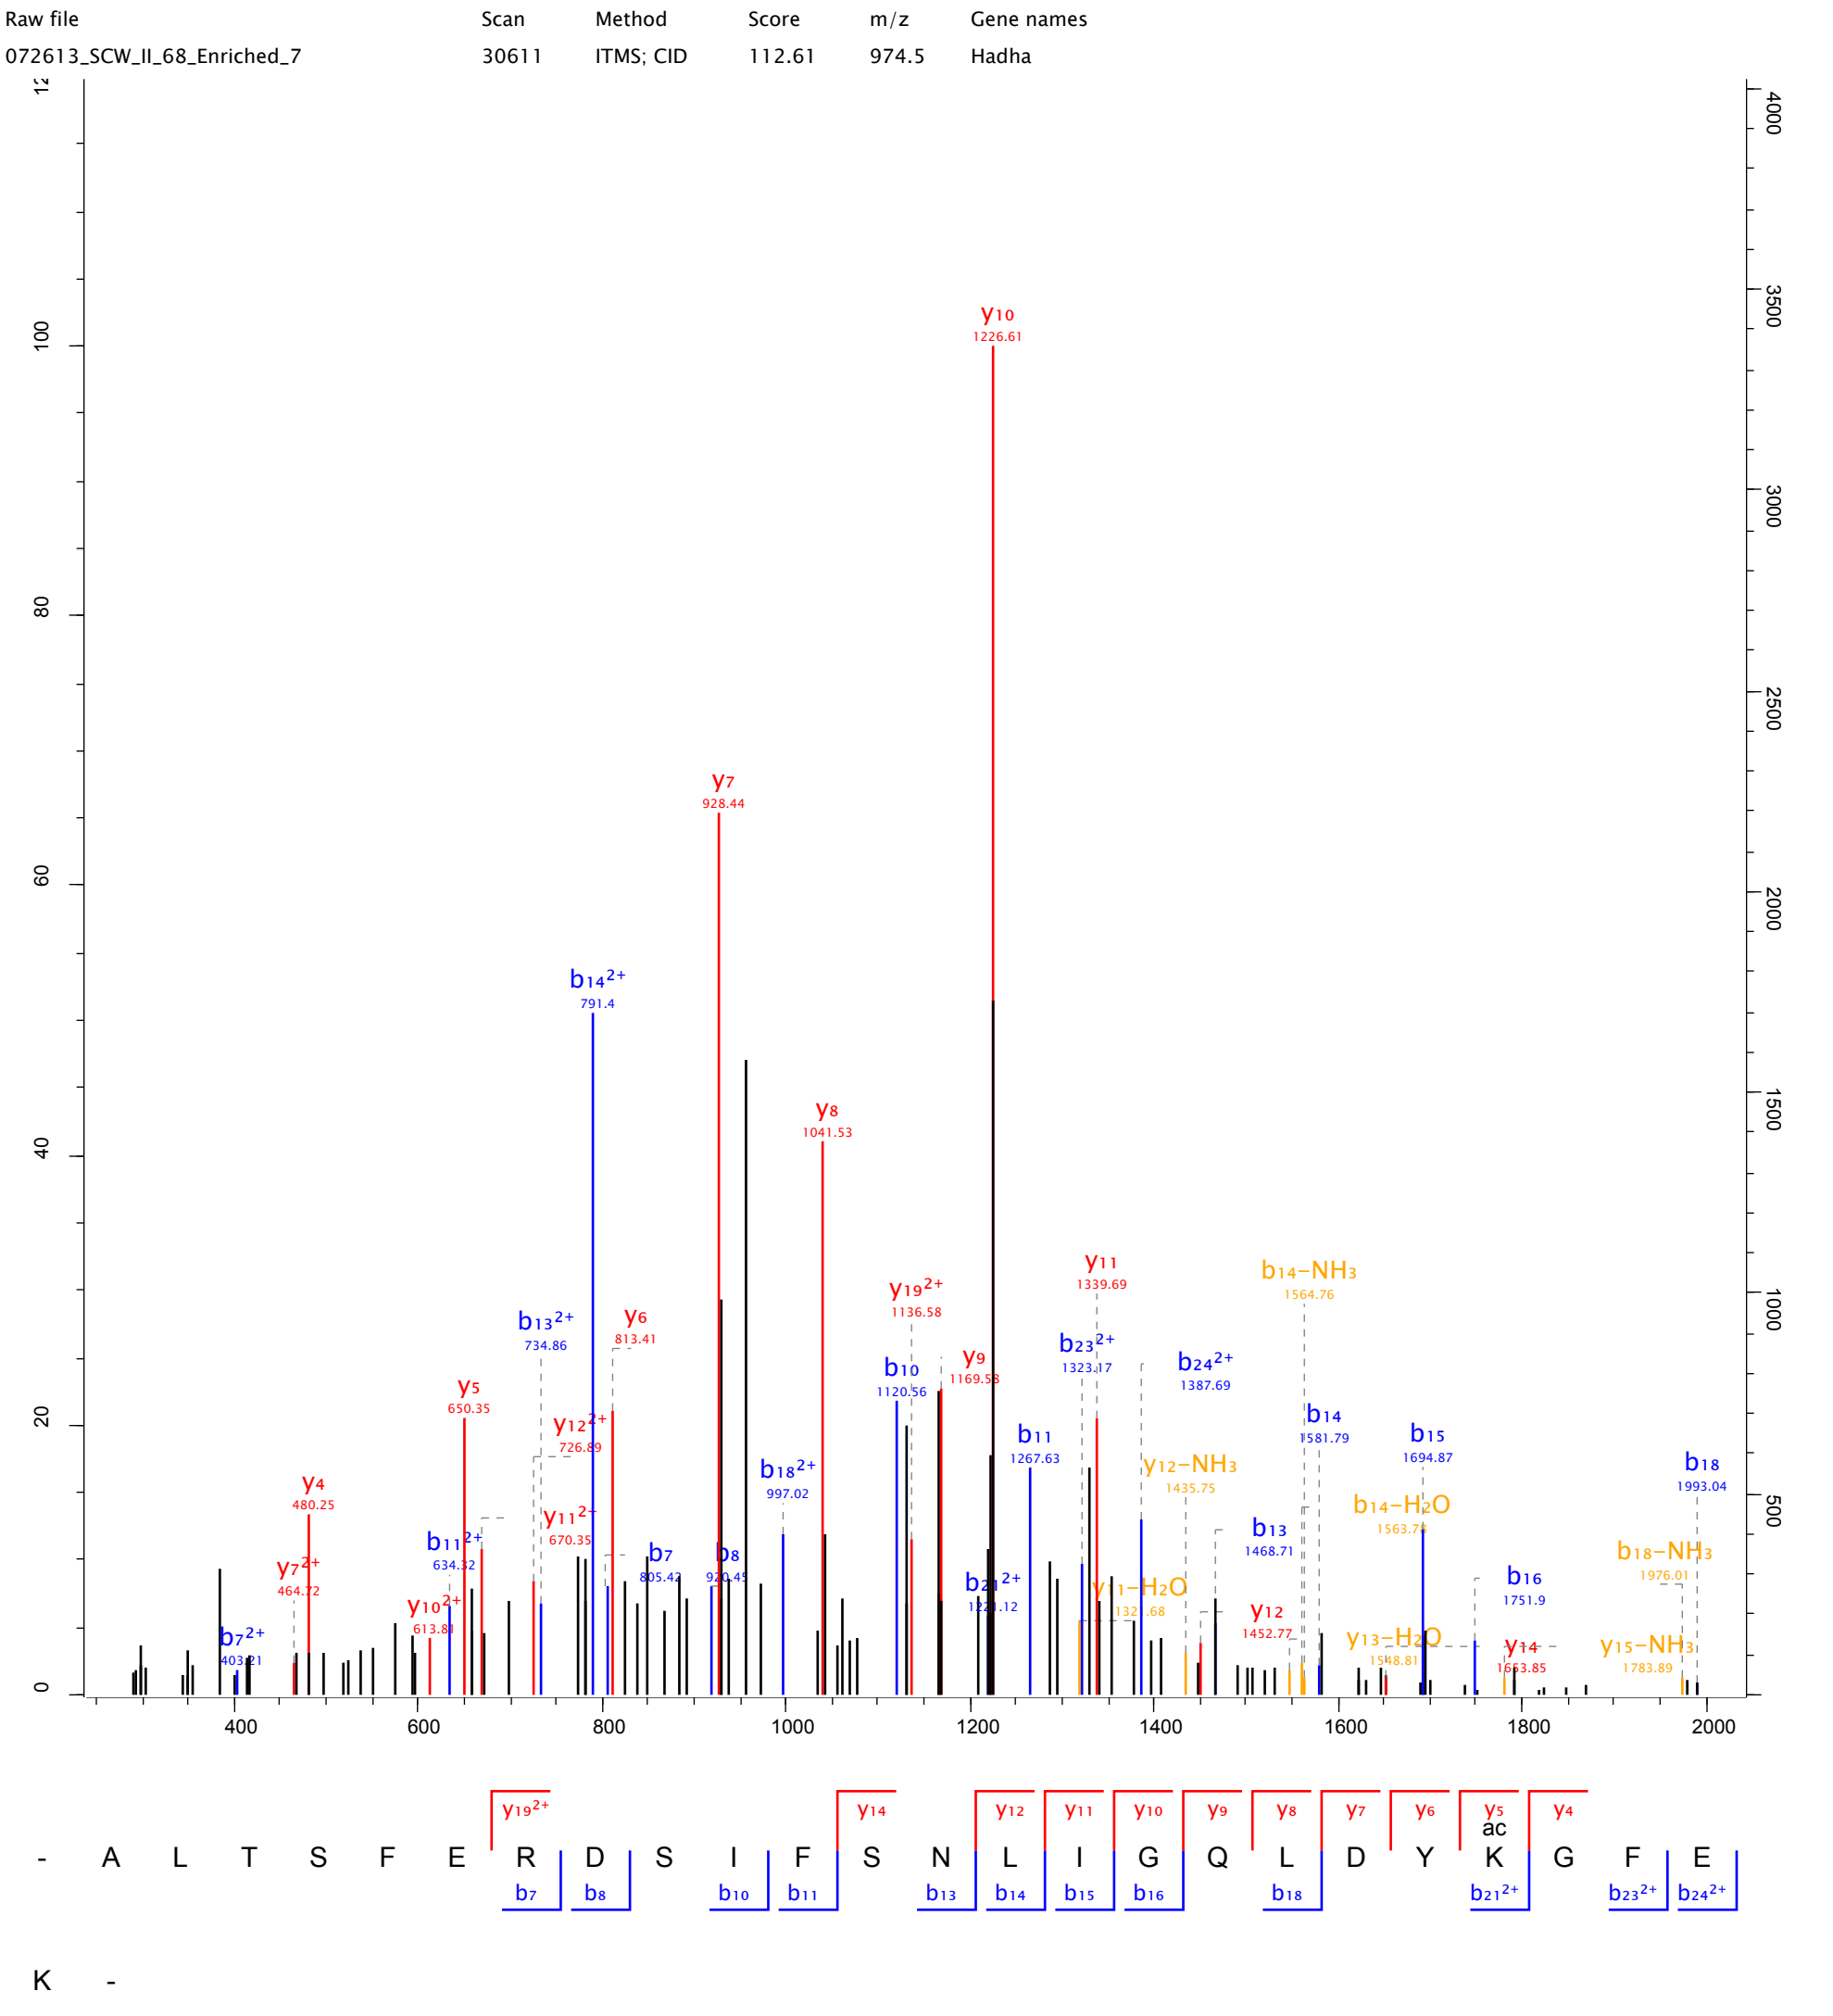



Raw file 072613\_SCW\_II\_68\_Enriched\_8 Scan 10965 Method ITMS; CID Score 171.29 m/z 908.41 Gene names Set

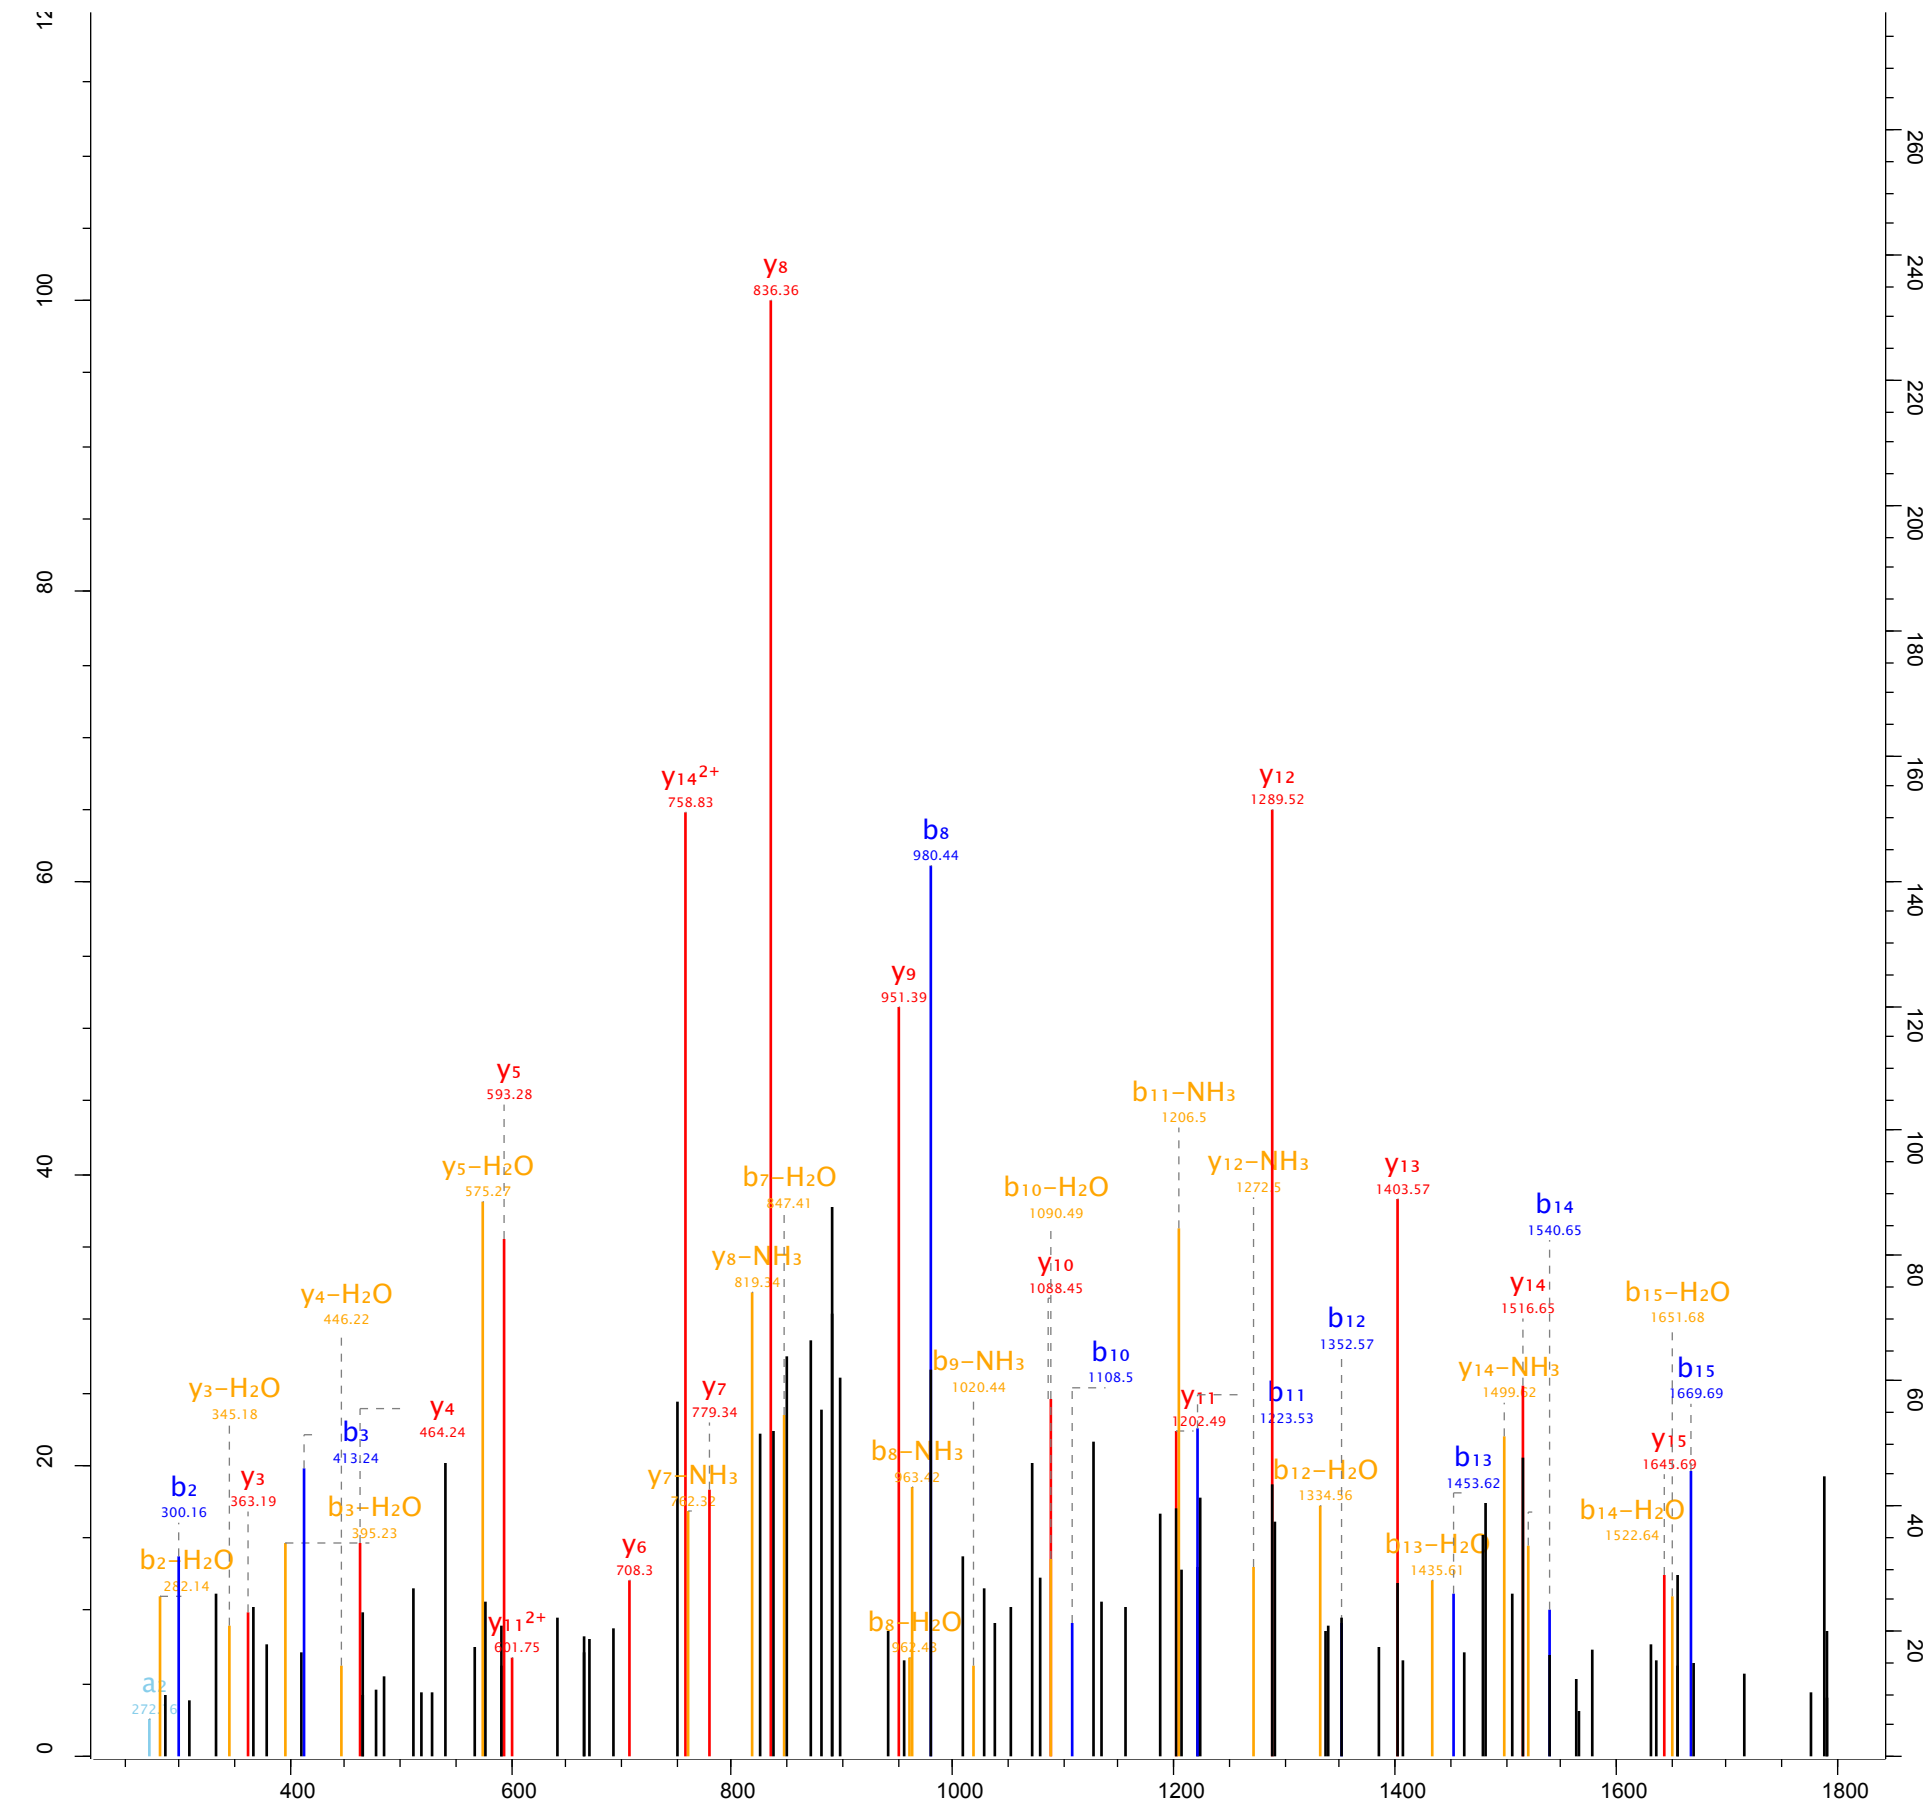

ac K E L N S N H D G A D E T S E K -

b2 b3 b8 b10 b11 b12 b13 b14 b15

072613\_SCW\_II\_68\_Enriched\_8

13539

ITMS; CID

57.97

668.68

Hnrnpa3

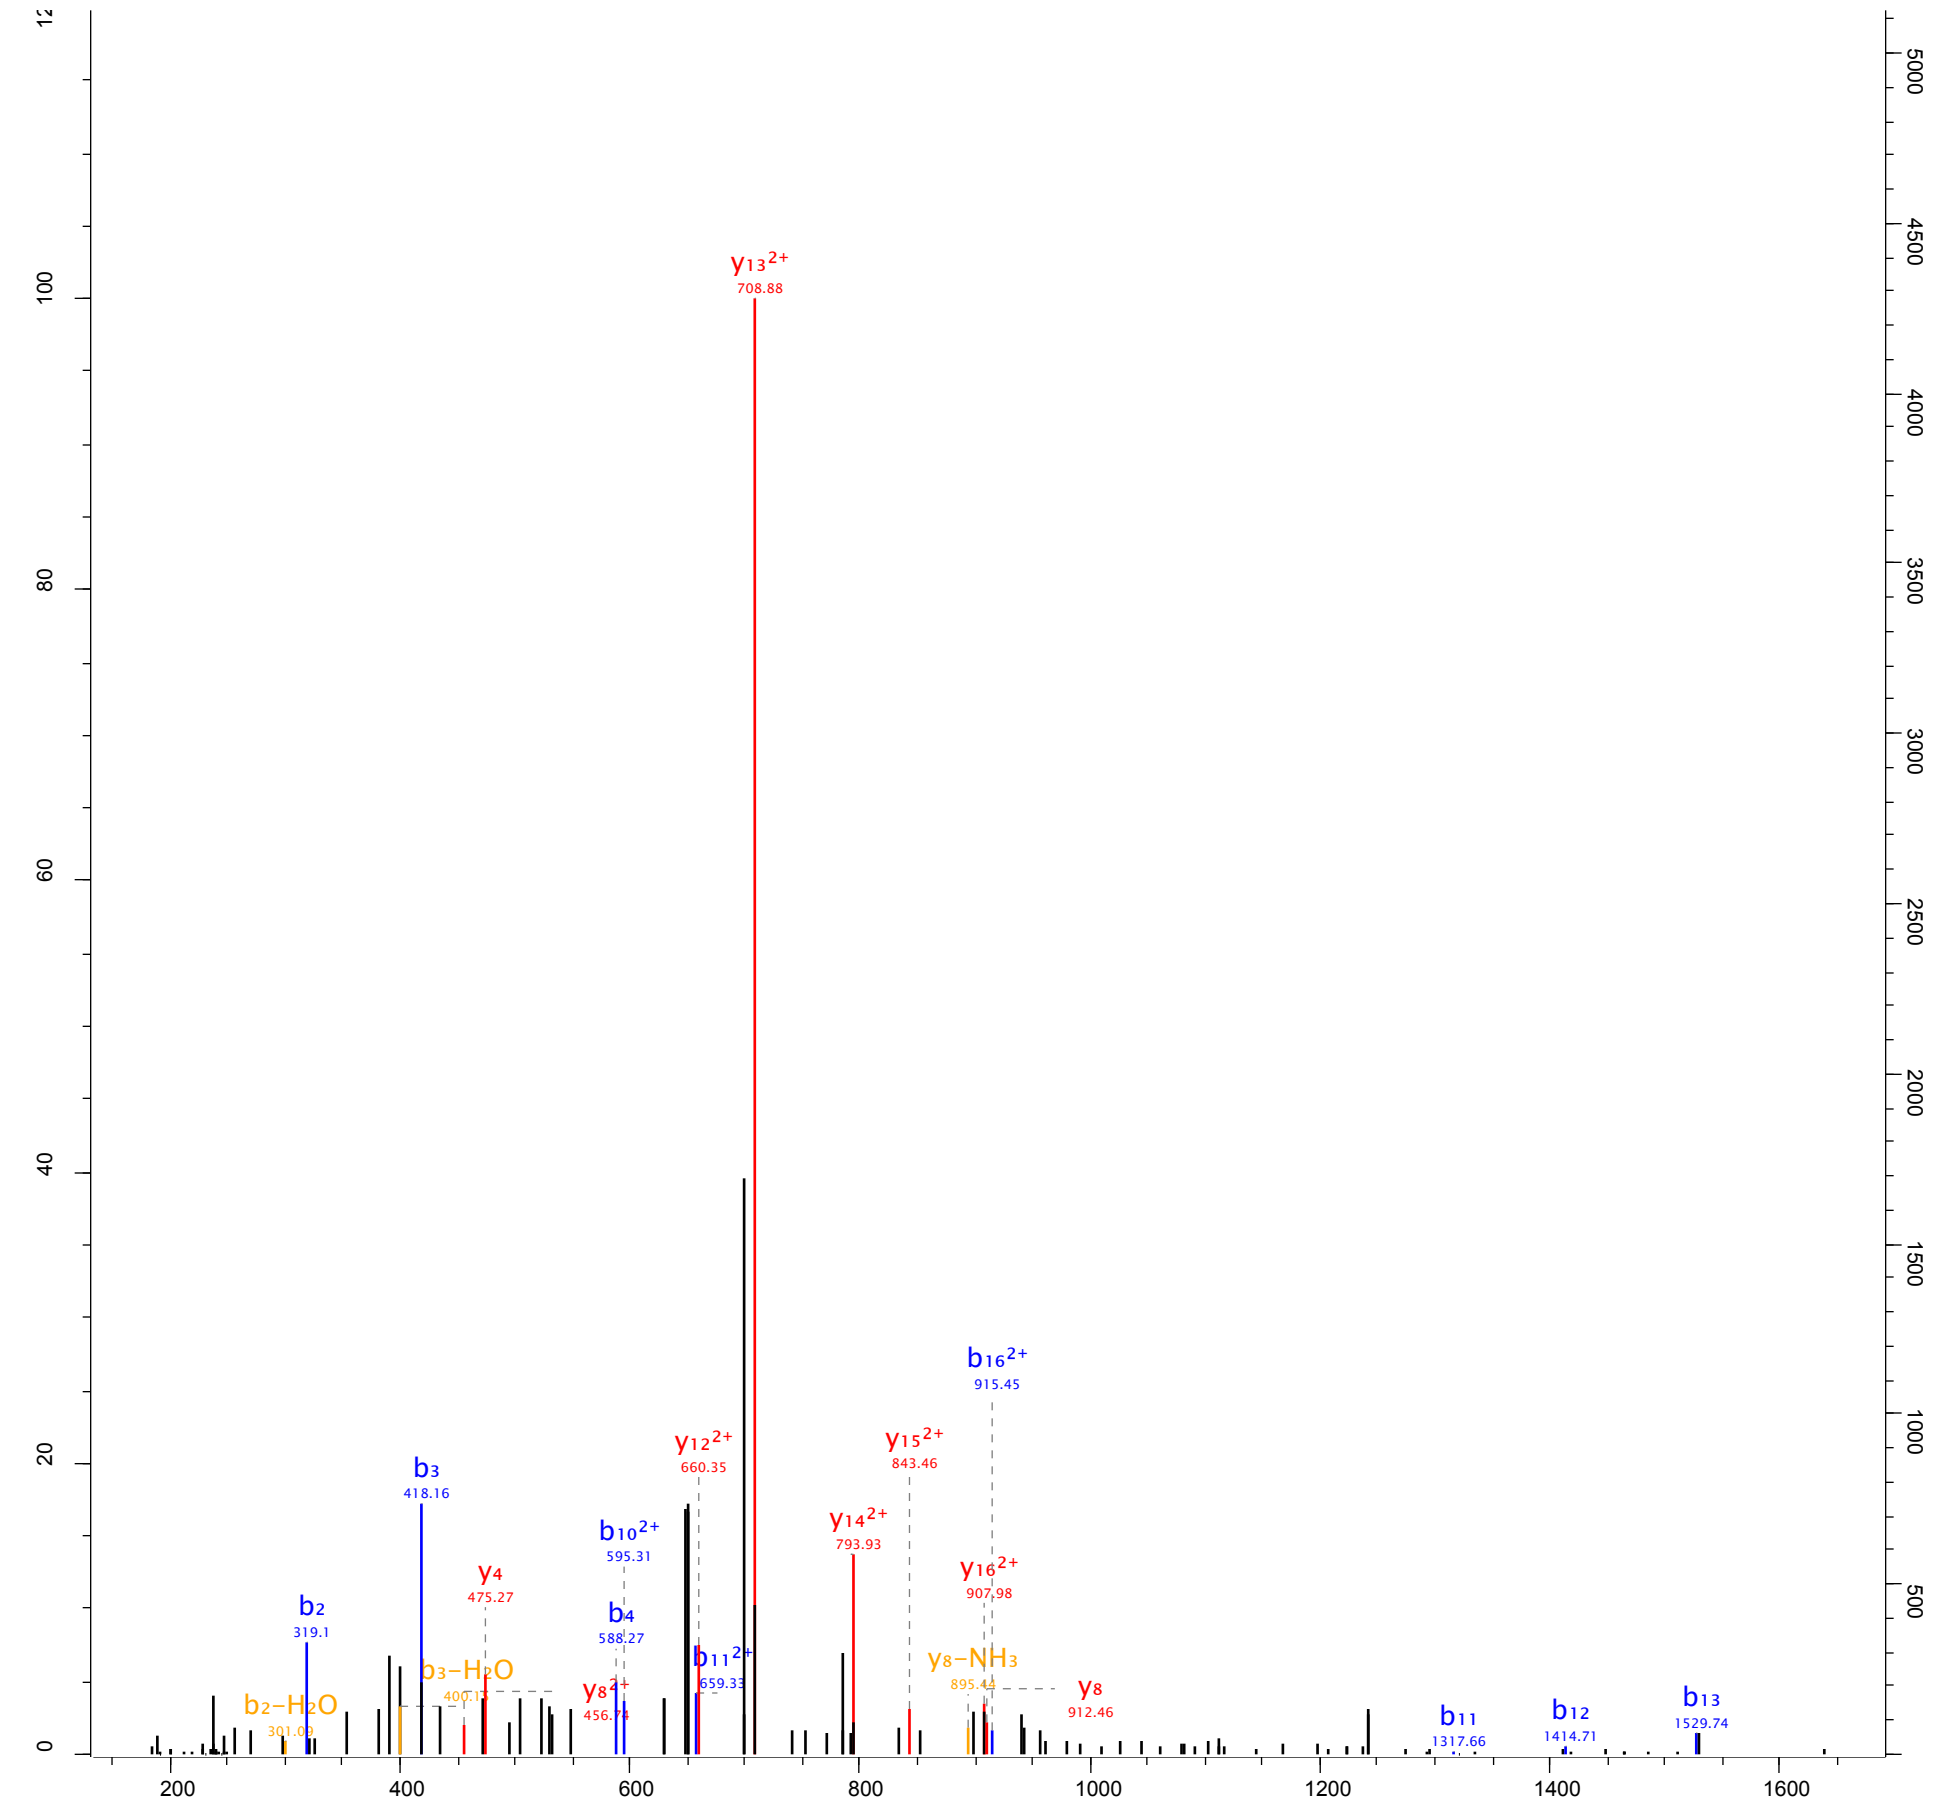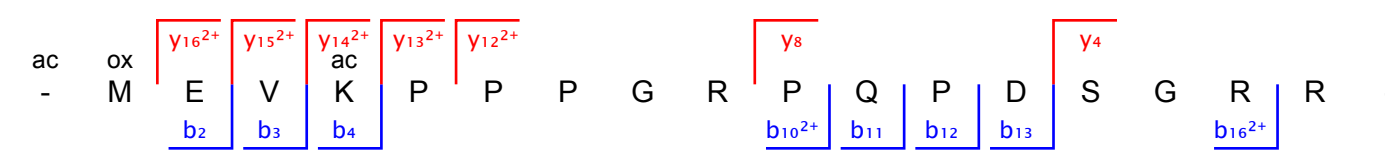

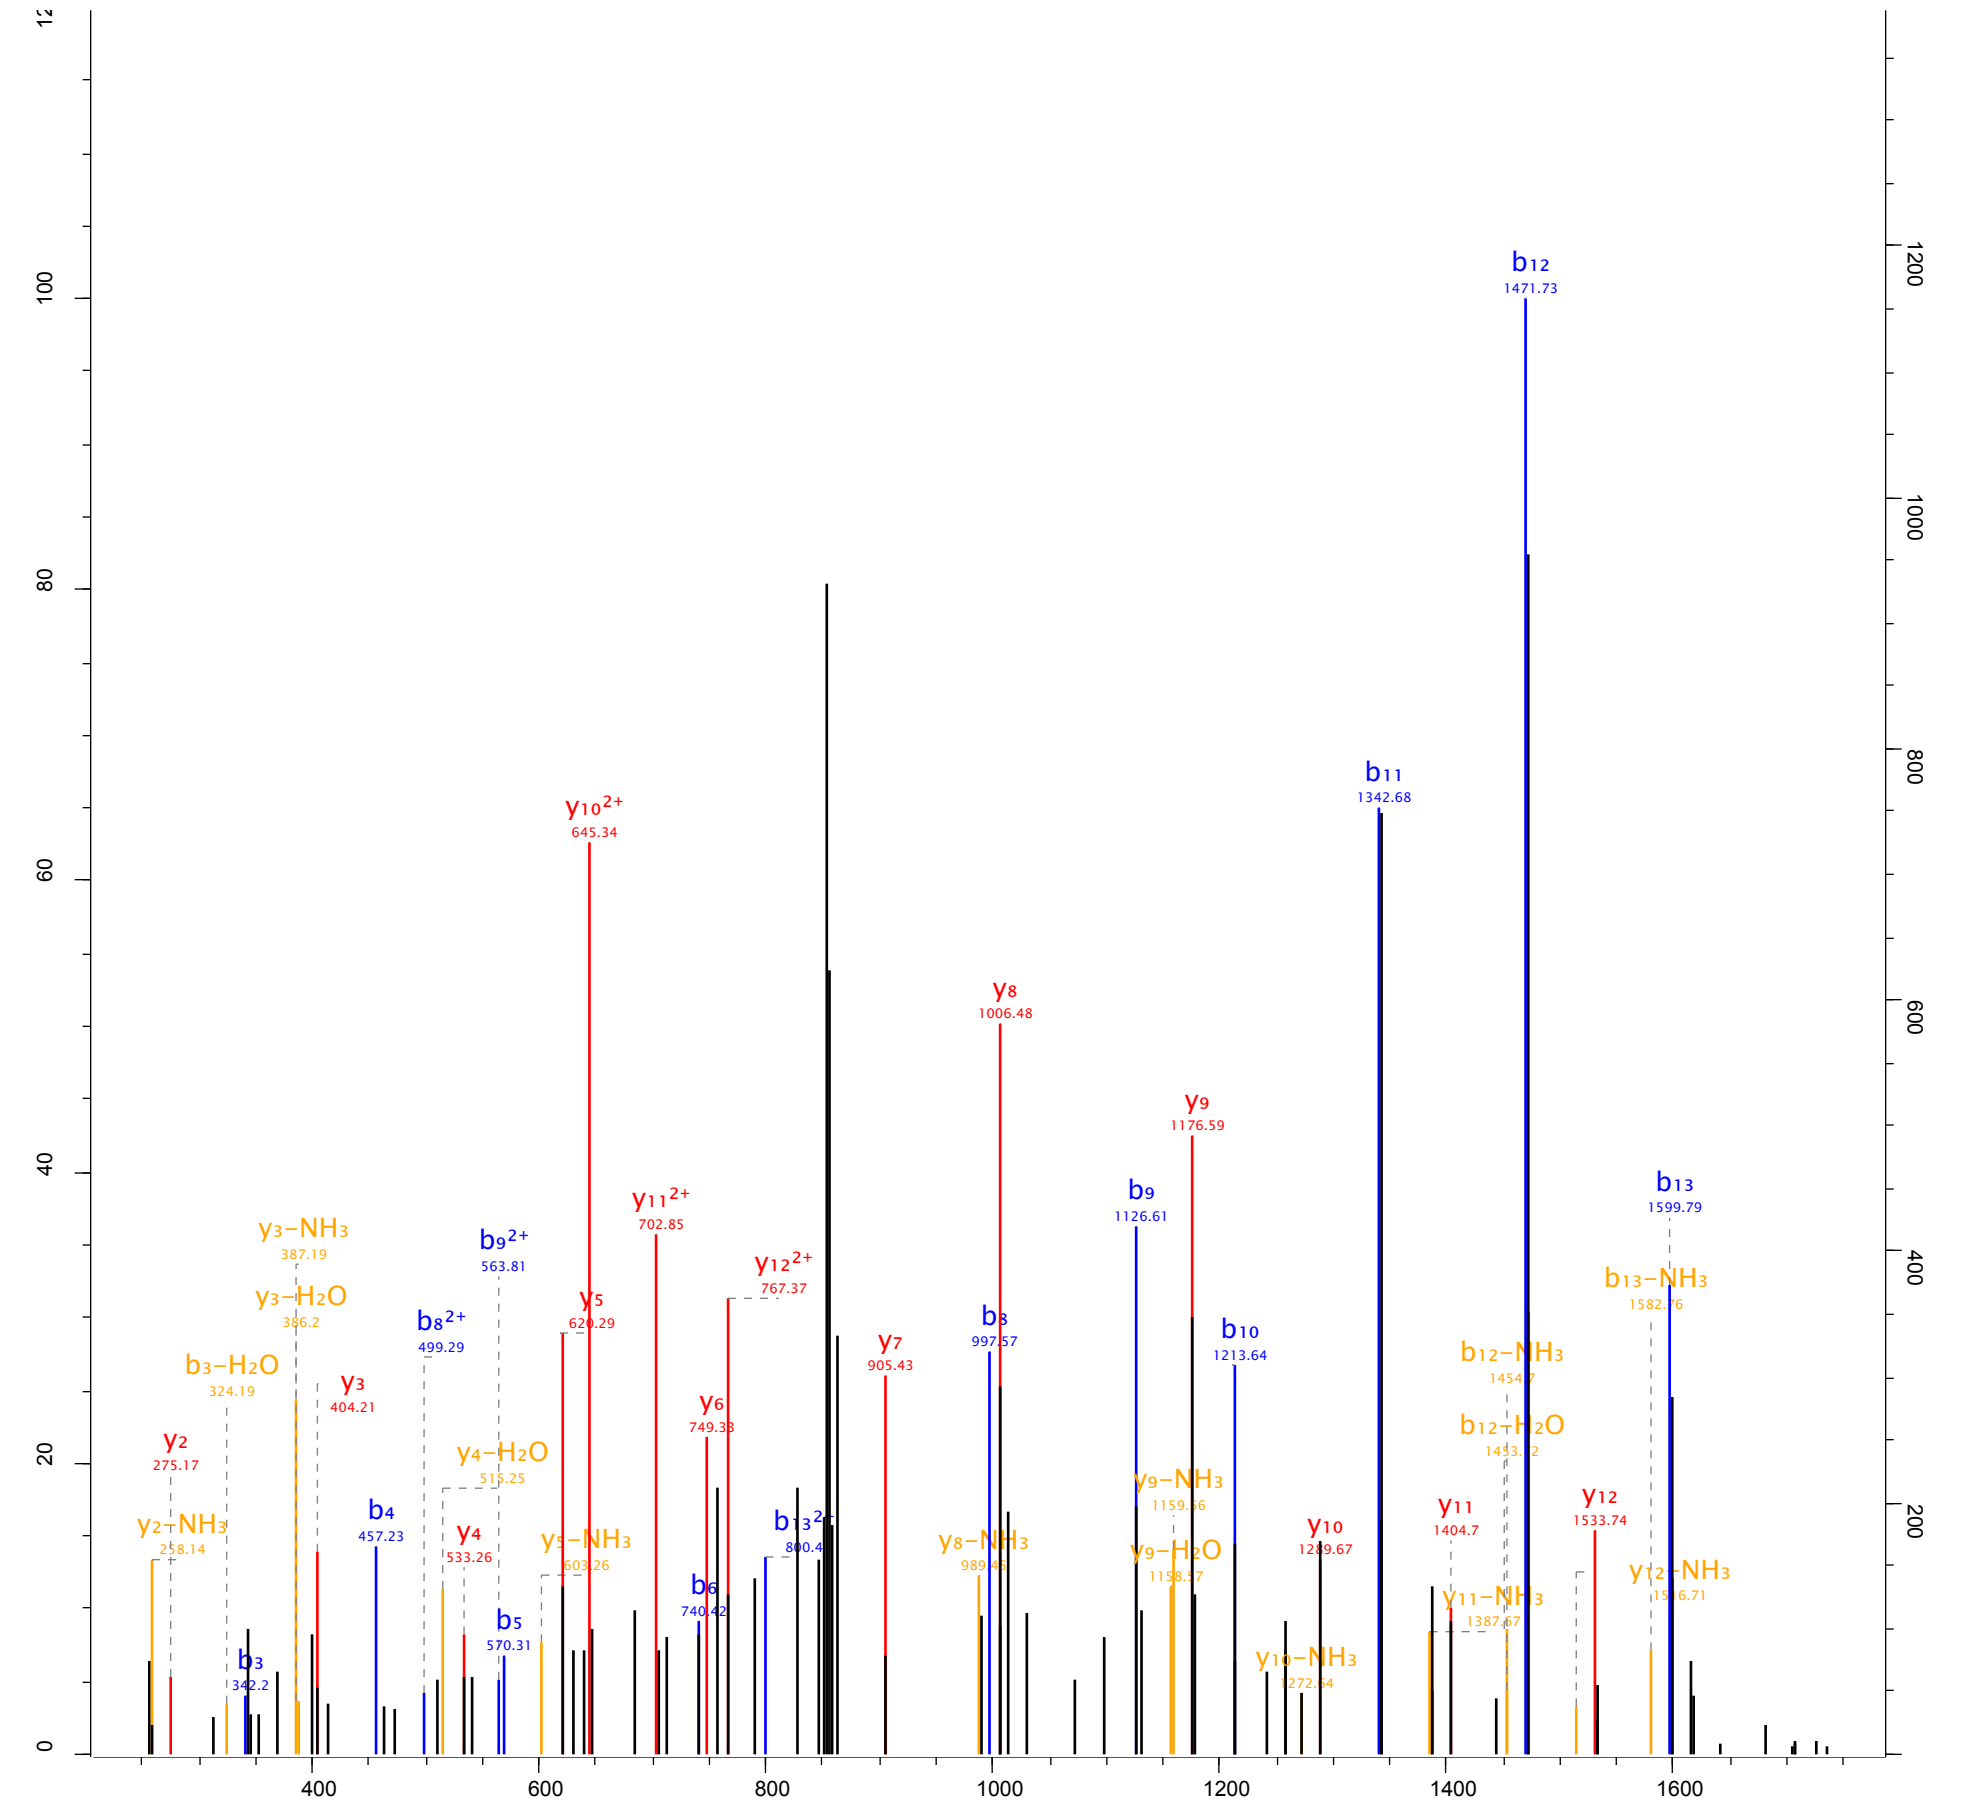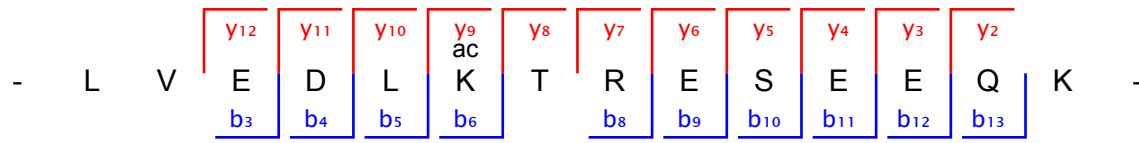

Raw file 072613\_SCW\_II\_68\_Enriched\_8 Scan 15625 Method ITMS; CID 165.35 m/z 490.59 Gene names Isoc2a

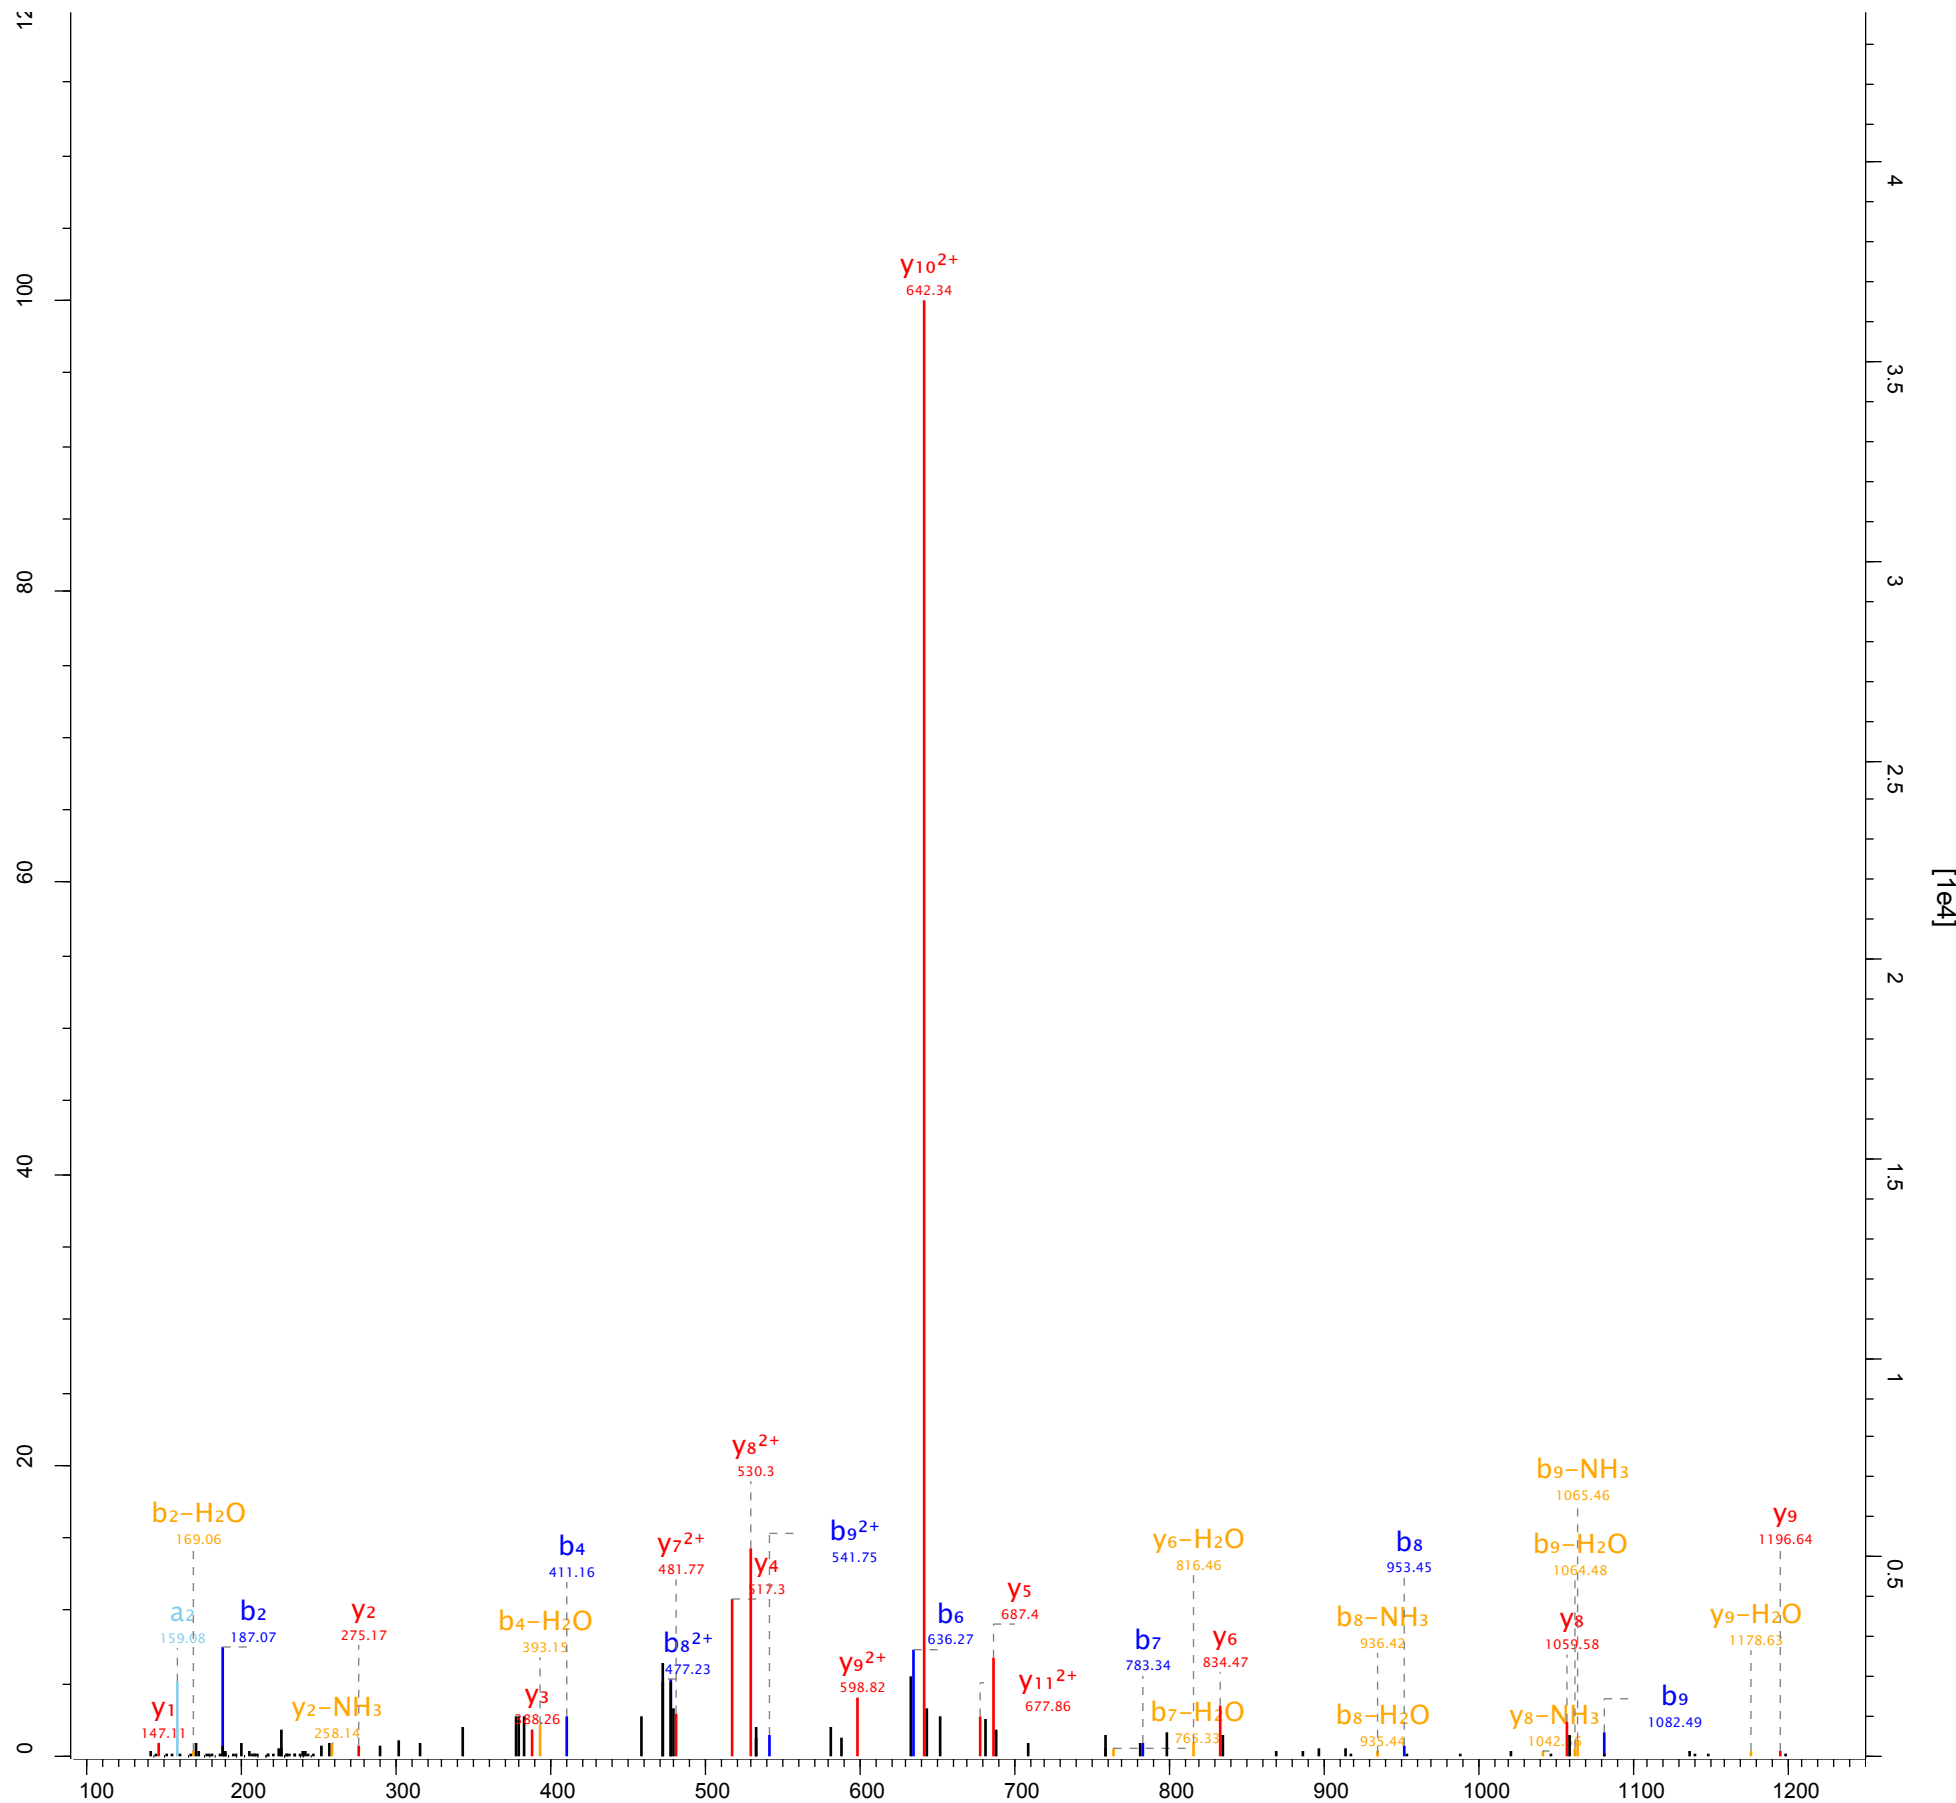

- D A S H P Q F K E I Q K -

$y_{11}^{2+}$ 
 $y_{10}^{2+}$ 
 $y_9$ 
 $y_8$ 
 $y_7^{2+}$ 
 $y_6$ 
 $y_5$   
ac
 $y_4$ 
 $y_3$ 
 $y_2$ 
 $y_1$

$b_2$ 
 $b_4$ 
 $b_6$ 
 $b_7$ 
 $b_8$ 
 $b_9$

Raw file 072613\_SCW\_II\_68\_Enriched\_8 Scan 16740 Method ITMS; CID Score 113.86 m/z 677.68 Gene names Nfib

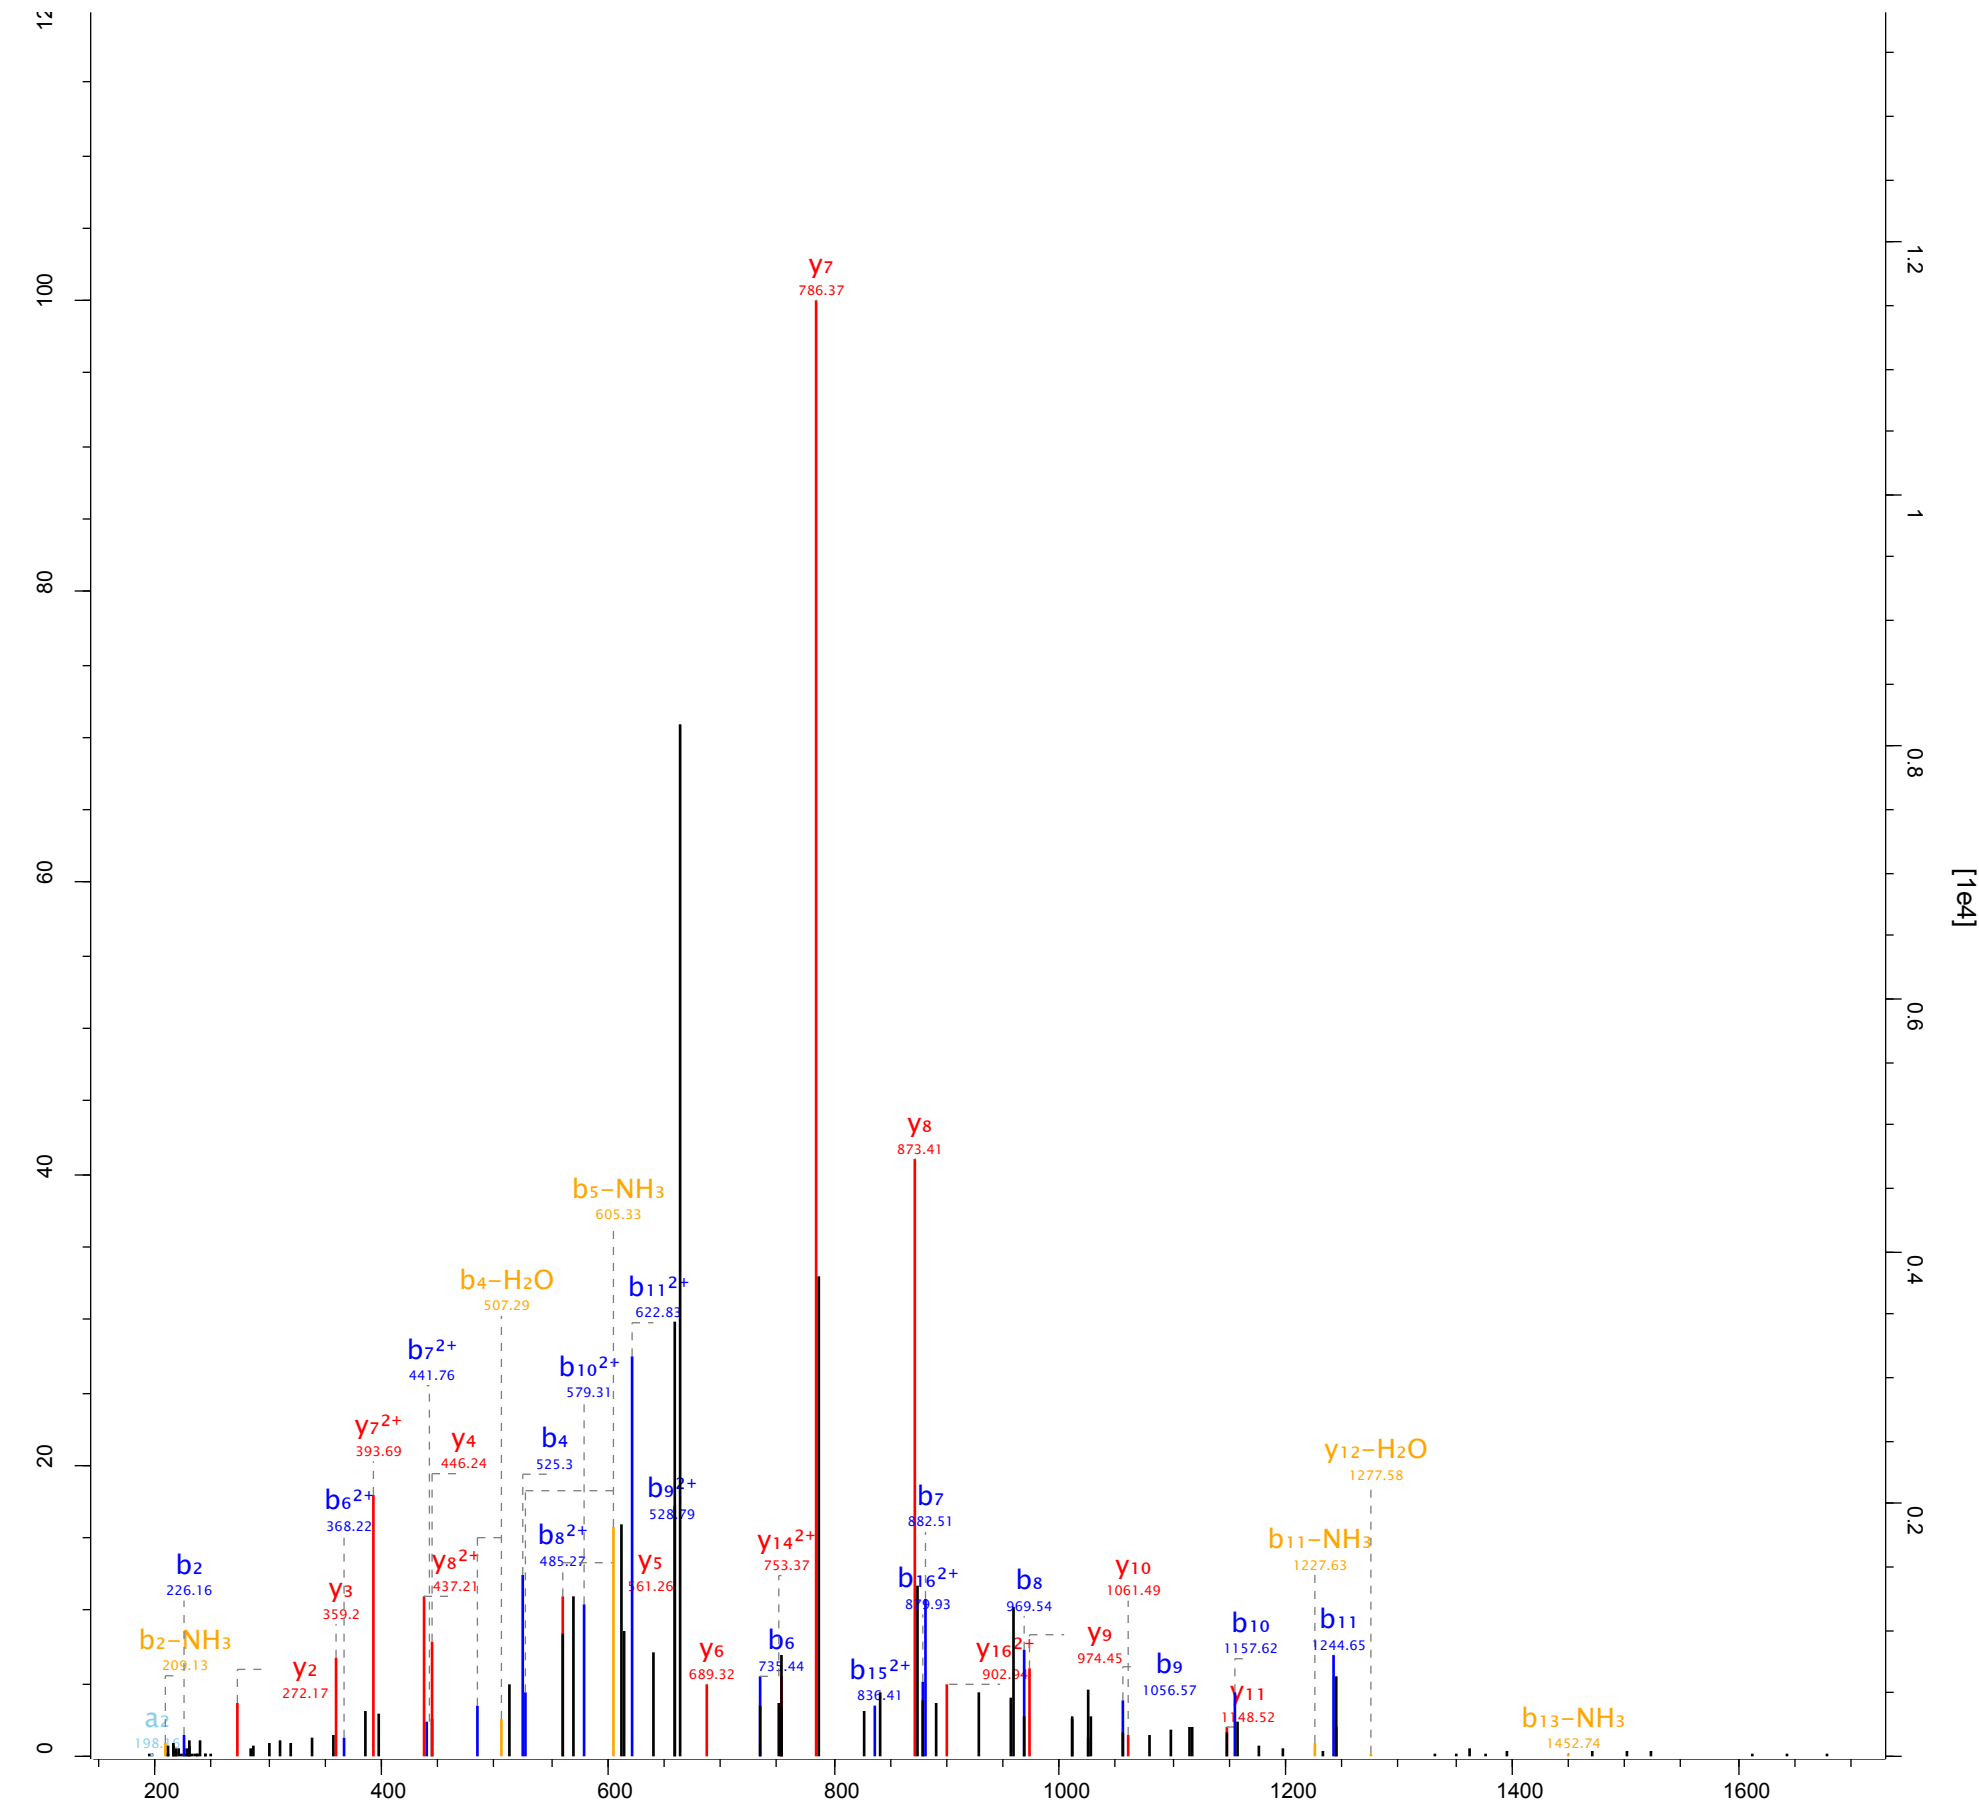

- K P E K P L F S S T S P Q D S S P R -

b<sub>2</sub>
b<sub>4</sub>
b<sub>6</sub>
b<sub>7</sub>
b<sub>8</sub>
b<sub>9</sub>
b<sub>10</sub>
b<sub>11</sub>
b<sub>15<sup>2+</sup></sub>
b<sub>16<sup>2+</sup></sub>
y<sub>2</sub>
y<sub>3</sub>
y<sub>4</sub>
y<sub>5</sub>
y<sub>6</sub>
y<sub>7</sub>
y<sub>8</sub>
y<sub>9</sub>
y<sub>10</sub>
y<sub>11</sub>
y<sub>14<sup>2+</sup></sub>
y<sub>16<sup>2+</sup></sub>

Raw file  
072613\_SCW\_II\_68\_Enriched\_8

Scan 18811 Method ITMS; CID Score 199.15 m/z 641.01 Gene names Anxa3

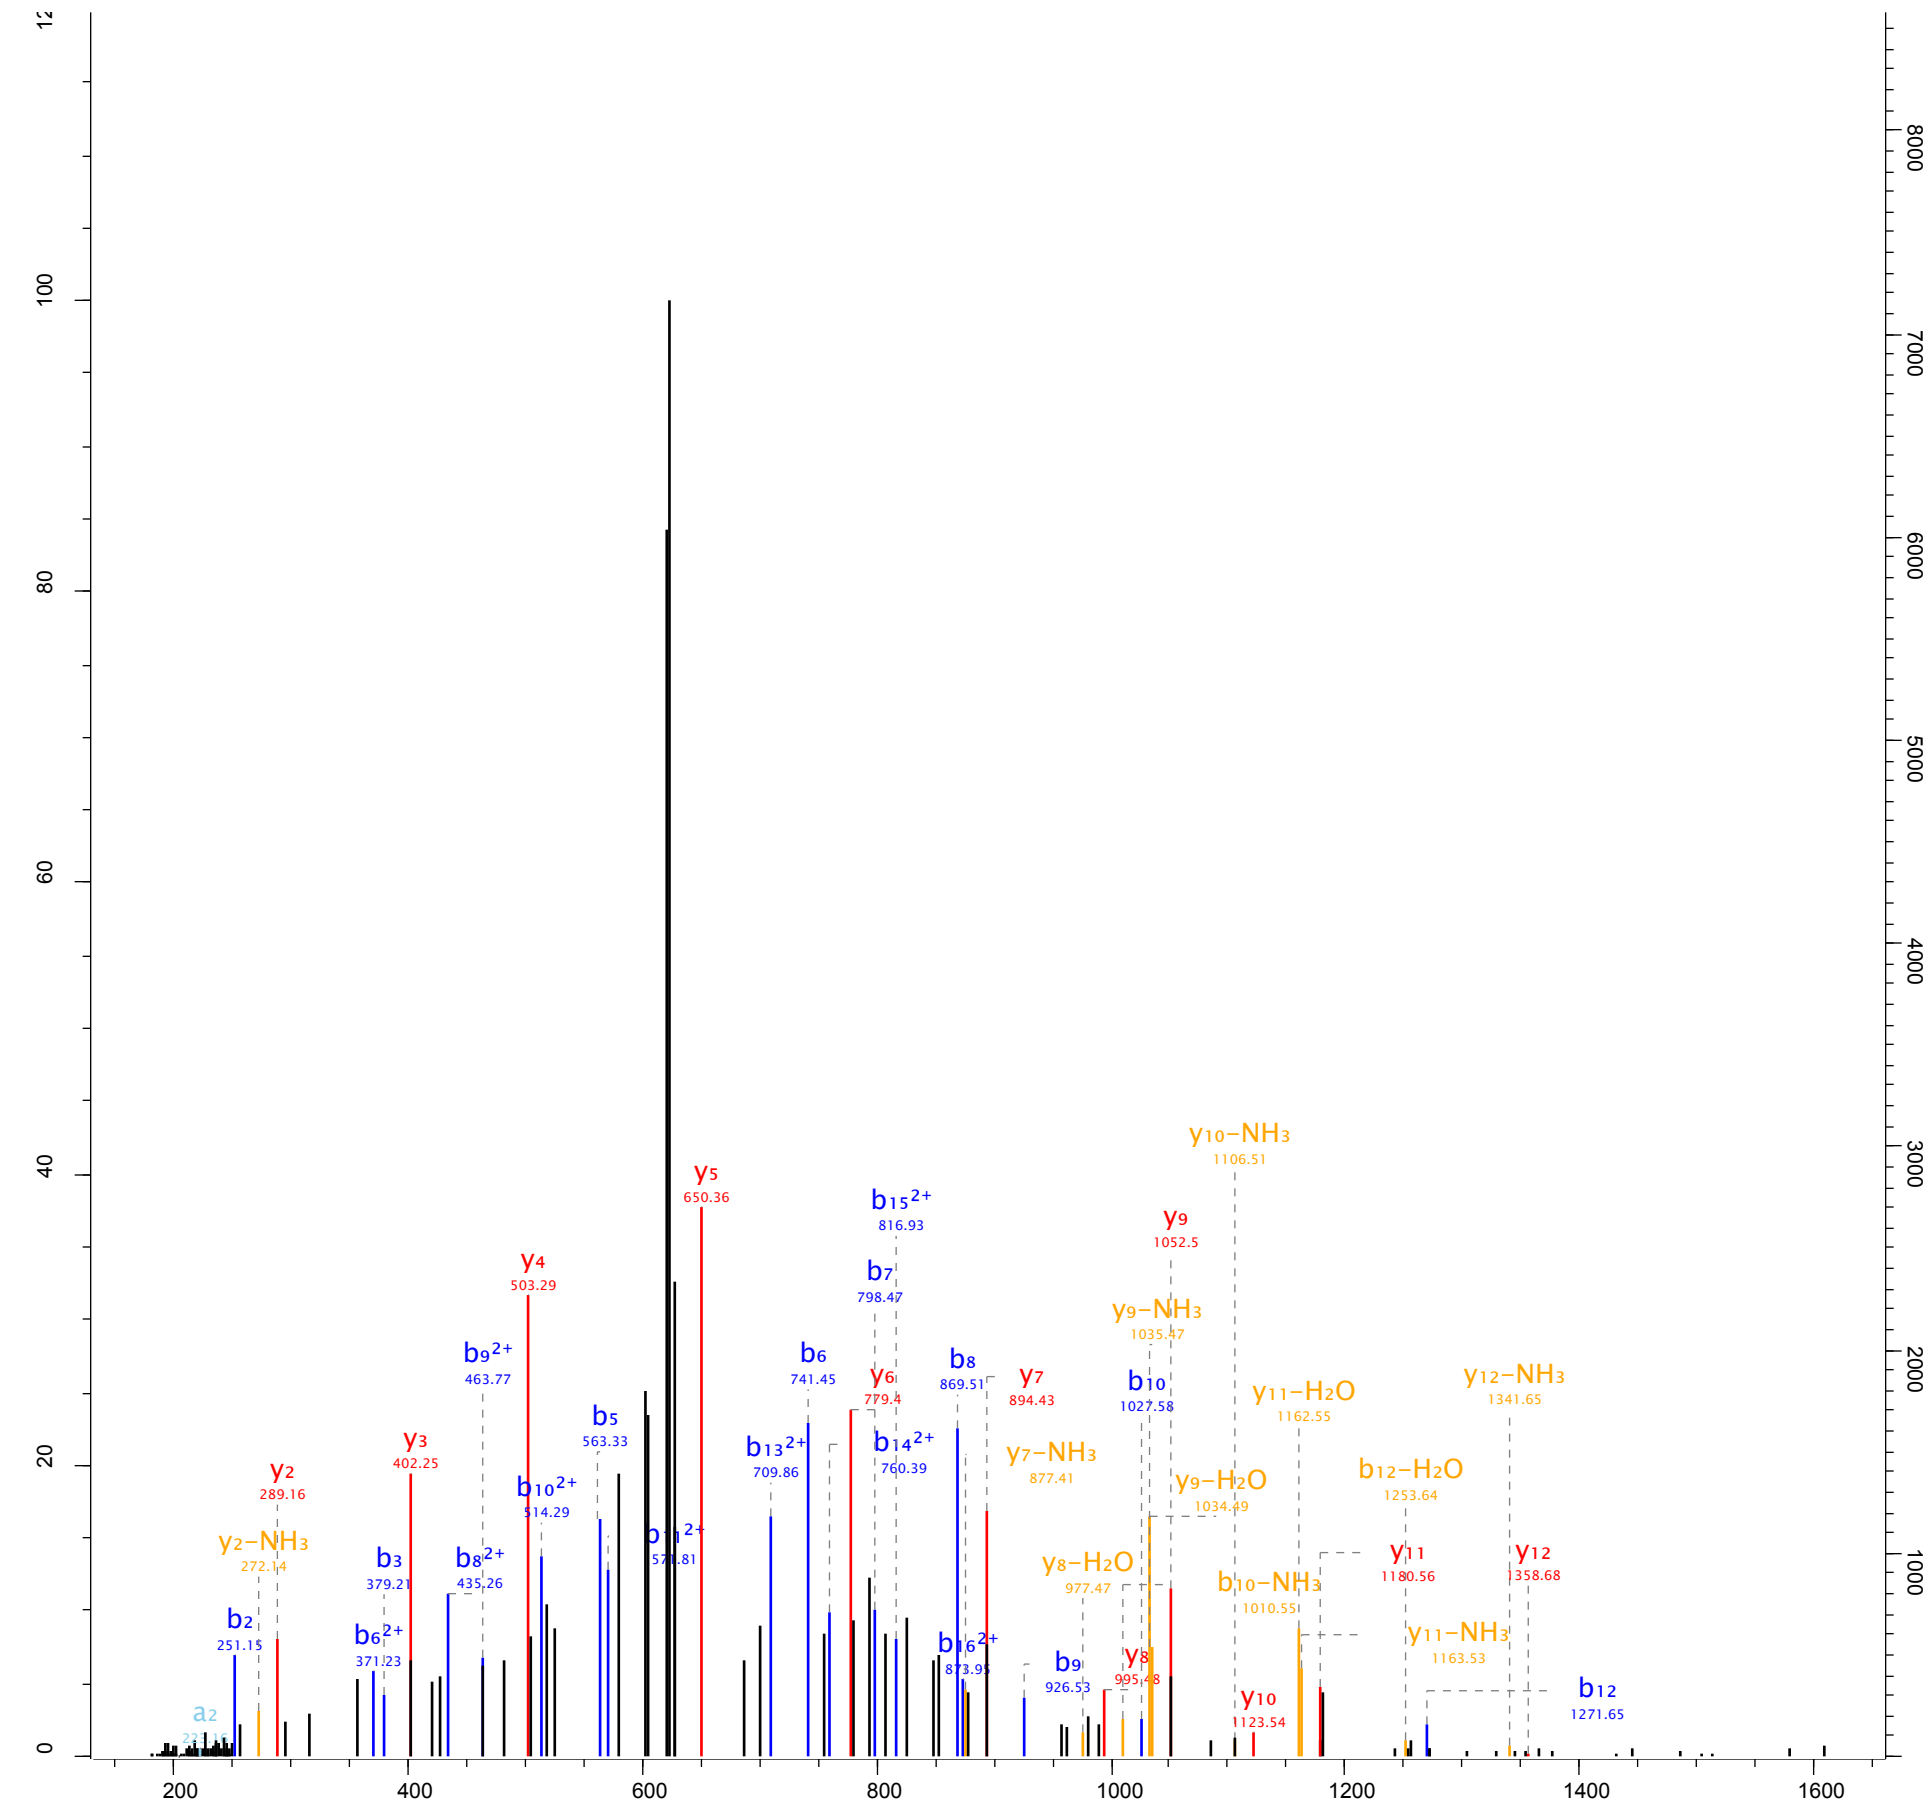

- L H Q A L K G A G T D E F T L N R -

Peptide sequence: LHLQALKGATDEFTLNR

Fragmentation sites (b and y ions):

- b<sub>2</sub> (H), b<sub>3</sub> (Q)
- b<sub>5</sub> (L)
- b<sub>6</sub> (K), b<sub>6</sub> ac (K)
- b<sub>7</sub> (G)
- b<sub>8</sub> (A)
- b<sub>9</sub> (G)
- b<sub>10</sub> (T)
- b<sub>11</sub><sup>2+</sup> (D)
- b<sub>12</sub> (E)
- b<sub>13</sub><sup>2+</sup> (F)
- b<sub>14</sub><sup>2+</sup> (T)
- b<sub>15</sub><sup>2+</sup> (L)
- b<sub>16</sub><sup>2+</sup> (N)

Fragmentation sites (b and y ions):

- y<sub>2</sub> (N)
- y<sub>3</sub> (L)
- y<sub>4</sub> (T)
- y<sub>5</sub> (F)
- y<sub>6</sub> (E)
- y<sub>7</sub> (D)
- y<sub>8</sub> (T)
- y<sub>8</sub> (F)
- y<sub>9</sub> (G)
- y<sub>10</sub> (A)
- y<sub>11</sub> (K)
- y<sub>11</sub> ac (K)
- y<sub>12</sub> (L)

Raw file  
072613\_SCW\_II\_68\_Enriched\_8

Scan 19296 Method ITMS; CID Score 141.34 m/z 531.95 Gene names Hibch

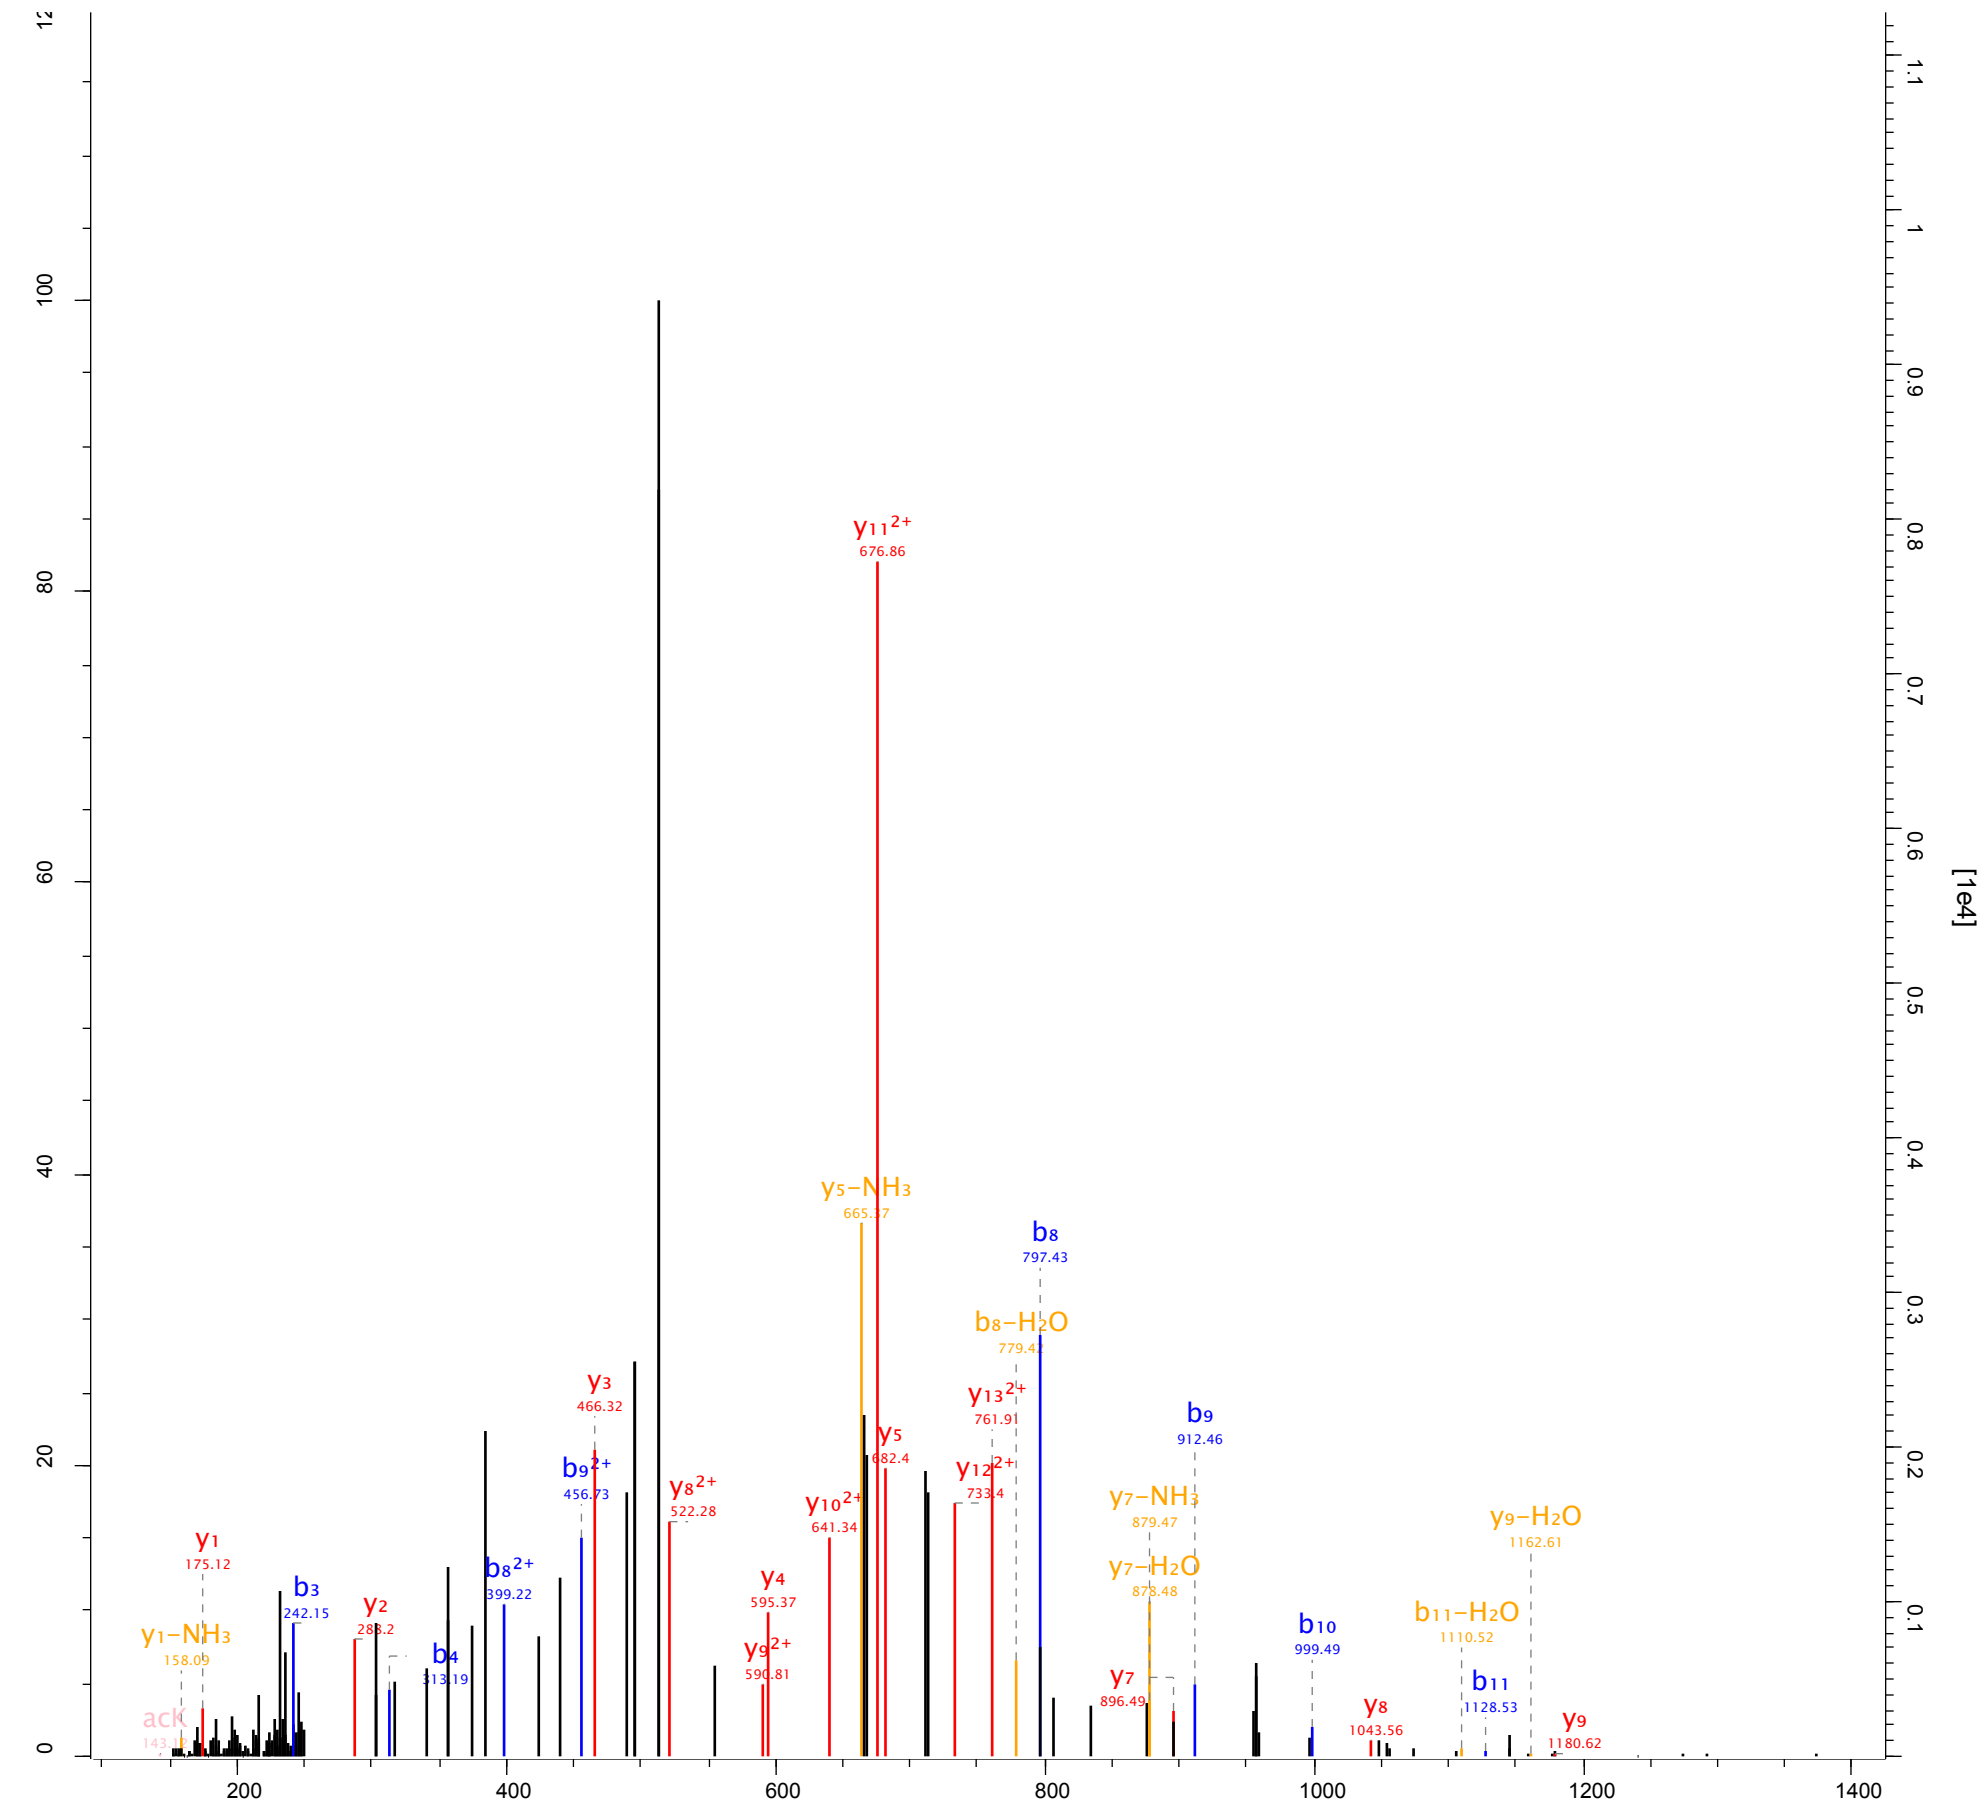

- A G I A T H F V D S E K L R -

Fragmentation mapping showing y and b ions corresponding to the peptide sequence. Red boxes indicate y ions (y1 to y13) and blue boxes indicate b ions (b3 to b11). The sequence is: A G I A T H F V D S E K L R.

Raw file: 072613\_SCW\_II\_68\_Enriched\_8  
 Scan: 19691 Method: ITMS; CID Score: 150.22 m/z: 508.96 Gene names: Pcbp2;Pcbp3;Pcbp1

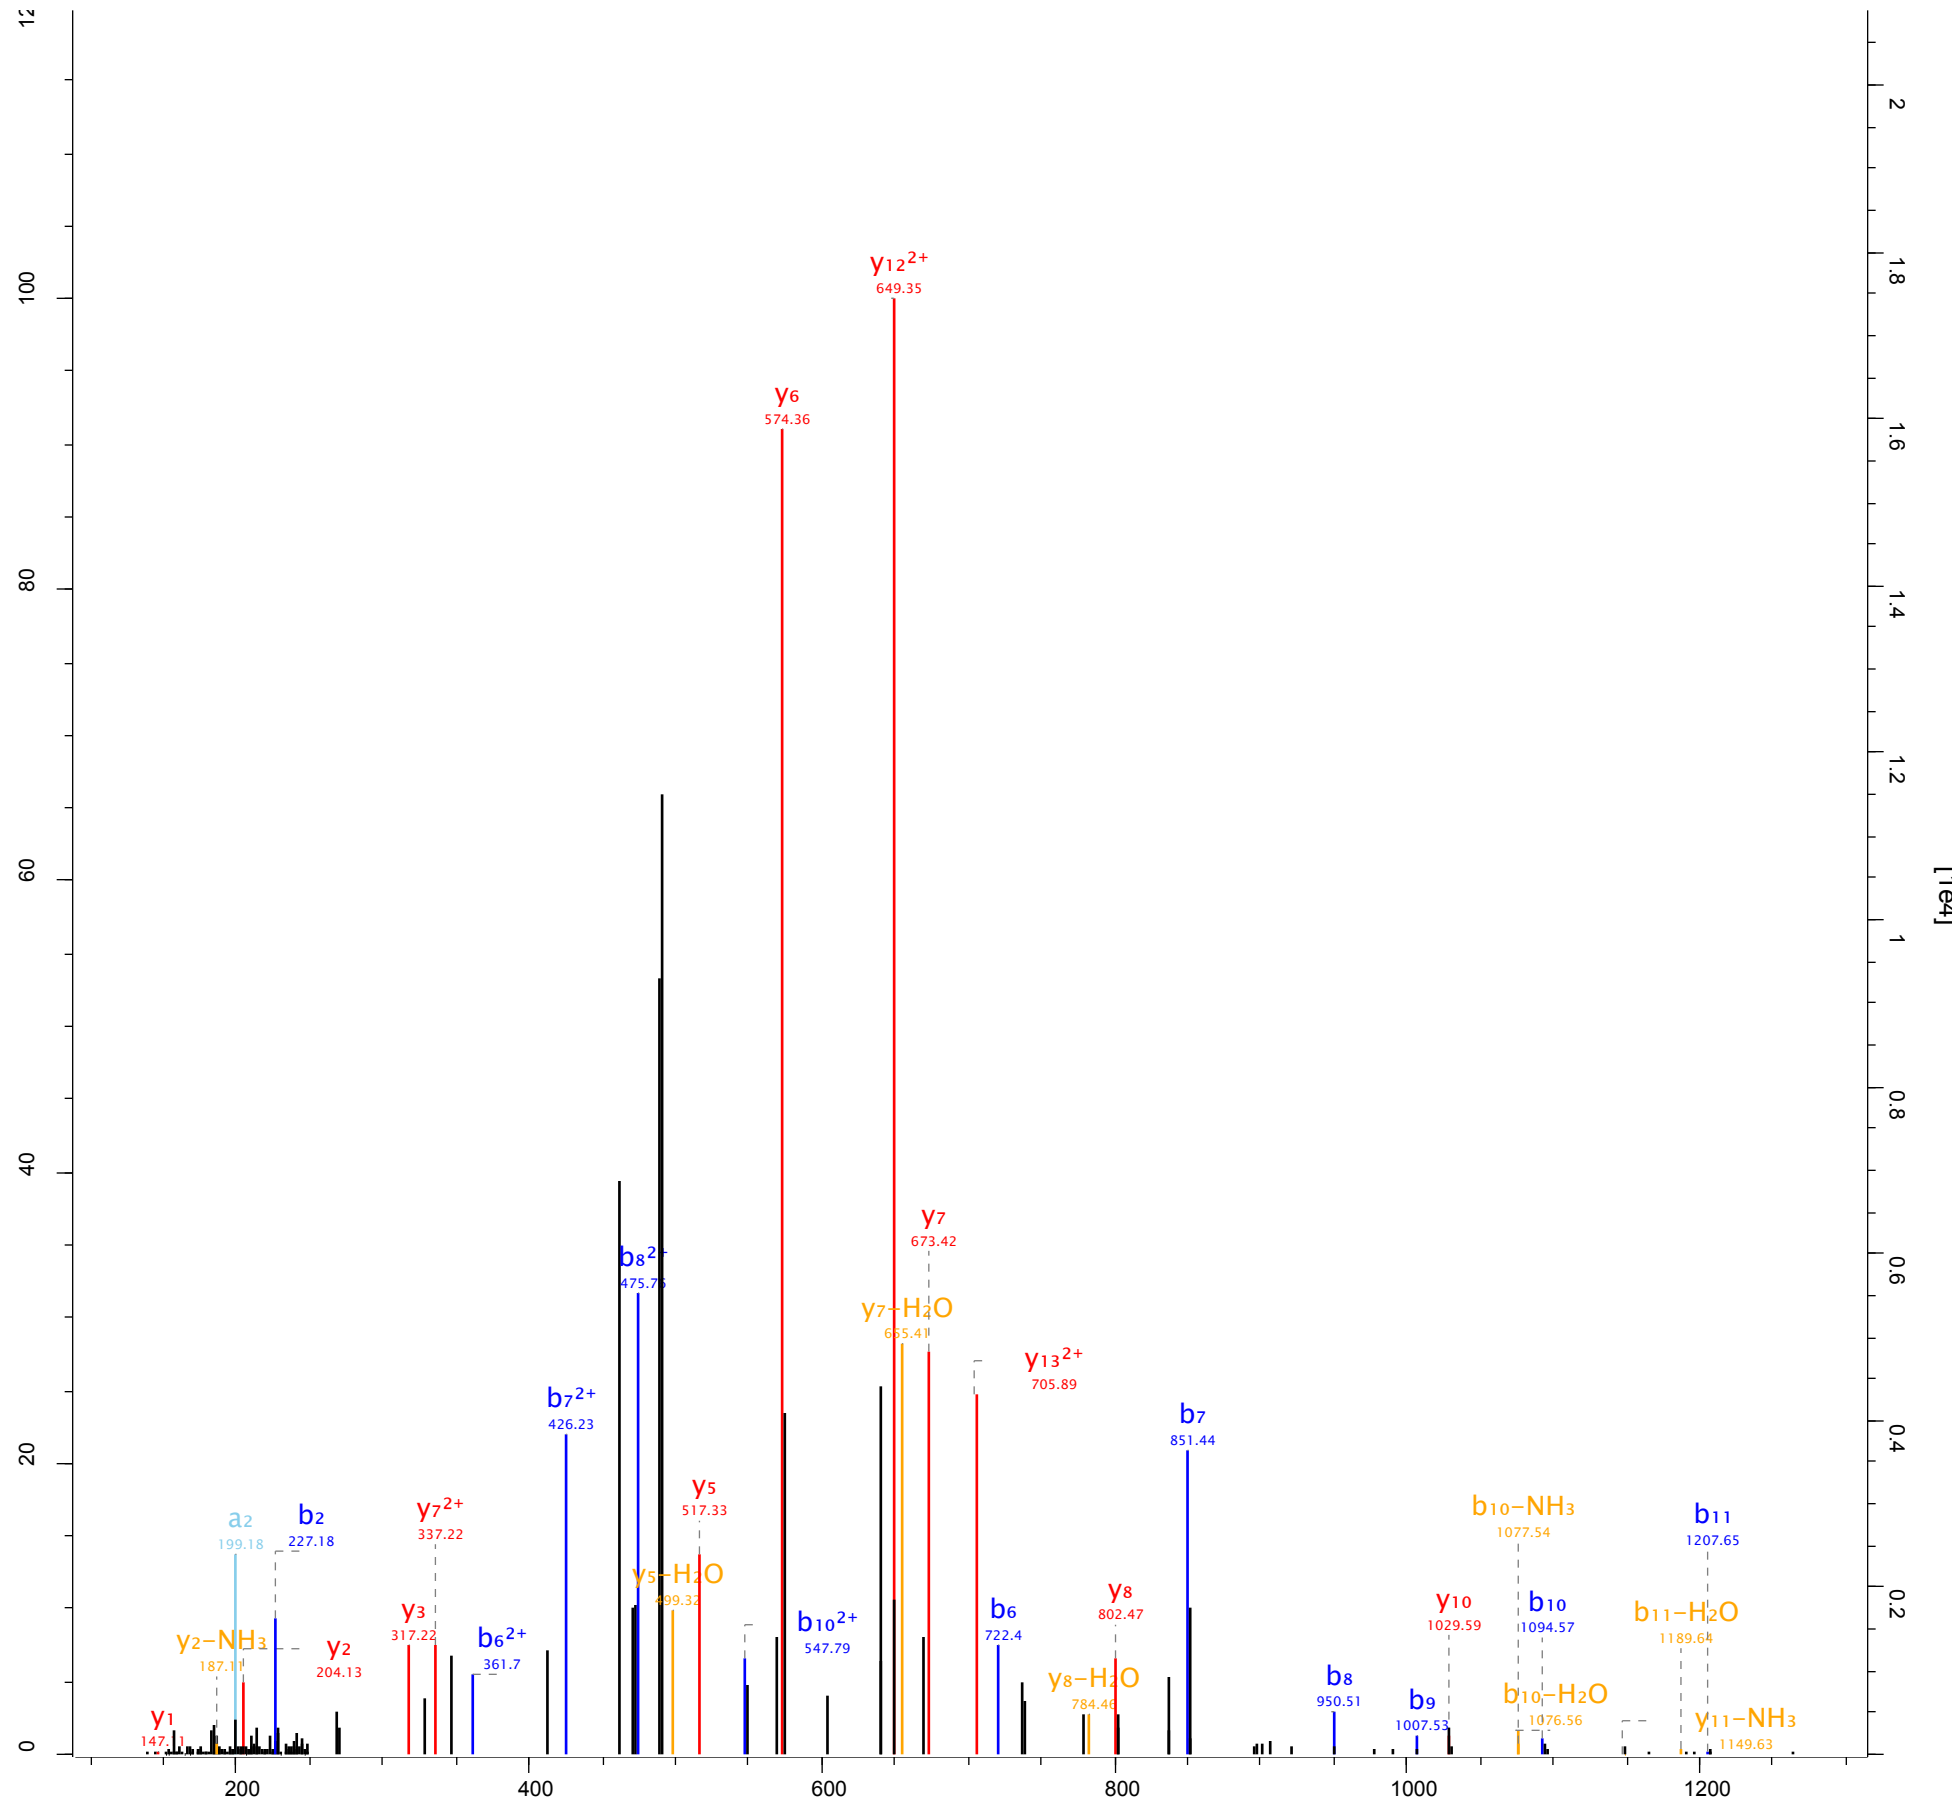

- L L M H G ac K E V G S I I G K -

y<sub>13</sub><sup>2+</sup>
y<sub>12</sub><sup>2+</sup>
y<sub>10</sub>
y<sub>8</sub>
y<sub>7</sub>
y<sub>6</sub>
y<sub>5</sub>
y<sub>3</sub>
y<sub>2</sub>
y<sub>1</sub>

b<sub>2</sub>
b<sub>6</sub>
b<sub>7</sub>
b<sub>8</sub>
b<sub>9</sub>
b<sub>10</sub>
b<sub>11</sub>



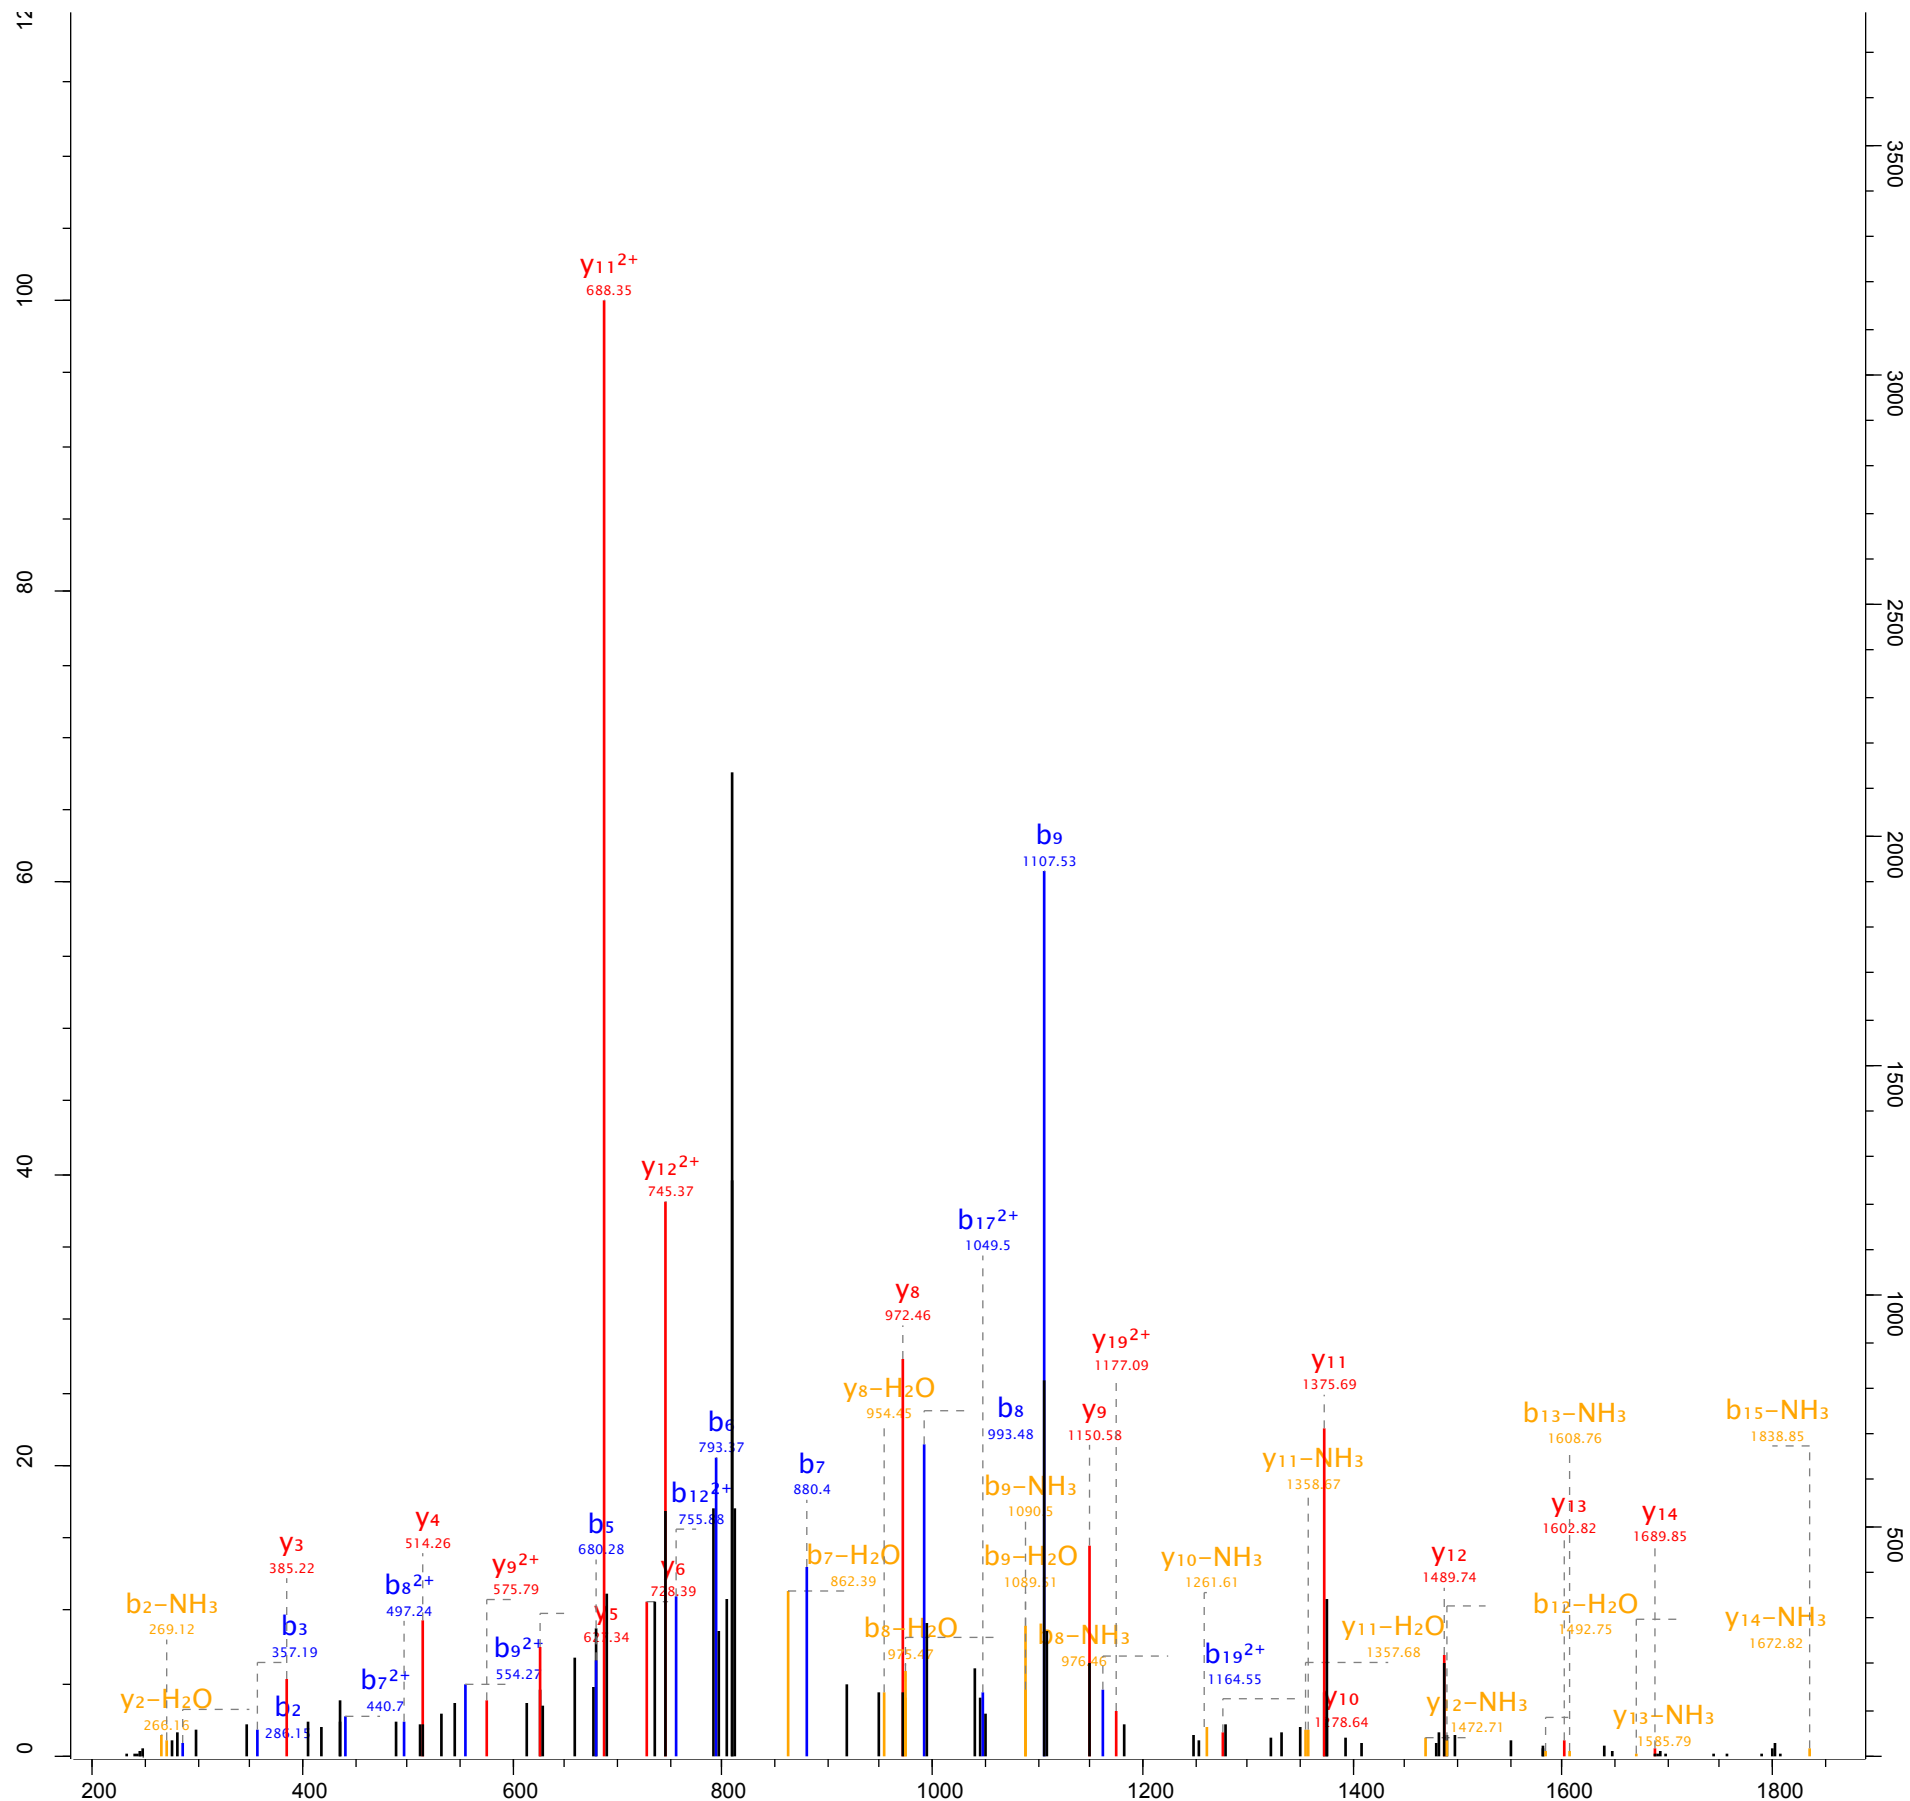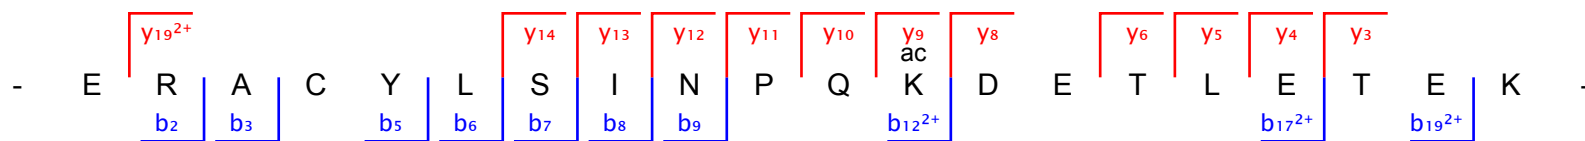

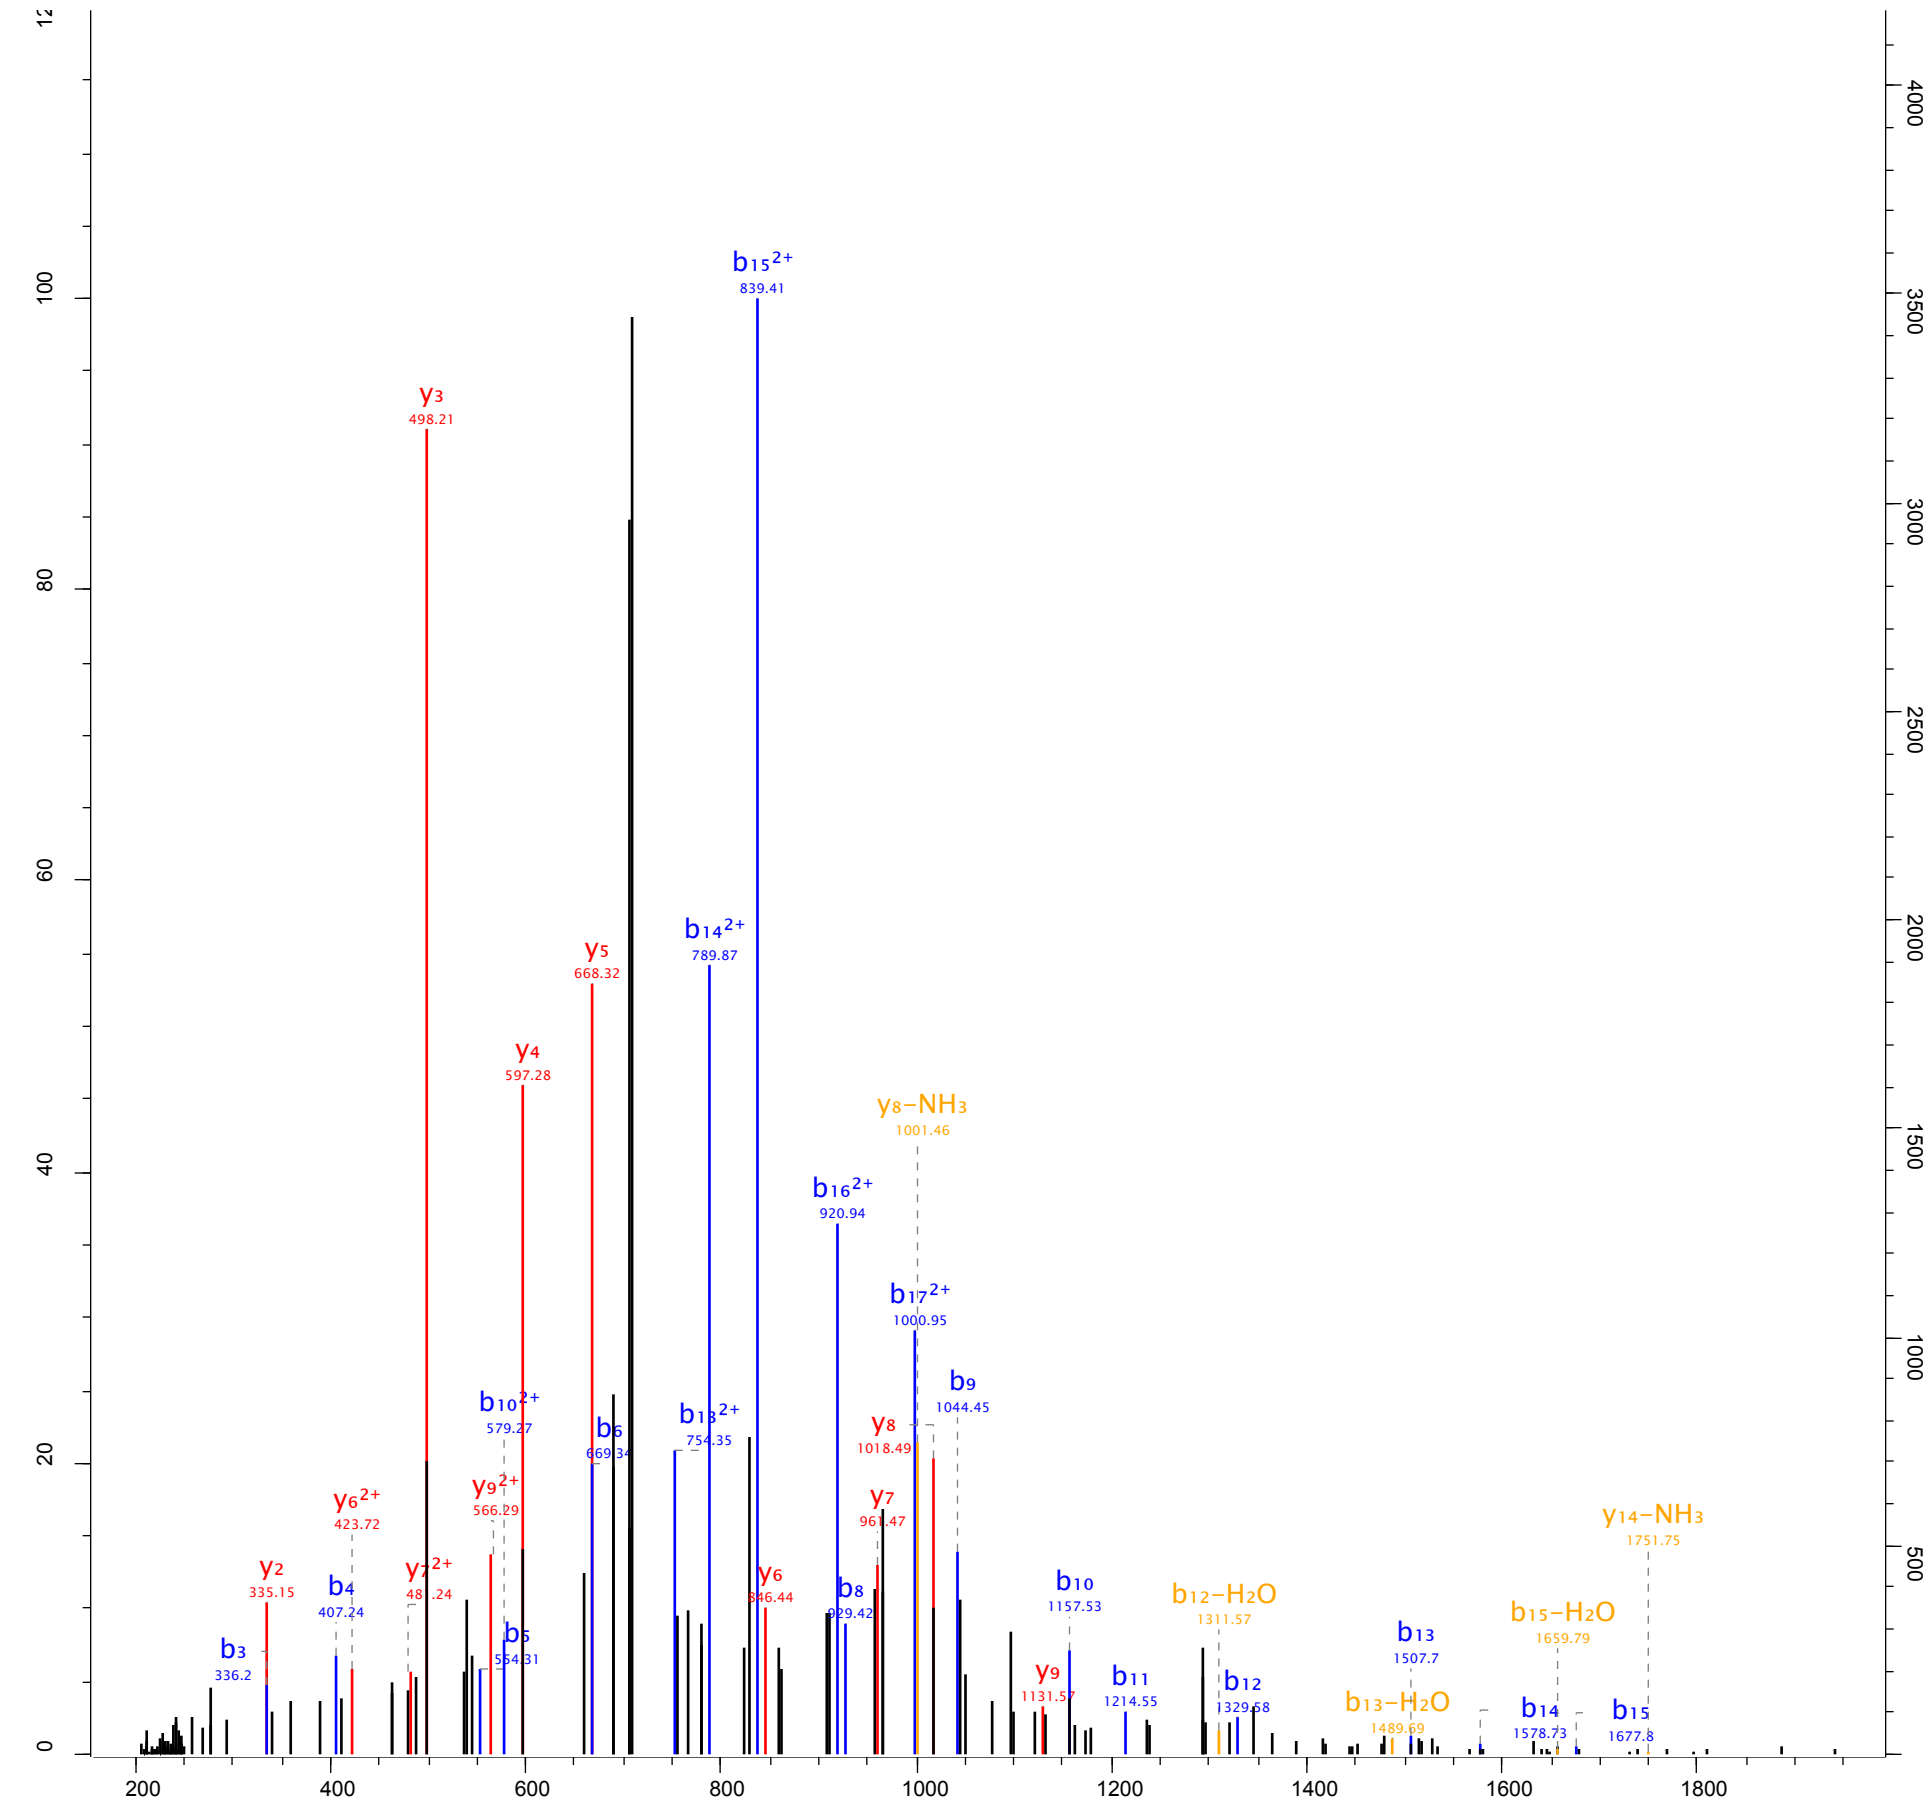

- V V H A F D M E D L G D K A V Y C R -

b<sub>3</sub>
b<sub>4</sub>
b<sub>5</sub>
b<sub>6</sub>
b<sub>8</sub>
b<sub>9</sub>
b<sub>10</sub>
b<sub>11</sub>
b<sub>12</sub>
b<sub>13</sub>
b<sub>14</sub>
b<sub>15</sub>
b<sub>16</sub><sup>2+</sup>
b<sub>17</sub><sup>2+</sup>

y<sub>9</sub>
y<sub>8</sub>
y<sub>7</sub>
y<sub>6</sub>  
ac
y<sub>5</sub>
y<sub>4</sub>
y<sub>3</sub>
y<sub>2</sub>

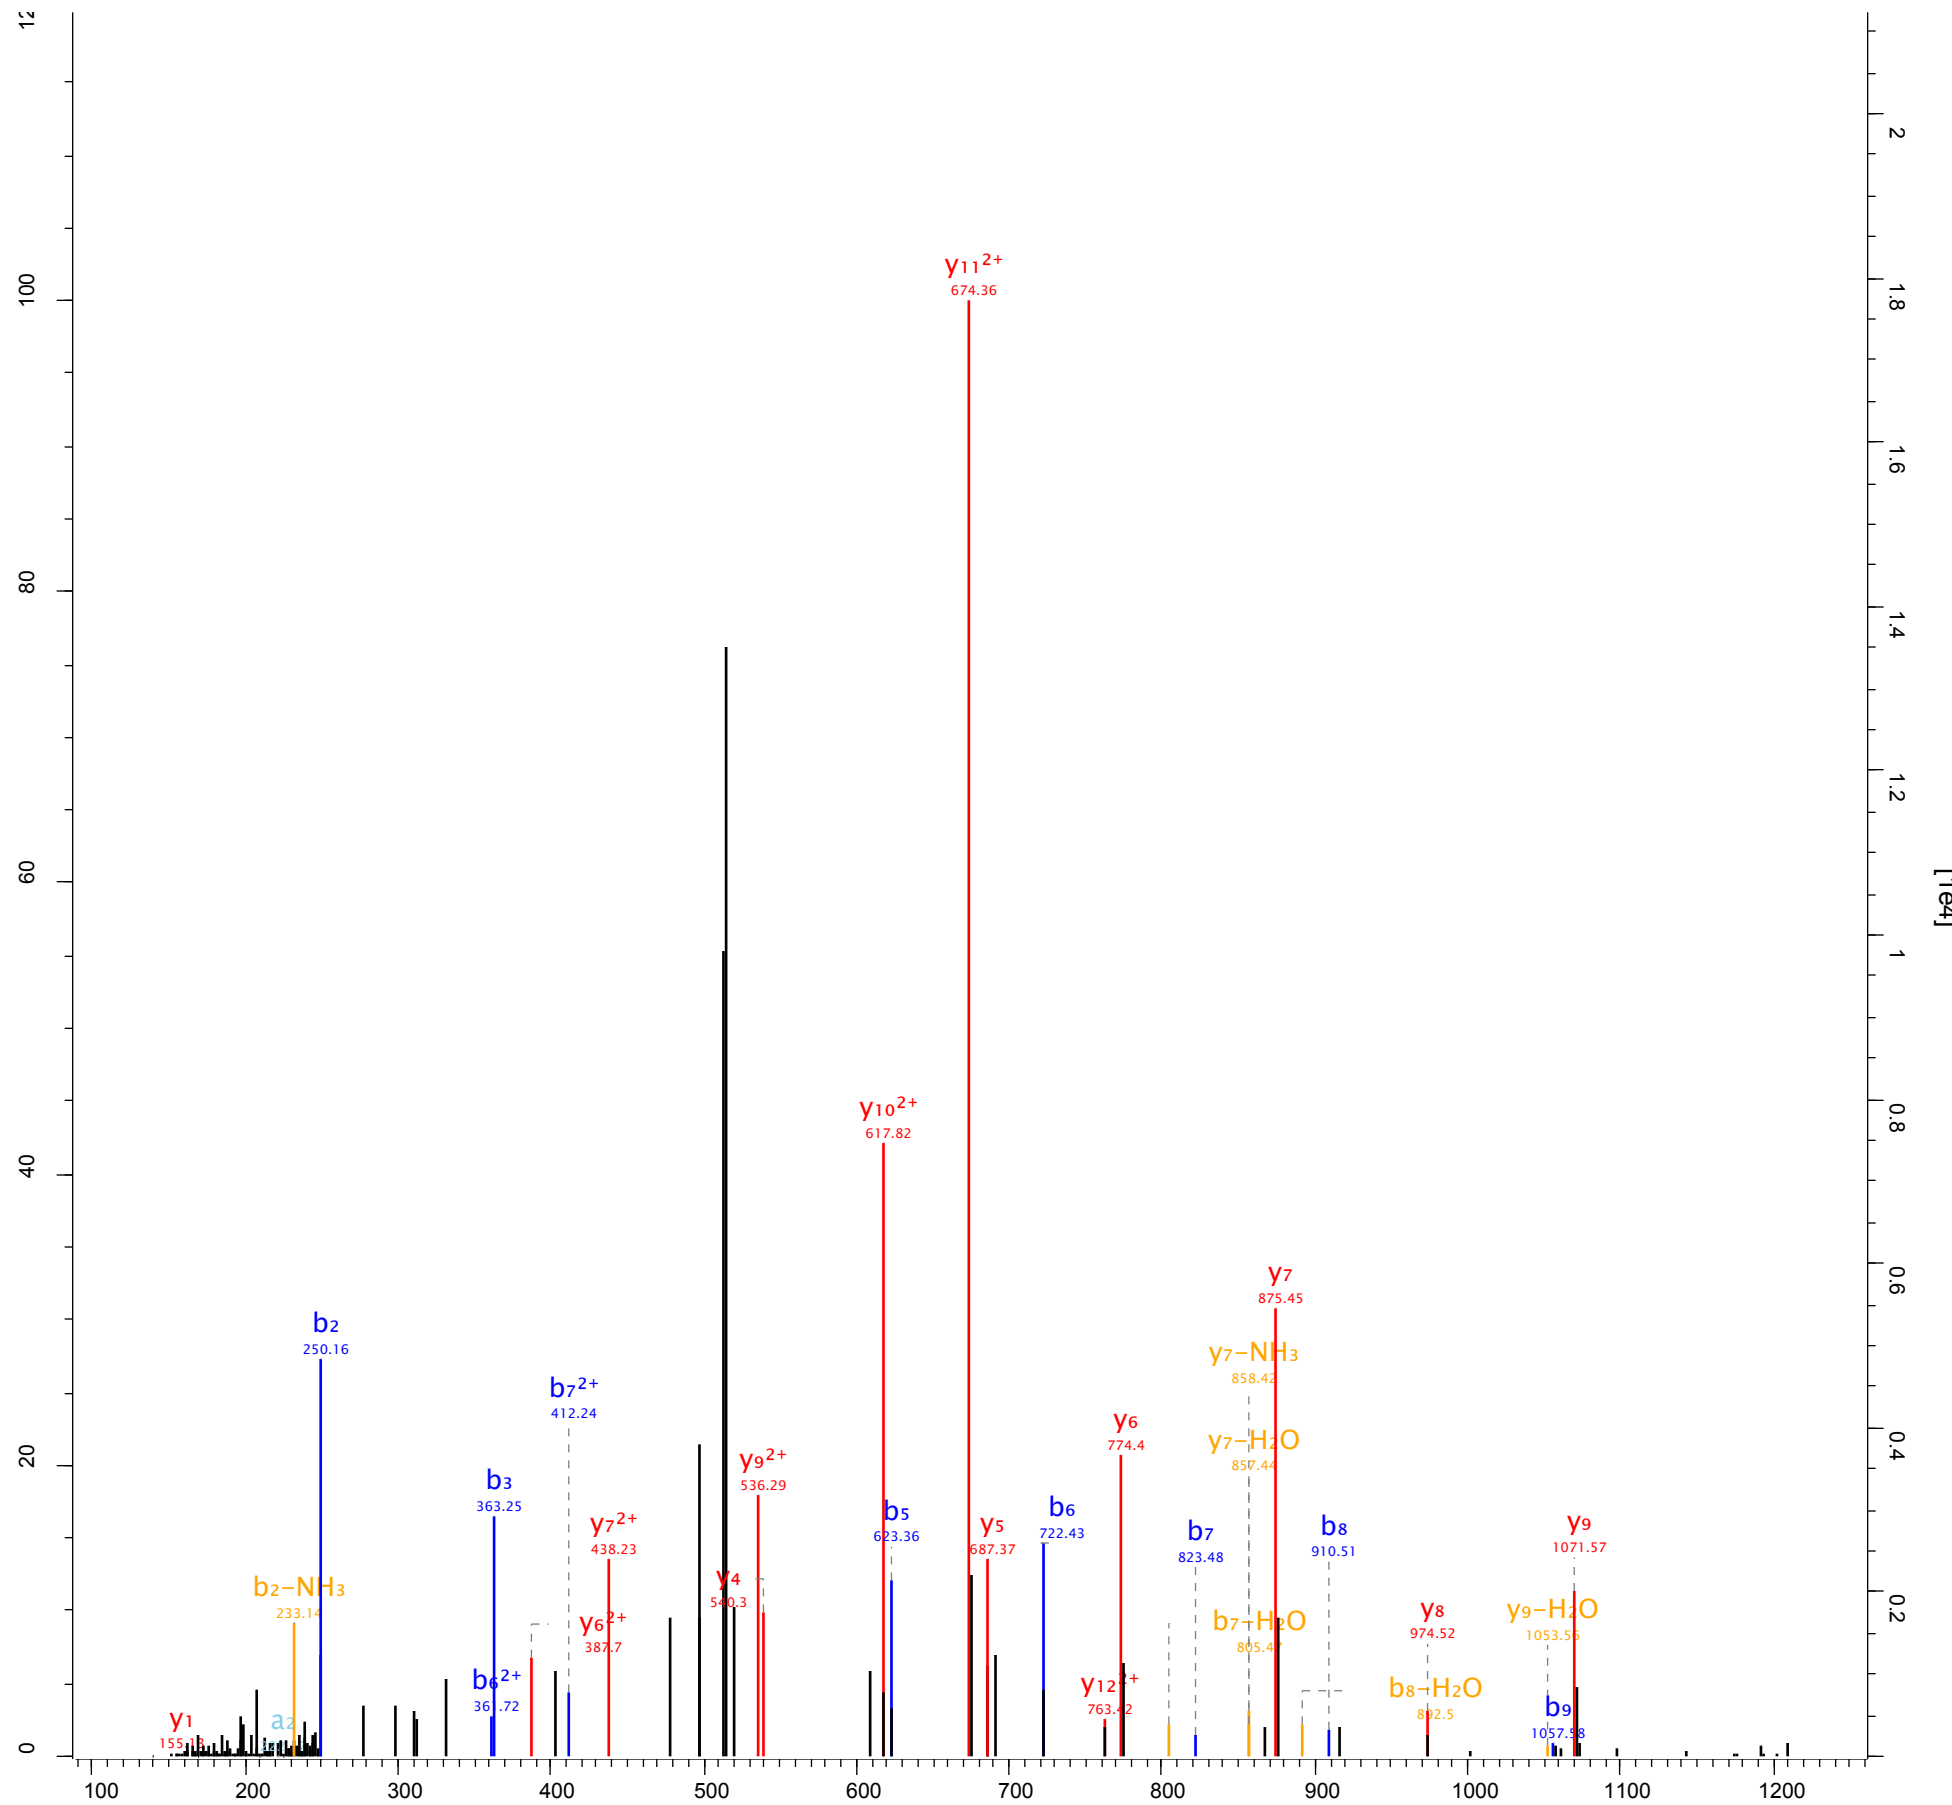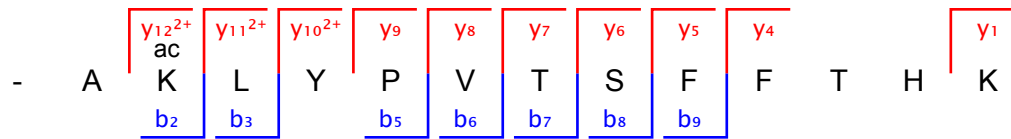

072613\_SCW\_II\_68\_Enriched\_8

24595

ITMS; CID

182.17

744.05

Actn1

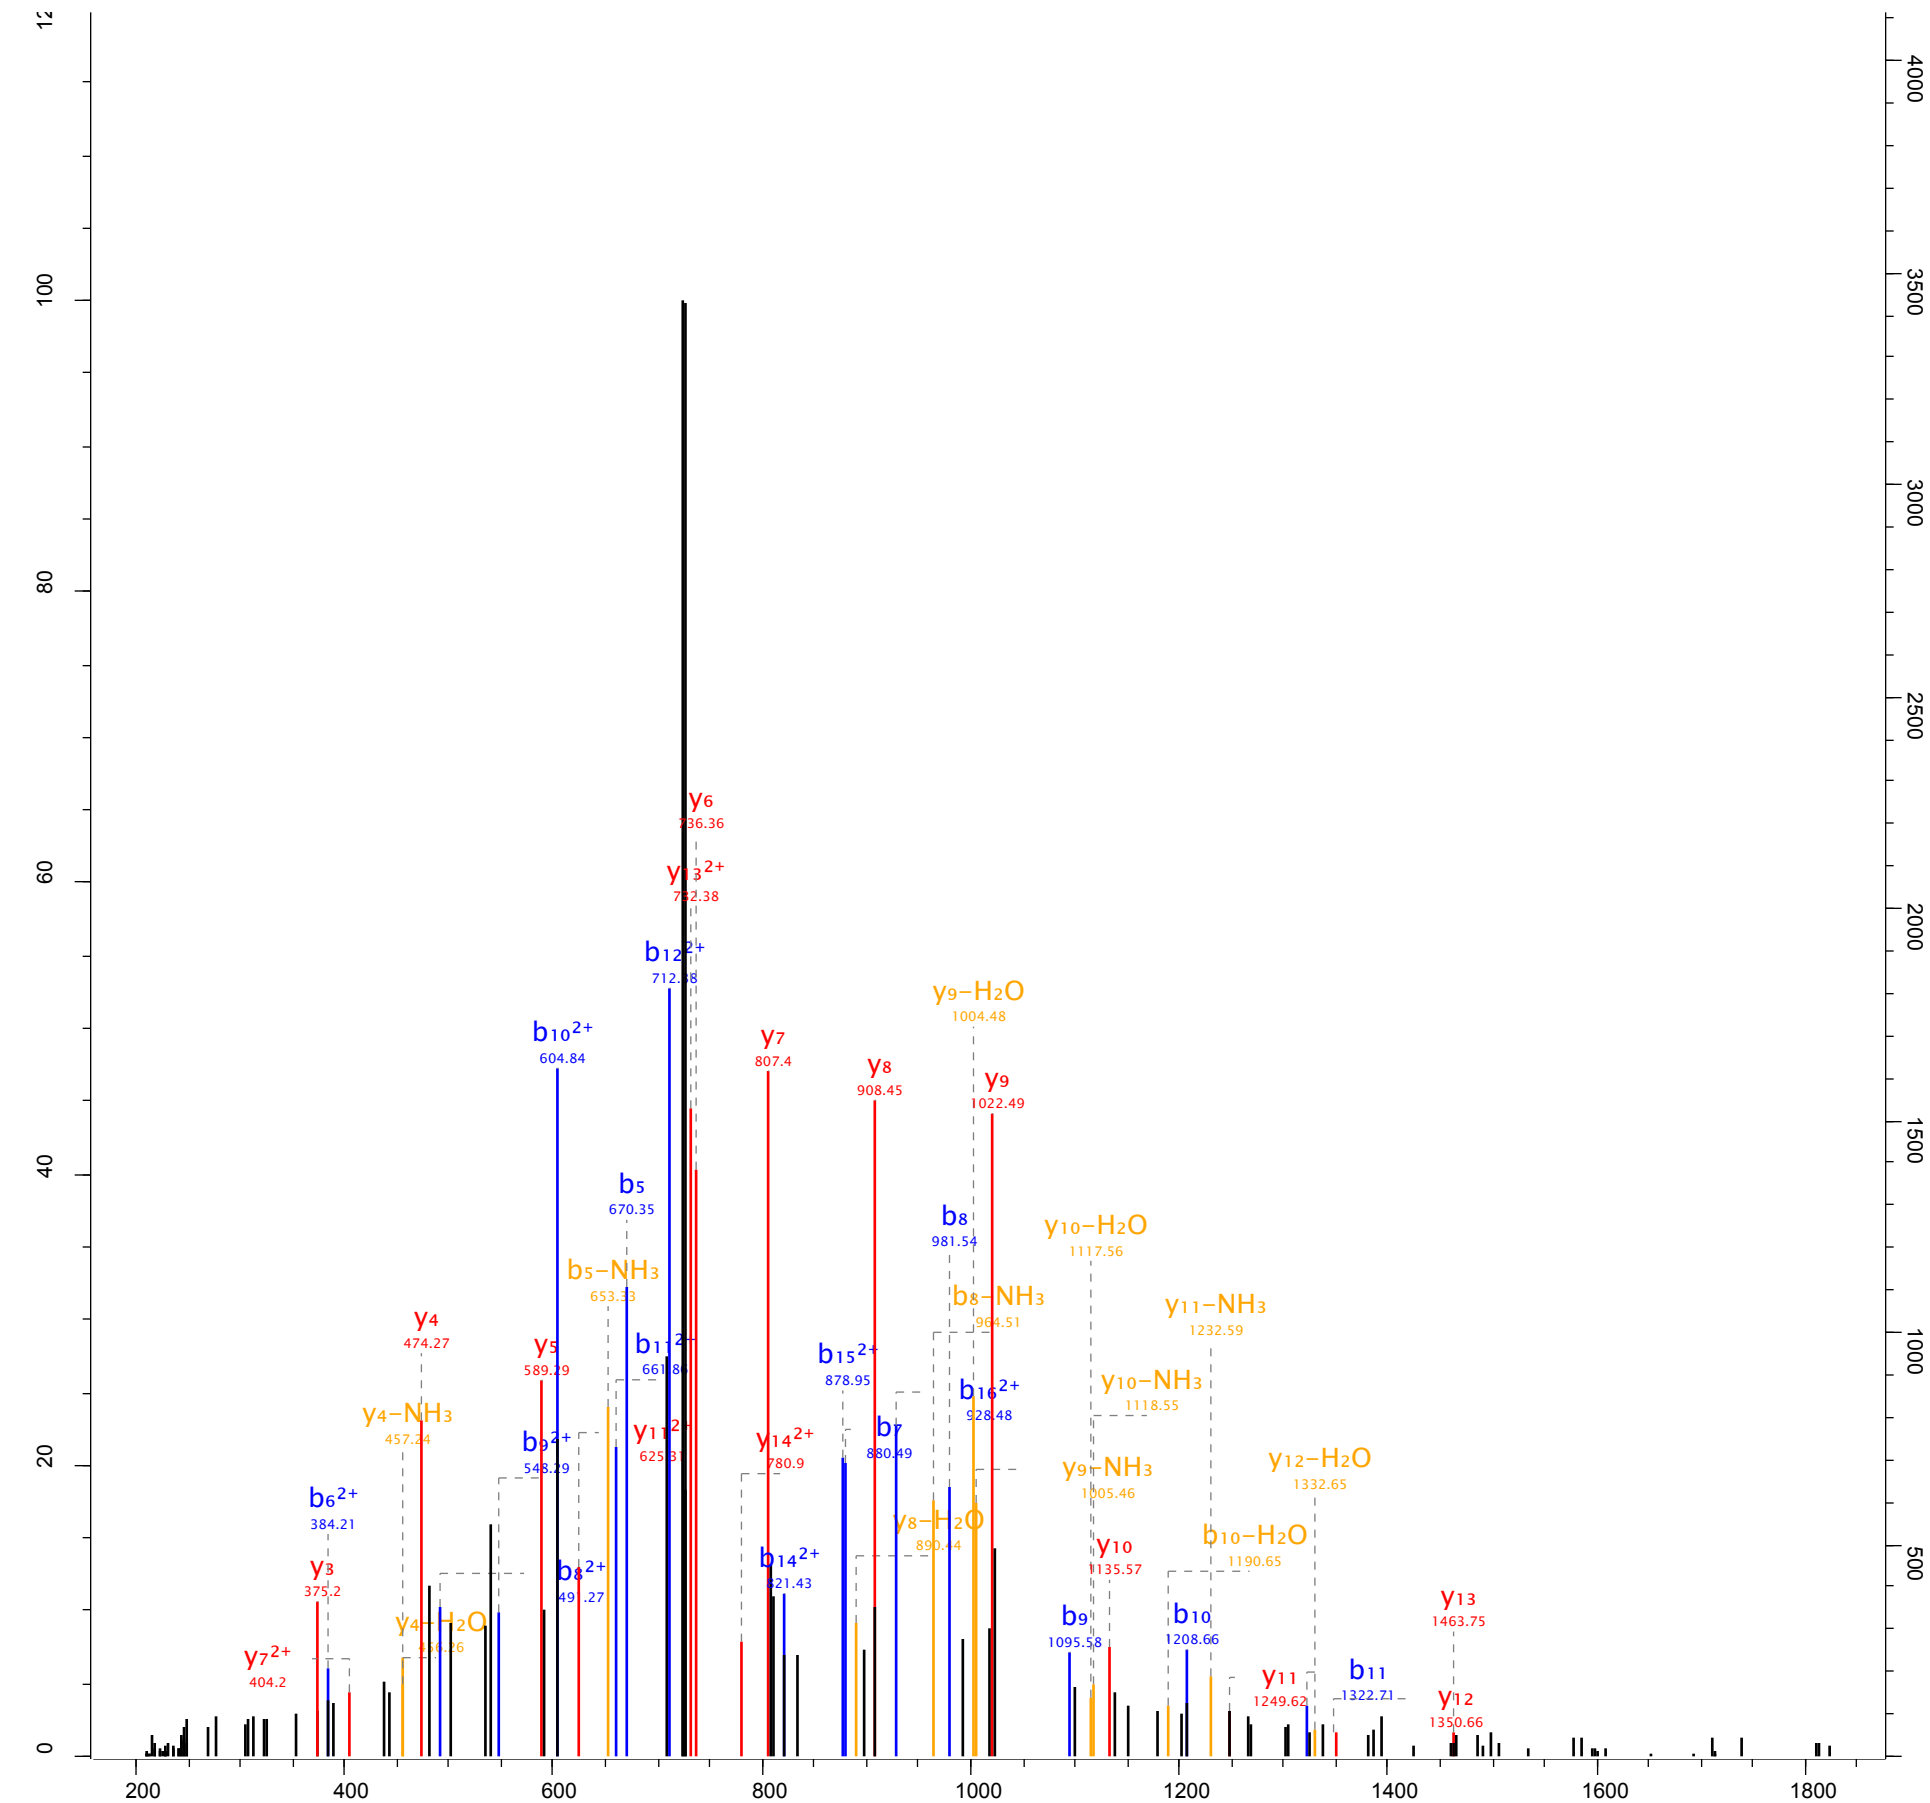

- L R ac K D D P L T N L N T A F D V A E R -

b<sub>5</sub> b<sub>6</sub><sup>2+</sup> b<sub>7</sub> b<sub>8</sub> b<sub>9</sub> b<sub>10</sub> b<sub>11</sub> b<sub>12</sub><sup>2+</sup> b<sub>14</sub><sup>2+</sup> b<sub>15</sub><sup>2+</sup> b<sub>16</sub><sup>2+</sup>

y<sub>14</sub><sup>2+</sup> y<sub>13</sub> y<sub>12</sub> y<sub>11</sub> y<sub>10</sub> y<sub>9</sub> y<sub>8</sub> y<sub>7</sub> y<sub>6</sub> y<sub>5</sub> y<sub>4</sub> y<sub>3</sub>

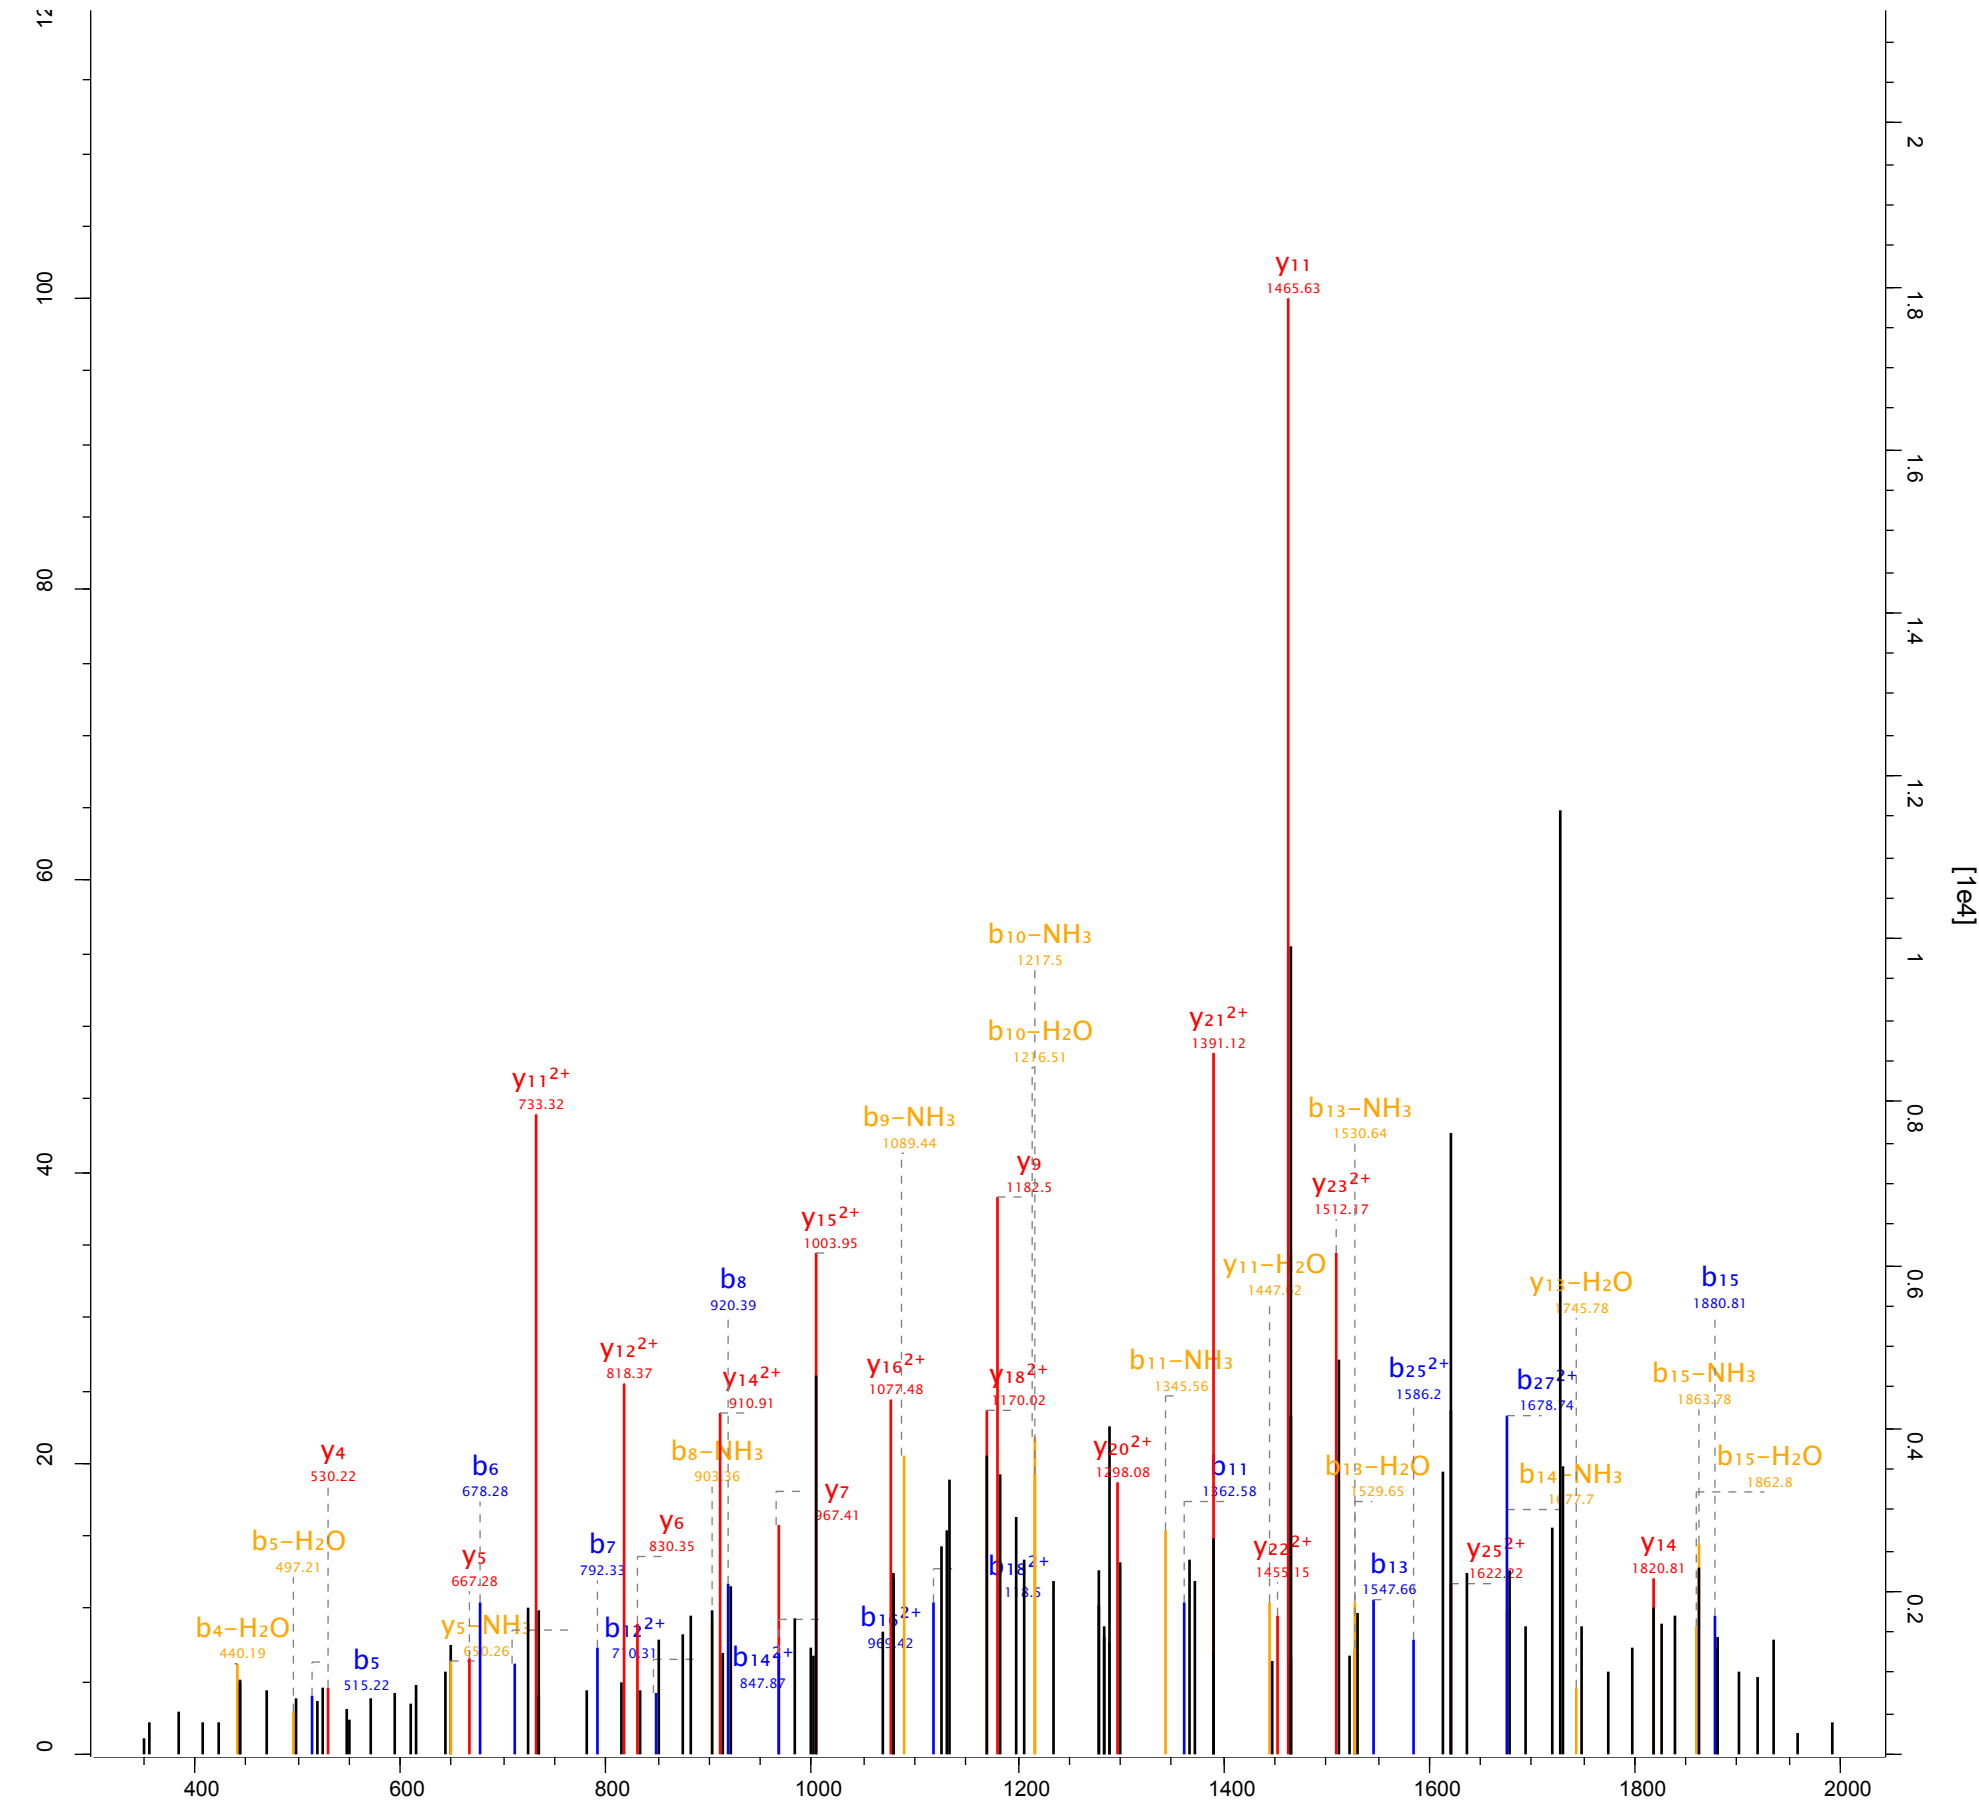

y<sub>25</sub><sup>2+</sup> y<sub>23</sub><sup>2+</sup> y<sub>22</sub><sup>2+</sup> y<sub>21</sub><sup>2+</sup> y<sub>20</sub><sup>2+</sup> y<sub>18</sub><sup>2+</sup> y<sub>16</sub><sup>2+</sup> y<sub>15</sub><sup>2+</sup> y<sub>14</sub> y<sub>12</sub><sup>2+</sup> y<sub>11</sub> y<sub>9</sub> y<sub>7</sub> y<sub>6</sub>  
 - N Q S Q G Y N Q W Q Q G Q F W G Q K P W S Q H Y  
b<sub>5</sub> b<sub>6</sub> b<sub>7</sub> b<sub>8</sub> b<sub>11</sub> b<sub>12</sub><sup>2+</sup> b<sub>13</sub> b<sub>14</sub><sup>2+</sup> b<sub>15</sub> b<sub>16</sub><sup>2+</sup> b<sub>18</sub><sup>2+</sup> b<sub>18</sub><sup>2+</sup>  
H Q G Y Y -

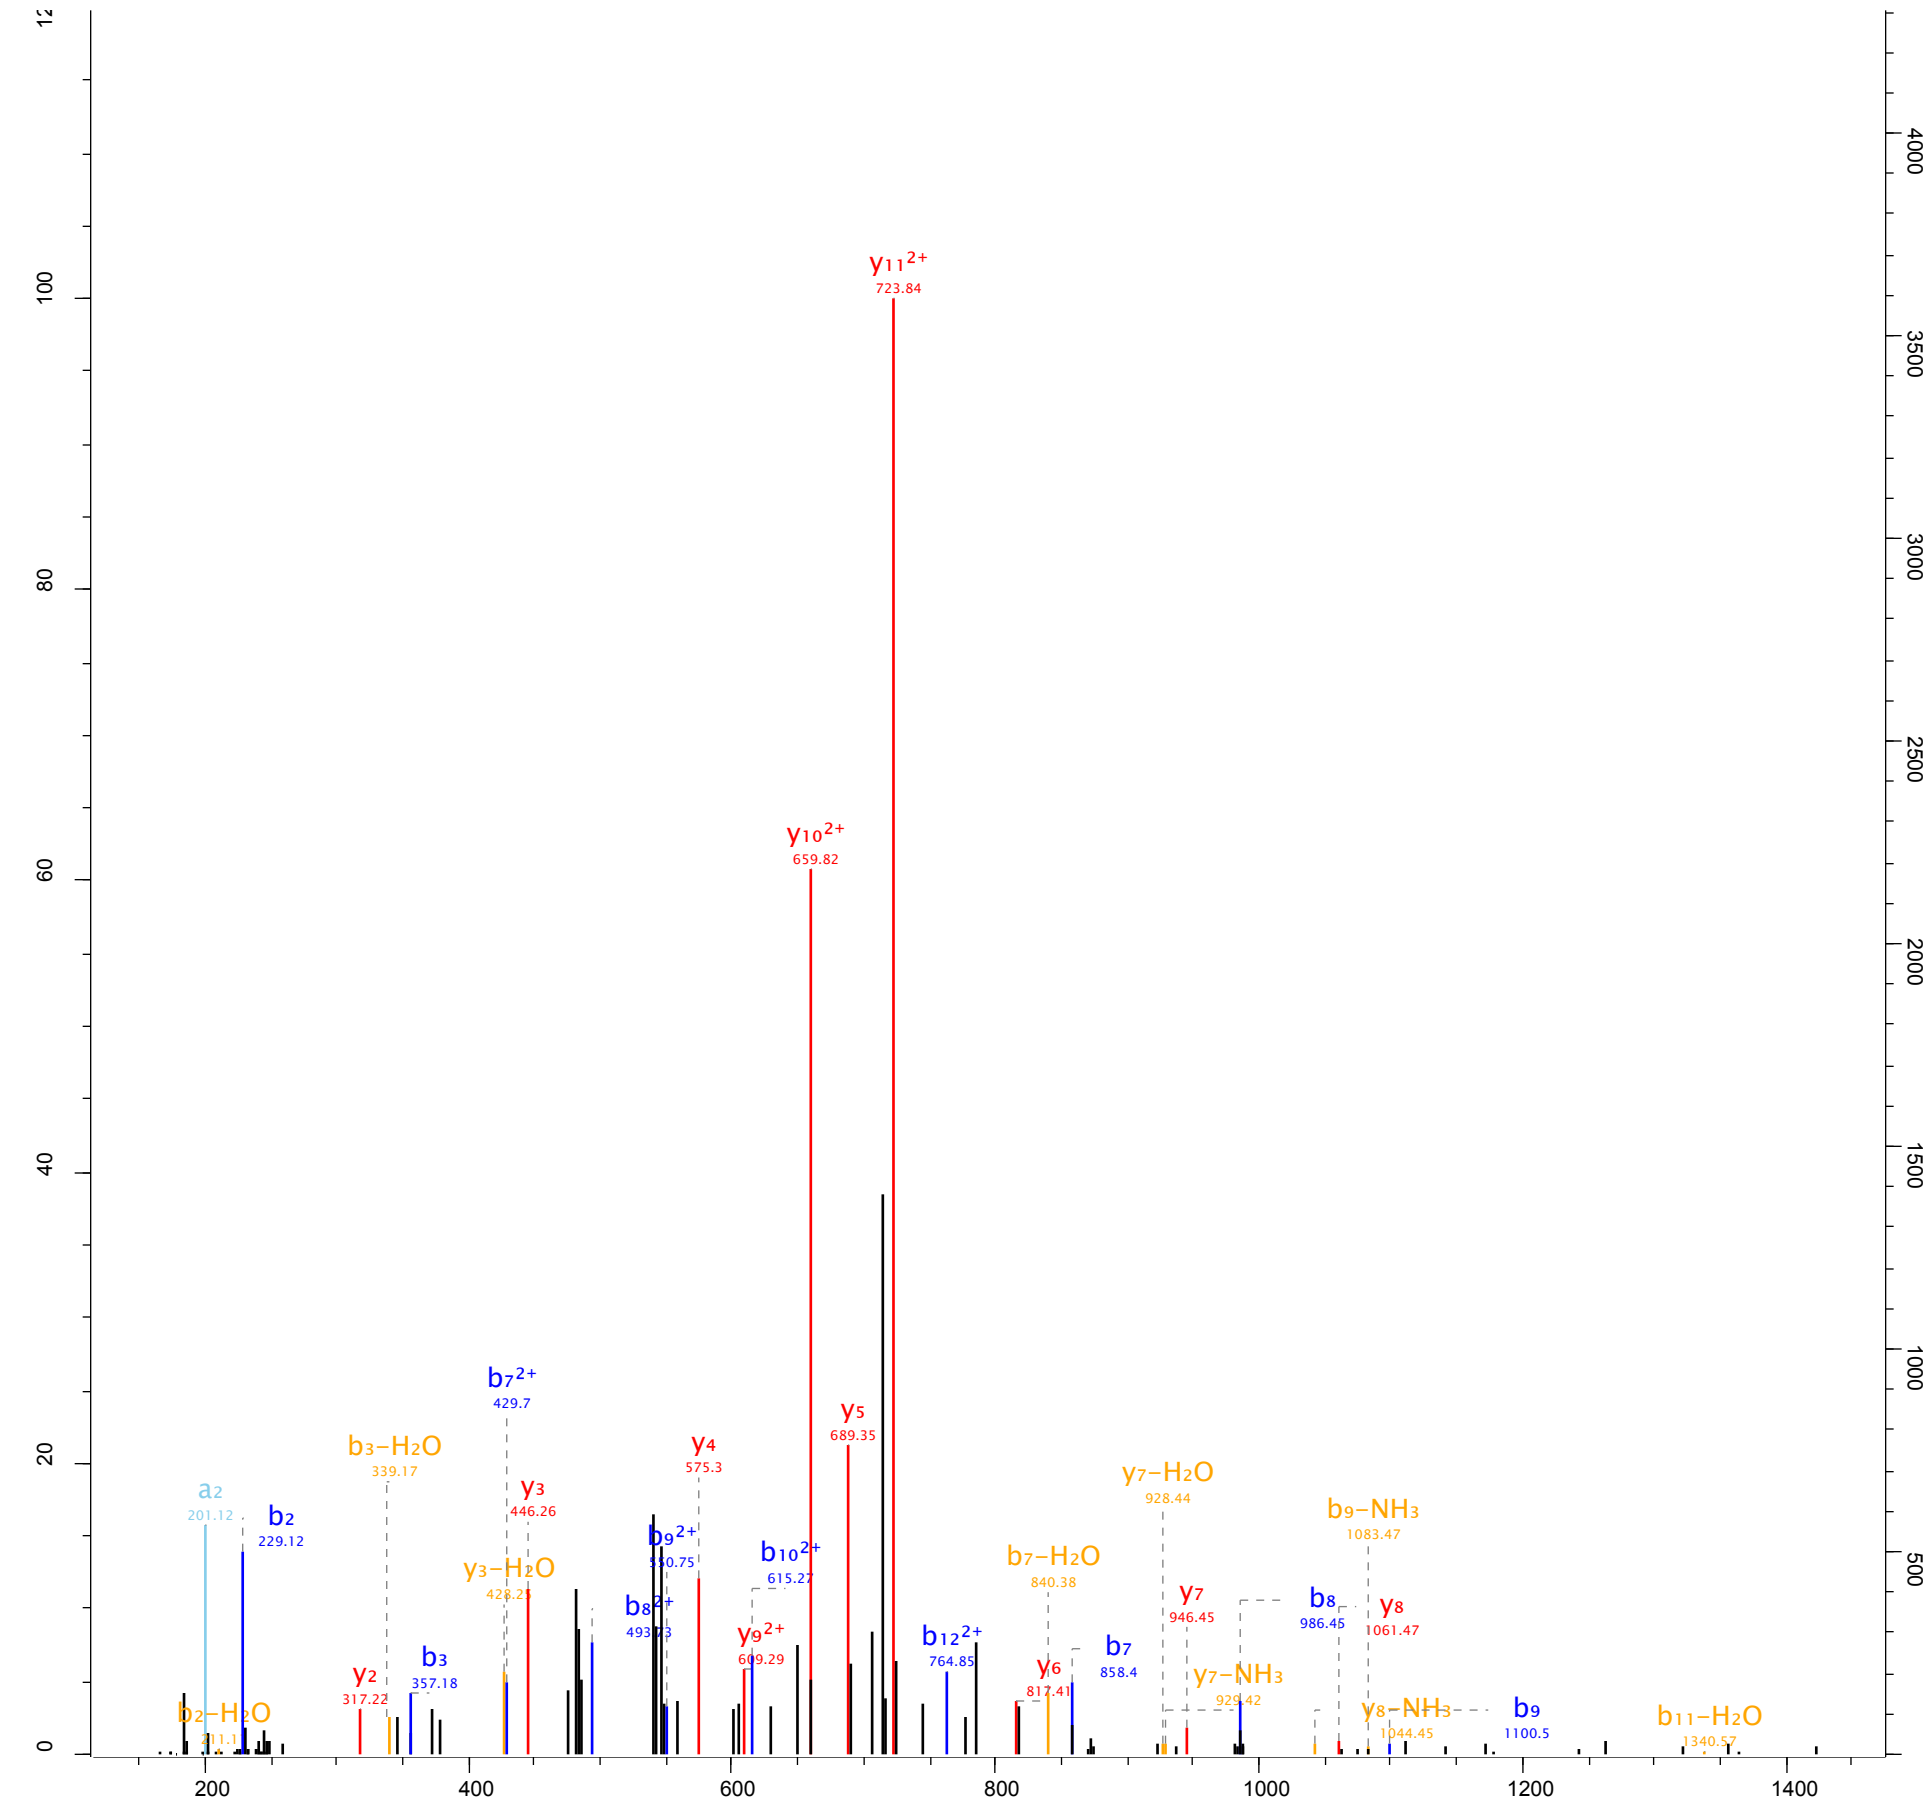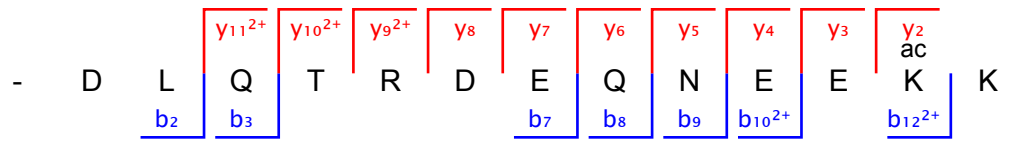

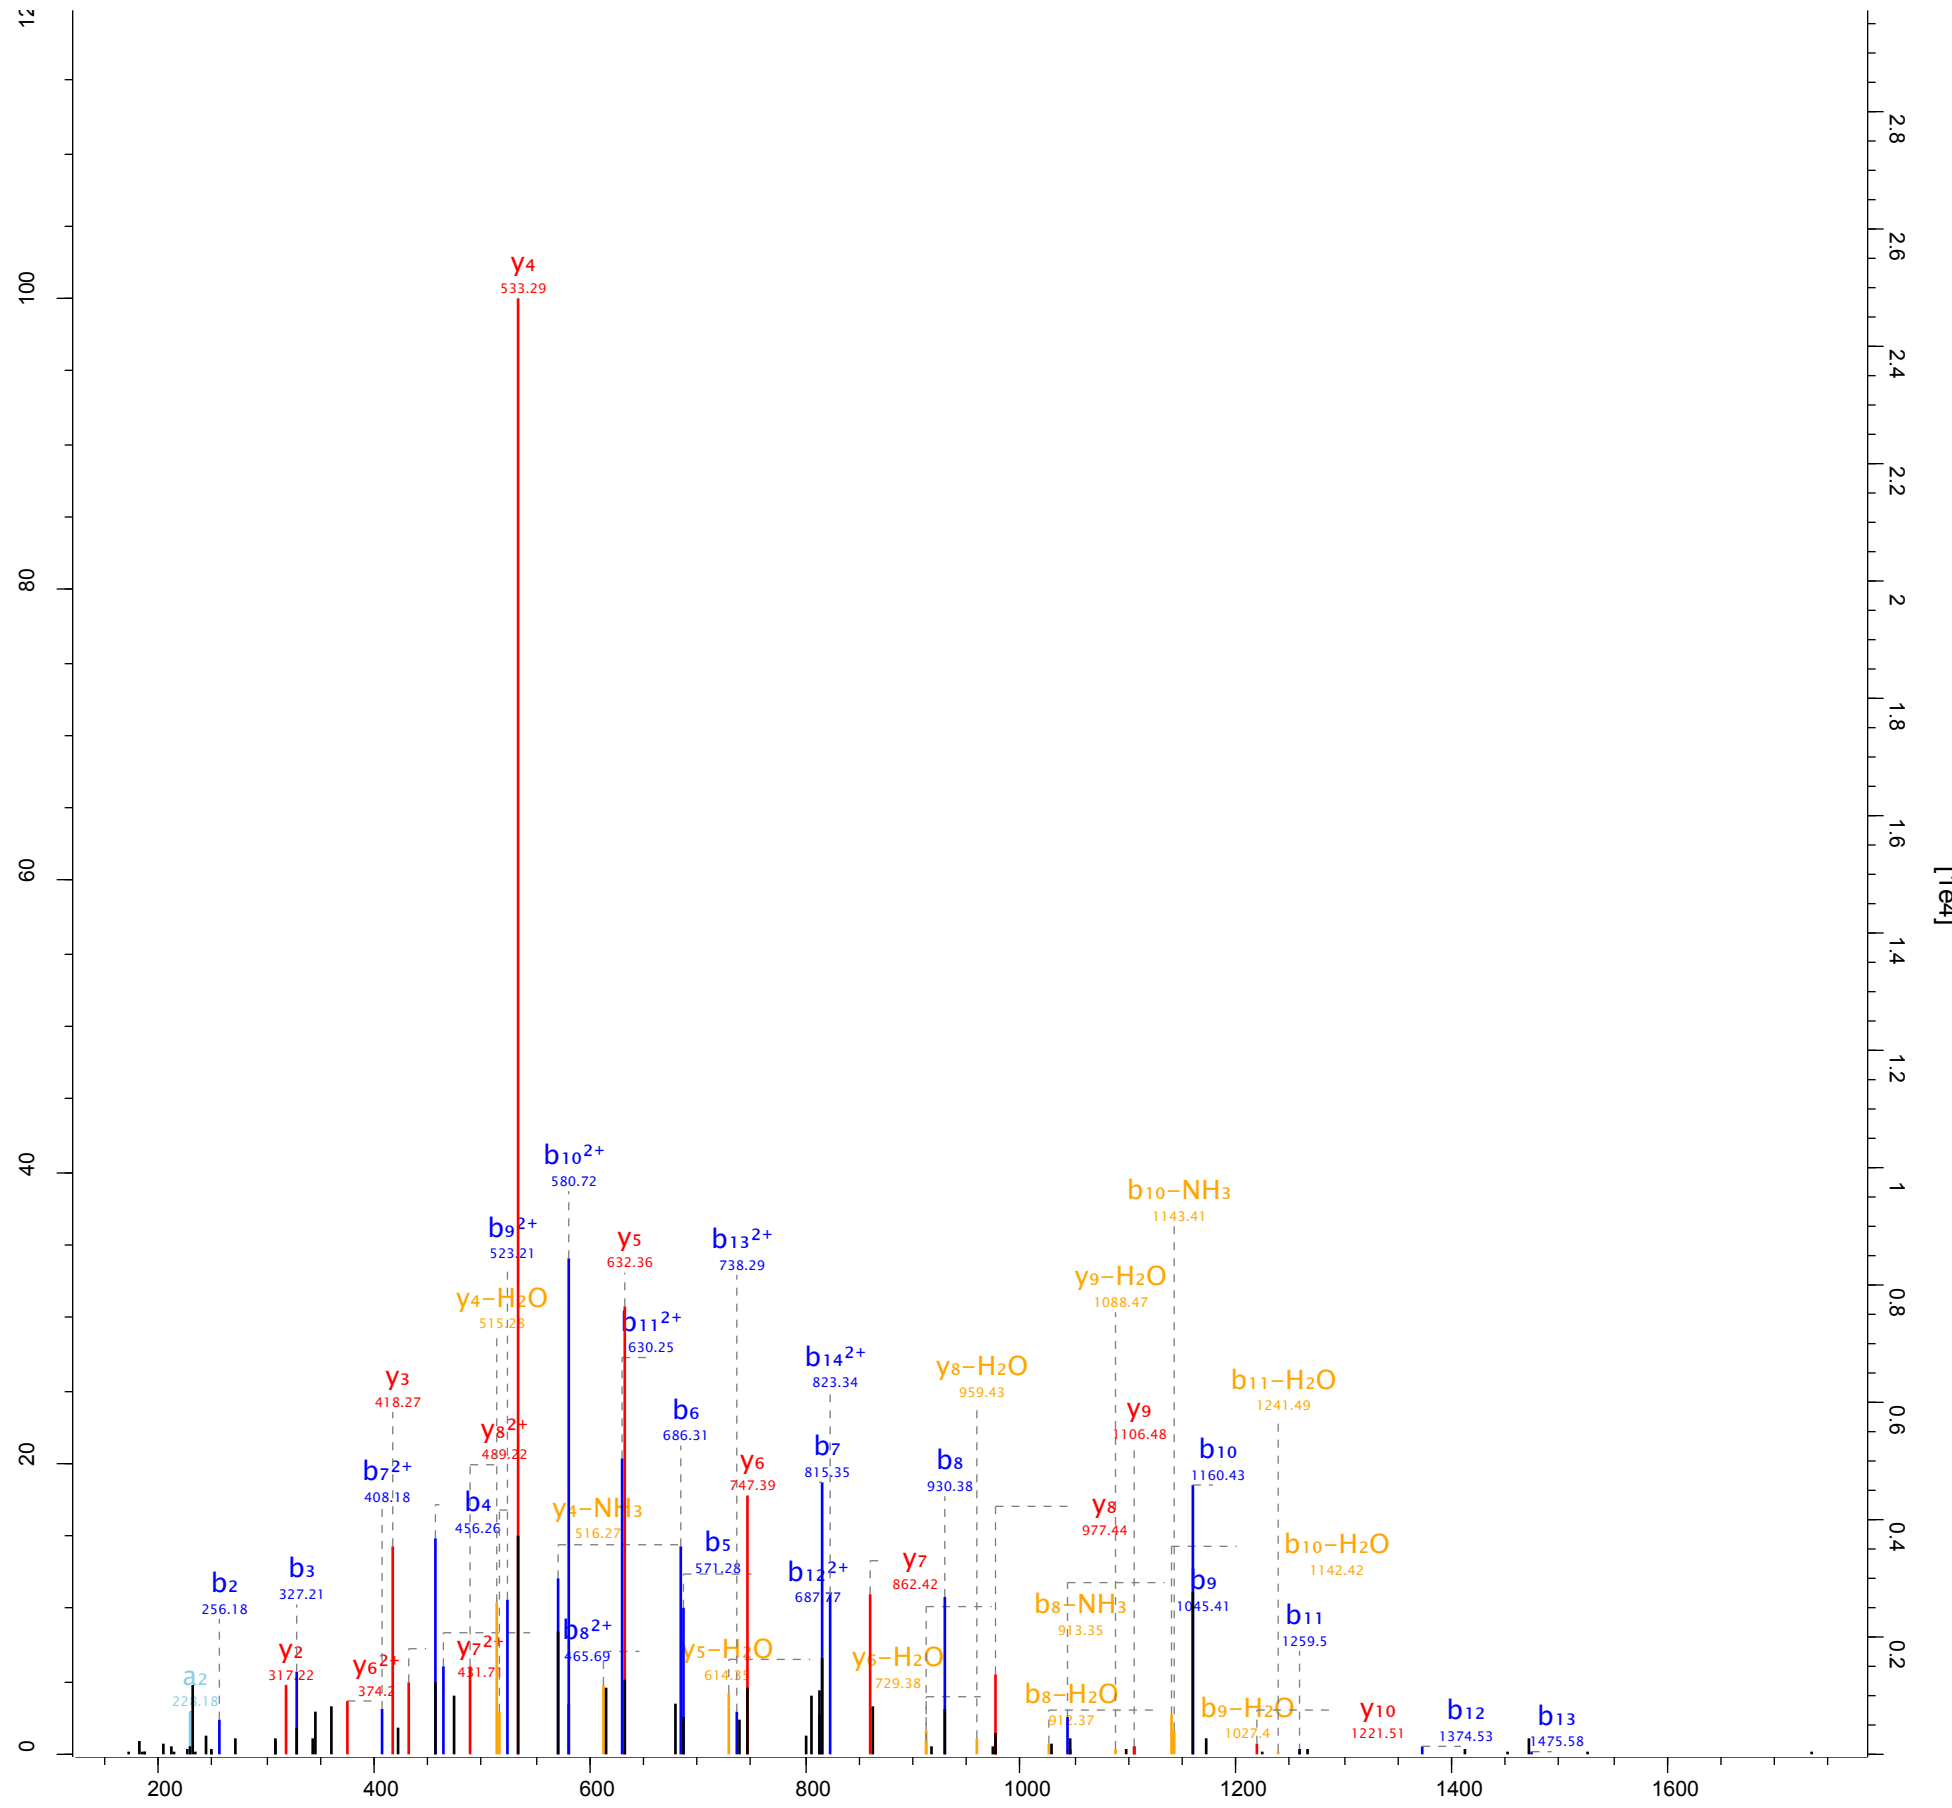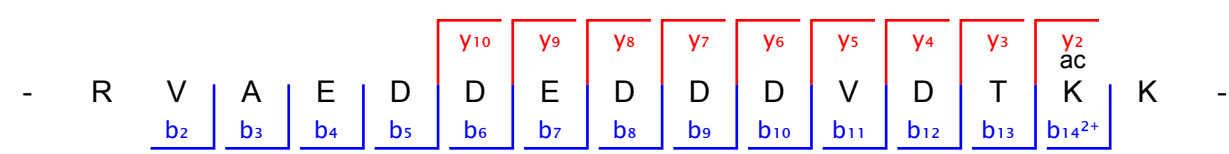

Raw file  
072613\_SCW\_II\_68\_Enriched\_9

Scan 12809 Method ITMS; CID Score 187.62 m/z 703.36 Gene names Ywhah

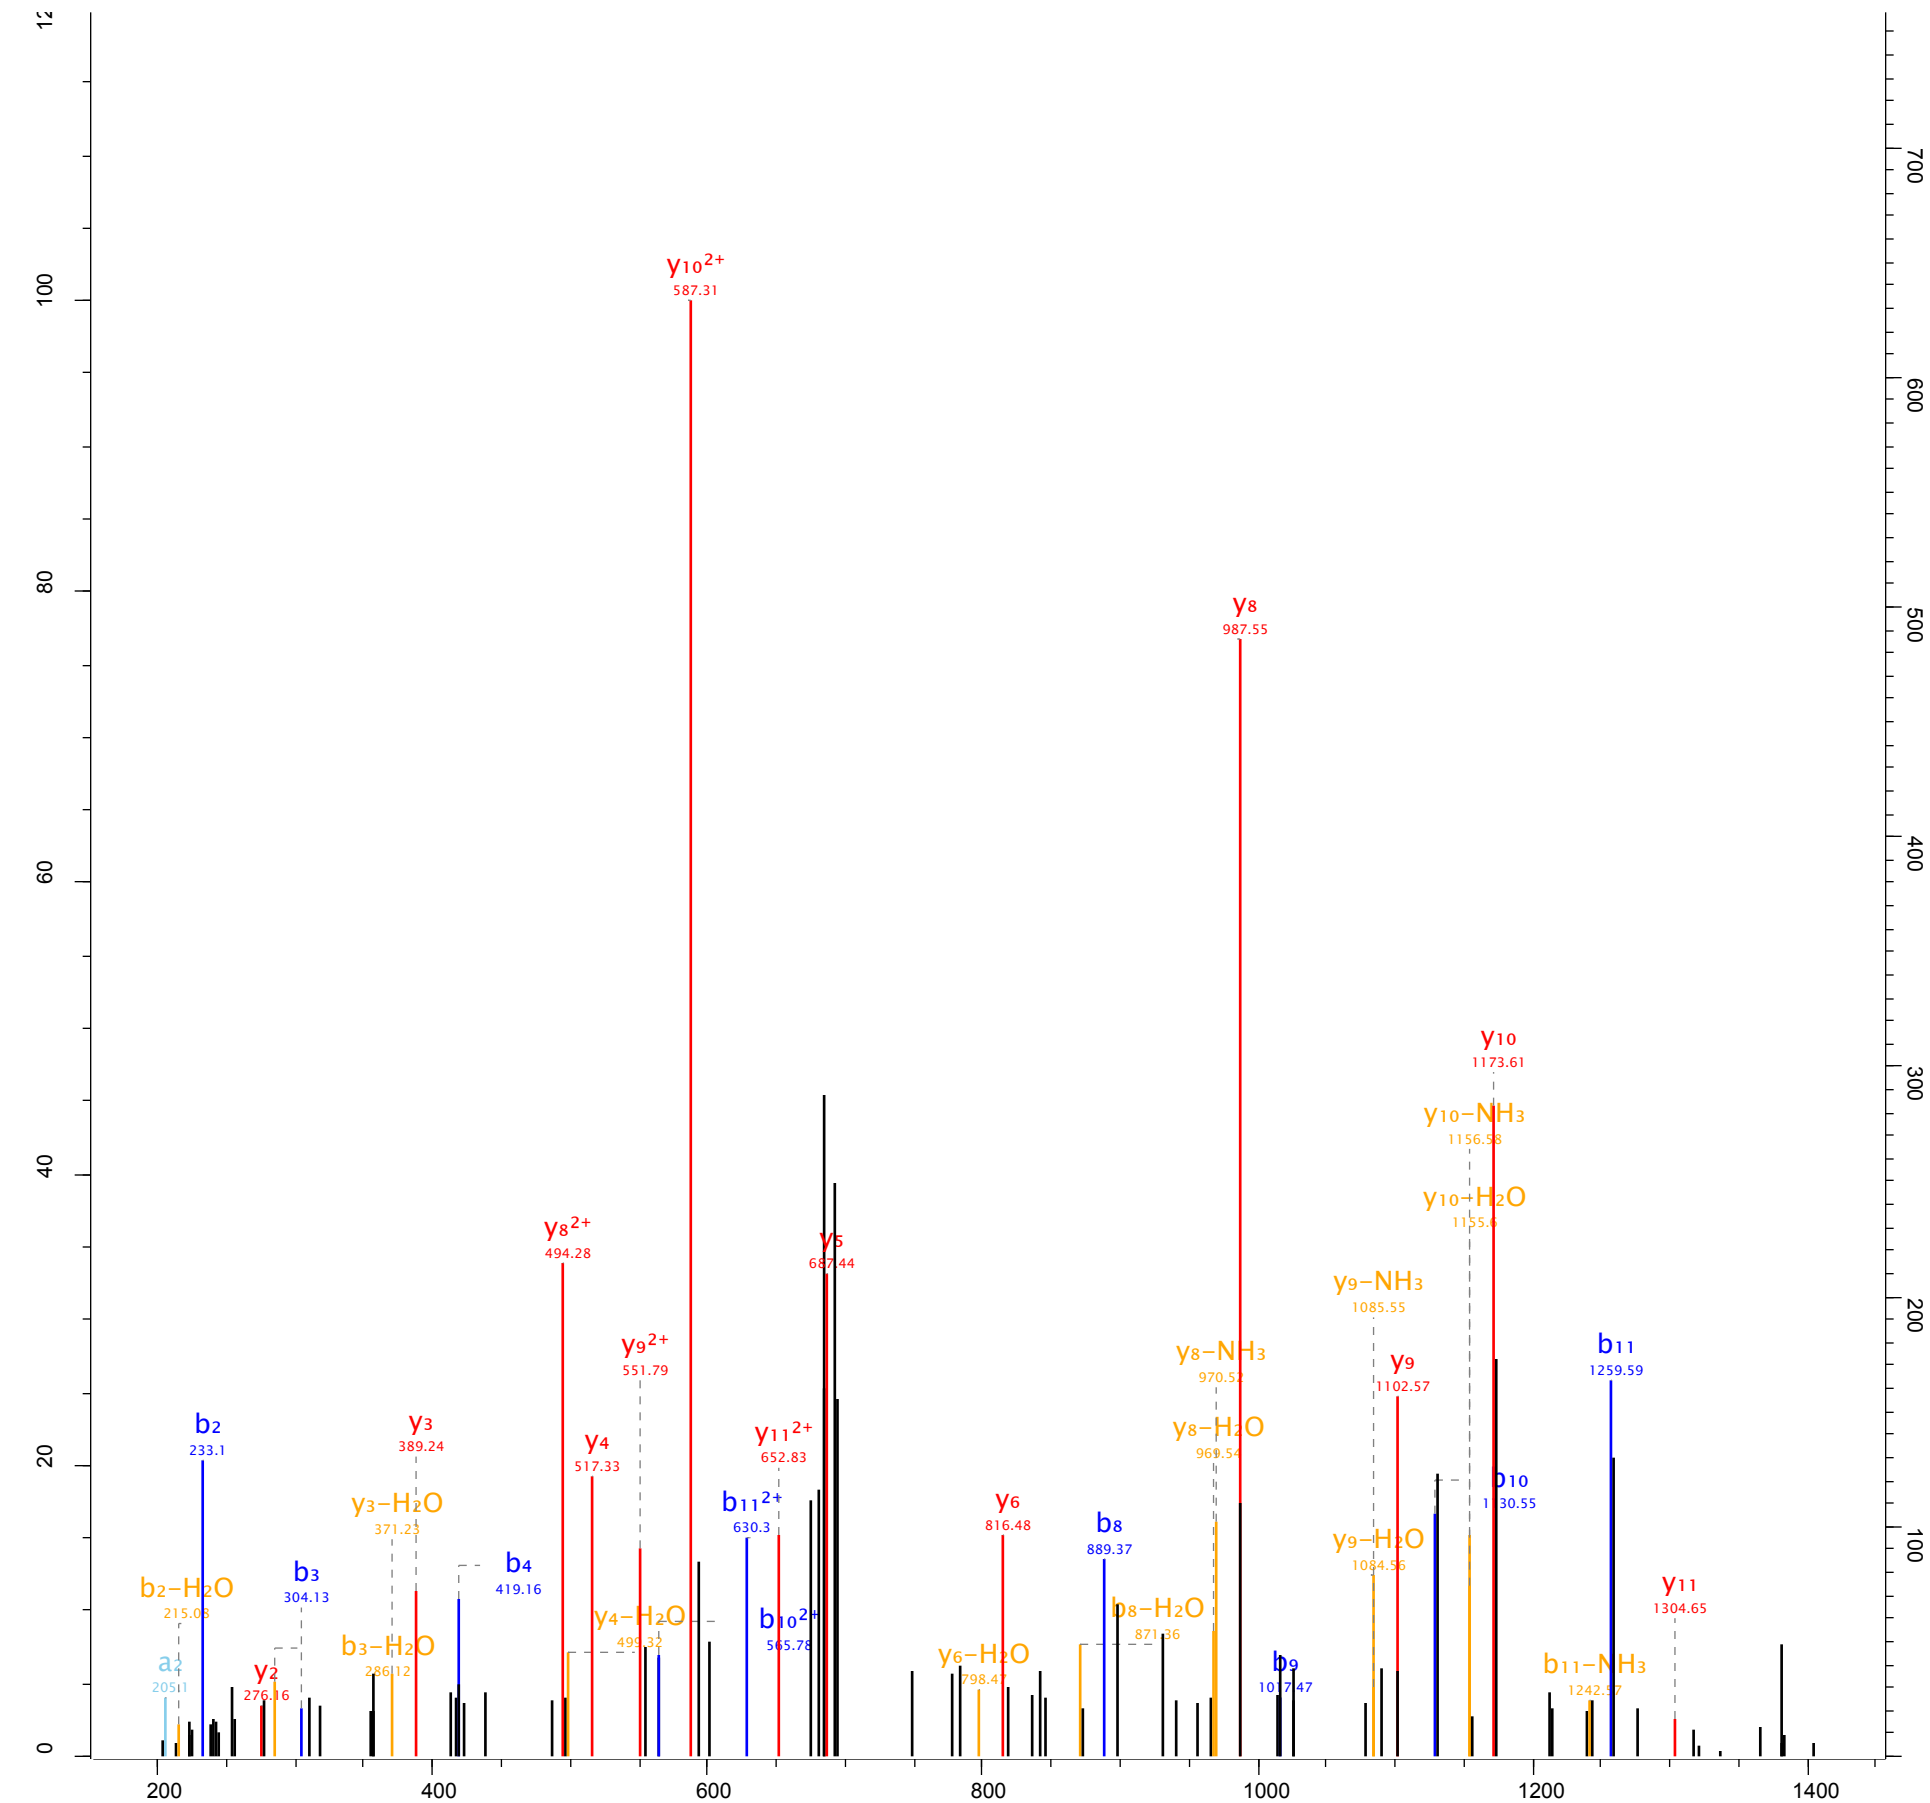

- T M A D G N E K K L E K -

Fragmentation mapping:  
-  $y_{11}$  (M) -  $y_{10}$  (A) -  $y_9$  (D) -  $y_8$  (G) - N -  $y_6$  (E) -  $y_5$  (K) -  $y_4$  (K) -  $y_3$  (L) -  $y_2$  (E) - K -  
-  $b_2$  (M) -  $b_3$  (A) -  $b_4$  (D) - G - N - E -  $b_8$  (K) -  $b_9$  (K) -  $b_{10}$  (L) -  $b_{11}$  (E) - K -



Raw file 072613\_SCW\_II\_68\_Enriched\_9 Scan 13669 Method ITMS; CID Score 94.69 m/z 518.6 Gene names Wbp11

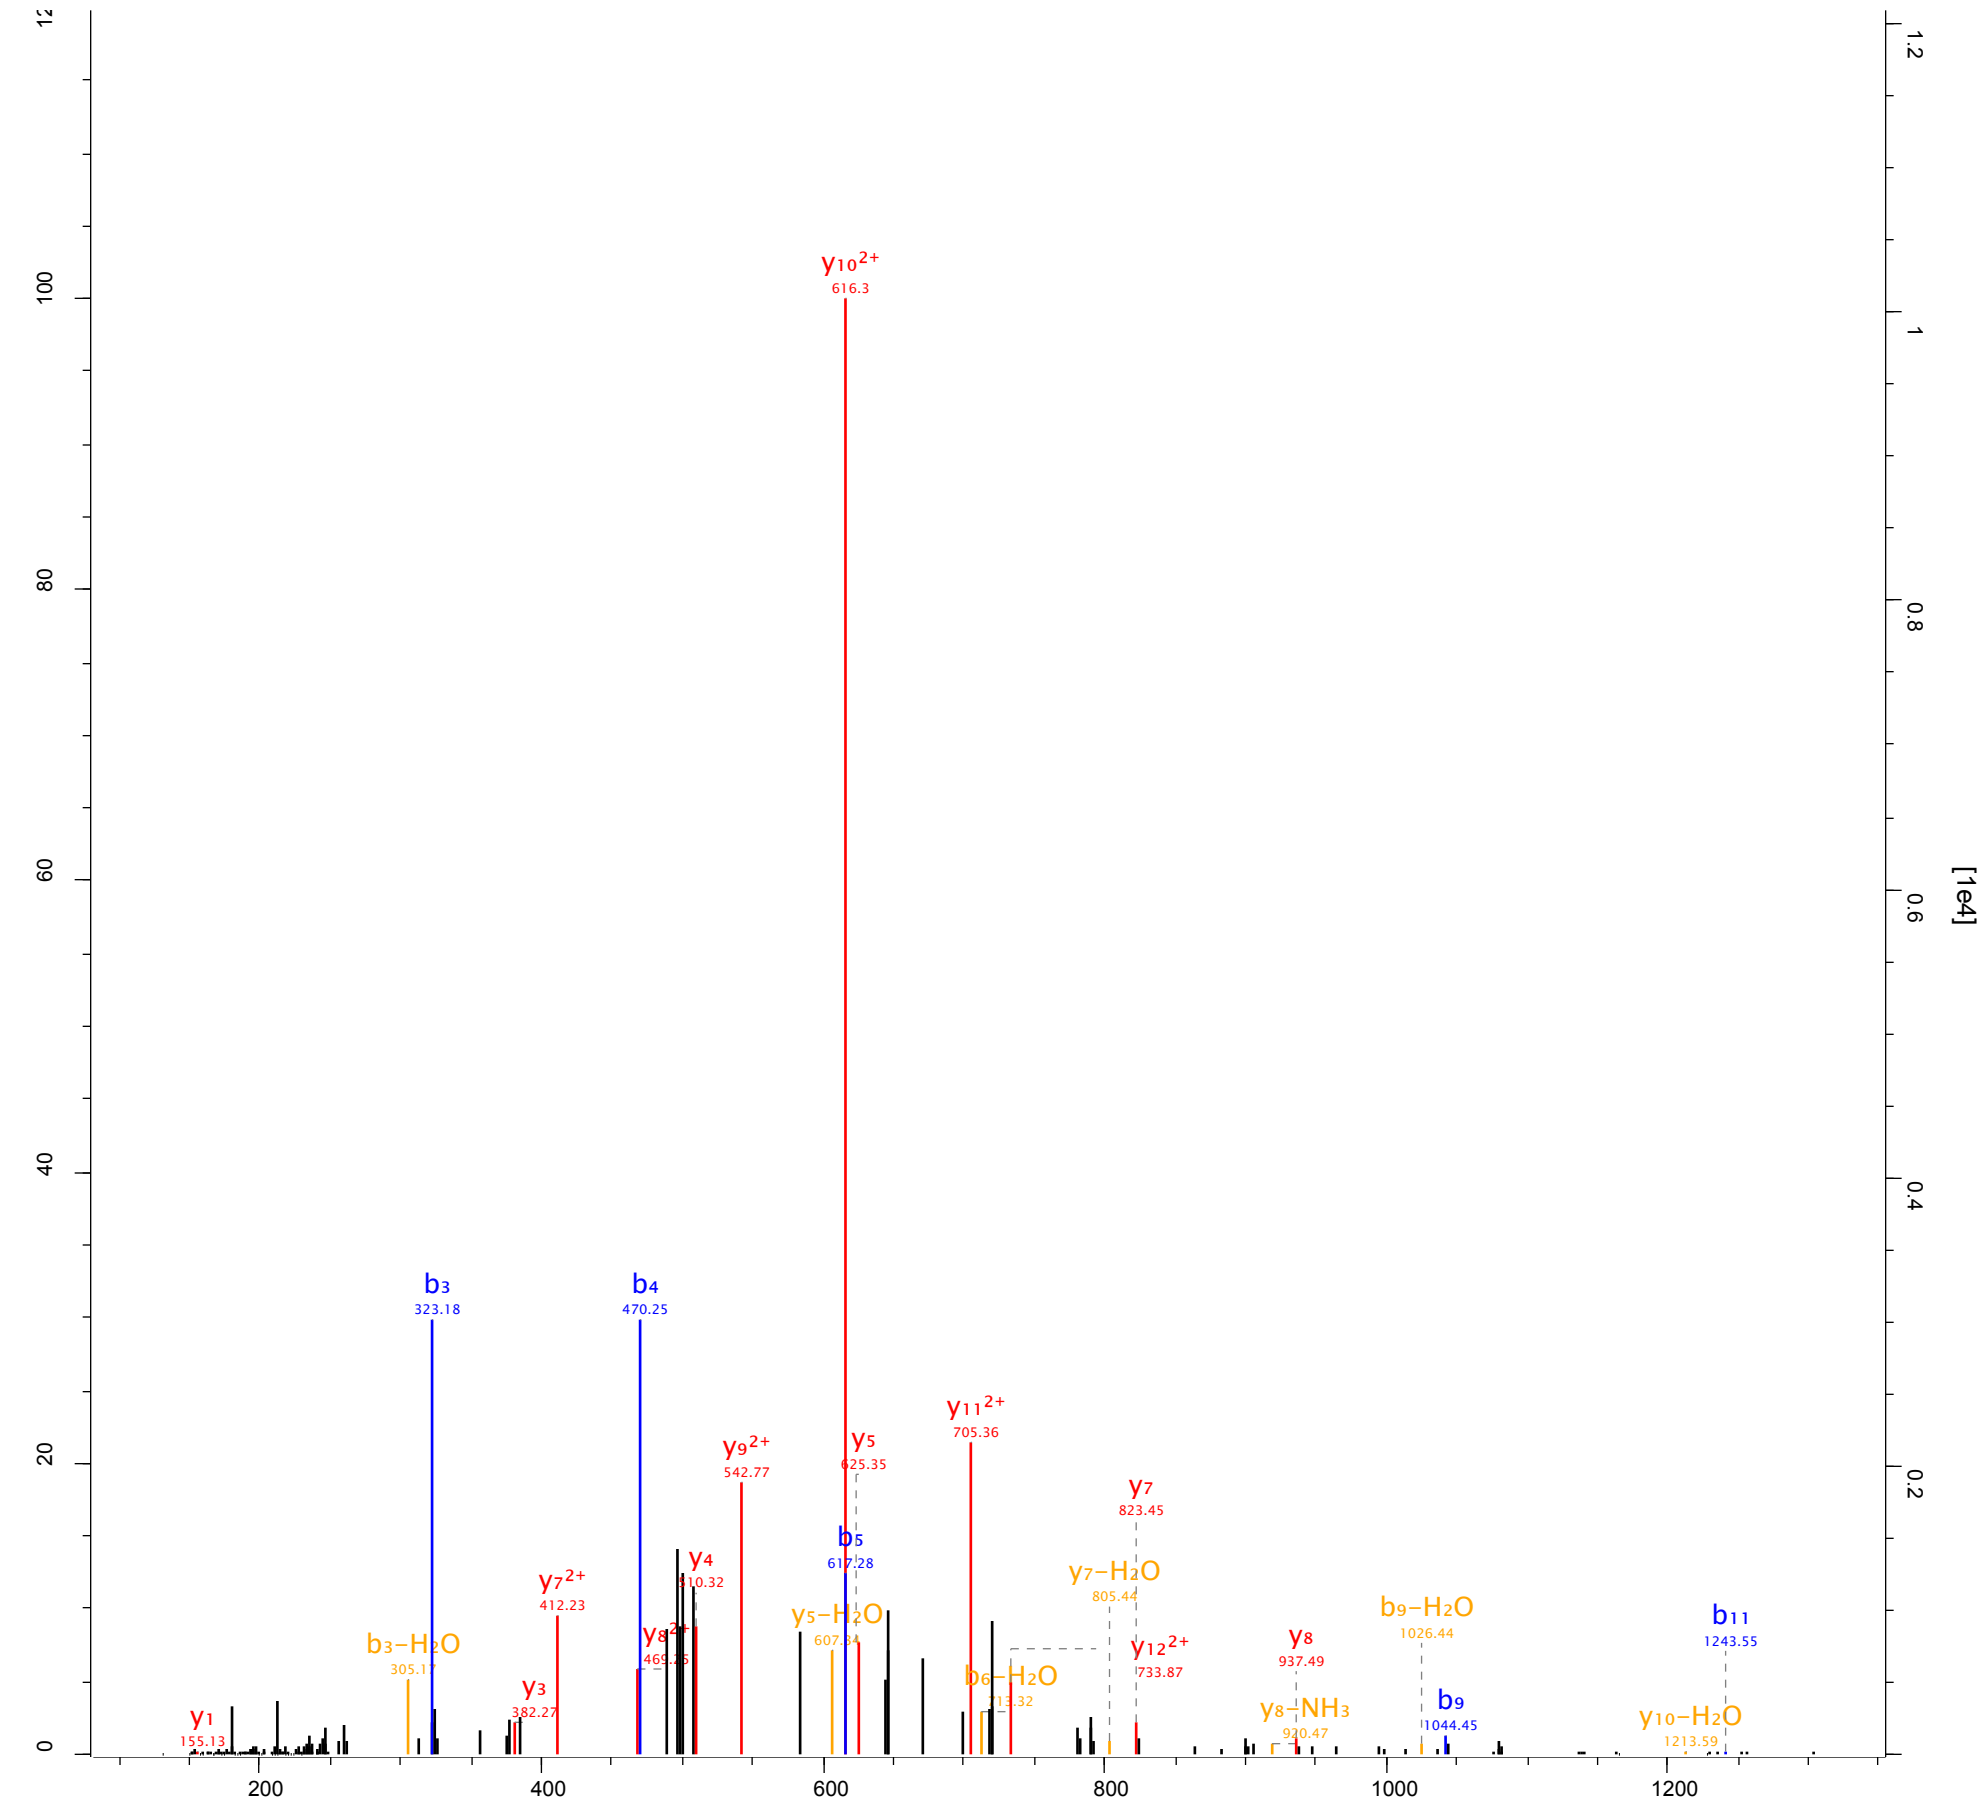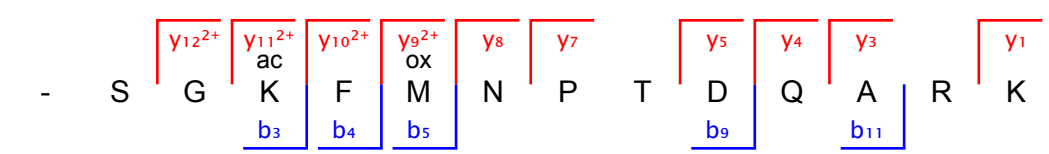

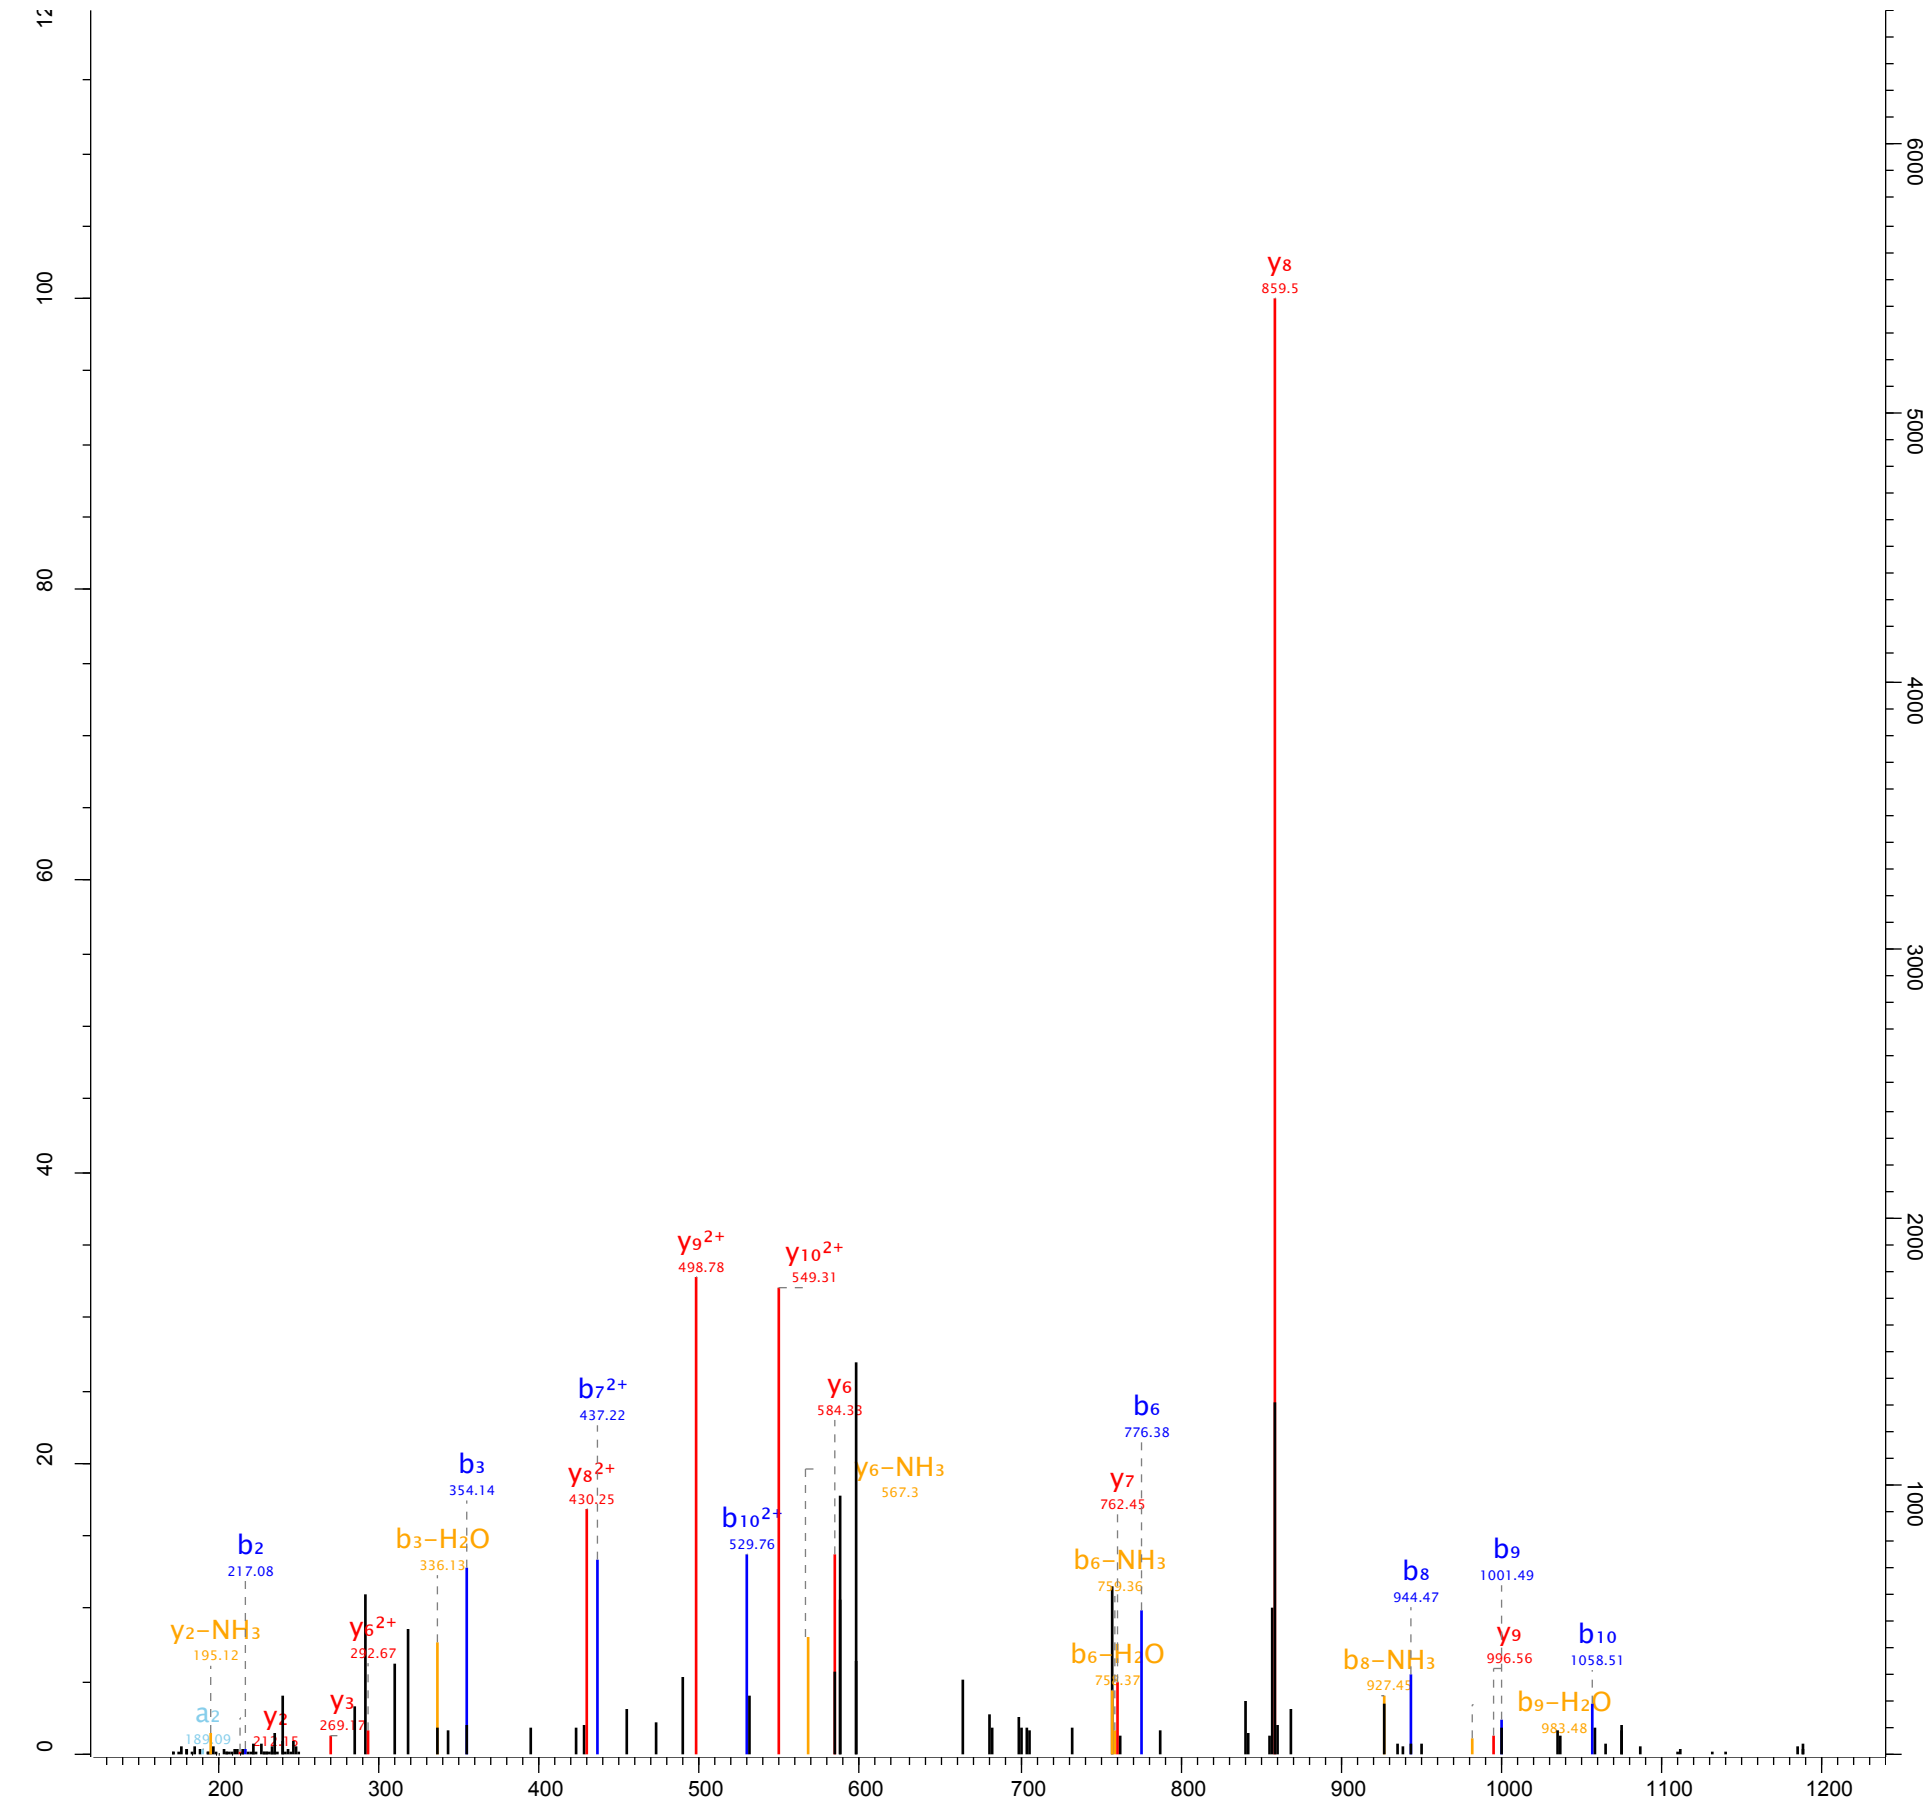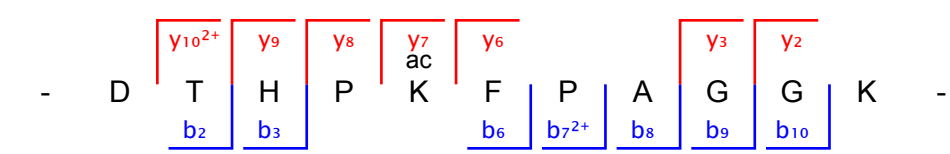

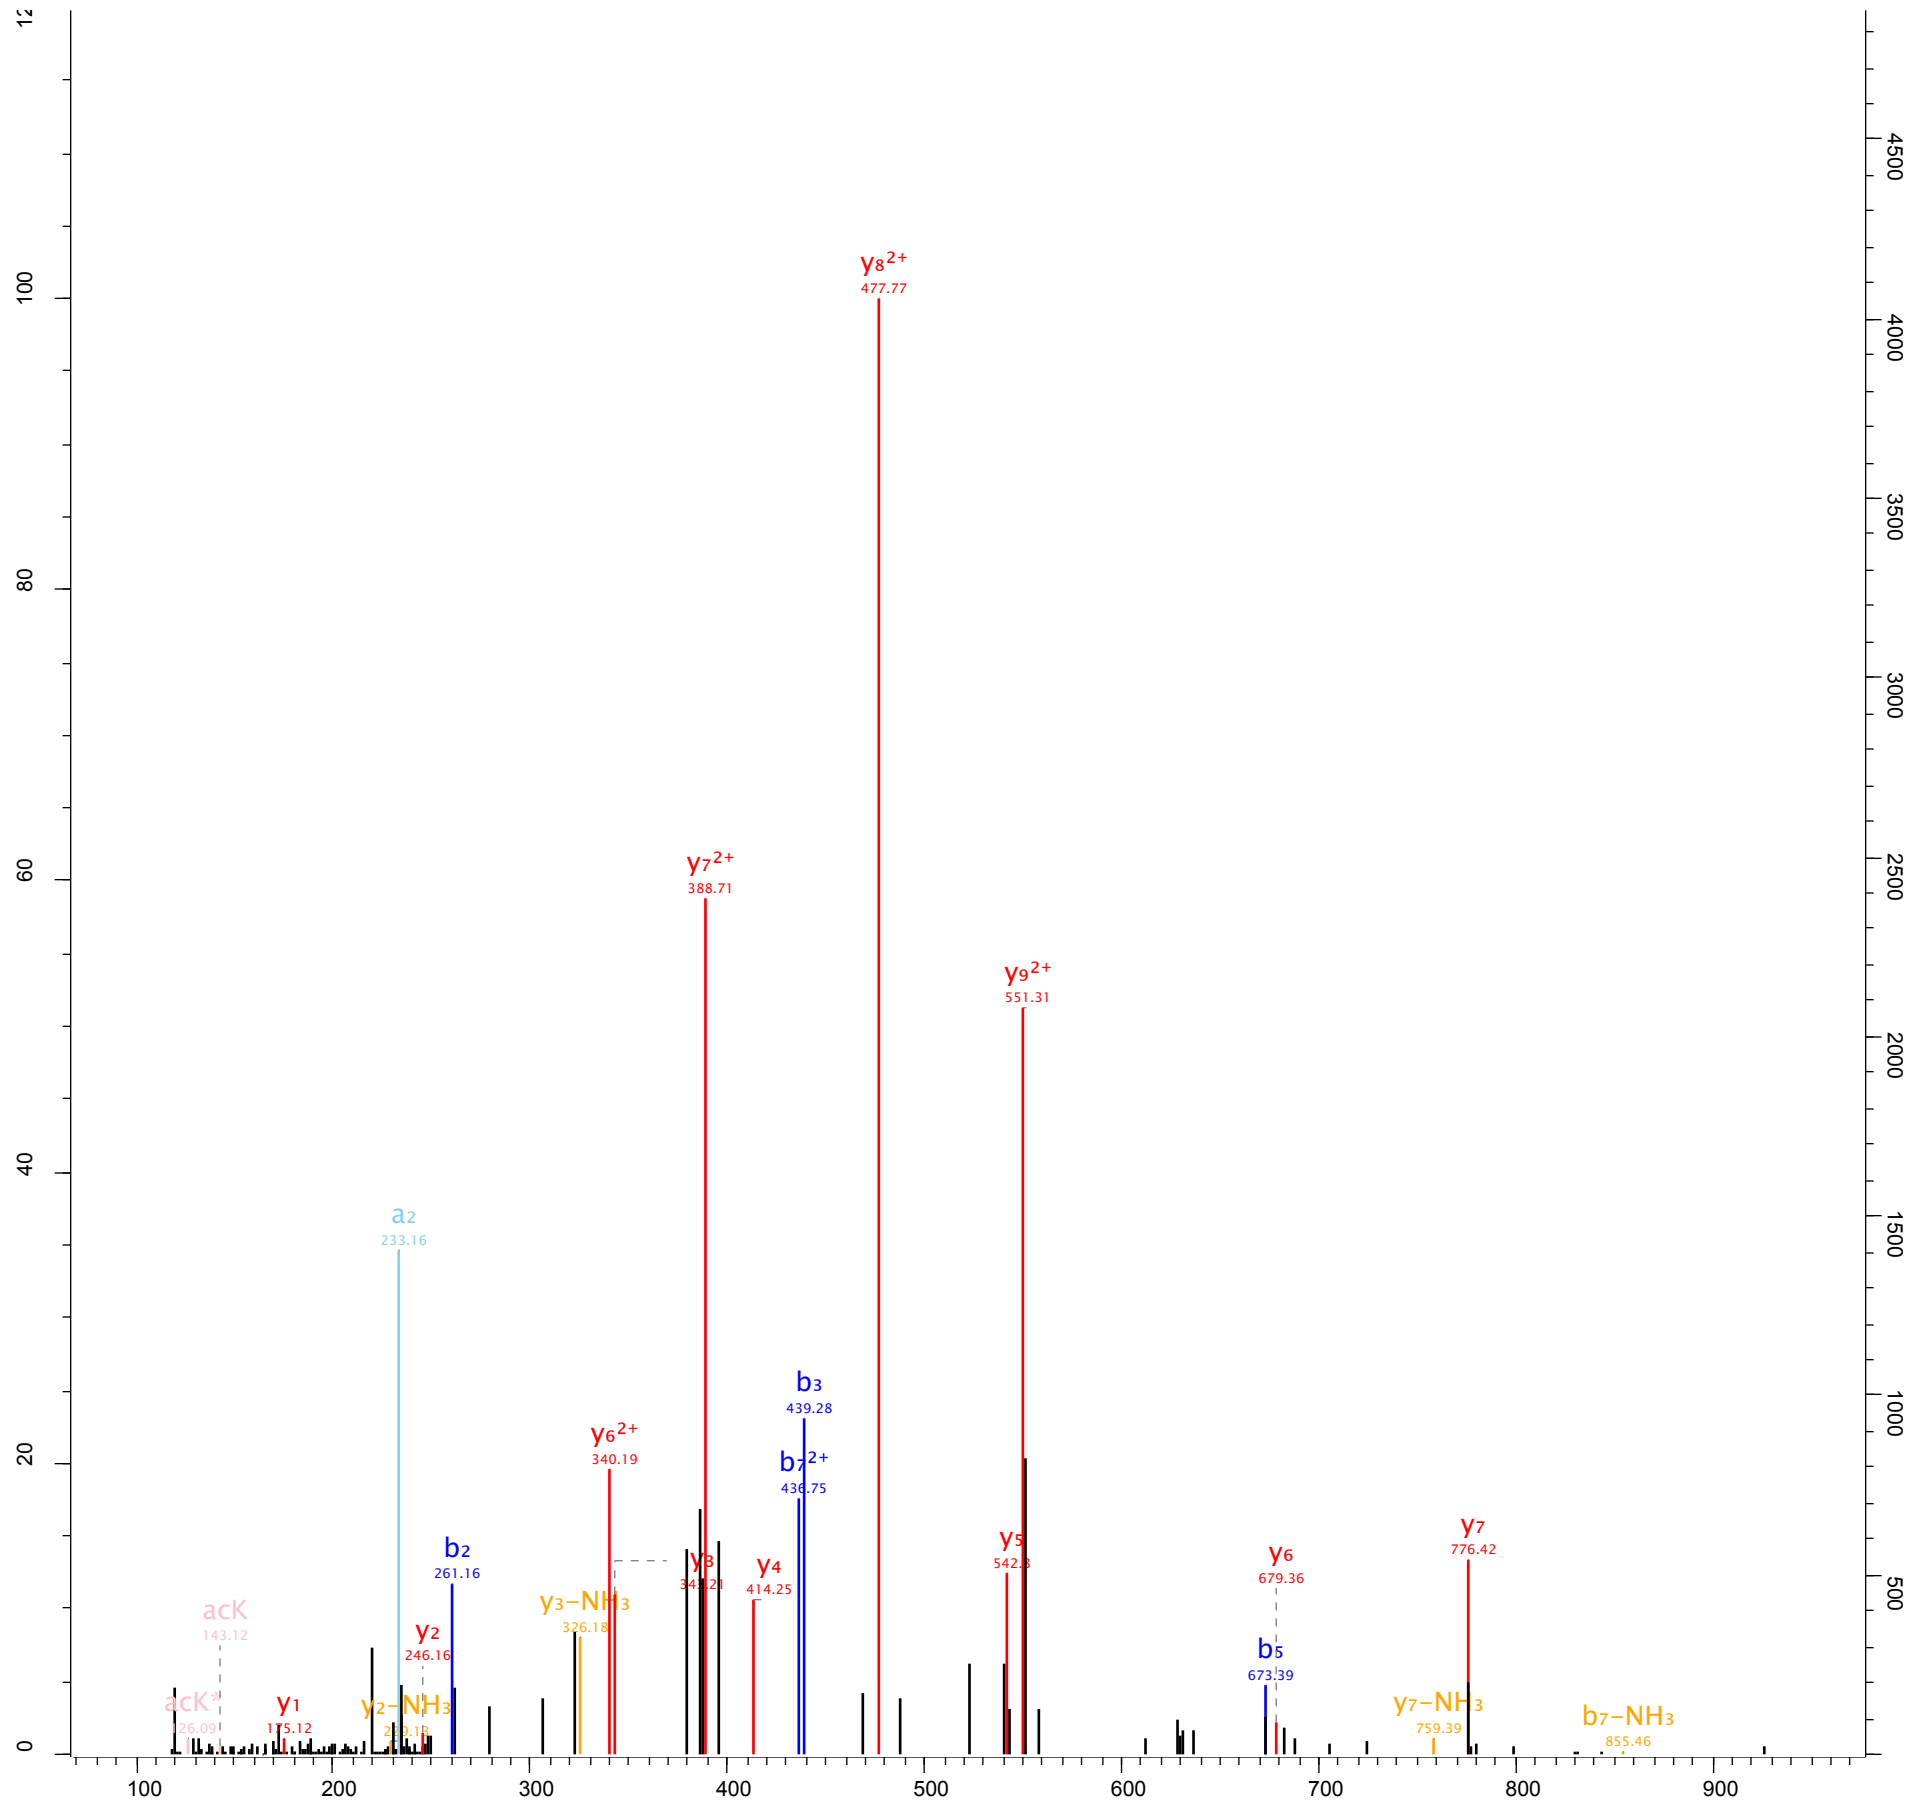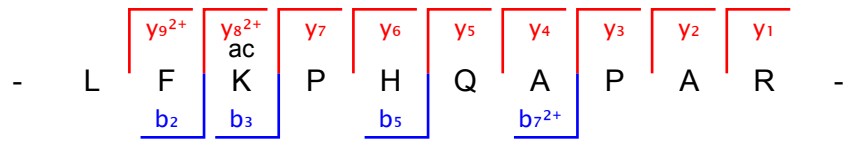

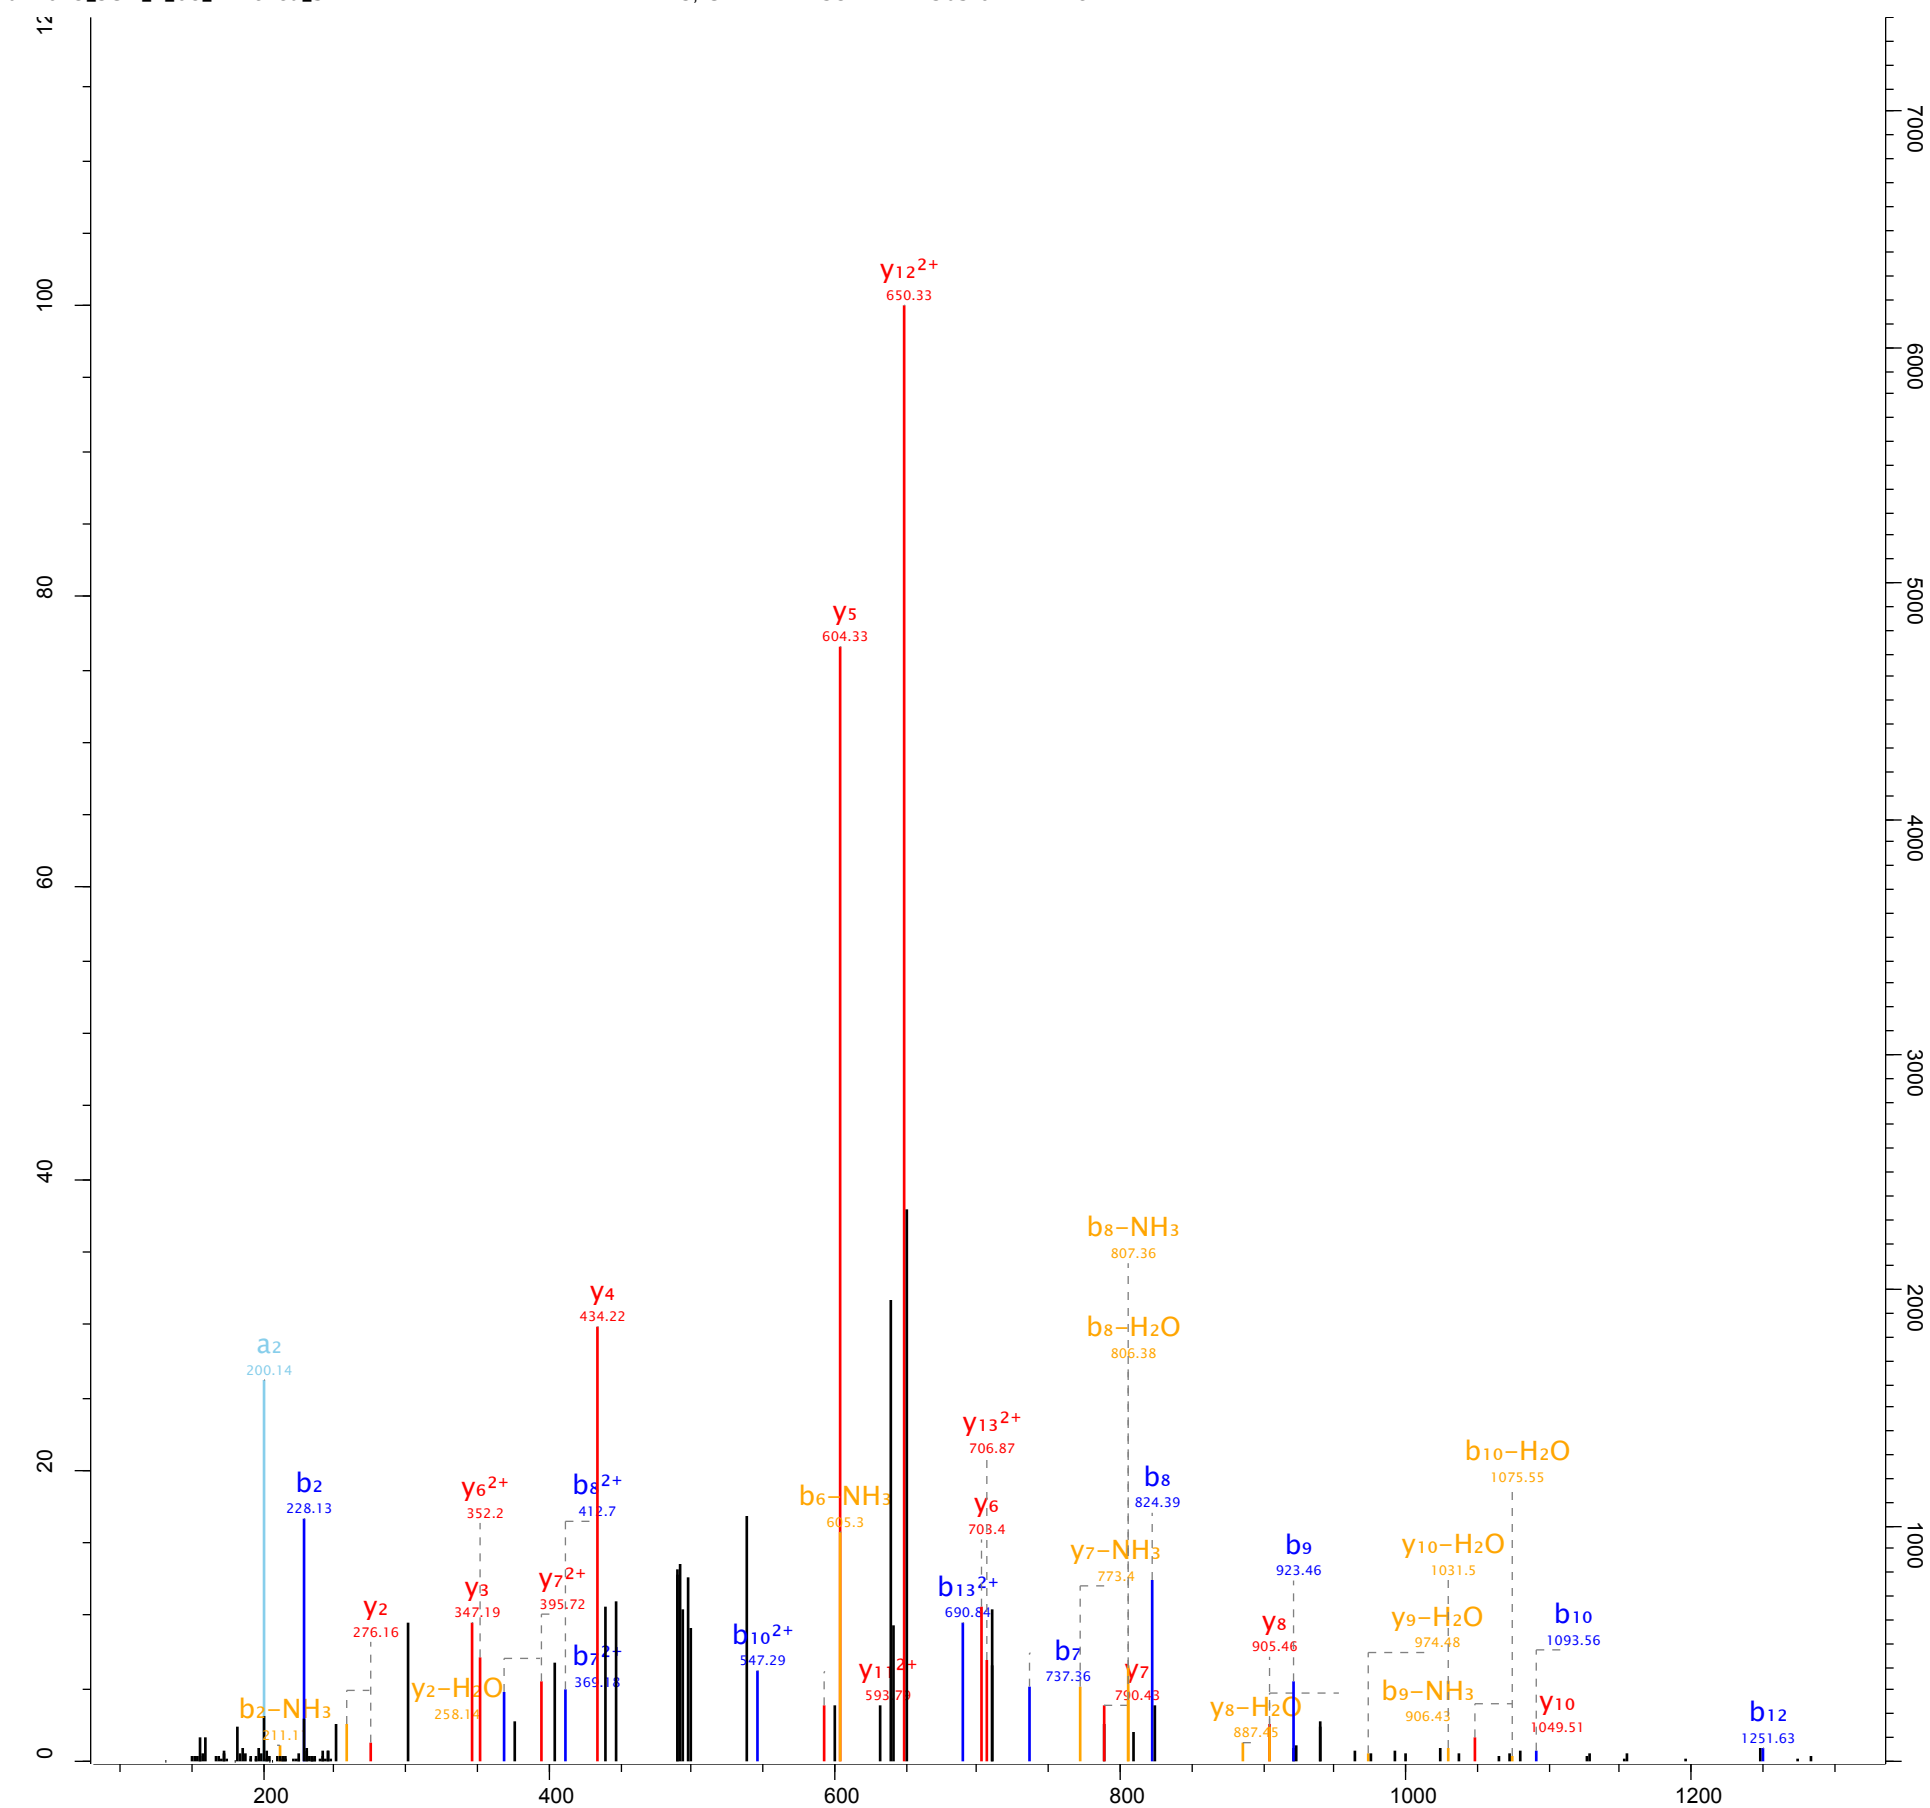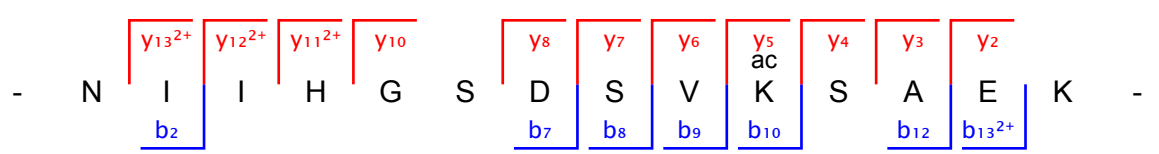

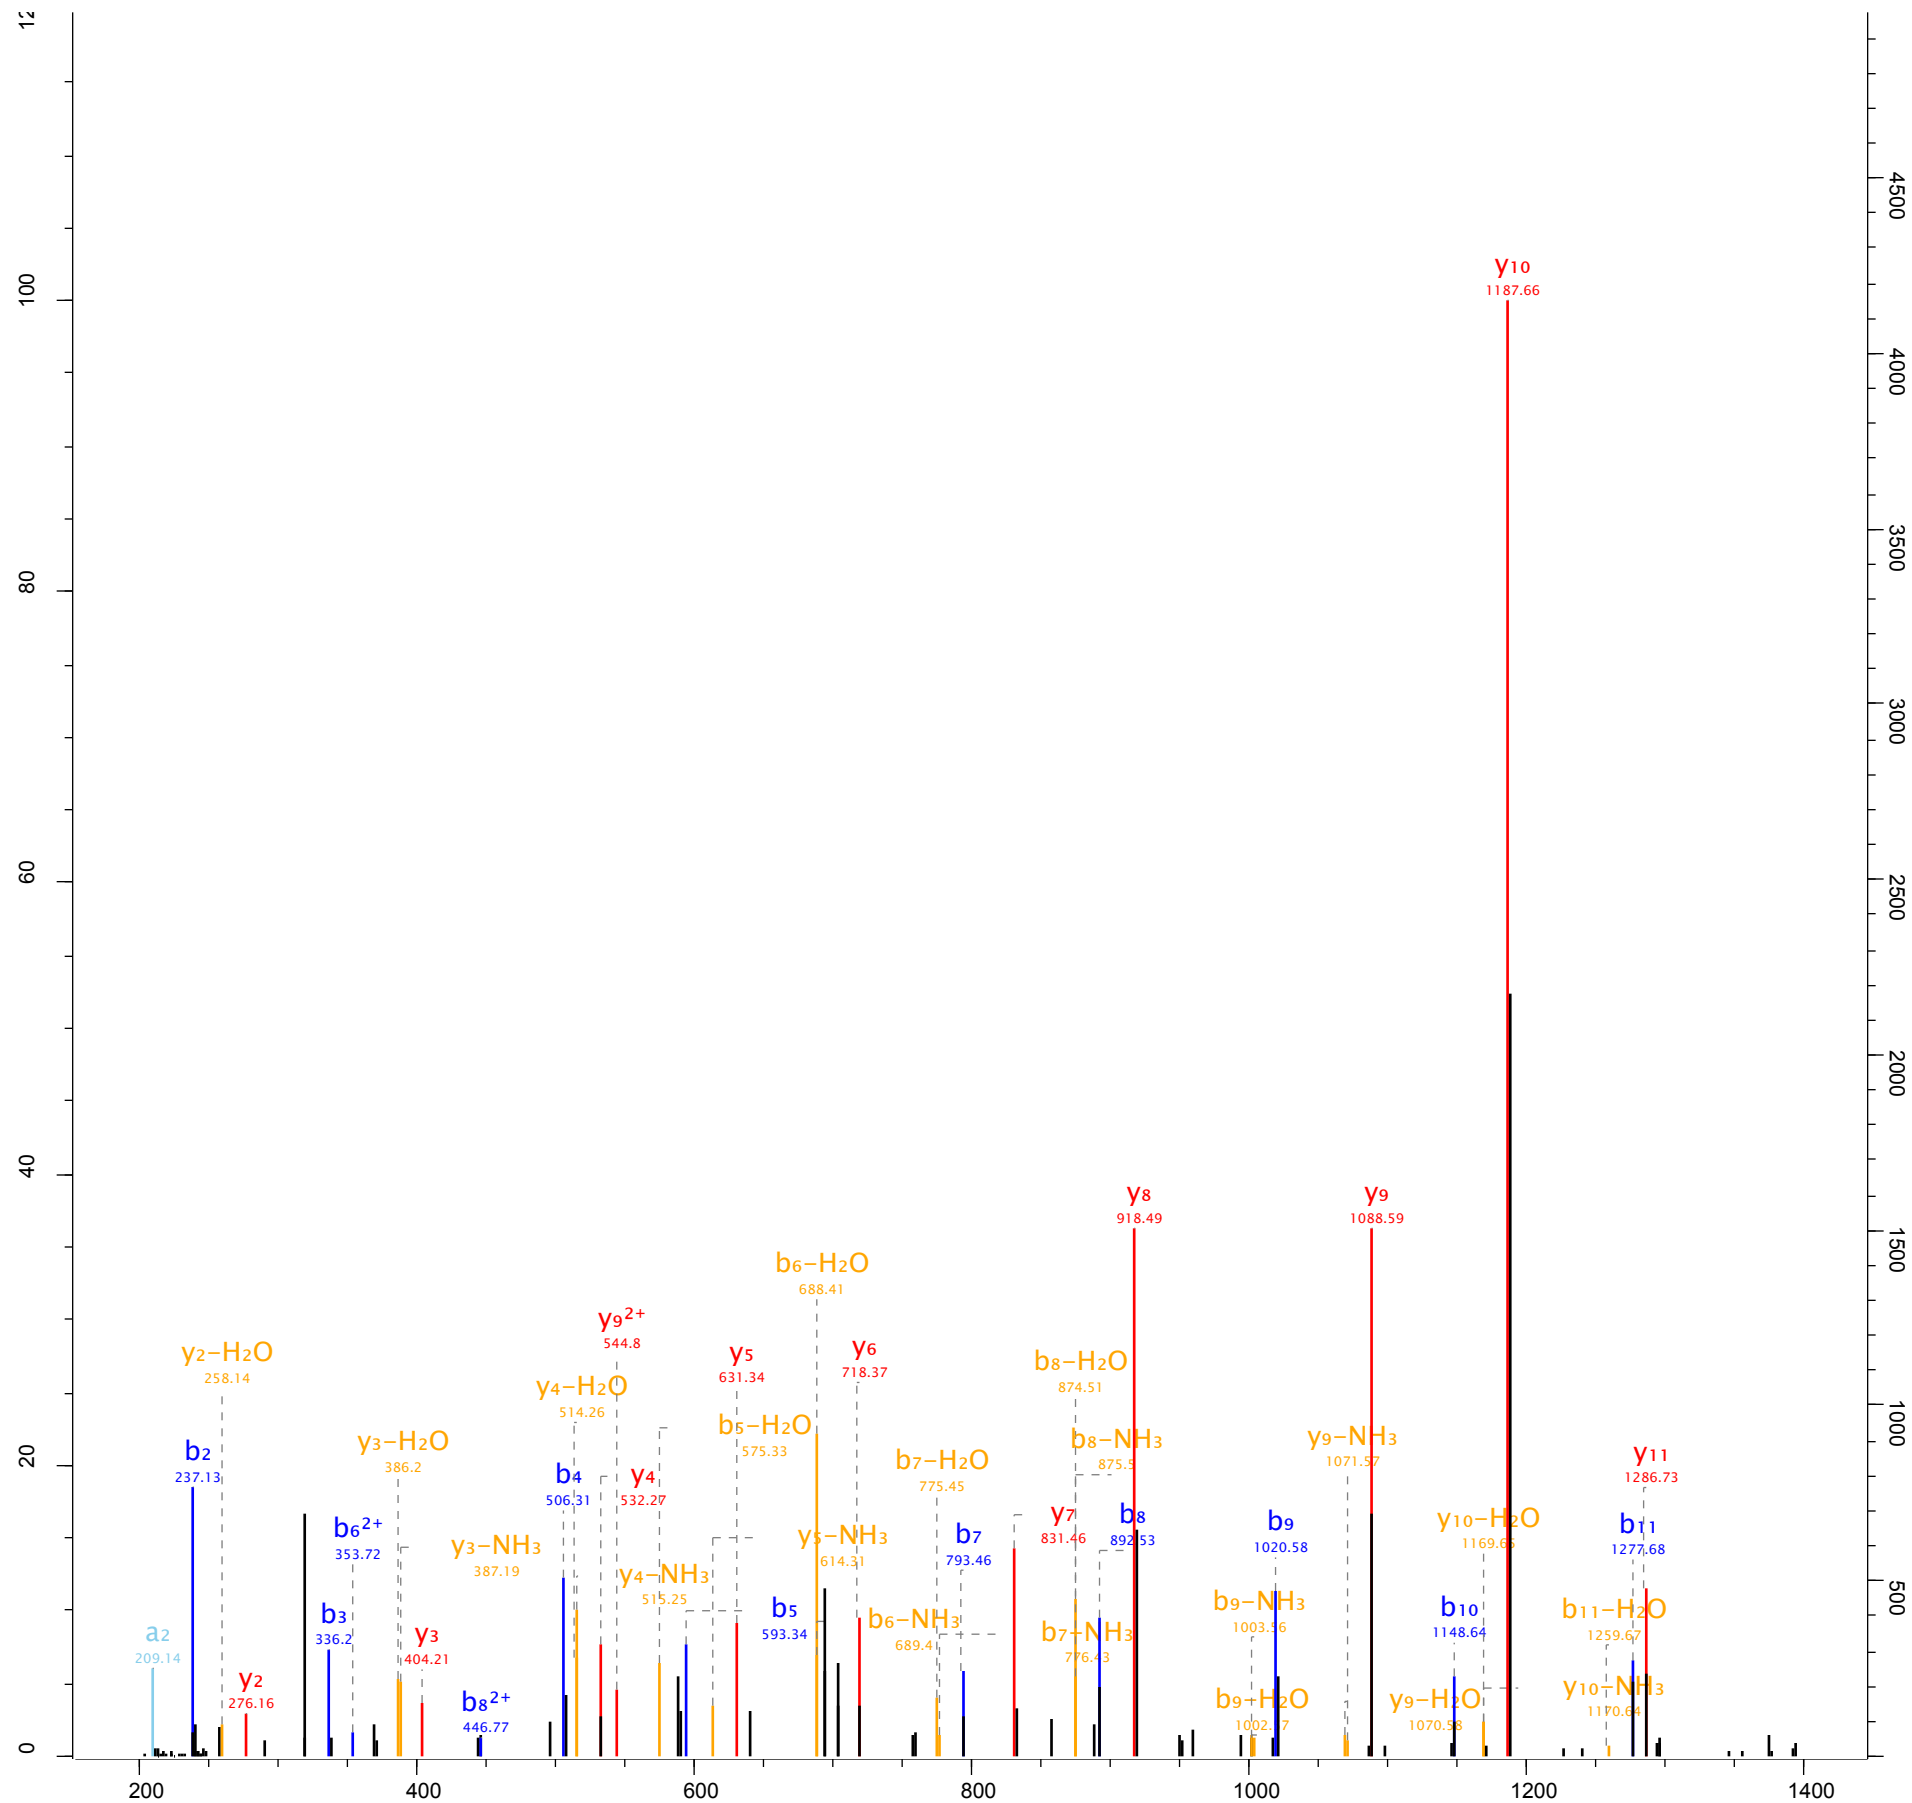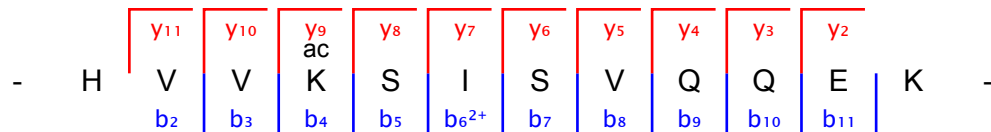

072613\_SCW\_II\_68\_Enriched\_9

14538

ITMS; CID

173.33

521.95

Oxct1

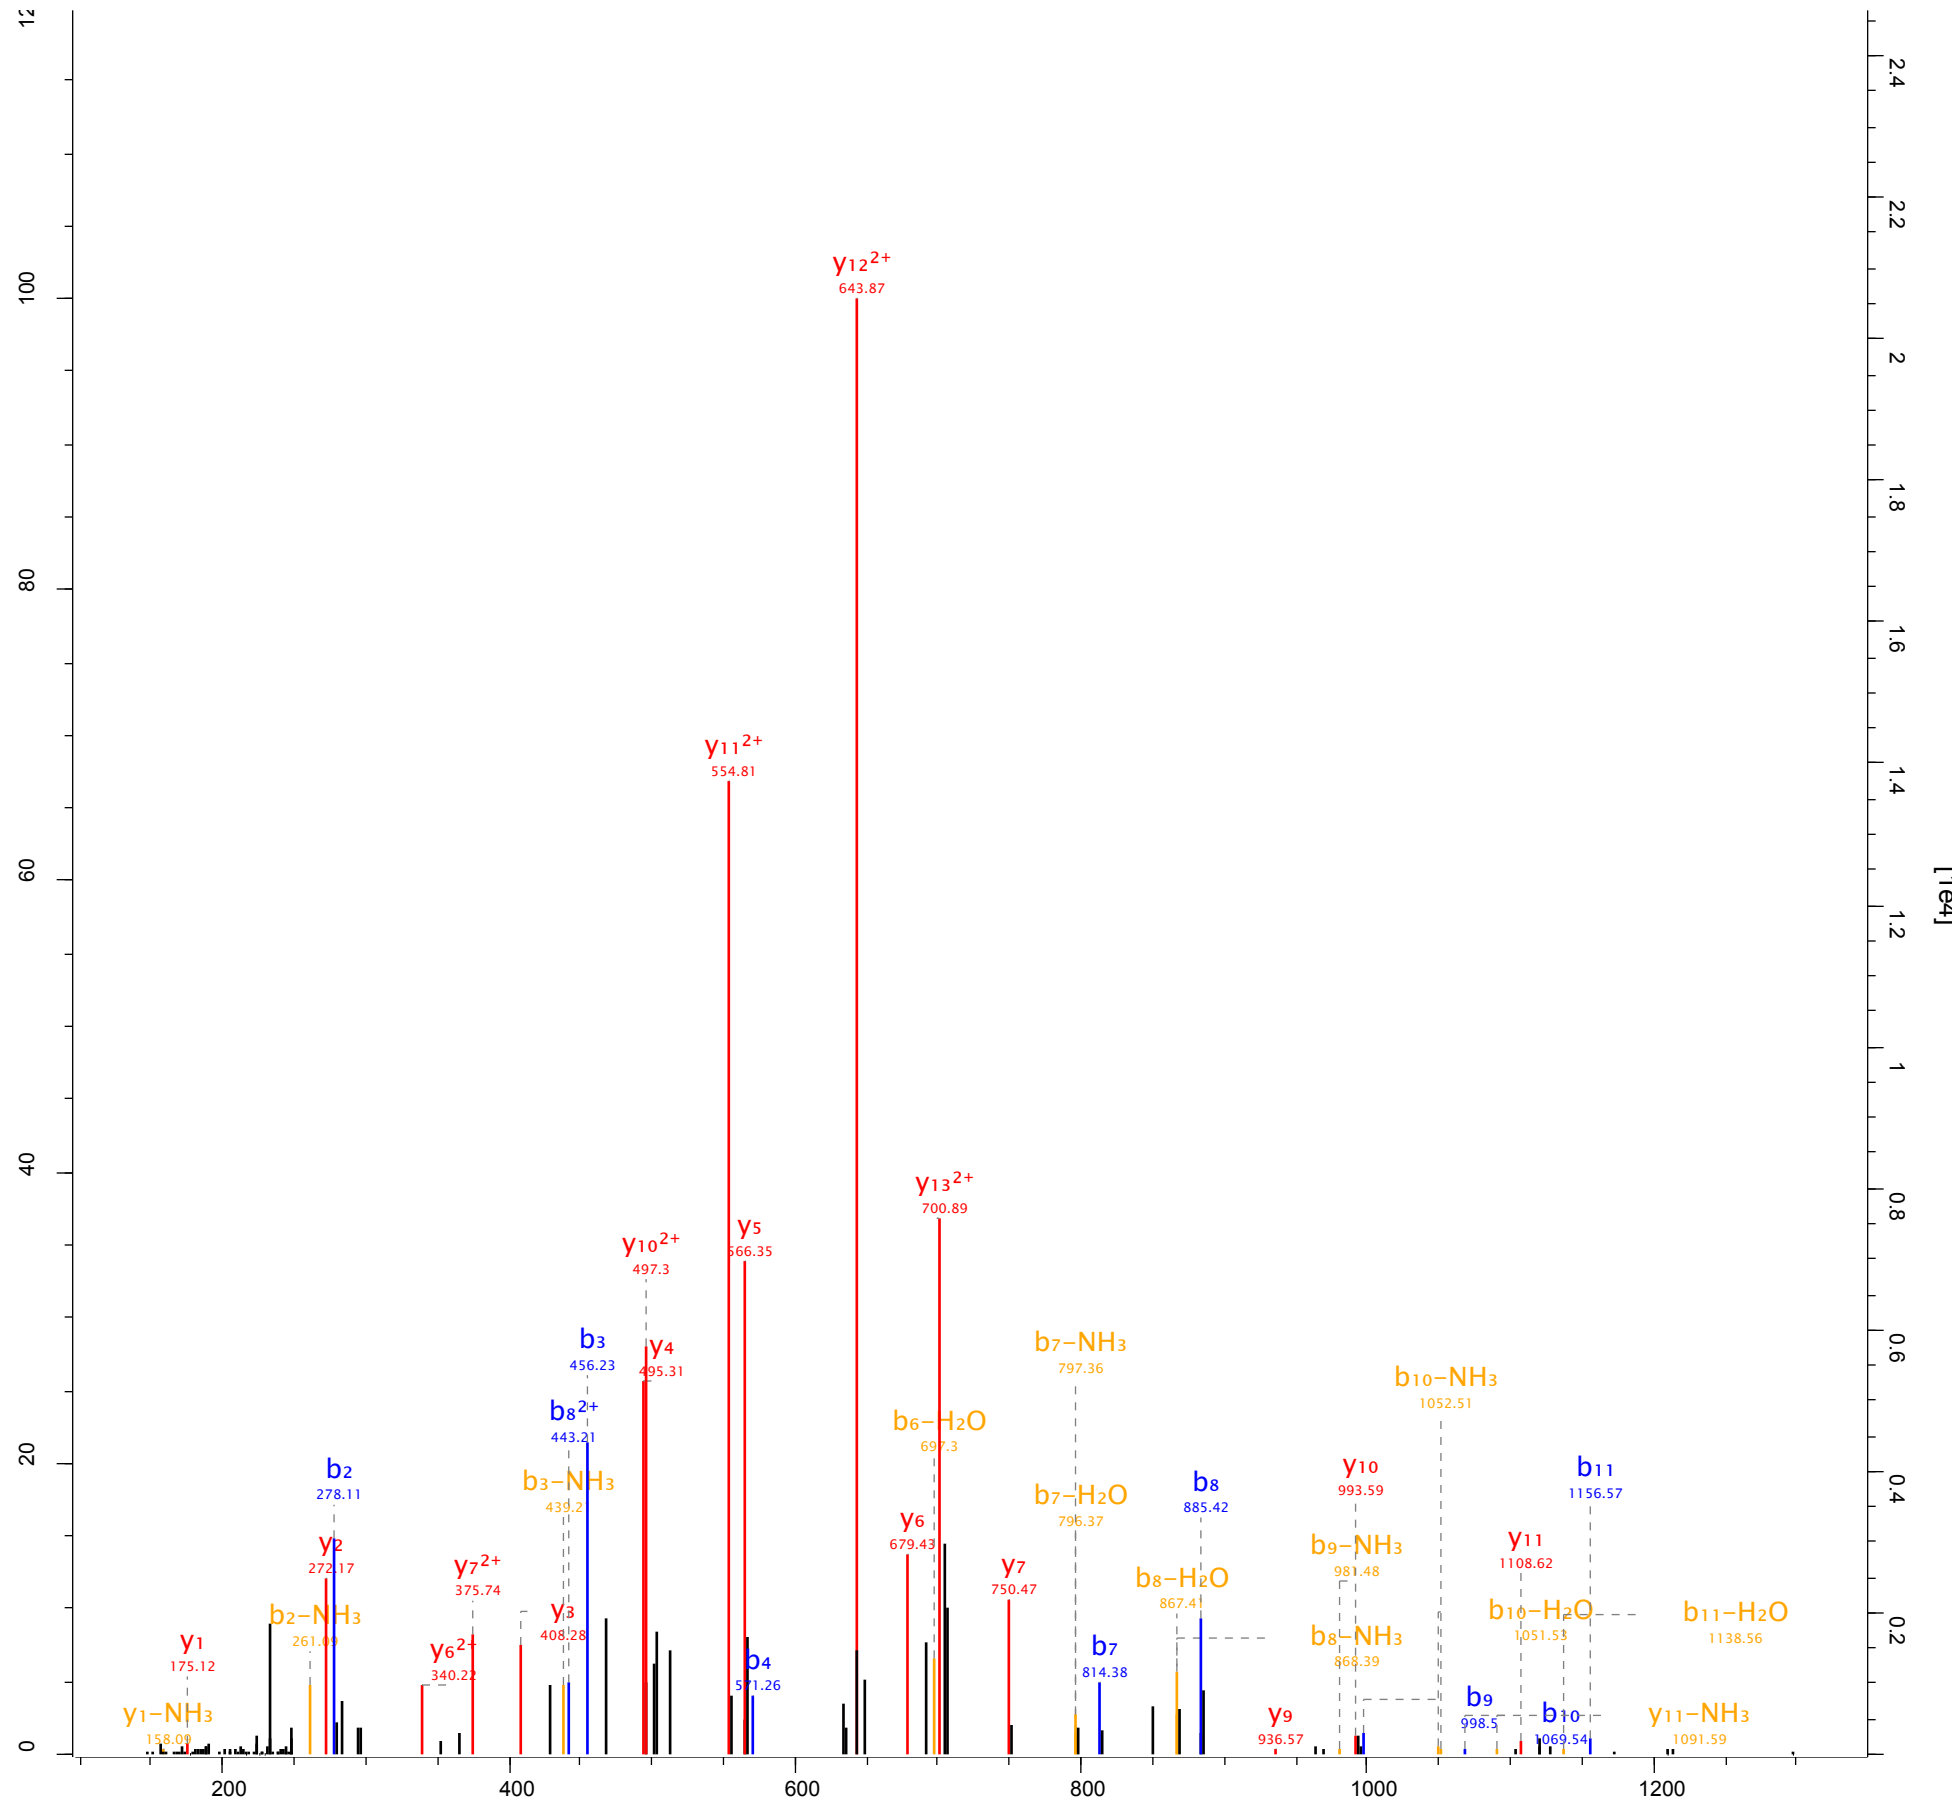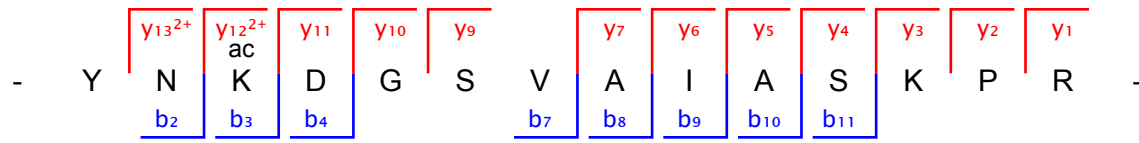

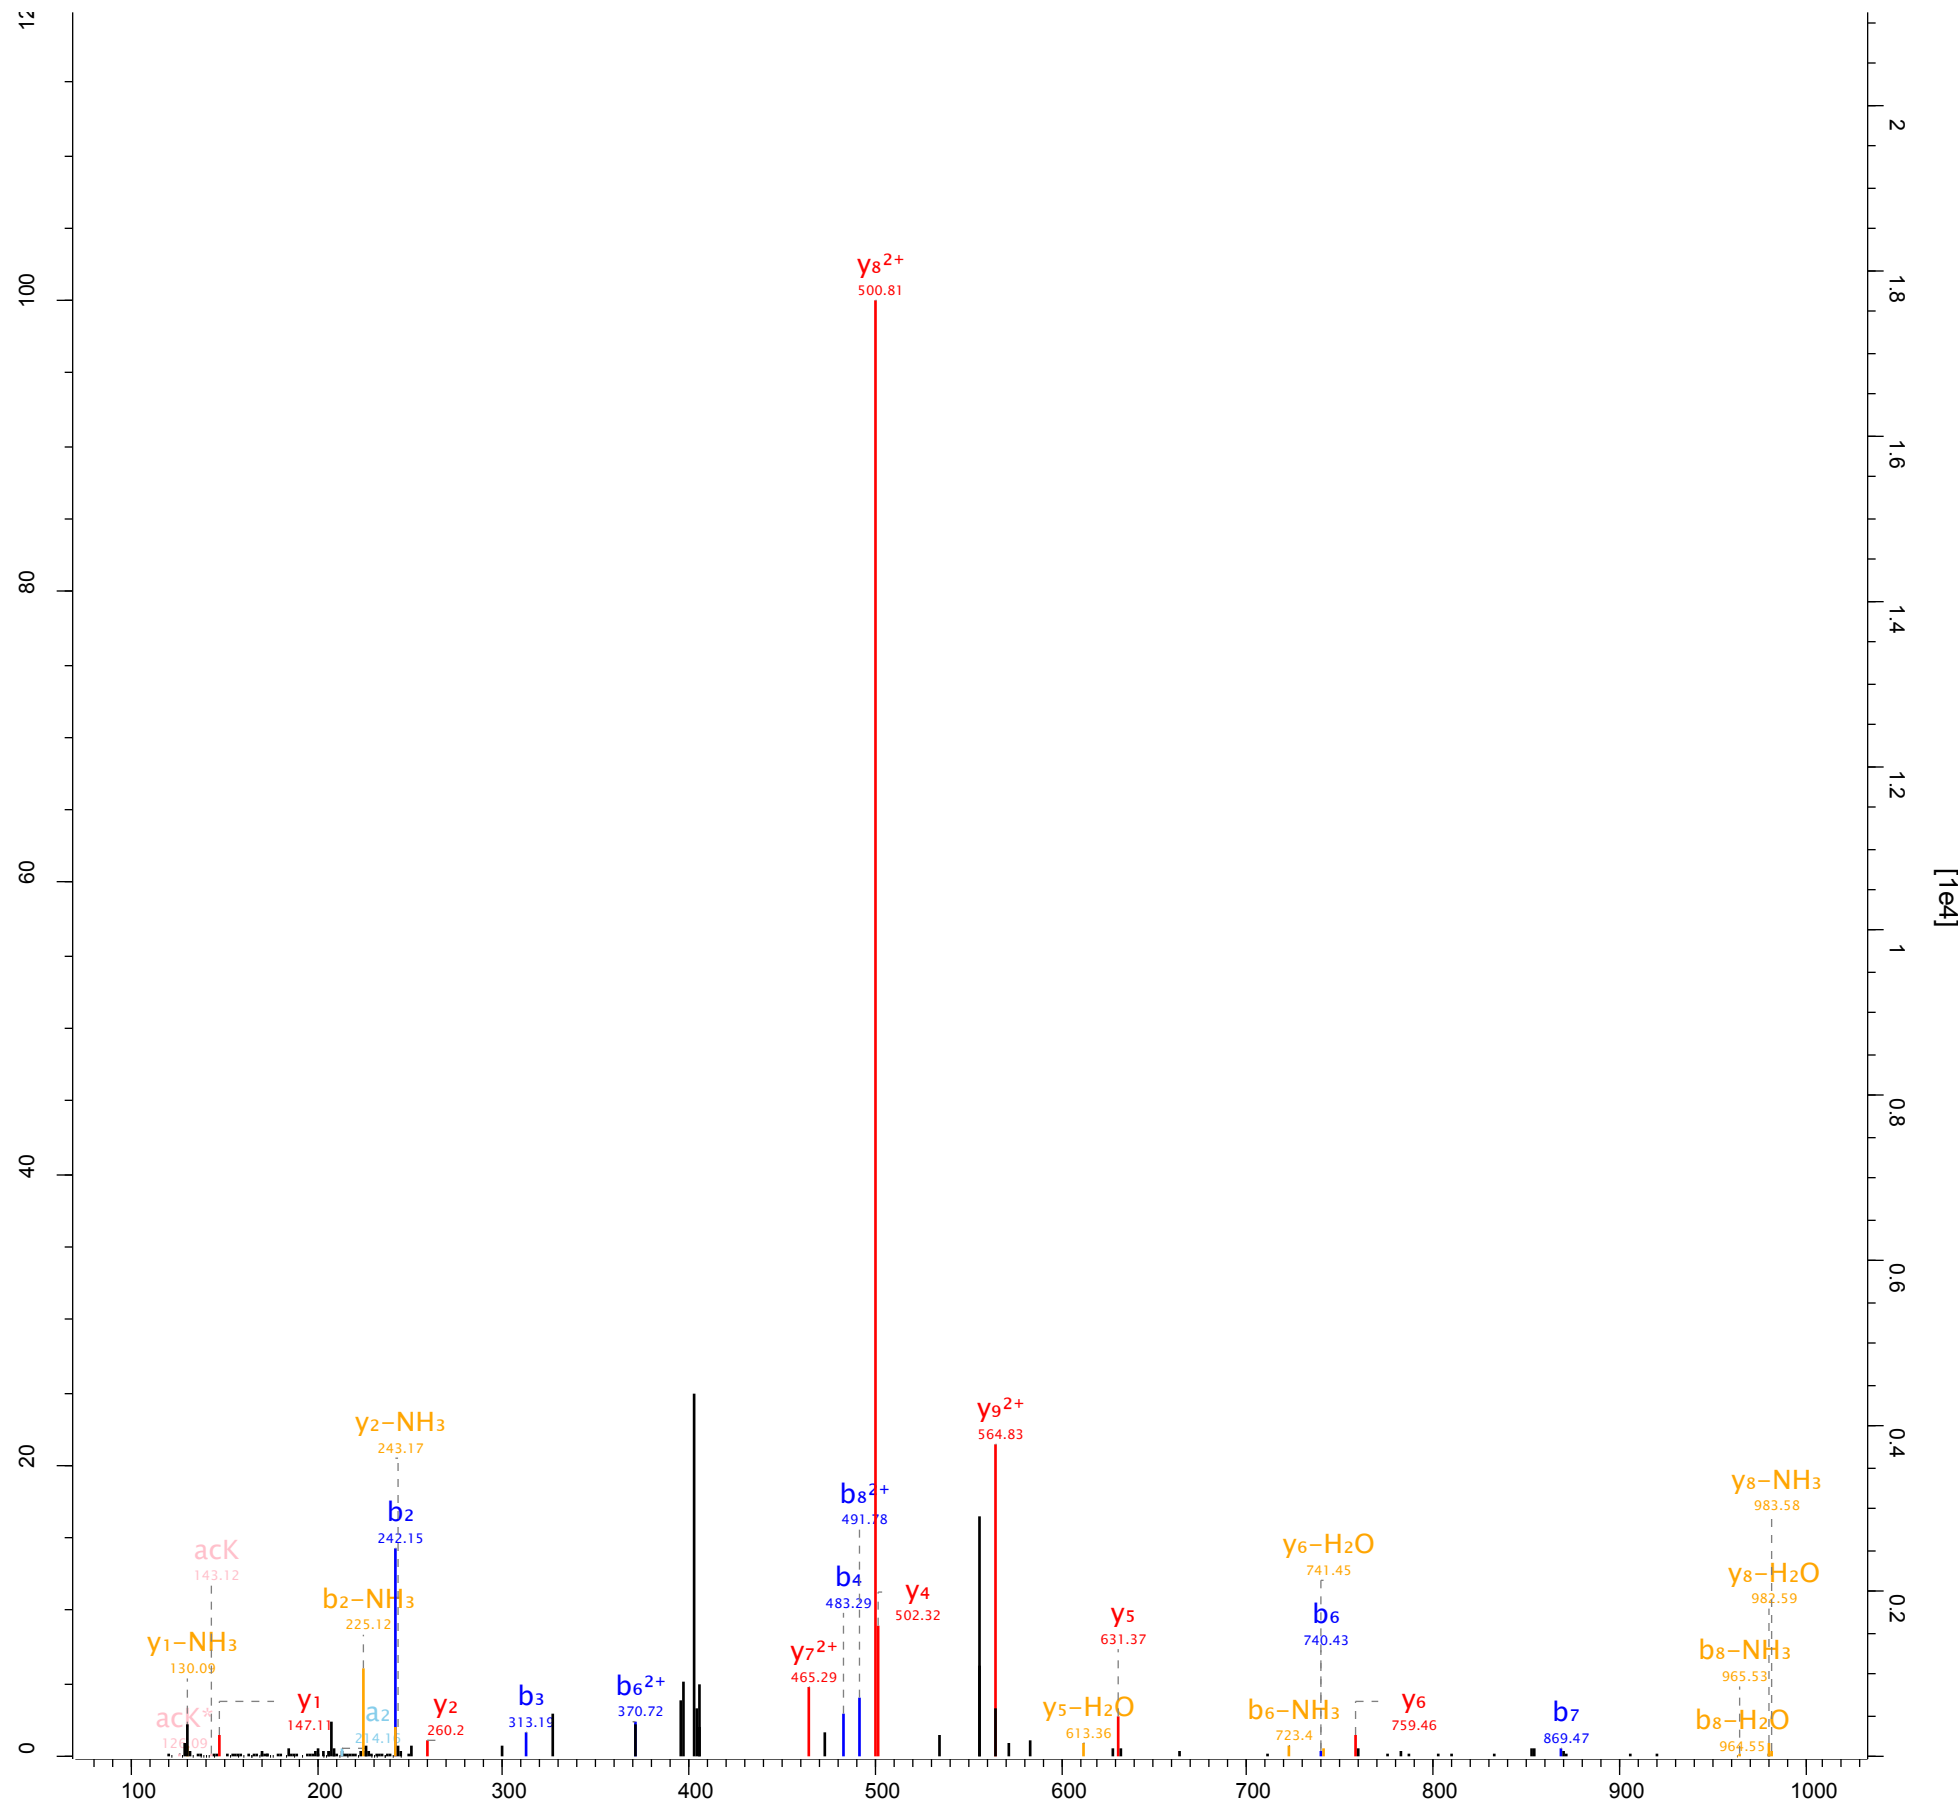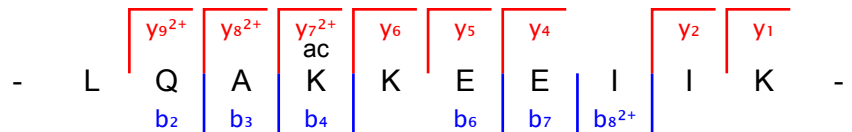

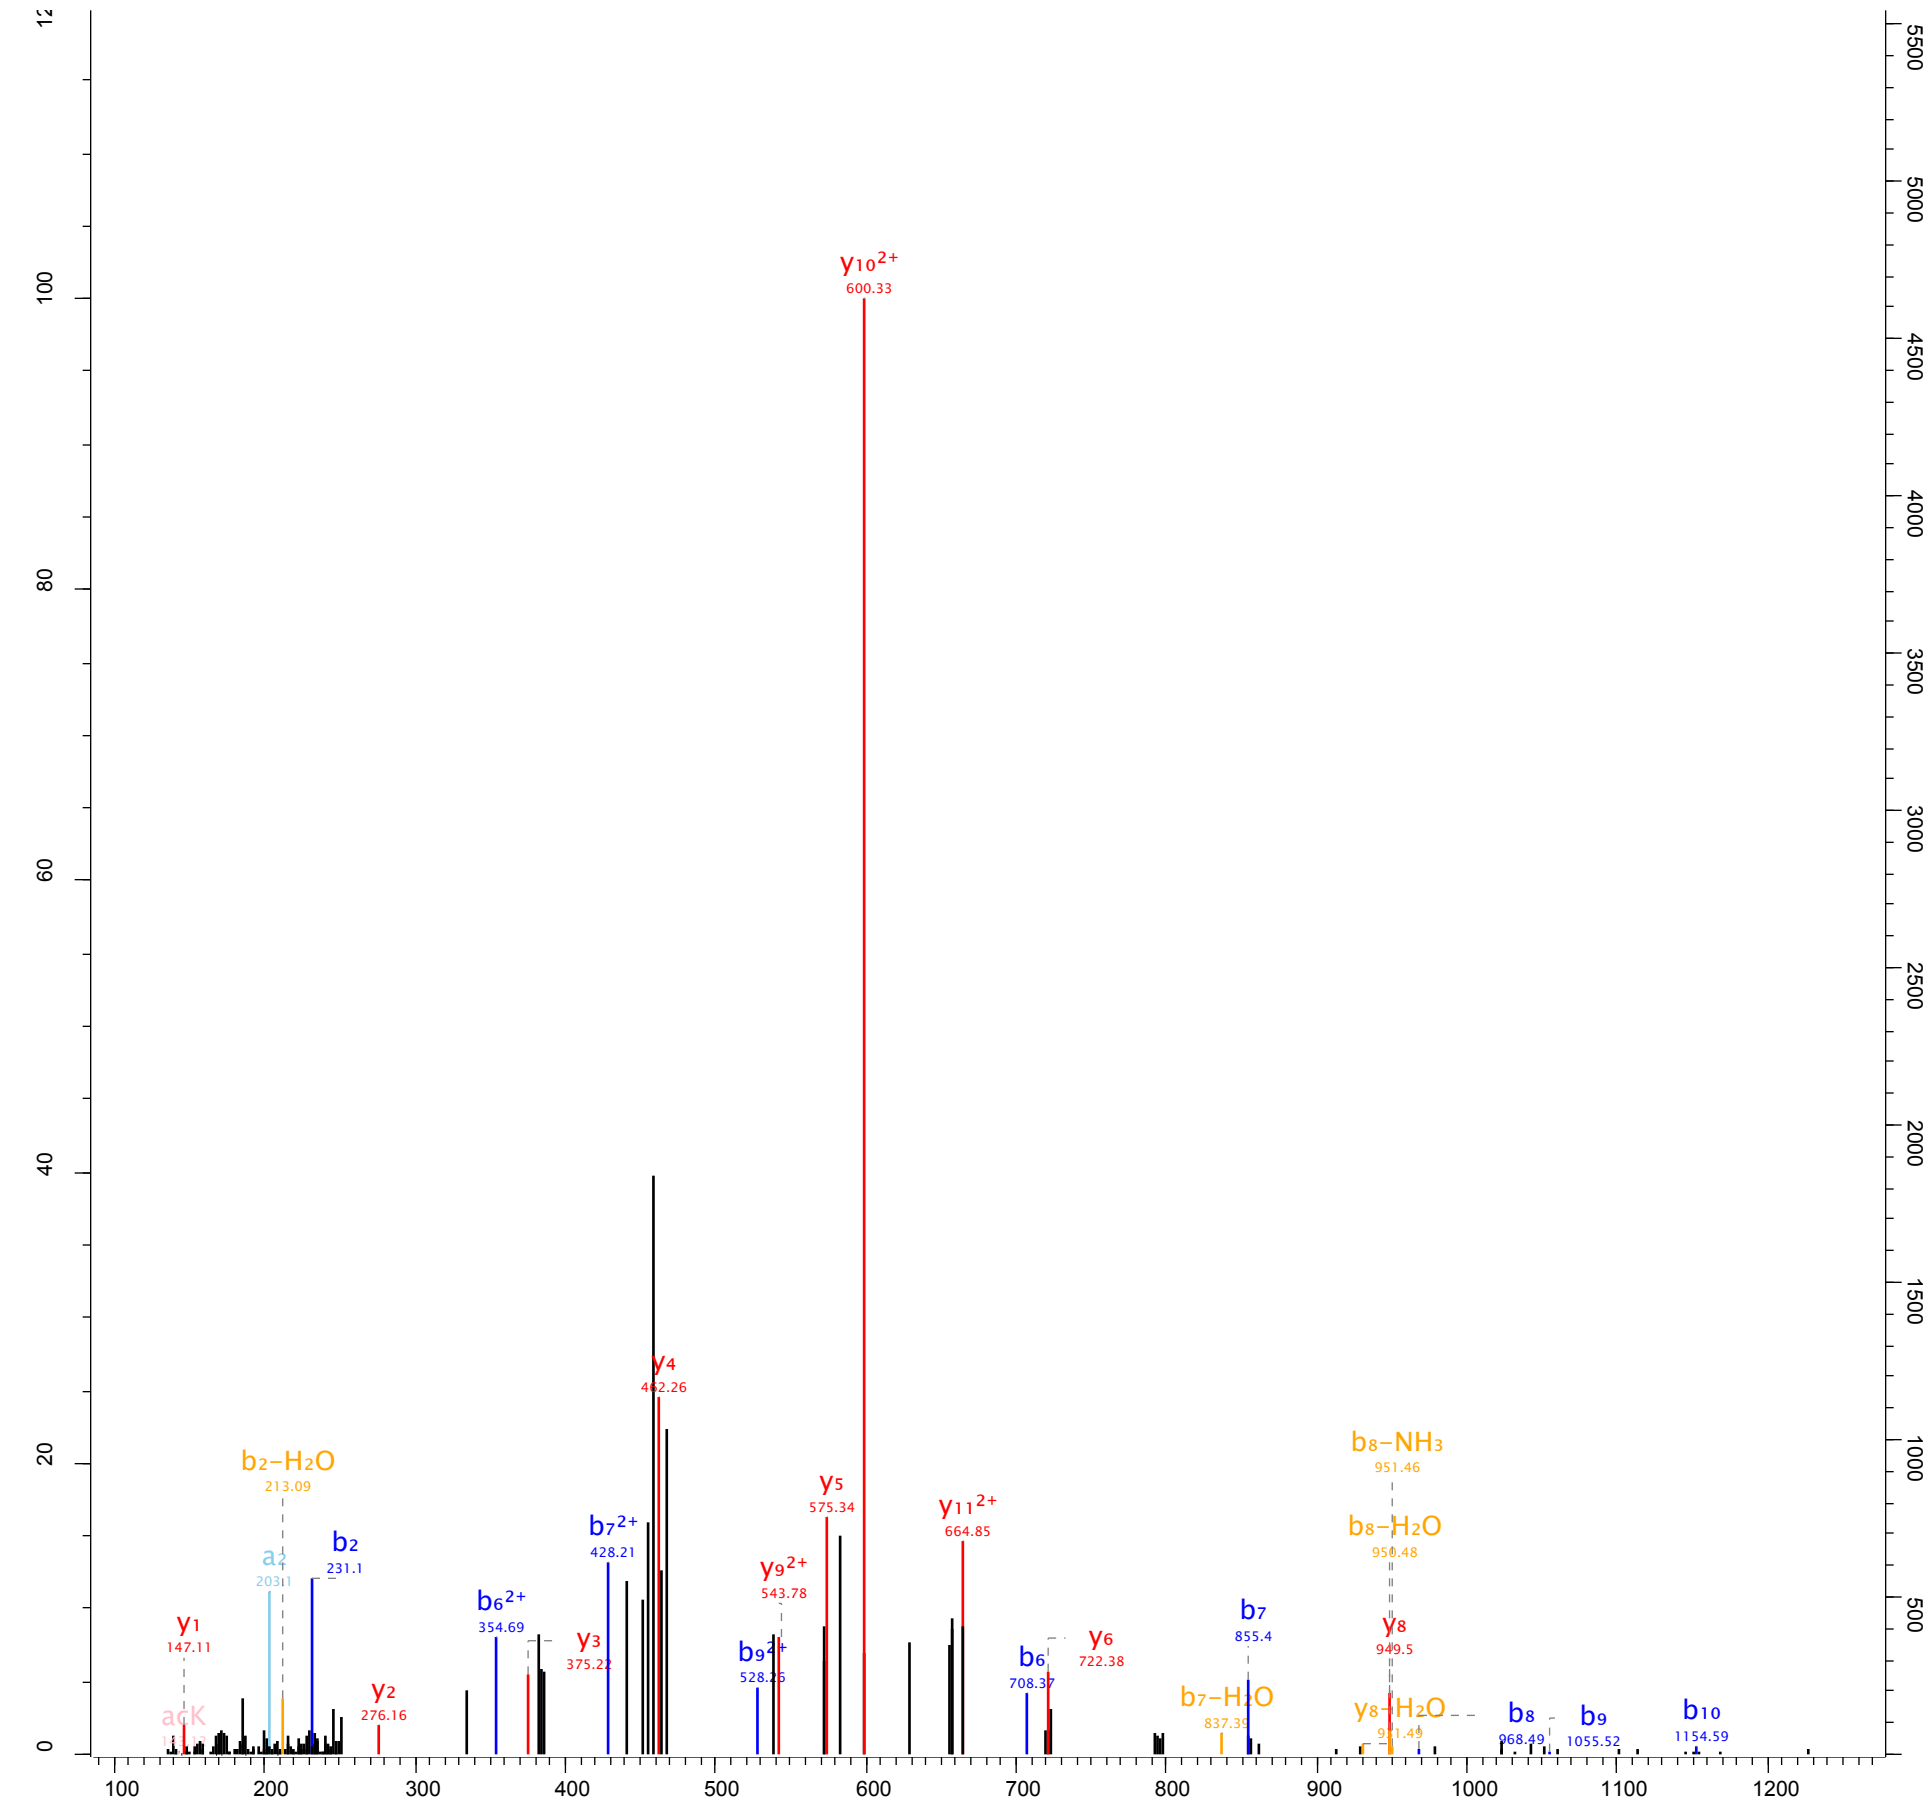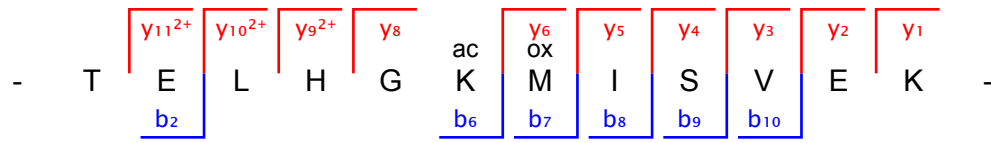



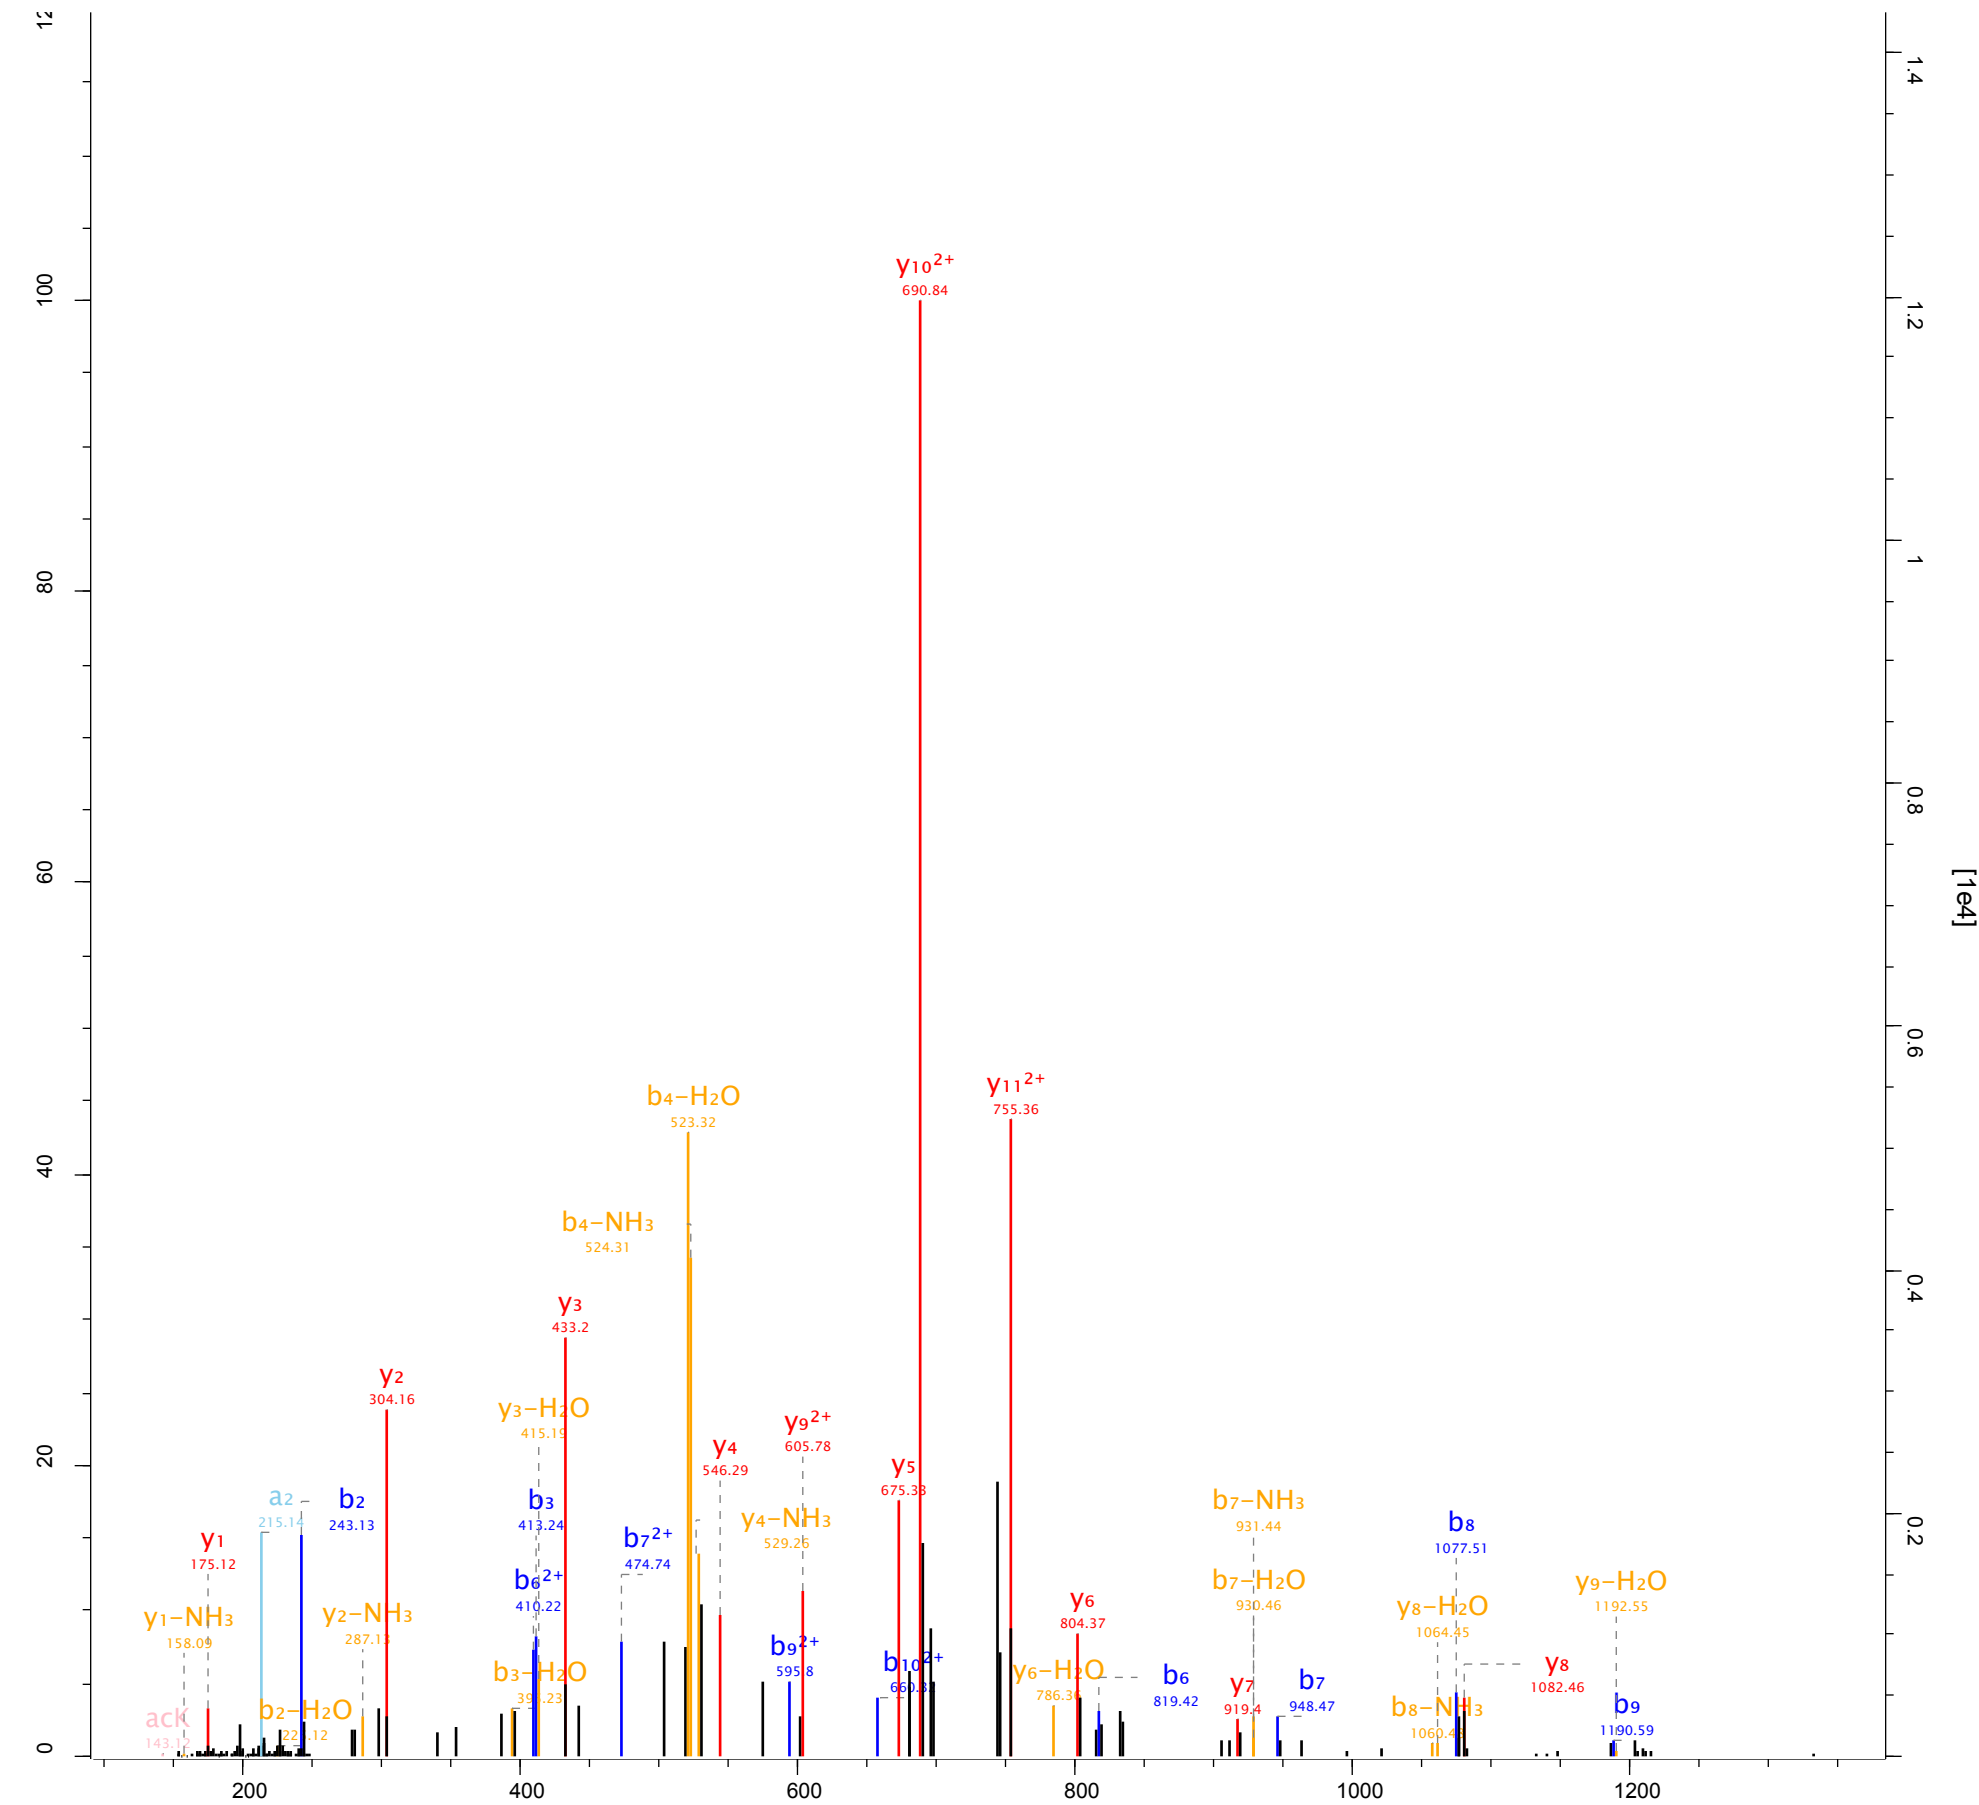

- I E K K Y D E E L E E R -

$y_{11}^{2+}$ 
 $y_{10}^{2+}$ 
 $y_9^{2+}$ 
 $y_8$ 
 $y_7$ 
 $y_6$ 
 $y_5$ 
 $y_4$ 
 $y_3$ 
 $y_2$ 
 $y_1$

$b_2$ 
ac
 $b_3$ 
 $b_6$ 
 $b_7$ 
 $b_8$ 
 $b_9$ 
 $b_{10}^{2+}$

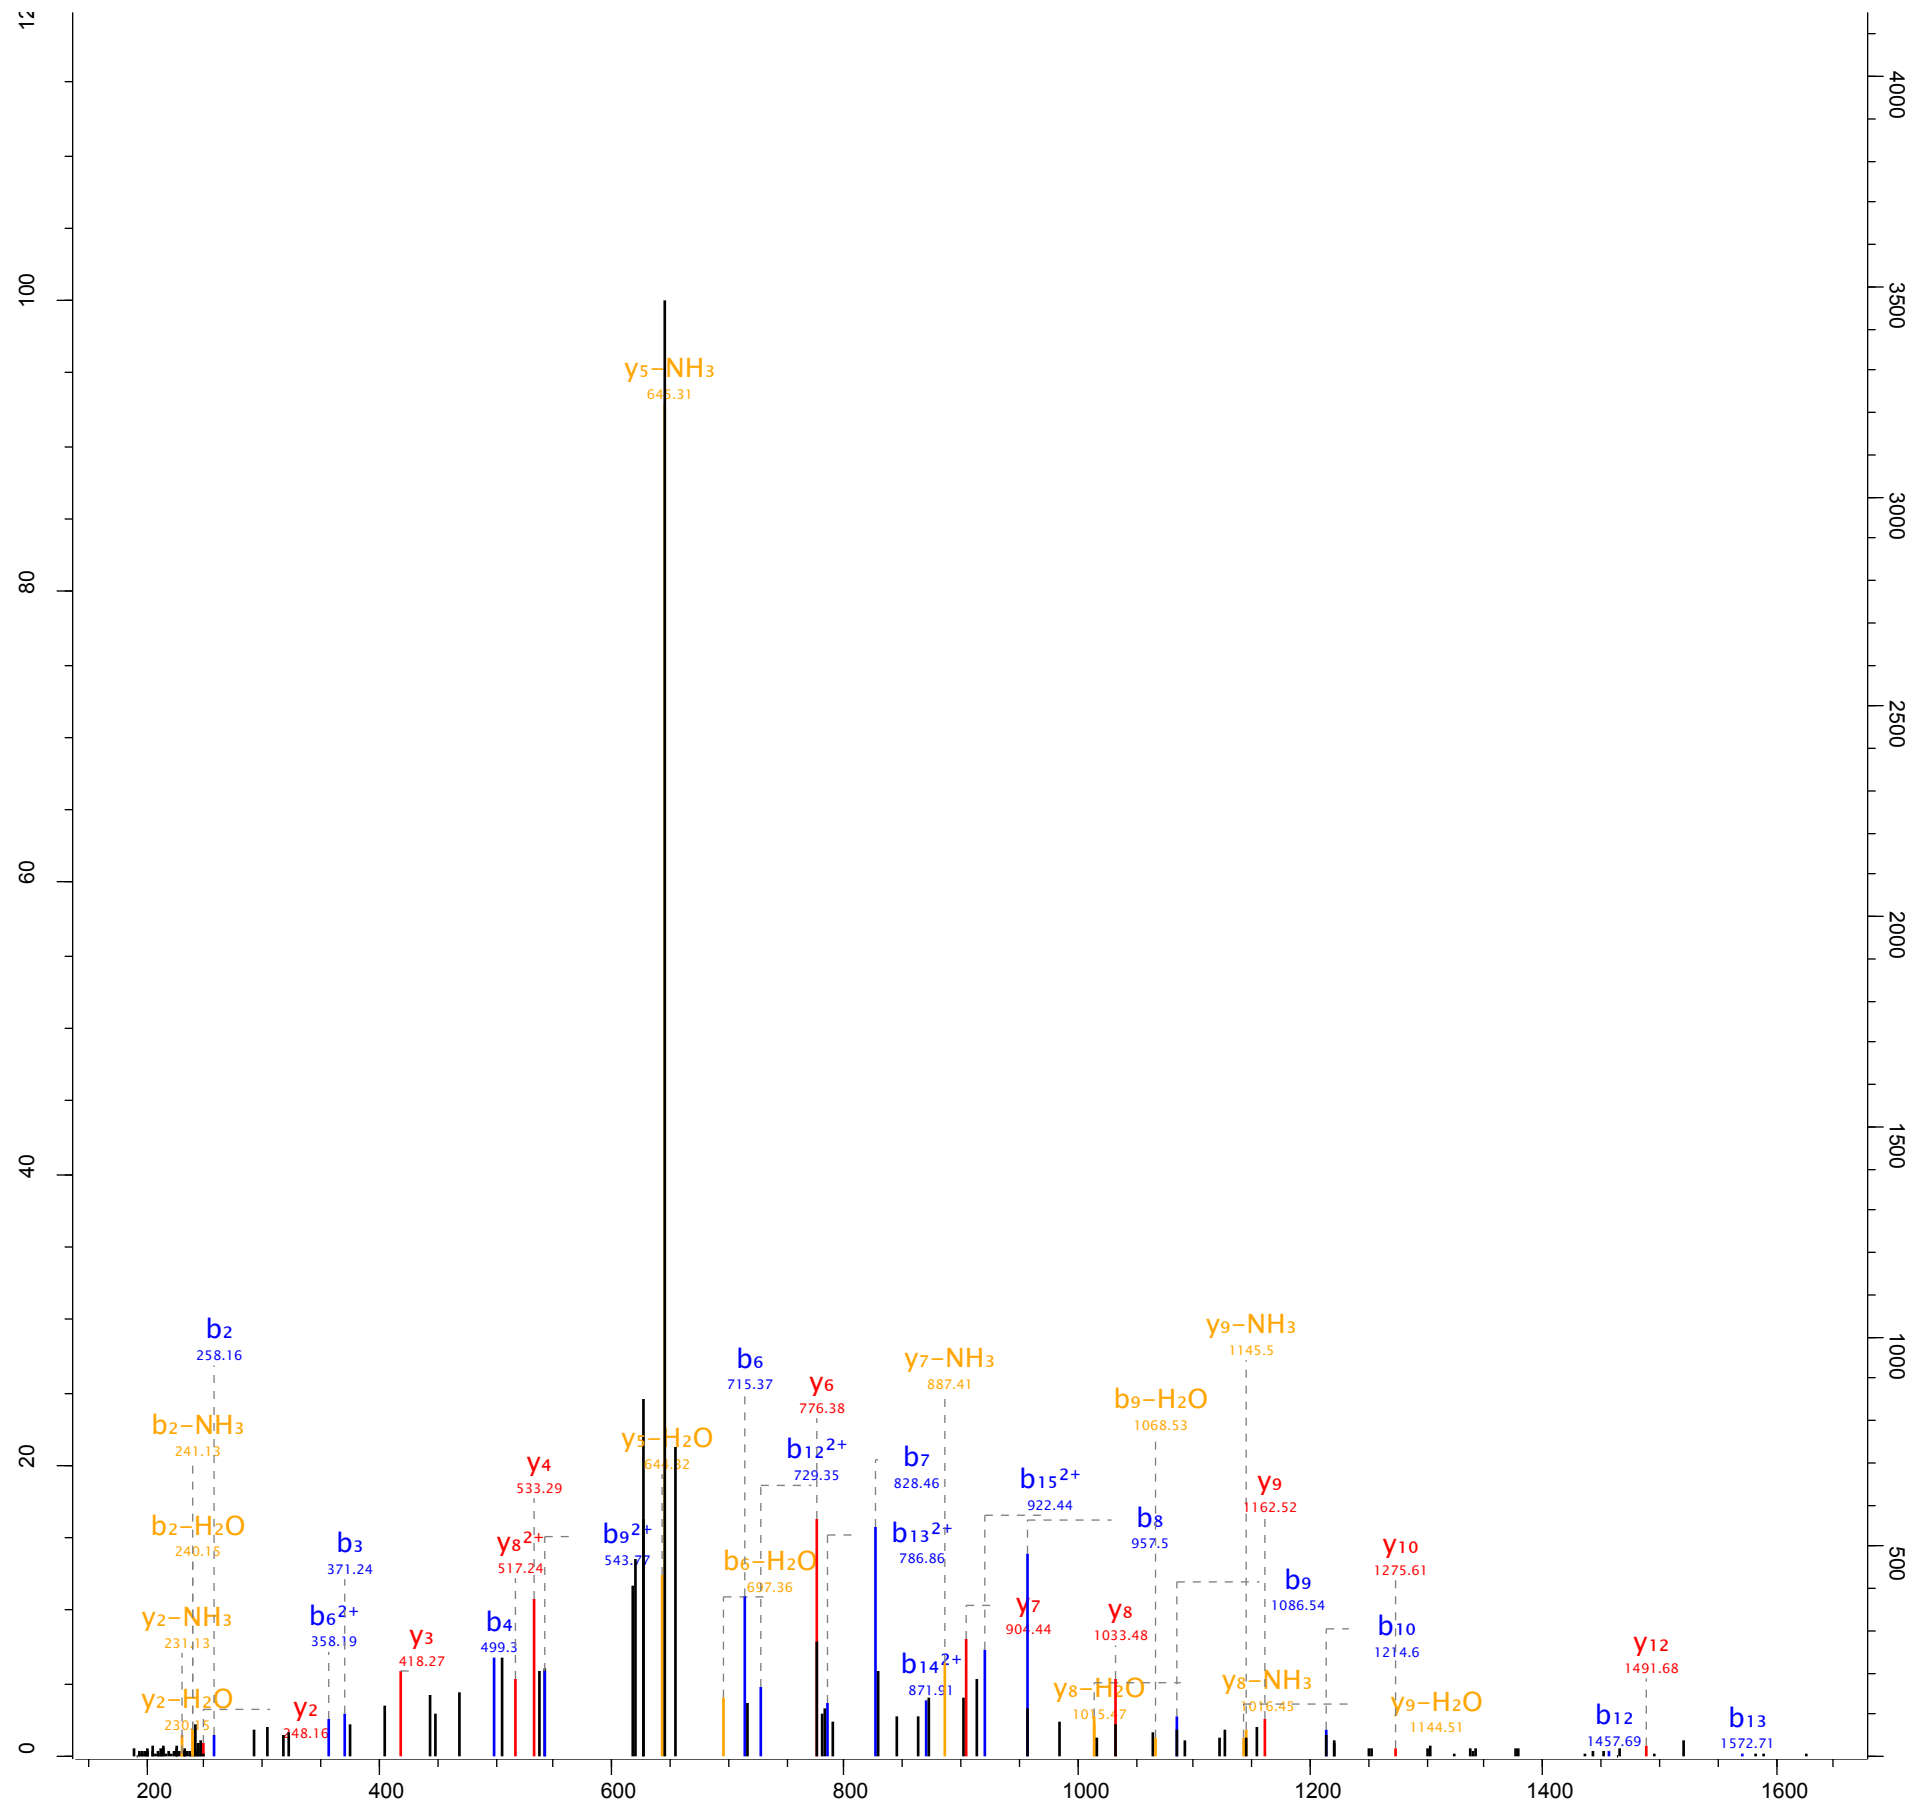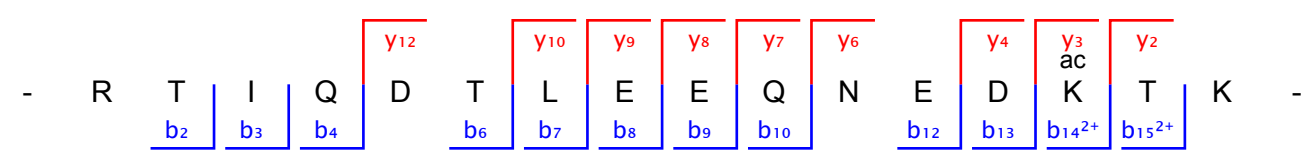

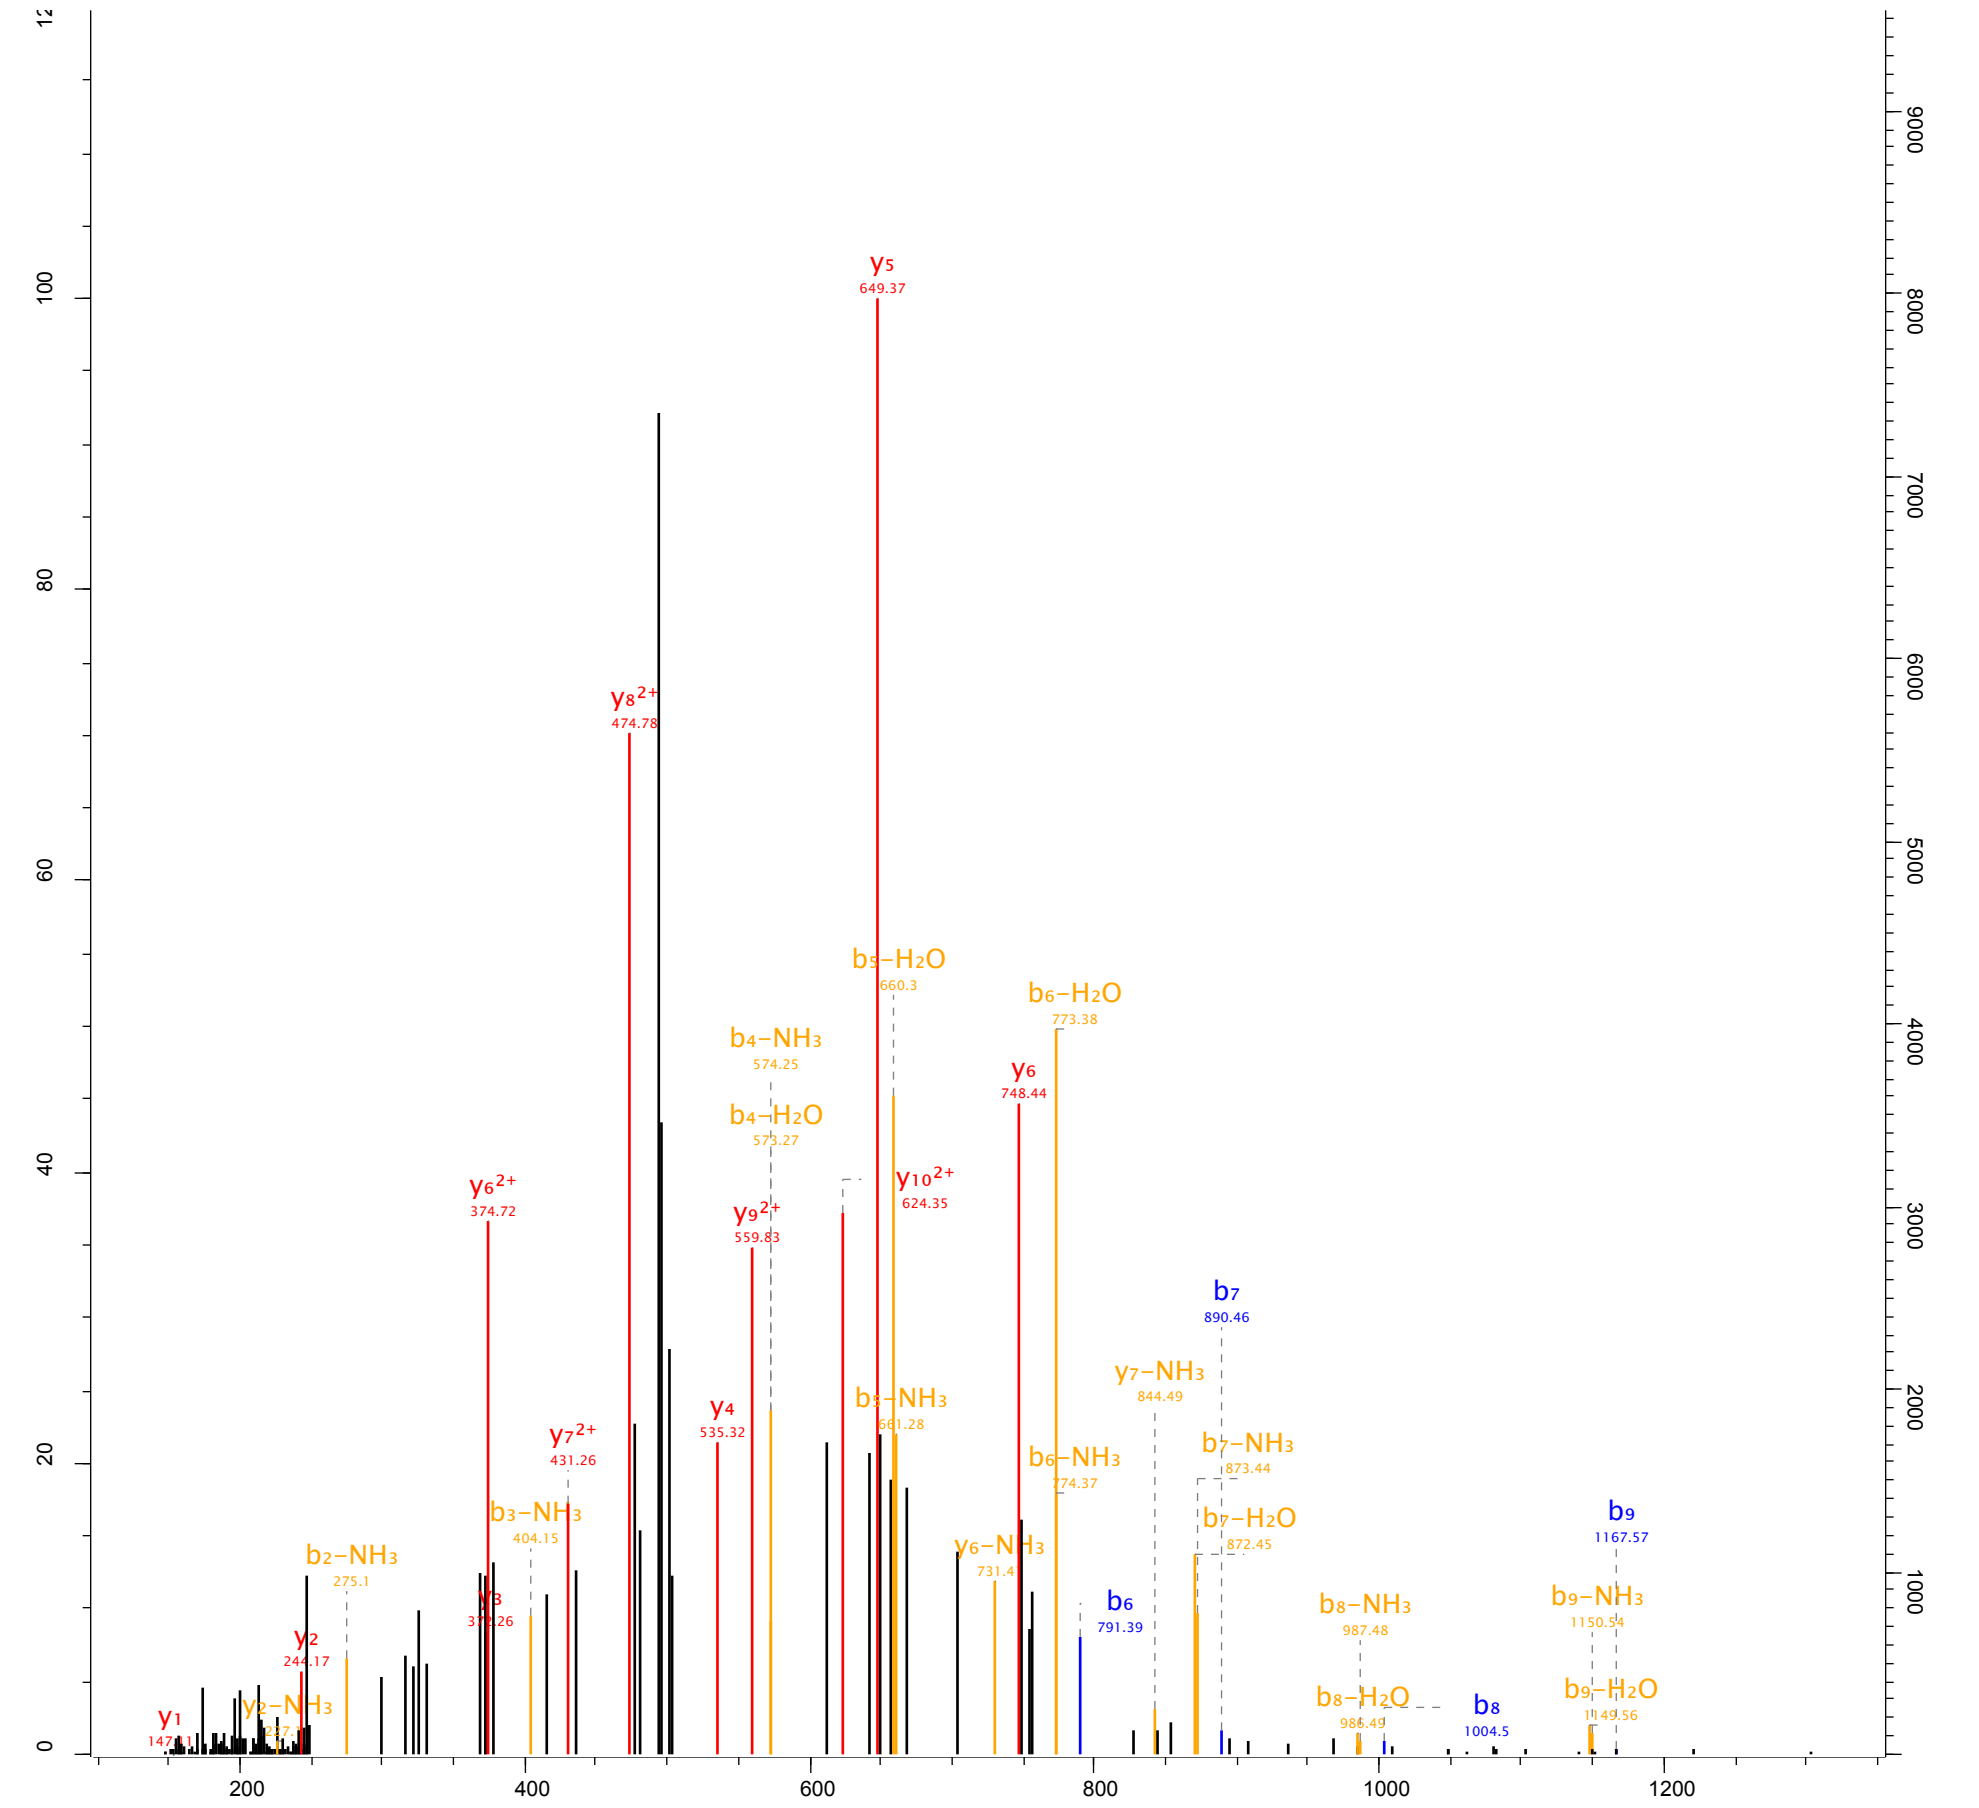

- Q Y E K S I V N Y K P K -

y10 2+
y9 2+ ac
y8 2+
y7 2+
y6
y5
y4
y3
y2
y1

b6
b7
b8
b9

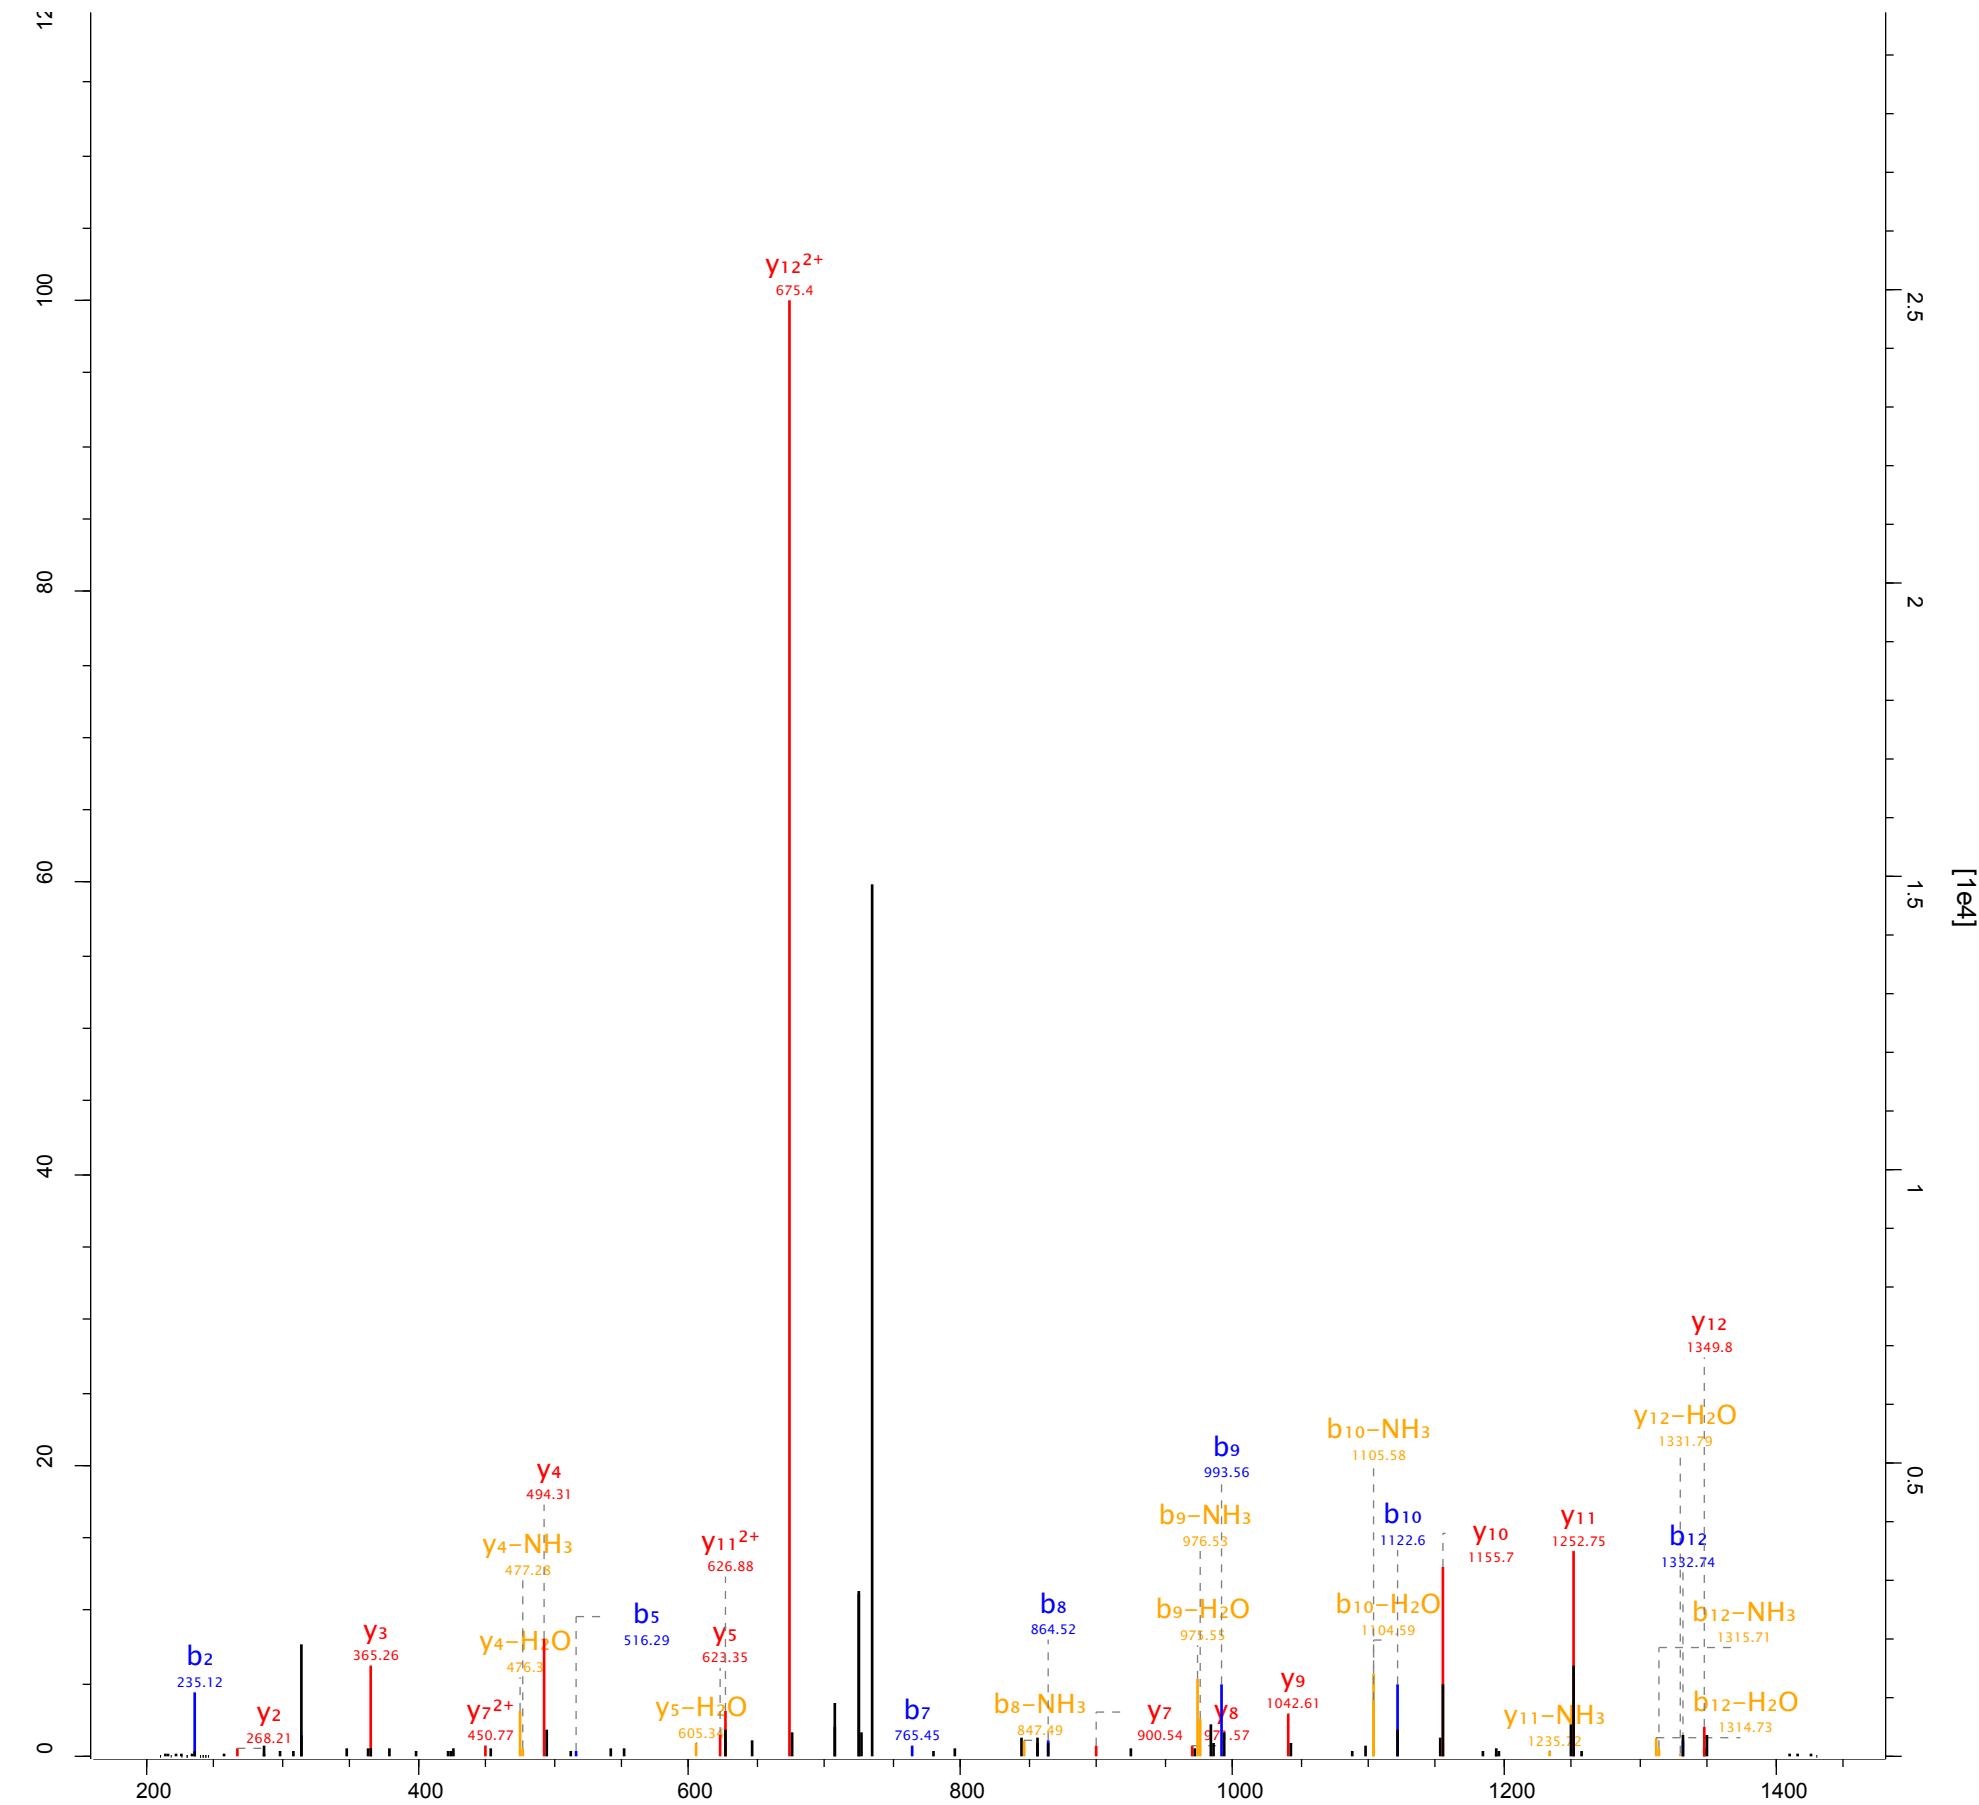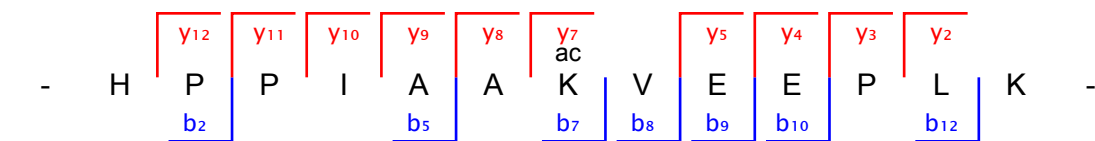

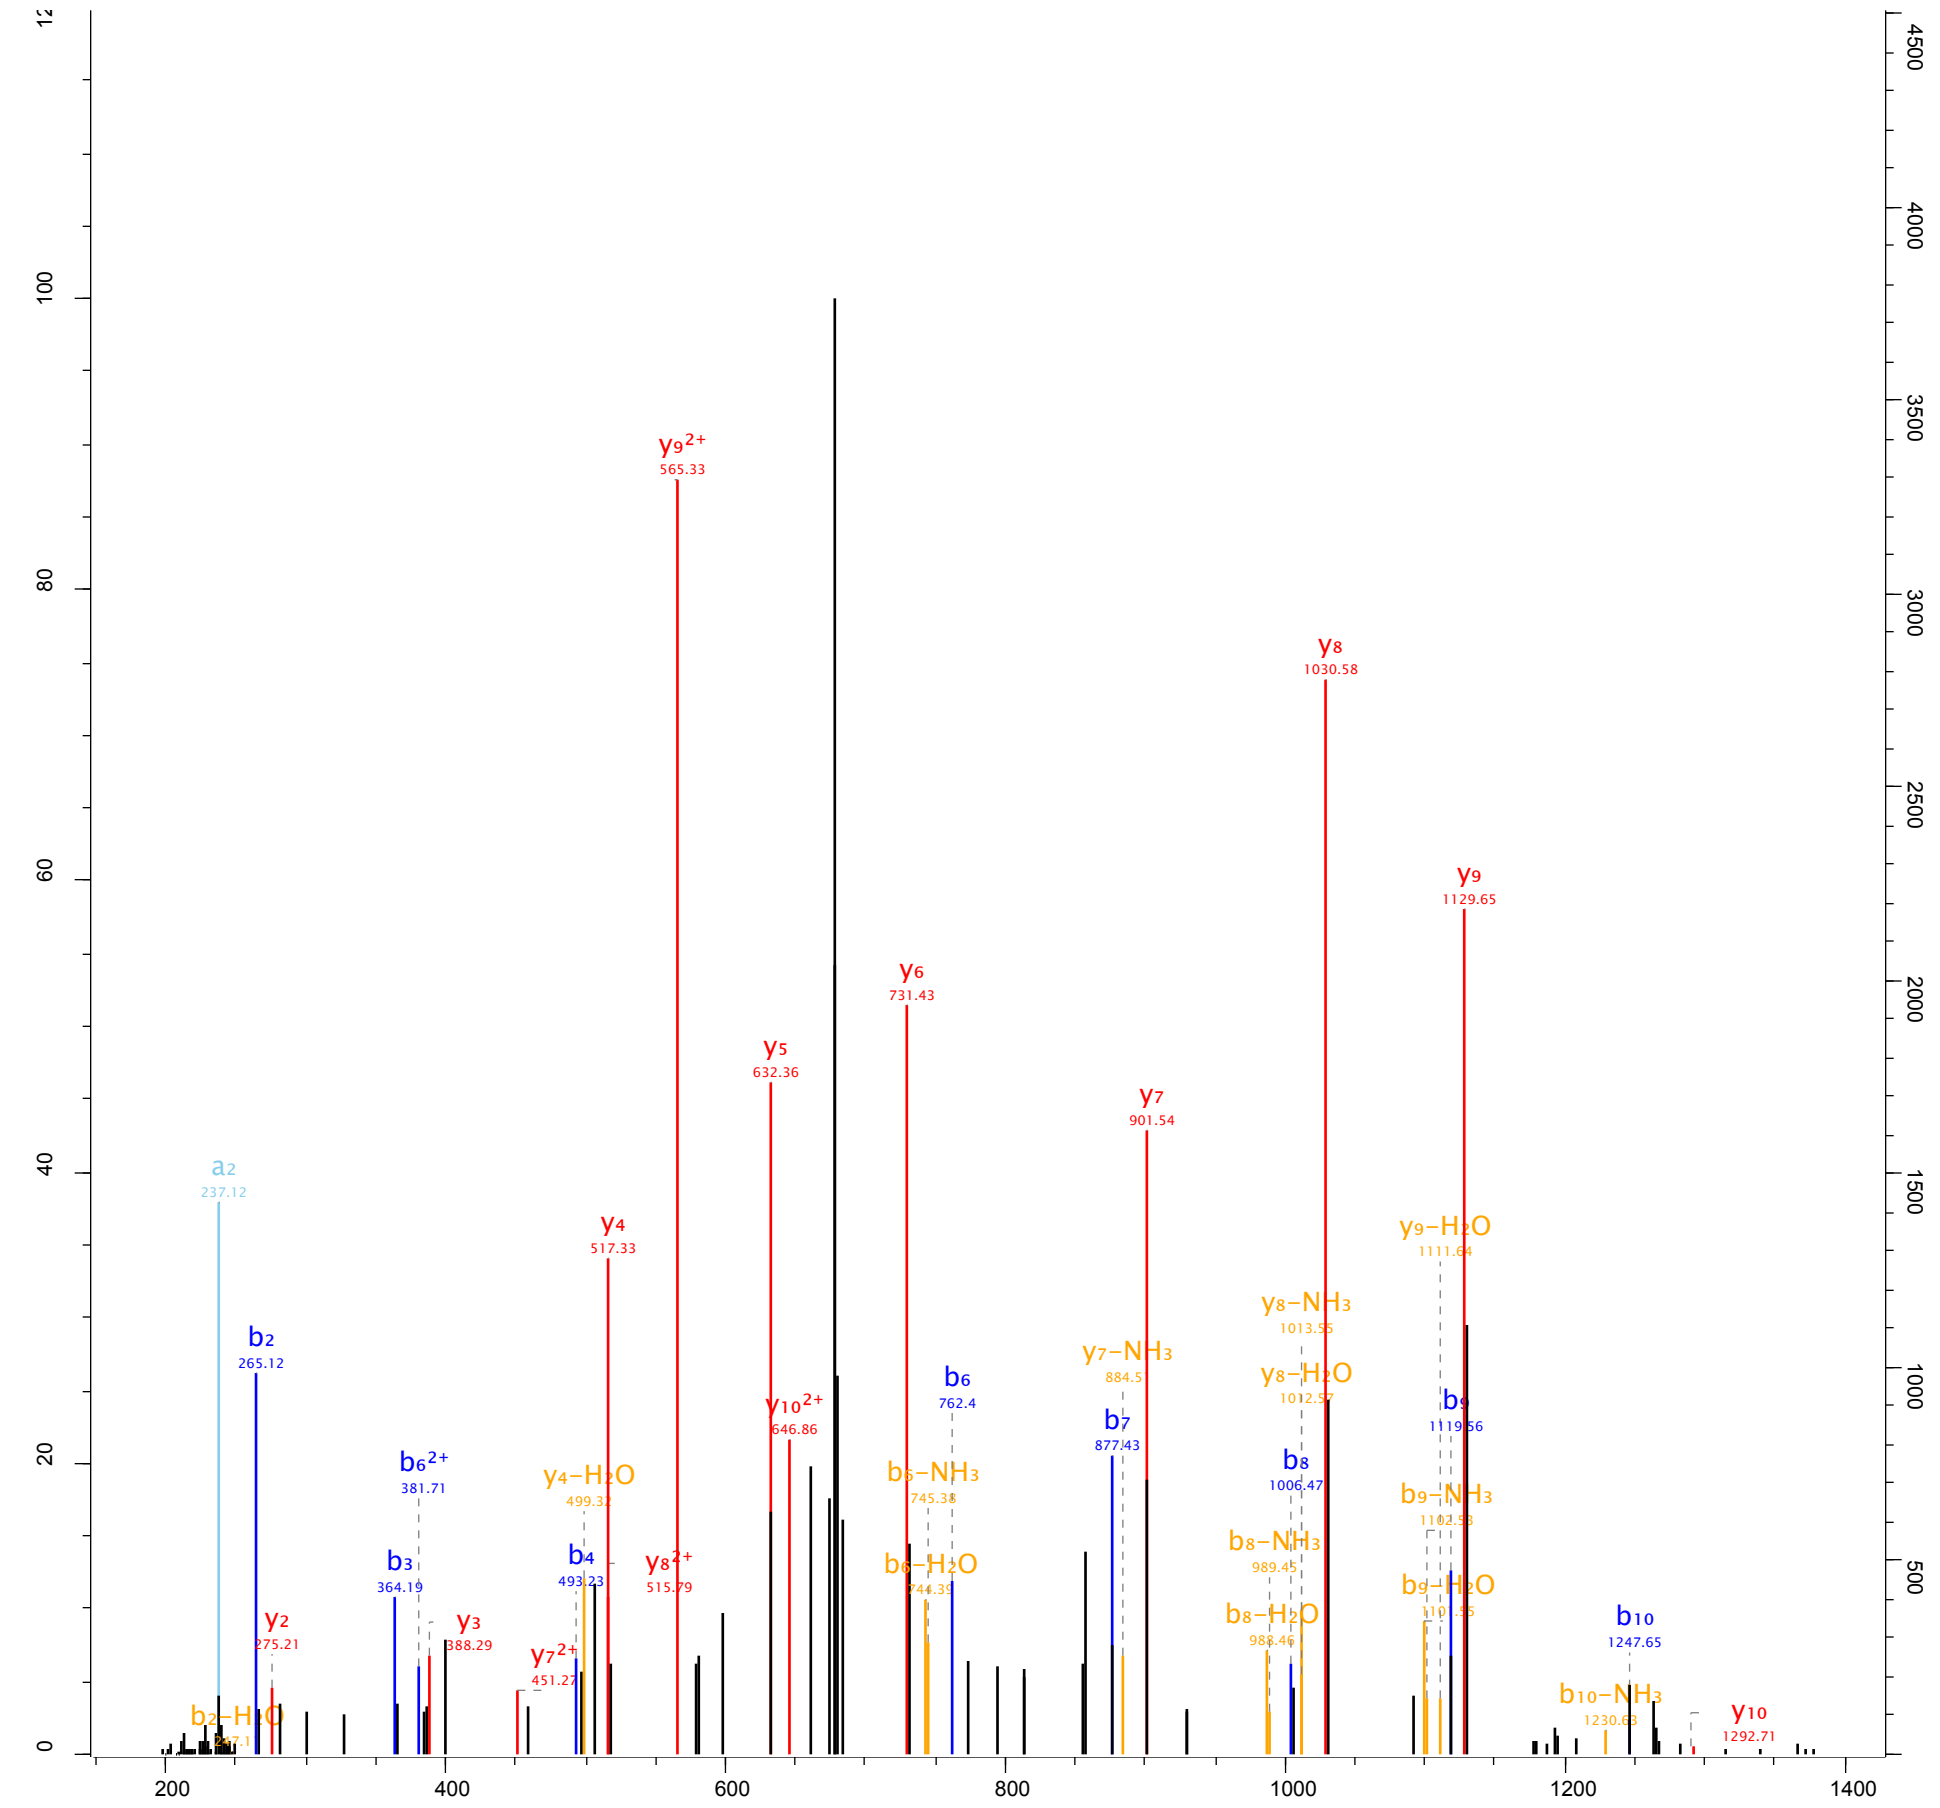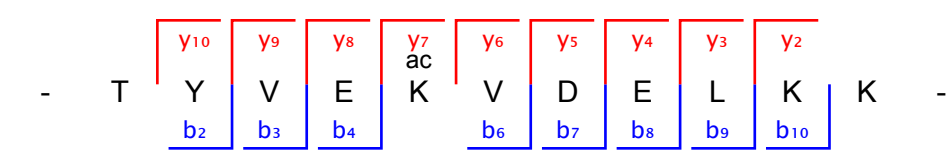

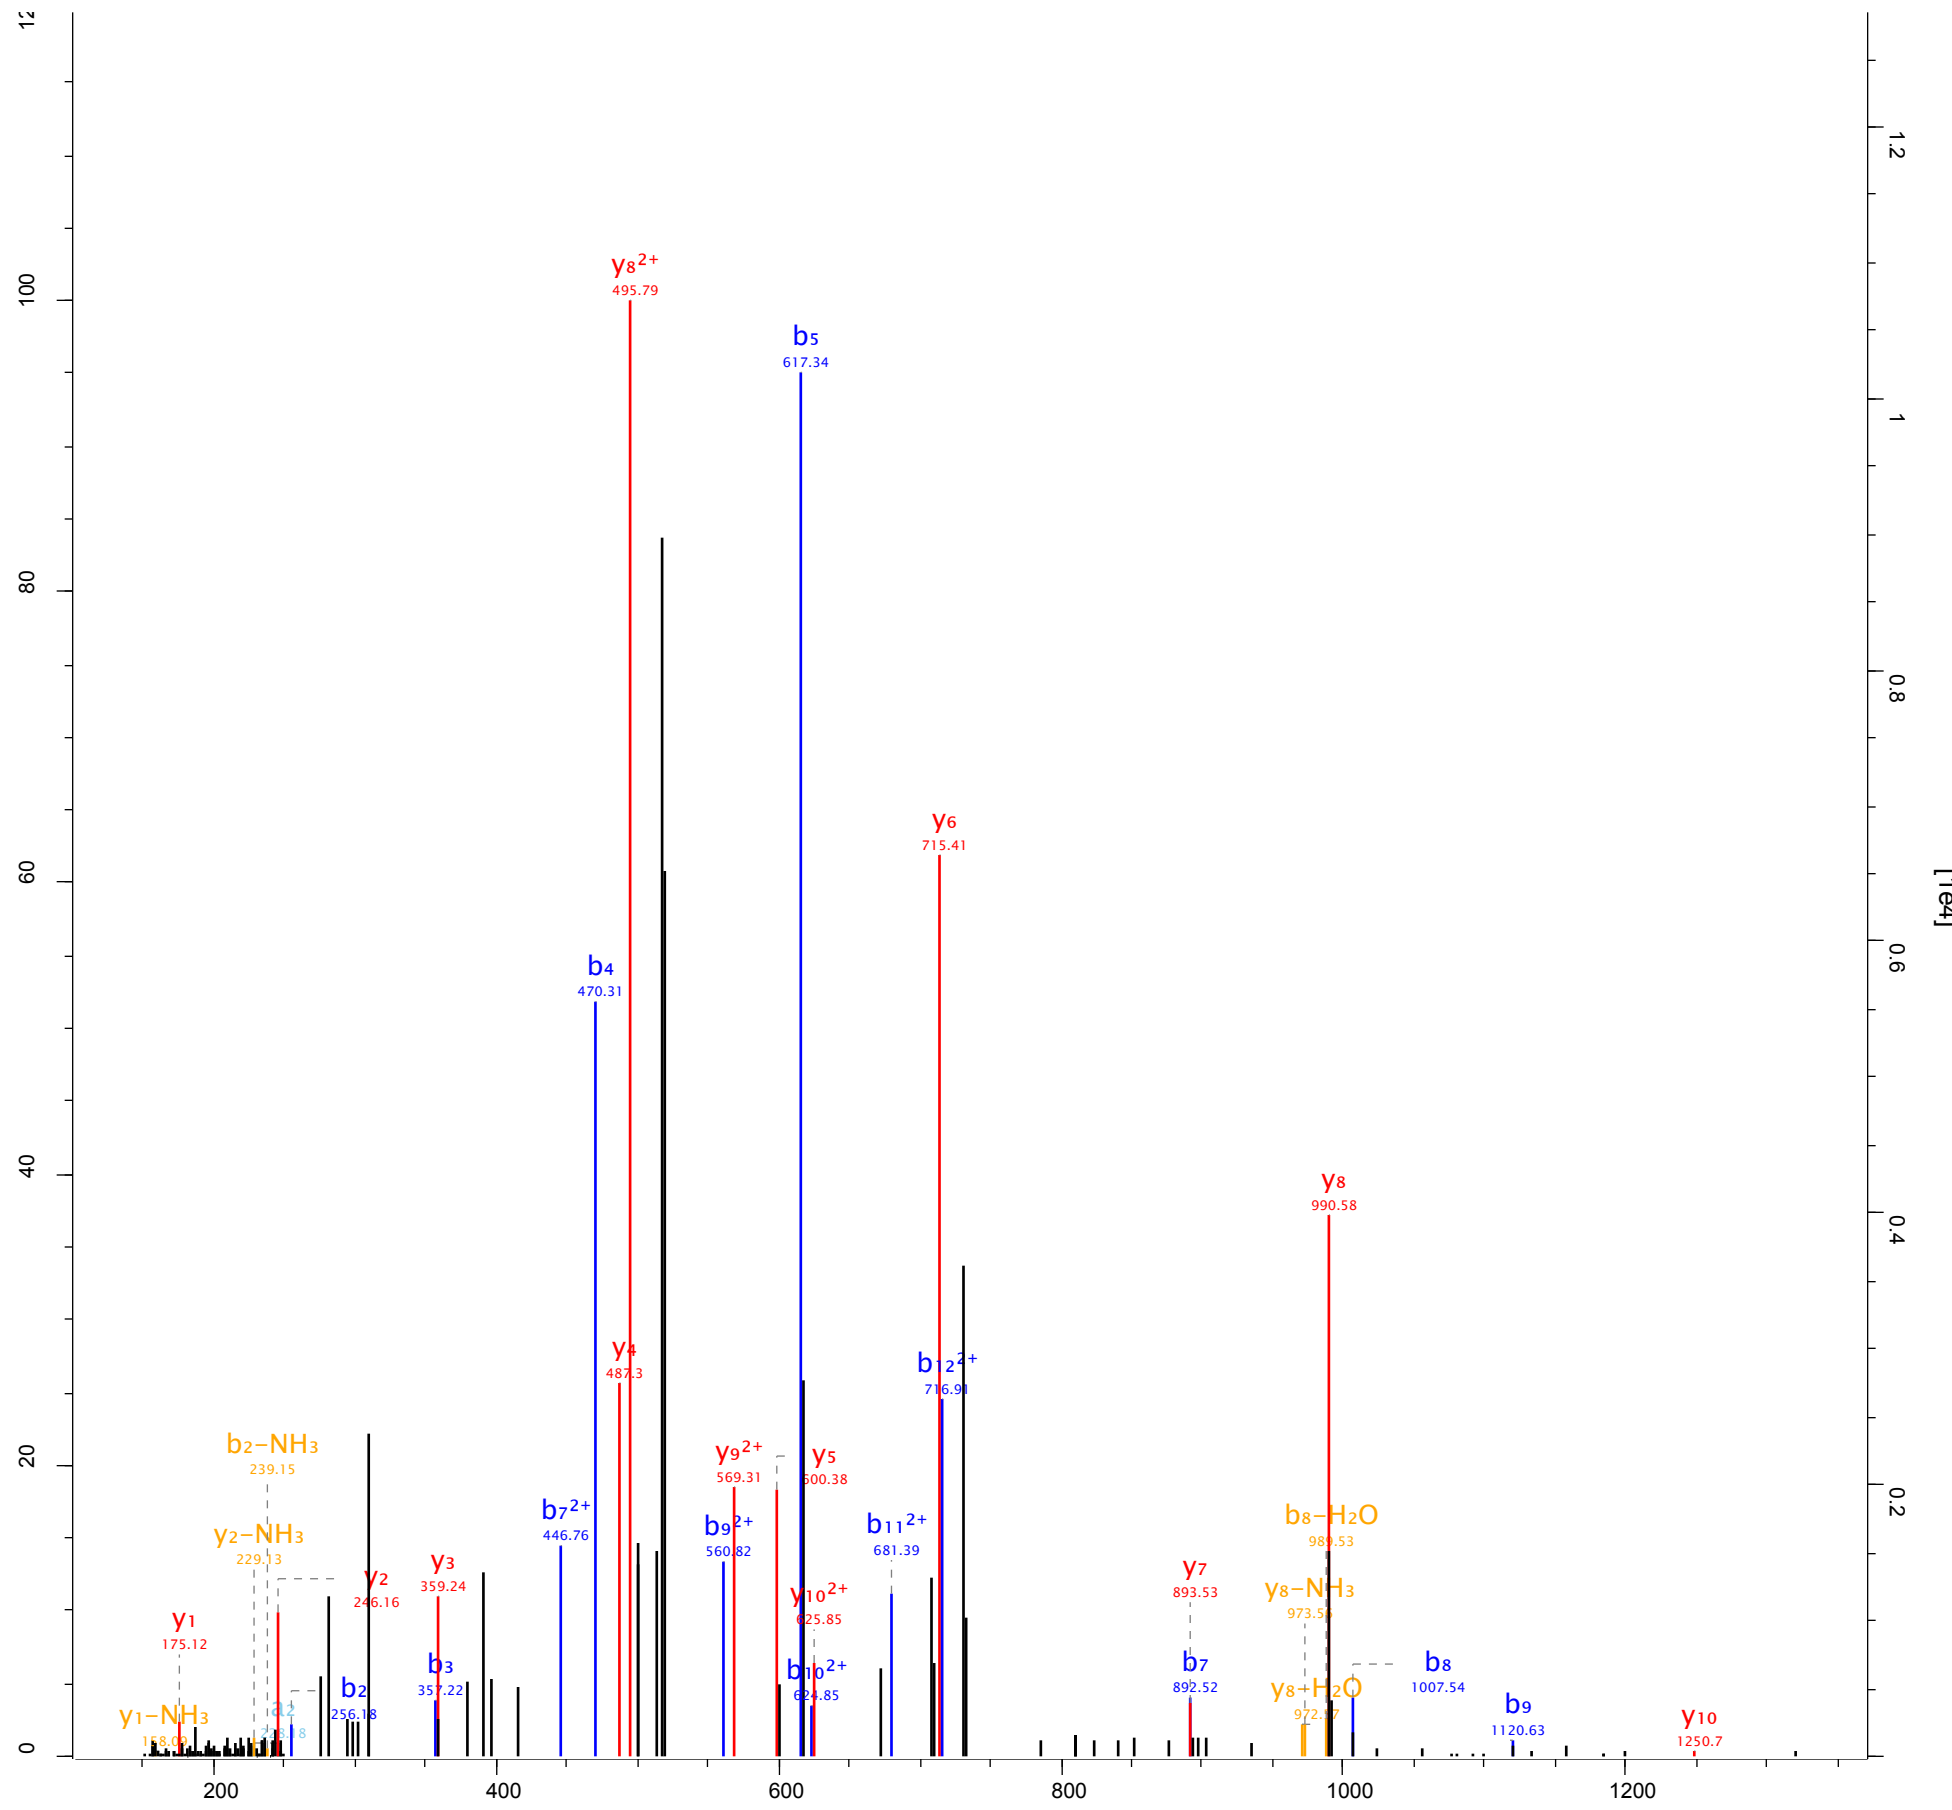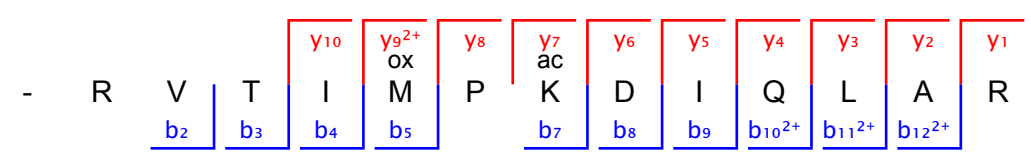

Raw file 072613\_SCW\_II\_68\_Enriched\_9 Scan 19485 Method ITMS; CID Score 176.08 m/z 888.96 Gene names Acadsb

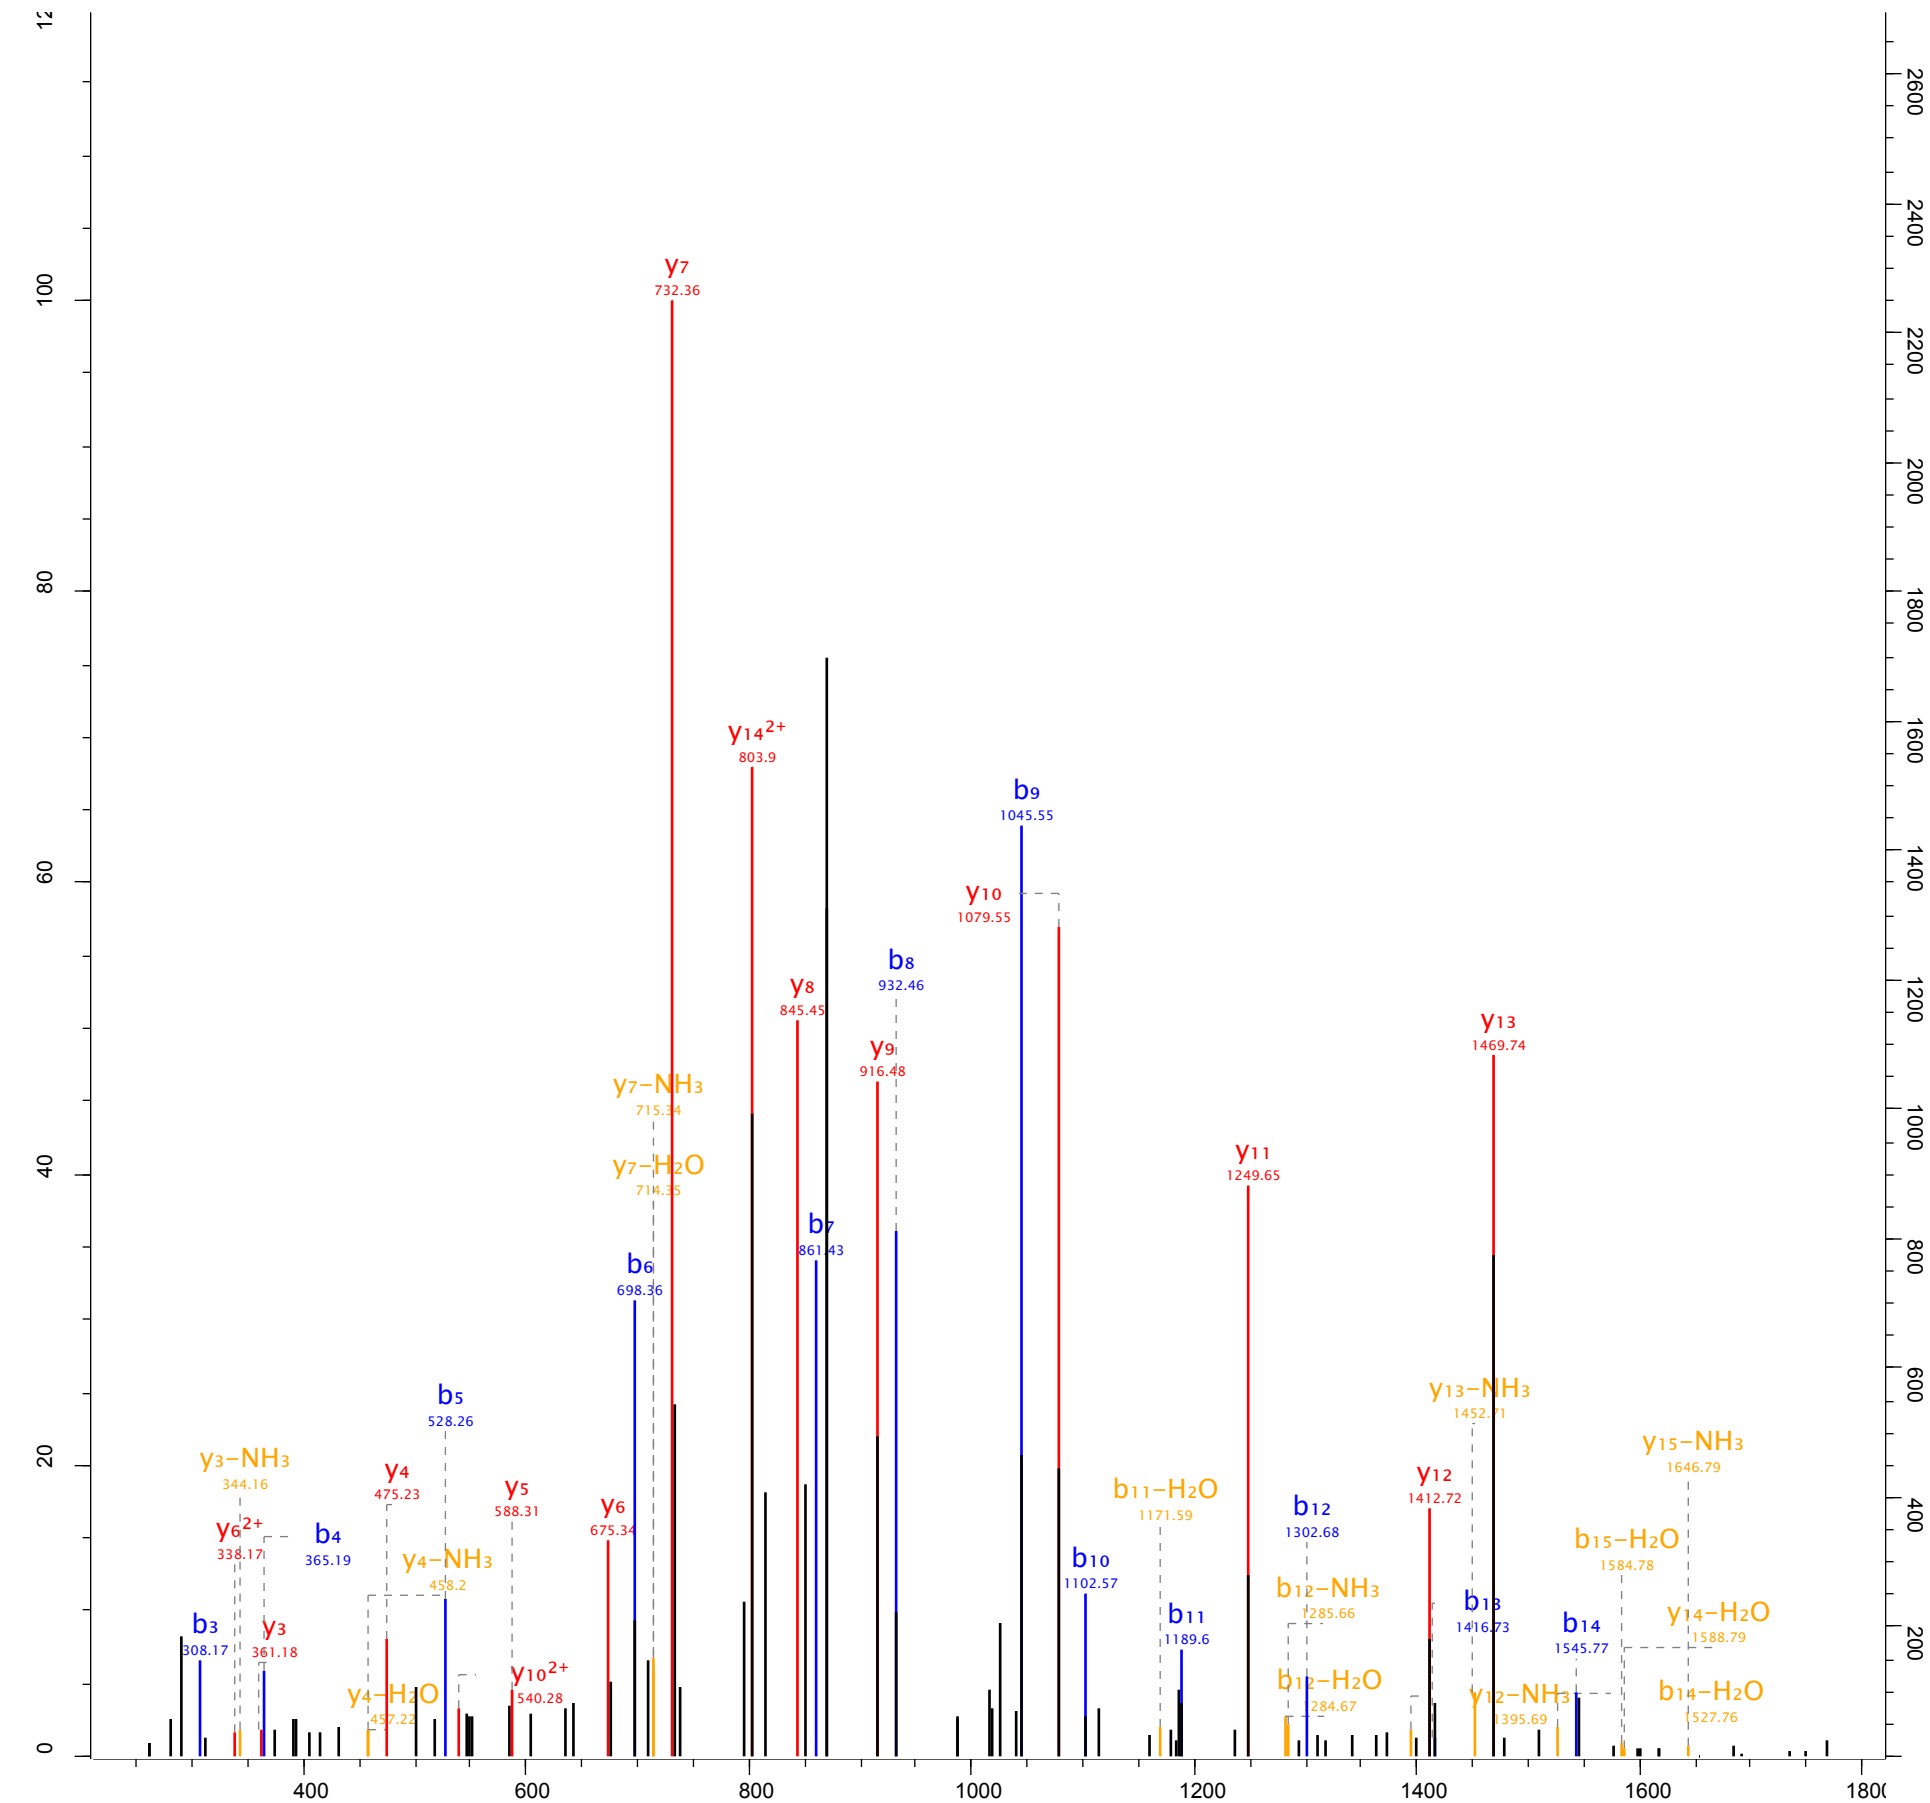

y14<sup>2+</sup>
y13
y12
y11 ac
y10
y9
y8
y7
y6
y5
y4
y3

b3
b4
b5
b6
b7
b8
b9
b10
b11
b12
b13
b14

- I G H G Y K Y A I G S L N E G R -

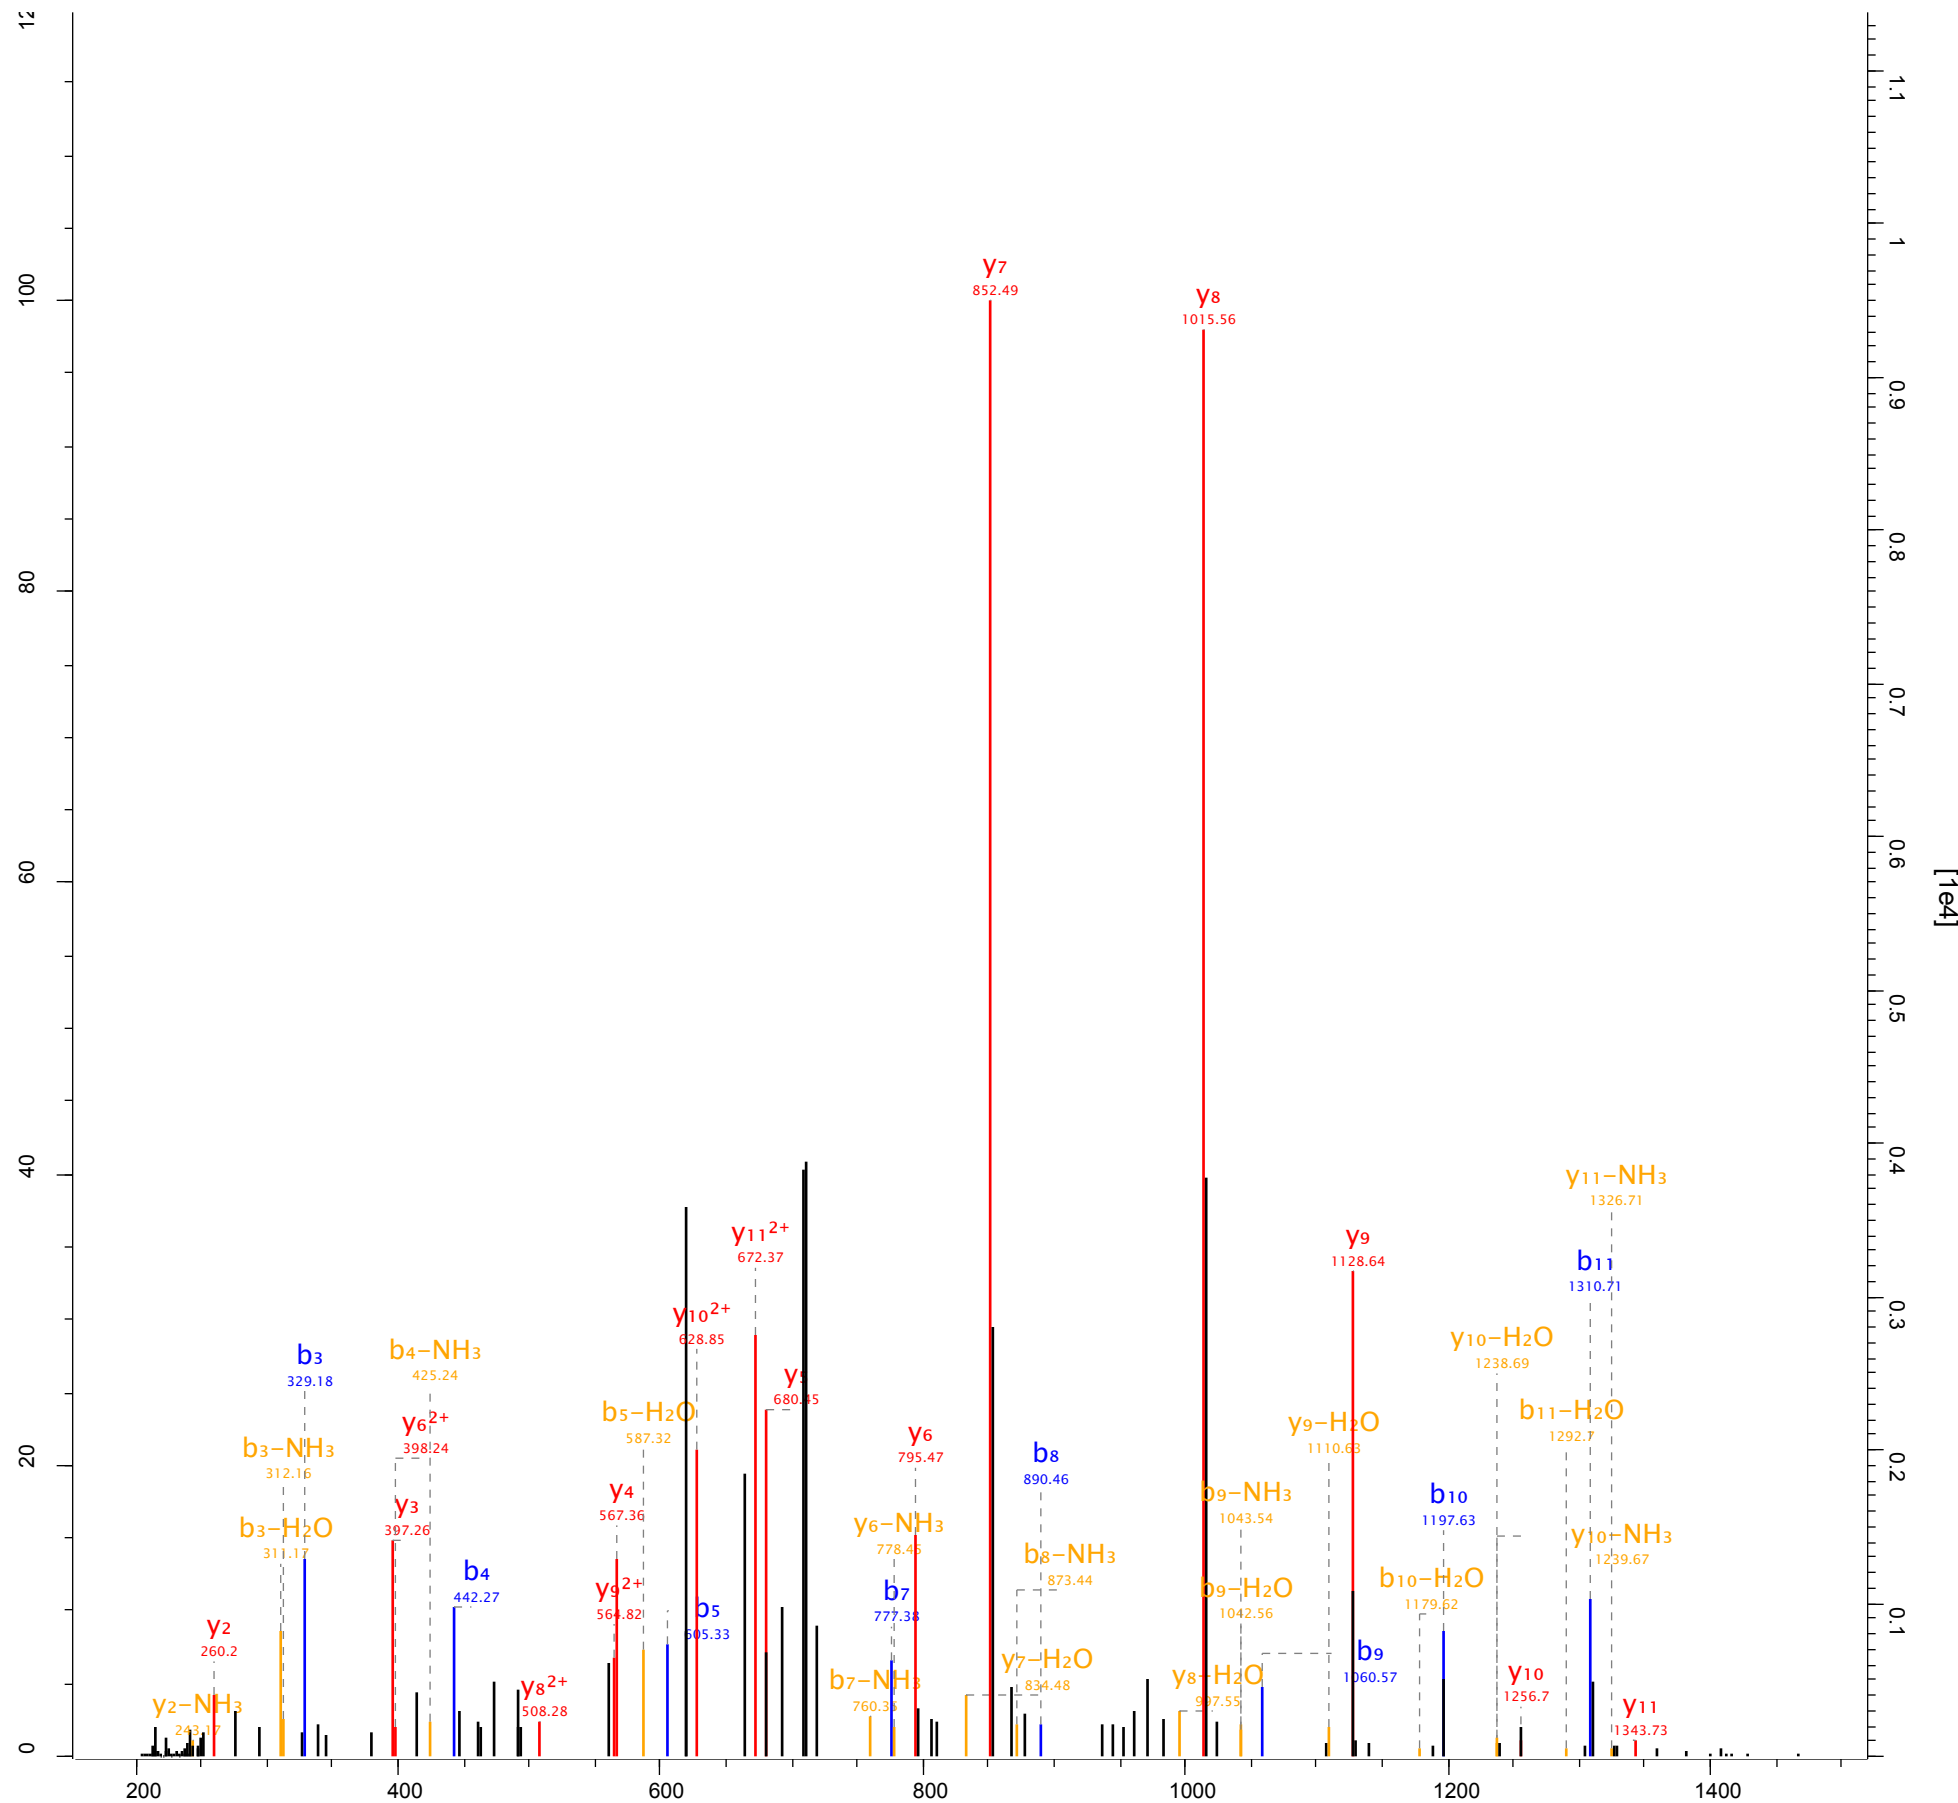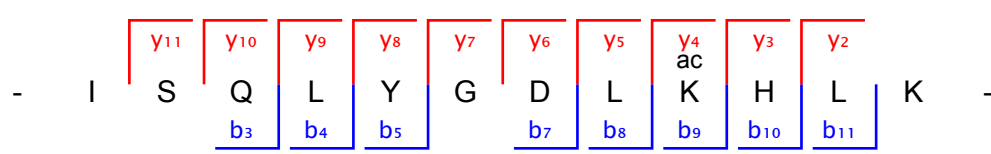



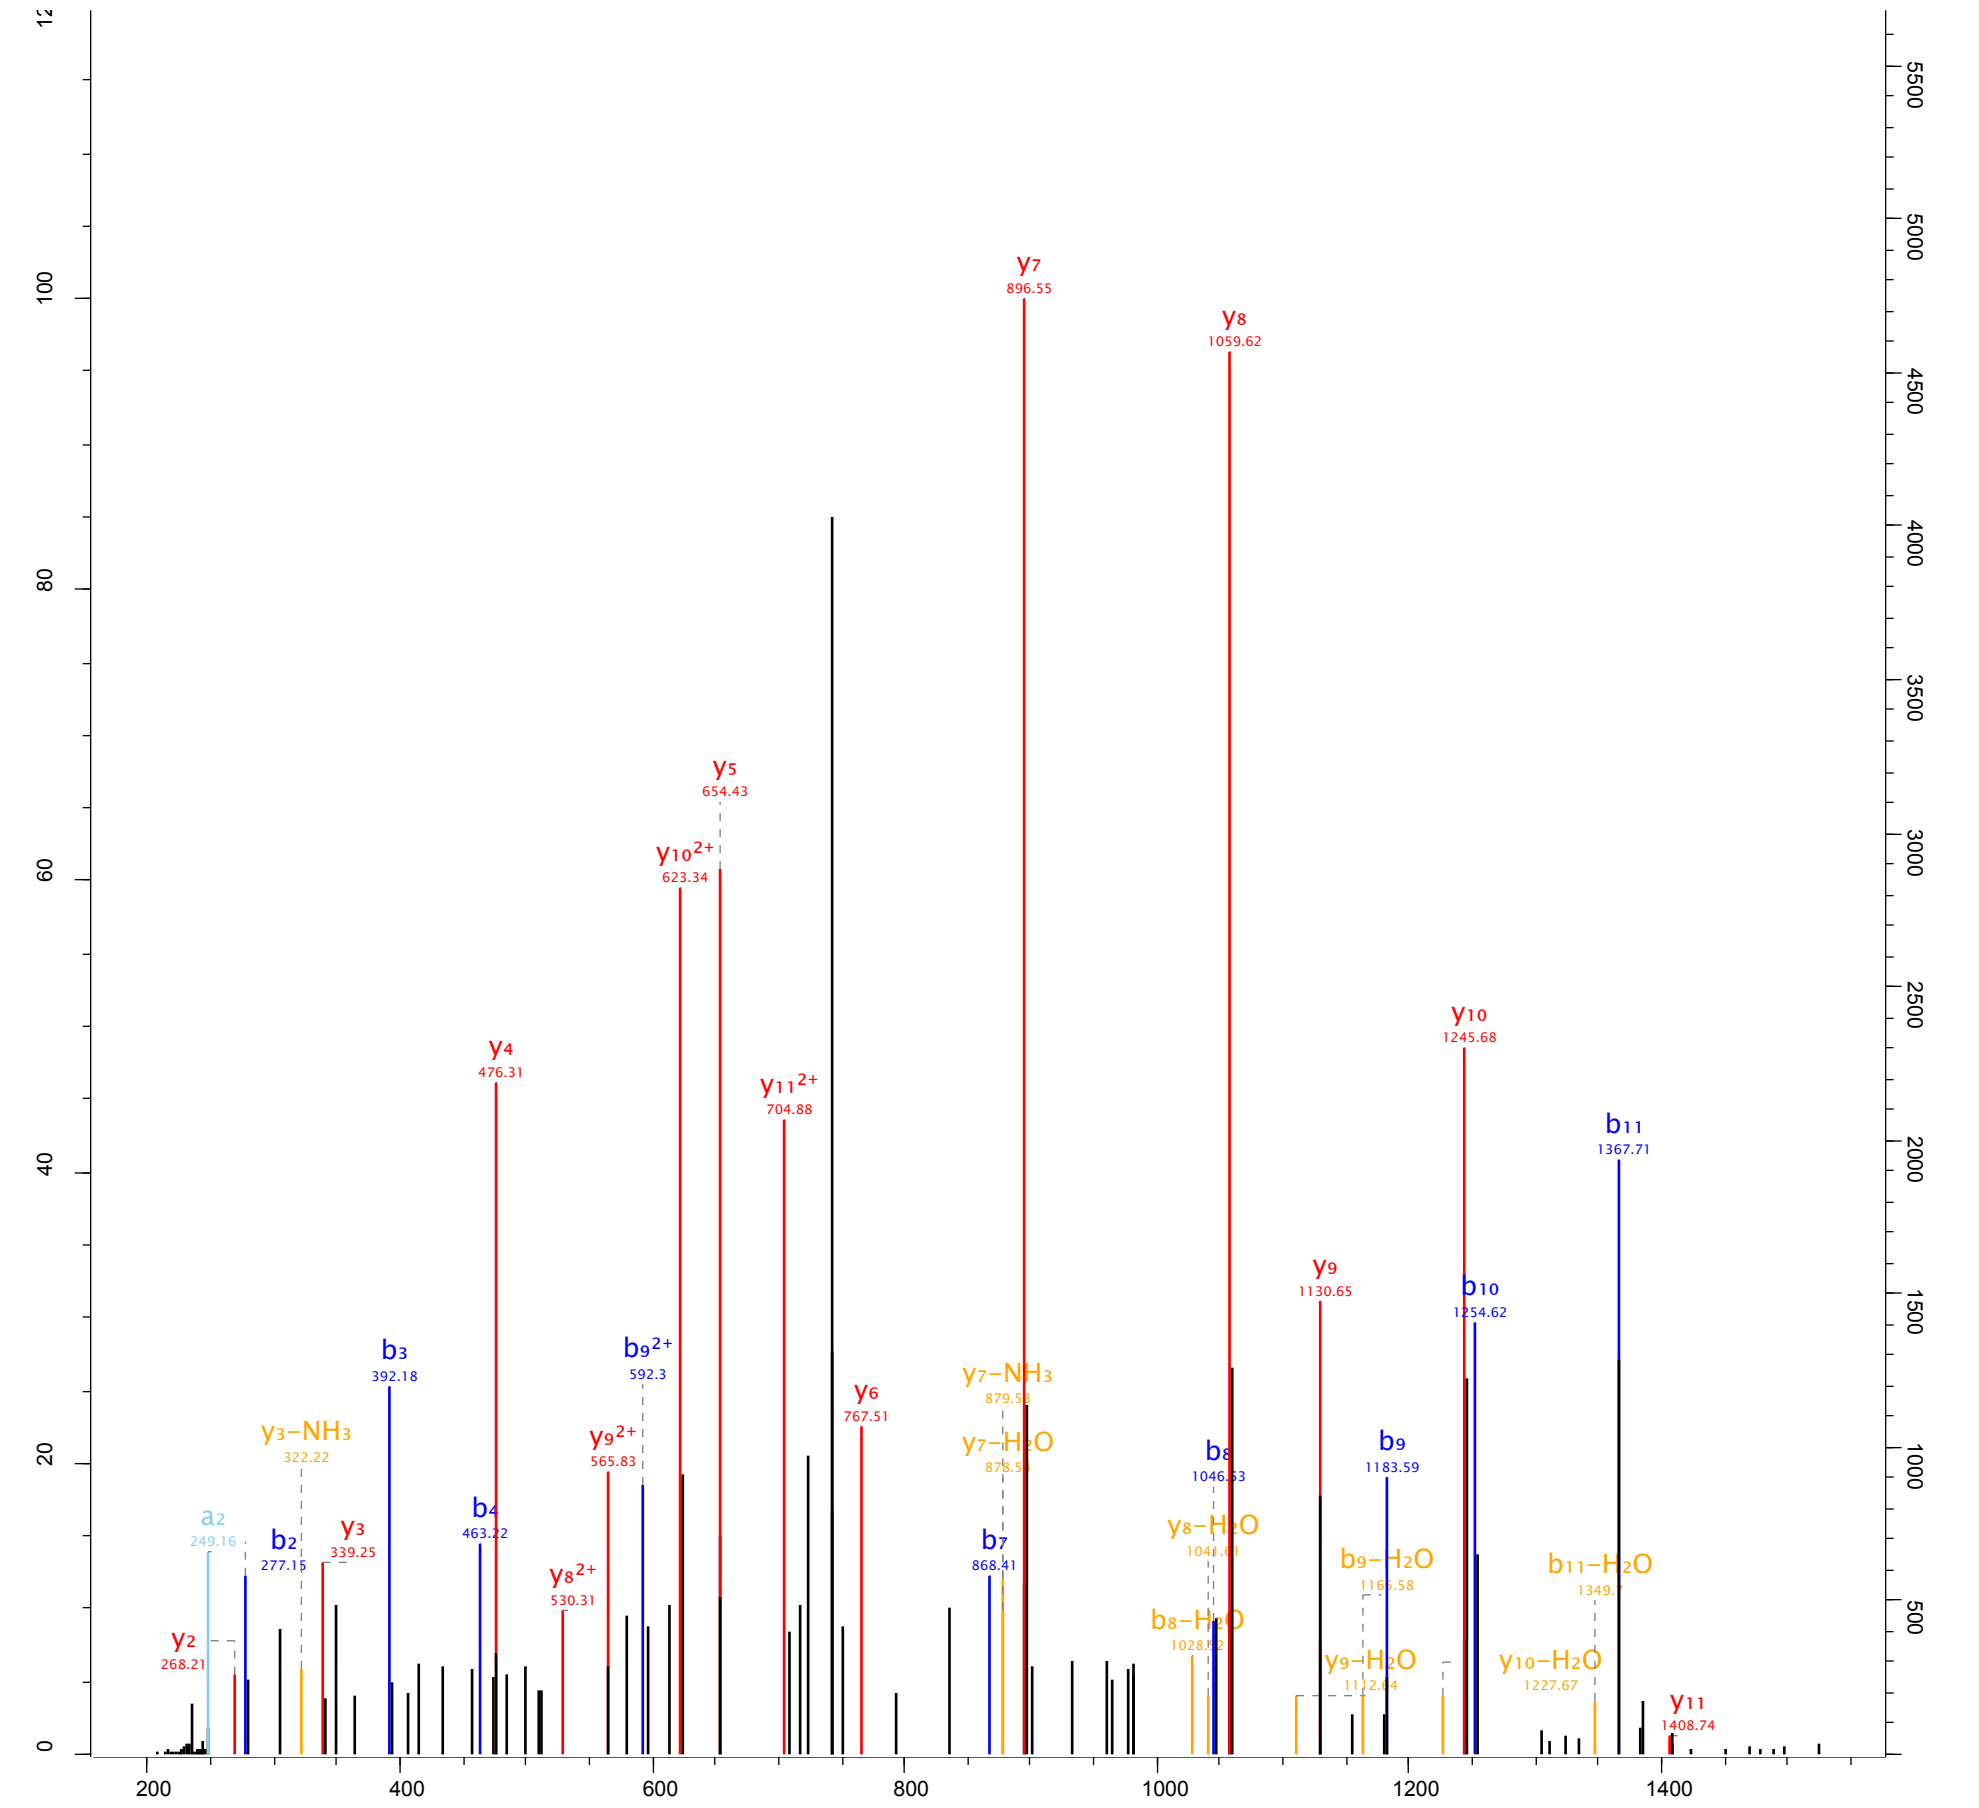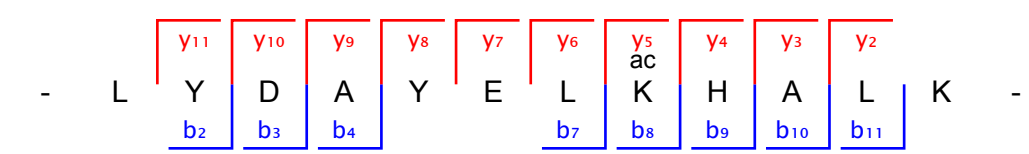

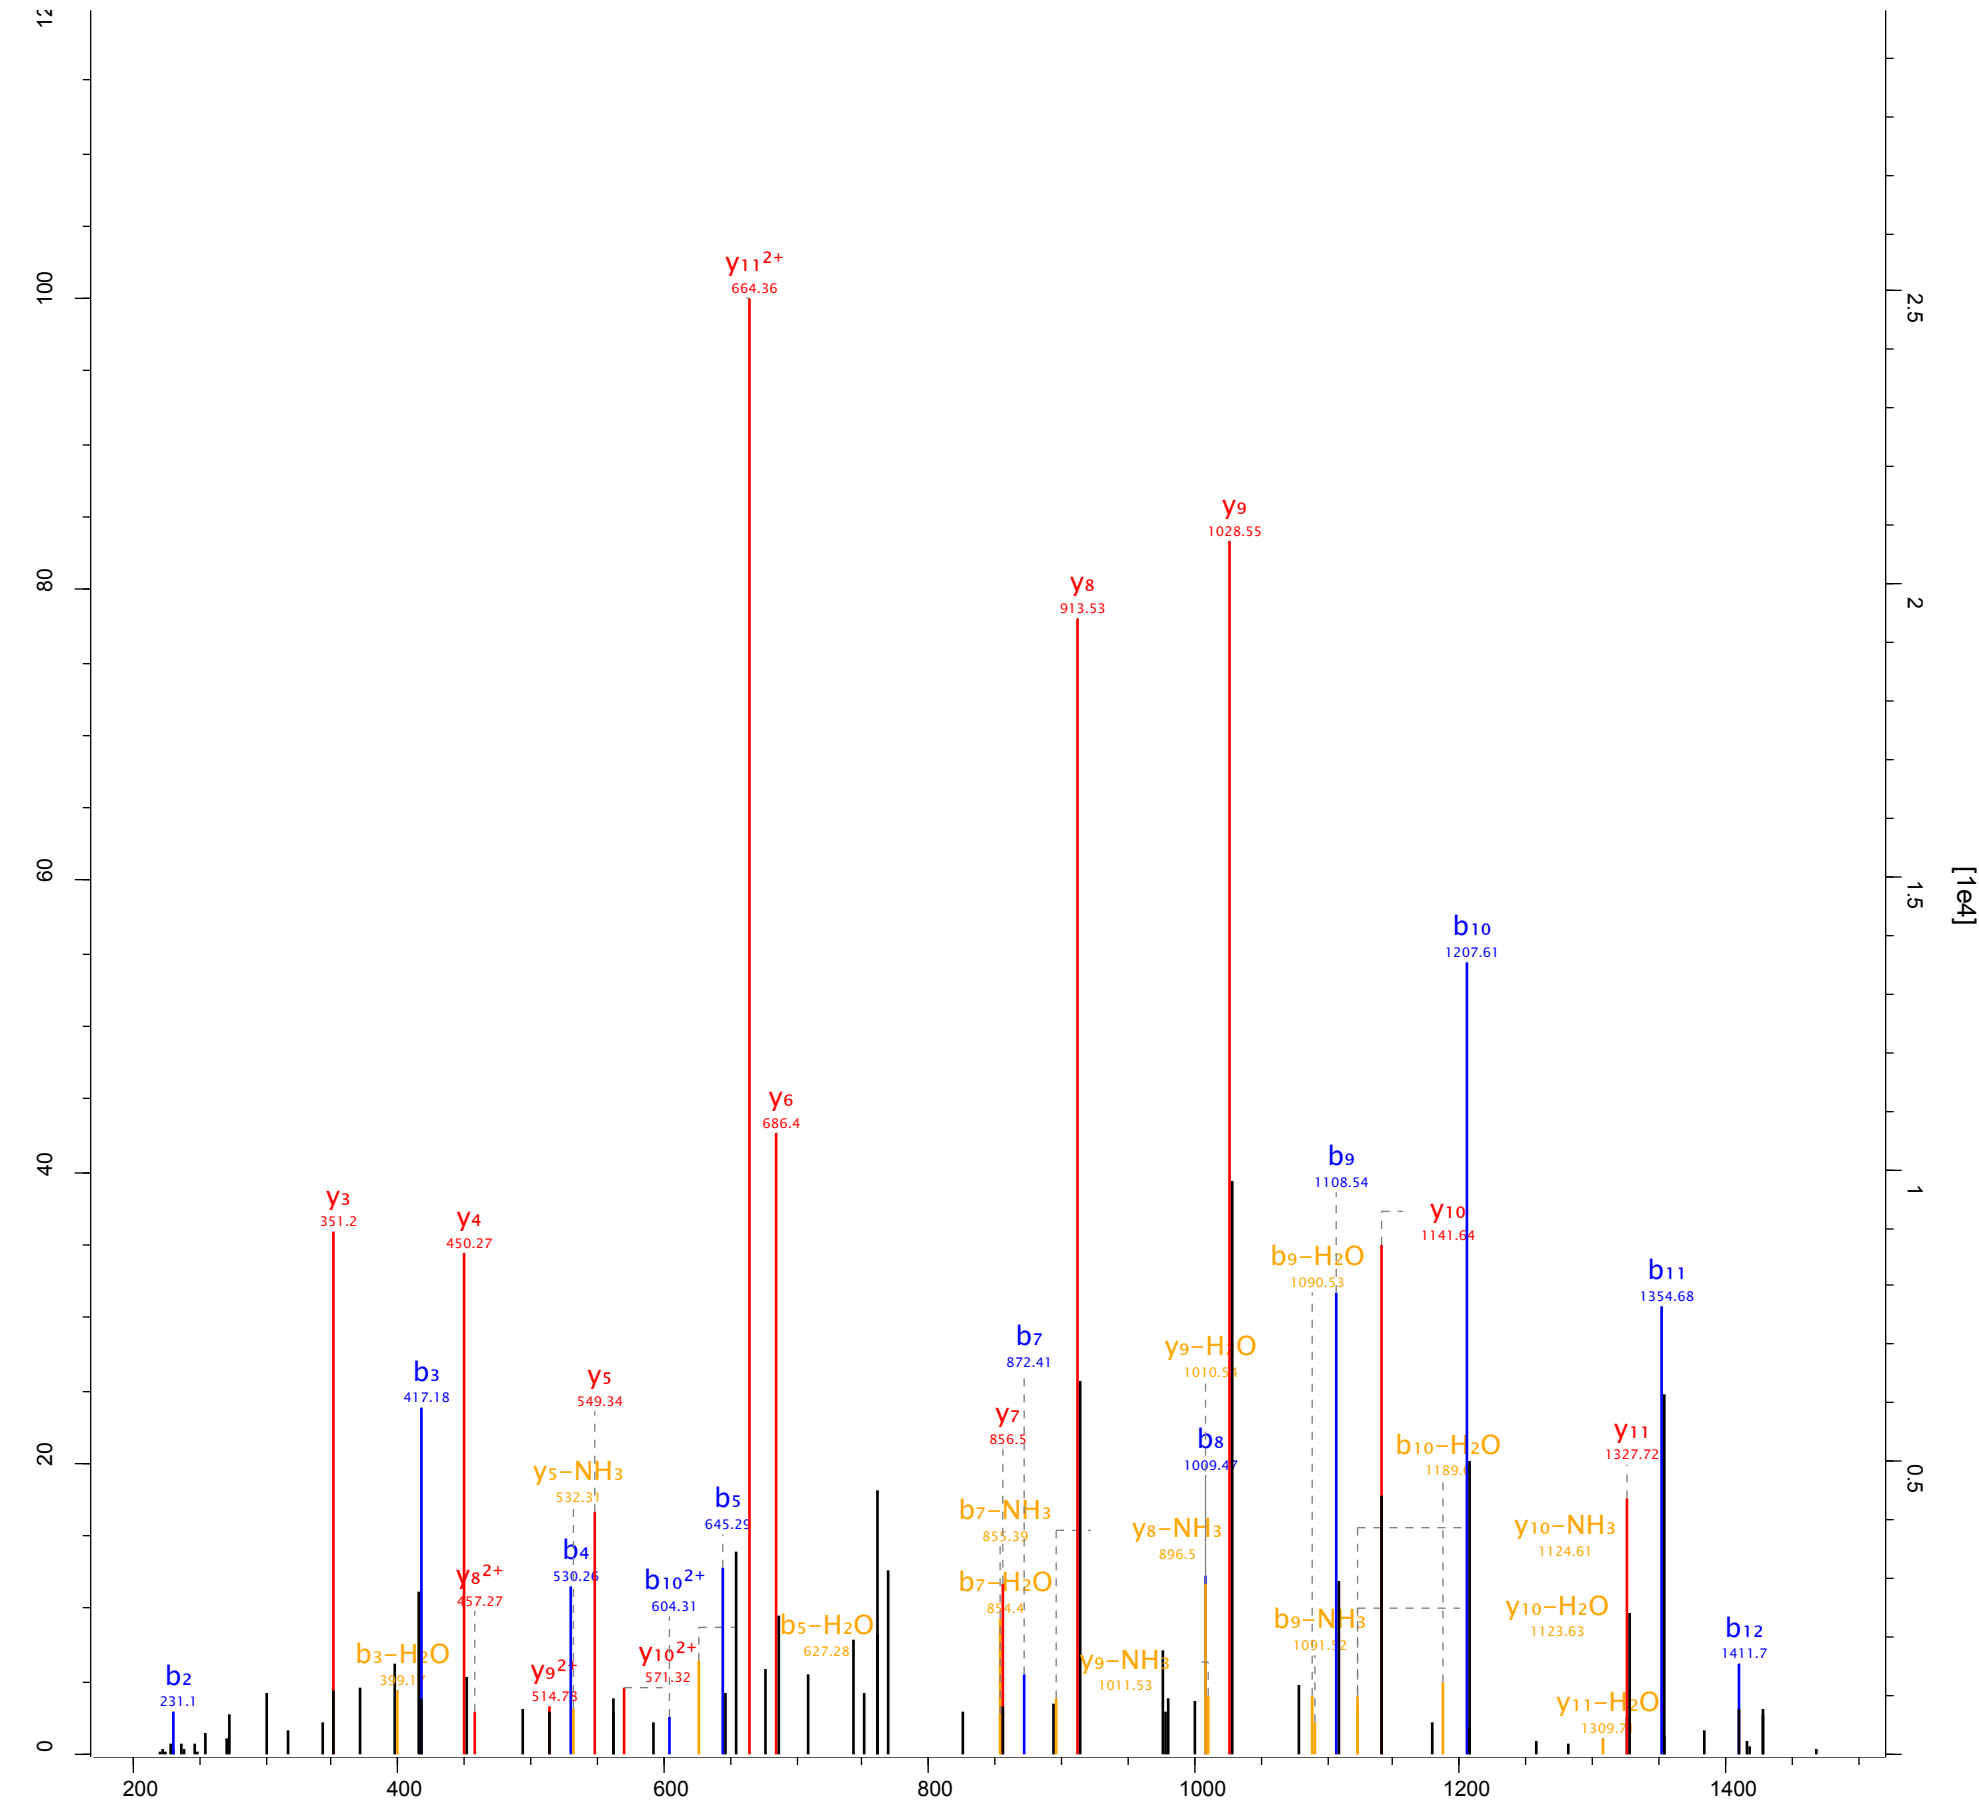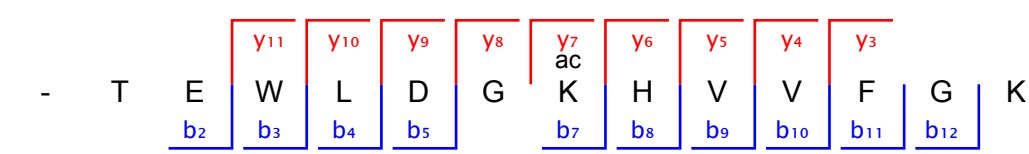

Raw file 072613\_SCW\_II\_68\_Enriched\_9 Scan 23027 Method ITMS; CID Score 161.51 m/z 627.37 Gene names Ndufa5

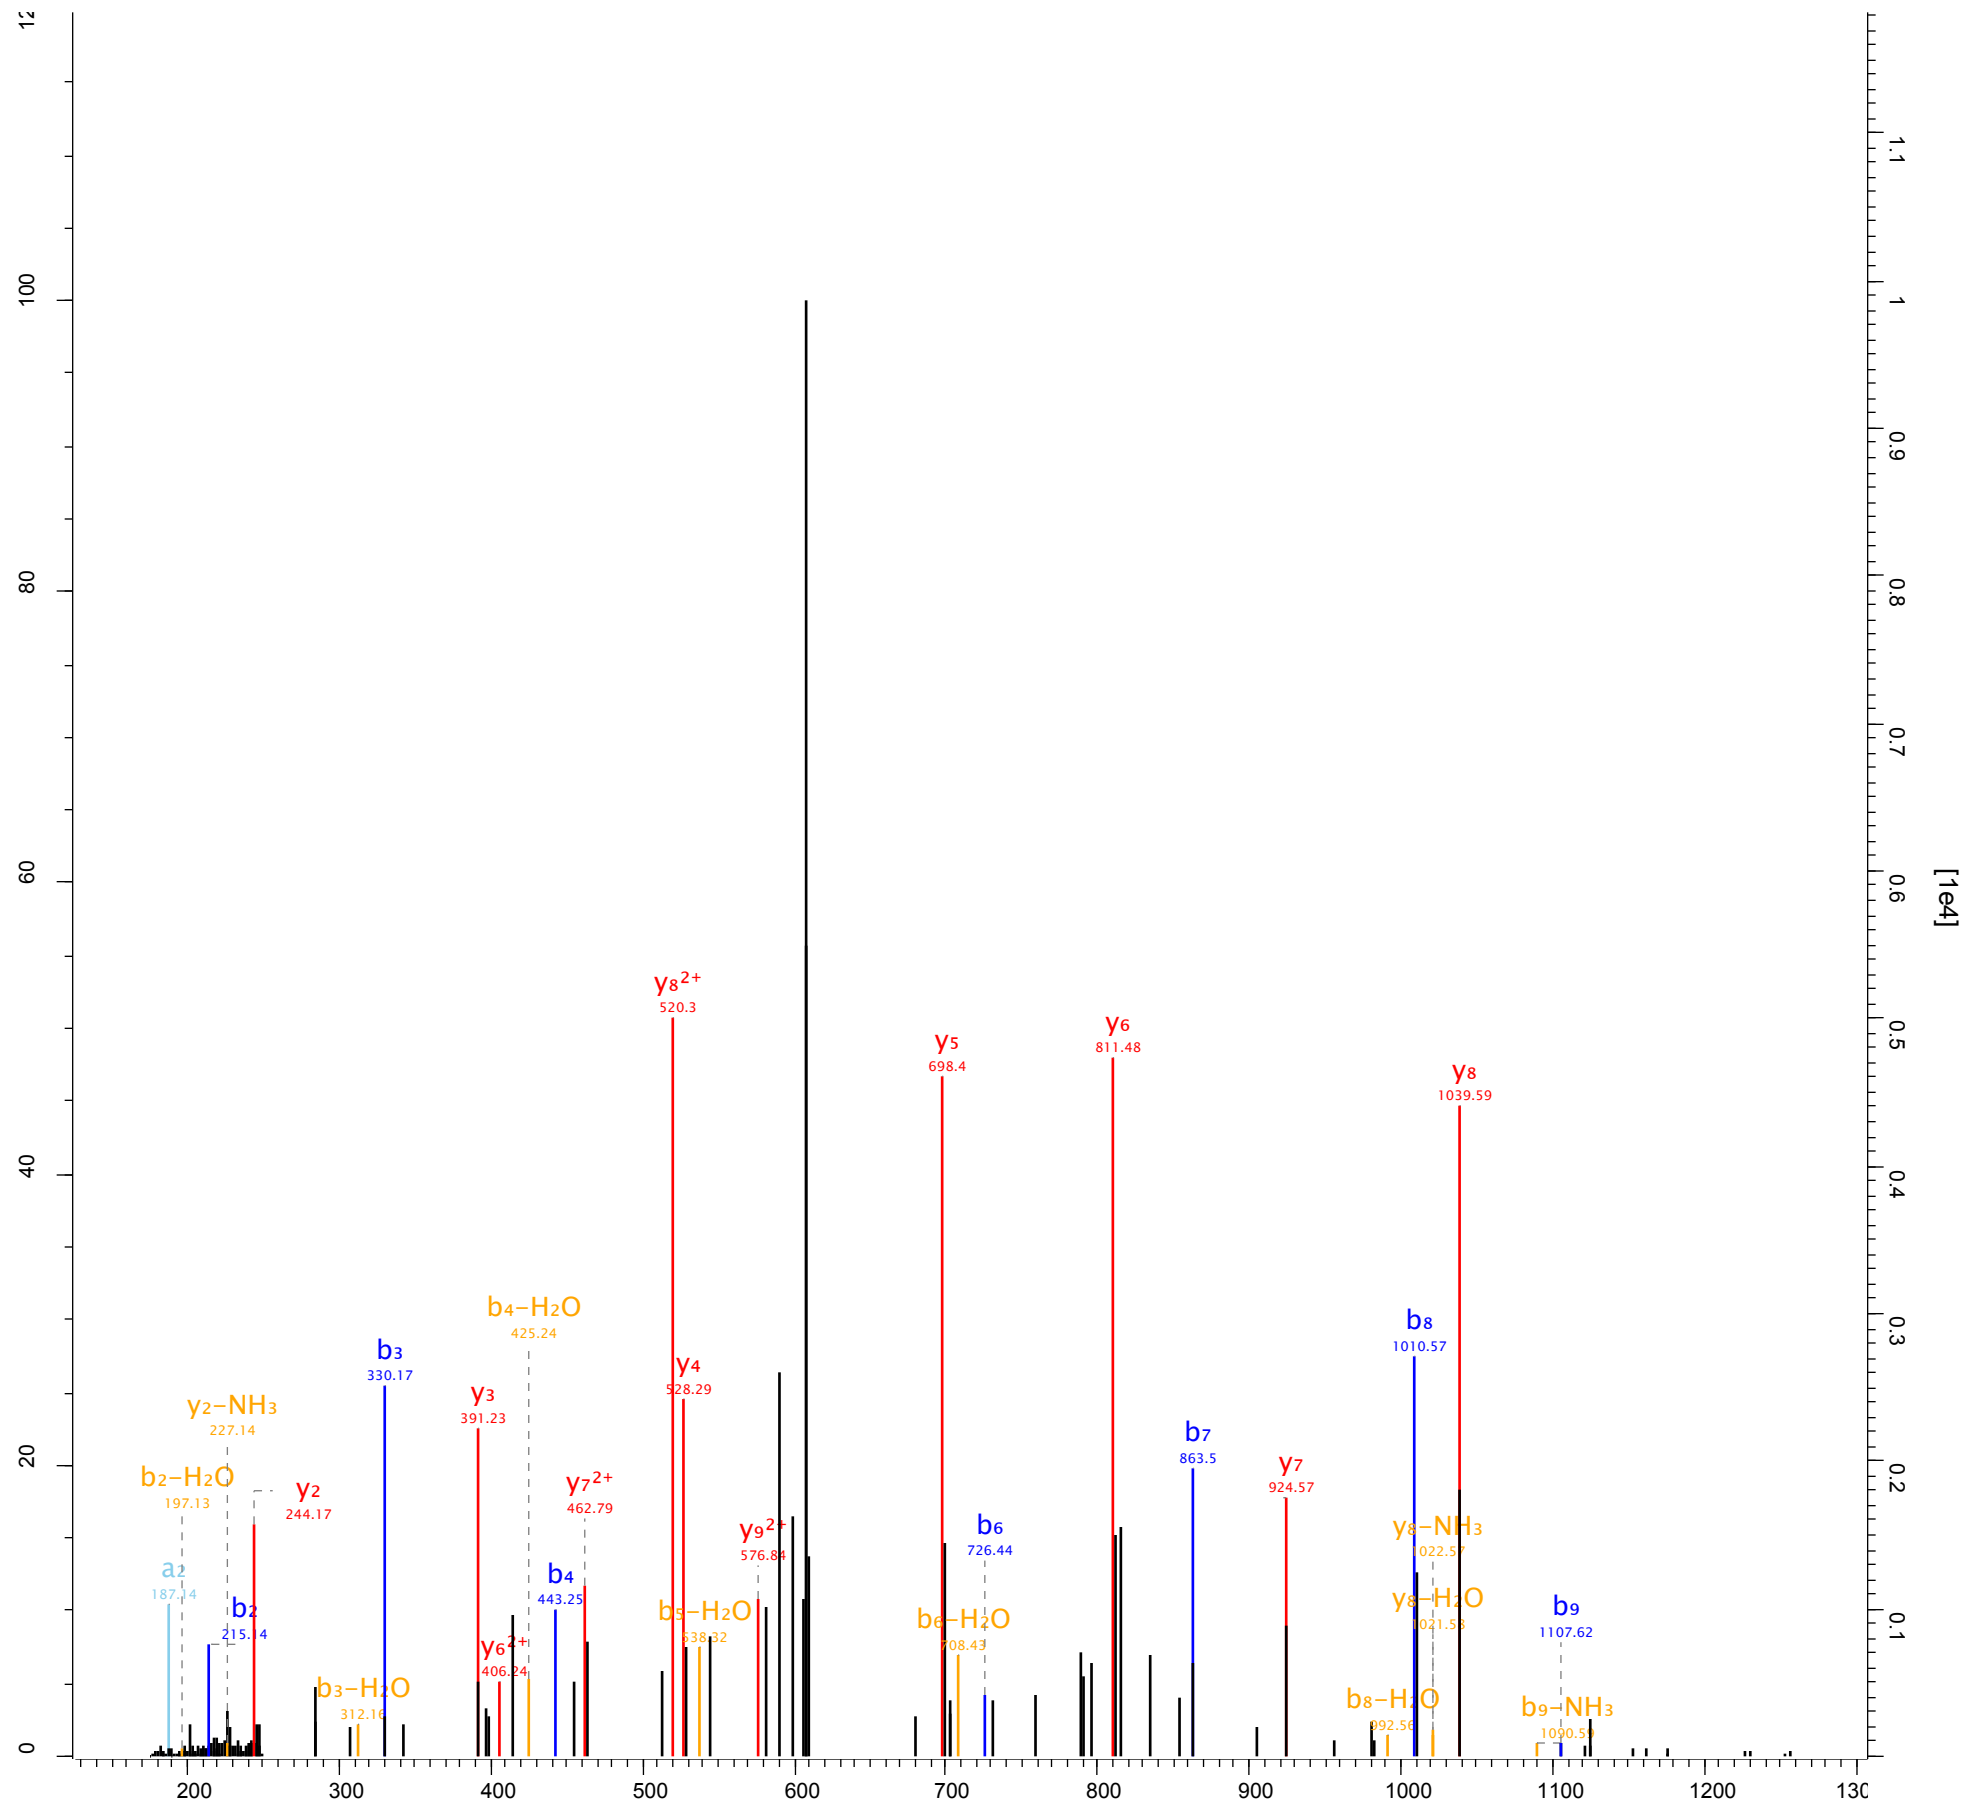

- T L D I L K H F P K -

y9<sup>2+</sup>
y8
y7
y6
y5
y4
y3
y2

b2
b3
b4
b6
b7
b8
b9

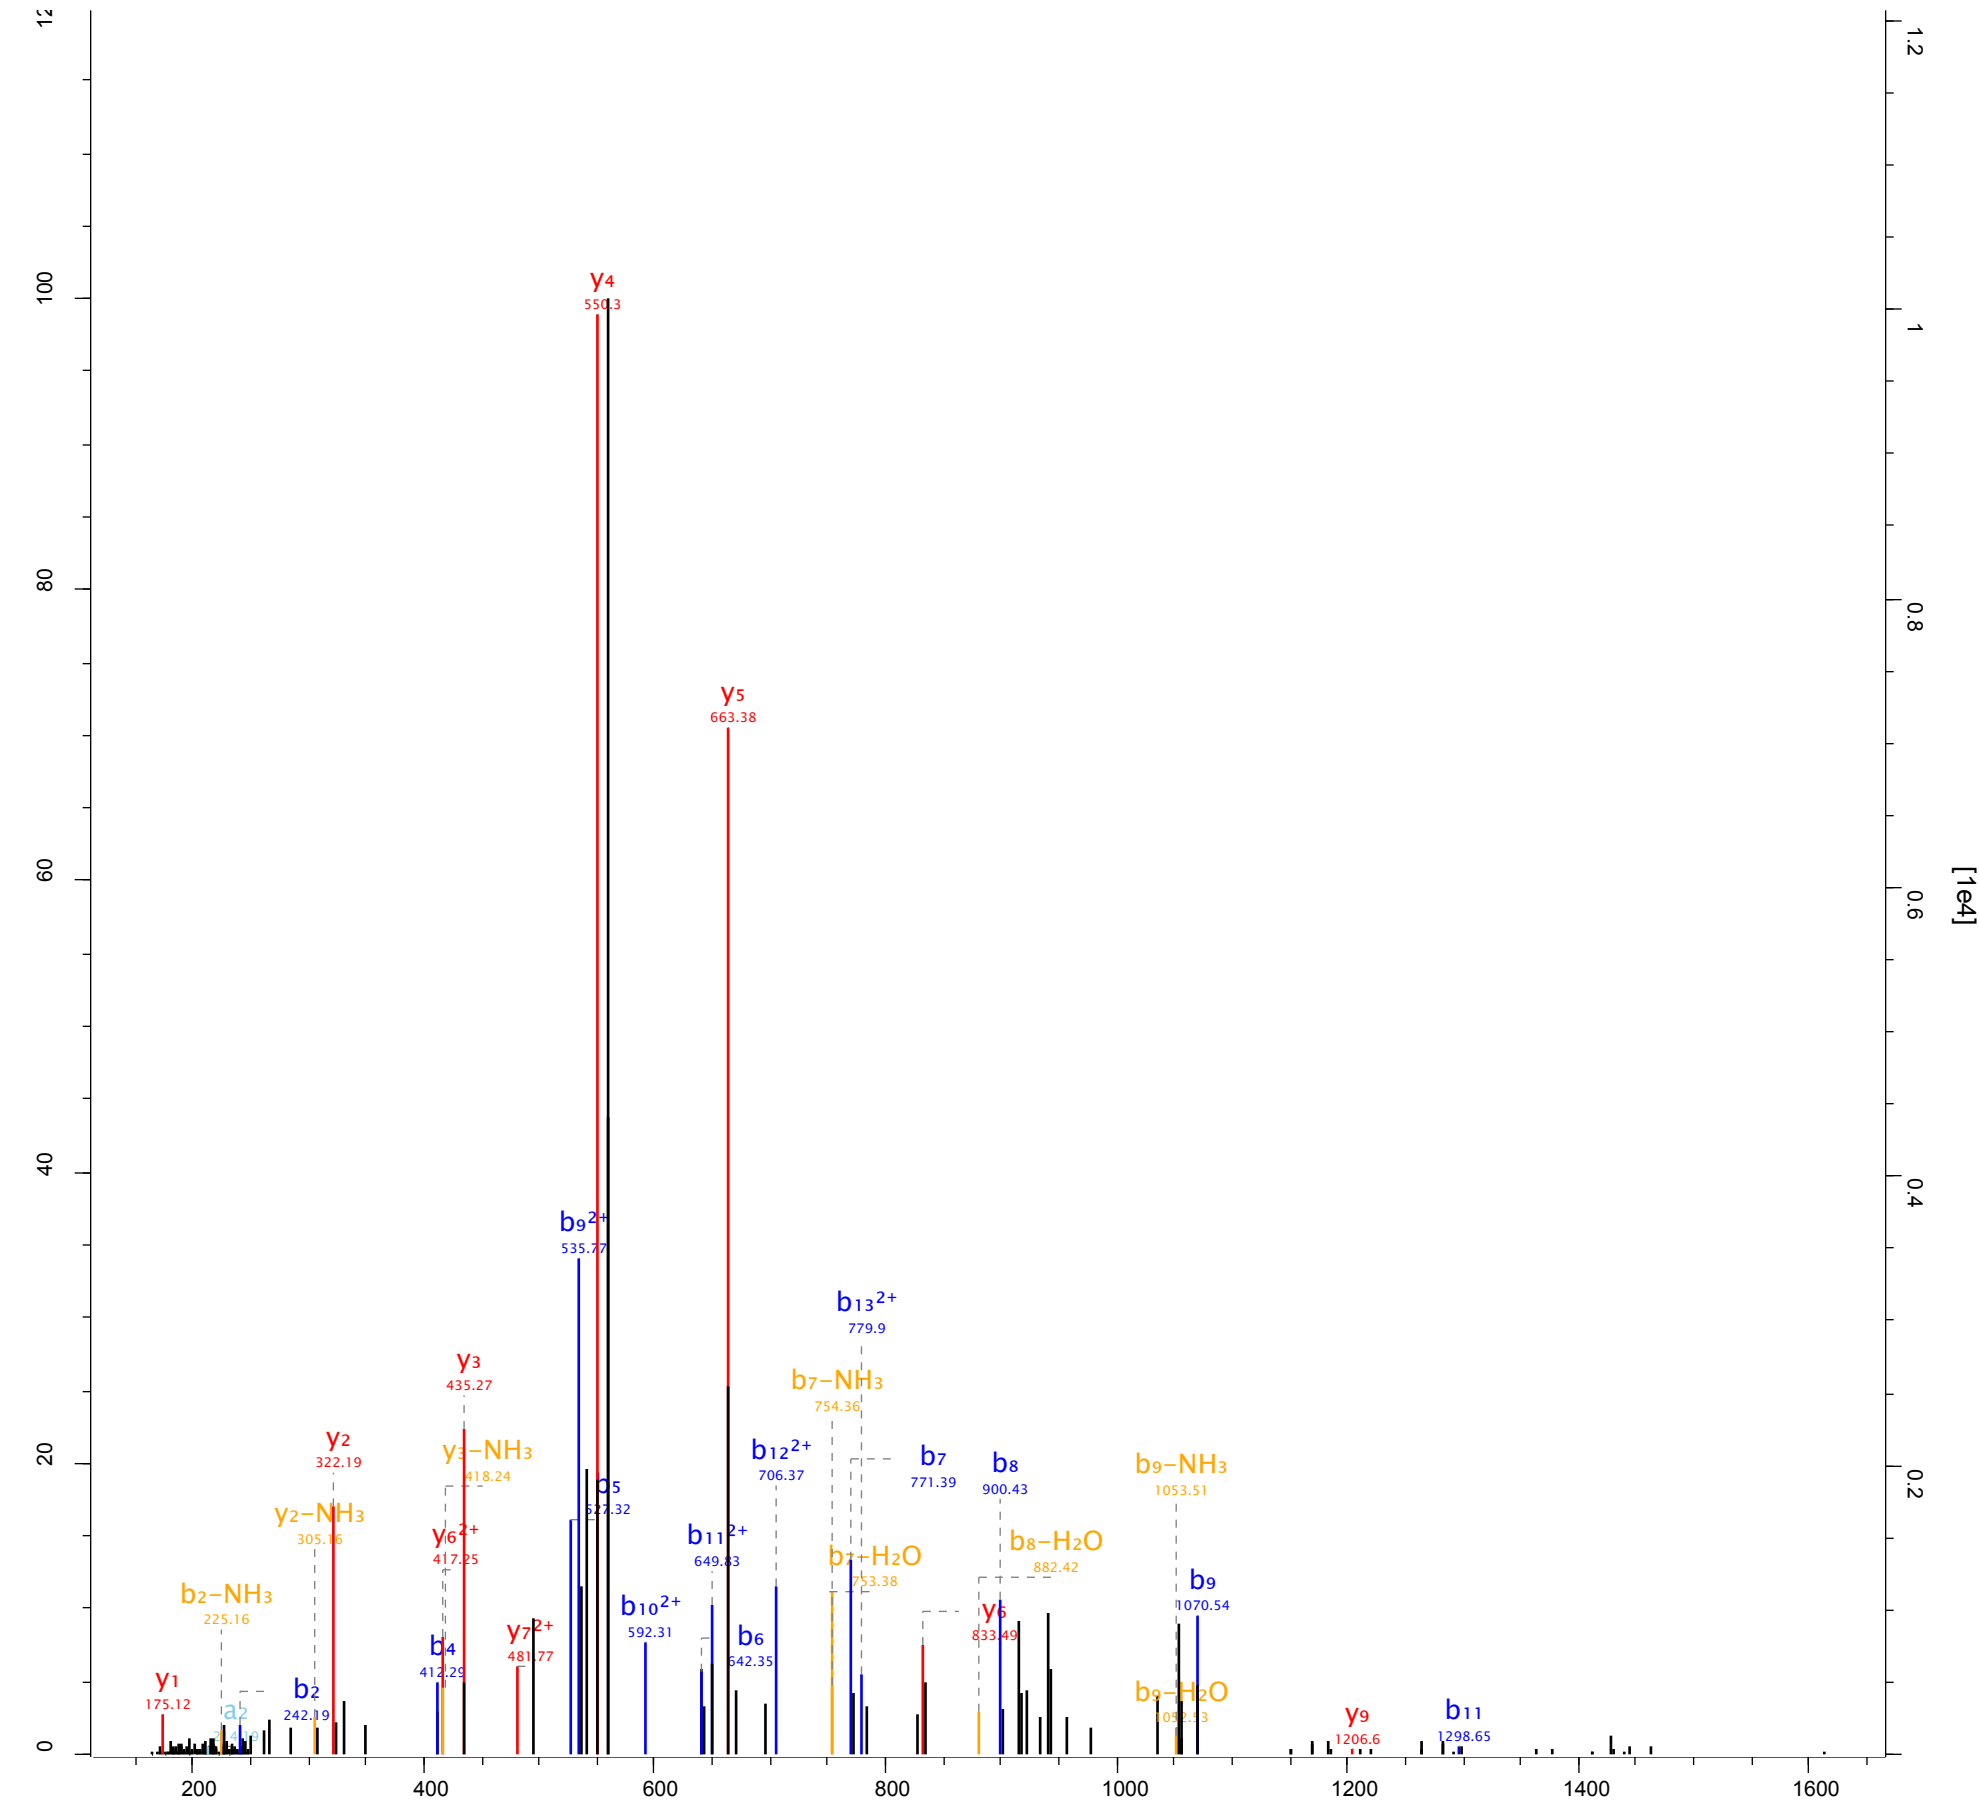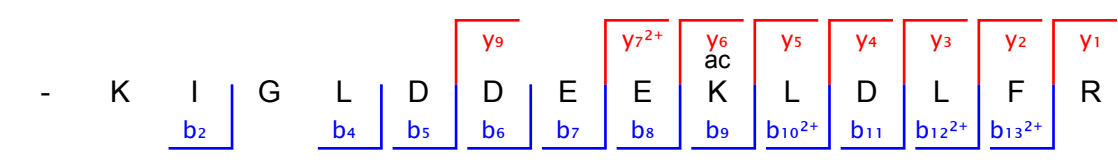

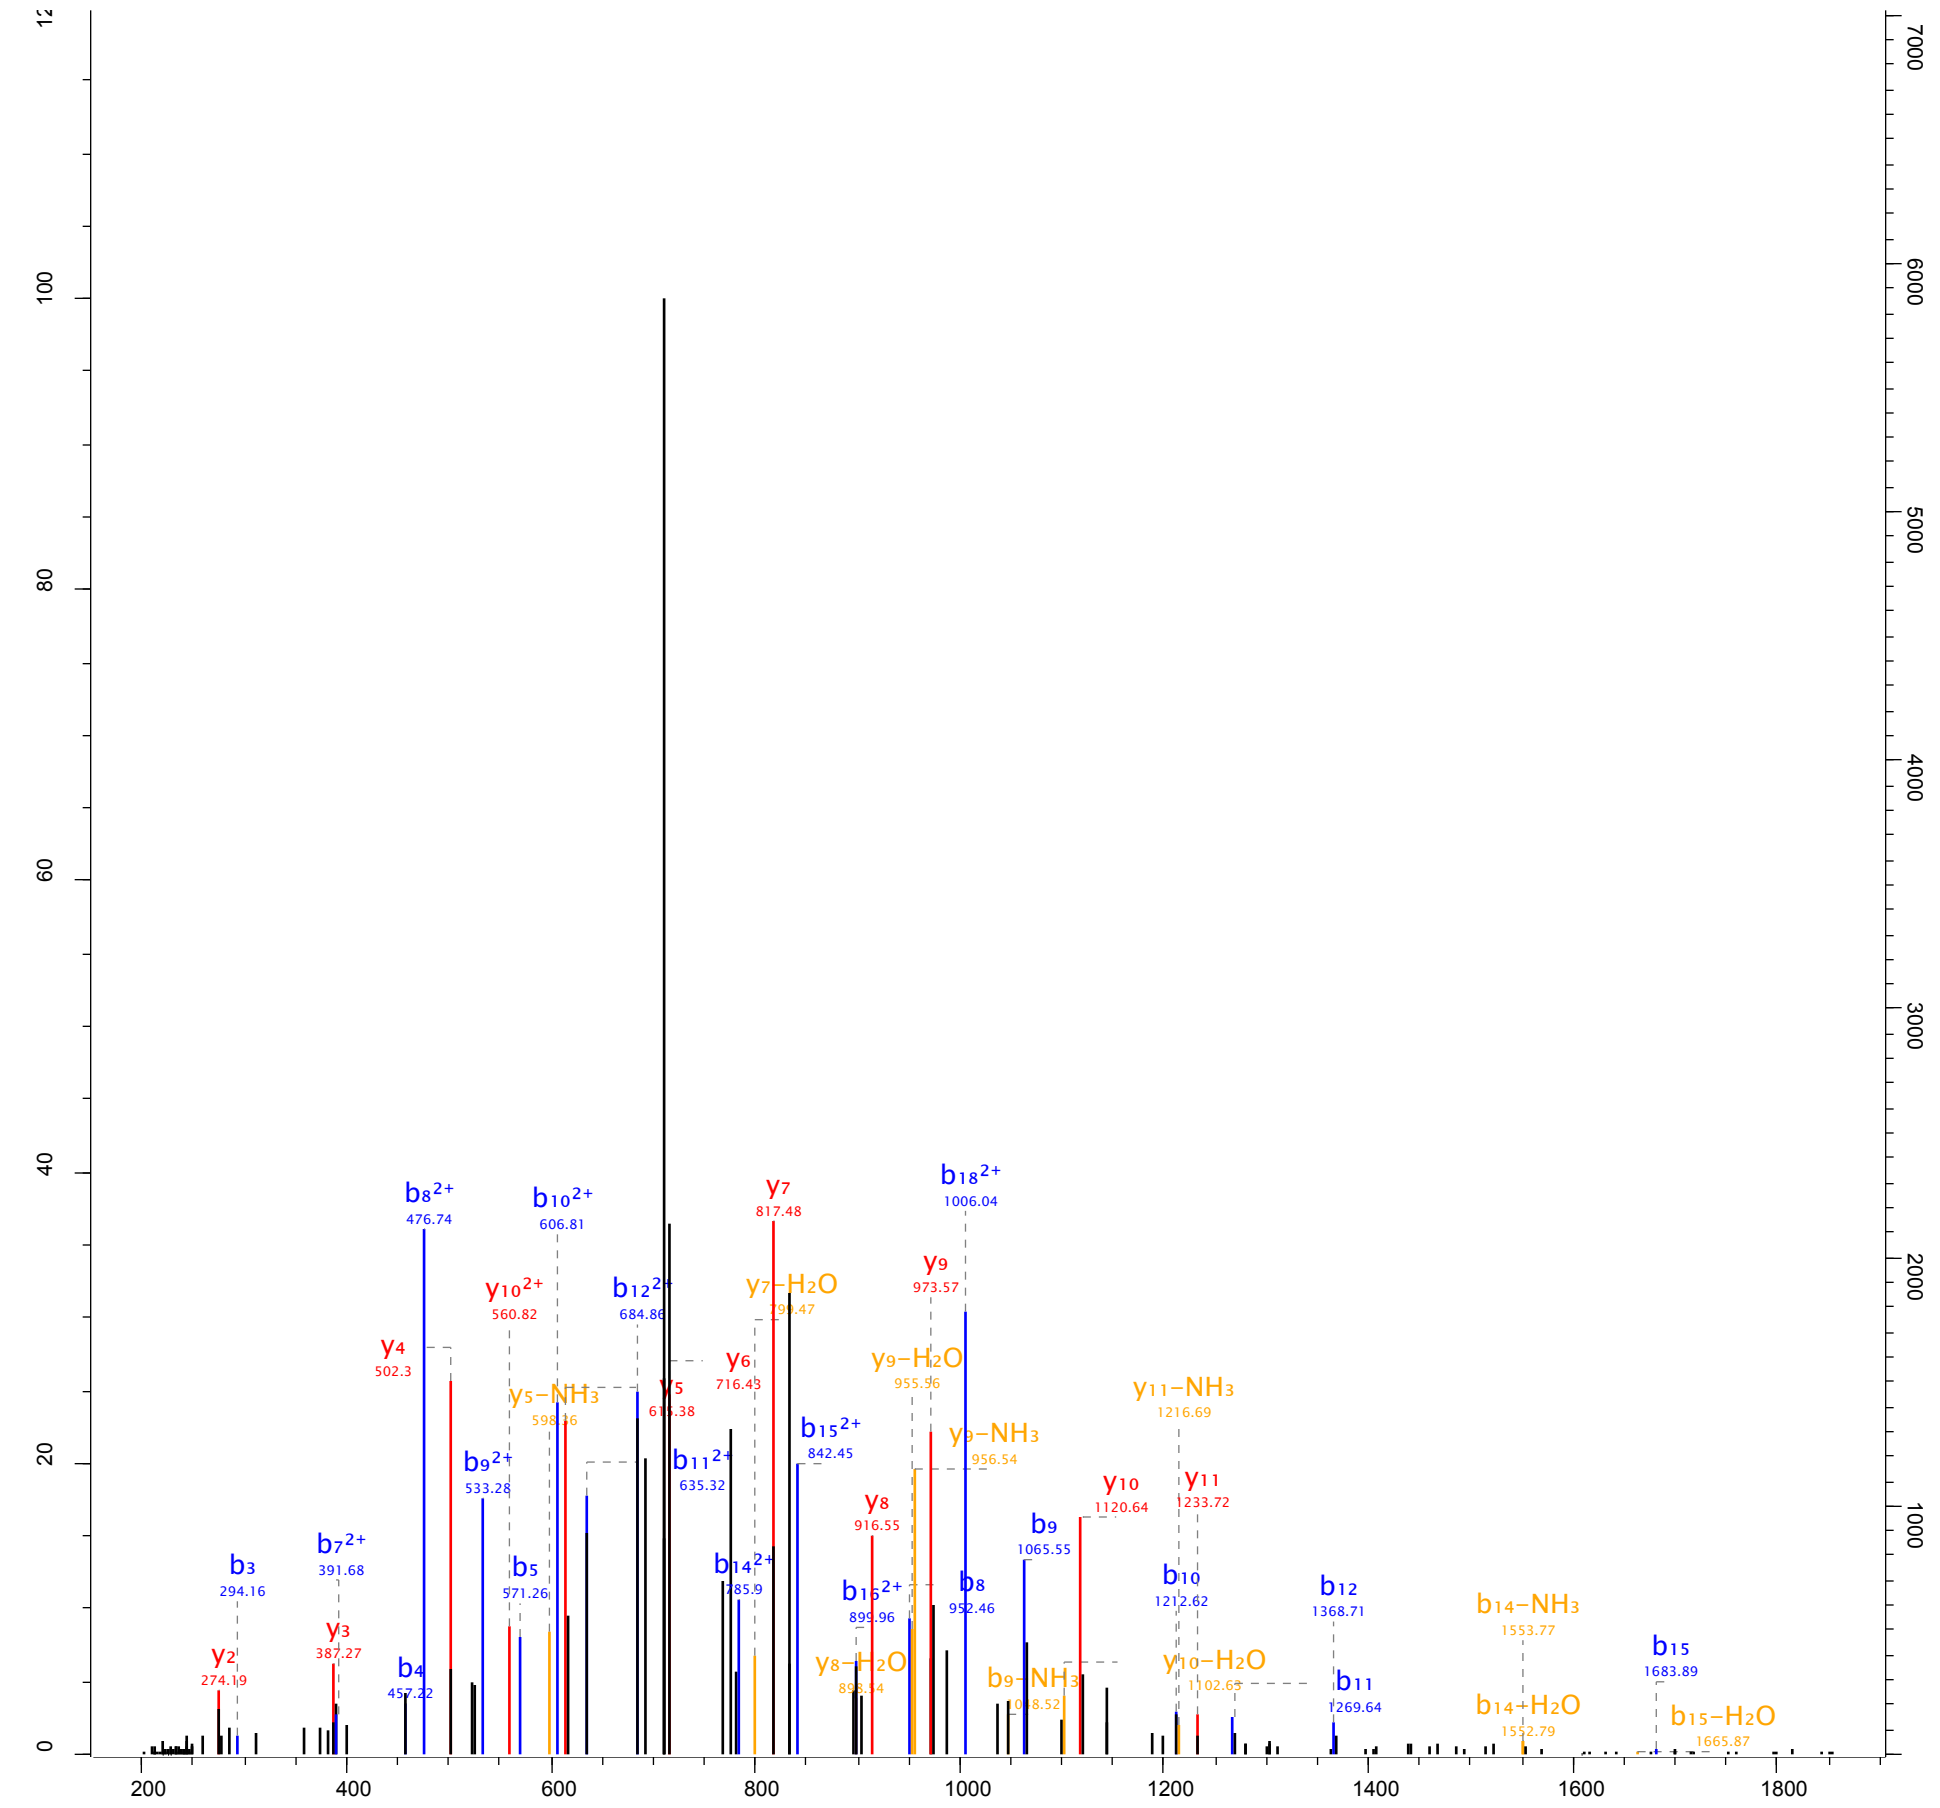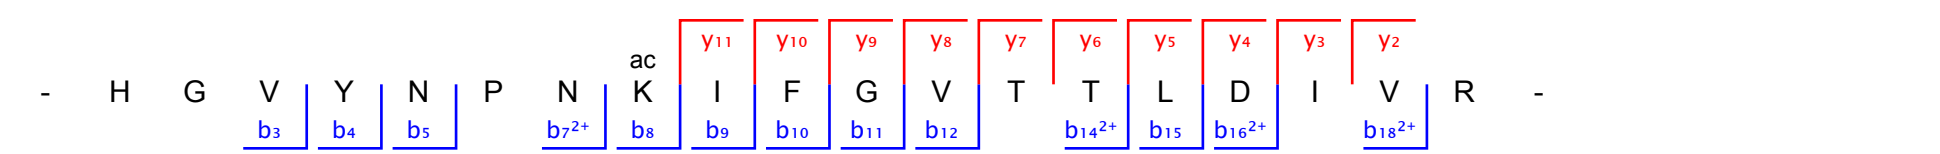

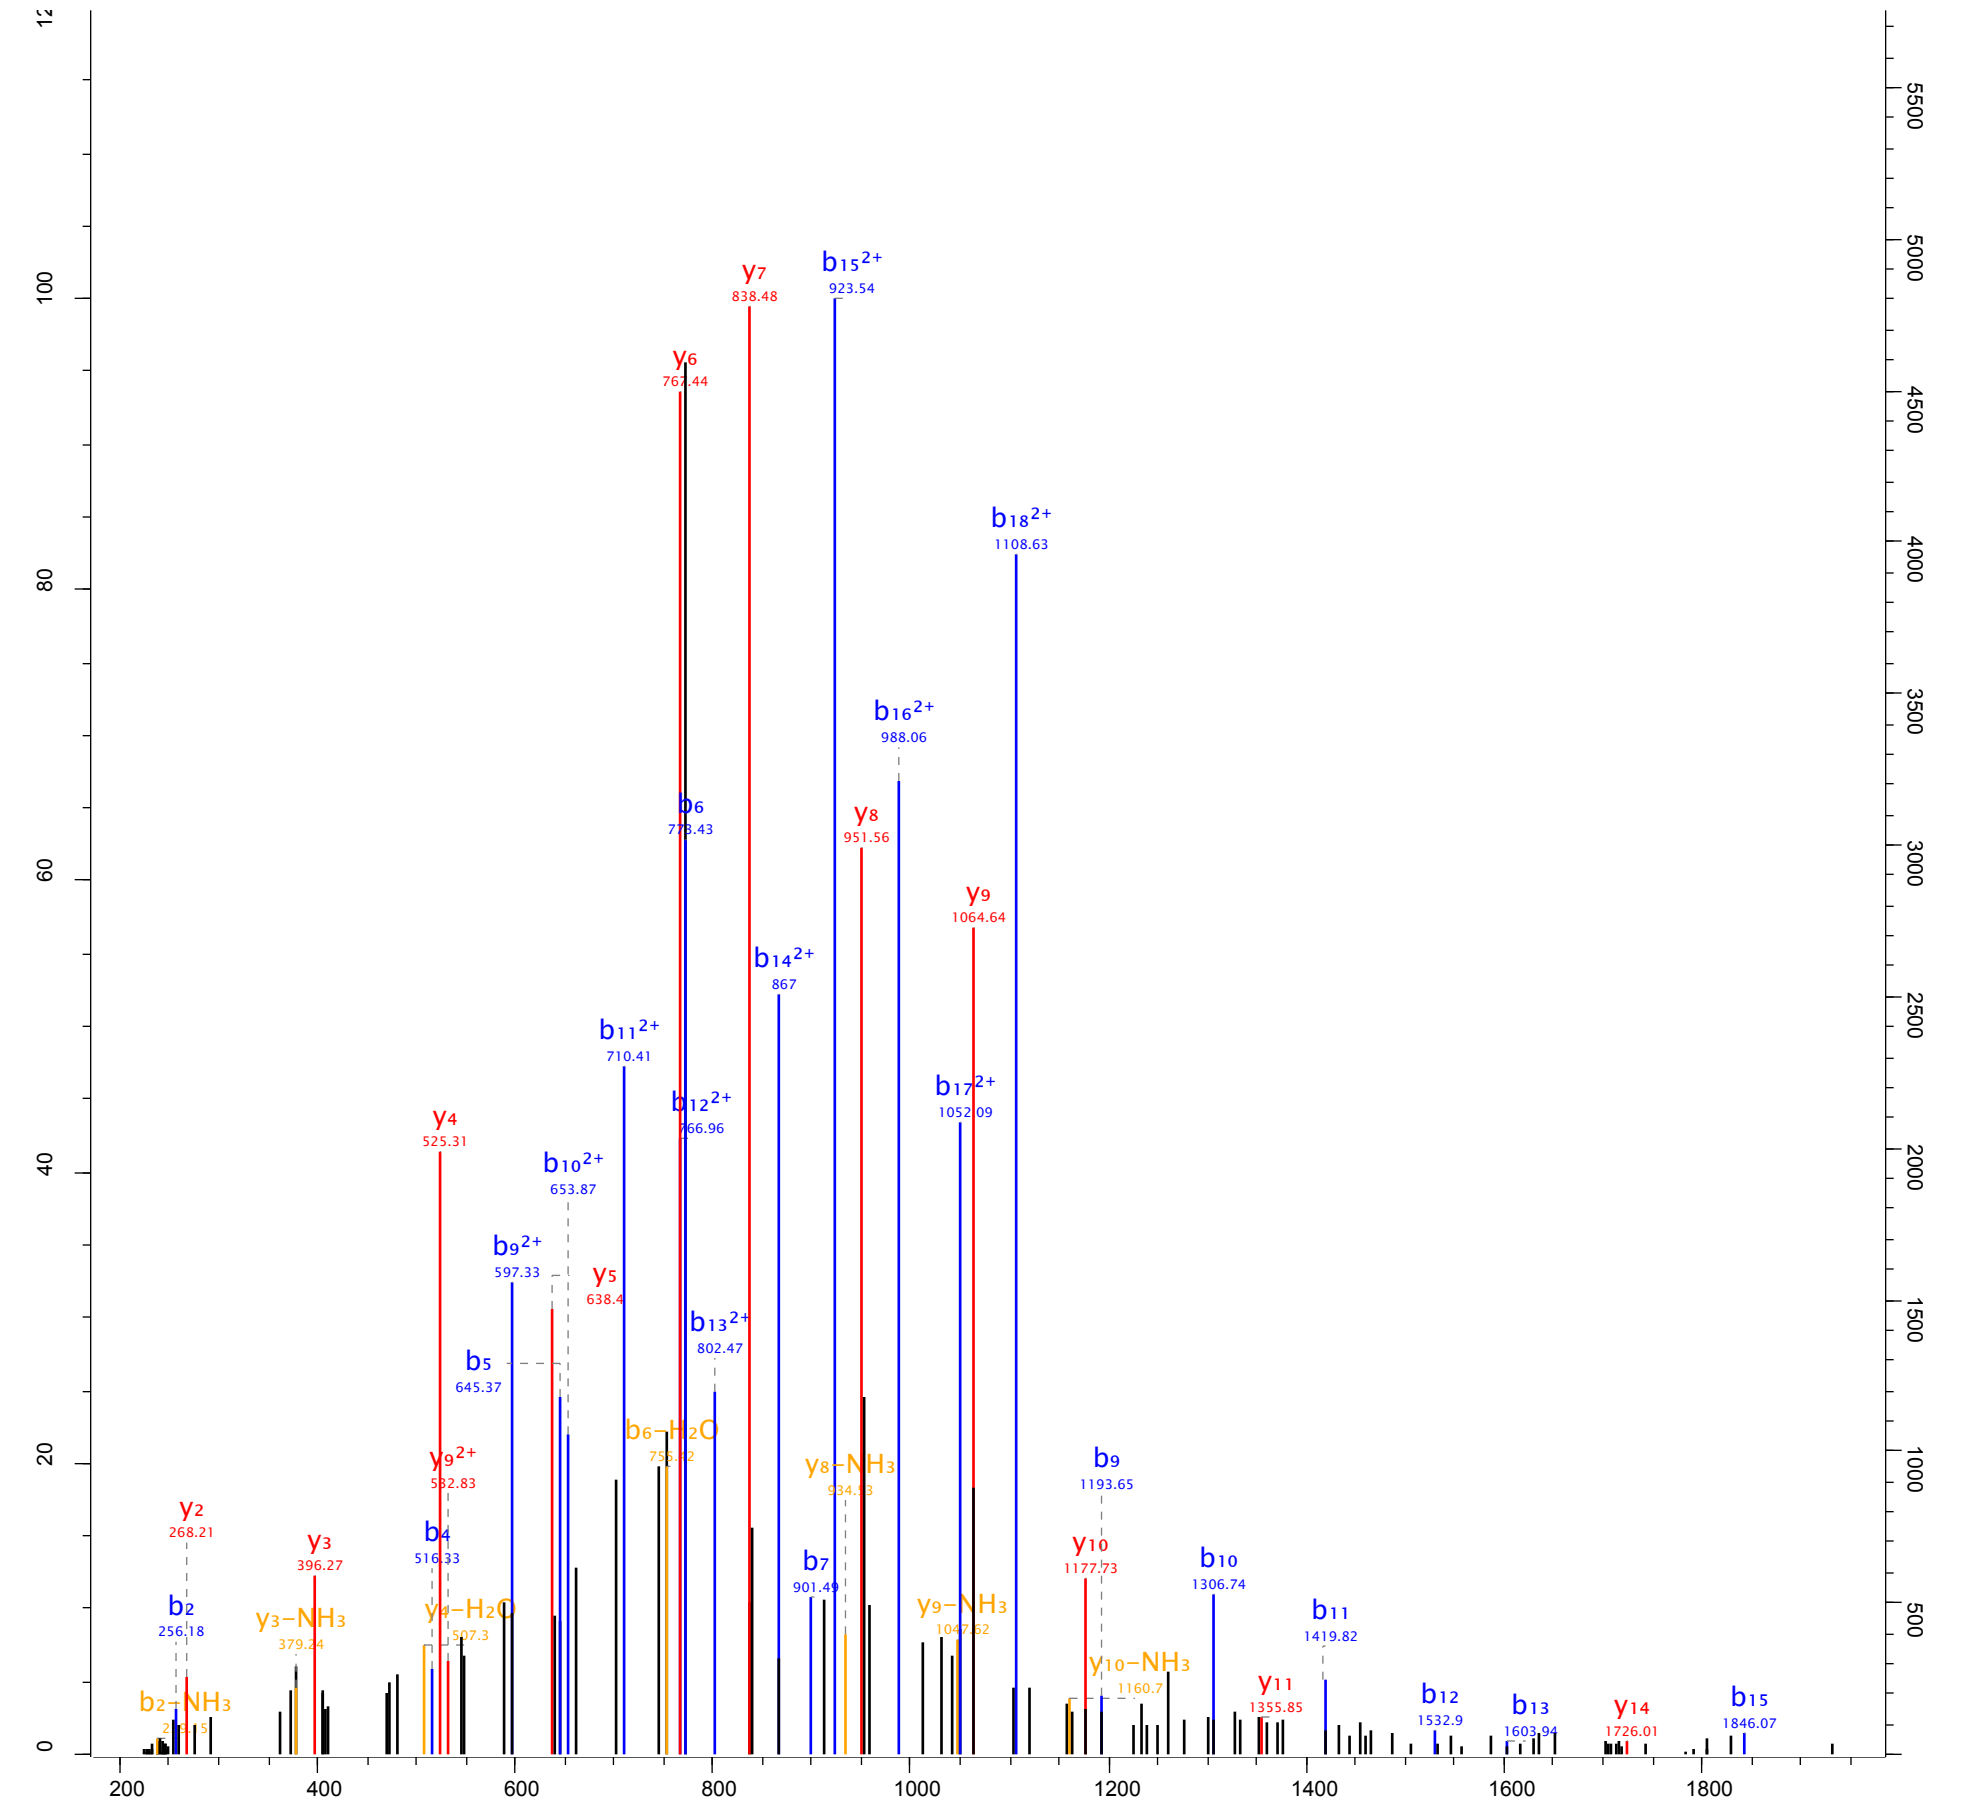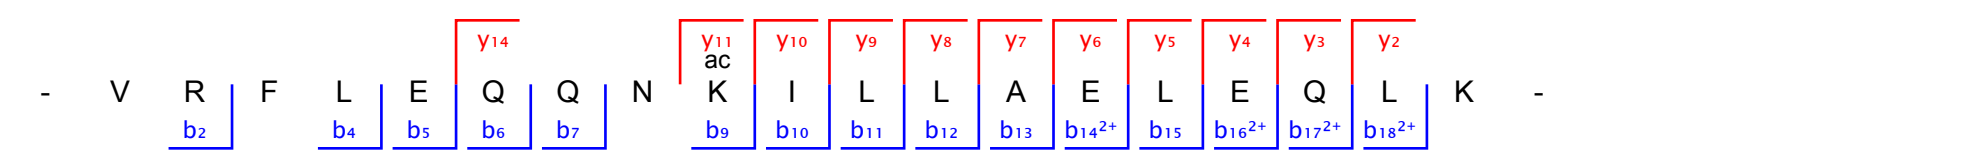

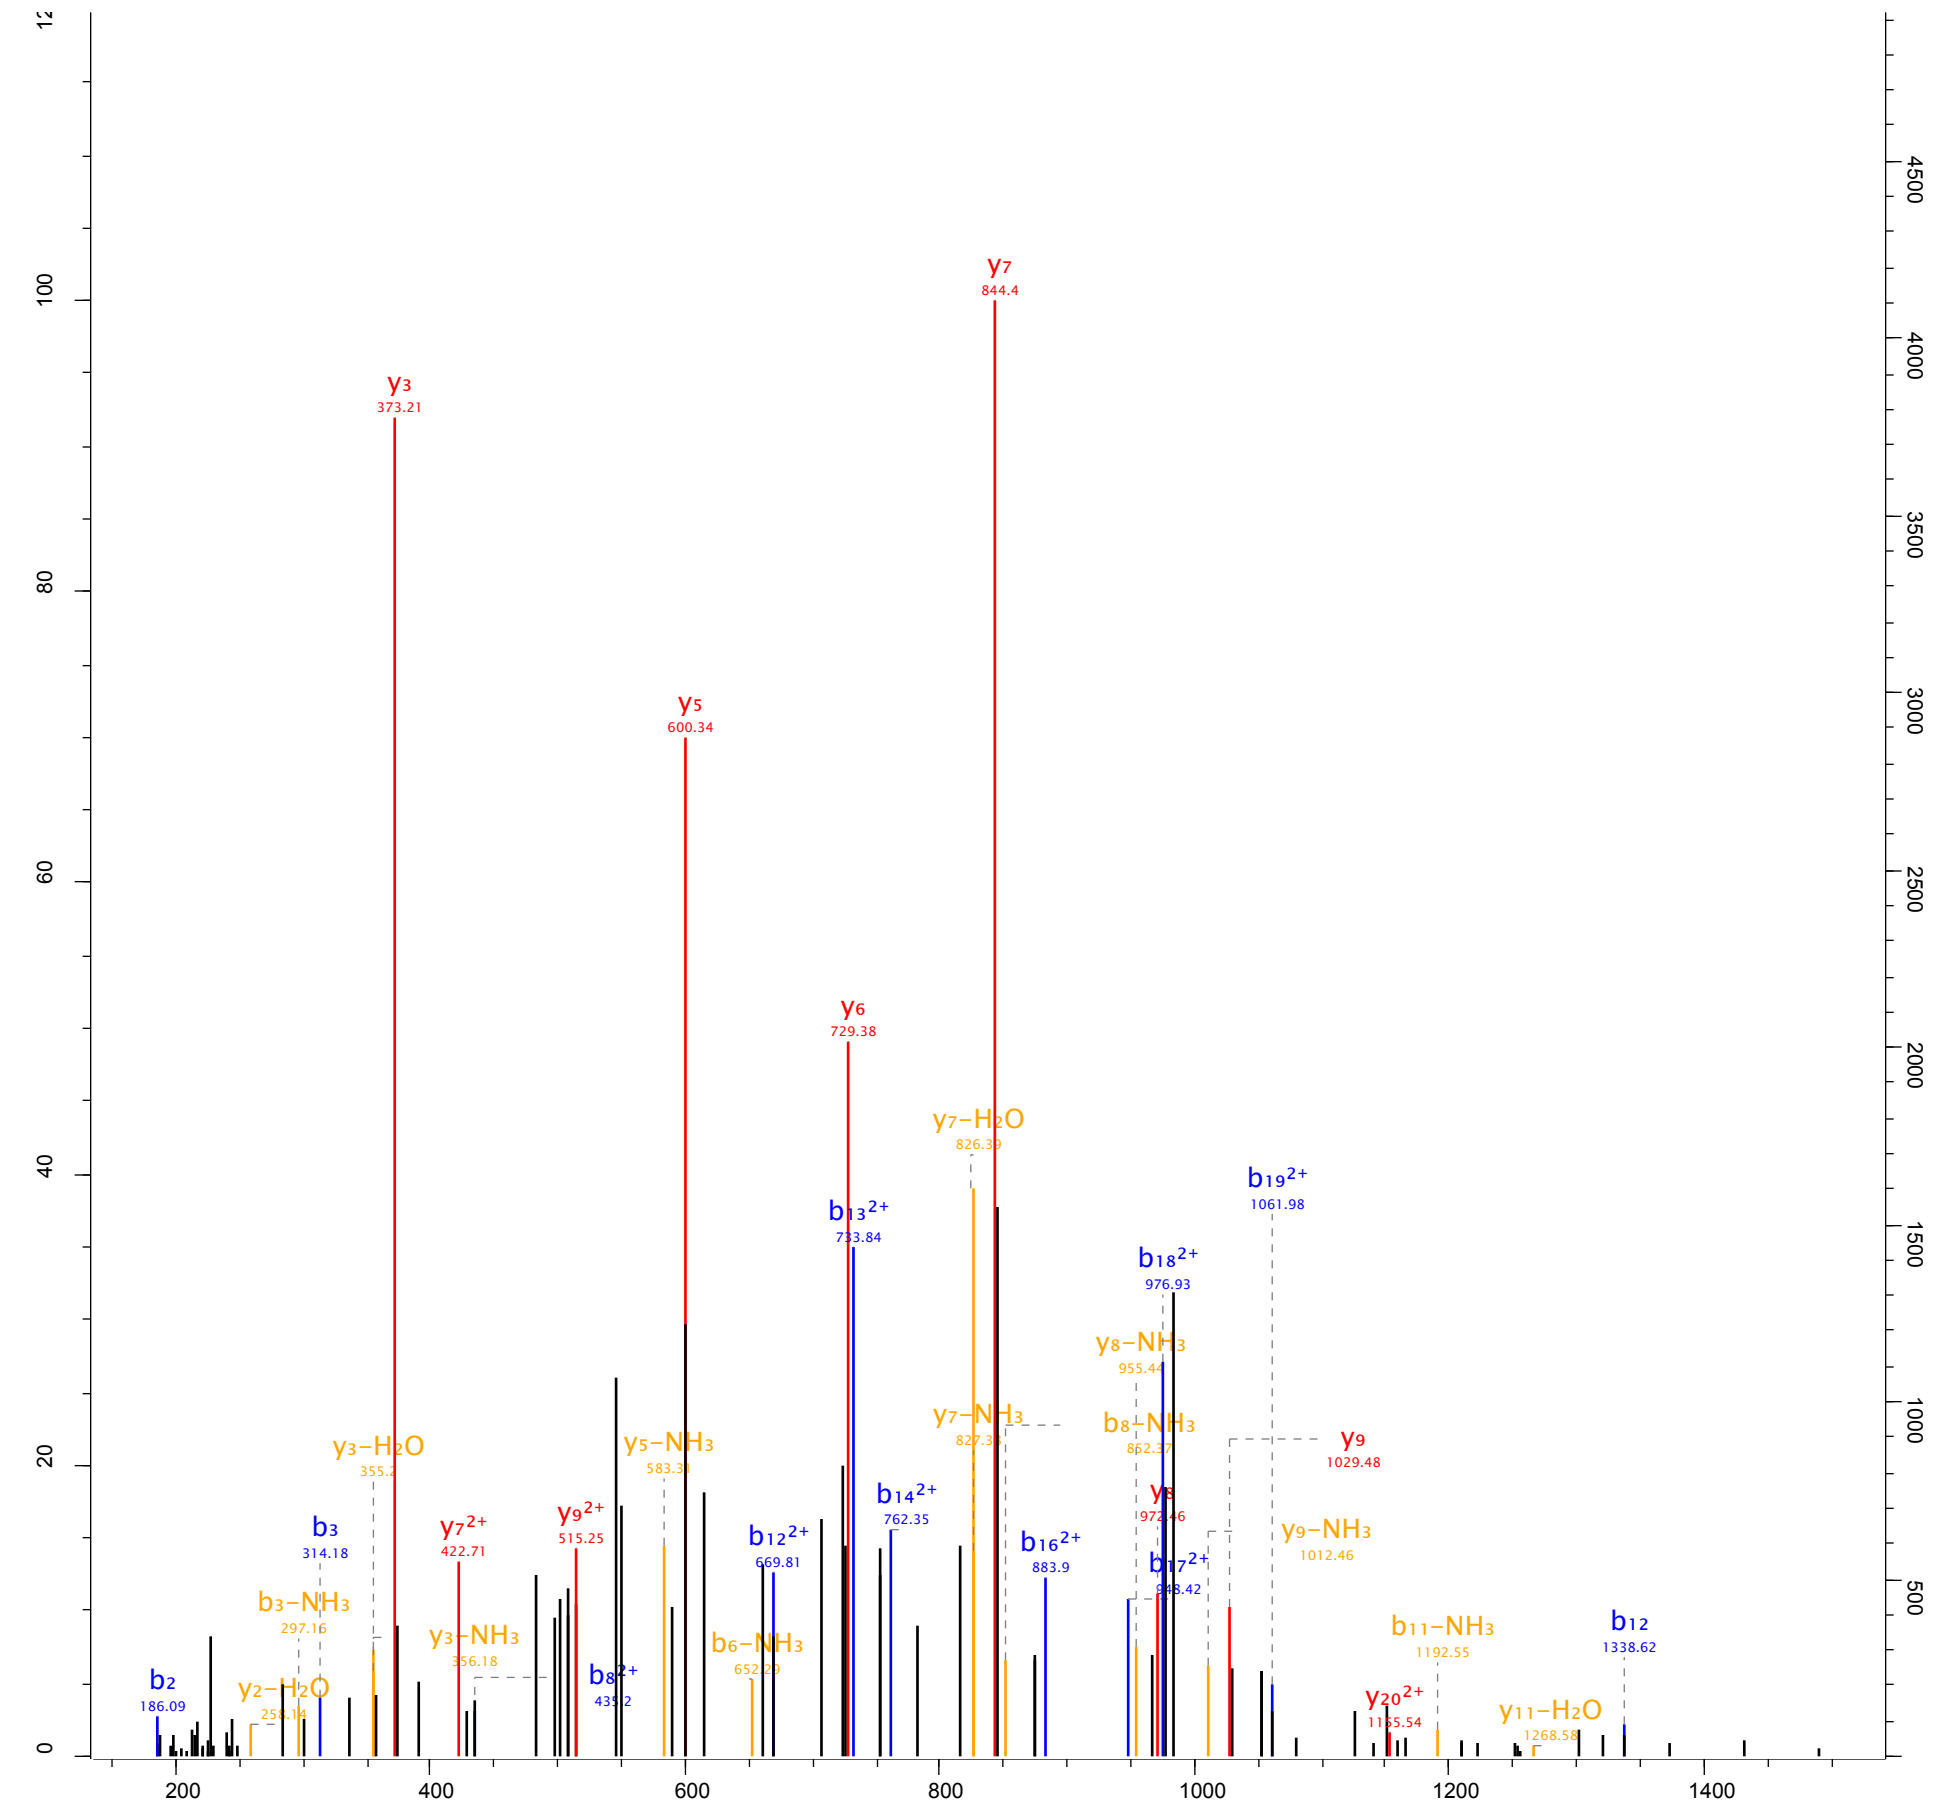

- Q G K P E E E A K P D E Q G Q D E G K P E K -

b<sub>2</sub>
b<sub>3</sub>
b<sub>8</sub><sup>2+</sup>
b<sub>12</sub>
b<sub>13</sub><sup>2+</sup>
b<sub>14</sub><sup>2+</sup>
b<sub>16</sub><sup>2+</sup>
b<sub>17</sub><sup>2+</sup>
b<sub>18</sub><sup>2+</sup>
b<sub>19</sub><sup>2+</sup>
y<sub>20</sub><sup>2+</sup>
y<sub>9</sub>
y<sub>8</sub>
y<sub>7</sub>
y<sub>6</sub>
y<sub>5</sub>
ac
y<sub>3</sub>

Raw file 072613\_SCW\_II\_68\_Enriched\_10 Scan 13872 Method ITMS; CID Score 106.88 m/z 581.8 Gene names Crebbp;Ep300

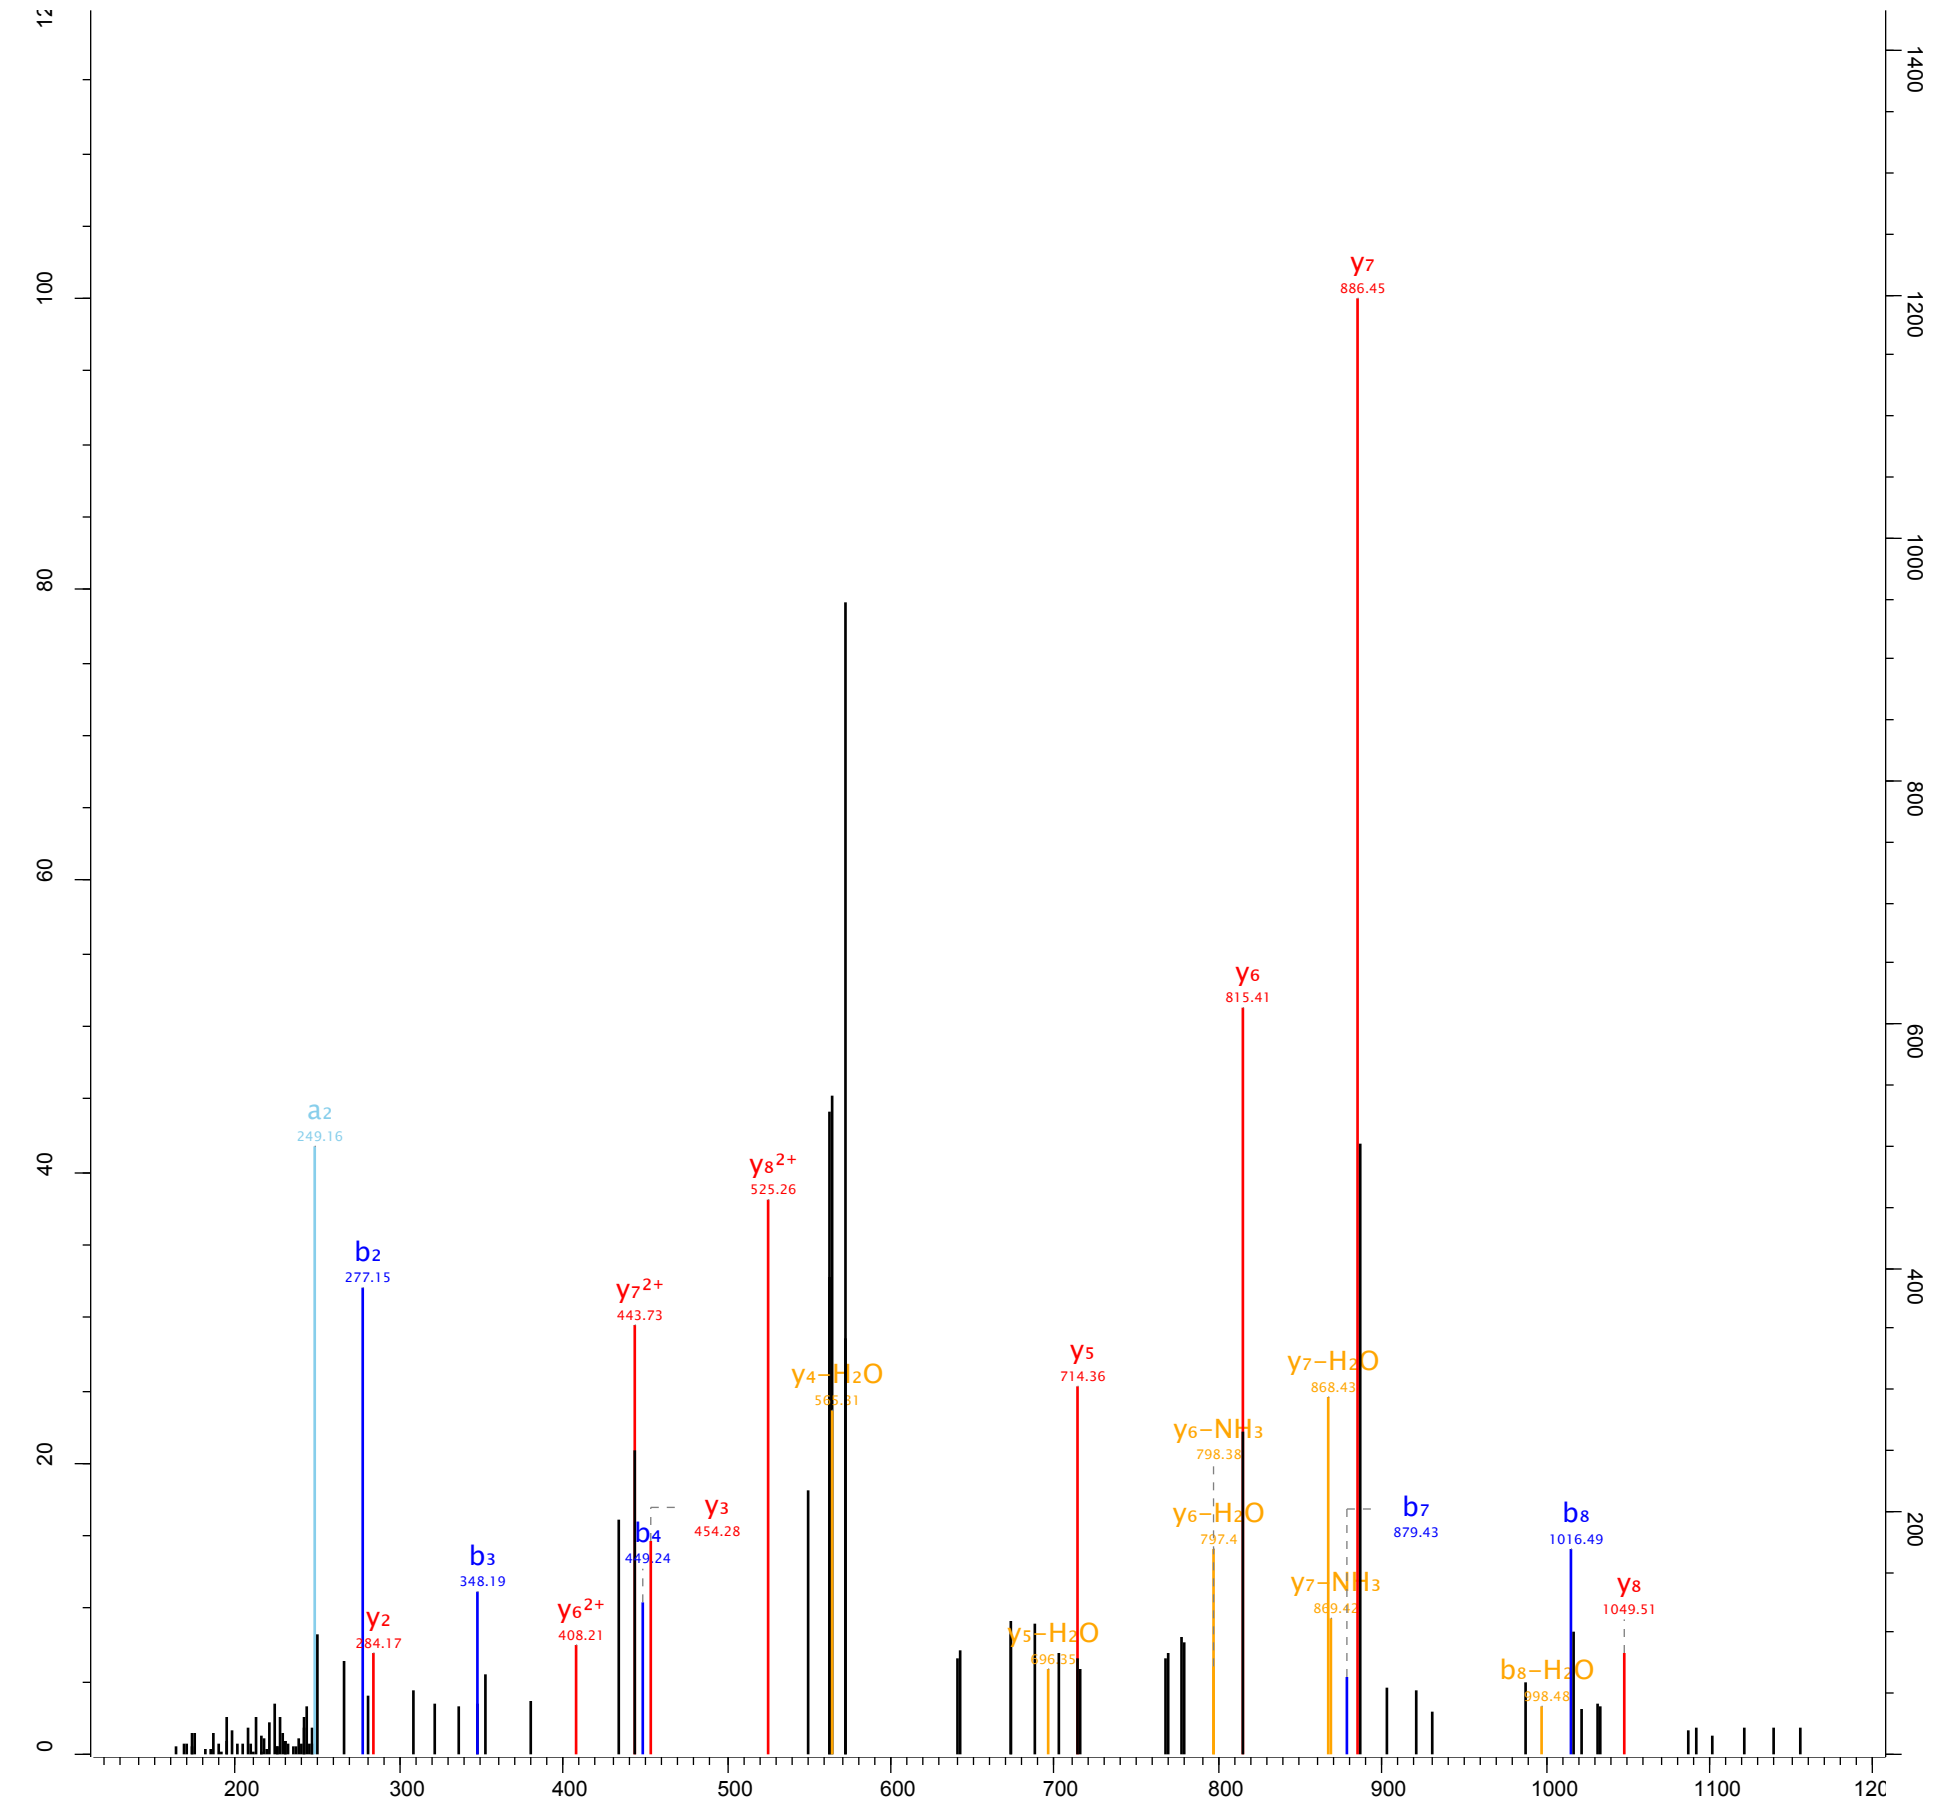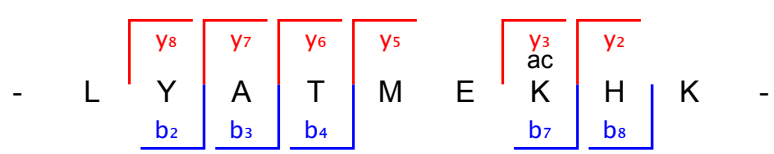



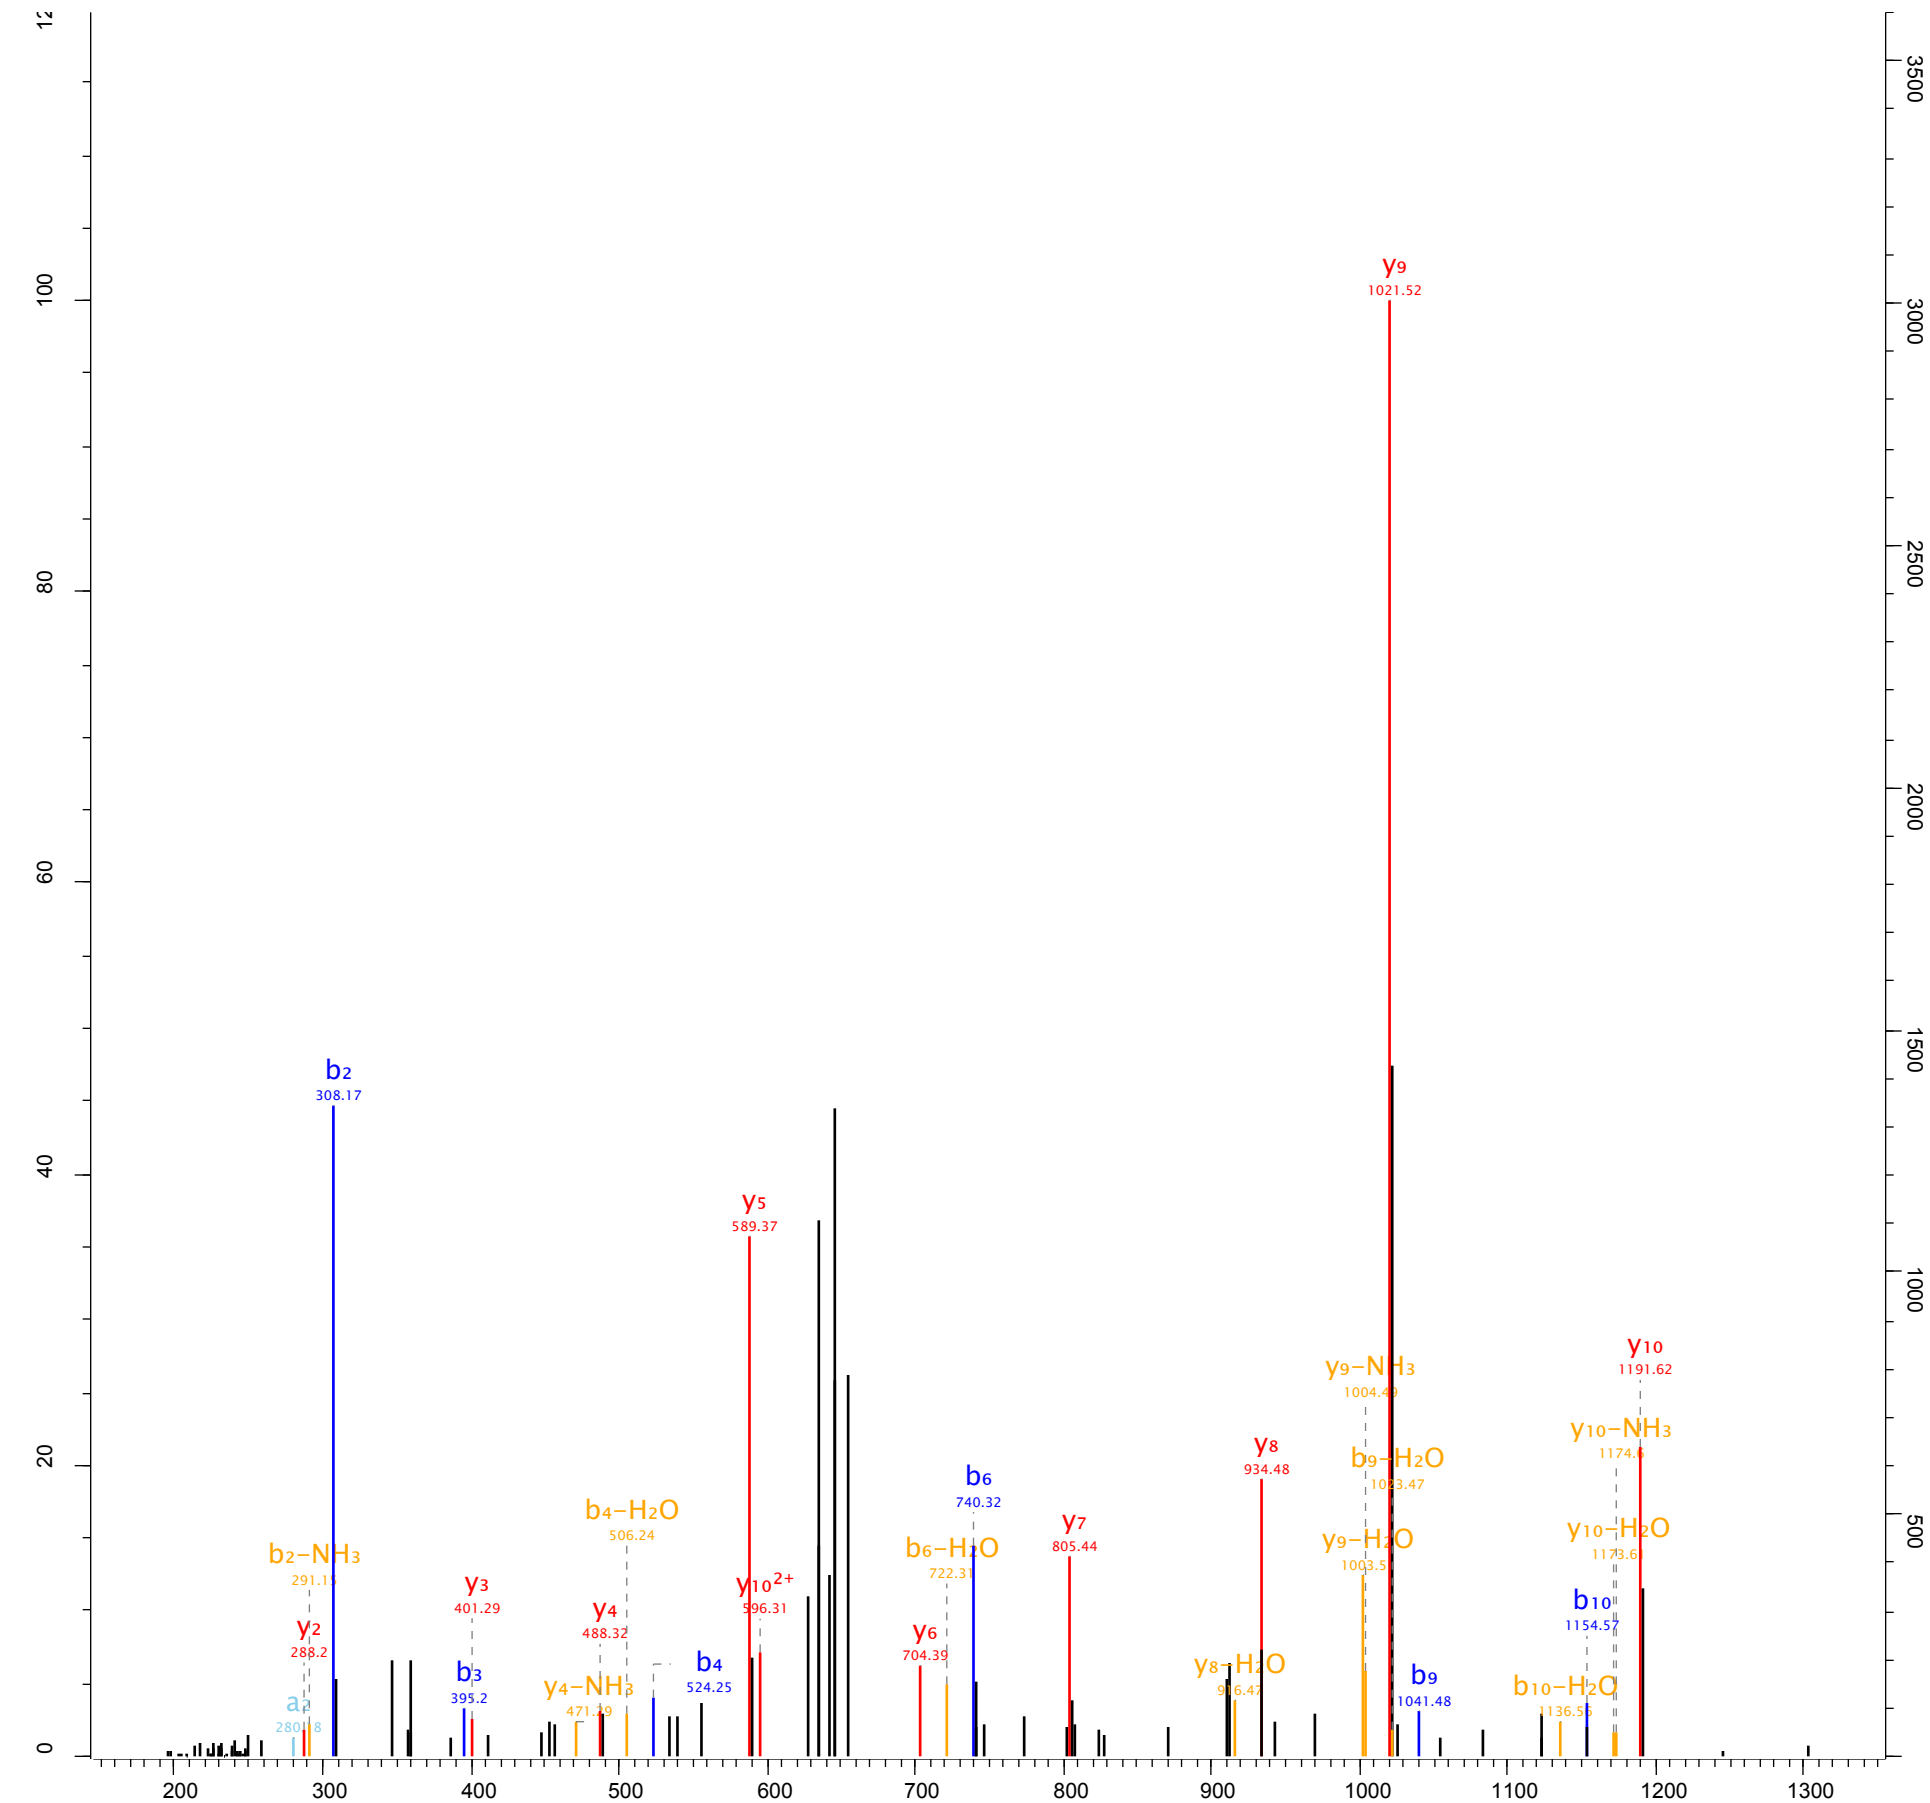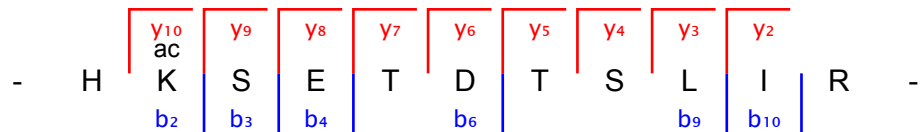

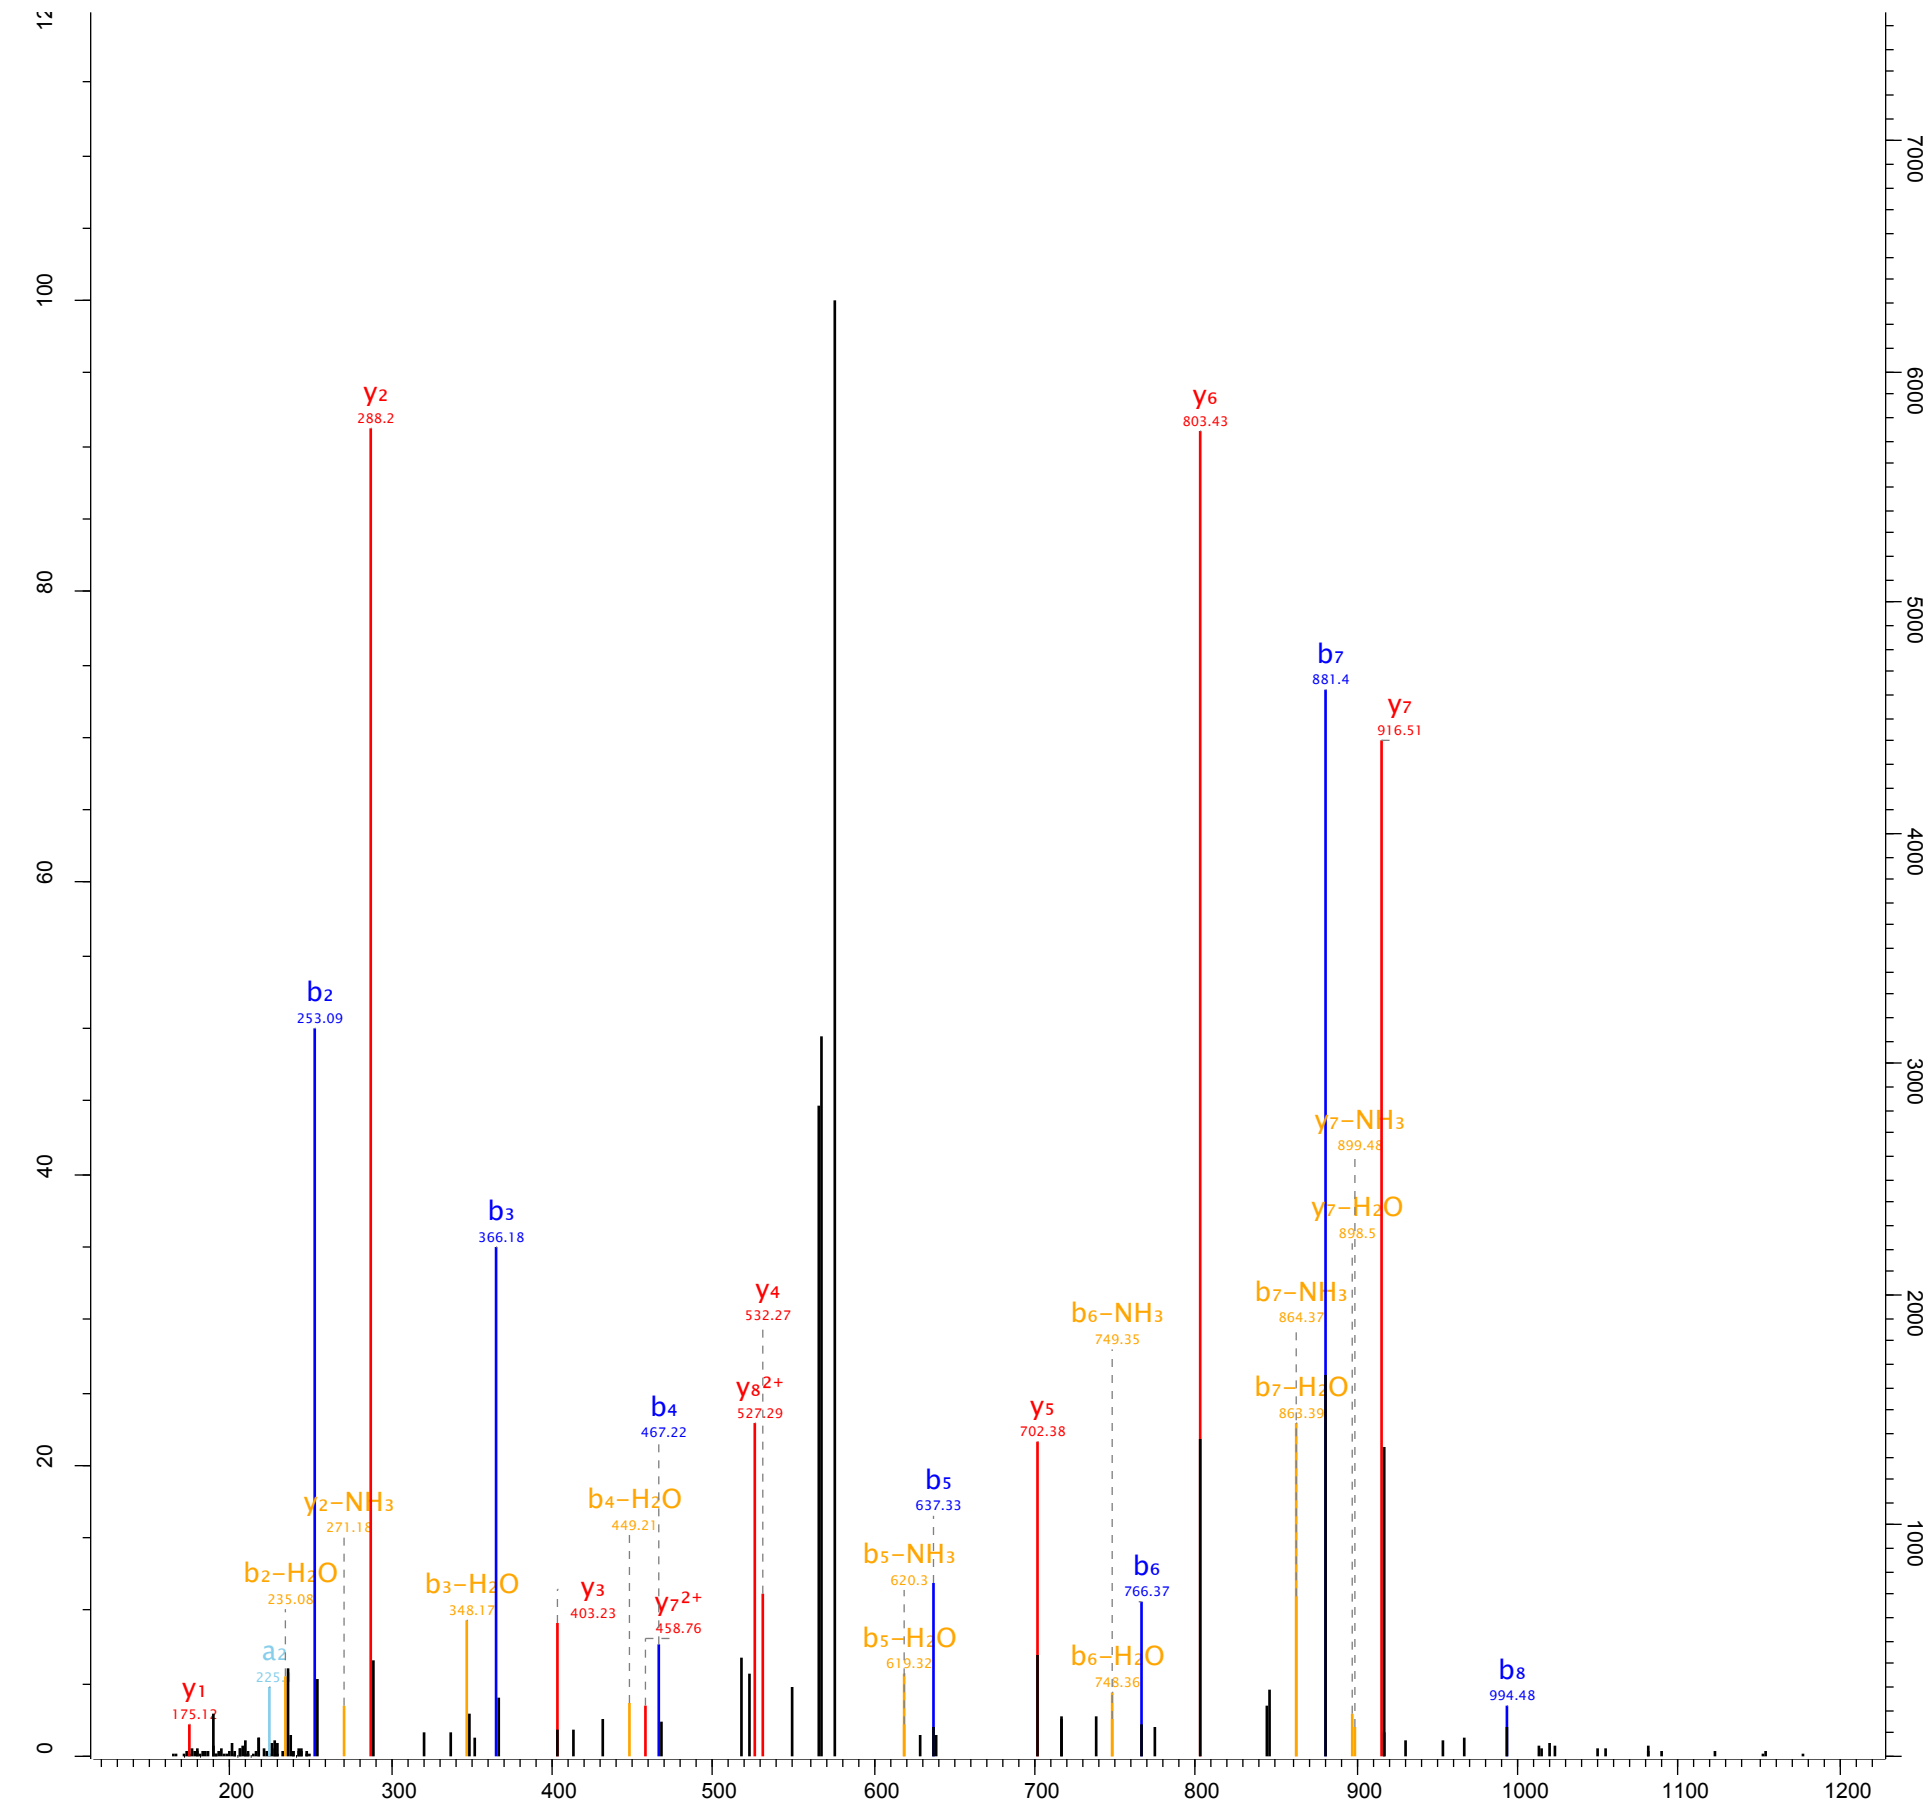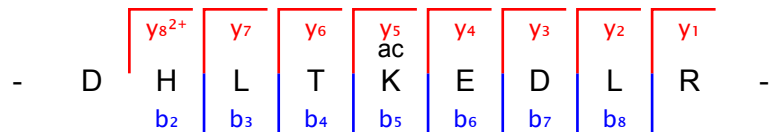

072613\_SCW\_II\_68\_Enriched\_10

15908

ITMS; CID

156.48

656.34

Fasn

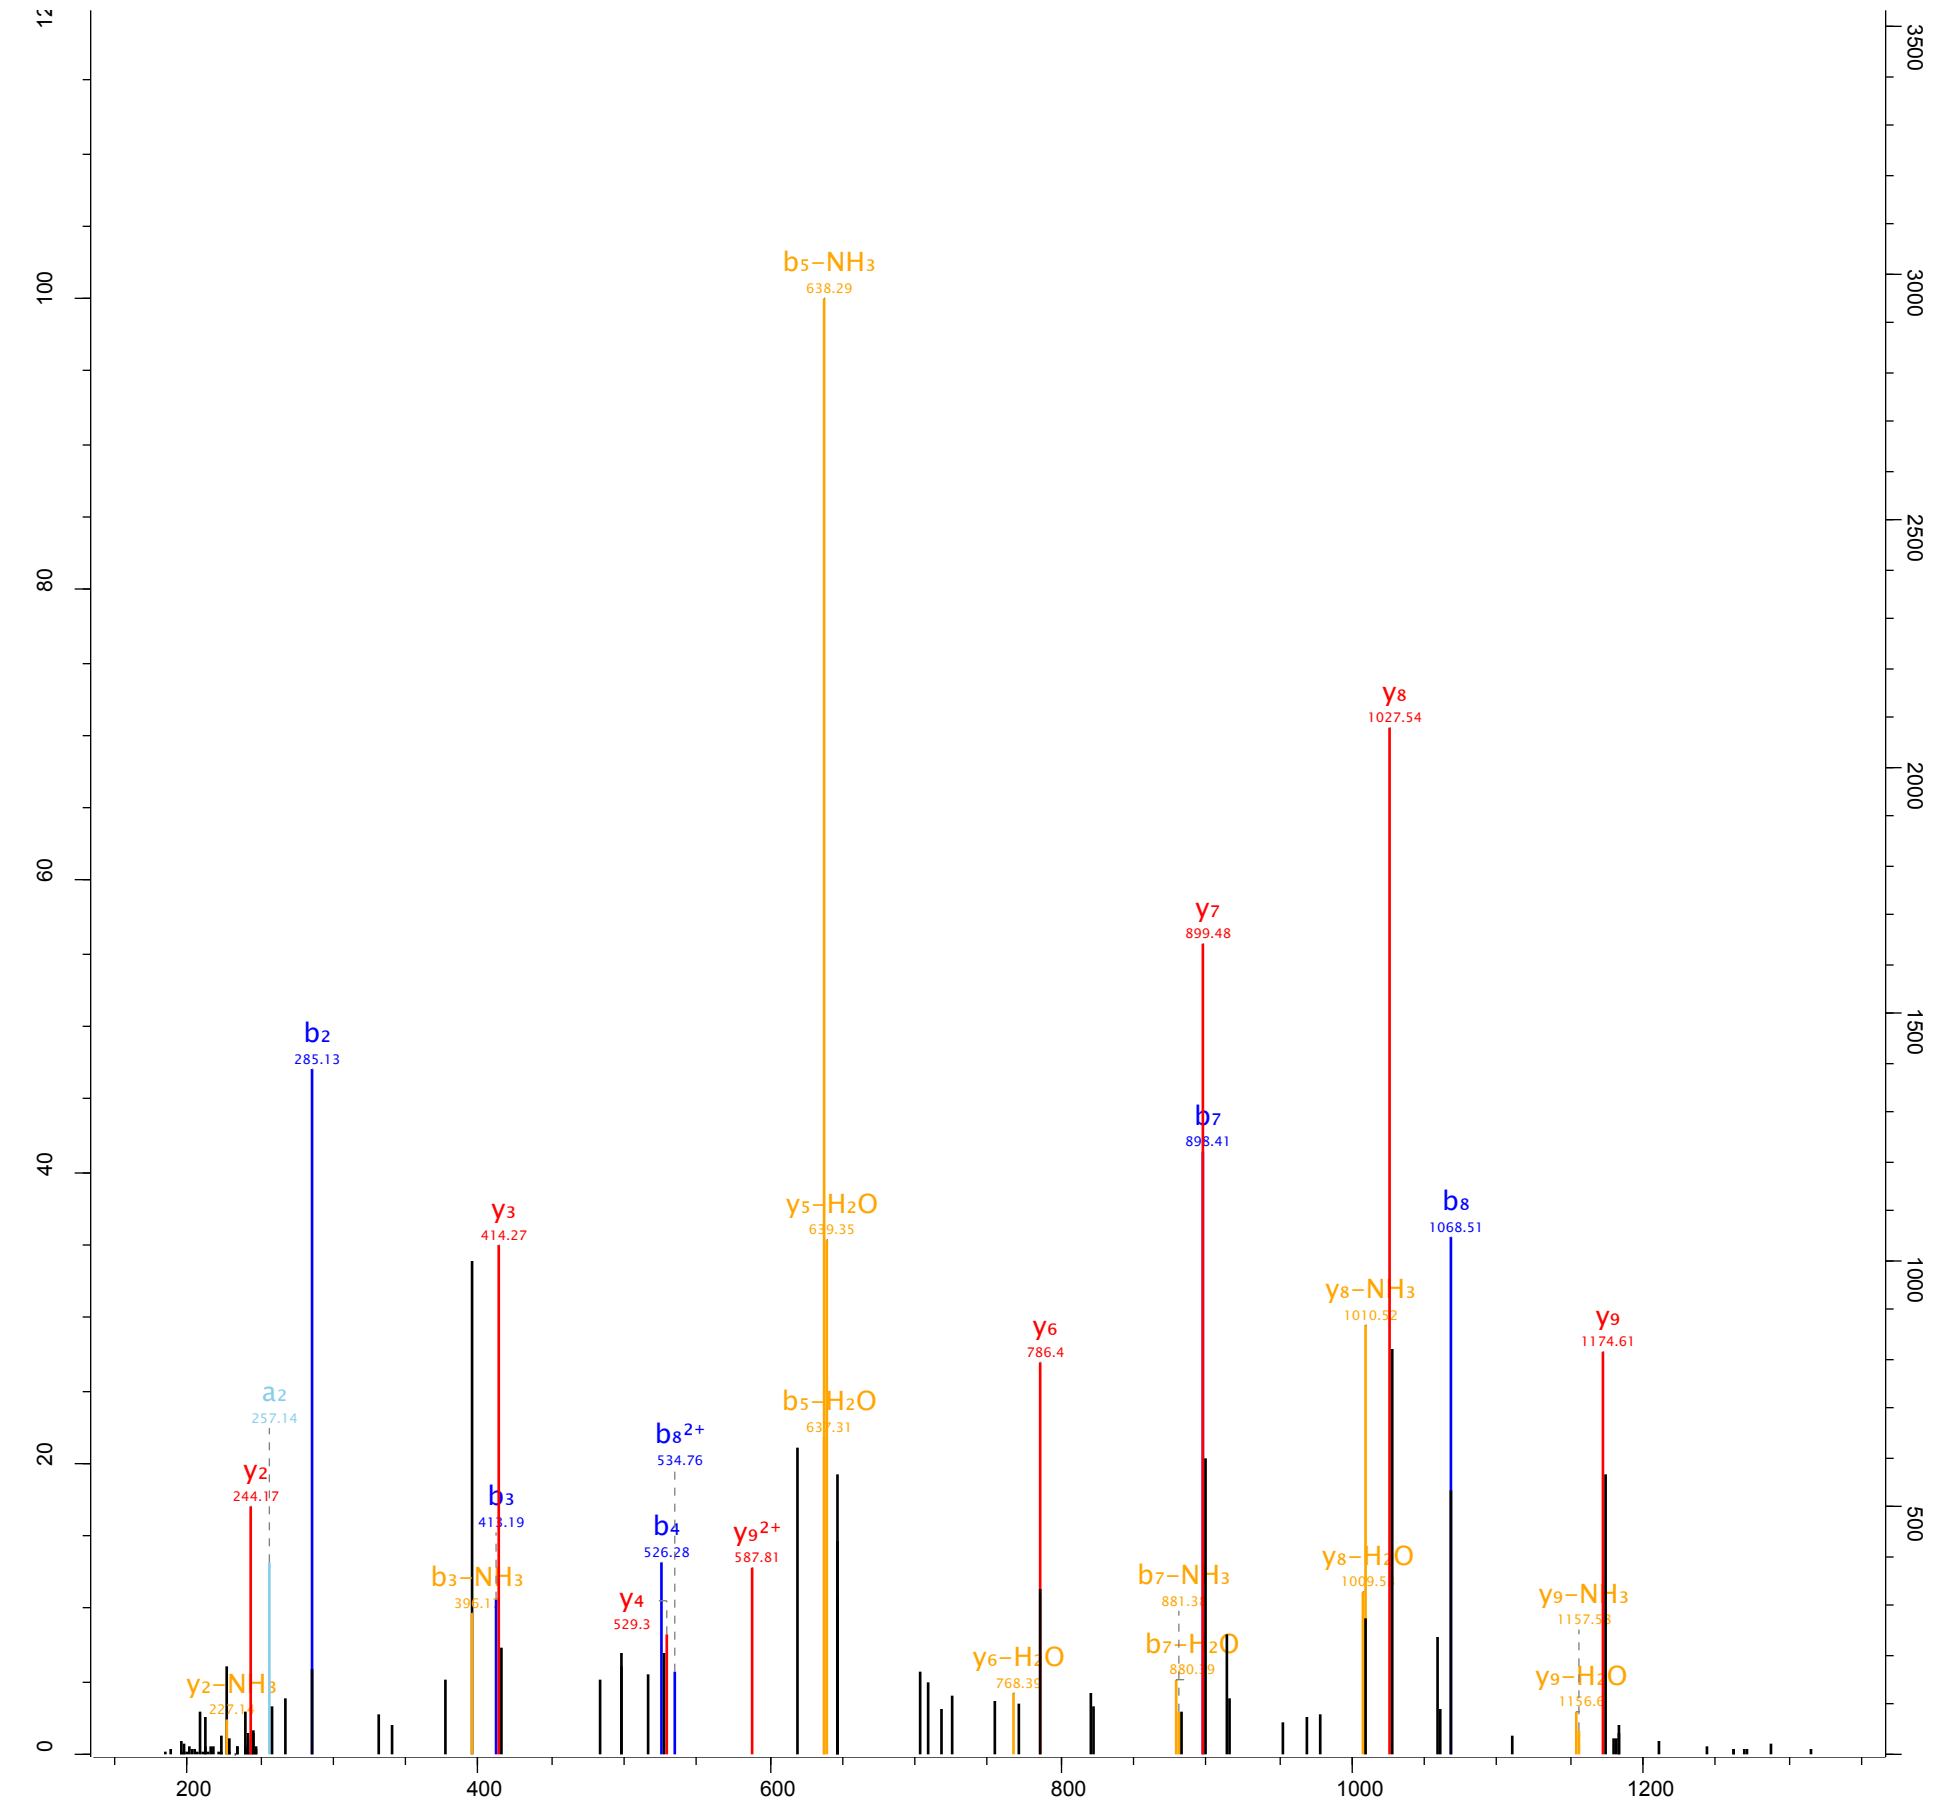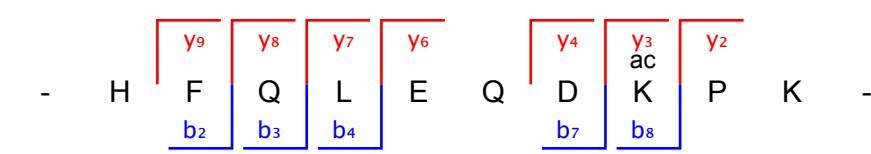

Raw file 072613\_SCW\_II\_68\_Enriched\_10 Scan 16236 Method ITMS; CID Score 154.84 m/z 602.83 Gene names Tkt

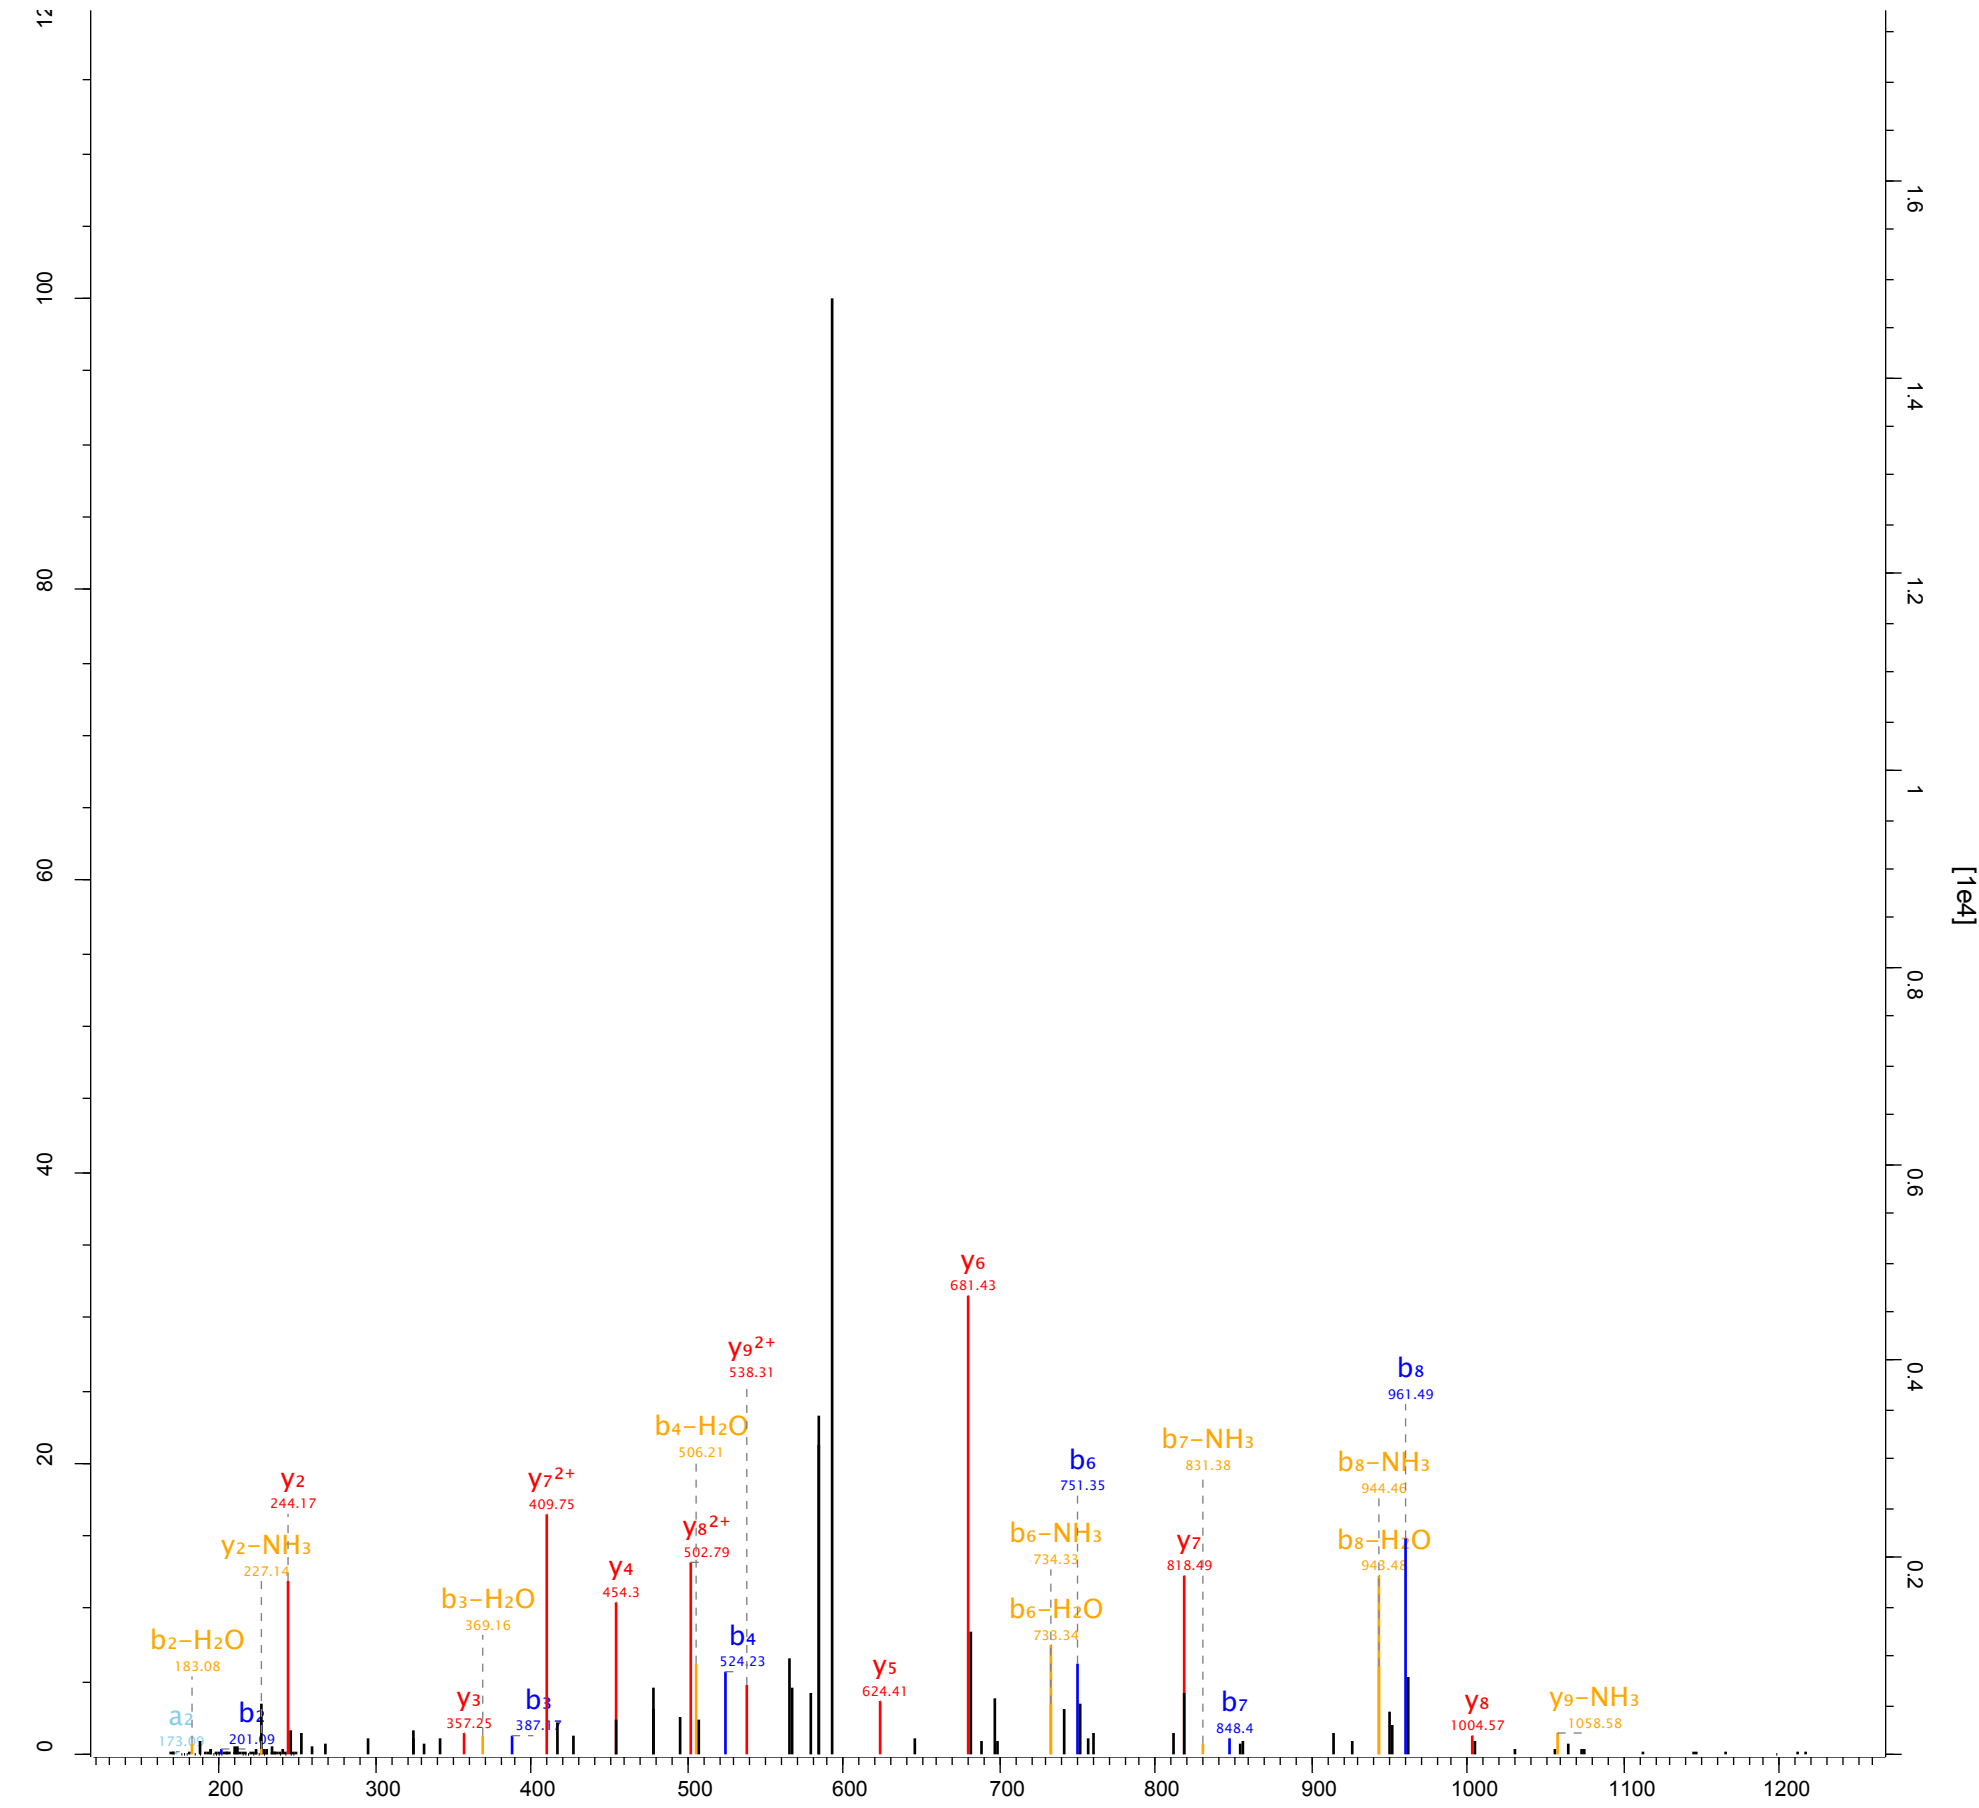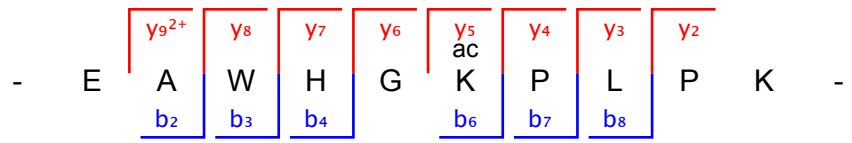

Supplement: 10.1074_M115.049288_mcp.M115.049288-8.pdf [file 10.1074_M115.049288_mcp.M115.049288-8.pdf]
