# Supplementary material
Source: PubMed Central journal article supplement (PMC4739669)

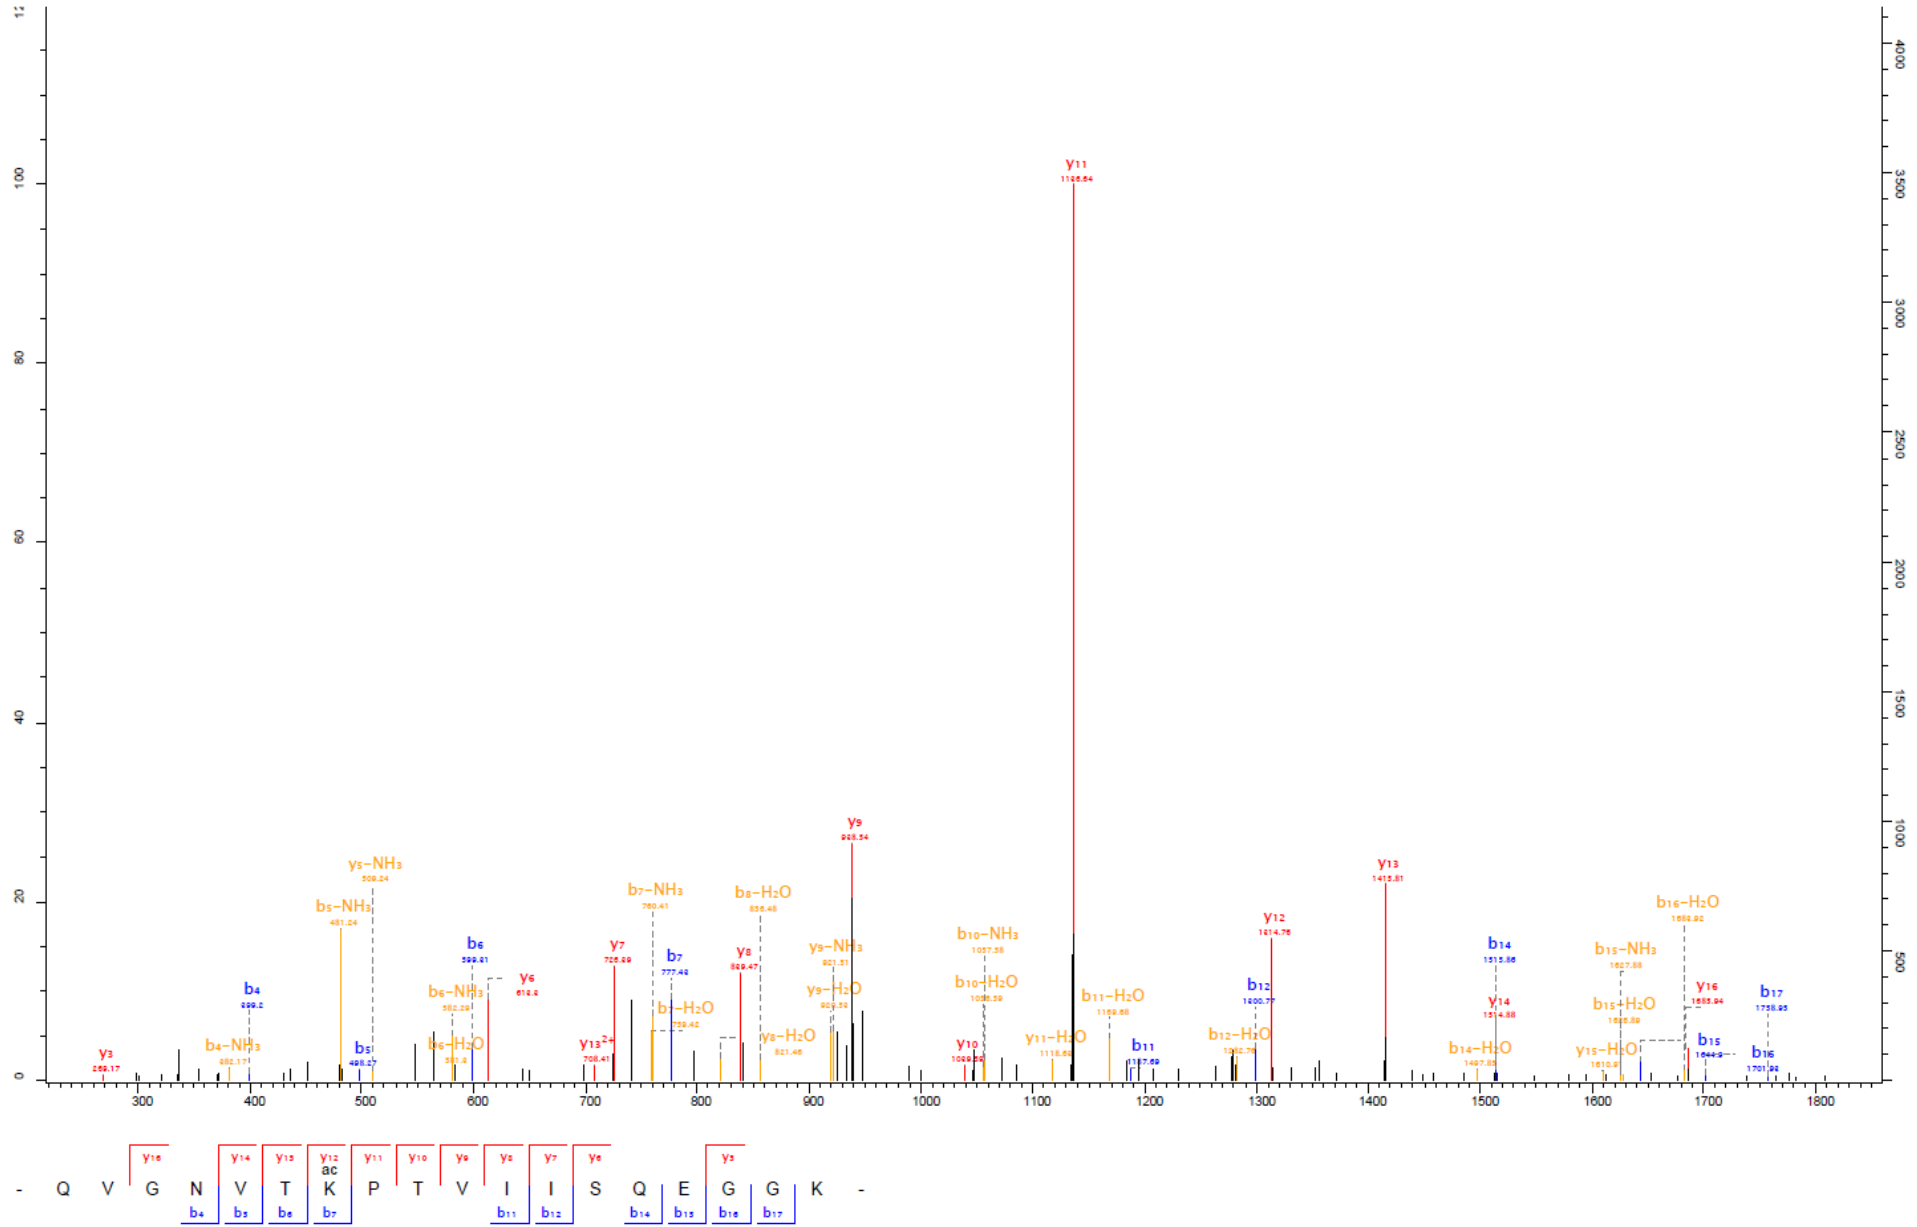

- Q V G N V T K P T V I I S Q E G G K -  
 - b4 b5 b6 b7 b11 b12 b14 b15 b16 b17 -

Gene name = Fabp7

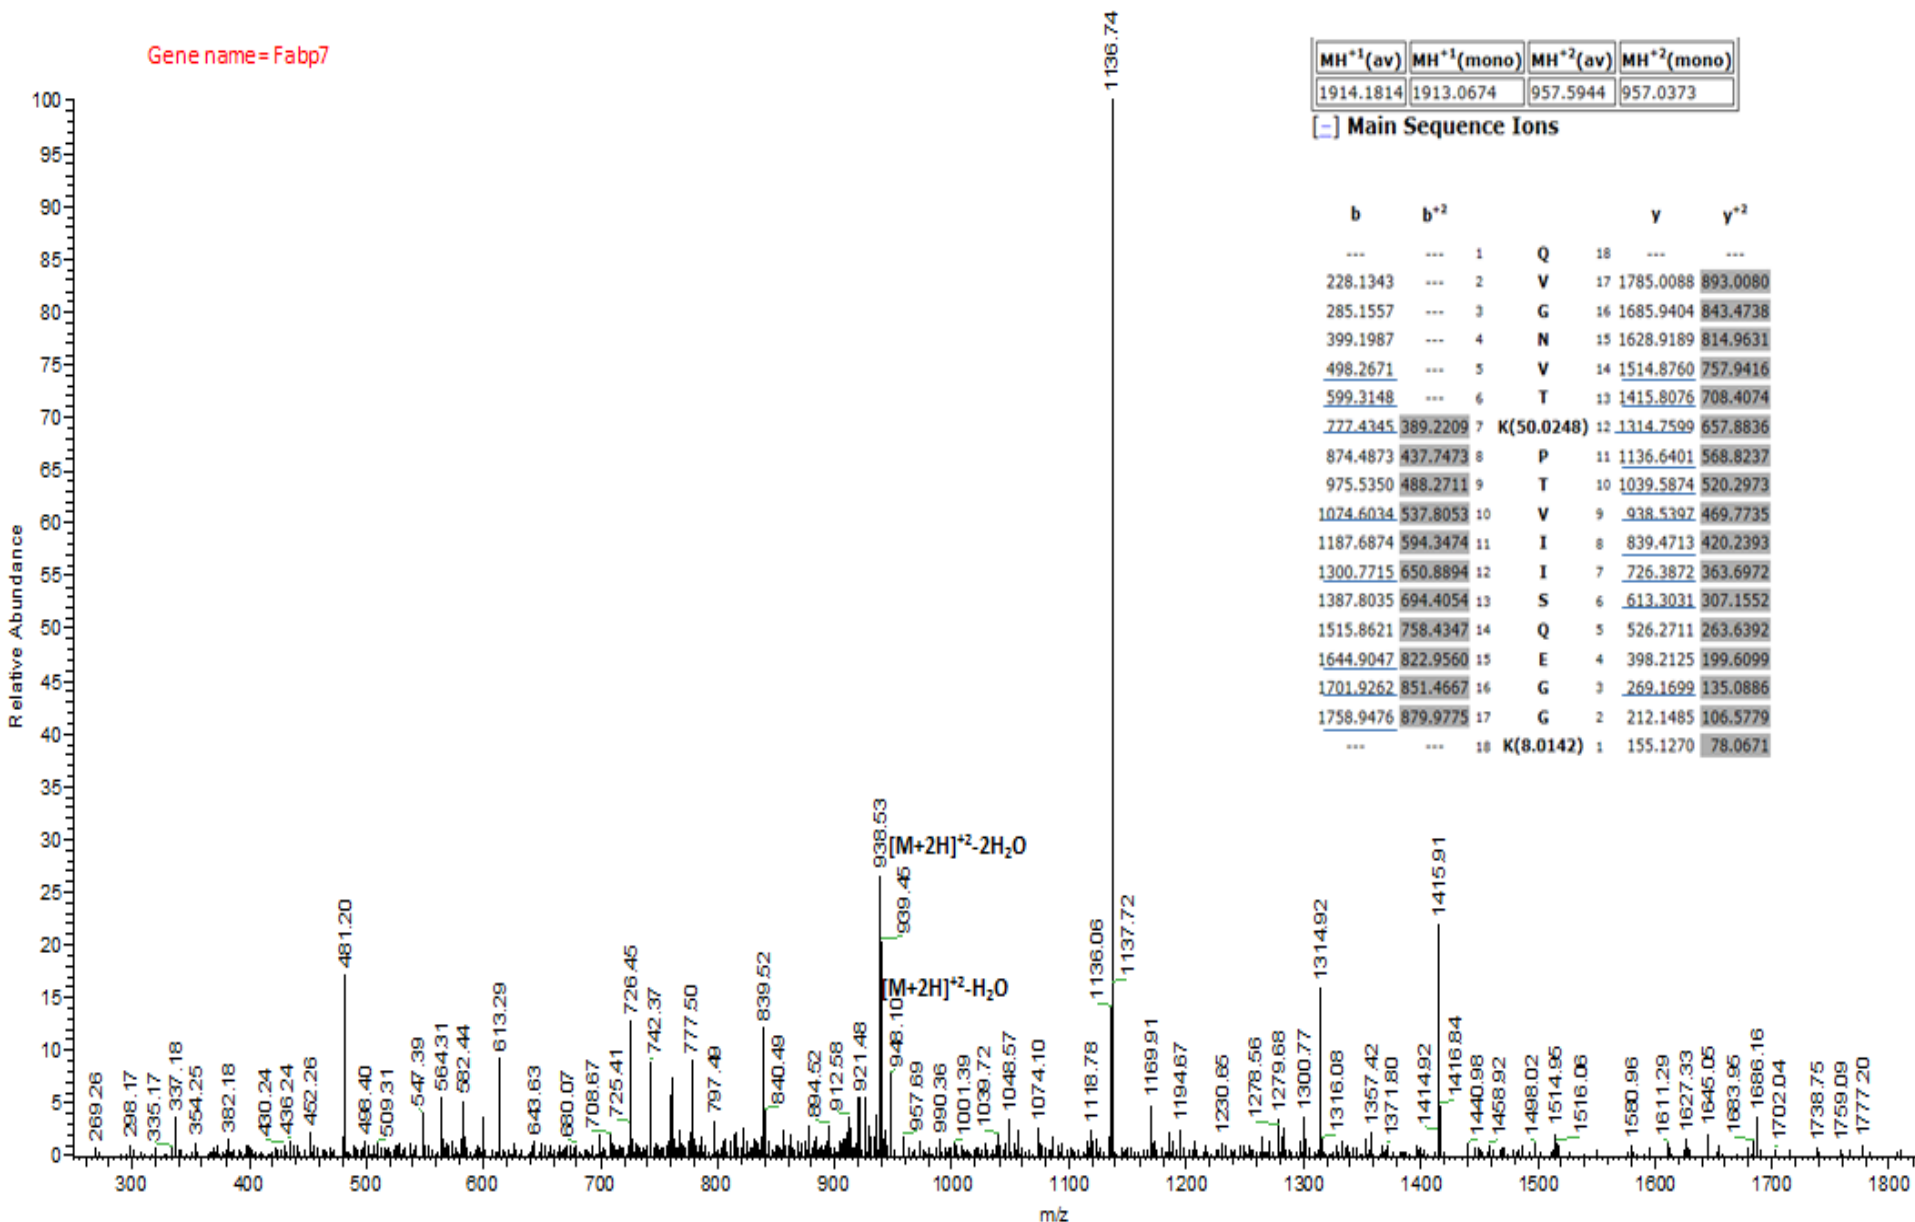

| MH <sup>+</sup> 1(av) | MH <sup>+</sup> 1(mono) | MH <sup>+</sup> 2(av) | MH <sup>+</sup> 2(mono) |
|-----------------------|-------------------------|-----------------------|-------------------------|
| 1914.1814             | 1913.0674               | 957.5944              | 957.0373                |

[-] Main Sequence Ions

| b         | b <sup>+</sup> |    | y                 | y <sup>+</sup> |                    |
|-----------|----------------|----|-------------------|----------------|--------------------|
| ---       | ---            | 1  | Q                 | 18             | ---                |
| 228.1343  | ---            | 2  | V                 | 17             | 1785.0088 893.0080 |
| 285.1557  | ---            | 3  | G                 | 16             | 1685.9404 843.4738 |
| 399.1987  | ---            | 4  | N                 | 15             | 1628.9189 814.9631 |
| 498.2671  | ---            | 5  | V                 | 14             | 1514.8760 757.9416 |
| 599.3148  | ---            | 6  | T                 | 13             | 1415.8076 708.4074 |
| 777.4345  | 389.2209       | 7  | <b>K(50.0248)</b> | 12             | 1314.7599 657.8836 |
| 874.4873  | 437.7473       | 8  | P                 | 11             | 1136.6401 568.8237 |
| 975.5350  | 488.2711       | 9  | T                 | 10             | 1039.5874 520.2973 |
| 1074.6034 | 537.8053       | 10 | V                 | 9              | 938.5397 469.7735  |
| 1187.6874 | 594.3474       | 11 | I                 | 8              | 839.4713 420.2393  |
| 1300.7715 | 650.8894       | 12 | I                 | 7              | 726.3872 363.6972  |
| 1387.8035 | 694.4054       | 13 | S                 | 6              | 613.3031 307.1552  |
| 1515.8621 | 758.4347       | 14 | Q                 | 5              | 526.2711 263.6392  |
| 1644.9047 | 822.9560       | 15 | E                 | 4              | 398.2125 199.6099  |
| 1701.9262 | 851.4667       | 16 | G                 | 3              | 269.1699 135.0886  |
| 1758.9476 | 879.9775       | 17 | G                 | 2              | 212.1485 106.5779  |
| ---       | ---            | 18 | <b>K(8.0142)</b>  | 1              | 155.1270 78.0671   |

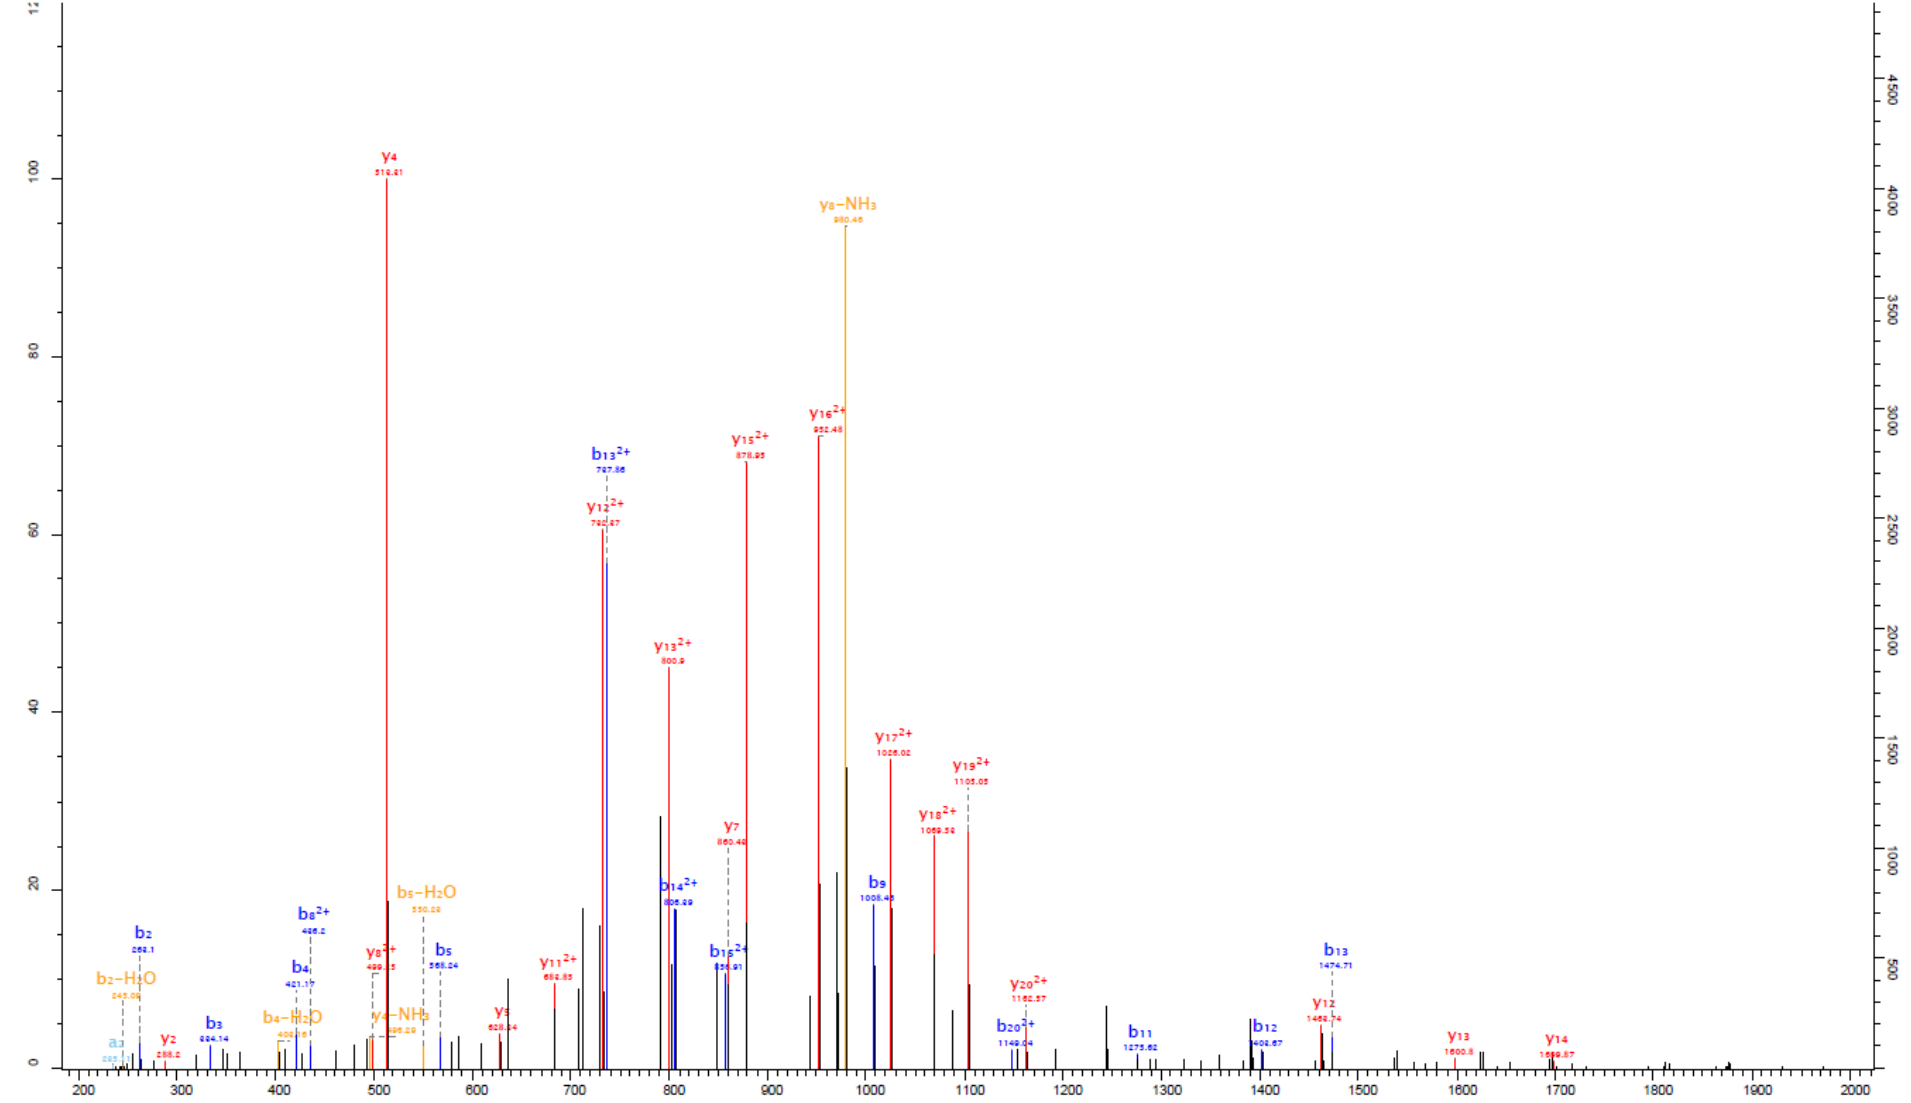

- F Y20^2+ Y16^2+ Y15^2+ Y12^2+ Y16^2+ Y12^2+ Y14 Y13 Y12 Y11^2+ ac K Q A H T M D P Q L R -

b2 b3 b4 b5 b2^2+ b6 b11 b12 b13 b14^2+ b15^2+ b20^2+

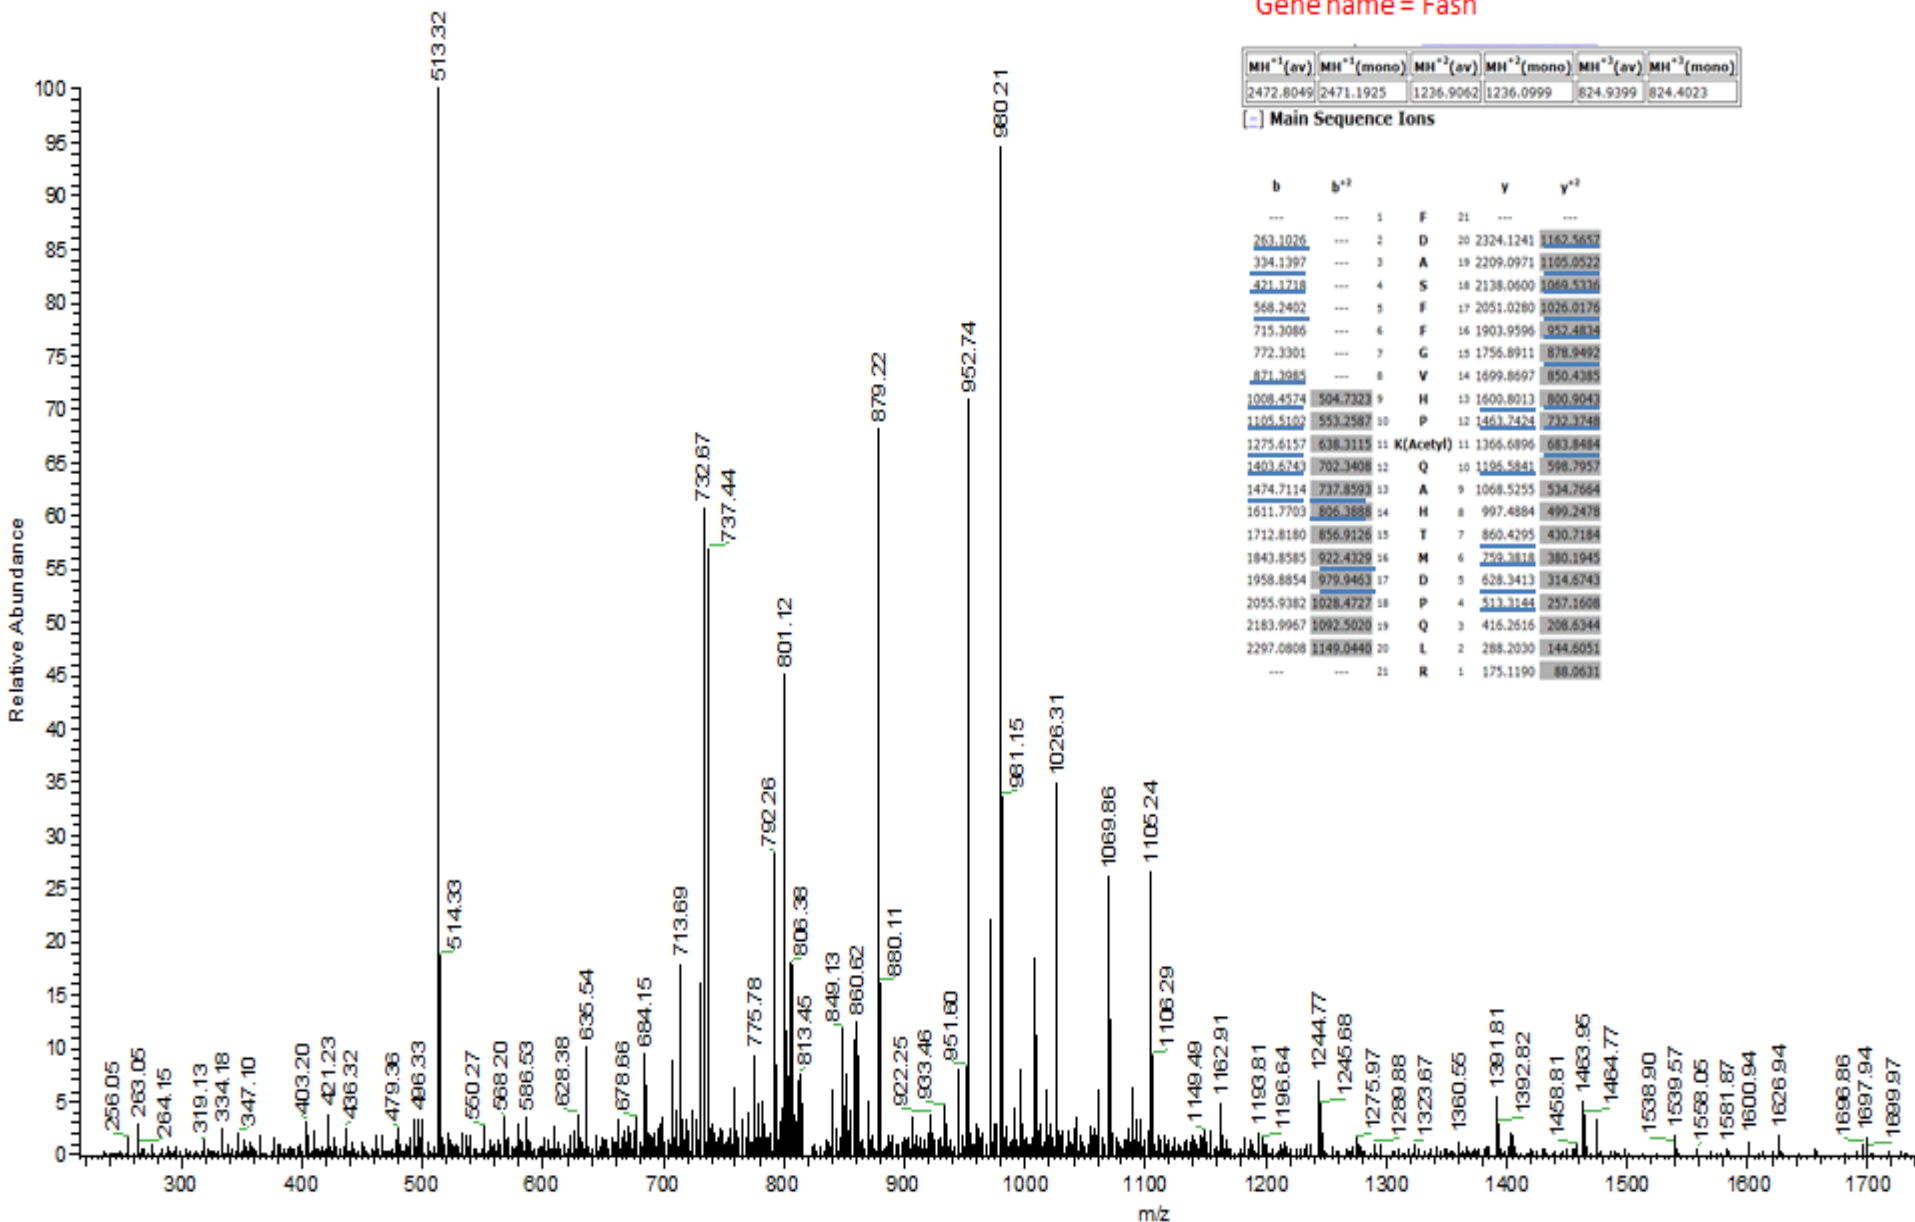

Gene name = Fasn

| MH <sup>+</sup> (av) | MH <sup>+</sup> (mono) | MH <sup>2+</sup> (av) | MH <sup>2+</sup> (mono) | MH <sup>3+</sup> (av) | MH <sup>3+</sup> (mono) |
|----------------------|------------------------|-----------------------|-------------------------|-----------------------|-------------------------|
| 2472.8049            | 2471.1925              | 1236.9062             | 1236.0999               | 824.9399              | 824.4023                |

Main Sequence Ions

| b         | b <sup>2</sup> | y         | y <sup>2</sup> |
|-----------|----------------|-----------|----------------|
| ...       | ...            | F         | ...            |
| 263.1026  | ...            | D         | 2324.1241      |
| 334.1397  | ...            | A         | 2209.0971      |
| 421.1718  | ...            | S         | 2138.0600      |
| 568.2402  | ...            | F         | 2051.0280      |
| 715.3086  | ...            | F         | 1903.9596      |
| 772.3301  | ...            | G         | 1756.8911      |
| 821.3985  | ...            | V         | 1699.8697      |
| 1008.4574 | 504.2322       | H         | 1600.8013      |
| 1105.5167 | 553.2987       | P         | 1463.7424      |
| 1275.6157 | 638.3115       | K(Acetyl) | 1366.6896      |
| 1403.6743 | 702.3408       | Q         | 1106.5841      |
| 1474.7114 | 737.8593       | A         | 1068.5255      |
| 1611.7703 | 806.3888       | H         | 997.4884       |
| 1712.8180 | 856.9128       | T         | 860.4295       |
| 1843.8585 | 922.4329       | M         | 729.3818       |
| 1958.8854 | 979.9463       | D         | 628.3413       |
| 2055.9382 | 1028.4727      | P         | 513.3144       |
| 2183.9967 | 1092.5020      | Q         | 416.2616       |
| 2297.0808 | 1149.0448      | L         | 288.2030       |
| ...       | ...            | R         | 175.1190       |

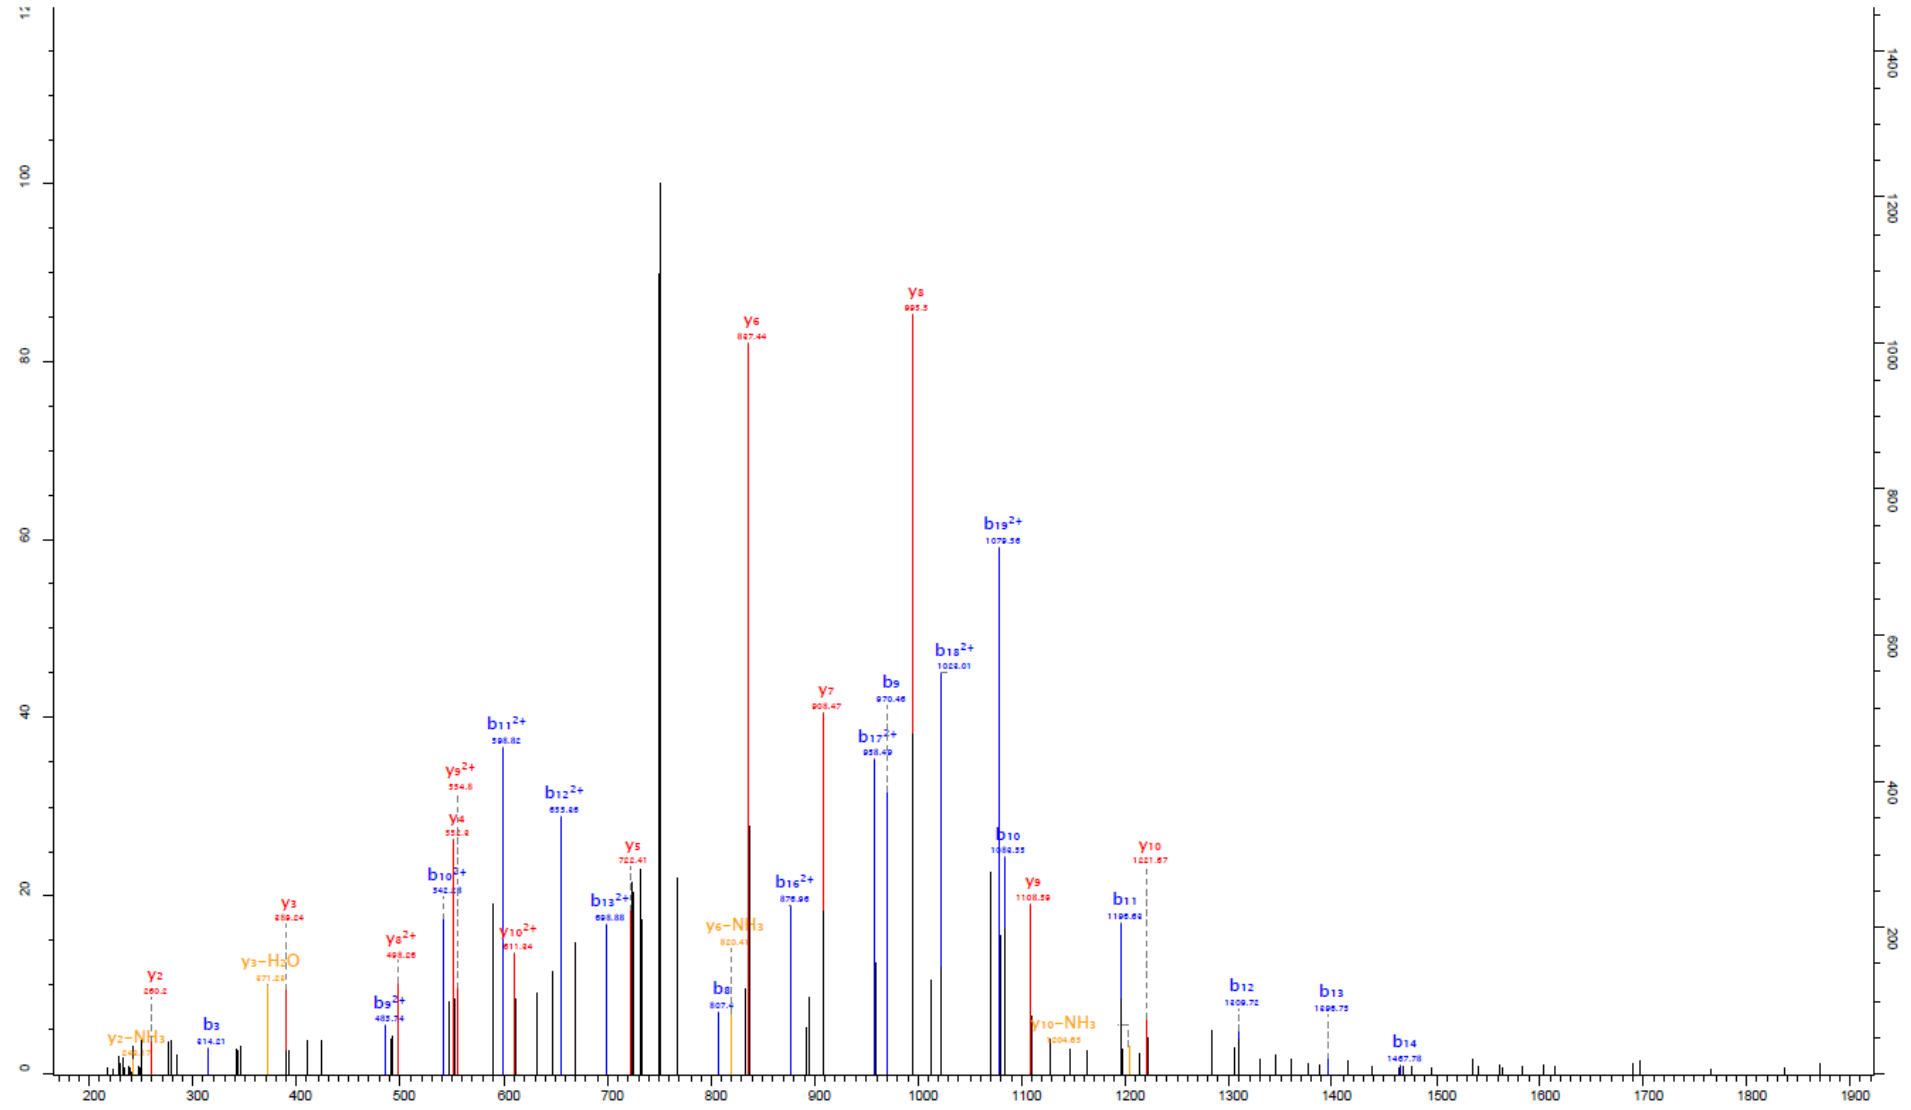

- S L L H S P G D Y I L L S A D Y s ac K Y E I K -

b<sub>3</sub>
b<sub>5</sub>
b<sub>9</sub>
b<sub>10</sub>
b<sub>11</sub>
b<sub>12</sub>
b<sub>13</sub>
b<sub>14</sub>
b<sub>14</sub><sup>2+</sup>
b<sub>17</sub><sup>2+</sup>
b<sub>18</sub><sup>2+</sup>
b<sub>18</sub><sup>2+</sup>

| MH <sup>+</sup> (av) | MH <sup>+</sup> (mono) | MH <sup>2+</sup> (av) | MH <sup>2+</sup> (mono) | MH <sup>3+</sup> (av) | MH <sup>3+</sup> (mono) |
|----------------------|------------------------|-----------------------|-------------------------|-----------------------|-------------------------|
| 2305.6495            | 2304.2122              | 1153.3284             | 1152.6097               | 769.2214              | 768.7422                |

Main Sequence Ions

| b         | b <sup>2</sup> | y  | y <sup>2</sup> |
|-----------|----------------|----|----------------|
| ...       | ...            | 1  | S              |
| 201.1234  | ...            | 2  | L              |
| 314.2074  | ...            | 3  | L              |
| 451.2663  | 226.1368       | 4  | H              |
| 538.2984  | 269.6528       | 5  | S              |
| 635.3511  | 318.1792       | 6  | P              |
| 692.3726  | 346.6899       | 7  | G              |
| 802.3995  | 404.2034       | 8  | D              |
| 970.4629  | 485.7351       | 9  | Y              |
| 1083.5469 | 542.2771       | 10 | I              |
| 1196.6310 | 598.8191       | 11 | L              |
| 1309.7151 | 655.3612       | 12 | L              |
| 1396.7471 | 698.8772       | 13 | S              |
| 1467.7842 | 734.3957       | 14 | A              |
| 1582.8111 | 791.9092       | 15 | D              |
| 1752.9167 | 876.9620       | 16 | K(Acetyl)      |
| 1915.9800 | 958.4936       | 17 | Y              |
| 2045.0226 | 1023.0149      | 18 | E              |
| 2158.1067 | 1079.5570      | 19 | I              |
| ...       | ...            | 20 | K              |

Gene name = Fbxw2

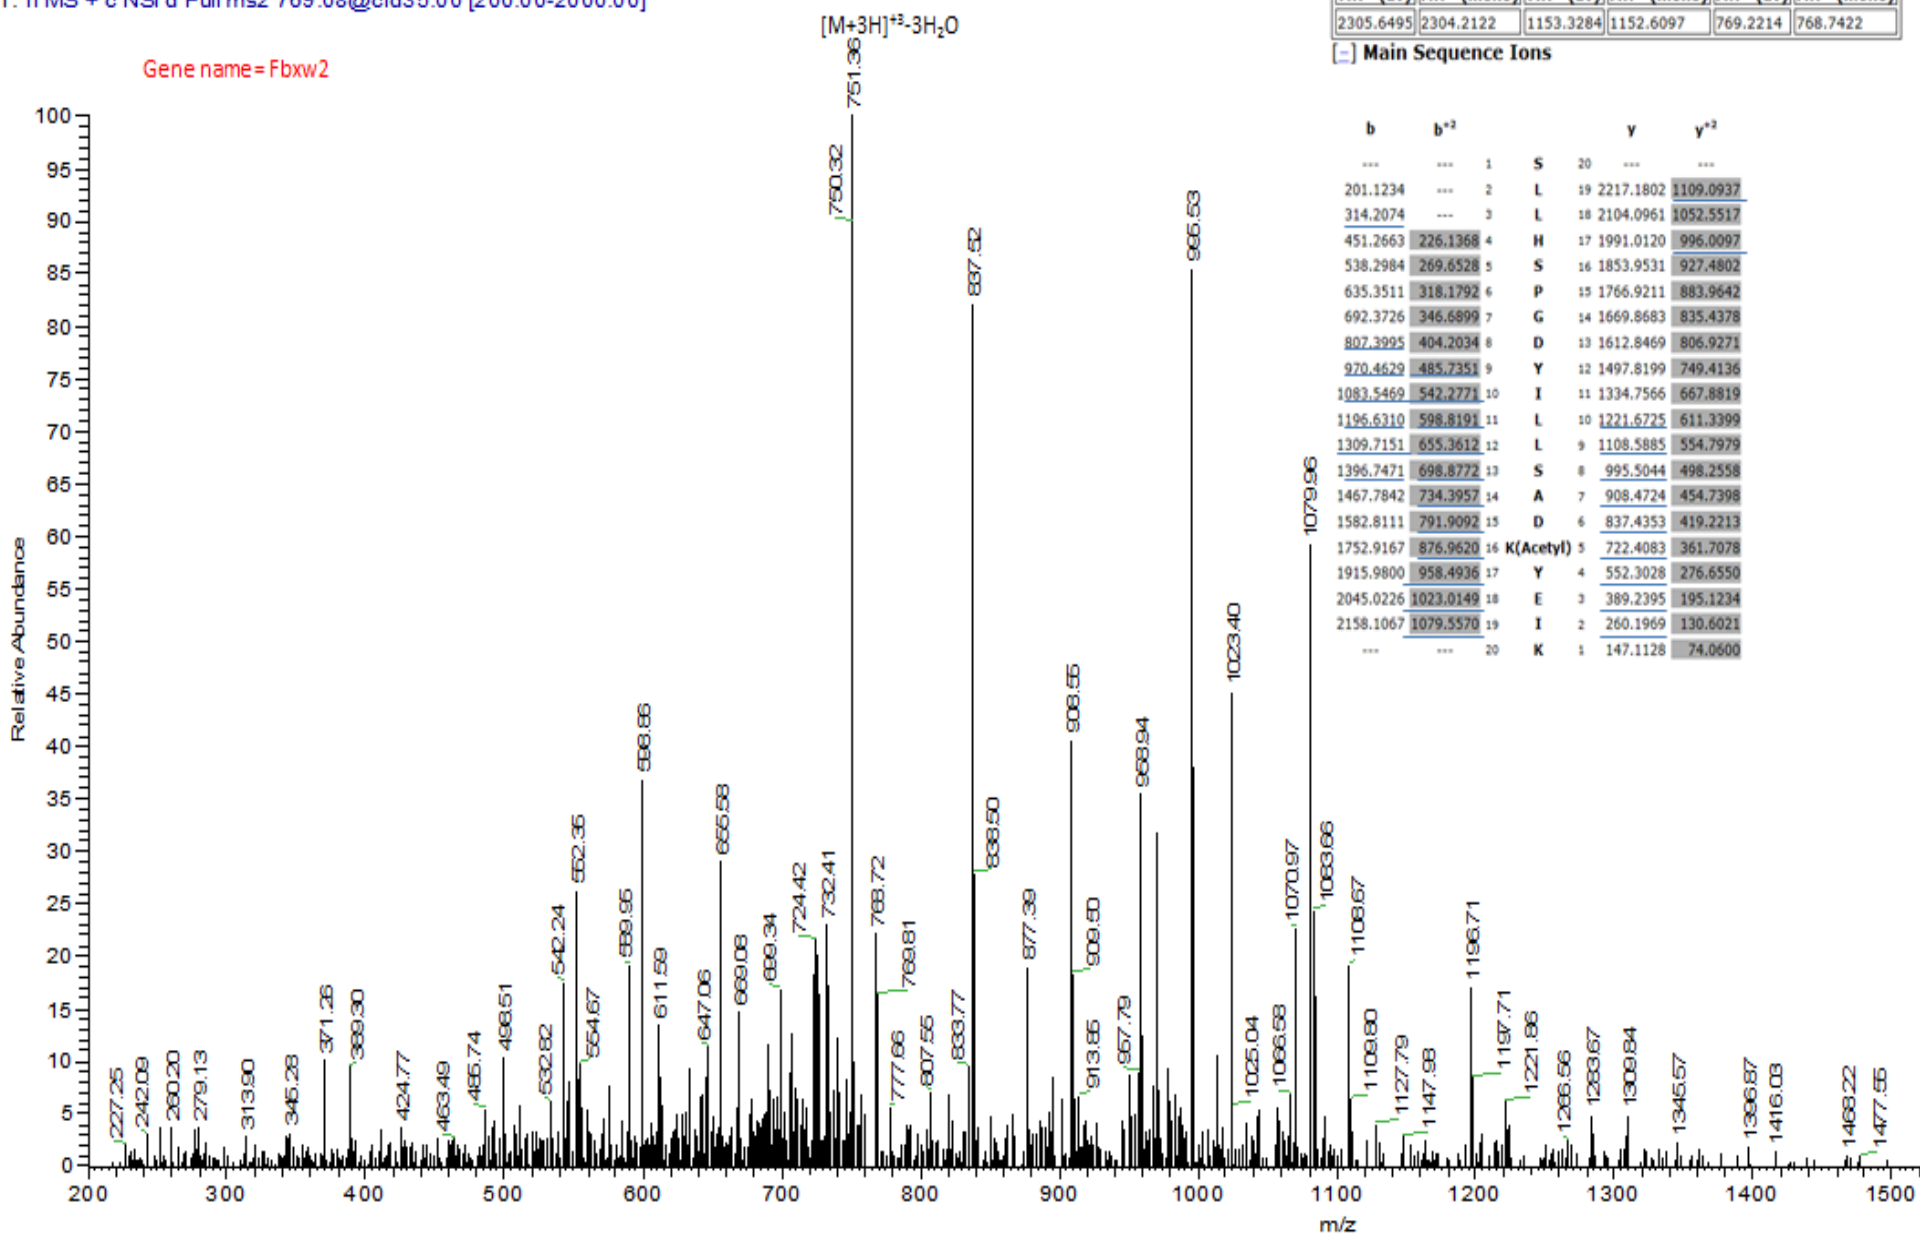

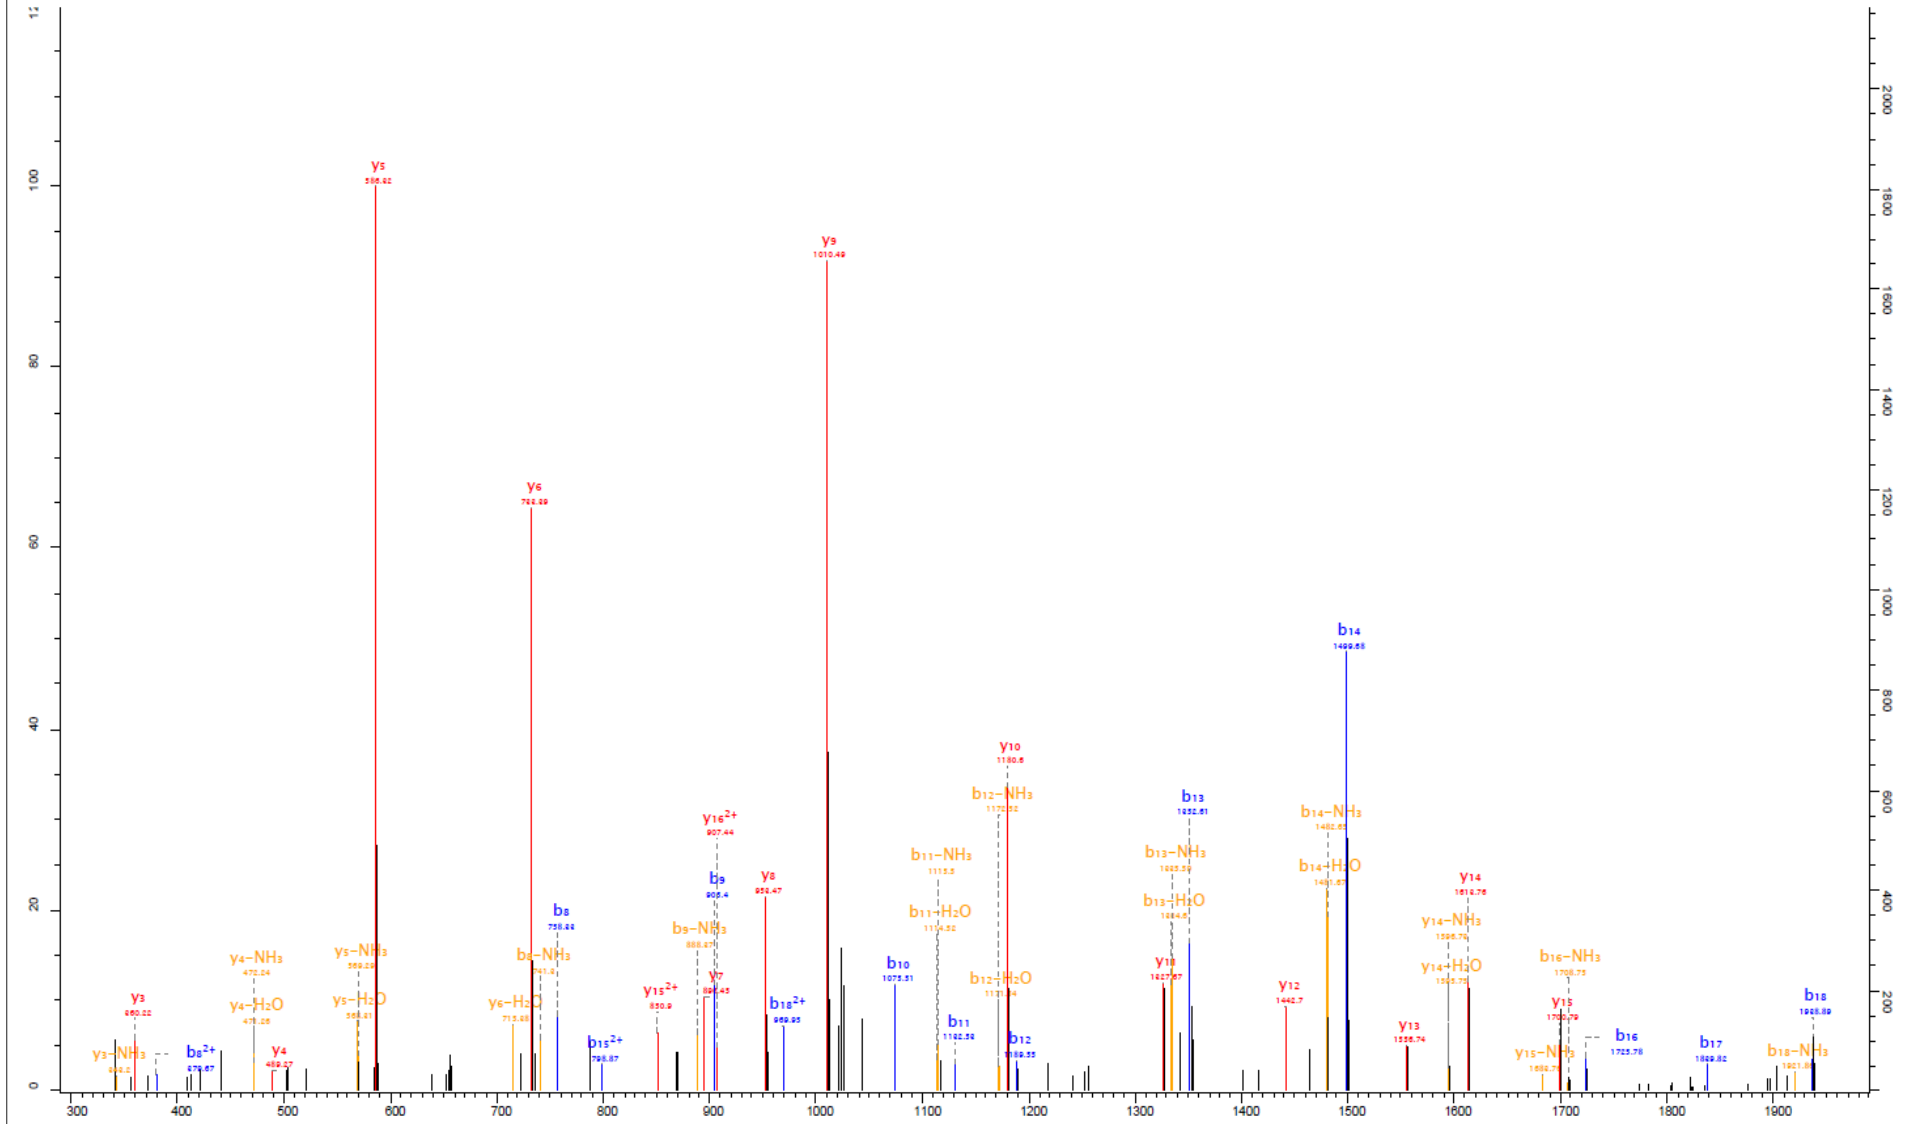

- G V D L S G N D F K AC G Y F P E N V K -

y16<sup>2+</sup>
y15
y14
y13
y12
y11
y10
y9
y8
y7
y6
y5
y4
y3

b8
b6
b10
b11
b12
b13
b14
b15<sup>2+</sup>
b16
b17
b18

| MH <sup>+</sup> (av) | MH <sup>+</sup> (mono) | MH <sup>+</sup> (av) | MH <sup>+</sup> (mono) |
|----------------------|------------------------|----------------------|------------------------|
| 2086.2794            | 2084.9924              | 1043.6434            | 1042.9998              |

**Main Sequence Ions**

| b         | b <sup>+</sup> |    | y         | y <sup>+</sup> |           |
|-----------|----------------|----|-----------|----------------|-----------|
| ---       | ---            | 1  | G         | 19             | ---       |
| 157.0972  | ---            | 2  | V         | 18             | 2027.9709 |
| 272.1241  | ---            | 3  | D         | 17             | 1928.9025 |
| 385.2082  | ---            | 4  | L         | 16             | 1813.8755 |
| 472.2402  | ---            | 5  | S         | 15             | 1700.7915 |
| 529.2617  | ---            | 6  | G         | 14             | 1613.7594 |
| 643.3046  | ---            | 7  | N         | 13             | 1556.7380 |
| 758.3315  | ---            | 8  | D         | 12             | 1442.6951 |
| 905.3999  | ---            | 9  | F         | 11             | 1327.6681 |
| 1075.5055 | 538.2564       | 10 | K(Acetyl) | 10             | 1180.5997 |
| 1132.5269 | 566.7671       | 11 | G         | 9              | 1010.4942 |
| 1189.5484 | 595.2778       | 12 | G         | 8              | 953.4727  |
| 1352.6117 | 676.8095       | 13 | Y         | 7              | 896.4512  |
| 1499.6801 | 750.3437       | 14 | F         | 6              | 733.3879  |
| 1596.7329 | 798.8701       | 15 | P         | 5              | 586.3195  |
| 1725.7755 | 863.3914       | 16 | E         | 4              | 489.2667  |
| 1839.8184 | 920.4128       | 17 | N         | 3              | 360.2241  |
| 1938.8868 | 969.9471       | 18 | V         | 2              | 246.1812  |
| --        | --             | 19 | K         | 1              | 147.1128  |

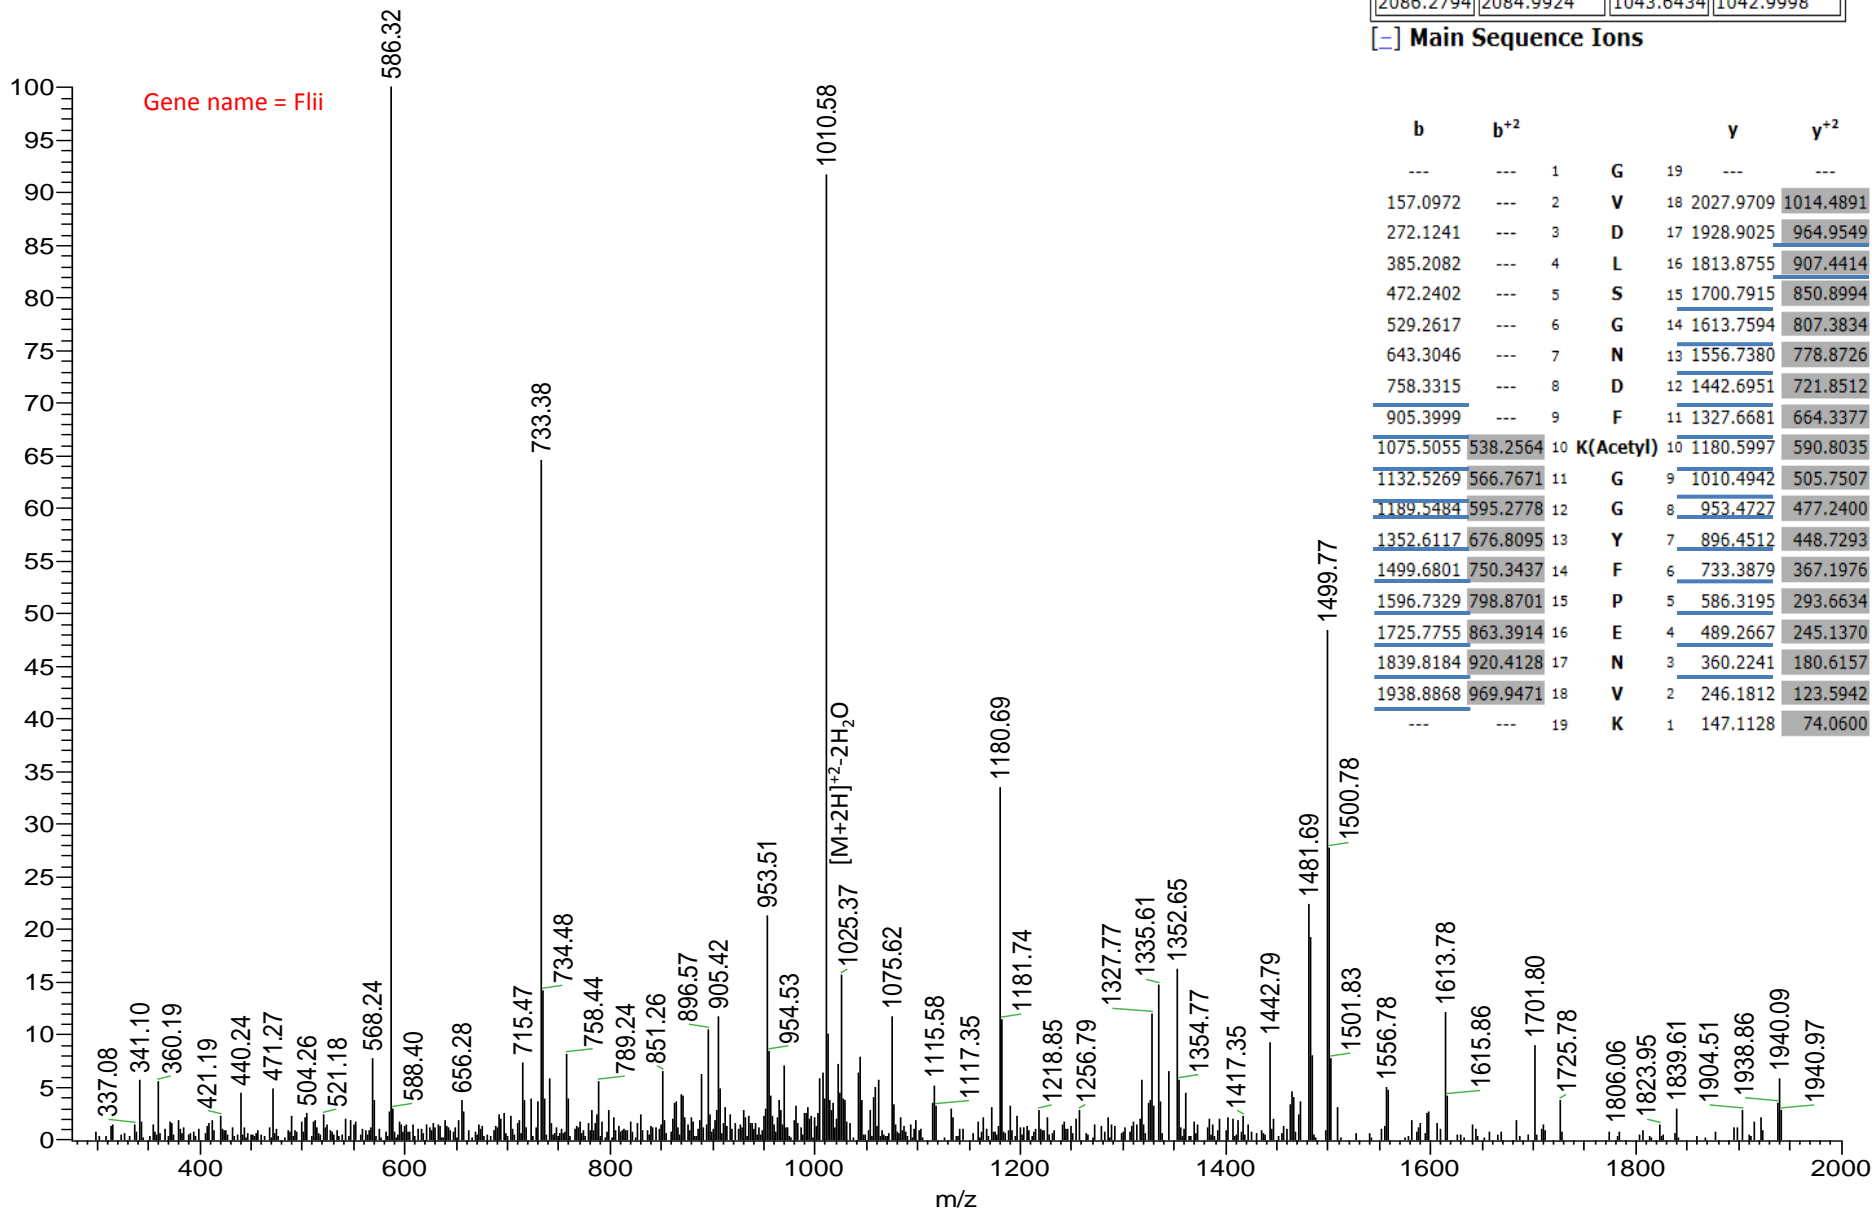



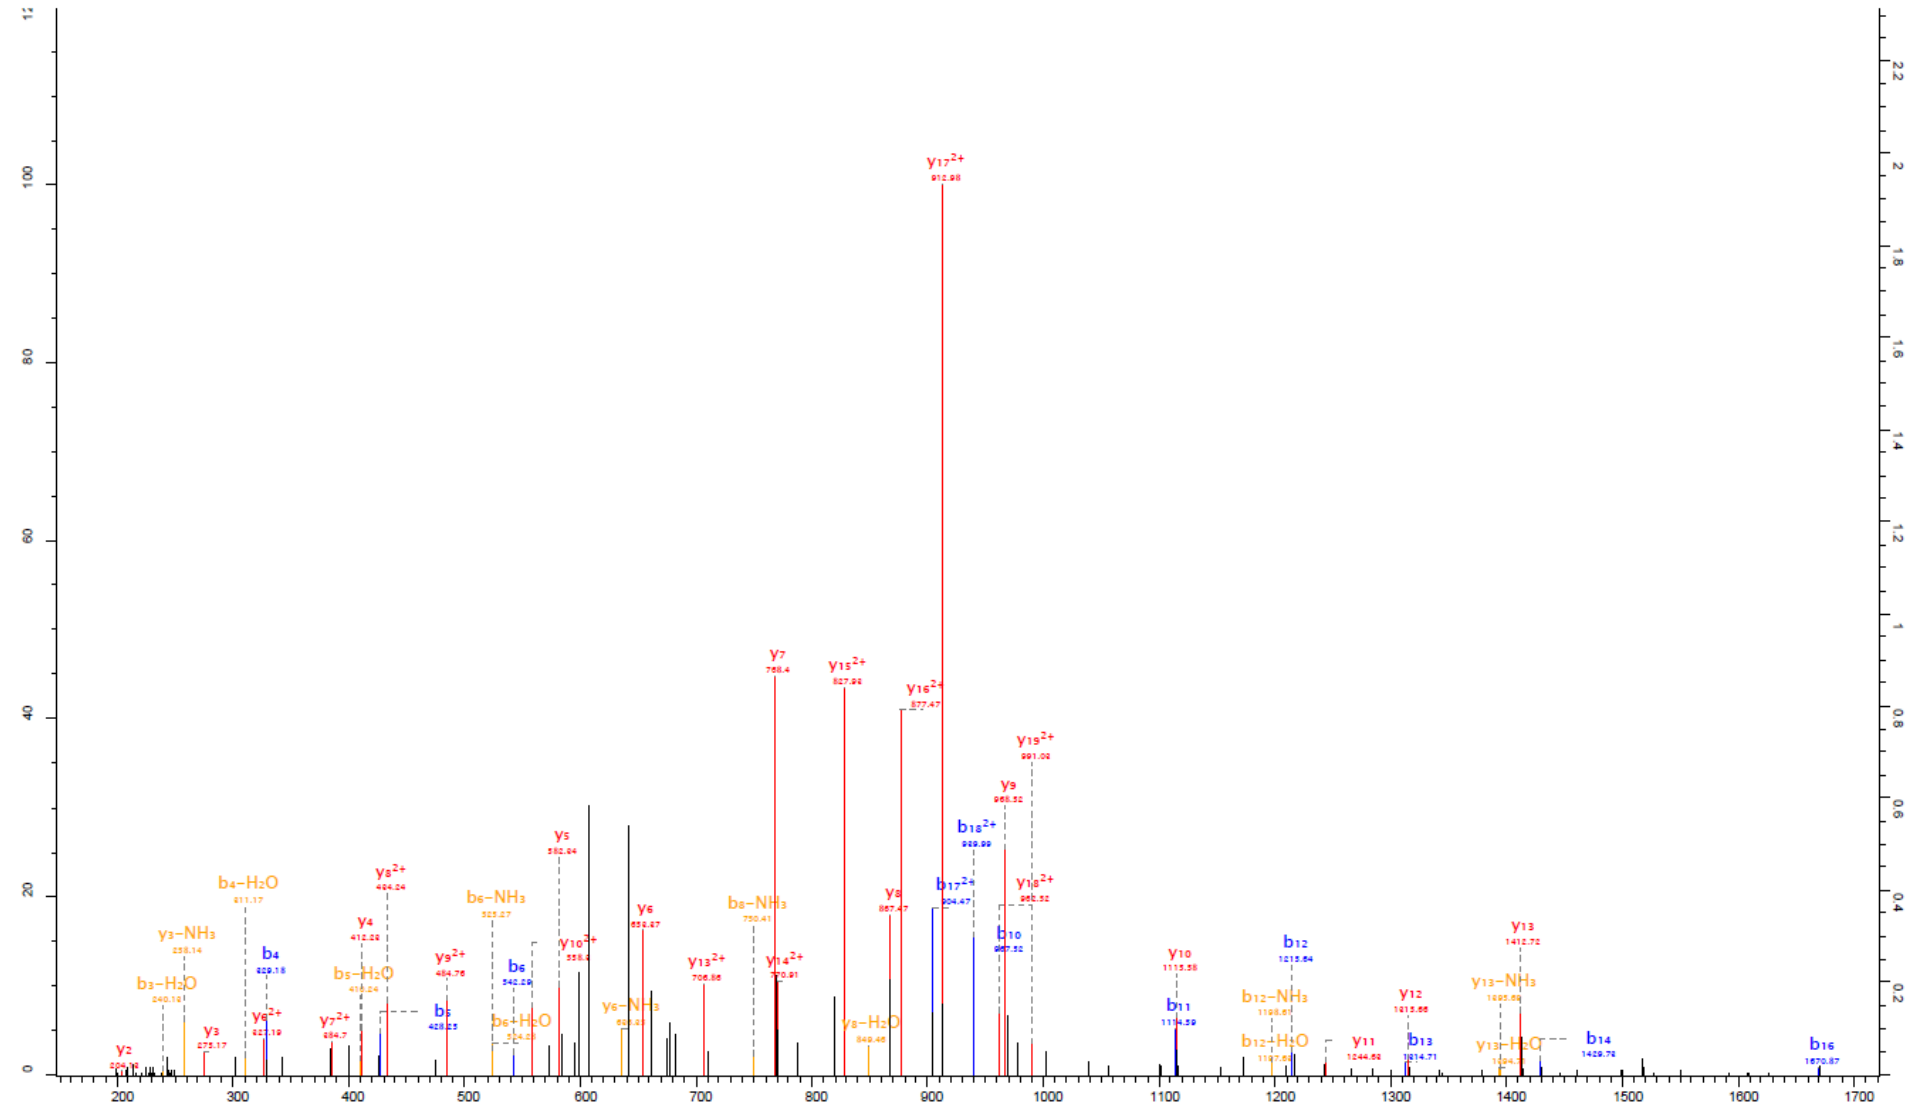

- T G V A V N K P A E F T V D A Y5 AC K H A G K -

Fragmentation mapping:  
 Y19<sup>2+</sup> (T), Y18<sup>2+</sup> (G), Y17<sup>2+</sup> (V), Y16<sup>2+</sup> (A), Y15<sup>2+</sup> (V), Y14<sup>2+</sup> (N), Y13 (K), Y12 (P), Y11 (A), Y10 (E), Y9 (F), Y8 (T), Y7 (V), Y6 (D), Y5 (A), Y5-AC (K), Y4 (H), Y3 (A), Y2 (G), Y1 (K)

Fragmentation mapping:  
 b4 (V), b5 (V), b6 (N), b10 (E), b11 (F), b12 (T), b13 (V), b14 (D), b16 (A), b17<sup>2+</sup> (H), b18<sup>2+</sup> (A)

Gene name = Flna

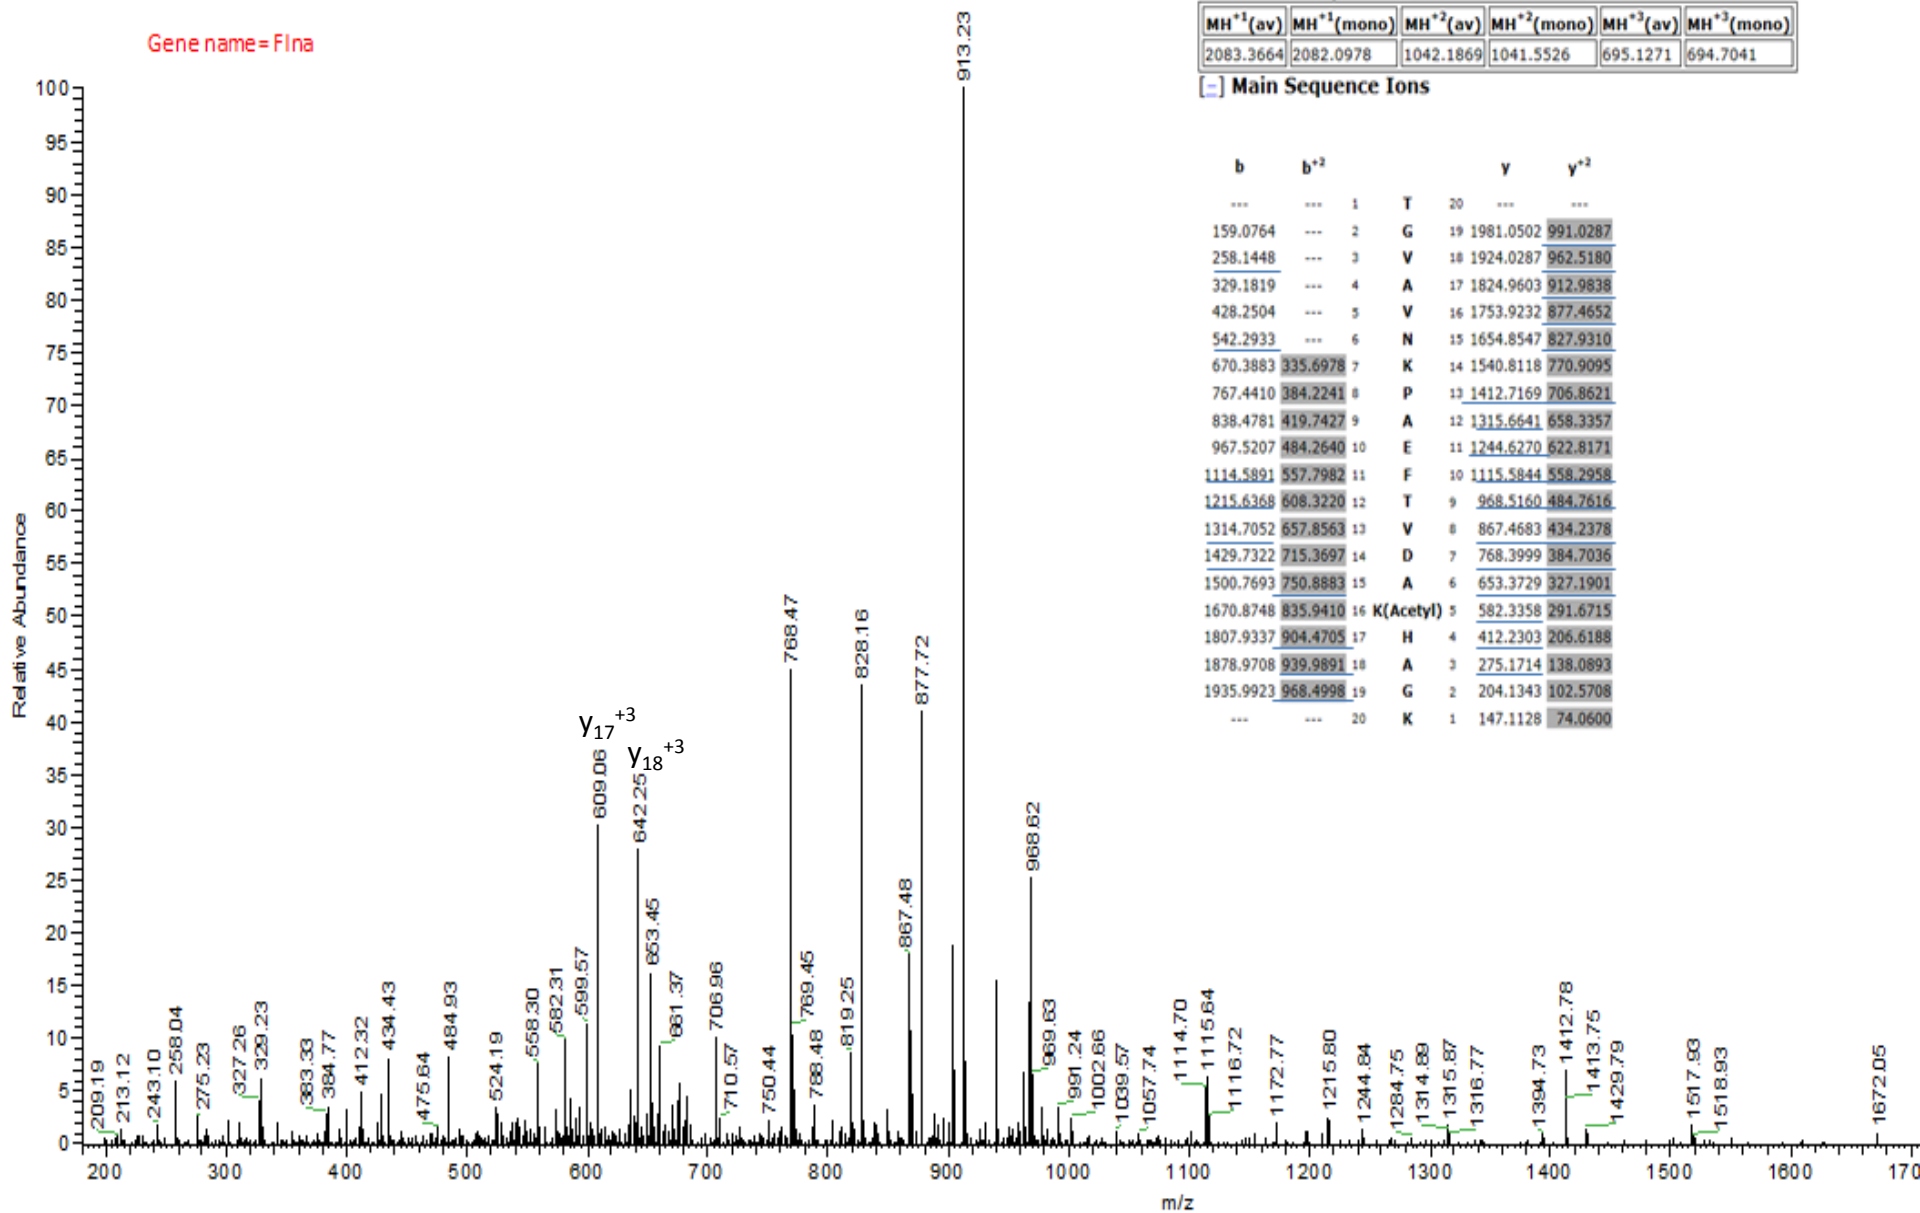

| MH <sup>+</sup> (av) | MH <sup>+</sup> (mono) | MH <sup>2+</sup> (av) | MH <sup>2+</sup> (mono) | MH <sup>3+</sup> (av) | MH <sup>3+</sup> (mono) |
|----------------------|------------------------|-----------------------|-------------------------|-----------------------|-------------------------|
| 2083.3664            | 2082.0978              | 1042.1869             | 1041.5526               | 695.1271              | 694.7041                |

[-] Main Sequence Ions

| b         | b <sup>2</sup> |    | y         | y <sup>2</sup> |
|-----------|----------------|----|-----------|----------------|
| ...       | ...            | 1  | T         | 20             |
| 159.0764  | ...            | 2  | G         | 19 1981.0502   |
| 258.1448  | ...            | 3  | V         | 18 1924.0287   |
| 329.1819  | ...            | 4  | A         | 17 1824.9603   |
| 428.2504  | ...            | 5  | V         | 16 1753.9232   |
| 542.2933  | ...            | 6  | N         | 15 1654.8547   |
| 670.3883  | 335.6978       | 7  | K         | 14 1540.8118   |
| 767.4410  | 384.2241       | 8  | P         | 13 1412.7169   |
| 838.4781  | 419.7427       | 9  | A         | 12 1315.6641   |
| 967.5207  | 484.2640       | 10 | E         | 11 1244.6270   |
| 1114.5891 | 557.7982       | 11 | F         | 10 1115.5844   |
| 1215.6368 | 608.3220       | 12 | T         | 9 968.5160     |
| 1314.7052 | 657.8563       | 13 | V         | 8 867.4683     |
| 1429.7322 | 715.3697       | 14 | D         | 7 768.3999     |
| 1500.7693 | 750.8883       | 15 | A         | 6 653.3729     |
| 1670.8748 | 835.9410       | 16 | K(Acetyl) | 5 582.3358     |
| 1807.9337 | 904.4705       | 17 | H         | 4 412.2303     |
| 1878.9708 | 939.9891       | 18 | A         | 3 275.1714     |
| 1935.9923 | 968.4998       | 19 | G         | 2 204.1343     |
| ...       | ...            | 20 | K         | 1 147.1128     |

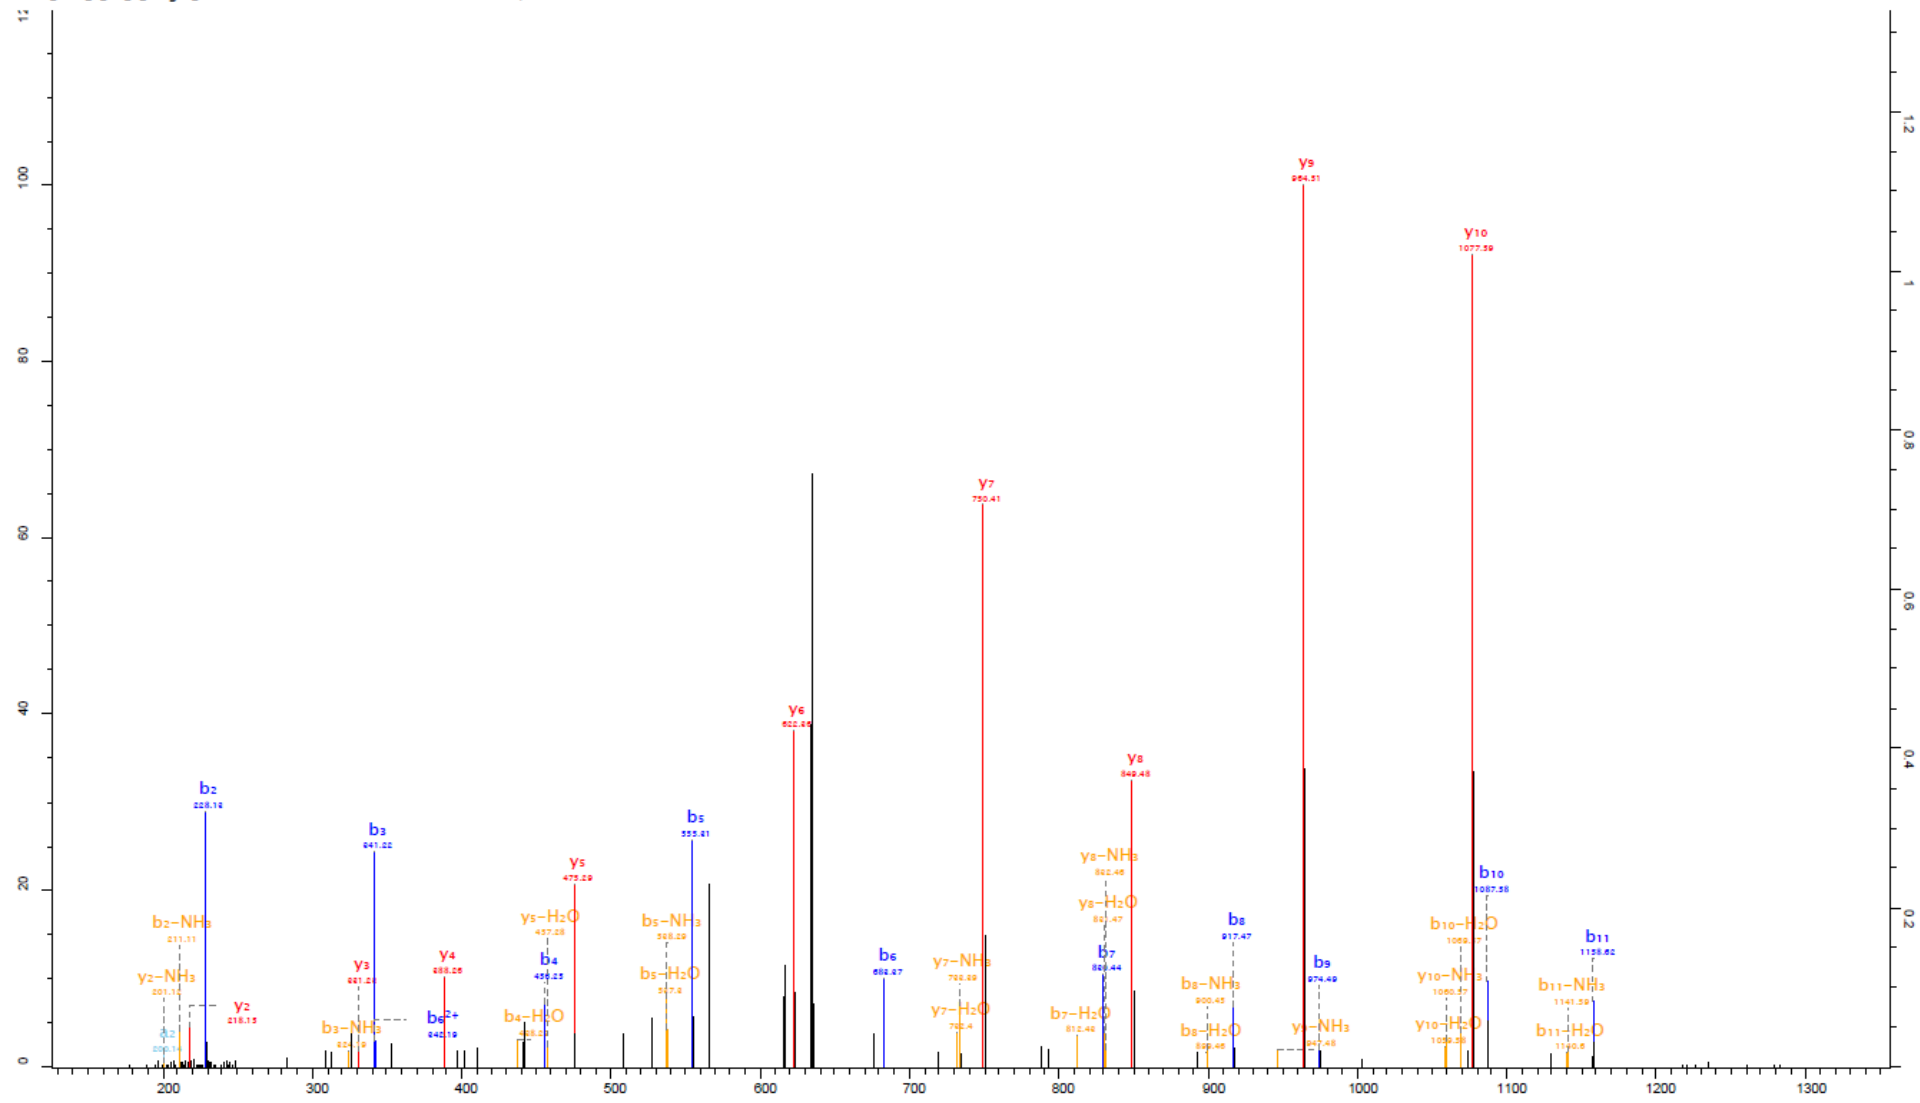

ac Y10 Y9 Y8 Y7 Y6 Y5 Y4 Y3 Y2  
 G K L D V Q F S G L A K -  
 b2 b3 b4 b5 b6 b7 b8 b9 b10 b11

Gene name = Flna

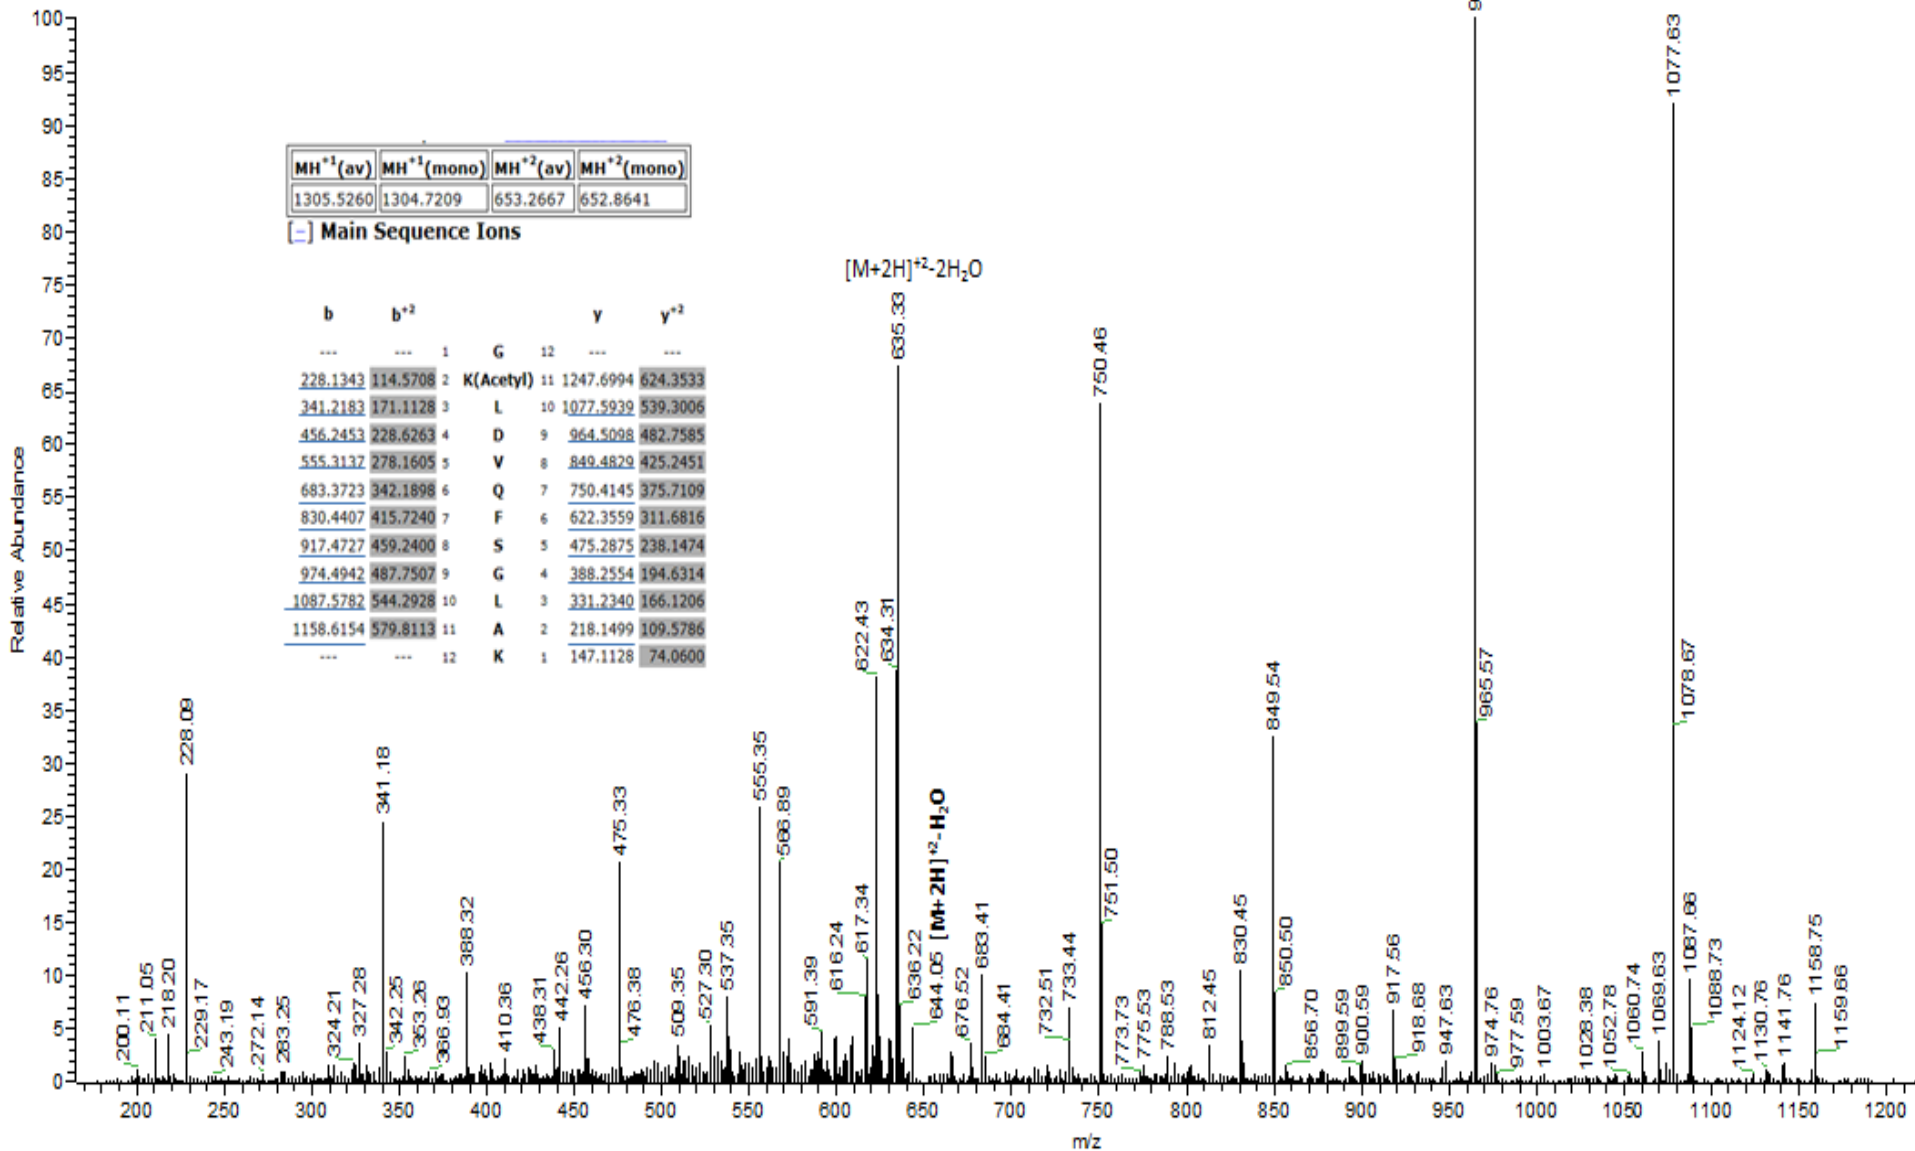

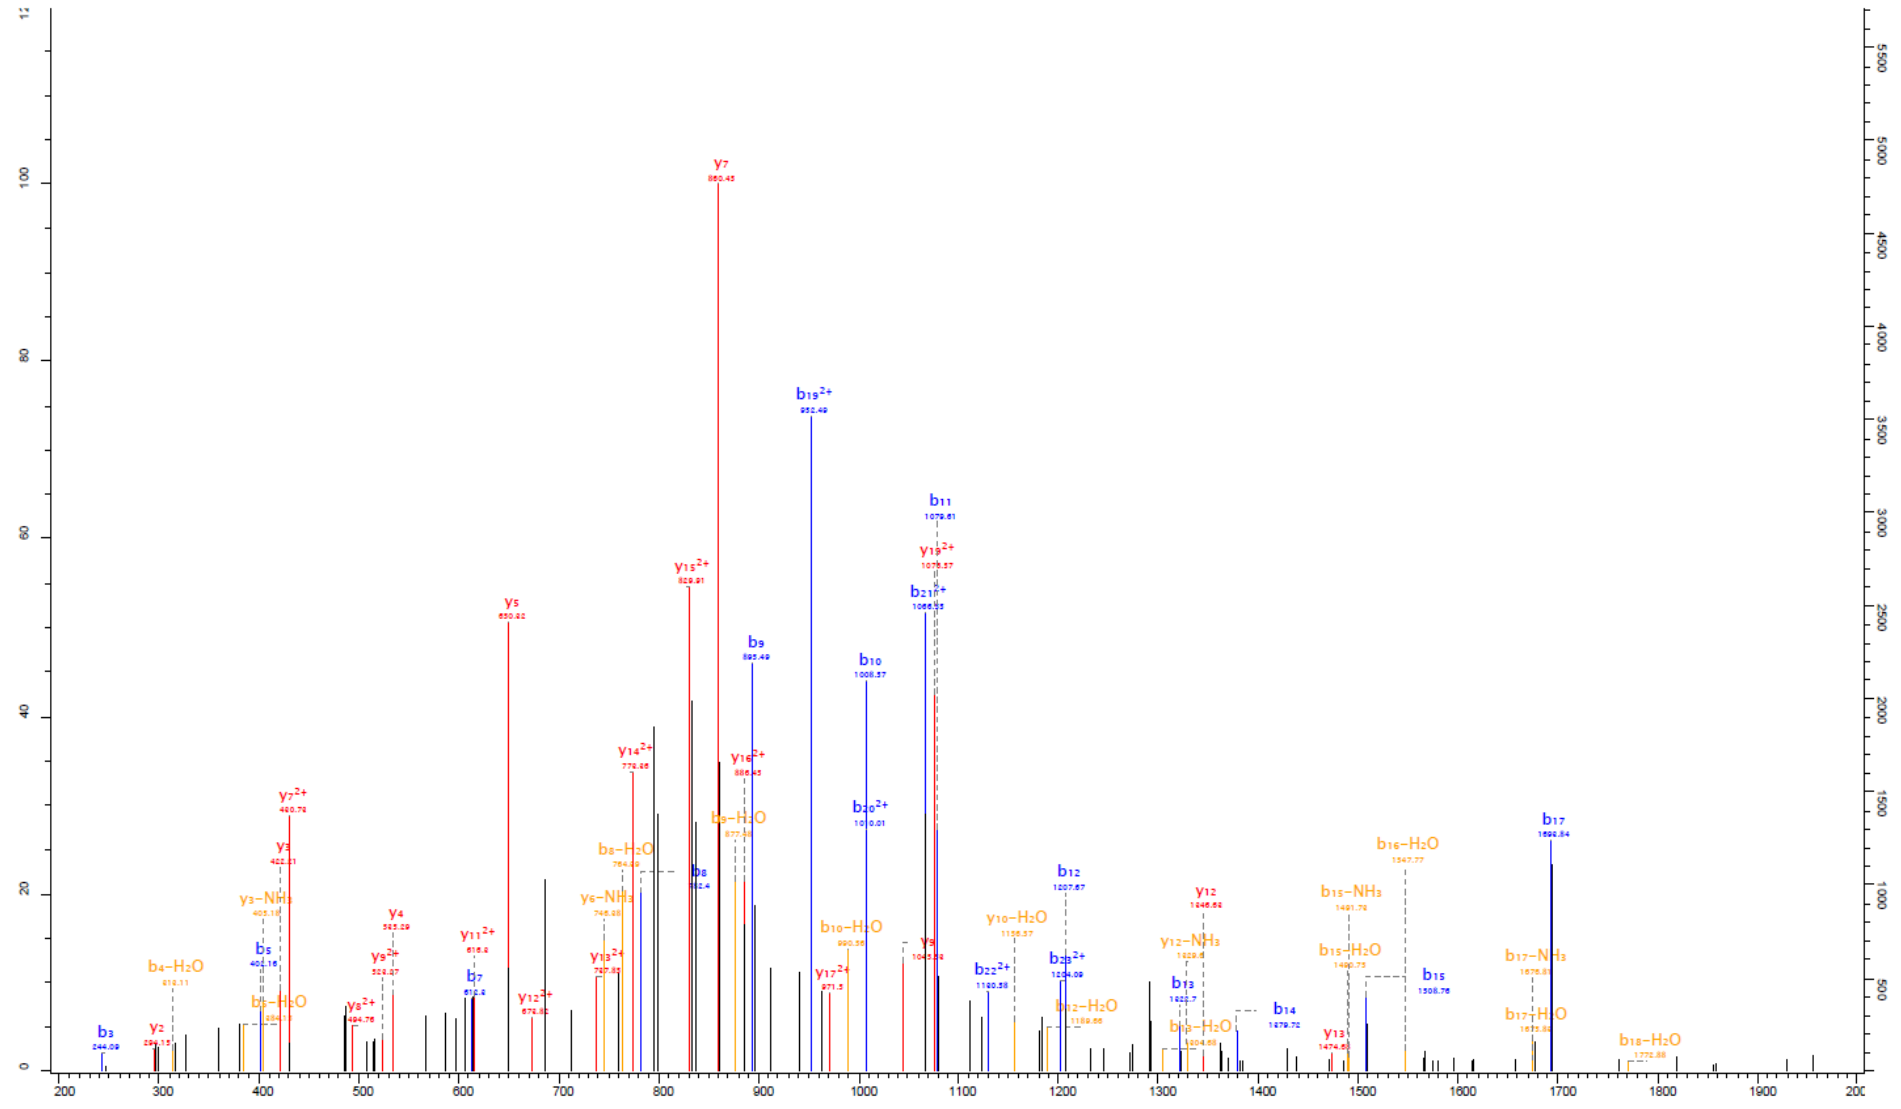

- D A G S A P L K I L A Q D G E G Q P I D I Q M K -

Fragmentation mapping below the sequence:

- b3 (D), b4-H2O (A), b5 (S), b5-H2O (A), b7 (P), b8 (L), b8-AC (K), b6 (I), b10 (L), b11 (A), b12 (Q), b13 (D), b14 (G), b15 (E), b17 (G), b18 2+ (Q), b19 2+ (P), b20 2+ (I), b21 2+ (D), b22 2+ (I), b23 2+ (Q), b24 2+ (M)
- y2 (S), y3-NH3 (A), y3 2+ (A), y4 (P), y4 2+ (P), y5 (L), y5 2+ (L), y6 (A), y6-NH3 (A), y7 (E), y7 2+ (E), y8 (G), y8-H2O (G), y9 (G), y9 2+ (G), y10-H2O (P), y11 (I), y11 2+ (I), y12 (D), y12-NH3 (D), y13 (D), y13-H2O (D), y14 2+ (I), y14-NH3 (I), y15 2+ (I), y15-H2O (I), y16 2+ (Q), y16-NH3 (Q), y17 2+ (Q), y17-H2O (Q), y18 (M), y18-H2O (M)

| MH <sup>+</sup> 1(av) | MH <sup>+</sup> 1(mono) | MH <sup>+</sup> 2(av) | MH <sup>+</sup> 2(mono) | MH <sup>+</sup> 3(av) | MH <sup>+</sup> 3(mono) |
|-----------------------|-------------------------|-----------------------|-------------------------|-----------------------|-------------------------|
| 2554.8967             | 2553.2865               | 1277.9520             | 1277.1469               | 852.3038              | 851.7670                |

**[-] Main Sequence Ions**

| b         | b <sup>+</sup> 2 |    | y                   | y <sup>+</sup> 2 |
|-----------|------------------|----|---------------------|------------------|
| ---       | ---              | 1  | D                   | 24               |
| 187.0713  | ---              | 2  | A                   | 23               |
| 244.0928  | ---              | 3  | G                   | 22               |
| 331.1248  | ---              | 4  | S                   | 21               |
| 402.1619  | ---              | 5  | A                   | 20               |
| 499.2147  | ---              | 6  | P                   | 19               |
| 612.2988  | ---              | 7  | L                   | 18               |
| 782.4043  | 391.7058         | 8  | <b>K(Acetyl)</b>    | 17               |
| 895.4884  | 448.2478         | 9  | I                   | 16               |
| 1008.5724 | 504.7898         | 10 | L                   | 15               |
| 1079.6095 | 540.3084         | 11 | A                   | 14               |
| 1207.6681 | 604.3377         | 12 | Q                   | 13               |
| 1322.6951 | 661.8512         | 13 | D                   | 12               |
| 1379.7165 | 690.3619         | 14 | G                   | 11               |
| 1508.7591 | 754.8832         | 15 | E                   | 10               |
| 1565.7806 | 783.3939         | 16 | G                   | 9                |
| 1693.8392 | 847.4232         | 17 | Q                   | 8                |
| 1790.8919 | 895.9496         | 18 | P                   | 7                |
| 1903.9760 | 952.4916         | 19 | I                   | 6                |
| 2019.0029 | 1010.0051        | 20 | D                   | 5                |
| 2132.0870 | 1066.5471        | 21 | I                   | 4                |
| 2260.1456 | 1130.5764        | 22 | Q                   | 3                |
| 2407.1810 | 1204.0941        | 23 | <b>M(Oxidation)</b> | 2                |
| ---       | ---              | 24 | K                   | 1                |

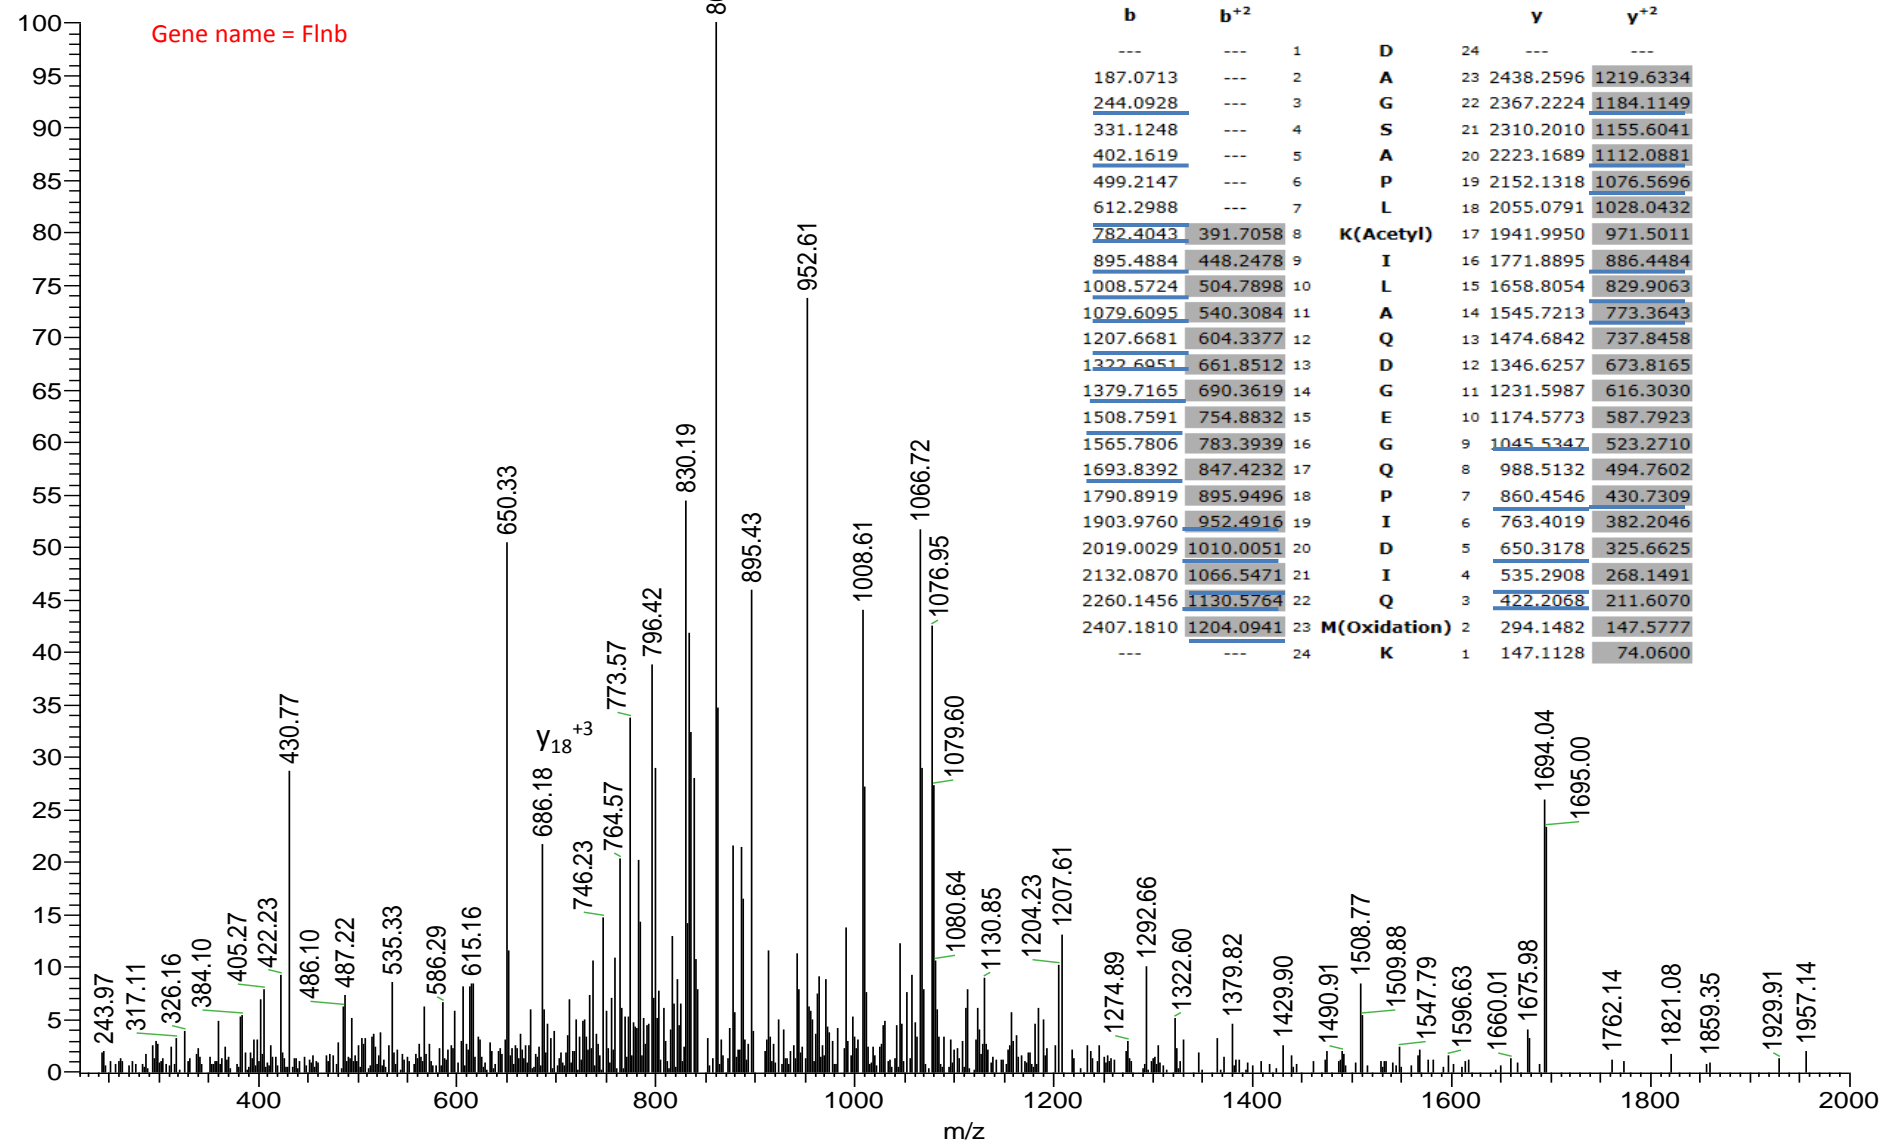

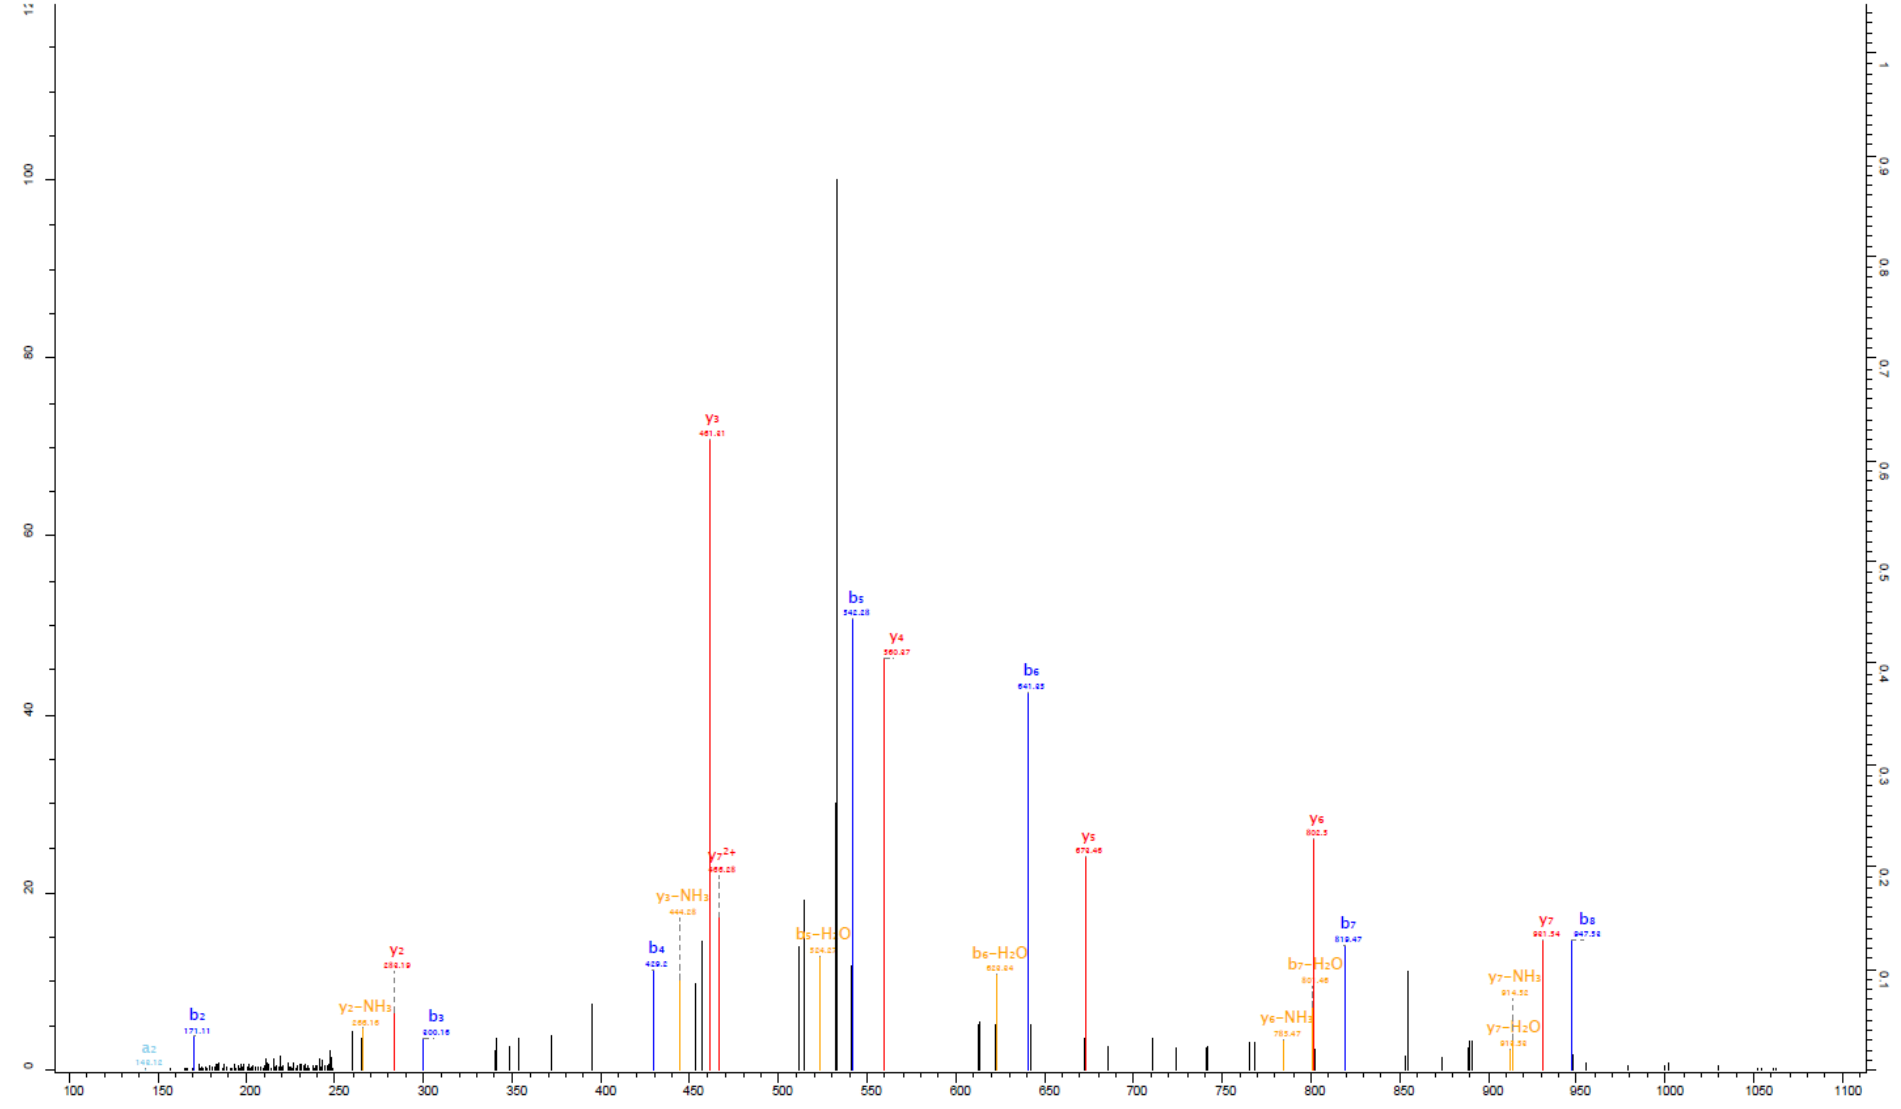

- G L E E L V K Q K -  
b<sub>2</sub> b<sub>3</sub> b<sub>4</sub> b<sub>5</sub> b<sub>6</sub> b<sub>7</sub> b<sub>8</sub>

Gene name = Flnb

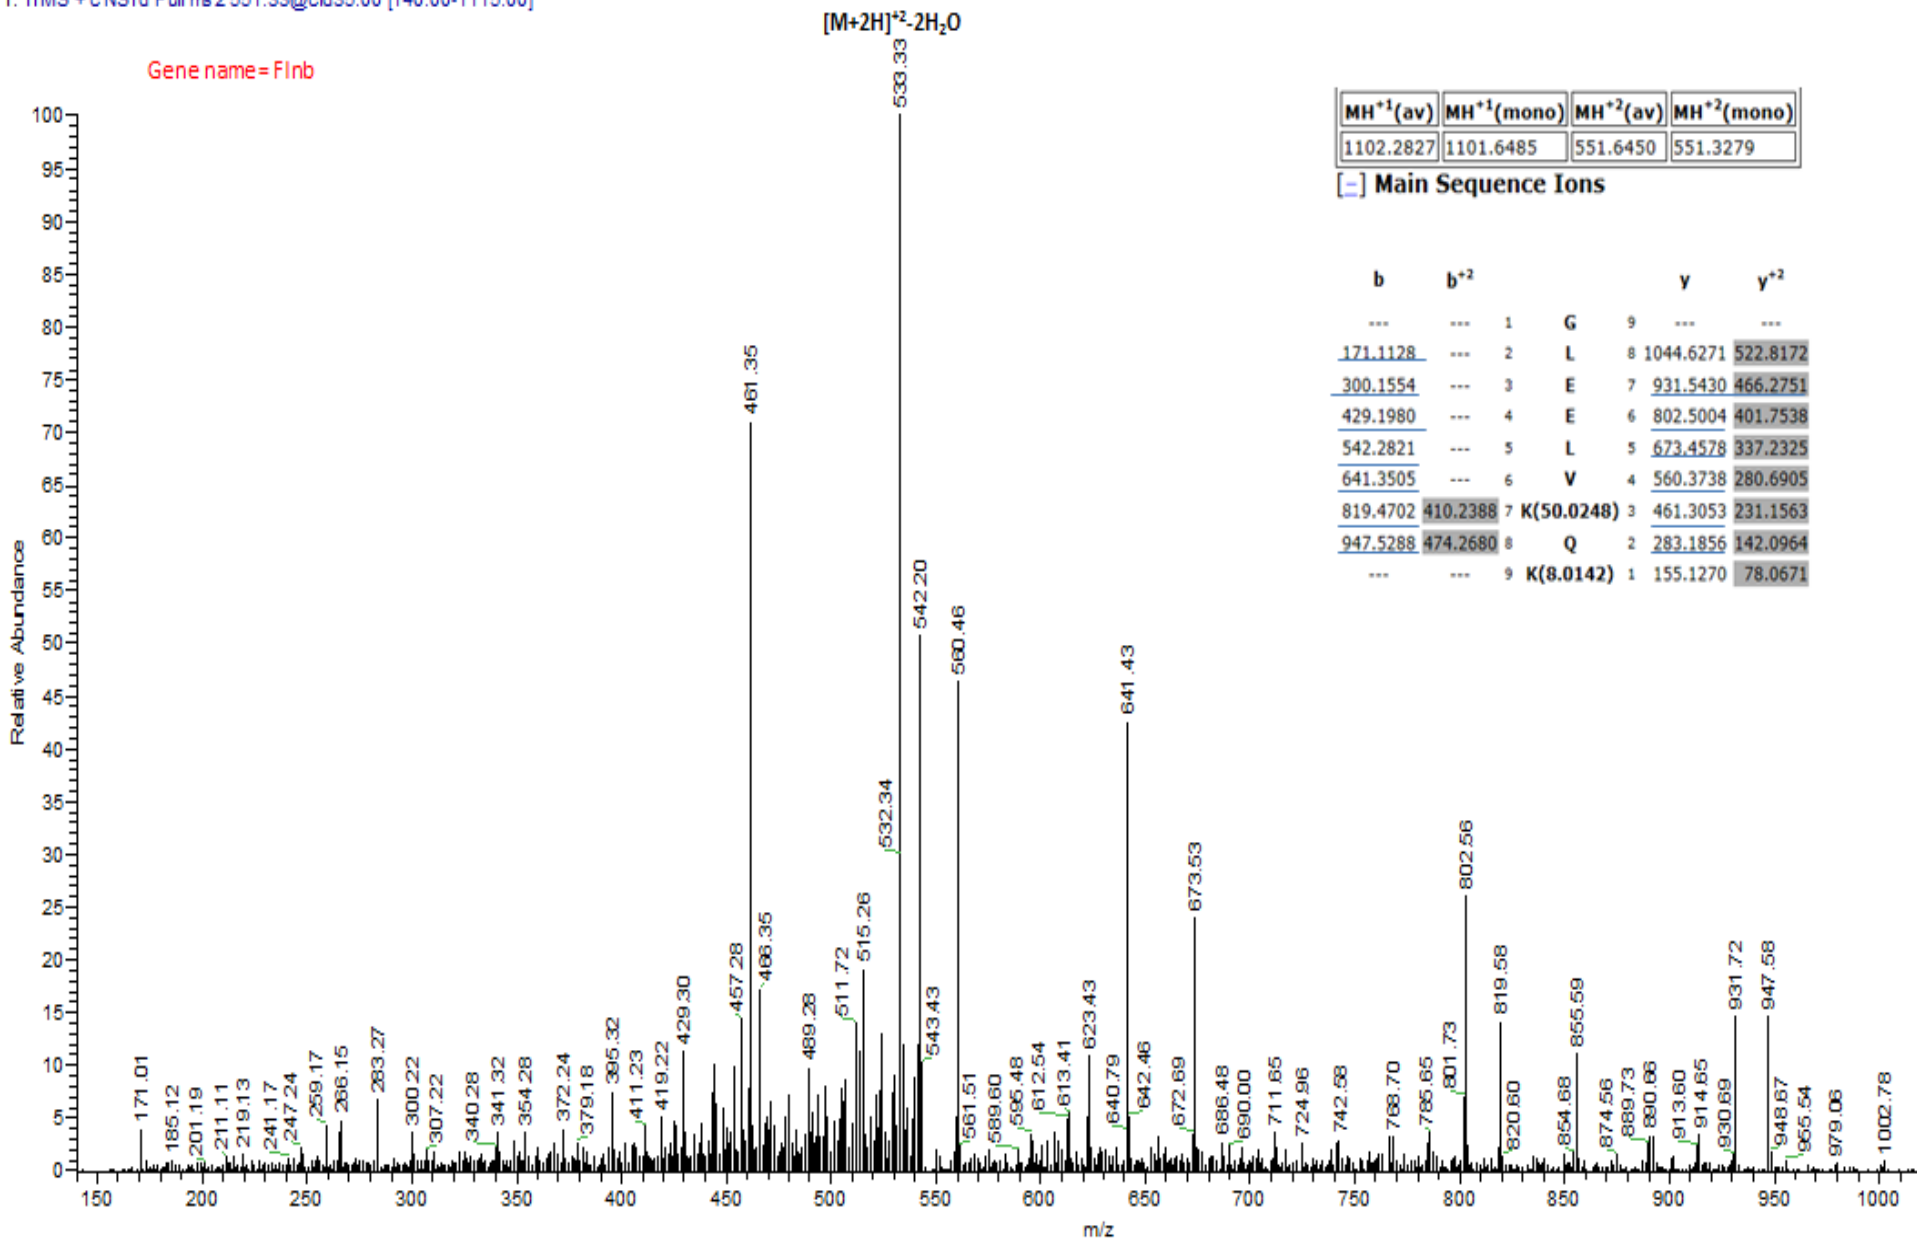

| MH <sup>+</sup> (av) | MH <sup>+</sup> (mono) | MH <sup>2+</sup> (av) | MH <sup>2+</sup> (mono) |
|----------------------|------------------------|-----------------------|-------------------------|
| 1102.2827            | 1101.6485              | 551.6450              | 551.3279                |

**[-] Main Sequence Ions**

| b               | b <sup>2</sup>  |   | y                 | y <sup>2</sup> |           |
|-----------------|-----------------|---|-------------------|----------------|-----------|
| ---             | ---             | 1 | G                 | 9              | ---       |
| <u>171.1128</u> | ---             | 2 | L                 | 8              | 1044.6271 |
| <u>300.1554</u> | ---             | 3 | E                 | 7              | 931.5430  |
| <u>429.1980</u> | ---             | 4 | E                 | 6              | 802.5004  |
| <u>542.2821</u> | ---             | 5 | L                 | 5              | 673.4578  |
| <u>641.3505</u> | ---             | 6 | V                 | 4              | 560.3738  |
| <u>819.4702</u> | <u>410.2388</u> | 7 | <b>K(50.0248)</b> | 3              | 461.3053  |
| <u>947.5288</u> | <u>474.2680</u> | 8 | <b>Q</b>          | 2              | 283.1856  |
| ---             | ---             | 9 | <b>K(8.0142)</b>  | 1              | 155.1270  |



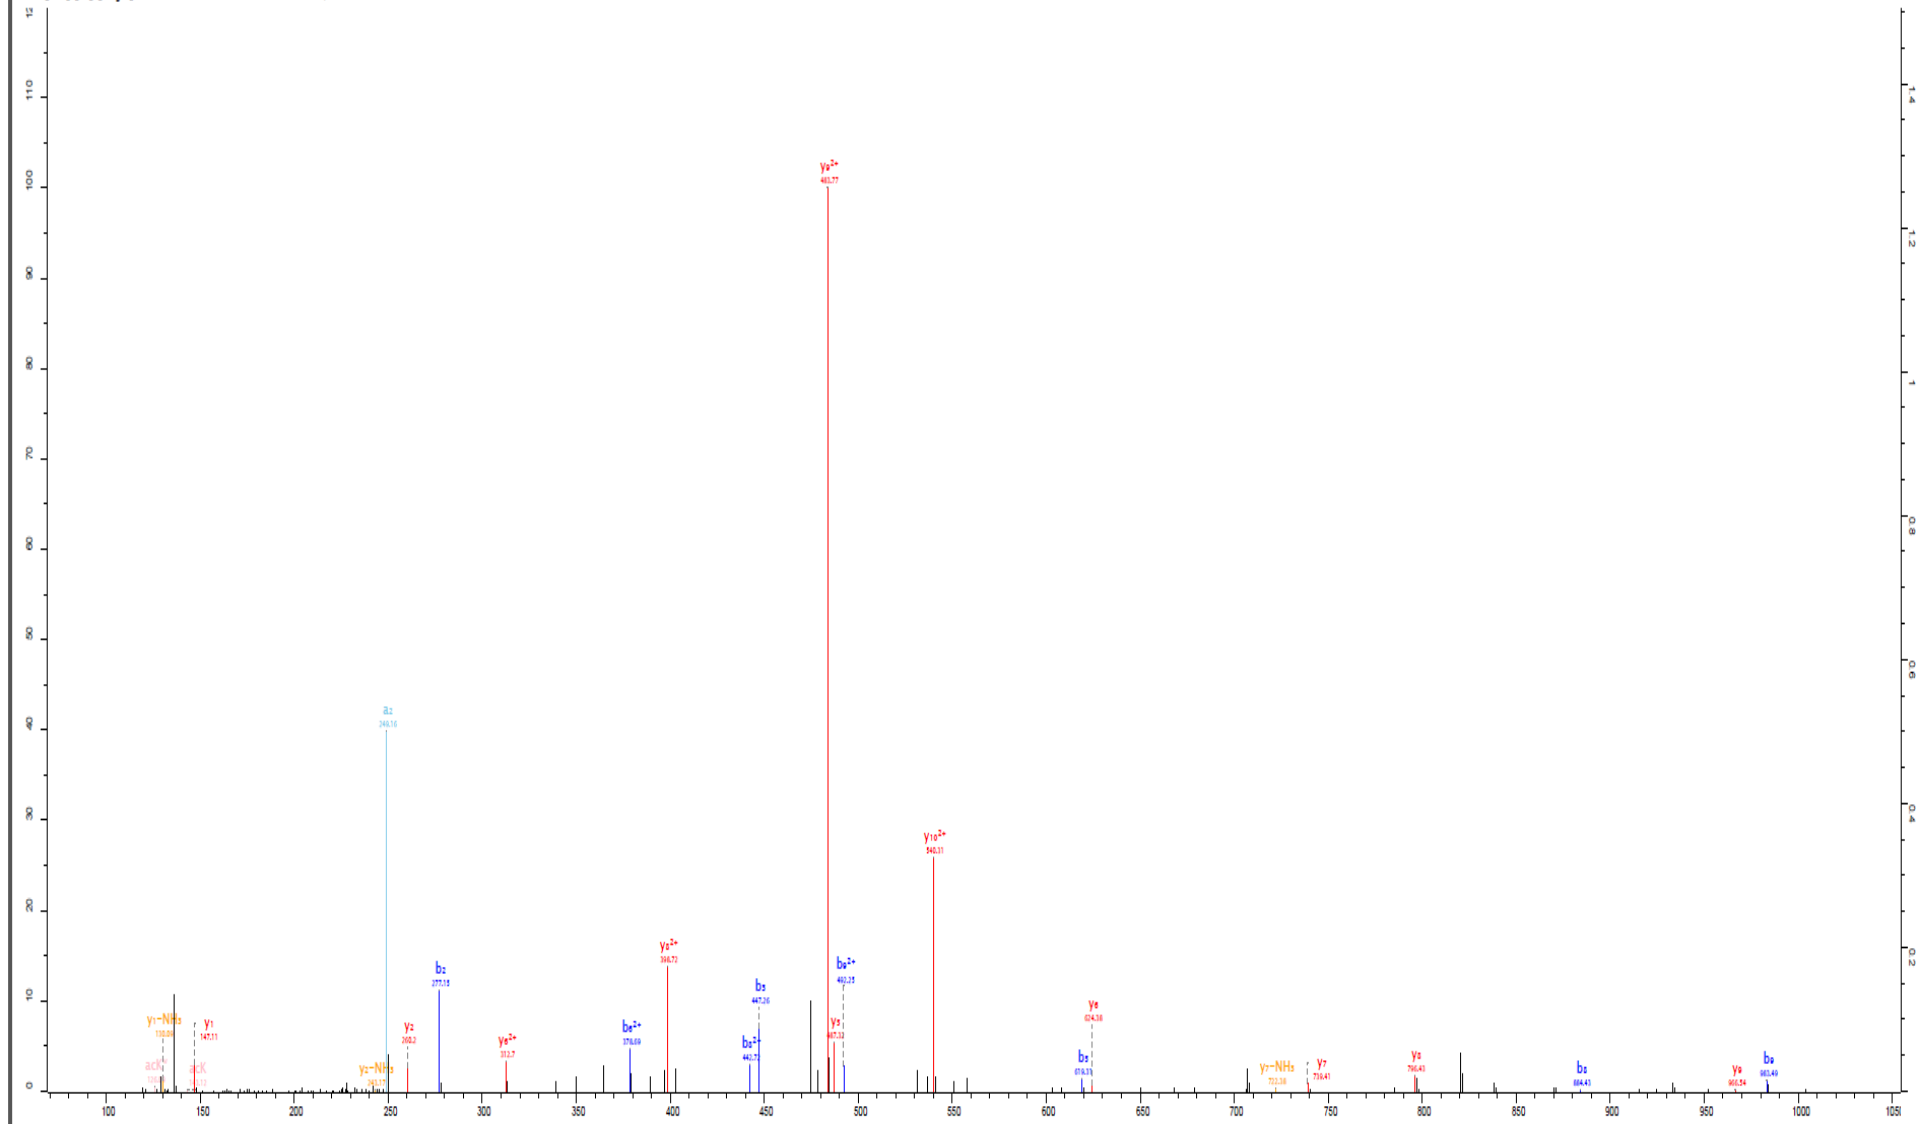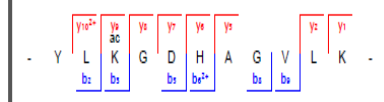

Gene name = Fscn1

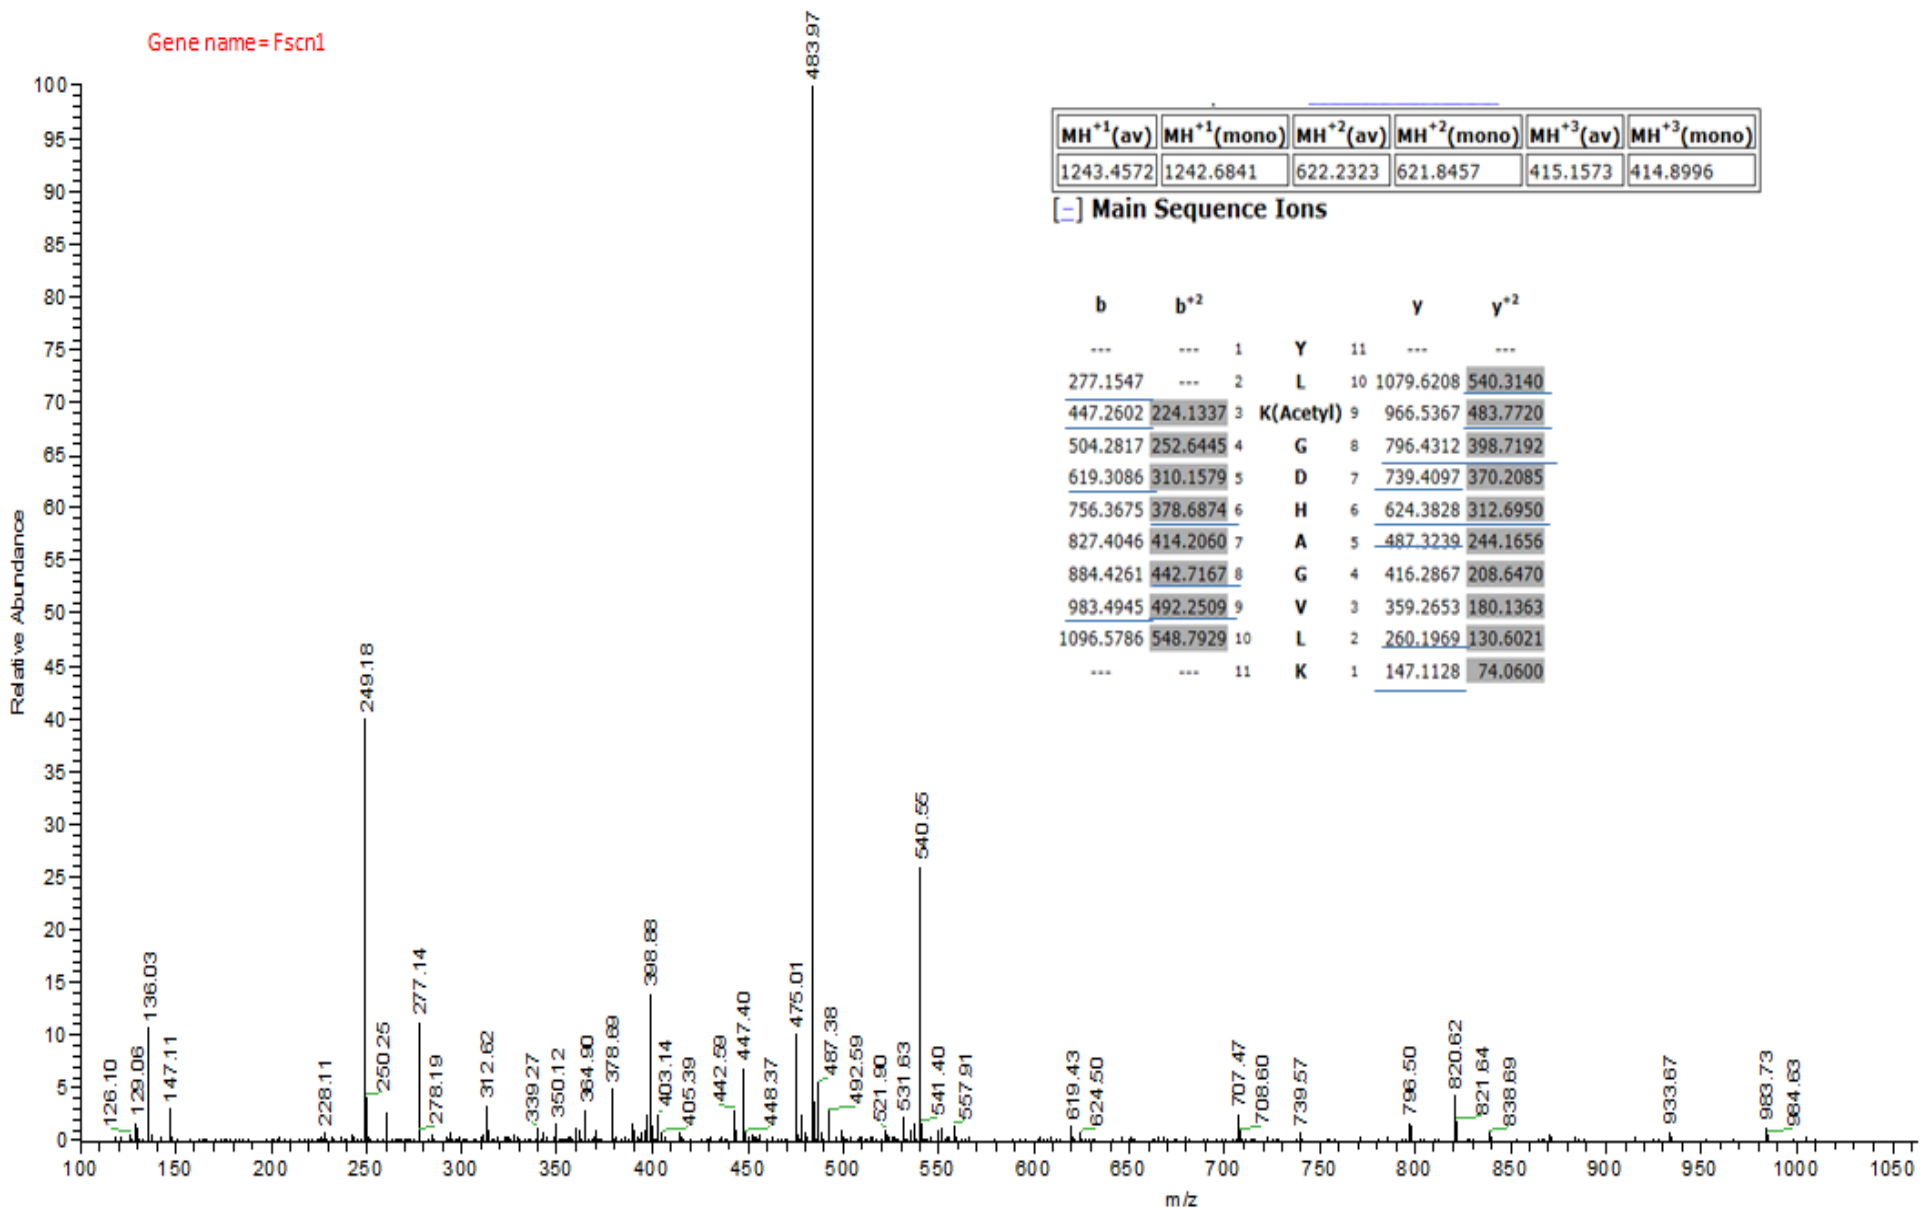

| MH <sup>+</sup> (av) | MH <sup>+</sup> (mono) | MH <sup>2+</sup> (av) | MH <sup>2+</sup> (mono) | MH <sup>3+</sup> (av) | MH <sup>3+</sup> (mono) |
|----------------------|------------------------|-----------------------|-------------------------|-----------------------|-------------------------|
| 1243.4572            | 1242.6841              | 622.2323              | 621.8457                | 415.1573              | 414.8996                |

[ - ] Main Sequence Ions

| b         | b <sup>2</sup> |    | y                | y <sup>2</sup> |
|-----------|----------------|----|------------------|----------------|
| ---       | ---            | 1  | Y                | 11             |
| 277.1547  | ---            | 2  | L                | 10             |
| 447.2602  | 224.1337       | 3  | <b>K(Acetyl)</b> | 9              |
| 504.2817  | 252.6445       | 4  | G                | 8              |
| 619.3086  | 310.1579       | 5  | D                | 7              |
| 756.3675  | 378.6874       | 6  | H                | 6              |
| 827.4046  | 414.2060       | 7  | A                | 5              |
| 884.4261  | 442.7167       | 8  | G                | 4              |
| 983.4945  | 492.2509       | 9  | V                | 3              |
| 1096.5786 | 548.7929       | 10 | L                | 2              |
| ---       | ---            | 11 | K                | 1              |

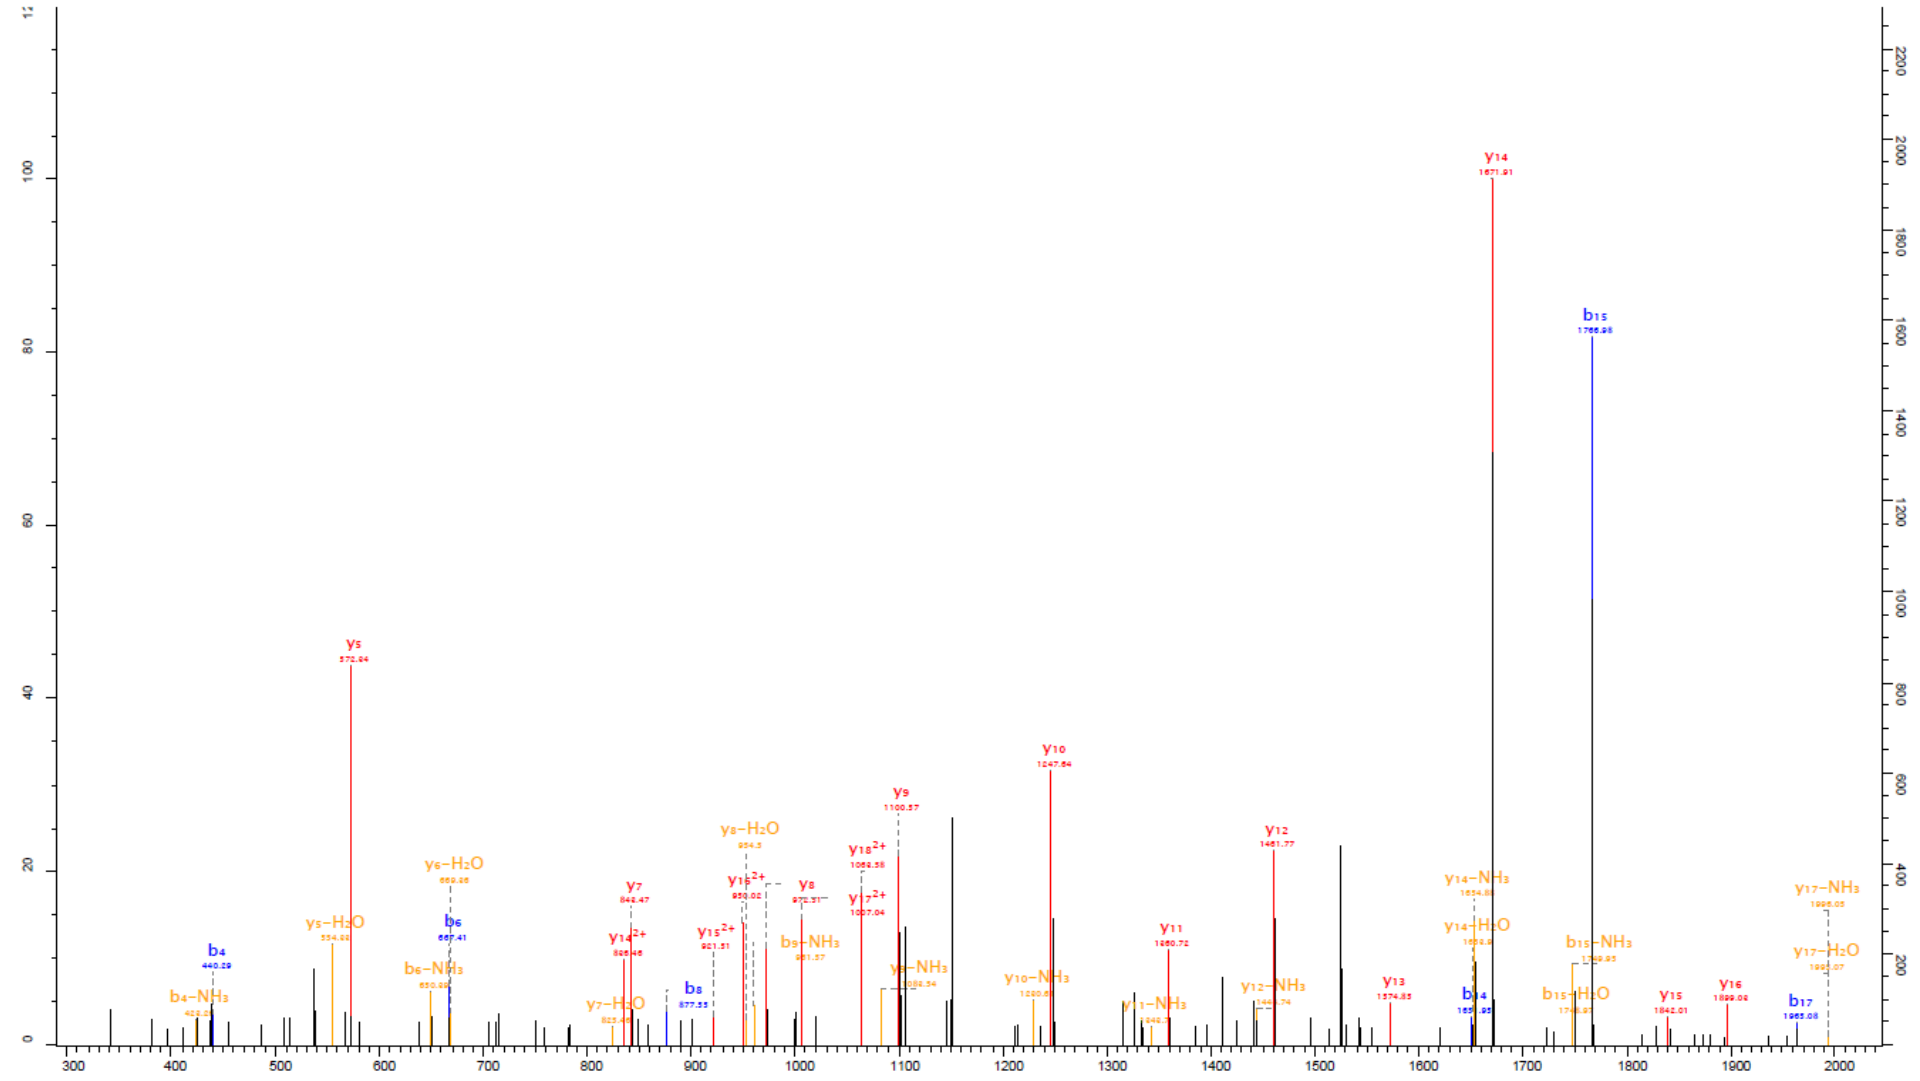

- L V I N G K P I T I F Q E R D P T N I K -

Fragmentation mapping: b4 (I-N), b6 (K), b2 (I), b14 (R), b15 (D), b17 (P)

Gene name = Gapdh

| MH <sup>+</sup> 1(av) | MH <sup>+</sup> 1(mono) | MH <sup>+</sup> 2(av) | MH <sup>+</sup> 2(mono) |
|-----------------------|-------------------------|-----------------------|-------------------------|
| 2339.7574             | 2338.3129               | 1170.3824             | 1169.6601               |

[-] Main Sequence Ions

| b         | b <sup>+</sup> | y  | y <sup>+</sup> |
|-----------|----------------|----|----------------|
| ...       | ...            | 1  | L              |
| 213.1598  | ...            | 2  | V              |
| 326.2438  | ...            | 3  | I              |
| 440.2867  | ...            | 4  | N              |
| 497.3082  | ...            | 5  | G              |
| 667.4137  | 334.2105       | 6  | K(Acetyl)      |
| 764.4665  | 382.7369       | 7  | P              |
| 877.5506  | 439.2789       | 8  | I              |
| 978.5982  | 489.8028       | 9  | T              |
| 1091.6823 | 546.3448       | 10 | I              |
| 1238.7507 | 619.8790       | 11 | F              |
| 1366.8093 | 683.9083       | 12 | Q              |
| 1495.8519 | 748.4296       | 13 | E              |
| 1651.9530 | 826.4801       | 14 | R              |
| 1766.9799 | 883.9936       | 15 | D              |
| 1864.0327 | 932.5200       | 16 | P              |
| 1965.0804 | 983.0438       | 17 | T              |
| 2079.1233 | 1040.0653      | 18 | N              |
| 2192.2074 | 1096.6073      | 19 | I              |
| ...       | ...            | 20 | K              |

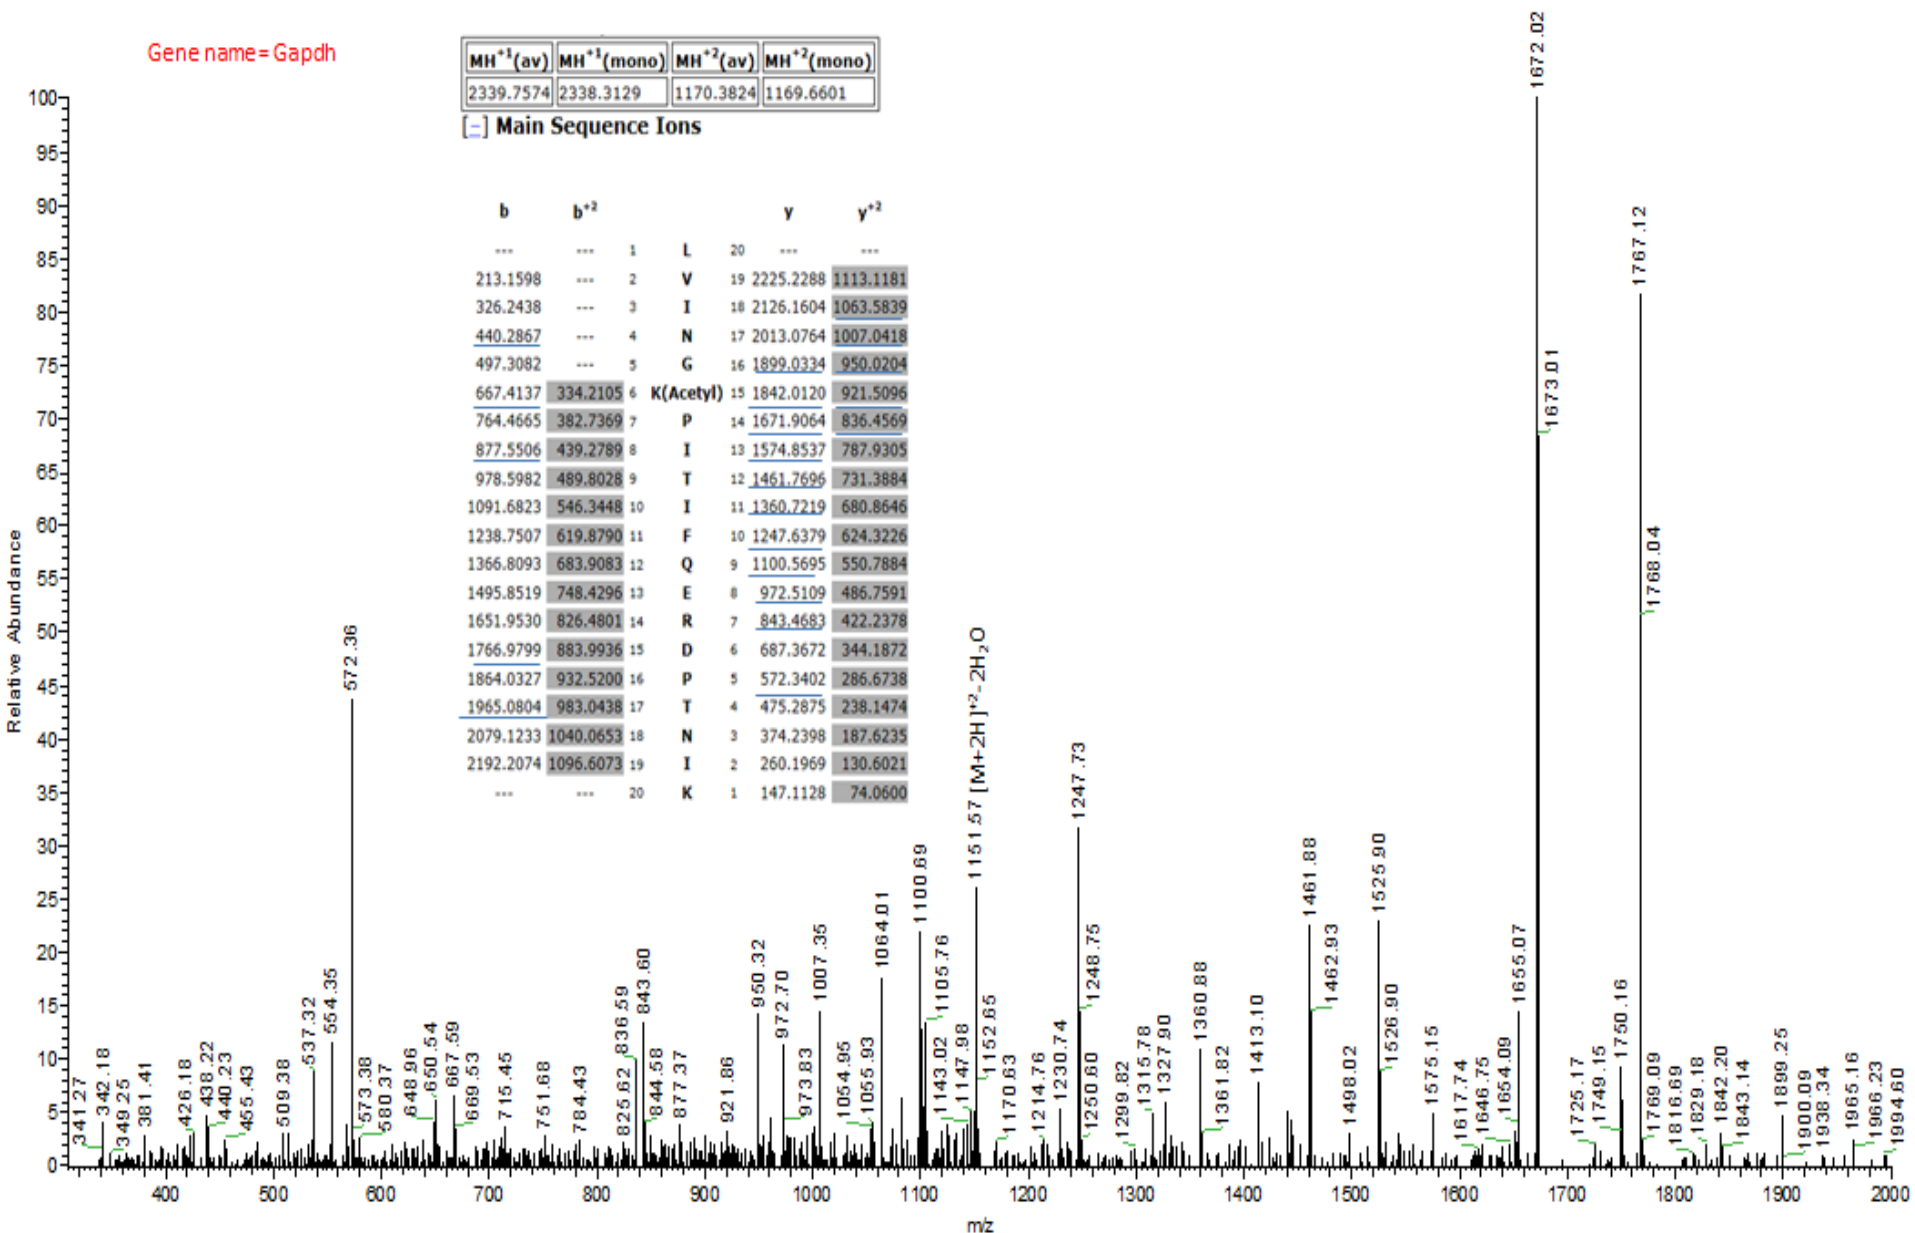

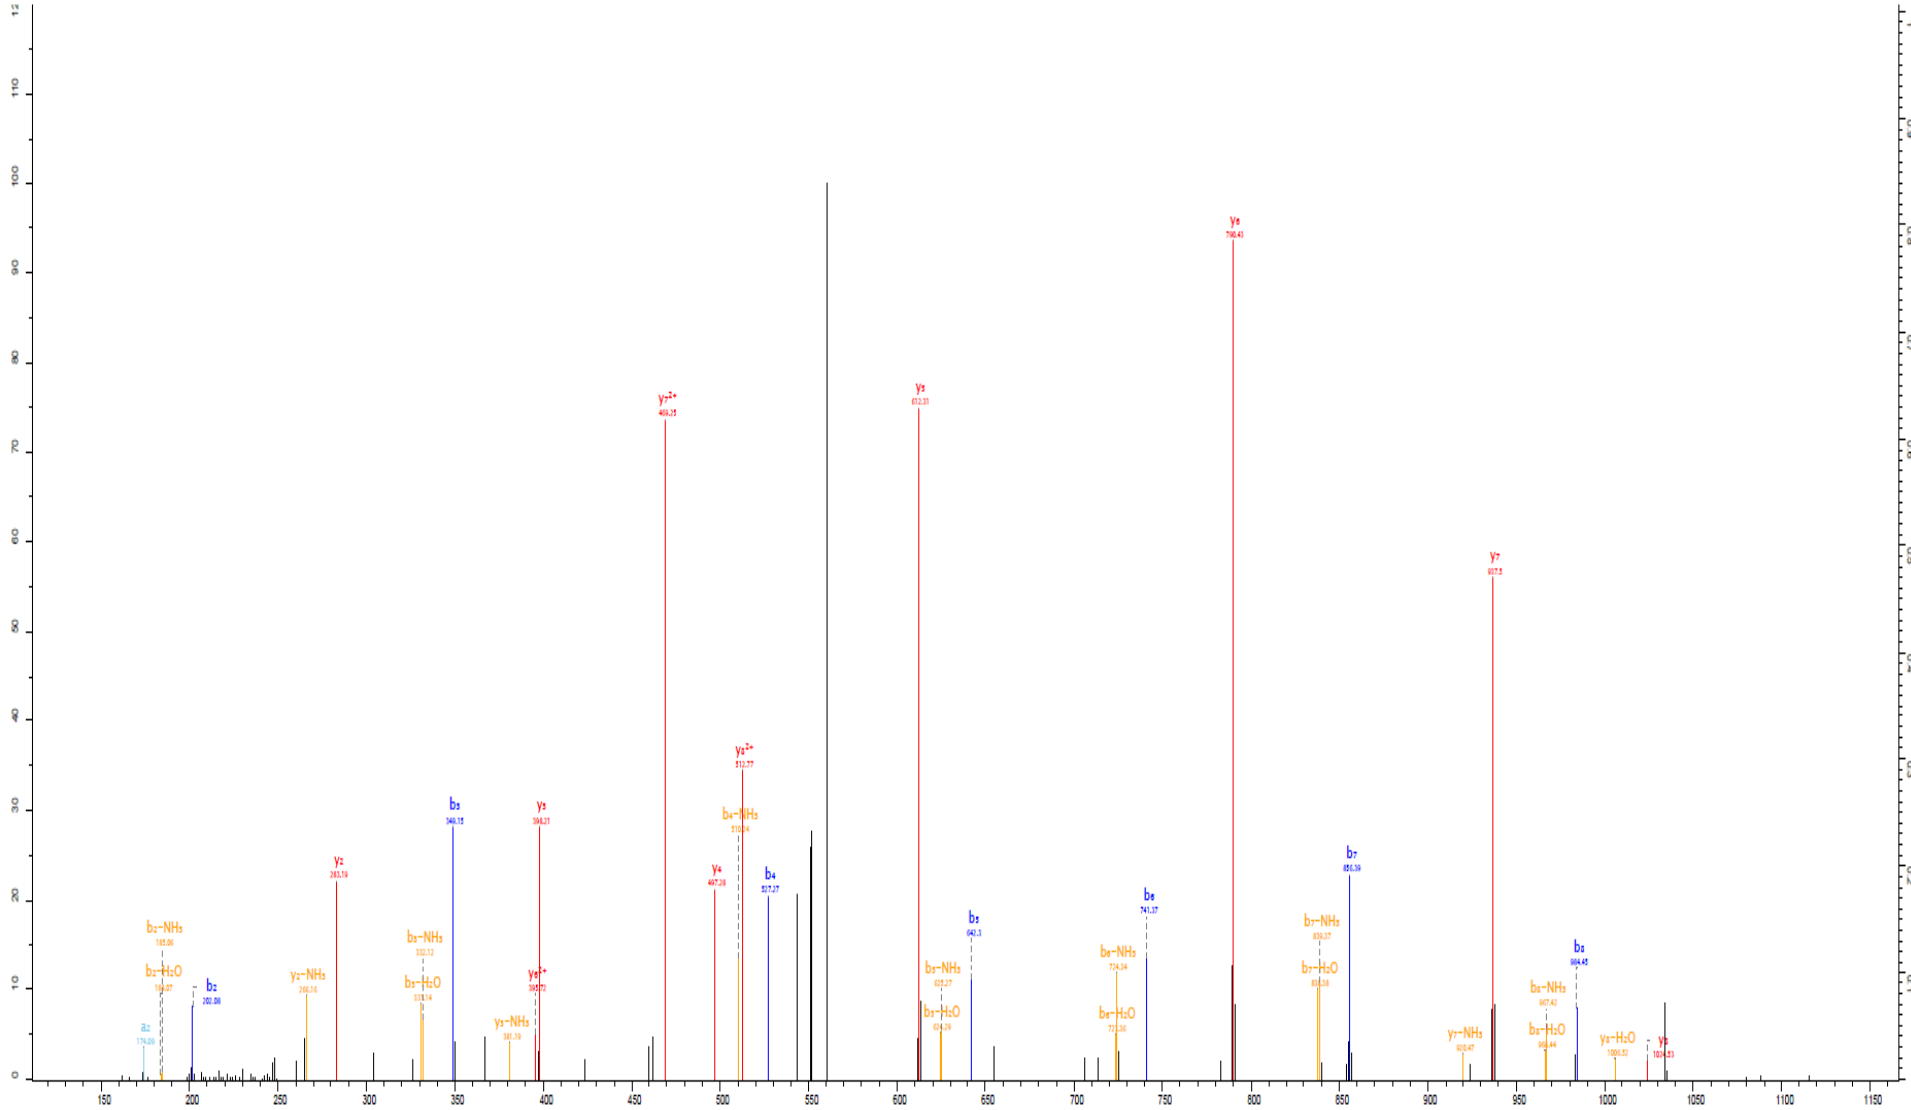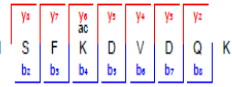

- N S F K D V D Q K -

Gene name = Gbp2

| MH <sup>+</sup> 1(av) | MH <sup>+</sup> 1(mono) | MH <sup>+</sup> 2(av) | MH <sup>+</sup> 2(mono) |
|-----------------------|-------------------------|-----------------------|-------------------------|
| 1139.2163             | 1138.5710               | 570.1119              | 569.7891                |

[-] Main Sequence Ions

| b        | b <sup>+</sup> |   | y                 | y <sup>+</sup> |
|----------|----------------|---|-------------------|----------------|
| ---      | ---            | 1 | N                 | 9              |
| 202.0822 | ---            | 2 | S                 | 8              |
| 349.1506 | ---            | 3 | F                 | 7              |
| 527.2704 | 264.1388       | 4 | <b>K(50.0248)</b> | 6              |
| 642.2974 | 321.6523       | 5 | D                 | 5              |
| 741.3658 | 371.1865       | 6 | V                 | 4              |
| 856.3927 | 428.7000       | 7 | D                 | 3              |
| 984.4513 | 492.7293       | 8 | Q                 | 2              |
| ---      | ---            | 9 | <b>K(8.0142)</b>  | 1              |

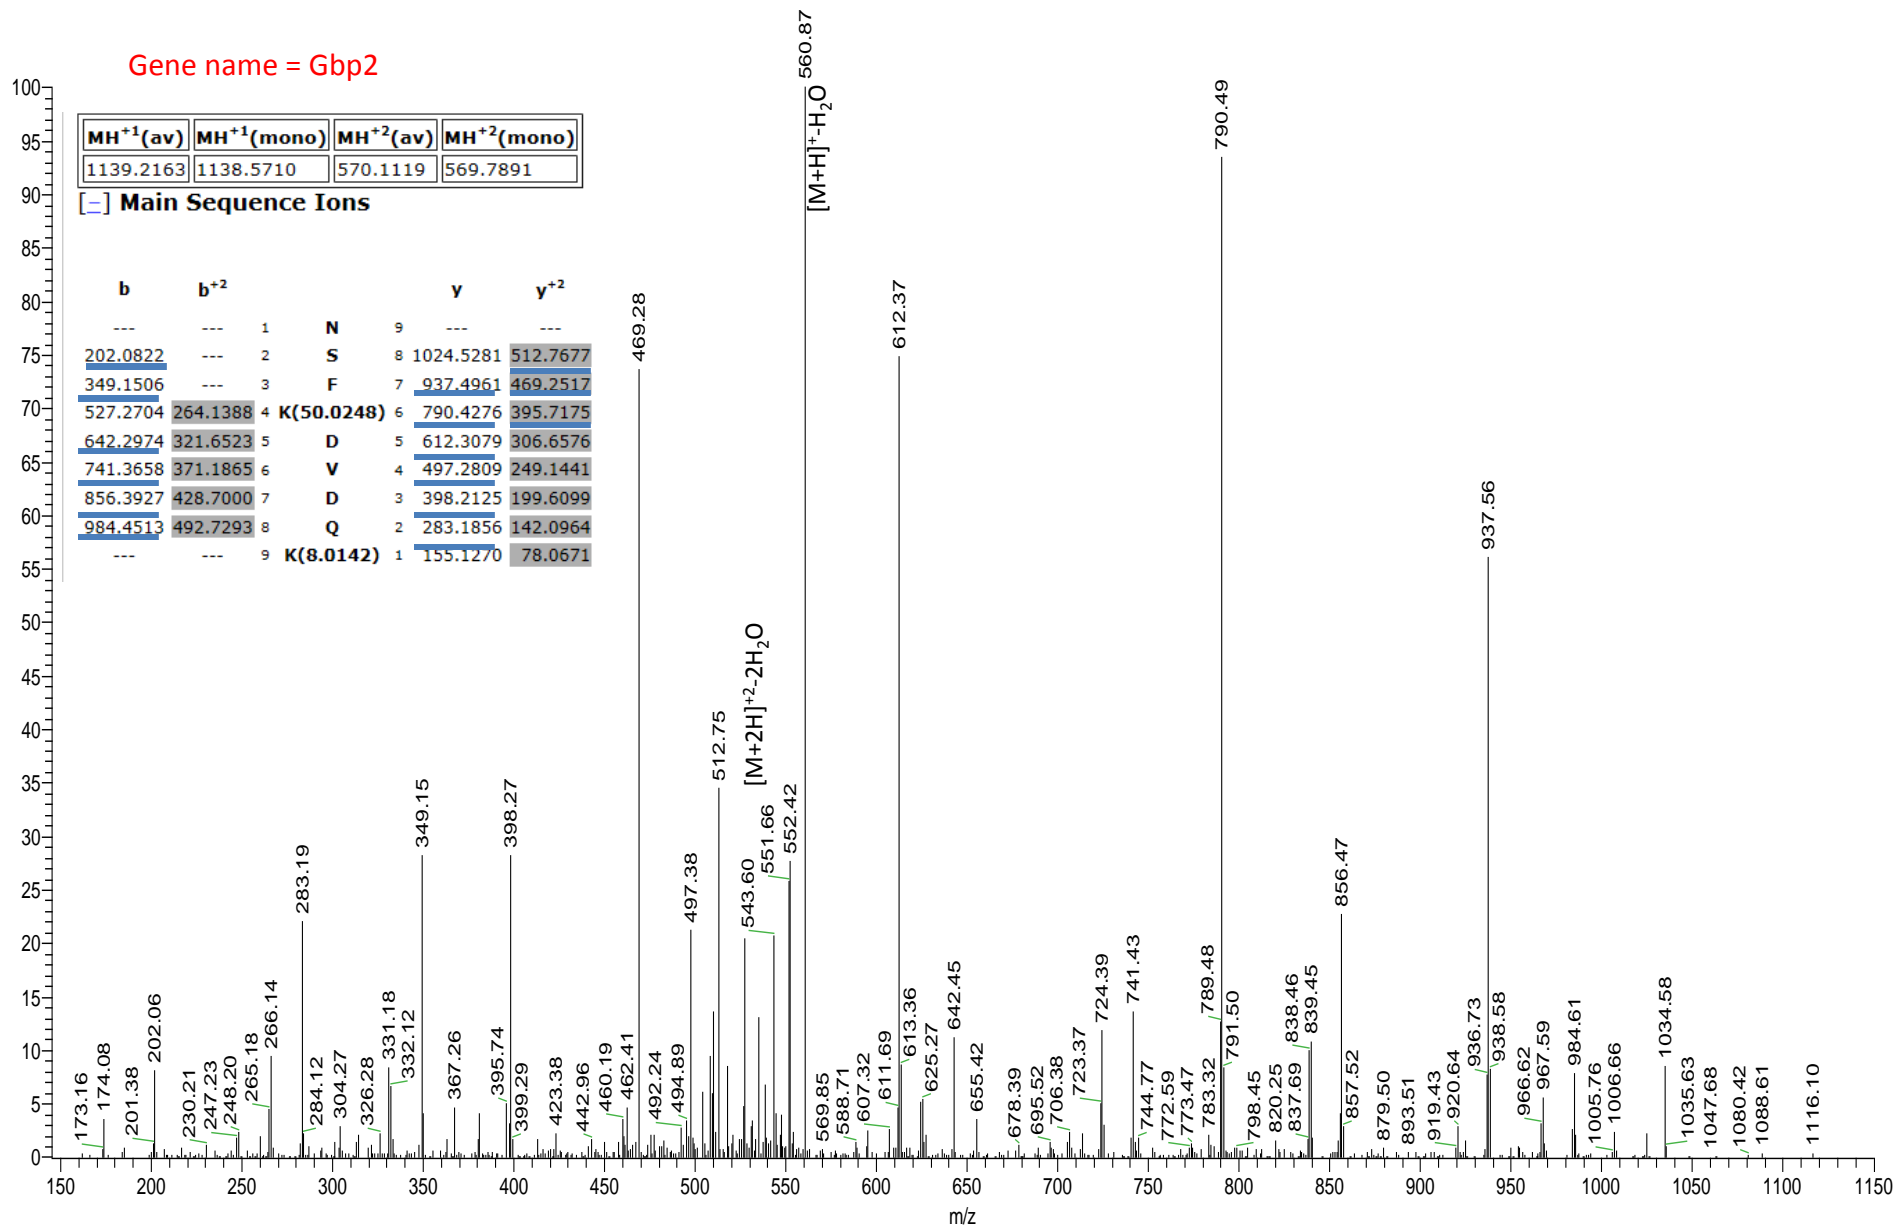

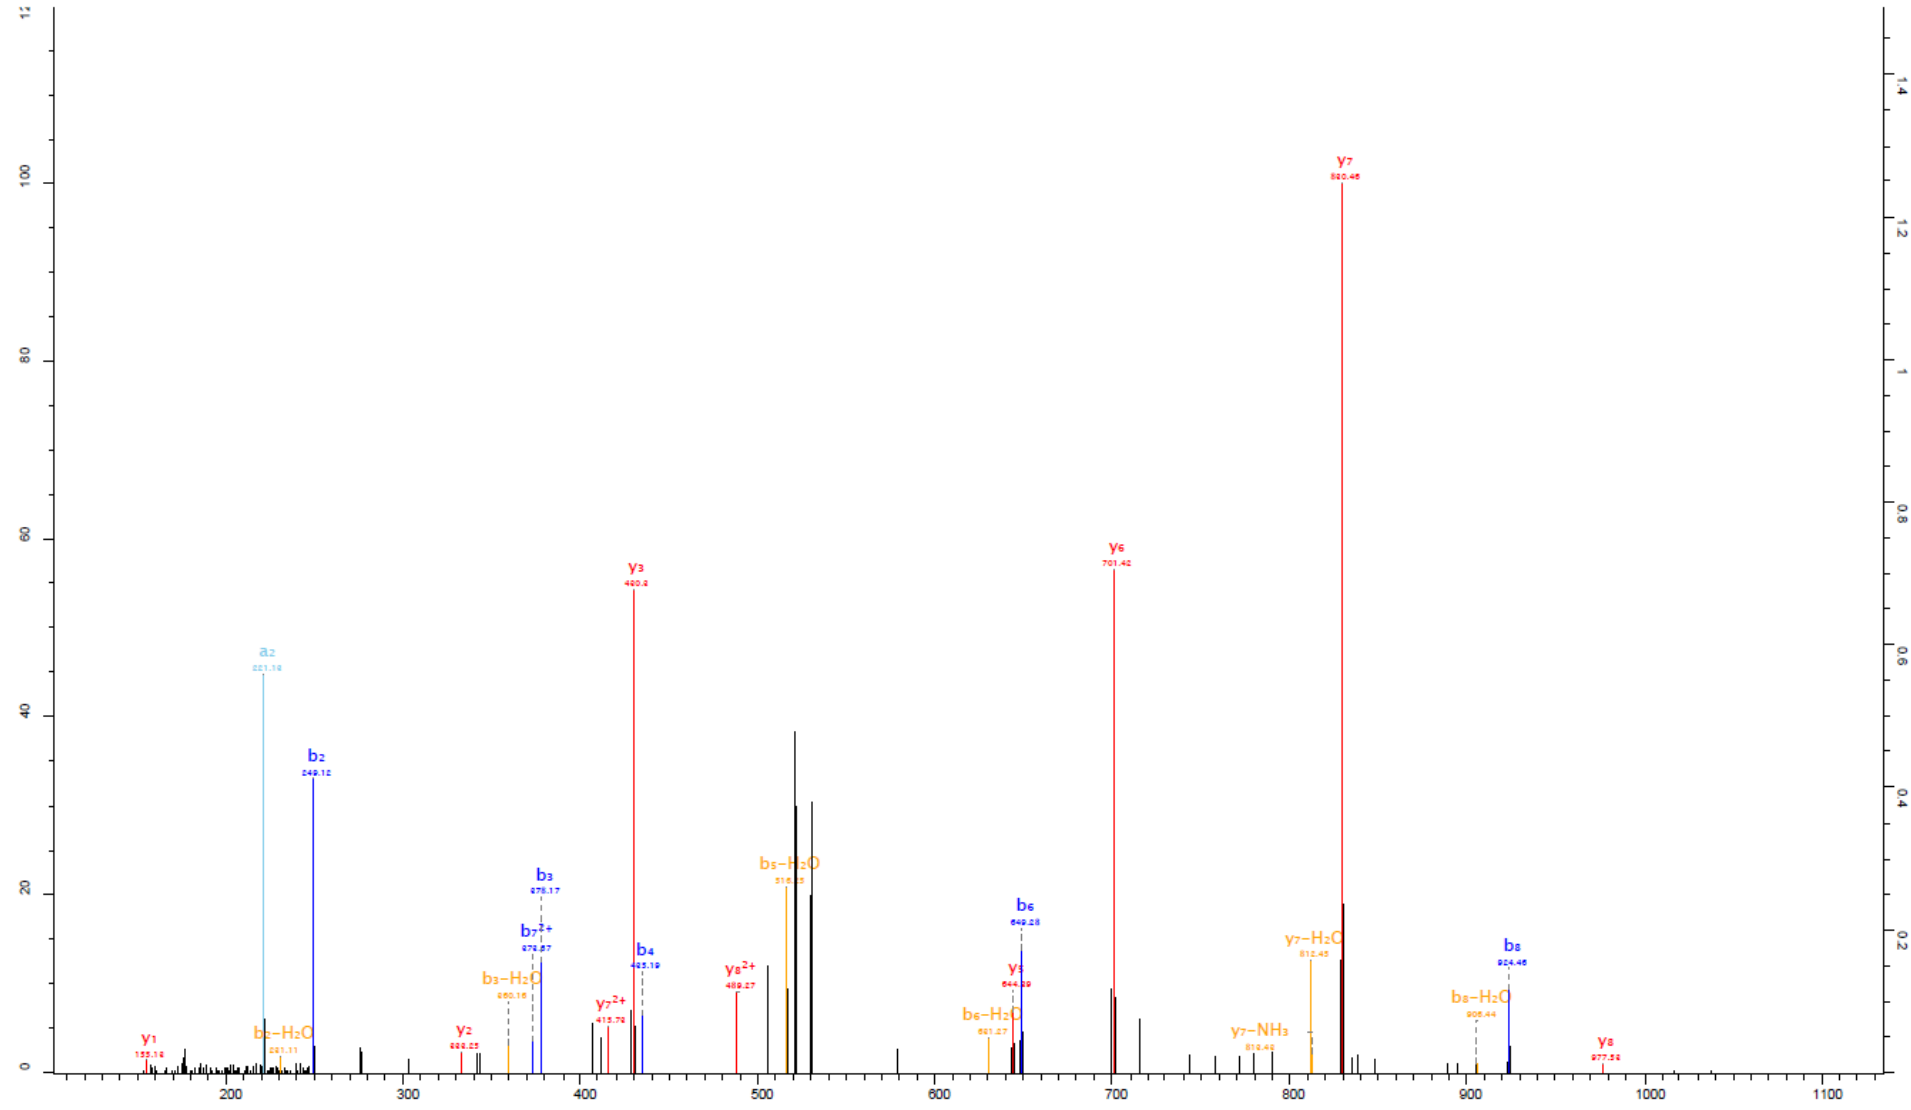

- T F E G V D P K K -

y5 y7 y6 y5  
b2 b3 b4

b6 b7<sup>2+</sup> b8  
y3 y2 y1  
y4 y6 y8

| MH <sup>+</sup> (av) | MH <sup>+</sup> (mono) | MH <sup>2+</sup> (av) | MH <sup>2+</sup> (mono) |
|----------------------|------------------------|-----------------------|-------------------------|
| 1079.2042            | 1078.5750              | 540.1058              | 539.7912                |

**Main Sequence Ions**

| b        | b <sup>2</sup> | y | y <sup>2</sup> |
|----------|----------------|---|----------------|
| ---      | ---            | 1 | T              |
| 249.1234 | ---            | 2 | F              |
| 378.1660 | ---            | 3 | E              |
| 435.1874 | ---            | 4 | G              |
| 534.2558 | ---            | 5 | V              |
| 649.2828 | ---            | 6 | D              |
| 746.3355 | ---            | 7 | P              |
| 924.4553 | 462.7313       | 8 | K(50.0248)     |
| ---      | ---            | 9 | K(8.0142)      |

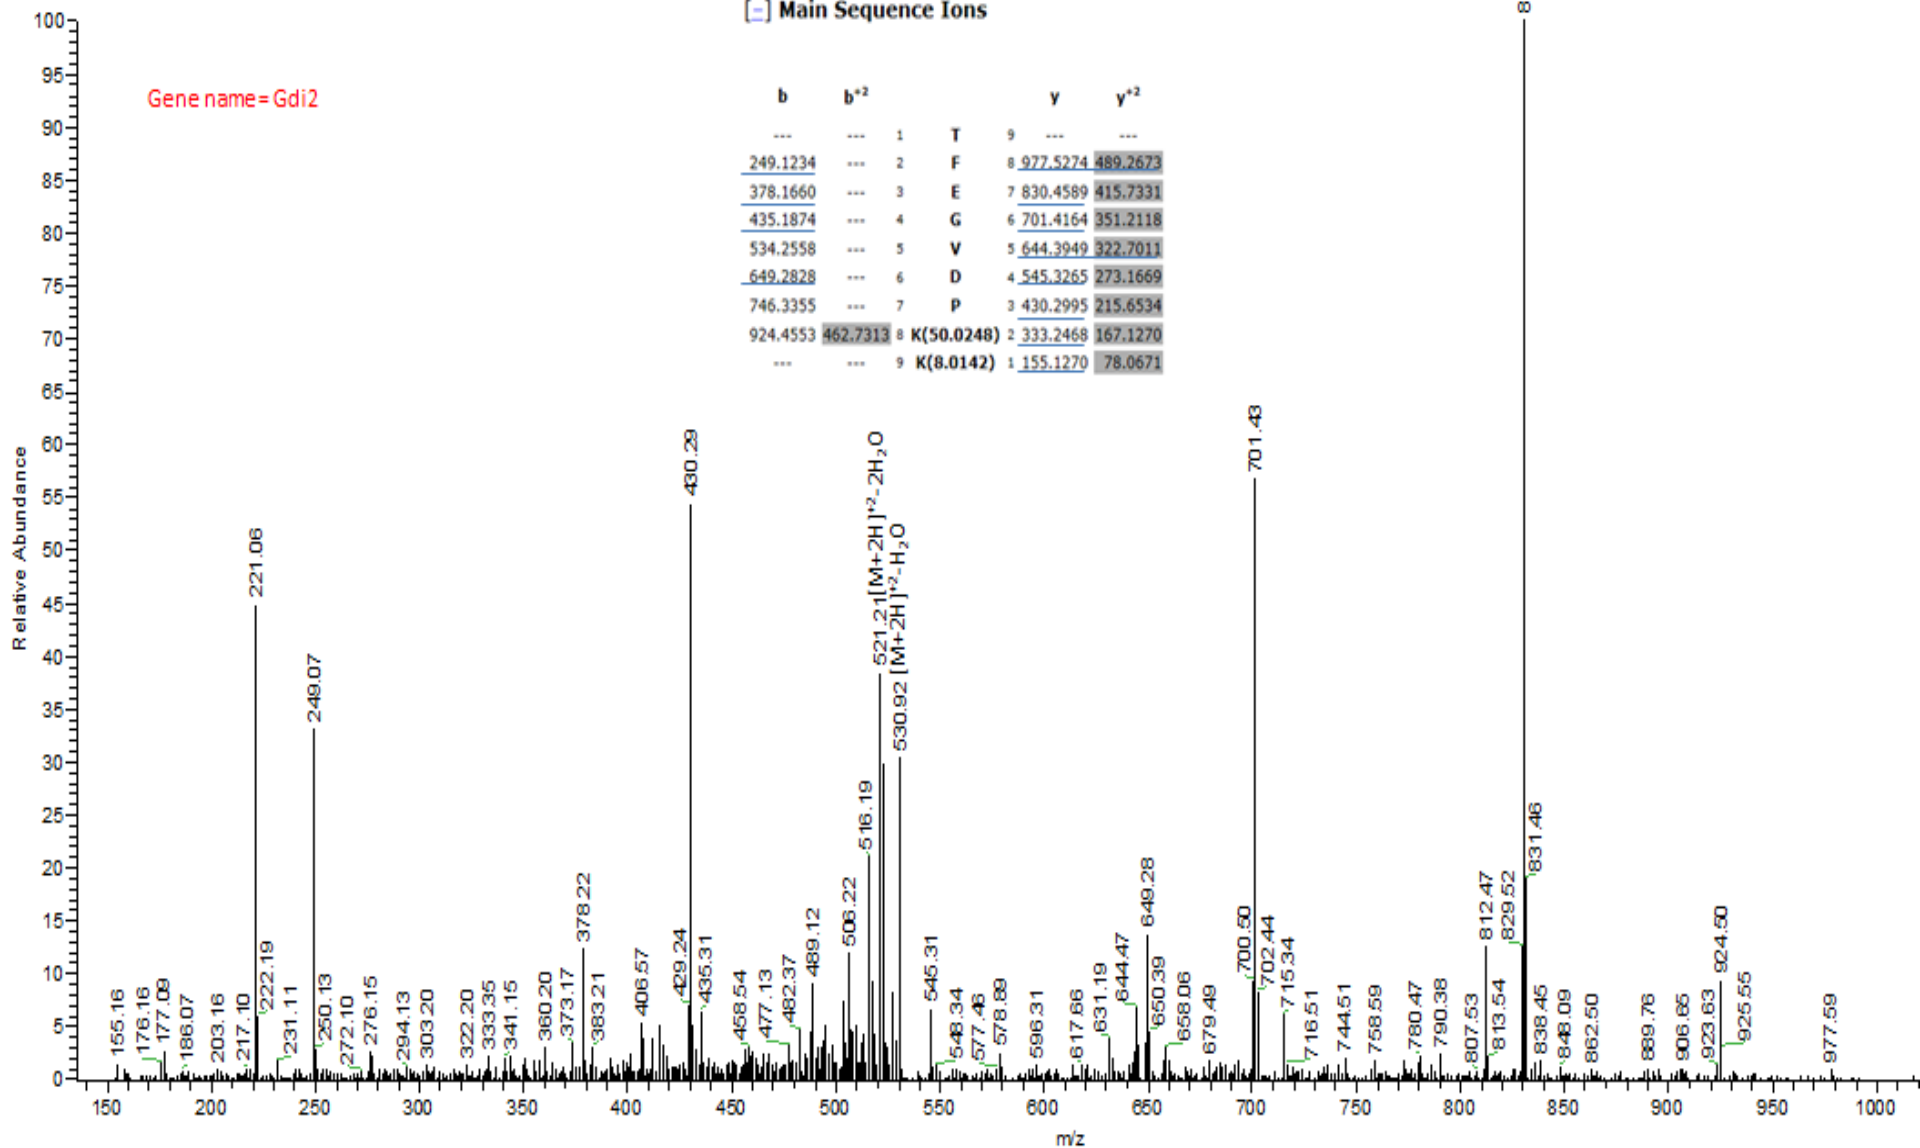



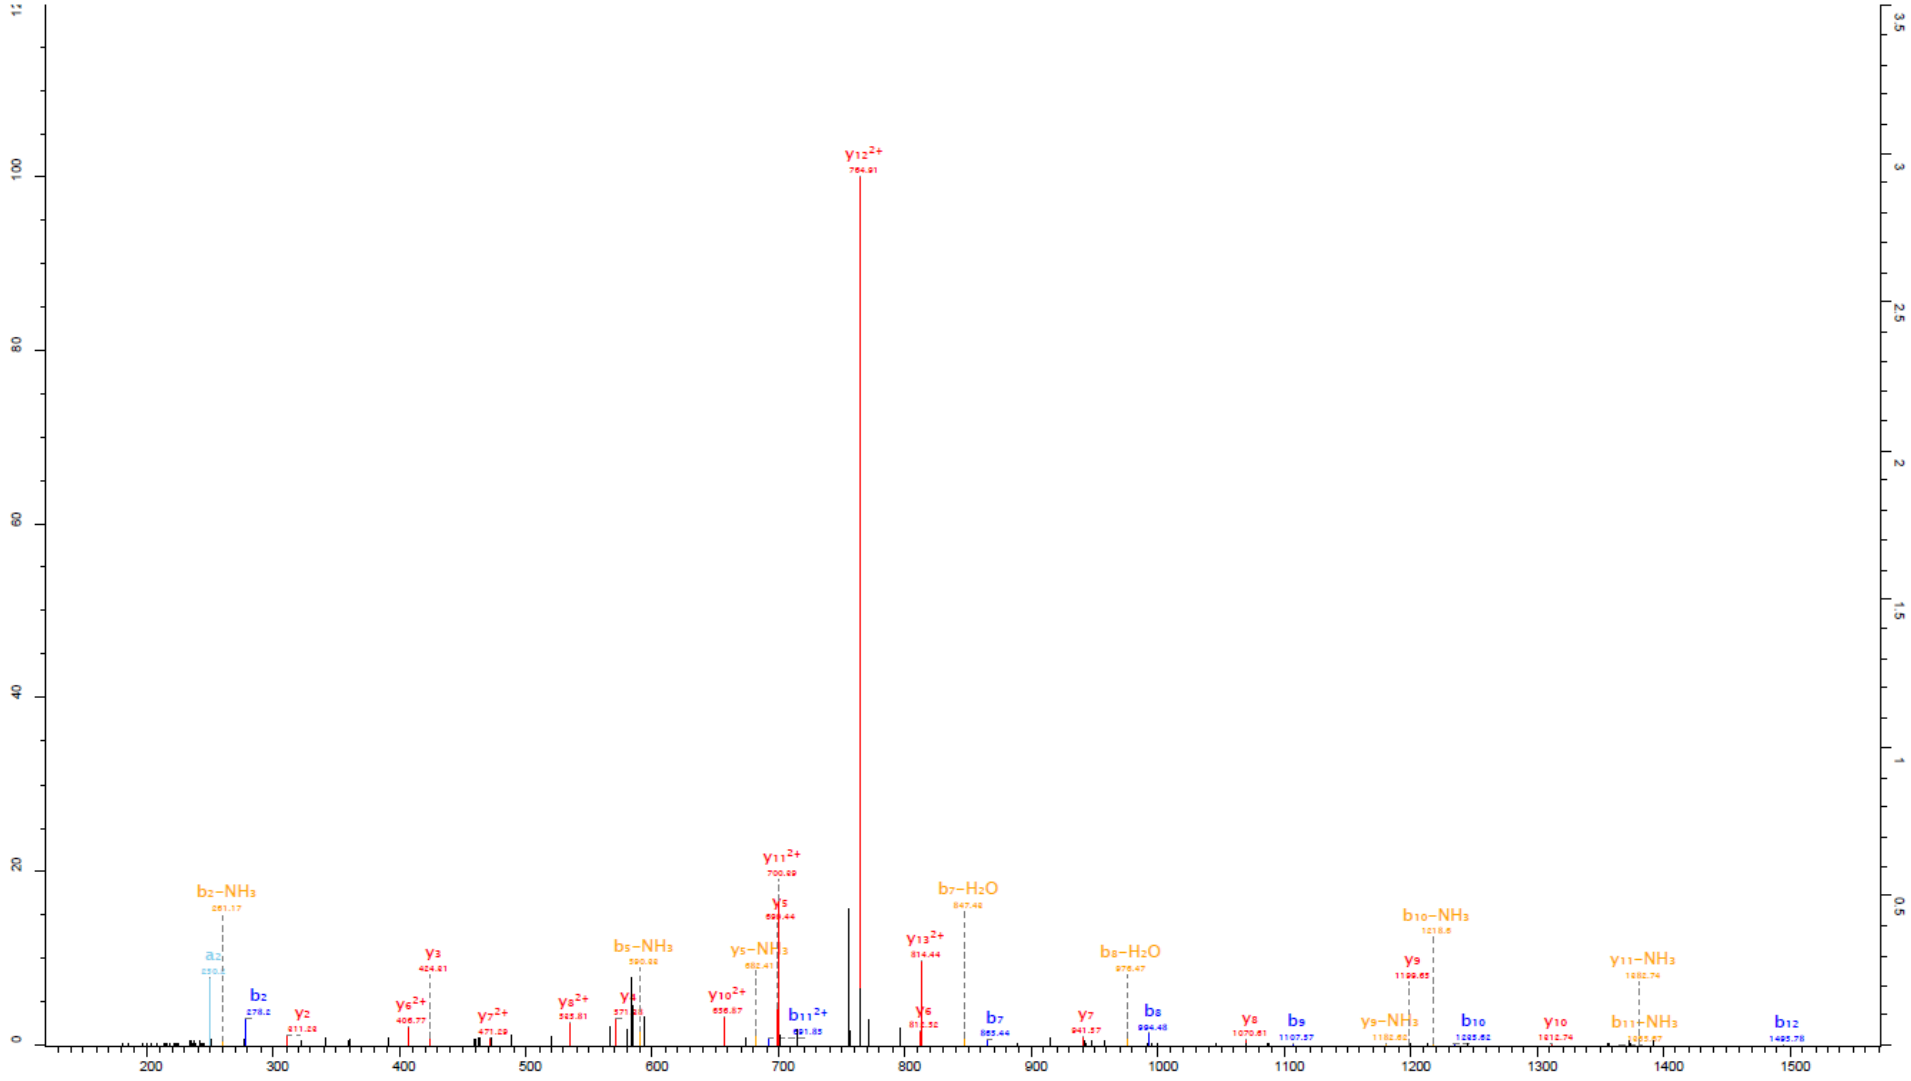

ac K V E S L E E E I Q F L R K -  
 b2 b7 bs b9 b10 b11^2+ b12

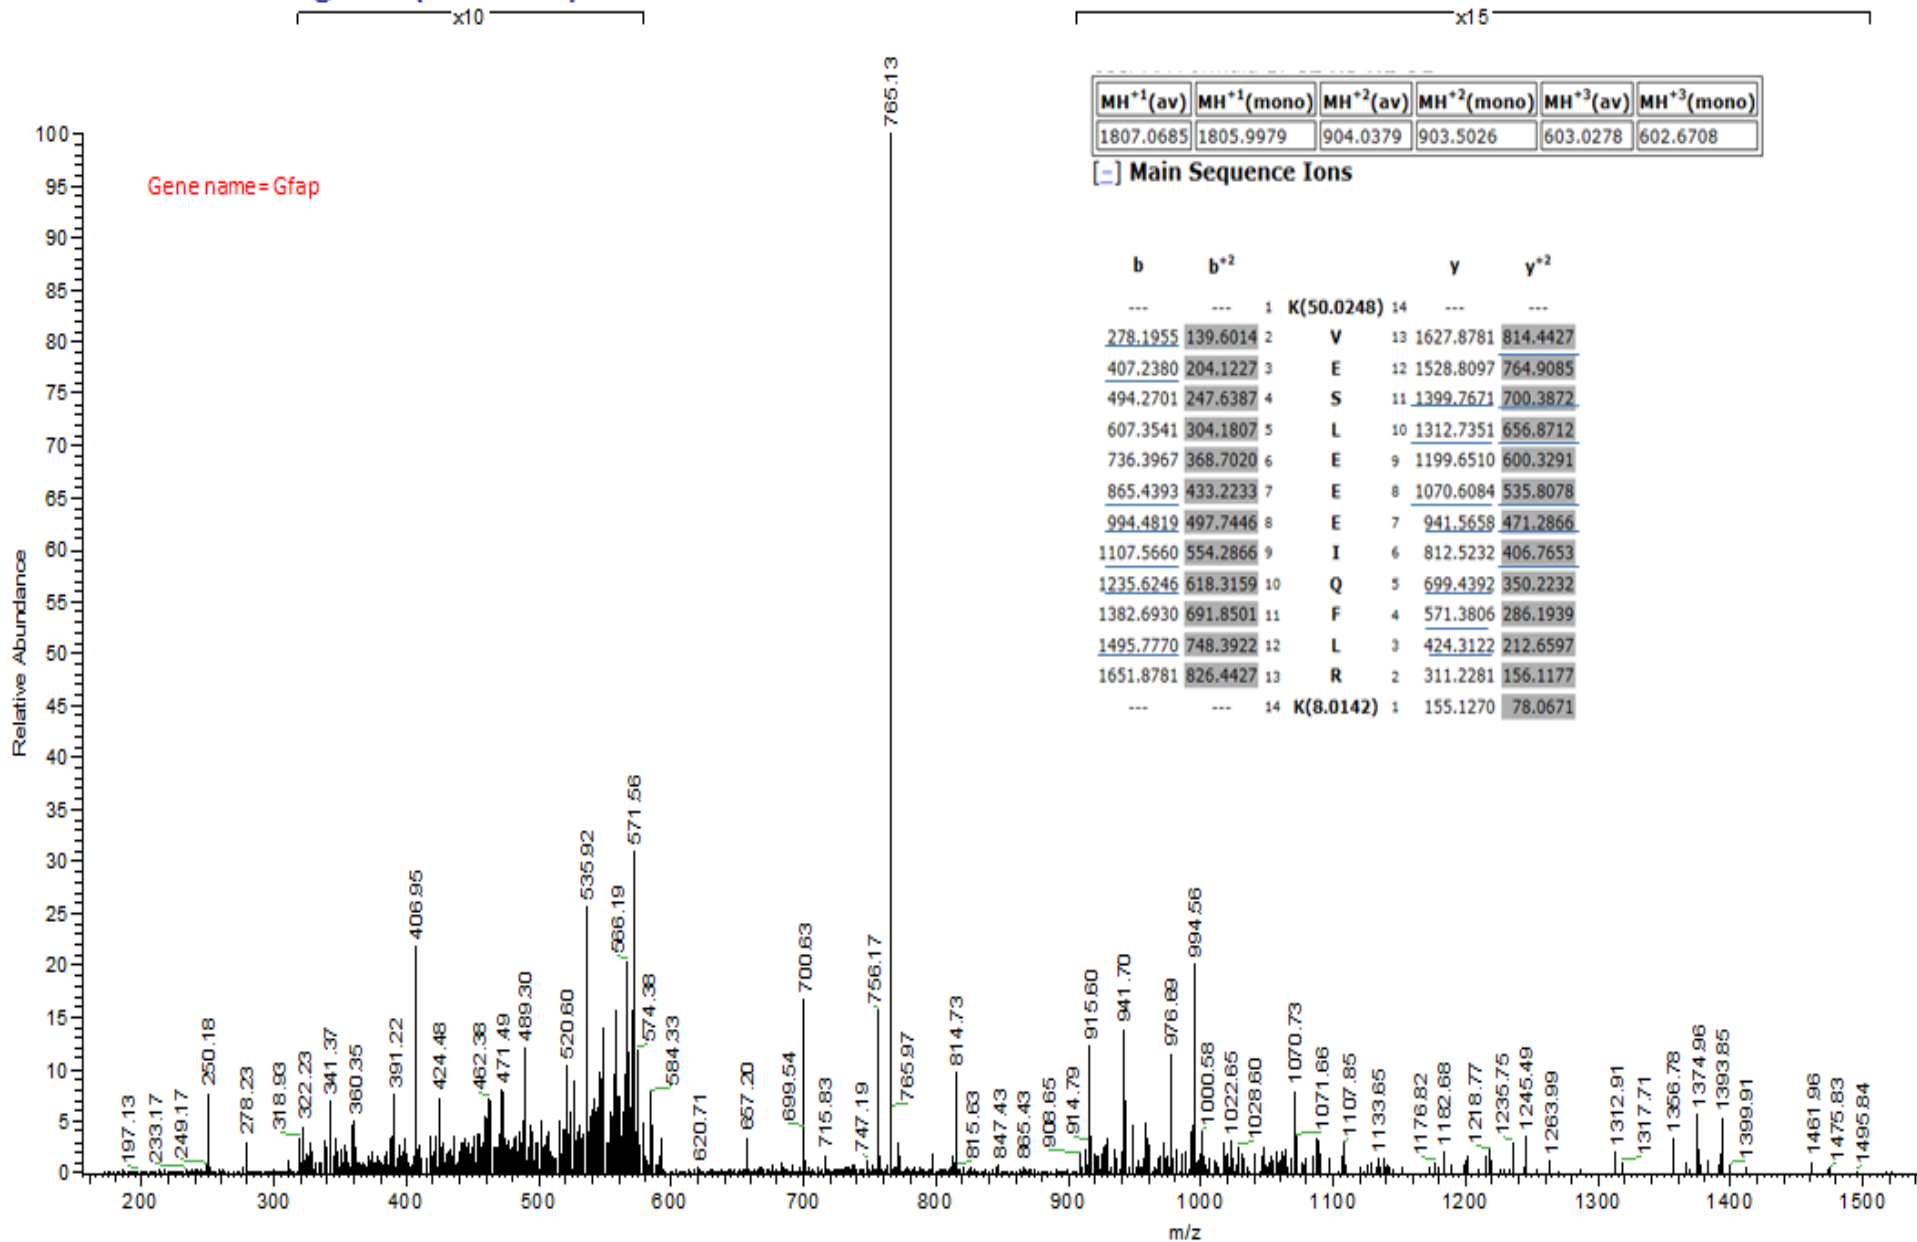

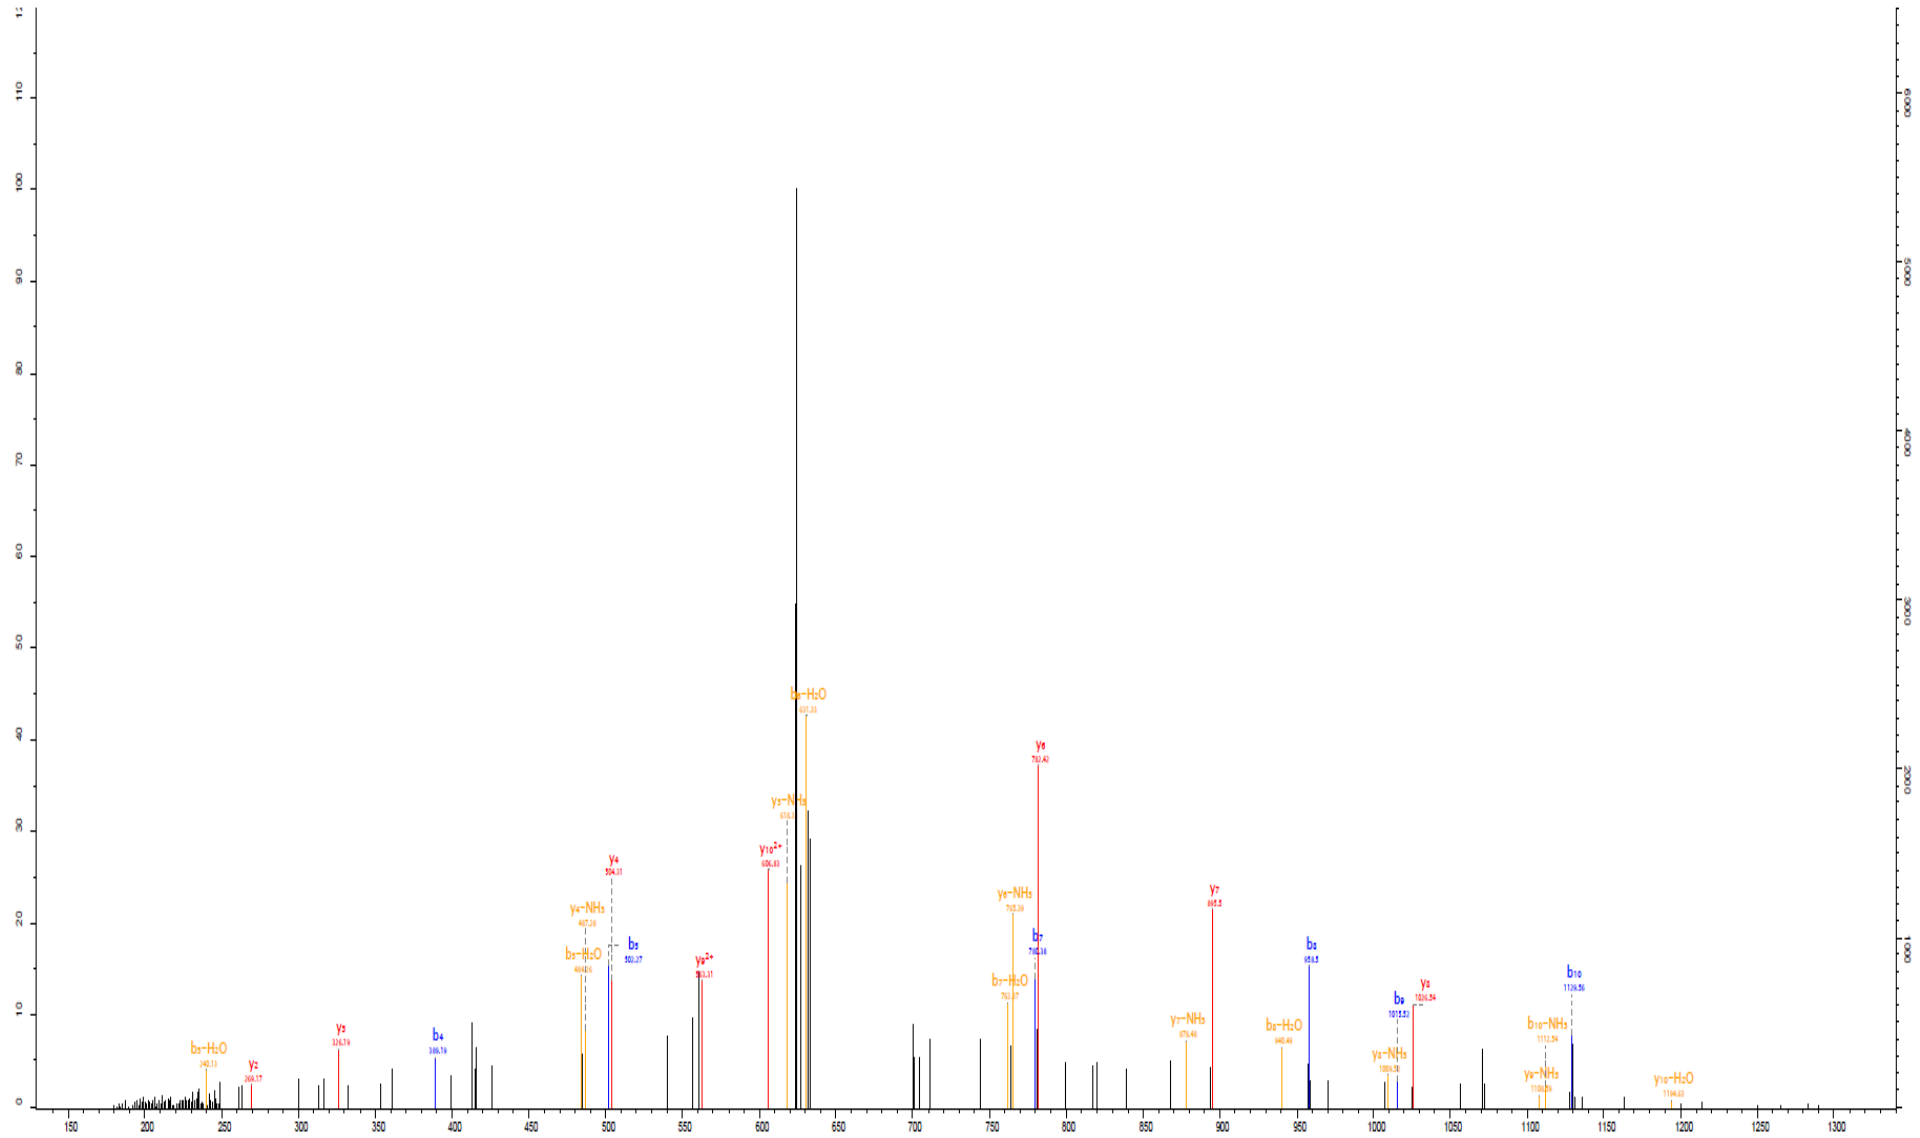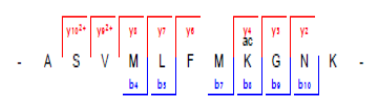

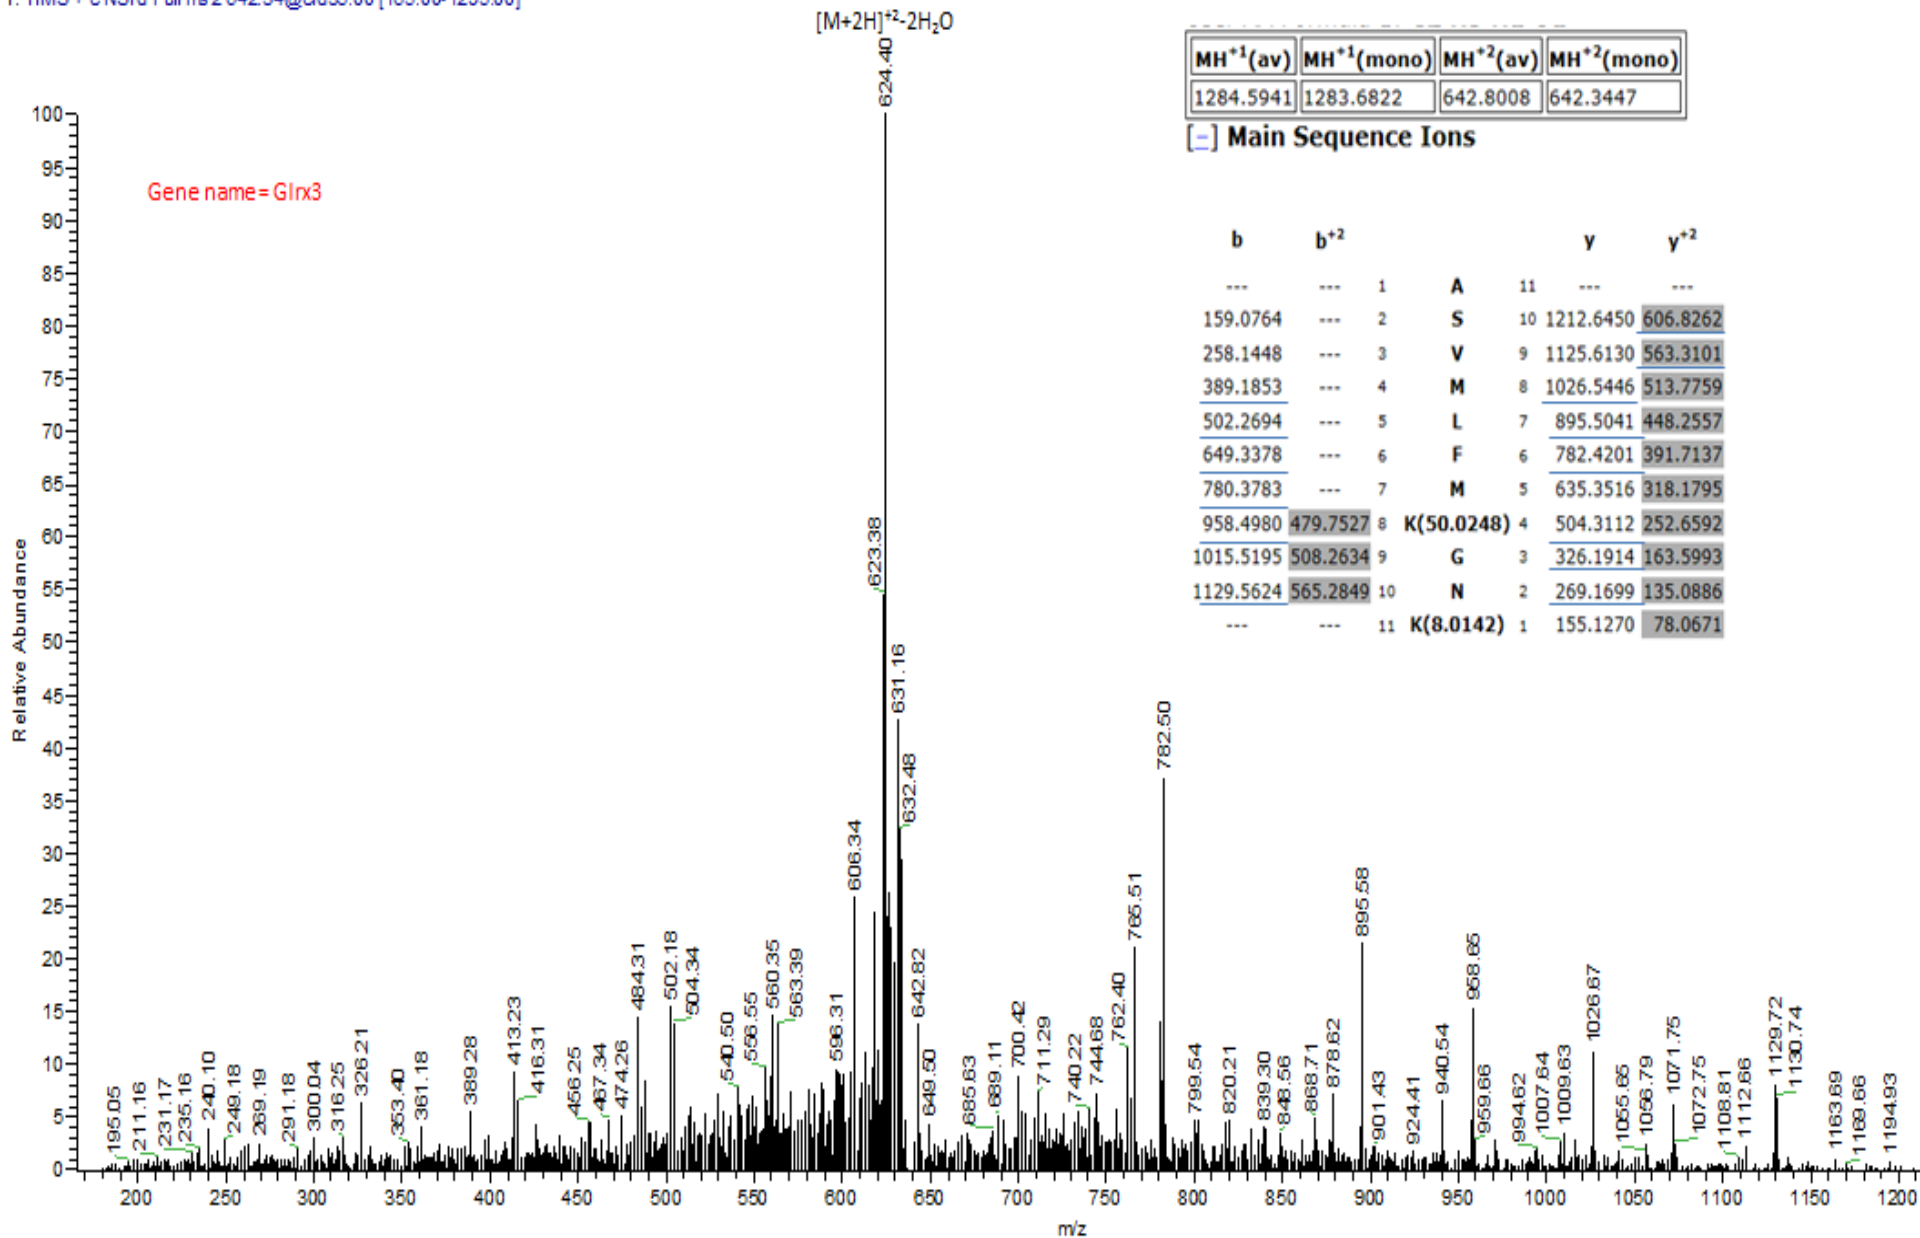

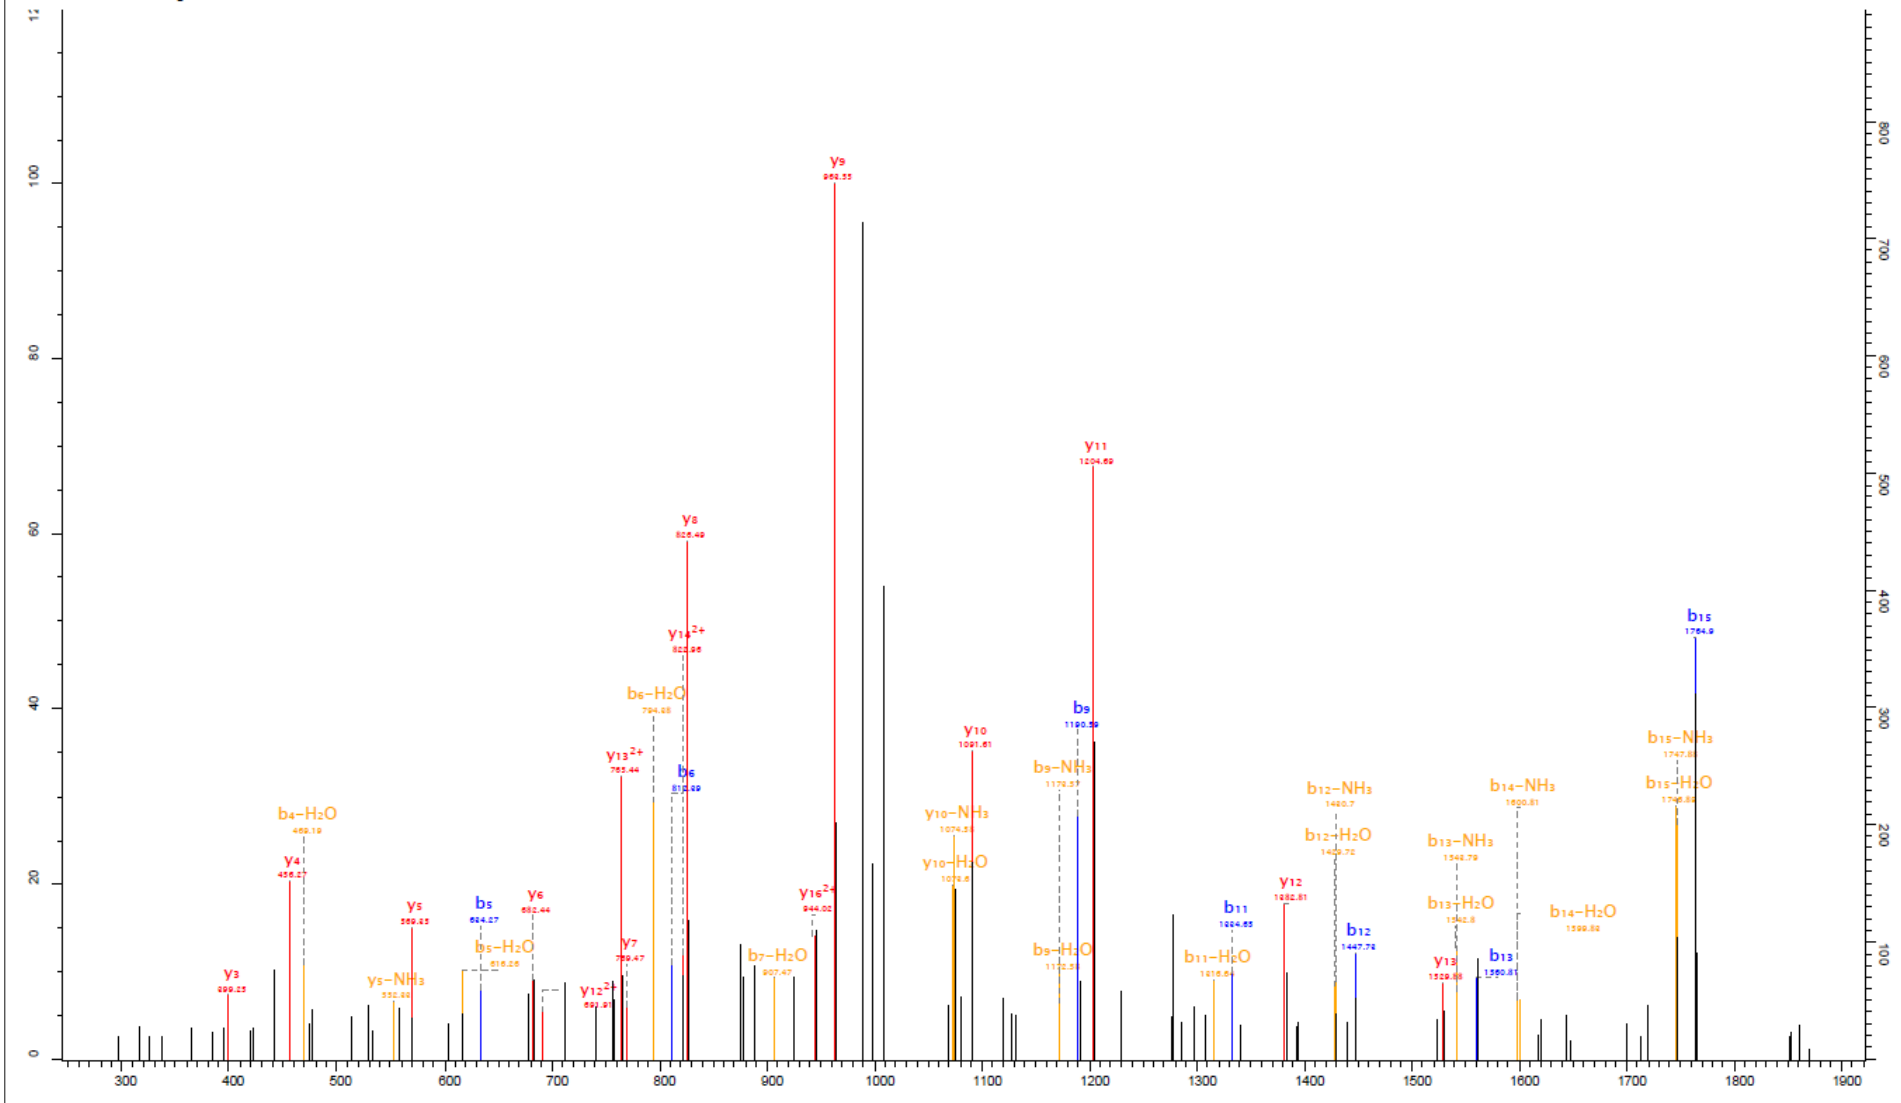

- E L E D F K L Q H G S I L G F P K -

Y14<sup>2+</sup>
Y13
Y12 ac
Y11
Y10
Y9
Y8
Y7
Y6
Y5
Y4
Y3

b5
b6
b9
b11
b12
b13
b15

| MH <sup>1</sup> (av) | MH <sup>1</sup> (mono) | MH <sup>2</sup> (av) | MH <sup>2</sup> (mono) | MH <sup>3</sup> (av) | MH <sup>3</sup> (mono) |
|----------------------|------------------------|----------------------|------------------------|----------------------|------------------------|
| 2017.3054            | 2016.0772              | 1009.1564            | 1008.5422              | 673.1068             | 672.6972               |

[-] Main Sequence Ions

| b         | b <sup>+</sup> | y          | y <sup>+</sup>               |
|-----------|----------------|------------|------------------------------|
| ---       | ---            | 1          | ---                          |
| 243.1339  | ---            | 2          | L 16 1887.0346 944.0209      |
| 372.1765  | ---            | 3          | E 15 1773.9505 887.4789      |
| 487.2035  | ---            | 4          | D 14 1644.9079 822.9576      |
| 634.2719  | ---            | 5          | F 13 1529.8810 765.4441      |
| 812.3916  | 406.6995       | K(50.0248) | 12 1382.8126 691.9099        |
| 925.4757  | 463.2415       | 7          | L 11 1204.6928 602.8500      |
| 1053.5343 | 527.2708       | 8          | Q 10 1091.6088 546.3080      |
| 1190.5932 | 595.8002       | 9          | H 9 963.5502 482.2787        |
| 1247.6147 | 624.3110       | 10         | G 8 826.4913 413.7493        |
| 1334.6467 | 667.8270       | 11         | S 7 769.4698 385.2385        |
| 1447.7308 | 724.3690       | 12         | I 6 682.4378 341.7225        |
| 1560.8148 | 780.9110       | 13         | L 5 569.3537 285.1805        |
| 1617.8363 | 809.4218       | 14         | G 4 456.2696 228.6385        |
| 1764.9047 | 882.9560       | 15         | F 3 399.2482 200.1277        |
| 1861.9575 | 931.4824       | 16         | P 2 252.1798 126.5935        |
| ---       | ---            | 17         | K(8.0142) 1 155.1270 78.0671 |

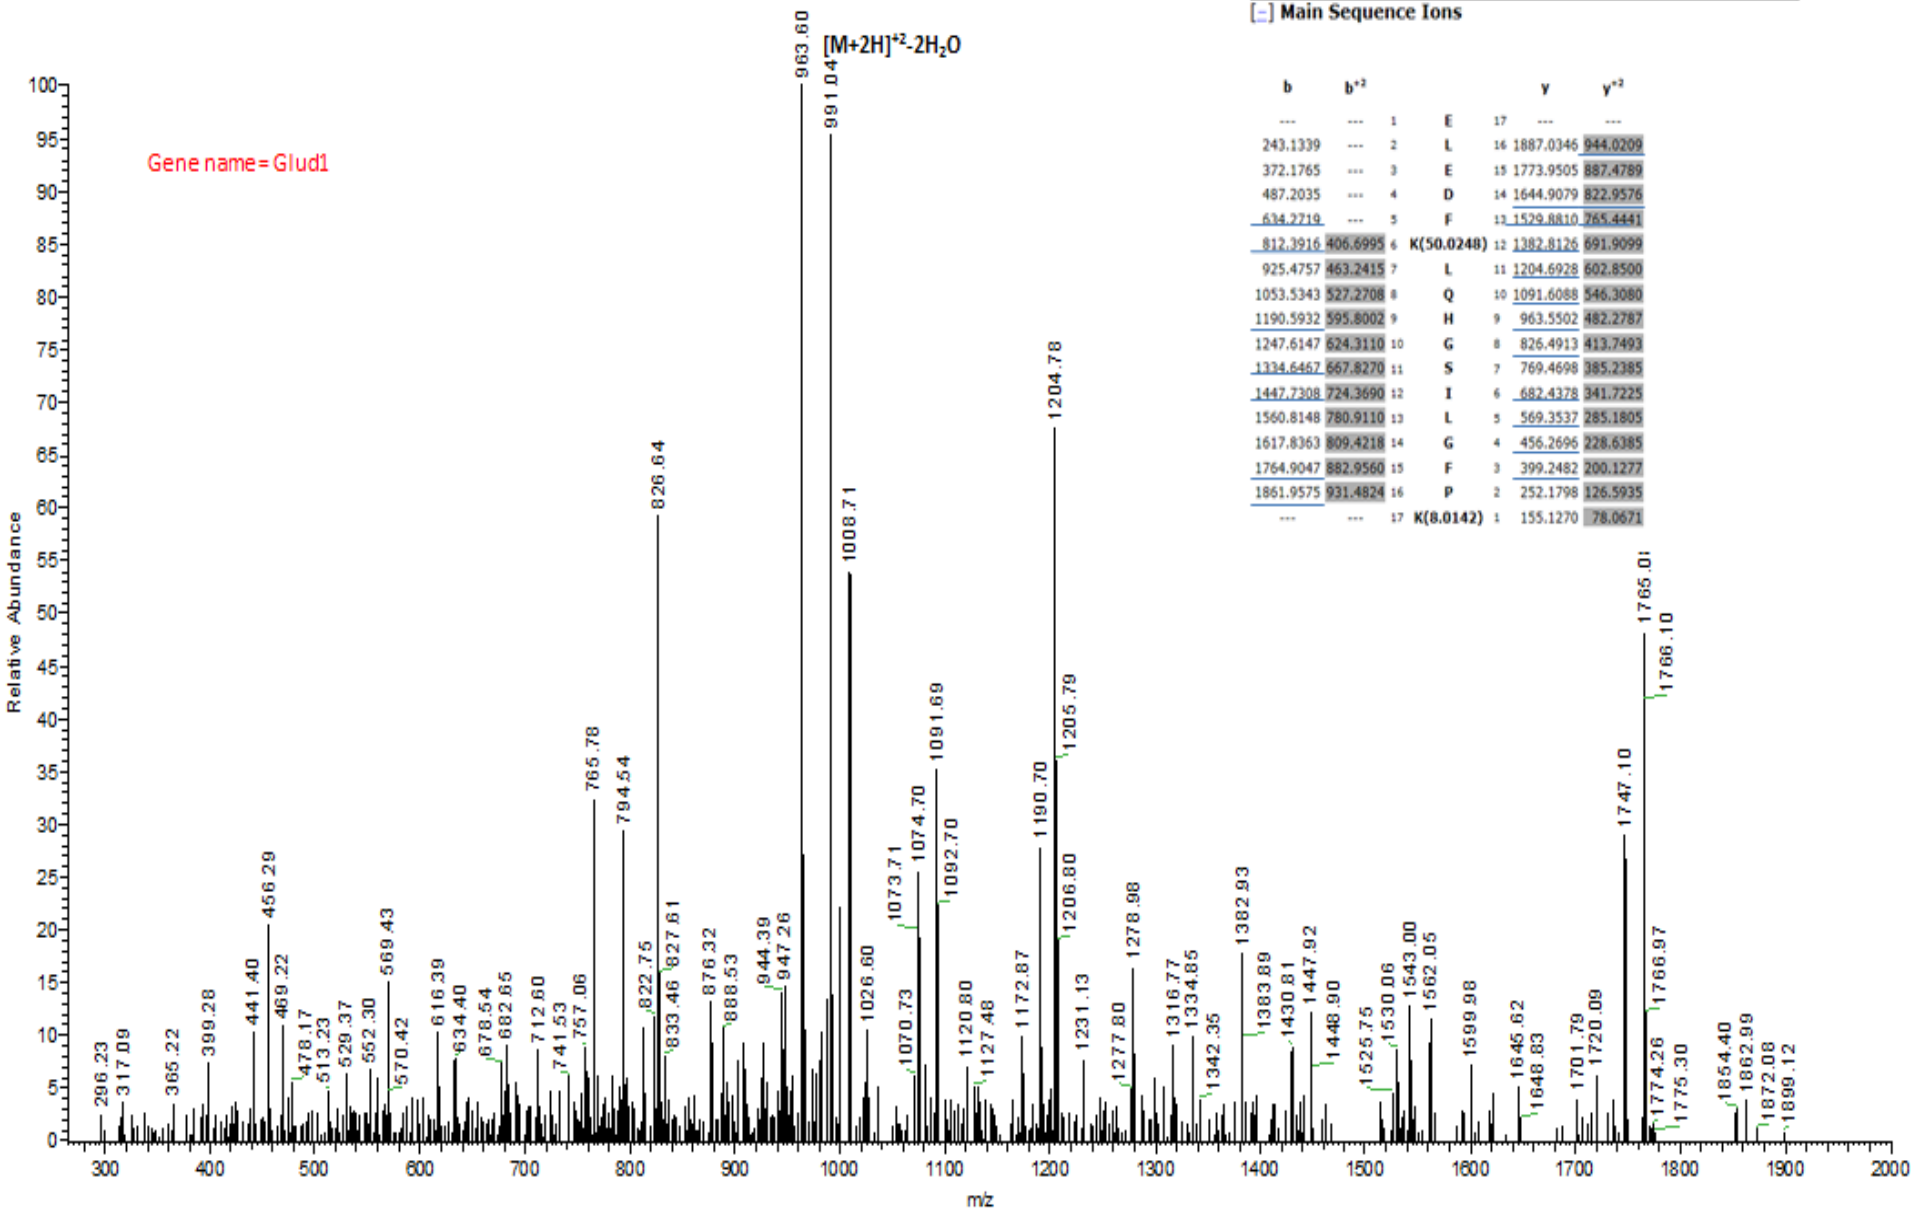

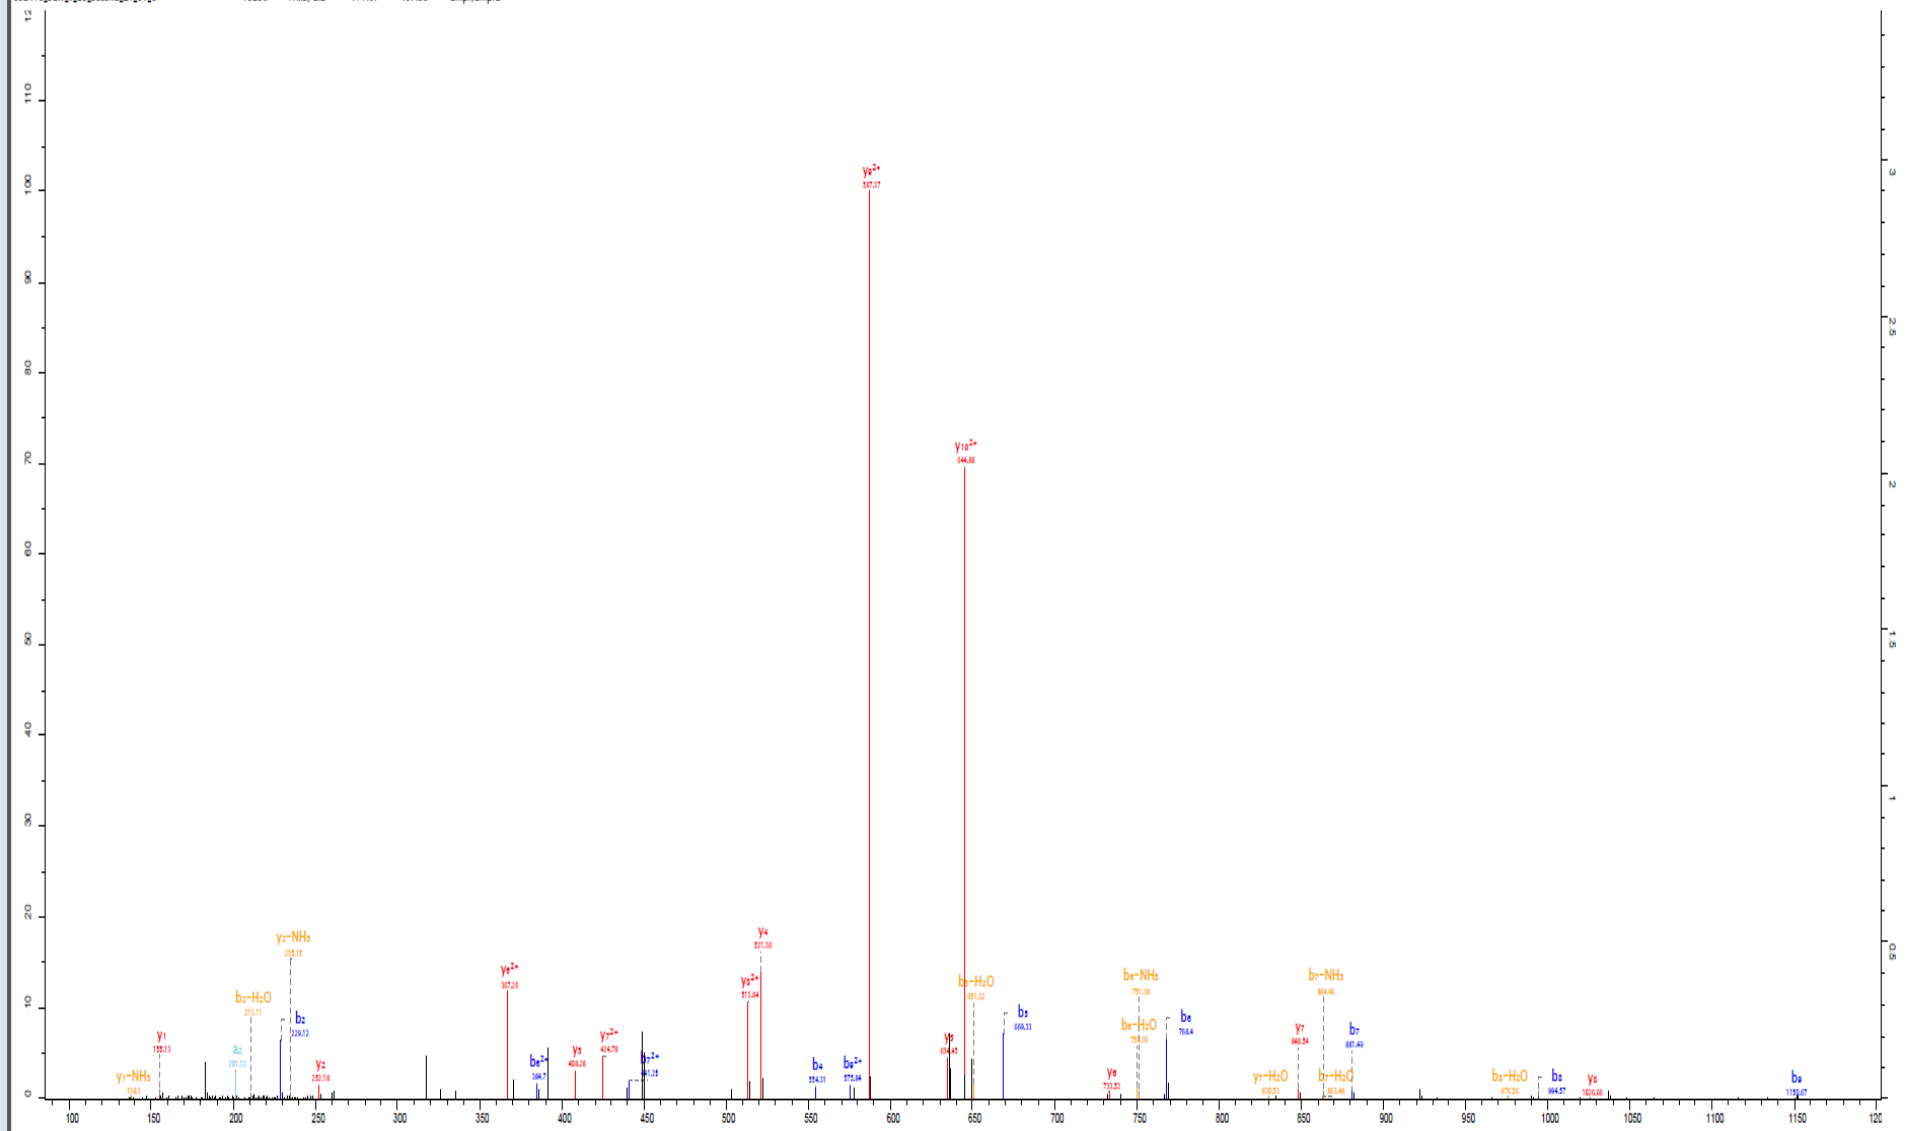

- L D F K D V L L R P K -

Fragmentation labels below the sequence:

- L: y2+, y2+
- D: y2+
- F: y2+
- K: y2+
- D: y2+
- V: y2+
- L: y2+
- L: y2+
- R: y2+
- P: y2+
- K: y2+

x10

Gene names= Gmpr; Gmpr2

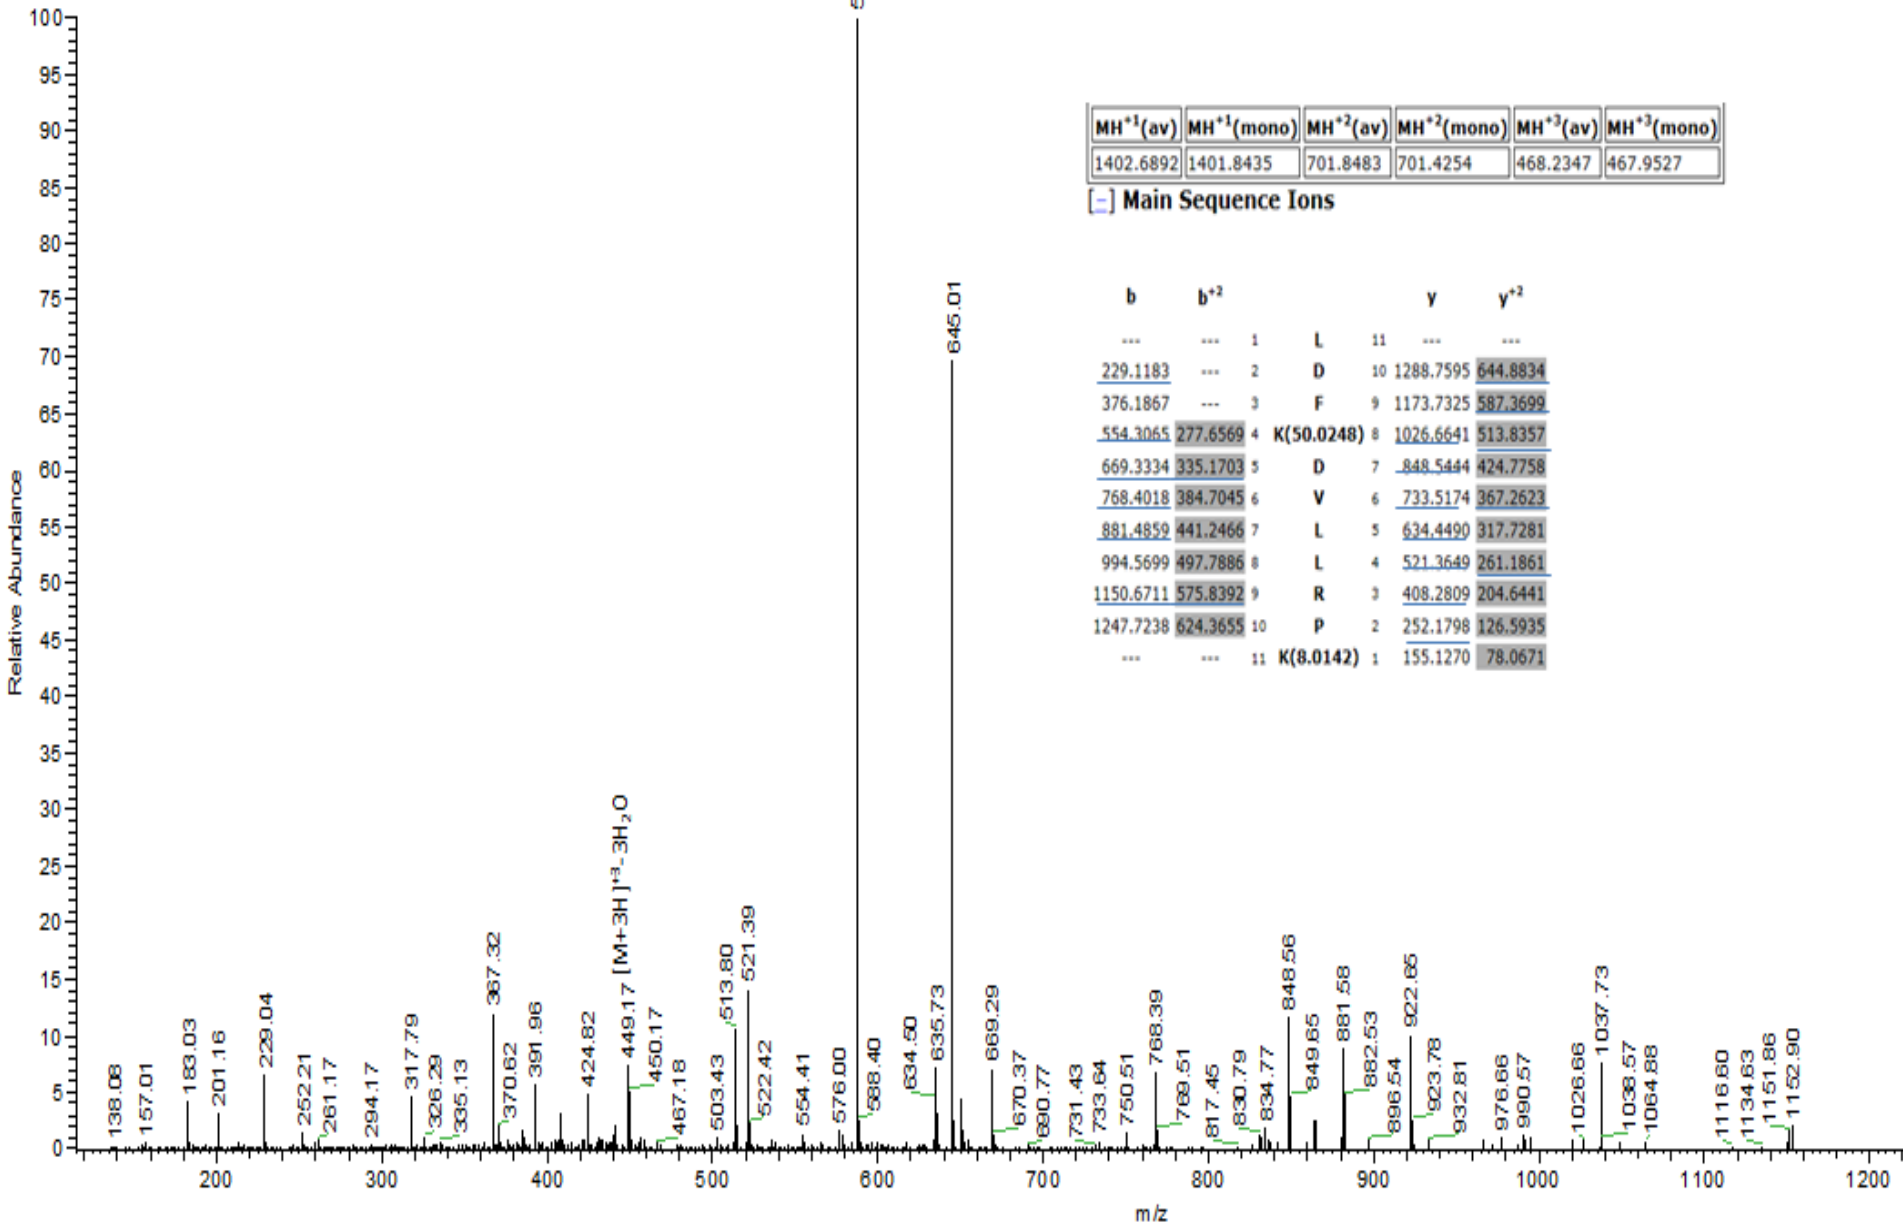

| MH <sup>+1</sup> (av) | MH <sup>+1</sup> (mono) | MH <sup>+2</sup> (av) | MH <sup>+2</sup> (mono) | MH <sup>+3</sup> (av) | MH <sup>+3</sup> (mono) |
|-----------------------|-------------------------|-----------------------|-------------------------|-----------------------|-------------------------|
| 1402.6892             | 1401.8435               | 701.8483              | 701.4254                | 468.2347              | 467.9527                |

**[-] Main Sequence Ions**

| b               | b <sup>+2</sup> |    | y                 | y <sup>+2</sup> |                                  |
|-----------------|-----------------|----|-------------------|-----------------|----------------------------------|
| ...             | ...             | 1  | L                 | 11              | ...                              |
| 229.1183        | ...             | 2  | D                 | 10              | 1288.7595 <b>644.8834</b>        |
| 376.1867        | ...             | 3  | F                 | 9               | 1173.7325 <b>587.3699</b>        |
| <b>554.3065</b> | <b>277.6569</b> | 4  | <b>K(50.0248)</b> | 8               | <b>1026.6641</b> <b>513.8357</b> |
| 669.3334        | 335.1703        | 5  | D                 | 7               | .848.5444 <b>424.7758</b>        |
| 768.4018        | 384.7045        | 6  | V                 | 6               | 733.5174 <b>367.2623</b>         |
| 881.4859        | 441.2466        | 7  | L                 | 5               | 634.4490 <b>317.7281</b>         |
| 994.5699        | 497.7886        | 8  | L                 | 4               | 521.3649 <b>261.1861</b>         |
| 1150.6711       | 575.8392        | 9  | R                 | 3               | 408.2809 <b>204.6441</b>         |
| 1247.7238       | 624.3655        | 10 | P                 | 2               | 252.1798 <b>126.5935</b>         |
| ...             | ...             | 11 | <b>K(8.0142)</b>  | 1               | 155.1270 <b>78.0671</b>          |



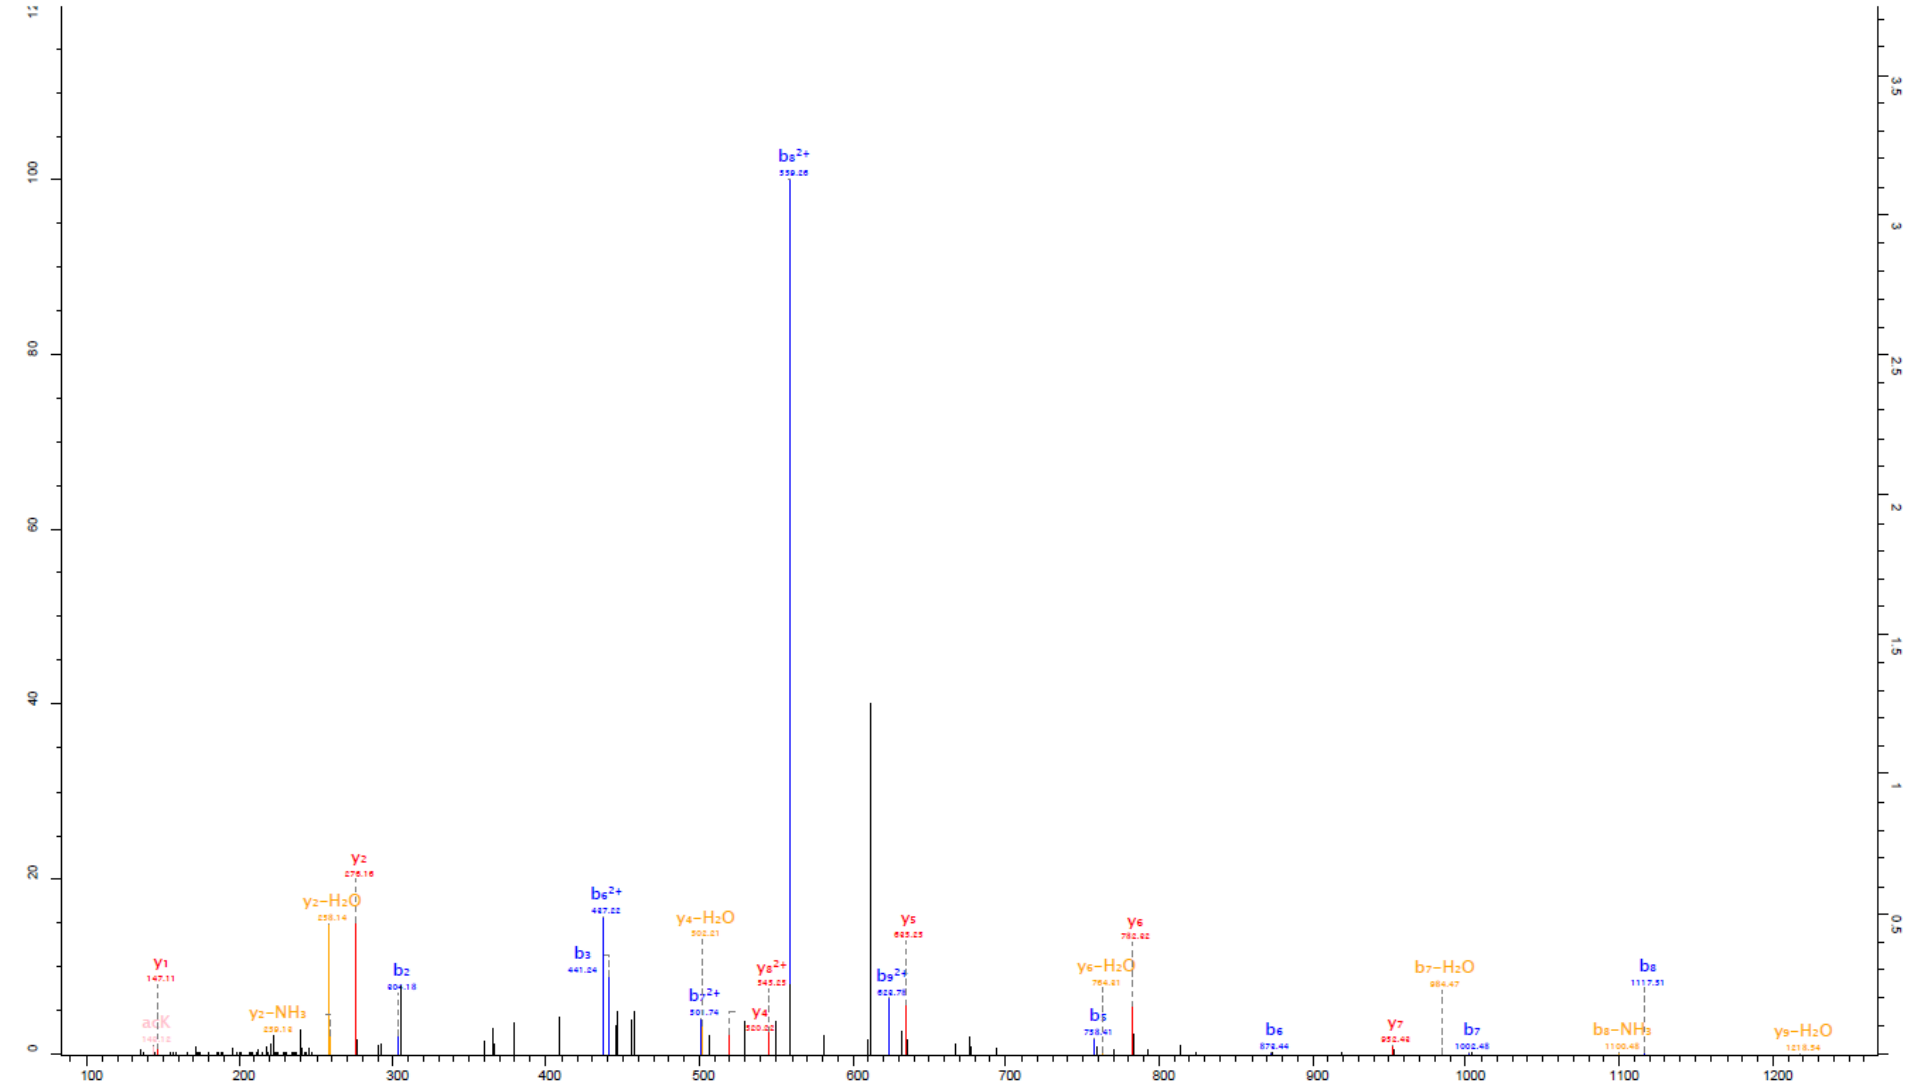

- R F H K F D E D E K -

b<sub>2</sub>
b<sub>3</sub>
y<sub>2</sub><sup>2+</sup>
y<sub>7</sub> ac
K
F
D
E
D
E
b<sub>6</sub><sup>2+</sup>
K

Gene name= Gpd2

| MH <sup>+1</sup> (av) | MH <sup>+1</sup> (mono) | MH <sup>+2</sup> (av) | MH <sup>+2</sup> (mono) | MH <sup>+3</sup> (av) | MH <sup>+3</sup> (mono) |
|-----------------------|-------------------------|-----------------------|-------------------------|-----------------------|-------------------------|
| 1393.5077             | 1392.6543               | 697.2576              | 696.8308                | 465.1742              | 464.8896                |

[-] Main Sequence Ions

| b         | b <sup>+</sup> |    |           | y  | y <sup>+</sup> |
|-----------|----------------|----|-----------|----|----------------|
| ...       | ...            | 1  | R         | 10 | ...            |
| 304.1768  | 152.5920       | 2  | F         | 9  | 1236.5531      |
| 441.2357  | 221.1215       | 3  | H         | 8  | 1089.4847      |
| 611.3412  | 306.1743       | 4  | K(Acetyl) | 7  | 952.4258       |
| 758.4097  | 379.7085       | 5  | F         | 6  | 782.3203       |
| 873.4366  | 437.2219       | 6  | D         | 5  | 635.2519       |
| 1002.4792 | 501.7432       | 7  | E         | 4  | 520.2249       |
| 1117.5061 | 559.2567       | 8  | D         | 3  | 391.1823       |
| 1246.5487 | 623.7780       | 9  | E         | 2  | 276.1554       |
| ...       | ...            | 10 | K         | 1  | 147.1128       |

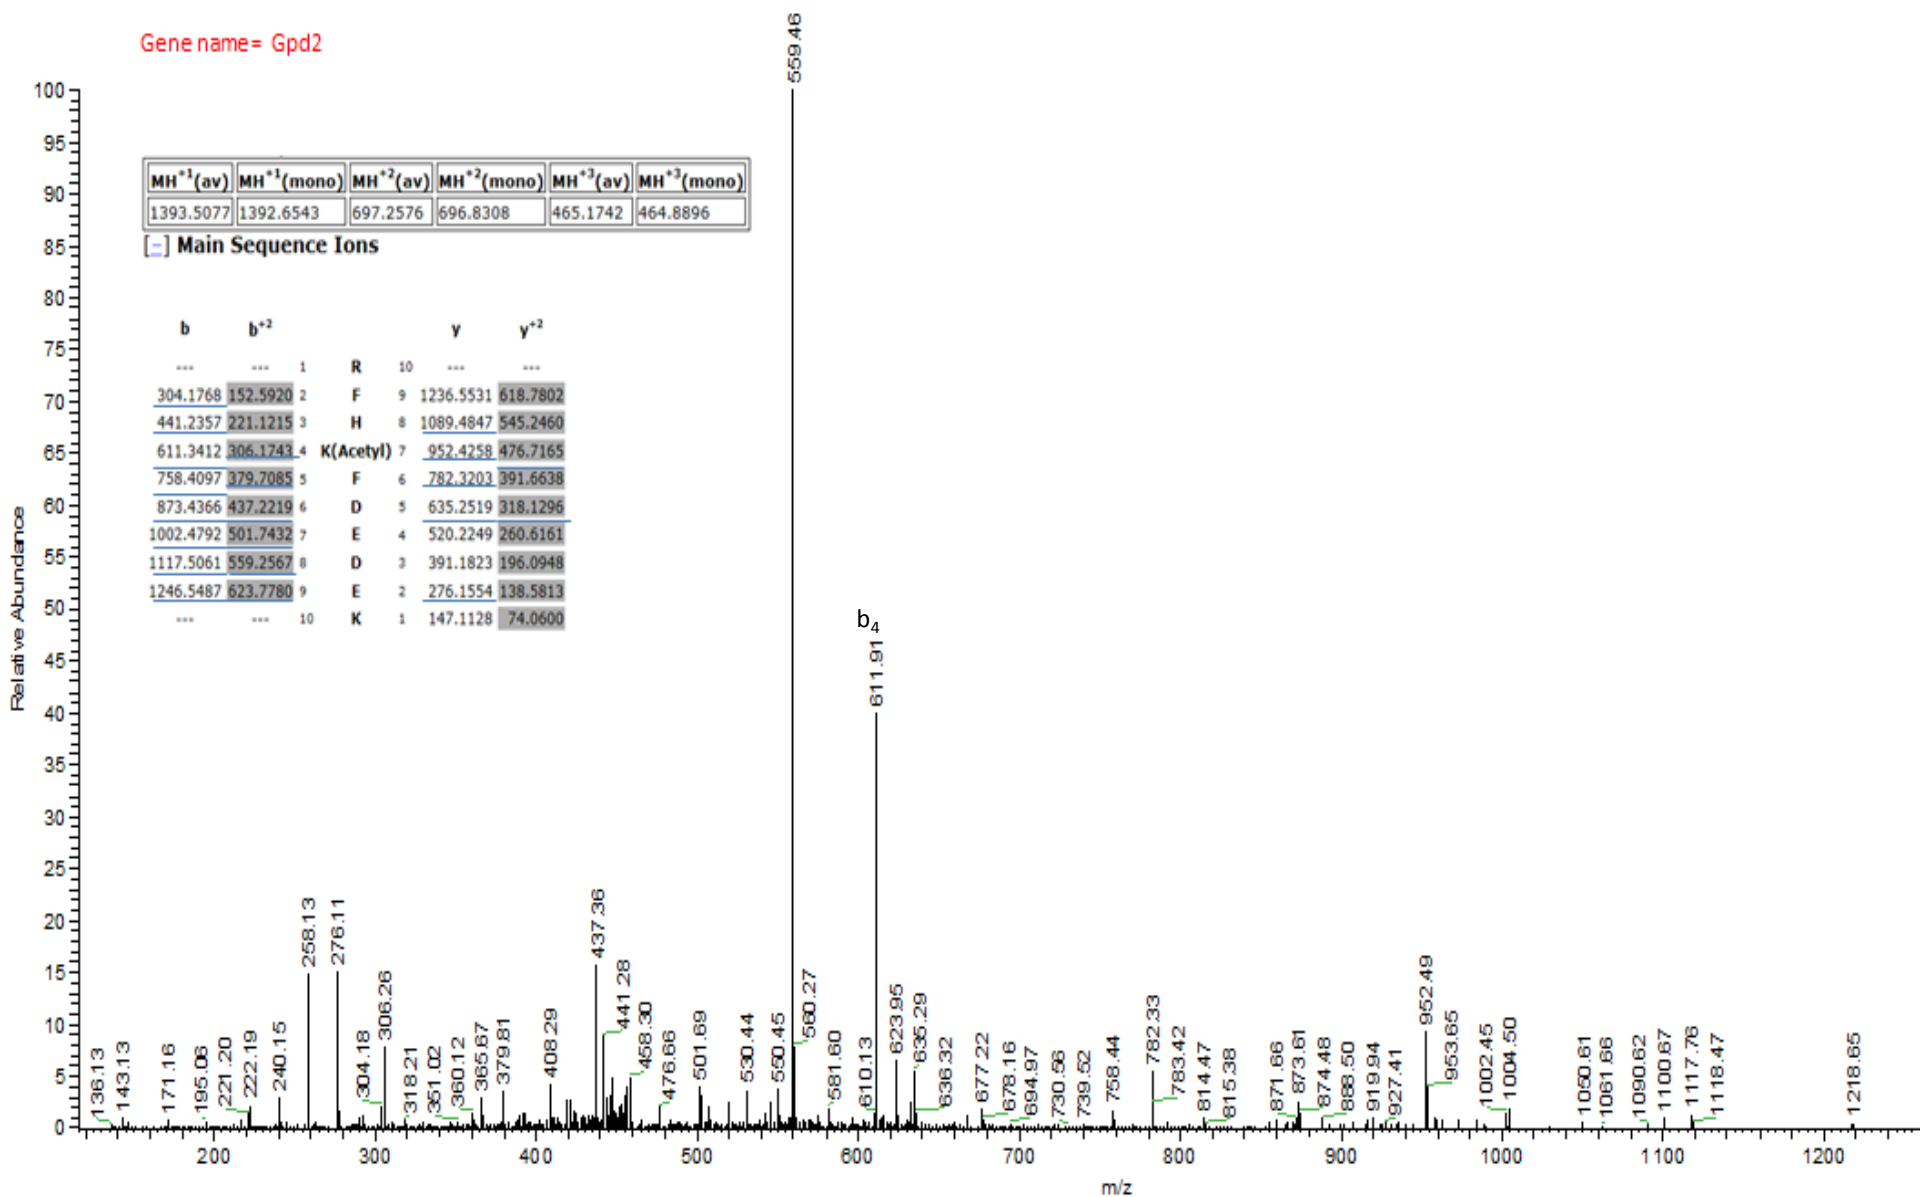

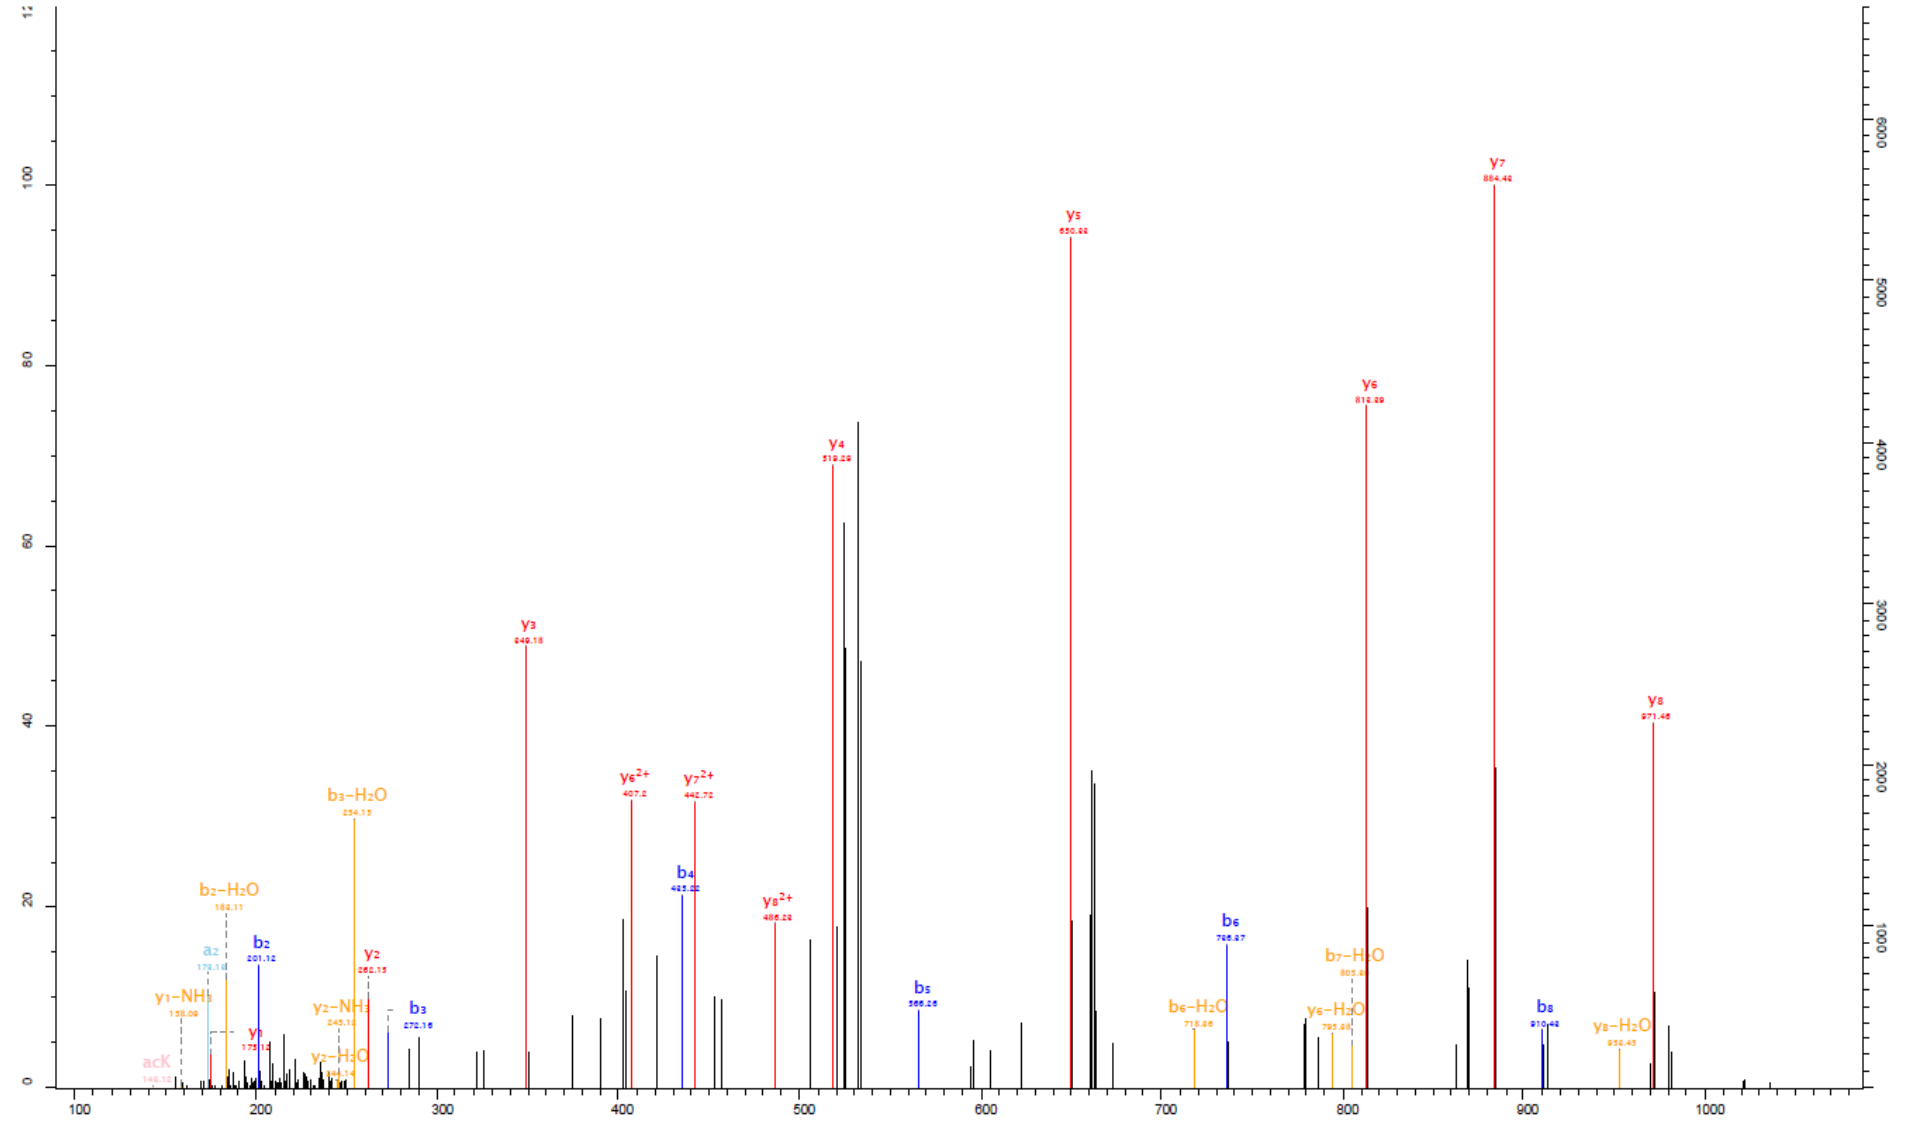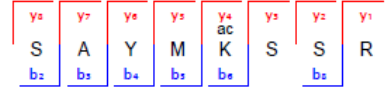

Gene name= *Gstm1*

| MH <sup>+</sup> (av) | MH <sup>+</sup> (mono) | MH <sup>2+</sup> (av) | MH <sup>2+</sup> (mono) |
|----------------------|------------------------|-----------------------|-------------------------|
| 1085.2749            | 1084.5456              | 543.1412              | 542.7764                |

(-) Main Sequence Ions

| b        | b <sup>+</sup> | y | y <sup>+</sup> |
|----------|----------------|---|----------------|
| ---      | ---            | 1 | I              |
| 201.1234 | ---            | 2 | S              |
| 272.1605 | ---            | 3 | A              |
| 435.2238 | ---            | 4 | Y              |
| 566.2643 | ---            | 5 | M              |
| 736.3698 | 368.6885       | 6 | K(Acetyl)      |
| 823.4019 | 412.2046       | 7 | S              |
| 910.4339 | 455.7206       | 8 | S              |
| ---      | ---            | 9 | R              |

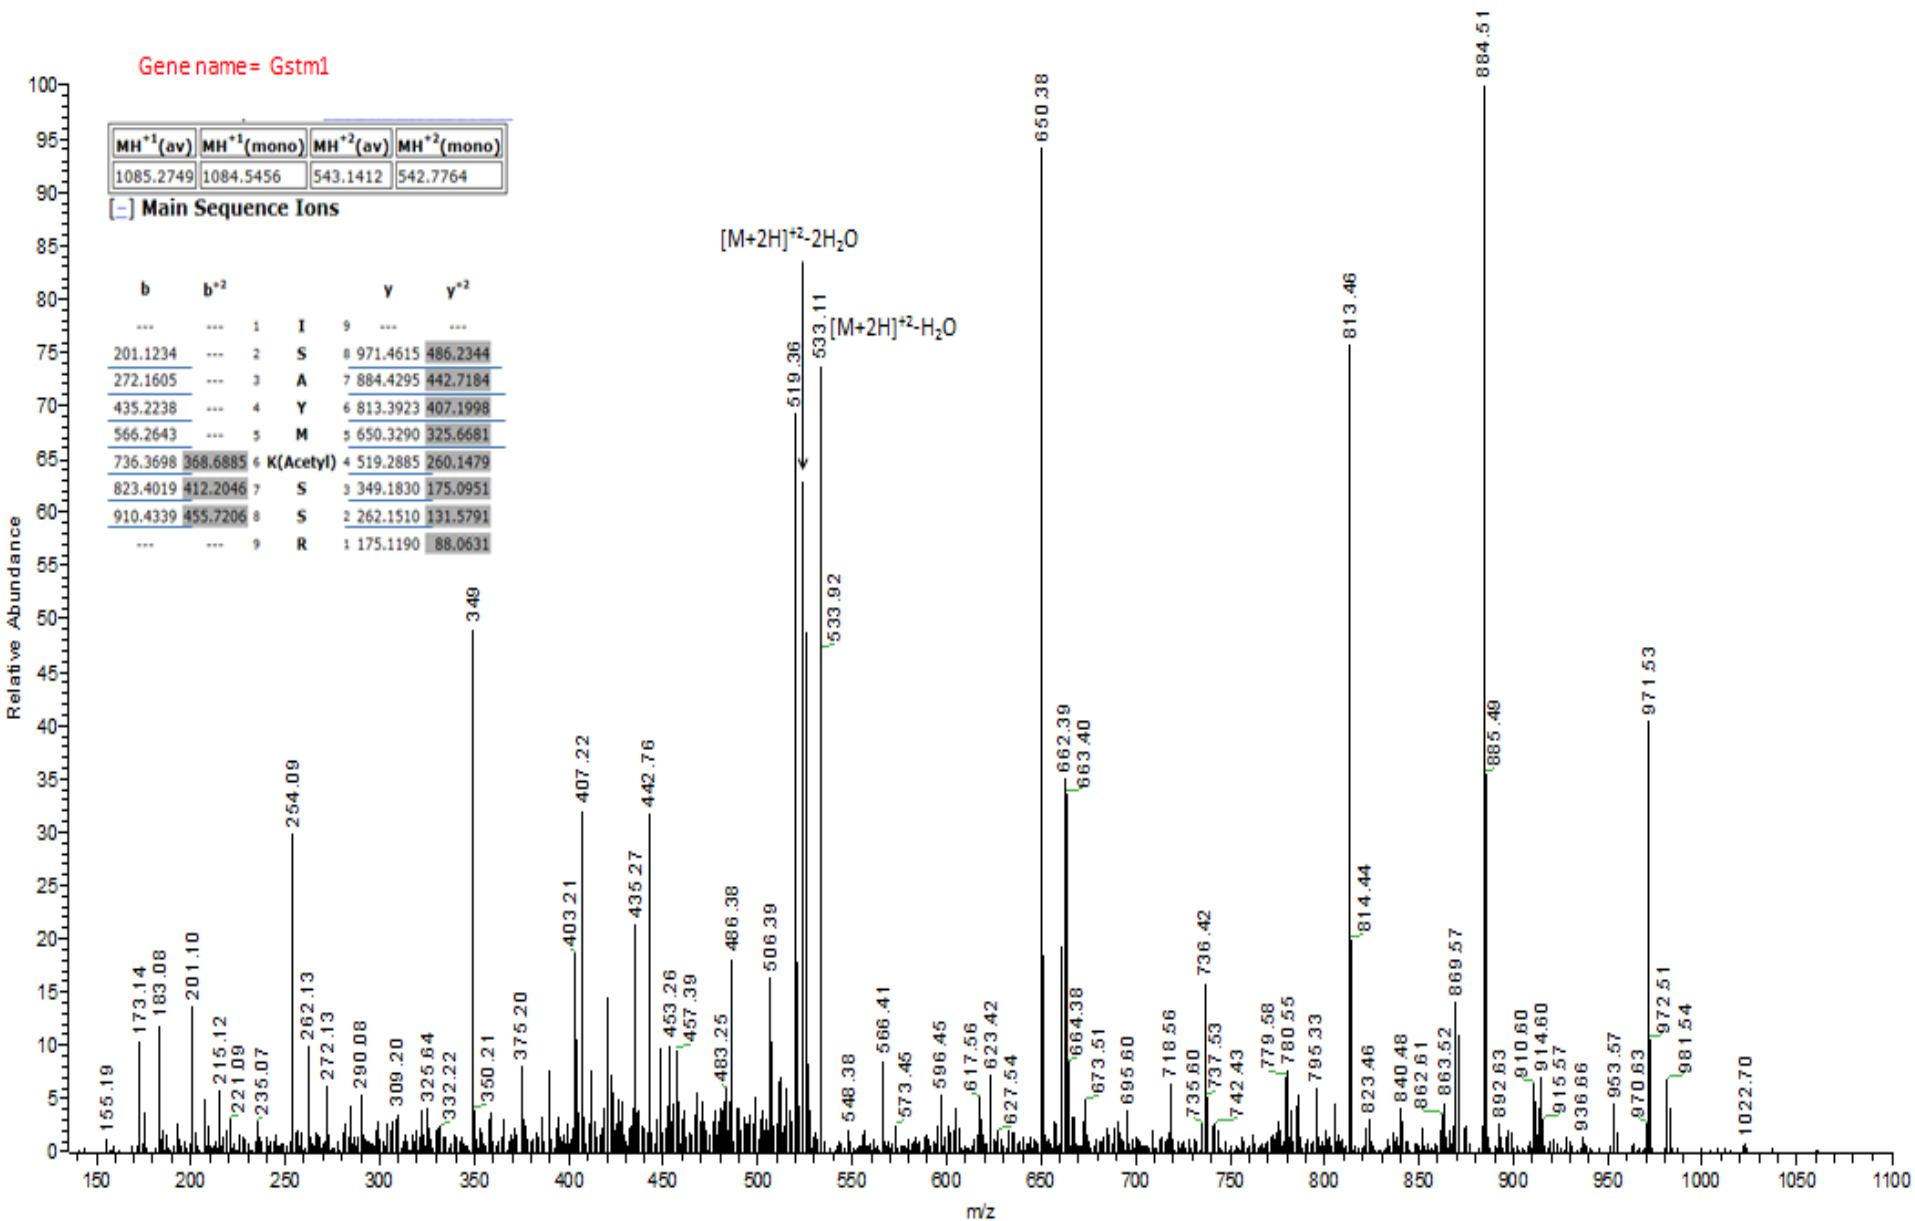

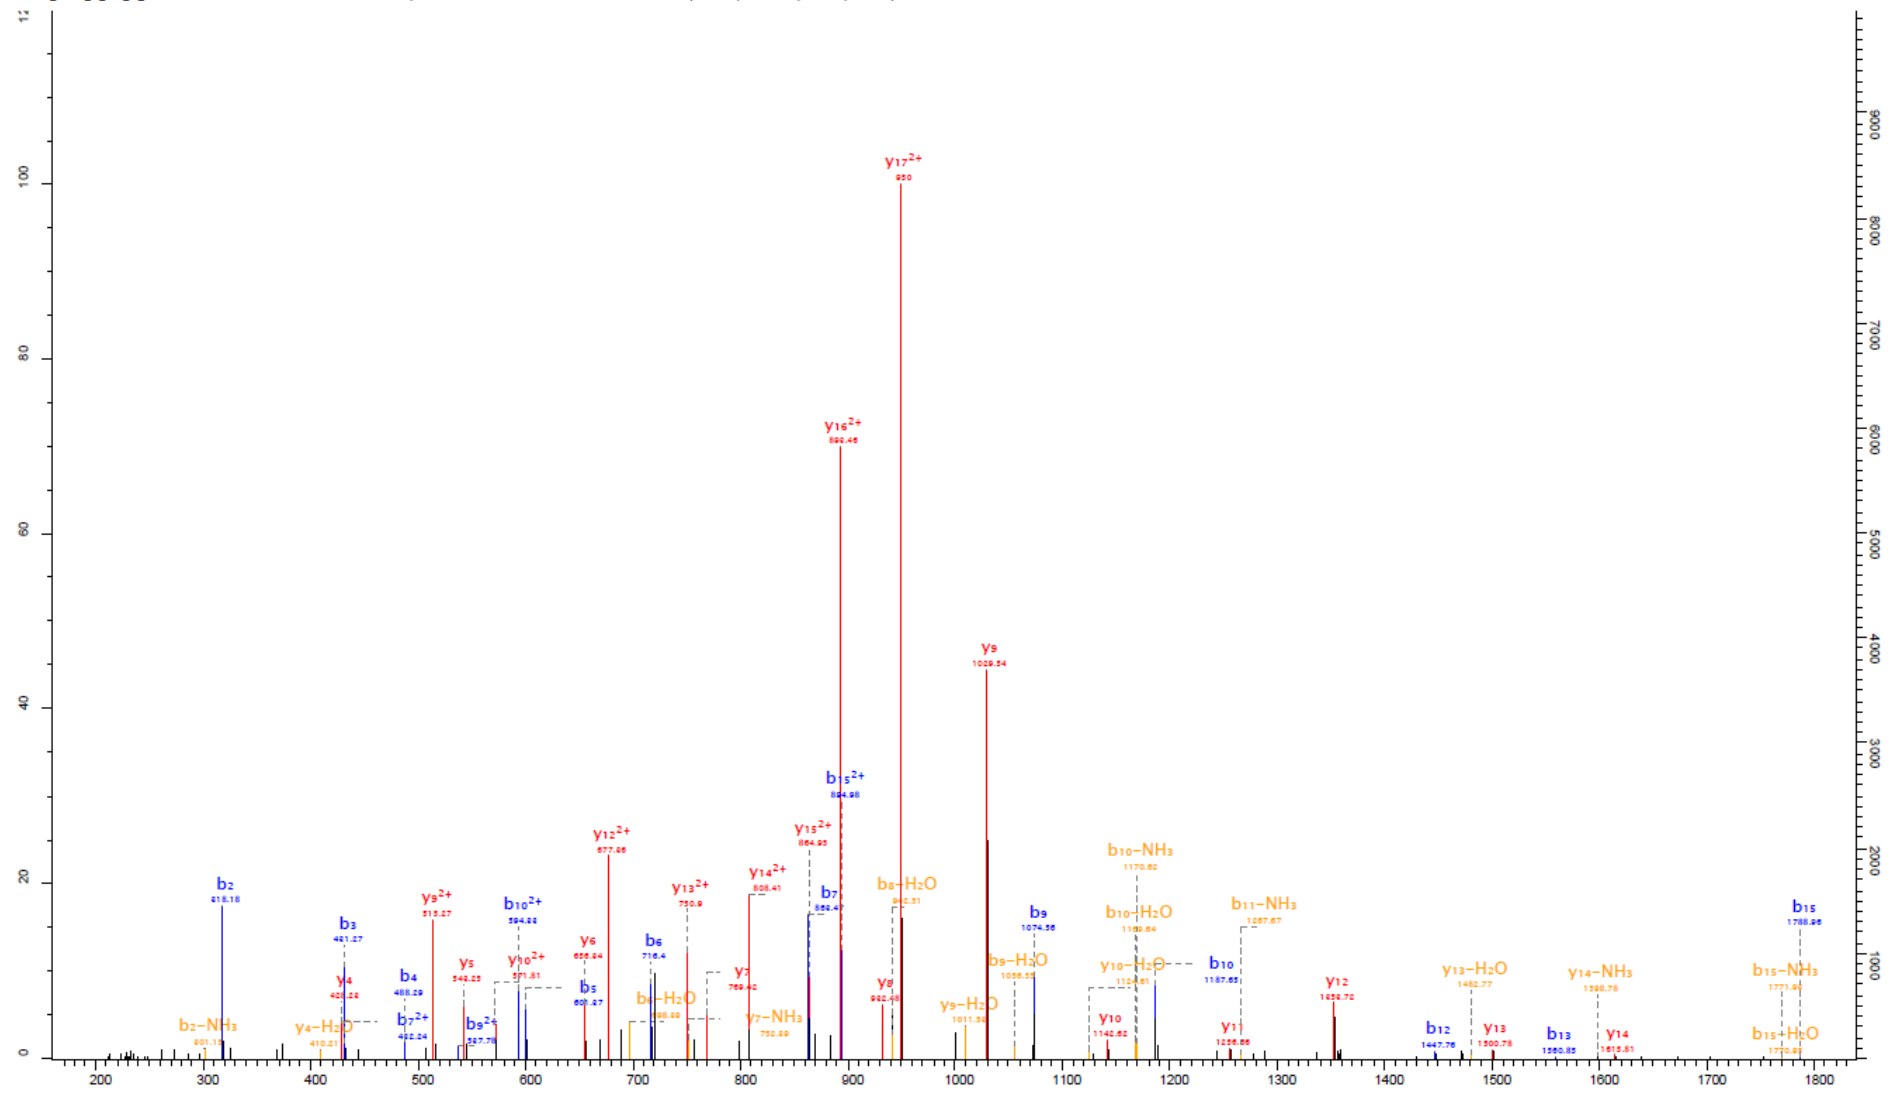

- F ac K L G L D F P N L P Y L I D G S H K -

y17<sup>2+</sup>
y16<sup>2+</sup>
y15<sup>2+</sup>
y14
y15
y12
y11
y10
y9
y8
y7
y6
y5
y4

b2
b2
b4
b5
b6
b7
b6
b10
b12
b15
b15

Gene names = Gstm7; Gstm4; Gm6665; Gstm6; Gstm2; Gstm1

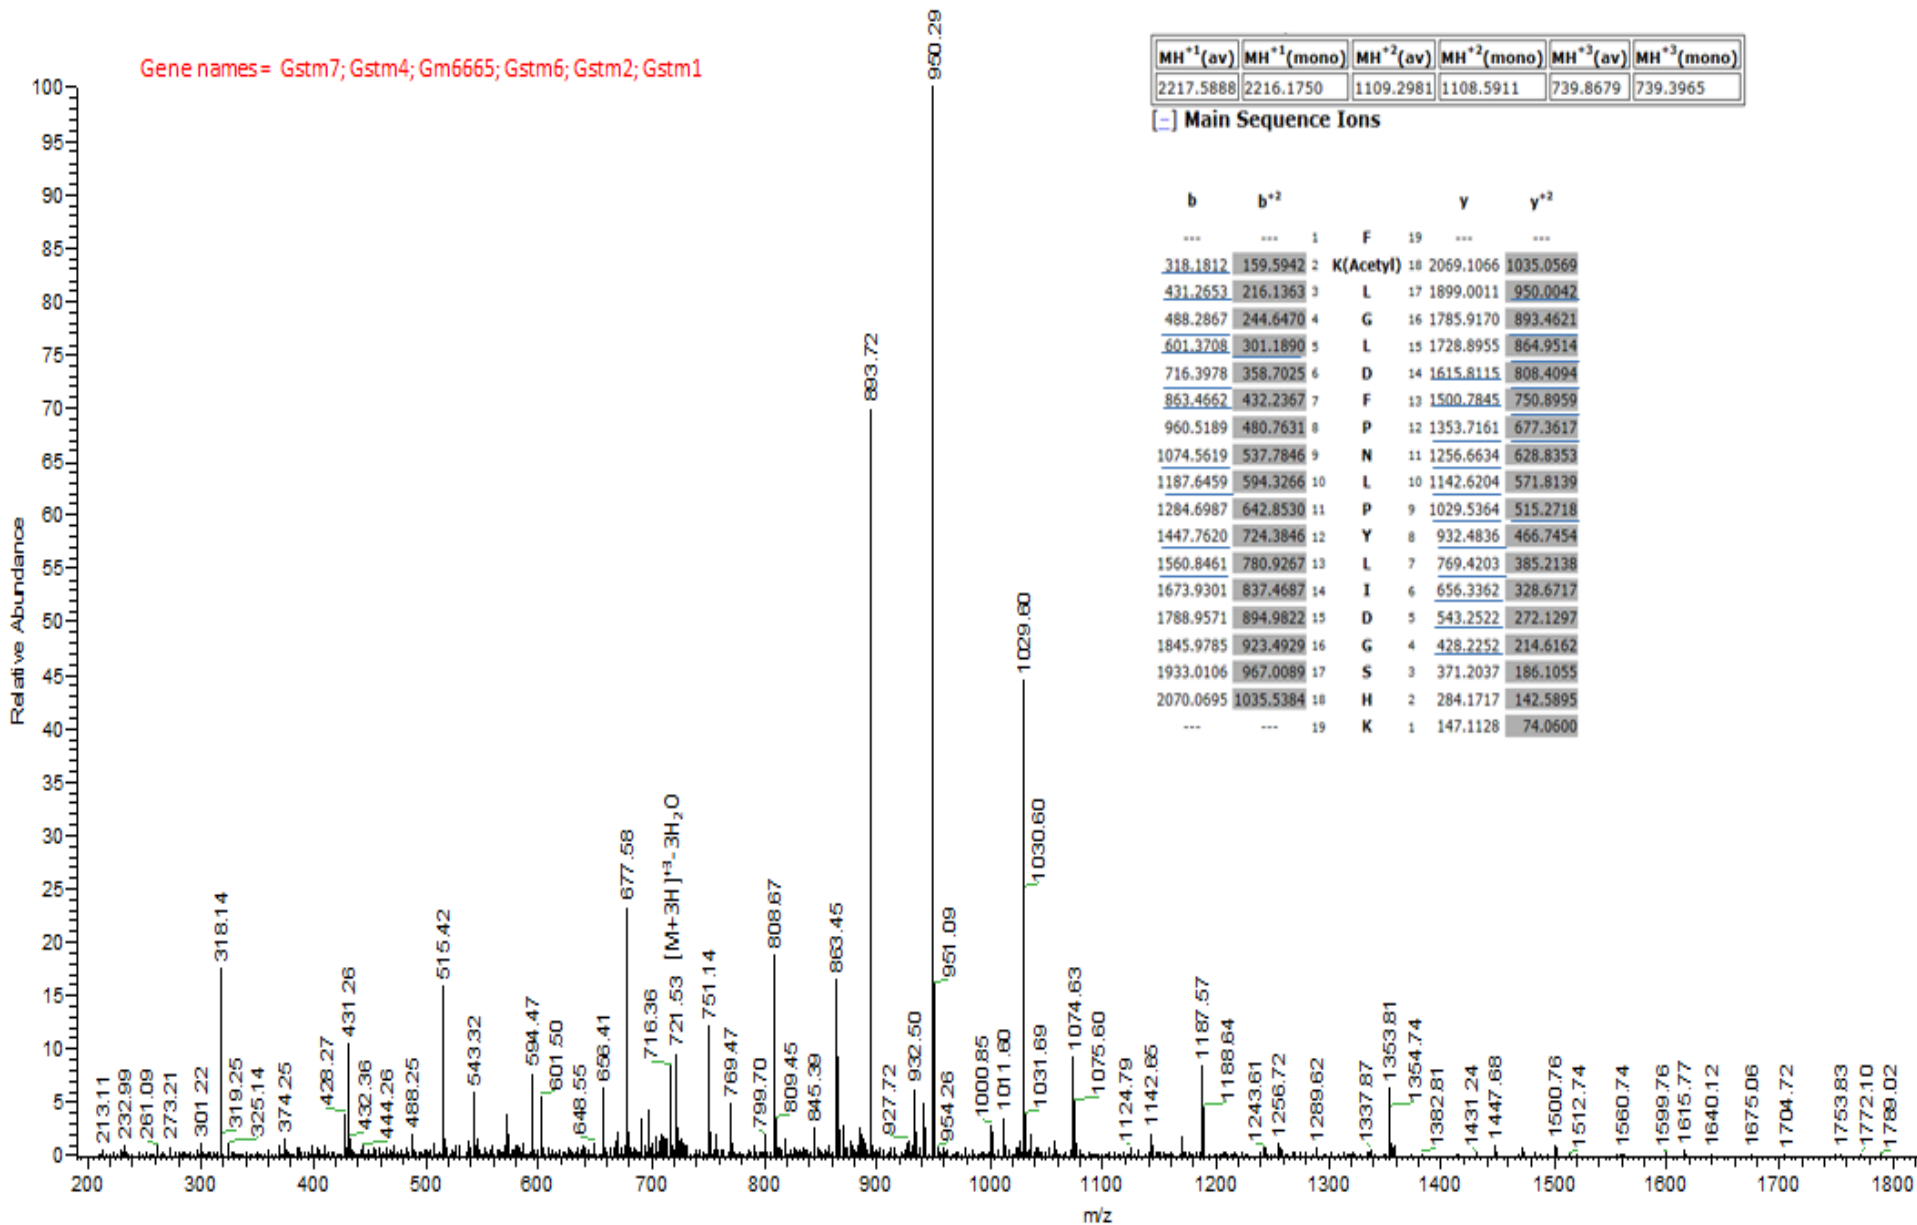

| MH <sup>+</sup> (av) | MH <sup>+</sup> (mono) | MH <sup>2+</sup> (av) | MH <sup>2+</sup> (mono) | MH <sup>3+</sup> (av) | MH <sup>3+</sup> (mono) |
|----------------------|------------------------|-----------------------|-------------------------|-----------------------|-------------------------|
| 2217.5888            | 2216.1750              | 1109.2981             | 1108.5911               | 739.8679              | 739.3965                |

[-] Main Sequence Ions

| b         | b <sup>2</sup> |           | y  | y <sup>2</sup> |
|-----------|----------------|-----------|----|----------------|
| ...       | ...            | 1         | F  | 19             |
| 318.1812  | 159.5942       | K(Acetyl) | 18 | 2069.1066      |
| 431.2653  | 216.1363       | L         | 17 | 1899.0011      |
| 488.2867  | 244.6470       | G         | 16 | 1785.9170      |
| 601.3708  | 301.1890       | L         | 15 | 1728.8955      |
| 716.3978  | 358.7025       | F         | 14 | 1615.8115      |
| 863.4662  | 432.2367       | D         | 13 | 1500.2845      |
| 960.5189  | 480.7631       | P         | 12 | 1353.7161      |
| 1074.5619 | 537.7846       | N         | 11 | 1256.6634      |
| 1187.6459 | 594.3266       | L         | 10 | 1142.6204      |
| 1284.6987 | 642.8530       | P         | 9  | 1029.5364      |
| 1447.7620 | 724.3846       | Y         | 8  | 932.4836       |
| 1560.8461 | 780.9267       | L         | 7  | 769.4203       |
| 1673.9301 | 837.4687       | I         | 6  | 656.3362       |
| 1788.9571 | 894.9822       | D         | 5  | 543.2522       |
| 1845.9785 | 923.4929       | G         | 4  | 428.2252       |
| 1933.0106 | 967.0089       | S         | 3  | 371.2037       |
| 2070.0695 | 1035.5384      | H         | 2  | 284.1717       |
| --        | --             | K         | 1  | 147.1128       |

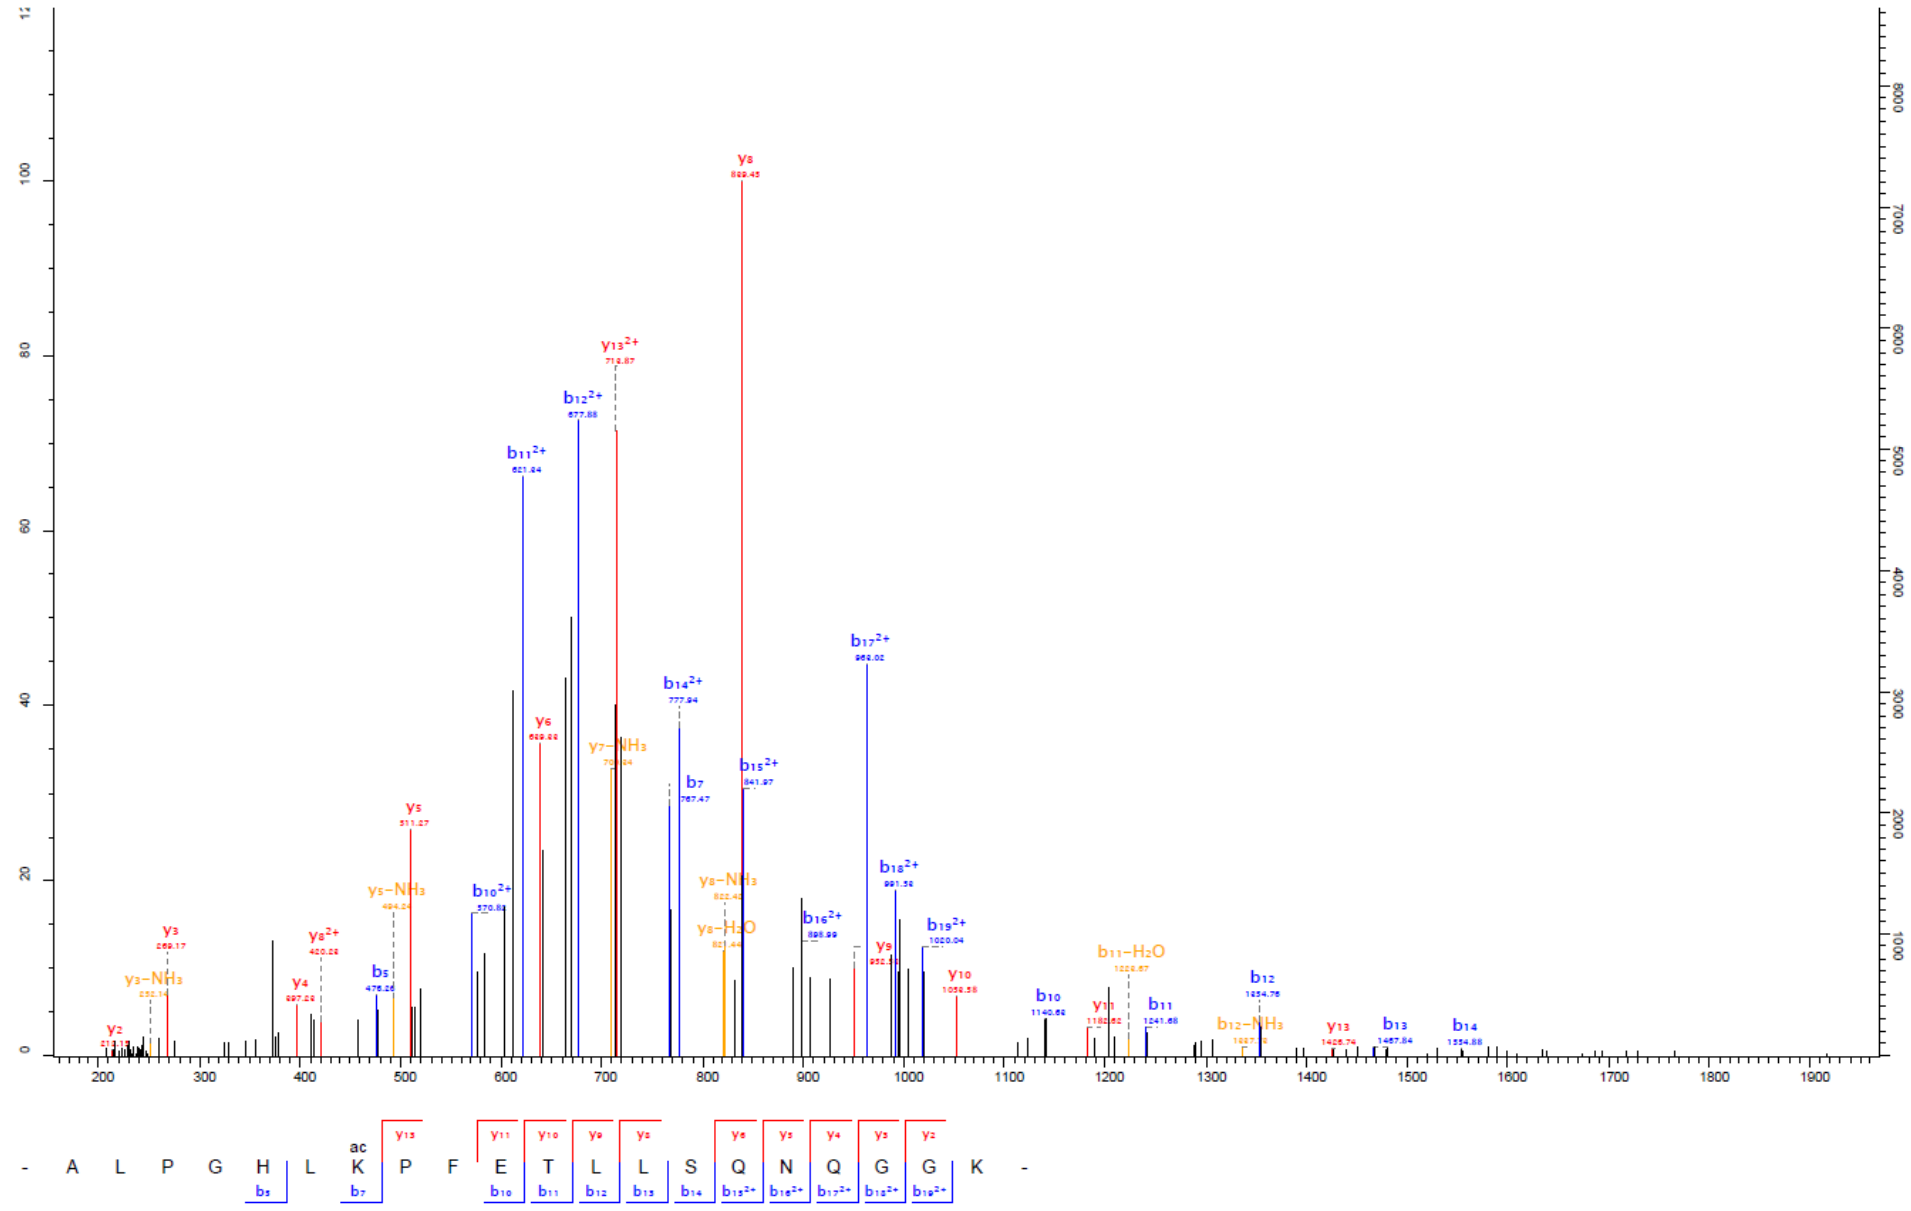

Gene names = *Gstp1*; *Gstp2*

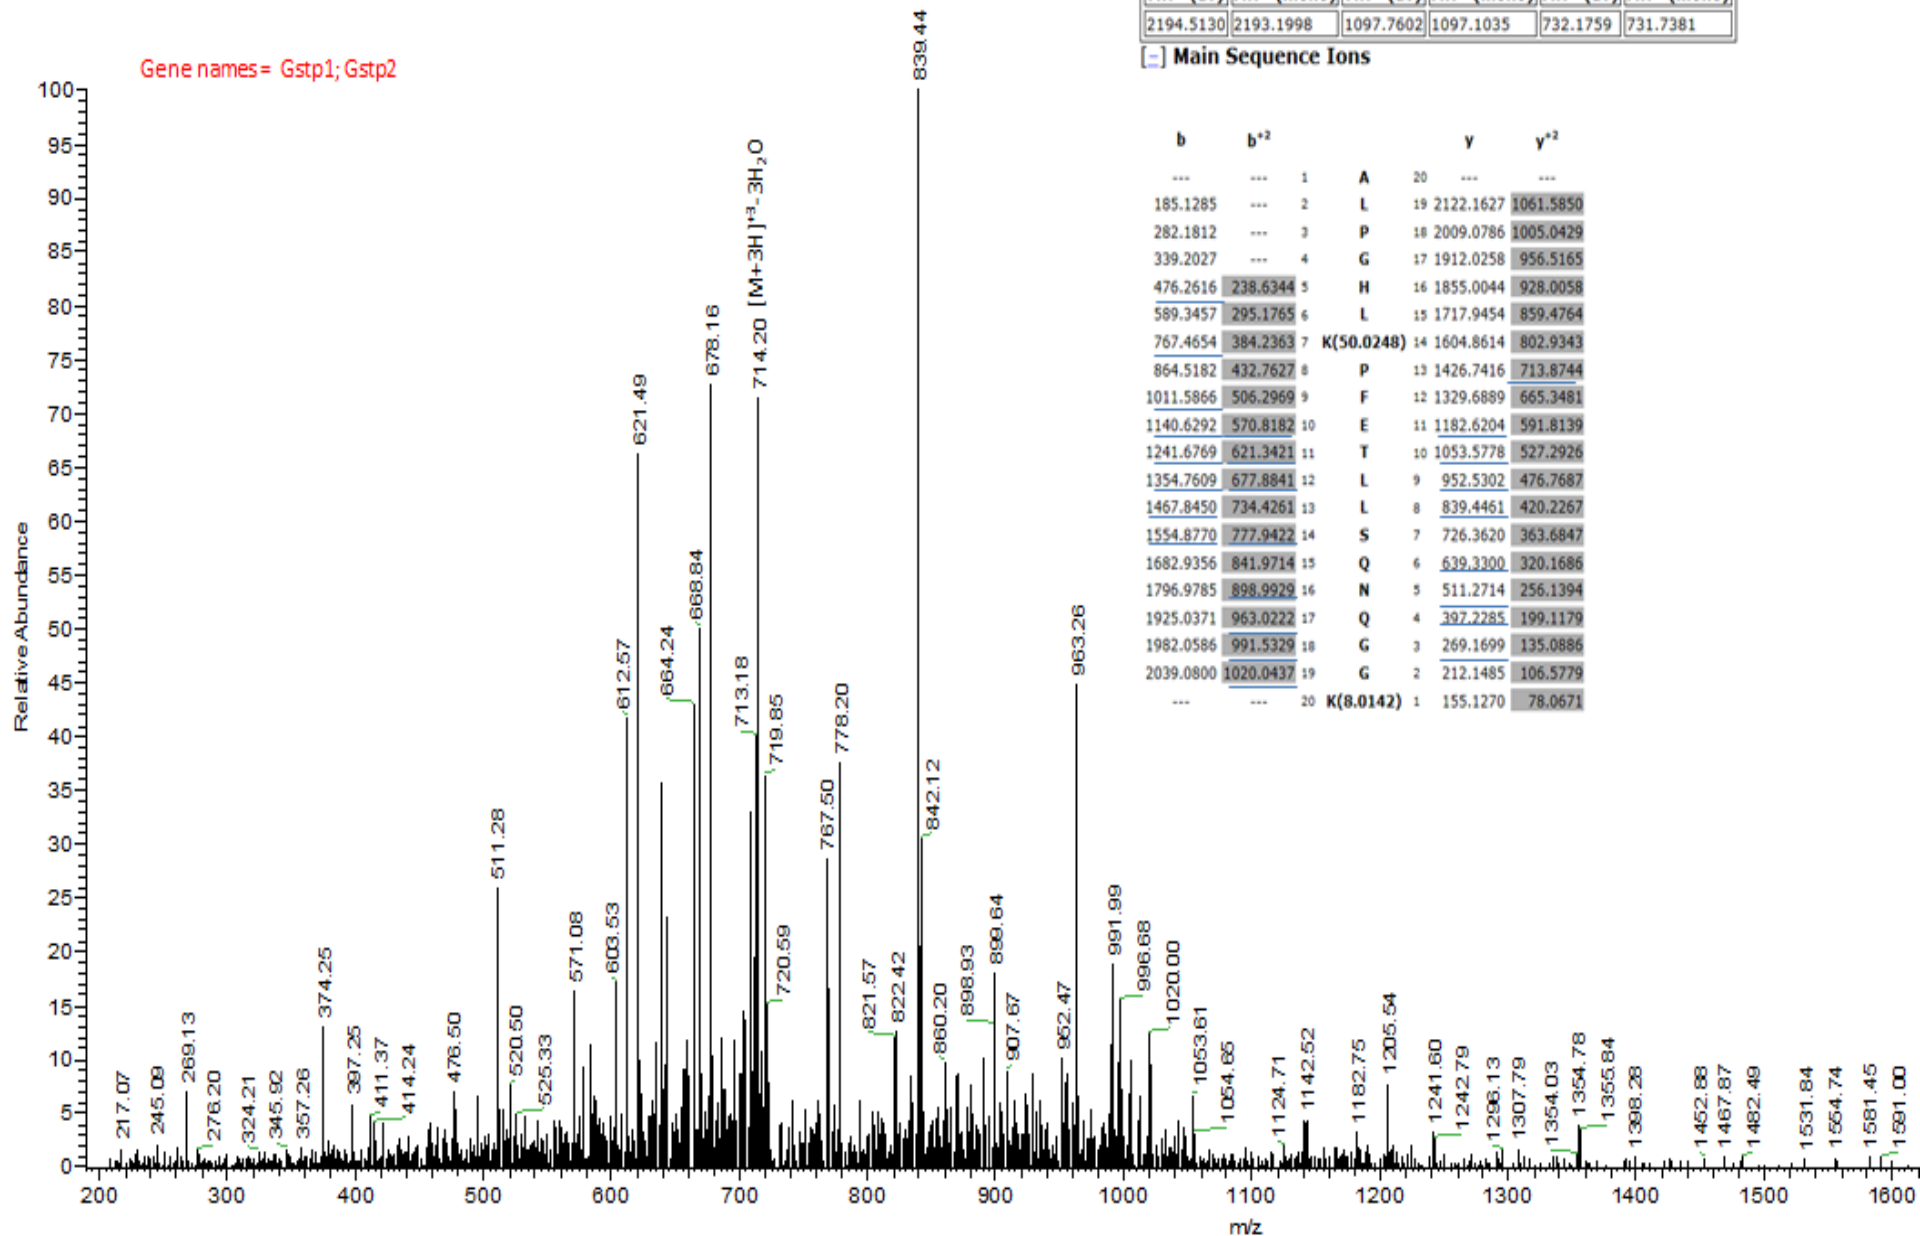

| MH <sup>+</sup> (av) | MH <sup>+</sup> (mono) | MH <sup>2+</sup> (av) | MH <sup>2+</sup> (mono) | MH <sup>3+</sup> (av) | MH <sup>3+</sup> (mono) |
|----------------------|------------------------|-----------------------|-------------------------|-----------------------|-------------------------|
| 2194.5130            | 2193.1998              | 1097.7602             | 1097.1035               | 732.1759              | 731.7381                |

Main Sequence Ions

| b         | b <sup>2+</sup> | y         | y <sup>2+</sup> |
|-----------|-----------------|-----------|-----------------|
| ---       | ---             | 1         | A               |
| ---       | ---             | 20        | ---             |
| 185.1285  | ---             | 2         | L               |
| 19        | 2122.1627       | 1061.5850 |                 |
| 282.1812  | ---             | 3         | P               |
| 18        | 2009.0786       | 1005.0429 |                 |
| 339.2027  | ---             | 4         | G               |
| 17        | 1912.0258       | 956.5165  |                 |
| 476.2616  | 238.6344        | 5         | H               |
| 16        | 1855.0044       | 928.0058  |                 |
| 589.3457  | 295.1765        | 6         | L               |
| 15        | 1717.9454       | 859.4764  |                 |
| 767.4654  | 384.2363        | 7         | K(50.0248)      |
| 14        | 1604.8614       | 802.9343  |                 |
| 864.5182  | 432.7627        | 8         | P               |
| 13        | 1426.7416       | 713.8744  |                 |
| 1011.5866 | 506.2969        | 9         | F               |
| 12        | 1329.6889       | 665.3481  |                 |
| 1140.6292 | 570.8182        | 10        | E               |
| 11        | 1182.6204       | 591.8139  |                 |
| 1241.6769 | 621.3421        | 11        | T               |
| 10        | 1053.5778       | 527.2926  |                 |
| 1354.7609 | 677.8841        | 12        | L               |
| 9         | 952.5302        | 476.7687  |                 |
| 1467.8450 | 734.4261        | 13        | L               |
| 8         | 839.4461        | 420.2267  |                 |
| 1554.8770 | 777.9422        | 14        | S               |
| 7         | 726.3620        | 363.6847  |                 |
| 1682.9356 | 841.9714        | 15        | Q               |
| 6         | 639.3300        | 320.1686  |                 |
| 1796.9785 | 898.9929        | 16        | N               |
| 5         | 511.2714        | 256.1394  |                 |
| 1925.0371 | 963.0222        | 17        | Q               |
| 4         | 397.2285        | 199.1179  |                 |
| 1982.0586 | 991.5329        | 18        | G               |
| 3         | 269.1699        | 135.0886  |                 |
| 2039.0800 | 1020.0437       | 19        | G               |
| 2         | 212.1485        | 106.5779  |                 |
| ---       | ---             | 20        | K(8.0142)       |
| 1         | 155.1270        | 78.0671   |                 |



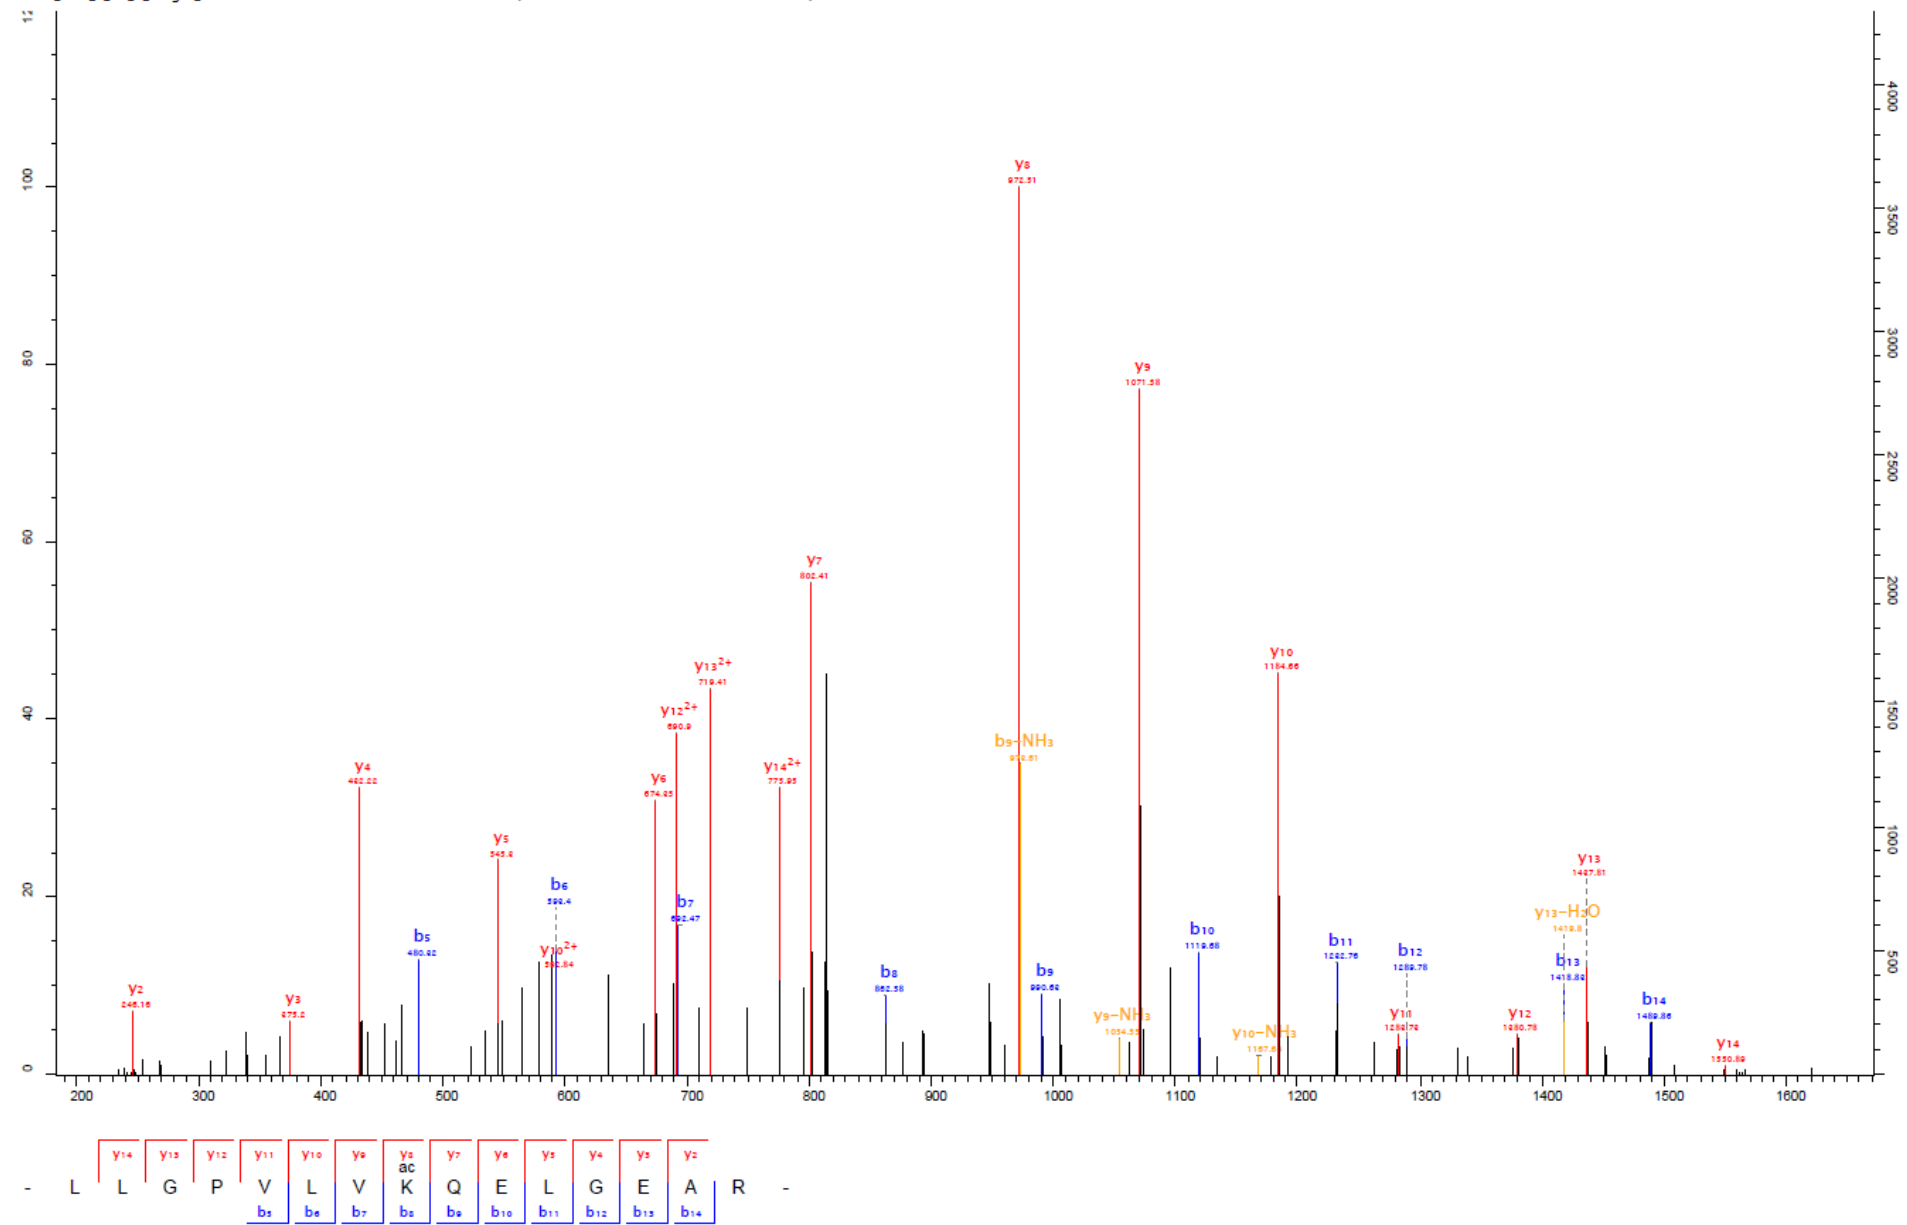

Gene names = H2-Ke2; Pfdn6

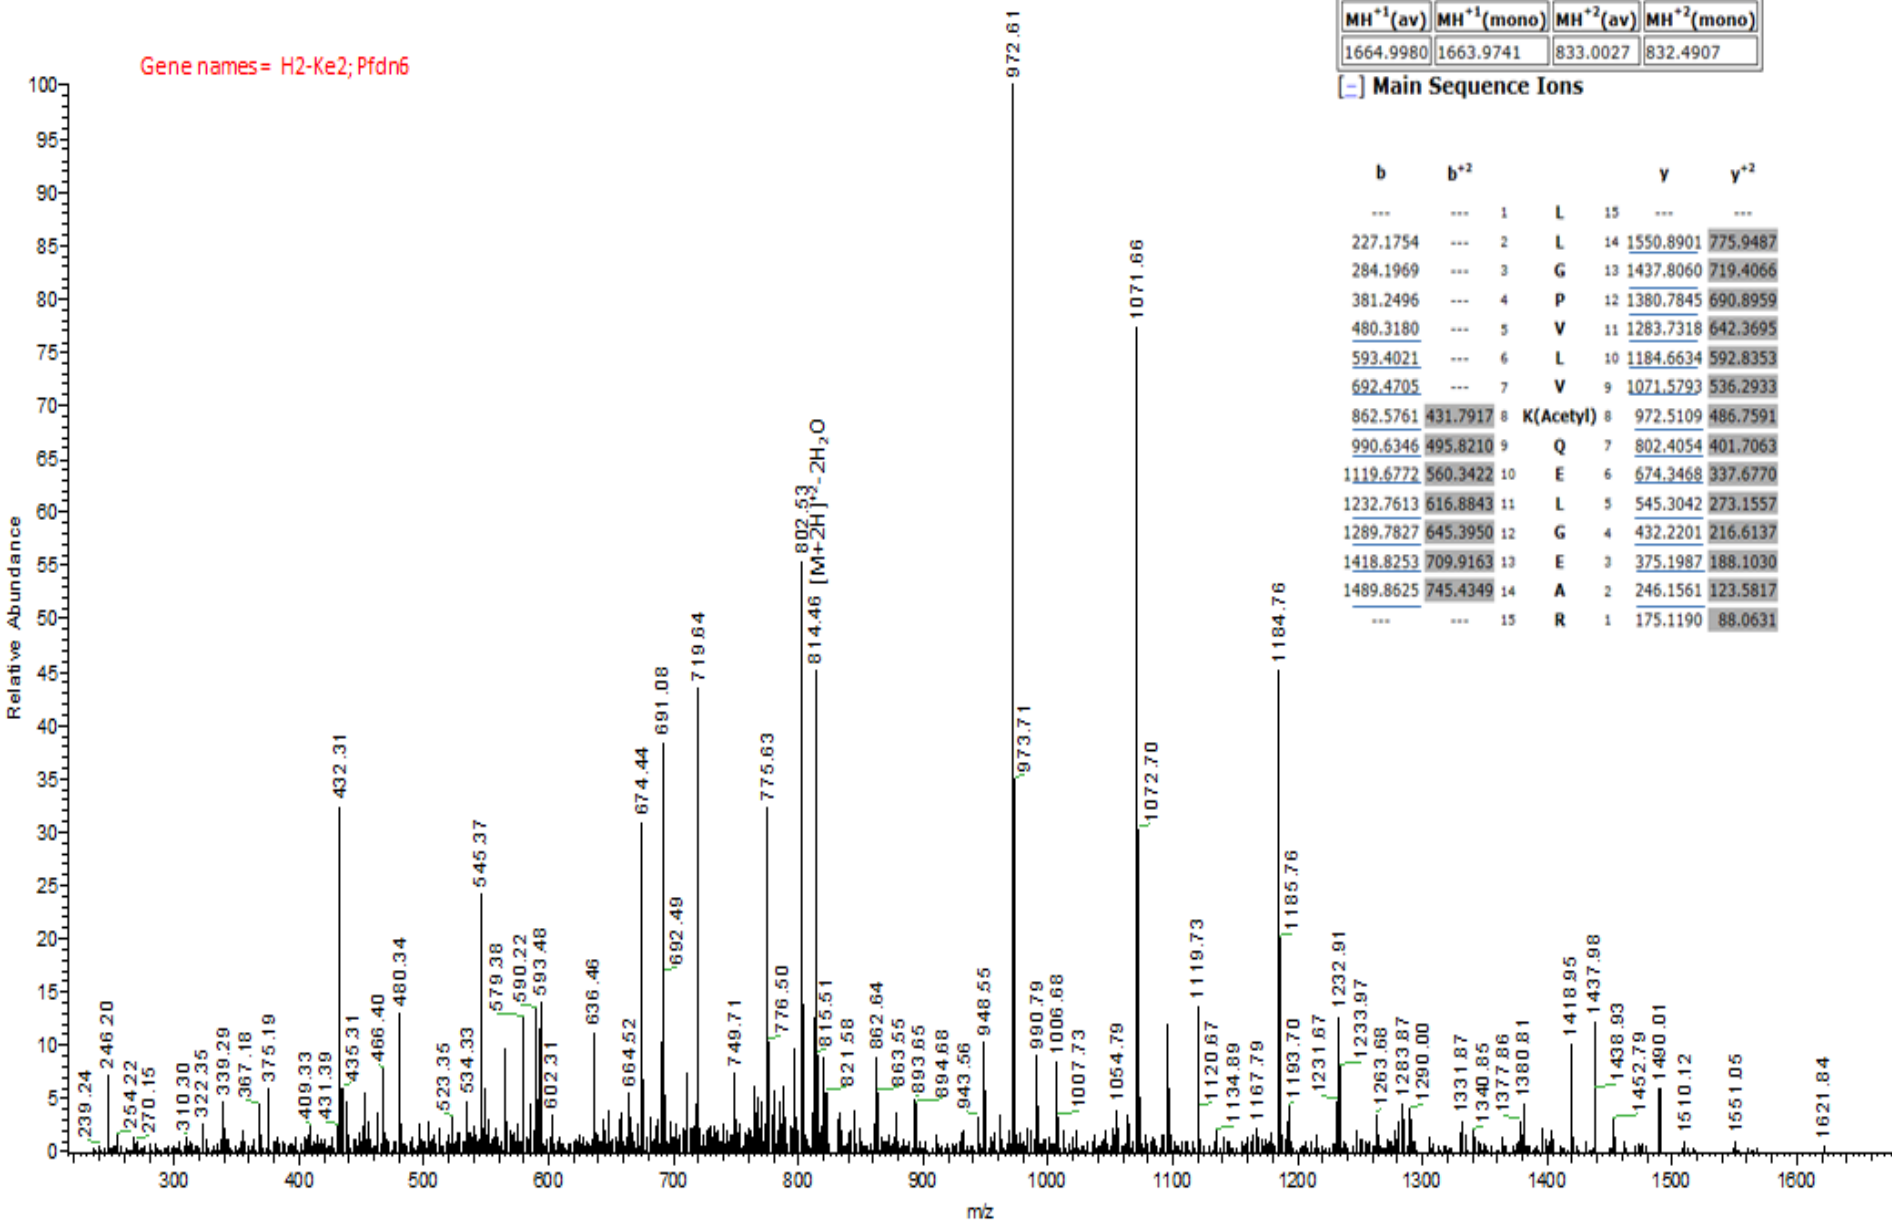

| MH <sup>+</sup> (av) | MH <sup>+</sup> (mono) | MH <sup>2+</sup> (av) | MH <sup>2+</sup> (mono) |
|----------------------|------------------------|-----------------------|-------------------------|
| 1664.9980            | 1663.9741              | 833.0027              | 832.4907                |

(-) Main Sequence Ions

| b         | b <sup>2</sup> | y         | y <sup>2</sup> |
|-----------|----------------|-----------|----------------|
| ---       | ---            | L         | 15             |
| ---       | ---            | L         | 14             |
| 227.1754  | ---            | L         | 14             |
| 284.1969  | ---            | G         | 13             |
| 381.2496  | ---            | P         | 12             |
| 480.3180  | ---            | V         | 11             |
| 593.4021  | ---            | L         | 10             |
| 692.4705  | ---            | V         | 9              |
| 862.5761  | 431.7917       | K(Acetyl) | 8              |
| 990.6346  | 495.8210       | Q         | 7              |
| 1119.6772 | 560.3422       | E         | 6              |
| 1232.7613 | 616.8843       | L         | 5              |
| 1289.7827 | 645.3950       | G         | 4              |
| 1418.8253 | 709.9163       | E         | 3              |
| 1489.8625 | 745.4349       | A         | 2              |
| ---       | ---            | R         | 1              |

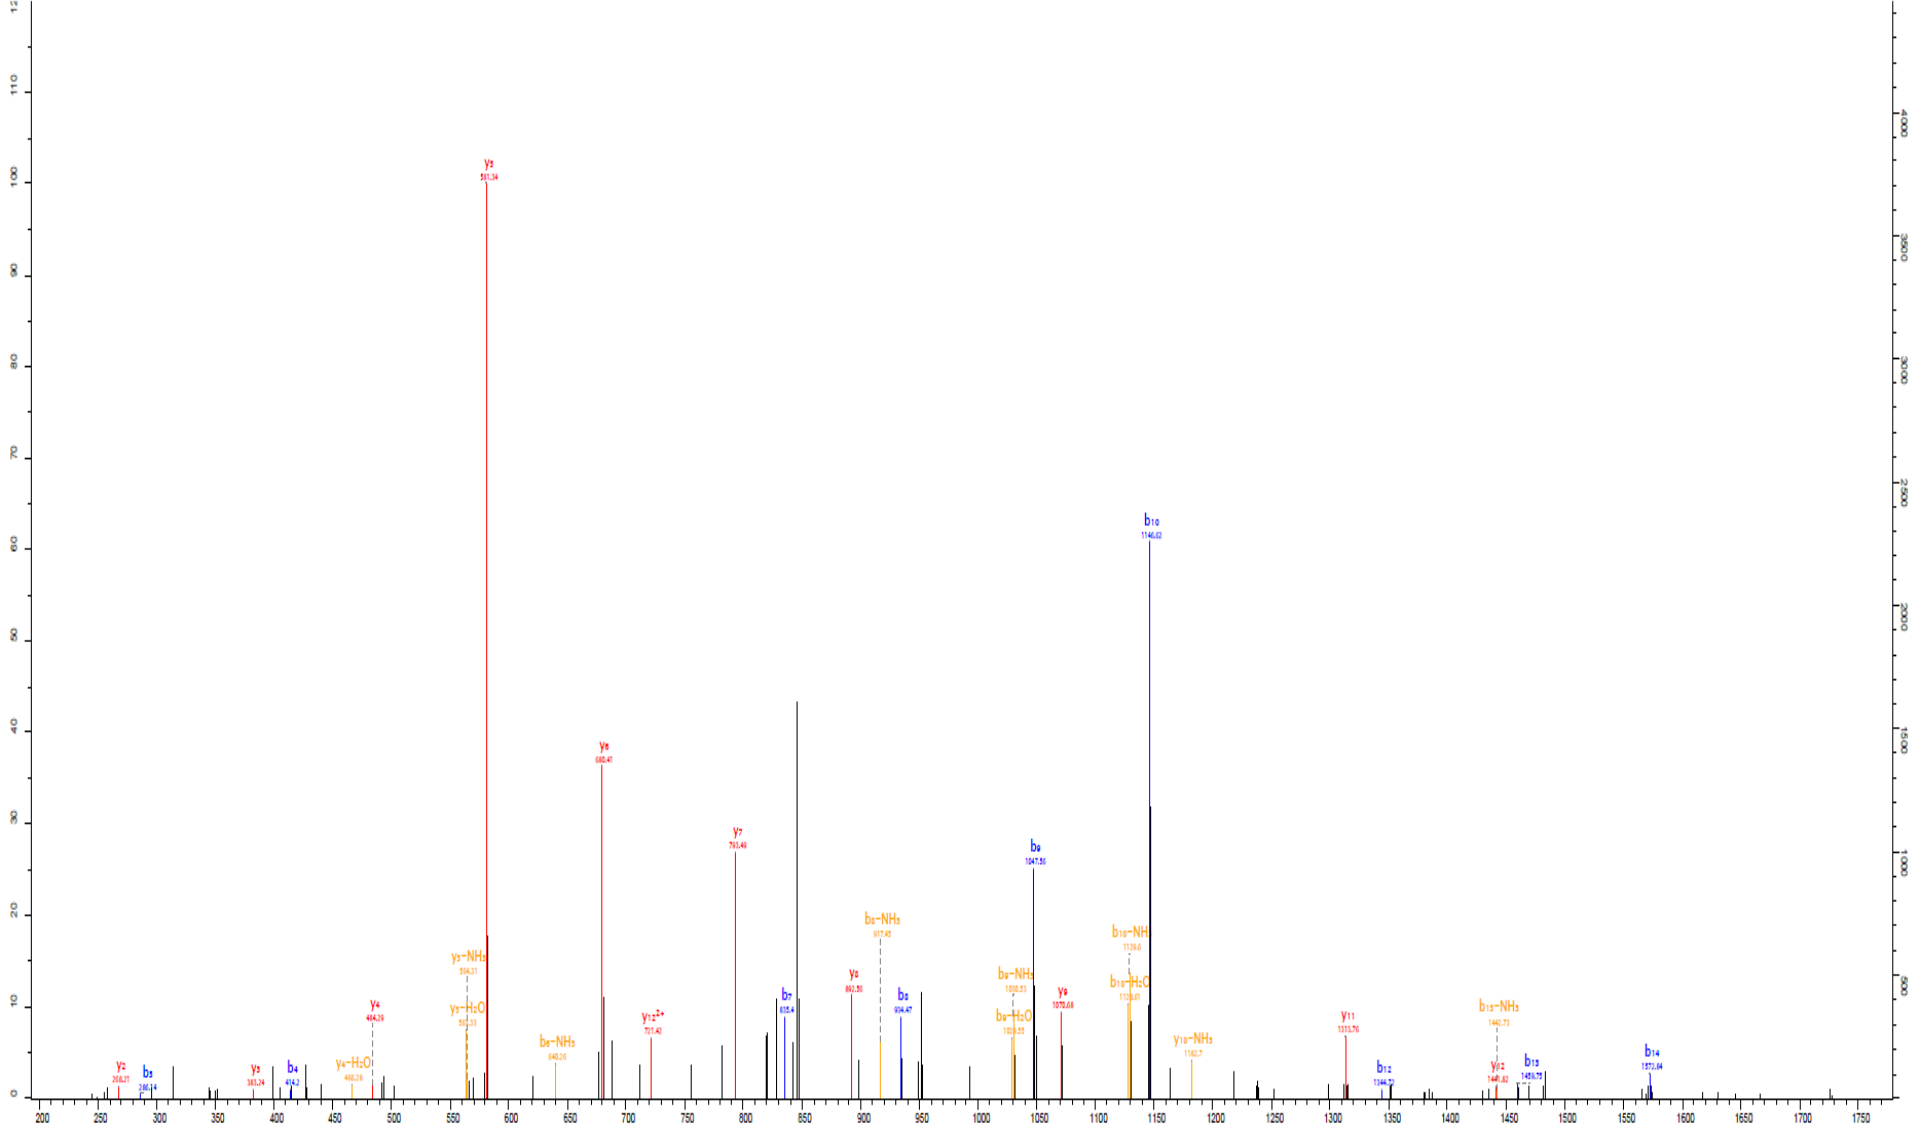

- D G L Q N E K V I V P T D I K -

Y12
Y11
Y5
ac
Y5
Y7
Y6
Y5
Y4
Y5
Y2

b7
b4
b7
b5
b6
b10
b11
b15
b14

Gene name = Hmgcl1

| MH <sup>+</sup> 1(av) | MH <sup>+</sup> 1(mono) | MH <sup>+</sup> 2(av) | MH <sup>+</sup> 2(mono) |
|-----------------------|-------------------------|-----------------------|-------------------------|
| 1727.9663             | 1726.9557               | 864.4869              | 863.9815                |

Main Sequence Ions

| b         | b <sup>+2</sup> |    | y                 | y <sup>+2</sup> |                    |
|-----------|-----------------|----|-------------------|-----------------|--------------------|
| ...       | ...             | 1  | D                 | 15              | ...                |
| 173.0557  | ...             | 2  | G                 | 14              | 1611.9287 806.4680 |
| 286.1397  | ...             | 3  | L                 | 13              | 1554.9073 777.9573 |
| 414.1983  | ...             | 4  | Q                 | 12              | 1441.8232 721.4152 |
| 528.2413  | ...             | 5  | N                 | 11              | 1313.7646 657.3860 |
| 657.2838  | ...             | 6  | E                 | 10              | 1199.7217 600.3645 |
| 835.4036  | 418.2054        | 7  | <b>K(50.0248)</b> | 9               | 1070.6791 535.8432 |
| 934.4720  | 467.7396        | 8  | V                 | 8               | 892.5593 446.7833  |
| 1047.5561 | 524.2817        | 9  | I                 | 7               | 793.4909 397.2491  |
| 1146.6245 | 573.8159        | 10 | V                 | 6               | 680.4069 340.7071  |
| 1243.6773 | 622.3423        | 11 | P                 | 5               | 581.3385 291.1729  |
| 1344.7249 | 672.8661        | 12 | T                 | 4               | 484.2857 242.6465  |
| 1459.7519 | 730.3796        | 13 | D                 | 3               | 383.2380 192.1226  |
| 1572.8359 | 786.9216        | 14 | I                 | 2               | 268.2111 134.6092  |
| ...       | ...             | 15 | <b>K(8.0142)</b>  | 1               | 155.1270 78.0671   |

[M+2H]<sup>2+</sup>-2H<sub>2</sub>O

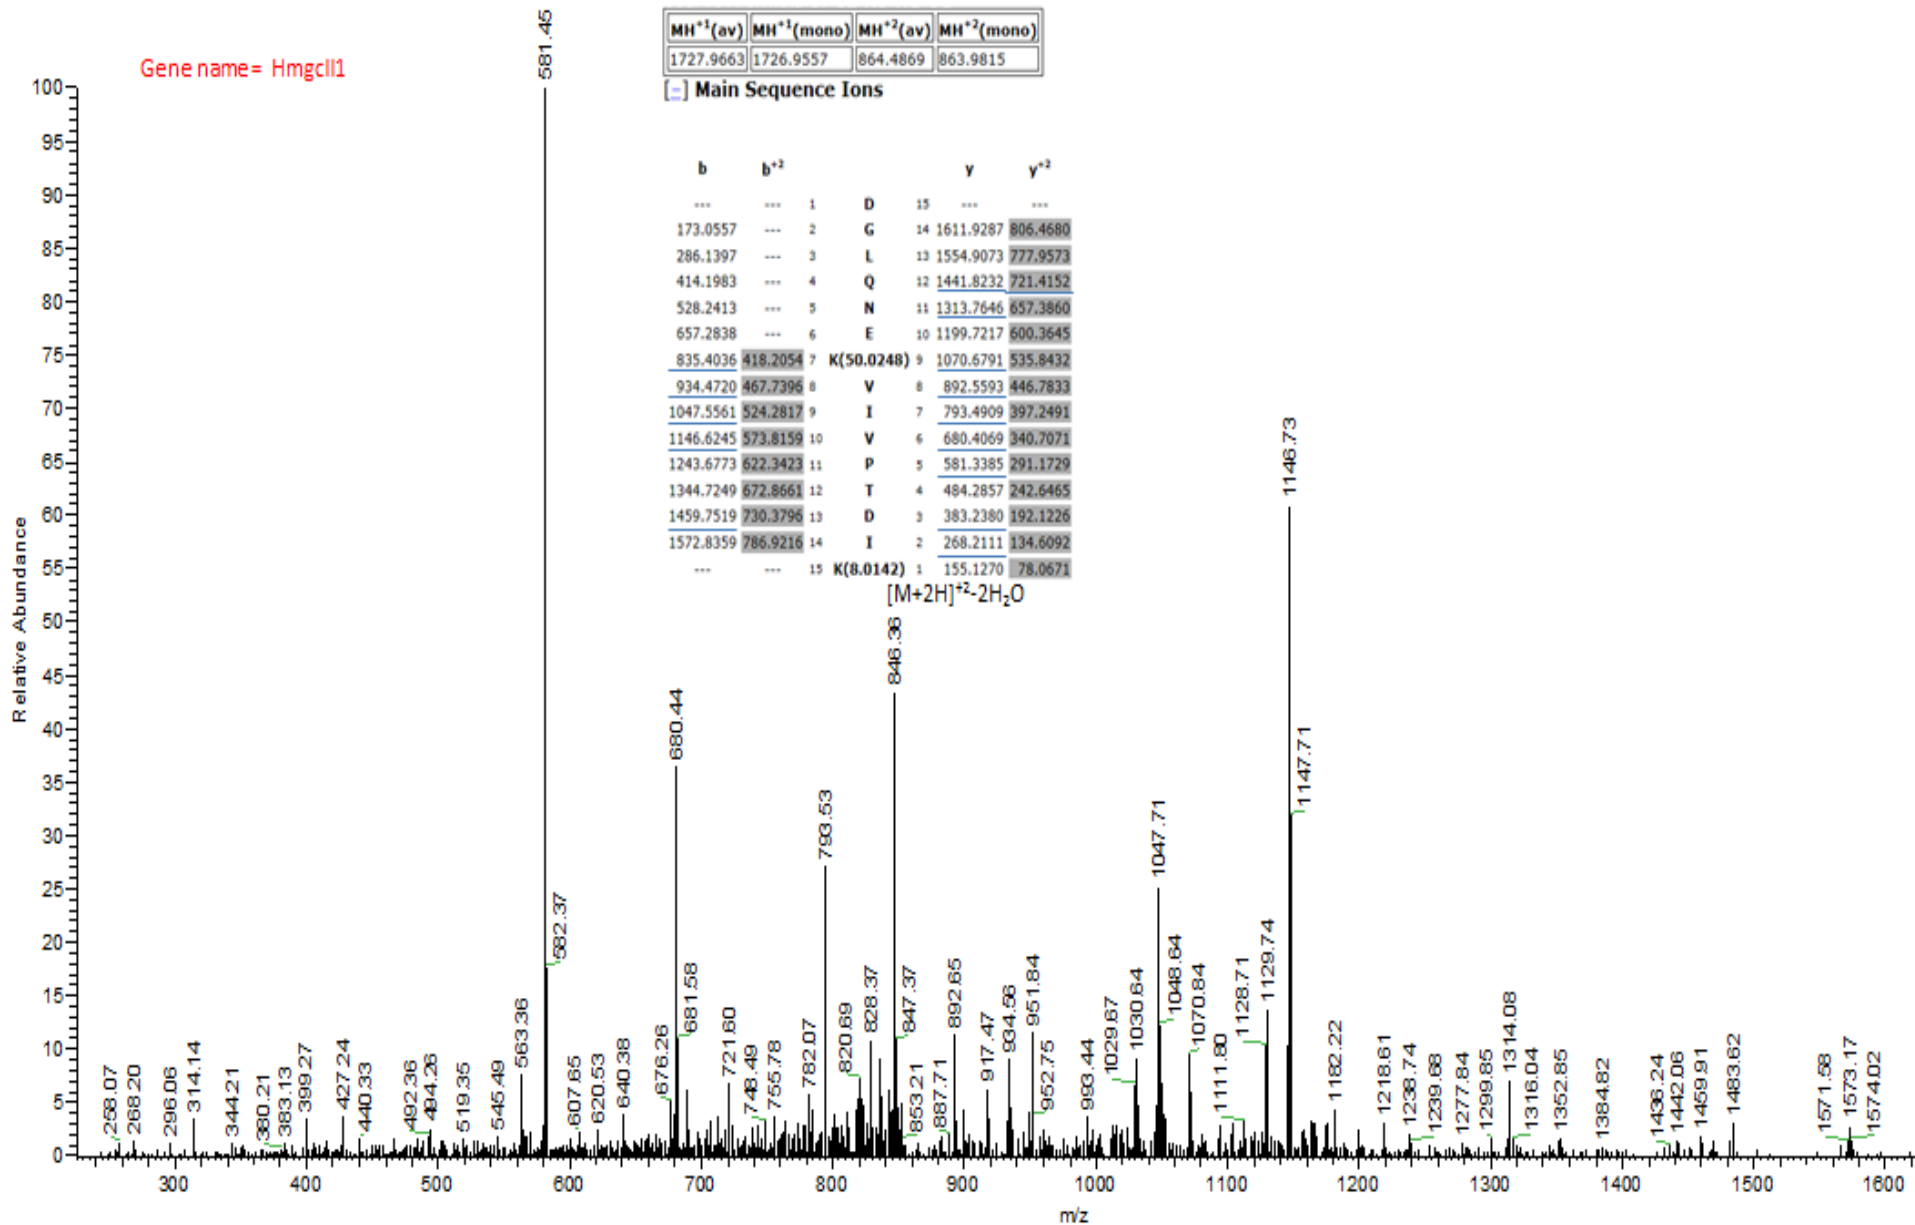

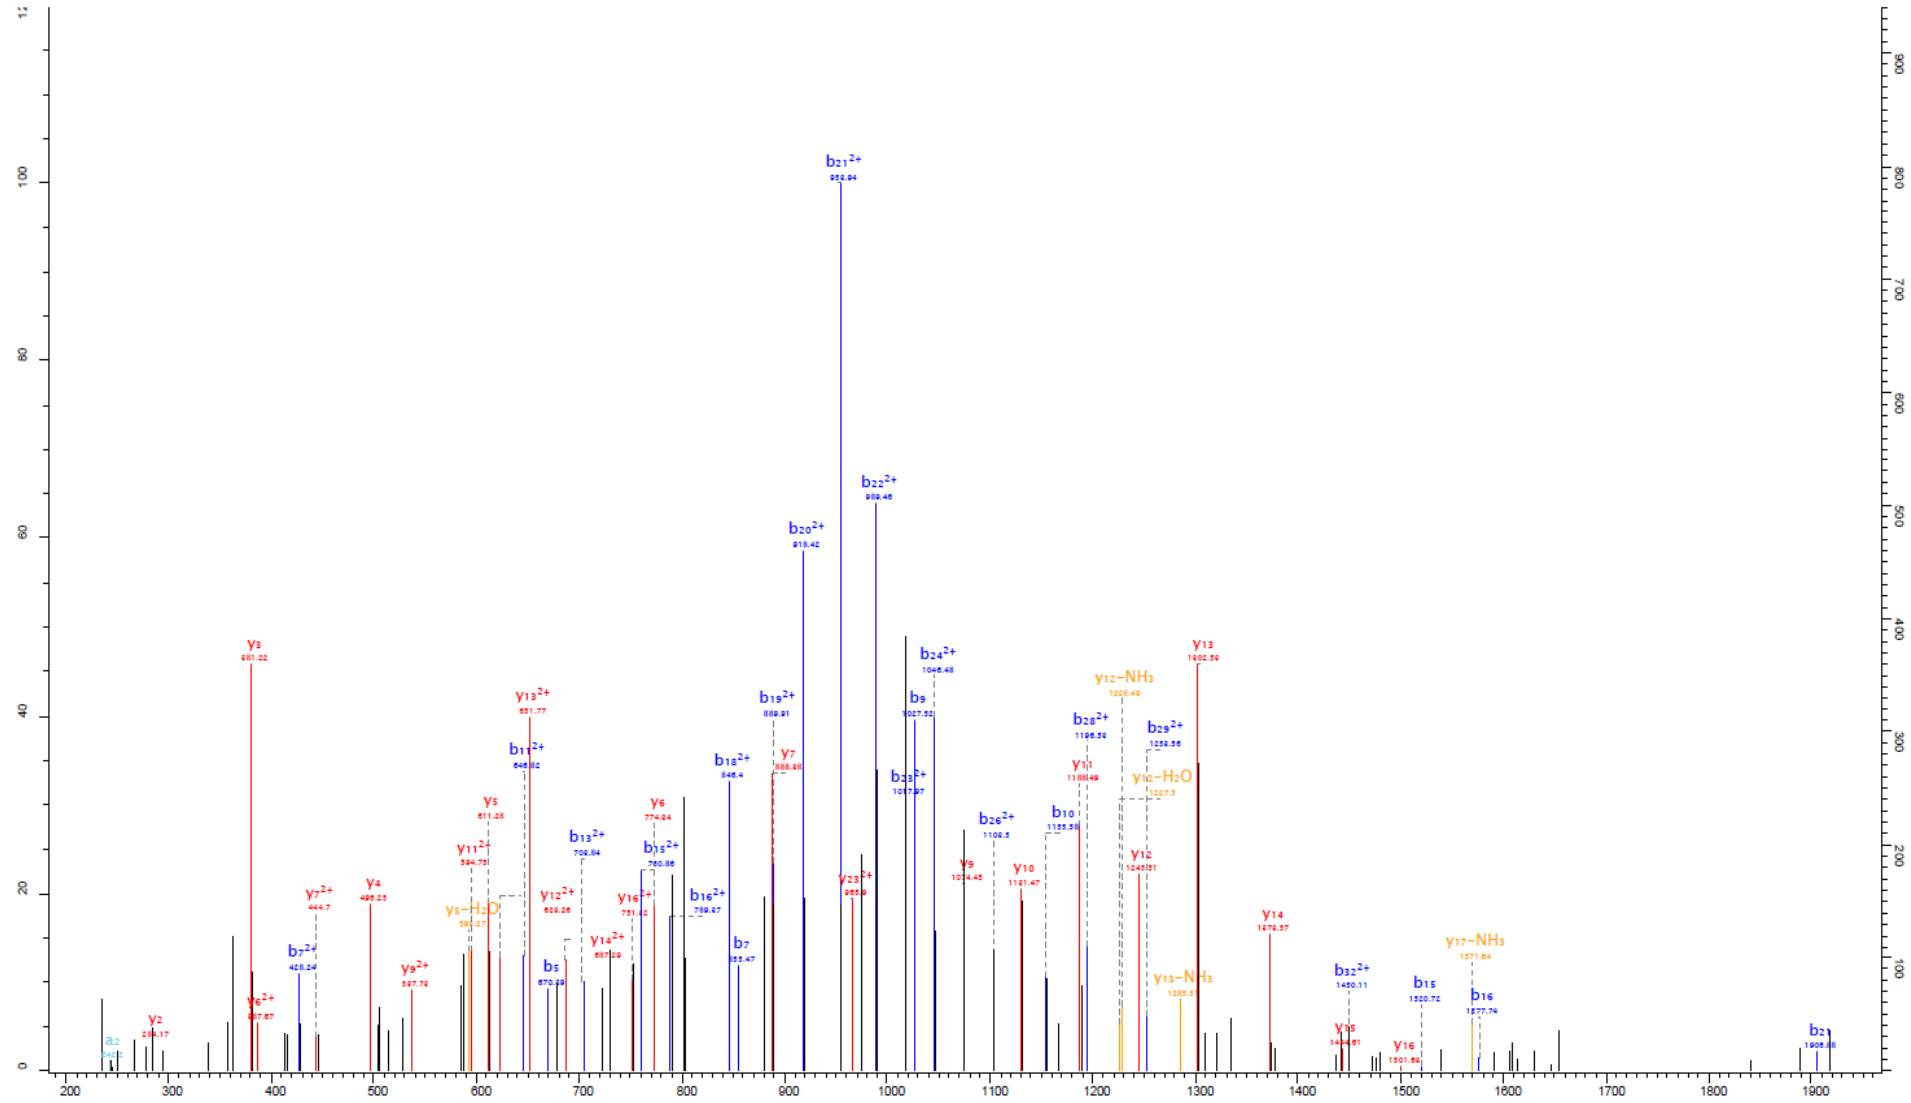

- R L K T E N A G D Q H G G G G G G S G A A G G G G E N Y D D P H K -

ac a2 b5 b7 b6 b10 b11<sup>2+</sup> b13<sup>2+</sup> y22<sup>2+</sup> b15 b16 b12<sup>2+</sup> y14 y15 y14 y13 y12 y11 y10 y9 y7 y8 y2 y4 y3 y2

| MH <sup>+1</sup> (av) | MH <sup>+1</sup> (mono) | MH <sup>+2</sup> (av) | MH <sup>+2</sup> (mono) | MH <sup>+3</sup> (av) | MH <sup>+3</sup> (mono) | MH <sup>+4</sup> (av) | MH <sup>+4</sup> (mono) |
|-----------------------|-------------------------|-----------------------|-------------------------|-----------------------|-------------------------|-----------------------|-------------------------|
| 3281.3325             | 3279.4394               | 1641.1699             | 1640.2233               | 1094.4491             | 1093.8180               | 821.0887              | 820.6153                |

Main Sequence Ions

| b         | b <sup>+2</sup> | y  | y <sup>+2</sup>                  |
|-----------|-----------------|----|----------------------------------|
| ---       | ---             | 1  | ---                              |
| 270.1925  | 135.5999        | 2  | L 34 3123.3383 1562.1728         |
| 440.2980  | 220.6526        | 3  | K(Acetyl) 33 3010.2542 1505.6308 |
| 541.3457  | 271.1765        | 4  | T 32 2840.1487 1420.5780         |
| 670.3883  | 335.6978        | 5  | E 31 2739.1010 1370.0542         |
| 784.4312  | 392.7192        | 6  | N 30 2610.0584 1305.5329         |
| 855.4683  | 428.2378        | 7  | A 29 2496.0155 1248.5114         |
| 912.4898  | 456.7485        | 8  | G 28 2424.9784 1212.9928         |
| 1027.5167 | 514.2620        | 9  | D 27 2367.9569 1184.4821         |
| 1155.5753 | 578.2913        | 10 | Q 26 2252.9300 1126.9686         |
| 1292.6342 | 646.8207        | 11 | H 25 2124.8714 1062.9393         |
| 1349.6557 | 675.3315        | 12 | G 24 1987.8125 994.4099          |
| 1406.6771 | 703.8422        | 13 | G 23 1930.7910 965.8992          |
| 1463.6986 | 732.3529        | 14 | G 22 1873.7696 937.3884          |
| 1520.7200 | 760.8637        | 15 | G 21 1816.7481 908.8777          |
| 1577.7415 | 789.3744        | 16 | G 20 1759.7266 880.3670          |
| 1634.7630 | 817.8851        | 17 | G 19 1702.7052 851.8562          |
| 1691.7844 | 846.3958        | 18 | G 18 1645.6837 823.3455          |
| 1778.8165 | 889.9119        | 19 | S 17 1588.6623 794.8348          |
| 1835.8379 | 918.4226        | 20 | G 16 1501.6302 751.3188          |
| 1906.8750 | 953.9412        | 21 | A 15 1444.6088 722.8080          |
| 1977.9122 | 989.4597        | 22 | A 14 1372.5716 687.2895          |
| 2034.9336 | 1017.9704       | 23 | G 13 1302.5345 651.7709          |
| 2091.9551 | 1046.4812       | 24 | G 12 1245.5131 623.2602          |
| 2148.9765 | 1074.9919       | 25 | G 11 1188.4916 594.7494          |
| 2205.9980 | 1103.5026       | 26 | G 10 1131.4701 566.2387          |
| 2263.0195 | 1132.0134       | 27 | G 9 1074.4487 537.7280           |
| 2392.0621 | 1196.5347       | 28 | E 8 1017.4272 509.2172           |
| 2506.1050 | 1253.5561       | 29 | N 7 988.3846 444.6959            |
| 2669.1683 | 1335.0878       | 30 | Y 6 774.3417 387.6745            |
| 2784.1953 | 1392.6013       | 31 | D 5 611.2784 306.1428            |
| 2899.2222 | 1450.1147       | 32 | D 4 496.2514 248.6293            |
| 2996.2750 | 1498.6411       | 33 | P 3 381.2345 191.1159            |
| 3133.3339 | 1567.1706       | 34 | H 2 284.1717 142.5895            |
| ---       | ---             | 35 | K 1 147.1128 74.0600             |

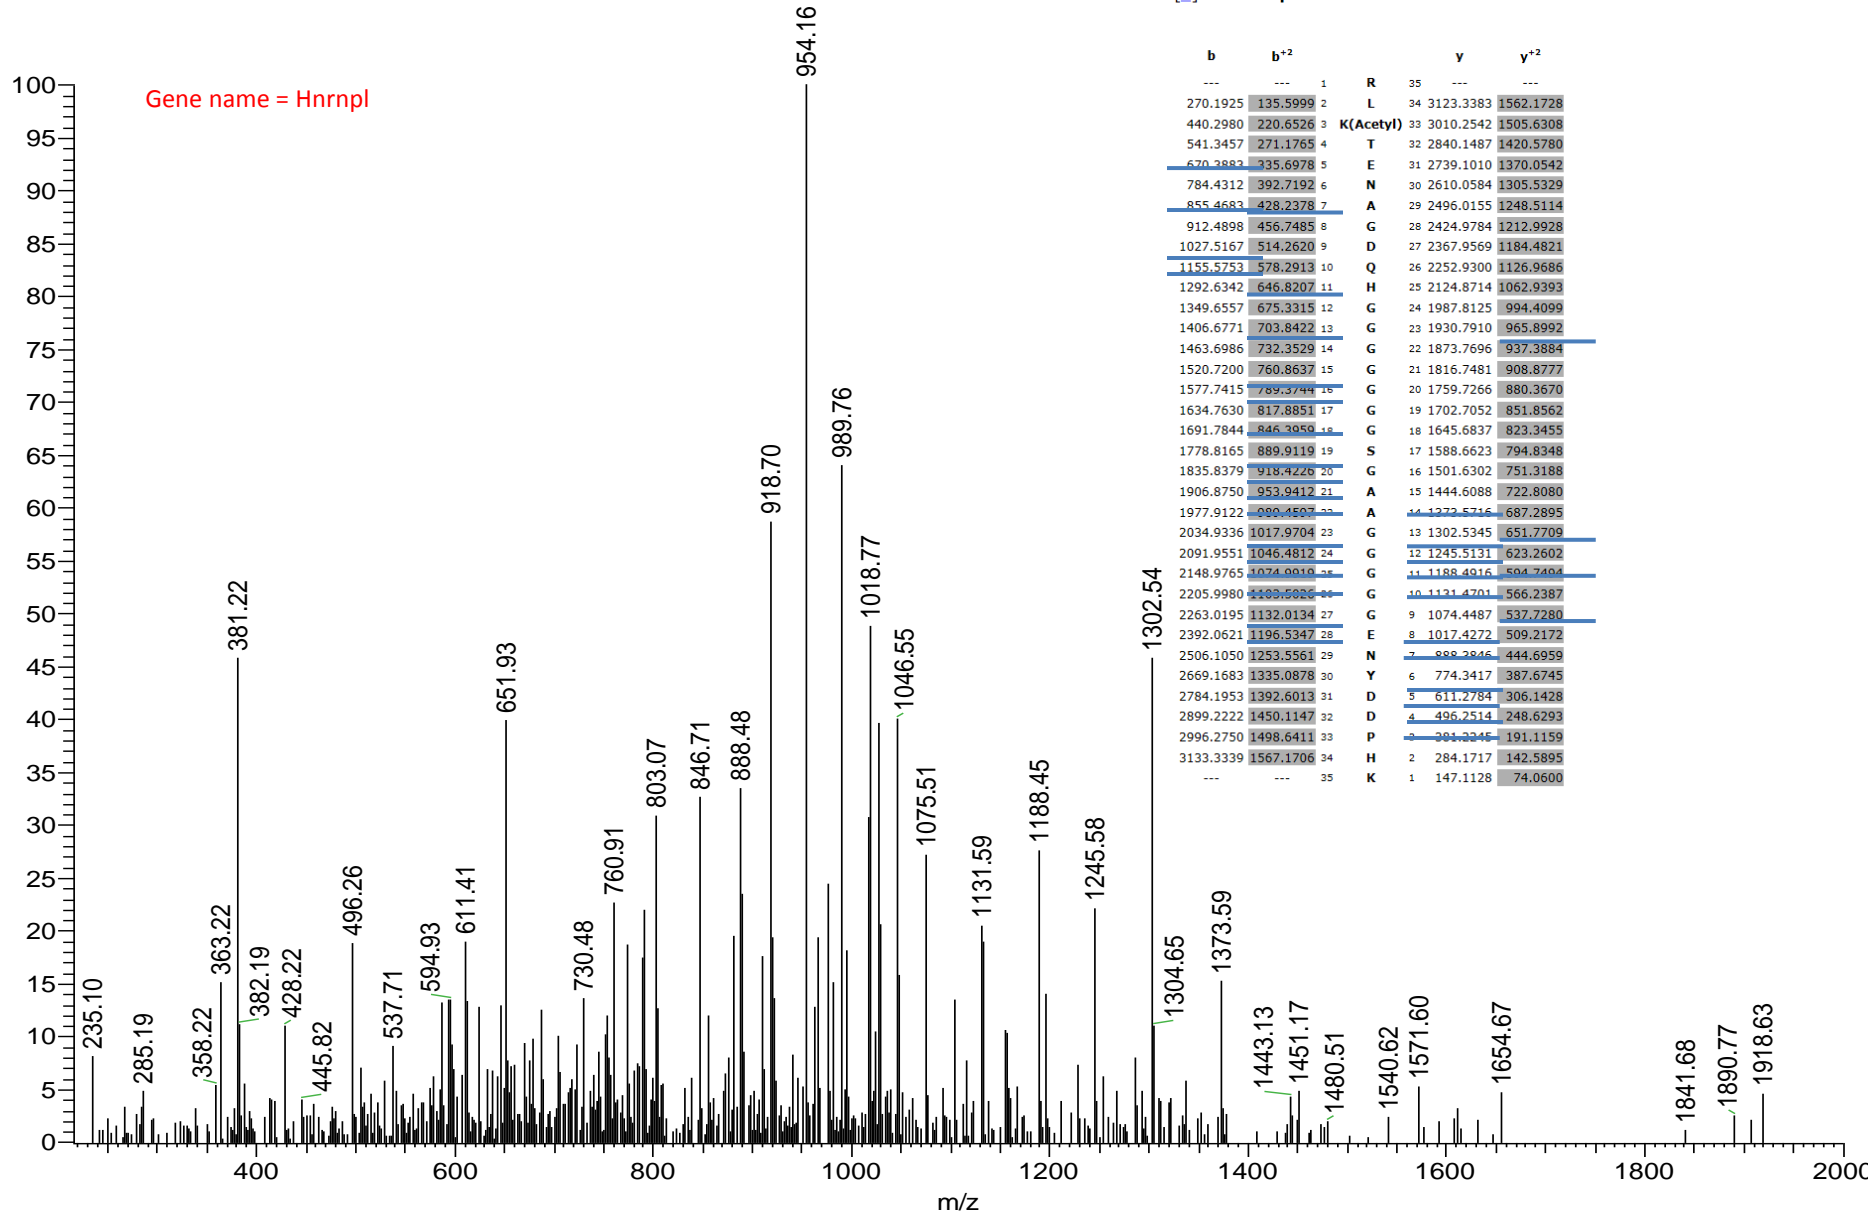

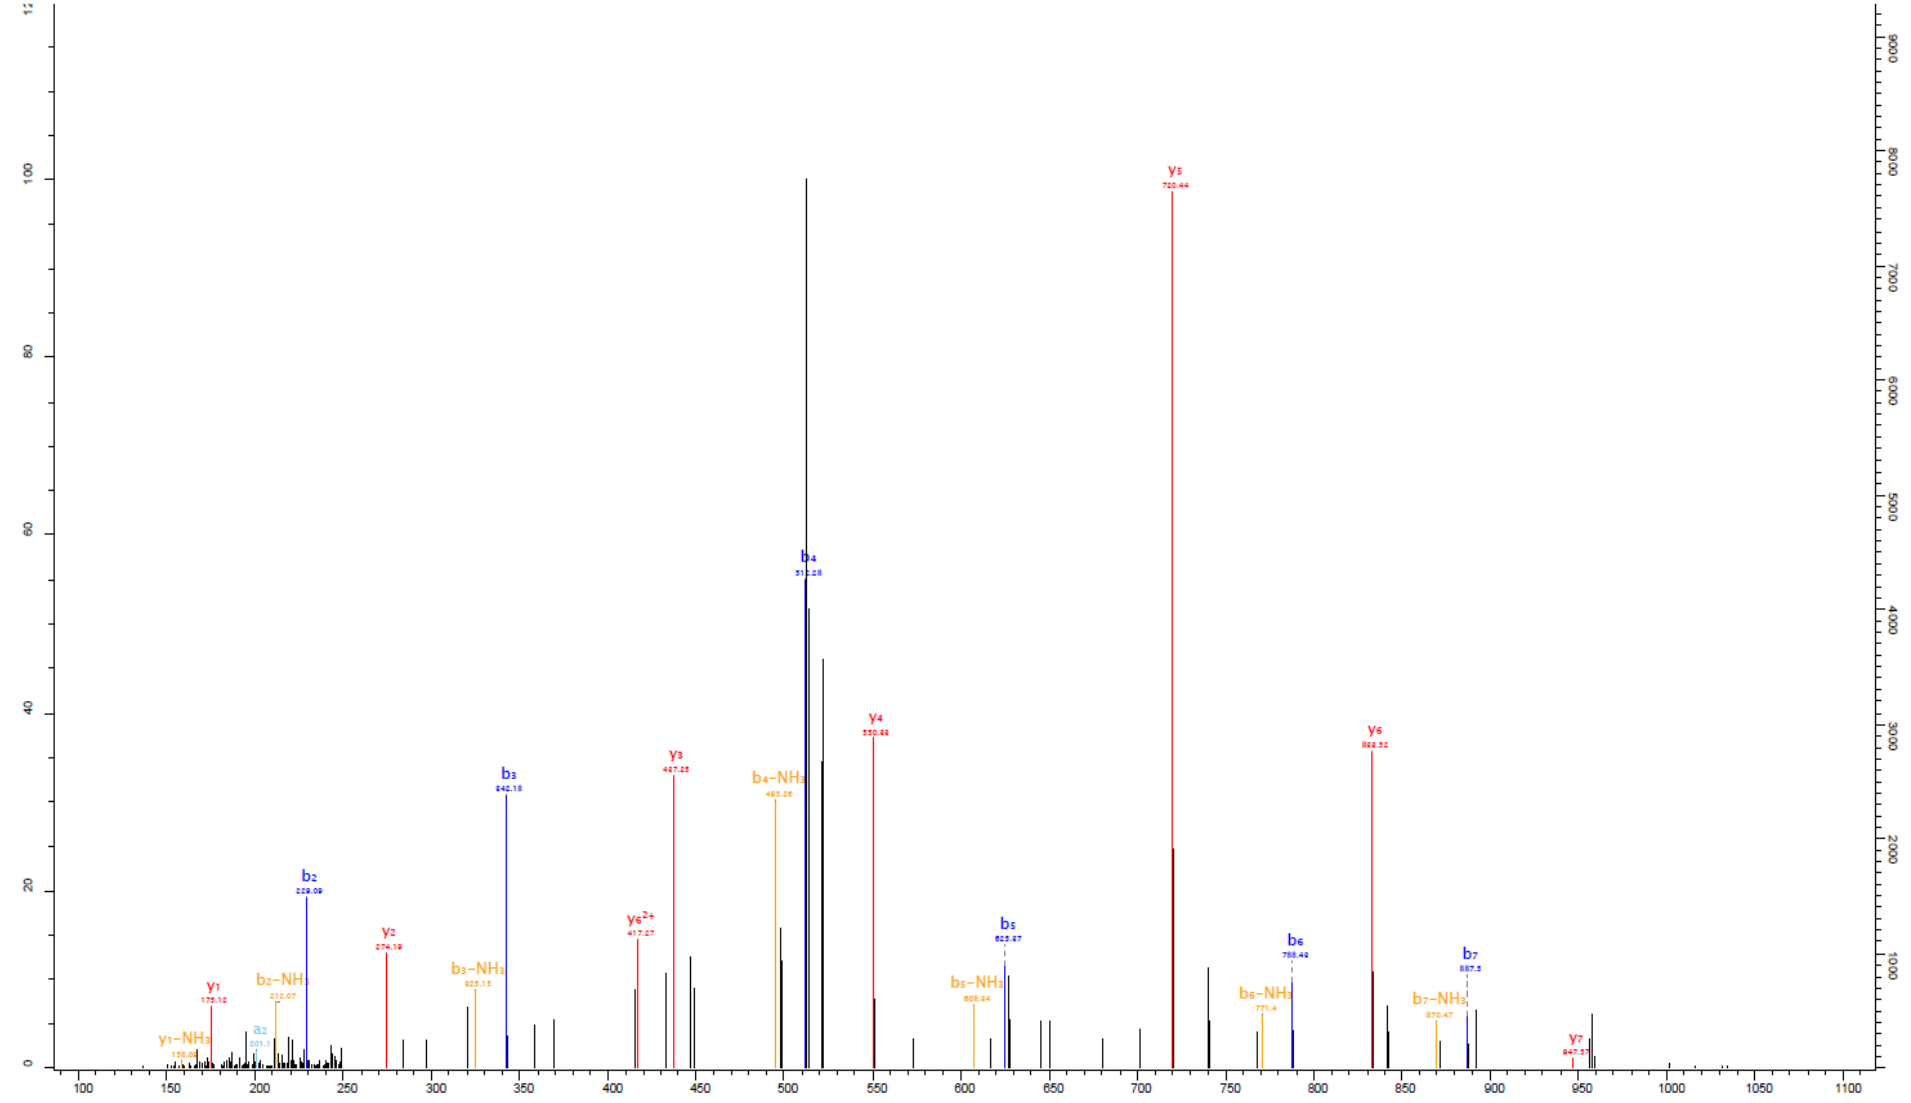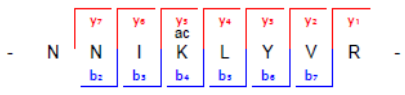

Gene name = Hsp90ab1; Hsp90aa1

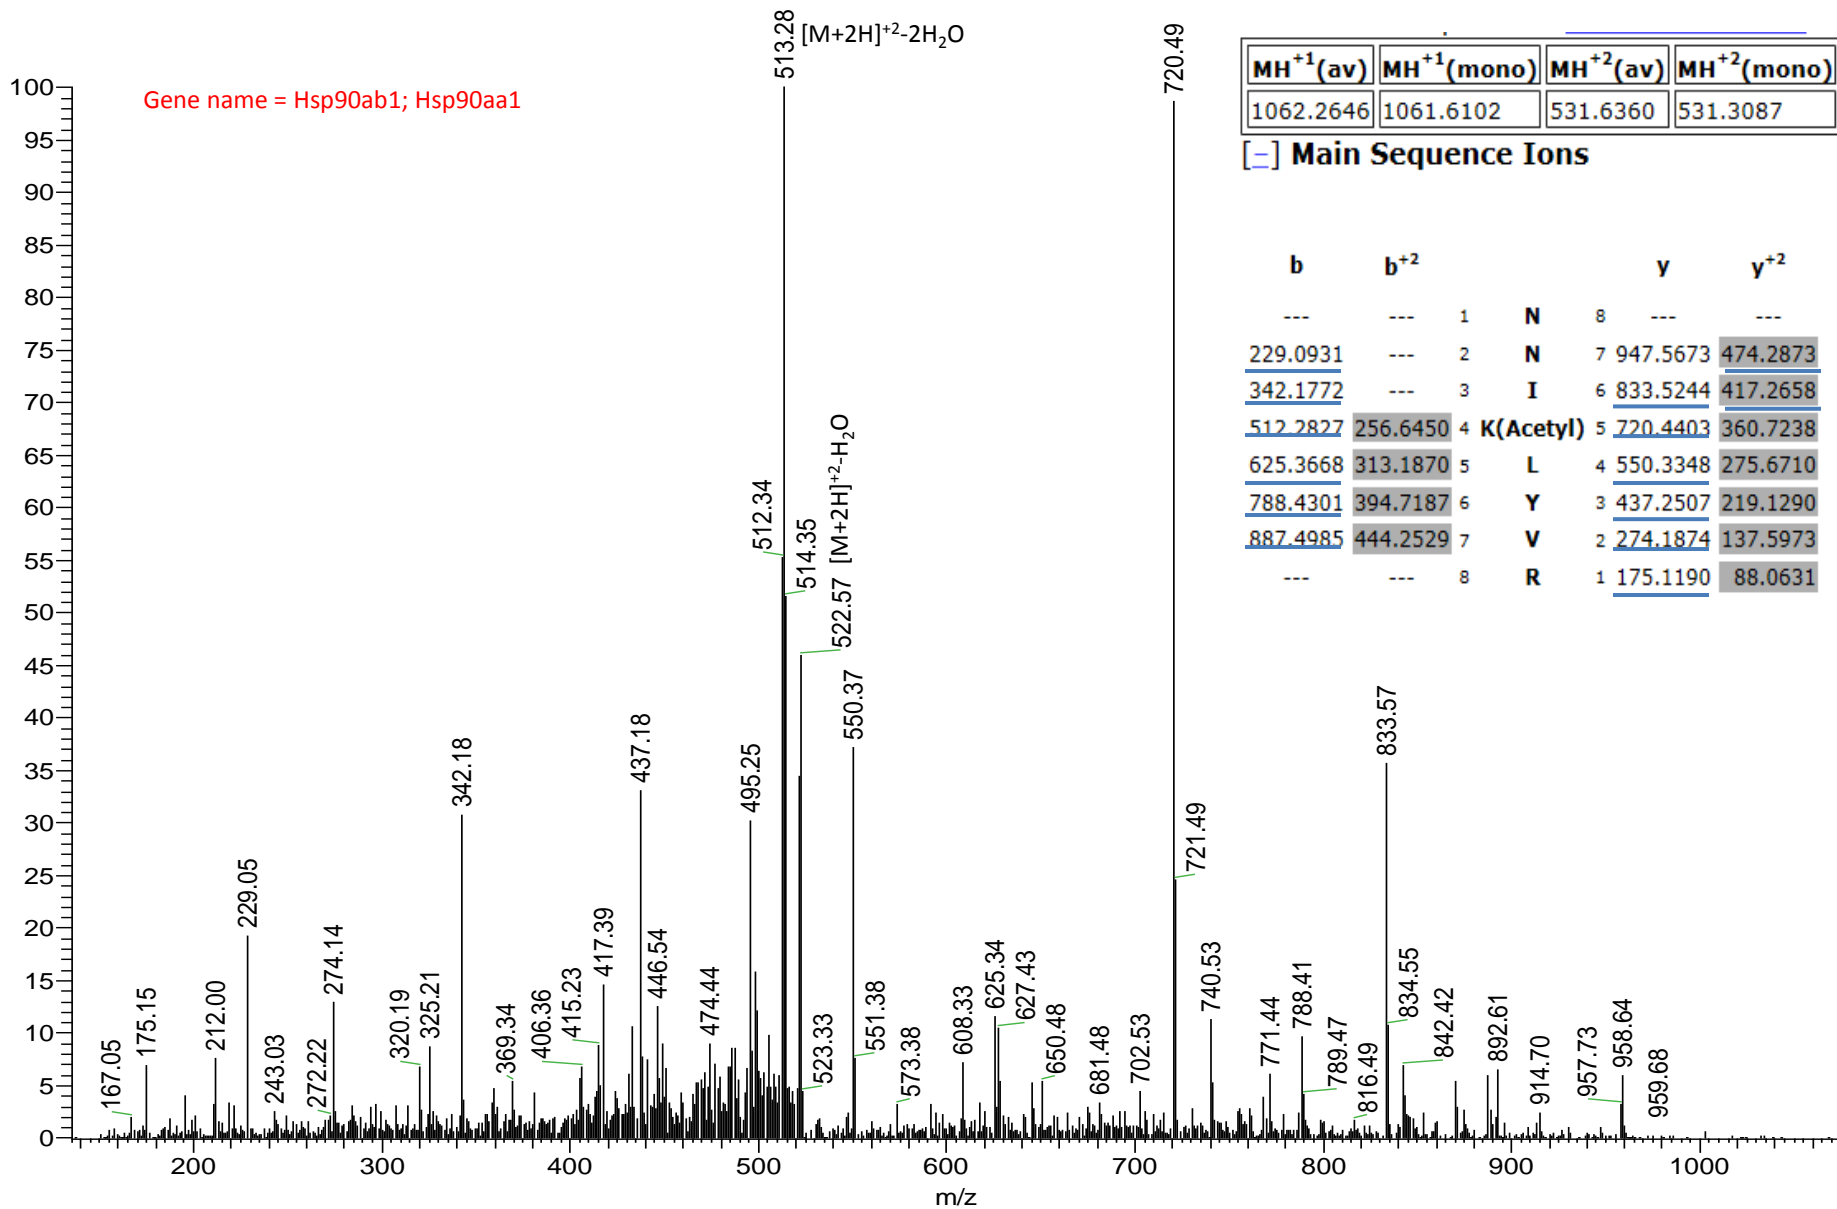

| MH <sup>+1</sup> (av) | MH <sup>+1</sup> (mono) | MH <sup>+2</sup> (av) | MH <sup>+2</sup> (mono) |
|-----------------------|-------------------------|-----------------------|-------------------------|
| 1062.2646             | 1061.6102               | 531.6360              | 531.3087                |

**[ - ] Main Sequence Ions**

| b               | b <sup>+2</sup> |   | y                | y <sup>+2</sup> |                                 |
|-----------------|-----------------|---|------------------|-----------------|---------------------------------|
| ---             | ---             | 1 | <b>N</b>         | 8               | ---                             |
| <u>229.0931</u> | ---             | 2 | <b>N</b>         | 7               | <u>947.5673</u> <u>474.2873</u> |
| <u>342.1772</u> | ---             | 3 | <b>I</b>         | 6               | <u>833.5244</u> <u>417.2658</u> |
| <u>512.2827</u> | <u>256.6450</u> | 4 | <b>K(Acetyl)</b> | 5               | <u>720.4403</u> <u>360.7238</u> |
| <u>625.3668</u> | <u>313.1870</u> | 5 | <b>L</b>         | 4               | <u>550.3348</u> <u>275.6710</u> |
| <u>788.4301</u> | <u>394.7187</u> | 6 | <b>Y</b>         | 3               | <u>437.2507</u> <u>219.1290</u> |
| <u>887.4985</u> | <u>444.2529</u> | 7 | <b>V</b>         | 2               | <u>274.1874</u> <u>137.5973</u> |
| ---             | ---             | 8 | <b>R</b>         | 1               | <u>175.1190</u> <u>88.0631</u>  |



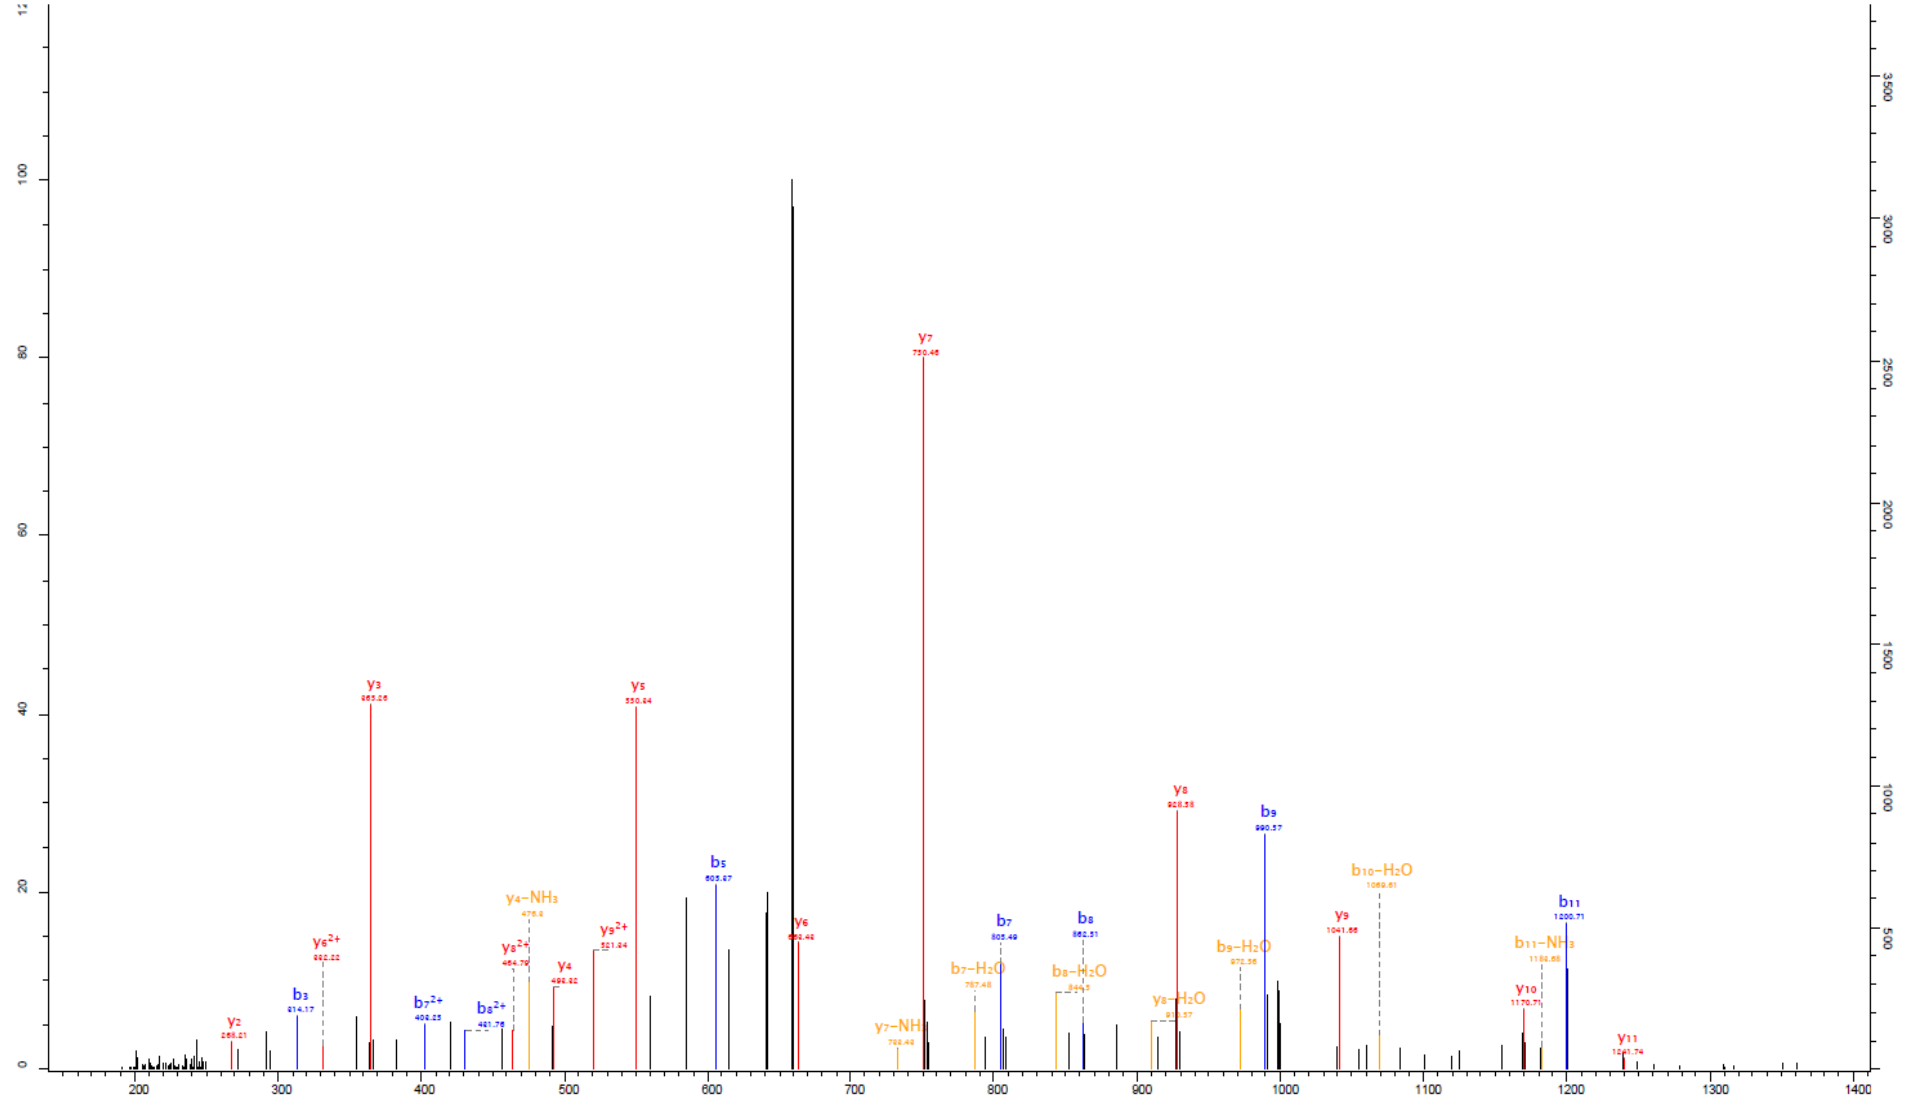

- L A E L S L G Q P I K -

Fragmentation mapping: Y11, Y10, Y9, Y8, Y7, Y6, Y5, Y4, Y3, Y2 (red boxes); b5, b3, b7, b8, b11 (blue boxes).

| H <sup>+</sup> (mono) | MH <sup>+</sup> (av) | MH <sup>+</sup> (mono) |
|-----------------------|----------------------|------------------------|
| 654.8276              | 678.3184             | 677.9174               |

**Sequence Ions**

| b         | b <sup>+</sup> |    | y                 | y <sup>+</sup> |           |          |
|-----------|----------------|----|-------------------|----------------|-----------|----------|
| ---       | ---            | 1  | L                 | 12             | ---       | ---      |
| 185.1285  | ---            | 2  | <b>A</b>          | 11             | 1241.7435 | 621.3754 |
| 314.1710  | ---            | 3  | E                 | 10             | 1170.7064 | 585.8568 |
| 427.2551  | ---            | 4  | L                 | 9              | 1041.6638 | 521.3355 |
| 605.3749  | 303.1911       | 5  | <b>K(50.0248)</b> | 8              | 928.5797  | 464.7935 |
| 692.4069  | 346.7071       | 6  | <b>S</b>          | 7              | 750.4600  | 375.7336 |
| 805.4910  | 403.2491       | 7  | L                 | 6              | 663.4279  | 332.2176 |
| 862.5124  | 431.7599       | 8  | G                 | 5              | 550.3439  | 275.6756 |
| 990.5710  | 495.7891       | 9  | <b>Q</b>          | 4              | 493.3224  | 247.1648 |
| 1087.6238 | 544.3155       | 10 | <b>P</b>          | 3              | 365.2638  | 183.1356 |
| 1200.7078 | 600.8576       | 11 | <b>I</b>          | 2              | 268.2111  | 134.6092 |
| ---       | ---            | 12 | <b>K(8.0142)</b>  | 1              | 155.1270  | 78.0671  |

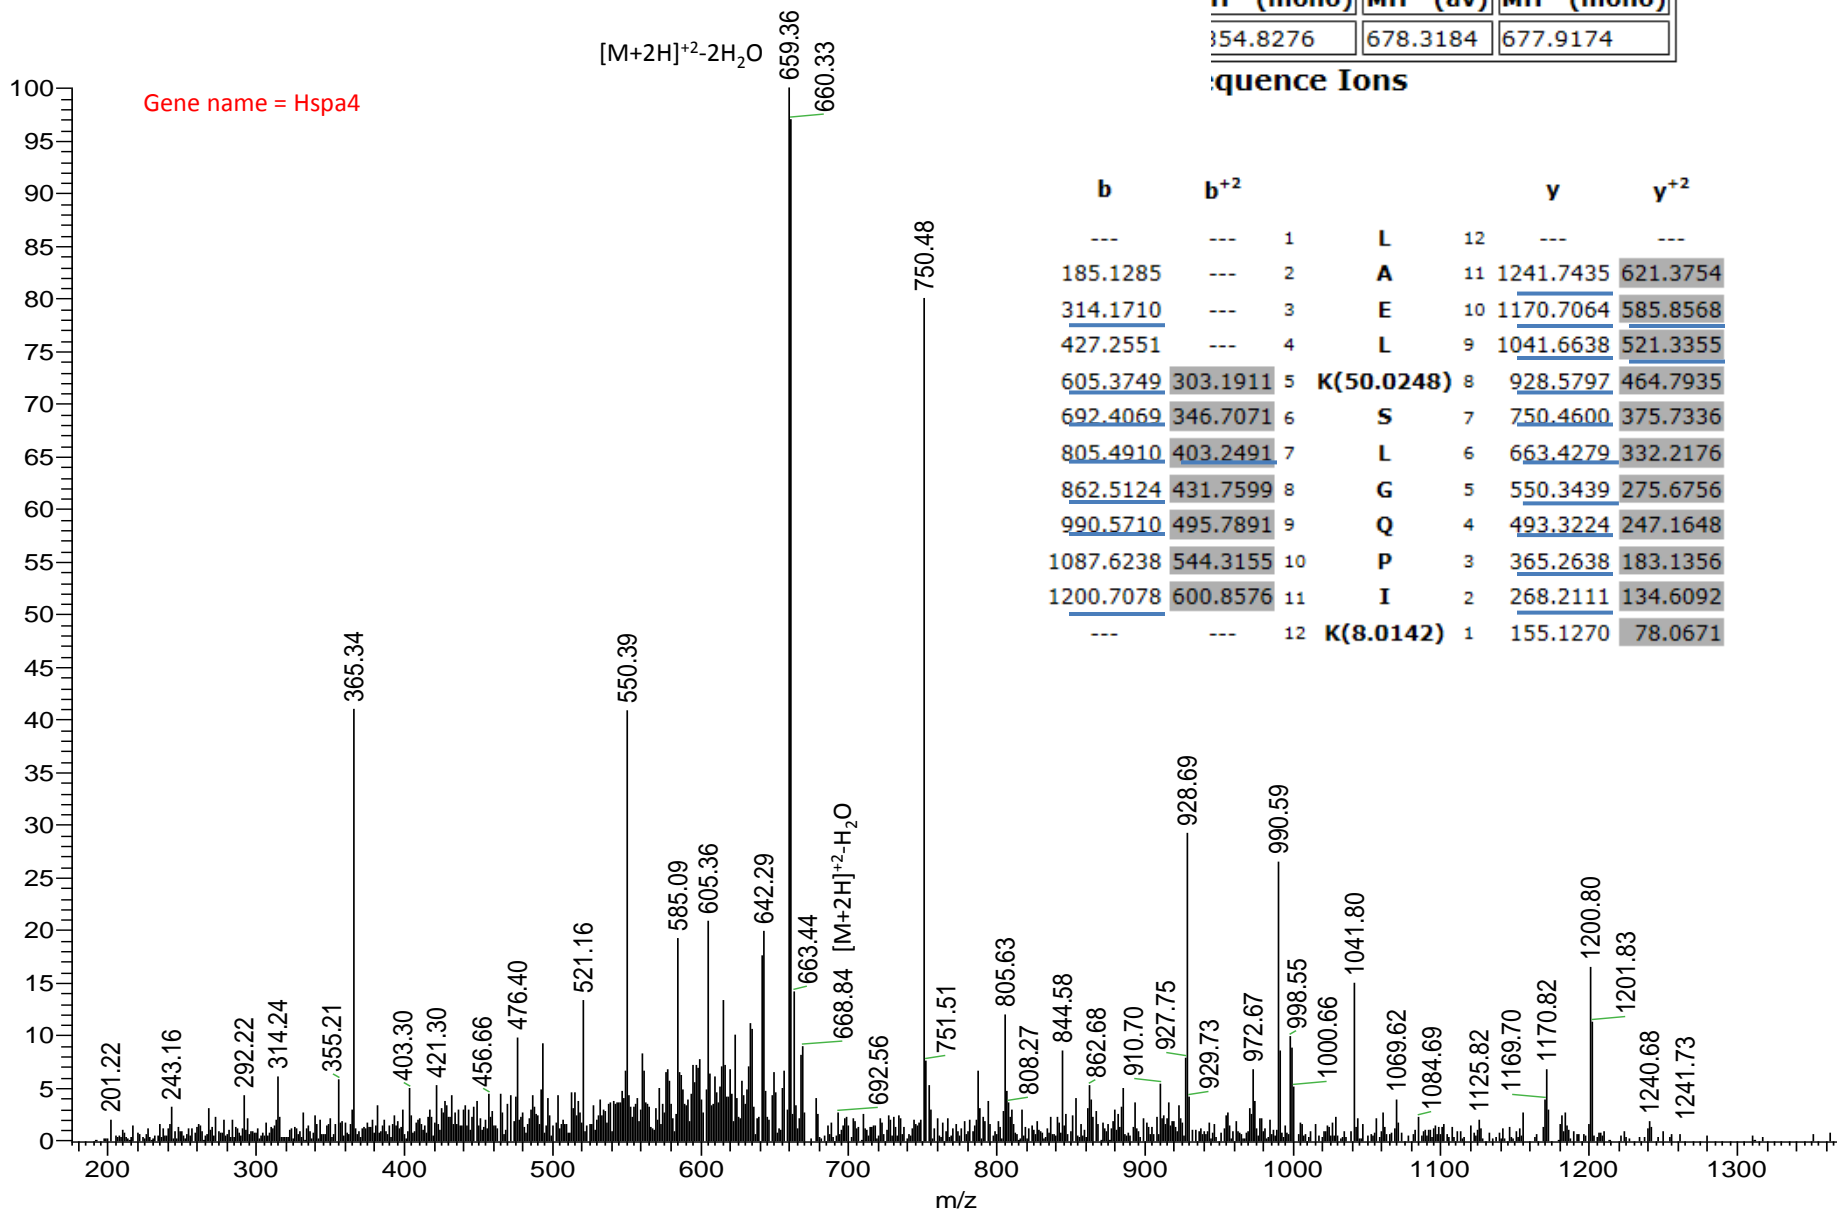

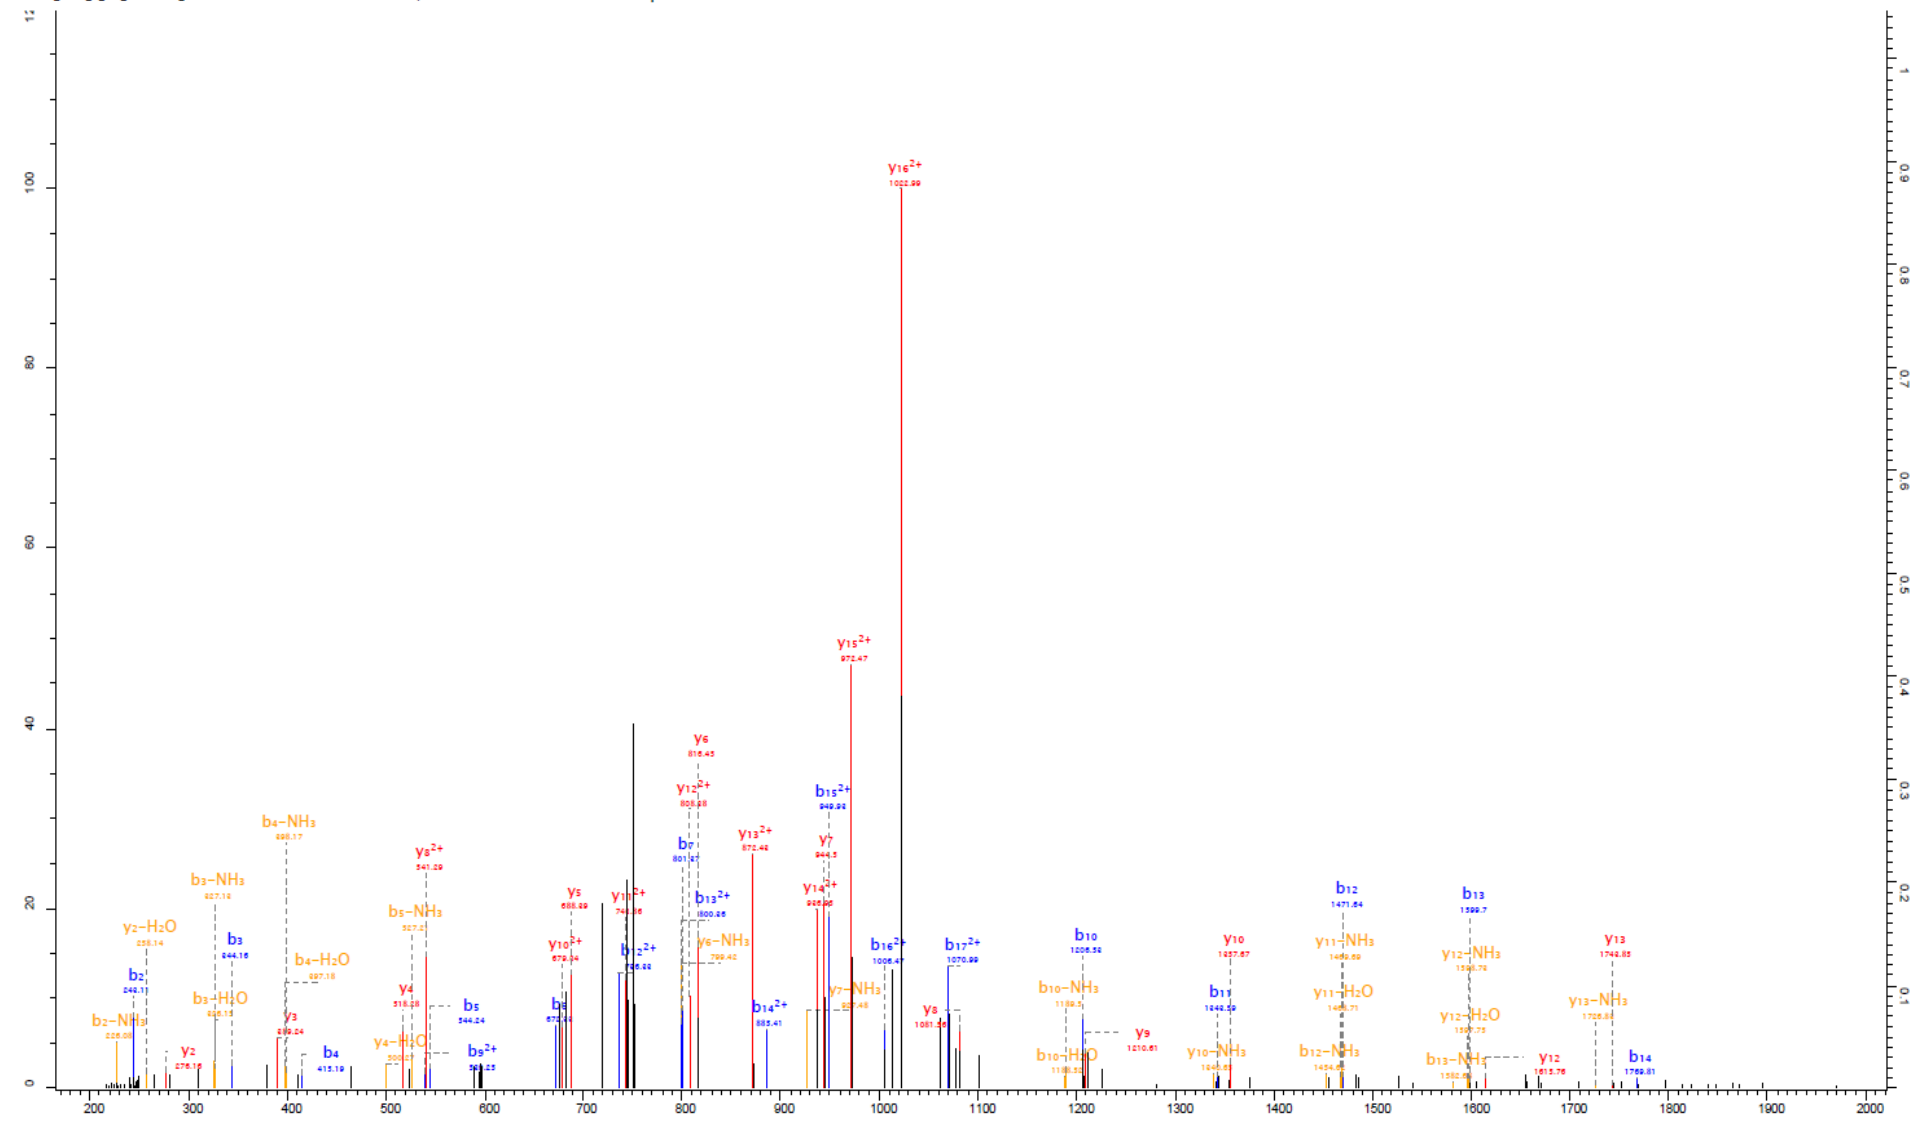

- N Q T A E K E E F E H Q Q K E L E K -

y16<sup>2+</sup>
y15<sup>2+</sup>
y14<sup>2+</sup>
y13
y12
y11<sup>2+</sup>
y10
y9
y8
y7
y6
y5
y4
y3
y2

b2
b3
b4
b5
b6
b7
b8<sup>2+</sup>
b10
b11
b12
b13
b14
b15<sup>2+</sup>
b16<sup>2+</sup>
b17<sup>2+</sup>

Gene name = Hspa8

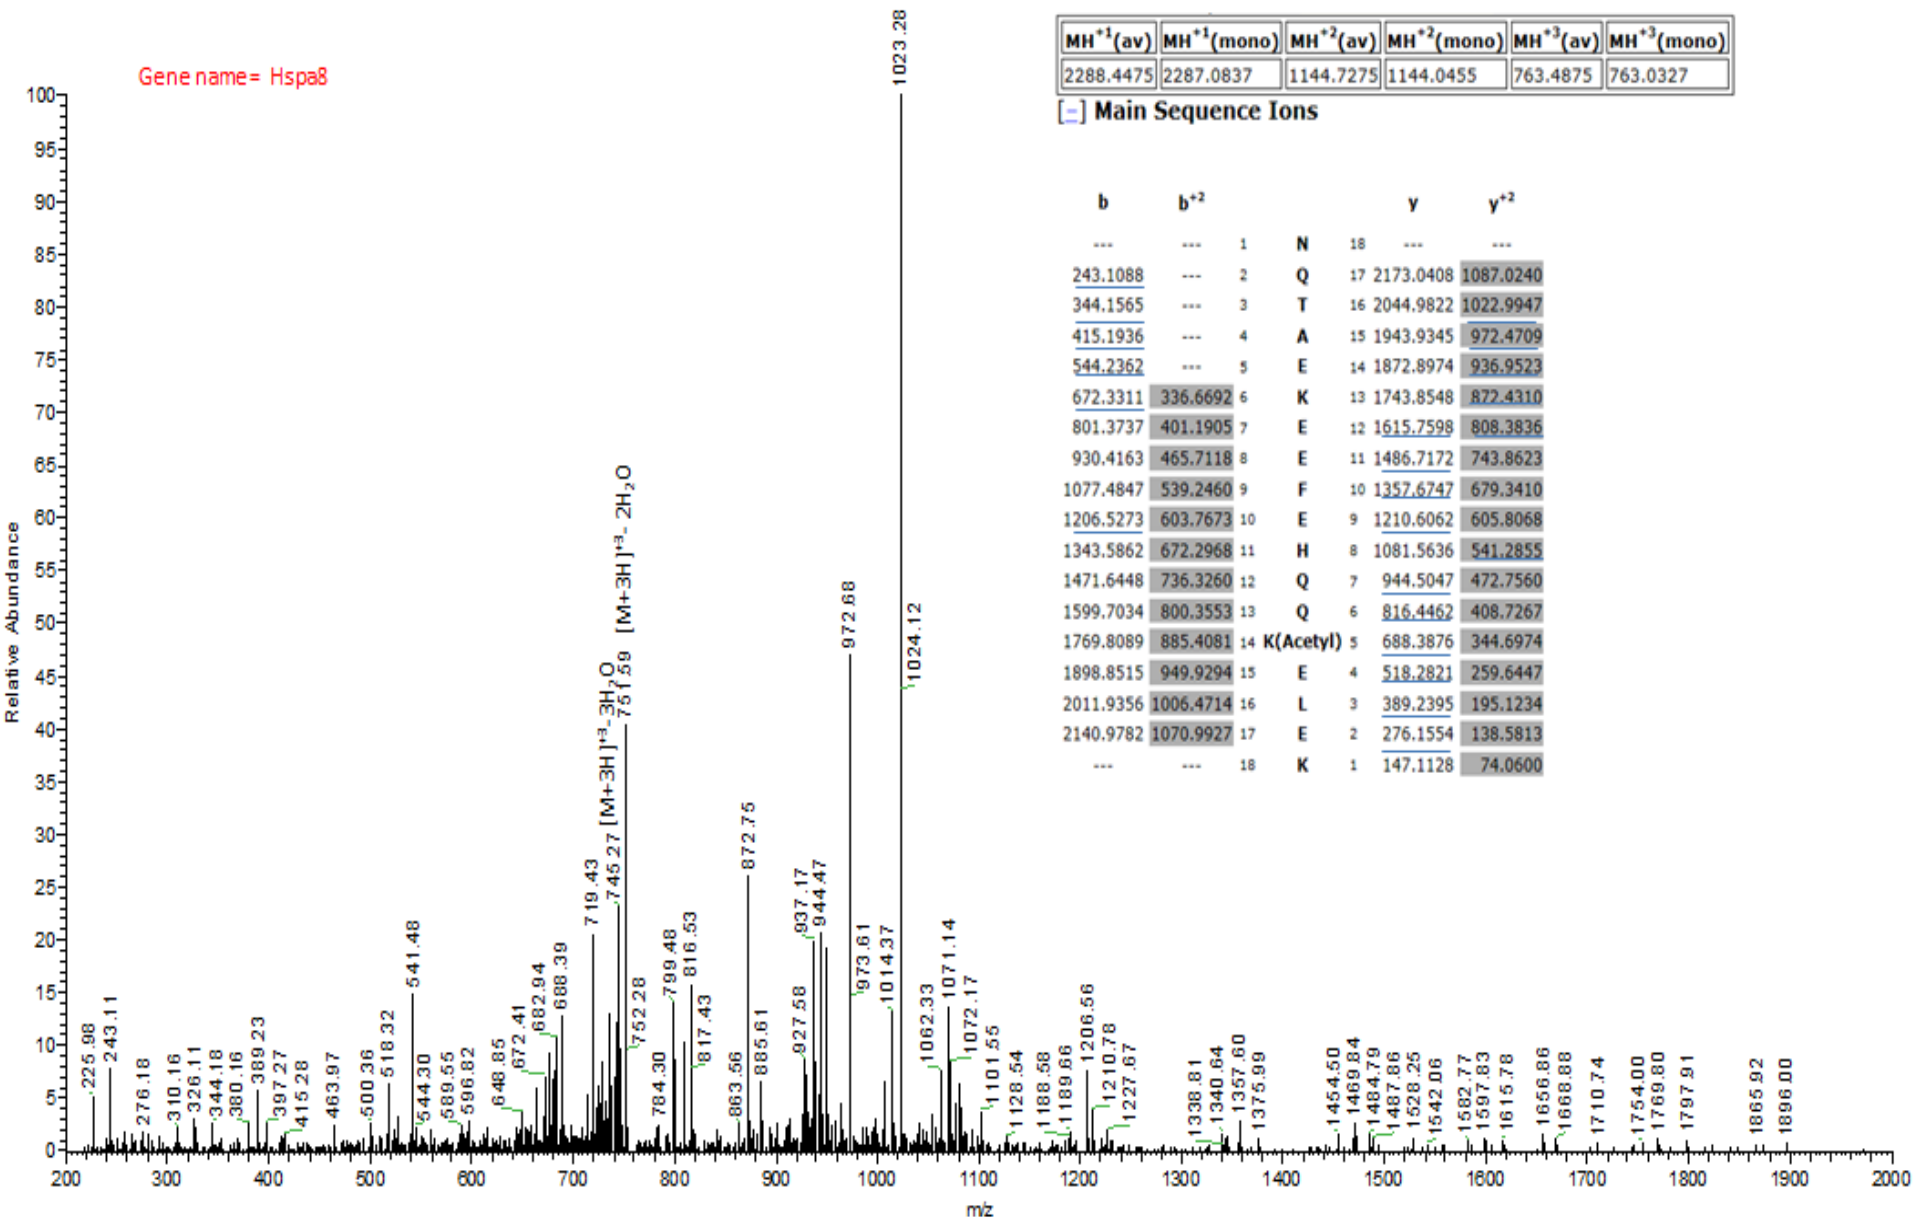

| MH <sup>+</sup> (av) | MH <sup>+</sup> (mono) | MH <sup>2+</sup> (av) | MH <sup>2+</sup> (mono) | MH <sup>3+</sup> (av) | MH <sup>3+</sup> (mono) |
|----------------------|------------------------|-----------------------|-------------------------|-----------------------|-------------------------|
| 2288.4475            | 2287.0837              | 1144.7275             | 1144.0455               | 763.4875              | 763.0327                |

[-] Main Sequence Ions

| b         | b <sup>+</sup> |    | y         | y <sup>+</sup> |
|-----------|----------------|----|-----------|----------------|
| ---       | ---            | 1  | N         | 18             |
| 243.1088  | ---            | 2  | Q         | 17             |
| 344.1565  | ---            | 3  | T         | 16             |
| 415.1936  | ---            | 4  | A         | 15             |
| 544.2362  | ---            | 5  | E         | 14             |
| 672.3311  | 336.6692       | 6  | K         | 13             |
| 801.3737  | 401.1905       | 7  | E         | 12             |
| 930.4163  | 465.7118       | 8  | E         | 11             |
| 1077.4847 | 539.2460       | 9  | F         | 10             |
| 1206.5273 | 603.7673       | 10 | E         | 9              |
| 1343.5862 | 672.2968       | 11 | H         | 8              |
| 1471.6448 | 736.3260       | 12 | Q         | 7              |
| 1599.7034 | 800.3553       | 13 | Q         | 6              |
| 1769.8089 | 885.4081       | 14 | K(Acetyl) | 5              |
| 1898.8515 | 949.9294       | 15 | E         | 4              |
| 2011.9356 | 1006.4714      | 16 | L         | 3              |
| 2140.9782 | 1070.9927      | 17 | E         | 2              |
| --        | --             | 18 | K         | 1              |

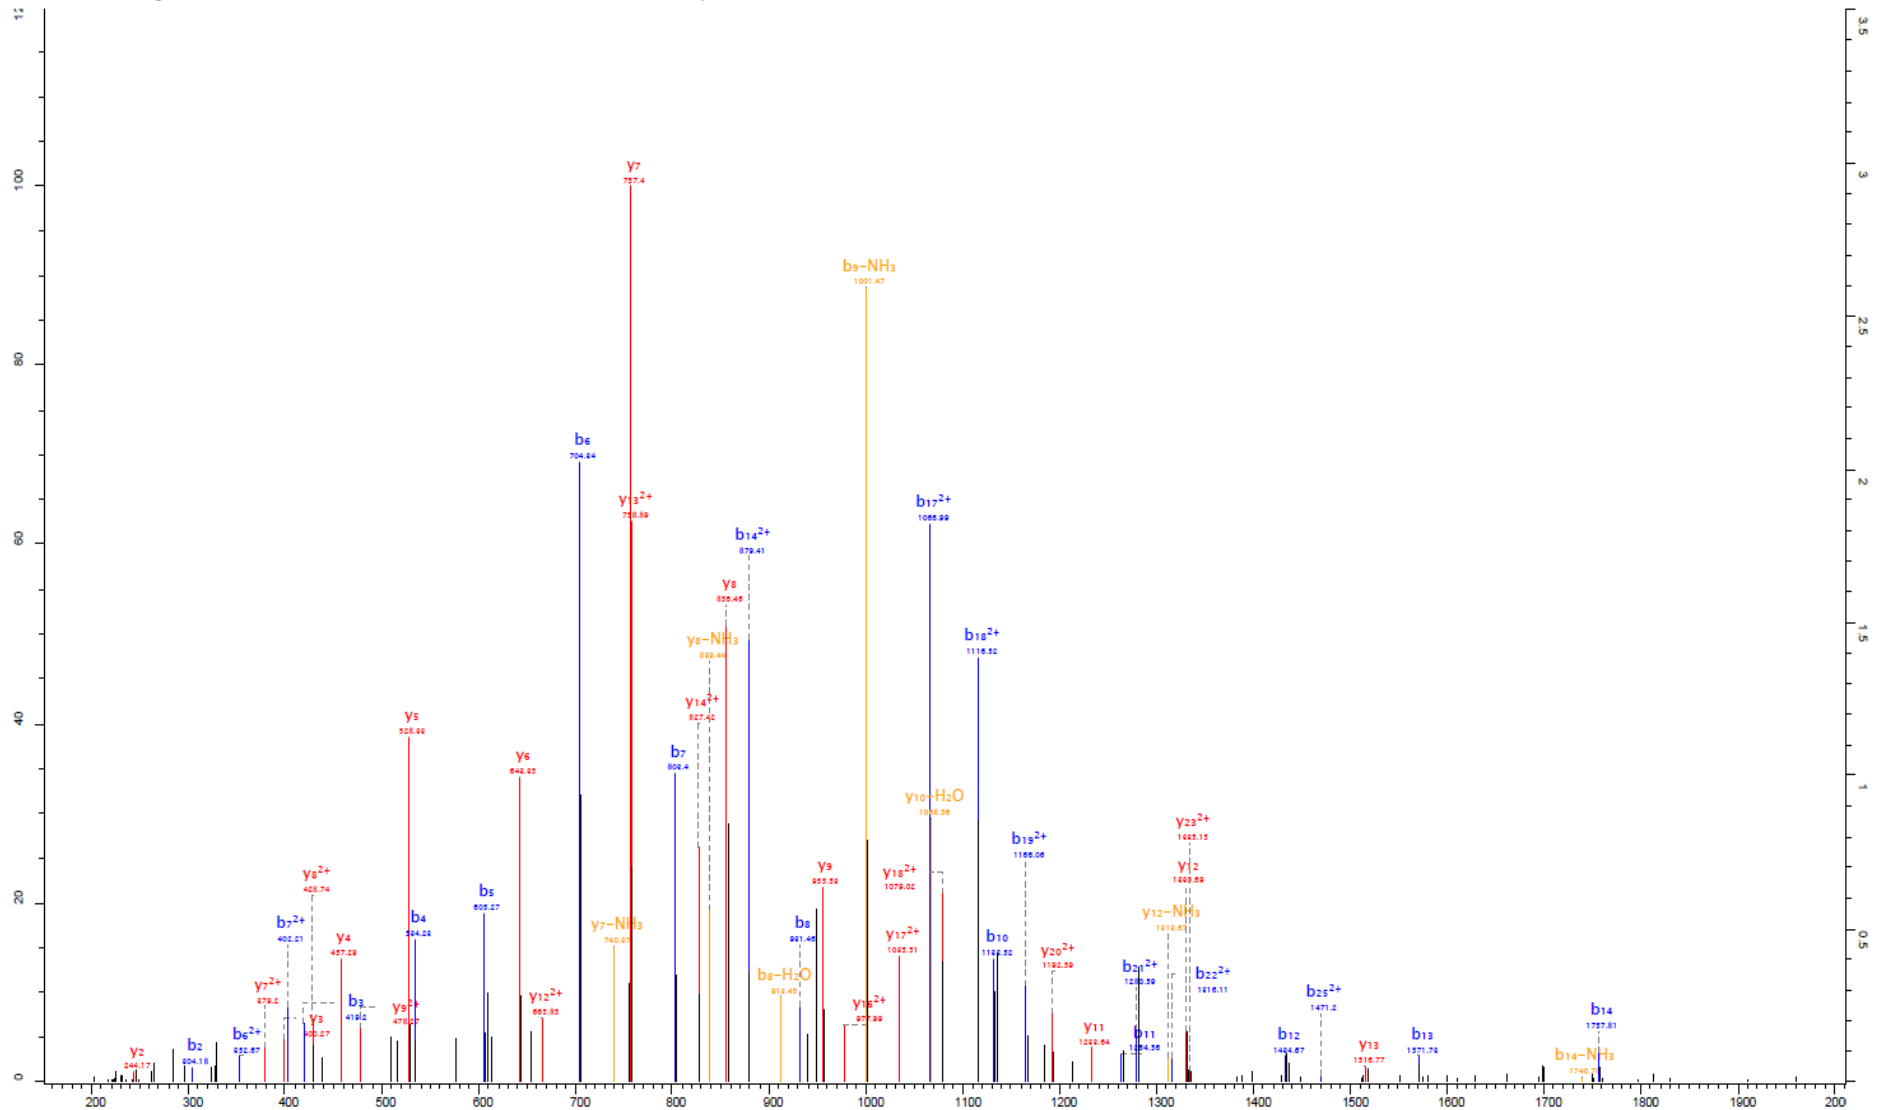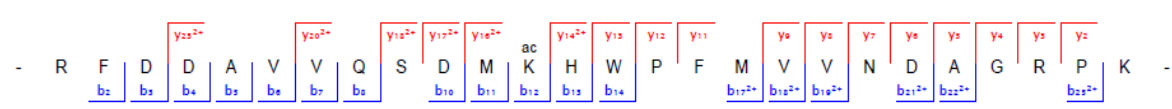

| MH <sup>+</sup> (av) | MH <sup>+</sup> (mono) |
|----------------------|------------------------|----------------------|------------------------|----------------------|------------------------|----------------------|------------------------|
| 3089.5467            | 3087.4928              | 1545.2771            | 1544.2500              | 1030.5205            | 1029.8358              | 773.1422             | 772.6286               |

[-] Main Sequence Ions

| b         | b <sup>+</sup> |    | y         | y <sup>+</sup> |
|-----------|----------------|----|-----------|----------------|
| ...       | ...            | 1  | R         | 26             |
| 304.1768  | 152.5920       | 2  | F         | 25             |
| 419.2037  | 210.1055       | 3  | D         | 24             |
| 534.2307  | 267.6190       | 4  | D         | 23             |
| 605.2678  | 303.1375       | 5  | A         | 22             |
| 704.3362  | 352.6717       | 6  | V         | 21             |
| 803.4046  | 402.2060       | 7  | V         | 20             |
| 931.4632  | 466.2352       | 8  | Q         | 19             |
| 1018.4952 | 509.7513       | 9  | S         | 18             |
| 1133.5222 | 567.2647       | 10 | D         | 17             |
| 1264.5627 | 632.7850       | 11 | M         | 16             |
| 1434.6682 | 717.8377       | 12 | K(Acetyl) | 15             |
| 1571.7271 | 786.3672       | 13 | H         | 14             |
| 1757.8064 | 879.4068       | 14 | W         | 13             |
| 1854.8592 | 927.9332       | 15 | P         | 12             |
| 2001.9276 | 1001.4674      | 16 | F         | 11             |
| 2132.9681 | 1066.9877      | 17 | M         | 10             |
| 2232.0365 | 1116.5219      | 18 | V         | 9              |
| 2331.1049 | 1166.0561      | 19 | V         | 8              |
| 2445.1478 | 1223.0776      | 20 | N         | 7              |
| 2560.1748 | 1280.5910      | 21 | D         | 6              |
| 2631.2119 | 1316.1096      | 22 | A         | 5              |
| 2688.2334 | 1344.6203      | 23 | G         | 4              |
| 2844.3345 | 1422.6709      | 24 | R         | 3              |
| 2941.3872 | 1471.1973      | 25 | P         | 2              |
| ...       | ...            | 26 | K         | 1              |

Gene name= Hspa8

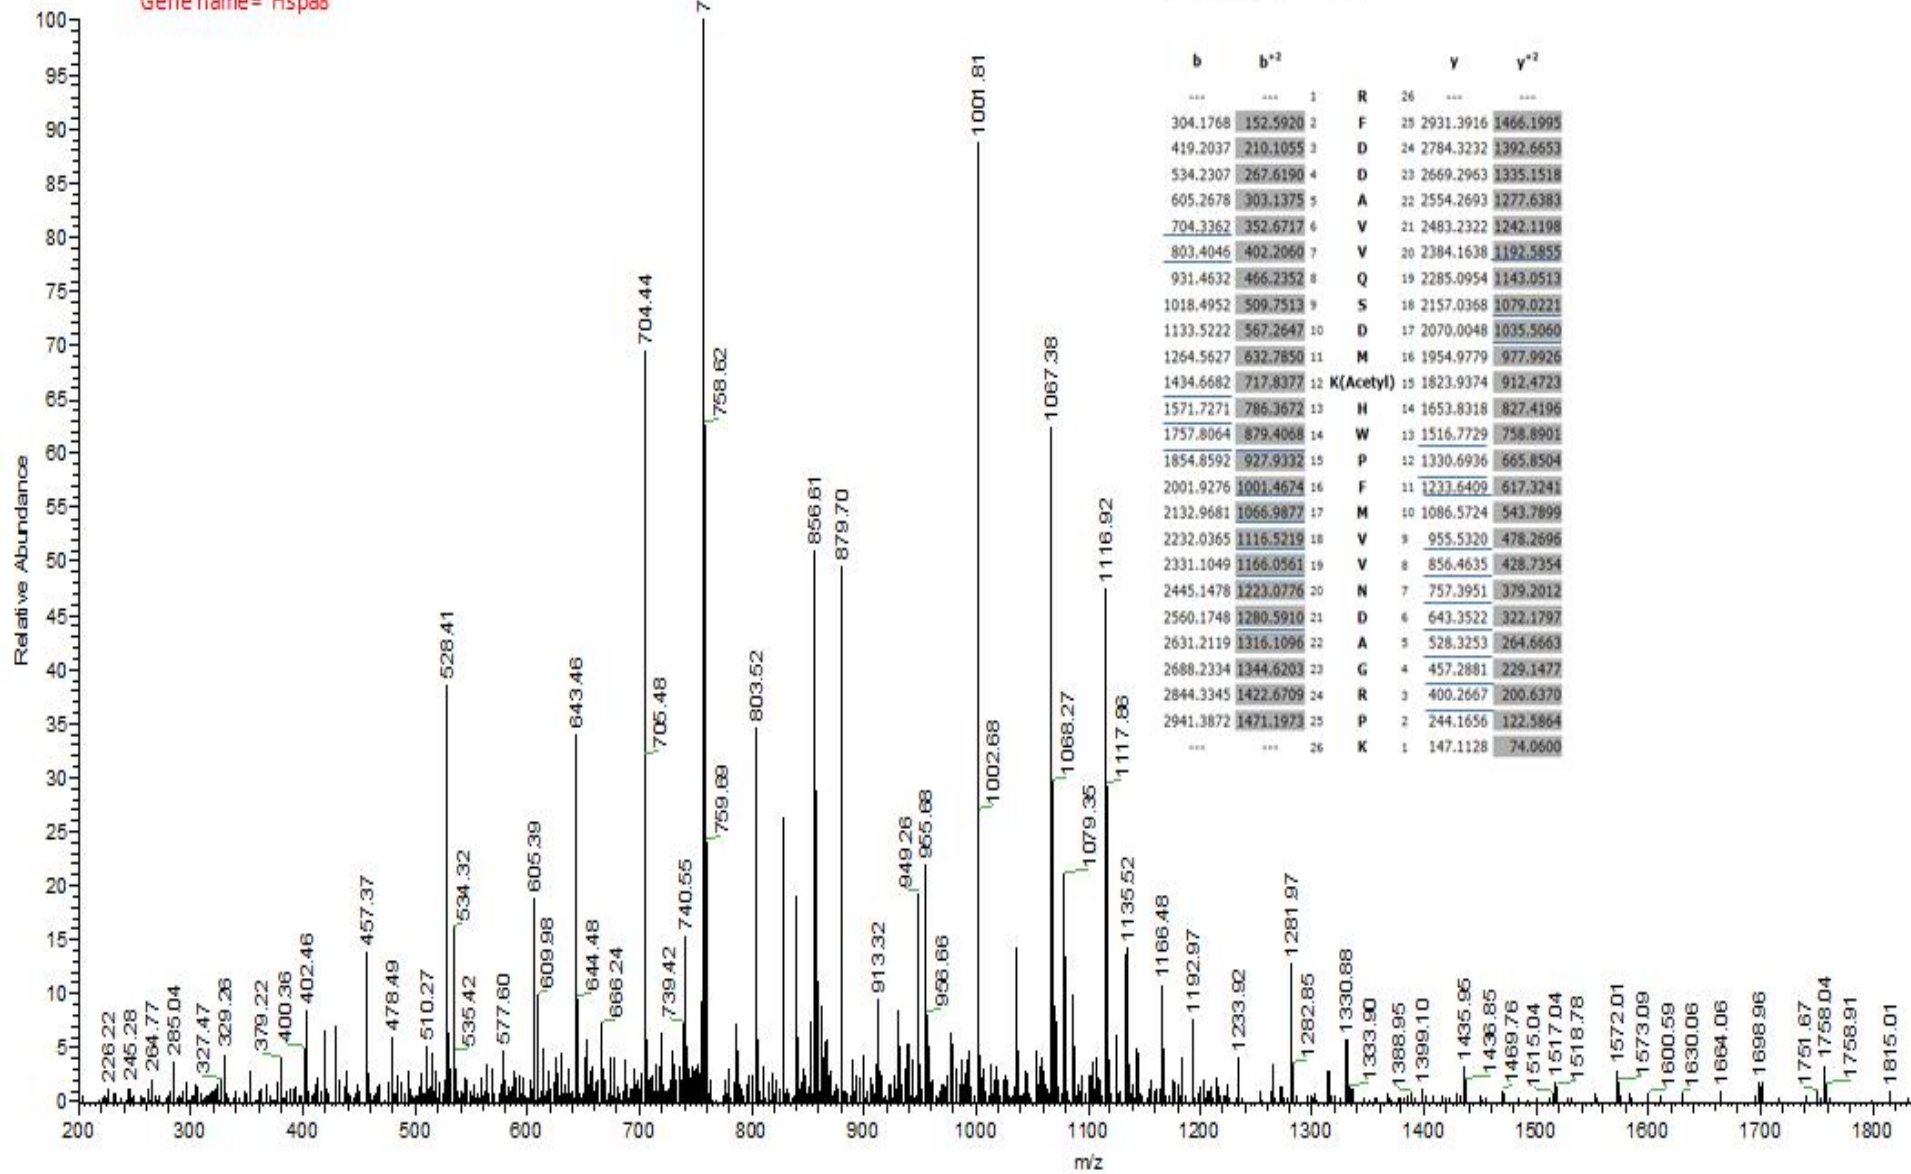

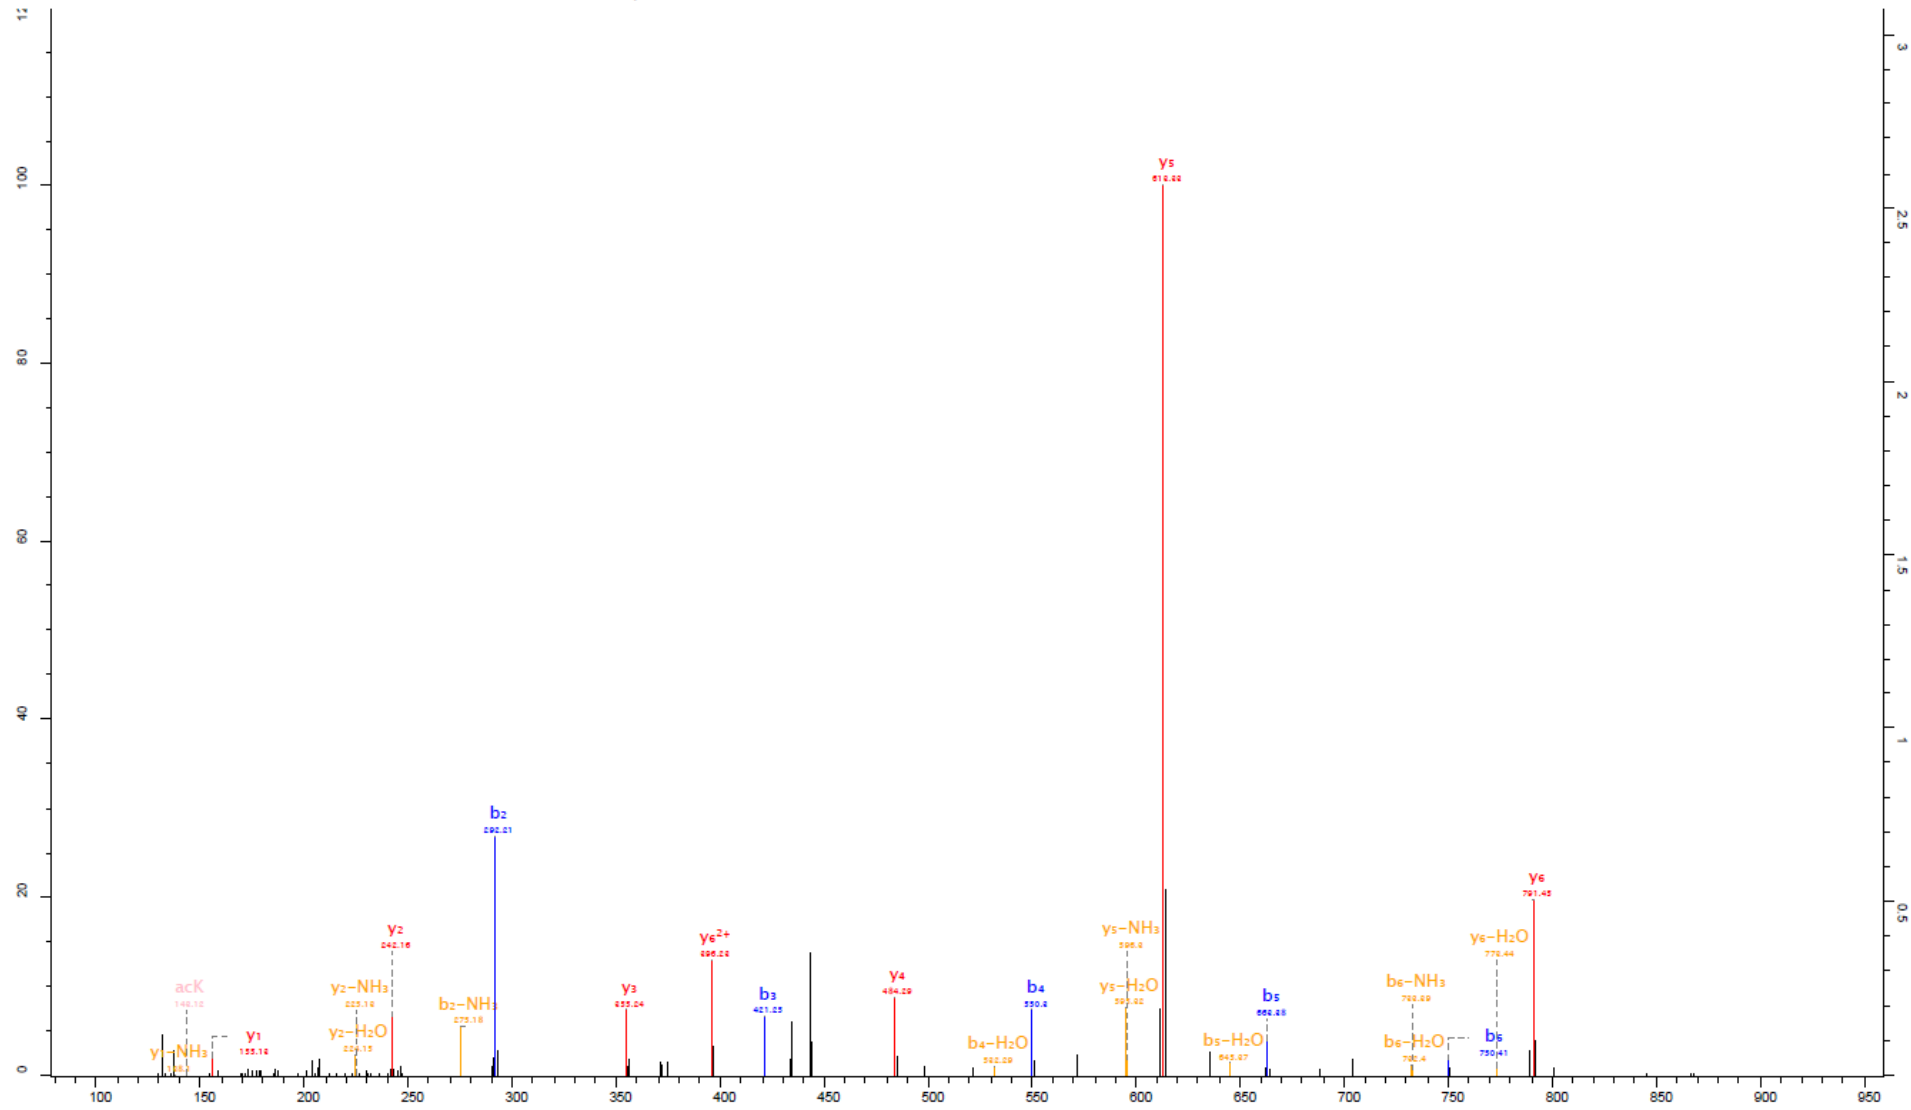

- L 

|    |    |    |    |    |    |
|----|----|----|----|----|----|
| Y6 | Y5 | Y4 | Y3 | Y2 | Y1 |
| ac |    |    |    |    |    |
| K  | E  | E  | I  | S  | K  |
| b2 | b3 | b4 | b5 | b6 |    |

 -

Gene name= Hspa9

| MH <sup>+1</sup> (av) | MH <sup>+1</sup> (mono) | MH <sup>+2</sup> (av) | MH <sup>+2</sup> (mono) |
|-----------------------|-------------------------|-----------------------|-------------------------|
| 905.0441              | 904.5321                | 453.0258              | 452.7697                |

**[-] Main Sequence Ions**

| b        | b <sup>+2</sup> | y             | y <sup>+2</sup> |
|----------|-----------------|---------------|-----------------|
| ---      | ---             | 1             | ---             |
| ---      | ---             | L             | ---             |
| ---      | ---             | 7             | ---             |
| 292.2111 | 146.6092        | 2 K(50.0248I) | 6 791.4480      |
| 421.2537 | 211.1305        | 3 E           | 5 613.3283      |
| 550.2963 | 275.6518        | 4 E           | 4 484.2857      |
| 663.3804 | 332.1938        | 5 I           | 3 355.2431      |
| 750.4124 | 375.7098        | 6 S           | 2 242.1590      |
| ---      | ---             | 7 K(8.0142)   | 1 155.1270      |
|          |                 |               | 8 78.0671       |

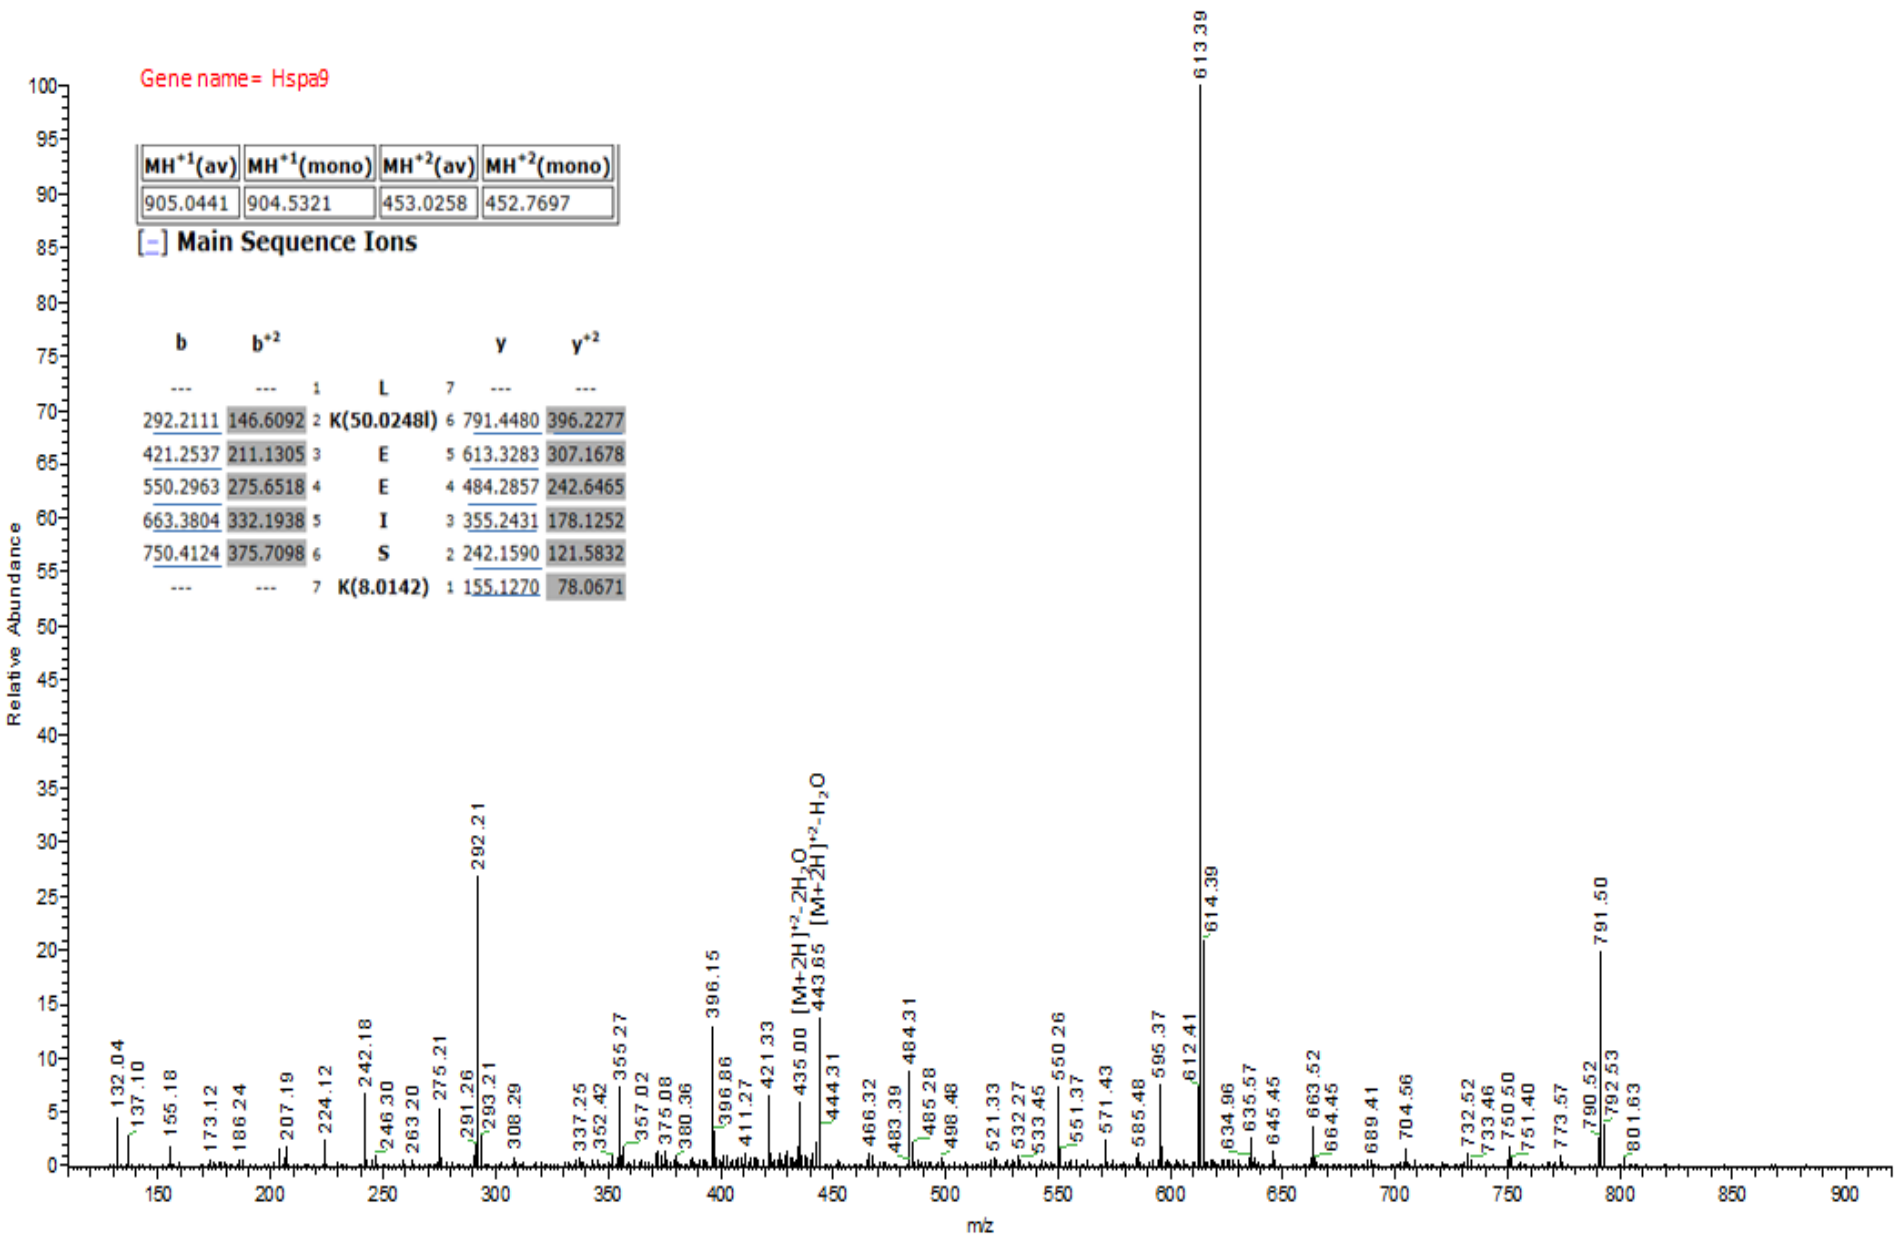



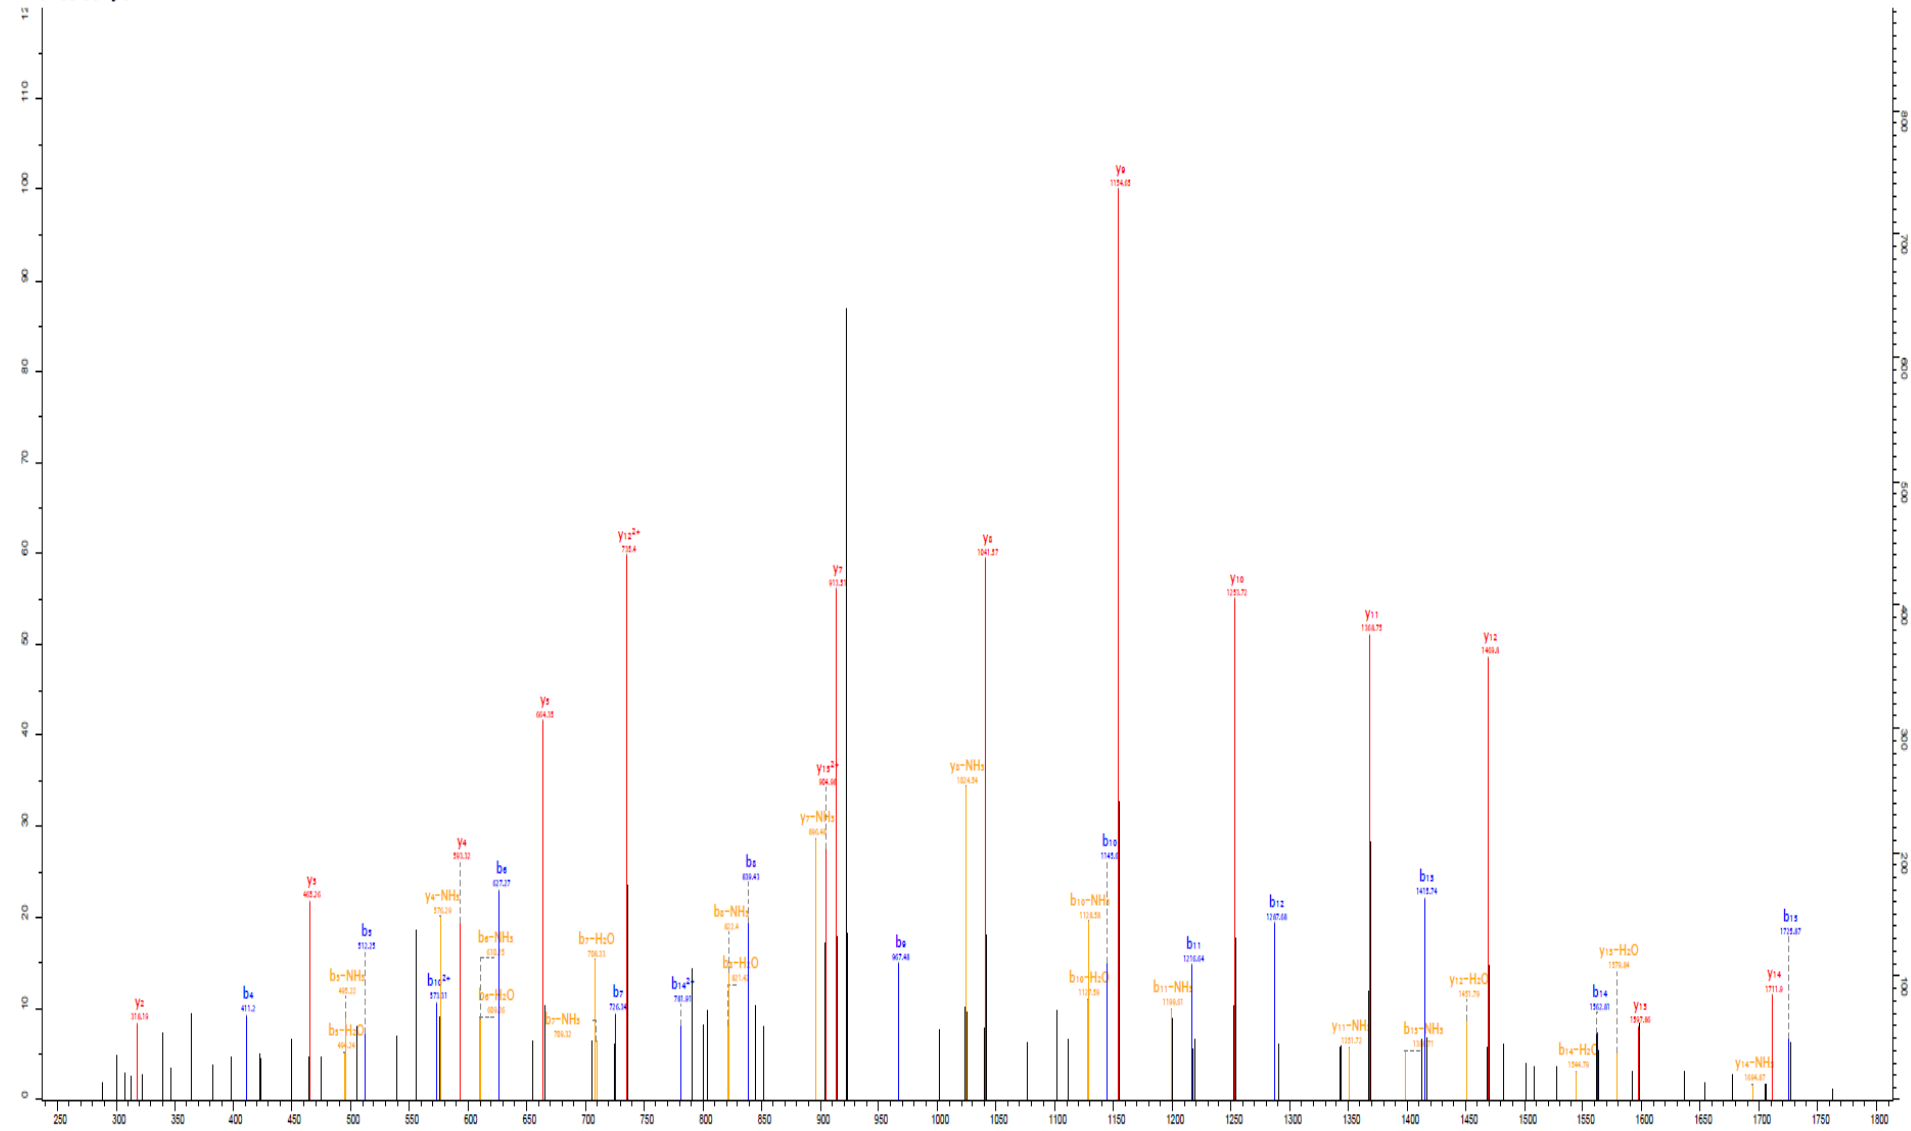

- A P N Q T D V L Q K A A Q F Y K -  
 b1 b2 b3 b4 b5 b6 b7 b8 b9 b10 b11 b12 b13 b14 b15

Gene names = 1830012016Rik; lft3

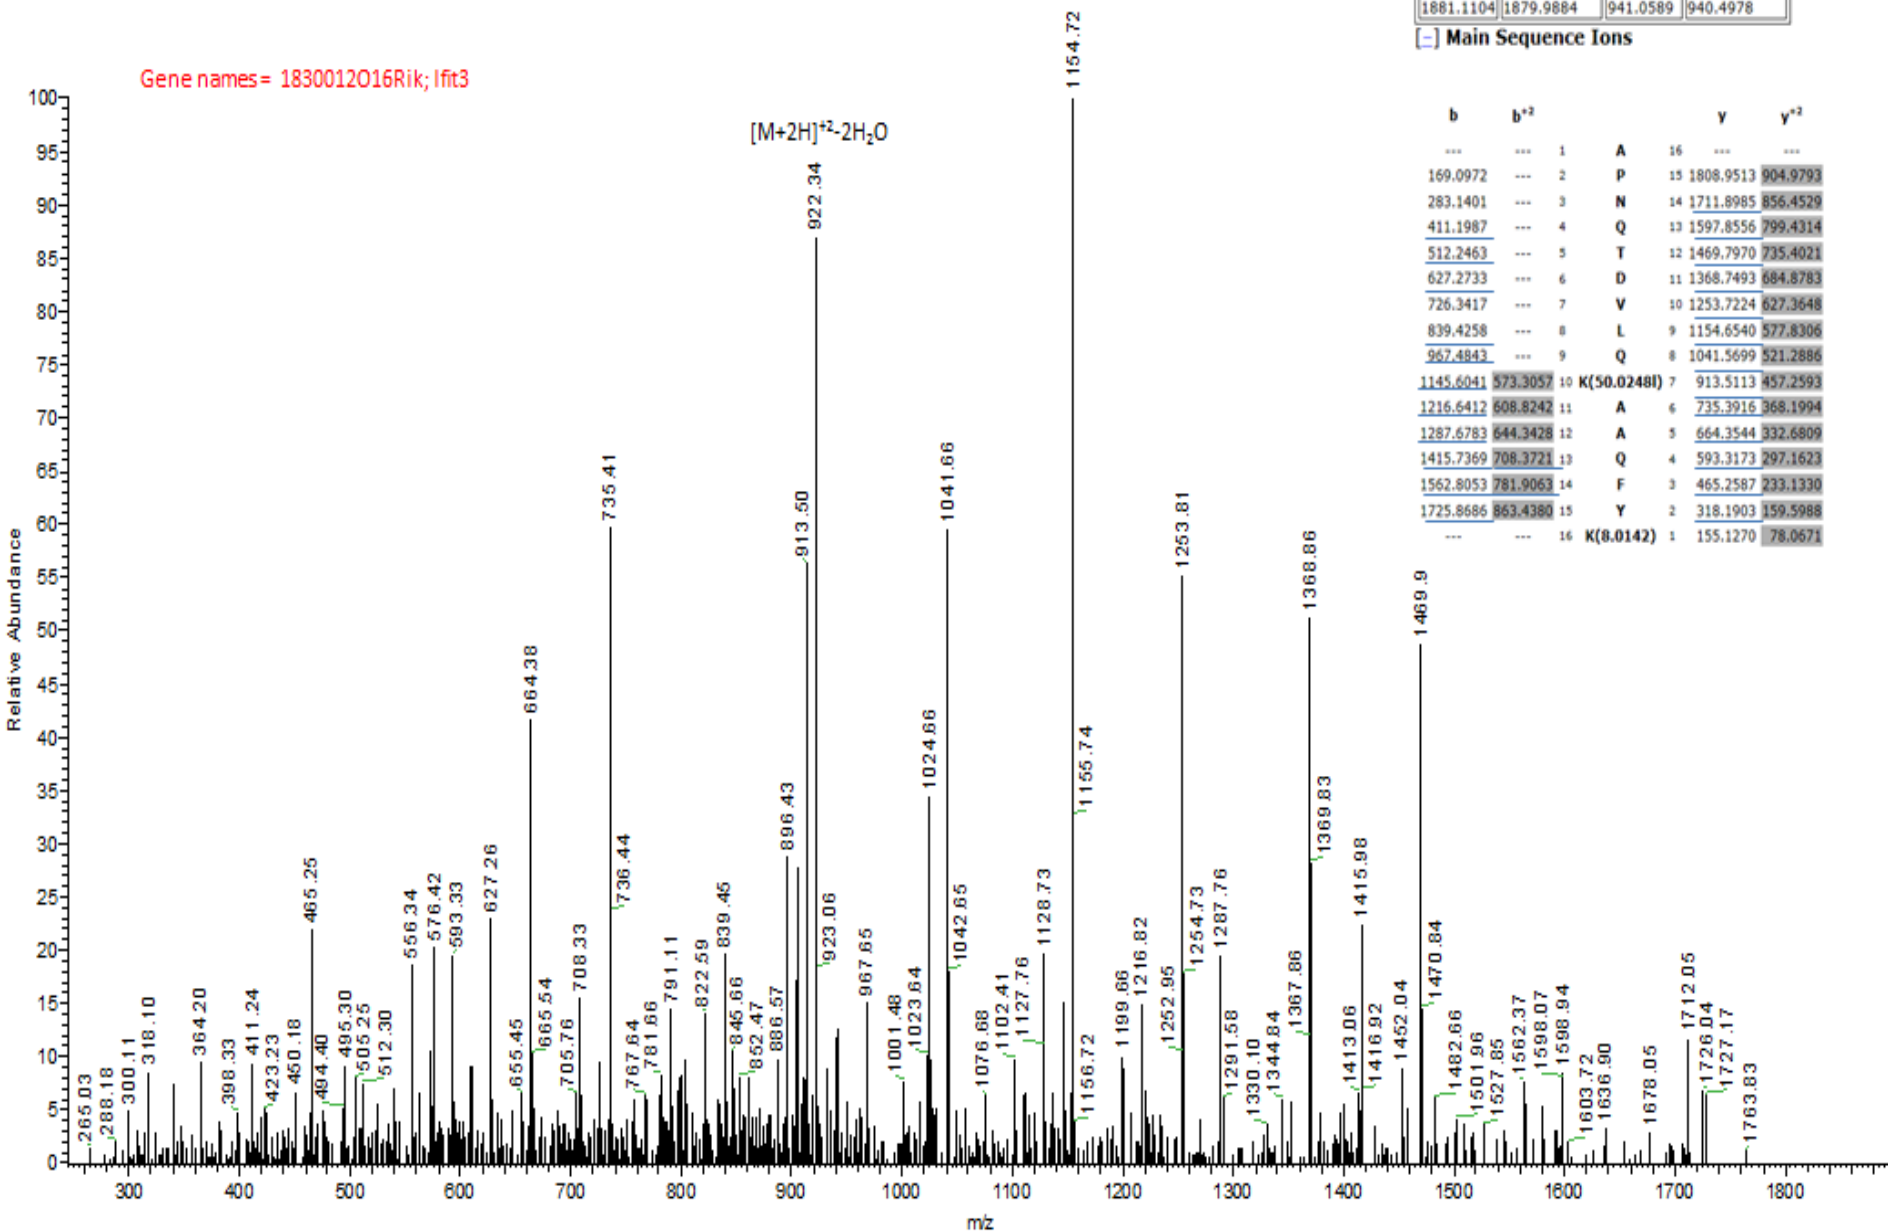

| MH <sup>+</sup> (av) | MH <sup>+</sup> (mono) | MH <sup>2+</sup> (av) | MH <sup>2+</sup> (mono) |
|----------------------|------------------------|-----------------------|-------------------------|
| 1881.1104            | 1879.9884              | 941.0589              | 940.4978                |

**[ - ] Main Sequence Ions**

| b         | b <sup>2</sup> | y   | y <sup>2</sup>    |
|-----------|----------------|-----|-------------------|
| ---       | ---            | 1   | A                 |
| ---       | ---            | 16  | ---               |
| 169.0972  | ---            | 2   | P                 |
| ---       | ---            | 15  | 1808.9513         |
| 283.1401  | ---            | 3   | N                 |
| ---       | ---            | 14  | 1711.8985         |
| 411.1987  | ---            | 4   | Q                 |
| ---       | ---            | 13  | 1597.8556         |
| 512.2463  | ---            | 5   | T                 |
| ---       | ---            | 12  | 1469.7970         |
| 627.2733  | ---            | 6   | D                 |
| ---       | ---            | 11  | 1368.7493         |
| 726.3417  | ---            | 7   | V                 |
| ---       | ---            | 10  | 1253.7224         |
| 839.4258  | ---            | 8   | L                 |
| ---       | ---            | 9   | 1154.6540         |
| 967.4843  | ---            | 9   | Q                 |
| ---       | ---            | 8   | 1041.5699         |
| 1145.6041 | 573.3057       | 10  | <b>K(50.0248)</b> |
| ---       | ---            | 7   | 913.5113          |
| 1216.6412 | 608.8242       | 11  | A                 |
| ---       | ---            | 6   | 735.3916          |
| 1287.6783 | 644.3428       | 12  | A                 |
| ---       | ---            | 5   | 664.3544          |
| 1415.7369 | 708.3721       | 13  | Q                 |
| ---       | ---            | 4   | 593.3173          |
| 1562.8053 | 781.9063       | 14  | F                 |
| ---       | ---            | 3   | 465.2587          |
| 1725.8686 | 863.4380       | 15  | Y                 |
| ---       | ---            | 2   | 318.1903          |
| ---       | ---            | 16  | <b>K(8.0142)</b>  |
| ---       | ---            | 1   | 155.1270          |
| ---       | ---            | --- | 78.0671           |

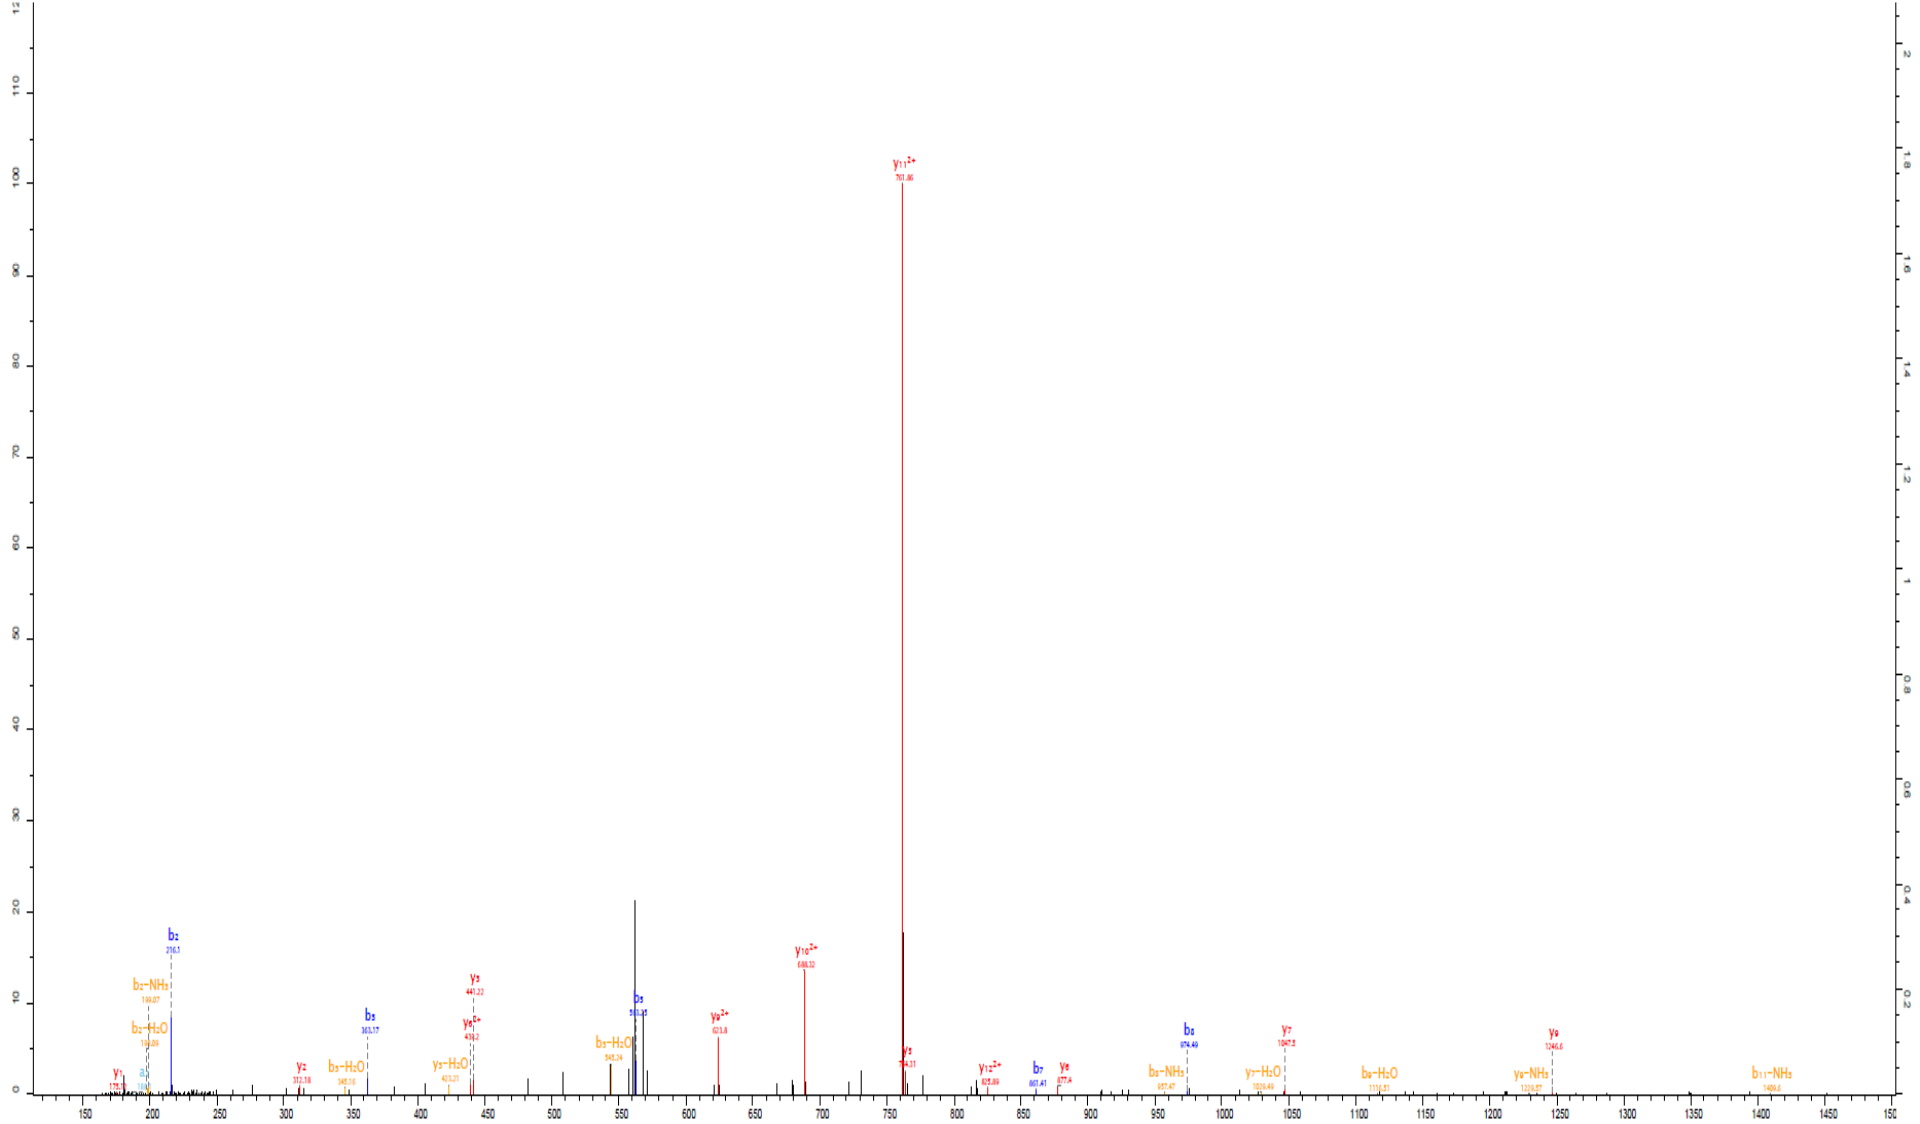

- S Q F E A Q K I C Y E H R -

y12<sup>2+</sup> y11<sup>2+</sup> y10<sup>2+</sup> y6 y7 a0 y6 y5 y2 y1  
b2 b2 b3 b2 b2

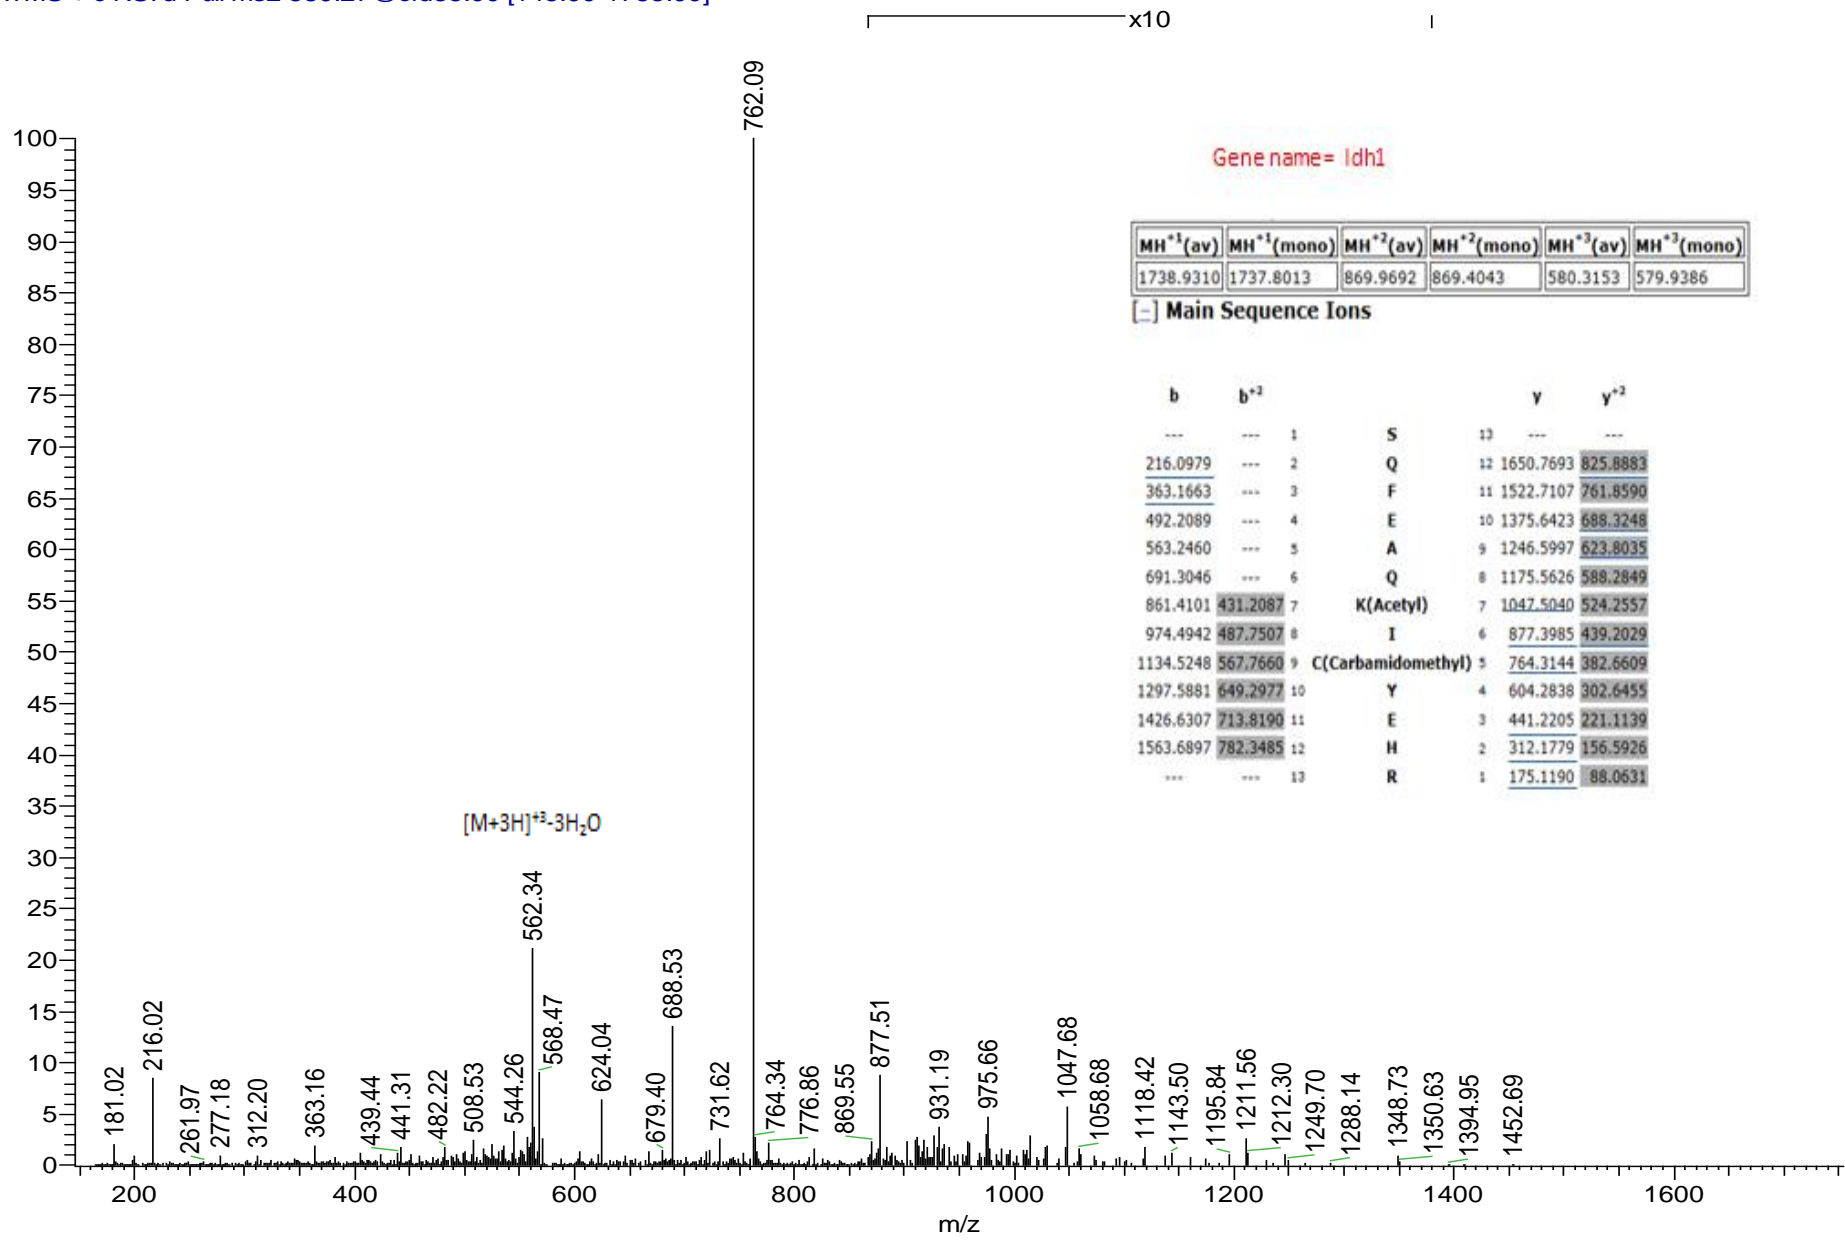

x10

Gene name= Idh1

| MH <sup>+1</sup> (av) | MH <sup>+1</sup> (mono) | MH <sup>+2</sup> (av) | MH <sup>+2</sup> (mono) | MH <sup>+3</sup> (av) | MH <sup>+3</sup> (mono) |
|-----------------------|-------------------------|-----------------------|-------------------------|-----------------------|-------------------------|
| 1738.9310             | 1737.8013               | 869.9692              | 869.4043                | 580.3153              | 579.9386                |

[ - ] Main Sequence Ions

| b         | b <sup>+2</sup> |    | y                  | y <sup>+2</sup> |                    |
|-----------|-----------------|----|--------------------|-----------------|--------------------|
| ---       | ---             | 1  | S                  | 13              | ---                |
| 216.0979  | ---             | 2  | Q                  | 12              | 1650.7693 825.8883 |
| 363.1663  | ---             | 3  | F                  | 11              | 1522.7107 761.8590 |
| 492.2089  | ---             | 4  | E                  | 10              | 1375.6423 688.3248 |
| 563.2460  | ---             | 5  | A                  | 9               | 1246.5997 623.8035 |
| 691.3046  | ---             | 6  | Q                  | 8               | 1175.5626 588.2849 |
| 861.4101  | 431.2087        | 7  | K(Acetyl)          | 7               | 1047.5040 524.2557 |
| 974.4942  | 487.7507        | 8  | I                  | 6               | 877.3985 439.2029  |
| 1134.5248 | 567.7660        | 9  | C(Carbamidomethyl) | 5               | 764.3144 382.6609  |
| 1297.5881 | 649.2977        | 10 | Y                  | 4               | 604.2838 302.6455  |
| 1426.6307 | 713.8190        | 11 | E                  | 3               | 441.2205 221.1139  |
| 1563.6897 | 782.3485        | 12 | H                  | 2               | 312.1779 156.5926  |
| ---       | ---             | 13 | R                  | 1               | 175.1190 88.0631   |

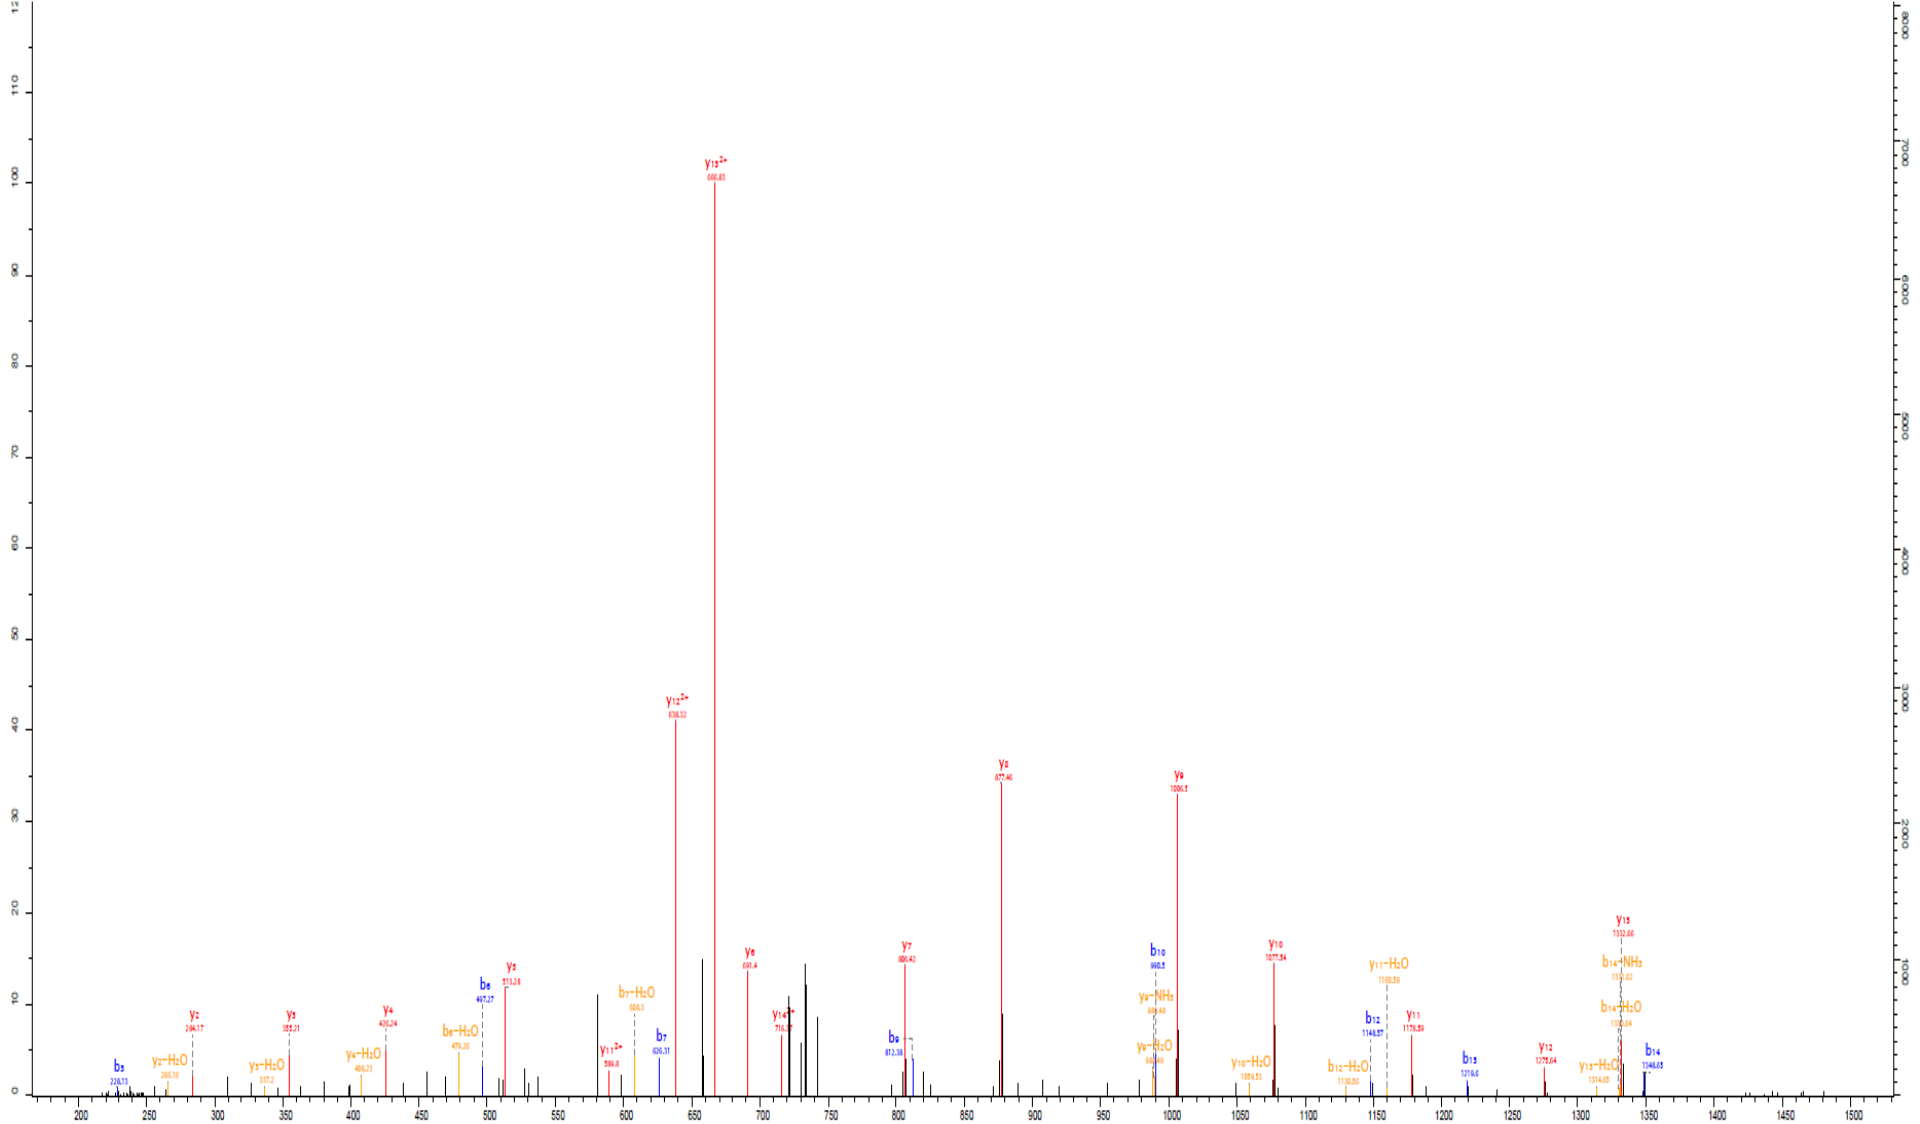

- A V G P T A E A D K S A A E K -

y14^2+
y13
y12
y11
y10
y9
y8
y7
y6
y5
y4
y3
y2

b14
b13
b12
b11
b10
b9
b8
b7
b6
b5
b4
b3
b2

| MH <sup>+</sup> (av) | MH <sup>+</sup> (mono) | MH <sup>2+</sup> (av) | MH <sup>2+</sup> (mono) |
|----------------------|------------------------|-----------------------|-------------------------|
| 1503.6177            | 1502.7668              | 752.3126              | 751.8870                |

[-] Main Sequence Ions

| b         |          | b <sup>+</sup> |                   | y  |           | y <sup>+</sup> |     |
|-----------|----------|----------------|-------------------|----|-----------|----------------|-----|
| ---       | ---      | 1              | <b>A</b>          | 15 | ---       | ---            | --- |
| 171.1128  | ---      | 2              | <b>V</b>          | 14 | 1431.7297 | 716.3685       | --- |
| 228.1343  | ---      | 3              | <b>G</b>          | 13 | 1332.6613 | 666.8343       | --- |
| 325.1870  | ---      | 4              | <b>P</b>          | 12 | 1275.6398 | 638.3235       | --- |
| 426.2347  | ---      | 5              | <b>T</b>          | 11 | 1178.5871 | 589.7972       | --- |
| 497.2718  | ---      | 6              | <b>A</b>          | 10 | 1077.5394 | 539.2733       | --- |
| 626.3144  | ---      | 7              | <b>E</b>          | 9  | 1006.5023 | 503.7548       | --- |
| 697.3515  | ---      | 8              | <b>A</b>          | 8  | 877.4597  | 439.2335       | --- |
| 812.3785  | ---      | 9              | <b>D</b>          | 7  | 806.4226  | 403.7149       | --- |
| 990.4982  | 495.7528 | 10             | <b>K(50.0248)</b> | 6  | 691.3956  | 346.2014       | --- |
| 1077.5303 | 539.2688 | 11             | <b>S</b>          | 5  | 513.2759  | 257.1416       | --- |
| 1148.5674 | 574.7873 | 12             | <b>A</b>          | 4  | 426.2438  | 213.6256       | --- |
| 1219.6045 | 610.3059 | 13             | <b>A</b>          | 3  | 355.2067  | 178.1070       | --- |
| 1348.6471 | 674.8272 | 14             | <b>E</b>          | 2  | 284.1696  | 142.5884       | --- |
| ---       | ---      | 15             | <b>K(8.0142)</b>  | 1  | 155.1270  | 78.0671        | --- |

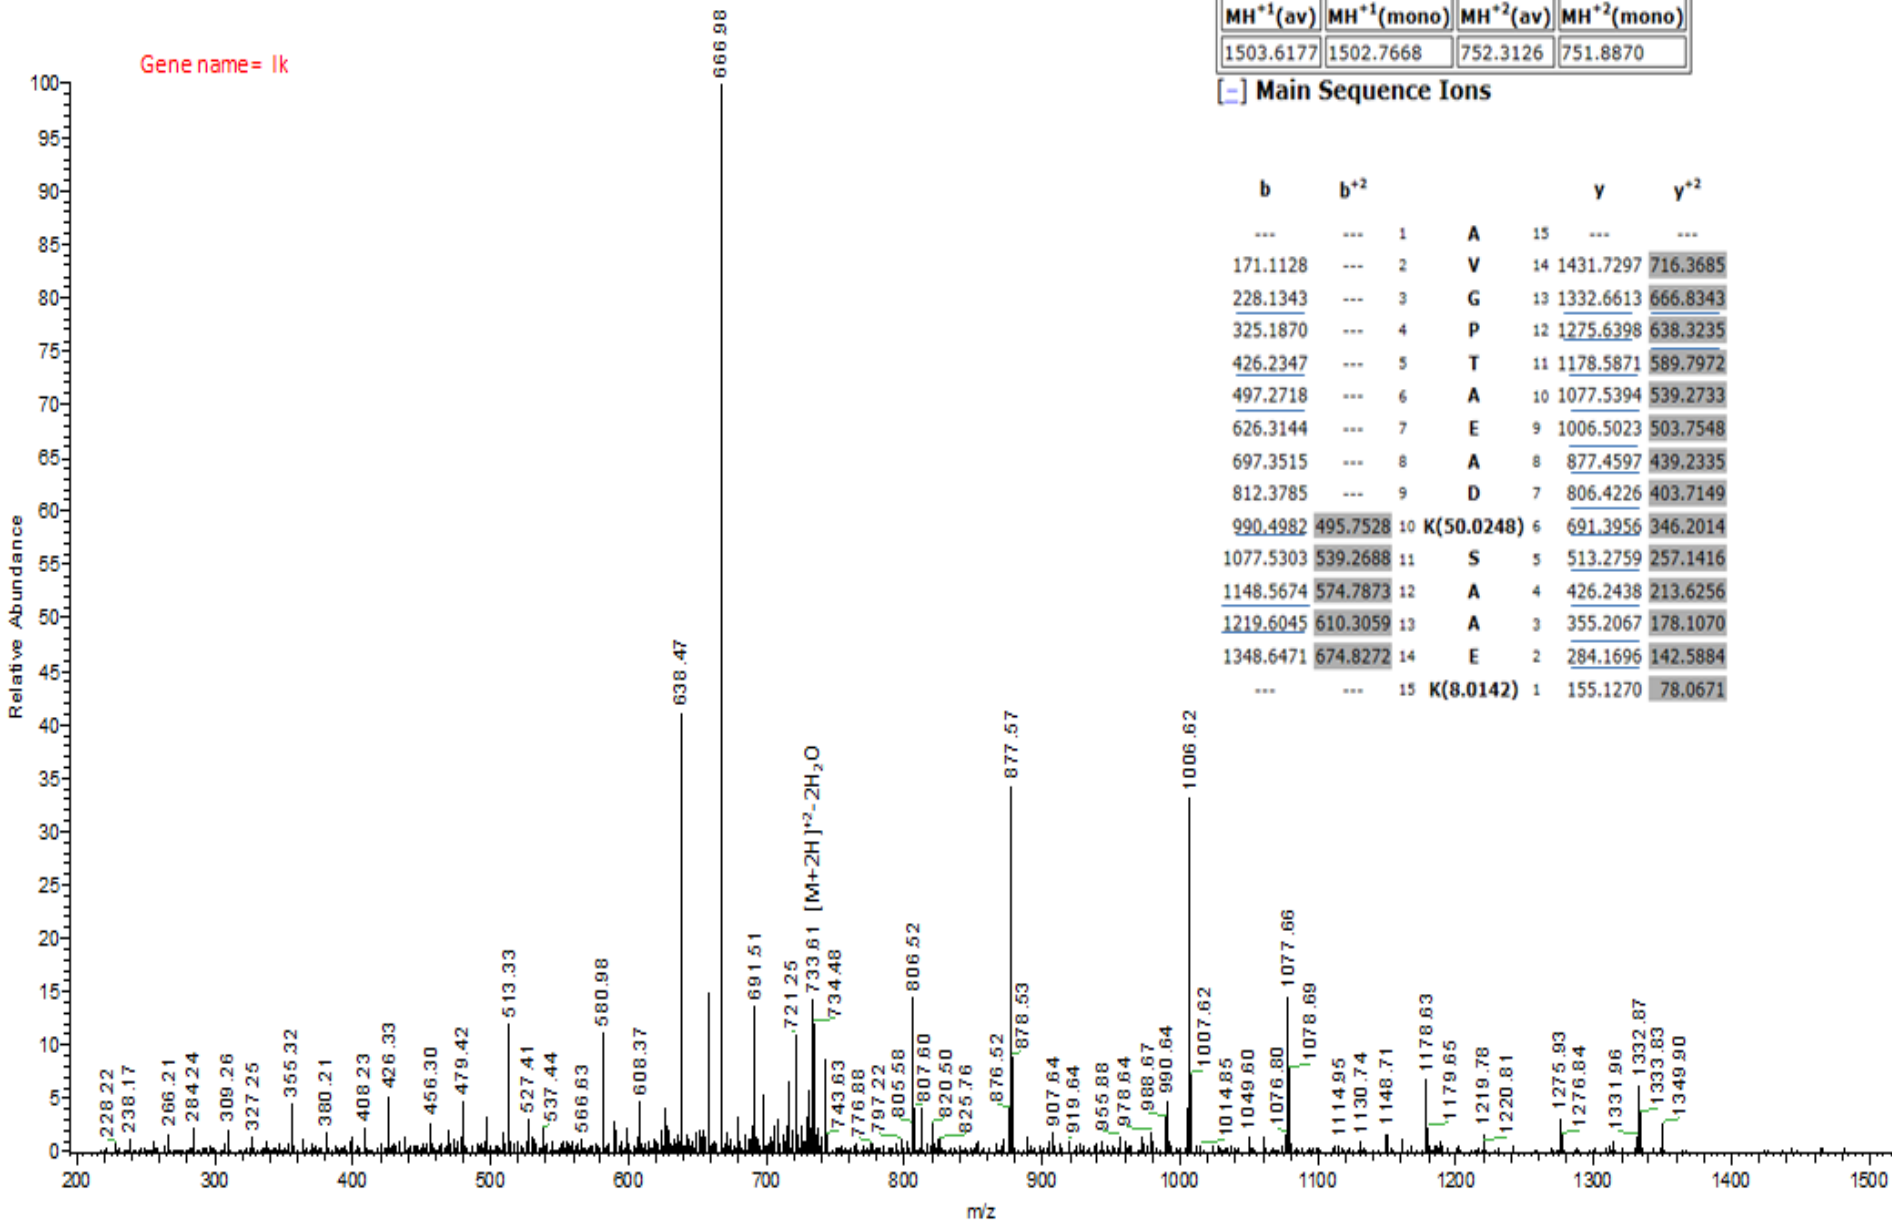

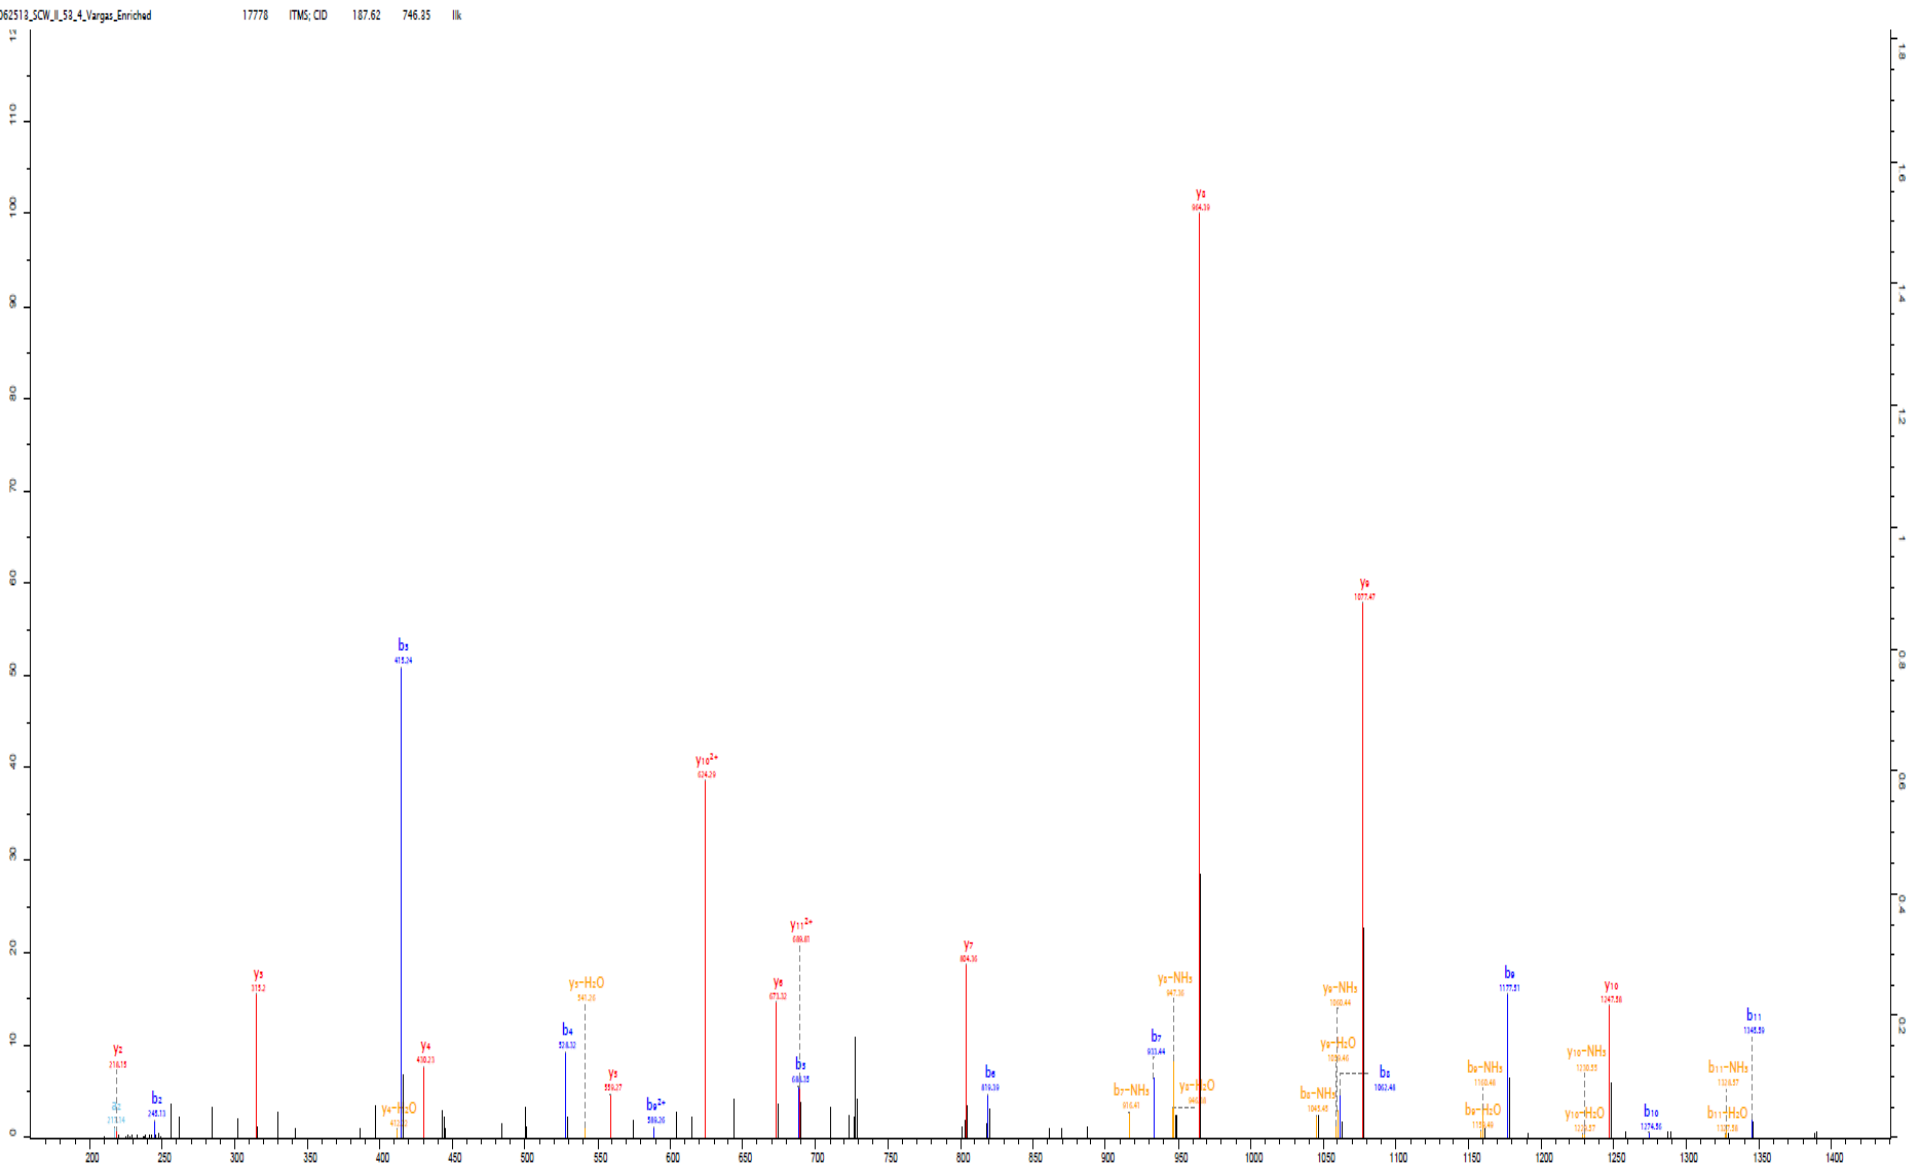

y11<sup>2+</sup>
y10
y9
y8
y7
y6
y5
y4
y3
y2  
b11<sup>2+</sup>
b10
b9
b8
b7
b6
b5
b4
b3
b2
b1

- L M K I K C M N E D P A K -

Gene name = Ilk

| MH <sup>+</sup> 1(av) | MH <sup>+</sup> 1(mono) | MH <sup>+</sup> 2(av) | MH <sup>+</sup> 2(mono) |
|-----------------------|-------------------------|-----------------------|-------------------------|
| 1492.8297             | 1491.7004               | 746.9186              | 746.3538                |

**Main Sequence Ions**

| b         | b <sup>+</sup> 2 | y                         | y <sup>+</sup> 2 |
|-----------|------------------|---------------------------|------------------|
| ---       | ---              | L                         | 12               |
| 245.1318  | ---              | M                         | 11               |
| 415.2374  | 208.1223         | <b>K(Acetyl)</b>          | 10               |
| 528.3214  | 264.6643         | I                         | 9                |
| 688.3521  | 344.6797         | <b>C(Carbamidomethyl)</b> | 8                |
| 819.3925  | 410.1999         | M                         | 7                |
| 923.4355  | 467.2214         | N                         | 6                |
| 1062.4781 | 531.7427         | E                         | 5                |
| 1177.5050 | 589.2561         | D                         | 4                |
| 1274.5578 | 637.7825         | P                         | 3                |
| 1345.5949 | 673.3011         | A                         | 2                |
| ---       | ---              | K                         | 1                |

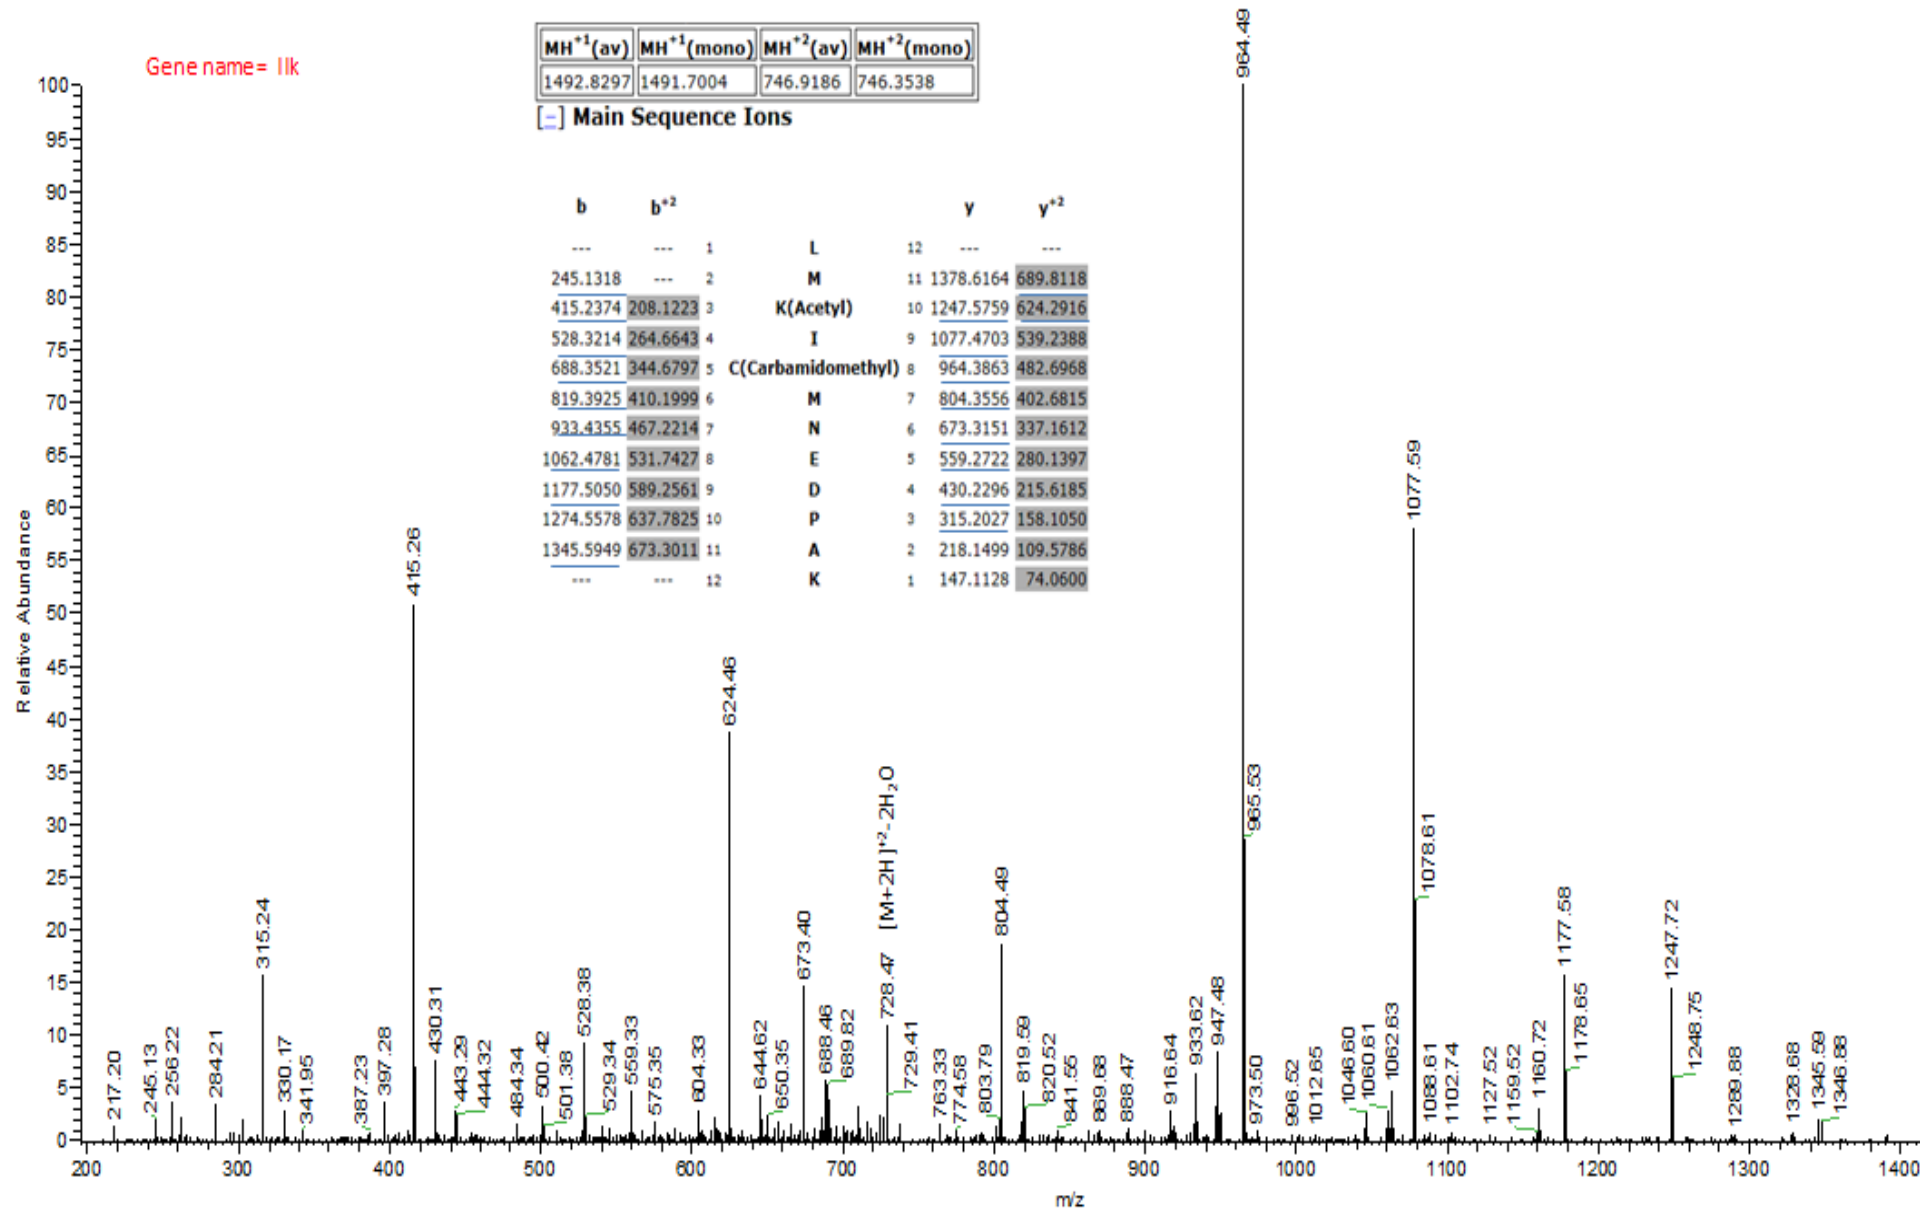



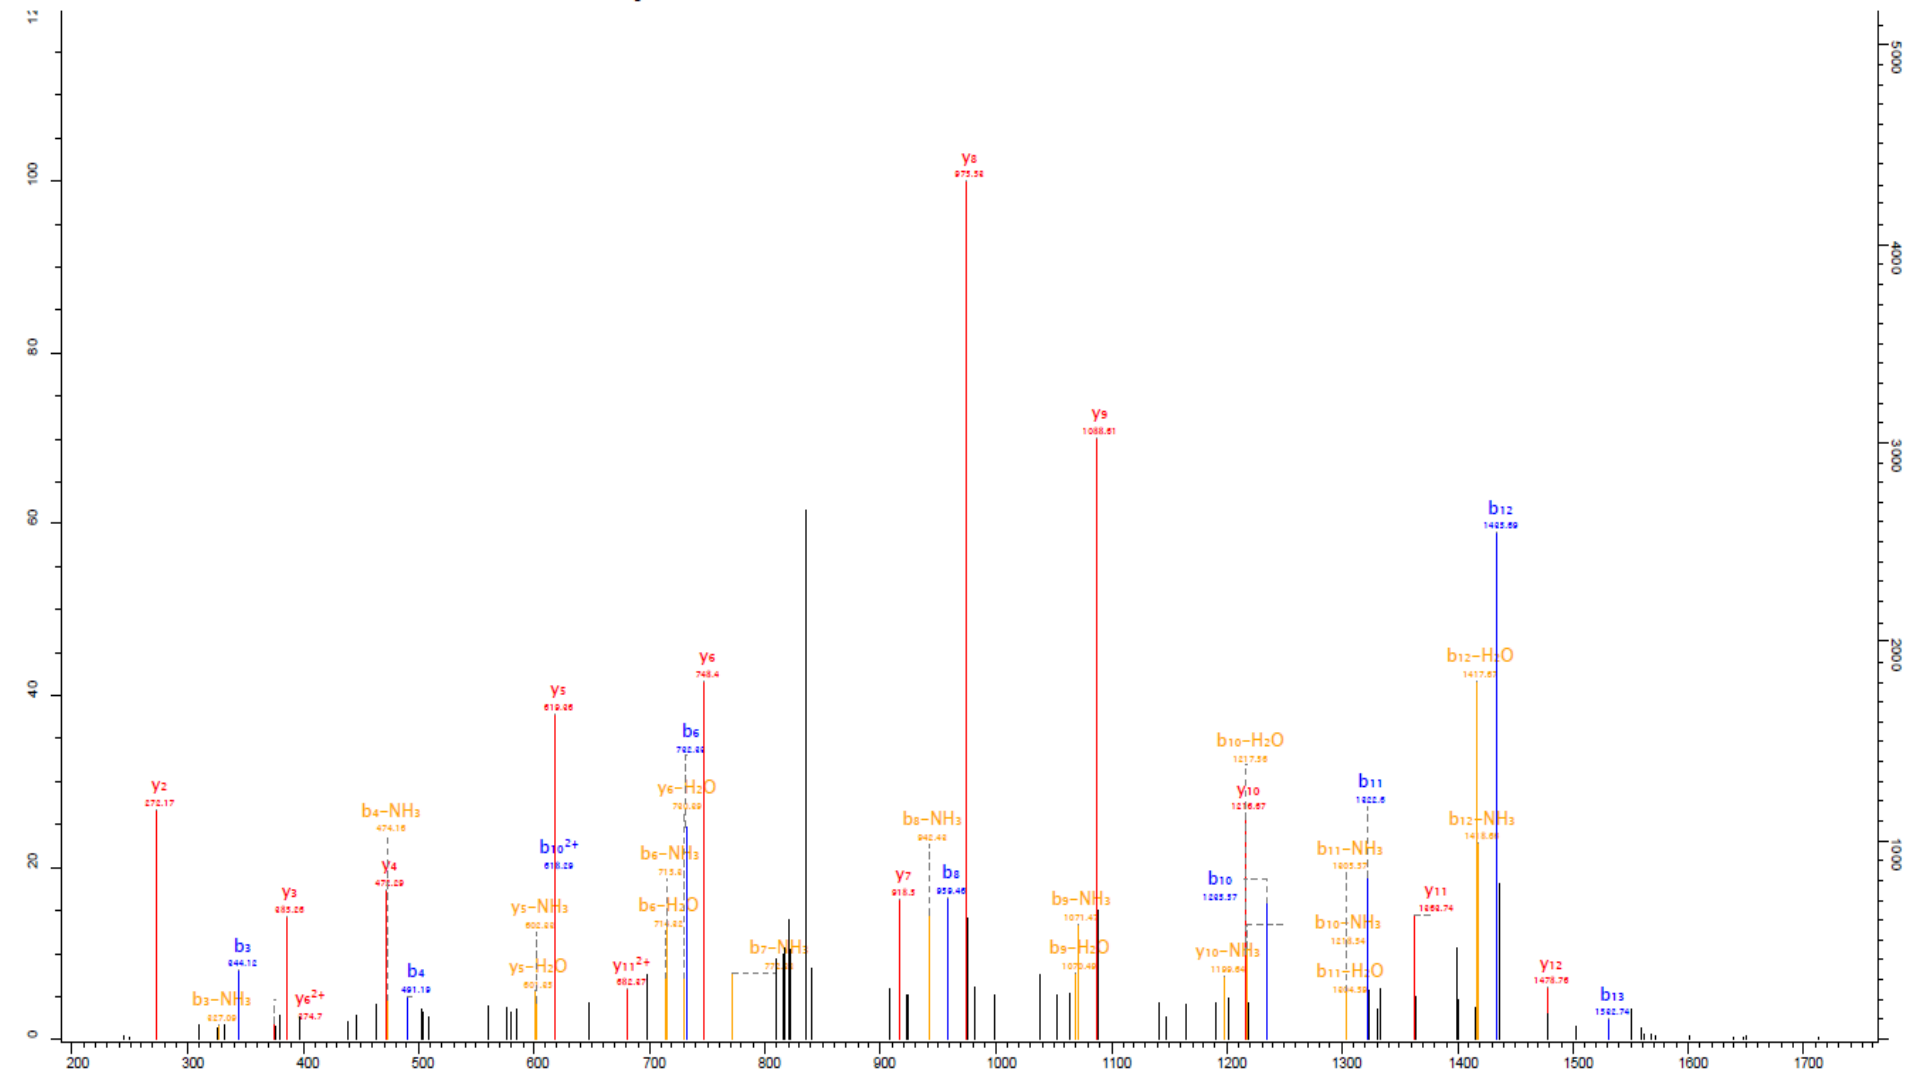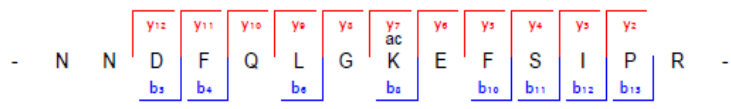

Gene name = Ing3

| MH <sup>+</sup> 1(av) | MH <sup>+</sup> 1(mono) | MH <sup>+</sup> 2(av) | MH <sup>+</sup> 2(mono) |
|-----------------------|-------------------------|-----------------------|-------------------------|
| 1707.8950             | 1706.8497               | 854.4512              | 853.9285                |

[-] Main Sequence Ions

| b         |          | b <sup>+</sup> |           | y  |           | y <sup>+</sup> |     |
|-----------|----------|----------------|-----------|----|-----------|----------------|-----|
| ---       | ---      | 1              | N         | 14 | ---       | ---            | --- |
| 229.0931  | ---      | 2              | N         | 13 | 1592.8067 | 796.9070       | --- |
| 344.1201  | ---      | 3              | D         | 12 | 1478.7638 | 739.8855       | --- |
| 491.1885  | ---      | 4              | F         | 11 | 1363.7369 | 682.3721       | --- |
| 619.2471  | ---      | 5              | Q         | 10 | 1216.6684 | 608.8379       | --- |
| 732.3311  | ---      | 6              | L         | 9  | 1088.6099 | 544.8086       | --- |
| 789.3526  | ---      | 7              | G         | 8  | 975.5258  | 488.2665       | --- |
| 959.4581  | 480.2327 | 8              | K(Acetyl) | 7  | 918.5043  | 459.7558       | --- |
| 1088.5007 | 544.7540 | 9              | E         | 6  | 748.3988  | 374.7030       | --- |
| 1235.5691 | 618.2882 | 10             | F         | 5  | 619.3562  | 310.1817       | --- |
| 1322.6012 | 661.8042 | 11             | S         | 4  | 472.2878  | 236.6475       | --- |
| 1435.6852 | 718.3462 | 12             | I         | 3  | 385.2558  | 193.1315       | --- |
| 1532.7380 | 766.8726 | 13             | P         | 2  | 272.1717  | 136.5895       | --- |
| ---       | ---      | 14             | R         | 1  | 175.1190  | 88.0631        | --- |

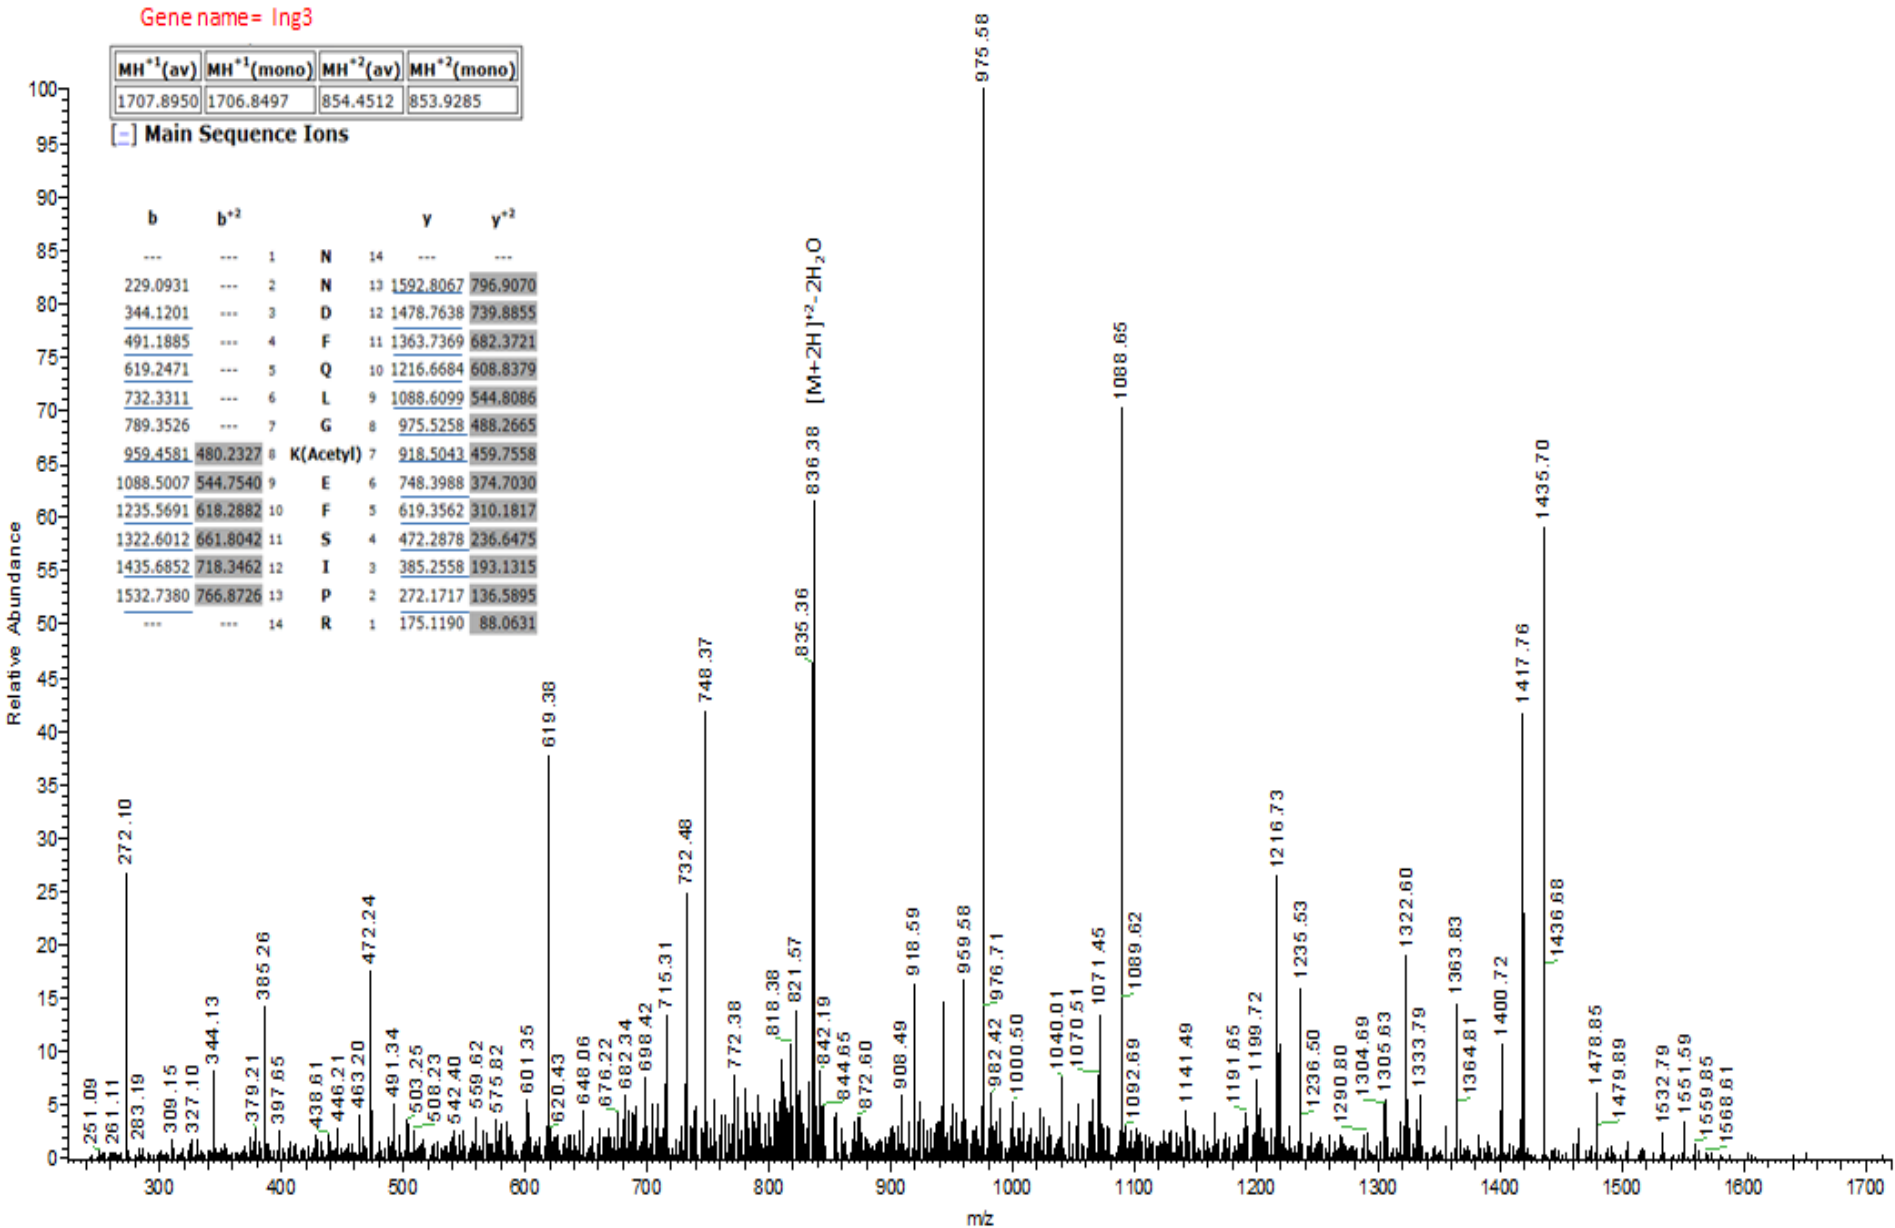

Supplement: 10.1074_M115.049288_mcp.M115.049288-11.pdf [file 10.1074_M115.049288_mcp.M115.049288-11.pdf]
