# Supplementary material
Source: PubMed Central journal article supplement (PMC4739669)
Supplement: 10.1074_M115.049288_mcp.M115.049288-10.pdf [file 10.1074_M115.049288_mcp.M115.049288-10.pdf]

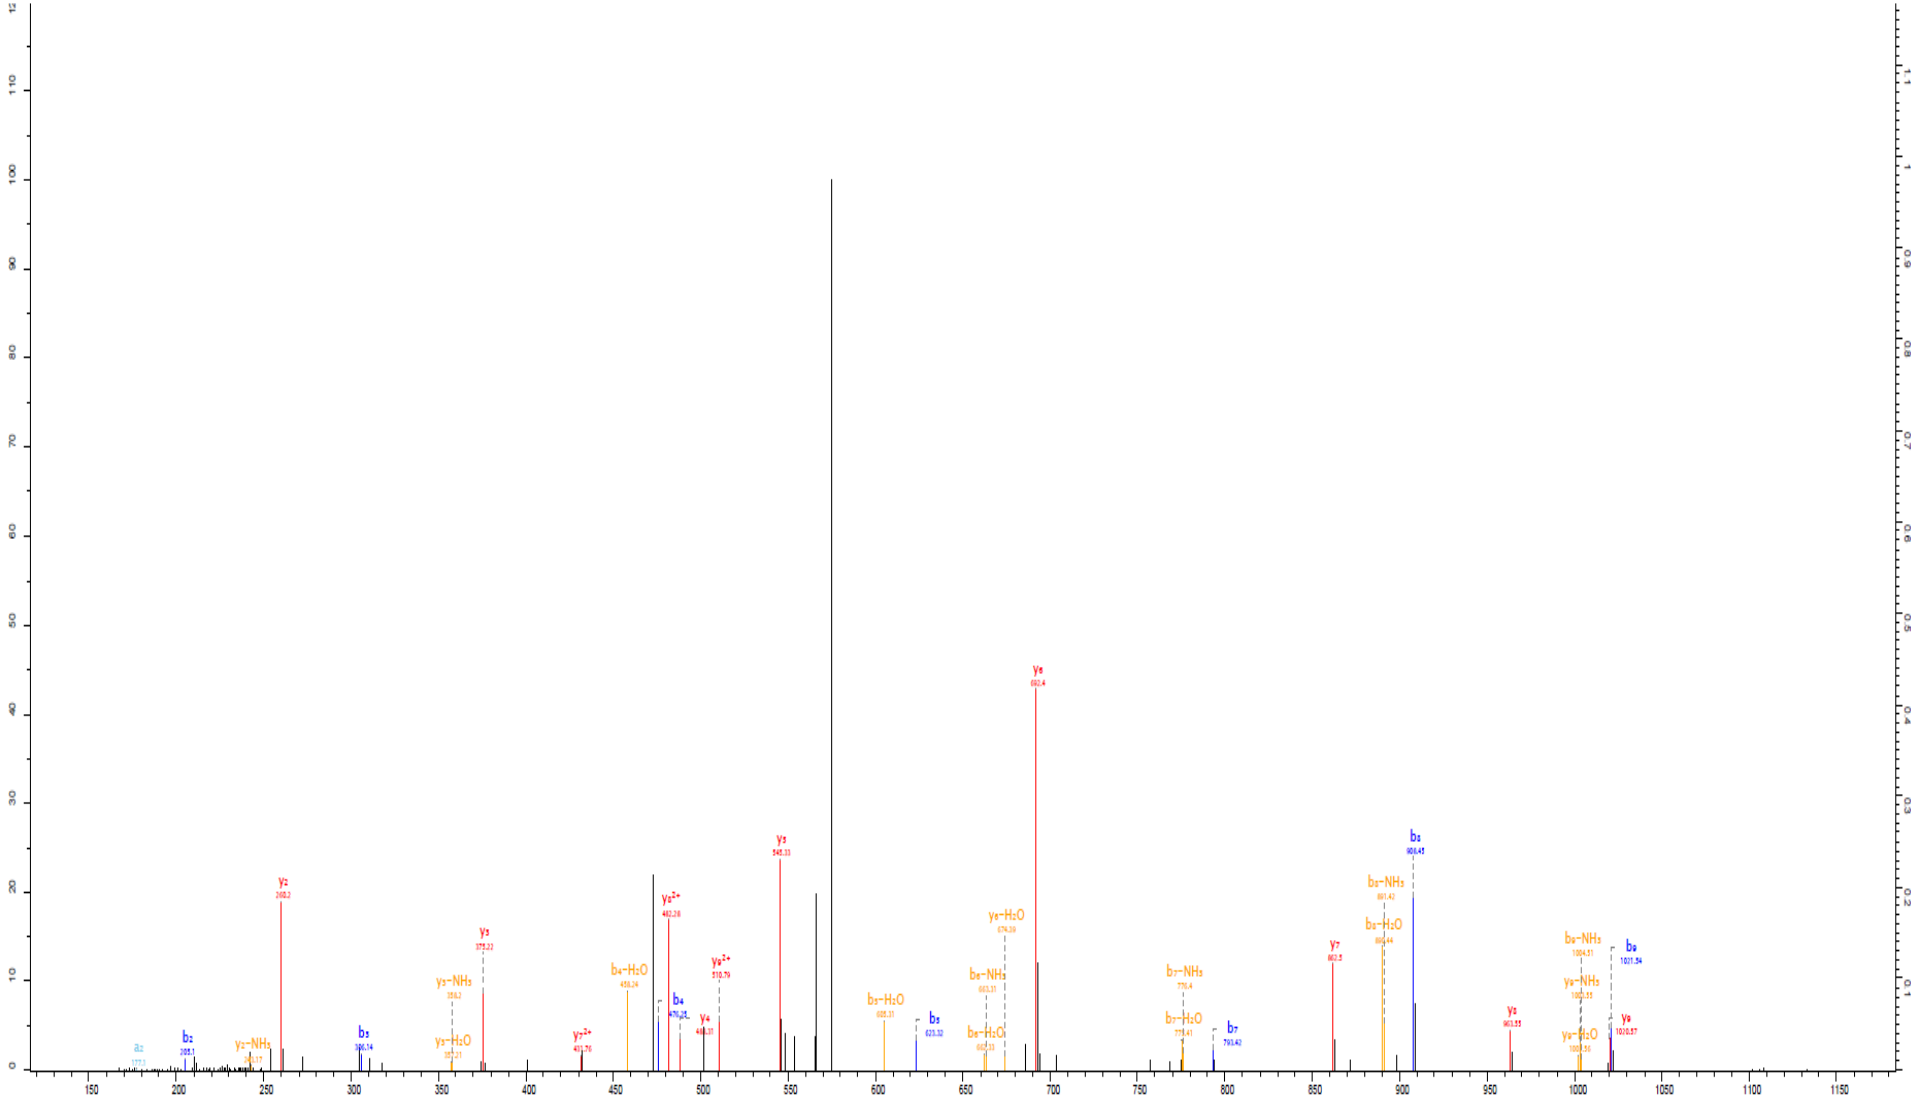

F G T K F G L D L K  
 b2 b2 b3 b4 b1 b7 b2 b2 b2

Gene name = Acaa2

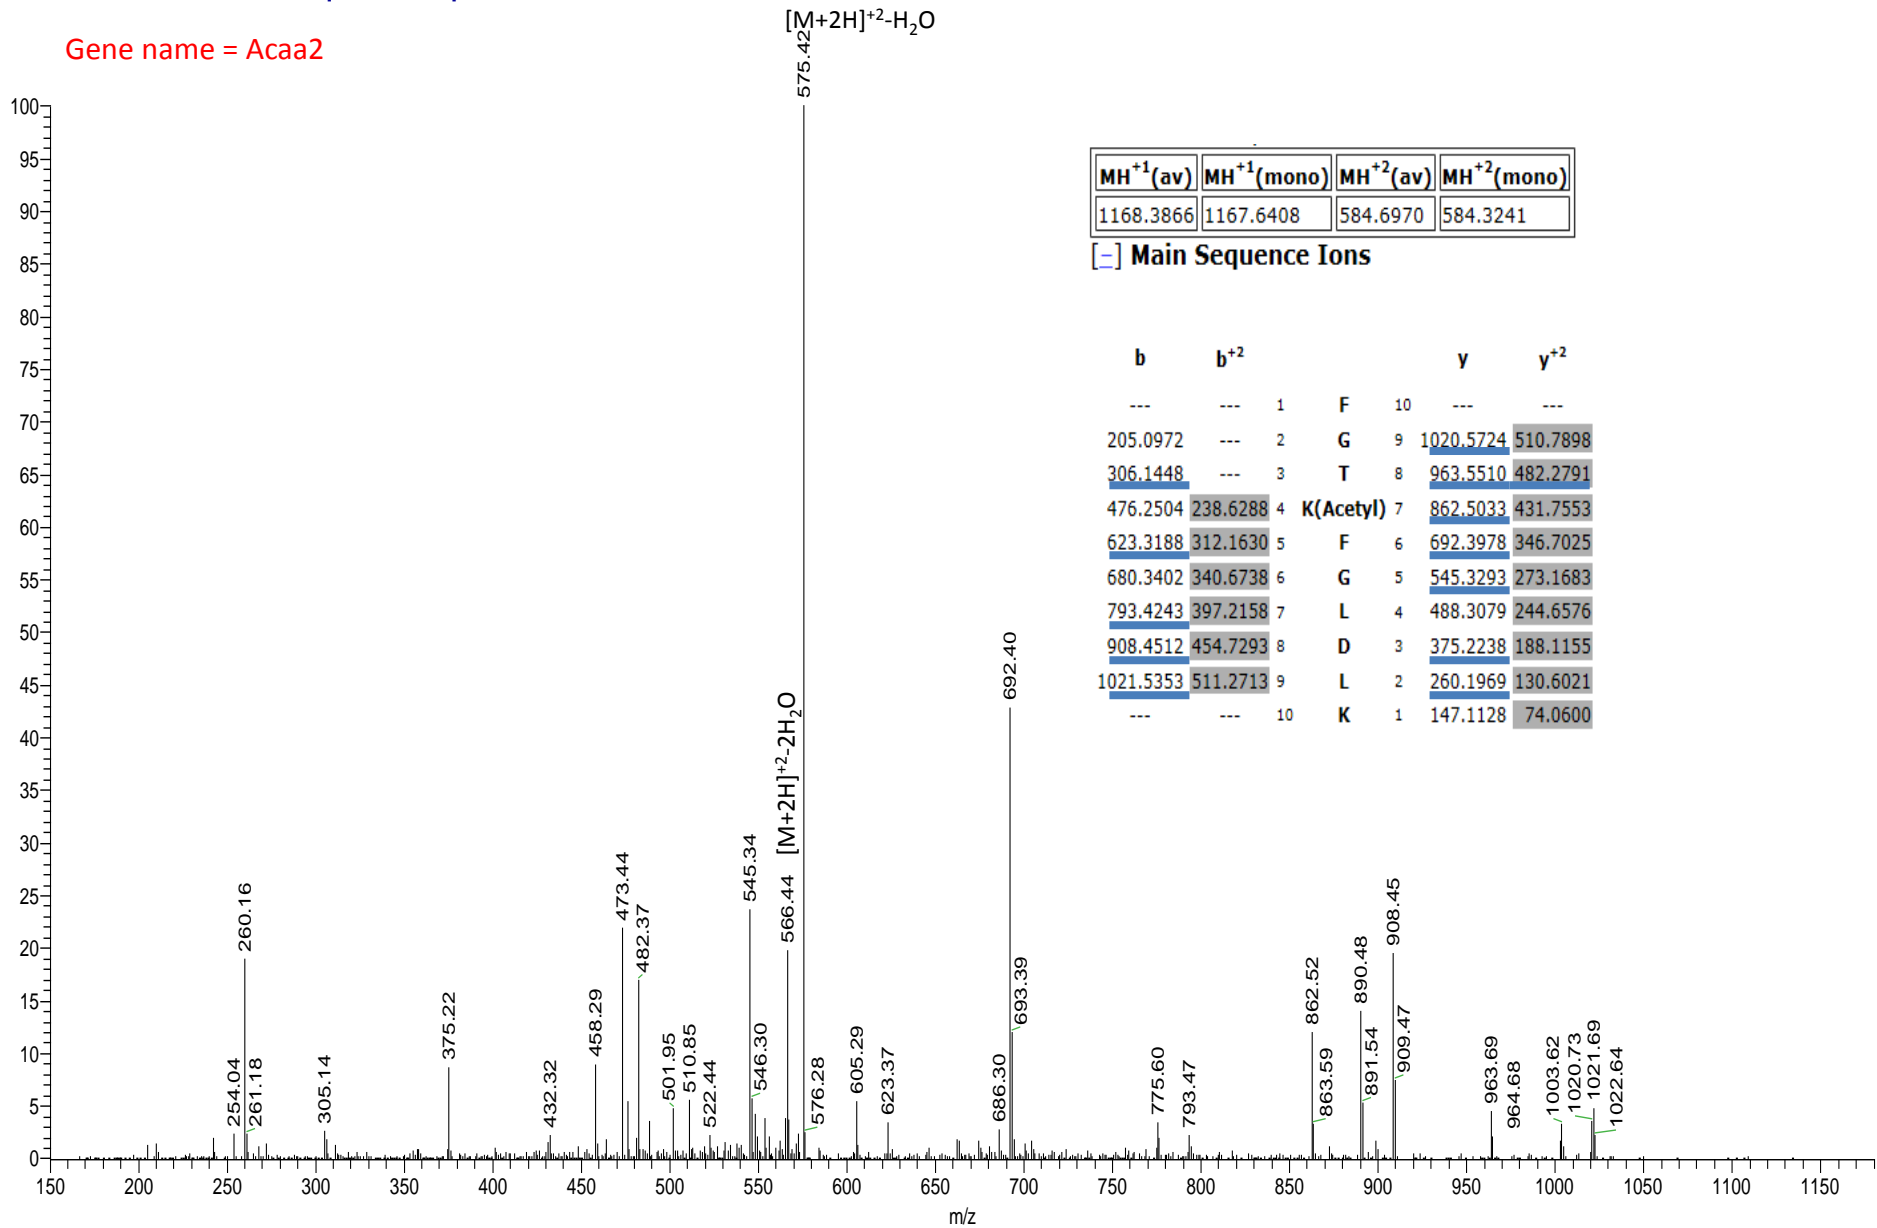

| MH <sup>+1</sup> (av) | MH <sup>+1</sup> (mono) | MH <sup>+2</sup> (av) | MH <sup>+2</sup> (mono) |
|-----------------------|-------------------------|-----------------------|-------------------------|
| 1168.3866             | 1167.6408               | 584.6970              | 584.3241                |

**[-] Main Sequence Ions**

| b         | b <sup>+2</sup> |    |           | y  | y <sup>+2</sup>    |
|-----------|-----------------|----|-----------|----|--------------------|
| ---       | ---             | 1  | F         | 10 | ---                |
| 205.0972  | ---             | 2  | G         | 9  | 1020.5724 510.7898 |
| 306.1448  | ---             | 3  | T         | 8  | 963.5510 482.2791  |
| 476.2504  | 238.6288        | 4  | K(Acetyl) | 7  | 862.5033 431.7553  |
| 623.3188  | 312.1630        | 5  | F         | 6  | 692.3978 346.7025  |
| 680.3402  | 340.6738        | 6  | G         | 5  | 545.3293 273.1683  |
| 793.4243  | 397.2158        | 7  | L         | 4  | 488.3079 244.6576  |
| 908.4512  | 454.7293        | 8  | D         | 3  | 375.2238 188.1155  |
| 1021.5353 | 511.2713        | 9  | L         | 2  | 260.1969 130.6021  |
| ---       | ---             | 10 | K         | 1  | 147.1128 74.0600   |

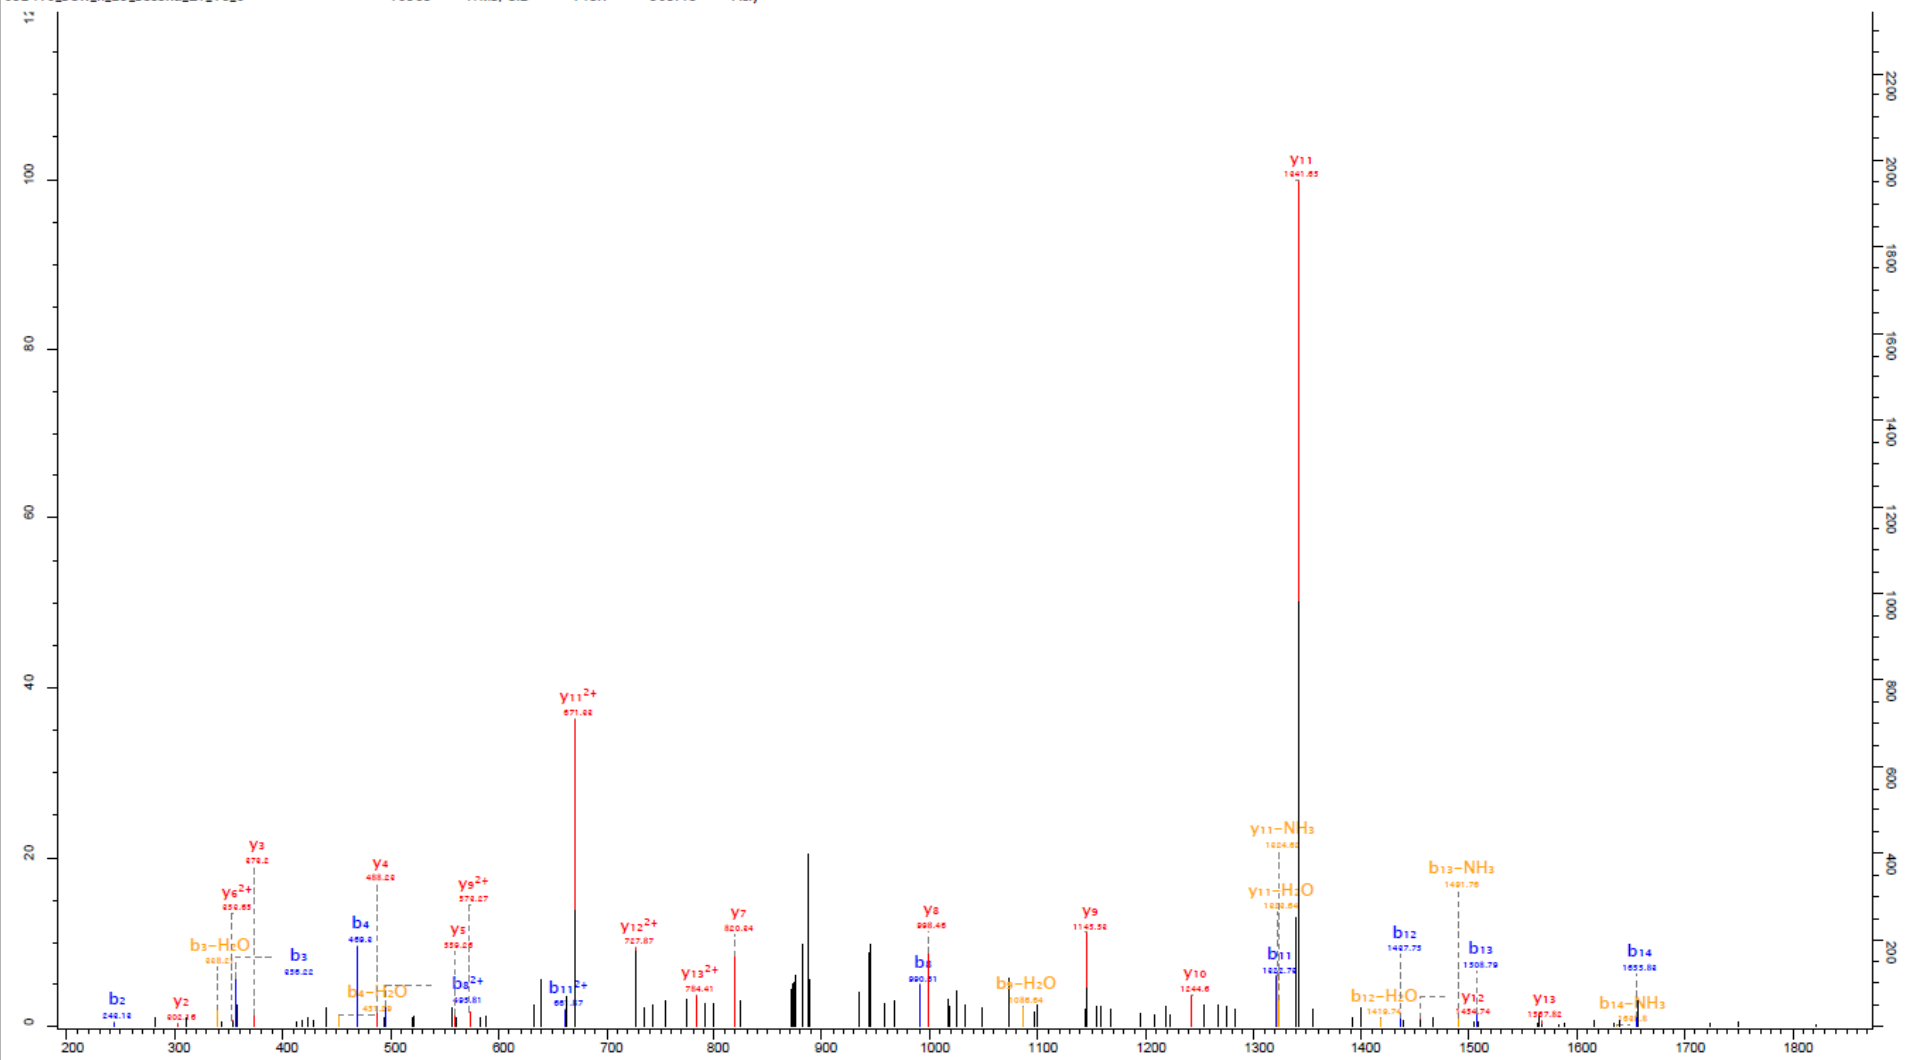

- E I L I P V F K N M A D A M K -

b<sub>2</sub> b<sub>3</sub> b<sub>4</sub> b<sub>6</sub> b<sub>11</sub> b<sub>12</sub> b<sub>13</sub> b<sub>14</sub>

y<sub>13</sub> y<sub>12</sub> y<sub>11</sub> y<sub>10</sub> y<sub>9</sub> y<sub>8</sub> ac y<sub>7</sub> y<sub>6</sub><sup>2+</sup> ox y<sub>5</sub> y<sub>4</sub> y<sub>3</sub> y<sub>2</sub> ox

Gene name = Acly

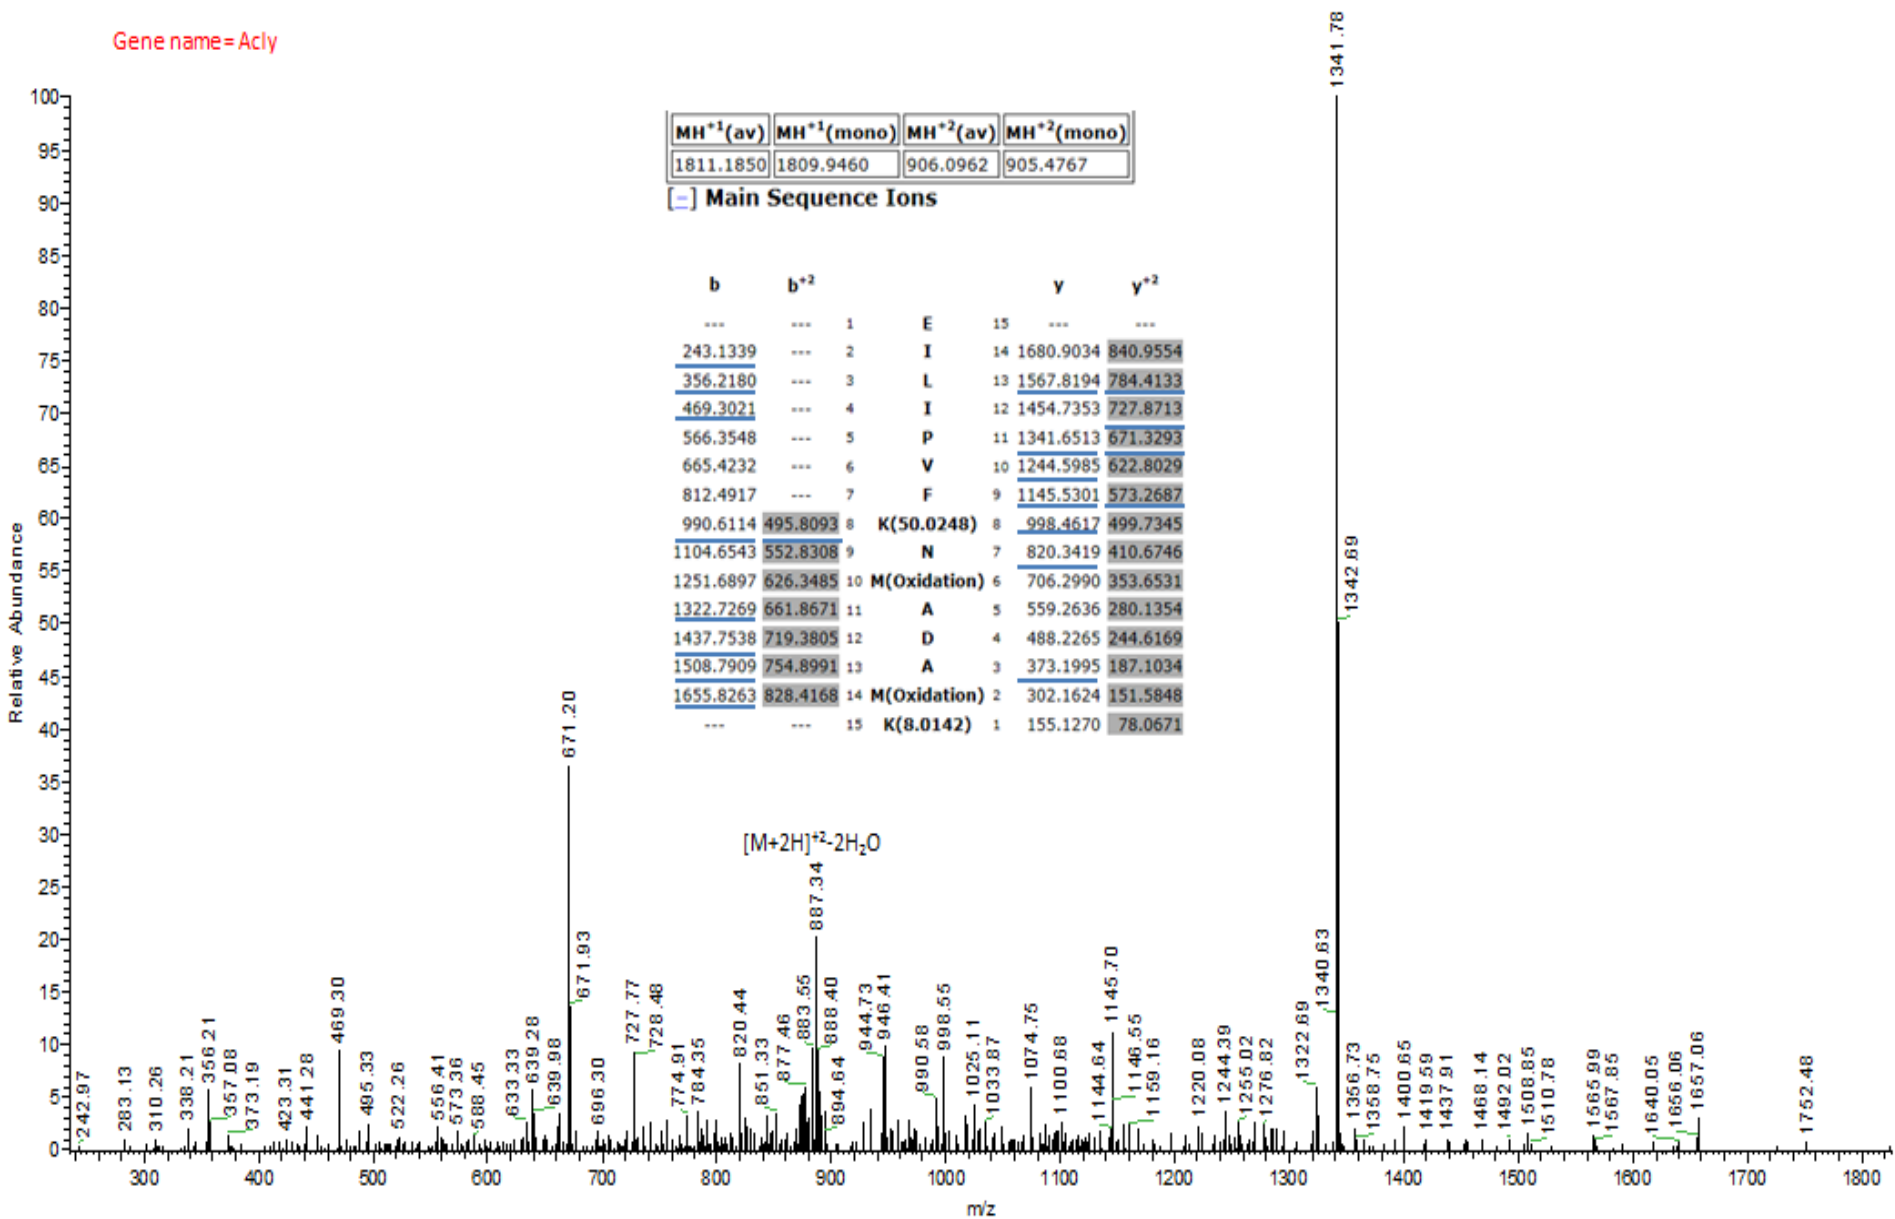

| MH <sup>+</sup> (av) | MH <sup>+</sup> (mono) | MH <sup>2+</sup> (av) | MH <sup>2+</sup> (mono) |
|----------------------|------------------------|-----------------------|-------------------------|
| 1811.1850            | 1809.9460              | 906.0962              | 905.4767                |

**(-) Main Sequence Ions**

| b         | b <sup>+</sup> |    | y                   | y <sup>+</sup> |                    |
|-----------|----------------|----|---------------------|----------------|--------------------|
| ---       | ---            | 1  | E                   | 15             | ---                |
| 243.1339  | ---            | 2  | I                   | 14             | 1680.9034 840.9554 |
| 356.2180  | ---            | 3  | L                   | 13             | 1567.8194 784.4133 |
| 469.3021  | ---            | 4  | I                   | 12             | 1454.7353 727.8713 |
| 566.3548  | ---            | 5  | P                   | 11             | 1341.6513 671.3293 |
| 665.4232  | ---            | 6  | V                   | 10             | 1244.5985 622.8029 |
| 812.4917  | ---            | 7  | F                   | 9              | 1145.5301 573.2687 |
| 990.6114  | 495.8093       | 8  | <b>K(50.0248)</b>   | 8              | 998.4617 499.7345  |
| 1104.6543 | 552.8308       | 9  | <b>N</b>            | 7              | 820.3419 410.6746  |
| 1251.6897 | 626.3485       | 10 | <b>M(Oxidation)</b> | 6              | 706.2990 353.6531  |
| 1322.7269 | 661.8671       | 11 | <b>A</b>            | 5              | 559.2636 280.1354  |
| 1437.7538 | 719.3805       | 12 | <b>D</b>            | 4              | 488.2265 244.6169  |
| 1508.7909 | 754.8991       | 13 | <b>A</b>            | 3              | 373.1995 187.1034  |
| 1655.8263 | 828.4168       | 14 | <b>M(Oxidation)</b> | 2              | 302.1624 151.5848  |
| ---       | ---            | 15 | <b>K(8.0142)</b>    | 1              | 155.1270 78.0671   |

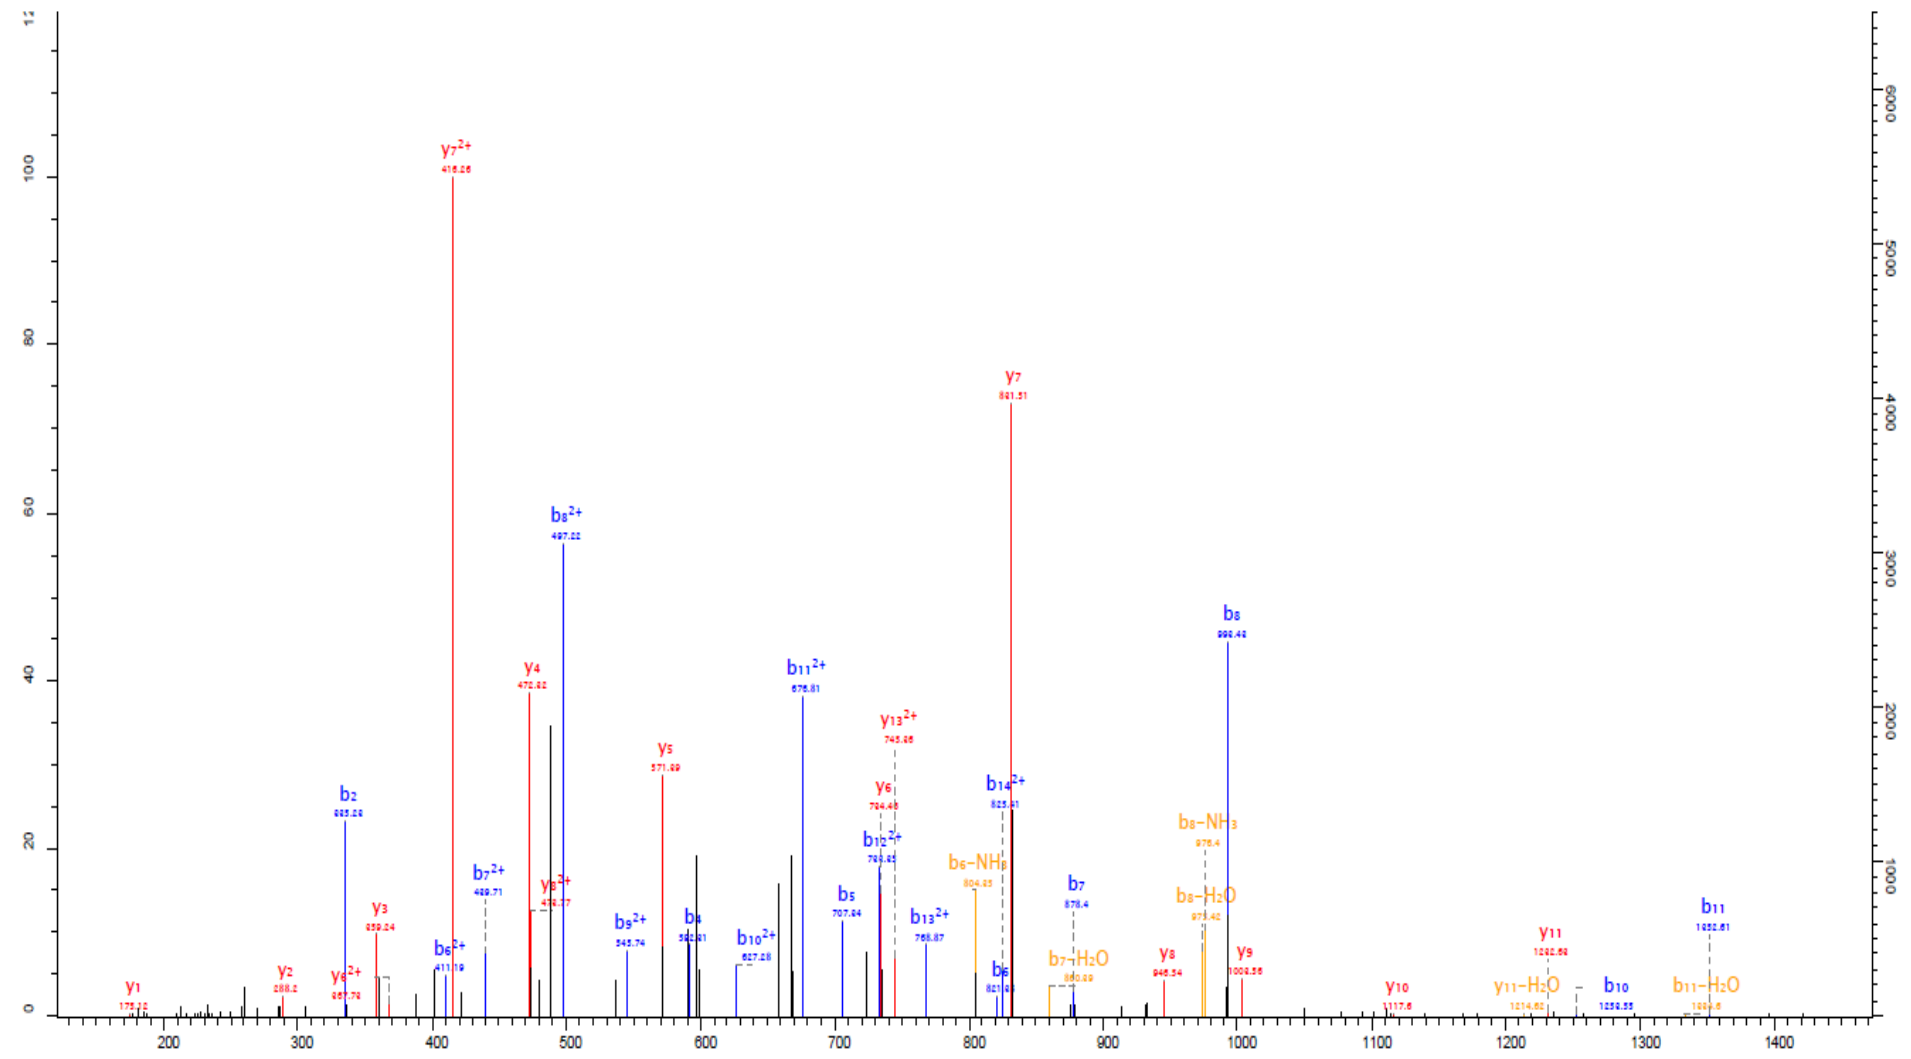

ac R K P C D N G D P Y V I A L R -  
 b2 y13<sup>2+</sup> y11 y10 y6 y5 y7 y6 y5 y4 y3 y2 y1  
 b4 b3 b2 b1 b7 b6 b5<sup>2+</sup> b10 b11 b12<sup>2+</sup> b13<sup>2+</sup> b14<sup>2+</sup>

Gene name = Acot11

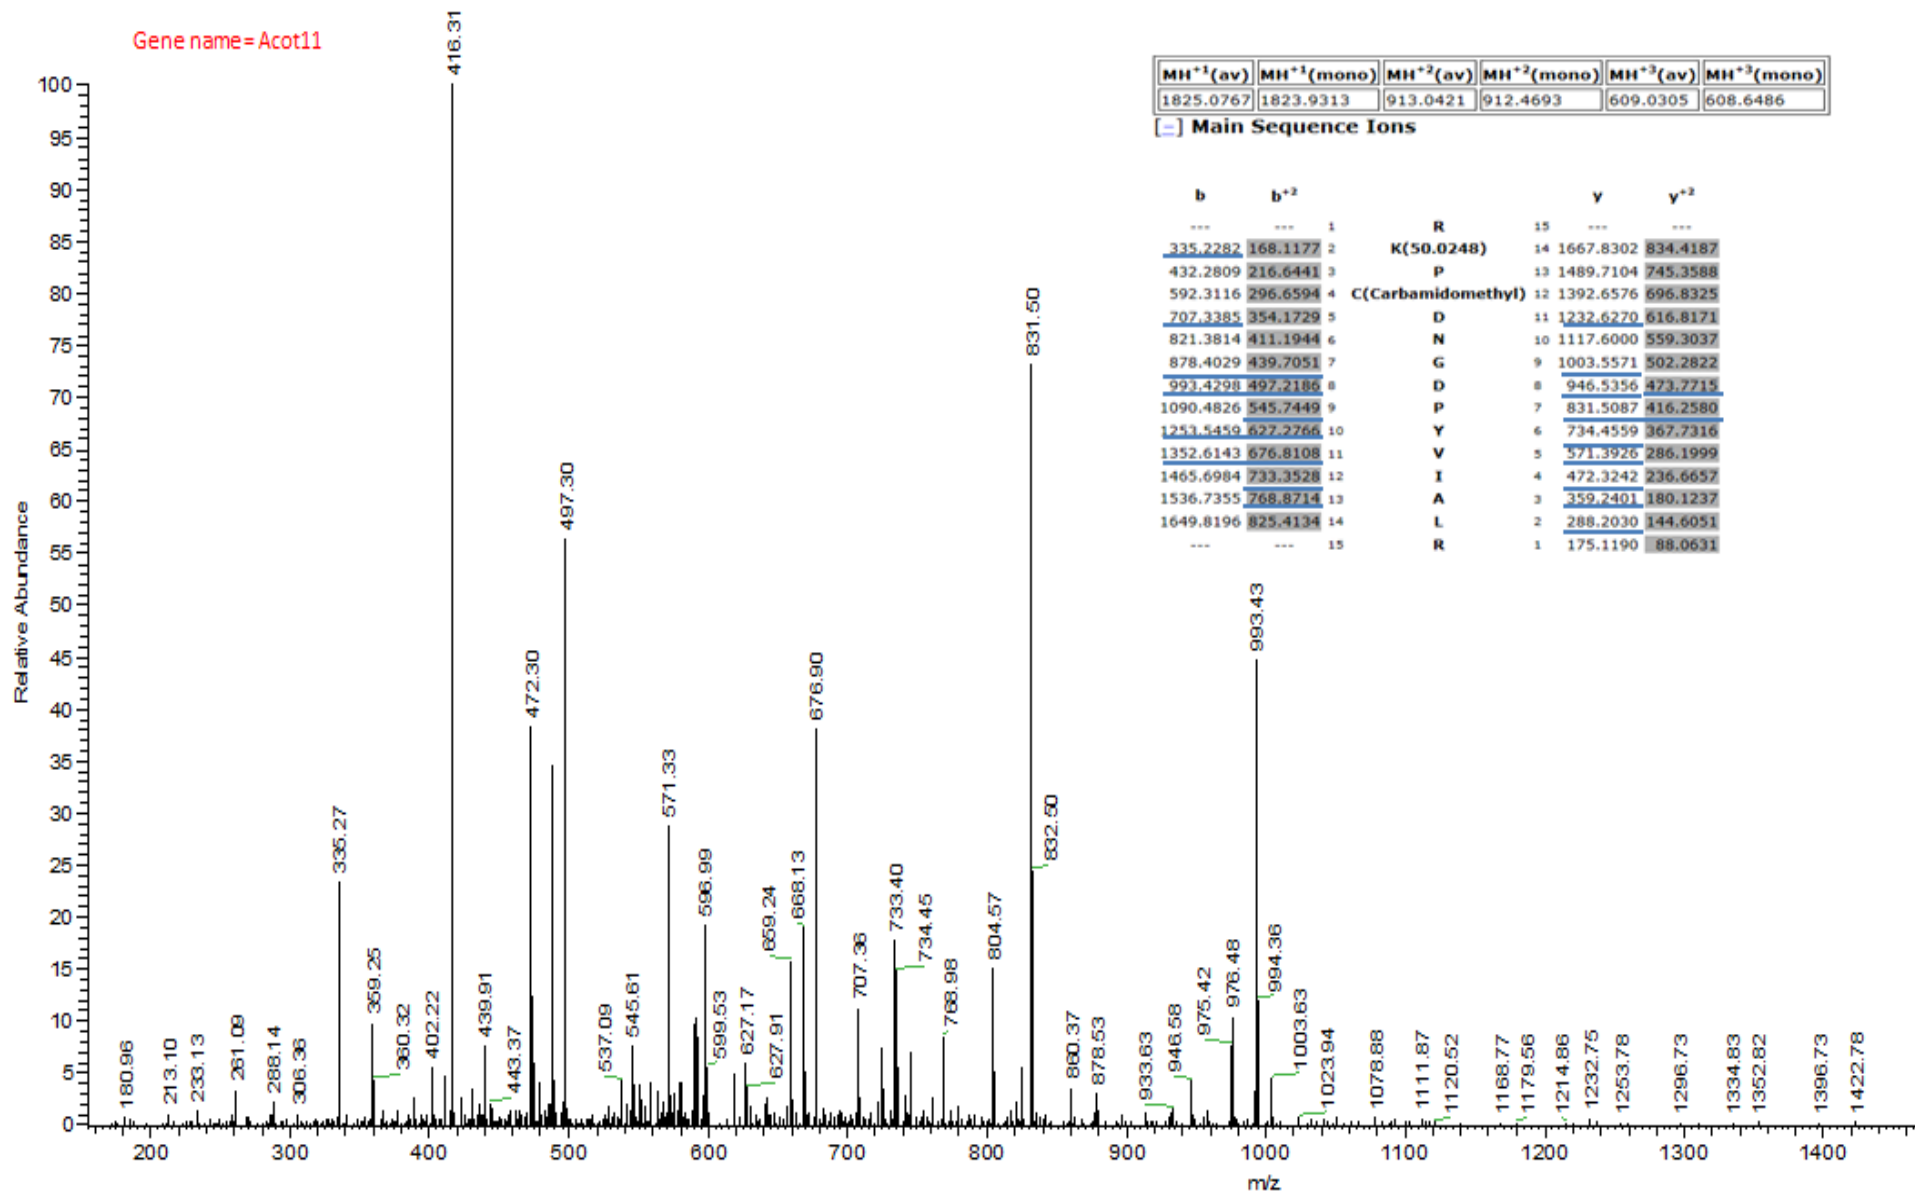

| MH <sup>+</sup> (av) | MH <sup>+</sup> (mono) | MH <sup>2+</sup> (av) | MH <sup>2+</sup> (mono) | MH <sup>3+</sup> (av) | MH <sup>3+</sup> (mono) |
|----------------------|------------------------|-----------------------|-------------------------|-----------------------|-------------------------|
| 1825.0767            | 1823.9313              | 913.0421              | 912.4693                | 609.0305              | 608.6486                |

**Main Sequence Ions**

| b         | b <sup>2</sup> | R  | y   | y <sup>2</sup> |
|-----------|----------------|----|-----|----------------|
| ---       | ---            | 1  | --- | ---            |
| 335.2282  | 168.1177       | 2  | 15  | 1667.8302      |
| 432.2809  | 216.6441       | 3  | --- | ---            |
| 592.3116  | 296.6594       | 4  | 14  | 1489.7104      |
| 707.3385  | 354.1729       | 5  | 13  | 1232.6270      |
| 821.3814  | 411.1944       | 6  | 12  | 1392.6576      |
| 878.4029  | 439.7051       | 7  | 11  | 1232.6270      |
| 993.4298  | 497.2186       | 8  | 10  | 1117.6000      |
| 1090.4826 | 545.7449       | 9  | 9   | 1003.5571      |
| 1253.5459 | 627.2266       | 10 | 8   | 946.5356       |
| 1352.6143 | 676.8108       | 11 | 7   | 831.5087       |
| 1465.6984 | 733.3528       | 12 | 6   | 734.4559       |
| 1536.7355 | 768.8714       | 13 | 5   | 571.3926       |
| 1649.8196 | 825.4134       | 14 | 4   | 472.3242       |
| ---       | ---            | 15 | 3   | 359.2401       |
|           |                |    | 2   | 288.2030       |
|           |                |    | 1   | 175.1190       |

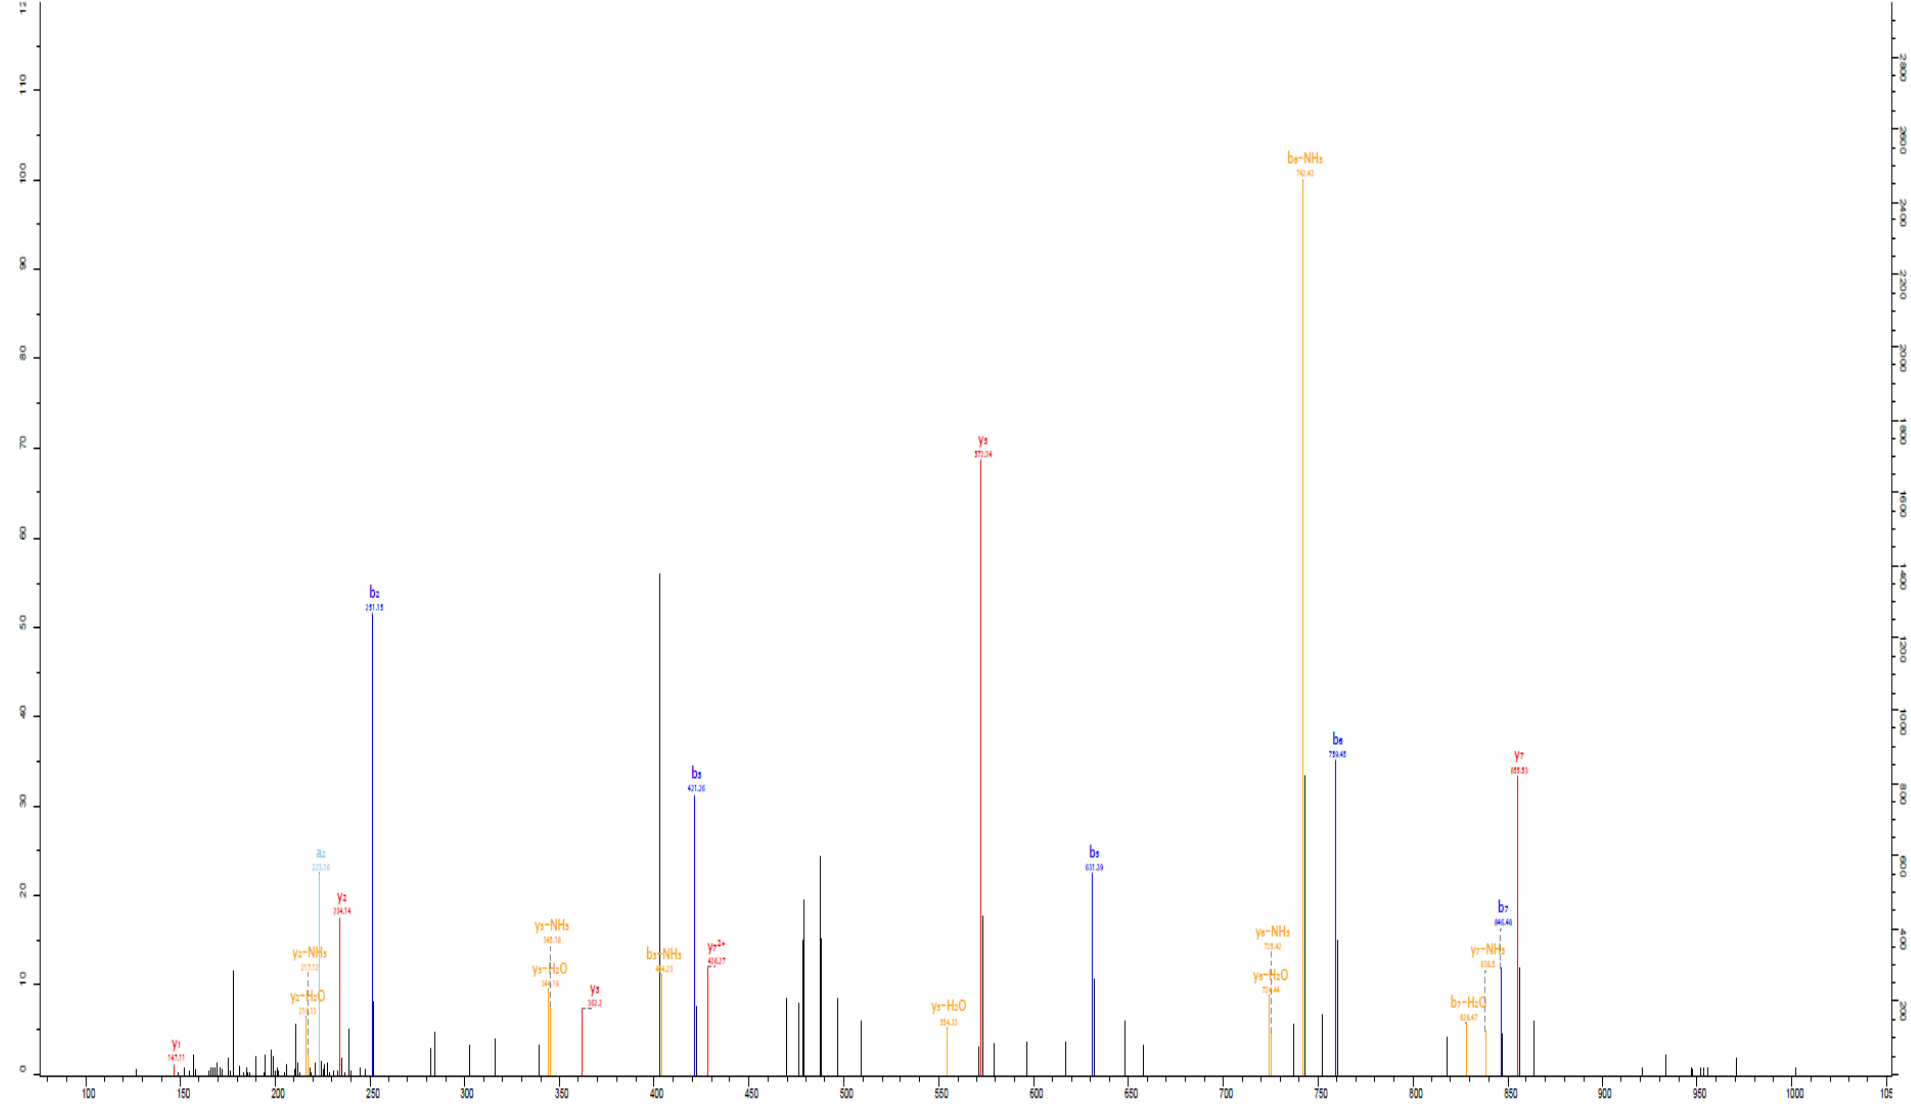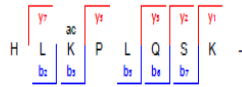

Gene name = Acox1

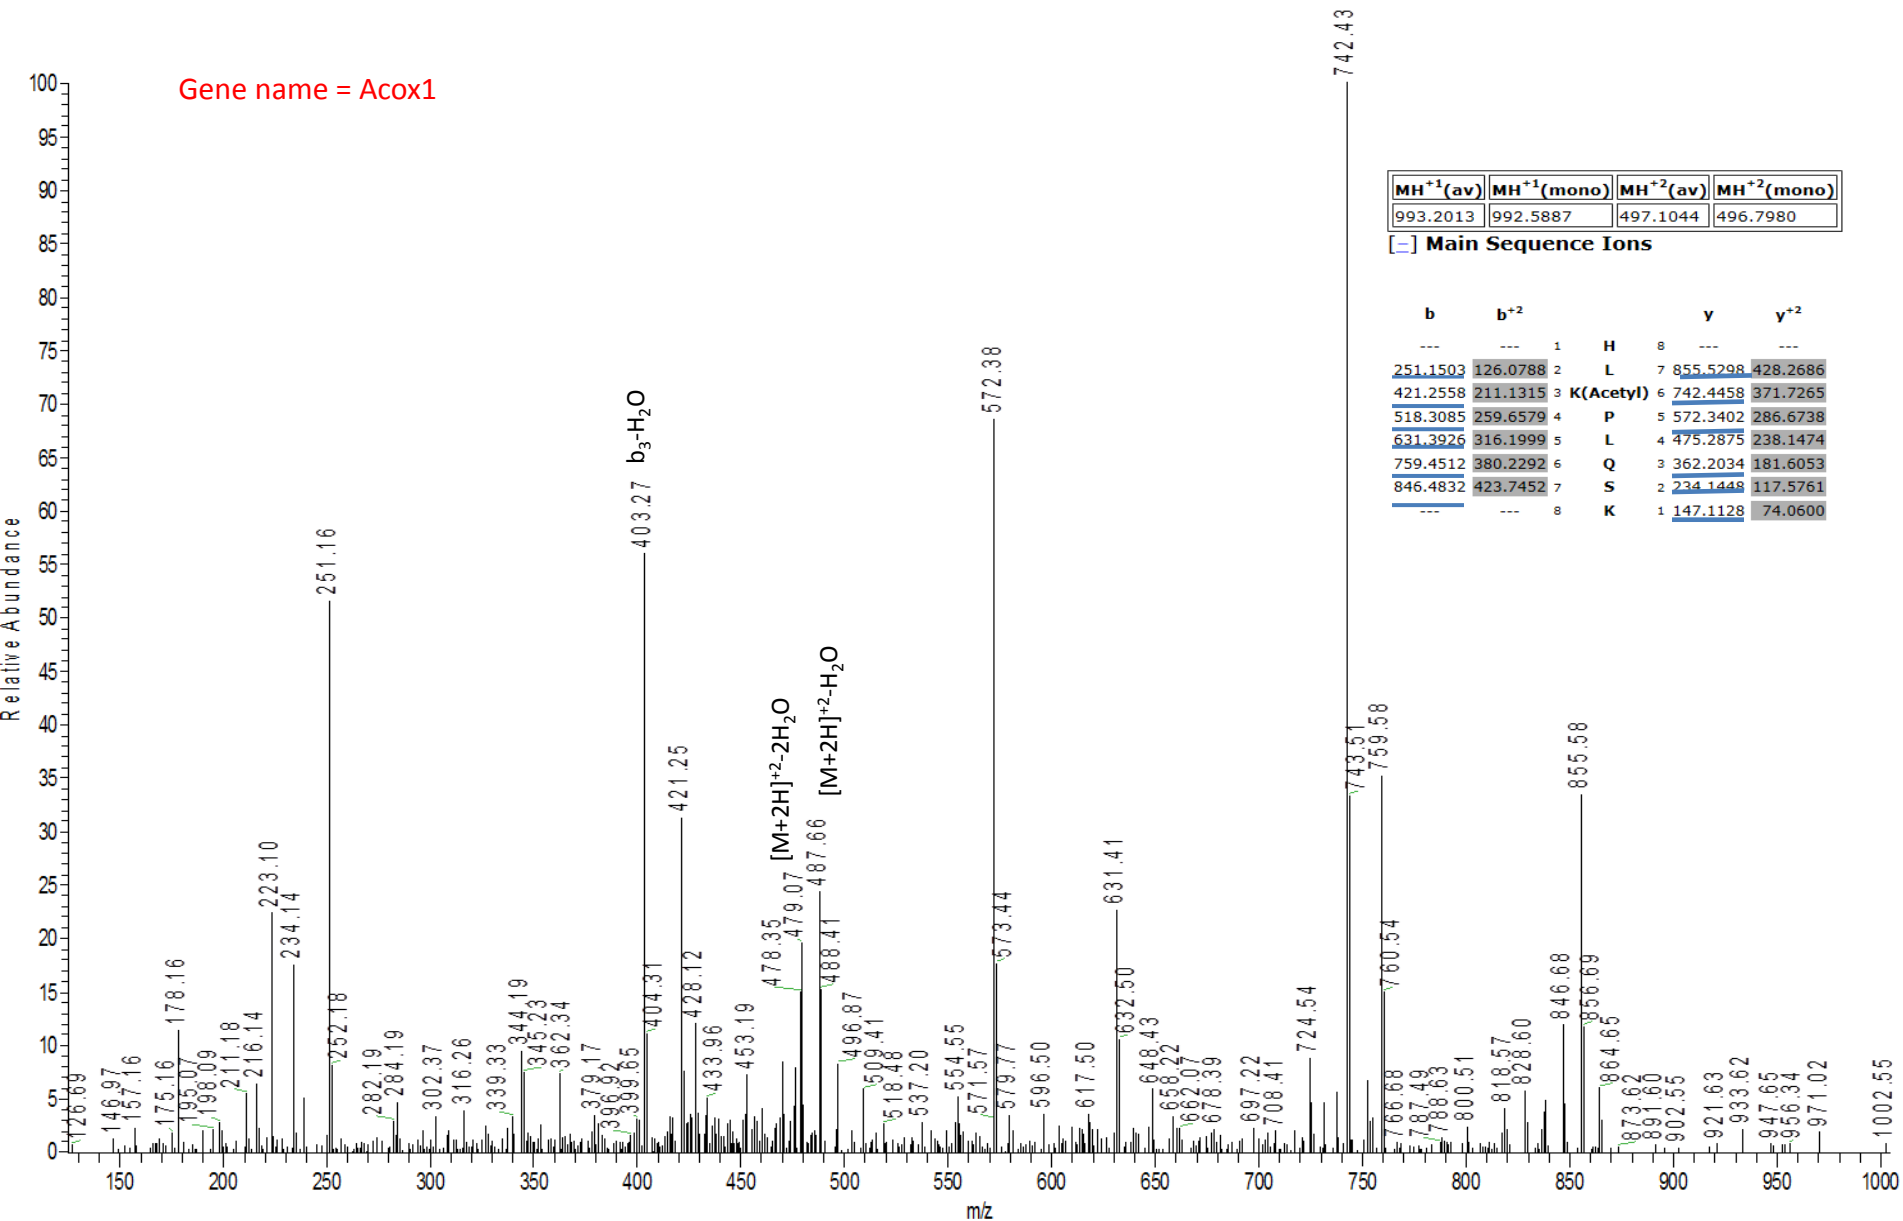

| MH <sup>+</sup> 1(av) | MH <sup>+</sup> 1(mono) | MH <sup>+</sup> 2(av) | MH <sup>+</sup> 2(mono) |
|-----------------------|-------------------------|-----------------------|-------------------------|
| 993.2013              | 992.5887                | 497.1044              | 496.7980                |

[-] Main Sequence Ions

| b        | b <sup>+</sup> 2 |   | y         | y <sup>+</sup> 2 |          |          |
|----------|------------------|---|-----------|------------------|----------|----------|
| ---      | ---              | 1 | H         | 8                | ---      |          |
| 251.1503 | 126.0788         | 2 | L         | 7                | 855.5298 |          |
| 421.2558 | 211.1315         | 3 | K(Acetyl) |                  | 6        | 742.4458 |
| 518.3085 | 259.6579         | 4 | P         | 5                | 572.3402 |          |
| 631.3926 | 316.1999         | 5 | L         | 4                | 475.2875 |          |
| 759.4512 | 380.2292         | 6 | Q         | 3                | 362.2034 |          |
| 846.4832 | 423.7452         | 7 | S         | 2                | 234.1448 |          |
| ---      | ---              | 8 | K         | 1                | 147.1128 |          |
|          |                  |   |           |                  |          | 74.0600  |



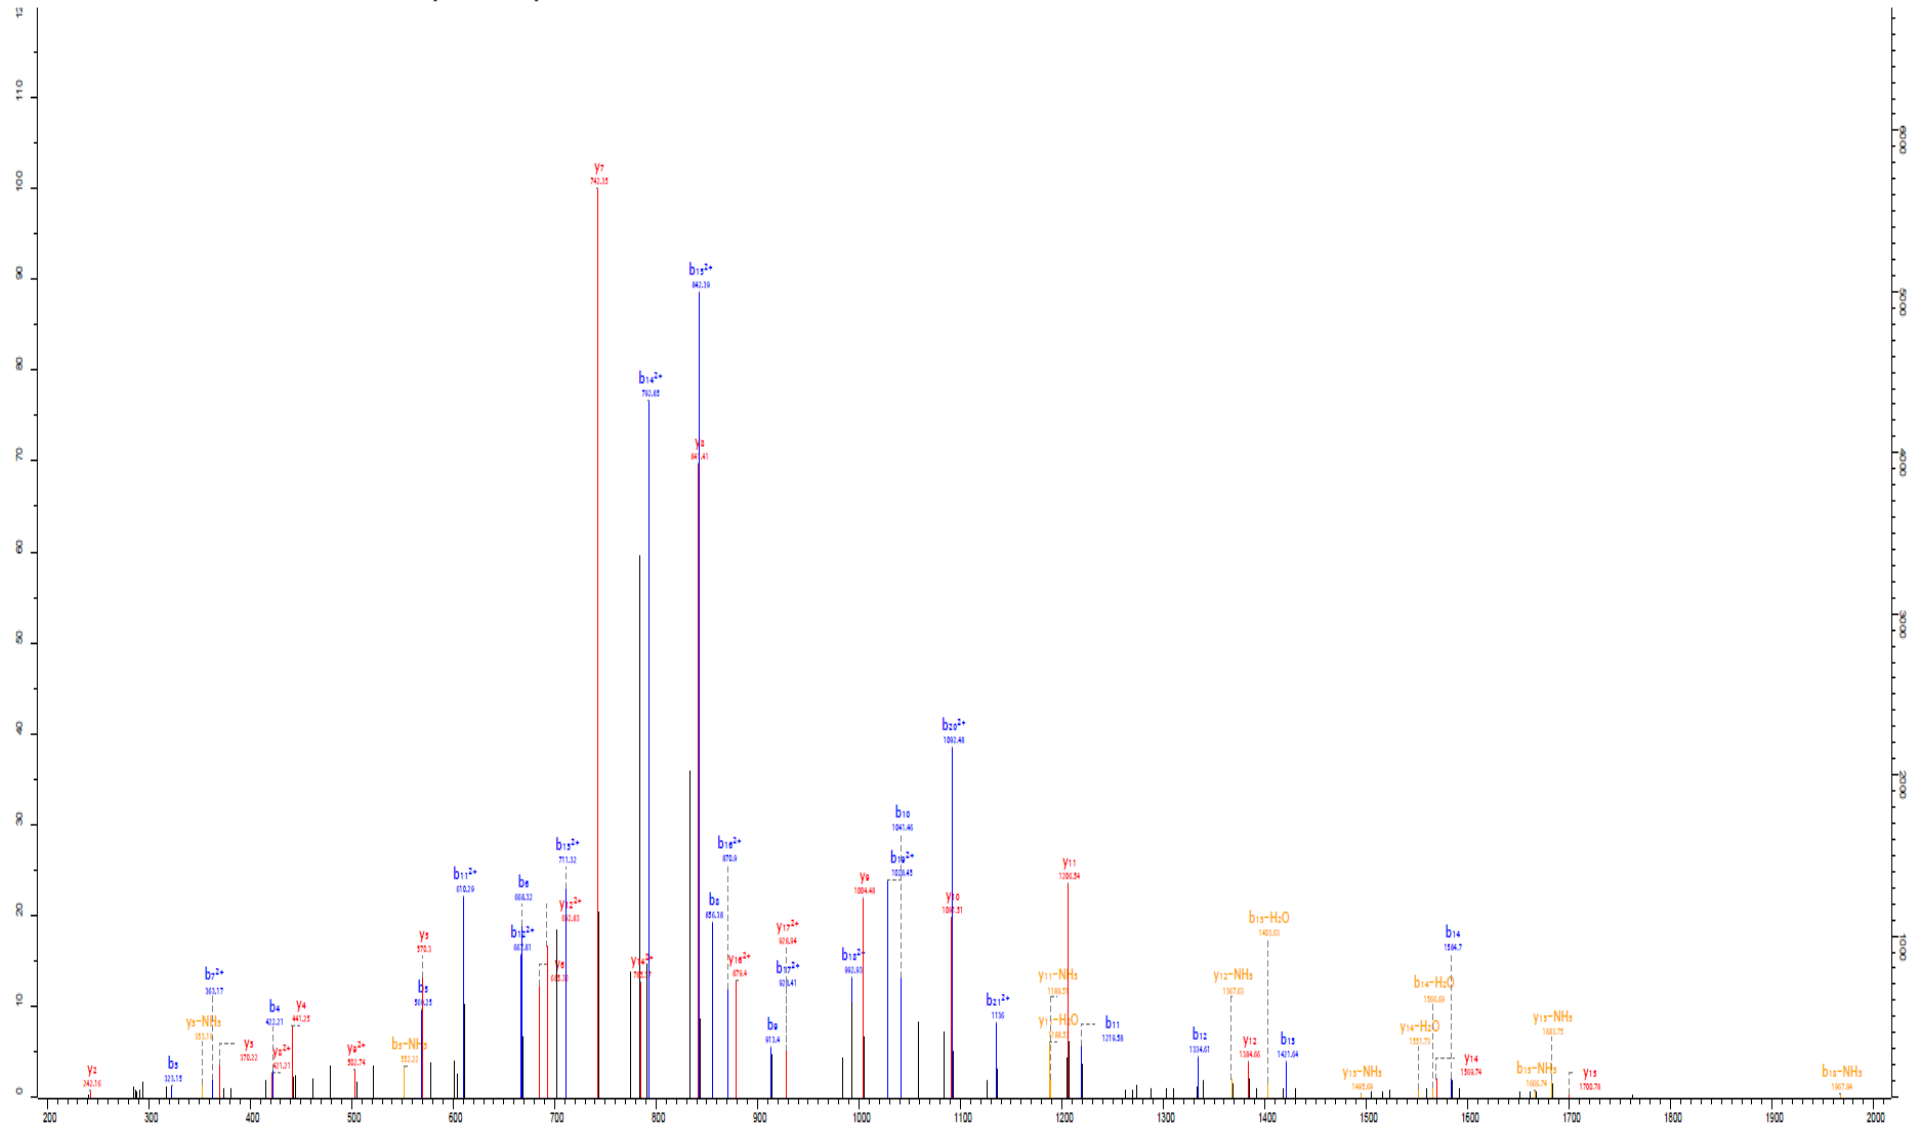

H Q G V M V G M G Q K D S Y V G D E A Q S K  
 Ox b1 b2 b3 b4 b5 b6 b7 b8 b9 b10 b11 b12 b13 b14 b15 b16 b17 b18 b19 b20

x10

x10

Gene name = Actb;Actg1;Actc1;  
 Acta1;Acta2;Actg2

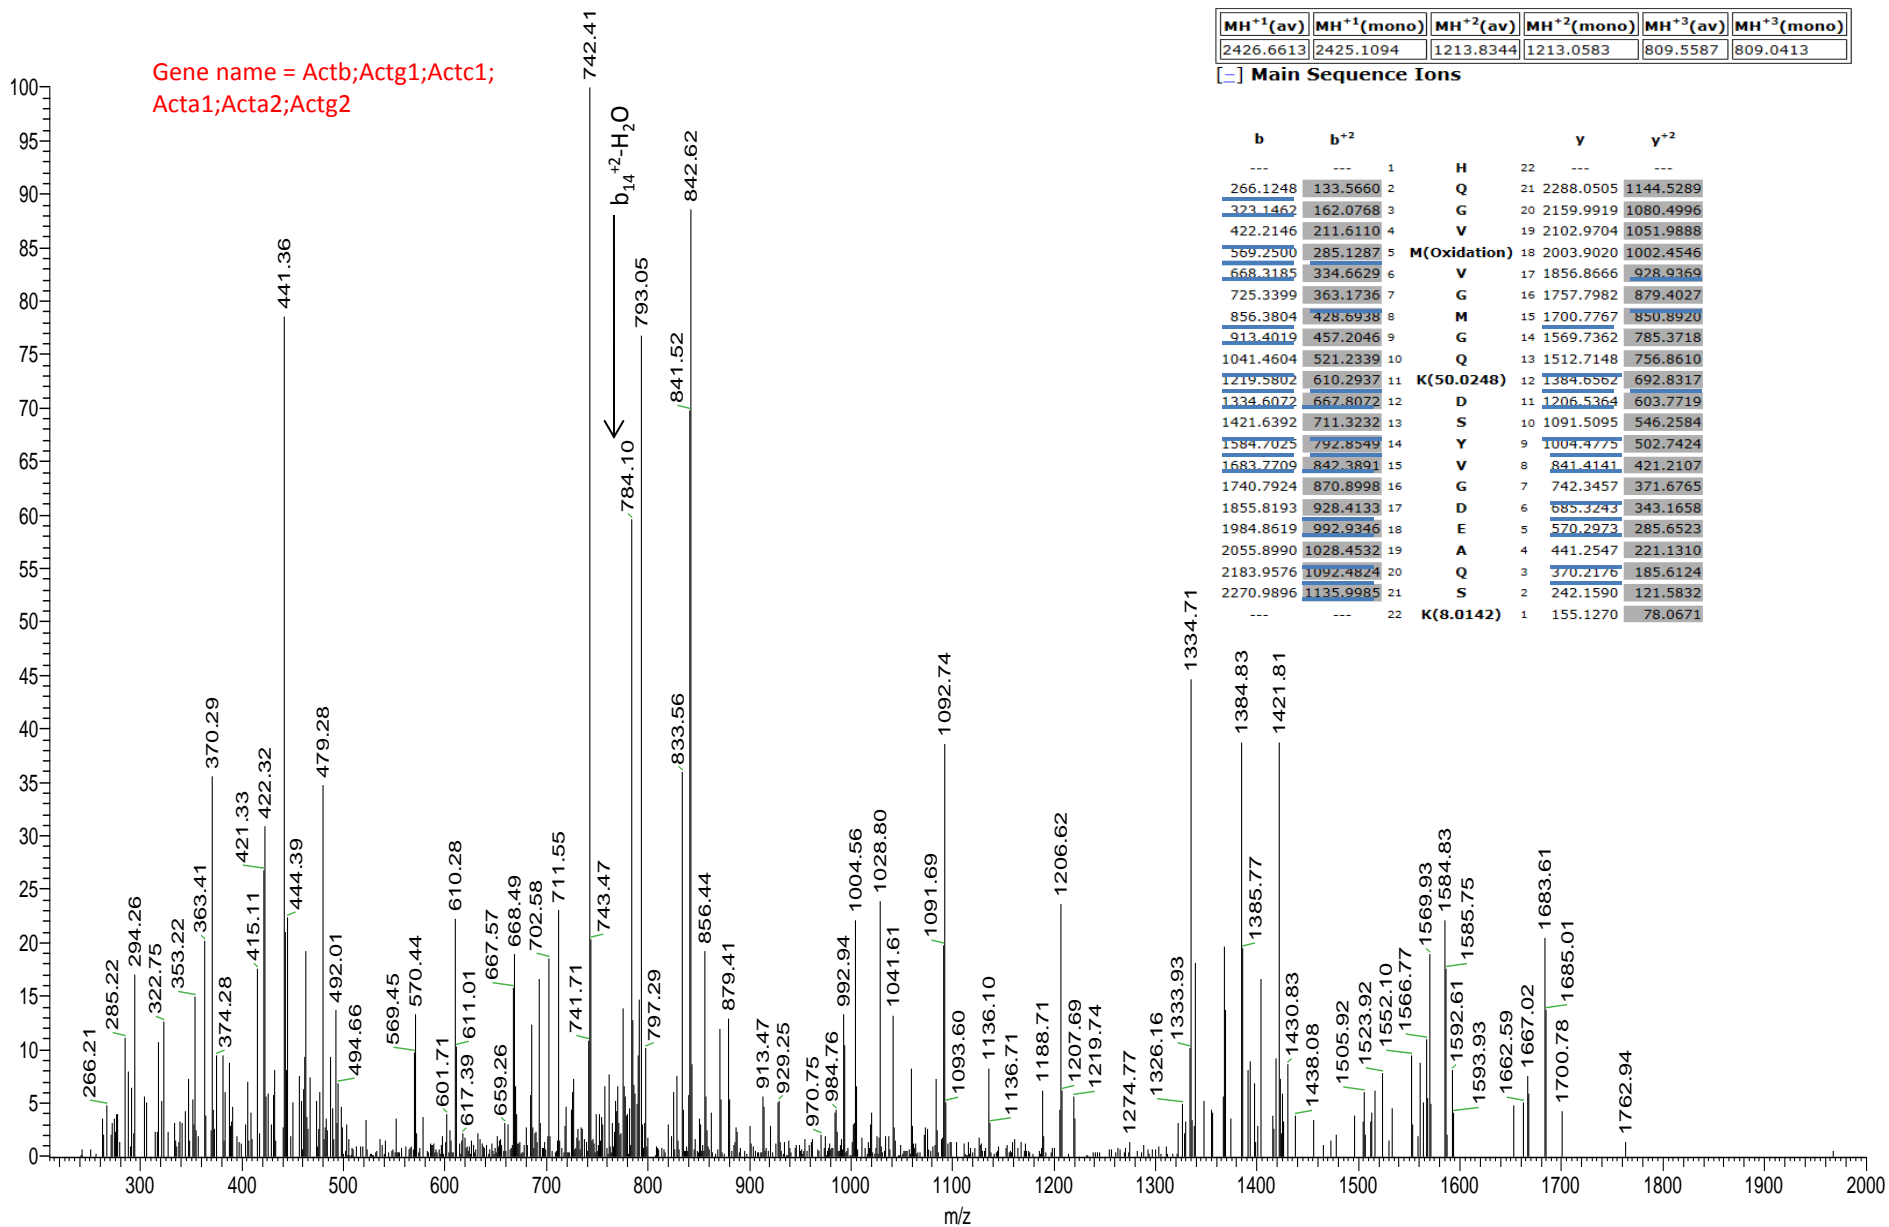

| MH <sup>+</sup> (av) | MH <sup>+</sup> (mono) | MH <sup>2+</sup> (av) | MH <sup>2+</sup> (mono) | MH <sup>3+</sup> (av) | MH <sup>3+</sup> (mono) |
|----------------------|------------------------|-----------------------|-------------------------|-----------------------|-------------------------|
| 2426.6613            | 2425.1094              | 1213.8344             | 1213.0583               | 809.5587              | 809.0413                |

[-] Main Sequence Ions

| b         | b <sup>+</sup> |    | y            | y <sup>+</sup> |
|-----------|----------------|----|--------------|----------------|
| ---       | ---            | 1  | H            | 22             |
| 266.1248  | 133.5660       | 2  | Q            | 21 2288.0505   |
| 323.1462  | 162.0768       | 3  | G            | 20 2159.9919   |
| 422.2146  | 211.6110       | 4  | V            | 19 2102.9704   |
| 569.2500  | 285.1287       | 5  | M(Oxidation) | 18 2003.9020   |
| 668.3185  | 334.6629       | 6  | V            | 17 1856.8666   |
| 725.3399  | 363.1736       | 7  | G            | 16 1757.7982   |
| 856.3804  | 428.6938       | 8  | M            | 15 1700.7767   |
| 913.4019  | 457.2046       | 9  | G            | 14 1569.7362   |
| 1041.4604 | 521.2339       | 10 | Q            | 13 1512.7148   |
| 1219.5802 | 610.2937       | 11 | K(50.0248)   | 12 1384.6562   |
| 1334.6072 | 667.8072       | 12 | D            | 11 1206.5364   |
| 1421.6392 | 711.3232       | 13 | S            | 10 1091.5095   |
| 1584.7025 | 792.3549       | 14 | Y            | 9 1004.4775    |
| 1683.7709 | 842.3891       | 15 | V            | 8 841.4141     |
| 1740.7924 | 870.8998       | 16 | G            | 7 742.3457     |
| 1855.8193 | 928.4133       | 17 | D            | 6 685.3243     |
| 1984.8619 | 992.9346       | 18 | E            | 5 570.2973     |
| 2055.8990 | 1028.4532      | 19 | A            | 4 441.2547     |
| 2183.9576 | 1092.4824      | 20 | Q            | 3 370.2176     |
| 2270.9896 | 1135.9985      | 21 | S            | 2 242.1590     |
| ---       | ---            | 22 | K(8.0142)    | 1 155.1270     |

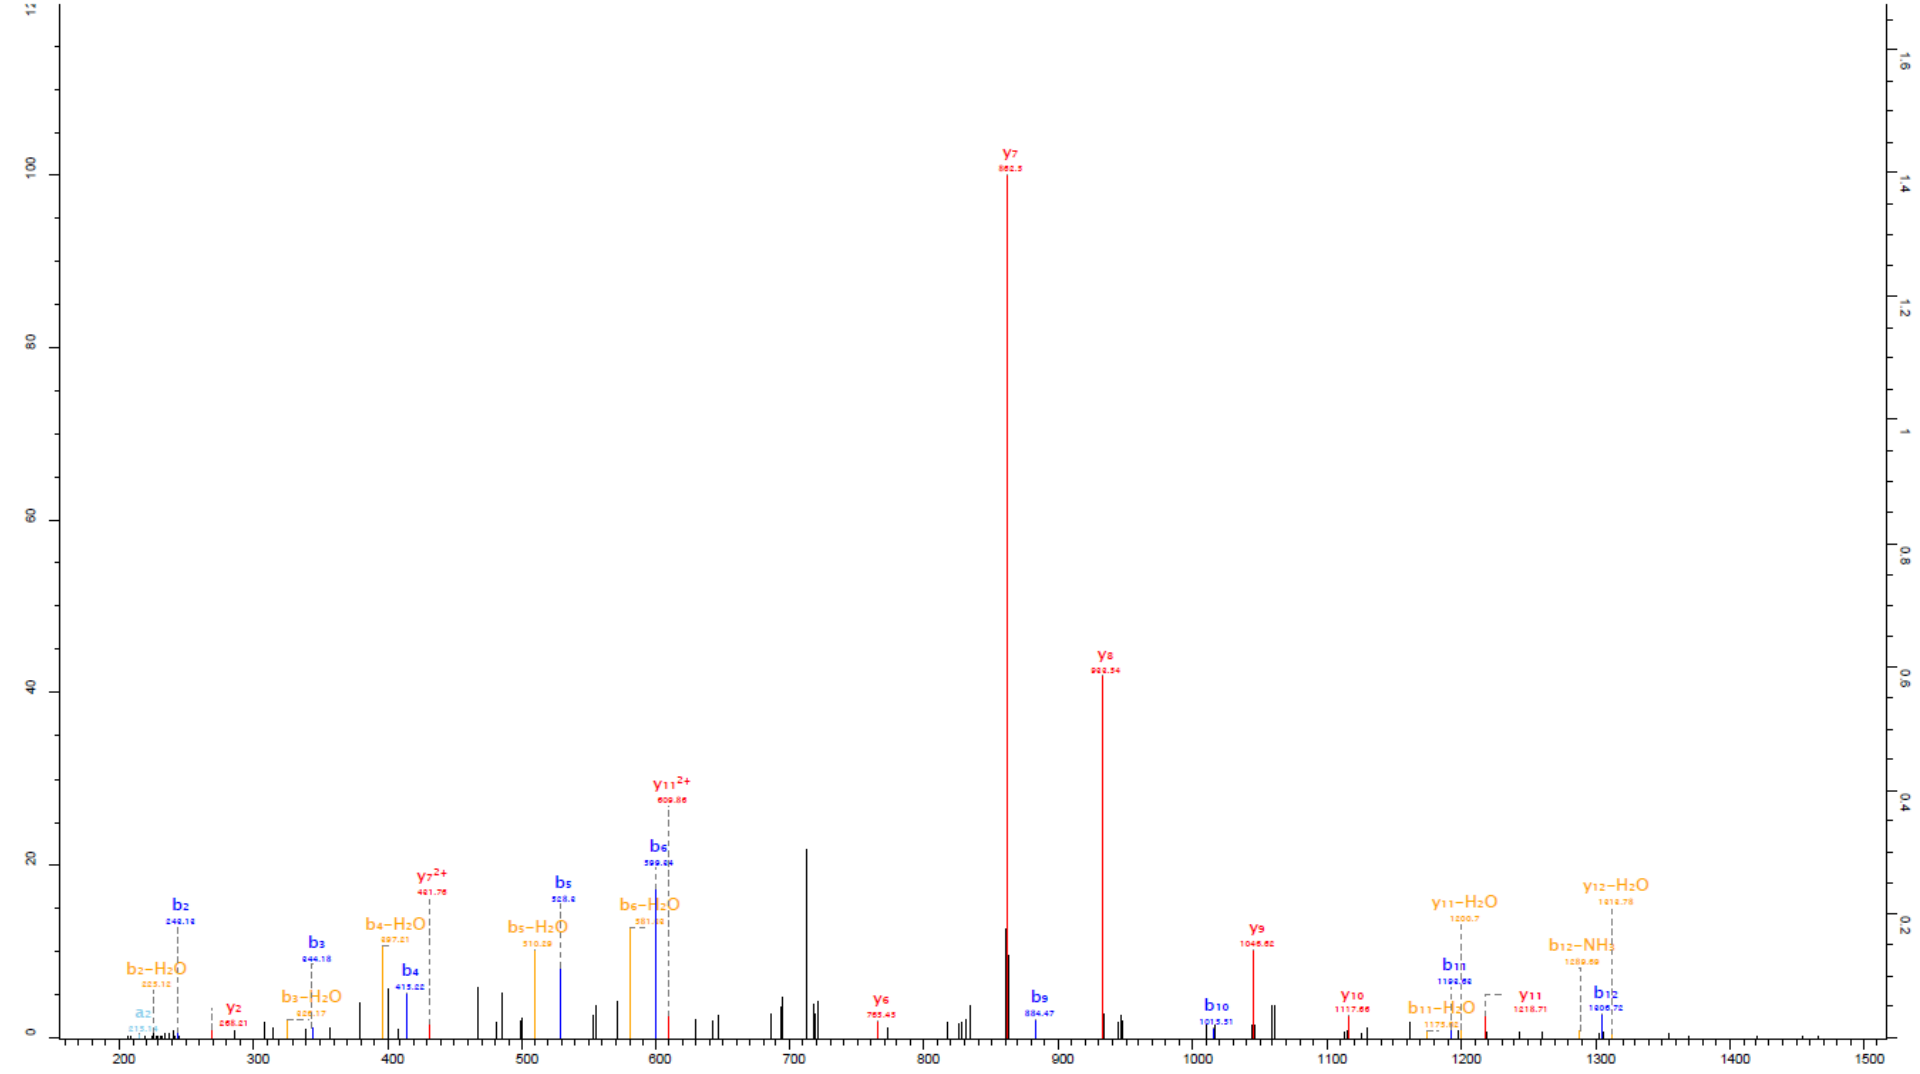

- E I T A L A P S T M K I K -

y<sub>11</sub>
y<sub>10</sub>
y<sub>9</sub>
y<sub>8</sub>
y<sub>7</sub>
y<sub>6</sub>
y<sub>5</sub>
y<sub>2</sub>

b<sub>2</sub>
b<sub>3</sub>
b<sub>4</sub>
b<sub>5</sub>
b<sub>6</sub>
b<sub>9</sub>
b<sub>10</sub>
b<sub>11</sub>
b<sub>12</sub>

ac

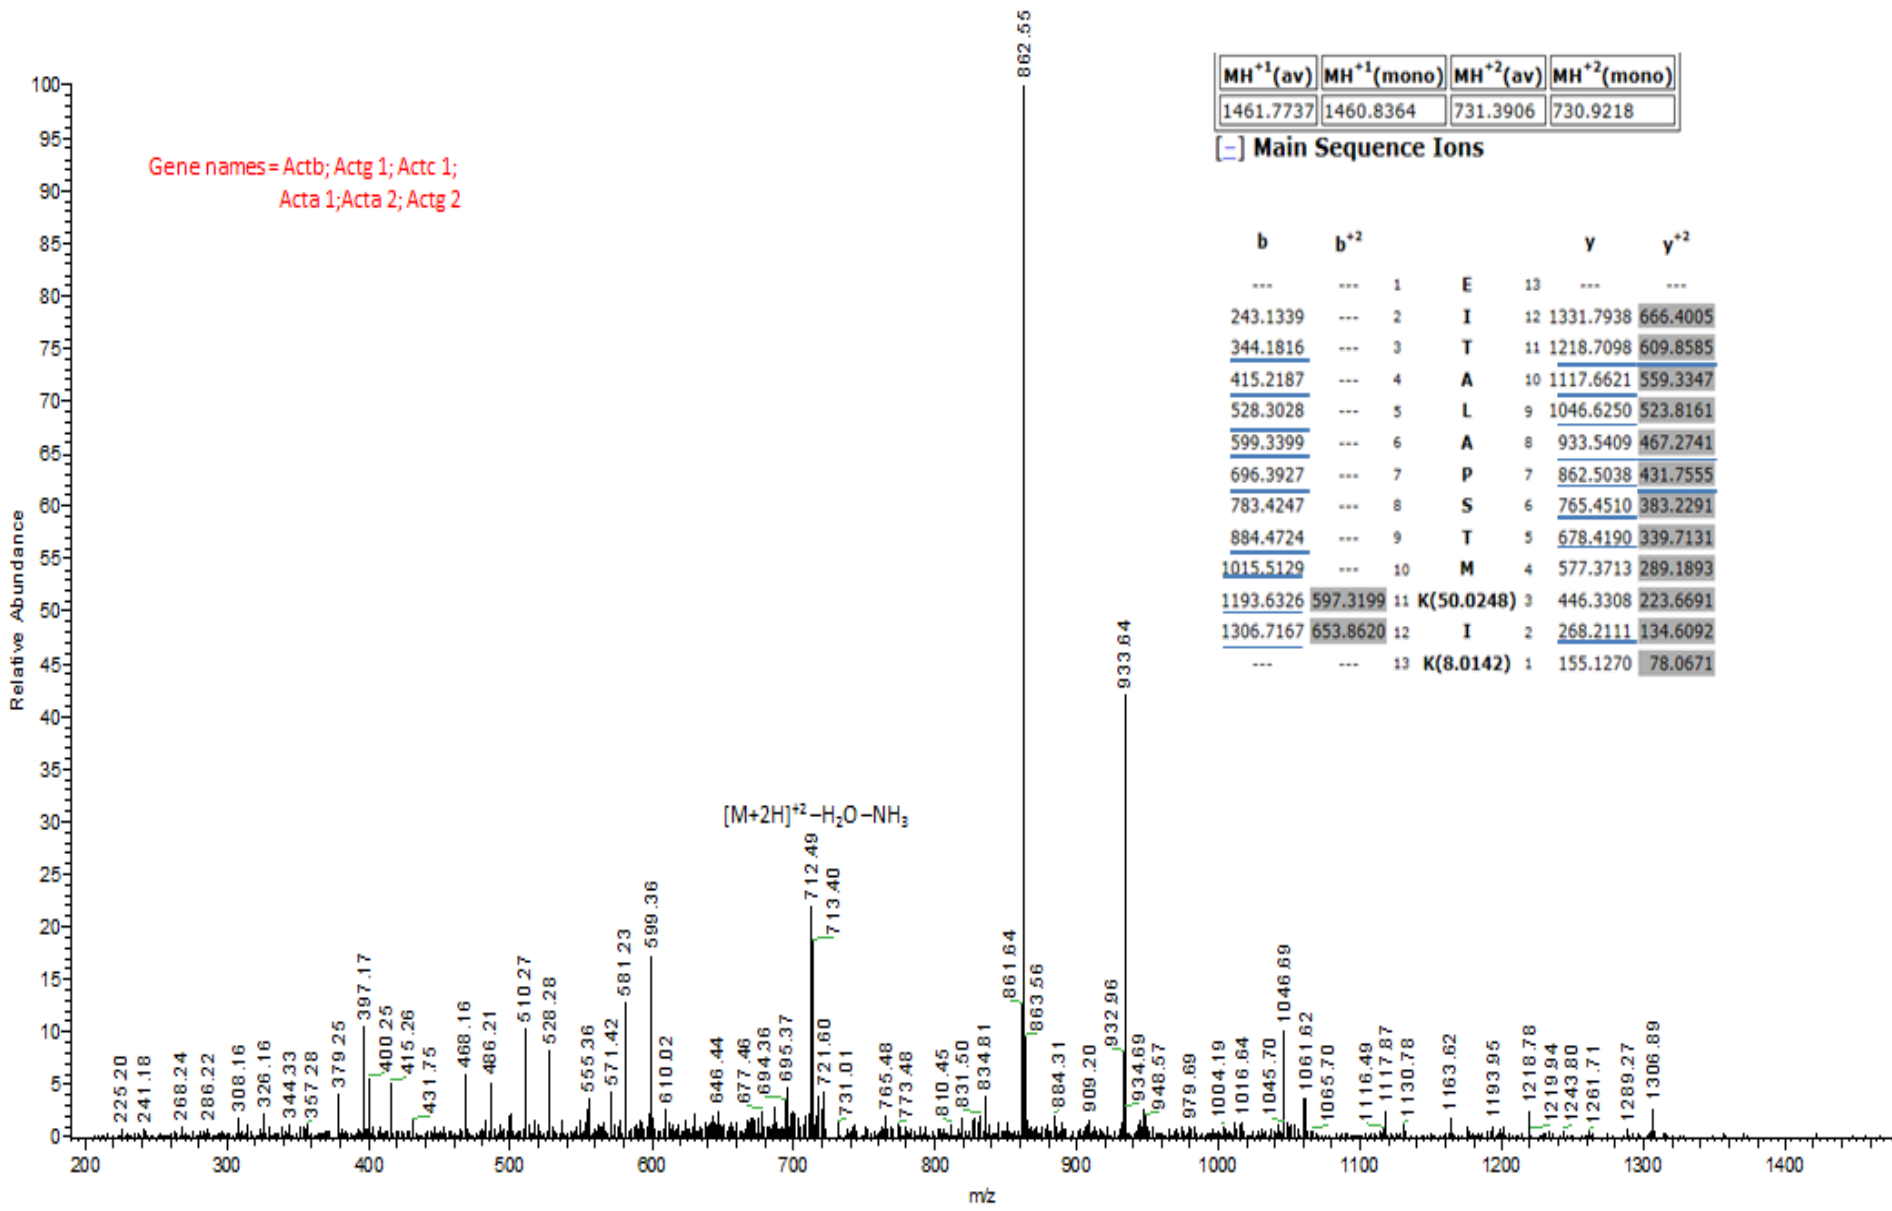

| MH <sup>+</sup> (av) | MH <sup>+</sup> (mono) | MH <sup>2+</sup> (av) | MH <sup>2+</sup> (mono) |
|----------------------|------------------------|-----------------------|-------------------------|
| 1461.7737            | 1460.8364              | 731.3906              | 730.9218                |

[-] Main Sequence Ions

| b         | b <sup>2+</sup> |    | y          | y <sup>2+</sup> |           |
|-----------|-----------------|----|------------|-----------------|-----------|
| ---       | ---             | 1  | E          | 13              | ---       |
| 243.1339  | ---             | 2  | I          | 12              | 1331.7938 |
| 344.1816  | ---             | 3  | T          | 11              | 1218.7098 |
| 415.2187  | ---             | 4  | A          | 10              | 1117.6621 |
| 528.3028  | ---             | 5  | L          | 9               | 1046.6250 |
| 599.3399  | ---             | 6  | A          | 8               | 933.5409  |
| 696.3927  | ---             | 7  | P          | 7               | 862.5038  |
| 783.4247  | ---             | 8  | S          | 6               | 765.4510  |
| 884.4724  | ---             | 9  | T          | 5               | 678.4190  |
| 1015.5129 | ---             | 10 | M          | 4               | 577.3713  |
| 1193.6326 | 597.3199        | 11 | K(50.0248) | 3               | 446.3308  |
| 1306.7167 | 653.8620        | 12 | I          | 2               | 268.2111  |
| ---       | ---             | 13 | K(8.0142)  | 1               | 155.1270  |

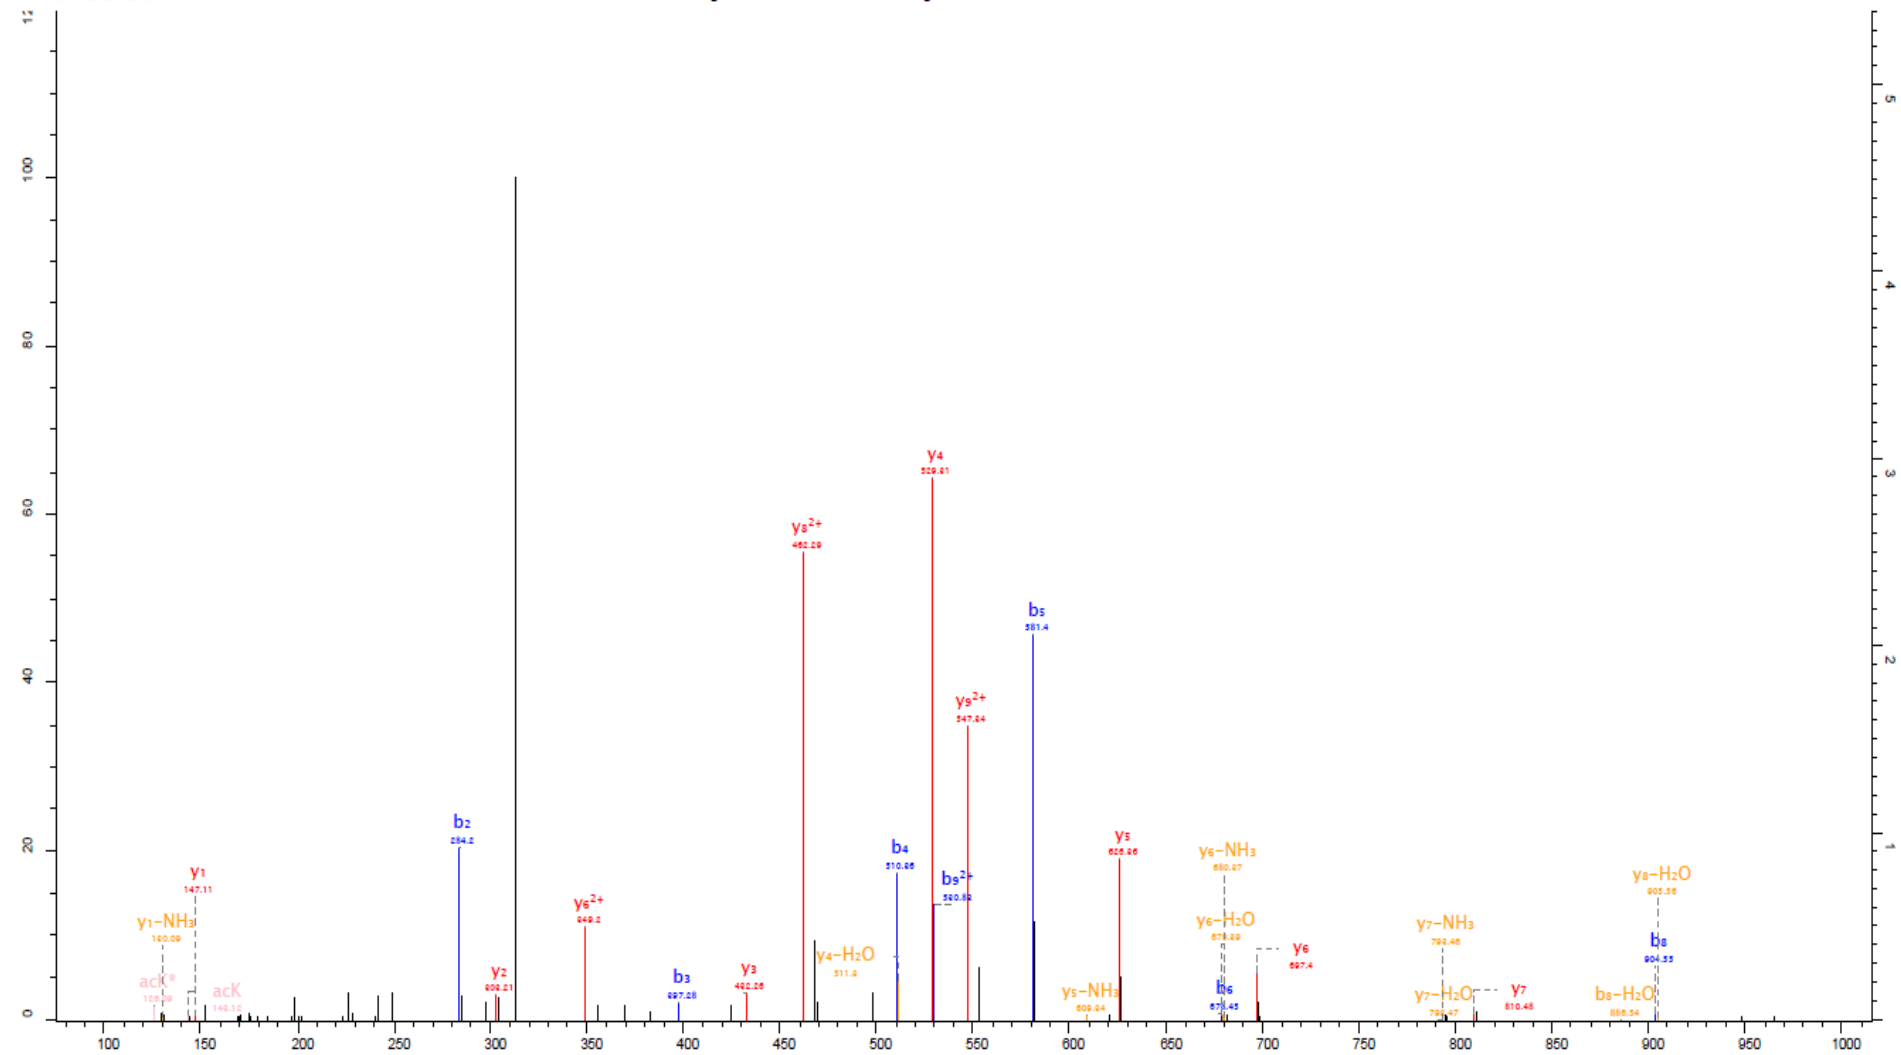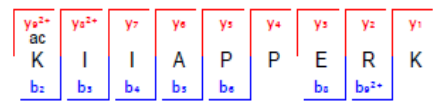

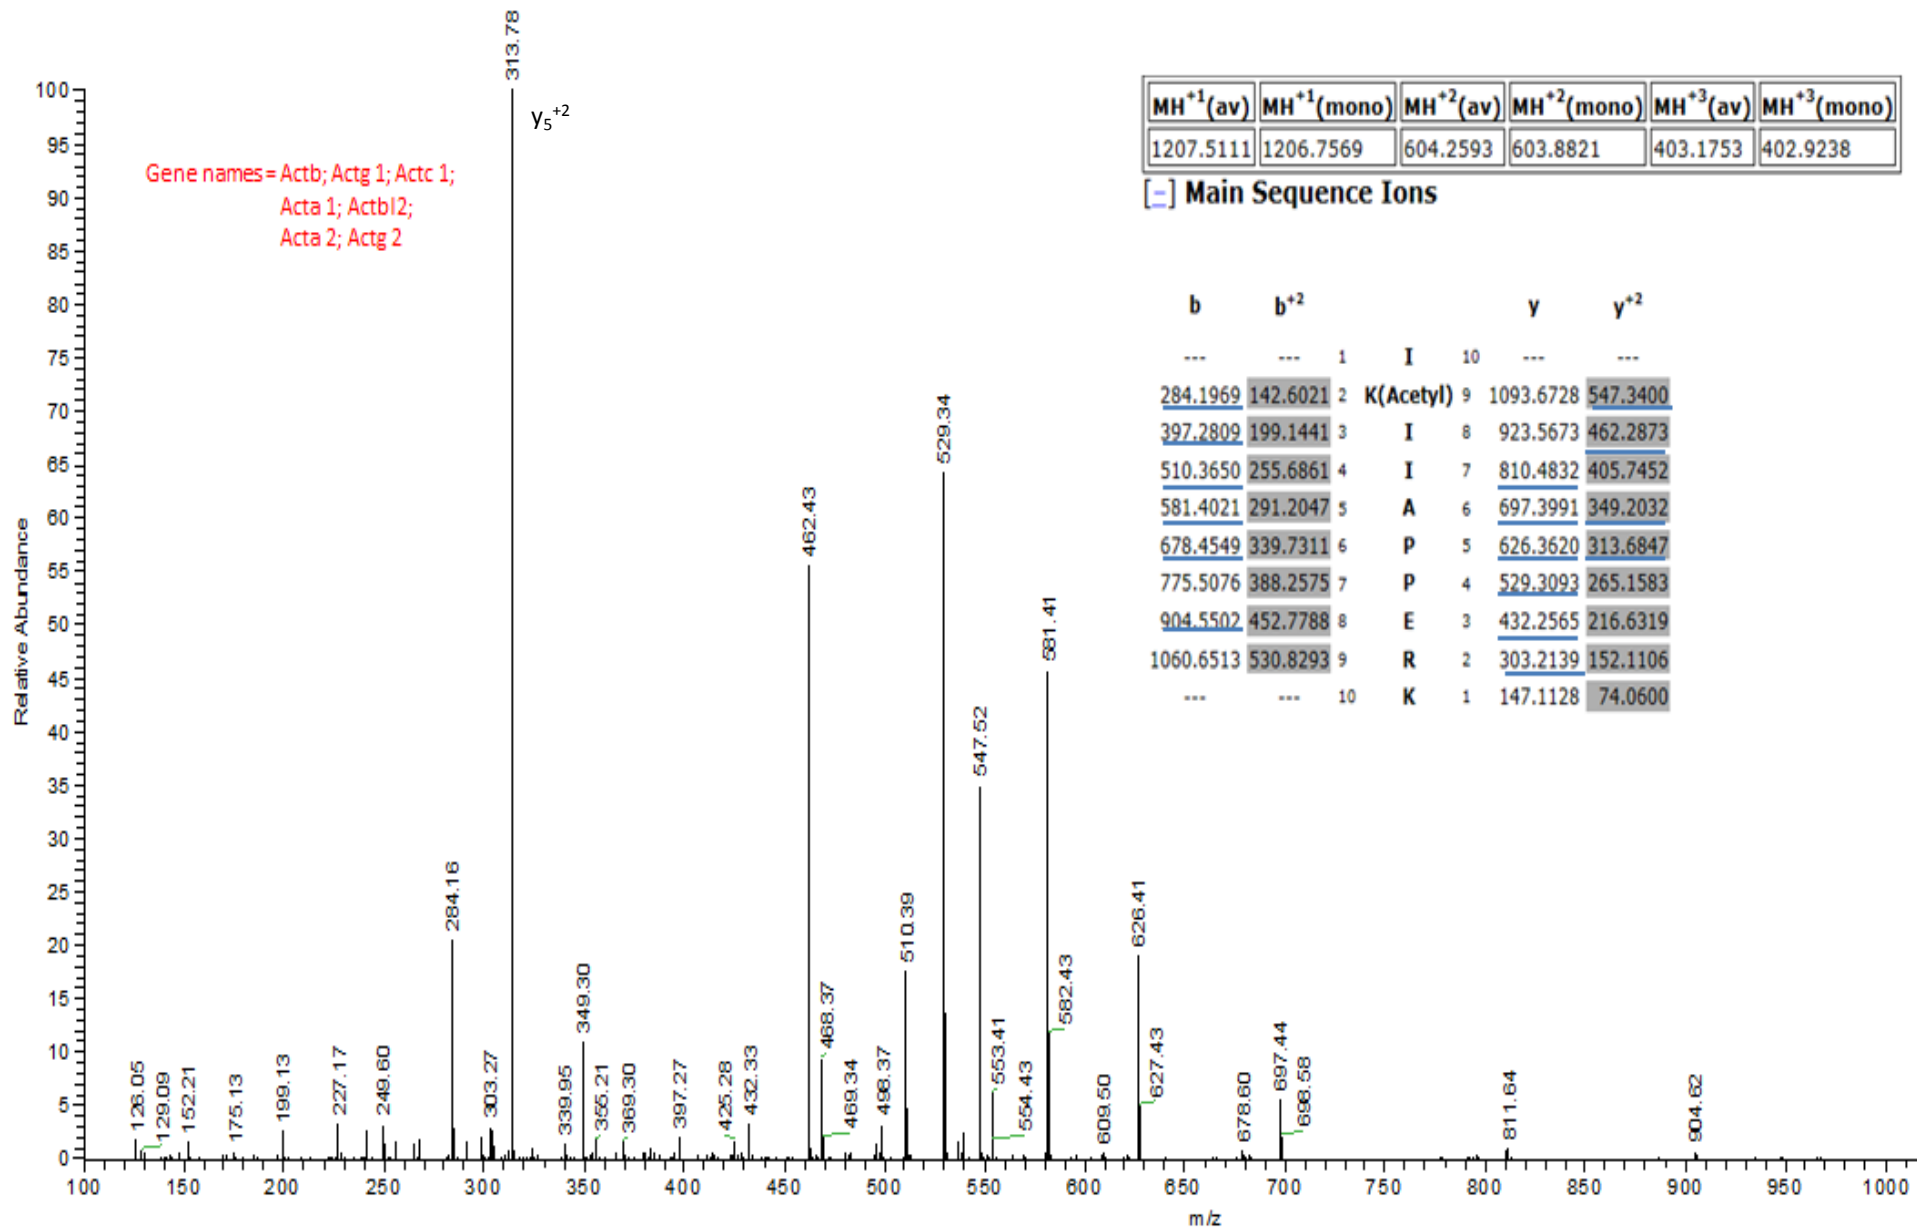

| MH <sup>+</sup> (av) | MH <sup>+</sup> (mono) | MH <sup>2+</sup> (av) | MH <sup>2+</sup> (mono) | MH <sup>3+</sup> (av) | MH <sup>3+</sup> (mono) |
|----------------------|------------------------|-----------------------|-------------------------|-----------------------|-------------------------|
| 1207.5111            | 1206.7569              | 604.2593              | 603.8821                | 403.1753              | 402.9238                |

**[ - ] Main Sequence Ions**

| b         | b <sup>+</sup> |    | y                | y <sup>+</sup> |
|-----------|----------------|----|------------------|----------------|
| ---       | ---            | 1  | I                | 10             |
| 284.1969  | 142.6021       | 2  | <b>K(Acetyl)</b> | 9              |
| 397.2809  | 199.1441       | 3  | I                | 8              |
| 510.3650  | 255.6861       | 4  | I                | 7              |
| 581.4021  | 291.2047       | 5  | A                | 6              |
| 678.4549  | 339.7311       | 6  | P                | 5              |
| 775.5076  | 388.2575       | 7  | P                | 4              |
| 904.5502  | 452.7788       | 8  | E                | 3              |
| 1060.6513 | 530.8293       | 9  | R                | 2              |
| ---       | ---            | 10 | K                | 1              |

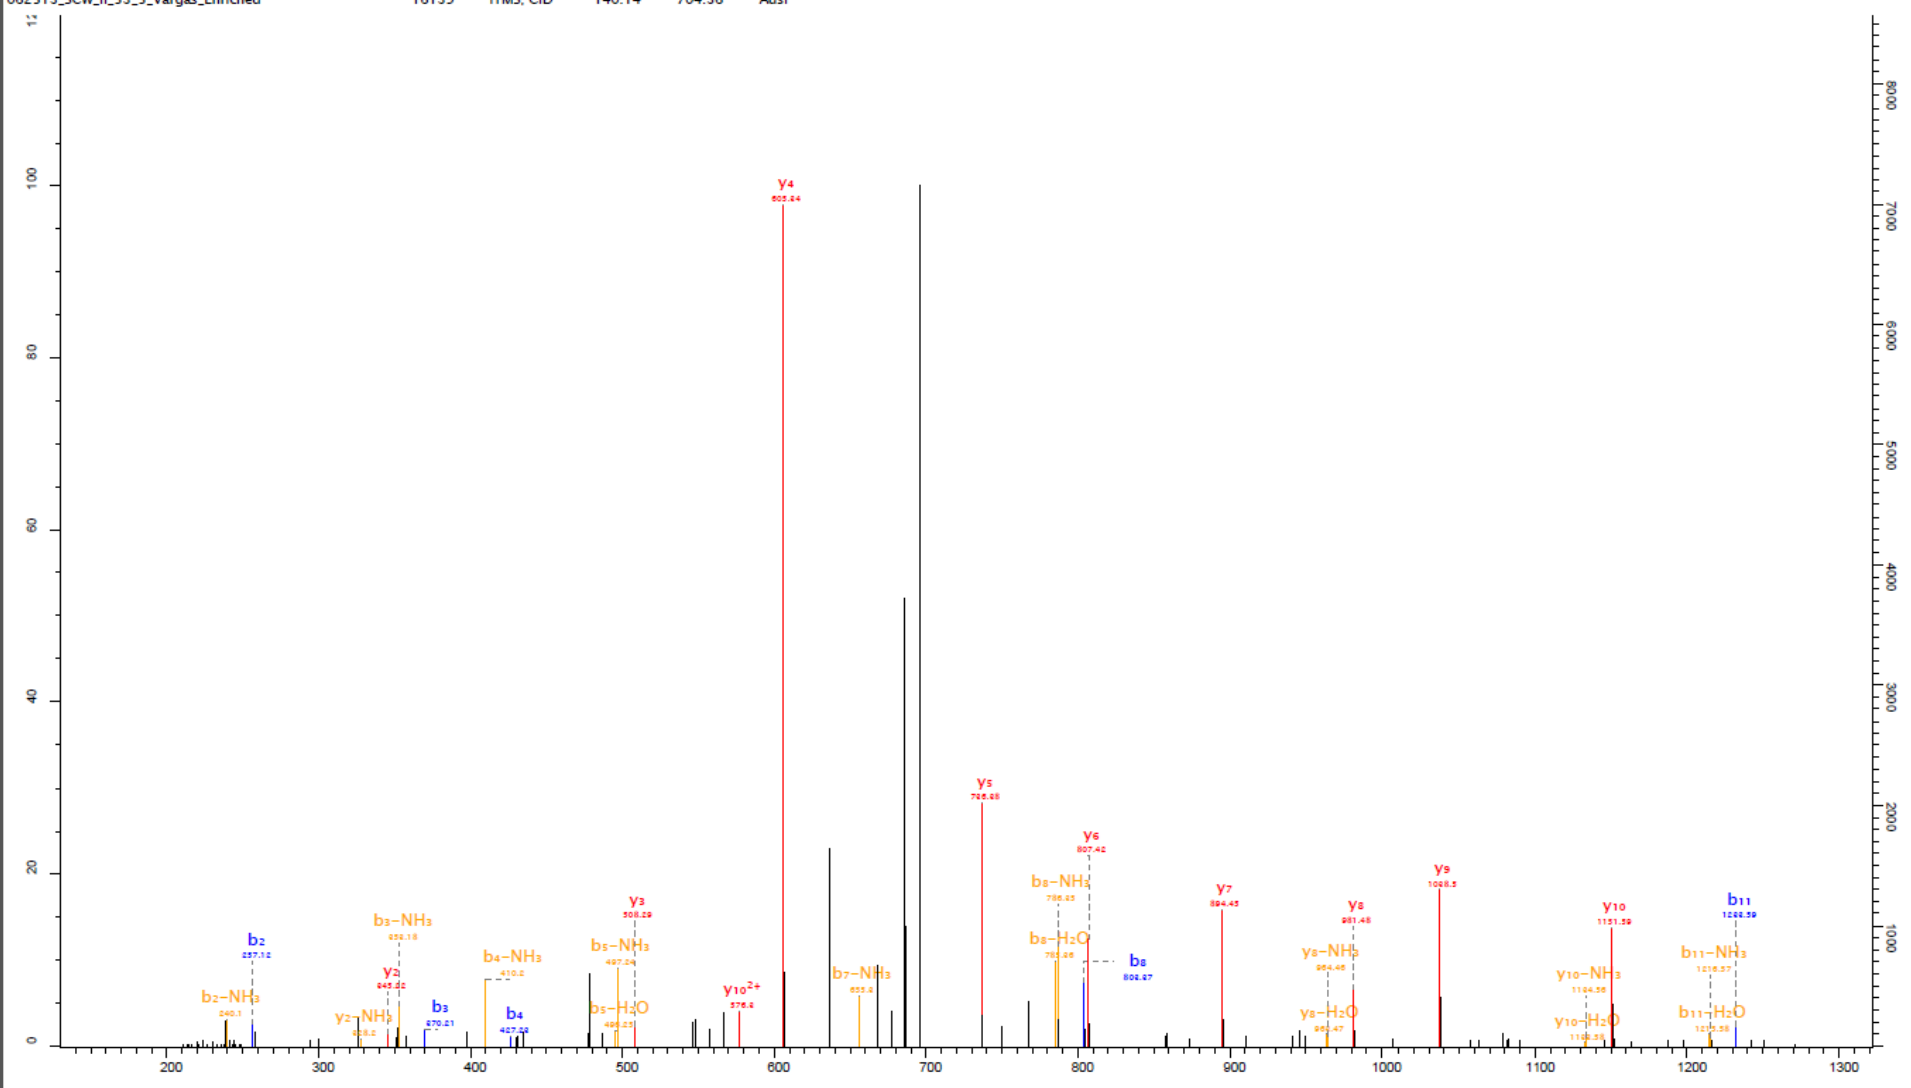

- Q Q I G S S A M P Y K R -  
 b2 b3 b4 b5 ac b11

Gene names = Adsl

$[M+2H]^{2+}-H_2O$

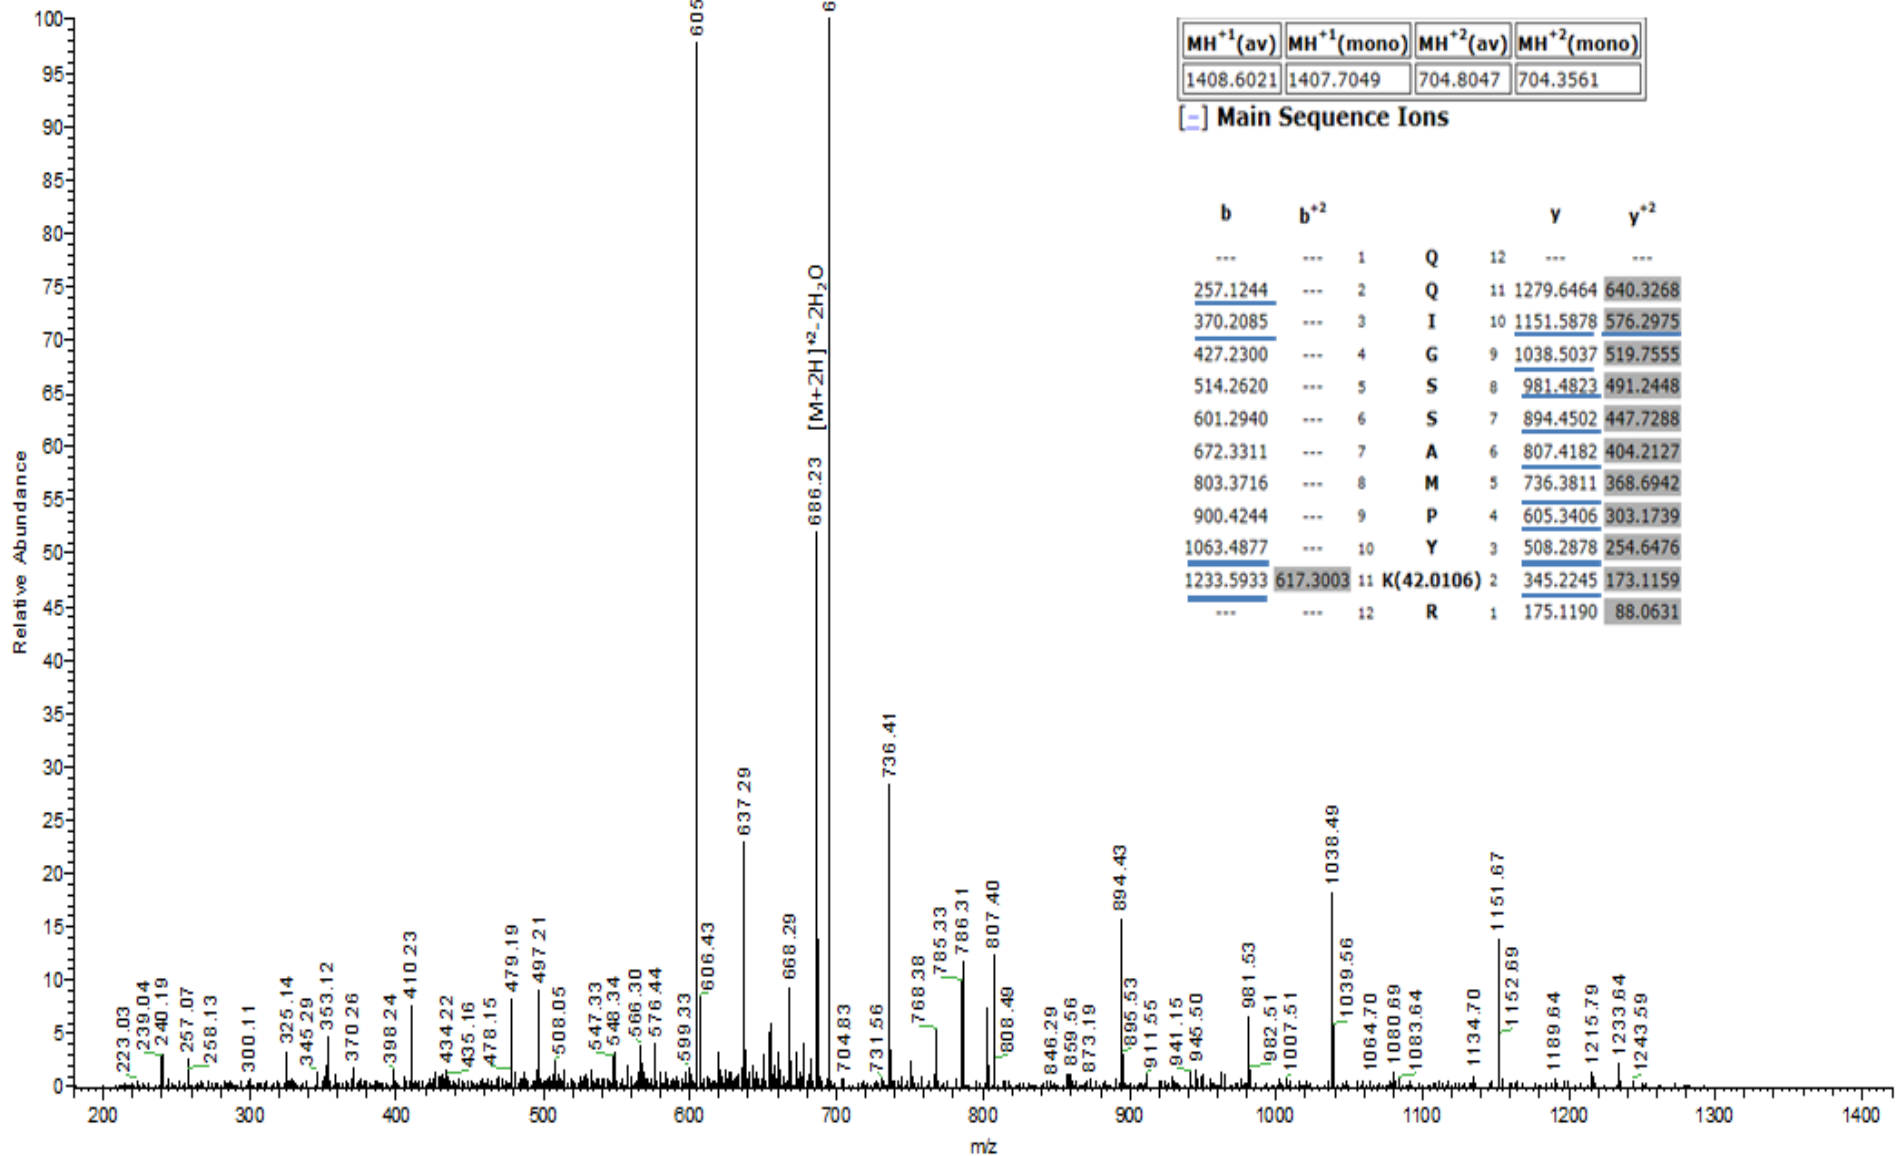



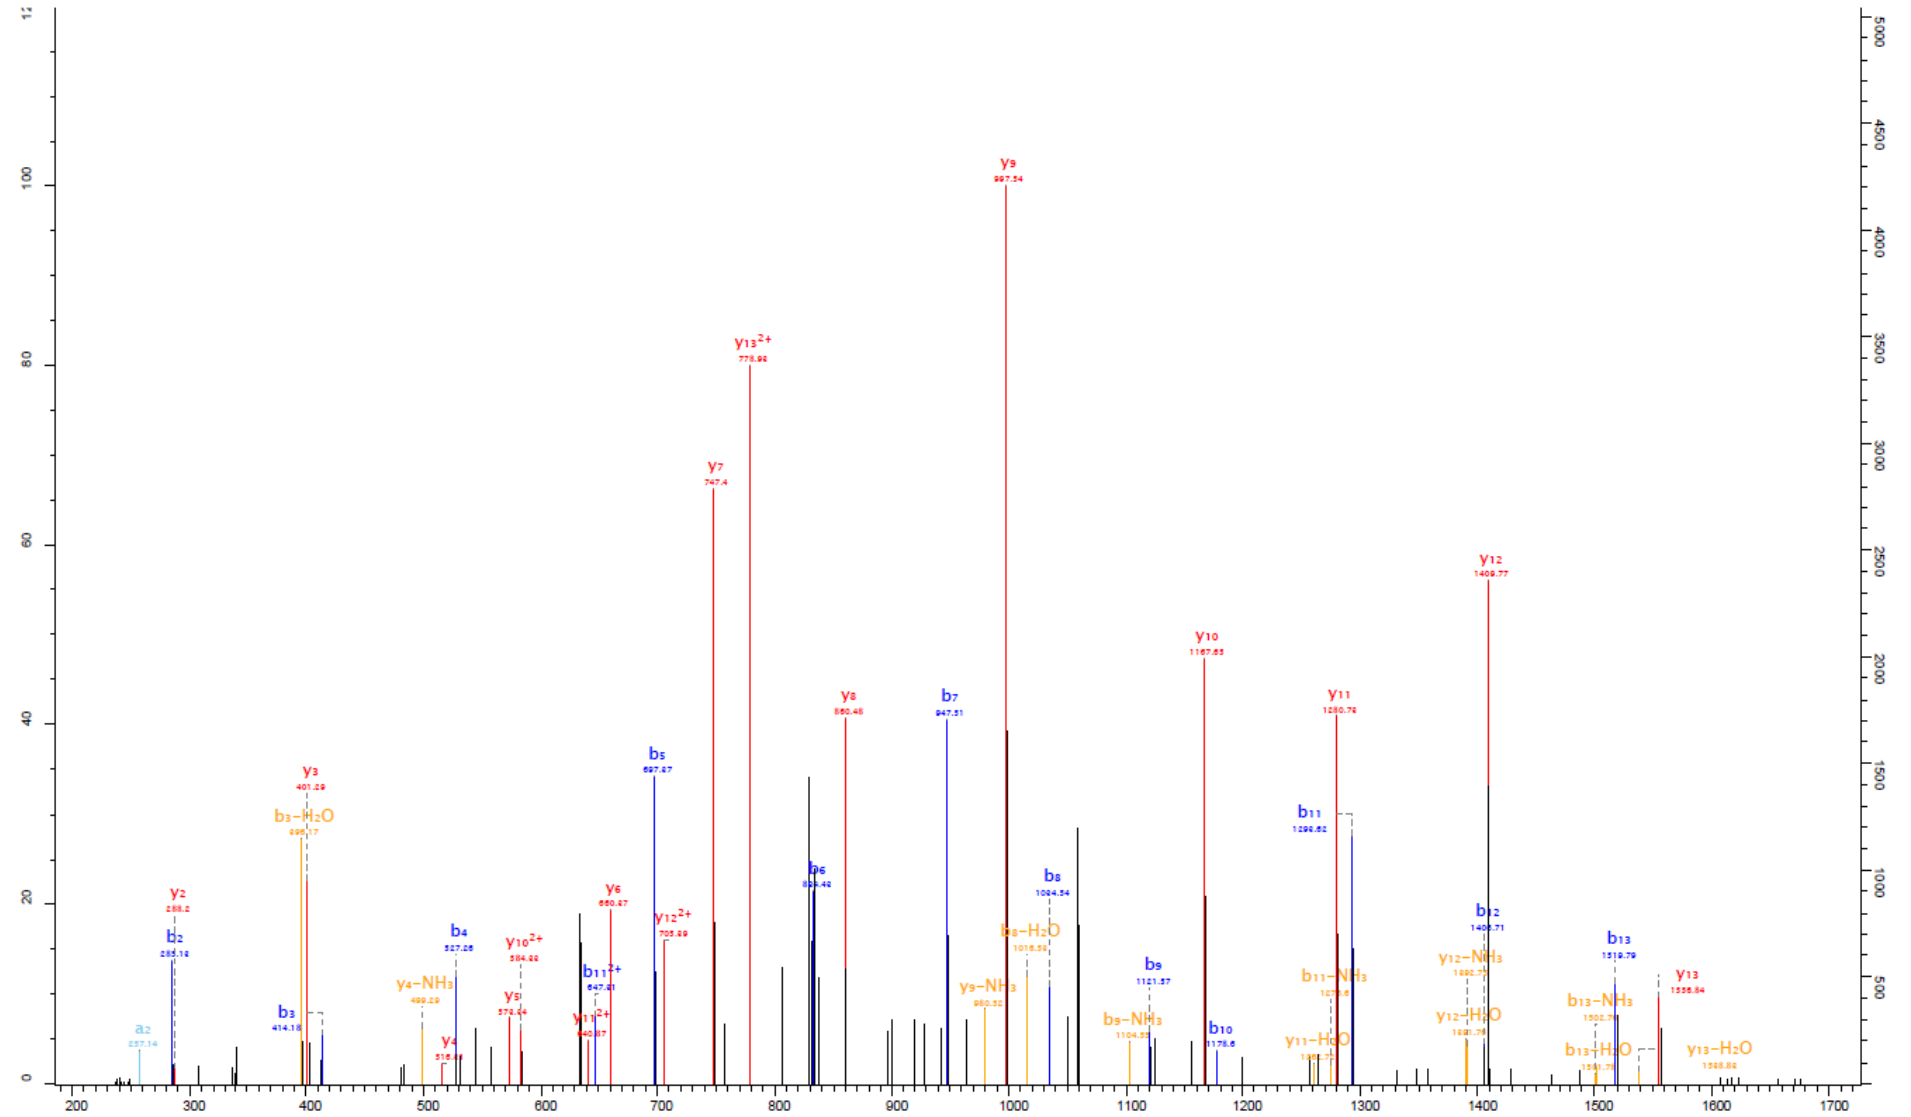

- H 

|     |     |     |     |    |    |    |    |     |     |     |     |
|-----|-----|-----|-----|----|----|----|----|-----|-----|-----|-----|
| y13 | y12 | y11 | y10 | y9 | y8 | y7 | y6 | y5  | y4  | y3  | y2  |
| F   | E   | L   | ac  | H  | L  | S  | S  | G   | D   | L   | L   |
| b2  | b2  | b4  | b5  | b6 | b7 | b8 | b9 | b10 | b11 | b12 | b13 |

 R -

Gene names = Ak3

| MH <sup>+</sup> (av) | MH <sup>+</sup> (mono) | MH <sup>2+</sup> (av) | MH <sup>2+</sup> (mono) |
|----------------------|------------------------|-----------------------|-------------------------|
| 1694.9428            | 1693.9020              | 847.9751              | 847.4547                |

**[-] Main Sequence Ions**

| b         |          | b <sup>+</sup> |           | y  |           | y <sup>+</sup> |     |
|-----------|----------|----------------|-----------|----|-----------|----------------|-----|
| ...       | ...      | 1              | H         | 14 | ...       | ...            | ... |
| 285.1346  | 143.0709 | 2              | F         | 13 | 1556.8431 | 778.9252       |     |
| 414.1772  | 207.5922 | 3              | E         | 12 | 1409.7747 | 705.3910       |     |
| 527.2613  | 264.1343 | 4              | L         | 11 | 1280.7321 | 640.8697       |     |
| 697.3668  | 349.1870 | 5              | K(acetyl) | 10 | 1167.6480 | 584.3277       |     |
| 834.4257  | 417.7165 | 6              | H         | 9  | 997.5425  | 499.2749       |     |
| 947.5098  | 474.2585 | 7              | L         | 8  | 860.4836  | 430.7454       |     |
| 1034.5418 | 517.7745 | 8              | S         | 7  | 747.3995  | 374.2034       |     |
| 1121.5738 | 561.2905 | 9              | S         | 6  | 660.3675  | 330.6874       |     |
| 1178.5953 | 589.8013 | 10             | G         | 5  | 573.3355  | 287.1714       |     |
| 1293.6222 | 647.3148 | 11             | D         | 4  | 516.3140  | 258.6606       |     |
| 1406.7063 | 703.8568 | 12             | L         | 3  | 401.2871  | 201.1472       |     |
| 1519.7904 | 760.3988 | 13             | L         | 2  | 288.2030  | 144.6051       |     |
| ...       | ...      | 14             | R         | 1  | 175.1190  | 88.0631        |     |

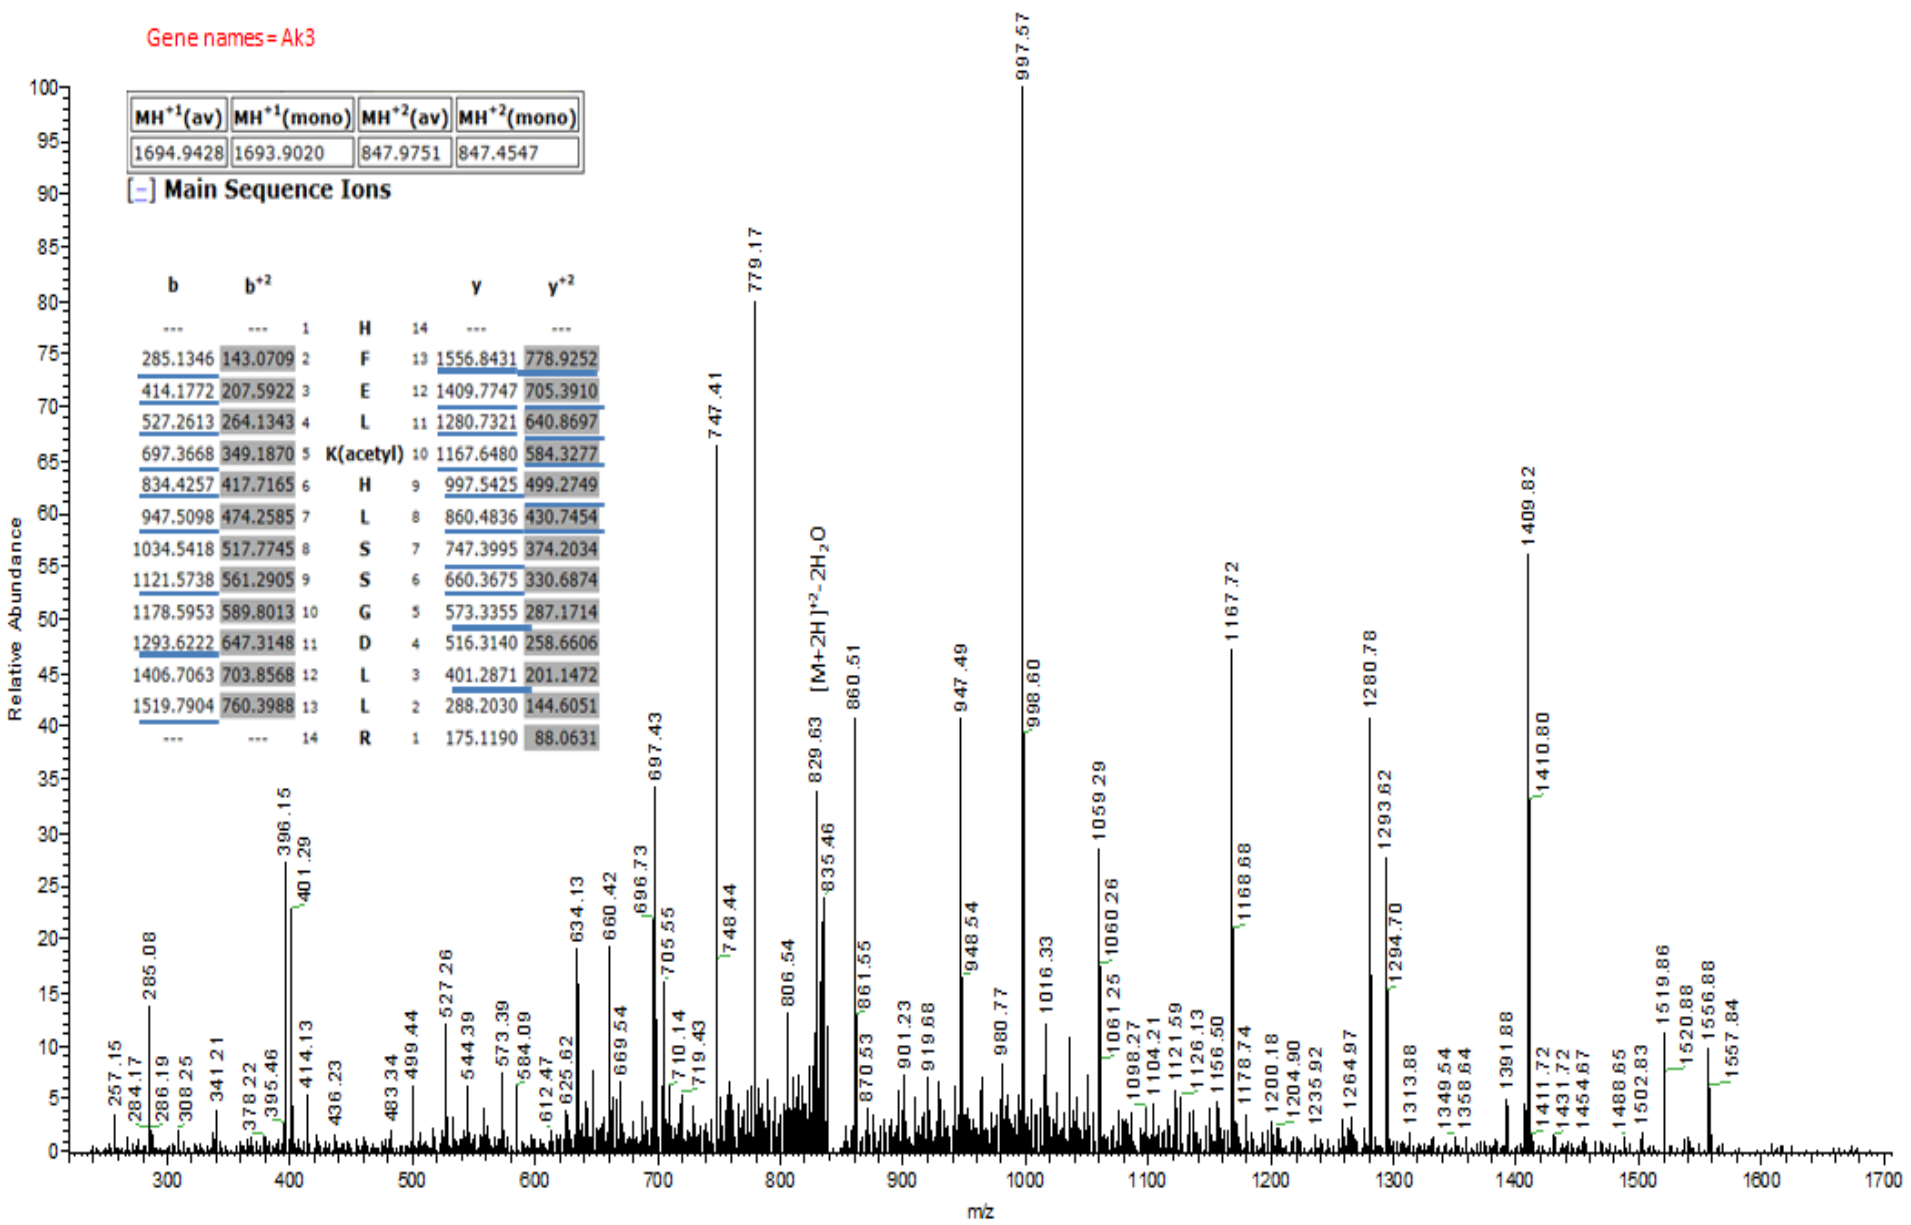

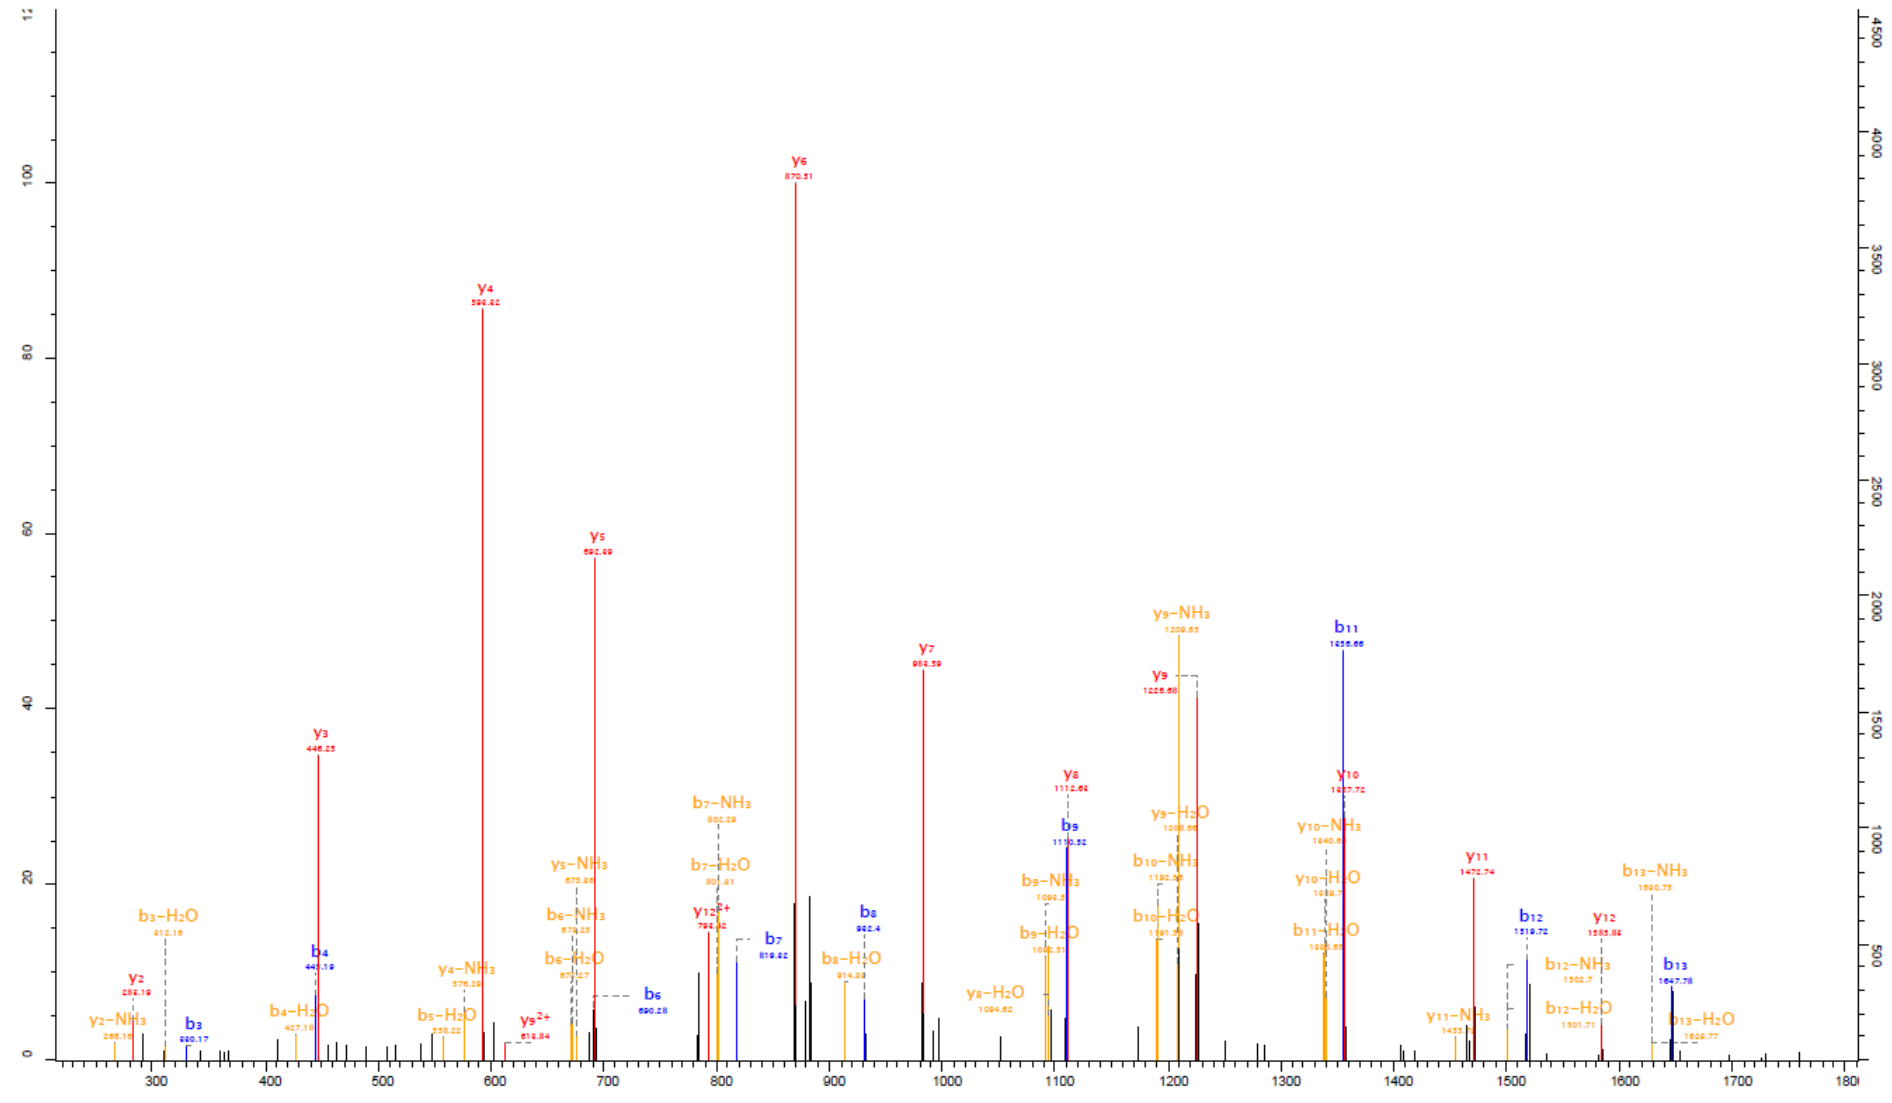

- S E I D M N E I K V F Y Q K -

Y12
Y11
Y10
Y9
Y8
Y7
Y6
Y5
Y4
Y3
Y2

b2
b4
b6
b7
b8
b9
b11
b12
b13

Gene names = Anxa1

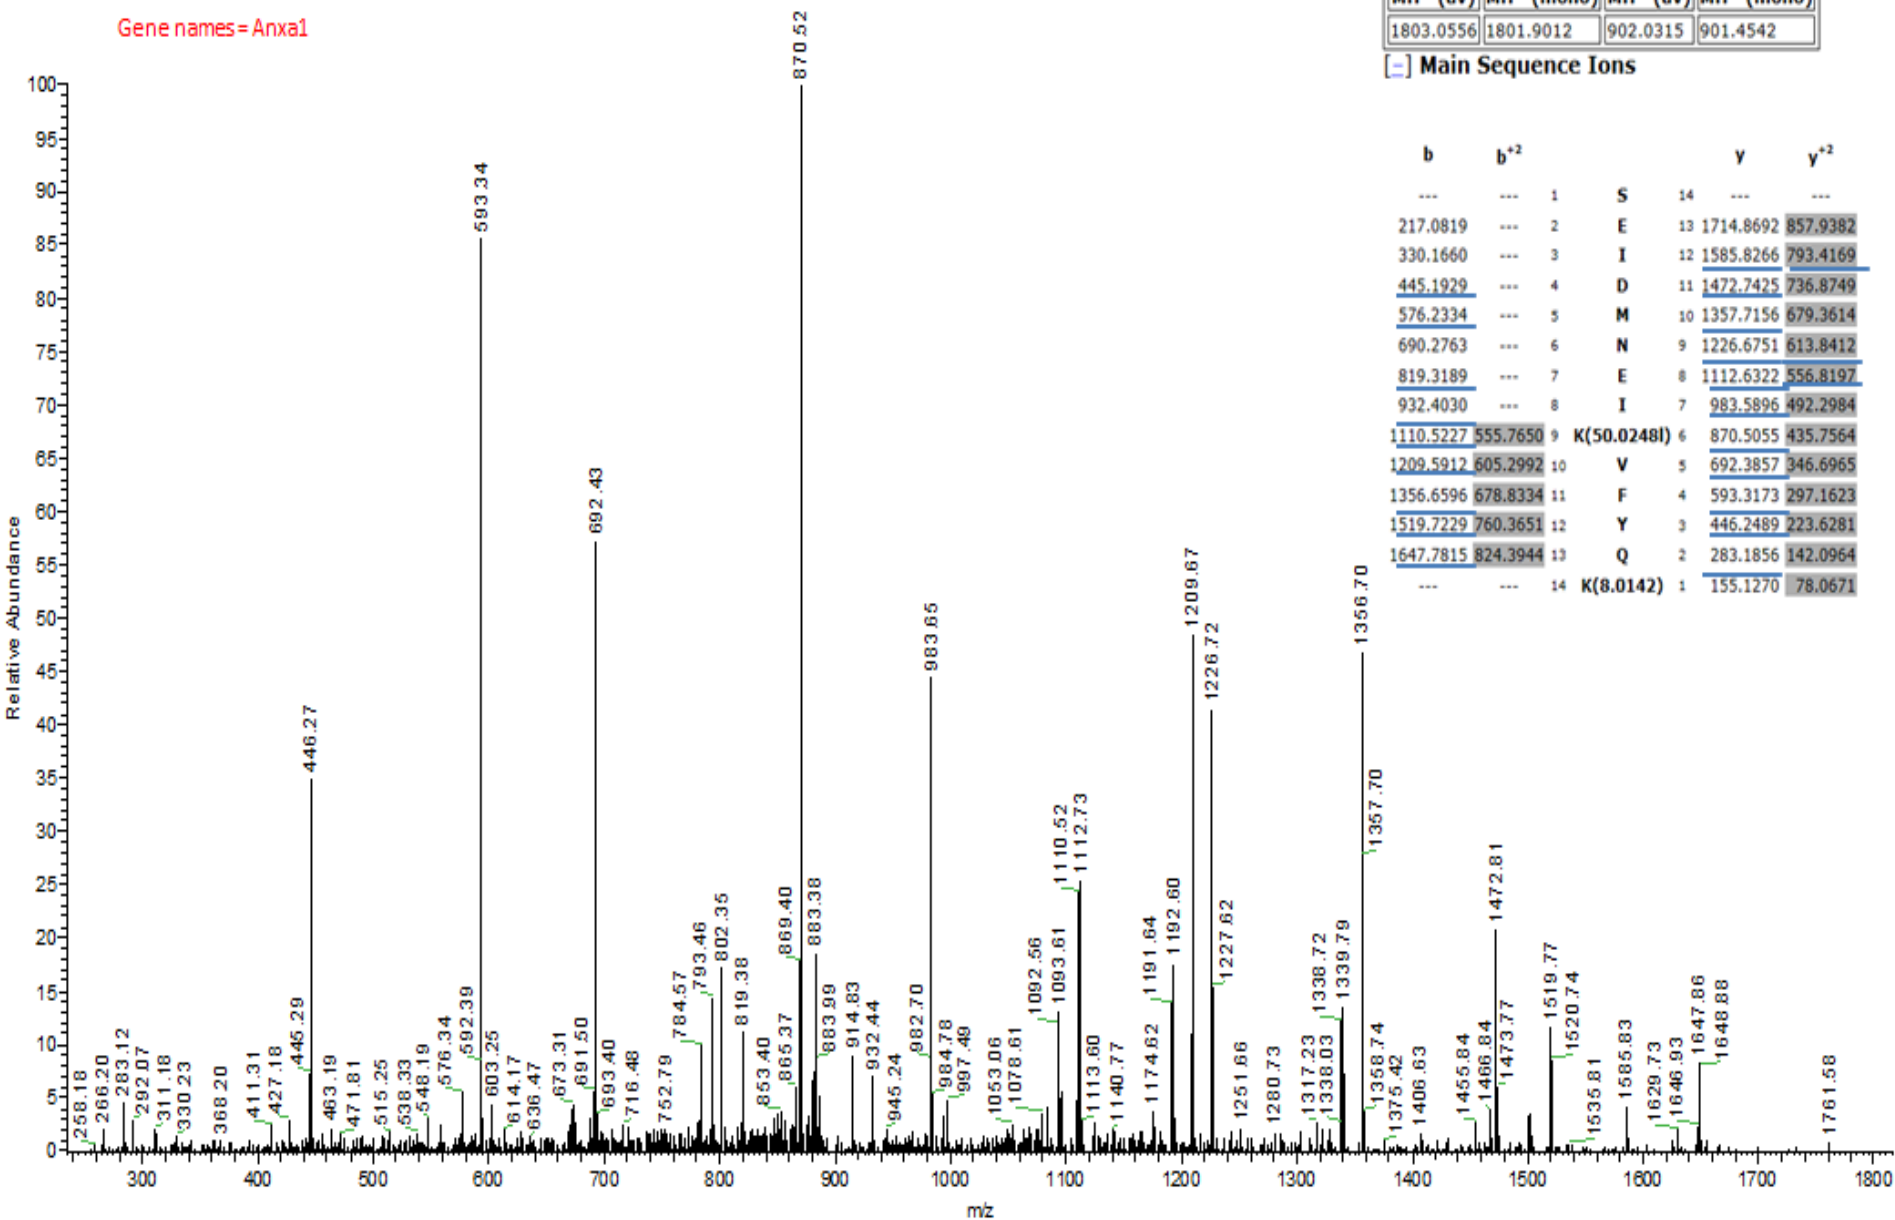

| MH <sup>+</sup> (av) | MH <sup>+</sup> (mono) | MH <sup>2+</sup> (av) | MH <sup>2+</sup> (mono) |
|----------------------|------------------------|-----------------------|-------------------------|
| 1803.0556            | 1801.9012              | 902.0315              | 901.4542                |

[-] Main Sequence Ions

| b         | b <sup>2+</sup> |    | y                  | y <sup>2+</sup> |                    |
|-----------|-----------------|----|--------------------|-----------------|--------------------|
| ---       | ---             | 1  | S                  | 14              | ---                |
| 217.0819  | ---             | 2  | E                  | 13              | 1714.8692 857.9382 |
| 330.1660  | ---             | 3  | I                  | 12              | 1585.8266 793.4169 |
| 445.1929  | ---             | 4  | D                  | 11              | 1472.7425 736.8749 |
| 576.2334  | ---             | 5  | M                  | 10              | 1357.7156 679.3614 |
| 690.2763  | ---             | 6  | N                  | 9               | 1226.6751 613.8412 |
| 819.3189  | ---             | 7  | E                  | 8               | 1112.6322 556.8197 |
| 932.4030  | ---             | 8  | I                  | 7               | 983.5896 492.2984  |
| 1110.5227 | 555.7650        | 9  | <b>K(50.0248I)</b> | 6               | 870.5055 435.7564  |
| 1209.5912 | 605.2992        | 10 | V                  | 5               | 692.3857 346.6965  |
| 1356.6596 | 678.8334        | 11 | F                  | 4               | 593.3173 297.1623  |
| 1519.7229 | 760.3651        | 12 | Y                  | 3               | 446.2489 223.6281  |
| 1647.7815 | 824.3944        | 13 | Q                  | 2               | 283.1856 142.0964  |
| ---       | ---             | 14 | <b>K(8.0142)</b>   | 1               | 155.1270 78.0671   |

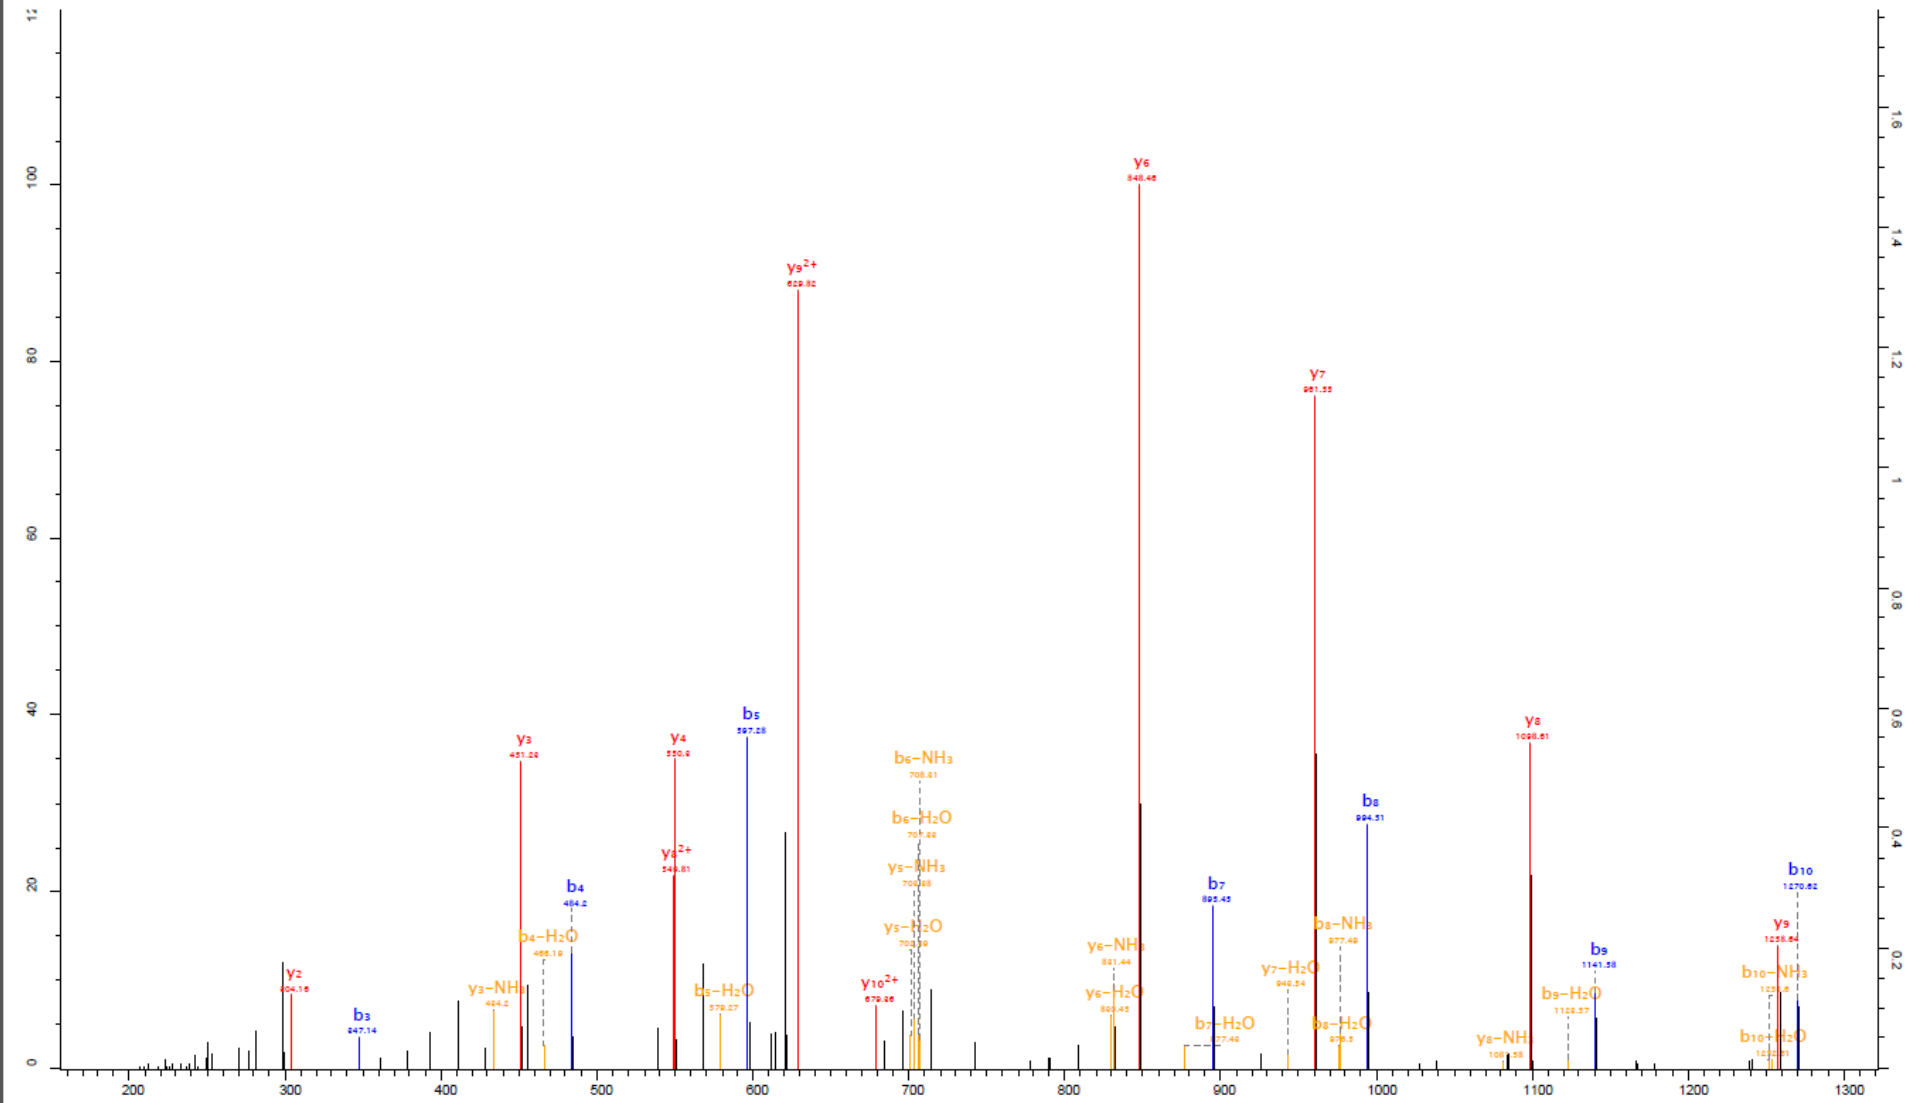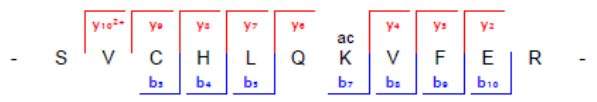

Gene names = Anxa2

| MH <sup>+</sup> 1(av) | MH <sup>+</sup> 1(mono) | MH <sup>+</sup> 2(av) | MH <sup>+</sup> 2(mono) |
|-----------------------|-------------------------|-----------------------|-------------------------|
| 1445.6936             | 1444.7365               | 723.3505              | 722.8719                |

**[-] Main Sequence Ions**

| b         | b <sup>+</sup> 2 |    | y                  | y <sup>+</sup> 2 |
|-----------|------------------|----|--------------------|------------------|
| ---       | ---              | 1  | S                  | 11               |
| 187.1077  | ---              | 2  | V                  | 10               |
| 347.1384  | ---              | 3  | C(Carbamidomethyl) | 9                |
| 484.1973  | 242.6023         | 4  | H                  | 8                |
| 597.2813  | 299.1443         | 5  | L                  | 7                |
| 725.3399  | 363.1736         | 6  | Q                  | 6                |
| 895.4454  | 448.2264         | 7  | K(Acetyl)          | 5                |
| 994.5139  | 497.7606         | 8  | V                  | 4                |
| 1141.5823 | 571.2948         | 9  | F                  | 3                |
| 1270.6249 | 635.8161         | 10 | E                  | 2                |
| --        | --               | 11 | R                  | 1                |

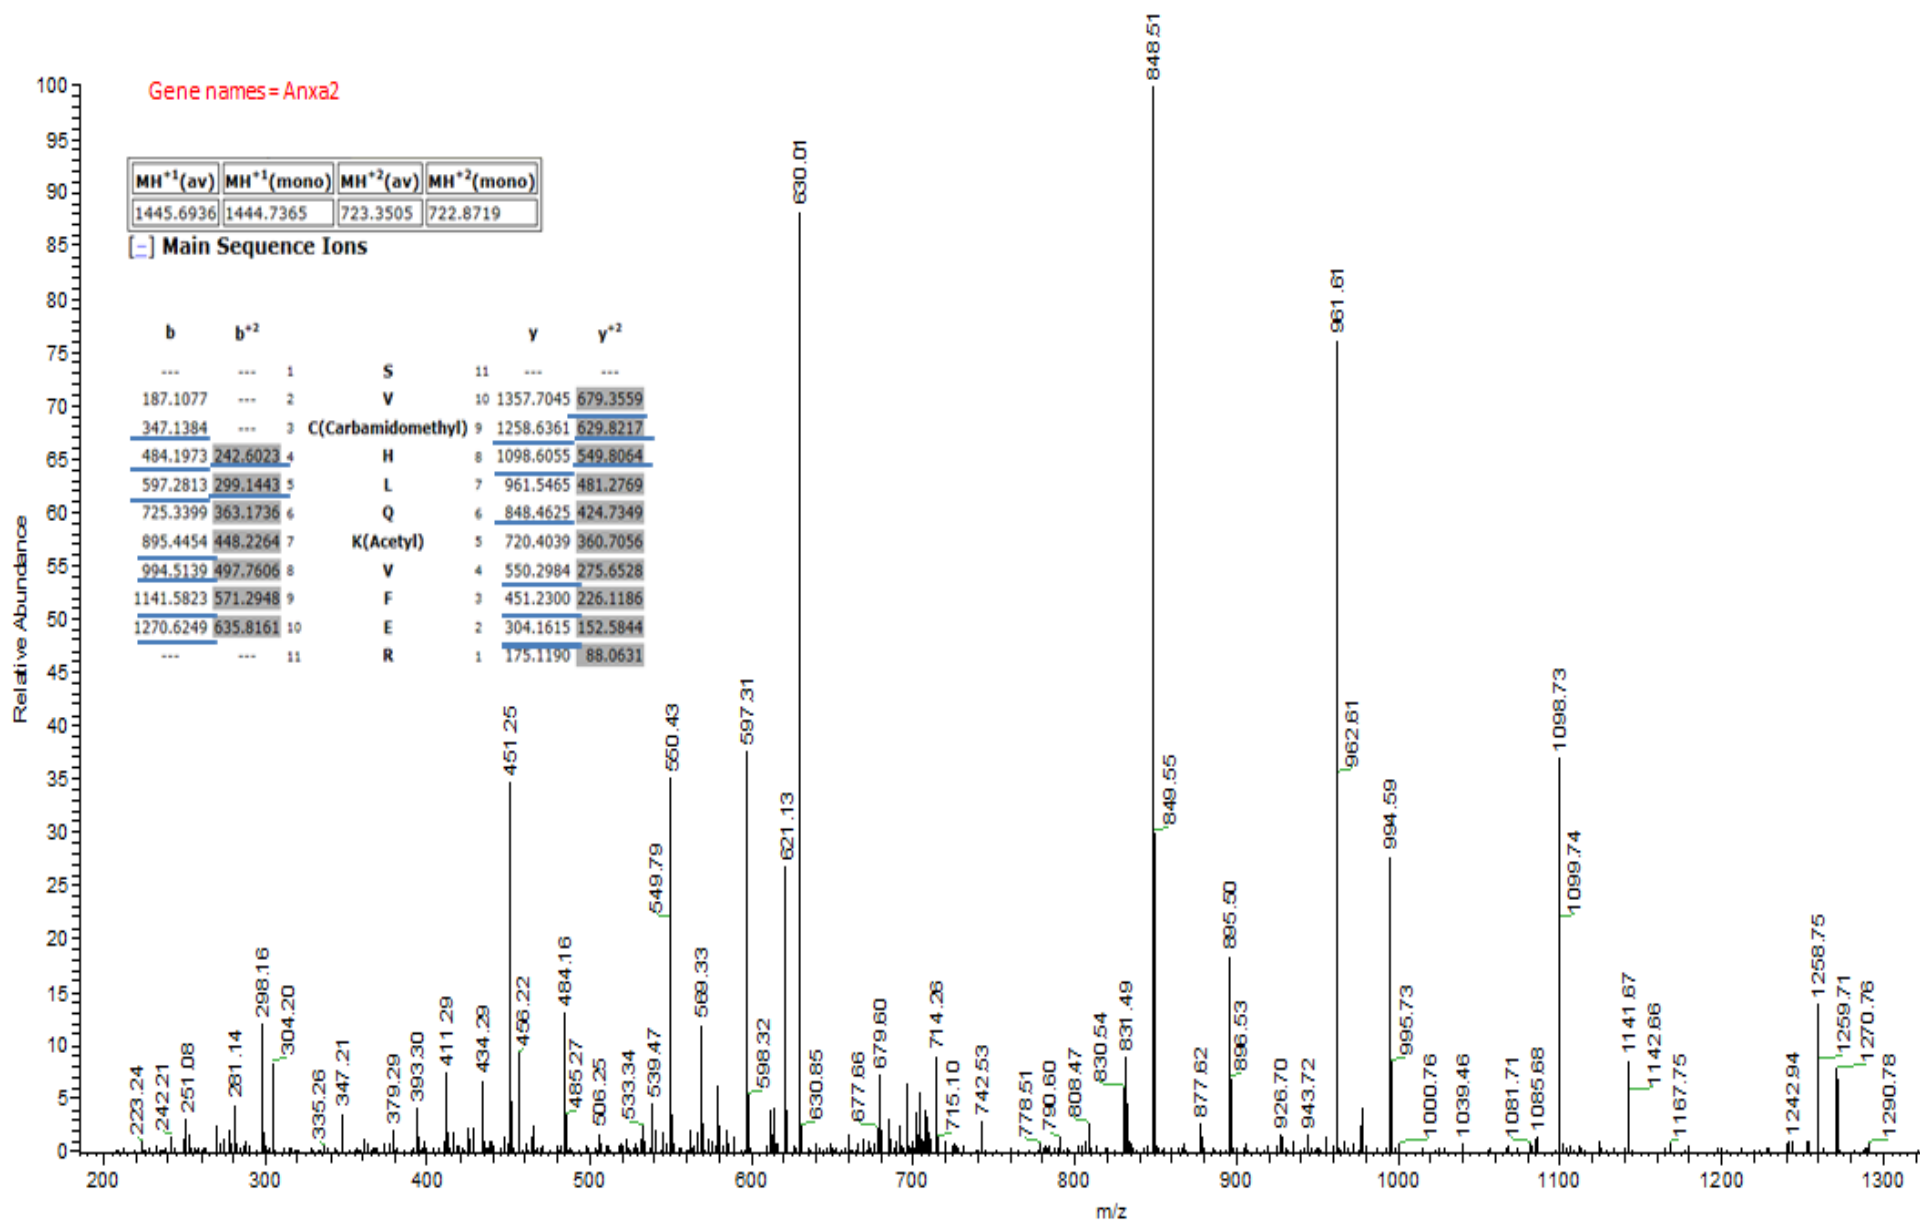

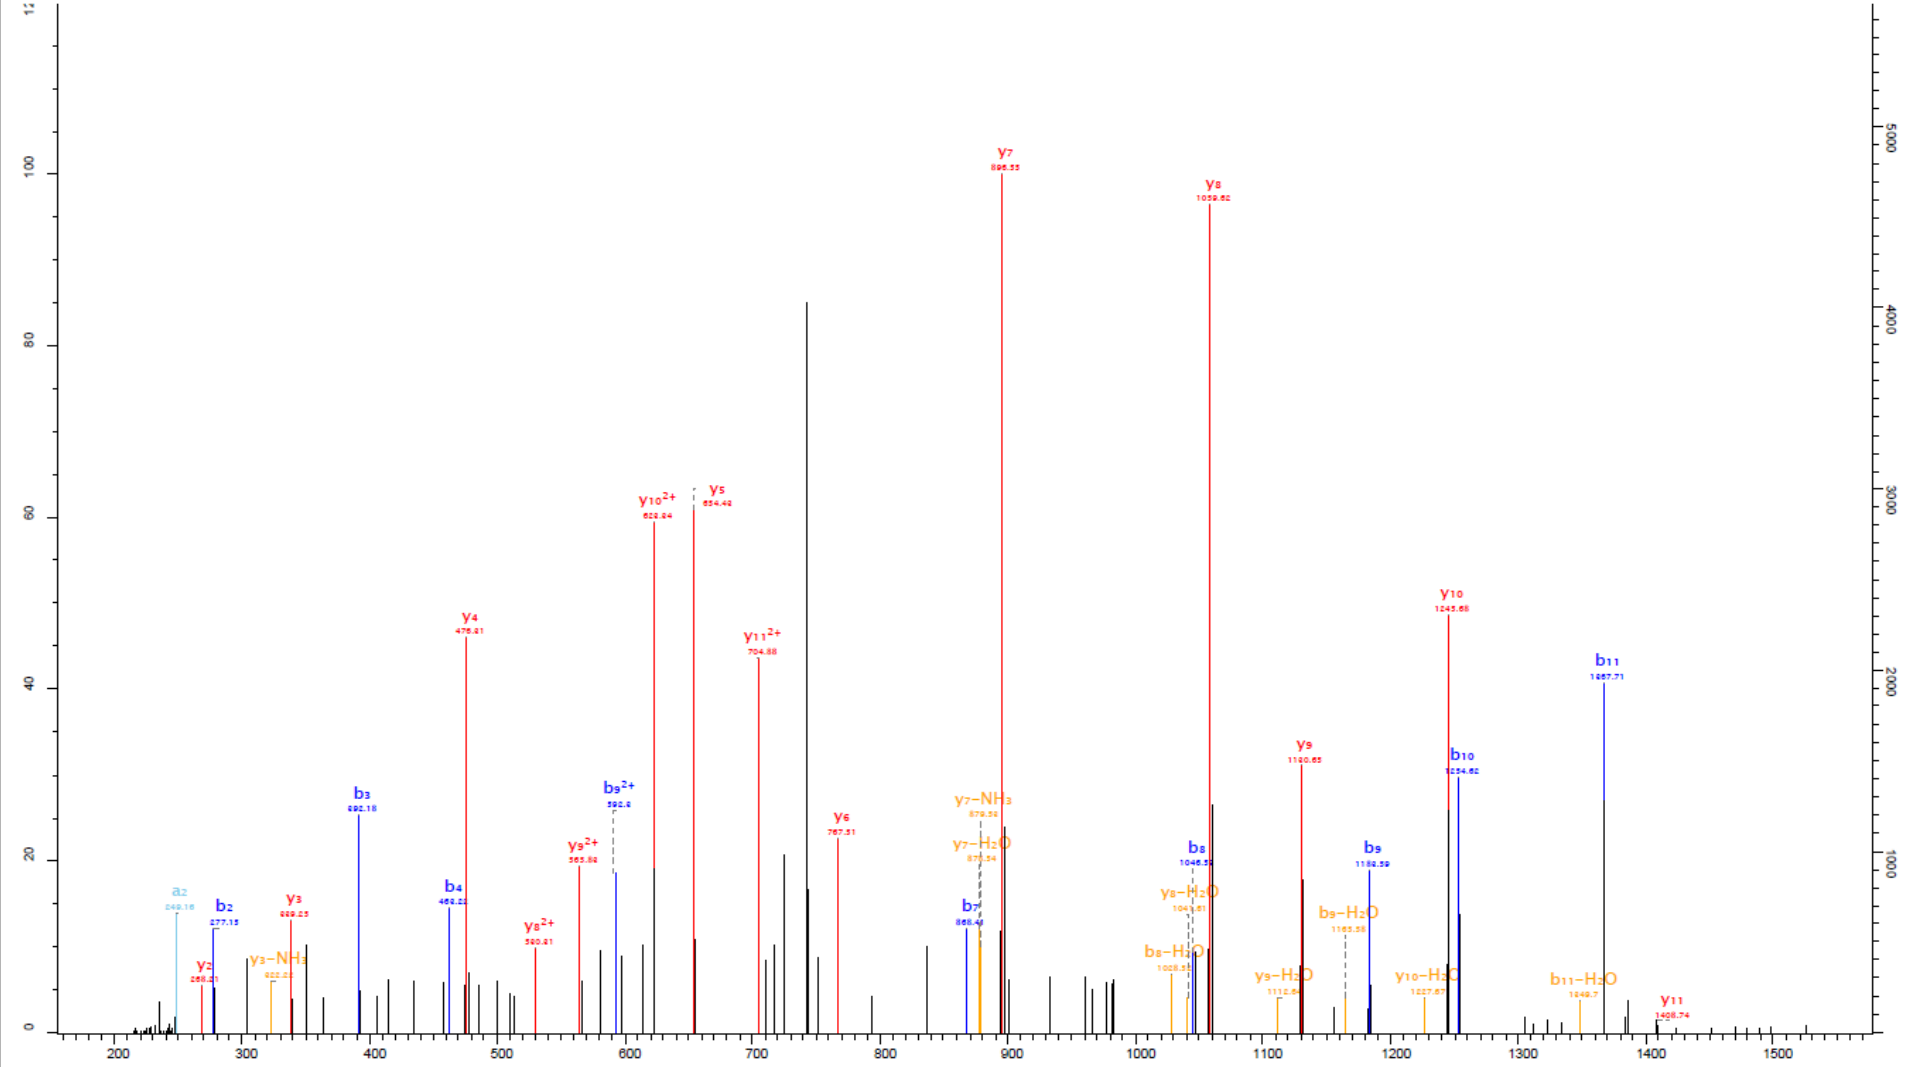

- L 

|     |
|-----|
| y11 |
| Y   |
| b2  |

|     |
|-----|
| y10 |
| D   |
| b3  |

|    |
|----|
| y9 |
| A  |
| b4 |

|    |
|----|
| y8 |
| Y  |

|    |
|----|
| y7 |
| E  |

|    |
|----|
| y6 |
| L  |
| b7 |

|       |
|-------|
| y5 ac |
| K     |
| b8    |

|    |
|----|
| y4 |
| H  |
| b9 |

|     |
|-----|
| y3  |
| A   |
| b10 |

|     |
|-----|
| y2  |
| L   |
| b11 |

|   |
|---|
| K |
|---|

-

Gene names = Anxa5

| MH <sup>+</sup> (av) | MH <sup>+</sup> (mono) | MH <sup>2+</sup> (av) | MH <sup>2+</sup> (mono) |
|----------------------|------------------------|-----------------------|-------------------------|
| 1522.7539            | 1521.8283              | 761.8807              | 761.4178                |

[-] Main Sequence Ions

| b         | b <sup>+</sup> |    | y          | y <sup>+</sup> |                    |
|-----------|----------------|----|------------|----------------|--------------------|
| ---       | ---            | 1  | L          | 12             | ---                |
| 277.1547  | ---            | 2  | Y          | 11             | 1408.7442 704.8758 |
| 392.1816  | ---            | 3  | D          | 10             | 1245.6809 623.3441 |
| 463.2187  | ---            | 4  | A          | 9              | 1130.6540 565.8306 |
| 626.2821  | ---            | 5  | Y          | 8              | 1059.6168 530.3121 |
| 755.3246  | ---            | 6  | E          | 7              | 896.5535 448.7804  |
| 868.4087  | ---            | 7  | L          | 6              | 767.5109 384.2591  |
| 1046.5285 | 523.7679       | 8  | K(50.0248) | 5              | 654.4269 327.7171  |
| 1183.5874 | 592.2973       | 9  | H          | 4              | 476.3071 238.6572  |
| 1254.6245 | 627.8159       | 10 | A          | 3              | 339.2482 170.1277  |
| 1367.7086 | 684.3579       | 11 | L          | 2              | 268.2111 134.6092  |
| ---       | ---            | 12 | K(8.0142)  | 1              | 155.1270 78.0671   |

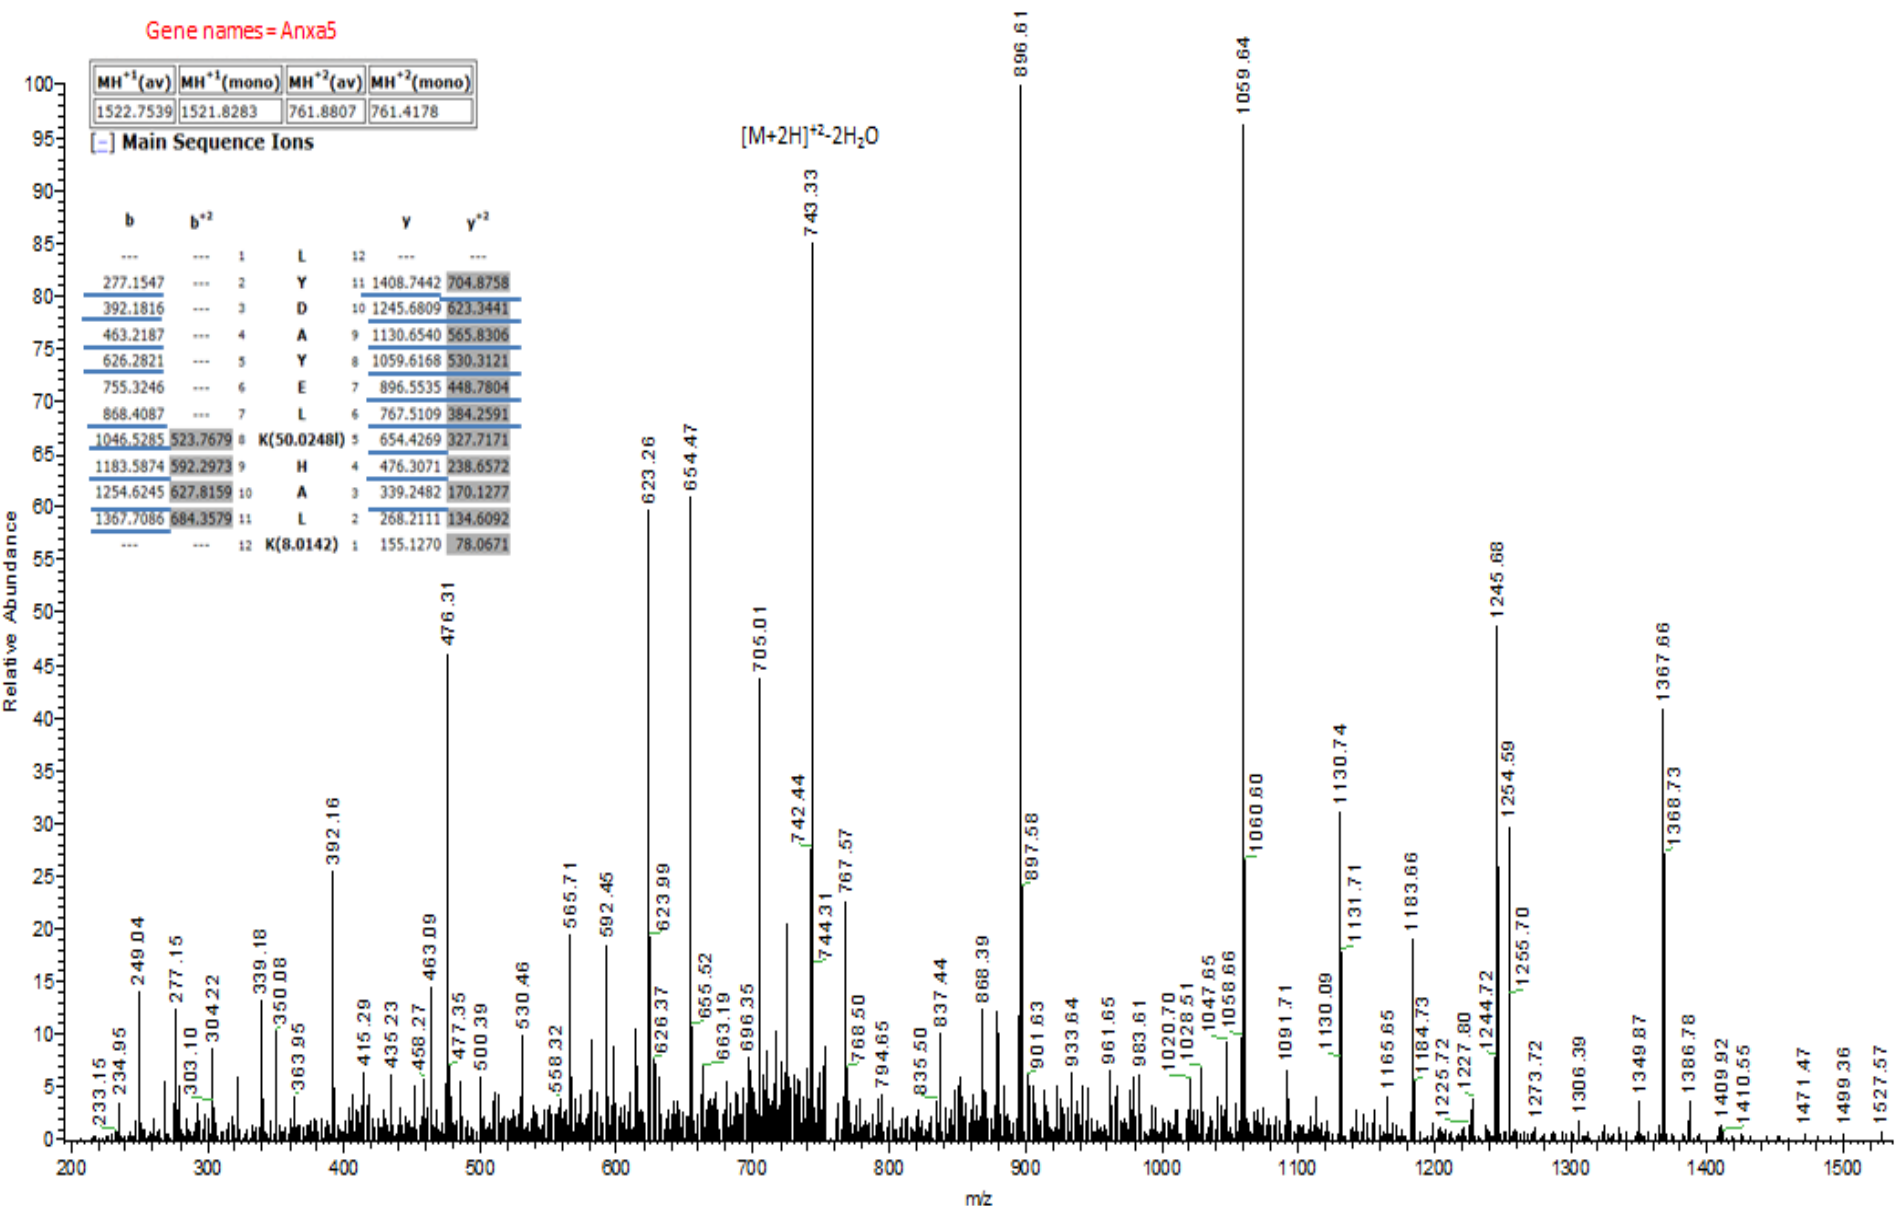



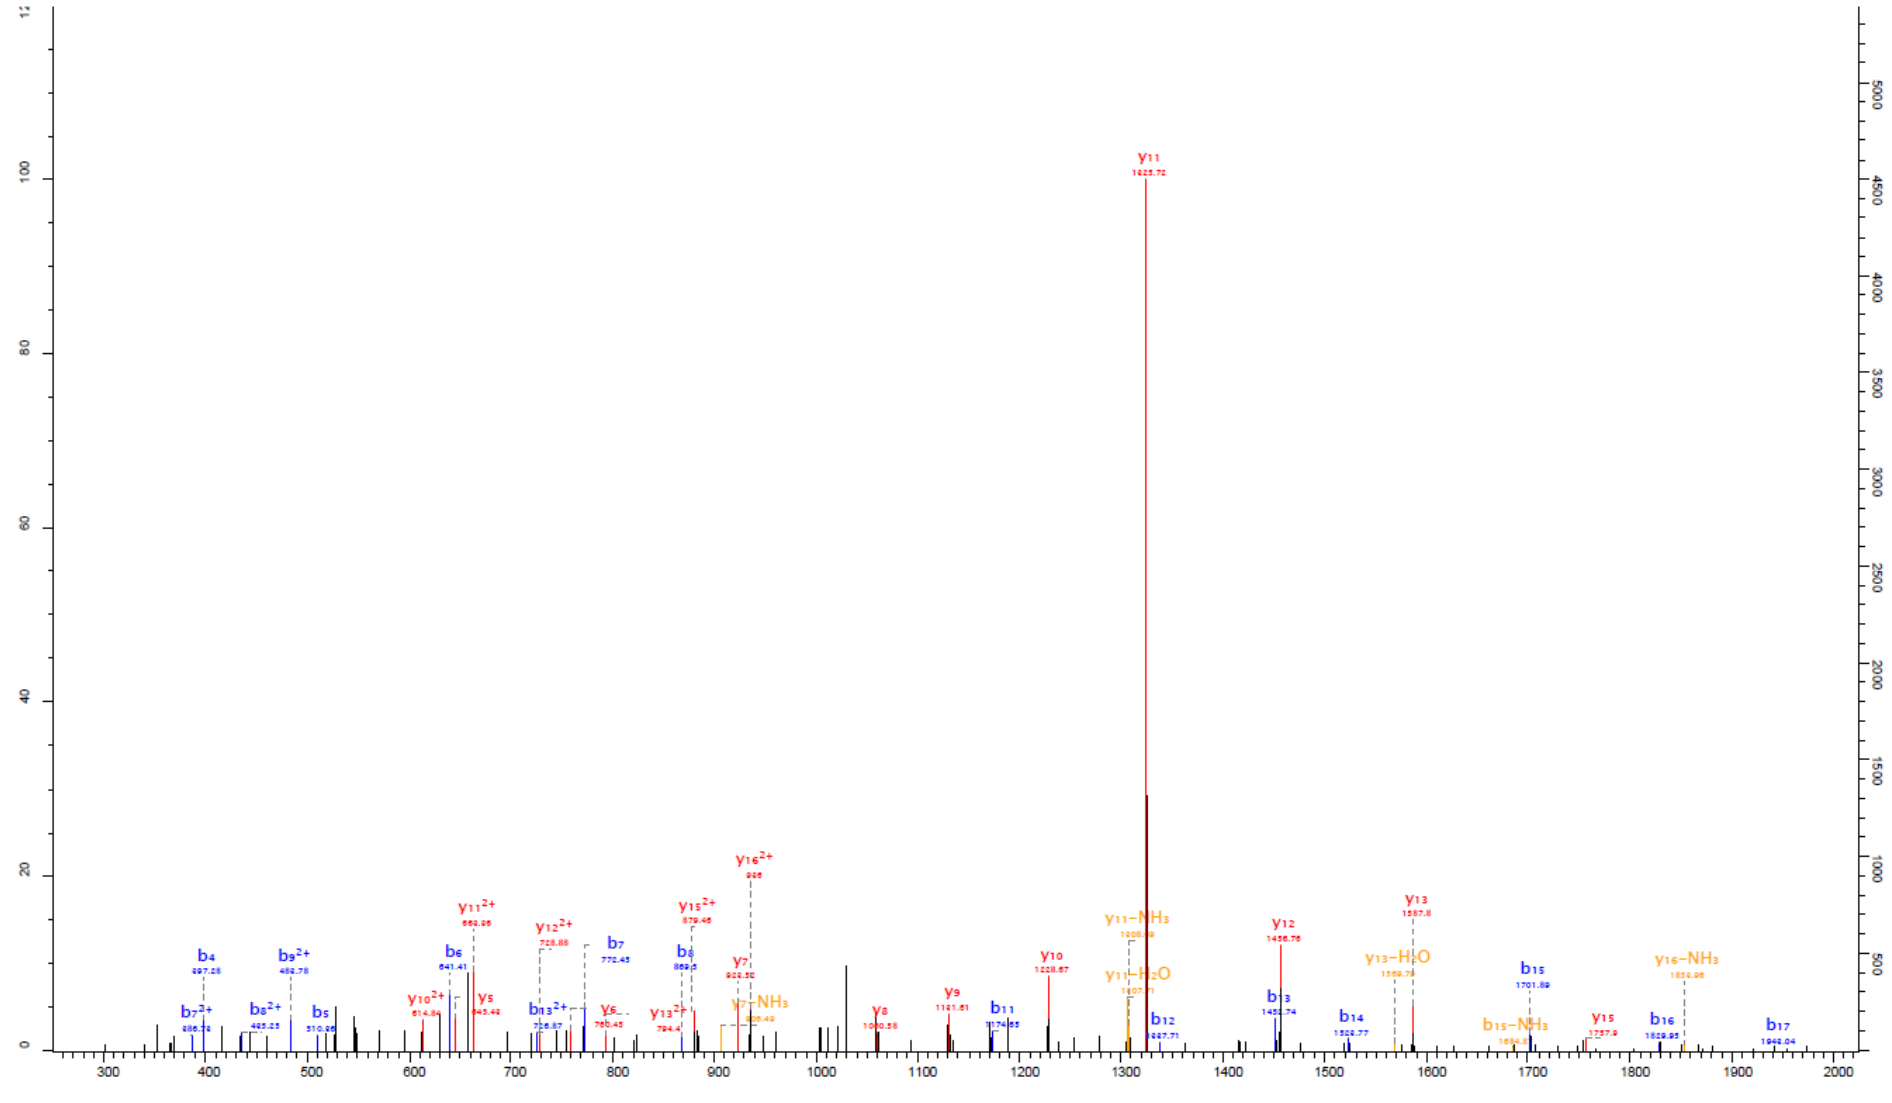

- L I L y<sub>16</sub><sup>2+</sup> y<sub>15</sub> y<sub>13</sub> y<sub>12</sub> y<sub>11</sub> y<sub>10</sub> y<sub>9</sub> y<sub>8</sub> y<sub>7</sub> y<sub>6</sub> y<sub>5</sub> A H Y D A K ac Q L K -

b<sub>4</sub> b<sub>5</sub> b<sub>6</sub> b<sub>7</sub> b<sub>8</sub> b<sub>8</sub><sup>2+</sup> b<sub>11</sub> b<sub>12</sub> b<sub>13</sub> b<sub>14</sub> b<sub>15</sub> b<sub>16</sub> b<sub>17</sub>

Gene names = Anxa6

| MH <sup>+</sup> (av) | MH <sup>+</sup> (mono) | MH <sup>+</sup> (av) | MH <sup>+</sup> (mono) |
|----------------------|------------------------|----------------------|------------------------|
| 2098.5958            | 2097.1570              | 1049.8016            | 1049.0822              |

[-] Main Sequence Ions

| b         | b <sup>+</sup> |    | γ          | γ <sup>+</sup> |
|-----------|----------------|----|------------|----------------|
| ---       | ---            | 1  | L          | 18             |
| ---       | ---            | 2  | I          | 17             |
| 227.1754  | ---            | 3  | L          | 16             |
| 340.2595  | ---            | 4  | G          | 15             |
| 397.2809  | ---            | 5  | L          | 14             |
| 510.3650  | ---            | 6  | M          | 13             |
| 641.4055  | ---            | 7  | M          | 12             |
| 772.4460  | ---            | 8  | P          | 11             |
| 869.4987  | ---            | 9  | P          | 10             |
| 966.5515  | ---            | 10 | A          | 9              |
| 1037.5886 | ---            | 11 | H          | 8              |
| 1174.6475 | 587.8274       | 12 | Y          | 7              |
| 1337.7108 | 669.3591       | 13 | D          | 6              |
| 1452.7378 | 726.8725       | 14 | A          | 5              |
| 1523.7749 | 762.3911       | 15 | K(50.0248) | 4              |
| 1701.8947 | 851.4510       | 16 | Q          | 3              |
| 1829.9532 | 915.4803       | 17 | L          | 2              |
| 1943.0373 | 972.0223       | 18 | K(8.0142)  | 1              |

Relative Abundance

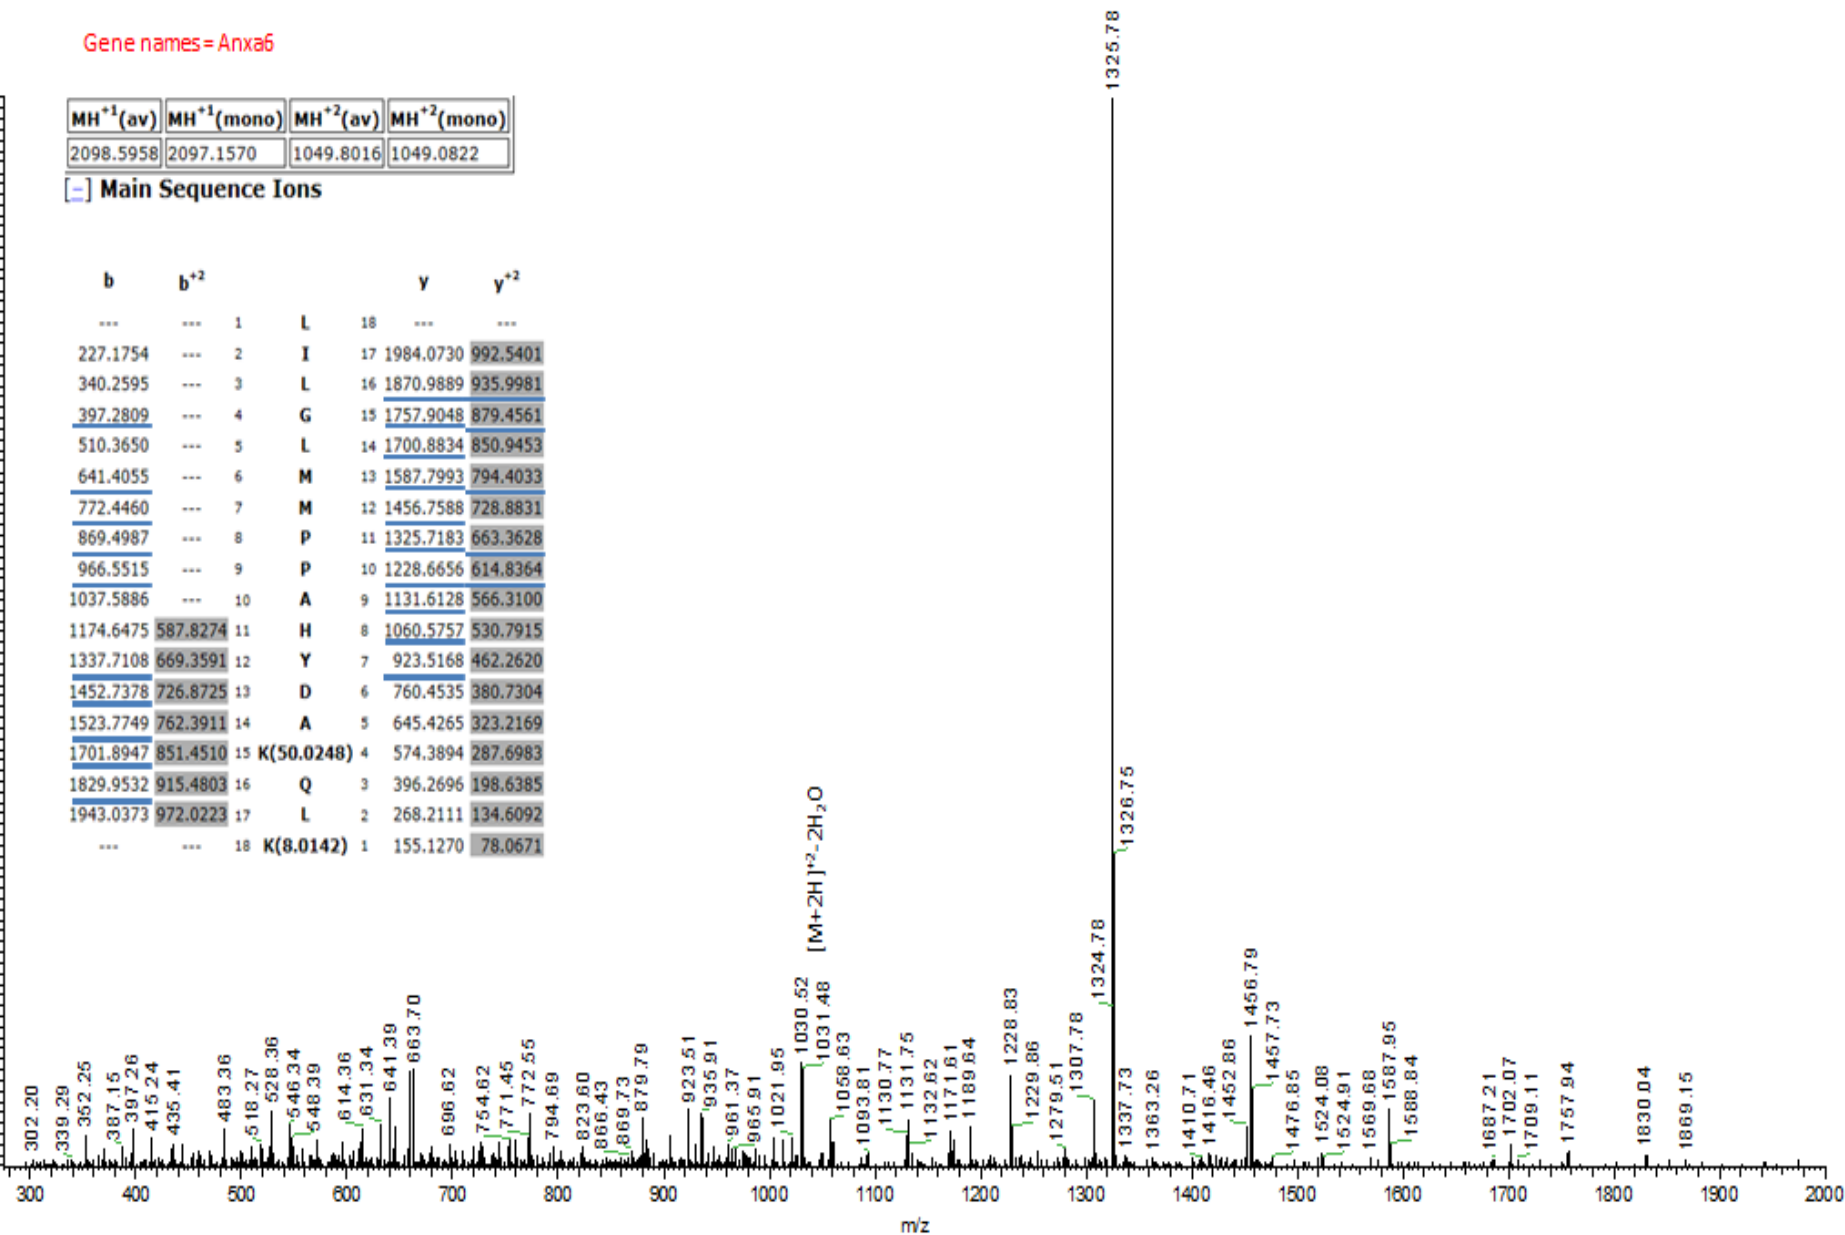

[M+2H]<sup>2+</sup>·2H<sub>2</sub>O

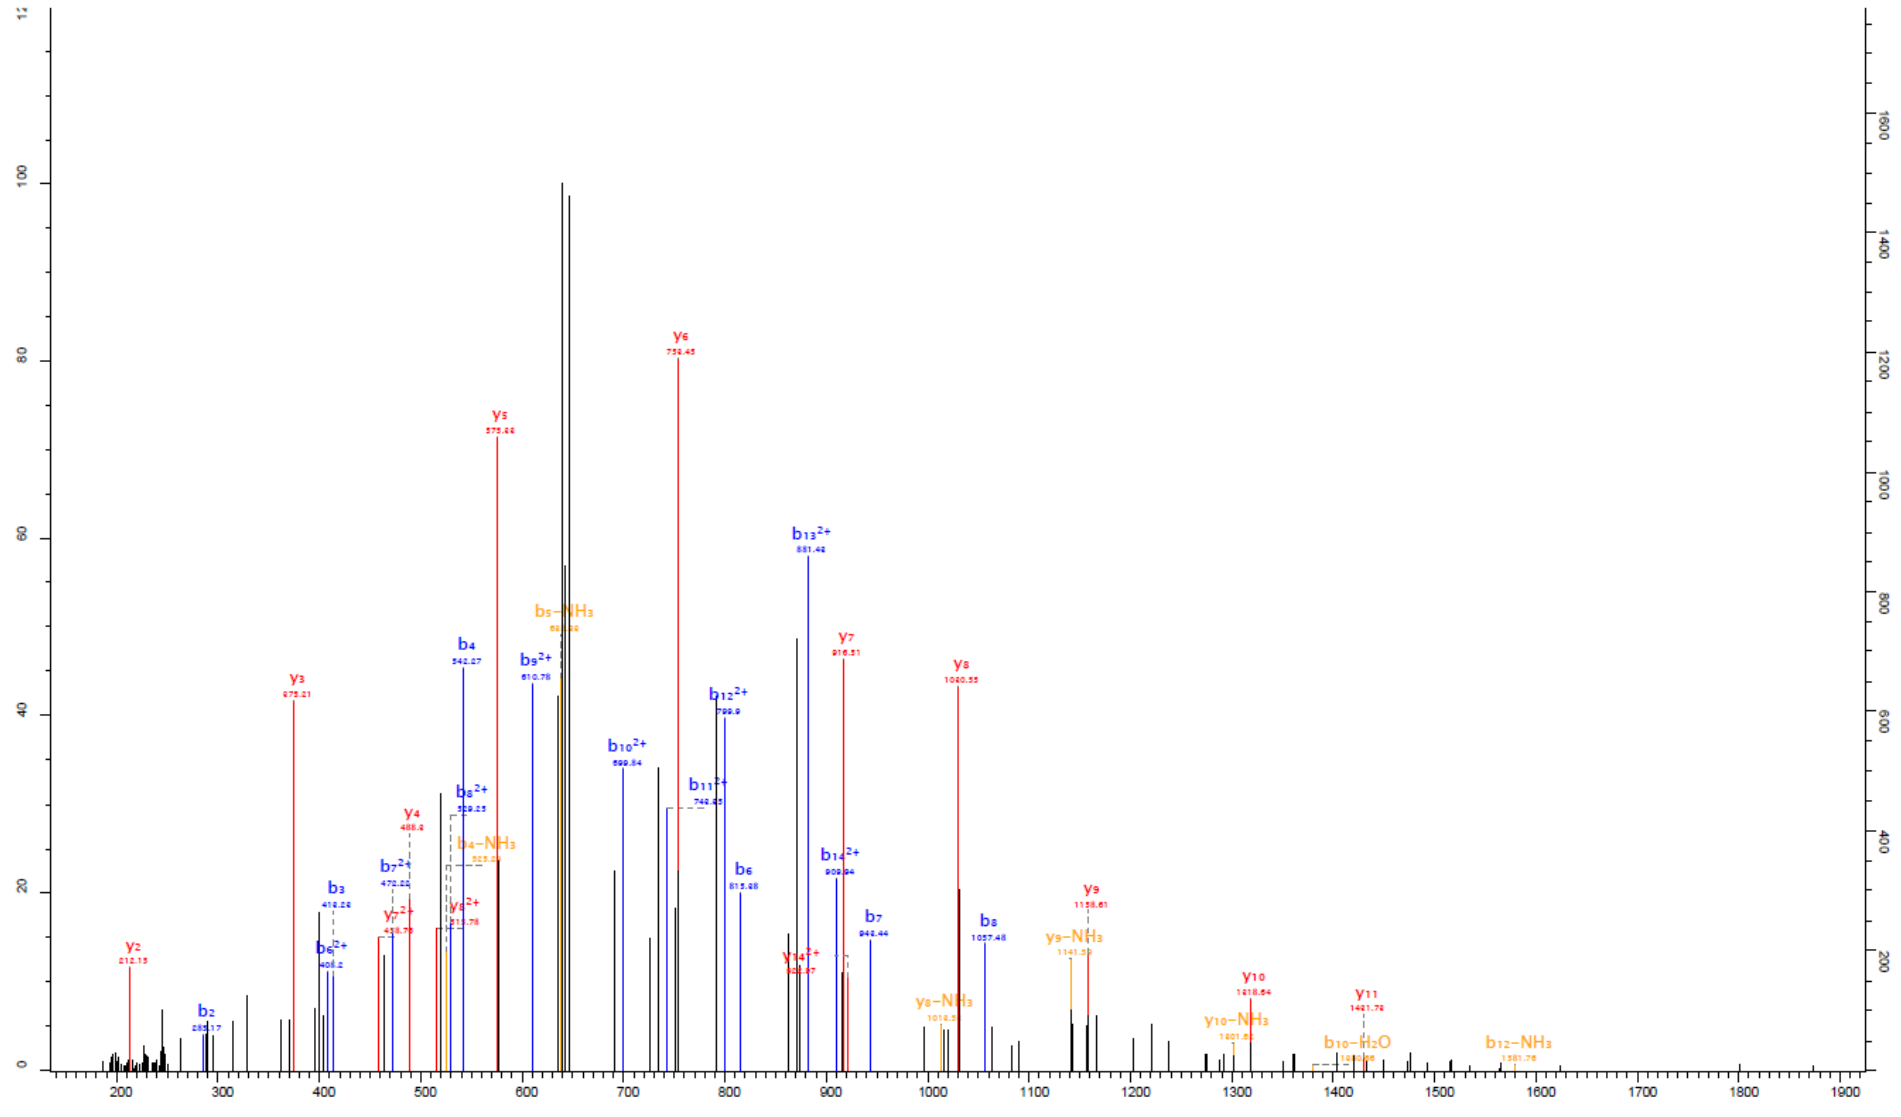

Q R Q E I C Q N Y K S L Y G K

y<sub>14</sub><sup>2+</sup>
y<sub>11</sub>
y<sub>10</sub>
y<sub>9</sub>
y<sub>8</sub>
y<sub>7</sub>
y<sub>6</sub>  
ac
y<sub>5</sub>
y<sub>4</sub>
y<sub>3</sub>
y<sub>2</sub>

b<sub>2</sub>
b<sub>3</sub>
b<sub>4</sub>
b<sub>6</sub>
b<sub>7</sub>
b<sub>8</sub>
b<sub>7</sub><sup>2+</sup>
b<sub>8</sub><sup>2+</sup>
b<sub>10</sub><sup>2+</sup>
b<sub>11</sub><sup>2+</sup>
b<sub>12</sub><sup>2+</sup>
b<sub>13</sub><sup>2+</sup>
b<sub>14</sub><sup>2+</sup>

Gene names = Anxa6

$[M+3H]^{+3}-3H_2O$

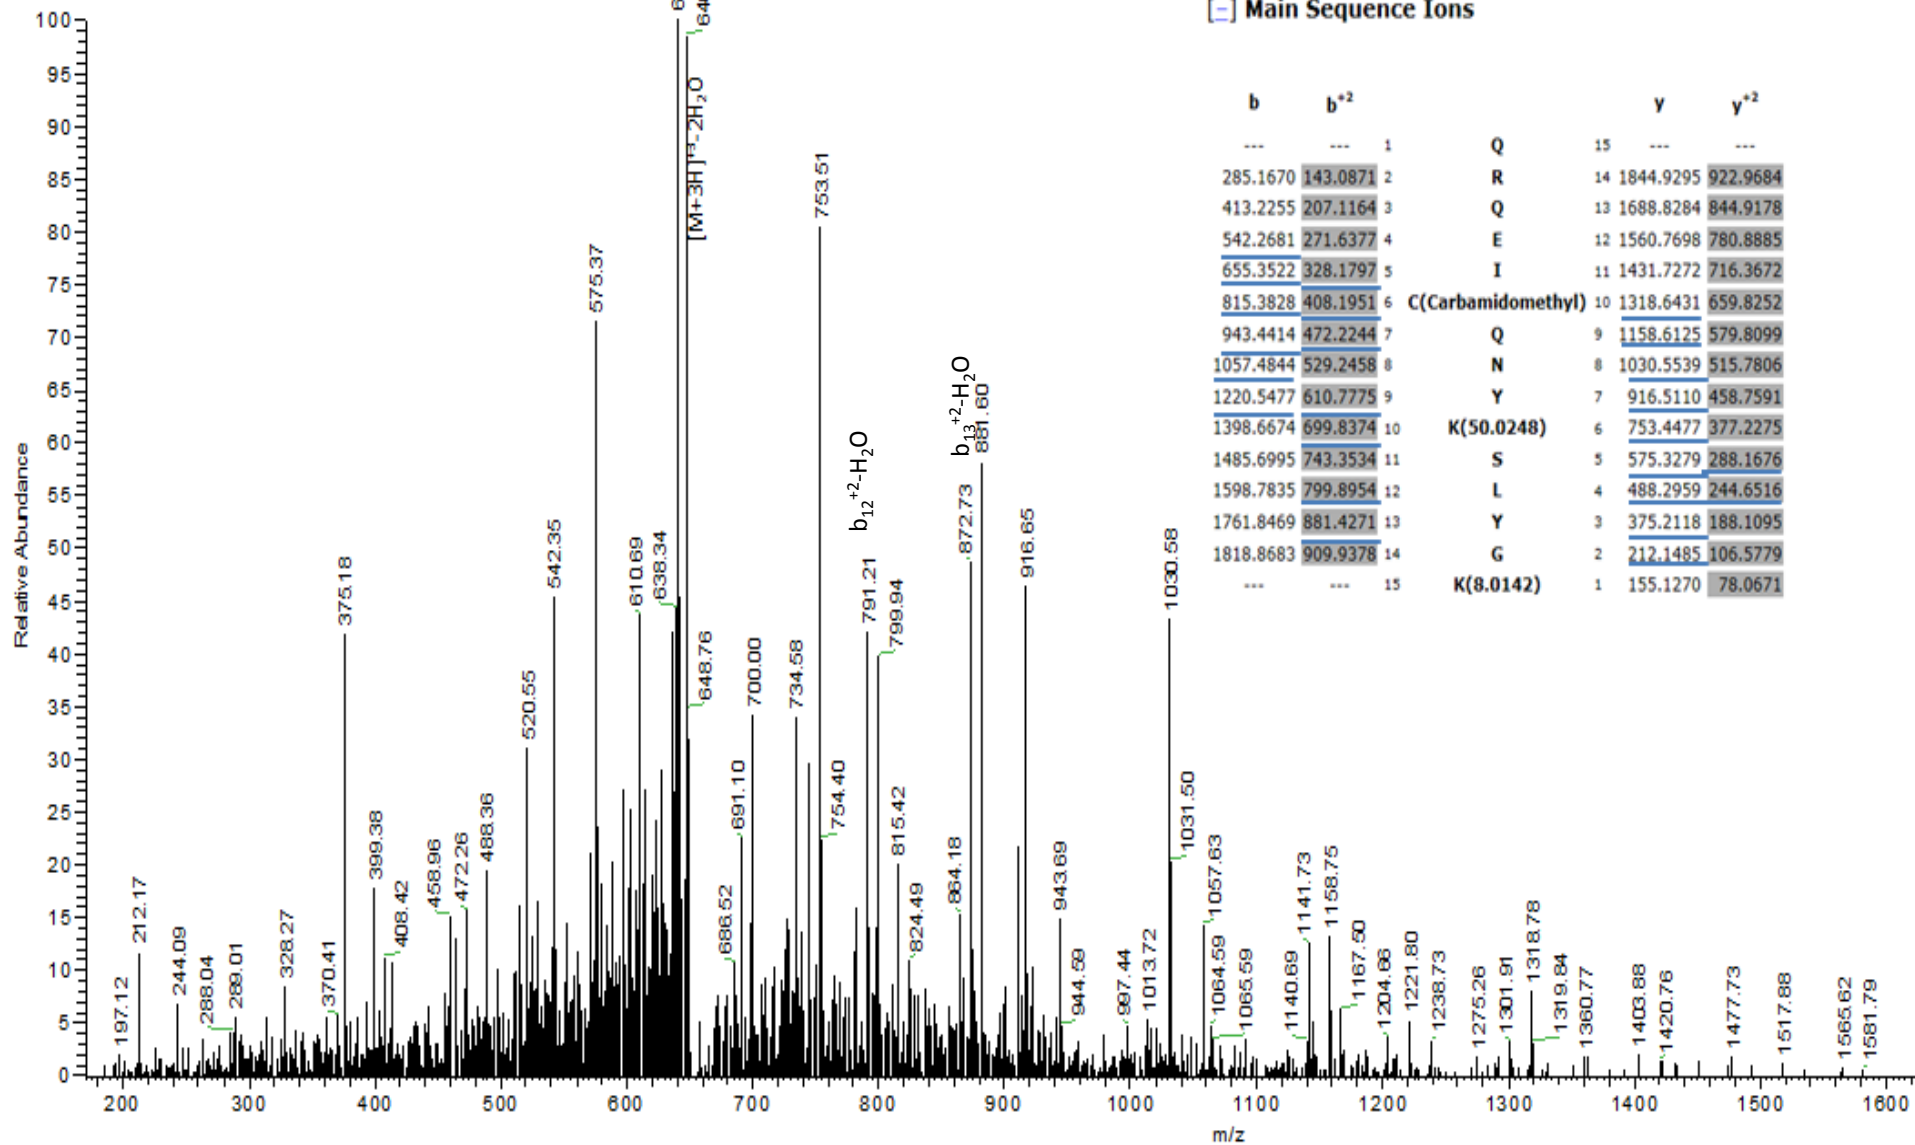

| MH <sup>+</sup> (av) | MH <sup>+</sup> (mono) | MH <sup>2+</sup> (av) | MH <sup>2+</sup> (mono) | MH <sup>3+</sup> (av) | MH <sup>3+</sup> (mono) |
|----------------------|------------------------|-----------------------|-------------------------|-----------------------|-------------------------|
| 1974.2182            | 1972.9881              | 987.6128              | 986.9977                | 658.7444              | 658.3342                |

**[-] Main Sequence Ions**

| b         | b <sup>2+</sup> |    | y                   | y <sup>2+</sup>       |
|-----------|-----------------|----|---------------------|-----------------------|
| ---       | ---             | 1  | Q                   | 15                    |
| 285.1670  | 143.0871        | 2  | R                   | 14 1844.9295 922.9684 |
| 413.2255  | 207.1164        | 3  | Q                   | 13 1688.8284 844.9178 |
| 542.2681  | 271.6377        | 4  | E                   | 12 1560.7698 780.8885 |
| 655.3522  | 328.1797        | 5  | I                   | 11 1431.7272 716.3672 |
| 815.3828  | 408.1951        | 6  | C (Carbamidomethyl) | 10 1318.6431 659.8252 |
| 943.4414  | 472.2244        | 7  | Q                   | 9 1158.6125 579.8099  |
| 1057.4844 | 529.2458        | 8  | N                   | 8 1030.5539 515.7806  |
| 1220.5477 | 610.7775        | 9  | Y                   | 7 916.5110 458.7591   |
| 1398.6674 | 699.8374        | 10 | K (50.0248)         | 6 753.4477 377.2275   |
| 1485.6995 | 743.3534        | 11 | S                   | 5 575.3279 288.1676   |
| 1598.7835 | 799.8954        | 12 | L                   | 4 488.2959 244.6516   |
| 1761.8469 | 881.4271        | 13 | Y                   | 3 375.2118 188.1095   |
| 1818.8683 | 909.9378        | 14 | G                   | 2 212.1485 106.5779   |
| --        | --              | 15 | K (8.0142)          | 1 155.1270 78.0671    |

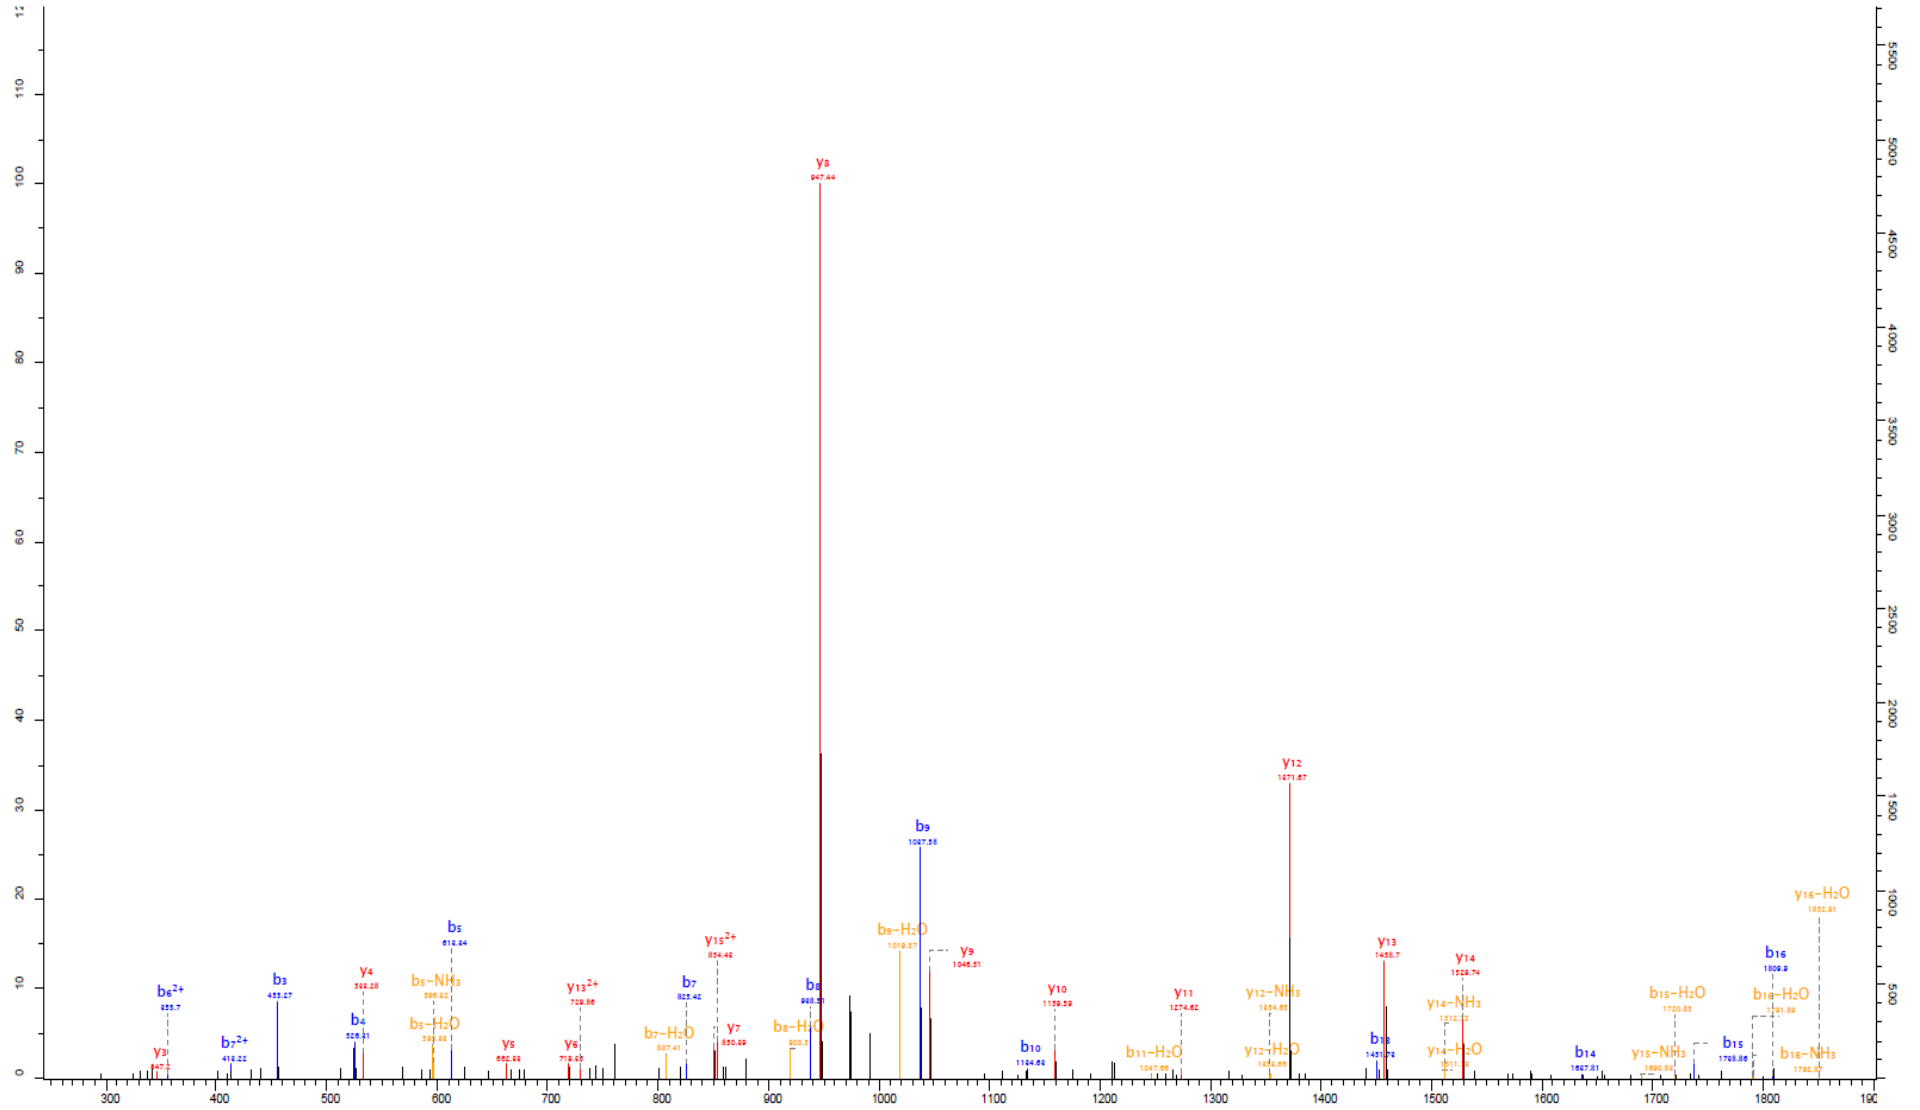

- L Y y13<sup>2+</sup> ac y14 y13 y12 y11 y10 y9 y8 y7 y6 y5 y4 y3  
b5 b4 b3 b2<sup>+</sup> b7 b6 b5 b4 b3 b2 b1 M G E W T A R -  
b13 b14 b13 b16

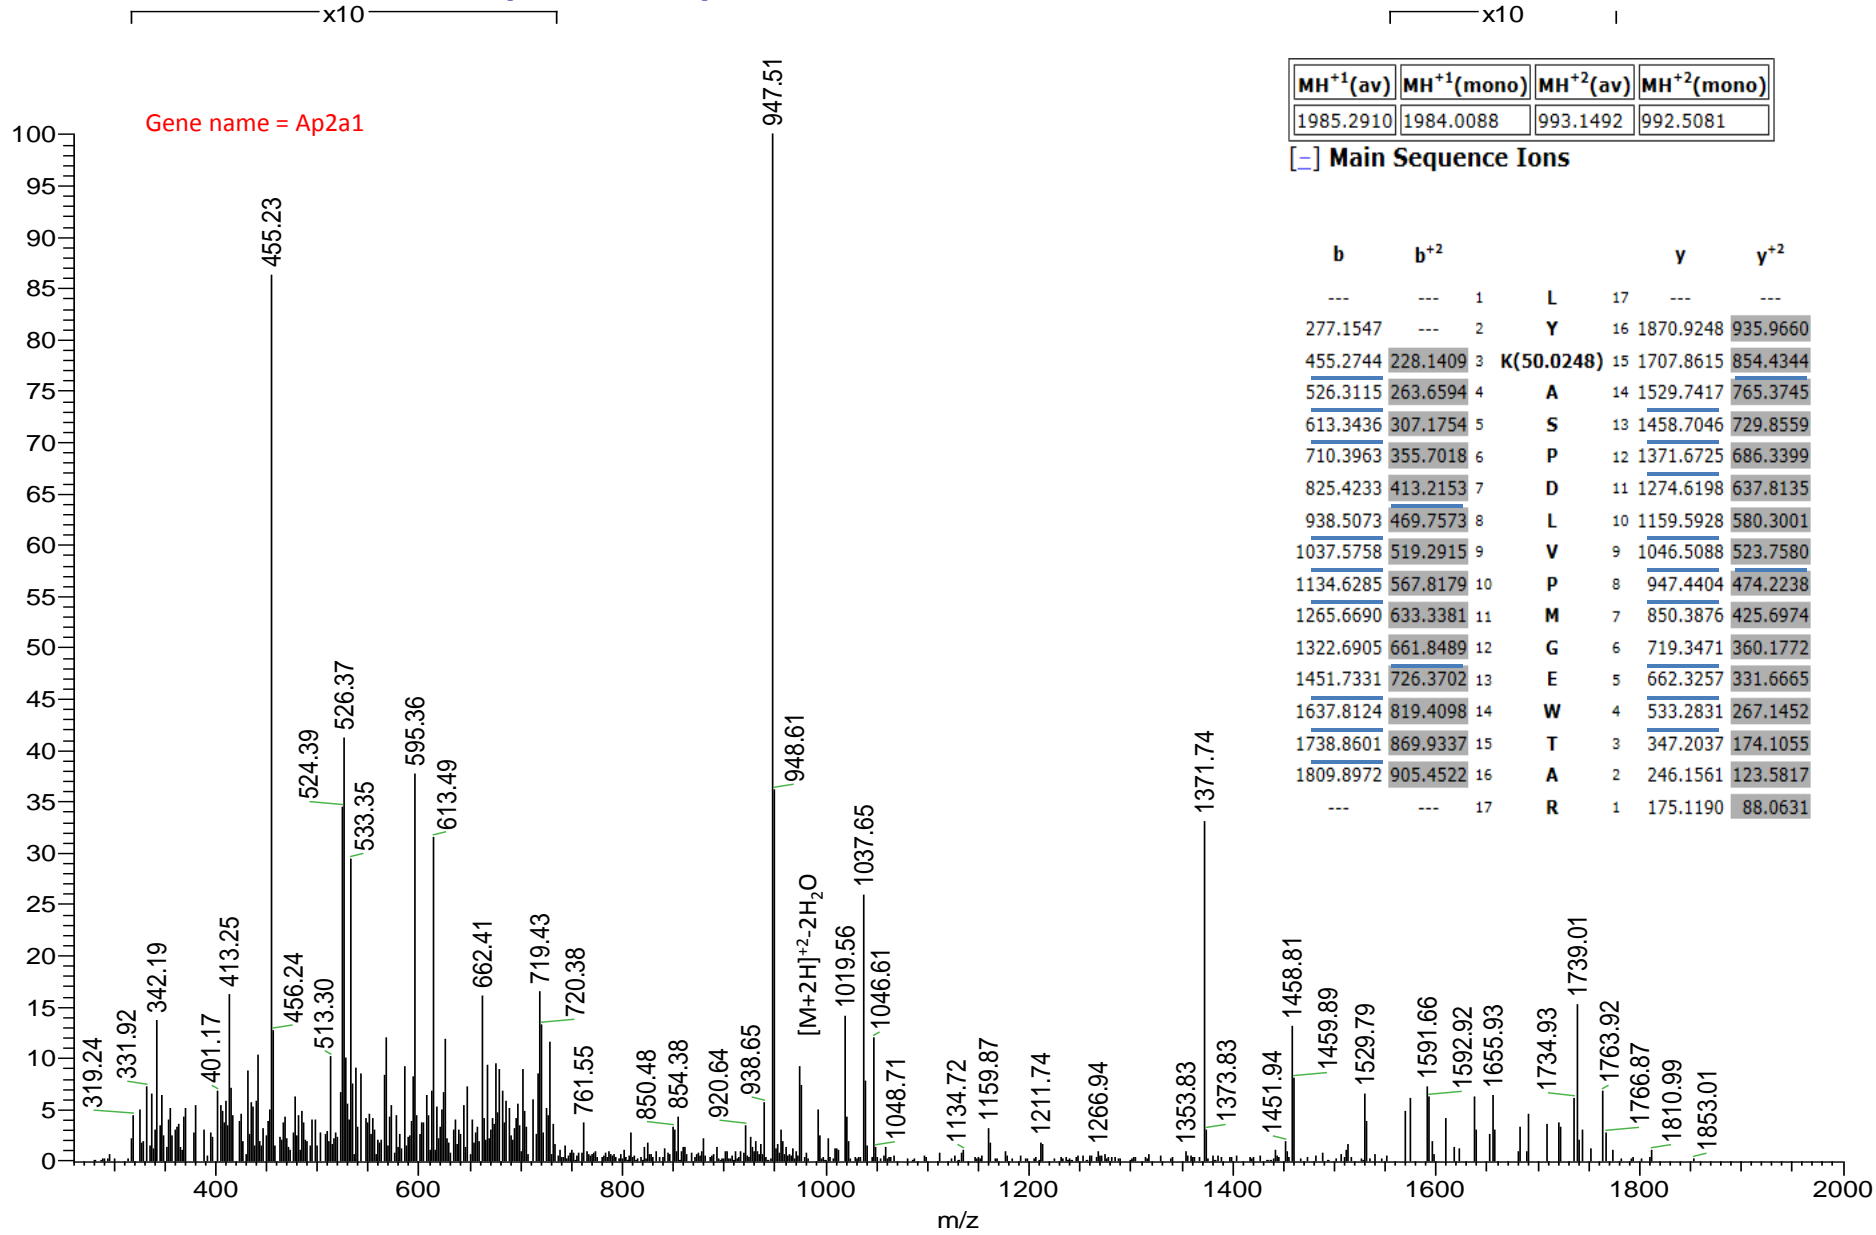

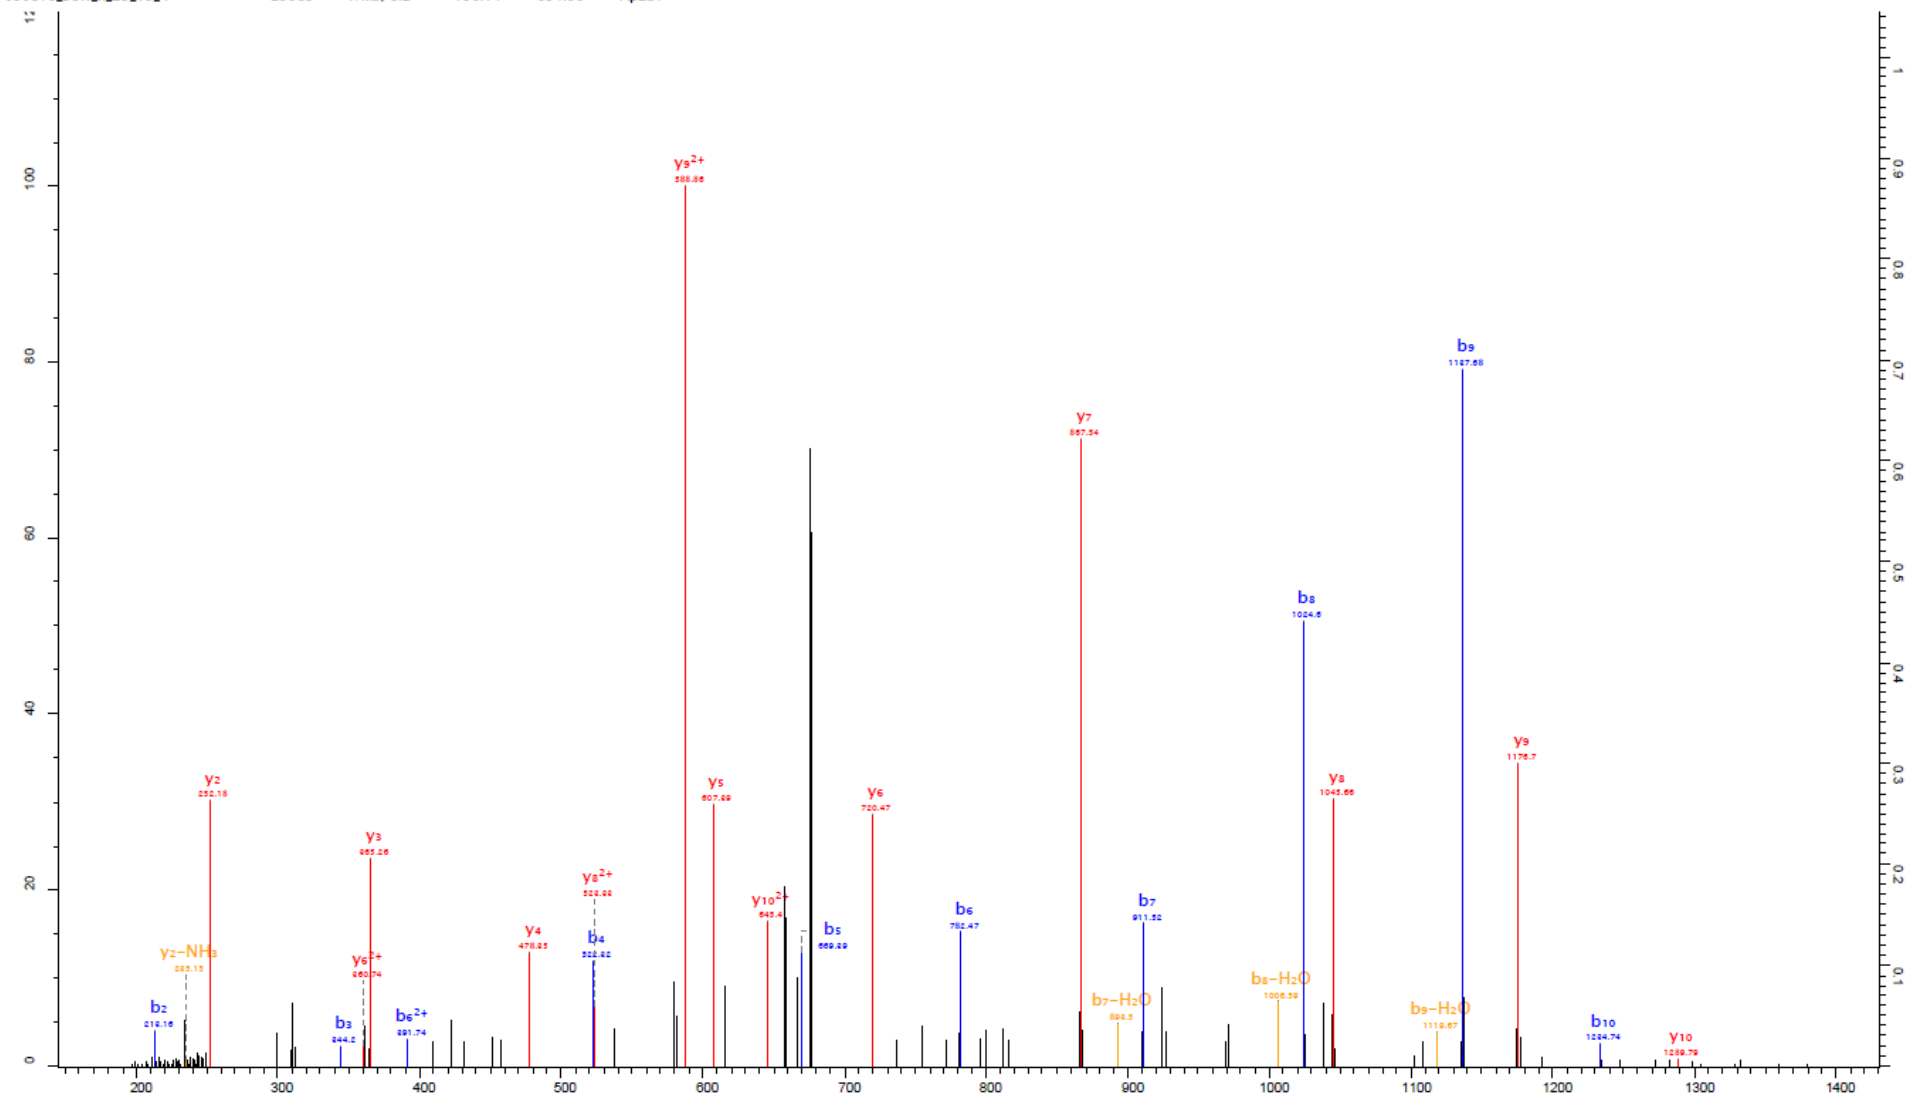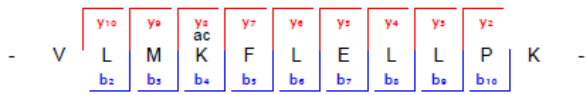

Gene names = Ap2b1

| MH <sup>+</sup> (av) | MH <sup>+</sup> (mono) | MH <sup>2+</sup> (av) | MH <sup>2+</sup> (mono) |
|----------------------|------------------------|-----------------------|-------------------------|
| 1389.7967            | 1388.8557              | 695.4021              | 694.9315                |

[-] Main Sequence Ions

| b         | b <sup>+</sup> | y  | y <sup>+</sup> |
|-----------|----------------|----|----------------|
| ---       | ---            | 1  | V              |
| 213.1598  | ---            | 2  | L              |
| 344.2002  | ---            | 3  | M              |
| 522.3200  | 261.6636       | 4  | K(50.0248)     |
| 669.3884  | 335.1978       | 5  | F              |
| 782.4725  | 391.7399       | 6  | L              |
| 911.5151  | 456.2612       | 7  | E              |
| 1024.5991 | 512.8032       | 8  | L              |
| 1137.6832 | 569.3452       | 9  | L              |
| 1234.7360 | 617.8716       | 10 | P              |
| ---       | ---            | 11 | K(8.0142)      |

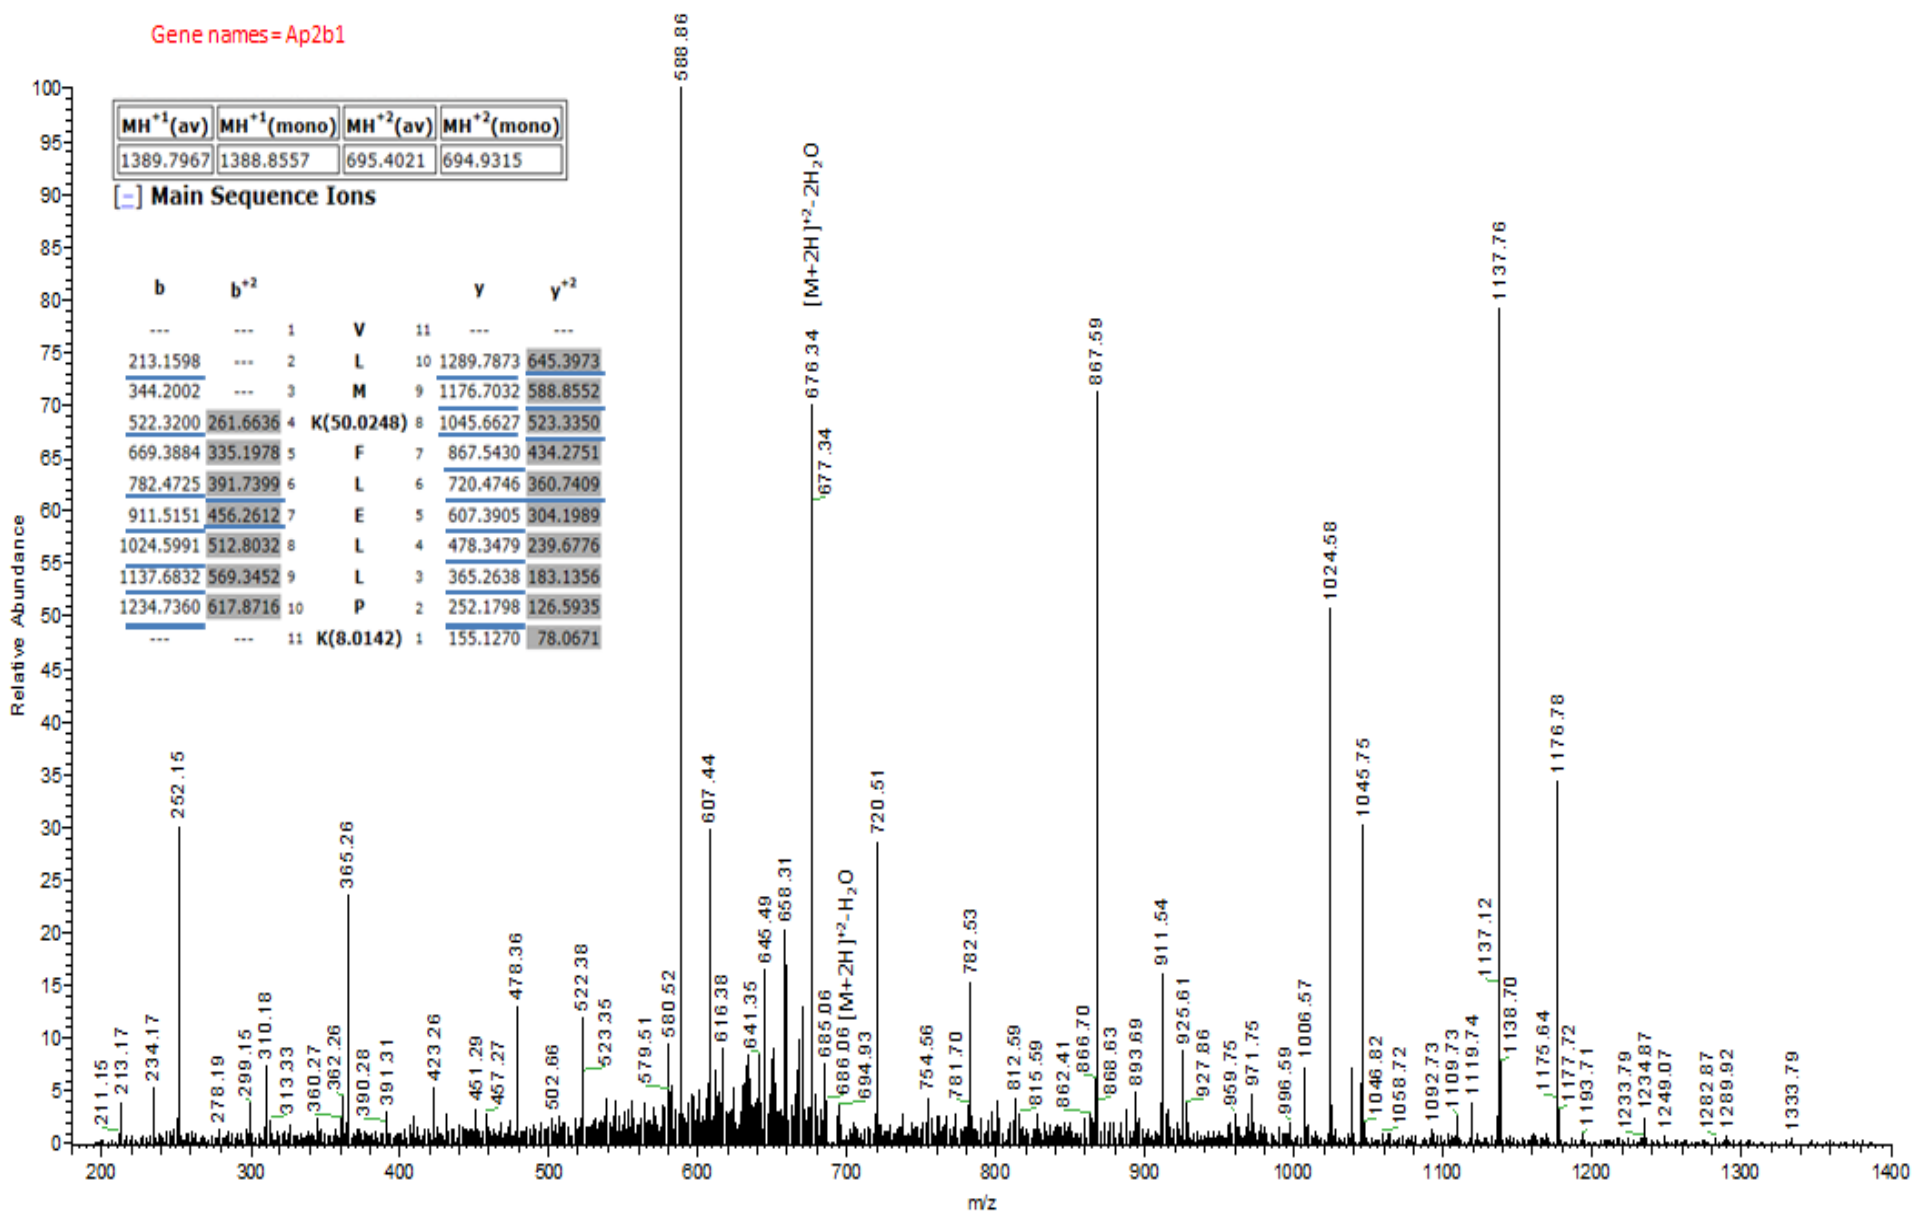



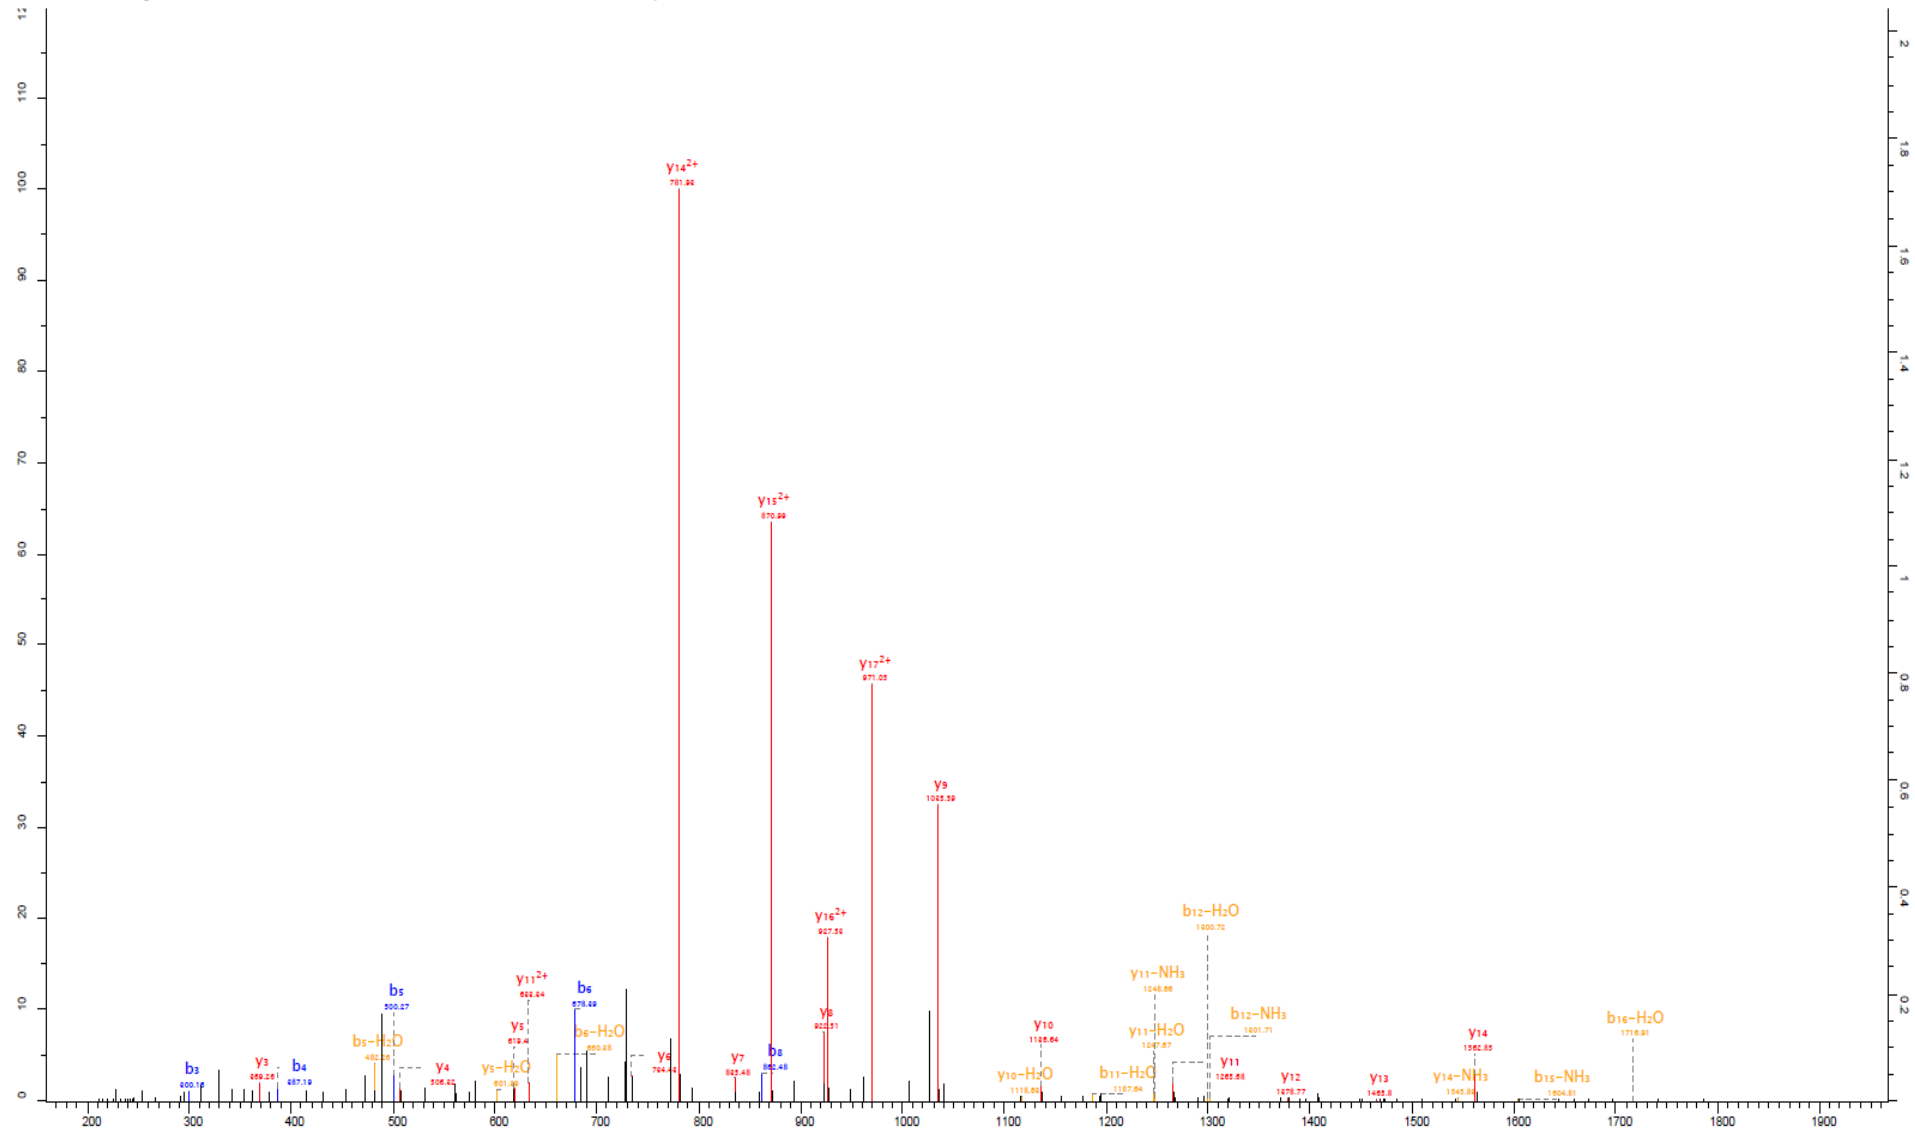

- A V E S L K P S I E T L S T D L H T I K -

Fragmentation sites are indicated by boxes below the sequence:

- $y_{17}^{2+}$  (red box) above E
- $b_3$  (blue box) below E
- $y_{16}^{2+}$  (red box) above S
- $b_4$  (blue box) below S
- $y_{15}^{2+}$  (red box) above L
- $b_5$  (blue box) below L
- $y_{14}^{2+}$  (red box) above K
- $b_6$  (blue box) below K
- $y_{13}$  (red box) above P
- $b_7$  (blue box) below P
- $y_{12}$  (red box) above S
- $y_{11}$  (red box) above I
- $y_{10}$  (red box) above E
- $y_9$  (red box) above T
- $y_8$  (red box) above L
- $y_7$  (red box) above S
- $y_6$  (red box) above T
- $y_5$  (red box) above D
- $y_4$  (red box) above L
- $y_3$  (red box) above H
- $y_2$  (red box) above T
- $y_1$  (red box) above I

Gene names = Asap2

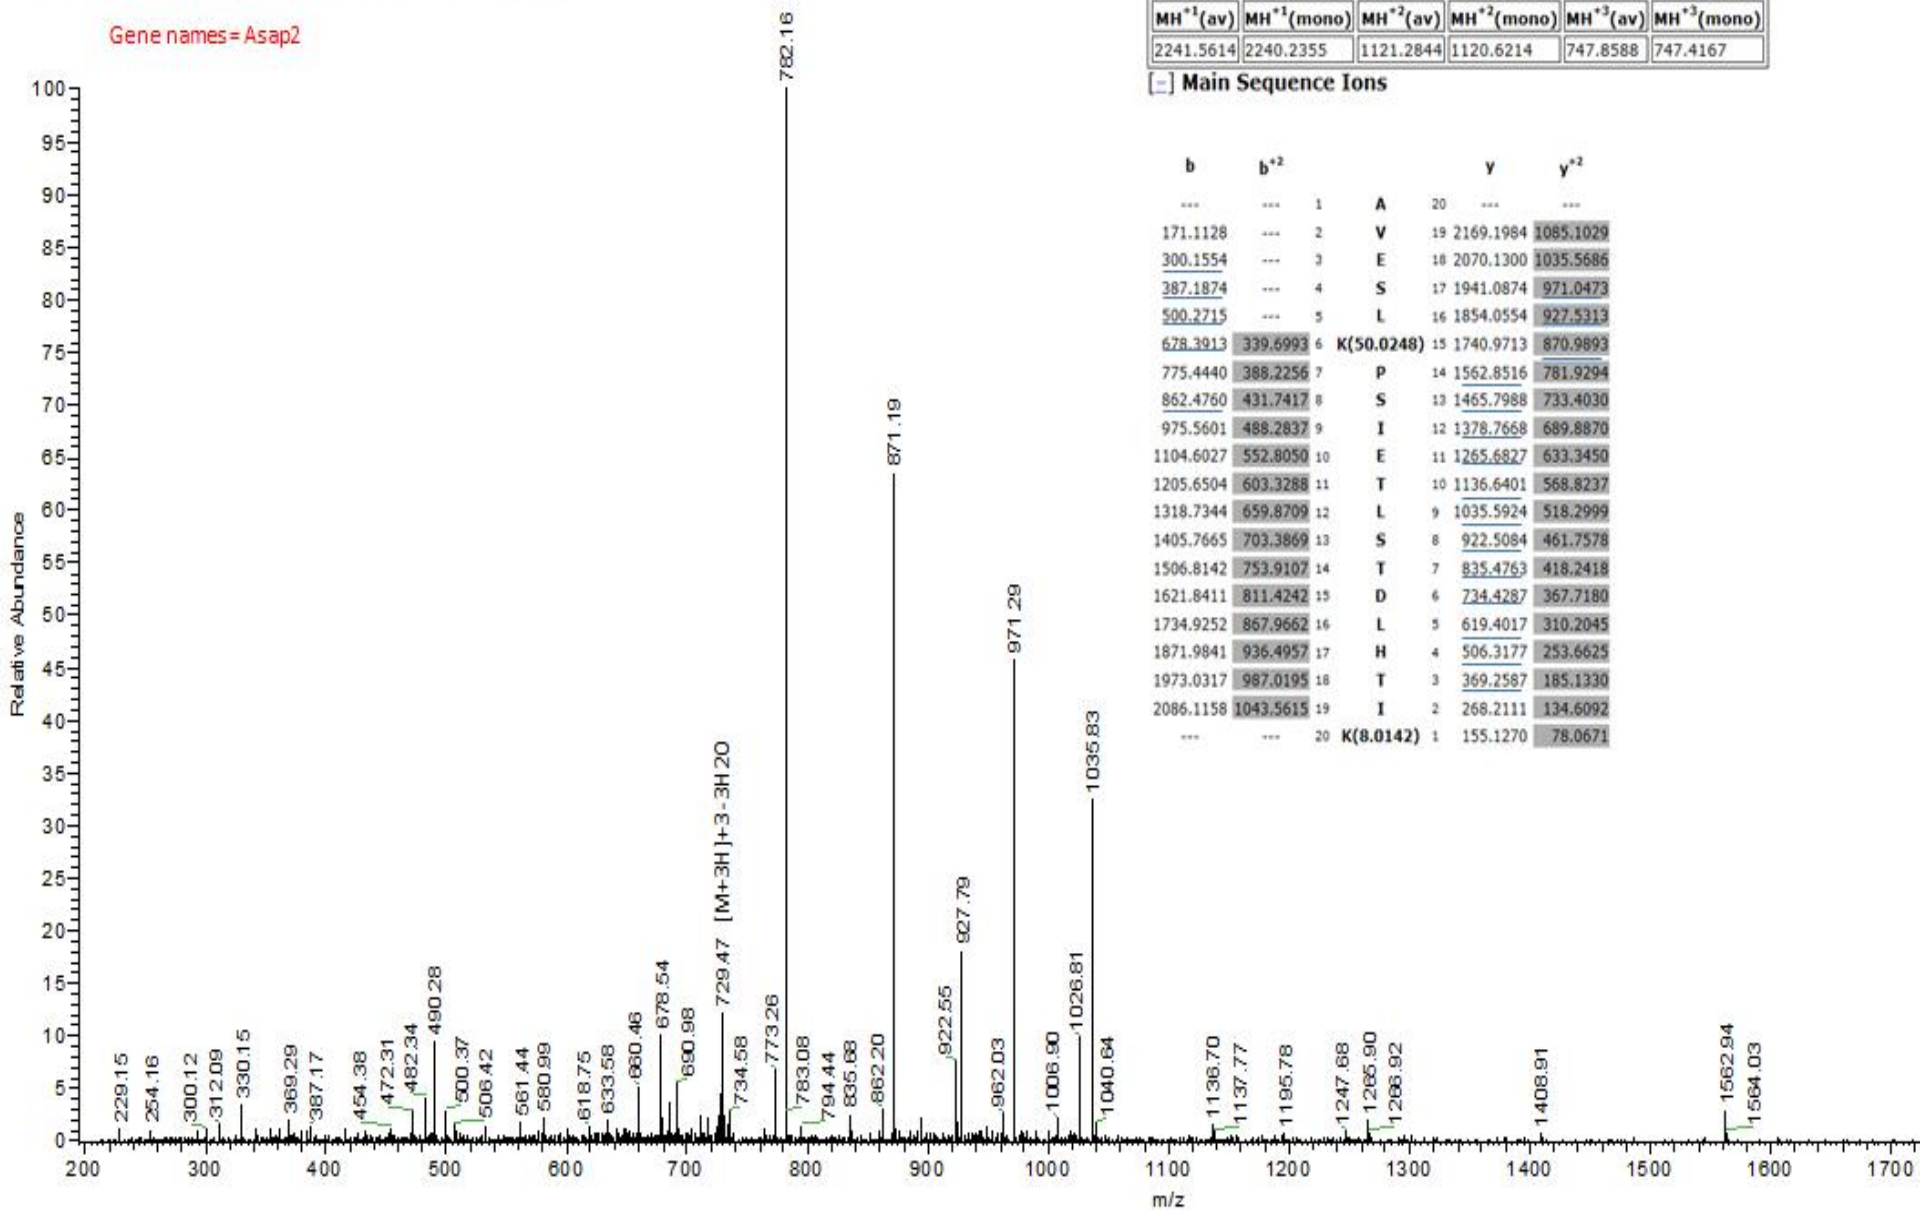

| MH <sup>+</sup> (av) | MH <sup>+</sup> (mono) | MH <sup>2+</sup> (av) | MH <sup>2+</sup> (mono) | MH <sup>3+</sup> (av) | MH <sup>3+</sup> (mono) |
|----------------------|------------------------|-----------------------|-------------------------|-----------------------|-------------------------|
| 2241.5614            | 2240.2355              | 1121.2844             | 1120.6214               | 747.8588              | 747.4167                |

[-] Main Sequence Ions

| b         | b <sup>+</sup> |    | y          | y <sup>+</sup> |           |
|-----------|----------------|----|------------|----------------|-----------|
| ...       | ...            | 1  | A          | 20             | ...       |
| 171.1128  | ...            | 2  | V          | 19             | 2169.1984 |
| 300.1554  | ...            | 3  | E          | 18             | 2070.1300 |
| 387.1874  | ...            | 4  | S          | 17             | 1941.0874 |
| 500.2715  | ...            | 5  | L          | 16             | 1854.0554 |
| 678.3913  | 339.6993       | 6  | K(50.0248) | 15             | 1740.9713 |
| 775.4440  | 388.2256       | 7  | P          | 14             | 1562.8516 |
| 862.4760  | 431.7417       | 8  | S          | 13             | 1465.7988 |
| 975.5601  | 488.2837       | 9  | I          | 12             | 1378.7668 |
| 1104.6027 | 552.8050       | 10 | E          | 11             | 1265.6827 |
| 1205.6504 | 603.3288       | 11 | T          | 10             | 1136.6401 |
| 1318.7344 | 659.8709       | 12 | L          | 9              | 1035.5924 |
| 1405.7665 | 703.3869       | 13 | S          | 8              | 922.5084  |
| 1506.8142 | 753.9107       | 14 | T          | 7              | 835.4263  |
| 1621.8411 | 811.4242       | 15 | D          | 6              | 734.4287  |
| 1734.9252 | 867.9662       | 16 | L          | 5              | 619.4017  |
| 1871.9841 | 936.4957       | 17 | H          | 4              | 506.3177  |
| 1973.0317 | 987.0195       | 18 | T          | 3              | 369.2587  |
| 2086.1158 | 1043.5615      | 19 | I          | 2              | 268.2111  |
| ...       | ...            | 20 | K(8.0142)  | 1              | 155.1270  |

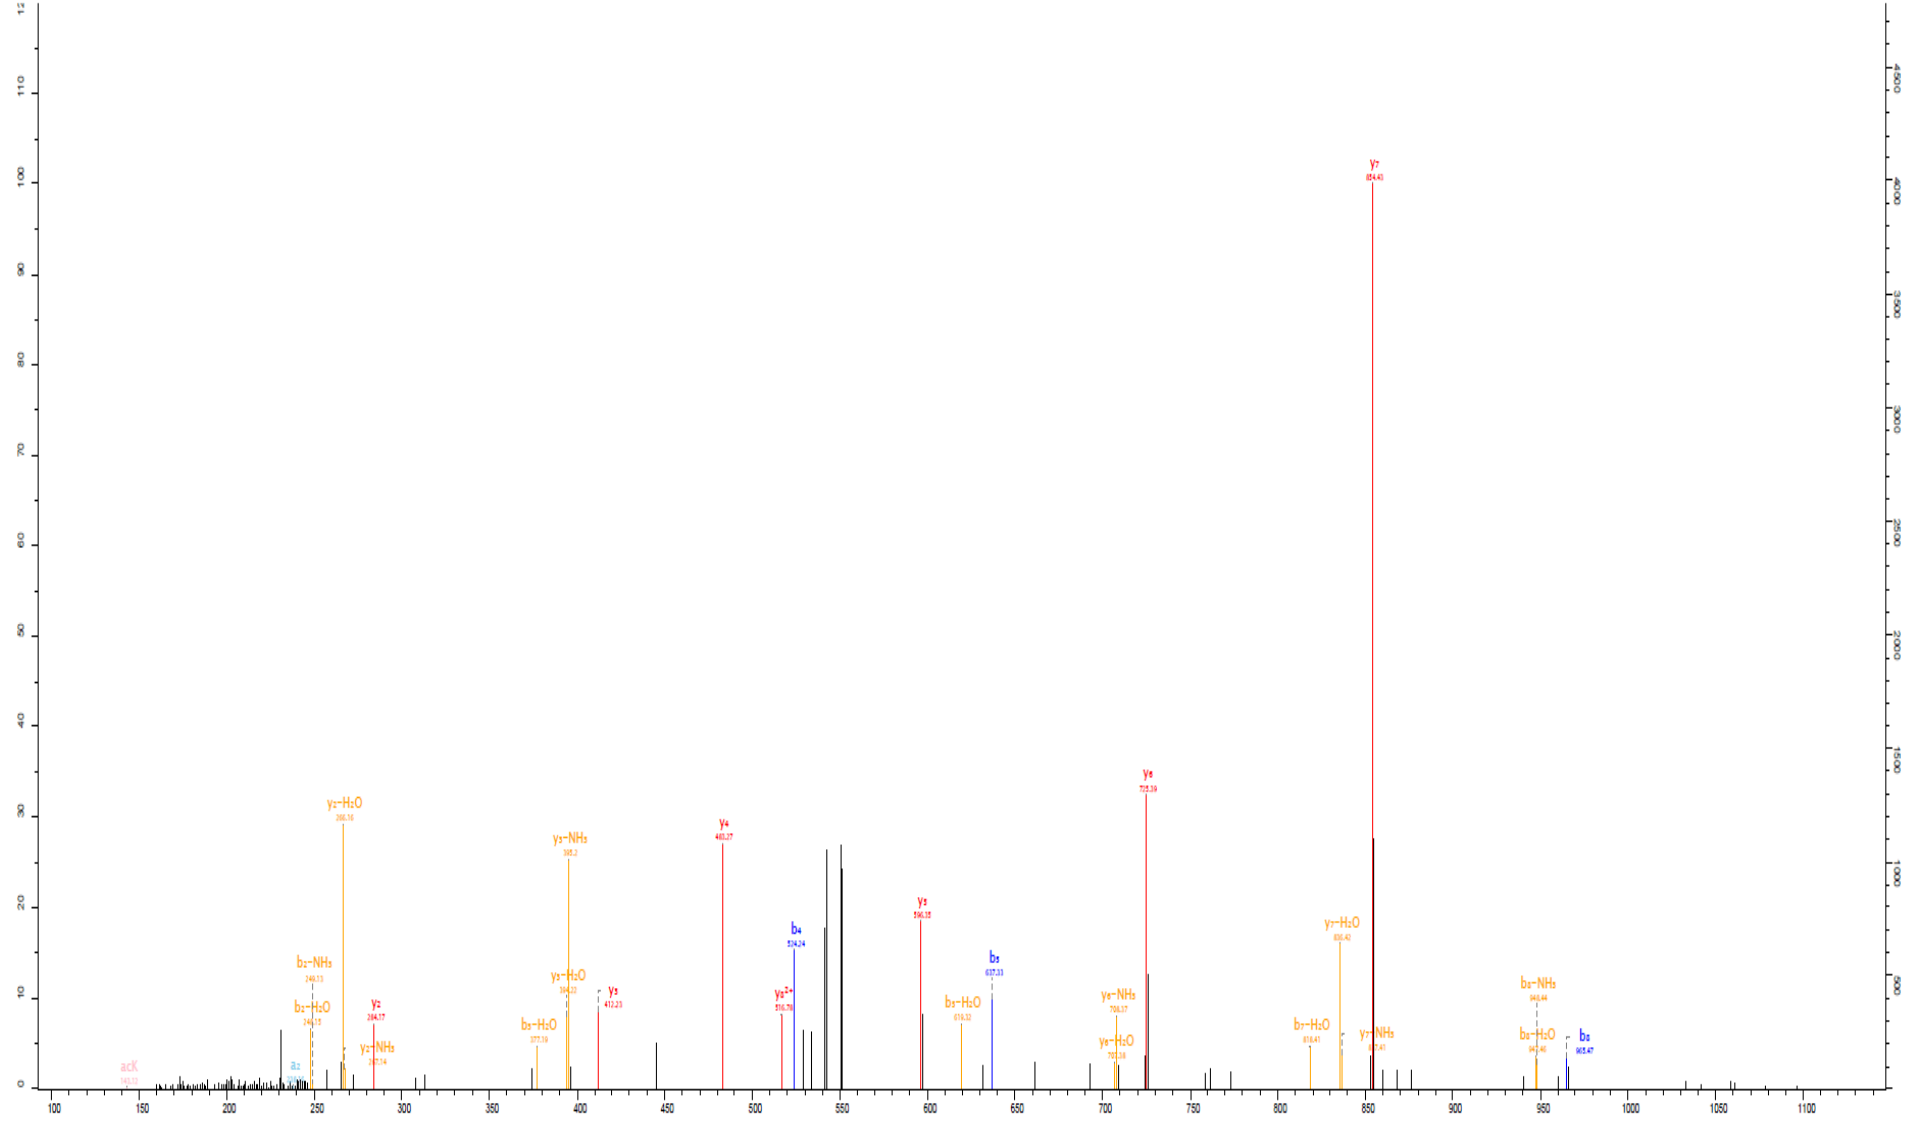

S  
 [y2+ ac] K [y7] E [y4] E [y5] L [y4] A [y2] Q [y2] E [y2] K

Gene names = Brd3

|                           |                             |                            |                              |
|---------------------------|-----------------------------|----------------------------|------------------------------|
| <b>MH<sup>+</sup>(av)</b> | <b>MH<sup>+</sup>(mono)</b> | <b>MH<sup>2+</sup>(av)</b> | <b>MH<sup>2+</sup>(mono)</b> |
| 1120.2107                 | 1119.5863                   | 560.6091                   | 560.2968                     |

**[-] Main Sequence Ions**

| b        | b <sup>+</sup> |   |                    | y | y <sup>+</sup> |
|----------|----------------|---|--------------------|---|----------------|
| ---      | ---            | 1 | <b>S</b>           | 9 | ---            |
| 266.1591 | 133.5832       | 2 | <b>K(50.02481)</b> | 8 | 1032.5543      |
| 395.2017 | 198.1045       | 3 | <b>E</b>           | 7 | 854.4345       |
| 524.2443 | 262.6258       | 4 | <b>E</b>           | 6 | 725.3919       |
| 637.3283 | 319.1678       | 5 | <b>L</b>           | 5 | 596.3494       |
| 708.3654 | 354.6864       | 6 | <b>A</b>           | 4 | 483.2653       |
| 836.4240 | 418.7156       | 7 | <b>Q</b>           | 3 | 412.2282       |
| 965.4666 | 483.2369       | 8 | <b>E</b>           | 2 | 284.1696       |
| ---      | ---            | 9 | <b>K(8.0142)</b>   | 1 | 155.1270       |

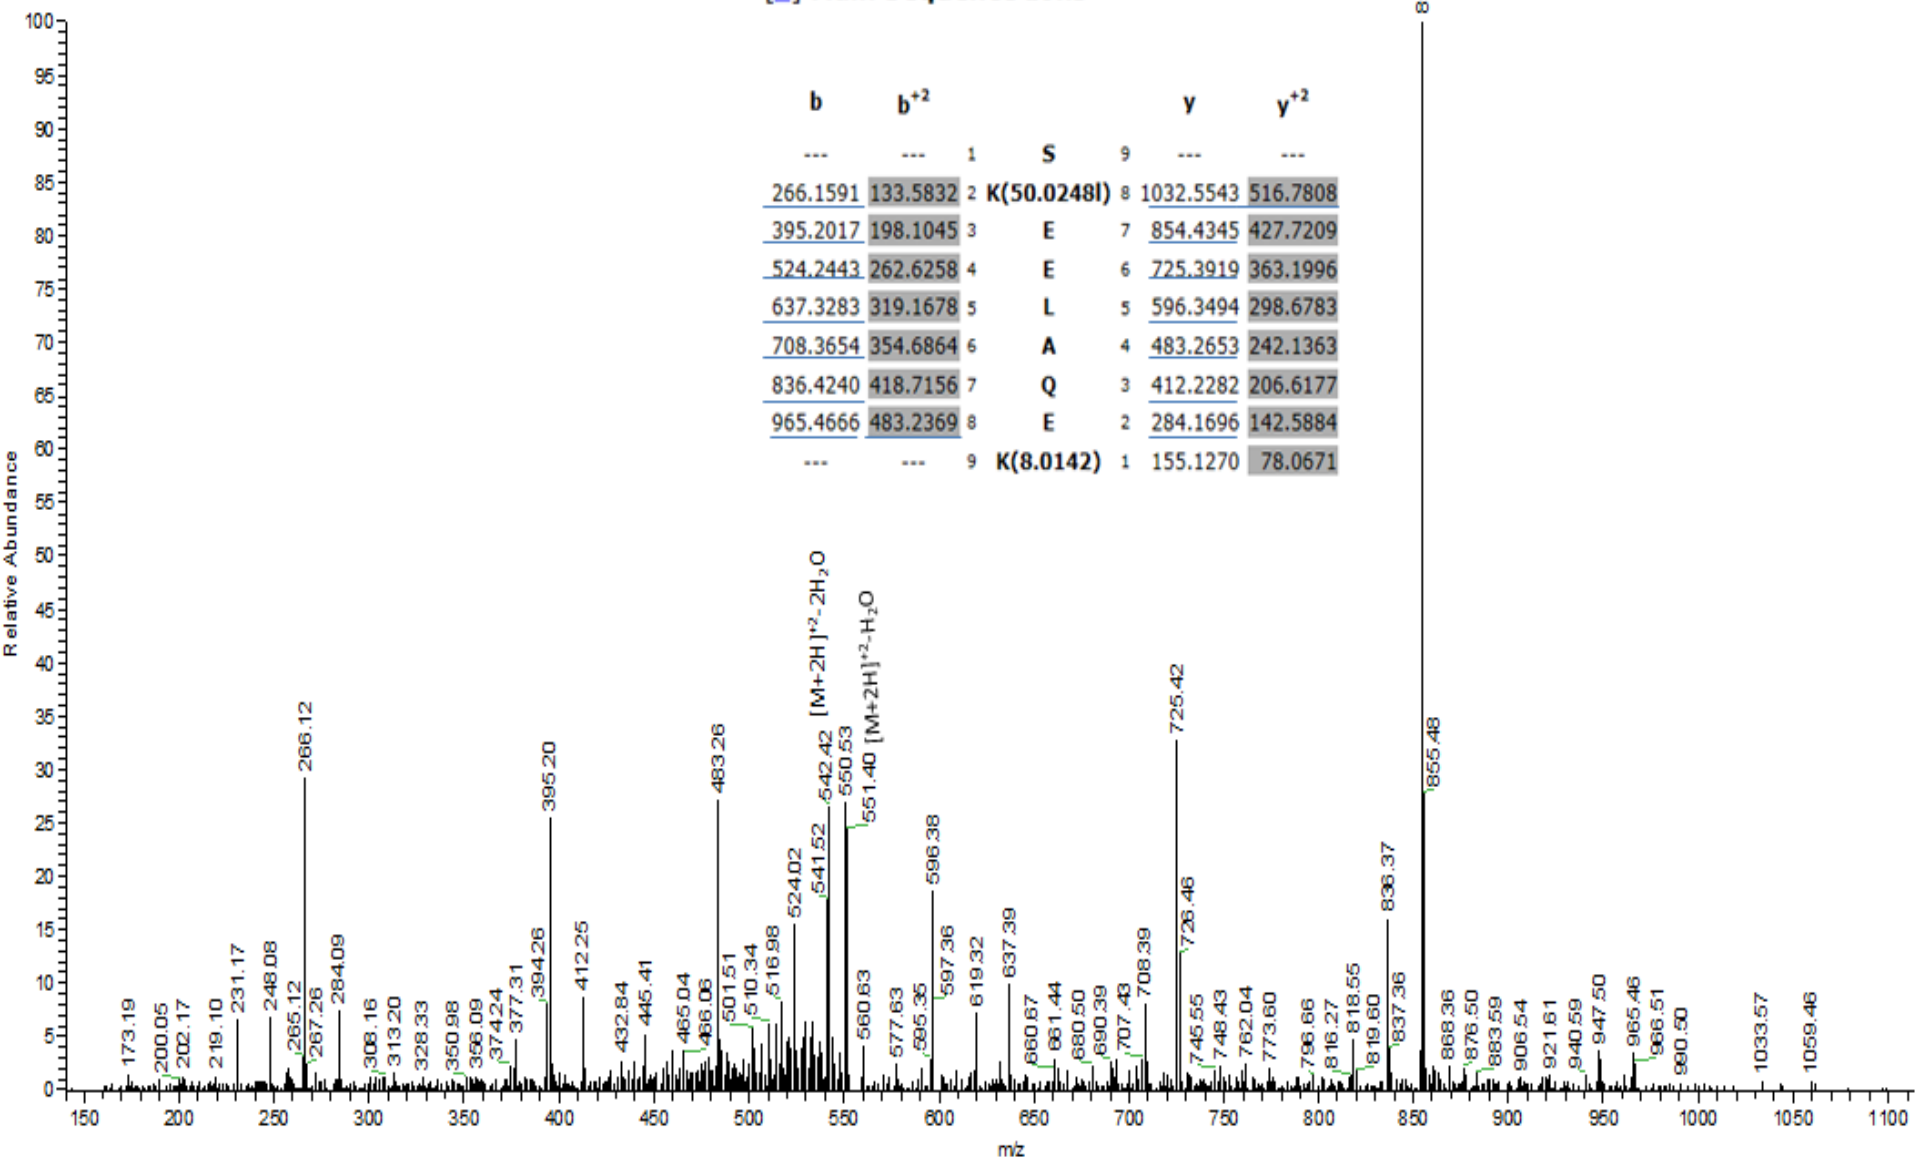

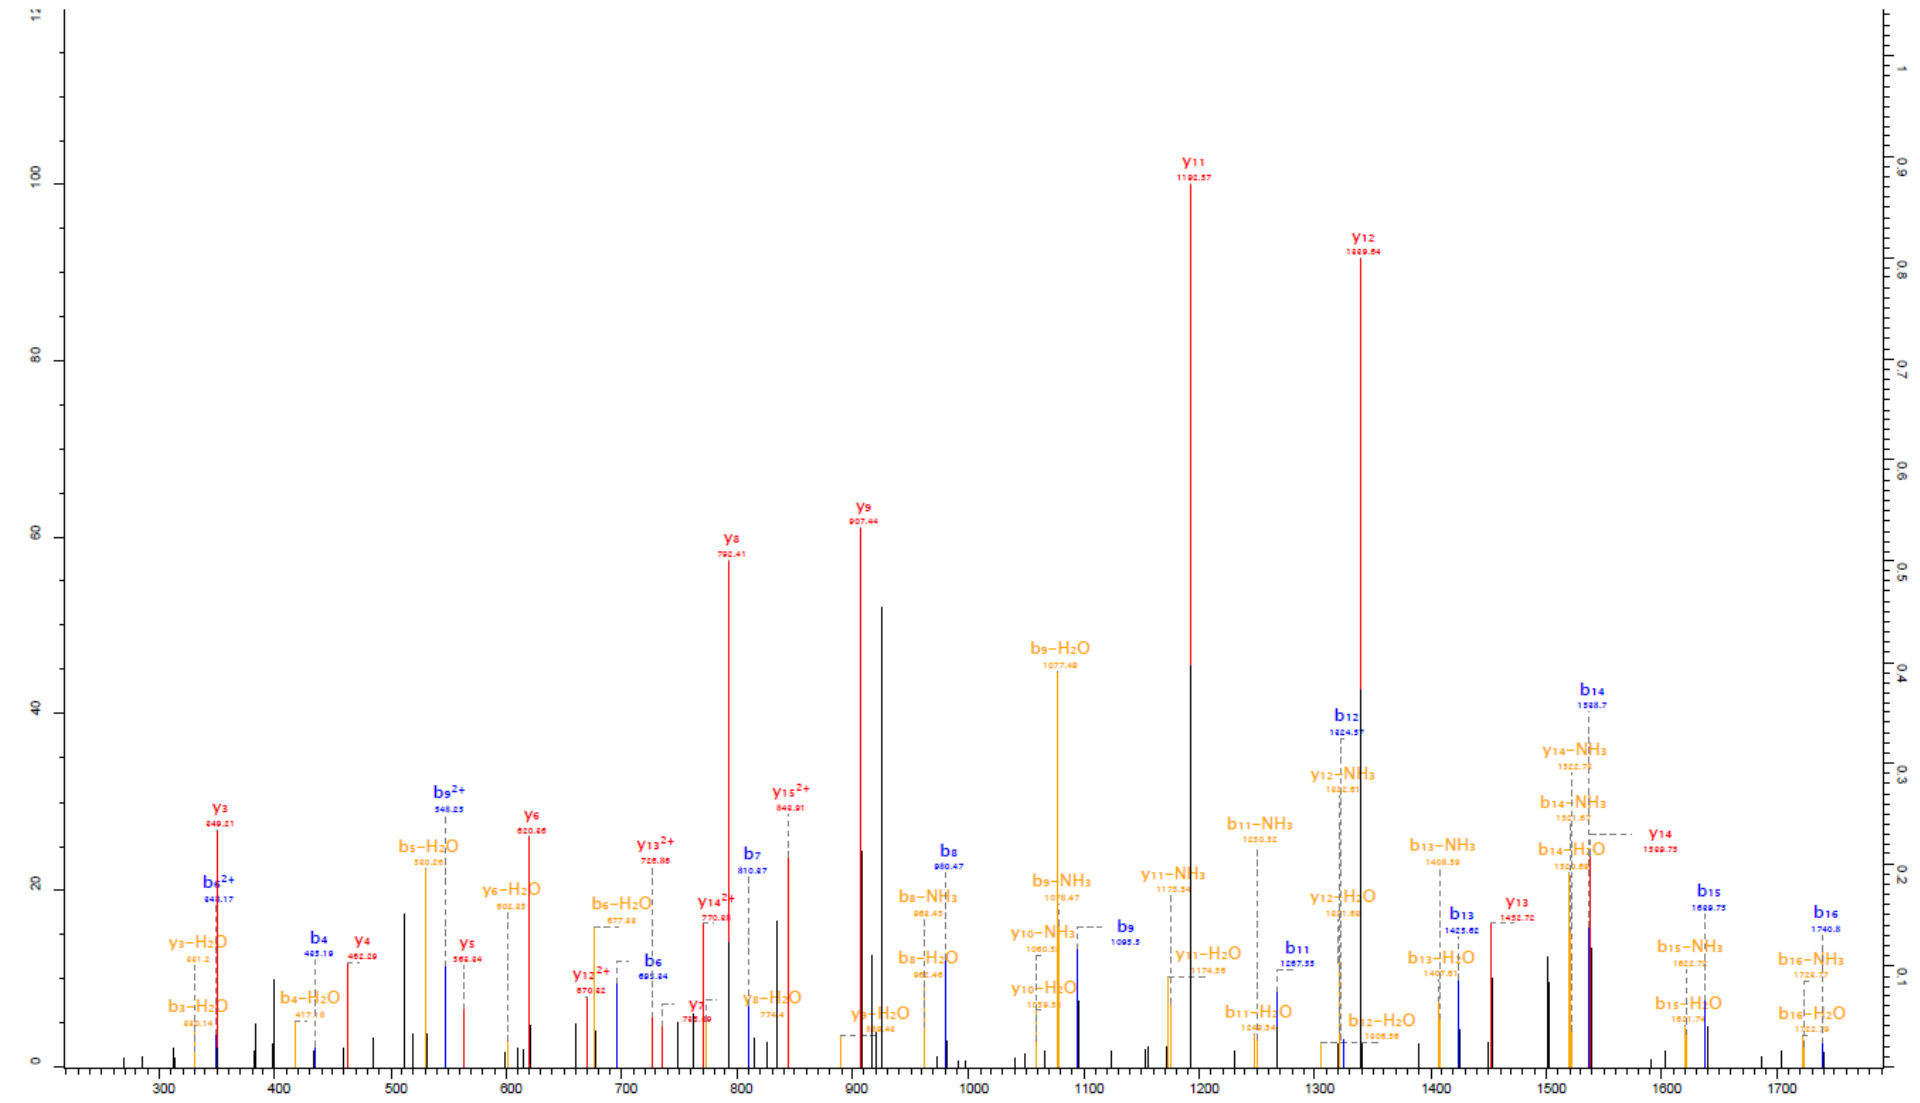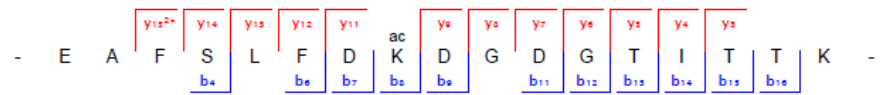

Gene names = Calm1

| MH <sup>+</sup> (av) | MH <sup>+</sup> (mono) | MH <sup>2+</sup> (av) | MH <sup>2+</sup> (mono) |
|----------------------|------------------------|-----------------------|-------------------------|
| 1888.0506            | 1886.9018              | 944.5290              | 943.9545                |

[-] Main Sequence Ions

| b         | b <sup>+</sup> | y  | y <sup>+</sup> |
|-----------|----------------|----|----------------|
| ---       | ---            | 1  | E              |
| 201.0870  | ---            | 2  | A              |
| 348.1554  | ---            | 3  | F              |
| 435.1874  | ---            | 4  | S              |
| 548.2715  | ---            | 5  | L              |
| 695.3399  | ---            | 6  | F              |
| 810.3668  | ---            | 7  | D              |
| 980.4724  | 490.7398       | 8  | K(Acetyl)      |
| 1095.4993 | 548.2533       | 9  | D              |
| 1152.5208 | 576.7640       | 10 | G              |
| 1267.5477 | 634.2775       | 11 | D              |
| 1324.5692 | 662.7882       | 12 | G              |
| 1425.6169 | 713.3121       | 13 | T              |
| 1538.7009 | 769.8541       | 14 | I              |
| 1639.7486 | 820.3779       | 15 | T              |
| 1740.7963 | 870.9018       | 16 | T              |
| --        | --             | 17 | K              |

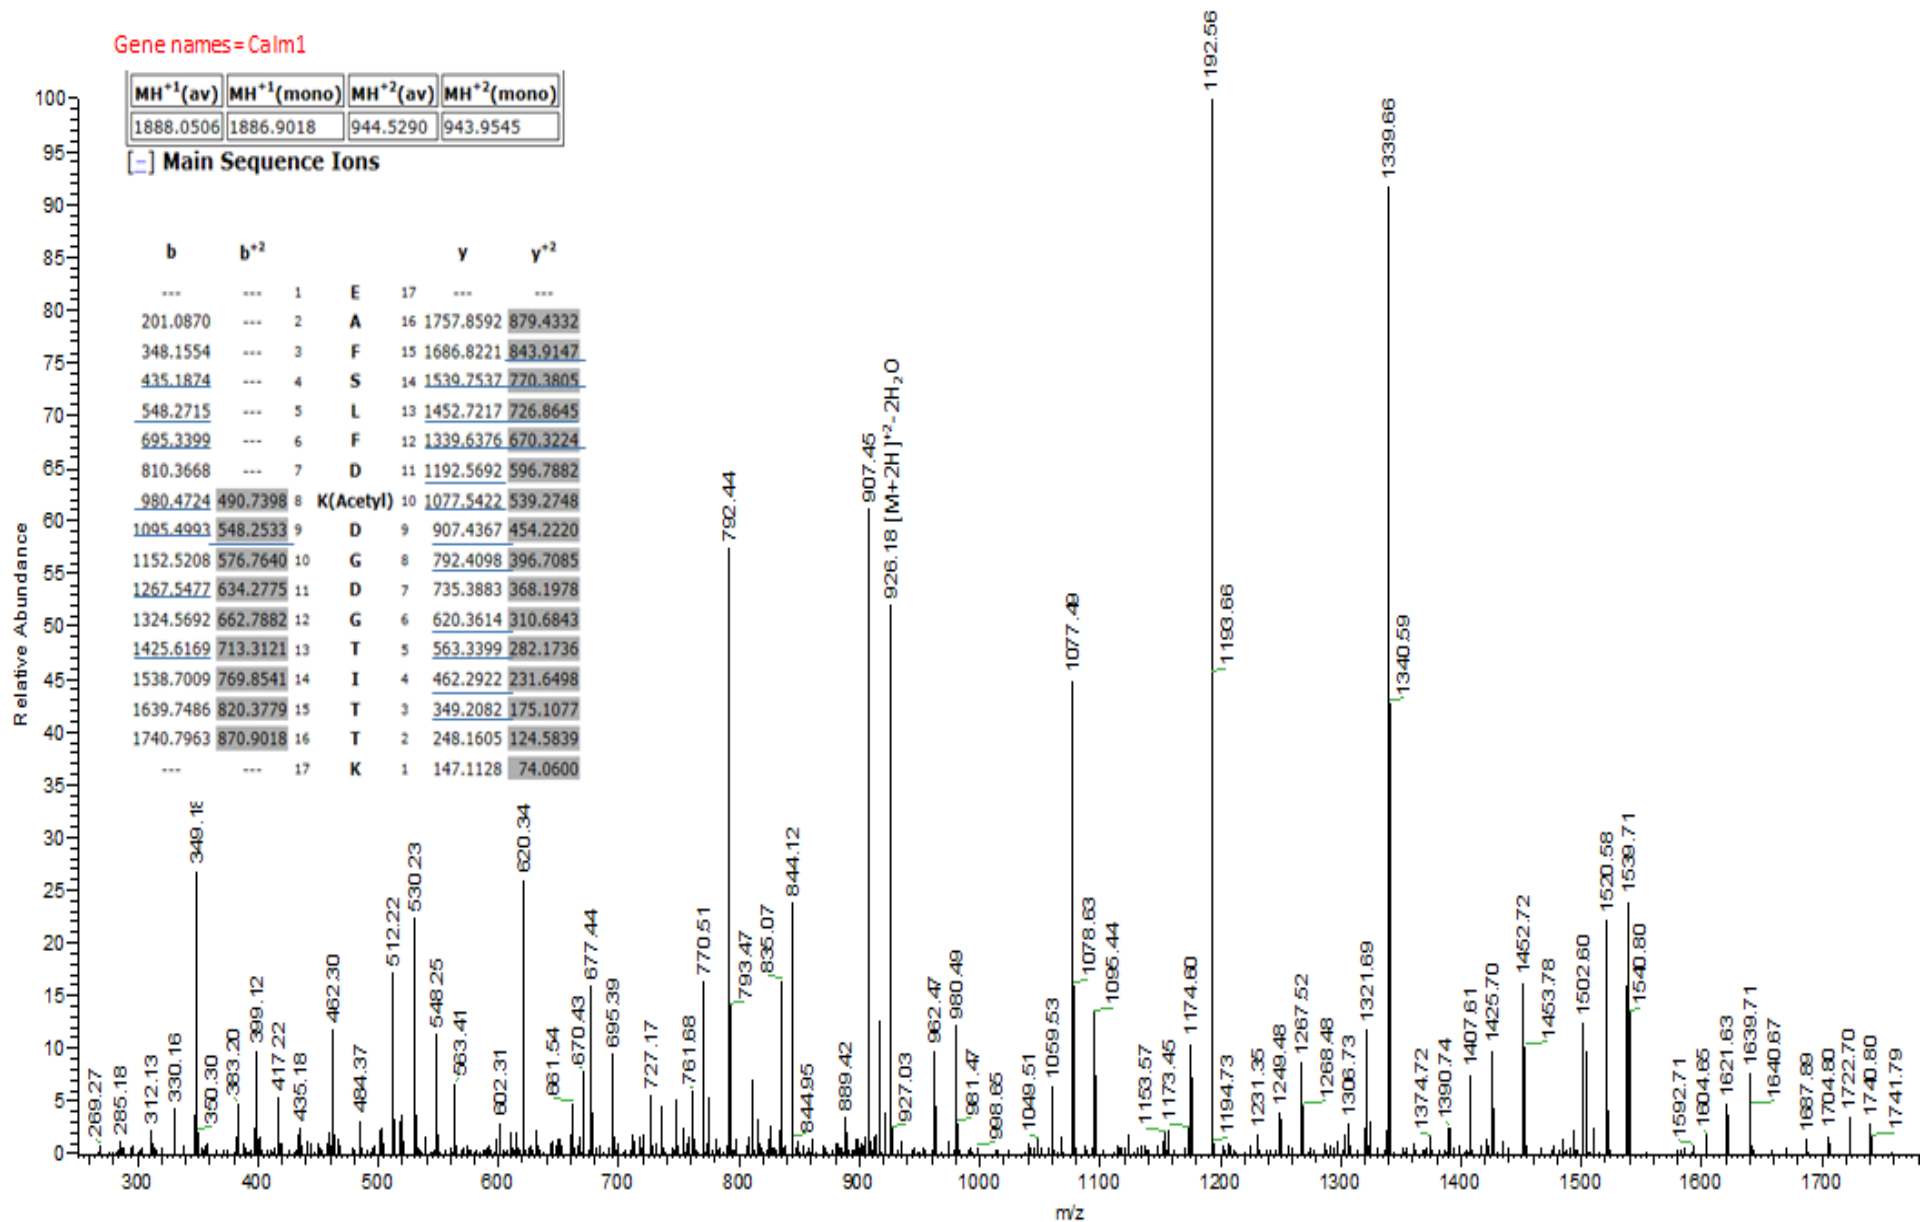

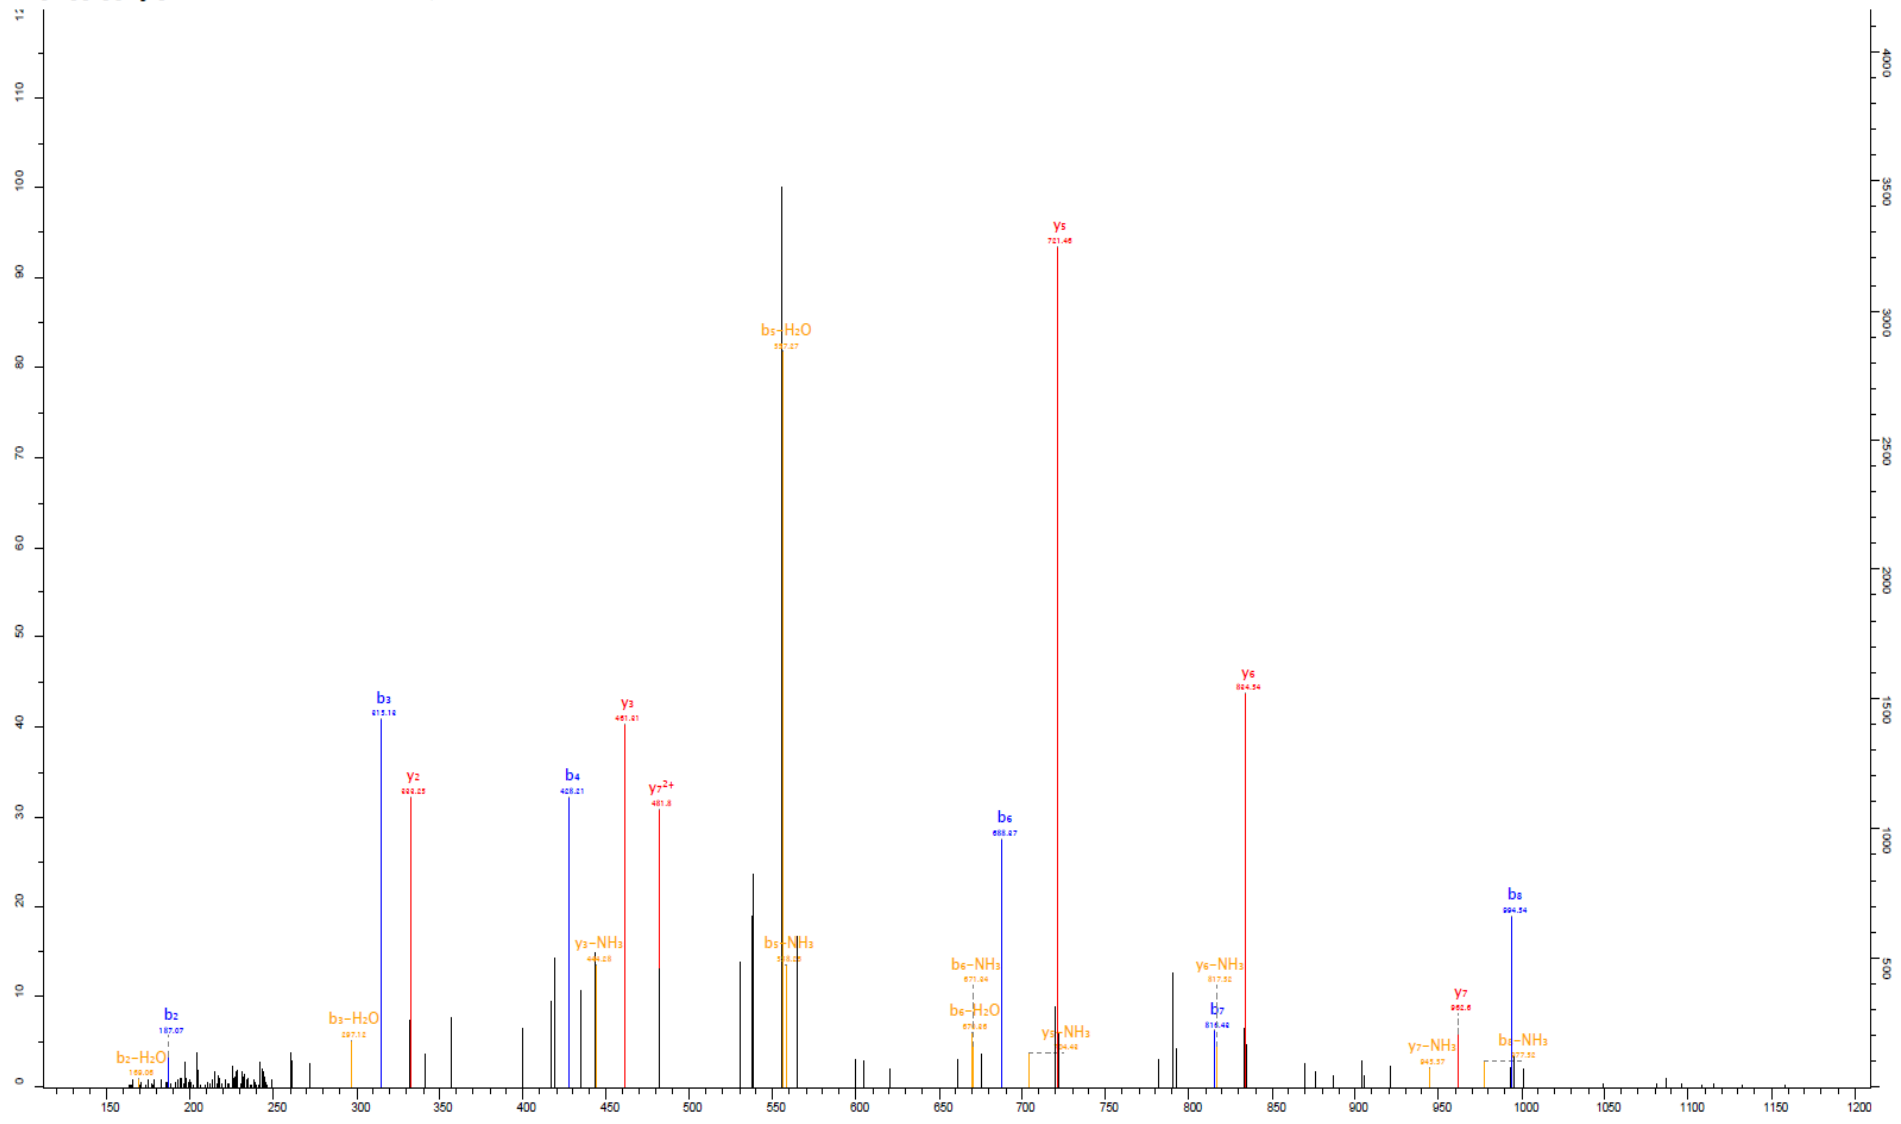

- D A Q L F I Q K K -  
 b2 b3 b4 b5 b6 b7 b8

|                           |                             |                            |                              |
|---------------------------|-----------------------------|----------------------------|------------------------------|
| <b>MH<sup>+</sup>(av)</b> | <b>MH<sup>+</sup>(mono)</b> | <b>MH<sup>2+</sup>(av)</b> | <b>MH<sup>2+</sup>(mono)</b> |
| 1149.3424                 | 1148.6645                   | 575.1749                   | 574.8359                     |

**[-] Main Sequence Ions**

| <b>b</b>        | <b>b<sup>2+</sup></b> |   | <b>y</b>          | <b>y<sup>2+</sup></b> |                                 |
|-----------------|-----------------------|---|-------------------|-----------------------|---------------------------------|
| ---             | ---                   | 1 | <b>D</b>          | 9                     | ---                             |
| <u>187.0713</u> | ---                   | 2 | <b>A</b>          | 8                     | 1033.6376 <b>517.3224</b>       |
| 315.1299        | ---                   | 3 | <b>Q</b>          | 7                     | 962.6005 <b>481.8039</b>        |
| <u>428.2140</u> | ---                   | 4 | <b>L</b>          | 6                     | <u>834.5419</u> <b>417.7746</b> |
| 575.2824        | ---                   | 5 | <b>F</b>          | 5                     | <u>721.4578</u> <b>361.2325</b> |
| <u>688.3665</u> | ---                   | 6 | <b>I</b>          | 4                     | <u>574.3894</u> <b>287.6983</b> |
| <u>816.4250</u> | ---                   | 7 | <b>Q</b>          | 3                     | <u>461.3053</u> <b>231.1563</b> |
| <u>994.5448</u> | <b>497.7760</b>       | 8 | <b>K(50.0248)</b> | 2                     | <u>333.2468</u> <b>167.1270</b> |
| ---             | ---                   | 9 | <b>K(8.0142)</b>  | 1                     | <u>155.1270</u> <b>78.0671</b>  |

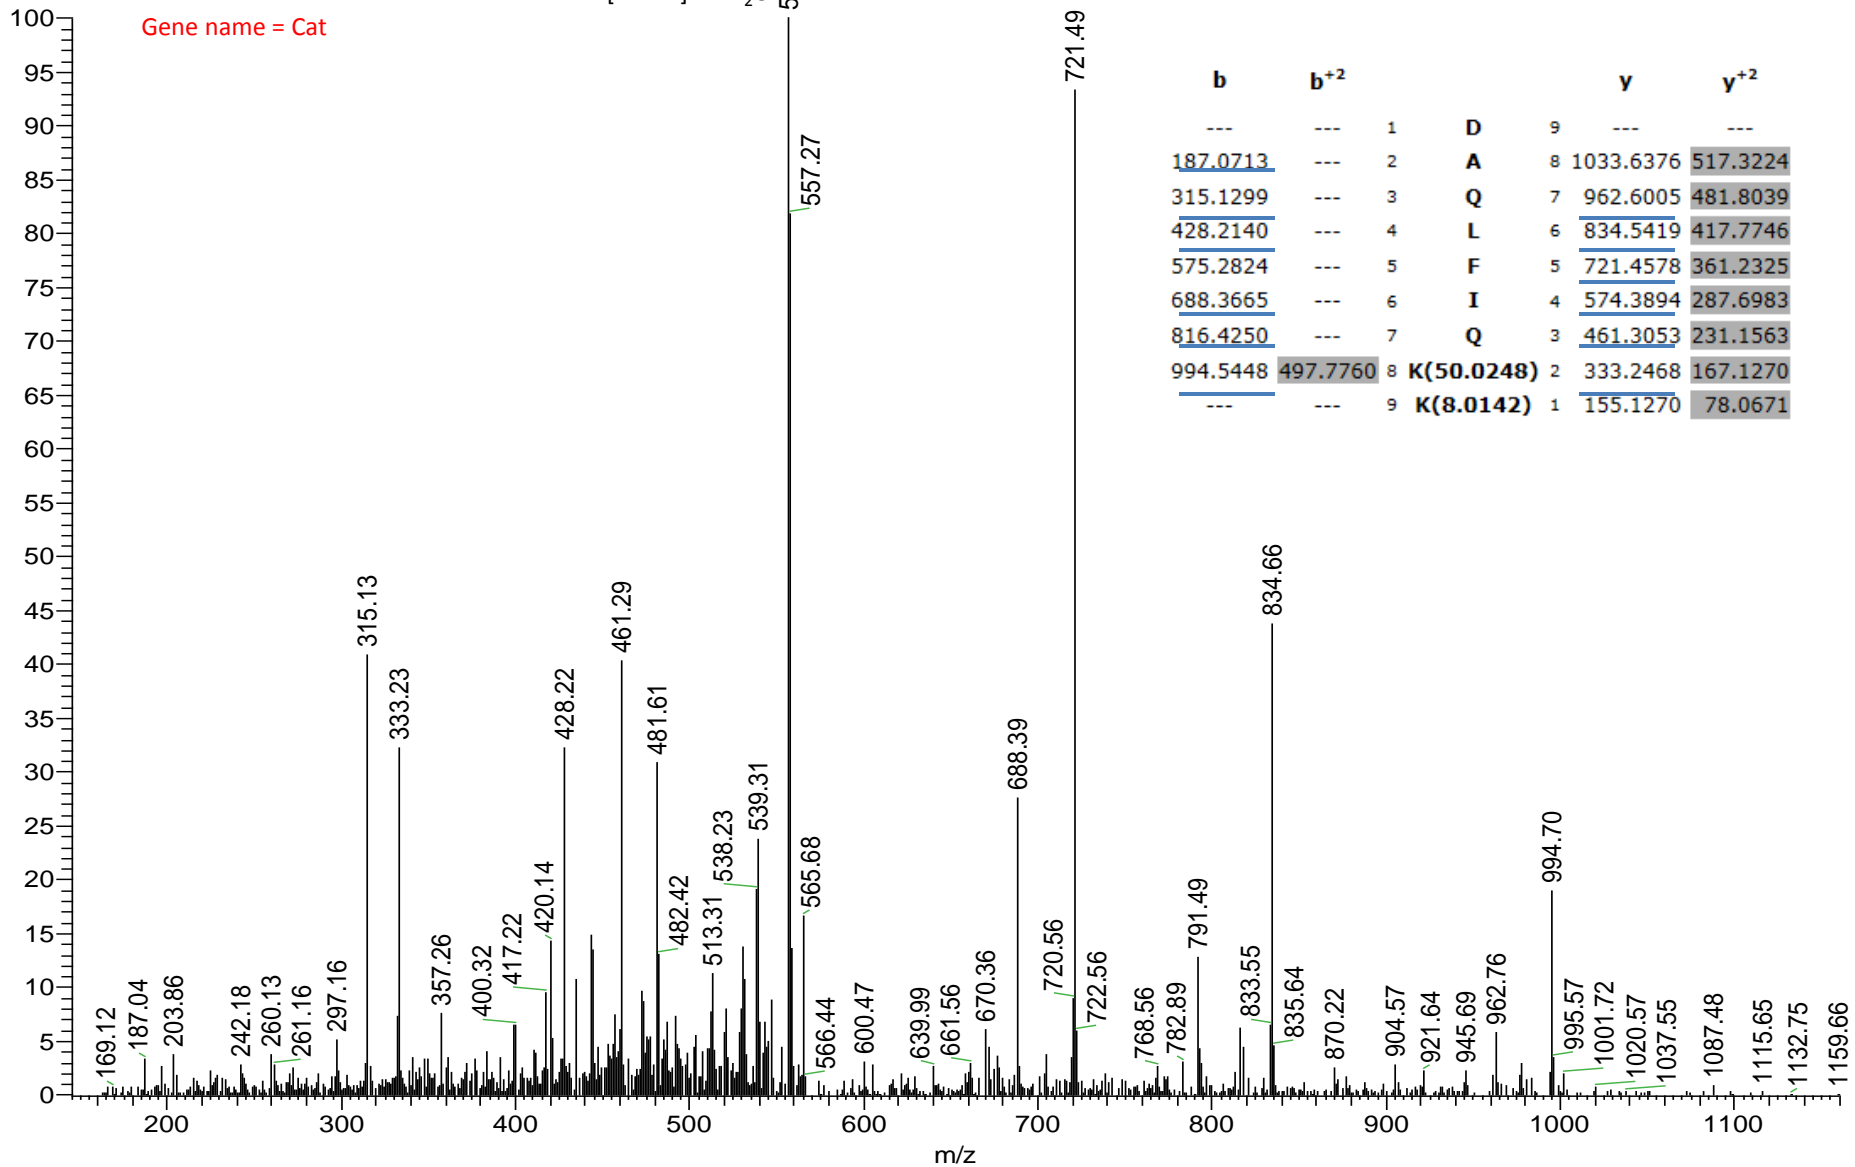



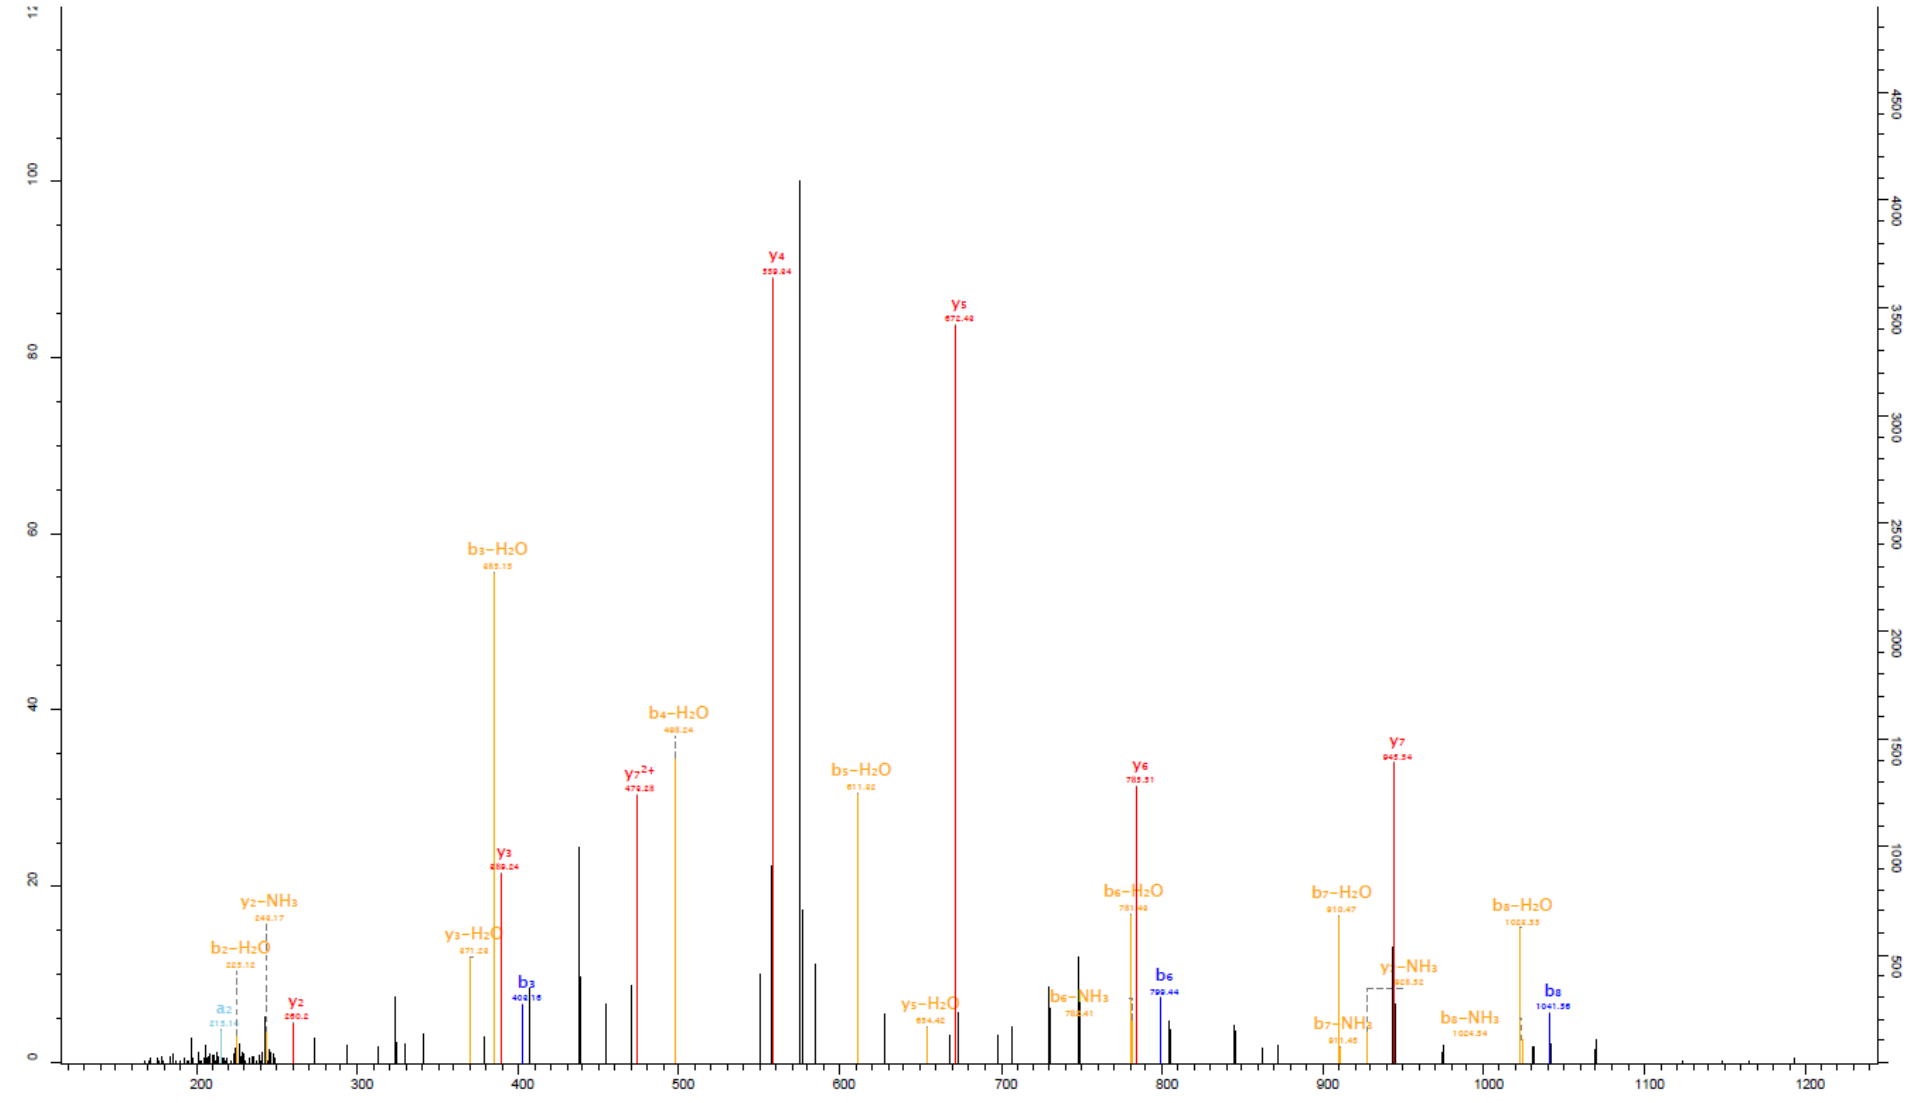

- E I C L L K E L K -  
 a2 b3 b4 b5 b6 b7 b8

Gene names = Cdk5

$[M+2H]^{+2}-2H_2O$

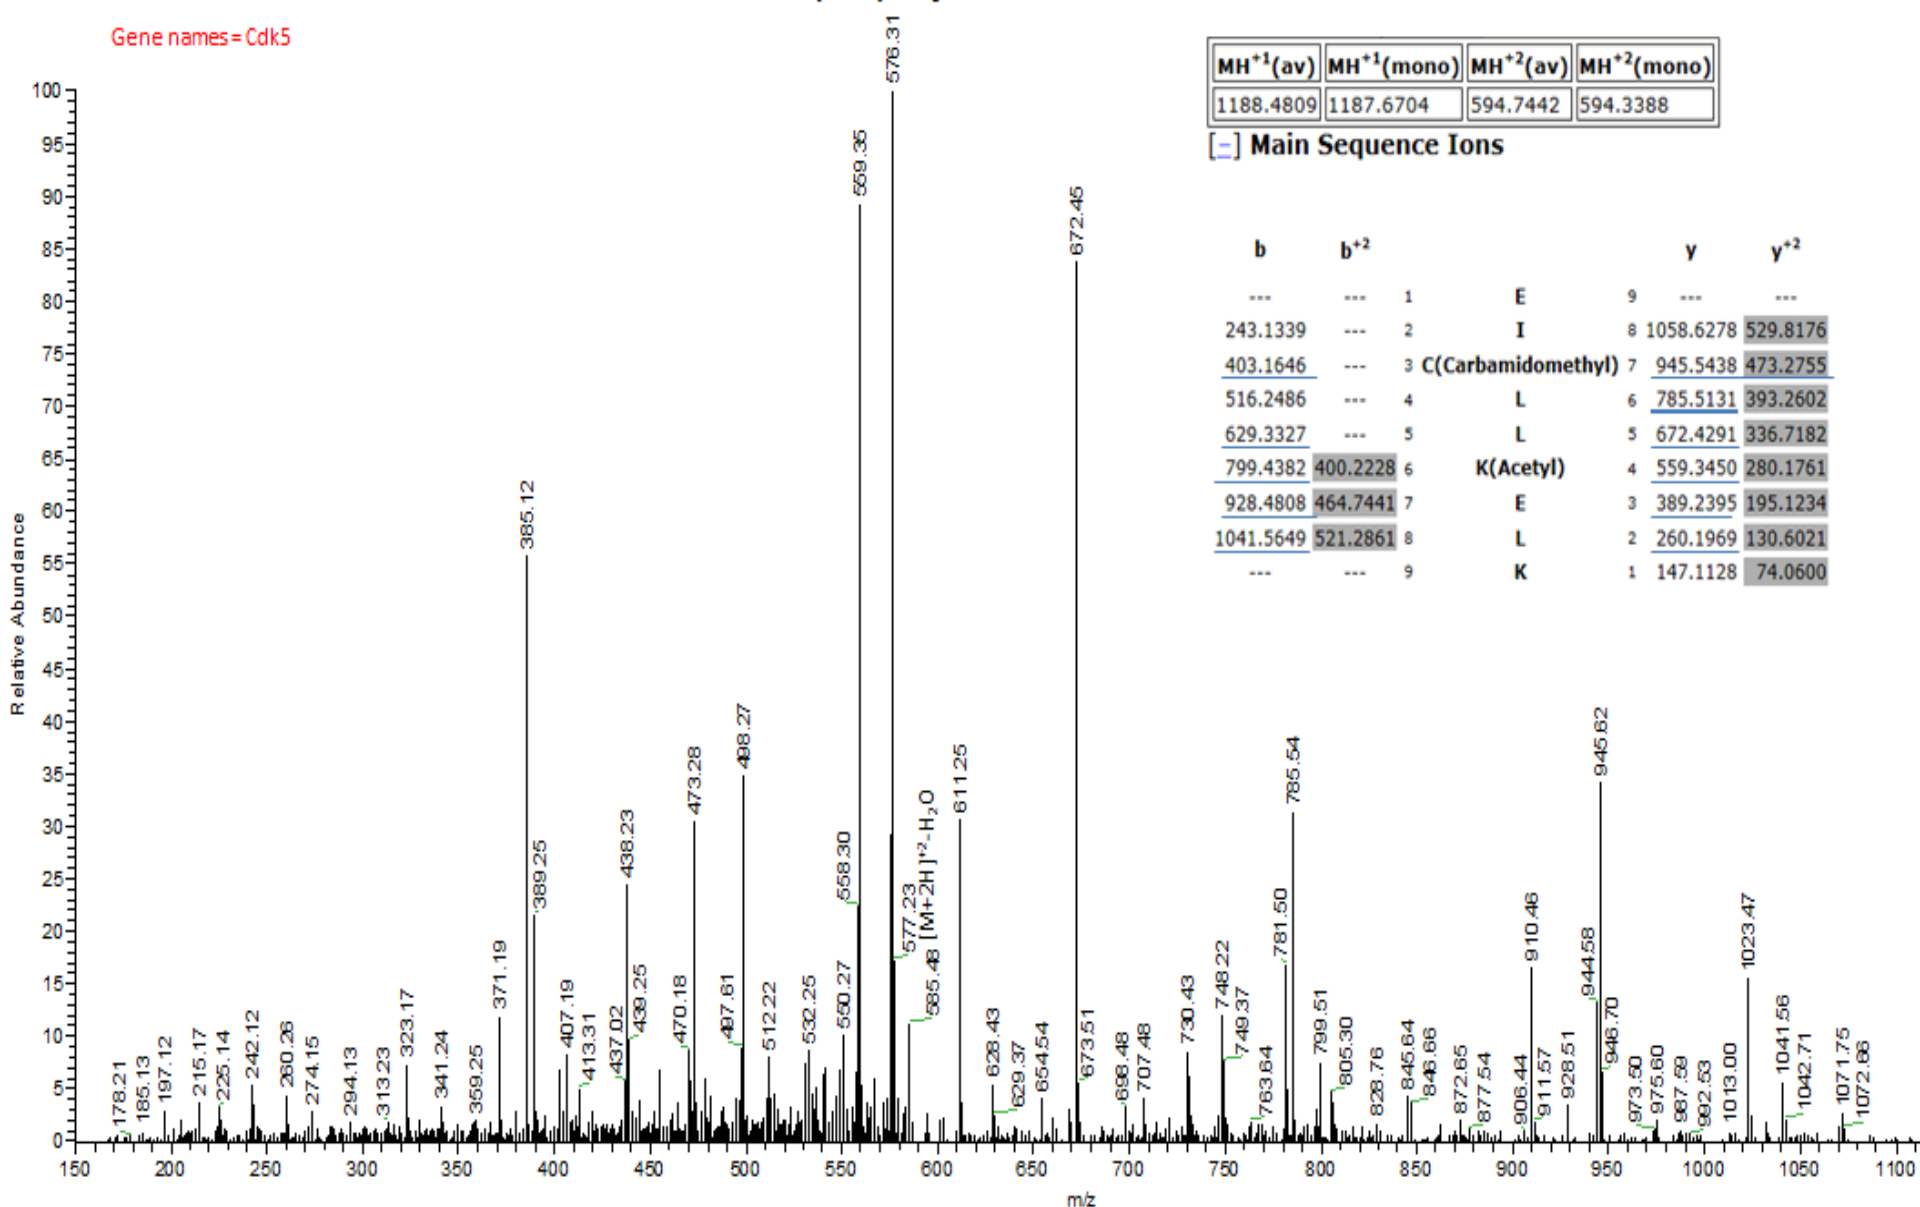

| MH <sup>+1</sup> (av) | MH <sup>+1</sup> (mono) | MH <sup>+2</sup> (av) | MH <sup>+2</sup> (mono) |
|-----------------------|-------------------------|-----------------------|-------------------------|
| 1188.4809             | 1187.6704               | 594.7442              | 594.3388                |

**[-] Main Sequence Ions**

| b         | b <sup>+2</sup> |   | y                  | y <sup>+2</sup> |           |
|-----------|-----------------|---|--------------------|-----------------|-----------|
| ---       | ---             | 1 | E                  | 9               | ---       |
| 243.1339  | ---             | 2 | I                  | 8               | 1058.6278 |
| 403.1646  | ---             | 3 | C(Carbamidomethyl) | 7               | 945.5438  |
| 516.2486  | ---             | 4 | L                  | 6               | 785.5131  |
| 629.3327  | ---             | 5 | L                  | 5               | 672.4291  |
| 799.4382  | 400.2228        | 6 | K(Acetyl)          | 4               | 559.3450  |
| 928.4808  | 464.7441        | 7 | E                  | 3               | 389.2395  |
| 1041.5649 | 521.2861        | 8 | L                  | 2               | 260.1969  |
| ---       | ---             | 9 | K                  | 1               | 147.1128  |

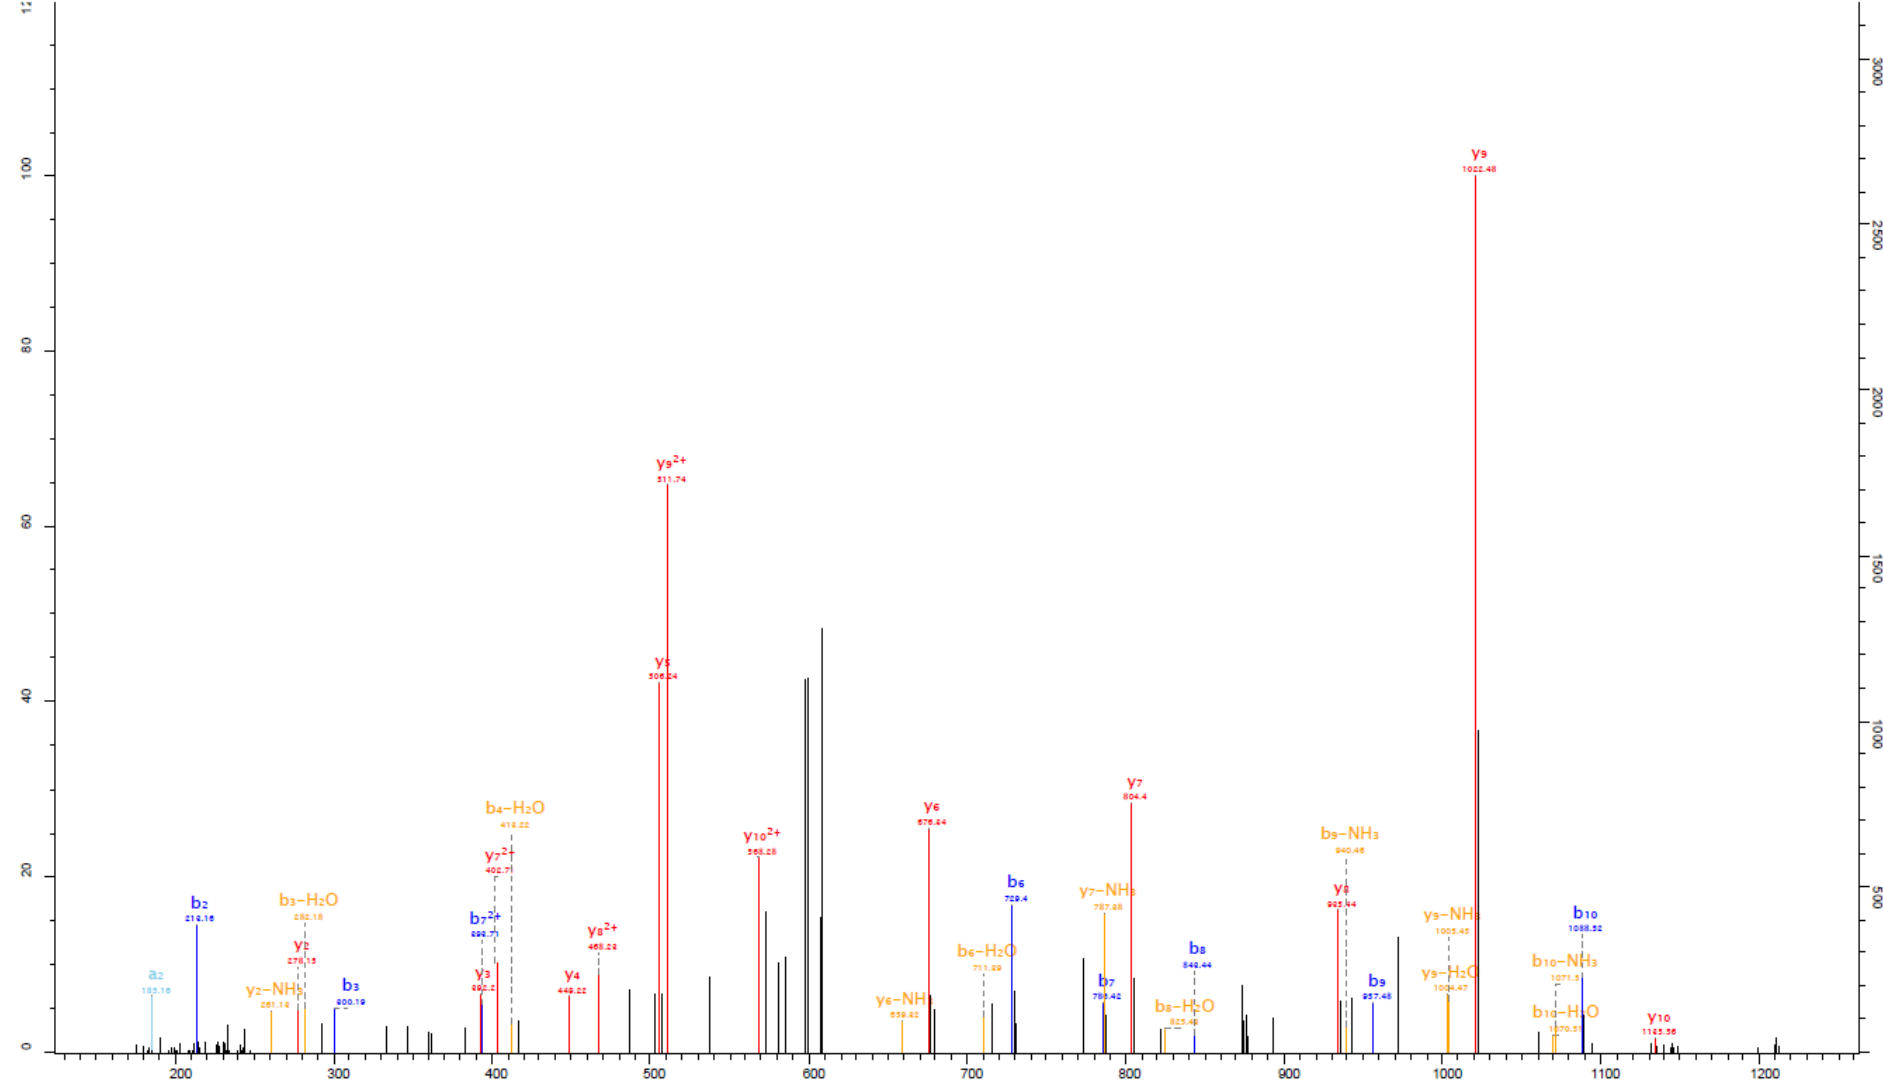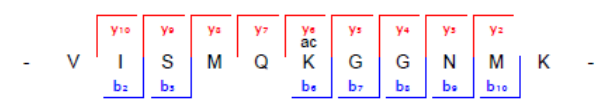

Gene name = Ckb

| MH <sup>+</sup> 1(av) | MH <sup>+</sup> 1(mono) | MH <sup>+</sup> 2(av) | MH <sup>+</sup> 2(mono) |
|-----------------------|-------------------------|-----------------------|-------------------------|
| 1235.5193             | 1234.6282               | 618.2634              | 617.8178                |

**[-] Main Sequence Ions**

| b         | b <sup>+</sup> |    | y         | y <sup>+</sup> |                    |
|-----------|----------------|----|-----------|----------------|--------------------|
| ---       | ---            | 1  | V         | 11             | ---                |
| 213.1598  | ---            | 2  | I         | 10             | 1135.5598 568.2836 |
| 300.1918  | ---            | 3  | S         | 9              | 1022.4758 511.7415 |
| 431.2323  | ---            | 4  | M         | 8              | 935.4432 468.2255  |
| 559.2908  | ---            | 5  | Q         | 7              | 804.4032 402.7053  |
| 729.3964  | 365.2018       | 6  | K(Acetyl) | 6              | 676.3447 338.6760  |
| 786.4178  | 393.7126       | 7  | G         | 5              | 506.2391 253.6232  |
| 843.4393  | 422.2233       | 8  | G         | 4              | 449.2177 225.1125  |
| 957.4822  | 479.2448       | 9  | N         | 3              | 392.1962 196.6017  |
| 1088.5227 | 544.7650       | 10 | M         | 2              | 278.1533 139.5803  |
| ---       | ---            | 11 | K         | 1              | 147.1128 74.0600   |

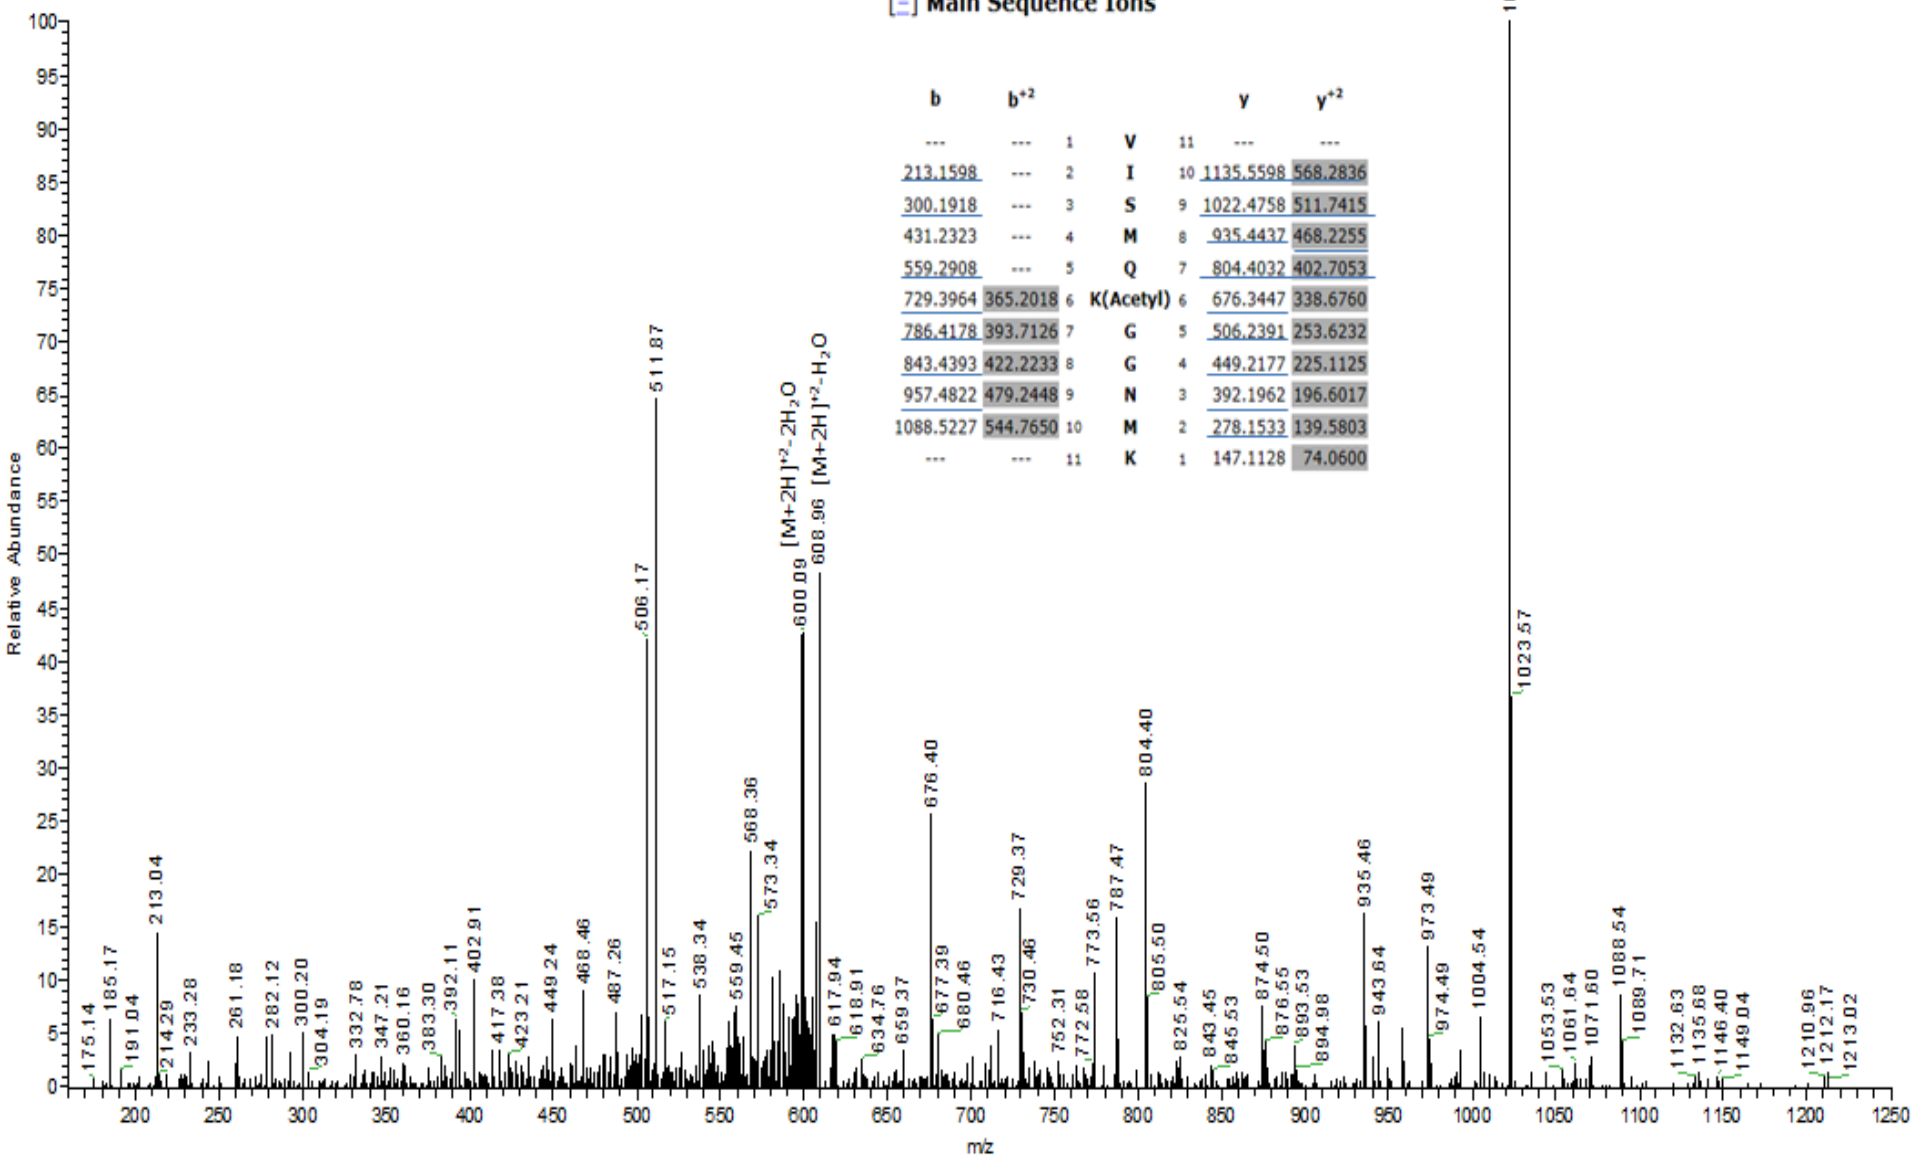

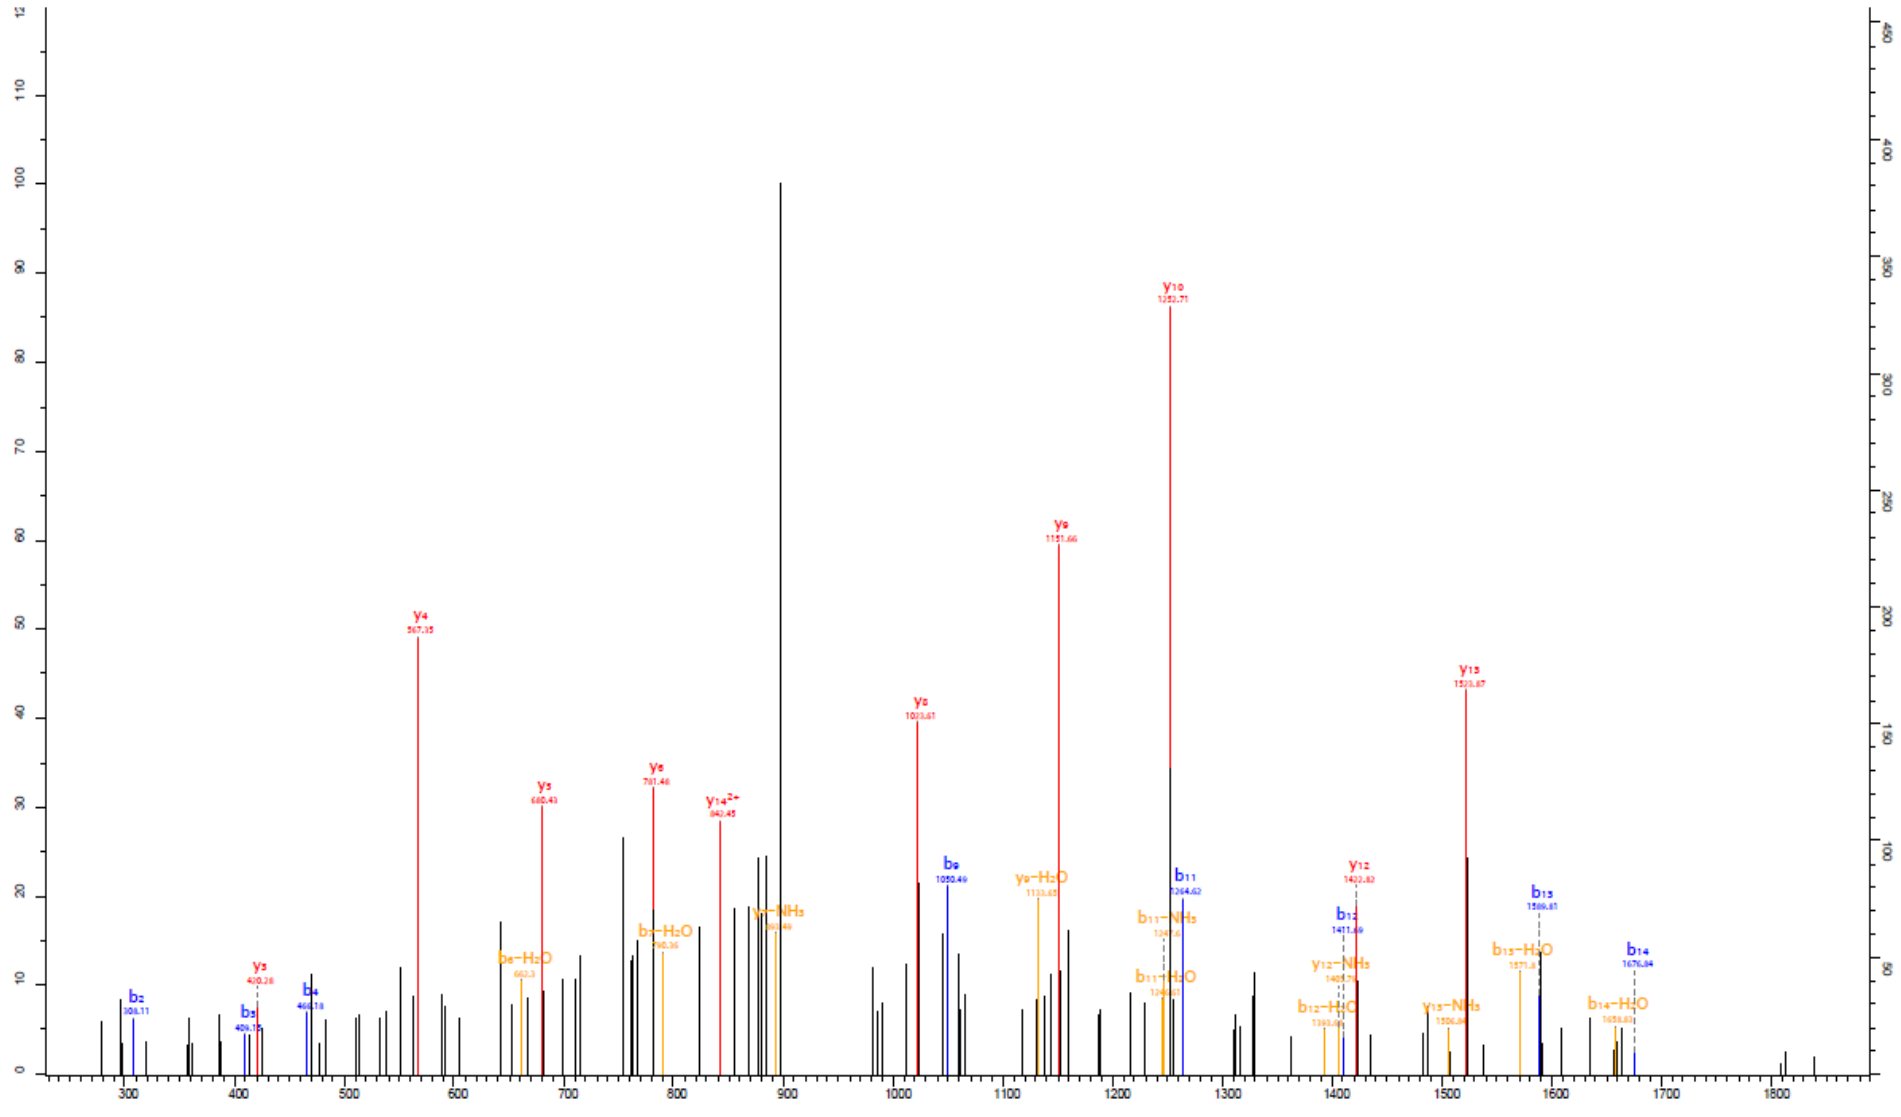

- F C T G L T Q I E T L F K S K -  
 [y14 2+] [y15] [y12] [y10] [y9] [y8] [y6] [y5] [y4] [y1 ac] [b2] [b3] [b4] [b9] [b11] [b12] [b13] [b14]

|                            |                              |                            |                              |
|----------------------------|------------------------------|----------------------------|------------------------------|
| <b>MH<sup>+1</sup>(av)</b> | <b>MH<sup>+1</sup>(mono)</b> | <b>MH<sup>+2</sup>(av)</b> | <b>MH<sup>+2</sup>(mono)</b> |
| 1832.1410                  | 1830.9641                    | 916.5742                   | 915.9857                     |

**[-] Main Sequence Ions**

|  | <b>b</b>         | <b>b<sup>+2</sup></b> |    | <b>y</b>                  | <b>y<sup>+2</sup></b> |                                  |
|--|------------------|-----------------------|----|---------------------------|-----------------------|----------------------------------|
|  | ---              | ---                   | 1  | F                         | 15                    | ---                              |
|  | <u>308.1063</u>  | ---                   | 2  | <b>C(Carbamidomethyl)</b> | 14                    | <u>1683.8957</u> <u>842.4515</u> |
|  | 409.1540         | ---                   | 3  | T                         | 13                    | <u>1523.8651</u> <u>762.4362</u> |
|  | <u>466.1755</u>  | ---                   | 4  | G                         | 12                    | <u>1422.8174</u> <u>711.9123</u> |
|  | 579.2595         | ---                   | 5  | L                         | 11                    | 1365.7959 <u>683.4016</u>        |
|  | <u>680.3072</u>  | ---                   | 6  | T                         | 10                    | <u>1252.7119</u> <u>626.8596</u> |
|  | 808.3658         | ---                   | 7  | Q                         | 9                     | <u>1151.6642</u> <u>576.3357</u> |
|  | 921.4499         | ---                   | 8  | I                         | 8                     | <u>1023.6056</u> <u>512.3064</u> |
|  | <u>1050.4925</u> | ---                   | 9  | E                         | 7                     | 910.5215 <u>455.7644</u>         |
|  | <u>1151.5401</u> | ---                   | 10 | T                         | 6                     | <u>781.4790</u> <u>391.2431</u>  |
|  | <u>1264.6242</u> | ---                   | 11 | L                         | 5                     | <u>680.4313</u> <u>340.7193</u>  |
|  | 1411.6926        | ---                   | 12 | F                         | 4                     | <u>567.3472</u> <u>284.1772</u>  |
|  | <u>1589.8124</u> | <u>795.4098</u>       | 13 | <b>K(50.0248)</b>         | 3                     | <u>420.2788</u> <u>210.6430</u>  |
|  | <u>1676.8444</u> | <u>838.9258</u>       | 14 | <b>S</b>                  | 2                     | 242.1590 <u>121.5832</u>         |
|  | ---              | ---                   | 15 | <b>K(8.0142)</b>          | 1                     | 155.1270 <u>78.0671</u>          |

Gene name = Ckb

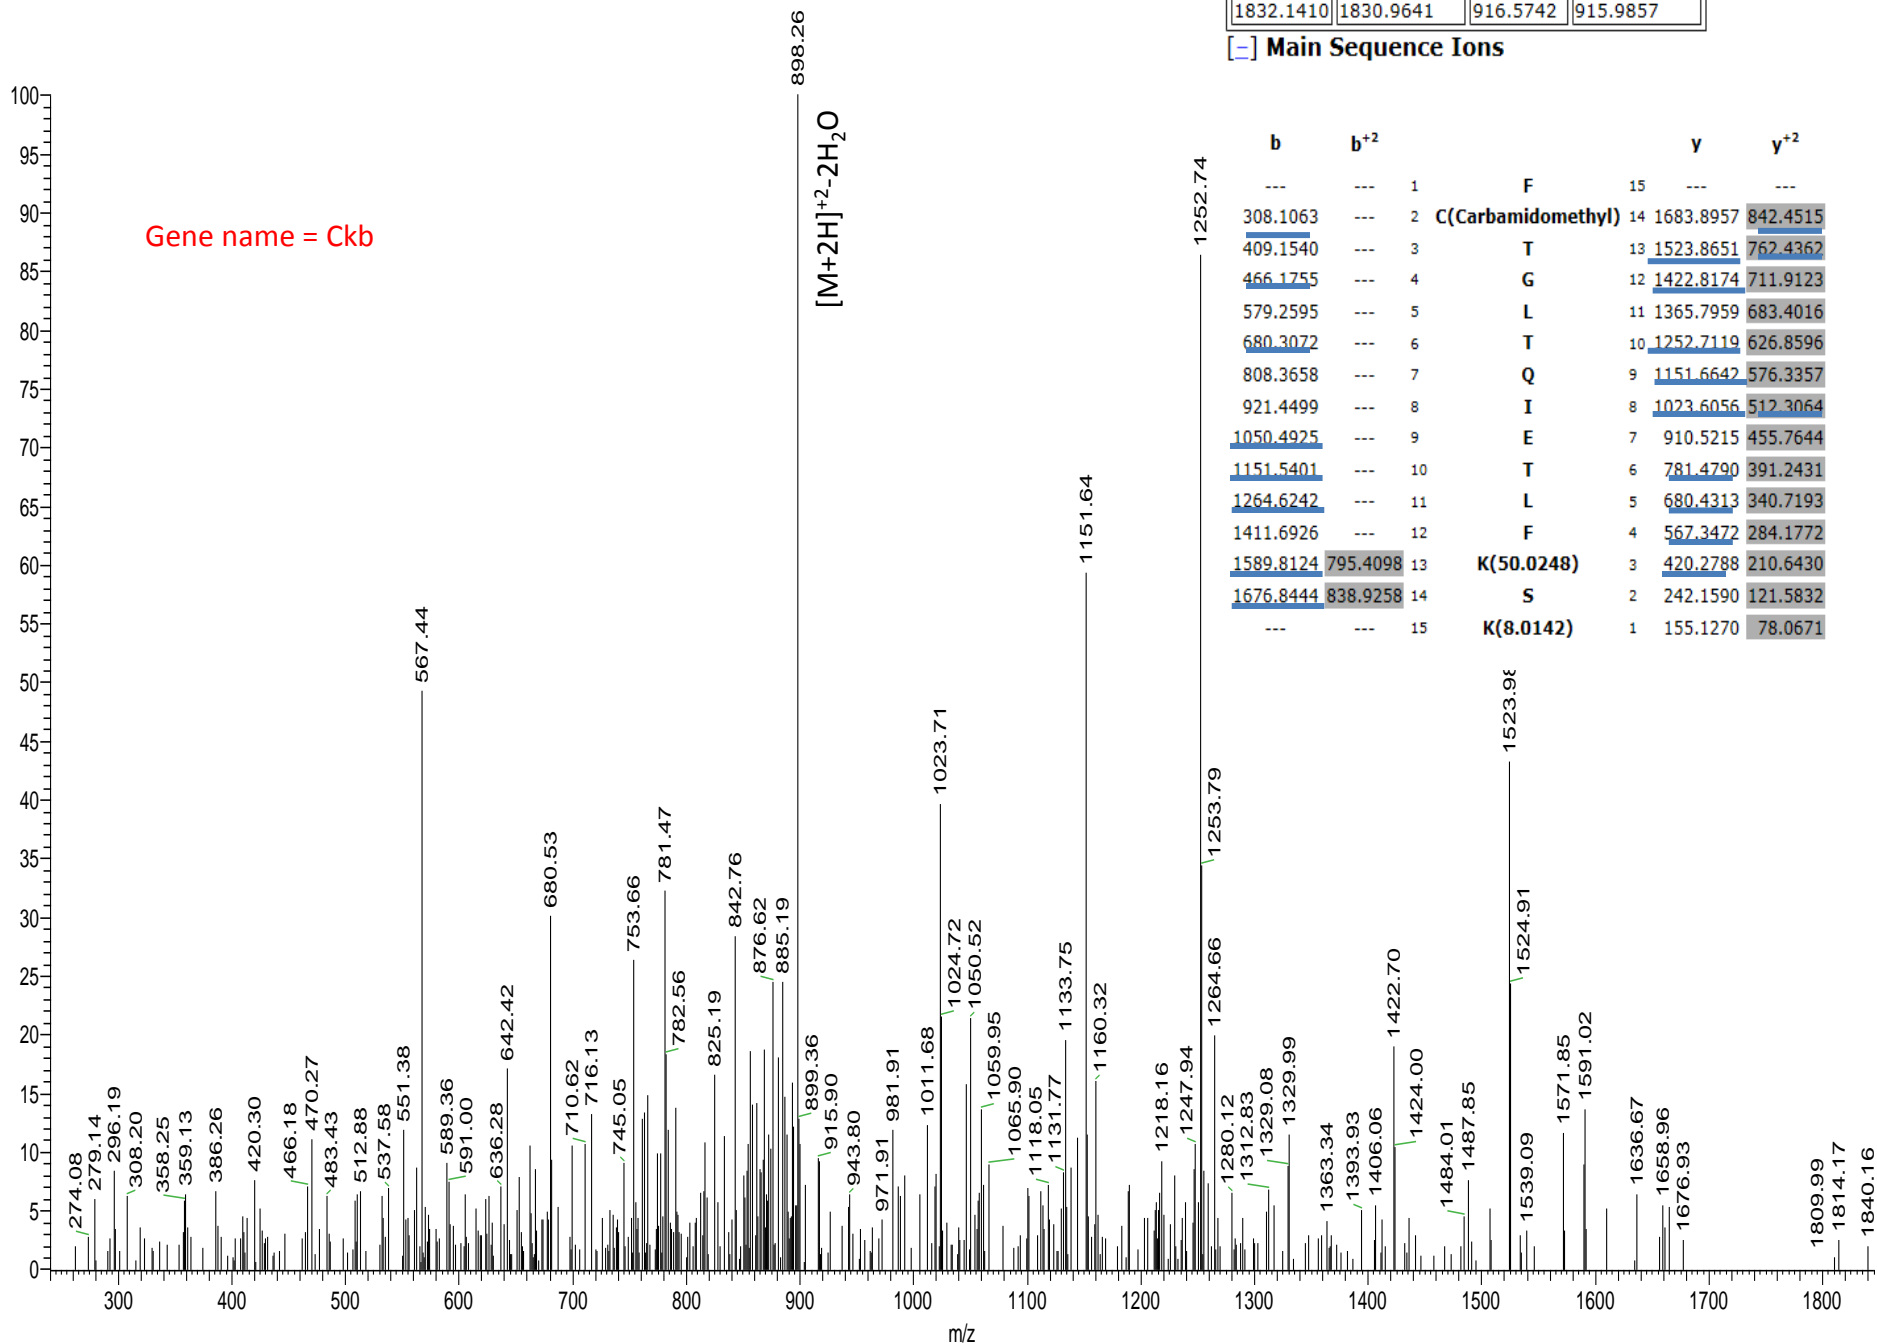

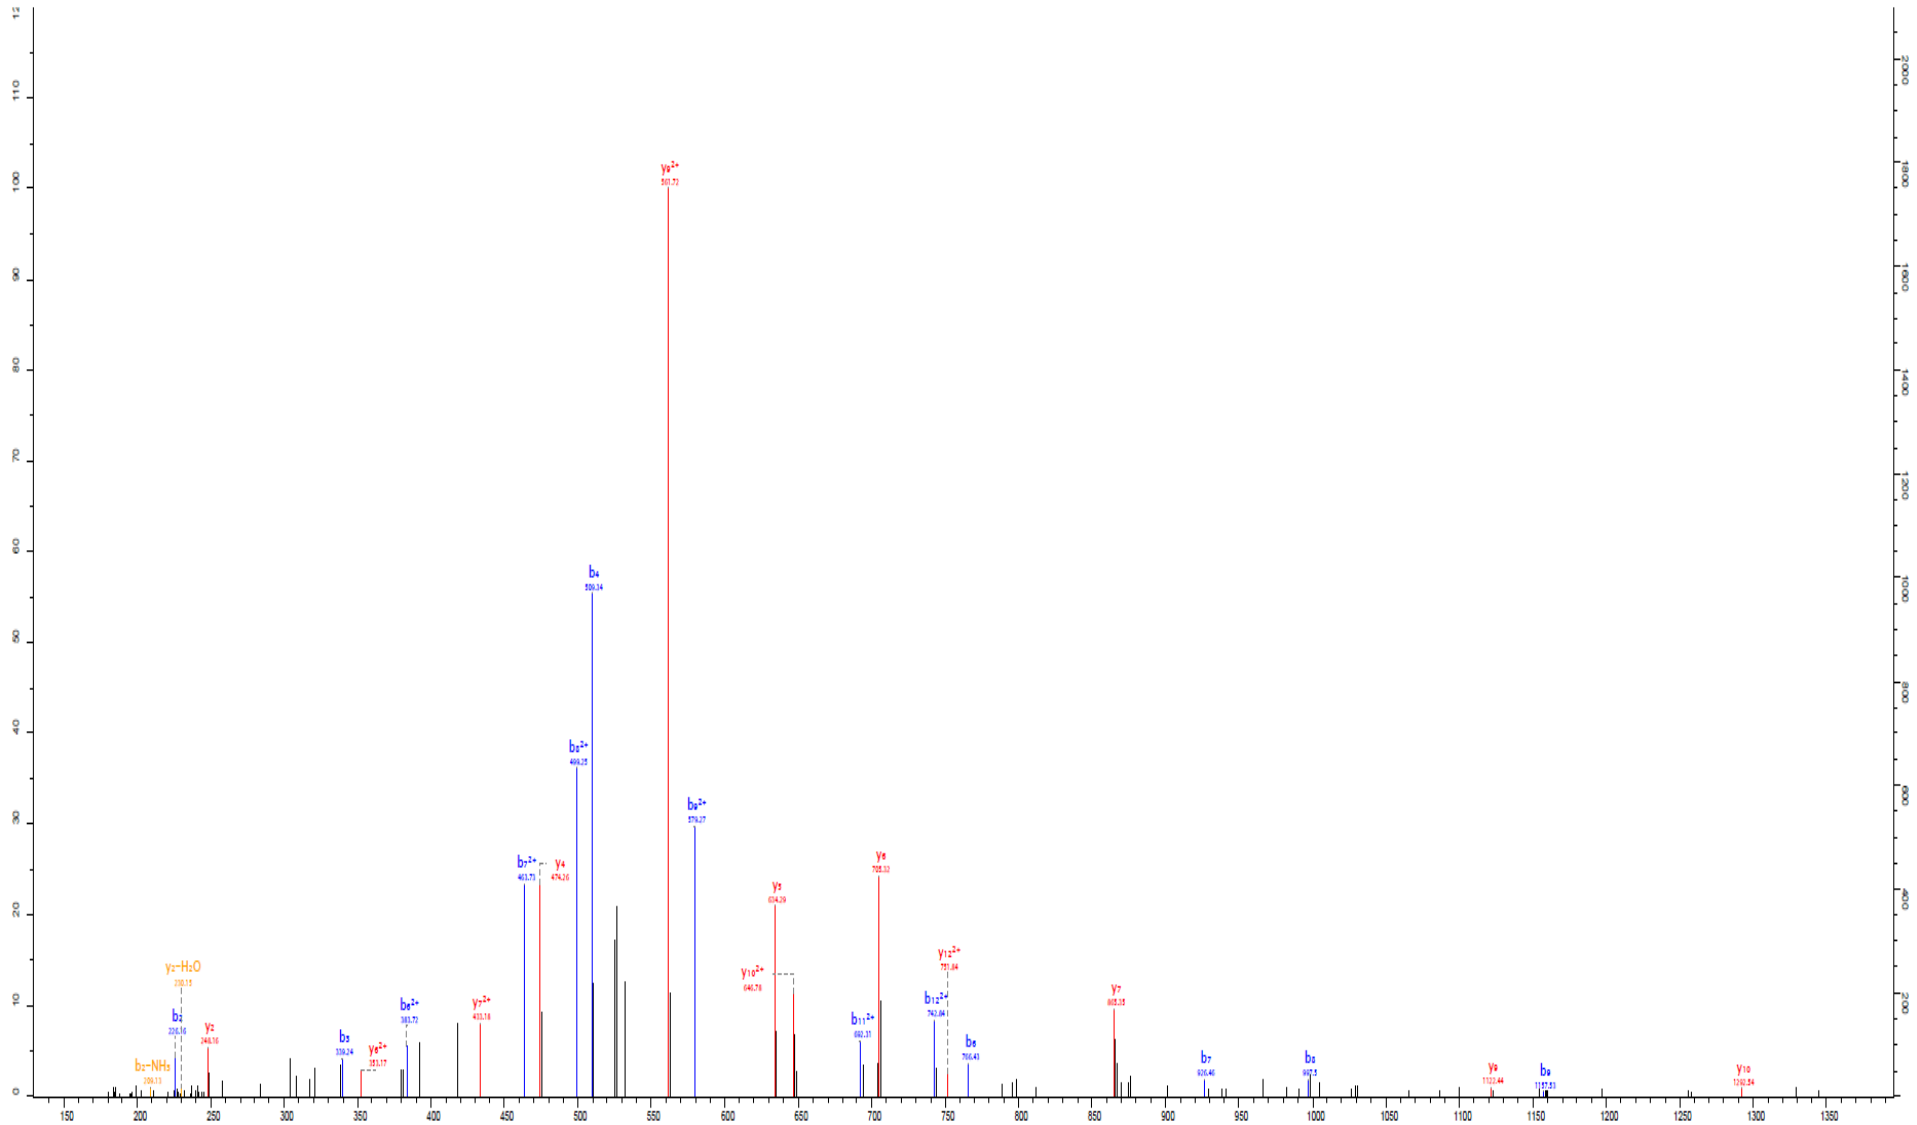

- K y<sub>12</sub><sup>+</sup> P L K P C C A C P E T K -

b<sub>2</sub> b<sub>3</sub> b<sub>4</sub> b<sub>5</sub> b<sub>6</sub> b<sub>7</sub> b<sub>8</sub> b<sub>11</sub><sup>+</sup> b<sub>12</sub><sup>+</sup>

Gene name = Cox17

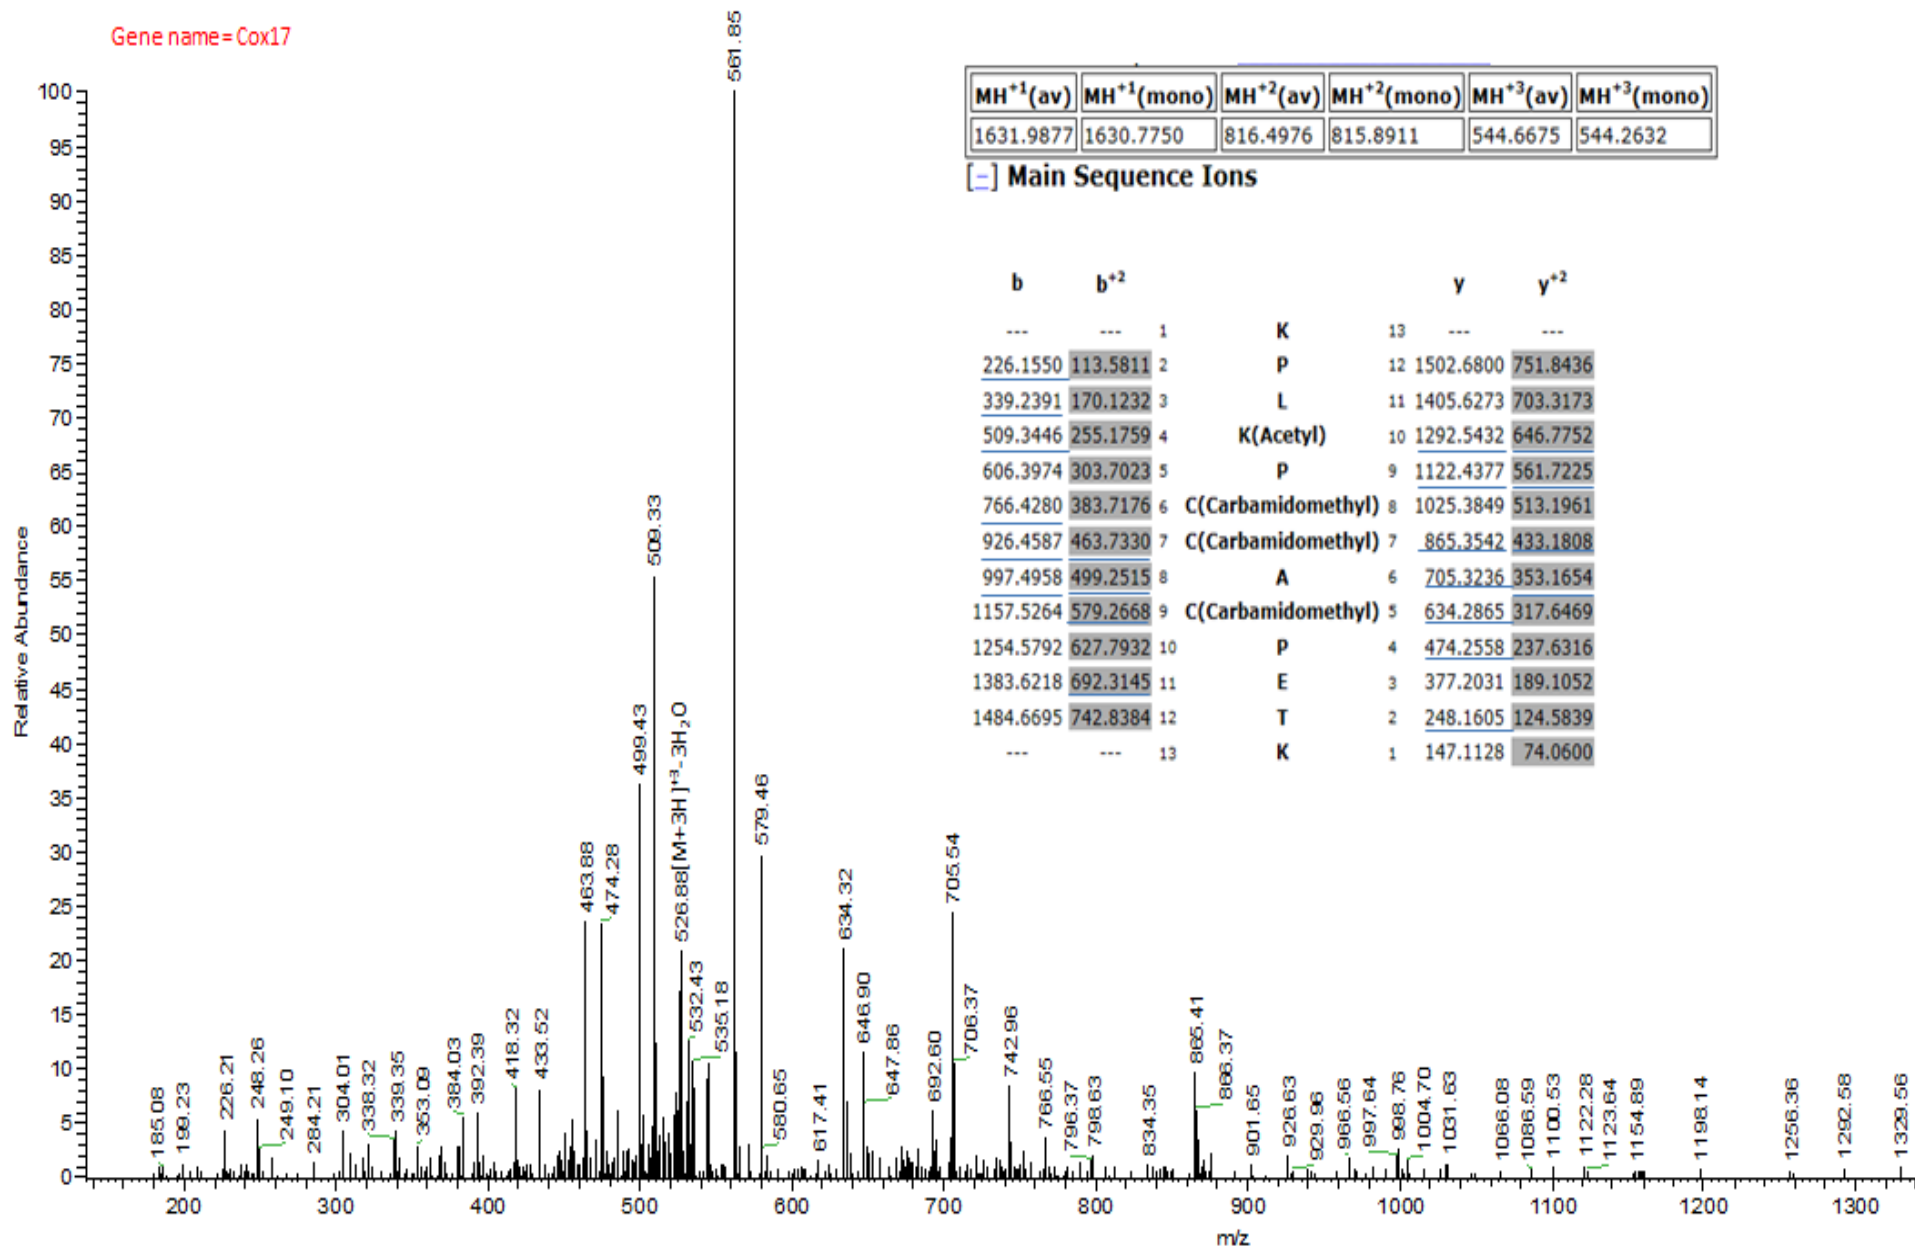

| MH <sup>+1</sup> (av) | MH <sup>+1</sup> (mono) | MH <sup>+2</sup> (av) | MH <sup>+2</sup> (mono) | MH <sup>+3</sup> (av) | MH <sup>+3</sup> (mono) |
|-----------------------|-------------------------|-----------------------|-------------------------|-----------------------|-------------------------|
| 1631.9877             | 1630.7750               | 816.4976              | 815.8911                | 544.6675              | 544.2632                |

**[-] Main Sequence Ions**

| b         | b <sup>+2</sup> |    | y                  | y <sup>+2</sup> |                    |
|-----------|-----------------|----|--------------------|-----------------|--------------------|
| ---       | ---             | 1  | K                  | 13              | ---                |
| 226.1550  | 113.5811        | 2  | P                  | 12              | 1502.6800 751.8436 |
| 339.2391  | 170.1232        | 3  | L                  | 11              | 1405.6273 703.3173 |
| 509.3446  | 255.1759        | 4  | K(Acetyl)          | 10              | 1292.5432 646.7752 |
| 606.3974  | 303.7023        | 5  | P                  | 9               | 1122.4377 561.7225 |
| 766.4280  | 383.7176        | 6  | C(Carbamidomethyl) | 8               | 1025.3849 513.1961 |
| 926.4587  | 463.7330        | 7  | C(Carbamidomethyl) | 7               | 865.3542 433.1808  |
| 997.4958  | 499.2515        | 8  | A                  | 6               | 705.3236 353.1654  |
| 1157.5264 | 579.2668        | 9  | C(Carbamidomethyl) | 5               | 634.2865 317.6469  |
| 1254.5792 | 627.7932        | 10 | P                  | 4               | 474.2558 237.6316  |
| 1383.6218 | 692.3145        | 11 | E                  | 3               | 377.2031 189.1052  |
| 1484.6695 | 742.8384        | 12 | T                  | 2               | 248.1605 124.5839  |
| ---       | ---             | 13 | K                  | 1               | 147.1128 74.0600   |



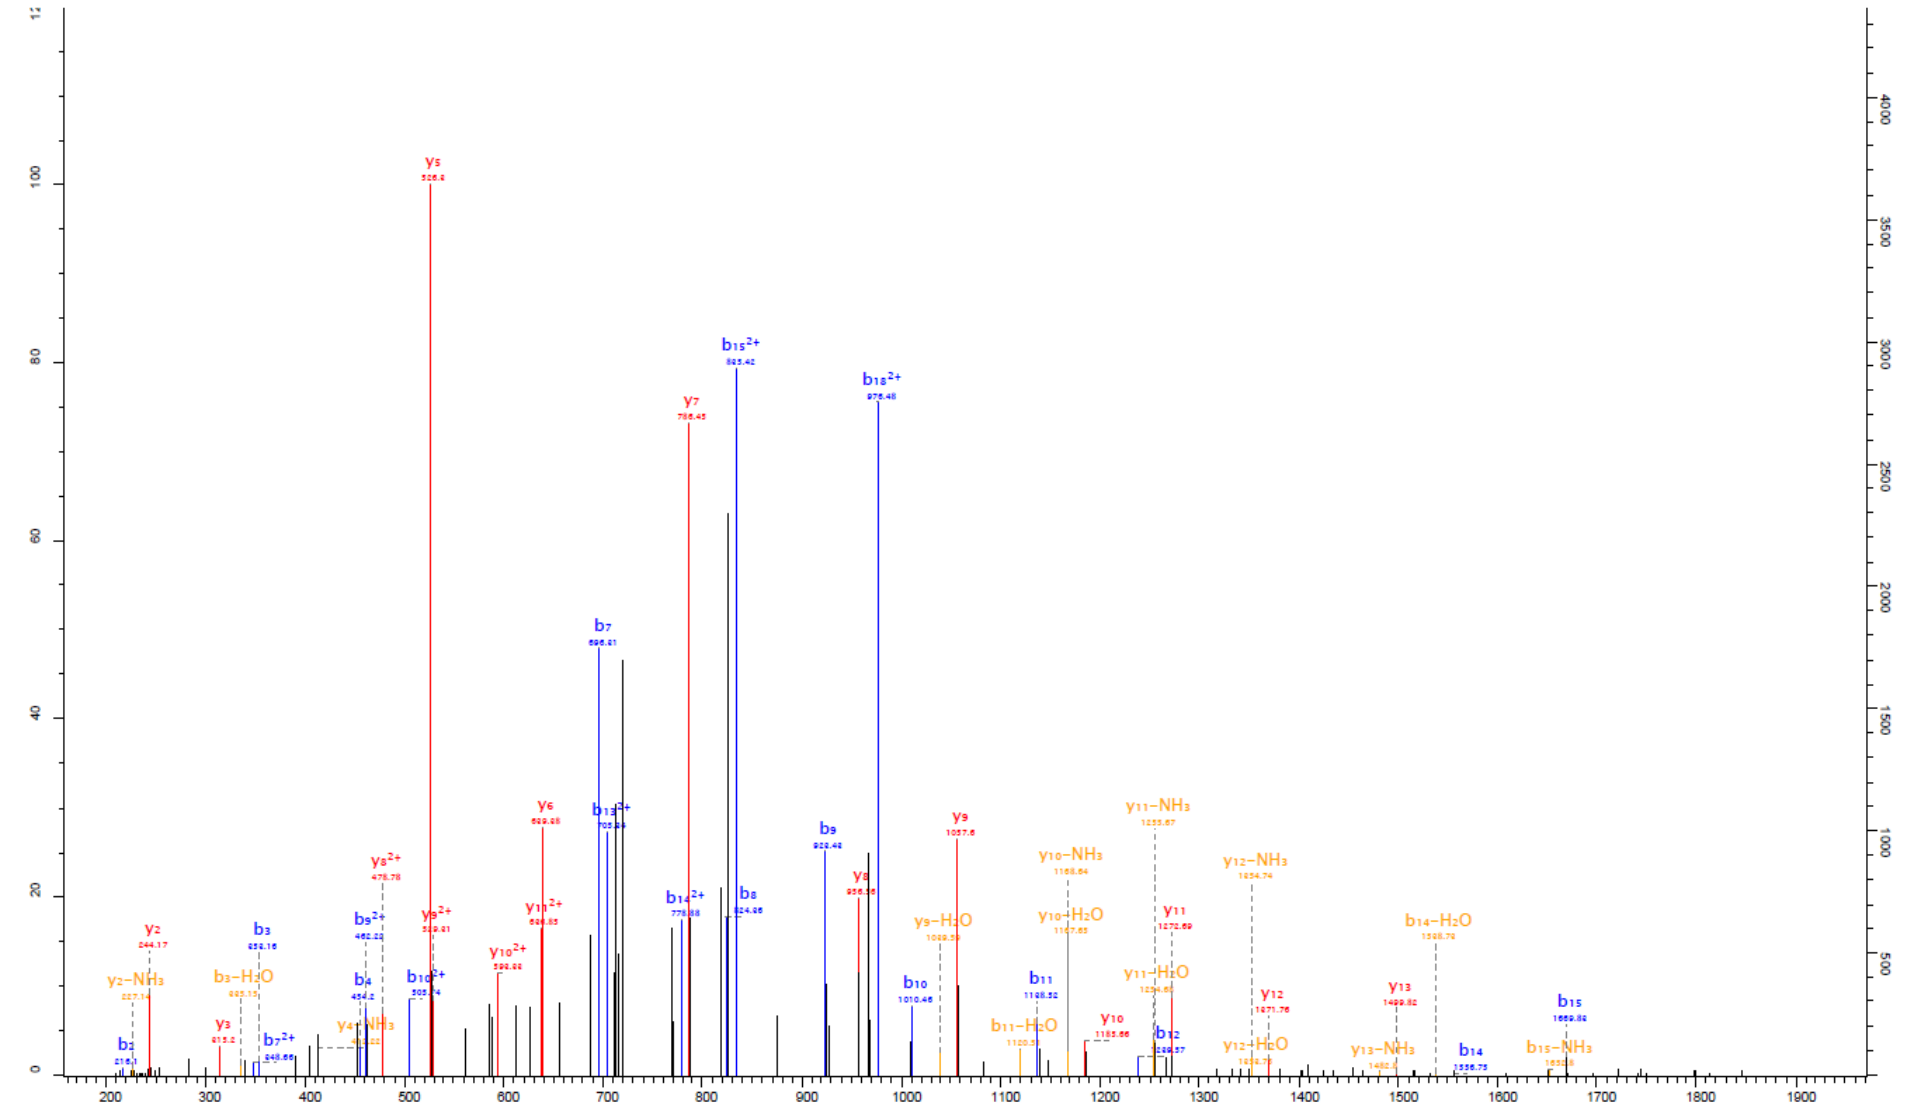

- S Q H T G N A Q V S Q T Y5 ac K F L P N Y5 Y2 A P K -

b<sub>2</sub>
b<sub>3</sub>
b<sub>4</sub>
b<sub>7</sub>
b<sub>8</sub>
b<sub>9</sub>
b<sub>10</sub>
b<sub>11</sub>
b<sub>12</sub>
b<sub>13</sub><sup>2+</sup>
b<sub>14</sub>
b<sub>15</sub>
b<sub>12</sub><sup>2+</sup>

Gene name= Ddx1

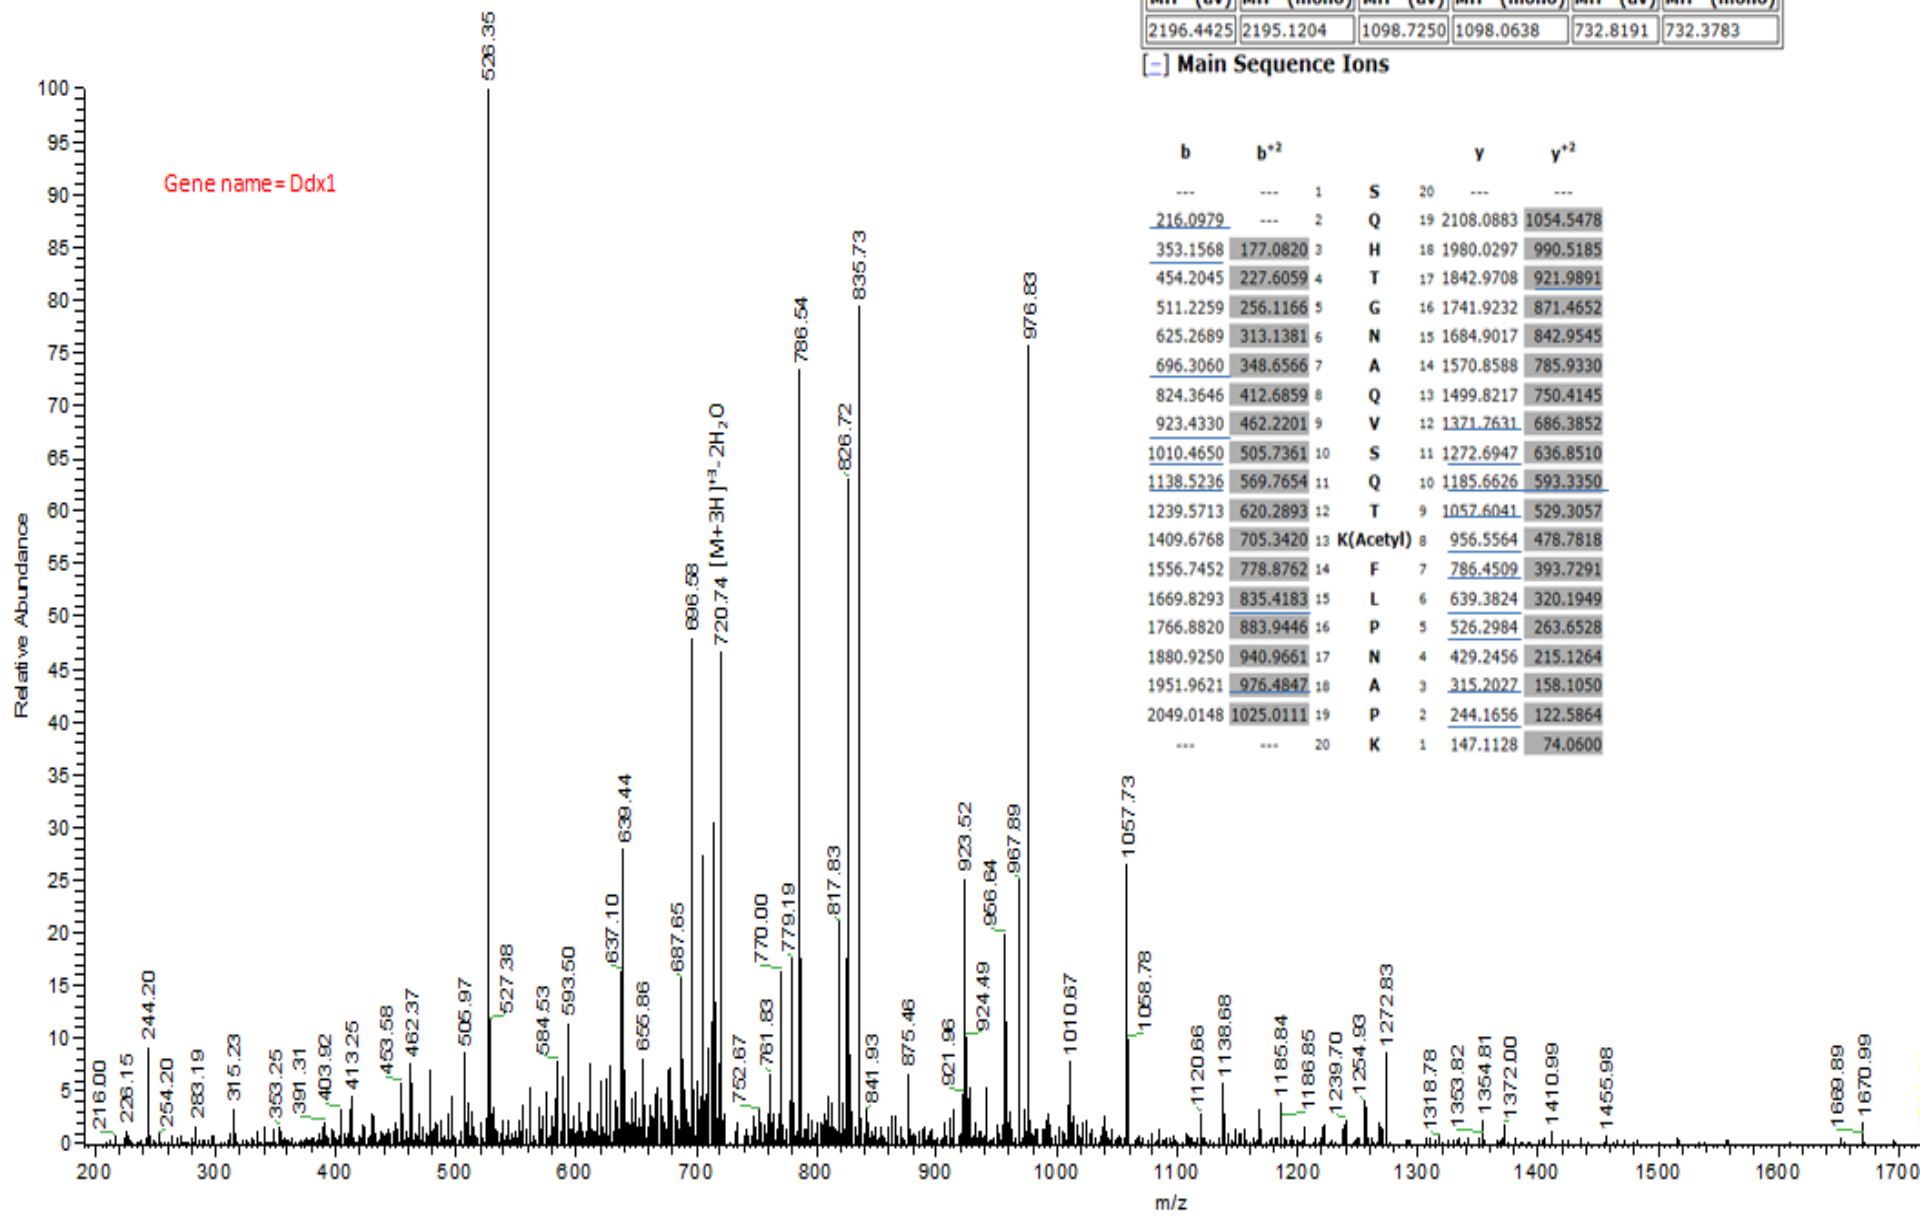

| MH <sup>+</sup> (av) | MH <sup>+</sup> (mono) | MH <sup>2+</sup> (av) | MH <sup>2+</sup> (mono) | MH <sup>3+</sup> (av) | MH <sup>3+</sup> (mono) |
|----------------------|------------------------|-----------------------|-------------------------|-----------------------|-------------------------|
| 2196.4425            | 2195.1204              | 1098.7250             | 1098.0638               | 732.8191              | 732.3783                |

[-] Main Sequence Ions

| b         | b <sup>2</sup> |    | y         | y <sup>2</sup> |           |           |
|-----------|----------------|----|-----------|----------------|-----------|-----------|
| ---       | ---            | 1  | S         | 20             | ---       | ---       |
| 216.0979  | ---            | 2  | Q         | 19             | 2108.0883 | 1054.5478 |
| 353.1568  | 177.0820       | 3  | H         | 18             | 1980.0297 | 990.5185  |
| 454.2045  | 227.6059       | 4  | T         | 17             | 1842.9708 | 921.9891  |
| 511.2259  | 256.1166       | 5  | G         | 16             | 1741.9232 | 871.4652  |
| 625.2689  | 313.1381       | 6  | N         | 15             | 1684.9017 | 842.9545  |
| 696.3060  | 348.6566       | 7  | A         | 14             | 1570.8588 | 785.9330  |
| 824.3646  | 412.6859       | 8  | Q         | 13             | 1499.8217 | 750.4145  |
| 923.4330  | 462.2201       | 9  | V         | 12             | 1371.7631 | 686.3852  |
| 1010.4650 | 505.7361       | 10 | S         | 11             | 1272.6947 | 636.8510  |
| 1138.5236 | 569.7654       | 11 | Q         | 10             | 1185.6626 | 593.3350  |
| 1239.5713 | 620.2893       | 12 | T         | 9              | 1057.6041 | 529.3057  |
| 1409.6768 | 705.3420       | 13 | K(Acetyl) | 8              | 956.5564  | 478.7818  |
| 1556.7452 | 778.8762       | 14 | F         | 7              | 786.4509  | 393.7291  |
| 1669.8293 | 835.4183       | 15 | L         | 6              | 639.3824  | 320.1949  |
| 1766.8820 | 883.9446       | 16 | P         | 5              | 526.2984  | 263.6528  |
| 1880.9250 | 940.9661       | 17 | N         | 4              | 429.2456  | 215.1264  |
| 1951.9621 | 976.4847       | 18 | A         | 3              | 315.2027  | 158.1050  |
| 2049.0148 | 1025.0111      | 19 | P         | 2              | 244.1656  | 122.5864  |
| --        | ---            | 20 | K         | 1              | 147.1128  | 74.0600   |

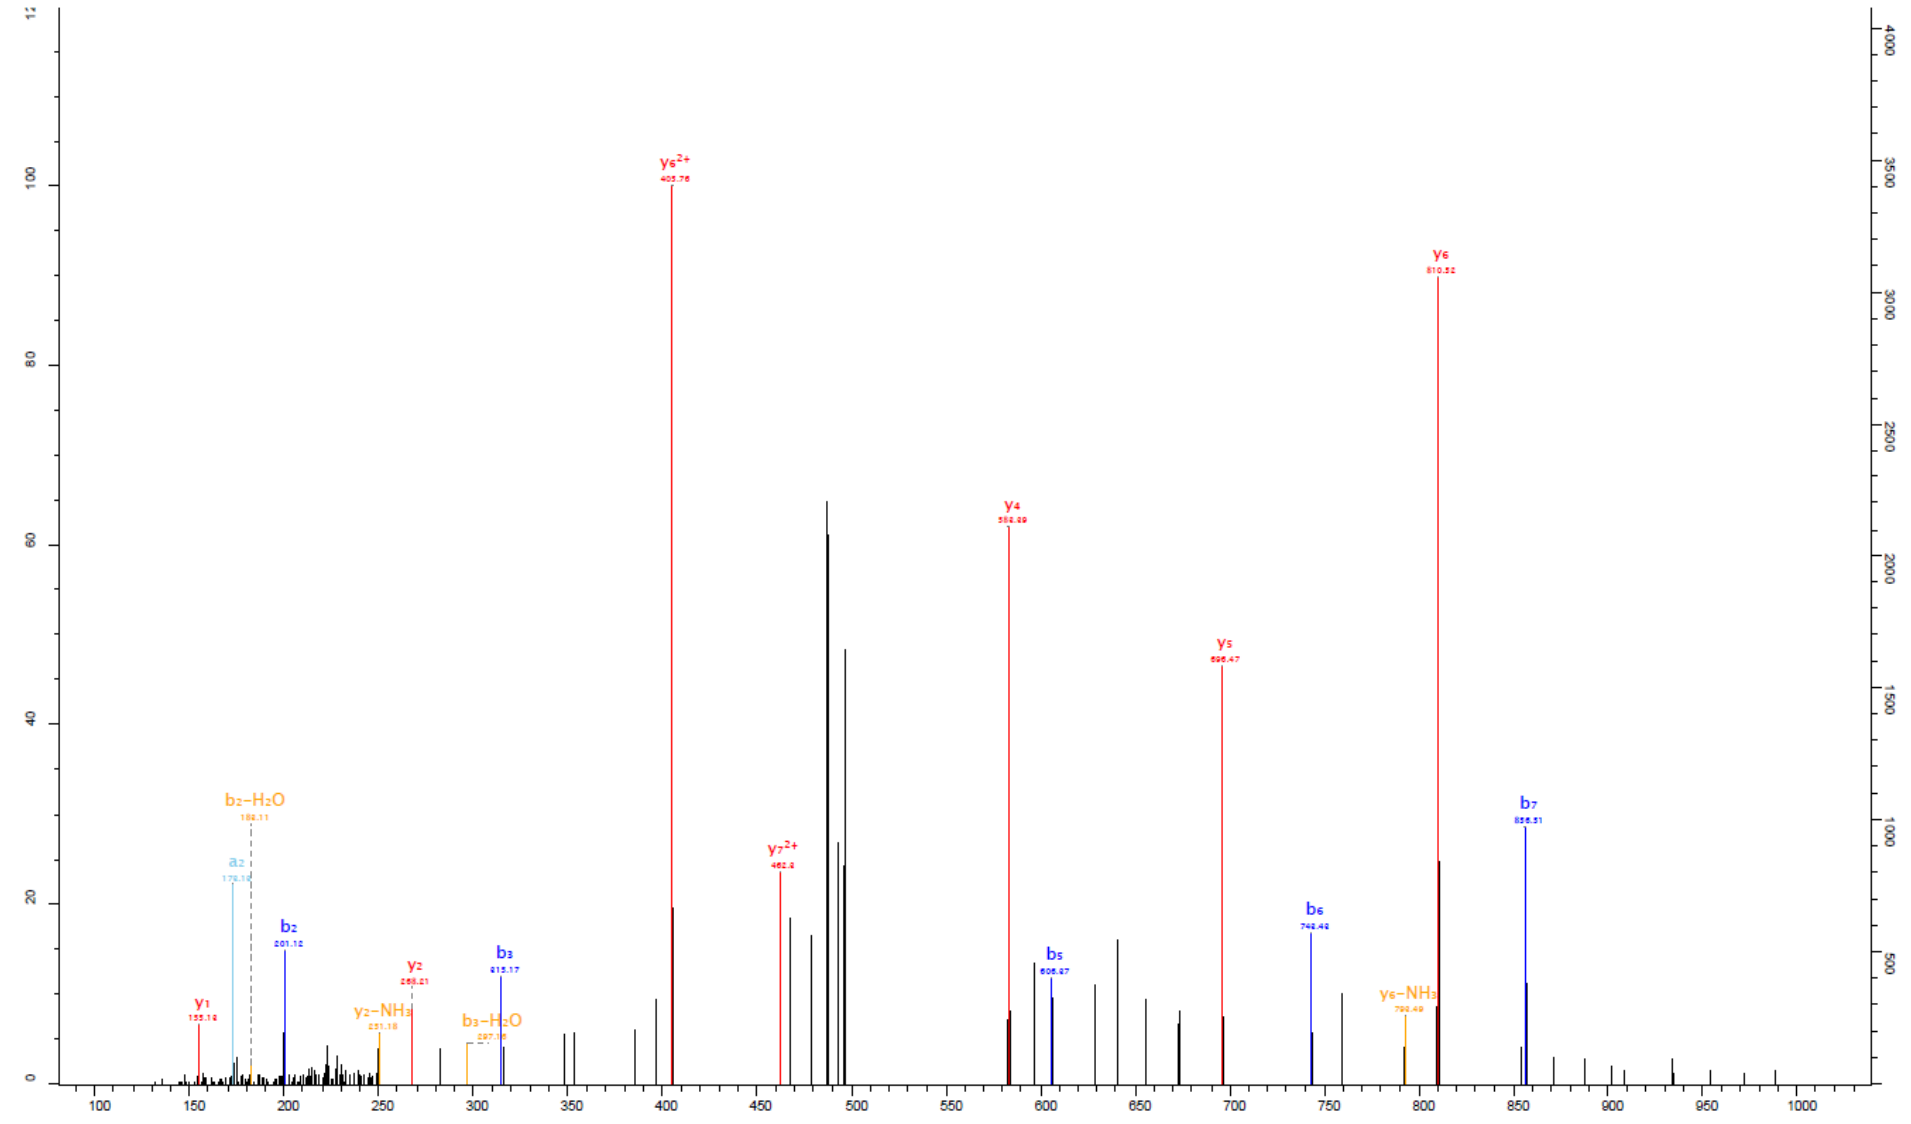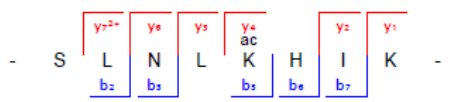

Gene name = Ddx39b

| MH <sup>+</sup> 1(av) | MH <sup>+</sup> 1(mono) | MH <sup>+</sup> 2(av) | MH <sup>+</sup> 2(mono) |
|-----------------------|-------------------------|-----------------------|-------------------------|
| 1011.2187             | 1010.6328               | 506.1131              | 505.8201                |

**[-] Main Sequence Ions**

| b        | b <sup>+</sup> 2 |              | y          | y <sup>+</sup> 2 |
|----------|------------------|--------------|------------|------------------|
| ...      | ...              | 1 S          | 8          | ...              |
| 201.1234 | ...              | 2 L          | 7 923.6008 | 462.3040         |
| 315.1663 | ...              | 3 N          | 6 810.5167 | 405.7620         |
| 428.2504 | ...              | 4 L          | 5 696.4738 | 348.7405         |
| 606.3701 | 303.6887         | 5 K(50.0248) | 4 583.3897 | 292.1985         |
| 743.4290 | 372.2182         | 6 H          | 3 405.2700 | 203.1386         |
| 856.5131 | 428.7602         | 7 I          | 2 268.2111 | 134.6092         |
| ...      | ...              | 8 K(8.0142)  | 1 155.1270 | 78.0671          |

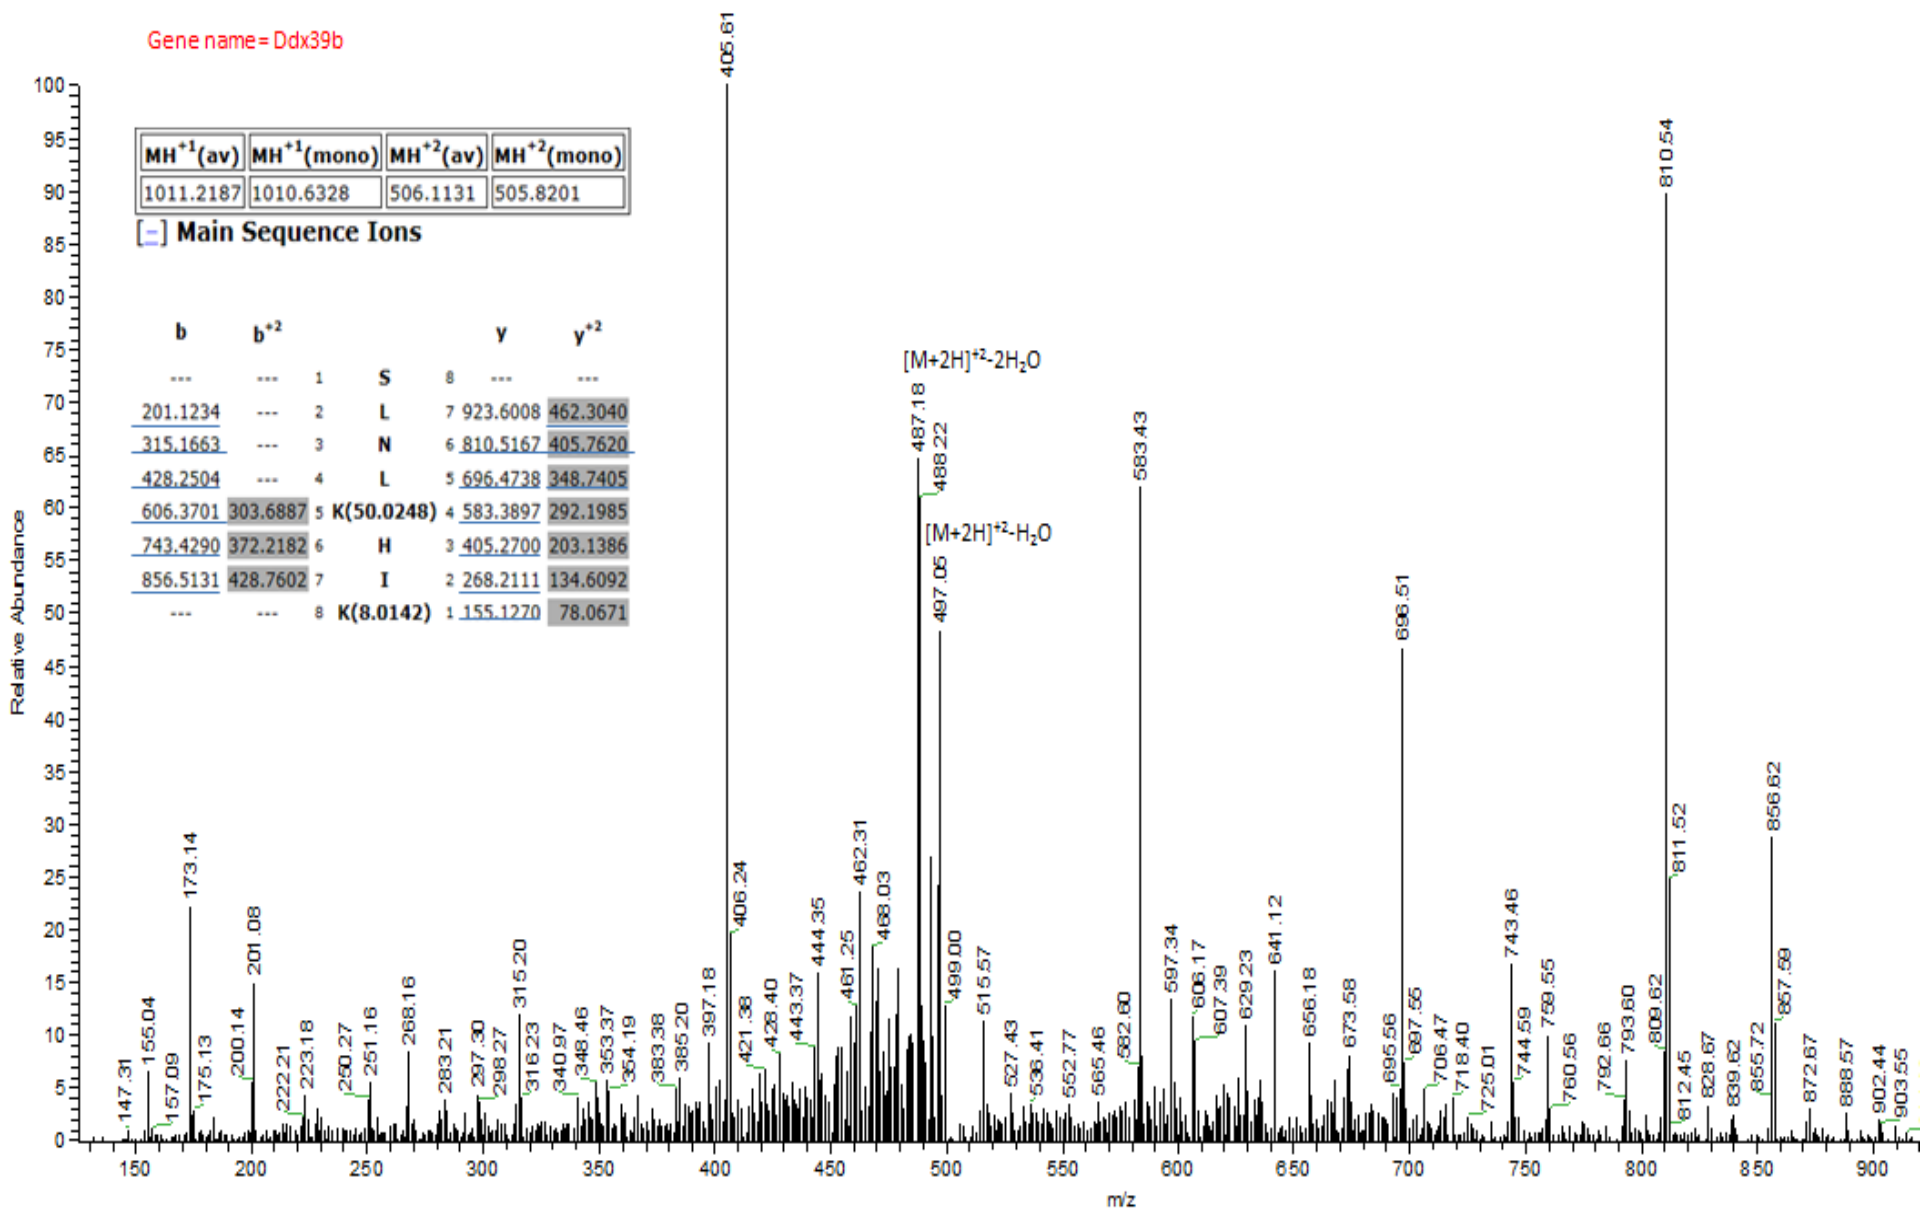

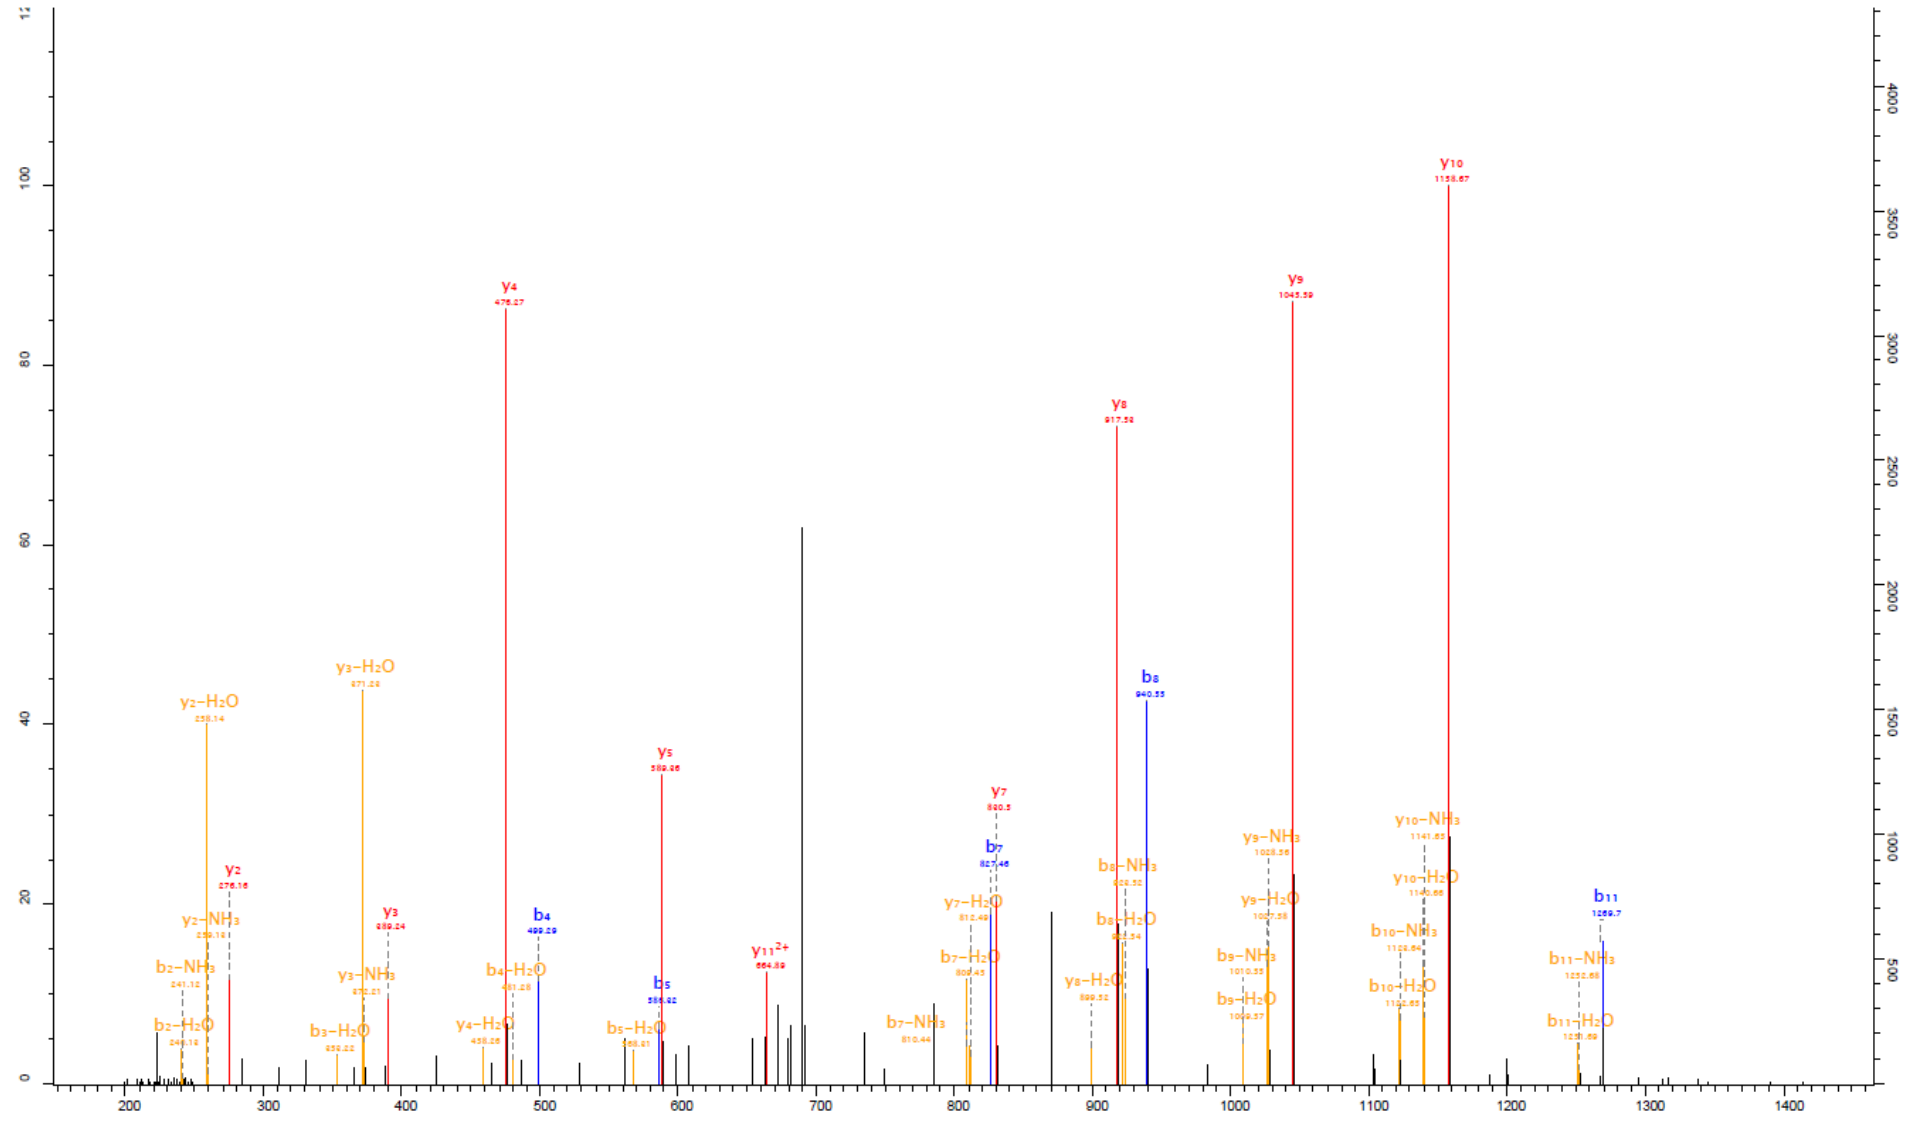

- S K L Q S Q L L S L E K -

y<sub>11</sub><sup>2+</sup> y<sub>10</sub> y<sub>9</sub> y<sub>8</sub> y<sub>7</sub>
b<sub>4</sub> b<sub>5</sub>
b<sub>7</sub> b<sub>8</sub> b<sub>11</sub>

Gene name = Dnm2

| MH <sup>+</sup> (av) | MH <sup>+</sup> (mono) | MH <sup>2+</sup> (av) | MH <sup>2+</sup> (mono) |
|----------------------|------------------------|-----------------------|-------------------------|
| 1416.6678            | 1415.8104              | 708.8376              | 708.4088                |

Main Sequence Ions

| b         | b <sup>+</sup> | S  | y         | y <sup>+</sup>        |
|-----------|----------------|----|-----------|-----------------------|
| ...       | ...            | 1  | ...       | ...                   |
| 258.1448  | 329.5761       | 2  | K(Acetyl) | 11 1328.7784 664.8928 |
| 371.2289  | 386.1181       | 3  | L         | 10 1158.6729 579.8401 |
| 499.2875  | 250.1474       | 4  | Q         | 9 1045.5888 523.2980  |
| 586.3195  | 293.6634       | 5  | S         | 8 917.5302 459.2687   |
| 714.3781  | 357.6927       | 6  | Q         | 7 830.4982 415.7527   |
| 827.4621  | 414.2347       | 7  | L         | 6 702.4396 351.7234   |
| 940.5462  | 470.7767       | 8  | L         | 5 589.3556 295.1814   |
| 1027.5782 | 514.2928       | 9  | S         | 4 476.2715 238.6394   |
| 1140.6623 | 570.8348       | 10 | L         | 3 389.2395 195.1234   |
| 1269.7049 | 635.3561       | 11 | E         | 2 276.1554 138.5813   |
| ...       | ...            | 12 | K         | 1 147.1128 74.0600    |

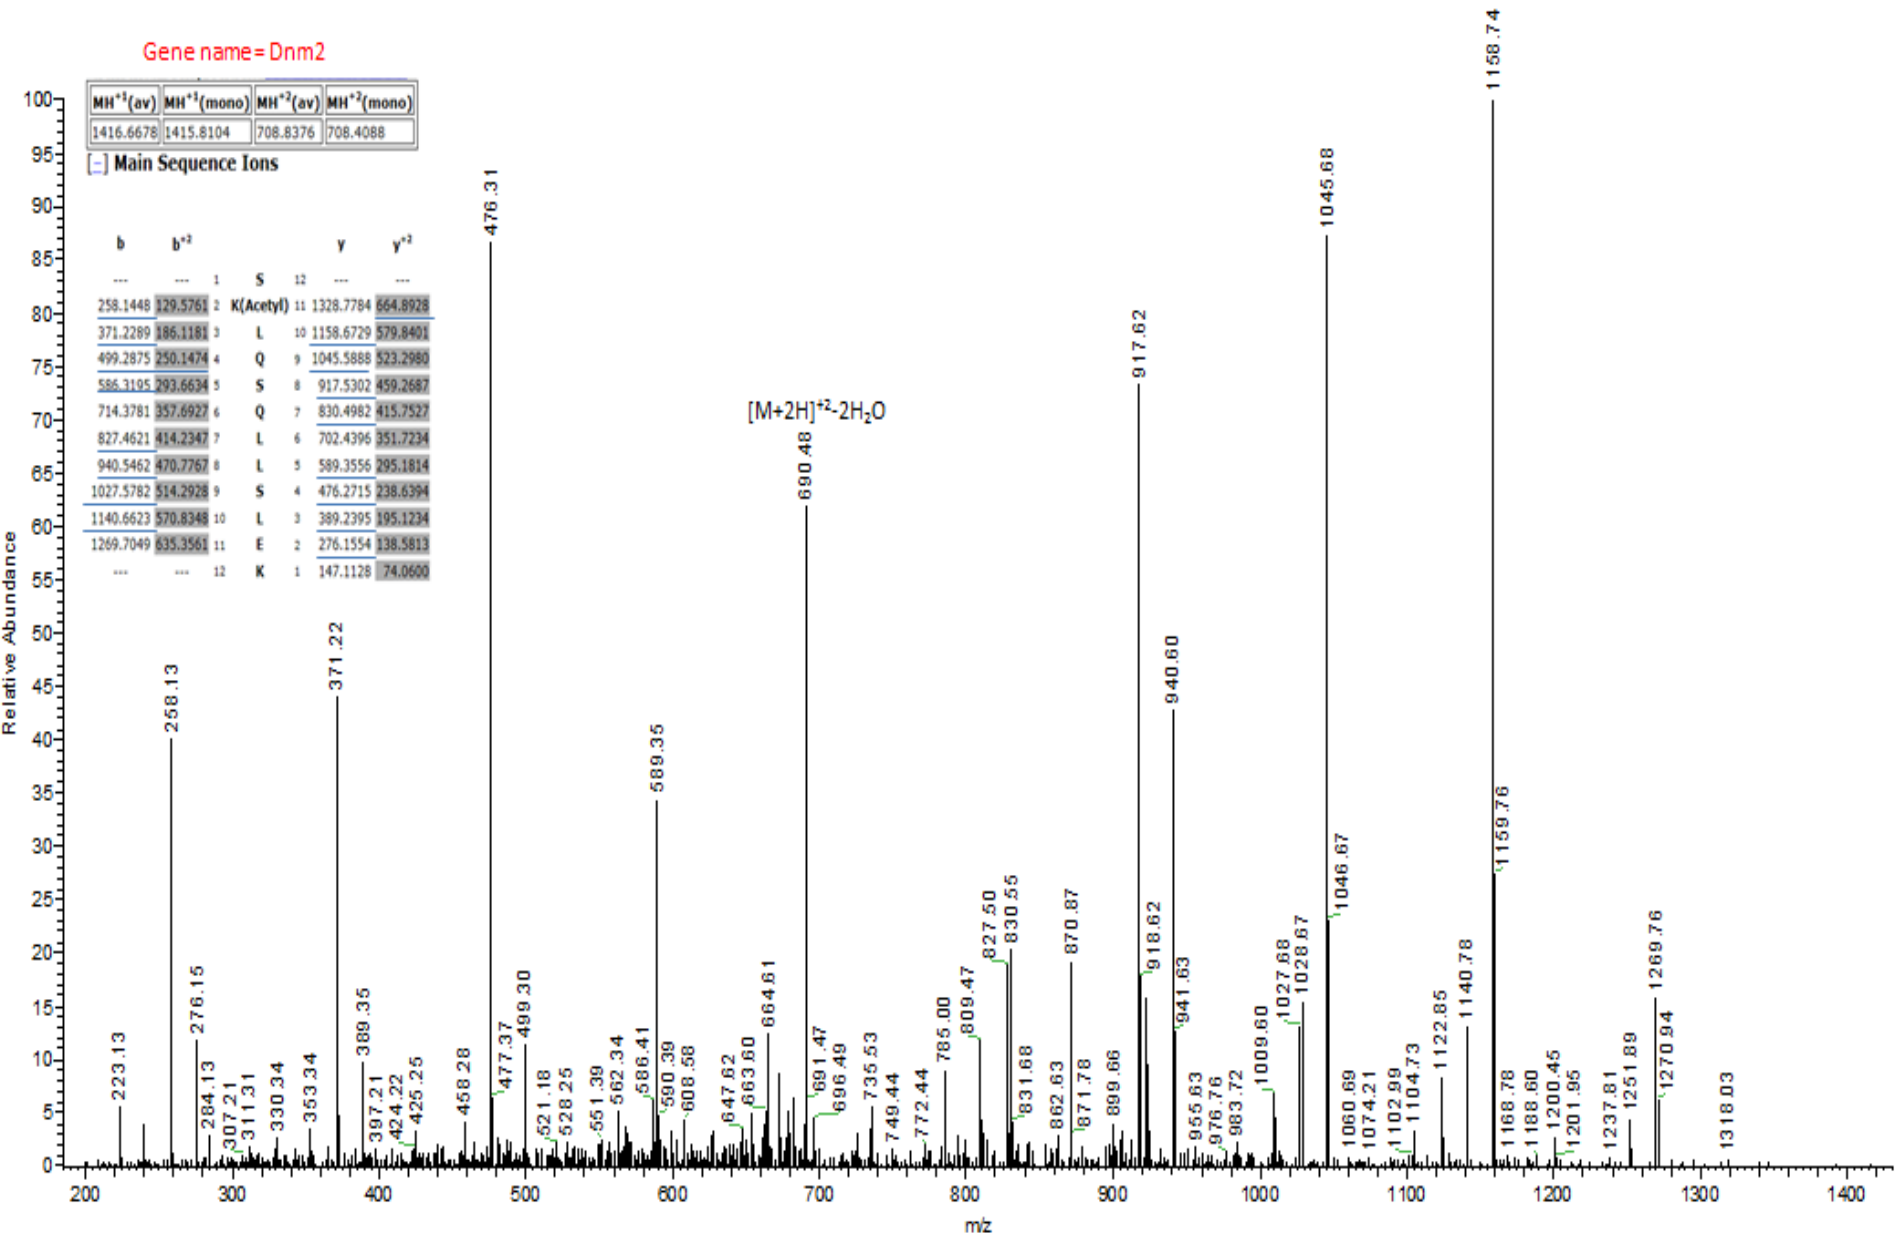

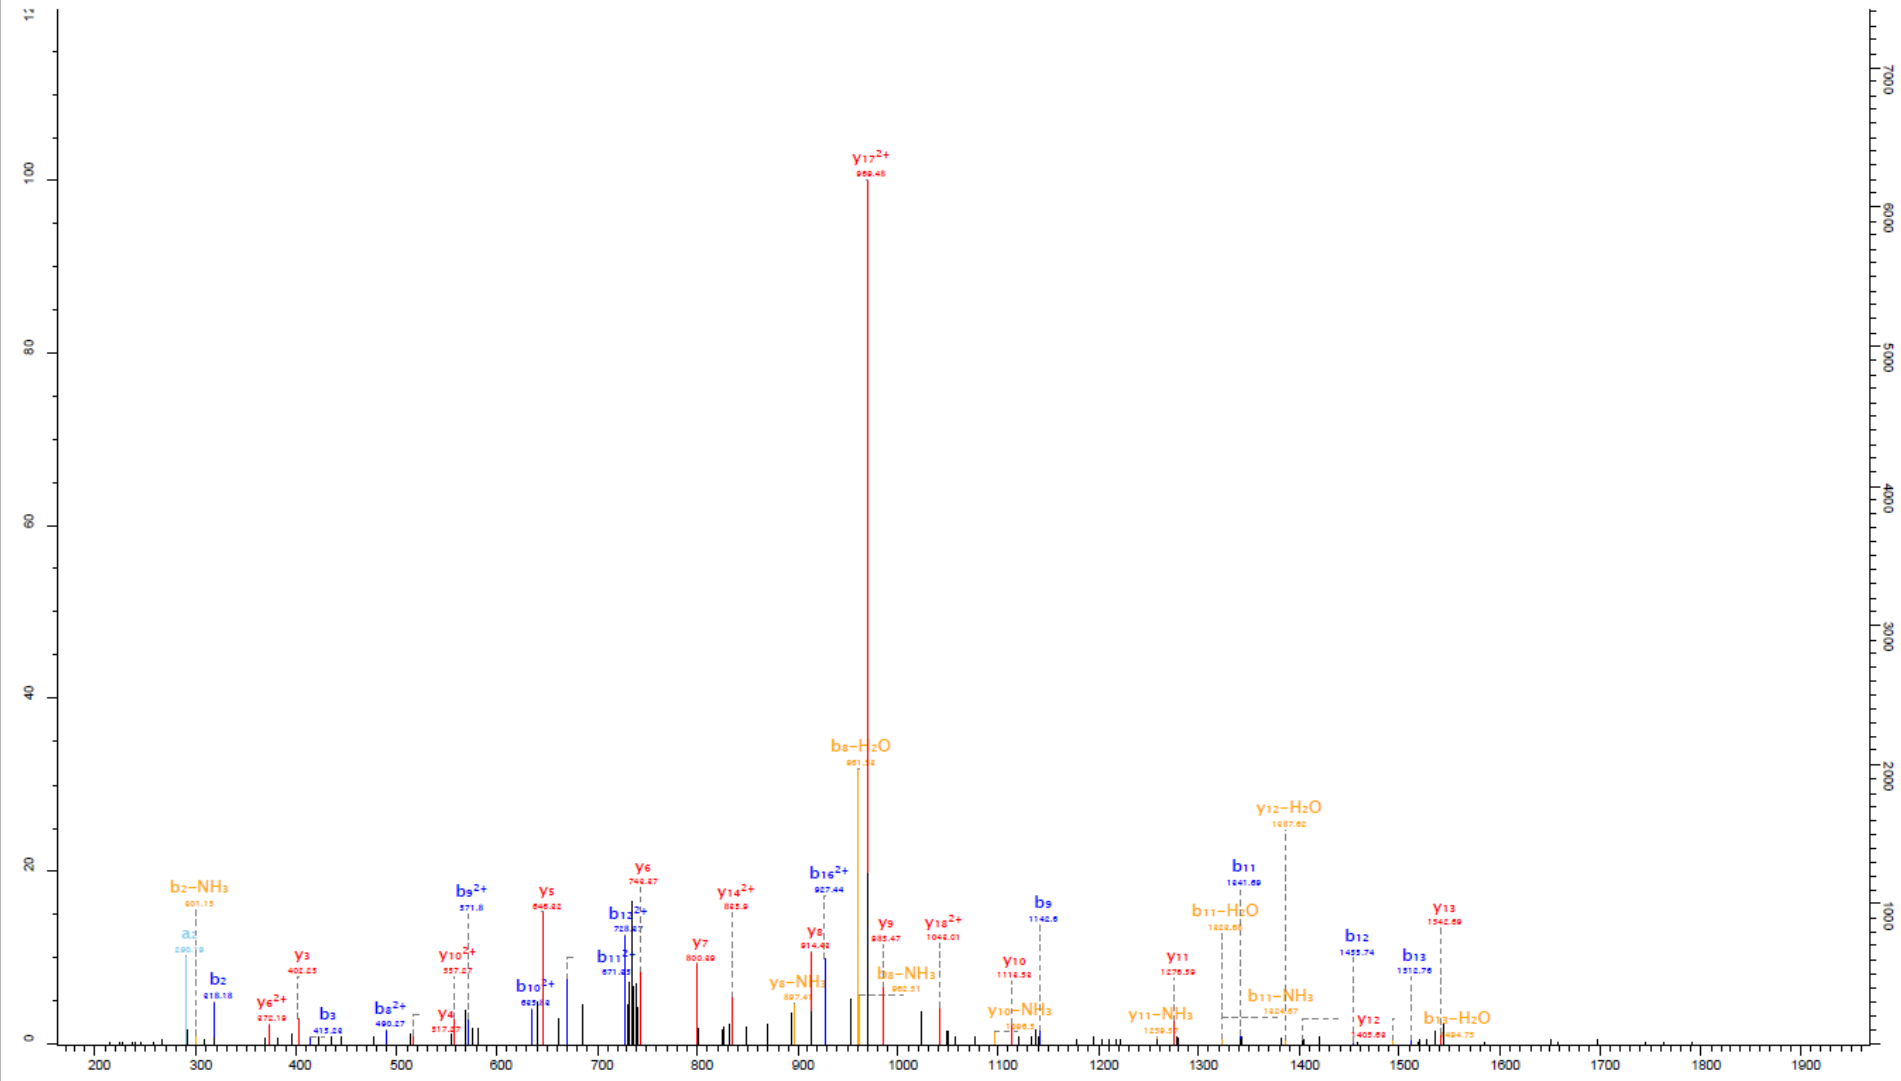

ac K y<sub>10</sub><sup>2+</sup> y<sub>17</sub><sup>2+</sup> y<sub>14</sub><sup>2+</sup> y<sub>12</sub> y<sub>11</sub> y<sub>10</sub> y<sub>8</sub> y<sub>7</sub> y<sub>6</sub> y<sub>5</sub> y<sub>4</sub> y<sub>3</sub>  
b<sub>2</sub> b<sub>3</sub> G I b<sub>2</sub><sup>2+</sup> b<sub>6</sub> b<sub>10</sub><sup>2+</sup> b<sub>11</sub> b<sub>12</sub> b<sub>15</sub> b<sub>12</sub><sup>2+</sup> P E b<sub>12</sub><sup>2+</sup> L N R -

Gene name = Dstn

| MH <sup>+1</sup> (av) | MH <sup>+1</sup> (mono) | MH <sup>+2</sup> (av) | MH <sup>+2</sup> (mono) | MH <sup>+3</sup> (av) | MH <sup>+3</sup> (mono) |
|-----------------------|-------------------------|-----------------------|-------------------------|-----------------------|-------------------------|
| 2256.4981             | 2255.1204               | 1128.7527             | 1128.0638               | 752.8376              | 752.3783                |

[-] Main Sequence Ions

| b         | b <sup>+2</sup> | y              | y <sup>+2</sup> |
|-----------|-----------------|----------------|-----------------|
| ---       | ---             | 1 K(Acetyl) 19 | ---             |
| 318.1812  | 159.5942        | 2 F            | 18 2085.0148    |
| 415.2340  | 208.1206        | 3 P            | 17 1937.9464    |
| 472.2554  | 236.6314        | 4 G            | 16 1840.8937    |
| 585.3395  | 293.1734        | 5 I            | 15 1783.8722    |
| 713.4345  | 357.2209        | 6 K            | 14 1670.7881    |
| 850.4934  | 425.7503        | 7 H            | 13 1542.6932    |
| 979.5360  | 490.2716        | 8 E            | 12 1405.6342    |
| 1142.5993 | 571.8033        | 9 Y            | 11 1276.5917    |
| 1270.6579 | 635.8326        | 10 Q           | 10 1113.5283    |
| 1341.6950 | 671.3511        | 11 A           | 9 985.4697      |
| 1455.7379 | 728.3226        | 12 N           | 8 914.4326      |
| 1512.7594 | 756.8833        | 13 G           | 7 800.3897      |
| 1609.8122 | 805.4097        | 14 P           | 6 743.3682      |
| 1738.8547 | 869.9310        | 15 E           | 5 646.3155      |
| 1853.8817 | 927.4445        | 16 D           | 4 517.2729      |
| 1966.9658 | 983.9865        | 17 L           | 3 402.2459      |
| 2081.0087 | 1041.0080       | 18 N           | 2 289.1619      |
| ---       | ---             | 19 R           | 1 175.1190      |

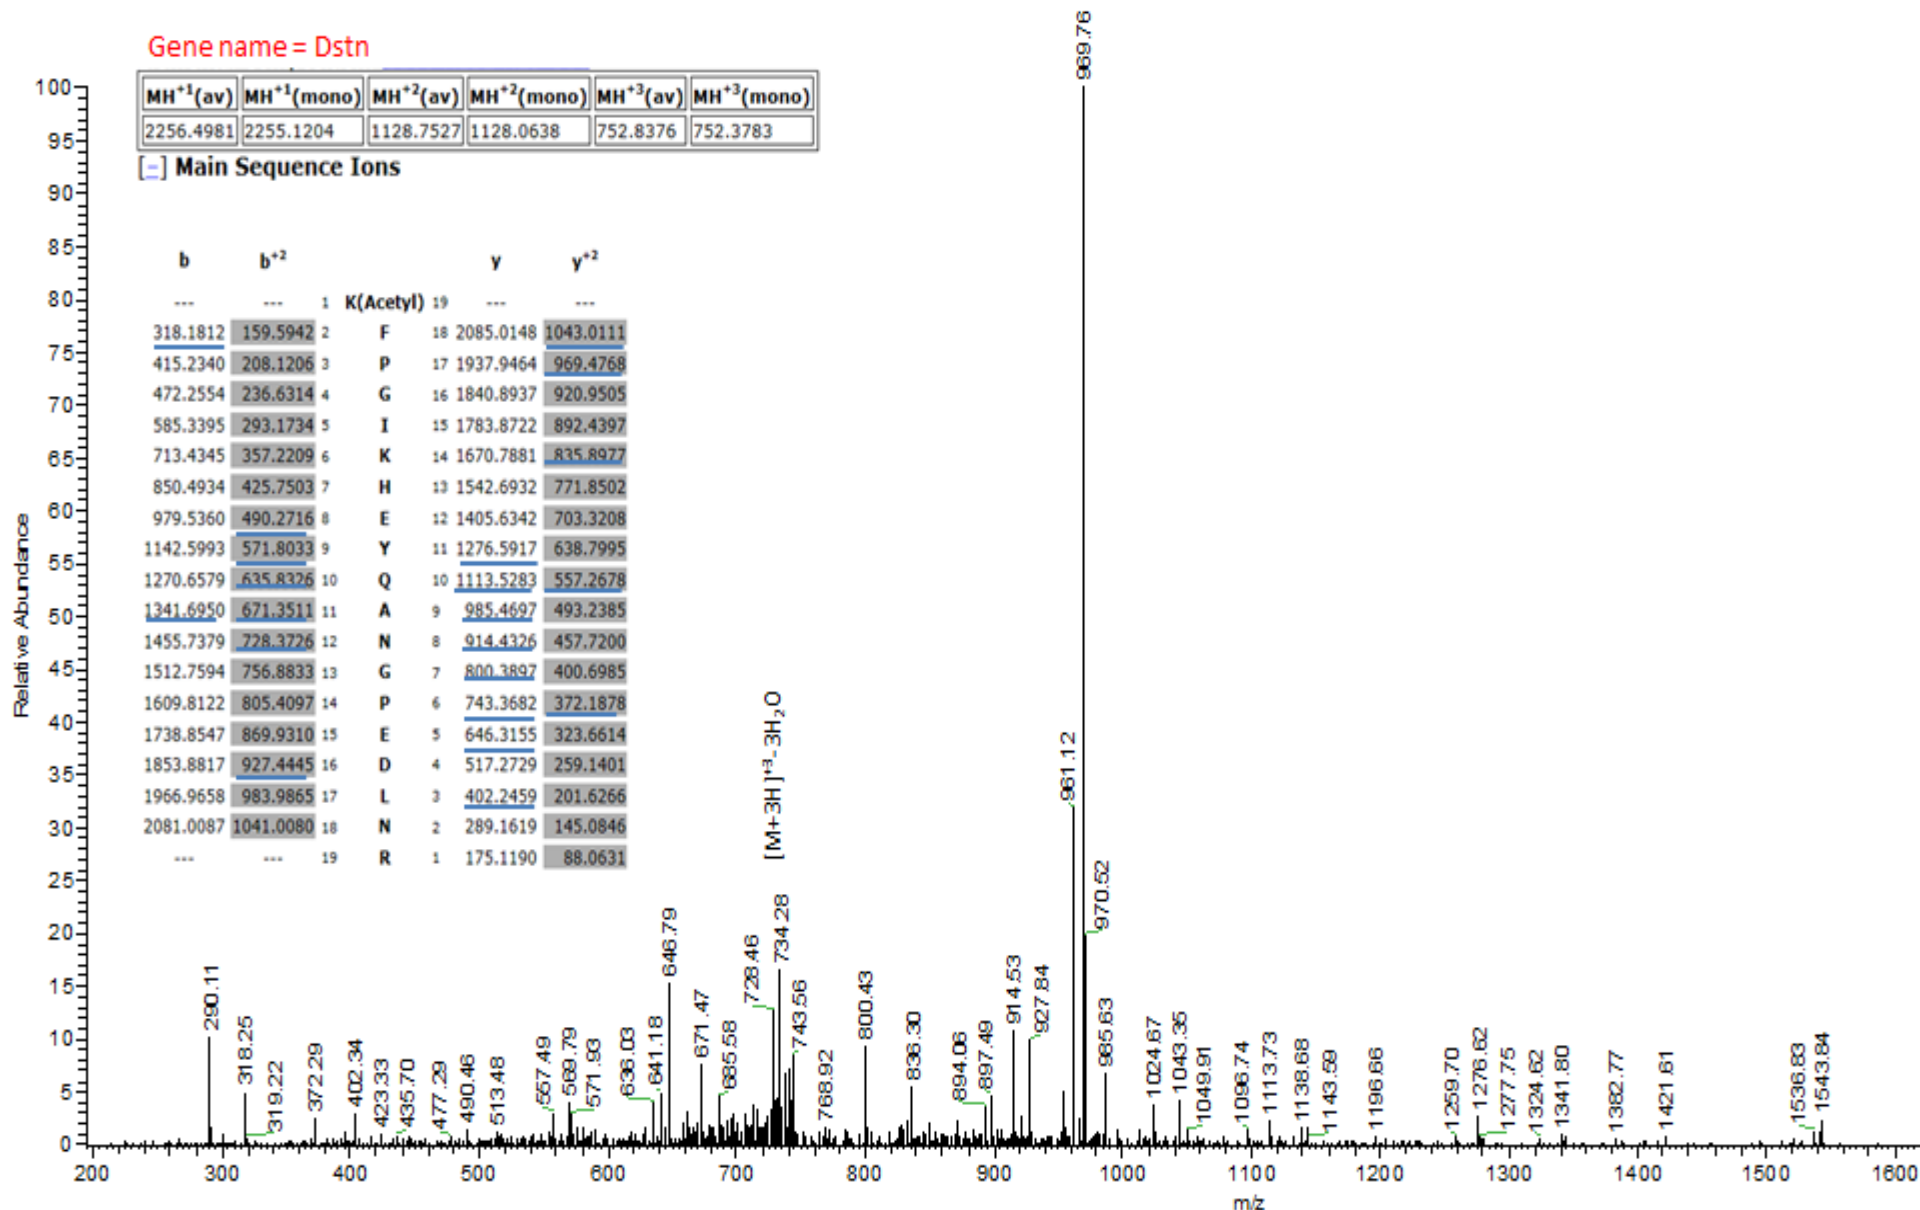



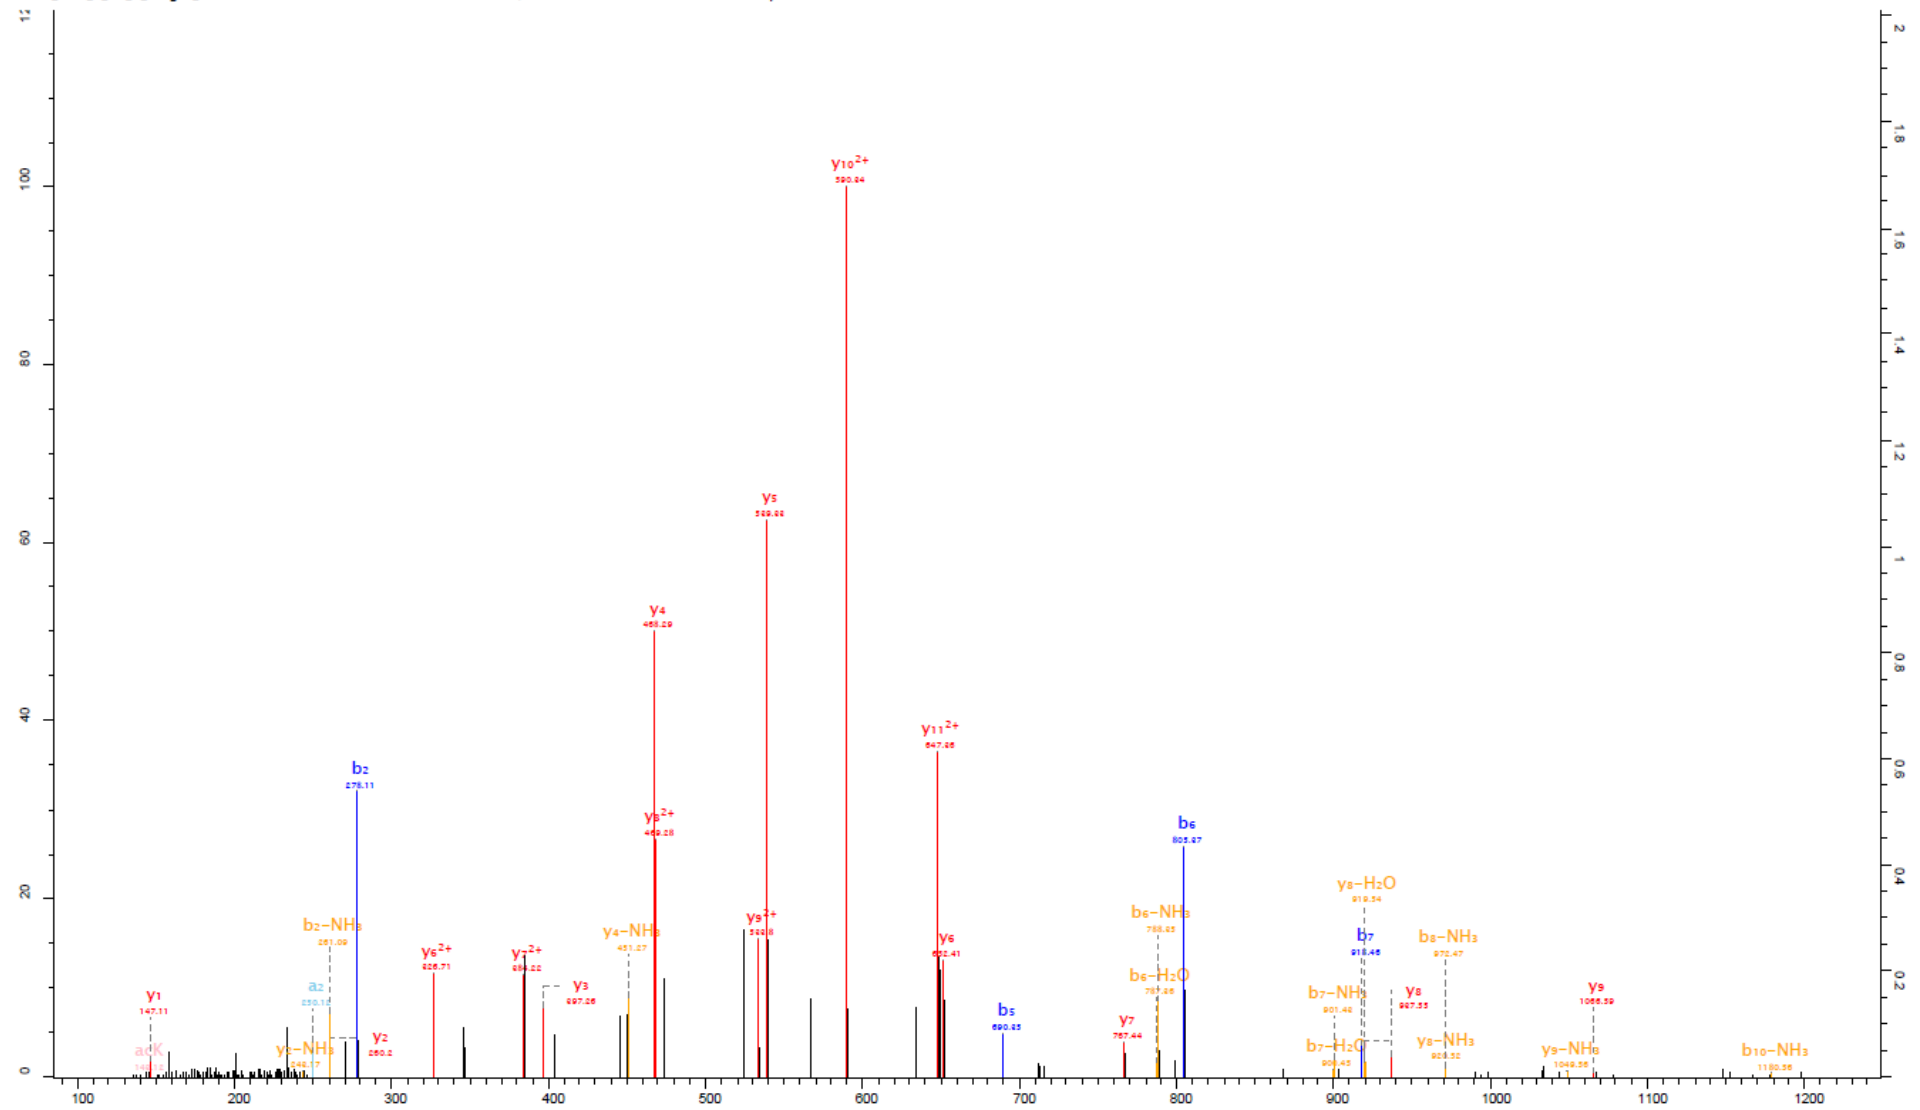

- Y y11<sup>2+</sup> y10<sup>2+</sup> y5 ys y7 y6 ys y4 ys y2 y1 -  
bz ac D I A A H I K -

Gene name = Dynl1

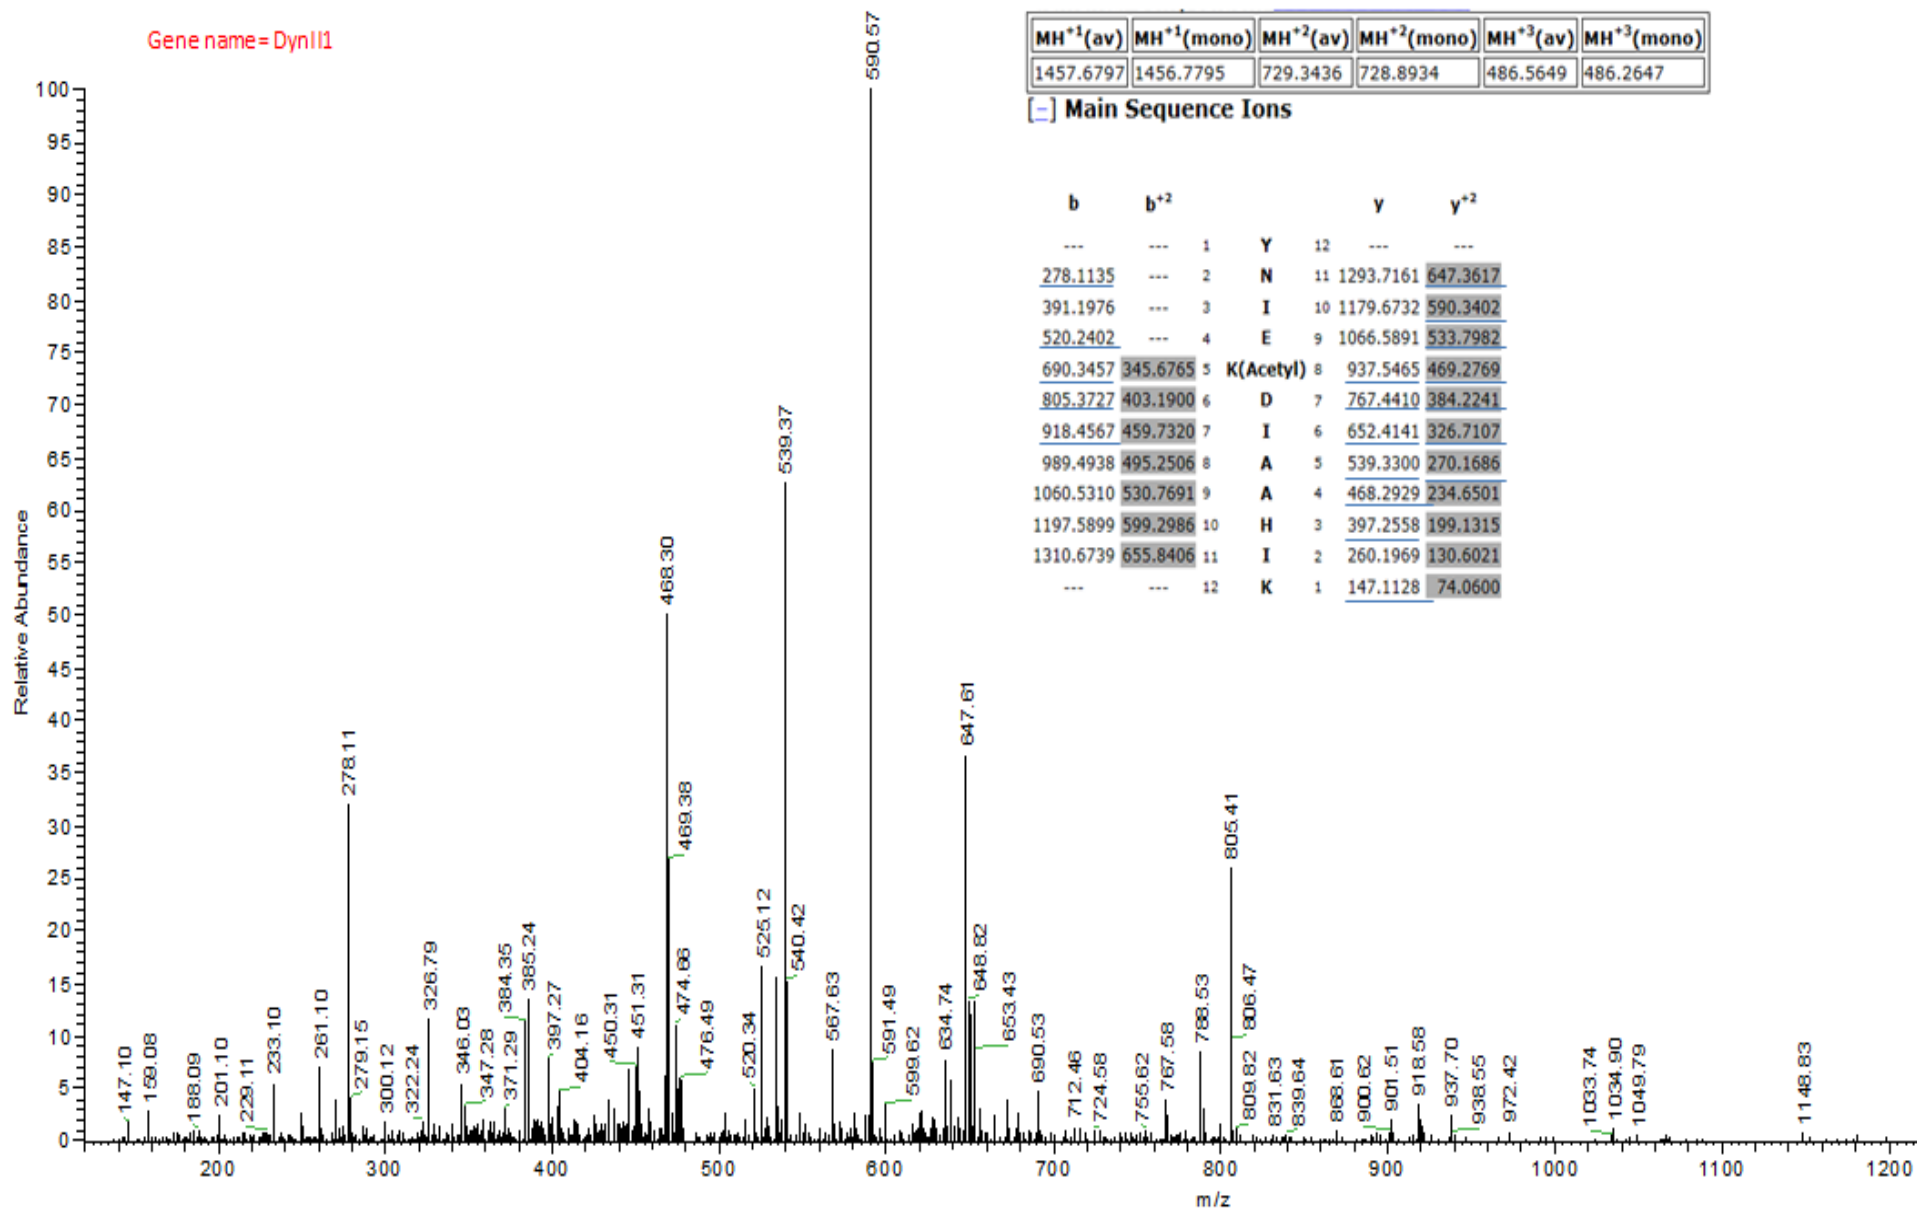

| MH <sup>+</sup> (av) | MH <sup>+</sup> (mono) | MH <sup>2+</sup> (av) | MH <sup>2+</sup> (mono) | MH <sup>3+</sup> (av) | MH <sup>3+</sup> (mono) |
|----------------------|------------------------|-----------------------|-------------------------|-----------------------|-------------------------|
| 1457.6797            | 1456.7795              | 729.3436              | 728.8934                | 486.5649              | 486.2647                |

[-] Main Sequence Ions

| b         | b <sup>+</sup> |    | y         | y <sup>+</sup> |
|-----------|----------------|----|-----------|----------------|
| ---       | ---            | 1  | Y         | 12             |
| ---       | ---            | 2  | N         | 11             |
| 278.1135  | ---            | 2  | N         | 11             |
| 391.1976  | ---            | 3  | I         | 10             |
| 520.2402  | ---            | 4  | E         | 9              |
| 690.3457  | 345.6765       | 5  | K(Acetyl) | 8              |
| 805.3727  | 403.1900       | 6  | D         | 7              |
| 918.4567  | 459.7320       | 7  | I         | 6              |
| 989.4938  | 495.2506       | 8  | A         | 5              |
| 1060.5310 | 530.7691       | 9  | A         | 4              |
| 1197.5899 | 599.2986       | 10 | H         | 3              |
| 1310.6739 | 655.8406       | 11 | I         | 2              |
| ---       | ---            | 12 | K         | 1              |

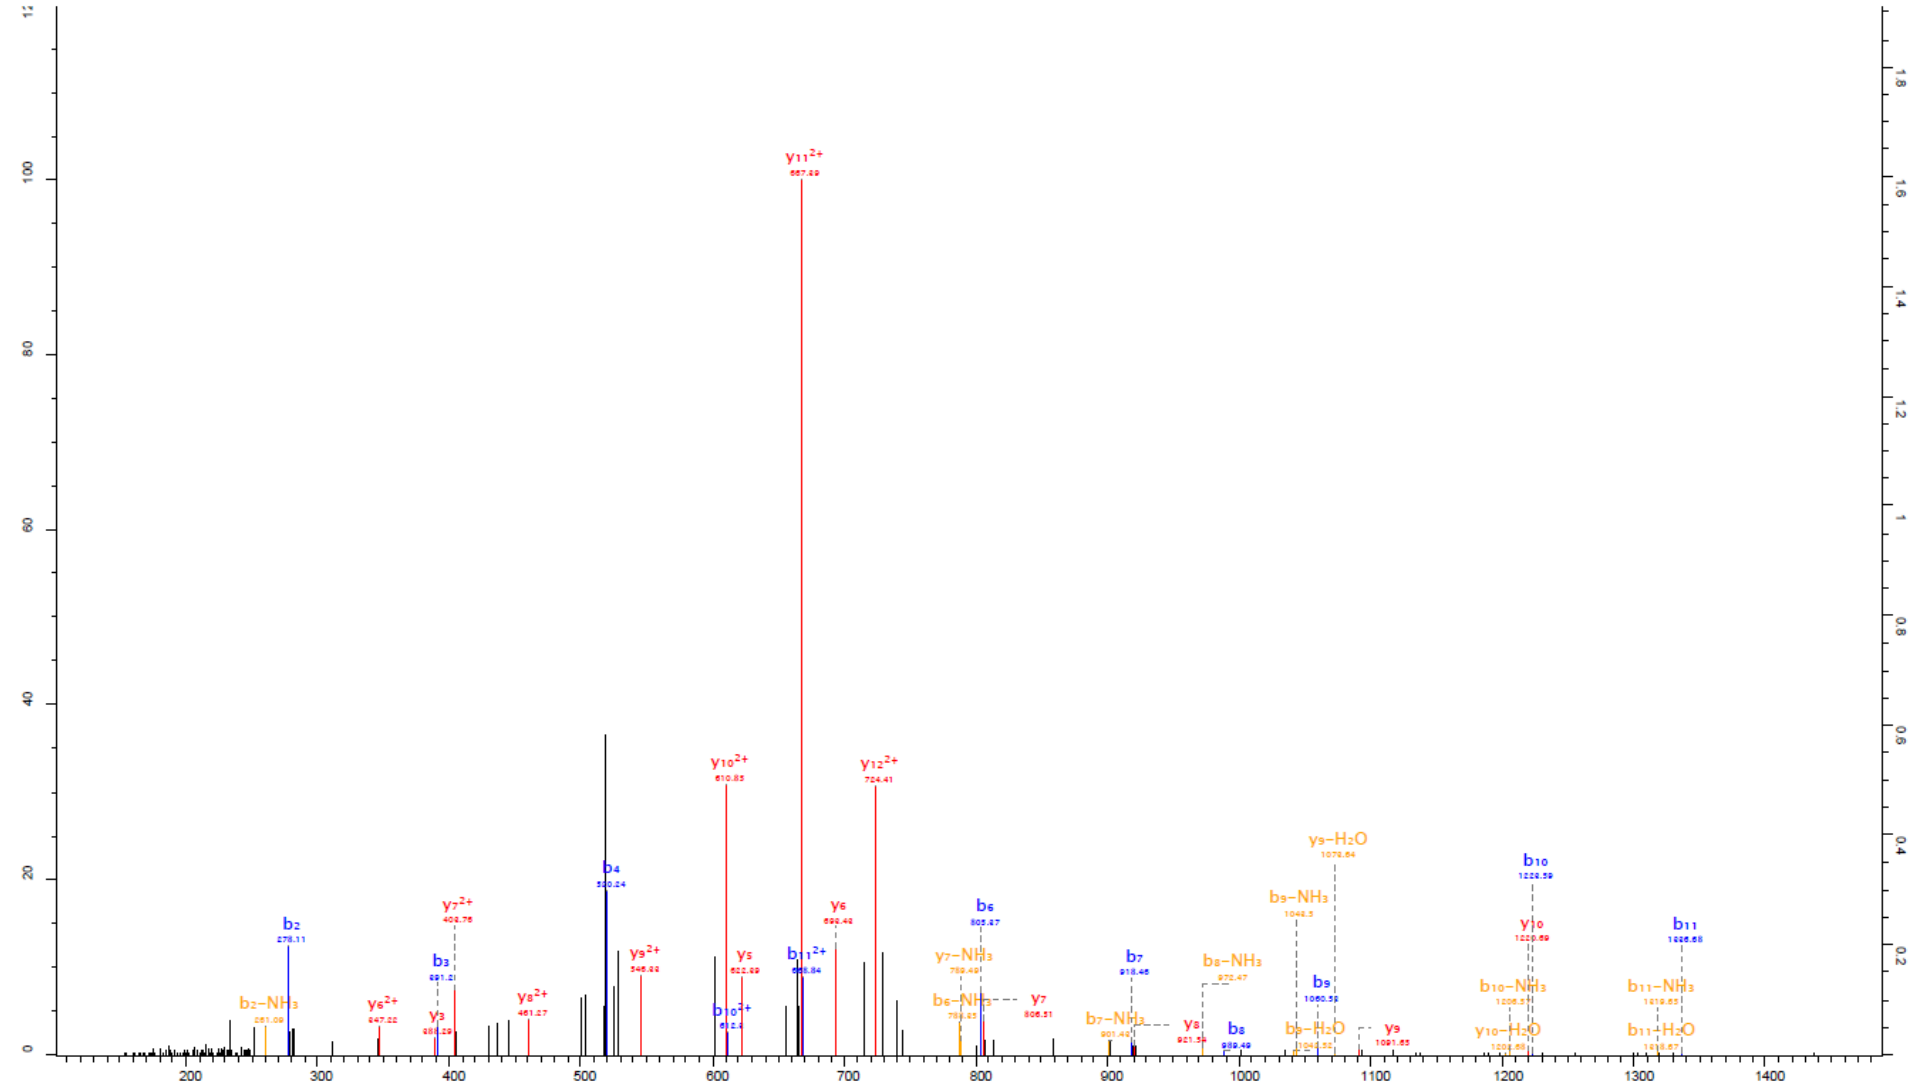

- Y Y<sub>12</sub><sup>2+</sup> Y<sub>11</sub><sup>2+</sup> Y<sub>10</sub> y<sub>6</sub> ac y<sub>7</sub> y<sub>8</sub> y<sub>9</sub> y<sub>9</sub> Y y<sub>5</sub> K K -

b<sub>2</sub> b<sub>3</sub> b<sub>4</sub> b<sub>6</sub> b<sub>7</sub> b<sub>8</sub> b<sub>9</sub> b<sub>10</sub> b<sub>11</sub>

Gene name = DynII2

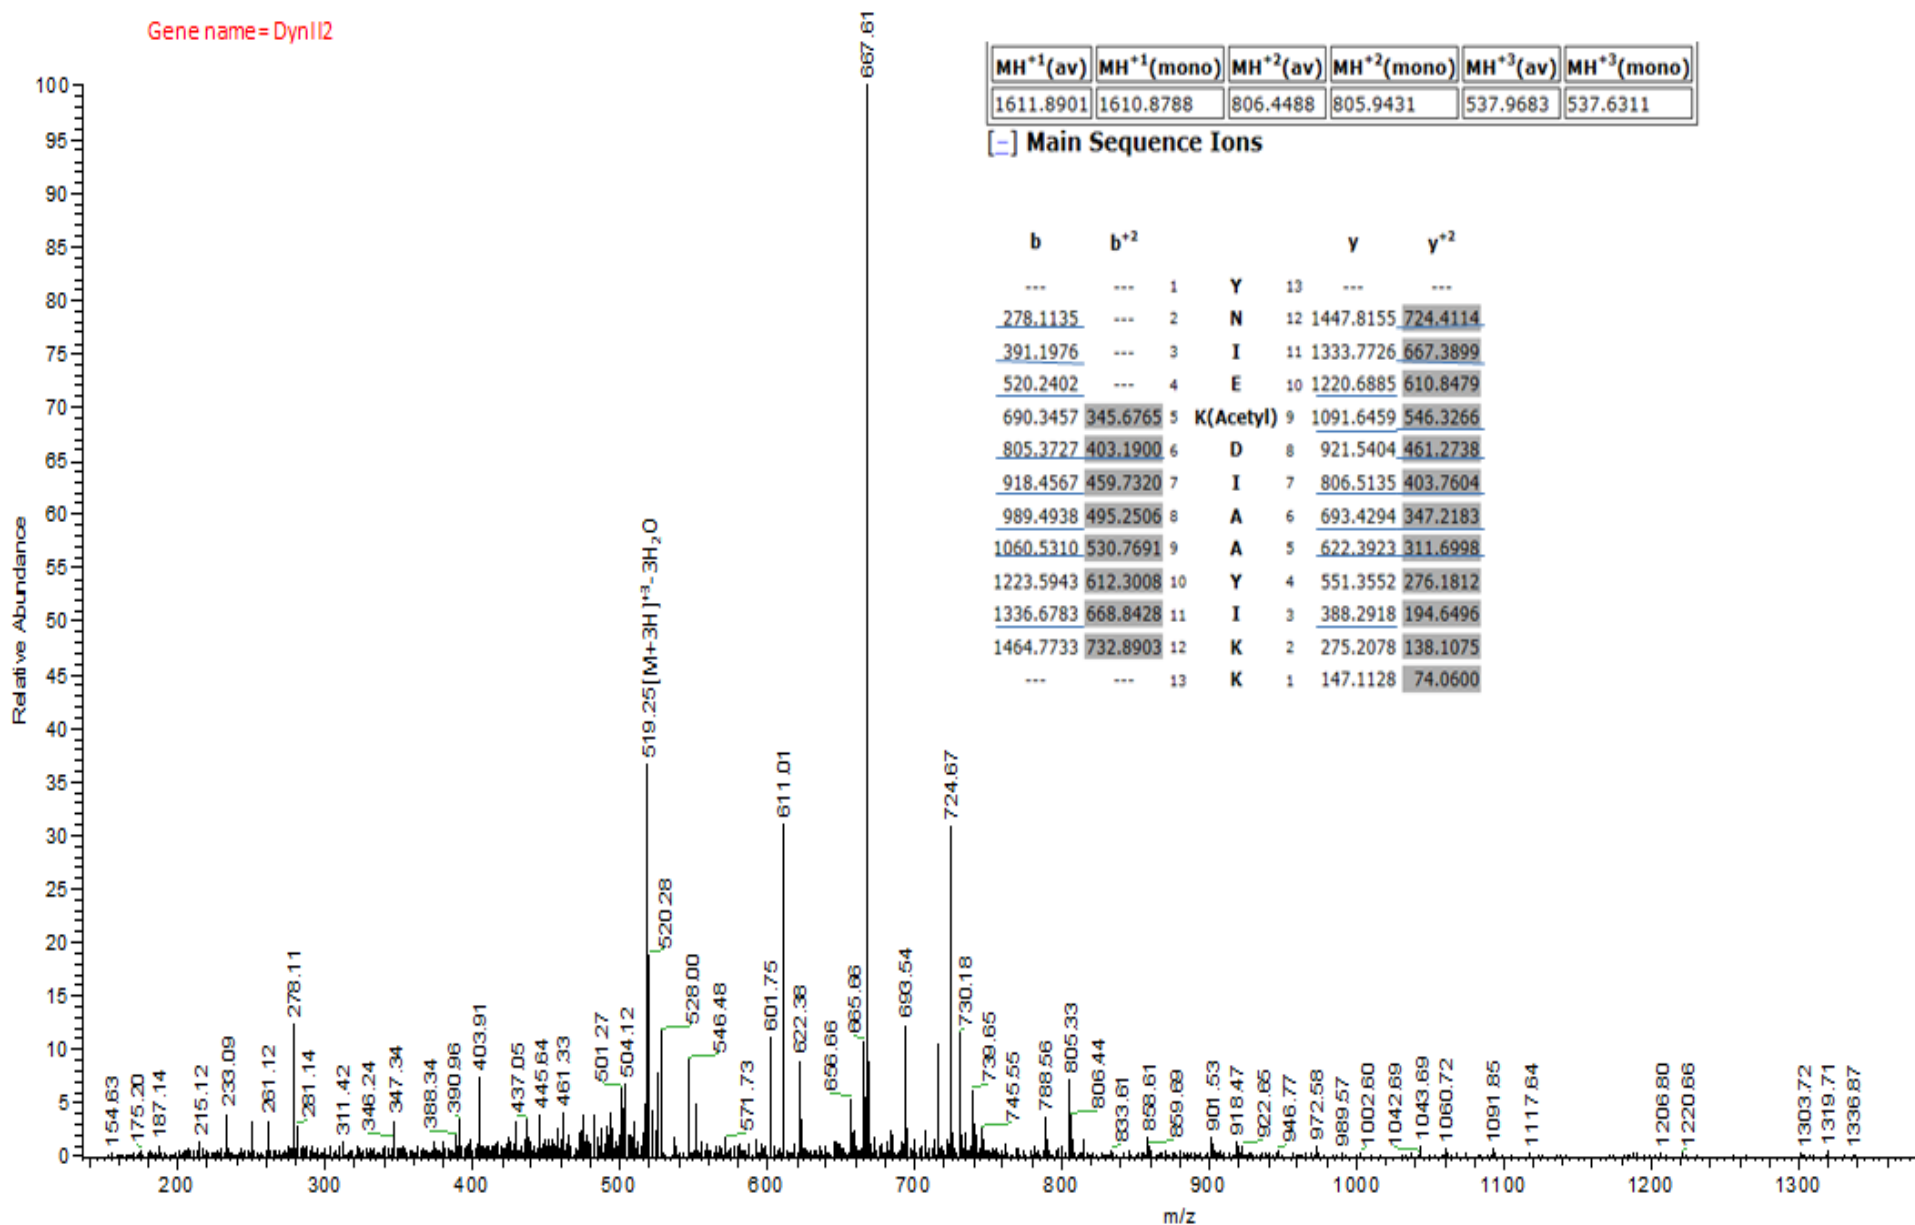

| MH <sup>+1</sup> (av) | MH <sup>+1</sup> (mono) | MH <sup>+2</sup> (av) | MH <sup>+2</sup> (mono) | MH <sup>+3</sup> (av) | MH <sup>+3</sup> (mono) |
|-----------------------|-------------------------|-----------------------|-------------------------|-----------------------|-------------------------|
| 1611.8901             | 1610.8788               | 806.4488              | 805.9431                | 537.9683              | 537.6311                |

**[-] Main Sequence Ions**

| b         | b <sup>+</sup> |    | y         | y <sup>+</sup>        |
|-----------|----------------|----|-----------|-----------------------|
| ---       | ---            | 1  | Y         | 13                    |
| 278.1135  | ---            | 2  | N         | 12 1447.8155 724.4114 |
| 391.1976  | ---            | 3  | I         | 11 1333.7726 667.3899 |
| 520.2402  | ---            | 4  | E         | 10 1220.6885 610.8479 |
| 690.3457  | 345.6765       | 5  | K(Acetyl) | 9 1091.6459 546.3266  |
| 805.3727  | 403.1900       | 6  | D         | 8 921.5404 461.2738   |
| 918.4567  | 459.7320       | 7  | I         | 7 806.5135 403.7604   |
| 989.4938  | 495.2506       | 8  | A         | 6 693.4294 347.2183   |
| 1060.5310 | 530.7691       | 9  | A         | 5 622.3923 311.6998   |
| 1223.5943 | 612.3008       | 10 | Y         | 4 551.3552 276.1812   |
| 1336.6783 | 668.8428       | 11 | I         | 3 388.2918 194.6496   |
| 1464.7733 | 732.8903       | 12 | K         | 2 275.2078 138.1075   |
| ---       | ---            | 13 | K         | 1 147.1128 74.0600    |

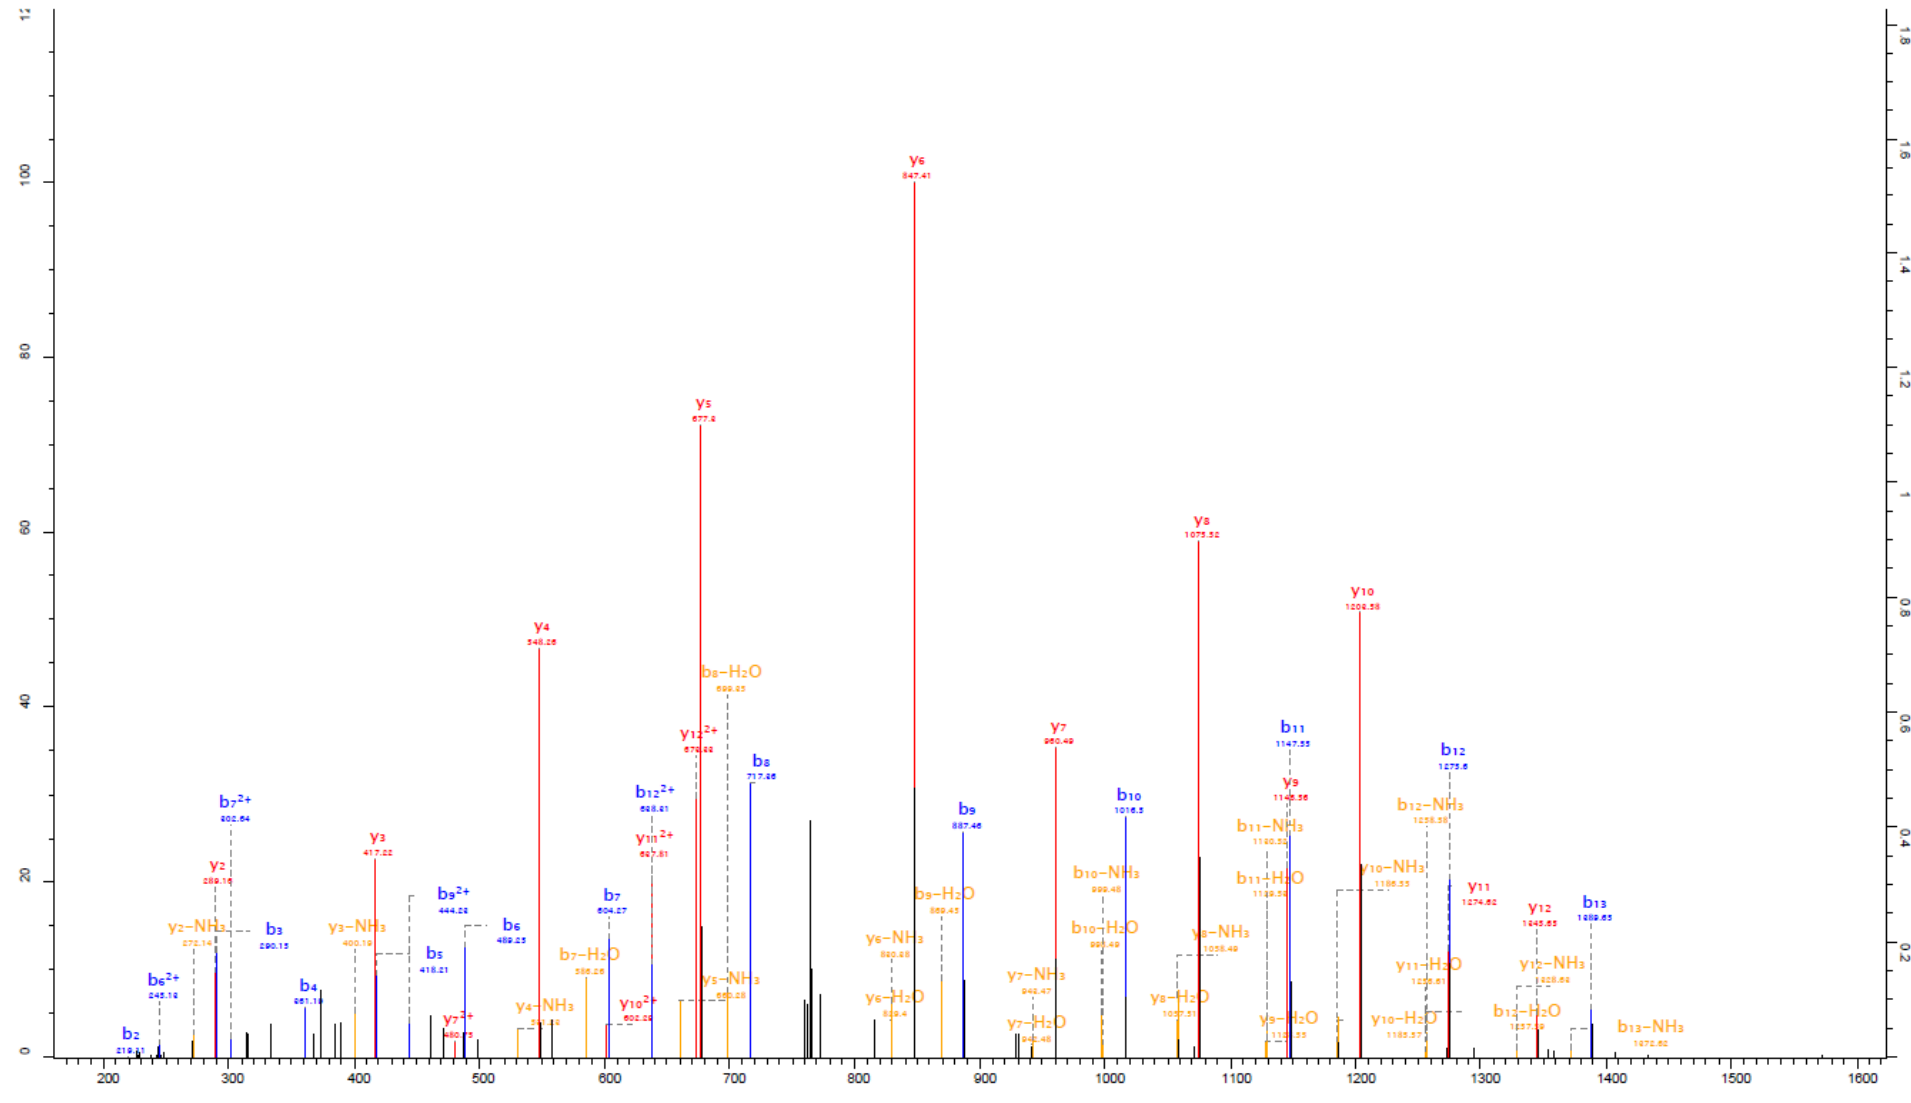

- A F 

|     |     |     |    |    |    |    |    |     |     |     |     |
|-----|-----|-----|----|----|----|----|----|-----|-----|-----|-----|
| Y12 | Y11 | Y10 | Y9 | Y8 | Y7 | Y6 | Y5 | Y4  | Y3  | Y2  |     |
| b2  | b3  | b4  | b5 | b6 | b7 | b8 | b9 | b10 | b11 | b12 | b13 |

 R -

Gene name = Echs1

| MH <sup>+</sup> 1(av) | MH <sup>+</sup> 1(mono) | MH <sup>+</sup> 2(av) | MH <sup>+</sup> 2(mono) |
|-----------------------|-------------------------|-----------------------|-------------------------|
| 1564.7710             | 1563.7584               | 782.8892              | 782.3828                |

[ - ] Main Sequence Ions

| b         | b <sup>+</sup> |    | y                | y <sup>+</sup> |           |
|-----------|----------------|----|------------------|----------------|-----------|
| ---       | ---            | 1  | <b>A</b>         | 14             | ---       |
| 219.1128  | ---            | 2  | <b>F</b>         | 13             | 1492.7213 |
| 290.1499  | ---            | 3  | <b>A</b>         | 12             | 1345.6529 |
| 361.1870  | ---            | 4  | <b>A</b>         | 11             | 1274.6158 |
| 418.2085  | ---            | 5  | <b>G</b>         | 10             | 1203.5786 |
| 489.2456  | ---            | 6  | <b>A</b>         | 9              | 1146.5572 |
| 604.2726  | ---            | 7  | <b>D</b>         | 8              | 1075.5201 |
| 717.3566  | ---            | 8  | <b>I</b>         | 7              | 960.4931  |
| 887.4621  | 844.2347       | 9  | <b>K(Acetyl)</b> | 6              | 847.4091  |
| 1016.5047 | 508.7560       | 10 | <b>E</b>         | 5              | 677.3035  |
| 1147.5452 | 574.2762       | 11 | <b>M</b>         | 4              | 548.2609  |
| 1275.6038 | 638.3055       | 12 | <b>Q</b>         | 3              | 417.2205  |
| 1389.6467 | 695.3270       | 13 | <b>N</b>         | 2              | 289.1619  |
| ---       | ---            | 14 | <b>R</b>         | 1              | 175.1190  |

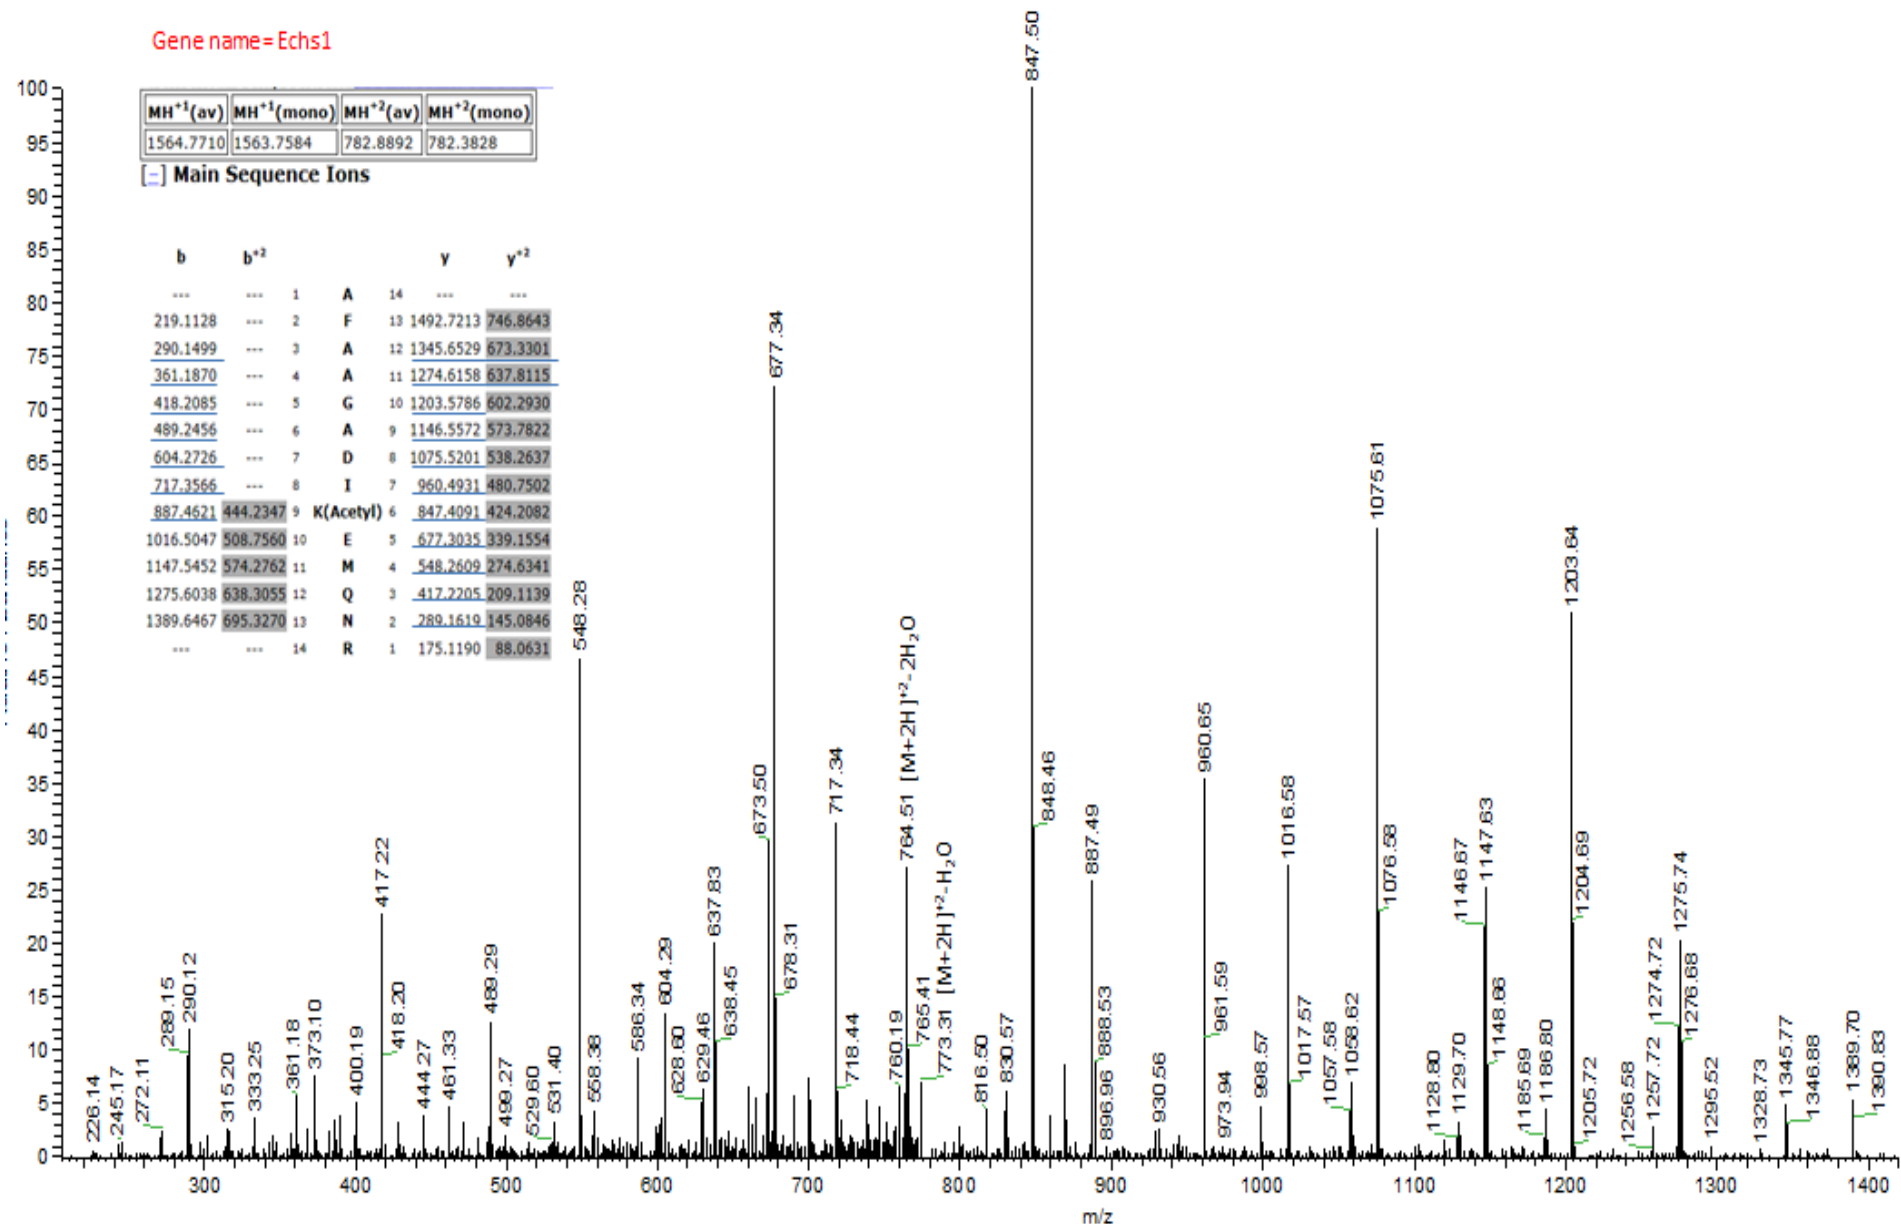

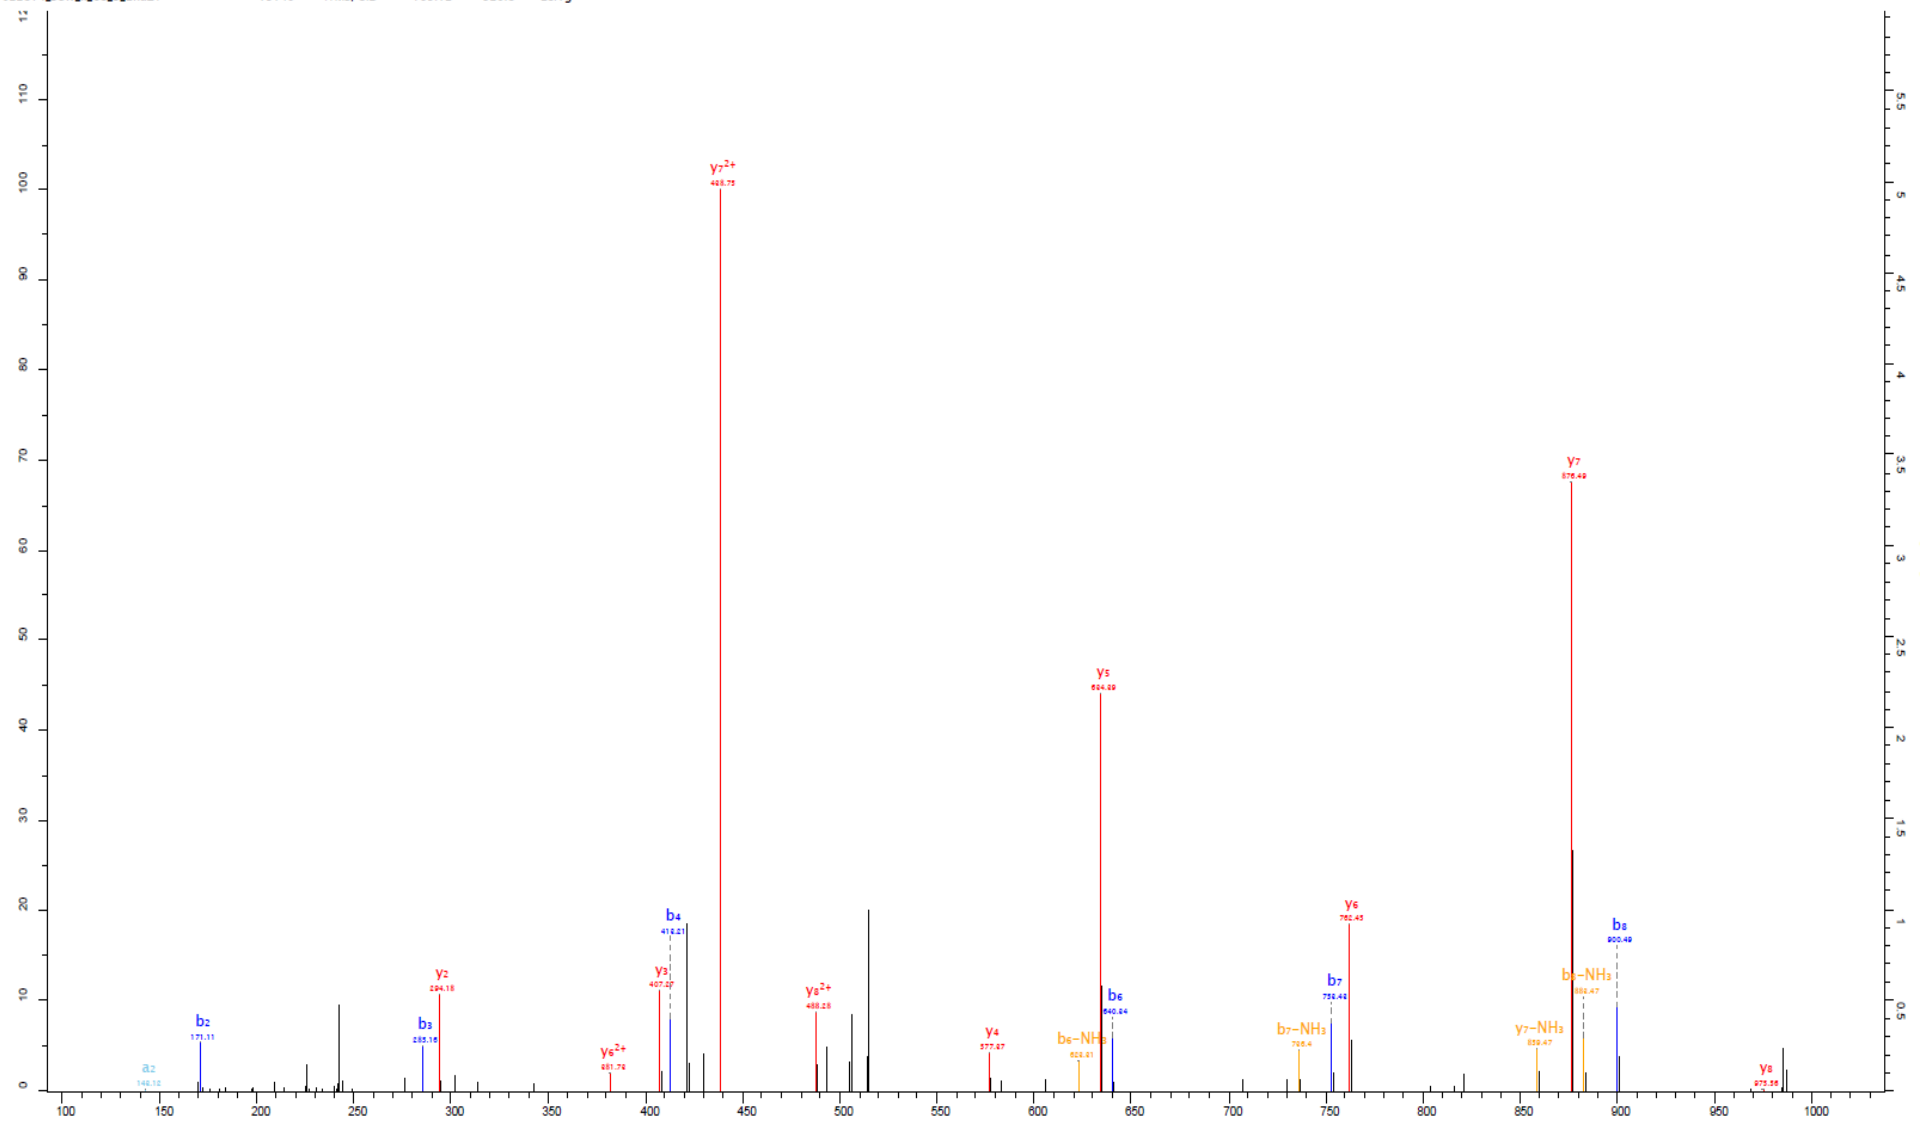

- A V N Q G K I F K -

y6 y7 y6 y5 y4 y3 y2  
b2 b3 b4 b5 b6 b7 b8

Gene name = Eef1g

| MH <sup>+</sup> 1(av) | MH <sup>+</sup> 1(mono) | MH <sup>+</sup> 2(av) | MH <sup>+</sup> 2(mono) |
|-----------------------|-------------------------|-----------------------|-------------------------|
| 1047.2499             | 1046.5993               | 524.1287              | 523.8033                |

**[-] Main Sequence Ions**

| b        | b <sup>+</sup> 2 | y           | y <sup>+</sup> 2    |
|----------|------------------|-------------|---------------------|
| ---      | ---              | 1 A         | 9 ---               |
| 171.1128 | ---              | 2 V         | 8 975.5622 488.2847 |
| 285.1557 | ---              | 3 N         | 7 876.4938 438.7505 |
| 413.2143 | ---              | 4 Q         | 6 762.4509 381.7291 |
| 470.2358 | ---              | 5 G         | 5 634.3923 317.6998 |
| 640.3413 | 320.6743         | 6 K(Acetyl) | 4 577.3708 289.1890 |
| 753.4254 | 377.2163         | 7 I         | 3 407.2653 204.1363 |
| 900.4938 | 450.7505         | 8 F         | 2 294.1812 147.5942 |
| ---      | ---              | 9 K         | 1 147.1128 74.0600  |

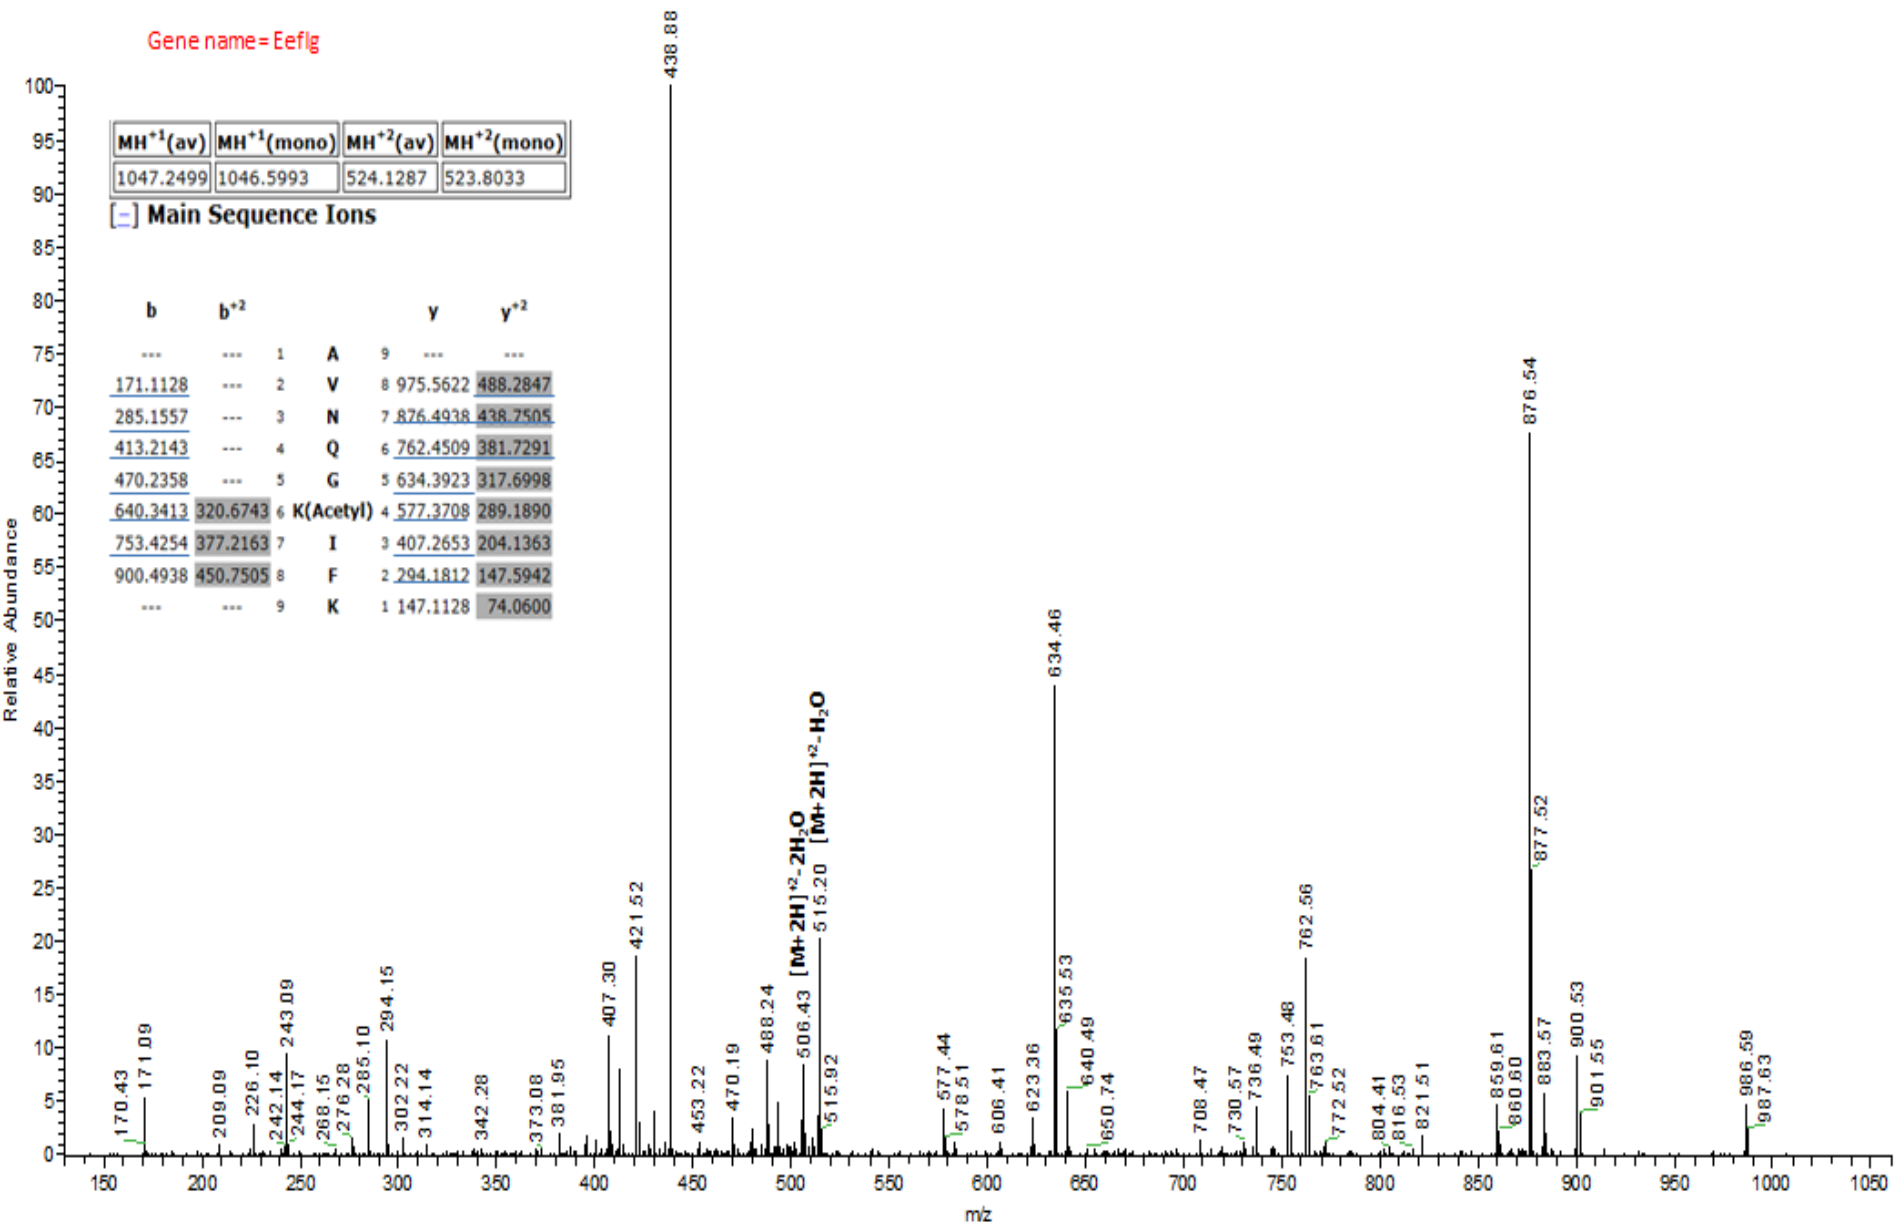



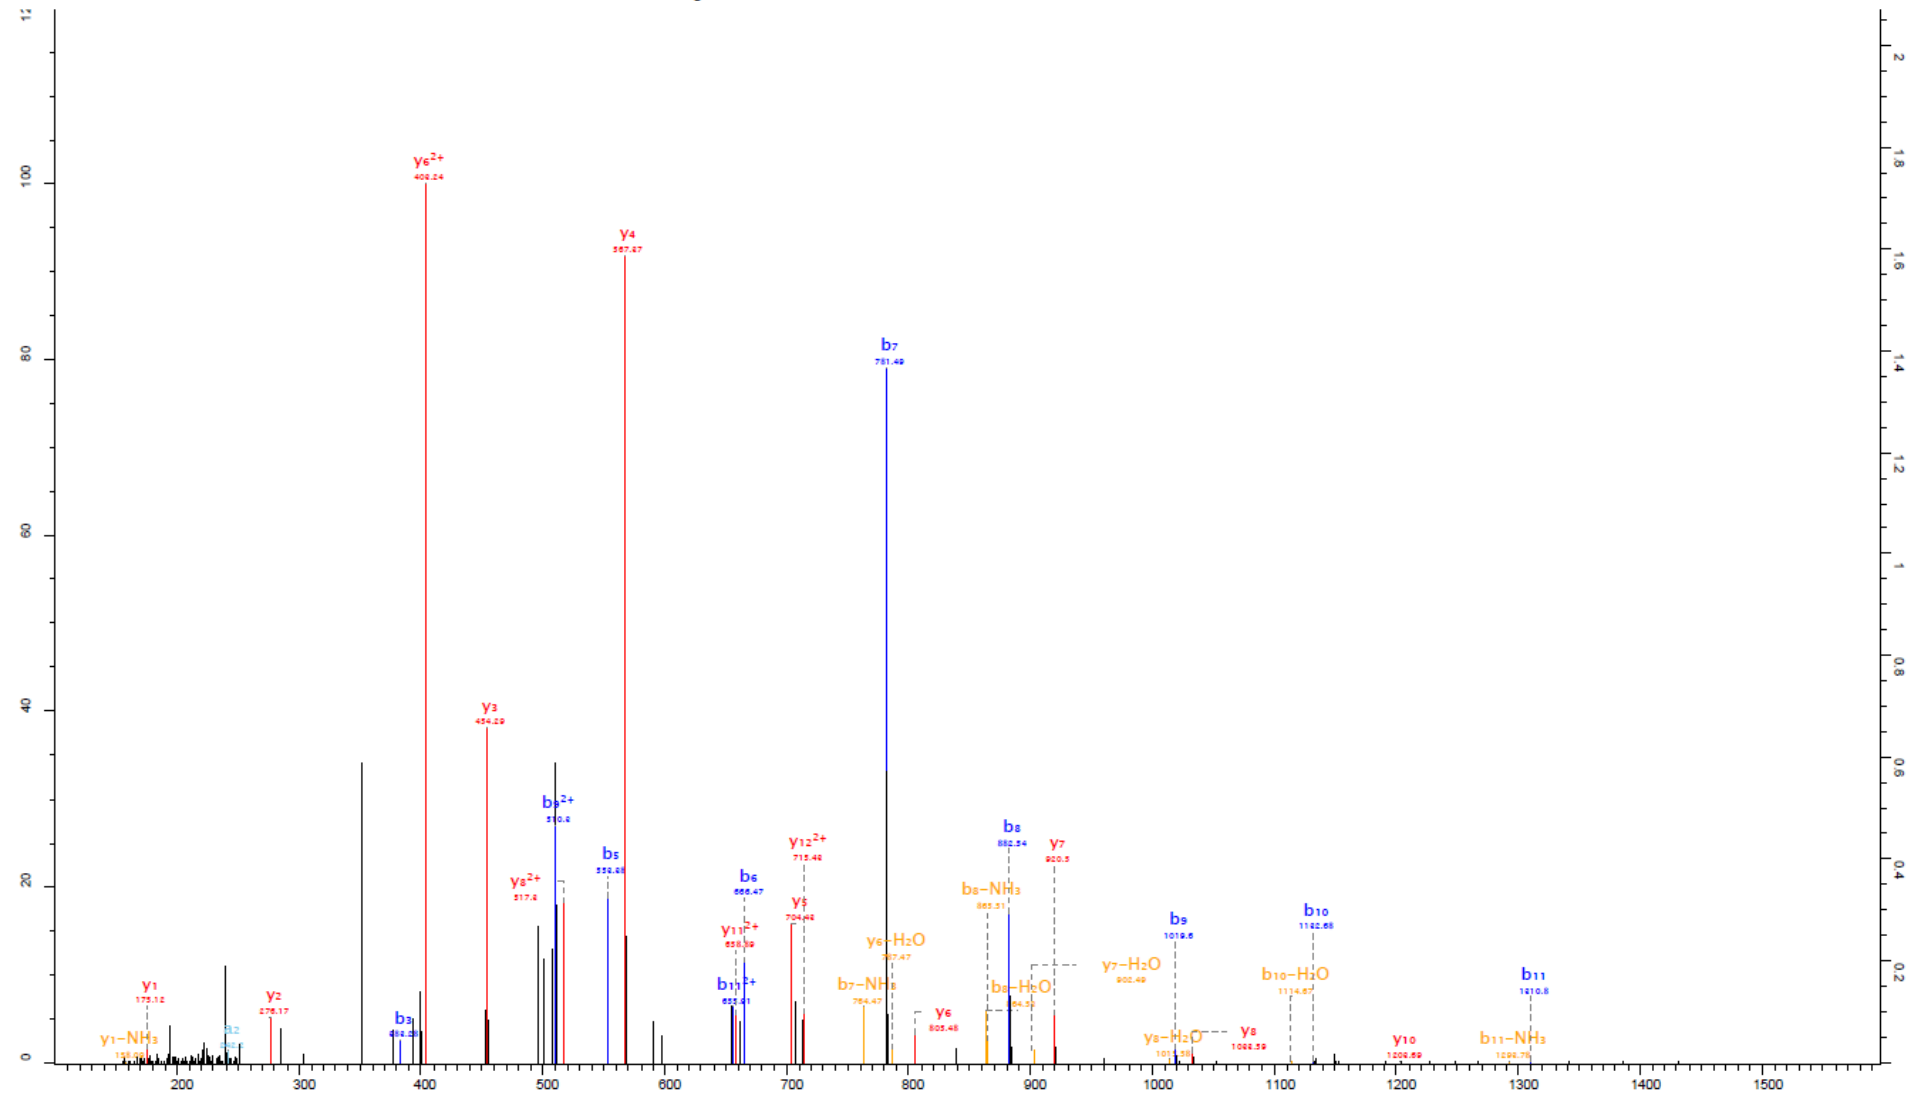

- R y<sub>12</sub><sup>2+</sup> y<sub>11</sub><sup>2+</sup> y<sub>10</sub> L y<sub>6</sub> y<sub>7</sub> y<sub>8</sub> y<sub>5</sub> y<sub>4</sub> y<sub>5</sub> ac y<sub>2</sub> y<sub>1</sub>  
a<sub>2</sub> b<sub>2</sub> b<sub>5</sub> b<sub>6</sub> b<sub>7</sub> b<sub>8</sub> b<sub>10</sub> b<sub>11</sub> T R -

Gene name = Eef1g

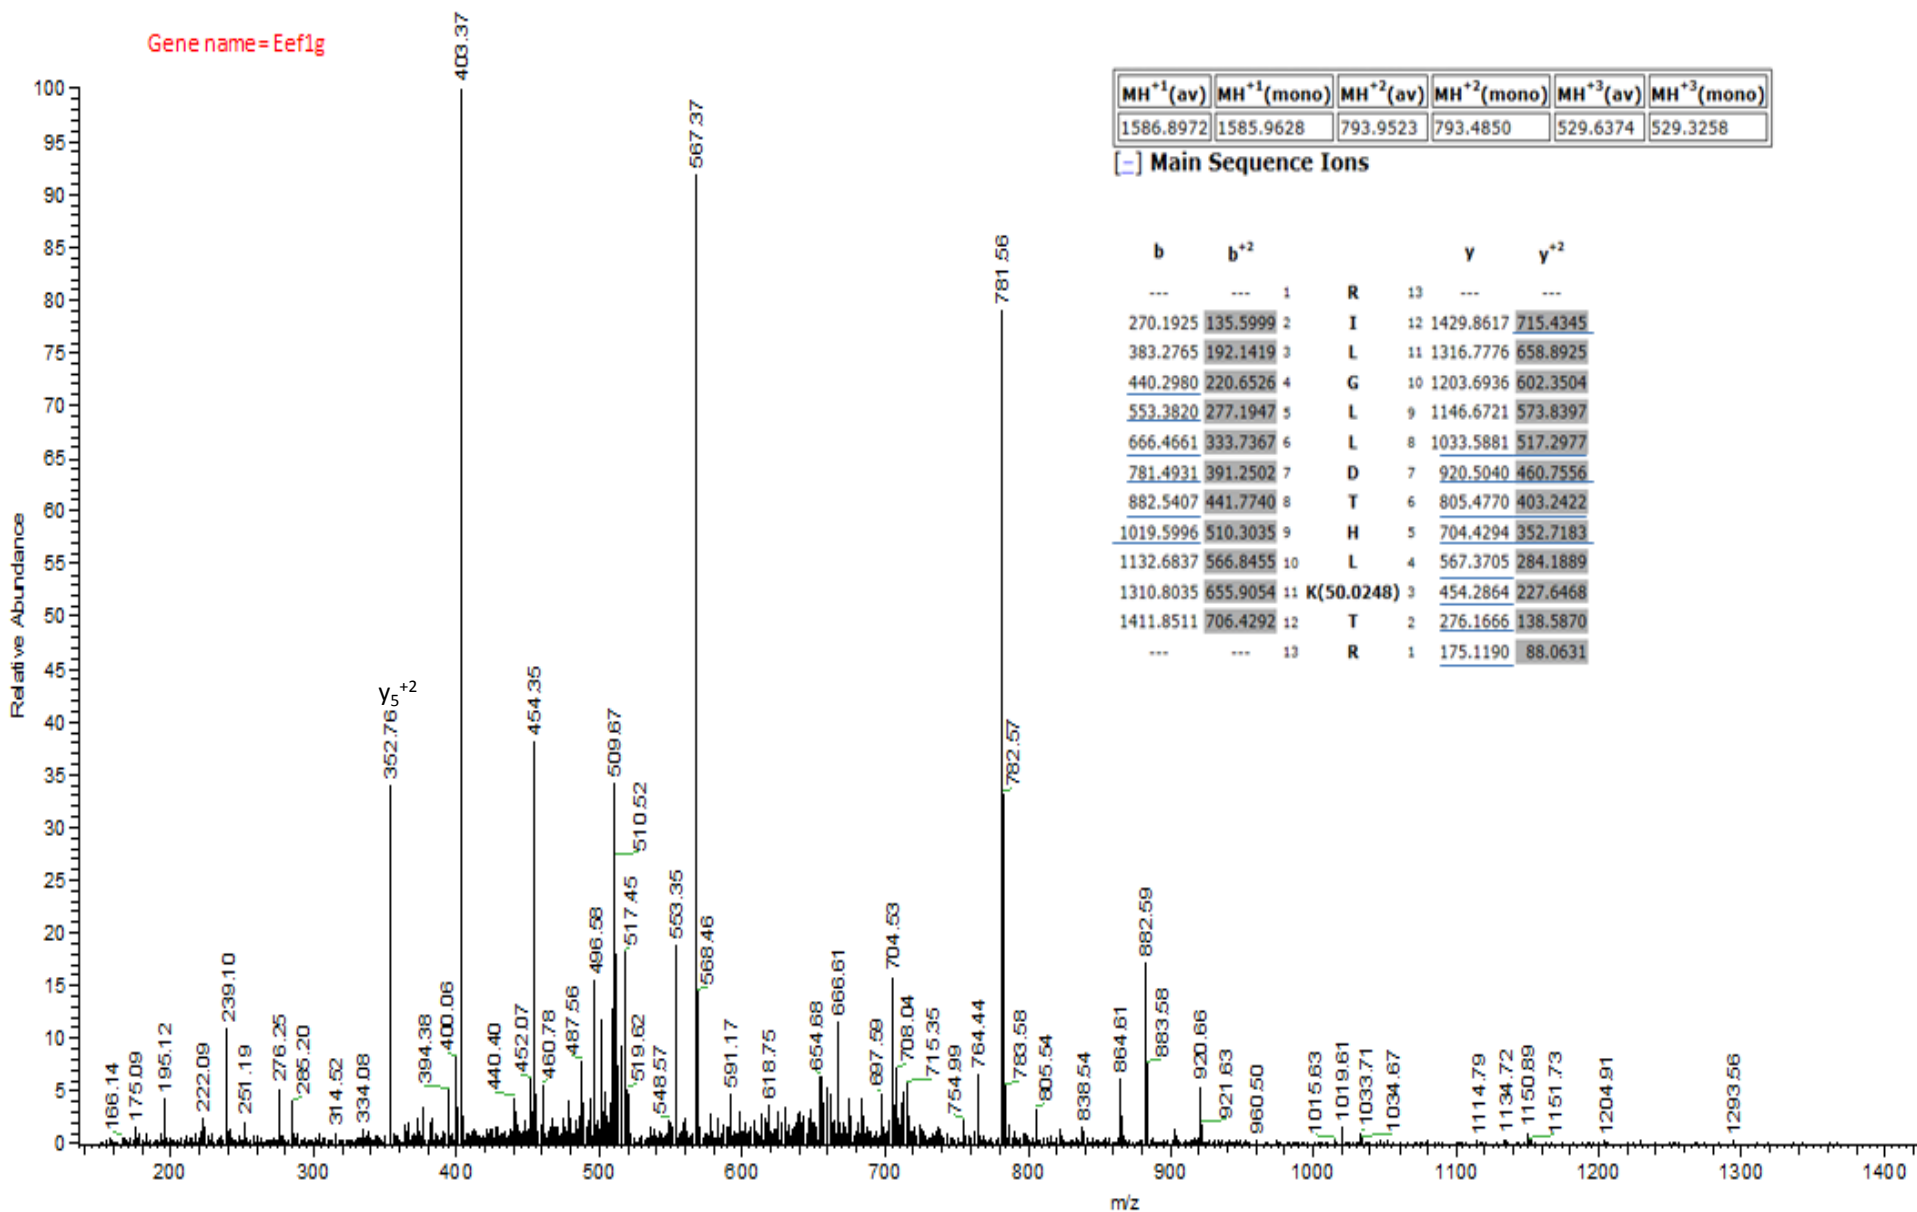

| MH <sup>+</sup> (av) | MH <sup>+</sup> (mono) | MH <sup>2+</sup> (av) | MH <sup>2+</sup> (mono) | MH <sup>3+</sup> (av) | MH <sup>3+</sup> (mono) |
|----------------------|------------------------|-----------------------|-------------------------|-----------------------|-------------------------|
| 1586.8972            | 1585.9628              | 793.9523              | 793.4850                | 529.6374              | 529.3258                |

**[-] Main Sequence Ions**

| b         | b <sup>+</sup> |    | y          | y <sup>+</sup> |                    |
|-----------|----------------|----|------------|----------------|--------------------|
| ---       | ---            | 1  | R          | 13             | ---                |
| 270.1925  | 135.5999       | 2  | I          | 12             | 1429.8617 715.4345 |
| 383.2765  | 192.1419       | 3  | L          | 11             | 1316.7776 658.8925 |
| 440.2980  | 220.6526       | 4  | G          | 10             | 1203.6936 602.3504 |
| 553.3820  | 277.1947       | 5  | L          | 9              | 1146.6721 573.8397 |
| 666.4661  | 333.7367       | 6  | L          | 8              | 1033.5881 517.2977 |
| 781.4931  | 391.2502       | 7  | D          | 7              | 920.5040 460.7556  |
| 882.5407  | 441.7740       | 8  | T          | 6              | 805.4770 403.2422  |
| 1019.5996 | 510.3035       | 9  | H          | 5              | 704.4294 352.7183  |
| 1132.6837 | 566.8455       | 10 | L          | 4              | 567.3705 284.1889  |
| 1310.8035 | 655.9054       | 11 | K(50.0248) | 3              | 454.2864 227.6468  |
| 1411.8511 | 706.4292       | 12 | T          | 2              | 276.1666 138.5870  |
| --        | --             | 13 | R          | 1              | 175.1190 88.0631   |

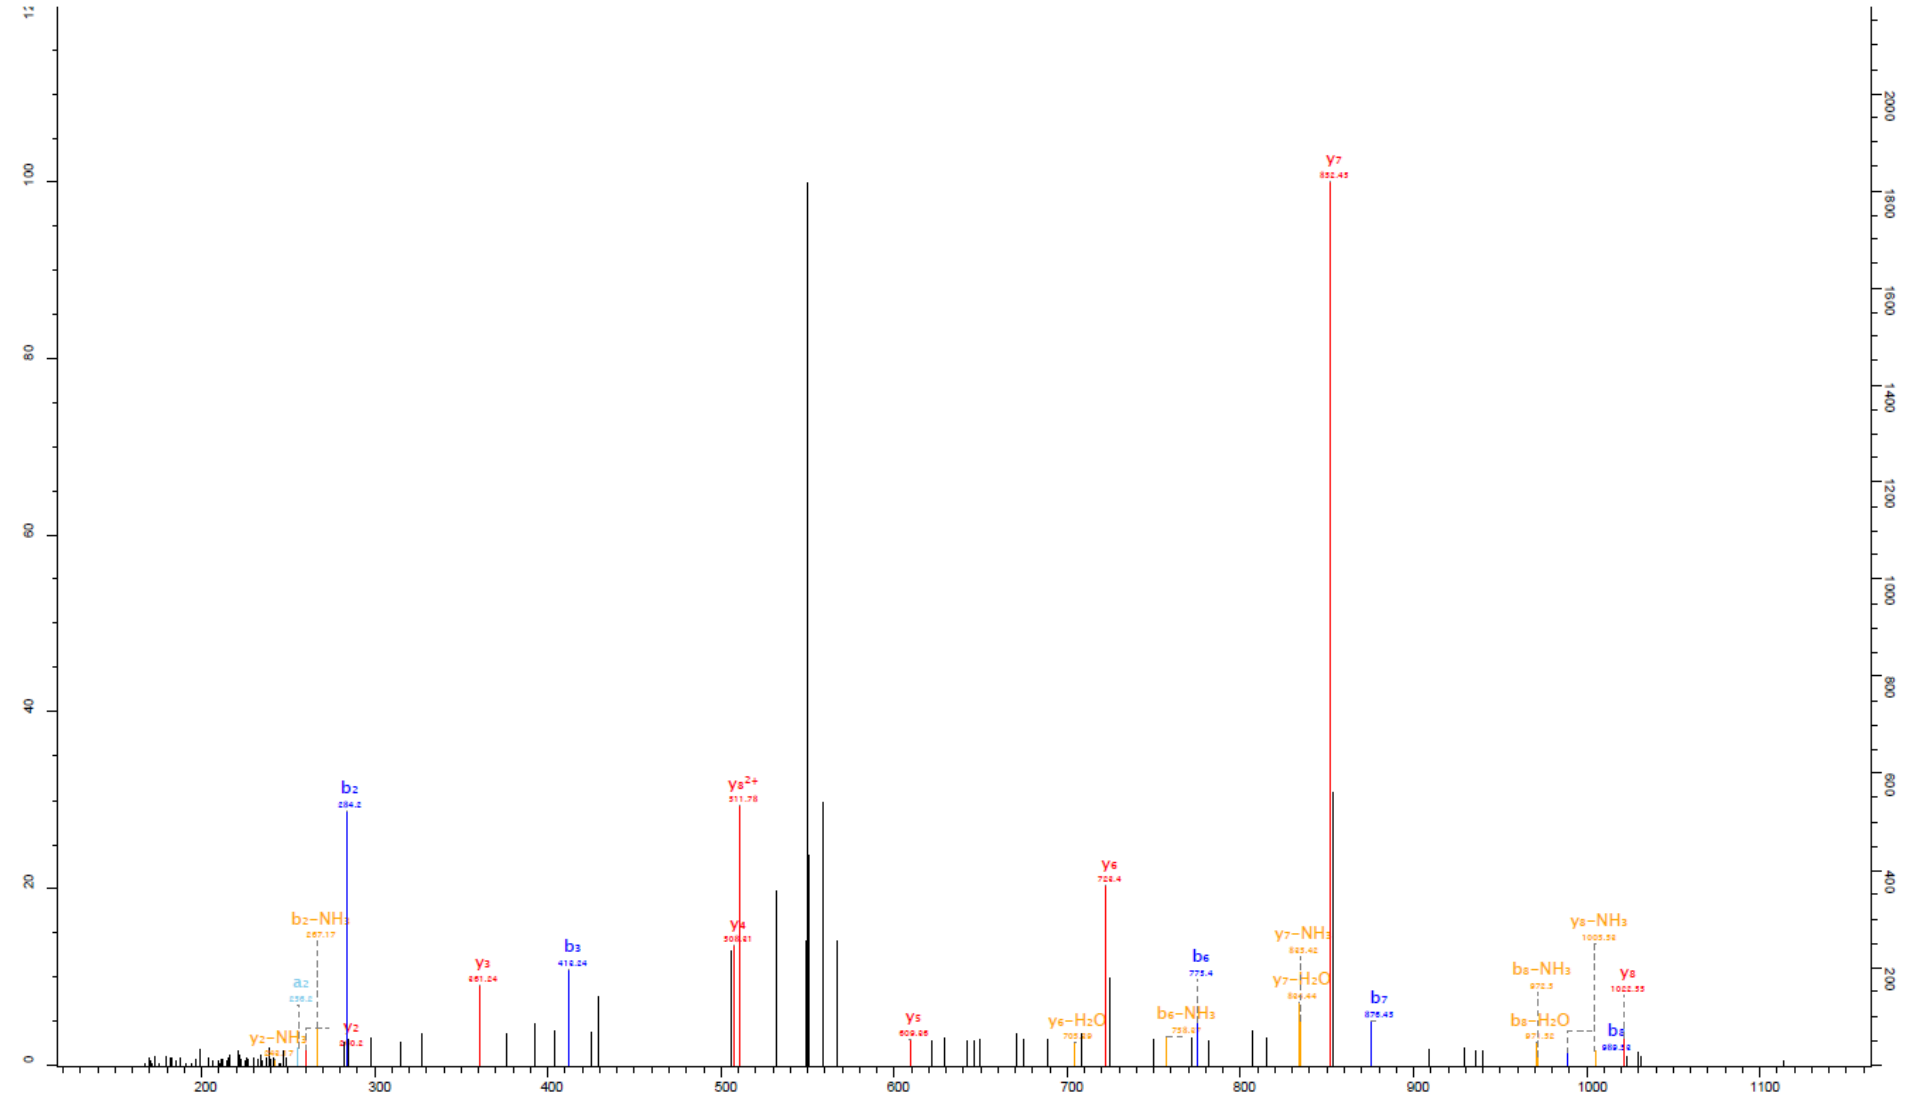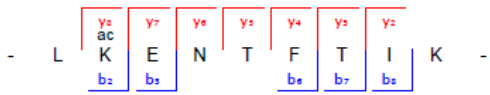

Gene name = E1p2

| MH <sup>+</sup> (av) | MH <sup>+</sup> (mono) | MH <sup>2+</sup> (av) | MH <sup>2+</sup> (mono) |
|----------------------|------------------------|-----------------------|-------------------------|
| 1136.3416            | 1135.6358              | 568.6745              | 568.3215                |

**[ - ] Main Sequence Ions**

| b        | b <sup>+</sup> |   | y         | y <sup>+</sup> |
|----------|----------------|---|-----------|----------------|
| ---      | ---            | 1 | L         | 9              |
| ---      | ---            | 2 | ---       | ---            |
| 284.1969 | 142.6021       | 2 | K(Acetyl) | 8              |
| 413.2395 | 207.1234       | 3 | E         | 7              |
| 527.2824 | 264.1448       | 4 | N         | 6              |
| 628.3301 | 314.6687       | 5 | T         | 5              |
| 775.3985 | 388.2029       | 6 | F         | 4              |
| 876.4462 | 438.7267       | 7 | T         | 3              |
| 989.5302 | 495.2687       | 8 | I         | 2              |
| ---      | ---            | 9 | K         | 1              |

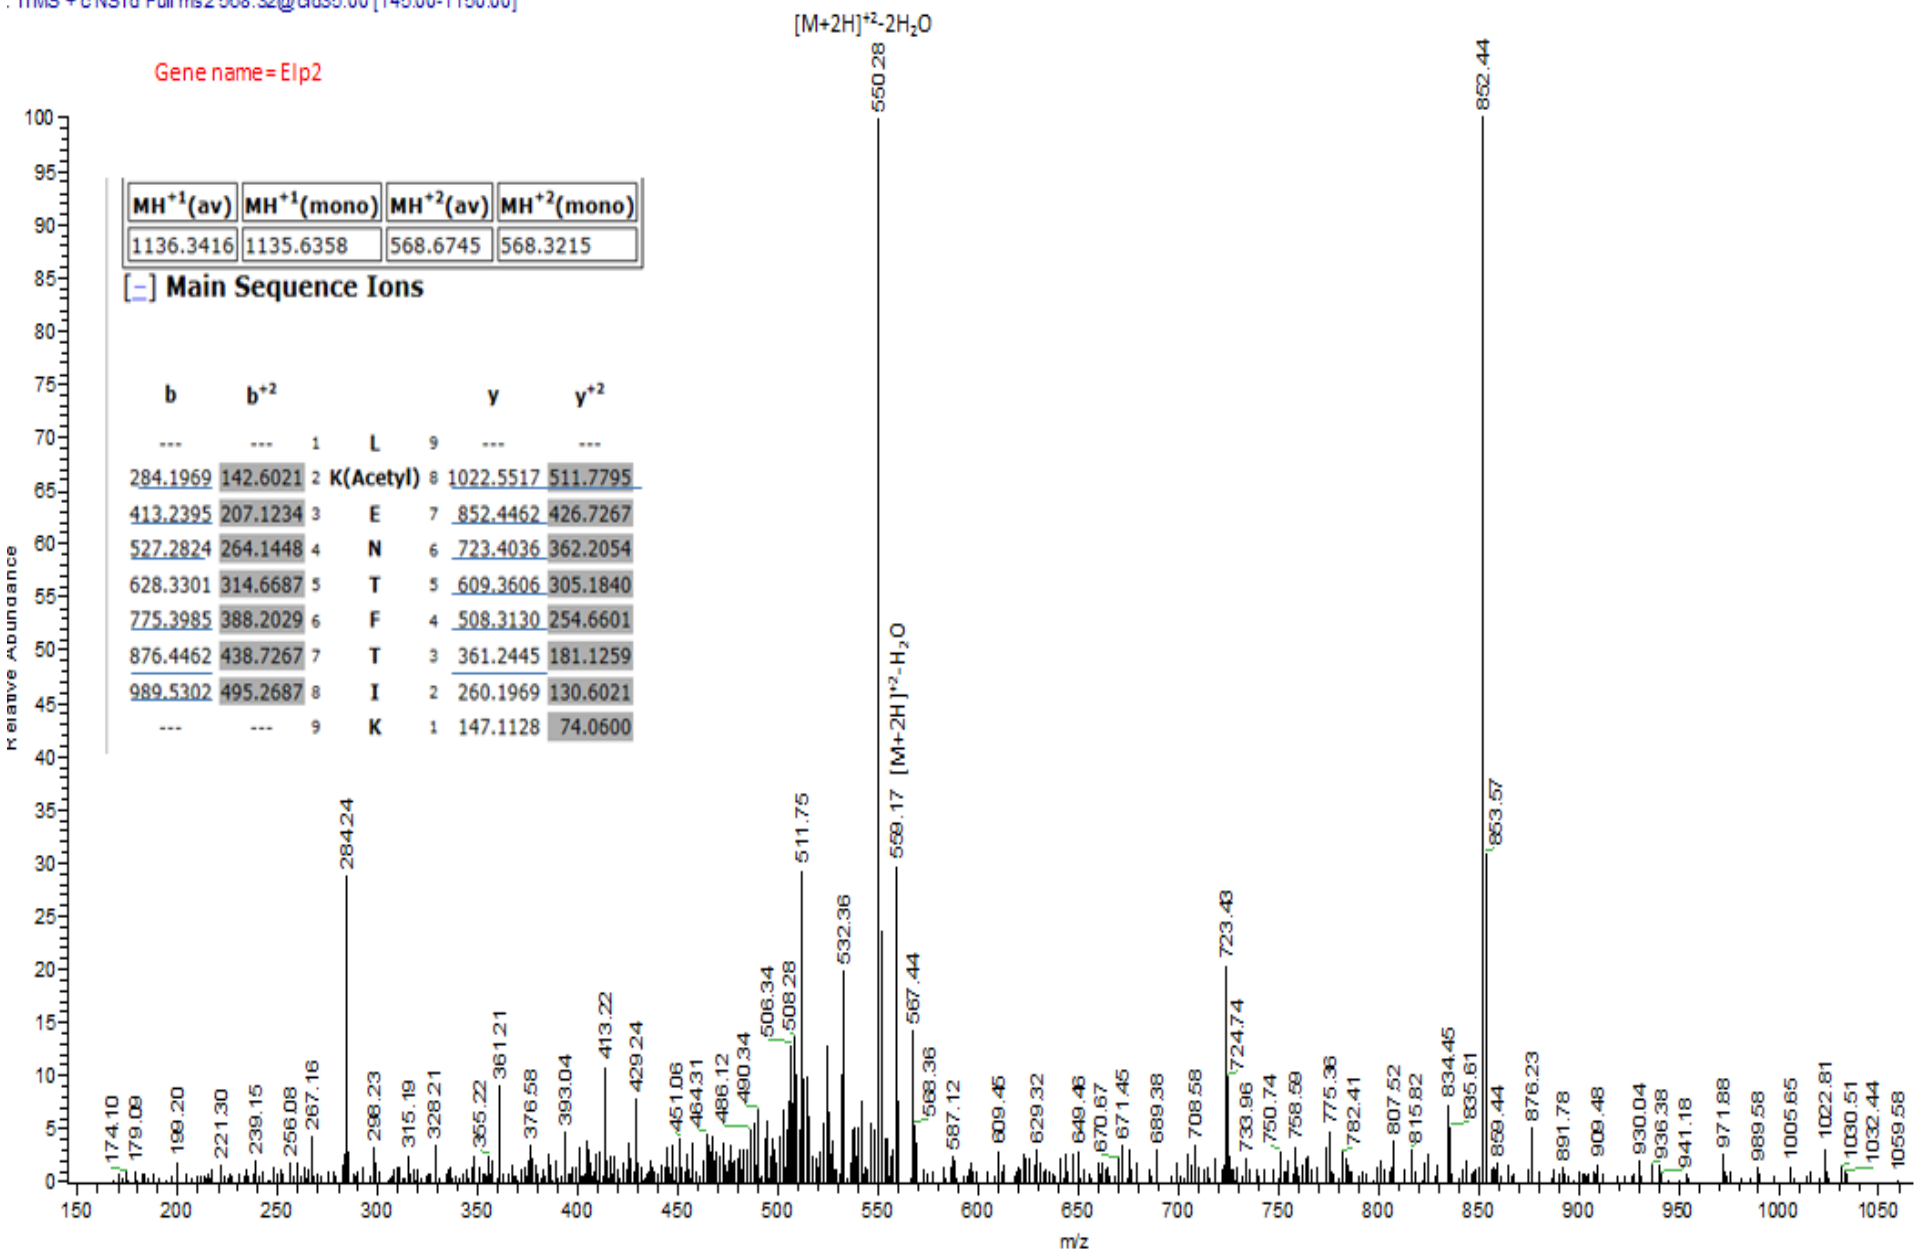

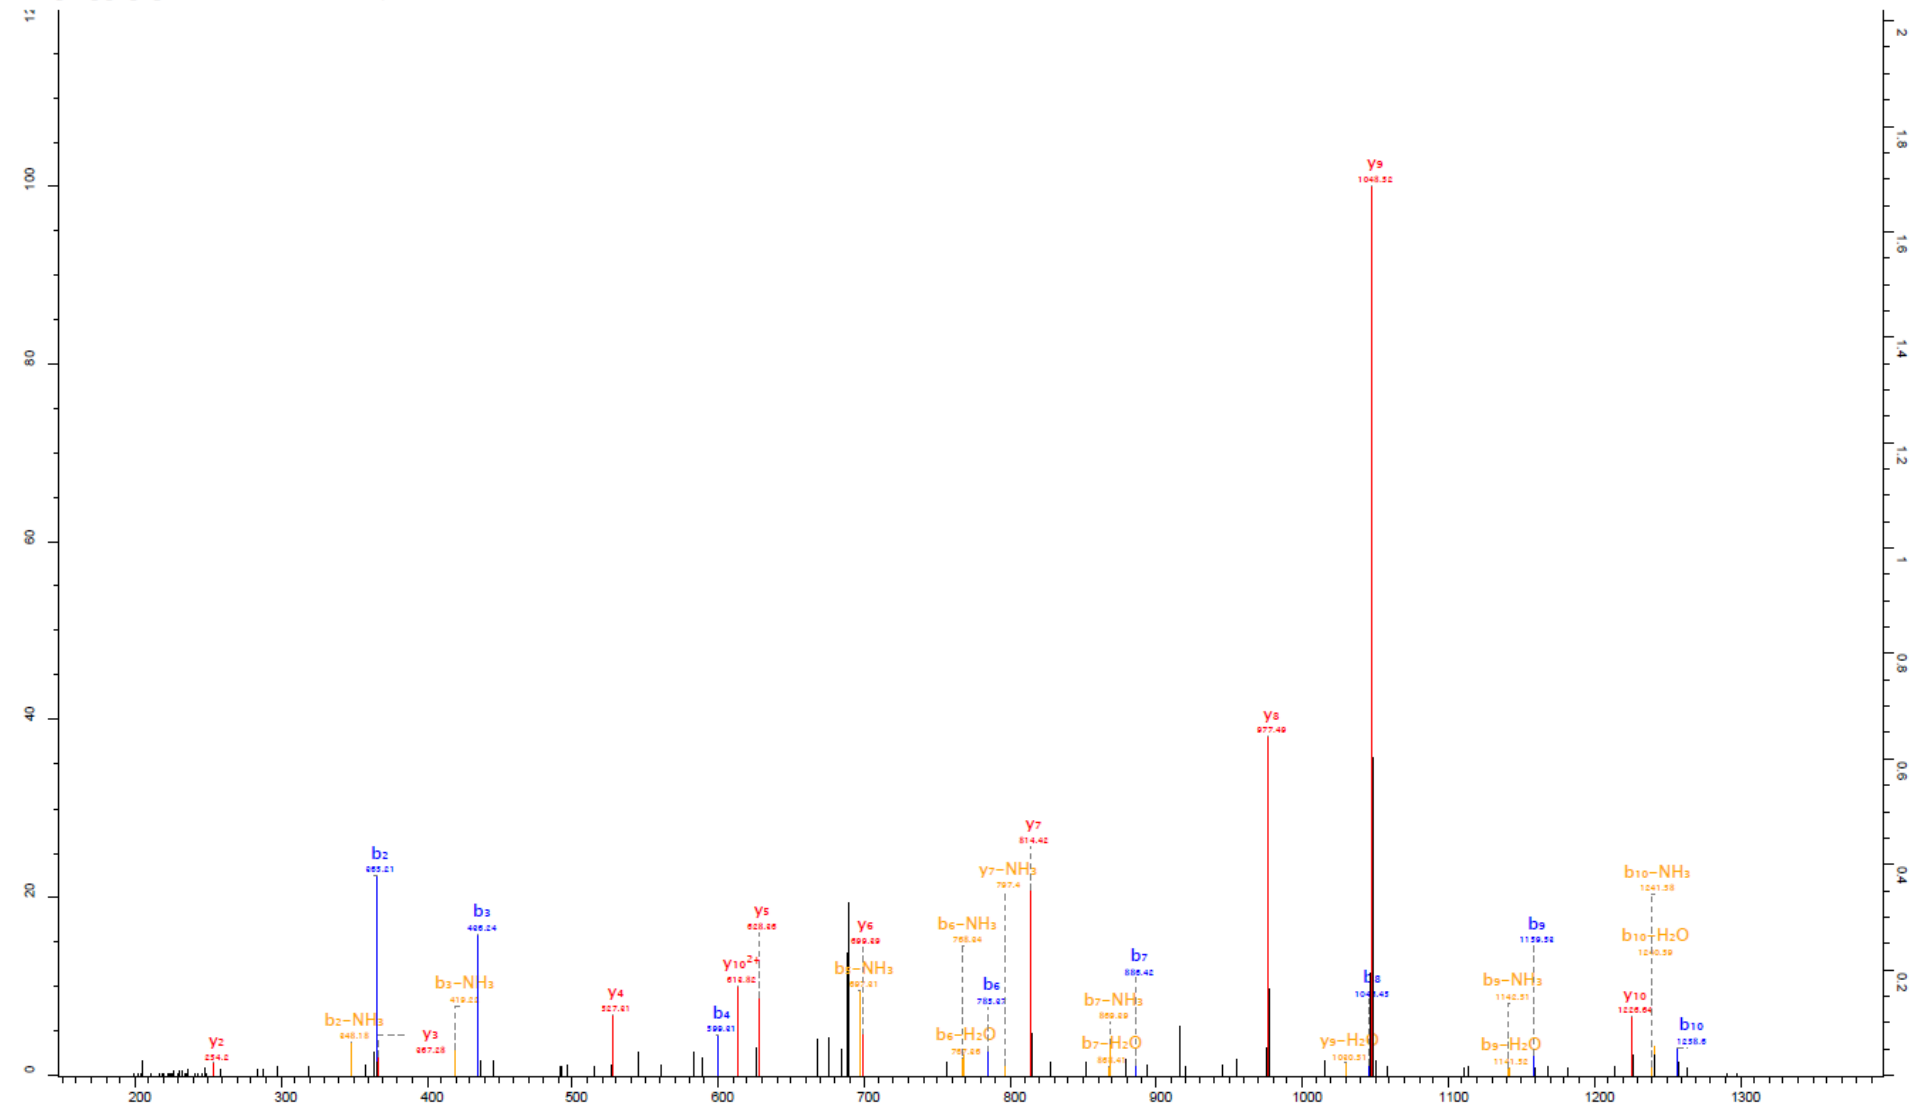

- W 

|     |    |    |    |    |    |    |    |     |
|-----|----|----|----|----|----|----|----|-----|
| y10 | y9 | y8 | y7 | y6 | y5 | y4 | y3 | y2  |
| ac  |    |    |    |    |    |    |    |     |
| b2  | b3 | b4 |    | b6 | b7 | b8 | b9 | b10 |

 K -

Gene name = Esd

| MH <sup>+</sup> 1(av) | MH <sup>+</sup> 1(mono) | MH <sup>+</sup> 2(av) | MH <sup>+</sup> 2(mono) |
|-----------------------|-------------------------|-----------------------|-------------------------|
| 1413.6474             | 1412.7214               | 707.3274              | 706.8643                |

[-] Main Sequence Ions

| b         | b <sup>+</sup> |    | y                         | y <sup>+</sup> |
|-----------|----------------|----|---------------------------|----------------|
| ---       | ---            | 1  | W                         | 11             |
| 365.2064  | 183.1068       | 2  | <b>K(50.0248)</b>         | 10             |
| 436.2435  | 218.6254       | 3  | A                         | 9              |
| 599.3068  | 300.1570       | 4  | Y                         | 8              |
| 714.3337  | 357.6705       | 5  | D                         | 7              |
| 785.3709  | 393.1891       | 6  | A                         | 6              |
| 886.4185  | 443.7129       | 7  | T                         | 5              |
| 1046.4492 | 523.7282       | 8  | <b>C(Carbamidomethyl)</b> | 4              |
| 1159.5332 | 580.2703       | 9  | L                         | 3              |
| 1258.6017 | 629.8045       | 10 | V                         | 2              |
| ---       | ---            | 11 | <b>K(8.0142)</b>          | 1              |

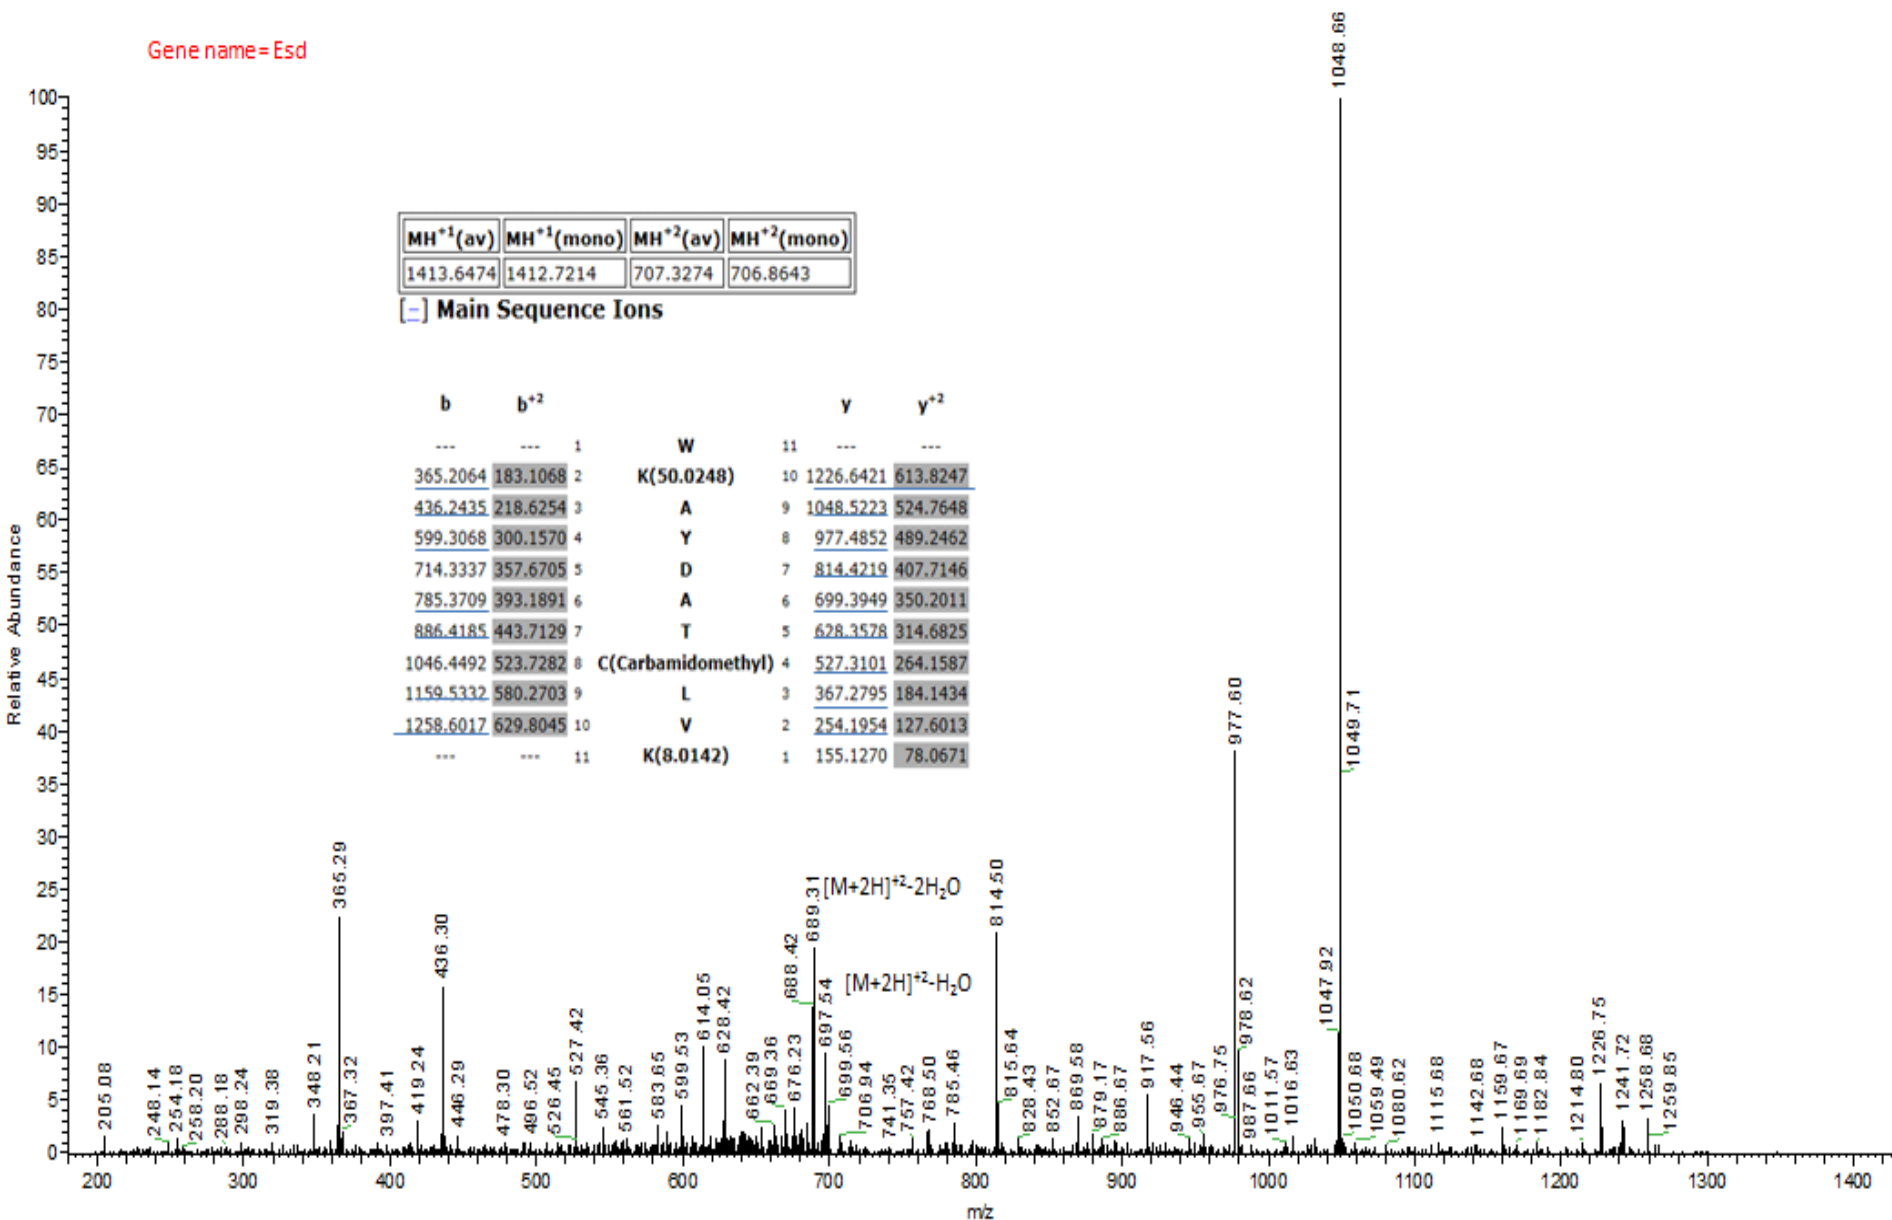

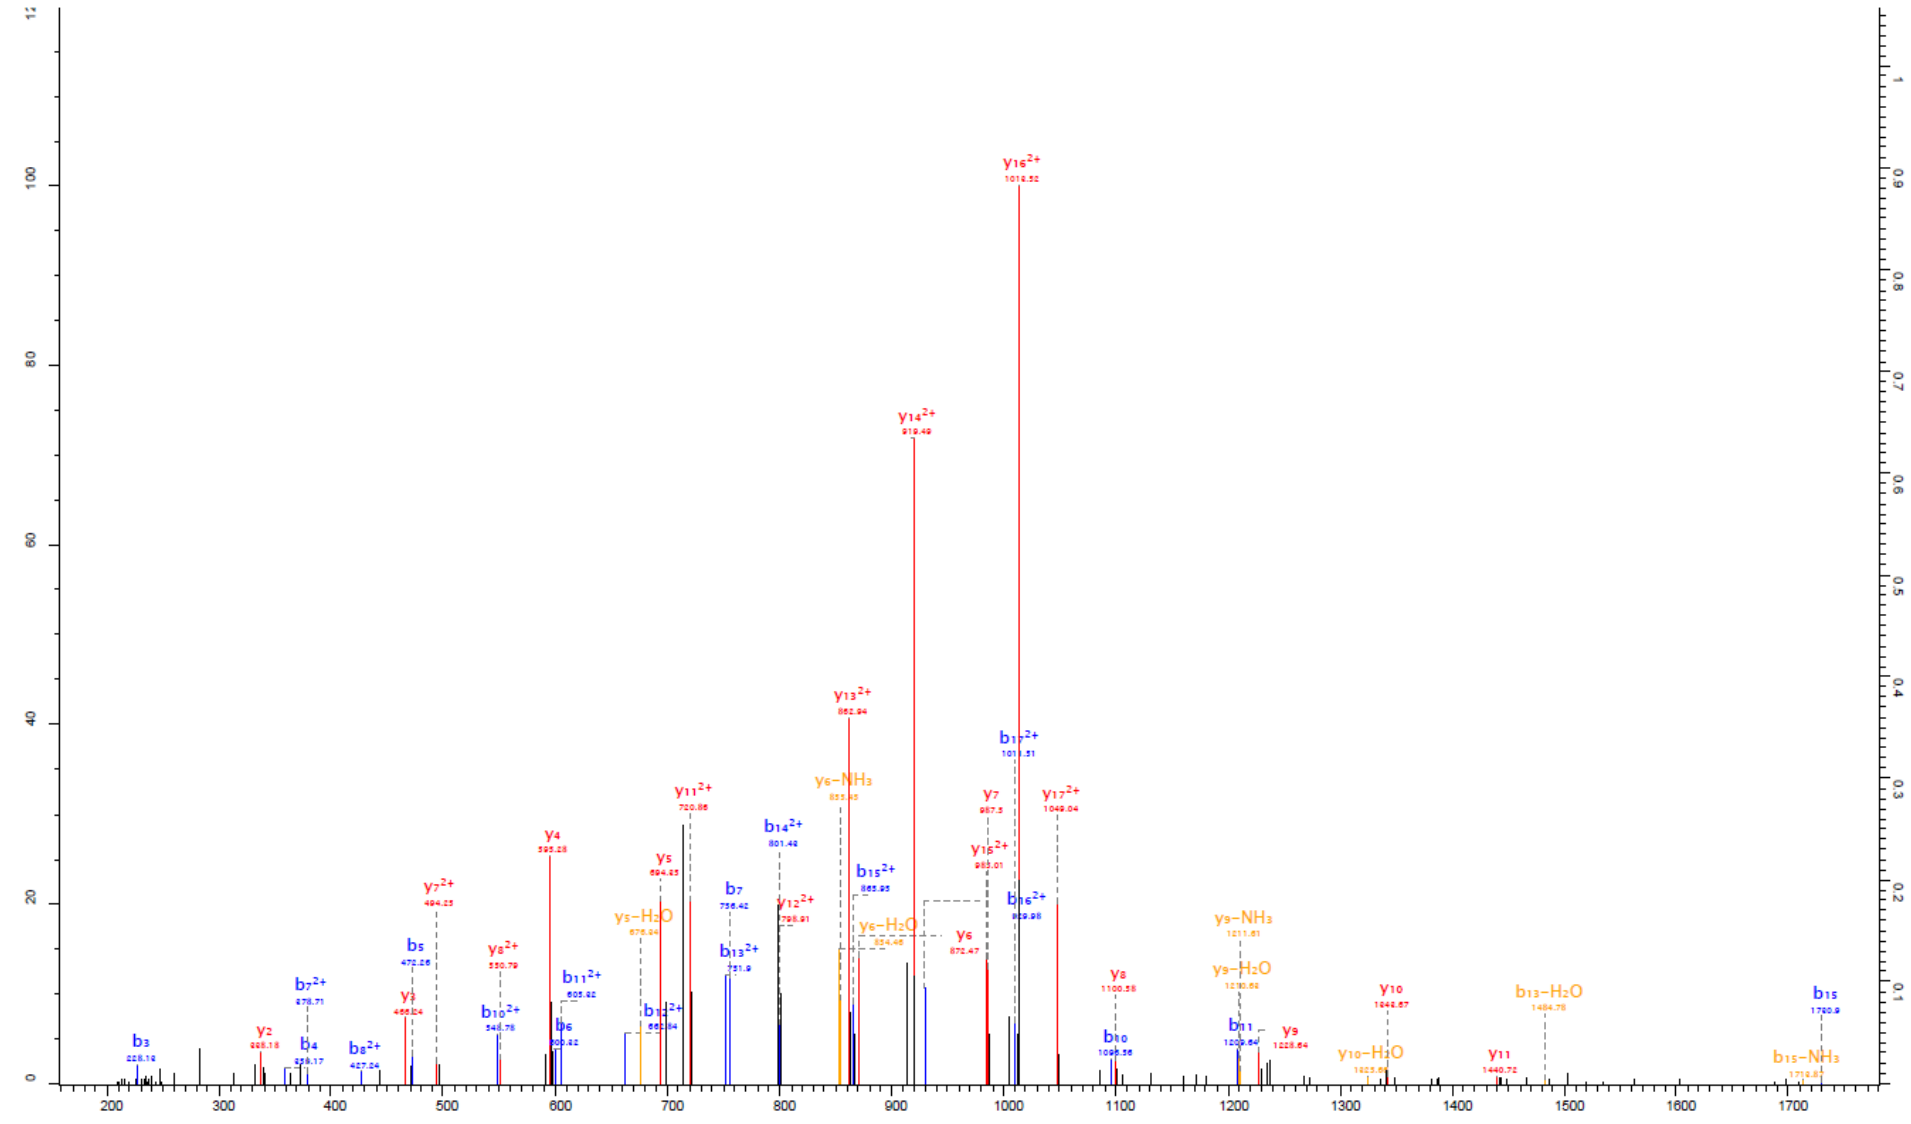

- V A G M L Q R P D Q L D K V E Q Y R -

Fragmentation labels below the sequence:

- Y12 2+ (above A)
- Y16 2+ (above G)
- Y15 2+ (above M)
- Y14 2+ (above L)
- Y13 2+ (above Q)
- Y12 2+ (above R)
- Y11 (above P)
- Y10 (above D)
- Y4 (above Q)
- Y5 (above L)
- Y7 (above D)
- Y5 (above K)
- Y5 (above V)
- Y4 (above E)
- Y5 (above Q)
- Y2 (above Y)

Fragmentation labels below the sequence:

- b3 (below A)
- b4 (below G)
- b5 (below M)
- b6 (below L)
- b7 (below Q)
- b2 2+ (below R)
- b10 (below D)
- b11 (below Q)
- b12 2+ (below L)
- b13 2+ (below D)
- b14 2+ (below K)
- b15 (below V)
- b16 2+ (below E)
- b17 2+ (below Q)

Gene name = Exoc3

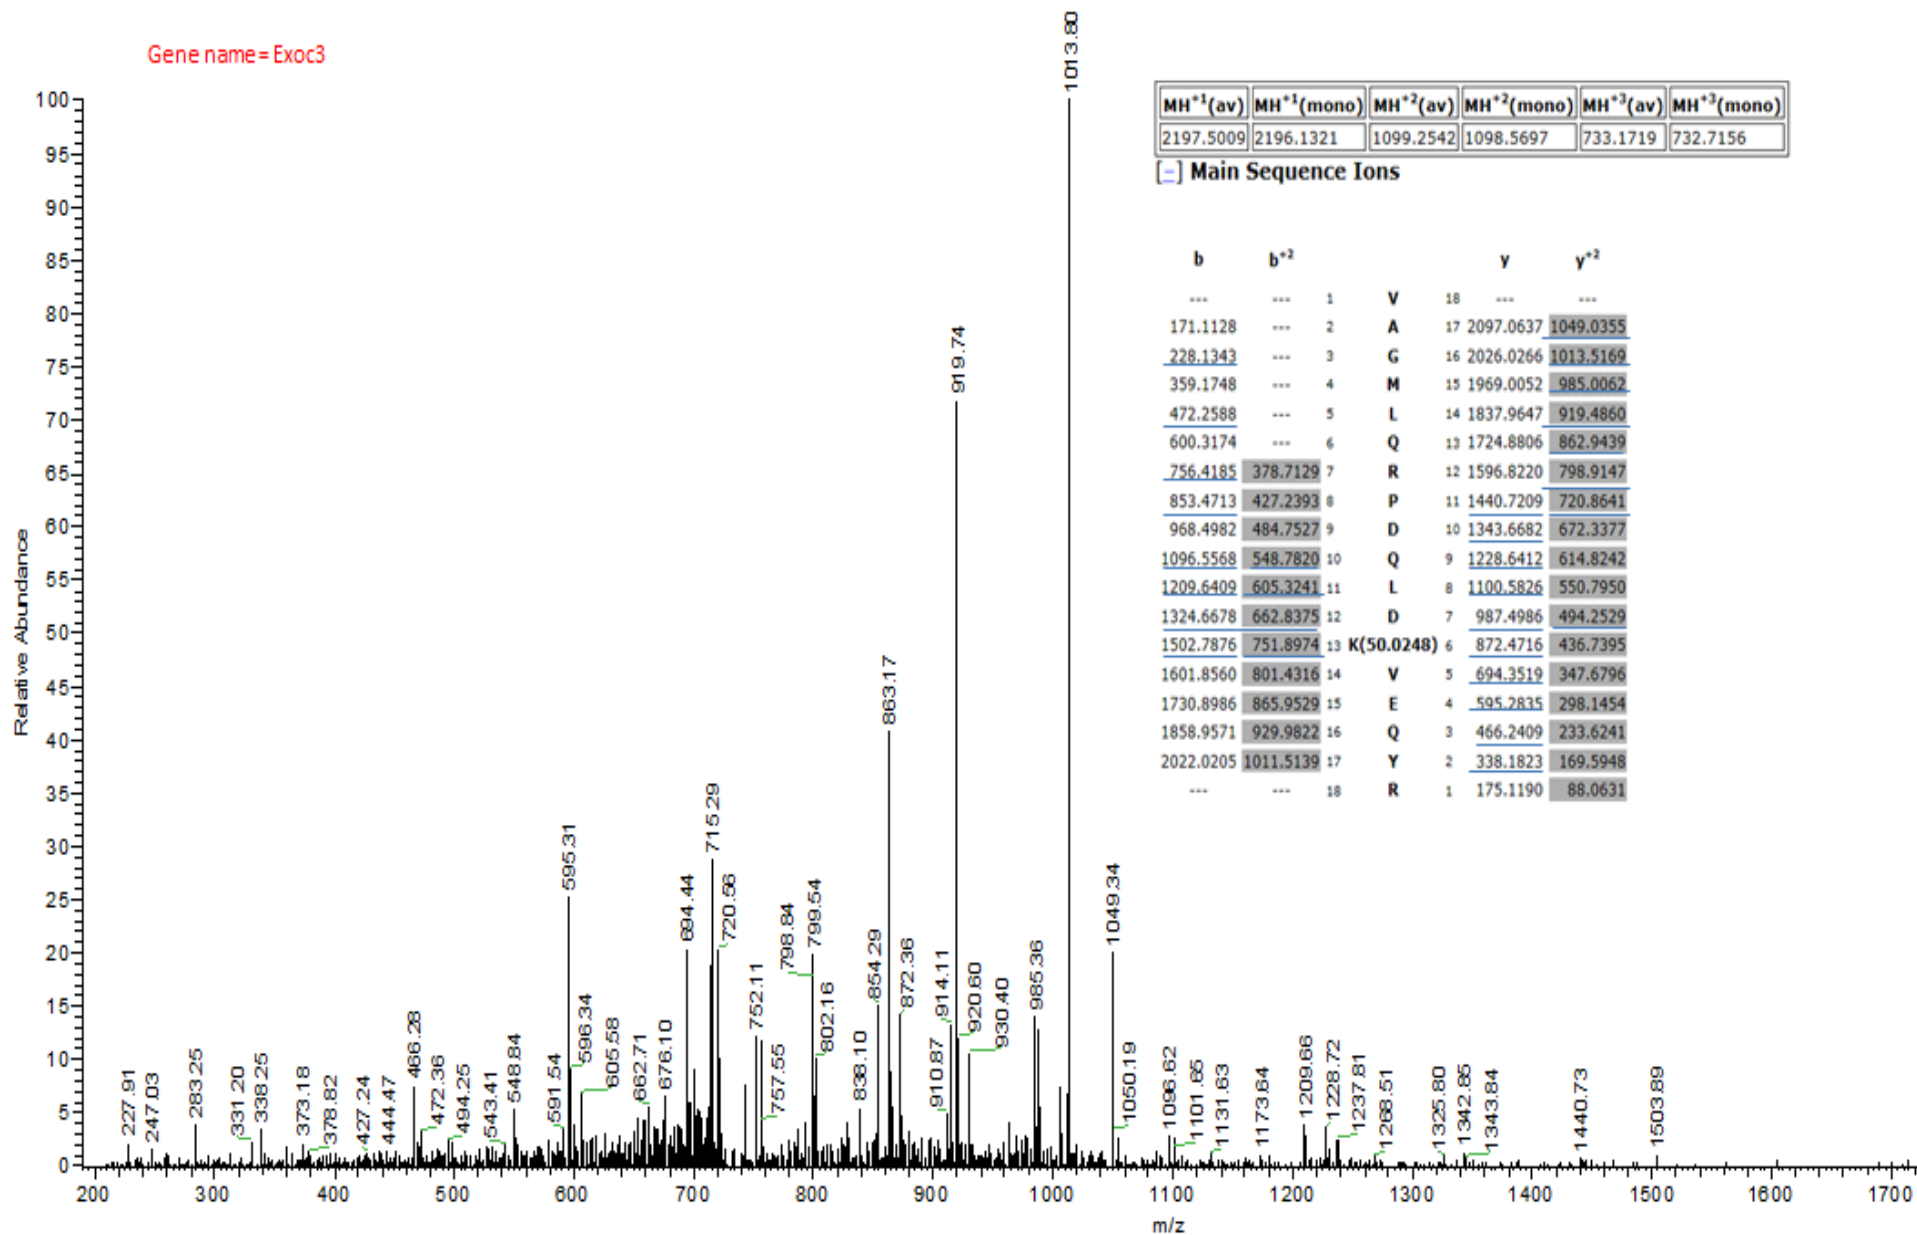

| MH <sup>+</sup> 1(av) | MH <sup>+</sup> 1(mono) | MH <sup>+</sup> 2(av) | MH <sup>+</sup> 2(mono) | MH <sup>+</sup> 3(av) | MH <sup>+</sup> 3(mono) |
|-----------------------|-------------------------|-----------------------|-------------------------|-----------------------|-------------------------|
| 2197.5009             | 2196.1321               | 1099.2542             | 1098.5697               | 733.1719              | 732.7156                |

[-] Main Sequence Ions

| b         | b <sup>+</sup> |    | y                 | y <sup>+</sup> |           |
|-----------|----------------|----|-------------------|----------------|-----------|
| ---       | ---            | 1  | V                 | 18             | ---       |
| 171.1128  | ---            | 2  | A                 | 17             | 2097.0637 |
| 228.1343  | ---            | 3  | G                 | 16             | 2026.0266 |
| 359.1748  | ---            | 4  | M                 | 15             | 1969.0052 |
| 472.2588  | ---            | 5  | L                 | 14             | 1837.9647 |
| 600.3174  | ---            | 6  | Q                 | 13             | 1724.8806 |
| 756.4185  | 378.7129       | 7  | R                 | 12             | 1596.8220 |
| 853.4713  | 427.2393       | 8  | P                 | 11             | 1440.7209 |
| 968.4982  | 484.7527       | 9  | D                 | 10             | 1343.6682 |
| 1096.5568 | 548.7820       | 10 | Q                 | 9              | 1228.6412 |
| 1209.6409 | 605.3241       | 11 | L                 | 8              | 1100.5826 |
| 1324.6678 | 662.8375       | 12 | D                 | 7              | 987.4986  |
| 1502.7876 | 751.8974       | 13 | <b>K(50.0248)</b> | 6              | 872.4716  |
| 1601.8560 | 801.4316       | 14 | V                 | 5              | 694.3519  |
| 1730.8986 | 865.9529       | 15 | E                 | 4              | 595.2835  |
| 1858.9571 | 929.9822       | 16 | Q                 | 3              | 466.2409  |
| 2022.0205 | 1011.5139      | 17 | Y                 | 2              | 338.1823  |
| ---       | ---            | 18 | R                 | 1              | 175.1190  |
