# Supplementary material
Source: PubMed Central journal article supplement (PMC4739669)
Supplement: 10.1074_M115.049288_mcp.M115.049288-12.pdf [file 10.1074_M115.049288_mcp.M115.049288-12.pdf]

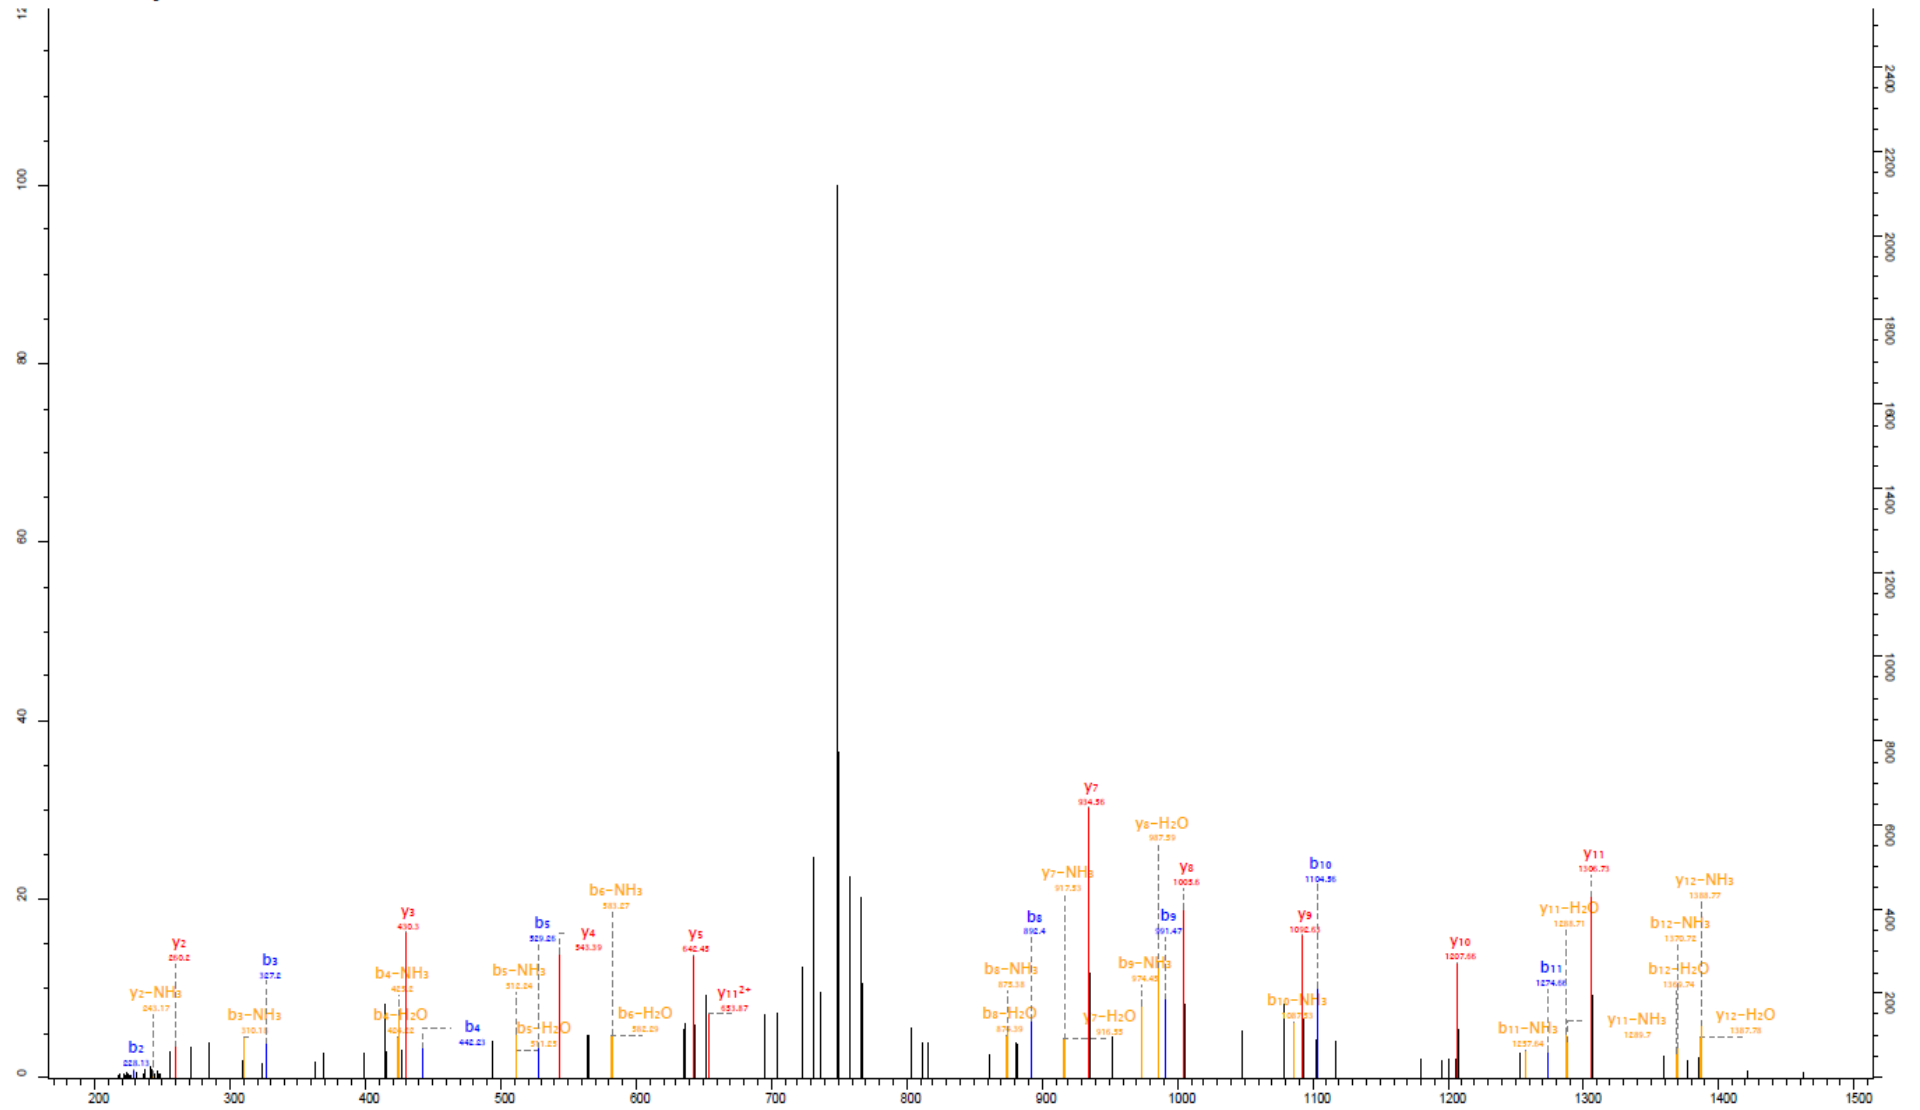

- Q V V D S A Y E V I K L K -  
b2 b2 b4 b5 b5 b8 b9 b10 b11 y11 y10 y9 y8 y7 y5 y4 y3 ac y2

Gene name = Ldha

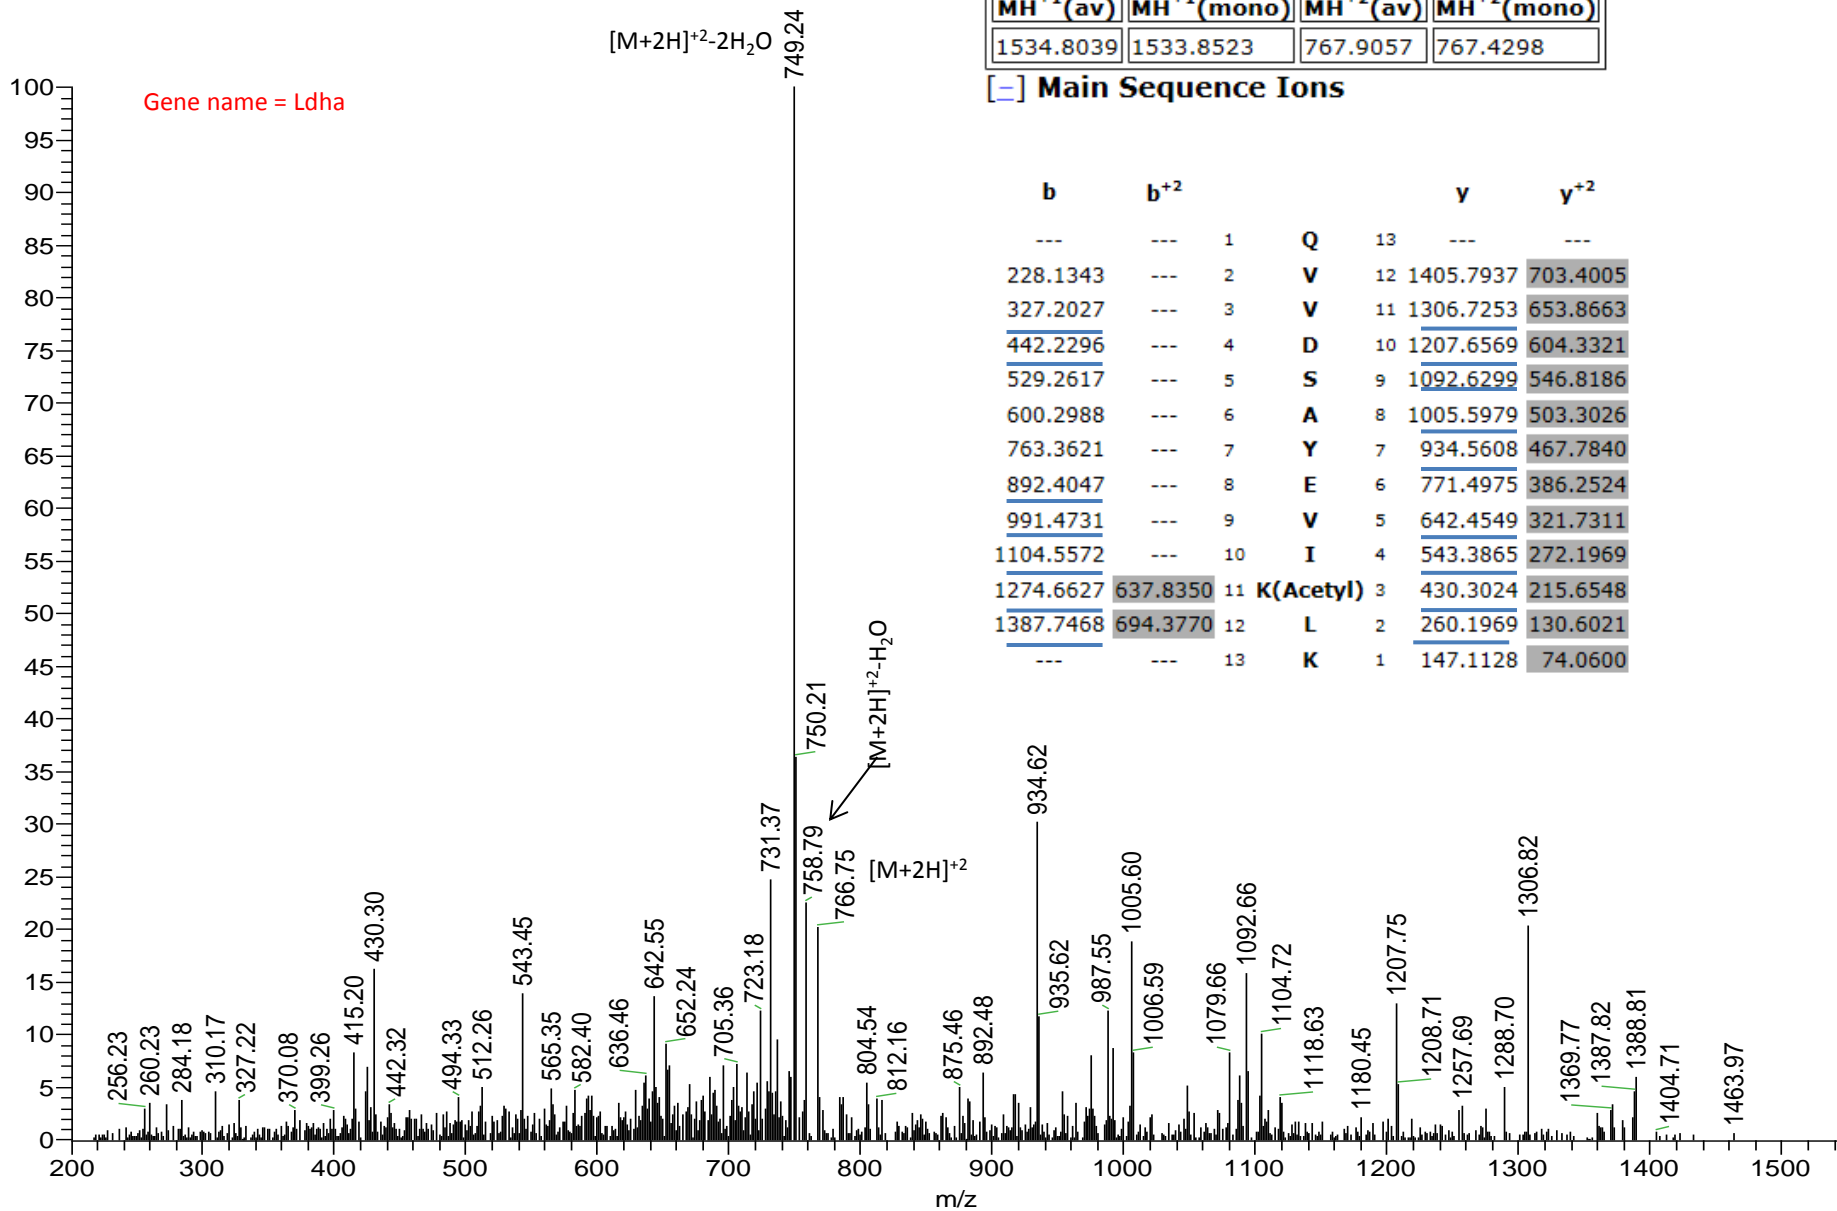

| MH <sup>+</sup> (av) | MH <sup>+</sup> (mono) | MH <sup>+</sup> (av) | MH <sup>+</sup> (mono) |
|----------------------|------------------------|----------------------|------------------------|
| 1534.8039            | 1533.8523              | 767.9057             | 767.4298               |

**[-] Main Sequence Ions**

| b         | b <sup>+</sup> |    | y                | y <sup>+</sup> |           |          |
|-----------|----------------|----|------------------|----------------|-----------|----------|
| ---       | ---            | 1  | <b>Q</b>         | 13             | ---       | ---      |
| 228.1343  | ---            | 2  | <b>V</b>         | 12             | 1405.7937 | 703.4005 |
| 327.2027  | ---            | 3  | <b>V</b>         | 11             | 1306.7253 | 653.8663 |
| 442.2296  | ---            | 4  | <b>D</b>         | 10             | 1207.6569 | 604.3321 |
| 529.2617  | ---            | 5  | <b>S</b>         | 9              | 1092.6299 | 546.8186 |
| 600.2988  | ---            | 6  | <b>A</b>         | 8              | 1005.5979 | 503.3026 |
| 763.3621  | ---            | 7  | <b>Y</b>         | 7              | 934.5608  | 467.7840 |
| 892.4047  | ---            | 8  | <b>E</b>         | 6              | 771.4975  | 386.2524 |
| 991.4731  | ---            | 9  | <b>V</b>         | 5              | 642.4549  | 321.7311 |
| 1104.5572 | ---            | 10 | <b>I</b>         | 4              | 543.3865  | 272.1969 |
| 1274.6627 | 637.8350       | 11 | <b>K(Acetyl)</b> | 3              | 430.3024  | 215.6548 |
| 1387.7468 | 694.3770       | 12 | <b>L</b>         | 2              | 260.1969  | 130.6021 |
| --        | --             | 13 | <b>K</b>         | 1              | 147.1128  | 74.0600  |

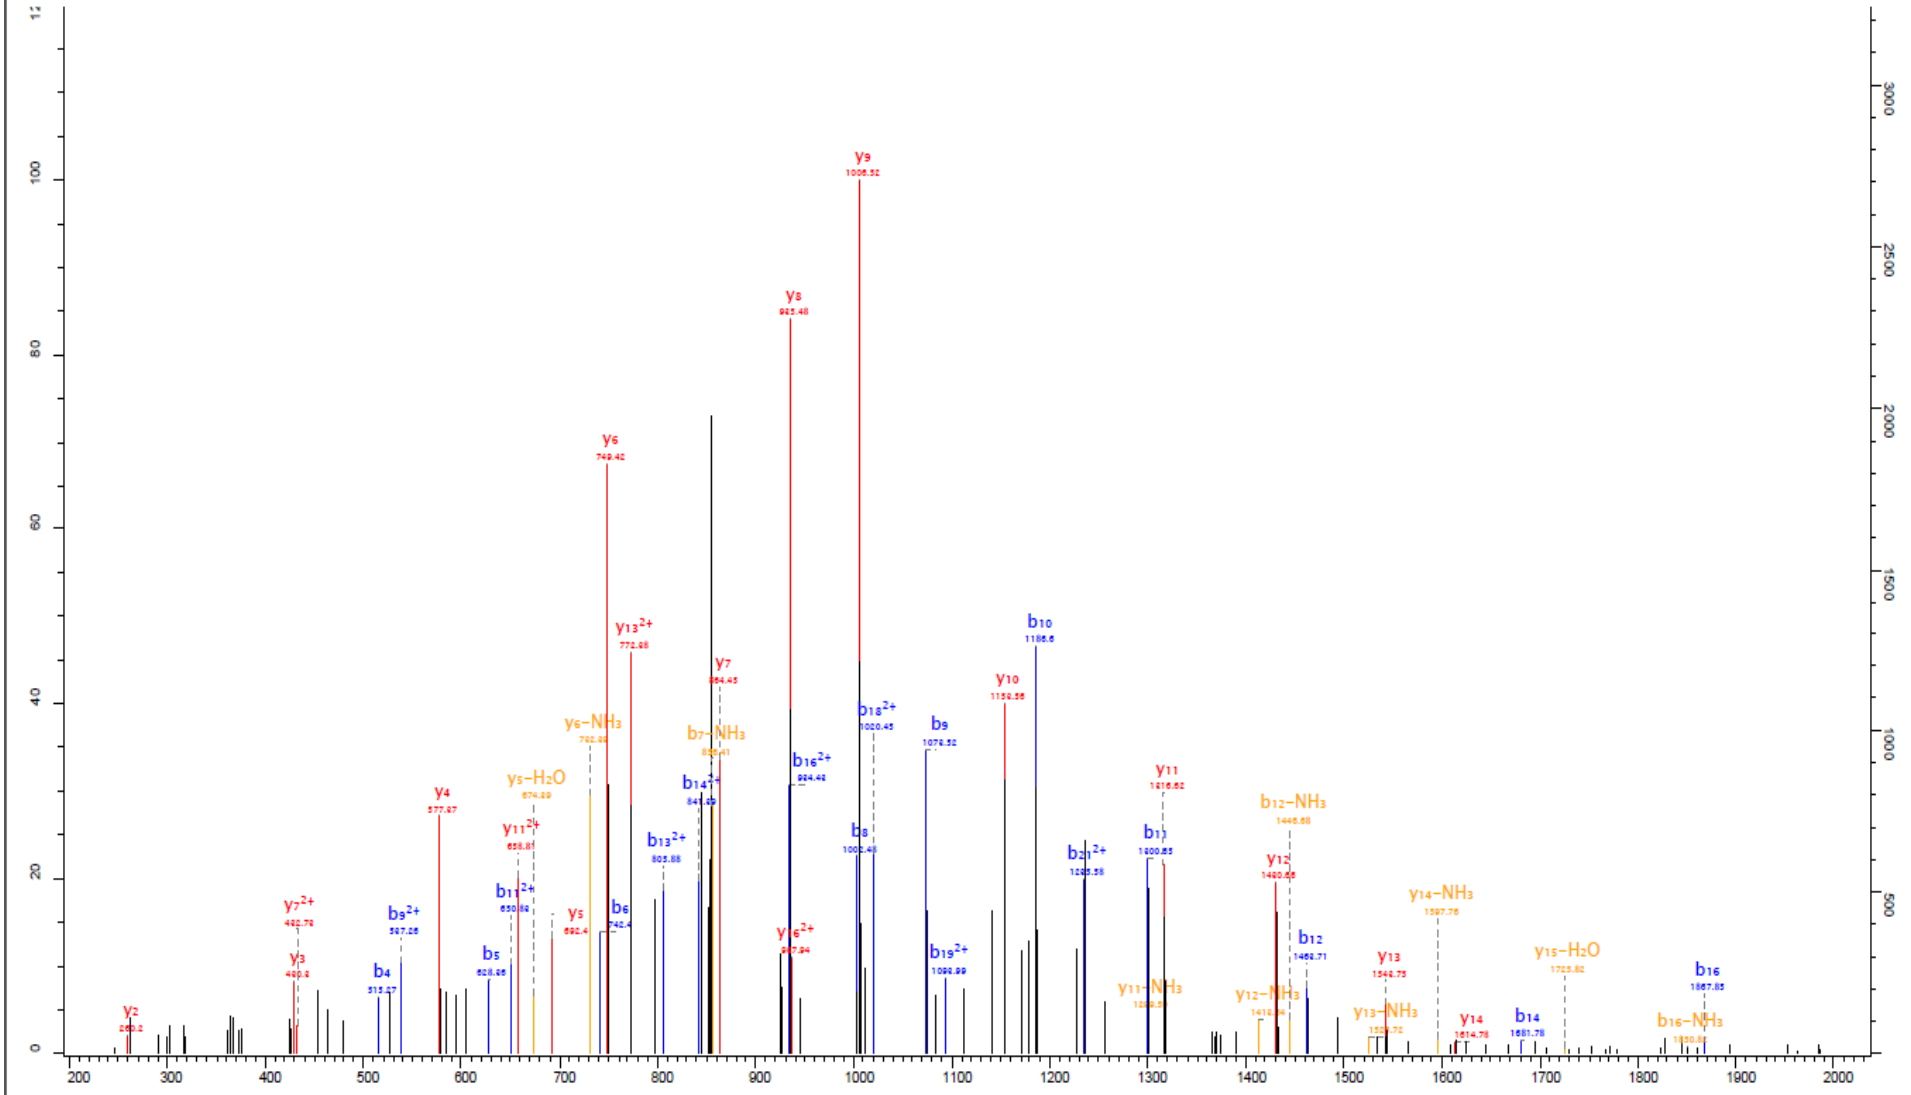

- F P N R L N M E A I N Y M A A D G D F K I K -

b4 b5 b6
y16<sup>2+</sup>
y14
y13
y12
y11
y10 OX
y6
y5
y7
y6
y5
y4
y5 AC
y2
b5
b6
b10
b11
b12
b13<sup>2+</sup>
b14
b16
b16<sup>2+</sup>
b16<sup>2+</sup>

| MH <sup>+</sup> (av) | MH <sup>+</sup> (mono) | MH <sup>2+</sup> (av) | MH <sup>2+</sup> (mono) | MH <sup>3+</sup> (av) | MH <sup>3+</sup> (mono) |
|----------------------|------------------------|-----------------------|-------------------------|-----------------------|-------------------------|
| 2618.0241            | 2616.2585              | 1309.5158             | 1308.6329               | 873.3463              | 872.7577                |

**[-] Main Sequence Ions**

| b         | b <sup>+</sup> |    | y            | y <sup>+</sup> |           |
|-----------|----------------|----|--------------|----------------|-----------|
| ---       | ---            | 1  | F            | 22             | ---       |
| 245.1285  | ---            | 2  | P            | 21             | 2469.1901 |
| 359.1714  | ---            | 3  | N            | 20             | 2372.1373 |
| 515.2725  | 258.1399       | 4  | R            | 19             | 2258.0944 |
| 628.3566  | 314.6819       | 5  | L            | 18             | 2101.9933 |
| 742.3995  | 371.7034       | 6  | N            | 17             | 1988.9092 |
| 873.4400  | 437.2236       | 7  | M            | 16             | 1874.8663 |
| 1002.4826 | 501.7449       | 8  | E            | 15             | 1743.8258 |
| 1073.5197 | 537.2635       | 9  | A            | 14             | 1614.7832 |
| 1186.6037 | 593.8055       | 10 | I            | 13             | 1543.7461 |
| 1300.6467 | 650.8270       | 11 | N            | 12             | 1430.6620 |
| 1463.7100 | 732.3586       | 12 | Y            | 11             | 1316.6191 |
| 1610.7454 | 805.8763       | 13 | M(Oxidation) | 10             | 1153.5558 |
| 1681.7825 | 841.3949       | 14 | A            | 9              | 1006.5204 |
| 1752.8196 | 876.9134       | 15 | A            | 8              | 935.4833  |
| 1867.8466 | 934.4269       | 16 | D            | 7              | 864.4462  |
| 1924.8680 | 962.9377       | 17 | D            | 6              | 749.4192  |
| 2039.8950 | 1020.4511      | 18 | G            | 5              | 692.3978  |
| 2186.9634 | 1093.9853      | 19 | F            | 4              | 577.3708  |
| 2357.0689 | 1179.0381      | 20 | K(Acetyl)    | 3              | 430.3024  |
| 2470.1530 | 1235.5801      | 21 | I            | 2              | 260.1969  |
| --        | --             | 22 | K            | 1              | 147.1128  |

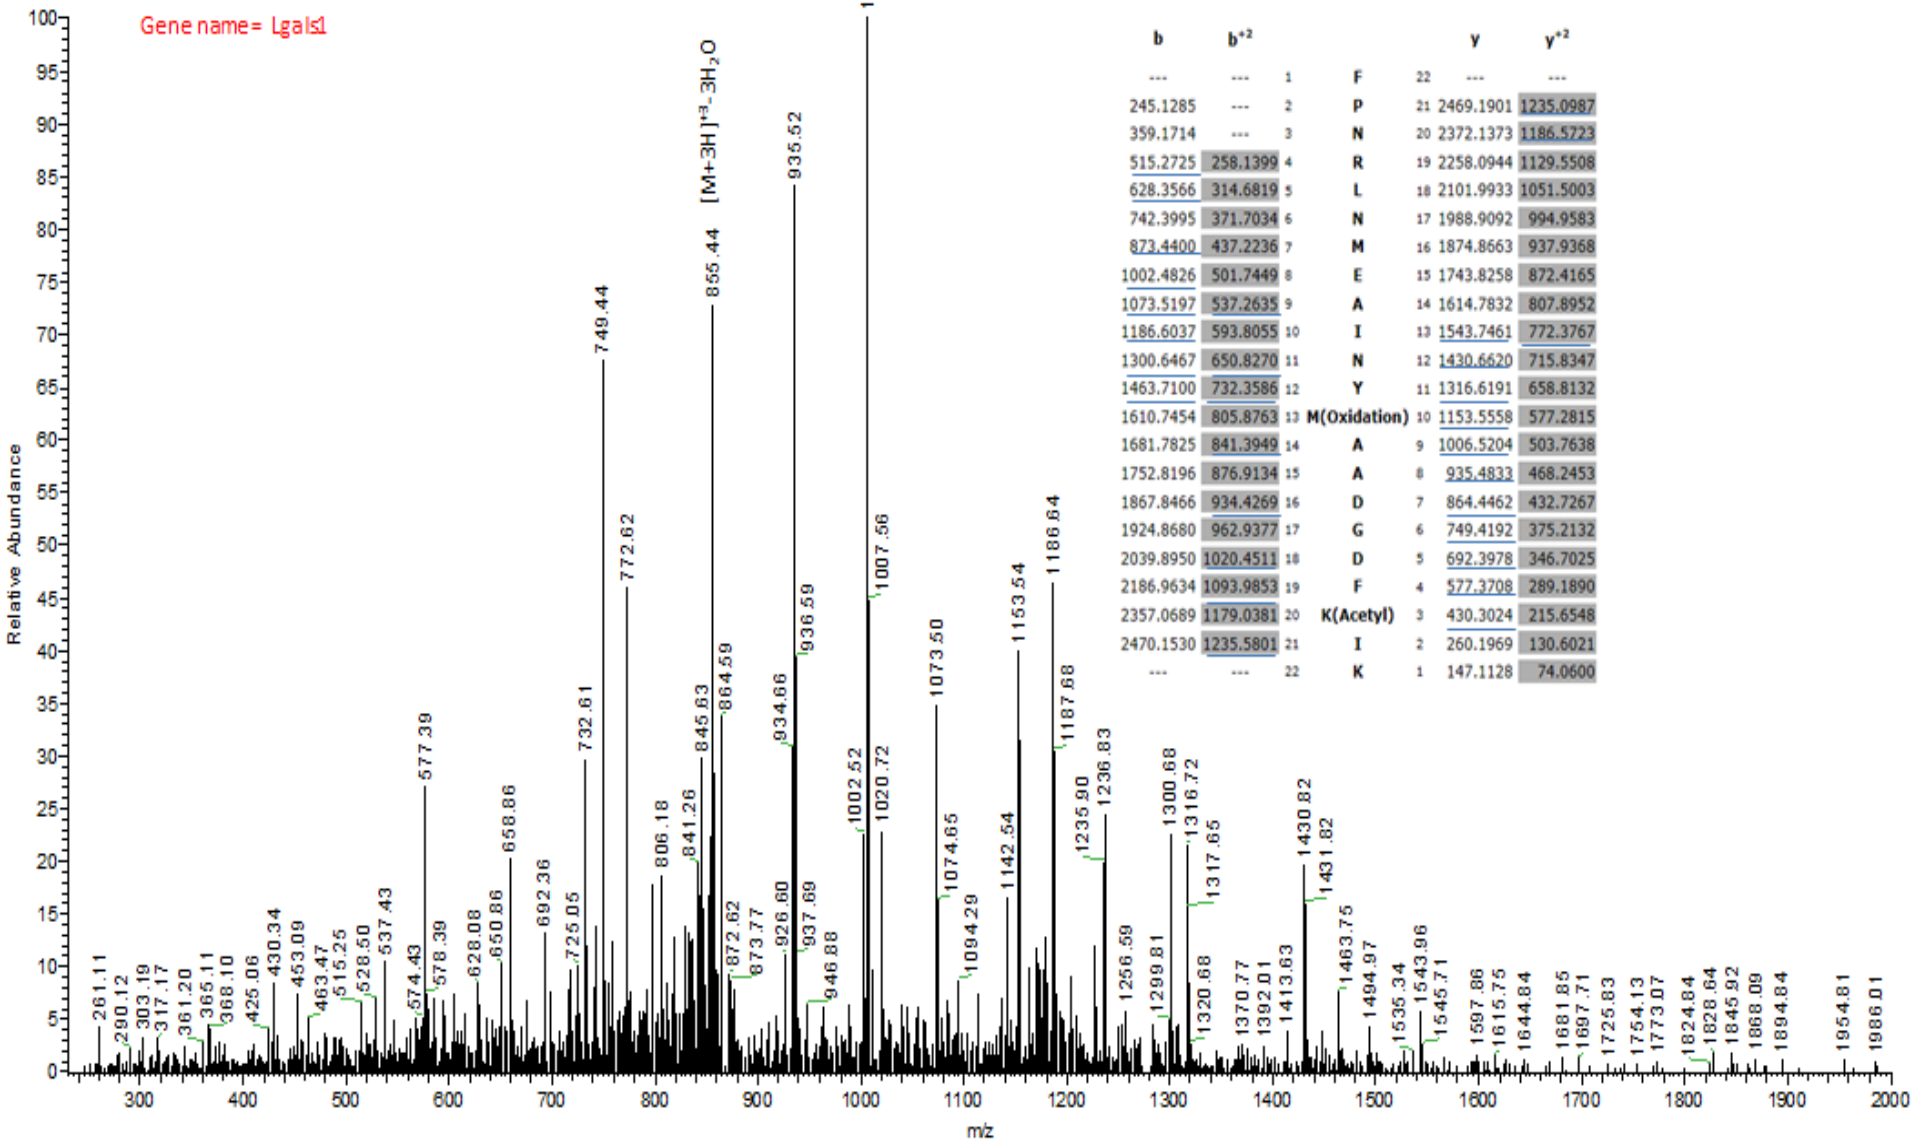

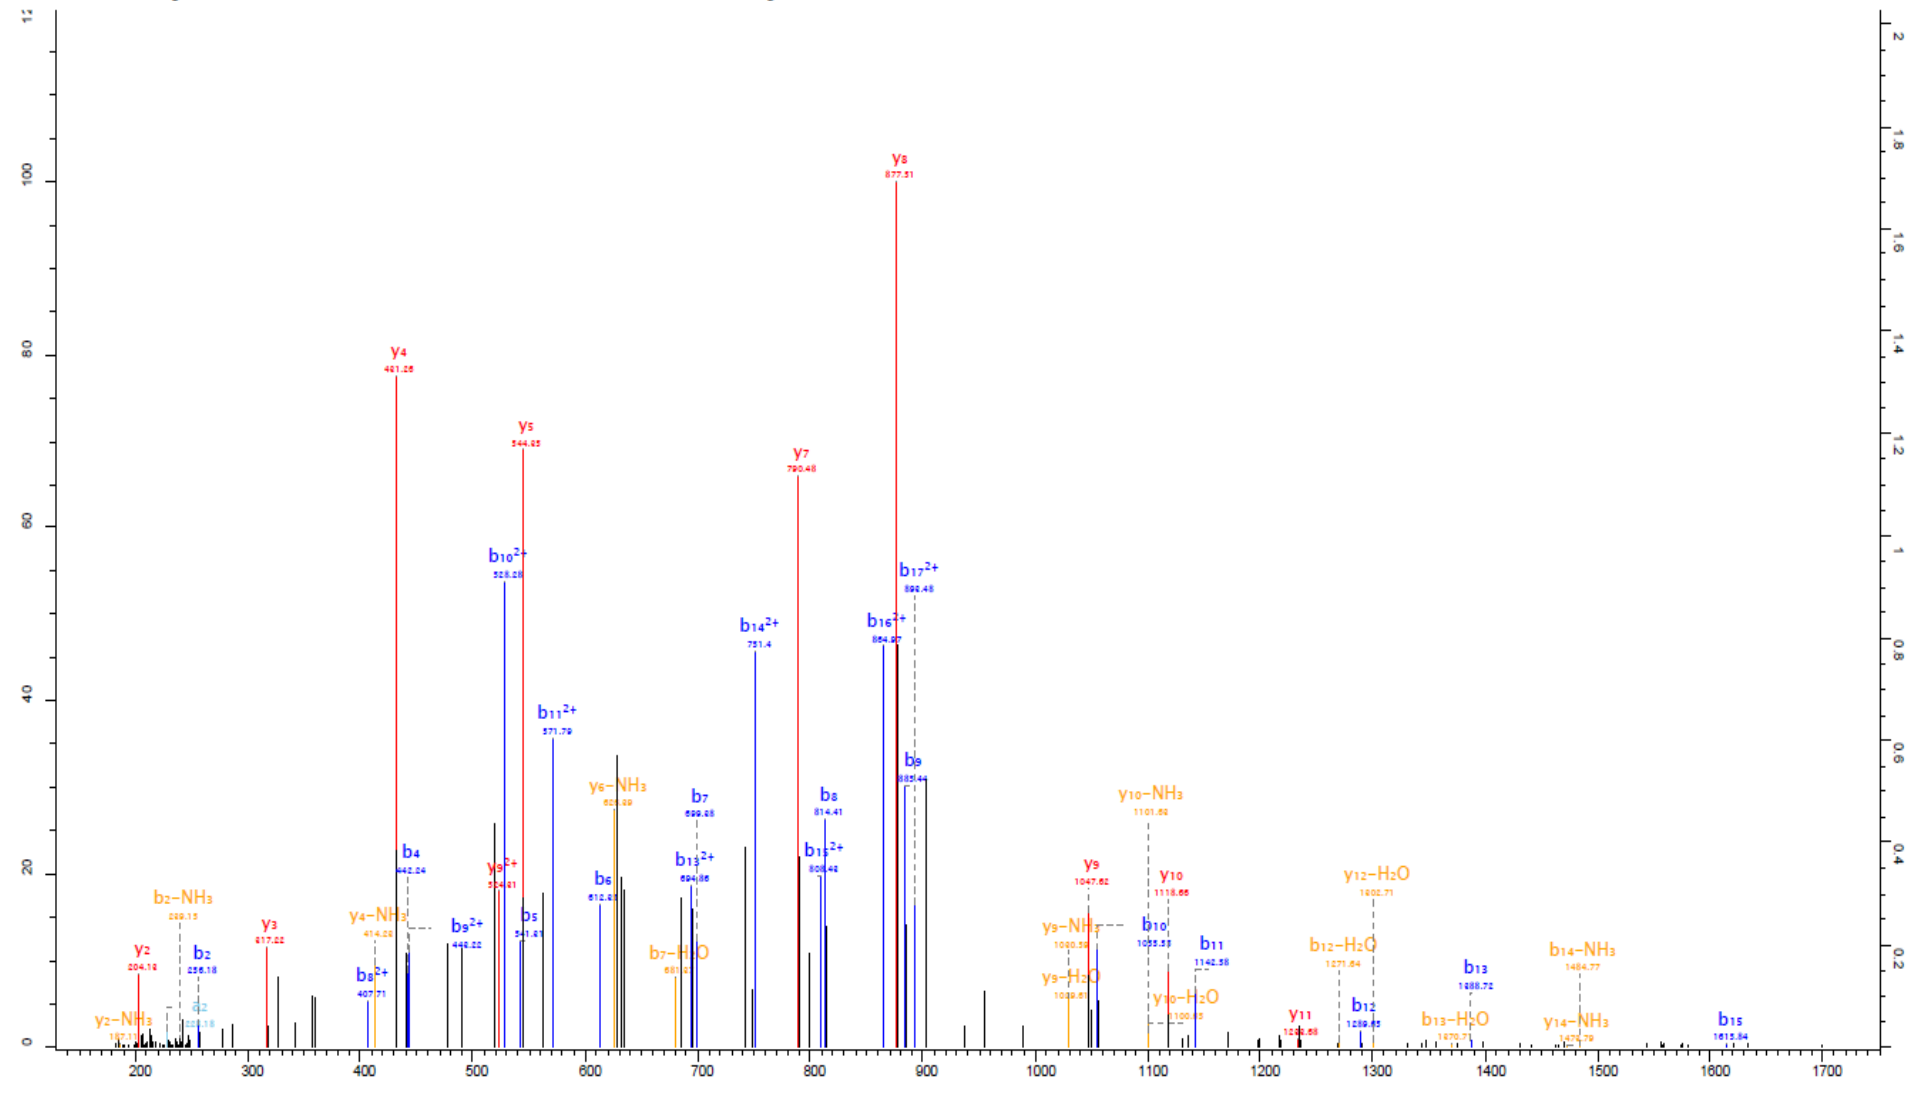

- V R G E V A S D A K S F V L N L G K -

b<sub>2</sub>
b<sub>+</sub>
b<sub>7</sub>
b<sub>e</sub>
b<sub>7</sub>
b<sub>s</sub>
b<sub>6</sub>
b<sub>10</sub>
b<sub>11</sub>
b<sub>12</sub>
b<sub>13</sub>
b<sub>14</sub><sup>2+</sup>
b<sub>15</sub>
b<sub>16</sub><sup>2+</sup>
b<sub>17</sub><sup>2+</sup>

y<sub>11</sub>
y<sub>10</sub>
y<sub>8</sub>  
AC
y<sub>6</sub>
y<sub>7</sub>
y<sub>5</sub>
y<sub>4</sub>
y<sub>3</sub>
y<sub>2</sub>

| MH <sup>+</sup> (av) | MH <sup>+</sup> (mono) | MH <sup>2+</sup> (av) | MH <sup>2+</sup> (mono) | MH <sup>3+</sup> (av) | MH <sup>3+</sup> (mono) |
|----------------------|------------------------|-----------------------|-------------------------|-----------------------|-------------------------|
| 1933.2286            | 1932.0549              | 967.1180              | 966.5311                | 645.0811              | 644.6898                |

[-] Main Sequence Ions

| b         | b <sup>2</sup> |    | y         | y <sup>2</sup> |           |
|-----------|----------------|----|-----------|----------------|-----------|
| ---       | ---            | 1  | V         | 18             | ---       |
| 256.1768  | 128.5920       | 2  | R         | 17             | 1832.9865 |
| 313.1983  | 157.1028       | 3  | G         | 16             | 1676.8854 |
| 442.2409  | 221.6241       | 4  | E         | 15             | 1619.8639 |
| 541.3093  | 271.1583       | 5  | V         | 14             | 1490.8213 |
| 612.3464  | 306.6768       | 6  | A         | 13             | 1391.7529 |
| 699.3784  | 350.1928       | 7  | S         | 12             | 1320.7158 |
| 814.4054  | 407.7063       | 8  | D         | 11             | 1233.6838 |
| 885.4425  | 443.2249       | 9  | A         | 10             | 1118.6568 |
| 1055.5480 | 528.2776       | 10 | K(Acetyl) | 9              | 1047.6197 |
| 1142.5800 | 571.7937       | 11 | S         | 8              | 877.5142  |
| 1289.6484 | 645.3279       | 12 | F         | 7              | 790.4822  |
| 1388.7169 | 694.8621       | 13 | V         | 6              | 643.4137  |
| 1501.8009 | 751.4041       | 14 | L         | 5              | 544.3453  |
| 1615.8438 | 808.4256       | 15 | N         | 4              | 431.2613  |
| 1728.9279 | 864.9676       | 16 | L         | 3              | 317.2183  |
| 1785.9494 | 893.4783       | 17 | G         | 2              | 204.1343  |
| ---       | ---            | 18 | K         | 1              | 147.1128  |

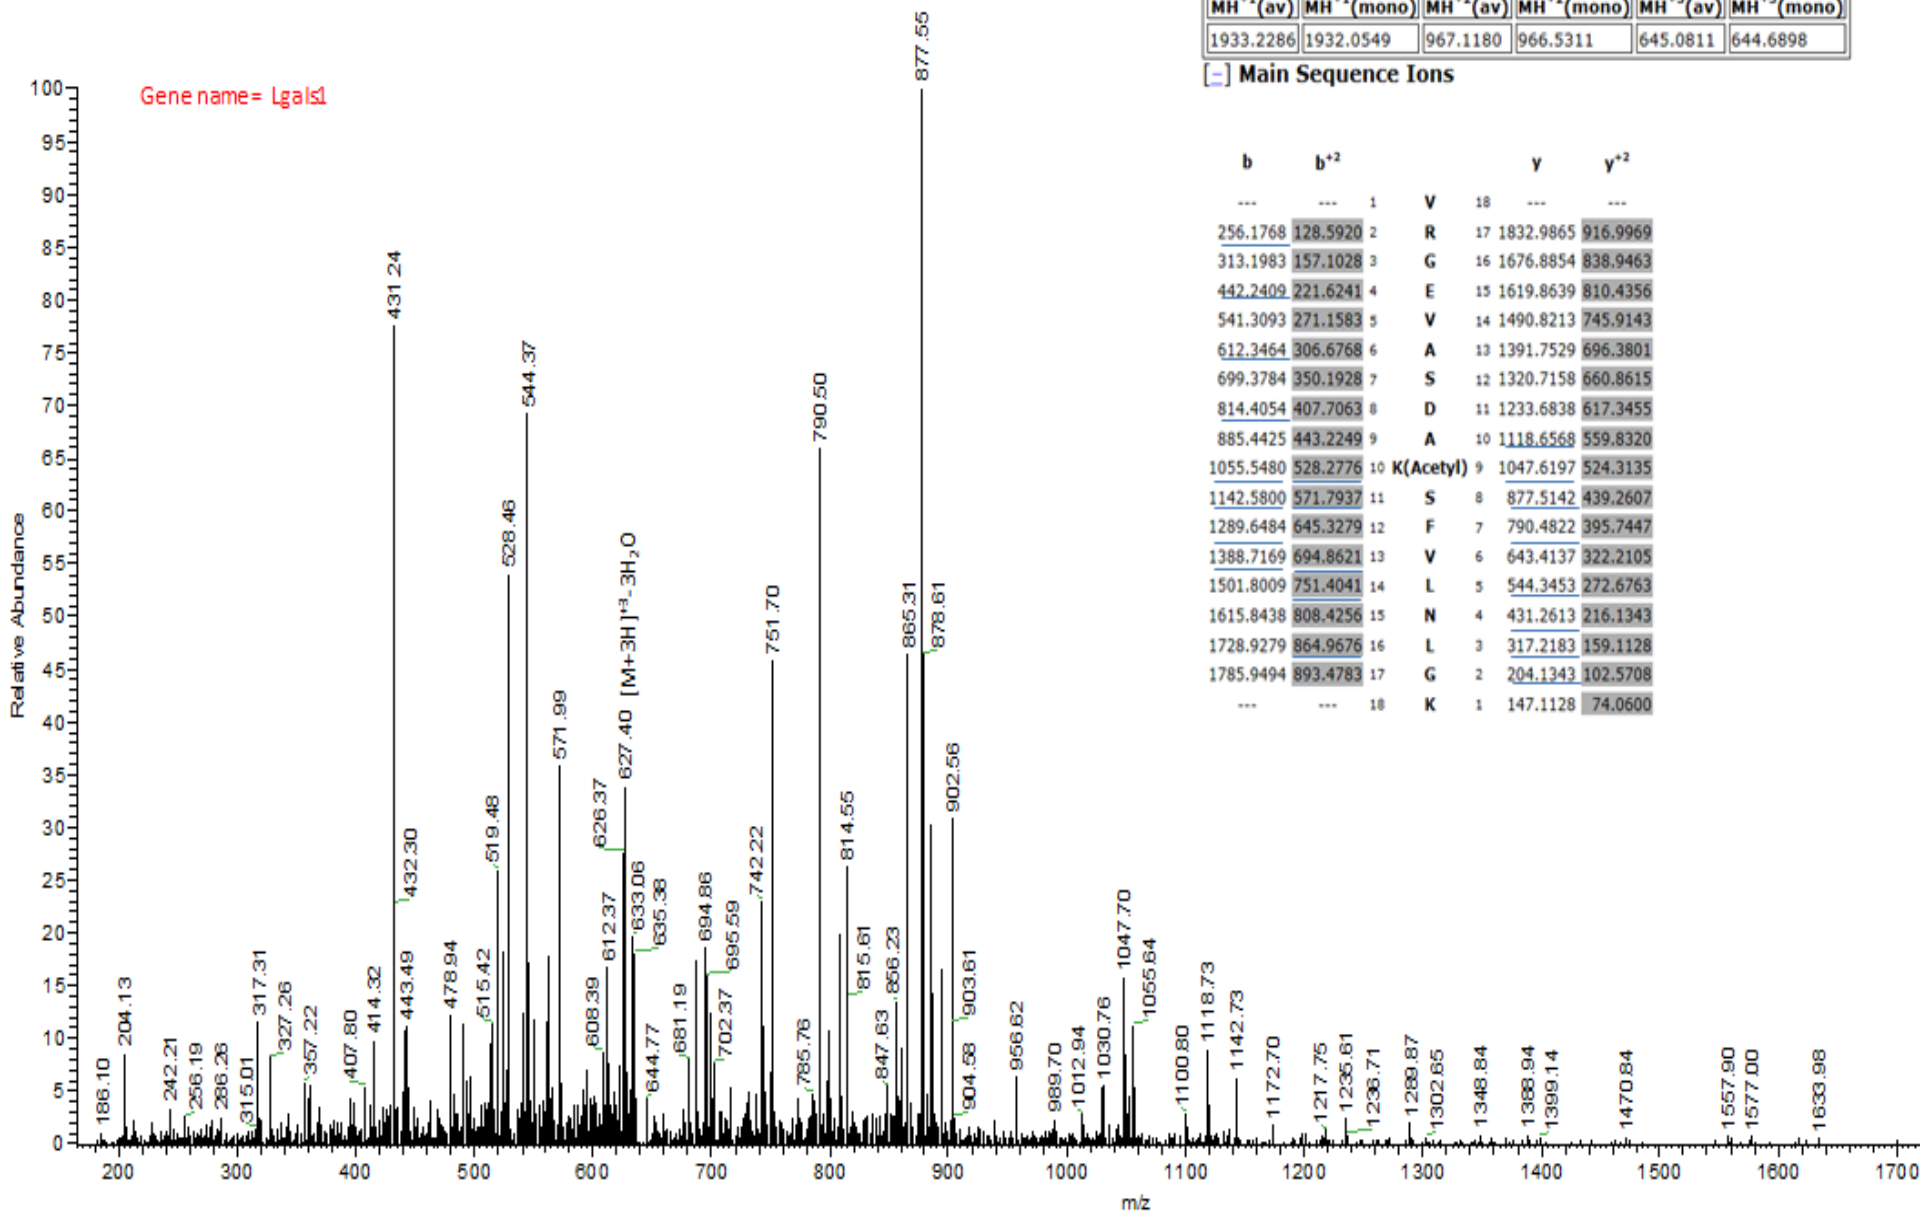

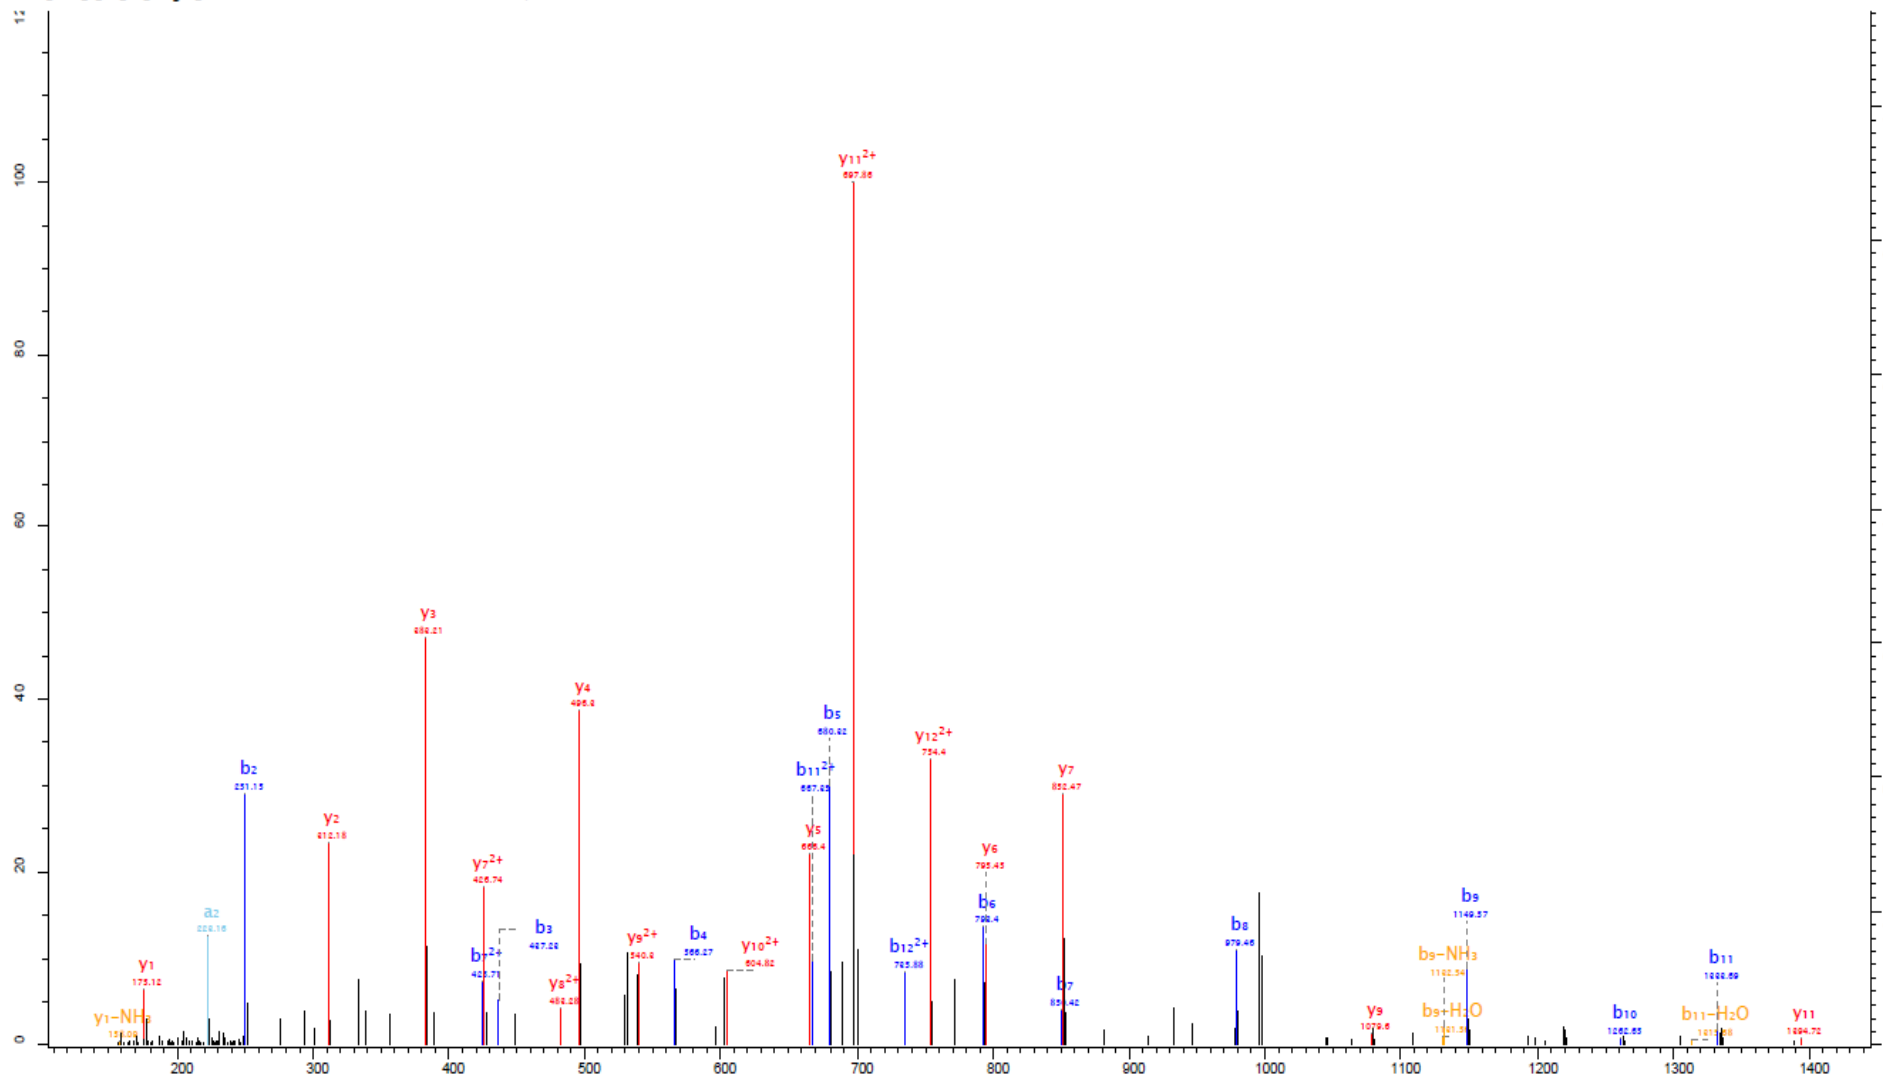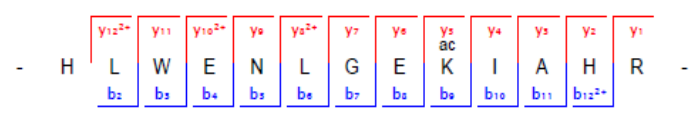

Gene name = Macf1

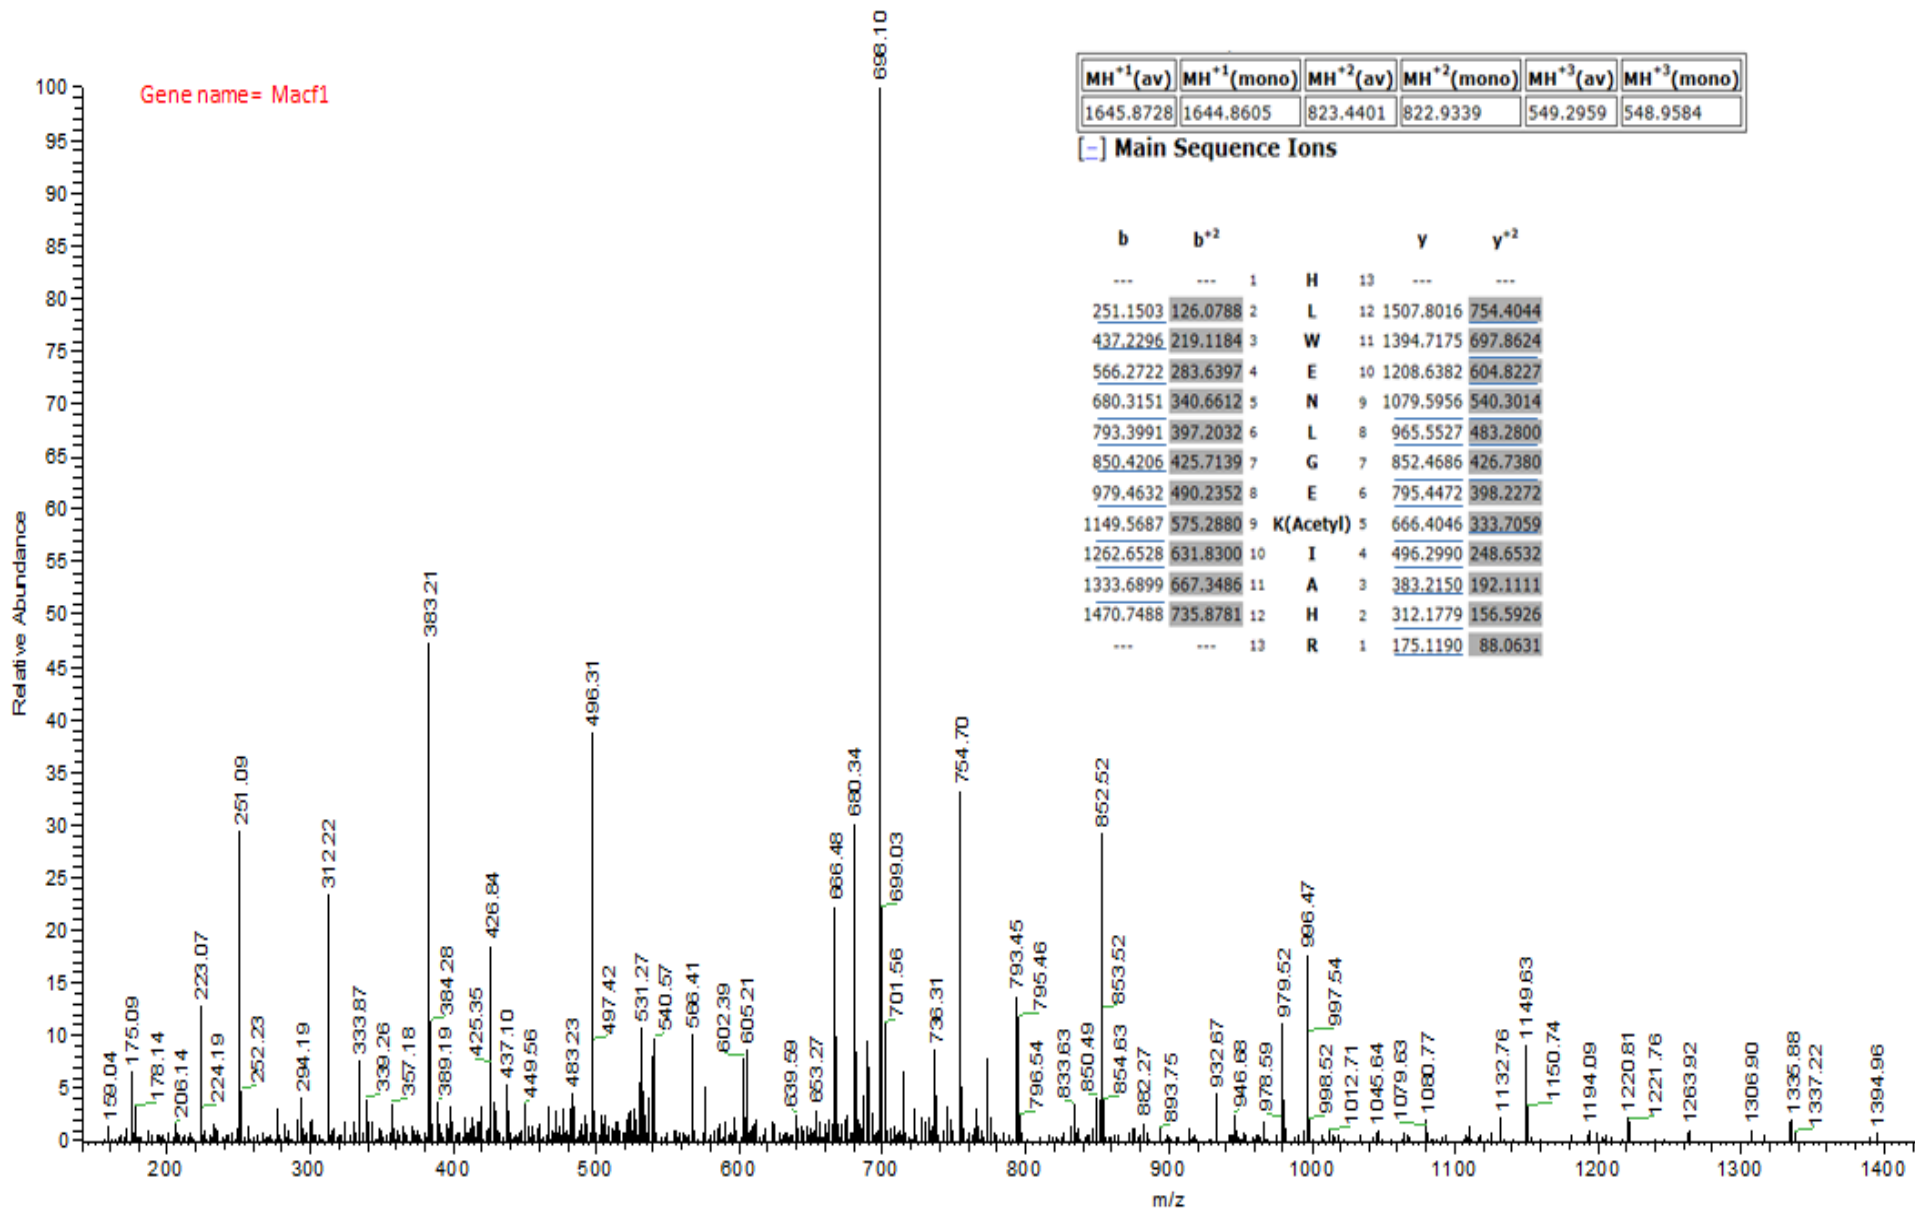

| MH <sup>+</sup> (av) | MH <sup>+</sup> (mono) | MH <sup>2+</sup> (av) | MH <sup>2+</sup> (mono) | MH <sup>3+</sup> (av) | MH <sup>3+</sup> (mono) |
|----------------------|------------------------|-----------------------|-------------------------|-----------------------|-------------------------|
| 1645.8728            | 1644.8605              | 823.4401              | 822.9339                | 549.2959              | 548.9584                |

[-] Main Sequence Ions

| b         | b <sup>2</sup> | y  | y <sup>2</sup> |
|-----------|----------------|----|----------------|
| ---       | ---            | 1  | H              |
| ---       | ---            | 13 | ---            |
| 251.1503  | 126.0788       | 2  | L              |
| 437.2296  | 219.1184       | 3  | W              |
| 566.2722  | 283.6397       | 4  | E              |
| 680.3151  | 340.6612       | 5  | N              |
| 793.3991  | 397.2032       | 6  | L              |
| 850.4206  | 425.7139       | 7  | G              |
| 979.4632  | 490.2352       | 8  | E              |
| 1149.5687 | 575.2880       | 9  | K(Acetyl)      |
| 1262.6528 | 631.8300       | 10 | I              |
| 1333.6899 | 667.3486       | 11 | A              |
| 1470.7488 | 735.8781       | 12 | H              |
| ---       | ---            | 13 | R              |



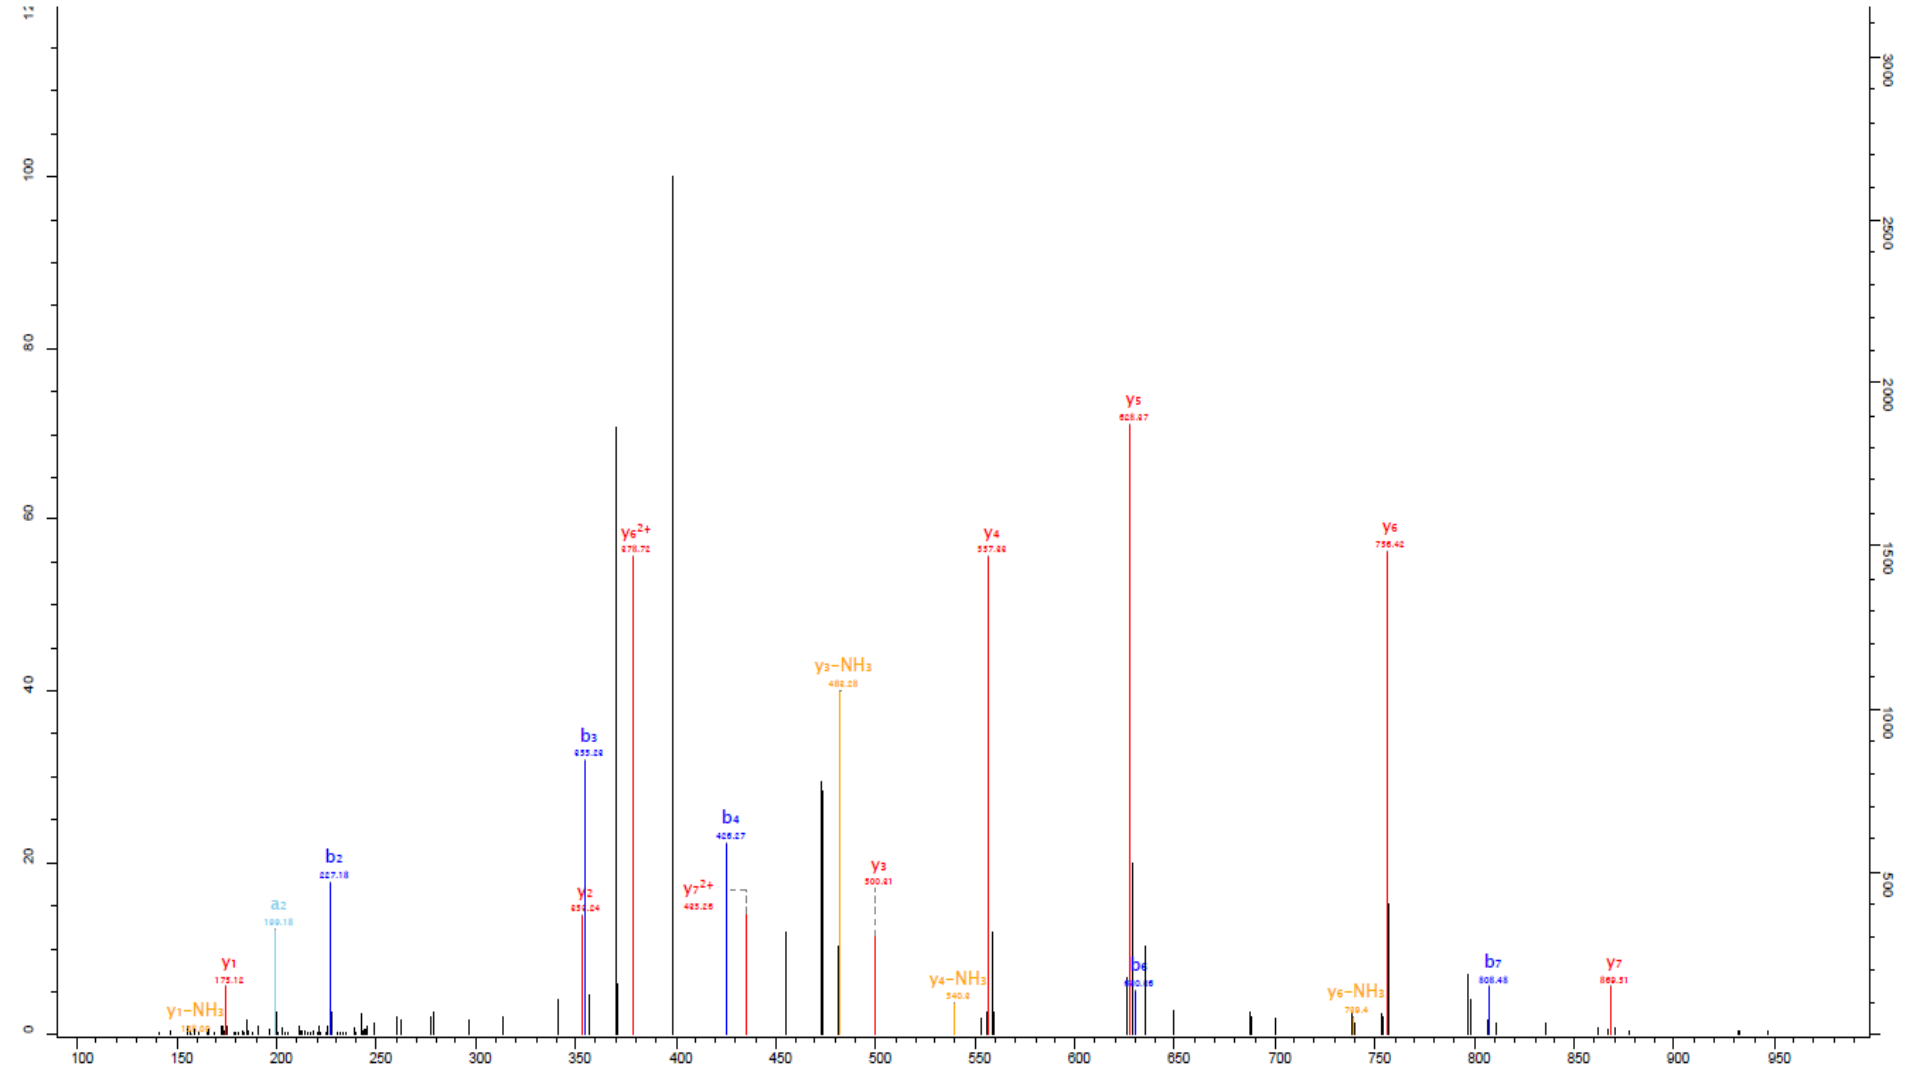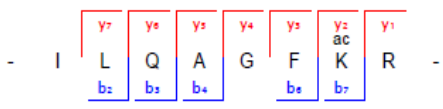

Gene name = Mapre1

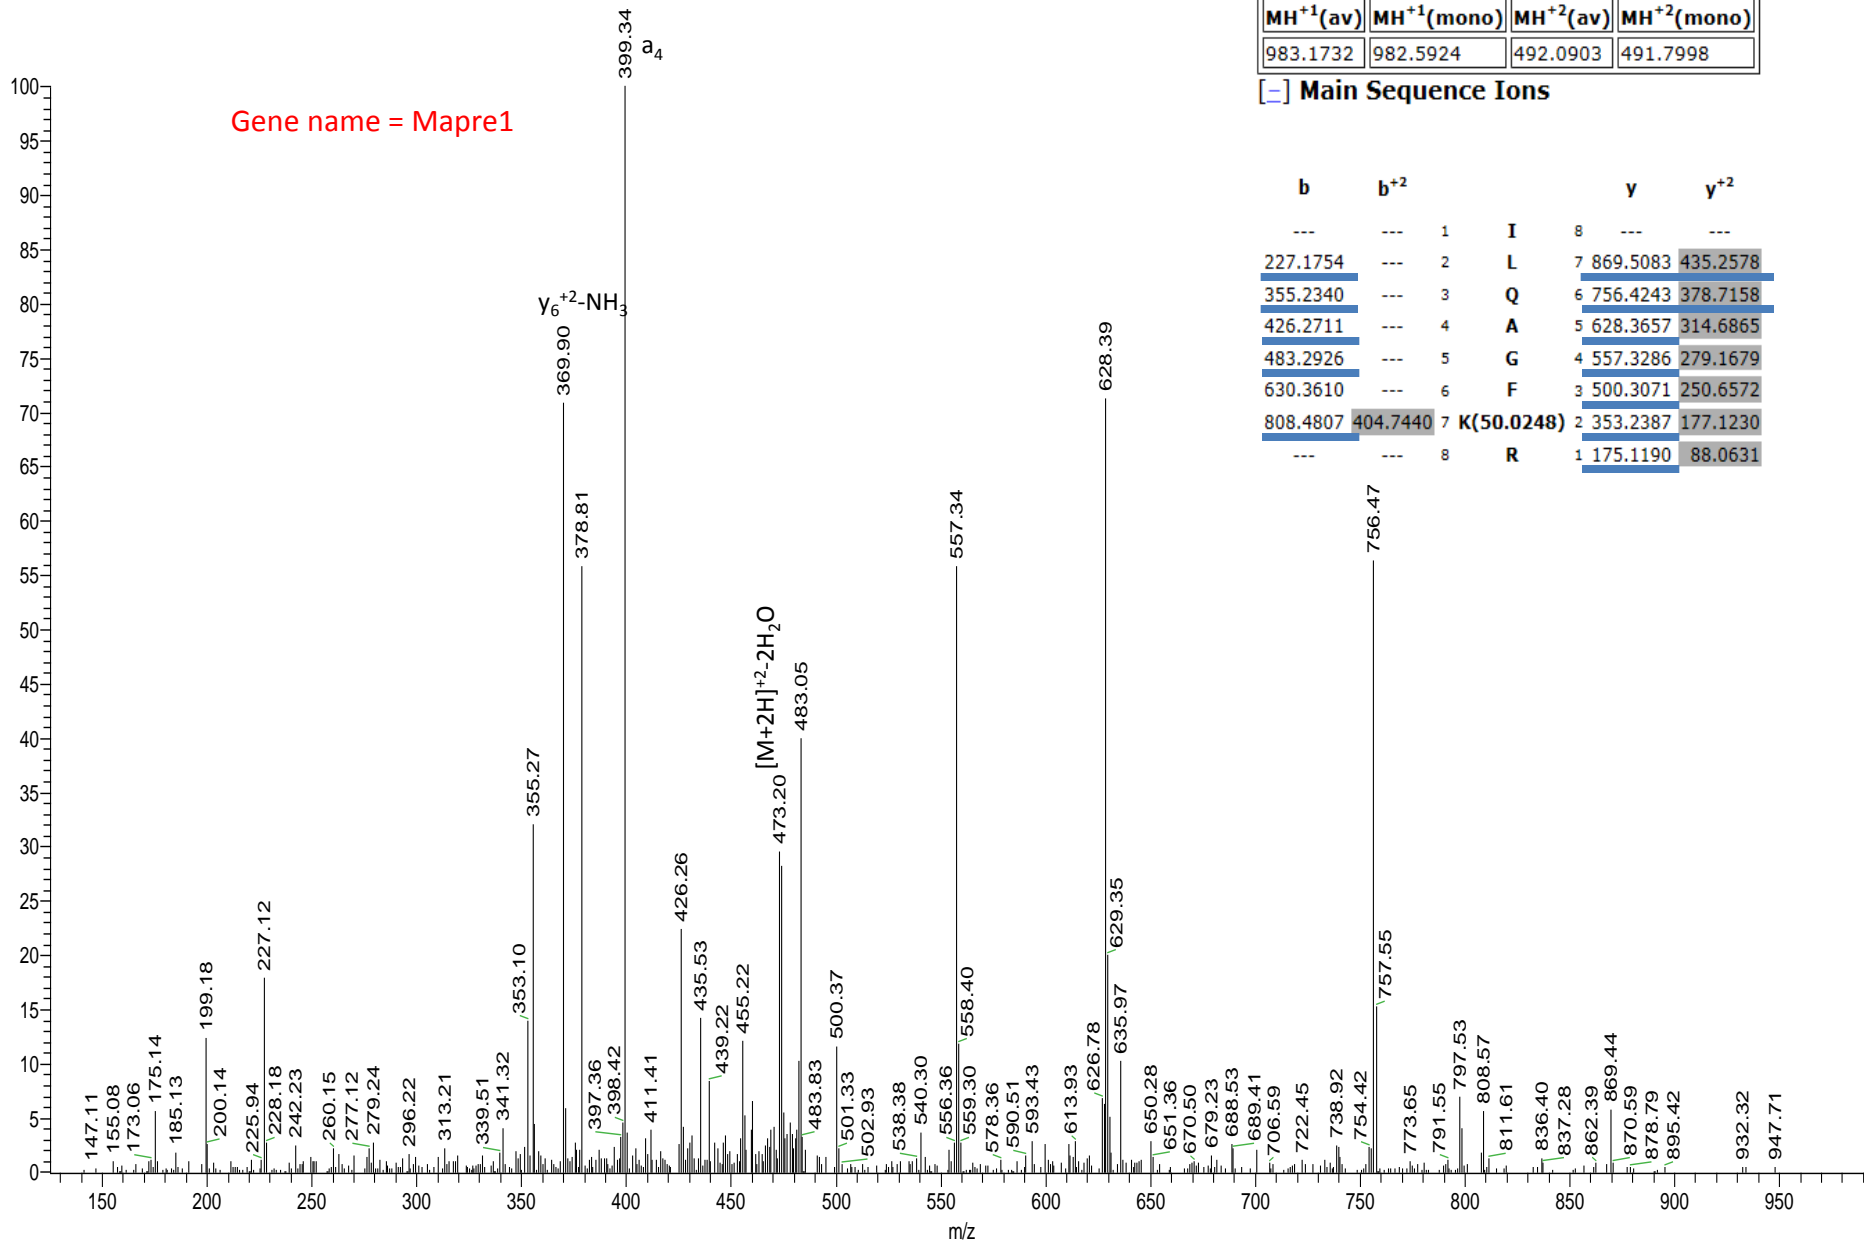

| MH <sup>+</sup> (av) | MH <sup>+</sup> (mono) | MH <sup>+</sup> (av) | MH <sup>+</sup> (mono) |
|----------------------|------------------------|----------------------|------------------------|
| 983.1732             | 982.5924               | 492.0903             | 491.7998               |

[-] Main Sequence Ions

| b        | b <sup>+</sup> |   | y                 | y <sup>+</sup>      |
|----------|----------------|---|-------------------|---------------------|
| ---      | ---            | 1 | I                 | 8                   |
| 227.1754 | ---            | 2 | L                 | 7 869.5083 435.2578 |
| 355.2340 | ---            | 3 | Q                 | 6 756.4243 378.7158 |
| 426.2711 | ---            | 4 | A                 | 5 628.3657 314.6865 |
| 483.2926 | ---            | 5 | G                 | 4 557.3286 279.1679 |
| 630.3610 | ---            | 6 | F                 | 3 500.3071 250.6572 |
| 808.4807 | 404.7440       | 7 | <b>K(50.0248)</b> | 2 353.2387 177.1230 |
| ---      | ---            | 8 | R                 | 1 175.1190 88.0631  |

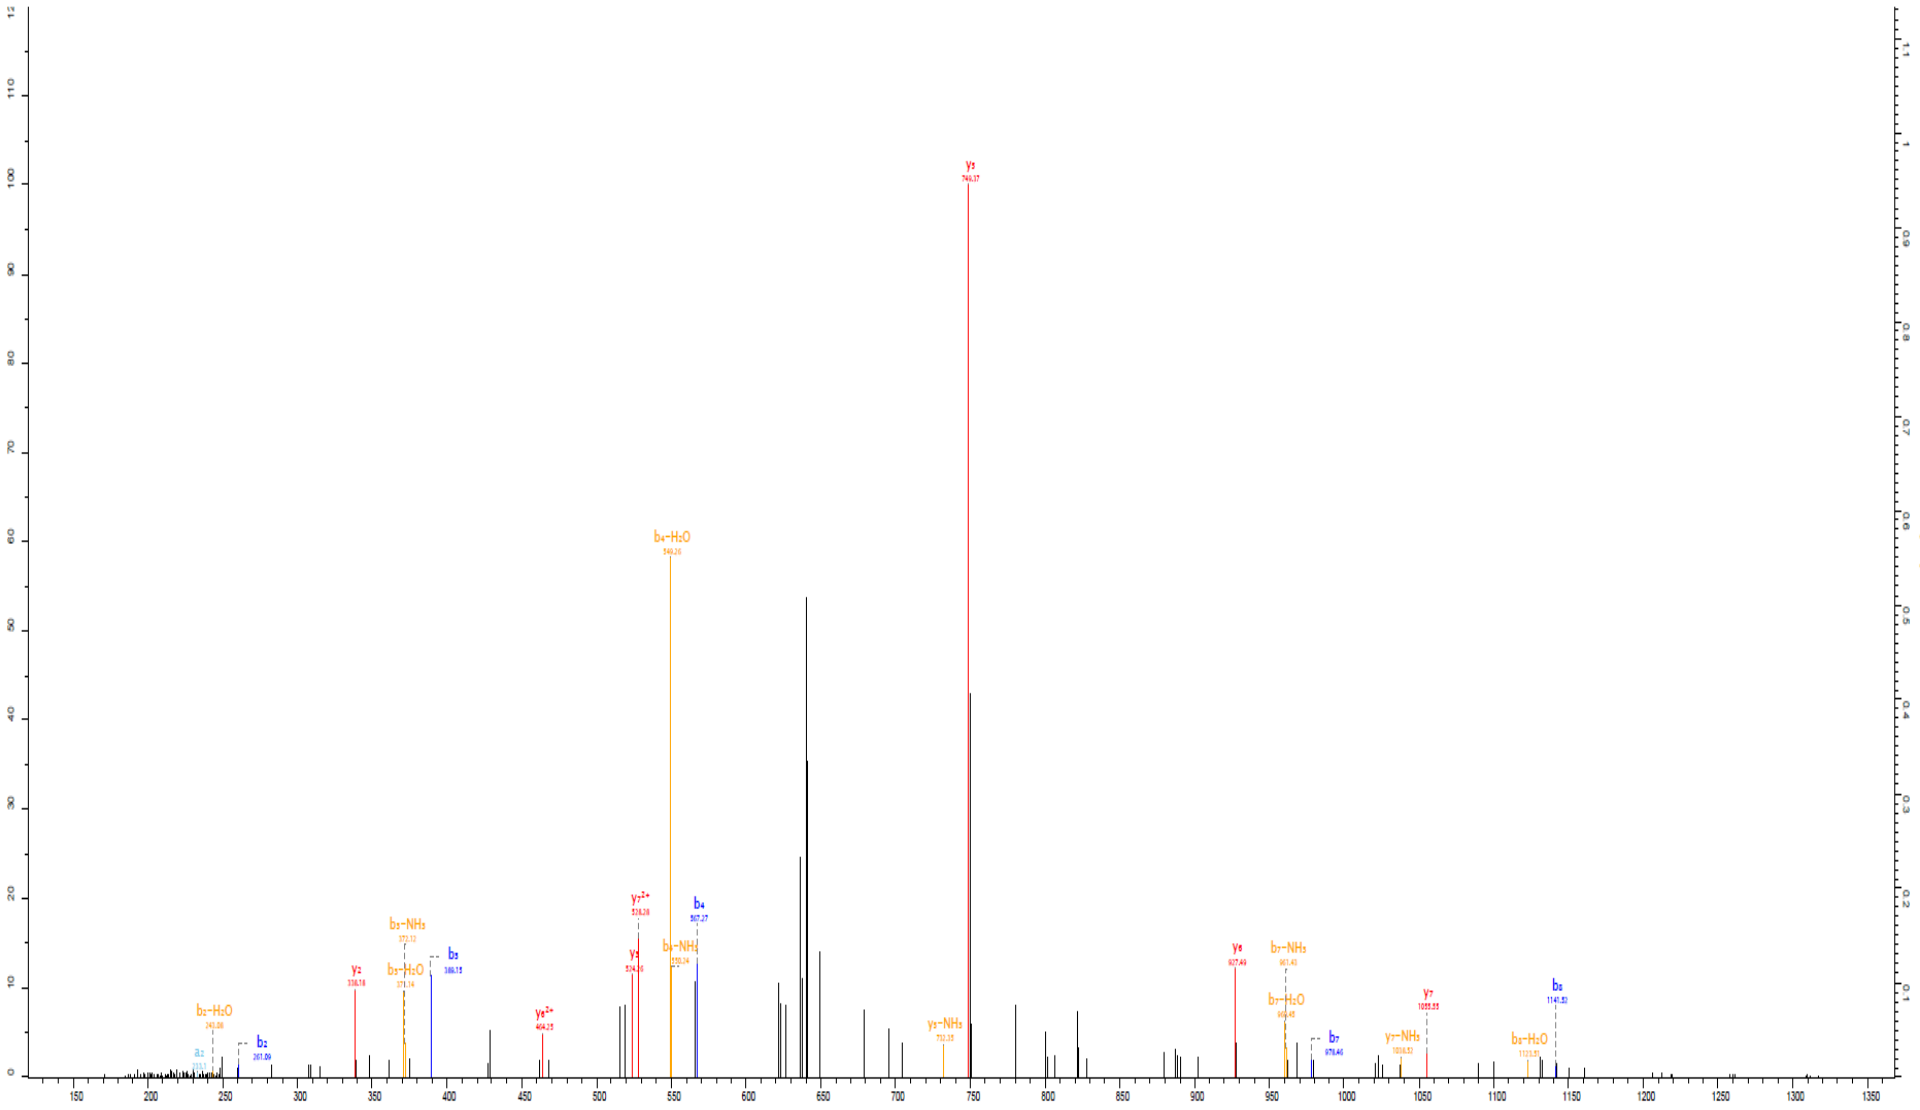

- E M Q K P Q W Y R -

b<sub>2</sub>
y<sub>2</sub>
b<sub>3</sub>
y<sub>3</sub>
y<sub>3</sub><sup>+</sup>
y<sub>3</sub>
y<sub>3</sub><sup>+</sup>
y<sub>5</sub>
y<sub>5</sub><sup>+</sup>
y<sub>6</sub>
y<sub>7</sub>
y<sub>7</sub><sup>+</sup>
b<sub>2</sub>
b<sub>3</sub>
b<sub>4</sub>
b<sub>4</sub>
b<sub>4</sub>-NH<sub>2</sub>
b<sub>4</sub>
b<sub>6</sub>
b<sub>6</sub>
b<sub>6</sub>-NH<sub>2</sub>
b<sub>6</sub>
b<sub>7</sub>
b<sub>7</sub>

Gene name = Mtor

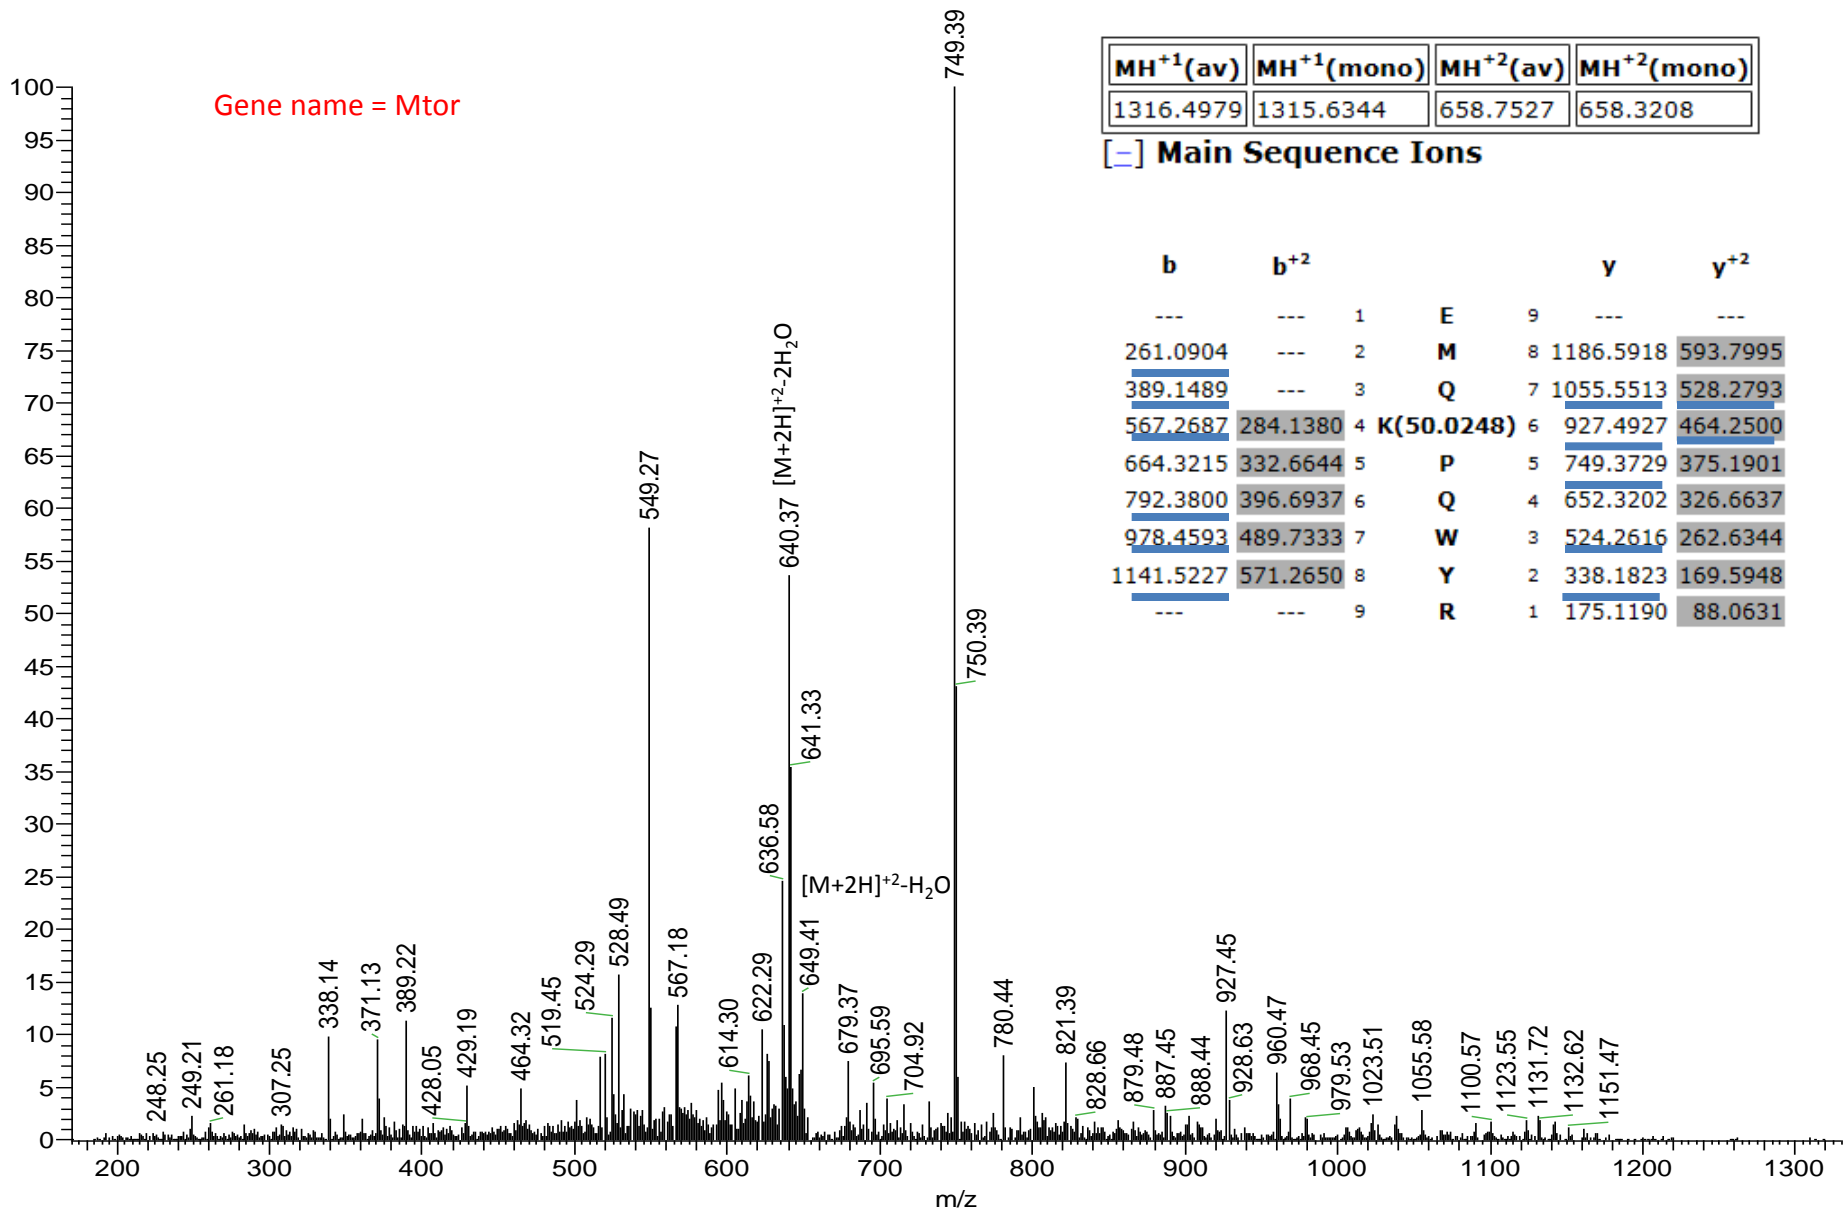

| MH <sup>+1</sup> (av) | MH <sup>+1</sup> (mono) | MH <sup>+2</sup> (av) | MH <sup>+2</sup> (mono) |
|-----------------------|-------------------------|-----------------------|-------------------------|
| 1316.4979             | 1315.6344               | 658.7527              | 658.3208                |

**[-] Main Sequence Ions**

| b                | b <sup>+2</sup> |   | y                 | y <sup>+2</sup> |                 |
|------------------|-----------------|---|-------------------|-----------------|-----------------|
| ---              | ---             | 1 | E                 | 9               | ---             |
| <u>261.0904</u>  | ---             | 2 | M                 | 8               | 1186.5918       |
| <u>389.1489</u>  | ---             | 3 | Q                 | 7               | 1055.5513       |
| <u>567.2687</u>  | <u>284.1380</u> | 4 | <b>K(50.0248)</b> | 6               | <u>927.4927</u> |
| 664.3215         | 332.6644        | 5 | P                 | 5               | 749.3729        |
| 792.3800         | 396.6937        | 6 | Q                 | 4               | 652.3202        |
| <u>978.4593</u>  | <u>489.7333</u> | 7 | W                 | 3               | <u>524.2616</u> |
| <u>1141.5227</u> | <u>571.2650</u> | 8 | Y                 | 2               | <u>338.1823</u> |
| ---              | ---             | 9 | R                 | 1               | 175.1190        |
|                  |                 |   |                   |                 | 88.0631         |

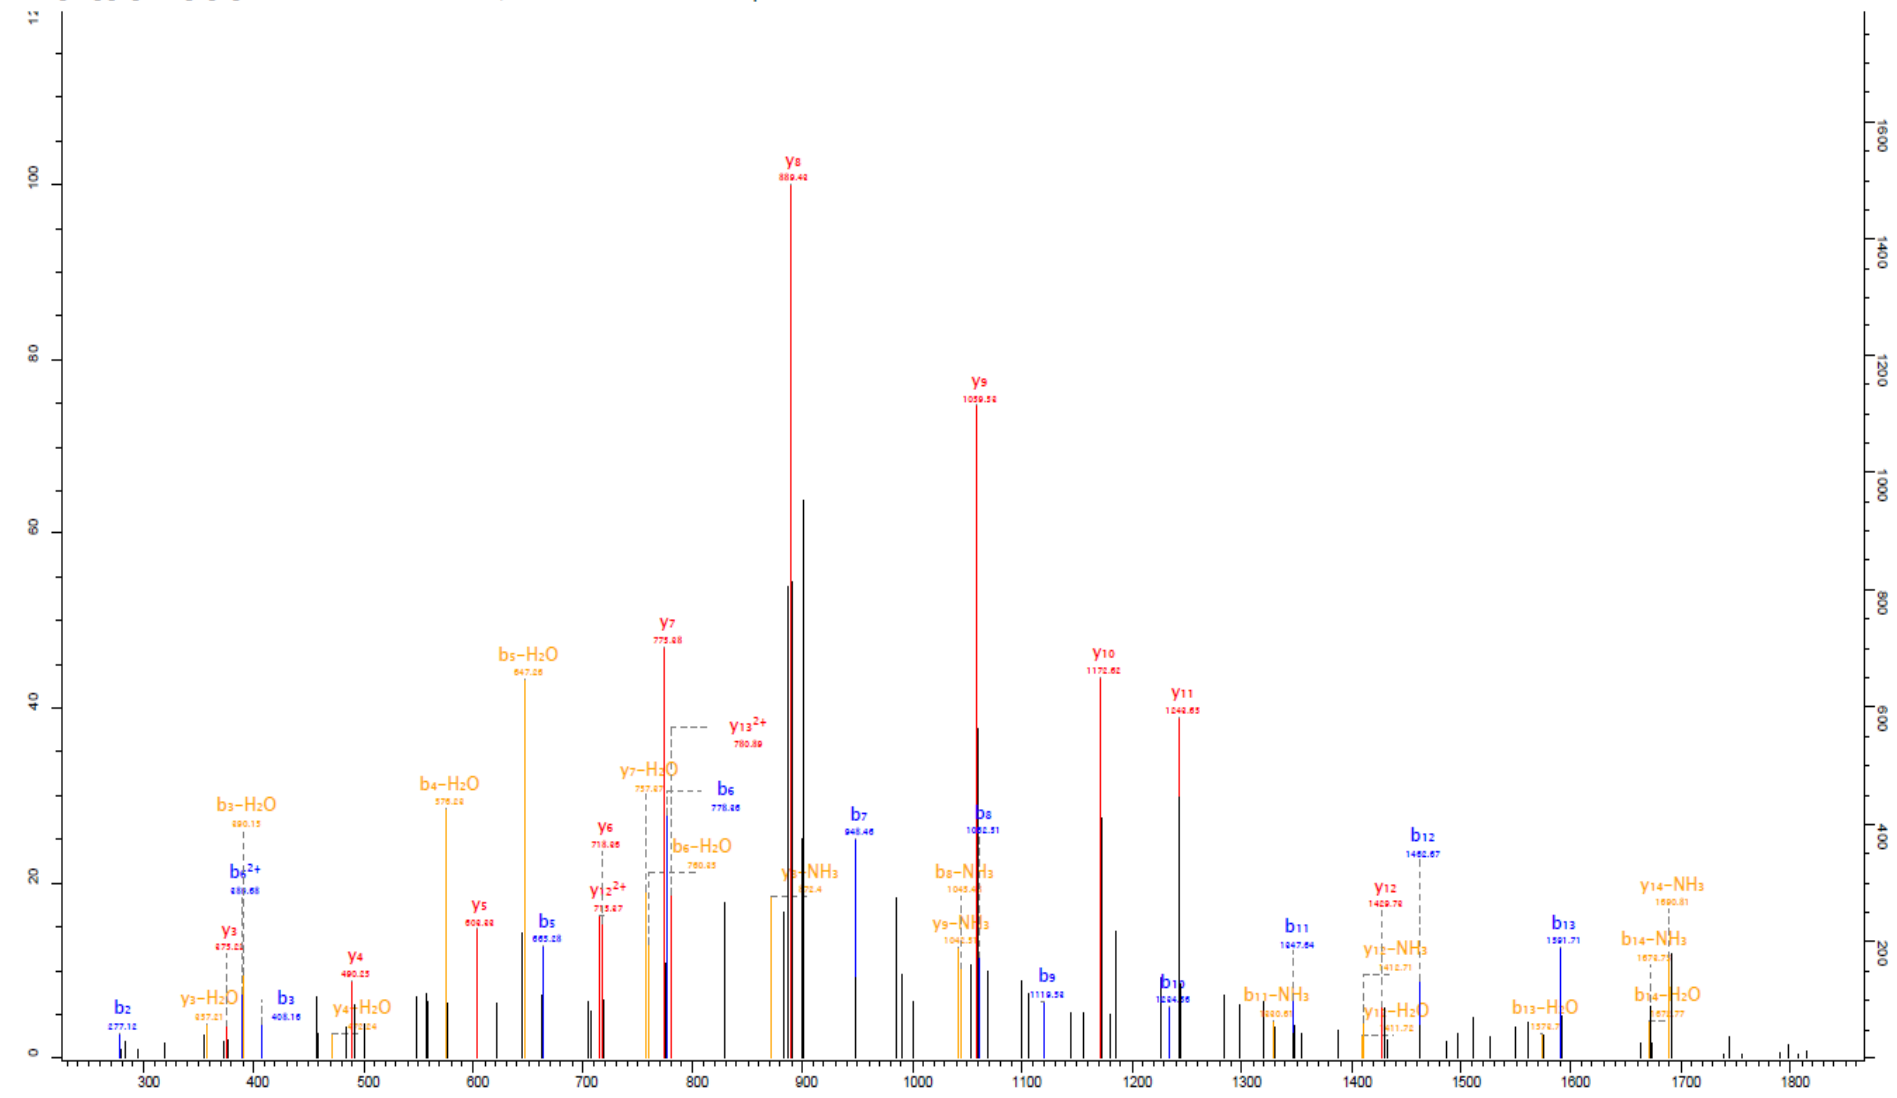

- E F M W A L K N G D L D E V K -

b2 b3 b5 b6 b7 b8 b9 b10 b11 b12 b13 b14 b15

y12<sup>2+</sup> y12 y11 y10 y8 y6 y7 y5 y4 y3

| MH <sup>+</sup> (av) | MH <sup>+</sup> (mono) | MH <sup>+</sup> (av) | MH <sup>+</sup> (mono) |
|----------------------|------------------------|----------------------|------------------------|
| 1838.1021            | 1836.8837              | 919.5548             | 918.9455               |

[-] Main Sequence Ions

| b         | b <sup>+</sup> |    | y         | y <sup>+</sup> |           |           |
|-----------|----------------|----|-----------|----------------|-----------|-----------|
| ---       | ---            | 1  | E         | 15             | ---       |           |
| 277.1183  | ---            | 2  | F         | 14             | 1707.8411 |           |
| 408.1588  | ---            | 3  | M         | 13             | 1560.7727 |           |
| 594.2381  | ---            | 4  | W         | 12             | 1429.7322 |           |
| 665.2752  | ---            | 5  | A         | 11             | 1243.6529 |           |
| 778.3593  | ---            | 6  | L         | 10             | 1172.6157 |           |
| 948.4648  | 474.7360       | 7  | K(Acetyl) |                | 9         | 1059.5317 |
| 1062.5077 | 531.7575       | 8  | N         | 8              | 889.4262  |           |
| 1119.5292 | 560.2682       | 9  | G         | 7              | 775.3832  |           |
| 1234.5561 | 617.7817       | 10 | D         | 6              | 718.3618  |           |
| 1347.6402 | 674.3237       | 11 | L         | 5              | 603.3348  |           |
| 1462.6671 | 731.8372       | 12 | D         | 4              | 490.2508  |           |
| 1591.7097 | 796.3585       | 13 | E         | 3              | 375.2238  |           |
| 1690.7781 | 845.8927       | 14 | V         | 2              | 246.1812  |           |
| ---       | ---            | 15 | K         | 1              | 147.1128  |           |

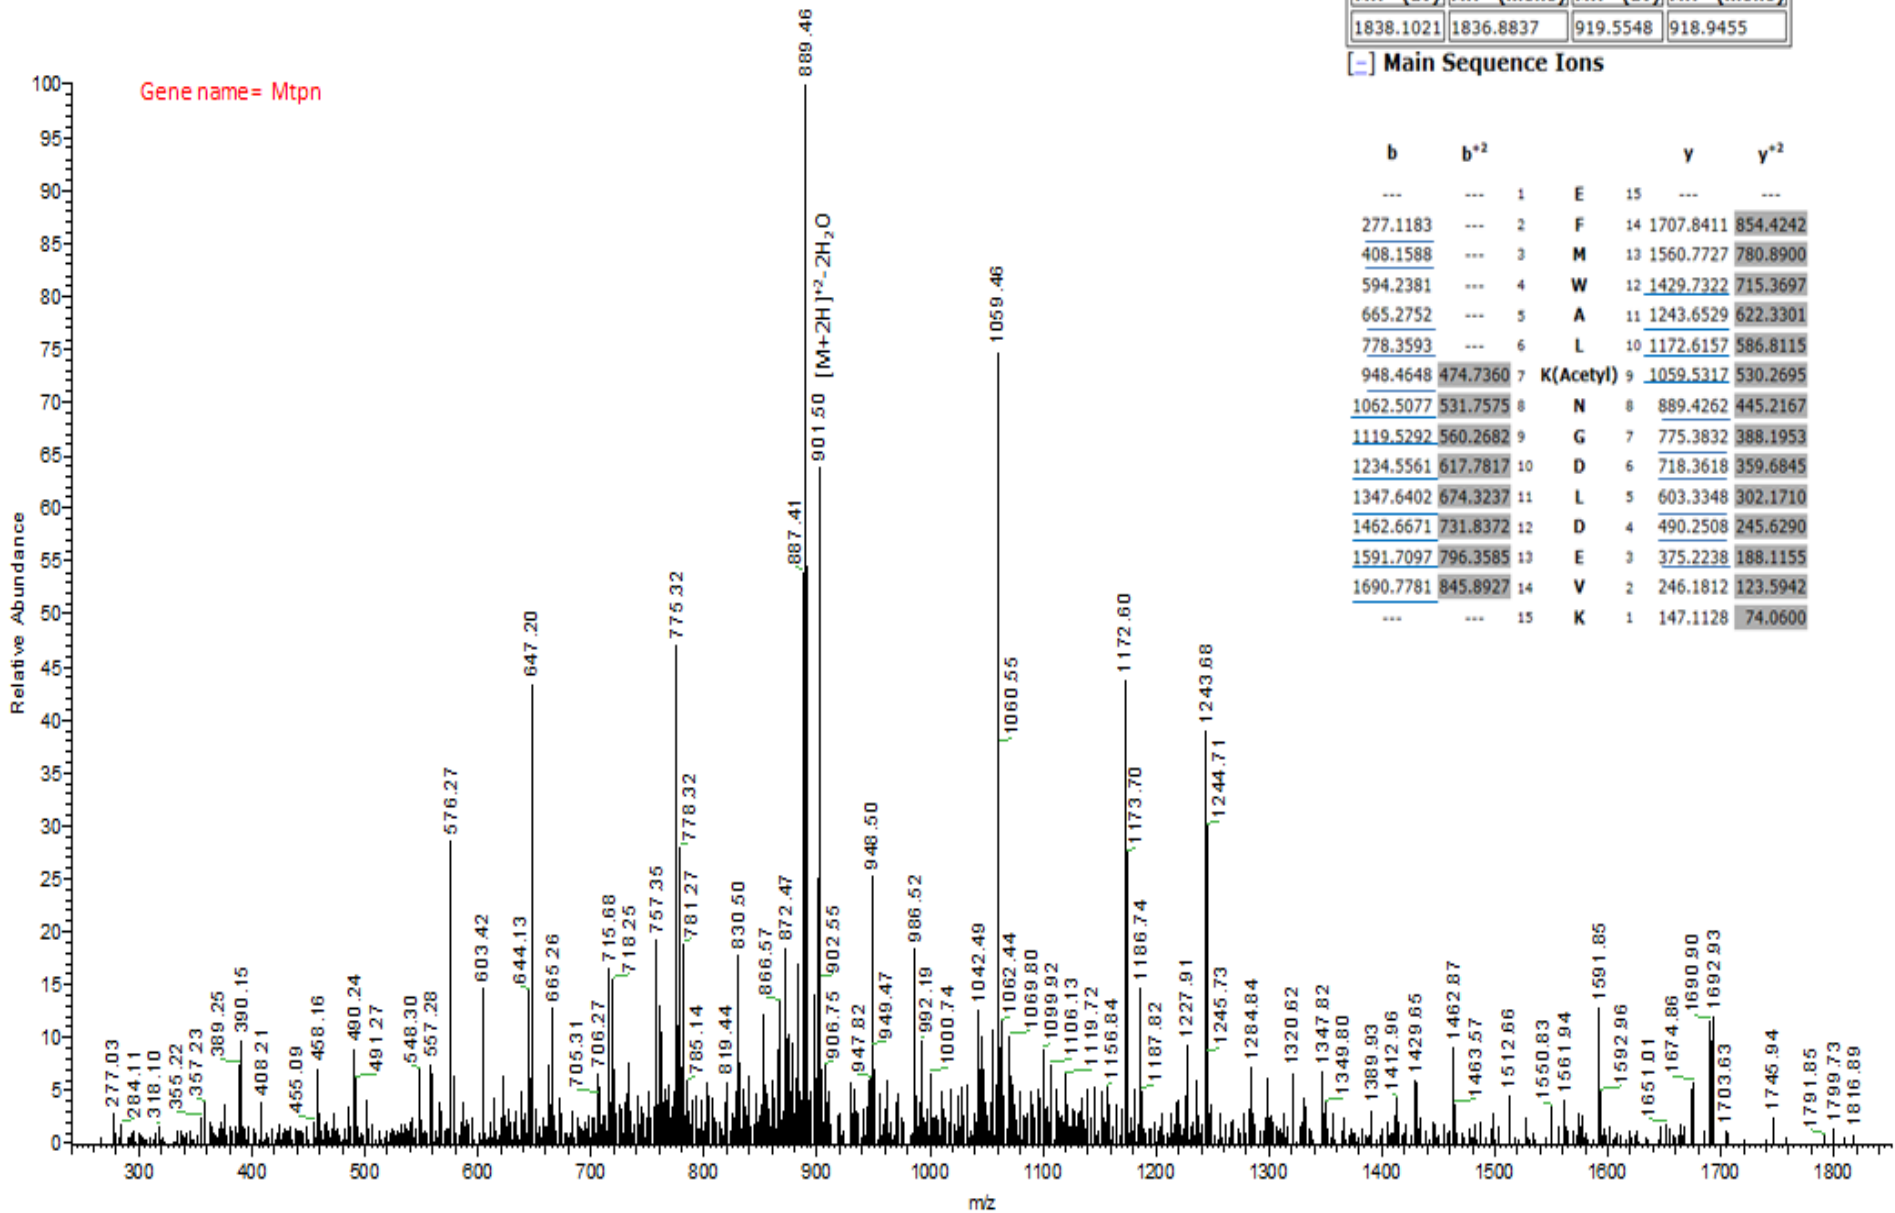

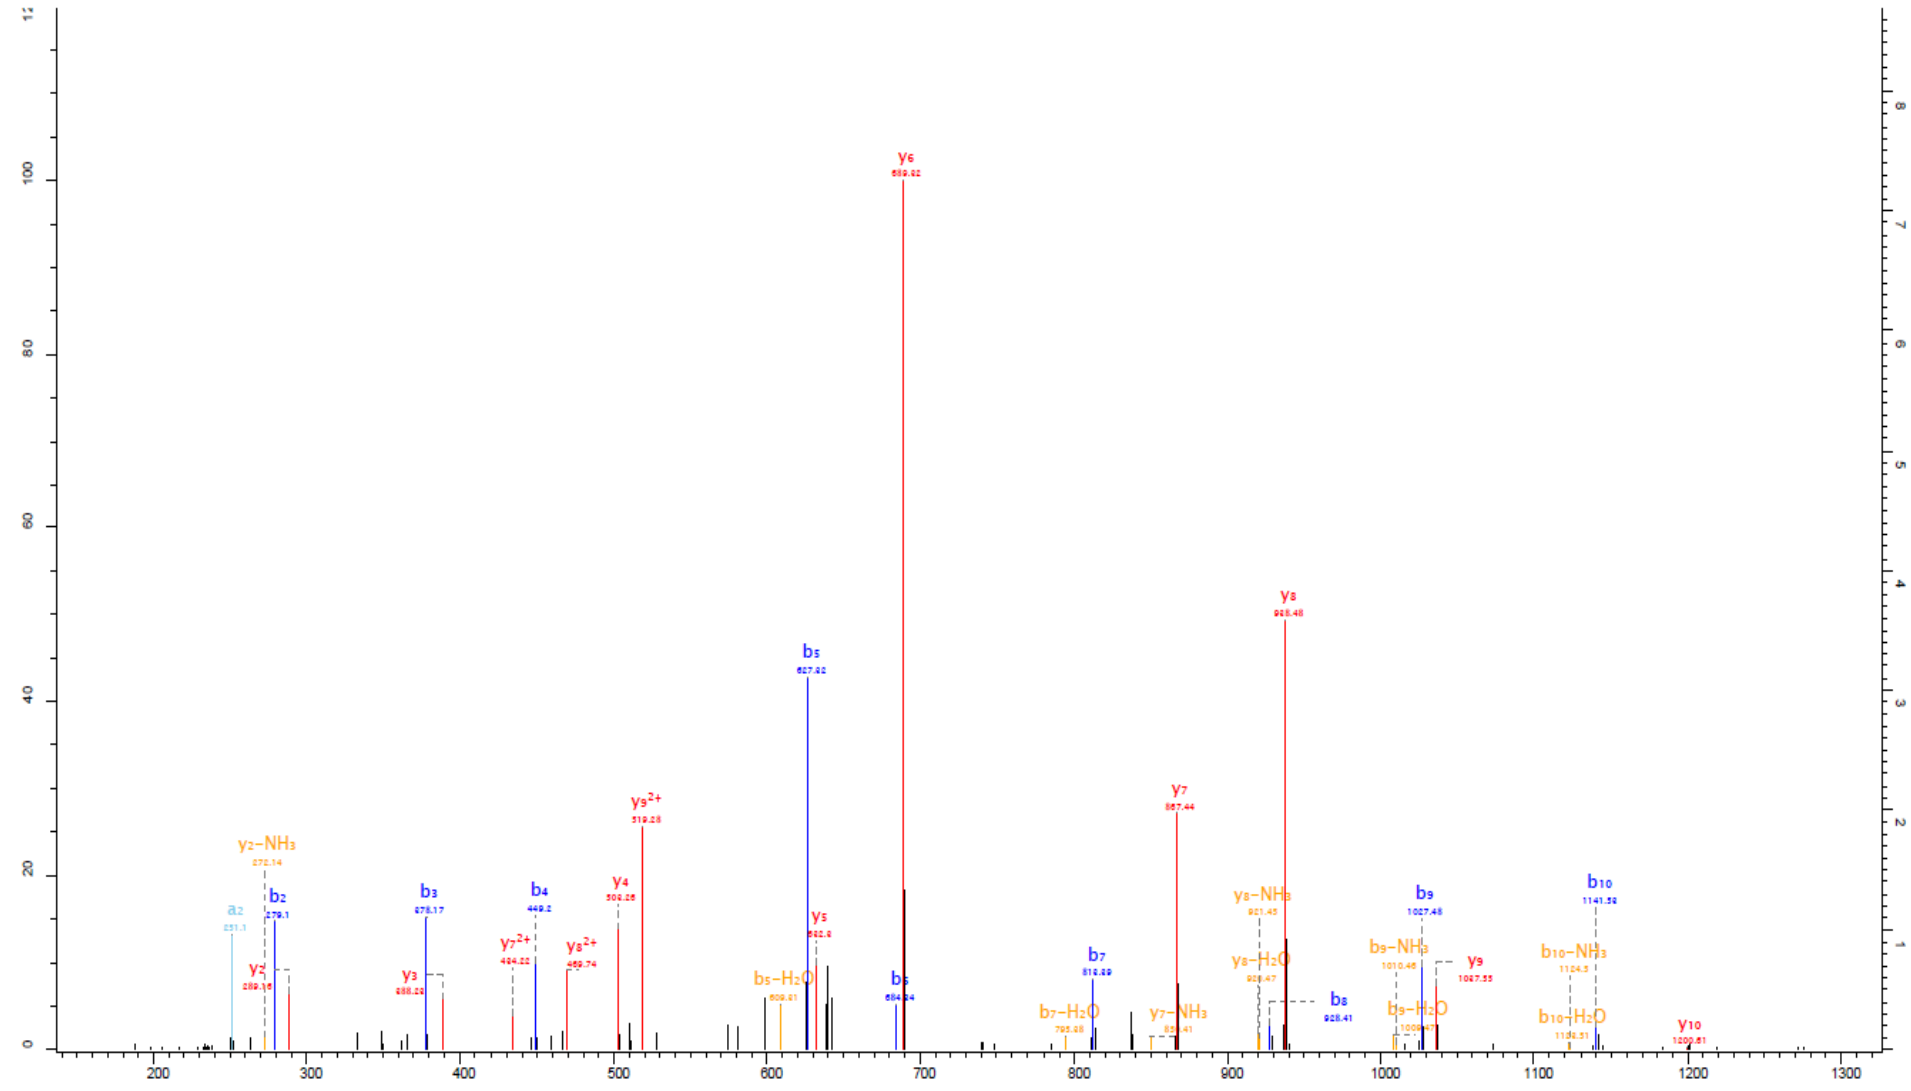

- D Y V A K G E D V N R -

y10 y9 y8 y7 y6 y5 y4 y3 y2  
ac  
b2 b3 b4 b5 b6 b7 b8 b9 b10

| MH <sup>+</sup> (av) | MH <sup>+</sup> (mono) | MH <sup>2+</sup> (av) | MH <sup>2+</sup> (mono) |
|----------------------|------------------------|-----------------------|-------------------------|
| 1316.3859            | 1315.6369              | 658.6967              | 658.3221                |

[-] Main Sequence Ions

| b         | b <sup>2</sup> |    | y          | y <sup>2</sup> |           |
|-----------|----------------|----|------------|----------------|-----------|
| ---       | ---            | 1  | D          | 11             | ---       |
| 279.0975  | ---            | 2  | Y          | 10             | 1200.6099 |
| 378.1660  | ---            | 3  | V          | 9              | 1037.5466 |
| 449.2031  | ---            | 4  | A          | 8              | 938.4782  |
| 627.3228  | 314.1651       | 5  | K(50.0248) | 7              | 867.4411  |
| 684.3443  | 342.6758       | 6  | G          | 6              | 689.3213  |
| 813.3869  | 407.1971       | 7  | E          | 5              | 632.2998  |
| 928.4138  | 464.7106       | 8  | D          | 4              | 503.2572  |
| 1027.4823 | 514.2448       | 9  | V          | 3              | 388.2303  |
| 1141.5252 | 571.2662       | 10 | N          | 2              | 289.1619  |
| ---       | ---            | 11 | R          | 1              | 175.1190  |

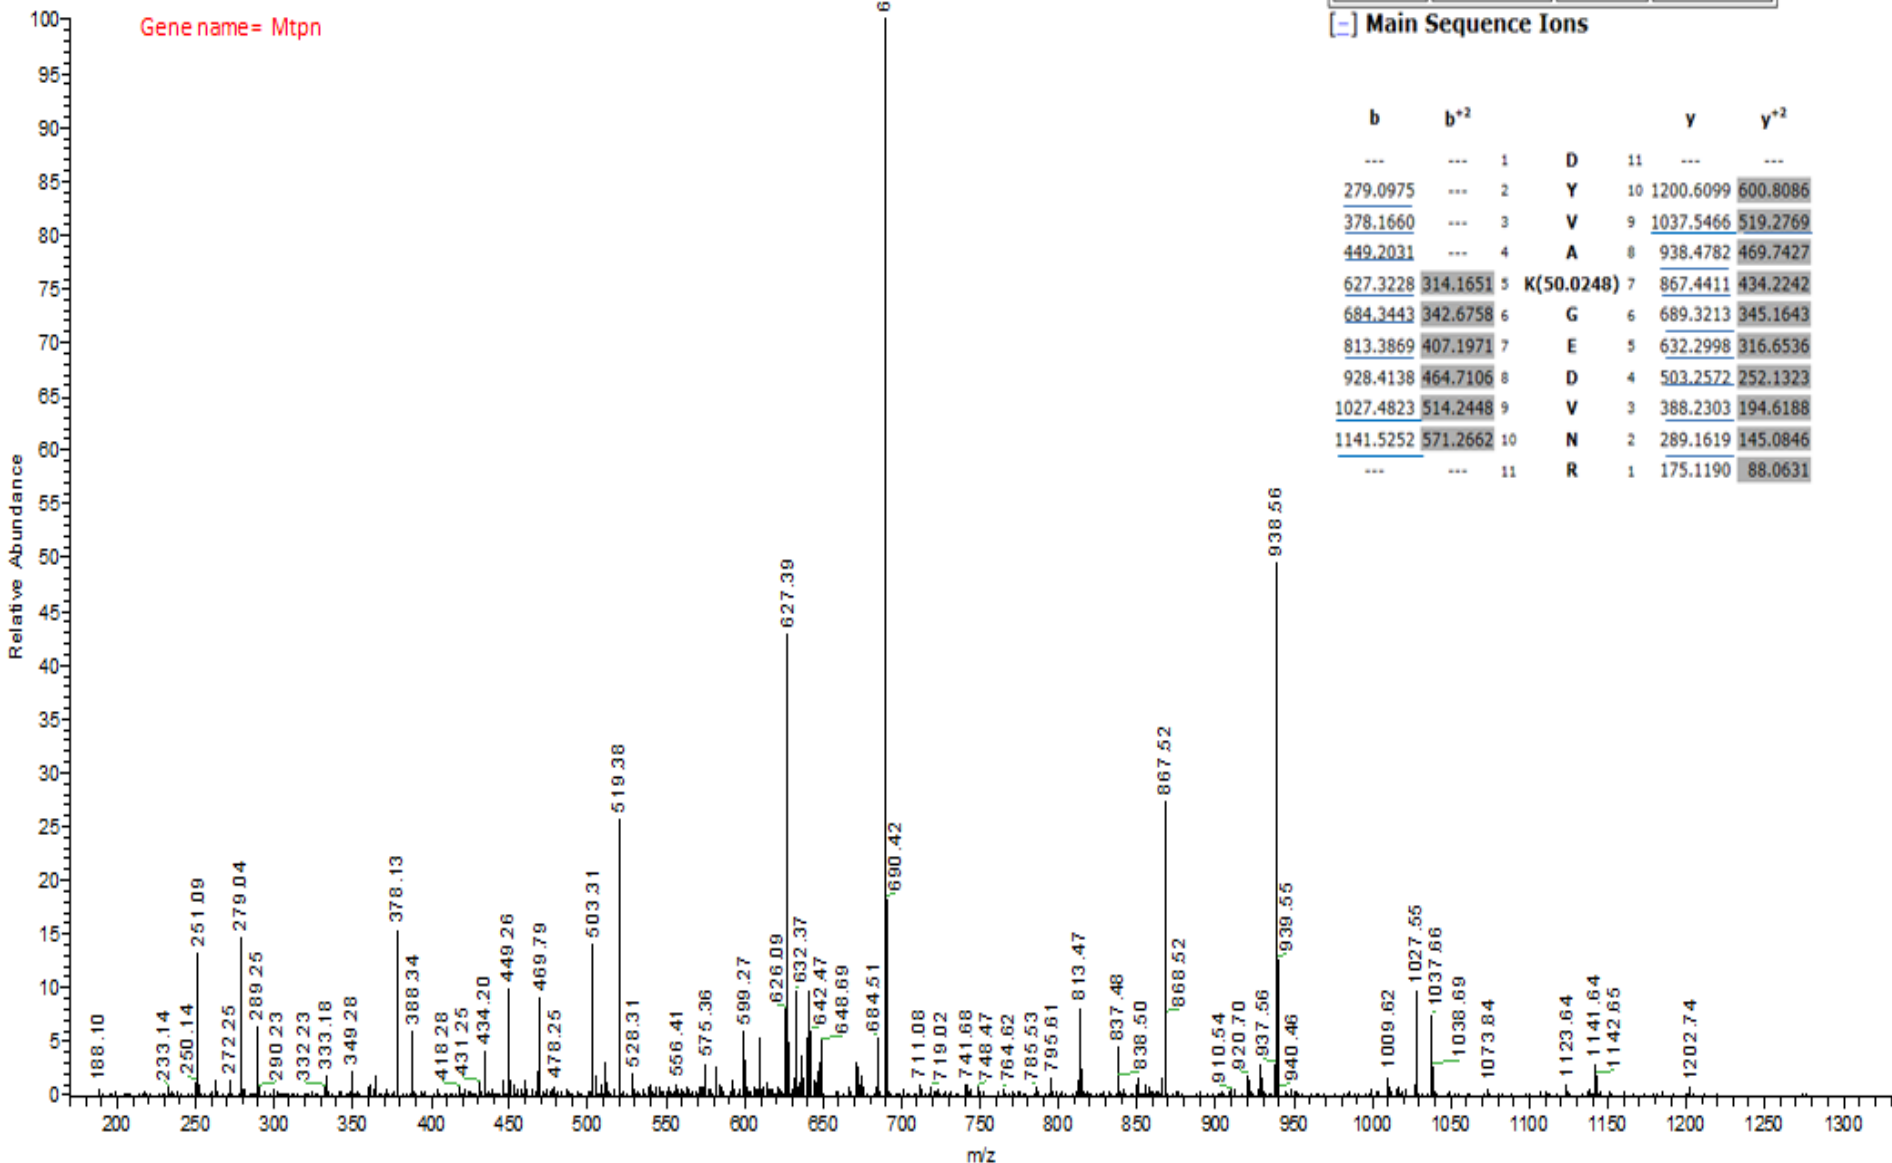



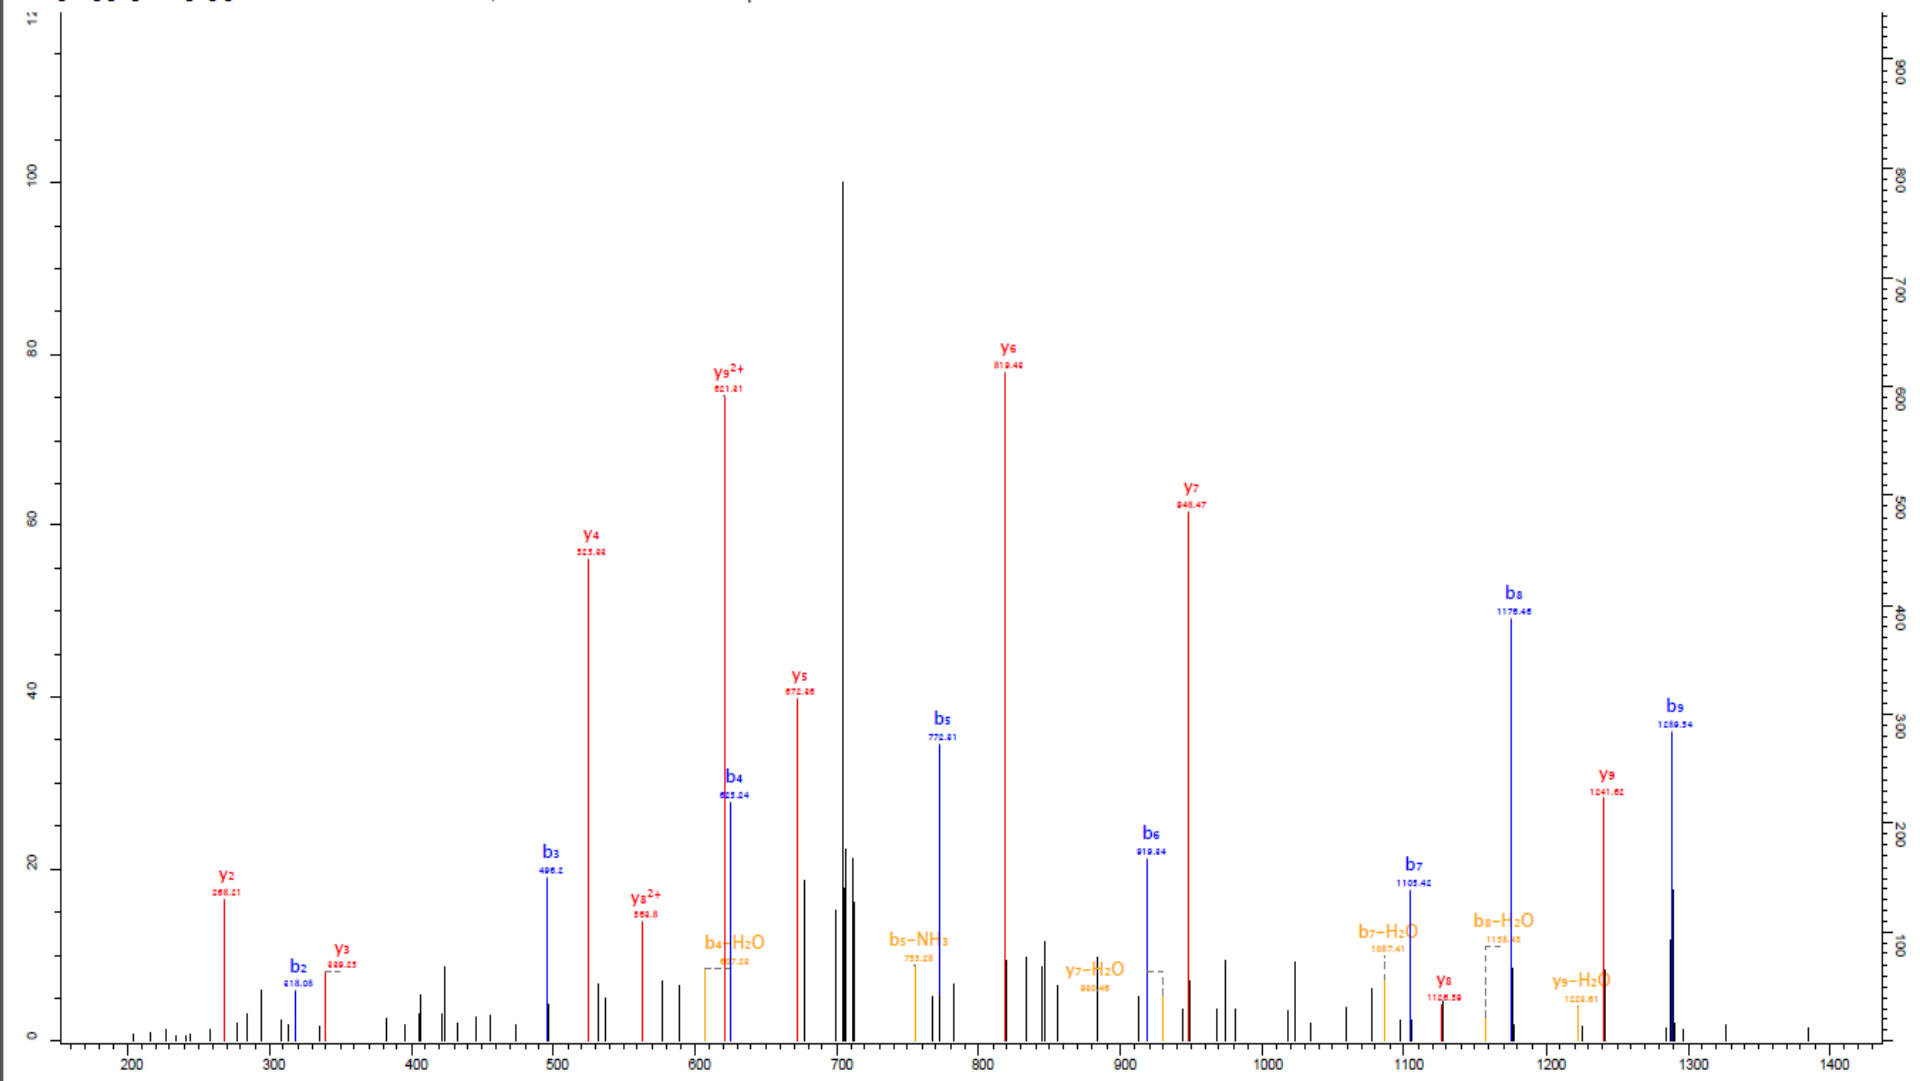

ac - C 

|    |    |    |    |    |    |    |    |
|----|----|----|----|----|----|----|----|
| y9 | y5 | y7 | y8 | y5 | y4 | y3 | y2 |
| D  | K  | E  | F  | M  | W  | A  | L  |
| b2 | b3 | b4 | b5 | b6 | b7 | b8 | b9 |

 K -

| MH <sup>+</sup> (av) | MH <sup>+</sup> (mono) | MH <sup>2+</sup> (av) | MH <sup>2+</sup> (mono) |
|----------------------|------------------------|-----------------------|-------------------------|
| 1444.6805            | 1443.6618              | 722.8440              | 722.3345                |

[-] Main Sequence Ions

| b         | b <sup>+</sup> |    | y         | y <sup>+</sup>     |
|-----------|----------------|----|-----------|--------------------|
| 203.0485  | ---            | 1  | Acetyl    |                    |
| 318.0754  | ---            | 2  | 1401.6513 | 701.3293           |
| 496.1952  | 248.6012       | 3  | 9         | 1241.6206 621.3139 |
| 625.2378  | 313.1225       | 4  | 8         | 1126.5937 563.8005 |
| 772.3062  | 386.6567       | 5  | 7         | 948.4739 474.7406  |
| 919.3416  | 460.1744       | 6  | 6         | 819.4313 410.2193  |
| 1105.4209 | 553.2141       | 7  | 5         | 672.3629 336.6851  |
| 1176.4580 | 588.7327       | 8  | 4         | 525.3275 263.1674  |
| 1289.5421 | 645.2747       | 9  | 3         | 339.2482 170.1277  |
| --        | --             | 10 | 2         | 268.2111 134.6092  |
|           |                |    | 1         | 155.1270 78.0671   |

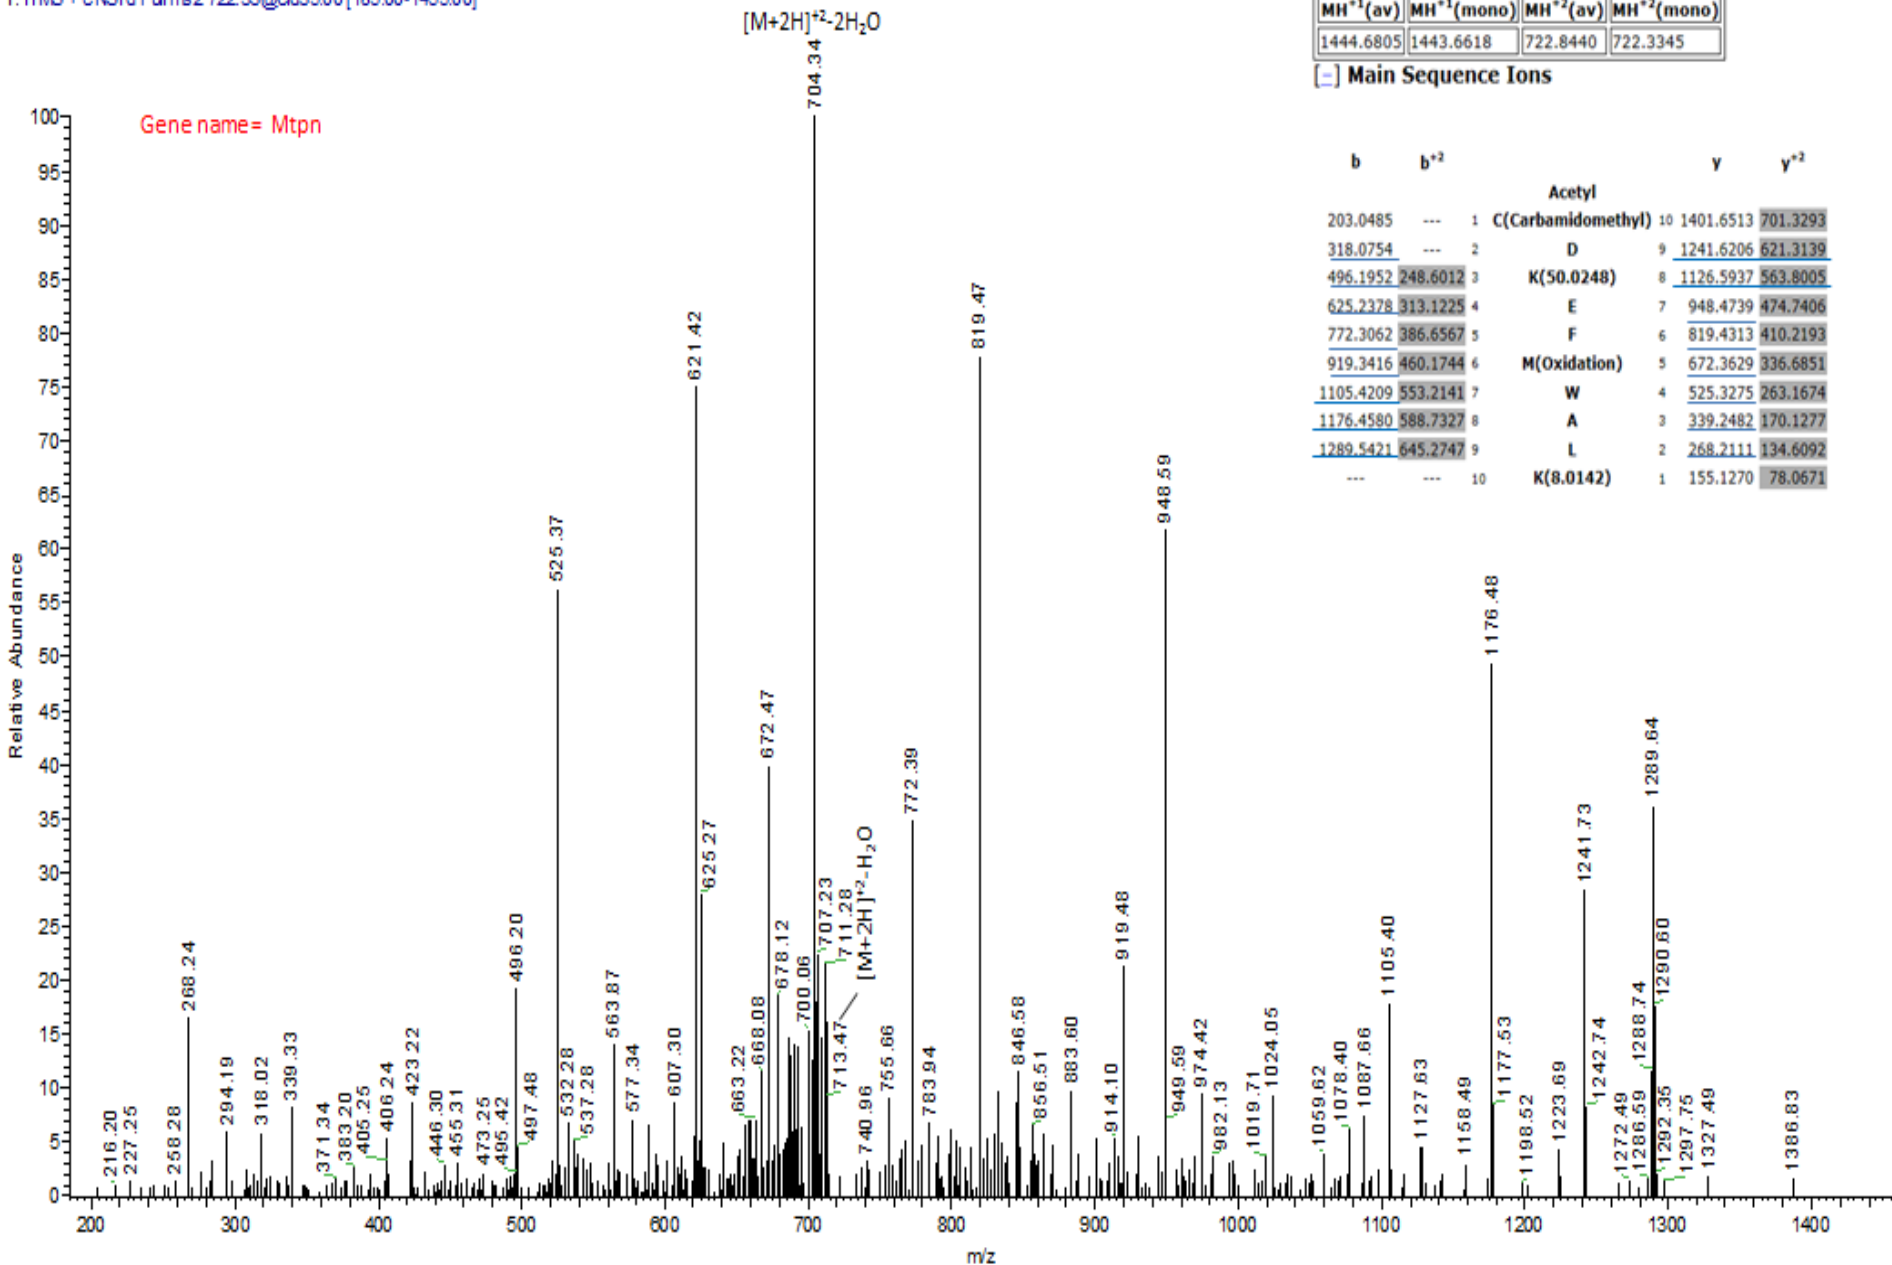

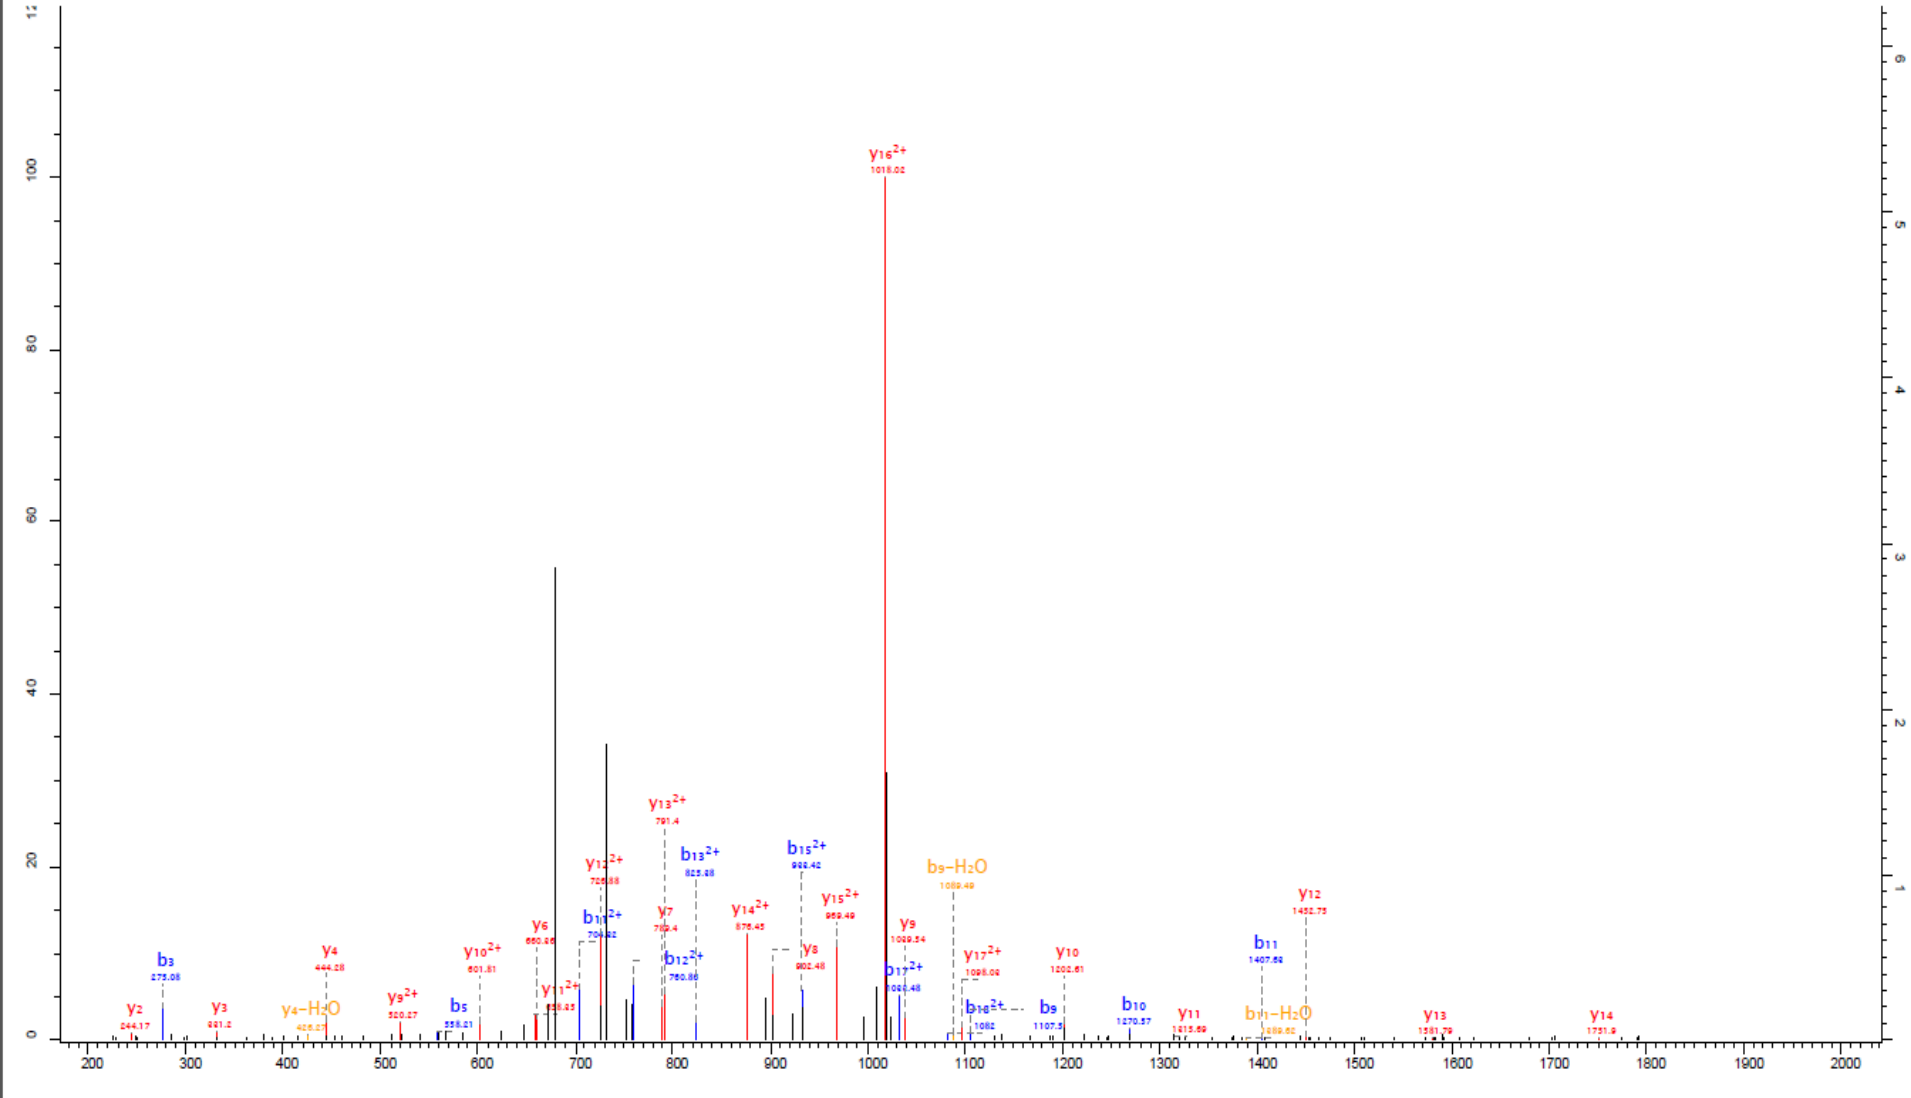

- G G C P W K E H L Y H L E S E L S P K -  
 b5 b10 b11 b12^2+ b13^2+ b15^2+ b17^2+ b18^2+  
 y12^2+ y14 ac y15 y12 y11 y10 y9 y8 y7 y6 y4 y3 y2

Gene name = Myg1

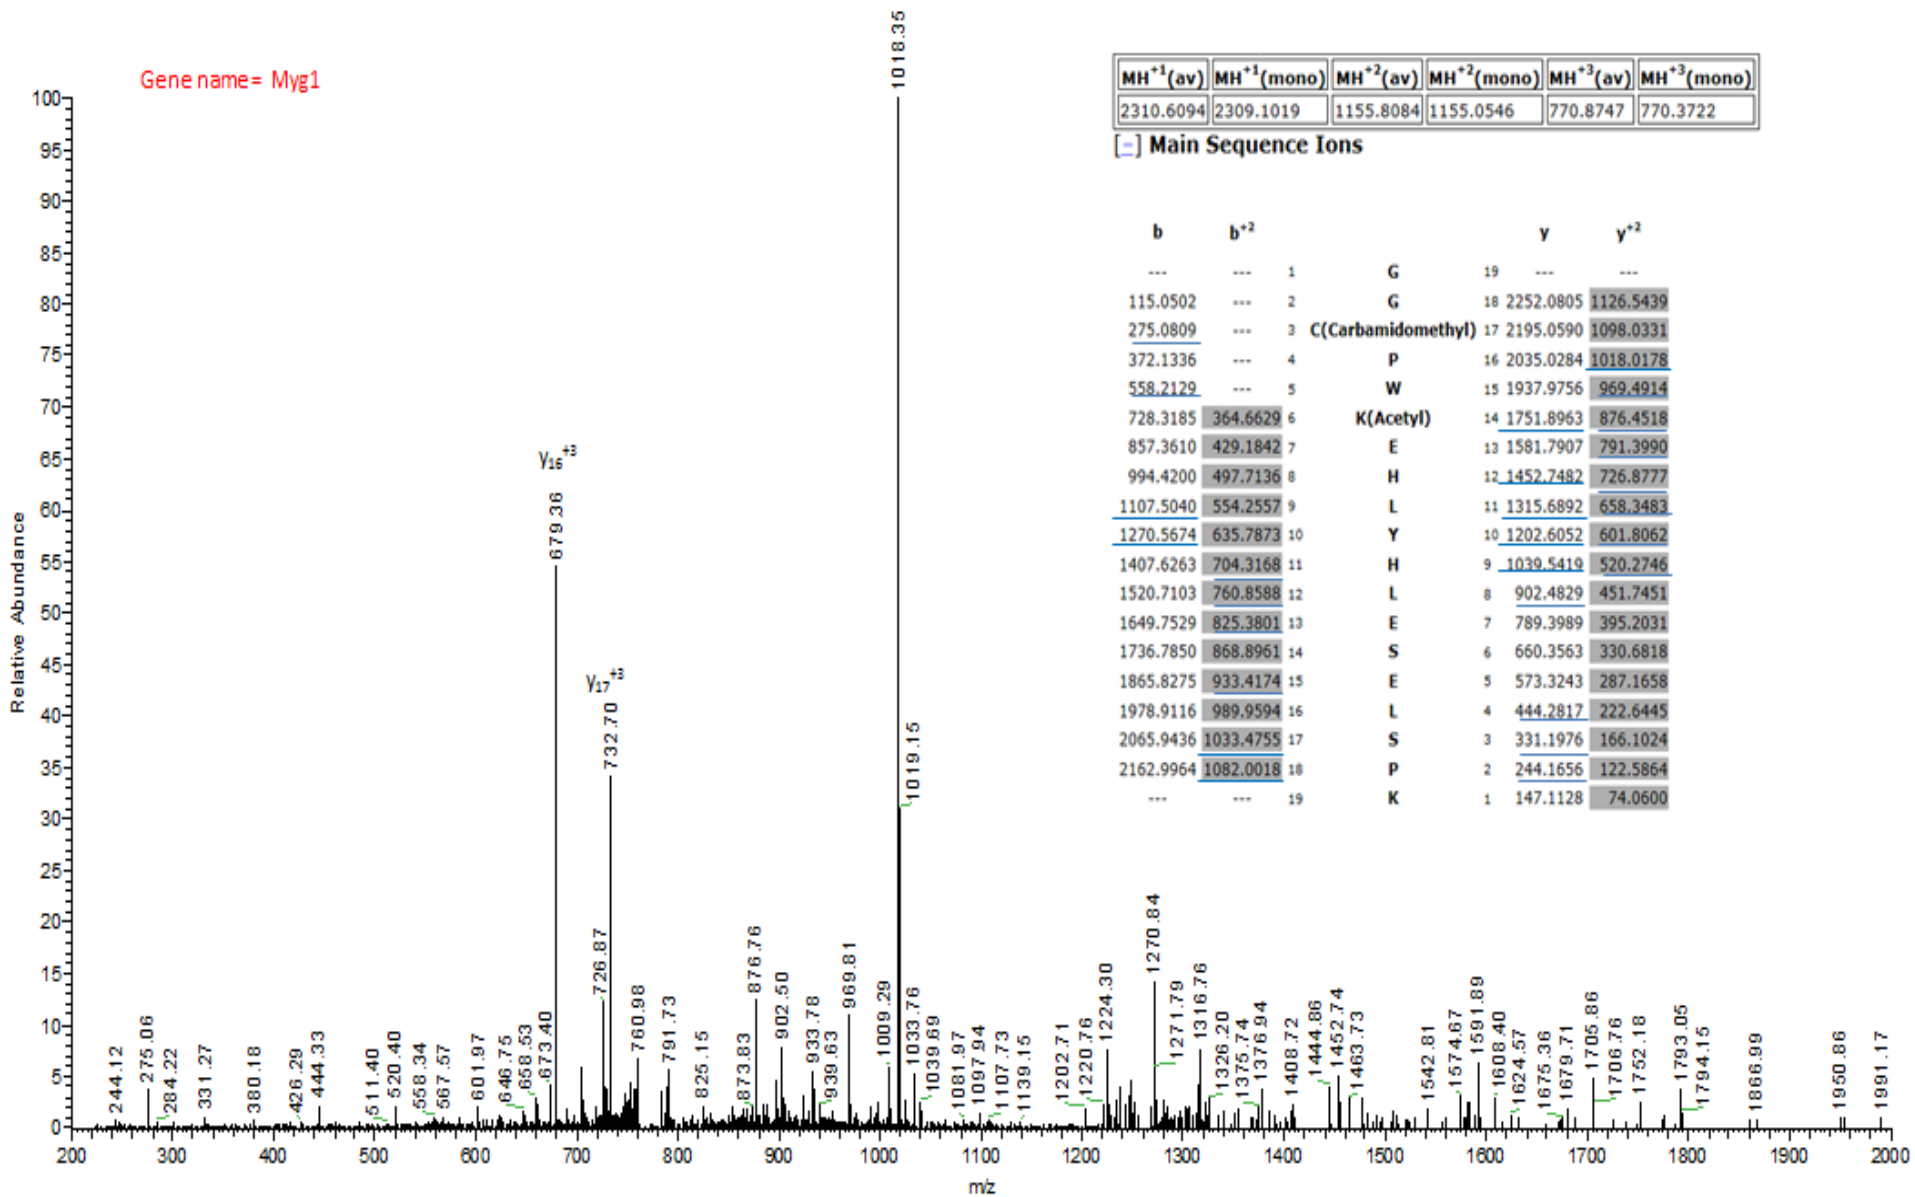

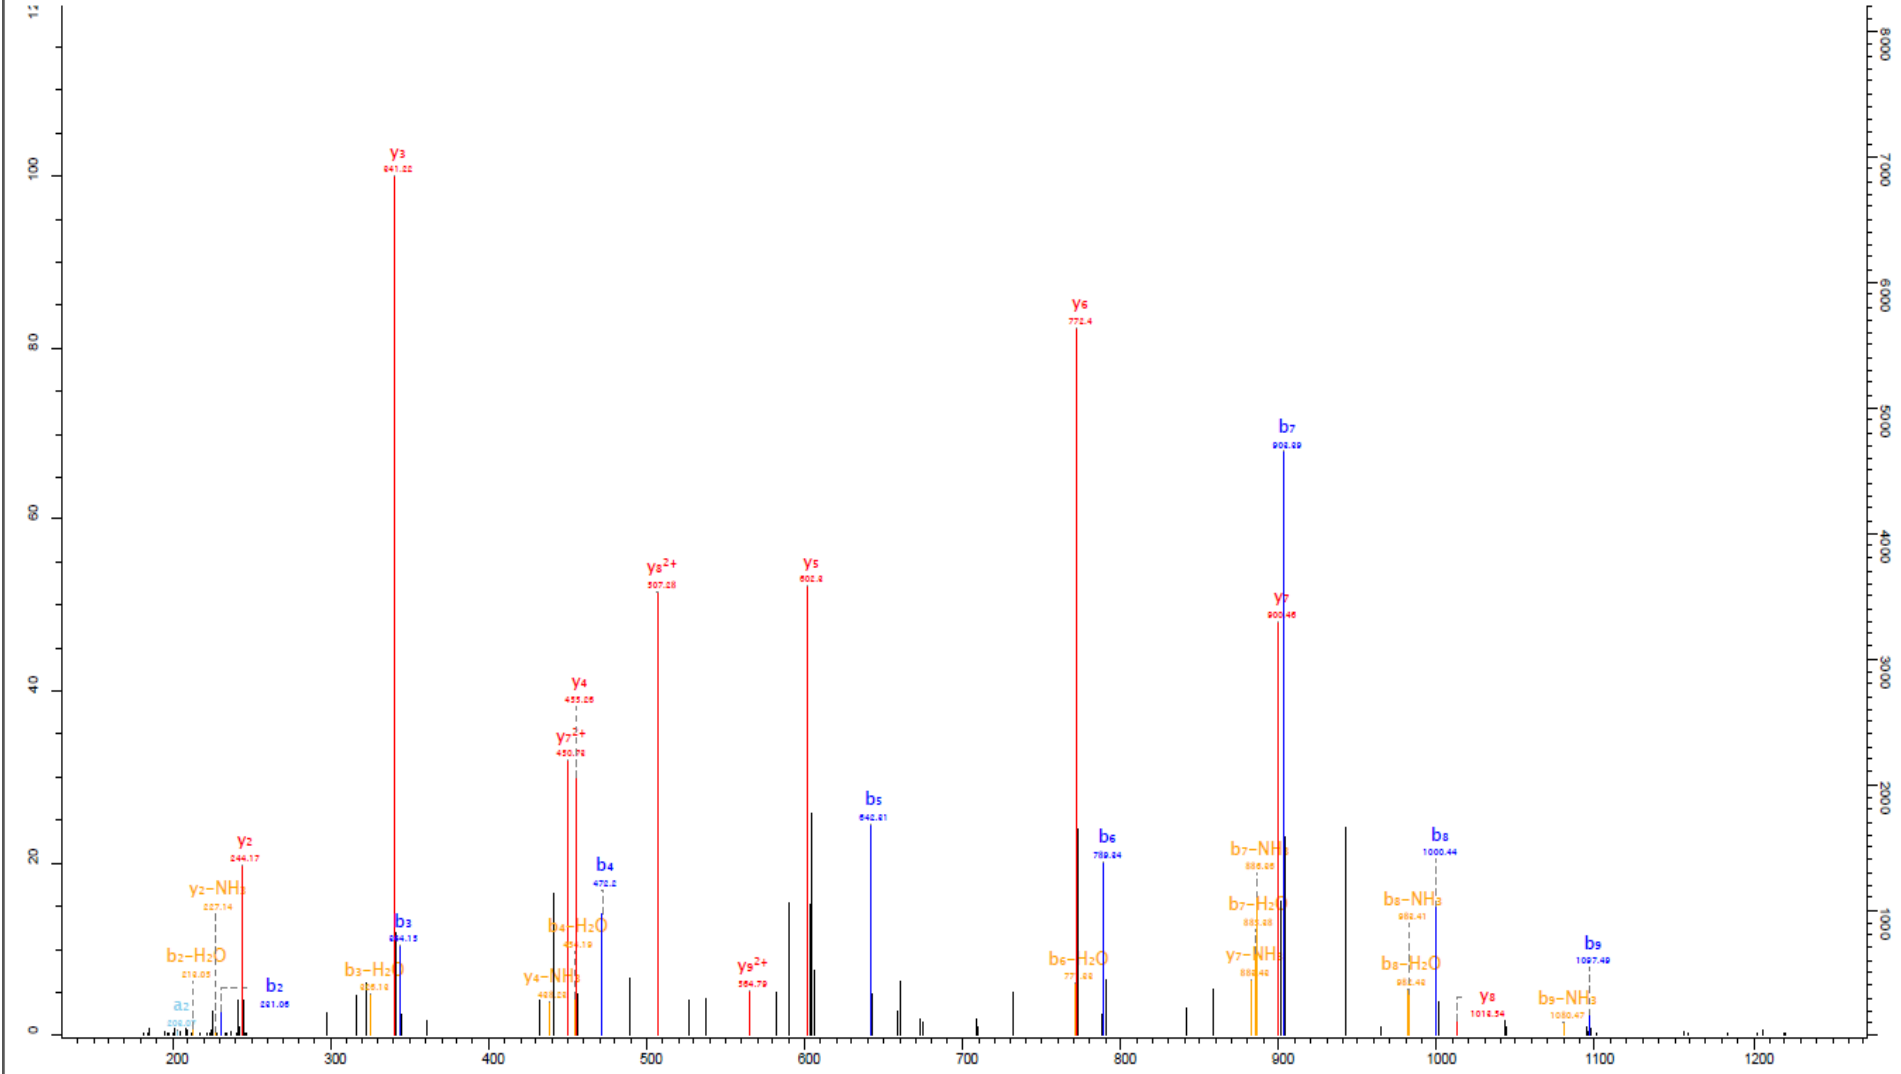

- D 

|                 |                |                |                |                |                |                |                |
|-----------------|----------------|----------------|----------------|----------------|----------------|----------------|----------------|
| y <sup>2+</sup> | y <sub>5</sub> | y <sub>7</sub> | y <sub>8</sub> | y <sub>5</sub> | y <sub>4</sub> | y <sub>3</sub> | y <sub>2</sub> |
| D               | I              | Q              | K              | M              | N              | P              | P              |
| b <sub>2</sub>  | b <sub>3</sub> | b <sub>4</sub> | b <sub>5</sub> | b <sub>6</sub> | b <sub>7</sub> | b <sub>8</sub> | b <sub>8</sub> |

 K -

|                       |                         |                       |                         |
|-----------------------|-------------------------|-----------------------|-------------------------|
| MH <sup>+</sup> 1(av) | MH <sup>+</sup> 1(mono) | MH <sup>+</sup> 2(av) | MH <sup>+</sup> 2(mono) |
| 1244.4175             | 1243.5987               | 622.7125              | 622.3030                |

**Main Sequence Ions**

| b         | b <sup>+</sup> 2 |    | y            | y <sup>+</sup> 2 |           |
|-----------|------------------|----|--------------|------------------|-----------|
| ...       | ...              | 1  | D            | 10               | ...       |
| 231.0612  | ...              | 2  | D            | 9                | 1128.5718 |
| 344.1452  | ...              | 3  | I            | 8                | 1013.5448 |
| 472.2038  | ...              | 4  | Q            | 7                | 900.4608  |
| 642.3093  | 321.6583         | 5  | K(Acetyl)    | 6                | 772.4022  |
| 789.3447  | 395.1760         | 6  | M(Oxidation) | 5                | 602.2967  |
| 903.3877  | 452.1975         | 7  | N            | 4                | 455.2613  |
| 1000.4404 | 500.7238         | 8  | P            | 3                | 341.2183  |
| 1097.4932 | 549.2502         | 9  | P            | 2                | 244.1656  |
| ...       | ...              | 10 | K            | 1                | 147.1128  |

Gene names = Myh9; Myh10; Myh11

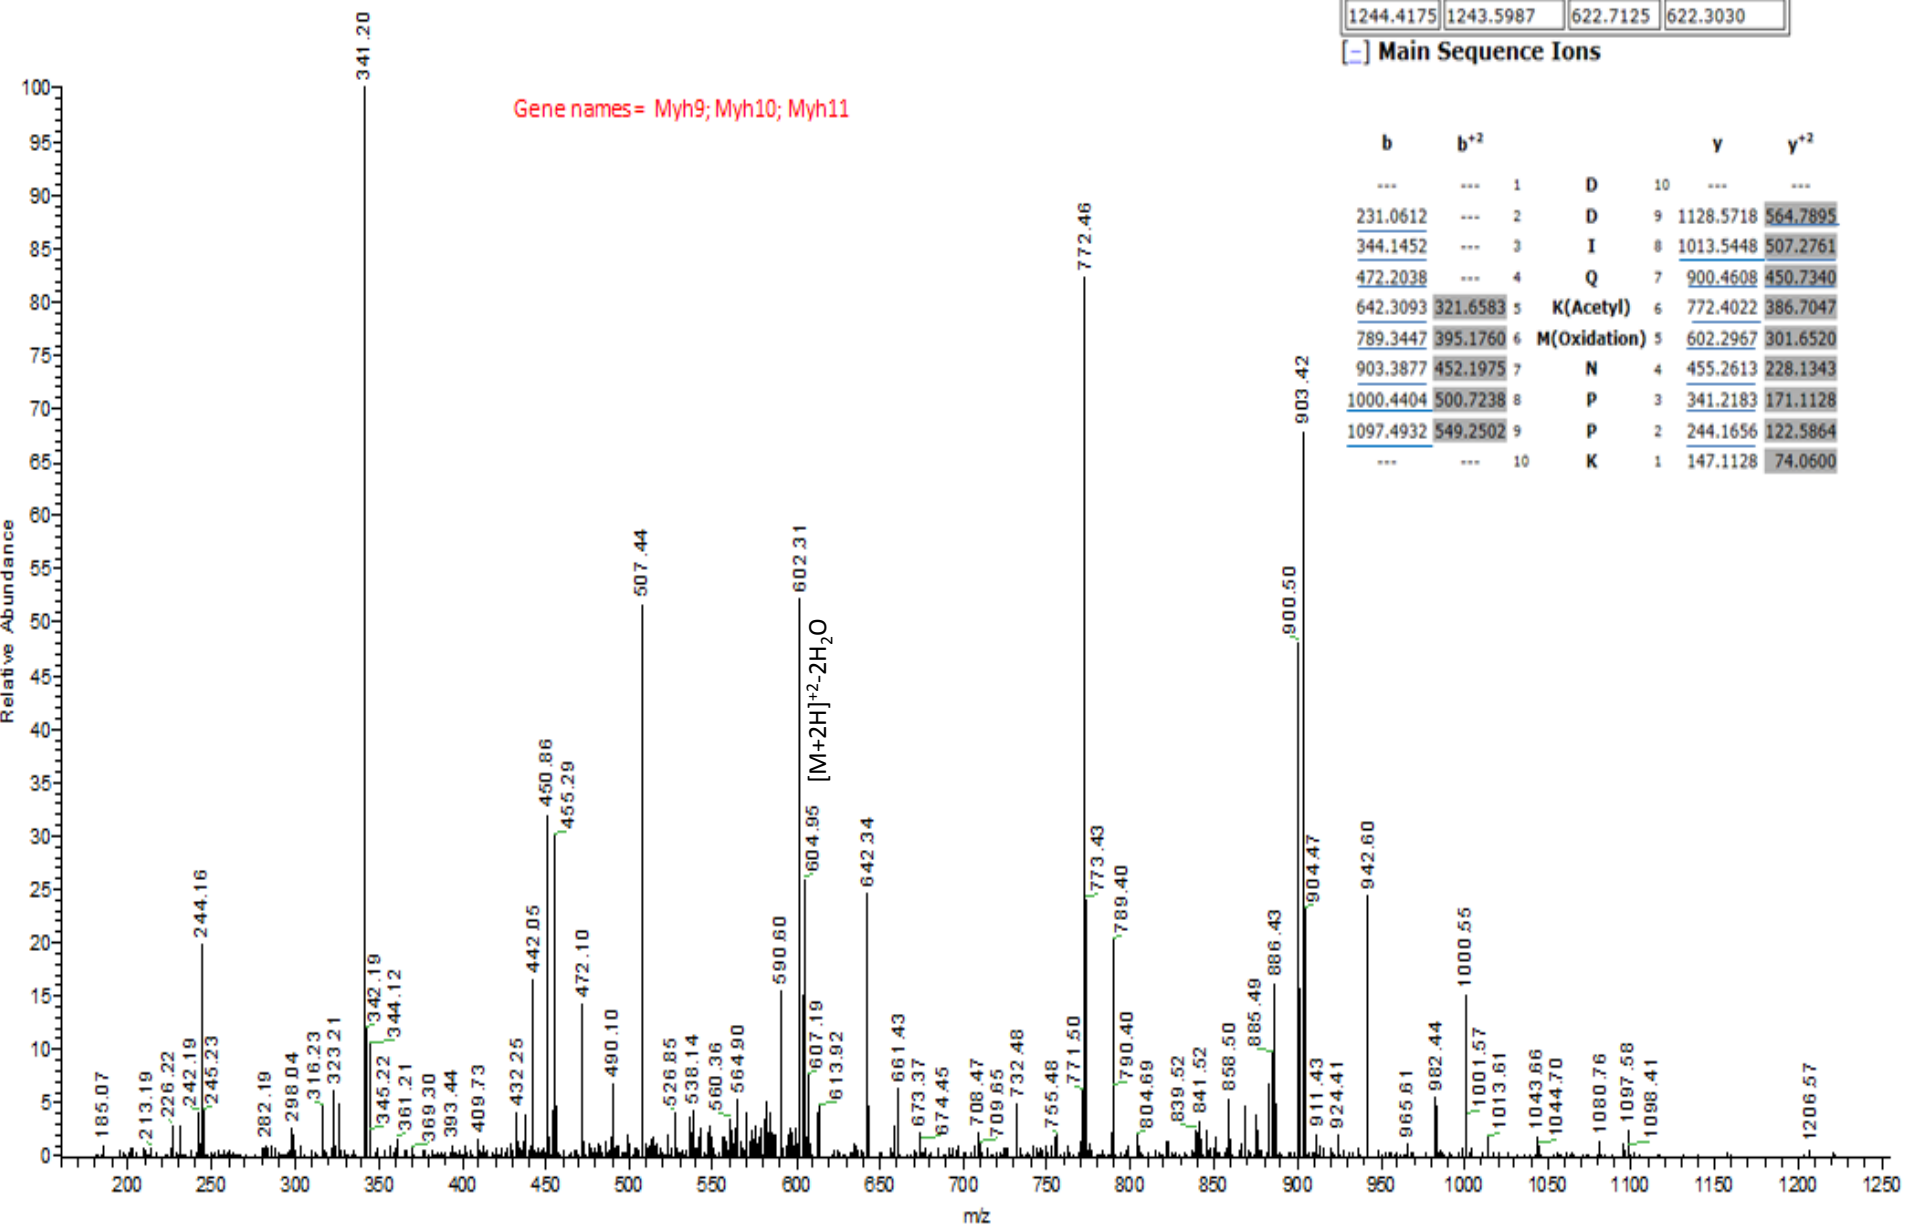

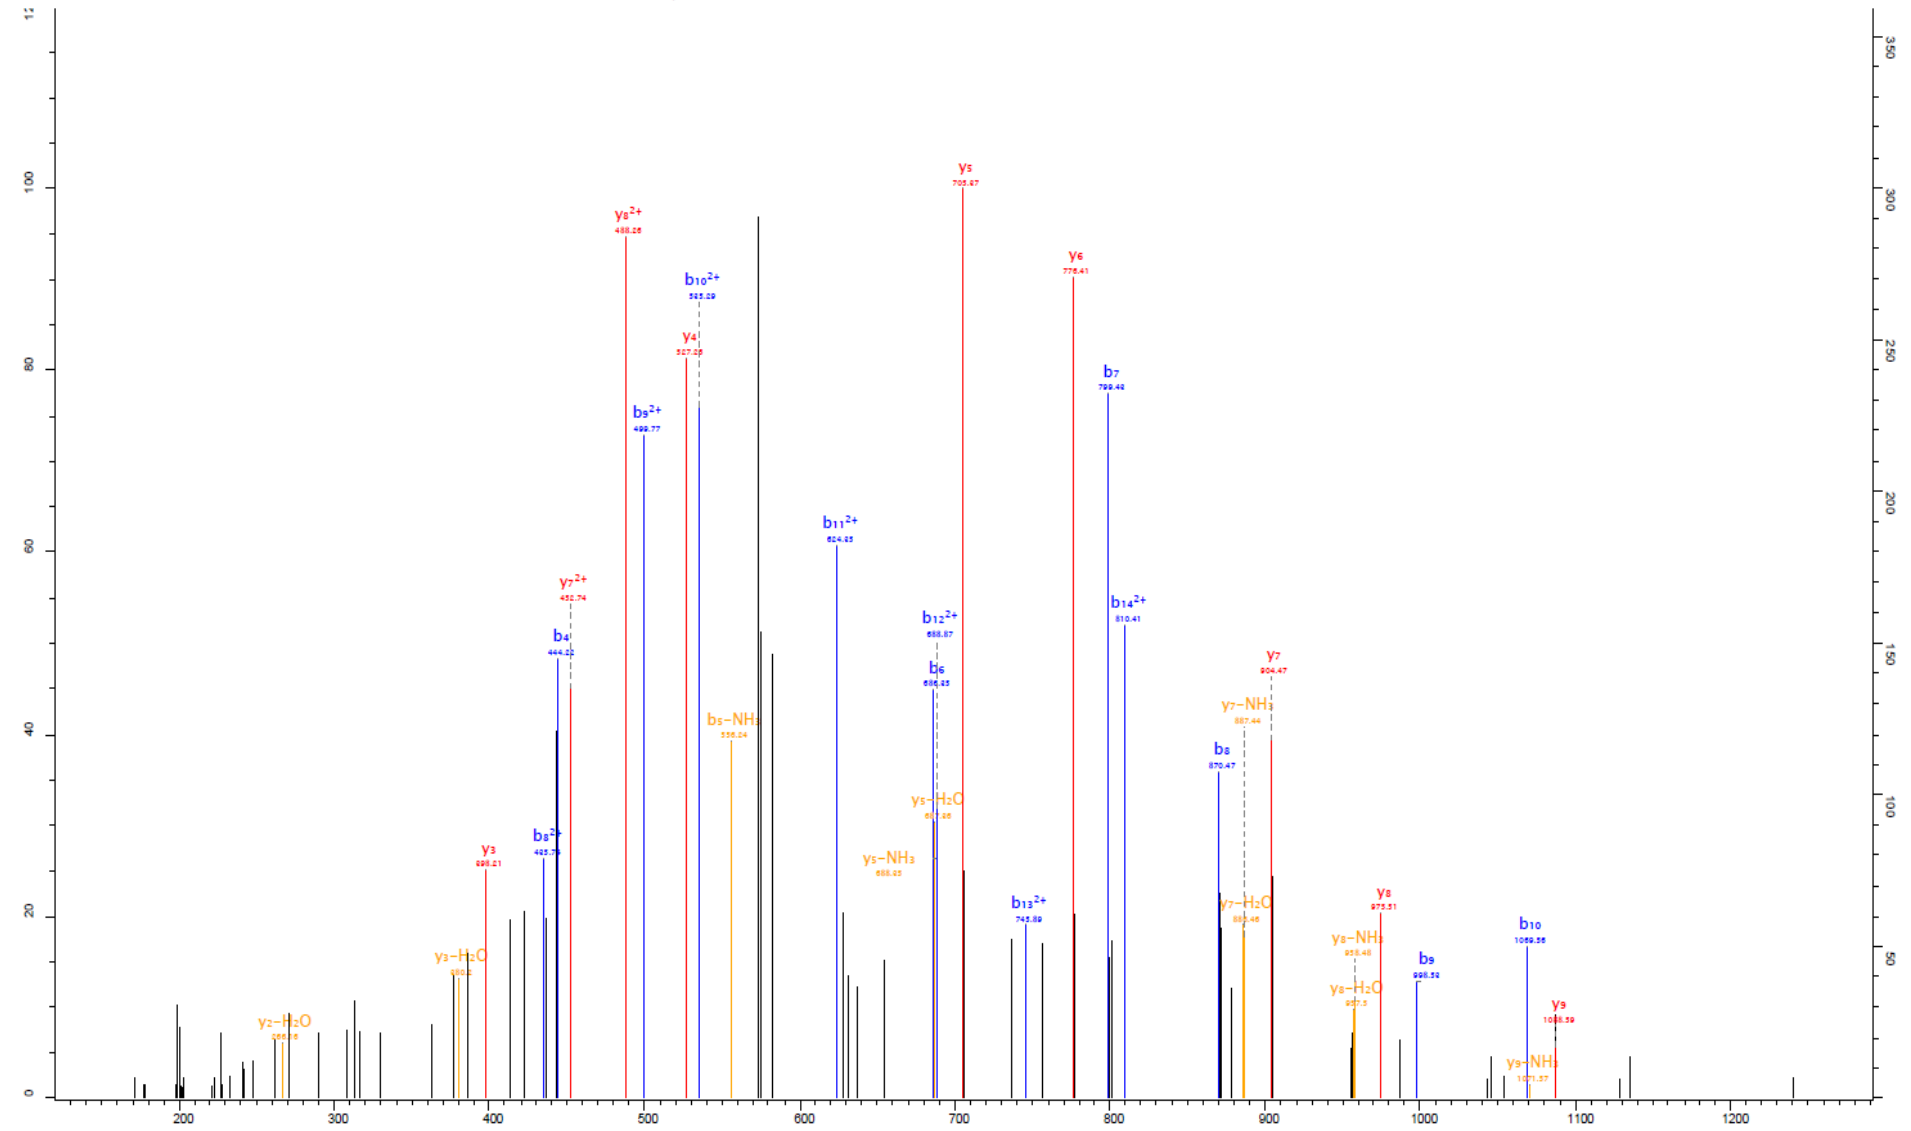

- A S R E E I L A Q A K -  
 [b4] [b5] [b7] [b8] [b9] [b10] [b11<sup>2+</sup>] [b12<sup>2+</sup>] [b13<sup>2+</sup>] [b14<sup>2+</sup>]  
 [y6] [y5] [y7] [y8] [y5-AC] [y4] [y3]

| MH <sup>+1</sup> (av) | MH <sup>+1</sup> (mono) | MH <sup>+2</sup> (av) | MH <sup>+2</sup> (mono) | MH <sup>+3</sup> (av) | MH <sup>+3</sup> (mono) |
|-----------------------|-------------------------|-----------------------|-------------------------|-----------------------|-------------------------|
| 1774.9391             | 1773.9313               | 887.9733              | 887.4693                | 592.3180              | 591.9819                |

**[-] Main Sequence Ions**

| b         |          | b <sup>+2</sup> |                   | y  |           | y <sup>+2</sup> |     |
|-----------|----------|-----------------|-------------------|----|-----------|-----------------|-----|
| ---       | ---      | 1               | <b>A</b>          | 15 | ---       | ---             | --- |
| 159.0764  | ---      | 2               | <b>S</b>          | 14 | 1702.8941 | 851.9507        | --- |
| 315.1775  | 158.0924 | 3               | <b>R</b>          | 13 | 1615.8621 | 808.4347        | --- |
| 444.2201  | 222.6137 | 4               | <b>E</b>          | 12 | 1459.7610 | 730.3841        | --- |
| 573.2627  | 287.1350 | 5               | <b>E</b>          | 11 | 1330.7184 | 665.8628        | --- |
| 686.3468  | 343.6770 | 6               | <b>I</b>          | 10 | 1201.6758 | 601.3415        | --- |
| 799.4308  | 400.2191 | 7               | <b>L</b>          | 9  | 1088.5917 | 544.7995        | --- |
| 870.4680  | 435.7376 | 8               | <b>A</b>          | 8  | 975.5077  | 488.2575        | --- |
| 998.5265  | 499.7669 | 9               | <b>Q</b>          | 7  | 904.4706  | 452.7389        | --- |
| 1069.5636 | 535.2855 | 10              | <b>A</b>          | 6  | 776.4120  | 388.7096        | --- |
| 1247.6834 | 624.3453 | 11              | <b>K(50.0248)</b> | 5  | 705.3749  | 353.1911        | --- |
| 1376.7260 | 688.8666 | 12              | <b>E</b>          | 4  | 527.2551  | 264.1312        | --- |
| 1490.7689 | 745.8881 | 13              | <b>N</b>          | 3  | 398.2125  | 199.6099        | --- |
| 1619.8115 | 810.4094 | 14              | <b>E</b>          | 2  | 284.1696  | 142.5884        | --- |
| ---       | ---      | 15              | <b>K(8.0142)</b>  | 1  | 155.1270  | 78.0671         | --- |

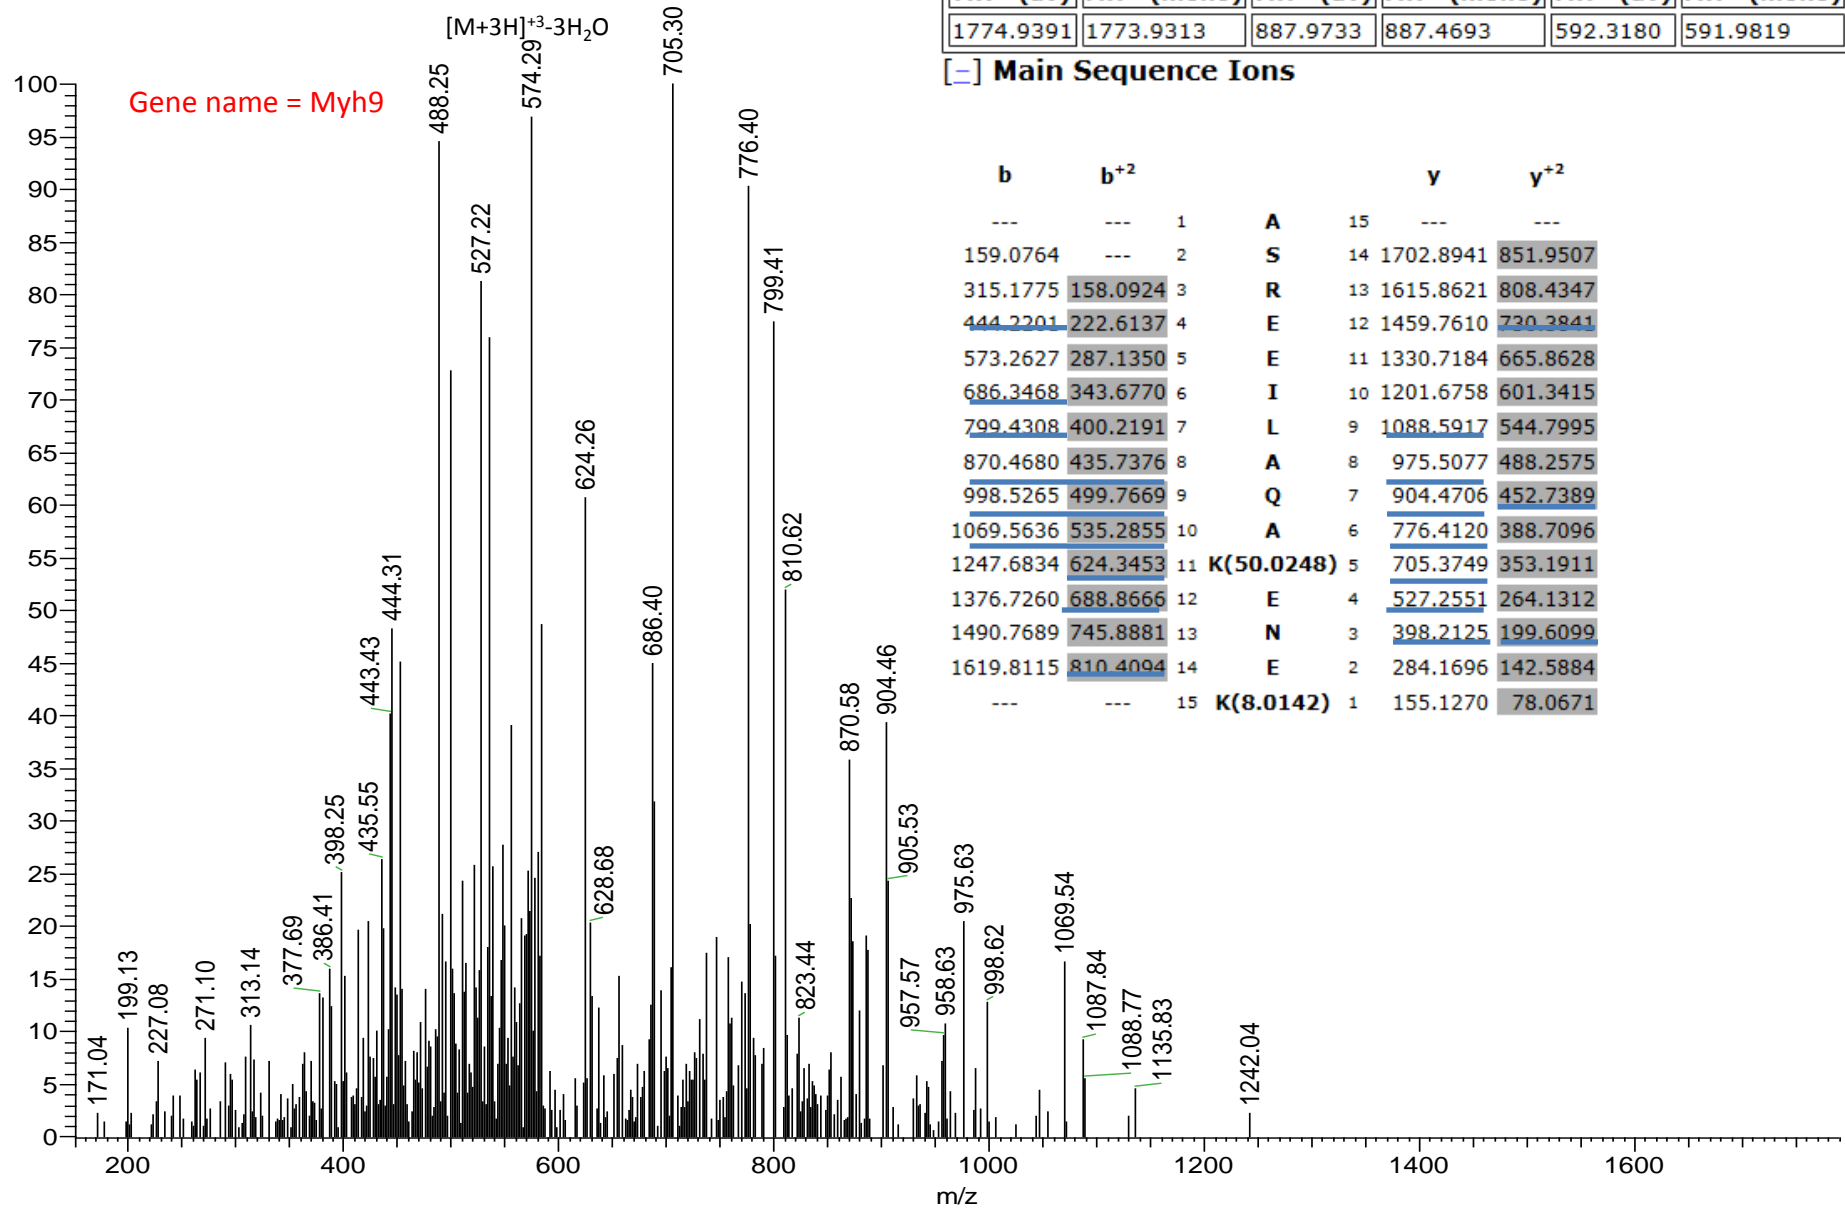



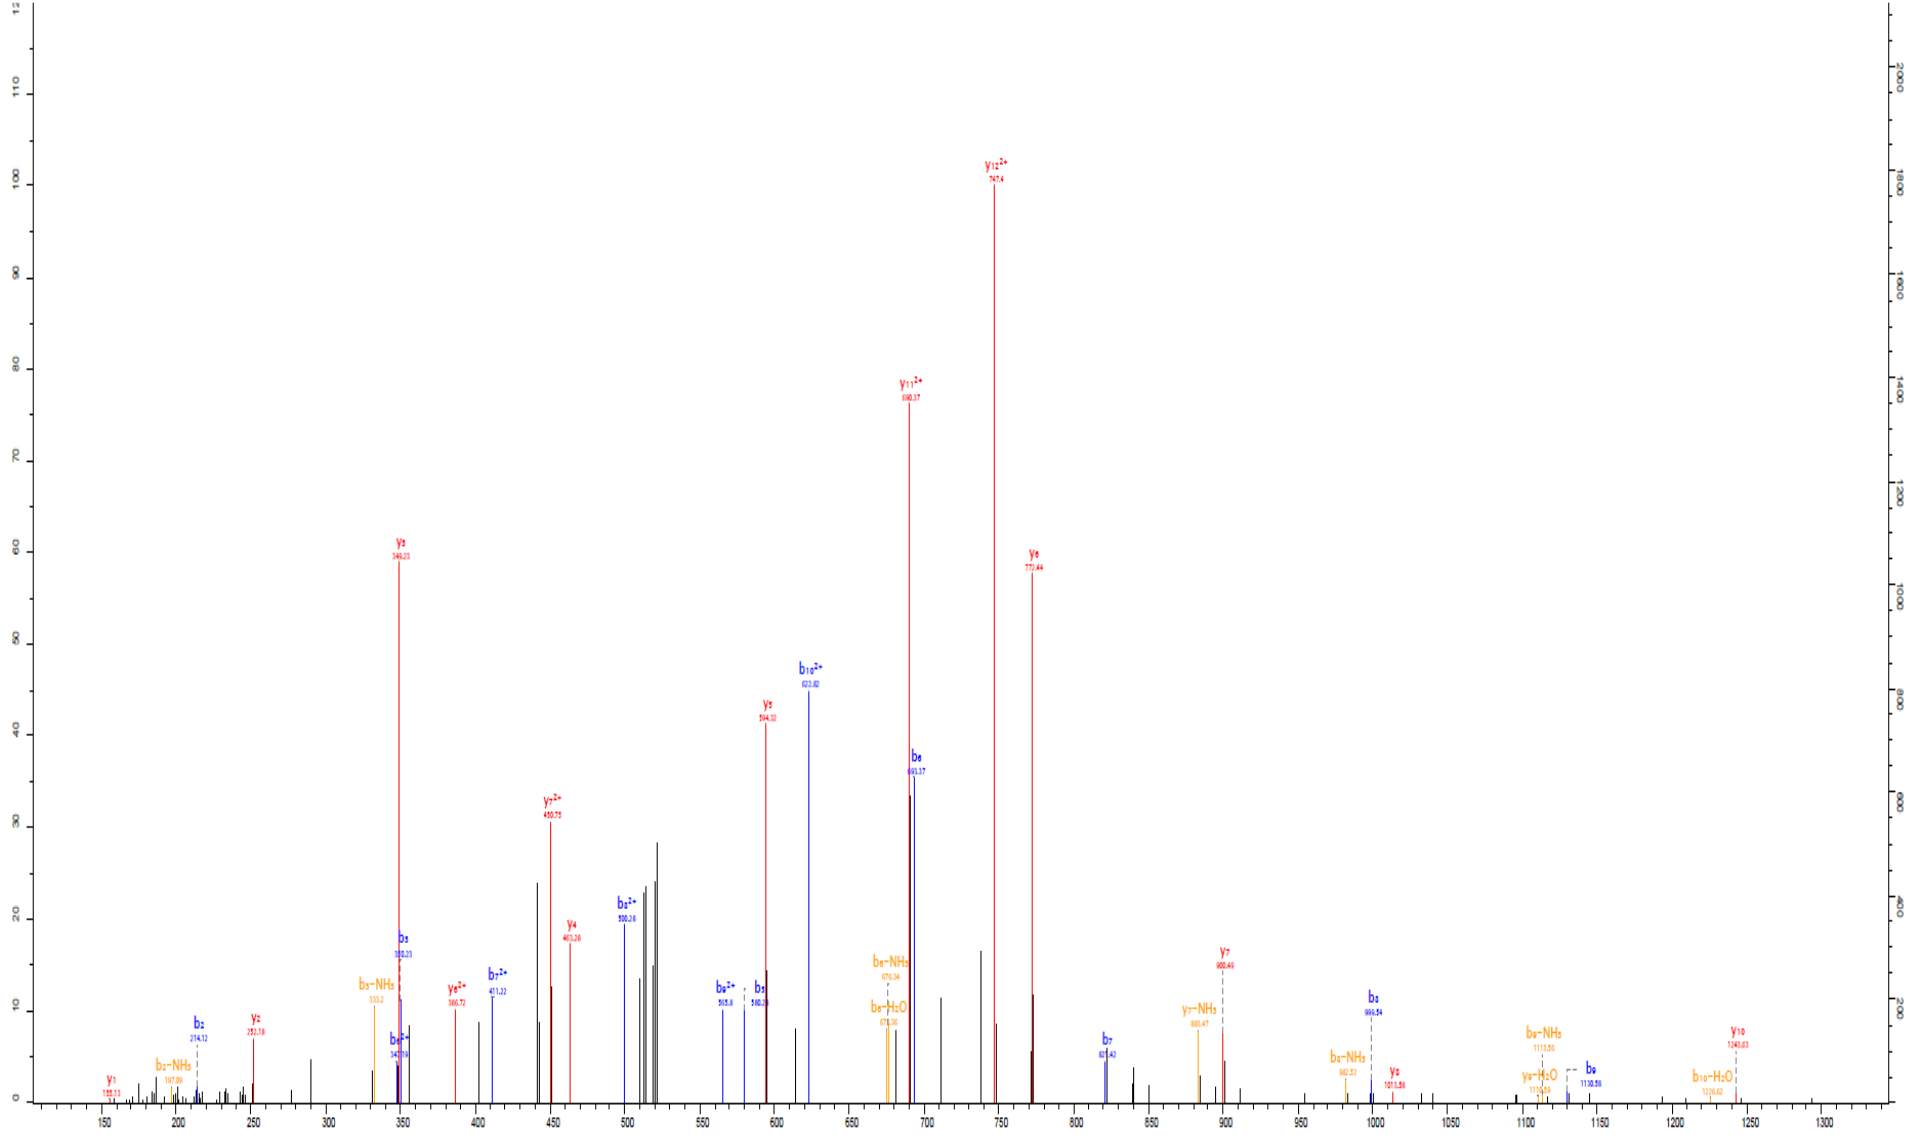

V N K D I Q K M N P P K  
 b2 b3 b4 b5 b6 b7 b8 b9 b10 b11 b12

Gene name = Myh9

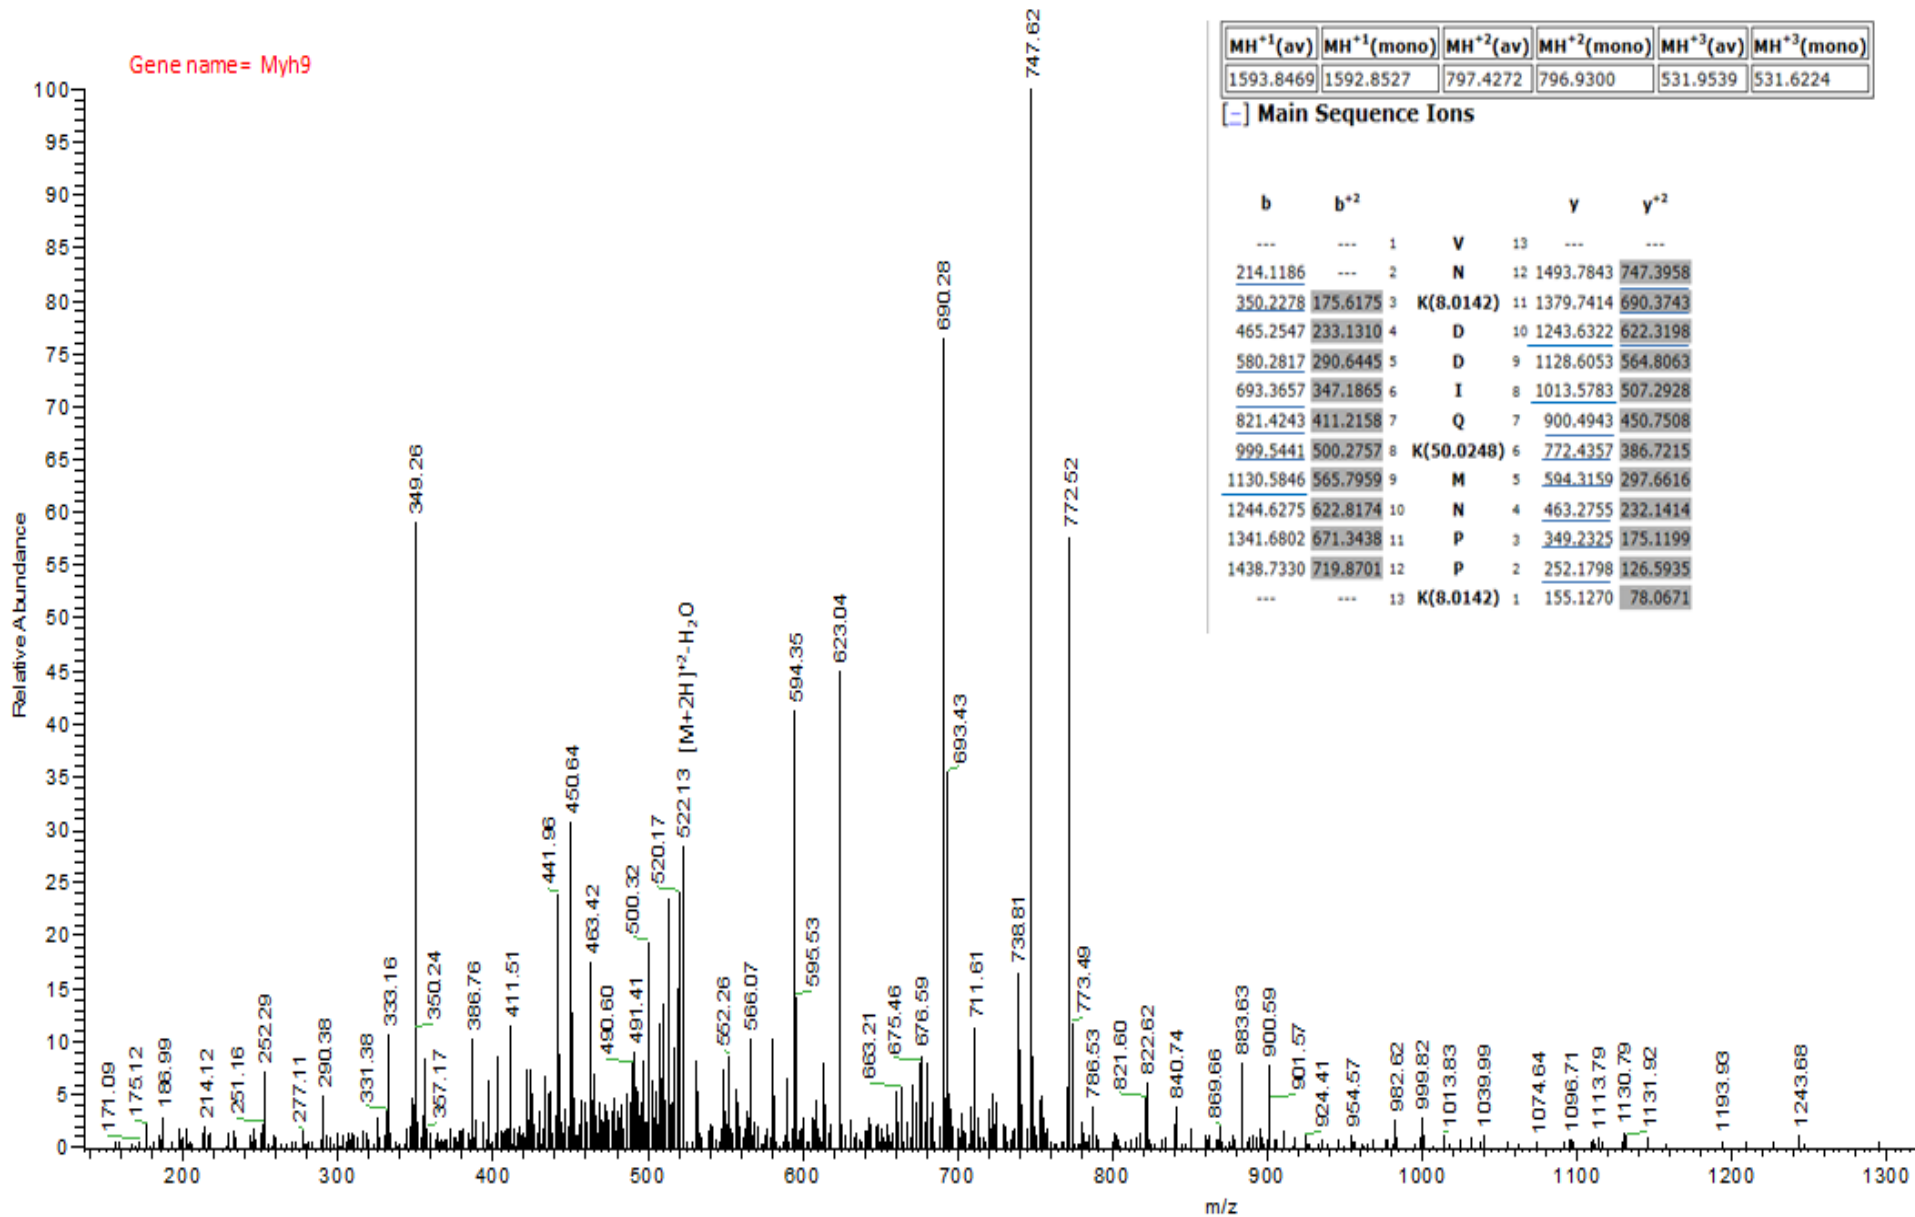

| MH <sup>+</sup> (av) | MH <sup>+</sup> (mono) | MH <sup>2+</sup> (av) | MH <sup>2+</sup> (mono) | MH <sup>3+</sup> (av) | MH <sup>3+</sup> (mono) |
|----------------------|------------------------|-----------------------|-------------------------|-----------------------|-------------------------|
| 1593.8469            | 1592.8527              | 797.4272              | 796.9300                | 531.9539              | 531.6224                |

[-] Main Sequence Ions

| b         | b <sup>2+</sup> |    | y                 | y <sup>2+</sup> |           |
|-----------|-----------------|----|-------------------|-----------------|-----------|
| ---       | ---             | 1  | V                 | 13              | ---       |
| 214.1186  | ---             | 2  | N                 | 12              | 1493.7843 |
| 350.2278  | 175.6175        | 3  | <b>K(8.0142)</b>  | 11              | 1379.7414 |
| 465.2547  | 233.1310        | 4  | D                 | 10              | 1243.6322 |
| 580.2817  | 290.6445        | 5  | D                 | 9               | 1128.6053 |
| 693.3657  | 347.1865        | 6  | I                 | 8               | 1013.5783 |
| 821.4243  | 411.2158        | 7  | Q                 | 7               | 900.4943  |
| 999.5441  | 500.2757        | 8  | <b>K(50.0248)</b> | 6               | 772.4357  |
| 1130.5846 | 565.7959        | 9  | M                 | 5               | 504.3159  |
| 1244.6275 | 622.8174        | 10 | N                 | 4               | 463.2755  |
| 1341.6802 | 671.3438        | 11 | P                 | 3               | 349.2325  |
| 1438.7330 | 719.8701        | 12 | P                 | 2               | 252.1798  |
| ---       | ---             | 13 | <b>K(8.0142)</b>  | 1               | 155.1270  |

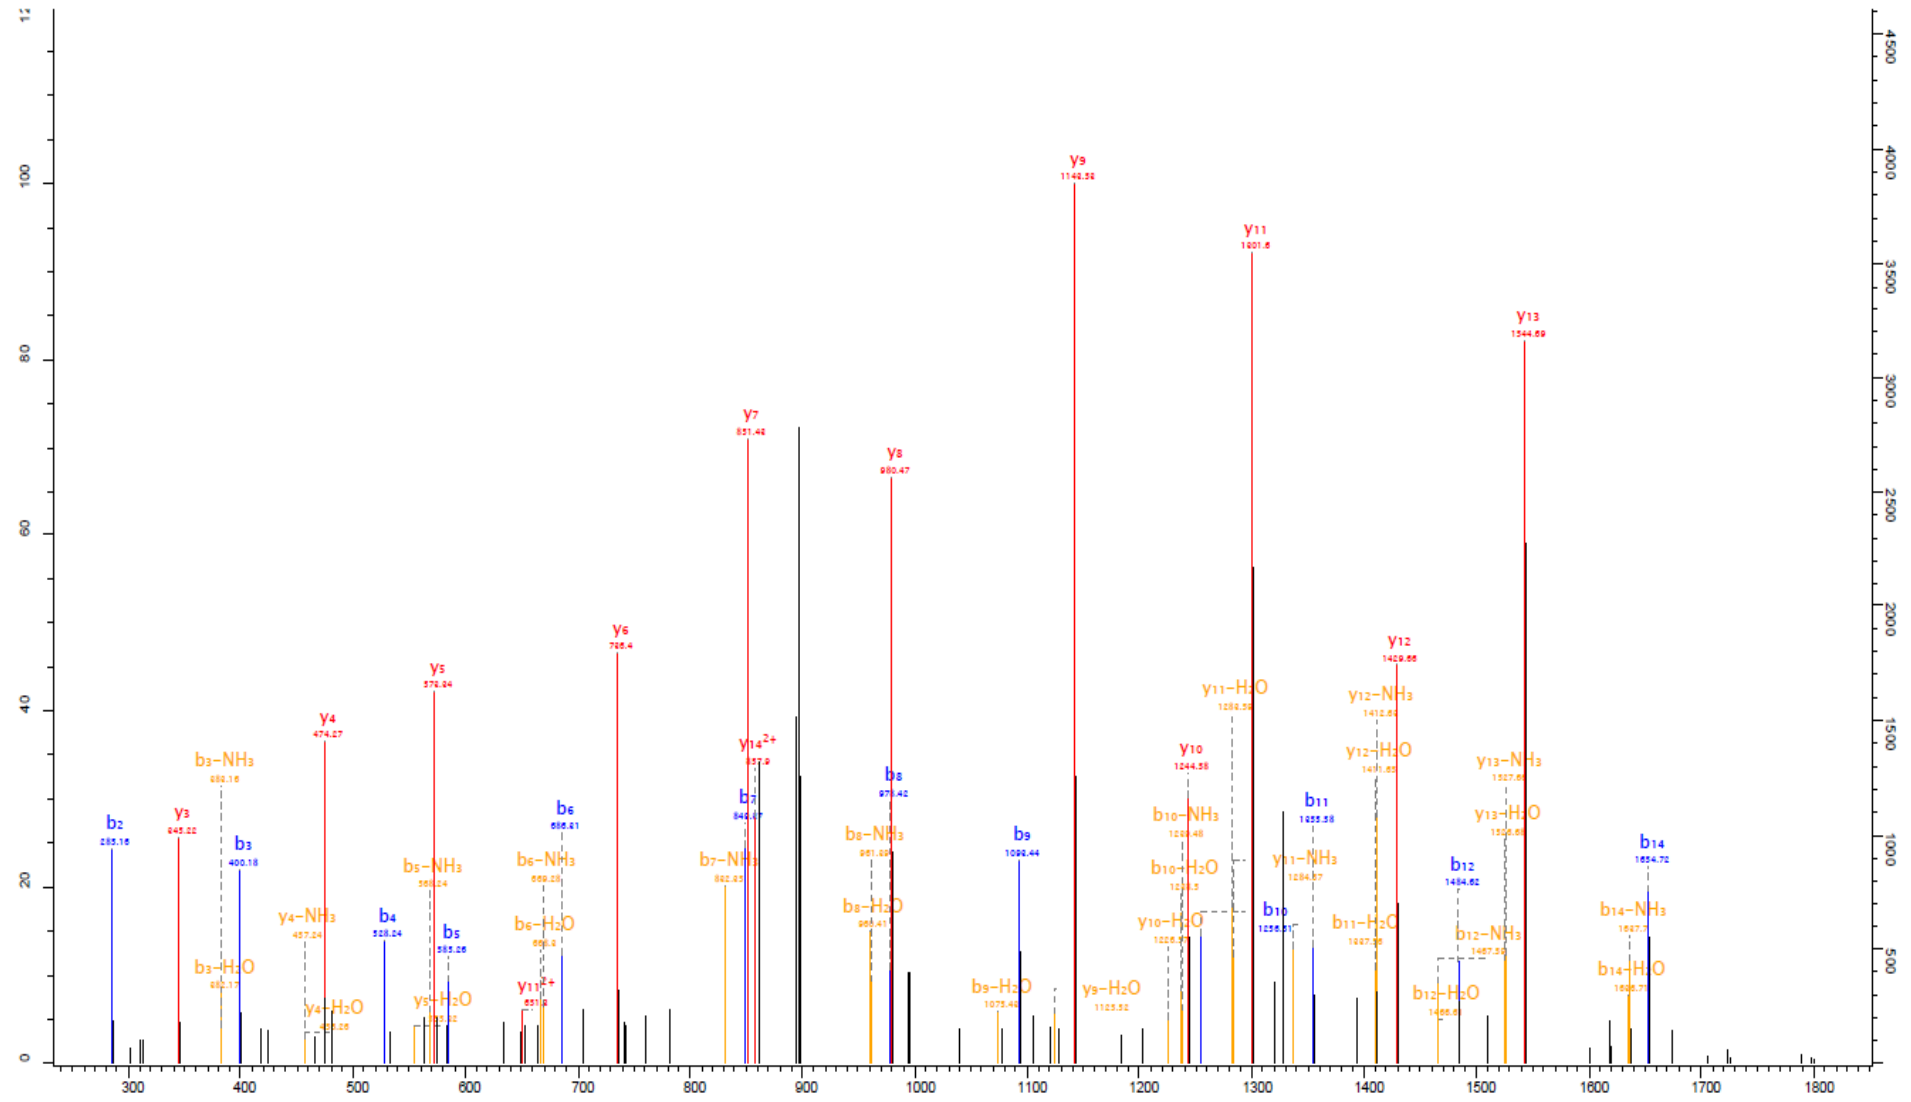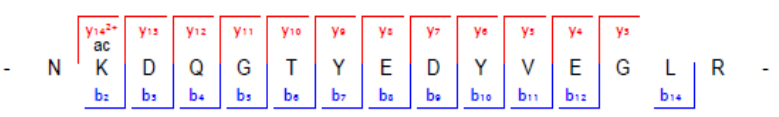

Gene name = Myl6

| MH <sup>+</sup> (av) | MH <sup>+</sup> (mono) | MH <sup>2+</sup> (av) | MH <sup>2+</sup> (mono) |
|----------------------|------------------------|-----------------------|-------------------------|
| 1829.9293            | 1828.8348              | 915.4684              | 914.9210                |

Main Sequence Ions

| b         | b <sup>+</sup> | y   | y <sup>+</sup>                  |
|-----------|----------------|-----|---------------------------------|
| ...       | ...            | 1   | ...                             |
| ...       | ...            | N   | 15                              |
| ...       | ...            | ... | ...                             |
| 285.1557  | 143.0815       | 2   | K(Acetyl) 14 1714.7919 857.8998 |
| 400.1827  | 200.5950       | 3   | D 13 1544.6863 772.8468         |
| 528.2413  | 264.6243       | 4   | Q 12 1429.6594 715.3333         |
| 585.2627  | 293.1350       | 5   | G 11 1301.6008 651.3040         |
| 686.3104  | 343.6588       | 6   | T 10 1244.5794 622.7933         |
| 849.3737  | 425.1905       | 7   | Y 9 1143.5317 572.2695          |
| 978.4163  | 489.7118       | 8   | E 8 980.4684 490.7378           |
| 1093.4433 | 547.2253       | 9   | D 7 851.4258 426.2165           |
| 1256.5066 | 628.7569       | 10  | Y 6 736.3988 368.7030           |
| 1355.5750 | 678.2911       | 11  | V 5 573.3355 287.1714           |
| 1484.6176 | 742.8124       | 12  | E 4 474.2671 237.6372           |
| 1541.6391 | 771.3232       | 13  | G 3 345.2245 173.1159           |
| 1654.7231 | 827.8652       | 14  | L 2 288.2030 144.6051           |
| ...       | ...            | 15  | R 1 175.1190 88.0631            |

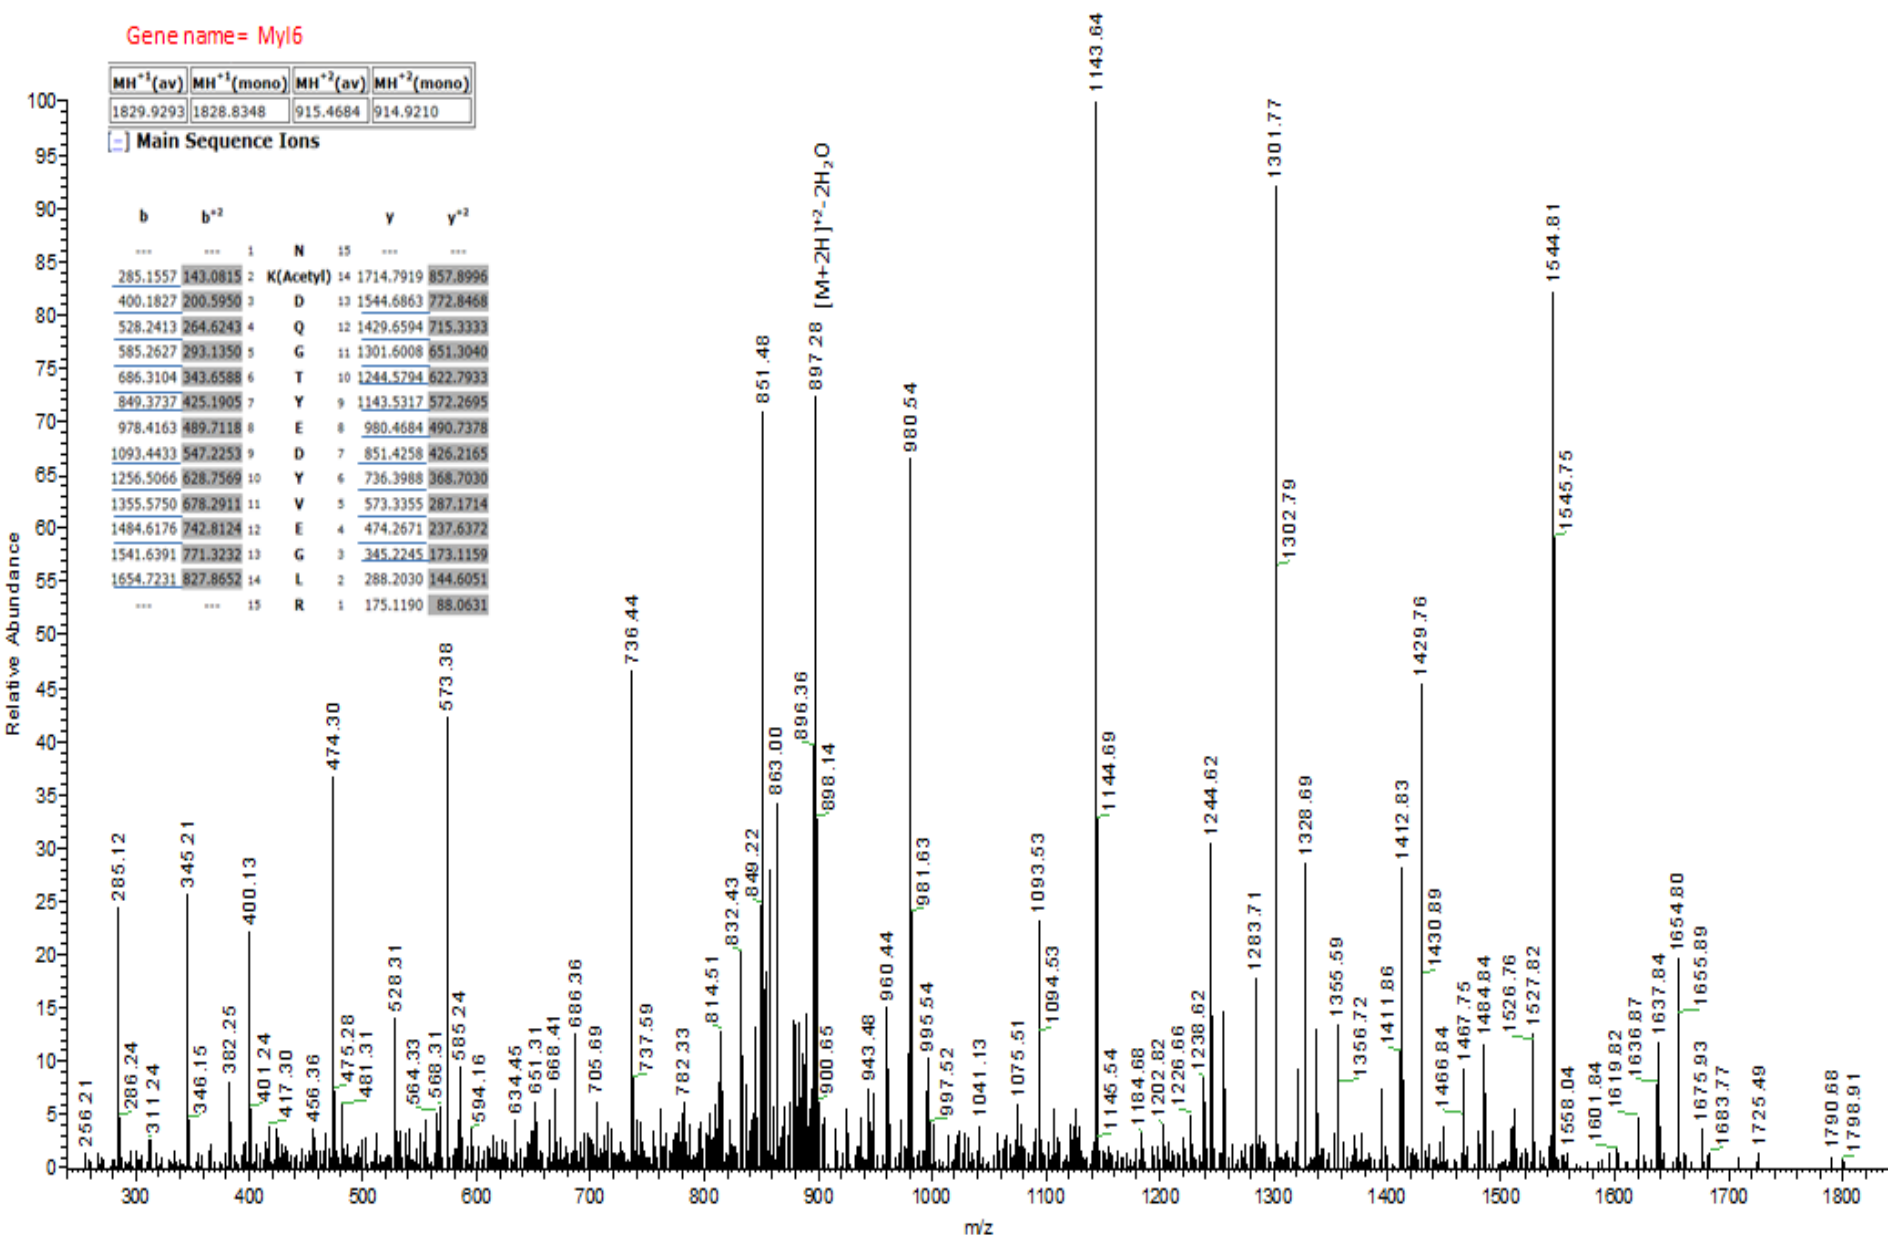

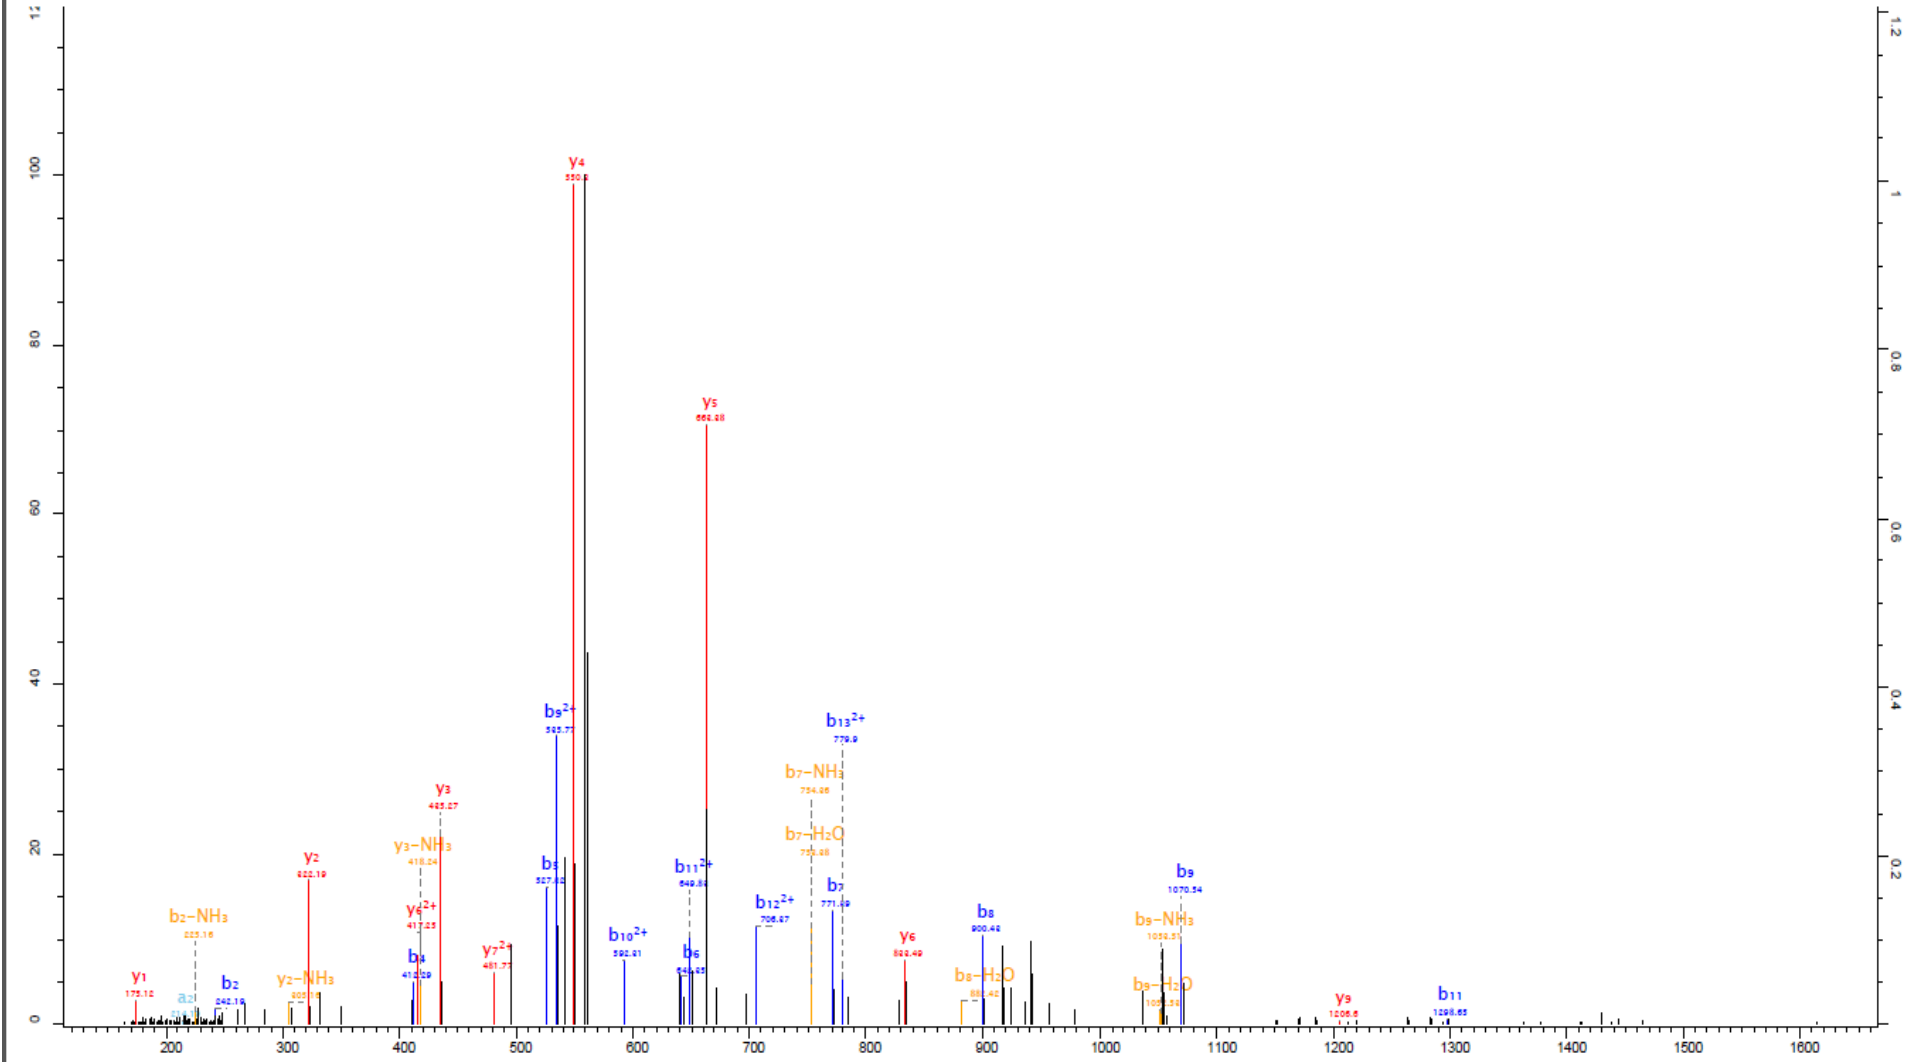

- K I G L D D E E K L D L F R -

b<sub>2</sub>
b<sub>4</sub>
b<sub>5</sub>
b<sub>6</sub>
b<sub>7</sub>
b<sub>8</sub>
b<sub>9</sub>
b<sub>10</sub><sup>2+</sup>
b<sub>11</sub>
b<sub>12</sub><sup>2+</sup>
b<sub>13</sub><sup>2+</sup>

Gene name = Myo6

[M+3H]<sup>3+</sup>-3H<sub>2</sub>O

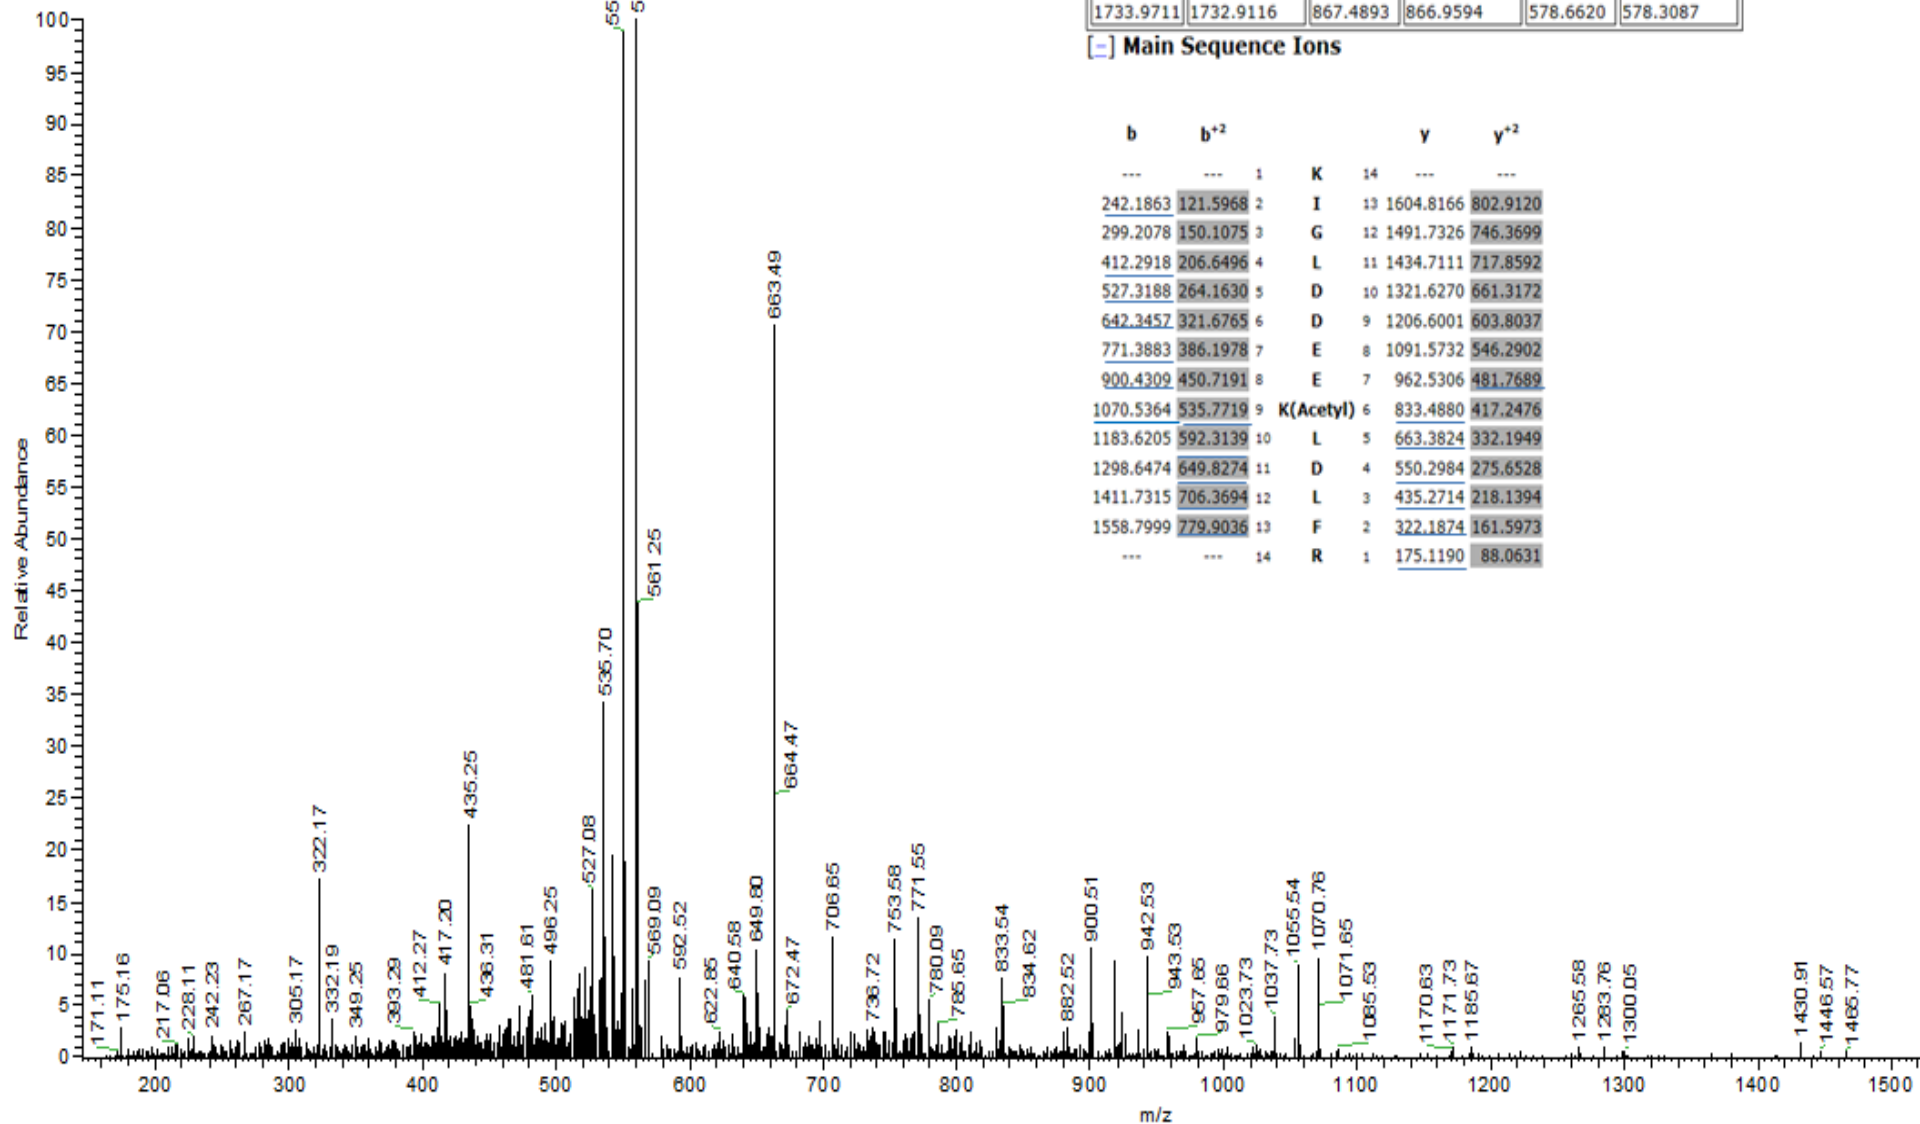

| MH <sup>+</sup> (av) | MH <sup>+</sup> (mono) | MH <sup>2+</sup> (av) | MH <sup>2+</sup> (mono) | MH <sup>3+</sup> (av) | MH <sup>3+</sup> (mono) |
|----------------------|------------------------|-----------------------|-------------------------|-----------------------|-------------------------|
| 1733.9711            | 1732.9116              | 867.4893              | 866.9594                | 578.6620              | 578.3087                |

[-] Main Sequence Ions

| b         | b <sup>2+</sup> |    | y         | y <sup>2+</sup> |
|-----------|-----------------|----|-----------|-----------------|
| ---       | ---             | 1  | K         | 14              |
| 242.1863  | 121.5968        | 2  | I         | 13              |
| 299.2078  | 150.1075        | 3  | G         | 12              |
| 412.2918  | 206.6496        | 4  | L         | 11              |
| 527.3188  | 264.1630        | 5  | D         | 10              |
| 642.3457  | 321.6765        | 6  | D         | 9               |
| 771.3883  | 386.1978        | 7  | E         | 8               |
| 900.4309  | 450.7191        | 8  | E         | 7               |
| 1070.5364 | 535.7719        | 9  | K(Acetyl) | 6               |
| 1183.6205 | 592.3139        | 10 | L         | 5               |
| 1298.6474 | 649.8274        | 11 | D         | 4               |
| 1411.7315 | 706.3694        | 12 | L         | 3               |
| 1558.7999 | 779.9036        | 13 | F         | 2               |
| ---       | ---             | 14 | R         | 1               |

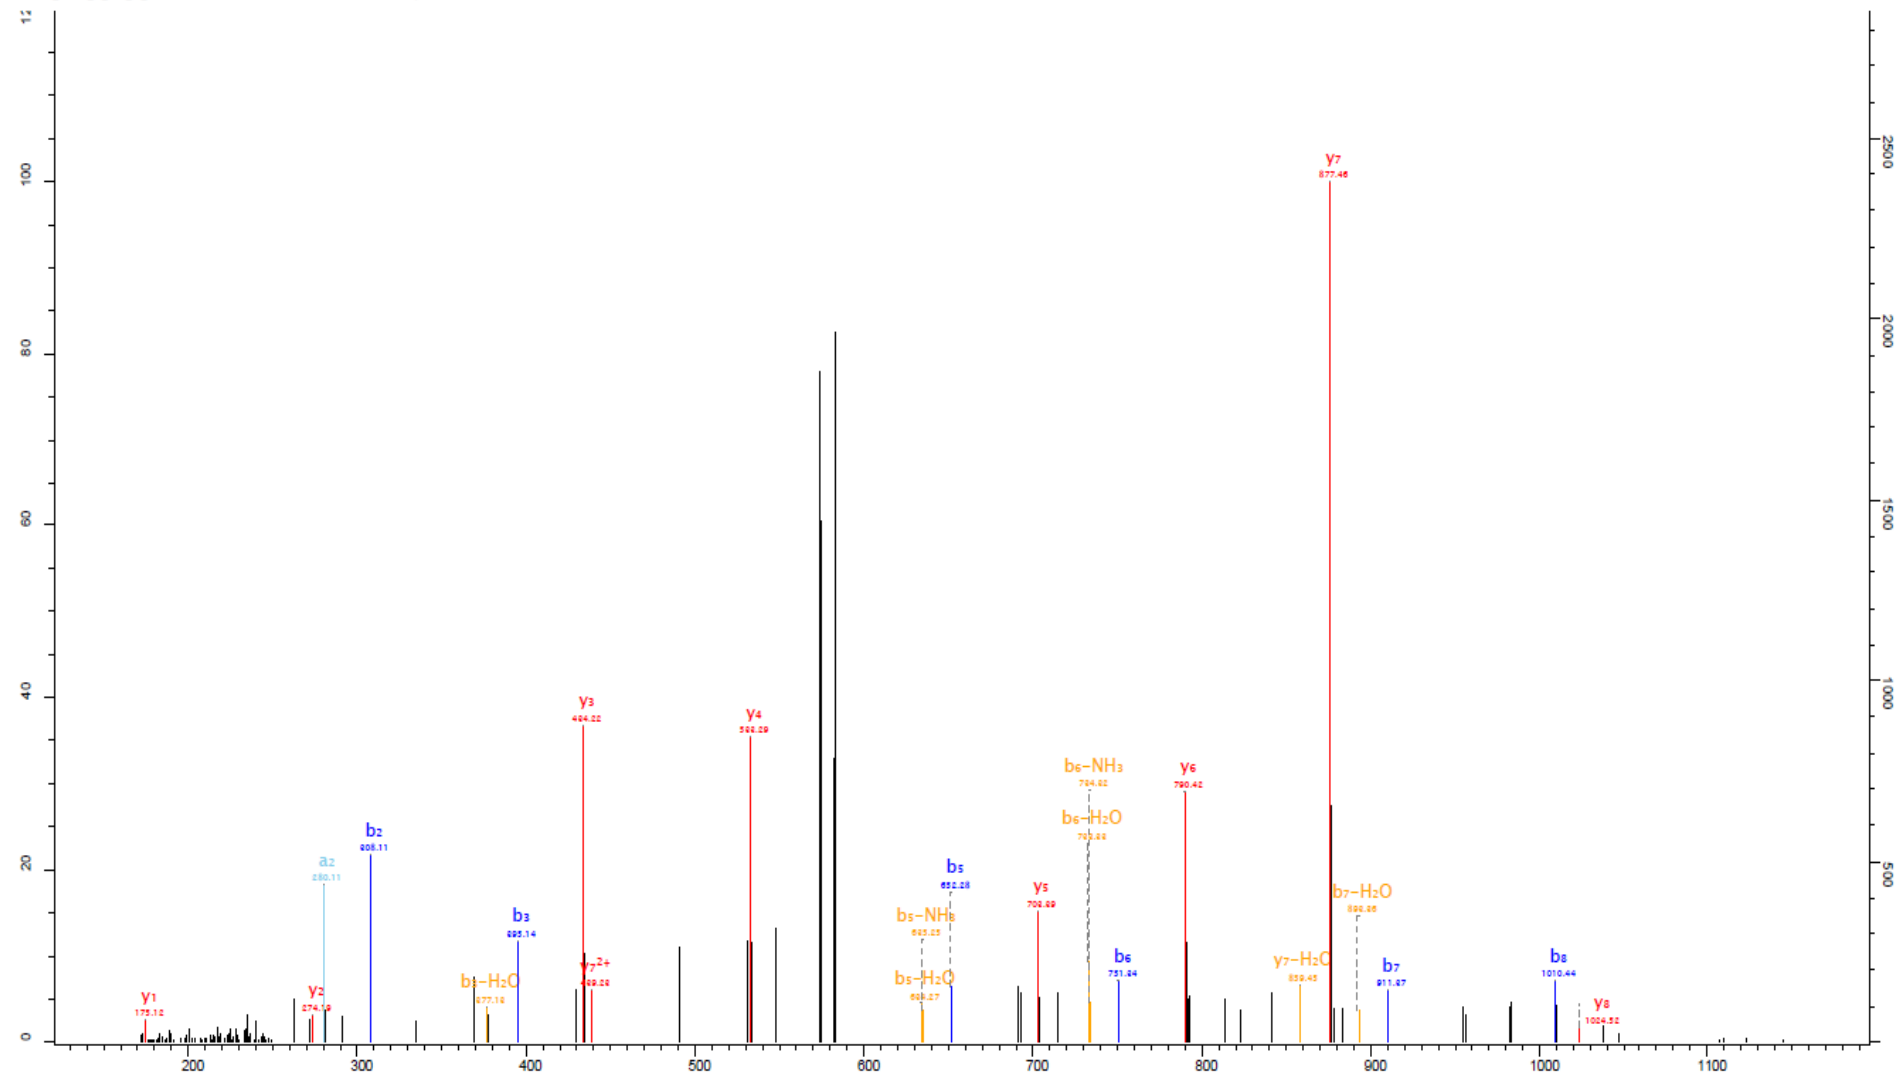

- C Y3 Y7 Y6 Y5 Y4 Y3 Y2 Y1  
b2 b2 b3 b6 b7 b8 R -

Gene name = Nadk2

| MH <sup>+</sup> (av) | MH <sup>+</sup> (mono) | MH <sup>+</sup> (av) | MH <sup>+</sup> (mono) |
|----------------------|------------------------|----------------------|------------------------|
| 1185.4180            | 1184.5551              | 593.2127             | 592.7812               |

[-] Main Sequence Ions

| b         | b <sup>+</sup> |                      | y           | y <sup>+</sup> |
|-----------|----------------|----------------------|-------------|----------------|
| ---       | ---            | 1 C(Carbamidomethyl) | ---         | ---            |
| 308.1063  | ---            | 2 F                  | 8 1024.5244 | 512.7659       |
| 395.1384  | ---            | 3 S                  | 7 877.4560  | 439.2316       |
| 482.1704  | ---            | 4 S                  | 6 790.4240  | 395.7156       |
| 652.2759  | 326.6416       | 5 K(Acetyl)          | 5 703.3920  | 352.1996       |
| 751.3443  | 376.1758       | 6 V                  | 4 533.2864  | 267.1469       |
| 911.3750  | 456.1911       | 7 C(Carbamidomethyl) | 3 434.2180  | 217.6126       |
| 1010.4434 | 505.7253       | 8 V                  | 2 274.1874  | 137.5973       |
| ---       | ---            | 9 R                  | 1 175.1190  | 88.0631        |

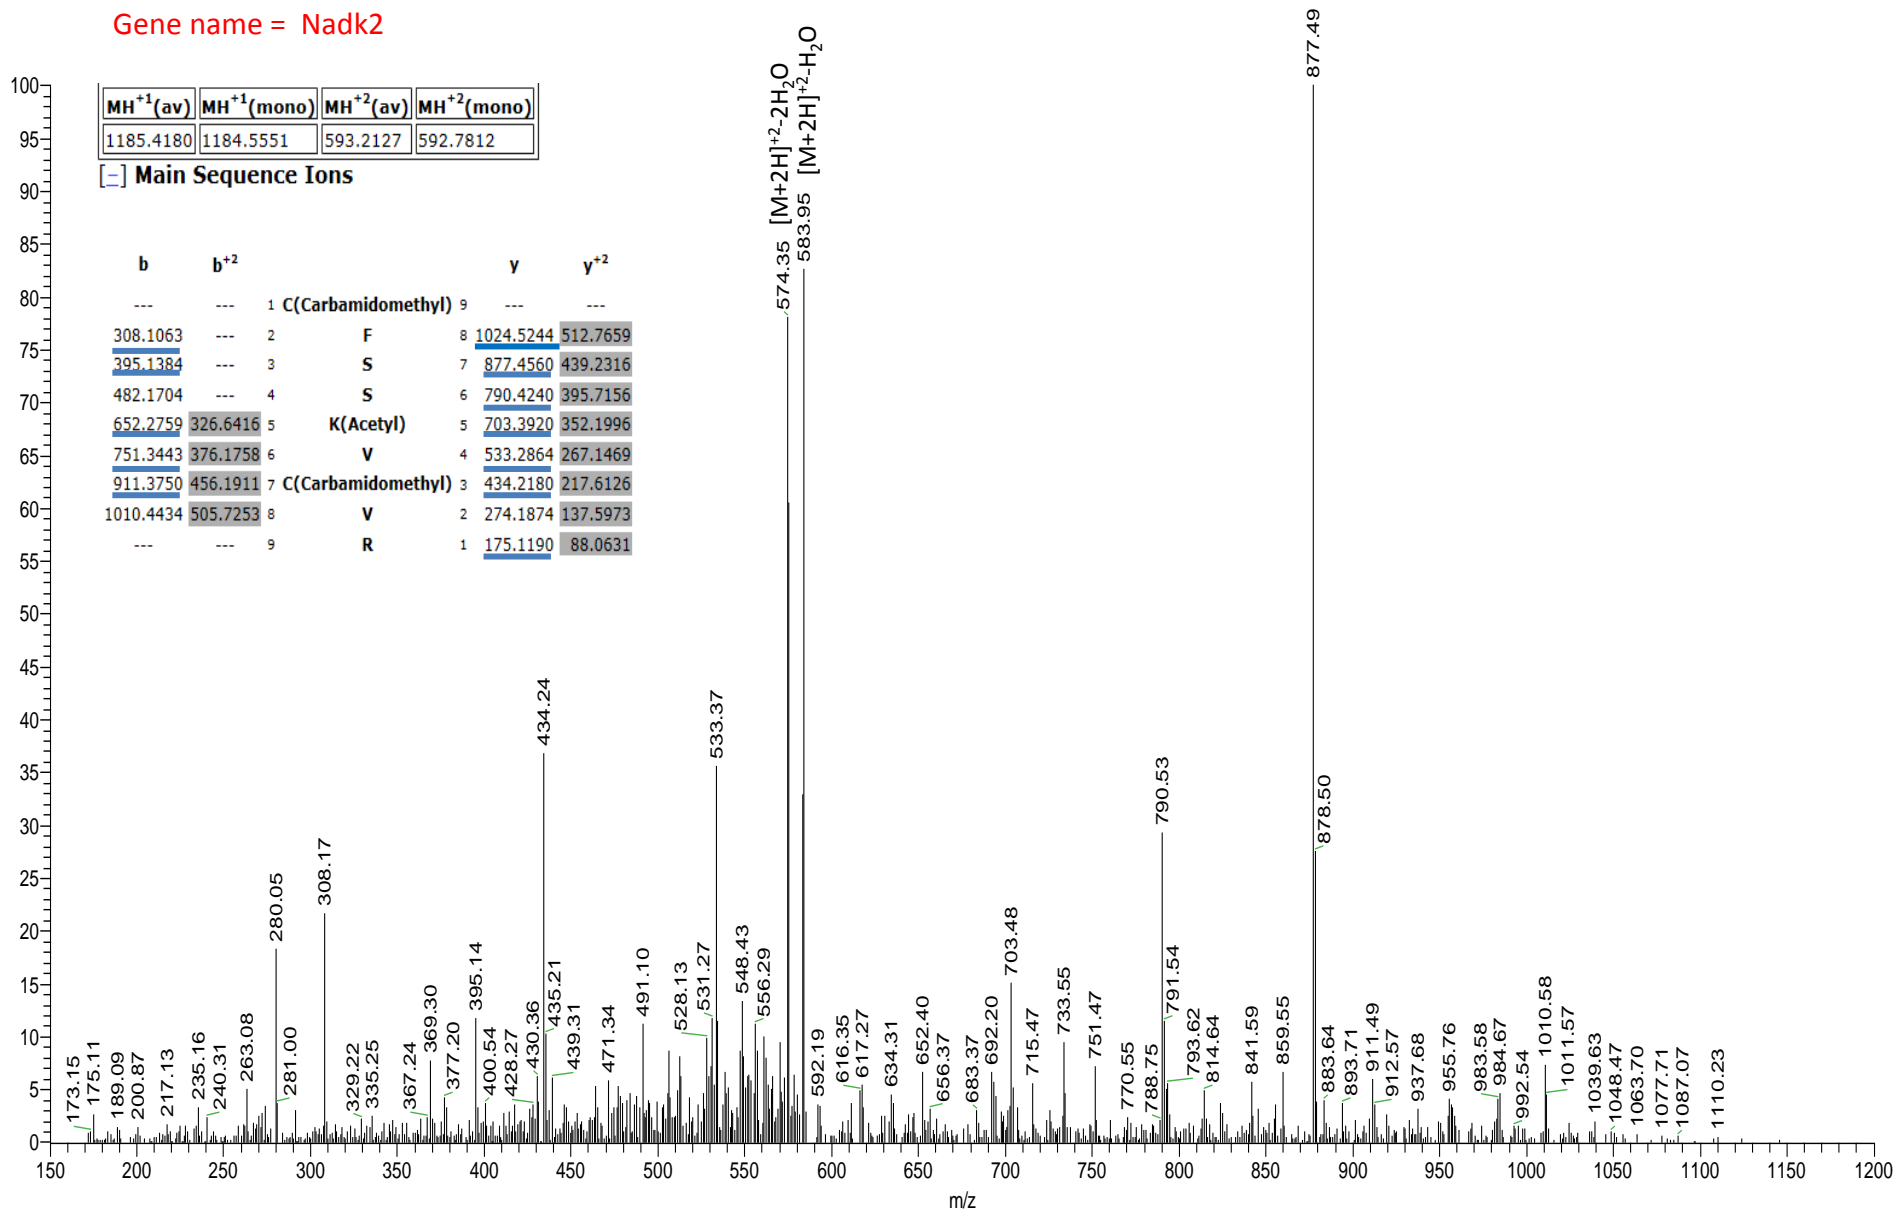



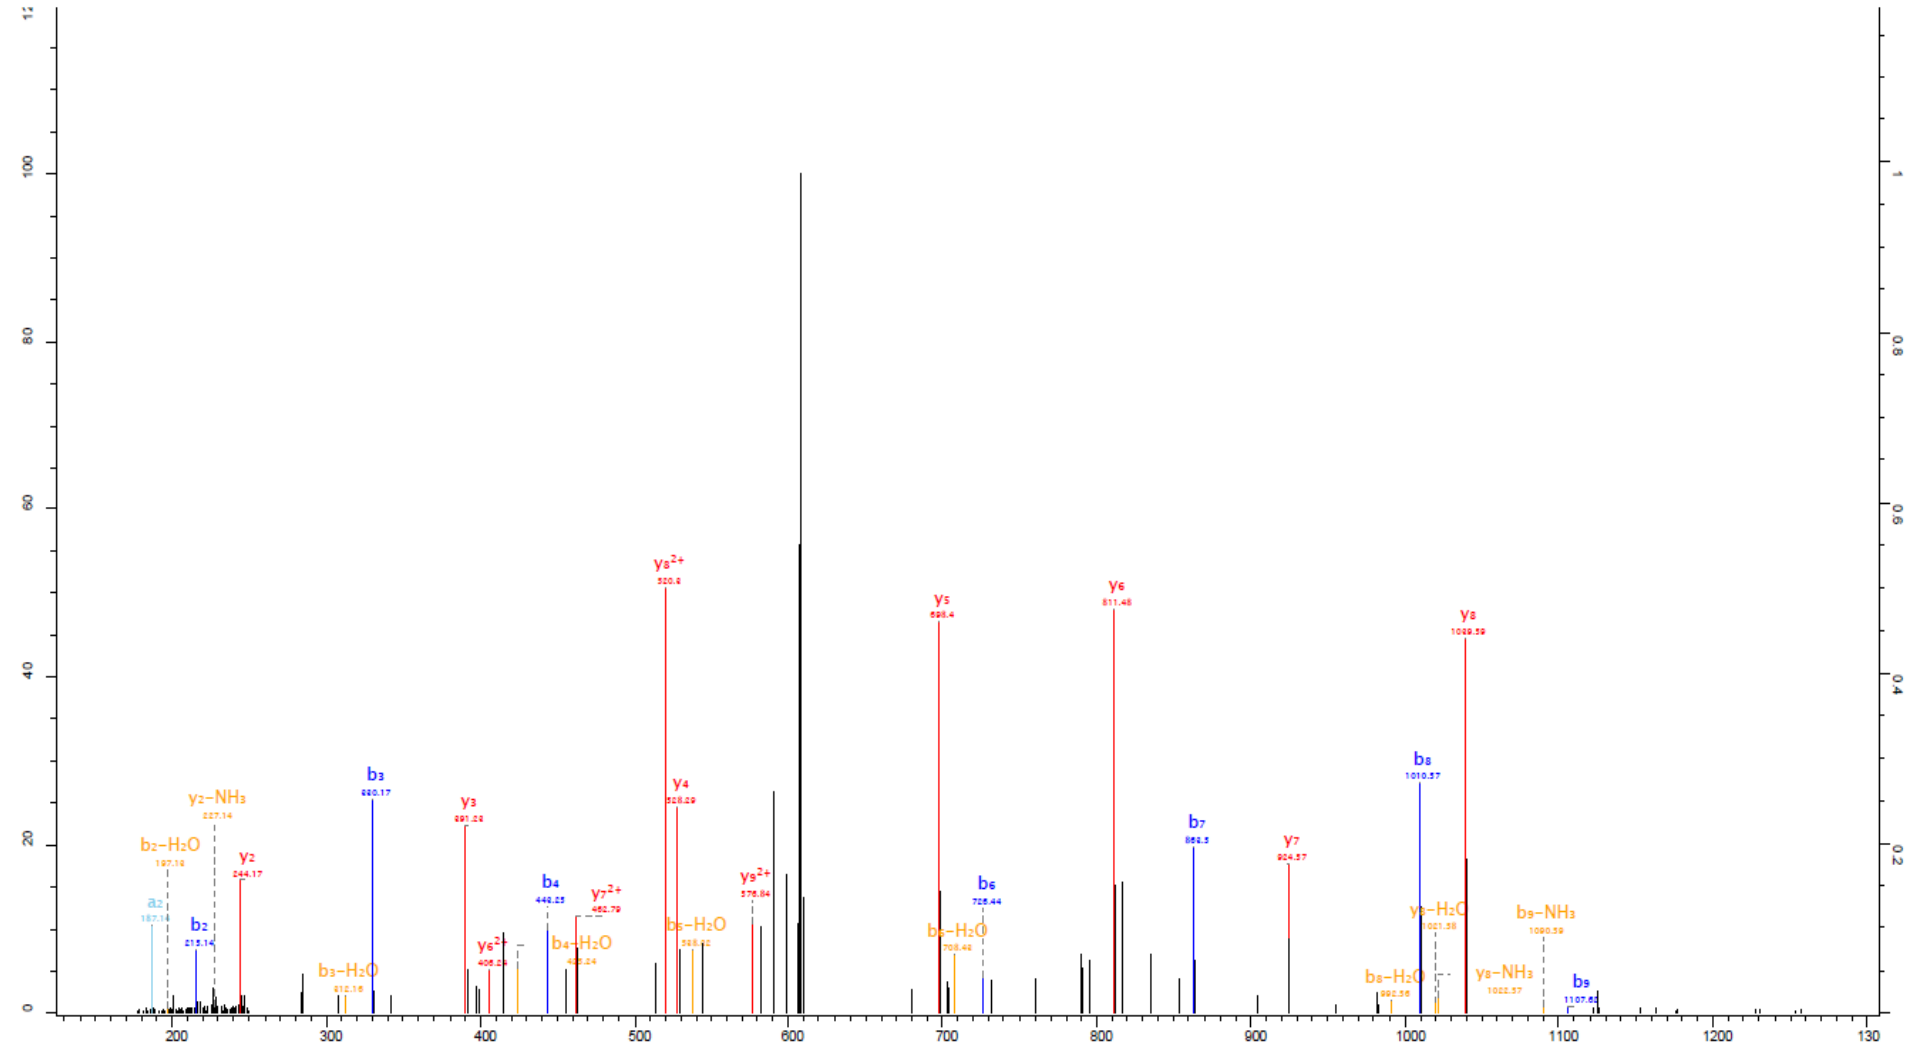

- T L D I L K H F P K -

y6<sup>2+</sup>
y5
y7
y8
y5 ac
y4
y3
y2  
b2
b3
b4
b6
b7
b5
b6

Gene name = Ndufa5

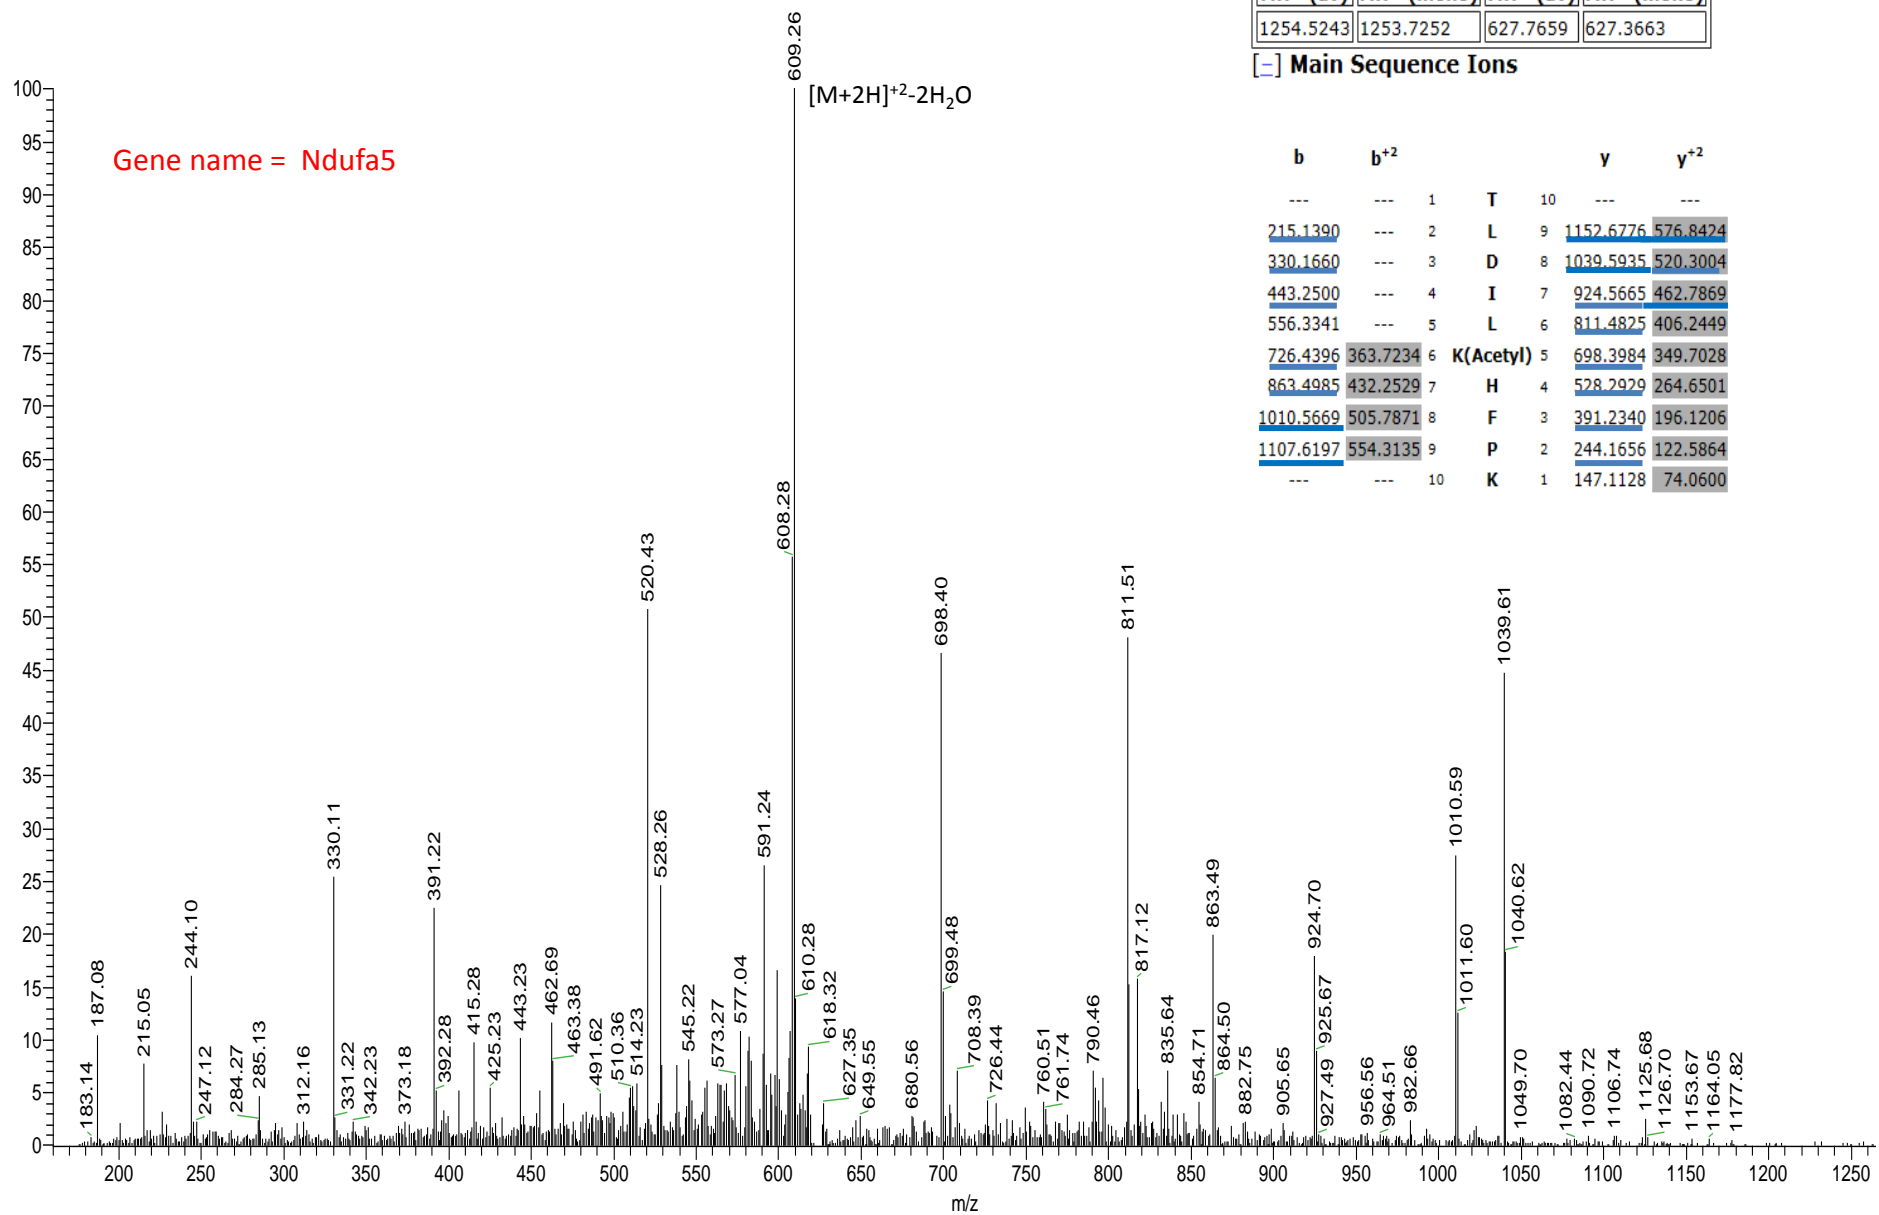

| MH <sup>+</sup> (av) | MH <sup>+</sup> (mono) | MH <sup>2+</sup> (av) | MH <sup>2+</sup> (mono) |
|----------------------|------------------------|-----------------------|-------------------------|
| 1254.5243            | 1253.7252              | 627.7659              | 627.3663                |

[-] Main Sequence Ions

| b                | b <sup>+</sup>  |    | y                | y <sup>+</sup> |                  |                 |
|------------------|-----------------|----|------------------|----------------|------------------|-----------------|
| ---              | ---             | 1  | T                | 10             | ---              | ---             |
| <u>215.1390</u>  | ---             | 2  | L                | 9              | <u>1152.6776</u> | <u>576.8424</u> |
| <u>330.1660</u>  | ---             | 3  | D                | 8              | <u>1039.5935</u> | <u>520.3004</u> |
| <u>443.2500</u>  | ---             | 4  | I                | 7              | <u>924.5665</u>  | <u>462.7869</u> |
| 556.3341         | ---             | 5  | L                | 6              | <u>811.4825</u>  | 406.2449        |
| <u>726.4396</u>  | <u>363.7234</u> | 6  | <b>K(Acetyl)</b> | 5              | <u>698.3984</u>  | <u>349.7028</u> |
| <u>863.4985</u>  | <u>432.2529</u> | 7  | H                | 4              | <u>528.2929</u>  | <u>264.6501</u> |
| <u>1010.5669</u> | <u>505.7871</u> | 8  | F                | 3              | <u>391.2340</u>  | <u>196.1206</u> |
| <u>1107.6197</u> | <u>554.3135</u> | 9  | P                | 2              | <u>244.1656</u>  | <u>122.5864</u> |
| ---              | ---             | 10 | K                | 1              | 147.1128         | <u>74.0600</u>  |

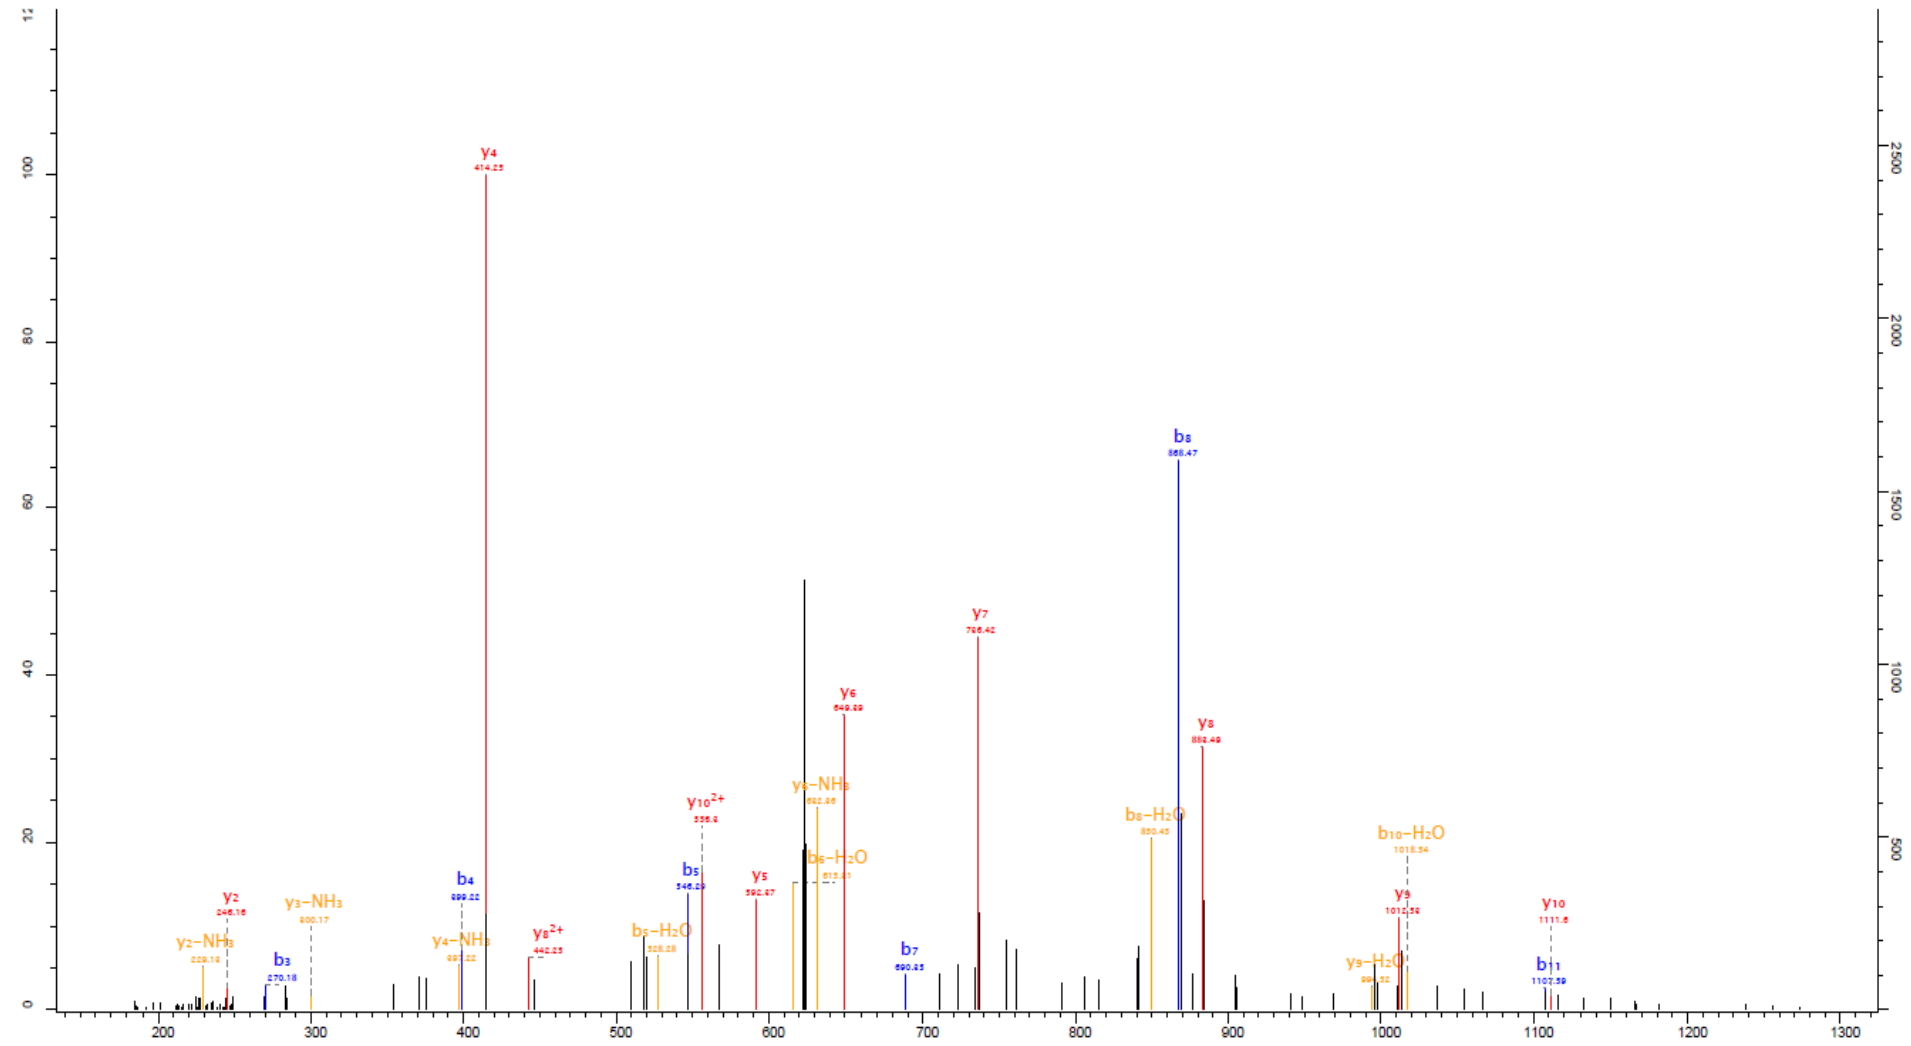

- G I V E F S G AC K P A A R -  
 [b<sub>3</sub>] [b<sub>4</sub>] [b<sub>5</sub>] [b<sub>7</sub>] [b<sub>8</sub>] [b<sub>11</sub>]

Gene name= Nono

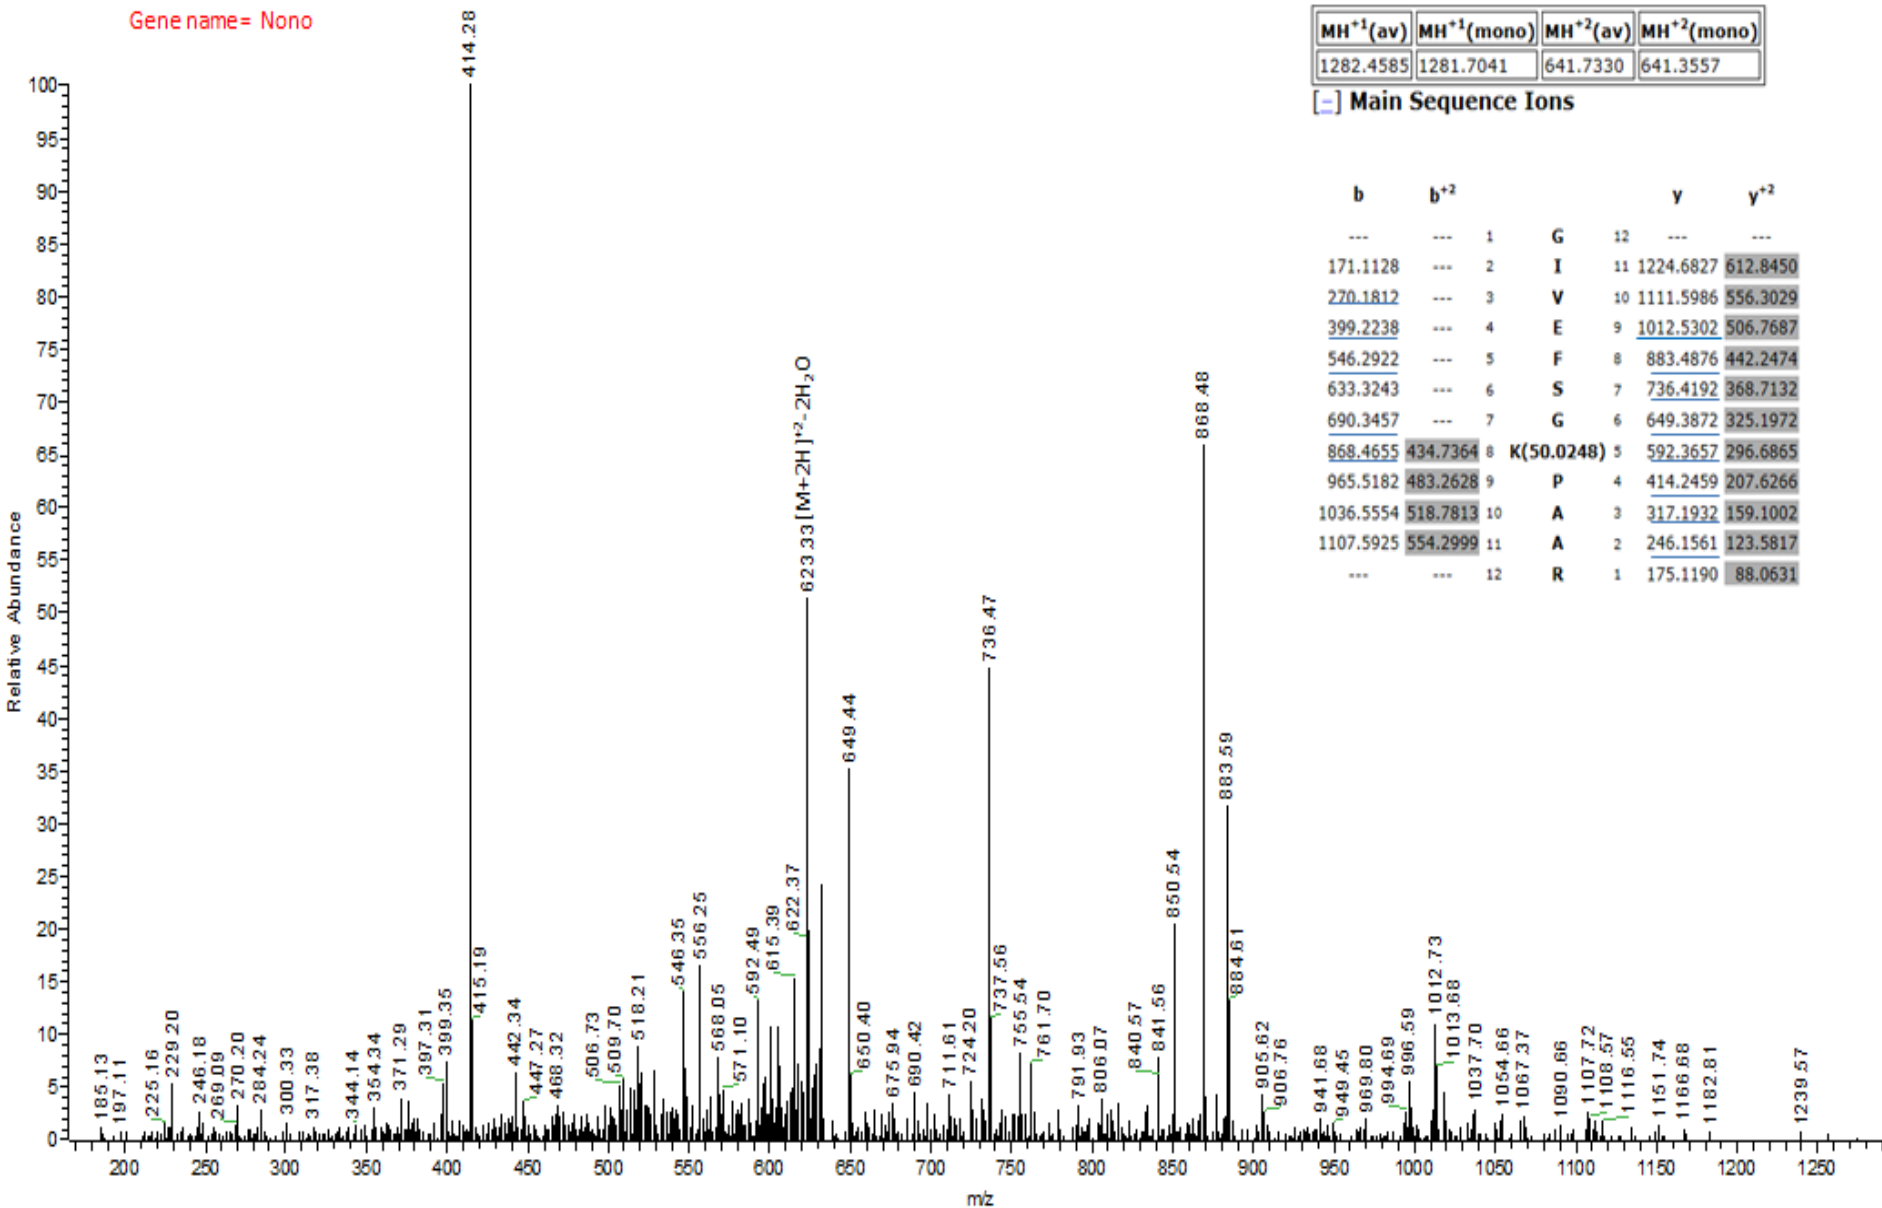

| MH <sup>+</sup> 1(av) | MH <sup>+</sup> 1(mono) | MH <sup>+</sup> 2(av) | MH <sup>+</sup> 2(mono) |
|-----------------------|-------------------------|-----------------------|-------------------------|
| 1282.4585             | 1281.7041               | 641.7330              | 641.3557                |

Main Sequence Ions

| b         | b <sup>+</sup> |    | y                 | y <sup>+</sup> |           |
|-----------|----------------|----|-------------------|----------------|-----------|
| ---       | ---            | 1  | G                 | 12             | ---       |
| 171.1128  | ---            | 2  | I                 | 11             | 1224.6827 |
| 270.1812  | ---            | 3  | V                 | 10             | 1111.5986 |
| 399.2238  | ---            | 4  | E                 | 9              | 1012.5302 |
| 546.2922  | ---            | 5  | F                 | 8              | 883.4876  |
| 633.3243  | ---            | 6  | S                 | 7              | 736.4192  |
| 690.3457  | ---            | 7  | G                 | 6              | 649.3872  |
| 868.4655  | 434.7364       | 8  | <b>K(50.0248)</b> | 5              | 592.3657  |
| 965.5182  | 483.2628       | 9  | P                 | 4              | 414.2459  |
| 1036.5554 | 518.7813       | 10 | A                 | 3              | 317.1932  |
| 1107.5925 | 554.2999       | 11 | A                 | 2              | 246.1561  |
| ---       | ---            | 12 | R                 | 1              | 175.1190  |

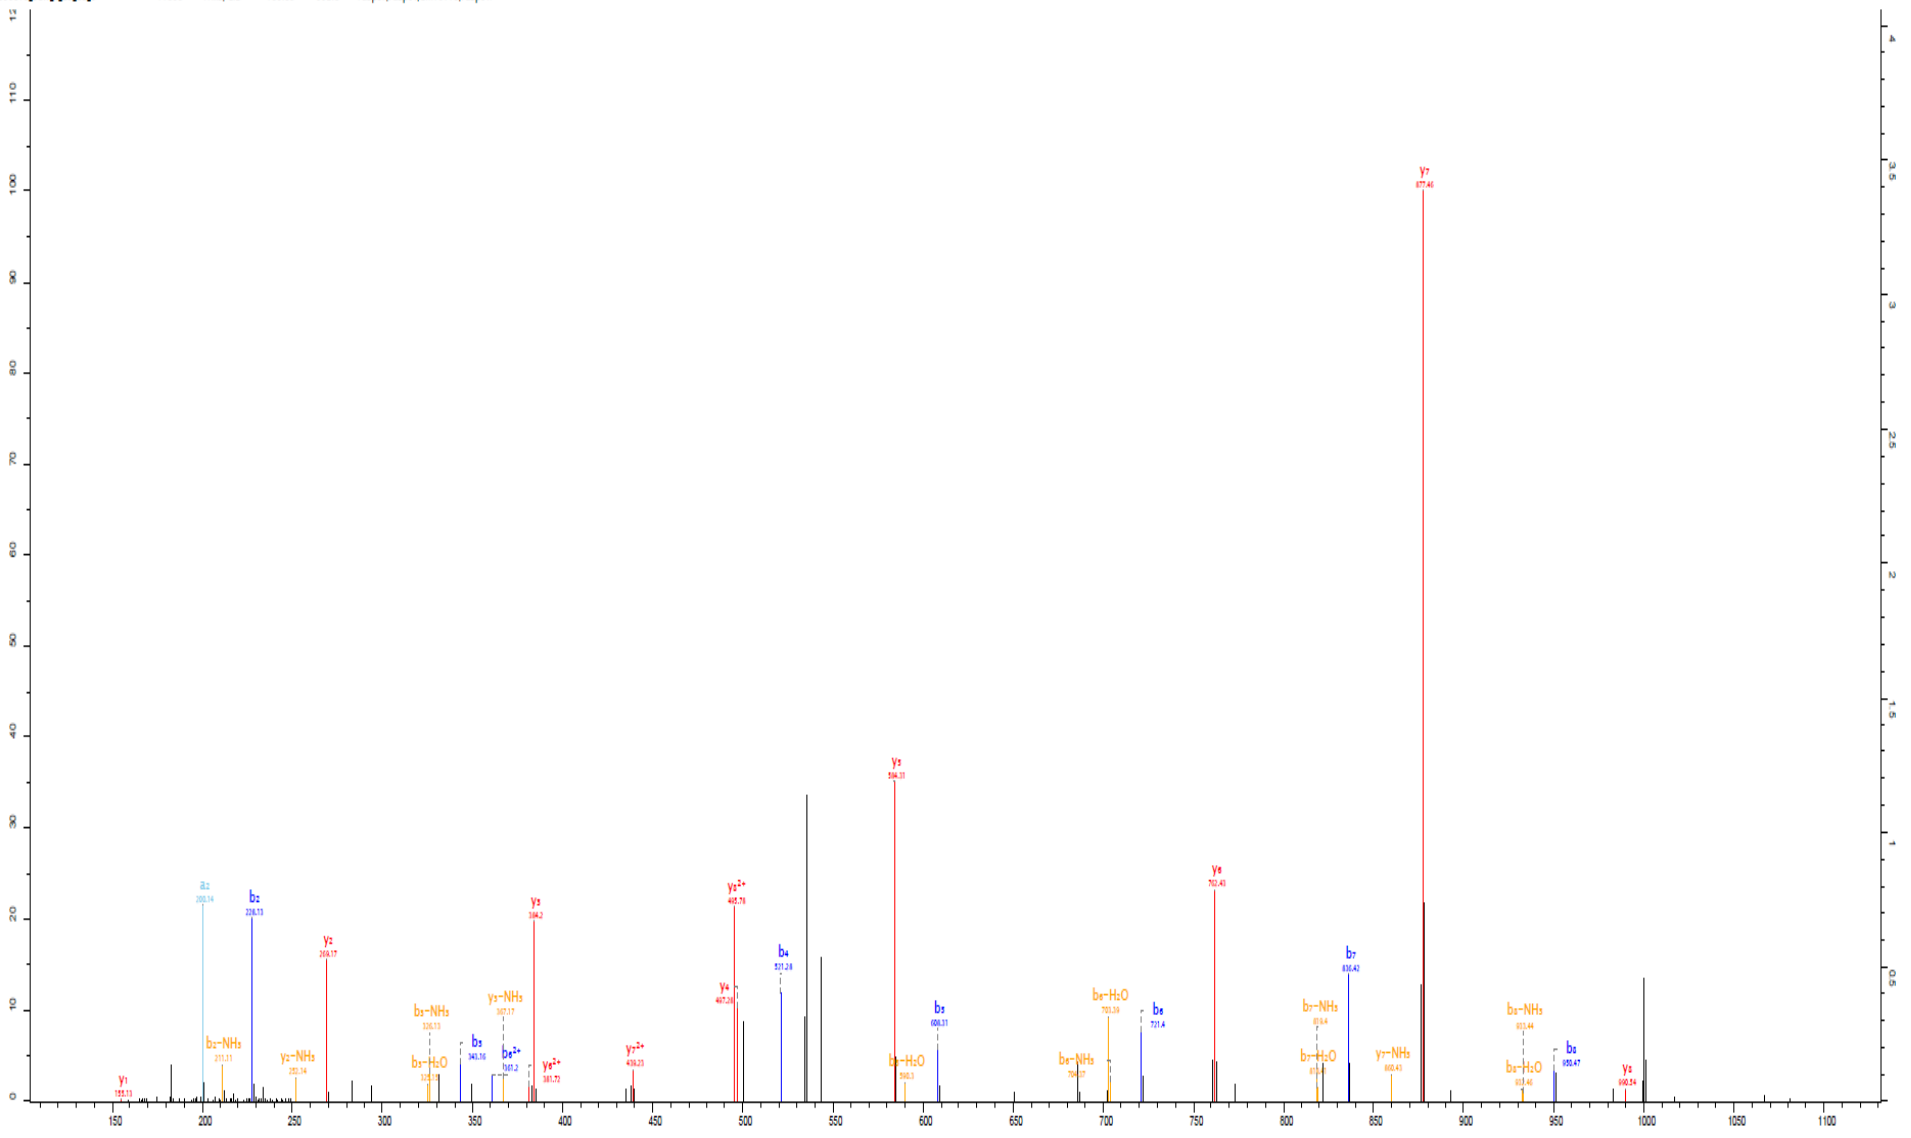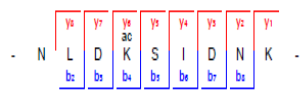

Gene names = Pabpc1;Pabpc4;Gm10110;Pabpc4l

| MH <sup>+</sup> 1(av) | MH <sup>+</sup> 1(mono) | MH <sup>+</sup> 2(av) | MH <sup>+</sup> 2(mono) |
|-----------------------|-------------------------|-----------------------|-------------------------|
| 1105.1990             | 1104.5867               | 553.1032              | 552.7970                |

**(-)** Main Sequence Ions

| b        | b <sup>+</sup> 2 |   | y                 | y <sup>+</sup> 2 |          |          |
|----------|------------------|---|-------------------|------------------|----------|----------|
| ---      | ---              | 1 | <b>N</b>          | 9                | ---      | ---      |
| 228.1343 | ---              | 2 | <b>L</b>          | 8                | 990.5437 | 495.7755 |
| 343.1612 | ---              | 3 | <b>D</b>          | 7                | 877.4597 | 439.2335 |
| 521.2810 | 261.1441         | 4 | <b>K(50.0248)</b> | 6                | 762.4327 | 381.7200 |
| 608.3130 | 304.6601         | 5 | <b>S</b>          | 5                | 584.3130 | 292.6601 |
| 721.3971 | 361.2022         | 6 | <b>I</b>          | 4                | 497.2809 | 249.1441 |
| 836.4240 | 418.7156         | 7 | <b>D</b>          | 3                | 384.1969 | 192.6021 |
| 950.4669 | 475.7371         | 8 | <b>N</b>          | 2                | 269.1699 | 135.0886 |
| ---      | ---              | 9 | <b>K(8.0142)</b>  | 1                | 155.1270 | 78.0671  |

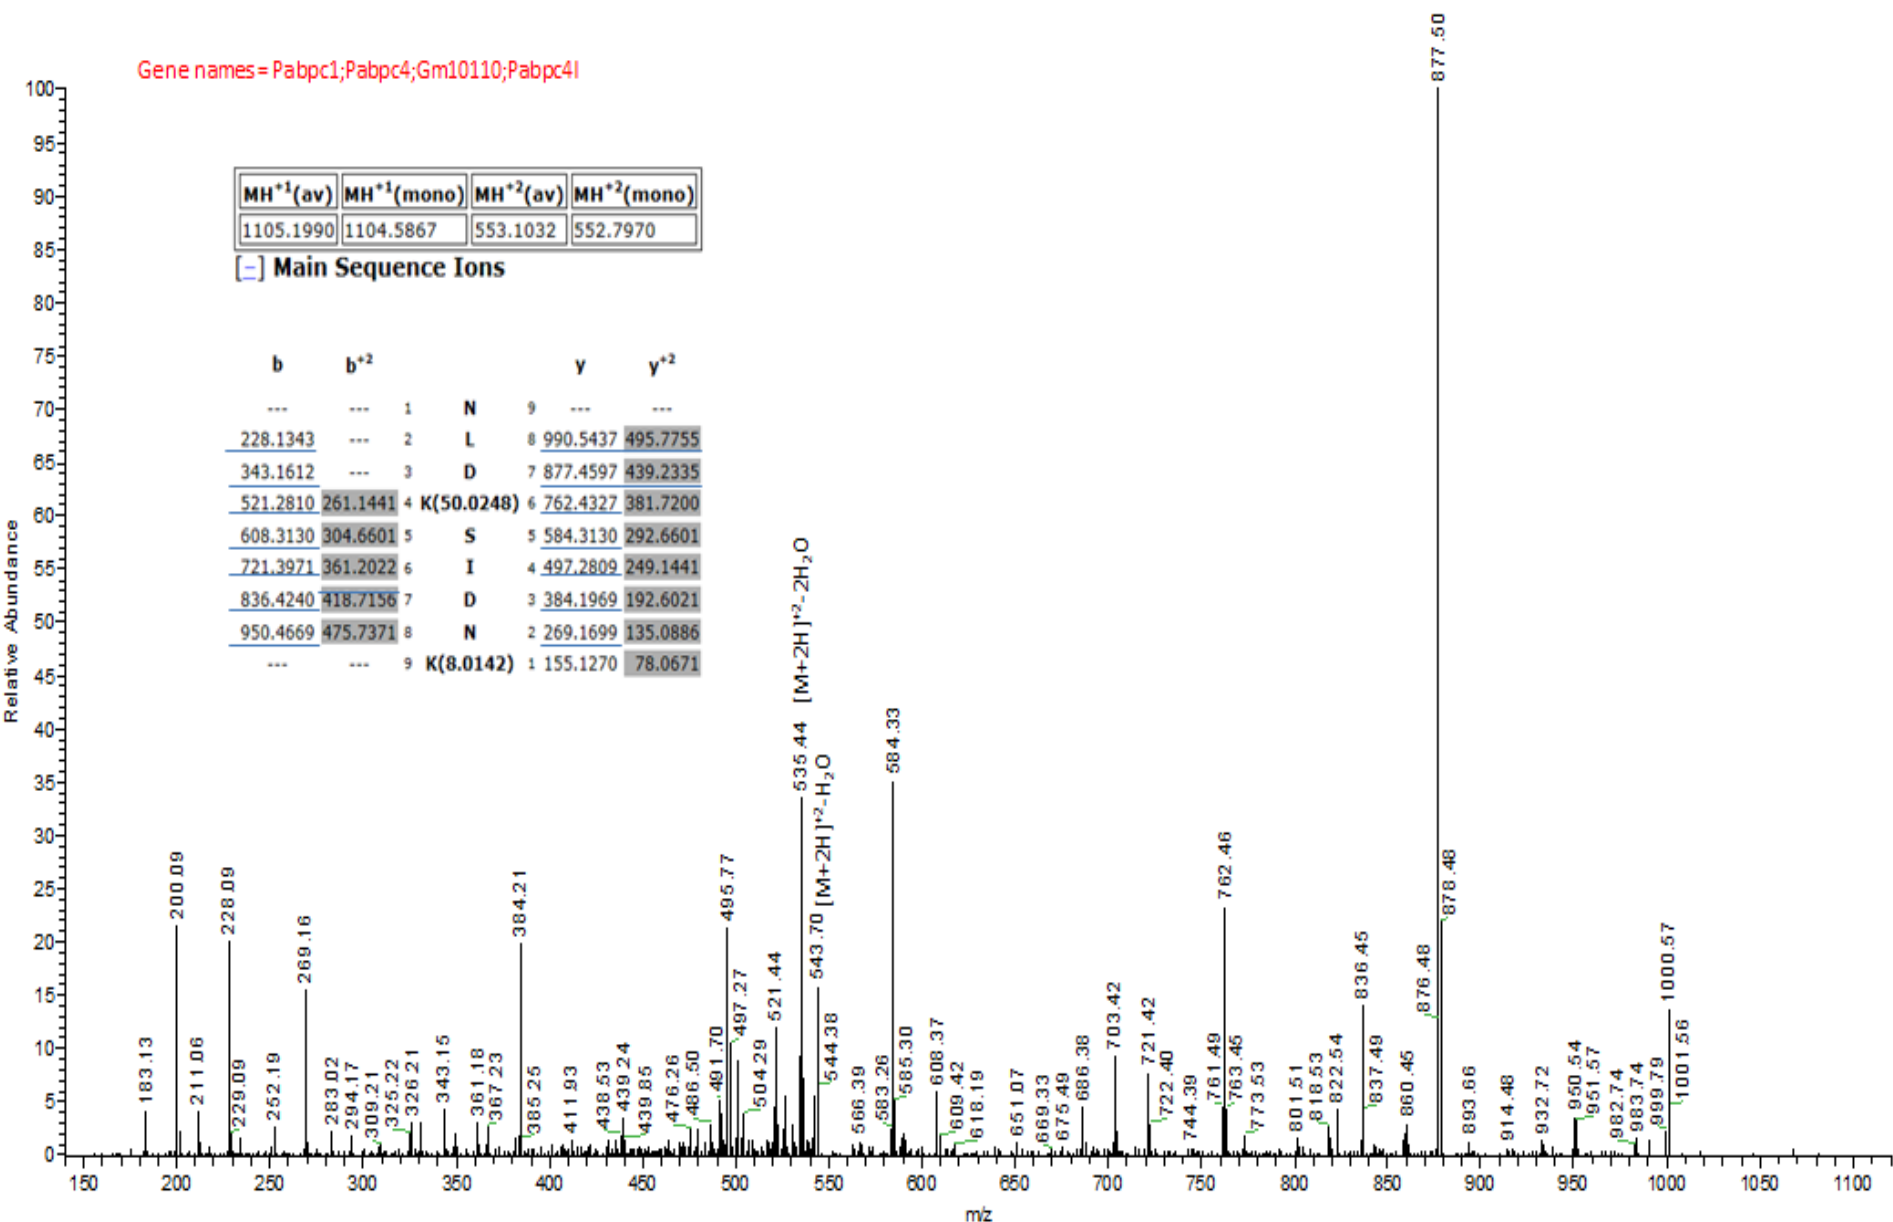



Gene name= Pdpr

| MH <sup>+</sup> (av) | MH <sup>+</sup> (mono) | MH <sup>2+</sup> (av) | MH <sup>2+</sup> (mono) | MH <sup>3+</sup> (av) | MH <sup>3+</sup> (mono) |
|----------------------|------------------------|-----------------------|-------------------------|-----------------------|-------------------------|
| 1597.8678            | 1596.8756              | 799.4376              | 798.9414                | 533.2942              | 532.9634                |

**Main Sequence Ions**

| b         | b <sup>+</sup> | A  | y                 | y <sup>+</sup> |
|-----------|----------------|----|-------------------|----------------|
| ---       | ---            | 1  | A                 | 13             |
| 250.1642  | 125.5857       | 2  | <b>K(50.0248)</b> | 12             |
| 363.2482  | 182.1277       | 3  | L                 | 11             |
| 526.3115  | 263.6594       | 4  | Y                 | 10             |
| 623.3643  | 312.1858       | 5  | P                 | 9              |
| 722.4327  | 361.7200       | 6  | V                 | 8              |
| 823.4804  | 412.2438       | 7  | T                 | 7              |
| 910.5124  | 455.7599       | 8  | S                 | 6              |
| 1057.5808 | 529.2941       | 9  | F                 | 5              |
| 1204.6493 | 602.8283       | 10 | F                 | 4              |
| 1305.6969 | 653.3521       | 11 | T                 | 3              |
| 1442.7558 | 721.8816       | 12 | H                 | 2              |
| ---       | ---            | 13 | <b>K(8.0142)</b>  | 1              |

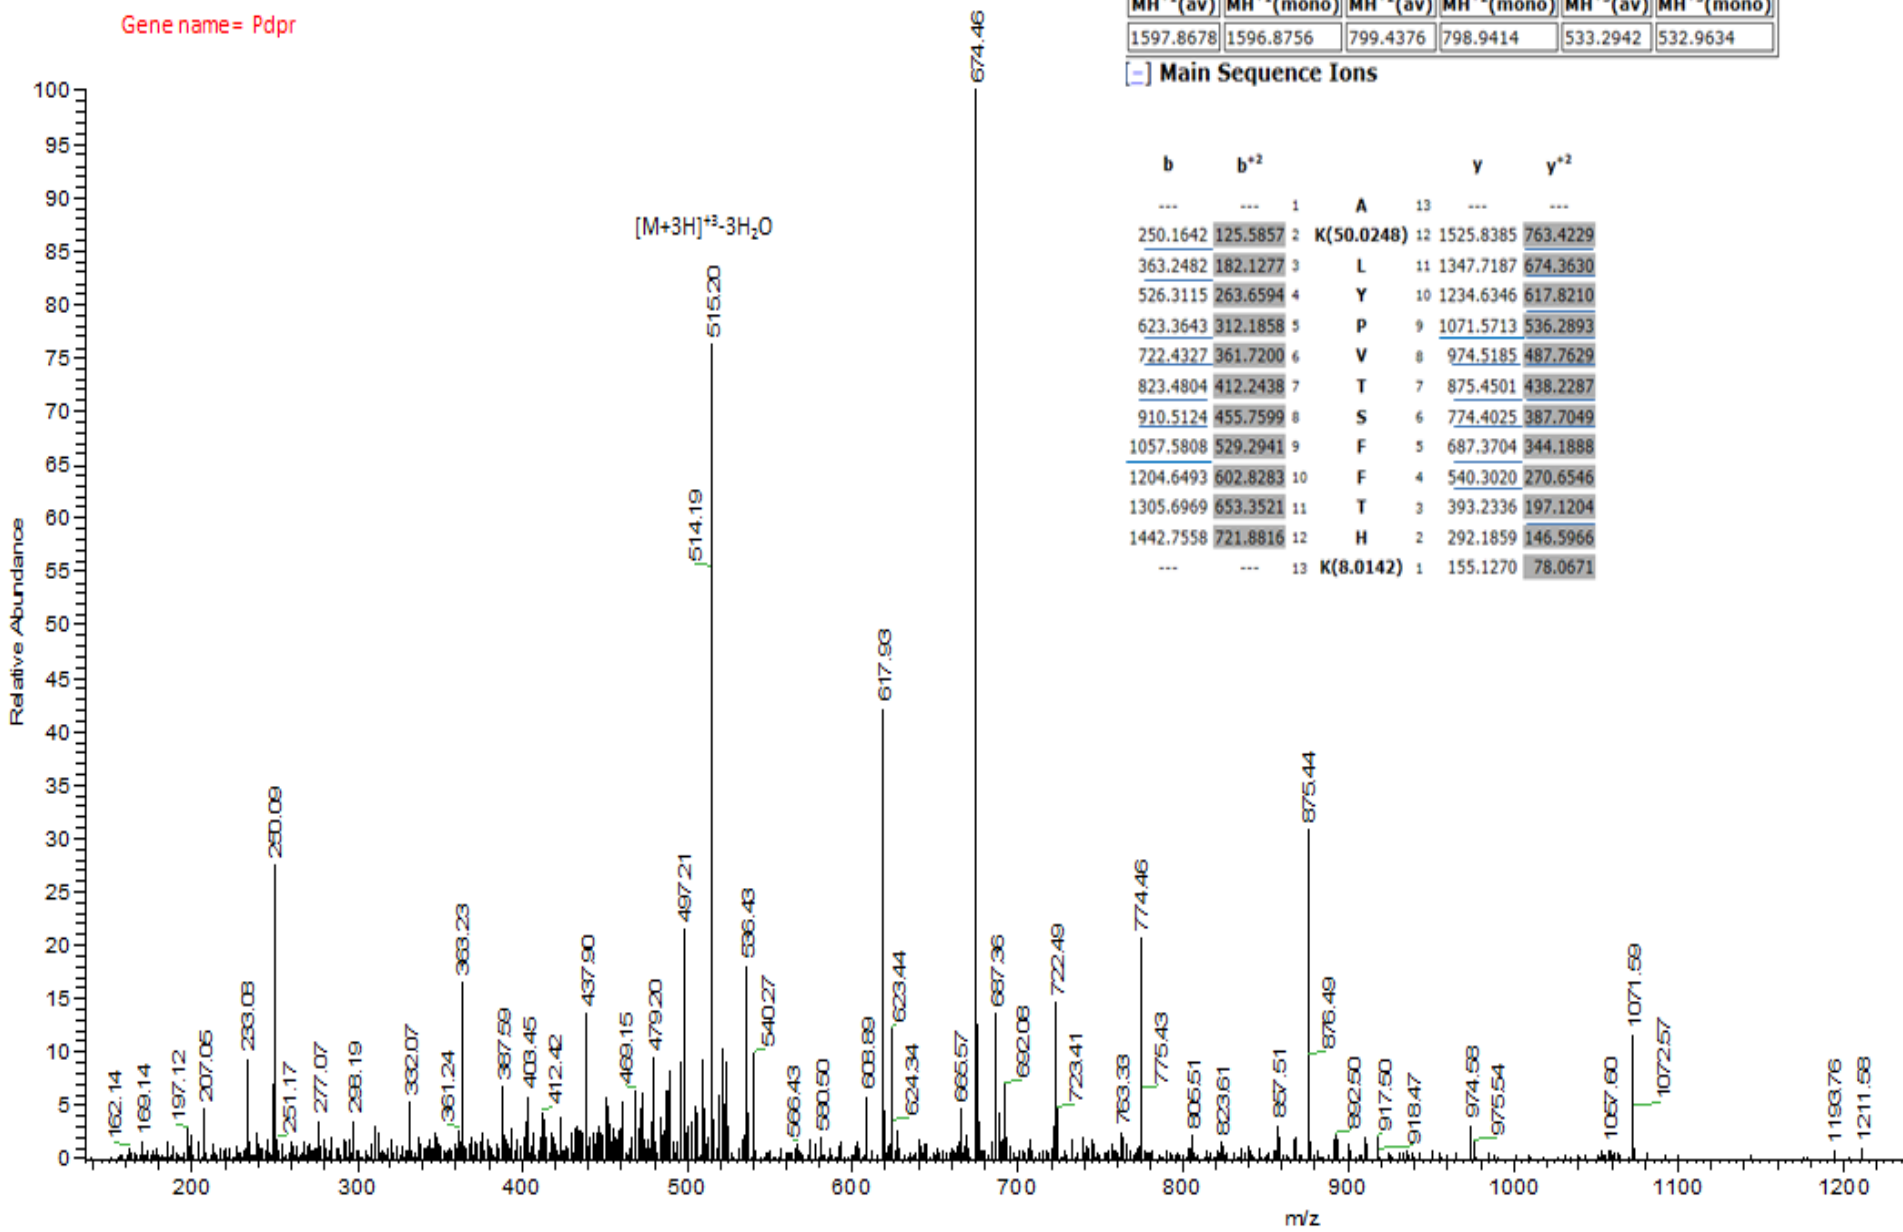



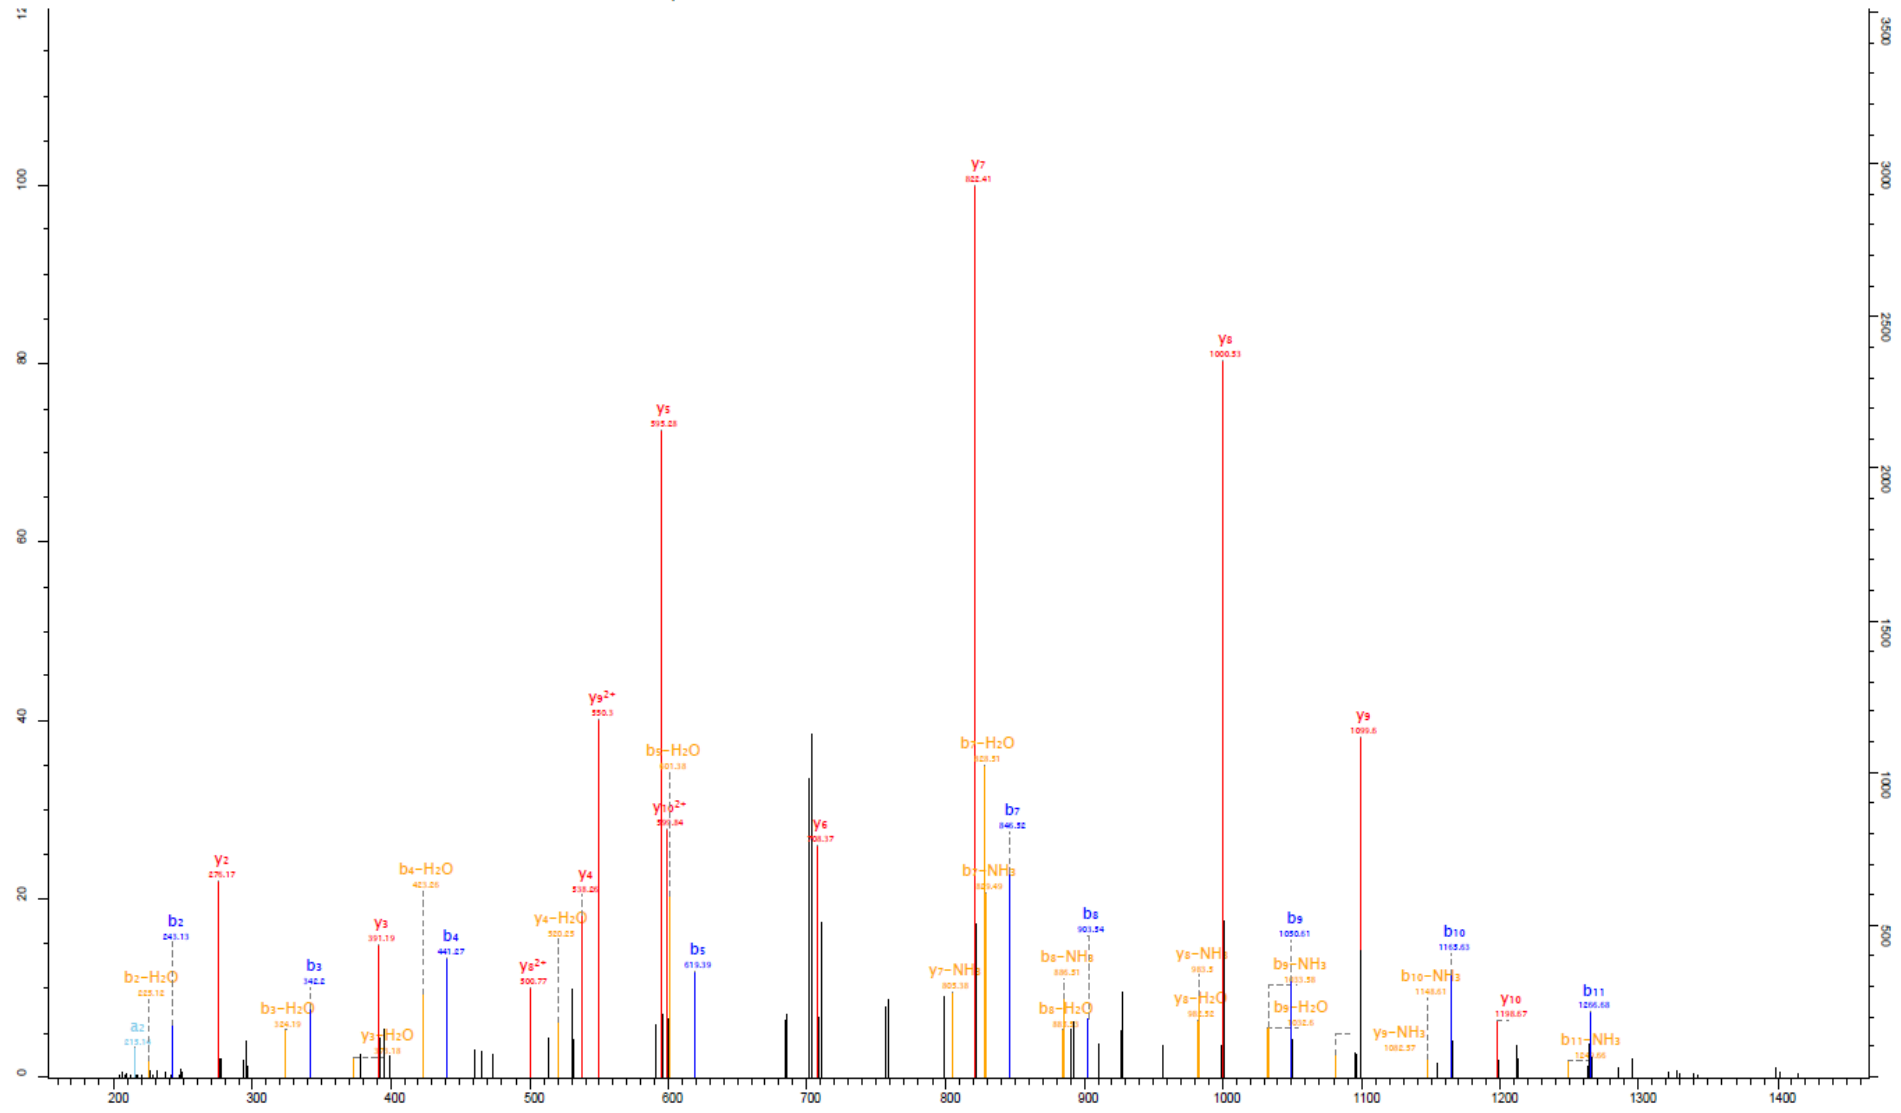

- E L V V K N L G F D T R -  
 b2 b3 b4 b5 b7 b8 b9 b10 b11

Gene name = Pfkp

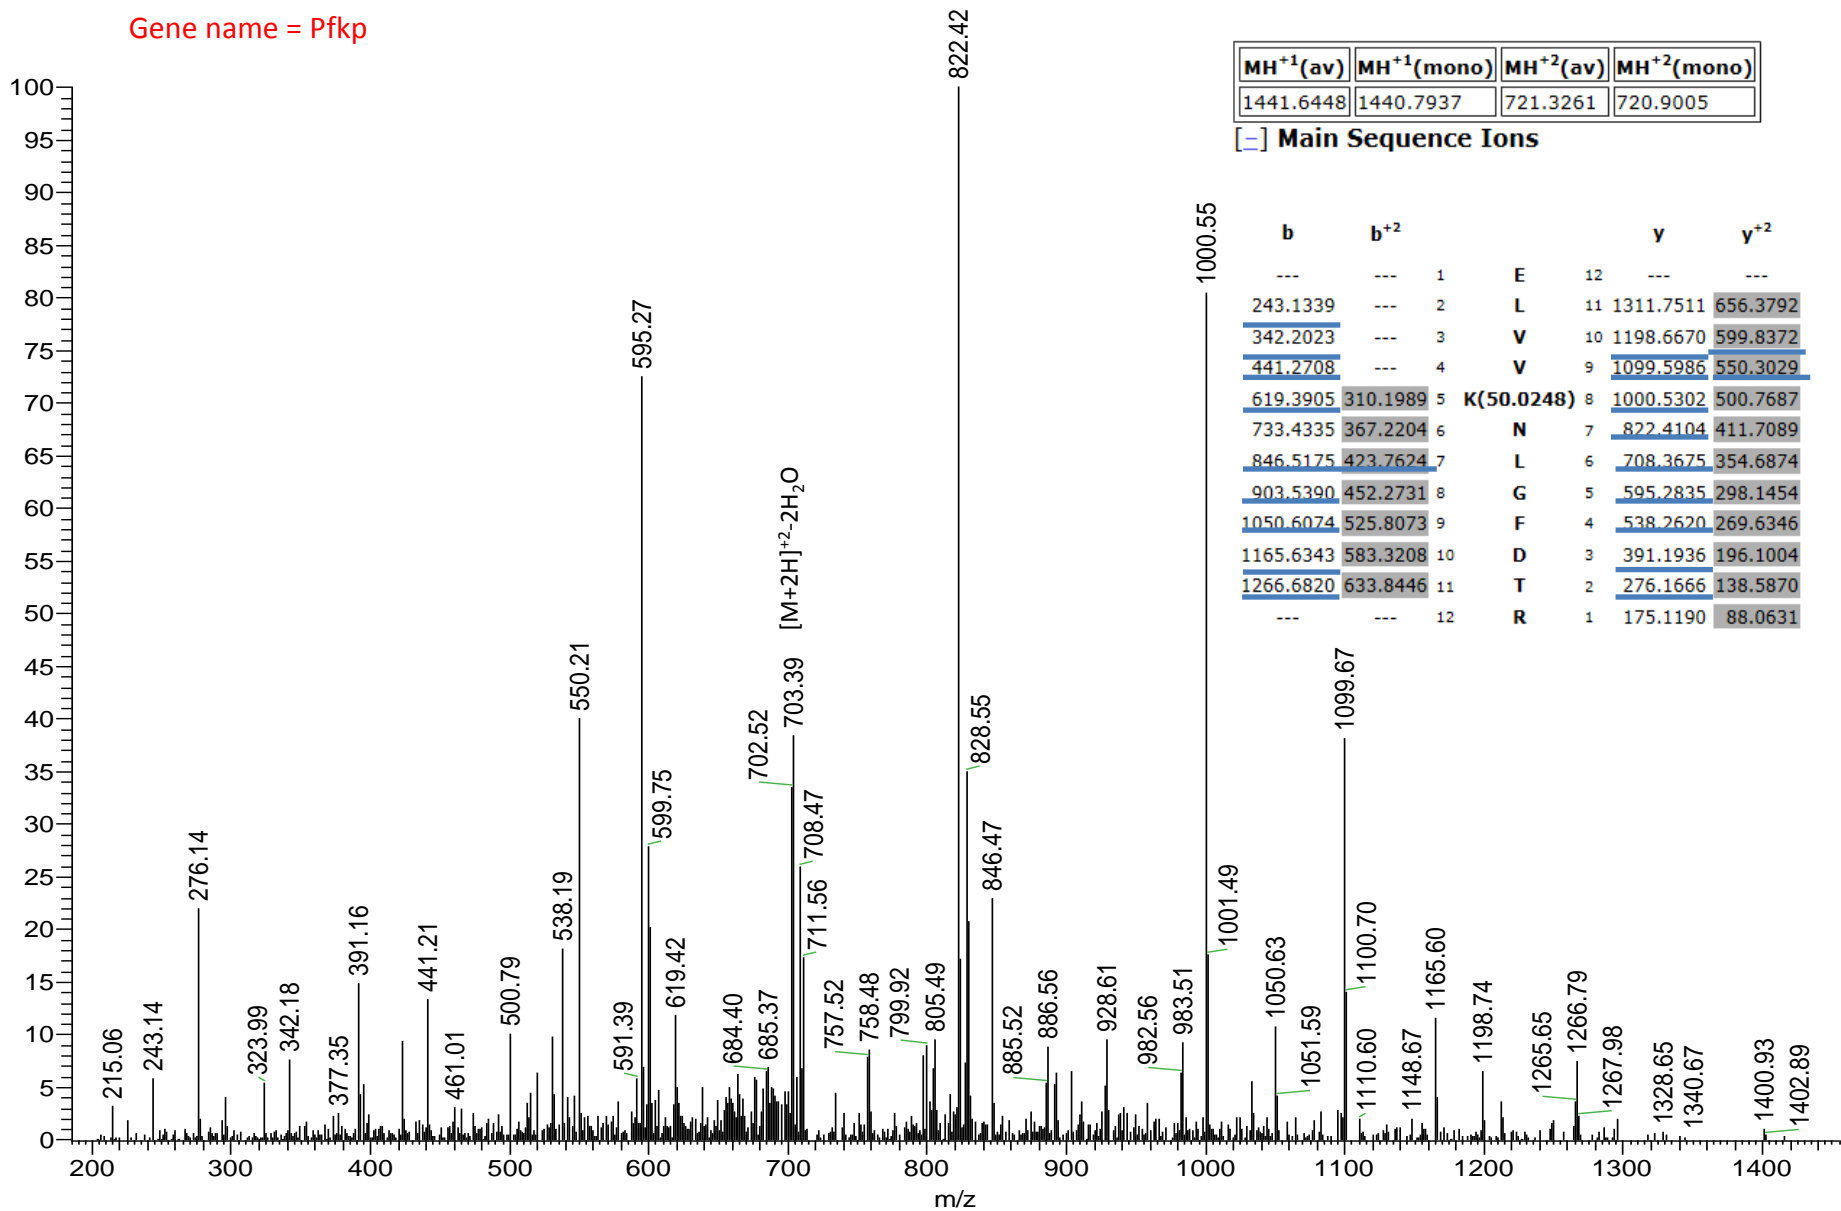

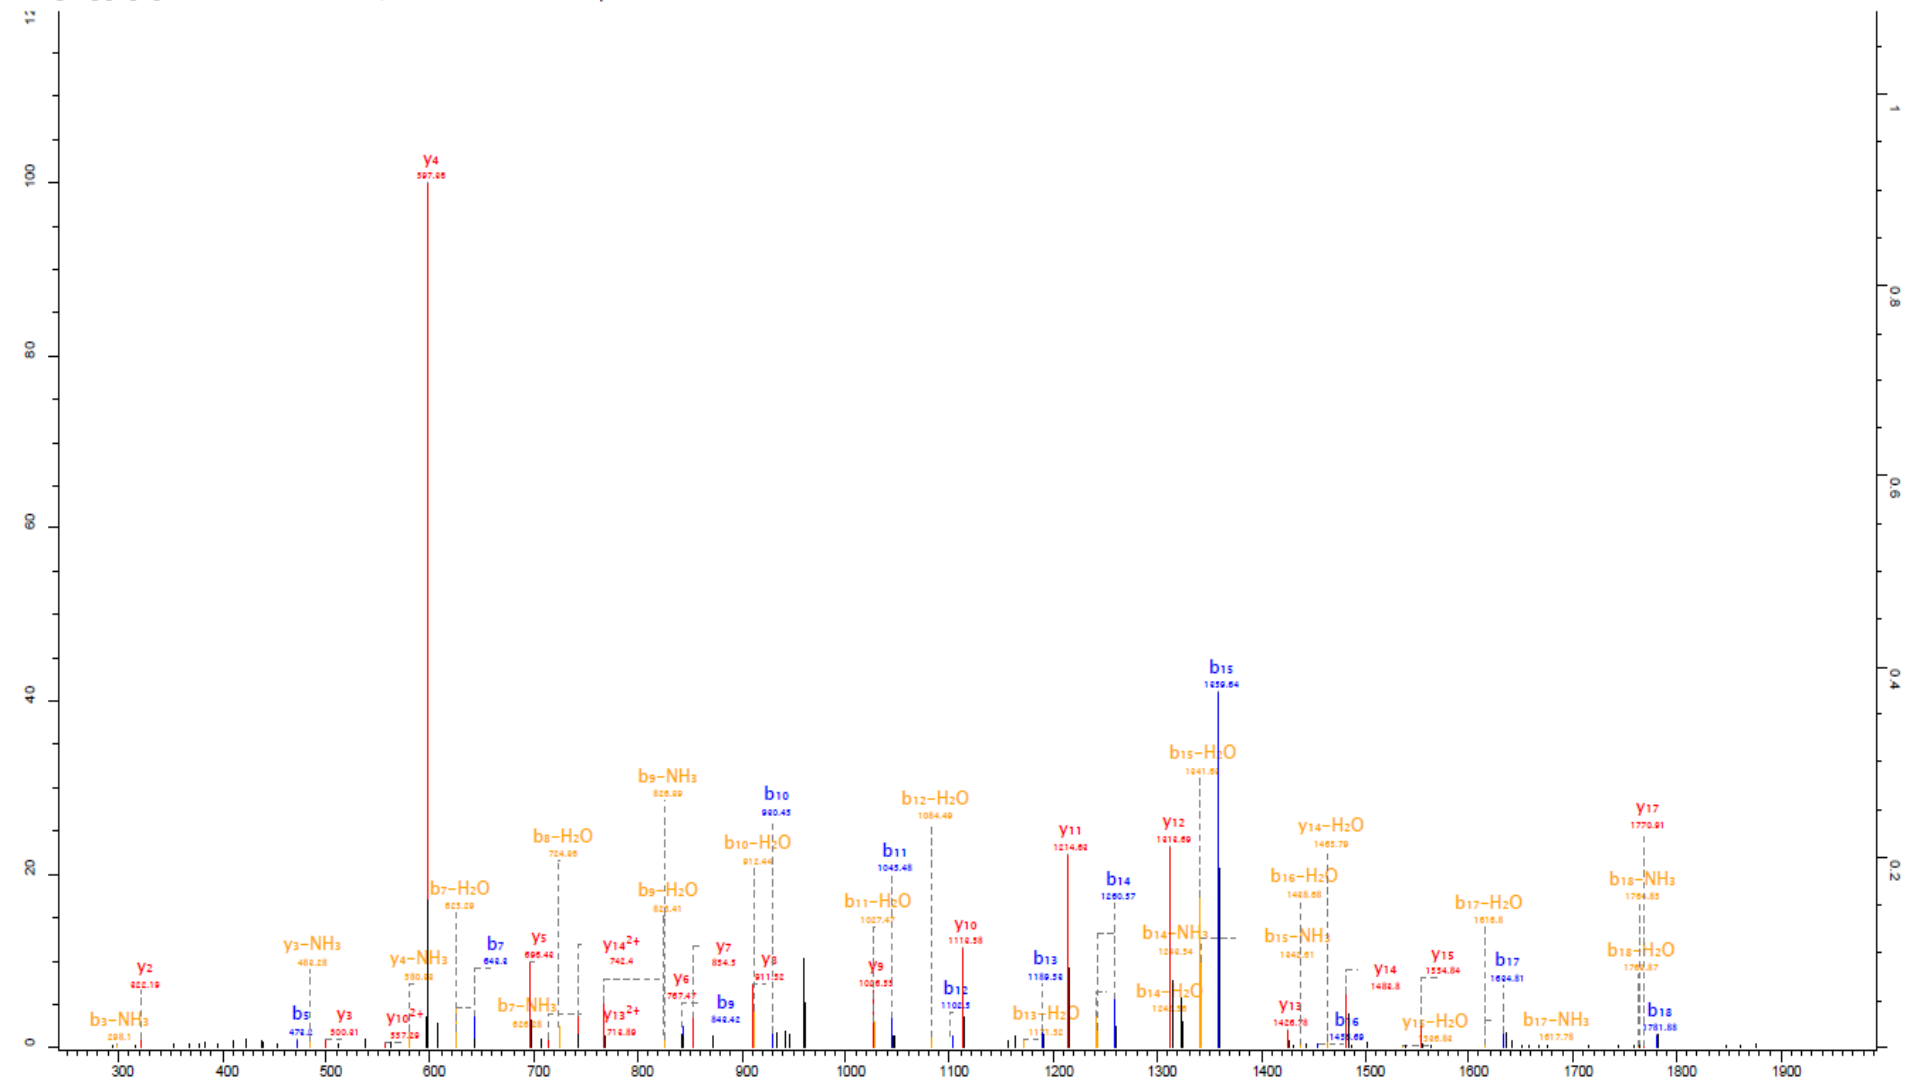

- G Q E S A G I V T S D G S A V P K F R -

Y17
Y15
Y14
Y15
Y12
Y11
Y10
Y9
Y8
Y7
Y6
Y5
Y4
Y5
ac
K
Y2

b5
b7
b6
b10
b11
b12
b13
b14
b15
b16
b17
b18

Gene name = Ppat

| MH <sup>+</sup> 1(av) | MH <sup>+</sup> 1(mono) | MH <sup>+</sup> 2(av) | MH <sup>+</sup> 2(mono) |
|-----------------------|-------------------------|-----------------------|-------------------------|
| 1957.1279             | 1955.9913               | 979.0677              | 978.4993                |

[-] Main Sequence Ions

| b         | b <sup>+2</sup> |    | y                 | y <sup>+2</sup> |           |          |
|-----------|-----------------|----|-------------------|-----------------|-----------|----------|
| ...       | ...             | 1  | G                 | 19              | ...       | ...      |
| 186.0873  | ...             | 2  | Q                 | 18              | 1898.9698 | 949.9885 |
| 315.1299  | ...             | 3  | E                 | 17              | 1770.9112 | 885.9593 |
| 402.1619  | ...             | 4  | S                 | 16              | 1641.8686 | 821.4380 |
| 473.1991  | ...             | 5  | A                 | 15              | 1554.8366 | 777.9219 |
| 530.2205  | ...             | 6  | G                 | 14              | 1483.7905 | 742.4034 |
| 643.3046  | ...             | 7  | I                 | 13              | 1426.7780 | 713.8927 |
| 742.3730  | ...             | 8  | V                 | 12              | 1313.6940 | 657.3506 |
| 843.4207  | ...             | 9  | T                 | 11              | 1214.6256 | 607.8164 |
| 930.4527  | ...             | 10 | S                 | 10              | 1113.5779 | 557.2926 |
| 1045.4796 | ...             | 11 | D                 | 9               | 1026.5459 | 513.7766 |
| 1102.5011 | ...             | 12 | G                 | 8               | 911.5189  | 456.2631 |
| 1189.5331 | ...             | 13 | S                 | 7               | 854.4974  | 427.7524 |
| 1260.5703 | ...             | 14 | A                 | 6               | 767.4654  | 384.2363 |
| 1359.6387 | ...             | 15 | V                 | 5               | 696.4283  | 348.7178 |
| 1456.6914 | ...             | 16 | P                 | 4               | 597.3599  | 299.1836 |
| 1634.8112 | 817.9092        | 17 | <b>K(50.0248)</b> | 3               | 500.3071  | 250.6572 |
| 1781.8796 | 891.4434        | 18 | F                 | 2               | 322.1874  | 161.5973 |
| ...       | ...             | 19 | R                 | 1               | 175.1190  | 88.0631  |

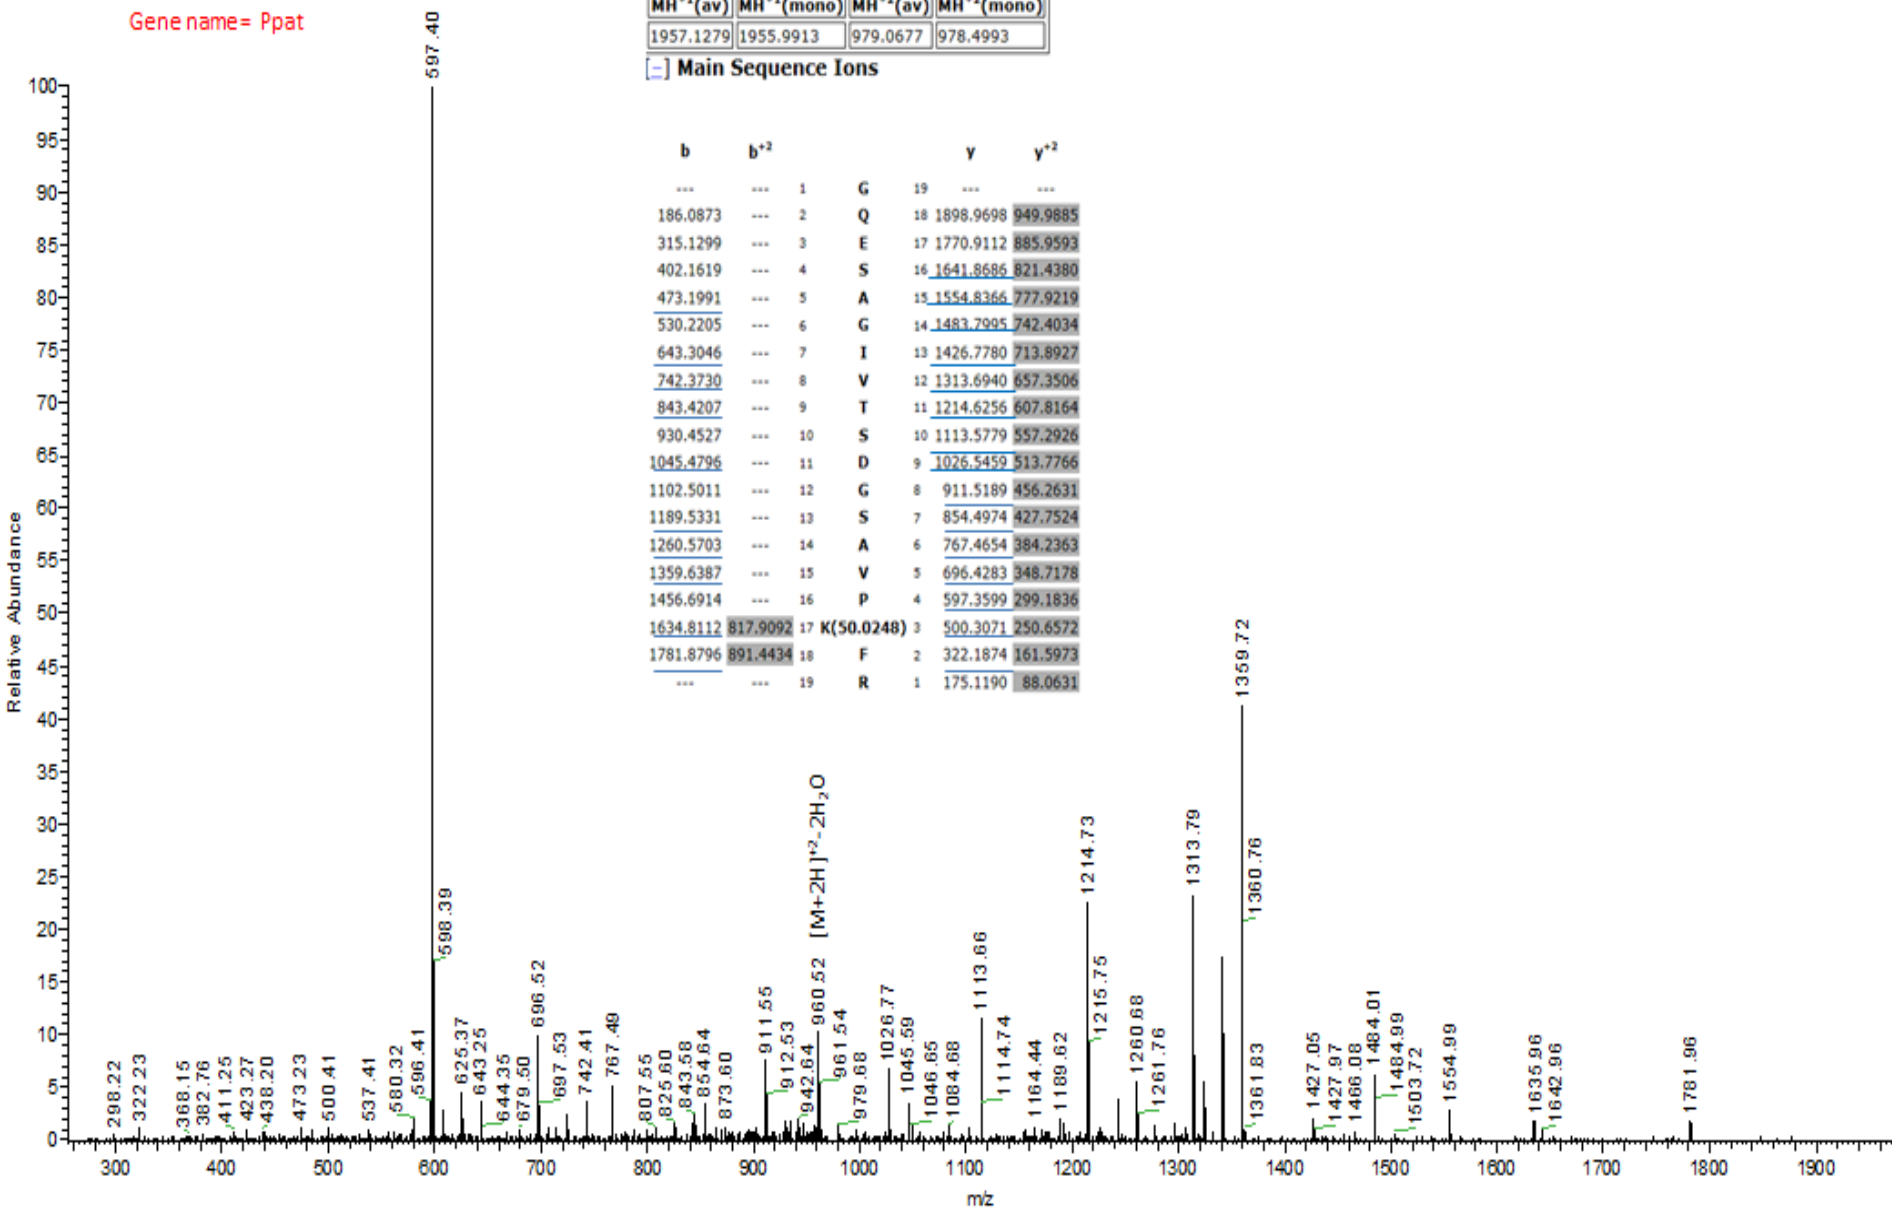

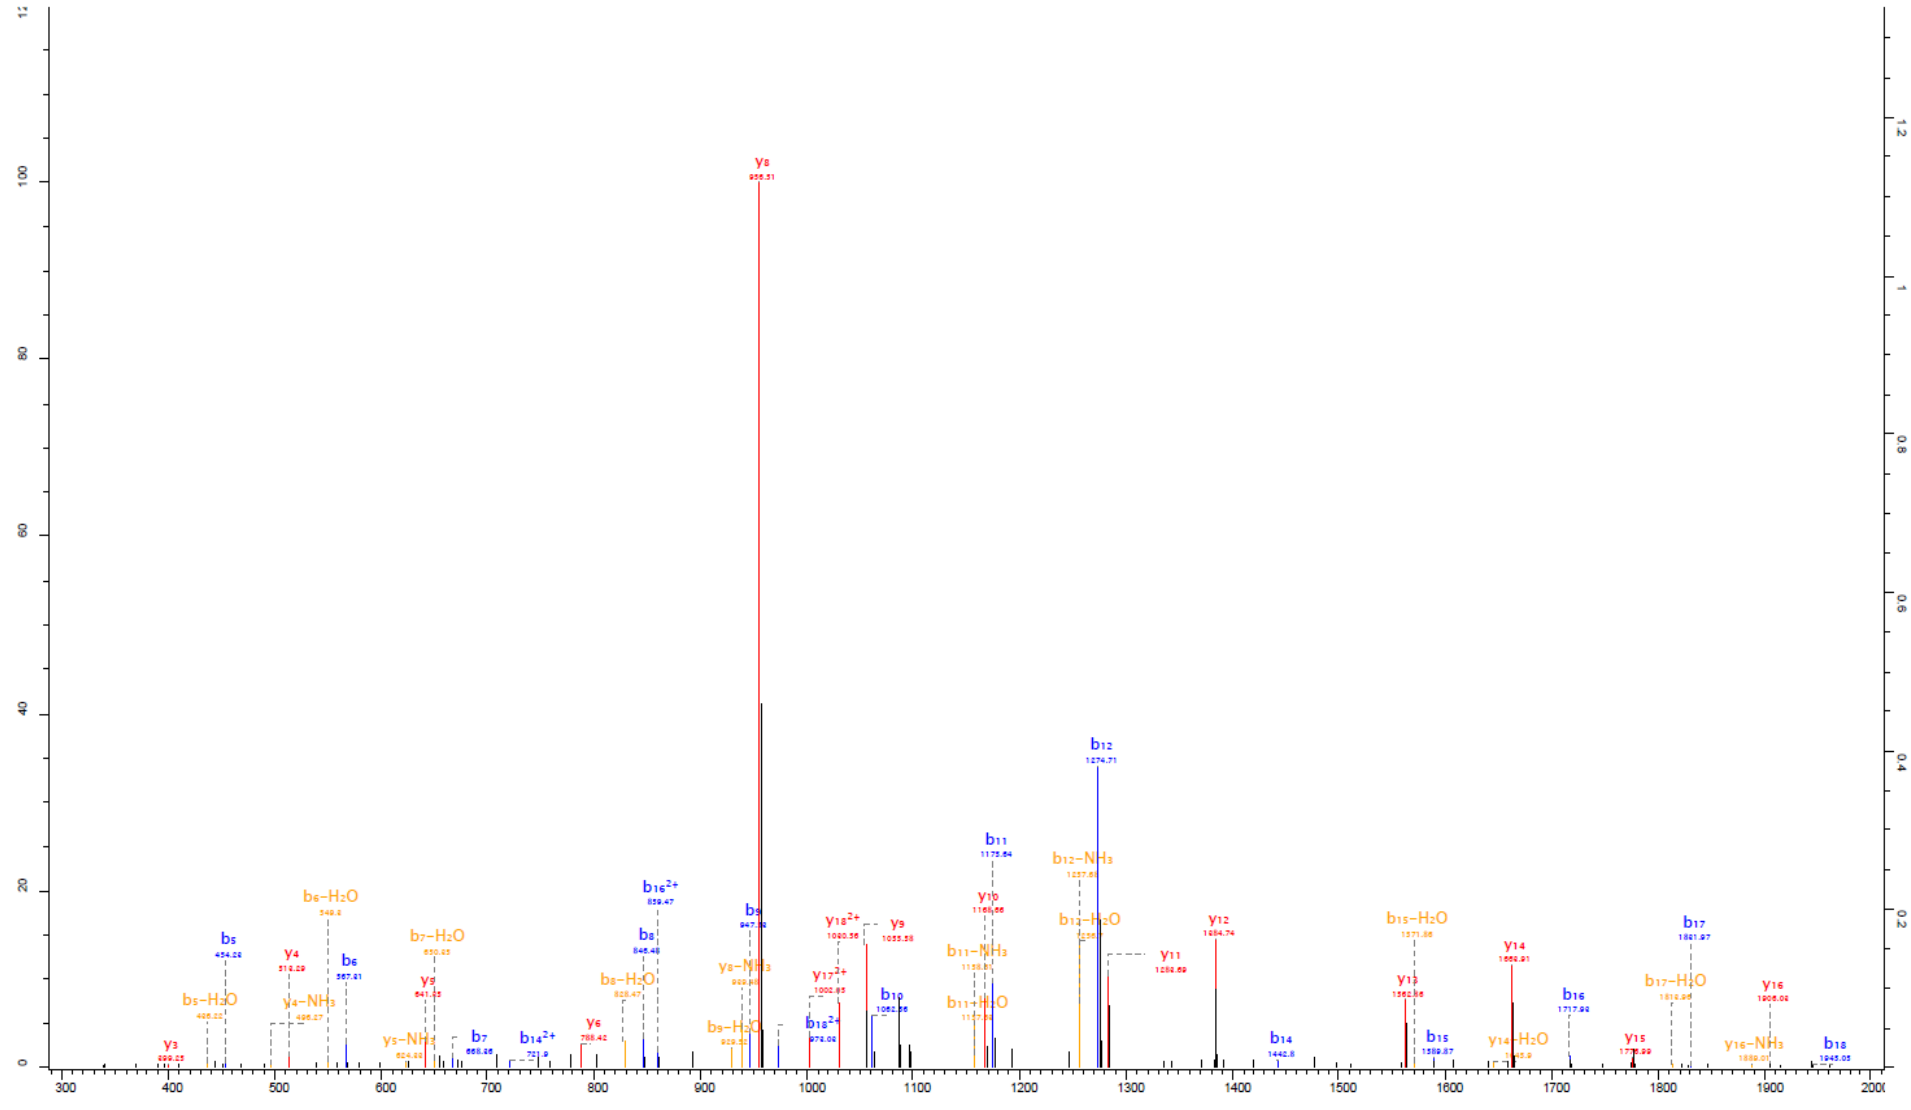

- A V G P E I T K T D L V P A F Q N L M K -

y16<sup>2+</sup>
y17<sup>2+</sup>
y18
y15
y14
y13
y12
y11
y10
y9
y8
y6
y5
y4
y3

b5
b6
b7
b8
b9
b10
b11
b12
b14
b15
b16
b17
b18

Gene name = Ppp2r1a

|                      |                        |                      |                        |
|----------------------|------------------------|----------------------|------------------------|
| MH <sup>+</sup> (av) | MH <sup>+</sup> (mono) | MH <sup>+</sup> (av) | MH <sup>+</sup> (mono) |
| 2231.6346            | 2230.2123              | 1116.3210            | 1115.6098              |

**[-] Main Sequence Ions**

| b         | b <sup>+</sup> |    | y                 | y <sup>+</sup> |                            |
|-----------|----------------|----|-------------------|----------------|----------------------------|
| ---       | ---            | 1  | <b>A</b>          | 20             | ---                        |
| 171.1128  | ---            | 2  | <b>V</b>          | 19             | 2159.1752 <b>1080.0912</b> |
| 228.1343  | ---            | 3  | <b>G</b>          | 18             | 2060.1068 <b>1030.5570</b> |
| 325.1870  | ---            | 4  | <b>P</b>          | 17             | 2003.0853 <b>1002.0463</b> |
| 454.2296  | ---            | 5  | <b>E</b>          | 16             | 1906.0325 <b>953.5199</b>  |
| 567.3137  | ---            | 6  | <b>I</b>          | 15             | 1776.9900 <b>888.9986</b>  |
| 668.3614  | ---            | 7  | <b>T</b>          | 14             | 1663.9059 <b>832.4566</b>  |
| 846.4811  | 423.7442       | 8  | <b>K(50.0248)</b> | 13             | 1562.8582 <b>781.9327</b>  |
| 947.5288  | 474.2680       | 9  | <b>T</b>          | 12             | 1384.7384 <b>692.8729</b>  |
| 1062.5558 | 531.7815       | 10 | <b>D</b>          | 11             | 1283.6908 <b>642.3490</b>  |
| 1175.6398 | 588.3235       | 11 | <b>L</b>          | 10             | 1168.6638 <b>584.8356</b>  |
| 1274.7082 | 637.8578       | 12 | <b>V</b>          | 9              | 1055.5798 <b>528.2935</b>  |
| 1371.7610 | 686.3841       | 13 | <b>P</b>          | 8              | 956.5113 <b>478.7593</b>   |
| 1442.7981 | 721.9027       | 14 | <b>A</b>          | 7              | 859.4586 <b>430.2329</b>   |
| 1589.8665 | 795.4369       | 15 | <b>F</b>          | 6              | 788.4215 <b>394.7144</b>   |
| 1717.9251 | 859.4662       | 16 | <b>Q</b>          | 5              | 641.3531 <b>321.1802</b>   |
| 1831.9680 | 916.4877       | 17 | <b>N</b>          | 4              | 513.2945 <b>257.1509</b>   |
| 1945.0521 | 973.0297       | 18 | <b>L</b>          | 3              | 399.2516 <b>200.1294</b>   |
| 2076.0926 | 1038.5499      | 19 | <b>M</b>          | 2              | 286.1675 <b>143.5874</b>   |
| ---       | ---            | 20 | <b>K(8.0142)</b>  | 1              | 155.1270 <b>78.0671</b>    |

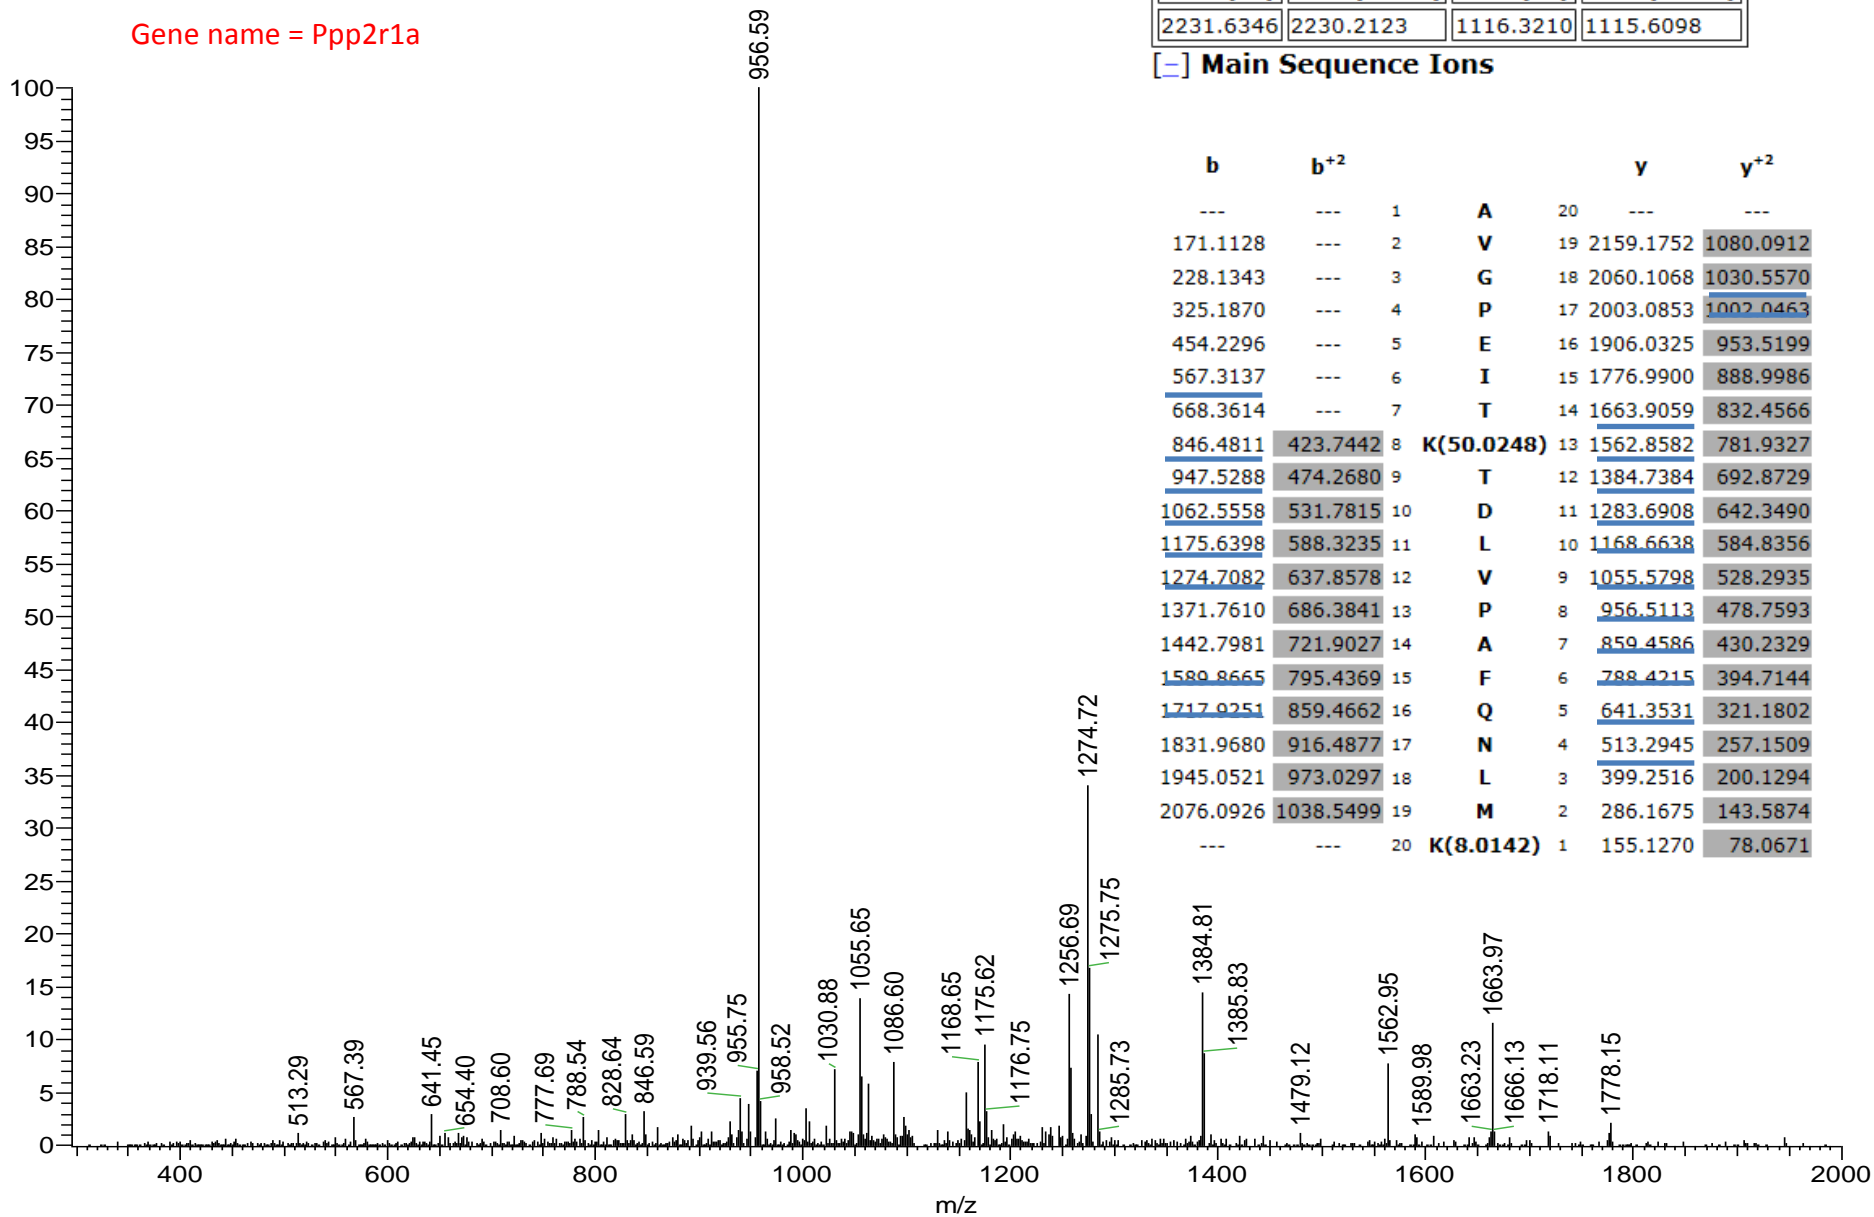

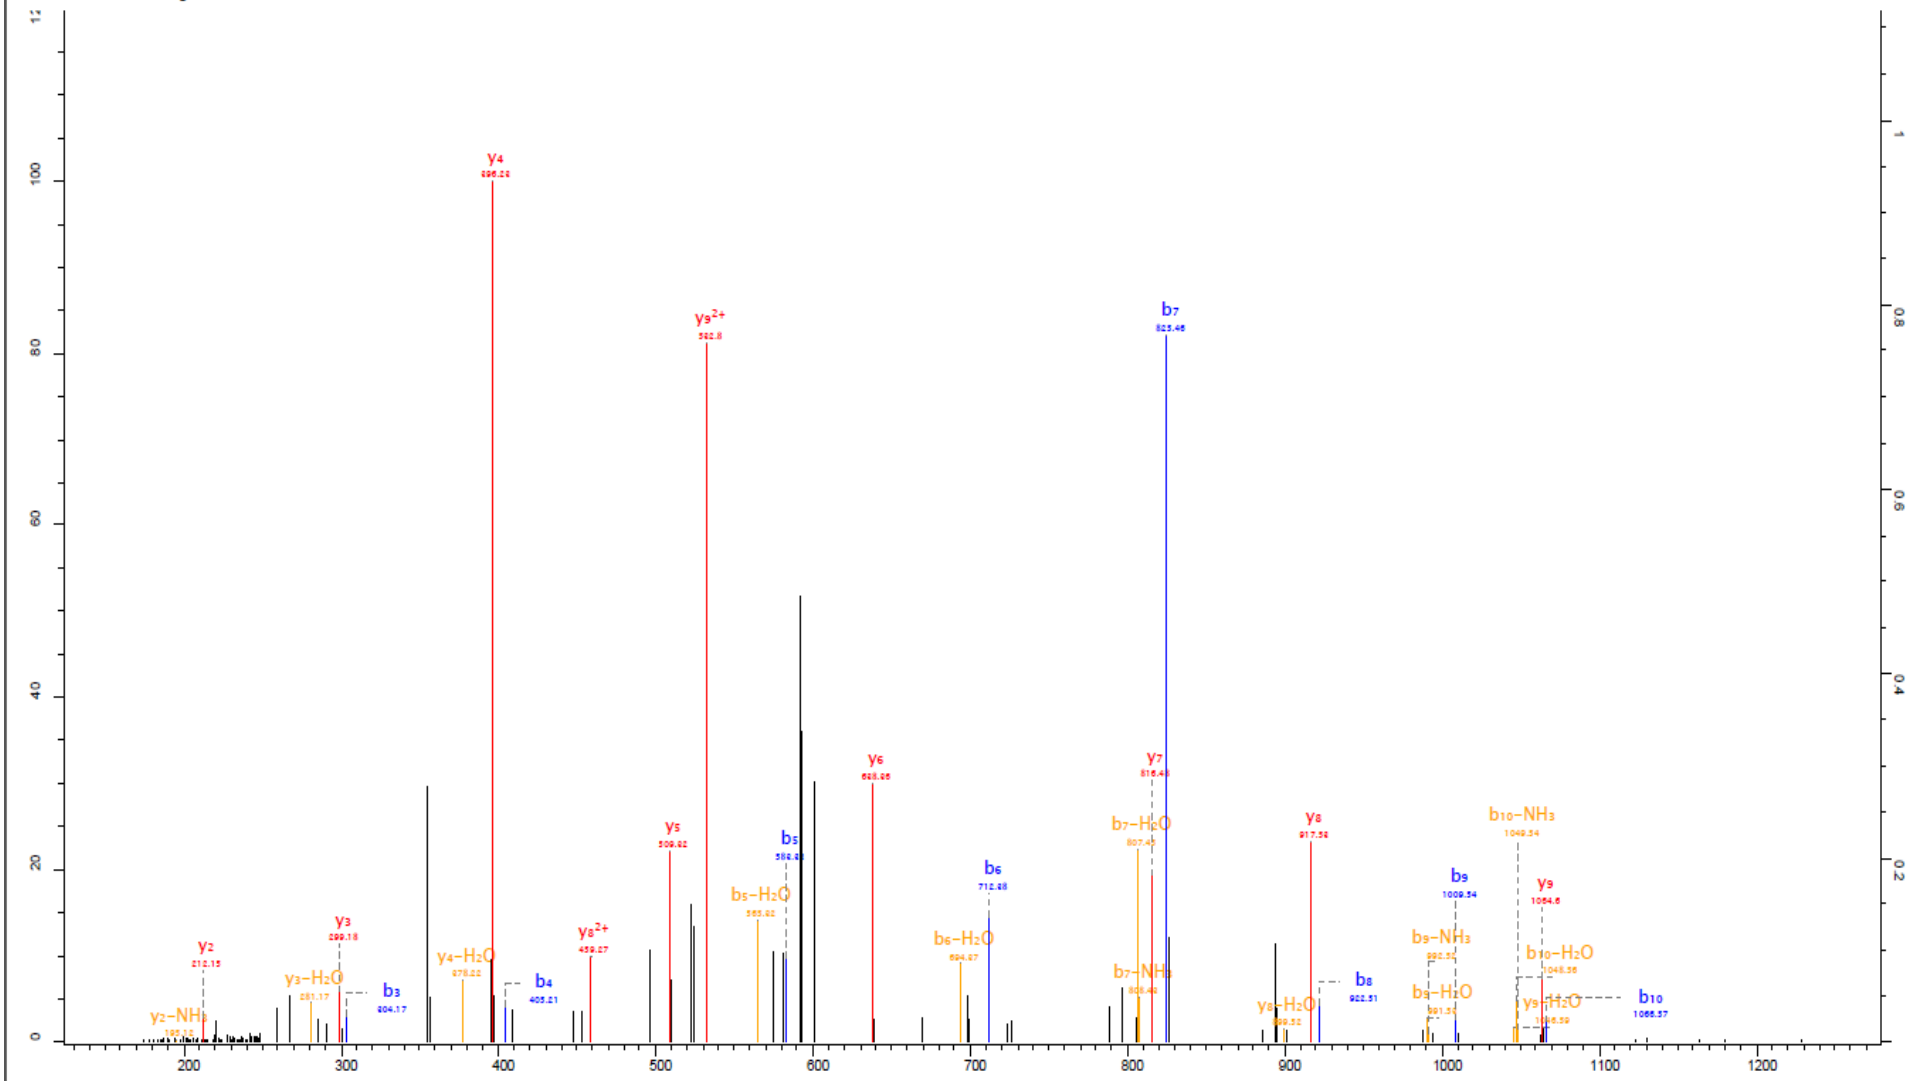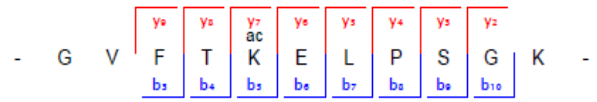

Gene name= Prdx6

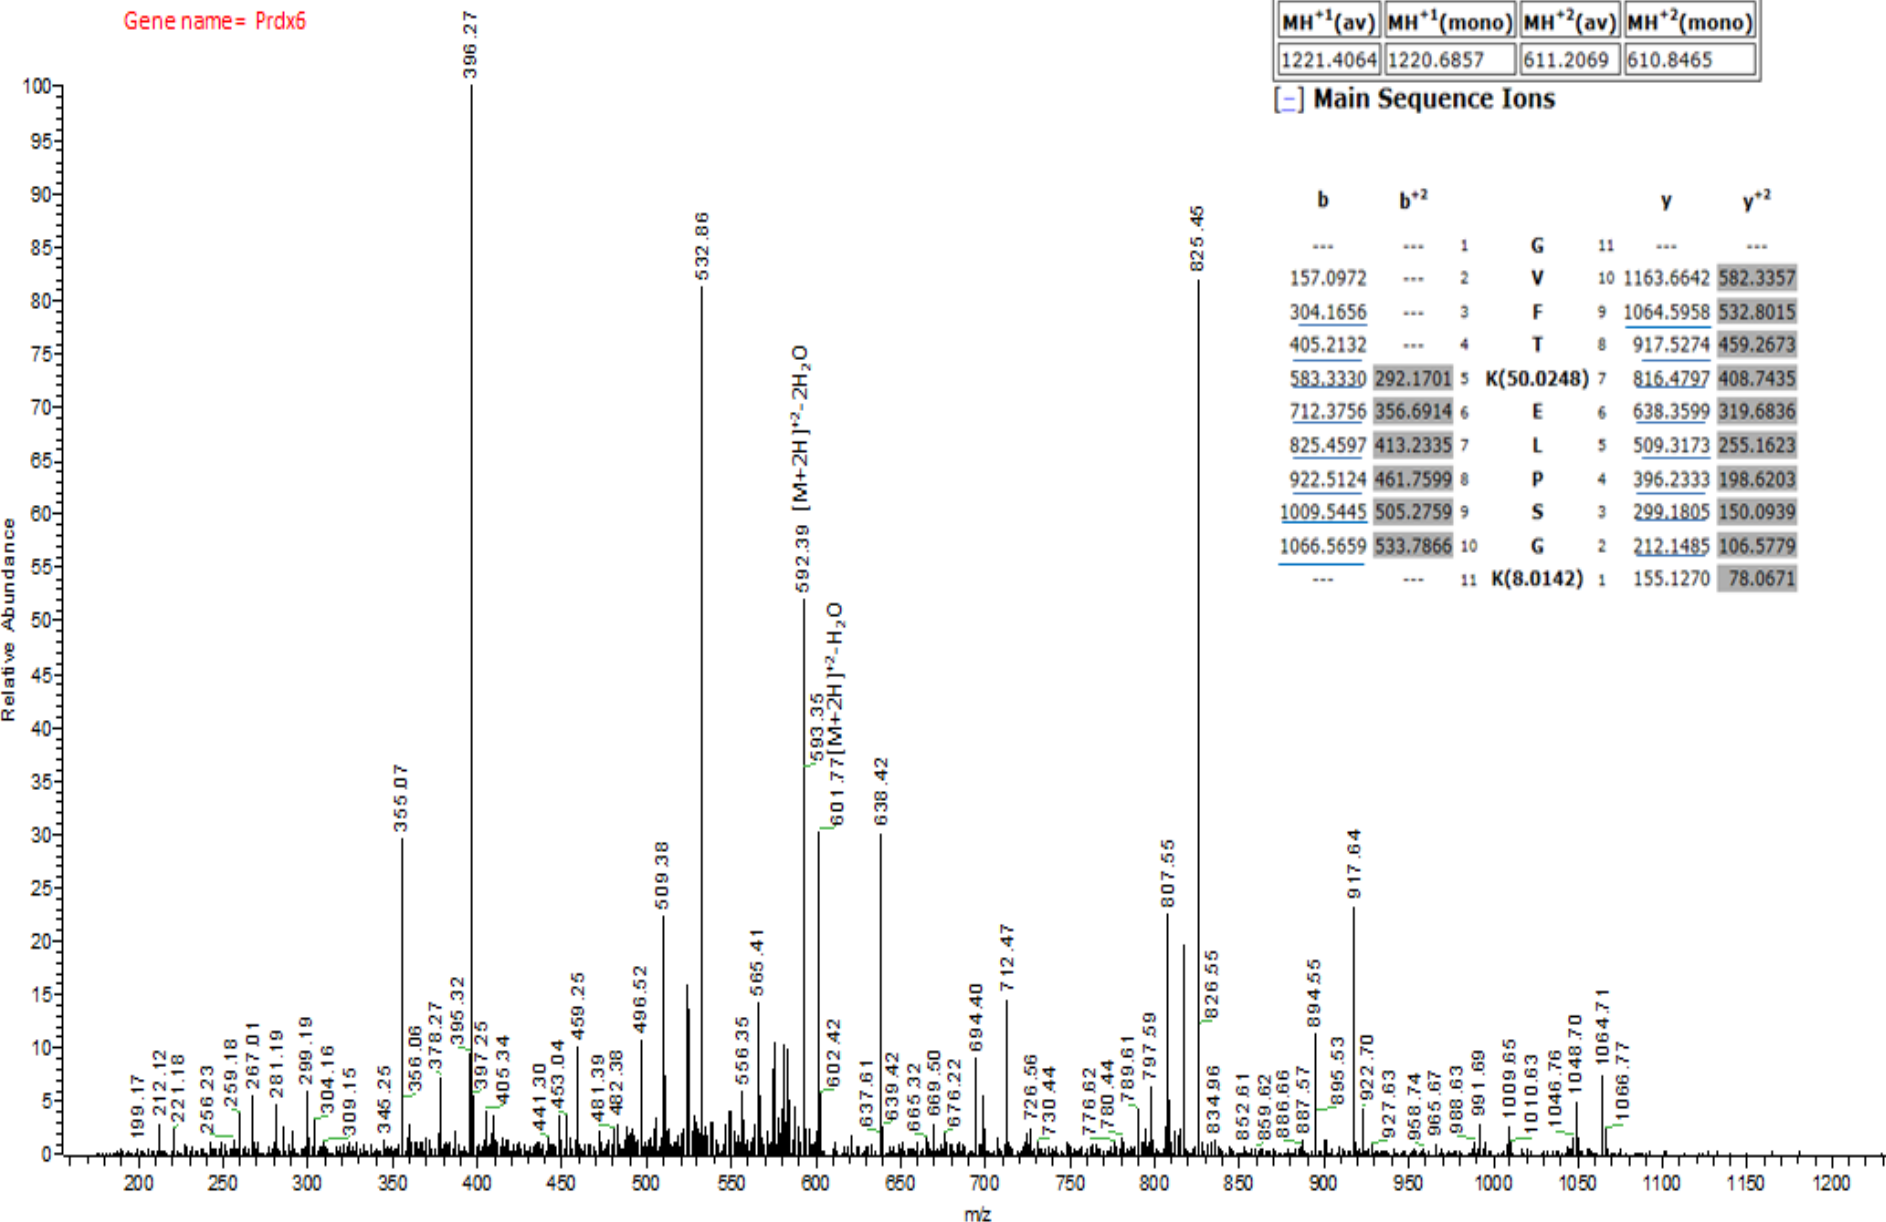

| MH <sup>+</sup> (av) | MH <sup>+</sup> (mono) | MH <sup>2+</sup> (av) | MH <sup>2+</sup> (mono) |
|----------------------|------------------------|-----------------------|-------------------------|
| 1221.4064            | 1220.6857              | 611.2069              | 610.8465                |

**[ ] Main Sequence Ions**

| b         | b <sup>+</sup> |    | y                 | y <sup>+</sup> |           |
|-----------|----------------|----|-------------------|----------------|-----------|
| ---       | ---            | 1  | G                 | 11             | ---       |
| 157.0972  | ---            | 2  | V                 | 10             | 1163.6642 |
| 304.1656  | ---            | 3  | F                 | 9              | 1064.5958 |
| 405.2132  | ---            | 4  | T                 | 8              | 917.5274  |
| 583.3330  | 292.1701       | 5  | <b>K(50.0248)</b> | 7              | 816.4797  |
| 712.3756  | 356.6914       | 6  | E                 | 6              | 638.3599  |
| 825.4597  | 413.2335       | 7  | L                 | 5              | 509.3173  |
| 922.5124  | 461.7599       | 8  | P                 | 4              | 396.2333  |
| 1009.5445 | 505.2759       | 9  | S                 | 3              | 299.1805  |
| 1066.5659 | 533.7866       | 10 | G                 | 2              | 212.1485  |
| ---       | ---            | 11 | <b>K(8.0142)</b>  | 1              | 155.1270  |



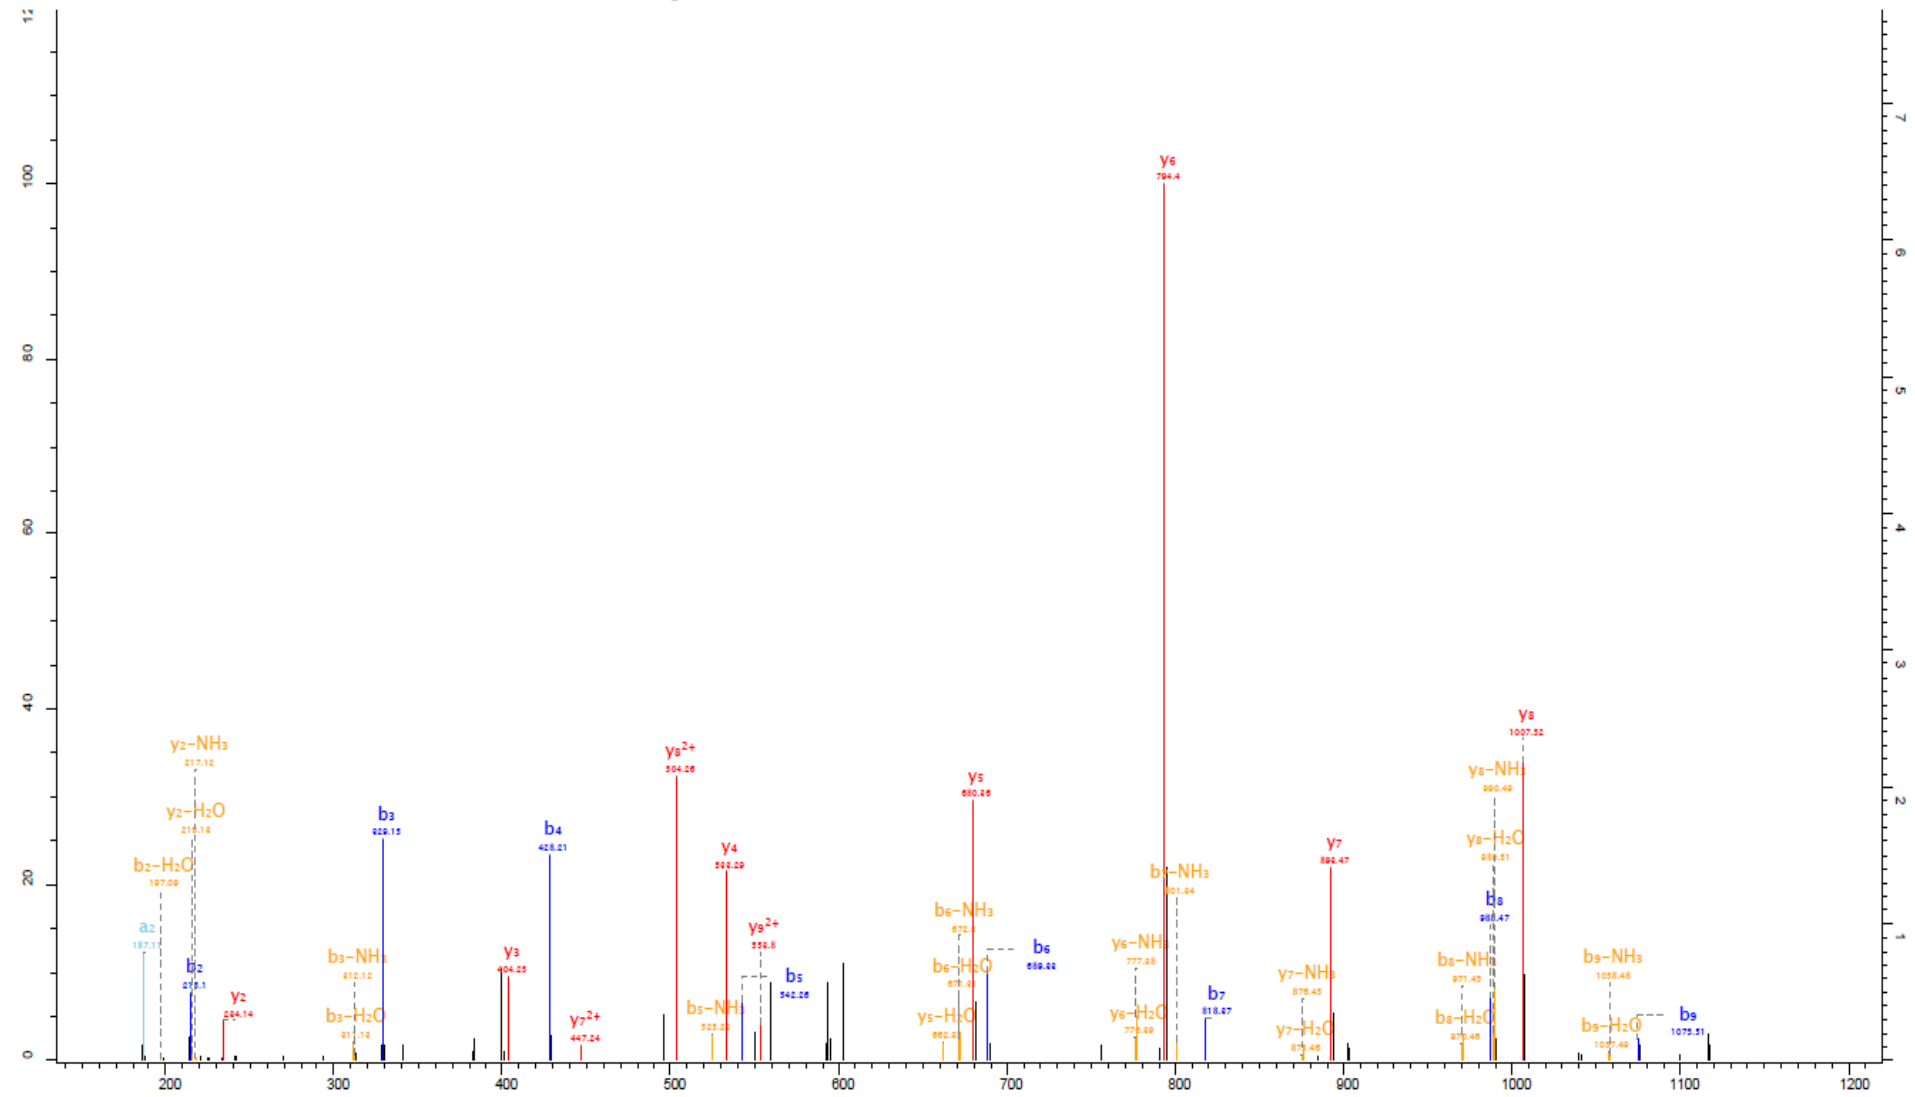

- D V N V N F E K S K -  
 b2 b3 b4 b5 b6 b7 b8 b9

Gene name = Ptges3

| MH <sup>+</sup> 1(av) | MH <sup>+</sup> 1(mono) | MH <sup>+</sup> 2(av) | MH <sup>+</sup> 2(mono) |
|-----------------------|-------------------------|-----------------------|-------------------------|
| 1222.3483             | 1221.6110               | 611.6779              | 611.3091                |

**[-] Main Sequence Ions**

| b         | b <sup>+</sup> |    | y                | y <sup>+</sup> |                    |
|-----------|----------------|----|------------------|----------------|--------------------|
| ---       | ---            | 1  | <b>D</b>         | 10             | ---                |
| 215.1026  | ---            | 2  | <b>V</b>         | 9              | 1106.5840 553.7957 |
| 329.1456  | ---            | 3  | <b>N</b>         | 8              | 1007.5156 504.2615 |
| 428.2140  | ---            | 4  | <b>V</b>         | 7              | 893.4727 447.2400  |
| 542.2569  | ---            | 5  | <b>N</b>         | 6              | 794.4043 397.7058  |
| 689.3253  | ---            | 6  | <b>F</b>         | 5              | 680.3614 340.6843  |
| 818.3679  | ---            | 7  | <b>E</b>         | 4              | 533.2930 267.1501  |
| 988.4734  | 494.7404       | 8  | <b>K(Acetyl)</b> | 3              | 404.2504 202.6288  |
| 1075.5055 | 538.2564       | 9  | <b>S</b>         | 2              | 234.1448 117.5761  |
| ---       | ---            | 10 | <b>K</b>         | 1              | 147.1128 74.0600   |

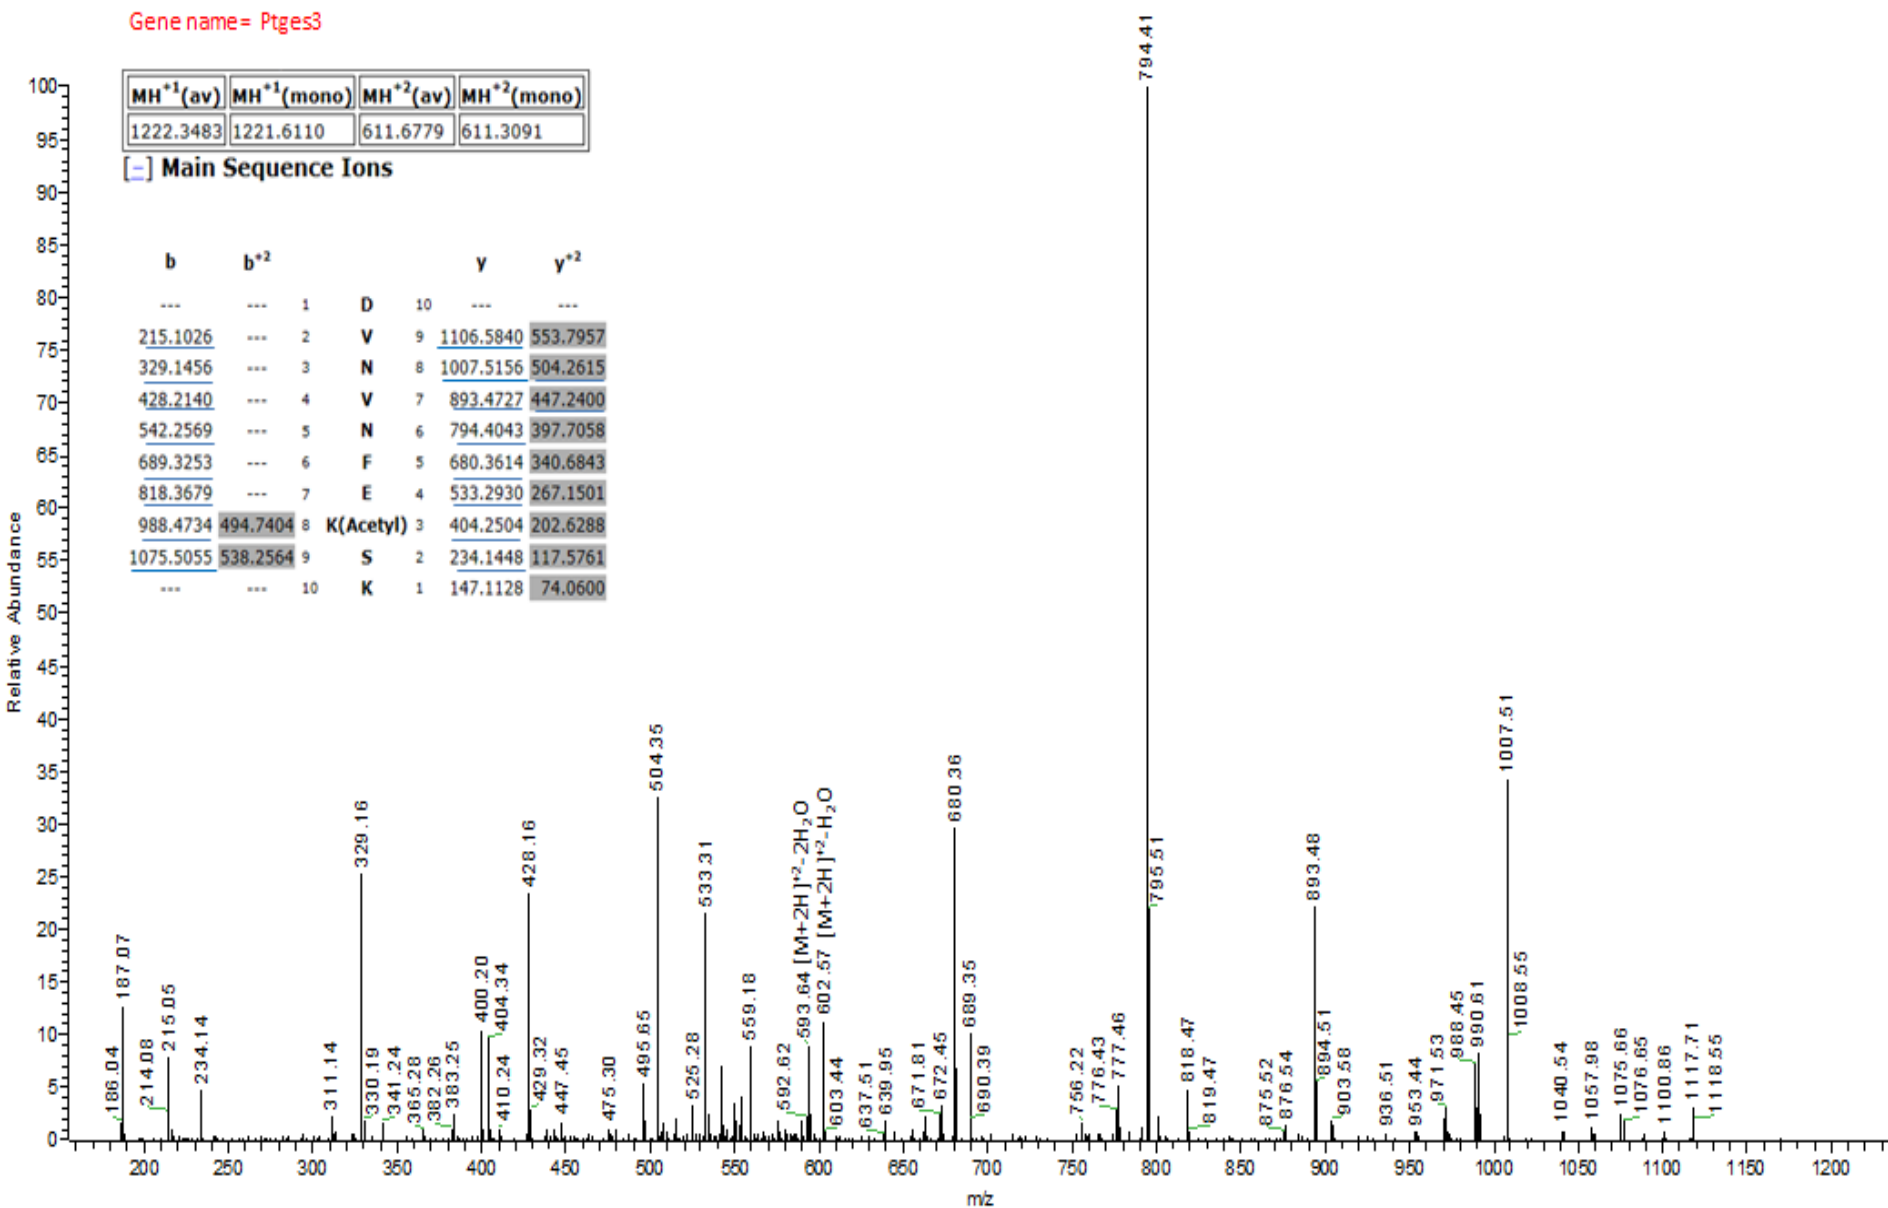

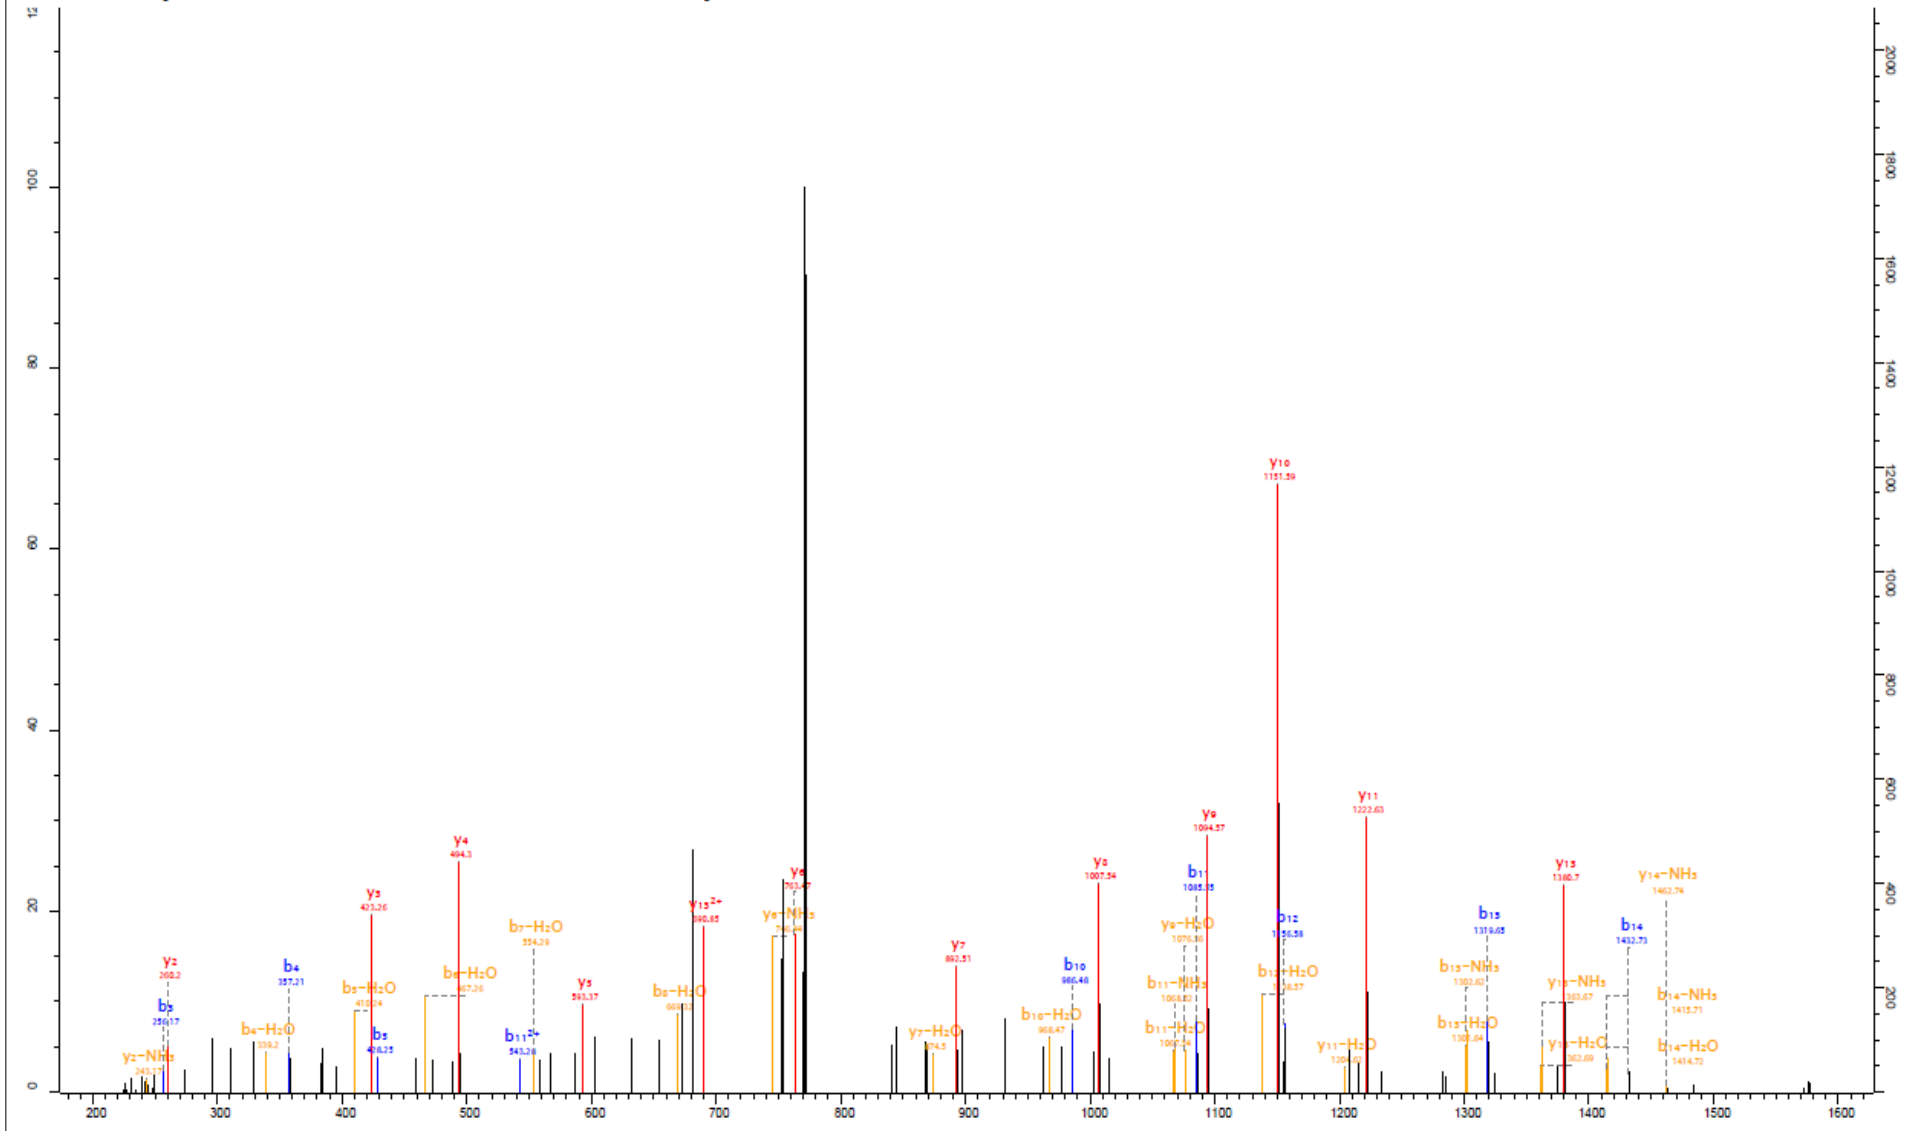

- V V y13  
G y11  
T y10  
A G S D E y5 ac  
K y5  
V y4  
A y3  
Y y2  
L K -

b5 b4 b5 b10 b11 b12 b13 b14

Gene name = Ptgr1

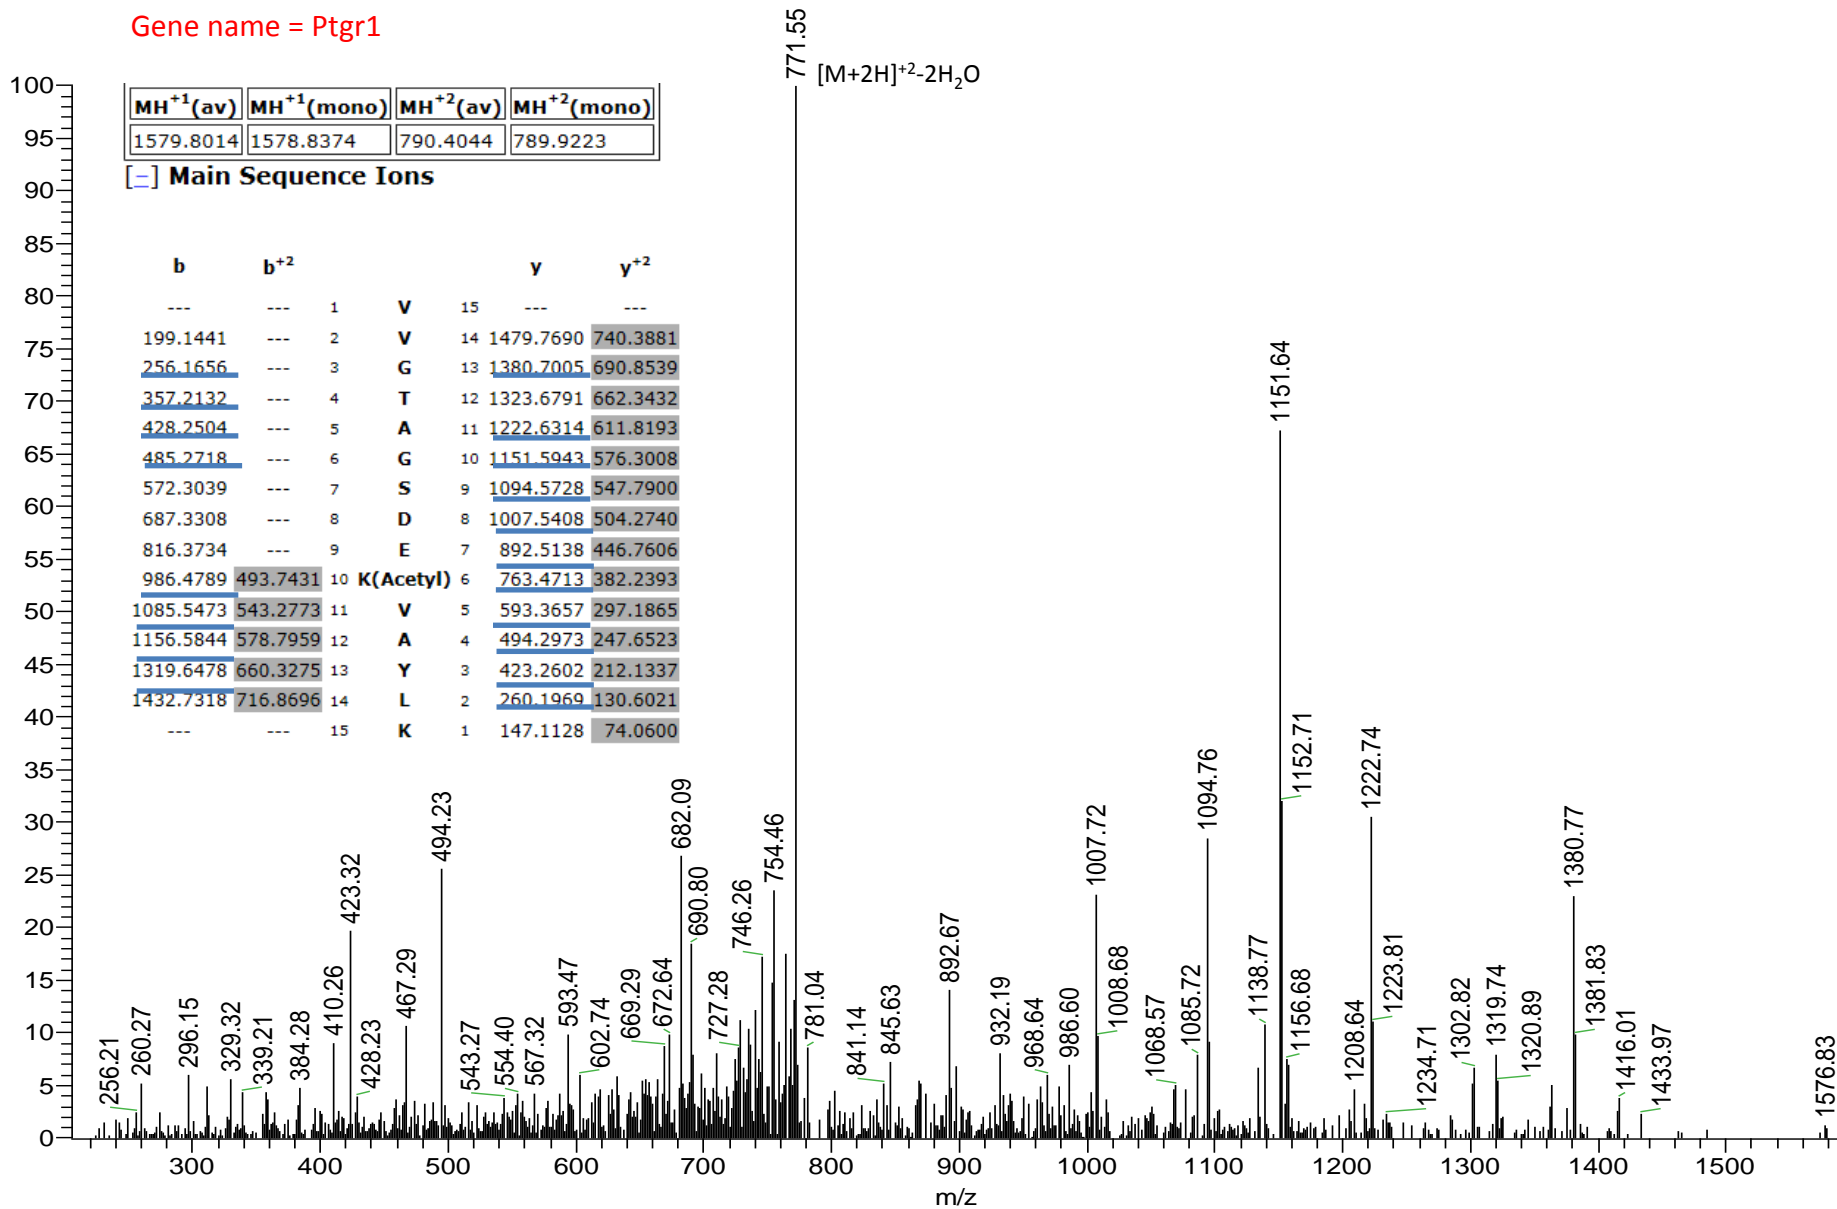

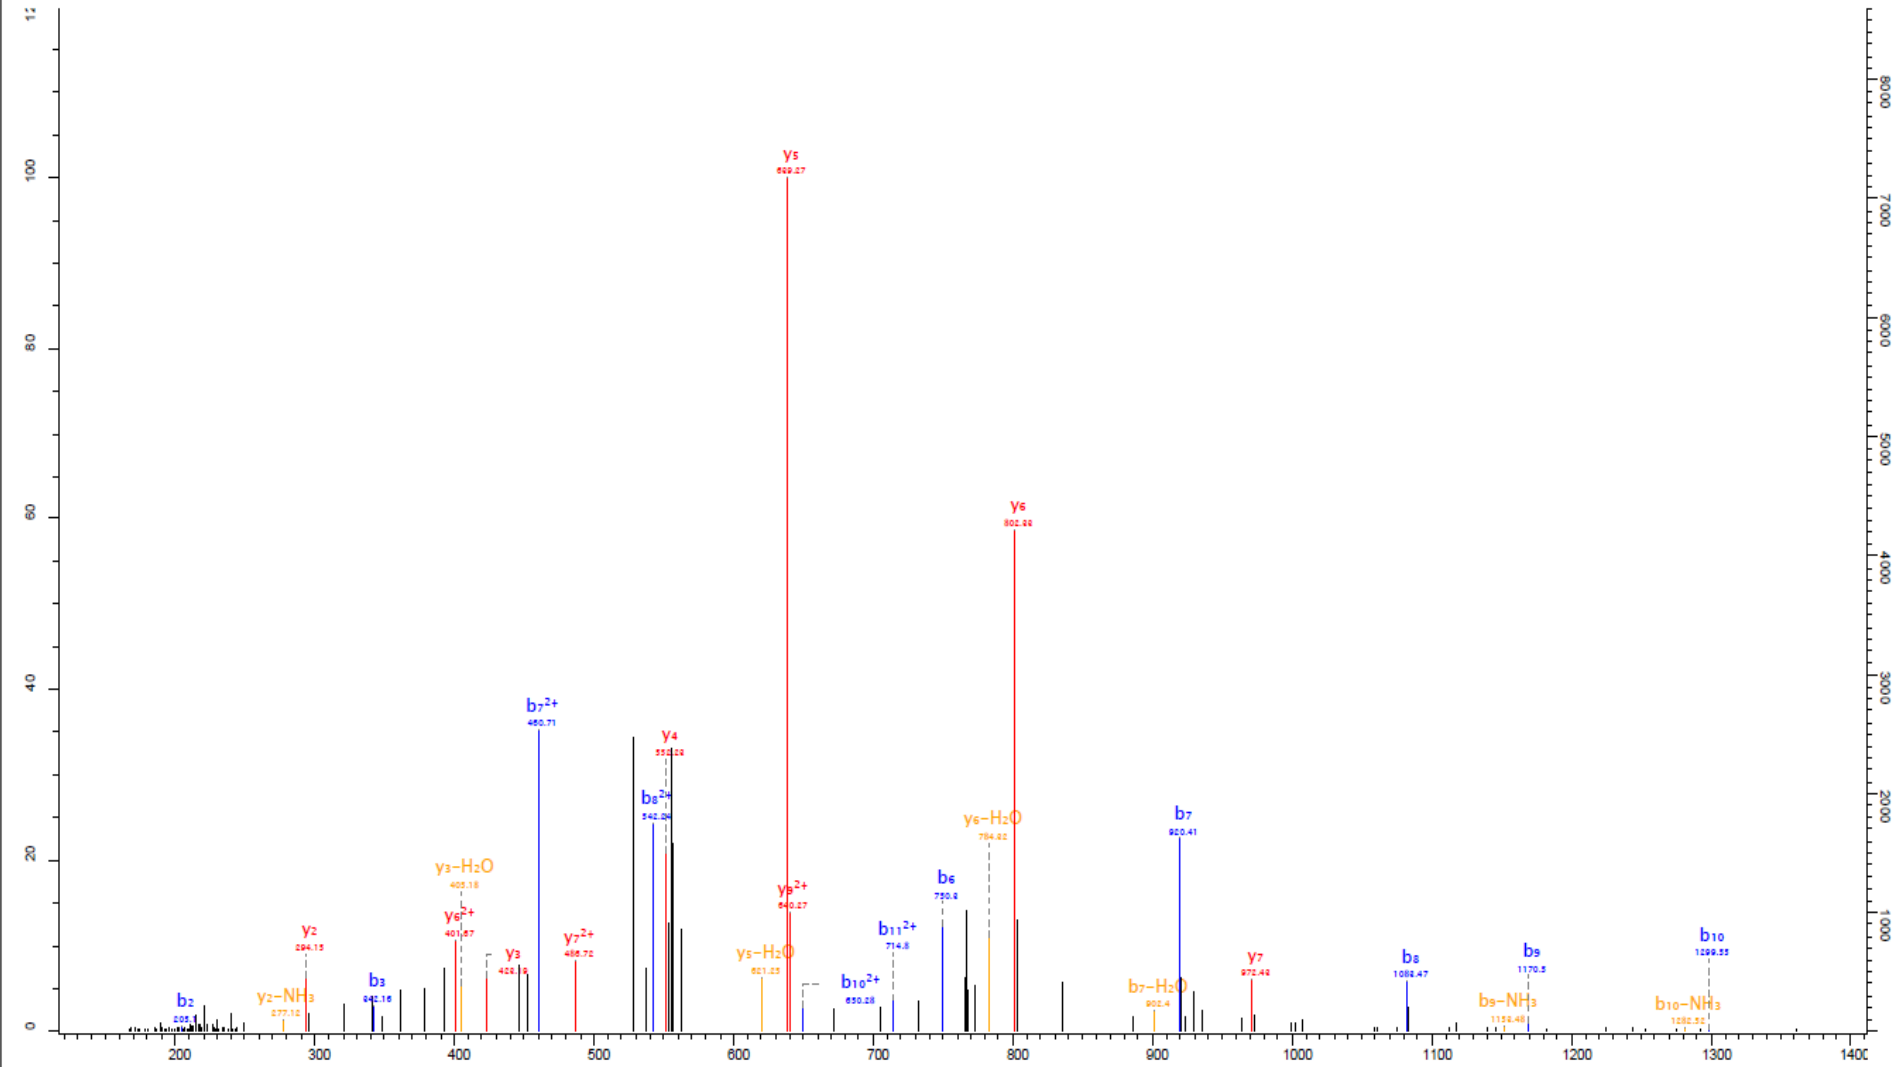

- F G H T F C K Y S E E M K -

b2
b3
y6<sup>2+</sup>
b6
b7
b8
b9
b10
b11<sup>2+</sup>

y7 AC
 y6
y5
y4
y3
y2 OX

Gene name= Pura

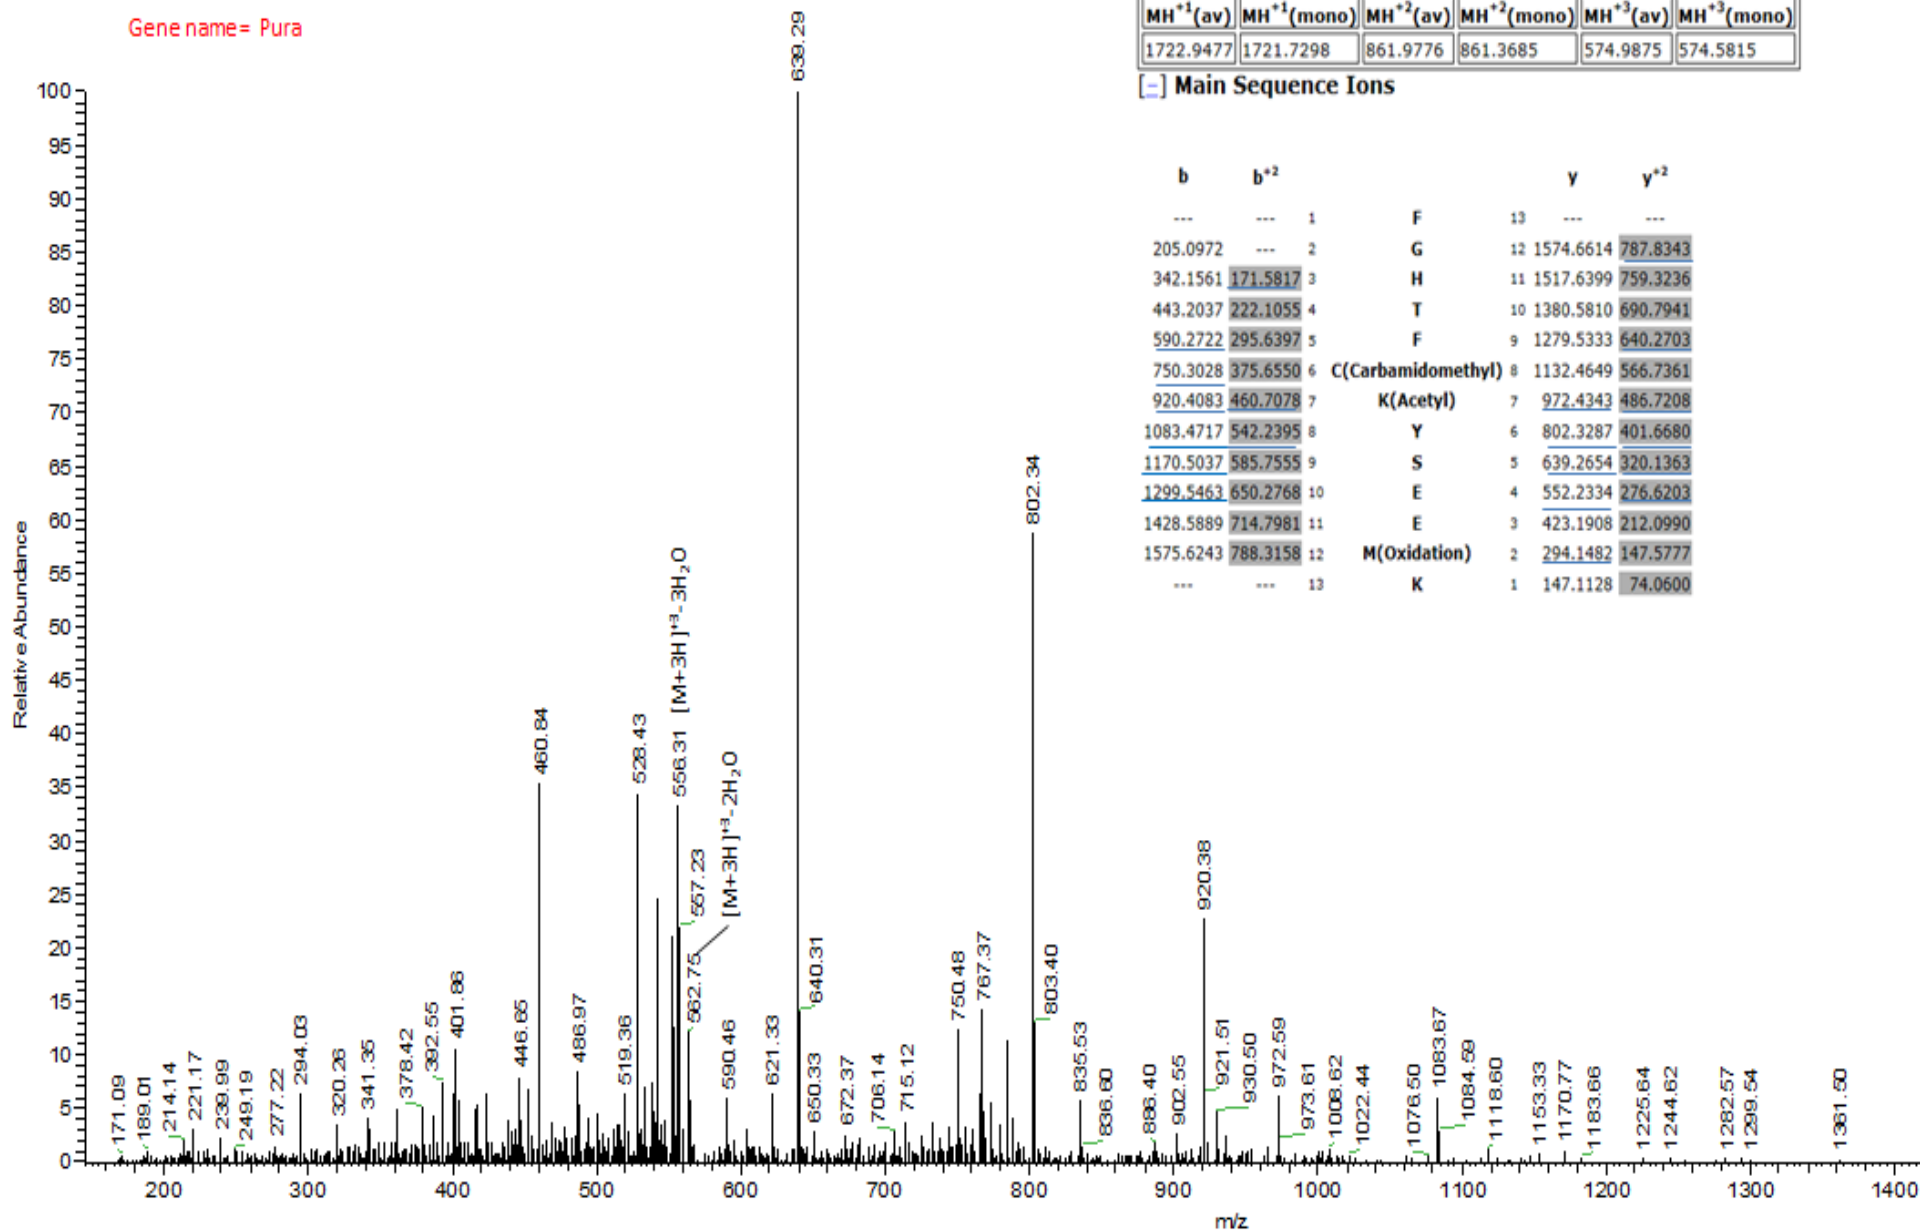

| MH <sup>+</sup> (av) | MH <sup>+</sup> (mono) | MH <sup>2+</sup> (av) | MH <sup>2+</sup> (mono) | MH <sup>3+</sup> (av) | MH <sup>3+</sup> (mono) |
|----------------------|------------------------|-----------------------|-------------------------|-----------------------|-------------------------|
| 1722.9477            | 1721.7298              | 861.9776              | 861.3685                | 574.9875              | 574.5815                |

[-] Main Sequence Ions

| b         | b <sup>2</sup> |    | y                  | y <sup>2</sup> |           |
|-----------|----------------|----|--------------------|----------------|-----------|
| ---       | ---            | 1  | F                  | 13             | ---       |
| 205.0972  | ---            | 2  | G                  | 12             | 1574.6614 |
| 342.1561  | 171.5817       | 3  | H                  | 11             | 1517.6399 |
| 443.2037  | 222.1055       | 4  | T                  | 10             | 1380.5810 |
| 590.2722  | 295.6397       | 5  | F                  | 9              | 1279.5333 |
| 750.3028  | 375.6550       | 6  | C(Carbamidomethyl) | 8              | 1132.4649 |
| 920.4083  | 460.7078       | 7  | K(Acetyl)          | 7              | 972.4343  |
| 1083.4717 | 542.2395       | 8  | Y                  | 6              | 802.3287  |
| 1170.5037 | 585.7555       | 9  | S                  | 5              | 639.2654  |
| 1299.5463 | 650.2768       | 10 | E                  | 4              | 552.2334  |
| 1428.5889 | 714.7981       | 11 | E                  | 3              | 423.1908  |
| 1575.6243 | 788.3158       | 12 | M(Oxidation)       | 2              | 294.1482  |
| --        | --             | 13 | K                  | 1              | 147.1128  |
