# Supplementary material
Source: PubMed Central journal article supplement (PMC4739669)
Supplement: 10.1074_M115.049288_mcp.M115.049288-13.pdf [file 10.1074_M115.049288_mcp.M115.049288-13.pdf]

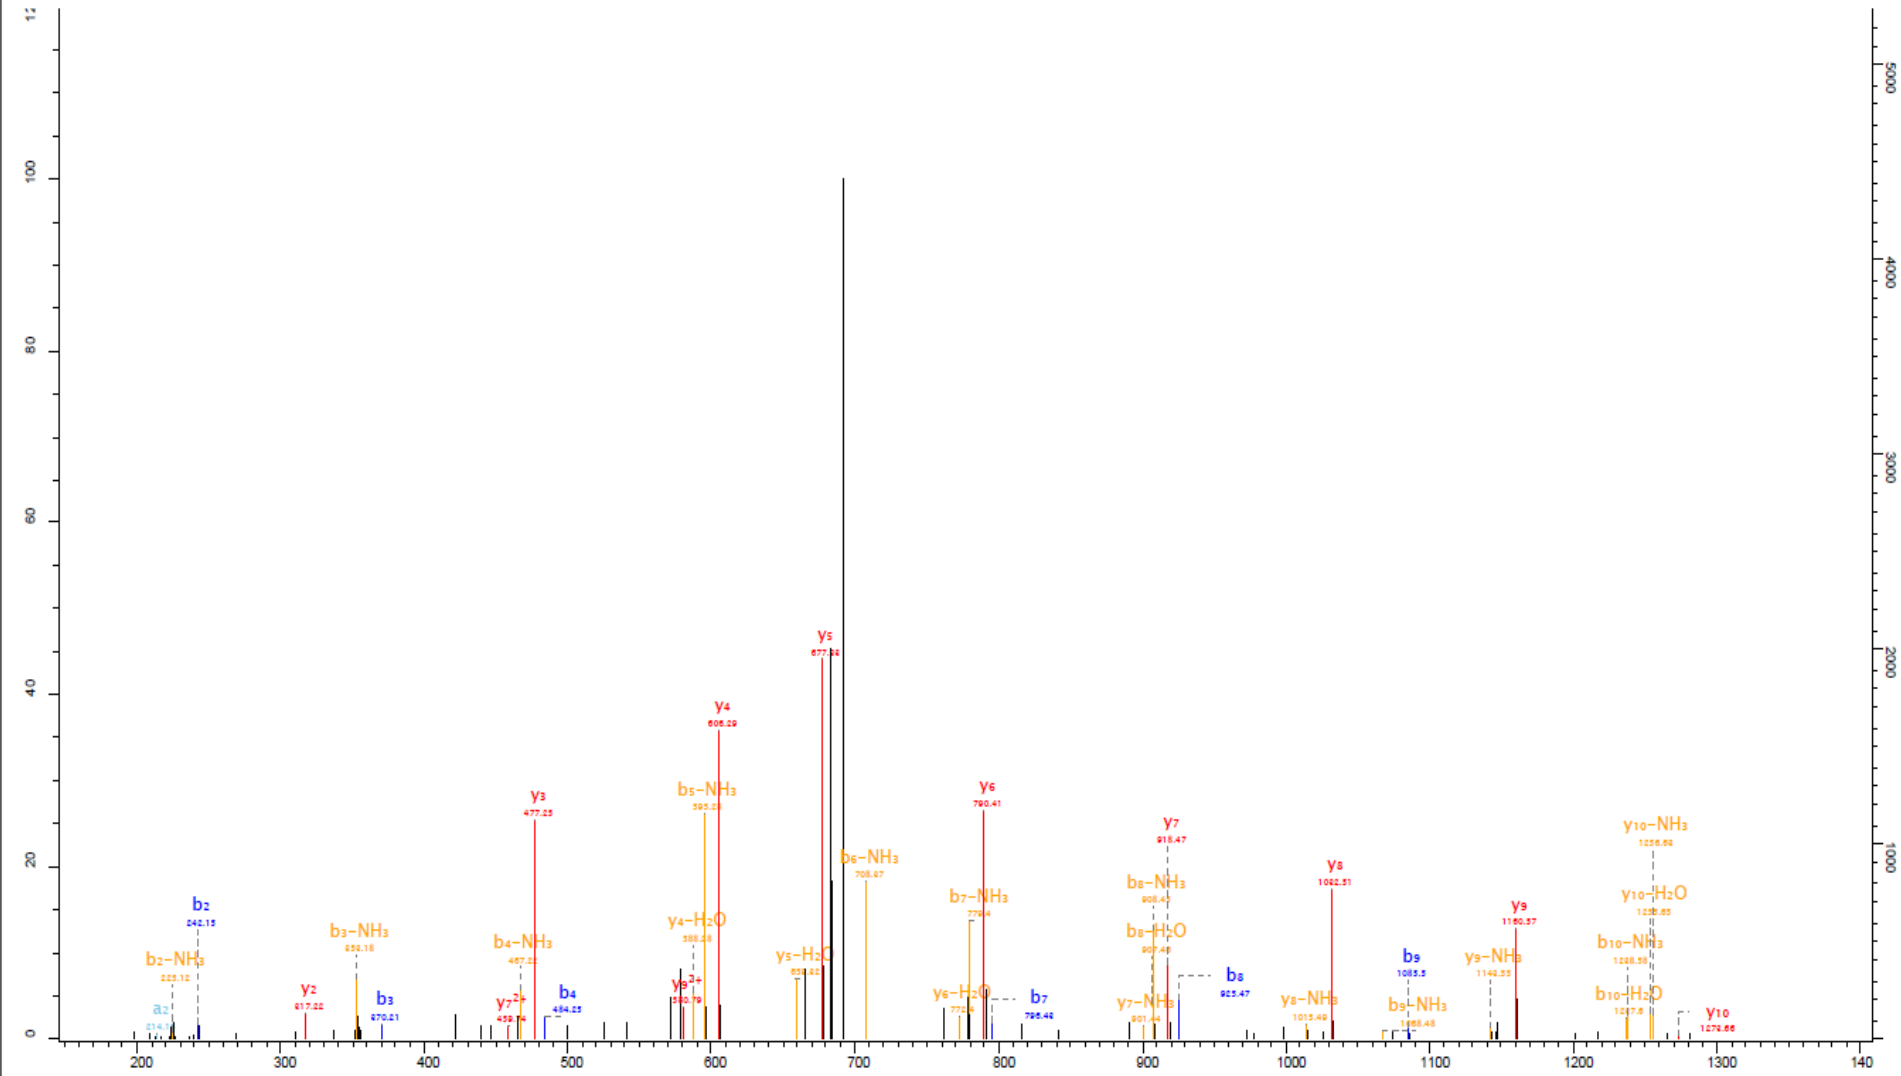

- Q L Q N Q L A E C K K -

b<sub>2</sub> b<sub>3</sub> b<sub>4</sub>
b<sub>7</sub> b<sub>8</sub> b<sub>9</sub> b<sub>10</sub>

Gene name= Rai4

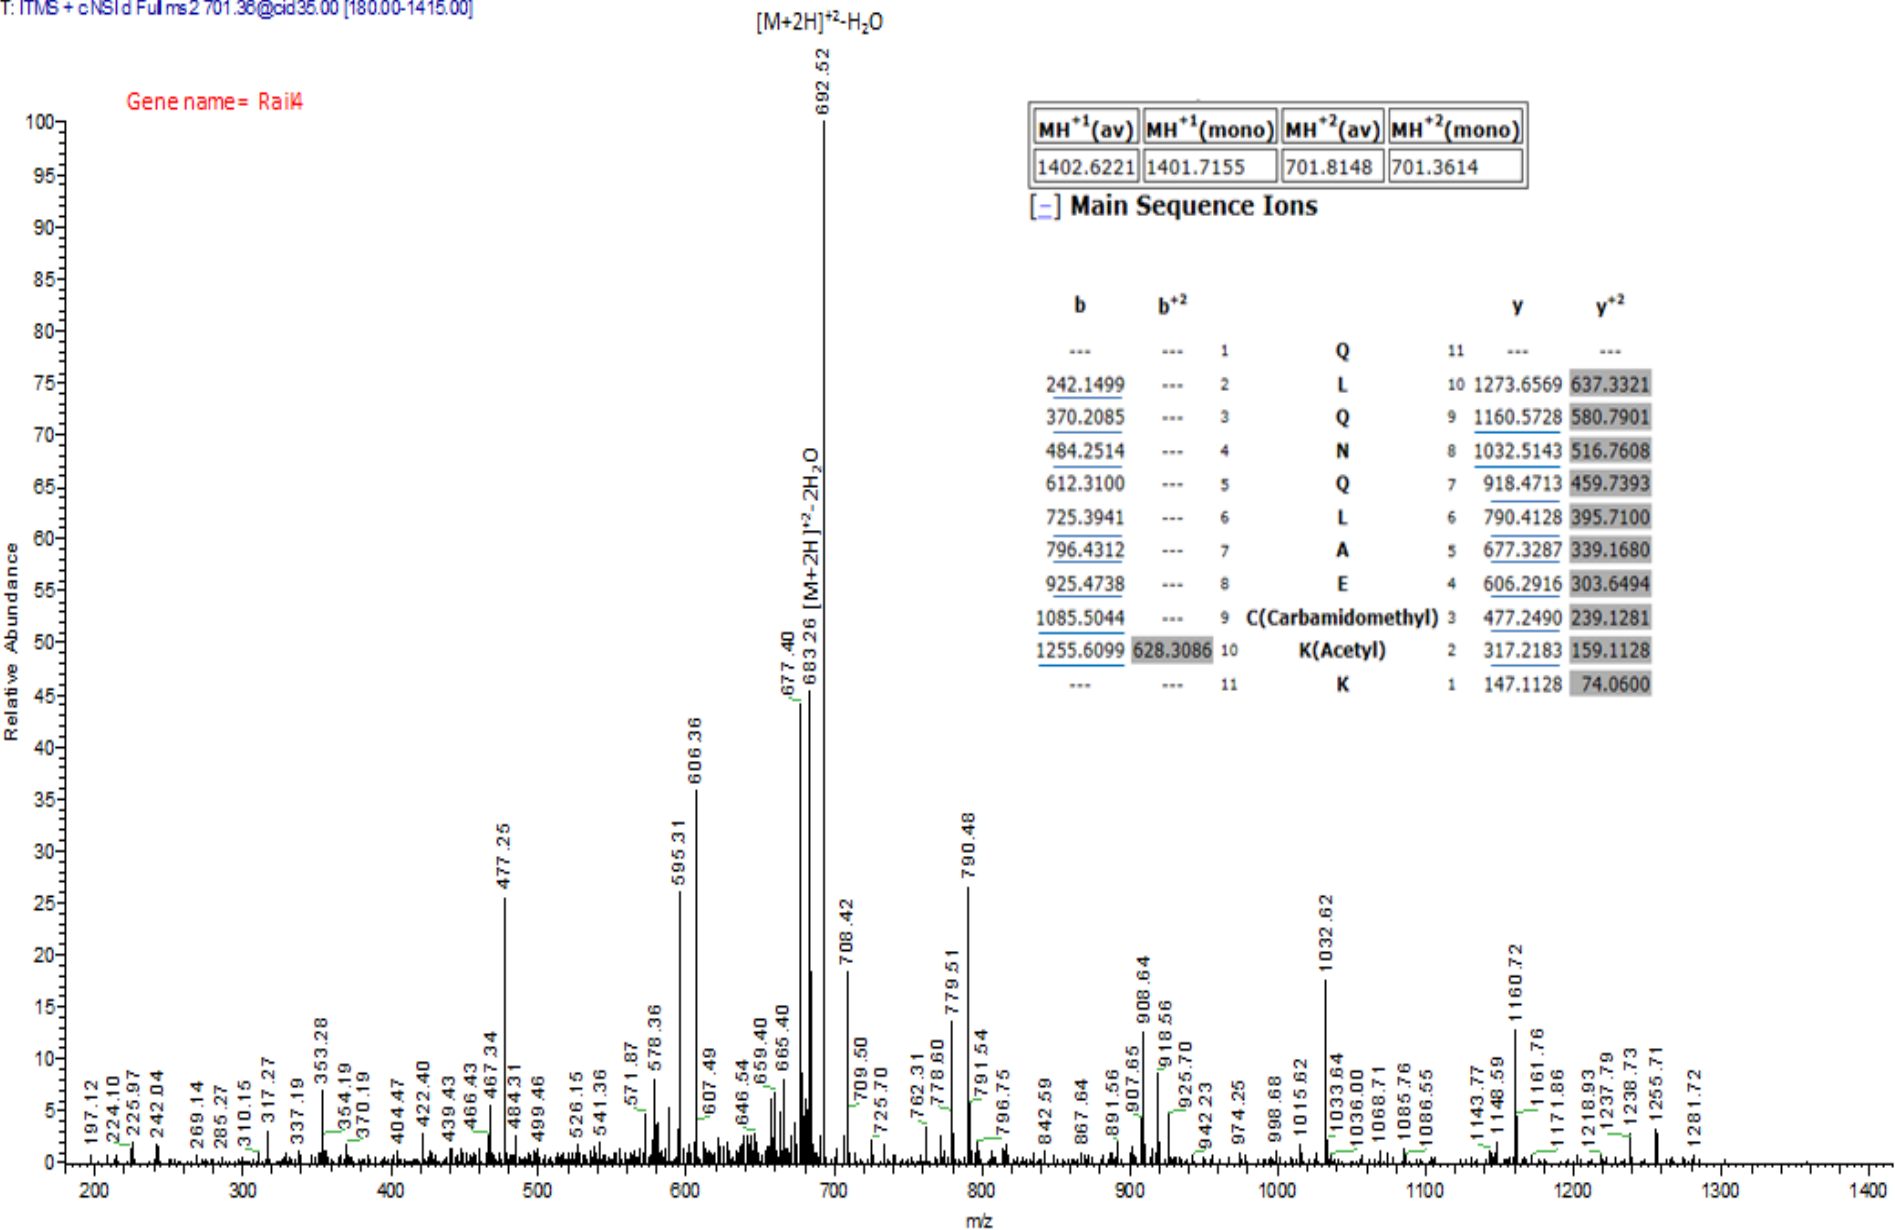

| MH <sup>+</sup> 1(av) | MH <sup>+</sup> 1(mono) | MH <sup>+</sup> 2(av) | MH <sup>+</sup> 2(mono) |
|-----------------------|-------------------------|-----------------------|-------------------------|
| 1402.6221             | 1401.7155               | 701.8148              | 701.3614                |

**[-] Main Sequence Ions**

| b         | b <sup>+</sup> |    | y                  | y <sup>+</sup>        |
|-----------|----------------|----|--------------------|-----------------------|
| ---       | ---            | 1  | Q                  | 11 ---                |
| 242.1499  | ---            | 2  | L                  | 10 1273.6569 637.3321 |
| 370.2085  | ---            | 3  | Q                  | 9 1160.5728 580.7901  |
| 484.2514  | ---            | 4  | N                  | 8 1032.5143 516.7608  |
| 612.3100  | ---            | 5  | Q                  | 7 918.4713 459.7393   |
| 725.3941  | ---            | 6  | L                  | 6 790.4128 395.7100   |
| 796.4312  | ---            | 7  | A                  | 5 677.3287 339.1680   |
| 925.4738  | ---            | 8  | E                  | 4 606.2916 303.6494   |
| 1085.5044 | ---            | 9  | C(Carbamidomethyl) | 3 477.2490 239.1281   |
| 1255.6099 | 528.3086       | 10 | K(Acetyl)          | 2 317.2183 159.1128   |
| ---       | ---            | 11 | K                  | 1 147.1128 74.0600    |

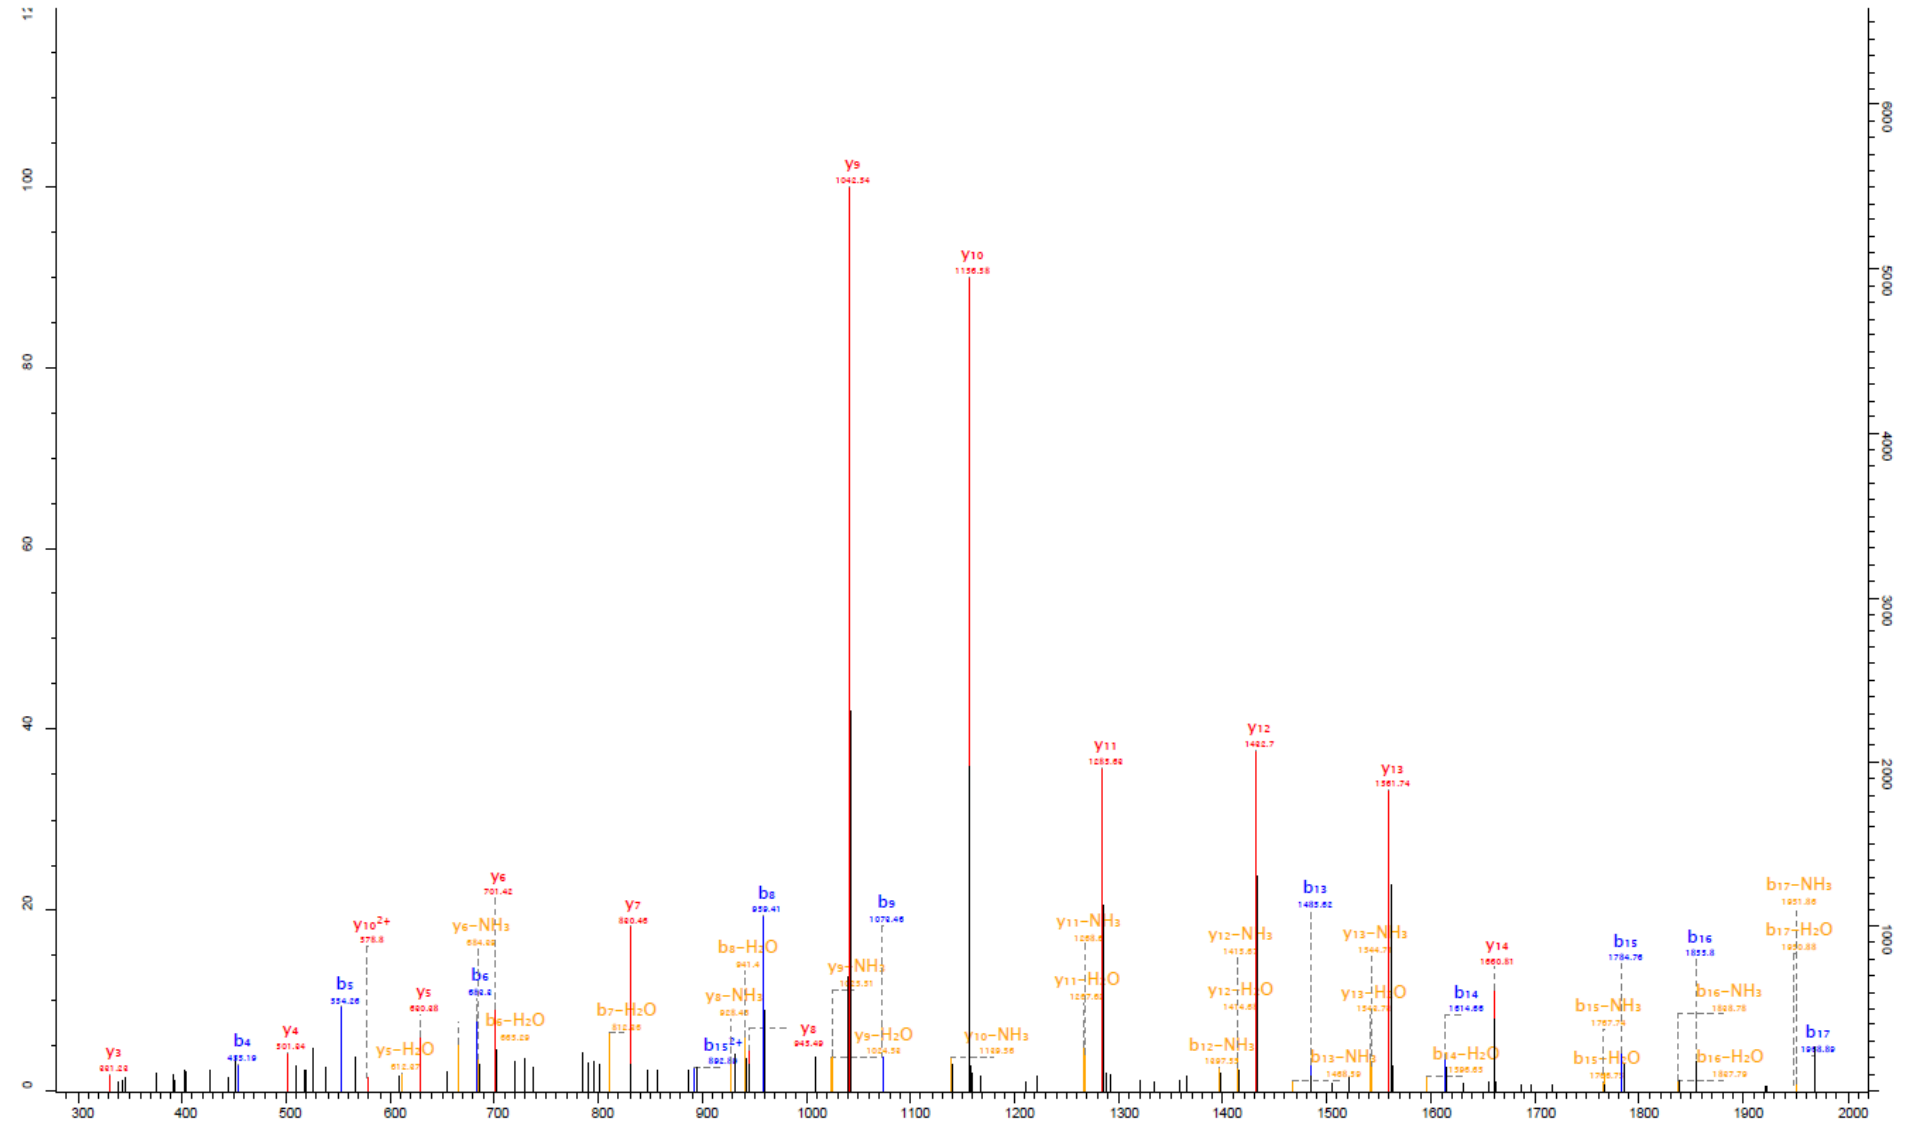

- G Y A Y V E F E N P D E A E K A L K -  
 b4 b5 b6 b5 b6 b15 b14 b15 b16 b17

Gene names = Rnps1;Gm9825

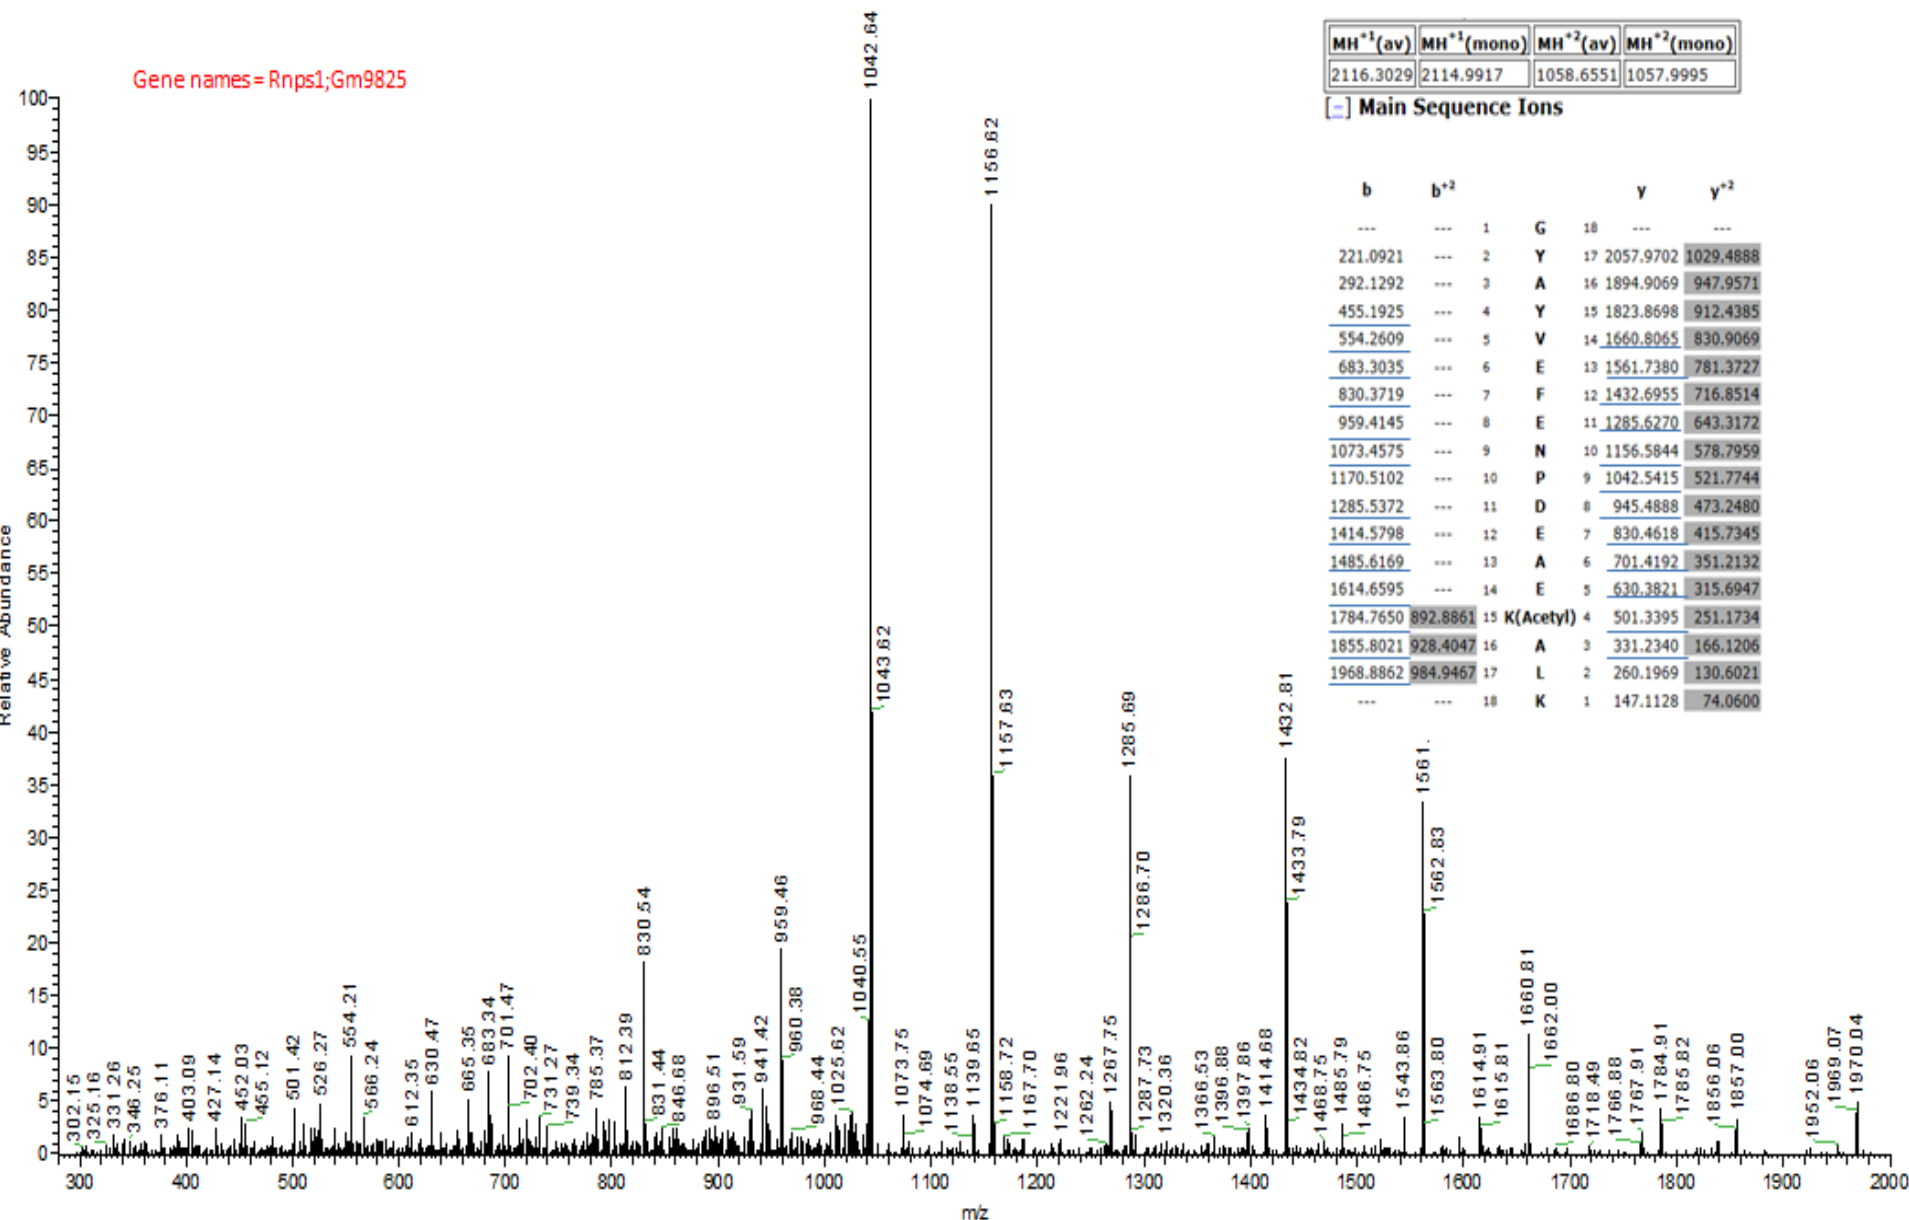

| MH <sup>+</sup> (av) | MH <sup>+</sup> (mono) | MH <sup>+</sup> (av) | MH <sup>+</sup> (mono) |
|----------------------|------------------------|----------------------|------------------------|
| 2116.3029            | 2114.9917              | 1058.6551            | 1057.9995              |

[-] Main Sequence Ions

| b         | b <sup>+</sup> |    | y         | y <sup>+</sup>         |
|-----------|----------------|----|-----------|------------------------|
| ---       | ---            | 1  | G         | ---                    |
| 221.0921  | ---            | 2  | Y         | 17 2057.9702 1029.4888 |
| 292.1292  | ---            | 3  | A         | 16 1894.9069 947.9571  |
| 455.1925  | ---            | 4  | Y         | 15 1823.8698 912.4385  |
| 554.2609  | ---            | 5  | V         | 14 1660.8065 830.9069  |
| 683.3035  | ---            | 6  | E         | 13 1561.7380 781.3727  |
| 830.3719  | ---            | 7  | F         | 12 1432.6955 716.8514  |
| 959.4145  | ---            | 8  | E         | 11 1285.6270 643.3172  |
| 1073.4575 | ---            | 9  | N         | 10 1156.5844 578.7959  |
| 1170.5102 | ---            | 10 | P         | 9 1042.5415 521.7744   |
| 1285.5372 | ---            | 11 | D         | 8 945.4888 473.2480    |
| 1414.5798 | ---            | 12 | E         | 7 830.4618 415.7345    |
| 1485.6169 | ---            | 13 | A         | 6 701.4192 351.2132    |
| 1614.6595 | ---            | 14 | E         | 5 630.3821 315.6947    |
| 1784.7650 | 892.8861       | 15 | K(Acetyl) | 4 501.3395 251.1734    |
| 1855.8021 | 928.4047       | 16 | A         | 3 331.2340 166.1206    |
| 1968.8862 | 984.9467       | 17 | L         | 2 260.1969 130.6021    |
| ---       | ---            | 18 | K         | 1 147.1128 74.0600     |

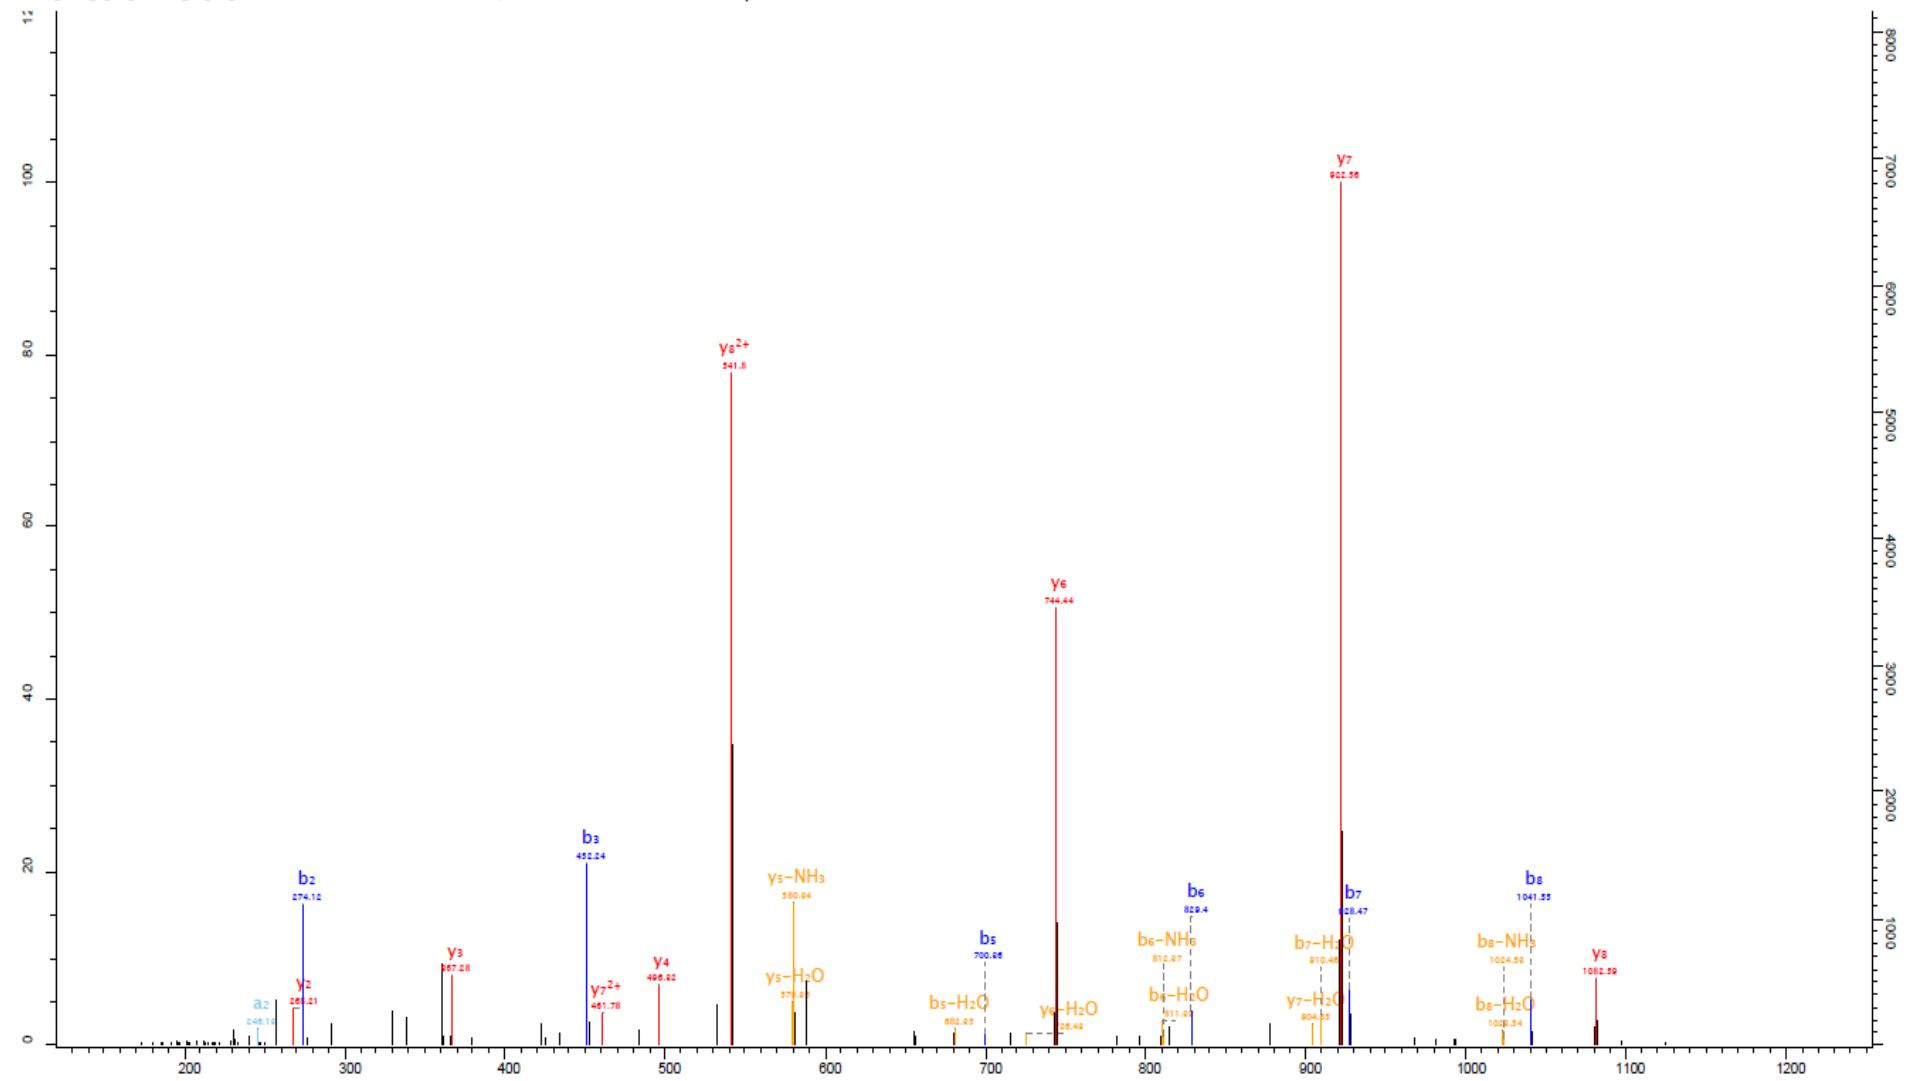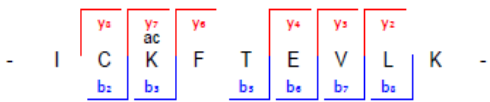

Gene name = Rpl13a

| MH <sup>+</sup> (av) | MH <sup>+</sup> (mono) | MH <sup>+</sup> (av) | MH <sup>+</sup> (mono) |
|----------------------|------------------------|----------------------|------------------------|
| 1196.4622            | 1195.6726              | 598.7348             | 598.3400               |

[-] Main Sequence Ions

| b         | b <sup>+</sup> |   | y                         | y <sup>+</sup> |
|-----------|----------------|---|---------------------------|----------------|
| ---       | ---            | 1 | I                         | 9              |
| 274.1220  | ---            | 2 | <b>C(Carbamidomethyl)</b> | 8              |
| 452.2418  | 226.6245       | 3 | <b>K(50.0248)</b>         | 7              |
| 599.3102  | 300.1587       | 4 | <b>F</b>                  | 6              |
| 700.3578  | 350.6826       | 5 | <b>T</b>                  | 5              |
| 829.4004  | 415.2039       | 6 | <b>E</b>                  | 4              |
| 928.4689  | 464.7381       | 7 | <b>V</b>                  | 3              |
| 1041.5529 | 521.2801       | 8 | <b>L</b>                  | 2              |
| ---       | ---            | 9 | <b>K(8.0142)</b>          | 1              |

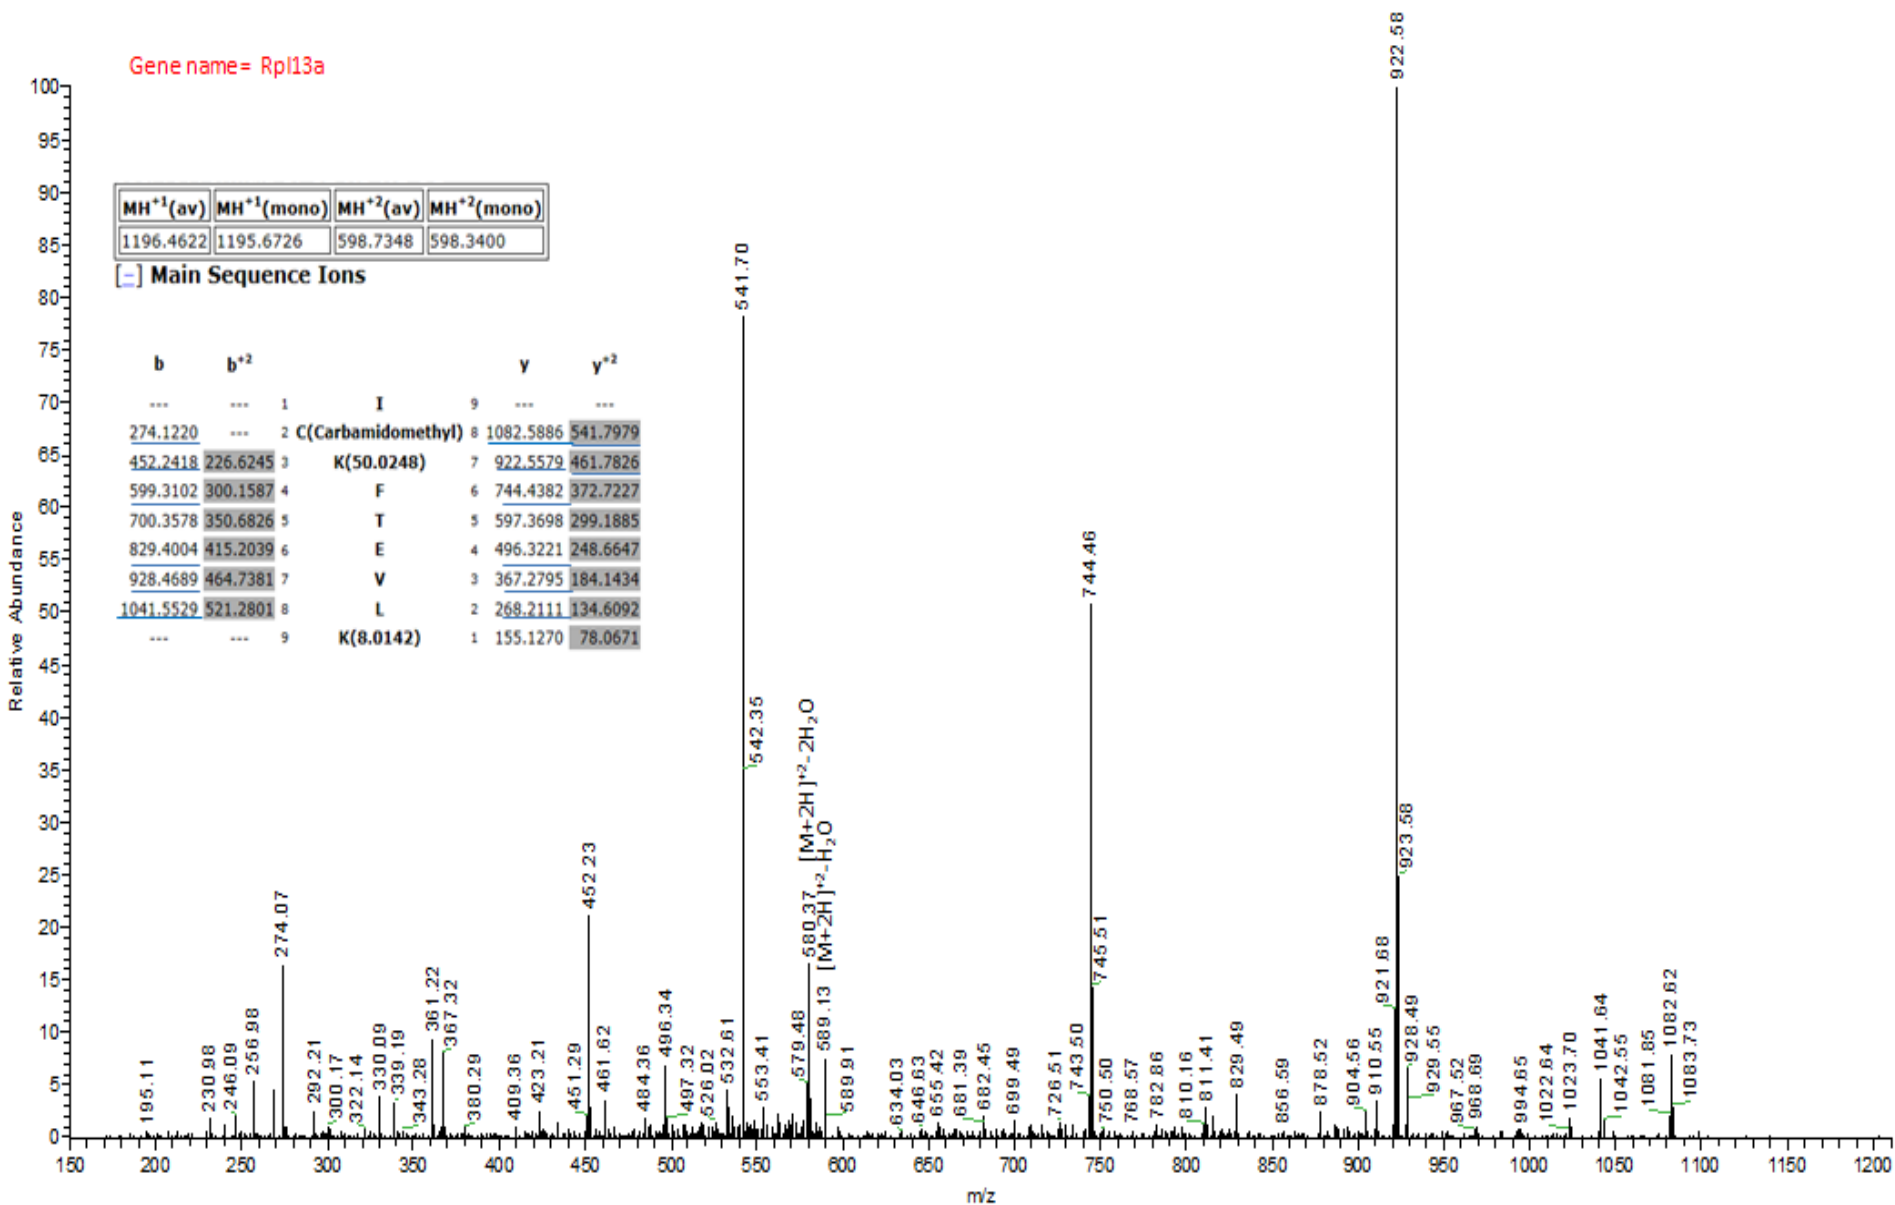

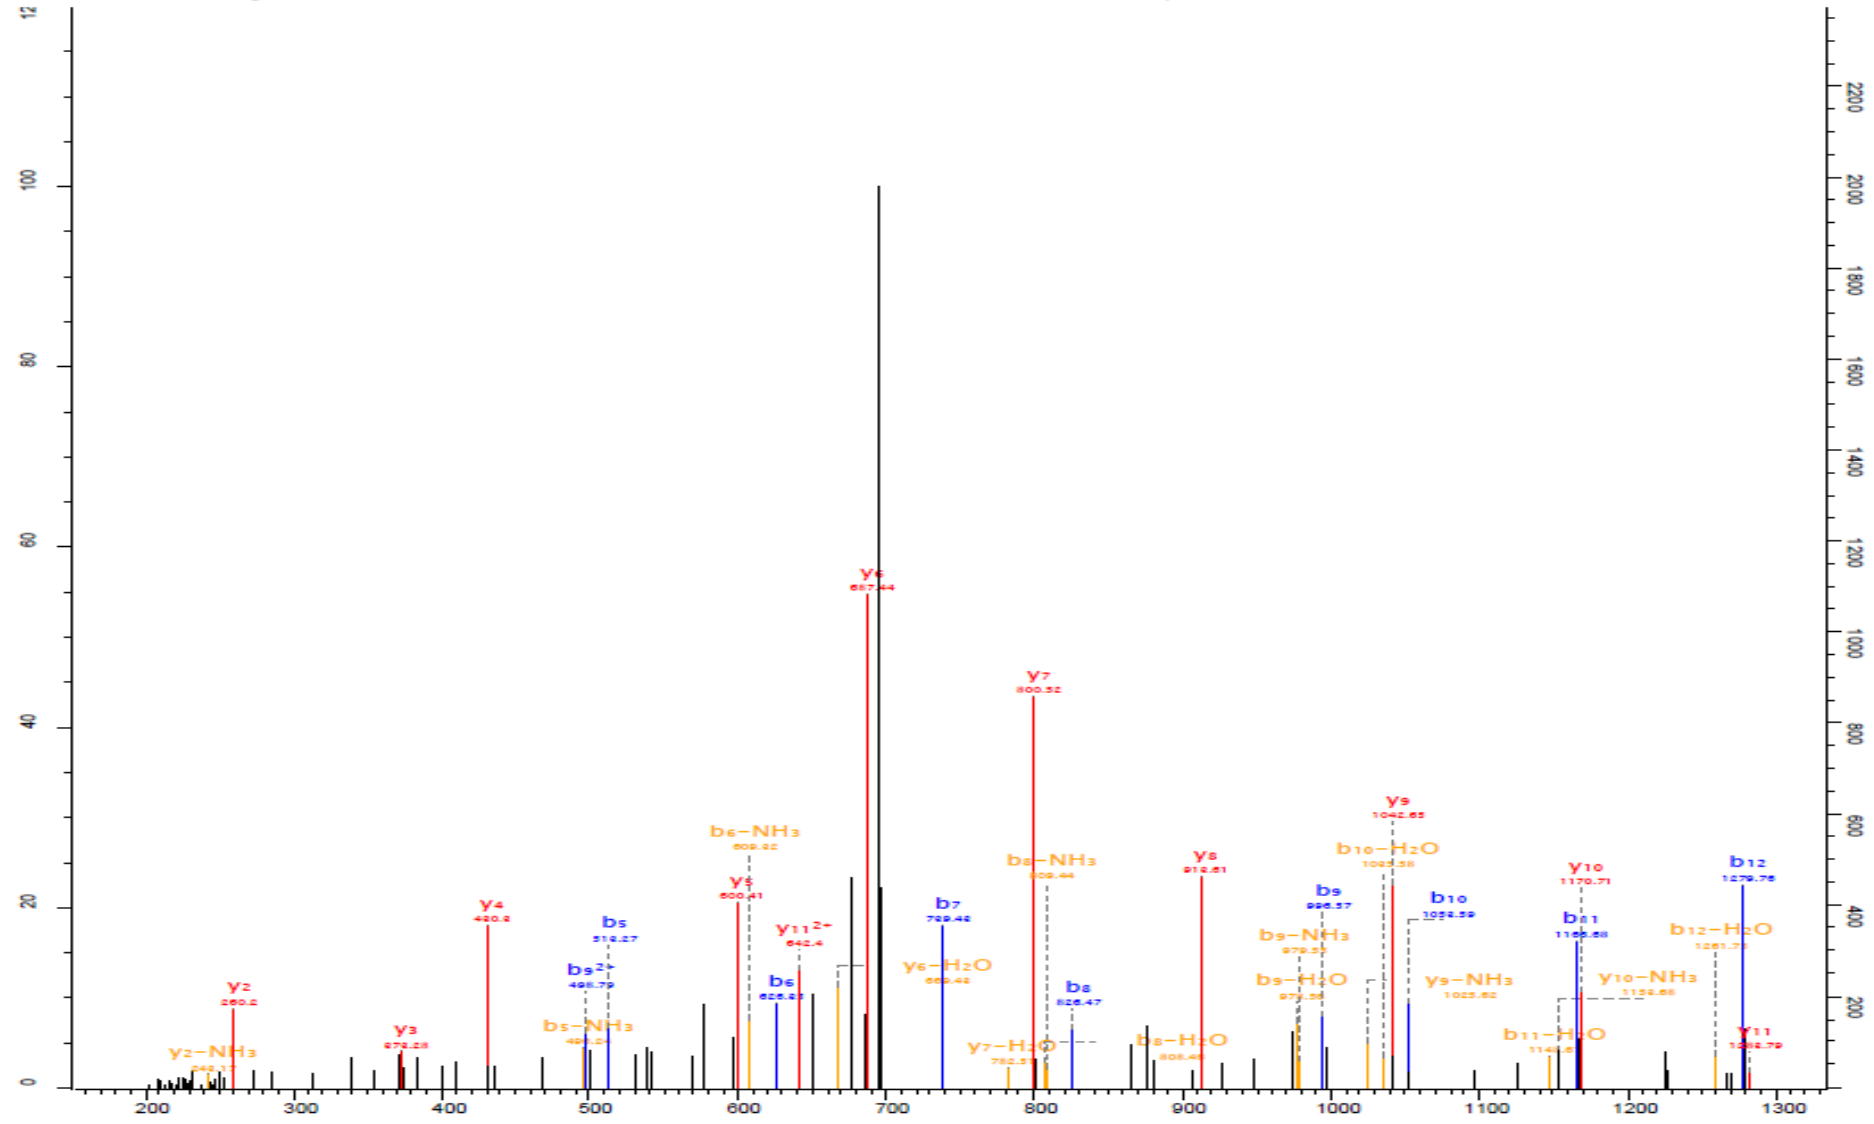

- A A L Q E L L S ac K G L I K -

Fragmentation mapping below the sequence:

- L: Y11, Y10
- Q: Y9
- E: Y5, b5
- L: Y4, b6
- L: Y7, b7
- S: Y6, b8
- ac: Y5, b9
- K: Y4, b10
- G: Y5, b11
- L: Y2, b12
- I: Y11

Gene name = Rps25

| MH <sup>+</sup> 1 (av) | MH <sup>+</sup> 1 (mono) | MH <sup>+</sup> 2 (av) | MH <sup>+</sup> 2 (mono) |
|------------------------|--------------------------|------------------------|--------------------------|
| 1426.7503              | 1425.8675                | 713.8788               | 713.4374                 |

**[-] Main Sequence Ions**

| b         | b <sup>+</sup> 2 |    | y                | y <sup>+</sup> 2 |           |
|-----------|------------------|----|------------------|------------------|-----------|
| ---       | ---              | 1  | <b>A</b>         | 13               | ---       |
| 143.0815  | ---              | 2  | <b>A</b>         | 12               | 1354.8304 |
| 256.1656  | ---              | 3  | <b>L</b>         | 11               | 1283.7933 |
| 384.2241  | ---              | 4  | <b>Q</b>         | 10               | 1170.7093 |
| 513.2667  | ---              | 5  | <b>E</b>         | 9                | 1042.6507 |
| 626.3508  | ---              | 6  | <b>L</b>         | 8                | 913.6081  |
| 739.4349  | ---              | 7  | <b>L</b>         | 7                | 800.5240  |
| 826.4669  | ---              | 8  | <b>S</b>         | 6                | 687.4400  |
| 996.5724  | 498.7898         | 9  | <b>K(Acetyl)</b> | 5                | 600.4070  |
| 1053.5939 | 527.3006         | 10 | <b>G</b>         | 4                | 430.3024  |
| 1166.6780 | 583.8426         | 11 | <b>L</b>         | 3                | 373.2800  |
| 1279.7620 | 640.3846         | 12 | <b>I</b>         | 2                | 260.1969  |
| ---       | ---              | 13 | <b>K</b>         | 1                | 147.1128  |

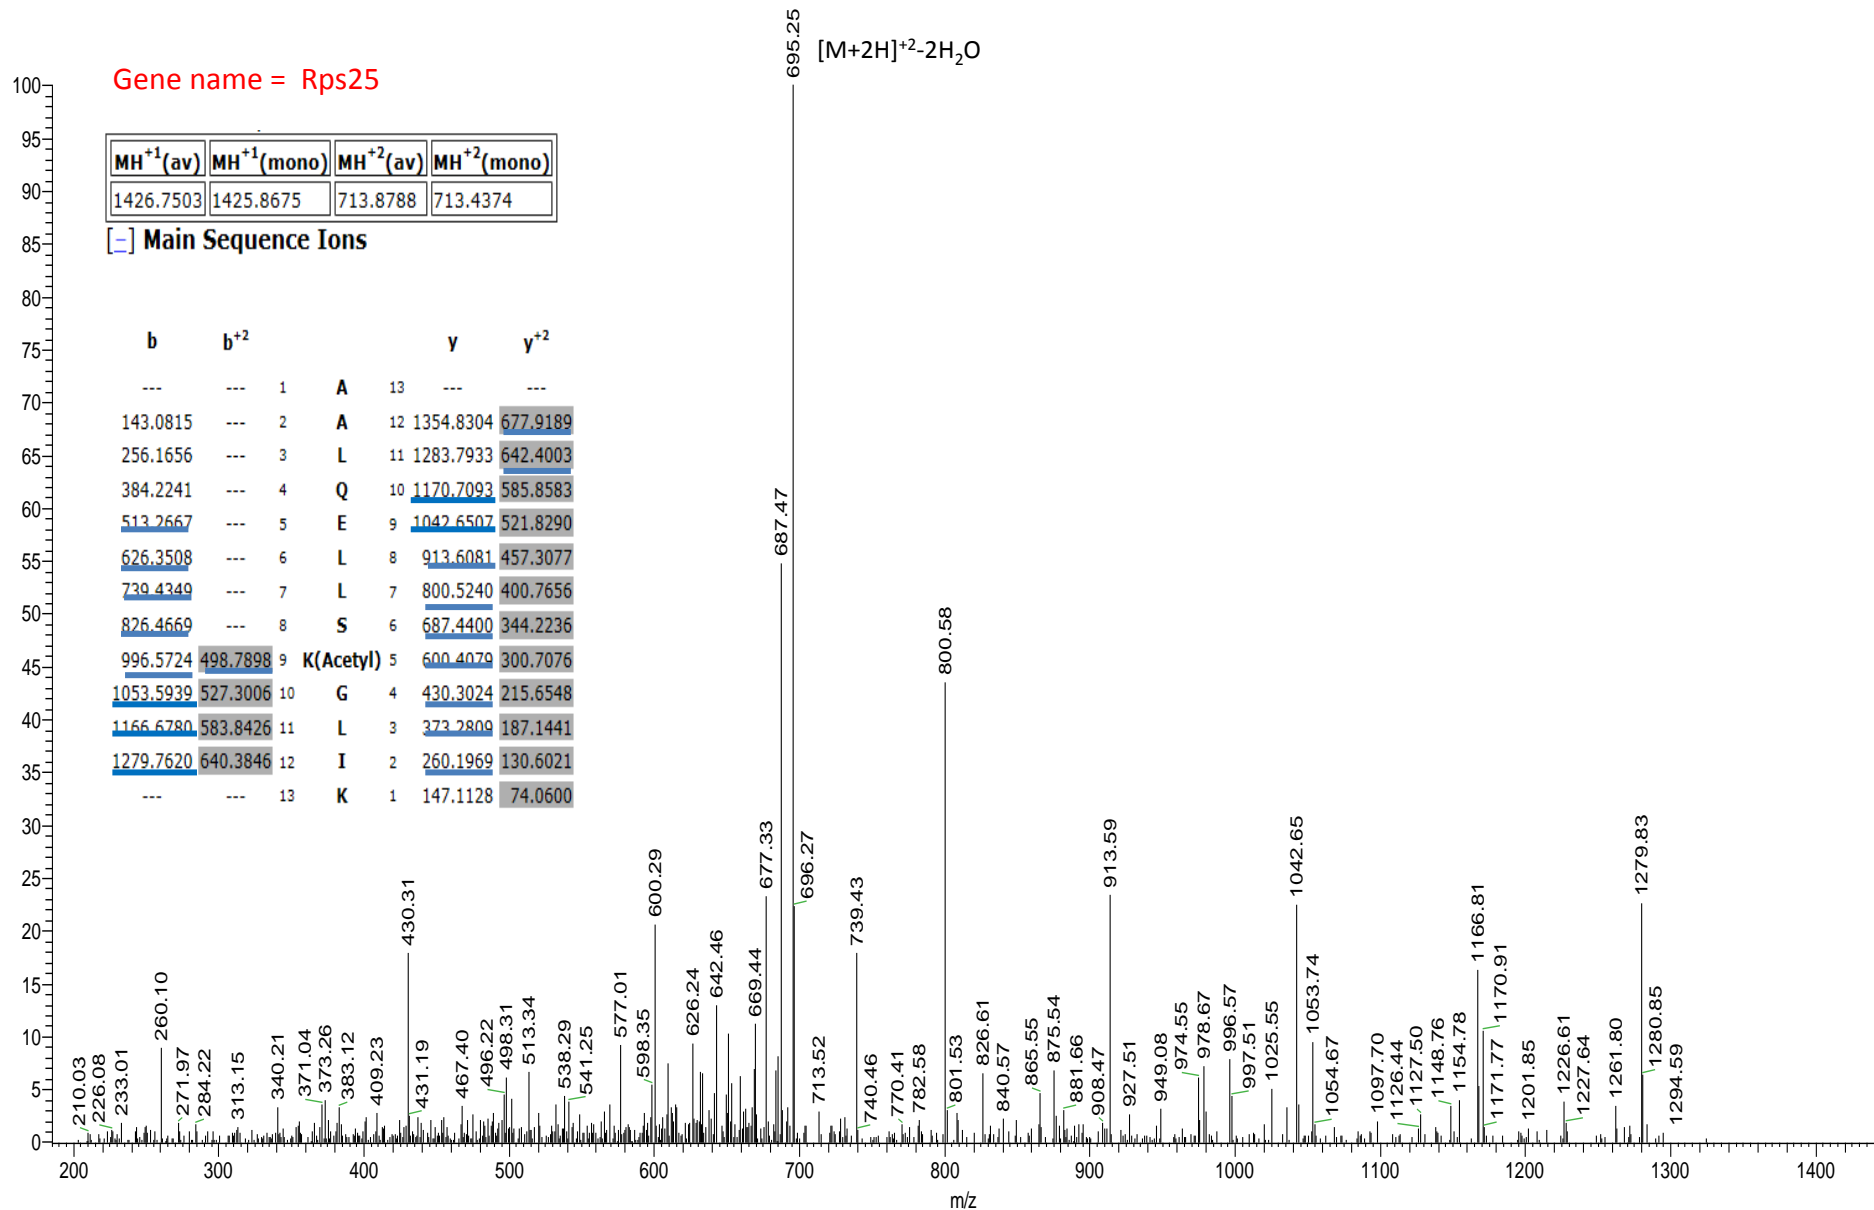



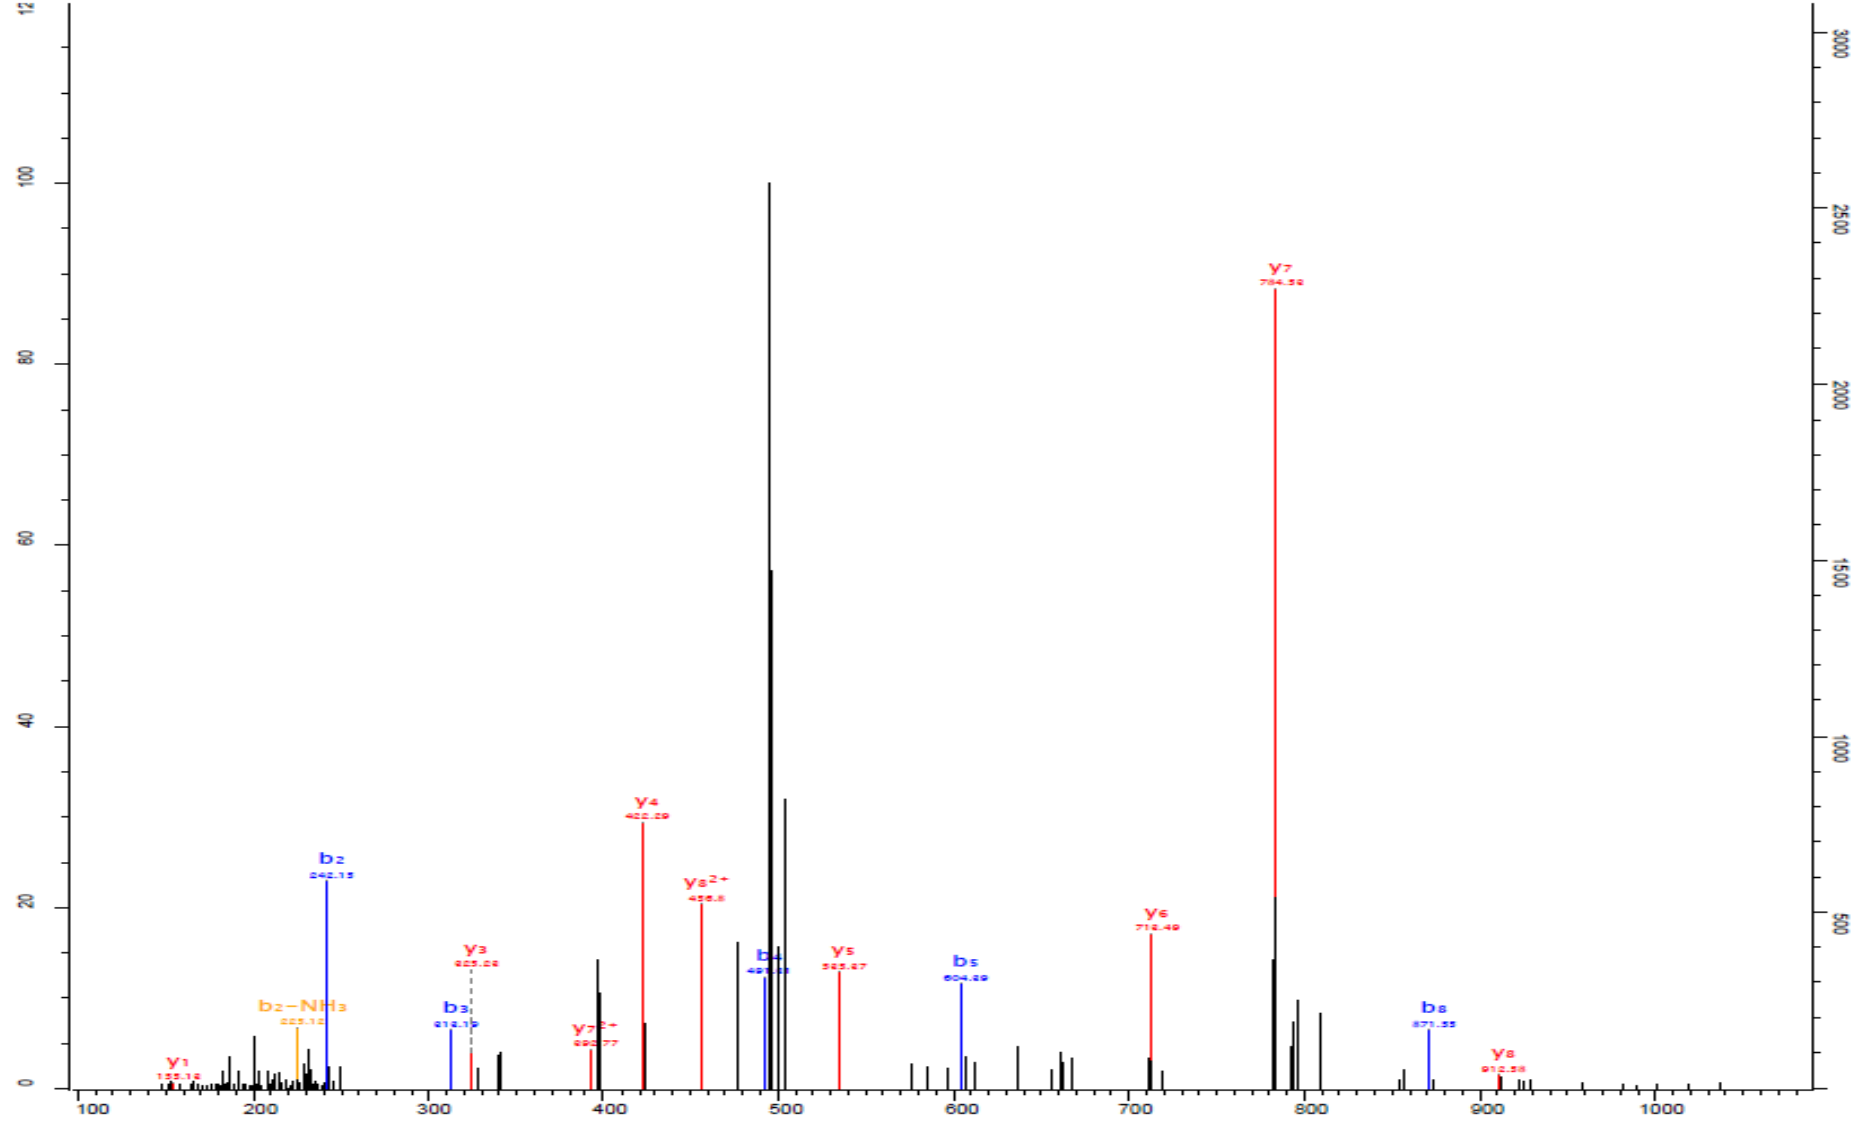

- I [Y6 Q] [Y7 A] [Y5 ac K] [Y5 I] [Y6 P] [Y5 G] [Y1 L] [Y1 K] -  
 [b2] [b3] [b4] [b5] [b6]

[M+2H]<sup>+</sup>-2H<sub>2</sub>O

Gene name = Rtn4

| MH <sup>+</sup> 1(av) | MH <sup>+</sup> 1(mono) | MH <sup>+</sup> 2(av) | MH <sup>+</sup> 2(mono) |
|-----------------------|-------------------------|-----------------------|-------------------------|
| 1026.2741             | 1025.6689               | 513.6407              | 513.3381                |

**(-) Main Sequence Ions**

| b   | b <sup>+</sup> |   | y          | y <sup>+</sup> |
|-----|----------------|---|------------|----------------|
| --- | ---            | 1 | I          | 9              |
| --- | ---            | 2 | Q          | 8              |
| --- | ---            | 3 | A          | 7              |
| --- | ---            | 4 | K(50.0248) | 6              |
| --- | ---            | 5 | I          | 5              |
| --- | ---            | 6 | P          | 4              |
| --- | ---            | 7 | G          | 3              |
| --- | ---            | 8 | L          | 2              |
| --- | ---            | 9 | K(8.0142)  | 1              |

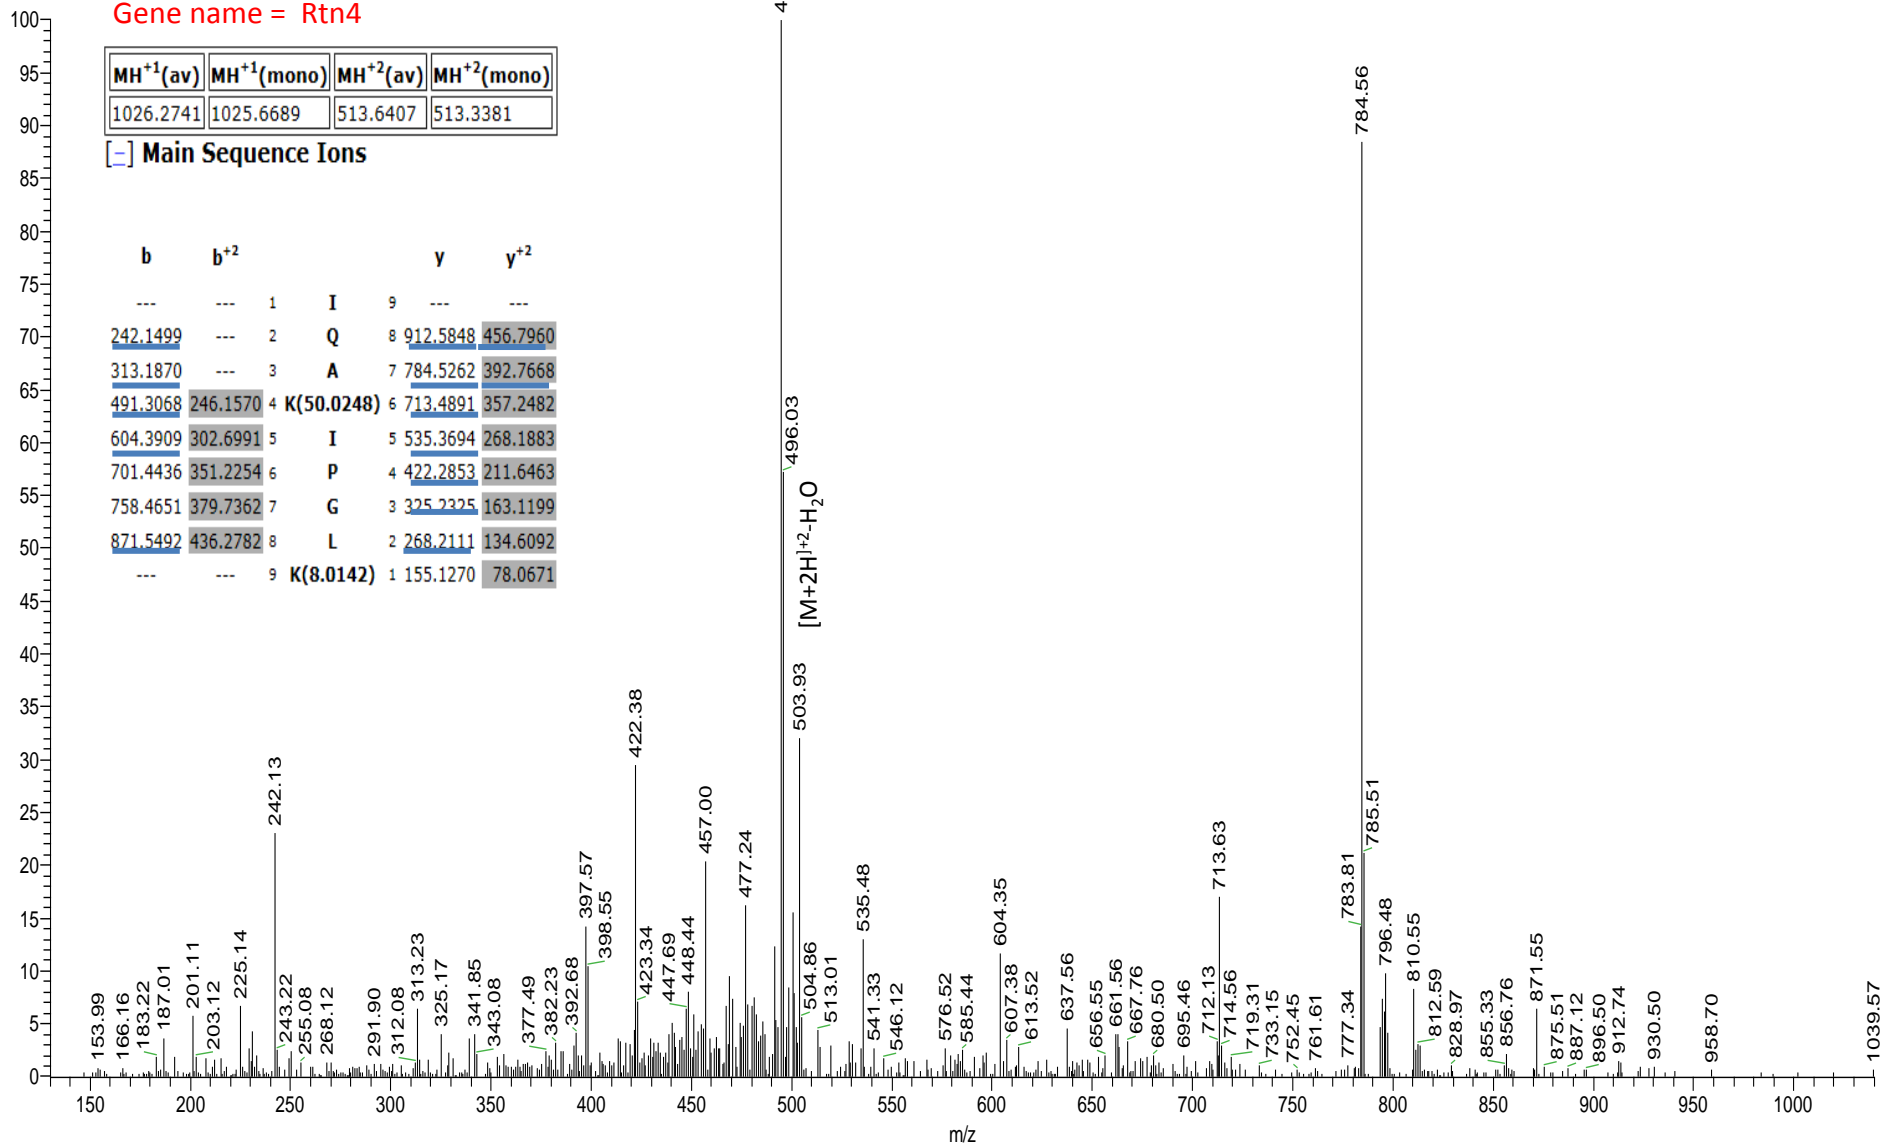

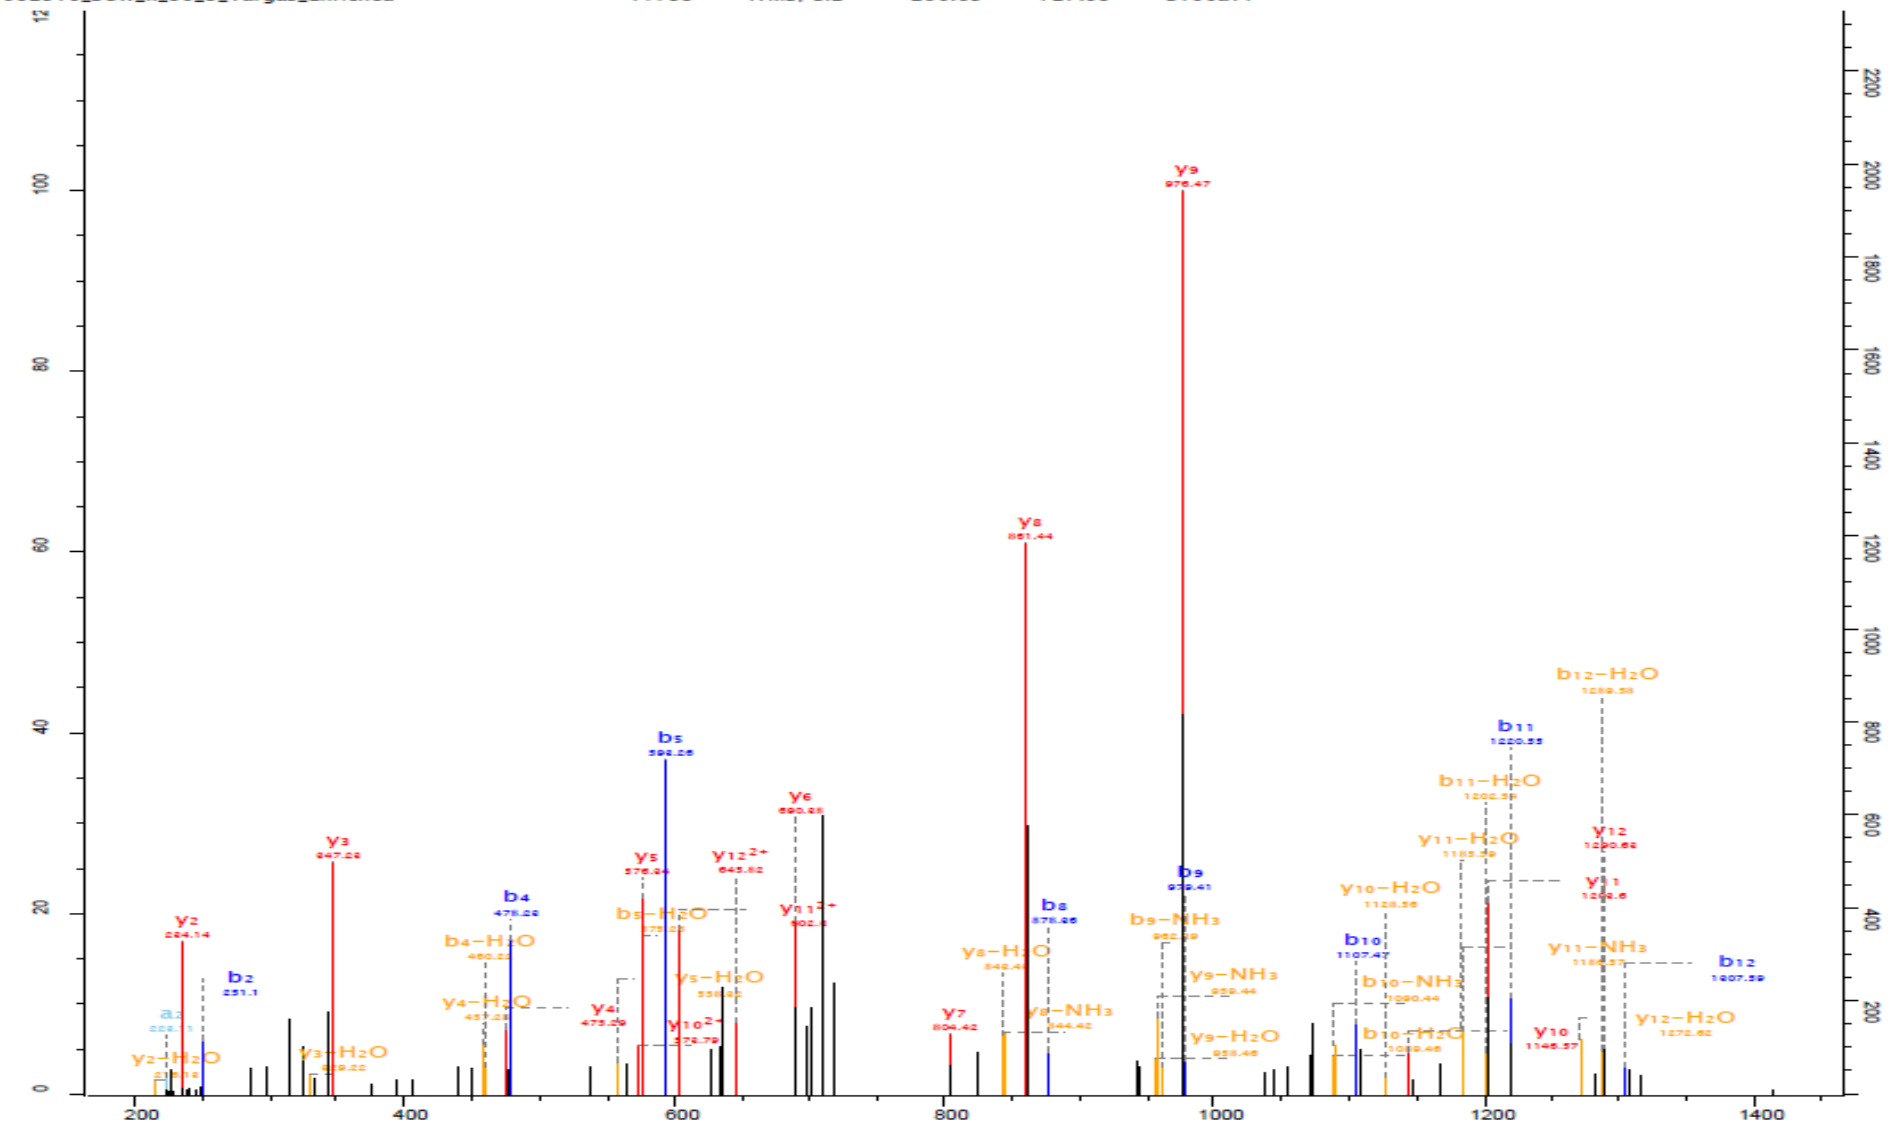

Y S G K D G N N T Q L S K

b<sub>2</sub> ac b<sub>4</sub> b<sub>5</sub> b<sub>6</sub> b<sub>9</sub> b<sub>10</sub> b<sub>11</sub> b<sub>12</sub>

Gene name = S100a11

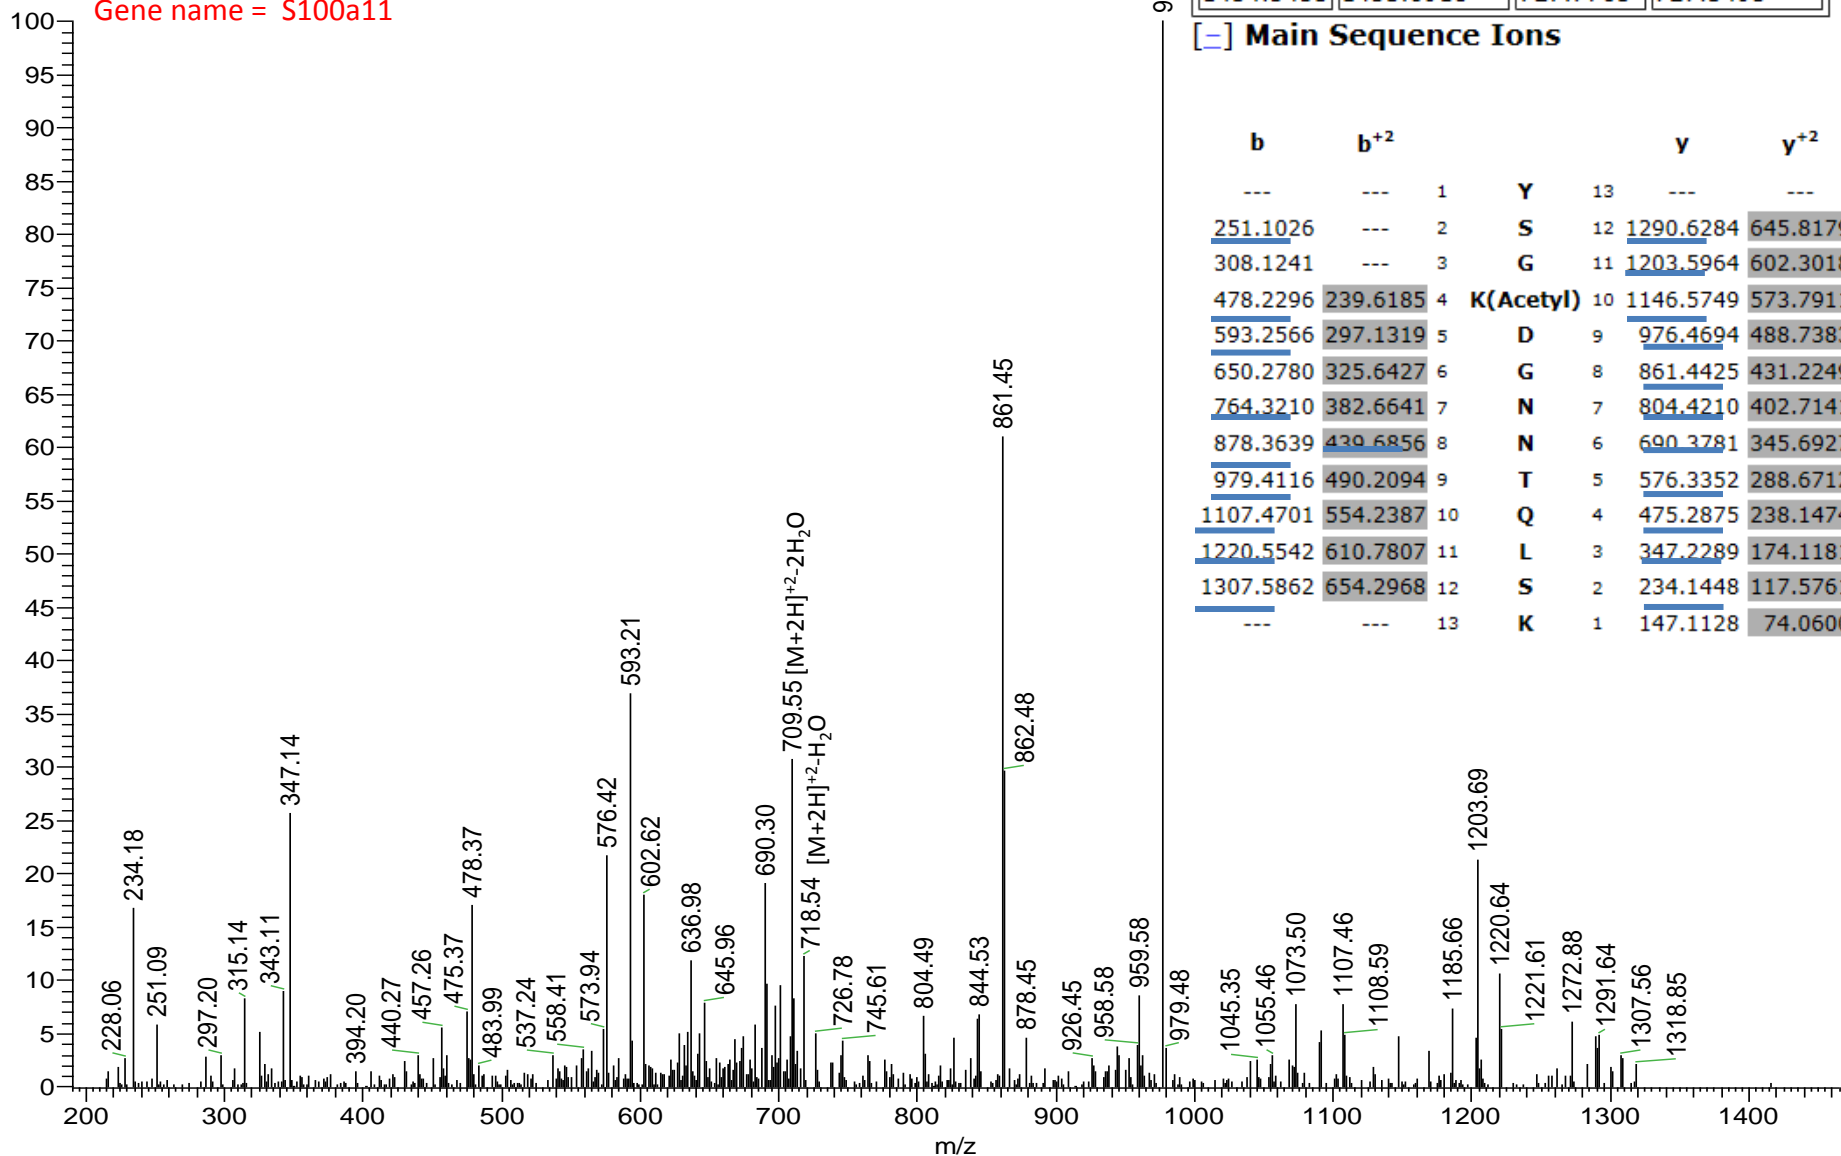

| MH <sup>+</sup> (av) | MH <sup>+</sup> (mono) | MH <sup>2+</sup> (av) | MH <sup>2+</sup> (mono) |
|----------------------|------------------------|-----------------------|-------------------------|
| 1454.5455            | 1453.6918              | 727.7765              | 727.3495                |

**[-] Main Sequence Ions**

| b                | b <sup>2+</sup> |    | y                | y <sup>2+</sup>                     |
|------------------|-----------------|----|------------------|-------------------------------------|
| ---              | ---             | 1  | <b>Y</b>         | 13                                  |
| <u>251.1026</u>  | ---             | 2  | <b>S</b>         | 12 <u>1290.6284</u> <u>645.8179</u> |
| <u>308.1241</u>  | ---             | 3  | <b>G</b>         | 11 <u>1203.5964</u> <u>602.3018</u> |
| <u>478.2296</u>  | <u>239.6185</u> | 4  | <b>K(Acetyl)</b> | 10 <u>1146.5749</u> <u>573.7911</u> |
| <u>593.2566</u>  | <u>297.1319</u> | 5  | <b>D</b>         | 9 <u>976.4694</u> <u>488.7383</u>   |
| <u>650.2780</u>  | <u>325.6427</u> | 6  | <b>G</b>         | 8 <u>861.4425</u> <u>431.2249</u>   |
| <u>764.3210</u>  | <u>382.6641</u> | 7  | <b>N</b>         | 7 <u>804.4210</u> <u>402.7141</u>   |
| <u>878.3639</u>  | <u>439.6856</u> | 8  | <b>N</b>         | 6 <u>690.3781</u> <u>345.6927</u>   |
| <u>979.4116</u>  | <u>490.2094</u> | 9  | <b>T</b>         | 5 <u>576.3352</u> <u>288.6712</u>   |
| <u>1107.4701</u> | <u>554.2387</u> | 10 | <b>Q</b>         | 4 <u>475.2875</u> <u>238.1474</u>   |
| <u>1220.5542</u> | <u>610.7807</u> | 11 | <b>L</b>         | 3 <u>347.2289</u> <u>174.1181</u>   |
| <u>1307.5862</u> | <u>654.2968</u> | 12 | <b>S</b>         | 2 <u>234.1448</u> <u>117.5761</u>   |
| ..               | ---             | 13 | <b>K</b>         | 1 <u>147.1128</u> <u>74.0600</u>    |

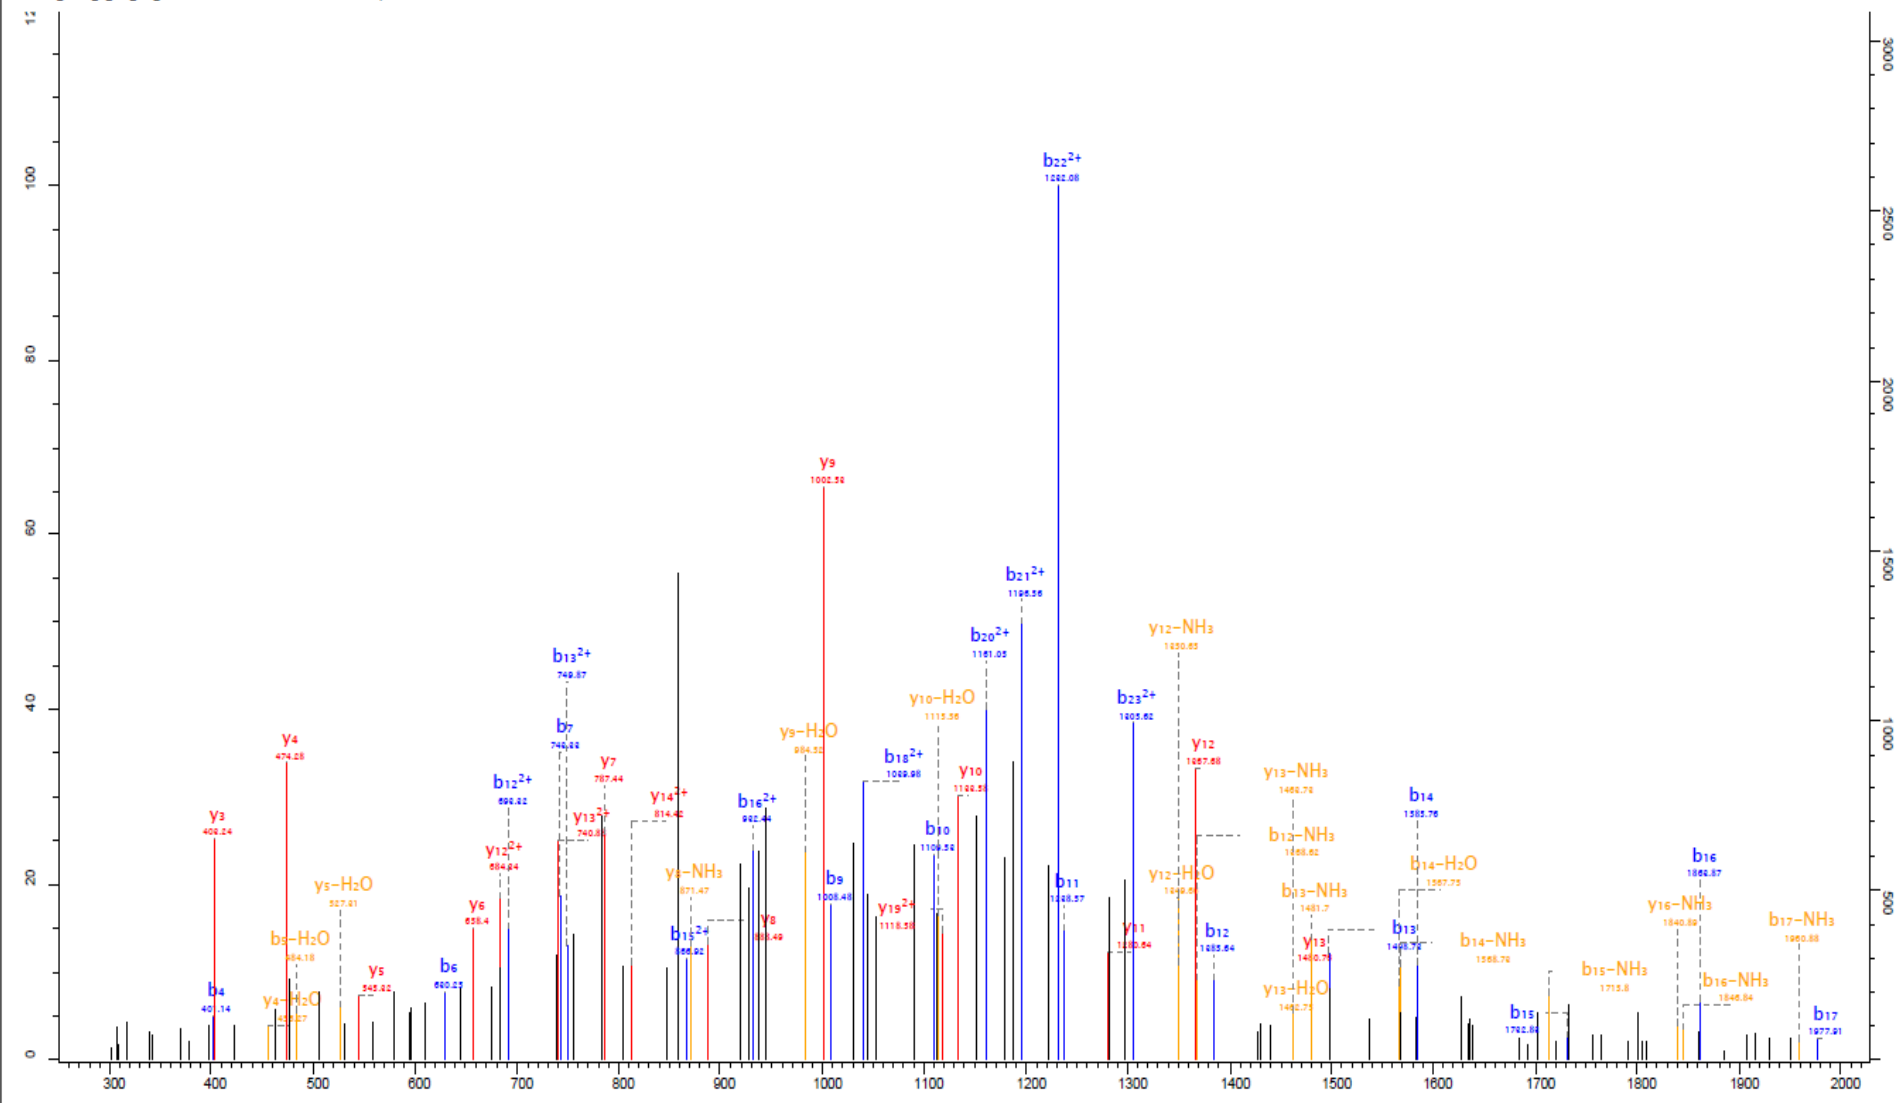

- D G N N T Q L S ac K T E F L S F M N T E L A A F T K -

b4
b5
b7
b8
b10
b11
b12
b13
b14
b15
b16
b17
b12<sup>2+</sup>
b20<sup>2+</sup>
b21<sup>2+</sup>
b22<sup>2+</sup>
b22<sup>2+</sup>

y12<sup>2+</sup>
y14<sup>2+</sup>
y15
y12
y11
y10
y9
y8
y7
y6
y5
y4
y3

Gene name= S100a11

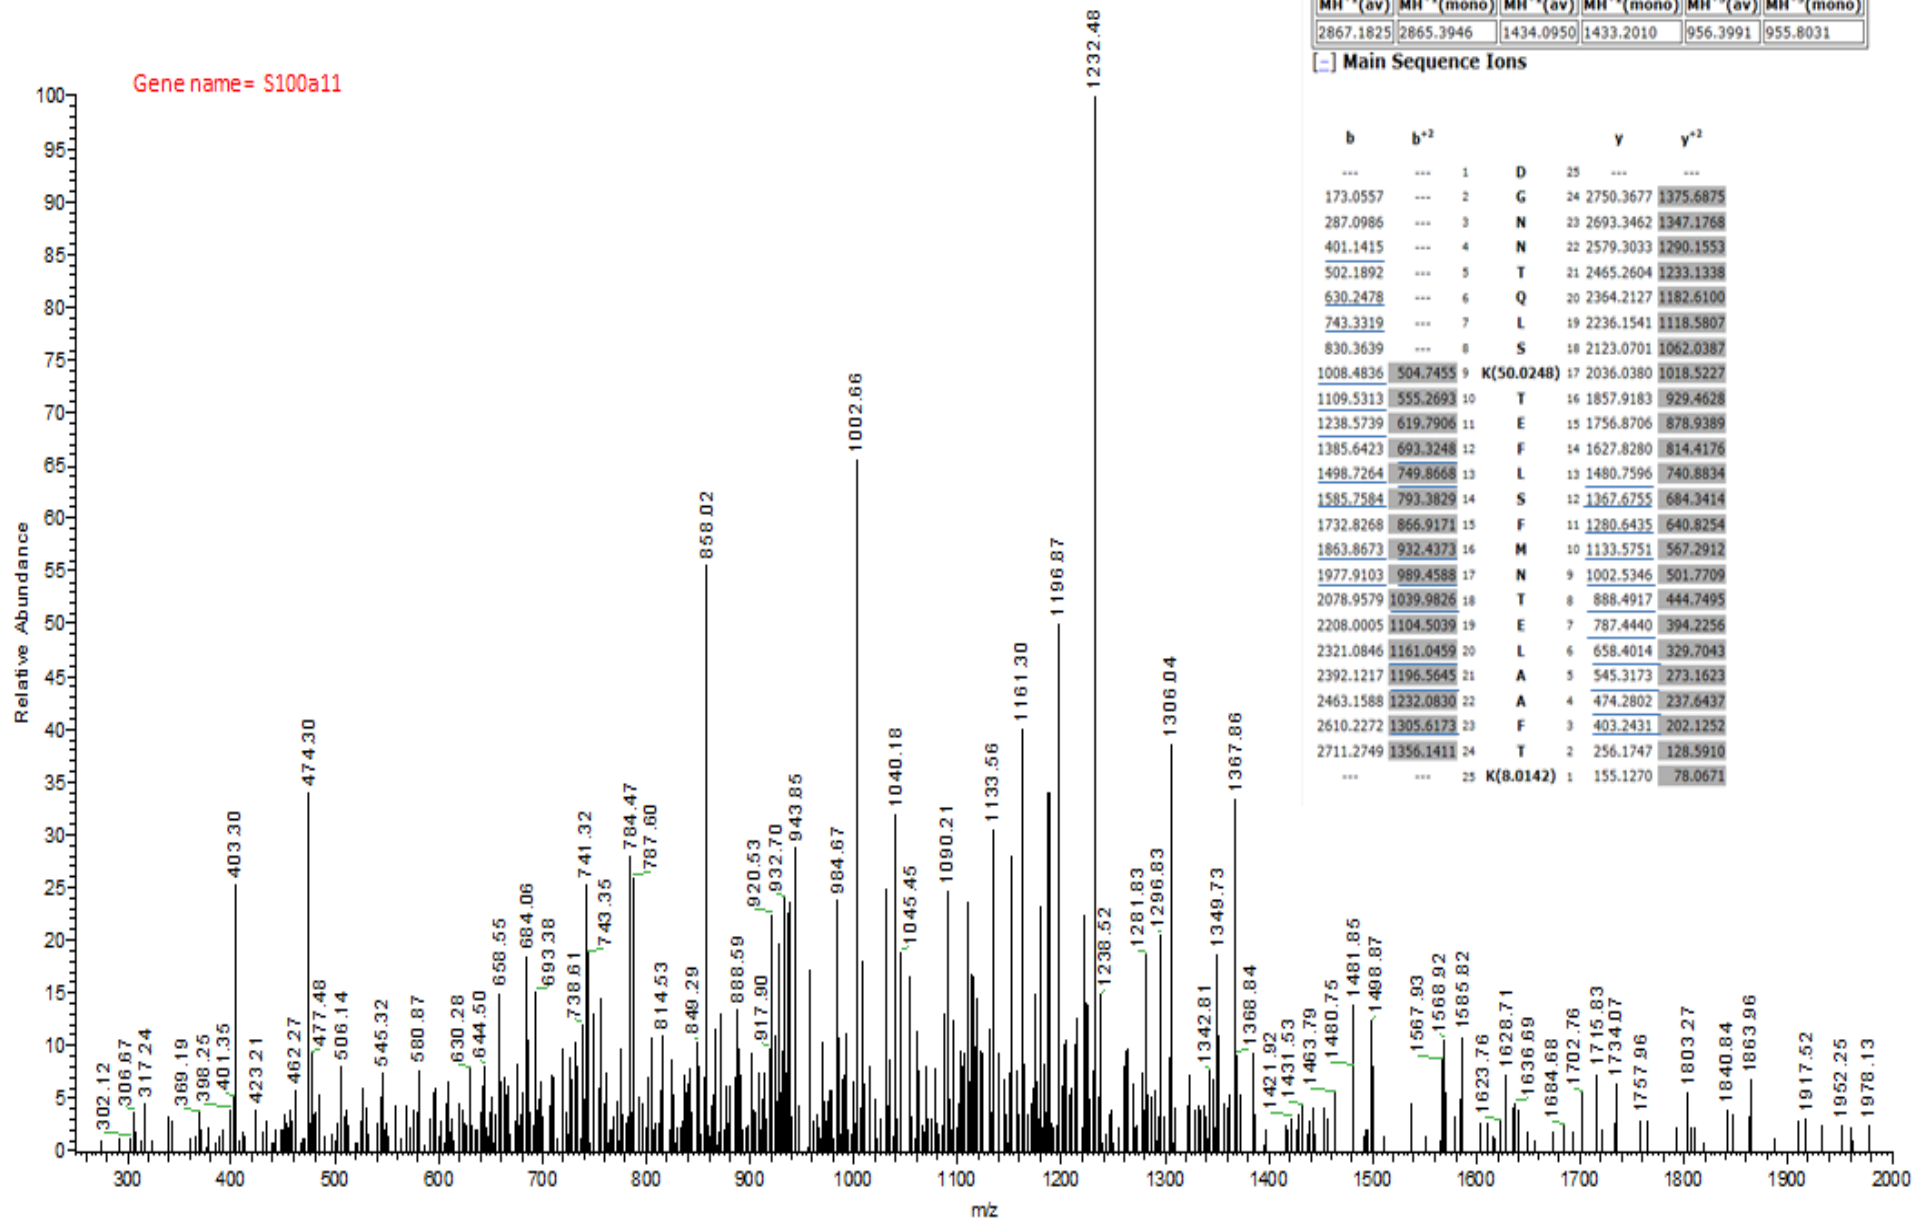

| MH <sup>+</sup> (av) | MH <sup>+</sup> (mono) | MH <sup>+</sup> (av) | MH <sup>+</sup> (mono) | MH <sup>+</sup> (av) | MH <sup>+</sup> (mono) |
|----------------------|------------------------|----------------------|------------------------|----------------------|------------------------|
| 2867.1825            | 2865.3946              | 1434.0950            | 1433.2010              | 956.3991             | 955.8031               |

**[-] Main Sequence Ions**

| b   | b <sup>+</sup> | y  | y <sup>+</sup> |
|-----|----------------|----|----------------|
| ... | ...            | 1  | D              |
| ... | ...            | 2  | G              |
| ... | ...            | 3  | N              |
| ... | ...            | 4  | N              |
| ... | ...            | 5  | T              |
| ... | ...            | 6  | Q              |
| ... | ...            | 7  | L              |
| ... | ...            | 8  | S              |
| ... | ...            | 9  | K(50.0248)     |
| ... | ...            | 10 | T              |
| ... | ...            | 11 | E              |
| ... | ...            | 12 | F              |
| ... | ...            | 13 | L              |
| ... | ...            | 14 | S              |
| ... | ...            | 15 | F              |
| ... | ...            | 16 | M              |
| ... | ...            | 17 | N              |
| ... | ...            | 18 | T              |
| ... | ...            | 19 | E              |
| ... | ...            | 20 | L              |
| ... | ...            | 21 | A              |
| ... | ...            | 22 | A              |
| ... | ...            | 23 | F              |
| ... | ...            | 24 | T              |
| ... | ...            | 25 | K(8.0142)      |

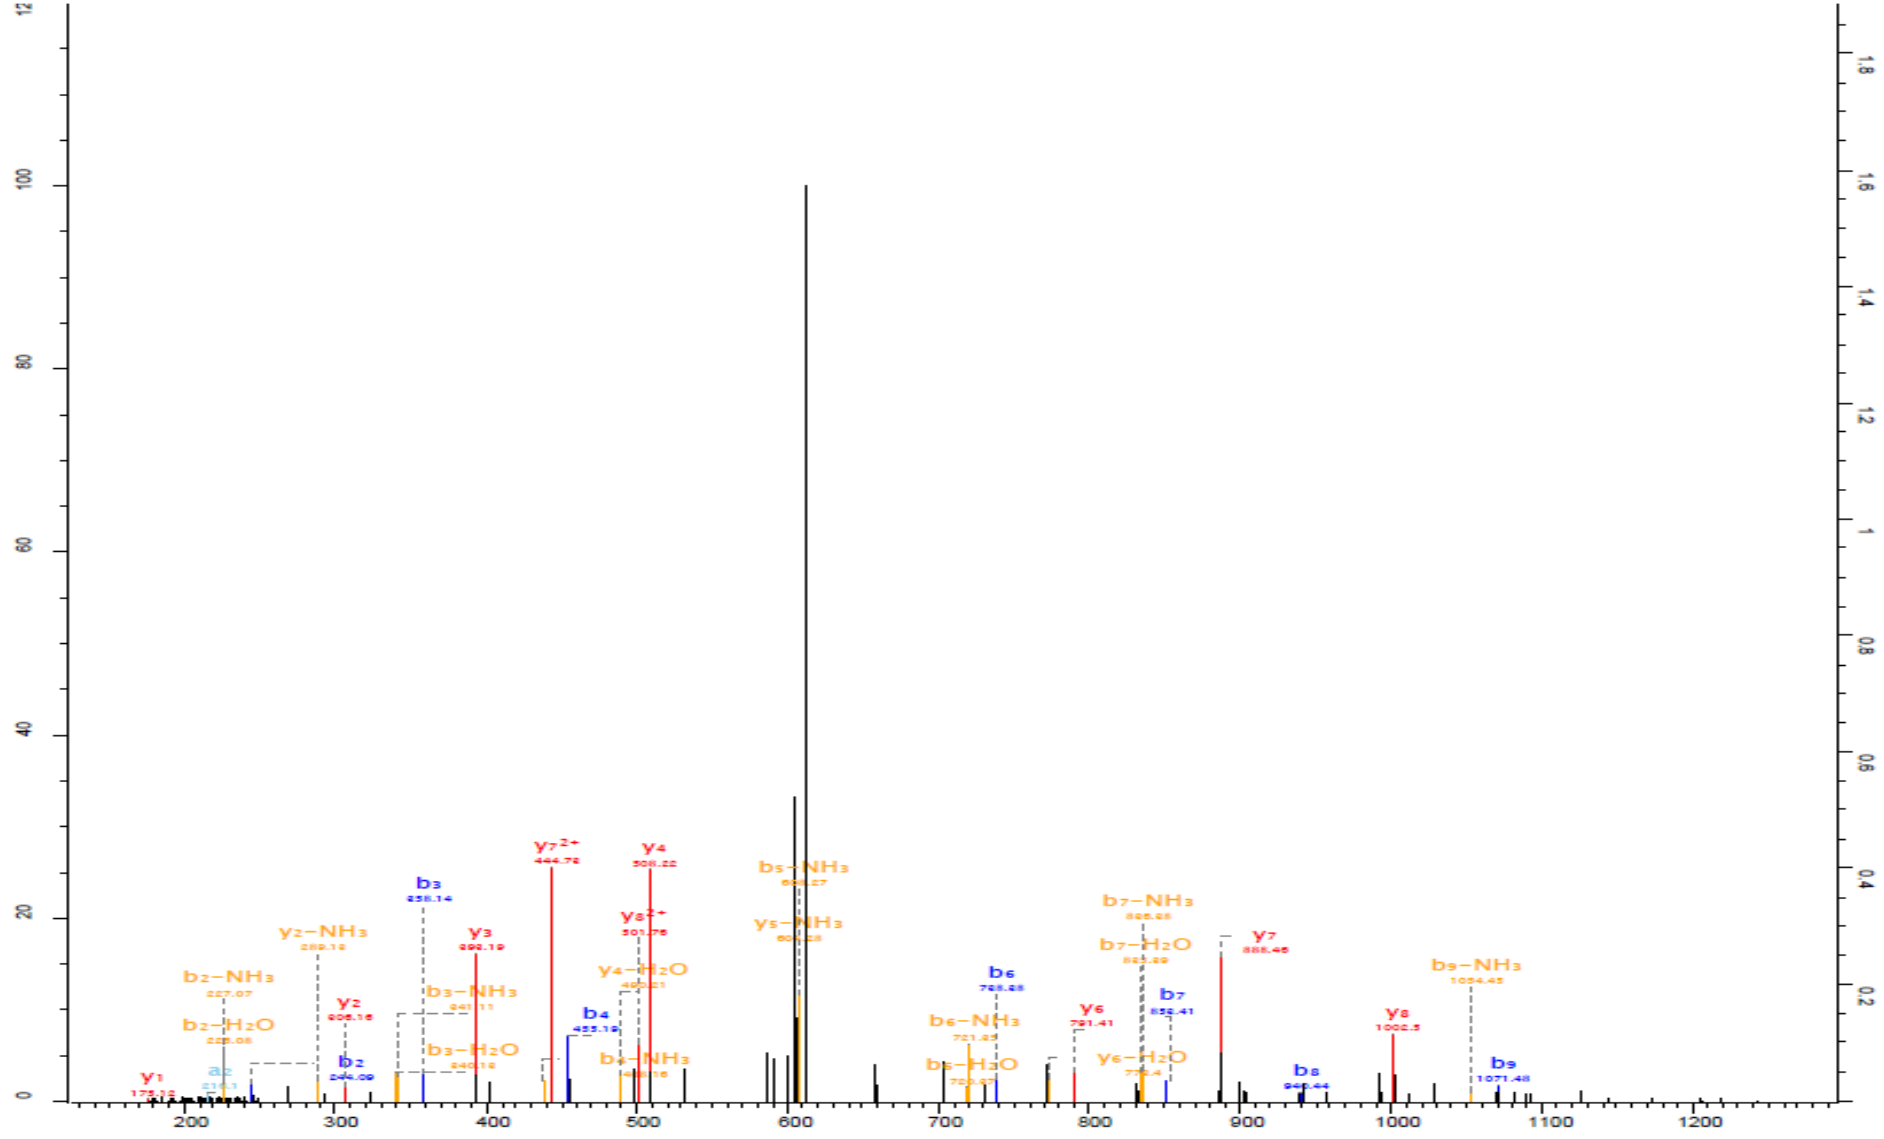

- Q D N P K L D S M R -

b<sub>2</sub>
y<sub>6</sub>
y<sub>7</sub>
y<sub>6</sub> ac
K
b<sub>5</sub>
b<sub>7</sub>
b<sub>5</sub>
b<sub>6</sub>

[M+2H]<sup>2+</sup>-H<sub>2</sub>O

|        |                       |                         |
|--------|-----------------------|-------------------------|
| (mono) | MH <sup>2+</sup> (av) | MH <sup>2+</sup> (mono) |
| 5892   | 623.7001              | 623.2982                |

Gene name = Smek1

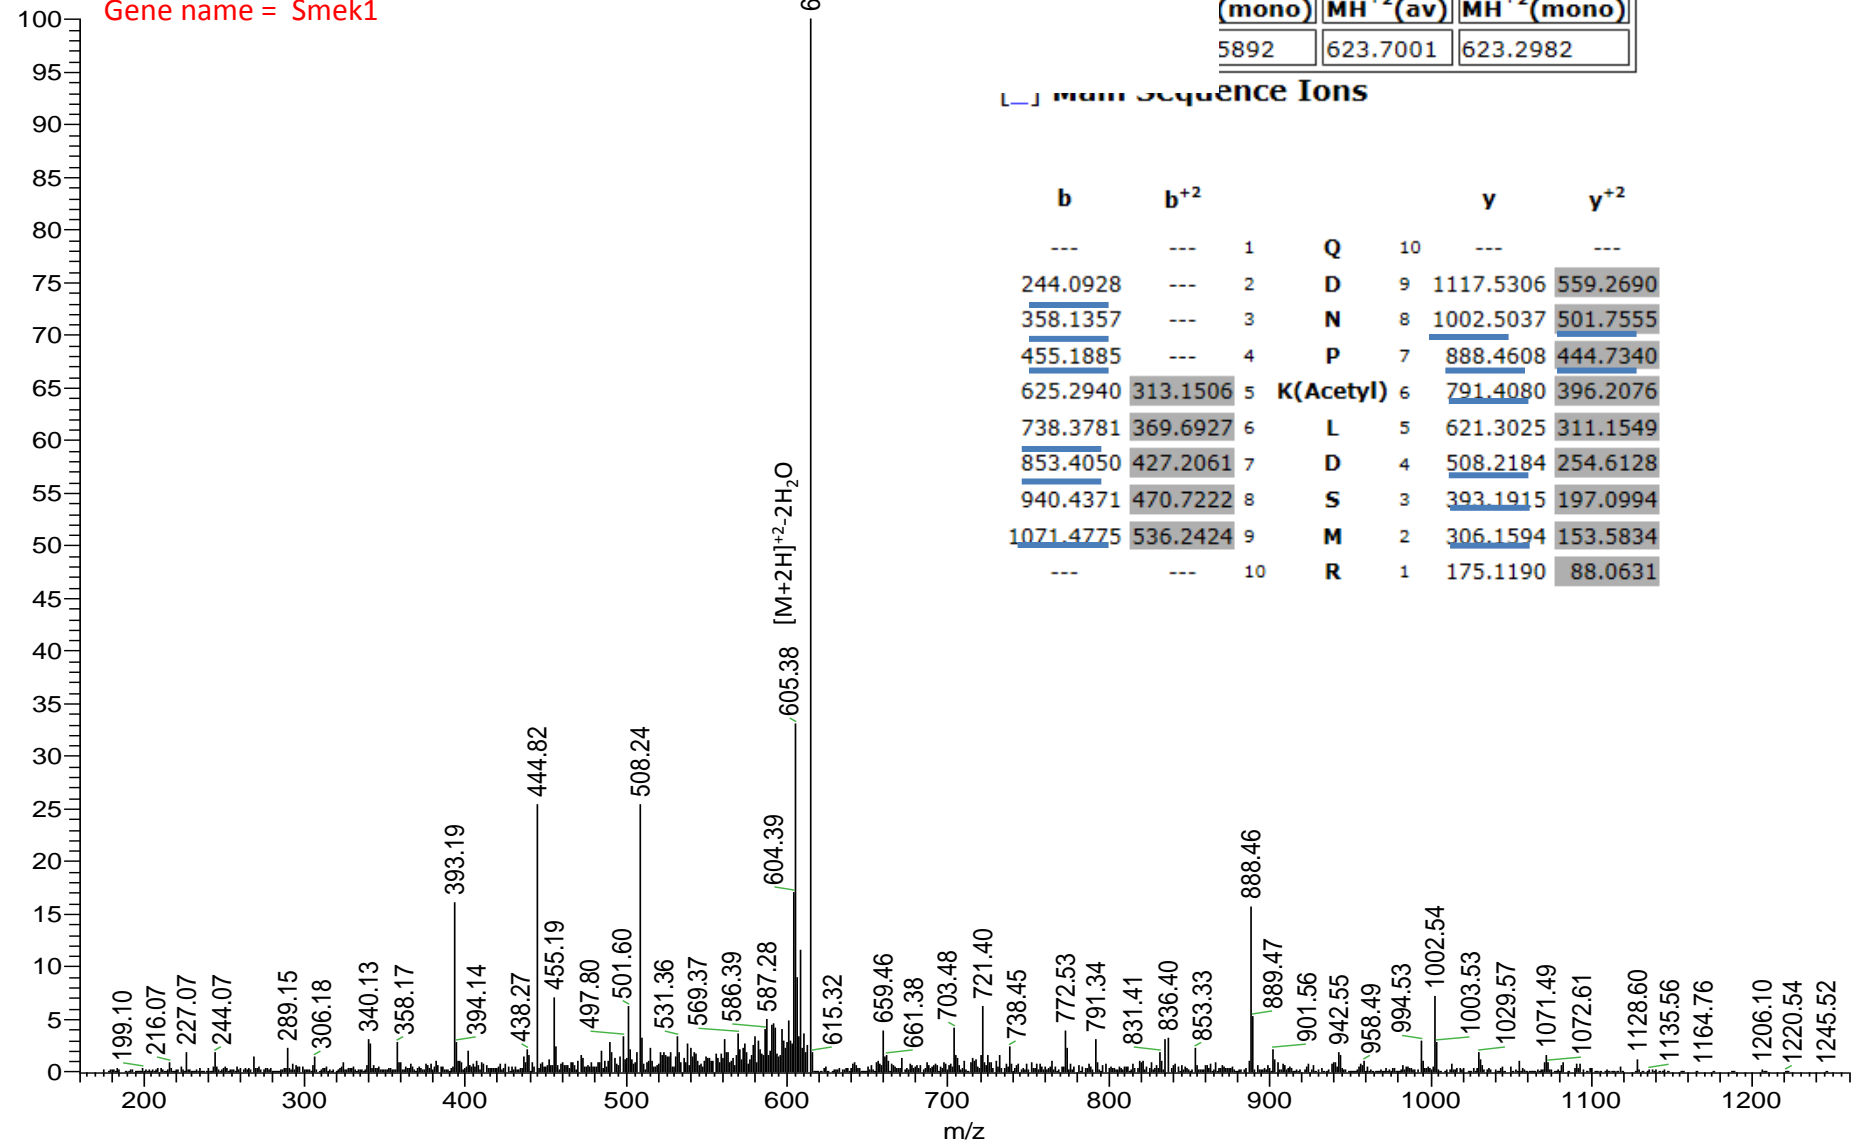

main sequence Ions

| b         | b <sup>2+</sup> |    |           | y  | y <sup>2+</sup>    |
|-----------|-----------------|----|-----------|----|--------------------|
| ---       | ---             | 1  | Q         | 10 | ---                |
| 244.0928  | ---             | 2  | D         | 9  | 1117.5306 559.2690 |
| 358.1357  | ---             | 3  | N         | 8  | 1002.5037 501.7555 |
| 455.1885  | ---             | 4  | P         | 7  | 888.4608 444.7340  |
| 625.2940  | 313.1506        | 5  | K(Acetyl) | 6  | 791.4080 396.2076  |
| 738.3781  | 369.6927        | 6  | L         | 5  | 621.3025 311.1549  |
| 853.4050  | 427.2061        | 7  | D         | 4  | 508.2184 254.6128  |
| 940.4371  | 470.7222        | 8  | S         | 3  | 393.1915 197.0994  |
| 1071.4775 | 536.2424        | 9  | M         | 2  | 306.1594 153.5834  |
| ---       | ---             | 10 | R         | 1  | 175.1190 88.0631   |



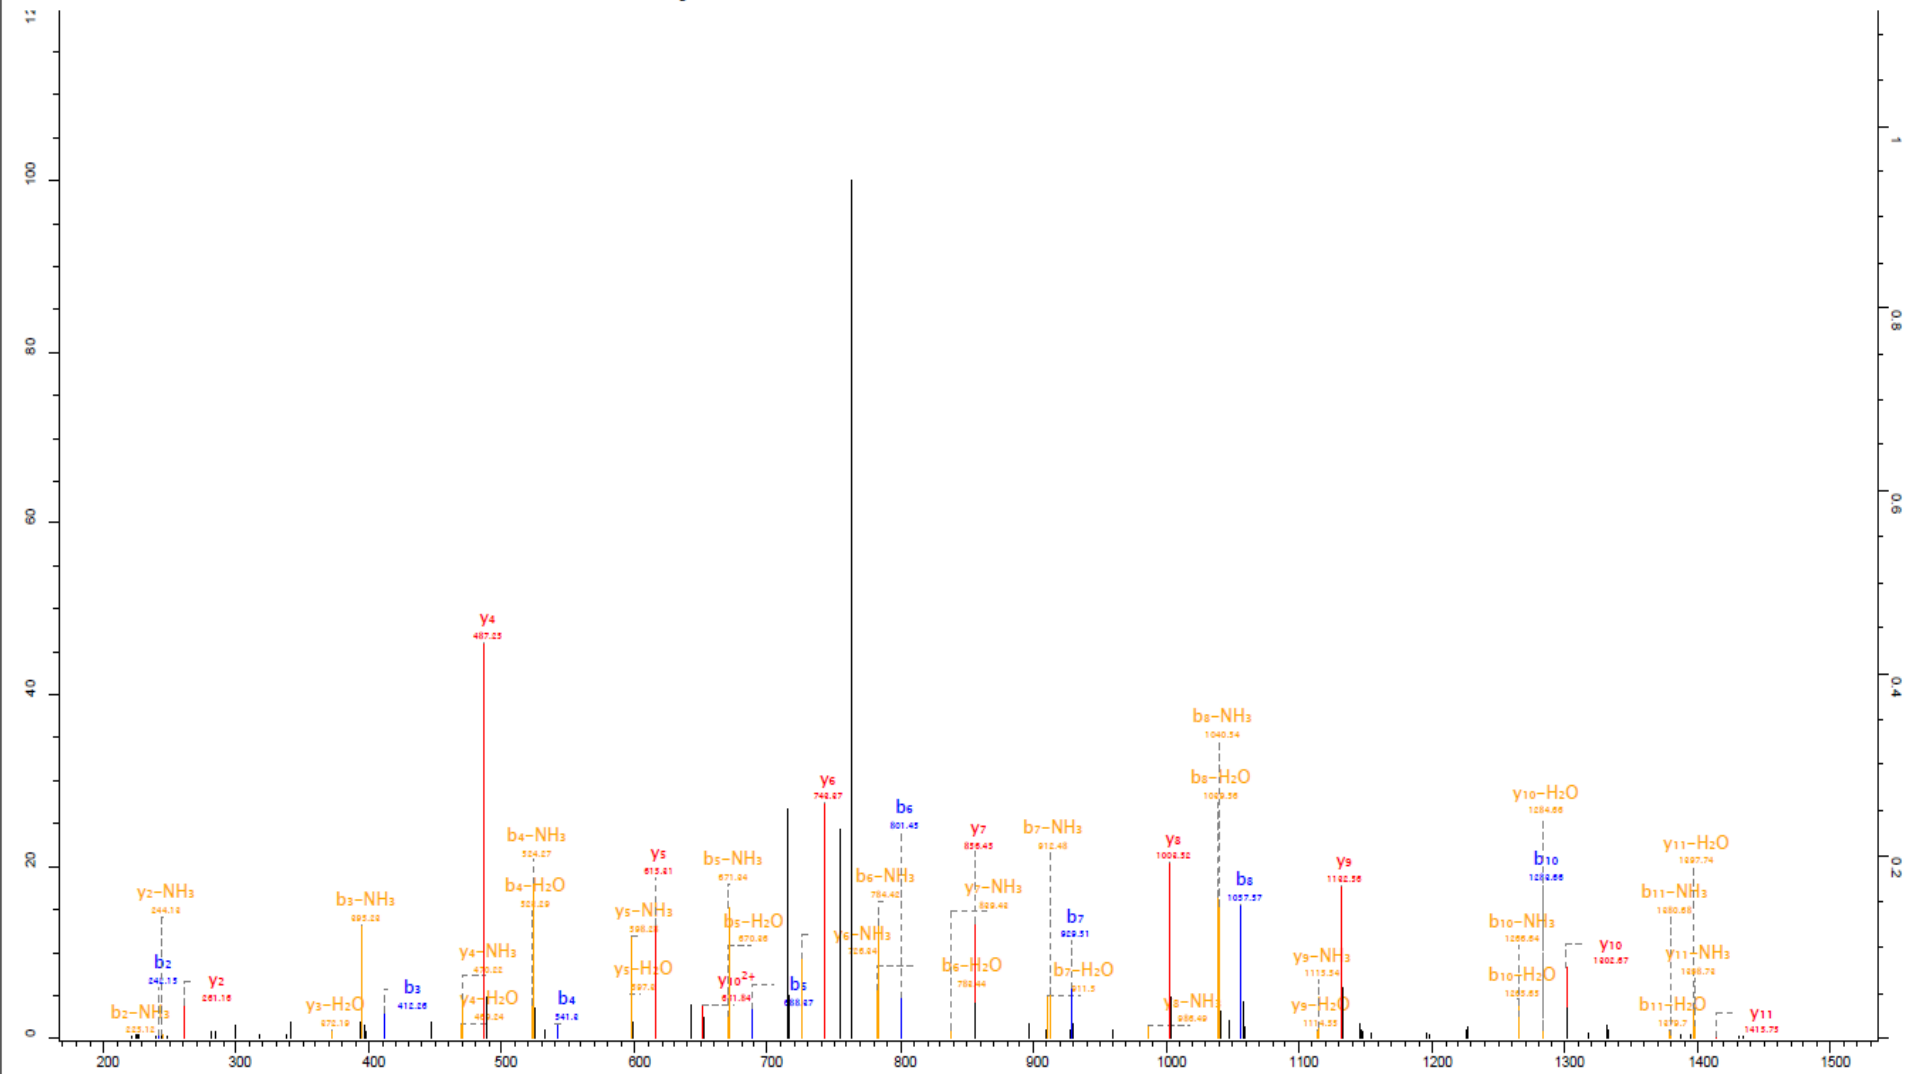

- Q L K E F I Q Q P E N K -  
 b2 b3 b4 b5 b6 b7 b8 b9 b10

[M+2H]<sup>2+</sup>-H<sub>2</sub>O

Gene name = Smg1

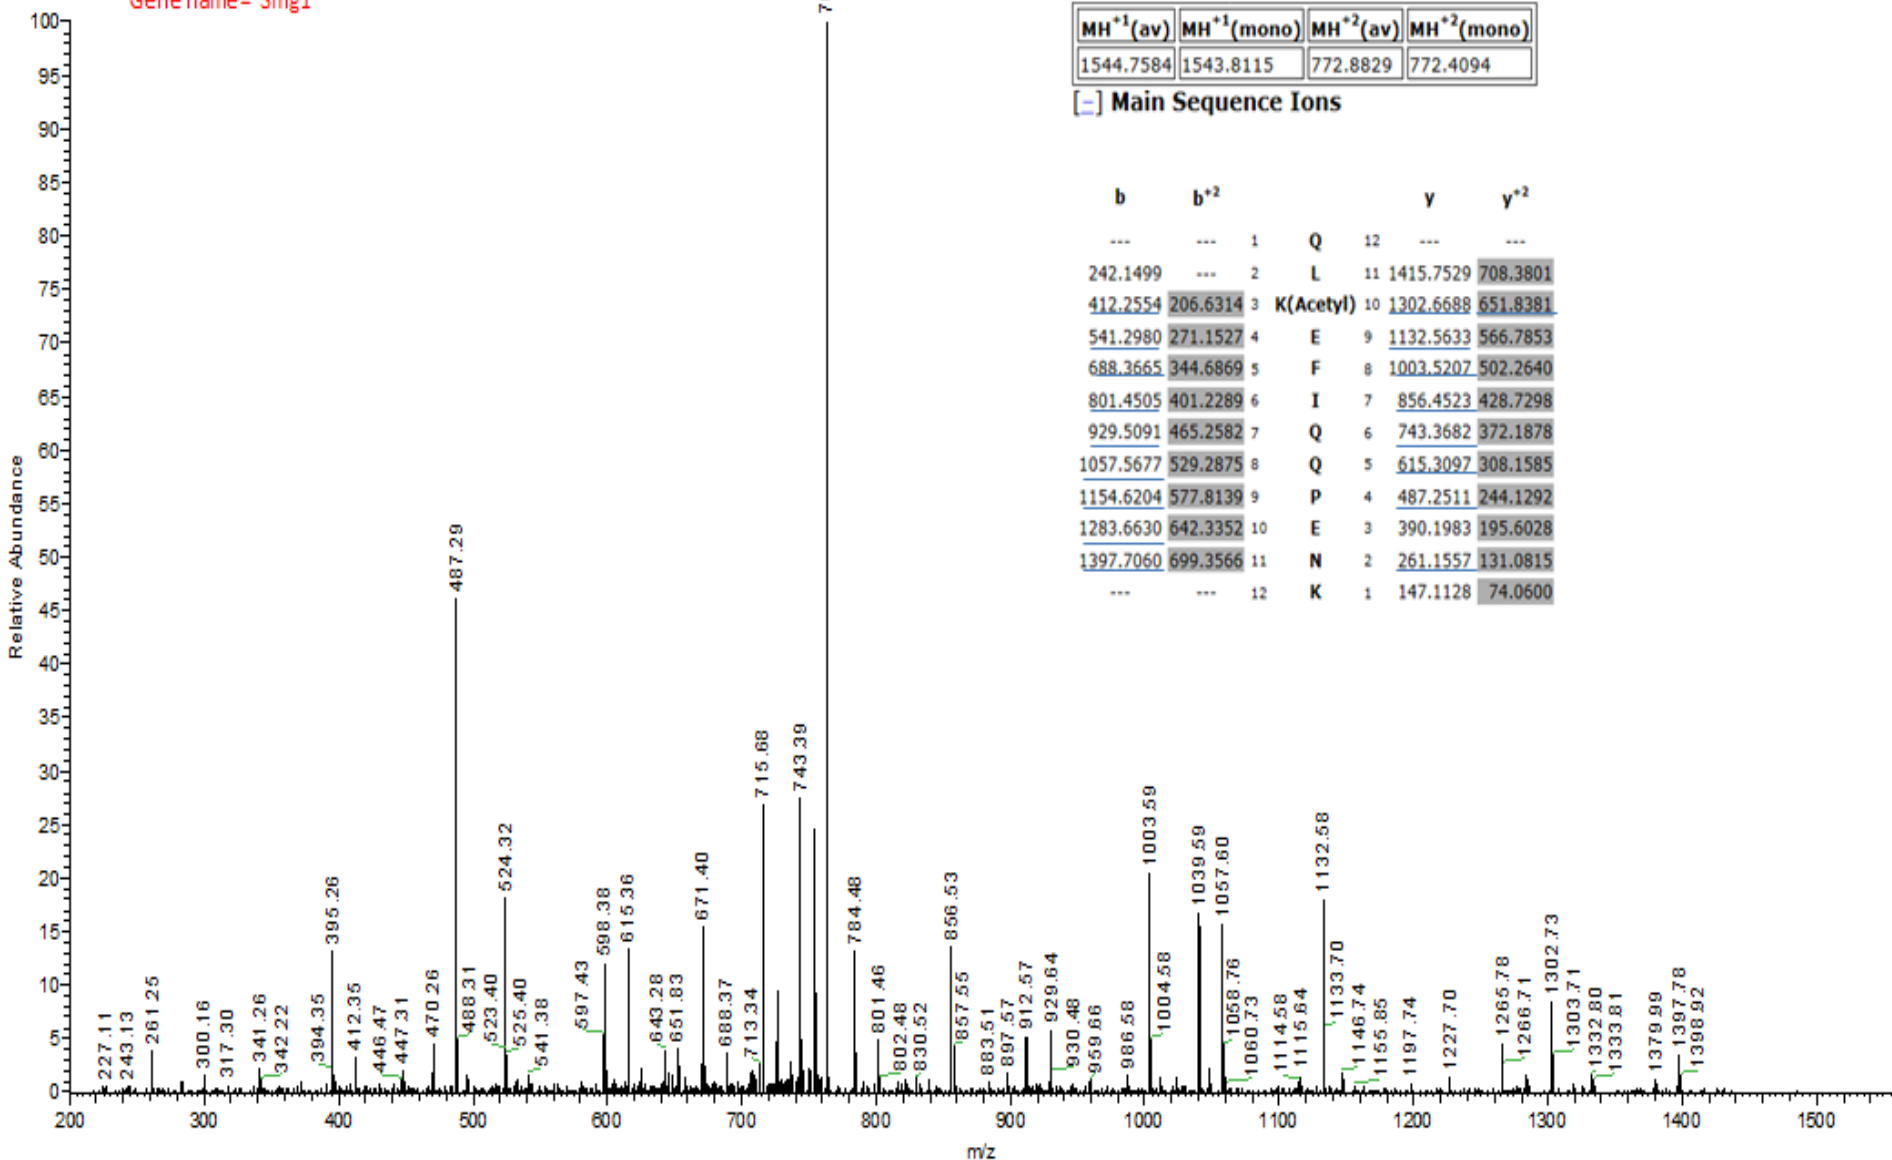

| MH <sup>+</sup> (av) | MH <sup>+</sup> (mono) | MH <sup>2+</sup> (av) | MH <sup>2+</sup> (mono) |
|----------------------|------------------------|-----------------------|-------------------------|
| 1544.7584            | 1543.8115              | 772.8829              | 772.4094                |

[-] Main Sequence Ions

| b         | b <sup>2+</sup> |    | y         | y <sup>2+</sup> |           |
|-----------|-----------------|----|-----------|-----------------|-----------|
| ---       | ---             | 1  | Q         | 12              | ---       |
| 242.1499  | ---             | 2  | L         | 11              | 1415.7529 |
| 412.2554  | 206.6314        | 3  | K(Acetyl) | 10              | 1302.6688 |
| 541.2980  | 271.1527        | 4  | E         | 9               | 1132.5633 |
| 688.3665  | 344.6869        | 5  | F         | 8               | 1003.5207 |
| 801.4505  | 401.2289        | 6  | I         | 7               | 856.4523  |
| 929.5091  | 465.2582        | 7  | Q         | 6               | 743.3682  |
| 1057.5677 | 529.2875        | 8  | Q         | 5               | 615.3097  |
| 1154.6204 | 577.8139        | 9  | P         | 4               | 487.2511  |
| 1283.6630 | 642.3352        | 10 | E         | 3               | 390.1983  |
| 1397.7060 | 699.3566        | 11 | N         | 2               | 261.1557  |
| ---       | ---             | 12 | K         | 1               | 147.1128  |

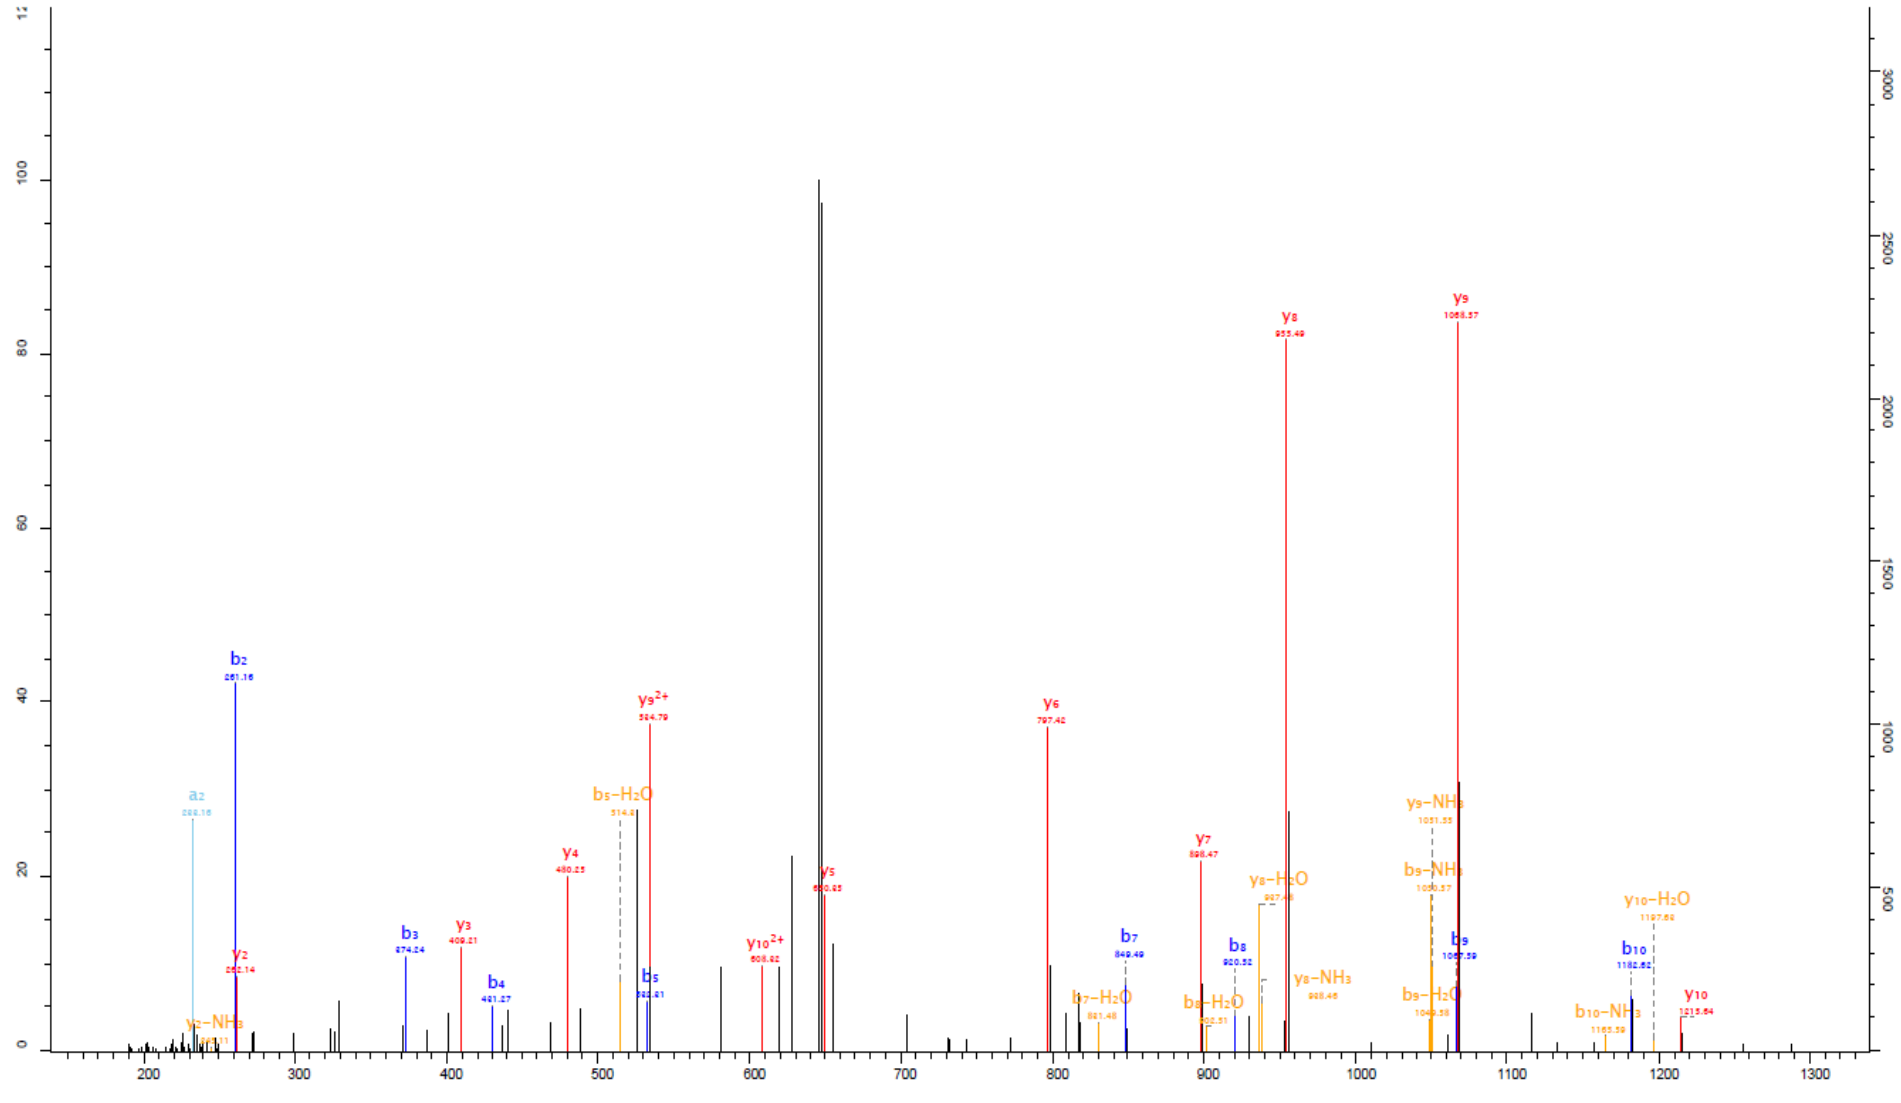

I F I G T F K A F D K

b2 b3 b4 b5 b7 b8 b9 b10

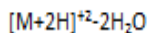

Gene names = Snrpb; Snrpn

| MH <sup>+</sup> 1(av) | MH <sup>+</sup> 1(mono) | MH <sup>+</sup> 2(av) | MH <sup>+</sup> 2(mono) |
|-----------------------|-------------------------|-----------------------|-------------------------|
| 1329.5915             | 1328.7249               | 665.2995              | 664.8661                |

**[-] Main Sequence Ions**

| b         | b <sup>+</sup> | y  | y <sup>+</sup>                |
|-----------|----------------|----|-------------------------------|
| ---       | ---            | 1  | ---                           |
| 261.1598  | ---            | 2  | F 10 1215.6408 608.3241       |
| 374.2438  | ---            | 3  | I 9 1068.5724 534.7898        |
| 431.2653  | ---            | 4  | G 8 955.4884 478.2478         |
| 532.3130  | ---            | 5  | T 7 898.4669 449.7371         |
| 679.3814  | ---            | 6  | F 6 797.4192 399.2132         |
| 849.4869  | 425.2471       | 7  | K(Acetyl) 5 650.3508 325.6790 |
| 920.5240  | 460.7656       | 8  | A 4 480.2453 240.6263         |
| 1067.5924 | 534.2999       | 9  | F 3 409.2082 205.1077         |
| 1182.6194 | 591.8133       | 10 | D 2 262.1397 131.5735         |
| ---       | ---            | 11 | K 1 147.1128 74.0600          |

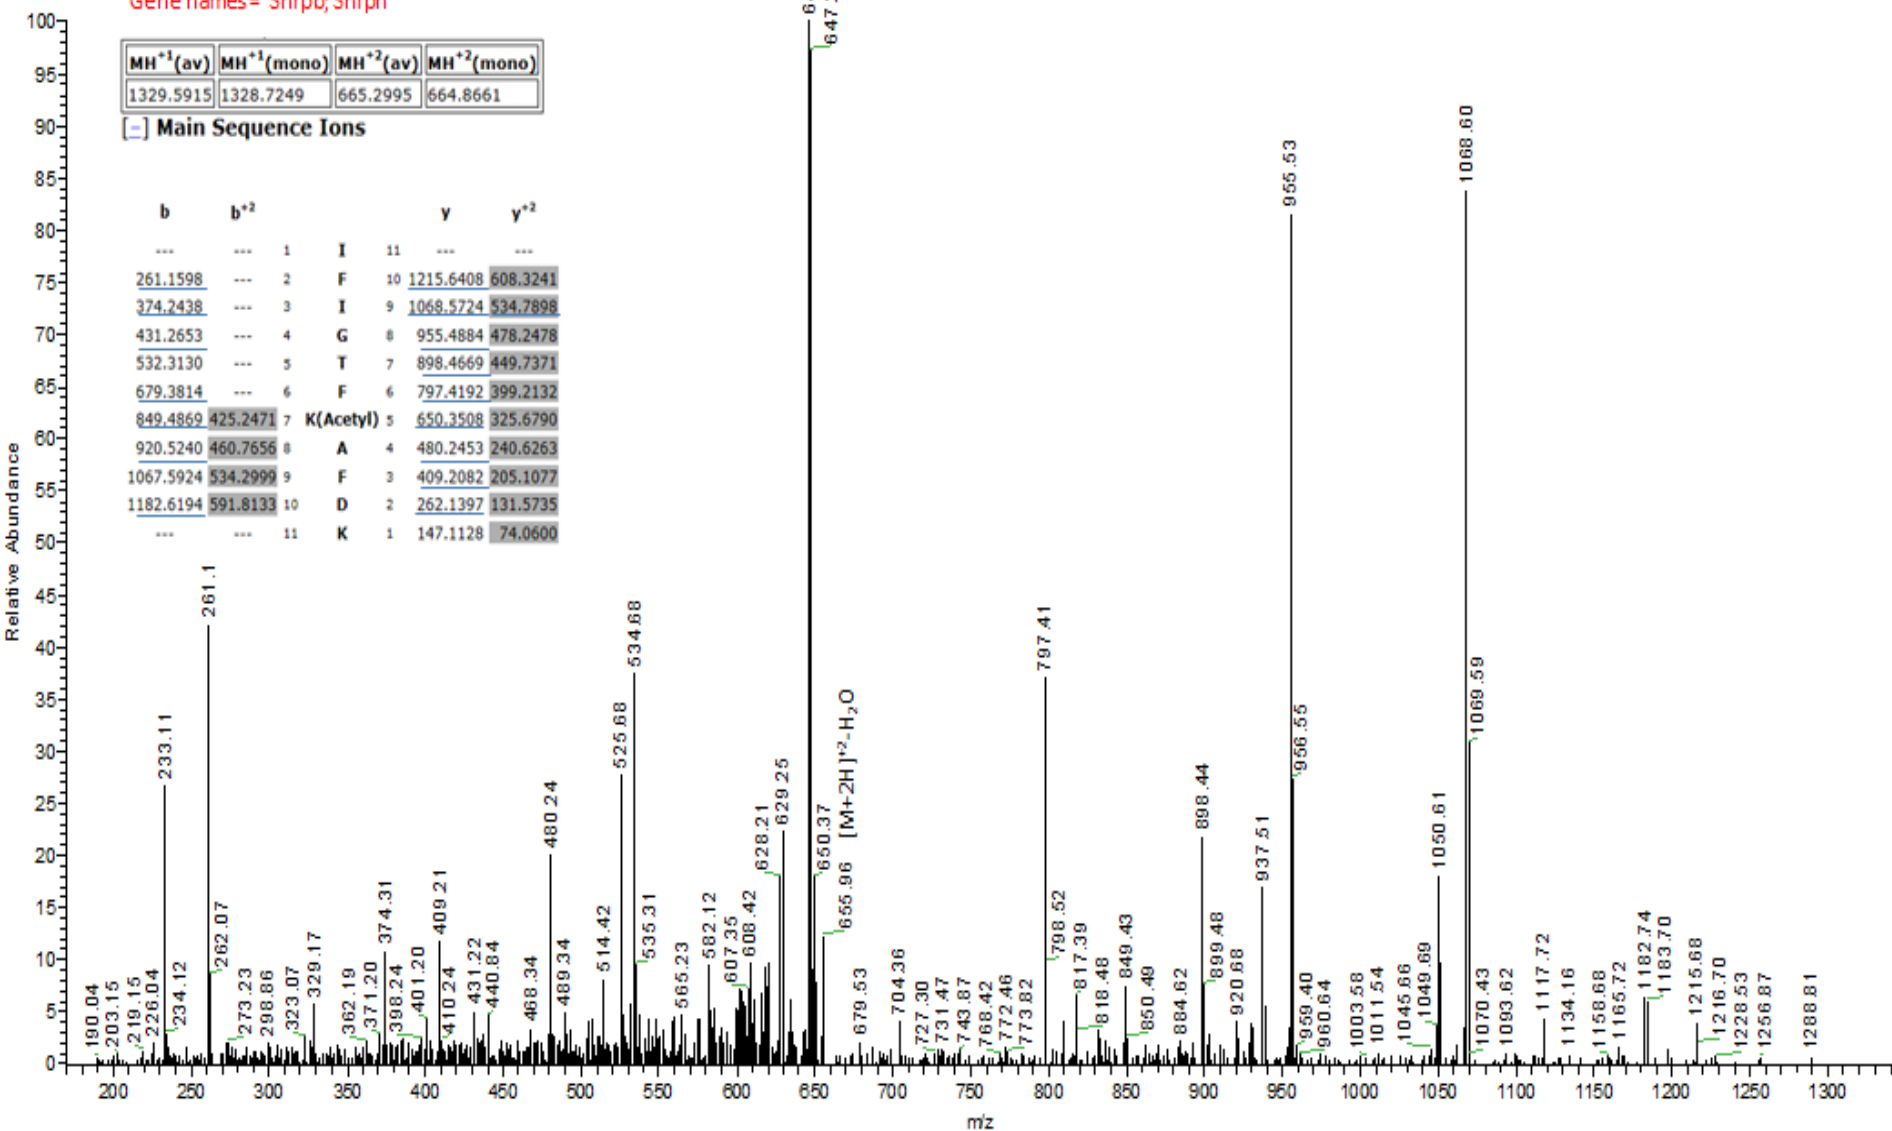

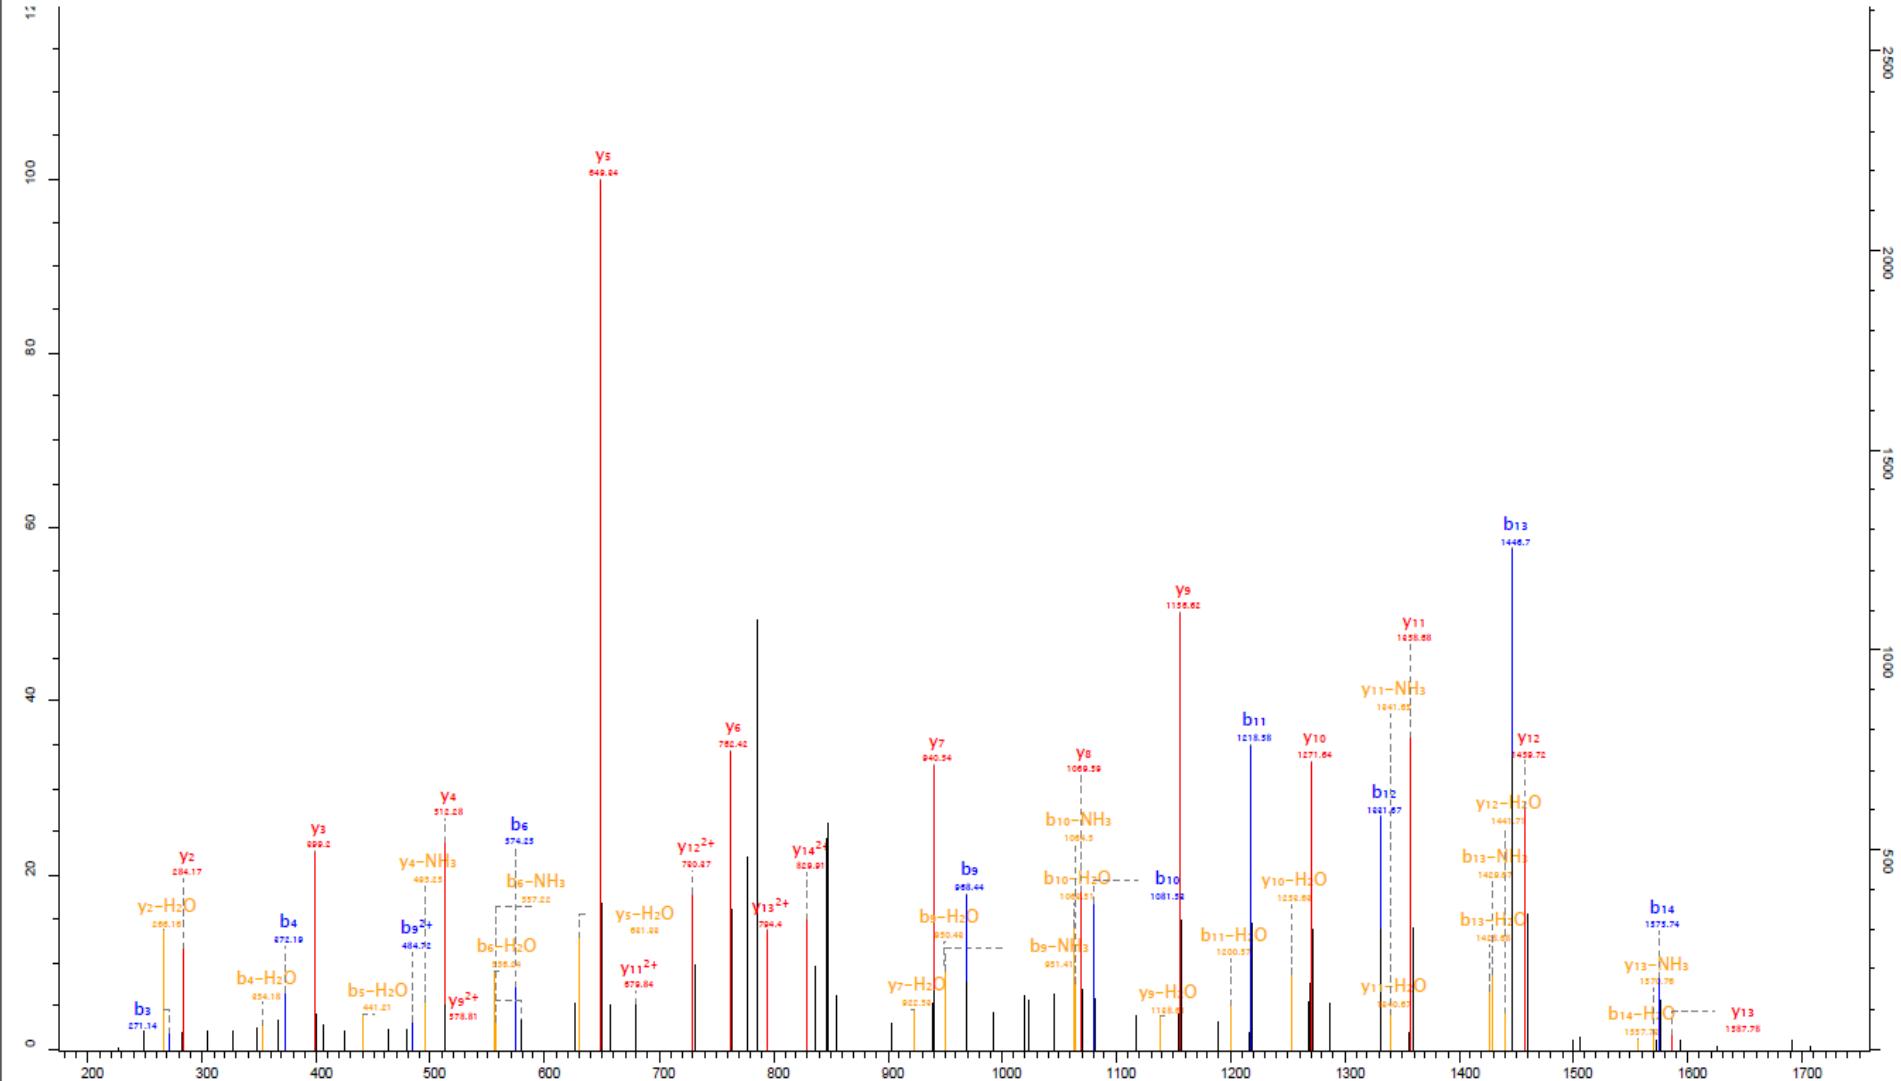

- A A Q T S D S E K I H L D E K -  
 b3 b4 b5 b6 b7 b8 b9 b10 b11 b12 b13 b14

Gene name= **Taldo1**

| MH <sup>+</sup> (av) | MH <sup>+</sup> (mono) | MH <sup>2+</sup> (av) | MH <sup>2+</sup> (mono) |
|----------------------|------------------------|-----------------------|-------------------------|
| 1730.8390            | 1729.8574              | 865.9232              | 865.4323                |

**Main Sequence Ions**

| b                | b <sup>+</sup>  |    | y                 | y <sup>+</sup> |                                 |
|------------------|-----------------|----|-------------------|----------------|---------------------------------|
| ---              | ---             | 1  | A                 | 15             | ---                             |
| 143.0815         | ---             | 2  | A                 | 14             | 1658.8203 <b>829.9138</b>       |
| 271.1401         | ---             | 3  | Q                 | 13             | 1587.7832 <b>794.3952</b>       |
| 372.1878         | ---             | 4  | T                 | 12             | 1459.7246 <b>730.3659</b>       |
| 459.2198         | ---             | 5  | S                 | 11             | 1358.6769 <b>679.8421</b>       |
| 574.2467         | ---             | 6  | D                 | 10             | 1271.6449 <b>636.3261</b>       |
| 661.2788         | ---             | 7  | S                 | 9              | 1156.6180 <b>578.8126</b>       |
| 790.3214         | ---             | 8  | E                 | 8              | 1069.5859 <b>535.2966</b>       |
| 968.4411         | <b>884.7242</b> | 9  | <b>K(50.0248)</b> | 7              | 940.5433 <b>470.7753</b>        |
| 1081.5252        | <b>541.2662</b> | 10 | I                 | 6              | 762.4236 <b>381.7154</b>        |
| <b>1218.5841</b> | <b>609.7957</b> | 11 | H                 | 5              | <b>649.3395</b> <b>325.1734</b> |
| <b>1331.6682</b> | <b>666.3377</b> | 12 | L                 | 4              | <b>512.2806</b> <b>256.6439</b> |
| <b>1446.6951</b> | <b>723.8512</b> | 13 | D                 | 3              | <b>399.1965</b> <b>200.1019</b> |
| <b>1575.7377</b> | <b>788.3725</b> | 14 | E                 | 2              | <b>284.1696</b> <b>142.5884</b> |
| ---              | ---             | 15 | <b>K(8.0142)</b>  | 1              | 155.1270 <b>78.0671</b>         |

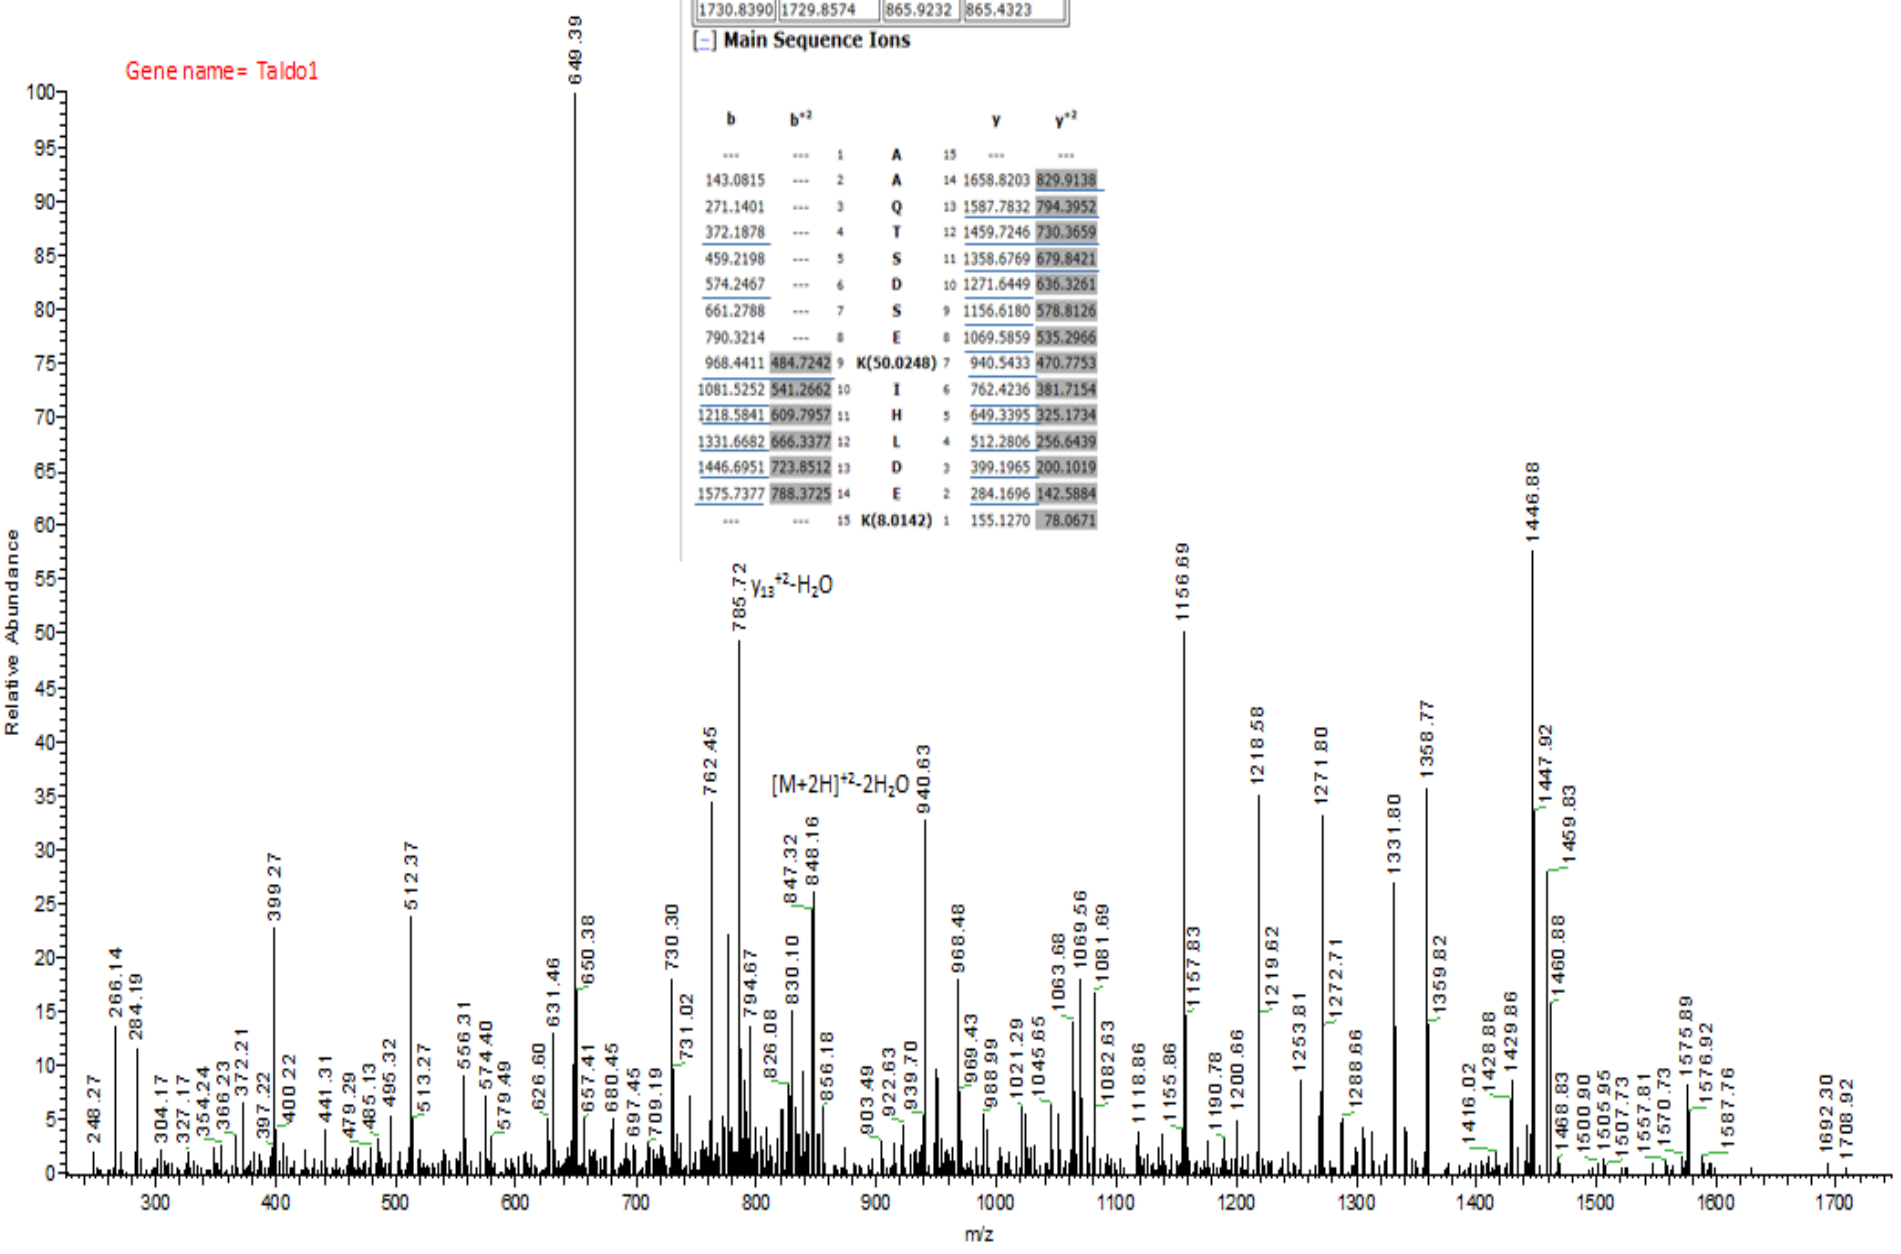

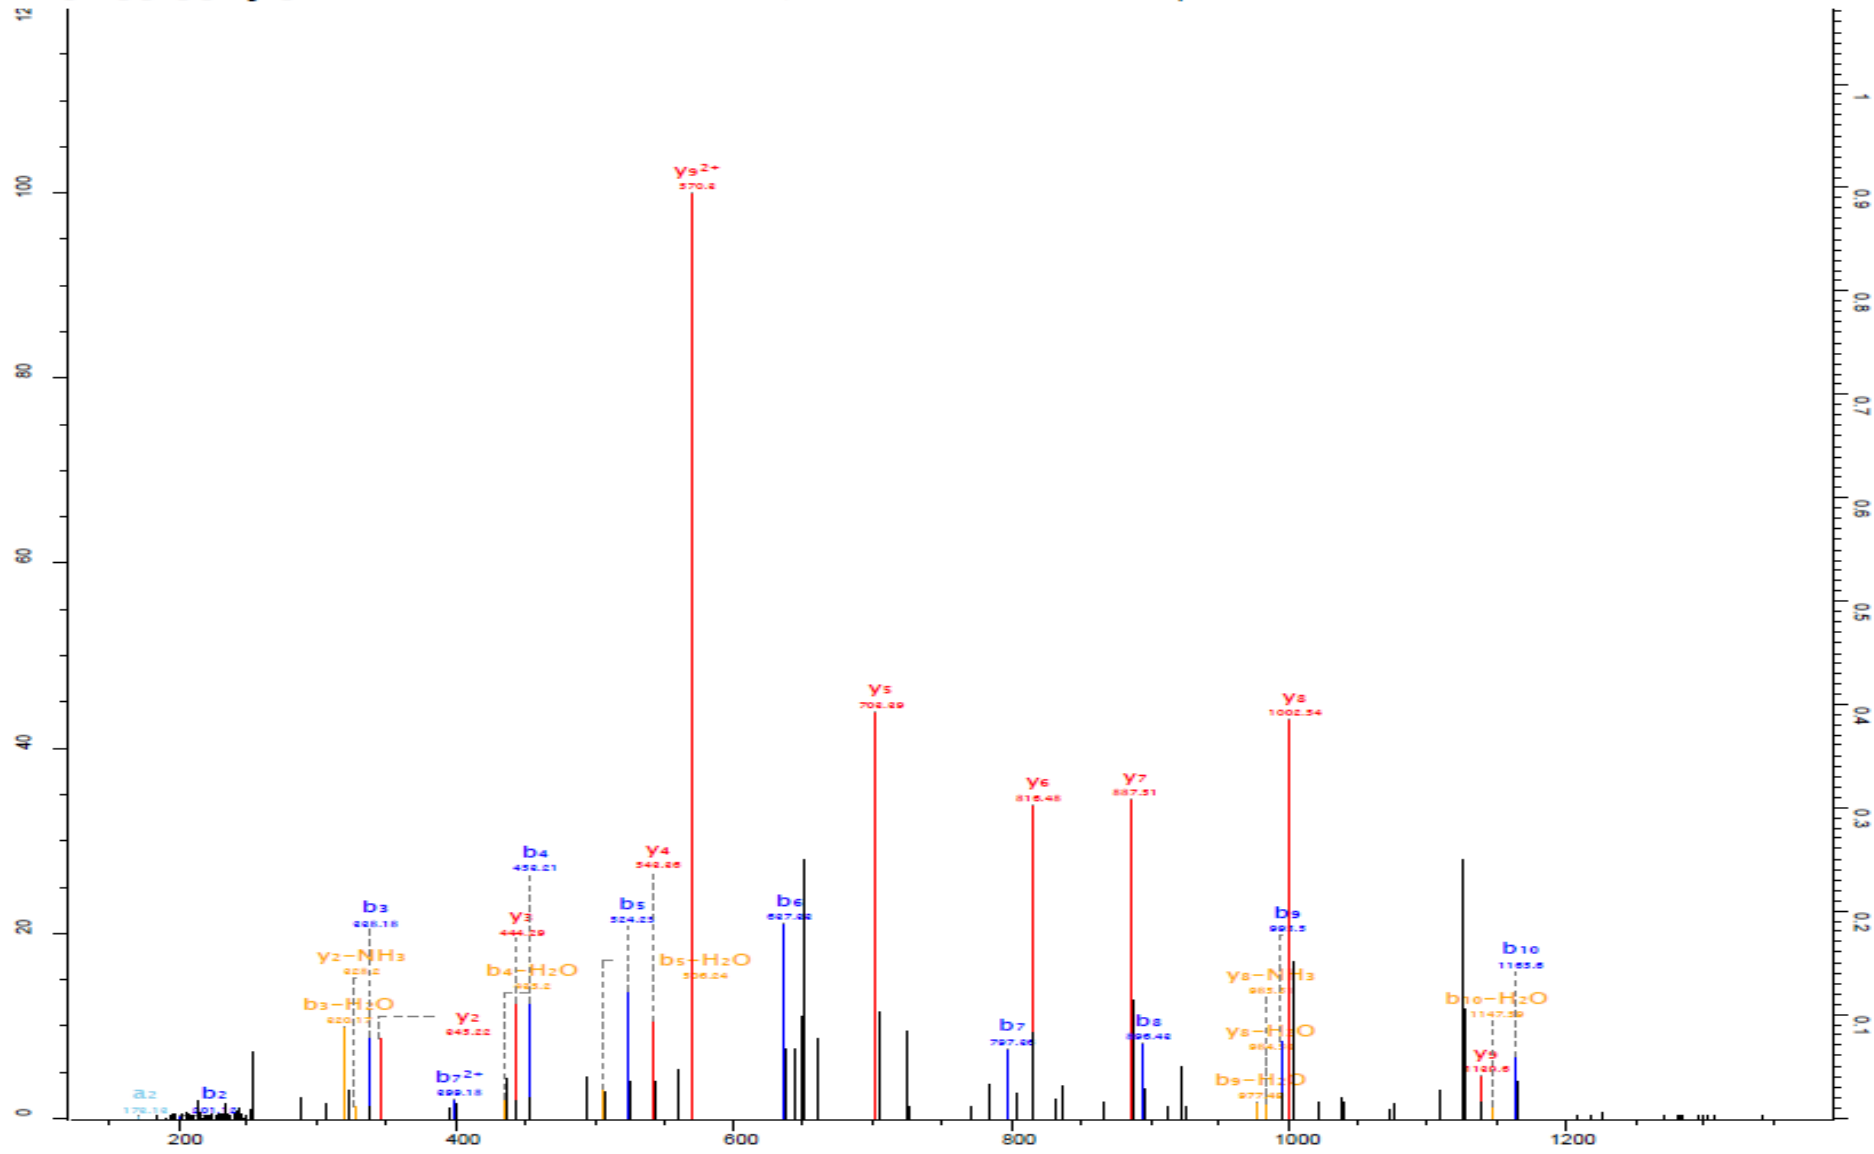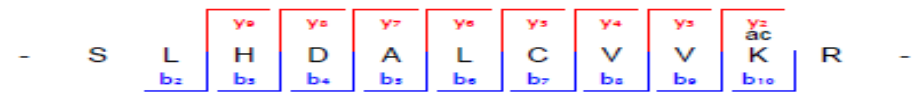

Gene name = **Tcp1**

| MH <sup>+</sup> 1(av) | MH <sup>+</sup> 1(mono) | MH <sup>+</sup> 2(av) | MH <sup>+</sup> 2(mono) |
|-----------------------|-------------------------|-----------------------|-------------------------|
| 1340.5969             | 1339.7151               | 670.8022              | 670.3612                |

**Main Sequence Ions**

| b         | b <sup>+</sup> |    | y                  | y <sup>+</sup> |           |
|-----------|----------------|----|--------------------|----------------|-----------|
| ---       | ---            | 1  | S                  | 11             | ---       |
| 201.1234  | ---            | 2  | L                  | 10             | 1252.6831 |
| 338.1823  | 169.5948       | 3  | H                  | 9              | 1139.5990 |
| 453.2092  | 227.1083       | 4  | D                  | 8              | 1002.5401 |
| 524.2463  | 262.6268       | 5  | A                  | 7              | 887.5131  |
| 637.3304  | 319.1688       | 6  | L                  | 6              | 816.4760  |
| 797.3610  | 399.1842       | 7  | C(Carbamidomethyl) | 5              | 703.3920  |
| 896.4295  | 448.7184       | 8  | V                  | 4              | 543.3613  |
| 995.4979  | 498.2526       | 9  | V                  | 3              | 444.2929  |
| 1165.6034 | 583.3053       | 10 | K(Acetyl)          | 2              | 345.2245  |
| ---       | ---            | 11 | R                  | 1              | 175.1190  |

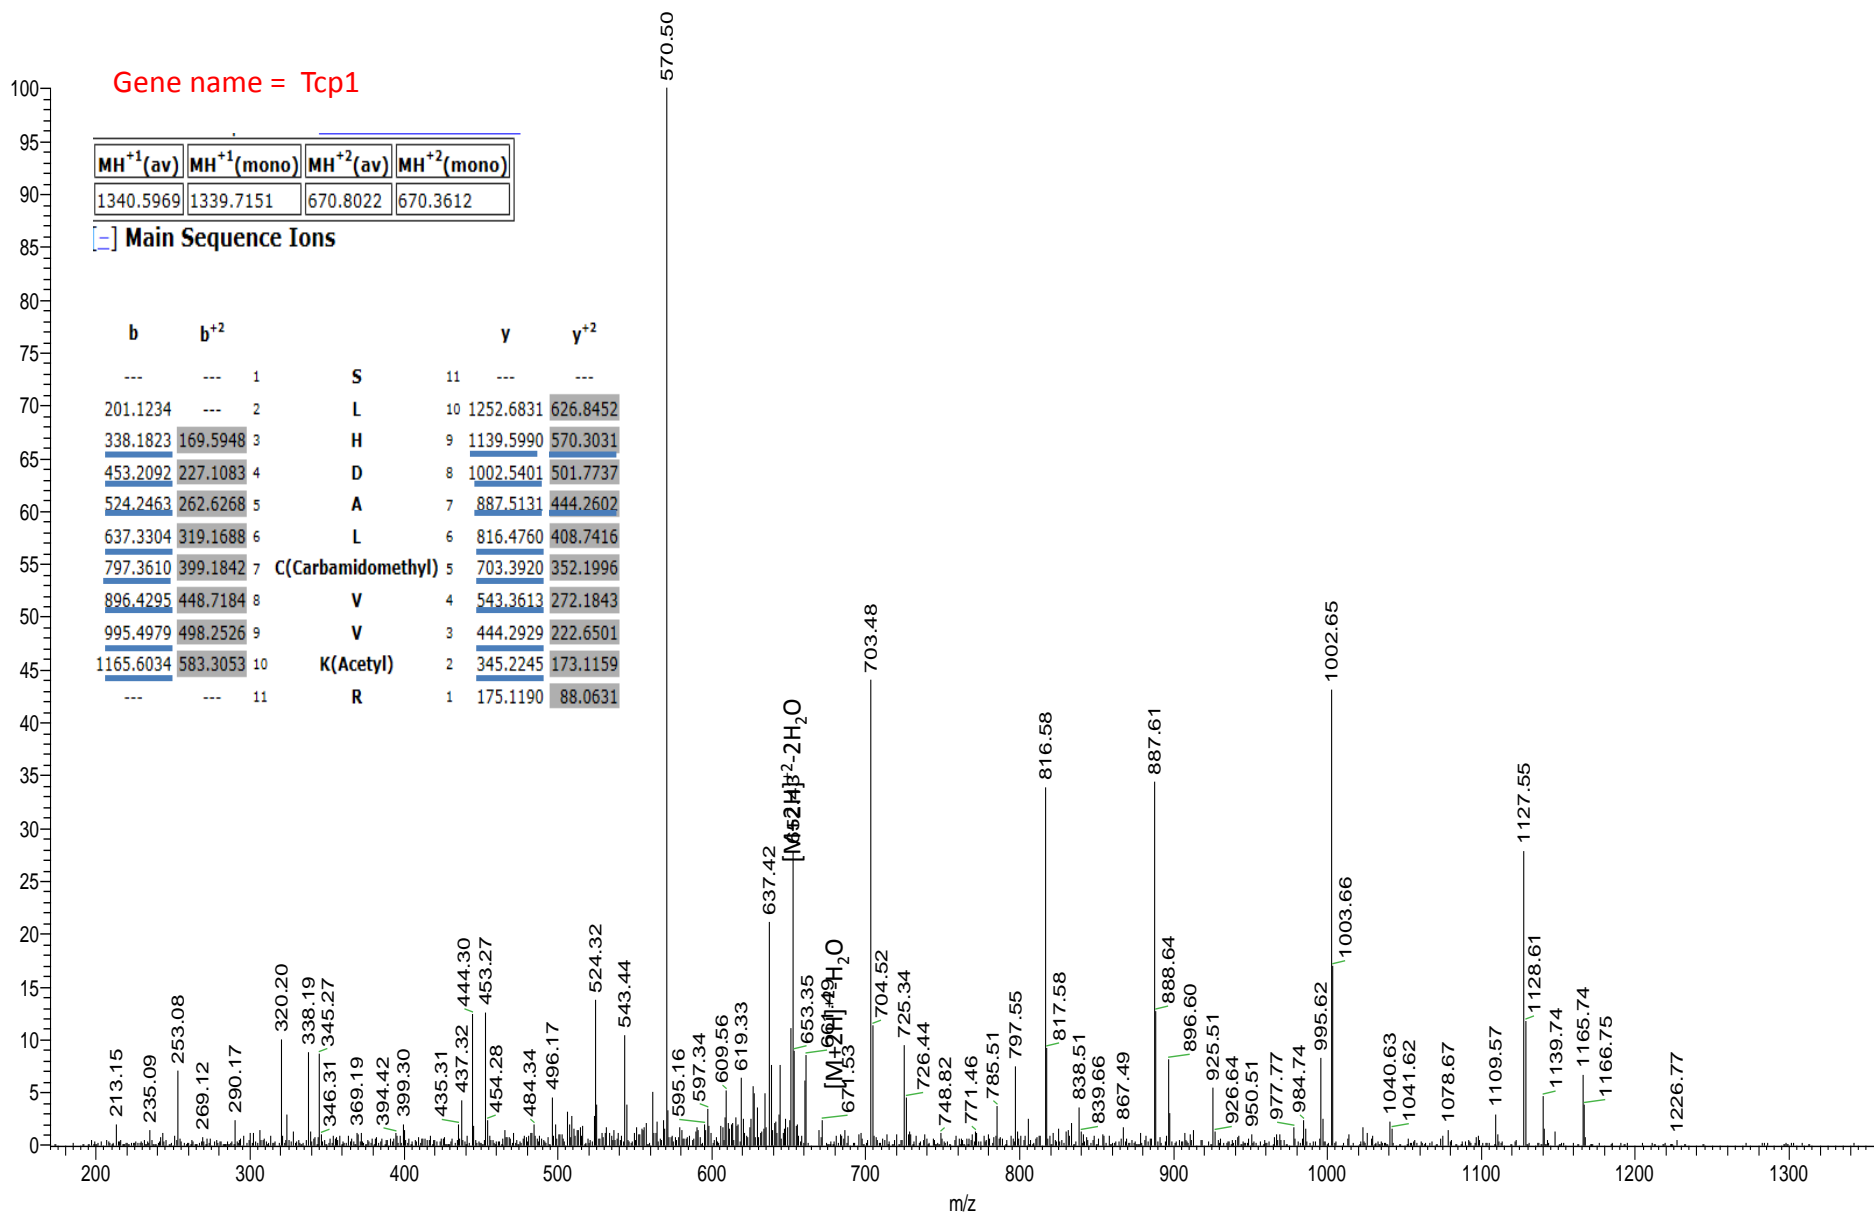



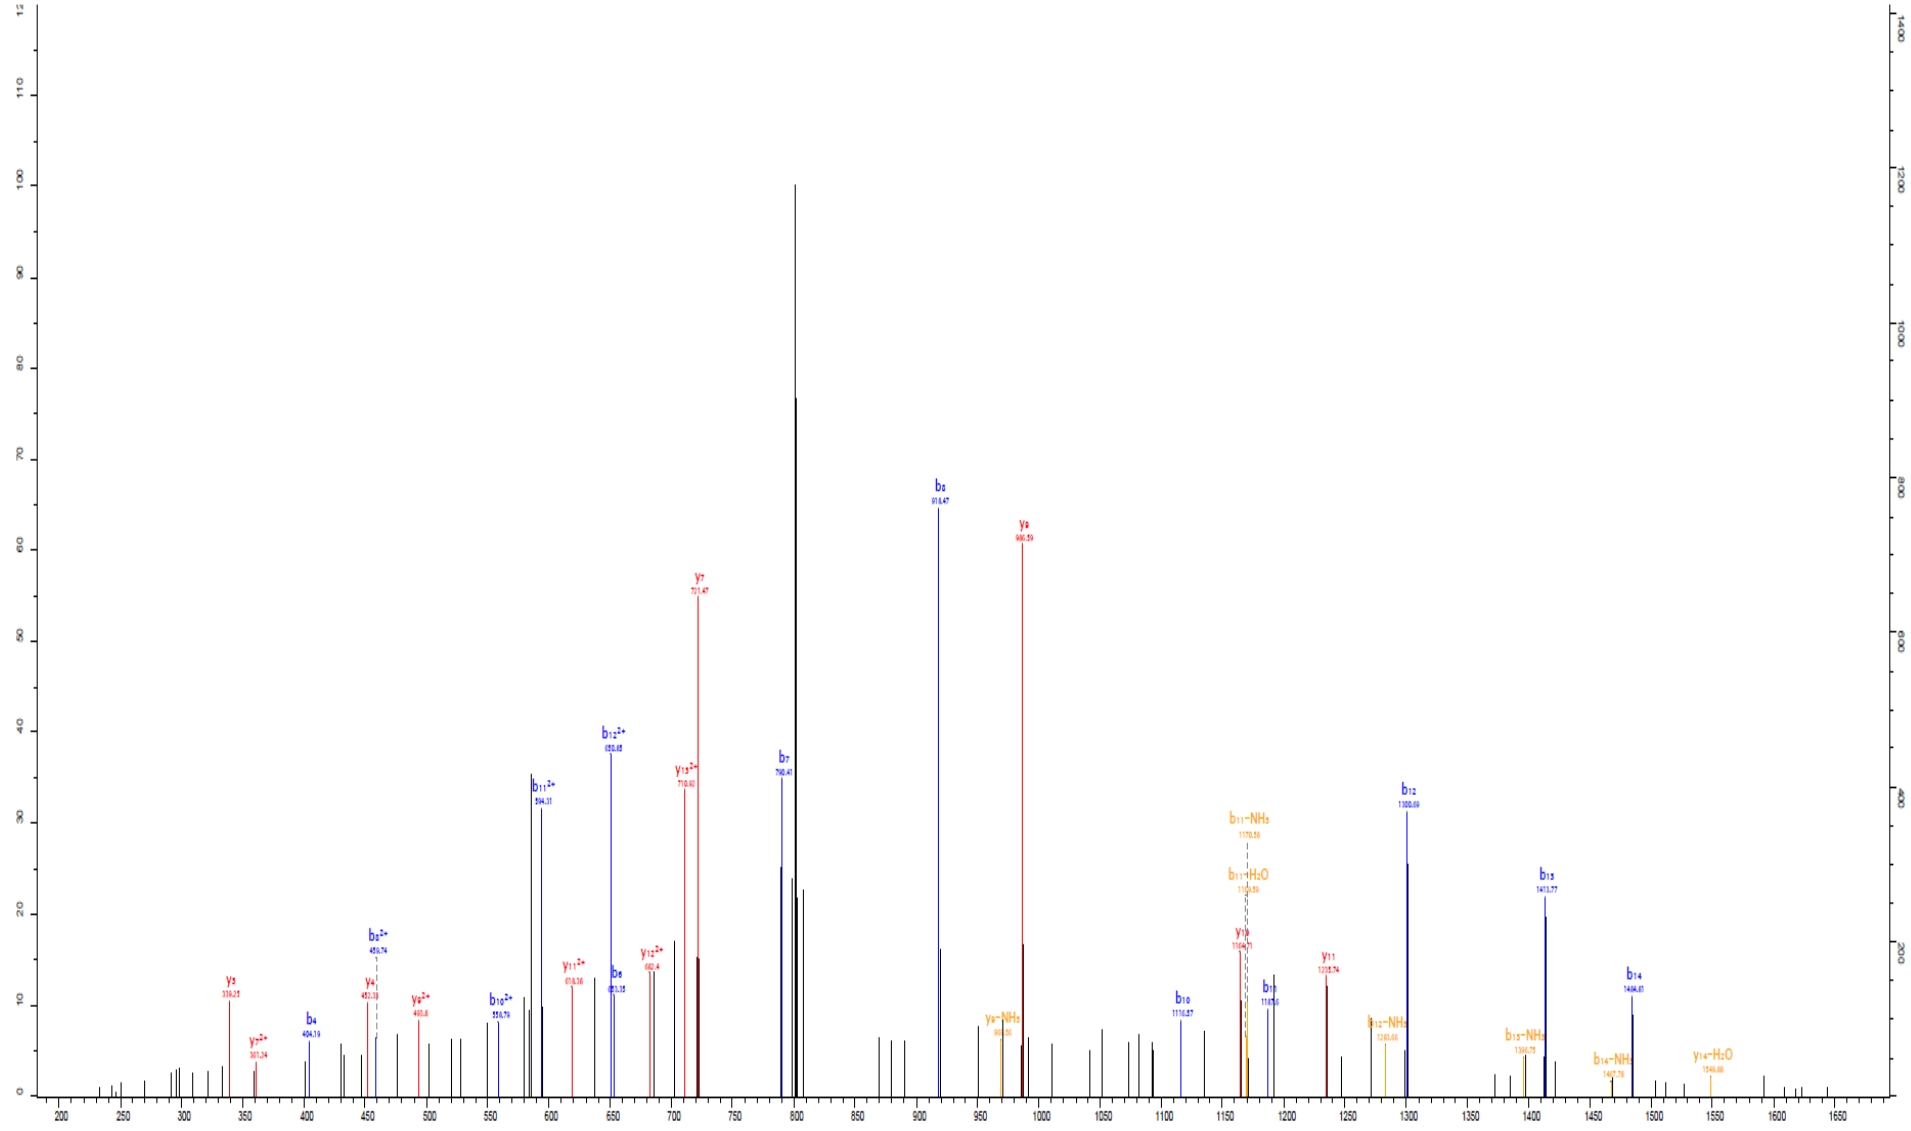

- A F G Q A K H Q P T A I I A K -

Fragmentation mapping:  
 - y12+ (G) - y12+ (Q) - y11 (A) - y10 ac (K) - y4 (H) - y2 (Q) - y7 (P)  
 - b4 (G) - b6 (A) - b7 (H) - b6 (Q) - b16 (P) - b11 (T) - b12 (A) - b16 (I) - b14 (A) - b14 (K)

Gene name = Tkt

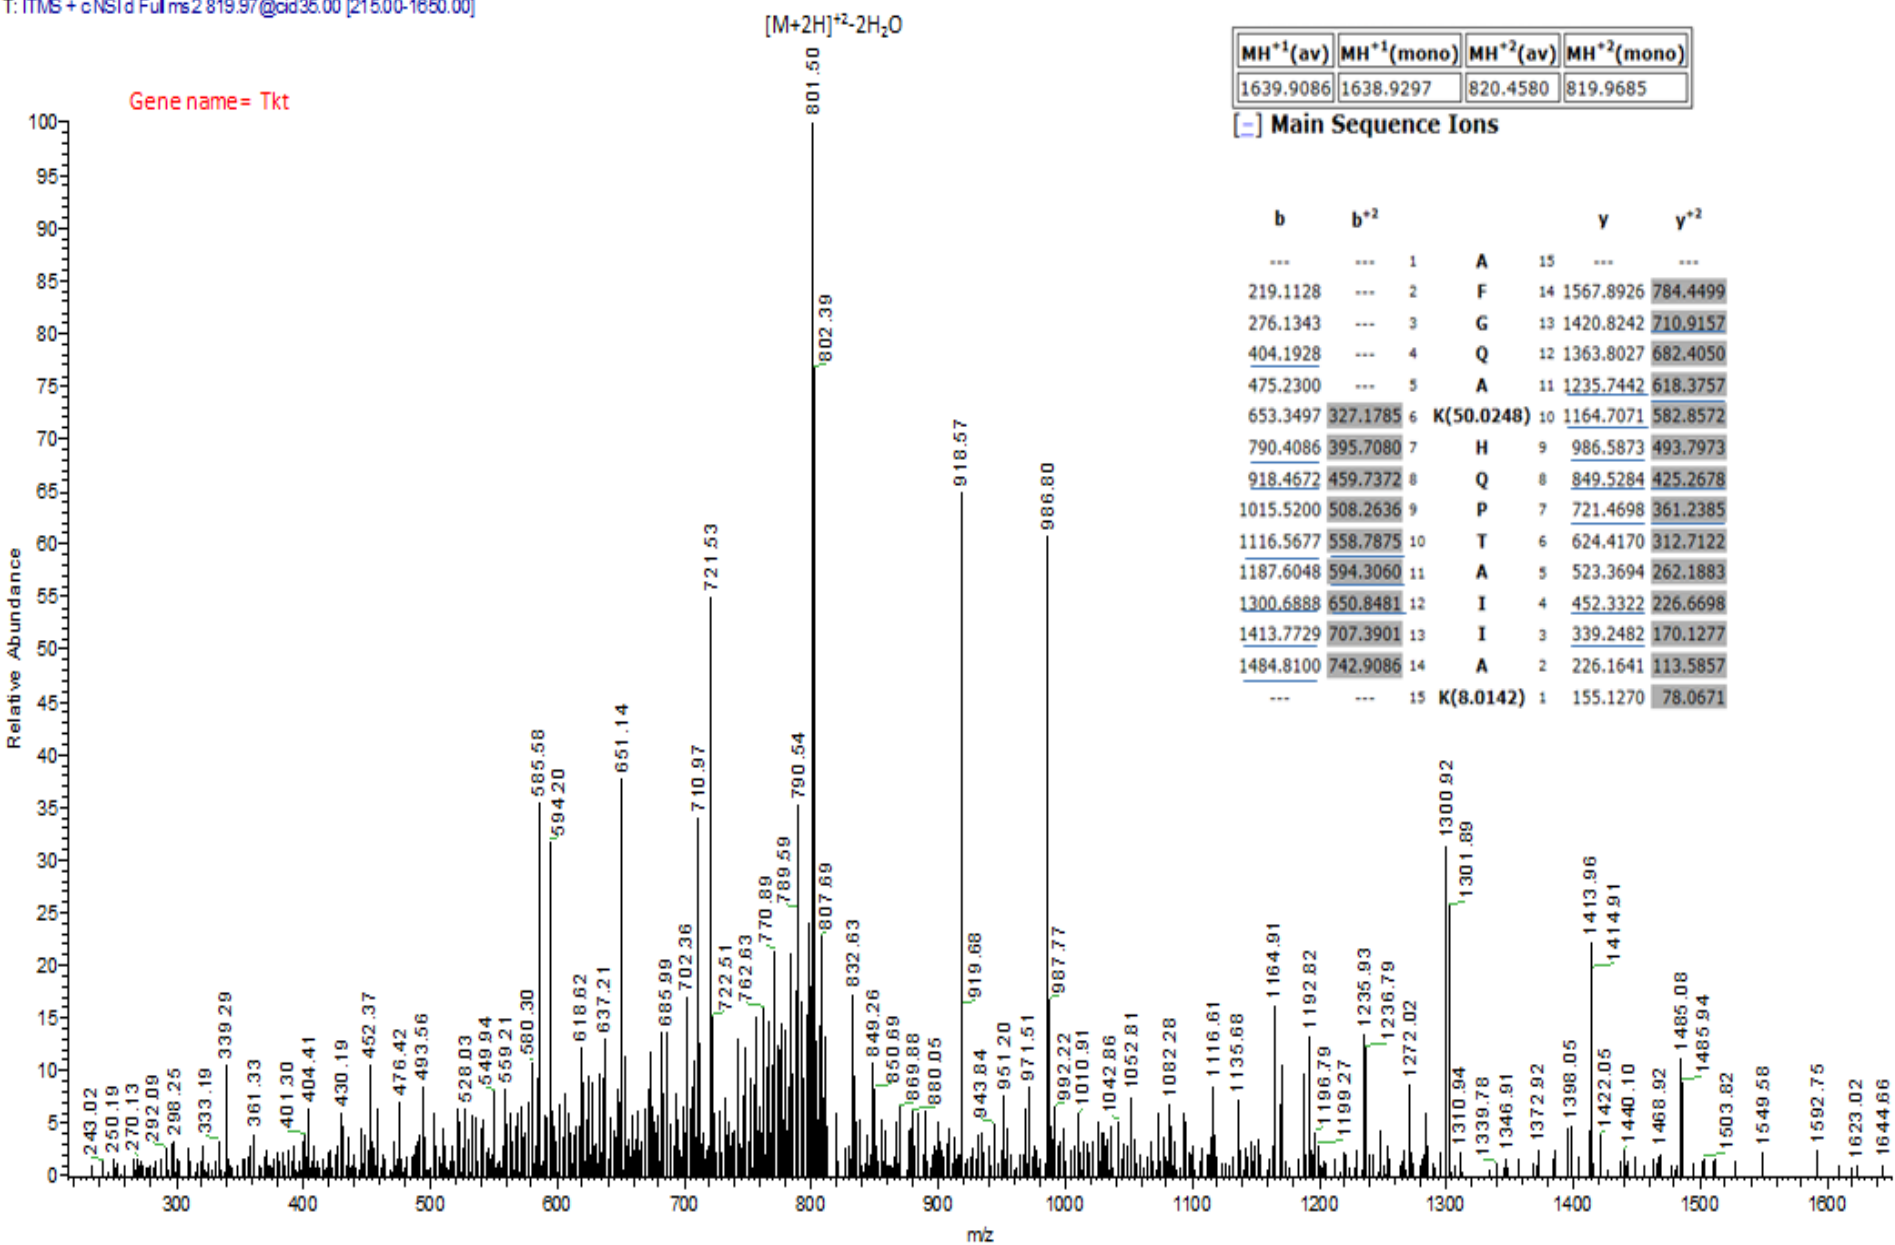

$[M+2H]^{+2}-2H_2O$

| MH <sup>+</sup> 1(av) | MH <sup>+</sup> 1(mono) | MH <sup>+</sup> 2(av) | MH <sup>+</sup> 2(mono) |
|-----------------------|-------------------------|-----------------------|-------------------------|
| 1639.9086             | 1638.9297               | 820.4580              | 819.9685                |

**[-] Main Sequence Ions**

| b         | b <sup>+</sup> |    | y                 | y <sup>+</sup> |           |
|-----------|----------------|----|-------------------|----------------|-----------|
| ---       | ---            | 1  | A                 | 15             | ---       |
| 219.1128  | ---            | 2  | F                 | 14             | 1567.8926 |
| 276.1343  | ---            | 3  | G                 | 13             | 1420.8242 |
| 404.1928  | ---            | 4  | Q                 | 12             | 1363.8027 |
| 475.2300  | ---            | 5  | A                 | 11             | 1235.7442 |
| 653.3497  | 327.1785       | 6  | <b>K(50.0248)</b> | 10             | 1164.7071 |
| 790.4086  | 395.7080       | 7  | H                 | 9              | 986.5873  |
| 918.4672  | 459.7372       | 8  | Q                 | 8              | 849.5284  |
| 1015.5200 | 508.2636       | 9  | P                 | 7              | 721.4698  |
| 1116.5677 | 558.7875       | 10 | T                 | 6              | 624.4170  |
| 1187.6048 | 594.3060       | 11 | A                 | 5              | 523.3694  |
| 1300.6888 | 650.8481       | 12 | I                 | 4              | 452.3322  |
| 1413.7729 | 707.3901       | 13 | I                 | 3              | 339.2482  |
| 1484.8100 | 742.9086       | 14 | A                 | 2              | 226.1641  |
| --        | --             | 15 | <b>K(8.0142)</b>  | 1              | 155.1270  |

784.4499  
710.9157  
682.4050  
618.3757  
582.8572  
493.7973  
425.2678  
361.2385  
312.7122  
262.1883  
226.6698  
170.1277  
113.5857  
78.0671

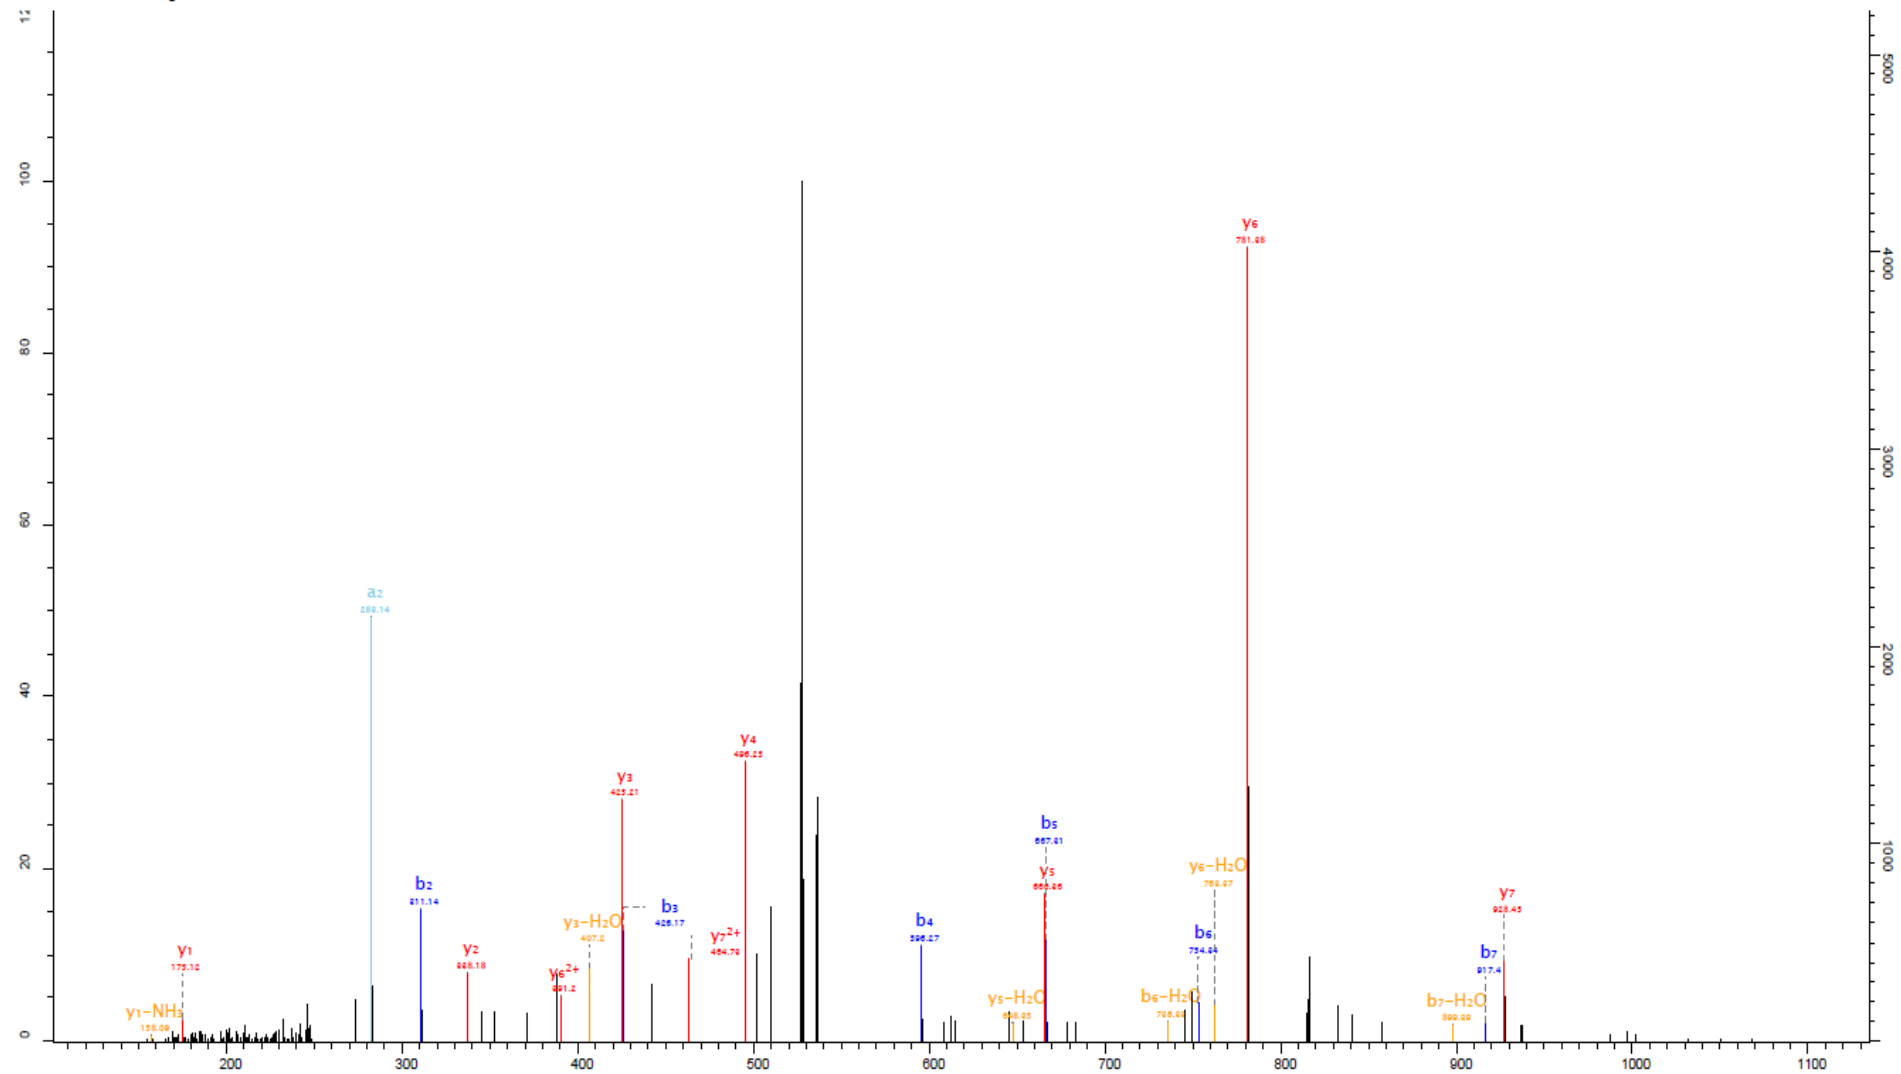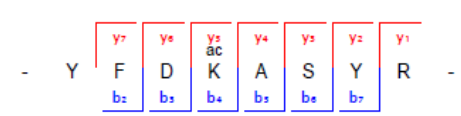

$[M+2H]^{2+}-2H_2O$

Gene names = Tkt; Tk12

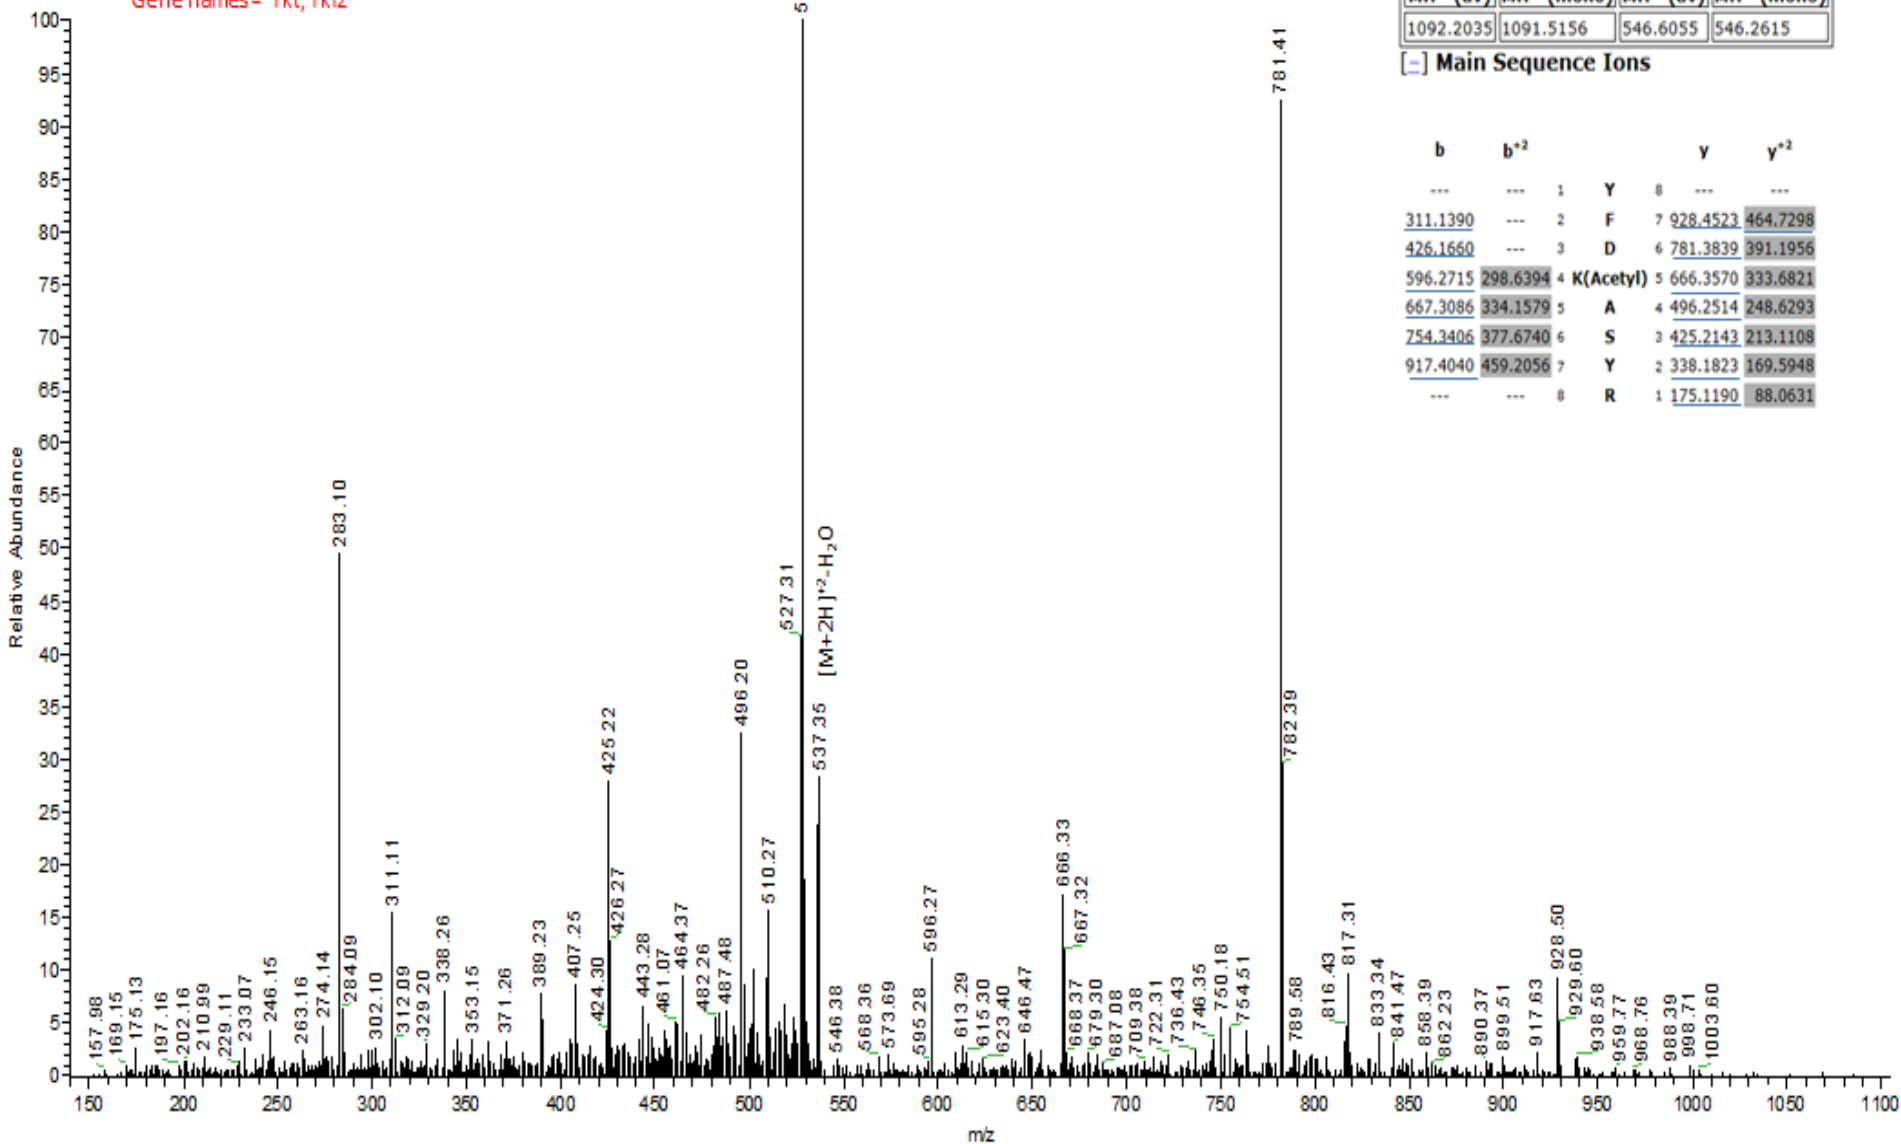

| MH <sup>+</sup> (av) | MH <sup>+</sup> (mono) | MH <sup>2+</sup> (av) | MH <sup>2+</sup> (mono) |
|----------------------|------------------------|-----------------------|-------------------------|
| 1092.2035            | 1091.5156              | 546.6055              | 546.2615                |

**[-] Main Sequence Ions**

| b        | b <sup>+</sup> |   | y         | y <sup>+</sup>      |
|----------|----------------|---|-----------|---------------------|
| ...      | ...            | 1 | Y         | 0                   |
| 311.1390 | ...            | 2 | F         | 7 928.4523 464.7298 |
| 426.1660 | ...            | 3 | D         | 6 781.3839 391.1956 |
| 596.2715 | 298.6394       | 4 | K(Acetyl) | 5 666.3570 333.6821 |
| 667.3086 | 334.1579       | 5 | S         | 4 496.2514 248.6293 |
| 754.3406 | 377.6740       | 6 | A         | 3 425.2143 213.1108 |
| 917.4040 | 459.2056       | 7 | Y         | 2 338.1823 169.5948 |
| ...      | ...            | 8 | R         | 1 175.1190 88.0631  |

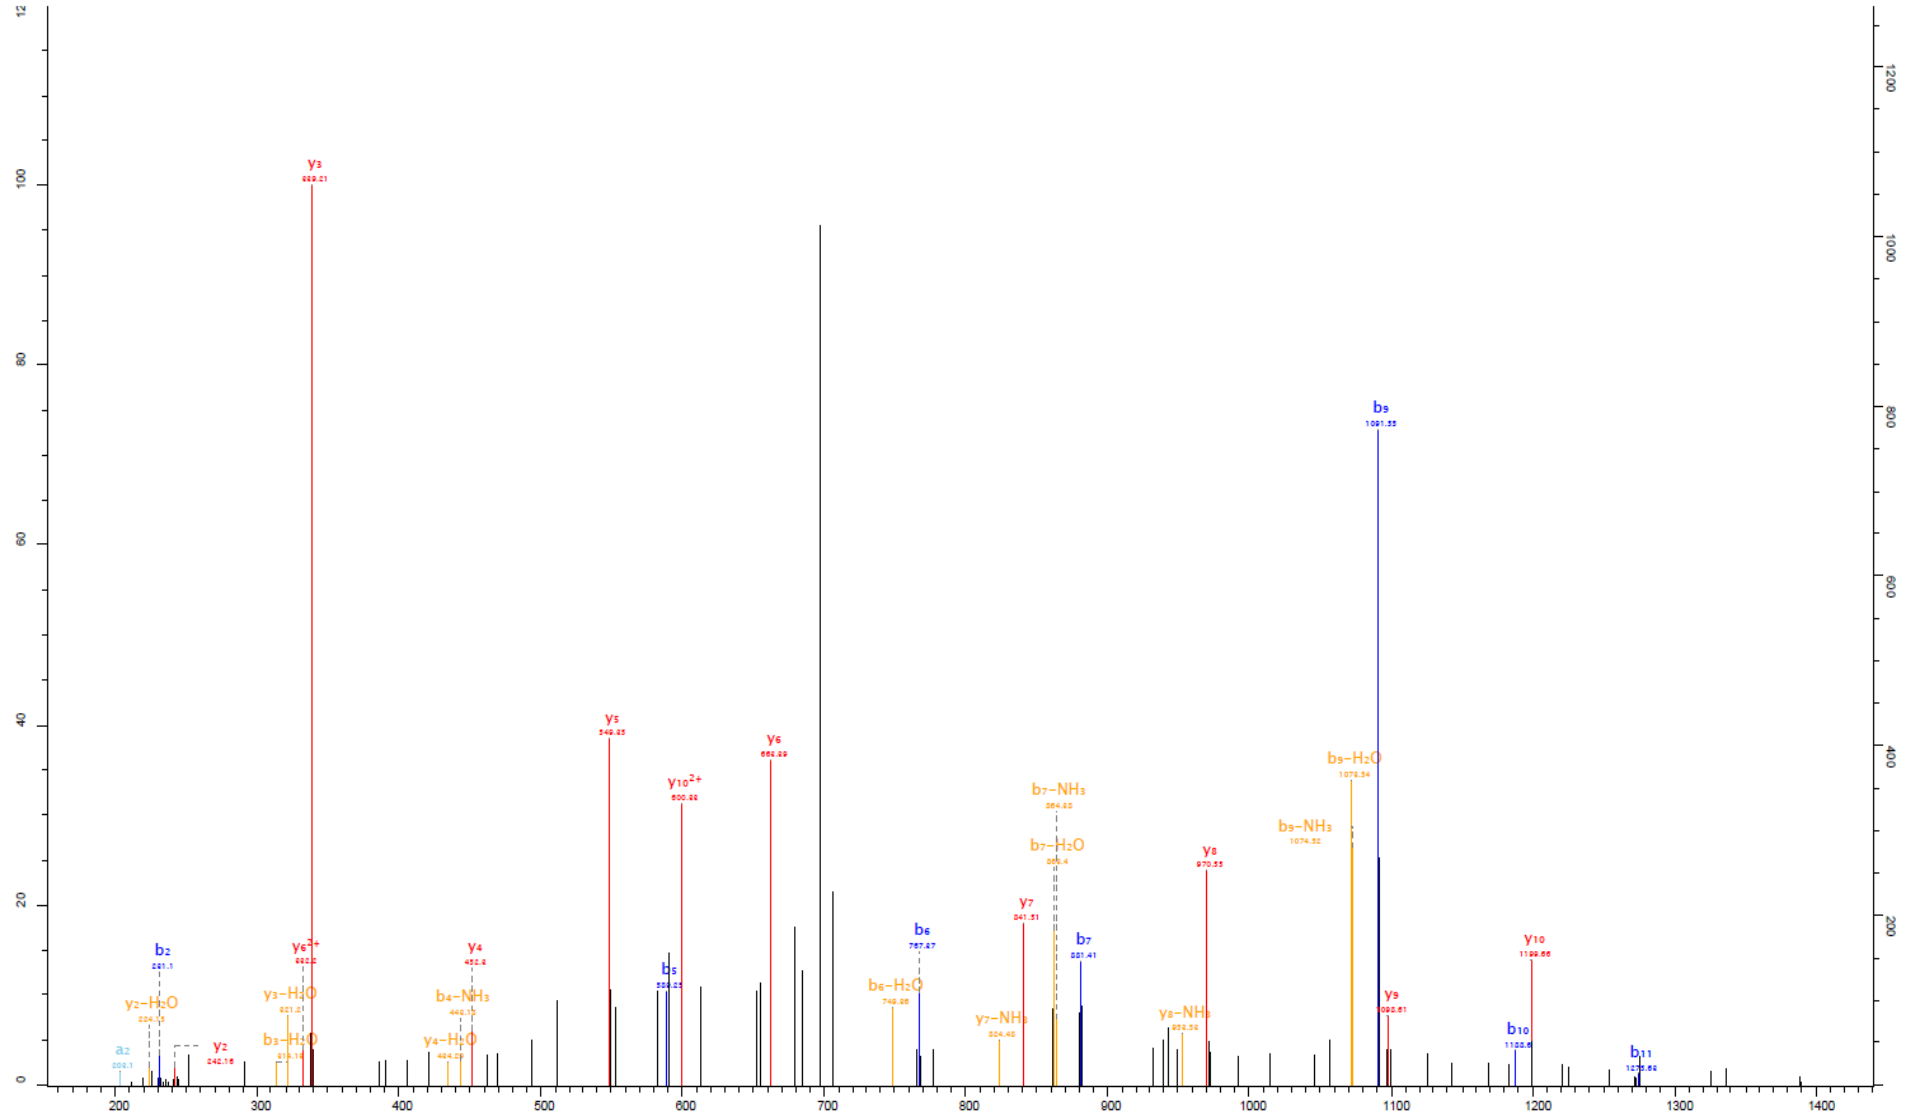

- T E T Q E K N P L P S K -

b<sub>2</sub>
y<sub>10</sub>
y<sub>9</sub>
y<sub>8</sub>
y<sub>7</sub>  
ac
y<sub>6</sub>
y<sub>5</sub>
y<sub>4</sub>
y<sub>3</sub>
y<sub>2</sub>  
b<sub>5</sub>
b<sub>6</sub>
b<sub>7</sub>
b<sub>8</sub>
b<sub>10</sub>
b<sub>11</sub>

Gene name = Tmsb4x

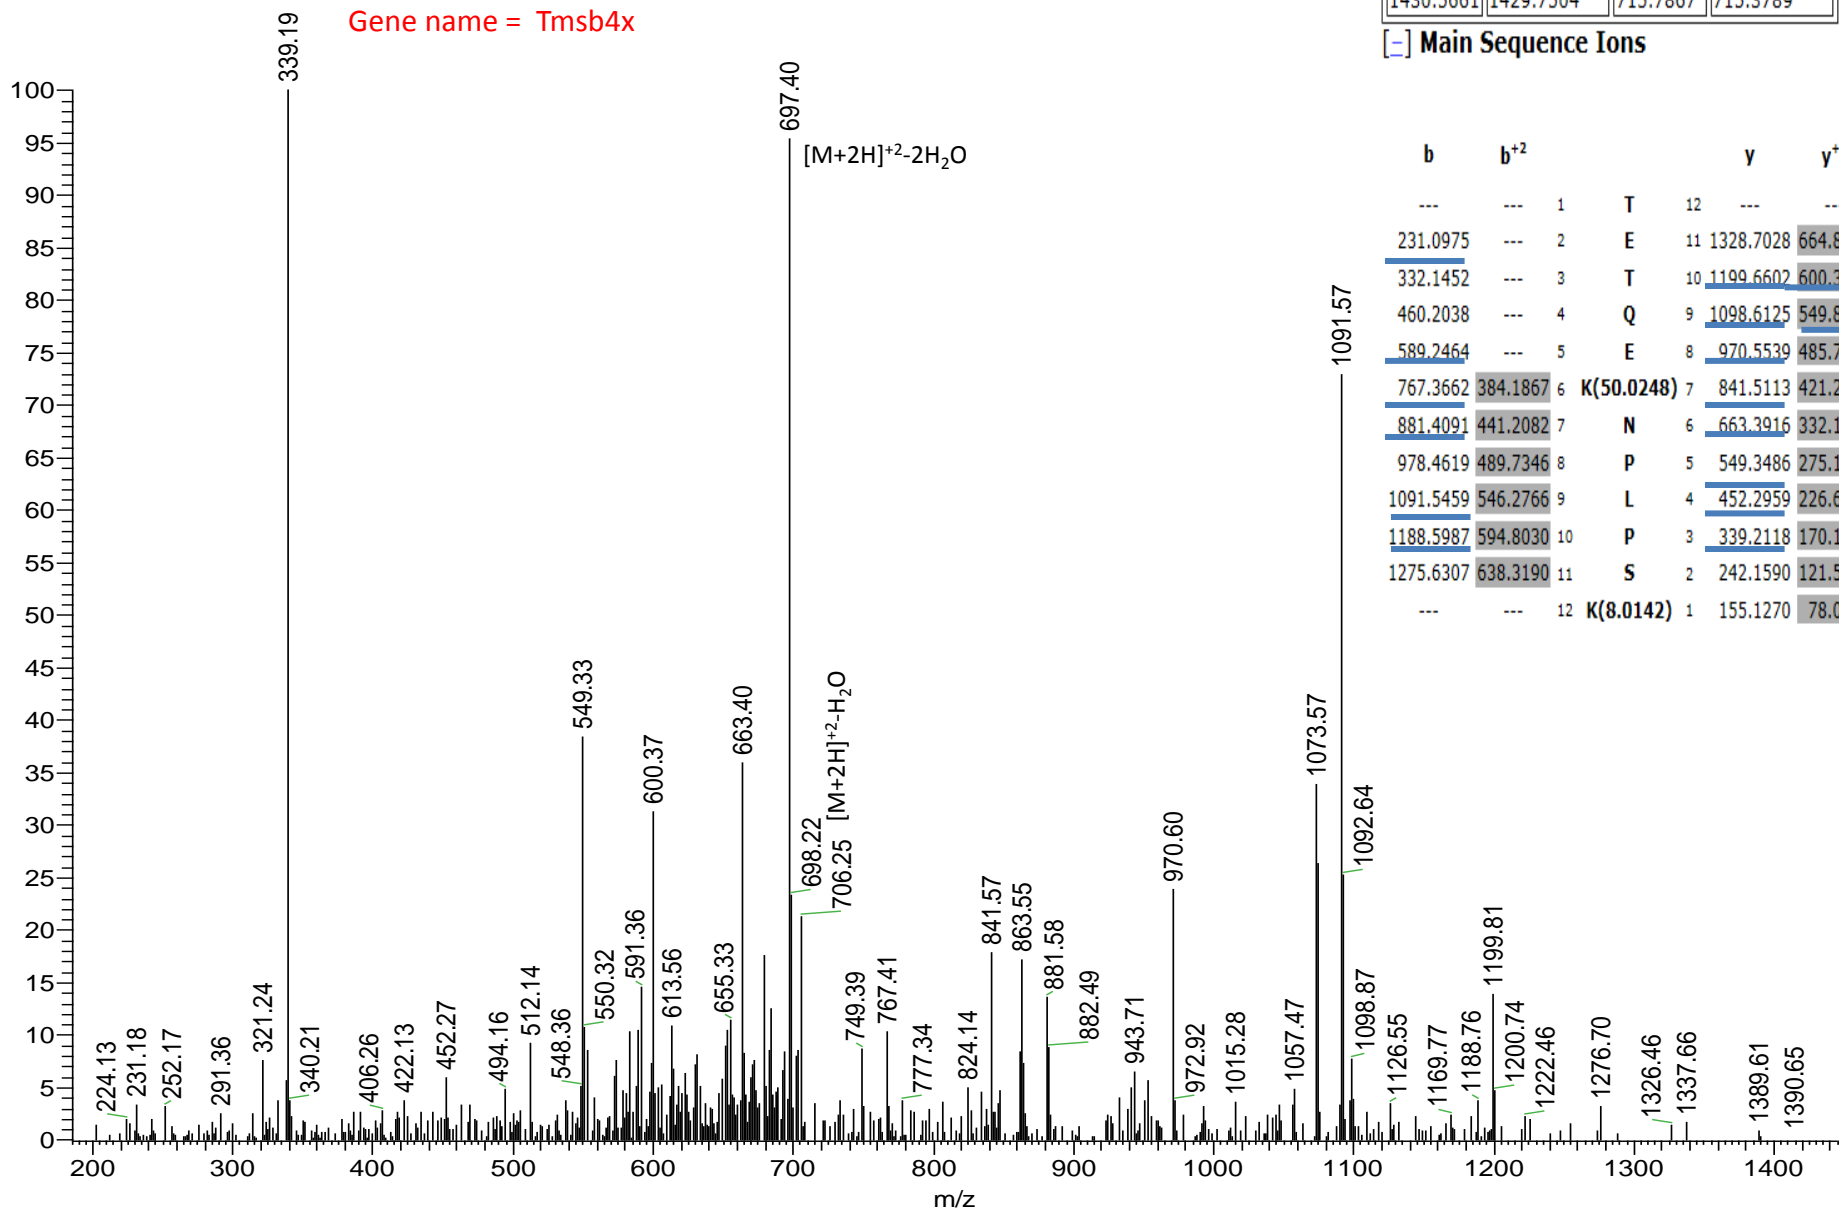

| MH <sup>+</sup> (av) | MH <sup>+</sup> (mono) | MH <sup>2+</sup> (av) | MH <sup>2+</sup> (mono) |
|----------------------|------------------------|-----------------------|-------------------------|
| 1430.5661            | 1429.7504              | 715.7867              | 715.3789                |

[ - ] Main Sequence Ions

| b         | b <sup>+</sup> |    | y                 | y <sup>+</sup> |           |
|-----------|----------------|----|-------------------|----------------|-----------|
| ---       | ---            | 1  | T                 | 12             | ---       |
| 231.0975  | ---            | 2  | E                 | 11             | 1328.7028 |
| 332.1452  | ---            | 3  | T                 | 10             | 1199.6602 |
| 460.2038  | ---            | 4  | Q                 | 9              | 1098.6125 |
| 589.2464  | ---            | 5  | E                 | 8              | 970.5539  |
| 767.3662  | 384.1867       | 6  | <b>K(50.0248)</b> | 7              | 841.5113  |
| 881.4091  | 441.2082       | 7  | <b>N</b>          | 6              | 663.3916  |
| 978.4619  | 489.7346       | 8  | <b>P</b>          | 5              | 549.3486  |
| 1091.5459 | 546.2766       | 9  | <b>L</b>          | 4              | 452.2959  |
| 1188.5987 | 594.8030       | 10 | <b>P</b>          | 3              | 339.2118  |
| 1275.6307 | 638.3190       | 11 | <b>S</b>          | 2              | 242.1590  |
| ---       | ---            | 12 | <b>K(8.0142)</b>  | 1              | 155.1270  |

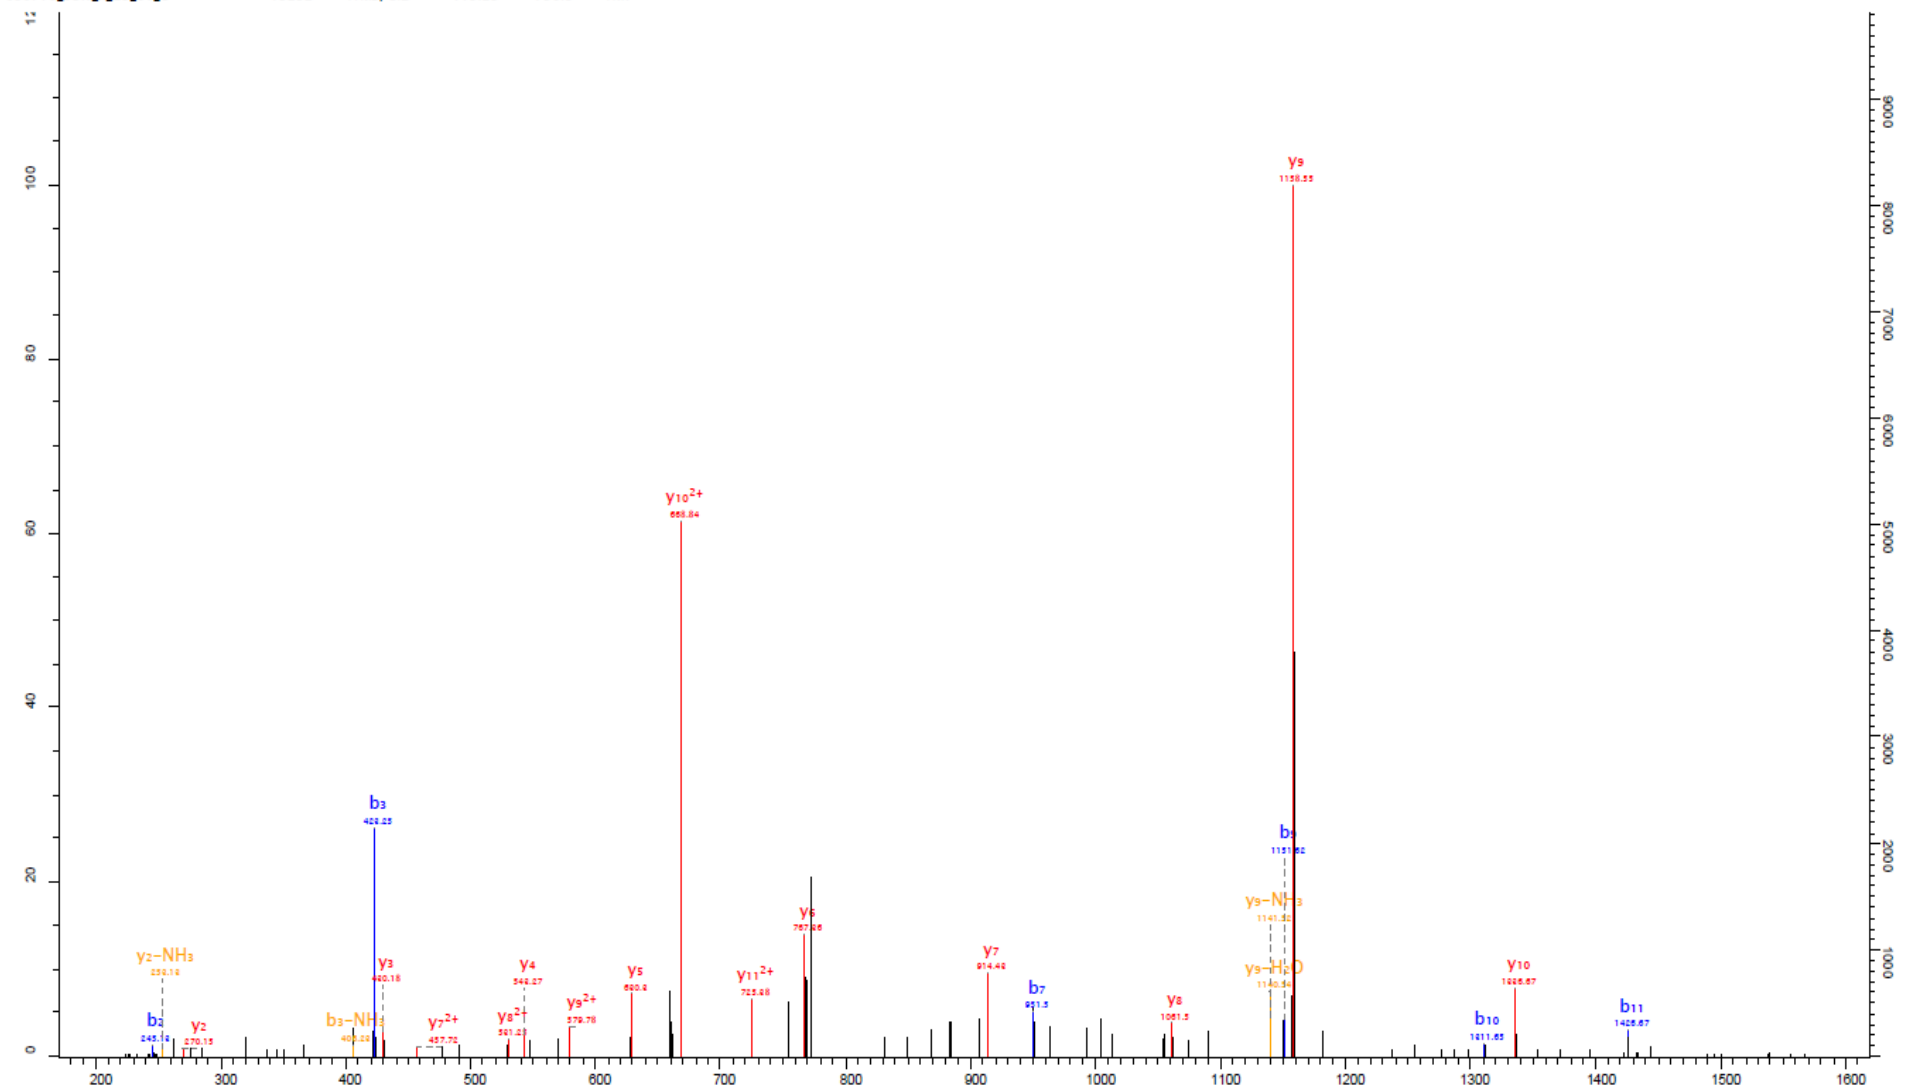

- M I K P F F H S L C D K -

y11<sup>2+</sup>
y10 ac
y9
y8
y7
y6
y5
y4
y3
y2

b2
b3
b7
b9
b10
b11

Gene name = Txn

| MH <sup>+</sup> 1(av) | MH <sup>+</sup> 1(mono) | MH <sup>+</sup> 2(av) | MH <sup>+</sup> 2(mono) |
|-----------------------|-------------------------|-----------------------|-------------------------|
| 1581.9098             | 1580.7935               | 791.4586              | 790.9004                |

[-] Main Sequence Ions

| b         | b <sup>+</sup> 2 |    | y                         | y <sup>+</sup> 2 |           |
|-----------|------------------|----|---------------------------|------------------|-----------|
| ---       | ---              | 1  | M                         | 12               | ---       |
| 245.1318  | ---              | 2  | I                         | 11               | 1449.7530 |
| 423.2516  | 212.1294         | 3  | <b>K(50.0248)</b>         | 10               | 1336.6690 |
| 520.3044  | 260.6558         | 4  | P                         | 9                | 1158.5492 |
| 667.3728  | 334.1900         | 5  | F                         | 8                | 1061.4964 |
| 814.4412  | 407.7242         | 6  | F                         | 7                | 914.4280  |
| 951.5001  | 476.2537         | 7  | H                         | 6                | 767.3596  |
| 1038.5321 | 519.7697         | 8  | S                         | 5                | 630.3007  |
| 1151.6162 | 576.3117         | 9  | L                         | 4                | 543.2687  |
| 1311.6468 | 656.3271         | 10 | <b>C(Carbamidomethyl)</b> | 3                | 430.1846  |
| 1426.6738 | 713.8405         | 11 | D                         | 2                | 270.1539  |
| ---       | ---              | 12 | <b>K(8.0142)</b>          | 1                | 155.1270  |

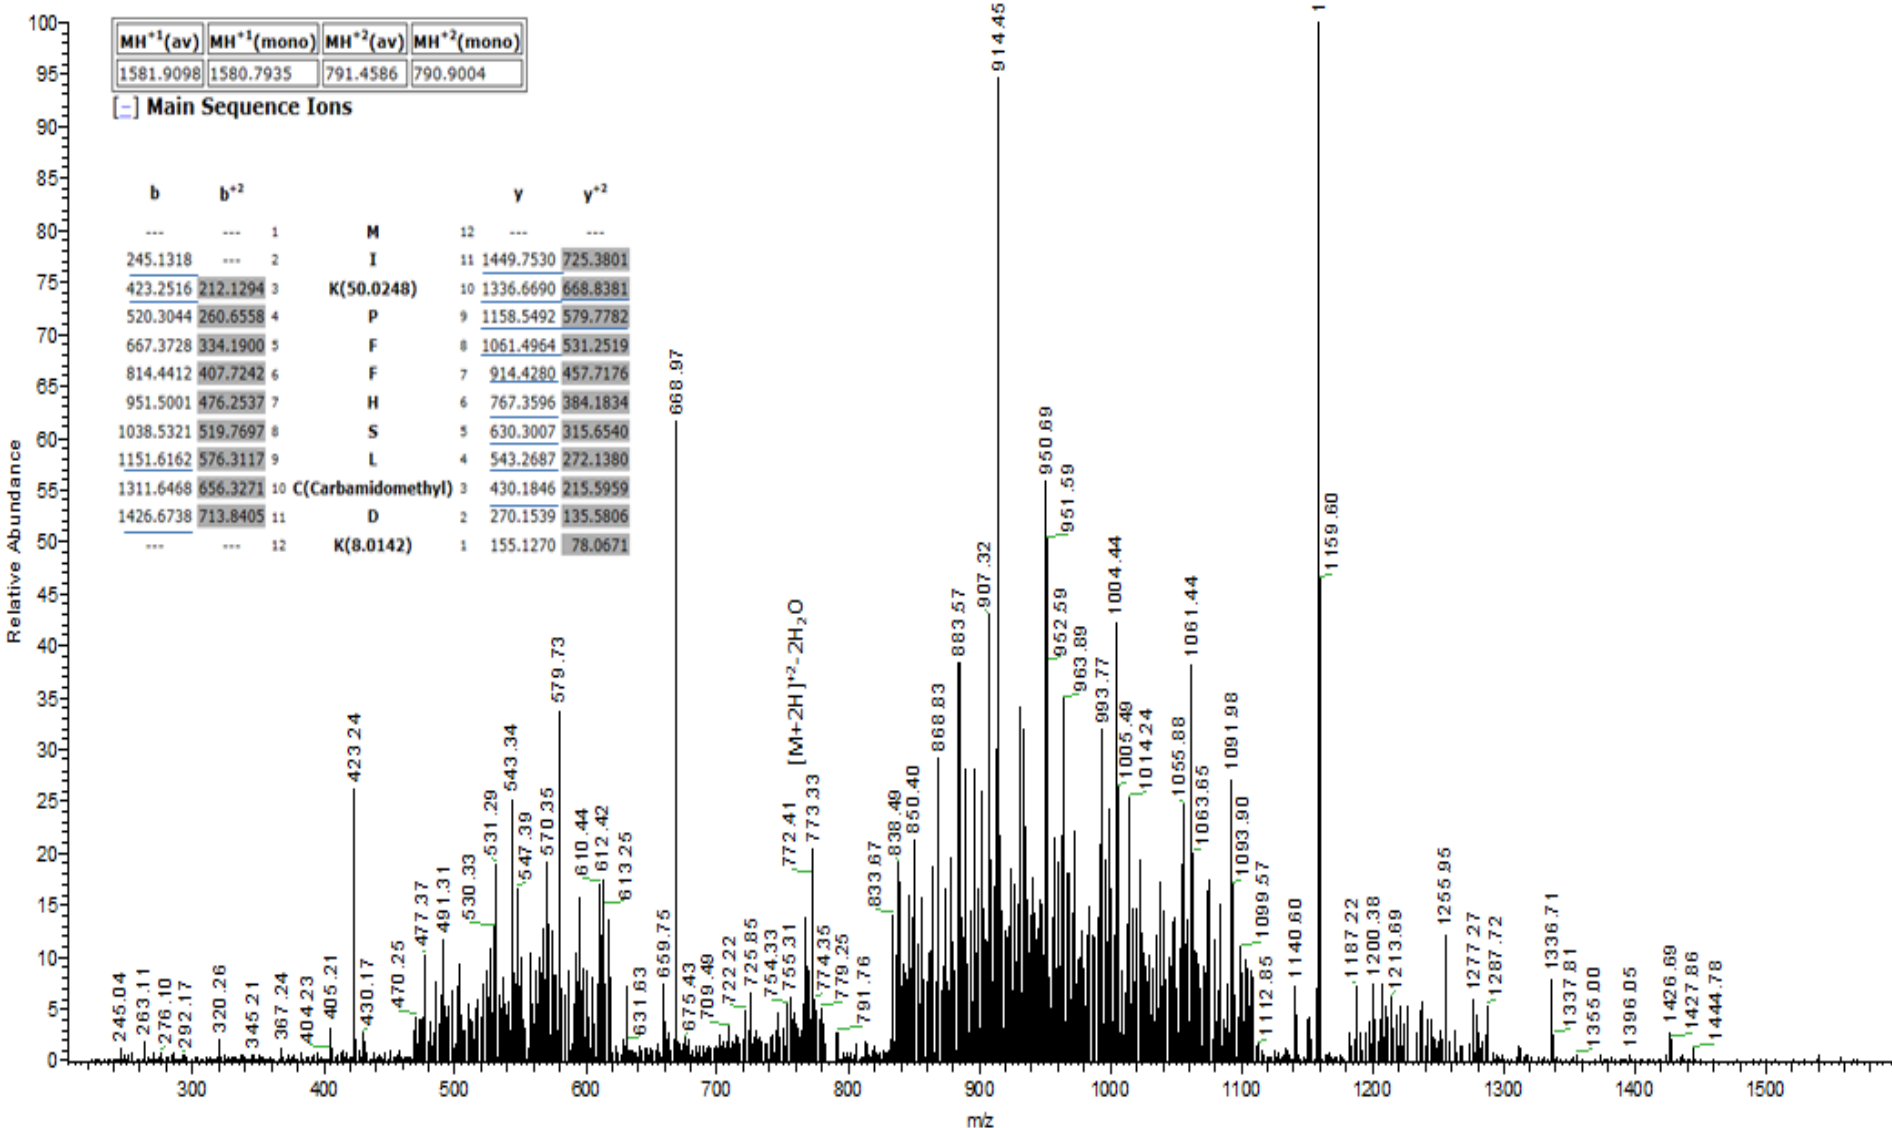



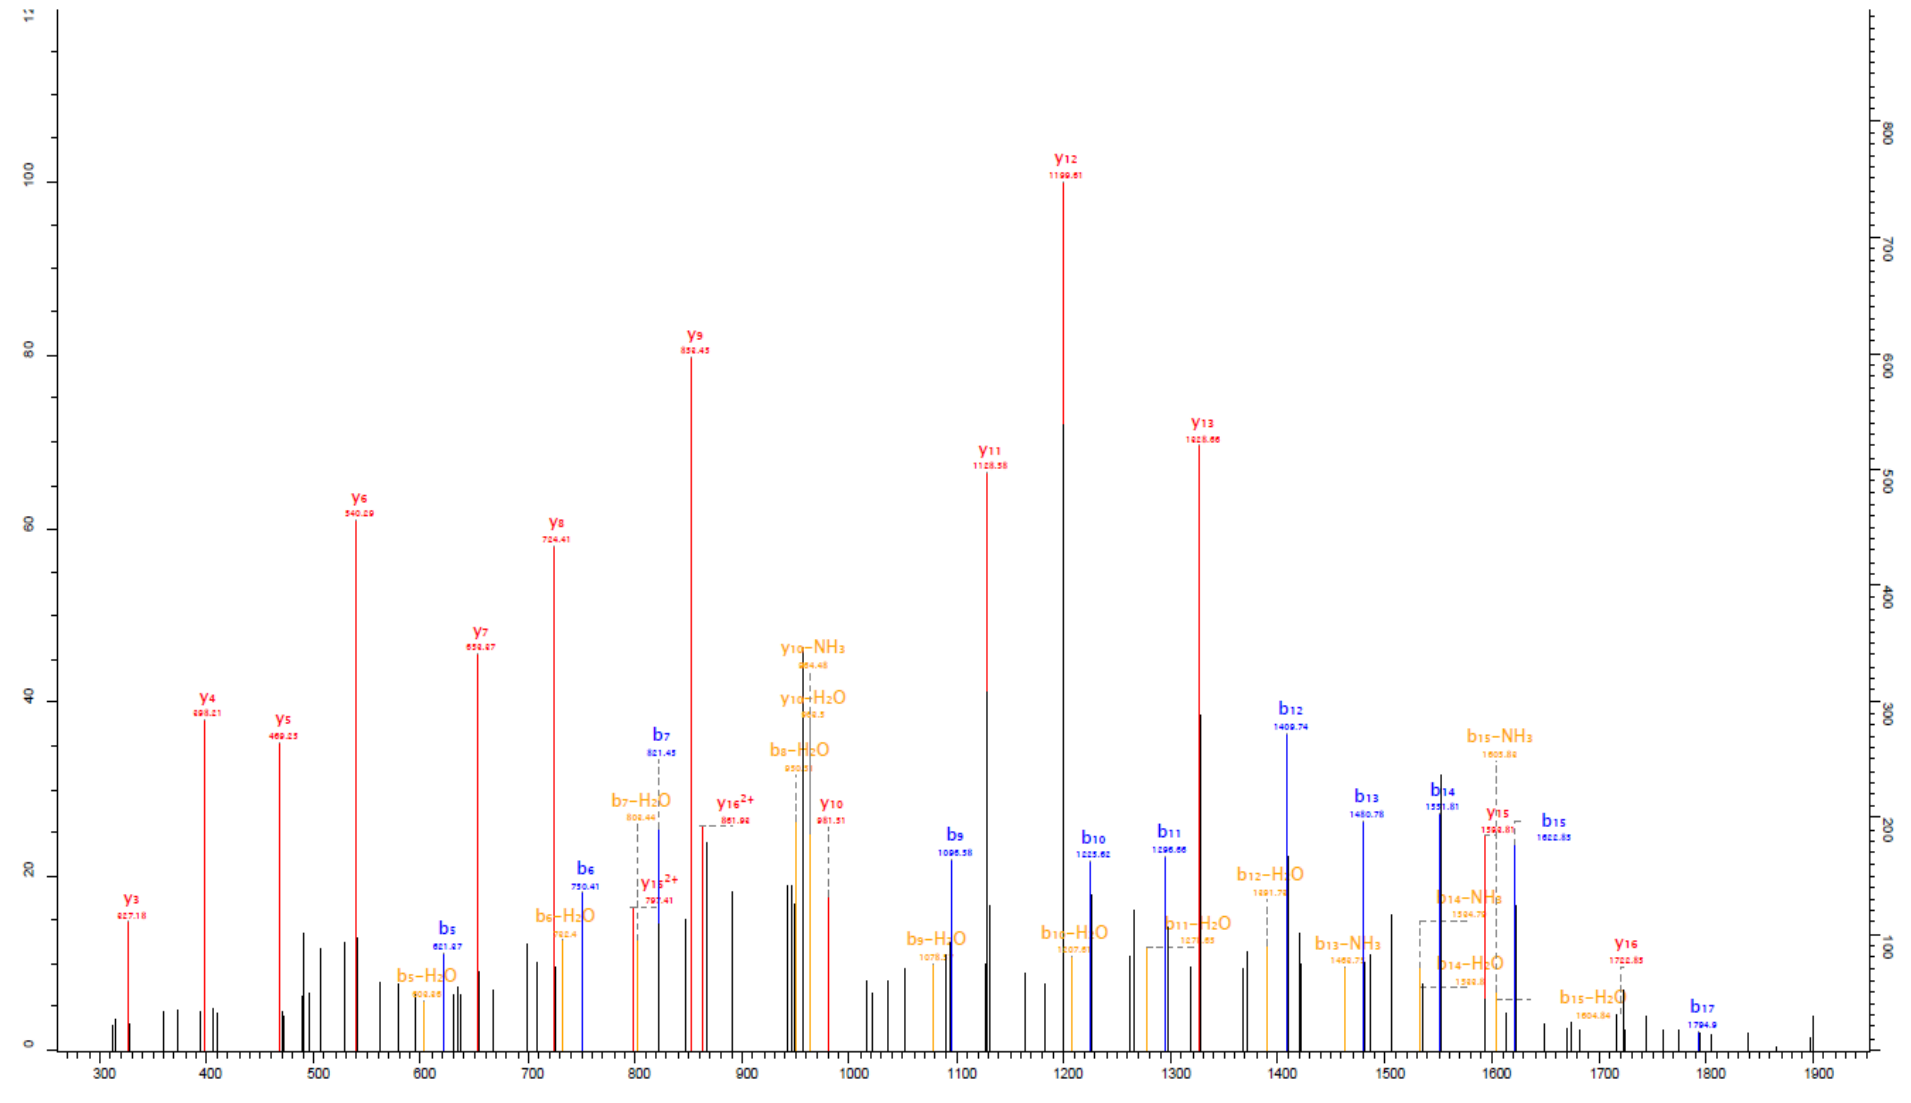

- L I E S ac Y16 Y15 K E A F Q Y10 Y9 Y8 Y7 Y6 Y5 Y4 Y3 b2 b4 b7 b8 b10 b11 b12 b13 b14 b15 b17 -

Gene name = Txn

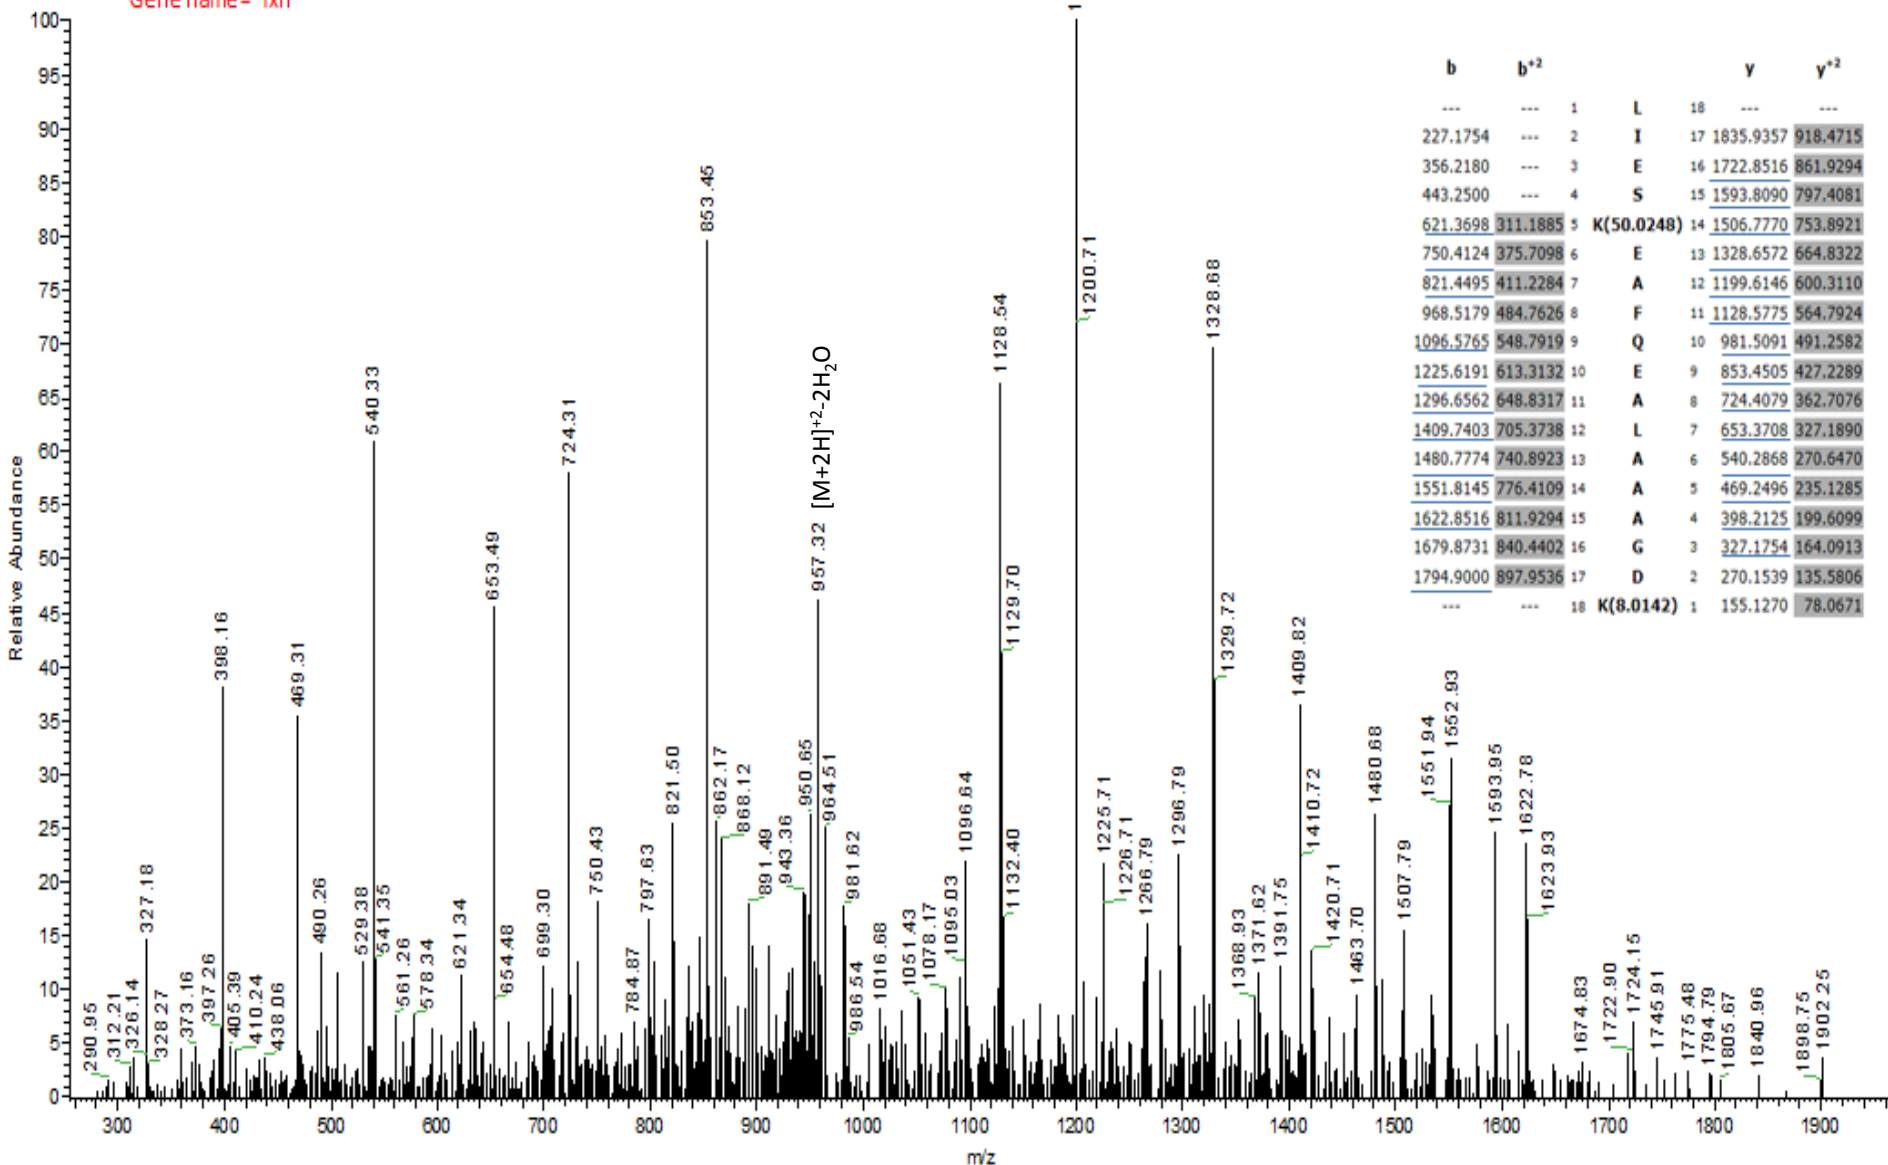

| MH <sup>+</sup> (av) | MH <sup>+</sup> (mono) | MH <sup>2+</sup> (av) | MH <sup>2+</sup> (mono) |
|----------------------|------------------------|-----------------------|-------------------------|
| 1950.1681            | 1949.0197              | 975.5878              | 975.0135                |

[-] Main Sequence Ions

| b         | b <sup>+</sup> | y        | y <sup>+</sup> |
|-----------|----------------|----------|----------------|
| ---       | ---            | 1        | L              |
| ---       | ---            | 18       | ---            |
| 227.1754  | ---            | 2        | I              |
| 17        | 1835.9357      | 918.4715 |                |
| 356.2180  | ---            | 3        | E              |
| 16        | 1722.8516      | 861.9294 |                |
| 443.2500  | ---            | 4        | S              |
| 15        | 1593.8090      | 797.4081 |                |
| 621.3698  | 311.1885       | 5        | K(50.0248)     |
| 14        | 1506.7770      | 753.8921 |                |
| 750.4124  | 375.7098       | 6        | E              |
| 13        | 1328.6572      | 664.8322 |                |
| 821.4495  | 411.2284       | 7        | A              |
| 12        | 1199.6146      | 600.3110 |                |
| 968.5179  | 484.7626       | 8        | F              |
| 11        | 1128.5775      | 564.7924 |                |
| 1096.5765 | 548.7919       | 9        | Q              |
| 10        | 981.5091       | 491.2582 |                |
| 1225.6191 | 613.3132       | 10       | E              |
| 9         | 853.4505       | 427.2289 |                |
| 1296.6562 | 648.8317       | 11       | A              |
| 8         | 724.4079       | 362.7076 |                |
| 1409.7403 | 705.3738       | 12       | L              |
| 7         | 653.3708       | 327.1890 |                |
| 1480.7774 | 740.8923       | 13       | A              |
| 6         | 540.2868       | 270.6470 |                |
| 1551.8145 | 776.4109       | 14       | A              |
| 5         | 469.2496       | 235.1285 |                |
| 1622.8516 | 811.9294       | 15       | A              |
| 4         | 398.2125       | 199.6099 |                |
| 1679.8731 | 840.4402       | 16       | G              |
| 3         | 327.1754       | 164.0913 |                |
| 1794.9000 | 897.9536       | 17       | D              |
| 2         | 270.1539       | 135.5806 |                |
| ---       | ---            | 18       | K(8.0142)      |
| 1         | 155.1270       | 78.0671  |                |

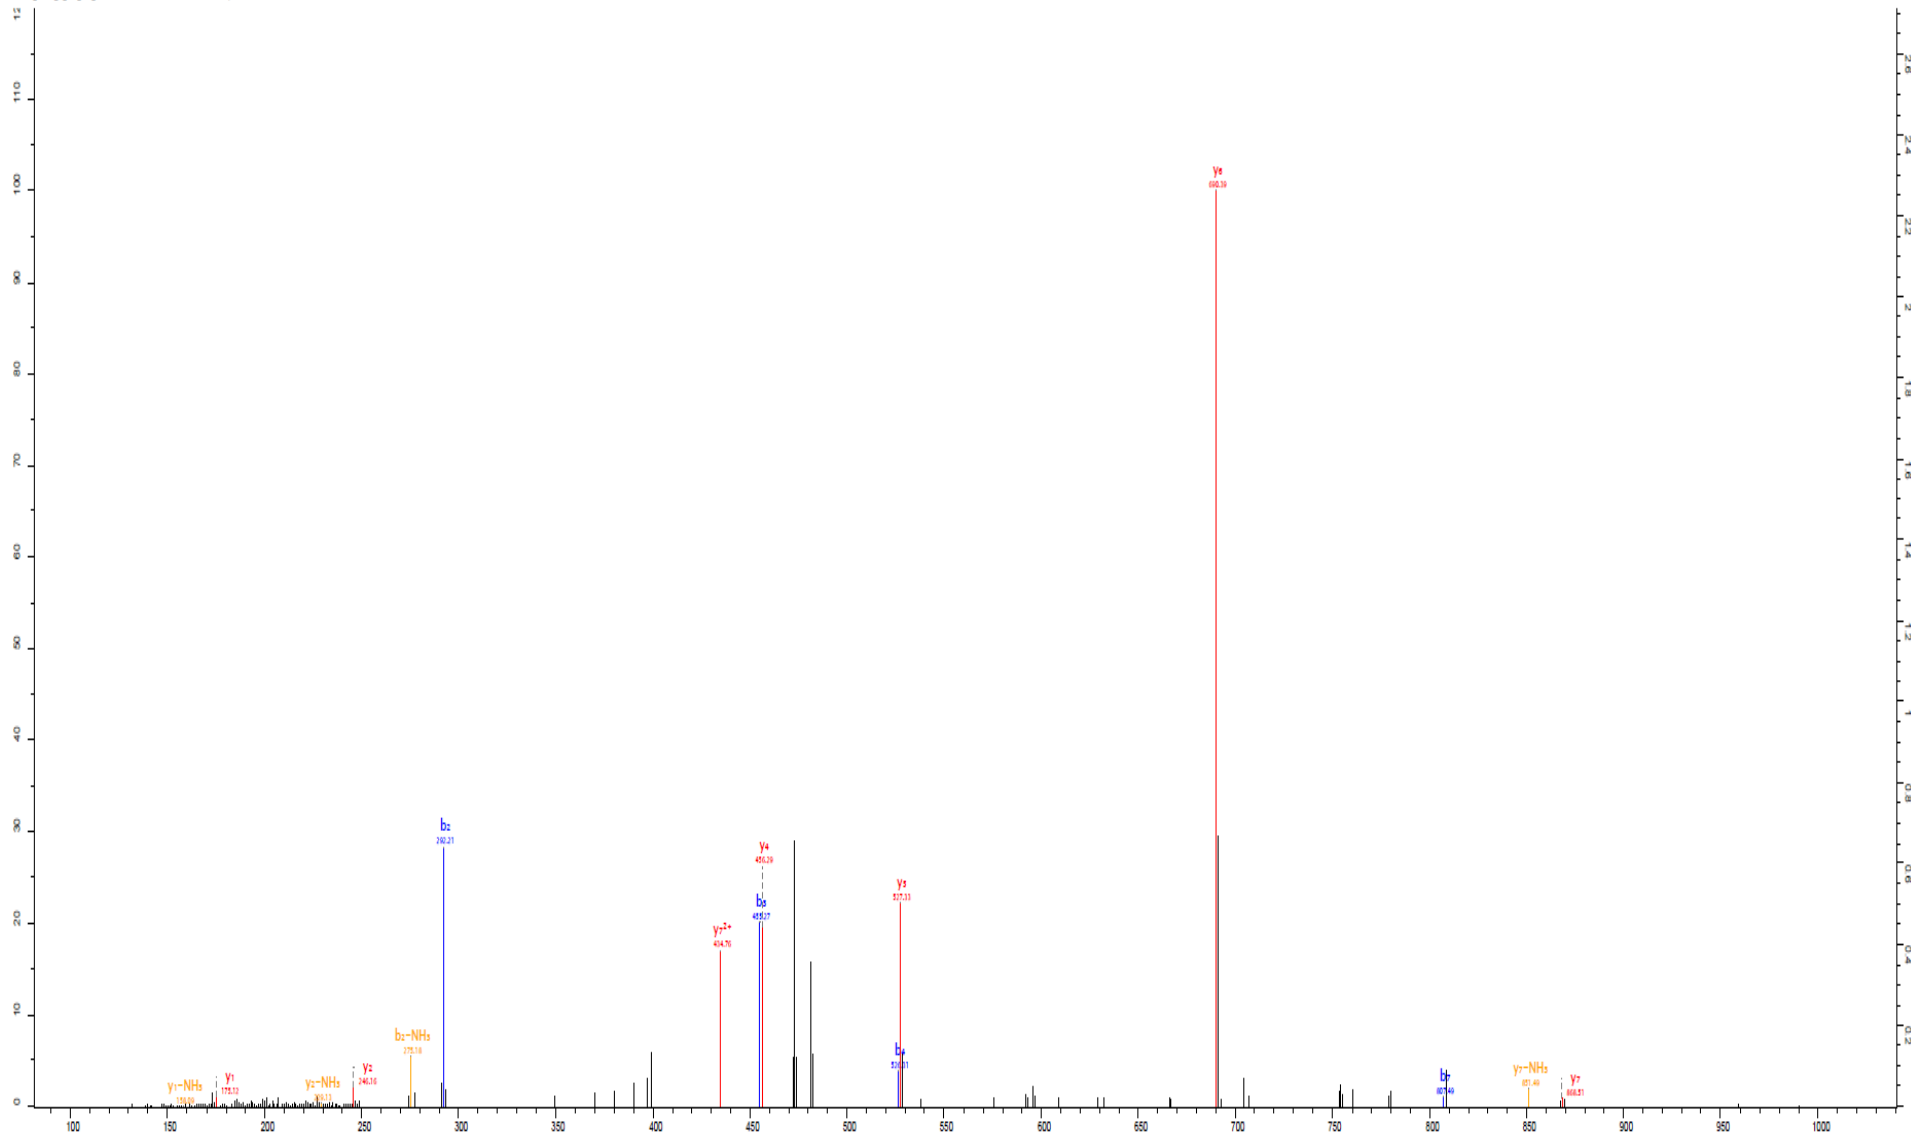

- L 

|    |
|----|
| y1 |
| ac |
| K  |
| b2 |

|    |
|----|
| y4 |
| Y  |
| bx |

|    |
|----|
| y3 |
| A  |
| bx |

|    |
|----|
| y4 |
| P  |
| bx |

|    |
|----|
| y2 |
| A  |
| bx |

|    |
|----|
| y1 |
| R  |
| bx |

 -

Gene name= Uaca

| MH <sup>+</sup> 1(av) | MH <sup>+</sup> 1(mono) | MH <sup>+</sup> 2(av) | MH <sup>+</sup> 2(mono) |
|-----------------------|-------------------------|-----------------------|-------------------------|
| 982.1856              | 981.5972                | 491.5965              | 491.3022                |

**[-] Main Sequence Ions**

| b        | b <sup>+</sup> 2 | y | y <sup>+</sup> 2  |
|----------|------------------|---|-------------------|
| ...      | ...              | 1 | L                 |
| 292.2111 | 146.6092         | 2 | <b>K(50.0248)</b> |
| 455.2744 | 228.1409         | 3 | Y                 |
| 526.3115 | 263.6594         | 4 | A                 |
| 623.3643 | 312.1858         | 5 | P                 |
| 736.4484 | 368.7278         | 6 | L                 |
| 807.4855 | 404.2464         | 7 | A                 |
| ...      | ...              | 8 | R                 |

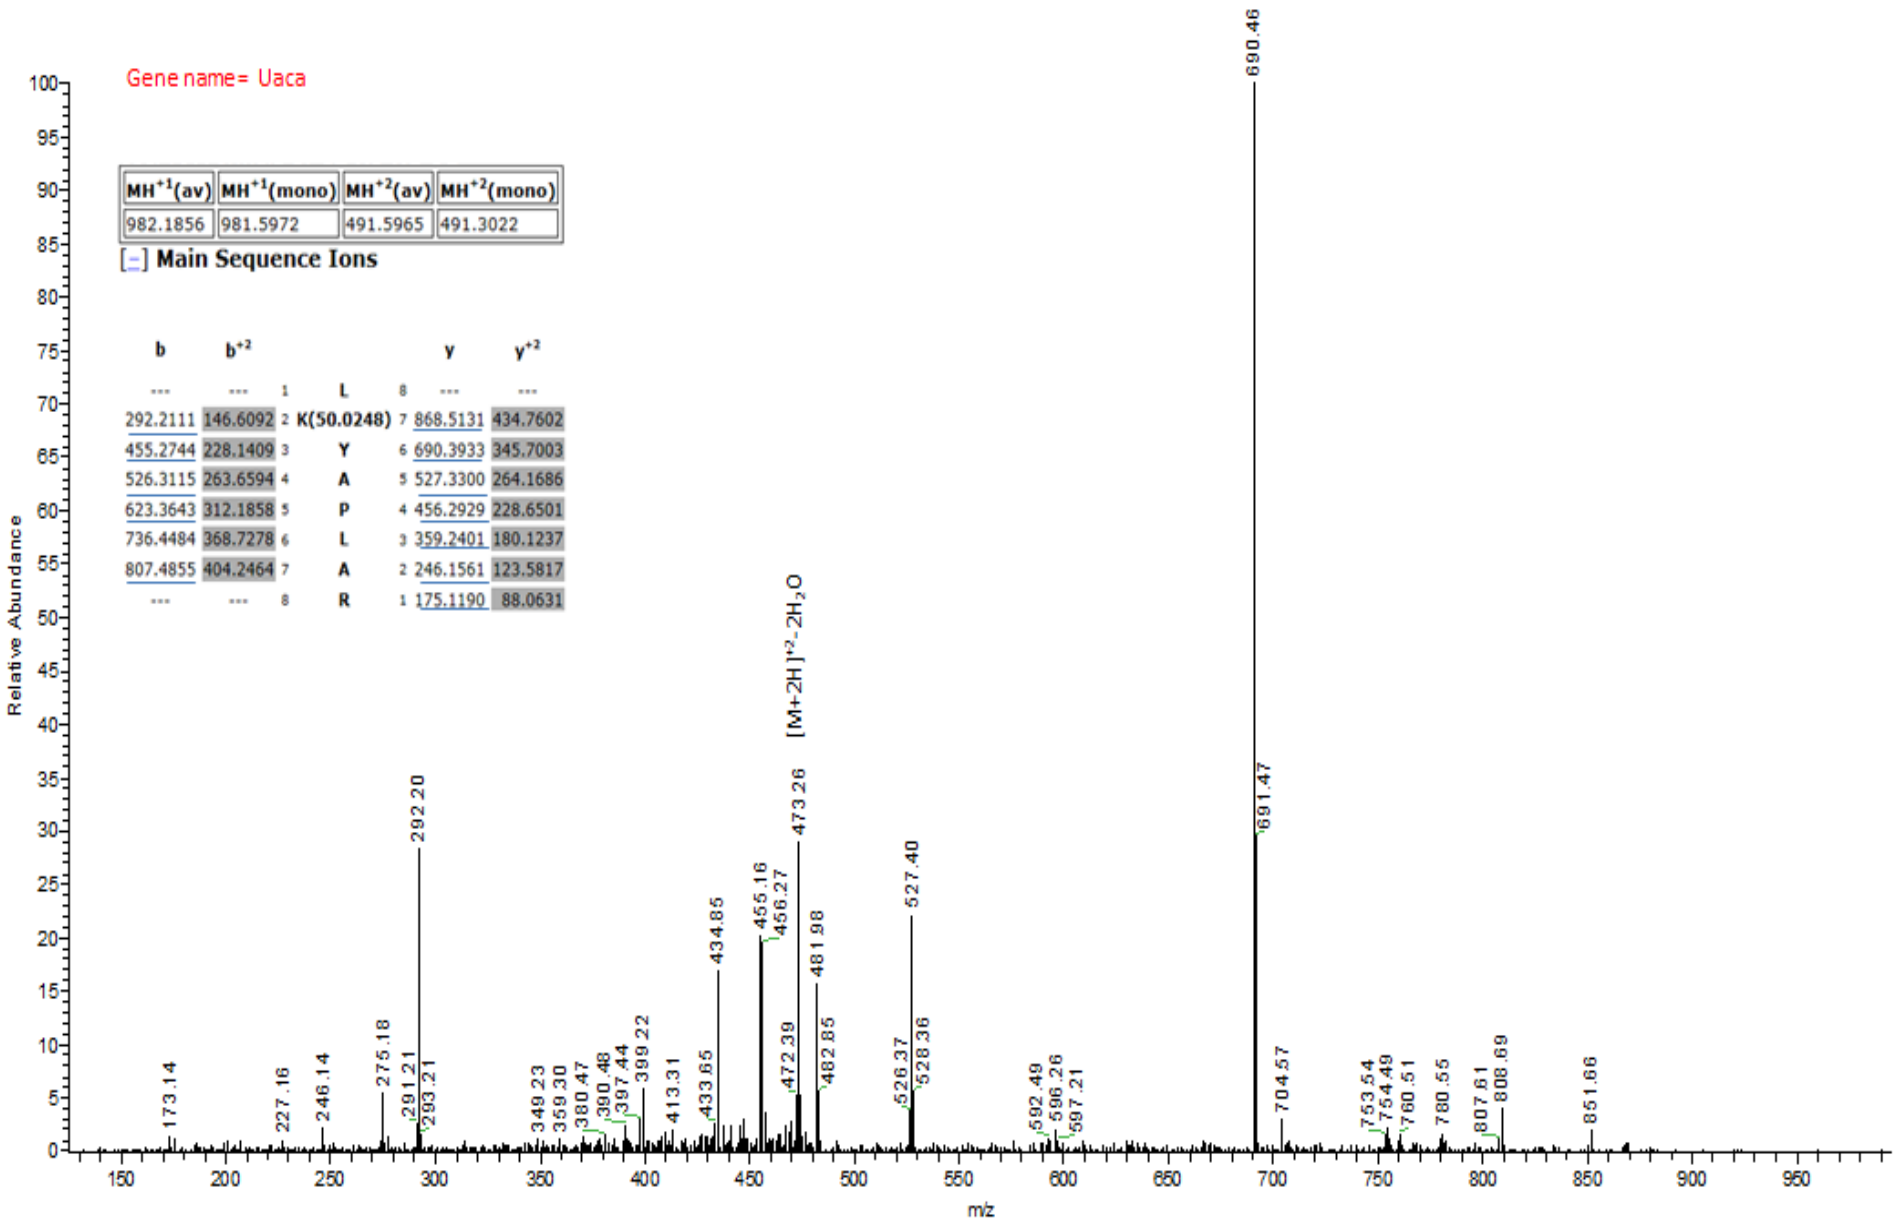

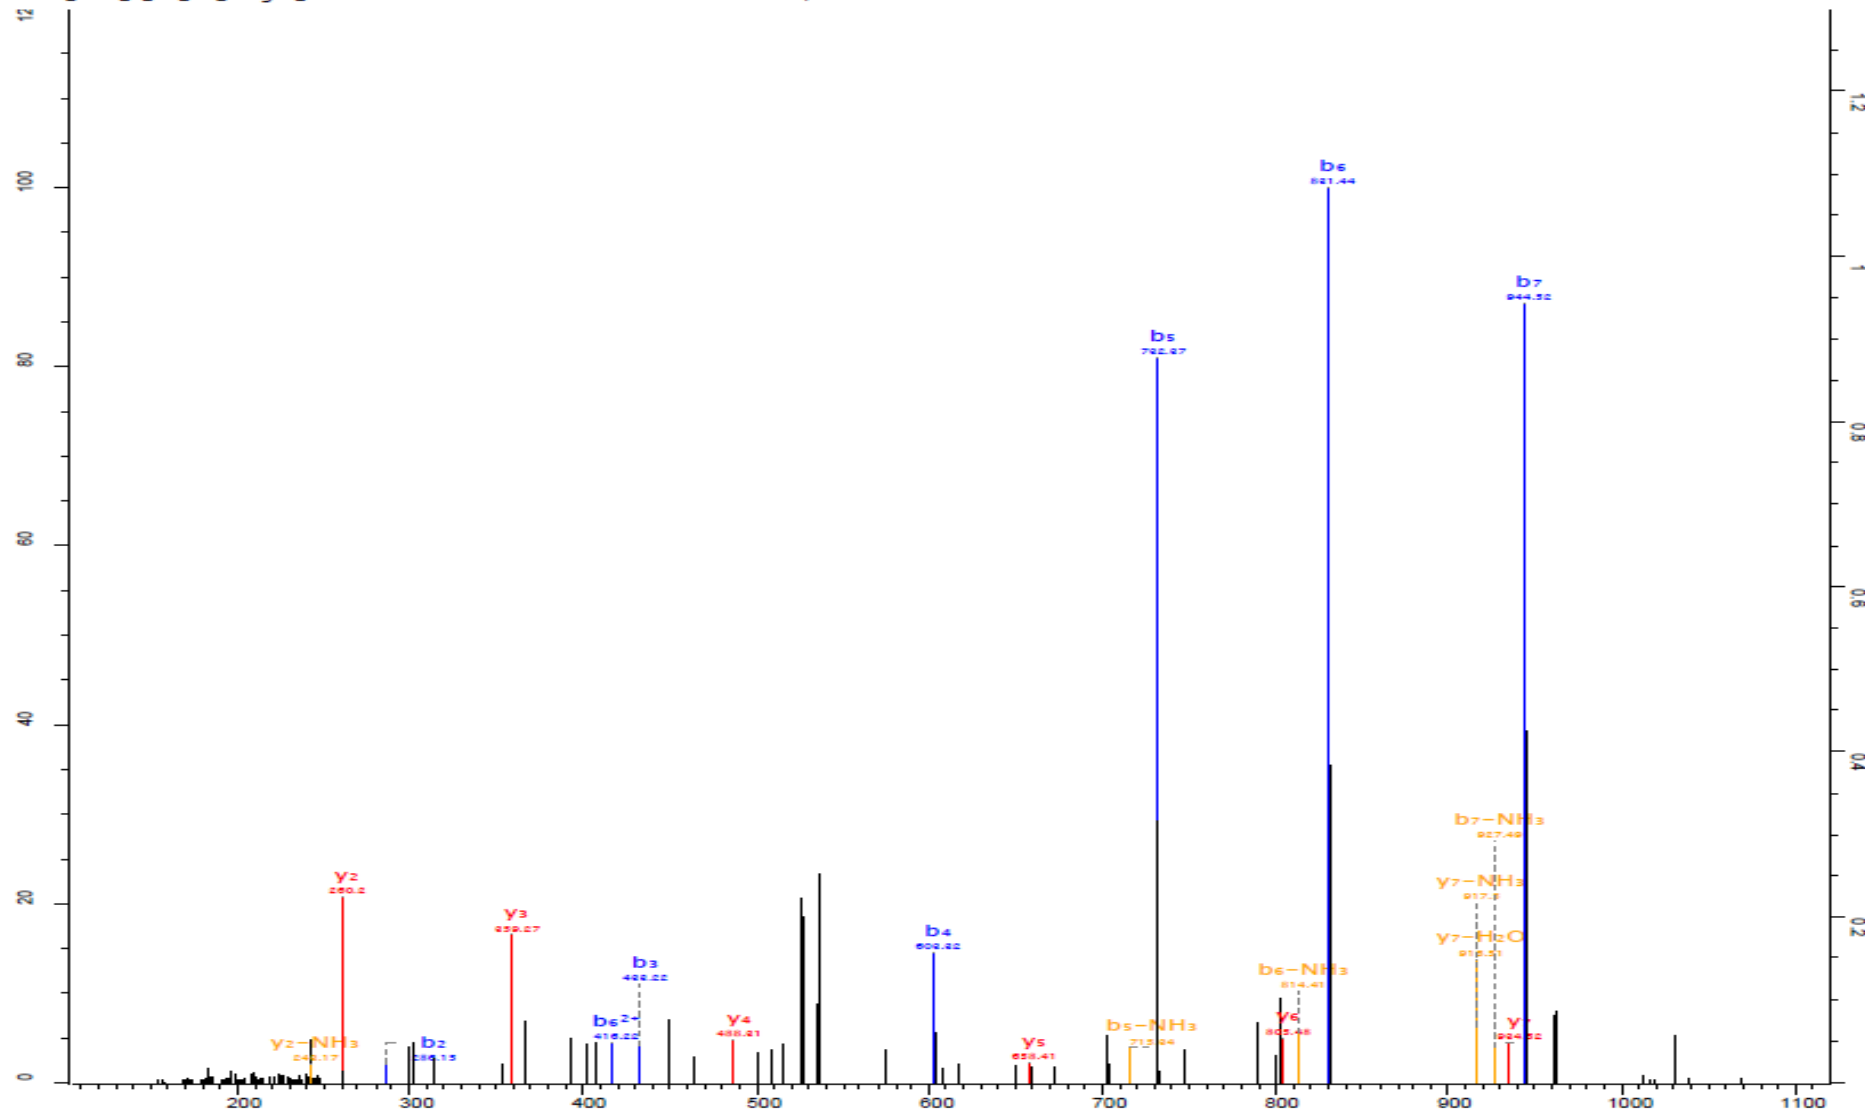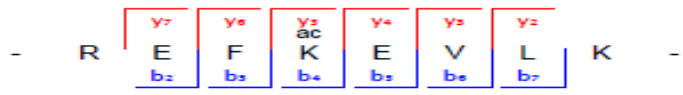

Gene name = Ube2k

| MH <sup>+1</sup> (av) | MH <sup>+1</sup> (mono) | MH <sup>+2</sup> (av) | MH <sup>+2</sup> (mono) |
|-----------------------|-------------------------|-----------------------|-------------------------|
| 1091.3034             | 1090.6255               | 546.1554              | 545.8164                |

[-] Main Sequence Ions

| b        | b <sup>+2</sup> |   | y         | y <sup>+2</sup> |
|----------|-----------------|---|-----------|-----------------|
| ---      | ---             | 1 | R         | 8               |
| 286.1510 | 143.5791        | 2 | E         | 7               |
| 433.2194 | 217.1133        | 3 | F         | 6               |
| 603.3249 | 302.1661        | 4 | K(Acetyl) | 5               |
| 732.3675 | 366.6874        | 5 | E         | 4               |
| 831.4359 | 416.2216        | 6 | V         | 3               |
| 944.5200 | 472.7636        | 7 | L         | 2               |
| ---      | ---             | 8 | K         | 1               |

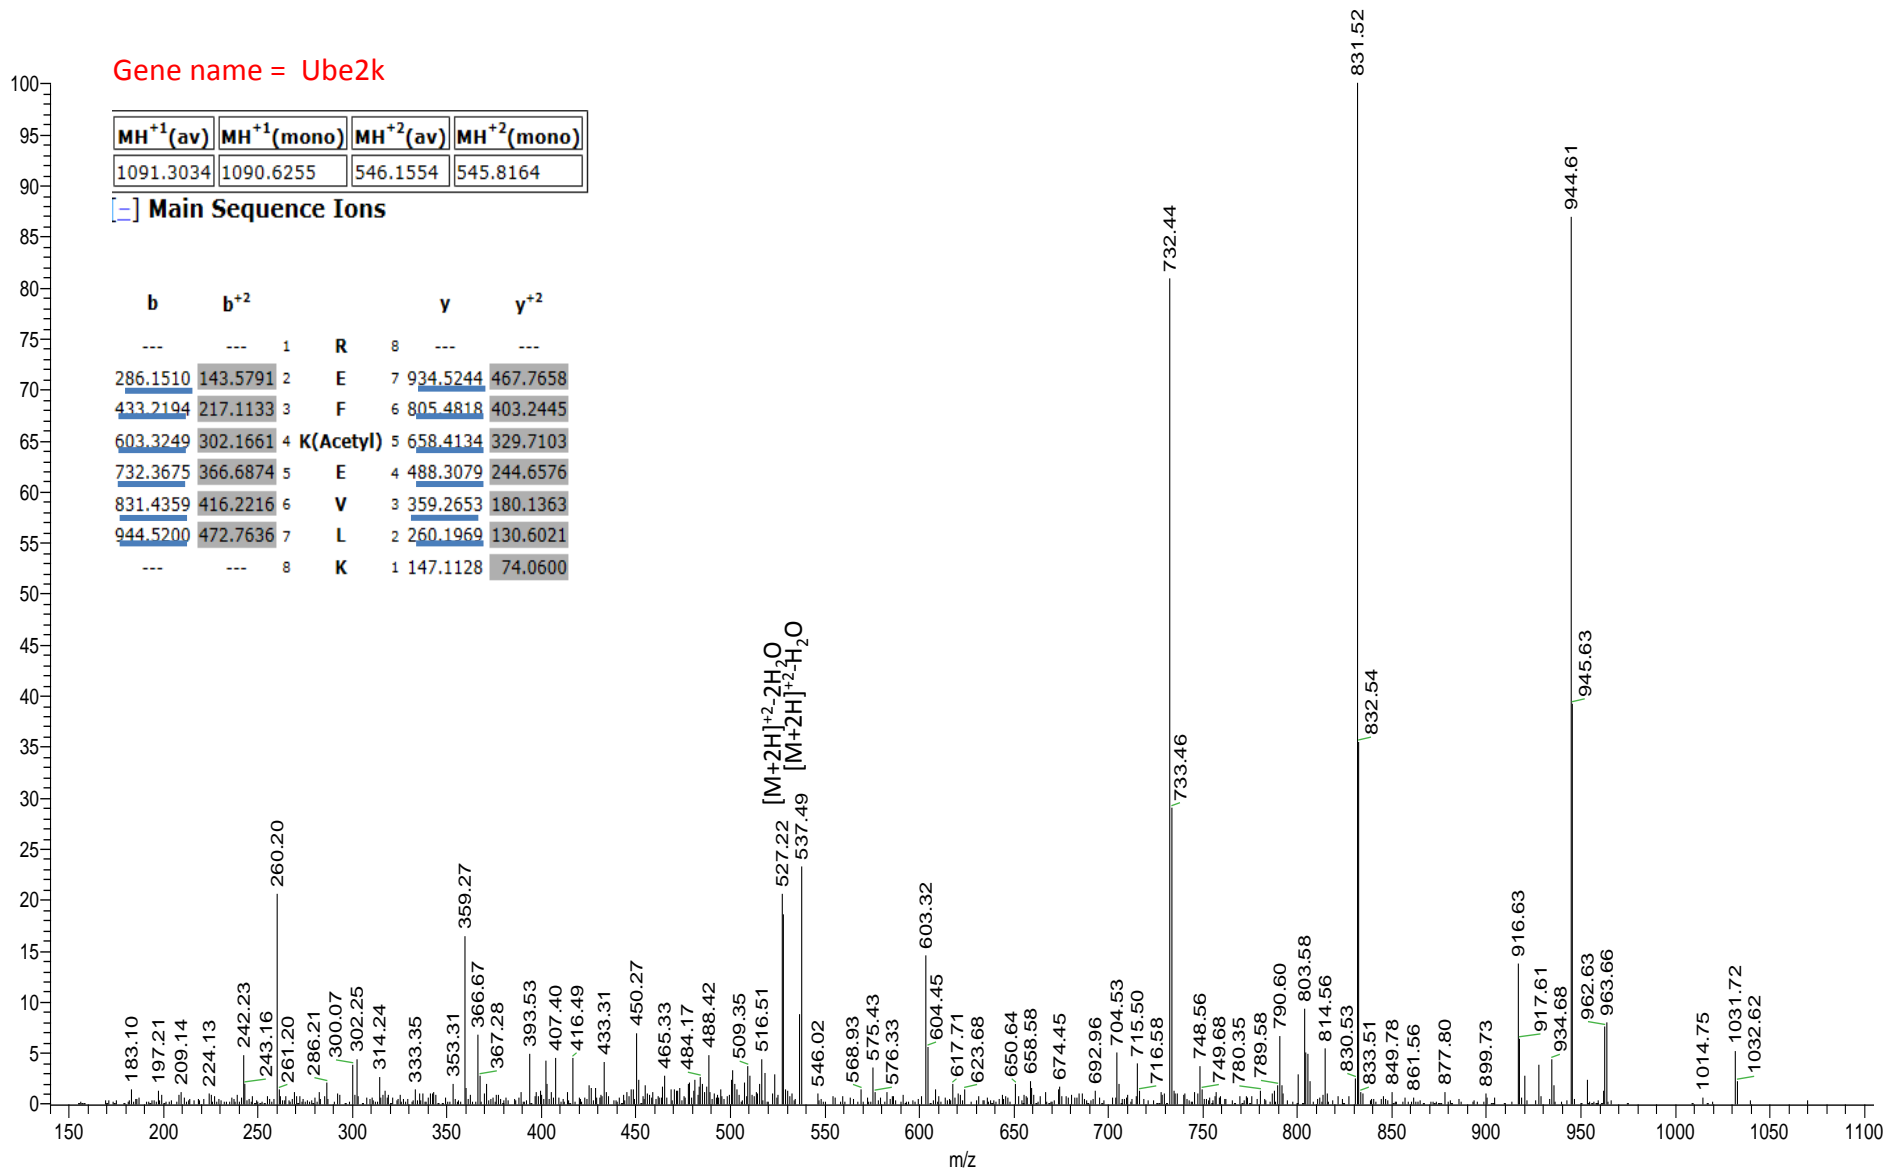

[M+2H]<sup>+2</sup>-2H<sub>2</sub>O  
 [M+2H]<sup>+2</sup>-H<sub>2</sub>O

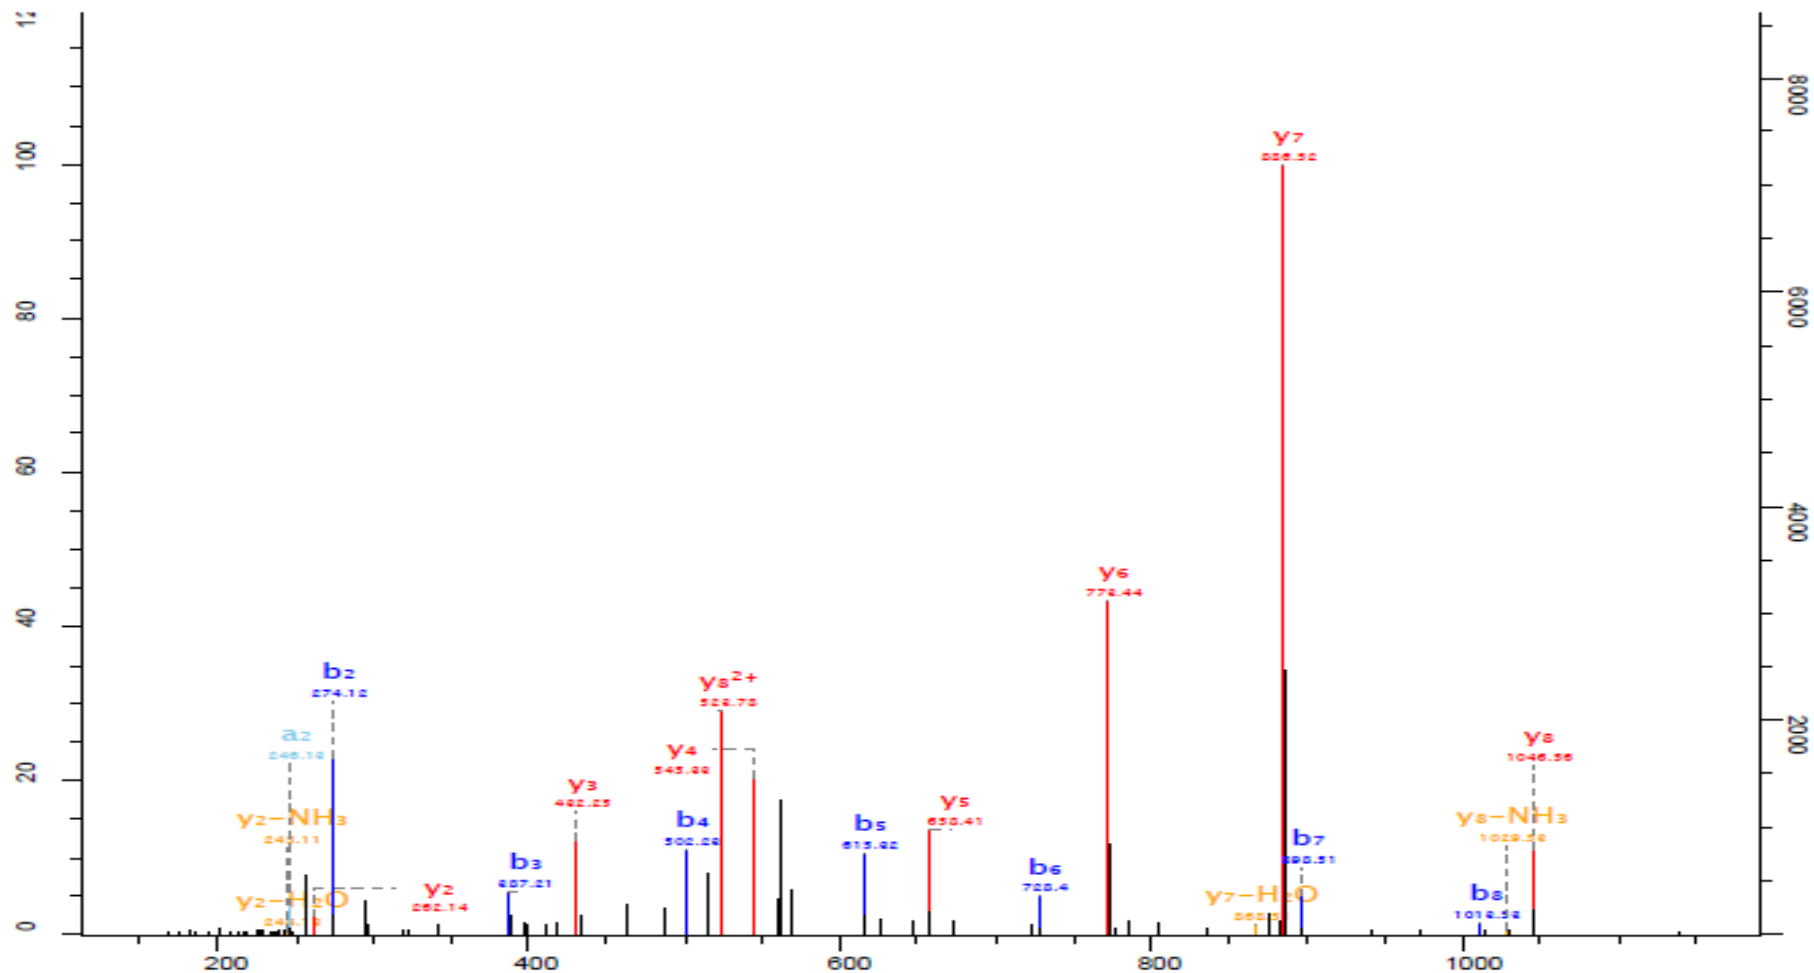

- I 

|    |
|----|
| y8 |
| C  |
| b2 |

|    |
|----|
| y7 |
| L  |
| b3 |

|    |
|----|
| y6 |
| D  |
| b4 |

|    |
|----|
| y5 |
| I  |
| b5 |

|    |
|----|
| y4 |
| L  |
| b6 |

|    |
|----|
| y3 |
| ac |
| K  |
| b7 |

|    |
|----|
| y2 |
| D  |
| b8 |

 K -

Gene name = Ube2n

| MH <sup>+</sup> 1(av) | MH <sup>+</sup> 1(mono) | MH <sup>+</sup> 2(av) | MH <sup>+</sup> 2(mono) |
|-----------------------|-------------------------|-----------------------|-------------------------|
| 1160.4268             | 1159.6391               | 580.7171              | 580.3232                |

**(-) Main Sequence Ions**

| b         | b <sup>+</sup> |   | y                  | y <sup>+</sup> |
|-----------|----------------|---|--------------------|----------------|
| ---       | ---            | 1 | I                  | 9              |
| ---       | ---            | 2 | C(Carbamidomethyl) | ---            |
| 274.1220  | ---            | 3 | L                  | 7              |
| 387.2061  | ---            | 4 | D                  | 6              |
| 502.2330  | ---            | 5 | I                  | 5              |
| 615.3171  | ---            | 6 | L                  | 4              |
| 728.4011  | ---            | 7 | K(Acetyl)          | 3              |
| 898.5067  | 449.7570       | 8 | D                  | 2              |
| 1013.5336 | 507.2704       | 9 | K                  | 1              |

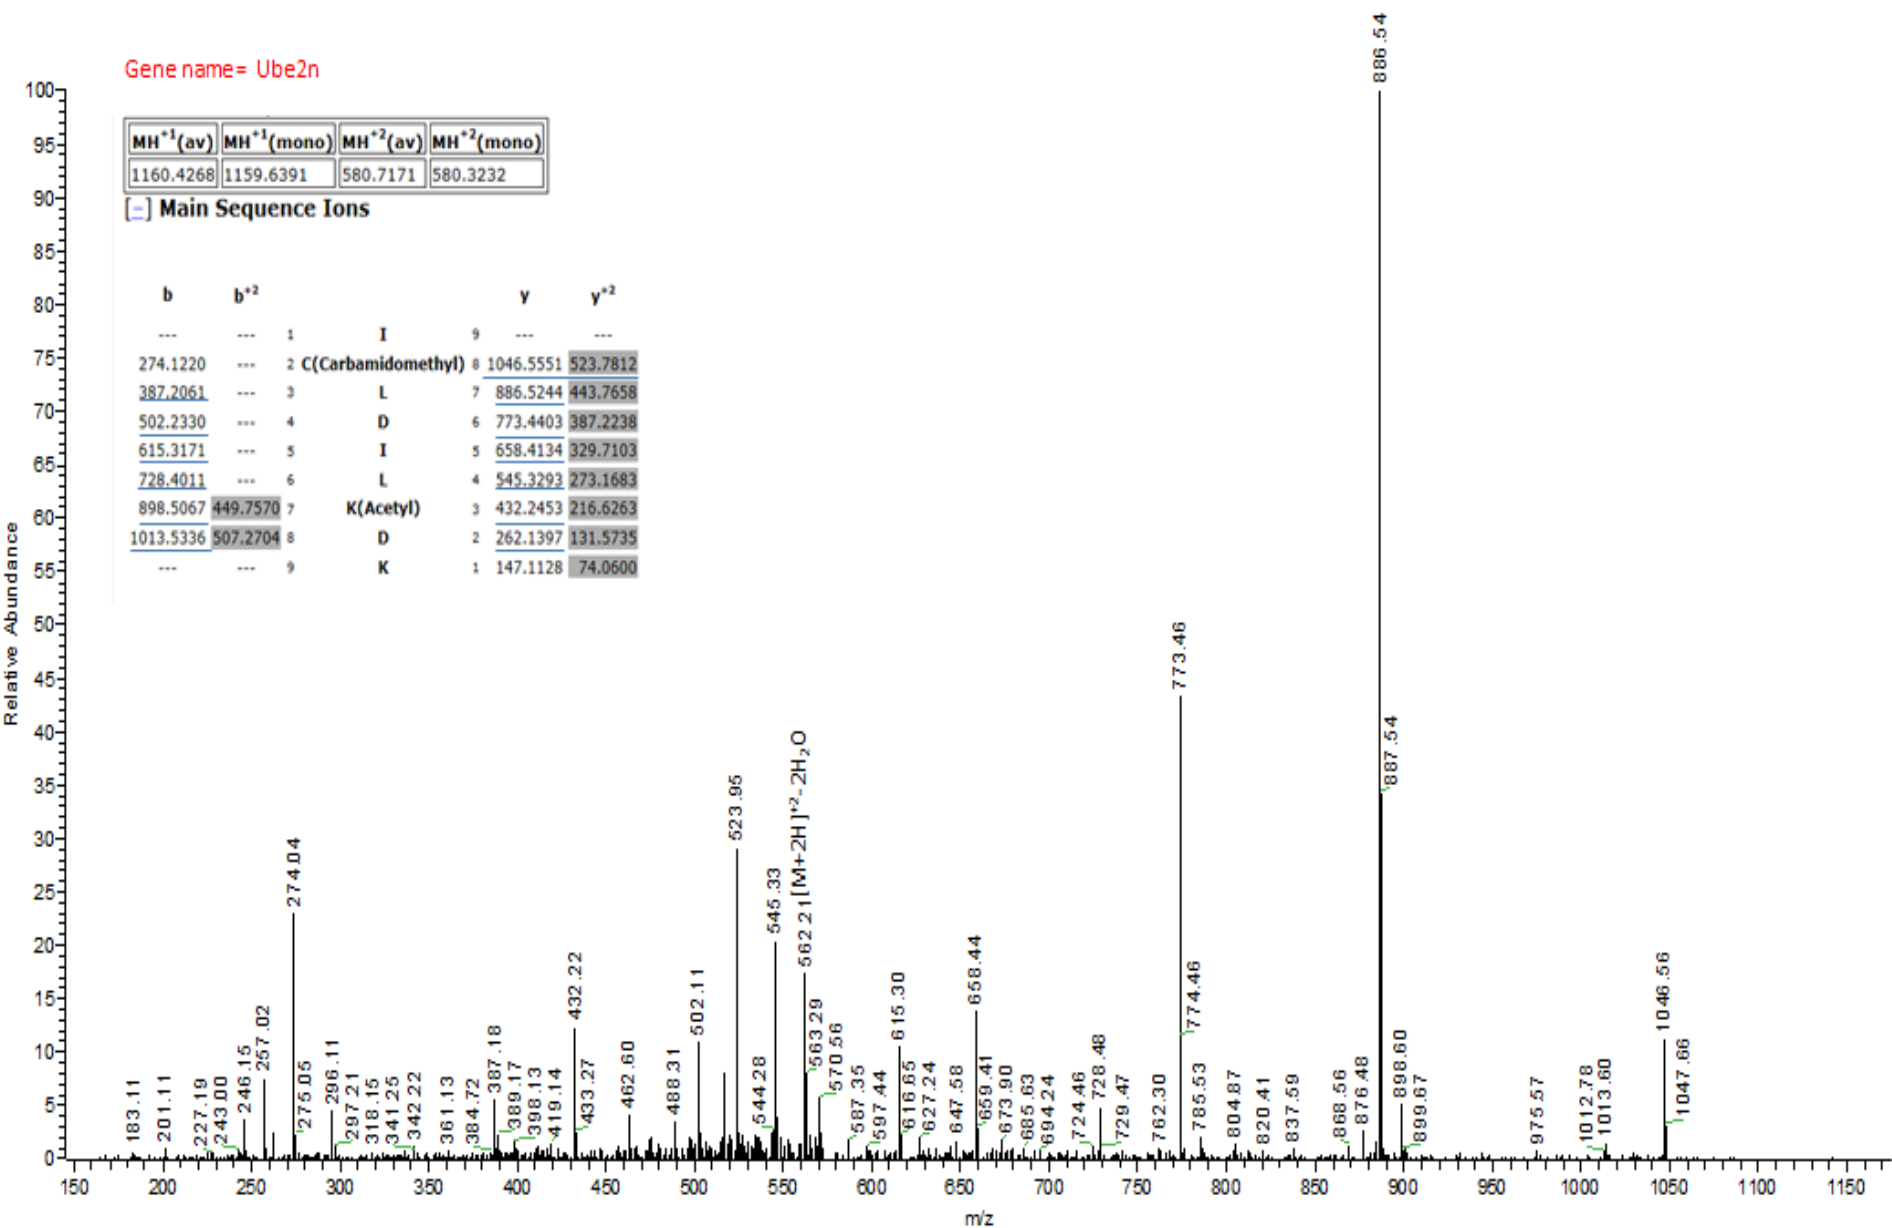



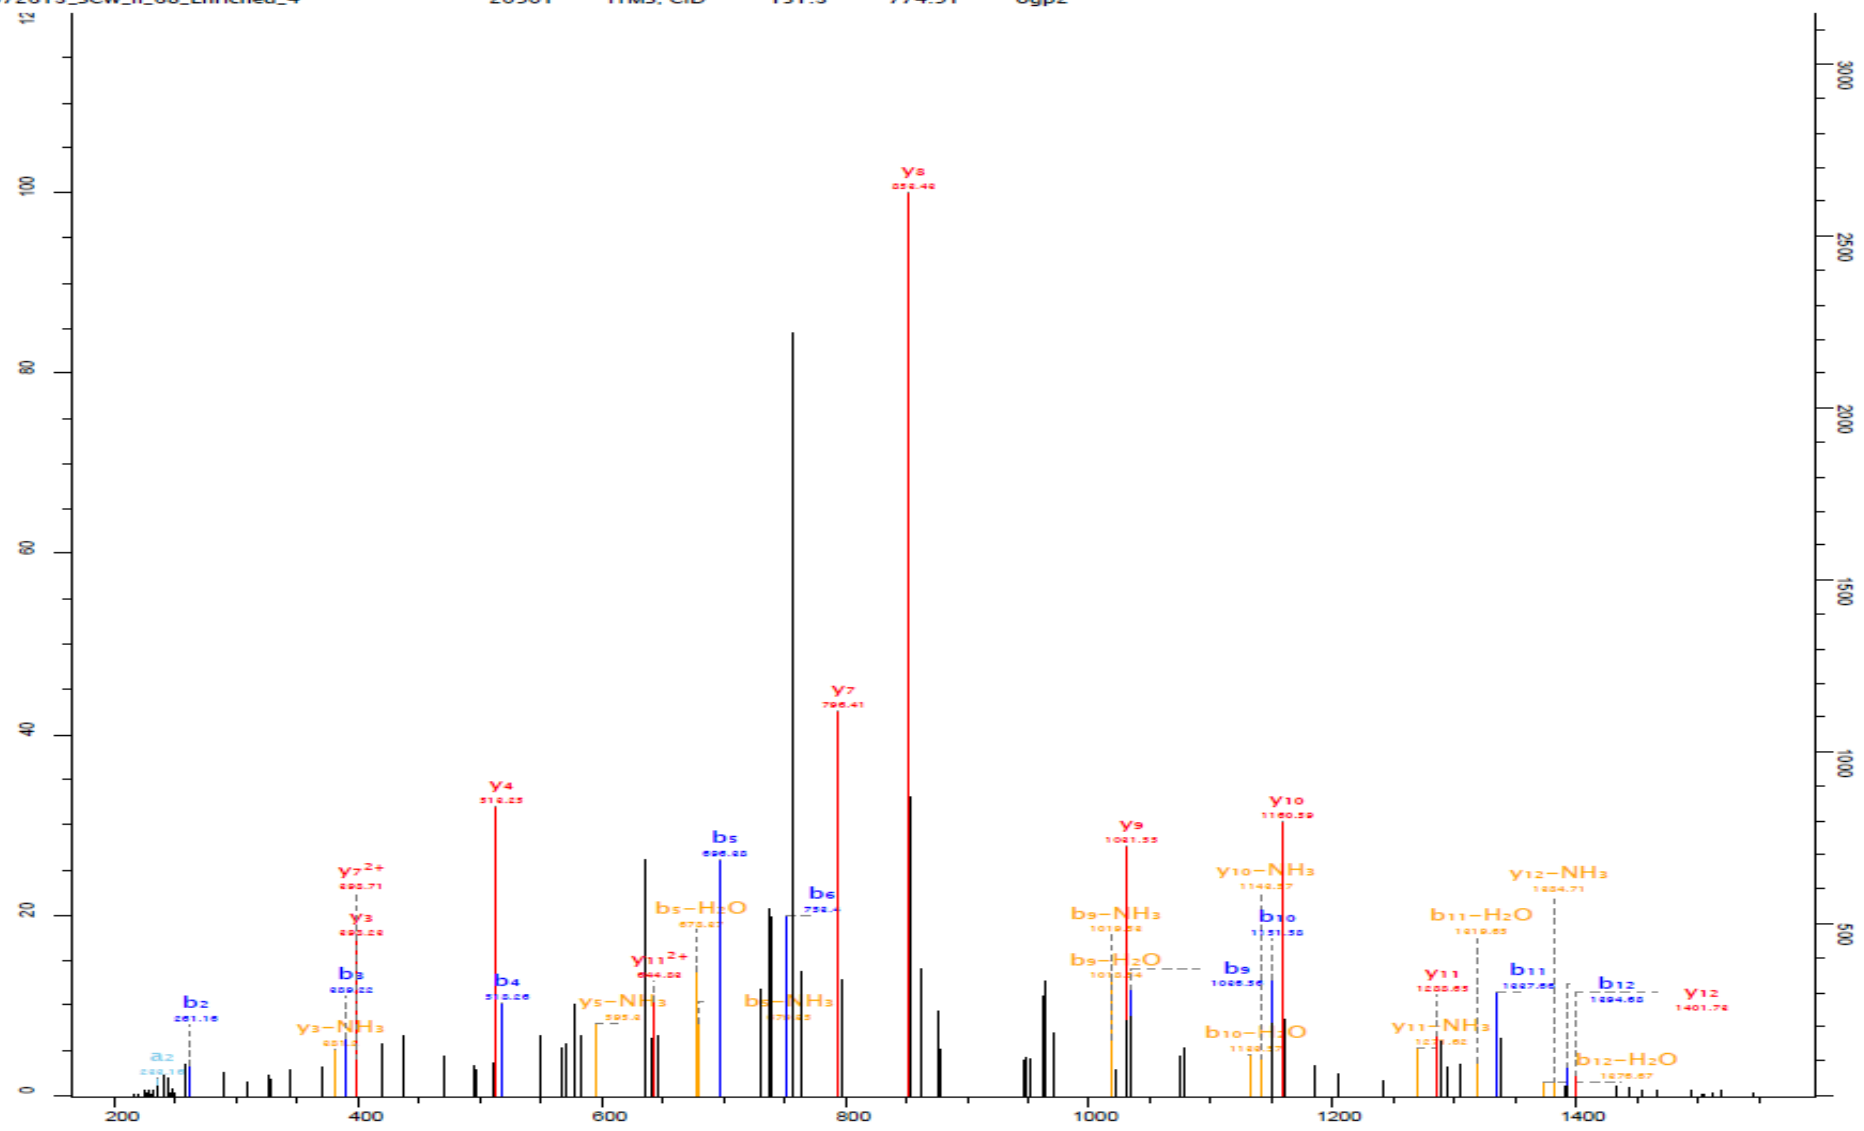

- F Y12  
L  
b2 Y11  
Q  
b3 Y10  
E  
b4 y3  
ac  
K  
b5 Y4  
G  
b6 Y7  
P S V  
b9 Y4  
D  
b10 Y3  
W  
b11 G  
b12 K -

Gene name = Ugp2

| MH <sup>+</sup> 1(av) | MH <sup>+</sup> 1(mono) | MH <sup>+</sup> 2(av) | MH <sup>+</sup> 2(mono) |
|-----------------------|-------------------------|-----------------------|-------------------------|
| 1549.7361             | 1548.8028               | 775.3718              | 774.9050                |

[-] Main Sequence Ions

| b         | b <sup>+</sup> 2 |    |                   | y  | y <sup>+</sup> 2   |
|-----------|------------------|----|-------------------|----|--------------------|
| ---       | ---              | 1  | F                 | 13 | ---                |
| 261.1598  | ---              | 2  | L                 | 12 | 1401.7344 701.3708 |
| 389.2183  | ---              | 3  | Q                 | 11 | 1288.6503 644.8288 |
| 518.2609  | ---              | 4  | E                 | 10 | 1160.5917 580.7995 |
| 696.3807  | 348.6940         | 5  | <b>K(50.0248)</b> | 9  | 1031.5492 516.2782 |
| 753.4022  | 377.2047         | 6  | G                 | 8  | 853.4294 427.2183  |
| 850.4549  | 425.7311         | 7  | P                 | 7  | 796.4079 398.7076  |
| 937.4869  | 469.2471         | 8  | S                 | 6  | 699.3552 350.1812  |
| 1036.5554 | 518.7813         | 9  | V                 | 5  | 612.3231 306.6652  |
| 1151.5823 | 576.2948         | 10 | D                 | 4  | 513.2547 257.1310  |
| 1337.6616 | 669.3344         | 11 | W                 | 3  | 398.2278 199.6175  |
| 1394.6831 | 697.8452         | 12 | G                 | 2  | 212.1485 106.5779  |
| ---       | ---              | 13 | <b>K(8.0142)</b>  | 1  | 155.1270 78.0671   |

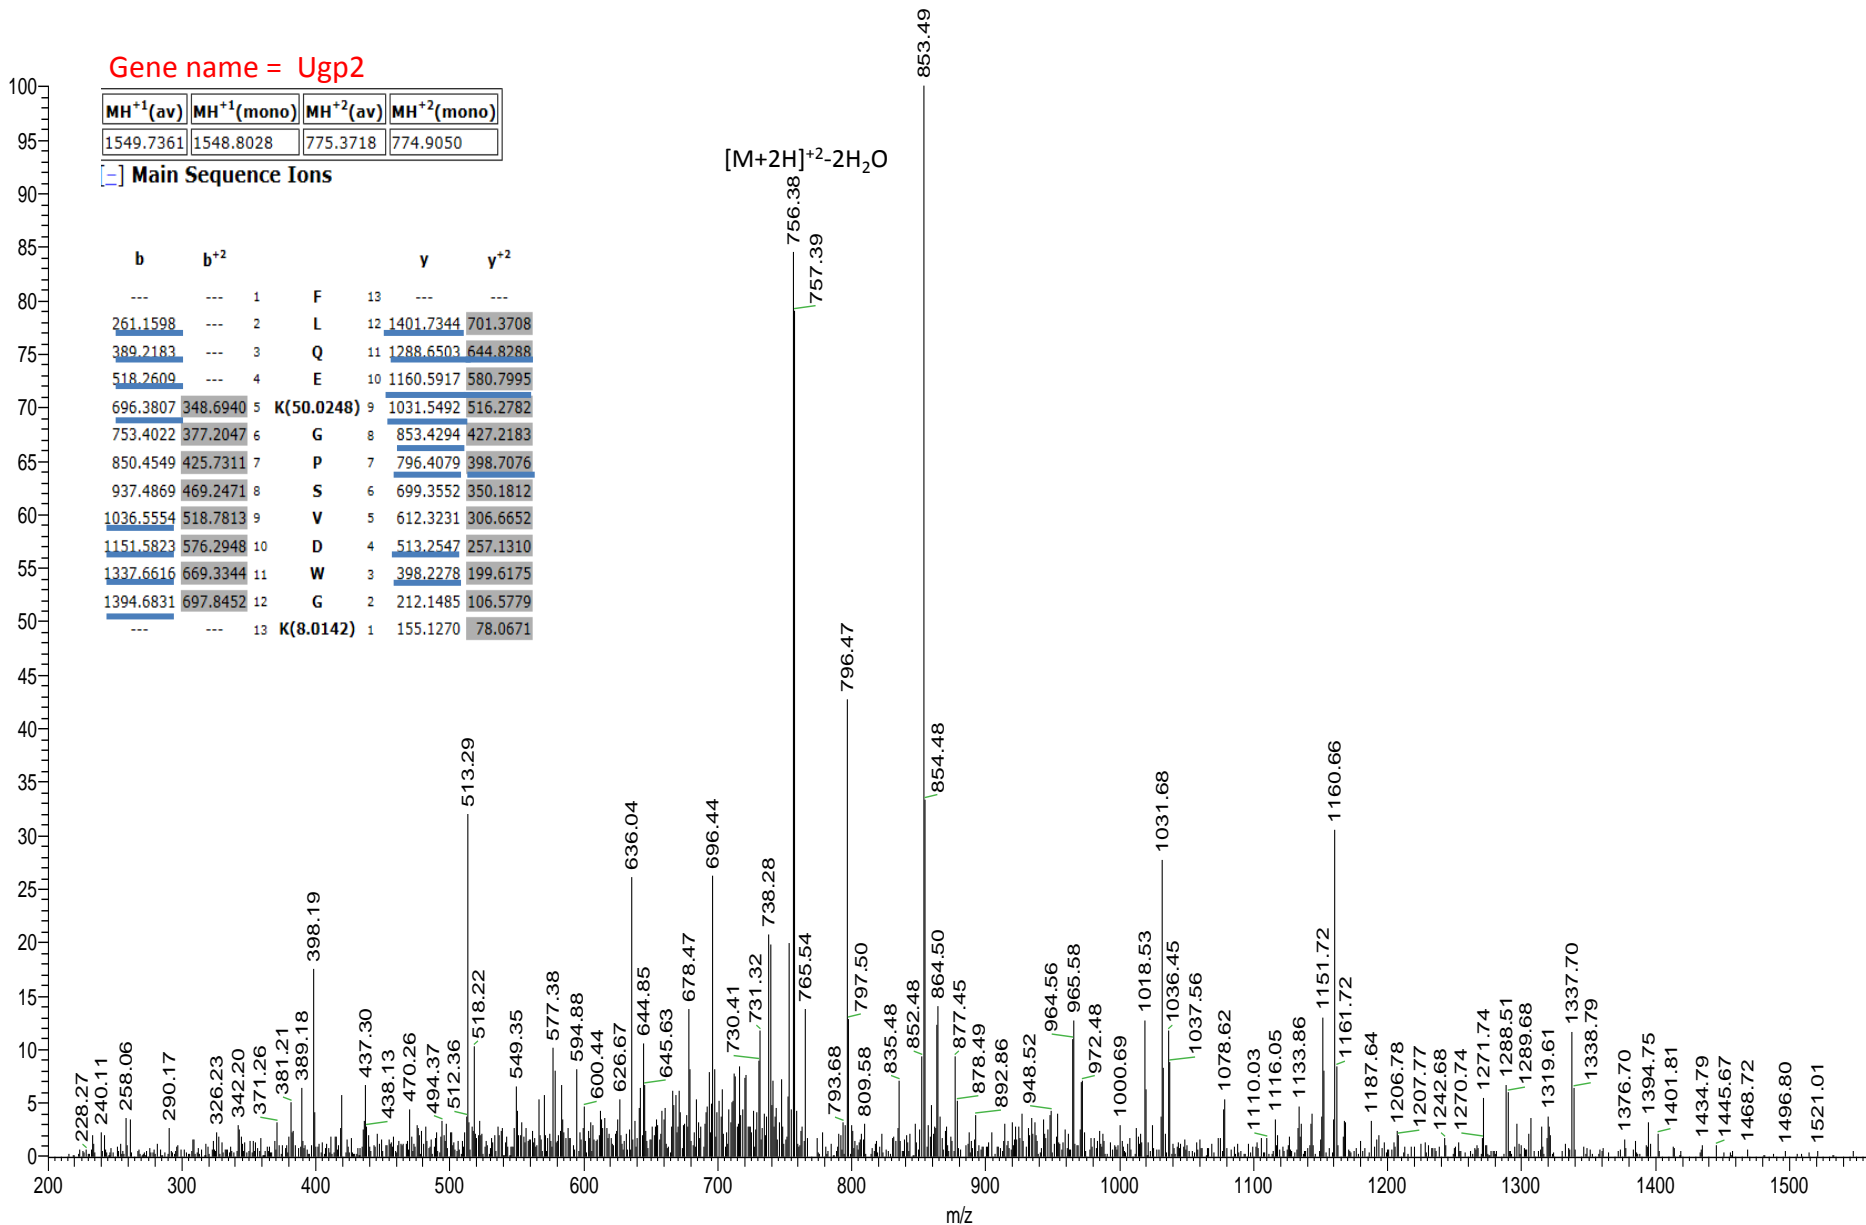

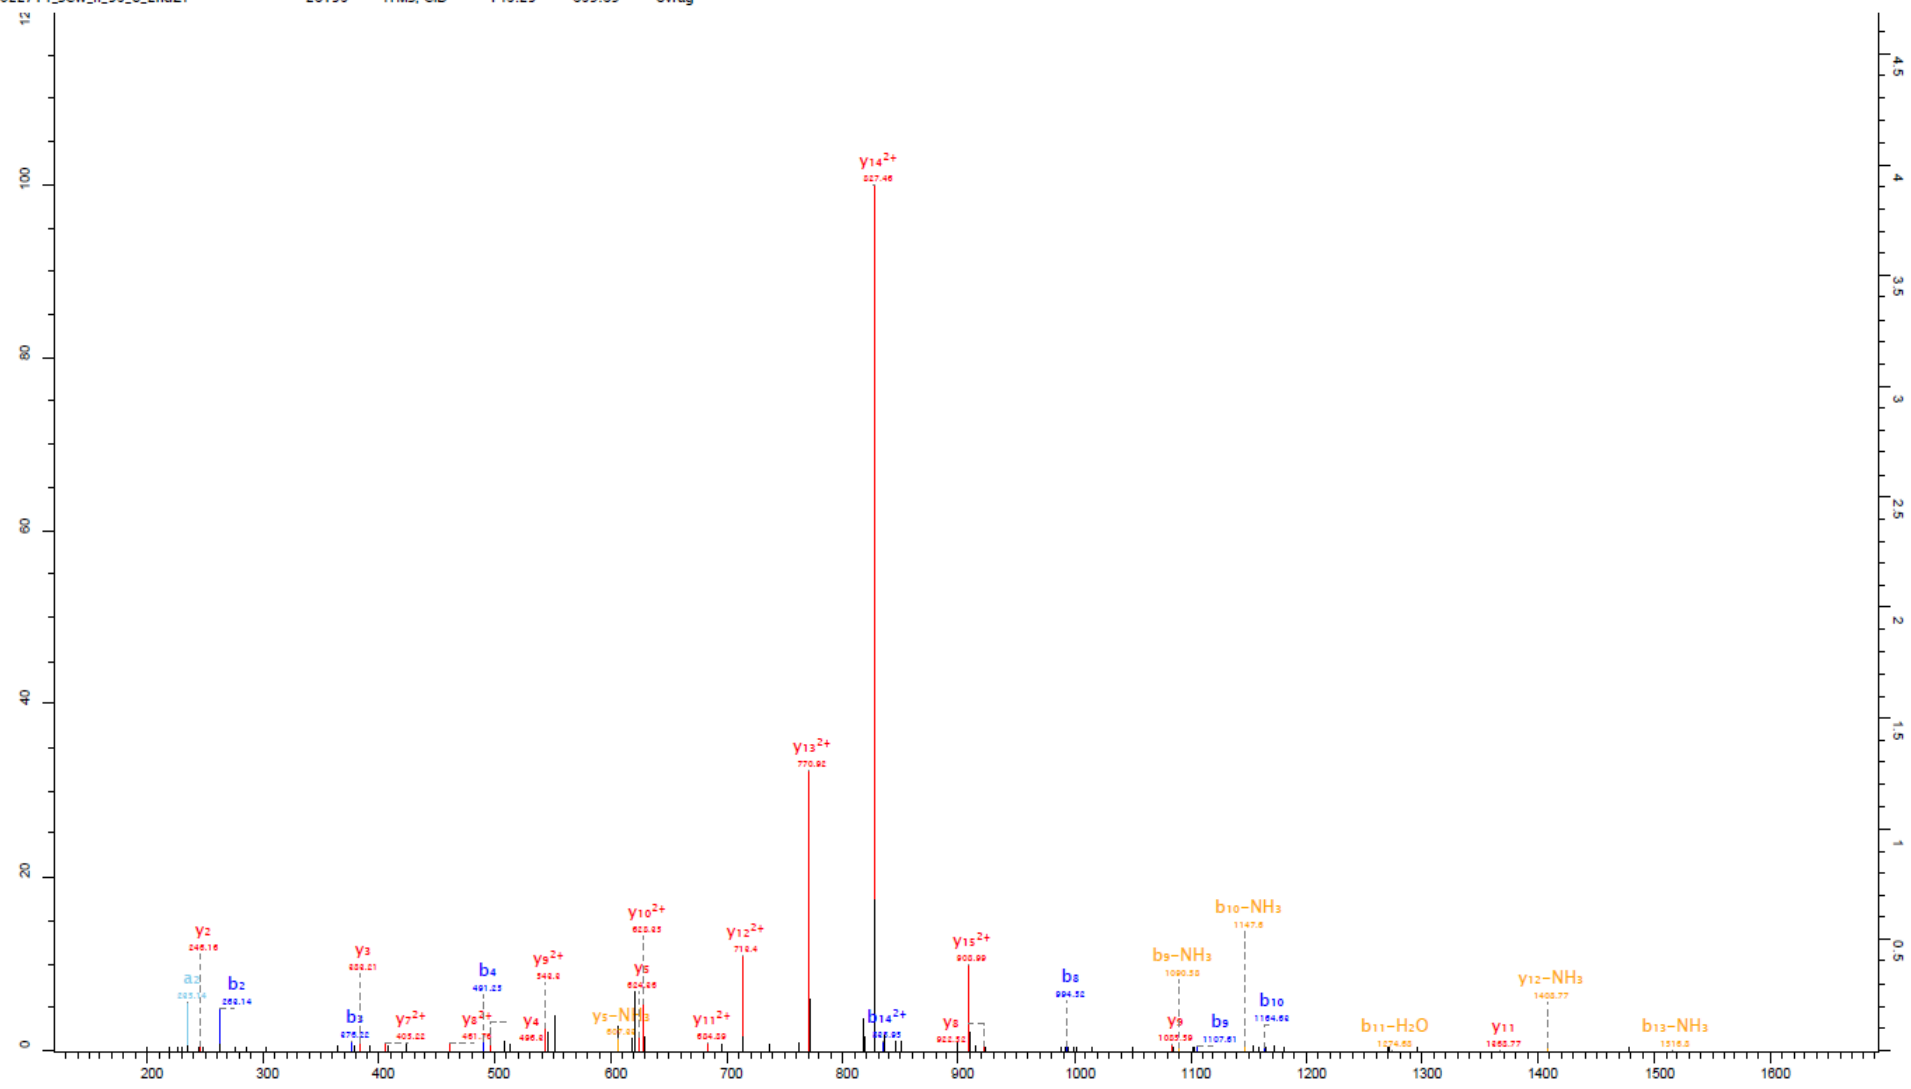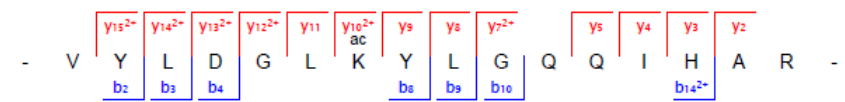

x10

x20

Gene name= Uvrag

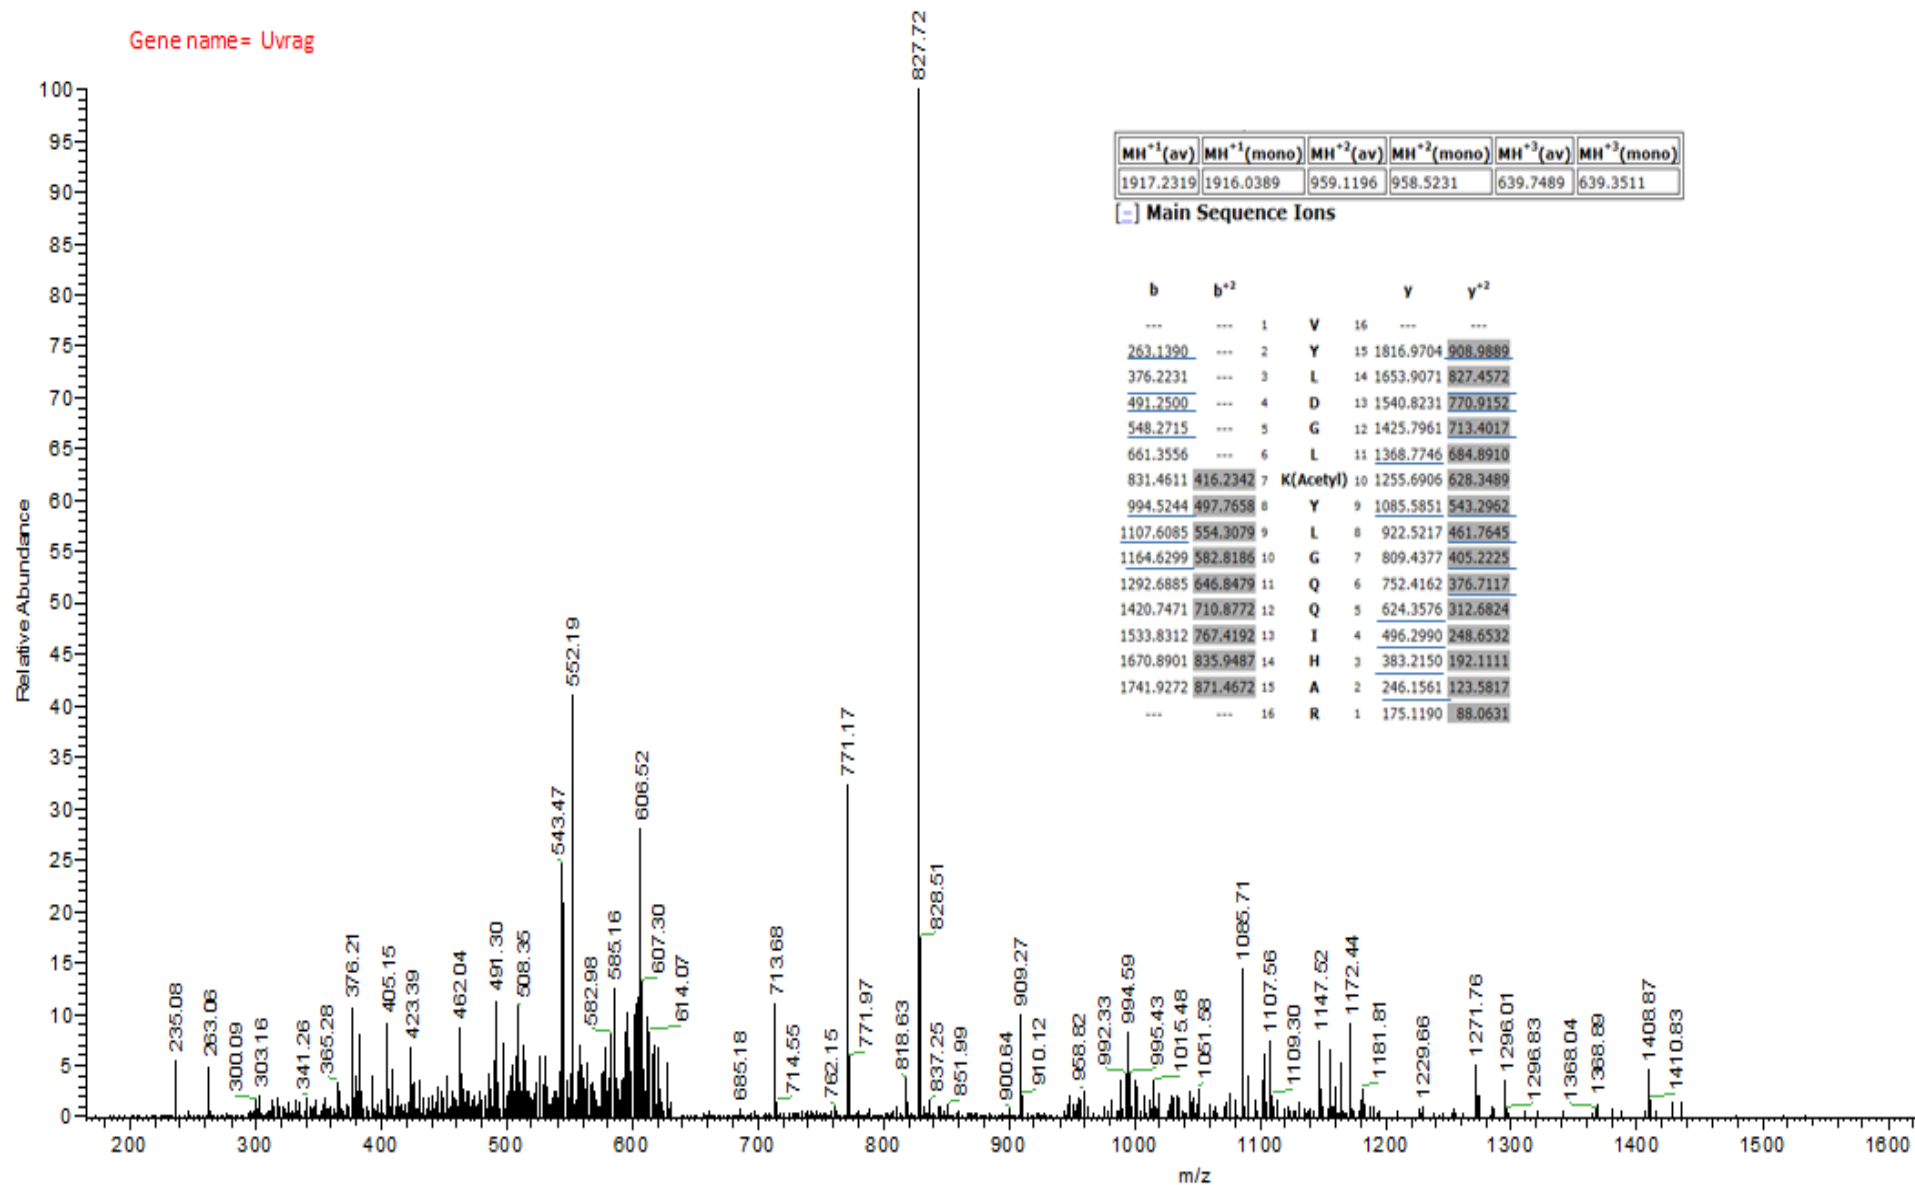

| MH <sup>+</sup> 1(av) | MH <sup>+</sup> 1(mono) | MH <sup>+</sup> 2(av) | MH <sup>+</sup> 2(mono) | MH <sup>+</sup> 3(av) | MH <sup>+</sup> 3(mono) |
|-----------------------|-------------------------|-----------------------|-------------------------|-----------------------|-------------------------|
| 1917.2319             | 1916.0389               | 959.1196              | 958.5231                | 639.7489              | 639.3511                |

[-] Main Sequence Ions

| b         | b <sup>+</sup> 2 |    | y         | y <sup>+</sup> 2 |           |
|-----------|------------------|----|-----------|------------------|-----------|
| ...       | ...              | 1  | V         | 16               | ...       |
| 263.1390  | ...              | 2  | Y         | 15               | 1816.9704 |
| 376.2231  | ...              | 3  | L         | 14               | 1653.9071 |
| 491.2500  | ...              | 4  | D         | 13               | 1540.8231 |
| 548.2715  | ...              | 5  | G         | 12               | 1425.7961 |
| 661.3556  | ...              | 6  | L         | 11               | 1368.7746 |
| 831.4611  | 416.2342         | 7  | K(Acetyl) | 10               | 1255.6906 |
| 994.5244  | 497.7658         | 8  | Y         | 9                | 1085.5851 |
| 1107.6085 | 554.3079         | 9  | L         | 8                | 922.5217  |
| 1164.6299 | 582.8186         | 10 | G         | 7                | 809.4377  |
| 1292.6885 | 646.8479         | 11 | Q         | 6                | 752.4162  |
| 1420.7471 | 710.8772         | 12 | Q         | 5                | 624.3576  |
| 1533.8312 | 767.4192         | 13 | I         | 4                | 496.2990  |
| 1670.8901 | 835.9487         | 14 | H         | 3                | 383.2150  |
| 1741.9272 | 871.4672         | 15 | A         | 2                | 246.1561  |
| ...       | ...              | 16 | R         | 1                | 175.1190  |

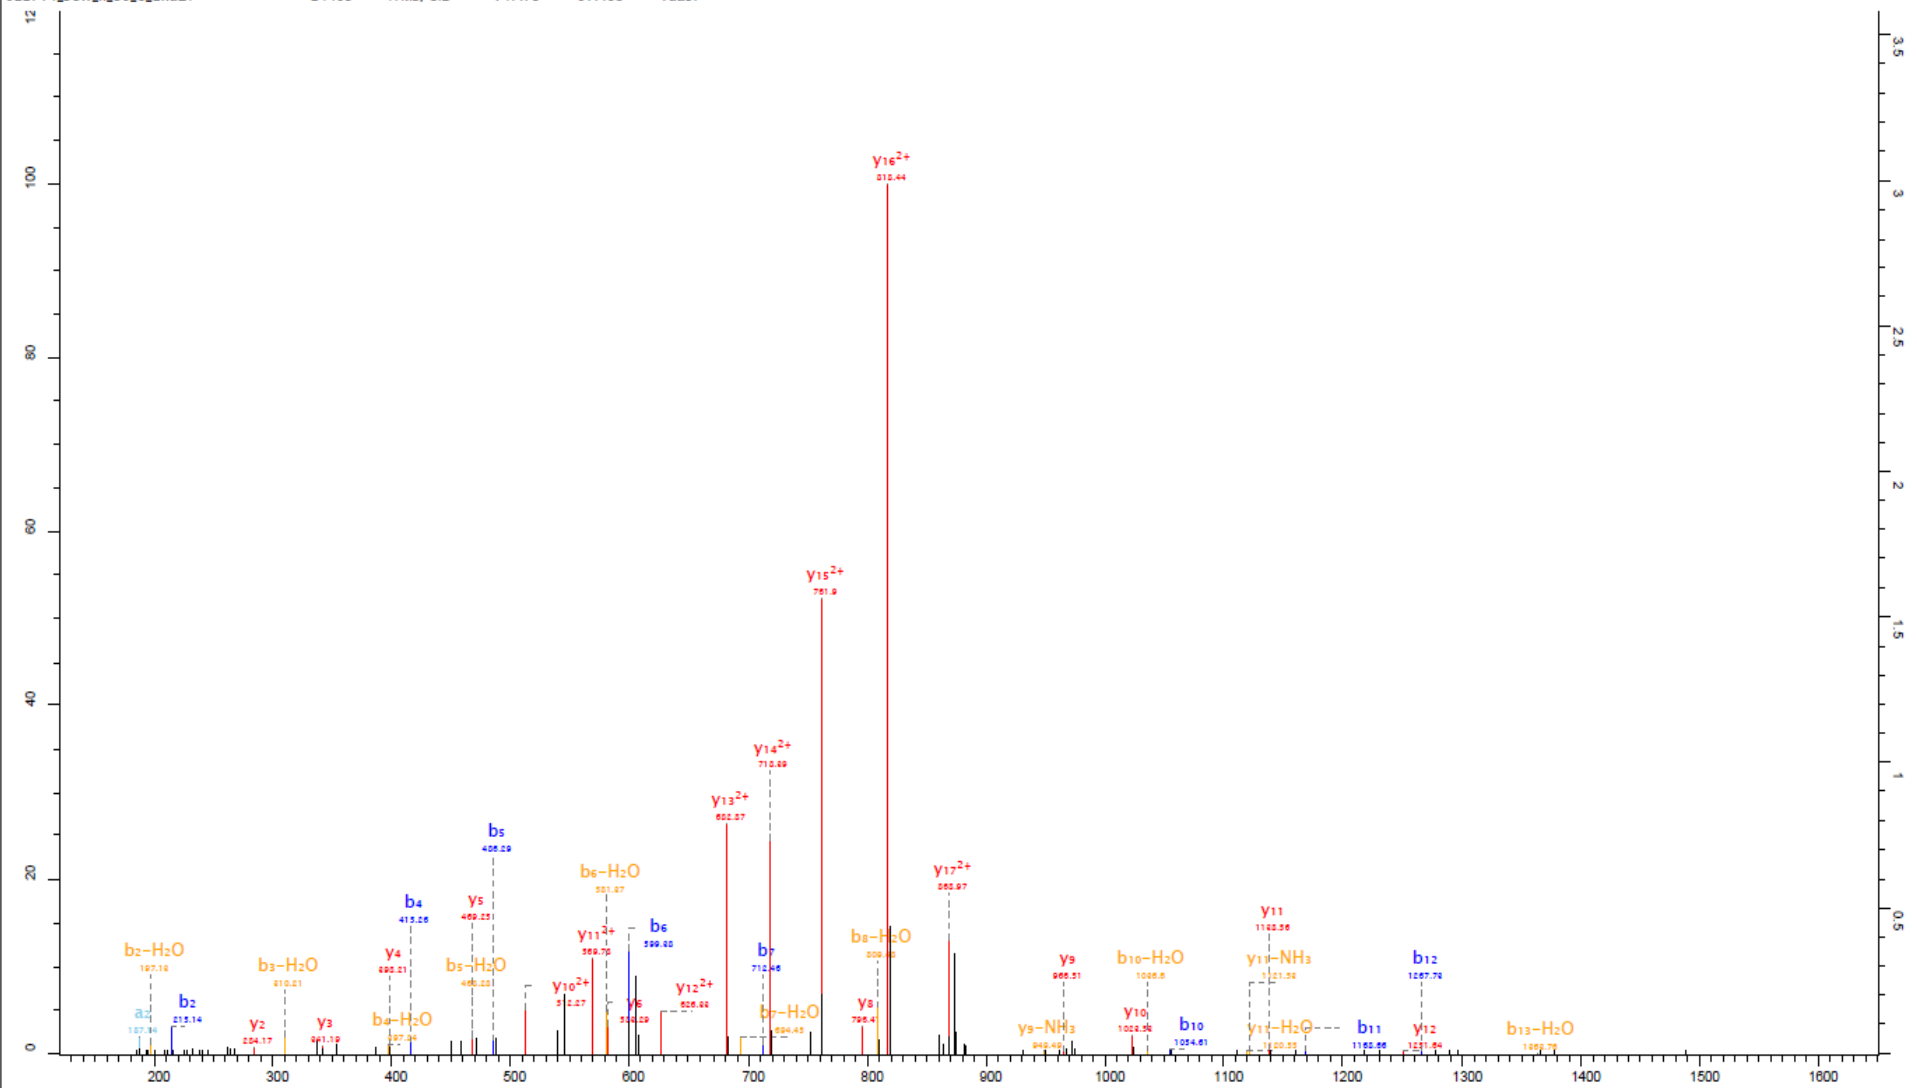

- L T L S A L L D G K N V N A G G H K -

y17<sup>2+</sup>
y16<sup>2+</sup>
y15<sup>2+</sup>
y14<sup>2+</sup>
y13<sup>2+</sup>
y12
y11
y10
y8
y6
y5
y4
y3
y2

b2
b4
b5
b6
b7
b10
b11
b12

x10

x20

Gene name= *Vdac1*

| MH <sup>+</sup> 1(av) | MH <sup>+</sup> 1(mono) | MH <sup>+</sup> 2(av) | MH <sup>+</sup> 2(mono) | MH <sup>+</sup> 3(av) | MH <sup>+</sup> 3(mono) |
|-----------------------|-------------------------|-----------------------|-------------------------|-----------------------|-------------------------|
| 1851.1258             | 1850.0130               | 926.0666              | 925.5102                | 617.7136              | 617.3425                |

Main Sequence Ions

| b         | b <sup>+</sup> |    | y         | y <sup>+</sup> |                    |
|-----------|----------------|----|-----------|----------------|--------------------|
| ---       | ---            | 1  | L         | 18             | ---                |
| 215.1390  | ---            | 2  | T         | 17             | 1736.9290 868.9681 |
| 328.2231  | ---            | 3  | L         | 16             | 1635.8813 818.4443 |
| 415.2551  | ---            | 4  | S         | 15             | 1522.7972 761.9023 |
| 486.2922  | ---            | 5  | A         | 14             | 1435.7652 718.3862 |
| 599.3763  | ---            | 6  | L         | 13             | 1364.7281 682.8677 |
| 712.4604  | ---            | 7  | L         | 12             | 1251.6440 626.3257 |
| 827.4873  | ---            | 8  | D         | 11             | 1138.5600 569.7836 |
| 884.5088  | ---            | 9  | G         | 10             | 1023.5330 512.2701 |
| 1054.6143 | 527.8108       | 10 | K(Acetyl) | 9              | 966.5116 483.7594  |
| 1168.6572 | 584.8322       | 11 | N         | 8              | 796.4060 398.7067  |
| 1267.7256 | 634.3665       | 12 | V         | 7              | 682.3631 341.6852  |
| 1381.7686 | 691.3879       | 13 | N         | 6              | 583.2947 292.1510  |
| 1452.8057 | 726.9065       | 14 | A         | 5              | 469.2518 235.1295  |
| 1509.8271 | 755.4172       | 15 | G         | 4              | 398.2146 199.6110  |
| 1566.8486 | 783.9279       | 16 | G         | 3              | 341.1932 171.1002  |
| 1703.9075 | 852.4574       | 17 | H         | 2              | 284.1717 142.5895  |
| ---       | ---            | 18 | K         | 1              | 147.1128 74.0600   |

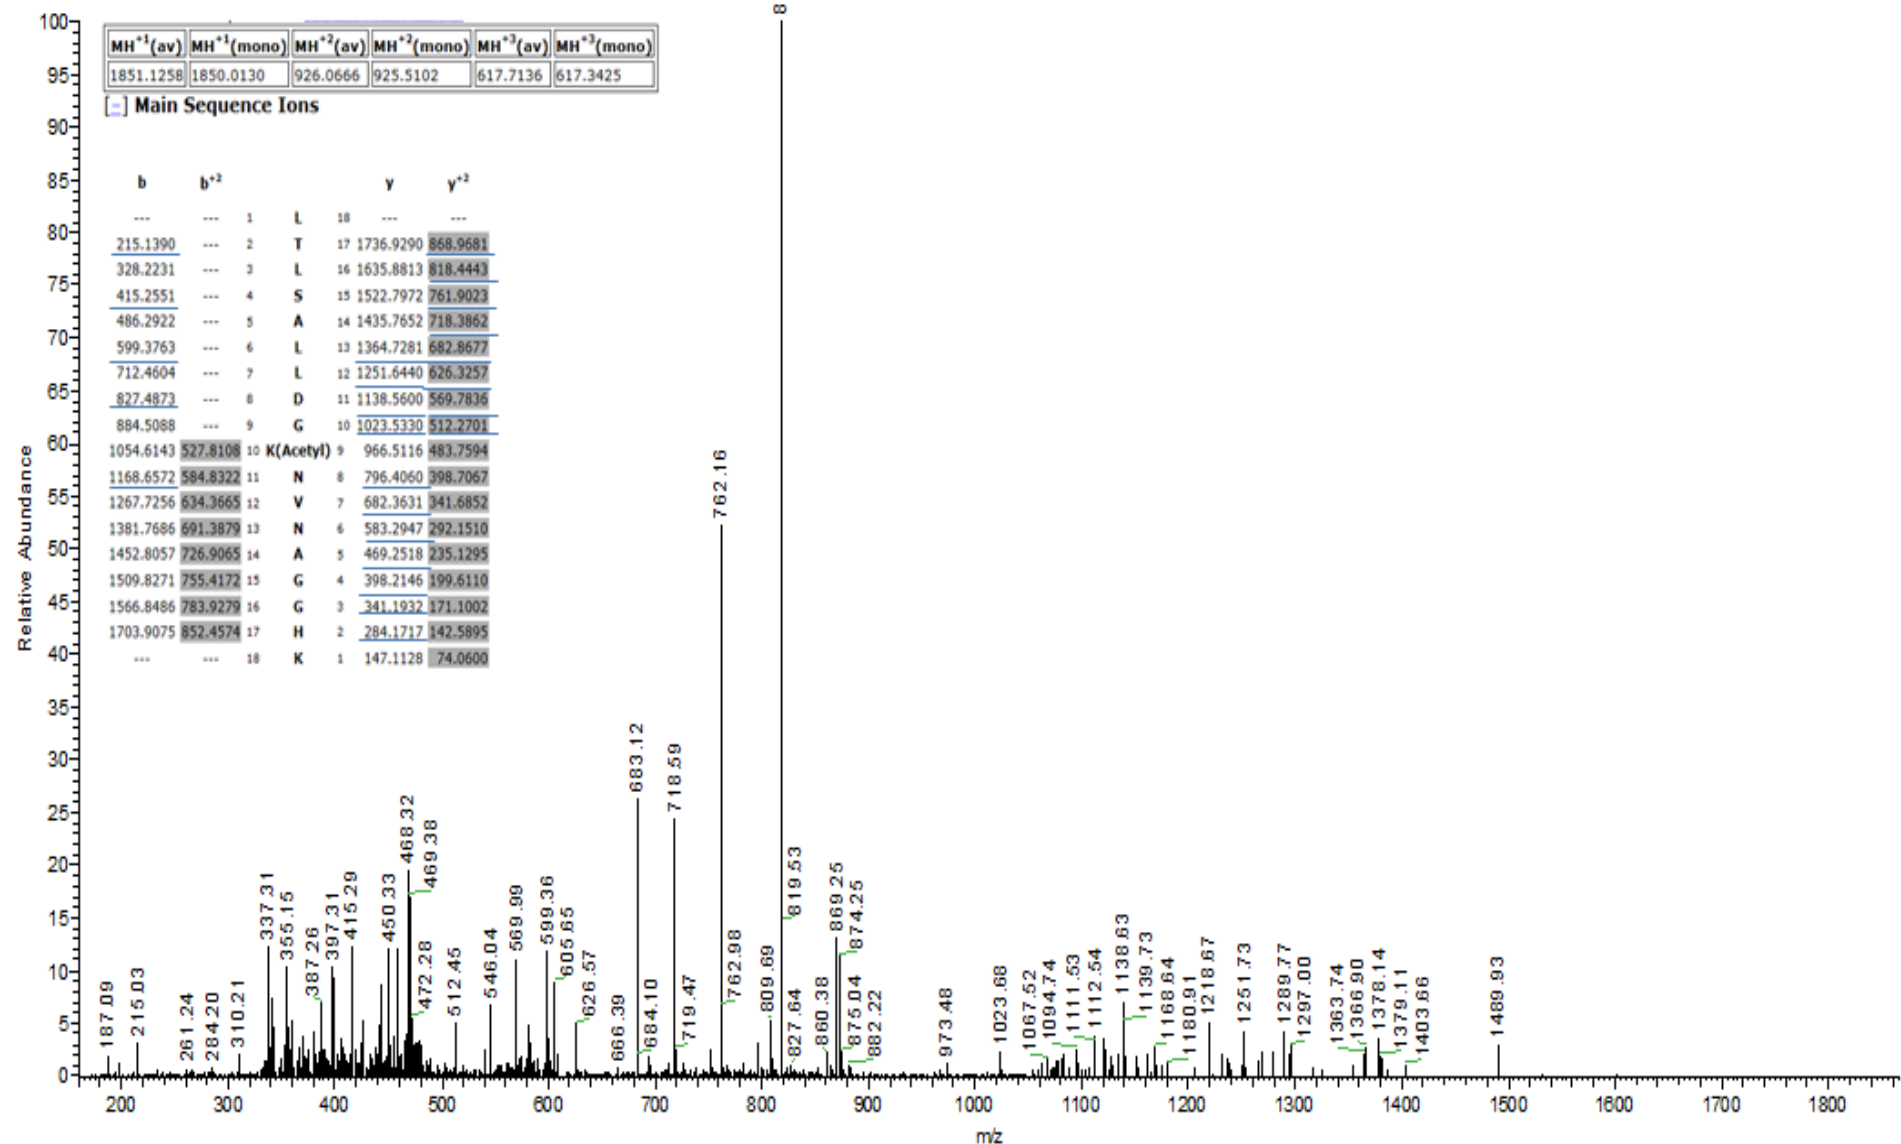

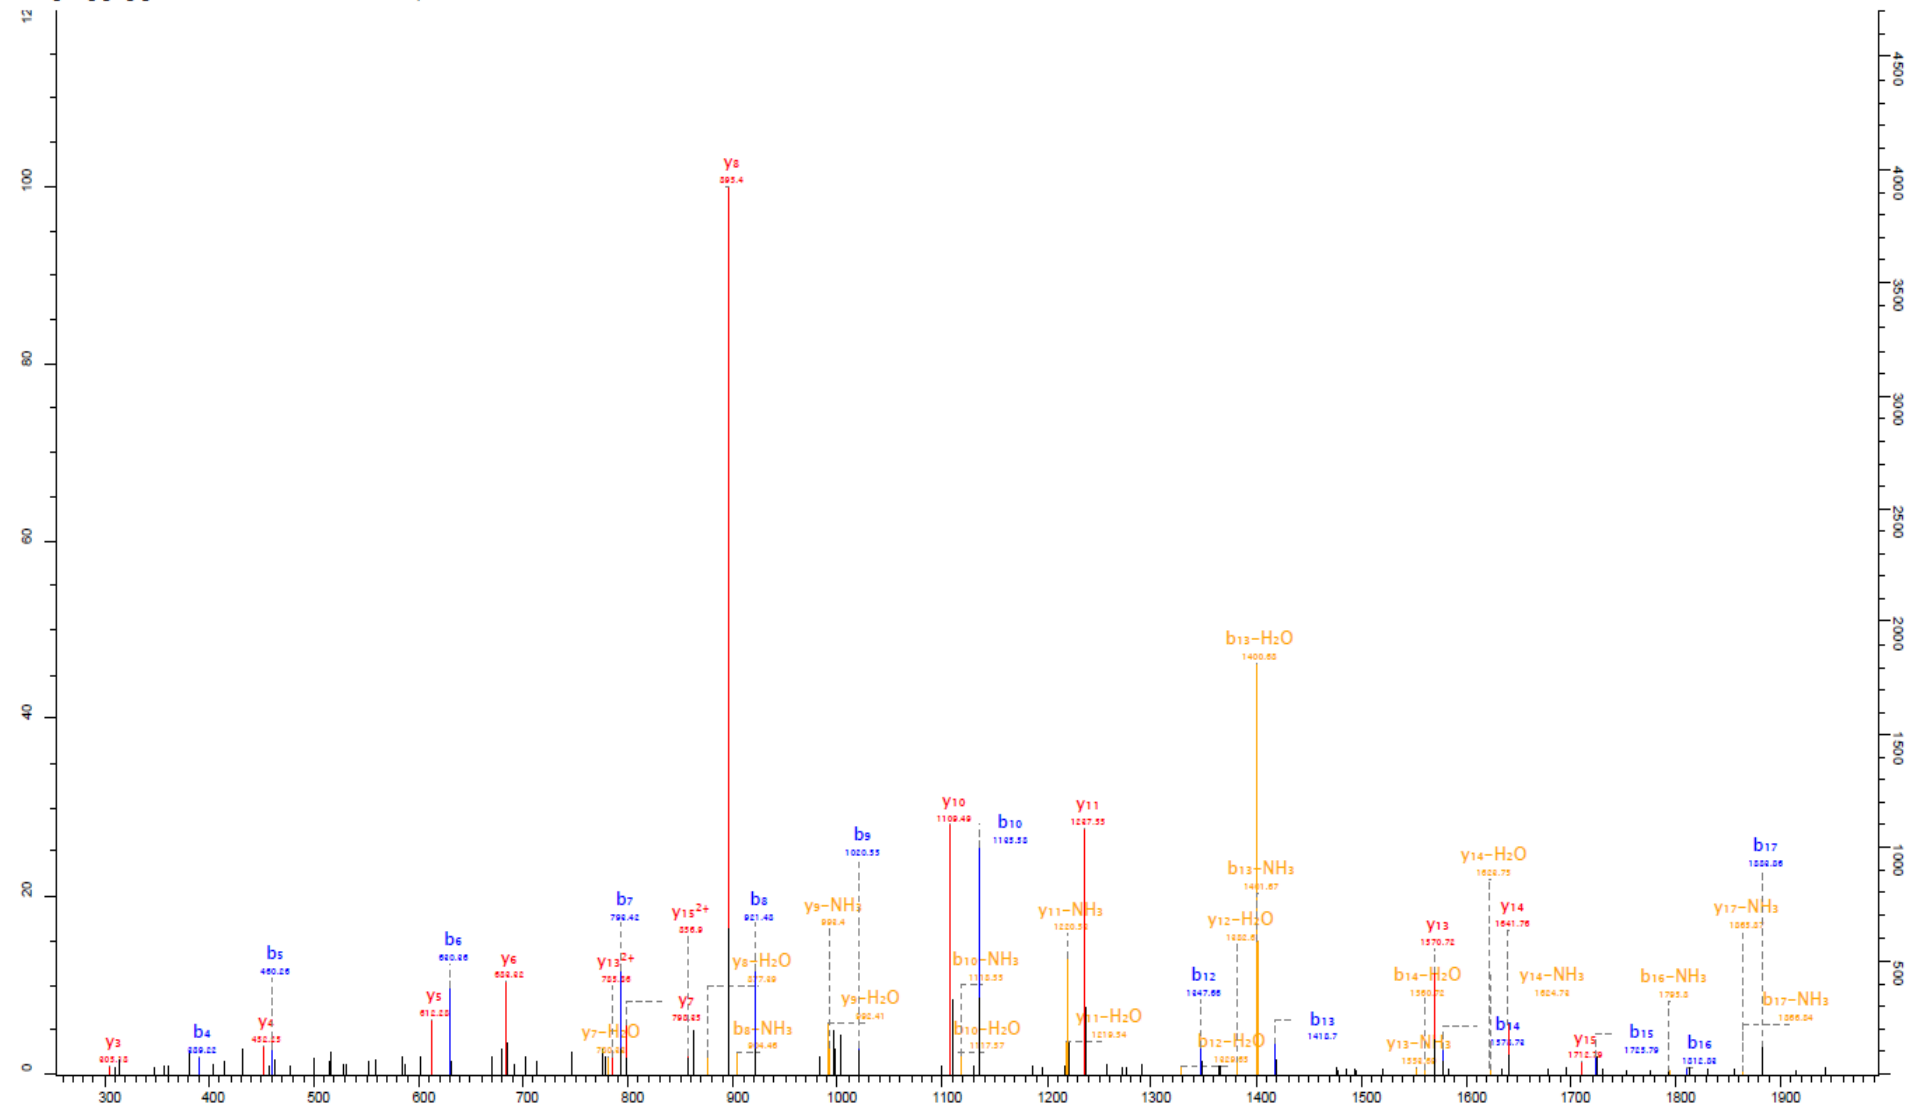

- F G I A A K Y Q V D P D A C F S A K -

y15
y14
y13 ac
y11
y10
y8
y7
y6
y5
y4
y3

b4
b5
b6
b7
b8
b9
b10
b12
b13
b14
b15
b16
b17

Gene name = *Vdac1*

| MH <sup>+</sup> (av) | MH <sup>+</sup> (mono) | MH <sup>+</sup> (av) | MH <sup>+</sup> (mono) |
|----------------------|------------------------|----------------------|------------------------|
| 2031.3088            | 2029.9688              | 1016.1581            | 1015.4880              |

Main Sequence Ions

| b         | b <sup>+</sup> |    | y                  | y <sup>+</sup> |                    |
|-----------|----------------|----|--------------------|----------------|--------------------|
| ---       | ---            | 1  | F                  | 18             | ---                |
| 205.0972  | ---            | 2  | G                  | 17             | 1882.9004 941.9538 |
| 318.1812  | ---            | 3  | I                  | 16             | 1825.8789 913.4431 |
| 389.2183  | ---            | 4  | A                  | 15             | 1712.7948 856.9011 |
| 460.2554  | ---            | 5  | A                  | 14             | 1641.7577 821.3825 |
| 630.3610  | 315.6841       | 6  | K(Acetyl)          |                |                    |
| 793.4243  | 397.2158       | 7  | Y                  | 12             | 1400.6151 700.8112 |
| 921.4829  | 461.2451       | 8  | Q                  | 11             | 1237.5518 619.2795 |
| 1020.5513 | 510.7793       | 9  | V                  | 10             | 1109.4932 555.2502 |
| 1135.5782 | 568.2928       | 10 | D                  | 9              | 1010.4248 505.7160 |
| 1232.6310 | 616.8191       | 11 | P                  | 8              | 895.3978 448.2026  |
| 1347.6579 | 674.3326       | 12 | D                  | 7              | 798.3451 399.6762  |
| 1418.6951 | 709.8512       | 13 | A                  | 6              | 683.3181 342.1627  |
| 1578.7257 | 789.8665       | 14 | C(Carbamidomethyl) |                |                    |
| 1725.7941 | 863.4007       | 15 | F                  | 4              | 452.2504 226.6288  |
| 1812.8261 | 906.9167       | 16 | S                  | 3              | 305.1819 153.0946  |
| 1883.8633 | 942.4353       | 17 | A                  | 2              | 218.1499 109.5786  |
| --        | --             | 18 | K                  | 1              | 147.1128 74.0600   |

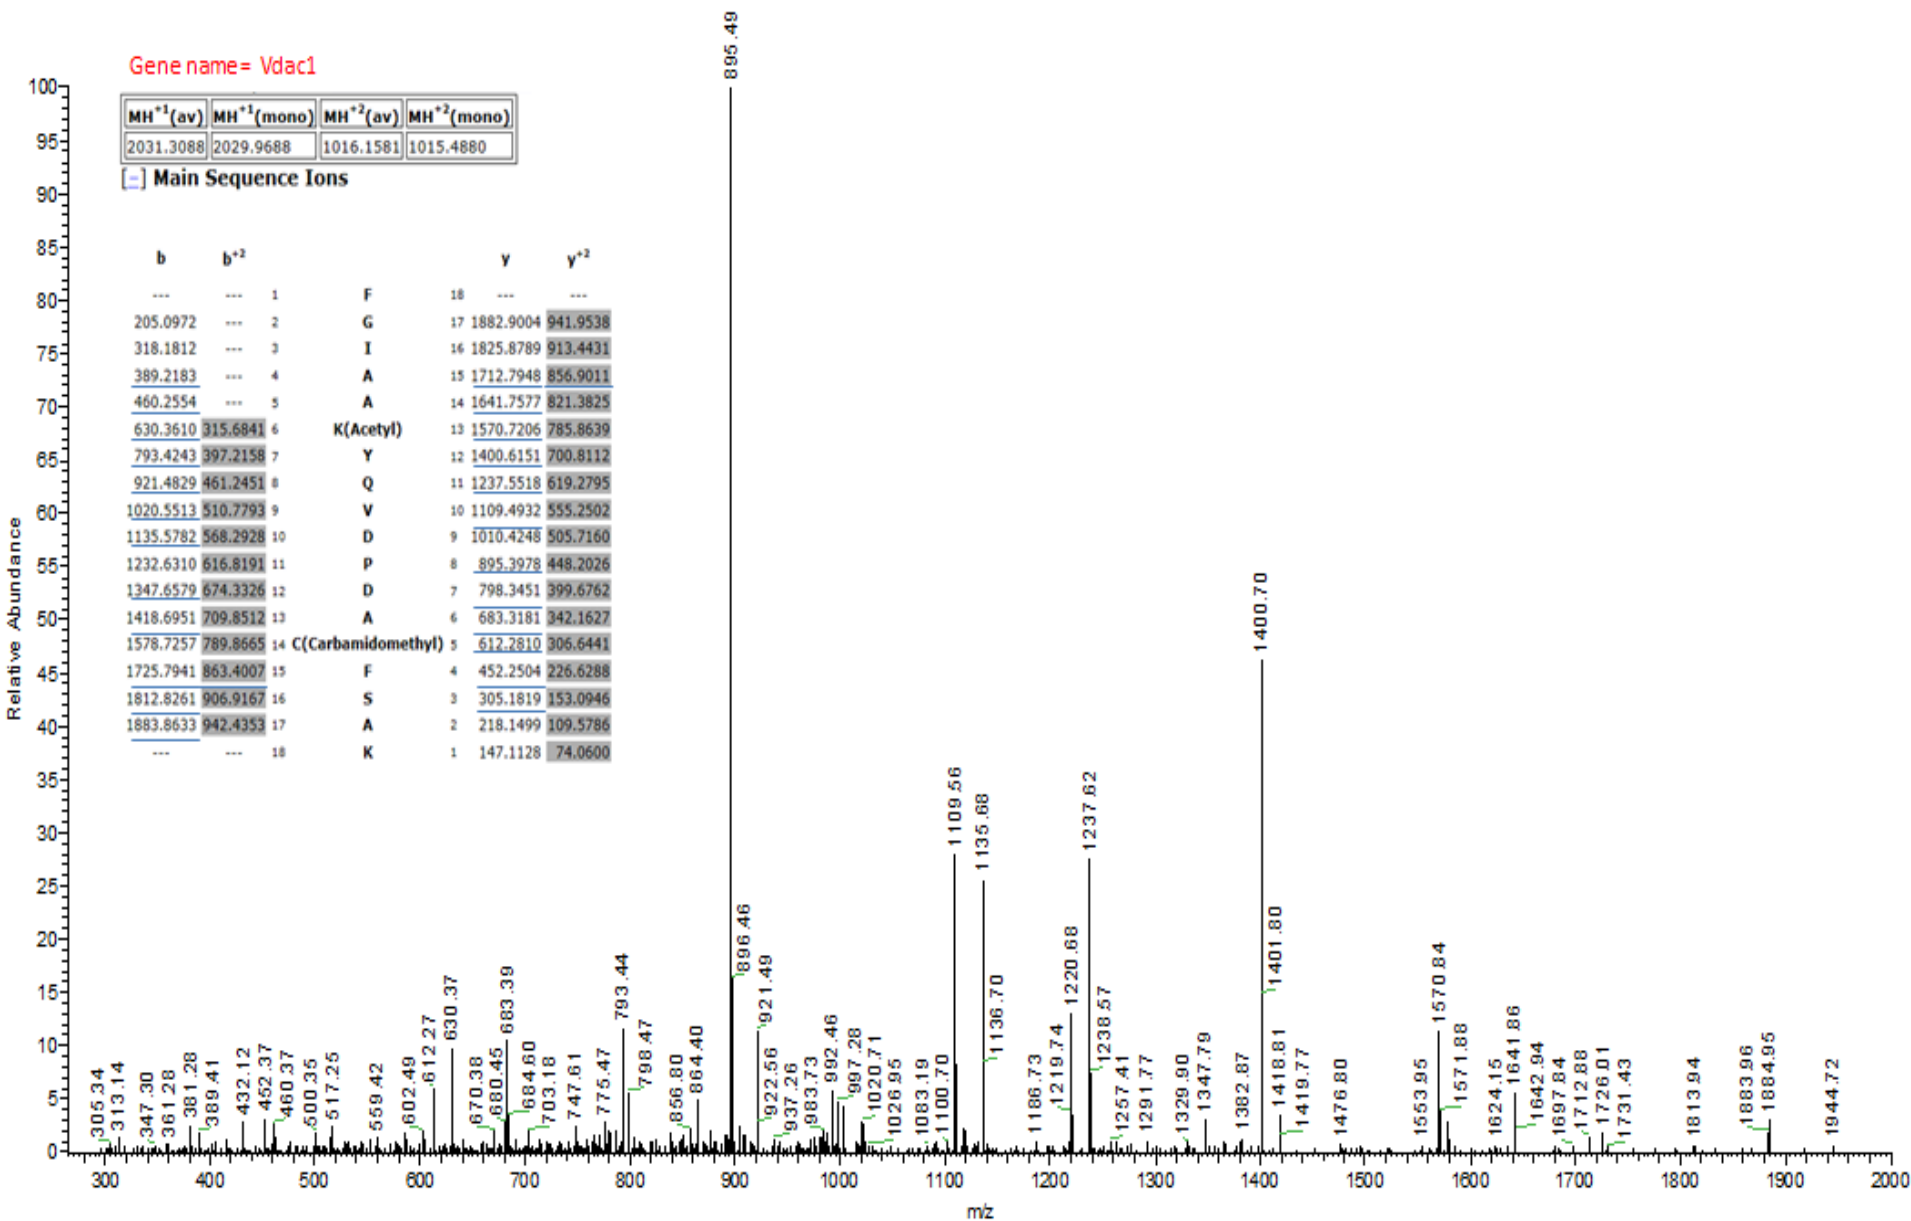



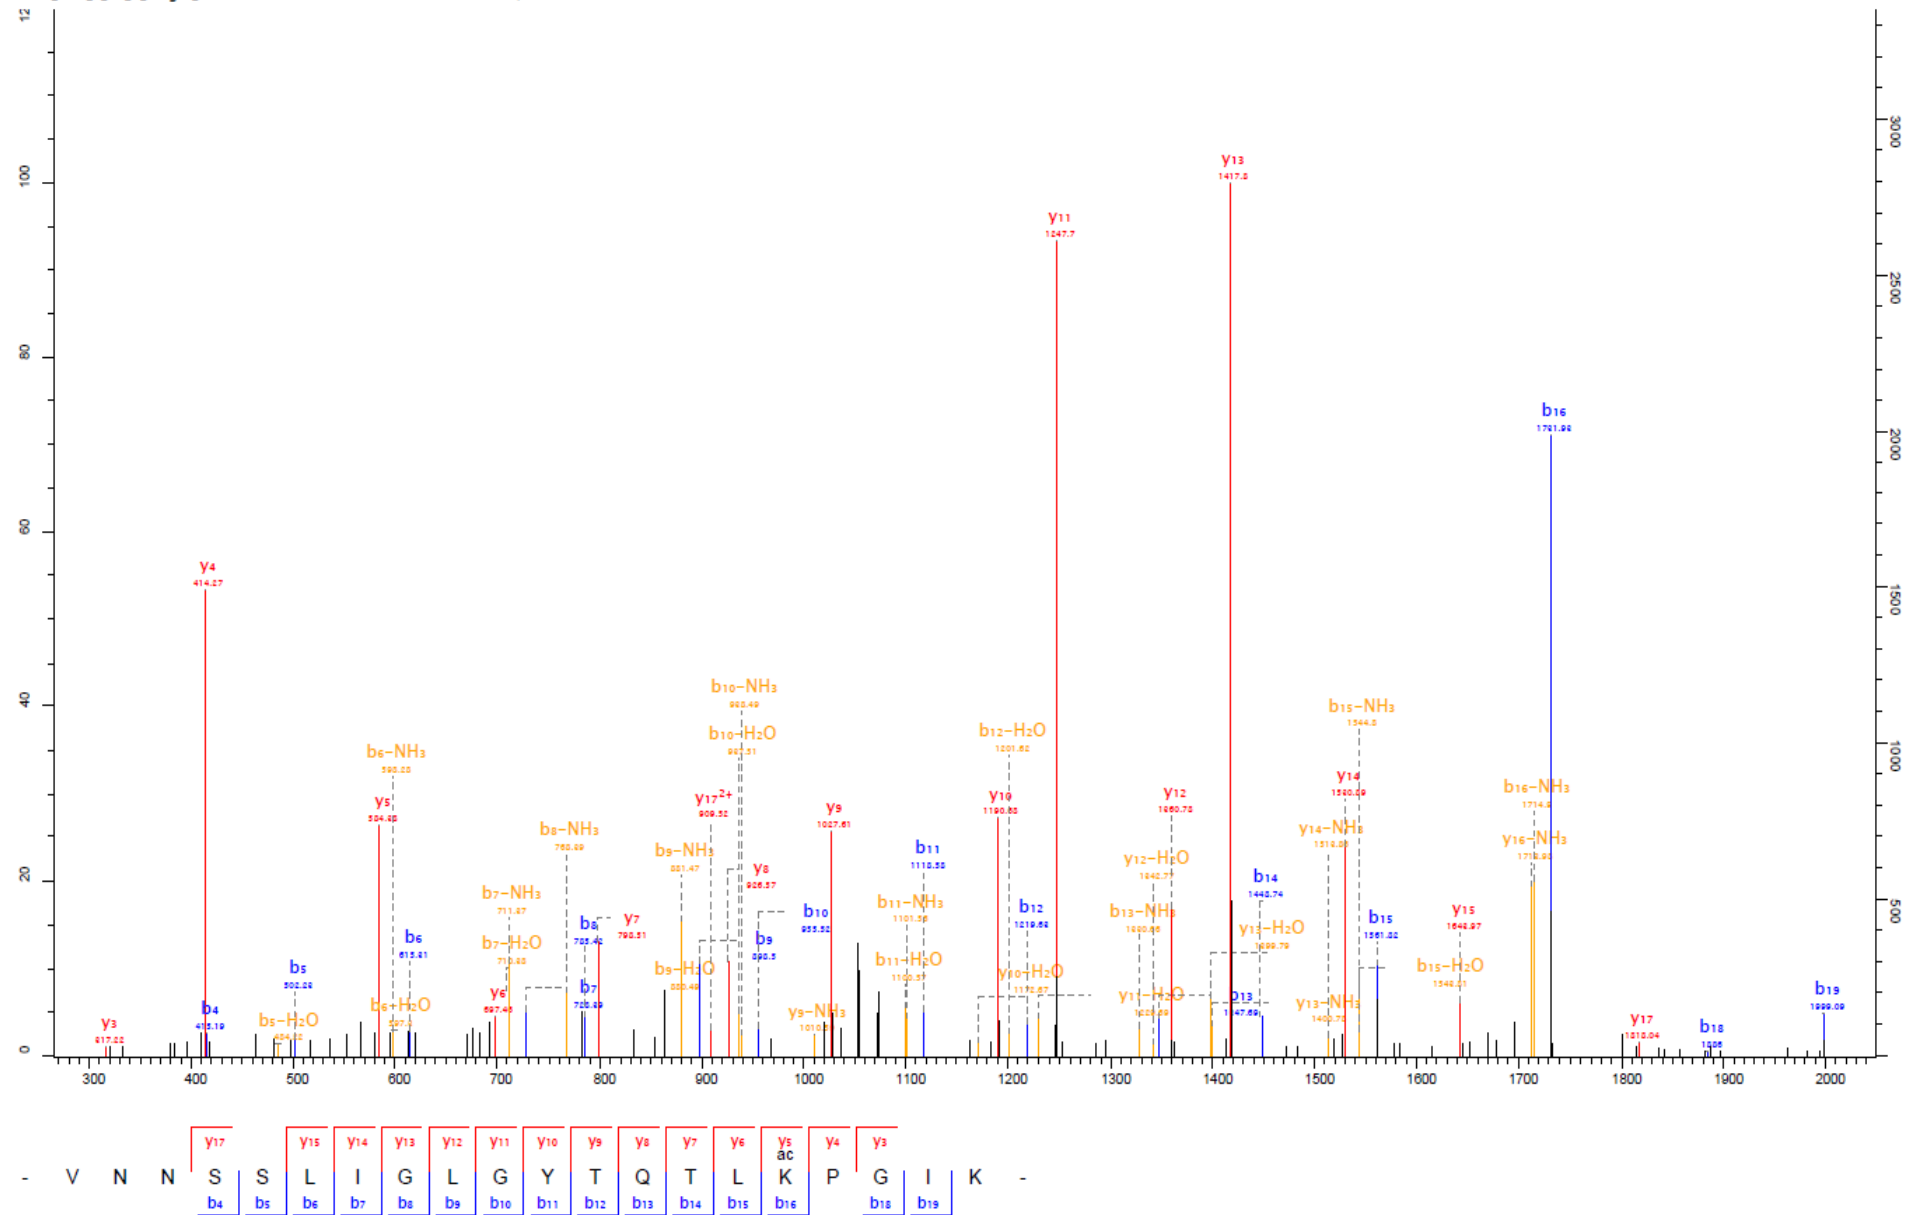

Gene name = Vdac1

| MH <sup>+</sup> (av) | MH <sup>+</sup> (mono) | MH <sup>+</sup> (av) | MH <sup>+</sup> (mono) |
|----------------------|------------------------|----------------------|------------------------|
| 2146.5071            | 2145.1914              | 1073.7573            | 1073.0993              |

(-) Main Sequence Ions

| b         | b <sup>+</sup> | y  | y <sup>+</sup> |
|-----------|----------------|----|----------------|
| ...       | ...            | 1  | V              |
| 214.1186  | ...            | 2  | N              |
| 328.1615  | ...            | 3  | N              |
| 415.1936  | ...            | 4  | S              |
| 502.2256  | ...            | 5  | S              |
| 615.3097  | ...            | 6  | L              |
| 728.3937  | ...            | 7  | I              |
| 785.4152  | ...            | 8  | G              |
| 898.4993  | ...            | 9  | L              |
| 955.5207  | ...            | 10 | G              |
| 1118.5840 | ...            | 11 | Y              |
| 1219.6317 | ...            | 12 | T              |
| 1347.6903 | ...            | 13 | Q              |
| 1448.7380 | ...            | 14 | T              |
| 1561.8220 | ...            | 15 | L              |
| 1731.9276 | 866.4674       | 16 | K(Acetyl)      |
| 1828.9803 | 914.9938       | 17 | P              |
| 1886.0018 | 943.5045       | 18 | G              |
| 1999.0859 | 1000.0466      | 19 | I              |
| ...       | ...            | 20 | K              |

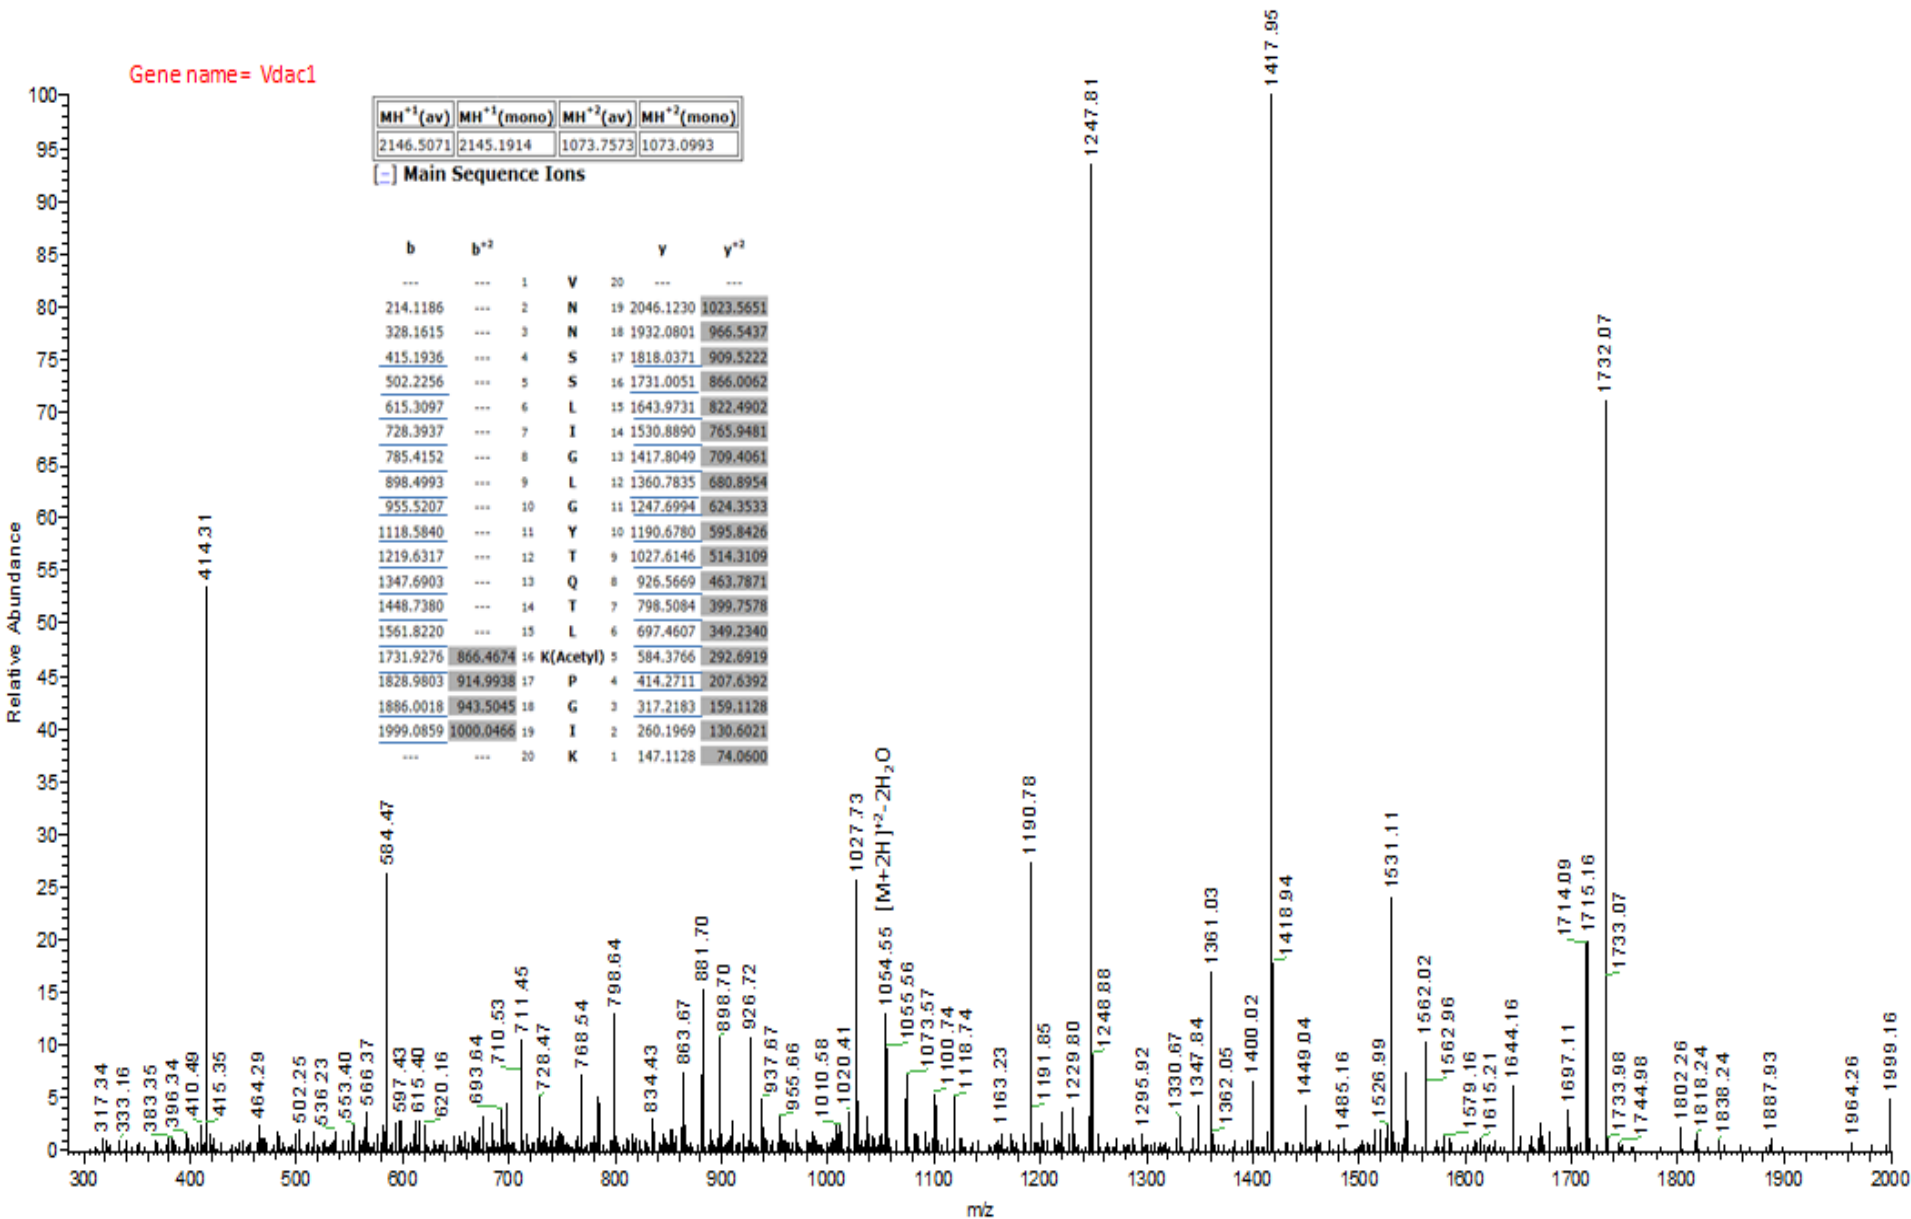

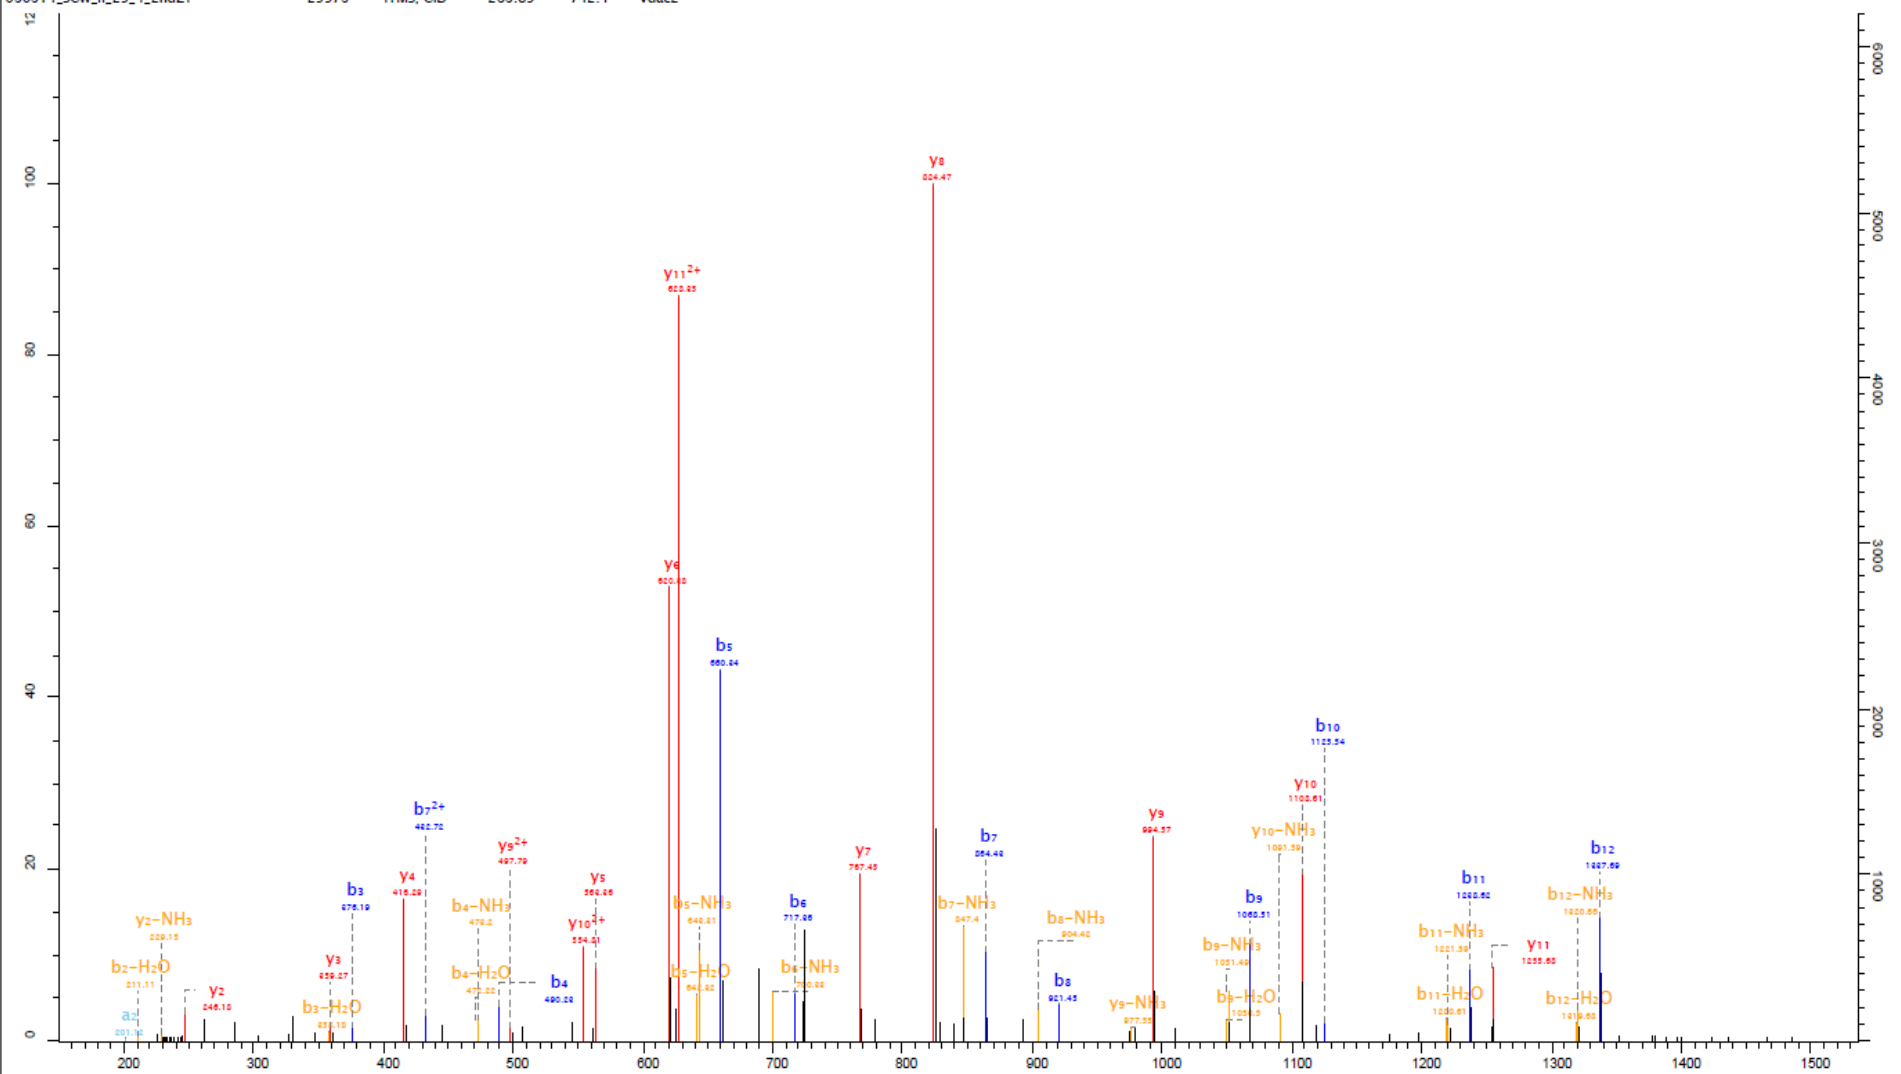

- D I F N K G F G F G L V K -

a2 b3 b4 b5 b6 b7 b8 b9 b10 b11 b12

Gene name = Vdac2

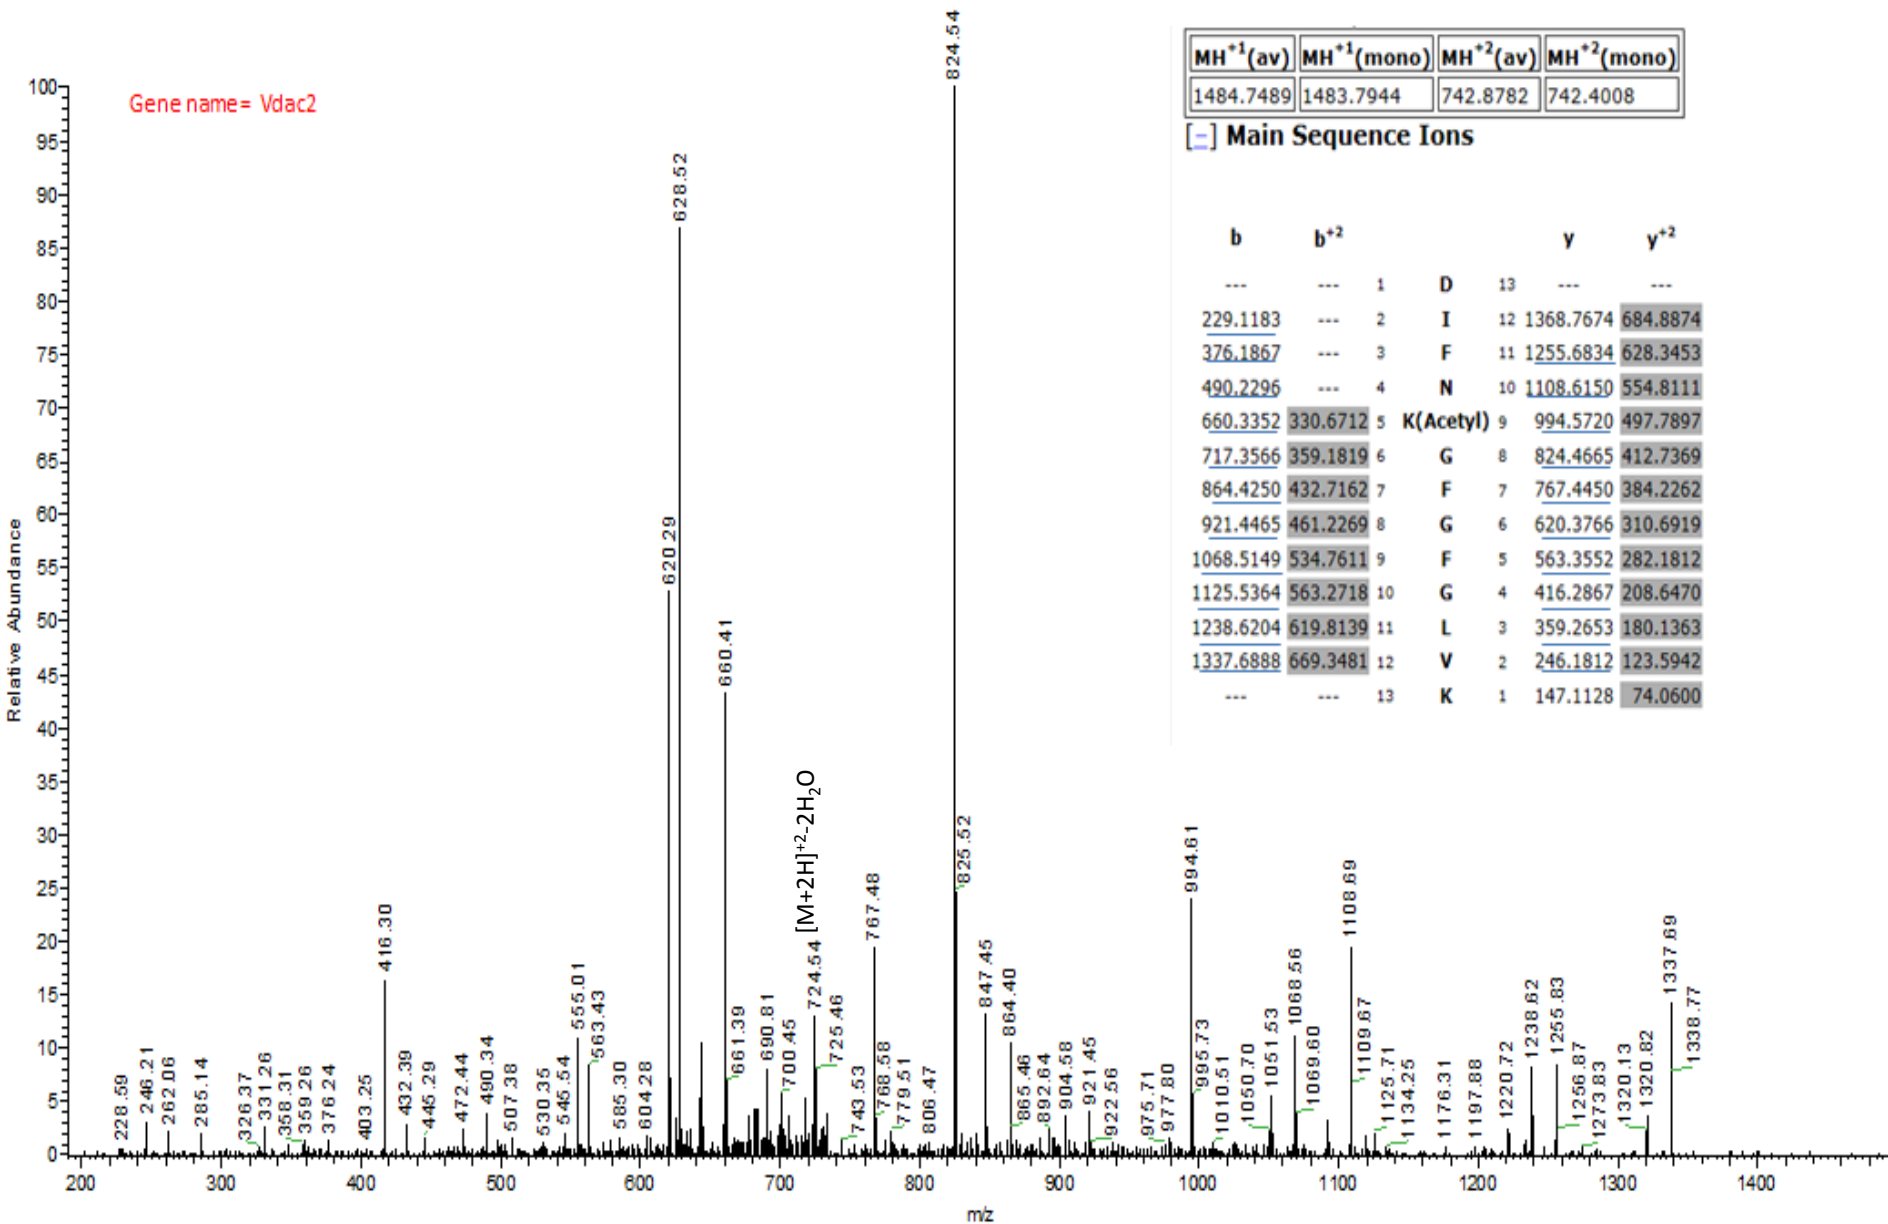

| MH <sup>+</sup> (av) | MH <sup>+</sup> (mono) | MH <sup>2+</sup> (av) | MH <sup>2+</sup> (mono) |
|----------------------|------------------------|-----------------------|-------------------------|
| 1484.7489            | 1483.7944              | 742.8782              | 742.4008                |

[-] Main Sequence Ions

| b         | b <sup>+</sup> |    | y         | y <sup>+</sup> |           |
|-----------|----------------|----|-----------|----------------|-----------|
| ---       | ---            | 1  | D         | 13             | ---       |
| 229.1183  | ---            | 2  | I         | 12             | 1368.7674 |
| 376.1867  | ---            | 3  | F         | 11             | 1255.6834 |
| 490.2296  | ---            | 4  | N         | 10             | 1108.6150 |
| 660.3352  | 330.6712       | 5  | K(Acetyl) | 9              | 994.5720  |
| 717.3566  | 359.1819       | 6  | G         | 8              | 824.4665  |
| 864.4250  | 432.7162       | 7  | F         | 7              | 767.4450  |
| 921.4465  | 461.2269       | 8  | G         | 6              | 620.3766  |
| 1068.5149 | 534.7611       | 9  | F         | 5              | 563.3552  |
| 1125.5364 | 563.2718       | 10 | G         | 4              | 416.2867  |
| 1238.6204 | 619.8139       | 11 | L         | 3              | 359.2653  |
| 1337.6888 | 669.3481       | 12 | V         | 2              | 246.1812  |
| ---       | ---            | 13 | K         | 1              | 147.1128  |

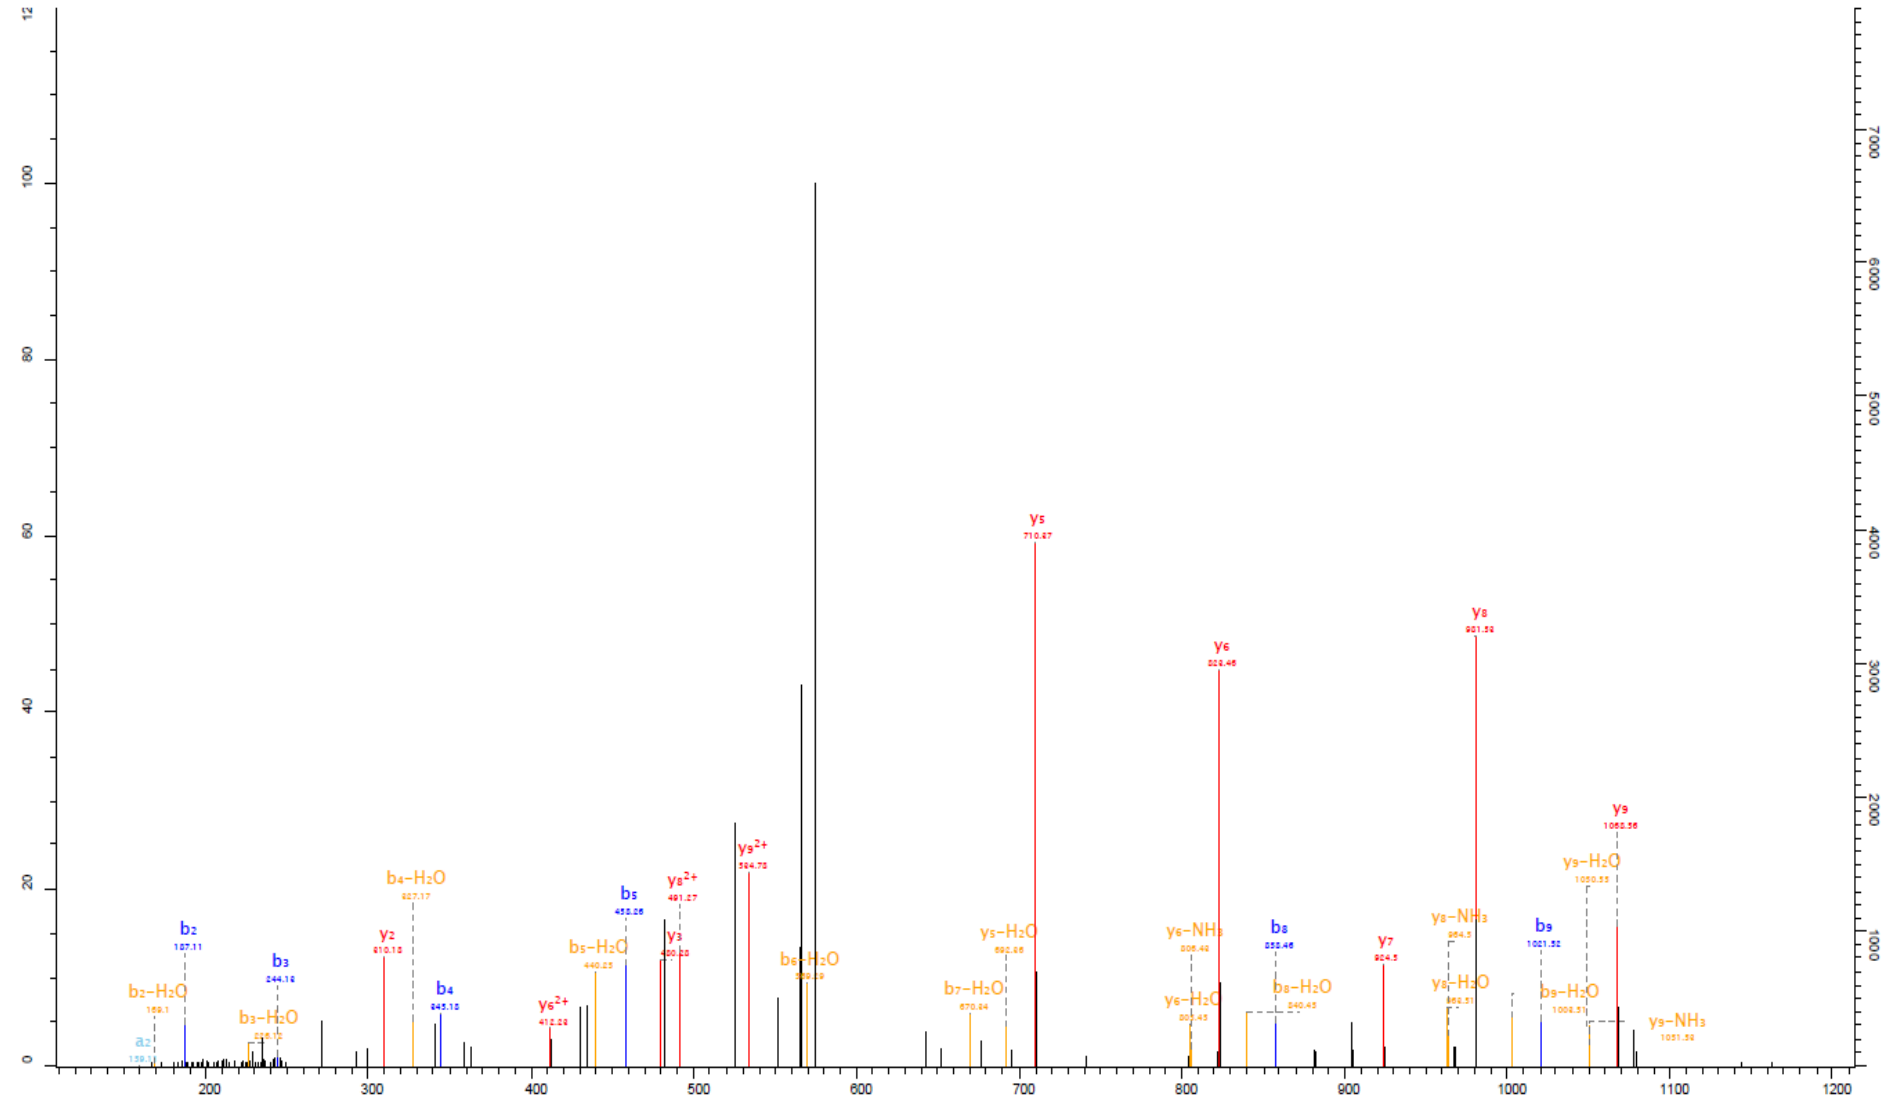

- V y<sub>9</sub> y<sub>8</sub> y<sub>7</sub> y<sub>6</sub> y<sub>5</sub> T y<sub>3</sub> y<sub>2</sub> K Y K -

b<sub>2</sub> b<sub>3</sub> b<sub>4</sub> b<sub>5</sub> b<sub>6</sub> b<sub>9</sub>

Gene name= Vdac2

| MH <sup>+</sup> (av) | MH <sup>+</sup> (mono) | MH <sup>+</sup> (av) | MH <sup>+</sup> (mono) |
|----------------------|------------------------|----------------------|------------------------|
| 1168.3403            | 1167.6256              | 584.6739             | 584.3164               |

**(-)** Main Sequence Ions

| b         | b <sup>+</sup> |    | y                | y <sup>+</sup> |           |
|-----------|----------------|----|------------------|----------------|-----------|
| ---       | ---            | 1  | <b>V</b>         | 10             | ---       |
| 187.1077  | ---            | 2  | <b>S</b>         | 9              | 1068.5572 |
| 244.1292  | ---            | 3  | <b>G</b>         | 8              | 981.5251  |
| 345.1769  | ---            | 4  | <b>T</b>         | 7              | 924.5037  |
| 458.2609  | ---            | 5  | <b>L</b>         | 6              | 823.4560  |
| 587.3035  | ---            | 6  | <b>E</b>         | 5              | 710.3719  |
| 688.3512  | ---            | 7  | <b>T</b>         | 4              | 581.3293  |
| 858.4567  | 429.7320       | 8  | <b>K(Acetyl)</b> | 3              | 480.2817  |
| 1021.5201 | 511.2637       | 9  | <b>Y</b>         | 2              | 310.1761  |
| ---       | ---            | 10 | <b>K</b>         | 1              | 147.1128  |

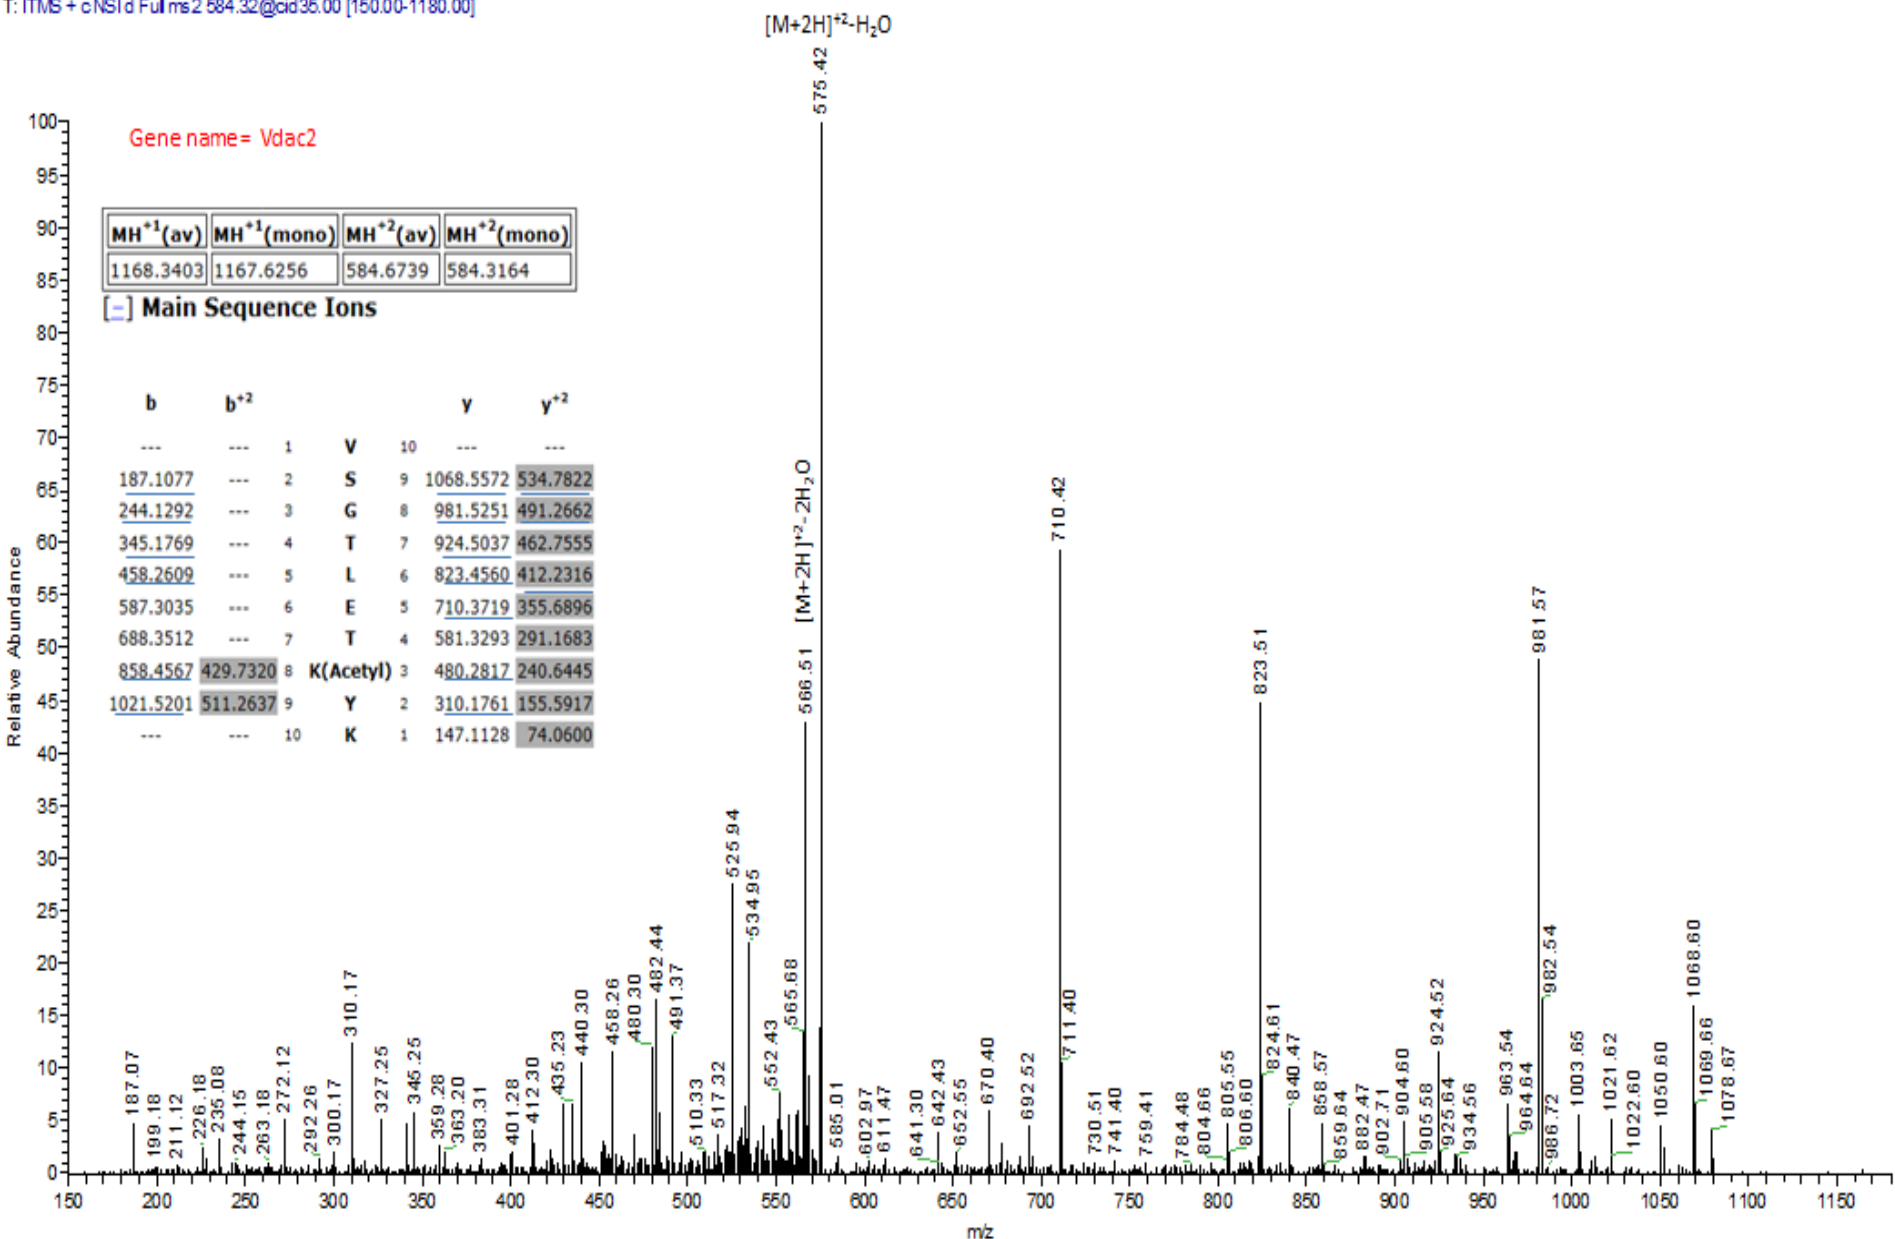

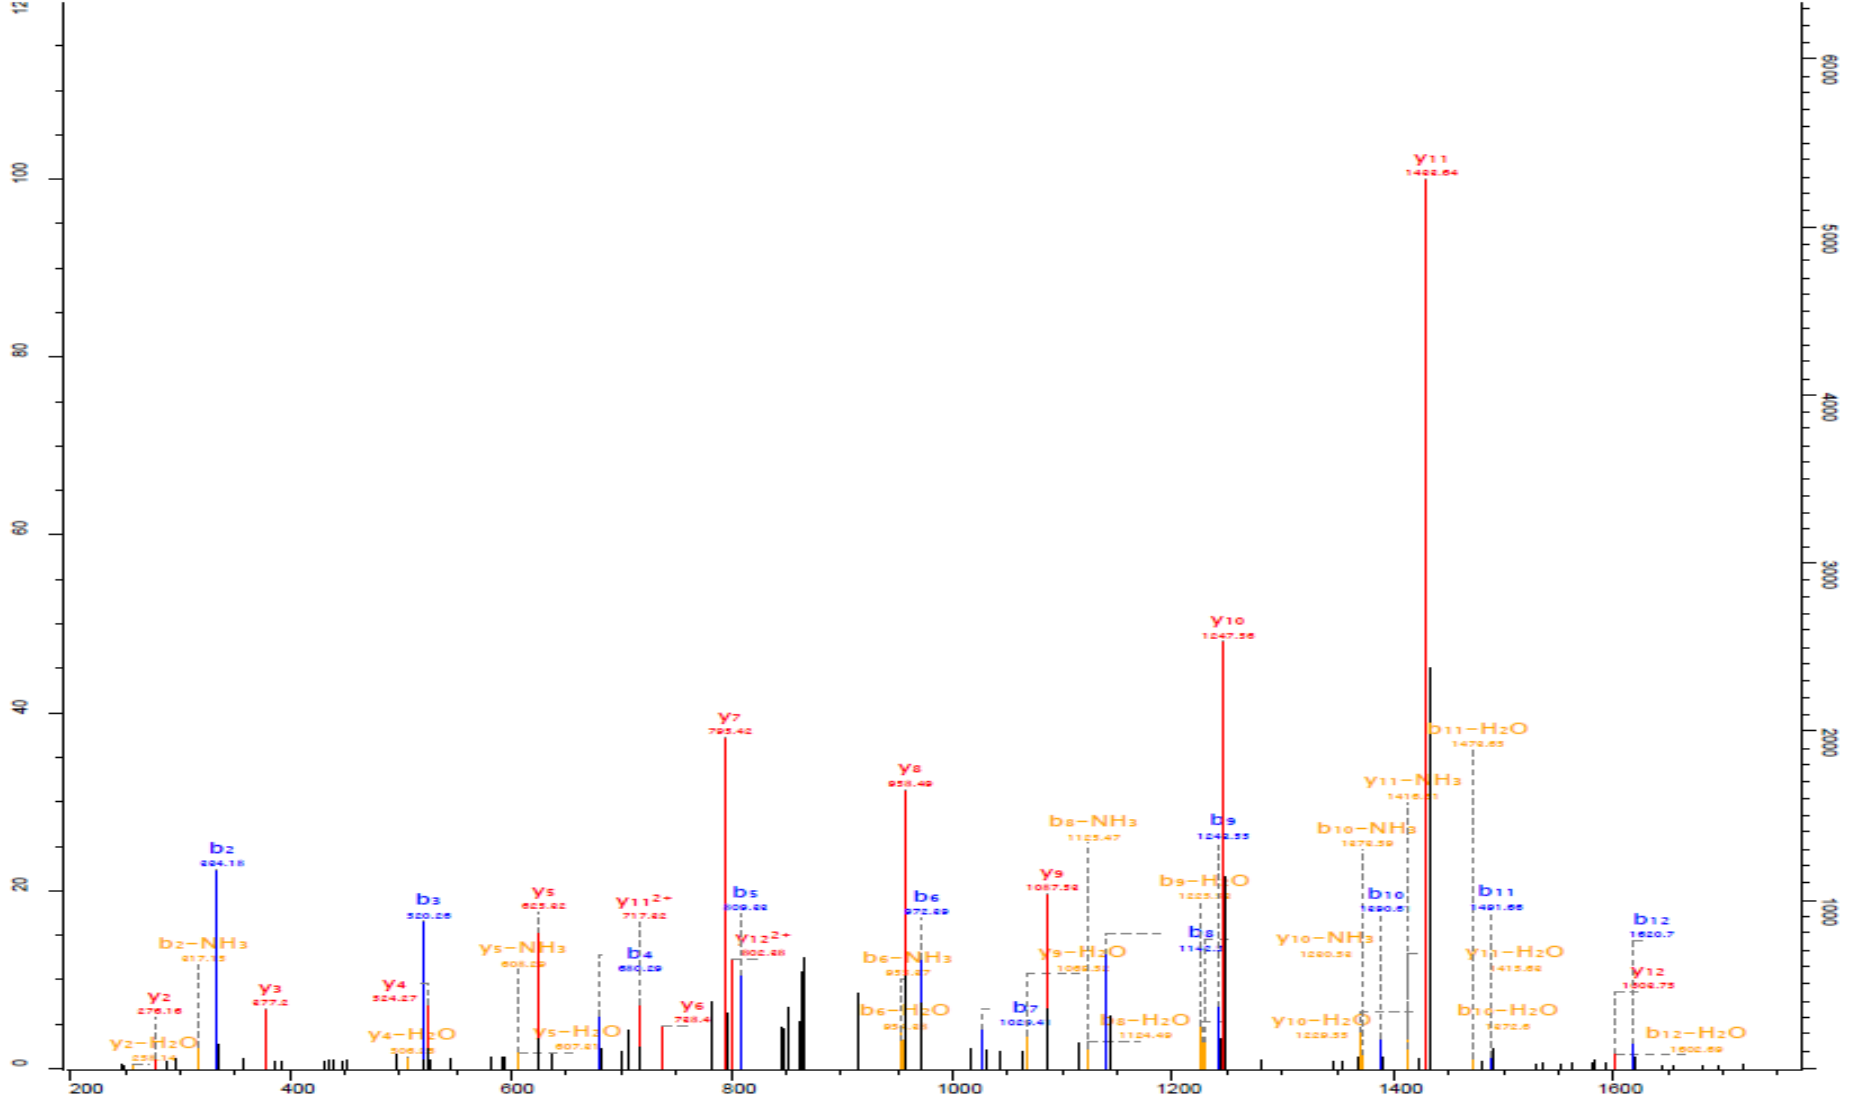

Y 

|     |     |     |    |    |    |    |    |     |     |     |
|-----|-----|-----|----|----|----|----|----|-----|-----|-----|
| Y12 | Y11 | Y10 | Y9 | Y8 | Y7 | Y6 | Y5 | Y4  | Y3  | Y2  |
| ac  |     |     |    |    |    |    |    |     |     |     |
| K   | W   | C   | E  | Y  | G  | L  | T  | F   | T   | E   |
| b2  | b5  | b4  | b5 | b6 | b7 | b8 | b9 | b10 | b11 | b12 |

 K -

Gene name = Vdac2

| MH <sup>+1</sup> (av) | MH <sup>+1</sup> (mono) | MH <sup>+2</sup> (av) | MH <sup>+2</sup> (mono) |
|-----------------------|-------------------------|-----------------------|-------------------------|
| 1768.0102             | 1766.8094               | 884.5088              | 883.9084                |

[-] Main Sequence Ions

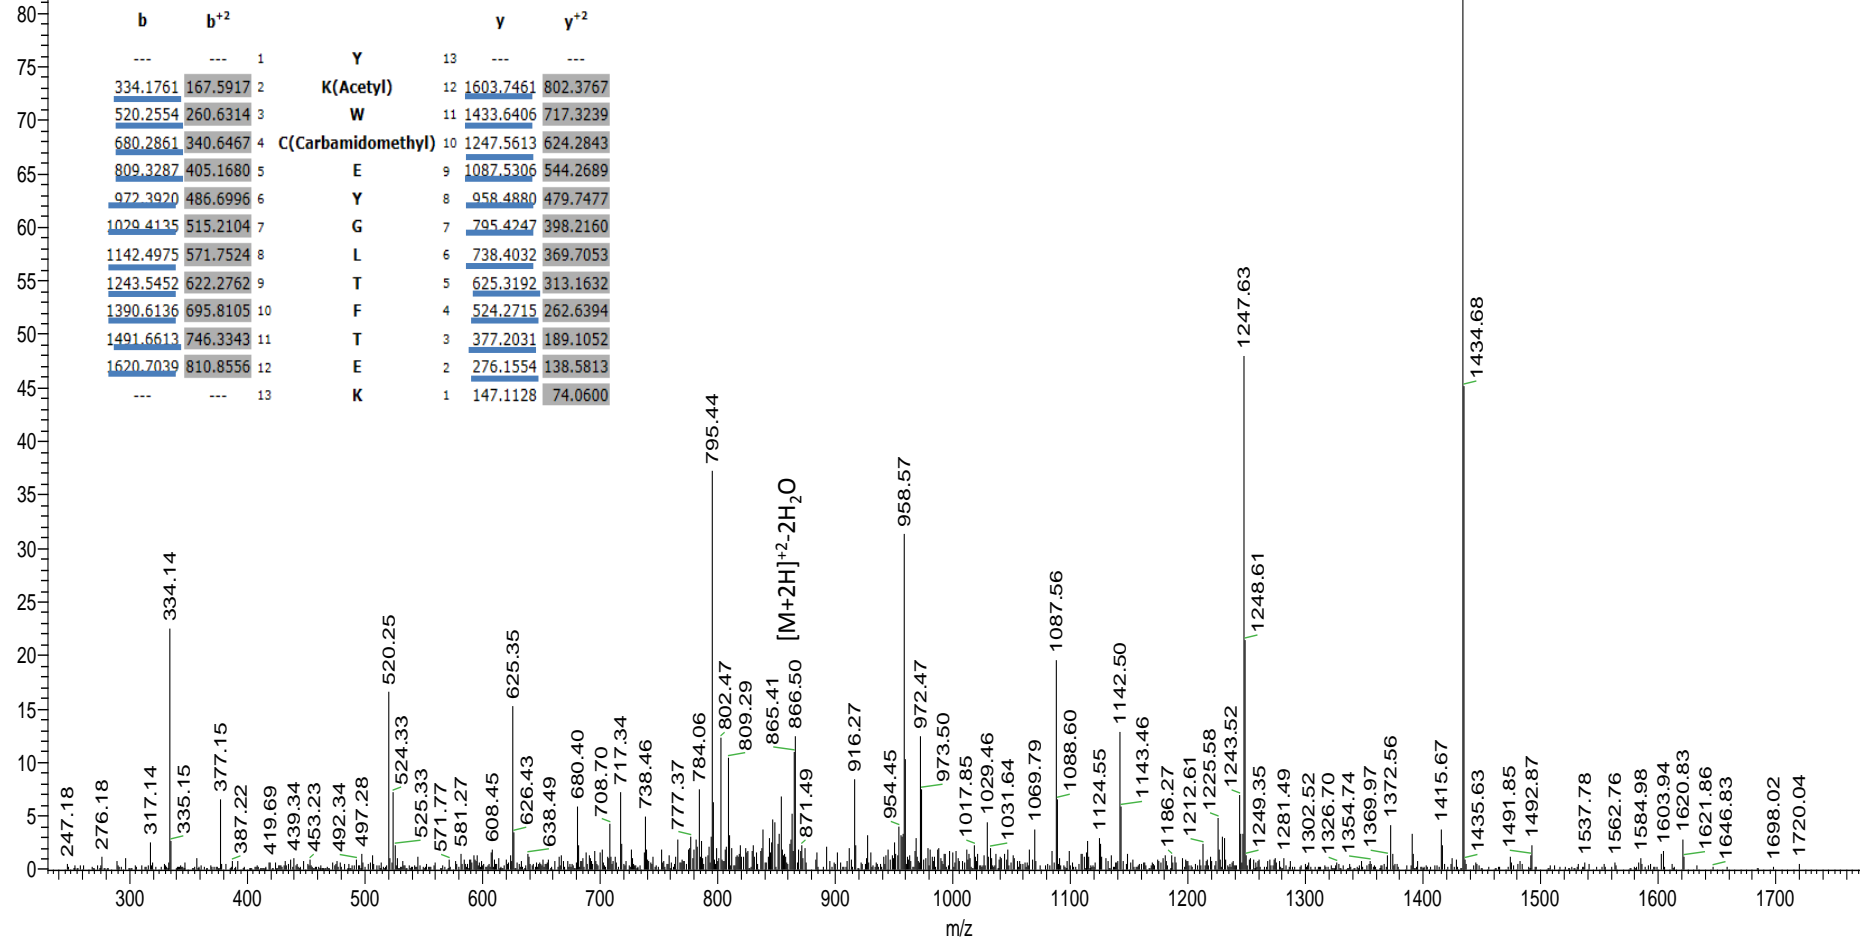



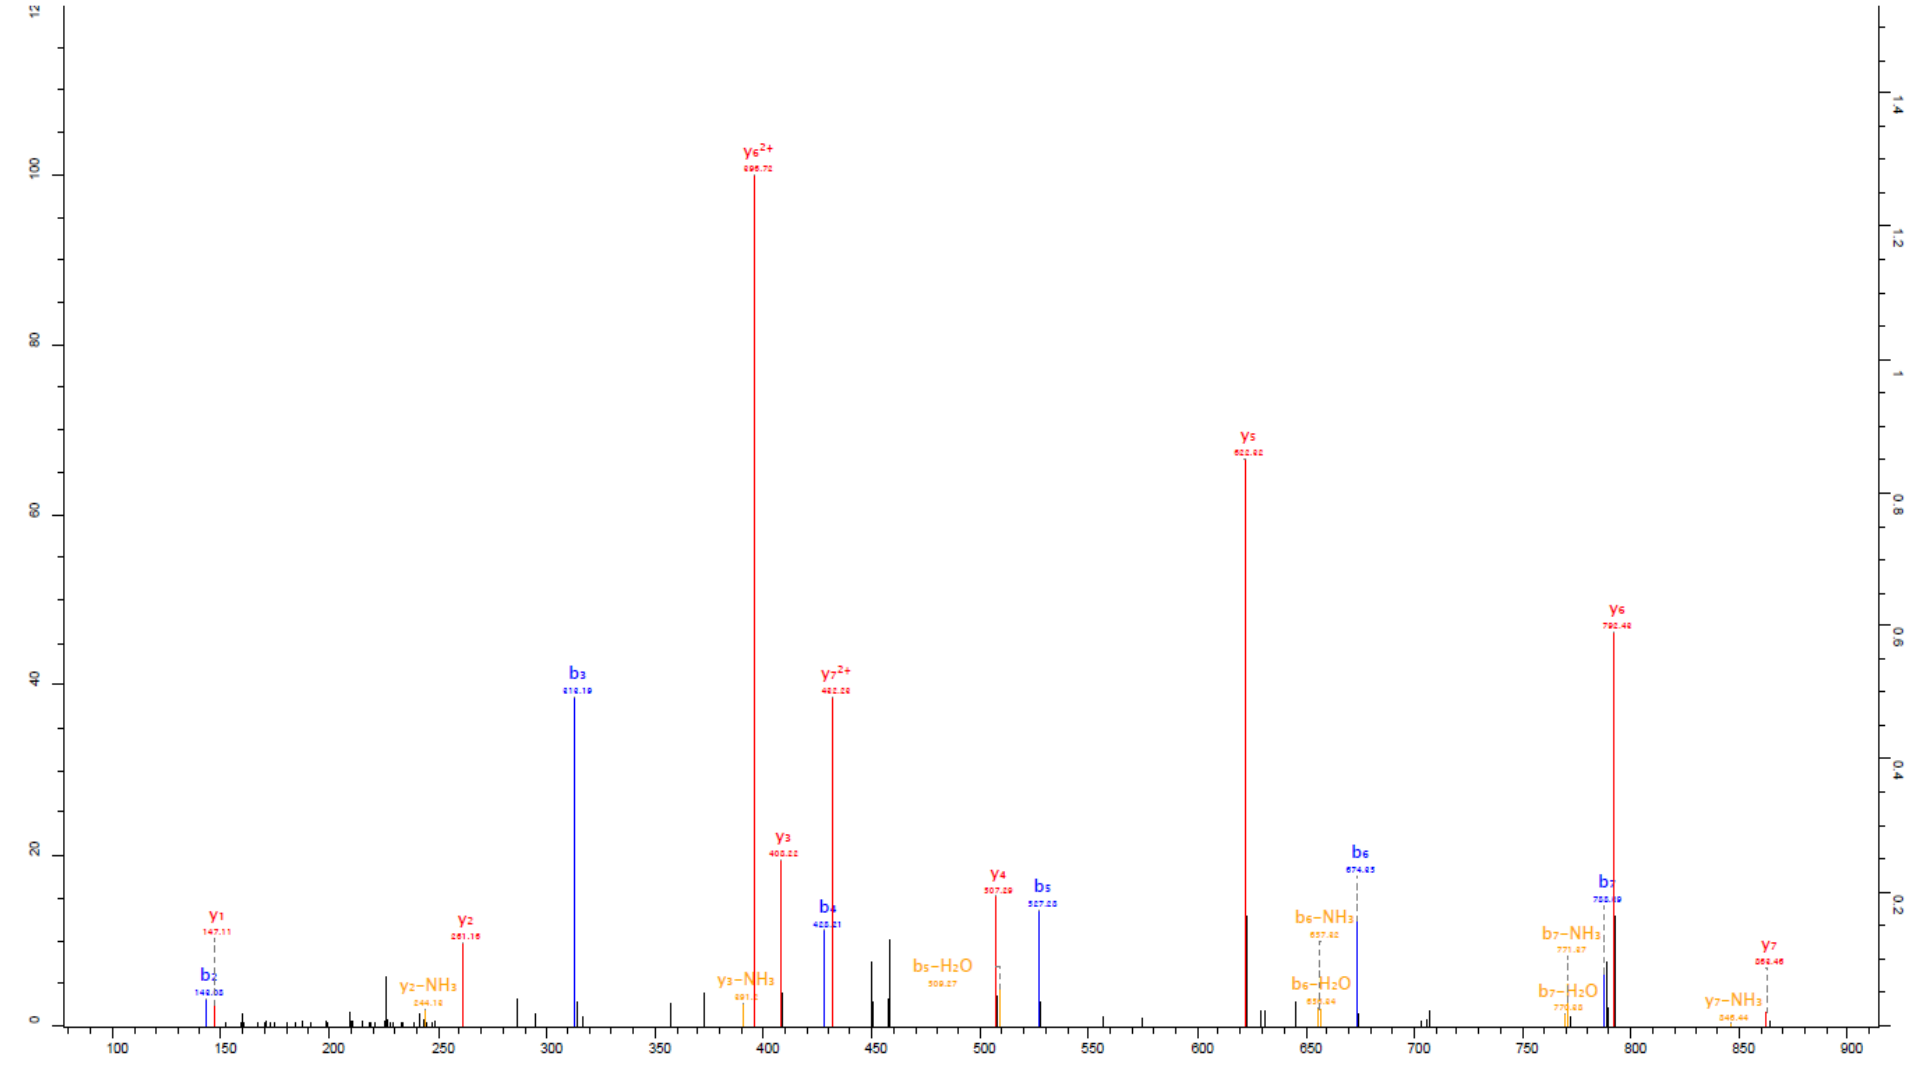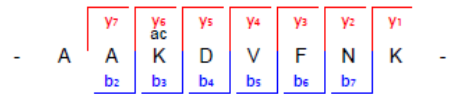

Gene name= Vdac3

| MH <sup>+</sup> (av) | MH <sup>+</sup> (mono) | MH <sup>+</sup> (av) | MH <sup>+</sup> (mono) |
|----------------------|------------------------|----------------------|------------------------|
| 935.0741             | 934.4993               | 468.0408             | 467.7533               |

**Main Sequence Ions**

| b        | b <sup>+</sup> |   | y         | y <sup>+</sup> |
|----------|----------------|---|-----------|----------------|
| ...      | ...            | 1 | A         | 8              |
| 143.0815 | ...            | 2 | A         | 7              |
| 313.1870 | 157.0972       | 3 | K(Acetyl) | 6              |
| 428.2140 | 214.6106       | 4 | D         | 5              |
| 527.2824 | 264.1448       | 5 | V         | 4              |
| 674.3508 | 337.6790       | 6 | F         | 3              |
| 788.3937 | 394.7005       | 7 | N         | 2              |
| ...      | ...            | 8 | K         | 1              |

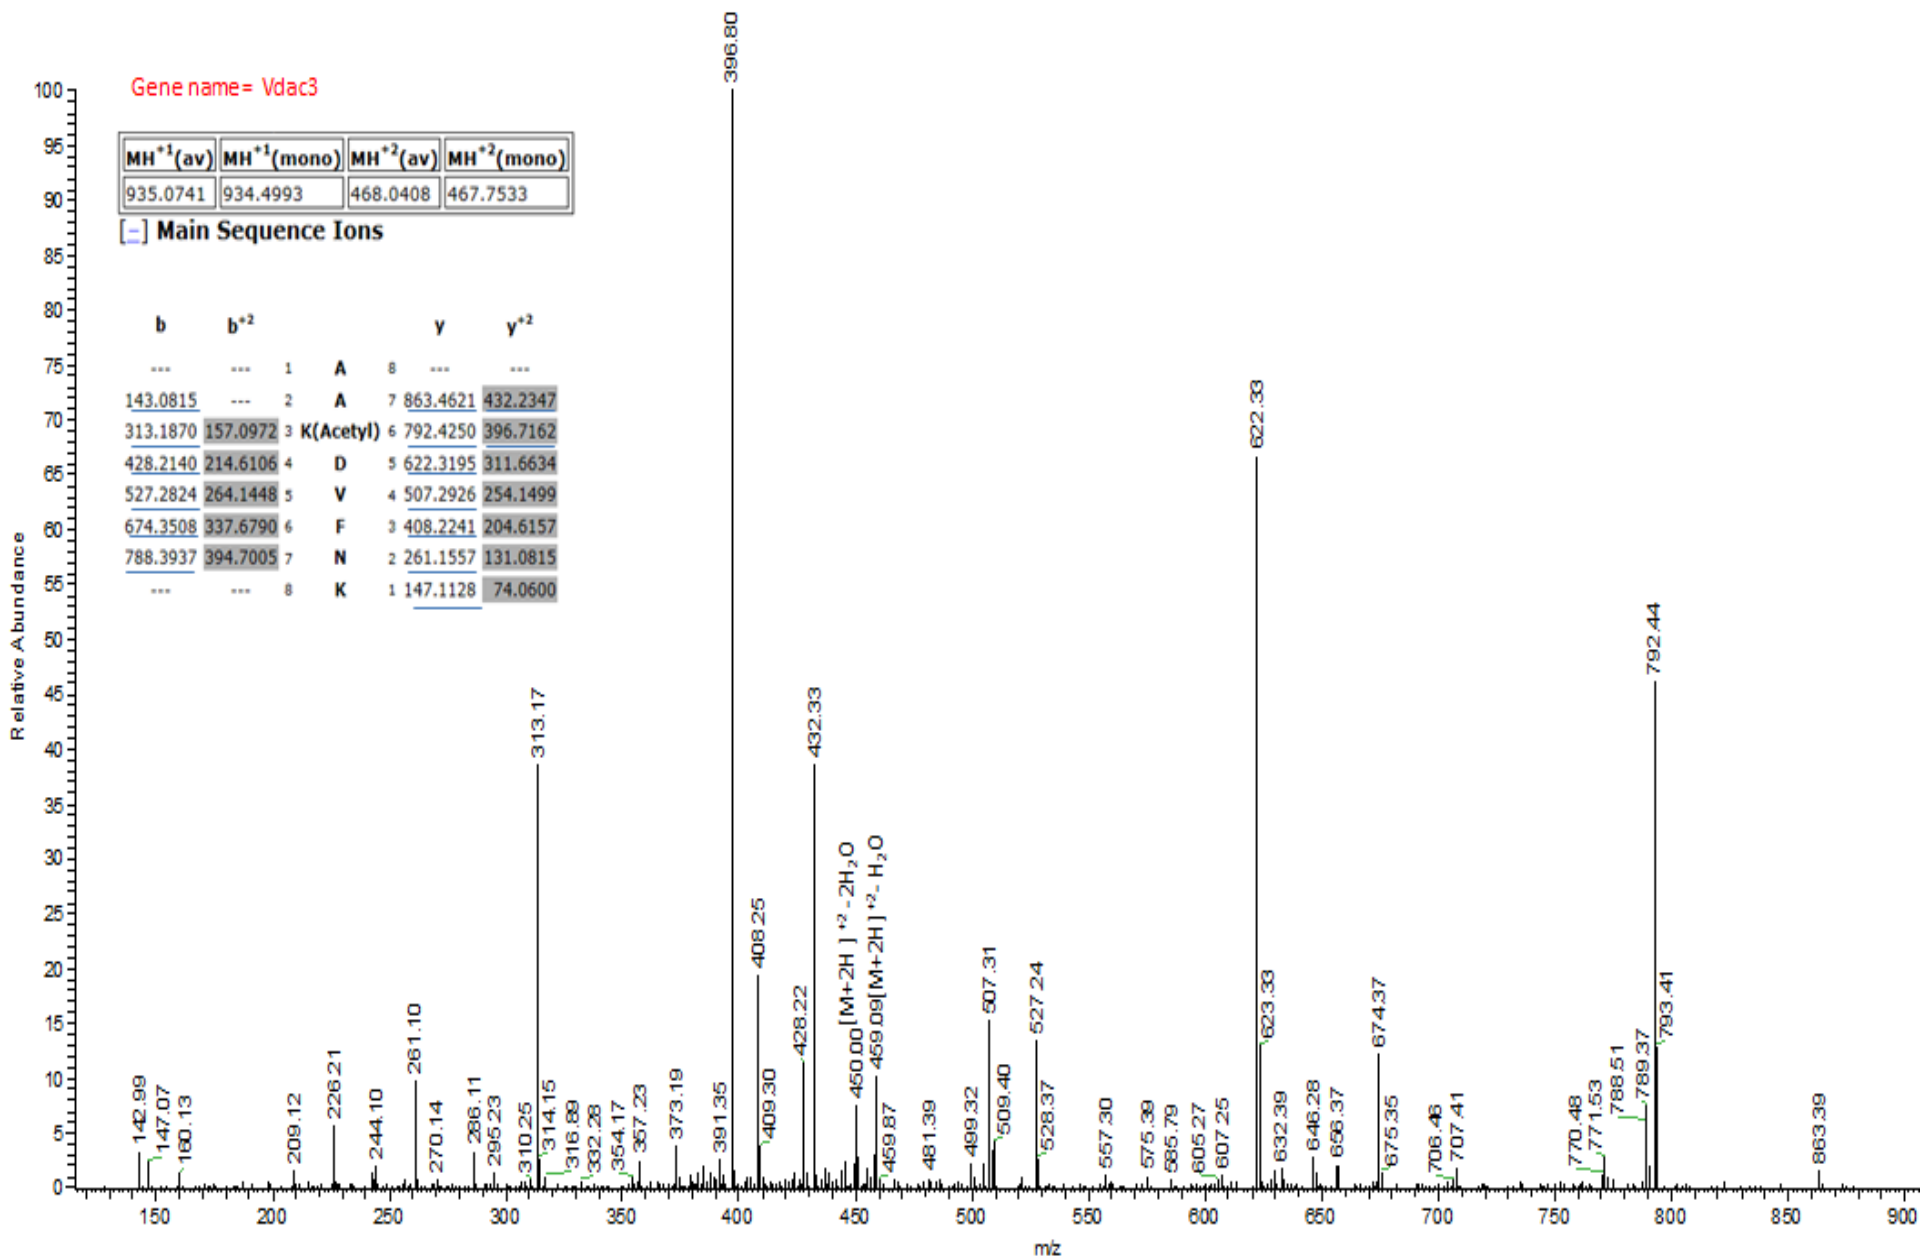

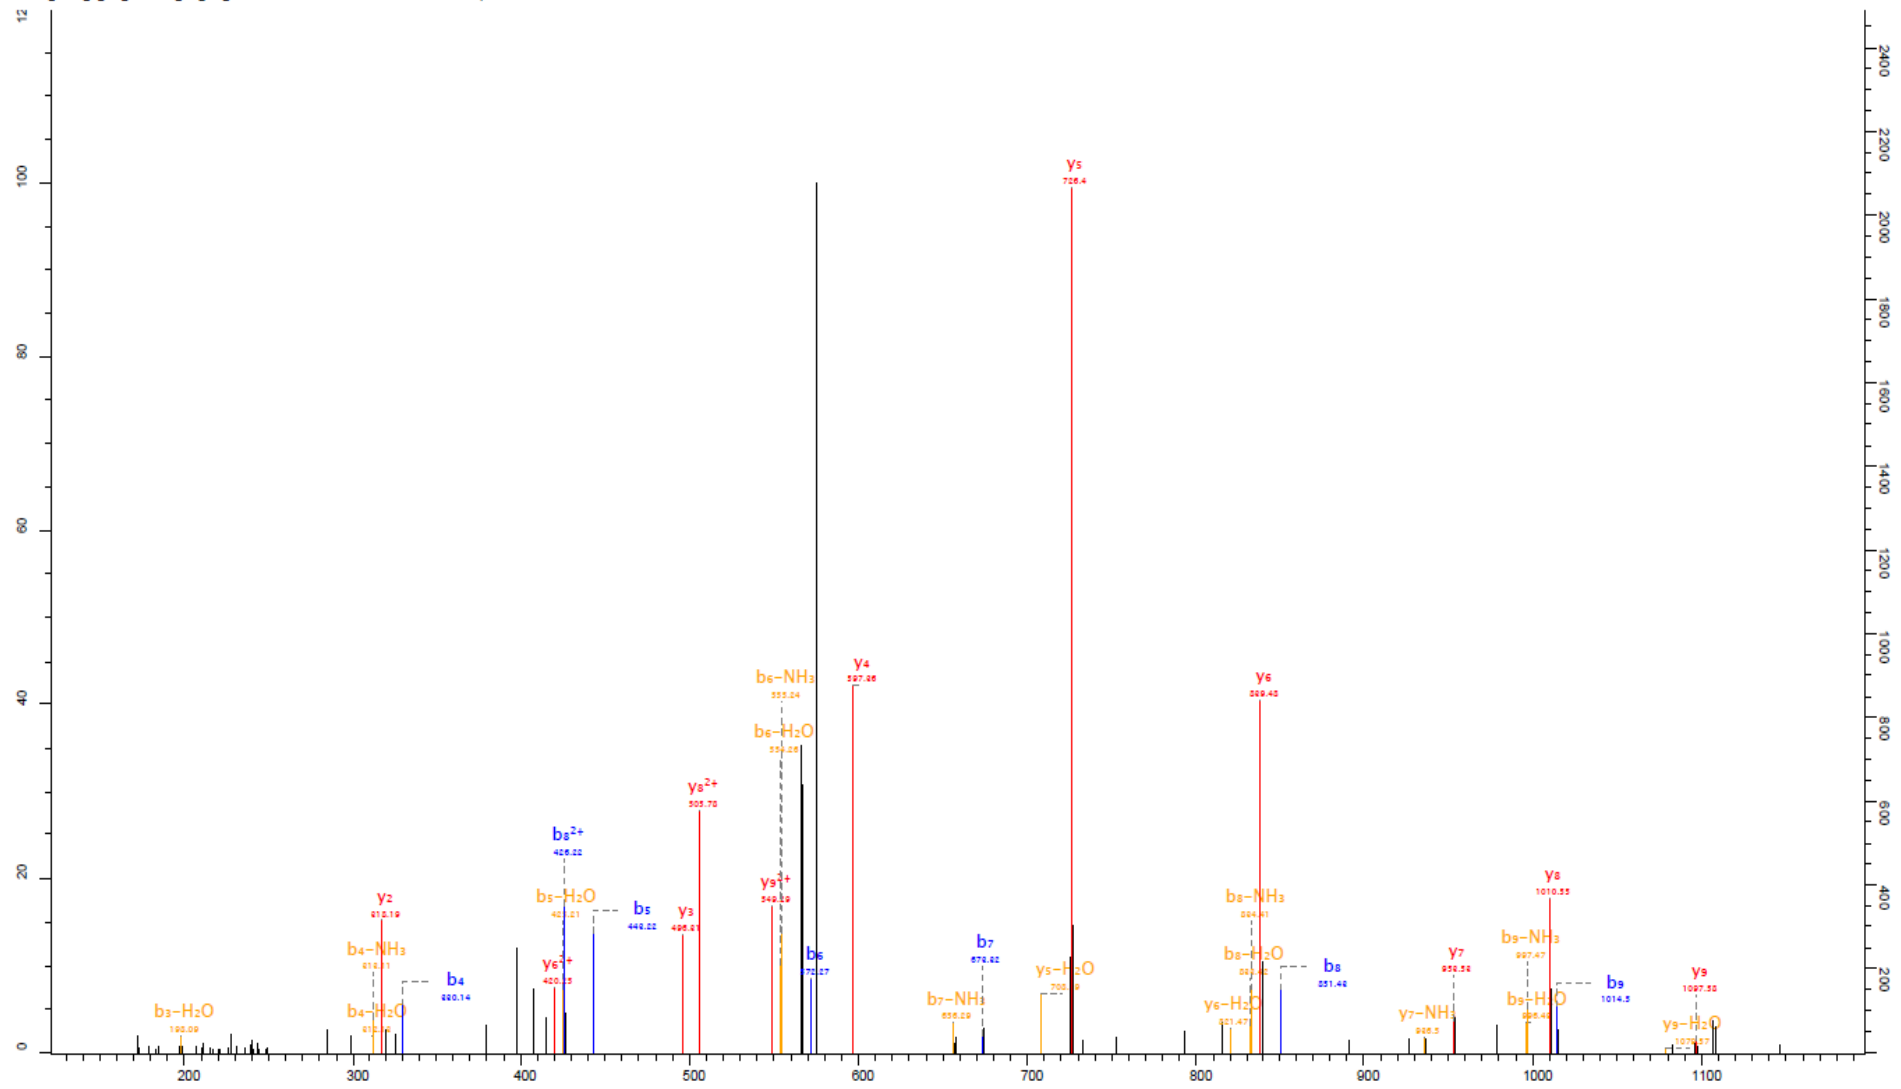

- A S G N L E T K Y K -

y9
y8
y7
y6
y5
y4
y3
y2  
b4
b5
b6
b7
b8
b9

Gene name = Vdac3

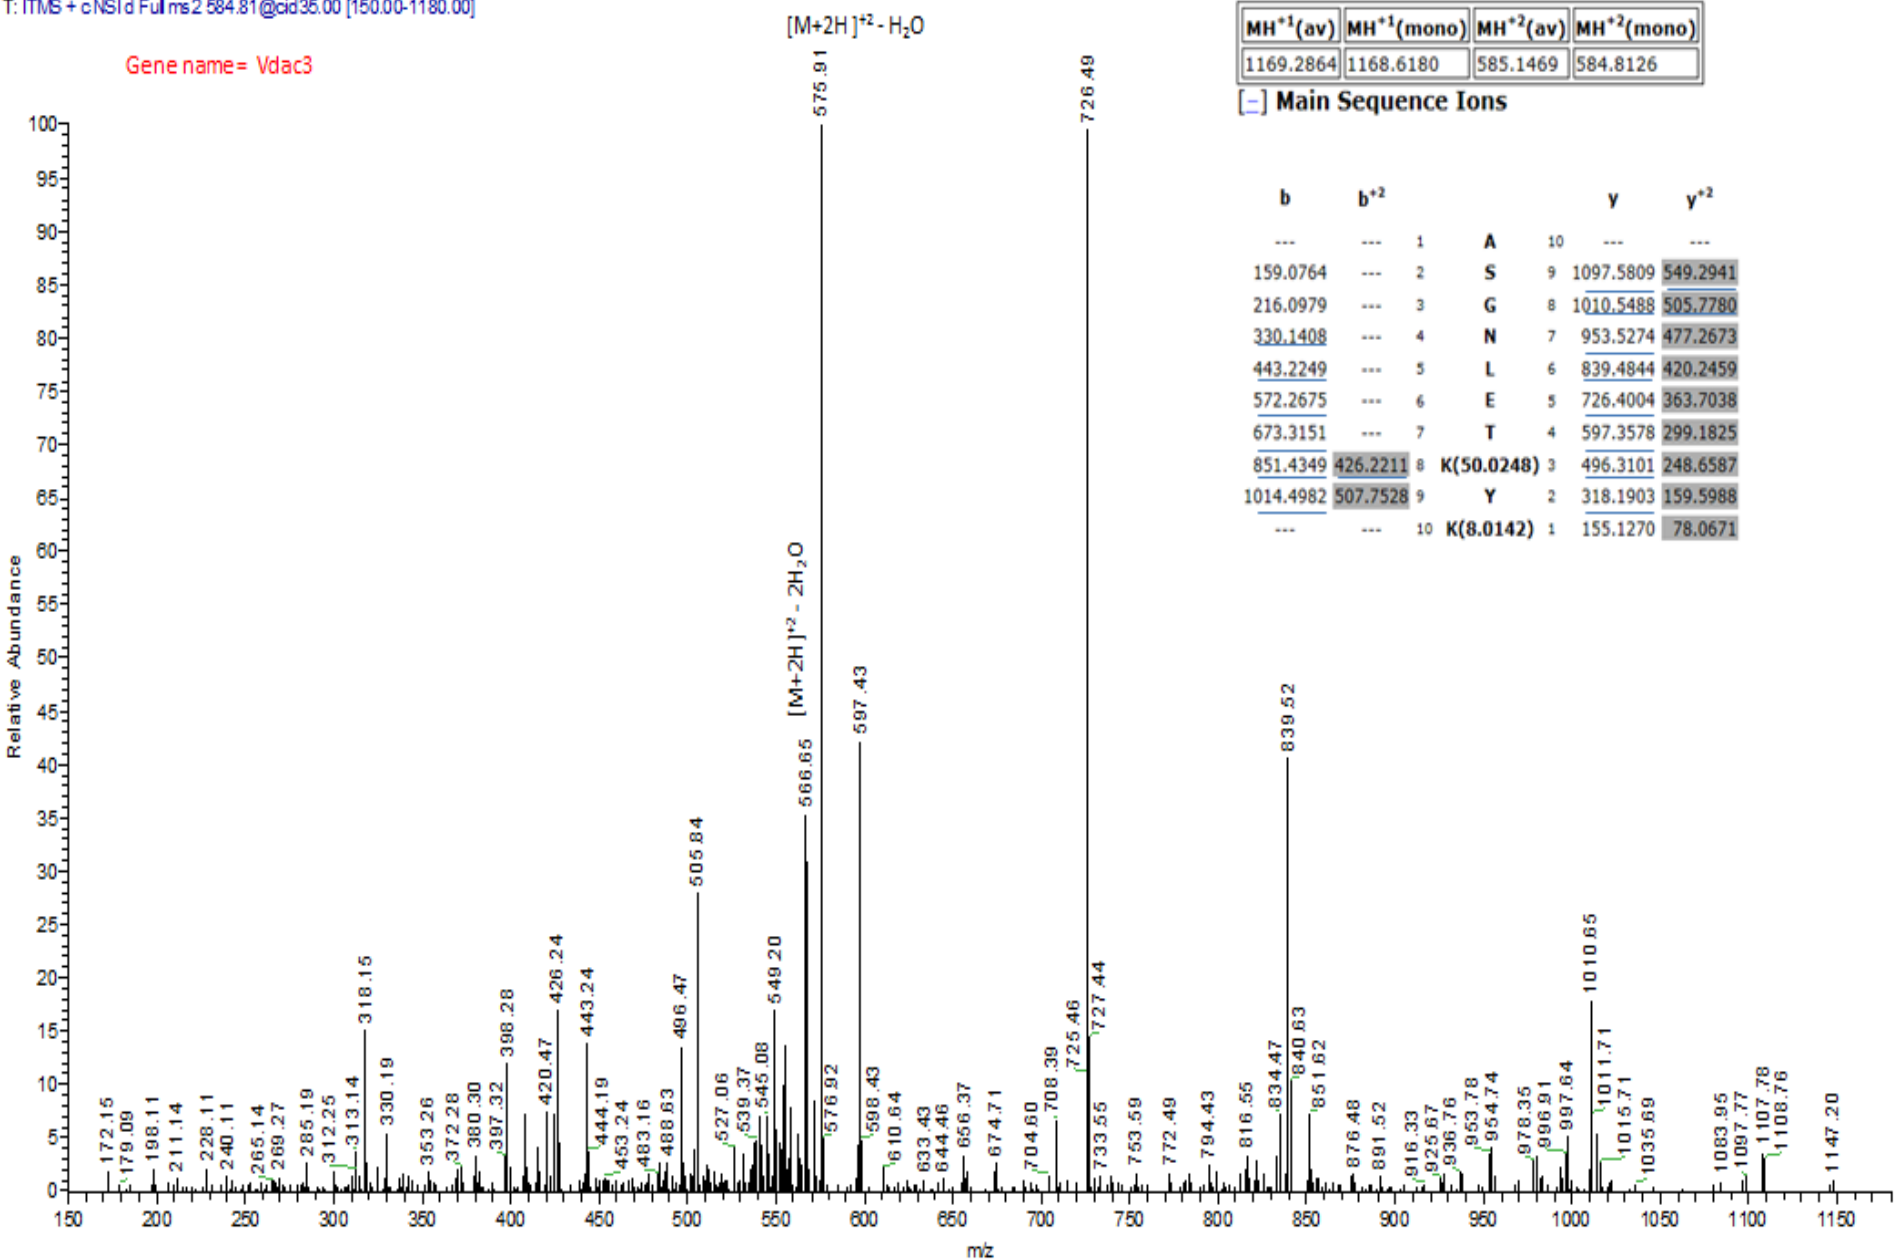

| MH <sup>+</sup> (av) | MH <sup>+</sup> (mono) | MH <sup>2+</sup> (av) | MH <sup>2+</sup> (mono) |
|----------------------|------------------------|-----------------------|-------------------------|
| 1169.2864            | 1168.6180              | 585.1469              | 584.8126                |

[ - ] Main Sequence Ions

| b         | b <sup>2+</sup> |    | y                 | y <sup>2+</sup> |           |
|-----------|-----------------|----|-------------------|-----------------|-----------|
| ---       | ---             | 1  | A                 | 10              | ---       |
| 159.0764  | ---             | 2  | S                 | 9               | 1097.5809 |
| 216.0979  | ---             | 3  | G                 | 8               | 1010.5488 |
| 330.1408  | ---             | 4  | N                 | 7               | 953.5274  |
| 443.2249  | ---             | 5  | L                 | 6               | 839.4844  |
| 572.2675  | ---             | 6  | E                 | 5               | 726.4004  |
| 673.3151  | ---             | 7  | T                 | 4               | 597.3578  |
| 851.4349  | 426.2211        | 8  | <b>K(50.0248)</b> | 3               | 496.3101  |
| 1014.4982 | 507.7528        | 9  | Y                 | 2               | 318.1903  |
| ---       | ---             | 10 | <b>K(8.0142)</b>  | 1               | 155.1270  |

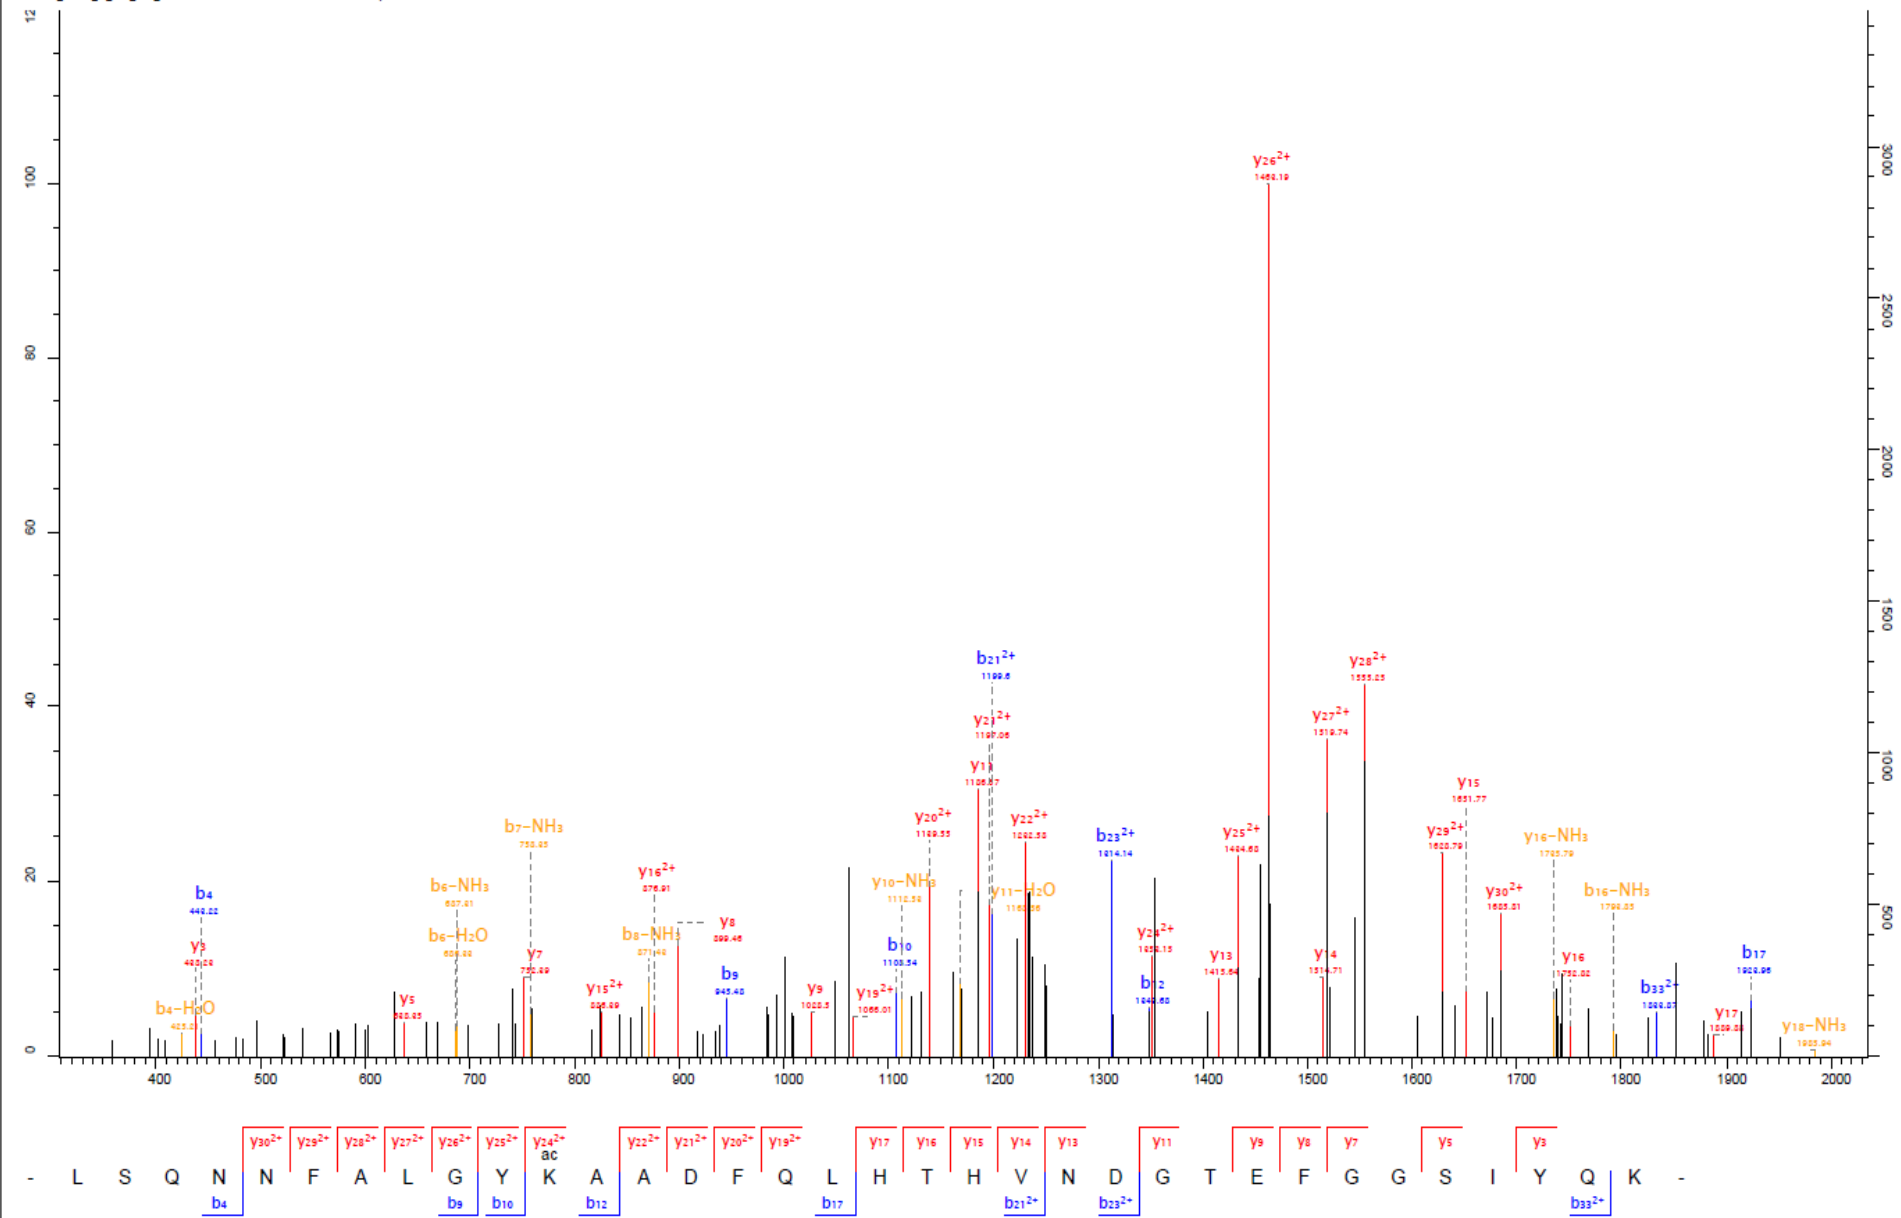

Gene name = Vdac3

| MH <sup>+</sup> (av) | MH <sup>+</sup> (mono) | MH <sup>2+</sup> (av) | MH <sup>2+</sup> (mono) | MH <sup>3+</sup> (av) | MH <sup>3+</sup> (mono) |
|----------------------|------------------------|-----------------------|-------------------------|-----------------------|-------------------------|
| 3815.1762            | 3812.8303              | 1908.0918             | 1906.9188               | 1272.3970             | 1271.6150               |

Main Sequence Ions

| b   | b <sup>+</sup> | y  | y <sup>+</sup> |
|-----|----------------|----|----------------|
| --- | ---            | 1  | L              |
| --- | ---            | 2  | S              |
| --- | ---            | 3  | Q              |
| --- | ---            | 4  | N              |
| --- | ---            | 5  | N              |
| --- | ---            | 6  | F              |
| --- | ---            | 7  | A              |
| --- | ---            | 8  | L              |
| --- | ---            | 9  | G              |
| --- | ---            | 10 | Y              |
| --- | ---            | 11 | K(Acetyl)      |
| --- | ---            | 12 | A              |
| --- | ---            | 13 | A              |
| --- | ---            | 14 | D              |
| --- | ---            | 15 | F              |
| --- | ---            | 16 | Q              |
| --- | ---            | 17 | L              |
| --- | ---            | 18 | H              |
| --- | ---            | 19 | T              |
| --- | ---            | 20 | H              |
| --- | ---            | 21 | V              |
| --- | ---            | 22 | N              |
| --- | ---            | 23 | D              |
| --- | ---            | 24 | G              |
| --- | ---            | 25 | T              |
| --- | ---            | 26 | E              |
| --- | ---            | 27 | F              |
| --- | ---            | 28 | G              |
| --- | ---            | 29 | G              |
| --- | ---            | 30 | S              |
| --- | ---            | 31 | I              |
| --- | ---            | 32 | Y              |
| --- | ---            | 33 | Q              |
| --- | ---            | 34 | K              |

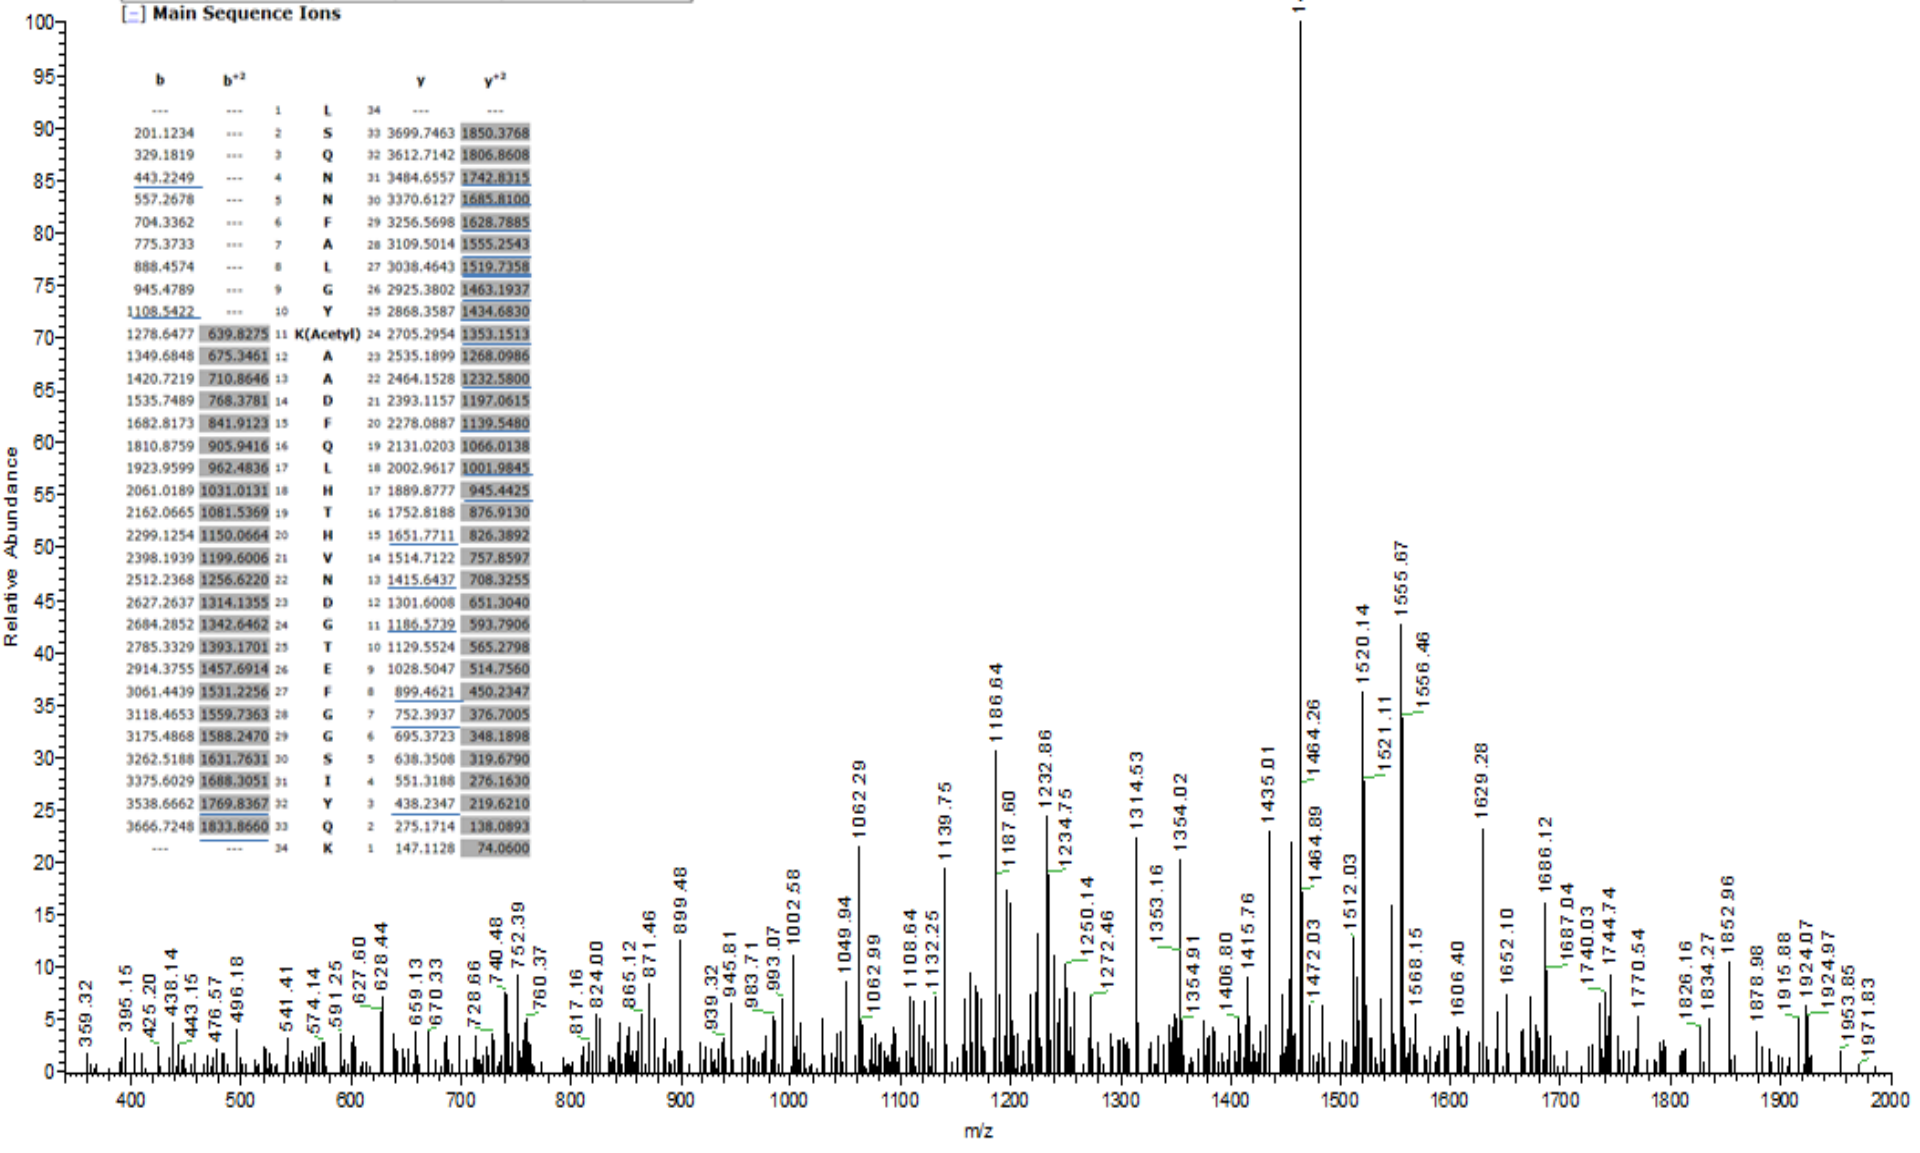

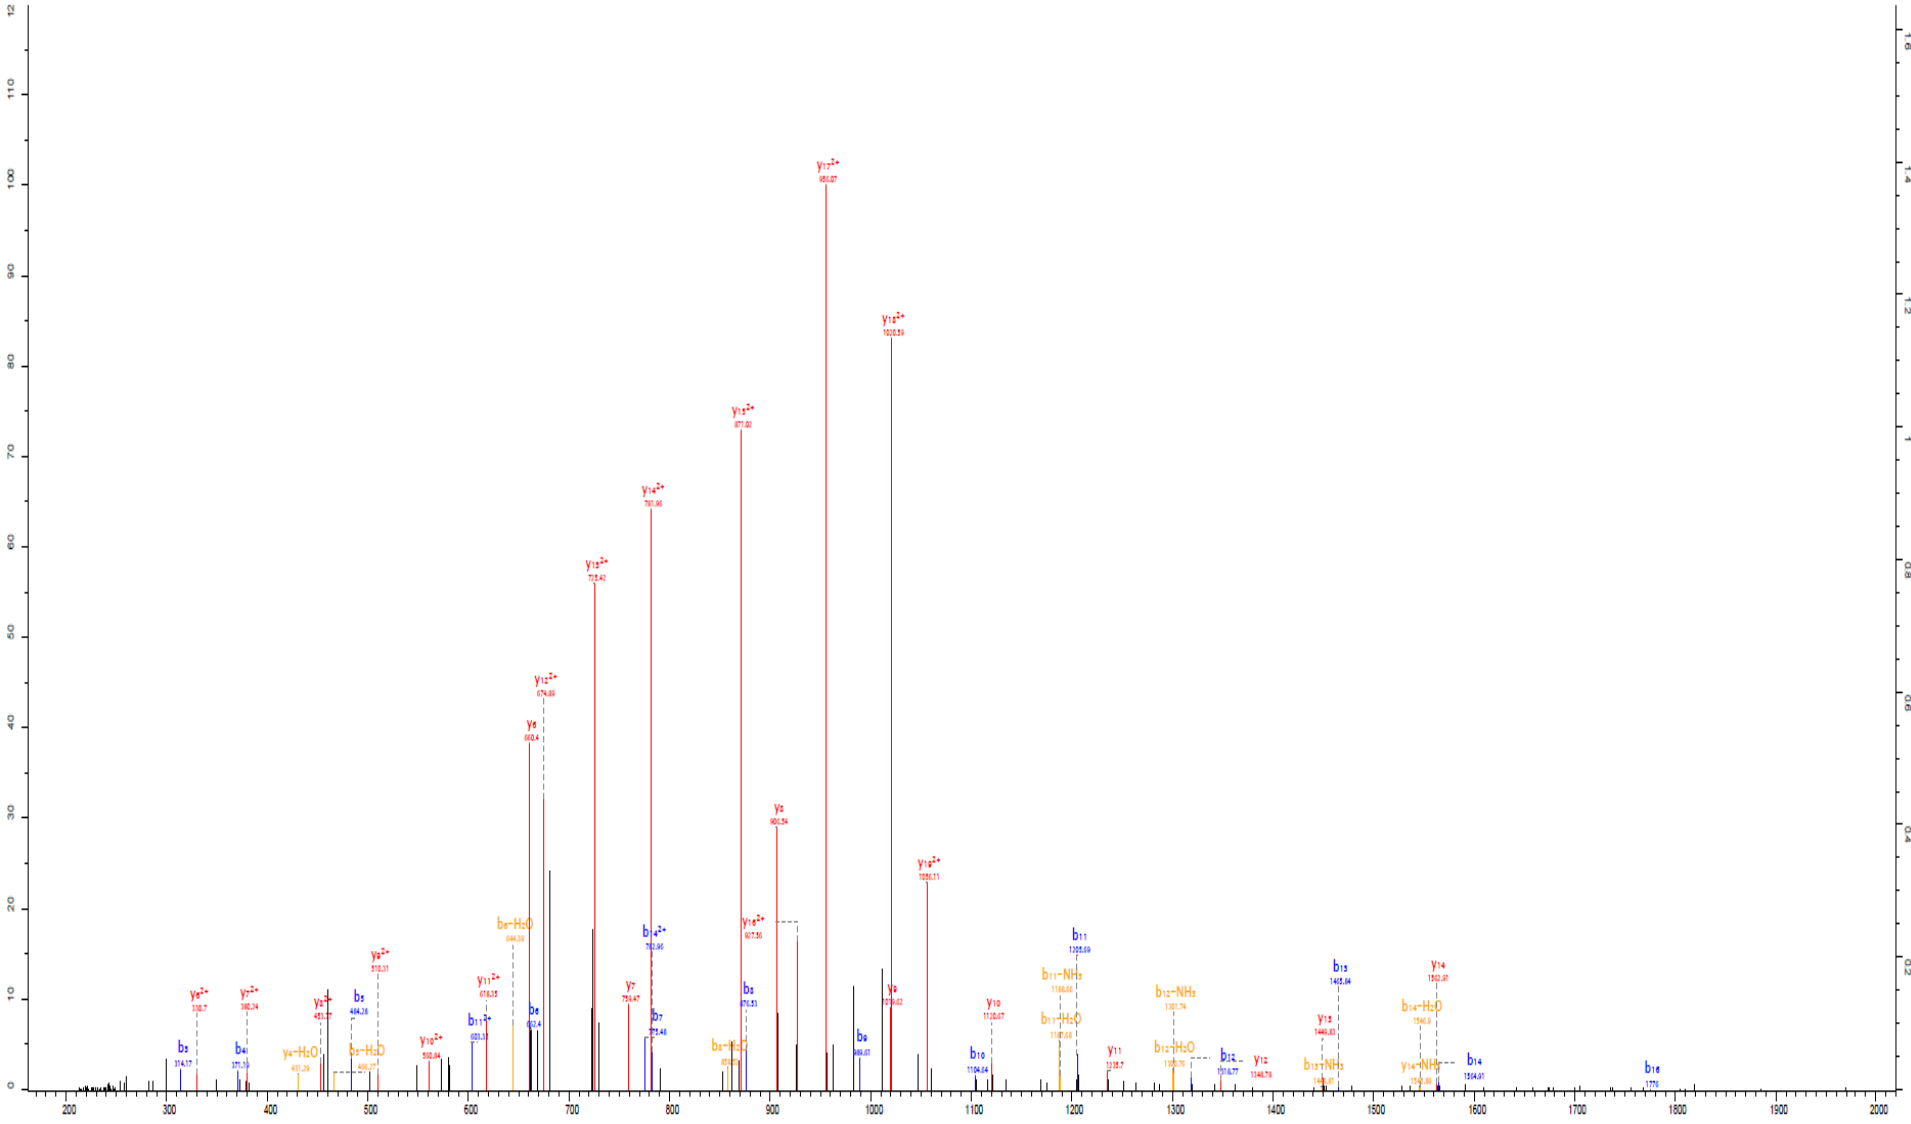

- L A E G L K L T L D T I F V P N T G K K -

bs bs

x10

Gene name = Vdac3

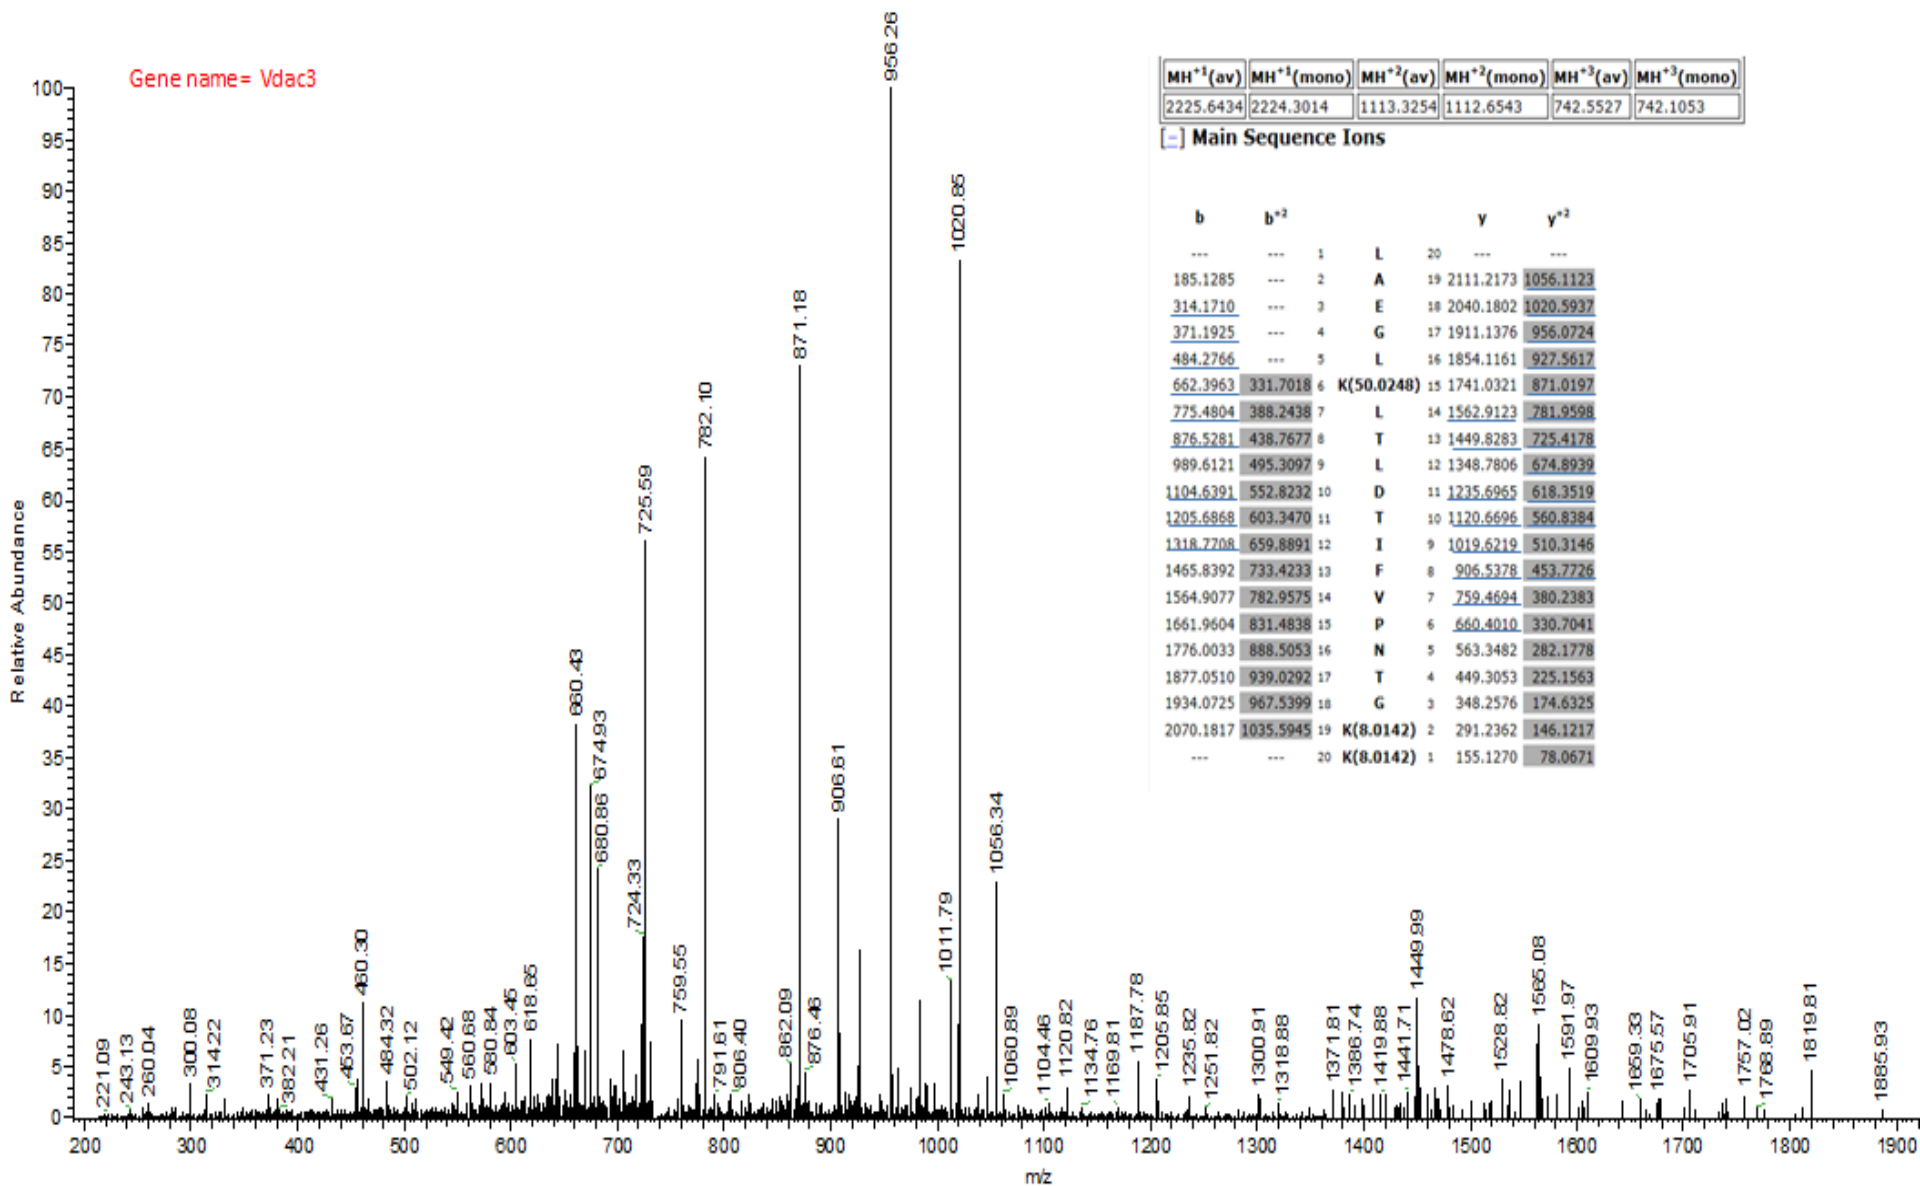

| MH <sup>+</sup> (av) | MH <sup>+</sup> (mono) | MH <sup>2+</sup> (av) | MH <sup>2+</sup> (mono) | MH <sup>3+</sup> (av) | MH <sup>3+</sup> (mono) |
|----------------------|------------------------|-----------------------|-------------------------|-----------------------|-------------------------|
| 2225.6434            | 2224.3014              | 1113.3254             | 1112.6543               | 742.5527              | 742.1053                |

[-] Main Sequence Ions

| b         | b <sup>+</sup> | y  | y <sup>+</sup> |
|-----------|----------------|----|----------------|
| ---       | ---            | 1  | L              |
| ---       | ---            | 20 | ---            |
| 185.1285  | ---            | 2  | A              |
| 314.1710  | ---            | 3  | E              |
| 371.1925  | ---            | 4  | G              |
| 484.2766  | ---            | 5  | L              |
| 662.3963  | 331.7018       | 6  | K(50.0248)     |
| 775.4804  | 388.2438       | 7  | L              |
| 876.5281  | 438.7677       | 8  | T              |
| 989.6121  | 495.3097       | 9  | L              |
| 1104.6391 | 552.8232       | 10 | D              |
| 1205.6868 | 603.3470       | 11 | T              |
| 1318.7208 | 659.8891       | 12 | I              |
| 1465.8392 | 733.4233       | 13 | F              |
| 1564.9077 | 782.9575       | 14 | V              |
| 1661.9604 | 831.4838       | 15 | P              |
| 1776.0033 | 888.5053       | 16 | N              |
| 1877.0510 | 939.0292       | 17 | T              |
| 1934.0725 | 967.5399       | 18 | G              |
| 2070.1817 | 1035.5945      | 19 | K(8.0142)      |
| ---       | ---            | 20 | K(8.0142)      |



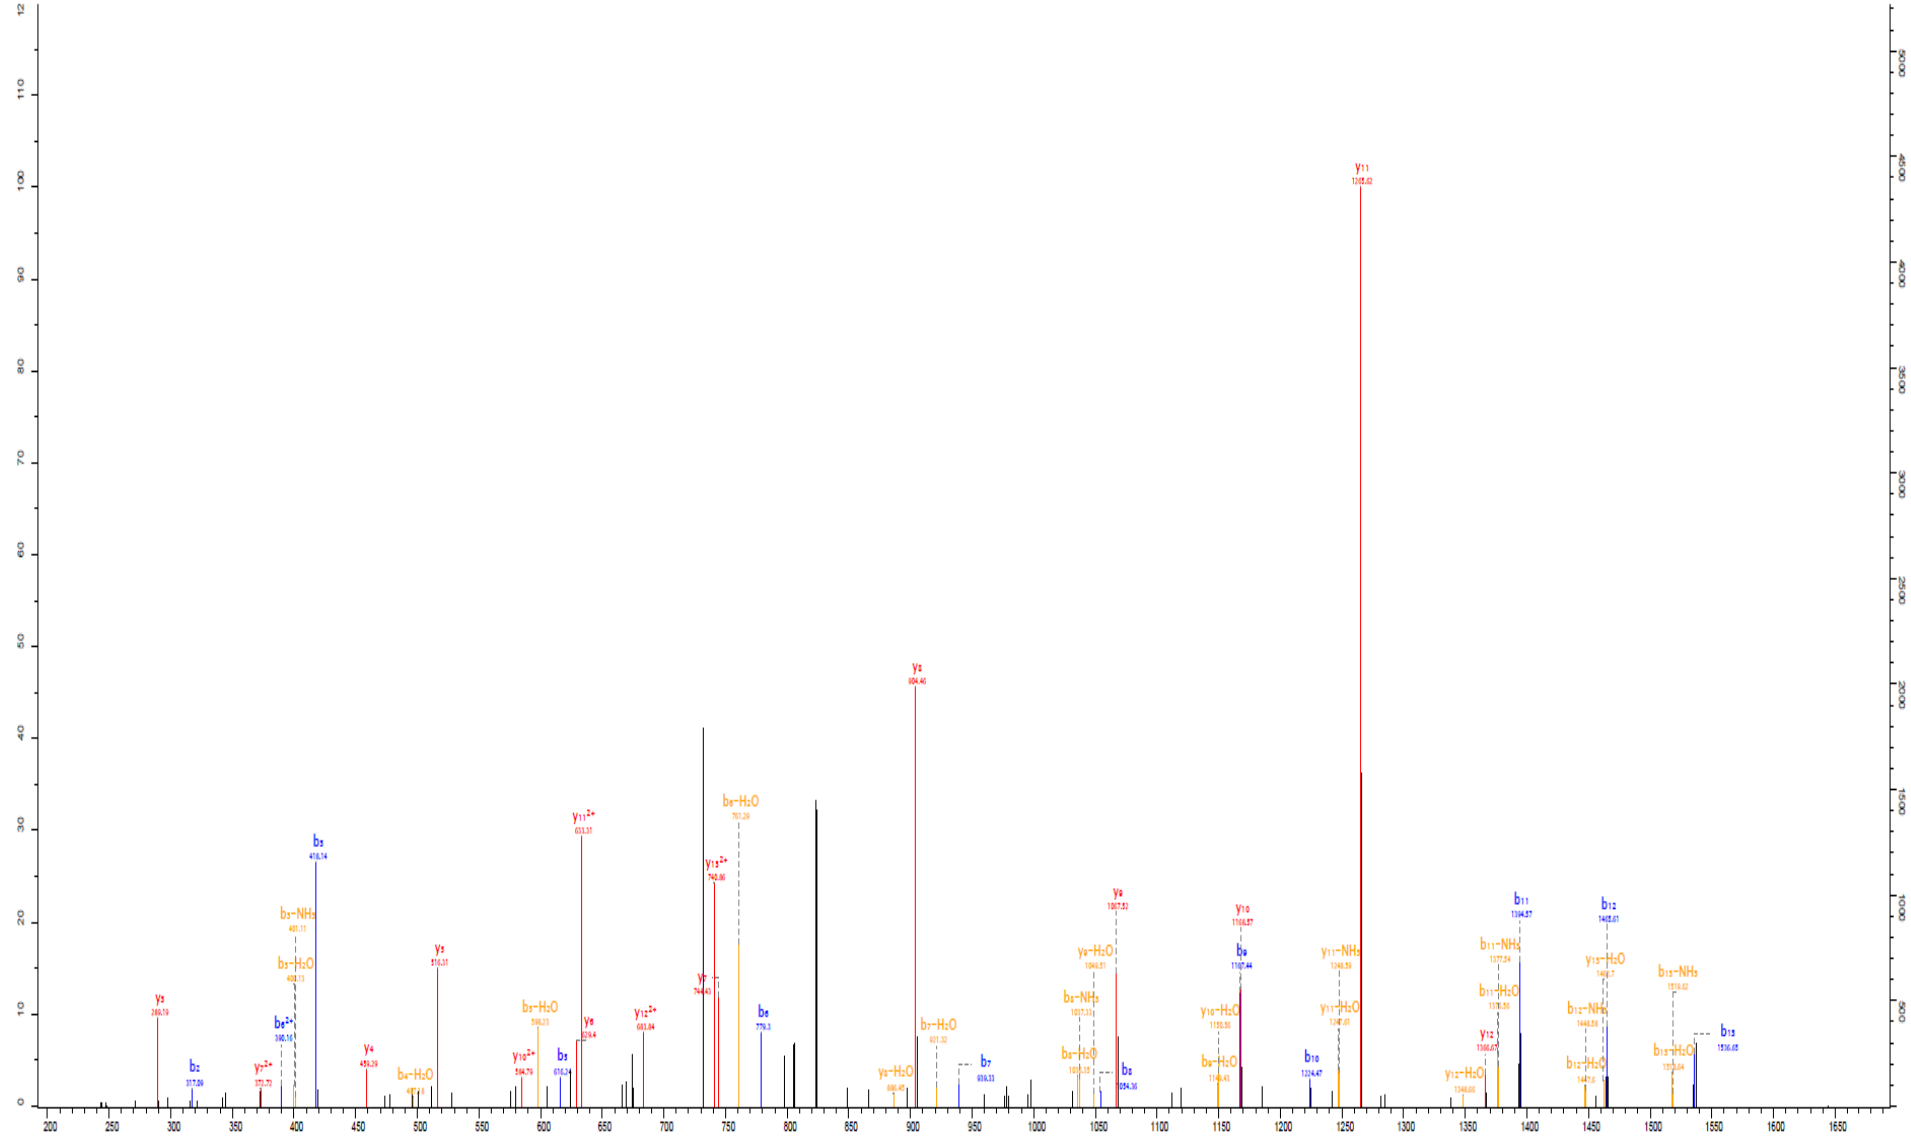

ac  
 - C 

|      |     |     |     |    |    |    |    |     |          |     |     |
|------|-----|-----|-----|----|----|----|----|-----|----------|-----|-----|
| Y12+ | Y12 | Y11 | Y10 | Y9 | Y8 | Y7 | Y6 | Y5  | Y5<br>bc | Y5  |     |
| b2   | b2  | b2  | b2  | b2 | b2 | b2 | b2 | b10 | b11      | b12 | b13 |

 N T P T Y C D L G K A A K -

Gene name = Vdac3

| MH <sup>+</sup> 1(av) | MH <sup>+</sup> 1(mono) | MH <sup>+</sup> 2(av) | MH <sup>+</sup> 2(mono) |
|-----------------------|-------------------------|-----------------------|-------------------------|
| 1683.9111             | 1682.7513               | 842.4593              | 841.8793                |

[-] Main Sequence Ions

| b             | b <sup>+</sup> 2 |    | y                  | y <sup>+</sup> 2 |           |          |
|---------------|------------------|----|--------------------|------------------|-----------|----------|
| <b>Acetyl</b> |                  |    |                    |                  |           |          |
| 203.0485      | ---              | 1  | C(Carbamidomethyl) | 14               | 1640.7407 | 820.8740 |
| 317.0914      | ---              | 2  | N                  | 13               | 1480.7101 | 740.8587 |
| 418.1391      | ---              | 3  | T                  | 12               | 1366.6671 | 683.8372 |
| 515.1919      | ---              | 4  | P                  | 11               | 1265.6194 | 633.3134 |
| 616.2395      | ---              | 5  | T                  | 10               | 1168.5667 | 584.7870 |
| 779.3029      | ---              | 6  | Y                  | 9                | 1067.5190 | 534.2631 |
| 939.3335      | ---              | 7  | C(Carbamidomethyl) | 8                | 904.4557  | 452.7315 |
| 1054.3605     | ---              | 8  | D                  | 7                | 744.4250  | 372.7162 |
| 1167.4445     | ---              | 9  | L                  | 6                | 629.3981  | 315.2027 |
| 1224.4660     | ---              | 10 | G                  | 5                | 516.3140  | 258.6606 |
| 1394.5715     | 697.7894         | 11 | K(Acetyl)          | 4                | 459.2926  | 230.1499 |
| 1465.6086     | 733.3080         | 12 | A                  | 3                | 289.1870  | 145.0972 |
| 1536.6457     | 768.8265         | 13 | A                  | 2                | 218.1499  | 109.5786 |
| ---           | ---              | 14 | K                  | 1                | 147.1128  | 74.0600  |

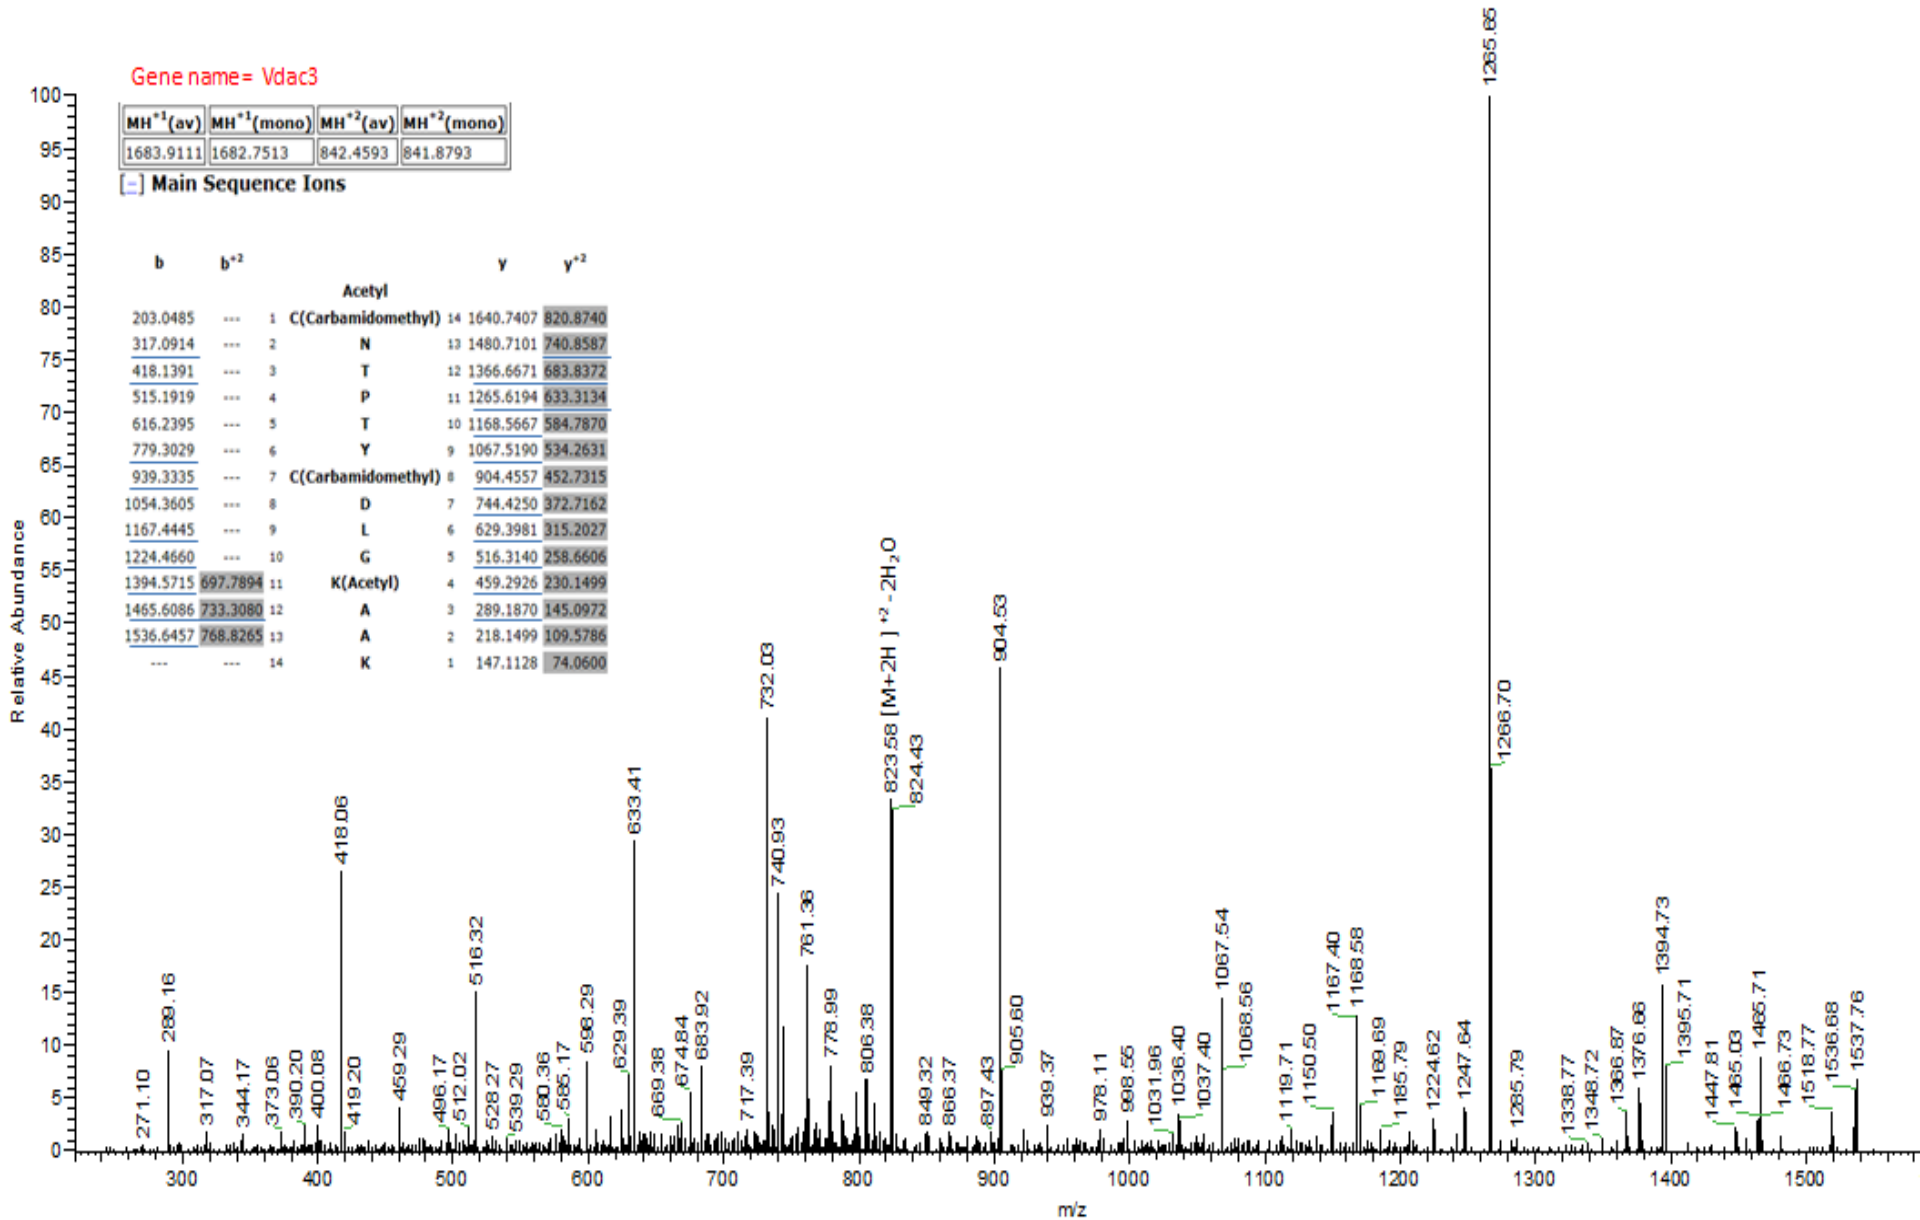

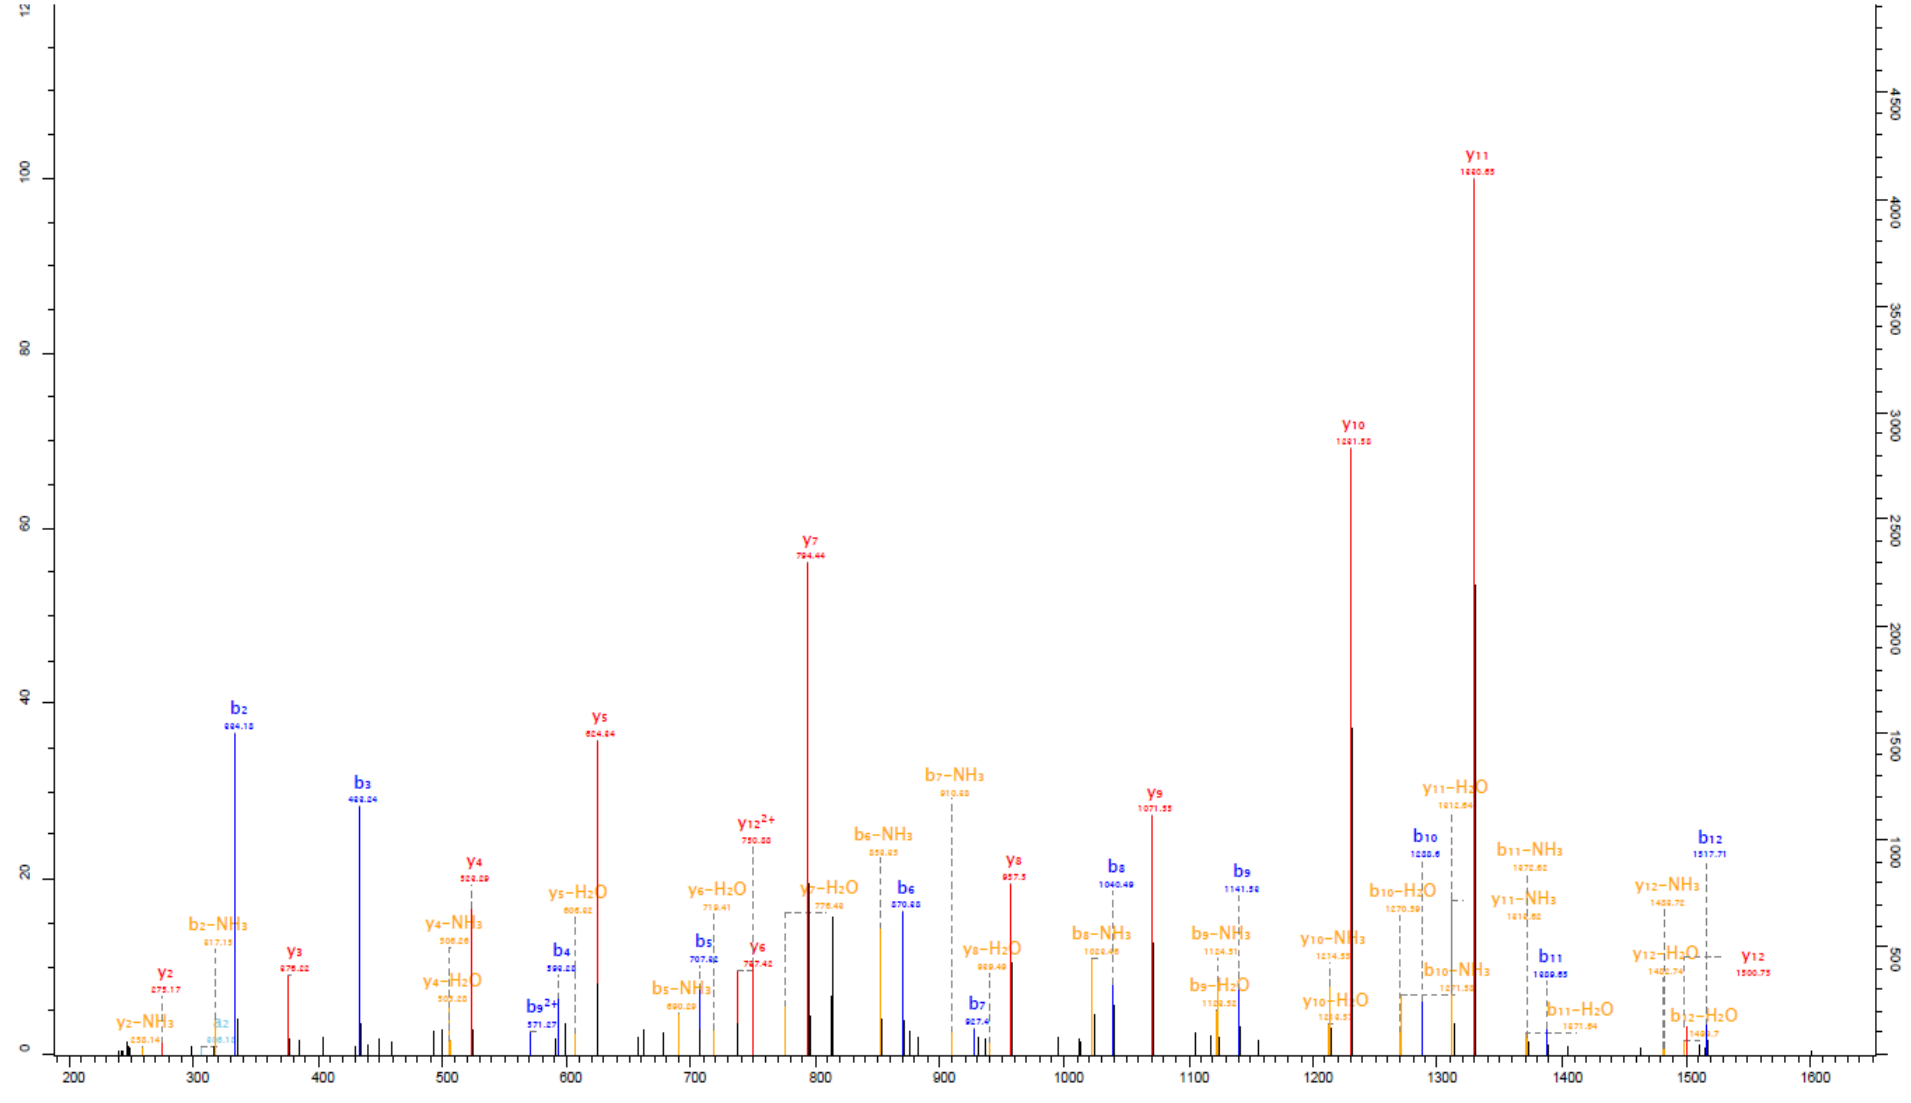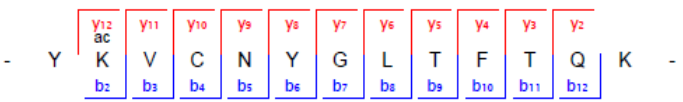

Gene name = Vdac3

| MH <sup>+</sup> 1(av) | MH <sup>+</sup> 1(mono) | MH <sup>+</sup> 2(av) | MH <sup>+</sup> 2(mono) |
|-----------------------|-------------------------|-----------------------|-------------------------|
| 1664.9324             | 1663.8149               | 832.9699              | 832.4111                |

[-] Main Sequence Ions

| b         | b <sup>+</sup> | y  | y <sup>+</sup> |
|-----------|----------------|----|----------------|
| ---       | ---            | 1  | ---            |
| 334.1761  | 167.5917       | 2  | 1500.7515      |
| 433.2445  | 217.1259       | 3  | 1330.6460      |
| 593.2752  | 297.1412       | 4  | 1231.5776      |
| 707.3181  | 354.1627       | 5  | 1071.5469      |
| 870.3815  | 435.6944       | 6  | 957.5040       |
| 927.4029  | 464.2051       | 7  | 794.4407       |
| 1040.4870 | 520.7471       | 8  | 737.4192       |
| 1141.5347 | 571.2710       | 9  | 624.3352       |
| 1288.6031 | 644.8052       | 10 | 523.2875       |
| 1389.6507 | 695.3290       | 11 | 376.2191       |
| 1517.7093 | 759.3583       | 12 | 275.1714       |
| ---       | ---            | 13 | 147.1128       |

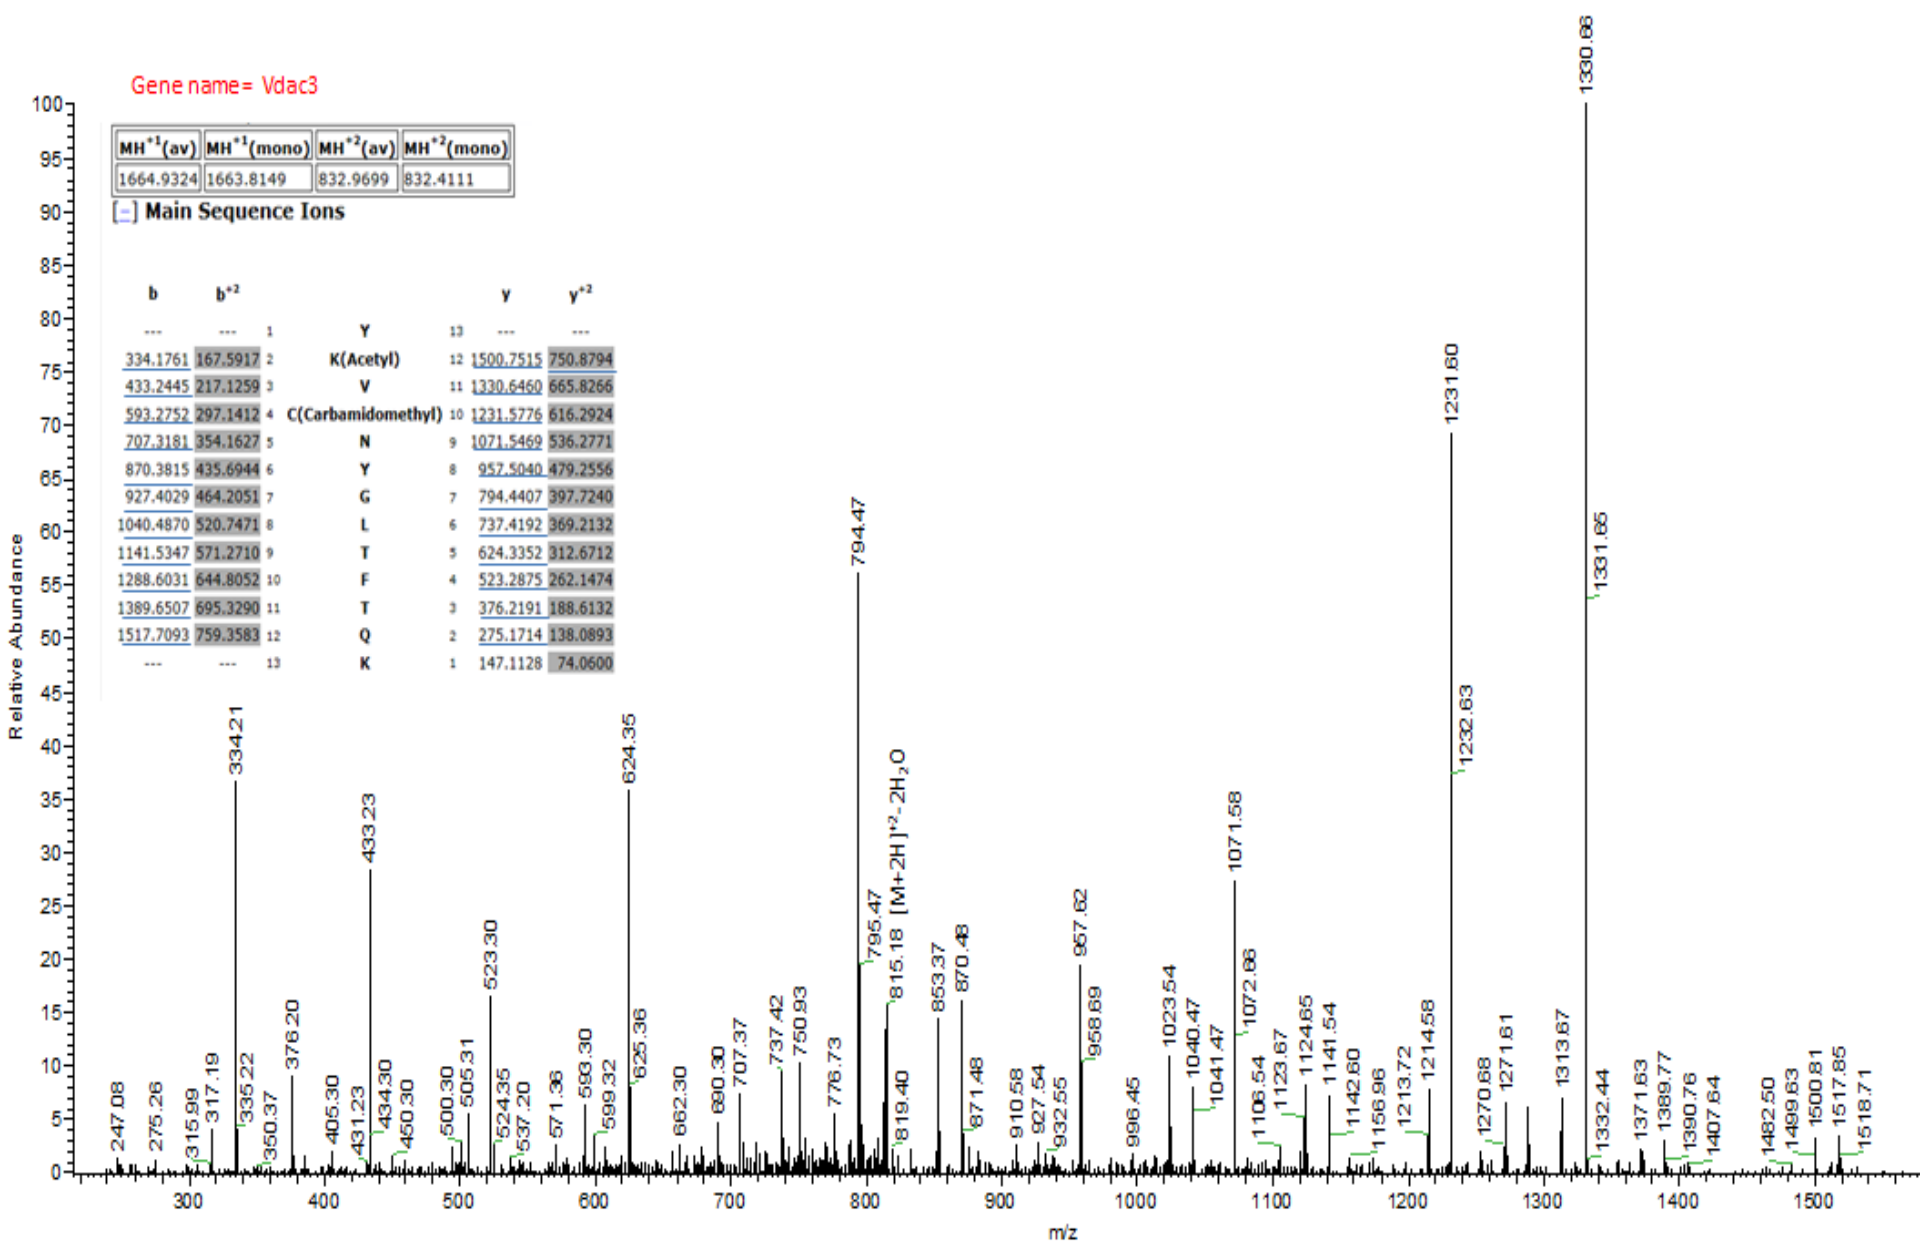

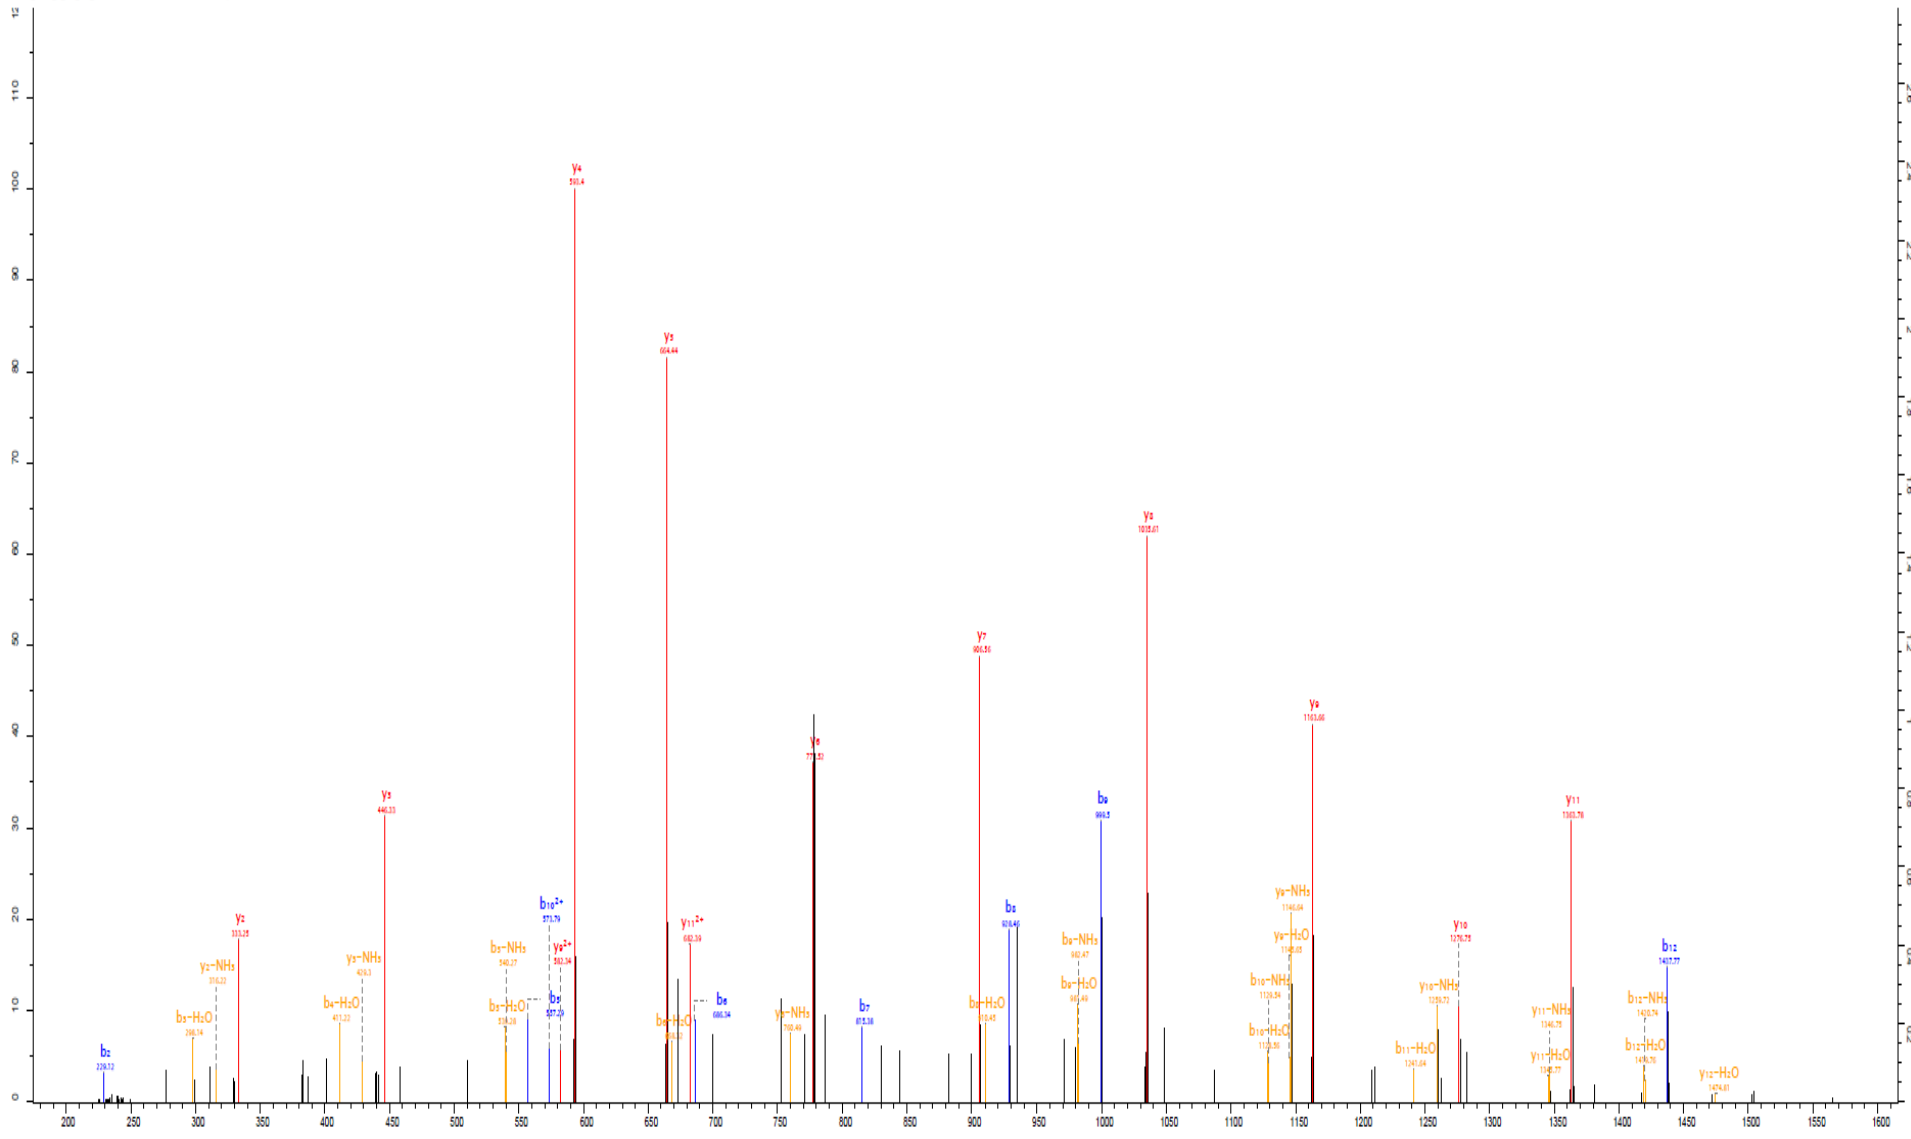

- V E S L Q E E I A F L K K -  
 b2 y1 y10 y6 y4 y7 y6 y5 y4 y3 y2 y2 ac  
 b5 b6 b7 b6 b5 b4 b3 b2 b1

Gene name= Vim

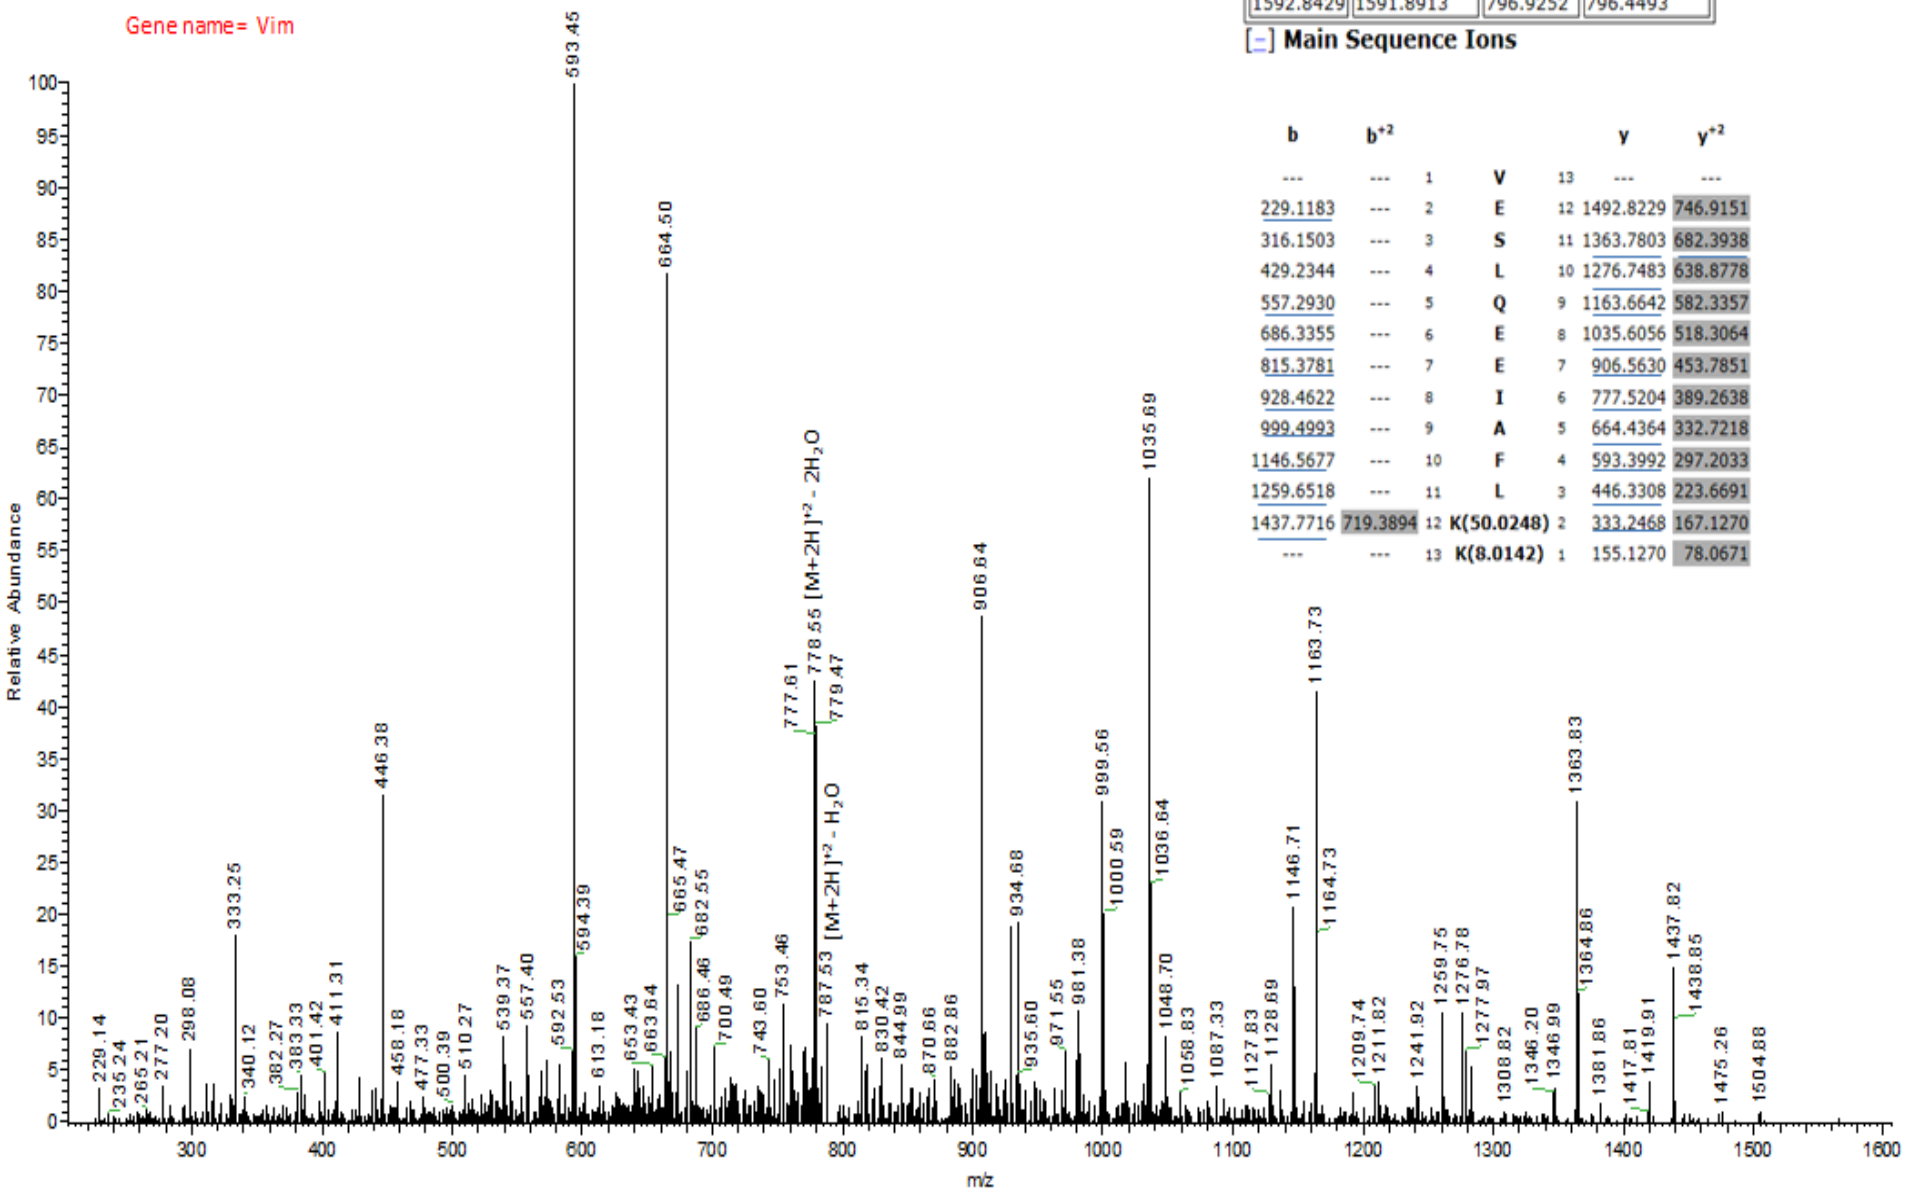

| MH <sup>+</sup> (av) | MH <sup>+</sup> (mono) | MH <sup>2+</sup> (av) | MH <sup>2+</sup> (mono) |
|----------------------|------------------------|-----------------------|-------------------------|
| 1592.8429            | 1591.8913              | 796.9252              | 796.4493                |

[-] Main Sequence Ions

| b         | b <sup>2+</sup> |    | y          | y <sup>2+</sup> |           |          |
|-----------|-----------------|----|------------|-----------------|-----------|----------|
| ---       | ---             | 1  | V          | 13              | ---       | ---      |
| 229.1183  | ---             | 2  | E          | 12              | 1492.8229 | 746.9151 |
| 316.1503  | ---             | 3  | S          | 11              | 1363.7803 | 682.3938 |
| 429.2344  | ---             | 4  | L          | 10              | 1276.7483 | 638.8778 |
| 557.2930  | ---             | 5  | Q          | 9               | 1163.6642 | 582.3357 |
| 686.3355  | ---             | 6  | E          | 8               | 1035.6056 | 518.3064 |
| 815.3781  | ---             | 7  | E          | 7               | 906.5630  | 453.7851 |
| 928.4622  | ---             | 8  | I          | 6               | 777.5204  | 389.2638 |
| 999.4993  | ---             | 9  | A          | 5               | 664.4364  | 332.7218 |
| 1146.5677 | ---             | 10 | F          | 4               | 593.3992  | 297.2033 |
| 1259.6518 | ---             | 11 | L          | 3               | 446.3308  | 223.6691 |
| 1437.7716 | 719.3894        | 12 | K(50.0248) | 2               | 333.2468  | 167.1270 |
| --        | --              | 13 | K(8.0142)  | 1               | 155.1270  | 78.0671  |

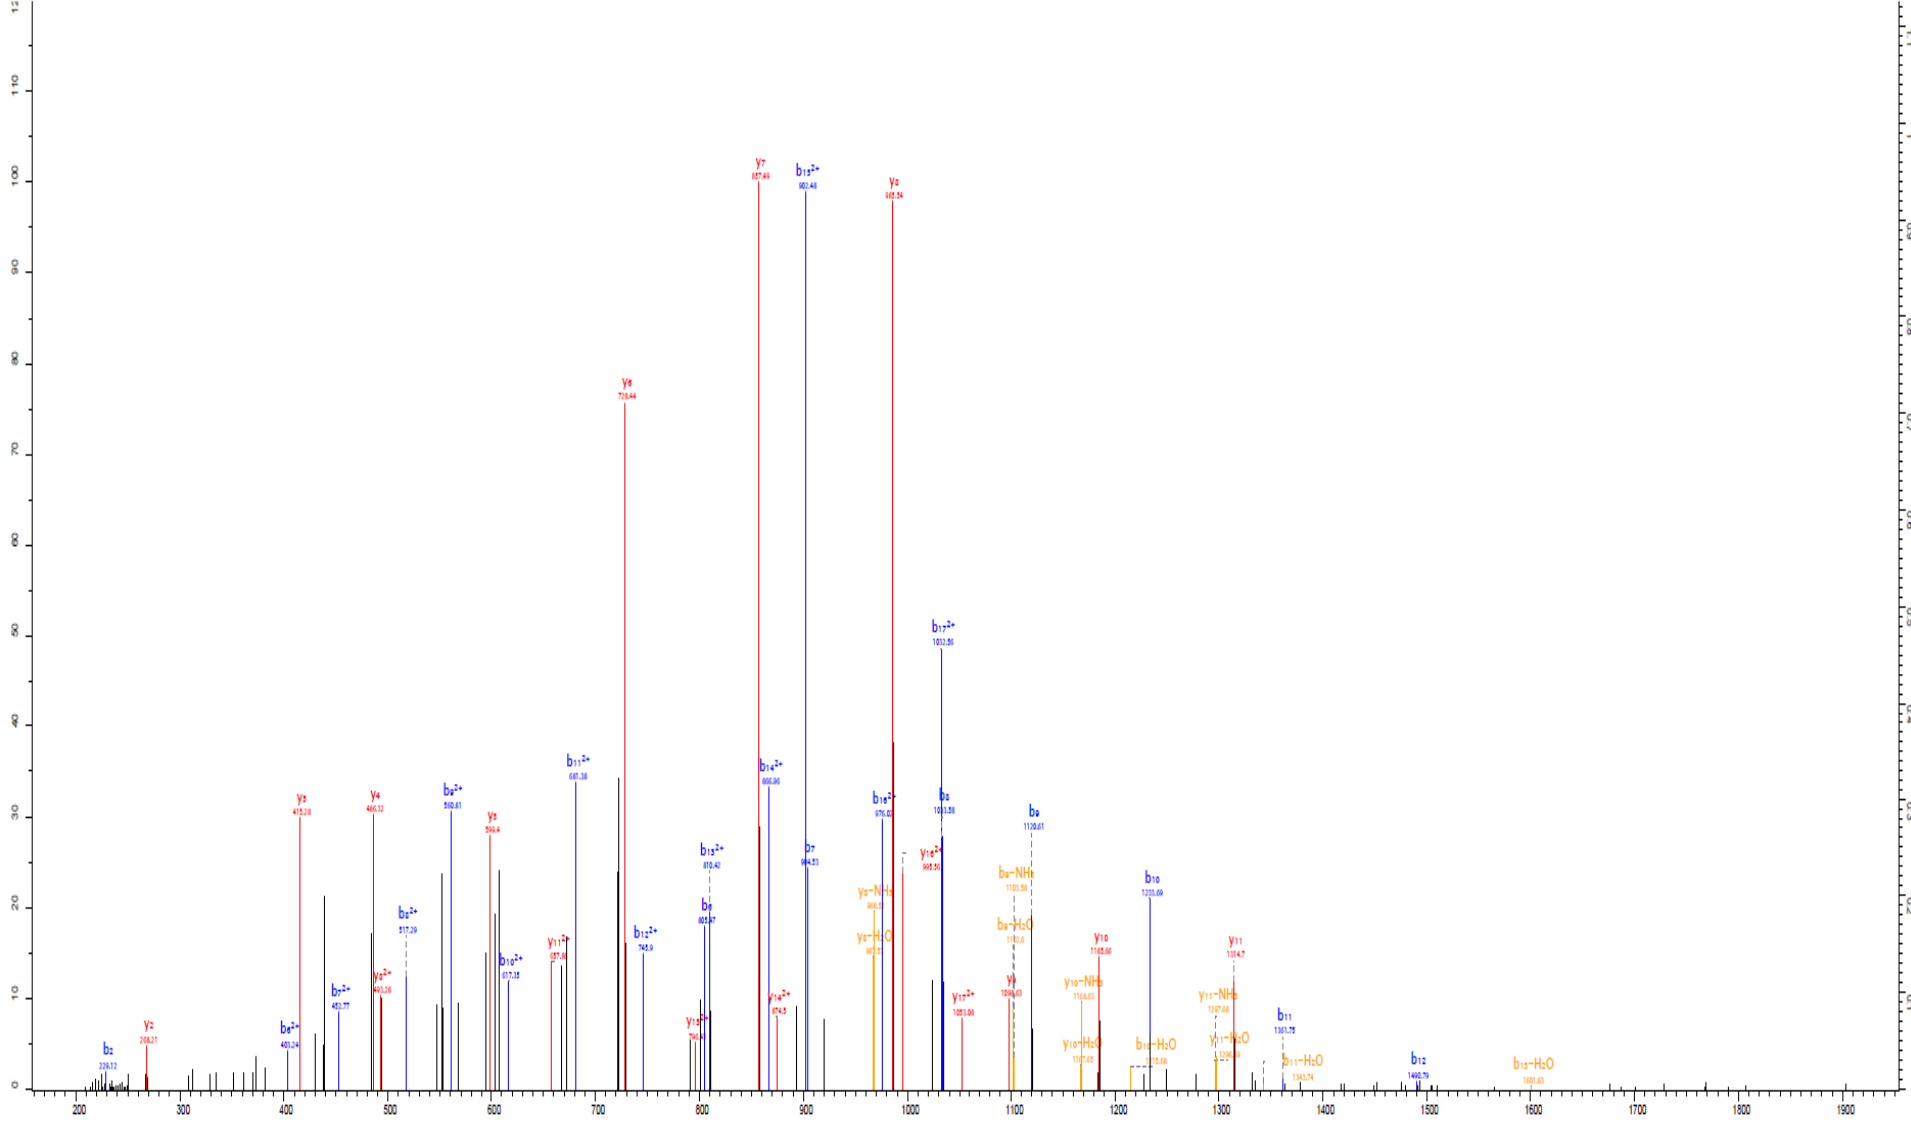

- L D L E R K V E S L Q E E I A F L K -

Fragmentation mapping:  
 - L:  $b_2$   
 - D:  $y_{12}^+$   
 - L:  $y_{14}^+$   
 - E:  $y_{12}^+$   
 - R: ac  
 - K:  $b_x$   
 - V:  $b_r$   
 - E:  $b_s$   
 - S:  $b_{10}$   
 - L:  $b_{11}$   
 - Q:  $b_{12}$   
 - E:  $b_{12}^+$   
 - E:  $b_{12}^+$   
 - I:  $b_{12}^+$   
 - A:  $b_{12}^+$   
 - F:  $b_{12}^+$   
 - L:  $b_{12}^+$   
 - K:  $b_{12}^+$

Gene name= Vim

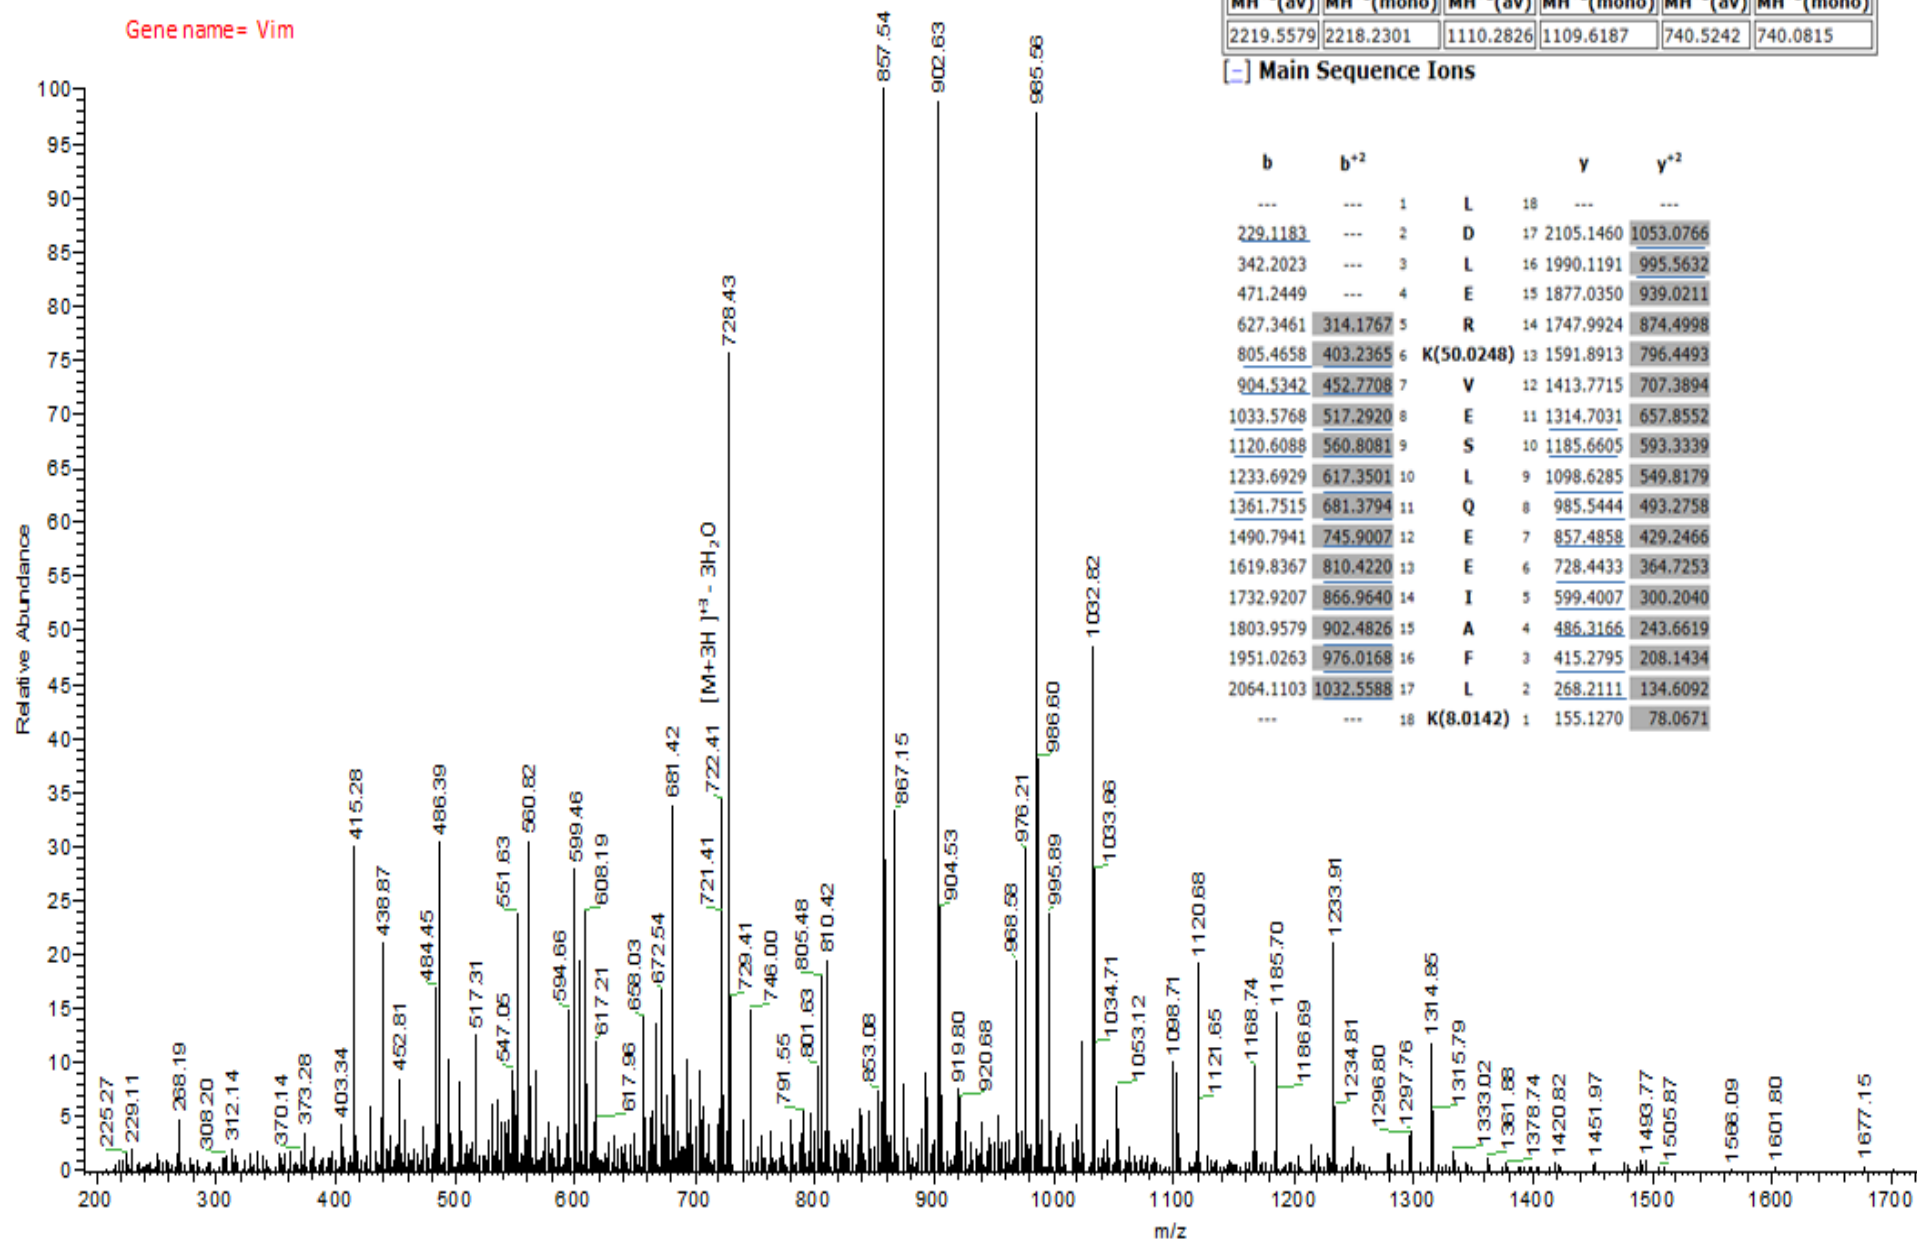

| MH <sup>+</sup> (av) | MH <sup>+</sup> (mono) | MH <sup>2+</sup> (av) | MH <sup>2+</sup> (mono) | MH <sup>3+</sup> (av) | MH <sup>3+</sup> (mono) |
|----------------------|------------------------|-----------------------|-------------------------|-----------------------|-------------------------|
| 2219.5579            | 2218.2301              | 1110.2826             | 1109.6187               | 740.5242              | 740.0815                |

[-] Main Sequence Ions

| b                | b <sup>+</sup>   |    | y                 | y <sup>+</sup>                      |
|------------------|------------------|----|-------------------|-------------------------------------|
| ---              | ---              | 1  | L                 | ---                                 |
| <u>229.1183</u>  | ---              | 2  | D                 | 17 2105.1460 <u>1053.0766</u>       |
| 342.2023         | ---              | 3  | L                 | 16 1990.1191 <u>995.5632</u>        |
| 471.2449         | ---              | 4  | E                 | 15 1877.0350 <u>939.0211</u>        |
| 627.3461         | <u>314.1767</u>  | 5  | R                 | 14 1747.9924 <u>874.4998</u>        |
| <u>805.4658</u>  | <u>403.2365</u>  | 6  | <b>K(50.0248)</b> | 13 1591.8913 <u>796.4493</u>        |
| <u>904.5342</u>  | <u>452.7708</u>  | 7  | V                 | 12 1413.7715 <u>707.3894</u>        |
| 1033.5768        | <u>517.2920</u>  | 8  | E                 | 11 <u>1314.7031</u> <u>657.8552</u> |
| 1120.6088        | <u>560.8081</u>  | 9  | S                 | 10 <u>1185.6605</u> <u>593.3339</u> |
| 1233.6929        | <u>617.3501</u>  | 10 | L                 | 9 <u>1098.6285</u> <u>549.8179</u>  |
| <u>1361.7515</u> | <u>681.3794</u>  | 11 | Q                 | 8 <u>985.5444</u> <u>493.2758</u>   |
| 1490.7941        | <u>745.9007</u>  | 12 | E                 | 7 <u>857.4858</u> <u>429.2466</u>   |
| 1619.8367        | <u>810.4220</u>  | 13 | E                 | 6 <u>728.4433</u> <u>364.7253</u>   |
| 1732.9207        | <u>866.9640</u>  | 14 | I                 | 5 <u>599.4007</u> <u>300.2040</u>   |
| 1803.9579        | <u>902.4826</u>  | 15 | A                 | 4 <u>486.3166</u> <u>243.6619</u>   |
| 1951.0263        | <u>976.0168</u>  | 16 | F                 | 3 <u>415.2795</u> <u>208.1434</u>   |
| 2064.1103        | <u>1032.5588</u> | 17 | L                 | 2 <u>268.2111</u> <u>134.6092</u>   |
| ---              | ---              | 18 | <b>K(8.0142)</b>  | 1 <u>155.1270</u> <u>78.0671</u>    |
