# Supplementary material
Source: PubMed Central journal article supplement (PMC4739669)

# Supplementary Figure 1

## A

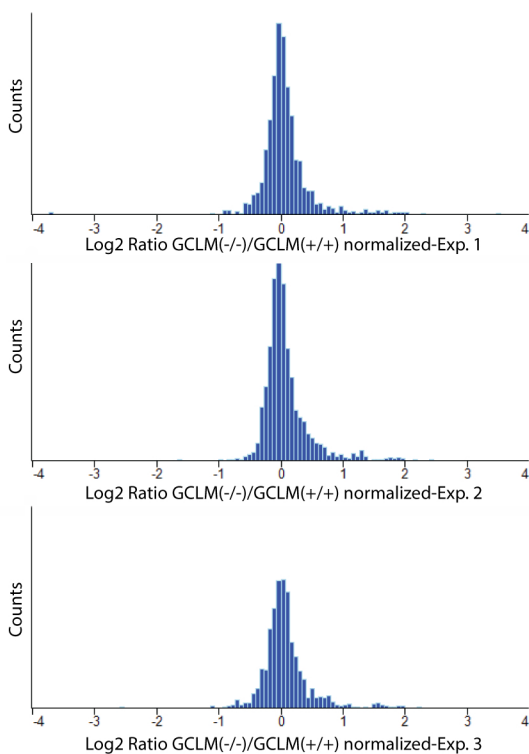

## B

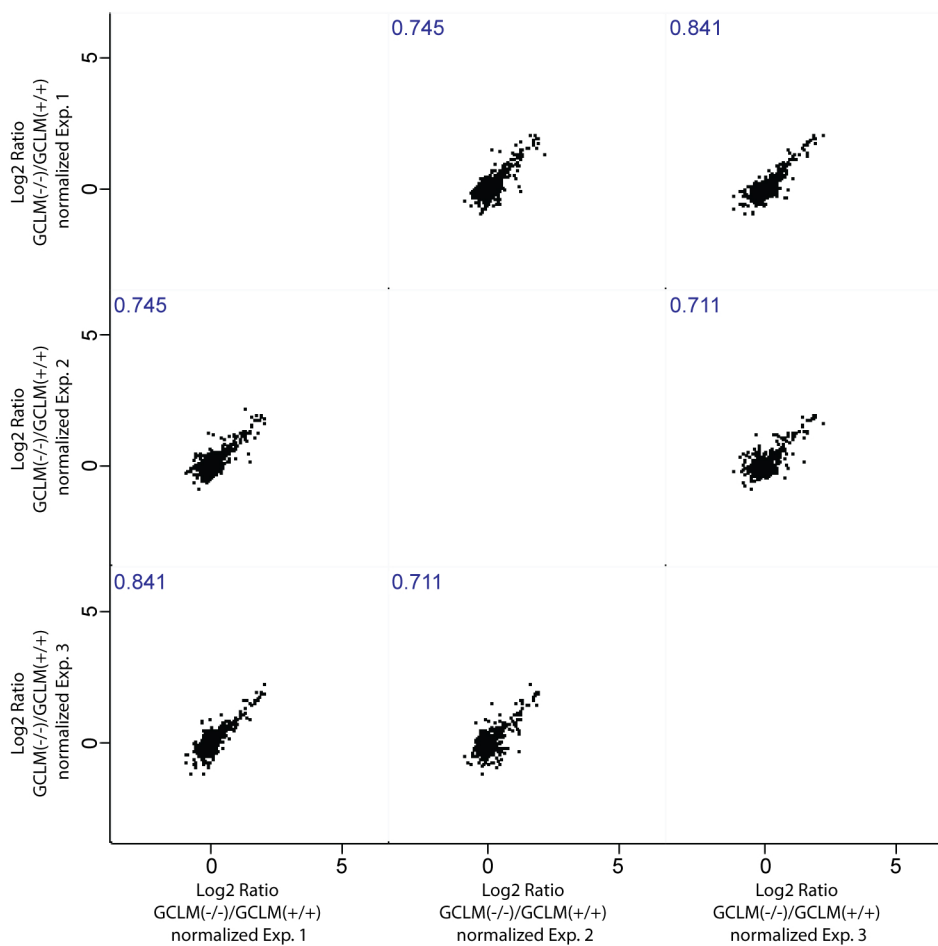

Supplement: 10.1074_M115.049288_mcp.M115.049288-9.pdf [file 10.1074_M115.049288_mcp.M115.049288-9.pdf]
